# Supplementary material for: SARS-CoV-2 Spike Protein Interaction Space
Source: MDPI journal article supplement (doi:10.3390/ijms241512058), 2023-07-27
Supplement: s1 [file s1]

# Supplemental Material File S3

## Protein monomers dihedral angles clusters

| Protein | Histogram of protein monomers dihedral angles                                        |  |
|---------|--------------------------------------------------------------------------------------|--|
| S       | 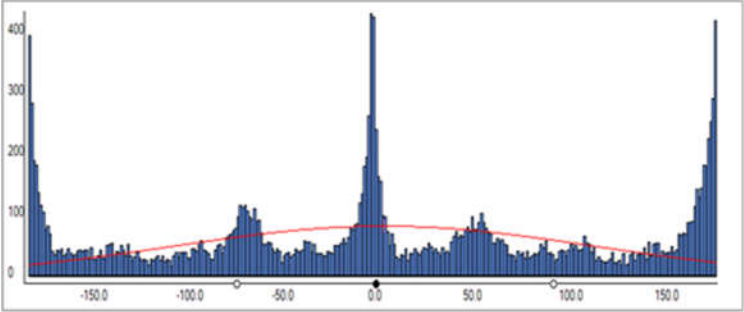   |  |
| E       |   |  |
| M       |  |  |
| 6vxx    |  |  |
