# Supplementary material for: SARS-CoV-2 Spike Protein Interaction Space
Source: MDPI journal article supplement (doi:10.3390/ijms241512058), 2023-07-27

## Supplementary Materials File S4

### Complex roots of energetically allowed regions equations

#### Spike protein monomer S SARS

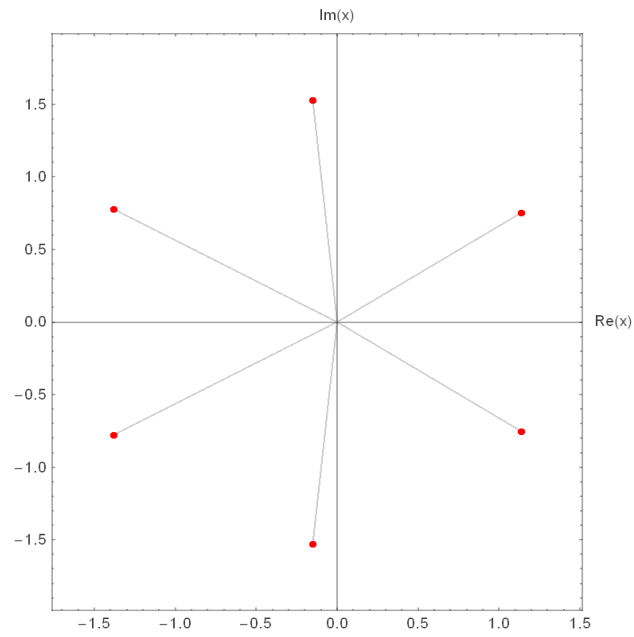

#### Spike protein monomer S SARS-CoV-2

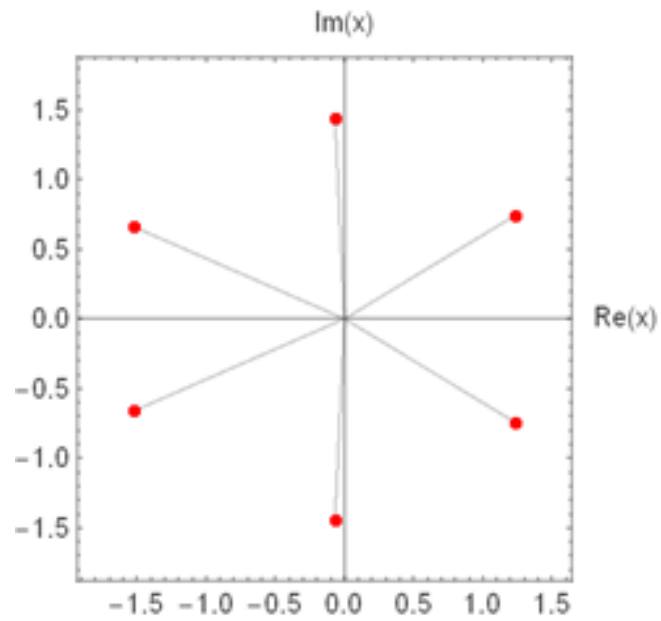

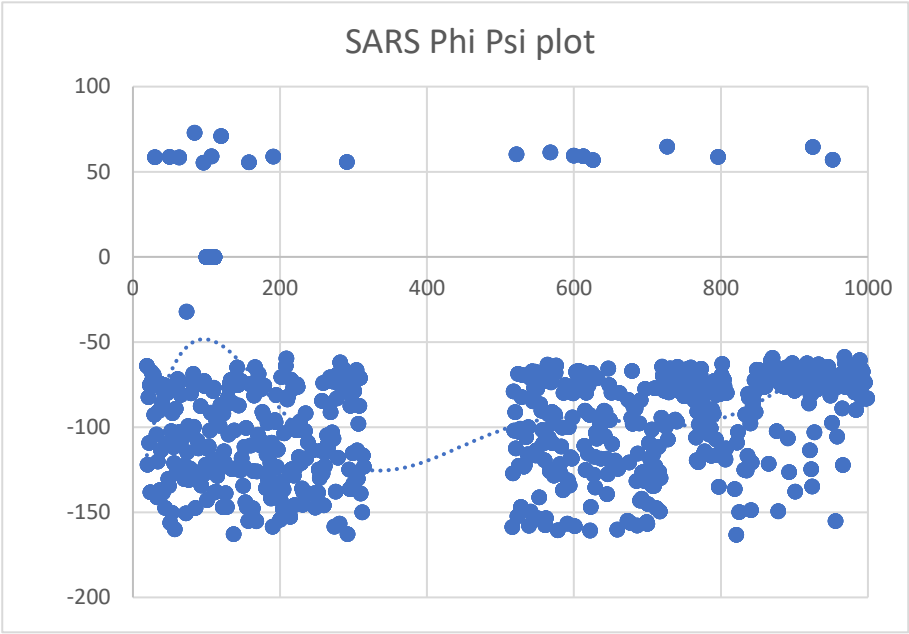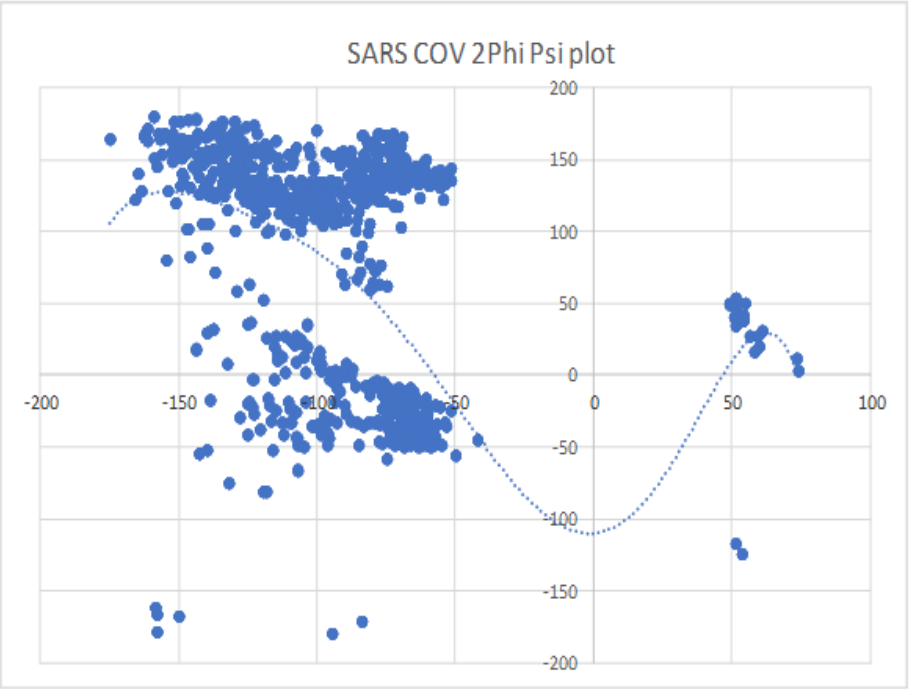

Supplement: s1 [file s1]
