# Supplementary material for: SARS-CoV-2 Spike Protein Interaction Space
Source: Int J Mol Sci. 2023 Jul 27;24(15):12058. doi: 10.3390/ijms241512058 (PMC10418891; doi:10.3390/ijms241512058)
Supplement: Supplementary file 1 [file ijms-24-12058-s001.zip]

Archive with 50 entries (50 files):
- Supplementary  Material File S1/1A8J.pdb
- Supplementary  Material File S1/1B0W.pdb
- Supplementary  Material File S1/1B6D.pdb
- Supplementary  Material File S1/1BJM.pdb
- Supplementary  Material File S1/1BWW.pdb
- Supplementary  Material File S1/1DCL.pdb
- Supplementary  Material File S1/1EEQ.pdb
- Supplementary  Material File S1/1EEU.pdb
- Supplementary  Material File S1/1EK3.pdb
- Supplementary  Material File S1/1IVL.pdb
- Supplementary  Material File S1/1LGV.pdb
- Supplementary  Material File S1/1MAJ.pdb
- Supplementary  Material File S1/1MCC.pdb
- Supplementary  Material File S1/1MCD.pdb
- Supplementary  Material File S1/1MCI.pdb
- Supplementary  Material File S1/1MCJ.pdb
- Supplementary  Material File S1/1MCS.pdb
- Supplementary  Material File S1/1MCW.pdb
- Supplementary  Material File S1/1QAC.pdb
- Supplementary  Material File S1/1QP1.pdb
- Supplementary  Material File S1/1REI.pdb
- Supplementary  Material File S1/2KQM.pdb
- Supplementary  Material File S1/2KQN.pdb
- Supplementary  Material File S1/2MCG.pdb
- Supplementary  Material File S1/2OMB.pdb
- Supplementary  Material File S1/2Q20.pdb
- Supplementary  Material File S1/3B5G.pdb
- Supplementary  Material File S1/3BD3.pdb
- Supplementary  Material File S1/3BDX.pdb
- Supplementary  Material File S1/3BJL.pdb
- Supplementary  Material File S1/3CDC.pdb
- Supplementary  Material File S1/3MCG.pdb
- Supplementary  Material File S1/3T0W.pdb
- Supplementary  Material File S1/3UPA.pdb
- Supplementary  Material File S1/4BJL.pdb
- Supplementary  Material File S1/4K07.pdb
- Supplementary  Material File S1/4K3G.pdb
- Supplementary  Material File S1/4LVE.pdb
- Supplementary  Material File S1/4N1C.pdb
- Supplementary  Material File S1/4X4Z.pdb
- Supplementary  Material File S1/5ACM.pdb
- Supplementary  Material File S1/5C9K.pdb
- Supplementary  Material File S1/5M6A.pdb
- Supplementary  Material File S1/5M76.pdb
- Supplementary Material File S2/Envelope protein monomer SARS CoV 2.cdf
- Supplementary Material File S2/Membrane protein monomer SARS CoV 2.cdf
- Supplementary Material File S2/Spike protein monomer SARS CoV 2.cdf
- Supplementary Material File S2/Spike protein monomer SARS.cdf
- Supplementary Materials File S3.pdf
- Supplementary Materials File S4.pdf
