# Supplementary material for: SARS-CoV-2 Spike Protein Interaction Space
Source: Int J Mol Sci. 2023 Jul 27;24(15):12058. doi: 10.3390/ijms241512058 (PMC10418891; doi:10.3390/ijms241512058)
Supplement: Supplementary file 1 [file ijms-24-12058-s001.zip › Supplementary Material File S1/1A8J.pdb]

REMARK 950 NUMBERING  Kabat
REMARK 950 METHOD     X-ray crystal structure
REMARK 950 RESOLUTION 2.700
REMARK 950 R-FACTOR   0.220
REMARK 950 R-FREE     0.380
REMARK 950 CHAIN-TYPE LABEL ORIGINAL
REMARK 950 CHAIN L    L    H
REMARK 950 CHAIN L    L    L
REMARK 950 MOLECULE : H : IMMUNOGLOBULIN LAMBDA LIGHT CHAIN DIMER (MCG)
REMARK 950 SPECIES  : H : HOMO SAPIENS
SEQRES   1 L 216  PCA SER ALA LEU THR GLN PRO PRO SER ALA SER GLY SER          
SEQRES   2 L 216  LEU GLY GLN SER VAL THR ILE SER CYS THR GLY THR SER          
SEQRES   3 L 216  SER ASP VAL GLY GLY TYR ASN TYR VAL SER TRP TYR GLN          
SEQRES   4 L 216  GLN HIS ALA GLY LYS ALA PRO LYS VAL ILE ILE TYR GLU          
SEQRES   5 L 216  VAL ASN LYS ARG PRO SER GLY VAL PRO ASP ARG PHE SER          
SEQRES   6 L 216  GLY SER LYS SER GLY ASN THR ALA SER LEU THR VAL SER          
SEQRES   7 L 216  GLY LEU GLN ALA GLU ASP GLU ALA ASP TYR TYR CYS SER          
SEQRES   8 L 216  SER TYR GLU GLY SER ASP ASN PHE VAL PHE GLY THR GLY          
SEQRES   9 L 216  THR LYS VAL THR VAL LEU GLY GLN PRO LYS ALA ASN PRO          
SEQRES  10 L 216  THR VAL THR LEU PHE PRO PRO SER SER GLU GLU LEU GLN          
SEQRES  11 L 216  ALA ASN LYS ALA THR LEU VAL CYS LEU ILE SER ASP PHE          
SEQRES  12 L 216  TYR PRO GLY ALA VAL THR VAL ALA TRP LYS ALA ASP GLY          
SEQRES  13 L 216  SER PRO VAL LYS ALA GLY VAL GLU THR THR LYS PRO SER          
SEQRES  14 L 216  LYS GLN SER ASN ASN LYS TYR ALA ALA SER SER TYR LEU          
SEQRES  15 L 216  SER LEU THR PRO GLU GLN TRP LYS SER HIS ARG SER TYR          
SEQRES  16 L 216  SER CYS GLN VAL THR HIS GLU GLY SER THR VAL GLU LYS          
SEQRES  17 L 216  THR VAL ALA PRO THR GLU CYS SER                              
SEQRES   1 L 216  PCA SER ALA LEU THR GLN PRO PRO SER ALA SER GLY SER          
SEQRES   2 L 216  LEU GLY GLN SER VAL THR ILE SER CYS THR GLY THR SER          
SEQRES   3 L 216  SER ASP VAL GLY GLY TYR ASN TYR VAL SER TRP TYR GLN          
SEQRES   4 L 216  GLN HIS ALA GLY LYS ALA PRO LYS VAL ILE ILE TYR GLU          
SEQRES   5 L 216  VAL ASN LYS ARG PRO SER GLY VAL PRO ASP ARG PHE SER          
SEQRES   6 L 216  GLY SER LYS SER GLY ASN THR ALA SER LEU THR VAL SER          
SEQRES   7 L 216  GLY LEU GLN ALA GLU ASP GLU ALA ASP TYR TYR CYS SER          
SEQRES   8 L 216  SER TYR GLU GLY SER ASP ASN PHE VAL PHE GLY THR GLY          
SEQRES   9 L 216  THR LYS VAL THR VAL LEU GLY GLN PRO LYS ALA ASN PRO          
SEQRES  10 L 216  THR VAL THR LEU PHE PRO PRO SER SER GLU GLU LEU GLN          
SEQRES  11 L 216  ALA ASN LYS ALA THR LEU VAL CYS LEU ILE SER ASP PHE          
SEQRES  12 L 216  TYR PRO GLY ALA VAL THR VAL ALA TRP LYS ALA ASP GLY          
SEQRES  13 L 216  SER PRO VAL LYS ALA GLY VAL GLU THR THR LYS PRO SER          
SEQRES  14 L 216  LYS GLN SER ASN ASN LYS TYR ALA ALA SER SER TYR LEU          
SEQRES  15 L 216  SER LEU THR PRO GLU GLN TRP LYS SER HIS ARG SER TYR          
SEQRES  16 L 216  SER CYS GLN VAL THR HIS GLU GLY SER THR VAL GLU LYS          
SEQRES  17 L 216  THR VAL ALA PRO THR GLU CYS SER                              
ATOM   1616  N   SER L   2      27.260 -22.771 106.886  1.00 16.95           N  
ATOM   1617  CA  SER L   2      28.668 -22.997 106.601  1.00 16.95           C  
ATOM   1618  C   SER L   2      28.920 -24.502 106.665  1.00 16.95           C  
ATOM   1619  O   SER L   2      29.903 -24.949 107.257  1.00 16.95           O  
ATOM   1620  CB  SER L   2      29.525 -22.285 107.650  1.00 16.95           C  
ATOM   1621  OG  SER L   2      30.535 -21.495 107.050  1.00 16.95           O  
ATOM   1622  N   ALA L   3      28.015 -25.271 106.061  1.00 20.00           N  
ATOM   1623  CA  ALA L   3      28.108 -26.729 106.044  1.00 20.00           C  
ATOM   1624  C   ALA L   3      29.552 -27.188 105.848  1.00 20.00           C  
ATOM   1625  O   ALA L   3      30.145 -27.822 106.736  1.00 20.00           O  
ATOM   1626  CB  ALA L   3      27.209 -27.301 104.938  1.00 20.00           C  
ATOM   1627  N   LEU L   4      30.116 -26.868 104.688  1.00 16.95           N  
ATOM   1628  CA  LEU L   4      31.491 -27.244 104.401  1.00 16.95           C  
ATOM   1629  C   LEU L   4      32.419 -26.420 105.293  1.00 16.95           C  
ATOM   1630  O   LEU L   4      32.233 -25.218 105.459  1.00 16.95           O  
ATOM   1631  CB  LEU L   4      31.816 -26.992 102.925  1.00 16.95           C  
ATOM   1632  CG  LEU L   4      31.344 -28.016 101.890  1.00 16.95           C  
ATOM   1633  CD1 LEU L   4      31.803 -29.386 102.287  1.00 16.95           C  
ATOM   1634  CD2 LEU L   4      29.844 -27.994 101.781  1.00 16.95           C  
ATOM   1635  N   THR L   5      33.417 -27.072 105.873  1.00 16.95           N  
ATOM   1636  CA  THR L   5      34.356 -26.385 106.740  1.00 16.95           C  
ATOM   1637  C   THR L   5      35.796 -26.742 106.379  1.00 16.95           C  
ATOM   1638  O   THR L   5      36.069 -27.847 105.904  1.00 16.95           O  
ATOM   1639  CB  THR L   5      34.100 -26.739 108.215  1.00 16.95           C  
ATOM   1640  OG1 THR L   5      35.348 -26.786 108.916  1.00 16.95           O  
ATOM   1641  CG2 THR L   5      33.386 -28.095 108.337  1.00 16.95           C  
ATOM   1642  N   GLN L   6      36.713 -25.799 106.594  1.00 16.95           N  
ATOM   1643  CA  GLN L   6      38.123 -26.013 106.289  1.00 16.95           C  
ATOM   1644  C   GLN L   6      39.035 -25.099 107.088  1.00 16.95           C  
ATOM   1645  O   GLN L   6      38.653 -23.982 107.440  1.00 16.95           O  
ATOM   1646  CB  GLN L   6      38.390 -25.800 104.801  1.00 16.95           C  
ATOM   1647  CG  GLN L   6      37.898 -24.485 104.252  1.00 16.95           C  
ATOM   1648  CD  GLN L   6      37.650 -24.552 102.758  1.00 16.95           C  
ATOM   1649  OE1 GLN L   6      36.522 -24.726 102.317  1.00 16.95           O  
ATOM   1650  NE2 GLN L   6      38.706 -24.419 101.974  1.00 16.95           N  
ATOM   1651  N   PRO L   7      40.266 -25.566 107.371  1.00 16.95           N  
ATOM   1652  CA  PRO L   7      41.304 -24.863 108.124  1.00 16.95           C  
ATOM   1653  C   PRO L   7      41.304 -23.364 107.926  1.00 16.95           C  
ATOM   1654  O   PRO L   7      40.924 -22.869 106.873  1.00 16.95           O  
ATOM   1655  CB  PRO L   7      42.609 -25.486 107.620  1.00 16.95           C  
ATOM   1656  CG  PRO L   7      42.221 -26.667 106.782  1.00 16.95           C  
ATOM   1657  CD  PRO L   7      40.747 -26.886 106.937  1.00 16.95           C  
ATOM   1658  N   PRO L   8      41.728 -22.615 108.946  1.00 16.95           N  
ATOM   1659  CA  PRO L   8      41.765 -21.159 108.819  1.00 16.95           C  
ATOM   1660  C   PRO L   8      42.958 -20.824 107.954  1.00 16.95           C  
ATOM   1661  O   PRO L   8      42.930 -19.885 107.169  1.00 16.95           O  
ATOM   1662  CB  PRO L   8      41.953 -20.663 110.256  1.00 16.95           C  
ATOM   1663  CG  PRO L   8      41.886 -21.894 111.132  1.00 16.95           C  
ATOM   1664  CD  PRO L   8      42.190 -23.067 110.265  1.00 16.95           C  
ATOM   1665  N   SER L   9      44.004 -21.626 108.122  1.00 16.95           N  
ATOM   1666  CA  SER L   9      45.239 -21.467 107.384  1.00 16.95           C  
ATOM   1667  C   SER L   9      45.969 -22.788 107.164  1.00 16.95           C  
ATOM   1668  O   SER L   9      45.945 -23.695 107.998  1.00 16.95           O  
ATOM   1669  CB  SER L   9      46.164 -20.499 108.115  1.00 16.95           C  
ATOM   1670  OG  SER L   9      47.464 -21.041 108.268  1.00 16.95           O  
ATOM   1671  N   ALA L  11      46.616 -22.868 106.011  1.00 16.95           N  
ATOM   1672  CA  ALA L  11      47.395 -24.020 105.605  1.00 16.95           C  
ATOM   1673  C   ALA L  11      48.597 -23.389 104.905  1.00 16.95           C  
ATOM   1674  O   ALA L  11      48.452 -22.744 103.869  1.00 16.95           O  
ATOM   1675  CB  ALA L  11      46.591 -24.886 104.638  1.00 16.95           C  
ATOM   1676  N   SER L  12      49.780 -23.557 105.488  1.00 16.95           N  
ATOM   1677  CA  SER L  12      50.993 -22.971 104.931  1.00 16.95           C  
ATOM   1678  C   SER L  12      52.157 -23.941 104.768  1.00 16.95           C  
ATOM   1679  O   SER L  12      52.176 -25.038 105.330  1.00 16.95           O  
ATOM   1680  CB  SER L  12      51.452 -21.800 105.802  1.00 16.95           C  
ATOM   1681  OG  SER L  12      52.464 -22.209 106.710  1.00 16.95           O  
ATOM   1682  N   GLY L  13      53.133 -23.493 103.988  1.00 16.95           N  
ATOM   1683  CA  GLY L  13      54.324 -24.269 103.717  1.00 16.95           C  
ATOM   1684  C   GLY L  13      55.332 -23.385 103.003  1.00 16.95           C  
ATOM   1685  O   GLY L  13      55.090 -22.197 102.775  1.00 16.95           O  
ATOM   1686  N   SER L  14      56.470 -23.953 102.644  1.00 16.95           N  
ATOM   1687  CA  SER L  14      57.483 -23.183 101.961  1.00 16.95           C  
ATOM   1688  C   SER L  14      57.486 -23.584 100.500  1.00 16.95           C  
ATOM   1689  O   SER L  14      56.593 -24.285 100.047  1.00 16.95           O  
ATOM   1690  CB  SER L  14      58.844 -23.460 102.589  1.00 16.95           C  
ATOM   1691  OG  SER L  14      58.818 -24.670 103.330  1.00 16.95           O  
ATOM   1692  N   LEU L  15      58.480 -23.125  99.756  1.00 16.95           N  
ATOM   1693  CA  LEU L  15      58.564 -23.487  98.360  1.00 16.95           C  
ATOM   1694  C   LEU L  15      58.899 -24.968  98.357  1.00 16.95           C  
ATOM   1695  O   LEU L  15      59.596 -25.447  99.245  1.00 16.95           O  
ATOM   1696  CB  LEU L  15      59.674 -22.696  97.664  1.00 16.95           C  
ATOM   1697  CG  LEU L  15      59.462 -21.224  97.290  1.00 16.95           C  
ATOM   1698  CD1 LEU L  15      57.983 -20.892  97.191  1.00 16.95           C  
ATOM   1699  CD2 LEU L  15      60.138 -20.355  98.327  1.00 16.95           C  
ATOM   1700  N   GLY L  16      58.392 -25.696  97.369  1.00 16.95           N  
ATOM   1701  CA  GLY L  16      58.672 -27.119  97.288  1.00 16.95           C  
ATOM   1702  C   GLY L  16      57.699 -27.981  98.066  1.00 16.95           C  
ATOM   1703  O   GLY L  16      57.250 -29.019  97.567  1.00 16.95           O  
ATOM   1704  N   GLN L  17      57.376 -27.558  99.287  1.00 16.95           N  
ATOM   1705  CA  GLN L  17      56.444 -28.288 100.148  1.00 16.95           C  
ATOM   1706  C   GLN L  17      55.146 -28.667  99.437  1.00 16.95           C  
ATOM   1707  O   GLN L  17      54.959 -28.368  98.260  1.00 16.95           O  
ATOM   1708  CB  GLN L  17      56.111 -27.452 101.383  1.00 16.95           C  
ATOM   1709  CG  GLN L  17      56.526 -28.093 102.689  1.00 16.95           C  
ATOM   1710  CD  GLN L  17      57.426 -27.196 103.502  1.00 16.95           C  
ATOM   1711  OE1 GLN L  17      58.603 -27.012 103.181  1.00 16.95           O  
ATOM   1712  NE2 GLN L  17      56.878 -26.629 104.563  1.00 16.95           N  
ATOM   1713  N   SER L  18      54.244 -29.322 100.160  1.00 16.95           N  
ATOM   1714  CA  SER L  18      52.972 -29.734  99.582  1.00 16.95           C  
ATOM   1715  C   SER L  18      51.814 -29.645 100.571  1.00 16.95           C  
ATOM   1716  O   SER L  18      51.380 -30.648 101.128  1.00 16.95           O  
ATOM   1717  CB  SER L  18      53.094 -31.156  99.046  1.00 16.95           C  
ATOM   1718  OG  SER L  18      54.112 -31.226  98.065  1.00 16.95           O  
ATOM   1719  N   VAL L  19      51.309 -28.436 100.782  1.00 16.95           N  
ATOM   1720  CA  VAL L  19      50.198 -28.230 101.699  1.00 16.95           C  
ATOM   1721  C   VAL L  19      49.011 -29.058 101.235  1.00 16.95           C  
ATOM   1722  O   VAL L  19      48.874 -29.314 100.041  1.00 16.95           O  
ATOM   1723  CB  VAL L  19      49.794 -26.733 101.750  1.00 16.95           C  
ATOM   1724  CG1 VAL L  19      51.026 -25.867 101.584  1.00 16.95           C  
ATOM   1725  CG2 VAL L  19      48.771 -26.410 100.665  1.00 16.95           C  
ATOM   1726  N   THR L  20      48.164 -29.494 102.169  1.00 16.95           N  
ATOM   1727  CA  THR L  20      46.977 -30.274 101.802  1.00 16.95           C  
ATOM   1728  C   THR L  20      45.715 -29.778 102.495  1.00 16.95           C  
ATOM   1729  O   THR L  20      45.361 -30.253 103.562  1.00 16.95           O  
ATOM   1730  CB  THR L  20      47.133 -31.782 102.115  1.00 16.95           C  
ATOM   1731  OG1 THR L  20      48.407 -32.251 101.655  1.00 16.95           O  
ATOM   1732  CG2 THR L  20      46.033 -32.573 101.417  1.00 16.95           C  
ATOM   1733  N   ILE L  21      45.041 -28.822 101.868  1.00 16.95           N  
ATOM   1734  CA  ILE L  21      43.811 -28.239 102.396  1.00 16.95           C  
ATOM   1735  C   ILE L  21      42.715 -29.302 102.506  1.00 16.95           C  
ATOM   1736  O   ILE L  21      42.705 -30.272 101.746  1.00 16.95           O  
ATOM   1737  CB  ILE L  21      43.320 -27.081 101.471  1.00 16.95           C  
ATOM   1738  CG1 ILE L  21      44.280 -25.898 101.567  1.00 16.95           C  
ATOM   1739  CG2 ILE L  21      41.926 -26.642 101.849  1.00 16.95           C  
ATOM   1740  CD1 ILE L  21      45.139 -25.705 100.326  1.00 16.95           C  
ATOM   1741  N   SER L  22      41.809 -29.120 103.465  1.00 16.95           N  
ATOM   1742  CA  SER L  22      40.691 -30.039 103.669  1.00 16.95           C  
ATOM   1743  C   SER L  22      39.356 -29.309 103.439  1.00 16.95           C  
ATOM   1744  O   SER L  22      39.308 -28.080 103.371  1.00 16.95           O  
ATOM   1745  CB  SER L  22      40.731 -30.627 105.089  1.00 16.95           C  
ATOM   1746  OG  SER L  22      41.684 -29.977 105.916  1.00 16.95           O  
ATOM   1747  N   CYS L  23      38.276 -30.065 103.304  1.00 16.95           N  
ATOM   1748  CA  CYS L  23      36.959 -29.474 103.087  1.00 16.95           C  
ATOM   1749  C   CYS L  23      35.957 -30.343 103.826  1.00 16.95           C  
ATOM   1750  O   CYS L  23      34.862 -30.605 103.331  1.00 16.95           O  
ATOM   1751  CB  CYS L  23      36.645 -29.440 101.586  1.00 16.95           C  
ATOM   1752  SG  CYS L  23      35.053 -28.707 101.083  1.00 16.95           S  
ATOM   1753  N   THR L  24      36.375 -30.783 105.018  1.00 16.95           N  
ATOM   1754  CA  THR L  24      35.608 -31.657 105.919  1.00 16.95           C  
ATOM   1755  C   THR L  24      34.203 -31.171 106.207  1.00 16.95           C  
ATOM   1756  O   THR L  24      33.792 -31.102 107.365  1.00 16.95           O  
ATOM   1757  CB  THR L  24      36.318 -31.803 107.275  1.00 16.95           C  
ATOM   1758  OG1 THR L  24      37.154 -30.656 107.498  1.00 16.95           O  
ATOM   1759  CG2 THR L  24      37.166 -33.070 107.308  1.00 16.95           C  
ATOM   1760  N   GLY L  25      33.471 -30.843 105.151  1.00 16.95           N  
ATOM   1761  CA  GLY L  25      32.119 -30.354 105.310  1.00 16.95           C  
ATOM   1762  C   GLY L  25      31.170 -31.466 105.667  1.00 16.95           C  
ATOM   1763  O   GLY L  25      30.134 -31.647 105.031  1.00 16.95           O  
ATOM   1764  N   THR L  26      31.530 -32.230 106.685  1.00 16.95           N  
ATOM   1765  CA  THR L  26      30.677 -33.308 107.125  1.00 16.95           C  
ATOM   1766  C   THR L  26      29.248 -32.799 107.123  1.00 16.95           C  
ATOM   1767  O   THR L  26      28.557 -32.847 106.099  1.00 16.95           O  
ATOM   1768  CB  THR L  26      31.012 -33.756 108.556  1.00 16.95           C  
ATOM   1769  OG1 THR L  26      29.816 -34.231 109.189  1.00 16.95           O  
ATOM   1770  CG2 THR L  26      31.591 -32.592 109.371  1.00 16.95           C  
ATOM   1771  N   SER L  27      28.820 -32.282 108.274  1.00 16.95           N  
ATOM   1772  CA  SER L  27      27.461 -31.796 108.428  1.00 16.95           C  
ATOM   1773  C   SER L  27      26.640 -32.943 107.869  1.00 16.95           C  
ATOM   1774  O   SER L  27      25.517 -32.752 107.397  1.00 16.95           O  
ATOM   1775  CB  SER L  27      27.246 -30.521 107.608  1.00 16.95           C  
ATOM   1776  OG  SER L  27      28.127 -29.496 108.043  1.00 16.95           O  
ATOM   1777  N   SER L  27A     27.259 -34.130 107.920  1.00 20.00           N  
ATOM   1778  CA  SER L  27A     26.710 -35.399 107.447  1.00 20.00           C  
ATOM   1779  C   SER L  27A     26.281 -35.430 105.979  1.00 20.00           C  
ATOM   1780  O   SER L  27A     26.641 -36.358 105.254  1.00 20.00           O  
ATOM   1781  CB  SER L  27A     25.565 -35.816 108.362  1.00 20.00           C  
ATOM   1782  OG  SER L  27A     25.958 -35.631 109.714  1.00 20.00           O  
ATOM   1783  N   ASP L  27B     25.531 -34.420 105.544  1.00 20.00           N  
ATOM   1784  CA  ASP L  27B     25.054 -34.323 104.157  1.00 20.00           C  
ATOM   1785  C   ASP L  27B     24.523 -35.680 103.710  1.00 20.00           C  
ATOM   1786  O   ASP L  27B     24.416 -36.603 104.523  1.00 20.00           O  
ATOM   1787  CB  ASP L  27B     26.200 -33.890 103.222  1.00 20.00           C  
ATOM   1788  CG  ASP L  27B     25.833 -32.687 102.349  1.00 20.00           C  
ATOM   1789  OD1 ASP L  27B     24.657 -32.273 102.358  1.00 20.00           O  
ATOM   1790  OD2 ASP L  27B     26.723 -32.152 101.650  1.00 20.00           O  
ATOM   1791  N   VAL L  27C     24.176 -35.804 102.430  1.00 20.00           N  
ATOM   1792  CA  VAL L  27C     23.693 -37.085 101.919  1.00 20.00           C  
ATOM   1793  C   VAL L  27C     24.909 -38.014 101.941  1.00 20.00           C  
ATOM   1794  O   VAL L  27C     24.788 -39.240 101.788  1.00 20.00           O  
ATOM   1795  CB  VAL L  27C     23.140 -36.975 100.446  1.00 20.00           C  
ATOM   1796  CG1 VAL L  27C     24.251 -36.597  99.480  1.00 20.00           C  
ATOM   1797  CG2 VAL L  27C     22.514 -38.305 100.015  1.00 20.00           C  
ATOM   1798  N   GLY L  28      26.080 -37.413 102.167  1.00 16.95           N  
ATOM   1799  CA  GLY L  28      27.316 -38.175 102.177  1.00 16.95           C  
ATOM   1800  C   GLY L  28      27.455 -38.796 100.800  1.00 16.95           C  
ATOM   1801  O   GLY L  28      28.042 -39.863 100.647  1.00 16.95           O  
ATOM   1802  N   GLY L  29      26.886 -38.113  99.803  1.00 16.95           N  
ATOM   1803  CA  GLY L  29      26.920 -38.579  98.425  1.00 16.95           C  
ATOM   1804  C   GLY L  29      26.783 -37.453  97.407  1.00 16.95           C  
ATOM   1805  O   GLY L  29      26.058 -37.573  96.416  1.00 16.95           O  
ATOM   1806  N   TYR L  30      27.469 -36.342  97.660  1.00 20.00           N  
ATOM   1807  CA  TYR L  30      27.455 -35.195  96.748  1.00 20.00           C  
ATOM   1808  C   TYR L  30      28.844 -35.139  96.124  1.00 20.00           C  
ATOM   1809  O   TYR L  30      29.744 -34.484  96.656  1.00 20.00           O  
ATOM   1810  CB  TYR L  30      27.179 -33.895  97.512  1.00 20.00           C  
ATOM   1811  CG  TYR L  30      25.712 -33.650  97.803  1.00 20.00           C  
ATOM   1812  CD1 TYR L  30      24.791 -33.512  96.768  1.00 20.00           C  
ATOM   1813  CD2 TYR L  30      25.245 -33.567  99.117  1.00 20.00           C  
ATOM   1814  CE1 TYR L  30      23.435 -33.302  97.034  1.00 20.00           C  
ATOM   1815  CE2 TYR L  30      23.890 -33.357  99.397  1.00 20.00           C  
ATOM   1816  CZ  TYR L  30      22.989 -33.228  98.351  1.00 20.00           C  
ATOM   1817  OH  TYR L  30      21.644 -33.055  98.617  1.00 20.00           O  
ATOM   1818  N   ASN L  31      29.017 -35.843  95.009  1.00 16.95           N  
ATOM   1819  CA  ASN L  31      30.305 -35.885  94.331  1.00 16.95           C  
ATOM   1820  C   ASN L  31      30.638 -34.604  93.590  1.00 16.95           C  
ATOM   1821  O   ASN L  31      31.584 -34.565  92.809  1.00 16.95           O  
ATOM   1822  CB  ASN L  31      30.349 -37.062  93.363  1.00 16.95           C  
ATOM   1823  CG  ASN L  31      29.899 -38.343  94.009  1.00 16.95           C  
ATOM   1824  OD1 ASN L  31      29.845 -38.452  95.234  1.00 16.95           O  
ATOM   1825  ND2 ASN L  31      29.575 -39.333  93.185  1.00 16.95           N  
ATOM   1826  N   TYR L  32      29.858 -33.556  93.818  1.00 16.95           N  
ATOM   1827  CA  TYR L  32      30.147 -32.289  93.162  1.00 16.95           C  
ATOM   1828  C   TYR L  32      30.803 -31.352  94.174  1.00 16.95           C  
ATOM   1829  O   TYR L  32      30.127 -30.653  94.938  1.00 16.95           O  
ATOM   1830  CB  TYR L  32      28.872 -31.649  92.591  1.00 16.95           C  
ATOM   1831  CG  TYR L  32      29.109 -30.682  91.437  1.00 16.95           C  
ATOM   1832  CD1 TYR L  32      30.267 -29.901  91.375  1.00 16.95           C  
ATOM   1833  CD2 TYR L  32      28.145 -30.508  90.435  1.00 16.95           C  
ATOM   1834  CE1 TYR L  32      30.454 -28.963  90.351  1.00 16.95           C  
ATOM   1835  CE2 TYR L  32      28.324 -29.570  89.407  1.00 16.95           C  
ATOM   1836  CZ  TYR L  32      29.477 -28.798  89.378  1.00 16.95           C  
ATOM   1837  OH  TYR L  32      29.628 -27.827  88.414  1.00 16.95           O  
ATOM   1838  N   VAL L  33      32.130 -31.366  94.178  1.00 16.95           N  
ATOM   1839  CA  VAL L  33      32.901 -30.529  95.069  1.00 16.95           C  
ATOM   1840  C   VAL L  33      33.870 -29.734  94.204  1.00 16.95           C  
ATOM   1841  O   VAL L  33      34.638 -30.316  93.449  1.00 16.95           O  
ATOM   1842  CB  VAL L  33      33.682 -31.388  96.071  1.00 16.95           C  
ATOM   1843  CG1 VAL L  33      34.453 -30.505  97.023  1.00 16.95           C  
ATOM   1844  CG2 VAL L  33      32.731 -32.277  96.827  1.00 16.95           C  
ATOM   1845  N   SER L  34      33.814 -28.409  94.292  1.00 16.95           N  
ATOM   1846  CA  SER L  34      34.704 -27.553  93.513  1.00 16.95           C  
ATOM   1847  C   SER L  34      35.746 -26.893  94.434  1.00 16.95           C  
ATOM   1848  O   SER L  34      35.554 -26.842  95.652  1.00 16.95           O  
ATOM   1849  CB  SER L  34      33.886 -26.487  92.786  1.00 16.95           C  
ATOM   1850  OG  SER L  34      32.636 -26.293  93.415  1.00 16.95           O  
ATOM   1851  N   TRP L  35      36.842 -26.389  93.860  1.00 16.95           N  
ATOM   1852  CA  TRP L  35      37.896 -25.752  94.654  1.00 16.95           C  
ATOM   1853  C   TRP L  35      38.377 -24.405  94.121  1.00 16.95           C  
ATOM   1854  O   TRP L  35      39.440 -24.313  93.524  1.00 16.95           O  
ATOM   1855  CB  TRP L  35      39.099 -26.695  94.782  1.00 16.95           C  
ATOM   1856  CG  TRP L  35      38.920 -27.765  95.830  1.00 16.95           C  
ATOM   1857  CD1 TRP L  35      38.477 -29.050  95.635  1.00 16.95           C  
ATOM   1858  CD2 TRP L  35      39.166 -27.635  97.235  1.00 16.95           C  
ATOM   1859  NE1 TRP L  35      38.435 -29.722  96.834  1.00 16.95           N  
ATOM   1860  CE2 TRP L  35      38.853 -28.877  97.832  1.00 16.95           C  
ATOM   1861  CE3 TRP L  35      39.621 -26.588  98.049  1.00 16.95           C  
ATOM   1862  CZ2 TRP L  35      38.982 -29.098  99.208  1.00 16.95           C  
ATOM   1863  CZ3 TRP L  35      39.749 -26.810  99.415  1.00 16.95           C  
ATOM   1864  CH2 TRP L  35      39.431 -28.055  99.979  1.00 16.95           C  
ATOM   1865  N   TYR L  36      37.604 -23.358  94.364  1.00 16.95           N  
ATOM   1866  CA  TYR L  36      37.962 -22.018  93.908  1.00 16.95           C  
ATOM   1867  C   TYR L  36      39.238 -21.502  94.573  1.00 16.95           C  
ATOM   1868  O   TYR L  36      39.405 -21.639  95.782  1.00 16.95           O  
ATOM   1869  CB  TYR L  36      36.819 -21.029  94.206  1.00 16.95           C  
ATOM   1870  CG  TYR L  36      35.490 -21.374  93.557  1.00 16.95           C  
ATOM   1871  CD1 TYR L  36      34.605 -22.279  94.153  1.00 16.95           C  
ATOM   1872  CD2 TYR L  36      35.116 -20.793  92.349  1.00 16.95           C  
ATOM   1873  CE1 TYR L  36      33.377 -22.595  93.558  1.00 16.95           C  
ATOM   1874  CE2 TYR L  36      33.894 -21.102  91.748  1.00 16.95           C  
ATOM   1875  CZ  TYR L  36      33.032 -22.002  92.355  1.00 16.95           C  
ATOM   1876  OH  TYR L  36      31.841 -22.304  91.735  1.00 16.95           O  
ATOM   1877  N   GLN L  37      40.137 -20.920  93.781  1.00 16.95           N  
ATOM   1878  CA  GLN L  37      41.365 -20.333  94.313  1.00 16.95           C  
ATOM   1879  C   GLN L  37      41.174 -18.829  94.249  1.00 16.95           C  
ATOM   1880  O   GLN L  37      40.836 -18.300  93.196  1.00 16.95           O  
ATOM   1881  CB  GLN L  37      42.585 -20.672  93.464  1.00 16.95           C  
ATOM   1882  CG  GLN L  37      43.661 -19.608  93.614  1.00 16.95           C  
ATOM   1883  CD  GLN L  37      44.877 -19.847  92.760  1.00 16.95           C  
ATOM   1884  OE1 GLN L  37      45.018 -19.266  91.685  1.00 16.95           O  
ATOM   1885  NE2 GLN L  37      45.766 -20.722  93.225  1.00 16.95           N  
ATOM   1886  N   GLN L  38      41.413 -18.122  95.343  1.00 16.95           N  
ATOM   1887  CA  GLN L  38      41.214 -16.680  95.308  1.00 16.95           C  
ATOM   1888  C   GLN L  38      42.376 -15.830  95.783  1.00 16.95           C  
ATOM   1889  O   GLN L  38      42.587 -15.649  96.976  1.00 16.95           O  
ATOM   1890  CB  GLN L  38      39.971 -16.318  96.102  1.00 16.95           C  
ATOM   1891  CG  GLN L  38      39.061 -15.385  95.373  1.00 16.95           C  
ATOM   1892  CD  GLN L  38      38.882 -14.090  96.102  1.00 16.95           C  
ATOM   1893  OE1 GLN L  38      39.353 -13.042  95.651  1.00 16.95           O  
ATOM   1894  NE2 GLN L  38      38.201 -14.144  97.246  1.00 16.95           N  
ATOM   1895  N   HIS L  39      43.130 -15.293  94.841  1.00 16.95           N  
ATOM   1896  CA  HIS L  39      44.246 -14.463  95.212  1.00 16.95           C  
ATOM   1897  C   HIS L  39      43.690 -13.184  95.827  1.00 16.95           C  
ATOM   1898  O   HIS L  39      42.472 -12.986  95.855  1.00 16.95           O  
ATOM   1899  CB  HIS L  39      45.105 -14.164  93.990  1.00 16.95           C  
ATOM   1900  CG  HIS L  39      46.387 -14.939  93.959  1.00 16.95           C  
ATOM   1901  ND1 HIS L  39      47.440 -14.668  94.806  1.00 16.95           N  
ATOM   1902  CD2 HIS L  39      46.778 -15.985  93.195  1.00 16.95           C  
ATOM   1903  CE1 HIS L  39      48.425 -15.515  94.565  1.00 16.95           C  
ATOM   1904  NE2 HIS L  39      48.050 -16.326  93.592  1.00 16.95           N  
ATOM   1905  N   ALA L  40      44.578 -12.328  96.329  1.00 16.95           N  
ATOM   1906  CA  ALA L  40      44.171 -11.074  96.961  1.00 16.95           C  
ATOM   1907  C   ALA L  40      44.045  -9.940  95.954  1.00 16.95           C  
ATOM   1908  O   ALA L  40      45.007  -9.613  95.249  1.00 16.95           O  
ATOM   1909  CB  ALA L  40      45.164 -10.696  98.045  1.00 16.95           C  
ATOM   1910  N   GLY L  41      42.853  -9.346  95.897  1.00 16.95           N  
ATOM   1911  CA  GLY L  41      42.598  -8.255  94.975  1.00 16.95           C  
ATOM   1912  C   GLY L  41      42.231  -8.729  93.579  1.00 16.95           C  
ATOM   1913  O   GLY L  41      42.366  -7.972  92.615  1.00 16.95           O  
ATOM   1914  N   LYS L  42      41.777  -9.980  93.468  1.00 16.95           N  
ATOM   1915  CA  LYS L  42      41.382 -10.565  92.181  1.00 16.95           C  
ATOM   1916  C   LYS L  42      40.113 -11.411  92.342  1.00 16.95           C  
ATOM   1917  O   LYS L  42      39.718 -11.750  93.465  1.00 16.95           O  
ATOM   1918  CB  LYS L  42      42.519 -11.426  91.609  1.00 16.95           C  
ATOM   1919  CG  LYS L  42      43.920 -10.806  91.761  1.00 16.95           C  
ATOM   1920  CD  LYS L  42      44.976 -11.474  90.869  1.00 16.95           C  
ATOM   1921  CE  LYS L  42      44.801 -12.987  90.788  1.00 16.95           C  
ATOM   1922  NZ  LYS L  42      45.963 -13.660  90.132  1.00 16.95           N  
ATOM   1923  N   ALA L  43      39.476 -11.751  91.222  1.00 16.95           N  
ATOM   1924  CA  ALA L  43      38.246 -12.535  91.255  1.00 16.95           C  
ATOM   1925  C   ALA L  43      38.514 -14.031  91.315  1.00 16.95           C  
ATOM   1926  O   ALA L  43      39.397 -14.547  90.630  1.00 16.95           O  
ATOM   1927  CB  ALA L  43      37.389 -12.205  90.045  1.00 16.95           C  
ATOM   1928  N   PRO L  44      37.752 -14.749  92.148  1.00 16.95           N  
ATOM   1929  CA  PRO L  44      37.890 -16.201  92.318  1.00 16.95           C  
ATOM   1930  C   PRO L  44      37.982 -16.953  90.993  1.00 16.95           C  
ATOM   1931  O   PRO L  44      37.804 -16.365  89.927  1.00 16.95           O  
ATOM   1932  CB  PRO L  44      36.641 -16.595  93.112  1.00 16.95           C  
ATOM   1933  CG  PRO L  44      36.256 -15.356  93.856  1.00 16.95           C  
ATOM   1934  CD  PRO L  44      36.694 -14.182  93.004  1.00 16.95           C  
ATOM   1935  N   LYS L  45      38.260 -18.252  91.056  1.00 16.95           N  
ATOM   1936  CA  LYS L  45      38.357 -19.036  89.832  1.00 16.95           C  
ATOM   1937  C   LYS L  45      38.474 -20.549  90.024  1.00 16.95           C  
ATOM   1938  O   LYS L  45      39.463 -21.048  90.549  1.00 16.95           O  
ATOM   1939  CB  LYS L  45      39.528 -18.521  88.978  1.00 16.95           C  
ATOM   1940  CG  LYS L  45      40.921 -18.954  89.436  1.00 16.95           C  
ATOM   1941  CD  LYS L  45      41.710 -19.586  88.293  1.00 16.95           C  
ATOM   1942  CE  LYS L  45      42.812 -18.656  87.808  1.00 16.95           C  
ATOM   1943  NZ  LYS L  45      43.006 -18.721  86.326  1.00 16.95           N  
ATOM   1944  N   VAL L  46      37.447 -21.271  89.590  1.00 16.95           N  
ATOM   1945  CA  VAL L  46      37.407 -22.729  89.678  1.00 16.95           C  
ATOM   1946  C   VAL L  46      38.781 -23.330  89.365  1.00 16.95           C  
ATOM   1947  O   VAL L  46      39.214 -23.296  88.217  1.00 16.95           O  
ATOM   1948  CB  VAL L  46      36.380 -23.287  88.659  1.00 16.95           C  
ATOM   1949  CG1 VAL L  46      36.519 -24.782  88.546  1.00 16.95           C  
ATOM   1950  CG2 VAL L  46      34.964 -22.901  89.072  1.00 16.95           C  
ATOM   1951  N   ILE L  47      39.464 -23.876  90.373  1.00 16.95           N  
ATOM   1952  CA  ILE L  47      40.793 -24.484  90.168  1.00 16.95           C  
ATOM   1953  C   ILE L  47      40.711 -26.010  90.020  1.00 16.95           C  
ATOM   1954  O   ILE L  47      41.573 -26.638  89.420  1.00 16.95           O  
ATOM   1955  CB  ILE L  47      41.780 -24.085  91.321  1.00 16.95           C  
ATOM   1956  CG1 ILE L  47      42.863 -23.155  90.757  1.00 16.95           C  
ATOM   1957  CG2 ILE L  47      42.383 -25.323  92.000  1.00 16.95           C  
ATOM   1958  CD1 ILE L  47      44.101 -23.845  90.235  1.00 16.95           C  
ATOM   1959  N   ILE L  48      39.665 -26.591  90.585  1.00 16.95           N  
ATOM   1960  CA  ILE L  48      39.408 -28.020  90.485  1.00 16.95           C  
ATOM   1961  C   ILE L  48      37.903 -28.088  90.610  1.00 16.95           C  
ATOM   1962  O   ILE L  48      37.295 -27.180  91.184  1.00 16.95           O  
ATOM   1963  CB  ILE L  48      40.066 -28.831  91.631  1.00 16.95           C  
ATOM   1964  CG1 ILE L  48      41.426 -29.368  91.171  1.00 16.95           C  
ATOM   1965  CG2 ILE L  48      39.180 -30.010  92.038  1.00 16.95           C  
ATOM   1966  CD1 ILE L  48      42.344 -29.752  92.311  1.00 16.95           C  
ATOM   1967  N   TYR L  49      37.293 -29.130  90.056  1.00 16.95           N  
ATOM   1968  CA  TYR L  49      35.849 -29.270  90.140  1.00 16.95           C  
ATOM   1969  C   TYR L  49      35.479 -30.738  90.113  1.00 16.95           C  
ATOM   1970  O   TYR L  49      36.257 -31.563  89.639  1.00 16.95           O  
ATOM   1971  CB  TYR L  49      35.172 -28.527  88.989  1.00 16.95           C  
ATOM   1972  CG  TYR L  49      35.201 -29.264  87.672  1.00 16.95           C  
ATOM   1973  CD1 TYR L  49      36.330 -29.234  86.856  1.00 16.95           C  
ATOM   1974  CD2 TYR L  49      34.095 -29.990  87.240  1.00 16.95           C  
ATOM   1975  CE1 TYR L  49      36.356 -29.913  85.639  1.00 16.95           C  
ATOM   1976  CE2 TYR L  49      34.108 -30.676  86.023  1.00 16.95           C  
ATOM   1977  CZ  TYR L  49      35.241 -30.634  85.233  1.00 16.95           C  
ATOM   1978  OH  TYR L  49      35.261 -31.339  84.055  1.00 16.95           O  
ATOM   1979  N   GLU L  50      34.293 -31.057  90.625  1.00 16.95           N  
ATOM   1980  CA  GLU L  50      33.824 -32.432  90.680  1.00 16.95           C  
ATOM   1981  C   GLU L  50      34.845 -33.286  91.442  1.00 16.95           C  
ATOM   1982  O   GLU L  50      35.452 -34.196  90.872  1.00 16.95           O  
ATOM   1983  CB  GLU L  50      33.656 -32.990  89.269  1.00 16.95           C  
ATOM   1984  CG  GLU L  50      32.230 -33.061  88.763  1.00 16.95           C  
ATOM   1985  CD  GLU L  50      32.176 -33.165  87.248  1.00 16.95           C  
ATOM   1986  OE1 GLU L  50      32.936 -33.980  86.681  1.00 16.95           O  
ATOM   1987  OE2 GLU L  50      31.382 -32.428  86.627  1.00 16.95           O  
ATOM   1988  N   VAL L  51      35.041 -32.985  92.724  1.00 16.95           N  
ATOM   1989  CA  VAL L  51      35.982 -33.729  93.556  1.00 16.95           C  
ATOM   1990  C   VAL L  51      37.418 -33.620  93.066  1.00 16.95           C  
ATOM   1991  O   VAL L  51      38.279 -33.079  93.761  1.00 16.95           O  
ATOM   1992  CB  VAL L  51      35.622 -35.246  93.627  1.00 16.95           C  
ATOM   1993  CG1 VAL L  51      36.558 -35.969  94.586  1.00 16.95           C  
ATOM   1994  CG2 VAL L  51      34.197 -35.428  94.087  1.00 16.95           C  
ATOM   1995  N   ASN L  52      37.672 -34.121  91.863  1.00 16.95           N  
ATOM   1996  CA  ASN L  52      39.025 -34.113  91.333  1.00 16.95           C  
ATOM   1997  C   ASN L  52      39.248 -33.743  89.872  1.00 16.95           C  
ATOM   1998  O   ASN L  52      40.359 -33.930  89.368  1.00 16.95           O  
ATOM   1999  CB  ASN L  52      39.658 -35.481  91.568  1.00 16.95           C  
ATOM   2000  CG  ASN L  52      39.016 -36.569  90.731  1.00 16.95           C  
ATOM   2001  OD1 ASN L  52      37.934 -36.377  90.163  1.00 16.95           O  
ATOM   2002  ND2 ASN L  52      39.682 -37.721  90.645  1.00 16.95           N  
ATOM   2003  N   LYS L  53      38.238 -33.229  89.180  1.00 16.95           N  
ATOM   2004  CA  LYS L  53      38.454 -32.870  87.777  1.00 16.95           C  
ATOM   2005  C   LYS L  53      39.106 -31.499  87.633  1.00 16.95           C  
ATOM   2006  O   LYS L  53      38.783 -30.557  88.369  1.00 16.95           O  
ATOM   2007  CB  LYS L  53      37.147 -32.906  86.991  1.00 16.95           C  
ATOM   2008  CG  LYS L  53      37.320 -33.377  85.565  1.00 16.95           C  
ATOM   2009  CD  LYS L  53      36.750 -34.762  85.400  1.00 16.95           C  
ATOM   2010  CE  LYS L  53      35.271 -34.701  85.103  1.00 16.95           C  
ATOM   2011  NZ  LYS L  53      34.526 -35.728  85.873  1.00 16.95           N  
ATOM   2012  N   ARG L  54      40.021 -31.394  86.673  1.00 16.95           N  
ATOM   2013  CA  ARG L  54      40.745 -30.152  86.445  1.00 16.95           C  
ATOM   2014  C   ARG L  54      40.512 -29.515  85.077  1.00 16.95           C  
ATOM   2015  O   ARG L  54      40.724 -30.132  84.036  1.00 16.95           O  
ATOM   2016  CB  ARG L  54      42.243 -30.388  86.650  1.00 16.95           C  
ATOM   2017  CG  ARG L  54      42.727 -30.149  88.073  1.00 16.95           C  
ATOM   2018  CD  ARG L  54      44.222 -29.953  88.092  1.00 16.95           C  
ATOM   2019  NE  ARG L  54      44.782 -30.154  86.766  1.00 16.95           N  
ATOM   2020  CZ  ARG L  54      45.222 -31.323  86.316  1.00 16.95           C  
ATOM   2021  NH1 ARG L  54      45.167 -32.396  87.092  1.00 16.95           N  
ATOM   2022  NH2 ARG L  54      45.708 -31.421  85.087  1.00 16.95           N  
ATOM   2023  N   PRO L  55      40.095 -28.247  85.070  1.00 16.95           N  
ATOM   2024  CA  PRO L  55      39.842 -27.542  83.811  1.00 16.95           C  
ATOM   2025  C   PRO L  55      41.135 -27.272  83.049  1.00 16.95           C  
ATOM   2026  O   PRO L  55      42.227 -27.642  83.488  1.00 16.95           O  
ATOM   2027  CB  PRO L  55      39.168 -26.247  84.256  1.00 16.95           C  
ATOM   2028  CG  PRO L  55      39.713 -26.020  85.661  1.00 16.95           C  
ATOM   2029  CD  PRO L  55      39.861 -27.391  86.253  1.00 16.95           C  
ATOM   2030  N   SER L  56      41.002 -26.623  81.901  1.00 16.95           N  
ATOM   2031  CA  SER L  56      42.155 -26.296  81.090  1.00 16.95           C  
ATOM   2032  C   SER L  56      42.926 -25.213  81.825  1.00 16.95           C  
ATOM   2033  O   SER L  56      42.335 -24.267  82.350  1.00 16.95           O  
ATOM   2034  CB  SER L  56      41.713 -25.784  79.712  1.00 16.95           C  
ATOM   2035  OG  SER L  56      41.266 -26.835  78.863  1.00 16.95           O  
ATOM   2036  N   GLY L  57      44.246 -25.368  81.869  1.00 16.95           N  
ATOM   2037  CA  GLY L  57      45.096 -24.396  82.532  1.00 16.95           C  
ATOM   2038  C   GLY L  57      45.777 -24.964  83.759  1.00 16.95           C  
ATOM   2039  O   GLY L  57      46.994 -25.158  83.780  1.00 16.95           O  
ATOM   2040  N   VAL L  58      44.972 -25.228  84.780  1.00 16.95           N  
ATOM   2041  CA  VAL L  58      45.431 -25.780  86.047  1.00 16.95           C  
ATOM   2042  C   VAL L  58      46.582 -26.778  85.922  1.00 16.95           C  
ATOM   2043  O   VAL L  58      46.455 -27.815  85.268  1.00 16.95           O  
ATOM   2044  CB  VAL L  58      44.265 -26.479  86.777  1.00 16.95           C  
ATOM   2045  CG1 VAL L  58      44.602 -26.680  88.238  1.00 16.95           C  
ATOM   2046  CG2 VAL L  58      43.006 -25.653  86.641  1.00 16.95           C  
ATOM   2047  N   PRO L  59      47.727 -26.475  86.552  1.00 16.95           N  
ATOM   2048  CA  PRO L  59      48.881 -27.377  86.493  1.00 16.95           C  
ATOM   2049  C   PRO L  59      48.604 -28.652  87.276  1.00 16.95           C  
ATOM   2050  O   PRO L  59      47.808 -28.641  88.213  1.00 16.95           O  
ATOM   2051  CB  PRO L  59      50.010 -26.563  87.119  1.00 16.95           C  
ATOM   2052  CG  PRO L  59      49.321 -25.609  88.014  1.00 16.95           C  
ATOM   2053  CD  PRO L  59      48.018 -25.269  87.345  1.00 16.95           C  
ATOM   2054  N   ASP L  60      49.267 -29.740  86.889  1.00 16.95           N  
ATOM   2055  CA  ASP L  60      49.096 -31.035  87.548  1.00 16.95           C  
ATOM   2056  C   ASP L  60      49.399 -30.949  89.043  1.00 16.95           C  
ATOM   2057  O   ASP L  60      49.051 -31.840  89.816  1.00 16.95           O  
ATOM   2058  CB  ASP L  60      50.013 -32.082  86.910  1.00 16.95           C  
ATOM   2059  CG  ASP L  60      49.988 -32.043  85.400  1.00 16.95           C  
ATOM   2060  OD1 ASP L  60      49.614 -31.000  84.828  1.00 16.95           O  
ATOM   2061  OD2 ASP L  60      50.350 -33.066  84.780  1.00 16.95           O  
ATOM   2062  N   ARG L  61      50.060 -29.865  89.428  1.00 16.95           N  
ATOM   2063  CA  ARG L  61      50.433 -29.608  90.809  1.00 16.95           C  
ATOM   2064  C   ARG L  61      49.215 -29.705  91.706  1.00 16.95           C  
ATOM   2065  O   ARG L  61      49.329 -29.750  92.926  1.00 16.95           O  
ATOM   2066  CB  ARG L  61      51.027 -28.207  90.928  1.00 16.95           C  
ATOM   2067  CG  ARG L  61      52.524 -28.178  91.048  1.00 16.95           C  
ATOM   2068  CD  ARG L  61      52.974 -26.821  91.503  1.00 16.95           C  
ATOM   2069  NE  ARG L  61      51.867 -25.873  91.555  1.00 16.95           N  
ATOM   2070  CZ  ARG L  61      51.904 -24.653  91.025  1.00 16.95           C  
ATOM   2071  NH1 ARG L  61      52.992 -24.232  90.398  1.00 16.95           N  
ATOM   2072  NH2 ARG L  61      50.857 -23.845  91.128  1.00 16.95           N  
ATOM   2073  N   PHE L  62      48.042 -29.743  91.097  1.00 16.95           N  
ATOM   2074  CA  PHE L  62      46.823 -29.811  91.874  1.00 16.95           C  
ATOM   2075  C   PHE L  62      46.048 -31.117  91.709  1.00 16.95           C  
ATOM   2076  O   PHE L  62      45.867 -31.622  90.595  1.00 16.95           O  
ATOM   2077  CB  PHE L  62      45.938 -28.614  91.524  1.00 16.95           C  
ATOM   2078  CG  PHE L  62      46.597 -27.286  91.767  1.00 16.95           C  
ATOM   2079  CD1 PHE L  62      47.623 -26.843  90.943  1.00 16.95           C  
ATOM   2080  CD2 PHE L  62      46.181 -26.471  92.808  1.00 16.95           C  
ATOM   2081  CE1 PHE L  62      48.222 -25.611  91.149  1.00 16.95           C  
ATOM   2082  CE2 PHE L  62      46.778 -25.234  93.019  1.00 16.95           C  
ATOM   2083  CZ  PHE L  62      47.801 -24.806  92.184  1.00 16.95           C  
ATOM   2084  N   SER L  63      45.611 -31.664  92.840  1.00 16.95           N  
ATOM   2085  CA  SER L  63      44.838 -32.895  92.858  1.00 16.95           C  
ATOM   2086  C   SER L  63      43.575 -32.630  93.664  1.00 16.95           C  
ATOM   2087  O   SER L  63      43.538 -31.706  94.468  1.00 16.95           O  
ATOM   2088  CB  SER L  63      45.639 -34.033  93.504  1.00 16.95           C  
ATOM   2089  OG  SER L  63      46.883 -33.580  94.007  1.00 16.95           O  
ATOM   2090  N   GLY L  64      42.543 -33.434  93.433  1.00 16.95           N  
ATOM   2091  CA  GLY L  64      41.290 -33.270  94.152  1.00 16.95           C  
ATOM   2092  C   GLY L  64      40.736 -34.623  94.554  1.00 16.95           C  
ATOM   2093  O   GLY L  64      40.939 -35.603  93.847  1.00 16.95           O  
ATOM   2094  N   SER L  65      40.043 -34.699  95.683  1.00 16.95           N  
ATOM   2095  CA  SER L  65      39.502 -35.980  96.104  1.00 16.95           C  
ATOM   2096  C   SER L  65      38.596 -35.874  97.314  1.00 16.95           C  
ATOM   2097  O   SER L  65      38.736 -34.962  98.126  1.00 16.95           O  
ATOM   2098  CB  SER L  65      40.646 -36.939  96.415  1.00 16.95           C  
ATOM   2099  OG  SER L  65      41.822 -36.223  96.731  1.00 16.95           O  
ATOM   2100  N   LYS L  66      37.661 -36.817  97.423  1.00 16.95           N  
ATOM   2101  CA  LYS L  66      36.730 -36.869  98.546  1.00 16.95           C  
ATOM   2102  C   LYS L  66      37.080 -38.077  99.409  1.00 16.95           C  
ATOM   2103  O   LYS L  66      37.160 -39.206  98.923  1.00 16.95           O  
ATOM   2104  CB  LYS L  66      35.287 -36.983  98.050  1.00 16.95           C  
ATOM   2105  CG  LYS L  66      34.277 -36.233  98.909  1.00 16.95           C  
ATOM   2106  CD  LYS L  66      32.855 -36.713  98.643  1.00 16.95           C  
ATOM   2107  CE  LYS L  66      32.366 -36.275  97.262  1.00 16.95           C  
ATOM   2108  NZ  LYS L  66      32.032 -37.414  96.360  1.00 16.95           N  
ATOM   2109  N   SER L  67      37.294 -37.824 100.695  1.00 16.95           N  
ATOM   2110  CA  SER L  67      37.658 -38.864 101.645  1.00 16.95           C  
ATOM   2111  C   SER L  67      36.523 -39.110 102.637  1.00 16.95           C  
ATOM   2112  O   SER L  67      36.469 -38.490 103.701  1.00 16.95           O  
ATOM   2113  CB  SER L  67      38.936 -38.445 102.391  1.00 16.95           C  
ATOM   2114  OG  SER L  67      39.337 -37.117 102.057  1.00 16.95           O  
ATOM   2115  N   GLY L  68      35.619 -40.017 102.279  1.00 16.95           N  
ATOM   2116  CA  GLY L  68      34.493 -40.331 103.140  1.00 16.95           C  
ATOM   2117  C   GLY L  68      33.509 -39.184 103.278  1.00 16.95           C  
ATOM   2118  O   GLY L  68      32.307 -39.360 103.135  1.00 16.95           O  
ATOM   2119  N   ASN L  69      34.033 -38.000 103.555  1.00 16.95           N  
ATOM   2120  CA  ASN L  69      33.231 -36.793 103.726  1.00 16.95           C  
ATOM   2121  C   ASN L  69      34.218 -35.621 103.723  1.00 16.95           C  
ATOM   2122  O   ASN L  69      33.902 -34.508 104.172  1.00 16.95           O  
ATOM   2123  CB  ASN L  69      32.495 -36.836 105.072  1.00 16.95           C  
ATOM   2124  CG  ASN L  69      30.993 -36.805 104.917  1.00 16.95           C  
ATOM   2125  OD1 ASN L  69      30.291 -36.103 105.653  1.00 16.95           O  
ATOM   2126  ND2 ASN L  69      30.486 -37.569 103.954  1.00 16.95           N  
ATOM   2127  N   THR L  70      35.419 -35.893 103.215  1.00 16.95           N  
ATOM   2128  CA  THR L  70      36.478 -34.901 103.174  1.00 16.95           C  
ATOM   2129  C   THR L  70      36.992 -34.610 101.763  1.00 16.95           C  
ATOM   2130  O   THR L  70      37.611 -35.459 101.118  1.00 16.95           O  
ATOM   2131  CB  THR L  70      37.659 -35.349 104.065  1.00 16.95           C  
ATOM   2132  OG1 THR L  70      37.188 -35.558 105.400  1.00 16.95           O  
ATOM   2133  CG2 THR L  70      38.754 -34.296 104.091  1.00 16.95           C  
ATOM   2134  N   ALA L  71      36.720 -33.398 101.293  1.00 16.95           N  
ATOM   2135  CA  ALA L  71      37.172 -32.967  99.983  1.00 16.95           C  
ATOM   2136  C   ALA L  71      38.534 -32.342 100.225  1.00 16.95           C  
ATOM   2137  O   ALA L  71      38.652 -31.389 100.991  1.00 16.95           O  
ATOM   2138  CB  ALA L  71      36.215 -31.938  99.412  1.00 16.95           C  
ATOM   2139  N   SER L  72      39.564 -32.882  99.590  1.00 16.95           N  
ATOM   2140  CA  SER L  72      40.904 -32.356  99.774  1.00 16.95           C  
ATOM   2141  C   SER L  72      41.542 -31.895  98.477  1.00 16.95           C  
ATOM   2142  O   SER L  72      41.135 -32.303  97.384  1.00 16.95           O  
ATOM   2143  CB  SER L  72      41.790 -33.407 100.435  1.00 16.95           C  
ATOM   2144  OG  SER L  72      41.361 -33.639 101.766  1.00 16.95           O  
ATOM   2145  N   LEU L  73      42.547 -31.035  98.625  1.00 16.95           N  
ATOM   2146  CA  LEU L  73      43.296 -30.466  97.512  1.00 16.95           C  
ATOM   2147  C   LEU L  73      44.752 -30.395  97.953  1.00 16.95           C  
ATOM   2148  O   LEU L  73      45.033 -30.248  99.143  1.00 16.95           O  
ATOM   2149  CB  LEU L  73      42.774 -29.064  97.185  1.00 16.95           C  
ATOM   2150  CG  LEU L  73      43.742 -28.123  96.477  1.00 16.95           C  
ATOM   2151  CD1 LEU L  73      43.353 -28.028  95.023  1.00 16.95           C  
ATOM   2152  CD2 LEU L  73      43.720 -26.755  97.140  1.00 16.95           C  
ATOM   2153  N   THR L  74      45.671 -30.498  96.999  1.00 16.95           N  
ATOM   2154  CA  THR L  74      47.091 -30.466  97.317  1.00 16.95           C  
ATOM   2155  C   THR L  74      47.864 -29.664  96.307  1.00 16.95           C  
ATOM   2156  O   THR L  74      47.724 -29.888  95.111  1.00 16.95           O  
ATOM   2157  CB  THR L  74      47.690 -31.873  97.319  1.00 16.95           C  
ATOM   2158  OG1 THR L  74      46.648 -32.831  97.528  1.00 16.95           O  
ATOM   2159  CG2 THR L  74      48.740 -32.002  98.402  1.00 16.95           C  
ATOM   2160  N   VAL L  75      48.687 -28.738  96.786  1.00 16.95           N  
ATOM   2161  CA  VAL L  75      49.499 -27.919  95.898  1.00 16.95           C  
ATOM   2162  C   VAL L  75      50.971 -28.323  96.001  1.00 16.95           C  
ATOM   2163  O   VAL L  75      51.819 -27.506  96.368  1.00 16.95           O  
ATOM   2164  CB  VAL L  75      49.373 -26.411  96.227  1.00 16.95           C  
ATOM   2165  CG1 VAL L  75      47.977 -25.918  95.927  1.00 16.95           C  
ATOM   2166  CG2 VAL L  75      49.713 -26.169  97.665  1.00 16.95           C  
ATOM   2167  N   SER L  76      51.268 -29.581  95.671  1.00 16.95           N  
ATOM   2168  CA  SER L  76      52.637 -30.096  95.725  1.00 16.95           C  
ATOM   2169  C   SER L  76      53.605 -29.104  95.095  1.00 16.95           C  
ATOM   2170  O   SER L  76      53.228 -28.325  94.225  1.00 16.95           O  
ATOM   2171  CB  SER L  76      52.737 -31.442  94.999  1.00 16.95           C  
ATOM   2172  OG  SER L  76      51.462 -31.901  94.574  1.00 16.95           O  
ATOM   2173  N   GLY L  77      54.854 -29.129  95.541  1.00 16.95           N  
ATOM   2174  CA  GLY L  77      55.833 -28.208  95.000  1.00 16.95           C  
ATOM   2175  C   GLY L  77      55.341 -26.781  95.122  1.00 16.95           C  
ATOM   2176  O   GLY L  77      55.548 -25.956  94.227  1.00 16.95           O  
ATOM   2177  N   LEU L  78      54.680 -26.501  96.240  1.00 16.95           N  
ATOM   2178  CA  LEU L  78      54.139 -25.178  96.520  1.00 16.95           C  
ATOM   2179  C   LEU L  78      54.925 -24.091  95.795  1.00 16.95           C  
ATOM   2180  O   LEU L  78      56.008 -23.715  96.219  1.00 16.95           O  
ATOM   2181  CB  LEU L  78      54.173 -24.907  98.029  1.00 16.95           C  
ATOM   2182  CG  LEU L  78      52.880 -24.594  98.789  1.00 16.95           C  
ATOM   2183  CD1 LEU L  78      53.243 -24.186 100.194  1.00 16.95           C  
ATOM   2184  CD2 LEU L  78      52.103 -23.488  98.112  1.00 16.95           C  
ATOM   2185  N   GLN L  79      54.384 -23.597  94.692  1.00 16.95           N  
ATOM   2186  CA  GLN L  79      55.052 -22.547  93.947  1.00 16.95           C  
ATOM   2187  C   GLN L  79      54.752 -21.235  94.648  1.00 16.95           C  
ATOM   2188  O   GLN L  79      53.775 -21.127  95.388  1.00 16.95           O  
ATOM   2189  CB  GLN L  79      54.532 -22.500  92.507  1.00 16.95           C  
ATOM   2190  CG  GLN L  79      55.497 -21.893  91.492  1.00 16.95           C  
ATOM   2191  CD  GLN L  79      56.904 -22.447  91.614  1.00 16.95           C  
ATOM   2192  OE1 GLN L  79      57.860 -21.690  91.790  1.00 16.95           O  
ATOM   2193  NE2 GLN L  79      57.038 -23.773  91.522  1.00 16.95           N  
ATOM   2194  N   ALA L  80      55.591 -20.236  94.426  1.00 16.95           N  
ATOM   2195  CA  ALA L  80      55.360 -18.949  95.050  1.00 16.95           C  
ATOM   2196  C   ALA L  80      53.965 -18.425  94.691  1.00 16.95           C  
ATOM   2197  O   ALA L  80      53.160 -18.096  95.561  1.00 16.95           O  
ATOM   2198  CB  ALA L  80      56.429 -17.962  94.600  1.00 16.95           C  
ATOM   2199  N   GLU L  81      53.685 -18.362  93.399  1.00 16.95           N  
ATOM   2200  CA  GLU L  81      52.408 -17.869  92.911  1.00 16.95           C  
ATOM   2201  C   GLU L  81      51.217 -18.711  93.353  1.00 16.95           C  
ATOM   2202  O   GLU L  81      50.165 -18.686  92.709  1.00 16.95           O  
ATOM   2203  CB  GLU L  81      52.435 -17.810  91.384  1.00 16.95           C  
ATOM   2204  CG  GLU L  81      53.613 -18.536  90.758  1.00 16.95           C  
ATOM   2205  CD  GLU L  81      54.869 -17.681  90.733  1.00 16.95           C  
ATOM   2206  OE1 GLU L  81      54.904 -16.658  91.446  1.00 16.95           O  
ATOM   2207  OE2 GLU L  81      55.823 -18.023  90.002  1.00 16.95           O  
ATOM   2208  N   ASP L  82      51.359 -19.452  94.443  1.00 16.95           N  
ATOM   2209  CA  ASP L  82      50.257 -20.297  94.891  1.00 16.95           C  
ATOM   2210  C   ASP L  82      49.623 -19.775  96.168  1.00 16.95           C  
ATOM   2211  O   ASP L  82      48.647 -20.336  96.657  1.00 16.95           O  
ATOM   2212  CB  ASP L  82      50.747 -21.741  95.095  1.00 16.95           C  
ATOM   2213  CG  ASP L  82      51.106 -22.442  93.772  1.00 16.95           C  
ATOM   2214  OD1 ASP L  82      50.788 -21.902  92.687  1.00 16.95           O  
ATOM   2215  OD2 ASP L  82      51.704 -23.540  93.820  1.00 16.95           O  
ATOM   2216  N   GLU L  83      50.173 -18.681  96.685  1.00 16.95           N  
ATOM   2217  CA  GLU L  83      49.685 -18.078  97.927  1.00 16.95           C  
ATOM   2218  C   GLU L  83      48.408 -17.262  97.751  1.00 16.95           C  
ATOM   2219  O   GLU L  83      48.444 -16.134  97.269  1.00 16.95           O  
ATOM   2220  CB  GLU L  83      50.782 -17.195  98.550  1.00 16.95           C  
ATOM   2221  CG  GLU L  83      50.465 -16.637  99.942  1.00 16.95           C  
ATOM   2222  CD  GLU L  83      51.628 -15.840 100.543  1.00 16.95           C  
ATOM   2223  OE1 GLU L  83      52.793 -16.113 100.180  1.00 16.95           O  
ATOM   2224  OE2 GLU L  83      51.381 -14.941 101.383  1.00 16.95           O  
ATOM   2225  N   ALA L  84      47.283 -17.841  98.157  1.00 16.95           N  
ATOM   2226  CA  ALA L  84      45.993 -17.169  98.059  1.00 16.95           C  
ATOM   2227  C   ALA L  84      45.037 -17.776  99.073  1.00 16.95           C  
ATOM   2228  O   ALA L  84      45.466 -18.324 100.091  1.00 16.95           O  
ATOM   2229  CB  ALA L  84      45.436 -17.332  96.659  1.00 16.95           C  
ATOM   2230  N   ASP L  85      43.742 -17.653  98.794  1.00 16.95           N  
ATOM   2231  CA  ASP L  85      42.698 -18.221  99.640  1.00 16.95           C  
ATOM   2232  C   ASP L  85      42.181 -19.354  98.795  1.00 16.95           C  
ATOM   2233  O   ASP L  85      42.074 -19.196  97.588  1.00 16.95           O  
ATOM   2234  CB  ASP L  85      41.557 -17.228  99.859  1.00 16.95           C  
ATOM   2235  CG  ASP L  85      41.907 -16.129 100.851  1.00 16.95           C  
ATOM   2236  OD1 ASP L  85      43.049 -16.122 101.355  1.00 16.95           O  
ATOM   2237  OD2 ASP L  85      41.037 -15.272 101.123  1.00 16.95           O  
ATOM   2238  N   TYR L  86      41.863 -20.491  99.399  1.00 16.95           N  
ATOM   2239  CA  TYR L  86      41.349 -21.620  98.626  1.00 16.95           C  
ATOM   2240  C   TYR L  86      39.989 -22.095  99.145  1.00 16.95           C  
ATOM   2241  O   TYR L  86      39.924 -22.771 100.171  1.00 16.95           O  
ATOM   2242  CB  TYR L  86      42.357 -22.777  98.658  1.00 16.95           C  
ATOM   2243  CG  TYR L  86      43.617 -22.506  97.861  1.00 16.95           C  
ATOM   2244  CD1 TYR L  86      43.637 -22.661  96.481  1.00 16.95           C  
ATOM   2245  CD2 TYR L  86      44.780 -22.063  98.486  1.00 16.95           C  
ATOM   2246  CE1 TYR L  86      44.783 -22.375  95.737  1.00 16.95           C  
ATOM   2247  CE2 TYR L  86      45.936 -21.775  97.752  1.00 16.95           C  
ATOM   2248  CZ  TYR L  86      45.929 -21.929  96.375  1.00 16.95           C  
ATOM   2249  OH  TYR L  86      47.058 -21.614  95.637  1.00 16.95           O  
ATOM   2250  N   TYR L  87      38.912 -21.751  98.434  1.00 16.95           N  
ATOM   2251  CA  TYR L  87      37.551 -22.138  98.837  1.00 16.95           C  
ATOM   2252  C   TYR L  87      37.186 -23.539  98.351  1.00 16.95           C  
ATOM   2253  O   TYR L  87      37.928 -24.132  97.579  1.00 16.95           O  
ATOM   2254  CB  TYR L  87      36.530 -21.120  98.307  1.00 16.95           C  
ATOM   2255  CG  TYR L  87      36.803 -19.705  98.768  1.00 16.95           C  
ATOM   2256  CD1 TYR L  87      37.737 -18.909  98.111  1.00 16.95           C  
ATOM   2257  CD2 TYR L  87      36.181 -19.184  99.899  1.00 16.95           C  
ATOM   2258  CE1 TYR L  87      38.052 -17.638  98.571  1.00 16.95           C  
ATOM   2259  CE2 TYR L  87      36.491 -17.913 100.365  1.00 16.95           C  
ATOM   2260  CZ  TYR L  87      37.429 -17.146  99.700  1.00 16.95           C  
ATOM   2261  OH  TYR L  87      37.772 -15.895 100.167  1.00 16.95           O  
ATOM   2262  N   CYS L  88      36.060 -24.071  98.822  1.00 16.95           N  
ATOM   2263  CA  CYS L  88      35.589 -25.397  98.419  1.00 16.95           C  
ATOM   2264  C   CYS L  88      34.063 -25.428  98.529  1.00 16.95           C  
ATOM   2265  O   CYS L  88      33.485 -24.747  99.380  1.00 16.95           O  
ATOM   2266  CB  CYS L  88      36.203 -26.494  99.300  1.00 16.95           C  
ATOM   2267  SG  CYS L  88      35.408 -26.716 100.927  1.00 16.95           S  
ATOM   2268  N   SER L  89      33.404 -26.209  97.671  1.00 16.95           N  
ATOM   2269  CA  SER L  89      31.945 -26.272  97.703  1.00 16.95           C  
ATOM   2270  C   SER L  89      31.313 -27.544  97.170  1.00 16.95           C  
ATOM   2271  O   SER L  89      31.946 -28.327  96.477  1.00 16.95           O  
ATOM   2272  CB  SER L  89      31.356 -25.100  96.929  1.00 16.95           C  
ATOM   2273  OG  SER L  89      30.160 -25.497  96.281  1.00 16.95           O  
ATOM   2274  N   SER L  90      30.038 -27.718  97.504  1.00 16.95           N  
ATOM   2275  CA  SER L  90      29.241 -28.866  97.078  1.00 16.95           C  
ATOM   2276  C   SER L  90      27.899 -28.318  96.606  1.00 16.95           C  
ATOM   2277  O   SER L  90      27.276 -27.524  97.310  1.00 16.95           O  
ATOM   2278  CB  SER L  90      29.020 -29.841  98.252  1.00 16.95           C  
ATOM   2279  OG  SER L  90      27.638 -30.054  98.520  1.00 16.95           O  
ATOM   2280  N   TYR L  91      27.449 -28.722  95.423  1.00 16.95           N  
ATOM   2281  CA  TYR L  91      26.169 -28.226  94.928  1.00 16.95           C  
ATOM   2282  C   TYR L  91      25.016 -29.000  95.540  1.00 16.95           C  
ATOM   2283  O   TYR L  91      25.061 -30.228  95.612  1.00 16.95           O  
ATOM   2284  CB  TYR L  91      26.097 -28.343  93.412  1.00 16.95           C  
ATOM   2285  CG  TYR L  91      25.091 -27.406  92.788  1.00 16.95           C  
ATOM   2286  CD1 TYR L  91      25.282 -26.027  92.827  1.00 16.95           C  
ATOM   2287  CD2 TYR L  91      23.964 -27.901  92.128  1.00 16.95           C  
ATOM   2288  CE1 TYR L  91      24.384 -25.168  92.227  1.00 16.95           C  
ATOM   2289  CE2 TYR L  91      23.053 -27.044  91.521  1.00 16.95           C  
ATOM   2290  CZ  TYR L  91      23.271 -25.679  91.575  1.00 16.95           C  
ATOM   2291  OH  TYR L  91      22.374 -24.820  90.986  1.00 16.95           O  
ATOM   2292  N   GLU L  92      23.980 -28.289  95.971  1.00 16.95           N  
ATOM   2293  CA  GLU L  92      22.836 -28.950  96.582  1.00 16.95           C  
ATOM   2294  C   GLU L  92      21.510 -28.241  96.283  1.00 16.95           C  
ATOM   2295  O   GLU L  92      21.423 -27.015  96.360  1.00 16.95           O  
ATOM   2296  CB  GLU L  92      23.060 -29.060  98.102  1.00 16.95           C  
ATOM   2297  CG  GLU L  92      24.417 -29.656  98.508  1.00 16.95           C  
ATOM   2298  CD  GLU L  92      24.653 -29.657 100.024  1.00 16.95           C  
ATOM   2299  OE1 GLU L  92      23.670 -29.817 100.790  1.00 16.95           O  
ATOM   2300  OE2 GLU L  92      25.828 -29.498 100.450  1.00 16.95           O  
ATOM   2301  N   GLY L  93      20.489 -29.024  95.928  1.00 16.95           N  
ATOM   2302  CA  GLY L  93      19.165 -28.486  95.627  1.00 16.95           C  
ATOM   2303  C   GLY L  93      19.020 -27.314  94.648  1.00 16.95           C  
ATOM   2304  O   GLY L  93      17.952 -26.679  94.587  1.00 16.95           O  
ATOM   2305  N   SER L  94      20.072 -27.033  93.875  1.00 16.95           N  
ATOM   2306  CA  SER L  94      20.074 -25.931  92.905  1.00 16.95           C  
ATOM   2307  C   SER L  94      19.869 -24.581  93.587  1.00 16.95           C  
ATOM   2308  O   SER L  94      19.769 -23.541  92.927  1.00 16.95           O  
ATOM   2309  CB  SER L  94      18.990 -26.133  91.838  1.00 16.95           C  
ATOM   2310  OG  SER L  94      18.892 -24.987  90.998  1.00 16.95           O  
ATOM   2311  N   ASP L  95      19.793 -24.612  94.912  1.00 16.95           N  
ATOM   2312  CA  ASP L  95      19.632 -23.405  95.718  1.00 16.95           C  
ATOM   2313  C   ASP L  95      20.819 -23.419  96.680  1.00 16.95           C  
ATOM   2314  O   ASP L  95      21.522 -22.424  96.845  1.00 16.95           O  
ATOM   2315  CB  ASP L  95      18.319 -23.438  96.521  1.00 16.95           C  
ATOM   2316  CG  ASP L  95      17.079 -23.123  95.665  1.00 16.95           C  
ATOM   2317  OD1 ASP L  95      17.151 -22.236  94.780  1.00 16.95           O  
ATOM   2318  OD2 ASP L  95      16.023 -23.767  95.890  1.00 16.95           O  
ATOM   2319  N   ASN L  95A     21.041 -24.579  97.289  1.00 16.95           N  
ATOM   2320  CA  ASN L  95A     22.121 -24.770  98.239  1.00 16.95           C  
ATOM   2321  C   ASN L  95A     23.452 -24.945  97.534  1.00 16.95           C  
ATOM   2322  O   ASN L  95A     23.793 -26.038  97.079  1.00 16.95           O  
ATOM   2323  CB  ASN L  95A     21.846 -25.994  99.115  1.00 16.95           C  
ATOM   2324  CG  ASN L  95A     21.715 -25.641 100.585  1.00 16.95           C  
ATOM   2325  OD1 ASN L  95A     20.783 -24.940 100.986  1.00 16.95           O  
ATOM   2326  ND2 ASN L  95A     22.651 -26.127 101.399  1.00 16.95           N  
ATOM   2327  N   PHE L  96      24.201 -23.851  97.451  1.00 16.95           N  
ATOM   2328  CA  PHE L  96      25.519 -23.855  96.825  1.00 16.95           C  
ATOM   2329  C   PHE L  96      26.581 -23.753  97.924  1.00 16.95           C  
ATOM   2330  O   PHE L  96      27.675 -23.230  97.686  1.00 16.95           O  
ATOM   2331  CB  PHE L  96      25.677 -22.661  95.870  1.00 16.95           C  
ATOM   2332  CG  PHE L  96      24.646 -22.599  94.772  1.00 16.95           C  
ATOM   2333  CD1 PHE L  96      23.400 -23.194  94.920  1.00 16.95           C  
ATOM   2334  CD2 PHE L  96      24.918 -21.914  93.592  1.00 16.95           C  
ATOM   2335  CE1 PHE L  96      22.443 -23.107  93.918  1.00 16.95           C  
ATOM   2336  CE2 PHE L  96      23.961 -21.820  92.577  1.00 16.95           C  
ATOM   2337  CZ  PHE L  96      22.720 -22.419  92.744  1.00 16.95           C  
ATOM   2338  N   VAL L  97      26.245 -24.255  99.114  1.00 16.95           N  
ATOM   2339  CA  VAL L  97      27.131 -24.230 100.275  1.00 16.95           C  
ATOM   2340  C   VAL L  97      28.583 -23.977  99.920  1.00 16.95           C  
ATOM   2341  O   VAL L  97      29.131 -24.592  99.001  1.00 16.95           O  
ATOM   2342  CB  VAL L  97      27.054 -25.537 101.064  1.00 16.95           C  
ATOM   2343  CG1 VAL L  97      25.793 -25.555 101.898  1.00 16.95           C  
ATOM   2344  CG2 VAL L  97      27.089 -26.720 100.116  1.00 16.95           C  
ATOM   2345  N   PHE L  98      29.205 -23.062 100.654  1.00 16.95           N  
ATOM   2346  CA  PHE L  98      30.590 -22.717 100.400  1.00 16.95           C  
ATOM   2347  C   PHE L  98      31.452 -22.963 101.635  1.00 16.95           C  
ATOM   2348  O   PHE L  98      31.044 -22.655 102.755  1.00 16.95           O  
ATOM   2349  CB  PHE L  98      30.680 -21.246  99.978  1.00 16.95           C  
ATOM   2350  CG  PHE L  98      31.060 -21.041  98.528  1.00 16.95           C  
ATOM   2351  CD1 PHE L  98      32.360 -21.284  98.088  1.00 16.95           C  
ATOM   2352  CD2 PHE L  98      30.124 -20.575  97.605  1.00 16.95           C  
ATOM   2353  CE1 PHE L  98      32.717 -21.063  96.759  1.00 16.95           C  
ATOM   2354  CE2 PHE L  98      30.481 -20.352  96.270  1.00 16.95           C  
ATOM   2355  CZ  PHE L  98      31.779 -20.598  95.852  1.00 16.95           C  
ATOM   2356  N   GLY L  99      32.639 -23.524 101.428  1.00 16.95           N  
ATOM   2357  CA  GLY L  99      33.537 -23.768 102.536  1.00 16.95           C  
ATOM   2358  C   GLY L  99      33.793 -22.456 103.247  1.00 16.95           C  
ATOM   2359  O   GLY L  99      33.082 -21.481 103.006  1.00 16.95           O  
ATOM   2360  N   THR L 100      34.799 -22.404 104.116  1.00 16.95           N  
ATOM   2361  CA  THR L 100      35.073 -21.164 104.834  1.00 16.95           C  
ATOM   2362  C   THR L 100      36.357 -20.458 104.425  1.00 16.95           C  
ATOM   2363  O   THR L 100      36.639 -19.367 104.917  1.00 16.95           O  
ATOM   2364  CB  THR L 100      35.097 -21.365 106.374  1.00 16.95           C  
ATOM   2365  OG1 THR L 100      34.319 -22.517 106.741  1.00 16.95           O  
ATOM   2366  CG2 THR L 100      34.517 -20.127 107.059  1.00 16.95           C  
ATOM   2367  N   GLY L 101      37.130 -21.071 103.533  1.00 16.95           N  
ATOM   2368  CA  GLY L 101      38.359 -20.446 103.069  1.00 16.95           C  
ATOM   2369  C   GLY L 101      39.640 -20.832 103.781  1.00 16.95           C  
ATOM   2370  O   GLY L 101      39.719 -20.797 105.008  1.00 16.95           O  
ATOM   2371  N   THR L 102      40.646 -21.198 102.992  1.00 16.95           N  
ATOM   2372  CA  THR L 102      41.960 -21.593 103.500  1.00 16.95           C  
ATOM   2373  C   THR L 102      43.009 -20.745 102.801  1.00 16.95           C  
ATOM   2374  O   THR L 102      43.127 -20.777 101.578  1.00 16.95           O  
ATOM   2375  CB  THR L 102      42.275 -23.072 103.200  1.00 16.95           C  
ATOM   2376  OG1 THR L 102      41.328 -23.916 103.867  1.00 16.95           O  
ATOM   2377  CG2 THR L 102      43.671 -23.417 103.672  1.00 16.95           C  
ATOM   2378  N   LYS L 103      43.774 -19.991 103.576  1.00 16.95           N  
ATOM   2379  CA  LYS L 103      44.789 -19.125 103.006  1.00 16.95           C  
ATOM   2380  C   LYS L 103      46.181 -19.714 103.069  1.00 16.95           C  
ATOM   2381  O   LYS L 103      46.812 -19.718 104.125  1.00 16.95           O  
ATOM   2382  CB  LYS L 103      44.780 -17.770 103.720  1.00 16.95           C  
ATOM   2383  CG  LYS L 103      45.892 -16.823 103.281  1.00 16.95           C  
ATOM   2384  CD  LYS L 103      46.618 -16.231 104.476  1.00 16.95           C  
ATOM   2385  CE  LYS L 103      46.492 -14.716 104.487  1.00 16.95           C  
ATOM   2386  NZ  LYS L 103      47.420 -14.071 105.475  1.00 16.95           N  
ATOM   2387  N   VAL L 104      46.665 -20.206 101.935  1.00 16.95           N  
ATOM   2388  CA  VAL L 104      48.008 -20.770 101.881  1.00 16.95           C  
ATOM   2389  C   VAL L 104      49.012 -19.634 102.039  1.00 16.95           C  
ATOM   2390  O   VAL L 104      48.707 -18.480 101.747  1.00 16.95           O  
ATOM   2391  CB  VAL L 104      48.267 -21.491 100.540  1.00 16.95           C  
ATOM   2392  CG1 VAL L 104      49.758 -21.628 100.288  1.00 16.95           C  
ATOM   2393  CG2 VAL L 104      47.625 -22.855 100.568  1.00 16.95           C  
ATOM   2394  N   THR L 105      50.206 -19.960 102.515  1.00 16.95           N  
ATOM   2395  CA  THR L 105      51.238 -18.957 102.691  1.00 16.95           C  
ATOM   2396  C   THR L 105      52.612 -19.586 102.606  1.00 16.95           C  
ATOM   2397  O   THR L 105      52.947 -20.464 103.390  1.00 16.95           O  
ATOM   2398  CB  THR L 105      51.106 -18.256 104.043  1.00 16.95           C  
ATOM   2399  OG1 THR L 105      49.757 -18.375 104.514  1.00 16.95           O  
ATOM   2400  CG2 THR L 105      51.467 -16.794 103.910  1.00 16.95           C  
ATOM   2401  N   VAL L 106      53.399 -19.166 101.624  1.00 16.95           N  
ATOM   2402  CA  VAL L 106      54.749 -19.686 101.496  1.00 16.95           C  
ATOM   2403  C   VAL L 106      55.452 -19.038 102.673  1.00 16.95           C  
ATOM   2404  O   VAL L 106      55.705 -17.833 102.674  1.00 16.95           O  
ATOM   2405  CB  VAL L 106      55.395 -19.250 100.164  1.00 16.95           C  
ATOM   2406  CG1 VAL L 106      56.896 -19.089 100.313  1.00 16.95           C  
ATOM   2407  CG2 VAL L 106      55.079 -20.267  99.108  1.00 16.95           C  
ATOM   2408  N   LEU L 106A     55.726 -19.839 103.691  1.00 16.95           N  
ATOM   2409  CA  LEU L 106A     56.366 -19.351 104.902  1.00 16.95           C  
ATOM   2410  C   LEU L 106A     57.404 -18.268 104.655  1.00 16.95           C  
ATOM   2411  O   LEU L 106A     58.322 -18.431 103.850  1.00 16.95           O  
ATOM   2412  CB  LEU L 106A     57.008 -20.513 105.658  1.00 16.95           C  
ATOM   2413  CG  LEU L 106A     56.328 -20.959 106.947  1.00 16.95           C  
ATOM   2414  CD1 LEU L 106A     54.847 -20.668 106.894  1.00 16.95           C  
ATOM   2415  CD2 LEU L 106A     56.571 -22.438 107.129  1.00 16.95           C  
ATOM   2416  N   GLY L 107      57.242 -17.158 105.364  1.00 16.95           N  
ATOM   2417  CA  GLY L 107      58.164 -16.046 105.236  1.00 16.95           C  
ATOM   2418  C   GLY L 107      58.956 -15.883 106.515  1.00 16.95           C  
ATOM   2419  O   GLY L 107      60.016 -15.253 106.528  1.00 16.95           O  
ATOM   2420  N   GLN L 108      58.429 -16.448 107.595  1.00 16.95           N  
ATOM   2421  CA  GLN L 108      59.080 -16.387 108.897  1.00 16.95           C  
ATOM   2422  C   GLN L 108      58.666 -17.626 109.674  1.00 16.95           C  
ATOM   2423  O   GLN L 108      57.821 -18.397 109.210  1.00 16.95           O  
ATOM   2424  CB  GLN L 108      58.654 -15.126 109.667  1.00 16.95           C  
ATOM   2425  CG  GLN L 108      57.541 -14.313 109.023  1.00 16.95           C  
ATOM   2426  CD  GLN L 108      56.664 -13.606 110.039  1.00 16.95           C  
ATOM   2427  OE1 GLN L 108      57.022 -13.484 111.211  1.00 16.95           O  
ATOM   2428  NE2 GLN L 108      55.504 -13.136 109.592  1.00 16.95           N  
ATOM   2429  N   PRO L 109      59.253 -17.840 110.864  1.00 16.95           N  
ATOM   2430  CA  PRO L 109      58.864 -19.023 111.628  1.00 16.95           C  
ATOM   2431  C   PRO L 109      57.358 -19.022 111.875  1.00 16.95           C  
ATOM   2432  O   PRO L 109      56.690 -18.009 111.679  1.00 16.95           O  
ATOM   2433  CB  PRO L 109      59.673 -18.896 112.924  1.00 16.95           C  
ATOM   2434  CG  PRO L 109      60.088 -17.474 112.994  1.00 16.95           C  
ATOM   2435  CD  PRO L 109      60.267 -17.046 111.579  1.00 16.95           C  
TER    2436      PRO L 109                                                      
ATOM      9  N   SER L   2      40.100 -15.141  79.209  1.00 16.95           N  
ATOM     10  CA  SER L   2      39.852 -13.866  79.859  1.00 16.95           C  
ATOM     11  C   SER L   2      38.616 -13.957  80.746  1.00 16.95           C  
ATOM     12  O   SER L   2      37.890 -14.956  80.719  1.00 16.95           O  
ATOM     13  CB  SER L   2      39.657 -12.769  78.798  1.00 16.95           C  
ATOM     14  OG  SER L   2      40.719 -12.751  77.851  1.00 16.95           O  
ATOM     15  N   ALA L   3      38.390 -12.906  81.529  1.00 16.95           N  
ATOM     16  CA  ALA L   3      37.239 -12.829  82.418  1.00 16.95           C  
ATOM     17  C   ALA L   3      36.068 -12.116  81.712  1.00 16.95           C  
ATOM     18  O   ALA L   3      36.152 -11.757  80.530  1.00 16.95           O  
ATOM     19  CB  ALA L   3      37.623 -12.084  83.694  1.00 16.95           C  
ATOM     20  N   LEU L   4      34.977 -11.912  82.437  1.00 16.95           N  
ATOM     21  CA  LEU L   4      33.812 -11.253  81.872  1.00 16.95           C  
ATOM     22  C   LEU L   4      33.743  -9.825  82.393  1.00 16.95           C  
ATOM     23  O   LEU L   4      33.300  -9.590  83.520  1.00 16.95           O  
ATOM     24  CB  LEU L   4      32.556 -12.027  82.261  1.00 16.95           C  
ATOM     25  CG  LEU L   4      32.643 -13.514  81.927  1.00 16.95           C  
ATOM     26  CD1 LEU L   4      31.579 -14.302  82.656  1.00 16.95           C  
ATOM     27  CD2 LEU L   4      32.498 -13.667  80.436  1.00 16.95           C  
ATOM     28  N   THR L   5      34.177  -8.878  81.563  1.00 16.95           N  
ATOM     29  CA  THR L   5      34.206  -7.461  81.924  1.00 16.95           C  
ATOM     30  C   THR L   5      33.049  -6.980  82.793  1.00 16.95           C  
ATOM     31  O   THR L   5      31.919  -6.805  82.334  1.00 16.95           O  
ATOM     32  CB  THR L   5      34.289  -6.561  80.684  1.00 16.95           C  
ATOM     33  OG1 THR L   5      34.750  -7.323  79.565  1.00 16.95           O  
ATOM     34  CG2 THR L   5      35.263  -5.421  80.929  1.00 16.95           C  
ATOM     35  N   GLN L   6      33.377  -6.762  84.059  1.00 16.95           N  
ATOM     36  CA  GLN L   6      32.446  -6.305  85.072  1.00 16.95           C  
ATOM     37  C   GLN L   6      32.980  -4.956  85.566  1.00 16.95           C  
ATOM     38  O   GLN L   6      34.185  -4.774  85.726  1.00 16.95           O  
ATOM     39  CB  GLN L   6      32.423  -7.322  86.212  1.00 16.95           C  
ATOM     40  CG  GLN L   6      31.166  -7.335  87.061  1.00 16.95           C  
ATOM     41  CD  GLN L   6      31.280  -8.309  88.221  1.00 16.95           C  
ATOM     42  OE1 GLN L   6      32.335  -8.890  88.448  1.00 16.95           O  
ATOM     43  NE2 GLN L   6      30.196  -8.493  88.955  1.00 16.95           N  
ATOM     44  N   PRO L   7      32.094  -3.988  85.818  1.00 16.95           N  
ATOM     45  CA  PRO L   7      32.646  -2.715  86.285  1.00 16.95           C  
ATOM     46  C   PRO L   7      33.371  -2.878  87.632  1.00 16.95           C  
ATOM     47  O   PRO L   7      33.169  -3.869  88.339  1.00 16.95           O  
ATOM     48  CB  PRO L   7      31.419  -1.802  86.376  1.00 16.95           C  
ATOM     49  CG  PRO L   7      30.335  -2.510  85.605  1.00 16.95           C  
ATOM     50  CD  PRO L   7      30.626  -3.961  85.738  1.00 16.95           C  
ATOM     51  N   PRO L   8      34.263  -1.925  87.976  1.00 16.95           N  
ATOM     52  CA  PRO L   8      35.012  -1.961  89.230  1.00 16.95           C  
ATOM     53  C   PRO L   8      34.365  -1.176  90.369  1.00 16.95           C  
ATOM     54  O   PRO L   8      34.981  -1.011  91.418  1.00 16.95           O  
ATOM     55  CB  PRO L   8      36.356  -1.374  88.840  1.00 16.95           C  
ATOM     56  CG  PRO L   8      35.996  -0.338  87.816  1.00 16.95           C  
ATOM     57  CD  PRO L   8      34.690  -0.779  87.153  1.00 16.95           C  
ATOM     58  N   SER L   9      33.139  -0.686  90.177  1.00 16.95           N  
ATOM     59  CA  SER L   9      32.470   0.064  91.245  1.00 16.95           C  
ATOM     60  C   SER L   9      31.065   0.585  90.943  1.00 16.95           C  
ATOM     61  O   SER L   9      30.728   0.900  89.802  1.00 16.95           O  
ATOM     62  CB  SER L   9      33.337   1.242  91.670  1.00 16.95           C  
ATOM     63  OG  SER L   9      33.134   2.328  90.788  1.00 16.95           O  
ATOM     64  N   ALA L  11      30.266   0.685  92.002  1.00 16.95           N  
ATOM     65  CA  ALA L  11      28.887   1.170  91.939  1.00 16.95           C  
ATOM     66  C   ALA L  11      28.537   1.912  93.238  1.00 16.95           C  
ATOM     67  O   ALA L  11      29.224   1.770  94.255  1.00 16.95           O  
ATOM     68  CB  ALA L  11      27.927   0.009  91.733  1.00 16.95           C  
ATOM     69  N   SER L  12      27.465   2.698  93.201  1.00 16.95           N  
ATOM     70  CA  SER L  12      27.049   3.464  94.369  1.00 16.95           C  
ATOM     71  C   SER L  12      25.541   3.678  94.375  1.00 16.95           C  
ATOM     72  O   SER L  12      24.969   4.122  93.385  1.00 16.95           O  
ATOM     73  CB  SER L  12      27.759   4.814  94.370  1.00 16.95           C  
ATOM     74  OG  SER L  12      27.749   5.384  93.073  1.00 16.95           O  
ATOM     75  N   GLY L  13      24.904   3.359  95.498  1.00 20.00           N  
ATOM     76  CA  GLY L  13      23.466   3.526  95.612  1.00 20.00           C  
ATOM     77  C   GLY L  13      23.087   4.299  96.861  1.00 20.00           C  
ATOM     78  O   GLY L  13      23.938   4.925  97.489  1.00 20.00           O  
ATOM     79  N   SER L  14      21.815   4.260  97.240  1.00 16.95           N  
ATOM     80  CA  SER L  14      21.393   4.988  98.424  1.00 16.95           C  
ATOM     81  C   SER L  14      20.180   4.437  99.167  1.00 16.95           C  
ATOM     82  O   SER L  14      19.043   4.479  98.675  1.00 16.95           O  
ATOM     83  CB  SER L  14      21.156   6.452  98.062  1.00 16.95           C  
ATOM     84  OG  SER L  14      22.372   7.050  97.654  1.00 16.95           O  
ATOM     85  N   LEU L  15      20.456   3.945 100.373  1.00 16.95           N  
ATOM     86  CA  LEU L  15      19.466   3.377 101.282  1.00 16.95           C  
ATOM     87  C   LEU L  15      18.033   3.428 100.774  1.00 16.95           C  
ATOM     88  O   LEU L  15      17.331   4.421 100.971  1.00 16.95           O  
ATOM     89  CB  LEU L  15      19.543   4.092 102.633  1.00 16.95           C  
ATOM     90  CG  LEU L  15      20.243   3.393 103.803  1.00 16.95           C  
ATOM     91  CD1 LEU L  15      19.794   1.936 103.868  1.00 16.95           C  
ATOM     92  CD2 LEU L  15      21.753   3.500 103.648  1.00 16.95           C  
ATOM     93  N   GLY L  16      17.595   2.351 100.134  1.00 20.00           N  
ATOM     94  CA  GLY L  16      16.240   2.313  99.622  1.00 20.00           C  
ATOM     95  C   GLY L  16      16.216   2.442  98.115  1.00 20.00           C  
ATOM     96  O   GLY L  16      15.234   2.059  97.460  1.00 20.00           O  
ATOM     97  N   GLN L  17      17.291   2.992  97.559  1.00 16.95           N  
ATOM     98  CA  GLN L  17      17.390   3.158  96.123  1.00 16.95           C  
ATOM     99  C   GLN L  17      17.587   1.794  95.463  1.00 16.95           C  
ATOM    100  O   GLN L  17      17.030   0.789  95.906  1.00 16.95           O  
ATOM    101  CB  GLN L  17      18.557   4.074  95.799  1.00 16.95           C  
ATOM    102  CG  GLN L  17      18.662   4.452  94.339  1.00 16.95           C  
ATOM    103  CD  GLN L  17      20.072   4.837  93.947  1.00 16.95           C  
ATOM    104  OE1 GLN L  17      20.312   5.953  93.479  1.00 16.95           O  
ATOM    105  NE2 GLN L  17      21.019   3.917  94.139  1.00 16.95           N  
ATOM    106  N   SER L  18      18.388   1.759  94.405  1.00 16.95           N  
ATOM    107  CA  SER L  18      18.663   0.525  93.683  1.00 16.95           C  
ATOM    108  C   SER L  18      19.881   0.685  92.777  1.00 16.95           C  
ATOM    109  O   SER L  18      20.172   1.777  92.295  1.00 16.95           O  
ATOM    110  CB  SER L  18      17.443   0.124  92.846  1.00 16.95           C  
ATOM    111  OG  SER L  18      16.843   1.256  92.231  1.00 16.95           O  
ATOM    112  N   VAL L  19      20.602  -0.407  92.560  1.00 16.95           N  
ATOM    113  CA  VAL L  19      21.780  -0.361  91.703  1.00 16.95           C  
ATOM    114  C   VAL L  19      21.881  -1.622  90.863  1.00 16.95           C  
ATOM    115  O   VAL L  19      21.661  -2.725  91.358  1.00 16.95           O  
ATOM    116  CB  VAL L  19      23.083  -0.222  92.519  1.00 16.95           C  
ATOM    117  CG1 VAL L  19      23.254  -1.409  93.441  1.00 16.95           C  
ATOM    118  CG2 VAL L  19      24.269  -0.111  91.575  1.00 16.95           C  
ATOM    119  N   THR L  20      22.212  -1.455  89.589  1.00 16.95           N  
ATOM    120  CA  THR L  20      22.349  -2.590  88.705  1.00 16.95           C  
ATOM    121  C   THR L  20      23.818  -2.799  88.366  1.00 16.95           C  
ATOM    122  O   THR L  20      24.458  -1.941  87.751  1.00 16.95           O  
ATOM    123  CB  THR L  20      21.533  -2.386  87.416  1.00 16.95           C  
ATOM    124  OG1 THR L  20      22.227  -2.965  86.300  1.00 16.95           O  
ATOM    125  CG2 THR L  20      21.290  -0.899  87.173  1.00 16.95           C  
ATOM    126  N   ILE L  21      24.349  -3.936  88.812  1.00 16.95           N  
ATOM    127  CA  ILE L  21      25.735  -4.326  88.569  1.00 16.95           C  
ATOM    128  C   ILE L  21      25.678  -5.248  87.360  1.00 16.95           C  
ATOM    129  O   ILE L  21      24.966  -6.247  87.386  1.00 16.95           O  
ATOM    130  CB  ILE L  21      26.321  -5.112  89.772  1.00 16.95           C  
ATOM    131  CG1 ILE L  21      26.048  -4.362  91.080  1.00 16.95           C  
ATOM    132  CG2 ILE L  21      27.824  -5.296  89.595  1.00 16.95           C  
ATOM    133  CD1 ILE L  21      24.756  -4.740  91.768  1.00 16.95           C  
ATOM    134  N   SER L  22      26.414  -4.917  86.302  1.00 16.95           N  
ATOM    135  CA  SER L  22      26.404  -5.730  85.085  1.00 16.95           C  
ATOM    136  C   SER L  22      27.784  -6.145  84.582  1.00 16.95           C  
ATOM    137  O   SER L  22      28.720  -5.350  84.584  1.00 16.95           O  
ATOM    138  CB  SER L  22      25.709  -4.968  83.973  1.00 16.95           C  
ATOM    139  OG  SER L  22      26.520  -3.886  83.561  1.00 16.95           O  
ATOM    140  N   CYS L  23      27.895  -7.389  84.133  1.00 16.95           N  
ATOM    141  CA  CYS L  23      29.151  -7.903  83.606  1.00 16.95           C  
ATOM    142  C   CYS L  23      28.947  -8.280  82.131  1.00 16.95           C  
ATOM    143  O   CYS L  23      27.822  -8.588  81.723  1.00 16.95           O  
ATOM    144  CB  CYS L  23      29.587  -9.124  84.410  1.00 16.95           C  
ATOM    145  SG  CYS L  23      28.856 -10.672  83.810  1.00 16.95           S  
ATOM    146  N   THR L  24      30.024  -8.258  81.338  1.00 16.95           N  
ATOM    147  CA  THR L  24      29.947  -8.586  79.903  1.00 16.95           C  
ATOM    148  C   THR L  24      31.002  -9.581  79.415  1.00 16.95           C  
ATOM    149  O   THR L  24      32.099  -9.641  79.956  1.00 16.95           O  
ATOM    150  CB  THR L  24      30.121  -7.337  79.039  1.00 16.95           C  
ATOM    151  OG1 THR L  24      31.497  -7.230  78.653  1.00 16.95           O  
ATOM    152  CG2 THR L  24      29.721  -6.091  79.807  1.00 16.95           C  
ATOM    153  N   GLY L  25      30.672 -10.340  78.373  1.00 16.95           N  
ATOM    154  CA  GLY L  25      31.620 -11.294  77.819  1.00 16.95           C  
ATOM    155  C   GLY L  25      31.494 -11.395  76.306  1.00 16.95           C  
ATOM    156  O   GLY L  25      31.268 -10.392  75.631  1.00 16.95           O  
ATOM    157  N   THR L  26      31.649 -12.607  75.774  1.00 16.95           N  
ATOM    158  CA  THR L  26      31.517 -12.853  74.337  1.00 16.95           C  
ATOM    159  C   THR L  26      30.373 -13.820  74.055  1.00 16.95           C  
ATOM    160  O   THR L  26      29.749 -14.361  74.970  1.00 16.95           O  
ATOM    161  CB  THR L  26      32.757 -13.507  73.735  1.00 16.95           C  
ATOM    162  OG1 THR L  26      33.149 -14.613  74.558  1.00 16.95           O  
ATOM    163  CG2 THR L  26      33.884 -12.495  73.592  1.00 16.95           C  
ATOM    164  N   SER L  27      30.120 -14.044  72.769  1.00 16.95           N  
ATOM    165  CA  SER L  27      29.073 -14.957  72.331  1.00 16.95           C  
ATOM    166  C   SER L  27      29.577 -16.403  72.397  1.00 16.95           C  
ATOM    167  O   SER L  27      29.020 -17.282  71.739  1.00 16.95           O  
ATOM    168  CB  SER L  27      28.668 -14.627  70.896  1.00 16.95           C  
ATOM    169  OG  SER L  27      29.732 -14.925  70.014  1.00 16.95           O  
ATOM    170  N   SER L  27A     30.626 -16.639  73.189  1.00 16.95           N  
ATOM    171  CA  SER L  27A     31.221 -17.975  73.339  1.00 16.95           C  
ATOM    172  C   SER L  27A     30.915 -18.593  74.704  1.00 16.95           C  
ATOM    173  O   SER L  27A     30.590 -19.779  74.799  1.00 16.95           O  
ATOM    174  CB  SER L  27A     32.747 -17.902  73.145  1.00 16.95           C  
ATOM    175  OG  SER L  27A     33.177 -18.695  72.047  1.00 16.95           O  
ATOM    176  N   ASP L  27B     31.040 -17.779  75.752  1.00 16.95           N  
ATOM    177  CA  ASP L  27B     30.779 -18.203  77.127  1.00 16.95           C  
ATOM    178  C   ASP L  27B     29.499 -17.548  77.628  1.00 16.95           C  
ATOM    179  O   ASP L  27B     28.480 -18.207  77.834  1.00 16.95           O  
ATOM    180  CB  ASP L  27B     31.945 -17.809  78.049  1.00 16.95           C  
ATOM    181  CG  ASP L  27B     32.667 -16.541  77.596  1.00 16.95           C  
ATOM    182  OD1 ASP L  27B     32.064 -15.444  77.651  1.00 16.95           O  
ATOM    183  OD2 ASP L  27B     33.846 -16.645  77.193  1.00 16.95           O  
ATOM    184  N   VAL L  27C     29.555 -16.242  77.833  1.00 16.95           N  
ATOM    185  CA  VAL L  27C     28.382 -15.534  78.294  1.00 16.95           C  
ATOM    186  C   VAL L  27C     27.378 -15.508  77.163  1.00 16.95           C  
ATOM    187  O   VAL L  27C     26.341 -16.166  77.235  1.00 16.95           O  
ATOM    188  CB  VAL L  27C     28.705 -14.081  78.698  1.00 16.95           C  
ATOM    189  CG1 VAL L  27C     27.415 -13.280  78.832  1.00 16.95           C  
ATOM    190  CG2 VAL L  27C     29.462 -14.068  80.009  1.00 16.95           C  
ATOM    191  N   GLY L  28      27.721 -14.760  76.115  1.00 16.95           N  
ATOM    192  CA  GLY L  28      26.865 -14.591  74.951  1.00 16.95           C  
ATOM    193  C   GLY L  28      26.254 -15.809  74.290  1.00 16.95           C  
ATOM    194  O   GLY L  28      25.347 -15.679  73.475  1.00 16.95           O  
ATOM    195  N   GLY L  29      26.731 -16.996  74.634  1.00 16.95           N  
ATOM    196  CA  GLY L  29      26.184 -18.188  74.020  1.00 16.95           C  
ATOM    197  C   GLY L  29      25.109 -18.904  74.816  1.00 16.95           C  
ATOM    198  O   GLY L  29      24.090 -19.314  74.250  1.00 16.95           O  
ATOM    199  N   TYR L  30      25.320 -19.045  76.125  1.00 16.95           N  
ATOM    200  CA  TYR L  30      24.371 -19.757  76.987  1.00 16.95           C  
ATOM    201  C   TYR L  30      23.562 -18.916  77.973  1.00 16.95           C  
ATOM    202  O   TYR L  30      23.604 -17.686  77.965  1.00 16.95           O  
ATOM    203  CB  TYR L  30      25.098 -20.859  77.778  1.00 16.95           C  
ATOM    204  CG  TYR L  30      26.334 -21.410  77.099  1.00 16.95           C  
ATOM    205  CD1 TYR L  30      27.437 -20.601  76.859  1.00 16.95           C  
ATOM    206  CD2 TYR L  30      26.399 -22.743  76.705  1.00 16.95           C  
ATOM    207  CE1 TYR L  30      28.571 -21.099  76.247  1.00 16.95           C  
ATOM    208  CE2 TYR L  30      27.539 -23.258  76.088  1.00 16.95           C  
ATOM    209  CZ  TYR L  30      28.621 -22.429  75.862  1.00 16.95           C  
ATOM    210  OH  TYR L  30      29.756 -22.919  75.257  1.00 16.95           O  
ATOM    211  N   ASN L  31      22.831 -19.621  78.831  1.00 16.95           N  
ATOM    212  CA  ASN L  31      21.982 -19.009  79.849  1.00 16.95           C  
ATOM    213  C   ASN L  31      22.445 -19.462  81.235  1.00 16.95           C  
ATOM    214  O   ASN L  31      21.631 -19.859  82.073  1.00 16.95           O  
ATOM    215  CB  ASN L  31      20.521 -19.431  79.615  1.00 16.95           C  
ATOM    216  CG  ASN L  31      19.522 -18.526  80.325  1.00 16.95           C  
ATOM    217  OD1 ASN L  31      19.225 -17.417  79.863  1.00 16.95           O  
ATOM    218  ND2 ASN L  31      18.990 -19.002  81.452  1.00 16.95           N  
ATOM    219  N   TYR L  32      23.758 -19.413  81.462  1.00 16.95           N  
ATOM    220  CA  TYR L  32      24.343 -19.821  82.744  1.00 16.95           C  
ATOM    221  C   TYR L  32      25.182 -18.696  83.341  1.00 16.95           C  
ATOM    222  O   TYR L  32      26.290 -18.921  83.835  1.00 16.95           O  
ATOM    223  CB  TYR L  32      25.222 -21.065  82.573  1.00 16.95           C  
ATOM    224  CG  TYR L  32      24.479 -22.386  82.673  1.00 16.95           C  
ATOM    225  CD1 TYR L  32      24.184 -22.958  83.906  1.00 16.95           C  
ATOM    226  CD2 TYR L  32      24.098 -23.077  81.525  1.00 16.95           C  
ATOM    227  CE1 TYR L  32      23.531 -24.192  83.988  1.00 16.95           C  
ATOM    228  CE2 TYR L  32      23.453 -24.295  81.598  1.00 16.95           C  
ATOM    229  CZ  TYR L  32      23.172 -24.855  82.825  1.00 16.95           C  
ATOM    230  OH  TYR L  32      22.556 -26.088  82.874  1.00 16.95           O  
ATOM    231  N   VAL L  33      24.646 -17.482  83.283  1.00 16.95           N  
ATOM    232  CA  VAL L  33      25.336 -16.327  83.823  1.00 16.95           C  
ATOM    233  C   VAL L  33      24.845 -16.136  85.233  1.00 16.95           C  
ATOM    234  O   VAL L  33      23.728 -15.689  85.454  1.00 16.95           O  
ATOM    235  CB  VAL L  33      25.035 -15.078  83.019  1.00 16.95           C  
ATOM    236  CG1 VAL L  33      26.170 -14.091  83.186  1.00 16.95           C  
ATOM    237  CG2 VAL L  33      24.838 -15.438  81.558  1.00 16.95           C  
ATOM    238  N   SER L  34      25.698 -16.478  86.185  1.00 16.95           N  
ATOM    239  CA  SER L  34      25.355 -16.388  87.591  1.00 16.95           C  
ATOM    240  C   SER L  34      26.125 -15.306  88.339  1.00 16.95           C  
ATOM    241  O   SER L  34      27.147 -14.818  87.861  1.00 16.95           O  
ATOM    242  CB  SER L  34      25.581 -17.755  88.223  1.00 16.95           C  
ATOM    243  OG  SER L  34      25.376 -18.769  87.245  1.00 16.95           O  
ATOM    244  N   TRP L  35      25.625 -14.935  89.515  1.00 16.95           N  
ATOM    245  CA  TRP L  35      26.254 -13.885  90.315  1.00 16.95           C  
ATOM    246  C   TRP L  35      26.586 -14.314  91.737  1.00 16.95           C  
ATOM    247  O   TRP L  35      25.756 -14.907  92.423  1.00 16.95           O  
ATOM    248  CB  TRP L  35      25.347 -12.646  90.368  1.00 16.95           C  
ATOM    249  CG  TRP L  35      25.192 -11.947  89.040  1.00 16.95           C  
ATOM    250  CD1 TRP L  35      24.420 -12.349  87.982  1.00 16.95           C  
ATOM    251  CD2 TRP L  35      25.835 -10.736  88.627  1.00 16.95           C  
ATOM    252  NE1 TRP L  35      24.545 -11.463  86.936  1.00 16.95           N  
ATOM    253  CE2 TRP L  35      25.408 -10.465  87.305  1.00 16.95           C  
ATOM    254  CE3 TRP L  35      26.730  -9.855  89.244  1.00 16.95           C  
ATOM    255  CZ2 TRP L  35      25.848  -9.350  86.592  1.00 16.95           C  
ATOM    256  CZ3 TRP L  35      27.166  -8.750  88.538  1.00 16.95           C  
ATOM    257  CH2 TRP L  35      26.726  -8.506  87.223  1.00 16.95           C  
ATOM    258  N   TYR L  36      27.808 -14.005  92.167  1.00 16.95           N  
ATOM    259  CA  TYR L  36      28.267 -14.331  93.511  1.00 16.95           C  
ATOM    260  C   TYR L  36      28.435 -13.036  94.312  1.00 16.95           C  
ATOM    261  O   TYR L  36      28.388 -11.941  93.753  1.00 16.95           O  
ATOM    262  CB  TYR L  36      29.603 -15.071  93.459  1.00 16.95           C  
ATOM    263  CG  TYR L  36      29.652 -16.240  92.501  1.00 16.95           C  
ATOM    264  CD1 TYR L  36      29.835 -16.040  91.133  1.00 16.95           C  
ATOM    265  CD2 TYR L  36      29.575 -17.551  92.969  1.00 16.95           C  
ATOM    266  CE1 TYR L  36      29.949 -17.116  90.257  1.00 16.95           C  
ATOM    267  CE2 TYR L  36      29.687 -18.636  92.103  1.00 16.95           C  
ATOM    268  CZ  TYR L  36      29.879 -18.412  90.750  1.00 16.95           C  
ATOM    269  OH  TYR L  36      30.042 -19.486  89.900  1.00 16.95           O  
ATOM    270  N   GLN L  37      28.635 -13.170  95.620  1.00 16.95           N  
ATOM    271  CA  GLN L  37      28.804 -12.017  96.505  1.00 16.95           C  
ATOM    272  C   GLN L  37      29.506 -12.386  97.806  1.00 16.95           C  
ATOM    273  O   GLN L  37      28.901 -12.954  98.713  1.00 16.95           O  
ATOM    274  CB  GLN L  37      27.442 -11.389  96.843  1.00 16.95           C  
ATOM    275  CG  GLN L  37      27.498 -10.376  97.993  1.00 16.95           C  
ATOM    276  CD  GLN L  37      26.174 -10.235  98.702  1.00 16.95           C  
ATOM    277  OE1 GLN L  37      25.492 -11.223  98.956  1.00 16.95           O  
ATOM    278  NE2 GLN L  37      25.799  -9.002  99.025  1.00 16.95           N  
ATOM    279  N   GLN L  38      30.786 -12.054  97.898  1.00 16.95           N  
ATOM    280  CA  GLN L  38      31.546 -12.348  99.104  1.00 16.95           C  
ATOM    281  C   GLN L  38      31.751 -11.051  99.863  1.00 16.95           C  
ATOM    282  O   GLN L  38      31.888  -9.979  99.261  1.00 16.95           O  
ATOM    283  CB  GLN L  38      32.906 -12.951  98.748  1.00 16.95           C  
ATOM    284  CG  GLN L  38      33.714 -12.118  97.768  1.00 16.95           C  
ATOM    285  CD  GLN L  38      35.160 -12.538  97.708  1.00 16.95           C  
ATOM    286  OE1 GLN L  38      35.595 -13.419  98.446  1.00 16.95           O  
ATOM    287  NE2 GLN L  38      35.918 -11.910  96.824  1.00 16.95           N  
ATOM    288  N   HIS L  39      31.760 -11.140 101.184  1.00 16.95           N  
ATOM    289  CA  HIS L  39      31.966  -9.951 101.986  1.00 16.95           C  
ATOM    290  C   HIS L  39      33.435  -9.813 102.372  1.00 16.95           C  
ATOM    291  O   HIS L  39      34.037 -10.728 102.928  1.00 16.95           O  
ATOM    292  CB  HIS L  39      31.088  -9.993 103.235  1.00 16.95           C  
ATOM    293  CG  HIS L  39      29.731  -9.399 103.035  1.00 16.95           C  
ATOM    294  ND1 HIS L  39      28.604 -10.167 102.841  1.00 16.95           N  
ATOM    295  CD2 HIS L  39      29.320  -8.110 102.966  1.00 16.95           C  
ATOM    296  CE1 HIS L  39      27.558  -9.377 102.659  1.00 16.95           C  
ATOM    297  NE2 HIS L  39      27.967  -8.124 102.730  1.00 16.95           N  
ATOM    298  N   ALA L  40      34.000  -8.660 102.039  1.00 16.95           N  
ATOM    299  CA  ALA L  40      35.391  -8.320 102.335  1.00 16.95           C  
ATOM    300  C   ALA L  40      36.283  -9.458 102.842  1.00 16.95           C  
ATOM    301  O   ALA L  40      36.404  -9.676 104.053  1.00 16.95           O  
ATOM    302  CB  ALA L  40      35.422  -7.158 103.333  1.00 16.95           C  
ATOM    303  N   GLY L  41      36.922 -10.162 101.911  1.00 16.95           N  
ATOM    304  CA  GLY L  41      37.803 -11.255 102.285  1.00 16.95           C  
ATOM    305  C   GLY L  41      37.105 -12.261 103.180  1.00 16.95           C  
ATOM    306  O   GLY L  41      37.433 -12.404 104.367  1.00 16.95           O  
ATOM    307  N   LYS L  42      36.129 -12.953 102.599  1.00 16.95           N  
ATOM    308  CA  LYS L  42      35.347 -13.953 103.308  1.00 16.95           C  
ATOM    309  C   LYS L  42      34.629 -14.763 102.242  1.00 16.95           C  
ATOM    310  O   LYS L  42      34.276 -14.227 101.196  1.00 16.95           O  
ATOM    311  CB  LYS L  42      34.334 -13.273 104.240  1.00 16.95           C  
ATOM    312  CG  LYS L  42      34.935 -12.748 105.549  1.00 16.95           C  
ATOM    313  CD  LYS L  42      34.464 -11.327 105.887  1.00 16.95           C  
ATOM    314  CE  LYS L  42      34.776 -10.965 107.353  1.00 16.95           C  
ATOM    315  NZ  LYS L  42      35.070  -9.516 107.570  1.00 16.95           N  
ATOM    316  N   ALA L  43      34.426 -16.051 102.511  1.00 16.95           N  
ATOM    317  CA  ALA L  43      33.769 -16.969 101.573  1.00 16.95           C  
ATOM    318  C   ALA L  43      32.661 -16.364 100.716  1.00 16.95           C  
ATOM    319  O   ALA L  43      31.847 -15.576 101.196  1.00 16.95           O  
ATOM    320  CB  ALA L  43      33.222 -18.177 102.329  1.00 16.95           C  
ATOM    321  N   PRO L  44      32.623 -16.735  99.424  1.00 16.95           N  
ATOM    322  CA  PRO L  44      31.608 -16.226  98.498  1.00 16.95           C  
ATOM    323  C   PRO L  44      30.243 -16.846  98.756  1.00 16.95           C  
ATOM    324  O   PRO L  44      30.112 -17.794  99.528  1.00 16.95           O  
ATOM    325  CB  PRO L  44      32.143 -16.599  97.114  1.00 16.95           C  
ATOM    326  CG  PRO L  44      33.508 -17.198  97.345  1.00 16.95           C  
ATOM    327  CD  PRO L  44      33.552 -17.659  98.756  1.00 16.95           C  
ATOM    328  N   LYS L  45      29.225 -16.291  98.117  1.00 16.95           N  
ATOM    329  CA  LYS L  45      27.870 -16.802  98.252  1.00 16.95           C  
ATOM    330  C   LYS L  45      27.163 -16.564  96.924  1.00 16.95           C  
ATOM    331  O   LYS L  45      27.528 -15.665  96.173  1.00 16.95           O  
ATOM    332  CB  LYS L  45      27.138 -16.094  99.397  1.00 16.95           C  
ATOM    333  CG  LYS L  45      25.620 -16.138  99.290  1.00 16.95           C  
ATOM    334  CD  LYS L  45      24.942 -15.352 100.412  1.00 16.95           C  
ATOM    335  CE  LYS L  45      24.567 -13.934  99.993  1.00 16.95           C  
ATOM    336  NZ  LYS L  45      25.300 -12.935 100.830  1.00 16.95           N  
ATOM    337  N   VAL L  46      26.171 -17.383  96.615  1.00 16.95           N  
ATOM    338  CA  VAL L  46      25.459 -17.212  95.367  1.00 16.95           C  
ATOM    339  C   VAL L  46      24.098 -16.598  95.627  1.00 16.95           C  
ATOM    340  O   VAL L  46      23.381 -17.006  96.538  1.00 16.95           O  
ATOM    341  CB  VAL L  46      25.285 -18.553  94.626  1.00 16.95           C  
ATOM    342  CG1 VAL L  46      24.226 -19.404  95.312  1.00 16.95           C  
ATOM    343  CG2 VAL L  46      24.908 -18.290  93.178  1.00 16.95           C  
ATOM    344  N   ILE L  47      23.751 -15.605  94.824  1.00 16.95           N  
ATOM    345  CA  ILE L  47      22.474 -14.926  94.960  1.00 16.95           C  
ATOM    346  C   ILE L  47      21.731 -14.912  93.611  1.00 16.95           C  
ATOM    347  O   ILE L  47      20.658 -14.315  93.478  1.00 16.95           O  
ATOM    348  CB  ILE L  47      22.691 -13.477  95.487  1.00 16.95           C  
ATOM    349  CG1 ILE L  47      23.854 -12.804  94.754  1.00 16.95           C  
ATOM    350  CG2 ILE L  47      23.023 -13.514  96.969  1.00 16.95           C  
ATOM    351  CD1 ILE L  47      23.547 -11.405  94.288  1.00 16.95           C  
ATOM    352  N   ILE L  48      22.309 -15.591  92.623  1.00 16.95           N  
ATOM    353  CA  ILE L  48      21.734 -15.667  91.287  1.00 16.95           C  
ATOM    354  C   ILE L  48      22.260 -16.887  90.554  1.00 16.95           C  
ATOM    355  O   ILE L  48      23.419 -17.254  90.713  1.00 16.95           O  
ATOM    356  CB  ILE L  48      22.107 -14.433  90.457  1.00 16.95           C  
ATOM    357  CG1 ILE L  48      20.870 -13.590  90.192  1.00 16.95           C  
ATOM    358  CG2 ILE L  48      22.705 -14.852  89.134  1.00 16.95           C  
ATOM    359  CD1 ILE L  48      21.099 -12.542  89.145  1.00 16.95           C  
ATOM    360  N   TYR L  49      21.407 -17.500  89.744  1.00 16.95           N  
ATOM    361  CA  TYR L  49      21.793 -18.662  88.958  1.00 16.95           C  
ATOM    362  C   TYR L  49      20.900 -18.785  87.722  1.00 16.95           C  
ATOM    363  O   TYR L  49      19.737 -18.375  87.735  1.00 16.95           O  
ATOM    364  CB  TYR L  49      21.731 -19.936  89.811  1.00 16.95           C  
ATOM    365  CG  TYR L  49      20.352 -20.543  89.987  1.00 16.95           C  
ATOM    366  CD1 TYR L  49      19.373 -19.891  90.732  1.00 16.95           C  
ATOM    367  CD2 TYR L  49      20.049 -21.799  89.464  1.00 16.95           C  
ATOM    368  CE1 TYR L  49      18.128 -20.479  90.957  1.00 16.95           C  
ATOM    369  CE2 TYR L  49      18.811 -22.391  89.684  1.00 16.95           C  
ATOM    370  CZ  TYR L  49      17.856 -21.727  90.434  1.00 16.95           C  
ATOM    371  OH  TYR L  49      16.632 -22.309  90.677  1.00 16.95           O  
ATOM    372  N   GLU L  50      21.451 -19.352  86.654  1.00 16.95           N  
ATOM    373  CA  GLU L  50      20.711 -19.502  85.407  1.00 16.95           C  
ATOM    374  C   GLU L  50      20.294 -18.093  84.996  1.00 16.95           C  
ATOM    375  O   GLU L  50      19.234 -17.880  84.412  1.00 16.95           O  
ATOM    376  CB  GLU L  50      19.485 -20.411  85.610  1.00 16.95           C  
ATOM    377  CG  GLU L  50      19.773 -21.906  85.352  1.00 16.95           C  
ATOM    378  CD  GLU L  50      18.634 -22.834  85.788  1.00 16.95           C  
ATOM    379  OE1 GLU L  50      17.921 -22.496  86.763  1.00 16.95           O  
ATOM    380  OE2 GLU L  50      18.455 -23.904  85.155  1.00 16.95           O  
ATOM    381  N   VAL L  51      21.169 -17.139  85.310  1.00 16.95           N  
ATOM    382  CA  VAL L  51      20.991 -15.717  85.026  1.00 16.95           C  
ATOM    383  C   VAL L  51      19.946 -15.065  85.931  1.00 16.95           C  
ATOM    384  O   VAL L  51      20.300 -14.385  86.897  1.00 16.95           O  
ATOM    385  CB  VAL L  51      20.617 -15.440  83.522  1.00 16.95           C  
ATOM    386  CG1 VAL L  51      21.368 -14.215  83.020  1.00 16.95           C  
ATOM    387  CG2 VAL L  51      20.970 -16.621  82.635  1.00 16.95           C  
ATOM    388  N   ASN L  52      18.666 -15.287  85.626  1.00 16.95           N  
ATOM    389  CA  ASN L  52      17.562 -14.698  86.388  1.00 16.95           C  
ATOM    390  C   ASN L  52      16.868 -15.694  87.315  1.00 16.95           C  
ATOM    391  O   ASN L  52      15.781 -16.187  87.000  1.00 16.95           O  
ATOM    392  CB  ASN L  52      16.527 -14.094  85.420  1.00 16.95           C  
ATOM    393  CG  ASN L  52      15.890 -12.798  85.949  1.00 16.95           C  
ATOM    394  OD1 ASN L  52      15.924 -12.507  87.146  1.00 16.95           O  
ATOM    395  ND2 ASN L  52      15.304 -12.019  85.045  1.00 16.95           N  
ATOM    396  N   LYS L  53      17.486 -15.962  88.465  1.00 16.95           N  
ATOM    397  CA  LYS L  53      16.947 -16.899  89.456  1.00 16.95           C  
ATOM    398  C   LYS L  53      17.698 -16.731  90.776  1.00 16.95           C  
ATOM    399  O   LYS L  53      18.794 -16.167  90.789  1.00 16.95           O  
ATOM    400  CB  LYS L  53      17.127 -18.334  88.968  1.00 16.95           C  
ATOM    401  CG  LYS L  53      16.003 -18.885  88.104  1.00 16.95           C  
ATOM    402  CD  LYS L  53      16.343 -20.285  87.615  1.00 16.95           C  
ATOM    403  CE  LYS L  53      15.432 -21.324  88.252  1.00 16.95           C  
ATOM    404  NZ  LYS L  53      14.924 -22.325  87.258  1.00 16.95           N  
ATOM    405  N   ARG L  54      17.125 -17.229  91.876  1.00 16.95           N  
ATOM    406  CA  ARG L  54      17.763 -17.121  93.199  1.00 16.95           C  
ATOM    407  C   ARG L  54      17.598 -18.306  94.161  1.00 16.95           C  
ATOM    408  O   ARG L  54      16.519 -18.891  94.271  1.00 16.95           O  
ATOM    409  CB  ARG L  54      17.270 -15.869  93.934  1.00 16.95           C  
ATOM    410  CG  ARG L  54      16.468 -14.900  93.103  1.00 16.95           C  
ATOM    411  CD  ARG L  54      16.452 -13.511  93.745  1.00 16.95           C  
ATOM    412  NE  ARG L  54      15.838 -13.500  95.071  1.00 16.95           N  
ATOM    413  CZ  ARG L  54      14.648 -14.022  95.356  1.00 16.95           C  
ATOM    414  NH1 ARG L  54      13.931 -14.604  94.405  1.00 16.95           N  
ATOM    415  NH2 ARG L  54      14.166 -13.952  96.590  1.00 16.95           N  
ATOM    416  N   PRO L  55      18.686 -18.695  94.850  1.00 16.95           N  
ATOM    417  CA  PRO L  55      18.583 -19.808  95.798  1.00 16.95           C  
ATOM    418  C   PRO L  55      17.594 -19.418  96.907  1.00 16.95           C  
ATOM    419  O   PRO L  55      17.475 -18.235  97.253  1.00 16.95           O  
ATOM    420  CB  PRO L  55      20.017 -19.973  96.314  1.00 16.95           C  
ATOM    421  CG  PRO L  55      20.871 -19.376  95.248  1.00 16.95           C  
ATOM    422  CD  PRO L  55      20.069 -18.203  94.753  1.00 16.95           C  
ATOM    423  N   SER L  56      16.894 -20.408  97.459  1.00 16.95           N  
ATOM    424  CA  SER L  56      15.892 -20.169  98.497  1.00 16.95           C  
ATOM    425  C   SER L  56      16.360 -19.384  99.717  1.00 16.95           C  
ATOM    426  O   SER L  56      16.028 -19.733 100.848  1.00 16.95           O  
ATOM    427  CB  SER L  56      15.286 -21.494  98.963  1.00 16.95           C  
ATOM    428  OG  SER L  56      14.084 -21.273  99.687  1.00 16.95           O  
ATOM    429  N   GLY L  57      17.112 -18.314  99.490  1.00 16.95           N  
ATOM    430  CA  GLY L  57      17.592 -17.509 100.600  1.00 16.95           C  
ATOM    431  C   GLY L  57      17.690 -16.031 100.254  1.00 16.95           C  
ATOM    432  O   GLY L  57      17.206 -15.171 101.003  1.00 16.95           O  
ATOM    433  N   VAL L  58      18.314 -15.734  99.117  1.00 16.95           N  
ATOM    434  CA  VAL L  58      18.478 -14.353  98.706  1.00 16.95           C  
ATOM    435  C   VAL L  58      17.110 -13.709  98.475  1.00 16.95           C  
ATOM    436  O   VAL L  58      16.236 -14.298  97.838  1.00 16.95           O  
ATOM    437  CB  VAL L  58      19.375 -14.247  97.442  1.00 16.95           C  
ATOM    438  CG1 VAL L  58      20.322 -15.414  97.391  1.00 16.95           C  
ATOM    439  CG2 VAL L  58      18.535 -14.195  96.194  1.00 16.95           C  
ATOM    440  N   PRO L  59      16.908 -12.494  99.022  1.00 16.95           N  
ATOM    441  CA  PRO L  59      15.674 -11.706  98.926  1.00 16.95           C  
ATOM    442  C   PRO L  59      15.320 -11.131  97.565  1.00 16.95           C  
ATOM    443  O   PRO L  59      16.111 -11.155  96.622  1.00 16.95           O  
ATOM    444  CB  PRO L  59      15.865 -10.608  99.968  1.00 16.95           C  
ATOM    445  CG  PRO L  59      17.346 -10.429 100.039  1.00 16.95           C  
ATOM    446  CD  PRO L  59      17.929 -11.807  99.840  1.00 16.95           C  
ATOM    447  N   ASP L  60      14.109 -10.585  97.519  1.00 16.95           N  
ATOM    448  CA  ASP L  60      13.482  -9.991  96.341  1.00 16.95           C  
ATOM    449  C   ASP L  60      14.077  -8.683  95.801  1.00 16.95           C  
ATOM    450  O   ASP L  60      13.498  -8.045  94.907  1.00 16.95           O  
ATOM    451  CB  ASP L  60      11.992  -9.791  96.640  1.00 16.95           C  
ATOM    452  CG  ASP L  60      11.657  -9.980  98.126  1.00 16.95           C  
ATOM    453  OD1 ASP L  60      12.512  -9.650  98.984  1.00 16.95           O  
ATOM    454  OD2 ASP L  60      10.537 -10.459  98.434  1.00 16.95           O  
ATOM    455  N   ARG L  61      15.221  -8.274  96.340  1.00 16.95           N  
ATOM    456  CA  ARG L  61      15.875  -7.055  95.872  1.00 16.95           C  
ATOM    457  C   ARG L  61      16.959  -7.499  94.904  1.00 16.95           C  
ATOM    458  O   ARG L  61      17.487  -6.709  94.119  1.00 16.95           O  
ATOM    459  CB  ARG L  61      16.503  -6.288  97.040  1.00 16.95           C  
ATOM    460  CG  ARG L  61      16.157  -6.809  98.411  1.00 16.95           C  
ATOM    461  CD  ARG L  61      17.201  -6.361  99.385  1.00 16.95           C  
ATOM    462  NE  ARG L  61      17.187  -7.161 100.601  1.00 16.95           N  
ATOM    463  CZ  ARG L  61      18.199  -7.229 101.458  1.00 16.95           C  
ATOM    464  NH1 ARG L  61      19.315  -6.539 101.232  1.00 16.95           N  
ATOM    465  NH2 ARG L  61      18.097  -7.993 102.537  1.00 16.95           N  
ATOM    466  N   PHE L  62      17.279  -8.783  94.980  1.00 16.95           N  
ATOM    467  CA  PHE L  62      18.284  -9.383  94.125  1.00 16.95           C  
ATOM    468  C   PHE L  62      17.618  -9.905  92.860  1.00 16.95           C  
ATOM    469  O   PHE L  62      16.667 -10.686  92.926  1.00 16.95           O  
ATOM    470  CB  PHE L  62      18.979 -10.504  94.891  1.00 16.95           C  
ATOM    471  CG  PHE L  62      19.719 -10.020  96.104  1.00 16.95           C  
ATOM    472  CD1 PHE L  62      20.579  -8.924  96.013  1.00 16.95           C  
ATOM    473  CD2 PHE L  62      19.551 -10.638  97.337  1.00 16.95           C  
ATOM    474  CE1 PHE L  62      21.259  -8.451  97.132  1.00 16.95           C  
ATOM    475  CE2 PHE L  62      20.227 -10.173  98.463  1.00 16.95           C  
ATOM    476  CZ  PHE L  62      21.083  -9.076  98.359  1.00 16.95           C  
ATOM    477  N   SER L  63      18.118  -9.462  91.711  1.00 16.95           N  
ATOM    478  CA  SER L  63      17.554  -9.856  90.426  1.00 16.95           C  
ATOM    479  C   SER L  63      18.404  -9.387  89.262  1.00 16.95           C  
ATOM    480  O   SER L  63      18.625  -8.195  89.068  1.00 16.95           O  
ATOM    481  CB  SER L  63      16.157  -9.264  90.262  1.00 16.95           C  
ATOM    482  OG  SER L  63      16.247  -7.926  89.798  1.00 16.95           O  
ATOM    483  N   GLY L  64      18.862 -10.343  88.474  1.00 16.95           N  
ATOM    484  CA  GLY L  64      19.678 -10.014  87.330  1.00 16.95           C  
ATOM    485  C   GLY L  64      19.017 -10.589  86.109  1.00 16.95           C  
ATOM    486  O   GLY L  64      18.140 -11.431  86.239  1.00 16.95           O  
ATOM    487  N   SER L  65      19.433 -10.148  84.929  1.00 16.95           N  
ATOM    488  CA  SER L  65      18.835 -10.637  83.700  1.00 16.95           C  
ATOM    489  C   SER L  65      19.777 -10.415  82.532  1.00 16.95           C  
ATOM    490  O   SER L  65      20.426  -9.373  82.456  1.00 16.95           O  
ATOM    491  CB  SER L  65      17.525  -9.899  83.448  1.00 16.95           C  
ATOM    492  OG  SER L  65      17.561  -8.617  84.043  1.00 16.95           O  
ATOM    493  N   LYS L  66      19.850 -11.393  81.626  1.00 16.95           N  
ATOM    494  CA  LYS L  66      20.725 -11.286  80.460  1.00 16.95           C  
ATOM    495  C   LYS L  66      20.106 -10.481  79.330  1.00 16.95           C  
ATOM    496  O   LYS L  66      18.938 -10.645  78.972  1.00 16.95           O  
ATOM    497  CB  LYS L  66      21.123 -12.664  79.924  1.00 16.95           C  
ATOM    498  CG  LYS L  66      22.346 -12.606  79.007  1.00 16.95           C  
ATOM    499  CD  LYS L  66      22.123 -13.359  77.703  1.00 16.95           C  
ATOM    500  CE  LYS L  66      22.501 -14.820  77.839  1.00 16.95           C  
ATOM    501  NZ  LYS L  66      21.328 -15.640  78.237  1.00 16.95           N  
ATOM    502  N   SER L  67      20.927  -9.613  78.765  1.00 16.95           N  
ATOM    503  CA  SER L  67      20.509  -8.750  77.684  1.00 16.95           C  
ATOM    504  C   SER L  67      21.141  -9.216  76.383  1.00 16.95           C  
ATOM    505  O   SER L  67      20.495  -9.886  75.578  1.00 16.95           O  
ATOM    506  CB  SER L  67      20.935  -7.328  78.018  1.00 16.95           C  
ATOM    507  OG  SER L  67      21.277  -7.248  79.396  1.00 16.95           O  
ATOM    508  N   GLY L  68      22.410  -8.867  76.193  1.00 16.95           N  
ATOM    509  CA  GLY L  68      23.119  -9.264  74.991  1.00 16.95           C  
ATOM    510  C   GLY L  68      24.138 -10.338  75.289  1.00 16.95           C  
ATOM    511  O   GLY L  68      23.787 -11.509  75.418  1.00 16.95           O  
ATOM    512  N   ASN L  69      25.403  -9.936  75.379  1.00 16.95           N  
ATOM    513  CA  ASN L  69      26.491 -10.852  75.693  1.00 16.95           C  
ATOM    514  C   ASN L  69      26.903 -10.472  77.103  1.00 16.95           C  
ATOM    515  O   ASN L  69      27.965 -10.851  77.602  1.00 16.95           O  
ATOM    516  CB  ASN L  69      27.658 -10.662  74.724  1.00 16.95           C  
ATOM    517  CG  ASN L  69      27.516 -11.513  73.475  1.00 16.95           C  
ATOM    518  OD1 ASN L  69      28.341 -11.452  72.555  1.00 16.95           O  
ATOM    519  ND2 ASN L  69      26.459 -12.310  73.433  1.00 16.95           N  
ATOM    520  N   THR L  70      26.028  -9.700  77.736  1.00 16.95           N  
ATOM    521  CA  THR L  70      26.235  -9.235  79.095  1.00 16.95           C  
ATOM    522  C   THR L  70      24.958  -9.386  79.903  1.00 16.95           C  
ATOM    523  O   THR L  70      23.891  -8.919  79.501  1.00 16.95           O  
ATOM    524  CB  THR L  70      26.650  -7.734  79.135  1.00 16.95           C  
ATOM    525  OG1 THR L  70      25.898  -7.048  80.148  1.00 16.95           O  
ATOM    526  CG2 THR L  70      26.394  -7.065  77.788  1.00 16.95           C  
ATOM    527  N   ALA L  71      25.069 -10.062  81.036  1.00 16.95           N  
ATOM    528  CA  ALA L  71      23.932 -10.212  81.926  1.00 16.95           C  
ATOM    529  C   ALA L  71      24.027  -8.980  82.821  1.00 16.95           C  
ATOM    530  O   ALA L  71      24.725  -8.019  82.488  1.00 16.95           O  
ATOM    531  CB  ALA L  71      24.065 -11.481  82.761  1.00 16.95           C  
ATOM    532  N   SER L  72      23.346  -9.004  83.957  1.00 16.95           N  
ATOM    533  CA  SER L  72      23.402  -7.870  84.852  1.00 16.95           C  
ATOM    534  C   SER L  72      22.456  -8.050  86.015  1.00 16.95           C  
ATOM    535  O   SER L  72      21.289  -8.398  85.819  1.00 16.95           O  
ATOM    536  CB  SER L  72      23.031  -6.595  84.102  1.00 16.95           C  
ATOM    537  OG  SER L  72      21.627  -6.430  84.066  1.00 16.95           O  
ATOM    538  N   LEU L  73      22.973  -7.805  87.218  1.00 16.95           N  
ATOM    539  CA  LEU L  73      22.202  -7.896  88.453  1.00 16.95           C  
ATOM    540  C   LEU L  73      21.903  -6.490  88.963  1.00 16.95           C  
ATOM    541  O   LEU L  73      22.672  -5.565  88.721  1.00 16.95           O  
ATOM    542  CB  LEU L  73      22.994  -8.641  89.523  1.00 16.95           C  
ATOM    543  CG  LEU L  73      22.648  -8.216  90.947  1.00 16.95           C  
ATOM    544  CD1 LEU L  73      21.838  -9.299  91.636  1.00 16.95           C  
ATOM    545  CD2 LEU L  73      23.927  -7.926  91.695  1.00 16.95           C  
ATOM    546  N   THR L  74      20.790  -6.329  89.671  1.00 16.95           N  
ATOM    547  CA  THR L  74      20.428  -5.026  90.223  1.00 16.95           C  
ATOM    548  C   THR L  74      19.809  -5.236  91.594  1.00 16.95           C  
ATOM    549  O   THR L  74      19.124  -6.226  91.824  1.00 16.95           O  
ATOM    550  CB  THR L  74      19.422  -4.258  89.315  1.00 16.95           C  
ATOM    551  OG1 THR L  74      18.093  -4.394  89.838  1.00 16.95           O  
ATOM    552  CG2 THR L  74      19.471  -4.791  87.878  1.00 16.95           C  
ATOM    553  N   VAL L  75      20.051  -4.309  92.510  1.00 16.95           N  
ATOM    554  CA  VAL L  75      19.512  -4.447  93.850  1.00 16.95           C  
ATOM    555  C   VAL L  75      18.828  -3.177  94.323  1.00 16.95           C  
ATOM    556  O   VAL L  75      19.436  -2.103  94.339  1.00 16.95           O  
ATOM    557  CB  VAL L  75      20.625  -4.812  94.858  1.00 16.95           C  
ATOM    558  CG1 VAL L  75      21.356  -6.082  94.412  1.00 16.95           C  
ATOM    559  CG2 VAL L  75      21.611  -3.658  94.978  1.00 16.95           C  
ATOM    560  N   SER L  76      17.559  -3.314  94.705  1.00 16.95           N  
ATOM    561  CA  SER L  76      16.762  -2.201  95.206  1.00 16.95           C  
ATOM    562  C   SER L  76      16.580  -2.403  96.693  1.00 16.95           C  
ATOM    563  O   SER L  76      17.105  -3.355  97.257  1.00 16.95           O  
ATOM    564  CB  SER L  76      15.396  -2.183  94.539  1.00 16.95           C  
ATOM    565  OG  SER L  76      14.468  -2.953  95.277  1.00 16.95           O  
ATOM    566  N   GLY L  77      15.816  -1.527  97.334  1.00 16.95           N  
ATOM    567  CA  GLY L  77      15.624  -1.660  98.771  1.00 16.95           C  
ATOM    568  C   GLY L  77      17.009  -1.680  99.394  1.00 16.95           C  
ATOM    569  O   GLY L  77      17.239  -2.289 100.450  1.00 16.95           O  
ATOM    570  N   LEU L  78      17.930  -1.000  98.703  1.00 16.95           N  
ATOM    571  CA  LEU L  78      19.328  -0.901  99.098  1.00 16.95           C  
ATOM    572  C   LEU L  78      19.484  -0.681 100.592  1.00 16.95           C  
ATOM    573  O   LEU L  78      18.780   0.140 101.189  1.00 16.95           O  
ATOM    574  CB  LEU L  78      20.008   0.233  98.325  1.00 16.95           C  
ATOM    575  CG  LEU L  78      21.301  -0.060  97.553  1.00 16.95           C  
ATOM    576  CD1 LEU L  78      21.579  -1.553  97.474  1.00 16.95           C  
ATOM    577  CD2 LEU L  78      21.169   0.519  96.166  1.00 16.95           C  
ATOM    578  N   GLN L  79      20.406  -1.439 101.181  1.00 16.95           N  
ATOM    579  CA  GLN L  79      20.700  -1.369 102.607  1.00 16.95           C  
ATOM    580  C   GLN L  79      22.202  -1.332 102.786  1.00 16.95           C  
ATOM    581  O   GLN L  79      22.944  -1.565 101.834  1.00 16.95           O  
ATOM    582  CB  GLN L  79      20.138  -2.588 103.323  1.00 16.95           C  
ATOM    583  CG  GLN L  79      19.117  -3.335 102.510  1.00 16.95           C  
ATOM    584  CD  GLN L  79      17.952  -3.807 103.342  1.00 16.95           C  
ATOM    585  OE1 GLN L  79      17.972  -3.697 104.571  1.00 16.95           O  
ATOM    586  NE2 GLN L  79      16.922  -4.337 102.679  1.00 16.95           N  
ATOM    587  N   ALA L  80      22.643  -1.042 104.005  1.00 16.95           N  
ATOM    588  CA  ALA L  80      24.066  -0.969 104.315  1.00 16.95           C  
ATOM    589  C   ALA L  80      24.738  -2.341 104.200  1.00 16.95           C  
ATOM    590  O   ALA L  80      25.870  -2.464 103.714  1.00 16.95           O  
ATOM    591  CB  ALA L  80      24.256  -0.409 105.722  1.00 16.95           C  
ATOM    592  N   GLU L  81      24.029  -3.369 104.651  1.00 16.95           N  
ATOM    593  CA  GLU L  81      24.540  -4.727 104.611  1.00 16.95           C  
ATOM    594  C   GLU L  81      24.837  -5.182 103.196  1.00 16.95           C  
ATOM    595  O   GLU L  81      25.501  -6.194 103.000  1.00 16.95           O  
ATOM    596  CB  GLU L  81      23.538  -5.694 105.261  1.00 16.95           C  
ATOM    597  CG  GLU L  81      22.141  -5.706 104.634  1.00 16.95           C  
ATOM    598  CD  GLU L  81      21.040  -5.298 105.618  1.00 16.95           C  
ATOM    599  OE1 GLU L  81      21.362  -4.678 106.656  1.00 16.95           O  
ATOM    600  OE2 GLU L  81      19.850  -5.593 105.353  1.00 16.95           O  
ATOM    601  N   ASP L  82      24.357  -4.441 102.205  1.00 16.95           N  
ATOM    602  CA  ASP L  82      24.589  -4.823 100.811  1.00 16.95           C  
ATOM    603  C   ASP L  82      25.980  -4.450 100.298  1.00 16.95           C  
ATOM    604  O   ASP L  82      26.376  -4.865  99.205  1.00 16.95           O  
ATOM    605  CB  ASP L  82      23.505  -4.225  99.903  1.00 16.95           C  
ATOM    606  CG  ASP L  82      22.089  -4.575 100.371  1.00 16.95           C  
ATOM    607  OD1 ASP L  82      21.619  -5.717 100.133  1.00 16.95           O  
ATOM    608  OD2 ASP L  82      21.448  -3.694 100.989  1.00 16.95           O  
ATOM    609  N   GLU L  83      26.724  -3.677 101.089  1.00 16.95           N  
ATOM    610  CA  GLU L  83      28.083  -3.283 100.706  1.00 16.95           C  
ATOM    611  C   GLU L  83      28.912  -4.549 100.519  1.00 16.95           C  
ATOM    612  O   GLU L  83      29.108  -5.307 101.474  1.00 16.95           O  
ATOM    613  CB  GLU L  83      28.727  -2.421 101.801  1.00 16.95           C  
ATOM    614  CG  GLU L  83      29.739  -1.391 101.305  1.00 16.95           C  
ATOM    615  CD  GLU L  83      29.738  -0.131 102.162  1.00 16.95           C  
ATOM    616  OE1 GLU L  83      28.817   0.700 102.001  1.00 16.95           O  
ATOM    617  OE2 GLU L  83      30.652   0.029 103.000  1.00 16.95           O  
ATOM    618  N   ALA L  84      29.400  -4.777  99.301  1.00 16.95           N  
ATOM    619  CA  ALA L  84      30.194  -5.965  99.032  1.00 16.95           C  
ATOM    620  C   ALA L  84      30.698  -6.056  97.597  1.00 16.95           C  
ATOM    621  O   ALA L  84      30.297  -5.284  96.722  1.00 16.95           O  
ATOM    622  CB  ALA L  84      29.376  -7.211  99.366  1.00 16.95           C  
ATOM    623  N   ASP L  85      31.587  -7.019  97.370  1.00 16.95           N  
ATOM    624  CA  ASP L  85      32.139  -7.264  96.046  1.00 16.95           C  
ATOM    625  C   ASP L  85      31.301  -8.369  95.423  1.00 16.95           C  
ATOM    626  O   ASP L  85      31.044  -9.391  96.054  1.00 16.95           O  
ATOM    627  CB  ASP L  85      33.599  -7.714  96.145  1.00 16.95           C  
ATOM    628  CG  ASP L  85      34.569  -6.545  96.298  1.00 16.95           C  
ATOM    629  OD1 ASP L  85      34.861  -5.873  95.278  1.00 16.95           O  
ATOM    630  OD2 ASP L  85      35.037  -6.310  97.440  1.00 16.95           O  
ATOM    631  N   TYR L  86      30.869  -8.151  94.190  1.00 16.95           N  
ATOM    632  CA  TYR L  86      30.042  -9.122  93.486  1.00 16.95           C  
ATOM    633  C   TYR L  86      30.808  -9.684  92.296  1.00 16.95           C  
ATOM    634  O   TYR L  86      31.614  -8.993  91.681  1.00 16.95           O  
ATOM    635  CB  TYR L  86      28.732  -8.458  93.010  1.00 16.95           C  
ATOM    636  CG  TYR L  86      27.857  -7.951  94.139  1.00 16.95           C  
ATOM    637  CD1 TYR L  86      28.259  -6.869  94.928  1.00 16.95           C  
ATOM    638  CD2 TYR L  86      26.668  -8.598  94.469  1.00 16.95           C  
ATOM    639  CE1 TYR L  86      27.508  -6.445  96.027  1.00 16.95           C  
ATOM    640  CE2 TYR L  86      25.900  -8.184  95.571  1.00 16.95           C  
ATOM    641  CZ  TYR L  86      26.331  -7.107  96.350  1.00 16.95           C  
ATOM    642  OH  TYR L  86      25.600  -6.714  97.456  1.00 16.95           O  
ATOM    643  N   TYR L  87      30.561 -10.949  91.979  1.00 16.95           N  
ATOM    644  CA  TYR L  87      31.225 -11.592  90.858  1.00 16.95           C  
ATOM    645  C   TYR L  87      30.168 -12.141  89.947  1.00 16.95           C  
ATOM    646  O   TYR L  87      29.056 -12.427  90.384  1.00 16.95           O  
ATOM    647  CB  TYR L  87      32.123 -12.718  91.348  1.00 16.95           C  
ATOM    648  CG  TYR L  87      33.264 -12.194  92.160  1.00 16.95           C  
ATOM    649  CD1 TYR L  87      34.253 -11.423  91.561  1.00 16.95           C  
ATOM    650  CD2 TYR L  87      33.329 -12.403  93.534  1.00 16.95           C  
ATOM    651  CE1 TYR L  87      35.279 -10.861  92.306  1.00 16.95           C  
ATOM    652  CE2 TYR L  87      34.352 -11.847  94.293  1.00 16.95           C  
ATOM    653  CZ  TYR L  87      35.324 -11.073  93.668  1.00 16.95           C  
ATOM    654  OH  TYR L  87      36.336 -10.478  94.381  1.00 16.95           O  
ATOM    655  N   CYS L  88      30.520 -12.262  88.674  1.00 16.95           N  
ATOM    656  CA  CYS L  88      29.626 -12.791  87.654  1.00 16.95           C  
ATOM    657  C   CYS L  88      30.340 -13.979  87.010  1.00 16.95           C  
ATOM    658  O   CYS L  88      31.547 -13.937  86.767  1.00 16.95           O  
ATOM    659  CB  CYS L  88      29.313 -11.704  86.612  1.00 16.95           C  
ATOM    660  SG  CYS L  88      29.803 -12.079  84.898  1.00 16.95           S  
ATOM    661  N   SER L  89      29.600 -15.049  86.758  1.00 16.95           N  
ATOM    662  CA  SER L  89      30.185 -16.236  86.156  1.00 16.95           C  
ATOM    663  C   SER L  89      29.555 -16.437  84.805  1.00 16.95           C  
ATOM    664  O   SER L  89      28.777 -15.599  84.351  1.00 16.95           O  
ATOM    665  CB  SER L  89      29.911 -17.461  87.020  1.00 16.95           C  
ATOM    666  OG  SER L  89      31.010 -18.341  87.006  1.00 16.95           O  
ATOM    667  N   SER L  90      29.897 -17.554  84.169  1.00 16.95           N  
ATOM    668  CA  SER L  90      29.354 -17.911  82.862  1.00 16.95           C  
ATOM    669  C   SER L  90      29.987 -19.156  82.265  1.00 16.95           C  
ATOM    670  O   SER L  90      31.210 -19.288  82.198  1.00 16.95           O  
ATOM    671  CB  SER L  90      29.495 -16.754  81.884  1.00 16.95           C  
ATOM    672  OG  SER L  90      28.230 -16.462  81.323  1.00 16.95           O  
ATOM    673  N   TYR L  91      29.132 -20.071  81.833  1.00 16.95           N  
ATOM    674  CA  TYR L  91      29.579 -21.319  81.241  1.00 16.95           C  
ATOM    675  C   TYR L  91      30.385 -21.070  79.979  1.00 16.95           C  
ATOM    676  O   TYR L  91      29.954 -20.343  79.091  1.00 16.95           O  
ATOM    677  CB  TYR L  91      28.372 -22.198  80.905  1.00 16.95           C  
ATOM    678  CG  TYR L  91      28.722 -23.621  80.536  1.00 16.95           C  
ATOM    679  CD1 TYR L  91      28.998 -24.569  81.522  1.00 16.95           C  
ATOM    680  CD2 TYR L  91      28.746 -24.031  79.201  1.00 16.95           C  
ATOM    681  CE1 TYR L  91      29.285 -25.895  81.193  1.00 16.95           C  
ATOM    682  CE2 TYR L  91      29.032 -25.358  78.858  1.00 16.95           C  
ATOM    683  CZ  TYR L  91      29.298 -26.285  79.864  1.00 16.95           C  
ATOM    684  OH  TYR L  91      29.556 -27.599  79.549  1.00 16.95           O  
ATOM    685  N   GLU L  92      31.563 -21.669  79.907  1.00 16.95           N  
ATOM    686  CA  GLU L  92      32.405 -21.531  78.735  1.00 16.95           C  
ATOM    687  C   GLU L  92      32.217 -22.795  77.902  1.00 16.95           C  
ATOM    688  O   GLU L  92      31.127 -23.365  77.858  1.00 16.95           O  
ATOM    689  CB  GLU L  92      33.869 -21.390  79.149  1.00 16.95           C  
ATOM    690  CG  GLU L  92      34.679 -20.469  78.258  1.00 16.95           C  
ATOM    691  CD  GLU L  92      35.597 -19.570  79.049  1.00 16.95           C  
ATOM    692  OE1 GLU L  92      36.027 -19.981  80.142  1.00 16.95           O  
ATOM    693  OE2 GLU L  92      35.887 -18.451  78.579  1.00 16.95           O  
ATOM    694  N   GLY L  93      33.280 -23.242  77.248  1.00 16.95           N  
ATOM    695  CA  GLY L  93      33.165 -24.442  76.451  1.00 16.95           C  
ATOM    696  C   GLY L  93      33.246 -25.691  77.303  1.00 16.95           C  
ATOM    697  O   GLY L  93      32.490 -25.865  78.255  1.00 16.95           O  
ATOM    698  N   SER L  94      34.186 -26.555  76.944  1.00 16.95           N  
ATOM    699  CA  SER L  94      34.436 -27.819  77.628  1.00 16.95           C  
ATOM    700  C   SER L  94      34.520 -27.723  79.158  1.00 16.95           C  
ATOM    701  O   SER L  94      35.618 -27.652  79.726  1.00 16.95           O  
ATOM    702  CB  SER L  94      35.733 -28.434  77.083  1.00 16.95           C  
ATOM    703  OG  SER L  94      36.669 -27.425  76.724  1.00 16.95           O  
ATOM    704  N   ASP L  95      33.357 -27.739  79.811  1.00 16.95           N  
ATOM    705  CA  ASP L  95      33.261 -27.674  81.270  1.00 16.95           C  
ATOM    706  C   ASP L  95      34.017 -26.495  81.872  1.00 16.95           C  
ATOM    707  O   ASP L  95      34.374 -26.525  83.045  1.00 16.95           O  
ATOM    708  CB  ASP L  95      33.786 -28.972  81.899  1.00 16.95           C  
ATOM    709  CG  ASP L  95      32.737 -30.078  81.945  1.00 16.95           C  
ATOM    710  OD1 ASP L  95      31.925 -30.089  82.899  1.00 16.95           O  
ATOM    711  OD2 ASP L  95      32.737 -30.941  81.038  1.00 16.95           O  
ATOM    712  N   ASN L  95A     34.254 -25.455  81.079  1.00 16.95           N  
ATOM    713  CA  ASN L  95A     34.974 -24.280  81.569  1.00 16.95           C  
ATOM    714  C   ASN L  95A     34.017 -23.201  82.100  1.00 16.95           C  
ATOM    715  O   ASN L  95A     32.996 -22.903  81.479  1.00 16.95           O  
ATOM    716  CB  ASN L  95A     35.856 -23.689  80.456  1.00 16.95           C  
ATOM    717  CG  ASN L  95A     36.797 -24.725  79.815  1.00 16.95           C  
ATOM    718  OD1 ASN L  95A     37.549 -25.428  80.509  1.00 16.95           O  
ATOM    719  ND2 ASN L  95A     36.760 -24.812  78.481  1.00 16.95           N  
ATOM    720  N   PHE L  96      34.356 -22.627  83.258  1.00 16.95           N  
ATOM    721  CA  PHE L  96      33.550 -21.576  83.895  1.00 16.95           C  
ATOM    722  C   PHE L  96      34.381 -20.287  84.039  1.00 16.95           C  
ATOM    723  O   PHE L  96      35.526 -20.333  84.482  1.00 16.95           O  
ATOM    724  CB  PHE L  96      33.069 -22.050  85.279  1.00 16.95           C  
ATOM    725  CG  PHE L  96      31.744 -22.780  85.256  1.00 16.95           C  
ATOM    726  CD1 PHE L  96      30.650 -22.256  84.575  1.00 16.95           C  
ATOM    727  CD2 PHE L  96      31.594 -23.995  85.909  1.00 16.95           C  
ATOM    728  CE1 PHE L  96      29.432 -22.932  84.540  1.00 16.95           C  
ATOM    729  CE2 PHE L  96      30.376 -24.672  85.877  1.00 16.95           C  
ATOM    730  CZ  PHE L  96      29.296 -24.139  85.189  1.00 16.95           C  
ATOM    731  N   VAL L  97      33.808 -19.140  83.675  1.00 16.95           N  
ATOM    732  CA  VAL L  97      34.537 -17.871  83.757  1.00 16.95           C  
ATOM    733  C   VAL L  97      33.866 -16.806  84.642  1.00 16.95           C  
ATOM    734  O   VAL L  97      32.639 -16.688  84.666  1.00 16.95           O  
ATOM    735  CB  VAL L  97      34.748 -17.296  82.353  1.00 16.95           C  
ATOM    736  CG1 VAL L  97      33.434 -16.775  81.818  1.00 16.95           C  
ATOM    737  CG2 VAL L  97      35.795 -16.211  82.385  1.00 16.95           C  
ATOM    738  N   PHE L  98      34.685 -16.023  85.352  1.00 16.95           N  
ATOM    739  CA  PHE L  98      34.189 -14.982  86.262  1.00 16.95           C  
ATOM    740  C   PHE L  98      34.432 -13.551  85.814  1.00 16.95           C  
ATOM    741  O   PHE L  98      35.231 -13.293  84.920  1.00 16.95           O  
ATOM    742  CB  PHE L  98      34.793 -15.166  87.652  1.00 16.95           C  
ATOM    743  CG  PHE L  98      34.510 -16.503  88.250  1.00 16.95           C  
ATOM    744  CD1 PHE L  98      35.306 -17.598  87.935  1.00 16.95           C  
ATOM    745  CD2 PHE L  98      33.431 -16.679  89.104  1.00 16.95           C  
ATOM    746  CE1 PHE L  98      35.029 -18.855  88.460  1.00 16.95           C  
ATOM    747  CE2 PHE L  98      33.145 -17.932  89.636  1.00 16.95           C  
ATOM    748  CZ  PHE L  98      33.948 -19.024  89.311  1.00 16.95           C  
ATOM    749  N   GLY L  99      33.739 -12.624  86.461  1.00 16.95           N  
ATOM    750  CA  GLY L  99      33.868 -11.224  86.112  1.00 16.95           C  
ATOM    751  C   GLY L  99      35.099 -10.630  86.736  1.00 16.95           C  
ATOM    752  O   GLY L  99      35.793 -11.306  87.490  1.00 16.95           O  
ATOM    753  N   THR L 100      35.377  -9.368  86.430  1.00 16.95           N  
ATOM    754  CA  THR L 100      36.552  -8.708  86.988  1.00 16.95           C  
ATOM    755  C   THR L 100      36.255  -8.102  88.358  1.00 16.95           C  
ATOM    756  O   THR L 100      37.123  -7.485  88.972  1.00 16.95           O  
ATOM    757  CB  THR L 100      37.092  -7.605  86.042  1.00 16.95           C  
ATOM    758  OG1 THR L 100      36.215  -6.477  86.064  1.00 16.95           O  
ATOM    759  CG2 THR L 100      37.200  -8.130  84.610  1.00 16.95           C  
ATOM    760  N   GLY L 101      35.025  -8.281  88.832  1.00 16.95           N  
ATOM    761  CA  GLY L 101      34.653  -7.764  90.137  1.00 16.95           C  
ATOM    762  C   GLY L 101      34.105  -6.346  90.220  1.00 16.95           C  
ATOM    763  O   GLY L 101      34.464  -5.460  89.439  1.00 16.95           O  
ATOM    764  N   THR L 102      33.225  -6.149  91.197  1.00 16.95           N  
ATOM    765  CA  THR L 102      32.594  -4.864  91.464  1.00 16.95           C  
ATOM    766  C   THR L 102      32.460  -4.709  92.980  1.00 16.95           C  
ATOM    767  O   THR L 102      32.092  -5.657  93.685  1.00 16.95           O  
ATOM    768  CB  THR L 102      31.170  -4.787  90.858  1.00 16.95           C  
ATOM    769  OG1 THR L 102      31.255  -4.472  89.467  1.00 16.95           O  
ATOM    770  CG2 THR L 102      30.333  -3.717  91.561  1.00 16.95           C  
ATOM    771  N   LYS L 103      32.765  -3.514  93.475  1.00 16.95           N  
ATOM    772  CA  LYS L 103      32.647  -3.219  94.895  1.00 16.95           C  
ATOM    773  C   LYS L 103      31.582  -2.131  95.031  1.00 16.95           C  
ATOM    774  O   LYS L 103      31.850  -0.961  94.763  1.00 16.95           O  
ATOM    775  CB  LYS L 103      33.987  -2.731  95.453  1.00 16.95           C  
ATOM    776  CG  LYS L 103      33.945  -2.282  96.913  1.00 16.95           C  
ATOM    777  CD  LYS L 103      35.017  -1.223  97.215  1.00 16.95           C  
ATOM    778  CE  LYS L 103      35.568  -1.346  98.636  1.00 16.95           C  
ATOM    779  NZ  LYS L 103      37.052  -1.216  98.666  1.00 16.95           N  
ATOM    780  N   VAL L 104      30.369  -2.527  95.421  1.00 16.95           N  
ATOM    781  CA  VAL L 104      29.271  -1.581  95.588  1.00 16.95           C  
ATOM    782  C   VAL L 104      29.336  -0.980  96.980  1.00 16.95           C  
ATOM    783  O   VAL L 104      29.580  -1.678  97.967  1.00 16.95           O  
ATOM    784  CB  VAL L 104      27.877  -2.244  95.393  1.00 16.95           C  
ATOM    785  CG1 VAL L 104      26.913  -1.243  94.801  1.00 16.95           C  
ATOM    786  CG2 VAL L 104      27.977  -3.454  94.466  1.00 16.95           C  
ATOM    787  N   THR L 105      29.121   0.328  97.043  1.00 16.95           N  
ATOM    788  CA  THR L 105      29.168   1.077  98.286  1.00 16.95           C  
ATOM    789  C   THR L 105      27.846   1.789  98.526  1.00 16.95           C  
ATOM    790  O   THR L 105      27.543   2.783  97.874  1.00 16.95           O  
ATOM    791  CB  THR L 105      30.275   2.132  98.226  1.00 16.95           C  
ATOM    792  OG1 THR L 105      30.432   2.562  96.866  1.00 16.95           O  
ATOM    793  CG2 THR L 105      31.597   1.563  98.735  1.00 16.95           C  
ATOM    794  N   VAL L 106      27.056   1.274  99.455  1.00 16.95           N  
ATOM    795  CA  VAL L 106      25.780   1.891  99.774  1.00 16.95           C  
ATOM    796  C   VAL L 106      26.061   3.214 100.484  1.00 16.95           C  
ATOM    797  O   VAL L 106      26.411   3.237 101.669  1.00 16.95           O  
ATOM    798  CB  VAL L 106      24.947   0.992 100.709  1.00 16.95           C  
ATOM    799  CG1 VAL L 106      23.512   1.490 100.777  1.00 16.95           C  
ATOM    800  CG2 VAL L 106      25.002  -0.441 100.218  1.00 16.95           C  
ATOM    801  N   LEU L 106A     25.909   4.314  99.756  1.00 16.95           N  
ATOM    802  CA  LEU L 106A     26.153   5.629 100.318  1.00 16.95           C  
ATOM    803  C   LEU L 106A     24.986   6.148 101.153  1.00 16.95           C  
ATOM    804  O   LEU L 106A     23.899   5.569 101.172  1.00 16.95           O  
ATOM    805  CB  LEU L 106A     26.459   6.622  99.203  1.00 16.95           C  
ATOM    806  CG  LEU L 106A     27.538   6.238  98.193  1.00 16.95           C  
ATOM    807  CD1 LEU L 106A     27.065   6.620  96.805  1.00 16.95           C  
ATOM    808  CD2 LEU L 106A     28.842   6.945  98.525  1.00 16.95           C  
ATOM    809  N   GLY L 107      25.226   7.259 101.838  1.00 16.95           N  
ATOM    810  CA  GLY L 107      24.203   7.845 102.675  1.00 16.95           C  
ATOM    811  C   GLY L 107      24.144   7.132 104.009  1.00 16.95           C  
ATOM    812  O   GLY L 107      23.276   7.424 104.836  1.00 16.95           O  
ATOM    813  N   GLN L 108      25.076   6.202 104.222  1.00 16.95           N  
ATOM    814  CA  GLN L 108      25.127   5.427 105.464  1.00 16.95           C  
ATOM    815  C   GLN L 108      25.409   6.303 106.677  1.00 16.95           C  
ATOM    816  O   GLN L 108      26.441   6.972 106.740  1.00 16.95           O  
ATOM    817  CB  GLN L 108      26.195   4.329 105.366  1.00 16.95           C  
ATOM    818  CG  GLN L 108      25.634   2.899 105.374  1.00 16.95           C  
ATOM    819  CD  GLN L 108      26.718   1.833 105.288  1.00 16.95           C  
ATOM    820  OE1 GLN L 108      27.032   1.165 106.275  1.00 16.95           O  
ATOM    821  NE2 GLN L 108      27.291   1.672 104.109  1.00 16.95           N  
ATOM    822  N   PRO L 109      24.479   6.327 107.647  1.00 16.95           N  
ATOM    823  CA  PRO L 109      24.621   7.120 108.871  1.00 16.95           C  
ATOM    824  C   PRO L 109      25.980   6.930 109.545  1.00 16.95           C  
ATOM    825  O   PRO L 109      26.502   5.808 109.624  1.00 16.95           O  
ATOM    826  CB  PRO L 109      23.471   6.636 109.747  1.00 16.95           C  
ATOM    827  CG  PRO L 109      22.453   6.194 108.789  1.00 16.95           C  
ATOM    828  CD  PRO L 109      23.193   5.614 107.616  1.00 16.95           C  
TER     829      PRO L 109                                                      
