# Supplementary material for: SARS-CoV-2 Spike Protein Interaction Space
Source: Int J Mol Sci. 2023 Jul 27;24(15):12058. doi: 10.3390/ijms241512058 (PMC10418891; doi:10.3390/ijms241512058)
Supplement: Supplementary file 1 [file ijms-24-12058-s001.zip › Supplementary Material File S1/1B0W.pdb]

REMARK 950 NUMBERING  Kabat
REMARK 950 METHOD     X-ray crystal structure
REMARK 950 RESOLUTION 1.800
REMARK 950 R-FACTOR   0.226
REMARK 950 R-FREE     0.299
REMARK 950 CHAIN-TYPE LABEL ORIGINAL
REMARK 950 CHAIN L    L    C
REMARK 950 CHAIN L    L    E
REMARK 950 MOLECULE : C : BENCE-JONES KAPPA I PROTEIN BRE
REMARK 950 SPECIES  : C : HOMO SAPIENS
SEQRES   1 L 108  ASP ILE GLN MET THR GLN SER PRO SER SER LEU SER ALA          
SEQRES   2 L 108  SER VAL GLY ASP ARG VAL THR ILE THR CYS GLN ALA SER          
SEQRES   3 L 108  GLN ASP ILE SER ASP TYR LEU ILE TRP TYR GLN GLN LYS          
SEQRES   4 L 108  LEU GLY LYS ALA PRO ASN LEU LEU ILE TYR ASP ALA SER          
SEQRES   5 L 108  THR LEU GLU THR GLY VAL PRO SER ARG PHE SER GLY SER          
SEQRES   6 L 108  GLY SER GLY THR GLU TYR THR PHE THR ILE SER SER LEU          
SEQRES   7 L 108  GLN PRO GLU ASP ILE ALA THR TYR TYR CYS GLN GLN TYR          
SEQRES   8 L 108  ASP ASP LEU PRO TYR THR PHE GLY GLN GLY THR LYS VAL          
SEQRES   9 L 108  GLU ILE LYS ARG                                              
SEQRES   1 L 108  ASP ILE GLN MET THR GLN SER PRO SER SER LEU SER ALA          
SEQRES   2 L 108  SER VAL GLY ASP ARG VAL THR ILE THR CYS GLN ALA SER          
SEQRES   3 L 108  GLN ASP ILE SER ASP TYR LEU ILE TRP TYR GLN GLN LYS          
SEQRES   4 L 108  LEU GLY LYS ALA PRO ASN LEU LEU ILE TYR ASP ALA SER          
SEQRES   5 L 108  THR LEU GLU THR GLY VAL PRO SER ARG PHE SER GLY SER          
SEQRES   6 L 108  GLY SER GLY THR GLU TYR THR PHE THR ILE SER SER LEU          
SEQRES   7 L 108  GLN PRO GLU ASP ILE ALA THR TYR TYR CYS GLN GLN TYR          
SEQRES   8 L 108  ASP ASP LEU PRO TYR THR PHE GLY GLN GLY THR LYS VAL          
SEQRES   9 L 108  GLU ILE LYS ARG                                              
ATOM   1683  N   ASP L   1      25.040 112.059  65.596  1.00 45.97           N  
ATOM   1684  CA  ASP L   1      24.848 113.245  66.482  1.00 44.68           C  
ATOM   1685  C   ASP L   1      23.475 113.875  66.310  1.00 40.73           C  
ATOM   1686  O   ASP L   1      22.763 114.040  67.296  1.00 43.16           O  
ATOM   1687  CB  ASP L   1      25.936 114.292  66.262  1.00 50.75           C  
ATOM   1688  CG  ASP L   1      25.772 115.496  67.174  1.00 56.07           C  
ATOM   1689  OD1 ASP L   1      25.647 115.291  68.407  1.00 59.63           O  
ATOM   1690  OD2 ASP L   1      25.764 116.639  66.654  1.00 58.45           O  
ATOM   1691  N   ILE L   2      23.113 114.270  65.091  1.00 34.21           N  
ATOM   1692  CA  ILE L   2      21.783 114.836  64.882  1.00 29.40           C  
ATOM   1693  C   ILE L   2      20.834 113.659  64.752  1.00 28.14           C  
ATOM   1694  O   ILE L   2      21.075 112.748  63.959  1.00 26.28           O  
ATOM   1695  CB  ILE L   2      21.694 115.746  63.639  1.00 31.53           C  
ATOM   1696  CG1 ILE L   2      22.706 116.893  63.767  1.00 29.91           C  
ATOM   1697  CG2 ILE L   2      20.258 116.296  63.487  1.00 26.87           C  
ATOM   1698  CD1 ILE L   2      22.672 117.890  62.632  1.00 35.53           C  
ATOM   1699  N   GLN L   3      19.817 113.634  65.604  1.00 28.47           N  
ATOM   1700  CA  GLN L   3      18.831 112.560  65.634  1.00 31.69           C  
ATOM   1701  C   GLN L   3      17.608 112.914  64.793  1.00 27.20           C  
ATOM   1702  O   GLN L   3      17.083 114.009  64.920  1.00 25.98           O  
ATOM   1703  CB  GLN L   3      18.394 112.315  67.083  1.00 36.98           C  
ATOM   1704  CG  GLN L   3      17.663 111.012  67.312  1.00 44.09           C  
ATOM   1705  CD  GLN L   3      18.584 109.812  67.139  1.00 50.59           C  
ATOM   1706  OE1 GLN L   3      18.175 108.763  66.630  1.00 54.96           O  
ATOM   1707  NE2 GLN L   3      19.839 109.962  67.562  1.00 50.92           N  
ATOM   1708  N   MET L   4      17.169 111.989  63.941  1.00 25.37           N  
ATOM   1709  CA  MET L   4      16.005 112.209  63.087  1.00 24.16           C  
ATOM   1710  C   MET L   4      14.917 111.248  63.515  1.00 22.61           C  
ATOM   1711  O   MET L   4      15.160 110.053  63.613  1.00 24.63           O  
ATOM   1712  CB  MET L   4      16.311 111.947  61.602  1.00 24.45           C  
ATOM   1713  CG  MET L   4      17.442 112.745  61.002  1.00 22.24           C  
ATOM   1714  SD  MET L   4      17.348 114.486  61.301  1.00 26.13           S  
ATOM   1715  CE  MET L   4      15.841 114.946  60.382  1.00 19.81           C  
ATOM   1716  N   THR L   5      13.725 111.781  63.755  1.00 19.86           N  
ATOM   1717  CA  THR L   5      12.571 111.006  64.170  1.00 18.25           C  
ATOM   1718  C   THR L   5      11.560 111.146  63.036  1.00 17.26           C  
ATOM   1719  O   THR L   5      11.129 112.252  62.725  1.00 18.60           O  
ATOM   1720  CB  THR L   5      11.962 111.622  65.417  1.00 24.25           C  
ATOM   1721  OG1 THR L   5      12.970 111.723  66.433  1.00 27.81           O  
ATOM   1722  CG2 THR L   5      10.803 110.777  65.908  1.00 26.95           C  
ATOM   1723  N   GLN L   6      11.160 110.041  62.433  1.00 15.28           N  
ATOM   1724  CA  GLN L   6      10.246 110.115  61.302  1.00 16.00           C  
ATOM   1725  C   GLN L   6       8.974 109.393  61.676  1.00 12.92           C  
ATOM   1726  O   GLN L   6       9.043 108.414  62.387  1.00 14.34           O  
ATOM   1727  CB  GLN L   6      10.939 109.463  60.088  1.00 17.98           C  
ATOM   1728  CG  GLN L   6      10.237 109.655  58.757  1.00 17.67           C  
ATOM   1729  CD  GLN L   6      10.897 108.872  57.633  1.00 10.18           C  
ATOM   1730  OE1 GLN L   6      12.110 108.691  57.620  1.00 10.19           O  
ATOM   1731  NE2 GLN L   6      10.091 108.360  56.717  1.00 21.64           N  
ATOM   1732  N   SER L   7       7.819 109.860  61.216  1.00 15.68           N  
ATOM   1733  CA  SER L   7       6.550 109.204  61.554  1.00 18.36           C  
ATOM   1734  C   SER L   7       5.549 109.261  60.402  1.00 18.61           C  
ATOM   1735  O   SER L   7       5.525 110.262  59.654  1.00 17.59           O  
ATOM   1736  CB  SER L   7       5.921 109.858  62.796  1.00 23.52           C  
ATOM   1737  OG  SER L   7       4.871 109.061  63.330  1.00 21.03           O  
ATOM   1738  N   PRO L   8       4.739 108.189  60.218  1.00 17.17           N  
ATOM   1739  CA  PRO L   8       4.650 106.916  60.958  1.00 17.23           C  
ATOM   1740  C   PRO L   8       5.661 105.914  60.406  1.00 20.20           C  
ATOM   1741  O   PRO L   8       6.392 106.249  59.490  1.00 23.44           O  
ATOM   1742  CB  PRO L   8       3.232 106.417  60.634  1.00 19.27           C  
ATOM   1743  CG  PRO L   8       2.523 107.578  59.978  1.00 15.95           C  
ATOM   1744  CD  PRO L   8       3.639 108.261  59.240  1.00 22.33           C  
ATOM   1745  N   SER L   9       5.731 104.711  60.979  1.00 14.00           N  
ATOM   1746  CA  SER L   9       6.628 103.660  60.490  1.00 19.57           C  
ATOM   1747  C   SER L   9       6.066 103.024  59.212  1.00 21.66           C  
ATOM   1748  O   SER L   9       6.803 102.472  58.361  1.00 22.06           O  
ATOM   1749  CB  SER L   9       6.762 102.552  61.524  1.00 20.15           C  
ATOM   1750  OG  SER L   9       7.216 103.069  62.763  1.00 36.79           O  
ATOM   1751  N   SER L  10       4.747 103.009  59.114  1.00 21.80           N  
ATOM   1752  CA  SER L  10       4.108 102.432  57.944  1.00 25.24           C  
ATOM   1753  C   SER L  10       2.667 102.880  57.875  1.00 24.44           C  
ATOM   1754  O   SER L  10       2.059 103.121  58.904  1.00 23.27           O  
ATOM   1755  CB  SER L  10       4.164 100.904  58.028  1.00 24.03           C  
ATOM   1756  OG  SER L  10       3.472 100.432  59.176  1.00 31.61           O  
ATOM   1757  N   LEU L  11       2.148 103.068  56.667  1.00 26.37           N  
ATOM   1758  CA  LEU L  11       0.749 103.425  56.504  1.00 26.09           C  
ATOM   1759  C   LEU L  11       0.159 102.796  55.256  1.00 28.67           C  
ATOM   1760  O   LEU L  11       0.874 102.207  54.446  1.00 27.20           O  
ATOM   1761  CB  LEU L  11       0.500 104.926  56.542  1.00 24.86           C  
ATOM   1762  CG  LEU L  11       0.762 105.972  55.467  1.00 22.30           C  
ATOM   1763  CD1 LEU L  11       2.065 106.625  55.695  1.00 20.71           C  
ATOM   1764  CD2 LEU L  11       0.610 105.440  54.070  1.00 23.77           C  
ATOM   1765  N   SER L  12      -1.157 102.841  55.157  1.00 29.35           N  
ATOM   1766  CA  SER L  12      -1.855 102.286  54.016  1.00 33.45           C  
ATOM   1767  C   SER L  12      -2.955 103.246  53.639  1.00 33.18           C  
ATOM   1768  O   SER L  12      -3.681 103.728  54.510  1.00 34.28           O  
ATOM   1769  CB  SER L  12      -2.428 100.926  54.372  1.00 34.67           C  
ATOM   1770  OG  SER L  12      -1.369 100.014  54.624  1.00 45.95           O  
ATOM   1771  N   ALA L  13      -3.016 103.599  52.361  1.00 30.32           N  
ATOM   1772  CA  ALA L  13      -4.034 104.515  51.879  1.00 30.61           C  
ATOM   1773  C   ALA L  13      -4.519 103.987  50.530  1.00 32.01           C  
ATOM   1774  O   ALA L  13      -3.955 103.032  50.001  1.00 34.64           O  
ATOM   1775  CB  ALA L  13      -3.458 105.930  51.745  1.00 28.34           C  
ATOM   1776  N   SER L  14      -5.575 104.584  49.993  1.00 30.49           N  
ATOM   1777  CA  SER L  14      -6.136 104.160  48.722  1.00 26.14           C  
ATOM   1778  C   SER L  14      -5.526 105.008  47.630  1.00 24.62           C  
ATOM   1779  O   SER L  14      -5.096 106.132  47.895  1.00 24.55           O  
ATOM   1780  CB  SER L  14      -7.642 104.378  48.754  1.00 29.00           C  
ATOM   1781  OG  SER L  14      -8.212 103.780  49.907  1.00 35.50           O  
ATOM   1782  N   VAL L  15      -5.515 104.506  46.393  1.00 22.82           N  
ATOM   1783  CA  VAL L  15      -4.943 105.292  45.302  1.00 19.58           C  
ATOM   1784  C   VAL L  15      -5.748 106.564  45.281  1.00 15.70           C  
ATOM   1785  O   VAL L  15      -6.952 106.530  45.501  1.00 20.52           O  
ATOM   1786  CB  VAL L  15      -5.023 104.573  43.928  1.00 22.23           C  
ATOM   1787  CG1 VAL L  15      -4.905 103.072  44.098  1.00 21.27           C  
ATOM   1788  CG2 VAL L  15      -6.278 104.951  43.182  1.00 26.25           C  
ATOM   1789  N   GLY L  16      -5.084 107.701  45.158  1.00 18.40           N  
ATOM   1790  CA  GLY L  16      -5.810 108.957  45.134  1.00 20.03           C  
ATOM   1791  C   GLY L  16      -5.716 109.724  46.424  1.00 24.16           C  
ATOM   1792  O   GLY L  16      -5.775 110.963  46.431  1.00 25.43           O  
ATOM   1793  N   ASP L  17      -5.519 108.988  47.510  1.00 25.98           N  
ATOM   1794  CA  ASP L  17      -5.418 109.570  48.841  1.00 26.57           C  
ATOM   1795  C   ASP L  17      -4.184 110.431  49.085  1.00 28.14           C  
ATOM   1796  O   ASP L  17      -3.143 110.287  48.427  1.00 25.59           O  
ATOM   1797  CB  ASP L  17      -5.467 108.468  49.907  1.00 27.00           C  
ATOM   1798  CG  ASP L  17      -6.872 108.061  50.259  1.00 30.57           C  
ATOM   1799  OD1 ASP L  17      -7.804 108.877  50.055  1.00 33.97           O  
ATOM   1800  OD2 ASP L  17      -7.049 106.929  50.756  1.00 32.58           O  
ATOM   1801  N   ARG L  18      -4.320 111.322  50.061  1.00 28.15           N  
ATOM   1802  CA  ARG L  18      -3.251 112.204  50.461  1.00 28.92           C  
ATOM   1803  C   ARG L  18      -2.447 111.488  51.533  1.00 29.44           C  
ATOM   1804  O   ARG L  18      -3.026 110.784  52.375  1.00 32.58           O  
ATOM   1805  CB  ARG L  18      -3.839 113.455  51.055  1.00 29.33           C  
ATOM   1806  CG  ARG L  18      -2.815 114.436  51.472  1.00 36.37           C  
ATOM   1807  CD  ARG L  18      -3.498 115.584  52.145  1.00 39.93           C  
ATOM   1808  NE  ARG L  18      -2.592 116.701  52.363  1.00 44.29           N  
ATOM   1809  CZ  ARG L  18      -2.904 117.763  53.092  1.00 47.27           C  
ATOM   1810  NH1 ARG L  18      -4.090 117.835  53.687  1.00 48.70           N  
ATOM   1811  NH2 ARG L  18      -2.025 118.743  53.237  1.00 51.88           N  
ATOM   1812  N   VAL L  19      -1.124 111.650  51.487  1.00 28.06           N  
ATOM   1813  CA  VAL L  19      -0.196 111.042  52.451  1.00 24.62           C  
ATOM   1814  C   VAL L  19       0.742 112.119  53.027  1.00 26.91           C  
ATOM   1815  O   VAL L  19       1.318 112.946  52.280  1.00 28.64           O  
ATOM   1816  CB  VAL L  19       0.654 109.935  51.789  1.00 22.91           C  
ATOM   1817  CG1 VAL L  19       1.744 109.446  52.731  1.00 26.65           C  
ATOM   1818  CG2 VAL L  19      -0.239 108.766  51.400  1.00 23.26           C  
ATOM   1819  N   THR L  20       0.862 112.137  54.356  1.00 23.73           N  
ATOM   1820  CA  THR L  20       1.733 113.084  55.036  1.00 21.30           C  
ATOM   1821  C   THR L  20       2.681 112.271  55.889  1.00 18.27           C  
ATOM   1822  O   THR L  20       2.258 111.345  56.581  1.00 23.05           O  
ATOM   1823  CB  THR L  20       0.927 114.069  55.930  1.00 25.49           C  
ATOM   1824  OG1 THR L  20       1.135 115.408  55.465  1.00 25.06           O  
ATOM   1825  CG2 THR L  20       1.374 113.997  57.415  1.00 24.20           C  
ATOM   1826  N   ILE L  21       3.960 112.561  55.783  1.00 13.01           N  
ATOM   1827  CA  ILE L  21       4.980 111.878  56.573  1.00 15.44           C  
ATOM   1828  C   ILE L  21       5.773 113.000  57.233  1.00 14.93           C  
ATOM   1829  O   ILE L  21       5.944 114.052  56.630  1.00 13.01           O  
ATOM   1830  CB  ILE L  21       5.922 111.034  55.668  1.00 15.34           C  
ATOM   1831  CG1 ILE L  21       5.188 109.786  55.149  1.00 19.47           C  
ATOM   1832  CG2 ILE L  21       7.146 110.566  56.467  1.00 21.90           C  
ATOM   1833  CD1 ILE L  21       5.804 109.211  53.856  1.00 12.45           C  
ATOM   1834  N   THR L  22       6.247 112.809  58.461  1.00 16.94           N  
ATOM   1835  CA  THR L  22       7.010 113.865  59.122  1.00 16.46           C  
ATOM   1836  C   THR L  22       8.358 113.414  59.655  1.00 13.46           C  
ATOM   1837  O   THR L  22       8.548 112.251  59.988  1.00 12.93           O  
ATOM   1838  CB  THR L  22       6.246 114.467  60.340  1.00 21.04           C  
ATOM   1839  OG1 THR L  22       5.588 113.422  61.075  1.00 25.76           O  
ATOM   1840  CG2 THR L  22       5.228 115.496  59.894  1.00 20.02           C  
ATOM   1841  N   CYS L  23       9.268 114.371  59.780  1.00 15.20           N  
ATOM   1842  CA  CYS L  23      10.585 114.131  60.341  1.00 18.17           C  
ATOM   1843  C   CYS L  23      10.911 115.301  61.237  1.00 17.32           C  
ATOM   1844  O   CYS L  23      10.702 116.451  60.874  1.00 17.97           O  
ATOM   1845  CB  CYS L  23      11.661 114.005  59.271  1.00 17.02           C  
ATOM   1846  SG  CYS L  23      11.789 112.306  58.678  1.00 24.26           S  
ATOM   1847  N   GLN L  24      11.311 114.993  62.460  1.00 20.98           N  
ATOM   1848  CA  GLN L  24      11.706 116.017  63.394  1.00 21.89           C  
ATOM   1849  C   GLN L  24      13.197 115.795  63.533  1.00 18.20           C  
ATOM   1850  O   GLN L  24      13.671 114.655  63.504  1.00 21.18           O  
ATOM   1851  CB  GLN L  24      10.987 115.832  64.730  1.00 29.19           C  
ATOM   1852  CG  GLN L  24       9.473 115.825  64.573  1.00 39.69           C  
ATOM   1853  CD  GLN L  24       8.692 115.848  65.893  1.00 50.00           C  
ATOM   1854  OE1 GLN L  24       7.477 115.595  65.898  1.00 51.60           O  
ATOM   1855  NE2 GLN L  24       9.372 116.171  67.010  1.00 48.59           N  
ATOM   1856  N   ALA L  25      13.934 116.885  63.624  1.00 16.87           N  
ATOM   1857  CA  ALA L  25      15.379 116.850  63.771  1.00 18.16           C  
ATOM   1858  C   ALA L  25      15.708 117.331  65.185  1.00 23.23           C  
ATOM   1859  O   ALA L  25      15.096 118.295  65.662  1.00 23.84           O  
ATOM   1860  CB  ALA L  25      15.995 117.771  62.766  1.00 16.29           C  
ATOM   1861  N   SER L  26      16.686 116.698  65.833  1.00 24.69           N  
ATOM   1862  CA  SER L  26      17.066 117.055  67.200  1.00 25.16           C  
ATOM   1863  C   SER L  26      17.726 118.407  67.359  1.00 27.47           C  
ATOM   1864  O   SER L  26      18.036 118.819  68.476  1.00 27.76           O  
ATOM   1865  CB  SER L  26      17.939 115.979  67.830  1.00 29.19           C  
ATOM   1866  OG  SER L  26      19.180 115.862  67.167  1.00 30.17           O  
ATOM   1867  N   GLN L  27      17.979 119.081  66.245  1.00 28.60           N  
ATOM   1868  CA  GLN L  27      18.544 120.426  66.252  1.00 32.07           C  
ATOM   1869  C   GLN L  27      18.176 121.099  64.938  1.00 32.24           C  
ATOM   1870  O   GLN L  27      17.788 120.434  63.981  1.00 34.03           O  
ATOM   1871  CB  GLN L  27      20.068 120.430  66.444  1.00 31.29           C  
ATOM   1872  CG  GLN L  27      20.882 120.147  65.205  1.00 39.42           C  
ATOM   1873  CD  GLN L  27      22.327 120.567  65.364  1.00 44.92           C  
ATOM   1874  OE1 GLN L  27      22.867 121.298  64.530  1.00 50.36           O  
ATOM   1875  NE2 GLN L  27      22.963 120.123  66.446  1.00 44.77           N  
ATOM   1876  N   ASP L  28      18.288 122.418  64.886  1.00 34.52           N  
ATOM   1877  CA  ASP L  28      17.960 123.140  63.664  1.00 35.10           C  
ATOM   1878  C   ASP L  28      18.947 122.771  62.552  1.00 34.37           C  
ATOM   1879  O   ASP L  28      20.119 123.128  62.624  1.00 34.31           O  
ATOM   1880  CB  ASP L  28      17.985 124.642  63.917  1.00 34.75           C  
ATOM   1881  CG  ASP L  28      17.616 125.435  62.699  1.00 38.34           C  
ATOM   1882  OD1 ASP L  28      16.990 124.859  61.798  1.00 40.27           O  
ATOM   1883  OD2 ASP L  28      17.945 126.639  62.634  1.00 43.52           O  
ATOM   1884  N   ILE L  29      18.461 122.081  61.522  1.00 32.35           N  
ATOM   1885  CA  ILE L  29      19.324 121.660  60.413  1.00 32.95           C  
ATOM   1886  C   ILE L  29      19.362 122.588  59.187  1.00 35.25           C  
ATOM   1887  O   ILE L  29      19.719 122.165  58.076  1.00 34.45           O  
ATOM   1888  CB  ILE L  29      19.008 120.218  59.954  1.00 26.94           C  
ATOM   1889  CG1 ILE L  29      17.516 120.067  59.640  1.00 25.80           C  
ATOM   1890  CG2 ILE L  29      19.477 119.236  61.005  1.00 24.69           C  
ATOM   1891  CD1 ILE L  29      17.177 118.797  58.877  1.00 17.01           C  
ATOM   1892  N   SER L  30      18.968 123.840  59.394  1.00 35.10           N  
ATOM   1893  CA  SER L  30      18.968 124.854  58.348  1.00 34.29           C  
ATOM   1894  C   SER L  30      18.385 124.435  57.000  1.00 31.86           C  
ATOM   1895  O   SER L  30      18.886 124.833  55.961  1.00 31.77           O  
ATOM   1896  CB  SER L  30      20.400 125.350  58.160  1.00 36.85           C  
ATOM   1897  OG  SER L  30      20.992 125.608  59.419  1.00 40.01           O  
ATOM   1898  N   ASP L  31      17.301 123.672  57.020  1.00 32.66           N  
ATOM   1899  CA  ASP L  31      16.645 123.192  55.794  1.00 33.19           C  
ATOM   1900  C   ASP L  31      17.457 122.194  54.968  1.00 29.77           C  
ATOM   1901  O   ASP L  31      17.098 121.885  53.824  1.00 27.73           O  
ATOM   1902  CB  ASP L  31      16.169 124.351  54.905  1.00 38.76           C  
ATOM   1903  CG  ASP L  31      15.186 125.266  55.618  1.00 44.28           C  
ATOM   1904  OD1 ASP L  31      14.283 124.759  56.326  1.00 43.47           O  
ATOM   1905  OD2 ASP L  31      15.343 126.501  55.486  1.00 50.11           O  
ATOM   1906  N   TYR L  32      18.556 121.703  55.527  1.00 24.88           N  
ATOM   1907  CA  TYR L  32      19.350 120.710  54.827  1.00 21.86           C  
ATOM   1908  C   TYR L  32      18.710 119.367  55.055  1.00 19.79           C  
ATOM   1909  O   TYR L  32      19.193 118.546  55.849  1.00 16.55           O  
ATOM   1910  CB  TYR L  32      20.801 120.700  55.292  1.00 23.90           C  
ATOM   1911  CG  TYR L  32      21.526 121.970  54.950  1.00 28.16           C  
ATOM   1912  CD1 TYR L  32      21.540 122.458  53.643  1.00 31.97           C  
ATOM   1913  CD2 TYR L  32      22.149 122.716  55.935  1.00 30.89           C  
ATOM   1914  CE1 TYR L  32      22.154 123.656  53.335  1.00 35.51           C  
ATOM   1915  CE2 TYR L  32      22.763 123.920  55.637  1.00 34.09           C  
ATOM   1916  CZ  TYR L  32      22.763 124.388  54.342  1.00 35.35           C  
ATOM   1917  OH  TYR L  32      23.356 125.606  54.066  1.00 40.97           O  
ATOM   1918  N   LEU L  33      17.596 119.146  54.361  1.00 17.12           N  
ATOM   1919  CA  LEU L  33      16.897 117.880  54.469  1.00 17.42           C  
ATOM   1920  C   LEU L  33      16.611 117.348  53.071  1.00 21.75           C  
ATOM   1921  O   LEU L  33      16.294 118.109  52.151  1.00 23.84           O  
ATOM   1922  CB  LEU L  33      15.567 118.044  55.206  1.00 19.54           C  
ATOM   1923  CG  LEU L  33      14.943 116.698  55.529  1.00 18.33           C  
ATOM   1924  CD1 LEU L  33      15.427 116.214  56.882  1.00 17.82           C  
ATOM   1925  CD2 LEU L  33      13.476 116.805  55.470  1.00 20.91           C  
ATOM   1926  N   ILE L  34      16.732 116.039  52.920  1.00 16.76           N  
ATOM   1927  CA  ILE L  34      16.445 115.403  51.667  1.00 19.70           C  
ATOM   1928  C   ILE L  34      15.445 114.266  51.947  1.00 17.45           C  
ATOM   1929  O   ILE L  34      15.384 113.735  53.076  1.00 17.25           O  
ATOM   1930  CB  ILE L  34      17.789 114.932  51.000  1.00 20.81           C  
ATOM   1931  CG1 ILE L  34      17.546 114.331  49.629  1.00 26.80           C  
ATOM   1932  CG2 ILE L  34      18.475 113.905  51.850  1.00 31.48           C  
ATOM   1933  CD1 ILE L  34      17.028 112.960  49.641  1.00 27.86           C  
ATOM   1934  N   TRP L  35      14.528 114.049  51.003  1.00 13.00           N  
ATOM   1935  CA  TRP L  35      13.576 112.953  51.090  1.00 13.67           C  
ATOM   1936  C   TRP L  35      13.917 111.968  49.974  1.00 13.35           C  
ATOM   1937  O   TRP L  35      14.162 112.381  48.861  1.00 13.05           O  
ATOM   1938  CB  TRP L  35      12.125 113.429  50.923  1.00 11.68           C  
ATOM   1939  CG  TRP L  35      11.637 114.209  52.060  1.00 11.89           C  
ATOM   1940  CD1 TRP L  35      11.661 115.563  52.191  1.00 13.64           C  
ATOM   1941  CD2 TRP L  35      11.076 113.694  53.273  1.00 13.30           C  
ATOM   1942  NE1 TRP L  35      11.147 115.927  53.407  1.00 16.21           N  
ATOM   1943  CE2 TRP L  35      10.777 114.793  54.094  1.00 13.83           C  
ATOM   1944  CE3 TRP L  35      10.788 112.405  53.748  1.00 14.27           C  
ATOM   1945  CZ2 TRP L  35      10.214 114.651  55.348  1.00  9.68           C  
ATOM   1946  CZ3 TRP L  35      10.225 112.267  54.993  1.00  9.03           C  
ATOM   1947  CH2 TRP L  35       9.941 113.378  55.776  1.00 10.94           C  
ATOM   1948  N   TYR L  36      14.024 110.686  50.286  1.00 13.48           N  
ATOM   1949  CA  TYR L  36      14.319 109.671  49.264  1.00 15.74           C  
ATOM   1950  C   TYR L  36      13.155 108.723  49.147  1.00 13.65           C  
ATOM   1951  O   TYR L  36      12.321 108.614  50.047  1.00 14.62           O  
ATOM   1952  CB  TYR L  36      15.504 108.778  49.651  1.00 12.55           C  
ATOM   1953  CG  TYR L  36      16.827 109.464  49.771  1.00 18.06           C  
ATOM   1954  CD1 TYR L  36      17.681 109.604  48.665  1.00 10.27           C  
ATOM   1955  CD2 TYR L  36      17.258 109.944  51.001  1.00 15.63           C  
ATOM   1956  CE1 TYR L  36      18.924 110.203  48.801  1.00 10.51           C  
ATOM   1957  CE2 TYR L  36      18.489 110.533  51.140  1.00 18.82           C  
ATOM   1958  CZ  TYR L  36      19.318 110.663  50.045  1.00 13.05           C  
ATOM   1959  OH  TYR L  36      20.542 111.244  50.241  1.00 11.71           O  
ATOM   1960  N   GLN L  37      13.177 107.943  48.084  1.00 12.74           N  
ATOM   1961  CA  GLN L  37      12.179 106.926  47.893  1.00  9.69           C  
ATOM   1962  C   GLN L  37      12.997 105.661  47.683  1.00  8.62           C  
ATOM   1963  O   GLN L  37      14.008 105.688  47.006  1.00 10.72           O  
ATOM   1964  CB  GLN L  37      11.317 107.248  46.672  1.00 12.64           C  
ATOM   1965  CG  GLN L  37      10.285 106.208  46.338  1.00 13.50           C  
ATOM   1966  CD  GLN L  37       9.871 106.315  44.908  1.00 14.79           C  
ATOM   1967  OE1 GLN L  37      10.685 106.146  44.017  1.00 24.58           O  
ATOM   1968  NE2 GLN L  37       8.623 106.662  44.675  1.00 19.11           N  
ATOM   1969  N   GLN L  38      12.654 104.588  48.373  1.00 11.57           N  
ATOM   1970  CA  GLN L  38      13.373 103.339  48.178  1.00 11.51           C  
ATOM   1971  C   GLN L  38      12.416 102.212  47.896  1.00 14.26           C  
ATOM   1972  O   GLN L  38      11.714 101.717  48.794  1.00 11.98           O  
ATOM   1973  CB  GLN L  38      14.222 102.997  49.396  1.00 18.67           C  
ATOM   1974  CG  GLN L  38      15.021 101.732  49.208  1.00 18.15           C  
ATOM   1975  CD  GLN L  38      15.934 101.456  50.356  1.00 18.37           C  
ATOM   1976  OE1 GLN L  38      15.611 101.744  51.518  1.00 25.34           O  
ATOM   1977  NE2 GLN L  38      17.099 100.917  50.049  1.00 19.07           N  
ATOM   1978  N   LYS L  39      12.334 101.824  46.629  1.00 15.74           N  
ATOM   1979  CA  LYS L  39      11.440 100.733  46.277  1.00 14.20           C  
ATOM   1980  C   LYS L  39      12.135  99.440  46.660  1.00 18.25           C  
ATOM   1981  O   LYS L  39      13.366  99.380  46.780  1.00 16.60           O  
ATOM   1982  CB  LYS L  39      11.090 100.739  44.794  1.00 15.42           C  
ATOM   1983  CG  LYS L  39      10.571 102.045  44.239  1.00 19.01           C  
ATOM   1984  CD  LYS L  39       9.597 101.743  43.094  1.00 28.46           C  
ATOM   1985  CE  LYS L  39       9.230 102.968  42.299  1.00 31.38           C  
ATOM   1986  NZ  LYS L  39       8.717 103.998  43.231  1.00 41.04           N  
ATOM   1987  N   LEU L  40      11.340  98.404  46.858  1.00 22.95           N  
ATOM   1988  CA  LEU L  40      11.840  97.092  47.253  1.00 27.43           C  
ATOM   1989  C   LEU L  40      13.052  96.582  46.450  1.00 26.18           C  
ATOM   1990  O   LEU L  40      12.956  96.365  45.248  1.00 27.21           O  
ATOM   1991  CB  LEU L  40      10.700  96.074  47.149  1.00 31.14           C  
ATOM   1992  CG  LEU L  40      10.965  94.763  47.878  1.00 34.88           C  
ATOM   1993  CD1 LEU L  40      11.180  95.050  49.348  1.00 37.15           C  
ATOM   1994  CD2 LEU L  40       9.801  93.815  47.682  1.00 39.58           C  
ATOM   1995  N   GLY L  41      14.185  96.409  47.114  1.00 21.52           N  
ATOM   1996  CA  GLY L  41      15.366  95.898  46.440  1.00 25.25           C  
ATOM   1997  C   GLY L  41      16.161  96.866  45.587  1.00 25.26           C  
ATOM   1998  O   GLY L  41      17.045  96.455  44.845  1.00 26.68           O  
ATOM   1999  N   LYS L  42      15.856  98.152  45.679  1.00 23.82           N  
ATOM   2000  CA  LYS L  42      16.559  99.137  44.899  1.00 18.48           C  
ATOM   2001  C   LYS L  42      17.213 100.149  45.815  1.00 21.81           C  
ATOM   2002  O   LYS L  42      16.986 100.138  47.021  1.00 24.24           O  
ATOM   2003  CB  LYS L  42      15.598  99.774  43.918  1.00 21.55           C  
ATOM   2004  CG  LYS L  42      15.446  98.939  42.633  1.00 31.15           C  
ATOM   2005  CD  LYS L  42      14.157  99.233  41.882  1.00 36.79           C  
ATOM   2006  CE  LYS L  42      12.974  98.542  42.573  1.00 40.72           C  
ATOM   2007  NZ  LYS L  42      11.669  98.705  41.866  1.00 39.79           N  
ATOM   2008  N   ALA L  43      18.070 100.998  45.269  1.00 18.93           N  
ATOM   2009  CA  ALA L  43      18.740 101.985  46.097  1.00 18.16           C  
ATOM   2010  C   ALA L  43      17.808 103.168  46.331  1.00 17.08           C  
ATOM   2011  O   ALA L  43      16.798 103.283  45.669  1.00 15.43           O  
ATOM   2012  CB  ALA L  43      20.061 102.445  45.416  1.00 17.50           C  
ATOM   2013  N   PRO L  44      18.033 103.938  47.409  1.00 16.31           N  
ATOM   2014  CA  PRO L  44      17.204 105.104  47.698  1.00 14.53           C  
ATOM   2015  C   PRO L  44      17.347 106.075  46.521  1.00  9.98           C  
ATOM   2016  O   PRO L  44      18.422 106.223  45.967  1.00 14.75           O  
ATOM   2017  CB  PRO L  44      17.872 105.690  48.945  1.00 13.18           C  
ATOM   2018  CG  PRO L  44      18.302 104.500  49.657  1.00 20.92           C  
ATOM   2019  CD  PRO L  44      18.893 103.619  48.559  1.00 21.17           C  
ATOM   2020  N   ASN L  45      16.277 106.751  46.157  1.00 13.02           N  
ATOM   2021  CA  ASN L  45      16.334 107.700  45.055  1.00 13.94           C  
ATOM   2022  C   ASN L  45      15.930 109.049  45.569  1.00 11.32           C  
ATOM   2023  O   ASN L  45      14.904 109.173  46.218  1.00 18.32           O  
ATOM   2024  CB  ASN L  45      15.384 107.300  43.945  1.00 18.92           C  
ATOM   2025  CG  ASN L  45      15.883 107.747  42.607  1.00 31.50           C  
ATOM   2026  OD1 ASN L  45      15.707 108.908  42.210  1.00 35.67           O  
ATOM   2027  ND2 ASN L  45      16.618 106.855  41.935  1.00 36.56           N  
ATOM   2028  N   LEU L  46      16.744 110.059  45.326  1.00 14.81           N  
ATOM   2029  CA  LEU L  46      16.440 111.404  45.812  1.00 15.76           C  
ATOM   2030  C   LEU L  46      15.232 111.995  45.071  1.00 19.46           C  
ATOM   2031  O   LEU L  46      15.120 111.858  43.839  1.00 20.06           O  
ATOM   2032  CB  LEU L  46      17.674 112.294  45.652  1.00 11.43           C  
ATOM   2033  CG  LEU L  46      17.713 113.639  46.364  1.00  4.64           C  
ATOM   2034  CD1 LEU L  46      19.150 114.017  46.682  1.00  8.67           C  
ATOM   2035  CD2 LEU L  46      17.051 114.726  45.507  1.00 13.94           C  
ATOM   2036  N   LEU L  47      14.299 112.586  45.826  1.00 19.14           N  
ATOM   2037  CA  LEU L  47      13.099 113.208  45.244  1.00 13.77           C  
ATOM   2038  C   LEU L  47      13.123 114.710  45.496  1.00 19.00           C  
ATOM   2039  O   LEU L  47      12.856 115.520  44.591  1.00 15.03           O  
ATOM   2040  CB  LEU L  47      11.816 112.652  45.895  1.00 12.60           C  
ATOM   2041  CG  LEU L  47      11.495 111.164  45.799  1.00 12.44           C  
ATOM   2042  CD1 LEU L  47      10.107 110.837  46.357  1.00  9.87           C  
ATOM   2043  CD2 LEU L  47      11.557 110.778  44.346  1.00 14.58           C  
ATOM   2044  N   ILE L  48      13.468 115.064  46.732  1.00 17.99           N  
ATOM   2045  CA  ILE L  48      13.493 116.450  47.208  1.00 15.81           C  
ATOM   2046  C   ILE L  48      14.753 116.648  48.037  1.00 16.45           C  
ATOM   2047  O   ILE L  48      15.182 115.728  48.719  1.00 17.15           O  
ATOM   2048  CB  ILE L  48      12.284 116.693  48.183  1.00 15.14           C  
ATOM   2049  CG1 ILE L  48      10.939 116.489  47.479  1.00 15.66           C  
ATOM   2050  CG2 ILE L  48      12.365 118.073  48.865  1.00 14.83           C  
ATOM   2051  CD1 ILE L  48       9.769 116.573  48.429  1.00 21.53           C  
ATOM   2052  N   TYR L  49      15.358 117.823  47.936  1.00 20.87           N  
ATOM   2053  CA  TYR L  49      16.539 118.208  48.719  1.00 23.98           C  
ATOM   2054  C   TYR L  49      16.252 119.637  49.206  1.00 26.15           C  
ATOM   2055  O   TYR L  49      15.234 120.223  48.806  1.00 25.62           O  
ATOM   2056  CB  TYR L  49      17.819 118.181  47.881  1.00 27.02           C  
ATOM   2057  CG  TYR L  49      17.836 119.076  46.667  1.00 25.64           C  
ATOM   2058  CD1 TYR L  49      17.343 118.633  45.441  1.00 30.06           C  
ATOM   2059  CD2 TYR L  49      18.352 120.350  46.737  1.00 28.34           C  
ATOM   2060  CE1 TYR L  49      17.361 119.445  44.311  1.00 31.11           C  
ATOM   2061  CE2 TYR L  49      18.381 121.177  45.613  1.00 34.69           C  
ATOM   2062  CZ  TYR L  49      17.878 120.720  44.403  1.00 34.70           C  
ATOM   2063  OH  TYR L  49      17.863 121.564  43.308  1.00 38.87           O  
ATOM   2064  N   ASP L  50      17.101 120.182  50.080  1.00 25.21           N  
ATOM   2065  CA  ASP L  50      16.898 121.539  50.592  1.00 23.38           C  
ATOM   2066  C   ASP L  50      15.480 121.659  51.191  1.00 22.48           C  
ATOM   2067  O   ASP L  50      14.818 122.701  51.114  1.00 19.46           O  
ATOM   2068  CB  ASP L  50      17.152 122.535  49.452  1.00 32.91           C  
ATOM   2069  CG  ASP L  50      17.197 123.985  49.906  1.00 42.96           C  
ATOM   2070  OD1 ASP L  50      17.481 124.268  51.097  1.00 48.82           O  
ATOM   2071  OD2 ASP L  50      16.964 124.861  49.038  1.00 48.18           O  
ATOM   2072  N   ALA L  51      15.007 120.552  51.761  1.00 17.97           N  
ATOM   2073  CA  ALA L  51      13.687 120.495  52.390  1.00 20.27           C  
ATOM   2074  C   ALA L  51      12.447 120.577  51.467  1.00 19.49           C  
ATOM   2075  O   ALA L  51      11.456 119.867  51.664  1.00 17.55           O  
ATOM   2076  CB  ALA L  51      13.592 121.560  53.511  1.00 24.71           C  
ATOM   2077  N   SER L  52      12.450 121.470  50.499  1.00 21.15           N  
ATOM   2078  CA  SER L  52      11.286 121.547  49.650  1.00 23.92           C  
ATOM   2079  C   SER L  52      11.546 121.615  48.142  1.00 24.19           C  
ATOM   2080  O   SER L  52      10.590 121.684  47.372  1.00 25.61           O  
ATOM   2081  CB  SER L  52      10.427 122.706  50.104  1.00 26.01           C  
ATOM   2082  OG  SER L  52      11.247 123.842  50.293  1.00 28.36           O  
ATOM   2083  N   THR L  53      12.799 121.586  47.691  1.00 21.52           N  
ATOM   2084  CA  THR L  53      12.979 121.638  46.248  1.00 21.16           C  
ATOM   2085  C   THR L  53      13.091 120.295  45.525  1.00 21.19           C  
ATOM   2086  O   THR L  53      13.991 119.499  45.776  1.00 24.72           O  
ATOM   2087  CB  THR L  53      14.059 122.644  45.771  1.00 23.38           C  
ATOM   2088  OG1 THR L  53      15.027 121.982  44.950  1.00 30.38           O  
ATOM   2089  CG2 THR L  53      14.715 123.343  46.912  1.00 18.61           C  
ATOM   2090  N   LEU L  54      12.132 120.042  44.651  1.00 19.02           N  
ATOM   2091  CA  LEU L  54      12.101 118.821  43.879  1.00 21.97           C  
ATOM   2092  C   LEU L  54      13.289 118.622  42.949  1.00 23.29           C  
ATOM   2093  O   LEU L  54      13.892 119.573  42.465  1.00 24.45           O  
ATOM   2094  CB  LEU L  54      10.820 118.763  43.040  1.00 20.13           C  
ATOM   2095  CG  LEU L  54       9.618 118.153  43.723  1.00 19.79           C  
ATOM   2096  CD1 LEU L  54       9.254 119.040  44.904  1.00 26.21           C  
ATOM   2097  CD2 LEU L  54       8.476 118.025  42.772  1.00 20.40           C  
ATOM   2098  N   GLU L  55      13.643 117.363  42.722  1.00 25.95           N  
ATOM   2099  CA  GLU L  55      14.712 117.064  41.796  1.00 27.24           C  
ATOM   2100  C   GLU L  55      14.053 117.101  40.409  1.00 27.16           C  
ATOM   2101  O   GLU L  55      12.828 116.954  40.273  1.00 24.98           O  
ATOM   2102  CB  GLU L  55      15.305 115.684  42.075  1.00 24.49           C  
ATOM   2103  CG  GLU L  55      16.545 115.381  41.248  1.00 34.68           C  
ATOM   2104  CD  GLU L  55      17.465 116.585  41.121  1.00 36.89           C  
ATOM   2105  OE1 GLU L  55      18.153 116.931  42.098  1.00 45.23           O  
ATOM   2106  OE2 GLU L  55      17.503 117.205  40.043  1.00 42.57           O  
ATOM   2107  N   THR L  56      14.837 117.333  39.371  1.00 27.10           N  
ATOM   2108  CA  THR L  56      14.249 117.364  38.053  1.00 27.40           C  
ATOM   2109  C   THR L  56      13.815 115.972  37.682  1.00 26.02           C  
ATOM   2110  O   THR L  56      14.589 115.020  37.811  1.00 28.26           O  
ATOM   2111  CB  THR L  56      15.229 117.887  37.028  1.00 29.89           C  
ATOM   2112  OG1 THR L  56      16.521 117.378  37.347  1.00 28.15           O  
ATOM   2113  CG2 THR L  56      15.254 119.413  37.055  1.00 29.77           C  
ATOM   2114  N   GLY L  57      12.539 115.853  37.331  1.00 26.38           N  
ATOM   2115  CA  GLY L  57      11.999 114.573  36.913  1.00 25.98           C  
ATOM   2116  C   GLY L  57      10.945 114.018  37.830  1.00 25.46           C  
ATOM   2117  O   GLY L  57      10.226 113.124  37.432  1.00 27.34           O  
ATOM   2118  N   VAL L  58      10.824 114.590  39.027  1.00 24.77           N  
ATOM   2119  CA  VAL L  58       9.880 114.141  40.055  1.00 22.15           C  
ATOM   2120  C   VAL L  58       8.437 114.627  39.830  1.00 19.64           C  
ATOM   2121  O   VAL L  58       8.194 115.785  39.480  1.00 19.48           O  
ATOM   2122  CB  VAL L  58      10.413 114.589  41.470  1.00 24.61           C  
ATOM   2123  CG1 VAL L  58       9.527 114.108  42.587  1.00 23.67           C  
ATOM   2124  CG2 VAL L  58      11.808 114.066  41.668  1.00 27.02           C  
ATOM   2125  N   PRO L  59       7.458 113.751  40.047  1.00 20.43           N  
ATOM   2126  CA  PRO L  59       6.074 114.180  39.841  1.00 21.96           C  
ATOM   2127  C   PRO L  59       5.720 115.336  40.759  1.00 26.51           C  
ATOM   2128  O   PRO L  59       6.397 115.566  41.763  1.00 28.04           O  
ATOM   2129  CB  PRO L  59       5.278 112.936  40.206  1.00 22.03           C  
ATOM   2130  CG  PRO L  59       6.227 111.818  39.856  1.00 20.70           C  
ATOM   2131  CD  PRO L  59       7.522 112.325  40.406  1.00 20.60           C  
ATOM   2132  N   SER L  60       4.657 116.058  40.414  1.00 25.62           N  
ATOM   2133  CA  SER L  60       4.190 117.185  41.215  1.00 25.68           C  
ATOM   2134  C   SER L  60       3.415 116.773  42.444  1.00 24.14           C  
ATOM   2135  O   SER L  60       3.273 117.570  43.362  1.00 29.31           O  
ATOM   2136  CB  SER L  60       3.320 118.107  40.381  1.00 26.45           C  
ATOM   2137  OG  SER L  60       4.124 118.803  39.446  1.00 42.00           O  
ATOM   2138  N   ARG L  61       2.911 115.538  42.452  1.00 25.06           N  
ATOM   2139  CA  ARG L  61       2.125 114.999  43.564  1.00 23.77           C  
ATOM   2140  C   ARG L  61       2.940 114.942  44.863  1.00 22.59           C  
ATOM   2141  O   ARG L  61       2.370 114.846  45.948  1.00 24.84           O  
ATOM   2142  CB  ARG L  61       1.600 113.589  43.216  1.00 23.10           C  
ATOM   2143  CG  ARG L  61       2.671 112.491  43.204  1.00 26.72           C  
ATOM   2144  CD  ARG L  61       2.117 111.044  43.048  1.00 26.49           C  
ATOM   2145  NE  ARG L  61       1.994 110.656  41.650  1.00 31.86           N  
ATOM   2146  CZ  ARG L  61       2.810 109.828  40.996  1.00 27.04           C  
ATOM   2147  NH1 ARG L  61       3.799 109.215  41.604  1.00 26.34           N  
ATOM   2148  NH2 ARG L  61       2.599 109.575  39.716  1.00 38.30           N  
ATOM   2149  N   PHE L  62       4.264 115.022  44.743  1.00 21.68           N  
ATOM   2150  CA  PHE L  62       5.174 114.950  45.883  1.00 20.62           C  
ATOM   2151  C   PHE L  62       5.551 116.350  46.289  1.00 21.72           C  
ATOM   2152  O   PHE L  62       5.835 117.176  45.414  1.00 24.33           O  
ATOM   2153  CB  PHE L  62       6.482 114.244  45.494  1.00 17.13           C  
ATOM   2154  CG  PHE L  62       6.342 112.785  45.223  1.00 18.91           C  
ATOM   2155  CD1 PHE L  62       5.939 111.910  46.213  1.00 17.39           C  
ATOM   2156  CD2 PHE L  62       6.602 112.277  43.961  1.00 24.81           C  
ATOM   2157  CE1 PHE L  62       5.797 110.534  45.948  1.00 23.60           C  
ATOM   2158  CE2 PHE L  62       6.463 110.896  43.695  1.00 25.17           C  
ATOM   2159  CZ  PHE L  62       6.060 110.036  44.694  1.00 18.78           C  
ATOM   2160  N   SER L  63       5.575 116.645  47.591  1.00 20.08           N  
ATOM   2161  CA  SER L  63       6.002 117.984  48.004  1.00 13.28           C  
ATOM   2162  C   SER L  63       6.584 117.965  49.380  1.00 17.20           C  
ATOM   2163  O   SER L  63       6.373 117.011  50.138  1.00 13.66           O  
ATOM   2164  CB  SER L  63       4.876 119.006  47.940  1.00 14.47           C  
ATOM   2165  OG  SER L  63       3.838 118.703  48.848  1.00 23.87           O  
ATOM   2166  N   GLY L  64       7.367 118.990  49.686  1.00 16.39           N  
ATOM   2167  CA  GLY L  64       7.961 119.072  51.002  1.00 21.22           C  
ATOM   2168  C   GLY L  64       7.904 120.470  51.573  1.00 22.52           C  
ATOM   2169  O   GLY L  64       8.030 121.468  50.855  1.00 23.48           O  
ATOM   2170  N   SER L  65       7.677 120.543  52.874  1.00 24.53           N  
ATOM   2171  CA  SER L  65       7.637 121.816  53.558  1.00 25.41           C  
ATOM   2172  C   SER L  65       8.244 121.668  54.956  1.00 28.51           C  
ATOM   2173  O   SER L  65       8.646 120.578  55.375  1.00 23.70           O  
ATOM   2174  CB  SER L  65       6.205 122.317  53.638  1.00 26.02           C  
ATOM   2175  OG  SER L  65       5.386 121.337  54.249  1.00 29.10           O  
ATOM   2176  N   GLY L  66       8.316 122.788  55.660  1.00 34.25           N  
ATOM   2177  CA  GLY L  66       8.873 122.799  56.994  1.00 38.74           C  
ATOM   2178  C   GLY L  66      10.089 123.700  57.017  1.00 41.47           C  
ATOM   2179  O   GLY L  66      10.491 124.267  55.989  1.00 43.69           O  
ATOM   2180  N   SER L  67      10.677 123.825  58.196  1.00 42.61           N  
ATOM   2181  CA  SER L  67      11.862 124.638  58.393  1.00 42.39           C  
ATOM   2182  C   SER L  67      12.343 124.313  59.792  1.00 41.60           C  
ATOM   2183  O   SER L  67      11.669 123.593  60.537  1.00 41.12           O  
ATOM   2184  CB  SER L  67      11.501 126.115  58.310  1.00 43.51           C  
ATOM   2185  OG  SER L  67      10.540 126.436  59.305  1.00 47.98           O  
ATOM   2186  N   GLY L  68      13.518 124.809  60.145  1.00 41.23           N  
ATOM   2187  CA  GLY L  68      14.023 124.567  61.478  1.00 39.16           C  
ATOM   2188  C   GLY L  68      14.212 123.112  61.839  1.00 37.52           C  
ATOM   2189  O   GLY L  68      15.182 122.493  61.395  1.00 39.17           O  
ATOM   2190  N   THR L  69      13.280 122.559  62.611  1.00 34.78           N  
ATOM   2191  CA  THR L  69      13.378 121.175  63.061  1.00 31.98           C  
ATOM   2192  C   THR L  69      12.196 120.244  62.694  1.00 29.36           C  
ATOM   2193  O   THR L  69      12.290 119.030  62.879  1.00 26.10           O  
ATOM   2194  CB  THR L  69      13.602 121.123  64.616  1.00 37.77           C  
ATOM   2195  OG1 THR L  69      12.477 121.715  65.282  1.00 42.65           O  
ATOM   2196  CG2 THR L  69      14.858 121.899  65.031  1.00 34.16           C  
ATOM   2197  N   GLU L  70      11.078 120.788  62.221  1.00 27.47           N  
ATOM   2198  CA  GLU L  70       9.938 119.941  61.870  1.00 28.48           C  
ATOM   2199  C   GLU L  70       9.679 119.962  60.365  1.00 25.85           C  
ATOM   2200  O   GLU L  70       9.390 121.006  59.785  1.00 25.89           O  
ATOM   2201  CB  GLU L  70       8.682 120.367  62.639  1.00 33.60           C  
ATOM   2202  CG  GLU L  70       8.080 119.272  63.550  1.00 47.77           C  
ATOM   2203  CD  GLU L  70       7.118 118.306  62.830  1.00 55.13           C  
ATOM   2204  OE1 GLU L  70       6.330 118.769  61.966  1.00 60.92           O  
ATOM   2205  OE2 GLU L  70       7.127 117.091  63.148  1.00 57.28           O  
ATOM   2206  N   TYR L  71       9.749 118.792  59.741  1.00 22.55           N  
ATOM   2207  CA  TYR L  71       9.555 118.684  58.310  1.00 17.05           C  
ATOM   2208  C   TYR L  71       8.496 117.682  57.904  1.00 18.25           C  
ATOM   2209  O   TYR L  71       8.384 116.607  58.499  1.00 16.55           O  
ATOM   2210  CB  TYR L  71      10.888 118.301  57.664  1.00 12.67           C  
ATOM   2211  CG  TYR L  71      11.954 119.326  57.878  1.00 11.64           C  
ATOM   2212  CD1 TYR L  71      12.053 120.418  57.025  1.00 11.81           C  
ATOM   2213  CD2 TYR L  71      12.858 119.229  58.946  1.00 12.04           C  
ATOM   2214  CE1 TYR L  71      13.005 121.388  57.196  1.00 12.61           C  
ATOM   2215  CE2 TYR L  71      13.835 120.219  59.132  1.00 13.07           C  
ATOM   2216  CZ  TYR L  71      13.896 121.297  58.237  1.00 18.67           C  
ATOM   2217  OH  TYR L  71      14.841 122.296  58.339  1.00 20.50           O  
ATOM   2218  N   THR L  72       7.723 118.040  56.881  1.00 22.19           N  
ATOM   2219  CA  THR L  72       6.681 117.160  56.345  1.00 26.38           C  
ATOM   2220  C   THR L  72       6.919 116.905  54.856  1.00 25.59           C  
ATOM   2221  O   THR L  72       7.377 117.791  54.131  1.00 25.81           O  
ATOM   2222  CB  THR L  72       5.261 117.759  56.490  1.00 27.71           C  
ATOM   2223  OG1 THR L  72       5.219 119.054  55.880  1.00 37.92           O  
ATOM   2224  CG2 THR L  72       4.915 117.917  57.914  1.00 24.98           C  
ATOM   2225  N   PHE L  73       6.611 115.686  54.425  1.00 23.68           N  
ATOM   2226  CA  PHE L  73       6.723 115.267  53.034  1.00 20.97           C  
ATOM   2227  C   PHE L  73       5.288 114.860  52.694  1.00 22.95           C  
ATOM   2228  O   PHE L  73       4.674 114.080  53.432  1.00 26.52           O  
ATOM   2229  CB  PHE L  73       7.662 114.064  52.921  1.00 16.07           C  
ATOM   2230  CG  PHE L  73       7.584 113.339  51.600  1.00  9.10           C  
ATOM   2231  CD1 PHE L  73       8.099 113.908  50.437  1.00 15.59           C  
ATOM   2232  CD2 PHE L  73       7.036 112.064  51.537  1.00 11.66           C  
ATOM   2233  CE1 PHE L  73       8.072 113.199  49.214  1.00 10.45           C  
ATOM   2234  CE2 PHE L  73       7.001 111.354  50.350  1.00 11.91           C  
ATOM   2235  CZ  PHE L  73       7.520 111.919  49.187  1.00  9.20           C  
ATOM   2236  N   THR L  74       4.742 115.382  51.600  1.00 26.17           N  
ATOM   2237  CA  THR L  74       3.369 115.058  51.213  1.00 25.11           C  
ATOM   2238  C   THR L  74       3.192 114.458  49.820  1.00 21.77           C  
ATOM   2239  O   THR L  74       3.865 114.871  48.866  1.00 18.78           O  
ATOM   2240  CB  THR L  74       2.500 116.326  51.228  1.00 27.33           C  
ATOM   2241  OG1 THR L  74       2.593 116.957  52.506  1.00 33.40           O  
ATOM   2242  CG2 THR L  74       1.043 115.989  50.932  1.00 30.41           C  
ATOM   2243  N   ILE L  75       2.319 113.458  49.727  1.00 19.12           N  
ATOM   2244  CA  ILE L  75       1.945 112.862  48.448  1.00 17.41           C  
ATOM   2245  C   ILE L  75       0.464 113.242  48.363  1.00 20.13           C  
ATOM   2246  O   ILE L  75      -0.354 112.727  49.121  1.00 25.37           O  
ATOM   2247  CB  ILE L  75       2.077 111.337  48.434  1.00 13.85           C  
ATOM   2248  CG1 ILE L  75       3.559 110.941  48.631  1.00 16.95           C  
ATOM   2249  CG2 ILE L  75       1.581 110.804  47.109  1.00 11.44           C  
ATOM   2250  CD1 ILE L  75       3.851 109.418  48.698  1.00  9.37           C  
ATOM   2251  N   SER L  76       0.119 114.170  47.475  1.00 22.35           N  
ATOM   2252  CA  SER L  76      -1.250 114.625  47.363  1.00 21.60           C  
ATOM   2253  C   SER L  76      -2.183 113.606  46.771  1.00 25.10           C  
ATOM   2254  O   SER L  76      -3.362 113.568  47.116  1.00 28.78           O  
ATOM   2255  CB  SER L  76      -1.327 115.917  46.573  1.00 23.14           C  
ATOM   2256  OG  SER L  76      -0.775 115.735  45.294  1.00 29.40           O  
ATOM   2257  N   SER L  77      -1.677 112.758  45.894  1.00 25.93           N  
ATOM   2258  CA  SER L  77      -2.543 111.759  45.299  1.00 25.42           C  
ATOM   2259  C   SER L  77      -1.684 110.544  45.150  1.00 23.98           C  
ATOM   2260  O   SER L  77      -0.739 110.567  44.381  1.00 25.18           O  
ATOM   2261  CB  SER L  77      -3.046 112.255  43.945  1.00 27.39           C  
ATOM   2262  OG  SER L  77      -4.190 111.529  43.543  1.00 36.26           O  
ATOM   2263  N   LEU L  78      -1.955 109.525  45.965  1.00 22.33           N  
ATOM   2264  CA  LEU L  78      -1.168 108.297  45.968  1.00 24.45           C  
ATOM   2265  C   LEU L  78      -1.429 107.402  44.772  1.00 23.46           C  
ATOM   2266  O   LEU L  78      -2.555 106.997  44.535  1.00 24.64           O  
ATOM   2267  CB  LEU L  78      -1.418 107.510  47.257  1.00 23.76           C  
ATOM   2268  CG  LEU L  78      -0.542 106.293  47.567  1.00 23.35           C  
ATOM   2269  CD1 LEU L  78       0.874 106.745  47.880  1.00 24.32           C  
ATOM   2270  CD2 LEU L  78      -1.116 105.526  48.753  1.00 27.47           C  
ATOM   2271  N   GLN L  79      -0.367 107.032  44.066  1.00 27.65           N  
ATOM   2272  CA  GLN L  79      -0.495 106.165  42.892  1.00 25.17           C  
ATOM   2273  C   GLN L  79       0.193 104.834  43.131  1.00 24.12           C  
ATOM   2274  O   GLN L  79       1.067 104.718  43.996  1.00 22.26           O  
ATOM   2275  CB  GLN L  79       0.061 106.856  41.647  1.00 26.38           C  
ATOM   2276  CG  GLN L  79      -0.807 108.023  41.201  1.00 34.19           C  
ATOM   2277  CD  GLN L  79      -0.233 108.790  40.025  1.00 39.14           C  
ATOM   2278  OE1 GLN L  79       0.395 108.219  39.129  1.00 41.27           O  
ATOM   2279  NE2 GLN L  79      -0.462 110.095  40.013  1.00 40.29           N  
ATOM   2280  N   PRO L  80      -0.239 103.789  42.417  1.00 22.19           N  
ATOM   2281  CA  PRO L  80       0.365 102.466  42.583  1.00 23.28           C  
ATOM   2282  C   PRO L  80       1.884 102.375  42.450  1.00 21.54           C  
ATOM   2283  O   PRO L  80       2.503 101.520  43.072  1.00 23.55           O  
ATOM   2284  CB  PRO L  80      -0.361 101.641  41.541  1.00 23.24           C  
ATOM   2285  CG  PRO L  80      -1.759 102.210  41.635  1.00 24.68           C  
ATOM   2286  CD  PRO L  80      -1.513 103.699  41.677  1.00 22.59           C  
ATOM   2287  N   GLU L  81       2.500 103.254  41.672  1.00 22.37           N  
ATOM   2288  CA  GLU L  81       3.948 103.184  41.520  1.00 23.43           C  
ATOM   2289  C   GLU L  81       4.663 103.848  42.689  1.00 22.61           C  
ATOM   2290  O   GLU L  81       5.892 103.829  42.765  1.00 21.58           O  
ATOM   2291  CB  GLU L  81       4.391 103.842  40.225  1.00 29.54           C  
ATOM   2292  CG  GLU L  81       4.041 105.311  40.147  1.00 37.56           C  
ATOM   2293  CD  GLU L  81       2.755 105.577  39.395  1.00 43.34           C  
ATOM   2294  OE1 GLU L  81       1.844 104.710  39.402  1.00 41.74           O  
ATOM   2295  OE2 GLU L  81       2.665 106.670  38.786  1.00 45.41           O  
ATOM   2296  N   ASP L  82       3.883 104.412  43.605  1.00 19.83           N  
ATOM   2297  CA  ASP L  82       4.407 105.109  44.767  1.00 15.71           C  
ATOM   2298  C   ASP L  82       4.673 104.198  45.944  1.00 15.99           C  
ATOM   2299  O   ASP L  82       5.149 104.657  46.970  1.00 17.31           O  
ATOM   2300  CB  ASP L  82       3.432 106.177  45.209  1.00 17.10           C  
ATOM   2301  CG  ASP L  82       3.326 107.303  44.227  1.00 14.20           C  
ATOM   2302  OD1 ASP L  82       4.295 107.498  43.471  1.00 17.89           O  
ATOM   2303  OD2 ASP L  82       2.300 108.017  44.244  1.00 17.14           O  
ATOM   2304  N   ILE L  83       4.353 102.919  45.807  1.00 13.93           N  
ATOM   2305  CA  ILE L  83       4.553 101.961  46.882  1.00 10.52           C  
ATOM   2306  C   ILE L  83       6.055 101.840  47.145  1.00 17.09           C  
ATOM   2307  O   ILE L  83       6.808 101.384  46.292  1.00 22.40           O  
ATOM   2308  CB  ILE L  83       3.934 100.614  46.473  1.00 13.79           C  
ATOM   2309  CG1 ILE L  83       2.429 100.727  46.385  1.00 14.38           C  
ATOM   2310  CG2 ILE L  83       4.246  99.533  47.456  1.00 13.81           C  
ATOM   2311  CD1 ILE L  83       1.806  99.544  45.614  1.00 22.78           C  
ATOM   2312  N   ALA L  84       6.509 102.286  48.307  1.00 15.58           N  
ATOM   2313  CA  ALA L  84       7.934 102.217  48.632  1.00 16.00           C  
ATOM   2314  C   ALA L  84       8.147 102.637  50.088  1.00 14.25           C  
ATOM   2315  O   ALA L  84       7.204 103.024  50.768  1.00 11.93           O  
ATOM   2316  CB  ALA L  84       8.699 103.194  47.731  1.00 11.23           C  
ATOM   2317  N   THR L  85       9.398 102.618  50.538  1.00 12.94           N  
ATOM   2318  CA  THR L  85       9.715 103.113  51.873  1.00 12.74           C  
ATOM   2319  C   THR L  85      10.368 104.453  51.627  1.00 12.55           C  
ATOM   2320  O   THR L  85      11.302 104.563  50.808  1.00 11.29           O  
ATOM   2321  CB  THR L  85      10.738 102.256  52.623  1.00 13.24           C  
ATOM   2322  OG1 THR L  85      10.161 100.989  52.915  1.00 15.29           O  
ATOM   2323  CG2 THR L  85      11.130 102.930  53.944  1.00 10.42           C  
ATOM   2324  N   TYR L  86       9.865 105.481  52.302  1.00 10.24           N  
ATOM   2325  CA  TYR L  86      10.407 106.830  52.162  1.00  9.55           C  
ATOM   2326  C   TYR L  86      11.214 107.148  53.414  1.00 12.92           C  
ATOM   2327  O   TYR L  86      10.848 106.700  54.514  1.00 13.94           O  
ATOM   2328  CB  TYR L  86       9.271 107.852  51.961  1.00 11.19           C  
ATOM   2329  CG  TYR L  86       8.450 107.594  50.682  1.00  9.52           C  
ATOM   2330  CD1 TYR L  86       7.537 106.555  50.626  1.00 12.26           C  
ATOM   2331  CD2 TYR L  86       8.624 108.378  49.532  1.00 15.07           C  
ATOM   2332  CE1 TYR L  86       6.804 106.276  49.470  1.00 13.60           C  
ATOM   2333  CE2 TYR L  86       7.876 108.107  48.351  1.00 13.40           C  
ATOM   2334  CZ  TYR L  86       6.976 107.048  48.339  1.00 14.89           C  
ATOM   2335  OH  TYR L  86       6.240 106.733  47.202  1.00 17.21           O  
ATOM   2336  N   TYR L  87      12.315 107.884  53.224  1.00 12.95           N  
ATOM   2337  CA  TYR L  87      13.271 108.318  54.272  1.00 15.30           C  
ATOM   2338  C   TYR L  87      13.615 109.788  54.171  1.00 17.19           C  
ATOM   2339  O   TYR L  87      13.610 110.356  53.076  1.00 21.43           O  
ATOM   2340  CB  TYR L  87      14.633 107.614  54.104  1.00 10.91           C  
ATOM   2341  CG  TYR L  87      14.605 106.133  54.317  1.00 12.95           C  
ATOM   2342  CD1 TYR L  87      14.586 105.596  55.597  1.00  6.89           C  
ATOM   2343  CD2 TYR L  87      14.593 105.257  53.238  1.00 16.50           C  
ATOM   2344  CE1 TYR L  87      14.558 104.236  55.787  1.00  3.70           C  
ATOM   2345  CE2 TYR L  87      14.566 103.884  53.429  1.00 14.85           C  
ATOM   2346  CZ  TYR L  87      14.551 103.383  54.712  1.00 11.87           C  
ATOM   2347  OH  TYR L  87      14.556 102.024  54.897  1.00 18.90           O  
ATOM   2348  N   CYS L  88      13.947 110.399  55.306  1.00 16.03           N  
ATOM   2349  CA  CYS L  88      14.410 111.779  55.311  1.00 14.80           C  
ATOM   2350  C   CYS L  88      15.881 111.673  55.778  1.00 17.73           C  
ATOM   2351  O   CYS L  88      16.265 110.724  56.493  1.00 19.31           O  
ATOM   2352  CB  CYS L  88      13.605 112.667  56.267  1.00 19.69           C  
ATOM   2353  SG  CYS L  88      13.708 112.181  58.019  1.00 20.44           S  
ATOM   2354  N   GLN L  89      16.716 112.602  55.332  1.00 17.02           N  
ATOM   2355  CA  GLN L  89      18.107 112.585  55.705  1.00 16.00           C  
ATOM   2356  C   GLN L  89      18.591 114.006  55.856  1.00 19.18           C  
ATOM   2357  O   GLN L  89      18.318 114.860  55.010  1.00 12.86           O  
ATOM   2358  CB  GLN L  89      18.920 111.879  54.636  1.00 16.68           C  
ATOM   2359  CG  GLN L  89      20.441 111.912  54.870  1.00 23.20           C  
ATOM   2360  CD  GLN L  89      21.242 111.539  53.632  1.00 19.12           C  
ATOM   2361  OE1 GLN L  89      21.993 110.576  53.643  1.00 31.61           O  
ATOM   2362  NE2 GLN L  89      21.104 112.314  52.582  1.00 19.01           N  
ATOM   2363  N   GLN L  90      19.237 114.307  56.973  1.00 17.95           N  
ATOM   2364  CA  GLN L  90      19.738 115.652  57.114  1.00 17.44           C  
ATOM   2365  C   GLN L  90      21.163 115.557  56.627  1.00 21.47           C  
ATOM   2366  O   GLN L  90      21.839 114.535  56.843  1.00 19.36           O  
ATOM   2367  CB  GLN L  90      19.659 116.154  58.569  1.00 19.95           C  
ATOM   2368  CG  GLN L  90      20.526 115.419  59.618  1.00 13.98           C  
ATOM   2369  CD  GLN L  90      21.987 115.828  59.593  1.00  7.61           C  
ATOM   2370  OE1 GLN L  90      22.332 116.930  59.184  1.00 13.83           O  
ATOM   2371  NE2 GLN L  90      22.851 114.928  59.989  1.00  4.66           N  
ATOM   2372  N   TYR L  91      21.591 116.571  55.884  1.00 22.43           N  
ATOM   2373  CA  TYR L  91      22.961 116.617  55.387  1.00 24.17           C  
ATOM   2374  C   TYR L  91      23.570 117.936  55.812  1.00 24.63           C  
ATOM   2375  O   TYR L  91      24.347 118.545  55.088  1.00 26.49           O  
ATOM   2376  CB  TYR L  91      23.017 116.421  53.866  1.00 21.39           C  
ATOM   2377  CG  TYR L  91      22.233 117.425  53.074  1.00 16.30           C  
ATOM   2378  CD1 TYR L  91      20.844 117.389  53.056  1.00 15.24           C  
ATOM   2379  CD2 TYR L  91      22.889 118.414  52.321  1.00 16.75           C  
ATOM   2380  CE1 TYR L  91      20.120 118.310  52.317  1.00 14.61           C  
ATOM   2381  CE2 TYR L  91      22.182 119.328  51.579  1.00 12.09           C  
ATOM   2382  CZ  TYR L  91      20.798 119.273  51.584  1.00 16.46           C  
ATOM   2383  OH  TYR L  91      20.088 120.169  50.829  1.00 16.64           O  
ATOM   2384  N   ASP L  92      23.177 118.381  56.998  1.00 25.17           N  
ATOM   2385  CA  ASP L  92      23.667 119.633  57.562  1.00 24.10           C  
ATOM   2386  C   ASP L  92      25.071 119.443  58.148  1.00 26.20           C  
ATOM   2387  O   ASP L  92      25.989 120.248  57.902  1.00 21.53           O  
ATOM   2388  CB  ASP L  92      22.678 120.083  58.647  1.00 29.95           C  
ATOM   2389  CG  ASP L  92      23.159 121.298  59.439  1.00 33.69           C  
ATOM   2390  OD1 ASP L  92      23.292 122.393  58.855  1.00 32.89           O  
ATOM   2391  OD2 ASP L  92      23.369 121.150  60.663  1.00 36.03           O  
ATOM   2392  N   ASP L  93      25.252 118.325  58.855  1.00 27.30           N  
ATOM   2393  CA  ASP L  93      26.502 118.022  59.537  1.00 27.14           C  
ATOM   2394  C   ASP L  93      26.771 116.520  59.493  1.00 26.04           C  
ATOM   2395  O   ASP L  93      25.852 115.726  59.584  1.00 29.90           O  
ATOM   2396  CB  ASP L  93      26.347 118.505  60.990  1.00 34.22           C  
ATOM   2397  CG  ASP L  93      27.614 118.397  61.809  1.00 40.08           C  
ATOM   2398  OD1 ASP L  93      28.720 118.662  61.297  1.00 45.72           O  
ATOM   2399  OD2 ASP L  93      27.493 118.074  63.006  1.00 47.06           O  
ATOM   2400  N   LEU L  94      28.026 116.131  59.304  1.00 24.82           N  
ATOM   2401  CA  LEU L  94      28.389 114.718  59.265  1.00 24.86           C  
ATOM   2402  C   LEU L  94      28.464 114.168  60.684  1.00 24.55           C  
ATOM   2403  O   LEU L  94      28.868 114.875  61.604  1.00 29.30           O  
ATOM   2404  CB  LEU L  94      29.745 114.518  58.581  1.00 23.15           C  
ATOM   2405  CG  LEU L  94      29.815 114.664  57.061  1.00 22.41           C  
ATOM   2406  CD1 LEU L  94      31.272 114.764  56.672  1.00 23.15           C  
ATOM   2407  CD2 LEU L  94      29.142 113.472  56.339  1.00 20.23           C  
ATOM   2408  N   PRO L  95      28.066 112.901  60.888  1.00 22.99           N  
ATOM   2409  CA  PRO L  95      27.556 111.970  59.885  1.00 22.05           C  
ATOM   2410  C   PRO L  95      26.091 112.271  59.509  1.00 25.42           C  
ATOM   2411  O   PRO L  95      25.267 112.670  60.357  1.00 24.83           O  
ATOM   2412  CB  PRO L  95      27.689 110.621  60.599  1.00 16.03           C  
ATOM   2413  CG  PRO L  95      27.303 110.995  62.019  1.00 14.02           C  
ATOM   2414  CD  PRO L  95      28.164 112.238  62.201  1.00 15.61           C  
ATOM   2415  N   TYR L  96      25.796 112.097  58.222  1.00 26.51           N  
ATOM   2416  CA  TYR L  96      24.464 112.309  57.674  1.00 23.36           C  
ATOM   2417  C   TYR L  96      23.594 111.220  58.230  1.00 20.58           C  
ATOM   2418  O   TYR L  96      23.889 110.043  58.052  1.00 20.65           O  
ATOM   2419  CB  TYR L  96      24.513 112.209  56.153  1.00 24.74           C  
ATOM   2420  CG  TYR L  96      25.224 113.361  55.516  1.00 22.19           C  
ATOM   2421  CD1 TYR L  96      25.466 114.526  56.223  1.00 23.38           C  
ATOM   2422  CD2 TYR L  96      25.640 113.293  54.198  1.00 25.76           C  
ATOM   2423  CE1 TYR L  96      26.114 115.615  55.621  1.00 30.25           C  
ATOM   2424  CE2 TYR L  96      26.284 114.359  53.583  1.00 28.64           C  
ATOM   2425  CZ  TYR L  96      26.519 115.519  54.289  1.00 31.02           C  
ATOM   2426  OH  TYR L  96      27.137 116.571  53.648  1.00 34.10           O  
ATOM   2427  N   THR L  97      22.535 111.616  58.919  1.00 20.31           N  
ATOM   2428  CA  THR L  97      21.624 110.669  59.550  1.00 17.28           C  
ATOM   2429  C   THR L  97      20.245 110.611  58.886  1.00 15.85           C  
ATOM   2430  O   THR L  97      19.668 111.629  58.473  1.00 11.98           O  
ATOM   2431  CB  THR L  97      21.461 111.008  61.066  1.00 13.04           C  
ATOM   2432  OG1 THR L  97      21.413 112.434  61.228  1.00 14.84           O  
ATOM   2433  CG2 THR L  97      22.643 110.503  61.839  1.00 13.11           C  
ATOM   2434  N   PHE L  98      19.666 109.422  58.938  1.00 18.18           N  
ATOM   2435  CA  PHE L  98      18.367 109.158  58.349  1.00 16.24           C  
ATOM   2436  C   PHE L  98      17.294 108.940  59.388  1.00 16.70           C  
ATOM   2437  O   PHE L  98      17.558 108.393  60.458  1.00 13.60           O  
ATOM   2438  CB  PHE L  98      18.399 107.833  57.570  1.00 17.80           C  
ATOM   2439  CG  PHE L  98      19.171 107.873  56.295  1.00 17.41           C  
ATOM   2440  CD1 PHE L  98      20.556 107.869  56.304  1.00 18.12           C  
ATOM   2441  CD2 PHE L  98      18.505 107.816  55.073  1.00 18.97           C  
ATOM   2442  CE1 PHE L  98      21.270 107.802  55.130  1.00 16.15           C  
ATOM   2443  CE2 PHE L  98      19.219 107.747  53.880  1.00 16.05           C  
ATOM   2444  CZ  PHE L  98      20.603 107.738  53.913  1.00 12.83           C  
ATOM   2445  N   GLY L  99      16.069 109.266  58.995  1.00 14.88           N  
ATOM   2446  CA  GLY L  99      14.922 108.987  59.825  1.00 15.27           C  
ATOM   2447  C   GLY L  99      14.794 107.466  59.729  1.00 19.56           C  
ATOM   2448  O   GLY L  99      15.495 106.822  58.939  1.00 18.52           O  
ATOM   2449  N   GLN L 100      13.853 106.885  60.462  1.00 19.44           N  
ATOM   2450  CA  GLN L 100      13.699 105.441  60.482  1.00 21.63           C  
ATOM   2451  C   GLN L 100      12.968 104.879  59.280  1.00 19.50           C  
ATOM   2452  O   GLN L 100      12.951 103.676  59.072  1.00 21.76           O  
ATOM   2453  CB  GLN L 100      13.031 105.019  61.791  1.00 29.35           C  
ATOM   2454  CG  GLN L 100      13.496 103.675  62.329  1.00 44.02           C  
ATOM   2455  CD  GLN L 100      12.772 102.491  61.695  1.00 50.41           C  
ATOM   2456  OE1 GLN L 100      11.572 102.560  61.407  1.00 55.38           O  
ATOM   2457  NE2 GLN L 100      13.493 101.389  61.507  1.00 51.31           N  
ATOM   2458  N   GLY L 101      12.382 105.756  58.485  1.00 19.86           N  
ATOM   2459  CA  GLY L 101      11.676 105.324  57.297  1.00 18.35           C  
ATOM   2460  C   GLY L 101      10.194 105.132  57.491  1.00 21.53           C  
ATOM   2461  O   GLY L 101       9.704 104.966  58.613  1.00 16.22           O  
ATOM   2462  N   THR L 102       9.469 105.224  56.381  1.00 20.11           N  
ATOM   2463  CA  THR L 102       8.031 105.016  56.386  1.00 17.45           C  
ATOM   2464  C   THR L 102       7.668 104.154  55.200  1.00 15.13           C  
ATOM   2465  O   THR L 102       7.904 104.536  54.050  1.00 16.02           O  
ATOM   2466  CB  THR L 102       7.259 106.314  56.256  1.00 17.48           C  
ATOM   2467  OG1 THR L 102       7.615 107.195  57.328  1.00 18.99           O  
ATOM   2468  CG2 THR L 102       5.759 106.025  56.258  1.00 19.43           C  
ATOM   2469  N   LYS L 103       7.102 102.995  55.471  1.00 11.21           N  
ATOM   2470  CA  LYS L 103       6.682 102.090  54.417  1.00 17.96           C  
ATOM   2471  C   LYS L 103       5.242 102.451  54.012  1.00 21.18           C  
ATOM   2472  O   LYS L 103       4.339 102.433  54.862  1.00 22.98           O  
ATOM   2473  CB  LYS L 103       6.713 100.668  54.959  1.00 21.19           C  
ATOM   2474  CG  LYS L 103       6.612  99.590  53.916  1.00 30.06           C  
ATOM   2475  CD  LYS L 103       6.519  98.203  54.559  1.00 31.38           C  
ATOM   2476  CE  LYS L 103       6.434  97.130  53.472  1.00 37.84           C  
ATOM   2477  NZ  LYS L 103       5.368  97.420  52.445  1.00 37.76           N  
ATOM   2478  N   VAL L 104       5.016 102.841  52.757  1.00 22.84           N  
ATOM   2479  CA  VAL L 104       3.654 103.163  52.353  1.00 22.49           C  
ATOM   2480  C   VAL L 104       3.095 102.127  51.375  1.00 24.67           C  
ATOM   2481  O   VAL L 104       3.768 101.724  50.433  1.00 26.44           O  
ATOM   2482  CB  VAL L 104       3.463 104.651  51.864  1.00 25.88           C  
ATOM   2483  CG1 VAL L 104       4.677 105.486  52.155  1.00 23.41           C  
ATOM   2484  CG2 VAL L 104       3.072 104.730  50.407  1.00 28.71           C  
ATOM   2485  N   GLU L 105       1.913 101.611  51.700  1.00 24.43           N  
ATOM   2486  CA  GLU L 105       1.226 100.617  50.910  1.00 28.99           C  
ATOM   2487  C   GLU L 105      -0.087 101.186  50.404  1.00 32.36           C  
ATOM   2488  O   GLU L 105      -0.498 102.300  50.786  1.00 31.66           O  
ATOM   2489  CB  GLU L 105       0.909  99.391  51.754  1.00 33.14           C  
ATOM   2490  CG  GLU L 105       2.114  98.718  52.363  1.00 43.81           C  
ATOM   2491  CD  GLU L 105       1.755  97.446  53.131  1.00 52.03           C  
ATOM   2492  OE1 GLU L 105       0.609  96.939  52.989  1.00 53.20           O  
ATOM   2493  OE2 GLU L 105       2.636  96.948  53.876  1.00 56.75           O  
ATOM   2494  N   ILE L 106      -0.742 100.404  49.549  1.00 35.06           N  
ATOM   2495  CA  ILE L 106      -2.024 100.777  48.971  1.00 39.25           C  
ATOM   2496  C   ILE L 106      -3.026  99.840  49.602  1.00 42.51           C  
ATOM   2497  O   ILE L 106      -2.834  98.624  49.579  1.00 39.77           O  
ATOM   2498  CB  ILE L 106      -2.056 100.552  47.436  1.00 39.85           C  
ATOM   2499  CG1 ILE L 106      -1.113 101.524  46.714  1.00 38.66           C  
ATOM   2500  CG2 ILE L 106      -3.474 100.679  46.913  1.00 38.81           C  
ATOM   2501  CD1 ILE L 106      -1.563 102.936  46.699  1.00 36.86           C  
ATOM   2502  N   LYS L 107      -4.065 100.411  50.198  1.00 48.69           N  
ATOM   2503  CA  LYS L 107      -5.122  99.643  50.835  1.00 56.88           C  
ATOM   2504  C   LYS L 107      -5.945  99.002  49.727  1.00 62.75           C  
ATOM   2505  O   LYS L 107      -6.082  99.568  48.635  1.00 65.62           O  
ATOM   2506  CB  LYS L 107      -6.013 100.568  51.668  1.00 57.02           C  
ATOM   2507  CG  LYS L 107      -6.827  99.862  52.742  1.00 60.74           C  
ATOM   2508  CD  LYS L 107      -8.053  99.162  52.187  1.00 62.21           C  
ATOM   2509  CE  LYS L 107      -8.313  97.844  52.906  1.00 63.83           C  
ATOM   2510  NZ  LYS L 107      -7.231  96.841  52.657  1.00 62.78           N  
ATOM   2511  N   ARG L 108      -6.463  97.812  50.001  1.00 67.82           N  
ATOM   2512  CA  ARG L 108      -7.285  97.091  49.044  1.00 71.01           C  
ATOM   2513  C   ARG L 108      -8.394  96.367  49.819  1.00 71.10           C  
ATOM   2514  O   ARG L 108      -9.499  96.943  49.920  1.00 70.78           O  
ATOM   2515  CB  ARG L 108      -6.415  96.115  48.236  1.00 73.27           C  
ATOM   2516  CG  ARG L 108      -5.458  96.801  47.265  1.00 75.36           C  
ATOM   2517  CD  ARG L 108      -4.282  95.916  46.898  1.00 79.00           C  
ATOM   2518  NE  ARG L 108      -4.699  94.687  46.233  1.00 84.21           N  
ATOM   2519  CZ  ARG L 108      -3.900  93.646  46.008  1.00 87.37           C  
ATOM   2520  NH1 ARG L 108      -2.630  93.676  46.398  1.00 88.88           N  
ATOM   2521  NH2 ARG L 108      -4.369  92.572  45.383  1.00 87.95           N  
ATOM   2522  OXT ARG L 108      -8.127  95.286  50.389  1.00 71.79           O  
TER    2523      ARG L 108                                                      
ATOM    842  N   ASP L   1      23.122 113.412  37.752  1.00 41.58           N  
ATOM    843  CA  ASP L   1      24.382 113.771  37.052  1.00 38.62           C  
ATOM    844  C   ASP L   1      25.416 112.715  37.387  1.00 36.12           C  
ATOM    845  O   ASP L   1      25.493 111.718  36.686  1.00 39.46           O  
ATOM    846  CB  ASP L   1      24.863 115.145  37.483  1.00 45.46           C  
ATOM    847  CG  ASP L   1      25.868 115.727  36.528  1.00 52.63           C  
ATOM    848  OD1 ASP L   1      25.596 115.715  35.299  1.00 57.77           O  
ATOM    849  OD2 ASP L   1      26.925 116.201  37.005  1.00 58.08           O  
ATOM    850  N   ILE L   2      26.145 112.876  38.493  1.00 31.97           N  
ATOM    851  CA  ILE L   2      27.152 111.880  38.888  1.00 26.07           C  
ATOM    852  C   ILE L   2      26.539 110.490  39.086  1.00 25.39           C  
ATOM    853  O   ILE L   2      25.666 110.292  39.927  1.00 25.13           O  
ATOM    854  CB  ILE L   2      27.926 112.295  40.170  1.00 25.09           C  
ATOM    855  CG1 ILE L   2      28.476 113.709  40.017  1.00 21.52           C  
ATOM    856  CG2 ILE L   2      29.077 111.323  40.446  1.00 21.62           C  
ATOM    857  CD1 ILE L   2      29.203 114.222  41.247  1.00 27.64           C  
ATOM    858  N   GLN L   3      26.938 109.567  38.227  1.00 25.79           N  
ATOM    859  CA  GLN L   3      26.485 108.180  38.236  1.00 28.17           C  
ATOM    860  C   GLN L   3      27.449 107.337  39.093  1.00 22.96           C  
ATOM    861  O   GLN L   3      28.664 107.497  38.997  1.00 22.26           O  
ATOM    862  CB  GLN L   3      26.513 107.658  36.793  1.00 33.80           C  
ATOM    863  CG  GLN L   3      25.291 106.872  36.366  1.00 46.24           C  
ATOM    864  CD  GLN L   3      24.176 107.743  35.787  1.00 51.86           C  
ATOM    865  OE1 GLN L   3      23.259 107.234  35.140  1.00 55.94           O  
ATOM    866  NE2 GLN L   3      24.251 109.054  36.009  1.00 56.05           N  
ATOM    867  N   MET L   4      26.903 106.479  39.952  1.00 22.80           N  
ATOM    868  CA  MET L   4      27.700 105.598  40.813  1.00 18.96           C  
ATOM    869  C   MET L   4      27.427 104.162  40.383  1.00 18.51           C  
ATOM    870  O   MET L   4      26.266 103.754  40.271  1.00 20.83           O  
ATOM    871  CB  MET L   4      27.330 105.746  42.296  1.00 18.70           C  
ATOM    872  CG  MET L   4      27.505 107.126  42.900  1.00 15.75           C  
ATOM    873  SD  MET L   4      29.092 107.836  42.612  1.00 26.47           S  
ATOM    874  CE  MET L   4      30.084 106.853  43.741  1.00 23.48           C  
ATOM    875  N   THR L   5      28.493 103.410  40.118  1.00 15.68           N  
ATOM    876  CA  THR L   5      28.394 102.018  39.689  1.00 18.95           C  
ATOM    877  C   THR L   5      29.021 101.133  40.764  1.00 17.86           C  
ATOM    878  O   THR L   5      30.242 101.128  40.955  1.00 19.25           O  
ATOM    879  CB  THR L   5      29.130 101.825  38.367  1.00 19.88           C  
ATOM    880  OG1 THR L   5      28.490 102.636  37.375  1.00 18.16           O  
ATOM    881  CG2 THR L   5      29.101 100.352  37.919  1.00 24.15           C  
ATOM    882  N   GLN L   6      28.187 100.348  41.425  1.00 19.05           N  
ATOM    883  CA  GLN L   6      28.658  99.509  42.512  1.00 19.59           C  
ATOM    884  C   GLN L   6      28.572  98.058  42.099  1.00 18.62           C  
ATOM    885  O   GLN L   6      27.632  97.658  41.427  1.00 21.76           O  
ATOM    886  CB  GLN L   6      27.811  99.823  43.762  1.00 21.40           C  
ATOM    887  CG  GLN L   6      27.838  98.805  44.865  1.00 18.07           C  
ATOM    888  CD  GLN L   6      27.280  99.333  46.177  1.00 18.74           C  
ATOM    889  OE1 GLN L   6      26.852 100.476  46.270  1.00 12.24           O  
ATOM    890  NE2 GLN L   6      27.289  98.491  47.202  1.00 19.21           N  
ATOM    891  N   SER L   7      29.554  97.275  42.517  1.00 21.69           N  
ATOM    892  CA  SER L   7      29.622  95.853  42.185  1.00 23.27           C  
ATOM    893  C   SER L   7      30.318  95.117  43.328  1.00 22.34           C  
ATOM    894  O   SER L   7      31.285  95.643  43.916  1.00 21.17           O  
ATOM    895  CB  SER L   7      30.437  95.665  40.901  1.00 26.23           C  
ATOM    896  OG  SER L   7      30.590  94.298  40.589  1.00 29.61           O  
ATOM    897  N   PRO L   8      29.871  93.878  43.633  1.00 21.42           N  
ATOM    898  CA  PRO L   8      28.793  93.067  43.044  1.00 18.89           C  
ATOM    899  C   PRO L   8      27.398  93.513  43.466  1.00 19.84           C  
ATOM    900  O   PRO L   8      27.253  94.490  44.191  1.00 20.78           O  
ATOM    901  CB  PRO L   8      29.053  91.674  43.624  1.00 17.98           C  
ATOM    902  CG  PRO L   8      30.428  91.730  44.171  1.00 18.99           C  
ATOM    903  CD  PRO L   8      30.522  93.122  44.706  1.00 21.50           C  
ATOM    904  N   SER L   9      26.383  92.799  43.001  1.00 16.25           N  
ATOM    905  CA  SER L   9      25.006  93.074  43.348  1.00 22.34           C  
ATOM    906  C   SER L   9      24.672  92.239  44.578  1.00 21.78           C  
ATOM    907  O   SER L   9      23.940  92.672  45.475  1.00 20.27           O  
ATOM    908  CB  SER L   9      24.090  92.687  42.203  1.00 24.68           C  
ATOM    909  OG  SER L   9      24.364  93.492  41.076  1.00 39.07           O  
ATOM    910  N   SER L  10      25.151  91.010  44.599  1.00 22.20           N  
ATOM    911  CA  SER L  10      24.931  90.166  45.764  1.00 23.26           C  
ATOM    912  C   SER L  10      26.102  89.210  45.899  1.00 23.78           C  
ATOM    913  O   SER L  10      26.866  89.036  44.957  1.00 21.60           O  
ATOM    914  CB  SER L  10      23.601  89.417  45.673  1.00 24.57           C  
ATOM    915  OG  SER L  10      23.469  88.716  44.444  1.00 34.25           O  
ATOM    916  N   LEU L  11      26.332  88.702  47.103  1.00 23.91           N  
ATOM    917  CA  LEU L  11      27.408  87.746  47.293  1.00 25.33           C  
ATOM    918  C   LEU L  11      27.235  86.918  48.562  1.00 27.34           C  
ATOM    919  O   LEU L  11      26.429  87.252  49.442  1.00 29.08           O  
ATOM    920  CB  LEU L  11      28.790  88.418  47.223  1.00 24.06           C  
ATOM    921  CG  LEU L  11      29.541  89.043  48.397  1.00 16.93           C  
ATOM    922  CD1 LEU L  11      30.342  90.245  47.884  1.00 20.22           C  
ATOM    923  CD2 LEU L  11      28.562  89.504  49.415  1.00 25.61           C  
ATOM    924  N   SER L  12      27.916  85.785  48.588  1.00 27.91           N  
ATOM    925  CA  SER L  12      27.888  84.897  49.728  1.00 30.61           C  
ATOM    926  C   SER L  12      29.323  84.564  50.081  1.00 29.30           C  
ATOM    927  O   SER L  12      30.164  84.424  49.183  1.00 28.32           O  
ATOM    928  CB  SER L  12      27.111  83.646  49.392  1.00 31.53           C  
ATOM    929  OG  SER L  12      25.781  84.007  49.064  1.00 38.90           O  
ATOM    930  N   ALA L  13      29.622  84.538  51.378  1.00 24.26           N  
ATOM    931  CA  ALA L  13      30.964  84.223  51.866  1.00 24.38           C  
ATOM    932  C   ALA L  13      30.761  83.517  53.203  1.00 23.46           C  
ATOM    933  O   ALA L  13      29.632  83.425  53.666  1.00 26.49           O  
ATOM    934  CB  ALA L  13      31.786  85.513  52.047  1.00 23.21           C  
ATOM    935  N   SER L  14      31.821  82.970  53.784  1.00 23.54           N  
ATOM    936  CA  SER L  14      31.737  82.275  55.076  1.00 20.45           C  
ATOM    937  C   SER L  14      32.161  83.219  56.190  1.00 22.44           C  
ATOM    938  O   SER L  14      32.915  84.175  55.935  1.00 15.93           O  
ATOM    939  CB  SER L  14      32.673  81.087  55.069  1.00 23.08           C  
ATOM    940  OG  SER L  14      32.312  80.195  54.038  1.00 27.43           O  
ATOM    941  N   VAL L  15      31.738  82.940  57.429  1.00 20.63           N  
ATOM    942  CA  VAL L  15      32.113  83.827  58.528  1.00 22.29           C  
ATOM    943  C   VAL L  15      33.619  83.782  58.582  1.00 23.03           C  
ATOM    944  O   VAL L  15      34.209  82.715  58.446  1.00 28.89           O  
ATOM    945  CB  VAL L  15      31.484  83.435  59.929  1.00 26.09           C  
ATOM    946  CG1 VAL L  15      30.048  82.898  59.778  1.00 21.30           C  
ATOM    947  CG2 VAL L  15      32.376  82.492  60.706  1.00 21.77           C  
ATOM    948  N   GLY L  16      34.248  84.944  58.612  1.00 27.24           N  
ATOM    949  CA  GLY L  16      35.695  84.974  58.665  1.00 23.86           C  
ATOM    950  C   GLY L  16      36.309  85.397  57.357  1.00 27.32           C  
ATOM    951  O   GLY L  16      37.410  85.939  57.364  1.00 24.75           O  
ATOM    952  N   ASP L  17      35.590  85.191  56.250  1.00 26.90           N  
ATOM    953  CA  ASP L  17      36.097  85.551  54.928  1.00 28.52           C  
ATOM    954  C   ASP L  17      36.229  87.050  54.661  1.00 28.25           C  
ATOM    955  O   ASP L  17      35.524  87.870  55.247  1.00 31.42           O  
ATOM    956  CB  ASP L  17      35.223  84.942  53.826  1.00 32.12           C  
ATOM    957  CG  ASP L  17      35.507  83.475  53.589  1.00 36.90           C  
ATOM    958  OD1 ASP L  17      36.667  83.044  53.758  1.00 38.12           O  
ATOM    959  OD2 ASP L  17      34.564  82.754  53.210  1.00 39.42           O  
ATOM    960  N   ARG L  18      37.145  87.396  53.768  1.00 30.53           N  
ATOM    961  CA  ARG L  18      37.339  88.780  53.391  1.00 32.88           C  
ATOM    962  C   ARG L  18      36.324  89.138  52.297  1.00 33.95           C  
ATOM    963  O   ARG L  18      35.990  88.292  51.447  1.00 34.22           O  
ATOM    964  CB  ARG L  18      38.752  88.996  52.886  1.00 32.99           C  
ATOM    965  CG  ARG L  18      39.002  90.409  52.440  1.00 36.64           C  
ATOM    966  CD  ARG L  18      40.397  90.860  52.787  1.00 37.18           C  
ATOM    967  NE  ARG L  18      40.661  92.156  52.187  1.00 46.06           N  
ATOM    968  CZ  ARG L  18      41.349  92.326  51.062  1.00 50.69           C  
ATOM    969  NH1 ARG L  18      41.895  91.278  50.452  1.00 48.44           N  
ATOM    970  NH2 ARG L  18      41.525  93.552  50.570  1.00 52.45           N  
ATOM    971  N   VAL L  19      35.823  90.377  52.326  1.00 32.68           N  
ATOM    972  CA  VAL L  19      34.847  90.852  51.338  1.00 29.56           C  
ATOM    973  C   VAL L  19      35.258  92.211  50.799  1.00 29.86           C  
ATOM    974  O   VAL L  19      35.667  93.103  51.557  1.00 29.78           O  
ATOM    975  CB  VAL L  19      33.410  90.950  51.925  1.00 28.45           C  
ATOM    976  CG1 VAL L  19      32.487  91.699  50.971  1.00 26.86           C  
ATOM    977  CG2 VAL L  19      32.852  89.548  52.179  1.00 32.23           C  
ATOM    978  N   THR L  20      35.204  92.341  49.475  1.00 29.71           N  
ATOM    979  CA  THR L  20      35.540  93.591  48.817  1.00 28.20           C  
ATOM    980  C   THR L  20      34.410  93.974  47.881  1.00 23.90           C  
ATOM    981  O   THR L  20      33.860  93.140  47.166  1.00 20.51           O  
ATOM    982  CB  THR L  20      36.904  93.520  48.087  1.00 32.12           C  
ATOM    983  OG1 THR L  20      37.855  94.332  48.796  1.00 38.68           O  
ATOM    984  CG2 THR L  20      36.797  94.014  46.655  1.00 30.37           C  
ATOM    985  N   ILE L  21      34.039  95.238  47.953  1.00 21.20           N  
ATOM    986  CA  ILE L  21      32.959  95.802  47.163  1.00 17.54           C  
ATOM    987  C   ILE L  21      33.534  97.058  46.561  1.00 17.42           C  
ATOM    988  O   ILE L  21      34.391  97.703  47.167  1.00 18.64           O  
ATOM    989  CB  ILE L  21      31.743  96.153  48.080  1.00 18.32           C  
ATOM    990  CG1 ILE L  21      31.216  94.877  48.753  1.00 15.72           C  
ATOM    991  CG2 ILE L  21      30.639  96.791  47.278  1.00 14.37           C  
ATOM    992  CD1 ILE L  21      30.088  95.113  49.714  1.00 22.91           C  
ATOM    993  N   THR L  22      33.084  97.412  45.366  1.00 19.80           N  
ATOM    994  CA  THR L  22      33.622  98.595  44.716  1.00 22.27           C  
ATOM    995  C   THR L  22      32.574  99.546  44.197  1.00 16.93           C  
ATOM    996  O   THR L  22      31.455  99.158  43.906  1.00 16.97           O  
ATOM    997  CB  THR L  22      34.532  98.196  43.502  1.00 26.63           C  
ATOM    998  OG1 THR L  22      33.873  97.201  42.692  1.00 30.70           O  
ATOM    999  CG2 THR L  22      35.862  97.640  43.997  1.00 30.95           C  
ATOM   1000  N   CYS L  23      32.944 100.807  44.118  1.00 18.62           N  
ATOM   1001  CA  CYS L  23      32.060 101.802  43.554  1.00 22.20           C  
ATOM   1002  C   CYS L  23      32.913 102.591  42.624  1.00 20.57           C  
ATOM   1003  O   CYS L  23      34.073 102.849  42.921  1.00 22.09           O  
ATOM   1004  CB  CYS L  23      31.444 102.730  44.607  1.00 20.18           C  
ATOM   1005  SG  CYS L  23      29.846 102.028  45.077  1.00 23.19           S  
ATOM   1006  N   GLN L  24      32.373 102.891  41.463  1.00 18.86           N  
ATOM   1007  CA  GLN L  24      33.098 103.691  40.509  1.00 24.32           C  
ATOM   1008  C   GLN L  24      32.155 104.832  40.156  1.00 19.17           C  
ATOM   1009  O   GLN L  24      30.987 104.596  39.898  1.00 23.49           O  
ATOM   1010  CB  GLN L  24      33.463 102.833  39.302  1.00 29.60           C  
ATOM   1011  CG  GLN L  24      34.373 101.678  39.691  1.00 36.82           C  
ATOM   1012  CD  GLN L  24      34.411 100.540  38.677  1.00 45.52           C  
ATOM   1013  OE1 GLN L  24      34.756  99.403  39.027  1.00 49.55           O  
ATOM   1014  NE2 GLN L  24      34.076 100.835  37.423  1.00 47.30           N  
ATOM   1015  N   ALA L  25      32.665 106.057  40.218  1.00 19.75           N  
ATOM   1016  CA  ALA L  25      31.920 107.272  39.927  1.00 18.50           C  
ATOM   1017  C   ALA L  25      32.182 107.759  38.504  1.00 19.63           C  
ATOM   1018  O   ALA L  25      33.307 107.671  38.008  1.00 19.98           O  
ATOM   1019  CB  ALA L  25      32.332 108.358  40.907  1.00 16.61           C  
ATOM   1020  N   SER L  26      31.182 108.372  37.888  1.00 20.33           N  
ATOM   1021  CA  SER L  26      31.353 108.863  36.529  1.00 19.36           C  
ATOM   1022  C   SER L  26      32.185 110.114  36.457  1.00 22.65           C  
ATOM   1023  O   SER L  26      32.418 110.641  35.384  1.00 24.02           O  
ATOM   1024  CB  SER L  26      30.000 109.087  35.863  1.00 20.26           C  
ATOM   1025  OG  SER L  26      29.118 109.811  36.685  1.00 14.87           O  
ATOM   1026  N   GLN L  27      32.655 110.590  37.598  1.00 23.87           N  
ATOM   1027  CA  GLN L  27      33.470 111.784  37.619  1.00 26.77           C  
ATOM   1028  C   GLN L  27      34.234 111.896  38.940  1.00 26.84           C  
ATOM   1029  O   GLN L  27      33.821 111.354  39.962  1.00 31.10           O  
ATOM   1030  CB  GLN L  27      32.602 113.014  37.337  1.00 25.02           C  
ATOM   1031  CG  GLN L  27      32.491 113.991  38.475  1.00 30.82           C  
ATOM   1032  CD  GLN L  27      31.581 115.120  38.140  1.00 36.57           C  
ATOM   1033  OE1 GLN L  27      31.799 116.256  38.565  1.00 43.23           O  
ATOM   1034  NE2 GLN L  27      30.542 114.829  37.364  1.00 40.56           N  
ATOM   1035  N   ASP L  28      35.375 112.559  38.912  1.00 27.86           N  
ATOM   1036  CA  ASP L  28      36.190 112.697  40.108  1.00 30.12           C  
ATOM   1037  C   ASP L  28      35.374 113.351  41.239  1.00 28.72           C  
ATOM   1038  O   ASP L  28      35.011 114.521  41.144  1.00 29.31           O  
ATOM   1039  CB  ASP L  28      37.443 113.504  39.759  1.00 33.36           C  
ATOM   1040  CG  ASP L  28      38.284 113.825  40.955  1.00 37.18           C  
ATOM   1041  OD1 ASP L  28      38.281 113.039  41.925  1.00 38.69           O  
ATOM   1042  OD2 ASP L  28      38.959 114.876  40.920  1.00 43.23           O  
ATOM   1043  N   ILE L  29      35.064 112.588  42.291  1.00 24.43           N  
ATOM   1044  CA  ILE L  29      34.273 113.133  43.402  1.00 22.06           C  
ATOM   1045  C   ILE L  29      35.070 113.637  44.623  1.00 28.31           C  
ATOM   1046  O   ILE L  29      34.511 113.843  45.713  1.00 26.20           O  
ATOM   1047  CB  ILE L  29      33.146 112.155  43.851  1.00 20.22           C  
ATOM   1048  CG1 ILE L  29      33.723 110.813  44.310  1.00 16.50           C  
ATOM   1049  CG2 ILE L  29      32.146 111.939  42.711  1.00 15.31           C  
ATOM   1050  CD1 ILE L  29      32.731 109.964  45.079  1.00  5.55           C  
ATOM   1051  N   SER L  30      36.379 113.804  44.458  1.00 29.29           N  
ATOM   1052  CA  SER L  30      37.230 114.306  45.531  1.00 30.28           C  
ATOM   1053  C   SER L  30      37.079 113.590  46.869  1.00 30.82           C  
ATOM   1054  O   SER L  30      37.090 114.224  47.920  1.00 30.65           O  
ATOM   1055  CB  SER L  30      36.957 115.794  45.721  1.00 32.77           C  
ATOM   1056  OG  SER L  30      37.079 116.471  44.479  1.00 38.32           O  
ATOM   1057  N   ASP L  31      36.935 112.272  46.823  1.00 29.97           N  
ATOM   1058  CA  ASP L  31      36.786 111.443  48.020  1.00 33.36           C  
ATOM   1059  C   ASP L  31      35.514 111.671  48.826  1.00 30.78           C  
ATOM   1060  O   ASP L  31      35.380 111.150  49.931  1.00 32.45           O  
ATOM   1061  CB  ASP L  31      38.006 111.564  48.927  1.00 38.19           C  
ATOM   1062  CG  ASP L  31      39.289 111.115  48.246  1.00 43.60           C  
ATOM   1063  OD1 ASP L  31      39.270 110.706  47.057  1.00 44.85           O  
ATOM   1064  OD2 ASP L  31      40.334 111.185  48.920  1.00 50.67           O  
ATOM   1065  N   TYR L  32      34.578 112.434  48.276  1.00 28.38           N  
ATOM   1066  CA  TYR L  32      33.316 112.667  48.960  1.00 25.78           C  
ATOM   1067  C   TYR L  32      32.415 111.452  48.768  1.00 24.37           C  
ATOM   1068  O   TYR L  32      31.368 111.501  48.106  1.00 22.43           O  
ATOM   1069  CB  TYR L  32      32.637 113.917  48.434  1.00 29.21           C  
ATOM   1070  CG  TYR L  32      33.349 115.177  48.817  1.00 30.13           C  
ATOM   1071  CD1 TYR L  32      33.694 115.426  50.137  1.00 31.04           C  
ATOM   1072  CD2 TYR L  32      33.667 116.126  47.861  1.00 31.60           C  
ATOM   1073  CE1 TYR L  32      34.334 116.587  50.498  1.00 34.31           C  
ATOM   1074  CE2 TYR L  32      34.307 117.292  48.207  1.00 34.85           C  
ATOM   1075  CZ  TYR L  32      34.640 117.519  49.530  1.00 34.57           C  
ATOM   1076  OH  TYR L  32      35.287 118.681  49.872  1.00 40.86           O  
ATOM   1077  N   LEU L  33      32.822 110.360  49.386  1.00 20.32           N  
ATOM   1078  CA  LEU L  33      32.084 109.123  49.304  1.00 21.09           C  
ATOM   1079  C   LEU L  33      31.838 108.530  50.696  1.00 23.44           C  
ATOM   1080  O   LEU L  33      32.729 108.496  51.568  1.00 20.65           O  
ATOM   1081  CB  LEU L  33      32.844 108.124  48.436  1.00 20.09           C  
ATOM   1082  CG  LEU L  33      32.209 106.750  48.382  1.00 19.89           C  
ATOM   1083  CD1 LEU L  33      31.778 106.428  46.973  1.00 25.05           C  
ATOM   1084  CD2 LEU L  33      33.186 105.734  48.920  1.00 24.30           C  
ATOM   1085  N   ILE L  34      30.609 108.082  50.899  1.00 21.46           N  
ATOM   1086  CA  ILE L  34      30.248 107.491  52.154  1.00 19.94           C  
ATOM   1087  C   ILE L  34      29.745 106.071  51.937  1.00 18.06           C  
ATOM   1088  O   ILE L  34      29.241 105.750  50.851  1.00 13.69           O  
ATOM   1089  CB  ILE L  34      29.288 108.448  52.977  1.00 18.88           C  
ATOM   1090  CG1 ILE L  34      28.538 107.690  54.044  1.00 20.38           C  
ATOM   1091  CG2 ILE L  34      28.339 109.202  52.121  1.00 23.69           C  
ATOM   1092  CD1 ILE L  34      27.557 106.825  53.566  1.00 20.38           C  
ATOM   1093  N   TRP L  35      29.977 105.192  52.923  1.00 12.27           N  
ATOM   1094  CA  TRP L  35      29.510 103.813  52.844  1.00 15.34           C  
ATOM   1095  C   TRP L  35      28.474 103.560  53.914  1.00 15.13           C  
ATOM   1096  O   TRP L  35      28.687 103.916  55.070  1.00 20.48           O  
ATOM   1097  CB  TRP L  35      30.667 102.808  52.984  1.00 14.77           C  
ATOM   1098  CG  TRP L  35      31.570 102.735  51.764  1.00 16.14           C  
ATOM   1099  CD1 TRP L  35      32.742 103.393  51.589  1.00 18.22           C  
ATOM   1100  CD2 TRP L  35      31.347 101.994  50.550  1.00 12.59           C  
ATOM   1101  NE1 TRP L  35      33.264 103.120  50.357  1.00 16.35           N  
ATOM   1102  CE2 TRP L  35      32.428 102.264  49.691  1.00 17.45           C  
ATOM   1103  CE3 TRP L  35      30.327 101.140  50.104  1.00 18.66           C  
ATOM   1104  CZ2 TRP L  35      32.535 101.713  48.401  1.00  9.13           C  
ATOM   1105  CZ3 TRP L  35      30.427 100.593  48.825  1.00 17.21           C  
ATOM   1106  CH2 TRP L  35      31.530 100.884  47.990  1.00 12.27           C  
ATOM   1107  N   TYR L  36      27.340 102.987  53.529  1.00 12.68           N  
ATOM   1108  CA  TYR L  36      26.243 102.683  54.448  1.00  9.42           C  
ATOM   1109  C   TYR L  36      26.000 101.198  54.528  1.00 14.78           C  
ATOM   1110  O   TYR L  36      26.285 100.445  53.583  1.00 18.47           O  
ATOM   1111  CB  TYR L  36      24.906 103.279  53.972  1.00  4.41           C  
ATOM   1112  CG  TYR L  36      24.832 104.793  53.890  1.00 11.50           C  
ATOM   1113  CD1 TYR L  36      24.664 105.578  55.039  1.00 11.37           C  
ATOM   1114  CD2 TYR L  36      24.876 105.436  52.662  1.00 12.81           C  
ATOM   1115  CE1 TYR L  36      24.552 106.959  54.948  1.00  9.33           C  
ATOM   1116  CE2 TYR L  36      24.751 106.816  52.556  1.00 14.55           C  
ATOM   1117  CZ  TYR L  36      24.599 107.576  53.699  1.00 12.91           C  
ATOM   1118  OH  TYR L  36      24.557 108.963  53.581  1.00 11.16           O  
ATOM   1119  N   GLN L  37      25.397 100.800  55.639  1.00 12.09           N  
ATOM   1120  CA  GLN L  37      24.989  99.429  55.862  1.00  7.66           C  
ATOM   1121  C   GLN L  37      23.503  99.536  56.112  1.00  8.61           C  
ATOM   1122  O   GLN L  37      23.066 100.420  56.847  1.00 15.51           O  
ATOM   1123  CB  GLN L  37      25.643  98.865  57.100  1.00  7.47           C  
ATOM   1124  CG  GLN L  37      25.190  97.444  57.419  1.00 11.90           C  
ATOM   1125  CD  GLN L  37      25.601  97.052  58.824  1.00 16.37           C  
ATOM   1126  OE1 GLN L  37      25.339  97.791  59.783  1.00 15.89           O  
ATOM   1127  NE2 GLN L  37      26.287  95.923  58.956  1.00 19.82           N  
ATOM   1128  N   GLN L  38      22.714  98.751  55.399  1.00 13.30           N  
ATOM   1129  CA  GLN L  38      21.275  98.764  55.607  1.00 13.00           C  
ATOM   1130  C   GLN L  38      20.760  97.386  55.887  1.00 16.10           C  
ATOM   1131  O   GLN L  38      20.581  96.602  54.975  1.00 16.32           O  
ATOM   1132  CB  GLN L  38      20.534  99.307  54.400  1.00 16.09           C  
ATOM   1133  CG  GLN L  38      19.060  99.613  54.704  1.00 17.58           C  
ATOM   1134  CD  GLN L  38      18.299 100.065  53.473  1.00 20.71           C  
ATOM   1135  OE1 GLN L  38      18.669  99.734  52.335  1.00 18.41           O  
ATOM   1136  NE2 GLN L  38      17.205 100.783  53.688  1.00 20.40           N  
ATOM   1137  N   LYS L  39      20.541  97.073  57.155  1.00 18.28           N  
ATOM   1138  CA  LYS L  39      20.006  95.774  57.523  1.00 17.55           C  
ATOM   1139  C   LYS L  39      18.541  95.744  57.145  1.00 16.69           C  
ATOM   1140  O   LYS L  39      17.923  96.786  57.001  1.00 21.36           O  
ATOM   1141  CB  LYS L  39      20.178  95.545  59.012  1.00 15.65           C  
ATOM   1142  CG  LYS L  39      21.619  95.419  59.399  1.00 16.83           C  
ATOM   1143  CD  LYS L  39      21.784  95.340  60.895  1.00 27.87           C  
ATOM   1144  CE  LYS L  39      23.244  95.162  61.236  1.00 30.45           C  
ATOM   1145  NZ  LYS L  39      23.720  93.947  60.523  1.00 37.59           N  
ATOM   1146  N   LEU L  40      17.976  94.554  57.037  1.00 17.72           N  
ATOM   1147  CA  LEU L  40      16.575  94.380  56.643  1.00 21.32           C  
ATOM   1148  C   LEU L  40      15.541  95.187  57.438  1.00 22.91           C  
ATOM   1149  O   LEU L  40      15.566  95.207  58.669  1.00 24.88           O  
ATOM   1150  CB  LEU L  40      16.205  92.900  56.702  1.00 23.50           C  
ATOM   1151  CG  LEU L  40      14.931  92.545  55.941  1.00 25.93           C  
ATOM   1152  CD1 LEU L  40      15.067  92.954  54.500  1.00 25.57           C  
ATOM   1153  CD2 LEU L  40      14.685  91.053  56.034  1.00 31.56           C  
ATOM   1154  N   GLY L  41      14.671  95.892  56.727  1.00 20.22           N  
ATOM   1155  CA  GLY L  41      13.642  96.664  57.388  1.00 24.55           C  
ATOM   1156  C   GLY L  41      14.137  97.855  58.194  1.00 26.11           C  
ATOM   1157  O   GLY L  41      13.381  98.427  58.974  1.00 28.39           O  
ATOM   1158  N   LYS L  42      15.397  98.237  58.024  1.00 26.26           N  
ATOM   1159  CA  LYS L  42      15.944  99.371  58.753  1.00 20.80           C  
ATOM   1160  C   LYS L  42      16.516 100.408  57.798  1.00 20.59           C  
ATOM   1161  O   LYS L  42      16.693 100.138  56.619  1.00 20.72           O  
ATOM   1162  CB  LYS L  42      16.996  98.889  59.735  1.00 19.90           C  
ATOM   1163  CG  LYS L  42      16.413  97.885  60.731  1.00 28.35           C  
ATOM   1164  CD  LYS L  42      17.259  97.744  61.980  1.00 33.94           C  
ATOM   1165  CE  LYS L  42      18.020  96.407  62.015  1.00 41.83           C  
ATOM   1166  NZ  LYS L  42      17.127  95.198  61.983  1.00 42.23           N  
ATOM   1167  N   ALA L  43      16.790 101.600  58.302  1.00 20.19           N  
ATOM   1168  CA  ALA L  43      17.338 102.673  57.473  1.00 22.12           C  
ATOM   1169  C   ALA L  43      18.829 102.485  57.307  1.00 19.45           C  
ATOM   1170  O   ALA L  43      19.442 101.773  58.088  1.00 21.37           O  
ATOM   1171  CB  ALA L  43      17.058 104.032  58.128  1.00 19.09           C  
ATOM   1172  N   PRO L  44      19.425 103.066  56.254  1.00 19.08           N  
ATOM   1173  CA  PRO L  44      20.868 102.890  56.113  1.00 14.44           C  
ATOM   1174  C   PRO L  44      21.573 103.598  57.258  1.00 14.90           C  
ATOM   1175  O   PRO L  44      21.086 104.597  57.778  1.00 13.20           O  
ATOM   1176  CB  PRO L  44      21.189 103.513  54.749  1.00 18.28           C  
ATOM   1177  CG  PRO L  44      19.997 104.307  54.385  1.00 25.60           C  
ATOM   1178  CD  PRO L  44      18.834 103.565  55.002  1.00 19.63           C  
ATOM   1179  N   ASN L  45      22.732 103.078  57.623  1.00 16.08           N  
ATOM   1180  CA  ASN L  45      23.517 103.582  58.736  1.00 13.81           C  
ATOM   1181  C   ASN L  45      24.931 103.852  58.218  1.00 10.36           C  
ATOM   1182  O   ASN L  45      25.524 103.013  57.549  1.00 13.23           O  
ATOM   1183  CB  ASN L  45      23.450 102.495  59.824  1.00 18.57           C  
ATOM   1184  CG  ASN L  45      24.474 102.663  60.884  1.00 29.98           C  
ATOM   1185  OD1 ASN L  45      24.790 103.778  61.292  1.00 31.64           O  
ATOM   1186  ND2 ASN L  45      25.017 101.537  61.358  1.00 39.21           N  
ATOM   1187  N   LEU L  46      25.432 105.057  58.442  1.00 13.68           N  
ATOM   1188  CA  LEU L  46      26.759 105.460  57.946  1.00 15.31           C  
ATOM   1189  C   LEU L  46      27.909 104.766  58.674  1.00 19.15           C  
ATOM   1190  O   LEU L  46      27.941 104.730  59.902  1.00 18.13           O  
ATOM   1191  CB  LEU L  46      26.890 106.987  58.006  1.00 13.98           C  
ATOM   1192  CG  LEU L  46      28.034 107.736  57.325  1.00 11.81           C  
ATOM   1193  CD1 LEU L  46      27.574 109.126  56.950  1.00  5.87           C  
ATOM   1194  CD2 LEU L  46      29.298 107.774  58.179  1.00  7.26           C  
ATOM   1195  N   LEU L  47      28.804 104.142  57.909  1.00 17.74           N  
ATOM   1196  CA  LEU L  47      29.972 103.455  58.484  1.00 15.93           C  
ATOM   1197  C   LEU L  47      31.258 104.253  58.229  1.00 16.56           C  
ATOM   1198  O   LEU L  47      32.072 104.451  59.142  1.00 13.14           O  
ATOM   1199  CB  LEU L  47      30.146 102.045  57.886  1.00  9.53           C  
ATOM   1200  CG  LEU L  47      28.996 101.054  57.915  1.00 11.61           C  
ATOM   1201  CD1 LEU L  47      29.415  99.787  57.230  1.00  4.50           C  
ATOM   1202  CD2 LEU L  47      28.608 100.750  59.333  1.00 16.49           C  
ATOM   1203  N   ILE L  48      31.423 104.705  56.983  1.00 17.65           N  
ATOM   1204  CA  ILE L  48      32.591 105.445  56.524  1.00 17.23           C  
ATOM   1205  C   ILE L  48      32.171 106.674  55.704  1.00 18.42           C  
ATOM   1206  O   ILE L  48      31.193 106.624  54.971  1.00 16.86           O  
ATOM   1207  CB  ILE L  48      33.505 104.540  55.605  1.00 19.44           C  
ATOM   1208  CG1 ILE L  48      34.236 103.452  56.402  1.00 14.95           C  
ATOM   1209  CG2 ILE L  48      34.537 105.379  54.860  1.00 23.31           C  
ATOM   1210  CD1 ILE L  48      33.543 102.136  56.373  1.00 22.94           C  
ATOM   1211  N   TYR L  49      32.854 107.793  55.912  1.00 20.23           N  
ATOM   1212  CA  TYR L  49      32.613 109.024  55.157  1.00 20.20           C  
ATOM   1213  C   TYR L  49      33.978 109.484  54.661  1.00 22.64           C  
ATOM   1214  O   TYR L  49      34.998 108.925  55.073  1.00 20.48           O  
ATOM   1215  CB  TYR L  49      31.930 110.119  55.993  1.00 23.08           C  
ATOM   1216  CG  TYR L  49      32.671 110.549  57.233  1.00 24.63           C  
ATOM   1217  CD1 TYR L  49      32.489 109.872  58.429  1.00 24.48           C  
ATOM   1218  CD2 TYR L  49      33.592 111.586  57.199  1.00 25.74           C  
ATOM   1219  CE1 TYR L  49      33.201 110.193  59.548  1.00 25.41           C  
ATOM   1220  CE2 TYR L  49      34.320 111.926  58.333  1.00 30.49           C  
ATOM   1221  CZ  TYR L  49      34.122 111.210  59.509  1.00 30.77           C  
ATOM   1222  OH  TYR L  49      34.898 111.456  60.632  1.00 31.24           O  
ATOM   1223  N   ASP L  50      34.004 110.407  53.698  1.00 24.07           N  
ATOM   1224  CA  ASP L  50      35.261 110.914  53.168  1.00 25.84           C  
ATOM   1225  C   ASP L  50      36.092 109.780  52.552  1.00 25.72           C  
ATOM   1226  O   ASP L  50      37.324 109.836  52.508  1.00 25.78           O  
ATOM   1227  CB  ASP L  50      36.018 111.611  54.303  1.00 34.98           C  
ATOM   1228  CG  ASP L  50      37.098 112.532  53.814  1.00 43.88           C  
ATOM   1229  OD1 ASP L  50      36.847 113.291  52.846  1.00 49.48           O  
ATOM   1230  OD2 ASP L  50      38.197 112.505  54.423  1.00 49.02           O  
ATOM   1231  N   ALA L  51      35.396 108.730  52.124  1.00 22.06           N  
ATOM   1232  CA  ALA L  51      35.986 107.556  51.482  1.00 23.63           C  
ATOM   1233  C   ALA L  51      36.715 106.562  52.363  1.00 20.61           C  
ATOM   1234  O   ALA L  51      36.684 105.366  52.096  1.00 18.73           O  
ATOM   1235  CB  ALA L  51      36.888 107.967  50.312  1.00 24.62           C  
ATOM   1236  N   SER L  52      37.383 107.026  53.408  1.00 25.70           N  
ATOM   1237  CA  SER L  52      38.116 106.086  54.243  1.00 24.13           C  
ATOM   1238  C   SER L  52      38.054 106.264  55.759  1.00 24.76           C  
ATOM   1239  O   SER L  52      38.586 105.422  56.487  1.00 25.67           O  
ATOM   1240  CB  SER L  52      39.566 106.028  53.769  1.00 26.09           C  
ATOM   1241  OG  SER L  52      40.039 107.313  53.420  1.00 28.28           O  
ATOM   1242  N   THR L  53      37.382 107.305  56.248  1.00 24.44           N  
ATOM   1243  CA  THR L  53      37.312 107.503  57.690  1.00 26.46           C  
ATOM   1244  C   THR L  53      36.104 106.927  58.434  1.00 24.04           C  
ATOM   1245  O   THR L  53      34.981 107.397  58.275  1.00 27.47           O  
ATOM   1246  CB  THR L  53      37.591 108.984  58.112  1.00 28.34           C  
ATOM   1247  OG1 THR L  53      36.724 109.380  59.192  1.00 33.30           O  
ATOM   1248  CG2 THR L  53      37.498 109.930  56.949  1.00 28.21           C  
ATOM   1249  N   LEU L  54      36.368 105.926  59.270  1.00 22.82           N  
ATOM   1250  CA  LEU L  54      35.341 105.276  60.067  1.00 22.25           C  
ATOM   1251  C   LEU L  54      34.625 106.256  61.005  1.00 21.00           C  
ATOM   1252  O   LEU L  54      35.226 107.190  61.518  1.00 23.80           O  
ATOM   1253  CB  LEU L  54      35.957 104.140  60.904  1.00 19.48           C  
ATOM   1254  CG  LEU L  54      36.001 102.710  60.373  1.00 18.93           C  
ATOM   1255  CD1 LEU L  54      36.900 102.635  59.188  1.00 20.91           C  
ATOM   1256  CD2 LEU L  54      36.500 101.761  61.420  1.00 19.75           C  
ATOM   1257  N   GLU L  55      33.318 106.086  61.151  1.00 22.61           N  
ATOM   1258  CA  GLU L  55      32.534 106.909  62.056  1.00 27.55           C  
ATOM   1259  C   GLU L  55      32.832 106.286  63.434  1.00 30.55           C  
ATOM   1260  O   GLU L  55      33.260 105.119  63.512  1.00 26.99           O  
ATOM   1261  CB  GLU L  55      31.045 106.763  61.722  1.00 24.23           C  
ATOM   1262  CG  GLU L  55      30.123 107.619  62.563  1.00 37.37           C  
ATOM   1263  CD  GLU L  55      30.565 109.067  62.622  1.00 41.60           C  
ATOM   1264  OE1 GLU L  55      30.499 109.755  61.583  1.00 50.59           O  
ATOM   1265  OE2 GLU L  55      30.985 109.528  63.703  1.00 45.31           O  
ATOM   1266  N   THR L  56      32.607 107.027  64.521  1.00 32.63           N  
ATOM   1267  CA  THR L  56      32.881 106.465  65.843  1.00 33.91           C  
ATOM   1268  C   THR L  56      31.898 105.347  66.190  1.00 33.32           C  
ATOM   1269  O   THR L  56      30.677 105.512  66.065  1.00 33.91           O  
ATOM   1270  CB  THR L  56      32.839 107.529  66.936  1.00 32.48           C  
ATOM   1271  OG1 THR L  56      31.594 108.212  66.860  1.00 32.84           O  
ATOM   1272  CG2 THR L  56      33.949 108.530  66.733  1.00 32.40           C  
ATOM   1273  N   GLY L  57      32.449 104.200  66.581  1.00 31.12           N  
ATOM   1274  CA  GLY L  57      31.622 103.067  66.948  1.00 28.71           C  
ATOM   1275  C   GLY L  57      31.712 101.924  65.964  1.00 29.88           C  
ATOM   1276  O   GLY L  57      31.362 100.785  66.276  1.00 28.36           O  
ATOM   1277  N   VAL L  58      32.264 102.207  64.793  1.00 25.92           N  
ATOM   1278  CA  VAL L  58      32.360 101.204  63.755  1.00 20.88           C  
ATOM   1279  C   VAL L  58      33.525 100.249  63.970  1.00 18.47           C  
ATOM   1280  O   VAL L  58      34.632 100.678  64.257  1.00 18.56           O  
ATOM   1281  CB  VAL L  58      32.460 101.920  62.367  1.00 22.66           C  
ATOM   1282  CG1 VAL L  58      32.552 100.900  61.211  1.00 18.22           C  
ATOM   1283  CG2 VAL L  58      31.244 102.827  62.192  1.00 21.87           C  
ATOM   1284  N   PRO L  59      33.281  98.937  63.854  1.00 16.38           N  
ATOM   1285  CA  PRO L  59      34.328  97.927  64.028  1.00 20.78           C  
ATOM   1286  C   PRO L  59      35.461  98.224  63.058  1.00 24.48           C  
ATOM   1287  O   PRO L  59      35.239  98.868  62.030  1.00 29.95           O  
ATOM   1288  CB  PRO L  59      33.623  96.638  63.629  1.00 20.97           C  
ATOM   1289  CG  PRO L  59      32.245  96.883  64.006  1.00 13.06           C  
ATOM   1290  CD  PRO L  59      32.001  98.294  63.542  1.00 14.05           C  
ATOM   1291  N   SER L  60      36.653  97.708  63.336  1.00 24.76           N  
ATOM   1292  CA  SER L  60      37.797  97.975  62.479  1.00 25.66           C  
ATOM   1293  C   SER L  60      37.964  97.040  61.311  1.00 25.20           C  
ATOM   1294  O   SER L  60      38.818  97.269  60.464  1.00 28.55           O  
ATOM   1295  CB  SER L  60      39.080  98.052  63.301  1.00 31.76           C  
ATOM   1296  OG  SER L  60      39.075  99.248  64.085  1.00 41.37           O  
ATOM   1297  N   ARG L  61      37.145  95.997  61.256  1.00 23.47           N  
ATOM   1298  CA  ARG L  61      37.197  95.035  60.157  1.00 19.49           C  
ATOM   1299  C   ARG L  61      36.538  95.664  58.928  1.00 20.13           C  
ATOM   1300  O   ARG L  61      36.394  95.015  57.897  1.00 20.73           O  
ATOM   1301  CB  ARG L  61      36.469  93.749  60.541  1.00 22.32           C  
ATOM   1302  CG  ARG L  61      34.971  93.885  60.574  1.00 27.73           C  
ATOM   1303  CD  ARG L  61      34.289  92.750  61.324  1.00 28.32           C  
ATOM   1304  NE  ARG L  61      33.344  93.344  62.266  1.00 33.40           N  
ATOM   1305  CZ  ARG L  61      32.127  92.894  62.506  1.00 26.00           C  
ATOM   1306  NH1 ARG L  61      31.707  91.796  61.933  1.00 35.07           N  
ATOM   1307  NH2 ARG L  61      31.348  93.525  63.354  1.00 28.65           N  
ATOM   1308  N   PHE L  62      36.059  96.889  59.091  1.00 17.86           N  
ATOM   1309  CA  PHE L  62      35.424  97.646  58.037  1.00 20.40           C  
ATOM   1310  C   PHE L  62      36.396  98.721  57.578  1.00 22.81           C  
ATOM   1311  O   PHE L  62      36.954  99.440  58.403  1.00 24.61           O  
ATOM   1312  CB  PHE L  62      34.148  98.329  58.543  1.00 18.30           C  
ATOM   1313  CG  PHE L  62      32.968  97.411  58.667  1.00 24.21           C  
ATOM   1314  CD1 PHE L  62      32.538  96.652  57.582  1.00 22.02           C  
ATOM   1315  CD2 PHE L  62      32.274  97.308  59.863  1.00 27.95           C  
ATOM   1316  CE1 PHE L  62      31.435  95.807  57.688  1.00 23.20           C  
ATOM   1317  CE2 PHE L  62      31.160  96.458  59.977  1.00 26.89           C  
ATOM   1318  CZ  PHE L  62      30.746  95.707  58.885  1.00 24.28           C  
ATOM   1319  N   SER L  63      36.634  98.820  56.272  1.00 22.86           N  
ATOM   1320  CA  SER L  63      37.527  99.867  55.789  1.00 22.30           C  
ATOM   1321  C   SER L  63      37.214 100.246  54.349  1.00 20.62           C  
ATOM   1322  O   SER L  63      36.478  99.531  53.654  1.00 20.04           O  
ATOM   1323  CB  SER L  63      38.999  99.470  55.956  1.00 16.67           C  
ATOM   1324  OG  SER L  63      39.492  98.672  54.882  1.00 23.88           O  
ATOM   1325  N   GLY L  64      37.735 101.396  53.939  1.00 19.88           N  
ATOM   1326  CA  GLY L  64      37.530 101.884  52.588  1.00 20.51           C  
ATOM   1327  C   GLY L  64      38.695 102.697  52.046  1.00 24.10           C  
ATOM   1328  O   GLY L  64      39.286 103.520  52.739  1.00 23.69           O  
ATOM   1329  N   SER L  65      39.042 102.460  50.788  1.00 26.59           N  
ATOM   1330  CA  SER L  65      40.117 103.203  50.145  1.00 29.22           C  
ATOM   1331  C   SER L  65      39.744 103.617  48.718  1.00 28.95           C  
ATOM   1332  O   SER L  65      38.601 103.458  48.274  1.00 23.42           O  
ATOM   1333  CB  SER L  65      41.382 102.369  50.100  1.00 27.92           C  
ATOM   1334  OG  SER L  65      41.113 101.165  49.407  1.00 37.30           O  
ATOM   1335  N   GLY L  66      40.752 104.080  47.990  1.00 33.27           N  
ATOM   1336  CA  GLY L  66      40.561 104.523  46.625  1.00 36.85           C  
ATOM   1337  C   GLY L  66      40.594 106.035  46.596  1.00 38.37           C  
ATOM   1338  O   GLY L  66      40.889 106.674  47.613  1.00 39.87           O  
ATOM   1339  N   SER L  67      40.290 106.604  45.436  1.00 38.09           N  
ATOM   1340  CA  SER L  67      40.279 108.042  45.260  1.00 37.17           C  
ATOM   1341  C   SER L  67      39.853 108.373  43.849  1.00 37.21           C  
ATOM   1342  O   SER L  67      39.843 107.512  42.953  1.00 34.95           O  
ATOM   1343  CB  SER L  67      41.660 108.637  45.531  1.00 37.50           C  
ATOM   1344  OG  SER L  67      42.634 108.104  44.653  1.00 35.35           O  
ATOM   1345  N   GLY L  68      39.503 109.637  43.651  1.00 37.68           N  
ATOM   1346  CA  GLY L  68      39.067 110.067  42.345  1.00 35.90           C  
ATOM   1347  C   GLY L  68      37.735 109.462  41.944  1.00 34.20           C  
ATOM   1348  O   GLY L  68      36.681 109.915  42.402  1.00 34.70           O  
ATOM   1349  N   THR L  69      37.787 108.404  41.143  1.00 31.58           N  
ATOM   1350  CA  THR L  69      36.580 107.761  40.640  1.00 31.07           C  
ATOM   1351  C   THR L  69      36.430 106.295  41.020  1.00 27.14           C  
ATOM   1352  O   THR L  69      35.393 105.688  40.745  1.00 26.65           O  
ATOM   1353  CB  THR L  69      36.486 107.897  39.080  1.00 35.02           C  
ATOM   1354  OG1 THR L  69      37.742 107.535  38.483  1.00 40.85           O  
ATOM   1355  CG2 THR L  69      36.157 109.331  38.669  1.00 33.08           C  
ATOM   1356  N   GLU L  70      37.461 105.715  41.622  1.00 26.29           N  
ATOM   1357  CA  GLU L  70      37.401 104.307  42.017  1.00 27.86           C  
ATOM   1358  C   GLU L  70      37.539 104.163  43.522  1.00 25.28           C  
ATOM   1359  O   GLU L  70      38.502 104.650  44.111  1.00 23.75           O  
ATOM   1360  CB  GLU L  70      38.495 103.497  41.329  1.00 29.63           C  
ATOM   1361  CG  GLU L  70      38.134 103.033  39.940  1.00 40.60           C  
ATOM   1362  CD  GLU L  70      37.591 101.603  39.902  1.00 49.99           C  
ATOM   1363  OE1 GLU L  70      37.232 101.045  40.976  1.00 52.19           O  
ATOM   1364  OE2 GLU L  70      37.524 101.034  38.782  1.00 51.20           O  
ATOM   1365  N   TYR L  71      36.548 103.538  44.142  1.00 22.43           N  
ATOM   1366  CA  TYR L  71      36.568 103.340  45.572  1.00 21.82           C  
ATOM   1367  C   TYR L  71      36.206 101.918  45.916  1.00 21.75           C  
ATOM   1368  O   TYR L  71      35.381 101.297  45.225  1.00 22.73           O  
ATOM   1369  CB  TYR L  71      35.615 104.308  46.250  1.00 19.80           C  
ATOM   1370  CG  TYR L  71      35.988 105.733  46.010  1.00 18.86           C  
ATOM   1371  CD1 TYR L  71      35.553 106.397  44.876  1.00 15.02           C  
ATOM   1372  CD2 TYR L  71      36.778 106.430  46.931  1.00 18.21           C  
ATOM   1373  CE1 TYR L  71      35.894 107.736  44.667  1.00 19.01           C  
ATOM   1374  CE2 TYR L  71      37.123 107.756  46.729  1.00 15.63           C  
ATOM   1375  CZ  TYR L  71      36.678 108.406  45.603  1.00 18.26           C  
ATOM   1376  OH  TYR L  71      37.008 109.736  45.416  1.00 24.57           O  
ATOM   1377  N   THR L  72      36.815 101.405  46.985  1.00 19.41           N  
ATOM   1378  CA  THR L  72      36.573 100.022  47.418  1.00 22.56           C  
ATOM   1379  C   THR L  72      36.296  99.938  48.929  1.00 22.24           C  
ATOM   1380  O   THR L  72      36.914 100.646  49.712  1.00 22.19           O  
ATOM   1381  CB  THR L  72      37.774  99.083  47.004  1.00 20.15           C  
ATOM   1382  OG1 THR L  72      37.528  97.737  47.439  1.00 26.98           O  
ATOM   1383  CG2 THR L  72      39.055  99.565  47.597  1.00 22.49           C  
ATOM   1384  N   PHE L  73      35.378  99.059  49.314  1.00 20.56           N  
ATOM   1385  CA  PHE L  73      34.988  98.859  50.711  1.00 18.38           C  
ATOM   1386  C   PHE L  73      35.329  97.402  51.056  1.00 21.74           C  
ATOM   1387  O   PHE L  73      35.104  96.482  50.239  1.00 25.51           O  
ATOM   1388  CB  PHE L  73      33.485  99.141  50.843  1.00 19.55           C  
ATOM   1389  CG  PHE L  73      32.889  98.795  52.193  1.00 15.35           C  
ATOM   1390  CD1 PHE L  73      33.067  99.628  53.291  1.00 19.17           C  
ATOM   1391  CD2 PHE L  73      32.077  97.665  52.339  1.00 18.03           C  
ATOM   1392  CE1 PHE L  73      32.433  99.343  54.522  1.00 10.34           C  
ATOM   1393  CE2 PHE L  73      31.447  97.376  53.544  1.00 15.50           C  
ATOM   1394  CZ  PHE L  73      31.629  98.228  54.640  1.00 10.79           C  
ATOM   1395  N   THR L  74      35.913  97.186  52.232  1.00 21.48           N  
ATOM   1396  CA  THR L  74      36.292  95.837  52.628  1.00 22.37           C  
ATOM   1397  C   THR L  74      35.837  95.422  54.012  1.00 20.54           C  
ATOM   1398  O   THR L  74      35.790  96.245  54.934  1.00 18.58           O  
ATOM   1399  CB  THR L  74      37.833  95.669  52.614  1.00 23.98           C  
ATOM   1400  OG1 THR L  74      38.357  96.070  51.343  1.00 31.09           O  
ATOM   1401  CG2 THR L  74      38.211  94.212  52.869  1.00 23.57           C  
ATOM   1402  N   ILE L  75      35.522  94.138  54.144  1.00 18.31           N  
ATOM   1403  CA  ILE L  75      35.157  93.541  55.423  1.00 16.28           C  
ATOM   1404  C   ILE L  75      36.241  92.473  55.520  1.00 18.75           C  
ATOM   1405  O   ILE L  75      36.228  91.496  54.779  1.00 20.61           O  
ATOM   1406  CB  ILE L  75      33.751  92.872  55.423  1.00 11.29           C  
ATOM   1407  CG1 ILE L  75      32.673  93.894  55.067  1.00 11.07           C  
ATOM   1408  CG2 ILE L  75      33.419  92.348  56.793  1.00 12.32           C  
ATOM   1409  CD1 ILE L  75      31.233  93.364  55.152  1.00  9.35           C  
ATOM   1410  N   SER L  76      37.241  92.716  56.355  1.00 22.68           N  
ATOM   1411  CA  SER L  76      38.343  91.777  56.516  1.00 22.75           C  
ATOM   1412  C   SER L  76      37.866  90.407  56.956  1.00 26.92           C  
ATOM   1413  O   SER L  76      38.362  89.386  56.481  1.00 30.79           O  
ATOM   1414  CB  SER L  76      39.328  92.319  57.535  1.00 25.96           C  
ATOM   1415  OG  SER L  76      38.689  92.444  58.789  1.00 38.61           O  
ATOM   1416  N   SER L  77      36.928  90.375  57.892  1.00 26.71           N  
ATOM   1417  CA  SER L  77      36.419  89.111  58.381  1.00 28.19           C  
ATOM   1418  C   SER L  77      34.935  89.266  58.583  1.00 27.43           C  
ATOM   1419  O   SER L  77      34.485  90.061  59.403  1.00 30.10           O  
ATOM   1420  CB  SER L  77      37.099  88.726  59.699  1.00 32.53           C  
ATOM   1421  OG  SER L  77      36.629  87.458  60.150  1.00 36.01           O  
ATOM   1422  N   LEU L  78      34.177  88.514  57.807  1.00 28.62           N  
ATOM   1423  CA  LEU L  78      32.739  88.583  57.849  1.00 27.86           C  
ATOM   1424  C   LEU L  78      32.100  87.903  59.057  1.00 28.38           C  
ATOM   1425  O   LEU L  78      32.237  86.701  59.256  1.00 24.31           O  
ATOM   1426  CB  LEU L  78      32.168  87.999  56.554  1.00 26.54           C  
ATOM   1427  CG  LEU L  78      30.679  88.197  56.293  1.00 28.63           C  
ATOM   1428  CD1 LEU L  78      30.408  89.656  55.971  1.00 26.20           C  
ATOM   1429  CD2 LEU L  78      30.242  87.292  55.144  1.00 29.61           C  
ATOM   1430  N   GLN L  79      31.380  88.686  59.852  1.00 30.04           N  
ATOM   1431  CA  GLN L  79      30.687  88.152  61.015  1.00 25.12           C  
ATOM   1432  C   GLN L  79      29.219  88.065  60.666  1.00 23.36           C  
ATOM   1433  O   GLN L  79      28.708  88.842  59.839  1.00 18.63           O  
ATOM   1434  CB  GLN L  79      30.885  89.034  62.241  1.00 28.48           C  
ATOM   1435  CG  GLN L  79      32.249  88.928  62.887  1.00 34.24           C  
ATOM   1436  CD  GLN L  79      32.191  89.332  64.345  1.00 43.48           C  
ATOM   1437  OE1 GLN L  79      31.689  88.578  65.196  1.00 47.11           O  
ATOM   1438  NE2 GLN L  79      32.657  90.538  64.644  1.00 45.67           N  
ATOM   1439  N   PRO L  80      28.494  87.165  61.332  1.00 21.43           N  
ATOM   1440  CA  PRO L  80      27.062  87.007  61.051  1.00 24.19           C  
ATOM   1441  C   PRO L  80      26.225  88.270  61.217  1.00 20.87           C  
ATOM   1442  O   PRO L  80      25.174  88.395  60.609  1.00 26.46           O  
ATOM   1443  CB  PRO L  80      26.637  85.912  62.038  1.00 22.19           C  
ATOM   1444  CG  PRO L  80      27.926  85.158  62.271  1.00 22.85           C  
ATOM   1445  CD  PRO L  80      28.928  86.247  62.400  1.00 18.64           C  
ATOM   1446  N   GLU L  81      26.697  89.211  62.019  1.00 18.32           N  
ATOM   1447  CA  GLU L  81      25.954  90.437  62.263  1.00 22.68           C  
ATOM   1448  C   GLU L  81      26.211  91.474  61.168  1.00 25.14           C  
ATOM   1449  O   GLU L  81      25.721  92.600  61.252  1.00 19.99           O  
ATOM   1450  CB  GLU L  81      26.330  91.028  63.617  1.00 25.21           C  
ATOM   1451  CG  GLU L  81      27.761  91.531  63.688  1.00 30.19           C  
ATOM   1452  CD  GLU L  81      28.687  90.619  64.472  1.00 35.48           C  
ATOM   1453  OE1 GLU L  81      28.479  89.374  64.475  1.00 31.17           O  
ATOM   1454  OE2 GLU L  81      29.641  91.163  65.080  1.00 34.36           O  
ATOM   1455  N   ASP L  82      26.983  91.081  60.151  1.00 23.22           N  
ATOM   1456  CA  ASP L  82      27.327  91.955  59.043  1.00 19.25           C  
ATOM   1457  C   ASP L  82      26.395  91.804  57.857  1.00 19.55           C  
ATOM   1458  O   ASP L  82      26.451  92.611  56.930  1.00 16.12           O  
ATOM   1459  CB  ASP L  82      28.733  91.676  58.568  1.00 21.39           C  
ATOM   1460  CG  ASP L  82      29.776  92.091  59.552  1.00 19.84           C  
ATOM   1461  OD1 ASP L  82      29.514  92.993  60.387  1.00 26.81           O  
ATOM   1462  OD2 ASP L  82      30.893  91.532  59.451  1.00 26.51           O  
ATOM   1463  N   ILE L  83      25.612  90.727  57.857  1.00 19.84           N  
ATOM   1464  CA  ILE L  83      24.638  90.436  56.811  1.00 20.14           C  
ATOM   1465  C   ILE L  83      23.777  91.678  56.580  1.00 21.38           C  
ATOM   1466  O   ILE L  83      23.144  92.178  57.503  1.00 27.43           O  
ATOM   1467  CB  ILE L  83      23.757  89.259  57.255  1.00 19.11           C  
ATOM   1468  CG1 ILE L  83      24.579  87.978  57.244  1.00 21.09           C  
ATOM   1469  CG2 ILE L  83      22.516  89.154  56.405  1.00 23.00           C  
ATOM   1470  CD1 ILE L  83      23.987  86.886  58.120  1.00 25.11           C  
ATOM   1471  N   ALA L  84      23.775  92.200  55.367  1.00 22.89           N  
ATOM   1472  CA  ALA L  84      22.999  93.406  55.074  1.00 24.50           C  
ATOM   1473  C   ALA L  84      23.233  93.808  53.641  1.00 20.71           C  
ATOM   1474  O   ALA L  84      23.845  93.078  52.871  1.00 25.82           O  
ATOM   1475  CB  ALA L  84      23.452  94.556  55.986  1.00 16.70           C  
ATOM   1476  N   THR L  85      22.730  94.973  53.284  1.00 19.02           N  
ATOM   1477  CA  THR L  85      22.944  95.491  51.949  1.00 16.91           C  
ATOM   1478  C   THR L  85      23.765  96.723  52.187  1.00 17.49           C  
ATOM   1479  O   THR L  85      23.414  97.530  53.038  1.00 16.59           O  
ATOM   1480  CB  THR L  85      21.662  95.935  51.302  1.00 14.09           C  
ATOM   1481  OG1 THR L  85      20.834  94.802  51.093  1.00 13.32           O  
ATOM   1482  CG2 THR L  85      21.954  96.599  49.976  1.00 11.44           C  
ATOM   1483  N   TYR L  86      24.871  96.840  51.461  1.00 15.57           N  
ATOM   1484  CA  TYR L  86      25.775  97.981  51.578  1.00 17.09           C  
ATOM   1485  C   TYR L  86      25.626  98.905  50.383  1.00 15.65           C  
ATOM   1486  O   TYR L  86      25.331  98.442  49.261  1.00 15.72           O  
ATOM   1487  CB  TYR L  86      27.228  97.499  51.710  1.00 12.67           C  
ATOM   1488  CG  TYR L  86      27.442  96.737  52.999  1.00 10.04           C  
ATOM   1489  CD1 TYR L  86      27.033  95.426  53.117  1.00 14.12           C  
ATOM   1490  CD2 TYR L  86      27.985  97.367  54.116  1.00 16.35           C  
ATOM   1491  CE1 TYR L  86      27.139  94.740  54.317  1.00 16.51           C  
ATOM   1492  CE2 TYR L  86      28.117  96.689  55.335  1.00 17.29           C  
ATOM   1493  CZ  TYR L  86      27.685  95.379  55.427  1.00 16.73           C  
ATOM   1494  OH  TYR L  86      27.780  94.709  56.620  1.00 13.87           O  
ATOM   1495  N   TYR L  87      25.774 100.205  50.631  1.00 11.93           N  
ATOM   1496  CA  TYR L  87      25.662 101.214  49.560  1.00 14.84           C  
ATOM   1497  C   TYR L  87      26.722 102.271  49.665  1.00 15.14           C  
ATOM   1498  O   TYR L  87      27.126 102.616  50.772  1.00 15.55           O  
ATOM   1499  CB  TYR L  87      24.330 101.990  49.643  1.00 14.55           C  
ATOM   1500  CG  TYR L  87      23.085 101.192  49.402  1.00 13.39           C  
ATOM   1501  CD1 TYR L  87      22.603 100.993  48.106  1.00  6.47           C  
ATOM   1502  CD2 TYR L  87      22.366 100.653  50.471  1.00  6.12           C  
ATOM   1503  CE1 TYR L  87      21.434 100.279  47.872  1.00  9.53           C  
ATOM   1504  CE2 TYR L  87      21.186  99.918  50.250  1.00 13.05           C  
ATOM   1505  CZ  TYR L  87      20.727  99.736  48.934  1.00 15.25           C  
ATOM   1506  OH  TYR L  87      19.592  98.981  48.689  1.00 13.86           O  
ATOM   1507  N   CYS L  88      27.164 102.798  48.522  1.00 13.90           N  
ATOM   1508  CA  CYS L  88      28.095 103.920  48.525  1.00 13.49           C  
ATOM   1509  C   CYS L  88      27.206 105.084  48.081  1.00 15.22           C  
ATOM   1510  O   CYS L  88      26.145 104.880  47.501  1.00 16.39           O  
ATOM   1511  CB  CYS L  88      29.259 103.739  47.529  1.00 18.39           C  
ATOM   1512  SG  CYS L  88      28.799 103.612  45.757  1.00 21.99           S  
ATOM   1513  N   GLN L  89      27.592 106.298  48.413  1.00 16.73           N  
ATOM   1514  CA  GLN L  89      26.838 107.447  47.996  1.00 17.79           C  
ATOM   1515  C   GLN L  89      27.824 108.576  47.843  1.00 16.42           C  
ATOM   1516  O   GLN L  89      28.721 108.723  48.666  1.00 19.05           O  
ATOM   1517  CB  GLN L  89      25.786 107.847  49.040  1.00 21.50           C  
ATOM   1518  CG  GLN L  89      25.320 109.316  48.855  1.00 25.19           C  
ATOM   1519  CD  GLN L  89      24.299 109.786  49.855  1.00 23.53           C  
ATOM   1520  OE1 GLN L  89      23.156 110.040  49.496  1.00 31.44           O  
ATOM   1521  NE2 GLN L  89      24.706 109.949  51.095  1.00 16.93           N  
ATOM   1522  N   GLN L  90      27.671 109.370  46.789  1.00 17.38           N  
ATOM   1523  CA  GLN L  90      28.557 110.511  46.593  1.00 16.91           C  
ATOM   1524  C   GLN L  90      27.860 111.748  47.136  1.00 17.83           C  
ATOM   1525  O   GLN L  90      26.649 111.908  46.972  1.00 16.19           O  
ATOM   1526  CB  GLN L  90      28.913 110.707  45.097  1.00 17.14           C  
ATOM   1527  CG  GLN L  90      27.746 111.125  44.175  1.00 13.87           C  
ATOM   1528  CD  GLN L  90      27.493 112.624  44.171  1.00 14.79           C  
ATOM   1529  OE1 GLN L  90      28.297 113.398  44.683  1.00 20.75           O  
ATOM   1530  NE2 GLN L  90      26.375 113.035  43.604  1.00 14.67           N  
ATOM   1531  N   TYR L  91      28.603 112.603  47.826  1.00 18.22           N  
ATOM   1532  CA  TYR L  91      28.024 113.837  48.345  1.00 21.44           C  
ATOM   1533  C   TYR L  91      28.903 114.986  47.896  1.00 21.49           C  
ATOM   1534  O   TYR L  91      29.161 115.926  48.634  1.00 22.86           O  
ATOM   1535  CB  TYR L  91      27.835 113.797  49.879  1.00 19.06           C  
ATOM   1536  CG  TYR L  91      29.088 113.616  50.694  1.00 12.96           C  
ATOM   1537  CD1 TYR L  91      29.764 112.406  50.710  1.00 12.93           C  
ATOM   1538  CD2 TYR L  91      29.578 114.644  51.488  1.00 16.35           C  
ATOM   1539  CE1 TYR L  91      30.885 112.224  51.488  1.00 12.68           C  
ATOM   1540  CE2 TYR L  91      30.701 114.464  52.274  1.00 15.99           C  
ATOM   1541  CZ  TYR L  91      31.346 113.252  52.263  1.00 14.58           C  
ATOM   1542  OH  TYR L  91      32.489 113.073  53.013  1.00 20.98           O  
ATOM   1543  N   ASP L  92      29.402 114.887  46.672  1.00 21.85           N  
ATOM   1544  CA  ASP L  92      30.254 115.935  46.163  1.00 24.46           C  
ATOM   1545  C   ASP L  92      29.377 117.010  45.559  1.00 25.75           C  
ATOM   1546  O   ASP L  92      29.674 118.199  45.677  1.00 27.36           O  
ATOM   1547  CB  ASP L  92      31.262 115.374  45.148  1.00 27.68           C  
ATOM   1548  CG  ASP L  92      31.949 116.466  44.324  1.00 29.87           C  
ATOM   1549  OD1 ASP L  92      32.638 117.344  44.902  1.00 27.94           O  
ATOM   1550  OD2 ASP L  92      31.773 116.452  43.086  1.00 30.08           O  
ATOM   1551  N   ASP L  93      28.248 116.606  44.989  1.00 28.09           N  
ATOM   1552  CA  ASP L  93      27.349 117.570  44.374  1.00 29.33           C  
ATOM   1553  C   ASP L  93      25.942 117.016  44.383  1.00 25.98           C  
ATOM   1554  O   ASP L  93      25.756 115.817  44.260  1.00 26.52           O  
ATOM   1555  CB  ASP L  93      27.824 117.847  42.937  1.00 37.38           C  
ATOM   1556  CG  ASP L  93      27.100 119.020  42.273  1.00 43.31           C  
ATOM   1557  OD1 ASP L  93      26.706 119.991  42.963  1.00 48.35           O  
ATOM   1558  OD2 ASP L  93      26.942 118.970  41.036  1.00 46.99           O  
ATOM   1559  N   LEU L  94      24.955 117.876  44.597  1.00 25.42           N  
ATOM   1560  CA  LEU L  94      23.557 117.450  44.604  1.00 24.83           C  
ATOM   1561  C   LEU L  94      23.098 117.228  43.170  1.00 24.69           C  
ATOM   1562  O   LEU L  94      23.496 117.970  42.280  1.00 30.34           O  
ATOM   1563  CB  LEU L  94      22.658 118.523  45.245  1.00 24.56           C  
ATOM   1564  CG  LEU L  94      22.695 118.775  46.762  1.00 26.03           C  
ATOM   1565  CD1 LEU L  94      21.781 119.944  47.082  1.00 26.54           C  
ATOM   1566  CD2 LEU L  94      22.251 117.534  47.549  1.00 21.79           C  
ATOM   1567  N   PRO L  95      22.213 116.240  42.929  1.00 23.32           N  
ATOM   1568  CA  PRO L  95      21.634 115.330  43.922  1.00 23.04           C  
ATOM   1569  C   PRO L  95      22.614 114.215  44.316  1.00 26.05           C  
ATOM   1570  O   PRO L  95      23.397 113.746  43.482  1.00 25.27           O  
ATOM   1571  CB  PRO L  95      20.406 114.778  43.193  1.00 21.43           C  
ATOM   1572  CG  PRO L  95      20.842 114.766  41.748  1.00 18.27           C  
ATOM   1573  CD  PRO L  95      21.485 116.135  41.650  1.00 18.05           C  
ATOM   1574  N   TYR L  96      22.610 113.846  45.601  1.00 23.13           N  
ATOM   1575  CA  TYR L  96      23.472 112.783  46.112  1.00 20.13           C  
ATOM   1576  C   TYR L  96      22.932 111.490  45.563  1.00 20.74           C  
ATOM   1577  O   TYR L  96      21.751 111.178  45.672  1.00 21.71           O  
ATOM   1578  CB  TYR L  96      23.483 112.761  47.638  1.00 21.37           C  
ATOM   1579  CG  TYR L  96      24.059 114.030  48.232  1.00 21.74           C  
ATOM   1580  CD1 TYR L  96      24.876 114.863  47.480  1.00 18.49           C  
ATOM   1581  CD2 TYR L  96      23.790 114.394  49.547  1.00 25.32           C  
ATOM   1582  CE1 TYR L  96      25.415 116.035  48.023  1.00 26.15           C  
ATOM   1583  CE2 TYR L  96      24.326 115.570  50.105  1.00 28.44           C  
ATOM   1584  CZ  TYR L  96      25.135 116.380  49.339  1.00 26.21           C  
ATOM   1585  OH  TYR L  96      25.667 117.522  49.891  1.00 32.48           O  
ATOM   1586  N   THR L  97      23.801 110.776  44.891  1.00 18.51           N  
ATOM   1587  CA  THR L  97      23.432 109.534  44.251  1.00 18.62           C  
ATOM   1588  C   THR L  97      24.114 108.338  44.920  1.00 12.14           C  
ATOM   1589  O   THR L  97      25.232 108.434  45.401  1.00 15.22           O  
ATOM   1590  CB  THR L  97      23.795 109.643  42.763  1.00 14.35           C  
ATOM   1591  OG1 THR L  97      25.050 110.338  42.642  1.00 13.96           O  
ATOM   1592  CG2 THR L  97      22.741 110.480  42.056  1.00 15.36           C  
ATOM   1593  N   PHE L  98      23.412 107.220  44.929  1.00 13.77           N  
ATOM   1594  CA  PHE L  98      23.876 105.983  45.527  1.00 12.08           C  
ATOM   1595  C   PHE L  98      24.229 104.968  44.448  1.00 16.27           C  
ATOM   1596  O   PHE L  98      23.738 105.043  43.311  1.00 18.28           O  
ATOM   1597  CB  PHE L  98      22.729 105.329  46.296  1.00 11.39           C  
ATOM   1598  CG  PHE L  98      22.419 105.947  47.623  1.00 17.14           C  
ATOM   1599  CD1 PHE L  98      21.793 107.181  47.712  1.00 14.36           C  
ATOM   1600  CD2 PHE L  98      22.634 105.216  48.799  1.00 16.37           C  
ATOM   1601  CE1 PHE L  98      21.375 107.678  48.939  1.00 19.34           C  
ATOM   1602  CE2 PHE L  98      22.212 105.714  50.027  1.00 18.45           C  
ATOM   1603  CZ  PHE L  98      21.584 106.937  50.096  1.00 12.48           C  
ATOM   1604  N   GLY L  99      25.010 103.977  44.856  1.00 13.39           N  
ATOM   1605  CA  GLY L  99      25.355 102.874  43.992  1.00 14.38           C  
ATOM   1606  C   GLY L  99      24.099 102.022  44.057  1.00 18.71           C  
ATOM   1607  O   GLY L  99      23.156 102.342  44.798  1.00 20.60           O  
ATOM   1608  N   GLN L 100      24.088 100.923  43.314  1.00 14.98           N  
ATOM   1609  CA  GLN L 100      22.951 100.028  43.225  1.00 16.40           C  
ATOM   1610  C   GLN L 100      22.784  99.157  44.448  1.00 15.25           C  
ATOM   1611  O   GLN L 100      21.743  98.538  44.622  1.00 12.09           O  
ATOM   1612  CB  GLN L 100      23.097  99.171  41.958  1.00 25.92           C  
ATOM   1613  CG  GLN L 100      22.302  97.856  41.902  1.00 38.12           C  
ATOM   1614  CD  GLN L 100      23.169  96.665  41.448  1.00 48.83           C  
ATOM   1615  OE1 GLN L 100      22.911  96.038  40.399  1.00 47.52           O  
ATOM   1616  NE2 GLN L 100      24.205  96.351  42.243  1.00 49.78           N  
ATOM   1617  N   GLY L 101      23.793  99.134  45.303  1.00 17.08           N  
ATOM   1618  CA  GLY L 101      23.740  98.312  46.504  1.00 17.77           C  
ATOM   1619  C   GLY L 101      24.402  96.956  46.293  1.00 21.38           C  
ATOM   1620  O   GLY L 101      24.564  96.512  45.147  1.00 17.01           O  
ATOM   1621  N   THR L 102      24.824  96.331  47.395  1.00 19.97           N  
ATOM   1622  CA  THR L 102      25.447  94.998  47.369  1.00 16.42           C  
ATOM   1623  C   THR L 102      24.852  94.213  48.524  1.00 16.03           C  
ATOM   1624  O   THR L 102      25.030  94.603  49.670  1.00 13.23           O  
ATOM   1625  CB  THR L 102      26.958  95.048  47.629  1.00 15.58           C  
ATOM   1626  OG1 THR L 102      27.605  95.804  46.604  1.00 17.98           O  
ATOM   1627  CG2 THR L 102      27.521  93.608  47.668  1.00 15.27           C  
ATOM   1628  N   LYS L 103      24.133  93.135  48.242  1.00 14.36           N  
ATOM   1629  CA  LYS L 103      23.534  92.357  49.303  1.00 16.30           C  
ATOM   1630  C   LYS L 103      24.525  91.284  49.689  1.00 21.81           C  
ATOM   1631  O   LYS L 103      24.859  90.424  48.849  1.00 18.62           O  
ATOM   1632  CB  LYS L 103      22.247  91.709  48.819  1.00 21.71           C  
ATOM   1633  CG  LYS L 103      21.281  91.342  49.946  1.00 35.49           C  
ATOM   1634  CD  LYS L 103      20.052  90.613  49.426  1.00 40.41           C  
ATOM   1635  CE  LYS L 103      20.345  89.137  49.223  1.00 46.42           C  
ATOM   1636  NZ  LYS L 103      19.181  88.381  48.674  1.00 52.48           N  
ATOM   1637  N   VAL L 104      25.047  91.365  50.917  1.00 22.59           N  
ATOM   1638  CA  VAL L 104      26.006  90.377  51.411  1.00 23.73           C  
ATOM   1639  C   VAL L 104      25.344  89.398  52.391  1.00 25.71           C  
ATOM   1640  O   VAL L 104      24.736  89.801  53.387  1.00 27.13           O  
ATOM   1641  CB  VAL L 104      27.339  91.017  51.967  1.00 22.55           C  
ATOM   1642  CG1 VAL L 104      27.449  92.472  51.605  1.00 19.33           C  
ATOM   1643  CG2 VAL L 104      27.517  90.785  53.454  1.00 26.24           C  
ATOM   1644  N   GLU L 105      25.391  88.117  52.025  1.00 25.51           N  
ATOM   1645  CA  GLU L 105      24.813  87.026  52.791  1.00 28.06           C  
ATOM   1646  C   GLU L 105      25.910  86.118  53.342  1.00 27.73           C  
ATOM   1647  O   GLU L 105      27.057  86.167  52.889  1.00 24.82           O  
ATOM   1648  CB  GLU L 105      23.904  86.197  51.878  1.00 32.40           C  
ATOM   1649  CG  GLU L 105      22.889  87.039  51.119  1.00 42.69           C  
ATOM   1650  CD  GLU L 105      22.439  86.404  49.813  1.00 49.85           C  
ATOM   1651  OE1 GLU L 105      23.263  86.354  48.860  1.00 53.12           O  
ATOM   1652  OE2 GLU L 105      21.260  85.981  49.732  1.00 49.37           O  
ATOM   1653  N   ILE L 106      25.576  85.308  54.345  1.00 30.04           N  
ATOM   1654  CA  ILE L 106      26.568  84.394  54.879  1.00 34.58           C  
ATOM   1655  C   ILE L 106      26.244  82.986  54.475  1.00 38.02           C  
ATOM   1656  O   ILE L 106      25.117  82.529  54.613  1.00 39.20           O  
ATOM   1657  CB  ILE L 106      26.769  84.479  56.417  1.00 31.91           C  
ATOM   1658  CG1 ILE L 106      27.966  85.379  56.706  1.00 30.89           C  
ATOM   1659  CG2 ILE L 106      27.070  83.089  57.005  1.00 30.21           C  
ATOM   1660  CD1 ILE L 106      28.366  85.449  58.132  1.00 34.31           C  
ATOM   1661  N   LYS L 107      27.250  82.351  53.903  1.00 44.14           N  
ATOM   1662  CA  LYS L 107      27.195  80.982  53.460  1.00 54.73           C  
ATOM   1663  C   LYS L 107      27.152  80.080  54.694  1.00 60.91           C  
ATOM   1664  O   LYS L 107      27.834  80.342  55.696  1.00 62.99           O  
ATOM   1665  CB  LYS L 107      28.463  80.689  52.657  1.00 56.26           C  
ATOM   1666  CG  LYS L 107      28.630  79.264  52.195  1.00 58.35           C  
ATOM   1667  CD  LYS L 107      30.011  79.070  51.614  1.00 58.85           C  
ATOM   1668  CE  LYS L 107      30.051  77.845  50.735  1.00 63.39           C  
ATOM   1669  NZ  LYS L 107      29.033  77.945  49.642  1.00 67.63           N  
ATOM   1670  N   ARG L 108      26.307  79.058  54.639  1.00 66.56           N  
ATOM   1671  CA  ARG L 108      26.199  78.090  55.716  1.00 71.00           C  
ATOM   1672  C   ARG L 108      26.508  76.734  55.077  1.00 72.92           C  
ATOM   1673  O   ARG L 108      27.683  76.323  55.168  1.00 74.28           O  
ATOM   1674  CB  ARG L 108      24.798  78.103  56.337  1.00 74.04           C  
ATOM   1675  CG  ARG L 108      24.499  79.290  57.240  1.00 77.40           C  
ATOM   1676  CD  ARG L 108      23.115  79.125  57.848  1.00 82.51           C  
ATOM   1677  NE  ARG L 108      22.730  80.229  58.725  1.00 87.49           N  
ATOM   1678  CZ  ARG L 108      21.534  80.344  59.304  1.00 89.72           C  
ATOM   1679  NH1 ARG L 108      20.597  79.422  59.103  1.00 89.21           N  
ATOM   1680  NH2 ARG L 108      21.270  81.385  60.083  1.00 91.16           N  
ATOM   1681  OXT ARG L 108      25.617  76.144  54.417  1.00 72.42           O  
TER    1682      ARG L 108                                                      
