# Supplementary material for: SARS-CoV-2 Spike Protein Interaction Space
Source: Int J Mol Sci. 2023 Jul 27;24(15):12058. doi: 10.3390/ijms241512058 (PMC10418891; doi:10.3390/ijms241512058)
Supplement: Supplementary file 1 [file ijms-24-12058-s001.zip › Supplementary Material File S1/1B6D.pdb]

REMARK 950 NUMBERING  Kabat
REMARK 950 METHOD     X-ray crystal structure
REMARK 950 RESOLUTION 2.740
REMARK 950 R-FACTOR   0.207
REMARK 950 R-FREE     0.265
REMARK 950 CHAIN-TYPE LABEL ORIGINAL
REMARK 950 CHAIN L    L    A
REMARK 950 CHAIN L    L    B
REMARK 950 MOLECULE : A : IMMUNOGLOBULIN
REMARK 950 SPECIES  : A : HOMO SAPIENS
SEQRES   1 L 212  ASP ILE GLN MET THR GLN SER PRO SER SER LEU SER ALA          
SEQRES   2 L 212  SER VAL GLY ASP ARG VAL THR ILE THR CYS GLN ALA SER          
SEQRES   3 L 212  GLN ASP ILE SER SER TYR LEU ASN TRP TYR GLN GLN LYS          
SEQRES   4 L 212  PRO GLY LYS ALA PRO LYS LEU LEU ILE HIS ALA ALA SER          
SEQRES   5 L 212  SER LEU GLU THR GLY VAL PRO SER ARG PHE SER GLY SER          
SEQRES   6 L 212  GLY SER GLY THR ASP PHE SER PHE THR ILE SER SER LEU          
SEQRES   7 L 212  GLN PRO GLU ASP LEU ALA THR TYR TYR CYS GLN GLN TYR          
SEQRES   8 L 212  ASP SER LEU PRO LEU THR PHE GLY GLY GLY THR LYS VAL          
SEQRES   9 L 212  GLU ILE LYS ARG THR VAL ALA ALA PRO SER VAL PHE ILE          
SEQRES  10 L 212  PHE PRO PRO SER ASP GLU GLN LEU LYS SER GLY THR ALA          
SEQRES  11 L 212  SER VAL VAL CYS LEU LEU ASN ASN PHE TYR PRO ARG GLU          
SEQRES  12 L 212  ALA LYS VAL GLN TRP LYS VAL ASP ASN ALA LEU GLN SER          
SEQRES  13 L 212  GLY ASN SER GLN GLU SER VAL THR GLU GLN ASP SER LYS          
SEQRES  14 L 212  ASP SER THR TYR SER LEU SER SER THR LEU THR LEU SER          
SEQRES  15 L 212  LYS ALA ASP TYR GLU LYS HIS LYS VAL TYR ALA CYS GLU          
SEQRES  16 L 212  VAL THR HIS GLN GLY LEU SER SER PRO VAL THR LYS SER          
SEQRES  17 L 212  PHE ASN ARG GLY                                              
SEQRES   1 L 212  ASP ILE GLN MET THR GLN SER PRO SER SER LEU SER ALA          
SEQRES   2 L 212  SER VAL GLY ASP ARG VAL THR ILE THR CYS GLN ALA SER          
SEQRES   3 L 212  GLN ASP ILE SER SER TYR LEU ASN TRP TYR GLN GLN LYS          
SEQRES   4 L 212  PRO GLY LYS ALA PRO LYS LEU LEU ILE HIS ALA ALA SER          
SEQRES   5 L 212  SER LEU GLU THR GLY VAL PRO SER ARG PHE SER GLY SER          
SEQRES   6 L 212  GLY SER GLY THR ASP PHE SER PHE THR ILE SER SER LEU          
SEQRES   7 L 212  GLN PRO GLU ASP LEU ALA THR TYR TYR CYS GLN GLN TYR          
SEQRES   8 L 212  ASP SER LEU PRO LEU THR PHE GLY GLY GLY THR LYS VAL          
SEQRES   9 L 212  GLU ILE LYS ARG THR VAL ALA ALA PRO SER VAL PHE ILE          
SEQRES  10 L 212  PHE PRO PRO SER ASP GLU GLN LEU LYS SER GLY THR ALA          
SEQRES  11 L 212  SER VAL VAL CYS LEU LEU ASN ASN PHE TYR PRO ARG GLU          
SEQRES  12 L 212  ALA LYS VAL GLN TRP LYS VAL ASP ASN ALA LEU GLN SER          
SEQRES  13 L 212  GLY ASN SER GLN GLU SER VAL THR GLU GLN ASP SER LYS          
SEQRES  14 L 212  ASP SER THR TYR SER LEU SER SER THR LEU THR LEU SER          
SEQRES  15 L 212  LYS ALA ASP TYR GLU LYS HIS LYS VAL TYR ALA CYS GLU          
SEQRES  16 L 212  VAL THR HIS GLN GLY LEU SER SER PRO VAL THR LYS SER          
SEQRES  17 L 212  PHE ASN ARG GLY                                              
ATOM      1  N   ASP L   1      27.297  68.877   2.889  1.00 45.96           N  
ATOM      2  CA  ASP L   1      26.986  69.329   4.276  1.00 45.58           C  
ATOM      3  C   ASP L   1      28.284  69.847   4.893  1.00 42.75           C  
ATOM      4  O   ASP L   1      29.281  70.012   4.180  1.00 45.32           O  
ATOM      5  CB  ASP L   1      26.454  68.154   5.107  1.00 52.56           C  
ATOM      6  CG  ASP L   1      25.220  67.491   4.491  1.00 58.29           C  
ATOM      7  OD1 ASP L   1      24.326  68.211   3.988  1.00 61.52           O  
ATOM      8  OD2 ASP L   1      25.141  66.239   4.537  1.00 60.05           O  
ATOM      9  H1  ASP L   1      27.706  69.666   2.356  1.00  0.00           H  
ATOM     10  H2  ASP L   1      28.035  68.127   2.953  1.00  0.00           H  
ATOM     11  H3  ASP L   1      26.457  68.500   2.429  1.00  0.00           H  
ATOM     12  N   ILE L   2      28.264  70.155   6.190  1.00 32.49           N  
ATOM     13  CA  ILE L   2      29.472  70.634   6.855  1.00 22.65           C  
ATOM     14  C   ILE L   2      30.116  69.416   7.454  1.00 20.17           C  
ATOM     15  O   ILE L   2      29.503  68.727   8.262  1.00 21.76           O  
ATOM     16  CB  ILE L   2      29.190  71.602   8.009  1.00 21.95           C  
ATOM     17  CG1 ILE L   2      28.356  72.779   7.534  1.00 19.80           C  
ATOM     18  CG2 ILE L   2      30.505  72.117   8.585  1.00 19.86           C  
ATOM     19  CD1 ILE L   2      27.971  73.697   8.659  1.00 27.55           C  
ATOM     20  H   ILE L   2      27.438  70.048   6.714  1.00  0.00           H  
ATOM     21  N   GLN L   3      31.336  69.134   7.037  1.00 19.86           N  
ATOM     22  CA  GLN L   3      32.050  67.986   7.547  1.00 23.26           C  
ATOM     23  C   GLN L   3      32.777  68.373   8.821  1.00 22.10           C  
ATOM     24  O   GLN L   3      33.422  69.422   8.871  1.00 25.72           O  
ATOM     25  CB  GLN L   3      33.069  67.493   6.512  1.00 33.80           C  
ATOM     26  CG  GLN L   3      32.473  66.749   5.310  1.00 47.81           C  
ATOM     27  CD  GLN L   3      31.815  67.665   4.283  1.00 54.69           C  
ATOM     28  OE1 GLN L   3      30.589  67.660   4.123  1.00 58.20           O  
ATOM     29  NE2 GLN L   3      32.631  68.428   3.555  1.00 57.23           N  
ATOM     30  H   GLN L   3      31.759  69.719   6.377  1.00  0.00           H  
ATOM     31 HE21 GLN L   3      32.223  69.014   2.887  1.00  0.00           H  
ATOM     32 HE22 GLN L   3      33.598  68.368   3.696  1.00  0.00           H  
ATOM     33  N   MET L   4      32.651  67.550   9.857  1.00 17.24           N  
ATOM     34  CA  MET L   4      33.342  67.807  11.116  1.00 13.25           C  
ATOM     35  C   MET L   4      34.446  66.773  11.286  1.00 12.58           C  
ATOM     36  O   MET L   4      34.165  65.581  11.412  1.00 19.70           O  
ATOM     37  CB  MET L   4      32.373  67.734  12.289  1.00 16.45           C  
ATOM     38  CG  MET L   4      31.244  68.754  12.225  1.00 19.96           C  
ATOM     39  SD  MET L   4      31.831  70.439  12.266  1.00 21.45           S  
ATOM     40  CE  MET L   4      32.873  70.368  13.677  1.00 16.37           C  
ATOM     41  H   MET L   4      32.103  66.742   9.769  1.00  0.00           H  
ATOM     42  N   THR L   5      35.693  67.233  11.306  1.00  6.68           N  
ATOM     43  CA  THR L   5      36.862  66.365  11.444  1.00  7.85           C  
ATOM     44  C   THR L   5      37.459  66.411  12.840  1.00 10.55           C  
ATOM     45  O   THR L   5      38.144  67.381  13.191  1.00 16.25           O  
ATOM     46  CB  THR L   5      37.952  66.792  10.467  1.00  6.14           C  
ATOM     47  OG1 THR L   5      37.466  66.658   9.129  1.00  5.27           O  
ATOM     48  CG2 THR L   5      39.199  65.969  10.664  1.00  2.00           C  
ATOM     49  H   THR L   5      35.833  68.198  11.225  1.00  0.00           H  
ATOM     50  HG1 THR L   5      37.095  65.769   9.027  1.00  0.00           H  
ATOM     51  N   GLN L   6      37.270  65.338  13.603  1.00 11.72           N  
ATOM     52  CA  GLN L   6      37.770  65.290  14.972  1.00  9.33           C  
ATOM     53  C   GLN L   6      39.078  64.539  15.085  1.00  7.43           C  
ATOM     54  O   GLN L   6      39.339  63.628  14.312  1.00 17.06           O  
ATOM     55  CB  GLN L   6      36.727  64.664  15.882  1.00  7.56           C  
ATOM     56  CG  GLN L   6      36.980  64.890  17.351  1.00  5.77           C  
ATOM     57  CD  GLN L   6      35.833  64.439  18.206  1.00  4.01           C  
ATOM     58  OE1 GLN L   6      35.996  64.246  19.397  1.00  7.19           O  
ATOM     59  NE2 GLN L   6      34.647  64.295  17.606  1.00  6.47           N  
ATOM     60  H   GLN L   6      36.798  64.559  13.229  1.00  0.00           H  
ATOM     61 HE21 GLN L   6      33.902  64.003  18.178  1.00  0.00           H  
ATOM     62 HE22 GLN L   6      34.546  64.489  16.663  1.00  0.00           H  
ATOM     63  N   SER L   7      39.891  64.913  16.061  1.00  4.48           N  
ATOM     64  CA  SER L   7      41.175  64.274  16.257  1.00  4.43           C  
ATOM     65  C   SER L   7      41.659  64.356  17.713  1.00  9.51           C  
ATOM     66  O   SER L   7      41.407  65.355  18.407  1.00  7.51           O  
ATOM     67  CB  SER L   7      42.183  64.932  15.341  1.00  3.06           C  
ATOM     68  OG  SER L   7      43.455  64.337  15.506  1.00 16.29           O  
ATOM     69  H   SER L   7      39.618  65.627  16.685  1.00  0.00           H  
ATOM     70  HG  SER L   7      44.086  64.856  15.016  1.00  0.00           H  
ATOM     71  N   PRO L   8      42.331  63.293  18.213  1.00  9.49           N  
ATOM     72  CA  PRO L   8      42.690  62.021  17.572  1.00 10.42           C  
ATOM     73  C   PRO L   8      41.513  61.059  17.600  1.00  9.25           C  
ATOM     74  O   PRO L   8      40.450  61.415  18.101  1.00 13.65           O  
ATOM     75  CB  PRO L   8      43.824  61.520  18.459  1.00 13.17           C  
ATOM     76  CG  PRO L   8      43.362  61.938  19.820  1.00 13.80           C  
ATOM     77  CD  PRO L   8      42.922  63.361  19.565  1.00 14.85           C  
ATOM     78  N   SER L   9      41.694  59.855  17.060  1.00  8.81           N  
ATOM     79  CA  SER L   9      40.620  58.863  17.050  1.00  7.61           C  
ATOM     80  C   SER L   9      40.483  58.257  18.443  1.00  8.37           C  
ATOM     81  O   SER L   9      39.375  57.948  18.905  1.00 10.03           O  
ATOM     82  CB  SER L   9      40.906  57.782  16.028  1.00 12.65           C  
ATOM     83  OG  SER L   9      41.061  58.363  14.746  1.00 29.21           O  
ATOM     84  H   SER L   9      42.557  59.626  16.670  1.00  0.00           H  
ATOM     85  HG  SER L   9      40.299  58.919  14.559  1.00  0.00           H  
ATOM     86  N   SER L  10      41.610  58.101  19.120  1.00  2.00           N  
ATOM     87  CA  SER L  10      41.612  57.580  20.472  1.00  7.14           C  
ATOM     88  C   SER L  10      42.922  58.002  21.072  1.00  6.52           C  
ATOM     89  O   SER L  10      43.808  58.460  20.346  1.00  4.89           O  
ATOM     90  CB  SER L  10      41.447  56.051  20.508  1.00 10.70           C  
ATOM     91  OG  SER L  10      42.445  55.379  19.760  1.00 11.46           O  
ATOM     92  H   SER L  10      42.458  58.321  18.691  1.00  0.00           H  
ATOM     93  HG  SER L  10      43.201  55.189  20.297  1.00  0.00           H  
ATOM     94  N   LEU L  11      43.043  57.884  22.391  1.00  7.96           N  
ATOM     95  CA  LEU L  11      44.272  58.275  23.067  1.00  7.19           C  
ATOM     96  C   LEU L  11      44.254  57.731  24.467  1.00 10.54           C  
ATOM     97  O   LEU L  11      43.172  57.479  25.018  1.00 13.74           O  
ATOM     98  CB  LEU L  11      44.380  59.801  23.122  1.00  6.01           C  
ATOM     99  CG  LEU L  11      43.341  60.561  23.941  1.00  2.00           C  
ATOM    100  CD1 LEU L  11      43.857  60.803  25.330  1.00  2.00           C  
ATOM    101  CD2 LEU L  11      43.065  61.886  23.265  1.00  5.78           C  
ATOM    102  H   LEU L  11      42.296  57.535  22.925  1.00  0.00           H  
ATOM    103  N   SER L  12      45.447  57.497  25.014  1.00  7.14           N  
ATOM    104  CA  SER L  12      45.593  57.025  26.384  1.00  7.47           C  
ATOM    105  C   SER L  12      46.511  57.994  27.139  1.00 10.22           C  
ATOM    106  O   SER L  12      47.556  58.428  26.633  1.00  9.43           O  
ATOM    107  CB  SER L  12      46.136  55.606  26.431  1.00  4.13           C  
ATOM    108  OG  SER L  12      47.422  55.553  25.857  1.00 20.64           O  
ATOM    109  H   SER L  12      46.265  57.640  24.489  1.00  0.00           H  
ATOM    110  HG  SER L  12      47.647  54.658  25.608  1.00  0.00           H  
ATOM    111  N   ALA L  13      46.096  58.367  28.338  1.00  7.97           N  
ATOM    112  CA  ALA L  13      46.857  59.297  29.135  1.00  5.55           C  
ATOM    113  C   ALA L  13      46.669  58.926  30.586  1.00  6.46           C  
ATOM    114  O   ALA L  13      45.694  58.265  30.931  1.00  7.60           O  
ATOM    115  CB  ALA L  13      46.354  60.679  28.881  1.00  7.04           C  
ATOM    116  H   ALA L  13      45.268  57.980  28.713  1.00  0.00           H  
ATOM    117  N   SER L  14      47.616  59.318  31.430  1.00  7.95           N  
ATOM    118  CA  SER L  14      47.544  59.005  32.857  1.00  9.62           C  
ATOM    119  C   SER L  14      46.561  59.934  33.553  1.00  8.30           C  
ATOM    120  O   SER L  14      46.253  60.999  33.036  1.00 16.16           O  
ATOM    121  CB  SER L  14      48.930  59.142  33.473  1.00 12.12           C  
ATOM    122  OG  SER L  14      49.927  58.651  32.583  1.00 20.50           O  
ATOM    123  H   SER L  14      48.389  59.809  31.095  1.00  0.00           H  
ATOM    124  HG  SER L  14      50.304  57.829  32.921  1.00  0.00           H  
ATOM    125  N   VAL L  15      46.028  59.530  34.698  1.00 11.18           N  
ATOM    126  CA  VAL L  15      45.091  60.400  35.404  1.00 14.82           C  
ATOM    127  C   VAL L  15      45.875  61.579  35.948  1.00 19.83           C  
ATOM    128  O   VAL L  15      46.878  61.386  36.558  1.00 28.43           O  
ATOM    129  CB  VAL L  15      44.316  59.674  36.537  1.00  7.04           C  
ATOM    130  CG1 VAL L  15      44.713  58.248  36.634  1.00  9.29           C  
ATOM    131  CG2 VAL L  15      44.505  60.384  37.872  1.00  6.49           C  
ATOM    132  H   VAL L  15      46.272  58.654  35.061  1.00  0.00           H  
ATOM    133  N   GLY L  16      45.402  62.792  35.691  1.00 17.83           N  
ATOM    134  CA  GLY L  16      46.088  63.989  36.126  1.00  6.48           C  
ATOM    135  C   GLY L  16      46.594  64.704  34.882  1.00 10.34           C  
ATOM    136  O   GLY L  16      46.881  65.894  34.921  1.00 19.06           O  
ATOM    137  H   GLY L  16      44.576  62.868  35.179  1.00  0.00           H  
ATOM    138  N   ASP L  17      46.671  63.992  33.761  1.00  7.18           N  
ATOM    139  CA  ASP L  17      47.153  64.585  32.526  1.00  7.82           C  
ATOM    140  C   ASP L  17      46.118  65.466  31.859  1.00 11.92           C  
ATOM    141  O   ASP L  17      44.915  65.246  31.998  1.00 10.67           O  
ATOM    142  CB  ASP L  17      47.587  63.509  31.527  1.00  9.88           C  
ATOM    143  CG  ASP L  17      48.904  62.847  31.900  1.00 21.55           C  
ATOM    144  OD1 ASP L  17      49.358  62.990  33.057  1.00 23.92           O  
ATOM    145  OD2 ASP L  17      49.492  62.166  31.026  1.00 29.21           O  
ATOM    146  H   ASP L  17      46.394  63.053  33.764  1.00  0.00           H  
ATOM    147  N   ARG L  18      46.611  66.458  31.126  1.00  9.72           N  
ATOM    148  CA  ARG L  18      45.766  67.363  30.382  1.00 11.78           C  
ATOM    149  C   ARG L  18      45.447  66.642  29.086  1.00 14.07           C  
ATOM    150  O   ARG L  18      46.315  66.025  28.494  1.00 13.88           O  
ATOM    151  CB  ARG L  18      46.508  68.678  30.087  1.00 18.70           C  
ATOM    152  CG  ARG L  18      45.695  69.682  29.259  1.00 26.88           C  
ATOM    153  CD  ARG L  18      46.428  70.985  28.978  1.00 33.99           C  
ATOM    154  NE  ARG L  18      46.534  71.837  30.162  1.00 45.11           N  
ATOM    155  CZ  ARG L  18      47.492  72.744  30.351  1.00 54.05           C  
ATOM    156  NH1 ARG L  18      48.443  72.925  29.436  1.00 55.97           N  
ATOM    157  NH2 ARG L  18      47.507  73.466  31.467  1.00 59.03           N  
ATOM    158  H   ARG L  18      47.576  66.576  31.089  1.00  0.00           H  
ATOM    159  HE  ARG L  18      45.854  71.747  30.865  1.00  0.00           H  
ATOM    160 HH11 ARG L  18      48.446  72.382  28.600  1.00  0.00           H  
ATOM    161 HH12 ARG L  18      49.162  73.605  29.592  1.00  0.00           H  
ATOM    162 HH21 ARG L  18      46.807  73.327  32.168  1.00  0.00           H  
ATOM    163 HH22 ARG L  18      48.231  74.145  31.621  1.00  0.00           H  
ATOM    164  N   VAL L  19      44.200  66.709  28.648  1.00 16.70           N  
ATOM    165  CA  VAL L  19      43.800  66.057  27.407  1.00 11.88           C  
ATOM    166  C   VAL L  19      43.203  67.115  26.478  1.00  9.62           C  
ATOM    167  O   VAL L  19      42.354  67.909  26.888  1.00 10.01           O  
ATOM    168  CB  VAL L  19      42.760  64.943  27.689  1.00  8.75           C  
ATOM    169  CG1 VAL L  19      42.177  64.412  26.399  1.00  6.89           C  
ATOM    170  CG2 VAL L  19      43.405  63.829  28.472  1.00  5.88           C  
ATOM    171  H   VAL L  19      43.535  67.202  29.173  1.00  0.00           H  
ATOM    172  N   THR L  20      43.660  67.121  25.236  1.00  7.37           N  
ATOM    173  CA  THR L  20      43.179  68.068  24.255  1.00  9.87           C  
ATOM    174  C   THR L  20      42.716  67.337  22.991  1.00 11.43           C  
ATOM    175  O   THR L  20      43.449  66.532  22.414  1.00 11.41           O  
ATOM    176  CB  THR L  20      44.270  69.078  23.918  1.00 12.10           C  
ATOM    177  OG1 THR L  20      44.776  69.634  25.133  1.00 17.79           O  
ATOM    178  CG2 THR L  20      43.713  70.202  23.060  1.00 15.13           C  
ATOM    179  H   THR L  20      44.341  66.469  24.980  1.00  0.00           H  
ATOM    180  HG1 THR L  20      44.102  70.196  25.538  1.00  0.00           H  
ATOM    181  N   ILE L  21      41.487  67.638  22.584  1.00 12.70           N  
ATOM    182  CA  ILE L  21      40.833  67.042  21.416  1.00  7.62           C  
ATOM    183  C   ILE L  21      40.477  68.204  20.502  1.00  6.83           C  
ATOM    184  O   ILE L  21      40.144  69.271  21.005  1.00  6.42           O  
ATOM    185  CB  ILE L  21      39.539  66.338  21.881  1.00  2.01           C  
ATOM    186  CG1 ILE L  21      39.904  65.115  22.708  1.00  2.00           C  
ATOM    187  CG2 ILE L  21      38.668  65.935  20.720  1.00  6.28           C  
ATOM    188  CD1 ILE L  21      38.748  64.489  23.376  1.00  5.93           C  
ATOM    189  H   ILE L  21      40.987  68.309  23.090  1.00  0.00           H  
ATOM    190  N   THR L  22      40.603  68.033  19.188  1.00  2.00           N  
ATOM    191  CA  THR L  22      40.255  69.108  18.278  1.00  5.97           C  
ATOM    192  C   THR L  22      39.181  68.751  17.249  1.00 15.24           C  
ATOM    193  O   THR L  22      38.952  67.579  16.950  1.00 20.63           O  
ATOM    194  CB  THR L  22      41.469  69.645  17.506  1.00  8.25           C  
ATOM    195  OG1 THR L  22      41.857  68.709  16.498  1.00  8.73           O  
ATOM    196  CG2 THR L  22      42.622  69.896  18.436  1.00 11.00           C  
ATOM    197  H   THR L  22      40.944  67.184  18.826  1.00  0.00           H  
ATOM    198  HG1 THR L  22      41.265  68.781  15.749  1.00  0.00           H  
ATOM    199  N   CYS L  23      38.544  69.784  16.705  1.00 16.85           N  
ATOM    200  CA  CYS L  23      37.530  69.638  15.676  1.00 14.28           C  
ATOM    201  C   CYS L  23      37.647  70.769  14.692  1.00 17.83           C  
ATOM    202  O   CYS L  23      37.990  71.890  15.065  1.00 19.29           O  
ATOM    203  CB  CYS L  23      36.126  69.629  16.261  1.00 13.73           C  
ATOM    204  SG  CYS L  23      35.619  67.951  16.692  1.00 28.24           S  
ATOM    205  H   CYS L  23      38.761  70.691  17.015  1.00  0.00           H  
ATOM    206  N   GLN L  24      37.428  70.450  13.425  1.00 19.04           N  
ATOM    207  CA  GLN L  24      37.465  71.440  12.365  1.00 23.46           C  
ATOM    208  C   GLN L  24      36.226  71.238  11.529  1.00 20.76           C  
ATOM    209  O   GLN L  24      35.809  70.105  11.308  1.00 25.52           O  
ATOM    210  CB  GLN L  24      38.695  71.269  11.491  1.00 28.39           C  
ATOM    211  CG  GLN L  24      39.984  71.636  12.170  1.00 41.38           C  
ATOM    212  CD  GLN L  24      41.178  71.283  11.315  1.00 50.35           C  
ATOM    213  OE1 GLN L  24      41.346  71.806  10.210  1.00 54.04           O  
ATOM    214  NE2 GLN L  24      42.005  70.371  11.809  1.00 52.79           N  
ATOM    215  H   GLN L  24      37.223  69.521  13.192  1.00  0.00           H  
ATOM    216 HE21 GLN L  24      42.786  70.136  11.273  1.00  0.00           H  
ATOM    217 HE22 GLN L  24      41.819  69.978  12.694  1.00  0.00           H  
ATOM    218  N   ALA L  25      35.597  72.335  11.137  1.00 19.30           N  
ATOM    219  CA  ALA L  25      34.403  72.273  10.317  1.00 18.30           C  
ATOM    220  C   ALA L  25      34.857  72.524   8.895  1.00 20.24           C  
ATOM    221  O   ALA L  25      35.878  73.178   8.676  1.00 19.47           O  
ATOM    222  CB  ALA L  25      33.413  73.325  10.756  1.00 18.22           C  
ATOM    223  H   ALA L  25      35.943  73.210  11.413  1.00  0.00           H  
ATOM    224  N   SER L  26      34.121  71.991   7.926  1.00 22.79           N  
ATOM    225  CA  SER L  26      34.493  72.181   6.537  1.00 22.81           C  
ATOM    226  C   SER L  26      34.367  73.646   6.150  1.00 28.25           C  
ATOM    227  O   SER L  26      34.971  74.084   5.170  1.00 36.06           O  
ATOM    228  CB  SER L  26      33.651  71.298   5.612  1.00 21.79           C  
ATOM    229  OG  SER L  26      32.257  71.522   5.766  1.00 26.98           O  
ATOM    230  H   SER L  26      33.328  71.460   8.159  1.00  0.00           H  
ATOM    231  HG  SER L  26      32.001  72.312   5.290  1.00  0.00           H  
ATOM    232  N   GLN L  27      33.584  74.398   6.925  1.00 30.41           N  
ATOM    233  CA  GLN L  27      33.355  75.829   6.692  1.00 33.78           C  
ATOM    234  C   GLN L  27      33.069  76.558   8.003  1.00 33.29           C  
ATOM    235  O   GLN L  27      32.689  75.937   8.995  1.00 38.97           O  
ATOM    236  CB  GLN L  27      32.182  76.038   5.726  1.00 38.65           C  
ATOM    237  CG  GLN L  27      30.859  75.463   6.209  1.00 43.36           C  
ATOM    238  CD  GLN L  27      29.725  75.677   5.224  1.00 46.42           C  
ATOM    239  OE1 GLN L  27      28.885  76.560   5.416  1.00 48.08           O  
ATOM    240  NE2 GLN L  27      29.681  74.856   4.172  1.00 45.65           N  
ATOM    241  H   GLN L  27      33.148  73.992   7.700  1.00  0.00           H  
ATOM    242 HE21 GLN L  27      28.951  74.987   3.532  1.00  0.00           H  
ATOM    243 HE22 GLN L  27      30.361  74.164   4.066  1.00  0.00           H  
ATOM    244  N   ASP L  28      33.224  77.877   7.994  1.00 28.17           N  
ATOM    245  CA  ASP L  28      32.998  78.701   9.174  1.00 21.47           C  
ATOM    246  C   ASP L  28      31.639  78.413   9.790  1.00 16.42           C  
ATOM    247  O   ASP L  28      30.621  78.631   9.139  1.00 17.38           O  
ATOM    248  CB  ASP L  28      33.074  80.177   8.777  1.00 23.95           C  
ATOM    249  CG  ASP L  28      33.394  81.087   9.946  1.00 30.13           C  
ATOM    250  OD1 ASP L  28      32.480  81.388  10.746  1.00 27.13           O  
ATOM    251  OD2 ASP L  28      34.569  81.507  10.070  1.00 36.91           O  
ATOM    252  H   ASP L  28      33.511  78.309   7.169  1.00  0.00           H  
ATOM    253  N   ILE L  29      31.627  77.885  11.016  1.00 14.90           N  
ATOM    254  CA  ILE L  29      30.374  77.590  11.731  1.00 12.69           C  
ATOM    255  C   ILE L  29      30.236  78.531  12.933  1.00 12.13           C  
ATOM    256  O   ILE L  29      29.477  78.275  13.873  1.00  5.74           O  
ATOM    257  CB  ILE L  29      30.268  76.114  12.223  1.00  8.35           C  
ATOM    258  CG1 ILE L  29      31.420  75.766  13.162  1.00  5.97           C  
ATOM    259  CG2 ILE L  29      30.189  75.148  11.041  1.00  5.32           C  
ATOM    260  CD1 ILE L  29      31.293  74.390  13.764  1.00 11.20           C  
ATOM    261  H   ILE L  29      32.479  77.670  11.451  1.00  0.00           H  
ATOM    262  N   SER L  30      30.978  79.634  12.879  1.00 11.44           N  
ATOM    263  CA  SER L  30      30.967  80.633  13.929  1.00 12.20           C  
ATOM    264  C   SER L  30      31.303  79.937  15.248  1.00 13.15           C  
ATOM    265  O   SER L  30      32.272  79.199  15.303  1.00 16.01           O  
ATOM    266  CB  SER L  30      29.613  81.346  13.958  1.00 15.45           C  
ATOM    267  OG  SER L  30      29.610  82.406  14.896  1.00 19.48           O  
ATOM    268  H   SER L  30      31.562  79.761  12.106  1.00  0.00           H  
ATOM    269  HG  SER L  30      28.746  82.856  14.885  1.00  0.00           H  
ATOM    270  N   SER L  31      30.529  80.159  16.301  1.00 17.38           N  
ATOM    271  CA  SER L  31      30.798  79.526  17.592  1.00 16.35           C  
ATOM    272  C   SER L  31      29.782  78.422  17.873  1.00 15.15           C  
ATOM    273  O   SER L  31      29.680  77.936  18.993  1.00 12.59           O  
ATOM    274  CB  SER L  31      30.705  80.575  18.703  1.00 18.87           C  
ATOM    275  OG  SER L  31      29.404  81.165  18.728  1.00 20.19           O  
ATOM    276  H   SER L  31      29.756  80.761  16.216  1.00  0.00           H  
ATOM    277  HG  SER L  31      29.184  81.426  19.627  1.00  0.00           H  
ATOM    278  N   TYR L  32      29.038  78.029  16.850  1.00 13.65           N  
ATOM    279  CA  TYR L  32      28.003  77.017  16.996  1.00 14.98           C  
ATOM    280  C   TYR L  32      28.484  75.563  17.058  1.00 13.90           C  
ATOM    281  O   TYR L  32      28.127  74.747  16.208  1.00 11.23           O  
ATOM    282  CB  TYR L  32      26.974  77.193  15.883  1.00 14.47           C  
ATOM    283  CG  TYR L  32      26.420  78.589  15.800  1.00 14.81           C  
ATOM    284  CD1 TYR L  32      25.865  79.205  16.919  1.00 13.92           C  
ATOM    285  CD2 TYR L  32      26.441  79.296  14.595  1.00 17.49           C  
ATOM    286  CE1 TYR L  32      25.344  80.478  16.845  1.00 15.71           C  
ATOM    287  CE2 TYR L  32      25.920  80.576  14.511  1.00 18.15           C  
ATOM    288  CZ  TYR L  32      25.371  81.156  15.640  1.00 19.63           C  
ATOM    289  OH  TYR L  32      24.816  82.406  15.549  1.00 25.85           O  
ATOM    290  H   TYR L  32      29.203  78.416  15.965  1.00  0.00           H  
ATOM    291  HH  TYR L  32      24.749  82.663  14.629  1.00  0.00           H  
ATOM    292  N   LEU L  33      29.215  75.232  18.117  1.00 10.27           N  
ATOM    293  CA  LEU L  33      29.747  73.896  18.305  1.00 10.67           C  
ATOM    294  C   LEU L  33      29.485  73.420  19.724  1.00 14.47           C  
ATOM    295  O   LEU L  33      29.665  74.180  20.664  1.00 14.94           O  
ATOM    296  CB  LEU L  33      31.247  73.890  18.064  1.00  5.99           C  
ATOM    297  CG  LEU L  33      31.862  72.496  18.053  1.00  6.08           C  
ATOM    298  CD1 LEU L  33      31.902  71.990  16.632  1.00  4.62           C  
ATOM    299  CD2 LEU L  33      33.250  72.542  18.643  1.00  7.18           C  
ATOM    300  H   LEU L  33      29.396  75.909  18.799  1.00  0.00           H  
ATOM    301  N   ASN L  34      29.061  72.162  19.866  1.00 18.30           N  
ATOM    302  CA  ASN L  34      28.784  71.542  21.164  1.00 13.03           C  
ATOM    303  C   ASN L  34      29.736  70.379  21.396  1.00 10.86           C  
ATOM    304  O   ASN L  34      30.254  69.804  20.450  1.00 13.72           O  
ATOM    305  CB  ASN L  34      27.347  71.023  21.204  1.00 16.54           C  
ATOM    306  CG  ASN L  34      26.350  72.062  21.692  1.00 26.01           C  
ATOM    307  OD1 ASN L  34      25.214  72.096  21.237  1.00 27.62           O  
ATOM    308  ND2 ASN L  34      26.763  72.898  22.621  1.00 32.69           N  
ATOM    309  H   ASN L  34      28.955  71.599  19.065  1.00  0.00           H  
ATOM    310 HD21 ASN L  34      26.140  73.545  22.923  1.00  0.00           H  
ATOM    311 HD22 ASN L  34      27.670  72.871  23.009  1.00  0.00           H  
ATOM    312  N   TRP L  35      29.995  70.057  22.651  1.00 12.27           N  
ATOM    313  CA  TRP L  35      30.856  68.935  22.991  1.00 11.41           C  
ATOM    314  C   TRP L  35      30.064  67.984  23.891  1.00 15.01           C  
ATOM    315  O   TRP L  35      29.466  68.423  24.898  1.00 16.63           O  
ATOM    316  CB  TRP L  35      32.124  69.406  23.716  1.00 12.20           C  
ATOM    317  CG  TRP L  35      33.174  69.999  22.809  1.00 13.99           C  
ATOM    318  CD1 TRP L  35      33.360  71.317  22.524  1.00  8.64           C  
ATOM    319  CD2 TRP L  35      34.160  69.281  22.048  1.00 12.01           C  
ATOM    320  NE1 TRP L  35      34.388  71.462  21.630  1.00  8.00           N  
ATOM    321  CE2 TRP L  35      34.896  70.233  21.322  1.00  8.68           C  
ATOM    322  CE3 TRP L  35      34.485  67.928  21.914  1.00  8.48           C  
ATOM    323  CZ2 TRP L  35      35.939  69.878  20.472  1.00 12.27           C  
ATOM    324  CZ3 TRP L  35      35.524  67.574  21.072  1.00  9.88           C  
ATOM    325  CH2 TRP L  35      36.238  68.546  20.360  1.00 14.40           C  
ATOM    326  H   TRP L  35      29.585  70.570  23.374  1.00  0.00           H  
ATOM    327  HE1 TRP L  35      34.710  72.321  21.274  1.00  0.00           H  
ATOM    328  N   TYR L  36      29.980  66.714  23.484  1.00 11.69           N  
ATOM    329  CA  TYR L  36      29.279  65.694  24.261  1.00  6.62           C  
ATOM    330  C   TYR L  36      30.237  64.656  24.826  1.00  8.23           C  
ATOM    331  O   TYR L  36      31.344  64.472  24.315  1.00 14.28           O  
ATOM    332  CB  TYR L  36      28.280  64.959  23.398  1.00  2.00           C  
ATOM    333  CG  TYR L  36      27.151  65.800  22.872  1.00  4.40           C  
ATOM    334  CD1 TYR L  36      25.949  65.911  23.570  1.00  3.97           C  
ATOM    335  CD2 TYR L  36      27.241  66.399  21.626  1.00  3.04           C  
ATOM    336  CE1 TYR L  36      24.870  66.584  23.032  1.00  2.00           C  
ATOM    337  CE2 TYR L  36      26.167  67.075  21.081  1.00  2.00           C  
ATOM    338  CZ  TYR L  36      24.986  67.158  21.786  1.00  2.00           C  
ATOM    339  OH  TYR L  36      23.917  67.788  21.207  1.00  4.97           O  
ATOM    340  H   TYR L  36      30.407  66.463  22.649  1.00  0.00           H  
ATOM    341  HH  TYR L  36      24.071  67.870  20.260  1.00  0.00           H  
ATOM    342  N   GLN L  37      29.810  64.003  25.902  1.00  9.14           N  
ATOM    343  CA  GLN L  37      30.565  62.933  26.537  1.00  2.00           C  
ATOM    344  C   GLN L  37      29.664  61.713  26.466  1.00  4.75           C  
ATOM    345  O   GLN L  37      28.501  61.777  26.867  1.00  3.51           O  
ATOM    346  CB  GLN L  37      30.817  63.250  27.989  1.00  2.00           C  
ATOM    347  CG  GLN L  37      31.453  62.104  28.735  1.00  2.00           C  
ATOM    348  CD  GLN L  37      31.630  62.394  30.202  1.00  2.00           C  
ATOM    349  OE1 GLN L  37      30.661  62.658  30.927  1.00  2.00           O  
ATOM    350  NE2 GLN L  37      32.864  62.365  30.649  1.00  2.00           N  
ATOM    351  H   GLN L  37      28.948  64.253  26.280  1.00  0.00           H  
ATOM    352 HE21 GLN L  37      33.006  62.551  31.606  1.00  0.00           H  
ATOM    353 HE22 GLN L  37      33.608  62.168  30.045  1.00  0.00           H  
ATOM    354  N   GLN L  38      30.166  60.624  25.902  1.00  9.50           N  
ATOM    355  CA  GLN L  38      29.373  59.405  25.809  1.00  5.47           C  
ATOM    356  C   GLN L  38      30.024  58.274  26.589  1.00  6.99           C  
ATOM    357  O   GLN L  38      30.994  57.645  26.133  1.00  6.93           O  
ATOM    358  CB  GLN L  38      29.138  58.985  24.354  1.00  2.00           C  
ATOM    359  CG  GLN L  38      28.370  57.684  24.246  1.00  2.00           C  
ATOM    360  CD  GLN L  38      27.626  57.536  22.935  1.00  3.56           C  
ATOM    361  OE1 GLN L  38      28.185  57.716  21.859  1.00  5.60           O  
ATOM    362  NE2 GLN L  38      26.357  57.190  23.021  1.00  5.01           N  
ATOM    363  H   GLN L  38      31.075  60.643  25.538  1.00  0.00           H  
ATOM    364 HE21 GLN L  38      25.931  56.874  22.217  1.00  0.00           H  
ATOM    365 HE22 GLN L  38      25.907  57.274  23.887  1.00  0.00           H  
ATOM    366  N   LYS L  39      29.556  58.098  27.816  1.00  8.71           N  
ATOM    367  CA  LYS L  39      30.056  57.028  28.663  1.00 11.97           C  
ATOM    368  C   LYS L  39      29.690  55.728  27.969  1.00 15.44           C  
ATOM    369  O   LYS L  39      28.781  55.686  27.143  1.00 13.34           O  
ATOM    370  CB  LYS L  39      29.380  57.071  30.024  1.00 12.40           C  
ATOM    371  CG  LYS L  39      29.783  58.239  30.881  1.00 12.91           C  
ATOM    372  CD  LYS L  39      31.242  58.153  31.210  1.00 19.65           C  
ATOM    373  CE  LYS L  39      31.643  59.221  32.203  1.00 26.89           C  
ATOM    374  NZ  LYS L  39      31.026  59.021  33.547  1.00 33.00           N  
ATOM    375  H   LYS L  39      28.870  58.695  28.157  1.00  0.00           H  
ATOM    376  HZ1 LYS L  39      31.324  58.102  33.921  1.00  0.00           H  
ATOM    377  HZ2 LYS L  39      31.338  59.783  34.183  1.00  0.00           H  
ATOM    378  HZ3 LYS L  39      29.993  59.047  33.447  1.00  0.00           H  
ATOM    379  N   PRO L  40      30.406  54.650  28.276  1.00 21.51           N  
ATOM    380  CA  PRO L  40      30.095  53.372  27.635  1.00 24.44           C  
ATOM    381  C   PRO L  40      28.663  52.900  27.873  1.00 28.67           C  
ATOM    382  O   PRO L  40      28.243  52.691  29.015  1.00 31.68           O  
ATOM    383  CB  PRO L  40      31.121  52.436  28.257  1.00 23.40           C  
ATOM    384  CG  PRO L  40      32.314  53.342  28.415  1.00 25.83           C  
ATOM    385  CD  PRO L  40      31.676  54.576  29.017  1.00 25.00           C  
ATOM    386  N   GLY L  41      27.913  52.774  26.780  1.00 31.36           N  
ATOM    387  CA  GLY L  41      26.533  52.312  26.838  1.00 31.10           C  
ATOM    388  C   GLY L  41      25.474  53.296  27.311  1.00 32.07           C  
ATOM    389  O   GLY L  41      24.355  52.894  27.640  1.00 34.23           O  
ATOM    390  H   GLY L  41      28.300  53.003  25.917  1.00  0.00           H  
ATOM    391  N   LYS L  42      25.801  54.582  27.318  1.00 28.98           N  
ATOM    392  CA  LYS L  42      24.858  55.593  27.771  1.00 22.39           C  
ATOM    393  C   LYS L  42      24.610  56.579  26.655  1.00 20.67           C  
ATOM    394  O   LYS L  42      25.323  56.579  25.646  1.00 15.71           O  
ATOM    395  CB  LYS L  42      25.439  56.342  28.963  1.00 27.31           C  
ATOM    396  CG  LYS L  42      26.026  55.455  30.045  1.00 34.11           C  
ATOM    397  CD  LYS L  42      24.979  54.997  31.042  1.00 41.74           C  
ATOM    398  CE  LYS L  42      24.483  56.161  31.894  1.00 46.67           C  
ATOM    399  NZ  LYS L  42      23.689  55.690  33.067  1.00 46.45           N  
ATOM    400  H   LYS L  42      26.681  54.852  26.995  1.00  0.00           H  
ATOM    401  HZ1 LYS L  42      24.290  55.073  33.650  1.00  0.00           H  
ATOM    402  HZ2 LYS L  42      23.381  56.510  33.615  1.00  0.00           H  
ATOM    403  HZ3 LYS L  42      22.870  55.157  32.717  1.00  0.00           H  
ATOM    404  N   ALA L  43      23.585  57.409  26.833  1.00 17.26           N  
ATOM    405  CA  ALA L  43      23.254  58.445  25.857  1.00 15.05           C  
ATOM    406  C   ALA L  43      24.296  59.540  26.033  1.00 11.82           C  
ATOM    407  O   ALA L  43      24.881  59.666  27.114  1.00 14.11           O  
ATOM    408  CB  ALA L  43      21.881  59.007  26.145  1.00 14.98           C  
ATOM    409  H   ALA L  43      23.042  57.323  27.627  1.00  0.00           H  
ATOM    410  N   PRO L  44      24.584  60.306  24.972  1.00  7.19           N  
ATOM    411  CA  PRO L  44      25.573  61.387  25.073  1.00  7.97           C  
ATOM    412  C   PRO L  44      25.089  62.509  26.013  1.00 12.06           C  
ATOM    413  O   PRO L  44      23.897  62.812  26.073  1.00 16.86           O  
ATOM    414  CB  PRO L  44      25.678  61.880  23.630  1.00  3.53           C  
ATOM    415  CG  PRO L  44      25.354  60.663  22.820  1.00  4.55           C  
ATOM    416  CD  PRO L  44      24.172  60.103  23.573  1.00  7.01           C  
ATOM    417  N   LYS L  45      26.014  63.127  26.738  1.00  9.93           N  
ATOM    418  CA  LYS L  45      25.679  64.206  27.668  1.00 10.74           C  
ATOM    419  C   LYS L  45      26.378  65.501  27.231  1.00  9.48           C  
ATOM    420  O   LYS L  45      27.563  65.474  26.891  1.00 11.32           O  
ATOM    421  CB  LYS L  45      26.136  63.805  29.073  1.00 16.60           C  
ATOM    422  CG  LYS L  45      25.733  64.745  30.186  1.00 24.78           C  
ATOM    423  CD  LYS L  45      26.333  64.307  31.514  1.00 30.61           C  
ATOM    424  CE  LYS L  45      25.893  65.225  32.640  1.00 32.65           C  
ATOM    425  NZ  LYS L  45      26.268  66.641  32.380  1.00 38.91           N  
ATOM    426  H   LYS L  45      26.945  62.846  26.659  1.00  0.00           H  
ATOM    427  HZ1 LYS L  45      25.943  66.905  31.428  1.00  0.00           H  
ATOM    428  HZ2 LYS L  45      25.793  67.257  33.076  1.00  0.00           H  
ATOM    429  HZ3 LYS L  45      27.291  66.762  32.443  1.00  0.00           H  
ATOM    430  N   LEU L  46      25.649  66.617  27.200  1.00  7.04           N  
ATOM    431  CA  LEU L  46      26.220  67.906  26.801  1.00  2.58           C  
ATOM    432  C   LEU L  46      27.135  68.469  27.871  1.00  4.50           C  
ATOM    433  O   LEU L  46      26.767  68.557  29.040  1.00 11.22           O  
ATOM    434  CB  LEU L  46      25.114  68.911  26.492  1.00  7.65           C  
ATOM    435  CG  LEU L  46      25.546  70.298  25.975  1.00 11.45           C  
ATOM    436  CD1 LEU L  46      26.390  70.199  24.715  1.00 10.88           C  
ATOM    437  CD2 LEU L  46      24.326  71.129  25.700  1.00 12.12           C  
ATOM    438  H   LEU L  46      24.712  66.598  27.459  1.00  0.00           H  
ATOM    439  N   LEU L  47      28.348  68.830  27.479  1.00  4.97           N  
ATOM    440  CA  LEU L  47      29.310  69.378  28.432  1.00  6.35           C  
ATOM    441  C   LEU L  47      29.551  70.864  28.182  1.00  8.53           C  
ATOM    442  O   LEU L  47      29.636  71.680  29.109  1.00 10.99           O  
ATOM    443  CB  LEU L  47      30.651  68.667  28.294  1.00  4.89           C  
ATOM    444  CG  LEU L  47      30.810  67.209  28.663  1.00  5.01           C  
ATOM    445  CD1 LEU L  47      32.284  66.985  28.925  1.00  9.08           C  
ATOM    446  CD2 LEU L  47      30.010  66.892  29.906  1.00  6.77           C  
ATOM    447  H   LEU L  47      28.612  68.715  26.551  1.00  0.00           H  
ATOM    448  N   ILE L  48      29.679  71.188  26.906  1.00  5.37           N  
ATOM    449  CA  ILE L  48      29.973  72.526  26.468  1.00  3.41           C  
ATOM    450  C   ILE L  48      29.084  72.916  25.317  1.00  2.87           C  
ATOM    451  O   ILE L  48      28.898  72.139  24.396  1.00 10.29           O  
ATOM    452  CB  ILE L  48      31.459  72.585  26.065  1.00  2.00           C  
ATOM    453  CG1 ILE L  48      32.298  72.677  27.332  1.00  4.08           C  
ATOM    454  CG2 ILE L  48      31.747  73.716  25.115  1.00  2.00           C  
ATOM    455  CD1 ILE L  48      33.742  72.429  27.100  1.00  9.64           C  
ATOM    456  H   ILE L  48      29.572  70.489  26.232  1.00  0.00           H  
ATOM    457  N   HIS L  49      28.502  74.106  25.420  1.00  3.41           N  
ATOM    458  CA  HIS L  49      27.631  74.655  24.412  1.00  7.07           C  
ATOM    459  C   HIS L  49      28.233  75.928  23.822  1.00  9.06           C  
ATOM    460  O   HIS L  49      29.038  76.575  24.473  1.00  9.25           O  
ATOM    461  CB  HIS L  49      26.244  74.883  24.994  1.00  4.95           C  
ATOM    462  CG  HIS L  49      25.214  75.307  23.988  1.00 13.09           C  
ATOM    463  ND1 HIS L  49      24.726  76.591  23.928  1.00 16.86           N  
ATOM    464  CD2 HIS L  49      24.540  74.612  23.038  1.00 17.30           C  
ATOM    465  CE1 HIS L  49      23.803  76.669  22.988  1.00 18.86           C  
ATOM    466  NE2 HIS L  49      23.674  75.481  22.429  1.00 20.22           N  
ATOM    467  H   HIS L  49      28.673  74.637  26.217  1.00  0.00           H  
ATOM    468  HD1 HIS L  49      25.004  77.337  24.499  1.00  0.00           H  
ATOM    469  HE2 HIS L  49      23.059  75.245  21.695  1.00  0.00           H  
ATOM    470  N   ALA L  50      27.838  76.291  22.603  1.00  9.39           N  
ATOM    471  CA  ALA L  50      28.365  77.480  21.936  1.00  6.70           C  
ATOM    472  C   ALA L  50      29.877  77.636  22.093  1.00  6.79           C  
ATOM    473  O   ALA L  50      30.369  78.655  22.564  1.00 12.17           O  
ATOM    474  CB  ALA L  50      27.639  78.728  22.416  1.00  8.04           C  
ATOM    475  H   ALA L  50      27.169  75.767  22.117  1.00  0.00           H  
ATOM    476  N   ALA L  51      30.601  76.581  21.747  1.00  8.96           N  
ATOM    477  CA  ALA L  51      32.061  76.547  21.788  1.00  4.29           C  
ATOM    478  C   ALA L  51      32.735  76.586  23.134  1.00  6.48           C  
ATOM    479  O   ALA L  51      33.688  75.856  23.346  1.00  9.10           O  
ATOM    480  CB  ALA L  51      32.644  77.625  20.913  1.00  2.00           C  
ATOM    481  H   ALA L  51      30.121  75.792  21.442  1.00  0.00           H  
ATOM    482  N   SER L  52      32.230  77.398  24.056  1.00  5.60           N  
ATOM    483  CA  SER L  52      32.857  77.524  25.367  1.00  4.58           C  
ATOM    484  C   SER L  52      31.991  77.623  26.628  1.00  2.40           C  
ATOM    485  O   SER L  52      32.528  77.644  27.730  1.00  5.29           O  
ATOM    486  CB  SER L  52      33.835  78.692  25.334  1.00  6.64           C  
ATOM    487  OG  SER L  52      33.272  79.790  24.634  1.00 22.88           O  
ATOM    488  H   SER L  52      31.415  77.905  23.869  1.00  0.00           H  
ATOM    489  HG  SER L  52      33.059  79.535  23.726  1.00  0.00           H  
ATOM    490  N   SER L  53      30.673  77.652  26.495  1.00  2.00           N  
ATOM    491  CA  SER L  53      29.818  77.745  27.668  1.00  2.88           C  
ATOM    492  C   SER L  53      29.695  76.404  28.398  1.00  8.74           C  
ATOM    493  O   SER L  53      29.018  75.492  27.923  1.00 10.76           O  
ATOM    494  CB  SER L  53      28.441  78.261  27.266  1.00  2.19           C  
ATOM    495  OG  SER L  53      27.503  78.110  28.319  1.00 12.34           O  
ATOM    496  H   SER L  53      30.271  77.615  25.603  1.00  0.00           H  
ATOM    497  HG  SER L  53      27.387  77.208  28.441  1.00  0.00           H  
ATOM    498  N   LEU L  54      30.337  76.293  29.557  1.00  8.94           N  
ATOM    499  CA  LEU L  54      30.302  75.071  30.345  1.00  5.02           C  
ATOM    500  C   LEU L  54      28.948  74.920  31.003  1.00 13.74           C  
ATOM    501  O   LEU L  54      28.515  75.808  31.736  1.00 20.23           O  
ATOM    502  CB  LEU L  54      31.365  75.140  31.429  1.00  4.43           C  
ATOM    503  CG  LEU L  54      31.716  73.889  32.235  1.00  5.83           C  
ATOM    504  CD1 LEU L  54      32.342  72.843  31.328  1.00  7.34           C  
ATOM    505  CD2 LEU L  54      32.689  74.274  33.316  1.00  2.00           C  
ATOM    506  H   LEU L  54      30.833  77.064  29.904  1.00  0.00           H  
ATOM    507  N   GLU L  55      28.261  73.814  30.734  1.00 17.12           N  
ATOM    508  CA  GLU L  55      26.959  73.575  31.354  1.00 15.97           C  
ATOM    509  C   GLU L  55      27.091  73.426  32.873  1.00 16.96           C  
ATOM    510  O   GLU L  55      28.102  72.929  33.375  1.00 18.24           O  
ATOM    511  CB  GLU L  55      26.313  72.320  30.775  1.00 14.47           C  
ATOM    512  CG  GLU L  55      25.733  72.508  29.394  1.00 19.65           C  
ATOM    513  CD  GLU L  55      24.554  73.454  29.372  1.00 21.88           C  
ATOM    514  OE1 GLU L  55      23.532  73.161  30.027  1.00 24.51           O  
ATOM    515  OE2 GLU L  55      24.641  74.468  28.672  1.00 23.65           O  
ATOM    516  H   GLU L  55      28.634  73.144  30.122  1.00  0.00           H  
ATOM    517  N   THR L  56      26.073  73.870  33.603  1.00 19.46           N  
ATOM    518  CA  THR L  56      26.092  73.771  35.056  1.00 25.82           C  
ATOM    519  C   THR L  56      25.985  72.302  35.433  1.00 30.83           C  
ATOM    520  O   THR L  56      25.191  71.559  34.845  1.00 36.08           O  
ATOM    521  CB  THR L  56      24.940  74.551  35.682  1.00 26.81           C  
ATOM    522  OG1 THR L  56      23.725  74.209  35.005  1.00 23.61           O  
ATOM    523  CG2 THR L  56      25.200  76.060  35.571  1.00 29.76           C  
ATOM    524  H   THR L  56      25.290  74.245  33.166  1.00  0.00           H  
ATOM    525  HG1 THR L  56      23.788  74.444  34.079  1.00  0.00           H  
ATOM    526  N   GLY L  57      26.802  71.886  36.398  1.00 30.49           N  
ATOM    527  CA  GLY L  57      26.811  70.495  36.810  1.00 30.59           C  
ATOM    528  C   GLY L  57      28.023  69.769  36.249  1.00 31.96           C  
ATOM    529  O   GLY L  57      28.465  68.766  36.809  1.00 36.31           O  
ATOM    530  H   GLY L  57      27.411  72.520  36.836  1.00  0.00           H  
ATOM    531  N   VAL L  58      28.538  70.255  35.122  1.00 29.91           N  
ATOM    532  CA  VAL L  58      29.720  69.680  34.491  1.00 23.52           C  
ATOM    533  C   VAL L  58      30.945  70.179  35.250  1.00 24.22           C  
ATOM    534  O   VAL L  58      31.049  71.364  35.564  1.00 29.51           O  
ATOM    535  CB  VAL L  58      29.814  70.100  33.022  1.00 17.89           C  
ATOM    536  CG1 VAL L  58      31.176  69.782  32.473  1.00 16.10           C  
ATOM    537  CG2 VAL L  58      28.739  69.394  32.223  1.00 17.88           C  
ATOM    538  H   VAL L  58      28.129  71.040  34.708  1.00  0.00           H  
ATOM    539  N   PRO L  59      31.884  69.278  35.568  1.00 22.94           N  
ATOM    540  CA  PRO L  59      33.089  69.669  36.298  1.00 21.03           C  
ATOM    541  C   PRO L  59      33.872  70.752  35.565  1.00 22.43           C  
ATOM    542  O   PRO L  59      34.006  70.719  34.342  1.00 26.41           O  
ATOM    543  CB  PRO L  59      33.873  68.362  36.369  1.00 21.88           C  
ATOM    544  CG  PRO L  59      32.807  67.325  36.361  1.00 22.21           C  
ATOM    545  CD  PRO L  59      31.901  67.834  35.283  1.00 22.34           C  
ATOM    546  N   SER L  60      34.429  71.676  36.334  1.00 24.51           N  
ATOM    547  CA  SER L  60      35.197  72.798  35.806  1.00 25.93           C  
ATOM    548  C   SER L  60      36.445  72.429  35.027  1.00 28.13           C  
ATOM    549  O   SER L  60      37.034  73.297  34.378  1.00 32.54           O  
ATOM    550  CB  SER L  60      35.588  73.744  36.937  1.00 27.27           C  
ATOM    551  OG  SER L  60      36.107  73.019  38.042  1.00 33.06           O  
ATOM    552  H   SER L  60      34.330  71.605  37.303  1.00  0.00           H  
ATOM    553  HG  SER L  60      36.493  73.625  38.682  1.00  0.00           H  
ATOM    554  N   ARG L  61      36.864  71.163  35.108  1.00 26.21           N  
ATOM    555  CA  ARG L  61      38.066  70.715  34.402  1.00 19.84           C  
ATOM    556  C   ARG L  61      37.848  70.654  32.887  1.00 18.55           C  
ATOM    557  O   ARG L  61      38.808  70.535  32.122  1.00 20.28           O  
ATOM    558  CB  ARG L  61      38.576  69.377  34.972  1.00 14.73           C  
ATOM    559  CG  ARG L  61      37.793  68.133  34.580  1.00 20.69           C  
ATOM    560  CD  ARG L  61      38.237  66.904  35.375  1.00 16.61           C  
ATOM    561  NE  ARG L  61      37.268  66.627  36.428  1.00 17.73           N  
ATOM    562  CZ  ARG L  61      36.581  65.498  36.532  1.00 14.83           C  
ATOM    563  NH1 ARG L  61      36.813  64.524  35.691  1.00 16.53           N  
ATOM    564  NH2 ARG L  61      35.699  65.323  37.504  1.00 13.99           N  
ATOM    565  H   ARG L  61      36.358  70.527  35.644  1.00  0.00           H  
ATOM    566  HE  ARG L  61      37.100  67.315  37.101  1.00  0.00           H  
ATOM    567 HH11 ARG L  61      37.491  64.646  34.968  1.00  0.00           H  
ATOM    568 HH12 ARG L  61      36.294  63.672  35.748  1.00  0.00           H  
ATOM    569 HH21 ARG L  61      35.527  66.047  38.162  1.00  0.00           H  
ATOM    570 HH22 ARG L  61      35.188  64.461  37.547  1.00  0.00           H  
ATOM    571  N   PHE L  62      36.587  70.717  32.459  1.00 14.59           N  
ATOM    572  CA  PHE L  62      36.256  70.693  31.036  1.00 15.54           C  
ATOM    573  C   PHE L  62      36.149  72.127  30.524  1.00 16.11           C  
ATOM    574  O   PHE L  62      35.619  72.999  31.210  1.00 23.91           O  
ATOM    575  CB  PHE L  62      34.924  69.964  30.791  1.00 12.84           C  
ATOM    576  CG  PHE L  62      34.935  68.513  31.198  1.00 12.93           C  
ATOM    577  CD1 PHE L  62      35.712  67.587  30.520  1.00 12.43           C  
ATOM    578  CD2 PHE L  62      34.167  68.075  32.265  1.00 15.76           C  
ATOM    579  CE1 PHE L  62      35.724  66.268  30.909  1.00 11.10           C  
ATOM    580  CE2 PHE L  62      34.177  66.746  32.660  1.00 11.00           C  
ATOM    581  CZ  PHE L  62      34.952  65.846  31.980  1.00  8.72           C  
ATOM    582  H   PHE L  62      35.858  70.787  33.105  1.00  0.00           H  
ATOM    583  N   SER L  63      36.658  72.367  29.324  1.00 14.18           N  
ATOM    584  CA  SER L  63      36.602  73.686  28.715  1.00 10.85           C  
ATOM    585  C   SER L  63      36.774  73.535  27.221  1.00  8.56           C  
ATOM    586  O   SER L  63      37.397  72.587  26.756  1.00  9.89           O  
ATOM    587  CB  SER L  63      37.700  74.595  29.269  1.00 13.38           C  
ATOM    588  OG  SER L  63      38.977  74.217  28.789  1.00 18.53           O  
ATOM    589  H   SER L  63      37.098  71.649  28.838  1.00  0.00           H  
ATOM    590  HG  SER L  63      39.002  74.273  27.841  1.00  0.00           H  
ATOM    591  N   GLY L  64      36.181  74.453  26.476  1.00 12.45           N  
ATOM    592  CA  GLY L  64      36.288  74.430  25.035  1.00  9.94           C  
ATOM    593  C   GLY L  64      36.684  75.808  24.544  1.00 13.68           C  
ATOM    594  O   GLY L  64      36.682  76.769  25.313  1.00 17.02           O  
ATOM    595  H   GLY L  64      35.664  75.170  26.913  1.00  0.00           H  
ATOM    596  N   SER L  65      37.070  75.912  23.282  1.00 14.52           N  
ATOM    597  CA  SER L  65      37.454  77.197  22.726  1.00 18.29           C  
ATOM    598  C   SER L  65      37.569  77.151  21.221  1.00 18.08           C  
ATOM    599  O   SER L  65      37.403  76.095  20.605  1.00 22.52           O  
ATOM    600  CB  SER L  65      38.742  77.725  23.363  1.00 20.08           C  
ATOM    601  OG  SER L  65      39.792  76.797  23.248  1.00 30.09           O  
ATOM    602  H   SER L  65      37.107  75.105  22.713  1.00  0.00           H  
ATOM    603  HG  SER L  65      39.486  75.936  23.560  1.00  0.00           H  
ATOM    604  N   GLY L  66      37.840  78.309  20.636  1.00 18.38           N  
ATOM    605  CA  GLY L  66      37.932  78.406  19.196  1.00 16.67           C  
ATOM    606  C   GLY L  66      36.611  78.905  18.646  1.00 16.91           C  
ATOM    607  O   GLY L  66      35.632  79.093  19.389  1.00 13.21           O  
ATOM    608  H   GLY L  66      37.968  79.110  21.171  1.00  0.00           H  
ATOM    609  N   SER L  67      36.616  79.188  17.351  1.00 16.73           N  
ATOM    610  CA  SER L  67      35.442  79.667  16.637  1.00 22.13           C  
ATOM    611  C   SER L  67      35.808  79.692  15.161  1.00 14.94           C  
ATOM    612  O   SER L  67      36.987  79.703  14.812  1.00 17.45           O  
ATOM    613  CB  SER L  67      35.024  81.059  17.129  1.00 27.30           C  
ATOM    614  OG  SER L  67      36.021  82.025  16.857  1.00 38.27           O  
ATOM    615  H   SER L  67      37.438  79.061  16.841  1.00  0.00           H  
ATOM    616  HG  SER L  67      36.835  81.789  17.297  1.00  0.00           H  
ATOM    617  N   GLY L  68      34.806  79.626  14.300  1.00  9.77           N  
ATOM    618  CA  GLY L  68      35.072  79.629  12.883  1.00 11.13           C  
ATOM    619  C   GLY L  68      35.254  78.224  12.353  1.00 14.00           C  
ATOM    620  O   GLY L  68      34.274  77.512  12.122  1.00 13.51           O  
ATOM    621  H   GLY L  68      33.892  79.537  14.622  1.00  0.00           H  
ATOM    622  N   THR L  69      36.500  77.819  12.144  1.00 16.52           N  
ATOM    623  CA  THR L  69      36.759  76.483  11.623  1.00 16.64           C  
ATOM    624  C   THR L  69      37.465  75.576  12.618  1.00 15.01           C  
ATOM    625  O   THR L  69      37.130  74.403  12.715  1.00 16.28           O  
ATOM    626  CB  THR L  69      37.526  76.534  10.279  1.00 14.41           C  
ATOM    627  OG1 THR L  69      38.624  77.451  10.373  1.00 17.35           O  
ATOM    628  CG2 THR L  69      36.599  76.993   9.175  1.00 12.53           C  
ATOM    629  H   THR L  69      37.242  78.421  12.332  1.00  0.00           H  
ATOM    630  HG1 THR L  69      39.366  77.008  10.807  1.00  0.00           H  
ATOM    631  N   ASP L  70      38.415  76.123  13.373  1.00 17.64           N  
ATOM    632  CA  ASP L  70      39.164  75.334  14.362  1.00 23.07           C  
ATOM    633  C   ASP L  70      38.614  75.486  15.777  1.00 22.42           C  
ATOM    634  O   ASP L  70      38.387  76.611  16.236  1.00 28.25           O  
ATOM    635  CB  ASP L  70      40.638  75.739  14.379  1.00 28.30           C  
ATOM    636  CG  ASP L  70      41.327  75.541  13.037  1.00 32.95           C  
ATOM    637  OD1 ASP L  70      40.665  75.183  12.037  1.00 37.18           O  
ATOM    638  OD2 ASP L  70      42.555  75.759  12.985  1.00 38.66           O  
ATOM    639  H   ASP L  70      38.622  77.069  13.274  1.00  0.00           H  
ATOM    640  N   PHE L  71      38.410  74.360  16.459  1.00 16.74           N  
ATOM    641  CA  PHE L  71      37.901  74.359  17.822  1.00  8.44           C  
ATOM    642  C   PHE L  71      38.667  73.308  18.621  1.00 11.14           C  
ATOM    643  O   PHE L  71      39.253  72.391  18.042  1.00 14.19           O  
ATOM    644  CB  PHE L  71      36.429  73.999  17.842  1.00  2.00           C  
ATOM    645  CG  PHE L  71      35.576  74.842  16.950  1.00  4.89           C  
ATOM    646  CD1 PHE L  71      35.508  74.587  15.593  1.00  4.70           C  
ATOM    647  CD2 PHE L  71      34.771  75.847  17.480  1.00  6.15           C  
ATOM    648  CE1 PHE L  71      34.635  75.312  14.768  1.00  5.28           C  
ATOM    649  CE2 PHE L  71      33.908  76.569  16.682  1.00  2.00           C  
ATOM    650  CZ  PHE L  71      33.840  76.302  15.322  1.00  3.32           C  
ATOM    651  H   PHE L  71      38.603  73.495  16.027  1.00  0.00           H  
ATOM    652  N   SER L  72      38.656  73.426  19.944  1.00  9.26           N  
ATOM    653  CA  SER L  72      39.338  72.465  20.793  1.00  2.87           C  
ATOM    654  C   SER L  72      38.659  72.288  22.150  1.00  3.12           C  
ATOM    655  O   SER L  72      38.013  73.197  22.648  1.00  6.14           O  
ATOM    656  CB  SER L  72      40.796  72.853  20.973  1.00  5.86           C  
ATOM    657  OG  SER L  72      40.912  74.065  21.685  1.00 15.98           O  
ATOM    658  H   SER L  72      38.180  74.179  20.361  1.00  0.00           H  
ATOM    659  HG  SER L  72      41.845  74.205  21.894  1.00  0.00           H  
ATOM    660  N   PHE L  73      38.775  71.088  22.707  1.00  3.94           N  
ATOM    661  CA  PHE L  73      38.183  70.708  23.983  1.00  2.00           C  
ATOM    662  C   PHE L  73      39.350  70.276  24.844  1.00  5.61           C  
ATOM    663  O   PHE L  73      40.299  69.667  24.335  1.00  8.14           O  
ATOM    664  CB  PHE L  73      37.231  69.527  23.739  1.00  8.35           C  
ATOM    665  CG  PHE L  73      36.649  68.905  24.991  1.00  9.33           C  
ATOM    666  CD1 PHE L  73      35.499  69.438  25.590  1.00 10.10           C  
ATOM    667  CD2 PHE L  73      37.218  67.760  25.543  1.00  7.43           C  
ATOM    668  CE1 PHE L  73      34.937  68.842  26.723  1.00  5.11           C  
ATOM    669  CE2 PHE L  73      36.660  67.162  26.673  1.00  5.91           C  
ATOM    670  CZ  PHE L  73      35.521  67.702  27.259  1.00  2.53           C  
ATOM    671  H   PHE L  73      39.295  70.417  22.225  1.00  0.00           H  
ATOM    672  N   THR L  74      39.289  70.571  26.139  1.00  2.88           N  
ATOM    673  CA  THR L  74      40.382  70.235  27.042  1.00  2.00           C  
ATOM    674  C   THR L  74      39.906  69.748  28.399  1.00  5.32           C  
ATOM    675  O   THR L  74      38.891  70.221  28.917  1.00  6.77           O  
ATOM    676  CB  THR L  74      41.287  71.485  27.274  1.00  3.21           C  
ATOM    677  OG1 THR L  74      41.967  71.824  26.056  1.00  4.23           O  
ATOM    678  CG2 THR L  74      42.328  71.227  28.355  1.00  2.00           C  
ATOM    679  H   THR L  74      38.505  71.038  26.492  1.00  0.00           H  
ATOM    680  HG1 THR L  74      41.333  71.866  25.344  1.00  0.00           H  
ATOM    681  N   ILE L  75      40.620  68.769  28.949  1.00  3.92           N  
ATOM    682  CA  ILE L  75      40.323  68.238  30.271  1.00  4.66           C  
ATOM    683  C   ILE L  75      41.583  68.604  31.041  1.00 10.77           C  
ATOM    684  O   ILE L  75      42.678  68.168  30.681  1.00 12.53           O  
ATOM    685  CB  ILE L  75      40.125  66.717  30.250  1.00  5.74           C  
ATOM    686  CG1 ILE L  75      38.955  66.367  29.327  1.00 11.58           C  
ATOM    687  CG2 ILE L  75      39.829  66.214  31.644  1.00  6.32           C  
ATOM    688  CD1 ILE L  75      38.700  64.892  29.155  1.00  8.95           C  
ATOM    689  H   ILE L  75      41.364  68.377  28.449  1.00  0.00           H  
ATOM    690  N   SER L  76      41.442  69.479  32.029  1.00 14.34           N  
ATOM    691  CA  SER L  76      42.579  69.952  32.807  1.00 13.80           C  
ATOM    692  C   SER L  76      43.375  68.824  33.432  1.00 13.47           C  
ATOM    693  O   SER L  76      44.580  68.753  33.243  1.00 18.08           O  
ATOM    694  CB  SER L  76      42.128  70.964  33.858  1.00 17.22           C  
ATOM    695  OG  SER L  76      41.204  70.382  34.758  1.00 27.62           O  
ATOM    696  H   SER L  76      40.547  69.817  32.236  1.00  0.00           H  
ATOM    697  HG  SER L  76      41.667  69.858  35.419  1.00  0.00           H  
ATOM    698  N   SER L  77      42.736  67.990  34.243  1.00 14.79           N  
ATOM    699  CA  SER L  77      43.442  66.847  34.827  1.00 18.60           C  
ATOM    700  C   SER L  77      42.537  65.619  34.753  1.00 17.27           C  
ATOM    701  O   SER L  77      41.530  65.525  35.463  1.00 13.30           O  
ATOM    702  CB  SER L  77      43.907  67.123  36.260  1.00 17.64           C  
ATOM    703  OG  SER L  77      42.820  67.291  37.149  1.00 25.91           O  
ATOM    704  H   SER L  77      41.787  68.127  34.453  1.00  0.00           H  
ATOM    705  HG  SER L  77      42.362  66.462  37.273  1.00  0.00           H  
ATOM    706  N   LEU L  78      42.880  64.719  33.835  1.00 16.09           N  
ATOM    707  CA  LEU L  78      42.133  63.485  33.576  1.00 13.61           C  
ATOM    708  C   LEU L  78      41.882  62.679  34.834  1.00 10.52           C  
ATOM    709  O   LEU L  78      42.777  62.518  35.655  1.00 14.60           O  
ATOM    710  CB  LEU L  78      42.893  62.632  32.555  1.00  8.81           C  
ATOM    711  CG  LEU L  78      42.209  61.395  31.995  1.00  2.42           C  
ATOM    712  CD1 LEU L  78      40.907  61.760  31.351  1.00  2.74           C  
ATOM    713  CD2 LEU L  78      43.137  60.787  30.973  1.00  6.75           C  
ATOM    714  H   LEU L  78      43.679  64.901  33.292  1.00  0.00           H  
ATOM    715  N   GLN L  79      40.659  62.196  34.993  1.00  7.95           N  
ATOM    716  CA  GLN L  79      40.293  61.400  36.155  1.00 10.79           C  
ATOM    717  C   GLN L  79      39.643  60.115  35.649  1.00 12.36           C  
ATOM    718  O   GLN L  79      39.163  60.064  34.514  1.00 15.73           O  
ATOM    719  CB  GLN L  79      39.329  62.179  37.044  1.00 18.72           C  
ATOM    720  CG  GLN L  79      39.803  63.588  37.420  1.00 24.62           C  
ATOM    721  CD  GLN L  79      40.771  63.618  38.588  1.00 22.46           C  
ATOM    722  OE1 GLN L  79      40.414  63.253  39.703  1.00 27.09           O  
ATOM    723  NE2 GLN L  79      41.983  64.107  38.348  1.00 25.88           N  
ATOM    724  H   GLN L  79      39.994  62.376  34.307  1.00  0.00           H  
ATOM    725 HE21 GLN L  79      42.616  64.141  39.099  1.00  0.00           H  
ATOM    726 HE22 GLN L  79      42.211  64.420  37.449  1.00  0.00           H  
ATOM    727  N   PRO L  80      39.545  59.084  36.502  1.00 12.79           N  
ATOM    728  CA  PRO L  80      38.945  57.817  36.067  1.00 11.84           C  
ATOM    729  C   PRO L  80      37.558  57.947  35.459  1.00 12.43           C  
ATOM    730  O   PRO L  80      37.240  57.297  34.463  1.00 19.08           O  
ATOM    731  CB  PRO L  80      38.914  56.996  37.359  1.00 14.57           C  
ATOM    732  CG  PRO L  80      40.053  57.561  38.169  1.00 10.81           C  
ATOM    733  CD  PRO L  80      39.906  59.033  37.931  1.00  9.75           C  
ATOM    734  N   GLU L  81      36.746  58.821  36.035  1.00  9.24           N  
ATOM    735  CA  GLU L  81      35.385  59.016  35.562  1.00  7.26           C  
ATOM    736  C   GLU L  81      35.274  59.717  34.229  1.00  8.63           C  
ATOM    737  O   GLU L  81      34.178  59.872  33.716  1.00 15.60           O  
ATOM    738  CB  GLU L  81      34.531  59.762  36.598  1.00 12.52           C  
ATOM    739  CG  GLU L  81      35.129  61.038  37.186  1.00 20.57           C  
ATOM    740  CD  GLU L  81      35.899  60.799  38.477  1.00 28.65           C  
ATOM    741  OE1 GLU L  81      36.749  59.883  38.526  1.00 34.75           O  
ATOM    742  OE2 GLU L  81      35.657  61.530  39.460  1.00 36.14           O  
ATOM    743  H   GLU L  81      37.082  59.337  36.766  1.00  0.00           H  
ATOM    744  N   ASP L  82      36.389  60.177  33.679  1.00  8.26           N  
ATOM    745  CA  ASP L  82      36.354  60.873  32.397  1.00  9.30           C  
ATOM    746  C   ASP L  82      36.496  59.915  31.255  1.00  7.58           C  
ATOM    747  O   ASP L  82      36.599  60.321  30.094  1.00  8.61           O  
ATOM    748  CB  ASP L  82      37.461  61.898  32.335  1.00 11.75           C  
ATOM    749  CG  ASP L  82      37.298  62.958  33.364  1.00 10.15           C  
ATOM    750  OD1 ASP L  82      36.120  63.245  33.696  1.00  2.32           O  
ATOM    751  OD2 ASP L  82      38.335  63.490  33.837  1.00  9.91           O  
ATOM    752  H   ASP L  82      37.243  60.038  34.122  1.00  0.00           H  
ATOM    753  N   LEU L  83      36.586  58.646  31.612  1.00  8.02           N  
ATOM    754  CA  LEU L  83      36.713  57.579  30.652  1.00  7.59           C  
ATOM    755  C   LEU L  83      35.434  57.610  29.816  1.00  7.12           C  
ATOM    756  O   LEU L  83      34.340  57.387  30.350  1.00  2.03           O  
ATOM    757  CB  LEU L  83      36.824  56.256  31.401  1.00 11.83           C  
ATOM    758  CG  LEU L  83      37.140  55.086  30.494  1.00 17.76           C  
ATOM    759  CD1 LEU L  83      38.559  54.642  30.760  1.00 23.91           C  
ATOM    760  CD2 LEU L  83      36.149  53.973  30.755  1.00 20.87           C  
ATOM    761  H   LEU L  83      36.575  58.415  32.562  1.00  0.00           H  
ATOM    762  N   ALA L  84      35.573  57.926  28.526  1.00  5.88           N  
ATOM    763  CA  ALA L  84      34.434  57.998  27.611  1.00  2.00           C  
ATOM    764  C   ALA L  84      34.867  58.341  26.197  1.00  2.00           C  
ATOM    765  O   ALA L  84      36.058  58.355  25.893  1.00  2.79           O  
ATOM    766  CB  ALA L  84      33.455  59.044  28.108  1.00  2.00           C  
ATOM    767  H   ALA L  84      36.470  58.121  28.174  1.00  0.00           H  
ATOM    768  N   THR L  85      33.892  58.558  25.318  1.00  8.94           N  
ATOM    769  CA  THR L  85      34.170  58.974  23.940  1.00  8.47           C  
ATOM    770  C   THR L  85      33.583  60.381  23.875  1.00  5.98           C  
ATOM    771  O   THR L  85      32.448  60.589  24.295  1.00  4.86           O  
ATOM    772  CB  THR L  85      33.435  58.106  22.902  1.00 10.73           C  
ATOM    773  OG1 THR L  85      33.773  56.726  23.103  1.00 22.28           O  
ATOM    774  CG2 THR L  85      33.815  58.527  21.489  1.00  2.76           C  
ATOM    775  H   THR L  85      32.959  58.418  25.585  1.00  0.00           H  
ATOM    776  HG1 THR L  85      33.128  56.172  22.664  1.00  0.00           H  
ATOM    777  N   TYR L  86      34.378  61.349  23.443  1.00  6.50           N  
ATOM    778  CA  TYR L  86      33.919  62.728  23.340  1.00  5.57           C  
ATOM    779  C   TYR L  86      33.619  63.047  21.893  1.00  8.24           C  
ATOM    780  O   TYR L  86      34.302  62.557  20.999  1.00 15.90           O  
ATOM    781  CB  TYR L  86      34.964  63.685  23.929  1.00  2.90           C  
ATOM    782  CG  TYR L  86      35.141  63.487  25.427  1.00  2.00           C  
ATOM    783  CD1 TYR L  86      34.318  64.150  26.343  1.00  3.14           C  
ATOM    784  CD2 TYR L  86      36.045  62.560  25.918  1.00  2.00           C  
ATOM    785  CE1 TYR L  86      34.387  63.877  27.701  1.00  2.00           C  
ATOM    786  CE2 TYR L  86      36.127  62.281  27.271  1.00  2.00           C  
ATOM    787  CZ  TYR L  86      35.296  62.933  28.152  1.00  2.73           C  
ATOM    788  OH  TYR L  86      35.342  62.594  29.478  1.00  8.19           O  
ATOM    789  H   TYR L  86      35.300  61.136  23.178  1.00  0.00           H  
ATOM    790  HH  TYR L  86      36.074  61.998  29.639  1.00  0.00           H  
ATOM    791  N   TYR L  87      32.534  63.773  21.655  1.00 10.09           N  
ATOM    792  CA  TYR L  87      32.137  64.156  20.300  1.00  8.95           C  
ATOM    793  C   TYR L  87      31.913  65.663  20.206  1.00 10.23           C  
ATOM    794  O   TYR L  87      31.482  66.295  21.167  1.00 13.57           O  
ATOM    795  CB  TYR L  87      30.791  63.513  19.935  1.00  7.45           C  
ATOM    796  CG  TYR L  87      30.812  62.029  19.805  1.00  8.08           C  
ATOM    797  CD1 TYR L  87      31.303  61.418  18.651  1.00  9.33           C  
ATOM    798  CD2 TYR L  87      30.340  61.220  20.835  1.00 10.23           C  
ATOM    799  CE1 TYR L  87      31.320  60.024  18.531  1.00 11.40           C  
ATOM    800  CE2 TYR L  87      30.355  59.829  20.728  1.00  8.91           C  
ATOM    801  CZ  TYR L  87      30.849  59.240  19.579  1.00  9.51           C  
ATOM    802  OH  TYR L  87      30.901  57.874  19.499  1.00 13.76           O  
ATOM    803  H   TYR L  87      31.985  64.067  22.420  1.00  0.00           H  
ATOM    804  HH  TYR L  87      30.537  57.502  20.307  1.00  0.00           H  
ATOM    805  N   CYS L  88      32.182  66.238  19.044  1.00 12.74           N  
ATOM    806  CA  CYS L  88      31.904  67.649  18.837  1.00 10.21           C  
ATOM    807  C   CYS L  88      30.802  67.617  17.810  1.00  8.15           C  
ATOM    808  O   CYS L  88      30.782  66.728  16.966  1.00 13.03           O  
ATOM    809  CB  CYS L  88      33.112  68.404  18.295  1.00 10.98           C  
ATOM    810  SG  CYS L  88      33.600  68.017  16.593  1.00  2.00           S  
ATOM    811  H   CYS L  88      32.569  65.706  18.323  1.00  0.00           H  
ATOM    812  N   GLN L  89      29.852  68.533  17.916  1.00 11.12           N  
ATOM    813  CA  GLN L  89      28.732  68.589  16.977  1.00  7.11           C  
ATOM    814  C   GLN L  89      28.543  70.027  16.504  1.00  9.16           C  
ATOM    815  O   GLN L  89      28.550  70.955  17.317  1.00 12.14           O  
ATOM    816  CB  GLN L  89      27.453  68.117  17.669  1.00  2.00           C  
ATOM    817  CG  GLN L  89      26.236  68.209  16.800  1.00  2.56           C  
ATOM    818  CD  GLN L  89      24.937  68.151  17.581  1.00  6.49           C  
ATOM    819  OE1 GLN L  89      23.988  67.496  17.178  1.00  8.61           O  
ATOM    820  NE2 GLN L  89      24.898  68.836  18.708  1.00 10.67           N  
ATOM    821  H   GLN L  89      29.893  69.195  18.646  1.00  0.00           H  
ATOM    822 HE21 GLN L  89      24.068  68.805  19.227  1.00  0.00           H  
ATOM    823 HE22 GLN L  89      25.674  69.363  18.991  1.00  0.00           H  
ATOM    824  N   GLN L  90      28.437  70.238  15.199  1.00  9.20           N  
ATOM    825  CA  GLN L  90      28.225  71.595  14.704  1.00 15.07           C  
ATOM    826  C   GLN L  90      26.731  71.820  14.625  1.00 15.23           C  
ATOM    827  O   GLN L  90      26.003  70.912  14.233  1.00 18.03           O  
ATOM    828  CB  GLN L  90      28.866  71.815  13.318  1.00 12.91           C  
ATOM    829  CG  GLN L  90      28.227  71.050  12.137  1.00 10.48           C  
ATOM    830  CD  GLN L  90      27.001  71.735  11.549  1.00  9.85           C  
ATOM    831  OE1 GLN L  90      26.754  72.907  11.816  1.00 17.29           O  
ATOM    832  NE2 GLN L  90      26.223  71.009  10.759  1.00  2.00           N  
ATOM    833  H   GLN L  90      28.492  69.488  14.575  1.00  0.00           H  
ATOM    834 HE21 GLN L  90      25.433  71.440  10.380  1.00  0.00           H  
ATOM    835 HE22 GLN L  90      26.454  70.071  10.600  1.00  0.00           H  
ATOM    836  N   TYR L  91      26.258  72.993  15.039  1.00 17.80           N  
ATOM    837  CA  TYR L  91      24.834  73.283  14.933  1.00 15.92           C  
ATOM    838  C   TYR L  91      24.565  74.563  14.163  1.00 17.18           C  
ATOM    839  O   TYR L  91      23.606  75.279  14.437  1.00 22.91           O  
ATOM    840  CB  TYR L  91      24.126  73.271  16.285  1.00 12.41           C  
ATOM    841  CG  TYR L  91      24.614  74.249  17.321  1.00 14.06           C  
ATOM    842  CD1 TYR L  91      25.751  73.981  18.076  1.00 16.70           C  
ATOM    843  CD2 TYR L  91      23.893  75.403  17.610  1.00 13.90           C  
ATOM    844  CE1 TYR L  91      26.154  74.828  19.103  1.00 17.48           C  
ATOM    845  CE2 TYR L  91      24.289  76.267  18.634  1.00 14.21           C  
ATOM    846  CZ  TYR L  91      25.414  75.970  19.380  1.00 16.69           C  
ATOM    847  OH  TYR L  91      25.775  76.783  20.435  1.00 17.29           O  
ATOM    848  H   TYR L  91      26.875  73.663  15.393  1.00  0.00           H  
ATOM    849  HH  TYR L  91      25.281  77.606  20.391  1.00  0.00           H  
ATOM    850  N   ASP L  92      25.437  74.860  13.208  1.00 16.26           N  
ATOM    851  CA  ASP L  92      25.262  76.030  12.381  1.00 19.06           C  
ATOM    852  C   ASP L  92      24.038  75.724  11.530  1.00 21.90           C  
ATOM    853  O   ASP L  92      23.163  76.565  11.394  1.00 30.72           O  
ATOM    854  CB  ASP L  92      26.490  76.261  11.499  1.00 24.58           C  
ATOM    855  CG  ASP L  92      26.385  77.537  10.668  1.00 30.18           C  
ATOM    856  OD1 ASP L  92      26.335  78.639  11.258  1.00 33.92           O  
ATOM    857  OD2 ASP L  92      26.361  77.445   9.420  1.00 31.71           O  
ATOM    858  H   ASP L  92      26.209  74.280  13.053  1.00  0.00           H  
ATOM    859  N   SER L  93      23.948  74.498  11.018  1.00 24.99           N  
ATOM    860  CA  SER L  93      22.823  74.101  10.168  1.00 25.85           C  
ATOM    861  C   SER L  93      22.574  72.593  10.115  1.00 25.17           C  
ATOM    862  O   SER L  93      23.396  71.794  10.572  1.00 26.65           O  
ATOM    863  CB  SER L  93      23.038  74.586   8.747  1.00 28.70           C  
ATOM    864  OG  SER L  93      24.189  73.983   8.168  1.00 31.79           O  
ATOM    865  H   SER L  93      24.648  73.843  11.218  1.00  0.00           H  
ATOM    866  HG  SER L  93      24.984  74.412   8.495  1.00  0.00           H  
ATOM    867  N   LEU L  94      21.433  72.221   9.542  1.00 22.65           N  
ATOM    868  CA  LEU L  94      21.062  70.830   9.385  1.00 20.60           C  
ATOM    869  C   LEU L  94      21.798  70.246   8.194  1.00 20.77           C  
ATOM    870  O   LEU L  94      21.987  70.921   7.187  1.00 26.47           O  
ATOM    871  CB  LEU L  94      19.563  70.715   9.138  1.00 20.62           C  
ATOM    872  CG  LEU L  94      18.651  71.145  10.277  1.00 21.61           C  
ATOM    873  CD1 LEU L  94      17.227  70.981   9.820  1.00 25.86           C  
ATOM    874  CD2 LEU L  94      18.895  70.304  11.503  1.00 21.70           C  
ATOM    875  H   LEU L  94      20.814  72.908   9.237  1.00  0.00           H  
ATOM    876  N   PRO L  95      22.149  68.954   8.258  1.00 19.81           N  
ATOM    877  CA  PRO L  95      21.871  68.067   9.387  1.00 17.20           C  
ATOM    878  C   PRO L  95      22.956  68.307  10.419  1.00 16.74           C  
ATOM    879  O   PRO L  95      24.114  68.494  10.046  1.00 24.01           O  
ATOM    880  CB  PRO L  95      22.000  66.688   8.750  1.00 16.60           C  
ATOM    881  CG  PRO L  95      23.134  66.892   7.795  1.00 18.50           C  
ATOM    882  CD  PRO L  95      22.791  68.211   7.155  1.00 19.62           C  
ATOM    883  N   LEU L  96      22.584  68.396  11.695  1.00  9.92           N  
ATOM    884  CA  LEU L  96      23.586  68.615  12.727  1.00  5.93           C  
ATOM    885  C   LEU L  96      24.537  67.450  12.549  1.00 12.08           C  
ATOM    886  O   LEU L  96      24.109  66.300  12.543  1.00 19.32           O  
ATOM    887  CB  LEU L  96      22.971  68.586  14.126  1.00 12.64           C  
ATOM    888  CG  LEU L  96      21.785  69.493  14.499  1.00 14.13           C  
ATOM    889  CD1 LEU L  96      21.881  70.854  13.821  1.00 13.94           C  
ATOM    890  CD2 LEU L  96      20.520  68.814  14.104  1.00  9.90           C  
ATOM    891  H   LEU L  96      21.642  68.310  11.930  1.00  0.00           H  
ATOM    892  N   THR L  97      25.802  67.754  12.300  1.00  8.37           N  
ATOM    893  CA  THR L  97      26.805  66.732  12.063  1.00 11.68           C  
ATOM    894  C   THR L  97      27.791  66.604  13.222  1.00 12.81           C  
ATOM    895  O   THR L  97      28.150  67.600  13.848  1.00 15.69           O  
ATOM    896  CB  THR L  97      27.563  67.033  10.750  1.00 14.21           C  
ATOM    897  OG1 THR L  97      28.080  68.366  10.789  1.00 22.90           O  
ATOM    898  CG2 THR L  97      26.643  66.942   9.567  1.00 11.81           C  
ATOM    899  H   THR L  97      26.056  68.694  12.253  1.00  0.00           H  
ATOM    900  HG1 THR L  97      28.445  68.586   9.919  1.00  0.00           H  
ATOM    901  N   PHE L  98      28.200  65.369  13.520  1.00  9.66           N  
ATOM    902  CA  PHE L  98      29.140  65.078  14.614  1.00  3.49           C  
ATOM    903  C   PHE L  98      30.497  64.696  14.024  1.00  7.48           C  
ATOM    904  O   PHE L  98      30.600  64.302  12.851  1.00 13.23           O  
ATOM    905  CB  PHE L  98      28.670  63.857  15.416  1.00  4.27           C  
ATOM    906  CG  PHE L  98      27.644  64.132  16.497  1.00  2.00           C  
ATOM    907  CD1 PHE L  98      26.313  64.335  16.191  1.00  2.00           C  
ATOM    908  CD2 PHE L  98      28.005  64.045  17.837  1.00  2.00           C  
ATOM    909  CE1 PHE L  98      25.361  64.444  17.200  1.00  2.00           C  
ATOM    910  CE2 PHE L  98      27.059  64.151  18.847  1.00  2.00           C  
ATOM    911  CZ  PHE L  98      25.741  64.346  18.523  1.00  2.00           C  
ATOM    912  H   PHE L  98      27.862  64.627  12.982  1.00  0.00           H  
ATOM    913  N   GLY L  99      31.540  64.775  14.838  1.00  7.36           N  
ATOM    914  CA  GLY L  99      32.856  64.389  14.374  1.00  8.44           C  
ATOM    915  C   GLY L  99      33.003  62.924  14.729  1.00 12.67           C  
ATOM    916  O   GLY L  99      32.189  62.401  15.492  1.00  8.39           O  
ATOM    917  H   GLY L  99      31.413  65.098  15.749  1.00  0.00           H  
ATOM    918  N   GLY L 100      34.058  62.281  14.232  1.00 10.94           N  
ATOM    919  CA  GLY L 100      34.277  60.869  14.500  1.00 10.39           C  
ATOM    920  C   GLY L 100      34.238  60.401  15.949  1.00 12.42           C  
ATOM    921  O   GLY L 100      33.777  59.292  16.209  1.00 17.94           O  
ATOM    922  H   GLY L 100      34.688  62.757  13.656  1.00  0.00           H  
ATOM    923  N   GLY L 101      34.709  61.228  16.881  1.00  9.58           N  
ATOM    924  CA  GLY L 101      34.729  60.854  18.288  1.00  2.00           C  
ATOM    925  C   GLY L 101      36.161  60.630  18.726  1.00  2.00           C  
ATOM    926  O   GLY L 101      37.042  60.593  17.876  1.00  2.00           O  
ATOM    927  H   GLY L 101      35.070  62.089  16.619  1.00  0.00           H  
ATOM    928  N   THR L 102      36.403  60.482  20.028  1.00  5.54           N  
ATOM    929  CA  THR L 102      37.753  60.248  20.564  1.00  5.38           C  
ATOM    930  C   THR L 102      37.643  59.399  21.816  1.00  9.94           C  
ATOM    931  O   THR L 102      37.066  59.841  22.805  1.00 14.59           O  
ATOM    932  CB  THR L 102      38.441  61.564  20.965  1.00  8.10           C  
ATOM    933  OG1 THR L 102      38.627  62.376  19.802  1.00 10.69           O  
ATOM    934  CG2 THR L 102      39.787  61.309  21.660  1.00  3.73           C  
ATOM    935  H   THR L 102      35.659  60.541  20.656  1.00  0.00           H  
ATOM    936  HG1 THR L 102      38.734  61.803  19.036  1.00  0.00           H  
ATOM    937  N   LYS L 103      38.175  58.182  21.779  1.00 10.76           N  
ATOM    938  CA  LYS L 103      38.088  57.310  22.938  1.00 13.84           C  
ATOM    939  C   LYS L 103      39.261  57.632  23.837  1.00 11.93           C  
ATOM    940  O   LYS L 103      40.405  57.577  23.386  1.00 20.74           O  
ATOM    941  CB  LYS L 103      38.121  55.825  22.511  1.00 11.94           C  
ATOM    942  CG  LYS L 103      37.410  54.905  23.509  1.00 25.98           C  
ATOM    943  CD  LYS L 103      38.222  53.641  23.834  1.00 39.15           C  
ATOM    944  CE  LYS L 103      37.614  52.354  23.248  1.00 46.69           C  
ATOM    945  NZ  LYS L 103      36.817  52.611  22.003  1.00 54.56           N  
ATOM    946  H   LYS L 103      38.613  57.859  20.967  1.00  0.00           H  
ATOM    947  HZ1 LYS L 103      37.395  53.113  21.305  1.00  0.00           H  
ATOM    948  HZ2 LYS L 103      36.435  51.735  21.605  1.00  0.00           H  
ATOM    949  HZ3 LYS L 103      36.018  53.234  22.279  1.00  0.00           H  
ATOM    950  N   VAL L 104      39.012  58.058  25.068  1.00  5.00           N  
ATOM    951  CA  VAL L 104      40.147  58.312  25.946  1.00  9.07           C  
ATOM    952  C   VAL L 104      40.241  57.109  26.872  1.00 12.63           C  
ATOM    953  O   VAL L 104      39.219  56.609  27.359  1.00 18.00           O  
ATOM    954  CB  VAL L 104      40.065  59.664  26.746  1.00  5.70           C  
ATOM    955  CG1 VAL L 104      39.384  60.741  25.923  1.00  2.63           C  
ATOM    956  CG2 VAL L 104      39.395  59.485  28.080  1.00 12.59           C  
ATOM    957  H   VAL L 104      38.095  58.168  25.409  1.00  0.00           H  
ATOM    958  N   GLU L 105      41.447  56.572  27.013  1.00 15.41           N  
ATOM    959  CA  GLU L 105      41.679  55.424  27.879  1.00 17.22           C  
ATOM    960  C   GLU L 105      42.700  55.825  28.931  1.00 14.43           C  
ATOM    961  O   GLU L 105      43.674  56.506  28.628  1.00 18.78           O  
ATOM    962  CB  GLU L 105      42.162  54.243  27.045  1.00 21.53           C  
ATOM    963  CG  GLU L 105      41.153  53.872  25.972  1.00 29.74           C  
ATOM    964  CD  GLU L 105      41.681  52.898  24.945  1.00 35.22           C  
ATOM    965  OE1 GLU L 105      42.906  52.879  24.704  1.00 35.51           O  
ATOM    966  OE2 GLU L 105      40.856  52.156  24.368  1.00 39.73           O  
ATOM    967  H   GLU L 105      42.200  56.953  26.527  1.00  0.00           H  
ATOM    968  N   ILE L 106      42.424  55.480  30.179  1.00 10.74           N  
ATOM    969  CA  ILE L 106      43.294  55.816  31.292  1.00  7.93           C  
ATOM    970  C   ILE L 106      44.465  54.848  31.367  1.00 15.83           C  
ATOM    971  O   ILE L 106      44.265  53.629  31.374  1.00 14.75           O  
ATOM    972  CB  ILE L 106      42.531  55.711  32.626  1.00  4.72           C  
ATOM    973  CG1 ILE L 106      41.270  56.556  32.592  1.00  8.61           C  
ATOM    974  CG2 ILE L 106      43.390  56.159  33.764  1.00  3.22           C  
ATOM    975  CD1 ILE L 106      41.543  58.005  32.335  1.00 12.90           C  
ATOM    976  H   ILE L 106      41.611  54.964  30.362  1.00  0.00           H  
ATOM    977  N   LYS L 107      45.687  55.378  31.377  1.00 19.89           N  
ATOM    978  CA  LYS L 107      46.856  54.513  31.512  1.00 18.80           C  
ATOM    979  C   LYS L 107      47.055  54.410  33.012  1.00 19.47           C  
ATOM    980  O   LYS L 107      46.757  55.356  33.749  1.00 14.63           O  
ATOM    981  CB  LYS L 107      48.111  55.103  30.860  1.00 15.91           C  
ATOM    982  CG  LYS L 107      48.974  54.066  30.157  1.00 14.25           C  
ATOM    983  CD  LYS L 107      50.268  54.645  29.613  1.00 21.96           C  
ATOM    984  CE  LYS L 107      51.211  55.065  30.747  1.00 27.99           C  
ATOM    985  NZ  LYS L 107      52.608  55.364  30.294  1.00 32.79           N  
ATOM    986  H   LYS L 107      45.802  56.350  31.300  1.00  0.00           H  
ATOM    987  HZ1 LYS L 107      52.597  56.135  29.599  1.00  0.00           H  
ATOM    988  HZ2 LYS L 107      53.192  55.637  31.111  1.00  0.00           H  
ATOM    989  HZ3 LYS L 107      53.019  54.512  29.853  1.00  0.00           H  
ATOM    990  N   ARG L 108      47.434  53.220  33.463  1.00 15.41           N  
ATOM    991  CA  ARG L 108      47.676  52.978  34.868  1.00 10.80           C  
ATOM    992  C   ARG L 108      48.671  51.862  35.038  1.00 12.78           C  
ATOM    993  O   ARG L 108      49.196  51.334  34.058  1.00 15.21           O  
ATOM    994  CB  ARG L 108      46.373  52.662  35.597  1.00 10.41           C  
ATOM    995  CG  ARG L 108      45.517  51.634  34.919  1.00 16.74           C  
ATOM    996  CD  ARG L 108      45.405  50.384  35.769  1.00 21.07           C  
ATOM    997  NE  ARG L 108      44.590  50.581  36.965  1.00 17.41           N  
ATOM    998  CZ  ARG L 108      44.925  50.139  38.172  1.00 16.86           C  
ATOM    999  NH1 ARG L 108      46.071  49.480  38.348  1.00  7.13           N  
ATOM   1000  NH2 ARG L 108      44.105  50.349  39.197  1.00 11.67           N  
ATOM   1001  H   ARG L 108      47.542  52.481  32.821  1.00  0.00           H  
ATOM   1002  HE  ARG L 108      43.749  51.074  36.868  1.00  0.00           H  
ATOM   1003 HH11 ARG L 108      46.674  49.315  37.576  1.00  0.00           H  
ATOM   1004 HH12 ARG L 108      46.311  49.152  39.262  1.00  0.00           H  
ATOM   1005 HH21 ARG L 108      43.256  50.862  39.064  1.00  0.00           H  
ATOM   1006 HH22 ARG L 108      44.354  50.038  40.113  1.00  0.00           H  
ATOM   1007  N   THR L 109      48.987  51.554  36.288  1.00 15.02           N  
ATOM   1008  CA  THR L 109      49.937  50.494  36.593  1.00 19.37           C  
ATOM   1009  C   THR L 109      49.353  49.115  36.305  1.00 20.27           C  
ATOM   1010  O   THR L 109      48.128  48.948  36.296  1.00 21.01           O  
ATOM   1011  CB  THR L 109      50.399  50.571  38.063  1.00 20.77           C  
ATOM   1012  OG1 THR L 109      49.316  51.025  38.894  1.00 23.40           O  
ATOM   1013  CG2 THR L 109      51.570  51.516  38.189  1.00 22.33           C  
ATOM   1014  H   THR L 109      48.569  52.036  37.027  1.00  0.00           H  
ATOM   1015  HG1 THR L 109      49.608  51.068  39.804  1.00  0.00           H  
ATOM   1016  N   VAL L 110      50.235  48.152  36.039  1.00 16.24           N  
ATOM   1017  CA  VAL L 110      49.835  46.776  35.758  1.00 17.44           C  
ATOM   1018  C   VAL L 110      49.159  46.128  36.953  1.00 17.62           C  
ATOM   1019  O   VAL L 110      49.628  46.258  38.083  1.00 18.82           O  
ATOM   1020  CB  VAL L 110      51.045  45.901  35.405  1.00 19.06           C  
ATOM   1021  CG1 VAL L 110      50.611  44.460  35.187  1.00 17.67           C  
ATOM   1022  CG2 VAL L 110      51.740  46.446  34.171  1.00 20.05           C  
ATOM   1023  H   VAL L 110      51.185  48.370  36.024  1.00  0.00           H  
TER    1024      VAL L 110                                                      
ATOM   1997  N   ASP L   1      15.432  69.622  34.776  1.00 51.75           N  
ATOM   1998  CA  ASP L   1      15.375  69.864  33.310  1.00 49.33           C  
ATOM   1999  C   ASP L   1      14.321  68.959  32.700  1.00 45.36           C  
ATOM   2000  O   ASP L   1      13.449  68.443  33.398  1.00 45.68           O  
ATOM   2001  CB  ASP L   1      16.722  69.552  32.654  1.00 53.71           C  
ATOM   2002  CG  ASP L   1      17.897  69.895  33.538  1.00 55.76           C  
ATOM   2003  OD1 ASP L   1      17.915  71.001  34.119  1.00 59.28           O  
ATOM   2004  OD2 ASP L   1      18.805  69.047  33.650  1.00 55.51           O  
ATOM   2005  H1  ASP L   1      14.506  69.783  35.207  1.00  0.00           H  
ATOM   2006  H2  ASP L   1      15.680  68.625  34.921  1.00  0.00           H  
ATOM   2007  H3  ASP L   1      16.153  70.210  35.217  1.00  0.00           H  
ATOM   2008  N   ILE L   2      14.400  68.793  31.389  1.00 35.79           N  
ATOM   2009  CA  ILE L   2      13.473  67.948  30.673  1.00 30.23           C  
ATOM   2010  C   ILE L   2      14.114  66.582  30.603  1.00 31.00           C  
ATOM   2011  O   ILE L   2      15.264  66.458  30.182  1.00 31.03           O  
ATOM   2012  CB  ILE L   2      13.257  68.469  29.243  1.00 29.99           C  
ATOM   2013  CG1 ILE L   2      12.789  69.923  29.292  1.00 25.92           C  
ATOM   2014  CG2 ILE L   2      12.258  67.583  28.499  1.00 26.99           C  
ATOM   2015  CD1 ILE L   2      12.661  70.570  27.943  1.00 27.33           C  
ATOM   2016  H   ILE L   2      15.106  69.242  30.876  1.00  0.00           H  
ATOM   2017  N   GLN L   3      13.407  65.570  31.082  1.00 32.18           N  
ATOM   2018  CA  GLN L   3      13.928  64.211  31.032  1.00 37.56           C  
ATOM   2019  C   GLN L   3      13.254  63.462  29.915  1.00 36.52           C  
ATOM   2020  O   GLN L   3      12.032  63.535  29.751  1.00 38.21           O  
ATOM   2021  CB  GLN L   3      13.690  63.488  32.344  1.00 46.75           C  
ATOM   2022  CG  GLN L   3      14.685  63.848  33.425  1.00 57.21           C  
ATOM   2023  CD  GLN L   3      14.216  63.408  34.791  1.00 60.59           C  
ATOM   2024  OE1 GLN L   3      13.849  64.235  35.625  1.00 64.36           O  
ATOM   2025  NE2 GLN L   3      14.207  62.100  35.023  1.00 63.90           N  
ATOM   2026  H   GLN L   3      12.525  65.737  31.456  1.00  0.00           H  
ATOM   2027 HE21 GLN L   3      13.904  61.814  35.911  1.00  0.00           H  
ATOM   2028 HE22 GLN L   3      14.495  61.477  34.328  1.00  0.00           H  
ATOM   2029  N   MET L   4      14.062  62.752  29.141  1.00 32.06           N  
ATOM   2030  CA  MET L   4      13.564  61.972  28.018  1.00 29.81           C  
ATOM   2031  C   MET L   4      13.686  60.474  28.311  1.00 29.18           C  
ATOM   2032  O   MET L   4      14.784  59.987  28.600  1.00 30.40           O  
ATOM   2033  CB  MET L   4      14.364  62.327  26.767  1.00 27.36           C  
ATOM   2034  CG  MET L   4      14.425  63.809  26.481  1.00 19.71           C  
ATOM   2035  SD  MET L   4      12.792  64.424  26.268  1.00 25.55           S  
ATOM   2036  CE  MET L   4      12.423  63.793  24.655  1.00 17.41           C  
ATOM   2037  H   MET L   4      15.018  62.750  29.325  1.00  0.00           H  
ATOM   2038  N   THR L   5      12.565  59.757  28.275  1.00 28.24           N  
ATOM   2039  CA  THR L   5      12.572  58.314  28.526  1.00 28.01           C  
ATOM   2040  C   THR L   5      12.217  57.530  27.260  1.00 25.94           C  
ATOM   2041  O   THR L   5      11.165  57.763  26.654  1.00 30.23           O  
ATOM   2042  CB  THR L   5      11.615  57.932  29.677  1.00 28.74           C  
ATOM   2043  OG1 THR L   5      10.352  58.582  29.493  1.00 35.35           O  
ATOM   2044  CG2 THR L   5      12.190  58.358  31.017  1.00 30.24           C  
ATOM   2045  H   THR L   5      11.716  60.207  28.082  1.00  0.00           H  
ATOM   2046  HG1 THR L   5       9.803  58.022  28.942  1.00  0.00           H  
ATOM   2047  N   GLN L   6      13.107  56.630  26.845  1.00 21.80           N  
ATOM   2048  CA  GLN L   6      12.888  55.834  25.640  1.00 16.81           C  
ATOM   2049  C   GLN L   6      12.351  54.459  25.956  1.00 16.51           C  
ATOM   2050  O   GLN L   6      12.383  54.034  27.098  1.00 21.45           O  
ATOM   2051  CB  GLN L   6      14.185  55.696  24.865  1.00 12.24           C  
ATOM   2052  CG  GLN L   6      14.093  56.215  23.470  1.00  7.36           C  
ATOM   2053  CD  GLN L   6      15.440  56.330  22.844  1.00 10.78           C  
ATOM   2054  OE1 GLN L   6      16.277  57.114  23.293  1.00  7.60           O  
ATOM   2055  NE2 GLN L   6      15.681  55.536  21.816  1.00  7.64           N  
ATOM   2056  H   GLN L   6      13.923  56.488  27.365  1.00  0.00           H  
ATOM   2057 HE21 GLN L   6      16.549  55.608  21.397  1.00  0.00           H  
ATOM   2058 HE22 GLN L   6      14.987  54.914  21.509  1.00  0.00           H  
ATOM   2059  N   SER L   7      11.849  53.772  24.939  1.00 21.92           N  
ATOM   2060  CA  SER L   7      11.303  52.429  25.100  1.00 25.37           C  
ATOM   2061  C   SER L   7      11.127  51.668  23.792  1.00 26.86           C  
ATOM   2062  O   SER L   7      10.568  52.188  22.820  1.00 30.13           O  
ATOM   2063  CB  SER L   7       9.974  52.458  25.848  1.00 24.56           C  
ATOM   2064  OG  SER L   7      10.206  52.500  27.243  1.00 33.43           O  
ATOM   2065  H   SER L   7      11.836  54.183  24.045  1.00  0.00           H  
ATOM   2066  HG  SER L   7      10.602  53.347  27.485  1.00  0.00           H  
ATOM   2067  N   PRO L   8      11.571  50.403  23.769  1.00 26.21           N  
ATOM   2068  CA  PRO L   8      12.190  49.763  24.929  1.00 19.14           C  
ATOM   2069  C   PRO L   8      13.676  50.085  24.946  1.00 18.73           C  
ATOM   2070  O   PRO L   8      14.144  50.860  24.123  1.00 19.73           O  
ATOM   2071  CB  PRO L   8      11.937  48.296  24.653  1.00 20.64           C  
ATOM   2072  CG  PRO L   8      12.136  48.215  23.158  1.00 23.58           C  
ATOM   2073  CD  PRO L   8      11.432  49.452  22.644  1.00 27.63           C  
ATOM   2074  N   SER L   9      14.418  49.492  25.875  1.00 20.69           N  
ATOM   2075  CA  SER L   9      15.859  49.726  25.967  1.00 22.58           C  
ATOM   2076  C   SER L   9      16.640  48.924  24.909  1.00 25.15           C  
ATOM   2077  O   SER L   9      17.782  49.251  24.566  1.00 26.18           O  
ATOM   2078  CB  SER L   9      16.358  49.419  27.386  1.00 23.70           C  
ATOM   2079  OG  SER L   9      15.773  48.232  27.902  1.00 40.25           O  
ATOM   2080  H   SER L   9      13.993  48.881  26.517  1.00  0.00           H  
ATOM   2081  HG  SER L   9      16.309  47.463  27.662  1.00  0.00           H  
ATOM   2082  N   SER L  10      16.014  47.867  24.403  1.00 24.26           N  
ATOM   2083  CA  SER L  10      16.604  47.025  23.371  1.00 20.03           C  
ATOM   2084  C   SER L  10      15.491  46.175  22.816  1.00 19.09           C  
ATOM   2085  O   SER L  10      14.462  46.000  23.465  1.00 23.05           O  
ATOM   2086  CB  SER L  10      17.704  46.131  23.944  1.00 19.97           C  
ATOM   2087  OG  SER L  10      17.201  45.271  24.951  1.00 22.17           O  
ATOM   2088  H   SER L  10      15.129  47.626  24.748  1.00  0.00           H  
ATOM   2089  HG  SER L  10      16.730  44.552  24.565  1.00  0.00           H  
ATOM   2090  N   LEU L  11      15.673  45.684  21.601  1.00 16.89           N  
ATOM   2091  CA  LEU L  11      14.682  44.828  20.969  1.00 18.69           C  
ATOM   2092  C   LEU L  11      15.350  43.996  19.894  1.00 20.47           C  
ATOM   2093  O   LEU L  11      16.291  44.452  19.239  1.00 20.91           O  
ATOM   2094  CB  LEU L  11      13.505  45.646  20.409  1.00 21.38           C  
ATOM   2095  CG  LEU L  11      13.643  46.785  19.385  1.00 25.17           C  
ATOM   2096  CD1 LEU L  11      13.853  46.233  17.977  1.00 20.86           C  
ATOM   2097  CD2 LEU L  11      12.378  47.638  19.421  1.00 23.26           C  
ATOM   2098  H   LEU L  11      16.488  45.915  21.105  1.00  0.00           H  
ATOM   2099  N   SER L  12      14.970  42.729  19.818  1.00 24.69           N  
ATOM   2100  CA  SER L  12      15.529  41.837  18.811  1.00 28.26           C  
ATOM   2101  C   SER L  12      14.459  41.676  17.743  1.00 28.77           C  
ATOM   2102  O   SER L  12      13.281  41.529  18.069  1.00 32.42           O  
ATOM   2103  CB  SER L  12      15.918  40.474  19.423  1.00 27.86           C  
ATOM   2104  OG  SER L  12      14.892  39.920  20.229  1.00 31.60           O  
ATOM   2105  H   SER L  12      14.304  42.374  20.438  1.00  0.00           H  
ATOM   2106  HG  SER L  12      14.899  40.357  21.090  1.00  0.00           H  
ATOM   2107  N   ALA L  13      14.846  41.789  16.478  1.00 25.71           N  
ATOM   2108  CA  ALA L  13      13.895  41.646  15.391  1.00 26.73           C  
ATOM   2109  C   ALA L  13      14.594  41.126  14.146  1.00 32.14           C  
ATOM   2110  O   ALA L  13      15.814  41.280  13.993  1.00 34.38           O  
ATOM   2111  CB  ALA L  13      13.207  42.967  15.105  1.00 23.84           C  
ATOM   2112  H   ALA L  13      15.774  41.972  16.260  1.00  0.00           H  
ATOM   2113  N   SER L  14      13.825  40.446  13.298  1.00 34.77           N  
ATOM   2114  CA  SER L  14      14.334  39.875  12.056  1.00 32.54           C  
ATOM   2115  C   SER L  14      14.094  40.790  10.878  1.00 27.50           C  
ATOM   2116  O   SER L  14      13.125  41.555  10.848  1.00 25.92           O  
ATOM   2117  CB  SER L  14      13.706  38.508  11.798  1.00 34.89           C  
ATOM   2118  OG  SER L  14      14.244  37.548  12.696  1.00 43.15           O  
ATOM   2119  H   SER L  14      12.888  40.306  13.517  1.00  0.00           H  
ATOM   2120  HG  SER L  14      15.114  37.257  12.393  1.00  0.00           H  
ATOM   2121  N   VAL L  15      15.007  40.717   9.921  1.00 24.28           N  
ATOM   2122  CA  VAL L  15      14.940  41.531   8.722  1.00 23.14           C  
ATOM   2123  C   VAL L  15      13.533  41.468   8.144  1.00 26.03           C  
ATOM   2124  O   VAL L  15      12.944  40.389   8.045  1.00 32.11           O  
ATOM   2125  CB  VAL L  15      15.974  41.051   7.682  1.00 21.04           C  
ATOM   2126  CG1 VAL L  15      15.867  41.860   6.417  1.00 23.03           C  
ATOM   2127  CG2 VAL L  15      17.376  41.169   8.260  1.00 18.47           C  
ATOM   2128  H   VAL L  15      15.748  40.084  10.023  1.00  0.00           H  
ATOM   2129  N   GLY L  16      12.971  42.641   7.862  1.00 26.99           N  
ATOM   2130  CA  GLY L  16      11.633  42.724   7.301  1.00 24.58           C  
ATOM   2131  C   GLY L  16      10.525  43.074   8.279  1.00 25.76           C  
ATOM   2132  O   GLY L  16       9.390  43.305   7.854  1.00 26.22           O  
ATOM   2133  H   GLY L  16      13.472  43.454   8.036  1.00  0.00           H  
ATOM   2134  N   ASP L  17      10.842  43.111   9.575  1.00 27.18           N  
ATOM   2135  CA  ASP L  17       9.864  43.446  10.613  1.00 30.51           C  
ATOM   2136  C   ASP L  17       9.619  44.942  10.703  1.00 31.14           C  
ATOM   2137  O   ASP L  17      10.458  45.743  10.292  1.00 33.70           O  
ATOM   2138  CB  ASP L  17      10.350  42.992  11.993  1.00 34.71           C  
ATOM   2139  CG  ASP L  17      10.302  41.500  12.175  1.00 37.98           C  
ATOM   2140  OD1 ASP L  17       9.636  40.815  11.372  1.00 43.57           O  
ATOM   2141  OD2 ASP L  17      10.927  41.010  13.136  1.00 37.98           O  
ATOM   2142  H   ASP L  17      11.769  42.922   9.839  1.00  0.00           H  
ATOM   2143  N   ARG L  18       8.477  45.313  11.267  1.00 30.57           N  
ATOM   2144  CA  ARG L  18       8.135  46.716  11.468  1.00 32.39           C  
ATOM   2145  C   ARG L  18       8.565  47.004  12.901  1.00 33.08           C  
ATOM   2146  O   ARG L  18       8.137  46.318  13.831  1.00 38.63           O  
ATOM   2147  CB  ARG L  18       6.628  46.940  11.308  1.00 34.56           C  
ATOM   2148  CG  ARG L  18       6.212  48.397  11.404  1.00 43.32           C  
ATOM   2149  CD  ARG L  18       4.729  48.615  11.098  1.00 47.04           C  
ATOM   2150  NE  ARG L  18       4.458  50.011  10.742  1.00 54.40           N  
ATOM   2151  CZ  ARG L  18       4.690  50.540   9.540  1.00 57.29           C  
ATOM   2152  NH1 ARG L  18       5.185  49.790   8.564  1.00 62.75           N  
ATOM   2153  NH2 ARG L  18       4.483  51.831   9.325  1.00 57.83           N  
ATOM   2154  H   ARG L  18       7.847  44.633  11.561  1.00  0.00           H  
ATOM   2155  HE  ARG L  18       4.077  50.595  11.428  1.00  0.00           H  
ATOM   2156 HH11 ARG L  18       5.397  48.824   8.727  1.00  0.00           H  
ATOM   2157 HH12 ARG L  18       5.369  50.188   7.663  1.00  0.00           H  
ATOM   2158 HH21 ARG L  18       4.157  52.418  10.060  1.00  0.00           H  
ATOM   2159 HH22 ARG L  18       4.668  52.218   8.417  1.00  0.00           H  
ATOM   2160  N   VAL L  19       9.461  47.964  13.084  1.00 30.75           N  
ATOM   2161  CA  VAL L  19       9.941  48.279  14.425  1.00 25.12           C  
ATOM   2162  C   VAL L  19       9.450  49.641  14.877  1.00 23.71           C  
ATOM   2163  O   VAL L  19       9.430  50.588  14.091  1.00 26.57           O  
ATOM   2164  CB  VAL L  19      11.489  48.296  14.483  1.00 25.11           C  
ATOM   2165  CG1 VAL L  19      11.954  48.278  15.907  1.00 17.59           C  
ATOM   2166  CG2 VAL L  19      12.080  47.130  13.711  1.00 24.81           C  
ATOM   2167  H   VAL L  19       9.808  48.459  12.309  1.00  0.00           H  
ATOM   2168  N   THR L  20       9.116  49.745  16.160  1.00 26.76           N  
ATOM   2169  CA  THR L  20       8.656  50.999  16.750  1.00 26.94           C  
ATOM   2170  C   THR L  20       9.276  51.273  18.124  1.00 26.97           C  
ATOM   2171  O   THR L  20       9.234  50.430  19.022  1.00 32.11           O  
ATOM   2172  CB  THR L  20       7.126  51.049  16.859  1.00 26.85           C  
ATOM   2173  OG1 THR L  20       6.559  51.126  15.546  1.00 33.42           O  
ATOM   2174  CG2 THR L  20       6.679  52.257  17.665  1.00 28.29           C  
ATOM   2175  H   THR L  20       9.175  48.955  16.720  1.00  0.00           H  
ATOM   2176  HG1 THR L  20       6.742  51.992  15.162  1.00  0.00           H  
ATOM   2177  N   ILE L  21       9.890  52.446  18.247  1.00 27.40           N  
ATOM   2178  CA  ILE L  21      10.522  52.910  19.479  1.00 22.78           C  
ATOM   2179  C   ILE L  21       9.719  54.121  19.935  1.00 18.52           C  
ATOM   2180  O   ILE L  21       9.046  54.761  19.126  1.00 16.61           O  
ATOM   2181  CB  ILE L  21      11.942  53.367  19.197  1.00 24.18           C  
ATOM   2182  CG1 ILE L  21      12.725  52.217  18.581  1.00 24.66           C  
ATOM   2183  CG2 ILE L  21      12.608  53.876  20.469  1.00 30.54           C  
ATOM   2184  CD1 ILE L  21      14.064  52.636  18.075  1.00 30.28           C  
ATOM   2185  H   ILE L  21       9.911  53.042  17.471  1.00  0.00           H  
ATOM   2186  N   THR L  22       9.745  54.425  21.221  1.00 13.26           N  
ATOM   2187  CA  THR L  22       9.010  55.574  21.698  1.00 16.03           C  
ATOM   2188  C   THR L  22       9.929  56.401  22.524  1.00 19.10           C  
ATOM   2189  O   THR L  22      10.993  55.938  22.936  1.00 22.31           O  
ATOM   2190  CB  THR L  22       7.815  55.200  22.552  1.00 19.79           C  
ATOM   2191  OG1 THR L  22       8.237  54.341  23.616  1.00 24.77           O  
ATOM   2192  CG2 THR L  22       6.755  54.530  21.704  1.00 23.40           C  
ATOM   2193  H   THR L  22      10.261  53.883  21.861  1.00  0.00           H  
ATOM   2194  HG1 THR L  22       7.566  54.342  24.307  1.00  0.00           H  
ATOM   2195  N   CYS L  23       9.481  57.611  22.817  1.00 23.39           N  
ATOM   2196  CA  CYS L  23      10.267  58.549  23.580  1.00 25.08           C  
ATOM   2197  C   CYS L  23       9.313  59.575  24.169  1.00 26.22           C  
ATOM   2198  O   CYS L  23       8.565  60.214  23.423  1.00 34.43           O  
ATOM   2199  CB  CYS L  23      11.239  59.217  22.613  1.00 22.66           C  
ATOM   2200  SG  CYS L  23      12.291  60.499  23.327  1.00 26.48           S  
ATOM   2201  H   CYS L  23       8.588  57.887  22.511  1.00  0.00           H  
ATOM   2202  N   GLN L  24       9.264  59.678  25.494  1.00 25.36           N  
ATOM   2203  CA  GLN L  24       8.382  60.659  26.118  1.00 31.02           C  
ATOM   2204  C   GLN L  24       9.143  61.636  26.991  1.00 30.05           C  
ATOM   2205  O   GLN L  24      10.068  61.250  27.722  1.00 30.10           O  
ATOM   2206  CB  GLN L  24       7.228  60.014  26.900  1.00 38.97           C  
ATOM   2207  CG  GLN L  24       7.616  59.117  28.062  1.00 55.06           C  
ATOM   2208  CD  GLN L  24       7.613  57.635  27.693  1.00 63.96           C  
ATOM   2209  OE1 GLN L  24       7.053  57.239  26.670  1.00 69.53           O  
ATOM   2210  NE2 GLN L  24       8.233  56.807  28.534  1.00 67.25           N  
ATOM   2211  H   GLN L  24       9.825  59.102  26.050  1.00  0.00           H  
ATOM   2212 HE21 GLN L  24       8.234  55.858  28.298  1.00  0.00           H  
ATOM   2213 HE22 GLN L  24       8.656  57.162  29.342  1.00  0.00           H  
ATOM   2214  N   ALA L  25       8.770  62.909  26.871  1.00 26.91           N  
ATOM   2215  CA  ALA L  25       9.393  63.994  27.618  1.00 28.77           C  
ATOM   2216  C   ALA L  25       8.629  64.334  28.899  1.00 30.45           C  
ATOM   2217  O   ALA L  25       7.394  64.276  28.937  1.00 31.78           O  
ATOM   2218  CB  ALA L  25       9.513  65.232  26.731  1.00 25.98           C  
ATOM   2219  H   ALA L  25       8.043  63.118  26.249  1.00  0.00           H  
ATOM   2220  N   SER L  26       9.370  64.730  29.934  1.00 30.32           N  
ATOM   2221  CA  SER L  26       8.780  65.084  31.219  1.00 30.85           C  
ATOM   2222  C   SER L  26       7.895  66.319  31.153  1.00 32.79           C  
ATOM   2223  O   SER L  26       7.218  66.650  32.122  1.00 39.30           O  
ATOM   2224  CB  SER L  26       9.873  65.282  32.265  1.00 31.92           C  
ATOM   2225  OG  SER L  26      10.744  66.339  31.905  1.00 35.26           O  
ATOM   2226  H   SER L  26      10.347  64.781  29.832  1.00  0.00           H  
ATOM   2227  HG  SER L  26      10.379  67.150  32.293  1.00  0.00           H  
ATOM   2228  N   GLN L  27       7.963  67.044  30.044  1.00 31.50           N  
ATOM   2229  CA  GLN L  27       7.133  68.226  29.849  1.00 34.65           C  
ATOM   2230  C   GLN L  27       6.988  68.508  28.369  1.00 33.41           C  
ATOM   2231  O   GLN L  27       7.807  68.070  27.572  1.00 38.64           O  
ATOM   2232  CB  GLN L  27       7.679  69.434  30.613  1.00 39.25           C  
ATOM   2233  CG  GLN L  27       9.136  69.762  30.379  1.00 47.60           C  
ATOM   2234  CD  GLN L  27       9.687  70.682  31.461  1.00 51.41           C  
ATOM   2235  OE1 GLN L  27       9.360  71.866  31.513  1.00 51.87           O  
ATOM   2236  NE2 GLN L  27      10.510  70.128  32.346  1.00 54.84           N  
ATOM   2237  H   GLN L  27       8.566  66.773  29.325  1.00  0.00           H  
ATOM   2238 HE21 GLN L  27      10.865  70.713  33.044  1.00  0.00           H  
ATOM   2239 HE22 GLN L  27      10.727  69.181  32.276  1.00  0.00           H  
ATOM   2240  N   ASP L  28       5.904  69.169  27.996  1.00 34.07           N  
ATOM   2241  CA  ASP L  28       5.634  69.468  26.600  1.00 40.13           C  
ATOM   2242  C   ASP L  28       6.800  70.158  25.906  1.00 41.03           C  
ATOM   2243  O   ASP L  28       7.252  71.214  26.351  1.00 46.02           O  
ATOM   2244  CB  ASP L  28       4.381  70.332  26.496  1.00 44.53           C  
ATOM   2245  CG  ASP L  28       3.881  70.462  25.077  1.00 50.32           C  
ATOM   2246  OD1 ASP L  28       4.564  71.107  24.258  1.00 51.40           O  
ATOM   2247  OD2 ASP L  28       2.796  69.919  24.782  1.00 57.45           O  
ATOM   2248  H   ASP L  28       5.274  69.459  28.676  1.00  0.00           H  
ATOM   2249  N   ILE L  29       7.263  69.571  24.802  1.00 35.45           N  
ATOM   2250  CA  ILE L  29       8.373  70.127  24.030  1.00 24.94           C  
ATOM   2251  C   ILE L  29       7.976  70.348  22.578  1.00 23.86           C  
ATOM   2252  O   ILE L  29       8.820  70.372  21.684  1.00 24.09           O  
ATOM   2253  CB  ILE L  29       9.597  69.209  24.050  1.00 21.39           C  
ATOM   2254  CG1 ILE L  29       9.224  67.823  23.527  1.00 20.65           C  
ATOM   2255  CG2 ILE L  29      10.177  69.148  25.438  1.00 18.83           C  
ATOM   2256  CD1 ILE L  29      10.416  66.974  23.183  1.00 23.30           C  
ATOM   2257  H   ILE L  29       6.861  68.740  24.505  1.00  0.00           H  
ATOM   2258  N   SER L  30       6.684  70.519  22.343  1.00 24.49           N  
ATOM   2259  CA  SER L  30       6.180  70.740  20.993  1.00 24.02           C  
ATOM   2260  C   SER L  30       6.758  69.648  20.094  1.00 21.54           C  
ATOM   2261  O   SER L  30       6.766  68.478  20.474  1.00 20.88           O  
ATOM   2262  CB  SER L  30       6.599  72.133  20.495  1.00 24.78           C  
ATOM   2263  OG  SER L  30       6.608  73.084  21.550  1.00 29.32           O  
ATOM   2264  H   SER L  30       6.059  70.492  23.084  1.00  0.00           H  
ATOM   2265  HG  SER L  30       7.228  72.817  22.225  1.00  0.00           H  
ATOM   2266  N   SER L  31       7.278  70.046  18.938  1.00 19.73           N  
ATOM   2267  CA  SER L  31       7.877  69.121  17.974  1.00 20.76           C  
ATOM   2268  C   SER L  31       9.403  69.191  18.010  1.00 21.26           C  
ATOM   2269  O   SER L  31      10.074  68.713  17.087  1.00 23.10           O  
ATOM   2270  CB  SER L  31       7.392  69.457  16.557  1.00 21.00           C  
ATOM   2271  OG  SER L  31       7.363  70.870  16.358  1.00 27.24           O  
ATOM   2272  H   SER L  31       7.266  70.997  18.705  1.00  0.00           H  
ATOM   2273  HG  SER L  31       8.141  71.164  15.900  1.00  0.00           H  
ATOM   2274  N   TYR L  32       9.952  69.774  19.073  1.00 17.89           N  
ATOM   2275  CA  TYR L  32      11.395  69.928  19.207  1.00 15.97           C  
ATOM   2276  C   TYR L  32      12.097  68.665  19.644  1.00 15.98           C  
ATOM   2277  O   TYR L  32      12.710  68.614  20.718  1.00 14.70           O  
ATOM   2278  CB  TYR L  32      11.718  71.080  20.153  1.00 20.05           C  
ATOM   2279  CG  TYR L  32      11.044  72.365  19.750  1.00 22.35           C  
ATOM   2280  CD1 TYR L  32      10.851  72.678  18.400  1.00 21.82           C  
ATOM   2281  CD2 TYR L  32      10.546  73.239  20.710  1.00 21.34           C  
ATOM   2282  CE1 TYR L  32      10.176  73.820  18.018  1.00 26.94           C  
ATOM   2283  CE2 TYR L  32       9.865  74.386  20.340  1.00 27.21           C  
ATOM   2284  CZ  TYR L  32       9.680  74.670  18.991  1.00 28.45           C  
ATOM   2285  OH  TYR L  32       8.983  75.793  18.610  1.00 34.29           O  
ATOM   2286  H   TYR L  32       9.377  70.083  19.796  1.00  0.00           H  
ATOM   2287  HH  TYR L  32       8.677  76.256  19.399  1.00  0.00           H  
ATOM   2288  N   LEU L  33      12.049  67.671  18.764  1.00 15.31           N  
ATOM   2289  CA  LEU L  33      12.662  66.378  19.012  1.00 15.92           C  
ATOM   2290  C   LEU L  33      13.402  65.864  17.773  1.00 17.18           C  
ATOM   2291  O   LEU L  33      12.878  65.959  16.655  1.00 14.93           O  
ATOM   2292  CB  LEU L  33      11.594  65.365  19.394  1.00 12.96           C  
ATOM   2293  CG  LEU L  33      12.178  64.078  19.939  1.00  9.32           C  
ATOM   2294  CD1 LEU L  33      12.529  64.267  21.387  1.00 11.66           C  
ATOM   2295  CD2 LEU L  33      11.198  62.968  19.771  1.00 10.31           C  
ATOM   2296  H   LEU L  33      11.567  67.811  17.919  1.00  0.00           H  
ATOM   2297  N   ASN L  34      14.632  65.378  17.965  1.00 16.33           N  
ATOM   2298  CA  ASN L  34      15.458  64.807  16.878  1.00 16.86           C  
ATOM   2299  C   ASN L  34      15.623  63.298  17.154  1.00 17.09           C  
ATOM   2300  O   ASN L  34      15.601  62.868  18.316  1.00 21.14           O  
ATOM   2301  CB  ASN L  34      16.876  65.428  16.845  1.00 16.59           C  
ATOM   2302  CG  ASN L  34      16.880  66.937  16.650  1.00 21.85           C  
ATOM   2303  OD1 ASN L  34      17.132  67.672  17.586  1.00 31.75           O  
ATOM   2304  ND2 ASN L  34      16.696  67.389  15.438  1.00 23.64           N  
ATOM   2305  H   ASN L  34      15.020  65.421  18.855  1.00  0.00           H  
ATOM   2306 HD21 ASN L  34      16.888  68.373  15.386  1.00  0.00           H  
ATOM   2307 HD22 ASN L  34      16.467  66.853  14.679  1.00  0.00           H  
ATOM   2308  N   TRP L  35      15.778  62.500  16.099  1.00 11.63           N  
ATOM   2309  CA  TRP L  35      16.000  61.051  16.237  1.00  3.73           C  
ATOM   2310  C   TRP L  35      17.316  60.717  15.563  1.00  2.15           C  
ATOM   2311  O   TRP L  35      17.478  60.972  14.368  1.00  2.81           O  
ATOM   2312  CB  TRP L  35      14.882  60.238  15.566  1.00  3.57           C  
ATOM   2313  CG  TRP L  35      13.578  60.142  16.346  1.00  2.00           C  
ATOM   2314  CD1 TRP L  35      12.422  60.797  16.073  1.00  3.38           C  
ATOM   2315  CD2 TRP L  35      13.303  59.300  17.477  1.00  5.07           C  
ATOM   2316  NE1 TRP L  35      11.443  60.420  16.956  1.00  6.33           N  
ATOM   2317  CE2 TRP L  35      11.958  59.503  17.828  1.00  3.96           C  
ATOM   2318  CE3 TRP L  35      14.066  58.389  18.225  1.00 11.81           C  
ATOM   2319  CZ2 TRP L  35      11.352  58.834  18.896  1.00  8.73           C  
ATOM   2320  CZ3 TRP L  35      13.459  57.719  19.291  1.00 10.06           C  
ATOM   2321  CH2 TRP L  35      12.116  57.947  19.613  1.00  8.62           C  
ATOM   2322  H   TRP L  35      15.726  62.886  15.209  1.00  0.00           H  
ATOM   2323  HE1 TRP L  35      10.522  60.755  16.958  1.00  0.00           H  
ATOM   2324  N   TYR L  36      18.267  60.202  16.339  1.00  8.45           N  
ATOM   2325  CA  TYR L  36      19.593  59.817  15.830  1.00  6.14           C  
ATOM   2326  C   TYR L  36      19.753  58.309  15.726  1.00  6.79           C  
ATOM   2327  O   TYR L  36      19.060  57.553  16.398  1.00 14.20           O  
ATOM   2328  CB  TYR L  36      20.702  60.294  16.763  1.00  9.57           C  
ATOM   2329  CG  TYR L  36      20.902  61.785  16.807  1.00 13.36           C  
ATOM   2330  CD1 TYR L  36      21.761  62.423  15.911  1.00 11.11           C  
ATOM   2331  CD2 TYR L  36      20.239  62.564  17.757  1.00 11.91           C  
ATOM   2332  CE1 TYR L  36      21.953  63.804  15.970  1.00 15.24           C  
ATOM   2333  CE2 TYR L  36      20.420  63.939  17.820  1.00 12.75           C  
ATOM   2334  CZ  TYR L  36      21.276  64.554  16.932  1.00 13.63           C  
ATOM   2335  OH  TYR L  36      21.468  65.913  17.030  1.00 17.17           O  
ATOM   2336  H   TYR L  36      18.073  60.071  17.272  1.00  0.00           H  
ATOM   2337  HH  TYR L  36      22.164  66.174  16.437  1.00  0.00           H  
ATOM   2338  N   GLN L  37      20.731  57.894  14.932  1.00  9.23           N  
ATOM   2339  CA  GLN L  37      21.057  56.492  14.720  1.00  7.99           C  
ATOM   2340  C   GLN L  37      22.547  56.428  14.983  1.00  7.61           C  
ATOM   2341  O   GLN L  37      23.282  57.272  14.483  1.00 15.54           O  
ATOM   2342  CB  GLN L  37      20.805  56.107  13.259  1.00  7.94           C  
ATOM   2343  CG  GLN L  37      21.244  54.695  12.916  1.00 10.15           C  
ATOM   2344  CD  GLN L  37      21.188  54.414  11.440  1.00 12.54           C  
ATOM   2345  OE1 GLN L  37      22.166  54.616  10.719  1.00 17.59           O  
ATOM   2346  NE2 GLN L  37      20.041  53.960  10.972  1.00 10.16           N  
ATOM   2347  H   GLN L  37      21.252  58.562  14.444  1.00  0.00           H  
ATOM   2348 HE21 GLN L  37      20.008  53.771  10.006  1.00  0.00           H  
ATOM   2349 HE22 GLN L  37      19.287  53.813  11.568  1.00  0.00           H  
ATOM   2350  N   GLN L  38      23.003  55.475  15.787  1.00  3.17           N  
ATOM   2351  CA  GLN L  38      24.434  55.348  16.047  1.00  3.31           C  
ATOM   2352  C   GLN L  38      24.905  53.909  15.885  1.00  8.46           C  
ATOM   2353  O   GLN L  38      24.520  53.041  16.669  1.00 16.24           O  
ATOM   2354  CB  GLN L  38      24.770  55.842  17.451  1.00  2.00           C  
ATOM   2355  CG  GLN L  38      26.256  55.735  17.783  1.00  2.00           C  
ATOM   2356  CD  GLN L  38      26.603  56.284  19.148  1.00  2.82           C  
ATOM   2357  OE1 GLN L  38      25.902  56.030  20.127  1.00  2.00           O  
ATOM   2358  NE2 GLN L  38      27.681  57.054  19.217  1.00  3.40           N  
ATOM   2359  H   GLN L  38      22.371  54.867  16.201  1.00  0.00           H  
ATOM   2360 HE21 GLN L  38      27.883  57.404  20.099  1.00  0.00           H  
ATOM   2361 HE22 GLN L  38      28.192  57.221  18.416  1.00  0.00           H  
ATOM   2362  N   LYS L  39      25.673  53.635  14.835  1.00  9.99           N  
ATOM   2363  CA  LYS L  39      26.211  52.292  14.600  1.00  9.85           C  
ATOM   2364  C   LYS L  39      27.305  52.137  15.637  1.00 17.16           C  
ATOM   2365  O   LYS L  39      27.841  53.137  16.120  1.00 20.10           O  
ATOM   2366  CB  LYS L  39      26.819  52.179  13.206  1.00 11.06           C  
ATOM   2367  CG  LYS L  39      25.815  52.196  12.081  1.00 18.32           C  
ATOM   2368  CD  LYS L  39      25.013  50.909  12.048  1.00 26.95           C  
ATOM   2369  CE  LYS L  39      23.969  50.937  10.939  1.00 28.33           C  
ATOM   2370  NZ  LYS L  39      24.568  51.110   9.579  1.00 30.94           N  
ATOM   2371  H   LYS L  39      25.886  54.340  14.192  1.00  0.00           H  
ATOM   2372  HZ1 LYS L  39      25.094  52.000   9.548  1.00  0.00           H  
ATOM   2373  HZ2 LYS L  39      25.215  50.314   9.391  1.00  0.00           H  
ATOM   2374  HZ3 LYS L  39      23.810  51.113   8.869  1.00  0.00           H  
ATOM   2375  N   PRO L  40      27.679  50.895  15.981  1.00 23.28           N  
ATOM   2376  CA  PRO L  40      28.729  50.717  16.988  1.00 20.71           C  
ATOM   2377  C   PRO L  40      30.028  51.363  16.540  1.00 17.81           C  
ATOM   2378  O   PRO L  40      30.442  51.191  15.403  1.00 13.18           O  
ATOM   2379  CB  PRO L  40      28.857  49.198  17.079  1.00 21.03           C  
ATOM   2380  CG  PRO L  40      27.496  48.712  16.674  1.00 23.55           C  
ATOM   2381  CD  PRO L  40      27.204  49.588  15.492  1.00 23.56           C  
ATOM   2382  N   GLY L  41      30.623  52.154  17.427  1.00 23.68           N  
ATOM   2383  CA  GLY L  41      31.872  52.834  17.120  1.00 23.37           C  
ATOM   2384  C   GLY L  41      31.777  53.979  16.124  1.00 26.94           C  
ATOM   2385  O   GLY L  41      32.784  54.368  15.532  1.00 31.38           O  
ATOM   2386  H   GLY L  41      30.205  52.293  18.300  1.00  0.00           H  
ATOM   2387  N   LYS L  42      30.578  54.511  15.919  1.00 25.65           N  
ATOM   2388  CA  LYS L  42      30.376  55.612  14.989  1.00 20.75           C  
ATOM   2389  C   LYS L  42      29.713  56.751  15.735  1.00 19.30           C  
ATOM   2390  O   LYS L  42      29.099  56.533  16.784  1.00 19.24           O  
ATOM   2391  CB  LYS L  42      29.466  55.170  13.841  1.00 29.22           C  
ATOM   2392  CG  LYS L  42      30.055  54.098  12.946  1.00 36.56           C  
ATOM   2393  CD  LYS L  42      31.134  54.659  12.046  1.00 43.50           C  
ATOM   2394  CE  LYS L  42      32.029  53.555  11.488  1.00 48.69           C  
ATOM   2395  NZ  LYS L  42      32.945  52.973  12.526  1.00 50.13           N  
ATOM   2396  H   LYS L  42      29.803  54.160  16.399  1.00  0.00           H  
ATOM   2397  HZ1 LYS L  42      32.388  52.575  13.309  1.00  0.00           H  
ATOM   2398  HZ2 LYS L  42      33.530  52.230  12.104  1.00  0.00           H  
ATOM   2399  HZ3 LYS L  42      33.566  53.725  12.903  1.00  0.00           H  
ATOM   2400  N   ALA L  43      29.827  57.958  15.186  1.00 16.02           N  
ATOM   2401  CA  ALA L  43      29.208  59.147  15.773  1.00  9.95           C  
ATOM   2402  C   ALA L  43      27.755  59.117  15.356  1.00  5.97           C  
ATOM   2403  O   ALA L  43      27.445  58.633  14.273  1.00 18.01           O  
ATOM   2404  CB  ALA L  43      29.864  60.369  15.231  1.00  7.90           C  
ATOM   2405  H   ALA L  43      30.339  58.053  14.364  1.00  0.00           H  
ATOM   2406  N   PRO L  44      26.843  59.630  16.190  1.00  2.28           N  
ATOM   2407  CA  PRO L  44      25.423  59.614  15.818  1.00  2.00           C  
ATOM   2408  C   PRO L  44      25.145  60.302  14.485  1.00  3.01           C  
ATOM   2409  O   PRO L  44      25.904  61.161  14.061  1.00  7.70           O  
ATOM   2410  CB  PRO L  44      24.766  60.368  16.971  1.00  2.00           C  
ATOM   2411  CG  PRO L  44      25.655  60.050  18.139  1.00  2.00           C  
ATOM   2412  CD  PRO L  44      27.030  60.162  17.548  1.00  2.00           C  
ATOM   2413  N   LYS L  45      24.073  59.907  13.815  1.00  7.59           N  
ATOM   2414  CA  LYS L  45      23.699  60.515  12.547  1.00 10.62           C  
ATOM   2415  C   LYS L  45      22.252  60.936  12.676  1.00  9.59           C  
ATOM   2416  O   LYS L  45      21.417  60.136  13.080  1.00 15.54           O  
ATOM   2417  CB  LYS L  45      23.836  59.519  11.387  1.00 15.45           C  
ATOM   2418  CG  LYS L  45      23.597  60.162  10.020  1.00 21.01           C  
ATOM   2419  CD  LYS L  45      23.796  59.212   8.851  1.00 23.96           C  
ATOM   2420  CE  LYS L  45      23.555  59.915   7.506  1.00 26.99           C  
ATOM   2421  NZ  LYS L  45      22.194  60.539   7.376  1.00 25.60           N  
ATOM   2422  H   LYS L  45      23.518  59.180  14.177  1.00  0.00           H  
ATOM   2423  HZ1 LYS L  45      21.475  59.831   7.621  1.00  0.00           H  
ATOM   2424  HZ2 LYS L  45      22.129  61.353   8.010  1.00  0.00           H  
ATOM   2425  HZ3 LYS L  45      22.054  60.846   6.391  1.00  0.00           H  
ATOM   2426  N   LEU L  46      21.955  62.194  12.373  1.00 13.95           N  
ATOM   2427  CA  LEU L  46      20.581  62.697  12.472  1.00 16.23           C  
ATOM   2428  C   LEU L  46      19.728  62.131  11.349  1.00 16.29           C  
ATOM   2429  O   LEU L  46      20.081  62.268  10.179  1.00 23.45           O  
ATOM   2430  CB  LEU L  46      20.545  64.227  12.417  1.00 13.79           C  
ATOM   2431  CG  LEU L  46      19.163  64.845  12.657  1.00 14.00           C  
ATOM   2432  CD1 LEU L  46      18.811  64.723  14.111  1.00 11.96           C  
ATOM   2433  CD2 LEU L  46      19.137  66.303  12.238  1.00 14.61           C  
ATOM   2434  H   LEU L  46      22.664  62.798  12.077  1.00  0.00           H  
ATOM   2435  N   LEU L  47      18.610  61.505  11.707  1.00 12.01           N  
ATOM   2436  CA  LEU L  47      17.717  60.909  10.724  1.00  9.12           C  
ATOM   2437  C   LEU L  47      16.440  61.699  10.600  1.00  8.80           C  
ATOM   2438  O   LEU L  47      15.868  61.810   9.520  1.00 13.68           O  
ATOM   2439  CB  LEU L  47      17.340  59.491  11.138  1.00 10.14           C  
ATOM   2440  CG  LEU L  47      18.426  58.435  11.250  1.00 13.04           C  
ATOM   2441  CD1 LEU L  47      17.736  57.151  11.684  1.00 15.51           C  
ATOM   2442  CD2 LEU L  47      19.151  58.259   9.916  1.00  6.86           C  
ATOM   2443  H   LEU L  47      18.381  61.432  12.657  1.00  0.00           H  
ATOM   2444  N   ILE L  48      15.951  62.193  11.725  1.00  8.84           N  
ATOM   2445  CA  ILE L  48      14.707  62.933  11.724  1.00  8.08           C  
ATOM   2446  C   ILE L  48      14.826  64.155  12.596  1.00 12.99           C  
ATOM   2447  O   ILE L  48      15.313  64.081  13.720  1.00 18.32           O  
ATOM   2448  CB  ILE L  48      13.551  62.038  12.210  1.00 11.86           C  
ATOM   2449  CG1 ILE L  48      13.182  61.029  11.115  1.00 11.08           C  
ATOM   2450  CG2 ILE L  48      12.351  62.870  12.639  1.00  7.79           C  
ATOM   2451  CD1 ILE L  48      12.042  60.117  11.493  1.00 12.14           C  
ATOM   2452  H   ILE L  48      16.435  62.048  12.562  1.00  0.00           H  
ATOM   2453  N   HIS L  49      14.388  65.286  12.062  1.00 17.95           N  
ATOM   2454  CA  HIS L  49      14.435  66.556  12.760  1.00 20.44           C  
ATOM   2455  C   HIS L  49      13.017  67.062  12.938  1.00 25.04           C  
ATOM   2456  O   HIS L  49      12.143  66.731  12.142  1.00 24.91           O  
ATOM   2457  CB  HIS L  49      15.208  67.557  11.917  1.00 25.45           C  
ATOM   2458  CG  HIS L  49      15.447  68.862  12.600  1.00 28.56           C  
ATOM   2459  ND1 HIS L  49      14.869  70.037  12.184  1.00 31.02           N  
ATOM   2460  CD2 HIS L  49      16.207  69.177  13.668  1.00 33.88           C  
ATOM   2461  CE1 HIS L  49      15.263  71.022  12.973  1.00 34.89           C  
ATOM   2462  NE2 HIS L  49      16.077  70.525  13.884  1.00 35.12           N  
ATOM   2463  H   HIS L  49      14.017  65.264  11.166  1.00  0.00           H  
ATOM   2464  HD1 HIS L  49      14.294  70.135  11.406  1.00  0.00           H  
ATOM   2465  HE2 HIS L  49      16.513  71.011  14.631  1.00  0.00           H  
ATOM   2466  N   ALA L  50      12.802  67.886  13.959  1.00 27.01           N  
ATOM   2467  CA  ALA L  50      11.483  68.457  14.245  1.00 25.46           C  
ATOM   2468  C   ALA L  50      10.354  67.430  14.368  1.00 24.65           C  
ATOM   2469  O   ALA L  50       9.242  67.660  13.883  1.00 29.76           O  
ATOM   2470  CB  ALA L  50      11.129  69.508  13.201  1.00 26.04           C  
ATOM   2471  H   ALA L  50      13.542  68.136  14.550  1.00  0.00           H  
ATOM   2472  N   ALA L  51      10.648  66.300  15.008  1.00 21.15           N  
ATOM   2473  CA  ALA L  51       9.686  65.211  15.233  1.00 18.42           C  
ATOM   2474  C   ALA L  51       9.373  64.302  14.060  1.00 19.37           C  
ATOM   2475  O   ALA L  51       9.278  63.094  14.243  1.00 27.34           O  
ATOM   2476  CB  ALA L  51       8.387  65.734  15.824  1.00 16.30           C  
ATOM   2477  H   ALA L  51      11.552  66.195  15.342  1.00  0.00           H  
ATOM   2478  N   SER L  52       9.244  64.856  12.858  1.00 21.13           N  
ATOM   2479  CA  SER L  52       8.911  64.046  11.688  1.00 16.72           C  
ATOM   2480  C   SER L  52       9.449  64.572  10.362  1.00 23.02           C  
ATOM   2481  O   SER L  52       8.867  64.314   9.302  1.00 27.38           O  
ATOM   2482  CB  SER L  52       7.403  63.932  11.579  1.00 20.45           C  
ATOM   2483  OG  SER L  52       6.833  65.217  11.418  1.00 26.48           O  
ATOM   2484  H   SER L  52       9.349  65.827  12.763  1.00  0.00           H  
ATOM   2485  HG  SER L  52       5.877  65.153  11.477  1.00  0.00           H  
ATOM   2486  N   SER L  53      10.538  65.324  10.402  1.00 24.83           N  
ATOM   2487  CA  SER L  53      11.114  65.832   9.171  1.00 23.00           C  
ATOM   2488  C   SER L  53      12.312  64.952   8.863  1.00 20.82           C  
ATOM   2489  O   SER L  53      13.324  65.003   9.559  1.00 21.60           O  
ATOM   2490  CB  SER L  53      11.529  67.303   9.319  1.00 29.73           C  
ATOM   2491  OG  SER L  53      10.399  68.165   9.433  1.00 33.00           O  
ATOM   2492  H   SER L  53      10.967  65.518  11.254  1.00  0.00           H  
ATOM   2493  HG  SER L  53       9.799  67.828  10.110  1.00  0.00           H  
ATOM   2494  N   LEU L  54      12.149  64.078   7.877  1.00 19.46           N  
ATOM   2495  CA  LEU L  54      13.205  63.167   7.462  1.00 21.20           C  
ATOM   2496  C   LEU L  54      14.375  63.961   6.895  1.00 22.32           C  
ATOM   2497  O   LEU L  54      14.203  64.759   5.976  1.00 24.60           O  
ATOM   2498  CB  LEU L  54      12.660  62.224   6.387  1.00 25.69           C  
ATOM   2499  CG  LEU L  54      13.078  60.749   6.393  1.00 25.74           C  
ATOM   2500  CD1 LEU L  54      12.487  60.070   7.603  1.00 28.14           C  
ATOM   2501  CD2 LEU L  54      12.636  60.047   5.115  1.00 26.32           C  
ATOM   2502  H   LEU L  54      11.289  64.045   7.419  1.00  0.00           H  
ATOM   2503  N   GLU L  55      15.560  63.785   7.458  1.00 25.54           N  
ATOM   2504  CA  GLU L  55      16.714  64.508   6.943  1.00 26.40           C  
ATOM   2505  C   GLU L  55      17.001  64.055   5.525  1.00 29.08           C  
ATOM   2506  O   GLU L  55      16.921  62.865   5.212  1.00 30.85           O  
ATOM   2507  CB  GLU L  55      17.946  64.302   7.825  1.00 22.69           C  
ATOM   2508  CG  GLU L  55      17.963  65.184   9.056  1.00 27.39           C  
ATOM   2509  CD  GLU L  55      17.755  66.644   8.715  1.00 32.40           C  
ATOM   2510  OE1 GLU L  55      18.636  67.237   8.047  1.00 33.93           O  
ATOM   2511  OE2 GLU L  55      16.694  67.188   9.092  1.00 35.30           O  
ATOM   2512  H   GLU L  55      15.661  63.160   8.203  1.00  0.00           H  
ATOM   2513  N   THR L  56      17.313  65.017   4.667  1.00 34.17           N  
ATOM   2514  CA  THR L  56      17.612  64.747   3.268  1.00 36.30           C  
ATOM   2515  C   THR L  56      18.599  63.602   3.134  1.00 35.25           C  
ATOM   2516  O   THR L  56      19.718  63.680   3.638  1.00 37.93           O  
ATOM   2517  CB  THR L  56      18.177  66.005   2.556  1.00 36.43           C  
ATOM   2518  OG1 THR L  56      18.716  65.642   1.276  1.00 37.15           O  
ATOM   2519  CG2 THR L  56      19.256  66.675   3.403  1.00 35.58           C  
ATOM   2520  H   THR L  56      17.331  65.934   4.995  1.00  0.00           H  
ATOM   2521  HG1 THR L  56      19.606  65.282   1.411  1.00  0.00           H  
ATOM   2522  N   GLY L  57      18.153  62.524   2.495  1.00 38.70           N  
ATOM   2523  CA  GLY L  57      19.009  61.370   2.284  1.00 35.34           C  
ATOM   2524  C   GLY L  57      18.647  60.099   3.032  1.00 32.10           C  
ATOM   2525  O   GLY L  57      19.099  59.027   2.642  1.00 33.52           O  
ATOM   2526  H   GLY L  57      17.228  62.502   2.171  1.00  0.00           H  
ATOM   2527  N   VAL L  58      17.879  60.189   4.113  1.00 26.53           N  
ATOM   2528  CA  VAL L  58      17.532  58.978   4.835  1.00 27.64           C  
ATOM   2529  C   VAL L  58      16.382  58.259   4.148  1.00 29.74           C  
ATOM   2530  O   VAL L  58      15.482  58.895   3.597  1.00 33.81           O  
ATOM   2531  CB  VAL L  58      17.214  59.232   6.325  1.00 25.60           C  
ATOM   2532  CG1 VAL L  58      18.399  59.852   7.007  1.00 29.40           C  
ATOM   2533  CG2 VAL L  58      16.034  60.111   6.476  1.00 24.48           C  
ATOM   2534  H   VAL L  58      17.553  61.064   4.416  1.00  0.00           H  
ATOM   2535  N   PRO L  59      16.431  56.916   4.128  1.00 29.58           N  
ATOM   2536  CA  PRO L  59      15.420  56.050   3.512  1.00 28.17           C  
ATOM   2537  C   PRO L  59      14.033  56.236   4.117  1.00 26.22           C  
ATOM   2538  O   PRO L  59      13.892  56.378   5.325  1.00 33.63           O  
ATOM   2539  CB  PRO L  59      15.966  54.656   3.798  1.00 29.67           C  
ATOM   2540  CG  PRO L  59      17.454  54.871   3.824  1.00 26.54           C  
ATOM   2541  CD  PRO L  59      17.543  56.107   4.658  1.00 27.01           C  
ATOM   2542  N   SER L  60      13.007  56.134   3.283  1.00 27.08           N  
ATOM   2543  CA  SER L  60      11.625  56.314   3.719  1.00 25.95           C  
ATOM   2544  C   SER L  60      11.034  55.256   4.647  1.00 22.42           C  
ATOM   2545  O   SER L  60       9.873  55.363   5.039  1.00 23.14           O  
ATOM   2546  CB  SER L  60      10.712  56.494   2.511  1.00 32.10           C  
ATOM   2547  OG  SER L  60      11.185  57.557   1.702  1.00 45.69           O  
ATOM   2548  H   SER L  60      13.180  55.952   2.337  1.00  0.00           H  
ATOM   2549  HG  SER L  60      11.191  58.386   2.215  1.00  0.00           H  
ATOM   2550  N   ARG L  61      11.786  54.212   4.972  1.00 19.24           N  
ATOM   2551  CA  ARG L  61      11.255  53.207   5.892  1.00 21.42           C  
ATOM   2552  C   ARG L  61      11.228  53.784   7.316  1.00 24.62           C  
ATOM   2553  O   ARG L  61      10.545  53.262   8.213  1.00 24.74           O  
ATOM   2554  CB  ARG L  61      12.075  51.916   5.836  1.00 17.91           C  
ATOM   2555  CG  ARG L  61      13.561  52.092   6.012  1.00 16.77           C  
ATOM   2556  CD  ARG L  61      14.281  50.756   5.920  1.00 21.21           C  
ATOM   2557  NE  ARG L  61      15.721  50.900   6.120  1.00 22.40           N  
ATOM   2558  CZ  ARG L  61      16.607  50.992   5.134  1.00 27.85           C  
ATOM   2559  NH1 ARG L  61      16.212  50.927   3.867  1.00 32.14           N  
ATOM   2560  NH2 ARG L  61      17.895  51.134   5.412  1.00 31.03           N  
ATOM   2561  H   ARG L  61      12.687  54.124   4.605  1.00  0.00           H  
ATOM   2562  HE  ARG L  61      16.052  50.941   7.033  1.00  0.00           H  
ATOM   2563 HH11 ARG L  61      15.249  50.792   3.643  1.00  0.00           H  
ATOM   2564 HH12 ARG L  61      16.891  50.980   3.129  1.00  0.00           H  
ATOM   2565 HH21 ARG L  61      18.202  51.181   6.357  1.00  0.00           H  
ATOM   2566 HH22 ARG L  61      18.563  51.199   4.665  1.00  0.00           H  
ATOM   2567  N   PHE L  62      11.976  54.869   7.496  1.00 23.31           N  
ATOM   2568  CA  PHE L  62      12.079  55.570   8.766  1.00 17.28           C  
ATOM   2569  C   PHE L  62      11.042  56.677   8.825  1.00 16.36           C  
ATOM   2570  O   PHE L  62      10.906  57.454   7.888  1.00 18.18           O  
ATOM   2571  CB  PHE L  62      13.462  56.194   8.892  1.00 12.44           C  
ATOM   2572  CG  PHE L  62      14.579  55.195   8.992  1.00  7.97           C  
ATOM   2573  CD1 PHE L  62      14.662  54.344  10.078  1.00  7.90           C  
ATOM   2574  CD2 PHE L  62      15.585  55.162   8.036  1.00  7.63           C  
ATOM   2575  CE1 PHE L  62      15.737  53.478  10.217  1.00 10.87           C  
ATOM   2576  CE2 PHE L  62      16.663  54.305   8.167  1.00  9.79           C  
ATOM   2577  CZ  PHE L  62      16.741  53.460   9.260  1.00 11.33           C  
ATOM   2578  H   PHE L  62      12.482  55.232   6.743  1.00  0.00           H  
ATOM   2579  N   SER L  63      10.309  56.753   9.923  1.00 19.06           N  
ATOM   2580  CA  SER L  63       9.308  57.793  10.081  1.00 24.91           C  
ATOM   2581  C   SER L  63       9.259  58.240  11.534  1.00 27.11           C  
ATOM   2582  O   SER L  63       9.730  57.535  12.425  1.00 30.51           O  
ATOM   2583  CB  SER L  63       7.940  57.276   9.642  1.00 26.87           C  
ATOM   2584  OG  SER L  63       7.531  56.198  10.464  1.00 34.14           O  
ATOM   2585  H   SER L  63      10.434  56.093  10.637  1.00  0.00           H  
ATOM   2586  HG  SER L  63       7.081  55.547   9.918  1.00  0.00           H  
ATOM   2587  N   GLY L  64       8.717  59.427  11.765  1.00 27.17           N  
ATOM   2588  CA  GLY L  64       8.605  59.944  13.116  1.00 23.75           C  
ATOM   2589  C   GLY L  64       7.210  60.500  13.288  1.00 22.44           C  
ATOM   2590  O   GLY L  64       6.570  60.877  12.306  1.00 24.62           O  
ATOM   2591  H   GLY L  64       8.366  59.962  11.031  1.00  0.00           H  
ATOM   2592  N   SER L  65       6.716  60.503  14.517  1.00 23.82           N  
ATOM   2593  CA  SER L  65       5.387  61.018  14.816  1.00 27.40           C  
ATOM   2594  C   SER L  65       5.393  61.510  16.243  1.00 31.22           C  
ATOM   2595  O   SER L  65       6.211  61.066  17.057  1.00 33.70           O  
ATOM   2596  CB  SER L  65       4.327  59.931  14.676  1.00 30.65           C  
ATOM   2597  OG  SER L  65       4.278  59.429  13.356  1.00 42.36           O  
ATOM   2598  H   SER L  65       7.265  60.152  15.251  1.00  0.00           H  
ATOM   2599  HG  SER L  65       4.774  58.613  13.298  1.00  0.00           H  
ATOM   2600  N   GLY L  66       4.503  62.447  16.538  1.00 33.86           N  
ATOM   2601  CA  GLY L  66       4.433  62.977  17.883  1.00 36.17           C  
ATOM   2602  C   GLY L  66       4.516  64.484  18.018  1.00 35.51           C  
ATOM   2603  O   GLY L  66       4.928  65.198  17.097  1.00 32.90           O  
ATOM   2604  H   GLY L  66       3.897  62.778  15.844  1.00  0.00           H  
ATOM   2605  N   SER L  67       4.123  64.947  19.198  1.00 34.68           N  
ATOM   2606  CA  SER L  67       4.110  66.357  19.556  1.00 38.63           C  
ATOM   2607  C   SER L  67       3.796  66.444  21.038  1.00 38.38           C  
ATOM   2608  O   SER L  67       3.072  65.601  21.572  1.00 43.35           O  
ATOM   2609  CB  SER L  67       3.024  67.095  18.777  1.00 42.77           C  
ATOM   2610  OG  SER L  67       2.757  68.364  19.354  1.00 49.32           O  
ATOM   2611  H   SER L  67       3.830  64.296  19.879  1.00  0.00           H  
ATOM   2612  HG  SER L  67       2.067  68.799  18.850  1.00  0.00           H  
ATOM   2613  N   GLY L  68       4.328  67.460  21.706  1.00 33.14           N  
ATOM   2614  CA  GLY L  68       4.063  67.615  23.123  1.00 31.26           C  
ATOM   2615  C   GLY L  68       4.917  66.751  24.023  1.00 30.30           C  
ATOM   2616  O   GLY L  68       6.016  67.159  24.386  1.00 34.21           O  
ATOM   2617  H   GLY L  68       4.890  68.105  21.236  1.00  0.00           H  
ATOM   2618  N   THR L  69       4.420  65.575  24.402  1.00 29.91           N  
ATOM   2619  CA  THR L  69       5.177  64.678  25.278  1.00 28.92           C  
ATOM   2620  C   THR L  69       5.368  63.238  24.815  1.00 29.71           C  
ATOM   2621  O   THR L  69       6.192  62.529  25.378  1.00 36.91           O  
ATOM   2622  CB  THR L  69       4.615  64.648  26.726  1.00 25.52           C  
ATOM   2623  OG1 THR L  69       3.199  64.453  26.704  1.00 24.72           O  
ATOM   2624  CG2 THR L  69       4.930  65.933  27.441  1.00 28.43           C  
ATOM   2625  H   THR L  69       3.527  65.310  24.091  1.00  0.00           H  
ATOM   2626  HG1 THR L  69       2.986  63.537  26.559  1.00  0.00           H  
ATOM   2627  N   ASP L  70       4.623  62.792  23.812  1.00 29.91           N  
ATOM   2628  CA  ASP L  70       4.768  61.414  23.348  1.00 32.23           C  
ATOM   2629  C   ASP L  70       5.208  61.371  21.909  1.00 28.58           C  
ATOM   2630  O   ASP L  70       4.536  61.899  21.024  1.00 32.11           O  
ATOM   2631  CB  ASP L  70       3.461  60.639  23.522  1.00 40.90           C  
ATOM   2632  CG  ASP L  70       3.022  60.558  24.974  1.00 49.75           C  
ATOM   2633  OD1 ASP L  70       3.838  60.126  25.826  1.00 51.69           O  
ATOM   2634  OD2 ASP L  70       1.862  60.937  25.267  1.00 53.94           O  
ATOM   2635  H   ASP L  70       3.976  63.383  23.371  1.00  0.00           H  
ATOM   2636  N   PHE L  71       6.338  60.734  21.671  1.00 20.81           N  
ATOM   2637  CA  PHE L  71       6.872  60.655  20.328  1.00 22.00           C  
ATOM   2638  C   PHE L  71       7.189  59.213  20.012  1.00 26.12           C  
ATOM   2639  O   PHE L  71       7.310  58.385  20.920  1.00 29.97           O  
ATOM   2640  CB  PHE L  71       8.156  61.484  20.253  1.00 21.02           C  
ATOM   2641  CG  PHE L  71       7.984  62.915  20.692  1.00 21.03           C  
ATOM   2642  CD1 PHE L  71       7.609  63.897  19.775  1.00 17.16           C  
ATOM   2643  CD2 PHE L  71       8.187  63.284  22.022  1.00 23.18           C  
ATOM   2644  CE1 PHE L  71       7.440  65.221  20.173  1.00 14.57           C  
ATOM   2645  CE2 PHE L  71       8.017  64.614  22.428  1.00 20.81           C  
ATOM   2646  CZ  PHE L  71       7.643  65.579  21.500  1.00 15.94           C  
ATOM   2647  H   PHE L  71       6.817  60.302  22.406  1.00  0.00           H  
ATOM   2648  N   SER L  72       7.351  58.922  18.727  1.00 27.43           N  
ATOM   2649  CA  SER L  72       7.696  57.580  18.267  1.00 27.49           C  
ATOM   2650  C   SER L  72       8.460  57.599  16.949  1.00 25.68           C  
ATOM   2651  O   SER L  72       8.459  58.594  16.216  1.00 31.37           O  
ATOM   2652  CB  SER L  72       6.469  56.667  18.188  1.00 32.59           C  
ATOM   2653  OG  SER L  72       5.375  57.291  17.542  1.00 41.08           O  
ATOM   2654  H   SER L  72       7.243  59.632  18.063  1.00  0.00           H  
ATOM   2655  HG  SER L  72       5.413  57.127  16.612  1.00  0.00           H  
ATOM   2656  N   PHE L  73       9.137  56.498  16.671  1.00 23.05           N  
ATOM   2657  CA  PHE L  73       9.956  56.359  15.487  1.00 20.44           C  
ATOM   2658  C   PHE L  73       9.588  55.008  14.932  1.00 20.11           C  
ATOM   2659  O   PHE L  73       9.357  54.080  15.695  1.00 16.20           O  
ATOM   2660  CB  PHE L  73      11.432  56.379  15.911  1.00 18.04           C  
ATOM   2661  CG  PHE L  73      12.409  56.228  14.777  1.00 16.59           C  
ATOM   2662  CD1 PHE L  73      12.490  57.179  13.775  1.00 20.57           C  
ATOM   2663  CD2 PHE L  73      13.283  55.162  14.743  1.00 15.48           C  
ATOM   2664  CE1 PHE L  73      13.431  57.072  12.768  1.00 21.45           C  
ATOM   2665  CE2 PHE L  73      14.227  55.048  13.741  1.00 17.01           C  
ATOM   2666  CZ  PHE L  73      14.302  56.001  12.752  1.00 19.84           C  
ATOM   2667  H   PHE L  73       9.078  55.736  17.288  1.00  0.00           H  
ATOM   2668  N   THR L  74       9.542  54.892  13.614  1.00 25.15           N  
ATOM   2669  CA  THR L  74       9.193  53.629  12.988  1.00 26.08           C  
ATOM   2670  C   THR L  74      10.089  53.249  11.805  1.00 27.11           C  
ATOM   2671  O   THR L  74      10.610  54.106  11.084  1.00 28.50           O  
ATOM   2672  CB  THR L  74       7.704  53.645  12.527  1.00 26.80           C  
ATOM   2673  OG1 THR L  74       6.849  53.751  13.670  1.00 31.37           O  
ATOM   2674  CG2 THR L  74       7.341  52.386  11.764  1.00 26.51           C  
ATOM   2675  H   THR L  74       9.756  55.666  13.049  1.00  0.00           H  
ATOM   2676  HG1 THR L  74       6.573  54.668  13.772  1.00  0.00           H  
ATOM   2677  N   ILE L  75      10.332  51.953  11.686  1.00 24.59           N  
ATOM   2678  CA  ILE L  75      11.093  51.396  10.587  1.00 28.25           C  
ATOM   2679  C   ILE L  75      10.064  50.429  10.003  1.00 33.52           C  
ATOM   2680  O   ILE L  75       9.622  49.506  10.696  1.00 34.73           O  
ATOM   2681  CB  ILE L  75      12.317  50.595  11.084  1.00 27.37           C  
ATOM   2682  CG1 ILE L  75      13.146  51.437  12.054  1.00 26.62           C  
ATOM   2683  CG2 ILE L  75      13.191  50.189   9.910  1.00 26.69           C  
ATOM   2684  CD1 ILE L  75      14.440  50.782  12.473  1.00 26.36           C  
ATOM   2685  H   ILE L  75       9.979  51.345  12.372  1.00  0.00           H  
ATOM   2686  N   SER L  76       9.608  50.687   8.780  1.00 34.60           N  
ATOM   2687  CA  SER L  76       8.612  49.819   8.140  1.00 35.00           C  
ATOM   2688  C   SER L  76       9.085  48.376   7.998  1.00 34.51           C  
ATOM   2689  O   SER L  76       8.361  47.431   8.317  1.00 37.27           O  
ATOM   2690  CB  SER L  76       8.241  50.358   6.763  1.00 31.92           C  
ATOM   2691  OG  SER L  76       7.457  51.528   6.883  1.00 44.42           O  
ATOM   2692  H   SER L  76       9.937  51.466   8.305  1.00  0.00           H  
ATOM   2693  HG  SER L  76       7.956  52.214   7.330  1.00  0.00           H  
ATOM   2694  N   SER L  77      10.299  48.224   7.496  1.00 31.23           N  
ATOM   2695  CA  SER L  77      10.895  46.925   7.301  1.00 30.85           C  
ATOM   2696  C   SER L  77      12.329  47.050   7.735  1.00 29.67           C  
ATOM   2697  O   SER L  77      13.110  47.773   7.114  1.00 28.96           O  
ATOM   2698  CB  SER L  77      10.853  46.519   5.827  1.00 37.31           C  
ATOM   2699  OG  SER L  77       9.528  46.284   5.386  1.00 48.18           O  
ATOM   2700  H   SER L  77      10.808  49.019   7.241  1.00  0.00           H  
ATOM   2701  HG  SER L  77       9.125  45.581   5.906  1.00  0.00           H  
ATOM   2702  N   LEU L  78      12.670  46.352   8.809  1.00 27.10           N  
ATOM   2703  CA  LEU L  78      14.017  46.374   9.336  1.00 22.66           C  
ATOM   2704  C   LEU L  78      14.945  45.830   8.257  1.00 27.22           C  
ATOM   2705  O   LEU L  78      14.656  44.810   7.628  1.00 27.91           O  
ATOM   2706  CB  LEU L  78      14.101  45.489  10.570  1.00 19.46           C  
ATOM   2707  CG  LEU L  78      14.992  45.949  11.718  1.00 24.71           C  
ATOM   2708  CD1 LEU L  78      15.266  44.766  12.634  1.00 25.06           C  
ATOM   2709  CD2 LEU L  78      16.295  46.511  11.202  1.00 22.34           C  
ATOM   2710  H   LEU L  78      11.991  45.804   9.250  1.00  0.00           H  
ATOM   2711  N   GLN L  79      16.018  46.557   7.995  1.00 30.25           N  
ATOM   2712  CA  GLN L  79      17.009  46.146   7.012  1.00 33.46           C  
ATOM   2713  C   GLN L  79      18.285  45.911   7.805  1.00 35.82           C  
ATOM   2714  O   GLN L  79      18.500  46.553   8.824  1.00 34.64           O  
ATOM   2715  CB  GLN L  79      17.225  47.247   5.969  1.00 35.76           C  
ATOM   2716  CG  GLN L  79      16.025  47.492   5.058  1.00 38.44           C  
ATOM   2717  CD  GLN L  79      15.730  46.316   4.148  1.00 40.53           C  
ATOM   2718  OE1 GLN L  79      16.465  46.061   3.193  1.00 40.89           O  
ATOM   2719  NE2 GLN L  79      14.656  45.585   4.446  1.00 40.26           N  
ATOM   2720  H   GLN L  79      16.152  47.392   8.483  1.00  0.00           H  
ATOM   2721 HE21 GLN L  79      14.449  44.821   3.869  1.00  0.00           H  
ATOM   2722 HE22 GLN L  79      14.111  45.821   5.228  1.00  0.00           H  
ATOM   2723  N   PRO L  80      19.163  45.007   7.336  1.00 38.52           N  
ATOM   2724  CA  PRO L  80      20.425  44.694   8.020  1.00 35.39           C  
ATOM   2725  C   PRO L  80      21.254  45.937   8.332  1.00 33.16           C  
ATOM   2726  O   PRO L  80      22.045  45.959   9.265  1.00 34.50           O  
ATOM   2727  CB  PRO L  80      21.145  43.812   7.007  1.00 33.97           C  
ATOM   2728  CG  PRO L  80      20.026  43.142   6.292  1.00 36.13           C  
ATOM   2729  CD  PRO L  80      19.069  44.270   6.064  1.00 36.80           C  
ATOM   2730  N   GLU L  81      21.072  46.970   7.533  1.00 29.86           N  
ATOM   2731  CA  GLU L  81      21.809  48.202   7.715  1.00 31.89           C  
ATOM   2732  C   GLU L  81      21.207  49.054   8.823  1.00 27.68           C  
ATOM   2733  O   GLU L  81      21.740  50.111   9.156  1.00 26.73           O  
ATOM   2734  CB  GLU L  81      21.811  48.966   6.398  1.00 42.36           C  
ATOM   2735  CG  GLU L  81      20.421  49.064   5.788  1.00 55.29           C  
ATOM   2736  CD  GLU L  81      20.425  49.546   4.359  1.00 61.20           C  
ATOM   2737  OE1 GLU L  81      20.695  50.751   4.136  1.00 63.92           O  
ATOM   2738  OE2 GLU L  81      20.137  48.716   3.465  1.00 66.38           O  
ATOM   2739  H   GLU L  81      20.436  46.892   6.796  1.00  0.00           H  
ATOM   2740  N   ASP L  82      20.082  48.610   9.368  1.00 22.14           N  
ATOM   2741  CA  ASP L  82      19.408  49.340  10.438  1.00 18.96           C  
ATOM   2742  C   ASP L  82      19.760  48.830  11.839  1.00 14.88           C  
ATOM   2743  O   ASP L  82      19.241  49.336  12.819  1.00 19.07           O  
ATOM   2744  CB  ASP L  82      17.880  49.280  10.258  1.00 19.23           C  
ATOM   2745  CG  ASP L  82      17.408  49.786   8.893  1.00 18.96           C  
ATOM   2746  OD1 ASP L  82      18.160  50.486   8.189  1.00 20.31           O  
ATOM   2747  OD2 ASP L  82      16.250  49.505   8.533  1.00 19.36           O  
ATOM   2748  H   ASP L  82      19.699  47.800   9.047  1.00  0.00           H  
ATOM   2749  N   LEU L  83      20.582  47.794  11.938  1.00 15.60           N  
ATOM   2750  CA  LEU L  83      20.960  47.261  13.248  1.00 14.82           C  
ATOM   2751  C   LEU L  83      21.871  48.273  13.918  1.00 18.28           C  
ATOM   2752  O   LEU L  83      23.039  48.417  13.524  1.00 28.02           O  
ATOM   2753  CB  LEU L  83      21.679  45.902  13.122  1.00 14.26           C  
ATOM   2754  CG  LEU L  83      20.915  44.588  12.866  1.00 12.53           C  
ATOM   2755  CD1 LEU L  83      19.553  44.611  13.536  1.00 14.42           C  
ATOM   2756  CD2 LEU L  83      20.738  44.319  11.401  1.00 14.32           C  
ATOM   2757  H   LEU L  83      20.960  47.389  11.126  1.00  0.00           H  
ATOM   2758  N   ALA L  84      21.332  48.983  14.910  1.00 17.35           N  
ATOM   2759  CA  ALA L  84      22.071  50.024  15.631  1.00 12.69           C  
ATOM   2760  C   ALA L  84      21.286  50.515  16.832  1.00 13.44           C  
ATOM   2761  O   ALA L  84      20.207  49.988  17.144  1.00 13.10           O  
ATOM   2762  CB  ALA L  84      22.346  51.202  14.710  1.00 12.02           C  
ATOM   2763  H   ALA L  84      20.412  48.794  15.170  1.00  0.00           H  
ATOM   2764  N   THR L  85      21.838  51.524  17.506  1.00 13.95           N  
ATOM   2765  CA  THR L  85      21.192  52.137  18.662  1.00  9.91           C  
ATOM   2766  C   THR L  85      20.585  53.456  18.195  1.00  8.03           C  
ATOM   2767  O   THR L  85      21.210  54.196  17.436  1.00  9.86           O  
ATOM   2768  CB  THR L  85      22.191  52.416  19.772  1.00  8.39           C  
ATOM   2769  OG1 THR L  85      22.988  51.246  20.002  1.00 13.35           O  
ATOM   2770  CG2 THR L  85      21.470  52.783  21.049  1.00 11.17           C  
ATOM   2771  H   THR L  85      22.708  51.871  17.228  1.00  0.00           H  
ATOM   2772  HG1 THR L  85      23.707  51.452  20.608  1.00  0.00           H  
ATOM   2773  N   TYR L  86      19.360  53.730  18.620  1.00  7.00           N  
ATOM   2774  CA  TYR L  86      18.668  54.952  18.240  1.00  6.54           C  
ATOM   2775  C   TYR L  86      18.389  55.834  19.453  1.00 11.59           C  
ATOM   2776  O   TYR L  86      18.088  55.323  20.548  1.00 10.34           O  
ATOM   2777  CB  TYR L  86      17.356  54.614  17.533  1.00  6.22           C  
ATOM   2778  CG  TYR L  86      17.551  53.915  16.212  1.00 12.57           C  
ATOM   2779  CD1 TYR L  86      17.706  52.530  16.149  1.00 16.92           C  
ATOM   2780  CD2 TYR L  86      17.615  54.639  15.022  1.00 12.93           C  
ATOM   2781  CE1 TYR L  86      17.925  51.882  14.927  1.00 14.11           C  
ATOM   2782  CE2 TYR L  86      17.834  53.995  13.797  1.00 13.75           C  
ATOM   2783  CZ  TYR L  86      17.991  52.617  13.764  1.00 10.96           C  
ATOM   2784  OH  TYR L  86      18.235  51.984  12.574  1.00 13.17           O  
ATOM   2785  H   TYR L  86      18.899  53.095  19.212  1.00  0.00           H  
ATOM   2786  HH  TYR L  86      18.330  51.033  12.726  1.00  0.00           H  
ATOM   2787  N   TYR L  87      18.510  57.153  19.266  1.00 15.27           N  
ATOM   2788  CA  TYR L  87      18.261  58.126  20.341  1.00 10.75           C  
ATOM   2789  C   TYR L  87      17.320  59.232  19.913  1.00 10.88           C  
ATOM   2790  O   TYR L  87      17.180  59.531  18.725  1.00 10.46           O  
ATOM   2791  CB  TYR L  87      19.552  58.813  20.788  1.00  2.00           C  
ATOM   2792  CG  TYR L  87      20.610  57.885  21.327  1.00  4.21           C  
ATOM   2793  CD1 TYR L  87      20.648  57.529  22.674  1.00  4.53           C  
ATOM   2794  CD2 TYR L  87      21.585  57.369  20.487  1.00  4.50           C  
ATOM   2795  CE1 TYR L  87      21.651  56.674  23.162  1.00  8.68           C  
ATOM   2796  CE2 TYR L  87      22.576  56.521  20.955  1.00  4.12           C  
ATOM   2797  CZ  TYR L  87      22.615  56.179  22.280  1.00  4.52           C  
ATOM   2798  OH  TYR L  87      23.645  55.374  22.696  1.00  2.00           O  
ATOM   2799  H   TYR L  87      18.756  57.481  18.376  1.00  0.00           H  
ATOM   2800  HH  TYR L  87      24.024  54.907  21.949  1.00  0.00           H  
ATOM   2801  N   CYS L  88      16.623  59.788  20.890  1.00  5.58           N  
ATOM   2802  CA  CYS L  88      15.767  60.925  20.646  1.00  9.58           C  
ATOM   2803  C   CYS L  88      16.434  62.019  21.466  1.00 14.74           C  
ATOM   2804  O   CYS L  88      17.168  61.742  22.426  1.00 14.57           O  
ATOM   2805  CB  CYS L  88      14.337  60.672  21.116  1.00 12.67           C  
ATOM   2806  SG  CYS L  88      14.166  59.972  22.782  1.00 16.98           S  
ATOM   2807  H   CYS L  88      16.685  59.422  21.799  1.00  0.00           H  
ATOM   2808  N   GLN L  89      16.267  63.257  21.033  1.00 19.00           N  
ATOM   2809  CA  GLN L  89      16.859  64.398  21.727  1.00 16.14           C  
ATOM   2810  C   GLN L  89      15.919  65.581  21.619  1.00 15.83           C  
ATOM   2811  O   GLN L  89      15.356  65.842  20.554  1.00 17.58           O  
ATOM   2812  CB  GLN L  89      18.183  64.787  21.087  1.00 12.42           C  
ATOM   2813  CG  GLN L  89      18.727  66.081  21.621  1.00 14.25           C  
ATOM   2814  CD  GLN L  89      19.861  66.626  20.781  1.00 17.88           C  
ATOM   2815  OE1 GLN L  89      20.937  66.931  21.299  1.00 19.73           O  
ATOM   2816  NE2 GLN L  89      19.622  66.777  19.479  1.00 15.79           N  
ATOM   2817  H   GLN L  89      15.728  63.421  20.224  1.00  0.00           H  
ATOM   2818 HE21 GLN L  89      20.330  67.150  18.943  1.00  0.00           H  
ATOM   2819 HE22 GLN L  89      18.735  66.530  19.134  1.00  0.00           H  
ATOM   2820  N   GLN L  90      15.705  66.264  22.729  1.00 15.98           N  
ATOM   2821  CA  GLN L  90      14.845  67.424  22.711  1.00 16.16           C  
ATOM   2822  C   GLN L  90      15.741  68.638  22.580  1.00 20.11           C  
ATOM   2823  O   GLN L  90      16.860  68.667  23.102  1.00 22.08           O  
ATOM   2824  CB  GLN L  90      13.996  67.490  23.979  1.00 14.21           C  
ATOM   2825  CG  GLN L  90      14.783  67.521  25.278  1.00 17.53           C  
ATOM   2826  CD  GLN L  90      15.211  68.917  25.676  1.00 15.94           C  
ATOM   2827  OE1 GLN L  90      14.798  69.891  25.059  1.00 20.93           O  
ATOM   2828  NE2 GLN L  90      16.035  69.022  26.712  1.00 13.94           N  
ATOM   2829  H   GLN L  90      16.160  65.996  23.558  1.00  0.00           H  
ATOM   2830 HE21 GLN L  90      16.302  69.927  26.974  1.00  0.00           H  
ATOM   2831 HE22 GLN L  90      16.329  68.214  27.177  1.00  0.00           H  
ATOM   2832  N   TYR L  91      15.289  69.609  21.810  1.00 21.10           N  
ATOM   2833  CA  TYR L  91      16.070  70.821  21.647  1.00 23.91           C  
ATOM   2834  C   TYR L  91      15.212  72.043  21.965  1.00 23.10           C  
ATOM   2835  O   TYR L  91      15.364  73.111  21.377  1.00 24.48           O  
ATOM   2836  CB  TYR L  91      16.706  70.887  20.254  1.00 20.71           C  
ATOM   2837  CG  TYR L  91      15.751  70.798  19.096  1.00 23.02           C  
ATOM   2838  CD1 TYR L  91      15.182  71.944  18.544  1.00 27.22           C  
ATOM   2839  CD2 TYR L  91      15.463  69.575  18.503  1.00 24.83           C  
ATOM   2840  CE1 TYR L  91      14.355  71.868  17.416  1.00 27.04           C  
ATOM   2841  CE2 TYR L  91      14.642  69.484  17.379  1.00 25.84           C  
ATOM   2842  CZ  TYR L  91      14.097  70.634  16.841  1.00 28.31           C  
ATOM   2843  OH  TYR L  91      13.314  70.532  15.716  1.00 29.01           O  
ATOM   2844  H   TYR L  91      14.426  69.513  21.359  1.00  0.00           H  
ATOM   2845  HH  TYR L  91      12.526  71.110  15.827  1.00  0.00           H  
ATOM   2846  N   ASP L  92      14.279  71.848  22.890  1.00 22.54           N  
ATOM   2847  CA  ASP L  92      13.405  72.915  23.337  1.00 26.69           C  
ATOM   2848  C   ASP L  92      14.258  73.891  24.128  1.00 26.77           C  
ATOM   2849  O   ASP L  92      14.039  75.092  24.064  1.00 33.13           O  
ATOM   2850  CB  ASP L  92      12.304  72.363  24.240  1.00 25.25           C  
ATOM   2851  CG  ASP L  92      11.364  73.438  24.725  1.00 29.00           C  
ATOM   2852  OD1 ASP L  92      11.041  74.336  23.922  1.00 33.28           O  
ATOM   2853  OD2 ASP L  92      10.956  73.397  25.907  1.00 32.59           O  
ATOM   2854  H   ASP L  92      14.188  70.959  23.289  1.00  0.00           H  
ATOM   2855  N   SER L  93      15.211  73.357  24.884  1.00 28.02           N  
ATOM   2856  CA  SER L  93      16.110  74.154  25.699  1.00 30.31           C  
ATOM   2857  C   SER L  93      17.282  73.321  26.208  1.00 27.00           C  
ATOM   2858  O   SER L  93      17.235  72.095  26.180  1.00 31.65           O  
ATOM   2859  CB  SER L  93      15.365  74.738  26.899  1.00 37.01           C  
ATOM   2860  OG  SER L  93      15.671  76.127  27.071  1.00 45.38           O  
ATOM   2861  H   SER L  93      15.309  72.385  24.905  1.00  0.00           H  
ATOM   2862  HG  SER L  93      15.271  76.616  26.338  1.00  0.00           H  
ATOM   2863  N   LEU L  94      18.341  73.995  26.648  1.00 21.11           N  
ATOM   2864  CA  LEU L  94      19.502  73.322  27.193  1.00 18.96           C  
ATOM   2865  C   LEU L  94      19.073  72.483  28.400  1.00 21.16           C  
ATOM   2866  O   LEU L  94      18.119  72.841  29.098  1.00 23.05           O  
ATOM   2867  CB  LEU L  94      20.543  74.353  27.622  1.00 18.86           C  
ATOM   2868  CG  LEU L  94      21.054  75.246  26.503  1.00 16.29           C  
ATOM   2869  CD1 LEU L  94      22.204  76.069  26.995  1.00 21.96           C  
ATOM   2870  CD2 LEU L  94      21.501  74.401  25.334  1.00 15.72           C  
ATOM   2871  H   LEU L  94      18.339  74.973  26.589  1.00  0.00           H  
ATOM   2872  N   PRO L  95      19.823  71.407  28.717  1.00 17.89           N  
ATOM   2873  CA  PRO L  95      21.035  70.938  28.048  1.00 16.92           C  
ATOM   2874  C   PRO L  95      20.847  69.950  26.895  1.00 17.86           C  
ATOM   2875  O   PRO L  95      21.626  68.998  26.764  1.00 18.54           O  
ATOM   2876  CB  PRO L  95      21.807  70.302  29.186  1.00 15.64           C  
ATOM   2877  CG  PRO L  95      20.730  69.645  29.943  1.00 16.00           C  
ATOM   2878  CD  PRO L  95      19.656  70.701  30.001  1.00 16.47           C  
ATOM   2879  N   LEU L  96      19.826  70.161  26.071  1.00 13.93           N  
ATOM   2880  CA  LEU L  96      19.597  69.292  24.919  1.00 13.04           C  
ATOM   2881  C   LEU L  96      19.688  67.821  25.314  1.00 14.76           C  
ATOM   2882  O   LEU L  96      20.572  67.092  24.870  1.00 18.23           O  
ATOM   2883  CB  LEU L  96      20.626  69.610  23.839  1.00 10.21           C  
ATOM   2884  CG  LEU L  96      20.457  70.805  22.901  1.00  4.91           C  
ATOM   2885  CD1 LEU L  96      19.586  71.881  23.465  1.00 11.64           C  
ATOM   2886  CD2 LEU L  96      21.815  71.341  22.630  1.00  7.48           C  
ATOM   2887  H   LEU L  96      19.209  70.904  26.237  1.00  0.00           H  
ATOM   2888  N   THR L  97      18.761  67.402  26.164  1.00 15.88           N  
ATOM   2889  CA  THR L  97      18.716  66.040  26.668  1.00 10.38           C  
ATOM   2890  C   THR L  97      18.429  64.946  25.653  1.00  9.96           C  
ATOM   2891  O   THR L  97      17.541  65.086  24.811  1.00 10.30           O  
ATOM   2892  CB  THR L  97      17.698  65.951  27.758  1.00  7.40           C  
ATOM   2893  OG1 THR L  97      17.679  67.199  28.453  1.00 14.18           O  
ATOM   2894  CG2 THR L  97      18.070  64.850  28.729  1.00  9.27           C  
ATOM   2895  H   THR L  97      18.071  68.027  26.451  1.00  0.00           H  
ATOM   2896  HG1 THR L  97      18.503  67.290  28.965  1.00  0.00           H  
ATOM   2897  N   PHE L  98      19.193  63.859  25.760  1.00 12.46           N  
ATOM   2898  CA  PHE L  98      19.067  62.671  24.915  1.00  9.18           C  
ATOM   2899  C   PHE L  98      18.392  61.570  25.731  1.00  9.33           C  
ATOM   2900  O   PHE L  98      18.651  61.425  26.922  1.00  8.99           O  
ATOM   2901  CB  PHE L  98      20.440  62.130  24.552  1.00  7.04           C  
ATOM   2902  CG  PHE L  98      21.037  62.705  23.307  1.00  3.79           C  
ATOM   2903  CD1 PHE L  98      21.780  63.870  23.357  1.00  2.00           C  
ATOM   2904  CD2 PHE L  98      20.972  62.003  22.108  1.00  2.00           C  
ATOM   2905  CE1 PHE L  98      22.455  64.315  22.241  1.00  4.83           C  
ATOM   2906  CE2 PHE L  98      21.643  62.442  20.989  1.00  2.00           C  
ATOM   2907  CZ  PHE L  98      22.387  63.594  21.050  1.00  3.25           C  
ATOM   2908  H   PHE L  98      19.899  63.853  26.445  1.00  0.00           H  
ATOM   2909  N   GLY L  99      17.547  60.777  25.087  1.00 11.78           N  
ATOM   2910  CA  GLY L  99      16.912  59.677  25.785  1.00  7.11           C  
ATOM   2911  C   GLY L  99      17.950  58.578  25.977  1.00 13.15           C  
ATOM   2912  O   GLY L  99      19.046  58.638  25.397  1.00 10.80           O  
ATOM   2913  H   GLY L  99      17.346  60.945  24.145  1.00  0.00           H  
ATOM   2914  N   GLY L 100      17.596  57.552  26.748  1.00 13.48           N  
ATOM   2915  CA  GLY L 100      18.516  56.457  27.026  1.00 12.23           C  
ATOM   2916  C   GLY L 100      19.025  55.637  25.862  1.00 10.90           C  
ATOM   2917  O   GLY L 100      20.114  55.066  25.930  1.00 15.10           O  
ATOM   2918  H   GLY L 100      16.706  57.531  27.147  1.00  0.00           H  
ATOM   2919  N   GLY L 101      18.242  55.581  24.793  1.00 12.75           N  
ATOM   2920  CA  GLY L 101      18.632  54.817  23.623  1.00 12.67           C  
ATOM   2921  C   GLY L 101      17.908  53.494  23.580  1.00 16.47           C  
ATOM   2922  O   GLY L 101      17.476  52.978  24.614  1.00 17.11           O  
ATOM   2923  H   GLY L 101      17.394  56.070  24.772  1.00  0.00           H  
ATOM   2924  N   THR L 102      17.739  52.972  22.373  1.00 17.98           N  
ATOM   2925  CA  THR L 102      17.080  51.693  22.150  1.00 16.58           C  
ATOM   2926  C   THR L 102      17.963  50.950  21.185  1.00 12.26           C  
ATOM   2927  O   THR L 102      18.221  51.450  20.088  1.00 13.96           O  
ATOM   2928  CB  THR L 102      15.717  51.878  21.482  1.00 19.43           C  
ATOM   2929  OG1 THR L 102      14.878  52.665  22.333  1.00 31.51           O  
ATOM   2930  CG2 THR L 102      15.055  50.547  21.202  1.00 19.41           C  
ATOM   2931  H   THR L 102      18.087  53.455  21.599  1.00  0.00           H  
ATOM   2932  HG1 THR L 102      14.998  52.386  23.255  1.00  0.00           H  
ATOM   2933  N   LYS L 103      18.524  49.828  21.627  1.00 10.24           N  
ATOM   2934  CA  LYS L 103      19.378  49.034  20.757  1.00  8.23           C  
ATOM   2935  C   LYS L 103      18.492  48.092  19.967  1.00  8.19           C  
ATOM   2936  O   LYS L 103      17.669  47.381  20.550  1.00  8.96           O  
ATOM   2937  CB  LYS L 103      20.388  48.223  21.555  1.00  3.81           C  
ATOM   2938  CG  LYS L 103      21.449  47.603  20.664  1.00  9.12           C  
ATOM   2939  CD  LYS L 103      22.561  46.950  21.477  1.00 13.04           C  
ATOM   2940  CE  LYS L 103      23.728  46.523  20.585  1.00 14.61           C  
ATOM   2941  NZ  LYS L 103      23.305  45.526  19.540  1.00 29.55           N  
ATOM   2942  H   LYS L 103      18.374  49.532  22.549  1.00  0.00           H  
ATOM   2943  HZ1 LYS L 103      22.564  45.928  18.926  1.00  0.00           H  
ATOM   2944  HZ2 LYS L 103      24.120  45.252  18.952  1.00  0.00           H  
ATOM   2945  HZ3 LYS L 103      22.925  44.669  20.001  1.00  0.00           H  
ATOM   2946  N   VAL L 104      18.600  48.144  18.646  1.00  7.62           N  
ATOM   2947  CA  VAL L 104      17.814  47.274  17.788  1.00  5.60           C  
ATOM   2948  C   VAL L 104      18.772  46.214  17.324  1.00  8.10           C  
ATOM   2949  O   VAL L 104      19.806  46.539  16.736  1.00 11.55           O  
ATOM   2950  CB  VAL L 104      17.315  48.007  16.556  1.00  3.67           C  
ATOM   2951  CG1 VAL L 104      16.741  46.997  15.571  1.00  3.95           C  
ATOM   2952  CG2 VAL L 104      16.287  49.069  16.946  1.00  2.00           C  
ATOM   2953  H   VAL L 104      19.230  48.767  18.236  1.00  0.00           H  
ATOM   2954  N   GLU L 105      18.464  44.959  17.625  1.00 11.75           N  
ATOM   2955  CA  GLU L 105      19.326  43.859  17.219  1.00 12.69           C  
ATOM   2956  C   GLU L 105      18.555  42.759  16.535  1.00 14.50           C  
ATOM   2957  O   GLU L 105      17.332  42.697  16.625  1.00 14.23           O  
ATOM   2958  CB  GLU L 105      20.129  43.317  18.395  1.00  9.33           C  
ATOM   2959  CG  GLU L 105      19.321  42.870  19.585  1.00  5.31           C  
ATOM   2960  CD  GLU L 105      20.208  42.686  20.797  1.00  8.15           C  
ATOM   2961  OE1 GLU L 105      21.442  42.796  20.652  1.00  2.63           O  
ATOM   2962  OE2 GLU L 105      19.679  42.459  21.904  1.00 10.47           O  
ATOM   2963  H   GLU L 105      17.648  44.757  18.117  1.00  0.00           H  
ATOM   2964  N   ILE L 106      19.280  41.895  15.840  1.00 18.38           N  
ATOM   2965  CA  ILE L 106      18.673  40.804  15.091  1.00 25.71           C  
ATOM   2966  C   ILE L 106      18.309  39.568  15.931  1.00 27.09           C  
ATOM   2967  O   ILE L 106      18.969  39.266  16.922  1.00 29.18           O  
ATOM   2968  CB  ILE L 106      19.625  40.399  13.949  1.00 26.21           C  
ATOM   2969  CG1 ILE L 106      18.891  39.597  12.886  1.00 24.46           C  
ATOM   2970  CG2 ILE L 106      20.831  39.664  14.507  1.00 30.61           C  
ATOM   2971  CD1 ILE L 106      18.044  40.454  12.010  1.00 28.13           C  
ATOM   2972  H   ILE L 106      20.253  41.992  15.839  1.00  0.00           H  
ATOM   2973  N   LYS L 107      17.228  38.886  15.562  1.00 29.64           N  
ATOM   2974  CA  LYS L 107      16.828  37.666  16.260  1.00 30.44           C  
ATOM   2975  C   LYS L 107      17.842  36.583  15.950  1.00 30.37           C  
ATOM   2976  O   LYS L 107      18.305  36.474  14.815  1.00 30.77           O  
ATOM   2977  CB  LYS L 107      15.458  37.172  15.805  1.00 33.03           C  
ATOM   2978  CG  LYS L 107      14.299  37.943  16.390  1.00 43.56           C  
ATOM   2979  CD  LYS L 107      12.970  37.260  16.087  1.00 52.47           C  
ATOM   2980  CE  LYS L 107      11.773  38.149  16.441  1.00 58.59           C  
ATOM   2981  NZ  LYS L 107      11.791  38.607  17.867  1.00 61.70           N  
ATOM   2982  H   LYS L 107      16.699  39.195  14.800  1.00  0.00           H  
ATOM   2983  HZ1 LYS L 107      11.776  37.780  18.497  1.00  0.00           H  
ATOM   2984  HZ2 LYS L 107      12.660  39.154  18.037  1.00  0.00           H  
ATOM   2985  HZ3 LYS L 107      10.963  39.205  18.048  1.00  0.00           H  
ATOM   2986  N   ARG L 108      18.198  35.810  16.970  1.00 31.42           N  
ATOM   2987  CA  ARG L 108      19.150  34.708  16.856  1.00 29.28           C  
ATOM   2988  C   ARG L 108      18.734  33.626  17.837  1.00 28.34           C  
ATOM   2989  O   ARG L 108      17.721  33.742  18.524  1.00 27.83           O  
ATOM   2990  CB  ARG L 108      20.550  35.177  17.240  1.00 31.63           C  
ATOM   2991  CG  ARG L 108      21.306  35.945  16.186  1.00 37.65           C  
ATOM   2992  CD  ARG L 108      22.566  36.560  16.785  1.00 41.59           C  
ATOM   2993  NE  ARG L 108      23.298  35.600  17.605  1.00 46.35           N  
ATOM   2994  CZ  ARG L 108      24.203  35.924  18.524  1.00 49.03           C  
ATOM   2995  NH1 ARG L 108      24.508  37.197  18.751  1.00 51.10           N  
ATOM   2996  NH2 ARG L 108      24.783  34.969  19.240  1.00 49.62           N  
ATOM   2997  H   ARG L 108      17.804  35.978  17.838  1.00  0.00           H  
ATOM   2998  HE  ARG L 108      23.114  34.647  17.468  1.00  0.00           H  
ATOM   2999 HH11 ARG L 108      24.051  37.922  18.238  1.00  0.00           H  
ATOM   3000 HH12 ARG L 108      25.183  37.436  19.446  1.00  0.00           H  
ATOM   3001 HH21 ARG L 108      24.543  34.011  19.085  1.00  0.00           H  
ATOM   3002 HH22 ARG L 108      25.464  35.205  19.934  1.00  0.00           H  
ATOM   3003  N   THR L 109      19.534  32.574  17.912  1.00 29.71           N  
ATOM   3004  CA  THR L 109      19.279  31.487  18.841  1.00 30.72           C  
ATOM   3005  C   THR L 109      19.311  32.133  20.231  1.00 26.53           C  
ATOM   3006  O   THR L 109      20.271  32.822  20.573  1.00 33.89           O  
ATOM   3007  CB  THR L 109      20.375  30.376  18.694  1.00 33.64           C  
ATOM   3008  OG1 THR L 109      19.996  29.463  17.655  1.00 36.83           O  
ATOM   3009  CG2 THR L 109      20.583  29.600  19.988  1.00 38.18           C  
ATOM   3010  H   THR L 109      20.310  32.514  17.321  1.00  0.00           H  
ATOM   3011  HG1 THR L 109      20.688  28.788  17.561  1.00  0.00           H  
ATOM   3012  N   VAL L 110      18.221  32.000  20.977  1.00 19.54           N  
ATOM   3013  CA  VAL L 110      18.128  32.554  22.326  1.00 16.72           C  
ATOM   3014  C   VAL L 110      19.126  31.881  23.269  1.00 15.64           C  
ATOM   3015  O   VAL L 110      19.042  30.677  23.500  1.00 26.44           O  
ATOM   3016  CB  VAL L 110      16.714  32.352  22.902  1.00 18.10           C  
ATOM   3017  CG1 VAL L 110      16.638  32.872  24.314  1.00 17.14           C  
ATOM   3018  CG2 VAL L 110      15.693  33.042  22.029  1.00 19.82           C  
ATOM   3019  H   VAL L 110      17.458  31.505  20.613  1.00  0.00           H  
TER    3020      VAL L 110                                                      
