# Supplementary material for: SARS-CoV-2 Spike Protein Interaction Space
Source: Int J Mol Sci. 2023 Jul 27;24(15):12058. doi: 10.3390/ijms241512058 (PMC10418891; doi:10.3390/ijms241512058)
Supplement: Supplementary file 1 [file ijms-24-12058-s001.zip › Supplementary Material File S1/1BJM.pdb]

REMARK 950 NUMBERING  Kabat
REMARK 950 METHOD     X-ray crystal structure
REMARK 950 RESOLUTION 2.200
REMARK 950 R-FACTOR   0.158
REMARK 950 R-FREE     0.000
REMARK 950 CHAIN-TYPE LABEL ORIGINAL
REMARK 950 CHAIN L    L    A
REMARK 950 CHAIN L    L    B
REMARK 950 MOLECULE : A : LOC - LAMBDA 1 TYPE LIGHT-CHAIN DIMER
REMARK 950 SPECIES  : A : HOMO SAPIENS
SEQRES   1 L 216  PCA SER VAL LEU THR GLN PRO PRO SER ALA SER GLY THR          
SEQRES   2 L 216  PRO GLY GLN ARG VAL THR ILE SER CYS SER GLY SER SER          
SEQRES   3 L 216  SER ASN ILE GLY GLU ASN SER VAL THR TRP TYR GLN HIS          
SEQRES   4 L 216  LEU SER GLY THR ALA PRO LYS LEU LEU ILE TYR GLU ASP          
SEQRES   5 L 216  ASN SER ARG ALA SER GLY VAL SER ASP ARG PHE SER ALA          
SEQRES   6 L 216  SER LYS SER GLY THR SER ALA SER LEU ALA ILE SER GLY          
SEQRES   7 L 216  LEU GLN PRO GLU ASP GLU THR ASP TYR TYR CYS ALA ALA          
SEQRES   8 L 216  TRP ASP ASP SER LEU ASP VAL ALA VAL PHE GLY THR GLY          
SEQRES   9 L 216  THR LYS VAL THR VAL LEU GLY GLN PRO LYS ALA ASN PRO          
SEQRES  10 L 216  THR VAL THR LEU PHE PRO PRO SER SER GLU GLU LEU GLN          
SEQRES  11 L 216  ALA ASN LYS ALA THR LEU VAL CYS LEU ILE SER ASP PHE          
SEQRES  12 L 216  TYR PRO GLY ALA VAL THR VAL ALA TRP LYS ALA ASP GLY          
SEQRES  13 L 216  SER PRO VAL LYS ALA GLY VAL GLU THR THR LYS PRO SER          
SEQRES  14 L 216  LYS GLN SER ASN ASN LYS TYR ALA ALA SER SER TYR LEU          
SEQRES  15 L 216  SER LEU THR PRO GLU GLN TRP LYS SER HIS ARG SER TYR          
SEQRES  16 L 216  SER CYS GLN VAL THR HIS GLU GLY SER THR VAL GLU LYS          
SEQRES  17 L 216  THR VAL ALA PRO THR GLU CYS SER                              
SEQRES   1 L 216  PCA SER VAL LEU THR GLN PRO PRO SER ALA SER GLY THR          
SEQRES   2 L 216  PRO GLY GLN ARG VAL THR ILE SER CYS SER GLY SER SER          
SEQRES   3 L 216  SER ASN ILE GLY GLU ASN SER VAL THR TRP TYR GLN HIS          
SEQRES   4 L 216  LEU SER GLY THR ALA PRO LYS LEU LEU ILE TYR GLU ASP          
SEQRES   5 L 216  ASN SER ARG ALA SER GLY VAL SER ASP ARG PHE SER ALA          
SEQRES   6 L 216  SER LYS SER GLY THR SER ALA SER LEU ALA ILE SER GLY          
SEQRES   7 L 216  LEU GLN PRO GLU ASP GLU THR ASP TYR TYR CYS ALA ALA          
SEQRES   8 L 216  TRP ASP ASP SER LEU ASP VAL ALA VAL PHE GLY THR GLY          
SEQRES   9 L 216  THR LYS VAL THR VAL LEU GLY GLN PRO LYS ALA ASN PRO          
SEQRES  10 L 216  THR VAL THR LEU PHE PRO PRO SER SER GLU GLU LEU GLN          
SEQRES  11 L 216  ALA ASN LYS ALA THR LEU VAL CYS LEU ILE SER ASP PHE          
SEQRES  12 L 216  TYR PRO GLY ALA VAL THR VAL ALA TRP LYS ALA ASP GLY          
SEQRES  13 L 216  SER PRO VAL LYS ALA GLY VAL GLU THR THR LYS PRO SER          
SEQRES  14 L 216  LYS GLN SER ASN ASN LYS TYR ALA ALA SER SER TYR LEU          
SEQRES  15 L 216  SER LEU THR PRO GLU GLN TRP LYS SER HIS ARG SER TYR          
SEQRES  16 L 216  SER CYS GLN VAL THR HIS GLU GLY SER THR VAL GLU LYS          
SEQRES  17 L 216  THR VAL ALA PRO THR GLU CYS SER                              
ATOM      8  N   SER L   2      23.142  25.947   4.545  1.00 43.32           N  
ATOM      9  CA  SER L   2      22.715  24.644   3.961  1.00 41.28           C  
ATOM     10  C   SER L   2      23.769  23.611   4.448  1.00 39.40           C  
ATOM     11  O   SER L   2      24.800  23.307   3.845  1.00 39.57           O  
ATOM     12  CB  SER L   2      22.387  24.670   2.506  1.00 41.25           C  
ATOM     13  OG  SER L   2      21.017  25.043   2.301  1.00 40.88           O  
ATOM     14  N   VAL L   3      23.372  23.112   5.609  1.00 36.75           N  
ATOM     15  CA  VAL L   3      24.045  22.192   6.487  1.00 33.97           C  
ATOM     16  C   VAL L   3      23.298  20.994   7.069  1.00 31.36           C  
ATOM     17  O   VAL L   3      22.138  20.647   6.775  1.00 31.17           O  
ATOM     18  CB  VAL L   3      24.473  23.197   7.627  1.00 34.70           C  
ATOM     19  CG1 VAL L   3      25.378  24.289   7.045  1.00 35.68           C  
ATOM     20  CG2 VAL L   3      23.240  23.840   8.261  1.00 34.09           C  
ATOM     21  N   LEU L   4      24.027  20.360   7.998  1.00 28.38           N  
ATOM     22  CA  LEU L   4      23.746  19.222   8.829  1.00 24.60           C  
ATOM     23  C   LEU L   4      22.479  19.319   9.647  1.00 22.67           C  
ATOM     24  O   LEU L   4      22.074  20.226  10.380  1.00 22.71           O  
ATOM     25  CB  LEU L   4      24.991  18.896   9.680  1.00 23.45           C  
ATOM     26  CG  LEU L   4      26.306  18.967   8.927  1.00 22.30           C  
ATOM     27  CD1 LEU L   4      27.464  18.387   9.702  1.00 22.99           C  
ATOM     28  CD2 LEU L   4      26.161  18.138   7.667  1.00 23.26           C  
ATOM     29  N   THR L   5      21.722  18.248   9.518  1.00 20.70           N  
ATOM     30  CA  THR L   5      20.460  18.144  10.229  1.00 19.07           C  
ATOM     31  C   THR L   5      20.640  17.324  11.494  1.00 17.62           C  
ATOM     32  O   THR L   5      21.110  16.193  11.363  1.00 17.34           O  
ATOM     33  CB  THR L   5      19.384  17.445   9.312  1.00 19.78           C  
ATOM     34  OG1 THR L   5      19.771  17.908   7.971  1.00 23.06           O  
ATOM     35  CG2 THR L   5      17.965  17.794   9.690  1.00 19.50           C  
ATOM     36  N   GLN L   6      20.240  17.914  12.591  1.00 15.82           N  
ATOM     37  CA  GLN L   6      20.250  17.317  13.930  1.00 13.89           C  
ATOM     38  C   GLN L   6      18.866  17.507  14.554  1.00 13.90           C  
ATOM     39  O   GLN L   6      18.204  18.563  14.350  1.00 14.26           O  
ATOM     40  CB  GLN L   6      21.322  17.985  14.762  1.00 11.21           C  
ATOM     41  CG  GLN L   6      22.733  17.760  14.299  1.00  9.17           C  
ATOM     42  CD  GLN L   6      23.662  18.531  15.212  1.00  8.16           C  
ATOM     43  OE1 GLN L   6      24.529  19.261  14.779  1.00  7.58           O  
ATOM     44  NE2 GLN L   6      23.422  18.423  16.511  1.00  8.41           N  
ATOM     45  N   PRO L   7      18.379  16.501  15.262  1.00 13.29           N  
ATOM     46  CA  PRO L   7      17.068  16.631  15.946  1.00 12.54           C  
ATOM     47  C   PRO L   7      17.255  17.834  16.906  1.00 11.92           C  
ATOM     48  O   PRO L   7      18.412  18.071  17.320  1.00 12.36           O  
ATOM     49  CB  PRO L   7      16.949  15.338  16.764  1.00 12.43           C  
ATOM     50  CG  PRO L   7      18.365  14.850  16.924  1.00 12.80           C  
ATOM     51  CD  PRO L   7      19.045  15.254  15.627  1.00 13.26           C  
ATOM     52  N   PRO L   8      16.194  18.532  17.213  1.00 11.02           N  
ATOM     53  CA  PRO L   8      16.188  19.667  18.132  1.00 10.83           C  
ATOM     54  C   PRO L   8      16.506  19.335  19.577  1.00 10.97           C  
ATOM     55  O   PRO L   8      17.205  20.060  20.286  1.00 12.40           O  
ATOM     56  CB  PRO L   8      14.781  20.247  18.028  1.00  9.96           C  
ATOM     57  CG  PRO L   8      14.101  19.438  16.990  1.00 10.21           C  
ATOM     58  CD  PRO L   8      14.842  18.194  16.696  1.00 10.20           C  
ATOM     59  N   SER L   9      15.989  18.314  20.183  1.00 11.38           N  
ATOM     60  CA  SER L   9      16.182  17.768  21.510  1.00 11.35           C  
ATOM     61  C   SER L   9      16.406  16.222  21.371  1.00 11.53           C  
ATOM     62  O   SER L   9      16.029  15.557  20.385  1.00 11.41           O  
ATOM     63  CB  SER L   9      14.960  17.985  22.392  1.00 12.47           C  
ATOM     64  OG  SER L   9      13.776  17.786  21.609  1.00 14.07           O  
ATOM     65  N   ALA L  11      17.025  15.686  22.353  1.00 10.57           N  
ATOM     66  CA  ALA L  11      17.407  14.329  22.686  1.00 10.75           C  
ATOM     67  C   ALA L  11      17.369  14.343  24.226  1.00 11.02           C  
ATOM     68  O   ALA L  11      17.791  15.364  24.817  1.00 11.56           O  
ATOM     69  CB  ALA L  11      18.690  13.936  22.028  1.00  9.31           C  
ATOM     70  N   SER L  12      16.818  13.364  24.891  1.00 11.19           N  
ATOM     71  CA  SER L  12      16.730  13.487  26.373  1.00 12.14           C  
ATOM     72  C   SER L  12      16.375  12.145  26.968  1.00 12.56           C  
ATOM     73  O   SER L  12      15.835  11.308  26.216  1.00 13.37           O  
ATOM     74  CB  SER L  12      15.570  14.501  26.551  1.00 13.09           C  
ATOM     75  OG  SER L  12      14.418  13.800  26.023  1.00 14.38           O  
ATOM     76  N   GLY L  13      16.683  11.901  28.222  1.00 12.78           N  
ATOM     77  CA  GLY L  13      16.382  10.590  28.844  1.00 13.74           C  
ATOM     78  C   GLY L  13      16.443  10.814  30.353  1.00 15.26           C  
ATOM     79  O   GLY L  13      16.688  11.971  30.717  1.00 15.50           O  
ATOM     80  N   THR L  14      16.232   9.769  31.111  1.00 15.97           N  
ATOM     81  CA  THR L  14      16.238   9.851  32.599  1.00 17.02           C  
ATOM     82  C   THR L  14      17.647   9.787  33.061  1.00 17.62           C  
ATOM     83  O   THR L  14      18.478   9.346  32.240  1.00 18.53           O  
ATOM     84  CB  THR L  14      15.218   8.764  33.089  1.00 18.43           C  
ATOM     85  OG1 THR L  14      15.322   7.654  32.138  1.00 18.82           O  
ATOM     86  CG2 THR L  14      13.761   9.278  33.045  1.00 19.06           C  
ATOM     87  N   PRO L  15      17.994  10.213  34.263  1.00 18.37           N  
ATOM     88  CA  PRO L  15      19.405  10.202  34.700  1.00 19.27           C  
ATOM     89  C   PRO L  15      20.089   8.873  34.470  1.00 20.17           C  
ATOM     90  O   PRO L  15      19.500   7.766  34.617  1.00 20.74           O  
ATOM     91  CB  PRO L  15      19.362  10.632  36.171  1.00 18.81           C  
ATOM     92  CG  PRO L  15      18.073  11.384  36.287  1.00 18.39           C  
ATOM     93  CD  PRO L  15      17.107  10.802  35.266  1.00 18.21           C  
ATOM     94  N   GLY L  16      21.376   8.919  34.163  1.00 20.22           N  
ATOM     95  CA  GLY L  16      22.141   7.674  33.956  1.00 20.20           C  
ATOM     96  C   GLY L  16      21.690   6.928  32.706  1.00 20.16           C  
ATOM     97  O   GLY L  16      22.230   5.852  32.387  1.00 19.81           O  
ATOM     98  N   GLN L  17      20.760   7.484  31.969  1.00 20.35           N  
ATOM     99  CA  GLN L  17      20.327   6.817  30.717  1.00 20.94           C  
ATOM    100  C   GLN L  17      21.453   7.107  29.686  1.00 21.17           C  
ATOM    101  O   GLN L  17      22.402   7.846  29.956  1.00 20.22           O  
ATOM    102  CB  GLN L  17      18.961   7.248  30.208  1.00 21.57           C  
ATOM    103  CG  GLN L  17      18.226   6.374  29.228  1.00 20.77           C  
ATOM    104  CD  GLN L  17      16.922   6.943  28.732  1.00 20.96           C  
ATOM    105  OE1 GLN L  17      16.086   7.506  29.433  1.00 20.43           O  
ATOM    106  NE2 GLN L  17      16.703   6.815  27.416  1.00 21.31           N  
ATOM    107  N   ARG L  18      21.199   6.526  28.555  1.00 22.13           N  
ATOM    108  CA  ARG L  18      21.957   6.524  27.331  1.00 23.37           C  
ATOM    109  C   ARG L  18      21.183   7.196  26.189  1.00 22.44           C  
ATOM    110  O   ARG L  18      20.163   6.722  25.718  1.00 21.61           O  
ATOM    111  CB  ARG L  18      22.254   5.077  26.907  1.00 27.90           C  
ATOM    112  CG  ARG L  18      23.742   4.790  26.716  1.00 31.15           C  
ATOM    113  CD  ARG L  18      24.160   5.078  25.331  1.00 33.55           C  
ATOM    114  NE  ARG L  18      23.400   4.324  24.317  1.00 36.28           N  
ATOM    115  CZ  ARG L  18      24.061   3.954  23.196  1.00 37.51           C  
ATOM    116  NH1 ARG L  18      25.391   4.161  23.213  1.00 38.73           N  
ATOM    117  NH2 ARG L  18      23.507   3.391  22.130  1.00 38.37           N  
ATOM    118  N   VAL L  19      21.800   8.293  25.733  1.00 22.08           N  
ATOM    119  CA  VAL L  19      21.231   9.134  24.699  1.00 21.34           C  
ATOM    120  C   VAL L  19      22.089   9.249  23.458  1.00 21.70           C  
ATOM    121  O   VAL L  19      23.309   9.444  23.496  1.00 22.44           O  
ATOM    122  CB  VAL L  19      20.951  10.518  25.319  1.00 20.81           C  
ATOM    123  CG1 VAL L  19      20.129  11.366  24.378  1.00 21.59           C  
ATOM    124  CG2 VAL L  19      20.322  10.380  26.676  1.00 21.63           C  
ATOM    125  N   THR L  20      21.405   9.207  22.341  1.00 21.42           N  
ATOM    126  CA  THR L  20      21.975   9.303  21.022  1.00 21.74           C  
ATOM    127  C   THR L  20      21.444  10.585  20.342  1.00 21.53           C  
ATOM    128  O   THR L  20      20.250  10.872  20.451  1.00 21.76           O  
ATOM    129  CB  THR L  20      21.583   8.080  20.121  1.00 22.83           C  
ATOM    130  OG1 THR L  20      21.820   6.917  20.930  1.00 23.82           O  
ATOM    131  CG2 THR L  20      22.280   8.039  18.763  1.00 23.94           C  
ATOM    132  N   ILE L  21      22.385  11.202  19.694  1.00 21.14           N  
ATOM    133  CA  ILE L  21      22.196  12.439  18.941  1.00 21.52           C  
ATOM    134  C   ILE L  21      22.722  12.157  17.529  1.00 21.64           C  
ATOM    135  O   ILE L  21      23.926  11.993  17.334  1.00 21.53           O  
ATOM    136  CB  ILE L  21      22.930  13.658  19.572  1.00 20.74           C  
ATOM    137  CG1 ILE L  21      22.568  13.894  21.064  1.00 19.10           C  
ATOM    138  CG2 ILE L  21      22.712  14.976  18.747  1.00 21.43           C  
ATOM    139  CD1 ILE L  21      23.759  14.702  21.712  1.00 18.08           C  
ATOM    140  N   SER L  22      21.791  12.094  16.600  1.00 22.70           N  
ATOM    141  CA  SER L  22      22.243  11.814  15.202  1.00 23.72           C  
ATOM    142  C   SER L  22      22.620  13.116  14.498  1.00 24.46           C  
ATOM    143  O   SER L  22      22.245  14.212  14.940  1.00 24.86           O  
ATOM    144  CB  SER L  22      21.138  11.088  14.462  1.00 22.55           C  
ATOM    145  OG  SER L  22      20.331  12.030  13.809  1.00 23.04           O  
ATOM    146  N   CYS L  23      23.315  12.960  13.393  1.00 24.99           N  
ATOM    147  CA  CYS L  23      23.817  14.019  12.506  1.00 25.25           C  
ATOM    148  C   CYS L  23      23.762  13.465  11.078  1.00 26.41           C  
ATOM    149  O   CYS L  23      24.327  12.387  10.820  1.00 26.89           O  
ATOM    150  CB  CYS L  23      25.173  14.448  13.011  1.00 22.90           C  
ATOM    151  SG  CYS L  23      26.007  15.640  11.977  1.00 21.04           S  
ATOM    152  N   SER L  24      23.052  14.133  10.196  1.00 27.48           N  
ATOM    153  CA  SER L  24      22.780  13.808   8.815  1.00 28.60           C  
ATOM    154  C   SER L  24      23.187  14.849   7.777  1.00 29.47           C  
ATOM    155  O   SER L  24      22.921  16.031   7.838  1.00 28.99           O  
ATOM    156  CB  SER L  24      21.271  13.508   8.614  1.00 28.08           C  
ATOM    157  OG  SER L  24      20.817  14.026   7.362  1.00 27.65           O  
ATOM    158  N   GLY L  25      23.776  14.336   6.700  1.00 31.22           N  
ATOM    159  CA  GLY L  25      24.228  15.092   5.558  1.00 32.98           C  
ATOM    160  C   GLY L  25      24.297  14.280   4.265  1.00 34.52           C  
ATOM    161  O   GLY L  25      23.775  13.176   4.053  1.00 33.96           O  
ATOM    162  N   SER L  26      25.019  14.933   3.354  1.00 36.05           N  
ATOM    163  CA  SER L  26      25.277  14.483   2.006  1.00 37.81           C  
ATOM    164  C   SER L  26      26.467  13.548   1.918  1.00 39.13           C  
ATOM    165  O   SER L  26      27.033  13.154   2.915  1.00 39.59           O  
ATOM    166  CB  SER L  26      25.547  15.660   1.055  1.00 37.15           C  
ATOM    167  OG  SER L  26      24.353  15.824   0.309  1.00 36.84           O  
ATOM    168  N   SER L  27      26.753  13.228   0.669  1.00 40.95           N  
ATOM    169  CA  SER L  27      27.923  12.338   0.385  1.00 42.80           C  
ATOM    170  C   SER L  27      28.958  13.340  -0.179  1.00 43.45           C  
ATOM    171  O   SER L  27      29.657  13.103  -1.170  1.00 44.03           O  
ATOM    172  CB  SER L  27      27.600  11.147  -0.473  1.00 42.82           C  
ATOM    173  OG  SER L  27      26.495  11.372  -1.336  1.00 42.36           O  
ATOM    174  N   SER L  27A     28.939  14.466   0.553  1.00 43.39           N  
ATOM    175  CA  SER L  27A     29.829  15.594   0.215  1.00 43.24           C  
ATOM    176  C   SER L  27A     30.508  16.104   1.476  1.00 43.47           C  
ATOM    177  O   SER L  27A     31.701  16.452   1.497  1.00 43.33           O  
ATOM    178  CB  SER L  27A     28.974  16.654  -0.468  1.00 42.57           C  
ATOM    179  OG  SER L  27A     28.010  16.009  -1.295  1.00 42.73           O  
ATOM    180  N   ASN L  27B     29.694  16.110   2.518  1.00 43.73           N  
ATOM    181  CA  ASN L  27B     30.127  16.586   3.852  1.00 44.25           C  
ATOM    182  C   ASN L  27B     30.495  15.361   4.686  1.00 43.88           C  
ATOM    183  O   ASN L  27B     31.554  14.793   4.362  1.00 44.45           O  
ATOM    184  CB  ASN L  27B     29.111  17.523   4.490  1.00 45.65           C  
ATOM    185  CG  ASN L  27B     27.701  17.383   3.918  1.00 46.22           C  
ATOM    186  OD1 ASN L  27B     27.174  16.247   3.906  1.00 46.40           O  
ATOM    187  ND2 ASN L  27B     27.155  18.518   3.461  1.00 45.62           N  
ATOM    188  N   ILE L  28      29.664  15.042   5.656  1.00 43.10           N  
ATOM    189  CA  ILE L  28      29.891  13.878   6.540  1.00 42.07           C  
ATOM    190  C   ILE L  28      30.316  12.732   5.616  1.00 41.54           C  
ATOM    191  O   ILE L  28      31.345  12.093   5.646  1.00 41.22           O  
ATOM    192  CB  ILE L  28      28.524  13.481   7.218  1.00 42.13           C  
ATOM    193  CG1 ILE L  28      28.333  14.223   8.566  1.00 42.51           C  
ATOM    194  CG2 ILE L  28      28.337  11.958   7.371  1.00 41.77           C  
ATOM    195  CD1 ILE L  28      26.852  14.459   9.005  1.00 42.12           C  
ATOM    196  N   GLY L  29      29.320  12.561   4.758  1.00 41.40           N  
ATOM    197  CA  GLY L  29      29.375  11.525   3.731  1.00 41.37           C  
ATOM    198  C   GLY L  29      30.654  11.813   2.955  1.00 41.62           C  
ATOM    199  O   GLY L  29      30.508  12.264   1.803  1.00 41.89           O  
ATOM    200  N   GLU L  30      31.778  11.551   3.613  1.00 41.50           N  
ATOM    201  CA  GLU L  30      33.051  11.768   2.895  1.00 41.52           C  
ATOM    202  C   GLU L  30      34.097  12.476   3.715  1.00 40.73           C  
ATOM    203  O   GLU L  30      35.306  12.155   3.592  1.00 41.02           O  
ATOM    204  CB  GLU L  30      32.840  12.628   1.647  1.00 43.25           C  
ATOM    205  CG  GLU L  30      33.684  12.439   0.400  1.00 44.76           C  
ATOM    206  CD  GLU L  30      32.986  12.903  -0.865  1.00 45.92           C  
ATOM    207  OE1 GLU L  30      31.961  12.394  -1.307  1.00 46.17           O  
ATOM    208  OE2 GLU L  30      33.573  13.882  -1.386  1.00 46.53           O  
ATOM    209  N   ASN L  31      33.641  13.489   4.448  1.00 39.33           N  
ATOM    210  CA  ASN L  31      34.634  14.236   5.260  1.00 38.33           C  
ATOM    211  C   ASN L  31      34.699  13.480   6.597  1.00 37.38           C  
ATOM    212  O   ASN L  31      34.192  12.350   6.683  1.00 37.72           O  
ATOM    213  CB  ASN L  31      34.394  15.735   5.312  1.00 38.00           C  
ATOM    214  CG  ASN L  31      35.132  16.447   4.180  1.00 38.29           C  
ATOM    215  OD1 ASN L  31      36.372  16.365   4.104  1.00 38.48           O  
ATOM    216  ND2 ASN L  31      34.403  17.117   3.300  1.00 38.39           N  
ATOM    217  N   SER L  32      35.350  14.151   7.513  1.00 36.15           N  
ATOM    218  CA  SER L  32      35.546  13.686   8.888  1.00 34.57           C  
ATOM    219  C   SER L  32      34.572  14.553   9.701  1.00 33.30           C  
ATOM    220  O   SER L  32      34.365  15.691   9.235  1.00 32.81           O  
ATOM    221  CB  SER L  32      36.985  13.876   9.324  1.00 34.49           C  
ATOM    222  OG  SER L  32      37.019  13.948  10.753  1.00 36.41           O  
ATOM    223  N   VAL L  33      34.019  14.006  10.760  1.00 32.17           N  
ATOM    224  CA  VAL L  33      33.067  14.749  11.583  1.00 30.68           C  
ATOM    225  C   VAL L  33      33.616  14.785  13.026  1.00 29.91           C  
ATOM    226  O   VAL L  33      34.132  13.820  13.566  1.00 28.83           O  
ATOM    227  CB  VAL L  33      31.590  14.408  11.515  1.00 30.10           C  
ATOM    228  CG1 VAL L  33      31.220  13.244  10.635  1.00 29.39           C  
ATOM    229  CG2 VAL L  33      31.019  14.251  12.932  1.00 29.90           C  
ATOM    230  N   THR L  34      33.407  15.995  13.479  1.00 29.24           N  
ATOM    231  CA  THR L  34      33.802  16.532  14.808  1.00 28.17           C  
ATOM    232  C   THR L  34      32.535  16.823  15.603  1.00 26.98           C  
ATOM    233  O   THR L  34      31.460  16.980  14.967  1.00 26.75           O  
ATOM    234  CB  THR L  34      34.721  17.768  14.425  1.00 28.47           C  
ATOM    235  OG1 THR L  34      36.126  17.347  14.458  1.00 28.70           O  
ATOM    236  CG2 THR L  34      34.462  19.040  15.197  1.00 28.84           C  
ATOM    237  N   TRP L  35      32.566  16.828  16.926  1.00 25.43           N  
ATOM    238  CA  TRP L  35      31.378  17.107  17.741  1.00 24.34           C  
ATOM    239  C   TRP L  35      31.696  18.202  18.738  1.00 24.15           C  
ATOM    240  O   TRP L  35      32.773  18.164  19.345  1.00 24.05           O  
ATOM    241  CB  TRP L  35      30.856  15.875  18.468  1.00 22.32           C  
ATOM    242  CG  TRP L  35      30.090  14.962  17.562  1.00 19.89           C  
ATOM    243  CD1 TRP L  35      30.563  14.011  16.717  1.00 19.04           C  
ATOM    244  CD2 TRP L  35      28.656  14.940  17.449  1.00 18.64           C  
ATOM    245  NE1 TRP L  35      29.515  13.409  16.085  1.00 18.81           N  
ATOM    246  CE2 TRP L  35      28.340  13.953  16.524  1.00 18.00           C  
ATOM    247  CE3 TRP L  35      27.649  15.671  18.057  1.00 18.04           C  
ATOM    248  CZ2 TRP L  35      27.042  13.717  16.125  1.00 18.62           C  
ATOM    249  CZ3 TRP L  35      26.356  15.431  17.679  1.00 18.11           C  
ATOM    250  CH2 TRP L  35      26.033  14.473  16.716  1.00 18.79           C  
ATOM    251  N   TYR L  36      30.773  19.132  18.892  1.00 24.37           N  
ATOM    252  CA  TYR L  36      31.034  20.235  19.817  1.00 25.29           C  
ATOM    253  C   TYR L  36      29.949  20.240  20.902  1.00 26.10           C  
ATOM    254  O   TYR L  36      28.816  19.838  20.684  1.00 25.78           O  
ATOM    255  CB  TYR L  36      31.203  21.631  19.197  1.00 25.48           C  
ATOM    256  CG  TYR L  36      32.275  21.771  18.140  1.00 25.63           C  
ATOM    257  CD1 TYR L  36      31.946  21.461  16.818  1.00 25.04           C  
ATOM    258  CD2 TYR L  36      33.581  22.163  18.385  1.00 25.75           C  
ATOM    259  CE1 TYR L  36      32.872  21.550  15.809  1.00 25.83           C  
ATOM    260  CE2 TYR L  36      34.537  22.224  17.361  1.00 26.43           C  
ATOM    261  CZ  TYR L  36      34.176  21.907  16.058  1.00 26.17           C  
ATOM    262  OH  TYR L  36      35.038  21.932  14.967  1.00 27.82           O  
ATOM    263  N   GLN L  37      30.451  20.706  22.017  1.00 27.26           N  
ATOM    264  CA  GLN L  37      29.731  20.897  23.258  1.00 29.25           C  
ATOM    265  C   GLN L  37      29.736  22.406  23.555  1.00 30.56           C  
ATOM    266  O   GLN L  37      30.810  23.015  23.672  1.00 30.33           O  
ATOM    267  CB  GLN L  37      30.379  20.088  24.397  1.00 29.26           C  
ATOM    268  CG  GLN L  37      29.764  20.553  25.704  1.00 30.22           C  
ATOM    269  CD  GLN L  37      29.864  19.520  26.794  1.00 30.41           C  
ATOM    270  OE1 GLN L  37      30.937  18.971  26.983  1.00 30.35           O  
ATOM    271  NE2 GLN L  37      28.730  19.353  27.489  1.00 31.25           N  
ATOM    272  N   HIS L  38      28.548  22.940  23.692  1.00 32.79           N  
ATOM    273  CA  HIS L  38      28.355  24.383  23.911  1.00 35.76           C  
ATOM    274  C   HIS L  38      27.457  24.843  25.021  1.00 37.33           C  
ATOM    275  O   HIS L  38      26.215  24.764  24.823  1.00 37.91           O  
ATOM    276  CB  HIS L  38      27.690  24.937  22.590  1.00 37.45           C  
ATOM    277  CG  HIS L  38      27.786  26.409  22.391  1.00 38.40           C  
ATOM    278  ND1 HIS L  38      27.357  27.367  23.279  1.00 38.52           N  
ATOM    279  CD2 HIS L  38      28.272  27.065  21.299  1.00 38.57           C  
ATOM    280  CE1 HIS L  38      27.605  28.556  22.771  1.00 39.05           C  
ATOM    281  NE2 HIS L  38      28.143  28.403  21.574  1.00 39.27           N  
ATOM    282  N   LEU L  39      27.959  25.332  26.174  1.00 39.01           N  
ATOM    283  CA  LEU L  39      26.953  25.829  27.145  1.00 40.58           C  
ATOM    284  C   LEU L  39      26.790  27.302  26.739  1.00 42.53           C  
ATOM    285  O   LEU L  39      27.719  27.776  26.027  1.00 43.77           O  
ATOM    286  CB  LEU L  39      27.121  25.498  28.580  1.00 39.08           C  
ATOM    287  CG  LEU L  39      25.765  25.042  29.189  1.00 39.09           C  
ATOM    288  CD1 LEU L  39      25.693  25.409  30.661  1.00 39.59           C  
ATOM    289  CD2 LEU L  39      24.617  25.692  28.426  1.00 38.29           C  
ATOM    290  N   SER L  40      25.692  27.931  27.076  1.00 43.75           N  
ATOM    291  CA  SER L  40      25.490  29.326  26.663  1.00 45.10           C  
ATOM    292  C   SER L  40      26.466  30.228  27.429  1.00 46.12           C  
ATOM    293  O   SER L  40      26.110  31.278  27.967  1.00 46.83           O  
ATOM    294  CB  SER L  40      24.076  29.853  26.788  1.00 44.83           C  
ATOM    295  OG  SER L  40      24.113  31.259  26.545  1.00 44.93           O  
ATOM    296  N   GLY L  41      27.662  29.740  27.457  1.00 46.83           N  
ATOM    297  CA  GLY L  41      28.870  30.298  28.046  1.00 47.53           C  
ATOM    298  C   GLY L  41      29.875  30.245  26.866  1.00 48.15           C  
ATOM    299  O   GLY L  41      29.846  29.357  25.988  1.00 47.95           O  
ATOM    300  N   THR L  42      30.601  31.127  26.925  1.00 48.60           N  
ATOM    301  CA  THR L  42      31.539  31.418  25.866  1.00 48.74           C  
ATOM    302  C   THR L  42      32.558  30.383  25.383  1.00 48.30           C  
ATOM    303  O   THR L  42      33.708  30.237  25.831  1.00 48.10           O  
ATOM    304  CB  THR L  42      32.236  32.851  26.043  1.00 49.38           C  
ATOM    305  OG1 THR L  42      32.374  33.160  27.462  1.00 49.01           O  
ATOM    306  CG2 THR L  42      31.497  33.982  25.290  1.00 50.05           C  
ATOM    307  N   ALA L  43      32.137  29.705  24.289  1.00 48.00           N  
ATOM    308  CA  ALA L  43      32.872  28.766  23.485  1.00 46.94           C  
ATOM    309  C   ALA L  43      32.206  27.418  23.256  1.00 46.63           C  
ATOM    310  O   ALA L  43      31.418  27.022  24.124  1.00 47.35           O  
ATOM    311  CB  ALA L  43      34.206  28.367  24.187  1.00 45.85           C  
ATOM    312  N   PRO L  44      32.654  26.811  22.182  1.00 45.88           N  
ATOM    313  CA  PRO L  44      32.275  25.415  21.811  1.00 44.81           C  
ATOM    314  C   PRO L  44      33.389  24.618  22.527  1.00 43.49           C  
ATOM    315  O   PRO L  44      34.158  25.378  23.180  1.00 44.33           O  
ATOM    316  CB  PRO L  44      32.412  25.373  20.316  1.00 45.32           C  
ATOM    317  CG  PRO L  44      33.384  26.466  19.956  1.00 45.53           C  
ATOM    318  CD  PRO L  44      33.637  27.307  21.202  1.00 45.69           C  
ATOM    319  N   LYS L  45      33.483  23.332  22.460  1.00 41.53           N  
ATOM    320  CA  LYS L  45      34.503  22.485  23.129  1.00 39.07           C  
ATOM    321  C   LYS L  45      34.484  21.124  22.398  1.00 37.39           C  
ATOM    322  O   LYS L  45      33.430  20.470  22.393  1.00 36.34           O  
ATOM    323  CB  LYS L  45      34.193  22.179  24.541  1.00 40.49           C  
ATOM    324  CG  LYS L  45      34.912  22.688  25.779  1.00 41.78           C  
ATOM    325  CD  LYS L  45      35.047  21.477  26.727  1.00 43.44           C  
ATOM    326  CE  LYS L  45      35.533  21.760  28.118  1.00 44.24           C  
ATOM    327  NZ  LYS L  45      34.360  21.801  29.043  1.00 45.17           N  
ATOM    328  N   LEU L  46      35.534  20.714  21.780  1.00 36.18           N  
ATOM    329  CA  LEU L  46      35.585  19.486  20.988  1.00 35.21           C  
ATOM    330  C   LEU L  46      35.562  18.232  21.863  1.00 34.64           C  
ATOM    331  O   LEU L  46      36.475  18.029  22.679  1.00 34.43           O  
ATOM    332  CB  LEU L  46      36.816  19.475  20.052  1.00 34.04           C  
ATOM    333  CG  LEU L  46      36.803  18.434  18.942  1.00 34.02           C  
ATOM    334  CD1 LEU L  46      36.207  18.980  17.653  1.00 34.59           C  
ATOM    335  CD2 LEU L  46      38.212  17.951  18.590  1.00 34.44           C  
ATOM    336  N   LEU L  47      34.530  17.448  21.621  1.00 33.96           N  
ATOM    337  CA  LEU L  47      34.349  16.162  22.318  1.00 33.09           C  
ATOM    338  C   LEU L  47      35.054  15.122  21.448  1.00 32.92           C  
ATOM    339  O   LEU L  47      35.949  14.410  21.879  1.00 32.75           O  
ATOM    340  CB  LEU L  47      32.860  15.981  22.559  1.00 32.02           C  
ATOM    341  CG  LEU L  47      32.270  16.964  23.575  1.00 31.68           C  
ATOM    342  CD1 LEU L  47      30.839  16.608  23.923  1.00 30.83           C  
ATOM    343  CD2 LEU L  47      33.118  16.882  24.831  1.00 31.52           C  
ATOM    344  N   ILE L  48      34.661  15.137  20.201  1.00 32.88           N  
ATOM    345  CA  ILE L  48      35.137  14.235  19.179  1.00 33.76           C  
ATOM    346  C   ILE L  48      35.692  14.921  17.935  1.00 34.39           C  
ATOM    347  O   ILE L  48      35.289  15.965  17.442  1.00 33.31           O  
ATOM    348  CB  ILE L  48      33.944  13.247  18.861  1.00 33.83           C  
ATOM    349  CG1 ILE L  48      33.692  12.377  20.103  1.00 34.64           C  
ATOM    350  CG2 ILE L  48      34.154  12.413  17.557  1.00 34.03           C  
ATOM    351  CD1 ILE L  48      33.038  13.036  21.347  1.00 34.47           C  
ATOM    352  N   TYR L  49      36.689  14.202  17.400  1.00 35.78           N  
ATOM    353  CA  TYR L  49      37.431  14.596  16.201  1.00 37.14           C  
ATOM    354  C   TYR L  49      37.792  13.375  15.361  1.00 37.80           C  
ATOM    355  O   TYR L  49      37.917  12.262  15.892  1.00 37.91           O  
ATOM    356  CB  TYR L  49      38.645  15.431  16.551  1.00 38.16           C  
ATOM    357  CG  TYR L  49      39.869  14.766  17.110  1.00 38.42           C  
ATOM    358  CD1 TYR L  49      40.644  13.881  16.348  1.00 38.57           C  
ATOM    359  CD2 TYR L  49      40.290  15.071  18.411  1.00 38.40           C  
ATOM    360  CE1 TYR L  49      41.809  13.321  16.873  1.00 38.87           C  
ATOM    361  CE2 TYR L  49      41.439  14.508  18.955  1.00 38.56           C  
ATOM    362  CZ  TYR L  49      42.197  13.646  18.178  1.00 38.68           C  
ATOM    363  OH  TYR L  49      43.315  13.109  18.736  1.00 39.11           O  
ATOM    364  N   GLU L  50      37.960  13.640  14.078  1.00 38.33           N  
ATOM    365  CA  GLU L  50      38.243  12.579  13.131  1.00 39.87           C  
ATOM    366  C   GLU L  50      37.270  11.412  13.344  1.00 40.16           C  
ATOM    367  O   GLU L  50      37.706  10.271  13.547  1.00 40.21           O  
ATOM    368  CB  GLU L  50      39.675  12.016  13.173  1.00 41.65           C  
ATOM    369  CG  GLU L  50      40.226  11.553  11.817  1.00 43.77           C  
ATOM    370  CD  GLU L  50      40.908  10.238  11.651  1.00 45.61           C  
ATOM    371  OE1 GLU L  50      42.053  10.217  12.197  1.00 46.59           O  
ATOM    372  OE2 GLU L  50      40.486   9.236  11.039  1.00 45.73           O  
ATOM    373  N   ASP L  51      35.980  11.646  13.301  1.00 40.77           N  
ATOM    374  CA  ASP L  51      34.838  10.762  13.419  1.00 40.80           C  
ATOM    375  C   ASP L  51      34.476  10.167  14.790  1.00 41.58           C  
ATOM    376  O   ASP L  51      33.328  10.212  15.276  1.00 41.34           O  
ATOM    377  CB  ASP L  51      34.944   9.597  12.416  1.00 39.43           C  
ATOM    378  CG  ASP L  51      34.850   9.900  10.961  1.00 38.80           C  
ATOM    379  OD1 ASP L  51      34.077  10.719  10.440  1.00 38.33           O  
ATOM    380  OD2 ASP L  51      35.630   9.212  10.255  1.00 38.59           O  
ATOM    381  N   ASN L  52      35.468   9.531  15.389  1.00 42.38           N  
ATOM    382  CA  ASN L  52      35.451   8.775  16.612  1.00 42.65           C  
ATOM    383  C   ASN L  52      36.519   9.035  17.650  1.00 43.14           C  
ATOM    384  O   ASN L  52      36.330   8.559  18.807  1.00 43.64           O  
ATOM    385  CB  ASN L  52      35.633   7.259  16.179  1.00 42.19           C  
ATOM    386  CG  ASN L  52      36.851   7.142  15.266  1.00 42.54           C  
ATOM    387  OD1 ASN L  52      36.751   6.946  14.038  1.00 41.26           O  
ATOM    388  ND2 ASN L  52      38.045   7.280  15.877  1.00 43.33           N  
ATOM    389  N   SER L  53      37.633   9.636  17.305  1.00 43.26           N  
ATOM    390  CA  SER L  53      38.687   9.779  18.346  1.00 43.40           C  
ATOM    391  C   SER L  53      38.332  10.877  19.309  1.00 43.42           C  
ATOM    392  O   SER L  53      38.255  12.086  19.018  1.00 44.17           O  
ATOM    393  CB  SER L  53      40.047   9.743  17.709  1.00 44.08           C  
ATOM    394  OG  SER L  53      40.149   8.455  17.052  1.00 45.29           O  
ATOM    395  N   ARG L  54      38.061  10.403  20.523  1.00 42.72           N  
ATOM    396  CA  ARG L  54      37.667  11.224  21.666  1.00 42.08           C  
ATOM    397  C   ARG L  54      38.748  12.259  21.962  1.00 42.03           C  
ATOM    398  O   ARG L  54      39.952  11.971  21.942  1.00 42.10           O  
ATOM    399  CB  ARG L  54      37.360  10.386  22.928  1.00 40.07           C  
ATOM    400  CG  ARG L  54      36.019  10.695  23.556  1.00 38.73           C  
ATOM    401  CD  ARG L  54      35.849  10.206  24.929  1.00 37.71           C  
ATOM    402  NE  ARG L  54      36.442   8.930  25.145  1.00 37.70           N  
ATOM    403  CZ  ARG L  54      36.131   7.700  24.799  1.00 37.62           C  
ATOM    404  NH1 ARG L  54      35.035   7.404  24.113  1.00 37.55           N  
ATOM    405  NH2 ARG L  54      36.920   6.672  25.162  1.00 37.98           N  
ATOM    406  N   ALA L  55      38.269  13.471  22.199  1.00 42.14           N  
ATOM    407  CA  ALA L  55      39.219  14.558  22.524  1.00 42.43           C  
ATOM    408  C   ALA L  55      39.902  14.113  23.816  1.00 42.73           C  
ATOM    409  O   ALA L  55      39.219  13.866  24.839  1.00 43.21           O  
ATOM    410  CB  ALA L  55      38.466  15.861  22.653  1.00 42.66           C  
ATOM    411  N   SER L  56      41.218  13.980  23.768  1.00 42.60           N  
ATOM    412  CA  SER L  56      41.937  13.554  24.983  1.00 42.20           C  
ATOM    413  C   SER L  56      41.374  14.277  26.203  1.00 42.02           C  
ATOM    414  O   SER L  56      41.260  15.518  26.224  1.00 42.36           O  
ATOM    415  CB  SER L  56      43.437  13.767  24.868  1.00 41.61           C  
ATOM    416  OG  SER L  56      44.043  13.110  25.985  1.00 41.48           O  
ATOM    417  N   GLY L  57      40.994  13.508  27.205  1.00 41.91           N  
ATOM    418  CA  GLY L  57      40.466  14.097  28.443  1.00 41.79           C  
ATOM    419  C   GLY L  57      38.969  14.130  28.496  1.00 41.73           C  
ATOM    420  O   GLY L  57      38.436  14.443  29.583  1.00 41.89           O  
ATOM    421  N   VAL L  58      38.305  13.844  27.361  1.00 41.31           N  
ATOM    422  CA  VAL L  58      36.816  13.875  27.476  1.00 40.77           C  
ATOM    423  C   VAL L  58      36.430  12.562  28.165  1.00 39.99           C  
ATOM    424  O   VAL L  58      37.147  11.554  28.109  1.00 39.97           O  
ATOM    425  CB  VAL L  58      36.065  14.308  26.238  1.00 41.41           C  
ATOM    426  CG1 VAL L  58      34.538  14.367  26.450  1.00 40.97           C  
ATOM    427  CG2 VAL L  58      36.491  15.699  25.757  1.00 41.71           C  
ATOM    428  N   SER L  59      35.297  12.645  28.847  1.00 39.06           N  
ATOM    429  CA  SER L  59      34.788  11.479  29.615  1.00 37.60           C  
ATOM    430  C   SER L  59      34.416  10.356  28.668  1.00 36.16           C  
ATOM    431  O   SER L  59      33.998  10.586  27.519  1.00 35.75           O  
ATOM    432  CB  SER L  59      33.741  11.955  30.589  1.00 38.70           C  
ATOM    433  OG  SER L  59      34.203  13.157  31.268  1.00 39.89           O  
ATOM    434  N   ASP L  60      34.609   9.125  29.174  1.00 34.72           N  
ATOM    435  CA  ASP L  60      34.366   7.879  28.430  1.00 32.40           C  
ATOM    436  C   ASP L  60      32.893   7.555  28.258  1.00 30.90           C  
ATOM    437  O   ASP L  60      32.542   6.536  27.644  1.00 30.62           O  
ATOM    438  CB  ASP L  60      35.281   6.750  28.852  1.00 31.72           C  
ATOM    439  CG  ASP L  60      35.514   6.545  30.323  1.00 30.97           C  
ATOM    440  OD1 ASP L  60      34.670   7.066  31.085  1.00 30.65           O  
ATOM    441  OD2 ASP L  60      36.485   5.883  30.723  1.00 30.38           O  
ATOM    442  N   ARG L  61      32.069   8.470  28.720  1.00 29.74           N  
ATOM    443  CA  ARG L  61      30.597   8.350  28.583  1.00 28.82           C  
ATOM    444  C   ARG L  61      30.226   8.931  27.217  1.00 27.83           C  
ATOM    445  O   ARG L  61      29.070   8.999  26.782  1.00 27.83           O  
ATOM    446  CB  ARG L  61      29.903   9.074  29.724  1.00 29.81           C  
ATOM    447  CG  ARG L  61      30.791   9.196  30.968  1.00 30.58           C  
ATOM    448  CD  ARG L  61      30.333  10.293  31.891  1.00 31.64           C  
ATOM    449  NE  ARG L  61      28.906  10.550  31.693  1.00 31.83           N  
ATOM    450  CZ  ARG L  61      28.511  11.792  31.364  1.00 32.33           C  
ATOM    451  NH1 ARG L  61      29.370  12.809  31.400  1.00 32.02           N  
ATOM    452  NH2 ARG L  61      27.233  11.969  31.050  1.00 32.75           N  
ATOM    453  N   PHE L  62      31.297   9.341  26.520  1.00 26.49           N  
ATOM    454  CA  PHE L  62      31.172   9.924  25.191  1.00 24.42           C  
ATOM    455  C   PHE L  62      31.846   8.995  24.199  1.00 24.31           C  
ATOM    456  O   PHE L  62      33.069   8.920  24.315  1.00 24.03           O  
ATOM    457  CB  PHE L  62      31.832  11.313  25.071  1.00 22.81           C  
ATOM    458  CG  PHE L  62      30.981  12.321  25.794  1.00 20.67           C  
ATOM    459  CD1 PHE L  62      29.776  12.698  25.227  1.00 19.31           C  
ATOM    460  CD2 PHE L  62      31.336  12.740  27.054  1.00 19.30           C  
ATOM    461  CE1 PHE L  62      28.942  13.574  25.904  1.00 19.04           C  
ATOM    462  CE2 PHE L  62      30.506  13.594  27.758  1.00 19.18           C  
ATOM    463  CZ  PHE L  62      29.318  14.005  27.162  1.00 19.72           C  
ATOM    464  N   SER L  63      31.009   8.479  23.340  1.00 24.46           N  
ATOM    465  CA  SER L  63      31.458   7.595  22.245  1.00 24.85           C  
ATOM    466  C   SER L  63      30.932   8.200  20.935  1.00 25.13           C  
ATOM    467  O   SER L  63      29.971   9.006  21.023  1.00 25.32           O  
ATOM    468  CB  SER L  63      30.997   6.185  22.462  1.00 24.78           C  
ATOM    469  OG  SER L  63      29.767   5.862  21.905  1.00 24.44           O  
ATOM    470  N   ALA L  64      31.536   7.848  19.804  1.00 24.79           N  
ATOM    471  CA  ALA L  64      30.988   8.471  18.558  1.00 25.17           C  
ATOM    472  C   ALA L  64      31.299   7.607  17.359  1.00 25.47           C  
ATOM    473  O   ALA L  64      32.249   6.813  17.446  1.00 25.58           O  
ATOM    474  CB  ALA L  64      31.439   9.911  18.473  1.00 25.50           C  
ATOM    475  N   SER L  65      30.481   7.702  16.323  1.00 25.91           N  
ATOM    476  CA  SER L  65      30.645   6.942  15.075  1.00 26.79           C  
ATOM    477  C   SER L  65      30.071   7.667  13.855  1.00 27.54           C  
ATOM    478  O   SER L  65      29.329   8.658  13.929  1.00 27.58           O  
ATOM    479  CB  SER L  65      30.111   5.525  15.171  1.00 25.96           C  
ATOM    480  OG  SER L  65      28.704   5.465  15.227  1.00 25.65           O  
ATOM    481  N   LYS L  66      30.438   7.156  12.688  1.00 28.51           N  
ATOM    482  CA  LYS L  66      29.974   7.734  11.396  1.00 29.71           C  
ATOM    483  C   LYS L  66      29.671   6.576  10.460  1.00 30.44           C  
ATOM    484  O   LYS L  66      30.174   5.484  10.782  1.00 30.11           O  
ATOM    485  CB  LYS L  66      31.115   8.564  10.833  1.00 30.73           C  
ATOM    486  CG  LYS L  66      30.780   9.770   9.991  1.00 30.63           C  
ATOM    487  CD  LYS L  66      30.645   9.436   8.534  1.00 30.75           C  
ATOM    488  CE  LYS L  66      31.989   9.299   7.839  1.00 30.32           C  
ATOM    489  NZ  LYS L  66      31.685   9.464   6.374  1.00 31.01           N  
ATOM    490  N   SER L  67      28.911   6.776   9.397  1.00 31.41           N  
ATOM    491  CA  SER L  67      28.661   5.636   8.465  1.00 32.75           C  
ATOM    492  C   SER L  67      28.279   6.118   7.071  1.00 33.80           C  
ATOM    493  O   SER L  67      27.325   5.618   6.431  1.00 34.95           O  
ATOM    494  CB  SER L  67      27.751   4.585   9.028  1.00 32.38           C  
ATOM    495  OG  SER L  67      26.449   4.439   8.485  1.00 31.46           O  
ATOM    496  N   GLY L  68      29.056   7.047   6.520  1.00 34.11           N  
ATOM    497  CA  GLY L  68      28.732   7.573   5.181  1.00 34.19           C  
ATOM    498  C   GLY L  68      27.868   8.834   5.381  1.00 34.05           C  
ATOM    499  O   GLY L  68      28.394   9.895   5.764  1.00 34.42           O  
ATOM    500  N   THR L  69      26.584   8.709   5.155  1.00 33.58           N  
ATOM    501  CA  THR L  69      25.658   9.823   5.253  1.00 33.22           C  
ATOM    502  C   THR L  69      25.459  10.399   6.629  1.00 32.72           C  
ATOM    503  O   THR L  69      25.411  11.632   6.786  1.00 33.19           O  
ATOM    504  CB  THR L  69      24.239   9.348   4.702  1.00 34.36           C  
ATOM    505  OG1 THR L  69      24.124   7.968   5.189  1.00 35.22           O  
ATOM    506  CG2 THR L  69      24.103   9.433   3.185  1.00 35.17           C  
ATOM    507  N   SER L  70      25.282   9.521   7.598  1.00 31.99           N  
ATOM    508  CA  SER L  70      25.002   9.882   8.995  1.00 30.18           C  
ATOM    509  C   SER L  70      26.219   9.772   9.898  1.00 29.39           C  
ATOM    510  O   SER L  70      27.296   9.359   9.434  1.00 29.37           O  
ATOM    511  CB  SER L  70      23.864   9.017   9.543  1.00 29.67           C  
ATOM    512  OG  SER L  70      24.364   7.760   9.944  1.00 28.63           O  
ATOM    513  N   ALA L  71      25.981  10.163  11.131  1.00 27.99           N  
ATOM    514  CA  ALA L  71      26.964  10.162  12.228  1.00 27.57           C  
ATOM    515  C   ALA L  71      26.182  10.221  13.545  1.00 27.03           C  
ATOM    516  O   ALA L  71      24.961  10.470  13.426  1.00 28.35           O  
ATOM    517  CB  ALA L  71      27.959  11.280  12.119  1.00 27.44           C  
ATOM    518  N   SER L  72      26.736   9.959  14.699  1.00 25.57           N  
ATOM    519  CA  SER L  72      25.960   9.958  15.951  1.00 24.30           C  
ATOM    520  C   SER L  72      26.915   9.970  17.154  1.00 23.77           C  
ATOM    521  O   SER L  72      28.003   9.418  17.071  1.00 23.86           O  
ATOM    522  CB  SER L  72      25.090   8.697  16.091  1.00 22.60           C  
ATOM    523  OG  SER L  72      25.906   7.726  16.725  1.00 22.09           O  
ATOM    524  N   LEU L  73      26.485  10.589  18.211  1.00 23.26           N  
ATOM    525  CA  LEU L  73      27.243  10.691  19.449  1.00 23.39           C  
ATOM    526  C   LEU L  73      26.284  10.187  20.541  1.00 23.84           C  
ATOM    527  O   LEU L  73      25.152  10.709  20.649  1.00 24.87           O  
ATOM    528  CB  LEU L  73      27.713  12.121  19.644  1.00 23.07           C  
ATOM    529  CG  LEU L  73      28.393  12.420  20.988  1.00 23.01           C  
ATOM    530  CD1 LEU L  73      29.891  12.277  20.897  1.00 22.17           C  
ATOM    531  CD2 LEU L  73      27.950  13.811  21.444  1.00 22.06           C  
ATOM    532  N   ALA L  74      26.717   9.198  21.259  1.00 23.64           N  
ATOM    533  CA  ALA L  74      25.990   8.571  22.349  1.00 23.91           C  
ATOM    534  C   ALA L  74      26.514   9.102  23.680  1.00 24.25           C  
ATOM    535  O   ALA L  74      27.734   9.117  23.872  1.00 24.74           O  
ATOM    536  CB  ALA L  74      26.215   7.061  22.346  1.00 23.31           C  
ATOM    537  N   ILE L  75      25.616   9.501  24.528  1.00 24.85           N  
ATOM    538  CA  ILE L  75      26.017   9.973  25.854  1.00 25.99           C  
ATOM    539  C   ILE L  75      25.594   8.844  26.809  1.00 26.87           C  
ATOM    540  O   ILE L  75      24.452   8.932  27.273  1.00 27.41           O  
ATOM    541  CB  ILE L  75      25.380  11.343  26.261  1.00 25.73           C  
ATOM    542  CG1 ILE L  75      25.602  12.352  25.126  1.00 26.14           C  
ATOM    543  CG2 ILE L  75      25.879  11.823  27.656  1.00 25.22           C  
ATOM    544  CD1 ILE L  75      25.576  13.845  25.377  1.00 25.38           C  
ATOM    545  N   SER L  76      26.458   7.882  27.004  1.00 27.57           N  
ATOM    546  CA  SER L  76      26.265   6.723  27.899  1.00 27.56           C  
ATOM    547  C   SER L  76      26.593   7.088  29.351  1.00 27.93           C  
ATOM    548  O   SER L  76      27.686   6.724  29.832  1.00 28.59           O  
ATOM    549  CB  SER L  76      27.222   5.614  27.478  1.00 27.75           C  
ATOM    550  OG  SER L  76      28.584   5.996  27.524  1.00 26.10           O  
ATOM    551  N   GLY L  77      25.715   7.758  30.038  1.00 27.85           N  
ATOM    552  CA  GLY L  77      25.866   8.180  31.405  1.00 28.24           C  
ATOM    553  C   GLY L  77      25.104   9.466  31.723  1.00 28.55           C  
ATOM    554  O   GLY L  77      25.499  10.197  32.667  1.00 28.37           O  
ATOM    555  N   LEU L  78      24.003   9.703  31.013  1.00 28.51           N  
ATOM    556  CA  LEU L  78      23.232  10.918  31.188  1.00 28.47           C  
ATOM    557  C   LEU L  78      23.163  11.387  32.637  1.00 28.96           C  
ATOM    558  O   LEU L  78      22.536  10.743  33.496  1.00 29.94           O  
ATOM    559  CB  LEU L  78      21.839  10.837  30.549  1.00 27.47           C  
ATOM    560  CG  LEU L  78      21.073  12.153  30.385  1.00 26.11           C  
ATOM    561  CD1 LEU L  78      21.590  12.952  29.188  1.00 25.68           C  
ATOM    562  CD2 LEU L  78      19.603  11.857  30.172  1.00 25.63           C  
ATOM    563  N   GLN L  79      23.768  12.525  32.839  1.00 28.79           N  
ATOM    564  CA  GLN L  79      23.788  13.285  34.114  1.00 28.52           C  
ATOM    565  C   GLN L  79      23.514  14.723  33.622  1.00 29.00           C  
ATOM    566  O   GLN L  79      23.768  14.998  32.433  1.00 29.45           O  
ATOM    567  CB  GLN L  79      24.922  13.047  35.036  1.00 27.48           C  
ATOM    568  CG  GLN L  79      26.352  13.149  34.650  1.00 27.18           C  
ATOM    569  CD  GLN L  79      27.260  11.973  34.984  1.00 27.35           C  
ATOM    570  OE1 GLN L  79      28.289  12.003  35.658  1.00 25.67           O  
ATOM    571  NE2 GLN L  79      26.856  10.802  34.423  1.00 28.22           N  
ATOM    572  N   PRO L  80      22.950  15.580  34.429  1.00 29.18           N  
ATOM    573  CA  PRO L  80      22.578  16.939  34.090  1.00 29.23           C  
ATOM    574  C   PRO L  80      23.687  17.881  33.744  1.00 28.25           C  
ATOM    575  O   PRO L  80      23.419  19.001  33.298  1.00 28.69           O  
ATOM    576  CB  PRO L  80      21.787  17.439  35.320  1.00 30.01           C  
ATOM    577  CG  PRO L  80      22.416  16.653  36.461  1.00 30.13           C  
ATOM    578  CD  PRO L  80      22.580  15.263  35.834  1.00 29.80           C  
ATOM    579  N   GLU L  81      24.897  17.487  33.952  1.00 27.95           N  
ATOM    580  CA  GLU L  81      26.035  18.367  33.601  1.00 28.01           C  
ATOM    581  C   GLU L  81      26.296  18.212  32.111  1.00 27.14           C  
ATOM    582  O   GLU L  81      27.212  18.781  31.486  1.00 26.62           O  
ATOM    583  CB  GLU L  81      27.242  18.088  34.464  1.00 31.01           C  
ATOM    584  CG  GLU L  81      27.362  18.745  35.842  1.00 34.03           C  
ATOM    585  CD  GLU L  81      27.065  17.946  37.078  1.00 36.18           C  
ATOM    586  OE1 GLU L  81      26.896  16.709  36.852  1.00 37.32           O  
ATOM    587  OE2 GLU L  81      26.991  18.417  38.222  1.00 37.14           O  
ATOM    588  N   ASP L  82      25.403  17.405  31.535  1.00 26.14           N  
ATOM    589  CA  ASP L  82      25.385  17.058  30.119  1.00 25.06           C  
ATOM    590  C   ASP L  82      24.288  17.921  29.445  1.00 24.58           C  
ATOM    591  O   ASP L  82      24.246  17.840  28.223  1.00 24.04           O  
ATOM    592  CB  ASP L  82      25.138  15.619  29.743  1.00 23.64           C  
ATOM    593  CG  ASP L  82      25.993  14.550  30.372  1.00 22.93           C  
ATOM    594  OD1 ASP L  82      27.217  14.737  30.533  1.00 20.09           O  
ATOM    595  OD2 ASP L  82      25.341  13.514  30.677  1.00 22.86           O  
ATOM    596  N   GLU L  83      23.525  18.565  30.294  1.00 24.78           N  
ATOM    597  CA  GLU L  83      22.422  19.420  29.790  1.00 25.28           C  
ATOM    598  C   GLU L  83      23.038  20.720  29.270  1.00 25.16           C  
ATOM    599  O   GLU L  83      23.247  21.741  29.917  1.00 24.94           O  
ATOM    600  CB  GLU L  83      21.375  19.643  30.833  1.00 26.63           C  
ATOM    601  CG  GLU L  83      19.965  19.114  30.546  1.00 29.76           C  
ATOM    602  CD  GLU L  83      19.043  19.225  31.738  1.00 31.27           C  
ATOM    603  OE1 GLU L  83      19.527  19.062  32.863  1.00 32.58           O  
ATOM    604  OE2 GLU L  83      17.840  19.478  31.484  1.00 31.75           O  
ATOM    605  N   THR L  84      23.385  20.629  28.006  1.00 24.74           N  
ATOM    606  CA  THR L  84      24.051  21.576  27.112  1.00 23.54           C  
ATOM    607  C   THR L  84      23.629  21.307  25.662  1.00 22.47           C  
ATOM    608  O   THR L  84      22.966  20.265  25.399  1.00 22.31           O  
ATOM    609  CB  THR L  84      25.578  21.175  27.282  1.00 25.20           C  
ATOM    610  OG1 THR L  84      26.211  22.181  28.123  1.00 26.77           O  
ATOM    611  CG2 THR L  84      26.215  20.830  25.955  1.00 26.32           C  
ATOM    612  N   ASP L  85      24.009  22.192  24.749  1.00 20.57           N  
ATOM    613  CA  ASP L  85      23.683  22.002  23.309  1.00 18.29           C  
ATOM    614  C   ASP L  85      24.847  21.259  22.694  1.00 16.43           C  
ATOM    615  O   ASP L  85      25.951  21.366  23.234  1.00 15.63           O  
ATOM    616  CB  ASP L  85      23.159  23.290  22.709  1.00 20.09           C  
ATOM    617  CG  ASP L  85      21.647  23.418  22.944  1.00 22.20           C  
ATOM    618  OD1 ASP L  85      21.091  23.159  24.045  1.00 22.06           O  
ATOM    619  OD2 ASP L  85      20.970  23.738  21.937  1.00 24.44           O  
ATOM    620  N   TYR L  86      24.604  20.476  21.651  1.00 15.93           N  
ATOM    621  CA  TYR L  86      25.627  19.663  20.961  1.00 14.71           C  
ATOM    622  C   TYR L  86      25.617  19.878  19.467  1.00 14.30           C  
ATOM    623  O   TYR L  86      24.560  19.827  18.877  1.00 13.40           O  
ATOM    624  CB  TYR L  86      25.428  18.158  21.231  1.00 15.38           C  
ATOM    625  CG  TYR L  86      25.675  17.786  22.699  1.00 15.04           C  
ATOM    626  CD1 TYR L  86      24.714  18.025  23.666  1.00 14.23           C  
ATOM    627  CD2 TYR L  86      26.904  17.258  23.093  1.00 14.45           C  
ATOM    628  CE1 TYR L  86      24.946  17.731  24.998  1.00 15.74           C  
ATOM    629  CE2 TYR L  86      27.124  16.943  24.427  1.00 15.07           C  
ATOM    630  CZ  TYR L  86      26.167  17.177  25.371  1.00 15.09           C  
ATOM    631  OH  TYR L  86      26.441  16.890  26.678  1.00 16.71           O  
ATOM    632  N   TYR L  87      26.820  20.073  18.910  1.00 14.65           N  
ATOM    633  CA  TYR L  87      26.997  20.305  17.503  1.00 14.89           C  
ATOM    634  C   TYR L  87      27.943  19.345  16.819  1.00 15.82           C  
ATOM    635  O   TYR L  87      29.039  18.989  17.262  1.00 16.33           O  
ATOM    636  CB  TYR L  87      27.567  21.753  17.176  1.00 14.42           C  
ATOM    637  CG  TYR L  87      26.597  22.852  17.522  1.00 13.48           C  
ATOM    638  CD1 TYR L  87      25.639  23.278  16.582  1.00 13.13           C  
ATOM    639  CD2 TYR L  87      26.572  23.416  18.797  1.00 12.72           C  
ATOM    640  CE1 TYR L  87      24.697  24.255  16.893  1.00 11.84           C  
ATOM    641  CE2 TYR L  87      25.627  24.395  19.144  1.00 12.19           C  
ATOM    642  CZ  TYR L  87      24.722  24.800  18.163  1.00 12.05           C  
ATOM    643  OH  TYR L  87      23.843  25.771  18.442  1.00 14.34           O  
ATOM    644  N   CYS L  88      27.496  18.994  15.625  1.00 16.91           N  
ATOM    645  CA  CYS L  88      28.331  18.164  14.734  1.00 17.96           C  
ATOM    646  C   CYS L  88      28.856  19.194  13.722  1.00 19.09           C  
ATOM    647  O   CYS L  88      28.357  20.345  13.696  1.00 19.19           O  
ATOM    648  CB  CYS L  88      27.665  16.979  14.144  1.00 18.45           C  
ATOM    649  SG  CYS L  88      26.319  17.238  13.016  1.00 19.70           S  
ATOM    650  N   ALA L  89      29.827  18.755  12.971  1.00 20.65           N  
ATOM    651  CA  ALA L  89      30.493  19.553  11.961  1.00 22.16           C  
ATOM    652  C   ALA L  89      31.372  18.657  11.079  1.00 23.71           C  
ATOM    653  O   ALA L  89      32.184  17.914  11.633  1.00 23.58           O  
ATOM    654  CB  ALA L  89      31.359  20.609  12.660  1.00 21.48           C  
ATOM    655  N   ALA L  90      31.121  18.776   9.807  1.00 25.88           N  
ATOM    656  CA  ALA L  90      31.795  18.202   8.645  1.00 28.33           C  
ATOM    657  C   ALA L  90      32.886  19.249   8.286  1.00 30.34           C  
ATOM    658  O   ALA L  90      32.883  20.293   8.957  1.00 30.00           O  
ATOM    659  CB  ALA L  90      30.921  18.067   7.414  1.00 26.72           C  
ATOM    660  N   TRP L  91      33.700  19.047   7.276  1.00 33.21           N  
ATOM    661  CA  TRP L  91      34.726  20.110   7.056  1.00 36.27           C  
ATOM    662  C   TRP L  91      35.297  20.165   5.678  1.00 38.25           C  
ATOM    663  O   TRP L  91      36.083  19.256   5.337  1.00 38.76           O  
ATOM    664  CB  TRP L  91      35.730  19.922   8.215  1.00 38.41           C  
ATOM    665  CG  TRP L  91      37.067  20.504   8.028  1.00 40.87           C  
ATOM    666  CD1 TRP L  91      38.116  19.895   7.364  1.00 42.10           C  
ATOM    667  CD2 TRP L  91      37.575  21.775   8.462  1.00 41.71           C  
ATOM    668  NE1 TRP L  91      39.236  20.723   7.354  1.00 42.36           N  
ATOM    669  CE2 TRP L  91      38.927  21.871   8.030  1.00 42.01           C  
ATOM    670  CE3 TRP L  91      37.025  22.824   9.184  1.00 42.06           C  
ATOM    671  CZ2 TRP L  91      39.728  22.965   8.292  1.00 42.11           C  
ATOM    672  CZ3 TRP L  91      37.820  23.926   9.444  1.00 42.37           C  
ATOM    673  CH2 TRP L  91      39.146  24.003   9.021  1.00 42.60           C  
ATOM    674  N   ASP L  92      34.872  21.114   4.845  1.00 40.27           N  
ATOM    675  CA  ASP L  92      35.351  21.426   3.517  1.00 42.19           C  
ATOM    676  C   ASP L  92      34.578  21.595   2.238  1.00 43.89           C  
ATOM    677  O   ASP L  92      35.102  21.265   1.114  1.00 43.78           O  
ATOM    678  CB  ASP L  92      36.698  20.624   3.363  1.00 41.84           C  
ATOM    679  CG  ASP L  92      37.769  21.669   3.697  1.00 41.99           C  
ATOM    680  OD1 ASP L  92      37.727  22.291   4.764  1.00 42.65           O  
ATOM    681  OD2 ASP L  92      38.592  21.895   2.791  1.00 43.20           O  
ATOM    682  N   ASP L  93      33.427  22.243   2.200  1.00 45.51           N  
ATOM    683  CA  ASP L  93      32.578  22.519   1.017  1.00 47.20           C  
ATOM    684  C   ASP L  93      33.096  23.567   0.019  1.00 46.95           C  
ATOM    685  O   ASP L  93      32.954  23.376  -1.241  1.00 46.40           O  
ATOM    686  CB  ASP L  93      31.080  22.648   1.472  1.00 50.04           C  
ATOM    687  CG  ASP L  93      30.529  21.193   1.562  1.00 51.76           C  
ATOM    688  OD1 ASP L  93      30.746  20.539   2.610  1.00 52.24           O  
ATOM    689  OD2 ASP L  93      29.974  20.773   0.505  1.00 52.25           O  
ATOM    690  N   SER L  94      33.634  24.660   0.504  1.00 46.35           N  
ATOM    691  CA  SER L  94      34.367  25.815  -0.048  1.00 45.23           C  
ATOM    692  C   SER L  94      35.719  25.548   0.689  1.00 44.37           C  
ATOM    693  O   SER L  94      35.534  24.892   1.789  1.00 44.60           O  
ATOM    694  CB  SER L  94      33.967  27.218   0.144  1.00 45.65           C  
ATOM    695  OG  SER L  94      32.996  27.542   1.122  1.00 46.65           O  
ATOM    696  N   LEU L  95      36.929  25.872   0.340  1.00 42.84           N  
ATOM    697  CA  LEU L  95      37.988  25.355   1.227  1.00 40.85           C  
ATOM    698  C   LEU L  95      38.194  25.873   2.626  1.00 39.24           C  
ATOM    699  O   LEU L  95      38.007  27.030   2.981  1.00 39.11           O  
ATOM    700  CB  LEU L  95      39.311  25.215   0.457  1.00 42.19           C  
ATOM    701  CG  LEU L  95      39.541  23.732   0.112  1.00 43.00           C  
ATOM    702  CD1 LEU L  95      38.612  23.396  -1.051  1.00 43.85           C  
ATOM    703  CD2 LEU L  95      40.995  23.485  -0.215  1.00 43.12           C  
ATOM    704  N   ASP L  95A     38.644  24.883   3.395  1.00 37.47           N  
ATOM    705  CA  ASP L  95A     39.036  24.867   4.800  1.00 35.43           C  
ATOM    706  C   ASP L  95A     37.991  25.489   5.719  1.00 32.98           C  
ATOM    707  O   ASP L  95A     38.338  26.471   6.431  1.00 32.51           O  
ATOM    708  CB  ASP L  95A     40.378  25.614   4.908  1.00 38.83           C  
ATOM    709  CG  ASP L  95A     41.714  24.955   4.793  1.00 41.28           C  
ATOM    710  OD1 ASP L  95A     42.128  24.524   3.666  1.00 42.53           O  
ATOM    711  OD2 ASP L  95A     42.505  24.906   5.803  1.00 42.04           O  
ATOM    712  N   VAL L  95B     36.774  25.007   5.755  1.00 30.55           N  
ATOM    713  CA  VAL L  95B     35.723  25.622   6.602  1.00 27.72           C  
ATOM    714  C   VAL L  95B     34.967  24.548   7.372  1.00 26.71           C  
ATOM    715  O   VAL L  95B     34.884  23.371   6.943  1.00 26.17           O  
ATOM    716  CB  VAL L  95B     34.742  26.428   5.692  1.00 26.59           C  
ATOM    717  CG1 VAL L  95B     35.395  27.146   4.517  1.00 25.53           C  
ATOM    718  CG2 VAL L  95B     33.602  25.581   5.164  1.00 25.81           C  
ATOM    719  N   ALA L  96      34.387  24.951   8.488  1.00 24.95           N  
ATOM    720  CA  ALA L  96      33.537  24.033   9.231  1.00 24.22           C  
ATOM    721  C   ALA L  96      32.100  24.188   8.651  1.00 23.39           C  
ATOM    722  O   ALA L  96      31.663  25.323   8.368  1.00 24.12           O  
ATOM    723  CB  ALA L  96      33.428  24.249  10.732  1.00 24.24           C  
ATOM    724  N   VAL L  97      31.447  23.073   8.540  1.00 22.02           N  
ATOM    725  CA  VAL L  97      30.056  22.927   8.150  1.00 20.92           C  
ATOM    726  C   VAL L  97      29.318  22.293   9.351  1.00 20.16           C  
ATOM    727  O   VAL L  97      29.274  21.073   9.500  1.00 20.13           O  
ATOM    728  CB  VAL L  97      29.764  22.271   6.823  1.00 21.06           C  
ATOM    729  CG1 VAL L  97      28.246  22.204   6.538  1.00 20.49           C  
ATOM    730  CG2 VAL L  97      30.556  23.023   5.727  1.00 21.17           C  
ATOM    731  N   PHE L  98      28.768  23.195  10.121  1.00 19.44           N  
ATOM    732  CA  PHE L  98      28.057  22.879  11.349  1.00 20.00           C  
ATOM    733  C   PHE L  98      26.661  22.295  11.149  1.00 19.77           C  
ATOM    734  O   PHE L  98      25.985  22.539  10.143  1.00 20.15           O  
ATOM    735  CB  PHE L  98      28.034  24.126  12.248  1.00 20.59           C  
ATOM    736  CG  PHE L  98      29.205  24.345  13.159  1.00 21.23           C  
ATOM    737  CD1 PHE L  98      30.380  24.906  12.692  1.00 21.90           C  
ATOM    738  CD2 PHE L  98      29.133  24.032  14.508  1.00 21.68           C  
ATOM    739  CE1 PHE L  98      31.452  25.151  13.516  1.00 21.54           C  
ATOM    740  CE2 PHE L  98      30.216  24.255  15.362  1.00 21.67           C  
ATOM    741  CZ  PHE L  98      31.385  24.822  14.845  1.00 21.46           C  
ATOM    742  N   GLY L  99      26.232  21.519  12.143  1.00 19.07           N  
ATOM    743  CA  GLY L  99      24.864  20.914  12.205  1.00 17.17           C  
ATOM    744  C   GLY L  99      24.030  21.948  12.992  1.00 16.38           C  
ATOM    745  O   GLY L  99      24.518  22.907  13.629  1.00 16.11           O  
ATOM    746  N   THR L 100      22.758  21.803  12.947  1.00 15.94           N  
ATOM    747  CA  THR L 100      21.741  22.652  13.568  1.00 15.86           C  
ATOM    748  C   THR L 100      21.747  22.785  15.052  1.00 15.83           C  
ATOM    749  O   THR L 100      21.046  23.641  15.625  1.00 16.10           O  
ATOM    750  CB  THR L 100      20.389  21.936  13.082  1.00 16.55           C  
ATOM    751  OG1 THR L 100      20.384  22.364  11.698  1.00 18.97           O  
ATOM    752  CG2 THR L 100      19.172  22.266  13.836  1.00 17.83           C  
ATOM    753  N   GLY L 101      22.439  21.907  15.758  1.00 15.34           N  
ATOM    754  CA  GLY L 101      22.573  21.827  17.207  1.00 13.40           C  
ATOM    755  C   GLY L 101      21.405  21.017  17.766  1.00 12.68           C  
ATOM    756  O   GLY L 101      20.311  21.145  17.225  1.00 12.29           O  
ATOM    757  N   THR L 102      21.653  20.253  18.805  1.00 12.82           N  
ATOM    758  CA  THR L 102      20.753  19.401  19.558  1.00 12.84           C  
ATOM    759  C   THR L 102      20.850  19.780  21.042  1.00 13.61           C  
ATOM    760  O   THR L 102      21.917  19.798  21.631  1.00 13.92           O  
ATOM    761  CB  THR L 102      20.965  17.844  19.441  1.00 10.16           C  
ATOM    762  OG1 THR L 102      20.951  17.506  18.012  1.00  9.70           O  
ATOM    763  CG2 THR L 102      19.980  16.951  20.176  1.00  8.57           C  
ATOM    764  N   LYS L 103      19.698  19.995  21.636  1.00 14.22           N  
ATOM    765  CA  LYS L 103      19.672  20.314  23.082  1.00 15.29           C  
ATOM    766  C   LYS L 103      19.338  19.045  23.845  1.00 15.35           C  
ATOM    767  O   LYS L 103      18.304  18.446  23.554  1.00 15.28           O  
ATOM    768  CB  LYS L 103      18.607  21.371  23.261  1.00 16.38           C  
ATOM    769  CG  LYS L 103      18.563  22.156  24.543  1.00 18.02           C  
ATOM    770  CD  LYS L 103      17.237  22.960  24.546  1.00 20.38           C  
ATOM    771  CE  LYS L 103      17.145  23.806  25.834  1.00 21.86           C  
ATOM    772  NZ  LYS L 103      16.757  25.199  25.500  1.00 22.38           N  
ATOM    773  N   VAL L 104      20.166  18.629  24.808  1.00 16.07           N  
ATOM    774  CA  VAL L 104      19.872  17.472  25.630  1.00 16.03           C  
ATOM    775  C   VAL L 104      19.328  17.888  27.013  1.00 16.43           C  
ATOM    776  O   VAL L 104      19.972  18.628  27.755  1.00 16.75           O  
ATOM    777  CB  VAL L 104      21.065  16.541  25.827  1.00 15.78           C  
ATOM    778  CG1 VAL L 104      22.138  16.657  24.792  1.00 16.29           C  
ATOM    779  CG2 VAL L 104      21.541  16.639  27.249  1.00 16.29           C  
ATOM    780  N   THR L 105      18.193  17.354  27.335  1.00 16.60           N  
ATOM    781  CA  THR L 105      17.427  17.504  28.541  1.00 16.45           C  
ATOM    782  C   THR L 105      17.203  16.125  29.190  1.00 17.06           C  
ATOM    783  O   THR L 105      16.920  15.145  28.531  1.00 17.02           O  
ATOM    784  CB  THR L 105      15.935  17.952  28.213  1.00 16.44           C  
ATOM    785  OG1 THR L 105      16.117  19.069  27.288  1.00 18.72           O  
ATOM    786  CG2 THR L 105      15.033  18.210  29.395  1.00 14.95           C  
ATOM    787  N   VAL L 106      17.319  16.153  30.481  1.00 17.43           N  
ATOM    788  CA  VAL L 106      17.041  15.006  31.340  1.00 17.31           C  
ATOM    789  C   VAL L 106      15.569  15.312  31.745  1.00 17.22           C  
ATOM    790  O   VAL L 106      15.290  16.329  32.398  1.00 17.27           O  
ATOM    791  CB  VAL L 106      18.007  14.898  32.503  1.00 17.41           C  
ATOM    792  CG1 VAL L 106      17.579  13.869  33.523  1.00 16.94           C  
ATOM    793  CG2 VAL L 106      19.439  14.675  32.005  1.00 18.85           C  
ATOM    794  N   LEU L 106A     14.707  14.466  31.228  1.00 17.03           N  
ATOM    795  CA  LEU L 106A     13.264  14.498  31.457  1.00 15.90           C  
ATOM    796  C   LEU L 106A     12.933  14.729  32.923  1.00 15.45           C  
ATOM    797  O   LEU L 106A     13.327  13.972  33.841  1.00 15.10           O  
ATOM    798  CB  LEU L 106A     12.838  13.088  30.982  1.00 15.25           C  
ATOM    799  CG  LEU L 106A     12.123  13.050  29.633  1.00 14.69           C  
ATOM    800  CD1 LEU L 106A     12.792  13.981  28.681  1.00 13.99           C  
ATOM    801  CD2 LEU L 106A     12.172  11.600  29.171  1.00 14.46           C  
ATOM    802  N   GLY L 107      12.201  15.774  33.138  1.00 15.77           N  
ATOM    803  CA  GLY L 107      11.715  16.207  34.471  1.00 16.71           C  
ATOM    804  C   GLY L 107      10.196  15.955  34.539  1.00 17.26           C  
ATOM    805  O   GLY L 107       9.572  16.133  35.583  1.00 17.56           O  
ATOM    806  N   GLN L 108       9.661  15.561  33.407  1.00 18.02           N  
ATOM    807  CA  GLN L 108       8.252  15.241  33.114  1.00 17.98           C  
ATOM    808  C   GLN L 108       8.253  14.382  31.854  1.00 17.65           C  
ATOM    809  O   GLN L 108       9.282  14.253  31.187  1.00 17.51           O  
ATOM    810  CB  GLN L 108       7.407  16.493  32.870  1.00 19.97           C  
ATOM    811  CG  GLN L 108       8.039  17.543  31.969  1.00 21.44           C  
ATOM    812  CD  GLN L 108       7.257  18.853  32.023  1.00 22.88           C  
ATOM    813  OE1 GLN L 108       6.114  18.997  31.576  1.00 23.83           O  
ATOM    814  NE2 GLN L 108       7.890  19.874  32.585  1.00 22.21           N  
ATOM    815  N   PRO L 109       7.109  13.820  31.533  1.00 18.17           N  
ATOM    816  CA  PRO L 109       7.005  12.967  30.347  1.00 17.99           C  
ATOM    817  C   PRO L 109       7.056  13.810  29.084  1.00 17.71           C  
ATOM    818  O   PRO L 109       6.710  14.981  29.093  1.00 17.63           O  
ATOM    819  CB  PRO L 109       5.672  12.261  30.486  1.00 18.57           C  
ATOM    820  CG  PRO L 109       4.987  12.778  31.692  1.00 18.24           C  
ATOM    821  CD  PRO L 109       5.832  13.916  32.252  1.00 18.61           C  
TER     822      PRO L 109                                                      
ATOM   1607  N   SER L   2      44.826  24.084  22.046  1.00 44.17           N  
ATOM   1608  CA  SER L   2      43.509  24.295  22.282  1.00 42.16           C  
ATOM   1609  C   SER L   2      42.669  25.357  21.589  1.00 40.40           C  
ATOM   1610  O   SER L   2      41.768  25.006  20.806  1.00 40.61           O  
ATOM   1611  CB  SER L   2      43.311  24.537  23.825  1.00 42.79           C  
ATOM   1612  OG  SER L   2      44.165  25.572  24.289  1.00 42.68           O  
ATOM   1613  N   VAL L   3      42.884  26.617  21.927  1.00 38.25           N  
ATOM   1614  CA  VAL L   3      42.127  27.733  21.444  1.00 35.63           C  
ATOM   1615  C   VAL L   3      42.910  28.983  21.033  1.00 33.77           C  
ATOM   1616  O   VAL L   3      44.052  29.274  21.319  1.00 33.76           O  
ATOM   1617  CB  VAL L   3      41.067  28.207  22.512  1.00 35.57           C  
ATOM   1618  CG1 VAL L   3      40.218  27.108  23.096  1.00 35.75           C  
ATOM   1619  CG2 VAL L   3      41.697  29.063  23.597  1.00 35.25           C  
ATOM   1620  N   LEU L   4      42.093  29.760  20.359  1.00 31.66           N  
ATOM   1621  CA  LEU L   4      42.222  31.068  19.764  1.00 28.99           C  
ATOM   1622  C   LEU L   4      41.441  31.994  20.726  1.00 27.93           C  
ATOM   1623  O   LEU L   4      40.277  31.835  21.142  1.00 27.24           O  
ATOM   1624  CB  LEU L   4      41.639  30.980  18.353  1.00 28.08           C  
ATOM   1625  CG  LEU L   4      42.516  30.698  17.171  1.00 26.65           C  
ATOM   1626  CD1 LEU L   4      43.487  29.556  17.366  1.00 26.09           C  
ATOM   1627  CD2 LEU L   4      41.611  30.436  15.977  1.00 26.93           C  
ATOM   1628  N   THR L   5      42.197  32.974  21.155  1.00 26.64           N  
ATOM   1629  CA  THR L   5      41.714  33.975  22.096  1.00 25.38           C  
ATOM   1630  C   THR L   5      41.018  35.128  21.394  1.00 24.58           C  
ATOM   1631  O   THR L   5      41.631  35.720  20.492  1.00 24.55           O  
ATOM   1632  CB  THR L   5      42.992  34.494  22.900  1.00 25.12           C  
ATOM   1633  OG1 THR L   5      43.786  33.278  23.079  1.00 24.87           O  
ATOM   1634  CG2 THR L   5      42.643  35.201  24.198  1.00 24.94           C  
ATOM   1635  N   GLN L   6      39.830  35.443  21.841  1.00 23.75           N  
ATOM   1636  CA  GLN L   6      38.964  36.549  21.401  1.00 22.65           C  
ATOM   1637  C   GLN L   6      38.535  37.316  22.653  1.00 22.26           C  
ATOM   1638  O   GLN L   6      38.332  36.731  23.718  1.00 22.32           O  
ATOM   1639  CB  GLN L   6      37.725  35.995  20.664  1.00 22.03           C  
ATOM   1640  CG  GLN L   6      37.916  35.146  19.418  1.00 20.84           C  
ATOM   1641  CD  GLN L   6      36.719  34.706  18.636  1.00 18.83           C  
ATOM   1642  OE1 GLN L   6      36.567  33.550  18.227  1.00 18.29           O  
ATOM   1643  NE2 GLN L   6      35.802  35.610  18.300  1.00 18.45           N  
ATOM   1644  N   PRO L   7      38.393  38.615  22.598  1.00 22.65           N  
ATOM   1645  CA  PRO L   7      37.870  39.366  23.775  1.00 22.53           C  
ATOM   1646  C   PRO L   7      36.424  38.843  23.864  1.00 21.96           C  
ATOM   1647  O   PRO L   7      35.821  38.583  22.821  1.00 22.20           O  
ATOM   1648  CB  PRO L   7      37.853  40.814  23.379  1.00 22.69           C  
ATOM   1649  CG  PRO L   7      37.650  40.698  21.878  1.00 23.18           C  
ATOM   1650  CD  PRO L   7      38.570  39.520  21.464  1.00 22.58           C  
ATOM   1651  N   PRO L   8      35.955  38.739  25.071  1.00 21.65           N  
ATOM   1652  CA  PRO L   8      34.622  38.231  25.360  1.00 21.63           C  
ATOM   1653  C   PRO L   8      33.505  38.972  24.675  1.00 22.32           C  
ATOM   1654  O   PRO L   8      32.522  38.391  24.148  1.00 22.41           O  
ATOM   1655  CB  PRO L   8      34.555  38.384  26.879  1.00 21.48           C  
ATOM   1656  CG  PRO L   8      35.995  38.191  27.291  1.00 21.66           C  
ATOM   1657  CD  PRO L   8      36.723  39.100  26.291  1.00 21.33           C  
ATOM   1658  N   SER L   9      33.618  40.316  24.745  1.00 22.56           N  
ATOM   1659  CA  SER L   9      32.598  41.164  24.106  1.00 22.46           C  
ATOM   1660  C   SER L   9      33.207  42.380  23.416  1.00 23.19           C  
ATOM   1661  O   SER L   9      34.339  42.846  23.500  1.00 23.01           O  
ATOM   1662  CB  SER L   9      31.572  41.594  25.154  1.00 20.62           C  
ATOM   1663  OG  SER L   9      32.117  42.697  25.859  1.00 19.32           O  
ATOM   1664  N   ALA L  11      32.324  42.944  22.619  1.00 24.08           N  
ATOM   1665  CA  ALA L  11      32.543  44.160  21.812  1.00 23.73           C  
ATOM   1666  C   ALA L  11      31.239  44.952  22.006  1.00 24.06           C  
ATOM   1667  O   ALA L  11      30.159  44.433  22.343  1.00 23.58           O  
ATOM   1668  CB  ALA L  11      33.006  43.836  20.438  1.00 23.00           C  
ATOM   1669  N   SER L  12      31.413  46.244  21.848  1.00 24.85           N  
ATOM   1670  CA  SER L  12      30.437  47.306  22.047  1.00 25.31           C  
ATOM   1671  C   SER L  12      30.558  48.464  21.064  1.00 25.41           C  
ATOM   1672  O   SER L  12      31.576  49.137  20.805  1.00 25.02           O  
ATOM   1673  CB  SER L  12      30.608  47.719  23.525  1.00 25.35           C  
ATOM   1674  OG  SER L  12      29.707  48.721  23.935  1.00 27.35           O  
ATOM   1675  N   GLY L  13      29.378  48.738  20.475  1.00 25.70           N  
ATOM   1676  CA  GLY L  13      29.234  49.798  19.504  1.00 26.48           C  
ATOM   1677  C   GLY L  13      27.856  50.361  19.265  1.00 26.90           C  
ATOM   1678  O   GLY L  13      26.799  49.695  19.375  1.00 27.16           O  
ATOM   1679  N   THR L  14      27.897  51.629  18.879  1.00 26.63           N  
ATOM   1680  CA  THR L  14      26.699  52.418  18.552  1.00 26.61           C  
ATOM   1681  C   THR L  14      26.406  52.190  17.064  1.00 25.88           C  
ATOM   1682  O   THR L  14      27.370  51.976  16.297  1.00 25.06           O  
ATOM   1683  CB  THR L  14      26.981  53.935  18.862  1.00 28.16           C  
ATOM   1684  OG1 THR L  14      28.201  54.254  18.091  1.00 29.21           O  
ATOM   1685  CG2 THR L  14      27.190  54.172  20.367  1.00 29.26           C  
ATOM   1686  N   PRO L  15      25.119  52.224  16.765  1.00 24.89           N  
ATOM   1687  CA  PRO L  15      24.680  51.974  15.390  1.00 24.89           C  
ATOM   1688  C   PRO L  15      25.437  52.923  14.476  1.00 24.78           C  
ATOM   1689  O   PRO L  15      25.698  54.036  14.901  1.00 24.54           O  
ATOM   1690  CB  PRO L  15      23.186  52.202  15.405  1.00 25.00           C  
ATOM   1691  CG  PRO L  15      22.756  52.225  16.852  1.00 24.83           C  
ATOM   1692  CD  PRO L  15      24.011  52.470  17.663  1.00 24.88           C  
ATOM   1693  N   GLY L  16      25.703  52.459  13.283  1.00 25.38           N  
ATOM   1694  CA  GLY L  16      26.429  53.166  12.232  1.00 25.72           C  
ATOM   1695  C   GLY L  16      27.933  53.167  12.513  1.00 25.66           C  
ATOM   1696  O   GLY L  16      28.761  53.429  11.613  1.00 25.86           O  
ATOM   1697  N   GLN L  17      28.311  52.872  13.730  1.00 25.68           N  
ATOM   1698  CA  GLN L  17      29.765  52.857  14.052  1.00 26.59           C  
ATOM   1699  C   GLN L  17      30.427  51.608  13.481  1.00 27.61           C  
ATOM   1700  O   GLN L  17      29.820  50.849  12.667  1.00 27.86           O  
ATOM   1701  CB  GLN L  17      29.930  53.134  15.527  1.00 25.14           C  
ATOM   1702  CG  GLN L  17      31.373  53.010  15.977  1.00 25.04           C  
ATOM   1703  CD  GLN L  17      31.425  53.135  17.493  1.00 24.88           C  
ATOM   1704  OE1 GLN L  17      30.395  53.426  18.086  1.00 23.39           O  
ATOM   1705  NE2 GLN L  17      32.649  52.888  17.975  1.00 25.09           N  
ATOM   1706  N   ARG L  18      31.712  51.392  13.806  1.00 28.00           N  
ATOM   1707  CA  ARG L  18      32.427  50.208  13.268  1.00 28.44           C  
ATOM   1708  C   ARG L  18      33.324  49.651  14.358  1.00 27.11           C  
ATOM   1709  O   ARG L  18      34.156  50.380  14.917  1.00 27.63           O  
ATOM   1710  CB  ARG L  18      33.089  50.458  11.934  1.00 31.39           C  
ATOM   1711  CG  ARG L  18      33.700  51.829  11.702  1.00 35.47           C  
ATOM   1712  CD  ARG L  18      34.224  52.087  10.330  1.00 38.39           C  
ATOM   1713  NE  ARG L  18      33.330  52.276   9.202  1.00 39.78           N  
ATOM   1714  CZ  ARG L  18      32.219  53.002   9.074  1.00 40.06           C  
ATOM   1715  NH1 ARG L  18      31.723  53.683  10.126  1.00 40.03           N  
ATOM   1716  NH2 ARG L  18      31.528  53.078   7.927  1.00 39.70           N  
ATOM   1717  N   VAL L  19      33.103  48.396  14.674  1.00 25.63           N  
ATOM   1718  CA  VAL L  19      33.719  47.555  15.716  1.00 23.28           C  
ATOM   1719  C   VAL L  19      34.695  46.536  15.141  1.00 22.10           C  
ATOM   1720  O   VAL L  19      34.395  46.011  14.034  1.00 21.60           O  
ATOM   1721  CB  VAL L  19      32.505  46.739  16.309  1.00 22.22           C  
ATOM   1722  CG1 VAL L  19      32.802  45.989  17.569  1.00 21.05           C  
ATOM   1723  CG2 VAL L  19      31.318  47.677  16.397  1.00 20.71           C  
ATOM   1724  N   THR L  20      35.747  46.309  15.862  1.00 21.35           N  
ATOM   1725  CA  THR L  20      36.793  45.337  15.508  1.00 21.26           C  
ATOM   1726  C   THR L  20      36.885  44.170  16.510  1.00 20.38           C  
ATOM   1727  O   THR L  20      36.957  44.274  17.751  1.00 19.43           O  
ATOM   1728  CB  THR L  20      38.223  45.956  15.257  1.00 22.31           C  
ATOM   1729  OG1 THR L  20      38.081  47.031  14.280  1.00 22.86           O  
ATOM   1730  CG2 THR L  20      39.268  44.940  14.759  1.00 22.36           C  
ATOM   1731  N   ILE L  21      36.864  42.986  15.883  1.00 19.62           N  
ATOM   1732  CA  ILE L  21      36.950  41.717  16.636  1.00 19.62           C  
ATOM   1733  C   ILE L  21      38.299  41.062  16.312  1.00 20.07           C  
ATOM   1734  O   ILE L  21      38.679  40.811  15.127  1.00 20.52           O  
ATOM   1735  CB  ILE L  21      35.712  40.821  16.339  1.00 19.32           C  
ATOM   1736  CG1 ILE L  21      34.420  41.576  16.728  1.00 19.76           C  
ATOM   1737  CG2 ILE L  21      35.795  39.432  17.029  1.00 19.20           C  
ATOM   1738  CD1 ILE L  21      33.132  41.152  15.981  1.00 18.93           C  
ATOM   1739  N   SER L  22      39.033  40.867  17.385  1.00 19.96           N  
ATOM   1740  CA  SER L  22      40.375  40.275  17.289  1.00 20.38           C  
ATOM   1741  C   SER L  22      40.308  38.805  17.674  1.00 20.51           C  
ATOM   1742  O   SER L  22      39.510  38.272  18.460  1.00 19.68           O  
ATOM   1743  CB  SER L  22      41.347  41.143  18.009  1.00 21.17           C  
ATOM   1744  OG  SER L  22      42.231  40.568  18.919  1.00 22.05           O  
ATOM   1745  N   CYS L  23      41.192  38.102  16.983  1.00 20.88           N  
ATOM   1746  CA  CYS L  23      41.398  36.629  17.118  1.00 21.25           C  
ATOM   1747  C   CYS L  23      42.920  36.432  17.133  1.00 21.08           C  
ATOM   1748  O   CYS L  23      43.587  36.910  16.190  1.00 21.03           O  
ATOM   1749  CB  CYS L  23      40.677  35.874  16.019  1.00 21.08           C  
ATOM   1750  SG  CYS L  23      40.970  34.091  15.825  1.00 19.98           S  
ATOM   1751  N   SER L  24      43.414  35.843  18.194  1.00 21.25           N  
ATOM   1752  CA  SER L  24      44.872  35.594  18.331  1.00 22.58           C  
ATOM   1753  C   SER L  24      45.092  34.093  18.239  1.00 22.81           C  
ATOM   1754  O   SER L  24      44.161  33.340  18.589  1.00 23.15           O  
ATOM   1755  CB  SER L  24      45.488  36.179  19.577  1.00 23.39           C  
ATOM   1756  OG  SER L  24      45.634  37.582  19.508  1.00 25.26           O  
ATOM   1757  N   GLY L  25      46.244  33.665  17.775  1.00 23.07           N  
ATOM   1758  CA  GLY L  25      46.358  32.158  17.705  1.00 24.06           C  
ATOM   1759  C   GLY L  25      47.827  31.828  17.824  1.00 25.04           C  
ATOM   1760  O   GLY L  25      48.547  32.611  18.471  1.00 24.95           O  
ATOM   1761  N   SER L  26      48.190  30.726  17.207  1.00 26.23           N  
ATOM   1762  CA  SER L  26      49.646  30.330  17.204  1.00 27.82           C  
ATOM   1763  C   SER L  26      50.110  30.222  15.758  1.00 27.95           C  
ATOM   1764  O   SER L  26      49.284  30.530  14.846  1.00 27.29           O  
ATOM   1765  CB  SER L  26      49.864  29.183  18.136  1.00 29.21           C  
ATOM   1766  OG  SER L  26      50.656  28.156  17.527  1.00 32.87           O  
ATOM   1767  N   SER L  27      51.367  29.858  15.486  1.00 28.40           N  
ATOM   1768  CA  SER L  27      51.832  29.789  14.091  1.00 29.51           C  
ATOM   1769  C   SER L  27      51.386  28.544  13.334  1.00 30.24           C  
ATOM   1770  O   SER L  27      51.453  28.552  12.063  1.00 31.28           O  
ATOM   1771  CB  SER L  27      53.319  30.006  13.880  1.00 29.90           C  
ATOM   1772  OG  SER L  27      54.158  29.436  14.854  1.00 30.02           O  
ATOM   1773  N   SER L  27A     50.983  27.529  14.071  1.00 30.26           N  
ATOM   1774  CA  SER L  27A     50.529  26.223  13.544  1.00 29.65           C  
ATOM   1775  C   SER L  27A     49.118  26.341  12.991  1.00 28.69           C  
ATOM   1776  O   SER L  27A     48.736  25.747  11.985  1.00 28.72           O  
ATOM   1777  CB  SER L  27A     50.590  25.153  14.632  1.00 30.74           C  
ATOM   1778  OG  SER L  27A     51.155  25.686  15.831  1.00 31.46           O  
ATOM   1779  N   ASN L  27B     48.344  27.145  13.697  1.00 28.22           N  
ATOM   1780  CA  ASN L  27B     46.954  27.408  13.297  1.00 27.43           C  
ATOM   1781  C   ASN L  27B     46.930  28.616  12.350  1.00 27.30           C  
ATOM   1782  O   ASN L  27B     47.150  28.386  11.147  1.00 26.96           O  
ATOM   1783  CB  ASN L  27B     46.017  27.466  14.477  1.00 25.73           C  
ATOM   1784  CG  ASN L  27B     46.456  28.382  15.592  1.00 24.36           C  
ATOM   1785  OD1 ASN L  27B     46.604  29.592  15.373  1.00 23.68           O  
ATOM   1786  ND2 ASN L  27B     46.564  27.757  16.760  1.00 23.40           N  
ATOM   1787  N   ILE L  28      46.649  29.784  12.898  1.00 26.92           N  
ATOM   1788  CA  ILE L  28      46.544  31.038  12.164  1.00 26.71           C  
ATOM   1789  C   ILE L  28      47.778  31.385  11.346  1.00 26.67           C  
ATOM   1790  O   ILE L  28      47.773  31.648  10.129  1.00 26.19           O  
ATOM   1791  CB  ILE L  28      46.215  32.181  13.180  1.00 26.63           C  
ATOM   1792  CG1 ILE L  28      44.788  31.995  13.750  1.00 25.64           C  
ATOM   1793  CG2 ILE L  28      46.385  33.620  12.595  1.00 27.43           C  
ATOM   1794  CD1 ILE L  28      44.580  33.035  14.911  1.00 25.79           C  
ATOM   1795  N   GLY L  29      48.846  31.469  12.117  1.00 27.30           N  
ATOM   1796  CA  GLY L  29      50.194  31.793  11.603  1.00 27.86           C  
ATOM   1797  C   GLY L  29      50.412  31.255  10.201  1.00 27.75           C  
ATOM   1798  O   GLY L  29      50.822  31.990   9.300  1.00 27.75           O  
ATOM   1799  N   GLU L  30      50.118  29.982  10.039  1.00 27.73           N  
ATOM   1800  CA  GLU L  30      50.294  29.325   8.746  1.00 28.34           C  
ATOM   1801  C   GLU L  30      49.034  29.048   7.977  1.00 27.53           C  
ATOM   1802  O   GLU L  30      49.140  29.289   6.734  1.00 28.43           O  
ATOM   1803  CB  GLU L  30      51.159  28.079   8.950  1.00 33.23           C  
ATOM   1804  CG  GLU L  30      52.664  28.077   8.686  1.00 36.52           C  
ATOM   1805  CD  GLU L  30      53.569  29.223   8.942  1.00 37.83           C  
ATOM   1806  OE1 GLU L  30      53.359  30.240   8.222  1.00 39.30           O  
ATOM   1807  OE2 GLU L  30      54.498  29.227   9.759  1.00 38.73           O  
ATOM   1808  N   ASN L  31      47.892  28.656   8.479  1.00 25.75           N  
ATOM   1809  CA  ASN L  31      46.619  28.357   7.847  1.00 24.07           C  
ATOM   1810  C   ASN L  31      45.601  29.526   7.819  1.00 24.01           C  
ATOM   1811  O   ASN L  31      45.614  30.462   8.642  1.00 23.88           O  
ATOM   1812  CB  ASN L  31      45.942  27.137   8.477  1.00 21.72           C  
ATOM   1813  CG  ASN L  31      46.889  26.201   9.145  1.00 22.44           C  
ATOM   1814  OD1 ASN L  31      47.743  25.525   8.570  1.00 21.93           O  
ATOM   1815  ND2 ASN L  31      46.817  26.137  10.481  1.00 23.84           N  
ATOM   1816  N   SER L  32      44.679  29.413   6.851  1.00 23.19           N  
ATOM   1817  CA  SER L  32      43.583  30.360   6.584  1.00 21.83           C  
ATOM   1818  C   SER L  32      42.541  30.292   7.715  1.00 20.35           C  
ATOM   1819  O   SER L  32      42.273  29.190   8.209  1.00 20.45           O  
ATOM   1820  CB  SER L  32      42.825  30.156   5.295  1.00 22.07           C  
ATOM   1821  OG  SER L  32      43.669  30.010   4.170  1.00 23.36           O  
ATOM   1822  N   VAL L  33      42.056  31.451   8.030  1.00 18.82           N  
ATOM   1823  CA  VAL L  33      41.081  31.681   9.092  1.00 17.86           C  
ATOM   1824  C   VAL L  33      39.642  31.708   8.561  1.00 17.31           C  
ATOM   1825  O   VAL L  33      39.435  32.074   7.409  1.00 16.77           O  
ATOM   1826  CB  VAL L  33      41.388  33.071   9.706  1.00 17.57           C  
ATOM   1827  CG1 VAL L  33      40.240  33.588  10.576  1.00 16.82           C  
ATOM   1828  CG2 VAL L  33      42.727  33.067  10.423  1.00 17.56           C  
ATOM   1829  N   THR L  34      38.729  31.366   9.433  1.00 17.26           N  
ATOM   1830  CA  THR L  34      37.284  31.411   9.160  1.00 17.09           C  
ATOM   1831  C   THR L  34      36.539  32.055  10.349  1.00 16.32           C  
ATOM   1832  O   THR L  34      36.754  31.807  11.534  1.00 16.79           O  
ATOM   1833  CB  THR L  34      36.629  30.074   8.721  1.00 17.72           C  
ATOM   1834  OG1 THR L  34      36.772  29.118   9.817  1.00 19.25           O  
ATOM   1835  CG2 THR L  34      37.119  29.424   7.421  1.00 18.72           C  
ATOM   1836  N   TRP L  35      35.560  32.863  10.029  1.00 15.54           N  
ATOM   1837  CA  TRP L  35      34.713  33.563  11.004  1.00 15.27           C  
ATOM   1838  C   TRP L  35      33.238  33.165  10.782  1.00 14.92           C  
ATOM   1839  O   TRP L  35      32.715  33.060   9.671  1.00 13.90           O  
ATOM   1840  CB  TRP L  35      34.905  35.074  10.984  1.00 13.18           C  
ATOM   1841  CG  TRP L  35      36.235  35.667  11.217  1.00 12.75           C  
ATOM   1842  CD1 TRP L  35      37.264  35.924  10.336  1.00 10.79           C  
ATOM   1843  CD2 TRP L  35      36.705  36.169  12.498  1.00 12.14           C  
ATOM   1844  NE1 TRP L  35      38.286  36.575  10.989  1.00 10.49           N  
ATOM   1845  CE2 TRP L  35      37.972  36.724  12.293  1.00 10.47           C  
ATOM   1846  CE3 TRP L  35      36.103  36.193  13.759  1.00 12.05           C  
ATOM   1847  CZ2 TRP L  35      38.686  37.266  13.333  1.00 11.52           C  
ATOM   1848  CZ3 TRP L  35      36.826  36.736  14.790  1.00 11.90           C  
ATOM   1849  CH2 TRP L  35      38.093  37.239  14.583  1.00 11.38           C  
ATOM   1850  N   TYR L  36      32.600  32.985  11.917  1.00 16.17           N  
ATOM   1851  CA  TYR L  36      31.195  32.580  11.993  1.00 17.45           C  
ATOM   1852  C   TYR L  36      30.396  33.539  12.877  1.00 18.16           C  
ATOM   1853  O   TYR L  36      30.887  34.140  13.851  1.00 18.97           O  
ATOM   1854  CB  TYR L  36      31.057  31.167  12.635  1.00 17.40           C  
ATOM   1855  CG  TYR L  36      31.706  30.025  11.924  1.00 16.88           C  
ATOM   1856  CD1 TYR L  36      33.067  29.810  12.076  1.00 17.54           C  
ATOM   1857  CD2 TYR L  36      30.969  29.154  11.106  1.00 17.64           C  
ATOM   1858  CE1 TYR L  36      33.727  28.793  11.402  1.00 18.18           C  
ATOM   1859  CE2 TYR L  36      31.588  28.104  10.437  1.00 18.49           C  
ATOM   1860  CZ  TYR L  36      32.969  27.968  10.575  1.00 19.35           C  
ATOM   1861  OH  TYR L  36      33.670  26.973   9.942  1.00 21.59           O  
ATOM   1862  N   GLN L  37      29.132  33.600  12.562  1.00 19.02           N  
ATOM   1863  CA  GLN L  37      28.198  34.408  13.426  1.00 19.60           C  
ATOM   1864  C   GLN L  37      27.285  33.307  13.957  1.00 20.75           C  
ATOM   1865  O   GLN L  37      26.905  32.386  13.212  1.00 20.50           O  
ATOM   1866  CB  GLN L  37      27.568  35.488  12.624  1.00 19.18           C  
ATOM   1867  CG  GLN L  37      26.046  35.508  12.575  1.00 17.90           C  
ATOM   1868  CD  GLN L  37      25.699  36.531  11.500  1.00 17.27           C  
ATOM   1869  OE1 GLN L  37      25.238  36.224  10.420  1.00 17.29           O  
ATOM   1870  NE2 GLN L  37      26.092  37.733  11.900  1.00 16.76           N  
ATOM   1871  N   HIS L  38      26.984  33.369  15.215  1.00 22.66           N  
ATOM   1872  CA  HIS L  38      26.140  32.336  15.836  1.00 24.70           C  
ATOM   1873  C   HIS L  38      24.971  32.925  16.595  1.00 25.91           C  
ATOM   1874  O   HIS L  38      25.120  33.730  17.537  1.00 26.64           O  
ATOM   1875  CB  HIS L  38      27.017  31.480  16.815  1.00 24.81           C  
ATOM   1876  CG  HIS L  38      26.352  30.309  17.469  1.00 25.25           C  
ATOM   1877  ND1 HIS L  38      26.684  29.805  18.700  1.00 24.76           N  
ATOM   1878  CD2 HIS L  38      25.347  29.494  17.022  1.00 25.29           C  
ATOM   1879  CE1 HIS L  38      25.951  28.755  18.971  1.00 24.52           C  
ATOM   1880  NE2 HIS L  38      25.110  28.572  17.976  1.00 24.92           N  
ATOM   1881  N   LEU L  39      23.803  32.501  16.202  1.00 27.03           N  
ATOM   1882  CA  LEU L  39      22.583  32.927  16.995  1.00 28.76           C  
ATOM   1883  C   LEU L  39      22.548  31.684  17.884  1.00 29.84           C  
ATOM   1884  O   LEU L  39      23.055  30.670  17.307  1.00 29.94           O  
ATOM   1885  CB  LEU L  39      21.523  33.104  15.956  1.00 29.09           C  
ATOM   1886  CG  LEU L  39      21.987  33.365  14.533  1.00 28.71           C  
ATOM   1887  CD1 LEU L  39      22.488  32.090  13.858  1.00 28.80           C  
ATOM   1888  CD2 LEU L  39      20.781  33.931  13.775  1.00 28.51           C  
ATOM   1889  N   SER L  40      22.154  31.704  19.130  1.00 30.91           N  
ATOM   1890  CA  SER L  40      22.239  30.408  19.888  1.00 31.74           C  
ATOM   1891  C   SER L  40      21.030  29.531  19.594  1.00 31.68           C  
ATOM   1892  O   SER L  40      20.002  29.772  20.197  1.00 32.34           O  
ATOM   1893  CB  SER L  40      22.515  30.562  21.358  1.00 32.16           C  
ATOM   1894  OG  SER L  40      23.917  30.514  21.672  1.00 32.35           O  
ATOM   1895  N   GLY L  41      21.148  28.559  18.704  1.00 31.51           N  
ATOM   1896  CA  GLY L  41      20.068  27.648  18.365  1.00 30.96           C  
ATOM   1897  C   GLY L  41      19.790  27.586  16.877  1.00 30.45           C  
ATOM   1898  O   GLY L  41      18.729  27.060  16.438  1.00 30.87           O  
ATOM   1899  N   THR L  42      20.719  28.112  16.091  1.00 29.67           N  
ATOM   1900  CA  THR L  42      20.518  28.081  14.635  1.00 28.83           C  
ATOM   1901  C   THR L  42      21.575  27.258  13.904  1.00 28.15           C  
ATOM   1902  O   THR L  42      21.218  26.672  12.854  1.00 29.61           O  
ATOM   1903  CB  THR L  42      20.659  29.525  14.002  1.00 28.90           C  
ATOM   1904  OG1 THR L  42      21.206  30.355  15.058  1.00 29.45           O  
ATOM   1905  CG2 THR L  42      19.447  30.111  13.312  1.00 30.59           C  
ATOM   1906  N   ALA L  43      22.797  27.302  14.379  1.00 26.08           N  
ATOM   1907  CA  ALA L  43      23.927  26.685  13.662  1.00 23.80           C  
ATOM   1908  C   ALA L  43      24.764  27.886  13.163  1.00 21.77           C  
ATOM   1909  O   ALA L  43      24.274  28.736  12.431  1.00 21.21           O  
ATOM   1910  CB  ALA L  43      23.482  25.957  12.394  1.00 23.50           C  
ATOM   1911  N   PRO L  44      25.986  27.875  13.605  1.00 20.75           N  
ATOM   1912  CA  PRO L  44      26.898  28.965  13.216  1.00 19.75           C  
ATOM   1913  C   PRO L  44      26.795  29.187  11.714  1.00 18.83           C  
ATOM   1914  O   PRO L  44      26.704  28.226  10.936  1.00 18.20           O  
ATOM   1915  CB  PRO L  44      28.258  28.454  13.671  1.00 19.76           C  
ATOM   1916  CG  PRO L  44      27.944  27.559  14.854  1.00 20.09           C  
ATOM   1917  CD  PRO L  44      26.628  26.899  14.499  1.00 20.09           C  
ATOM   1918  N   LYS L  45      26.837  30.460  11.341  1.00 17.96           N  
ATOM   1919  CA  LYS L  45      26.803  30.827   9.920  1.00 17.63           C  
ATOM   1920  C   LYS L  45      28.187  31.420   9.570  1.00 17.14           C  
ATOM   1921  O   LYS L  45      28.727  32.281  10.250  1.00 16.45           O  
ATOM   1922  CB  LYS L  45      25.710  31.797   9.493  1.00 16.49           C  
ATOM   1923  CG  LYS L  45      25.404  31.791   8.022  1.00 16.47           C  
ATOM   1924  CD  LYS L  45      25.192  33.124   7.335  1.00 17.52           C  
ATOM   1925  CE  LYS L  45      24.638  34.199   8.248  1.00 18.80           C  
ATOM   1926  NZ  LYS L  45      23.657  35.093   7.556  1.00 20.05           N  
ATOM   1927  N   LEU L  46      28.694  30.888   8.501  1.00 17.15           N  
ATOM   1928  CA  LEU L  46      29.980  31.288   7.894  1.00 17.96           C  
ATOM   1929  C   LEU L  46      29.775  32.727   7.376  1.00 18.15           C  
ATOM   1930  O   LEU L  46      28.705  32.903   6.737  1.00 17.77           O  
ATOM   1931  CB  LEU L  46      30.128  30.245   6.797  1.00 19.16           C  
ATOM   1932  CG  LEU L  46      31.406  29.946   6.071  1.00 20.22           C  
ATOM   1933  CD1 LEU L  46      31.210  30.117   4.565  1.00 19.14           C  
ATOM   1934  CD2 LEU L  46      32.534  30.799   6.631  1.00 20.42           C  
ATOM   1935  N   LEU L  47      30.712  33.628   7.631  1.00 18.40           N  
ATOM   1936  CA  LEU L  47      30.719  35.026   7.203  1.00 18.32           C  
ATOM   1937  C   LEU L  47      31.860  35.268   6.185  1.00 18.32           C  
ATOM   1938  O   LEU L  47      31.717  35.877   5.132  1.00 18.54           O  
ATOM   1939  CB  LEU L  47      31.099  35.923   8.405  1.00 17.92           C  
ATOM   1940  CG  LEU L  47      30.017  36.769   9.009  1.00 18.21           C  
ATOM   1941  CD1 LEU L  47      28.674  36.047   8.914  1.00 18.44           C  
ATOM   1942  CD2 LEU L  47      30.345  37.079  10.467  1.00 17.66           C  
ATOM   1943  N   ILE L  48      32.962  34.760   6.713  1.00 18.24           N  
ATOM   1944  CA  ILE L  48      34.285  34.823   6.069  1.00 18.03           C  
ATOM   1945  C   ILE L  48      34.972  33.478   5.884  1.00 17.67           C  
ATOM   1946  O   ILE L  48      34.974  32.521   6.670  1.00 17.35           O  
ATOM   1947  CB  ILE L  48      35.232  35.779   6.887  1.00 16.49           C  
ATOM   1948  CG1 ILE L  48      34.611  37.188   6.930  1.00 17.60           C  
ATOM   1949  CG2 ILE L  48      36.704  35.815   6.409  1.00 16.29           C  
ATOM   1950  CD1 ILE L  48      34.477  37.966   5.622  1.00 17.02           C  
ATOM   1951  N   TYR L  49      35.676  33.423   4.745  1.00 17.79           N  
ATOM   1952  CA  TYR L  49      36.437  32.152   4.559  1.00 18.60           C  
ATOM   1953  C   TYR L  49      37.774  32.618   3.996  1.00 18.92           C  
ATOM   1954  O   TYR L  49      37.876  33.826   3.702  1.00 18.98           O  
ATOM   1955  CB  TYR L  49      35.677  31.108   3.826  1.00 18.82           C  
ATOM   1956  CG  TYR L  49      35.233  31.422   2.431  1.00 20.25           C  
ATOM   1957  CD1 TYR L  49      34.039  32.093   2.200  1.00 20.30           C  
ATOM   1958  CD2 TYR L  49      35.988  31.017   1.322  1.00 20.78           C  
ATOM   1959  CE1 TYR L  49      33.637  32.402   0.904  1.00 20.64           C  
ATOM   1960  CE2 TYR L  49      35.578  31.304   0.024  1.00 21.09           C  
ATOM   1961  CZ  TYR L  49      34.403  31.996  -0.172  1.00 21.48           C  
ATOM   1962  OH  TYR L  49      34.011  32.300  -1.455  1.00 22.52           O  
ATOM   1963  N   GLU L  50      38.697  31.709   3.948  1.00 18.95           N  
ATOM   1964  CA  GLU L  50      40.022  31.970   3.421  1.00 20.29           C  
ATOM   1965  C   GLU L  50      40.570  33.342   3.798  1.00 19.39           C  
ATOM   1966  O   GLU L  50      40.961  34.052   2.872  1.00 18.71           O  
ATOM   1967  CB  GLU L  50      39.976  31.841   1.883  1.00 23.25           C  
ATOM   1968  CG  GLU L  50      39.778  30.417   1.345  1.00 28.25           C  
ATOM   1969  CD  GLU L  50      40.450  29.296   2.100  1.00 31.43           C  
ATOM   1970  OE1 GLU L  50      39.956  29.170   3.271  1.00 32.87           O  
ATOM   1971  OE2 GLU L  50      41.381  28.542   1.761  1.00 32.48           O  
ATOM   1972  N   ASP L  51      40.610  33.679   5.065  1.00 18.82           N  
ATOM   1973  CA  ASP L  51      41.063  34.916   5.644  1.00 18.99           C  
ATOM   1974  C   ASP L  51      40.150  36.146   5.399  1.00 19.22           C  
ATOM   1975  O   ASP L  51      39.890  36.848   6.394  1.00 19.23           O  
ATOM   1976  CB  ASP L  51      42.467  35.364   5.193  1.00 18.24           C  
ATOM   1977  CG  ASP L  51      43.540  34.393   5.650  1.00 18.02           C  
ATOM   1978  OD1 ASP L  51      43.835  34.443   6.852  1.00 17.13           O  
ATOM   1979  OD2 ASP L  51      44.041  33.653   4.802  1.00 17.81           O  
ATOM   1980  N   ASN L  52      39.847  36.432   4.148  1.00 18.80           N  
ATOM   1981  CA  ASN L  52      39.059  37.569   3.735  1.00 19.13           C  
ATOM   1982  C   ASN L  52      37.953  37.365   2.731  1.00 18.98           C  
ATOM   1983  O   ASN L  52      37.359  38.378   2.280  1.00 18.79           O  
ATOM   1984  CB  ASN L  52      40.003  38.699   3.265  1.00 19.97           C  
ATOM   1985  CG  ASN L  52      41.054  38.126   2.341  1.00 20.12           C  
ATOM   1986  OD1 ASN L  52      42.214  38.550   2.431  1.00 21.68           O  
ATOM   1987  ND2 ASN L  52      40.639  37.177   1.505  1.00 20.48           N  
ATOM   1988  N   SER L  53      37.586  36.174   2.401  1.00 19.89           N  
ATOM   1989  CA  SER L  53      36.486  35.910   1.442  1.00 20.86           C  
ATOM   1990  C   SER L  53      35.153  35.955   2.191  1.00 21.24           C  
ATOM   1991  O   SER L  53      35.076  35.507   3.371  1.00 21.25           O  
ATOM   1992  CB  SER L  53      36.766  34.637   0.679  1.00 20.78           C  
ATOM   1993  OG  SER L  53      37.830  34.947  -0.242  1.00 23.41           O  
ATOM   1994  N   ARG L  54      34.179  36.547   1.504  1.00 20.85           N  
ATOM   1995  CA  ARG L  54      32.806  36.702   2.032  1.00 21.17           C  
ATOM   1996  C   ARG L  54      31.926  35.588   1.456  1.00 21.69           C  
ATOM   1997  O   ARG L  54      32.175  35.355   0.268  1.00 21.59           O  
ATOM   1998  CB  ARG L  54      32.147  38.026   1.611  1.00 19.35           C  
ATOM   1999  CG  ARG L  54      32.456  39.152   2.601  1.00 17.64           C  
ATOM   2000  CD  ARG L  54      31.834  40.441   2.193  1.00 15.33           C  
ATOM   2001  NE  ARG L  54      32.661  41.505   2.751  1.00 13.83           N  
ATOM   2002  CZ  ARG L  54      33.637  41.981   1.940  1.00 13.79           C  
ATOM   2003  NH1 ARG L  54      33.827  41.420   0.740  1.00 13.67           N  
ATOM   2004  NH2 ARG L  54      34.375  42.990   2.349  1.00 12.76           N  
ATOM   2005  N   ALA L  55      31.042  35.013   2.269  1.00 22.73           N  
ATOM   2006  CA  ALA L  55      30.184  33.916   1.736  1.00 23.89           C  
ATOM   2007  C   ALA L  55      28.992  34.544   1.040  1.00 24.38           C  
ATOM   2008  O   ALA L  55      28.697  35.675   1.477  1.00 24.93           O  
ATOM   2009  CB  ALA L  55      29.695  32.974   2.840  1.00 24.24           C  
ATOM   2010  N   SER L  56      28.387  33.880   0.047  1.00 24.80           N  
ATOM   2011  CA  SER L  56      27.220  34.596  -0.548  1.00 24.66           C  
ATOM   2012  C   SER L  56      26.323  34.978   0.653  1.00 23.93           C  
ATOM   2013  O   SER L  56      26.424  34.352   1.705  1.00 23.48           O  
ATOM   2014  CB  SER L  56      26.393  33.895  -1.593  1.00 25.89           C  
ATOM   2015  OG  SER L  56      25.508  34.927  -2.159  1.00 27.36           O  
ATOM   2016  N   GLY L  57      25.508  35.980   0.438  1.00 23.84           N  
ATOM   2017  CA  GLY L  57      24.608  36.483   1.460  1.00 23.76           C  
ATOM   2018  C   GLY L  57      25.313  37.347   2.484  1.00 23.60           C  
ATOM   2019  O   GLY L  57      24.611  38.080   3.216  1.00 24.09           O  
ATOM   2020  N   VAL L  58      26.624  37.333   2.563  1.00 23.53           N  
ATOM   2021  CA  VAL L  58      27.374  38.180   3.525  1.00 23.78           C  
ATOM   2022  C   VAL L  58      27.584  39.580   2.896  1.00 23.55           C  
ATOM   2023  O   VAL L  58      27.944  39.703   1.718  1.00 23.65           O  
ATOM   2024  CB  VAL L  58      28.684  37.486   3.968  1.00 24.04           C  
ATOM   2025  CG1 VAL L  58      29.539  38.434   4.819  1.00 23.39           C  
ATOM   2026  CG2 VAL L  58      28.474  36.144   4.648  1.00 22.82           C  
ATOM   2027  N   SER L  59      27.327  40.602   3.675  1.00 23.10           N  
ATOM   2028  CA  SER L  59      27.462  42.049   3.306  1.00 22.45           C  
ATOM   2029  C   SER L  59      28.904  42.550   3.240  1.00 21.47           C  
ATOM   2030  O   SER L  59      29.869  41.864   3.684  1.00 20.95           O  
ATOM   2031  CB  SER L  59      26.572  42.724   4.344  1.00 22.35           C  
ATOM   2032  OG  SER L  59      26.616  44.083   4.576  1.00 23.12           O  
ATOM   2033  N   ASP L  60      29.134  43.772   2.703  1.00 21.05           N  
ATOM   2034  CA  ASP L  60      30.484  44.357   2.630  1.00 20.47           C  
ATOM   2035  C   ASP L  60      30.845  45.199   3.854  1.00 20.14           C  
ATOM   2036  O   ASP L  60      31.892  45.869   3.984  1.00 19.06           O  
ATOM   2037  CB  ASP L  60      30.792  45.066   1.336  1.00 21.82           C  
ATOM   2038  CG  ASP L  60      29.606  44.966   0.367  1.00 23.04           C  
ATOM   2039  OD1 ASP L  60      28.747  45.823   0.650  1.00 22.76           O  
ATOM   2040  OD2 ASP L  60      29.637  44.144  -0.561  1.00 23.10           O  
ATOM   2041  N   ARG L  61      29.916  45.109   4.791  1.00 19.94           N  
ATOM   2042  CA  ARG L  61      30.082  45.753   6.103  1.00 19.59           C  
ATOM   2043  C   ARG L  61      31.125  44.934   6.902  1.00 19.21           C  
ATOM   2044  O   ARG L  61      31.861  45.468   7.754  1.00 18.93           O  
ATOM   2045  CB  ARG L  61      28.766  45.853   6.812  1.00 20.70           C  
ATOM   2046  CG  ARG L  61      27.535  46.569   6.367  1.00 20.28           C  
ATOM   2047  CD  ARG L  61      26.676  46.944   7.510  1.00 21.29           C  
ATOM   2048  NE  ARG L  61      26.556  46.035   8.639  1.00 21.76           N  
ATOM   2049  CZ  ARG L  61      25.676  45.061   8.827  1.00 21.89           C  
ATOM   2050  NH1 ARG L  61      24.769  44.710   7.902  1.00 22.17           N  
ATOM   2051  NH2 ARG L  61      25.618  44.315   9.916  1.00 22.34           N  
ATOM   2052  N   PHE L  62      31.199  43.629   6.643  1.00 18.75           N  
ATOM   2053  CA  PHE L  62      32.120  42.679   7.286  1.00 17.95           C  
ATOM   2054  C   PHE L  62      33.336  42.409   6.376  1.00 17.69           C  
ATOM   2055  O   PHE L  62      33.204  41.940   5.246  1.00 17.78           O  
ATOM   2056  CB  PHE L  62      31.508  41.316   7.582  1.00 17.90           C  
ATOM   2057  CG  PHE L  62      30.218  41.236   8.328  1.00 17.56           C  
ATOM   2058  CD1 PHE L  62      29.018  41.513   7.693  1.00 17.53           C  
ATOM   2059  CD2 PHE L  62      30.216  40.884   9.687  1.00 18.29           C  
ATOM   2060  CE1 PHE L  62      27.814  41.463   8.401  1.00 18.28           C  
ATOM   2061  CE2 PHE L  62      29.032  40.818  10.420  1.00 18.22           C  
ATOM   2062  CZ  PHE L  62      27.834  41.086   9.740  1.00 18.07           C  
ATOM   2063  N   SER L  63      34.489  42.680   6.913  1.00 17.87           N  
ATOM   2064  CA  SER L  63      35.780  42.466   6.274  1.00 18.27           C  
ATOM   2065  C   SER L  63      36.706  41.902   7.366  1.00 18.76           C  
ATOM   2066  O   SER L  63      36.544  42.291   8.543  1.00 18.71           O  
ATOM   2067  CB  SER L  63      36.443  43.714   5.731  1.00 18.78           C  
ATOM   2068  OG  SER L  63      36.419  44.744   6.691  1.00 19.04           O  
ATOM   2069  N   ALA L  64      37.612  41.091   6.878  1.00 19.17           N  
ATOM   2070  CA  ALA L  64      38.568  40.446   7.797  1.00 20.58           C  
ATOM   2071  C   ALA L  64      39.956  40.433   7.154  1.00 21.02           C  
ATOM   2072  O   ALA L  64      40.075  40.705   5.964  1.00 20.71           O  
ATOM   2073  CB  ALA L  64      38.131  39.021   8.170  1.00 19.28           C  
ATOM   2074  N   SER L  65      40.875  40.079   8.031  1.00 21.74           N  
ATOM   2075  CA  SER L  65      42.293  39.983   7.671  1.00 23.29           C  
ATOM   2076  C   SER L  65      42.993  39.185   8.786  1.00 23.39           C  
ATOM   2077  O   SER L  65      42.388  38.900   9.833  1.00 24.03           O  
ATOM   2078  CB  SER L  65      42.961  41.328   7.425  1.00 24.08           C  
ATOM   2079  OG  SER L  65      43.284  42.012   8.626  1.00 25.53           O  
ATOM   2080  N   LYS L  66      44.202  38.842   8.478  1.00 23.42           N  
ATOM   2081  CA  LYS L  66      45.143  38.044   9.297  1.00 23.63           C  
ATOM   2082  C   LYS L  66      46.516  38.716   9.188  1.00 23.68           C  
ATOM   2083  O   LYS L  66      46.960  39.085   8.076  1.00 23.14           O  
ATOM   2084  CB  LYS L  66      45.105  36.617   8.781  1.00 23.92           C  
ATOM   2085  CG  LYS L  66      46.304  35.725   8.734  1.00 24.28           C  
ATOM   2086  CD  LYS L  66      46.329  34.806   7.515  1.00 24.60           C  
ATOM   2087  CE  LYS L  66      47.472  33.815   7.569  1.00 25.41           C  
ATOM   2088  NZ  LYS L  66      47.122  32.448   7.136  1.00 25.34           N  
ATOM   2089  N   SER L  67      47.142  38.941  10.332  1.00 24.09           N  
ATOM   2090  CA  SER L  67      48.485  39.575  10.377  1.00 24.95           C  
ATOM   2091  C   SER L  67      49.387  38.647  11.208  1.00 24.70           C  
ATOM   2092  O   SER L  67      49.289  38.634  12.458  1.00 24.69           O  
ATOM   2093  CB  SER L  67      48.450  40.996  10.870  1.00 26.74           C  
ATOM   2094  OG  SER L  67      49.724  41.452  11.360  1.00 29.58           O  
ATOM   2095  N   GLY L  68      50.196  37.865  10.463  1.00 23.68           N  
ATOM   2096  CA  GLY L  68      51.081  36.906  11.161  1.00 22.64           C  
ATOM   2097  C   GLY L  68      50.129  35.844  11.759  1.00 22.45           C  
ATOM   2098  O   GLY L  68      49.381  35.191  11.014  1.00 23.00           O  
ATOM   2099  N   THR L  69      50.135  35.798  13.038  1.00 21.74           N  
ATOM   2100  CA  THR L  69      49.483  35.038  14.070  1.00 20.39           C  
ATOM   2101  C   THR L  69      48.185  35.569  14.656  1.00 20.69           C  
ATOM   2102  O   THR L  69      47.596  34.891  15.531  1.00 20.00           O  
ATOM   2103  CB  THR L  69      50.643  34.809  15.128  1.00 18.84           C  
ATOM   2104  OG1 THR L  69      50.911  33.382  15.000  1.00 17.53           O  
ATOM   2105  CG2 THR L  69      50.495  35.360  16.522  1.00 18.37           C  
ATOM   2106  N   SER L  70      47.669  36.678  14.154  1.00 21.00           N  
ATOM   2107  CA  SER L  70      46.456  37.399  14.471  1.00 21.65           C  
ATOM   2108  C   SER L  70      45.490  37.645  13.285  1.00 21.55           C  
ATOM   2109  O   SER L  70      45.959  37.968  12.180  1.00 21.37           O  
ATOM   2110  CB  SER L  70      46.758  38.849  14.923  1.00 21.70           C  
ATOM   2111  OG  SER L  70      47.366  38.806  16.185  1.00 24.08           O  
ATOM   2112  N   ALA L  71      44.197  37.590  13.578  1.00 21.06           N  
ATOM   2113  CA  ALA L  71      43.156  37.822  12.564  1.00 20.95           C  
ATOM   2114  C   ALA L  71      42.139  38.820  13.138  1.00 20.68           C  
ATOM   2115  O   ALA L  71      41.942  38.893  14.362  1.00 21.07           O  
ATOM   2116  CB  ALA L  71      42.452  36.576  12.073  1.00 20.24           C  
ATOM   2117  N   SER L  72      41.527  39.581  12.238  1.00 19.71           N  
ATOM   2118  CA  SER L  72      40.554  40.575  12.722  1.00 19.13           C  
ATOM   2119  C   SER L  72      39.354  40.626  11.790  1.00 17.69           C  
ATOM   2120  O   SER L  72      39.476  40.370  10.595  1.00 17.06           O  
ATOM   2121  CB  SER L  72      41.184  41.957  12.821  1.00 20.15           C  
ATOM   2122  OG  SER L  72      42.587  41.774  13.065  1.00 22.92           O  
ATOM   2123  N   LEU L  73      38.261  40.878  12.496  1.00 16.91           N  
ATOM   2124  CA  LEU L  73      36.970  41.081  11.803  1.00 16.53           C  
ATOM   2125  C   LEU L  73      36.532  42.527  12.148  1.00 16.41           C  
ATOM   2126  O   LEU L  73      36.500  42.925  13.328  1.00 16.07           O  
ATOM   2127  CB  LEU L  73      35.945  40.027  12.133  1.00 14.93           C  
ATOM   2128  CG  LEU L  73      34.561  40.170  11.526  1.00 14.80           C  
ATOM   2129  CD1 LEU L  73      34.524  39.441  10.173  1.00 15.79           C  
ATOM   2130  CD2 LEU L  73      33.479  39.658  12.447  1.00 13.26           C  
ATOM   2131  N   ALA L  74      36.219  43.252  11.104  1.00 16.95           N  
ATOM   2132  CA  ALA L  74      35.696  44.623  11.218  1.00 17.00           C  
ATOM   2133  C   ALA L  74      34.232  44.749  10.783  1.00 17.12           C  
ATOM   2134  O   ALA L  74      33.833  44.444   9.637  1.00 16.27           O  
ATOM   2135  CB  ALA L  74      36.609  45.500  10.358  1.00 17.62           C  
ATOM   2136  N   ILE L  75      33.373  45.214  11.708  1.00 17.50           N  
ATOM   2137  CA  ILE L  75      31.983  45.437  11.289  1.00 18.36           C  
ATOM   2138  C   ILE L  75      31.855  46.972  11.140  1.00 19.90           C  
ATOM   2139  O   ILE L  75      32.090  47.740  12.076  1.00 20.51           O  
ATOM   2140  CB  ILE L  75      30.855  44.867  12.125  1.00 18.38           C  
ATOM   2141  CG1 ILE L  75      31.269  43.445  12.623  1.00 18.87           C  
ATOM   2142  CG2 ILE L  75      29.463  44.801  11.471  1.00 16.12           C  
ATOM   2143  CD1 ILE L  75      31.381  43.479  14.190  1.00 21.16           C  
ATOM   2144  N   SER L  76      31.599  47.340   9.908  1.00 20.63           N  
ATOM   2145  CA  SER L  76      31.421  48.759   9.564  1.00 22.10           C  
ATOM   2146  C   SER L  76      29.922  48.980   9.326  1.00 22.82           C  
ATOM   2147  O   SER L  76      29.218  48.230   8.589  1.00 23.57           O  
ATOM   2148  CB  SER L  76      32.331  49.087   8.406  1.00 21.65           C  
ATOM   2149  OG  SER L  76      32.168  48.075   7.424  1.00 21.79           O  
ATOM   2150  N   GLY L  77      29.402  50.006  10.000  1.00 22.42           N  
ATOM   2151  CA  GLY L  77      27.964  50.299   9.843  1.00 22.31           C  
ATOM   2152  C   GLY L  77      27.143  49.481  10.834  1.00 22.47           C  
ATOM   2153  O   GLY L  77      25.979  49.152  10.518  1.00 22.89           O  
ATOM   2154  N   LEU L  78      27.734  49.189  11.989  1.00 22.27           N  
ATOM   2155  CA  LEU L  78      27.064  48.410  13.032  1.00 22.12           C  
ATOM   2156  C   LEU L  78      25.535  48.626  12.964  1.00 22.73           C  
ATOM   2157  O   LEU L  78      25.063  49.767  13.173  1.00 22.65           O  
ATOM   2158  CB  LEU L  78      27.550  48.862  14.412  1.00 20.18           C  
ATOM   2159  CG  LEU L  78      28.106  47.881  15.415  1.00 18.23           C  
ATOM   2160  CD1 LEU L  78      27.980  48.370  16.837  1.00 16.19           C  
ATOM   2161  CD2 LEU L  78      27.441  46.548  15.174  1.00 19.19           C  
ATOM   2162  N   GLN L  79      24.851  47.543  12.702  1.00 22.85           N  
ATOM   2163  CA  GLN L  79      23.374  47.553  12.667  1.00 23.69           C  
ATOM   2164  C   GLN L  79      23.005  46.747  13.907  1.00 23.78           C  
ATOM   2165  O   GLN L  79      23.895  46.074  14.455  1.00 24.48           O  
ATOM   2166  CB  GLN L  79      22.784  46.940  11.415  1.00 25.25           C  
ATOM   2167  CG  GLN L  79      22.825  47.906  10.224  1.00 26.85           C  
ATOM   2168  CD  GLN L  79      21.876  49.056  10.513  1.00 28.03           C  
ATOM   2169  OE1 GLN L  79      20.697  48.811  10.756  1.00 28.21           O  
ATOM   2170  NE2 GLN L  79      22.438  50.261  10.484  1.00 28.96           N  
ATOM   2171  N   PRO L  80      21.784  46.874  14.340  1.00 23.83           N  
ATOM   2172  CA  PRO L  80      21.346  46.132  15.531  1.00 23.73           C  
ATOM   2173  C   PRO L  80      21.222  44.658  15.232  1.00 23.45           C  
ATOM   2174  O   PRO L  80      21.285  43.870  16.189  1.00 24.10           O  
ATOM   2175  CB  PRO L  80      20.098  46.851  15.957  1.00 24.15           C  
ATOM   2176  CG  PRO L  80      19.575  47.561  14.750  1.00 24.11           C  
ATOM   2177  CD  PRO L  80      20.722  47.715  13.772  1.00 24.00           C  
ATOM   2178  N   GLU L  81      21.037  44.233  13.999  1.00 22.89           N  
ATOM   2179  CA  GLU L  81      20.927  42.806  13.639  1.00 22.16           C  
ATOM   2180  C   GLU L  81      22.275  42.102  13.774  1.00 20.86           C  
ATOM   2181  O   GLU L  81      22.444  40.889  13.607  1.00 20.34           O  
ATOM   2182  CB  GLU L  81      20.466  42.663  12.172  1.00 24.38           C  
ATOM   2183  CG  GLU L  81      20.488  43.949  11.370  1.00 27.77           C  
ATOM   2184  CD  GLU L  81      20.864  44.002   9.934  1.00 30.26           C  
ATOM   2185  OE1 GLU L  81      21.884  43.357   9.611  1.00 31.09           O  
ATOM   2186  OE2 GLU L  81      20.267  44.640   9.050  1.00 32.18           O  
ATOM   2187  N   ASP L  82      23.273  42.877  14.111  1.00 19.45           N  
ATOM   2188  CA  ASP L  82      24.659  42.509  14.287  1.00 18.13           C  
ATOM   2189  C   ASP L  82      25.046  42.047  15.677  1.00 17.30           C  
ATOM   2190  O   ASP L  82      26.139  41.516  15.808  1.00 17.21           O  
ATOM   2191  CB  ASP L  82      25.585  43.646  13.830  1.00 16.79           C  
ATOM   2192  CG  ASP L  82      25.635  43.757  12.320  1.00 15.48           C  
ATOM   2193  OD1 ASP L  82      25.020  42.893  11.661  1.00 15.96           O  
ATOM   2194  OD2 ASP L  82      26.273  44.677  11.796  1.00 15.62           O  
ATOM   2195  N   GLU L  83      24.198  42.268  16.619  1.00 17.61           N  
ATOM   2196  CA  GLU L  83      24.350  41.903  18.023  1.00 17.93           C  
ATOM   2197  C   GLU L  83      24.305  40.373  18.011  1.00 17.80           C  
ATOM   2198  O   GLU L  83      23.187  39.897  17.774  1.00 18.15           O  
ATOM   2199  CB  GLU L  83      23.159  42.444  18.827  1.00 19.29           C  
ATOM   2200  CG  GLU L  83      23.219  42.805  20.296  1.00 20.75           C  
ATOM   2201  CD  GLU L  83      22.096  43.200  21.195  1.00 21.81           C  
ATOM   2202  OE1 GLU L  83      21.569  44.290  21.418  1.00 21.10           O  
ATOM   2203  OE2 GLU L  83      21.678  42.239  21.937  1.00 22.72           O  
ATOM   2204  N   THR L  84      25.390  39.654  18.138  1.00 17.65           N  
ATOM   2205  CA  THR L  84      25.398  38.174  18.124  1.00 17.64           C  
ATOM   2206  C   THR L  84      26.751  37.743  18.678  1.00 16.53           C  
ATOM   2207  O   THR L  84      27.411  38.616  19.255  1.00 16.78           O  
ATOM   2208  CB  THR L  84      25.097  37.510  16.721  1.00 18.57           C  
ATOM   2209  OG1 THR L  84      26.310  37.485  15.876  1.00 20.27           O  
ATOM   2210  CG2 THR L  84      24.027  38.265  15.909  1.00 19.65           C  
ATOM   2211  N   ASP L  85      27.114  36.504  18.427  1.00 15.82           N  
ATOM   2212  CA  ASP L  85      28.402  35.967  18.851  1.00 15.39           C  
ATOM   2213  C   ASP L  85      29.225  35.707  17.569  1.00 14.41           C  
ATOM   2214  O   ASP L  85      28.659  35.172  16.629  1.00 13.40           O  
ATOM   2215  CB  ASP L  85      28.387  34.723  19.709  1.00 17.30           C  
ATOM   2216  CG  ASP L  85      27.450  34.726  20.890  1.00 19.62           C  
ATOM   2217  OD1 ASP L  85      27.741  35.176  22.016  1.00 20.24           O  
ATOM   2218  OD2 ASP L  85      26.321  34.221  20.634  1.00 21.07           O  
ATOM   2219  N   TYR L  86      30.478  36.064  17.714  1.00 13.86           N  
ATOM   2220  CA  TYR L  86      31.422  35.872  16.598  1.00 14.23           C  
ATOM   2221  C   TYR L  86      32.608  35.057  17.117  1.00 14.97           C  
ATOM   2222  O   TYR L  86      33.173  35.419  18.147  1.00 14.58           O  
ATOM   2223  CB  TYR L  86      31.823  37.204  15.996  1.00 13.23           C  
ATOM   2224  CG  TYR L  86      30.673  37.997  15.359  1.00 13.13           C  
ATOM   2225  CD1 TYR L  86      29.907  38.876  16.127  1.00 12.12           C  
ATOM   2226  CD2 TYR L  86      30.363  37.893  14.002  1.00 12.80           C  
ATOM   2227  CE1 TYR L  86      28.867  39.574  15.577  1.00 12.46           C  
ATOM   2228  CE2 TYR L  86      29.329  38.595  13.422  1.00 12.28           C  
ATOM   2229  CZ  TYR L  86      28.584  39.438  14.231  1.00 11.92           C  
ATOM   2230  OH  TYR L  86      27.561  40.125  13.705  1.00 12.07           O  
ATOM   2231  N   TYR L  87      32.872  33.985  16.391  1.00 15.94           N  
ATOM   2232  CA  TYR L  87      33.894  32.985  16.536  1.00 16.89           C  
ATOM   2233  C   TYR L  87      34.768  32.928  15.272  1.00 17.42           C  
ATOM   2234  O   TYR L  87      34.340  33.148  14.130  1.00 17.53           O  
ATOM   2235  CB  TYR L  87      33.422  31.520  16.794  1.00 18.64           C  
ATOM   2236  CG  TYR L  87      32.433  31.434  17.942  1.00 20.21           C  
ATOM   2237  CD1 TYR L  87      32.813  31.352  19.271  1.00 20.66           C  
ATOM   2238  CD2 TYR L  87      31.061  31.461  17.682  1.00 20.89           C  
ATOM   2239  CE1 TYR L  87      31.852  31.307  20.290  1.00 21.49           C  
ATOM   2240  CE2 TYR L  87      30.097  31.428  18.687  1.00 21.62           C  
ATOM   2241  CZ  TYR L  87      30.496  31.341  20.017  1.00 21.54           C  
ATOM   2242  OH  TYR L  87      29.572  31.314  21.037  1.00 21.35           O  
ATOM   2243  N   CYS L  88      36.019  32.663  15.563  1.00 17.68           N  
ATOM   2244  CA  CYS L  88      37.037  32.540  14.531  1.00 17.78           C  
ATOM   2245  C   CYS L  88      37.454  31.061  14.598  1.00 18.46           C  
ATOM   2246  O   CYS L  88      37.038  30.388  15.550  1.00 18.36           O  
ATOM   2247  CB  CYS L  88      38.226  33.441  14.769  1.00 19.41           C  
ATOM   2248  SG  CYS L  88      39.184  33.315  16.278  1.00 20.65           S  
ATOM   2249  N   ALA L  89      38.228  30.693  13.618  1.00 19.32           N  
ATOM   2250  CA  ALA L  89      38.763  29.344  13.473  1.00 20.38           C  
ATOM   2251  C   ALA L  89      39.844  29.251  12.398  1.00 20.80           C  
ATOM   2252  O   ALA L  89      39.900  29.983  11.389  1.00 20.72           O  
ATOM   2253  CB  ALA L  89      37.593  28.398  13.158  1.00 20.34           C  
ATOM   2254  N   ALA L  90      40.703  28.285  12.644  1.00 21.73           N  
ATOM   2255  CA  ALA L  90      41.852  27.880  11.836  1.00 22.26           C  
ATOM   2256  C   ALA L  90      42.362  26.482  12.215  1.00 21.88           C  
ATOM   2257  O   ALA L  90      42.394  26.111  13.377  1.00 20.56           O  
ATOM   2258  CB  ALA L  90      43.015  28.867  11.994  1.00 22.58           C  
ATOM   2259  N   TRP L  91      42.801  25.765  11.214  1.00 23.12           N  
ATOM   2260  CA  TRP L  91      43.396  24.446  11.398  1.00 25.40           C  
ATOM   2261  C   TRP L  91      44.693  24.519  12.218  1.00 26.75           C  
ATOM   2262  O   TRP L  91      45.557  25.419  12.065  1.00 27.15           O  
ATOM   2263  CB  TRP L  91      43.633  23.805  10.023  1.00 26.78           C  
ATOM   2264  CG  TRP L  91      44.103  22.393  10.156  1.00 27.49           C  
ATOM   2265  CD1 TRP L  91      45.395  21.948  10.125  1.00 28.02           C  
ATOM   2266  CD2 TRP L  91      43.283  21.249  10.365  1.00 27.80           C  
ATOM   2267  NE1 TRP L  91      45.428  20.579  10.270  1.00 28.21           N  
ATOM   2268  CE2 TRP L  91      44.143  20.135  10.434  1.00 28.13           C  
ATOM   2269  CE3 TRP L  91      41.908  21.067  10.481  1.00 28.66           C  
ATOM   2270  CZ2 TRP L  91      43.669  18.847  10.632  1.00 28.18           C  
ATOM   2271  CZ3 TRP L  91      41.425  19.782  10.666  1.00 28.64           C  
ATOM   2272  CH2 TRP L  91      42.291  18.703  10.740  1.00 28.68           C  
ATOM   2273  N   ASP L  92      44.848  23.553  13.116  1.00 27.73           N  
ATOM   2274  CA  ASP L  92      46.051  23.483  13.953  1.00 29.43           C  
ATOM   2275  C   ASP L  92      46.857  22.285  13.424  1.00 30.92           C  
ATOM   2276  O   ASP L  92      46.508  21.119  13.575  1.00 31.08           O  
ATOM   2277  CB  ASP L  92      45.712  23.458  15.432  1.00 29.68           C  
ATOM   2278  CG  ASP L  92      47.002  23.649  16.215  1.00 30.96           C  
ATOM   2279  OD1 ASP L  92      47.848  22.749  16.178  1.00 31.70           O  
ATOM   2280  OD2 ASP L  92      47.202  24.720  16.826  1.00 31.36           O  
ATOM   2281  N   ASP L  93      47.922  22.595  12.753  1.00 32.56           N  
ATOM   2282  CA  ASP L  93      48.883  21.690  12.115  1.00 34.43           C  
ATOM   2283  C   ASP L  93      49.455  20.683  13.124  1.00 35.00           C  
ATOM   2284  O   ASP L  93      49.438  19.455  12.850  1.00 35.78           O  
ATOM   2285  CB  ASP L  93      49.984  22.484  11.382  1.00 35.39           C  
ATOM   2286  CG  ASP L  93      49.758  23.036  10.003  1.00 35.40           C  
ATOM   2287  OD1 ASP L  93      48.706  22.981   9.349  1.00 35.74           O  
ATOM   2288  OD2 ASP L  93      50.751  23.600   9.471  1.00 35.07           O  
ATOM   2289  N   SER L  94      49.983  21.154  14.239  1.00 35.05           N  
ATOM   2290  CA  SER L  94      50.577  20.283  15.270  1.00 35.26           C  
ATOM   2291  C   SER L  94      49.521  19.463  16.023  1.00 35.85           C  
ATOM   2292  O   SER L  94      49.697  18.294  16.472  1.00 35.95           O  
ATOM   2293  CB  SER L  94      51.402  21.146  16.212  1.00 34.76           C  
ATOM   2294  OG  SER L  94      50.549  21.555  17.282  1.00 34.90           O  
ATOM   2295  N   LEU L  95      48.341  20.049  16.151  1.00 35.64           N  
ATOM   2296  CA  LEU L  95      47.195  19.447  16.827  1.00 35.20           C  
ATOM   2297  C   LEU L  95      46.320  18.621  15.913  1.00 34.87           C  
ATOM   2298  O   LEU L  95      45.505  17.780  16.330  1.00 34.50           O  
ATOM   2299  CB  LEU L  95      46.432  20.650  17.503  1.00 34.32           C  
ATOM   2300  CG  LEU L  95      47.081  20.866  18.871  1.00 33.88           C  
ATOM   2301  CD1 LEU L  95      47.383  19.438  19.388  1.00 34.19           C  
ATOM   2302  CD2 LEU L  95      48.389  21.626  18.696  1.00 33.66           C  
ATOM   2303  N   ASP L  95A     46.481  18.924  14.628  1.00 34.86           N  
ATOM   2304  CA  ASP L  95A     45.672  18.220  13.626  1.00 34.92           C  
ATOM   2305  C   ASP L  95A     44.190  18.302  13.992  1.00 33.97           C  
ATOM   2306  O   ASP L  95A     43.643  17.238  14.311  1.00 34.37           O  
ATOM   2307  CB  ASP L  95A     46.117  16.737  13.493  1.00 36.92           C  
ATOM   2308  CG  ASP L  95A     46.983  16.607  12.229  1.00 38.74           C  
ATOM   2309  OD1 ASP L  95A     48.147  17.108  12.342  1.00 40.10           O  
ATOM   2310  OD2 ASP L  95A     46.540  16.078  11.192  1.00 38.48           O  
ATOM   2311  N   VAL L  95B     43.610  19.462  13.927  1.00 32.70           N  
ATOM   2312  CA  VAL L  95B     42.205  19.743  14.171  1.00 31.11           C  
ATOM   2313  C   VAL L  95B     41.924  21.233  13.820  1.00 29.48           C  
ATOM   2314  O   VAL L  95B     42.855  21.991  13.592  1.00 29.60           O  
ATOM   2315  CB  VAL L  95B     41.713  19.532  15.615  1.00 31.04           C  
ATOM   2316  CG1 VAL L  95B     40.767  18.360  15.766  1.00 31.86           C  
ATOM   2317  CG2 VAL L  95B     42.835  19.507  16.616  1.00 31.65           C  
ATOM   2318  N   ALA L  96      40.645  21.482  13.830  1.00 27.55           N  
ATOM   2319  CA  ALA L  96      40.103  22.839  13.697  1.00 25.80           C  
ATOM   2320  C   ALA L  96      40.006  23.254  15.200  1.00 24.64           C  
ATOM   2321  O   ALA L  96      39.559  22.538  16.114  1.00 24.01           O  
ATOM   2322  CB  ALA L  96      38.834  22.971  12.920  1.00 25.38           C  
ATOM   2323  N   VAL L  97      40.526  24.404  15.419  1.00 23.87           N  
ATOM   2324  CA  VAL L  97      40.659  25.107  16.733  1.00 23.46           C  
ATOM   2325  C   VAL L  97      39.832  26.374  16.577  1.00 22.83           C  
ATOM   2326  O   VAL L  97      39.962  27.156  15.621  1.00 22.32           O  
ATOM   2327  CB  VAL L  97      42.176  25.138  16.904  1.00 24.40           C  
ATOM   2328  CG1 VAL L  97      42.840  26.097  17.838  1.00 24.97           C  
ATOM   2329  CG2 VAL L  97      42.708  23.687  17.039  1.00 24.37           C  
ATOM   2330  N   PHE L  98      38.888  26.526  17.497  1.00 22.08           N  
ATOM   2331  CA  PHE L  98      37.956  27.660  17.499  1.00 21.66           C  
ATOM   2332  C   PHE L  98      38.393  28.775  18.457  1.00 21.01           C  
ATOM   2333  O   PHE L  98      39.160  28.579  19.398  1.00 20.28           O  
ATOM   2334  CB  PHE L  98      36.519  27.156  17.788  1.00 21.32           C  
ATOM   2335  CG  PHE L  98      35.803  26.760  16.553  1.00 21.35           C  
ATOM   2336  CD1 PHE L  98      36.243  25.643  15.829  1.00 22.20           C  
ATOM   2337  CD2 PHE L  98      34.703  27.480  16.103  1.00 21.96           C  
ATOM   2338  CE1 PHE L  98      35.625  25.268  14.635  1.00 21.93           C  
ATOM   2339  CE2 PHE L  98      34.088  27.109  14.887  1.00 22.01           C  
ATOM   2340  CZ  PHE L  98      34.555  26.005  14.161  1.00 20.51           C  
ATOM   2341  N   GLY L  99      37.834  29.934  18.205  1.00 21.06           N  
ATOM   2342  CA  GLY L  99      38.035  31.149  19.004  1.00 20.86           C  
ATOM   2343  C   GLY L  99      37.136  31.048  20.245  1.00 20.48           C  
ATOM   2344  O   GLY L  99      36.170  30.300  20.374  1.00 20.85           O  
ATOM   2345  N   THR L 100      37.479  31.860  21.218  1.00 20.72           N  
ATOM   2346  CA  THR L 100      36.711  31.861  22.493  1.00 20.95           C  
ATOM   2347  C   THR L 100      35.325  32.409  22.335  1.00 19.76           C  
ATOM   2348  O   THR L 100      34.420  32.095  23.102  1.00 19.66           O  
ATOM   2349  CB  THR L 100      37.682  32.482  23.568  1.00 22.34           C  
ATOM   2350  OG1 THR L 100      38.833  31.500  23.596  1.00 23.02           O  
ATOM   2351  CG2 THR L 100      37.118  32.690  24.961  1.00 23.04           C  
ATOM   2352  N   GLY L 101      35.019  33.199  21.353  1.00 19.46           N  
ATOM   2353  CA  GLY L 101      33.732  33.813  21.084  1.00 19.15           C  
ATOM   2354  C   GLY L 101      33.702  35.239  21.663  1.00 19.21           C  
ATOM   2355  O   GLY L 101      34.137  35.532  22.764  1.00 18.76           O  
ATOM   2356  N   THR L 102      33.154  36.101  20.829  1.00 19.87           N  
ATOM   2357  CA  THR L 102      32.890  37.498  21.058  1.00 19.52           C  
ATOM   2358  C   THR L 102      31.432  37.822  20.694  1.00 19.09           C  
ATOM   2359  O   THR L 102      31.005  37.497  19.584  1.00 19.58           O  
ATOM   2360  CB  THR L 102      33.752  38.547  20.261  1.00 19.23           C  
ATOM   2361  OG1 THR L 102      35.104  38.038  20.420  1.00 19.52           O  
ATOM   2362  CG2 THR L 102      33.558  39.980  20.824  1.00 18.53           C  
ATOM   2363  N   LYS L 103      30.844  38.485  21.662  1.00 19.22           N  
ATOM   2364  CA  LYS L 103      29.450  38.974  21.579  1.00 19.19           C  
ATOM   2365  C   LYS L 103      29.530  40.508  21.524  1.00 18.68           C  
ATOM   2366  O   LYS L 103      30.087  41.153  22.416  1.00 18.54           O  
ATOM   2367  CB  LYS L 103      28.571  38.471  22.681  1.00 20.32           C  
ATOM   2368  CG  LYS L 103      27.970  39.136  23.819  1.00 21.60           C  
ATOM   2369  CD  LYS L 103      28.795  39.666  24.991  1.00 23.60           C  
ATOM   2370  CE  LYS L 103      27.917  40.408  26.032  1.00 23.23           C  
ATOM   2371  NZ  LYS L 103      28.756  41.118  27.039  1.00 23.31           N  
ATOM   2372  N   VAL L 104      29.027  41.028  20.442  1.00 18.98           N  
ATOM   2373  CA  VAL L 104      28.911  42.461  20.130  1.00 20.19           C  
ATOM   2374  C   VAL L 104      27.576  42.937  20.738  1.00 20.95           C  
ATOM   2375  O   VAL L 104      26.524  42.237  20.611  1.00 20.75           O  
ATOM   2376  CB  VAL L 104      29.038  42.687  18.607  1.00 20.82           C  
ATOM   2377  CG1 VAL L 104      28.500  43.999  18.057  1.00 20.73           C  
ATOM   2378  CG2 VAL L 104      30.506  42.534  18.198  1.00 21.25           C  
ATOM   2379  N   THR L 105      27.683  44.057  21.437  1.00 20.99           N  
ATOM   2380  CA  THR L 105      26.512  44.711  22.063  1.00 20.50           C  
ATOM   2381  C   THR L 105      26.319  46.022  21.295  1.00 20.98           C  
ATOM   2382  O   THR L 105      27.286  46.787  21.140  1.00 21.14           O  
ATOM   2383  CB  THR L 105      26.696  44.924  23.594  1.00 19.74           C  
ATOM   2384  OG1 THR L 105      27.361  43.710  24.061  1.00 19.35           O  
ATOM   2385  CG2 THR L 105      25.433  45.142  24.417  1.00 19.80           C  
ATOM   2386  N   VAL L 106      25.152  46.168  20.701  1.00 21.28           N  
ATOM   2387  CA  VAL L 106      24.801  47.387  19.955  1.00 21.50           C  
ATOM   2388  C   VAL L 106      24.012  48.273  20.942  1.00 21.65           C  
ATOM   2389  O   VAL L 106      22.845  48.075  21.229  1.00 21.59           O  
ATOM   2390  CB  VAL L 106      24.076  47.147  18.638  1.00 21.64           C  
ATOM   2391  CG1 VAL L 106      23.990  48.389  17.769  1.00 21.32           C  
ATOM   2392  CG2 VAL L 106      24.678  46.004  17.809  1.00 22.23           C  
ATOM   2393  N   LEU L 106A     24.750  49.238  21.452  1.00 22.71           N  
ATOM   2394  CA  LEU L 106A     24.251  50.234  22.421  1.00 23.21           C  
ATOM   2395  C   LEU L 106A     23.281  51.191  21.757  1.00 23.69           C  
ATOM   2396  O   LEU L 106A     23.353  51.452  20.532  1.00 24.09           O  
ATOM   2397  CB  LEU L 106A     25.465  50.824  23.165  1.00 21.59           C  
ATOM   2398  CG  LEU L 106A     26.080  49.770  24.096  1.00 21.36           C  
ATOM   2399  CD1 LEU L 106A     27.464  50.183  24.526  1.00 22.63           C  
ATOM   2400  CD2 LEU L 106A     25.204  49.615  25.327  1.00 21.30           C  
ATOM   2401  N   GLY L 107      22.332  51.653  22.570  1.00 24.05           N  
ATOM   2402  CA  GLY L 107      21.289  52.553  22.176  1.00 24.50           C  
ATOM   2403  C   GLY L 107      20.577  52.317  20.851  1.00 24.54           C  
ATOM   2404  O   GLY L 107      20.599  53.170  19.919  1.00 24.16           O  
ATOM   2405  N   GLN L 108      19.882  51.190  20.829  1.00 24.65           N  
ATOM   2406  CA  GLN L 108      19.014  50.734  19.705  1.00 24.33           C  
ATOM   2407  C   GLN L 108      17.671  51.515  19.770  1.00 22.76           C  
ATOM   2408  O   GLN L 108      17.169  51.694  20.896  1.00 22.78           O  
ATOM   2409  CB  GLN L 108      18.721  49.247  19.946  1.00 25.84           C  
ATOM   2410  CG  GLN L 108      19.159  48.176  18.999  1.00 26.93           C  
ATOM   2411  CD  GLN L 108      18.356  46.885  19.207  1.00 27.75           C  
ATOM   2412  OE1 GLN L 108      17.204  46.762  18.776  1.00 27.01           O  
ATOM   2413  NE2 GLN L 108      19.013  45.934  19.885  1.00 27.89           N  
ATOM   2414  N   PRO L 109      17.139  51.945  18.648  1.00 21.81           N  
ATOM   2415  CA  PRO L 109      15.871  52.660  18.529  1.00 21.50           C  
ATOM   2416  C   PRO L 109      14.709  51.987  19.265  1.00 21.29           C  
ATOM   2417  O   PRO L 109      14.743  50.766  19.549  1.00 21.85           O  
ATOM   2418  CB  PRO L 109      15.560  52.672  17.005  1.00 21.20           C  
ATOM   2419  CG  PRO L 109      16.912  52.648  16.374  1.00 21.29           C  
ATOM   2420  CD  PRO L 109      17.748  51.759  17.307  1.00 21.64           C  
TER    2421      PRO L 109                                                      
