# Supplementary material for: SARS-CoV-2 Spike Protein Interaction Space
Source: Int J Mol Sci. 2023 Jul 27;24(15):12058. doi: 10.3390/ijms241512058 (PMC10418891; doi:10.3390/ijms241512058)
Supplement: Supplementary file 1 [file ijms-24-12058-s001.zip › Supplementary Material File S1/1BWW.pdb]

REMARK 950 NUMBERING  Kabat
REMARK 950 METHOD     X-ray crystal structure
REMARK 950 RESOLUTION 1.700
REMARK 950 R-FACTOR   0.182
REMARK 950 R-FREE     0.221
REMARK 950 CHAIN-TYPE LABEL ORIGINAL
REMARK 950 CHAIN L    L    A
REMARK 950 CHAIN L    L    B
REMARK 950 MOLECULE : A : PROTEIN (IG KAPPA CHAIN V-I REGION REI)
REMARK 950 SPECIES  : A : HOMO SAPIENS
SEQRES   1 L 109  THR PRO ASP ILE GLN MET THR GLN SER PRO SER SER LEU          
SEQRES   2 L 109  SER ALA SER VAL GLY ASP ARG VAL THR ILE THR CYS GLN          
SEQRES   3 L 109  ALA SER GLN ASP ILE ILE LYS TYR LEU ASN TRP TYR GLN          
SEQRES   4 L 109  GLN LYS PRO GLY LYS ALA PRO LYS LEU LEU ILE TYR GLU          
SEQRES   5 L 109  ALA SER ASN LEU GLN ALA GLY VAL PRO SER ARG PHE SER          
SEQRES   6 L 109  GLY SER GLY SER GLY THR ASP TYR THR PHE THR ILE SER          
SEQRES   7 L 109  SER LEU GLN PRO GLU ASP ILE ALA THR TYR TYR CYS GLN          
SEQRES   8 L 109  GLN TYR GLN SER LEU PRO TYR THR PHE GLY GLN GLY THR          
SEQRES   9 L 109  LYS LEU GLN ILE THR                                          
SEQRES   1 L 109  THR PRO ASP ILE GLN MET THR GLN SER PRO SER SER LEU          
SEQRES   2 L 109  SER ALA SER VAL GLY ASP ARG VAL THR ILE THR CYS GLN          
SEQRES   3 L 109  ALA SER GLN ASP ILE ILE LYS TYR LEU ASN TRP TYR GLN          
SEQRES   4 L 109  GLN LYS PRO GLY LYS ALA PRO LYS LEU LEU ILE TYR GLU          
SEQRES   5 L 109  ALA SER ASN LEU GLN ALA GLY VAL PRO SER ARG PHE SER          
SEQRES   6 L 109  GLY SER GLY SER GLY THR ASP TYR THR PHE THR ILE SER          
SEQRES   7 L 109  SER LEU GLN PRO GLU ASP ILE ALA THR TYR TYR CYS GLN          
SEQRES   8 L 109  GLN TYR GLN SER LEU PRO TYR THR PHE GLY GLN GLY THR          
SEQRES   9 L 109  LYS LEU GLN ILE THR                                          
ATOM     15  N   ASP L   1     -16.715  -4.073   9.709  1.00 27.28           N  
ATOM     16  CA  ASP L   1     -15.286  -3.958   9.417  1.00 21.41           C  
ATOM     17  C   ASP L   1     -14.541  -3.570  10.695  1.00 29.92           C  
ATOM     18  O   ASP L   1     -15.161  -2.961  11.568  1.00 27.09           O  
ATOM     19  CB  ASP L   1     -15.091  -2.800   8.435  1.00 23.48           C  
ATOM     20  CG  ASP L   1     -15.675  -3.097   7.070  1.00 24.91           C  
ATOM     21  OD1 ASP L   1     -15.931  -4.271   6.783  1.00 24.14           O  
ATOM     22  OD2 ASP L   1     -15.842  -2.110   6.329  1.00 30.93           O  
ATOM     23  N   ILE L   2     -13.232  -3.817  10.758  1.00 20.36           N  
ATOM     24  CA  ILE L   2     -12.458  -3.223  11.852  1.00 22.30           C  
ATOM     25  C   ILE L   2     -12.001  -1.828  11.422  1.00 22.18           C  
ATOM     26  O   ILE L   2     -11.385  -1.665  10.376  1.00 23.21           O  
ATOM     27  CB  ILE L   2     -11.276  -4.122  12.252  1.00 20.65           C  
ATOM     28  CG1 ILE L   2     -11.693  -5.501  12.745  1.00 25.07           C  
ATOM     29  CG2 ILE L   2     -10.418  -3.395  13.291  1.00 23.29           C  
ATOM     30  CD1 ILE L   2     -10.593  -6.492  13.008  1.00 29.90           C  
ATOM     31  N   GLN L   3     -12.363  -0.785  12.138  1.00 19.74           N  
ATOM     32  CA  GLN L   3     -12.045   0.599  11.890  1.00 21.62           C  
ATOM     33  C   GLN L   3     -10.763   1.008  12.612  1.00 21.66           C  
ATOM     34  O   GLN L   3     -10.558   0.727  13.790  1.00 22.71           O  
ATOM     35  CB  GLN L   3     -13.164   1.538  12.353  1.00 33.27           C  
ATOM     36  CG  GLN L   3     -13.132   2.909  11.696  1.00 55.26           C  
ATOM     37  CD  GLN L   3     -14.518   3.540  11.566  1.00 63.74           C  
ATOM     38  OE1 GLN L   3     -15.457   2.940  11.043  1.00 64.75           O  
ATOM     39  NE2 GLN L   3     -14.640   4.762  12.055  1.00 64.24           N  
ATOM     40  N   MET L   4      -9.839   1.571  11.834  1.00 19.06           N  
ATOM     41  CA  MET L   4      -8.562   1.994  12.395  1.00 17.74           C  
ATOM     42  C   MET L   4      -8.591   3.524  12.482  1.00 21.88           C  
ATOM     43  O   MET L   4      -8.882   4.148  11.465  1.00 23.24           O  
ATOM     44  CB  MET L   4      -7.416   1.565  11.483  1.00 19.02           C  
ATOM     45  CG  MET L   4      -7.293   0.066  11.254  1.00 19.75           C  
ATOM     46  SD  MET L   4      -7.184  -0.881  12.775  1.00 22.86           S  
ATOM     47  CE  MET L   4      -5.671  -0.244  13.492  1.00 29.43           C  
ATOM     48  N   THR L   5      -8.333   4.042  13.676  1.00 24.72           N  
ATOM     49  CA  THR L   5      -8.337   5.479  13.920  1.00 24.45           C  
ATOM     50  C   THR L   5      -6.920   5.988  14.199  1.00 21.42           C  
ATOM     51  O   THR L   5      -6.360   5.628  15.226  1.00 21.47           O  
ATOM     52  CB  THR L   5      -9.238   5.822  15.121  1.00 26.88           C  
ATOM     53  OG1 THR L   5     -10.571   5.377  14.830  1.00 31.64           O  
ATOM     54  CG2 THR L   5      -9.236   7.325  15.350  1.00 27.83           C  
ATOM     55  N   GLN L   6      -6.421   6.836  13.313  1.00 17.98           N  
ATOM     56  CA  GLN L   6      -5.066   7.369  13.345  1.00 20.54           C  
ATOM     57  C   GLN L   6      -4.992   8.826  13.777  1.00 26.02           C  
ATOM     58  O   GLN L   6      -5.824   9.652  13.380  1.00 22.31           O  
ATOM     59  CB  GLN L   6      -4.534   7.195  11.907  1.00 25.49           C  
ATOM     60  CG  GLN L   6      -3.056   7.260  11.746  1.00 26.49           C  
ATOM     61  CD  GLN L   6      -2.533   6.698  10.442  1.00 20.56           C  
ATOM     62  OE1 GLN L   6      -3.064   5.848   9.726  1.00 20.58           O  
ATOM     63  NE2 GLN L   6      -1.320   7.138  10.127  1.00 24.05           N  
ATOM     64  N   SER L   7      -4.027   9.177  14.634  1.00 17.28           N  
ATOM     65  CA  SER L   7      -3.955  10.563  15.113  1.00 22.21           C  
ATOM     66  C   SER L   7      -2.506  10.964  15.320  1.00 25.02           C  
ATOM     67  O   SER L   7      -1.707  10.110  15.746  1.00 22.69           O  
ATOM     68  CB  SER L   7      -4.761  10.692  16.407  1.00 26.55           C  
ATOM     69  OG  SER L   7      -4.655  11.988  16.966  1.00 40.57           O  
ATOM     70  N   PRO L   8      -2.112  12.178  14.976  1.00 22.74           N  
ATOM     71  CA  PRO L   8      -2.931  13.193  14.330  1.00 19.27           C  
ATOM     72  C   PRO L   8      -3.012  12.961  12.818  1.00 20.46           C  
ATOM     73  O   PRO L   8      -2.324  12.109  12.266  1.00 23.72           O  
ATOM     74  CB  PRO L   8      -2.157  14.481  14.611  1.00 22.82           C  
ATOM     75  CG  PRO L   8      -0.728  14.073  14.694  1.00 28.25           C  
ATOM     76  CD  PRO L   8      -0.718  12.646  15.160  1.00 30.57           C  
ATOM     77  N   SER L   9      -3.864  13.737  12.148  1.00 19.99           N  
ATOM     78  CA  SER L   9      -4.068  13.565  10.710  1.00 21.73           C  
ATOM     79  C   SER L   9      -3.032  14.359   9.943  1.00 21.36           C  
ATOM     80  O   SER L   9      -2.649  14.074   8.815  1.00 22.69           O  
ATOM     81  CB  SER L   9      -5.508  13.902  10.342  1.00 29.13           C  
ATOM     82  OG  SER L   9      -5.654  15.281  10.090  1.00 45.18           O  
ATOM     83  N   SER L  10      -2.451  15.355  10.616  1.00 20.88           N  
ATOM     84  CA  SER L  10      -1.327  16.074  10.043  1.00 22.50           C  
ATOM     85  C   SER L  10      -0.423  16.645  11.128  1.00 24.42           C  
ATOM     86  O   SER L  10      -0.842  16.979  12.230  1.00 26.14           O  
ATOM     87  CB  SER L  10      -1.814  17.134   9.056  1.00 37.42           C  
ATOM     88  OG  SER L  10      -1.557  18.446   9.504  1.00 44.66           O  
ATOM     89  N   LEU L  11       0.869  16.727  10.818  1.00 22.88           N  
ATOM     90  CA  LEU L  11       1.821  17.242  11.782  1.00 25.04           C  
ATOM     91  C   LEU L  11       2.977  17.952  11.100  1.00 27.66           C  
ATOM     92  O   LEU L  11       3.528  17.497  10.099  1.00 25.94           O  
ATOM     93  CB  LEU L  11       2.410  16.047  12.555  1.00 28.23           C  
ATOM     94  CG  LEU L  11       3.397  16.427  13.665  1.00 41.65           C  
ATOM     95  CD1 LEU L  11       2.779  17.487  14.571  1.00 47.56           C  
ATOM     96  CD2 LEU L  11       3.716  15.197  14.503  1.00 44.16           C  
ATOM     97  N   SER L  12       3.414  19.065  11.679  1.00 27.17           N  
ATOM     98  CA  SER L  12       4.646  19.688  11.171  1.00 26.57           C  
ATOM     99  C   SER L  12       5.630  19.824  12.327  1.00 22.85           C  
ATOM    100  O   SER L  12       5.247  20.267  13.417  1.00 25.86           O  
ATOM    101  CB  SER L  12       4.317  21.044  10.529  1.00 37.46           C  
ATOM    102  OG  SER L  12       5.472  21.591   9.907  1.00 49.31           O  
ATOM    103  N   ALA L  13       6.893  19.485  12.105  1.00 23.53           N  
ATOM    104  CA  ALA L  13       7.888  19.614  13.163  1.00 27.33           C  
ATOM    105  C   ALA L  13       9.248  20.036  12.618  1.00 26.20           C  
ATOM    106  O   ALA L  13       9.439  20.073  11.402  1.00 27.94           O  
ATOM    107  CB  ALA L  13       7.987  18.303  13.935  1.00 32.52           C  
ATOM    108  N   SER L  14      10.197  20.350  13.494  1.00 24.64           N  
ATOM    109  CA  SER L  14      11.526  20.758  13.031  1.00 32.19           C  
ATOM    110  C   SER L  14      12.460  19.558  12.871  1.00 27.60           C  
ATOM    111  O   SER L  14      12.223  18.526  13.506  1.00 26.40           O  
ATOM    112  CB  SER L  14      12.154  21.741  14.028  1.00 35.91           C  
ATOM    113  OG  SER L  14      11.538  23.018  13.964  1.00 34.42           O  
ATOM    114  N   VAL L  15      13.486  19.721  12.046  1.00 24.39           N  
ATOM    115  CA  VAL L  15      14.503  18.691  11.877  1.00 23.20           C  
ATOM    116  C   VAL L  15      15.098  18.370  13.241  1.00 23.77           C  
ATOM    117  O   VAL L  15      15.355  19.283  14.025  1.00 26.37           O  
ATOM    118  CB  VAL L  15      15.654  19.098  10.946  1.00 30.00           C  
ATOM    119  CG1 VAL L  15      16.740  18.030  11.020  1.00 31.51           C  
ATOM    120  CG2 VAL L  15      15.165  19.214   9.507  1.00 38.21           C  
ATOM    121  N   GLY L  16      15.249  17.090  13.529  1.00 22.19           N  
ATOM    122  CA  GLY L  16      15.783  16.658  14.799  1.00 22.62           C  
ATOM    123  C   GLY L  16      14.773  16.404  15.891  1.00 26.44           C  
ATOM    124  O   GLY L  16      15.119  15.811  16.919  1.00 26.05           O  
ATOM    125  N   ASP L  17      13.539  16.858  15.761  1.00 26.04           N  
ATOM    126  CA  ASP L  17      12.519  16.595  16.765  1.00 26.40           C  
ATOM    127  C   ASP L  17      12.089  15.120  16.762  1.00 24.87           C  
ATOM    128  O   ASP L  17      12.186  14.424  15.757  1.00 20.81           O  
ATOM    129  CB  ASP L  17      11.256  17.418  16.503  1.00 27.79           C  
ATOM    130  CG  ASP L  17      11.392  18.911  16.705  1.00 38.75           C  
ATOM    131  OD1 ASP L  17      12.441  19.377  17.198  1.00 41.58           O  
ATOM    132  OD2 ASP L  17      10.432  19.621  16.327  1.00 39.65           O  
ATOM    133  N   ARG L  18      11.513  14.721  17.882  1.00 25.74           N  
ATOM    134  CA  ARG L  18      10.848  13.443  18.086  1.00 24.29           C  
ATOM    135  C   ARG L  18       9.379  13.582  17.678  1.00 29.12           C  
ATOM    136  O   ARG L  18       8.740  14.570  18.031  1.00 25.36           O  
ATOM    137  CB  ARG L  18      10.932  13.034  19.554  1.00 27.79           C  
ATOM    138  CG  ARG L  18      10.360  11.659  19.873  1.00 33.54           C  
ATOM    139  CD  ARG L  18      10.715  11.217  21.290  1.00 40.46           C  
ATOM    140  NE  ARG L  18       9.845  10.140  21.744  1.00 47.13           N  
ATOM    141  CZ  ARG L  18      10.141   8.889  22.046  1.00 50.53           C  
ATOM    142  NH1 ARG L  18      11.378   8.406  22.002  1.00 45.53           N  
ATOM    143  NH2 ARG L  18       9.151   8.074  22.429  1.00 49.27           N  
ATOM    144  N   VAL L  19       8.860  12.619  16.928  1.00 20.57           N  
ATOM    145  CA  VAL L  19       7.474  12.595  16.492  1.00 19.36           C  
ATOM    146  C   VAL L  19       6.842  11.244  16.820  1.00 18.48           C  
ATOM    147  O   VAL L  19       7.500  10.224  16.584  1.00 17.23           O  
ATOM    148  CB  VAL L  19       7.422  12.821  14.960  1.00 29.59           C  
ATOM    149  CG1 VAL L  19       6.098  12.329  14.406  1.00 31.73           C  
ATOM    150  CG2 VAL L  19       7.604  14.307  14.660  1.00 34.76           C  
ATOM    151  N   THR L  20       5.592  11.247  17.289  1.00 16.81           N  
ATOM    152  CA  THR L  20       4.852  10.010  17.504  1.00 17.73           C  
ATOM    153  C   THR L  20       3.486  10.047  16.828  1.00 18.88           C  
ATOM    154  O   THR L  20       2.799  11.074  16.791  1.00 21.31           O  
ATOM    155  CB  THR L  20       4.706   9.617  18.977  1.00 20.77           C  
ATOM    156  OG1 THR L  20       4.095  10.692  19.700  1.00 22.32           O  
ATOM    157  CG2 THR L  20       6.066   9.415  19.642  1.00 21.17           C  
ATOM    158  N   ILE L  21       3.078   8.928  16.257  1.00 14.64           N  
ATOM    159  CA  ILE L  21       1.770   8.740  15.622  1.00 18.68           C  
ATOM    160  C   ILE L  21       1.041   7.573  16.274  1.00 15.97           C  
ATOM    161  O   ILE L  21       1.693   6.561  16.527  1.00 17.49           O  
ATOM    162  CB  ILE L  21       1.959   8.454  14.115  1.00 19.04           C  
ATOM    163  CG1 ILE L  21       2.751   9.565  13.433  1.00 25.05           C  
ATOM    164  CG2 ILE L  21       0.593   8.252  13.465  1.00 21.35           C  
ATOM    165  CD1 ILE L  21       3.152   9.225  12.010  1.00 27.77           C  
ATOM    166  N   THR L  22      -0.237   7.678  16.586  1.00 16.12           N  
ATOM    167  CA  THR L  22      -0.948   6.558  17.209  1.00 13.79           C  
ATOM    168  C   THR L  22      -2.000   5.972  16.280  1.00 18.45           C  
ATOM    169  O   THR L  22      -2.569   6.669  15.429  1.00 17.52           O  
ATOM    170  CB  THR L  22      -1.626   6.920  18.543  1.00 16.76           C  
ATOM    171  OG1 THR L  22      -2.664   7.872  18.298  1.00 30.76           O  
ATOM    172  CG2 THR L  22      -0.666   7.683  19.450  1.00 15.61           C  
ATOM    173  N   CYS L  23      -2.281   4.675  16.513  1.00 16.83           N  
ATOM    174  CA  CYS L  23      -3.383   4.083  15.747  1.00 18.43           C  
ATOM    175  C   CYS L  23      -4.215   3.321  16.740  1.00 20.13           C  
ATOM    176  O   CYS L  23      -3.611   2.491  17.437  1.00 19.71           O  
ATOM    177  CB  CYS L  23      -2.729   3.228  14.651  0.55 24.92           C  
ATOM    179  SG  CYS L  23      -3.073   3.949  13.054  0.55 16.34           S  
ATOM    181  N   GLN L  24      -5.540   3.377  16.737  1.00 18.58           N  
ATOM    182  CA  GLN L  24      -6.380   2.571  17.619  1.00 17.73           C  
ATOM    183  C   GLN L  24      -7.401   1.766  16.813  1.00 19.29           C  
ATOM    184  O   GLN L  24      -8.056   2.325  15.927  1.00 21.89           O  
ATOM    185  CB  GLN L  24      -7.133   3.463  18.619  1.00 25.36           C  
ATOM    186  CG  GLN L  24      -8.103   2.701  19.501  1.00 39.86           C  
ATOM    187  CD  GLN L  24      -8.859   3.492  20.547  1.00 42.18           C  
ATOM    188  OE1 GLN L  24      -9.928   4.034  20.272  1.00 41.60           O  
ATOM    189  NE2 GLN L  24      -8.387   3.525  21.790  1.00 36.99           N  
ATOM    190  N   ALA L  25      -7.514   0.477  17.121  1.00 19.20           N  
ATOM    191  CA  ALA L  25      -8.448  -0.412  16.433  1.00 23.10           C  
ATOM    192  C   ALA L  25      -9.771  -0.544  17.197  1.00 27.83           C  
ATOM    193  O   ALA L  25      -9.750  -0.579  18.434  1.00 24.20           O  
ATOM    194  CB  ALA L  25      -7.840  -1.799  16.327  1.00 22.25           C  
ATOM    195  N   SER L  26     -10.874  -0.685  16.459  1.00 25.46           N  
ATOM    196  CA  SER L  26     -12.183  -0.782  17.101  1.00 24.10           C  
ATOM    197  C   SER L  26     -12.413  -2.125  17.785  1.00 31.75           C  
ATOM    198  O   SER L  26     -13.424  -2.280  18.473  1.00 32.01           O  
ATOM    199  CB  SER L  26     -13.288  -0.470  16.083  1.00 25.07           C  
ATOM    200  OG  SER L  26     -13.385  -1.558  15.177  1.00 26.28           O  
ATOM    201  N   GLN L  27     -11.538  -3.088  17.548  1.00 26.88           N  
ATOM    202  CA  GLN L  27     -11.564  -4.411  18.164  1.00 20.86           C  
ATOM    203  C   GLN L  27     -10.124  -4.854  18.423  1.00 26.40           C  
ATOM    204  O   GLN L  27      -9.234  -4.392  17.723  1.00 27.85           O  
ATOM    205  CB  GLN L  27     -12.153  -5.445  17.195  1.00 31.07           C  
ATOM    206  CG  GLN L  27     -13.655  -5.347  16.972  1.00 40.27           C  
ATOM    207  CD  GLN L  27     -14.126  -6.183  15.796  1.00 48.45           C  
ATOM    208  OE1 GLN L  27     -14.840  -5.726  14.903  1.00 44.99           O  
ATOM    209  NE2 GLN L  27     -13.689  -7.439  15.795  1.00 50.86           N  
ATOM    210  N   ASP L  28      -9.933  -5.730  19.386  1.00 23.74           N  
ATOM    211  CA  ASP L  28      -8.600  -6.253  19.698  1.00 26.09           C  
ATOM    212  C   ASP L  28      -8.055  -6.982  18.474  1.00 30.37           C  
ATOM    213  O   ASP L  28      -8.742  -7.885  17.977  1.00 29.83           O  
ATOM    214  CB  ASP L  28      -8.760  -7.191  20.885  1.00 25.03           C  
ATOM    215  CG  ASP L  28      -7.528  -7.776  21.503  1.00 35.28           C  
ATOM    216  OD1 ASP L  28      -6.407  -7.634  20.975  1.00 31.18           O  
ATOM    217  OD2 ASP L  28      -7.647  -8.392  22.591  1.00 47.28           O  
ATOM    218  N   ILE L  29      -6.874  -6.640  17.976  1.00 22.31           N  
ATOM    219  CA  ILE L  29      -6.244  -7.337  16.849  1.00 18.19           C  
ATOM    220  C   ILE L  29      -4.930  -8.006  17.232  1.00 21.27           C  
ATOM    221  O   ILE L  29      -4.076  -8.362  16.410  1.00 21.08           O  
ATOM    222  CB  ILE L  29      -6.025  -6.353  15.679  1.00 21.11           C  
ATOM    223  CG1 ILE L  29      -5.151  -5.152  16.062  1.00 25.68           C  
ATOM    224  CG2 ILE L  29      -7.387  -5.924  15.156  1.00 22.45           C  
ATOM    225  CD1 ILE L  29      -4.669  -4.287  14.910  1.00 19.78           C  
ATOM    226  N   ILE L  30      -4.766  -8.152  18.541  1.00 20.50           N  
ATOM    227  CA  ILE L  30      -3.730  -8.918  19.207  1.00 21.42           C  
ATOM    228  C   ILE L  30      -2.357  -8.315  18.979  1.00 22.07           C  
ATOM    229  O   ILE L  30      -1.796  -7.669  19.874  1.00 24.94           O  
ATOM    230  CB  ILE L  30      -3.774 -10.415  18.832  1.00 30.43           C  
ATOM    231  CG1 ILE L  30      -5.155 -11.049  18.718  1.00 39.69           C  
ATOM    232  CG2 ILE L  30      -2.869 -11.185  19.788  1.00 30.95           C  
ATOM    233  CD1 ILE L  30      -6.101 -10.636  19.825  1.00 54.44           C  
ATOM    234  N   LYS L  31      -1.788  -8.449  17.791  1.00 20.36           N  
ATOM    235  CA  LYS L  31      -0.543  -7.846  17.383  1.00 15.22           C  
ATOM    236  C   LYS L  31      -0.433  -7.614  15.880  1.00 19.93           C  
ATOM    237  O   LYS L  31       0.671  -7.315  15.394  1.00 19.79           O  
ATOM    238  CB  LYS L  31       0.606  -8.769  17.815  1.00 21.78           C  
ATOM    239  CG  LYS L  31       0.619 -10.085  17.072  1.00 33.44           C  
ATOM    240  CD  LYS L  31       1.747 -10.989  17.577  1.00 41.89           C  
ATOM    241  CE  LYS L  31       1.209 -12.380  17.870  1.00 49.15           C  
ATOM    242  NZ  LYS L  31       2.244 -13.445  17.832  1.00 55.06           N  
ATOM    243  N   TYR L  32      -1.522  -7.757  15.117  1.00 22.49           N  
ATOM    244  CA  TYR L  32      -1.441  -7.874  13.674  1.00 15.51           C  
ATOM    245  C   TYR L  32      -1.623  -6.527  12.979  1.00 16.52           C  
ATOM    246  O   TYR L  32      -2.656  -6.238  12.389  1.00 17.95           O  
ATOM    247  CB  TYR L  32      -2.485  -8.891  13.209  1.00 17.92           C  
ATOM    248  CG  TYR L  32      -2.236 -10.233  13.857  1.00 23.03           C  
ATOM    249  CD1 TYR L  32      -1.040 -10.886  13.640  1.00 27.37           C  
ATOM    250  CD2 TYR L  32      -3.185 -10.847  14.655  1.00 25.91           C  
ATOM    251  CE1 TYR L  32      -0.771 -12.118  14.210  1.00 26.78           C  
ATOM    252  CE2 TYR L  32      -2.934 -12.082  15.229  1.00 26.84           C  
ATOM    253  CZ  TYR L  32      -1.731 -12.709  15.000  1.00 30.69           C  
ATOM    254  OH  TYR L  32      -1.494 -13.932  15.569  1.00 35.15           O  
ATOM    255  N   LEU L  33      -0.575  -5.718  13.124  1.00 16.00           N  
ATOM    256  CA  LEU L  33      -0.610  -4.343  12.616  1.00 16.04           C  
ATOM    257  C   LEU L  33       0.694  -3.966  11.918  1.00 20.40           C  
ATOM    258  O   LEU L  33       1.774  -4.183  12.475  1.00 19.02           O  
ATOM    259  CB  LEU L  33      -0.855  -3.396  13.809  1.00 18.59           C  
ATOM    260  CG  LEU L  33      -1.107  -1.946  13.415  1.00 26.01           C  
ATOM    261  CD1 LEU L  33      -2.561  -1.608  13.275  1.00 23.41           C  
ATOM    262  CD2 LEU L  33      -0.269  -0.919  14.129  1.00 34.82           C  
ATOM    263  N   ASN L  34       0.596  -3.399  10.713  1.00 16.20           N  
ATOM    264  CA  ASN L  34       1.755  -2.987   9.932  1.00 12.05           C  
ATOM    265  C   ASN L  34       1.829  -1.470   9.777  1.00 15.28           C  
ATOM    266  O   ASN L  34       0.792  -0.809   9.786  1.00 16.88           O  
ATOM    267  CB  ASN L  34       1.677  -3.617   8.543  1.00 11.22           C  
ATOM    268  CG  ASN L  34       1.842  -5.128   8.533  1.00 18.05           C  
ATOM    269  OD1 ASN L  34       2.536  -5.698   9.373  1.00 16.35           O  
ATOM    270  ND2 ASN L  34       1.182  -5.807   7.586  1.00 19.35           N  
ATOM    271  N   TRP L  35       3.024  -0.907   9.592  1.00 15.81           N  
ATOM    272  CA  TRP L  35       3.156   0.514   9.270  1.00 14.58           C  
ATOM    273  C   TRP L  35       3.808   0.707   7.901  1.00 15.37           C  
ATOM    274  O   TRP L  35       4.831   0.074   7.636  1.00 16.61           O  
ATOM    275  CB  TRP L  35       4.002   1.235  10.324  1.00 14.37           C  
ATOM    276  CG  TRP L  35       3.364   1.406  11.669  1.00 12.27           C  
ATOM    277  CD1 TRP L  35       3.548   0.609  12.758  1.00 15.52           C  
ATOM    278  CD2 TRP L  35       2.465   2.435  12.087  1.00 13.92           C  
ATOM    279  NE1 TRP L  35       2.810   1.073  13.829  1.00 15.21           N  
ATOM    280  CE2 TRP L  35       2.143   2.201  13.436  1.00 14.60           C  
ATOM    281  CE3 TRP L  35       1.908   3.552  11.463  1.00 15.13           C  
ATOM    282  CZ2 TRP L  35       1.280   3.021  14.159  1.00 16.72           C  
ATOM    283  CZ3 TRP L  35       1.058   4.362  12.191  1.00 18.57           C  
ATOM    284  CH2 TRP L  35       0.746   4.109  13.525  1.00 17.12           C  
ATOM    285  N   TYR L  36       3.241   1.580   7.080  1.00 14.51           N  
ATOM    286  CA  TYR L  36       3.741   1.904   5.751  1.00 17.82           C  
ATOM    287  C   TYR L  36       4.082   3.393   5.599  1.00 20.48           C  
ATOM    288  O   TYR L  36       3.403   4.225   6.215  1.00 18.17           O  
ATOM    289  CB  TYR L  36       2.672   1.605   4.680  1.00 14.62           C  
ATOM    290  CG  TYR L  36       2.322   0.149   4.517  1.00 14.25           C  
ATOM    291  CD1 TYR L  36       1.346  -0.443   5.306  1.00 19.31           C  
ATOM    292  CD2 TYR L  36       2.990  -0.628   3.582  1.00 19.19           C  
ATOM    293  CE1 TYR L  36       1.039  -1.778   5.163  1.00 20.07           C  
ATOM    294  CE2 TYR L  36       2.688  -1.963   3.433  1.00 23.67           C  
ATOM    295  CZ  TYR L  36       1.708  -2.523   4.219  1.00 25.29           C  
ATOM    296  OH  TYR L  36       1.414  -3.856   4.047  1.00 35.75           O  
ATOM    297  N   GLN L  37       5.066   3.671   4.753  1.00 18.16           N  
ATOM    298  CA  GLN L  37       5.423   5.036   4.317  1.00 15.54           C  
ATOM    299  C   GLN L  37       5.020   5.249   2.862  1.00 19.00           C  
ATOM    300  O   GLN L  37       5.279   4.371   2.035  1.00 19.19           O  
ATOM    301  CB  GLN L  37       6.943   5.204   4.398  1.00 20.36           C  
ATOM    302  CG  GLN L  37       7.453   6.616   4.142  1.00 24.36           C  
ATOM    303  CD  GLN L  37       8.975   6.677   4.136  1.00 21.64           C  
ATOM    304  OE1 GLN L  37       9.622   6.012   3.338  1.00 23.51           O  
ATOM    305  NE2 GLN L  37       9.562   7.465   5.014  1.00 22.18           N  
ATOM    306  N   GLN L  38       4.418   6.355   2.477  1.00 17.83           N  
ATOM    307  CA  GLN L  38       4.166   6.612   1.055  1.00 17.26           C  
ATOM    308  C   GLN L  38       4.612   8.022   0.671  1.00 20.15           C  
ATOM    309  O   GLN L  38       4.060   9.009   1.162  1.00 18.36           O  
ATOM    310  CB  GLN L  38       2.699   6.430   0.697  1.00 20.15           C  
ATOM    311  CG  GLN L  38       2.401   6.512  -0.792  1.00 19.29           C  
ATOM    312  CD  GLN L  38       0.970   6.231  -1.169  1.00 22.16           C  
ATOM    313  OE1 GLN L  38       0.023   6.392  -0.405  1.00 20.35           O  
ATOM    314  NE2 GLN L  38       0.782   5.751  -2.393  1.00 19.02           N  
ATOM    315  N   LYS L  39       5.633   8.122  -0.162  1.00 24.91           N  
ATOM    316  CA  LYS L  39       6.059   9.447  -0.629  1.00 26.91           C  
ATOM    317  C   LYS L  39       5.250   9.774  -1.875  1.00 31.21           C  
ATOM    318  O   LYS L  39       4.765   8.858  -2.546  1.00 23.72           O  
ATOM    319  CB  LYS L  39       7.554   9.527  -0.867  1.00 25.12           C  
ATOM    320  CG  LYS L  39       8.476   8.841   0.120  1.00 32.72           C  
ATOM    321  CD  LYS L  39       9.785   9.562   0.371  1.00 40.12           C  
ATOM    322  CE  LYS L  39      10.965   8.629   0.593  1.00 50.09           C  
ATOM    323  NZ  LYS L  39      11.290   8.474   2.038  1.00 60.65           N  
ATOM    324  N   PRO L  40       5.035  11.059  -2.160  1.00 39.30           N  
ATOM    325  CA  PRO L  40       4.164  11.450  -3.269  1.00 43.16           C  
ATOM    326  C   PRO L  40       4.615  10.884  -4.615  1.00 35.04           C  
ATOM    327  O   PRO L  40       5.798  10.838  -4.943  1.00 36.99           O  
ATOM    328  CB  PRO L  40       4.194  12.970  -3.259  1.00 51.91           C  
ATOM    329  CG  PRO L  40       5.335  13.364  -2.391  1.00 47.33           C  
ATOM    330  CD  PRO L  40       5.608  12.219  -1.465  1.00 45.30           C  
ATOM    331  N   GLY L  41       3.619  10.384  -5.337  1.00 36.07           N  
ATOM    332  CA  GLY L  41       3.788   9.751  -6.628  1.00 45.31           C  
ATOM    333  C   GLY L  41       4.300   8.333  -6.531  1.00 43.68           C  
ATOM    334  O   GLY L  41       4.566   7.697  -7.552  1.00 40.20           O  
ATOM    335  N   LYS L  42       4.486   7.823  -5.310  1.00 38.99           N  
ATOM    336  CA  LYS L  42       5.075   6.497  -5.162  1.00 28.39           C  
ATOM    337  C   LYS L  42       4.203   5.498  -4.433  1.00 21.28           C  
ATOM    338  O   LYS L  42       3.232   5.798  -3.749  1.00 22.44           O  
ATOM    339  CB  LYS L  42       6.465   6.628  -4.525  1.00 35.82           C  
ATOM    340  CG  LYS L  42       7.337   7.575  -5.358  1.00 51.36           C  
ATOM    341  CD  LYS L  42       8.665   6.949  -5.751  1.00 67.01           C  
ATOM    342  CE  LYS L  42       9.690   7.051  -4.634  1.00 74.67           C  
ATOM    343  NZ  LYS L  42      11.074   7.322  -5.119  1.00 77.81           N  
ATOM    344  N   ALA L  43       4.555   4.227  -4.623  1.00 24.63           N  
ATOM    345  CA  ALA L  43       3.843   3.142  -3.965  1.00 23.46           C  
ATOM    346  C   ALA L  43       4.216   3.067  -2.483  1.00 19.99           C  
ATOM    347  O   ALA L  43       5.339   3.412  -2.122  1.00 19.59           O  
ATOM    348  CB  ALA L  43       4.216   1.822  -4.624  1.00 25.04           C  
ATOM    349  N   PRO L  44       3.319   2.540  -1.661  1.00 18.85           N  
ATOM    350  CA  PRO L  44       3.645   2.327  -0.245  1.00 18.59           C  
ATOM    351  C   PRO L  44       4.839   1.388  -0.071  1.00 21.70           C  
ATOM    352  O   PRO L  44       5.044   0.496  -0.901  1.00 22.50           O  
ATOM    353  CB  PRO L  44       2.398   1.678   0.337  1.00 20.20           C  
ATOM    354  CG  PRO L  44       1.316   2.017  -0.625  1.00 24.55           C  
ATOM    355  CD  PRO L  44       1.951   2.125  -1.987  1.00 21.82           C  
ATOM    356  N   LYS L  45       5.599   1.630   0.996  1.00 17.13           N  
ATOM    357  CA  LYS L  45       6.757   0.878   1.443  1.00 15.90           C  
ATOM    358  C   LYS L  45       6.550   0.393   2.886  1.00 20.54           C  
ATOM    359  O   LYS L  45       6.200   1.178   3.772  1.00 16.85           O  
ATOM    360  CB  LYS L  45       8.041   1.700   1.319  1.00 18.24           C  
ATOM    361  CG  LYS L  45       9.235   0.967   1.914  1.00 34.93           C  
ATOM    362  CD  LYS L  45      10.555   1.710   1.780  1.00 41.72           C  
ATOM    363  CE  LYS L  45      11.715   0.814   2.187  1.00 53.20           C  
ATOM    364  NZ  LYS L  45      12.540   0.351   1.035  1.00 65.38           N  
ATOM    365  N   LEU L  46       6.675  -0.925   3.084  1.00 17.97           N  
ATOM    366  CA  LEU L  46       6.539  -1.515   4.405  1.00 13.17           C  
ATOM    367  C   LEU L  46       7.733  -1.181   5.280  1.00 14.16           C  
ATOM    368  O   LEU L  46       8.891  -1.464   4.961  1.00 17.34           O  
ATOM    369  CB  LEU L  46       6.363  -3.037   4.303  1.00 13.90           C  
ATOM    370  CG  LEU L  46       6.157  -3.768   5.633  1.00 19.67           C  
ATOM    371  CD1 LEU L  46       4.817  -3.447   6.277  1.00 21.34           C  
ATOM    372  CD2 LEU L  46       6.332  -5.267   5.444  1.00 19.24           C  
ATOM    373  N   LEU L  47       7.474  -0.582   6.431  1.00 14.81           N  
ATOM    374  CA  LEU L  47       8.500  -0.191   7.381  1.00 13.60           C  
ATOM    375  C   LEU L  47       8.586  -1.152   8.573  1.00 17.50           C  
ATOM    376  O   LEU L  47       9.668  -1.521   9.018  1.00 17.97           O  
ATOM    377  CB  LEU L  47       8.229   1.205   7.939  1.00 15.21           C  
ATOM    378  CG  LEU L  47       8.214   2.391   6.982  1.00 23.32           C  
ATOM    379  CD1 LEU L  47       8.075   3.684   7.774  1.00 26.55           C  
ATOM    380  CD2 LEU L  47       9.434   2.434   6.086  1.00 21.59           C  
ATOM    381  N   ILE L  48       7.426  -1.453   9.153  1.00 15.84           N  
ATOM    382  CA  ILE L  48       7.334  -2.264  10.360  1.00 15.69           C  
ATOM    383  C   ILE L  48       6.237  -3.315  10.228  1.00 16.38           C  
ATOM    384  O   ILE L  48       5.114  -3.018   9.811  1.00 16.70           O  
ATOM    385  CB  ILE L  48       7.052  -1.331  11.558  1.00 19.28           C  
ATOM    386  CG1 ILE L  48       8.192  -0.355  11.825  1.00 26.92           C  
ATOM    387  CG2 ILE L  48       6.738  -2.157  12.805  1.00 23.34           C  
ATOM    388  CD1 ILE L  48       7.826   0.740  12.808  1.00 32.41           C  
ATOM    389  N   TYR L  49       6.578  -4.553  10.585  1.00 15.08           N  
ATOM    390  CA  TYR L  49       5.687  -5.703  10.453  1.00 17.57           C  
ATOM    391  C   TYR L  49       5.314  -6.257  11.829  1.00 19.18           C  
ATOM    392  O   TYR L  49       6.176  -6.280  12.720  1.00 18.38           O  
ATOM    393  CB  TYR L  49       6.377  -6.784   9.607  1.00 18.51           C  
ATOM    394  CG  TYR L  49       5.633  -8.088   9.524  1.00 15.14           C  
ATOM    395  CD1 TYR L  49       4.507  -8.255   8.743  1.00 21.64           C  
ATOM    396  CD2 TYR L  49       6.114  -9.187  10.218  1.00 23.91           C  
ATOM    397  CE1 TYR L  49       3.858  -9.478   8.676  1.00 24.43           C  
ATOM    398  CE2 TYR L  49       5.474 -10.411  10.168  1.00 30.10           C  
ATOM    399  CZ  TYR L  49       4.346 -10.541   9.389  1.00 26.93           C  
ATOM    400  OH  TYR L  49       3.709 -11.756   9.352  1.00 39.49           O  
ATOM    401  N   GLU L  50       4.083  -6.693  12.008  1.00 17.06           N  
ATOM    402  CA  GLU L  50       3.614  -7.292  13.262  1.00 15.28           C  
ATOM    403  C   GLU L  50       3.974  -6.446  14.469  1.00 17.48           C  
ATOM    404  O   GLU L  50       4.649  -6.925  15.384  1.00 20.46           O  
ATOM    405  CB  GLU L  50       4.122  -8.729  13.411  1.00 16.67           C  
ATOM    406  CG  GLU L  50       3.287  -9.617  14.320  1.00 26.00           C  
ATOM    407  CD  GLU L  50       3.904 -10.979  14.599  1.00 33.71           C  
ATOM    408  OE1 GLU L  50       4.711 -11.113  15.546  1.00 31.87           O  
ATOM    409  OE2 GLU L  50       3.539 -11.930  13.882  1.00 28.30           O  
ATOM    410  N   ALA L  51       3.564  -5.190  14.444  1.00 18.38           N  
ATOM    411  CA  ALA L  51       3.683  -4.154  15.454  1.00 17.14           C  
ATOM    412  C   ALA L  51       5.071  -3.618  15.707  1.00 18.63           C  
ATOM    413  O   ALA L  51       5.245  -2.411  15.927  1.00 18.42           O  
ATOM    414  CB  ALA L  51       3.071  -4.609  16.776  1.00 18.17           C  
ATOM    415  N   SER L  52       6.097  -4.469  15.717  1.00 19.37           N  
ATOM    416  CA  SER L  52       7.406  -3.993  16.186  1.00 19.14           C  
ATOM    417  C   SER L  52       8.600  -4.486  15.396  1.00 14.91           C  
ATOM    418  O   SER L  52       9.734  -4.123  15.717  1.00 20.99           O  
ATOM    419  CB  SER L  52       7.543  -4.373  17.670  1.00 23.73           C  
ATOM    420  OG  SER L  52       7.433  -5.793  17.771  1.00 29.67           O  
ATOM    421  N   ASN L  53       8.421  -5.249  14.325  1.00 14.87           N  
ATOM    422  CA  ASN L  53       9.565  -5.788  13.589  1.00 14.71           C  
ATOM    423  C   ASN L  53      10.002  -4.909  12.428  1.00 17.97           C  
ATOM    424  O   ASN L  53       9.339  -4.865  11.386  1.00 19.46           O  
ATOM    425  CB  ASN L  53       9.192  -7.170  13.034  1.00 21.45           C  
ATOM    426  CG  ASN L  53       8.885  -8.105  14.189  1.00 36.43           C  
ATOM    427  OD1 ASN L  53       9.777  -8.555  14.902  1.00 43.45           O  
ATOM    428  ND2 ASN L  53       7.609  -8.335  14.450  1.00 42.12           N  
ATOM    429  N   LEU L  54      11.130  -4.242  12.611  1.00 17.12           N  
ATOM    430  CA  LEU L  54      11.678  -3.315  11.625  1.00 17.08           C  
ATOM    431  C   LEU L  54      12.199  -4.087  10.419  1.00 20.53           C  
ATOM    432  O   LEU L  54      12.813  -5.140  10.587  1.00 21.59           O  
ATOM    433  CB  LEU L  54      12.825  -2.520  12.265  1.00 19.64           C  
ATOM    434  CG  LEU L  54      13.309  -1.259  11.571  1.00 26.47           C  
ATOM    435  CD1 LEU L  54      12.219  -0.190  11.574  1.00 31.07           C  
ATOM    436  CD2 LEU L  54      14.564  -0.721  12.254  1.00 25.91           C  
ATOM    437  N   GLN L  55      11.901  -3.612   9.219  1.00 20.21           N  
ATOM    438  CA  GLN L  55      12.274  -4.313   8.001  1.00 23.44           C  
ATOM    439  C   GLN L  55      13.670  -3.915   7.559  1.00 21.39           C  
ATOM    440  O   GLN L  55      14.217  -2.905   7.983  1.00 20.46           O  
ATOM    441  CB  GLN L  55      11.279  -4.035   6.862  1.00 19.44           C  
ATOM    442  CG  GLN L  55       9.896  -4.596   7.136  1.00 17.38           C  
ATOM    443  CD  GLN L  55       9.918  -6.094   7.321  1.00 19.97           C  
ATOM    444  OE1 GLN L  55      10.092  -6.863   6.374  1.00 23.51           O  
ATOM    445  NE2 GLN L  55       9.735  -6.553   8.549  1.00 21.91           N  
ATOM    446  N   ALA L  56      14.237  -4.688   6.637  1.00 20.53           N  
ATOM    447  CA  ALA L  56      15.581  -4.355   6.164  1.00 20.70           C  
ATOM    448  C   ALA L  56      15.590  -3.034   5.410  1.00 20.68           C  
ATOM    449  O   ALA L  56      14.652  -2.662   4.709  1.00 23.56           O  
ATOM    450  CB  ALA L  56      16.093  -5.466   5.256  1.00 27.41           C  
ATOM    451  N   GLY L  57      16.705  -2.321   5.507  1.00 28.20           N  
ATOM    452  CA  GLY L  57      16.858  -1.082   4.779  1.00 31.47           C  
ATOM    453  C   GLY L  57      16.159   0.102   5.416  1.00 36.91           C  
ATOM    454  O   GLY L  57      16.176   1.214   4.885  1.00 48.74           O  
ATOM    455  N   VAL L  58      15.522  -0.109   6.567  1.00 22.55           N  
ATOM    456  CA  VAL L  58      14.848   0.990   7.253  1.00 19.99           C  
ATOM    457  C   VAL L  58      15.767   1.542   8.339  1.00 20.56           C  
ATOM    458  O   VAL L  58      16.321   0.742   9.095  1.00 25.23           O  
ATOM    459  CB  VAL L  58      13.519   0.555   7.871  1.00 21.77           C  
ATOM    460  CG1 VAL L  58      12.807   1.752   8.494  1.00 28.58           C  
ATOM    461  CG2 VAL L  58      12.635  -0.126   6.845  1.00 26.08           C  
ATOM    462  N   PRO L  59      15.922   2.853   8.441  1.00 28.48           N  
ATOM    463  CA  PRO L  59      16.770   3.411   9.503  1.00 30.13           C  
ATOM    464  C   PRO L  59      16.237   3.086  10.895  1.00 27.35           C  
ATOM    465  O   PRO L  59      15.040   2.970  11.145  1.00 23.47           O  
ATOM    466  CB  PRO L  59      16.690   4.923   9.294  1.00 30.94           C  
ATOM    467  CG  PRO L  59      16.263   5.077   7.877  1.00 35.98           C  
ATOM    468  CD  PRO L  59      15.353   3.918   7.597  1.00 30.36           C  
ATOM    469  N   SER L  60      17.198   2.959  11.795  1.00 24.76           N  
ATOM    470  CA  SER L  60      16.958   2.606  13.176  1.00 25.20           C  
ATOM    471  C   SER L  60      16.289   3.735  13.936  1.00 23.37           C  
ATOM    472  O   SER L  60      15.828   3.513  15.062  1.00 30.90           O  
ATOM    473  CB  SER L  60      18.257   2.186  13.867  1.00 33.65           C  
ATOM    474  OG  SER L  60      19.150   3.289  13.889  1.00 45.42           O  
ATOM    475  N   ARG L  61      16.126   4.924  13.342  1.00 21.75           N  
ATOM    476  CA  ARG L  61      15.380   5.919  14.123  1.00 22.18           C  
ATOM    477  C   ARG L  61      13.872   5.702  14.075  1.00 21.65           C  
ATOM    478  O   ARG L  61      13.142   6.396  14.795  1.00 24.72           O  
ATOM    479  CB  ARG L  61      15.717   7.341  13.691  0.60 25.47           C  
ATOM    481  CG  ARG L  61      15.440   7.616  12.243  0.60 27.30           C  
ATOM    483  CD  ARG L  61      15.209   9.088  11.928  0.60 29.52           C  
ATOM    485  NE  ARG L  61      14.977   9.163  10.479  0.60 28.48           N  
ATOM    487  CZ  ARG L  61      15.931   9.012   9.574  0.60 25.54           C  
ATOM    489  NH1 ARG L  61      17.190   8.838   9.956  0.60 33.89           N  
ATOM    491  NH2 ARG L  61      15.638   9.049   8.292  0.60 23.17           N  
ATOM    493  N   PHE L  62      13.396   4.762  13.278  1.00 17.17           N  
ATOM    494  CA  PHE L  62      11.992   4.363  13.270  1.00 18.45           C  
ATOM    495  C   PHE L  62      11.775   3.184  14.224  1.00 24.08           C  
ATOM    496  O   PHE L  62      12.597   2.264  14.243  1.00 24.48           O  
ATOM    497  CB  PHE L  62      11.593   3.906  11.872  1.00 15.40           C  
ATOM    498  CG  PHE L  62      11.557   4.988  10.820  1.00 23.22           C  
ATOM    499  CD1 PHE L  62      11.732   6.314  11.155  1.00 37.77           C  
ATOM    500  CD2 PHE L  62      11.300   4.682   9.498  1.00 36.96           C  
ATOM    501  CE1 PHE L  62      11.615   7.315  10.204  1.00 44.91           C  
ATOM    502  CE2 PHE L  62      11.212   5.675   8.541  1.00 40.87           C  
ATOM    503  CZ  PHE L  62      11.394   7.001   8.876  1.00 30.99           C  
ATOM    504  N   SER L  63      10.682   3.158  14.970  1.00 17.12           N  
ATOM    505  CA  SER L  63      10.313   2.017  15.790  1.00 15.54           C  
ATOM    506  C   SER L  63       8.790   1.990  15.979  1.00 18.33           C  
ATOM    507  O   SER L  63       8.083   2.971  15.753  1.00 18.54           O  
ATOM    508  CB  SER L  63      10.984   2.074  17.162  1.00 22.04           C  
ATOM    509  OG  SER L  63      10.551   3.182  17.926  1.00 22.66           O  
ATOM    510  N   GLY L  64       8.289   0.826  16.374  1.00 18.38           N  
ATOM    511  CA  GLY L  64       6.865   0.623  16.612  1.00 18.77           C  
ATOM    512  C   GLY L  64       6.643  -0.190  17.878  1.00 20.08           C  
ATOM    513  O   GLY L  64       7.453  -1.049  18.240  1.00 18.18           O  
ATOM    514  N   SER L  65       5.533   0.104  18.537  1.00 15.77           N  
ATOM    515  CA  SER L  65       5.138  -0.596  19.743  1.00 16.16           C  
ATOM    516  C   SER L  65       3.613  -0.724  19.820  1.00 18.49           C  
ATOM    517  O   SER L  65       2.875  -0.103  19.062  1.00 17.91           O  
ATOM    518  CB  SER L  65       5.641   0.132  20.990  1.00 18.51           C  
ATOM    519  OG  SER L  65       4.957   1.370  21.148  1.00 23.11           O  
ATOM    520  N   GLY L  66       3.175  -1.539  20.768  1.00 20.60           N  
ATOM    521  CA  GLY L  66       1.787  -1.679  21.175  1.00 18.36           C  
ATOM    522  C   GLY L  66       1.282  -3.099  21.044  1.00 21.84           C  
ATOM    523  O   GLY L  66       2.018  -3.977  20.591  1.00 24.55           O  
ATOM    524  N   SER L  67       0.026  -3.285  21.413  1.00 25.17           N  
ATOM    525  CA  SER L  67      -0.677  -4.553  21.423  1.00 24.11           C  
ATOM    526  C   SER L  67      -2.156  -4.304  21.748  1.00 24.54           C  
ATOM    527  O   SER L  67      -2.504  -3.193  22.149  1.00 22.04           O  
ATOM    528  CB  SER L  67      -0.086  -5.514  22.459  1.00 32.19           C  
ATOM    529  OG  SER L  67      -0.418  -5.078  23.768  1.00 38.19           O  
ATOM    530  N   GLY L  68      -2.979  -5.333  21.570  1.00 24.42           N  
ATOM    531  CA  GLY L  68      -4.402  -5.183  21.835  1.00 25.22           C  
ATOM    532  C   GLY L  68      -5.048  -4.270  20.812  1.00 26.63           C  
ATOM    533  O   GLY L  68      -5.000  -4.574  19.608  1.00 23.79           O  
ATOM    534  N   THR L  69      -5.608  -3.163  21.282  1.00 21.02           N  
ATOM    535  CA  THR L  69      -6.188  -2.152  20.406  1.00 18.46           C  
ATOM    536  C   THR L  69      -5.282  -0.946  20.177  1.00 21.74           C  
ATOM    537  O   THR L  69      -5.621  -0.146  19.289  1.00 23.14           O  
ATOM    538  CB  THR L  69      -7.527  -1.603  20.944  1.00 26.83           C  
ATOM    539  OG1 THR L  69      -7.257  -1.079  22.251  1.00 27.65           O  
ATOM    540  CG2 THR L  69      -8.563  -2.700  21.045  1.00 22.87           C  
ATOM    541  N   ASP L  70      -4.171  -0.750  20.885  1.00 17.15           N  
ATOM    542  CA  ASP L  70      -3.434   0.506  20.774  1.00 19.36           C  
ATOM    543  C   ASP L  70      -1.954   0.366  20.429  1.00 18.20           C  
ATOM    544  O   ASP L  70      -1.262  -0.455  21.032  1.00 17.91           O  
ATOM    545  CB  ASP L  70      -3.543   1.250  22.128  1.00 26.49           C  
ATOM    546  CG  ASP L  70      -4.958   1.743  22.410  1.00 27.43           C  
ATOM    547  OD1 ASP L  70      -5.760   0.857  22.739  1.00 36.12           O  
ATOM    548  OD2 ASP L  70      -5.243   2.944  22.298  1.00 36.88           O  
ATOM    549  N   TYR L  71      -1.509   1.109  19.424  1.00 15.67           N  
ATOM    550  CA  TYR L  71      -0.234   1.006  18.748  1.00 16.11           C  
ATOM    551  C   TYR L  71       0.402   2.358  18.480  1.00 16.96           C  
ATOM    552  O   TYR L  71      -0.283   3.363  18.284  1.00 18.66           O  
ATOM    553  CB  TYR L  71      -0.443   0.283  17.383  1.00 15.14           C  
ATOM    554  CG  TYR L  71      -0.978  -1.114  17.623  1.00 16.72           C  
ATOM    555  CD1 TYR L  71      -0.119  -2.191  17.808  1.00 17.25           C  
ATOM    556  CD2 TYR L  71      -2.342  -1.369  17.666  1.00 18.80           C  
ATOM    557  CE1 TYR L  71      -0.597  -3.465  18.047  1.00 15.71           C  
ATOM    558  CE2 TYR L  71      -2.834  -2.644  17.887  1.00 18.19           C  
ATOM    559  CZ  TYR L  71      -1.954  -3.685  18.088  1.00 19.53           C  
ATOM    560  OH  TYR L  71      -2.448  -4.946  18.331  1.00 21.32           O  
ATOM    561  N   THR L  72       1.724   2.422  18.492  1.00 18.67           N  
ATOM    562  CA  THR L  72       2.413   3.701  18.350  1.00 14.65           C  
ATOM    563  C   THR L  72       3.593   3.579  17.380  1.00 17.15           C  
ATOM    564  O   THR L  72       4.340   2.607  17.467  1.00 18.71           O  
ATOM    565  CB  THR L  72       2.933   4.196  19.715  1.00 22.52           C  
ATOM    566  OG1 THR L  72       1.814   4.383  20.592  1.00 20.45           O  
ATOM    567  CG2 THR L  72       3.631   5.543  19.568  1.00 22.74           C  
ATOM    568  N   PHE L  73       3.744   4.569  16.508  1.00 15.84           N  
ATOM    569  CA  PHE L  73       4.883   4.703  15.597  1.00 17.27           C  
ATOM    570  C   PHE L  73       5.725   5.921  15.993  1.00 18.93           C  
ATOM    571  O   PHE L  73       5.173   7.014  16.127  1.00 16.91           O  
ATOM    572  CB  PHE L  73       4.348   4.903  14.177  1.00 18.87           C  
ATOM    573  CG  PHE L  73       5.403   5.071  13.111  1.00 18.23           C  
ATOM    574  CD1 PHE L  73       6.119   3.975  12.675  1.00 24.63           C  
ATOM    575  CD2 PHE L  73       5.628   6.314  12.547  1.00 24.61           C  
ATOM    576  CE1 PHE L  73       7.026   4.106  11.637  1.00 28.23           C  
ATOM    577  CE2 PHE L  73       6.544   6.458  11.528  1.00 25.54           C  
ATOM    578  CZ  PHE L  73       7.230   5.352  11.083  1.00 25.59           C  
ATOM    579  N   THR L  74       7.033   5.730  16.148  1.00 18.81           N  
ATOM    580  CA  THR L  74       7.930   6.775  16.631  1.00 14.44           C  
ATOM    581  C   THR L  74       9.085   7.046  15.669  1.00 21.34           C  
ATOM    582  O   THR L  74       9.751   6.123  15.204  1.00 19.46           O  
ATOM    583  CB  THR L  74       8.545   6.314  17.975  1.00 19.15           C  
ATOM    584  OG1 THR L  74       7.522   6.089  18.953  1.00 20.51           O  
ATOM    585  CG2 THR L  74       9.508   7.354  18.524  1.00 21.86           C  
ATOM    586  N   ILE L  75       9.338   8.325  15.412  1.00 17.72           N  
ATOM    587  CA  ILE L  75      10.560   8.757  14.735  1.00 19.47           C  
ATOM    588  C   ILE L  75      11.386   9.574  15.733  1.00 20.10           C  
ATOM    589  O   ILE L  75      10.952  10.586  16.272  1.00 20.94           O  
ATOM    590  CB  ILE L  75      10.286   9.600  13.482  1.00 21.59           C  
ATOM    591  CG1 ILE L  75       9.402   8.881  12.459  1.00 25.01           C  
ATOM    592  CG2 ILE L  75      11.617  10.043  12.878  1.00 23.49           C  
ATOM    593  CD1 ILE L  75       8.907   9.757  11.325  1.00 29.86           C  
ATOM    594  N   SER L  76      12.529   9.040  16.102  1.00 18.88           N  
ATOM    595  CA  SER L  76      13.280   9.599  17.232  1.00 25.76           C  
ATOM    596  C   SER L  76      13.979  10.899  16.868  1.00 25.29           C  
ATOM    597  O   SER L  76      14.205  11.722  17.764  1.00 24.69           O  
ATOM    598  CB  SER L  76      14.358   8.598  17.680  1.00 26.71           C  
ATOM    599  OG  SER L  76      15.272   8.442  16.588  1.00 30.96           O  
ATOM    600  N   SER L  77      14.298  11.082  15.595  1.00 21.59           N  
ATOM    601  CA  SER L  77      14.901  12.336  15.133  1.00 22.80           C  
ATOM    602  C   SER L  77      14.494  12.632  13.700  1.00 22.66           C  
ATOM    603  O   SER L  77      15.002  12.031  12.754  1.00 28.76           O  
ATOM    604  CB  SER L  77      16.424  12.219  15.256  1.00 26.11           C  
ATOM    605  OG  SER L  77      17.062  13.384  14.781  1.00 32.98           O  
ATOM    606  N   LEU L  78      13.540  13.532  13.495  1.00 20.23           N  
ATOM    607  CA  LEU L  78      12.994  13.805  12.179  1.00 22.33           C  
ATOM    608  C   LEU L  78      14.036  14.353  11.200  1.00 27.67           C  
ATOM    609  O   LEU L  78      14.770  15.296  11.480  1.00 27.99           O  
ATOM    610  CB  LEU L  78      11.825  14.774  12.287  1.00 24.40           C  
ATOM    611  CG  LEU L  78      11.072  15.217  11.038  1.00 28.64           C  
ATOM    612  CD1 LEU L  78      10.329  14.006  10.482  1.00 30.45           C  
ATOM    613  CD2 LEU L  78      10.068  16.310  11.391  1.00 29.31           C  
ATOM    614  N   GLN L  79      14.066  13.768  10.013  1.00 22.59           N  
ATOM    615  CA  GLN L  79      14.953  14.177   8.943  1.00 23.23           C  
ATOM    616  C   GLN L  79      14.190  14.598   7.702  1.00 27.53           C  
ATOM    617  O   GLN L  79      13.065  14.163   7.471  1.00 22.30           O  
ATOM    618  CB  GLN L  79      15.901  13.032   8.581  1.00 22.81           C  
ATOM    619  CG  GLN L  79      16.851  12.650   9.709  1.00 31.27           C  
ATOM    620  CD  GLN L  79      17.755  13.817  10.082  1.00 37.48           C  
ATOM    621  OE1 GLN L  79      18.304  14.485   9.209  1.00 39.26           O  
ATOM    622  NE2 GLN L  79      17.826  14.119  11.366  1.00 39.35           N  
ATOM    623  N   PRO L  80      14.826  15.389   6.841  1.00 29.62           N  
ATOM    624  CA  PRO L  80      14.124  15.871   5.648  1.00 36.04           C  
ATOM    625  C   PRO L  80      13.588  14.775   4.744  1.00 30.66           C  
ATOM    626  O   PRO L  80      12.540  14.863   4.091  1.00 30.27           O  
ATOM    627  CB  PRO L  80      15.199  16.702   4.925  1.00 39.21           C  
ATOM    628  CG  PRO L  80      16.136  17.103   6.022  1.00 39.88           C  
ATOM    629  CD  PRO L  80      16.208  15.906   6.935  1.00 34.89           C  
ATOM    630  N   GLU L  81      14.320  13.671   4.625  1.00 27.01           N  
ATOM    631  CA  GLU L  81      13.813  12.638   3.713  1.00 31.63           C  
ATOM    632  C   GLU L  81      12.603  11.911   4.286  1.00 31.00           C  
ATOM    633  O   GLU L  81      12.030  11.055   3.593  1.00 26.86           O  
ATOM    634  CB  GLU L  81      14.953  11.656   3.428  1.00 29.47           C  
ATOM    635  CG  GLU L  81      15.519  10.978   4.659  1.00 40.35           C  
ATOM    636  CD  GLU L  81      16.847  11.561   5.122  1.00 53.89           C  
ATOM    637  OE1 GLU L  81      17.093  12.779   4.955  1.00 48.34           O  
ATOM    638  OE2 GLU L  81      17.633  10.772   5.696  1.00 57.61           O  
ATOM    639  N   ASP L  82      12.179  12.236   5.507  1.00 24.17           N  
ATOM    640  CA  ASP L  82      11.024  11.562   6.121  1.00 20.55           C  
ATOM    641  C   ASP L  82       9.698  12.174   5.756  1.00 20.98           C  
ATOM    642  O   ASP L  82       8.605  11.731   6.175  1.00 24.69           O  
ATOM    643  CB  ASP L  82      11.160  11.609   7.640  1.00 20.09           C  
ATOM    644  CG  ASP L  82      12.338  10.839   8.167  1.00 24.51           C  
ATOM    645  OD1 ASP L  82      12.864   9.971   7.448  1.00 24.29           O  
ATOM    646  OD2 ASP L  82      12.725  11.113   9.325  1.00 27.31           O  
ATOM    647  N   ILE L  83       9.710  13.262   4.992  1.00 21.41           N  
ATOM    648  CA  ILE L  83       8.434  13.870   4.593  1.00 23.60           C  
ATOM    649  C   ILE L  83       7.678  12.914   3.674  1.00 20.92           C  
ATOM    650  O   ILE L  83       8.206  12.458   2.661  1.00 23.24           O  
ATOM    651  CB  ILE L  83       8.637  15.230   3.905  1.00 33.97           C  
ATOM    652  CG1 ILE L  83       9.140  16.328   4.852  1.00 47.48           C  
ATOM    653  CG2 ILE L  83       7.377  15.661   3.174  1.00 34.50           C  
ATOM    654  CD1 ILE L  83       9.793  17.511   4.169  1.00 50.09           C  
ATOM    655  N   ALA L  84       6.488  12.533   4.115  1.00 25.61           N  
ATOM    656  CA  ALA L  84       5.644  11.528   3.488  1.00 21.05           C  
ATOM    657  C   ALA L  84       4.306  11.440   4.215  1.00 22.63           C  
ATOM    658  O   ALA L  84       4.085  12.126   5.214  1.00 20.37           O  
ATOM    659  CB  ALA L  84       6.309  10.154   3.560  1.00 18.39           C  
ATOM    660  N   THR L  85       3.455  10.548   3.709  1.00 17.86           N  
ATOM    661  CA  THR L  85       2.258  10.167   4.439  1.00 15.24           C  
ATOM    662  C   THR L  85       2.473   8.780   5.050  1.00 20.58           C  
ATOM    663  O   THR L  85       3.033   7.921   4.355  1.00 19.84           O  
ATOM    664  CB  THR L  85       1.017  10.162   3.529  1.00 23.60           C  
ATOM    665  OG1 THR L  85       0.758  11.472   3.019  1.00 27.02           O  
ATOM    666  CG2 THR L  85      -0.222   9.797   4.343  1.00 19.89           C  
ATOM    667  N   TYR L  86       2.112   8.583   6.318  1.00 16.02           N  
ATOM    668  CA  TYR L  86       2.309   7.302   7.011  1.00 14.89           C  
ATOM    669  C   TYR L  86       0.977   6.638   7.293  1.00 15.92           C  
ATOM    670  O   TYR L  86       0.014   7.324   7.675  1.00 18.48           O  
ATOM    671  CB  TYR L  86       3.075   7.578   8.323  1.00 14.11           C  
ATOM    672  CG  TYR L  86       4.498   7.995   8.037  1.00 16.65           C  
ATOM    673  CD1 TYR L  86       4.787   9.320   7.731  1.00 21.47           C  
ATOM    674  CD2 TYR L  86       5.535   7.070   8.051  1.00 18.75           C  
ATOM    675  CE1 TYR L  86       6.082   9.725   7.470  1.00 17.16           C  
ATOM    676  CE2 TYR L  86       6.839   7.471   7.778  1.00 21.82           C  
ATOM    677  CZ  TYR L  86       7.094   8.796   7.485  1.00 15.67           C  
ATOM    678  OH  TYR L  86       8.377   9.177   7.185  1.00 20.37           O  
ATOM    679  N   TYR L  87       0.861   5.325   7.151  1.00 14.22           N  
ATOM    680  CA  TYR L  87      -0.380   4.610   7.391  1.00 13.96           C  
ATOM    681  C   TYR L  87      -0.159   3.381   8.282  1.00 19.44           C  
ATOM    682  O   TYR L  87       0.862   2.723   8.139  1.00 16.93           O  
ATOM    683  CB  TYR L  87      -0.952   4.061   6.075  1.00 19.40           C  
ATOM    684  CG  TYR L  87      -1.425   5.030   5.035  1.00 13.94           C  
ATOM    685  CD1 TYR L  87      -2.625   5.704   5.176  1.00 16.38           C  
ATOM    686  CD2 TYR L  87      -0.658   5.270   3.903  1.00 18.68           C  
ATOM    687  CE1 TYR L  87      -3.059   6.607   4.224  1.00 17.90           C  
ATOM    688  CE2 TYR L  87      -1.068   6.179   2.947  1.00 21.50           C  
ATOM    689  CZ  TYR L  87      -2.270   6.833   3.119  1.00 23.95           C  
ATOM    690  OH  TYR L  87      -2.727   7.726   2.181  1.00 29.67           O  
ATOM    691  N   CYS L  88      -1.147   3.063   9.112  1.00 14.97           N  
ATOM    692  CA  CYS L  88      -1.219   1.763   9.794  1.00 11.72           C  
ATOM    693  C   CYS L  88      -2.272   0.890   9.112  1.00 17.60           C  
ATOM    694  O   CYS L  88      -3.232   1.412   8.515  1.00 18.00           O  
ATOM    695  CB  CYS L  88      -1.507   1.970  11.271  1.00 14.35           C  
ATOM    696  SG  CYS L  88      -3.177   2.609  11.600  1.00 18.52           S  
ATOM    697  N   GLN L  89      -2.116  -0.427   9.188  1.00 13.68           N  
ATOM    698  CA  GLN L  89      -2.999  -1.406   8.564  1.00 14.24           C  
ATOM    699  C   GLN L  89      -3.186  -2.640   9.454  1.00 13.49           C  
ATOM    700  O   GLN L  89      -2.184  -3.206   9.887  1.00 16.41           O  
ATOM    701  CB  GLN L  89      -2.433  -1.868   7.225  1.00 15.46           C  
ATOM    702  CG  GLN L  89      -3.182  -3.019   6.582  1.00 17.95           C  
ATOM    703  CD  GLN L  89      -2.324  -3.818   5.611  1.00 30.94           C  
ATOM    704  OE1 GLN L  89      -1.166  -4.137   5.917  1.00 21.81           O  
ATOM    705  NE2 GLN L  89      -2.927  -4.127   4.459  1.00 31.00           N  
ATOM    706  N   GLN L  90      -4.434  -3.053   9.675  1.00 13.05           N  
ATOM    707  CA  GLN L  90      -4.629  -4.296  10.429  1.00 14.31           C  
ATOM    708  C   GLN L  90      -4.744  -5.489   9.484  1.00 17.94           C  
ATOM    709  O   GLN L  90      -5.430  -5.334   8.454  1.00 17.41           O  
ATOM    710  CB  GLN L  90      -5.814  -4.231  11.372  1.00 20.61           C  
ATOM    711  CG  GLN L  90      -7.215  -4.152  10.821  1.00 19.10           C  
ATOM    712  CD  GLN L  90      -7.874  -5.439  10.375  1.00 18.23           C  
ATOM    713  OE1 GLN L  90      -7.444  -6.506  10.823  1.00 18.01           O  
ATOM    714  NE2 GLN L  90      -8.730  -5.393   9.364  1.00 17.96           N  
ATOM    715  N   TYR L  91      -4.325  -6.676   9.910  1.00 18.41           N  
ATOM    716  CA  TYR L  91      -4.540  -7.873   9.103  1.00 19.42           C  
ATOM    717  C   TYR L  91      -5.037  -9.046   9.926  1.00 20.81           C  
ATOM    718  O   TYR L  91      -4.804 -10.211   9.593  1.00 22.22           O  
ATOM    719  CB  TYR L  91      -3.292  -8.246   8.295  1.00 17.05           C  
ATOM    720  CG  TYR L  91      -2.052  -8.484   9.098  1.00 15.78           C  
ATOM    721  CD1 TYR L  91      -1.275  -7.423   9.551  1.00 19.89           C  
ATOM    722  CD2 TYR L  91      -1.604  -9.768   9.369  1.00 22.60           C  
ATOM    723  CE1 TYR L  91      -0.094  -7.667  10.248  1.00 16.95           C  
ATOM    724  CE2 TYR L  91      -0.447 -10.015  10.104  1.00 18.17           C  
ATOM    725  CZ  TYR L  91       0.298  -8.951  10.557  1.00 18.67           C  
ATOM    726  OH  TYR L  91       1.428  -9.192  11.304  1.00 20.40           O  
ATOM    727  N   GLN L  92      -5.758  -8.751  10.995  1.00 17.92           N  
ATOM    728  CA  GLN L  92      -6.384  -9.779  11.816  1.00 20.96           C  
ATOM    729  C   GLN L  92      -7.607 -10.404  11.159  1.00 22.10           C  
ATOM    730  O   GLN L  92      -7.937 -11.575  11.329  1.00 29.38           O  
ATOM    731  CB  GLN L  92      -6.785  -9.130  13.142  1.00 24.69           C  
ATOM    732  CG  GLN L  92      -8.044  -9.740  13.749  1.00 36.03           C  
ATOM    733  CD  GLN L  92      -7.712 -10.804  14.763  1.00 46.18           C  
ATOM    734  OE1 GLN L  92      -8.439 -11.006  15.735  1.00 61.40           O  
ATOM    735  NE2 GLN L  92      -6.586 -11.483  14.572  1.00 49.38           N  
ATOM    736  N   SER L  93      -8.342  -9.620  10.398  1.00 22.10           N  
ATOM    737  CA  SER L  93      -9.557 -10.067   9.723  1.00 24.71           C  
ATOM    738  C   SER L  93      -9.772  -9.367   8.393  1.00 25.63           C  
ATOM    739  O   SER L  93      -9.490  -8.176   8.216  1.00 25.21           O  
ATOM    740  CB  SER L  93     -10.741  -9.775  10.655  1.00 24.12           C  
ATOM    741  OG  SER L  93     -10.449 -10.339  11.935  1.00 44.71           O  
ATOM    742  N   LEU L  94     -10.348 -10.087   7.429  1.00 18.41           N  
ATOM    743  CA  LEU L  94     -10.677  -9.494   6.133  1.00 19.67           C  
ATOM    744  C   LEU L  94     -11.976  -8.721   6.242  1.00 22.42           C  
ATOM    745  O   LEU L  94     -12.870  -9.169   6.967  1.00 22.99           O  
ATOM    746  CB  LEU L  94     -10.907 -10.609   5.109  1.00 22.24           C  
ATOM    747  CG  LEU L  94      -9.667 -11.393   4.693  1.00 23.97           C  
ATOM    748  CD1 LEU L  94      -9.981 -12.740   4.104  1.00 29.09           C  
ATOM    749  CD2 LEU L  94      -8.795 -10.542   3.796  1.00 26.19           C  
ATOM    750  N   PRO L  95     -12.122  -7.586   5.583  1.00 18.68           N  
ATOM    751  CA  PRO L  95     -11.094  -6.985   4.748  1.00 16.61           C  
ATOM    752  C   PRO L  95     -10.044  -6.259   5.575  1.00 22.26           C  
ATOM    753  O   PRO L  95     -10.332  -5.682   6.620  1.00 19.89           O  
ATOM    754  CB  PRO L  95     -11.884  -5.956   3.927  1.00 25.47           C  
ATOM    755  CG  PRO L  95     -13.049  -5.596   4.782  1.00 24.06           C  
ATOM    756  CD  PRO L  95     -13.372  -6.799   5.616  1.00 21.37           C  
ATOM    757  N   TYR L  96      -8.800  -6.319   5.114  1.00 20.95           N  
ATOM    758  CA  TYR L  96      -7.736  -5.585   5.808  1.00 16.70           C  
ATOM    759  C   TYR L  96      -8.046  -4.110   5.610  1.00 18.14           C  
ATOM    760  O   TYR L  96      -8.437  -3.746   4.508  1.00 27.44           O  
ATOM    761  CB  TYR L  96      -6.387  -5.968   5.212  1.00 22.56           C  
ATOM    762  CG  TYR L  96      -6.083  -7.454   5.323  1.00 18.22           C  
ATOM    763  CD1 TYR L  96      -6.791  -8.253   6.218  1.00 17.77           C  
ATOM    764  CD2 TYR L  96      -5.106  -8.040   4.543  1.00 27.34           C  
ATOM    765  CE1 TYR L  96      -6.521  -9.601   6.322  1.00 26.63           C  
ATOM    766  CE2 TYR L  96      -4.824  -9.398   4.638  1.00 26.51           C  
ATOM    767  CZ  TYR L  96      -5.541 -10.165   5.534  1.00 28.91           C  
ATOM    768  OH  TYR L  96      -5.269 -11.509   5.649  1.00 32.74           O  
ATOM    769  N   THR L  97      -7.944  -3.334   6.689  1.00 18.26           N  
ATOM    770  CA  THR L  97      -8.229  -1.900   6.625  1.00 16.40           C  
ATOM    771  C   THR L  97      -7.036  -1.061   7.097  1.00 17.61           C  
ATOM    772  O   THR L  97      -6.258  -1.478   7.958  1.00 16.52           O  
ATOM    773  CB  THR L  97      -9.457  -1.576   7.497  1.00 21.01           C  
ATOM    774  OG1 THR L  97      -9.283  -2.188   8.786  1.00 21.51           O  
ATOM    775  CG2 THR L  97     -10.688  -2.236   6.883  1.00 18.57           C  
ATOM    776  N   PHE L  98      -6.985   0.136   6.530  1.00 19.72           N  
ATOM    777  CA  PHE L  98      -6.005   1.166   6.820  1.00 18.70           C  
ATOM    778  C   PHE L  98      -6.594   2.298   7.657  1.00 21.17           C  
ATOM    779  O   PHE L  98      -7.734   2.703   7.518  1.00 22.37           O  
ATOM    780  CB  PHE L  98      -5.454   1.817   5.540  1.00 18.70           C  
ATOM    781  CG  PHE L  98      -4.528   0.952   4.713  1.00 19.18           C  
ATOM    782  CD1 PHE L  98      -5.041  -0.091   3.959  1.00 31.50           C  
ATOM    783  CD2 PHE L  98      -3.168   1.138   4.701  1.00 22.96           C  
ATOM    784  CE1 PHE L  98      -4.206  -0.932   3.251  1.00 30.64           C  
ATOM    785  CE2 PHE L  98      -2.320   0.335   3.966  1.00 22.69           C  
ATOM    786  CZ  PHE L  98      -2.848  -0.710   3.243  1.00 25.65           C  
ATOM    787  N   GLY L  99      -5.752   2.921   8.467  1.00 18.94           N  
ATOM    788  CA  GLY L  99      -6.053   4.209   9.059  1.00 20.99           C  
ATOM    789  C   GLY L  99      -6.076   5.288   7.988  1.00 17.89           C  
ATOM    790  O   GLY L  99      -5.678   5.057   6.849  1.00 19.37           O  
ATOM    791  N   GLN L 100      -6.549   6.476   8.359  1.00 18.58           N  
ATOM    792  CA  GLN L 100      -6.774   7.522   7.363  1.00 22.03           C  
ATOM    793  C   GLN L 100      -5.508   8.227   6.916  1.00 23.36           C  
ATOM    794  O   GLN L 100      -5.519   8.981   5.937  1.00 26.30           O  
ATOM    795  CB  GLN L 100      -7.802   8.535   7.877  1.00 29.34           C  
ATOM    796  CG  GLN L 100      -7.234   9.630   8.768  1.00 39.58           C  
ATOM    797  CD  GLN L 100      -7.151   9.184  10.222  1.00 52.36           C  
ATOM    798  OE1 GLN L 100      -7.636   8.113  10.611  1.00 50.79           O  
ATOM    799  NE2 GLN L 100      -6.507  10.044  11.009  1.00 50.15           N  
ATOM    800  N   GLY L 101      -4.409   8.004   7.623  1.00 19.20           N  
ATOM    801  CA  GLY L 101      -3.138   8.577   7.237  1.00 19.02           C  
ATOM    802  C   GLY L 101      -2.772   9.821   8.028  1.00 21.20           C  
ATOM    803  O   GLY L 101      -3.616  10.545   8.534  1.00 24.38           O  
ATOM    804  N   THR L 102      -1.476   9.997   8.184  1.00 18.28           N  
ATOM    805  CA  THR L 102      -0.833  11.141   8.828  1.00 24.59           C  
ATOM    806  C   THR L 102       0.159  11.743   7.835  1.00 19.33           C  
ATOM    807  O   THR L 102       1.093  11.072   7.424  1.00 18.39           O  
ATOM    808  CB  THR L 102      -0.097  10.784  10.126  1.00 24.19           C  
ATOM    809  OG1 THR L 102      -1.064  10.389  11.124  1.00 21.05           O  
ATOM    810  CG2 THR L 102       0.585  12.012  10.745  1.00 20.35           C  
ATOM    811  N   LYS L 103      -0.094  12.973   7.420  1.00 18.79           N  
ATOM    812  CA  LYS L 103       0.845  13.713   6.585  1.00 18.68           C  
ATOM    813  C   LYS L 103       1.870  14.418   7.473  1.00 21.03           C  
ATOM    814  O   LYS L 103       1.489  15.189   8.358  1.00 22.33           O  
ATOM    815  CB  LYS L 103       0.093  14.757   5.744  1.00 32.37           C  
ATOM    816  CG  LYS L 103      -1.123  14.270   4.989  1.00 56.38           C  
ATOM    817  CD  LYS L 103      -2.458  14.697   5.597  1.00 80.70           C  
ATOM    818  CE  LYS L 103      -3.584  13.709   5.344  1.00 81.75           C  
ATOM    819  NZ  LYS L 103      -4.319  13.270   6.563  1.00 72.12           N  
ATOM    820  N   LEU L 104       3.141  14.171   7.221  1.00 17.93           N  
ATOM    821  CA  LEU L 104       4.280  14.682   7.975  1.00 26.79           C  
ATOM    822  C   LEU L 104       5.011  15.755   7.165  1.00 28.14           C  
ATOM    823  O   LEU L 104       5.398  15.521   6.022  1.00 25.11           O  
ATOM    824  CB  LEU L 104       5.276  13.569   8.313  1.00 31.97           C  
ATOM    825  CG  LEU L 104       5.765  13.304   9.710  1.00 40.69           C  
ATOM    826  CD1 LEU L 104       6.832  12.230   9.805  1.00 39.51           C  
ATOM    827  CD2 LEU L 104       6.173  14.514  10.516  1.00 42.79           C  
ATOM    828  N   GLN L 105       5.269  16.906   7.766  1.00 22.98           N  
ATOM    829  CA  GLN L 105       5.954  17.980   7.039  1.00 28.42           C  
ATOM    830  C   GLN L 105       6.949  18.659   7.974  1.00 27.98           C  
ATOM    831  O   GLN L 105       6.901  18.485   9.196  1.00 25.33           O  
ATOM    832  CB  GLN L 105       4.908  18.942   6.483  1.00 37.93           C  
ATOM    833  CG  GLN L 105       5.439  20.068   5.615  1.00 55.21           C  
ATOM    834  CD  GLN L 105       6.269  19.570   4.450  1.00 58.26           C  
ATOM    835  OE1 GLN L 105       7.498  19.662   4.453  1.00 45.40           O  
ATOM    836  NE2 GLN L 105       5.599  19.064   3.420  1.00 63.94           N  
ATOM    837  N   ILE L 106       7.931  19.361   7.426  1.00 21.54           N  
ATOM    838  CA  ILE L 106       8.925  20.042   8.255  1.00 26.68           C  
ATOM    839  C   ILE L 106       8.623  21.547   8.276  1.00 30.34           C  
ATOM    840  O   ILE L 106       8.243  22.127   7.249  1.00 23.05           O  
ATOM    841  CB  ILE L 106      10.352  19.845   7.734  1.00 33.61           C  
ATOM    842  CG1 ILE L 106      10.991  18.501   8.065  1.00 47.38           C  
ATOM    843  CG2 ILE L 106      11.254  20.960   8.252  1.00 30.90           C  
ATOM    844  CD1 ILE L 106      10.058  17.328   7.952  1.00 62.30           C  
ATOM    845  N   THR L 107       8.739  22.170   9.452  1.00 26.26           N  
ATOM    846  CA  THR L 107       8.436  23.591   9.597  1.00 22.03           C  
ATOM    847  C   THR L 107       9.526  24.454   8.978  1.00 29.53           C  
ATOM    848  O   THR L 107      10.621  24.487   9.551  1.00 32.22           O  
ATOM    849  CB  THR L 107       8.216  23.975  11.063  1.00 29.09           C  
ATOM    850  OG1 THR L 107       7.128  23.179  11.577  1.00 27.48           O  
ATOM    851  CG2 THR L 107       7.786  25.432  11.160  1.00 36.53           C  
ATOM    852  OXT THR L 107       9.285  25.099   7.935  1.00 37.59           O  
TER     853      THR L 107                                                      
ATOM    868  N   ASP L   1      14.872  -9.229  -2.422  1.00 21.46           N  
ATOM    869  CA  ASP L   1      13.446  -8.890  -2.321  1.00 22.25           C  
ATOM    870  C   ASP L   1      12.693  -9.482  -3.508  1.00 27.25           C  
ATOM    871  O   ASP L   1      13.312  -9.693  -4.554  1.00 26.32           O  
ATOM    872  CB  ASP L   1      13.292  -7.376  -2.413  1.00 22.39           C  
ATOM    873  CG  ASP L   1      13.884  -6.665  -1.211  1.00 24.39           C  
ATOM    874  OD1 ASP L   1      14.191  -7.343  -0.217  1.00 29.98           O  
ATOM    875  OD2 ASP L   1      14.025  -5.433  -1.321  1.00 32.73           O  
ATOM    876  N   ILE L   2      11.384  -9.678  -3.372  1.00 19.29           N  
ATOM    877  CA  ILE L   2      10.601 -10.019  -4.562  1.00 20.29           C  
ATOM    878  C   ILE L   2      10.119  -8.725  -5.205  1.00 22.41           C  
ATOM    879  O   ILE L   2       9.532  -7.874  -4.548  1.00 27.92           O  
ATOM    880  CB  ILE L   2       9.455 -10.981  -4.248  1.00 22.58           C  
ATOM    881  CG1 ILE L   2       9.910 -12.314  -3.647  1.00 25.91           C  
ATOM    882  CG2 ILE L   2       8.649 -11.226  -5.525  1.00 25.54           C  
ATOM    883  CD1 ILE L   2       8.808 -13.211  -3.113  1.00 25.44           C  
ATOM    884  N   GLN L   3      10.460  -8.469  -6.463  1.00 22.17           N  
ATOM    885  CA  GLN L   3      10.133  -7.268  -7.213  1.00 22.65           C  
ATOM    886  C   GLN L   3       8.871  -7.523  -8.038  1.00 20.26           C  
ATOM    887  O   GLN L   3       8.750  -8.518  -8.744  1.00 22.22           O  
ATOM    888  CB  GLN L   3      11.296  -6.903  -8.133  1.00 36.26           C  
ATOM    889  CG  GLN L   3      11.172  -5.563  -8.841  1.00 58.18           C  
ATOM    890  CD  GLN L   3      12.307  -5.342  -9.822  1.00 68.67           C  
ATOM    891  OE1 GLN L   3      13.484  -5.334  -9.445  1.00 69.54           O  
ATOM    892  NE2 GLN L   3      12.005  -5.127 -11.103  1.00 70.58           N  
ATOM    893  N   MET L   4       7.946  -6.576  -7.953  1.00 20.93           N  
ATOM    894  CA  MET L   4       6.697  -6.699  -8.692  1.00 16.38           C  
ATOM    895  C   MET L   4       6.736  -5.698  -9.850  1.00 22.26           C  
ATOM    896  O   MET L   4       6.979  -4.525  -9.575  1.00 24.94           O  
ATOM    897  CB  MET L   4       5.490  -6.392  -7.802  1.00 19.56           C  
ATOM    898  CG  MET L   4       5.319  -7.310  -6.615  1.00 23.81           C  
ATOM    899  SD  MET L   4       5.301  -9.052  -7.009  1.00 22.82           S  
ATOM    900  CE  MET L   4       3.996  -9.214  -8.203  1.00 29.31           C  
ATOM    901  N   THR L   5       6.480  -6.179 -11.056  1.00 25.02           N  
ATOM    902  CA  THR L   5       6.456  -5.330 -12.249  1.00 24.71           C  
ATOM    903  C   THR L   5       5.033  -5.164 -12.787  1.00 22.49           C  
ATOM    904  O   THR L   5       4.440  -6.161 -13.204  1.00 20.34           O  
ATOM    905  CB  THR L   5       7.312  -5.982 -13.359  1.00 25.92           C  
ATOM    906  OG1 THR L   5       8.656  -6.185 -12.892  1.00 29.36           O  
ATOM    907  CG2 THR L   5       7.369  -5.055 -14.556  1.00 30.24           C  
ATOM    908  N   GLN L   6       4.508  -3.949 -12.744  1.00 19.57           N  
ATOM    909  CA  GLN L   6       3.130  -3.635 -13.112  1.00 17.88           C  
ATOM    910  C   GLN L   6       2.998  -2.918 -14.440  1.00 23.04           C  
ATOM    911  O   GLN L   6       3.804  -2.033 -14.762  1.00 24.38           O  
ATOM    912  CB  GLN L   6       2.547  -2.787 -11.977  1.00 27.67           C  
ATOM    913  CG  GLN L   6       1.046  -2.782 -11.900  1.00 26.60           C  
ATOM    914  CD  GLN L   6       0.480  -2.192 -10.629  1.00 19.36           C  
ATOM    915  OE1 GLN L   6       1.017  -2.183  -9.525  1.00 21.29           O  
ATOM    916  NE2 GLN L   6      -0.744  -1.690 -10.763  1.00 23.92           N  
ATOM    917  N   SER L   7       2.017  -3.301 -15.275  1.00 22.06           N  
ATOM    918  CA  SER L   7       1.908  -2.653 -16.585  1.00 24.84           C  
ATOM    919  C   SER L   7       0.444  -2.551 -16.982  1.00 27.05           C  
ATOM    920  O   SER L   7      -0.324  -3.483 -16.703  1.00 25.12           O  
ATOM    921  CB  SER L   7       2.724  -3.439 -17.620  1.00 32.93           C  
ATOM    922  OG  SER L   7       2.550  -2.915 -18.930  1.00 40.96           O  
ATOM    923  N   PRO L   8       0.033  -1.464 -17.622  1.00 22.95           N  
ATOM    924  CA  PRO L   8       0.856  -0.295 -17.926  1.00 19.91           C  
ATOM    925  C   PRO L   8       0.974   0.616 -16.710  1.00 18.92           C  
ATOM    926  O   PRO L   8       0.287   0.408 -15.708  1.00 23.22           O  
ATOM    927  CB  PRO L   8       0.074   0.391 -19.036  1.00 23.67           C  
ATOM    928  CG  PRO L   8      -1.353   0.052 -18.768  1.00 30.83           C  
ATOM    929  CD  PRO L   8      -1.359  -1.282 -18.081  1.00 27.95           C  
ATOM    930  N   SER L   9       1.813   1.644 -16.817  1.00 22.77           N  
ATOM    931  CA  SER L   9       2.003   2.565 -15.694  1.00 24.54           C  
ATOM    932  C   SER L   9       0.931   3.641 -15.724  1.00 25.11           C  
ATOM    933  O   SER L   9       0.506   4.214 -14.721  1.00 23.99           O  
ATOM    934  CB  SER L   9       3.422   3.132 -15.700  1.00 32.51           C  
ATOM    935  OG  SER L   9       3.518   4.247 -16.570  1.00 44.84           O  
ATOM    936  N   SER L  10       0.369   3.834 -16.917  1.00 27.89           N  
ATOM    937  CA  SER L  10      -0.743   4.765 -17.053  1.00 29.92           C  
ATOM    938  C   SER L  10      -1.638   4.379 -18.221  1.00 25.58           C  
ATOM    939  O   SER L  10      -1.222   3.794 -19.222  1.00 27.27           O  
ATOM    940  CB  SER L  10      -0.245   6.207 -17.149  1.00 42.86           C  
ATOM    941  OG  SER L  10      -0.419   6.754 -18.440  1.00 54.21           O  
ATOM    942  N   LEU L  11      -2.928   4.662 -18.064  1.00 25.87           N  
ATOM    943  CA  LEU L  11      -3.879   4.251 -19.077  1.00 27.75           C  
ATOM    944  C   LEU L  11      -5.041   5.221 -19.185  1.00 32.45           C  
ATOM    945  O   LEU L  11      -5.639   5.632 -18.196  1.00 33.26           O  
ATOM    946  CB  LEU L  11      -4.435   2.868 -18.720  1.00 32.91           C  
ATOM    947  CG  LEU L  11      -5.407   2.306 -19.774  1.00 47.10           C  
ATOM    948  CD1 LEU L  11      -4.698   2.284 -21.127  1.00 50.54           C  
ATOM    949  CD2 LEU L  11      -5.851   0.910 -19.367  1.00 48.81           C  
ATOM    950  N   SER L  12      -5.430   5.509 -20.422  1.00 38.17           N  
ATOM    951  CA  SER L  12      -6.620   6.356 -20.597  1.00 37.41           C  
ATOM    952  C   SER L  12      -7.681   5.593 -21.372  1.00 35.44           C  
ATOM    953  O   SER L  12      -7.348   4.922 -22.356  1.00 36.29           O  
ATOM    954  CB  SER L  12      -6.236   7.648 -21.309  1.00 43.06           C  
ATOM    955  OG  SER L  12      -7.296   8.588 -21.199  1.00 59.25           O  
ATOM    956  N   ALA L  13      -8.917   5.560 -20.884  1.00 34.13           N  
ATOM    957  CA  ALA L  13      -9.940   4.786 -21.584  1.00 33.04           C  
ATOM    958  C   ALA L  13     -11.316   5.429 -21.450  1.00 34.95           C  
ATOM    959  O   ALA L  13     -11.496   6.353 -20.664  1.00 36.45           O  
ATOM    960  CB  ALA L  13      -9.962   3.335 -21.154  1.00 34.73           C  
ATOM    961  N   SER L  14     -12.272   4.978 -22.264  1.00 36.30           N  
ATOM    962  CA  SER L  14     -13.605   5.577 -22.213  1.00 36.62           C  
ATOM    963  C   SER L  14     -14.526   4.760 -21.307  1.00 38.39           C  
ATOM    964  O   SER L  14     -14.302   3.559 -21.134  1.00 31.21           O  
ATOM    965  CB  SER L  14     -14.214   5.666 -23.614  1.00 42.62           C  
ATOM    966  OG  SER L  14     -13.564   6.640 -24.413  1.00 49.95           O  
ATOM    967  N   VAL L  15     -15.575   5.413 -20.806  1.00 33.68           N  
ATOM    968  CA  VAL L  15     -16.632   4.762 -20.054  1.00 28.61           C  
ATOM    969  C   VAL L  15     -17.183   3.608 -20.878  1.00 31.52           C  
ATOM    970  O   VAL L  15     -17.369   3.728 -22.091  1.00 36.30           O  
ATOM    971  CB  VAL L  15     -17.817   5.688 -19.736  1.00 33.60           C  
ATOM    972  CG1 VAL L  15     -18.956   4.866 -19.156  1.00 37.03           C  
ATOM    973  CG2 VAL L  15     -17.456   6.825 -18.808  1.00 34.24           C  
ATOM    974  N   GLY L  16     -17.408   2.474 -20.231  1.00 26.03           N  
ATOM    975  CA  GLY L  16     -17.868   1.289 -20.910  1.00 27.21           C  
ATOM    976  C   GLY L  16     -16.802   0.390 -21.481  1.00 31.55           C  
ATOM    977  O   GLY L  16     -17.092  -0.783 -21.761  1.00 38.49           O  
ATOM    978  N   ASP L  17     -15.560   0.857 -21.604  1.00 30.95           N  
ATOM    979  CA  ASP L  17     -14.487  -0.015 -22.068  1.00 31.78           C  
ATOM    980  C   ASP L  17     -14.138  -1.100 -21.037  1.00 29.34           C  
ATOM    981  O   ASP L  17     -14.355  -0.938 -19.840  1.00 27.42           O  
ATOM    982  CB  ASP L  17     -13.201   0.777 -22.293  1.00 39.63           C  
ATOM    983  CG  ASP L  17     -13.190   1.750 -23.446  1.00 47.68           C  
ATOM    984  OD1 ASP L  17     -14.176   1.800 -24.211  1.00 51.65           O  
ATOM    985  OD2 ASP L  17     -12.158   2.453 -23.571  1.00 42.24           O  
ATOM    986  N   ARG L  18     -13.520  -2.146 -21.544  1.00 27.63           N  
ATOM    987  CA  ARG L  18     -12.849  -3.193 -20.790  1.00 26.89           C  
ATOM    988  C   ARG L  18     -11.386  -2.777 -20.582  1.00 32.49           C  
ATOM    989  O   ARG L  18     -10.726  -2.319 -21.516  1.00 30.58           O  
ATOM    990  CB  ARG L  18     -12.894  -4.511 -21.558  1.00 28.86           C  
ATOM    991  CG  ARG L  18     -12.255  -5.703 -20.866  1.00 34.90           C  
ATOM    992  CD  ARG L  18     -12.634  -7.007 -21.557  1.00 45.65           C  
ATOM    993  NE  ARG L  18     -12.236  -8.192 -20.821  1.00 47.34           N  
ATOM    994  CZ  ARG L  18     -12.973  -9.076 -20.175  1.00 43.87           C  
ATOM    995  NH1 ARG L  18     -14.287  -8.989 -20.099  1.00 45.45           N  
ATOM    996  NH2 ARG L  18     -12.402 -10.102 -19.556  1.00 46.37           N  
ATOM    997  N   VAL L  19     -10.896  -2.901 -19.354  1.00 23.41           N  
ATOM    998  CA  VAL L  19      -9.530  -2.531 -18.999  1.00 20.91           C  
ATOM    999  C   VAL L  19      -8.845  -3.688 -18.271  1.00 21.65           C  
ATOM   1000  O   VAL L  19      -9.472  -4.272 -17.377  1.00 21.76           O  
ATOM   1001  CB  VAL L  19      -9.564  -1.292 -18.083  1.00 27.98           C  
ATOM   1002  CG1 VAL L  19      -8.291  -1.198 -17.268  1.00 29.33           C  
ATOM   1003  CG2 VAL L  19      -9.777  -0.044 -18.927  1.00 34.75           C  
ATOM   1004  N   THR L  20      -7.602  -3.980 -18.636  1.00 18.86           N  
ATOM   1005  CA  THR L  20      -6.817  -4.980 -17.920  1.00 21.09           C  
ATOM   1006  C   THR L  20      -5.461  -4.421 -17.484  1.00 23.64           C  
ATOM   1007  O   THR L  20      -4.842  -3.618 -18.168  1.00 26.28           O  
ATOM   1008  CB  THR L  20      -6.621  -6.289 -18.701  1.00 23.26           C  
ATOM   1009  OG1 THR L  20      -6.010  -6.007 -19.964  1.00 22.55           O  
ATOM   1010  CG2 THR L  20      -7.963  -6.953 -19.004  1.00 22.11           C  
ATOM   1011  N   ILE L  21      -5.030  -4.814 -16.298  1.00 18.50           N  
ATOM   1012  CA  ILE L  21      -3.768  -4.430 -15.675  1.00 16.67           C  
ATOM   1013  C   ILE L  21      -3.011  -5.691 -15.279  1.00 16.96           C  
ATOM   1014  O   ILE L  21      -3.643  -6.625 -14.772  1.00 17.34           O  
ATOM   1015  CB  ILE L  21      -4.049  -3.587 -14.410  1.00 17.80           C  
ATOM   1016  CG1 ILE L  21      -4.805  -2.311 -14.807  1.00 25.25           C  
ATOM   1017  CG2 ILE L  21      -2.756  -3.283 -13.671  1.00 21.93           C  
ATOM   1018  CD1 ILE L  21      -5.299  -1.496 -13.618  1.00 29.85           C  
ATOM   1019  N   THR L  22      -1.717  -5.769 -15.589  1.00 17.49           N  
ATOM   1020  CA  THR L  22      -0.986  -6.988 -15.284  1.00 13.79           C  
ATOM   1021  C   THR L  22       0.095  -6.748 -14.224  1.00 17.71           C  
ATOM   1022  O   THR L  22       0.651  -5.661 -14.116  1.00 18.67           O  
ATOM   1023  CB  THR L  22      -0.348  -7.661 -16.514  1.00 20.17           C  
ATOM   1024  OG1 THR L  22       0.658  -6.806 -17.042  1.00 30.72           O  
ATOM   1025  CG2 THR L  22      -1.421  -7.846 -17.584  1.00 18.85           C  
ATOM   1026  N   CYS L  23       0.398  -7.843 -13.532  1.00 18.81           N  
ATOM   1027  CA  CYS L  23       1.447  -7.677 -12.502  1.00 20.65           C  
ATOM   1028  C   CYS L  23       2.349  -8.863 -12.542  1.00 20.86           C  
ATOM   1029  O   CYS L  23       1.783  -9.970 -12.624  1.00 19.23           O  
ATOM   1030  CB  CYS L  23       0.821  -7.508 -11.113  0.55 27.15           C  
ATOM   1032  SG  CYS L  23       1.153  -5.871 -10.506  0.55 16.25           S  
ATOM   1034  N   GLN L  24       3.676  -8.779 -12.695  1.00 18.14           N  
ATOM   1035  CA  GLN L  24       4.545  -9.944 -12.753  1.00 16.62           C  
ATOM   1036  C   GLN L  24       5.578  -9.937 -11.623  1.00 15.60           C  
ATOM   1037  O   GLN L  24       6.187  -8.913 -11.364  1.00 21.42           O  
ATOM   1038  CB  GLN L  24       5.269  -9.999 -14.103  1.00 25.94           C  
ATOM   1039  CG  GLN L  24       6.271 -11.136 -14.209  1.00 41.00           C  
ATOM   1040  CD  GLN L  24       6.992 -11.308 -15.531  1.00 49.02           C  
ATOM   1041  OE1 GLN L  24       8.002 -10.660 -15.835  1.00 47.01           O  
ATOM   1042  NE2 GLN L  24       6.526 -12.269 -16.332  1.00 43.74           N  
ATOM   1043  N   ALA L  25       5.735 -11.067 -10.961  1.00 18.68           N  
ATOM   1044  CA  ALA L  25       6.667 -11.228  -9.856  1.00 18.25           C  
ATOM   1045  C   ALA L  25       7.997 -11.817 -10.317  1.00 23.25           C  
ATOM   1046  O   ALA L  25       8.020 -12.656 -11.215  1.00 24.36           O  
ATOM   1047  CB  ALA L  25       6.061 -12.194  -8.839  1.00 21.41           C  
ATOM   1048  N   SER L  26       9.073 -11.408  -9.661  1.00 26.50           N  
ATOM   1049  CA  SER L  26      10.410 -11.888 -10.019  1.00 22.92           C  
ATOM   1050  C   SER L  26      10.653 -13.298  -9.524  1.00 31.39           C  
ATOM   1051  O   SER L  26      11.650 -13.908  -9.941  1.00 40.13           O  
ATOM   1052  CB  SER L  26      11.480 -10.947  -9.479  1.00 21.29           C  
ATOM   1053  OG  SER L  26      11.435 -10.896  -8.060  1.00 24.10           O  
ATOM   1054  N   GLN L  27       9.761 -13.877  -8.748  1.00 24.83           N  
ATOM   1055  CA  GLN L  27       9.822 -15.250  -8.254  1.00 23.38           C  
ATOM   1056  C   GLN L  27       8.387 -15.765  -8.119  1.00 29.19           C  
ATOM   1057  O   GLN L  27       7.491 -14.962  -7.866  1.00 27.28           O  
ATOM   1058  CB  GLN L  27      10.420 -15.324  -6.841  1.00 32.14           C  
ATOM   1059  CG  GLN L  27      11.892 -14.992  -6.711  1.00 42.53           C  
ATOM   1060  CD  GLN L  27      12.330 -14.947  -5.256  1.00 47.71           C  
ATOM   1061  OE1 GLN L  27      12.999 -14.017  -4.806  1.00 50.01           O  
ATOM   1062  NE2 GLN L  27      11.937 -15.952  -4.482  1.00 50.24           N  
ATOM   1063  N   ASP L  28       8.203 -17.070  -8.168  1.00 28.58           N  
ATOM   1064  CA  ASP L  28       6.909 -17.695  -7.918  1.00 28.05           C  
ATOM   1065  C   ASP L  28       6.386 -17.256  -6.550  1.00 27.47           C  
ATOM   1066  O   ASP L  28       7.113 -17.381  -5.571  1.00 29.36           O  
ATOM   1067  CB  ASP L  28       7.106 -19.208  -7.953  1.00 27.71           C  
ATOM   1068  CG  ASP L  28       5.906 -20.096  -7.847  1.00 36.08           C  
ATOM   1069  OD1 ASP L  28       4.758 -19.613  -7.886  1.00 35.58           O  
ATOM   1070  OD2 ASP L  28       6.092 -21.321  -7.637  1.00 46.33           O  
ATOM   1071  N   ILE L  29       5.179 -16.706  -6.480  1.00 23.57           N  
ATOM   1072  CA  ILE L  29       4.520 -16.353  -5.231  1.00 20.91           C  
ATOM   1073  C   ILE L  29       3.239 -17.151  -5.010  1.00 22.40           C  
ATOM   1074  O   ILE L  29       2.409 -16.866  -4.137  1.00 22.50           O  
ATOM   1075  CB  ILE L  29       4.223 -14.837  -5.209  1.00 23.87           C  
ATOM   1076  CG1 ILE L  29       3.348 -14.358  -6.365  1.00 23.55           C  
ATOM   1077  CG2 ILE L  29       5.562 -14.105  -5.163  1.00 22.93           C  
ATOM   1078  CD1 ILE L  29       2.867 -12.914  -6.305  1.00 17.38           C  
ATOM   1079  N   ILE L  30       3.127 -18.232  -5.775  1.00 24.50           N  
ATOM   1080  CA  ILE L  30       2.099 -19.254  -5.694  1.00 28.72           C  
ATOM   1081  C   ILE L  30       0.730 -18.704  -6.040  1.00 27.78           C  
ATOM   1082  O   ILE L  30       0.235 -18.920  -7.155  1.00 28.52           O  
ATOM   1083  CB  ILE L  30       2.138 -19.960  -4.323  1.00 36.57           C  
ATOM   1084  CG1 ILE L  30       3.529 -20.495  -3.945  1.00 39.30           C  
ATOM   1085  CG2 ILE L  30       1.089 -21.053  -4.217  1.00 35.10           C  
ATOM   1086  CD1 ILE L  30       4.236 -21.245  -5.052  1.00 50.12           C  
ATOM   1087  N   LYS L  31       0.100 -17.989  -5.124  1.00 21.34           N  
ATOM   1088  CA  LYS L  31      -1.130 -17.242  -5.390  1.00 18.94           C  
ATOM   1089  C   LYS L  31      -1.287 -16.025  -4.477  1.00 19.33           C  
ATOM   1090  O   LYS L  31      -2.385 -15.475  -4.340  1.00 19.72           O  
ATOM   1091  CB  LYS L  31      -2.328 -18.184  -5.155  1.00 29.81           C  
ATOM   1092  CG  LYS L  31      -2.449 -18.599  -3.694  1.00 43.19           C  
ATOM   1093  CD  LYS L  31      -3.564 -19.593  -3.452  1.00 46.65           C  
ATOM   1094  CE  LYS L  31      -3.058 -20.869  -2.800  1.00 51.40           C  
ATOM   1095  NZ  LYS L  31      -4.008 -22.002  -3.010  1.00 62.13           N  
ATOM   1096  N   TYR L  32      -0.213 -15.609  -3.807  1.00 21.86           N  
ATOM   1097  CA  TYR L  32      -0.302 -14.677  -2.692  1.00 17.41           C  
ATOM   1098  C   TYR L  32      -0.129 -13.240  -3.142  1.00 18.67           C  
ATOM   1099  O   TYR L  32       0.899 -12.620  -2.941  1.00 17.13           O  
ATOM   1100  CB  TYR L  32       0.694 -15.089  -1.601  1.00 21.60           C  
ATOM   1101  CG  TYR L  32       0.416 -16.533  -1.186  1.00 26.49           C  
ATOM   1102  CD1 TYR L  32      -0.856 -16.924  -0.807  1.00 30.25           C  
ATOM   1103  CD2 TYR L  32       1.400 -17.508  -1.272  1.00 28.22           C  
ATOM   1104  CE1 TYR L  32      -1.140 -18.225  -0.467  1.00 31.45           C  
ATOM   1105  CE2 TYR L  32       1.128 -18.810  -0.907  1.00 29.89           C  
ATOM   1106  CZ  TYR L  32      -0.134 -19.166  -0.507  1.00 34.16           C  
ATOM   1107  OH  TYR L  32      -0.415 -20.464  -0.141  1.00 44.63           O  
ATOM   1108  N   LEU L  33      -1.204 -12.791  -3.796  1.00 16.96           N  
ATOM   1109  CA  LEU L  33      -1.213 -11.453  -4.395  1.00 13.55           C  
ATOM   1110  C   LEU L  33      -2.506 -10.712  -4.106  1.00 18.01           C  
ATOM   1111  O   LEU L  33      -3.587 -11.282  -4.300  1.00 19.24           O  
ATOM   1112  CB  LEU L  33      -0.998 -11.605  -5.903  1.00 16.11           C  
ATOM   1113  CG  LEU L  33      -0.759 -10.309  -6.657  1.00 24.10           C  
ATOM   1114  CD1 LEU L  33       0.680  -9.873  -6.757  1.00 25.19           C  
ATOM   1115  CD2 LEU L  33      -1.467 -10.285  -7.986  1.00 41.55           C  
ATOM   1116  N   ASN L  34      -2.426  -9.467  -3.640  1.00 14.97           N  
ATOM   1117  CA  ASN L  34      -3.592  -8.636  -3.372  1.00 12.15           C  
ATOM   1118  C   ASN L  34      -3.682  -7.455  -4.339  1.00 15.50           C  
ATOM   1119  O   ASN L  34      -2.657  -6.992  -4.825  1.00 17.35           O  
ATOM   1120  CB  ASN L  34      -3.490  -8.089  -1.952  1.00 12.34           C  
ATOM   1121  CG  ASN L  34      -3.648  -9.137  -0.865  1.00 20.82           C  
ATOM   1122  OD1 ASN L  34      -4.378 -10.111  -1.015  1.00 22.56           O  
ATOM   1123  ND2 ASN L  34      -3.019  -8.903   0.285  1.00 20.39           N  
ATOM   1124  N   TRP L  35      -4.882  -6.944  -4.600  1.00 14.53           N  
ATOM   1125  CA  TRP L  35      -5.042  -5.729  -5.394  1.00 15.38           C  
ATOM   1126  C   TRP L  35      -5.737  -4.623  -4.581  1.00 15.55           C  
ATOM   1127  O   TRP L  35      -6.749  -4.907  -3.926  1.00 18.08           O  
ATOM   1128  CB  TRP L  35      -5.920  -6.019  -6.624  1.00 18.28           C  
ATOM   1129  CG  TRP L  35      -5.274  -6.850  -7.692  1.00 17.31           C  
ATOM   1130  CD1 TRP L  35      -5.417  -8.204  -7.852  1.00 17.92           C  
ATOM   1131  CD2 TRP L  35      -4.400  -6.420  -8.732  1.00 17.13           C  
ATOM   1132  NE1 TRP L  35      -4.689  -8.631  -8.943  1.00 18.07           N  
ATOM   1133  CE2 TRP L  35      -4.054  -7.552  -9.498  1.00 14.88           C  
ATOM   1134  CE3 TRP L  35      -3.883  -5.183  -9.116  1.00 15.65           C  
ATOM   1135  CZ2 TRP L  35      -3.204  -7.492 -10.597  1.00 15.76           C  
ATOM   1136  CZ3 TRP L  35      -3.053  -5.125 -10.224  1.00 20.18           C  
ATOM   1137  CH2 TRP L  35      -2.723  -6.264 -10.965  1.00 20.09           C  
ATOM   1138  N   TYR L  36      -5.217  -3.408  -4.646  1.00 17.36           N  
ATOM   1139  CA  TYR L  36      -5.720  -2.245  -3.936  1.00 16.01           C  
ATOM   1140  C   TYR L  36      -6.078  -1.089  -4.888  1.00 18.93           C  
ATOM   1141  O   TYR L  36      -5.401  -0.937  -5.919  1.00 18.28           O  
ATOM   1142  CB  TYR L  36      -4.646  -1.670  -3.001  1.00 17.18           C  
ATOM   1143  CG  TYR L  36      -4.245  -2.558  -1.854  1.00 16.84           C  
ATOM   1144  CD1 TYR L  36      -3.245  -3.504  -1.996  1.00 17.60           C  
ATOM   1145  CD2 TYR L  36      -4.902  -2.436  -0.633  1.00 19.09           C  
ATOM   1146  CE1 TYR L  36      -2.891  -4.326  -0.954  1.00 18.94           C  
ATOM   1147  CE2 TYR L  36      -4.539  -3.250   0.423  1.00 25.87           C  
ATOM   1148  CZ  TYR L  36      -3.533  -4.177   0.259  1.00 25.26           C  
ATOM   1149  OH  TYR L  36      -3.214  -4.964   1.337  1.00 32.68           O  
ATOM   1150  N   GLN L  37      -7.076  -0.313  -4.500  1.00 15.14           N  
ATOM   1151  CA  GLN L  37      -7.499   0.925  -5.185  1.00 14.81           C  
ATOM   1152  C   GLN L  37      -7.138   2.132  -4.320  1.00 21.59           C  
ATOM   1153  O   GLN L  37      -7.394   2.101  -3.113  1.00 21.97           O  
ATOM   1154  CB  GLN L  37      -9.028   0.933  -5.341  1.00 20.85           C  
ATOM   1155  CG  GLN L  37      -9.633   2.116  -6.066  1.00 24.99           C  
ATOM   1156  CD  GLN L  37     -11.150   2.070  -6.096  1.00 25.55           C  
ATOM   1157  OE1 GLN L  37     -11.816   1.989  -5.075  1.00 24.78           O  
ATOM   1158  NE2 GLN L  37     -11.759   2.078  -7.267  1.00 25.51           N  
ATOM   1159  N   GLN L  38      -6.601   3.220  -4.873  1.00 21.78           N  
ATOM   1160  CA  GLN L  38      -6.349   4.399  -4.042  1.00 19.11           C  
ATOM   1161  C   GLN L  38      -6.824   5.664  -4.739  1.00 19.20           C  
ATOM   1162  O   GLN L  38      -6.257   6.060  -5.756  1.00 21.91           O  
ATOM   1163  CB  GLN L  38      -4.875   4.524  -3.653  1.00 17.92           C  
ATOM   1164  CG  GLN L  38      -4.598   5.648  -2.661  1.00 18.41           C  
ATOM   1165  CD  GLN L  38      -3.152   5.787  -2.262  1.00 24.45           C  
ATOM   1166  OE1 GLN L  38      -2.220   5.423  -2.991  1.00 23.42           O  
ATOM   1167  NE2 GLN L  38      -2.963   6.261  -1.031  1.00 24.25           N  
ATOM   1168  N   LYS L  39      -7.826   6.325  -4.172  1.00 28.06           N  
ATOM   1169  CA  LYS L  39      -8.242   7.618  -4.737  1.00 30.33           C  
ATOM   1170  C   LYS L  39      -7.403   8.720  -4.093  1.00 33.68           C  
ATOM   1171  O   LYS L  39      -6.894   8.524  -2.988  1.00 28.61           O  
ATOM   1172  CB  LYS L  39      -9.743   7.831  -4.583  1.00 27.61           C  
ATOM   1173  CG  LYS L  39     -10.535   6.739  -5.279  1.00 28.23           C  
ATOM   1174  CD  LYS L  39     -12.027   6.891  -5.162  1.00 44.45           C  
ATOM   1175  CE  LYS L  39     -12.739   6.098  -6.249  1.00 51.73           C  
ATOM   1176  NZ  LYS L  39     -13.220   6.964  -7.369  1.00 61.53           N  
ATOM   1177  N   PRO L  40      -7.215   9.835  -4.787  1.00 39.29           N  
ATOM   1178  CA  PRO L  40      -6.324  10.888  -4.305  1.00 40.59           C  
ATOM   1179  C   PRO L  40      -6.743  11.454  -2.955  1.00 35.42           C  
ATOM   1180  O   PRO L  40      -7.924  11.665  -2.671  1.00 36.99           O  
ATOM   1181  CB  PRO L  40      -6.362  11.949  -5.400  1.00 50.28           C  
ATOM   1182  CG  PRO L  40      -7.533  11.637  -6.259  1.00 49.84           C  
ATOM   1183  CD  PRO L  40      -7.843  10.184  -6.077  1.00 50.86           C  
ATOM   1184  N   GLY L  41      -5.734  11.644  -2.116  1.00 38.73           N  
ATOM   1185  CA  GLY L  41      -5.878  12.116  -0.750  1.00 41.06           C  
ATOM   1186  C   GLY L  41      -6.410  11.050   0.187  1.00 39.55           C  
ATOM   1187  O   GLY L  41      -6.546  11.294   1.383  1.00 39.69           O  
ATOM   1188  N   LYS L  42      -6.683   9.850  -0.341  1.00 35.72           N  
ATOM   1189  CA  LYS L  42      -7.238   8.798   0.504  1.00 32.30           C  
ATOM   1190  C   LYS L  42      -6.336   7.580   0.676  1.00 19.93           C  
ATOM   1191  O   LYS L  42      -5.355   7.335  -0.018  1.00 22.70           O  
ATOM   1192  CB  LYS L  42      -8.596   8.408  -0.071  1.00 39.85           C  
ATOM   1193  CG  LYS L  42      -9.532   9.600  -0.233  1.00 54.33           C  
ATOM   1194  CD  LYS L  42     -10.883   9.282   0.381  1.00 67.10           C  
ATOM   1195  CE  LYS L  42     -10.924   9.554   1.874  1.00 71.87           C  
ATOM   1196  NZ  LYS L  42     -12.273  10.008   2.316  1.00 74.65           N  
ATOM   1197  N   ALA L  43      -6.673   6.799   1.698  1.00 20.53           N  
ATOM   1198  CA  ALA L  43      -5.944   5.577   1.979  1.00 20.82           C  
ATOM   1199  C   ALA L  43      -6.325   4.470   1.003  1.00 19.73           C  
ATOM   1200  O   ALA L  43      -7.459   4.448   0.524  1.00 21.40           O  
ATOM   1201  CB  ALA L  43      -6.267   5.128   3.401  1.00 22.53           C  
ATOM   1202  N   PRO L  44      -5.443   3.501   0.802  1.00 22.86           N  
ATOM   1203  CA  PRO L  44      -5.776   2.364  -0.070  1.00 21.13           C  
ATOM   1204  C   PRO L  44      -6.933   1.540   0.515  1.00 20.91           C  
ATOM   1205  O   PRO L  44      -7.098   1.490   1.735  1.00 18.96           O  
ATOM   1206  CB  PRO L  44      -4.498   1.526  -0.081  1.00 25.79           C  
ATOM   1207  CG  PRO L  44      -3.426   2.428   0.421  1.00 24.71           C  
ATOM   1208  CD  PRO L  44      -4.078   3.401   1.358  1.00 23.18           C  
ATOM   1209  N   LYS L  45      -7.668   0.894  -0.381  1.00 17.05           N  
ATOM   1210  CA  LYS L  45      -8.790   0.015  -0.155  1.00 16.20           C  
ATOM   1211  C   LYS L  45      -8.553  -1.361  -0.773  1.00 16.47           C  
ATOM   1212  O   LYS L  45      -8.151  -1.461  -1.940  1.00 18.42           O  
ATOM   1213  CB  LYS L  45     -10.082   0.630  -0.720  1.00 21.27           C  
ATOM   1214  CG  LYS L  45     -11.277  -0.305  -0.549  1.00 37.74           C  
ATOM   1215  CD  LYS L  45     -12.619   0.339  -0.845  1.00 46.47           C  
ATOM   1216  CE  LYS L  45     -13.669  -0.604  -1.398  1.00 55.12           C  
ATOM   1217  NZ  LYS L  45     -14.661  -1.075  -0.396  1.00 65.19           N  
ATOM   1218  N   LEU L  46      -8.647  -2.419   0.025  1.00 16.86           N  
ATOM   1219  CA  LEU L  46      -8.477  -3.772  -0.464  1.00 12.66           C  
ATOM   1220  C   LEU L  46      -9.638  -4.174  -1.362  1.00 17.68           C  
ATOM   1221  O   LEU L  46     -10.807  -4.171  -0.953  1.00 18.46           O  
ATOM   1222  CB  LEU L  46      -8.303  -4.785   0.671  1.00 14.08           C  
ATOM   1223  CG  LEU L  46      -8.046  -6.226   0.224  1.00 20.32           C  
ATOM   1224  CD1 LEU L  46      -6.702  -6.433  -0.453  1.00 20.05           C  
ATOM   1225  CD2 LEU L  46      -8.258  -7.197   1.366  1.00 19.83           C  
ATOM   1226  N   LEU L  47      -9.320  -4.569  -2.595  1.00 13.93           N  
ATOM   1227  CA  LEU L  47     -10.325  -5.036  -3.534  1.00 13.99           C  
ATOM   1228  C   LEU L  47     -10.379  -6.557  -3.648  1.00 20.94           C  
ATOM   1229  O   LEU L  47     -11.464  -7.144  -3.663  1.00 20.90           O  
ATOM   1230  CB  LEU L  47     -10.068  -4.469  -4.922  1.00 18.35           C  
ATOM   1231  CG  LEU L  47     -10.128  -2.950  -5.115  1.00 22.81           C  
ATOM   1232  CD1 LEU L  47      -9.881  -2.634  -6.586  1.00 28.67           C  
ATOM   1233  CD2 LEU L  47     -11.431  -2.370  -4.595  1.00 20.18           C  
ATOM   1234  N   ILE L  48      -9.204  -7.164  -3.813  1.00 16.62           N  
ATOM   1235  CA  ILE L  48      -9.077  -8.588  -4.061  1.00 15.08           C  
ATOM   1236  C   ILE L  48      -7.998  -9.232  -3.215  1.00 18.04           C  
ATOM   1237  O   ILE L  48      -6.876  -8.718  -3.132  1.00 21.27           O  
ATOM   1238  CB  ILE L  48      -8.822  -8.803  -5.572  1.00 18.49           C  
ATOM   1239  CG1 ILE L  48     -10.039  -8.391  -6.402  1.00 28.11           C  
ATOM   1240  CG2 ILE L  48      -8.401 -10.226  -5.875  1.00 23.15           C  
ATOM   1241  CD1 ILE L  48      -9.828  -8.386  -7.898  1.00 32.85           C  
ATOM   1242  N   TYR L  49      -8.324 -10.355  -2.584  1.00 16.73           N  
ATOM   1243  CA  TYR L  49      -7.418 -11.093  -1.702  1.00 17.50           C  
ATOM   1244  C   TYR L  49      -7.042 -12.437  -2.308  1.00 16.78           C  
ATOM   1245  O   TYR L  49      -7.910 -13.081  -2.922  1.00 15.68           O  
ATOM   1246  CB  TYR L  49      -8.072 -11.284  -0.331  1.00 18.98           C  
ATOM   1247  CG  TYR L  49      -7.367 -12.214   0.612  1.00 19.01           C  
ATOM   1248  CD1 TYR L  49      -6.213 -11.847   1.287  1.00 21.83           C  
ATOM   1249  CD2 TYR L  49      -7.852 -13.487   0.825  1.00 24.06           C  
ATOM   1250  CE1 TYR L  49      -5.569 -12.721   2.149  1.00 18.68           C  
ATOM   1251  CE2 TYR L  49      -7.230 -14.377   1.680  1.00 28.64           C  
ATOM   1252  CZ  TYR L  49      -6.092 -13.977   2.337  1.00 26.01           C  
ATOM   1253  OH  TYR L  49      -5.492 -14.882   3.178  1.00 37.74           O  
ATOM   1254  N   GLU L  50      -5.775 -12.839  -2.174  1.00 17.48           N  
ATOM   1255  CA  GLU L  50      -5.289 -14.125  -2.681  1.00 16.75           C  
ATOM   1256  C   GLU L  50      -5.717 -14.364  -4.129  1.00 20.17           C  
ATOM   1257  O   GLU L  50      -6.391 -15.350  -4.431  1.00 23.43           O  
ATOM   1258  CB  GLU L  50      -5.752 -15.282  -1.795  1.00 16.55           C  
ATOM   1259  CG  GLU L  50      -4.976 -16.569  -1.870  1.00 23.76           C  
ATOM   1260  CD  GLU L  50      -5.525 -17.685  -1.003  1.00 29.66           C  
ATOM   1261  OE1 GLU L  50      -5.163 -17.803   0.176  1.00 29.71           O  
ATOM   1262  OE2 GLU L  50      -6.331 -18.490  -1.510  1.00 30.78           O  
ATOM   1263  N   ALA L  51      -5.335 -13.455  -5.007  1.00 18.13           N  
ATOM   1264  CA  ALA L  51      -5.489 -13.445  -6.445  1.00 19.77           C  
ATOM   1265  C   ALA L  51      -6.889 -13.246  -6.983  1.00 18.64           C  
ATOM   1266  O   ALA L  51      -7.078 -12.536  -7.981  1.00 19.54           O  
ATOM   1267  CB  ALA L  51      -4.871 -14.691  -7.075  1.00 18.05           C  
ATOM   1268  N   SER L  52      -7.895 -13.863  -6.380  1.00 17.27           N  
ATOM   1269  CA  SER L  52      -9.212 -13.899  -7.029  1.00 17.10           C  
ATOM   1270  C   SER L  52     -10.397 -13.735  -6.101  1.00 16.75           C  
ATOM   1271  O   SER L  52     -11.539 -13.753  -6.589  1.00 20.36           O  
ATOM   1272  CB  SER L  52      -9.314 -15.222  -7.807  1.00 24.90           C  
ATOM   1273  OG  SER L  52      -9.183 -16.304  -6.883  1.00 25.93           O  
ATOM   1274  N   ASN L  53     -10.207 -13.522  -4.803  1.00 16.69           N  
ATOM   1275  CA  ASN L  53     -11.353 -13.392  -3.902  1.00 15.58           C  
ATOM   1276  C   ASN L  53     -11.807 -11.960  -3.688  1.00 19.59           C  
ATOM   1277  O   ASN L  53     -11.142 -11.202  -2.978  1.00 19.96           O  
ATOM   1278  CB  ASN L  53     -11.034 -14.018  -2.549  1.00 22.38           C  
ATOM   1279  CG  ASN L  53     -10.690 -15.485  -2.729  1.00 36.27           C  
ATOM   1280  OD1 ASN L  53     -11.570 -16.308  -2.968  1.00 37.86           O  
ATOM   1281  ND2 ASN L  53      -9.402 -15.786  -2.654  1.00 36.61           N  
ATOM   1282  N   LEU L  54     -12.942 -11.609  -4.282  1.00 18.88           N  
ATOM   1283  CA  LEU L  54     -13.474 -10.255  -4.244  1.00 18.71           C  
ATOM   1284  C   LEU L  54     -13.975  -9.927  -2.846  1.00 21.72           C  
ATOM   1285  O   LEU L  54     -14.573 -10.791  -2.202  1.00 23.91           O  
ATOM   1286  CB  LEU L  54     -14.626 -10.142  -5.249  1.00 23.51           C  
ATOM   1287  CG  LEU L  54     -15.141  -8.770  -5.659  1.00 28.26           C  
ATOM   1288  CD1 LEU L  54     -14.050  -7.977  -6.375  1.00 36.73           C  
ATOM   1289  CD2 LEU L  54     -16.272  -8.982  -6.674  1.00 32.17           C  
ATOM   1290  N   GLN L  55     -13.695  -8.726  -2.362  1.00 20.78           N  
ATOM   1291  CA  GLN L  55     -14.083  -8.350  -1.006  1.00 22.01           C  
ATOM   1292  C   GLN L  55     -15.483  -7.768  -0.994  1.00 23.70           C  
ATOM   1293  O   GLN L  55     -16.030  -7.394  -2.029  1.00 23.09           O  
ATOM   1294  CB  GLN L  55     -13.109  -7.317  -0.409  1.00 19.73           C  
ATOM   1295  CG  GLN L  55     -11.710  -7.875  -0.206  1.00 18.01           C  
ATOM   1296  CD  GLN L  55     -11.694  -9.118   0.658  1.00 18.98           C  
ATOM   1297  OE1 GLN L  55     -11.888  -9.013   1.873  1.00 26.31           O  
ATOM   1298  NE2 GLN L  55     -11.560 -10.288   0.054  1.00 21.25           N  
ATOM   1299  N   ALA L  56     -16.056  -7.670   0.207  1.00 25.08           N  
ATOM   1300  CA  ALA L  56     -17.381  -7.078   0.318  1.00 21.98           C  
ATOM   1301  C   ALA L  56     -17.368  -5.601  -0.065  1.00 24.95           C  
ATOM   1302  O   ALA L  56     -16.415  -4.863   0.179  1.00 28.30           O  
ATOM   1303  CB  ALA L  56     -17.889  -7.225   1.747  1.00 28.16           C  
ATOM   1304  N   GLY L  57     -18.480  -5.145  -0.627  1.00 28.79           N  
ATOM   1305  CA  GLY L  57     -18.588  -3.757  -1.005  1.00 29.85           C  
ATOM   1306  C   GLY L  57     -17.970  -3.445  -2.348  1.00 32.05           C  
ATOM   1307  O   GLY L  57     -17.986  -2.295  -2.794  1.00 48.77           O  
ATOM   1308  N   VAL L  58     -17.380  -4.424  -3.005  1.00 24.70           N  
ATOM   1309  CA  VAL L  58     -16.685  -4.178  -4.274  1.00 26.12           C  
ATOM   1310  C   VAL L  58     -17.602  -4.548  -5.438  1.00 24.55           C  
ATOM   1311  O   VAL L  58     -18.221  -5.612  -5.372  1.00 24.43           O  
ATOM   1312  CB  VAL L  58     -15.385  -4.995  -4.369  1.00 22.96           C  
ATOM   1313  CG1 VAL L  58     -14.649  -4.658  -5.658  1.00 27.89           C  
ATOM   1314  CG2 VAL L  58     -14.505  -4.701  -3.154  1.00 27.40           C  
ATOM   1315  N   PRO L  59     -17.696  -3.721  -6.466  1.00 27.17           N  
ATOM   1316  CA  PRO L  59     -18.577  -4.062  -7.592  1.00 28.98           C  
ATOM   1317  C   PRO L  59     -18.110  -5.304  -8.332  1.00 27.57           C  
ATOM   1318  O   PRO L  59     -16.919  -5.571  -8.491  1.00 27.90           O  
ATOM   1319  CB  PRO L  59     -18.508  -2.857  -8.522  1.00 35.71           C  
ATOM   1320  CG  PRO L  59     -17.993  -1.753  -7.662  1.00 39.46           C  
ATOM   1321  CD  PRO L  59     -17.067  -2.404  -6.667  1.00 30.80           C  
ATOM   1322  N   SER L  60     -19.115  -6.012  -8.832  1.00 21.39           N  
ATOM   1323  CA  SER L  60     -18.917  -7.262  -9.540  1.00 25.20           C  
ATOM   1324  C   SER L  60     -18.281  -7.029 -10.905  1.00 26.73           C  
ATOM   1325  O   SER L  60     -17.929  -7.975 -11.604  1.00 30.37           O  
ATOM   1326  CB  SER L  60     -20.251  -8.002  -9.698  1.00 40.94           C  
ATOM   1327  OG  SER L  60     -21.135  -7.222 -10.499  1.00 49.19           O  
ATOM   1328  N   ARG L  61     -18.076  -5.773 -11.304  1.00 23.11           N  
ATOM   1329  CA  ARG L  61     -17.370  -5.562 -12.553  1.00 22.39           C  
ATOM   1330  C   ARG L  61     -15.855  -5.767 -12.408  1.00 25.40           C  
ATOM   1331  O   ARG L  61     -15.166  -5.803 -13.428  1.00 25.67           O  
ATOM   1332  CB  ARG L  61     -17.668  -4.188 -13.136  0.60 24.27           C  
ATOM   1334  CG  ARG L  61     -17.303  -3.024 -12.239  0.60 25.32           C  
ATOM   1336  CD  ARG L  61     -17.350  -1.747 -13.075  0.60 26.60           C  
ATOM   1338  NE  ARG L  61     -17.183  -0.579 -12.218  0.60 28.73           N  
ATOM   1340  CZ  ARG L  61     -18.096  -0.189 -11.340  0.60 27.91           C  
ATOM   1342  NH1 ARG L  61     -19.251  -0.822 -11.215  0.60 27.53           N  
ATOM   1344  NH2 ARG L  61     -17.844   0.880 -10.592  0.60 29.82           N  
ATOM   1346  N   PHE L  62     -15.347  -5.869 -11.188  1.00 23.48           N  
ATOM   1347  CA  PHE L  62     -13.931  -6.136 -10.937  1.00 20.51           C  
ATOM   1348  C   PHE L  62     -13.682  -7.633 -10.811  1.00 21.86           C  
ATOM   1349  O   PHE L  62     -14.508  -8.336 -10.220  1.00 26.28           O  
ATOM   1350  CB  PHE L  62     -13.557  -5.493  -9.597  1.00 16.64           C  
ATOM   1351  CG  PHE L  62     -13.518  -3.978  -9.602  1.00 23.85           C  
ATOM   1352  CD1 PHE L  62     -13.740  -3.259 -10.760  1.00 32.74           C  
ATOM   1353  CD2 PHE L  62     -13.294  -3.282  -8.432  1.00 43.03           C  
ATOM   1354  CE1 PHE L  62     -13.765  -1.878 -10.743  1.00 43.07           C  
ATOM   1355  CE2 PHE L  62     -13.293  -1.899  -8.421  1.00 47.96           C  
ATOM   1356  CZ  PHE L  62     -13.521  -1.177  -9.578  1.00 34.34           C  
ATOM   1357  N   SER L  63     -12.559  -8.141 -11.299  1.00 15.99           N  
ATOM   1358  CA  SER L  63     -12.173  -9.522 -11.056  1.00 15.38           C  
ATOM   1359  C   SER L  63     -10.648  -9.657 -11.115  1.00 20.35           C  
ATOM   1360  O   SER L  63      -9.956  -8.797 -11.656  1.00 21.73           O  
ATOM   1361  CB  SER L  63     -12.807 -10.500 -12.049  1.00 21.50           C  
ATOM   1362  OG  SER L  63     -12.381 -10.215 -13.372  1.00 25.03           O  
ATOM   1363  N   GLY L  64     -10.136 -10.744 -10.534  1.00 20.19           N  
ATOM   1364  CA  GLY L  64      -8.709 -11.029 -10.560  1.00 17.01           C  
ATOM   1365  C   GLY L  64      -8.431 -12.477 -10.916  1.00 21.15           C  
ATOM   1366  O   GLY L  64      -9.212 -13.363 -10.579  1.00 22.44           O  
ATOM   1367  N   SER L  65      -7.328 -12.694 -11.626  1.00 17.91           N  
ATOM   1368  CA  SER L  65      -6.891 -14.031 -11.979  1.00 19.54           C  
ATOM   1369  C   SER L  65      -5.362 -14.150 -11.928  1.00 19.80           C  
ATOM   1370  O   SER L  65      -4.647 -13.153 -11.820  1.00 18.63           O  
ATOM   1371  CB  SER L  65      -7.369 -14.356 -13.396  1.00 16.67           C  
ATOM   1372  OG  SER L  65      -6.693 -13.576 -14.362  1.00 22.83           O  
ATOM   1373  N   GLY L  66      -4.899 -15.389 -12.042  1.00 20.22           N  
ATOM   1374  CA  GLY L  66      -3.500 -15.737 -12.214  1.00 16.19           C  
ATOM   1375  C   GLY L  66      -2.980 -16.657 -11.133  1.00 22.25           C  
ATOM   1376  O   GLY L  66      -3.717 -17.015 -10.207  1.00 26.56           O  
ATOM   1377  N   SER L  67      -1.710 -17.013 -11.264  1.00 24.77           N  
ATOM   1378  CA  SER L  67      -1.001 -17.932 -10.390  1.00 22.80           C  
ATOM   1379  C   SER L  67       0.475 -17.950 -10.788  1.00 21.91           C  
ATOM   1380  O   SER L  67       0.821 -17.405 -11.837  1.00 21.94           O  
ATOM   1381  CB  SER L  67      -1.550 -19.353 -10.463  1.00 27.90           C  
ATOM   1382  OG  SER L  67      -1.243 -19.920 -11.726  1.00 31.94           O  
ATOM   1383  N   GLY L  68       1.327 -18.511  -9.938  1.00 24.13           N  
ATOM   1384  CA  GLY L  68       2.754 -18.504 -10.206  1.00 22.09           C  
ATOM   1385  C   GLY L  68       3.310 -17.088 -10.156  1.00 27.94           C  
ATOM   1386  O   GLY L  68       3.200 -16.436  -9.105  1.00 22.90           O  
ATOM   1387  N   THR L  69       3.886 -16.657 -11.277  1.00 19.73           N  
ATOM   1388  CA  THR L  69       4.460 -15.331 -11.387  1.00 20.52           C  
ATOM   1389  C   THR L  69       3.575 -14.316 -12.103  1.00 22.30           C  
ATOM   1390  O   THR L  69       3.912 -13.122 -12.083  1.00 24.72           O  
ATOM   1391  CB  THR L  69       5.804 -15.343 -12.158  1.00 24.64           C  
ATOM   1392  OG1 THR L  69       5.544 -15.880 -13.461  1.00 25.89           O  
ATOM   1393  CG2 THR L  69       6.837 -16.204 -11.465  1.00 22.68           C  
ATOM   1394  N   ASP L  70       2.474 -14.682 -12.752  1.00 20.83           N  
ATOM   1395  CA  ASP L  70       1.724 -13.737 -13.580  1.00 16.20           C  
ATOM   1396  C   ASP L  70       0.238 -13.648 -13.234  1.00 19.36           C  
ATOM   1397  O   ASP L  70      -0.430 -14.672 -13.095  1.00 18.35           O  
ATOM   1398  CB  ASP L  70       1.861 -14.178 -15.045  1.00 21.18           C  
ATOM   1399  CG  ASP L  70       3.270 -13.939 -15.586  1.00 30.68           C  
ATOM   1400  OD1 ASP L  70       4.248 -14.536 -15.105  1.00 35.25           O  
ATOM   1401  OD2 ASP L  70       3.393 -13.074 -16.480  1.00 43.37           O  
ATOM   1402  N   TYR L  71      -0.226 -12.418 -13.016  1.00 18.02           N  
ATOM   1403  CA  TYR L  71      -1.532 -12.067 -12.475  1.00 16.76           C  
ATOM   1404  C   TYR L  71      -2.199 -10.956 -13.261  1.00 17.26           C  
ATOM   1405  O   TYR L  71      -1.518 -10.083 -13.810  1.00 20.48           O  
ATOM   1406  CB  TYR L  71      -1.357 -11.618 -11.002  1.00 16.36           C  
ATOM   1407  CG  TYR L  71      -0.783 -12.761 -10.193  1.00 17.81           C  
ATOM   1408  CD1 TYR L  71       0.585 -12.947 -10.050  1.00 17.14           C  
ATOM   1409  CD2 TYR L  71      -1.619 -13.650  -9.537  1.00 17.02           C  
ATOM   1410  CE1 TYR L  71       1.095 -13.987  -9.307  1.00 18.00           C  
ATOM   1411  CE2 TYR L  71      -1.123 -14.706  -8.809  1.00 17.25           C  
ATOM   1412  CZ  TYR L  71       0.240 -14.874  -8.698  1.00 21.37           C  
ATOM   1413  OH  TYR L  71       0.769 -15.924  -7.974  1.00 25.84           O  
ATOM   1414  N   THR L  72      -3.528 -10.986 -13.319  1.00 18.54           N  
ATOM   1415  CA  THR L  72      -4.253  -9.983 -14.086  1.00 15.54           C  
ATOM   1416  C   THR L  72      -5.441  -9.429 -13.280  1.00 18.32           C  
ATOM   1417  O   THR L  72      -6.150 -10.206 -12.644  1.00 20.42           O  
ATOM   1418  CB  THR L  72      -4.791 -10.615 -15.387  1.00 22.38           C  
ATOM   1419  OG1 THR L  72      -3.684 -11.042 -16.195  1.00 20.28           O  
ATOM   1420  CG2 THR L  72      -5.585  -9.604 -16.214  1.00 18.70           C  
ATOM   1421  N   PHE L  73      -5.639  -8.123 -13.339  1.00 15.15           N  
ATOM   1422  CA  PHE L  73      -6.788  -7.418 -12.782  1.00 19.02           C  
ATOM   1423  C   PHE L  73      -7.664  -6.870 -13.912  1.00 20.87           C  
ATOM   1424  O   PHE L  73      -7.148  -6.156 -14.786  1.00 19.47           O  
ATOM   1425  CB  PHE L  73      -6.264  -6.239 -11.936  1.00 19.86           C  
ATOM   1426  CG  PHE L  73      -7.338  -5.371 -11.327  1.00 18.94           C  
ATOM   1427  CD1 PHE L  73      -8.079  -5.832 -10.257  1.00 25.10           C  
ATOM   1428  CD2 PHE L  73      -7.580  -4.112 -11.839  1.00 26.20           C  
ATOM   1429  CE1 PHE L  73      -9.076  -5.039  -9.712  1.00 30.22           C  
ATOM   1430  CE2 PHE L  73      -8.576  -3.317 -11.308  1.00 29.53           C  
ATOM   1431  CZ  PHE L  73      -9.317  -3.788 -10.251  1.00 26.18           C  
ATOM   1432  N   THR L  74      -8.962  -7.137 -13.861  1.00 18.92           N  
ATOM   1433  CA  THR L  74      -9.875  -6.755 -14.939  1.00 16.38           C  
ATOM   1434  C   THR L  74     -11.039  -5.900 -14.463  1.00 19.40           C  
ATOM   1435  O   THR L  74     -11.677  -6.224 -13.467  1.00 22.86           O  
ATOM   1436  CB  THR L  74     -10.461  -8.041 -15.580  1.00 22.08           C  
ATOM   1437  OG1 THR L  74      -9.401  -8.866 -16.103  1.00 24.55           O  
ATOM   1438  CG2 THR L  74     -11.335  -7.671 -16.766  1.00 27.86           C  
ATOM   1439  N   ILE L  75     -11.330  -4.825 -15.178  1.00 17.47           N  
ATOM   1440  CA  ILE L  75     -12.577  -4.083 -15.012  1.00 21.10           C  
ATOM   1441  C   ILE L  75     -13.411  -4.278 -16.280  1.00 28.30           C  
ATOM   1442  O   ILE L  75     -12.990  -3.938 -17.397  1.00 25.56           O  
ATOM   1443  CB  ILE L  75     -12.344  -2.582 -14.775  1.00 22.06           C  
ATOM   1444  CG1 ILE L  75     -11.524  -2.303 -13.515  1.00 27.60           C  
ATOM   1445  CG2 ILE L  75     -13.687  -1.859 -14.695  1.00 28.99           C  
ATOM   1446  CD1 ILE L  75     -11.008  -0.885 -13.400  1.00 32.25           C  
ATOM   1447  N   SER L  76     -14.556  -4.941 -16.124  1.00 19.93           N  
ATOM   1448  CA  SER L  76     -15.262  -5.398 -17.327  1.00 25.84           C  
ATOM   1449  C   SER L  76     -15.947  -4.248 -18.058  1.00 34.74           C  
ATOM   1450  O   SER L  76     -16.143  -4.341 -19.270  1.00 32.75           O  
ATOM   1451  CB  SER L  76     -16.308  -6.447 -16.952  1.00 28.72           C  
ATOM   1452  OG  SER L  76     -17.340  -5.780 -16.242  1.00 34.57           O  
ATOM   1453  N   SER L  77     -16.324  -3.223 -17.295  1.00 28.93           N  
ATOM   1454  CA  SER L  77     -16.954  -2.049 -17.896  1.00 27.41           C  
ATOM   1455  C   SER L  77     -16.609  -0.798 -17.108  1.00 28.78           C  
ATOM   1456  O   SER L  77     -17.131  -0.560 -16.014  1.00 32.83           O  
ATOM   1457  CB  SER L  77     -18.472  -2.262 -17.963  1.00 29.11           C  
ATOM   1458  OG  SER L  77     -19.051  -1.152 -18.646  1.00 39.38           O  
ATOM   1459  N   LEU L  78     -15.692   0.014 -17.626  1.00 25.87           N  
ATOM   1460  CA  LEU L  78     -15.177   1.153 -16.887  1.00 25.48           C  
ATOM   1461  C   LEU L  78     -16.230   2.200 -16.559  1.00 32.77           C  
ATOM   1462  O   LEU L  78     -16.982   2.656 -17.420  1.00 36.61           O  
ATOM   1463  CB  LEU L  78     -14.022   1.800 -17.654  1.00 30.02           C  
ATOM   1464  CG  LEU L  78     -13.284   2.986 -17.036  1.00 38.17           C  
ATOM   1465  CD1 LEU L  78     -12.665   2.616 -15.690  1.00 33.82           C  
ATOM   1466  CD2 LEU L  78     -12.198   3.473 -17.994  1.00 36.19           C  
ATOM   1467  N   GLN L  79     -16.257   2.612 -15.293  1.00 26.96           N  
ATOM   1468  CA  GLN L  79     -17.172   3.654 -14.847  1.00 22.60           C  
ATOM   1469  C   GLN L  79     -16.424   4.844 -14.277  1.00 29.48           C  
ATOM   1470  O   GLN L  79     -15.316   4.716 -13.746  1.00 27.11           O  
ATOM   1471  CB  GLN L  79     -18.117   3.123 -13.793  1.00 27.08           C  
ATOM   1472  CG  GLN L  79     -19.010   1.973 -14.220  1.00 33.34           C  
ATOM   1473  CD  GLN L  79     -19.890   2.360 -15.395  1.00 45.90           C  
ATOM   1474  OE1 GLN L  79     -20.493   3.432 -15.384  1.00 47.75           O  
ATOM   1475  NE2 GLN L  79     -19.924   1.500 -16.406  1.00 43.99           N  
ATOM   1476  N   PRO L  80     -17.026   6.023 -14.334  1.00 35.60           N  
ATOM   1477  CA  PRO L  80     -16.346   7.219 -13.826  1.00 34.70           C  
ATOM   1478  C   PRO L  80     -15.872   7.113 -12.391  1.00 33.08           C  
ATOM   1479  O   PRO L  80     -14.807   7.603 -11.991  1.00 39.59           O  
ATOM   1480  CB  PRO L  80     -17.424   8.312 -13.945  1.00 42.24           C  
ATOM   1481  CG  PRO L  80     -18.237   7.841 -15.112  1.00 44.57           C  
ATOM   1482  CD  PRO L  80     -18.345   6.350 -14.908  1.00 43.48           C  
ATOM   1483  N   GLU L  81     -16.616   6.425 -11.524  1.00 29.43           N  
ATOM   1484  CA  GLU L  81     -16.121   6.345 -10.144  1.00 30.64           C  
ATOM   1485  C   GLU L  81     -14.869   5.474 -10.030  1.00 33.45           C  
ATOM   1486  O   GLU L  81     -14.303   5.356  -8.940  1.00 30.99           O  
ATOM   1487  CB  GLU L  81     -17.244   5.817  -9.255  1.00 29.39           C  
ATOM   1488  CG  GLU L  81     -17.690   4.408  -9.606  1.00 42.35           C  
ATOM   1489  CD  GLU L  81     -19.008   4.323 -10.339  1.00 55.76           C  
ATOM   1490  OE1 GLU L  81     -19.299   5.217 -11.165  1.00 53.71           O  
ATOM   1491  OE2 GLU L  81     -19.747   3.341 -10.081  1.00 60.44           O  
ATOM   1492  N   ASP L  82     -14.458   4.806 -11.103  1.00 29.27           N  
ATOM   1493  CA  ASP L  82     -13.303   3.908 -11.068  1.00 25.41           C  
ATOM   1494  C   ASP L  82     -11.966   4.609 -11.213  1.00 27.50           C  
ATOM   1495  O   ASP L  82     -10.879   4.013 -11.224  1.00 32.10           O  
ATOM   1496  CB  ASP L  82     -13.458   2.911 -12.225  1.00 23.02           C  
ATOM   1497  CG  ASP L  82     -14.599   1.951 -12.010  1.00 26.73           C  
ATOM   1498  OD1 ASP L  82     -15.092   1.818 -10.868  1.00 26.24           O  
ATOM   1499  OD2 ASP L  82     -14.960   1.297 -13.007  1.00 27.65           O  
ATOM   1500  N   ILE L  83     -12.012   5.920 -11.433  1.00 28.87           N  
ATOM   1501  CA  ILE L  83     -10.761   6.646 -11.647  1.00 27.56           C  
ATOM   1502  C   ILE L  83      -9.991   6.713 -10.336  1.00 21.73           C  
ATOM   1503  O   ILE L  83     -10.484   7.208  -9.335  1.00 27.65           O  
ATOM   1504  CB  ILE L  83     -10.995   8.041 -12.246  1.00 38.84           C  
ATOM   1505  CG1 ILE L  83     -11.429   7.988 -13.716  1.00 49.36           C  
ATOM   1506  CG2 ILE L  83      -9.799   8.950 -12.030  1.00 36.73           C  
ATOM   1507  CD1 ILE L  83     -12.071   9.244 -14.259  1.00 53.99           C  
ATOM   1508  N   ALA L  84      -8.793   6.157 -10.352  1.00 24.35           N  
ATOM   1509  CA  ALA L  84      -7.919   5.991  -9.206  1.00 21.88           C  
ATOM   1510  C   ALA L  84      -6.564   5.454  -9.665  1.00 21.87           C  
ATOM   1511  O   ALA L  84      -6.357   5.190 -10.847  1.00 22.54           O  
ATOM   1512  CB  ALA L  84      -8.518   4.979  -8.233  1.00 21.38           C  
ATOM   1513  N   THR L  85      -5.695   5.239  -8.681  1.00 19.57           N  
ATOM   1514  CA  THR L  85      -4.473   4.490  -8.915  1.00 16.96           C  
ATOM   1515  C   THR L  85      -4.642   3.076  -8.344  1.00 17.93           C  
ATOM   1516  O   THR L  85      -5.180   2.953  -7.247  1.00 21.73           O  
ATOM   1517  CB  THR L  85      -3.262   5.188  -8.289  1.00 23.81           C  
ATOM   1518  OG1 THR L  85      -3.064   6.478  -8.883  1.00 25.61           O  
ATOM   1519  CG2 THR L  85      -1.990   4.392  -8.563  1.00 22.10           C  
ATOM   1520  N   TYR L  86      -4.263   2.038  -9.081  1.00 16.12           N  
ATOM   1521  CA  TYR L  86      -4.392   0.648  -8.644  1.00 15.10           C  
ATOM   1522  C   TYR L  86      -3.033   0.021  -8.394  1.00 15.09           C  
ATOM   1523  O   TYR L  86      -2.087   0.273  -9.152  1.00 17.72           O  
ATOM   1524  CB  TYR L  86      -5.170  -0.141  -9.715  1.00 17.56           C  
ATOM   1525  CG  TYR L  86      -6.617   0.290  -9.773  1.00 16.21           C  
ATOM   1526  CD1 TYR L  86      -6.972   1.380 -10.555  1.00 20.45           C  
ATOM   1527  CD2 TYR L  86      -7.606  -0.384  -9.075  1.00 19.40           C  
ATOM   1528  CE1 TYR L  86      -8.289   1.803 -10.644  1.00 19.84           C  
ATOM   1529  CE2 TYR L  86      -8.932   0.041  -9.136  1.00 18.91           C  
ATOM   1530  CZ  TYR L  86      -9.254   1.130  -9.923  1.00 22.56           C  
ATOM   1531  OH  TYR L  86     -10.555   1.578  -9.983  1.00 25.07           O  
ATOM   1532  N   TYR L  87      -2.895  -0.795  -7.352  1.00 14.24           N  
ATOM   1533  CA  TYR L  87      -1.632  -1.426  -7.013  1.00 16.45           C  
ATOM   1534  C   TYR L  87      -1.813  -2.926  -6.749  1.00 18.38           C  
ATOM   1535  O   TYR L  87      -2.821  -3.316  -6.163  1.00 17.93           O  
ATOM   1536  CB  TYR L  87      -1.062  -0.852  -5.705  1.00 18.19           C  
ATOM   1537  CG  TYR L  87      -0.637   0.591  -5.695  1.00 15.20           C  
ATOM   1538  CD1 TYR L  87       0.571   0.994  -6.212  1.00 14.48           C  
ATOM   1539  CD2 TYR L  87      -1.457   1.551  -5.089  1.00 23.05           C  
ATOM   1540  CE1 TYR L  87       0.960   2.320  -6.177  1.00 17.10           C  
ATOM   1541  CE2 TYR L  87      -1.078   2.875  -5.051  1.00 23.06           C  
ATOM   1542  CZ  TYR L  87       0.134   3.250  -5.594  1.00 24.84           C  
ATOM   1543  OH  TYR L  87       0.525   4.570  -5.572  1.00 24.19           O  
ATOM   1544  N   CYS L  88      -0.810  -3.714  -7.116  1.00 19.16           N  
ATOM   1545  CA  CYS L  88      -0.707  -5.109  -6.672  1.00 13.66           C  
ATOM   1546  C   CYS L  88       0.339  -5.228  -5.574  1.00 16.47           C  
ATOM   1547  O   CYS L  88       1.263  -4.410  -5.506  1.00 18.11           O  
ATOM   1548  CB  CYS L  88      -0.392  -6.017  -7.861  1.00 15.92           C  
ATOM   1549  SG  CYS L  88       1.266  -5.771  -8.534  1.00 19.53           S  
ATOM   1550  N   GLN L  89       0.176  -6.210  -4.693  1.00 14.26           N  
ATOM   1551  CA  GLN L  89       1.077  -6.436  -3.559  1.00 12.07           C  
ATOM   1552  C   GLN L  89       1.270  -7.926  -3.282  1.00 15.75           C  
ATOM   1553  O   GLN L  89       0.271  -8.652  -3.231  1.00 16.44           O  
ATOM   1554  CB  GLN L  89       0.476  -5.821  -2.288  1.00 18.42           C  
ATOM   1555  CG  GLN L  89       1.284  -6.095  -1.034  1.00 18.52           C  
ATOM   1556  CD  GLN L  89       0.465  -6.087   0.238  1.00 24.84           C  
ATOM   1557  OE1 GLN L  89      -0.697  -6.493   0.287  1.00 24.59           O  
ATOM   1558  NE2 GLN L  89       1.119  -5.564   1.267  1.00 33.98           N  
ATOM   1559  N   GLN L  90       2.512  -8.373  -3.189  1.00 17.67           N  
ATOM   1560  CA  GLN L  90       2.759  -9.781  -2.883  1.00 14.10           C  
ATOM   1561  C   GLN L  90       2.910  -9.976  -1.381  1.00 15.22           C  
ATOM   1562  O   GLN L  90       3.571  -9.122  -0.767  1.00 17.11           O  
ATOM   1563  CB  GLN L  90       3.969 -10.334  -3.622  1.00 19.53           C  
ATOM   1564  CG  GLN L  90       5.365  -9.815  -3.302  1.00 17.76           C  
ATOM   1565  CD  GLN L  90       6.062 -10.406  -2.108  1.00 16.90           C  
ATOM   1566  OE1 GLN L  90       5.693 -11.494  -1.657  1.00 19.33           O  
ATOM   1567  NE2 GLN L  90       6.899  -9.640  -1.419  1.00 17.88           N  
ATOM   1568  N   TYR L  91       2.518 -11.123  -0.848  1.00 17.60           N  
ATOM   1569  CA  TYR L  91       2.755 -11.431   0.551  1.00 17.09           C  
ATOM   1570  C   TYR L  91       3.281 -12.842   0.756  1.00 19.08           C  
ATOM   1571  O   TYR L  91       3.101 -13.447   1.816  1.00 20.53           O  
ATOM   1572  CB  TYR L  91       1.525 -11.174   1.410  1.00 18.22           C  
ATOM   1573  CG  TYR L  91       0.284 -11.925   1.016  1.00 20.01           C  
ATOM   1574  CD1 TYR L  91      -0.516 -11.481  -0.040  1.00 21.06           C  
ATOM   1575  CD2 TYR L  91      -0.127 -13.068   1.701  1.00 20.33           C  
ATOM   1576  CE1 TYR L  91      -1.667 -12.166  -0.381  1.00 17.16           C  
ATOM   1577  CE2 TYR L  91      -1.270 -13.753   1.357  1.00 17.34           C  
ATOM   1578  CZ  TYR L  91      -2.046 -13.306   0.305  1.00 21.84           C  
ATOM   1579  OH  TYR L  91      -3.194 -13.987  -0.061  1.00 20.31           O  
ATOM   1580  N   GLN L  92       4.022 -13.337  -0.229  1.00 19.74           N  
ATOM   1581  CA  GLN L  92       4.706 -14.612  -0.074  1.00 23.04           C  
ATOM   1582  C   GLN L  92       5.944 -14.525   0.815  1.00 21.55           C  
ATOM   1583  O   GLN L  92       6.278 -15.446   1.560  1.00 24.50           O  
ATOM   1584  CB  GLN L  92       5.094 -15.129  -1.459  1.00 27.32           C  
ATOM   1585  CG  GLN L  92       6.348 -15.984  -1.437  1.00 31.19           C  
ATOM   1586  CD  GLN L  92       6.046 -17.461  -1.284  1.00 45.80           C  
ATOM   1587  OE1 GLN L  92       6.857 -18.287  -1.710  1.00 61.02           O  
ATOM   1588  NE2 GLN L  92       4.906 -17.800  -0.692  1.00 36.53           N  
ATOM   1589  N   SER L  93       6.634 -13.399   0.750  1.00 18.70           N  
ATOM   1590  CA  SER L  93       7.837 -13.199   1.559  1.00 20.06           C  
ATOM   1591  C   SER L  93       8.029 -11.764   2.011  1.00 21.92           C  
ATOM   1592  O   SER L  93       7.692 -10.813   1.311  1.00 24.16           O  
ATOM   1593  CB  SER L  93       9.053 -13.636   0.719  1.00 30.13           C  
ATOM   1594  OG  SER L  93       8.792 -14.941   0.218  1.00 48.49           O  
ATOM   1595  N   LEU L  94       8.608 -11.570   3.195  1.00 21.03           N  
ATOM   1596  CA  LEU L  94       8.902 -10.248   3.708  1.00 17.99           C  
ATOM   1597  C   LEU L  94      10.198  -9.730   3.118  1.00 23.76           C  
ATOM   1598  O   LEU L  94      11.133 -10.517   2.951  1.00 27.94           O  
ATOM   1599  CB  LEU L  94       9.095 -10.328   5.226  1.00 22.27           C  
ATOM   1600  CG  LEU L  94       7.834 -10.508   6.057  1.00 24.51           C  
ATOM   1601  CD1 LEU L  94       8.241 -10.775   7.504  1.00 26.11           C  
ATOM   1602  CD2 LEU L  94       6.957  -9.267   5.981  1.00 21.74           C  
ATOM   1603  N   PRO L  95      10.308  -8.446   2.823  1.00 20.26           N  
ATOM   1604  CA  PRO L  95       9.242  -7.468   3.014  1.00 19.15           C  
ATOM   1605  C   PRO L  95       8.190  -7.563   1.915  1.00 24.05           C  
ATOM   1606  O   PRO L  95       8.491  -7.862   0.760  1.00 20.29           O  
ATOM   1607  CB  PRO L  95       9.998  -6.147   2.898  1.00 28.61           C  
ATOM   1608  CG  PRO L  95      11.149  -6.442   1.981  1.00 25.08           C  
ATOM   1609  CD  PRO L  95      11.526  -7.868   2.213  1.00 23.54           C  
ATOM   1610  N   TYR L  96       6.931  -7.354   2.283  1.00 17.53           N  
ATOM   1611  CA  TYR L  96       5.866  -7.360   1.283  1.00 13.19           C  
ATOM   1612  C   TYR L  96       6.140  -6.158   0.376  1.00 20.86           C  
ATOM   1613  O   TYR L  96       6.561  -5.116   0.881  1.00 23.70           O  
ATOM   1614  CB  TYR L  96       4.525  -7.192   1.995  1.00 21.70           C  
ATOM   1615  CG  TYR L  96       4.200  -8.342   2.938  1.00 18.73           C  
ATOM   1616  CD1 TYR L  96       4.821  -9.569   2.821  1.00 22.43           C  
ATOM   1617  CD2 TYR L  96       3.262  -8.173   3.946  1.00 24.75           C  
ATOM   1618  CE1 TYR L  96       4.517 -10.609   3.679  1.00 28.40           C  
ATOM   1619  CE2 TYR L  96       2.949  -9.197   4.822  1.00 23.76           C  
ATOM   1620  CZ  TYR L  96       3.581 -10.413   4.671  1.00 31.16           C  
ATOM   1621  OH  TYR L  96       3.275 -11.440   5.545  1.00 42.33           O  
ATOM   1622  N   THR L  97       6.009  -6.360  -0.922  1.00 16.59           N  
ATOM   1623  CA  THR L  97       6.279  -5.330  -1.914  1.00 15.22           C  
ATOM   1624  C   THR L  97       5.079  -5.094  -2.834  1.00 17.92           C  
ATOM   1625  O   THR L  97       4.269  -5.982  -3.121  1.00 18.16           O  
ATOM   1626  CB  THR L  97       7.491  -5.742  -2.773  1.00 19.46           C  
ATOM   1627  OG1 THR L  97       7.354  -7.117  -3.165  1.00 18.60           O  
ATOM   1628  CG2 THR L  97       8.736  -5.679  -1.877  1.00 18.83           C  
ATOM   1629  N   PHE L  98       5.007  -3.828  -3.264  1.00 19.76           N  
ATOM   1630  CA  PHE L  98       4.011  -3.301  -4.178  1.00 18.12           C  
ATOM   1631  C   PHE L  98       4.572  -3.067  -5.571  1.00 21.04           C  
ATOM   1632  O   PHE L  98       5.723  -2.673  -5.768  1.00 20.10           O  
ATOM   1633  CB  PHE L  98       3.451  -1.969  -3.690  1.00 18.82           C  
ATOM   1634  CG  PHE L  98       2.519  -2.034  -2.500  1.00 16.96           C  
ATOM   1635  CD1 PHE L  98       3.023  -2.260  -1.229  1.00 29.14           C  
ATOM   1636  CD2 PHE L  98       1.159  -1.887  -2.630  1.00 19.50           C  
ATOM   1637  CE1 PHE L  98       2.183  -2.336  -0.135  1.00 27.40           C  
ATOM   1638  CE2 PHE L  98       0.310  -1.950  -1.540  1.00 24.04           C  
ATOM   1639  CZ  PHE L  98       0.825  -2.182  -0.286  1.00 22.14           C  
ATOM   1640  N   GLY L  99       3.702  -3.212  -6.569  1.00 19.76           N  
ATOM   1641  CA  GLY L  99       4.032  -2.744  -7.911  1.00 22.61           C  
ATOM   1642  C   GLY L  99       4.037  -1.221  -7.944  1.00 18.37           C  
ATOM   1643  O   GLY L  99       3.614  -0.574  -6.981  1.00 18.43           O  
ATOM   1644  N   GLN L 100       4.527  -0.645  -9.045  1.00 18.07           N  
ATOM   1645  CA  GLN L 100       4.687   0.801  -9.105  1.00 25.20           C  
ATOM   1646  C   GLN L 100       3.386   1.583  -9.246  1.00 24.69           C  
ATOM   1647  O   GLN L 100       3.362   2.804  -9.073  1.00 25.95           O  
ATOM   1648  CB  GLN L 100       5.662   1.181 -10.228  1.00 31.97           C  
ATOM   1649  CG  GLN L 100       5.020   1.386 -11.588  1.00 41.85           C  
ATOM   1650  CD  GLN L 100       4.829   0.092 -12.354  1.00 52.28           C  
ATOM   1651  OE1 GLN L 100       5.445  -0.924 -12.015  1.00 56.12           O  
ATOM   1652  NE2 GLN L 100       3.949   0.155 -13.350  1.00 48.58           N  
ATOM   1653  N   GLY L 101       2.314   0.879  -9.572  1.00 19.22           N  
ATOM   1654  CA  GLY L 101       1.017   1.521  -9.690  1.00 17.14           C  
ATOM   1655  C   GLY L 101       0.628   1.814 -11.127  1.00 22.03           C  
ATOM   1656  O   GLY L 101       1.496   2.067 -11.969  1.00 27.67           O  
ATOM   1657  N   THR L 102      -0.679   1.790 -11.369  1.00 23.55           N  
ATOM   1658  CA  THR L 102      -1.291   2.136 -12.648  1.00 24.34           C  
ATOM   1659  C   THR L 102      -2.299   3.259 -12.400  1.00 22.05           C  
ATOM   1660  O   THR L 102      -3.278   3.037 -11.696  1.00 18.68           O  
ATOM   1661  CB  THR L 102      -2.012   0.950 -13.303  1.00 23.18           C  
ATOM   1662  OG1 THR L 102      -1.070  -0.033 -13.706  1.00 19.86           O  
ATOM   1663  CG2 THR L 102      -2.751   1.329 -14.585  1.00 22.99           C  
ATOM   1664  N   LYS L 103      -2.009   4.433 -12.970  1.00 21.66           N  
ATOM   1665  CA  LYS L 103      -2.982   5.523 -12.906  1.00 23.11           C  
ATOM   1666  C   LYS L 103      -4.001   5.376 -14.044  1.00 25.92           C  
ATOM   1667  O   LYS L 103      -3.607   5.304 -15.201  1.00 27.39           O  
ATOM   1668  CB  LYS L 103      -2.318   6.896 -12.983  1.00 31.89           C  
ATOM   1669  CG  LYS L 103      -1.345   7.091 -11.822  1.00 63.09           C  
ATOM   1670  CD  LYS L 103       0.037   7.456 -12.340  1.00 81.70           C  
ATOM   1671  CE  LYS L 103       0.881   8.169 -11.290  1.00 80.87           C  
ATOM   1672  NZ  LYS L 103       1.551   9.393 -11.807  1.00 75.54           N  
ATOM   1673  N   LEU L 104      -5.266   5.350 -13.696  1.00 26.36           N  
ATOM   1674  CA  LEU L 104      -6.407   5.177 -14.580  1.00 31.04           C  
ATOM   1675  C   LEU L 104      -7.141   6.506 -14.769  1.00 33.18           C  
ATOM   1676  O   LEU L 104      -7.498   7.167 -13.801  1.00 31.98           O  
ATOM   1677  CB  LEU L 104      -7.395   4.161 -14.014  1.00 29.30           C  
ATOM   1678  CG  LEU L 104      -7.881   2.970 -14.816  1.00 44.03           C  
ATOM   1679  CD1 LEU L 104      -8.904   2.124 -14.060  1.00 41.12           C  
ATOM   1680  CD2 LEU L 104      -8.440   3.344 -16.179  1.00 44.35           C  
ATOM   1681  N   GLN L 105      -7.378   6.897 -16.016  1.00 32.64           N  
ATOM   1682  CA  GLN L 105      -8.102   8.152 -16.252  1.00 39.07           C  
ATOM   1683  C   GLN L 105      -9.115   7.945 -17.373  1.00 37.94           C  
ATOM   1684  O   GLN L 105      -9.033   6.980 -18.141  1.00 33.32           O  
ATOM   1685  CB  GLN L 105      -7.086   9.247 -16.541  1.00 49.80           C  
ATOM   1686  CG  GLN L 105      -7.606  10.632 -16.862  1.00 63.97           C  
ATOM   1687  CD  GLN L 105      -8.681  11.113 -15.901  1.00 68.07           C  
ATOM   1688  OE1 GLN L 105      -9.880  11.088 -16.203  1.00 66.46           O  
ATOM   1689  NE2 GLN L 105      -8.240  11.545 -14.723  1.00 69.99           N  
ATOM   1690  N   ILE L 106     -10.119   8.820 -17.454  1.00 35.35           N  
ATOM   1691  CA  ILE L 106     -11.106   8.697 -18.528  1.00 36.41           C  
ATOM   1692  C   ILE L 106     -10.816   9.687 -19.651  1.00 41.34           C  
ATOM   1693  O   ILE L 106     -10.472  10.835 -19.391  1.00 43.27           O  
ATOM   1694  CB  ILE L 106     -12.533   8.900 -18.005  1.00 39.31           C  
ATOM   1695  CG1 ILE L 106     -13.152   7.679 -17.327  1.00 48.34           C  
ATOM   1696  CG2 ILE L 106     -13.437   9.375 -19.142  1.00 38.92           C  
ATOM   1697  CD1 ILE L 106     -12.191   6.726 -16.668  1.00 62.91           C  
ATOM   1698  N   THR L 107     -10.942   9.250 -20.892  1.00 43.66           N  
ATOM   1699  CA  THR L 107     -10.701  10.038 -22.091  1.00 44.46           C  
ATOM   1700  C   THR L 107     -11.623  11.258 -22.187  1.00 52.17           C  
ATOM   1701  O   THR L 107     -12.858  11.060 -22.269  1.00 50.90           O  
ATOM   1702  CB  THR L 107     -10.947   9.179 -23.354  1.00 42.75           C  
ATOM   1703  OG1 THR L 107     -10.213   7.957 -23.326  1.00 47.78           O  
ATOM   1704  CG2 THR L 107     -10.504   9.946 -24.592  1.00 50.50           C  
ATOM   1705  OXT THR L 107     -11.128  12.406 -22.116  1.00 57.19           O  
TER    1706      THR L 107                                                      
