# Supplementary material for: SARS-CoV-2 Spike Protein Interaction Space
Source: Int J Mol Sci. 2023 Jul 27;24(15):12058. doi: 10.3390/ijms241512058 (PMC10418891; doi:10.3390/ijms241512058)
Supplement: Supplementary file 1 [file ijms-24-12058-s001.zip › Supplementary Material File S1/1DCL.pdb]

REMARK 950 NUMBERING  Kabat
REMARK 950 METHOD     X-ray crystal structure
REMARK 950 RESOLUTION 2.300
REMARK 950 R-FACTOR   0.140
REMARK 950 R-FREE     0.000
REMARK 950 CHAIN-TYPE LABEL ORIGINAL
REMARK 950 CHAIN L    L    A
REMARK 950 CHAIN L    L    B
REMARK 950 MOLECULE : A : MCG
REMARK 950 SPECIES  : A : HOMO SAPIENS
SEQRES   1 L 216  PRO SER ALA LEU THR GLN PRO PRO SER ALA SER GLY SER          
SEQRES   2 L 216  LEU GLY GLN SER VAL THR ILE SER CYS THR GLY THR SER          
SEQRES   3 L 216  SER ASN VAL GLY GLY TYR ASN TYR VAL SER TRP TYR GLN          
SEQRES   4 L 216  GLN HIS ALA GLY LYS ALA PRO LYS VAL ILE ILE TYR GLU          
SEQRES   5 L 216  VAL ASN LYS ARG PRO SER GLY VAL PRO ASP ARG PHE SER          
SEQRES   6 L 216  GLY SER LYS SER GLY ASN THR ALA SER LEU THR VAL SER          
SEQRES   7 L 216  GLY LEU GLN ALA GLU ASP GLU ALA ASP TYR TYR CYS SER          
SEQRES   8 L 216  SER TYR GLU GLY SER ASP ASN PHE VAL PHE GLY THR GLY          
SEQRES   9 L 216  THR LYS VAL THR VAL LEU GLY GLN PRO LYS ALA ASN PRO          
SEQRES  10 L 216  THR VAL THR LEU PHE PRO PRO SER SER GLU GLU LEU GLN          
SEQRES  11 L 216  ALA ASN LYS ALA THR LEU VAL CYS LEU ILE SER ASP PHE          
SEQRES  12 L 216  TYR PRO GLY ALA VAL THR VAL ALA TRP LYS ALA ASP GLY          
SEQRES  13 L 216  SER PRO VAL LYS ALA GLY VAL GLU THR THR LYS PRO SER          
SEQRES  14 L 216  LYS GLN SER ASN ASN LYS TYR ALA ALA SER SER TYR LEU          
SEQRES  15 L 216  SER LEU THR PRO GLU GLN TRP LYS SER HIS ARG SER TYR          
SEQRES  16 L 216  SER CYS GLN VAL THR HIS GLU GLY SER THR VAL GLU LYS          
SEQRES  17 L 216  THR VAL ALA PRO THR GLU CYS SER                              
SEQRES   1 L 216  PRO SER ALA LEU THR GLN PRO PRO SER ALA SER GLY SER          
SEQRES   2 L 216  LEU GLY GLN SER VAL THR ILE SER CYS THR GLY THR SER          
SEQRES   3 L 216  SER ASN VAL GLY GLY TYR ASN TYR VAL SER TRP TYR GLN          
SEQRES   4 L 216  GLN HIS ALA GLY LYS ALA PRO LYS VAL ILE ILE TYR GLU          
SEQRES   5 L 216  VAL ASN LYS ARG PRO SER GLY VAL PRO ASP ARG PHE SER          
SEQRES   6 L 216  GLY SER LYS SER GLY ASN THR ALA SER LEU THR VAL SER          
SEQRES   7 L 216  GLY LEU GLN ALA GLU ASP GLU ALA ASP TYR TYR CYS SER          
SEQRES   8 L 216  SER TYR GLU GLY SER ASP ASN PHE VAL PHE GLY THR GLY          
SEQRES   9 L 216  THR LYS VAL THR VAL LEU GLY GLN PRO LYS ALA ASN PRO          
SEQRES  10 L 216  THR VAL THR LEU PHE PRO PRO SER SER GLU GLU LEU GLN          
SEQRES  11 L 216  ALA ASN LYS ALA THR LEU VAL CYS LEU ILE SER ASP PHE          
SEQRES  12 L 216  TYR PRO GLY ALA VAL THR VAL ALA TRP LYS ALA ASP GLY          
SEQRES  13 L 216  SER PRO VAL LYS ALA GLY VAL GLU THR THR LYS PRO SER          
SEQRES  14 L 216  LYS GLN SER ASN ASN LYS TYR ALA ALA SER SER TYR LEU          
SEQRES  15 L 216  SER LEU THR PRO GLU GLN TRP LYS SER HIS ARG SER TYR          
SEQRES  16 L 216  SER CYS GLN VAL THR HIS GLU GLY SER THR VAL GLU LYS          
SEQRES  17 L 216  THR VAL ALA PRO THR GLU CYS SER                              
ATOM      1  N   PRO L   1      22.101 -24.293 103.425  1.00 47.98           N  
ATOM      2  CA  PRO L   1      23.446 -24.904 103.169  1.00 47.25           C  
ATOM      3  C   PRO L   1      23.973 -25.637 104.390  1.00 46.24           C  
ATOM      4  O   PRO L   1      23.822 -25.192 105.561  1.00 46.35           O  
ATOM      5  CB  PRO L   1      24.227 -23.668 102.688  1.00 47.79           C  
ATOM      6  CG  PRO L   1      23.199 -22.970 101.769  1.00 47.98           C  
ATOM      7  CD  PRO L   1      21.868 -23.111 102.528  1.00 48.04           C  
ATOM      8  N   SER L   2      24.604 -26.791 104.140  1.00 44.53           N  
ATOM      9  CA  SER L   2      25.142 -27.626 105.257  1.00 42.23           C  
ATOM     10  C   SER L   2      26.651 -27.476 105.443  1.00 40.19           C  
ATOM     11  O   SER L   2      27.508 -28.385 105.314  1.00 40.16           O  
ATOM     12  CB  SER L   2      24.635 -29.044 105.005  1.00 44.08           C  
ATOM     13  OG  SER L   2      24.182 -29.140 103.632  1.00 45.53           O  
ATOM     14  N   ALA L   3      27.017 -26.241 105.791  1.00 37.71           N  
ATOM     15  CA  ALA L   3      28.323 -25.709 106.007  1.00 34.02           C  
ATOM     16  C   ALA L   3      29.448 -26.685 105.605  1.00 31.67           C  
ATOM     17  O   ALA L   3      29.479 -27.900 105.777  1.00 31.13           O  
ATOM     18  CB  ALA L   3      28.554 -25.196 107.428  1.00 35.38           C  
ATOM     19  N   LEU L   4      30.416 -25.975 105.020  1.00 28.91           N  
ATOM     20  CA  LEU L   4      31.660 -26.527 104.520  1.00 25.36           C  
ATOM     21  C   LEU L   4      32.760 -25.776 105.293  1.00 23.40           C  
ATOM     22  O   LEU L   4      33.024 -24.595 105.178  1.00 22.98           O  
ATOM     23  CB  LEU L   4      31.695 -26.536 103.013  1.00 23.66           C  
ATOM     24  CG  LEU L   4      31.232 -27.684 102.155  1.00 22.02           C  
ATOM     25  CD1 LEU L   4      29.784 -27.514 101.704  1.00 23.11           C  
ATOM     26  CD2 LEU L   4      32.093 -27.771 100.901  1.00 21.42           C  
ATOM     27  N   THR L   5      33.377 -26.582 106.116  1.00 21.35           N  
ATOM     28  CA  THR L   5      34.425 -26.229 107.043  1.00 19.33           C  
ATOM     29  C   THR L   5      35.799 -26.392 106.400  1.00 17.49           C  
ATOM     30  O   THR L   5      36.026 -27.536 106.043  1.00 16.41           O  
ATOM     31  CB  THR L   5      34.383 -27.213 108.318  1.00 19.33           C  
ATOM     32  OG1 THR L   5      32.982 -27.454 108.653  1.00 19.15           O  
ATOM     33  CG2 THR L   5      35.162 -26.704 109.519  1.00 18.02           C  
ATOM     34  N   GLN L   6      36.582 -25.345 106.400  1.00 16.06           N  
ATOM     35  CA  GLN L   6      37.951 -25.322 105.895  1.00 15.24           C  
ATOM     36  C   GLN L   6      38.906 -24.709 106.951  1.00 14.98           C  
ATOM     37  O   GLN L   6      38.564 -23.619 107.469  1.00 15.44           O  
ATOM     38  CB  GLN L   6      38.099 -24.482 104.629  1.00 14.87           C  
ATOM     39  CG  GLN L   6      37.504 -25.026 103.341  1.00 13.32           C  
ATOM     40  CD  GLN L   6      37.766 -24.008 102.261  1.00 12.31           C  
ATOM     41  OE1 GLN L   6      36.831 -23.508 101.695  1.00 12.88           O  
ATOM     42  NE2 GLN L   6      39.038 -23.714 102.026  1.00 12.32           N  
ATOM     43  N   PRO L   7      40.058 -25.316 107.175  1.00 14.35           N  
ATOM     44  CA  PRO L   7      41.050 -24.767 108.129  1.00 13.83           C  
ATOM     45  C   PRO L   7      41.311 -23.314 107.753  1.00 13.56           C  
ATOM     46  O   PRO L   7      41.197 -22.943 106.569  1.00 13.34           O  
ATOM     47  CB  PRO L   7      42.232 -25.701 107.963  1.00 13.93           C  
ATOM     48  CG  PRO L   7      42.061 -26.372 106.618  1.00 13.53           C  
ATOM     49  CD  PRO L   7      40.542 -26.574 106.556  1.00 13.95           C  
ATOM     50  N   PRO L   8      41.661 -22.467 108.713  1.00 13.00           N  
ATOM     51  CA  PRO L   8      41.896 -21.052 108.476  1.00 13.02           C  
ATOM     52  C   PRO L   8      43.107 -20.657 107.674  1.00 13.19           C  
ATOM     53  O   PRO L   8      43.098 -19.745 106.808  1.00 13.14           O  
ATOM     54  CB  PRO L   8      41.989 -20.459 109.896  1.00 12.54           C  
ATOM     55  CG  PRO L   8      42.486 -21.586 110.715  1.00 12.85           C  
ATOM     56  CD  PRO L   8      41.765 -22.808 110.142  1.00 12.78           C  
ATOM     57  N   SER L   9      44.213 -21.294 107.990  1.00 13.27           N  
ATOM     58  CA  SER L   9      45.520 -20.971 107.360  1.00 12.59           C  
ATOM     59  C   SER L   9      46.182 -22.274 107.017  1.00 12.25           C  
ATOM     60  O   SER L   9      45.897 -23.263 107.680  1.00 12.51           O  
ATOM     61  CB  SER L   9      46.333 -20.202 108.384  1.00 11.64           C  
ATOM     62  OG  SER L   9      47.657 -20.155 108.026  1.00 12.12           O  
ATOM     63  N   ALA L  11      46.993 -22.274 106.013  1.00 12.32           N  
ATOM     64  CA  ALA L  11      47.703 -23.448 105.488  1.00 12.23           C  
ATOM     65  C   ALA L  11      49.026 -22.901 104.984  1.00 12.10           C  
ATOM     66  O   ALA L  11      48.938 -21.930 104.215  1.00 12.41           O  
ATOM     67  CB  ALA L  11      46.920 -24.113 104.353  1.00 13.53           C  
ATOM     68  N   SER L  12      50.156 -23.460 105.412  1.00 11.95           N  
ATOM     69  CA  SER L  12      51.407 -22.829 104.915  1.00 11.28           C  
ATOM     70  C   SER L  12      52.486 -23.891 104.780  1.00 11.48           C  
ATOM     71  O   SER L  12      52.270 -25.033 105.182  1.00 11.13           O  
ATOM     72  CB  SER L  12      51.810 -21.634 105.742  1.00 10.32           C  
ATOM     73  OG  SER L  12      52.104 -21.876 107.090  1.00 10.51           O  
ATOM     74  N   GLY L  13      53.564 -23.394 104.203  1.00 11.19           N  
ATOM     75  CA  GLY L  13      54.792 -24.090 103.902  1.00 10.99           C  
ATOM     76  C   GLY L  13      55.711 -23.138 103.135  1.00 10.64           C  
ATOM     77  O   GLY L  13      55.365 -22.012 102.808  1.00 10.43           O  
ATOM     78  N   SER L  14      56.901 -23.606 102.885  1.00 10.66           N  
ATOM     79  CA  SER L  14      57.900 -22.843 102.095  1.00 10.57           C  
ATOM     80  C   SER L  14      57.840 -23.452 100.677  1.00  9.96           C  
ATOM     81  O   SER L  14      57.239 -24.500 100.429  1.00  9.72           O  
ATOM     82  CB  SER L  14      59.238 -23.051 102.782  1.00 10.82           C  
ATOM     83  OG  SER L  14      58.954 -24.082 103.748  1.00 13.60           O  
ATOM     84  N   LEU L  15      58.477 -22.748  99.790  1.00 10.35           N  
ATOM     85  CA  LEU L  15      58.559 -23.183  98.384  1.00 10.24           C  
ATOM     86  C   LEU L  15      59.100 -24.606  98.284  1.00 10.38           C  
ATOM     87  O   LEU L  15      60.158 -24.848  98.887  1.00 10.72           O  
ATOM     88  CB  LEU L  15      59.541 -22.213  97.757  1.00  8.75           C  
ATOM     89  CG  LEU L  15      59.007 -20.816  97.692  1.00  8.38           C  
ATOM     90  CD1 LEU L  15      59.978 -20.027  96.821  1.00 10.01           C  
ATOM     91  CD2 LEU L  15      57.622 -20.849  97.108  1.00  7.74           C  
ATOM     92  N   GLY L  16      58.412 -25.403  97.528  1.00 10.66           N  
ATOM     93  CA  GLY L  16      58.781 -26.792  97.298  1.00 11.38           C  
ATOM     94  C   GLY L  16      58.064 -27.782  98.175  1.00 12.07           C  
ATOM     95  O   GLY L  16      58.224 -29.014  97.949  1.00 12.35           O  
ATOM     96  N   GLN L  17      57.263 -27.356  99.148  1.00 12.62           N  
ATOM     97  CA  GLN L  17      56.580 -28.342 100.017  1.00 13.63           C  
ATOM     98  C   GLN L  17      55.203 -28.745  99.575  1.00 13.58           C  
ATOM     99  O   GLN L  17      54.664 -28.014  98.749  1.00 14.30           O  
ATOM    100  CB  GLN L  17      56.518 -27.739 101.436  1.00 15.77           C  
ATOM    101  CG  GLN L  17      57.886 -27.944 102.116  1.00 19.77           C  
ATOM    102  CD  GLN L  17      57.875 -27.475 103.553  1.00 22.22           C  
ATOM    103  OE1 GLN L  17      56.803 -27.181 104.114  1.00 24.00           O  
ATOM    104  NE2 GLN L  17      59.070 -27.394 104.141  1.00 24.09           N  
ATOM    105  N   SER L  18      54.573 -29.778 100.081  1.00 13.40           N  
ATOM    106  CA  SER L  18      53.217 -30.167  99.690  1.00 13.66           C  
ATOM    107  C   SER L  18      52.196 -29.647 100.690  1.00 14.49           C  
ATOM    108  O   SER L  18      52.243 -29.968 101.939  1.00 14.47           O  
ATOM    109  CB  SER L  18      53.159 -31.686  99.462  1.00 14.80           C  
ATOM    110  OG  SER L  18      53.936 -32.121  98.330  1.00 15.67           O  
ATOM    111  N   VAL L  19      51.232 -28.820 100.240  1.00 14.54           N  
ATOM    112  CA  VAL L  19      50.193 -28.297 101.131  1.00 14.57           C  
ATOM    113  C   VAL L  19      48.841 -28.829 100.699  1.00 14.93           C  
ATOM    114  O   VAL L  19      48.331 -28.684  99.589  1.00 15.44           O  
ATOM    115  CB  VAL L  19      50.347 -26.795 101.343  1.00 14.71           C  
ATOM    116  CG1 VAL L  19      51.798 -26.289 101.420  1.00 15.45           C  
ATOM    117  CG2 VAL L  19      49.611 -25.917 100.375  1.00 15.79           C  
ATOM    118  N   THR L  20      48.211 -29.595 101.598  1.00 15.31           N  
ATOM    119  CA  THR L  20      46.861 -30.177 101.423  1.00 14.52           C  
ATOM    120  C   THR L  20      45.865 -29.325 102.191  1.00 14.41           C  
ATOM    121  O   THR L  20      46.198 -28.887 103.298  1.00 14.49           O  
ATOM    122  CB  THR L  20      46.809 -31.680 101.924  1.00 13.39           C  
ATOM    123  OG1 THR L  20      47.853 -32.346 101.116  1.00 14.24           O  
ATOM    124  CG2 THR L  20      45.445 -32.352 101.767  1.00 11.44           C  
ATOM    125  N   ILE L  21      44.720 -29.012 101.697  1.00 14.70           N  
ATOM    126  CA  ILE L  21      43.657 -28.242 102.351  1.00 15.21           C  
ATOM    127  C   ILE L  21      42.521 -29.244 102.524  1.00 15.79           C  
ATOM    128  O   ILE L  21      42.490 -30.149 101.666  1.00 16.52           O  
ATOM    129  CB  ILE L  21      43.212 -26.962 101.592  1.00 14.99           C  
ATOM    130  CG1 ILE L  21      44.410 -25.994 101.611  1.00 14.53           C  
ATOM    131  CG2 ILE L  21      41.871 -26.411 102.131  1.00 13.41           C  
ATOM    132  CD1 ILE L  21      44.703 -25.255 100.288  1.00 14.51           C  
ATOM    133  N   SER L  22      41.749 -29.140 103.541  1.00 16.62           N  
ATOM    134  CA  SER L  22      40.648 -30.050 103.851  1.00 17.27           C  
ATOM    135  C   SER L  22      39.395 -29.190 103.593  1.00 17.89           C  
ATOM    136  O   SER L  22      39.504 -27.968 103.617  1.00 17.55           O  
ATOM    137  CB  SER L  22      40.577 -30.580 105.270  1.00 18.36           C  
ATOM    138  OG  SER L  22      41.777 -30.947 105.912  1.00 17.69           O  
ATOM    139  N   CYS L  23      38.347 -29.909 103.414  1.00 18.72           N  
ATOM    140  CA  CYS L  23      37.006 -29.347 103.147  1.00 20.69           C  
ATOM    141  C   CYS L  23      36.049 -30.407 103.681  1.00 22.13           C  
ATOM    142  O   CYS L  23      35.989 -31.505 103.103  1.00 22.41           O  
ATOM    143  CB  CYS L  23      36.830 -28.996 101.679  1.00 19.13           C  
ATOM    144  SG  CYS L  23      35.258 -28.267 101.146  1.00 16.88           S  
ATOM    145  N   THR L  24      35.373 -30.081 104.783  1.00 23.91           N  
ATOM    146  CA  THR L  24      34.462 -31.061 105.389  1.00 25.66           C  
ATOM    147  C   THR L  24      33.051 -30.554 105.459  1.00 27.36           C  
ATOM    148  O   THR L  24      32.696 -29.535 106.034  1.00 27.09           O  
ATOM    149  CB  THR L  24      35.080 -31.682 106.686  1.00 25.31           C  
ATOM    150  OG1 THR L  24      34.042 -31.800 107.694  1.00 26.17           O  
ATOM    151  CG2 THR L  24      36.336 -30.993 107.234  1.00 25.61           C  
ATOM    152  N   GLY L  25      32.200 -31.303 104.774  1.00 29.25           N  
ATOM    153  CA  GLY L  25      30.768 -31.014 104.740  1.00 32.50           C  
ATOM    154  C   GLY L  25      30.187 -31.541 106.068  1.00 34.52           C  
ATOM    155  O   GLY L  25      30.754 -32.315 106.849  1.00 34.37           O  
ATOM    156  N   THR L  26      28.973 -31.076 106.254  1.00 36.79           N  
ATOM    157  CA  THR L  26      28.174 -31.449 107.437  1.00 40.05           C  
ATOM    158  C   THR L  26      27.026 -32.377 107.095  1.00 41.95           C  
ATOM    159  O   THR L  26      26.804 -33.383 107.868  1.00 42.34           O  
ATOM    160  CB  THR L  26      27.914 -30.106 108.224  1.00 39.97           C  
ATOM    161  OG1 THR L  26      29.055 -30.012 109.180  1.00 40.05           O  
ATOM    162  CG2 THR L  26      26.583 -29.884 108.876  1.00 39.20           C  
ATOM    163  N   SER L  27      26.341 -32.211 105.967  1.00 43.52           N  
ATOM    164  CA  SER L  27      25.190 -33.039 105.603  1.00 46.05           C  
ATOM    165  C   SER L  27      25.429 -34.480 105.152  1.00 47.44           C  
ATOM    166  O   SER L  27      26.054 -35.352 105.805  1.00 47.64           O  
ATOM    167  CB  SER L  27      24.249 -32.306 104.632  1.00 46.71           C  
ATOM    168  OG  SER L  27      23.025 -31.849 105.207  1.00 46.62           O  
ATOM    169  N   SER L  27A     24.766 -34.767 104.033  1.00 48.77           N  
ATOM    170  CA  SER L  27A     24.681 -35.999 103.252  1.00 50.19           C  
ATOM    171  C   SER L  27A     25.747 -35.880 102.143  1.00 50.90           C  
ATOM    172  O   SER L  27A     25.455 -35.658 100.959  1.00 51.16           O  
ATOM    173  CB  SER L  27A     23.313 -36.215 102.617  1.00 51.21           C  
ATOM    174  OG  SER L  27A     23.136 -37.392 101.832  1.00 52.20           O  
ATOM    175  N   ASN L  27B     26.955 -36.021 102.605  1.00 51.62           N  
ATOM    176  CA  ASN L  27B     28.232 -35.951 101.925  1.00 52.39           C  
ATOM    177  C   ASN L  27B     28.804 -34.546 102.251  1.00 52.61           C  
ATOM    178  O   ASN L  27B     30.044 -34.452 102.300  1.00 52.96           O  
ATOM    179  CB  ASN L  27B     28.355 -36.273 100.447  1.00 53.34           C  
ATOM    180  CG  ASN L  27B     28.821 -37.644 100.007  1.00 54.22           C  
ATOM    181  OD1 ASN L  27B     29.554 -37.834  99.016  1.00 54.17           O  
ATOM    182  ND2 ASN L  27B     28.426 -38.756 100.658  1.00 54.81           N  
ATOM    183  N   VAL L  27C     27.902 -33.595 102.441  1.00 52.73           N  
ATOM    184  CA  VAL L  27C     28.323 -32.215 102.705  1.00 52.99           C  
ATOM    185  C   VAL L  27C     27.190 -31.189 102.533  1.00 52.93           C  
ATOM    186  O   VAL L  27C     26.391 -31.006 103.457  1.00 53.23           O  
ATOM    187  CB  VAL L  27C     29.507 -31.811 101.768  1.00 53.17           C  
ATOM    188  CG1 VAL L  27C     29.235 -32.066 100.285  1.00 52.65           C  
ATOM    189  CG2 VAL L  27C     29.886 -30.356 102.057  1.00 52.56           C  
ATOM    190  N   GLY L  28      27.249 -30.544 101.383  1.00 52.78           N  
ATOM    191  CA  GLY L  28      26.324 -29.511 100.885  1.00 52.40           C  
ATOM    192  C   GLY L  28      25.238 -30.335 100.147  1.00 52.14           C  
ATOM    193  O   GLY L  28      24.197 -29.885  99.705  1.00 52.25           O  
ATOM    194  N   GLY L  29      25.640 -31.602 100.120  1.00 51.89           N  
ATOM    195  CA  GLY L  29      24.923 -32.699  99.589  1.00 51.45           C  
ATOM    196  C   GLY L  29      25.562 -33.579  98.566  1.00 51.18           C  
ATOM    197  O   GLY L  29      24.719 -34.273  97.902  1.00 51.45           O  
ATOM    198  N   TYR L  30      26.871 -33.664  98.355  1.00 50.72           N  
ATOM    199  CA  TYR L  30      27.378 -34.589  97.326  1.00 50.32           C  
ATOM    200  C   TYR L  30      28.296 -34.062  96.224  1.00 49.40           C  
ATOM    201  O   TYR L  30      28.224 -32.929  95.713  1.00 49.71           O  
ATOM    202  CB  TYR L  30      26.191 -35.289  96.542  1.00 51.76           C  
ATOM    203  CG  TYR L  30      26.152 -36.761  96.877  1.00 53.02           C  
ATOM    204  CD1 TYR L  30      27.357 -37.484  96.895  1.00 53.83           C  
ATOM    205  CD2 TYR L  30      24.981 -37.421  97.213  1.00 53.60           C  
ATOM    206  CE1 TYR L  30      27.385 -38.846  97.214  1.00 54.38           C  
ATOM    207  CE2 TYR L  30      24.992 -38.782  97.547  1.00 54.42           C  
ATOM    208  CZ  TYR L  30      26.189 -39.489  97.524  1.00 54.65           C  
ATOM    209  OH  TYR L  30      26.181 -40.827  97.839  1.00 55.80           O  
ATOM    210  N   ASN L  31      29.122 -34.999  95.788  1.00 48.14           N  
ATOM    211  CA  ASN L  31      30.122 -35.081  94.776  1.00 45.96           C  
ATOM    212  C   ASN L  31      30.483 -33.928  93.851  1.00 44.23           C  
ATOM    213  O   ASN L  31      31.520 -34.065  93.146  1.00 43.74           O  
ATOM    214  CB  ASN L  31      29.689 -36.279  93.855  1.00 47.28           C  
ATOM    215  CG  ASN L  31      29.946 -37.635  94.433  1.00 47.69           C  
ATOM    216  OD1 ASN L  31      30.892 -38.305  93.988  1.00 48.94           O  
ATOM    217  ND2 ASN L  31      29.140 -38.106  95.354  1.00 48.10           N  
ATOM    218  N   TYR L  32      29.694 -32.869  93.709  1.00 42.72           N  
ATOM    219  CA  TYR L  32      30.057 -31.799  92.795  1.00 40.67           C  
ATOM    220  C   TYR L  32      30.775 -30.606  93.457  1.00 38.29           C  
ATOM    221  O   TYR L  32      30.384 -29.426  93.269  1.00 38.50           O  
ATOM    222  CB  TYR L  32      28.977 -31.288  91.803  1.00 44.36           C  
ATOM    223  CG  TYR L  32      29.768 -30.405  90.812  1.00 48.31           C  
ATOM    224  CD1 TYR L  32      31.144 -30.144  91.015  1.00 48.91           C  
ATOM    225  CD2 TYR L  32      29.155 -29.834  89.714  1.00 50.07           C  
ATOM    226  CE1 TYR L  32      31.884 -29.322  90.192  1.00 50.13           C  
ATOM    227  CE2 TYR L  32      29.893 -29.014  88.834  1.00 51.46           C  
ATOM    228  CZ  TYR L  32      31.248 -28.751  89.081  1.00 51.27           C  
ATOM    229  OH  TYR L  32      31.868 -27.932  88.160  1.00 51.71           O  
ATOM    230  N   VAL L  33      31.858 -30.936  94.122  1.00 35.49           N  
ATOM    231  CA  VAL L  33      32.767 -30.069  94.847  1.00 31.67           C  
ATOM    232  C   VAL L  33      33.902 -29.607  93.931  1.00 29.57           C  
ATOM    233  O   VAL L  33      34.666 -30.414  93.389  1.00 28.91           O  
ATOM    234  CB  VAL L  33      33.311 -30.860  96.064  1.00 30.74           C  
ATOM    235  CG1 VAL L  33      33.215 -32.361  95.807  1.00 30.12           C  
ATOM    236  CG2 VAL L  33      34.738 -30.484  96.386  1.00 29.77           C  
ATOM    237  N   SER L  34      33.979 -28.310  93.809  1.00 27.05           N  
ATOM    238  CA  SER L  34      35.019 -27.671  93.001  1.00 24.26           C  
ATOM    239  C   SER L  34      35.867 -26.806  93.921  1.00 22.84           C  
ATOM    240  O   SER L  34      35.470 -26.490  95.060  1.00 22.96           O  
ATOM    241  CB  SER L  34      34.388 -26.940  91.860  1.00 23.57           C  
ATOM    242  OG  SER L  34      33.127 -26.428  92.172  1.00 22.20           O  
ATOM    243  N   TRP L  35      37.049 -26.461  93.506  1.00 21.02           N  
ATOM    244  CA  TRP L  35      37.982 -25.607  94.285  1.00 18.99           C  
ATOM    245  C   TRP L  35      38.250 -24.337  93.489  1.00 18.23           C  
ATOM    246  O   TRP L  35      38.316 -24.311  92.229  1.00 18.25           O  
ATOM    247  CB  TRP L  35      39.143 -26.493  94.630  1.00 17.00           C  
ATOM    248  CG  TRP L  35      39.013 -27.522  95.712  1.00 14.48           C  
ATOM    249  CD1 TRP L  35      38.758 -28.877  95.609  1.00 14.04           C  
ATOM    250  CD2 TRP L  35      39.207 -27.310  97.107  1.00 12.75           C  
ATOM    251  NE1 TRP L  35      38.763 -29.510  96.820  1.00 11.49           N  
ATOM    252  CE2 TRP L  35      39.013 -28.541  97.758  1.00 12.14           C  
ATOM    253  CE3 TRP L  35      39.511 -26.160  97.834  1.00 13.65           C  
ATOM    254  CZ2 TRP L  35      39.107 -28.662  99.133  1.00 11.22           C  
ATOM    255  CZ3 TRP L  35      39.605 -26.284  99.216  1.00 13.42           C  
ATOM    256  CH2 TRP L  35      39.407 -27.512  99.820  1.00 12.96           C  
ATOM    257  N   TYR L  36      38.330 -23.232  94.158  1.00 17.54           N  
ATOM    258  CA  TYR L  36      38.572 -21.878  93.614  1.00 16.87           C  
ATOM    259  C   TYR L  36      39.825 -21.289  94.276  1.00 16.70           C  
ATOM    260  O   TYR L  36      40.225 -21.502  95.434  1.00 16.30           O  
ATOM    261  CB  TYR L  36      37.332 -21.022  93.797  1.00 17.77           C  
ATOM    262  CG  TYR L  36      35.973 -21.485  93.340  1.00 19.36           C  
ATOM    263  CD1 TYR L  36      35.179 -22.430  93.987  1.00 19.05           C  
ATOM    264  CD2 TYR L  36      35.395 -20.891  92.191  1.00 20.53           C  
ATOM    265  CE1 TYR L  36      33.917 -22.803  93.534  1.00 19.62           C  
ATOM    266  CE2 TYR L  36      34.135 -21.243  91.703  1.00 21.00           C  
ATOM    267  CZ  TYR L  36      33.393 -22.216  92.396  1.00 20.91           C  
ATOM    268  OH  TYR L  36      32.161 -22.582  91.914  1.00 21.99           O  
ATOM    269  N   GLN L  37      40.553 -20.478  93.568  1.00 16.12           N  
ATOM    270  CA  GLN L  37      41.780 -19.867  94.082  1.00 16.05           C  
ATOM    271  C   GLN L  37      41.552 -18.379  93.858  1.00 16.17           C  
ATOM    272  O   GLN L  37      41.183 -18.058  92.750  1.00 16.06           O  
ATOM    273  CB  GLN L  37      43.006 -20.377  93.358  1.00 14.70           C  
ATOM    274  CG  GLN L  37      44.115 -19.352  93.424  1.00 15.26           C  
ATOM    275  CD  GLN L  37      45.250 -19.717  92.528  1.00 16.47           C  
ATOM    276  OE1 GLN L  37      45.060 -19.506  91.235  1.00 17.32           O  
ATOM    277  NE2 GLN L  37      46.318 -20.168  92.949  1.00 17.90           N  
ATOM    278  N   GLN L  38      41.687 -17.585  94.883  1.00 16.91           N  
ATOM    279  CA  GLN L  38      41.437 -16.156  94.822  1.00 17.34           C  
ATOM    280  C   GLN L  38      42.683 -15.371  95.106  1.00 17.70           C  
ATOM    281  O   GLN L  38      42.941 -15.056  96.239  1.00 17.60           O  
ATOM    282  CB  GLN L  38      40.346 -15.698  95.819  1.00 17.61           C  
ATOM    283  CG  GLN L  38      39.552 -14.580  95.164  1.00 18.87           C  
ATOM    284  CD  GLN L  38      38.514 -14.029  96.097  1.00 20.06           C  
ATOM    285  OE1 GLN L  38      38.257 -14.651  97.101  1.00 20.78           O  
ATOM    286  NE2 GLN L  38      37.965 -12.847  95.810  1.00 21.27           N  
ATOM    287  N   HIS L  39      43.432 -15.039  94.075  1.00 18.59           N  
ATOM    288  CA  HIS L  39      44.606 -14.221  94.395  1.00 19.80           C  
ATOM    289  C   HIS L  39      43.993 -13.022  95.106  1.00 21.07           C  
ATOM    290  O   HIS L  39      42.756 -12.846  95.141  1.00 22.03           O  
ATOM    291  CB  HIS L  39      45.375 -13.729  93.153  1.00 18.81           C  
ATOM    292  CG  HIS L  39      46.431 -14.771  92.931  1.00 18.57           C  
ATOM    293  ND1 HIS L  39      46.402 -15.710  91.941  1.00 19.74           N  
ATOM    294  CD2 HIS L  39      47.491 -15.039  93.700  1.00 18.82           C  
ATOM    295  CE1 HIS L  39      47.442 -16.519  92.076  1.00 20.30           C  
ATOM    296  NE2 HIS L  39      48.105 -16.126  93.163  1.00 20.04           N  
ATOM    297  N   ALA L  40      44.862 -12.214  95.579  1.00 21.57           N  
ATOM    298  CA  ALA L  40      44.634 -10.980  96.268  1.00 22.16           C  
ATOM    299  C   ALA L  40      43.992  -9.889  95.449  1.00 22.58           C  
ATOM    300  O   ALA L  40      44.722  -9.372  94.532  1.00 23.15           O  
ATOM    301  CB  ALA L  40      46.123 -10.487  96.464  1.00 23.67           C  
ATOM    302  N   GLY L  41      42.778  -9.504  95.736  1.00 22.79           N  
ATOM    303  CA  GLY L  41      42.171  -8.401  94.962  1.00 23.30           C  
ATOM    304  C   GLY L  41      41.580  -8.695  93.604  1.00 23.43           C  
ATOM    305  O   GLY L  41      40.962  -7.767  93.001  1.00 23.45           O  
ATOM    306  N   LYS L  42      41.740  -9.924  93.113  1.00 23.26           N  
ATOM    307  CA  LYS L  42      41.167 -10.329  91.830  1.00 23.02           C  
ATOM    308  C   LYS L  42      40.031 -11.305  92.105  1.00 22.10           C  
ATOM    309  O   LYS L  42      39.786 -11.653  93.245  1.00 22.20           O  
ATOM    310  CB  LYS L  42      42.146 -10.934  90.842  1.00 25.22           C  
ATOM    311  CG  LYS L  42      43.461 -10.106  90.880  1.00 28.57           C  
ATOM    312  CD  LYS L  42      44.574 -11.146  90.771  1.00 30.77           C  
ATOM    313  CE  LYS L  42      44.098 -12.293  89.853  1.00 32.34           C  
ATOM    314  NZ  LYS L  42      45.343 -12.779  89.163  1.00 33.86           N  
ATOM    315  N   ALA L  43      39.409 -11.714  91.013  1.00 21.87           N  
ATOM    316  CA  ALA L  43      38.269 -12.625  91.065  1.00 21.05           C  
ATOM    317  C   ALA L  43      38.674 -14.089  91.186  1.00 20.34           C  
ATOM    318  O   ALA L  43      39.792 -14.521  90.840  1.00 20.27           O  
ATOM    319  CB  ALA L  43      37.294 -12.356  89.906  1.00 20.73           C  
ATOM    320  N   PRO L  44      37.674 -14.825  91.649  1.00 19.45           N  
ATOM    321  CA  PRO L  44      37.784 -16.263  91.869  1.00 19.01           C  
ATOM    322  C   PRO L  44      38.135 -17.001  90.572  1.00 18.33           C  
ATOM    323  O   PRO L  44      37.818 -16.467  89.511  1.00 18.34           O  
ATOM    324  CB  PRO L  44      36.434 -16.686  92.437  1.00 19.20           C  
ATOM    325  CG  PRO L  44      35.829 -15.401  92.978  1.00 19.42           C  
ATOM    326  CD  PRO L  44      36.336 -14.310  92.038  1.00 19.39           C  
ATOM    327  N   LYS L  45      38.768 -18.145  90.760  1.00 16.99           N  
ATOM    328  CA  LYS L  45      39.169 -19.017  89.680  1.00 15.89           C  
ATOM    329  C   LYS L  45      38.990 -20.487  89.986  1.00 14.75           C  
ATOM    330  O   LYS L  45      39.537 -20.909  90.979  1.00 14.12           O  
ATOM    331  CB  LYS L  45      40.581 -18.729  89.293  1.00 18.44           C  
ATOM    332  CG  LYS L  45      41.496 -19.850  88.828  1.00 21.49           C  
ATOM    333  CD  LYS L  45      42.906 -19.273  88.634  1.00 26.22           C  
ATOM    334  CE  LYS L  45      43.100 -18.281  87.433  1.00 28.71           C  
ATOM    335  NZ  LYS L  45      44.506 -17.700  87.415  1.00 29.35           N  
ATOM    336  N   VAL L  46      38.279 -21.202  89.141  1.00 13.88           N  
ATOM    337  CA  VAL L  46      37.983 -22.646  89.251  1.00 12.81           C  
ATOM    338  C   VAL L  46      39.249 -23.433  88.972  1.00 12.42           C  
ATOM    339  O   VAL L  46      39.692 -23.284  87.813  1.00 12.37           O  
ATOM    340  CB  VAL L  46      36.847 -23.058  88.297  1.00 10.83           C  
ATOM    341  CG1 VAL L  46      36.307 -24.429  88.671  1.00 10.72           C  
ATOM    342  CG2 VAL L  46      35.725 -22.056  88.345  1.00 10.31           C  
ATOM    343  N   ILE L  47      39.752 -24.184  89.949  1.00 12.15           N  
ATOM    344  CA  ILE L  47      41.002 -24.926  89.715  1.00 11.21           C  
ATOM    345  C   ILE L  47      40.797 -26.437  89.723  1.00 11.39           C  
ATOM    346  O   ILE L  47      41.707 -27.121  89.193  1.00 11.04           O  
ATOM    347  CB  ILE L  47      42.135 -24.499  90.690  1.00 10.09           C  
ATOM    348  CG1 ILE L  47      41.569 -24.555  92.141  1.00  7.77           C  
ATOM    349  CG2 ILE L  47      42.783 -23.141  90.425  1.00 10.02           C  
ATOM    350  CD1 ILE L  47      42.735 -24.262  93.113  1.00  9.14           C  
ATOM    351  N   ILE L  48      39.706 -26.882  90.305  1.00 11.51           N  
ATOM    352  CA  ILE L  48      39.382 -28.325  90.423  1.00 12.13           C  
ATOM    353  C   ILE L  48      37.858 -28.410  90.345  1.00 12.74           C  
ATOM    354  O   ILE L  48      37.185 -27.577  90.965  1.00 12.91           O  
ATOM    355  CB  ILE L  48      39.954 -29.008  91.715  1.00 10.95           C  
ATOM    356  CG1 ILE L  48      41.476 -29.260  91.659  1.00  9.36           C  
ATOM    357  CG2 ILE L  48      39.181 -30.325  92.118  1.00  9.43           C  
ATOM    358  CD1 ILE L  48      42.017 -30.061  90.460  1.00  9.77           C  
ATOM    359  N   TYR L  49      37.297 -29.343  89.602  1.00 13.19           N  
ATOM    360  CA  TYR L  49      35.820 -29.442  89.516  1.00 13.50           C  
ATOM    361  C   TYR L  49      35.521 -30.929  89.473  1.00 14.23           C  
ATOM    362  O   TYR L  49      36.315 -31.713  88.927  1.00 14.32           O  
ATOM    363  CB  TYR L  49      35.245 -28.685  88.308  1.00 14.61           C  
ATOM    364  CG  TYR L  49      35.427 -29.294  86.907  1.00 14.17           C  
ATOM    365  CD1 TYR L  49      36.550 -28.999  86.155  1.00 14.35           C  
ATOM    366  CD2 TYR L  49      34.504 -30.153  86.318  1.00 14.16           C  
ATOM    367  CE1 TYR L  49      36.806 -29.531  84.910  1.00 14.71           C  
ATOM    368  CE2 TYR L  49      34.720 -30.729  85.097  1.00 14.99           C  
ATOM    369  CZ  TYR L  49      35.871 -30.407  84.376  1.00 15.92           C  
ATOM    370  OH  TYR L  49      36.159 -30.932  83.133  1.00 17.31           O  
ATOM    371  N   GLU L  50      34.407 -31.306  90.005  1.00 15.09           N  
ATOM    372  CA  GLU L  50      33.999 -32.704  90.018  1.00 17.00           C  
ATOM    373  C   GLU L  50      35.162 -33.547  90.549  1.00 17.61           C  
ATOM    374  O   GLU L  50      35.739 -34.536  90.088  1.00 18.44           O  
ATOM    375  CB  GLU L  50      33.490 -33.245  88.724  1.00 18.52           C  
ATOM    376  CG  GLU L  50      32.133 -32.736  88.170  1.00 19.78           C  
ATOM    377  CD  GLU L  50      31.997 -33.043  86.672  1.00 21.48           C  
ATOM    378  OE1 GLU L  50      32.754 -34.028  86.373  1.00 20.70           O  
ATOM    379  OE2 GLU L  50      31.289 -32.422  85.882  1.00 22.15           O  
ATOM    380  N   VAL L  51      35.455 -33.052  91.719  1.00 18.07           N  
ATOM    381  CA  VAL L  51      36.346 -33.429  92.749  1.00 18.13           C  
ATOM    382  C   VAL L  51      37.779 -33.389  92.351  1.00 18.20           C  
ATOM    383  O   VAL L  51      38.562 -32.867  93.136  1.00 18.27           O  
ATOM    384  CB  VAL L  51      35.979 -34.853  93.278  1.00 19.26           C  
ATOM    385  CG1 VAL L  51      37.206 -35.447  93.982  1.00 20.39           C  
ATOM    386  CG2 VAL L  51      34.757 -34.878  94.171  1.00 18.70           C  
ATOM    387  N   ASN L  52      38.043 -33.927  91.176  1.00 18.86           N  
ATOM    388  CA  ASN L  52      39.510 -33.945  90.876  1.00 19.75           C  
ATOM    389  C   ASN L  52      39.787 -33.695  89.435  1.00 19.77           C  
ATOM    390  O   ASN L  52      40.845 -34.167  88.935  1.00 19.85           O  
ATOM    391  CB  ASN L  52      39.949 -35.383  91.327  1.00 22.74           C  
ATOM    392  CG  ASN L  52      39.075 -36.276  90.426  1.00 24.72           C  
ATOM    393  OD1 ASN L  52      39.350 -36.334  89.230  1.00 26.11           O  
ATOM    394  ND2 ASN L  52      38.001 -36.831  90.920  1.00 25.84           N  
ATOM    395  N   LYS L  53      38.848 -33.009  88.812  1.00 19.74           N  
ATOM    396  CA  LYS L  53      39.098 -32.728  87.359  1.00 19.98           C  
ATOM    397  C   LYS L  53      39.763 -31.389  87.358  1.00 19.79           C  
ATOM    398  O   LYS L  53      39.368 -30.654  88.287  1.00 19.71           O  
ATOM    399  CB  LYS L  53      37.806 -32.848  86.591  1.00 21.92           C  
ATOM    400  CG  LYS L  53      37.804 -34.213  85.830  1.00 24.98           C  
ATOM    401  CD  LYS L  53      36.390 -34.781  85.736  1.00 27.20           C  
ATOM    402  CE  LYS L  53      35.720 -34.358  84.441  1.00 28.57           C  
ATOM    403  NZ  LYS L  53      34.439 -35.072  84.150  1.00 29.85           N  
ATOM    404  N   ARG L  54      40.712 -31.137  86.514  1.00 20.19           N  
ATOM    405  CA  ARG L  54      41.414 -29.852  86.373  1.00 20.80           C  
ATOM    406  C   ARG L  54      40.901 -29.163  85.081  1.00 21.23           C  
ATOM    407  O   ARG L  54      40.941 -29.784  84.017  1.00 21.21           O  
ATOM    408  CB  ARG L  54      42.920 -29.952  86.225  1.00 21.51           C  
ATOM    409  CG  ARG L  54      43.840 -30.222  87.348  1.00 21.72           C  
ATOM    410  CD  ARG L  54      45.184 -30.733  86.913  1.00 23.32           C  
ATOM    411  NE  ARG L  54      45.786 -31.442  88.086  1.00 24.50           N  
ATOM    412  CZ  ARG L  54      45.781 -32.783  88.107  1.00 26.32           C  
ATOM    413  NH1 ARG L  54      45.349 -33.416  86.998  1.00 27.58           N  
ATOM    414  NH2 ARG L  54      46.084 -33.512  89.200  1.00 27.05           N  
ATOM    415  N   PRO L  55      40.499 -27.926  85.172  1.00 21.85           N  
ATOM    416  CA  PRO L  55      39.981 -27.153  84.059  1.00 22.63           C  
ATOM    417  C   PRO L  55      40.841 -26.749  82.893  1.00 23.51           C  
ATOM    418  O   PRO L  55      40.238 -26.370  81.785  1.00 24.33           O  
ATOM    419  CB  PRO L  55      39.295 -25.955  84.759  1.00 22.00           C  
ATOM    420  CG  PRO L  55      39.182 -26.355  86.178  1.00 21.56           C  
ATOM    421  CD  PRO L  55      40.448 -27.138  86.442  1.00 21.54           C  
ATOM    422  N   SER L  56      42.152 -26.752  82.877  1.00 24.26           N  
ATOM    423  CA  SER L  56      42.941 -26.380  81.647  1.00 24.93           C  
ATOM    424  C   SER L  56      43.248 -24.886  81.637  1.00 24.56           C  
ATOM    425  O   SER L  56      42.486 -23.961  81.412  1.00 25.22           O  
ATOM    426  CB  SER L  56      42.387 -26.869  80.334  1.00 26.56           C  
ATOM    427  OG  SER L  56      42.647 -28.270  80.068  1.00 26.82           O  
ATOM    428  N   GLY L  57      44.499 -24.692  81.924  1.00 24.45           N  
ATOM    429  CA  GLY L  57      45.262 -23.468  82.124  1.00 23.48           C  
ATOM    430  C   GLY L  57      45.718 -23.630  83.610  1.00 23.01           C  
ATOM    431  O   GLY L  57      46.284 -22.697  84.152  1.00 23.07           O  
ATOM    432  N   VAL L  58      45.361 -24.806  84.122  1.00 22.27           N  
ATOM    433  CA  VAL L  58      45.622 -25.277  85.483  1.00 21.67           C  
ATOM    434  C   VAL L  58      46.659 -26.410  85.441  1.00 21.53           C  
ATOM    435  O   VAL L  58      46.404 -27.531  84.956  1.00 21.74           O  
ATOM    436  CB  VAL L  58      44.327 -25.670  86.213  1.00 20.02           C  
ATOM    437  CG1 VAL L  58      44.569 -26.398  87.521  1.00 19.72           C  
ATOM    438  CG2 VAL L  58      43.435 -24.489  86.527  1.00 19.10           C  
ATOM    439  N   PRO L  59      47.839 -26.104  85.943  1.00 21.57           N  
ATOM    440  CA  PRO L  59      48.979 -27.017  86.002  1.00 21.49           C  
ATOM    441  C   PRO L  59      48.642 -28.287  86.724  1.00 21.51           C  
ATOM    442  O   PRO L  59      47.536 -28.546  87.192  1.00 22.12           O  
ATOM    443  CB  PRO L  59      50.112 -26.241  86.637  1.00 21.69           C  
ATOM    444  CG  PRO L  59      49.701 -24.788  86.562  1.00 21.76           C  
ATOM    445  CD  PRO L  59      48.185 -24.792  86.565  1.00 21.67           C  
ATOM    446  N   ASP L  60      49.573 -29.146  86.828  1.00 21.37           N  
ATOM    447  CA  ASP L  60      49.662 -30.488  87.364  1.00 21.01           C  
ATOM    448  C   ASP L  60      49.777 -30.573  88.895  1.00 19.88           C  
ATOM    449  O   ASP L  60      49.314 -31.580  89.487  1.00 19.81           O  
ATOM    450  CB  ASP L  60      50.934 -31.075  86.676  1.00 24.83           C  
ATOM    451  CG  ASP L  60      50.855 -32.216  85.755  1.00 26.33           C  
ATOM    452  OD1 ASP L  60      50.397 -32.054  84.601  1.00 28.42           O  
ATOM    453  OD2 ASP L  60      51.342 -33.302  86.128  1.00 28.19           O  
ATOM    454  N   ARG L  61      50.412 -29.628  89.529  1.00 18.90           N  
ATOM    455  CA  ARG L  61      50.600 -29.616  90.959  1.00 18.40           C  
ATOM    456  C   ARG L  61      49.298 -29.557  91.744  1.00 17.76           C  
ATOM    457  O   ARG L  61      49.309 -29.970  92.914  1.00 18.28           O  
ATOM    458  CB  ARG L  61      51.589 -28.620  91.499  1.00 17.99           C  
ATOM    459  CG  ARG L  61      51.631 -27.259  90.848  1.00 17.17           C  
ATOM    460  CD  ARG L  61      52.621 -26.404  91.614  1.00 16.54           C  
ATOM    461  NE  ARG L  61      52.114 -25.068  91.410  1.00 19.24           N  
ATOM    462  CZ  ARG L  61      52.235 -24.337  90.304  1.00 19.07           C  
ATOM    463  NH1 ARG L  61      52.876 -24.717  89.237  1.00 18.29           N  
ATOM    464  NH2 ARG L  61      51.657 -23.127  90.299  1.00 20.29           N  
ATOM    465  N   PHE L  62      48.231 -29.116  91.150  1.00 17.63           N  
ATOM    466  CA  PHE L  62      46.950 -29.130  91.864  1.00 17.27           C  
ATOM    467  C   PHE L  62      46.238 -30.457  91.596  1.00 17.47           C  
ATOM    468  O   PHE L  62      45.955 -30.765  90.424  1.00 17.87           O  
ATOM    469  CB  PHE L  62      46.031 -27.981  91.447  1.00 15.78           C  
ATOM    470  CG  PHE L  62      46.686 -26.654  91.713  1.00 14.72           C  
ATOM    471  CD1 PHE L  62      46.571 -26.055  92.956  1.00 12.77           C  
ATOM    472  CD2 PHE L  62      47.400 -26.059  90.645  1.00 13.93           C  
ATOM    473  CE1 PHE L  62      47.191 -24.833  93.157  1.00 11.14           C  
ATOM    474  CE2 PHE L  62      48.048 -24.844  90.859  1.00 12.75           C  
ATOM    475  CZ  PHE L  62      47.940 -24.285  92.128  1.00 10.96           C  
ATOM    476  N   SER L  63      45.926 -31.178  92.638  1.00 17.33           N  
ATOM    477  CA  SER L  63      45.164 -32.420  92.437  1.00 17.30           C  
ATOM    478  C   SER L  63      44.118 -32.400  93.532  1.00 17.86           C  
ATOM    479  O   SER L  63      44.319 -31.761  94.586  1.00 17.76           O  
ATOM    480  CB  SER L  63      46.046 -33.595  92.265  1.00 16.77           C  
ATOM    481  OG  SER L  63      46.445 -34.091  93.524  1.00 16.67           O  
ATOM    482  N   GLY L  64      42.979 -32.968  93.246  1.00 18.58           N  
ATOM    483  CA  GLY L  64      41.815 -33.056  94.113  1.00 19.85           C  
ATOM    484  C   GLY L  64      41.400 -34.481  94.437  1.00 20.58           C  
ATOM    485  O   GLY L  64      41.602 -35.449  93.657  1.00 20.90           O  
ATOM    486  N   SER L  65      40.831 -34.570  95.633  1.00 21.30           N  
ATOM    487  CA  SER L  65      40.347 -35.907  96.133  1.00 22.15           C  
ATOM    488  C   SER L  65      39.222 -35.599  97.106  1.00 22.57           C  
ATOM    489  O   SER L  65      39.010 -34.384  97.287  1.00 22.33           O  
ATOM    490  CB  SER L  65      41.515 -36.650  96.706  1.00 21.87           C  
ATOM    491  OG  SER L  65      41.721 -36.307  98.070  1.00 22.78           O  
ATOM    492  N   LYS L  66      38.570 -36.603  97.609  1.00 23.51           N  
ATOM    493  CA  LYS L  66      37.474 -36.594  98.543  1.00 25.13           C  
ATOM    494  C   LYS L  66      37.408 -37.902  99.349  1.00 26.33           C  
ATOM    495  O   LYS L  66      37.314 -39.010  98.790  1.00 26.56           O  
ATOM    496  CB  LYS L  66      36.056 -36.400  97.961  1.00 25.50           C  
ATOM    497  CG  LYS L  66      34.994 -36.508  99.097  1.00 25.71           C  
ATOM    498  CD  LYS L  66      33.822 -35.553  98.934  1.00 25.77           C  
ATOM    499  CE  LYS L  66      32.501 -36.286  99.227  1.00 26.59           C  
ATOM    500  NZ  LYS L  66      32.426 -37.456  98.269  1.00 26.79           N  
ATOM    501  N   SER L  67      37.410 -37.725 100.655  1.00 27.19           N  
ATOM    502  CA  SER L  67      37.378 -38.775 101.687  1.00 27.83           C  
ATOM    503  C   SER L  67      35.998 -39.400 101.870  1.00 27.75           C  
ATOM    504  O   SER L  67      35.745 -40.520 101.324  1.00 28.65           O  
ATOM    505  CB  SER L  67      37.863 -38.168 103.003  1.00 30.19           C  
ATOM    506  OG  SER L  67      37.400 -38.912 104.122  1.00 34.70           O  
ATOM    507  N   GLY L  68      35.128 -38.749 102.618  1.00 26.97           N  
ATOM    508  CA  GLY L  68      33.762 -39.270 102.815  1.00 26.06           C  
ATOM    509  C   GLY L  68      32.928 -37.965 102.715  1.00 25.86           C  
ATOM    510  O   GLY L  68      32.191 -37.699 101.770  1.00 25.67           O  
ATOM    511  N   ASN L  69      33.212 -37.248 103.777  1.00 25.92           N  
ATOM    512  CA  ASN L  69      32.637 -35.921 104.035  1.00 25.73           C  
ATOM    513  C   ASN L  69      33.758 -34.900 103.801  1.00 24.80           C  
ATOM    514  O   ASN L  69      33.480 -33.693 103.635  1.00 25.55           O  
ATOM    515  CB  ASN L  69      31.915 -35.838 105.371  1.00 28.32           C  
ATOM    516  CG  ASN L  69      30.523 -36.452 105.449  1.00 30.41           C  
ATOM    517  OD1 ASN L  69      29.745 -36.242 106.422  1.00 31.41           O  
ATOM    518  ND2 ASN L  69      30.106 -37.242 104.442  1.00 31.28           N  
ATOM    519  N   THR L  70      34.987 -35.374 103.699  1.00 23.47           N  
ATOM    520  CA  THR L  70      36.130 -34.490 103.476  1.00 21.52           C  
ATOM    521  C   THR L  70      36.727 -34.610 102.080  1.00 20.20           C  
ATOM    522  O   THR L  70      36.978 -35.674 101.530  1.00 19.97           O  
ATOM    523  CB  THR L  70      37.189 -34.653 104.632  1.00 23.02           C  
ATOM    524  OG1 THR L  70      38.520 -34.368 104.074  1.00 23.91           O  
ATOM    525  CG2 THR L  70      37.157 -36.045 105.301  1.00 24.08           C  
ATOM    526  N   ALA L  71      36.965 -33.456 101.492  1.00 18.73           N  
ATOM    527  CA  ALA L  71      37.547 -33.184 100.182  1.00 17.32           C  
ATOM    528  C   ALA L  71      38.964 -32.673 100.407  1.00 16.09           C  
ATOM    529  O   ALA L  71      39.149 -32.061 101.459  1.00 15.65           O  
ATOM    530  CB  ALA L  71      36.665 -32.112  99.497  1.00 17.48           C  
ATOM    531  N   SER L  72      39.934 -32.878  99.579  1.00 14.98           N  
ATOM    532  CA  SER L  72      41.277 -32.362  99.858  1.00 14.11           C  
ATOM    533  C   SER L  72      41.911 -31.763  98.619  1.00 13.39           C  
ATOM    534  O   SER L  72      41.878 -32.477  97.596  1.00 13.62           O  
ATOM    535  CB  SER L  72      42.149 -33.528 100.328  1.00 14.59           C  
ATOM    536  OG  SER L  72      41.656 -34.070 101.563  1.00 13.60           O  
ATOM    537  N   LEU L  73      42.442 -30.566  98.701  1.00 12.40           N  
ATOM    538  CA  LEU L  73      43.148 -29.979  97.535  1.00 11.45           C  
ATOM    539  C   LEU L  73      44.645 -30.124  97.923  1.00 11.68           C  
ATOM    540  O   LEU L  73      44.872 -29.854  99.119  1.00 11.44           O  
ATOM    541  CB  LEU L  73      42.778 -28.561  97.372  1.00  9.31           C  
ATOM    542  CG  LEU L  73      43.043 -27.605  96.255  1.00  8.86           C  
ATOM    543  CD1 LEU L  73      44.295 -26.779  96.442  1.00  6.35           C  
ATOM    544  CD2 LEU L  73      43.088 -28.317  94.893  1.00  7.52           C  
ATOM    545  N   THR L  74      45.509 -30.454  96.970  1.00 11.16           N  
ATOM    546  CA  THR L  74      46.931 -30.563  97.285  1.00 10.60           C  
ATOM    547  C   THR L  74      47.781 -29.819  96.271  1.00 10.29           C  
ATOM    548  O   THR L  74      47.620 -30.185  95.130  1.00 10.55           O  
ATOM    549  CB  THR L  74      47.510 -32.024  97.249  1.00 10.32           C  
ATOM    550  OG1 THR L  74      46.424 -32.818  97.802  1.00 11.39           O  
ATOM    551  CG2 THR L  74      48.832 -32.164  97.975  1.00  9.76           C  
ATOM    552  N   VAL L  75      48.589 -28.954  96.738  1.00 10.00           N  
ATOM    553  CA  VAL L  75      49.508 -28.139  95.957  1.00  9.73           C  
ATOM    554  C   VAL L  75      50.858 -28.749  96.315  1.00 10.55           C  
ATOM    555  O   VAL L  75      51.187 -28.621  97.502  1.00  9.85           O  
ATOM    556  CB  VAL L  75      49.335 -26.673  96.381  1.00  8.41           C  
ATOM    557  CG1 VAL L  75      50.036 -25.705  95.462  1.00  9.86           C  
ATOM    558  CG2 VAL L  75      47.869 -26.265  96.475  1.00  6.83           C  
ATOM    559  N   SER L  76      51.517 -29.378  95.360  1.00 11.04           N  
ATOM    560  CA  SER L  76      52.823 -30.060  95.566  1.00 11.56           C  
ATOM    561  C   SER L  76      53.955 -29.262  94.986  1.00 12.01           C  
ATOM    562  O   SER L  76      53.819 -28.856  93.799  1.00 13.09           O  
ATOM    563  CB  SER L  76      52.698 -31.403  94.854  1.00 10.96           C  
ATOM    564  OG  SER L  76      51.272 -31.606  94.717  1.00 11.42           O  
ATOM    565  N   GLY L  77      55.027 -29.037  95.689  1.00 12.15           N  
ATOM    566  CA  GLY L  77      56.128 -28.211  95.198  1.00 12.21           C  
ATOM    567  C   GLY L  77      55.594 -26.790  95.015  1.00 12.59           C  
ATOM    568  O   GLY L  77      55.587 -26.234  93.903  1.00 12.55           O  
ATOM    569  N   LEU L  78      55.165 -26.203  96.102  1.00 13.00           N  
ATOM    570  CA  LEU L  78      54.569 -24.856  96.299  1.00 12.81           C  
ATOM    571  C   LEU L  78      55.489 -23.848  95.612  1.00 13.07           C  
ATOM    572  O   LEU L  78      56.711 -23.964  95.677  1.00 13.32           O  
ATOM    573  CB  LEU L  78      54.344 -24.564  97.776  1.00 11.98           C  
ATOM    574  CG  LEU L  78      53.575 -23.517  98.514  1.00 11.16           C  
ATOM    575  CD1 LEU L  78      52.103 -23.437  98.061  1.00 11.16           C  
ATOM    576  CD2 LEU L  78      53.540 -23.891 100.011  1.00 10.48           C  
ATOM    577  N   GLN L  79      54.829 -22.929  94.967  1.00 13.83           N  
ATOM    578  CA  GLN L  79      55.335 -21.800  94.171  1.00 13.16           C  
ATOM    579  C   GLN L  79      54.869 -20.517  94.902  1.00 13.61           C  
ATOM    580  O   GLN L  79      53.907 -20.520  95.705  1.00 12.73           O  
ATOM    581  CB  GLN L  79      54.734 -21.881  92.776  1.00 11.67           C  
ATOM    582  CG  GLN L  79      55.217 -23.080  91.947  1.00 11.67           C  
ATOM    583  CD  GLN L  79      56.685 -22.984  91.593  1.00 12.15           C  
ATOM    584  OE1 GLN L  79      57.233 -21.949  91.138  1.00 12.72           O  
ATOM    585  NE2 GLN L  79      57.351 -24.101  91.815  1.00 11.23           N  
ATOM    586  N   ALA L  80      55.584 -19.442  94.571  1.00 13.65           N  
ATOM    587  CA  ALA L  80      55.300 -18.129  95.186  1.00 13.55           C  
ATOM    588  C   ALA L  80      53.896 -17.734  94.789  1.00 13.72           C  
ATOM    589  O   ALA L  80      53.177 -17.232  95.670  1.00 14.11           O  
ATOM    590  CB  ALA L  80      56.393 -17.162  94.839  1.00 12.87           C  
ATOM    591  N   GLU L  81      53.443 -17.973  93.594  1.00 13.39           N  
ATOM    592  CA  GLU L  81      52.137 -17.622  93.057  1.00 13.30           C  
ATOM    593  C   GLU L  81      50.964 -18.405  93.542  1.00 12.87           C  
ATOM    594  O   GLU L  81      49.780 -18.112  93.254  1.00 12.19           O  
ATOM    595  CB  GLU L  81      52.155 -17.698  91.507  1.00 16.73           C  
ATOM    596  CG  GLU L  81      53.435 -18.372  90.977  1.00 21.11           C  
ATOM    597  CD  GLU L  81      53.389 -18.881  89.587  1.00 23.21           C  
ATOM    598  OE1 GLU L  81      53.551 -18.109  88.632  1.00 25.95           O  
ATOM    599  OE2 GLU L  81      53.204 -20.106  89.431  1.00 24.21           O  
ATOM    600  N   ASP L  82      51.240 -19.401  94.359  1.00 12.83           N  
ATOM    601  CA  ASP L  82      50.236 -20.307  94.964  1.00 12.33           C  
ATOM    602  C   ASP L  82      49.534 -19.713  96.159  1.00 11.87           C  
ATOM    603  O   ASP L  82      48.536 -20.256  96.660  1.00 11.73           O  
ATOM    604  CB  ASP L  82      50.919 -21.684  95.232  1.00 12.29           C  
ATOM    605  CG  ASP L  82      51.197 -22.235  93.798  1.00 10.00           C  
ATOM    606  OD1 ASP L  82      50.789 -21.592  92.839  1.00 10.23           O  
ATOM    607  OD2 ASP L  82      51.727 -23.324  93.678  1.00  9.89           O  
ATOM    608  N   GLU L  83      50.098 -18.601  96.564  1.00 11.61           N  
ATOM    609  CA  GLU L  83      49.632 -17.815  97.687  1.00 11.54           C  
ATOM    610  C   GLU L  83      48.342 -17.136  97.319  1.00 11.51           C  
ATOM    611  O   GLU L  83      48.287 -16.337  96.369  1.00 12.28           O  
ATOM    612  CB  GLU L  83      50.653 -16.766  98.065  1.00 11.49           C  
ATOM    613  CG  GLU L  83      51.366 -17.030  99.385  1.00 12.85           C  
ATOM    614  CD  GLU L  83      52.031 -15.868 100.039  1.00 12.78           C  
ATOM    615  OE1 GLU L  83      51.454 -15.137 100.789  1.00 13.31           O  
ATOM    616  OE2 GLU L  83      53.215 -15.709  99.682  1.00 13.36           O  
ATOM    617  N   ALA L  84      47.316 -17.416  98.044  1.00 11.71           N  
ATOM    618  CA  ALA L  84      45.977 -16.873  97.824  1.00 11.49           C  
ATOM    619  C   ALA L  84      45.050 -17.631  98.796  1.00 11.68           C  
ATOM    620  O   ALA L  84      45.536 -18.554  99.450  1.00 11.34           O  
ATOM    621  CB  ALA L  84      45.522 -17.302  96.434  1.00 12.36           C  
ATOM    622  N   ASP L  85      43.827 -17.232  98.743  1.00 11.86           N  
ATOM    623  CA  ASP L  85      42.737 -17.838  99.517  1.00 13.09           C  
ATOM    624  C   ASP L  85      42.258 -19.018  98.672  1.00 13.71           C  
ATOM    625  O   ASP L  85      42.582 -18.910  97.474  1.00 13.97           O  
ATOM    626  CB  ASP L  85      41.667 -16.850  99.903  1.00 14.08           C  
ATOM    627  CG  ASP L  85      42.226 -15.835 100.884  1.00 15.20           C  
ATOM    628  OD1 ASP L  85      43.099 -16.260 101.663  1.00 14.88           O  
ATOM    629  OD2 ASP L  85      41.832 -14.659 100.914  1.00 17.72           O  
ATOM    630  N   TYR L  86      41.609 -19.985  99.297  1.00 14.05           N  
ATOM    631  CA  TYR L  86      41.138 -21.171  98.600  1.00 14.36           C  
ATOM    632  C   TYR L  86      39.815 -21.633  99.183  1.00 15.57           C  
ATOM    633  O   TYR L  86      39.669 -21.853 100.386  1.00 16.41           O  
ATOM    634  CB  TYR L  86      42.223 -22.233  98.639  1.00 14.53           C  
ATOM    635  CG  TYR L  86      43.445 -22.037  97.768  1.00 14.12           C  
ATOM    636  CD1 TYR L  86      44.530 -21.349  98.284  1.00 14.92           C  
ATOM    637  CD2 TYR L  86      43.597 -22.638  96.527  1.00 13.71           C  
ATOM    638  CE1 TYR L  86      45.722 -21.189  97.556  1.00 15.87           C  
ATOM    639  CE2 TYR L  86      44.768 -22.469  95.768  1.00 15.01           C  
ATOM    640  CZ  TYR L  86      45.831 -21.745  96.283  1.00 15.39           C  
ATOM    641  OH  TYR L  86      46.981 -21.541  95.620  1.00 15.05           O  
ATOM    642  N   TYR L  87      38.819 -21.797  98.347  1.00 15.77           N  
ATOM    643  CA  TYR L  87      37.486 -22.154  98.721  1.00 16.33           C  
ATOM    644  C   TYR L  87      37.107 -23.435  98.015  1.00 17.35           C  
ATOM    645  O   TYR L  87      37.665 -23.782  97.006  1.00 17.43           O  
ATOM    646  CB  TYR L  87      36.486 -21.097  98.207  1.00 14.30           C  
ATOM    647  CG  TYR L  87      36.831 -19.722  98.737  1.00 12.97           C  
ATOM    648  CD1 TYR L  87      37.723 -18.874  98.071  1.00 13.03           C  
ATOM    649  CD2 TYR L  87      36.237 -19.283  99.887  1.00 12.21           C  
ATOM    650  CE1 TYR L  87      37.997 -17.617  98.605  1.00 13.70           C  
ATOM    651  CE2 TYR L  87      36.497 -18.030 100.415  1.00 13.52           C  
ATOM    652  CZ  TYR L  87      37.380 -17.191  99.771  1.00 14.04           C  
ATOM    653  OH  TYR L  87      37.685 -15.959 100.292  1.00 15.27           O  
ATOM    654  N   CYS L  88      36.122 -24.000  98.650  1.00 18.92           N  
ATOM    655  CA  CYS L  88      35.527 -25.269  98.174  1.00 20.32           C  
ATOM    656  C   CYS L  88      34.077 -24.826  97.976  1.00 21.38           C  
ATOM    657  O   CYS L  88      33.787 -23.768  98.529  1.00 21.81           O  
ATOM    658  CB  CYS L  88      35.753 -26.461  99.049  1.00 19.40           C  
ATOM    659  SG  CYS L  88      35.101 -26.382 100.680  1.00 18.83           S  
ATOM    660  N   SER L  89      33.384 -25.574  97.198  1.00 22.70           N  
ATOM    661  CA  SER L  89      31.981 -25.266  96.883  1.00 24.82           C  
ATOM    662  C   SER L  89      31.350 -26.619  96.589  1.00 26.21           C  
ATOM    663  O   SER L  89      32.115 -27.515  96.253  1.00 26.48           O  
ATOM    664  CB  SER L  89      31.927 -24.236  95.814  1.00 23.70           C  
ATOM    665  OG  SER L  89      30.762 -24.281  95.059  1.00 25.77           O  
ATOM    666  N   SER L  90      30.072 -26.740  96.837  1.00 28.15           N  
ATOM    667  CA  SER L  90      29.278 -27.936  96.654  1.00 30.68           C  
ATOM    668  C   SER L  90      27.806 -27.610  96.316  1.00 32.60           C  
ATOM    669  O   SER L  90      27.025 -26.866  96.885  1.00 32.32           O  
ATOM    670  CB  SER L  90      29.368 -28.951  97.788  1.00 28.95           C  
ATOM    671  OG  SER L  90      28.041 -29.213  98.250  1.00 28.18           O  
ATOM    672  N   TYR L  91      27.445 -28.253  95.260  1.00 35.13           N  
ATOM    673  CA  TYR L  91      26.325 -28.519  94.417  1.00 38.26           C  
ATOM    674  C   TYR L  91      25.797 -27.433  93.510  1.00 40.02           C  
ATOM    675  O   TYR L  91      25.555 -26.246  93.878  1.00 41.07           O  
ATOM    676  CB  TYR L  91      25.260 -29.332  95.182  1.00 38.30           C  
ATOM    677  CG  TYR L  91      24.044 -28.704  95.763  1.00 38.73           C  
ATOM    678  CD1 TYR L  91      23.258 -27.870  94.954  1.00 39.77           C  
ATOM    679  CD2 TYR L  91      23.596 -28.942  97.052  1.00 38.73           C  
ATOM    680  CE1 TYR L  91      22.108 -27.250  95.405  1.00 40.31           C  
ATOM    681  CE2 TYR L  91      22.437 -28.333  97.533  1.00 40.06           C  
ATOM    682  CZ  TYR L  91      21.687 -27.496  96.716  1.00 40.62           C  
ATOM    683  OH  TYR L  91      20.522 -26.896  97.150  1.00 41.25           O  
ATOM    684  N   GLU L  92      25.597 -27.807  92.237  1.00 41.55           N  
ATOM    685  CA  GLU L  92      25.058 -26.865  91.211  1.00 43.36           C  
ATOM    686  C   GLU L  92      23.525 -27.113  91.161  1.00 43.90           C  
ATOM    687  O   GLU L  92      22.643 -26.277  90.893  1.00 43.76           O  
ATOM    688  CB  GLU L  92      25.575 -27.145  89.803  1.00 45.41           C  
ATOM    689  CG  GLU L  92      27.012 -27.596  89.610  1.00 48.47           C  
ATOM    690  CD  GLU L  92      28.087 -26.706  90.175  1.00 50.33           C  
ATOM    691  OE1 GLU L  92      28.521 -26.728  91.327  1.00 51.49           O  
ATOM    692  OE2 GLU L  92      28.530 -25.912  89.306  1.00 51.80           O  
ATOM    693  N   GLY L  93      23.349 -28.403  91.448  1.00 44.38           N  
ATOM    694  CA  GLY L  93      22.088 -29.106  91.506  1.00 45.04           C  
ATOM    695  C   GLY L  93      21.132 -28.423  92.484  1.00 45.30           C  
ATOM    696  O   GLY L  93      21.056 -28.798  93.665  1.00 45.25           O  
ATOM    697  N   SER L  94      20.432 -27.437  91.908  1.00 45.57           N  
ATOM    698  CA  SER L  94      19.451 -26.722  92.772  1.00 45.92           C  
ATOM    699  C   SER L  94      19.614 -25.224  92.567  1.00 45.46           C  
ATOM    700  O   SER L  94      19.914 -24.687  91.501  1.00 45.81           O  
ATOM    701  CB  SER L  94      19.645 -27.181  94.197  1.00 48.19           C  
ATOM    702  OG  SER L  94      19.078 -26.503  95.294  1.00 50.42           O  
ATOM    703  N   ASP L  95      19.394 -24.611  93.691  1.00 45.20           N  
ATOM    704  CA  ASP L  95      19.425 -23.197  93.989  1.00 44.74           C  
ATOM    705  C   ASP L  95      20.279 -22.978  95.243  1.00 43.66           C  
ATOM    706  O   ASP L  95      20.349 -21.832  95.735  1.00 44.20           O  
ATOM    707  CB  ASP L  95      17.976 -22.709  94.137  1.00 48.33           C  
ATOM    708  CG  ASP L  95      17.471 -22.899  95.575  1.00 51.03           C  
ATOM    709  OD1 ASP L  95      17.936 -23.765  96.366  1.00 51.38           O  
ATOM    710  OD2 ASP L  95      16.562 -22.057  95.866  1.00 52.46           O  
ATOM    711  N   ASN L  95A     20.906 -24.018  95.791  1.00 42.14           N  
ATOM    712  CA  ASN L  95A     21.761 -23.726  96.982  1.00 40.02           C  
ATOM    713  C   ASN L  95A     23.143 -24.293  96.679  1.00 38.41           C  
ATOM    714  O   ASN L  95A     23.390 -25.512  96.643  1.00 38.38           O  
ATOM    715  CB  ASN L  95A     21.060 -24.052  98.286  1.00 41.12           C  
ATOM    716  CG  ASN L  95A     21.705 -25.101  99.166  1.00 41.59           C  
ATOM    717  OD1 ASN L  95A     21.060 -25.969  99.788  1.00 41.81           O  
ATOM    718  ND2 ASN L  95A     23.037 -25.090  99.271  1.00 41.85           N  
ATOM    719  N   PHE L  96      24.067 -23.376  96.413  1.00 36.57           N  
ATOM    720  CA  PHE L  96      25.486 -23.765  96.146  1.00 33.93           C  
ATOM    721  C   PHE L  96      26.224 -23.124  97.345  1.00 32.38           C  
ATOM    722  O   PHE L  96      26.267 -21.890  97.452  1.00 32.26           O  
ATOM    723  CB  PHE L  96      26.002 -23.294  94.811  1.00 34.14           C  
ATOM    724  CG  PHE L  96      24.951 -22.669  93.940  1.00 33.91           C  
ATOM    725  CD1 PHE L  96      24.162 -21.626  94.441  1.00 33.54           C  
ATOM    726  CD2 PHE L  96      24.726 -23.158  92.652  1.00 34.34           C  
ATOM    727  CE1 PHE L  96      23.173 -21.055  93.642  1.00 33.20           C  
ATOM    728  CE2 PHE L  96      23.725 -22.610  91.848  1.00 34.19           C  
ATOM    729  CZ  PHE L  96      22.958 -21.558  92.357  1.00 33.56           C  
ATOM    730  N   VAL L  97      26.693 -23.976  98.227  1.00 30.43           N  
ATOM    731  CA  VAL L  97      27.388 -23.480  99.440  1.00 27.94           C  
ATOM    732  C   VAL L  97      28.863 -23.449  99.165  1.00 26.90           C  
ATOM    733  O   VAL L  97      29.379 -24.255  98.366  1.00 27.02           O  
ATOM    734  CB  VAL L  97      26.839 -24.335 100.575  1.00 25.98           C  
ATOM    735  CG1 VAL L  97      25.462 -24.879 100.167  1.00 26.07           C  
ATOM    736  CG2 VAL L  97      27.689 -25.482 101.009  1.00 25.89           C  
ATOM    737  N   PHE L  98      29.521 -22.479  99.757  1.00 25.48           N  
ATOM    738  CA  PHE L  98      30.986 -22.335  99.614  1.00 23.54           C  
ATOM    739  C   PHE L  98      31.574 -22.685 101.010  1.00 22.48           C  
ATOM    740  O   PHE L  98      30.829 -22.530 101.990  1.00 22.04           O  
ATOM    741  CB  PHE L  98      31.421 -20.979  99.183  1.00 22.48           C  
ATOM    742  CG  PHE L  98      31.664 -20.672  97.750  1.00 20.97           C  
ATOM    743  CD1 PHE L  98      30.589 -20.368  96.909  1.00 20.69           C  
ATOM    744  CD2 PHE L  98      32.966 -20.613  97.267  1.00 19.51           C  
ATOM    745  CE1 PHE L  98      30.790 -20.055  95.587  1.00 18.92           C  
ATOM    746  CE2 PHE L  98      33.182 -20.292  95.930  1.00 19.21           C  
ATOM    747  CZ  PHE L  98      32.086 -20.025  95.091  1.00 18.87           C  
ATOM    748  N   GLY L  99      32.817 -23.125 100.975  1.00 21.29           N  
ATOM    749  CA  GLY L  99      33.583 -23.496 102.200  1.00 20.24           C  
ATOM    750  C   GLY L  99      33.943 -22.233 102.958  1.00 19.32           C  
ATOM    751  O   GLY L  99      33.503 -21.171 102.479  1.00 18.97           O  
ATOM    752  N   THR L 100      34.695 -22.320 104.028  1.00 19.19           N  
ATOM    753  CA  THR L 100      35.046 -21.107 104.805  1.00 18.59           C  
ATOM    754  C   THR L 100      36.277 -20.361 104.353  1.00 18.12           C  
ATOM    755  O   THR L 100      36.530 -19.189 104.724  1.00 18.25           O  
ATOM    756  CB  THR L 100      35.016 -21.417 106.359  1.00 17.35           C  
ATOM    757  OG1 THR L 100      35.415 -22.810 106.427  1.00 18.40           O  
ATOM    758  CG2 THR L 100      33.624 -21.170 106.940  1.00 17.51           C  
ATOM    759  N   GLY L 101      37.093 -21.019 103.555  1.00 17.72           N  
ATOM    760  CA  GLY L 101      38.295 -20.460 102.970  1.00 16.72           C  
ATOM    761  C   GLY L 101      39.521 -20.788 103.799  1.00 16.81           C  
ATOM    762  O   GLY L 101      39.474 -20.656 105.079  1.00 17.13           O  
ATOM    763  N   THR L 102      40.526 -21.248 103.055  1.00 15.20           N  
ATOM    764  CA  THR L 102      41.824 -21.563 103.616  1.00 13.89           C  
ATOM    765  C   THR L 102      42.730 -20.521 102.909  1.00 13.68           C  
ATOM    766  O   THR L 102      42.413 -20.301 101.735  1.00 13.80           O  
ATOM    767  CB  THR L 102      42.466 -22.943 103.330  1.00 11.89           C  
ATOM    768  OG1 THR L 102      41.401 -23.876 103.414  1.00 11.64           O  
ATOM    769  CG2 THR L 102      43.672 -23.195 104.222  1.00 11.67           C  
ATOM    770  N   LYS L 103      43.695 -20.054 103.649  1.00 13.48           N  
ATOM    771  CA  LYS L 103      44.619 -19.050 103.201  1.00 12.58           C  
ATOM    772  C   LYS L 103      46.017 -19.654 103.075  1.00 12.31           C  
ATOM    773  O   LYS L 103      46.606 -19.714 104.163  1.00 12.21           O  
ATOM    774  CB  LYS L 103      44.836 -17.929 104.241  1.00 13.92           C  
ATOM    775  CG  LYS L 103      45.767 -16.828 103.722  1.00 13.96           C  
ATOM    776  CD  LYS L 103      46.682 -16.238 104.731  1.00 15.43           C  
ATOM    777  CE  LYS L 103      47.508 -15.075 104.241  1.00 17.61           C  
ATOM    778  NZ  LYS L 103      46.792 -13.820 104.606  1.00 20.00           N  
ATOM    779  N   VAL L 104      46.416 -19.931 101.858  1.00 12.02           N  
ATOM    780  CA  VAL L 104      47.775 -20.433 101.655  1.00 11.74           C  
ATOM    781  C   VAL L 104      48.784 -19.298 101.716  1.00 11.94           C  
ATOM    782  O   VAL L 104      48.661 -18.262 101.056  1.00 12.30           O  
ATOM    783  CB  VAL L 104      47.821 -21.292 100.396  1.00 11.23           C  
ATOM    784  CG1 VAL L 104      49.238 -21.838 100.226  1.00 11.61           C  
ATOM    785  CG2 VAL L 104      46.800 -22.392 100.599  1.00 10.86           C  
ATOM    786  N   THR L 105      49.797 -19.504 102.566  1.00 12.03           N  
ATOM    787  CA  THR L 105      50.903 -18.594 102.816  1.00 11.66           C  
ATOM    788  C   THR L 105      52.265 -19.264 102.544  1.00 11.71           C  
ATOM    789  O   THR L 105      52.438 -20.439 102.864  1.00 11.77           O  
ATOM    790  CB  THR L 105      50.930 -18.070 104.306  1.00 13.10           C  
ATOM    791  OG1 THR L 105      49.617 -17.515 104.635  1.00 14.17           O  
ATOM    792  CG2 THR L 105      52.047 -17.054 104.613  1.00 12.71           C  
ATOM    793  N   VAL L 106      53.169 -18.516 101.914  1.00 11.60           N  
ATOM    794  CA  VAL L 106      54.517 -19.061 101.698  1.00 11.54           C  
ATOM    795  C   VAL L 106      55.290 -18.442 102.874  1.00 11.45           C  
ATOM    796  O   VAL L 106      55.490 -17.224 102.786  1.00 11.98           O  
ATOM    797  CB  VAL L 106      55.067 -18.787 100.307  1.00 10.38           C  
ATOM    798  CG1 VAL L 106      56.560 -18.466 100.344  1.00 11.06           C  
ATOM    799  CG2 VAL L 106      54.863 -19.951  99.364  1.00 10.07           C  
ATOM    800  N   LEU L 106A     55.648 -19.185 103.874  1.00 11.89           N  
ATOM    801  CA  LEU L 106A     56.329 -18.808 105.098  1.00 11.82           C  
ATOM    802  C   LEU L 106A     57.405 -17.761 104.912  1.00 12.57           C  
ATOM    803  O   LEU L 106A     58.515 -18.095 104.459  1.00 13.28           O  
ATOM    804  CB  LEU L 106A     56.978 -19.991 105.840  1.00  9.42           C  
ATOM    805  CG  LEU L 106A     56.260 -20.569 107.027  1.00  7.91           C  
ATOM    806  CD1 LEU L 106A     54.769 -20.349 106.905  1.00  8.26           C  
ATOM    807  CD2 LEU L 106A     56.553 -22.064 107.016  1.00  6.08           C  
ATOM    808  N   GLY L 107      57.036 -16.592 105.368  1.00 13.21           N  
ATOM    809  CA  GLY L 107      57.990 -15.462 105.268  1.00 13.91           C  
ATOM    810  C   GLY L 107      58.759 -15.352 106.581  1.00 13.94           C  
ATOM    811  O   GLY L 107      59.624 -14.453 106.664  1.00 14.72           O  
ATOM    812  N   GLN L 108      58.438 -16.150 107.566  1.00 14.27           N  
ATOM    813  CA  GLN L 108      59.135 -16.106 108.899  1.00 13.04           C  
ATOM    814  C   GLN L 108      58.713 -17.327 109.648  1.00 12.79           C  
ATOM    815  O   GLN L 108      57.986 -18.184 109.100  1.00 13.61           O  
ATOM    816  CB  GLN L 108      58.781 -14.885 109.662  1.00 13.08           C  
ATOM    817  CG  GLN L 108      57.297 -14.712 109.879  1.00 16.07           C  
ATOM    818  CD  GLN L 108      56.943 -13.239 110.054  1.00 18.43           C  
ATOM    819  OE1 GLN L 108      56.669 -12.564 109.020  1.00 21.57           O  
ATOM    820  NE2 GLN L 108      56.924 -12.772 111.305  1.00 18.15           N  
ATOM    821  N   PRO L 109      59.116 -17.442 110.863  1.00 12.97           N  
ATOM    822  CA  PRO L 109      58.736 -18.644 111.644  1.00 13.10           C  
ATOM    823  C   PRO L 109      57.243 -18.622 111.922  1.00 12.85           C  
ATOM    824  O   PRO L 109      56.669 -17.524 111.999  1.00 12.53           O  
ATOM    825  CB  PRO L 109      59.583 -18.514 112.912  1.00 13.09           C  
ATOM    826  CG  PRO L 109      60.706 -17.600 112.537  1.00 12.76           C  
ATOM    827  CD  PRO L 109      59.960 -16.566 111.642  1.00 13.14           C  
TER     828      PRO L 109                                                      
ATOM   1606  N   PRO L   1      43.474 -14.061  77.866  1.00 47.75           N  
ATOM   1607  CA  PRO L   1      43.153 -13.685  79.282  1.00 47.26           C  
ATOM   1608  C   PRO L   1      42.212 -14.721  79.912  1.00 46.53           C  
ATOM   1609  O   PRO L   1      42.546 -15.684  80.620  1.00 46.23           O  
ATOM   1610  CB  PRO L   1      42.506 -12.293  79.111  1.00 47.52           C  
ATOM   1611  CG  PRO L   1      41.782 -12.365  77.775  1.00 47.67           C  
ATOM   1612  CD  PRO L   1      42.641 -13.287  76.907  1.00 47.61           C  
ATOM   1613  N   SER L   2      40.971 -14.533  79.584  1.00 45.72           N  
ATOM   1614  CA  SER L   2      39.635 -14.938  79.683  1.00 44.45           C  
ATOM   1615  C   SER L   2      38.948 -14.394  80.951  1.00 43.34           C  
ATOM   1616  O   SER L   2      38.907 -15.087  81.980  1.00 43.59           O  
ATOM   1617  CB  SER L   2      39.272 -16.394  79.496  1.00 45.23           C  
ATOM   1618  OG  SER L   2      38.218 -16.406  78.521  1.00 47.12           O  
ATOM   1619  N   ALA L   3      38.510 -13.154  80.739  1.00 42.13           N  
ATOM   1620  CA  ALA L   3      37.821 -12.376  81.753  1.00 40.51           C  
ATOM   1621  C   ALA L   3      36.800 -11.353  81.229  1.00 39.19           C  
ATOM   1622  O   ALA L   3      37.022 -10.512  80.358  1.00 39.16           O  
ATOM   1623  CB  ALA L   3      38.779 -11.706  82.740  1.00 40.47           C  
ATOM   1624  N   LEU L   4      35.650 -11.488  81.885  1.00 37.72           N  
ATOM   1625  CA  LEU L   4      34.475 -10.644  81.739  1.00 35.64           C  
ATOM   1626  C   LEU L   4      34.853  -9.277  82.339  1.00 34.75           C  
ATOM   1627  O   LEU L   4      35.635  -9.091  83.276  1.00 34.81           O  
ATOM   1628  CB  LEU L   4      33.286 -11.363  82.392  1.00 32.37           C  
ATOM   1629  CG  LEU L   4      33.266 -12.867  82.175  1.00 30.98           C  
ATOM   1630  CD1 LEU L   4      31.949 -13.512  82.504  1.00 29.74           C  
ATOM   1631  CD2 LEU L   4      33.645 -13.117  80.715  1.00 29.93           C  
ATOM   1632  N   THR L   5      34.331  -8.273  81.724  1.00 34.04           N  
ATOM   1633  CA  THR L   5      34.464  -6.851  81.943  1.00 32.61           C  
ATOM   1634  C   THR L   5      33.313  -6.324  82.788  1.00 32.12           C  
ATOM   1635  O   THR L   5      32.108  -6.392  82.450  1.00 32.14           O  
ATOM   1636  CB  THR L   5      34.467  -6.176  80.487  1.00 31.58           C  
ATOM   1637  OG1 THR L   5      35.618  -6.743  79.804  1.00 30.37           O  
ATOM   1638  CG2 THR L   5      34.507  -4.667  80.578  1.00 31.15           C  
ATOM   1639  N   GLN L   6      33.715  -5.808  83.924  1.00 31.13           N  
ATOM   1640  CA  GLN L   6      32.752  -5.225  84.886  1.00 30.15           C  
ATOM   1641  C   GLN L   6      33.320  -3.878  85.347  1.00 30.00           C  
ATOM   1642  O   GLN L   6      34.559  -3.764  85.503  1.00 29.96           O  
ATOM   1643  CB  GLN L   6      32.626  -6.135  86.077  1.00 28.16           C  
ATOM   1644  CG  GLN L   6      31.745  -7.333  85.902  1.00 26.62           C  
ATOM   1645  CD  GLN L   6      31.953  -8.145  87.181  1.00 26.23           C  
ATOM   1646  OE1 GLN L   6      32.675  -9.106  87.146  1.00 25.33           O  
ATOM   1647  NE2 GLN L   6      31.327  -7.634  88.243  1.00 26.62           N  
ATOM   1648  N   PRO L   7      32.424  -2.935  85.578  1.00 29.60           N  
ATOM   1649  CA  PRO L   7      32.920  -1.626  86.051  1.00 29.44           C  
ATOM   1650  C   PRO L   7      33.606  -1.871  87.400  1.00 29.19           C  
ATOM   1651  O   PRO L   7      33.122  -2.610  88.286  1.00 28.90           O  
ATOM   1652  CB  PRO L   7      31.726  -0.686  86.077  1.00 29.14           C  
ATOM   1653  CG  PRO L   7      30.527  -1.572  86.002  1.00 29.69           C  
ATOM   1654  CD  PRO L   7      30.976  -2.963  85.478  1.00 29.53           C  
ATOM   1655  N   PRO L   8      34.770  -1.208  87.518  1.00 29.00           N  
ATOM   1656  CA  PRO L   8      35.558  -1.230  88.741  1.00 28.59           C  
ATOM   1657  C   PRO L   8      34.706  -0.848  89.939  1.00 28.27           C  
ATOM   1658  O   PRO L   8      35.008  -1.449  90.989  1.00 29.27           O  
ATOM   1659  CB  PRO L   8      36.639  -0.167  88.557  1.00 28.64           C  
ATOM   1660  CG  PRO L   8      36.512   0.385  87.159  1.00 28.75           C  
ATOM   1661  CD  PRO L   8      35.368  -0.330  86.483  1.00 28.91           C  
ATOM   1662  N   SER L   9      33.737   0.034  89.784  1.00 27.79           N  
ATOM   1663  CA  SER L   9      32.885   0.530  90.878  1.00 27.03           C  
ATOM   1664  C   SER L   9      31.501   1.019  90.525  1.00 26.77           C  
ATOM   1665  O   SER L   9      31.232   1.394  89.393  1.00 26.67           O  
ATOM   1666  CB  SER L   9      33.686   1.694  91.482  1.00 27.07           C  
ATOM   1667  OG  SER L   9      33.874   2.765  90.548  1.00 26.60           O  
ATOM   1668  N   ALA L  11      30.569   1.089  91.470  1.00 26.63           N  
ATOM   1669  CA  ALA L  11      29.201   1.578  91.234  1.00 26.49           C  
ATOM   1670  C   ALA L  11      28.562   1.970  92.562  1.00 26.66           C  
ATOM   1671  O   ALA L  11      28.174   1.142  93.399  1.00 26.87           O  
ATOM   1672  CB  ALA L  11      28.398   0.543  90.494  1.00 27.02           C  
ATOM   1673  N   SER L  12      28.424   3.273  92.759  1.00 26.69           N  
ATOM   1674  CA  SER L  12      27.861   3.800  94.041  1.00 26.17           C  
ATOM   1675  C   SER L  12      26.371   3.902  93.886  1.00 26.33           C  
ATOM   1676  O   SER L  12      25.877   3.837  92.746  1.00 26.36           O  
ATOM   1677  CB  SER L  12      28.585   5.110  94.305  1.00 25.11           C  
ATOM   1678  OG  SER L  12      29.279   5.475  93.069  1.00 24.72           O  
ATOM   1679  N   GLY L  13      25.657   4.028  94.987  1.00 26.49           N  
ATOM   1680  CA  GLY L  13      24.159   4.166  94.960  1.00 26.38           C  
ATOM   1681  C   GLY L  13      23.807   4.884  96.281  1.00 26.01           C  
ATOM   1682  O   GLY L  13      24.784   5.256  96.940  1.00 26.42           O  
ATOM   1683  N   SER L  14      22.568   5.066  96.615  1.00 25.59           N  
ATOM   1684  CA  SER L  14      22.237   5.718  97.903  1.00 25.52           C  
ATOM   1685  C   SER L  14      21.266   4.806  98.620  1.00 25.59           C  
ATOM   1686  O   SER L  14      20.498   4.135  97.898  1.00 25.50           O  
ATOM   1687  CB  SER L  14      21.707   7.114  97.615  1.00 25.48           C  
ATOM   1688  OG  SER L  14      22.778   7.746  96.898  1.00 26.29           O  
ATOM   1689  N   LEU L  15      21.321   4.734  99.929  1.00 25.48           N  
ATOM   1690  CA  LEU L  15      20.364   3.826 100.607  1.00 25.74           C  
ATOM   1691  C   LEU L  15      19.033   4.087  99.896  1.00 26.52           C  
ATOM   1692  O   LEU L  15      18.856   5.234  99.442  1.00 26.51           O  
ATOM   1693  CB  LEU L  15      20.394   4.138 102.065  1.00 24.47           C  
ATOM   1694  CG  LEU L  15      21.608   3.804 102.875  1.00 24.63           C  
ATOM   1695  CD1 LEU L  15      21.495   4.508 104.227  1.00 24.77           C  
ATOM   1696  CD2 LEU L  15      21.698   2.298 103.069  1.00 25.18           C  
ATOM   1697  N   GLY L  16      18.196   3.060  99.832  1.00 26.99           N  
ATOM   1698  CA  GLY L  16      16.912   3.130  99.153  1.00 27.64           C  
ATOM   1699  C   GLY L  16      17.033   3.447  97.654  1.00 28.26           C  
ATOM   1700  O   GLY L  16      16.007   3.433  96.915  1.00 28.49           O  
ATOM   1701  N   GLN L  17      18.226   3.723  97.160  1.00 28.49           N  
ATOM   1702  CA  GLN L  17      18.464   4.005  95.736  1.00 29.29           C  
ATOM   1703  C   GLN L  17      18.517   2.704  94.938  1.00 29.18           C  
ATOM   1704  O   GLN L  17      17.892   1.688  95.337  1.00 29.70           O  
ATOM   1705  CB  GLN L  17      19.717   4.842  95.488  1.00 31.15           C  
ATOM   1706  CG  GLN L  17      19.684   5.580  94.182  1.00 33.07           C  
ATOM   1707  CD  GLN L  17      19.990   7.062  94.173  1.00 34.41           C  
ATOM   1708  OE1 GLN L  17      19.087   7.925  94.320  1.00 35.31           O  
ATOM   1709  NE2 GLN L  17      21.267   7.384  93.941  1.00 33.47           N  
ATOM   1710  N   SER L  18      19.213   2.712  93.807  1.00 28.75           N  
ATOM   1711  CA  SER L  18      19.290   1.469  93.013  1.00 28.42           C  
ATOM   1712  C   SER L  18      20.505   1.462  92.109  1.00 28.53           C  
ATOM   1713  O   SER L  18      20.950   2.530  91.657  1.00 28.65           O  
ATOM   1714  CB  SER L  18      18.023   1.177  92.263  1.00 27.41           C  
ATOM   1715  OG  SER L  18      18.251  -0.053  91.613  1.00 28.40           O  
ATOM   1716  N   VAL L  19      21.058   0.265  91.913  1.00 28.44           N  
ATOM   1717  CA  VAL L  19      22.256   0.155  91.073  1.00 28.39           C  
ATOM   1718  C   VAL L  19      22.071  -0.918  89.999  1.00 28.30           C  
ATOM   1719  O   VAL L  19      21.174  -1.734  90.043  1.00 28.22           O  
ATOM   1720  CB  VAL L  19      23.596   0.046  91.814  1.00 27.81           C  
ATOM   1721  CG1 VAL L  19      24.150   1.449  92.082  1.00 27.61           C  
ATOM   1722  CG2 VAL L  19      23.633  -0.780  93.067  1.00 25.71           C  
ATOM   1723  N   THR L  20      22.997  -0.791  89.080  1.00 28.38           N  
ATOM   1724  CA  THR L  20      23.137  -1.637  87.911  1.00 28.71           C  
ATOM   1725  C   THR L  20      24.591  -1.761  87.411  1.00 28.44           C  
ATOM   1726  O   THR L  20      25.243  -0.869  86.862  1.00 28.07           O  
ATOM   1727  CB  THR L  20      22.112  -1.310  86.756  1.00 29.41           C  
ATOM   1728  OG1 THR L  20      21.907   0.138  86.683  1.00 29.64           O  
ATOM   1729  CG2 THR L  20      20.778  -2.055  86.976  1.00 30.10           C  
ATOM   1730  N   ILE L  21      25.054  -2.995  87.648  1.00 28.28           N  
ATOM   1731  CA  ILE L  21      26.342  -3.527  87.305  1.00 27.96           C  
ATOM   1732  C   ILE L  21      26.330  -4.397  86.029  1.00 28.25           C  
ATOM   1733  O   ILE L  21      25.664  -5.474  85.883  1.00 28.11           O  
ATOM   1734  CB  ILE L  21      26.875  -4.391  88.530  1.00 27.23           C  
ATOM   1735  CG1 ILE L  21      26.695  -3.543  89.776  1.00 26.81           C  
ATOM   1736  CG2 ILE L  21      28.295  -4.910  88.246  1.00 27.22           C  
ATOM   1737  CD1 ILE L  21      26.479  -4.291  91.091  1.00 26.64           C  
ATOM   1738  N   SER L  22      27.156  -3.871  85.120  1.00 27.59           N  
ATOM   1739  CA  SER L  22      27.331  -4.535  83.825  1.00 27.14           C  
ATOM   1740  C   SER L  22      28.479  -5.548  83.934  1.00 26.76           C  
ATOM   1741  O   SER L  22      29.403  -5.404  84.761  1.00 26.73           O  
ATOM   1742  CB  SER L  22      27.609  -3.532  82.701  1.00 27.65           C  
ATOM   1743  OG  SER L  22      28.896  -2.939  82.849  1.00 28.59           O  
ATOM   1744  N   CYS L  23      28.336  -6.505  83.044  1.00 26.29           N  
ATOM   1745  CA  CYS L  23      29.258  -7.633  82.857  1.00 25.80           C  
ATOM   1746  C   CYS L  23      29.241  -8.098  81.398  1.00 25.51           C  
ATOM   1747  O   CYS L  23      28.333  -8.792  80.855  1.00 25.48           O  
ATOM   1748  CB  CYS L  23      28.821  -8.699  83.853  1.00 26.36           C  
ATOM   1749  SG  CYS L  23      29.429 -10.345  83.372  1.00 28.95           S  
ATOM   1750  N   THR L  24      30.284  -7.736  80.686  1.00 24.75           N  
ATOM   1751  CA  THR L  24      30.402  -8.005  79.261  1.00 24.31           C  
ATOM   1752  C   THR L  24      31.386  -9.069  78.837  1.00 23.95           C  
ATOM   1753  O   THR L  24      32.584  -9.000  79.175  1.00 23.76           O  
ATOM   1754  CB  THR L  24      30.776  -6.590  78.619  1.00 24.86           C  
ATOM   1755  OG1 THR L  24      30.068  -5.567  79.357  1.00 23.31           O  
ATOM   1756  CG2 THR L  24      30.519  -6.570  77.110  1.00 26.22           C  
ATOM   1757  N   GLY L  25      30.905  -9.990  78.020  1.00 23.75           N  
ATOM   1758  CA  GLY L  25      31.706 -11.101  77.481  1.00 23.62           C  
ATOM   1759  C   GLY L  25      31.663 -11.120  75.956  1.00 23.52           C  
ATOM   1760  O   GLY L  25      31.696 -10.044  75.324  1.00 23.51           O  
ATOM   1761  N   THR L  26      31.636 -12.311  75.394  1.00 23.69           N  
ATOM   1762  CA  THR L  26      31.580 -12.615  73.982  1.00 23.81           C  
ATOM   1763  C   THR L  26      30.410 -13.592  73.736  1.00 24.08           C  
ATOM   1764  O   THR L  26      29.668 -13.850  74.712  1.00 25.14           O  
ATOM   1765  CB  THR L  26      32.849 -13.199  73.274  1.00 22.95           C  
ATOM   1766  OG1 THR L  26      33.264 -14.342  74.050  1.00 23.40           O  
ATOM   1767  CG2 THR L  26      33.991 -12.221  73.018  1.00 22.95           C  
ATOM   1768  N   SER L  27      30.309 -14.068  72.515  1.00 23.73           N  
ATOM   1769  CA  SER L  27      29.254 -15.000  72.086  1.00 23.78           C  
ATOM   1770  C   SER L  27      29.624 -16.458  72.359  1.00 23.19           C  
ATOM   1771  O   SER L  27      28.915 -17.434  72.041  1.00 23.62           O  
ATOM   1772  CB  SER L  27      28.937 -14.778  70.608  1.00 26.08           C  
ATOM   1773  OG  SER L  27      28.628 -13.366  70.446  1.00 29.22           O  
ATOM   1774  N   SER L  27A     30.755 -16.587  73.000  1.00 22.35           N  
ATOM   1775  CA  SER L  27A     31.452 -17.798  73.408  1.00 21.16           C  
ATOM   1776  C   SER L  27A     31.154 -18.163  74.850  1.00 21.40           C  
ATOM   1777  O   SER L  27A     31.156 -19.332  75.317  1.00 21.25           O  
ATOM   1778  CB  SER L  27A     32.896 -17.375  73.149  1.00 19.89           C  
ATOM   1779  OG  SER L  27A     33.716 -18.283  72.516  1.00 20.92           O  
ATOM   1780  N   ASN L  27B     30.866 -17.082  75.602  1.00 20.78           N  
ATOM   1781  CA  ASN L  27B     30.567 -17.123  77.041  1.00 19.80           C  
ATOM   1782  C   ASN L  27B     29.283 -16.407  77.349  1.00 19.64           C  
ATOM   1783  O   ASN L  27B     28.257 -17.104  77.244  1.00 20.38           O  
ATOM   1784  CB  ASN L  27B     31.775 -16.704  77.859  1.00 18.25           C  
ATOM   1785  CG  ASN L  27B     32.472 -15.469  77.353  1.00 16.72           C  
ATOM   1786  OD1 ASN L  27B     31.883 -14.401  77.415  1.00 16.54           O  
ATOM   1787  ND2 ASN L  27B     33.710 -15.569  76.879  1.00 16.66           N  
ATOM   1788  N   VAL L  27C     29.249 -15.153  77.707  1.00 19.97           N  
ATOM   1789  CA  VAL L  27C     27.997 -14.452  78.065  1.00 19.55           C  
ATOM   1790  C   VAL L  27C     26.949 -14.556  76.986  1.00 19.85           C  
ATOM   1791  O   VAL L  27C     25.806 -14.929  77.352  1.00 19.82           O  
ATOM   1792  CB  VAL L  27C     28.212 -13.042  78.593  1.00 18.05           C  
ATOM   1793  CG1 VAL L  27C     26.927 -12.348  78.971  1.00 17.40           C  
ATOM   1794  CG2 VAL L  27C     29.113 -13.150  79.802  1.00 17.68           C  
ATOM   1795  N   GLY L  28      27.342 -14.277  75.754  1.00 20.09           N  
ATOM   1796  CA  GLY L  28      26.473 -14.365  74.578  1.00 20.41           C  
ATOM   1797  C   GLY L  28      26.126 -15.745  74.067  1.00 20.33           C  
ATOM   1798  O   GLY L  28      25.226 -15.960  73.216  1.00 20.05           O  
ATOM   1799  N   GLY L  29      26.767 -16.773  74.588  1.00 20.58           N  
ATOM   1800  CA  GLY L  29      26.588 -18.139  74.186  1.00 20.92           C  
ATOM   1801  C   GLY L  29      25.594 -18.993  74.904  1.00 21.22           C  
ATOM   1802  O   GLY L  29      24.838 -19.764  74.244  1.00 21.68           O  
ATOM   1803  N   TYR L  30      25.601 -18.898  76.227  1.00 20.71           N  
ATOM   1804  CA  TYR L  30      24.729 -19.713  77.082  1.00 20.55           C  
ATOM   1805  C   TYR L  30      24.027 -18.797  78.069  1.00 20.92           C  
ATOM   1806  O   TYR L  30      24.385 -17.595  78.184  1.00 21.02           O  
ATOM   1807  CB  TYR L  30      25.637 -20.730  77.850  1.00 20.83           C  
ATOM   1808  CG  TYR L  30      26.810 -21.304  77.058  1.00 19.14           C  
ATOM   1809  CD1 TYR L  30      27.988 -20.594  76.859  1.00 18.16           C  
ATOM   1810  CD2 TYR L  30      26.743 -22.604  76.507  1.00 18.97           C  
ATOM   1811  CE1 TYR L  30      29.038 -21.118  76.114  1.00 17.97           C  
ATOM   1812  CE2 TYR L  30      27.773 -23.156  75.754  1.00 18.12           C  
ATOM   1813  CZ  TYR L  30      28.921 -22.405  75.575  1.00 18.61           C  
ATOM   1814  OH  TYR L  30      29.942 -22.936  74.849  1.00 19.67           O  
ATOM   1815  N   ASN L  31      23.080 -19.399  78.766  1.00 20.98           N  
ATOM   1816  CA  ASN L  31      22.321 -18.659  79.802  1.00 21.02           C  
ATOM   1817  C   ASN L  31      22.655 -19.205  81.202  1.00 20.66           C  
ATOM   1818  O   ASN L  31      21.785 -19.606  81.975  1.00 20.33           O  
ATOM   1819  CB  ASN L  31      20.844 -18.671  79.449  1.00 23.56           C  
ATOM   1820  CG  ASN L  31      20.521 -17.567  78.444  1.00 25.87           C  
ATOM   1821  OD1 ASN L  31      21.420 -17.190  77.660  1.00 27.32           O  
ATOM   1822  ND2 ASN L  31      19.290 -17.049  78.458  1.00 27.00           N  
ATOM   1823  N   TYR L  32      23.944 -19.219  81.454  1.00 20.30           N  
ATOM   1824  CA  TYR L  32      24.581 -19.705  82.646  1.00 19.85           C  
ATOM   1825  C   TYR L  32      25.534 -18.607  83.150  1.00 18.98           C  
ATOM   1826  O   TYR L  32      26.749 -18.854  83.230  1.00 18.69           O  
ATOM   1827  CB  TYR L  32      25.410 -20.995  82.431  1.00 24.82           C  
ATOM   1828  CG  TYR L  32      24.653 -22.215  81.960  1.00 28.76           C  
ATOM   1829  CD1 TYR L  32      23.838 -22.929  82.850  1.00 29.91           C  
ATOM   1830  CD2 TYR L  32      24.747 -22.670  80.627  1.00 30.62           C  
ATOM   1831  CE1 TYR L  32      23.107 -24.047  82.437  1.00 31.99           C  
ATOM   1832  CE2 TYR L  32      24.019 -23.787  80.175  1.00 32.23           C  
ATOM   1833  CZ  TYR L  32      23.202 -24.464  81.109  1.00 32.97           C  
ATOM   1834  OH  TYR L  32      22.483 -25.583  80.760  1.00 35.00           O  
ATOM   1835  N   VAL L  33      24.897 -17.488  83.389  1.00 18.08           N  
ATOM   1836  CA  VAL L  33      25.437 -16.236  83.921  1.00 16.85           C  
ATOM   1837  C   VAL L  33      24.932 -16.161  85.413  1.00 16.84           C  
ATOM   1838  O   VAL L  33      23.708 -16.124  85.674  1.00 16.74           O  
ATOM   1839  CB  VAL L  33      25.073 -15.018  83.050  1.00 14.56           C  
ATOM   1840  CG1 VAL L  33      25.075 -13.674  83.784  1.00 12.93           C  
ATOM   1841  CG2 VAL L  33      25.949 -14.940  81.832  1.00 13.24           C  
ATOM   1842  N   SER L  34      25.923 -16.246  86.305  1.00 16.15           N  
ATOM   1843  CA  SER L  34      25.705 -16.168  87.753  1.00 15.25           C  
ATOM   1844  C   SER L  34      26.614 -15.047  88.297  1.00 14.69           C  
ATOM   1845  O   SER L  34      27.612 -14.747  87.634  1.00 14.35           O  
ATOM   1846  CB  SER L  34      25.826 -17.438  88.524  1.00 14.59           C  
ATOM   1847  OG  SER L  34      26.928 -18.222  88.185  1.00 13.29           O  
ATOM   1848  N   TRP L  35      26.149 -14.501  89.406  1.00 14.54           N  
ATOM   1849  CA  TRP L  35      26.816 -13.394  90.084  1.00 14.17           C  
ATOM   1850  C   TRP L  35      27.170 -13.788  91.510  1.00 14.45           C  
ATOM   1851  O   TRP L  35      26.438 -14.479  92.209  1.00 13.70           O  
ATOM   1852  CB  TRP L  35      25.890 -12.165  90.187  1.00 12.20           C  
ATOM   1853  CG  TRP L  35      25.576 -11.582  88.866  1.00 10.83           C  
ATOM   1854  CD1 TRP L  35      24.637 -12.044  87.963  1.00  9.94           C  
ATOM   1855  CD2 TRP L  35      26.199 -10.463  88.228  1.00 10.57           C  
ATOM   1856  NE1 TRP L  35      24.658 -11.296  86.836  1.00  8.62           N  
ATOM   1857  CE2 TRP L  35      25.596 -10.309  86.961  1.00  9.74           C  
ATOM   1858  CE3 TRP L  35      27.225  -9.585  88.613  1.00 11.65           C  
ATOM   1859  CZ2 TRP L  35      25.973  -9.309  86.075  1.00 10.22           C  
ATOM   1860  CZ3 TRP L  35      27.569  -8.559  87.712  1.00 12.85           C  
ATOM   1861  CH2 TRP L  35      26.949  -8.417  86.458  1.00 11.02           C  
ATOM   1862  N   TYR L  36      28.294 -13.211  91.890  1.00 14.84           N  
ATOM   1863  CA  TYR L  36      28.750 -13.423  93.250  1.00 15.82           C  
ATOM   1864  C   TYR L  36      28.967 -12.115  94.011  1.00 16.58           C  
ATOM   1865  O   TYR L  36      29.571 -11.154  93.544  1.00 16.63           O  
ATOM   1866  CB  TYR L  36      30.020 -14.279  93.379  1.00 16.80           C  
ATOM   1867  CG  TYR L  36      29.909 -15.573  92.621  1.00 16.78           C  
ATOM   1868  CD1 TYR L  36      29.891 -15.547  91.229  1.00 17.84           C  
ATOM   1869  CD2 TYR L  36      29.778 -16.775  93.294  1.00 16.78           C  
ATOM   1870  CE1 TYR L  36      29.796 -16.719  90.481  1.00 18.28           C  
ATOM   1871  CE2 TYR L  36      29.634 -17.965  92.584  1.00 18.43           C  
ATOM   1872  CZ  TYR L  36      29.671 -17.907  91.176  1.00 19.31           C  
ATOM   1873  OH  TYR L  36      29.585 -19.068  90.453  1.00 22.12           O  
ATOM   1874  N   GLN L  37      28.487 -12.222  95.233  1.00 17.26           N  
ATOM   1875  CA  GLN L  37      28.568 -11.176  96.229  1.00 18.25           C  
ATOM   1876  C   GLN L  37      29.649 -11.634  97.198  1.00 18.85           C  
ATOM   1877  O   GLN L  37      29.673 -12.789  97.712  1.00 19.18           O  
ATOM   1878  CB  GLN L  37      27.258 -10.979  96.988  1.00 18.31           C  
ATOM   1879  CG  GLN L  37      27.307  -9.909  98.082  1.00 20.40           C  
ATOM   1880  CD  GLN L  37      26.119  -9.907  99.006  1.00 20.96           C  
ATOM   1881  OE1 GLN L  37      26.149 -10.696  99.972  1.00 20.54           O  
ATOM   1882  NE2 GLN L  37      25.233  -9.127  98.688  1.00 20.81           N  
ATOM   1883  N   GLN L  38      30.661 -10.774  97.373  1.00 19.13           N  
ATOM   1884  CA  GLN L  38      31.629 -11.264  98.382  1.00 19.51           C  
ATOM   1885  C   GLN L  38      31.958 -10.054  99.242  1.00 20.35           C  
ATOM   1886  O   GLN L  38      32.253  -8.986  98.701  1.00 20.13           O  
ATOM   1887  CB  GLN L  38      32.791 -12.047  97.922  1.00 19.65           C  
ATOM   1888  CG  GLN L  38      34.039 -11.806  98.745  1.00 19.04           C  
ATOM   1889  CD  GLN L  38      35.208 -12.617  98.245  1.00 18.61           C  
ATOM   1890  OE1 GLN L  38      36.017 -12.133  97.335  1.00 17.49           O  
ATOM   1891  NE2 GLN L  38      35.323 -13.719  98.778  1.00 20.34           N  
ATOM   1892  N   HIS L  39      31.814 -10.334 100.533  1.00 20.71           N  
ATOM   1893  CA  HIS L  39      32.141  -9.238 101.495  1.00 21.55           C  
ATOM   1894  C   HIS L  39      33.635  -9.359 101.790  1.00 21.78           C  
ATOM   1895  O   HIS L  39      34.170 -10.490 101.754  1.00 22.32           O  
ATOM   1896  CB  HIS L  39      31.276  -9.192 102.744  1.00 21.18           C  
ATOM   1897  CG  HIS L  39      29.914  -8.601 102.536  1.00 21.76           C  
ATOM   1898  ND1 HIS L  39      28.737  -9.305 102.655  1.00 22.50           N  
ATOM   1899  CD2 HIS L  39      29.556  -7.335 102.219  1.00 22.03           C  
ATOM   1900  CE1 HIS L  39      27.698  -8.523 102.394  1.00 22.39           C  
ATOM   1901  NE2 HIS L  39      28.174  -7.324 102.105  1.00 23.17           N  
ATOM   1902  N   ALA L  40      34.278  -8.235 101.992  1.00 22.17           N  
ATOM   1903  CA  ALA L  40      35.718  -8.230 102.313  1.00 22.62           C  
ATOM   1904  C   ALA L  40      35.949  -9.241 103.430  1.00 22.76           C  
ATOM   1905  O   ALA L  40      35.345  -9.228 104.496  1.00 22.83           O  
ATOM   1906  CB  ALA L  40      36.190  -6.833 102.689  1.00 23.40           C  
ATOM   1907  N   GLY L  41      36.842 -10.157 103.115  1.00 23.36           N  
ATOM   1908  CA  GLY L  41      37.237 -11.238 104.000  1.00 23.87           C  
ATOM   1909  C   GLY L  41      36.299 -12.424 104.050  1.00 23.97           C  
ATOM   1910  O   GLY L  41      36.639 -13.344 104.866  1.00 24.38           O  
ATOM   1911  N   LYS L  42      35.238 -12.532 103.273  1.00 23.55           N  
ATOM   1912  CA  LYS L  42      34.400 -13.756 103.397  1.00 23.08           C  
ATOM   1913  C   LYS L  42      34.367 -14.610 102.147  1.00 22.84           C  
ATOM   1914  O   LYS L  42      34.815 -14.284 101.014  1.00 22.73           O  
ATOM   1915  CB  LYS L  42      33.039 -13.424 103.967  1.00 23.02           C  
ATOM   1916  CG  LYS L  42      33.001 -13.254 105.477  1.00 24.64           C  
ATOM   1917  CD  LYS L  42      33.435 -11.881 105.977  1.00 25.18           C  
ATOM   1918  CE  LYS L  42      34.284 -11.986 107.234  1.00 26.90           C  
ATOM   1919  NZ  LYS L  42      33.878 -10.981 108.260  1.00 27.83           N  
ATOM   1920  N   ALA L  43      33.798 -15.812 102.337  1.00 22.44           N  
ATOM   1921  CA  ALA L  43      33.642 -16.746 101.187  1.00 22.19           C  
ATOM   1922  C   ALA L  43      32.713 -15.962 100.250  1.00 22.21           C  
ATOM   1923  O   ALA L  43      32.036 -14.999 100.653  1.00 22.09           O  
ATOM   1924  CB  ALA L  43      33.021 -18.045 101.629  1.00 21.47           C  
ATOM   1925  N   PRO L  44      32.677 -16.391  99.032  1.00 22.01           N  
ATOM   1926  CA  PRO L  44      31.814 -15.660  98.057  1.00 21.78           C  
ATOM   1927  C   PRO L  44      30.444 -16.259  98.309  1.00 21.65           C  
ATOM   1928  O   PRO L  44      30.402 -17.405  98.795  1.00 21.88           O  
ATOM   1929  CB  PRO L  44      32.424 -16.014  96.729  1.00 21.84           C  
ATOM   1930  CG  PRO L  44      33.647 -16.857  97.015  1.00 21.93           C  
ATOM   1931  CD  PRO L  44      33.422 -17.476  98.391  1.00 21.87           C  
ATOM   1932  N   LYS L  45      29.413 -15.524  98.003  1.00 21.39           N  
ATOM   1933  CA  LYS L  45      28.034 -16.075  98.137  1.00 20.93           C  
ATOM   1934  C   LYS L  45      27.370 -15.942  96.746  1.00 20.37           C  
ATOM   1935  O   LYS L  45      27.507 -14.915  96.078  1.00 19.58           O  
ATOM   1936  CB  LYS L  45      27.271 -15.392  99.244  1.00 22.06           C  
ATOM   1937  CG  LYS L  45      25.771 -15.176  99.094  1.00 22.17           C  
ATOM   1938  CD  LYS L  45      25.154 -14.338 100.194  1.00 23.80           C  
ATOM   1939  CE  LYS L  45      23.649 -14.074 100.082  1.00 24.49           C  
ATOM   1940  NZ  LYS L  45      22.952 -15.403 100.201  1.00 24.90           N  
ATOM   1941  N   VAL L  46      26.667 -16.993  96.341  1.00 20.15           N  
ATOM   1942  CA  VAL L  46      25.951 -16.978  95.060  1.00 20.25           C  
ATOM   1943  C   VAL L  46      24.575 -16.328  95.291  1.00 20.32           C  
ATOM   1944  O   VAL L  46      23.747 -16.835  96.074  1.00 20.75           O  
ATOM   1945  CB  VAL L  46      25.900 -18.323  94.329  1.00 19.51           C  
ATOM   1946  CG1 VAL L  46      25.156 -18.209  93.000  1.00 18.58           C  
ATOM   1947  CG2 VAL L  46      27.237 -18.974  93.993  1.00 18.75           C  
ATOM   1948  N   ILE L  47      24.385 -15.211  94.573  1.00 20.40           N  
ATOM   1949  CA  ILE L  47      23.111 -14.498  94.662  1.00 20.16           C  
ATOM   1950  C   ILE L  47      22.277 -14.752  93.403  1.00 20.58           C  
ATOM   1951  O   ILE L  47      21.042 -14.895  93.518  1.00 20.28           O  
ATOM   1952  CB  ILE L  47      23.248 -12.988  95.074  1.00 19.29           C  
ATOM   1953  CG1 ILE L  47      24.331 -12.275  94.217  1.00 17.19           C  
ATOM   1954  CG2 ILE L  47      23.449 -12.723  96.610  1.00 15.99           C  
ATOM   1955  CD1 ILE L  47      23.824 -10.909  93.645  1.00 15.70           C  
ATOM   1956  N   ILE L  48      22.913 -14.816  92.237  1.00 21.32           N  
ATOM   1957  CA  ILE L  48      22.321 -15.025  90.914  1.00 21.81           C  
ATOM   1958  C   ILE L  48      23.034 -16.187  90.187  1.00 22.45           C  
ATOM   1959  O   ILE L  48      24.279 -16.236  90.179  1.00 22.62           O  
ATOM   1960  CB  ILE L  48      22.305 -13.800  89.919  1.00 21.07           C  
ATOM   1961  CG1 ILE L  48      21.498 -12.586  90.425  1.00 21.41           C  
ATOM   1962  CG2 ILE L  48      21.833 -14.151  88.471  1.00 18.83           C  
ATOM   1963  CD1 ILE L  48      19.953 -12.734  90.291  1.00 22.62           C  
ATOM   1964  N   TYR L  49      22.154 -16.973  89.574  1.00 23.07           N  
ATOM   1965  CA  TYR L  49      22.571 -18.100  88.725  1.00 23.96           C  
ATOM   1966  C   TYR L  49      21.630 -18.329  87.544  1.00 24.45           C  
ATOM   1967  O   TYR L  49      20.396 -18.232  87.670  1.00 24.62           O  
ATOM   1968  CB  TYR L  49      22.801 -19.372  89.516  1.00 24.74           C  
ATOM   1969  CG  TYR L  49      21.569 -20.080  90.008  1.00 26.55           C  
ATOM   1970  CD1 TYR L  49      20.772 -19.518  90.997  1.00 27.25           C  
ATOM   1971  CD2 TYR L  49      21.220 -21.335  89.525  1.00 27.63           C  
ATOM   1972  CE1 TYR L  49      19.641 -20.169  91.462  1.00 28.82           C  
ATOM   1973  CE2 TYR L  49      20.093 -22.003  89.973  1.00 28.99           C  
ATOM   1974  CZ  TYR L  49      19.294 -21.414  90.940  1.00 29.64           C  
ATOM   1975  OH  TYR L  49      18.170 -22.081  91.383  1.00 30.10           O  
ATOM   1976  N   GLU L  50      22.166 -18.653  86.381  1.00 24.98           N  
ATOM   1977  CA  GLU L  50      21.252 -18.923  85.250  1.00 25.88           C  
ATOM   1978  C   GLU L  50      20.510 -17.649  84.861  1.00 26.18           C  
ATOM   1979  O   GLU L  50      19.281 -17.556  84.667  1.00 25.50           O  
ATOM   1980  CB  GLU L  50      20.216 -19.944  85.680  1.00 28.10           C  
ATOM   1981  CG  GLU L  50      20.633 -21.433  85.652  1.00 30.93           C  
ATOM   1982  CD  GLU L  50      19.420 -22.268  85.306  1.00 33.87           C  
ATOM   1983  OE1 GLU L  50      18.646 -21.934  84.384  1.00 36.17           O  
ATOM   1984  OE2 GLU L  50      19.243 -23.286  85.992  1.00 35.32           O  
ATOM   1985  N   VAL L  51      21.360 -16.642  84.757  1.00 26.39           N  
ATOM   1986  CA  VAL L  51      20.988 -15.300  84.370  1.00 27.35           C  
ATOM   1987  C   VAL L  51      20.135 -14.548  85.362  1.00 27.81           C  
ATOM   1988  O   VAL L  51      20.687 -13.581  85.947  1.00 27.88           O  
ATOM   1989  CB  VAL L  51      20.369 -15.333  82.951  1.00 27.25           C  
ATOM   1990  CG1 VAL L  51      21.010 -14.322  82.009  1.00 27.86           C  
ATOM   1991  CG2 VAL L  51      20.531 -16.719  82.358  1.00 27.84           C  
ATOM   1992  N   ASN L  52      18.891 -14.954  85.528  1.00 28.42           N  
ATOM   1993  CA  ASN L  52      17.972 -14.230  86.417  1.00 29.39           C  
ATOM   1994  C   ASN L  52      17.287 -15.013  87.507  1.00 29.97           C  
ATOM   1995  O   ASN L  52      16.183 -14.650  87.966  1.00 30.15           O  
ATOM   1996  CB  ASN L  52      16.915 -13.548  85.526  1.00 29.90           C  
ATOM   1997  CG  ASN L  52      15.865 -14.571  85.115  1.00 30.88           C  
ATOM   1998  OD1 ASN L  52      15.940 -15.770  85.413  1.00 30.97           O  
ATOM   1999  ND2 ASN L  52      14.841 -14.046  84.418  1.00 31.84           N  
ATOM   2000  N   LYS L  53      17.900 -16.032  88.013  1.00 31.02           N  
ATOM   2001  CA  LYS L  53      17.426 -16.934  89.045  1.00 32.25           C  
ATOM   2002  C   LYS L  53      18.079 -16.687  90.396  1.00 32.94           C  
ATOM   2003  O   LYS L  53      19.305 -16.926  90.476  1.00 32.92           O  
ATOM   2004  CB  LYS L  53      17.884 -18.376  88.681  1.00 33.57           C  
ATOM   2005  CG  LYS L  53      16.906 -19.483  89.067  1.00 34.69           C  
ATOM   2006  CD  LYS L  53      16.534 -20.208  87.758  1.00 36.09           C  
ATOM   2007  CE  LYS L  53      15.646 -21.406  87.989  1.00 37.18           C  
ATOM   2008  NZ  LYS L  53      14.757 -21.675  86.799  1.00 38.13           N  
ATOM   2009  N   ARG L  54      17.257 -16.314  91.343  1.00 33.67           N  
ATOM   2010  CA  ARG L  54      17.646 -16.104  92.739  1.00 34.67           C  
ATOM   2011  C   ARG L  54      17.388 -17.384  93.563  1.00 35.08           C  
ATOM   2012  O   ARG L  54      16.315 -18.005  93.627  1.00 34.85           O  
ATOM   2013  CB  ARG L  54      16.943 -14.950  93.392  1.00 36.19           C  
ATOM   2014  CG  ARG L  54      17.674 -13.632  93.628  1.00 37.44           C  
ATOM   2015  CD  ARG L  54      16.580 -12.560  93.564  1.00 39.28           C  
ATOM   2016  NE  ARG L  54      15.339 -13.197  94.017  1.00 41.02           N  
ATOM   2017  CZ  ARG L  54      14.186 -13.173  93.342  1.00 41.72           C  
ATOM   2018  NH1 ARG L  54      14.045 -12.471  92.223  1.00 42.08           N  
ATOM   2019  NH2 ARG L  54      13.212 -13.976  93.806  1.00 42.10           N  
ATOM   2020  N   PRO L  55      18.449 -17.771  94.250  1.00 35.66           N  
ATOM   2021  CA  PRO L  55      18.410 -18.973  95.108  1.00 36.21           C  
ATOM   2022  C   PRO L  55      17.770 -18.686  96.460  1.00 36.97           C  
ATOM   2023  O   PRO L  55      17.060 -17.680  96.690  1.00 36.62           O  
ATOM   2024  CB  PRO L  55      19.887 -19.320  95.151  1.00 36.07           C  
ATOM   2025  CG  PRO L  55      20.610 -17.984  95.190  1.00 35.85           C  
ATOM   2026  CD  PRO L  55      19.773 -17.116  94.247  1.00 35.57           C  
ATOM   2027  N   SER L  56      18.004 -19.614  97.390  1.00 37.83           N  
ATOM   2028  CA  SER L  56      17.530 -19.680  98.771  1.00 38.58           C  
ATOM   2029  C   SER L  56      17.956 -18.472  99.622  1.00 38.65           C  
ATOM   2030  O   SER L  56      19.146 -18.283 100.026  1.00 39.04           O  
ATOM   2031  CB  SER L  56      18.030 -20.931  99.504  1.00 40.52           C  
ATOM   2032  OG  SER L  56      17.281 -22.117  99.341  1.00 43.06           O  
ATOM   2033  N   GLY L  57      16.952 -17.667  99.938  1.00 38.24           N  
ATOM   2034  CA  GLY L  57      17.166 -16.492 100.757  1.00 37.95           C  
ATOM   2035  C   GLY L  57      17.591 -15.253 100.034  1.00 37.78           C  
ATOM   2036  O   GLY L  57      17.213 -14.148 100.518  1.00 38.25           O  
ATOM   2037  N   VAL L  58      18.326 -15.286  98.938  1.00 37.50           N  
ATOM   2038  CA  VAL L  58      18.658 -13.985  98.297  1.00 36.61           C  
ATOM   2039  C   VAL L  58      17.349 -13.169  98.306  1.00 37.08           C  
ATOM   2040  O   VAL L  58      16.234 -13.659  98.054  1.00 36.78           O  
ATOM   2041  CB  VAL L  58      19.334 -14.121  96.918  1.00 33.92           C  
ATOM   2042  CG1 VAL L  58      20.188 -12.900  96.595  1.00 32.75           C  
ATOM   2043  CG2 VAL L  58      20.176 -15.366  96.760  1.00 32.44           C  
ATOM   2044  N   PRO L  59      17.513 -11.894  98.613  1.00 37.34           N  
ATOM   2045  CA  PRO L  59      16.436 -10.897  98.639  1.00 37.48           C  
ATOM   2046  C   PRO L  59      15.809 -10.754  97.264  1.00 37.46           C  
ATOM   2047  O   PRO L  59      16.166 -11.491  96.325  1.00 38.14           O  
ATOM   2048  CB  PRO L  59      17.176  -9.616  99.045  1.00 37.68           C  
ATOM   2049  CG  PRO L  59      18.366 -10.138  99.857  1.00 37.86           C  
ATOM   2050  CD  PRO L  59      18.829 -11.269  98.929  1.00 37.64           C  
ATOM   2051  N   ASP L  60      14.910  -9.843  97.027  1.00 37.06           N  
ATOM   2052  CA  ASP L  60      14.260  -9.676  95.721  1.00 36.64           C  
ATOM   2053  C   ASP L  60      14.714  -8.407  95.020  1.00 35.84           C  
ATOM   2054  O   ASP L  60      14.230  -8.094  93.885  1.00 36.29           O  
ATOM   2055  CB  ASP L  60      12.727  -9.701  95.960  1.00 39.96           C  
ATOM   2056  CG  ASP L  60      12.444 -10.806  96.988  1.00 41.80           C  
ATOM   2057  OD1 ASP L  60      12.823 -11.957  96.688  1.00 42.88           O  
ATOM   2058  OD2 ASP L  60      11.912 -10.426  98.068  1.00 43.21           O  
ATOM   2059  N   ARG L  61      15.584  -7.666  95.680  1.00 34.64           N  
ATOM   2060  CA  ARG L  61      16.078  -6.408  95.083  1.00 32.99           C  
ATOM   2061  C   ARG L  61      17.313  -6.773  94.270  1.00 31.84           C  
ATOM   2062  O   ARG L  61      17.978  -5.902  93.698  1.00 32.15           O  
ATOM   2063  CB  ARG L  61      16.300  -5.292  96.073  1.00 33.77           C  
ATOM   2064  CG  ARG L  61      16.290  -5.787  97.535  1.00 33.55           C  
ATOM   2065  CD  ARG L  61      17.111  -4.866  98.349  1.00 33.60           C  
ATOM   2066  NE  ARG L  61      17.487  -5.498  99.616  1.00 33.84           N  
ATOM   2067  CZ  ARG L  61      18.825  -5.456  99.852  1.00 33.80           C  
ATOM   2068  NH1 ARG L  61      19.603  -4.878  98.941  1.00 33.54           N  
ATOM   2069  NH2 ARG L  61      19.309  -5.986 100.943  1.00 33.37           N  
ATOM   2070  N   PHE L  62      17.578  -8.059  94.262  1.00 30.30           N  
ATOM   2071  CA  PHE L  62      18.677  -8.592  93.447  1.00 28.84           C  
ATOM   2072  C   PHE L  62      17.887  -9.298  92.330  1.00 28.51           C  
ATOM   2073  O   PHE L  62      16.966 -10.085  92.624  1.00 28.10           O  
ATOM   2074  CB  PHE L  62      19.640  -9.505  94.143  1.00 27.79           C  
ATOM   2075  CG  PHE L  62      20.467  -8.841  95.209  1.00 27.20           C  
ATOM   2076  CD1 PHE L  62      21.474  -7.941  94.849  1.00 26.20           C  
ATOM   2077  CD2 PHE L  62      20.187  -9.107  96.550  1.00 26.44           C  
ATOM   2078  CE1 PHE L  62      22.218  -7.298  95.834  1.00 25.78           C  
ATOM   2079  CE2 PHE L  62      20.918  -8.484  97.551  1.00 25.98           C  
ATOM   2080  CZ  PHE L  62      21.935  -7.596  97.185  1.00 26.35           C  
ATOM   2081  N   SER L  63      18.260  -8.960  91.120  1.00 28.14           N  
ATOM   2082  CA  SER L  63      17.571  -9.575  89.952  1.00 27.35           C  
ATOM   2083  C   SER L  63      18.581  -9.292  88.845  1.00 27.29           C  
ATOM   2084  O   SER L  63      19.152  -8.211  88.948  1.00 27.40           O  
ATOM   2085  CB  SER L  63      16.309  -8.800  89.639  1.00 26.53           C  
ATOM   2086  OG  SER L  63      16.798  -7.500  89.293  1.00 26.01           O  
ATOM   2087  N   GLY L  64      18.730 -10.228  87.958  1.00 27.22           N  
ATOM   2088  CA  GLY L  64      19.655 -10.129  86.830  1.00 26.88           C  
ATOM   2089  C   GLY L  64      18.918 -10.361  85.510  1.00 26.61           C  
ATOM   2090  O   GLY L  64      17.837 -10.913  85.351  1.00 26.13           O  
ATOM   2091  N   SER L  65      19.641  -9.891  84.496  1.00 26.76           N  
ATOM   2092  CA  SER L  65      19.133 -10.000  83.119  1.00 27.29           C  
ATOM   2093  C   SER L  65      20.332 -10.028  82.173  1.00 27.25           C  
ATOM   2094  O   SER L  65      21.458  -9.654  82.557  1.00 27.60           O  
ATOM   2095  CB  SER L  65      18.251  -8.806  82.807  1.00 28.47           C  
ATOM   2096  OG  SER L  65      19.120  -7.708  82.450  1.00 30.65           O  
ATOM   2097  N   LYS L  66      20.024 -10.460  80.952  1.00 27.16           N  
ATOM   2098  CA  LYS L  66      21.069 -10.517  79.907  1.00 26.32           C  
ATOM   2099  C   LYS L  66      20.487  -9.915  78.650  1.00 26.03           C  
ATOM   2100  O   LYS L  66      19.275 -10.046  78.411  1.00 26.61           O  
ATOM   2101  CB  LYS L  66      21.532 -11.958  79.676  1.00 25.31           C  
ATOM   2102  CG  LYS L  66      23.047 -11.956  79.349  1.00 24.08           C  
ATOM   2103  CD  LYS L  66      23.309 -13.043  78.360  1.00 24.05           C  
ATOM   2104  CE  LYS L  66      22.535 -14.319  78.620  1.00 23.17           C  
ATOM   2105  NZ  LYS L  66      23.243 -15.355  77.772  1.00 22.80           N  
ATOM   2106  N   SER L  67      21.292  -9.248  77.874  1.00 25.80           N  
ATOM   2107  CA  SER L  67      20.773  -8.658  76.601  1.00 24.66           C  
ATOM   2108  C   SER L  67      21.465  -9.467  75.506  1.00 24.64           C  
ATOM   2109  O   SER L  67      20.858 -10.505  75.144  1.00 25.04           O  
ATOM   2110  CB  SER L  67      20.931  -7.191  76.559  1.00 25.25           C  
ATOM   2111  OG  SER L  67      22.286  -6.740  76.613  1.00 26.16           O  
ATOM   2112  N   GLY L  68      22.648  -9.080  75.055  1.00 24.00           N  
ATOM   2113  CA  GLY L  68      23.408  -9.813  74.034  1.00 23.04           C  
ATOM   2114  C   GLY L  68      24.627 -10.467  74.722  1.00 22.90           C  
ATOM   2115  O   GLY L  68      24.594 -11.529  75.371  1.00 21.98           O  
ATOM   2116  N   ASN L  69      25.726  -9.752  74.556  1.00 22.38           N  
ATOM   2117  CA  ASN L  69      27.016 -10.157  75.139  1.00 21.89           C  
ATOM   2118  C   ASN L  69      27.198  -9.634  76.537  1.00 21.12           C  
ATOM   2119  O   ASN L  69      28.184  -9.977  77.242  1.00 21.55           O  
ATOM   2120  CB  ASN L  69      28.120  -9.865  74.090  1.00 21.11           C  
ATOM   2121  CG  ASN L  69      27.893 -10.924  73.010  1.00 20.18           C  
ATOM   2122  OD1 ASN L  69      26.978 -11.721  73.233  1.00 20.12           O  
ATOM   2123  ND2 ASN L  69      28.621 -10.919  71.916  1.00 22.15           N  
ATOM   2124  N   THR L  70      26.259  -8.816  77.017  1.00 20.62           N  
ATOM   2125  CA  THR L  70      26.421  -8.322  78.394  1.00 20.60           C  
ATOM   2126  C   THR L  70      25.262  -8.721  79.293  1.00 19.89           C  
ATOM   2127  O   THR L  70      24.067  -8.765  78.990  1.00 20.00           O  
ATOM   2128  CB  THR L  70      26.680  -6.763  78.416  1.00 21.77           C  
ATOM   2129  OG1 THR L  70      25.317  -6.229  78.560  1.00 24.23           O  
ATOM   2130  CG2 THR L  70      27.360  -6.192  77.167  1.00 21.13           C  
ATOM   2131  N   ALA L  71      25.685  -9.072  80.487  1.00 19.62           N  
ATOM   2132  CA  ALA L  71      24.799  -9.447  81.613  1.00 19.13           C  
ATOM   2133  C   ALA L  71      24.815  -8.287  82.639  1.00 18.97           C  
ATOM   2134  O   ALA L  71      25.805  -7.553  82.857  1.00 18.24           O  
ATOM   2135  CB  ALA L  71      25.307 -10.752  82.178  1.00 19.95           C  
ATOM   2136  N   SER L  72      23.692  -8.107  83.314  1.00 18.58           N  
ATOM   2137  CA  SER L  72      23.592  -7.021  84.272  1.00 18.63           C  
ATOM   2138  C   SER L  72      22.788  -7.472  85.489  1.00 18.90           C  
ATOM   2139  O   SER L  72      21.995  -8.421  85.362  1.00 18.69           O  
ATOM   2140  CB  SER L  72      23.013  -5.827  83.504  1.00 18.00           C  
ATOM   2141  OG  SER L  72      21.604  -5.893  83.696  1.00 18.39           O  
ATOM   2142  N   LEU L  73      23.099  -6.804  86.600  1.00 18.98           N  
ATOM   2143  CA  LEU L  73      22.491  -7.058  87.917  1.00 19.18           C  
ATOM   2144  C   LEU L  73      22.036  -5.730  88.538  1.00 19.94           C  
ATOM   2145  O   LEU L  73      22.810  -4.768  88.695  1.00 19.63           O  
ATOM   2146  CB  LEU L  73      23.504  -7.846  88.701  1.00 18.28           C  
ATOM   2147  CG  LEU L  73      23.575  -8.189  90.136  1.00 16.95           C  
ATOM   2148  CD1 LEU L  73      23.960  -6.979  90.959  1.00 17.75           C  
ATOM   2149  CD2 LEU L  73      22.237  -8.721  90.669  1.00 17.83           C  
ATOM   2150  N   THR L  74      20.748  -5.705  88.863  1.00 20.35           N  
ATOM   2151  CA  THR L  74      20.099  -4.568  89.471  1.00 22.16           C  
ATOM   2152  C   THR L  74      19.792  -4.971  90.933  1.00 22.91           C  
ATOM   2153  O   THR L  74      19.224  -6.020  91.148  1.00 23.40           O  
ATOM   2154  CB  THR L  74      18.810  -3.890  88.933  1.00 22.62           C  
ATOM   2155  OG1 THR L  74      18.763  -3.963  87.491  1.00 23.90           O  
ATOM   2156  CG2 THR L  74      18.726  -2.387  89.327  1.00 24.08           C  
ATOM   2157  N   VAL L  75      20.241  -4.087  91.762  1.00 23.81           N  
ATOM   2158  CA  VAL L  75      20.206  -4.107  93.221  1.00 24.53           C  
ATOM   2159  C   VAL L  75      19.440  -2.859  93.613  1.00 24.92           C  
ATOM   2160  O   VAL L  75      20.007  -1.744  93.643  1.00 25.12           O  
ATOM   2161  CB  VAL L  75      21.691  -4.092  93.674  1.00 25.88           C  
ATOM   2162  CG1 VAL L  75      21.893  -3.534  95.071  1.00 26.97           C  
ATOM   2163  CG2 VAL L  75      22.365  -5.456  93.506  1.00 25.96           C  
ATOM   2164  N   SER L  76      18.145  -3.034  93.826  1.00 25.13           N  
ATOM   2165  CA  SER L  76      17.410  -1.786  94.174  1.00 25.43           C  
ATOM   2166  C   SER L  76      17.140  -1.680  95.650  1.00 25.65           C  
ATOM   2167  O   SER L  76      17.196  -2.661  96.401  1.00 25.62           O  
ATOM   2168  CB  SER L  76      16.192  -1.684  93.285  1.00 24.86           C  
ATOM   2169  OG  SER L  76      15.950  -2.971  92.730  1.00 24.28           O  
ATOM   2170  N   GLY L  77      16.831  -0.432  95.987  1.00 25.81           N  
ATOM   2171  CA  GLY L  77      16.475  -0.083  97.385  1.00 26.37           C  
ATOM   2172  C   GLY L  77      17.673  -0.585  98.228  1.00 26.69           C  
ATOM   2173  O   GLY L  77      17.539  -1.396  99.156  1.00 26.87           O  
ATOM   2174  N   LEU L  78      18.792  -0.047  97.759  1.00 26.66           N  
ATOM   2175  CA  LEU L  78      20.099  -0.259  98.328  1.00 26.78           C  
ATOM   2176  C   LEU L  78      19.989  -0.177  99.865  1.00 27.16           C  
ATOM   2177  O   LEU L  78      19.273   0.660 100.414  1.00 27.08           O  
ATOM   2178  CB  LEU L  78      21.050   0.779  97.755  1.00 24.93           C  
ATOM   2179  CG  LEU L  78      21.732   0.348  96.479  1.00 24.97           C  
ATOM   2180  CD1 LEU L  78      22.590   1.497  95.948  1.00 24.92           C  
ATOM   2181  CD2 LEU L  78      22.563  -0.891  96.806  1.00 24.49           C  
ATOM   2182  N   GLN L  79      20.689  -1.152 100.404  1.00 27.51           N  
ATOM   2183  CA  GLN L  79      20.889  -1.408 101.803  1.00 27.58           C  
ATOM   2184  C   GLN L  79      22.403  -1.133 102.027  1.00 27.29           C  
ATOM   2185  O   GLN L  79      23.210  -0.891 101.106  1.00 27.19           O  
ATOM   2186  CB  GLN L  79      20.549  -2.754 102.337  1.00 31.19           C  
ATOM   2187  CG  GLN L  79      19.289  -2.914 103.168  1.00 35.76           C  
ATOM   2188  CD  GLN L  79      18.080  -2.323 102.469  1.00 38.52           C  
ATOM   2189  OE1 GLN L  79      17.287  -2.948 101.724  1.00 39.92           O  
ATOM   2190  NE2 GLN L  79      17.996  -0.999 102.754  1.00 40.27           N  
ATOM   2191  N   ALA L  80      22.628  -1.210 103.303  1.00 26.78           N  
ATOM   2192  CA  ALA L  80      23.948  -0.955 103.867  1.00 26.63           C  
ATOM   2193  C   ALA L  80      24.859  -2.137 103.615  1.00 26.30           C  
ATOM   2194  O   ALA L  80      26.066  -1.959 103.435  1.00 26.01           O  
ATOM   2195  CB  ALA L  80      23.705  -0.810 105.388  1.00 28.52           C  
ATOM   2196  N   GLU L  81      24.221  -3.304 103.658  1.00 25.99           N  
ATOM   2197  CA  GLU L  81      24.993  -4.536 103.482  1.00 26.13           C  
ATOM   2198  C   GLU L  81      25.274  -4.962 102.056  1.00 24.81           C  
ATOM   2199  O   GLU L  81      25.982  -5.985 101.912  1.00 24.97           O  
ATOM   2200  CB  GLU L  81      24.398  -5.740 104.212  1.00 30.47           C  
ATOM   2201  CG  GLU L  81      23.031  -5.589 104.858  1.00 35.00           C  
ATOM   2202  CD  GLU L  81      23.014  -5.281 106.328  1.00 37.83           C  
ATOM   2203  OE1 GLU L  81      23.986  -5.779 106.964  1.00 39.74           O  
ATOM   2204  OE2 GLU L  81      22.144  -4.617 106.896  1.00 39.61           O  
ATOM   2205  N   ASP L  82      24.800  -4.259 101.063  1.00 23.79           N  
ATOM   2206  CA  ASP L  82      24.975  -4.570  99.636  1.00 21.81           C  
ATOM   2207  C   ASP L  82      26.353  -4.122  99.231  1.00 21.04           C  
ATOM   2208  O   ASP L  82      26.811  -4.330  98.128  1.00 20.75           O  
ATOM   2209  CB  ASP L  82      23.848  -3.883  98.835  1.00 19.43           C  
ATOM   2210  CG  ASP L  82      22.533  -4.268  99.482  1.00 17.49           C  
ATOM   2211  OD1 ASP L  82      22.423  -5.259 100.192  1.00 16.09           O  
ATOM   2212  OD2 ASP L  82      21.608  -3.515  99.236  1.00 18.00           O  
ATOM   2213  N   GLU L  83      26.922  -3.438 100.197  1.00 20.49           N  
ATOM   2214  CA  GLU L  83      28.271  -2.877  99.977  1.00 19.87           C  
ATOM   2215  C   GLU L  83      29.234  -4.038 100.009  1.00 19.39           C  
ATOM   2216  O   GLU L  83      29.505  -4.527 101.128  1.00 19.72           O  
ATOM   2217  CB  GLU L  83      28.597  -1.952 101.166  1.00 20.62           C  
ATOM   2218  CG  GLU L  83      29.790  -1.026 100.881  1.00 20.47           C  
ATOM   2219  CD  GLU L  83      29.951   0.171 101.749  1.00 19.96           C  
ATOM   2220  OE1 GLU L  83      29.066   1.018 101.547  1.00 20.34           O  
ATOM   2221  OE2 GLU L  83      30.881   0.328 102.531  1.00 20.71           O  
ATOM   2222  N   ALA L  84      29.684  -4.490  98.896  1.00 18.80           N  
ATOM   2223  CA  ALA L  84      30.590  -5.652  98.800  1.00 17.65           C  
ATOM   2224  C   ALA L  84      31.295  -5.591  97.455  1.00 17.39           C  
ATOM   2225  O   ALA L  84      31.335  -4.498  96.873  1.00 17.75           O  
ATOM   2226  CB  ALA L  84      29.743  -6.906  98.942  1.00 15.99           C  
ATOM   2227  N   ASP L  85      31.842  -6.687  97.016  1.00 17.09           N  
ATOM   2228  CA  ASP L  85      32.510  -6.888  95.728  1.00 16.43           C  
ATOM   2229  C   ASP L  85      31.572  -7.892  94.981  1.00 15.86           C  
ATOM   2230  O   ASP L  85      31.203  -8.909  95.578  1.00 15.48           O  
ATOM   2231  CB  ASP L  85      33.901  -7.426  95.848  1.00 18.73           C  
ATOM   2232  CG  ASP L  85      35.026  -6.517  96.209  1.00 21.49           C  
ATOM   2233  OD1 ASP L  85      35.218  -5.405  95.690  1.00 22.67           O  
ATOM   2234  OD2 ASP L  85      35.822  -6.969  97.096  1.00 22.86           O  
ATOM   2235  N   TYR L  86      31.215  -7.560  93.765  1.00 15.33           N  
ATOM   2236  CA  TYR L  86      30.319  -8.395  92.971  1.00 15.01           C  
ATOM   2237  C   TYR L  86      31.001  -8.919  91.724  1.00 15.75           C  
ATOM   2238  O   TYR L  86      31.408  -8.190  90.785  1.00 15.98           O  
ATOM   2239  CB  TYR L  86      29.005  -7.673  92.657  1.00 12.89           C  
ATOM   2240  CG  TYR L  86      28.181  -7.232  93.846  1.00 11.83           C  
ATOM   2241  CD1 TYR L  86      28.604  -6.241  94.740  1.00 10.70           C  
ATOM   2242  CD2 TYR L  86      26.965  -7.875  94.079  1.00 10.14           C  
ATOM   2243  CE1 TYR L  86      27.855  -5.918  95.859  1.00  9.52           C  
ATOM   2244  CE2 TYR L  86      26.214  -7.522  95.188  1.00 10.19           C  
ATOM   2245  CZ  TYR L  86      26.644  -6.557  96.084  1.00  9.67           C  
ATOM   2246  OH  TYR L  86      25.805  -6.299  97.144  1.00  8.95           O  
ATOM   2247  N   TYR L  87      31.073 -10.247  91.669  1.00 16.03           N  
ATOM   2248  CA  TYR L  87      31.703 -10.906  90.533  1.00 16.27           C  
ATOM   2249  C   TYR L  87      30.559 -11.600  89.822  1.00 16.59           C  
ATOM   2250  O   TYR L  87      29.586 -12.030  90.430  1.00 16.86           O  
ATOM   2251  CB  TYR L  87      32.758 -11.944  90.959  1.00 18.20           C  
ATOM   2252  CG  TYR L  87      33.924 -11.318  91.700  1.00 18.47           C  
ATOM   2253  CD1 TYR L  87      33.853 -11.180  93.081  1.00 19.04           C  
ATOM   2254  CD2 TYR L  87      35.057 -10.838  91.071  1.00 19.54           C  
ATOM   2255  CE1 TYR L  87      34.851 -10.561  93.805  1.00 19.52           C  
ATOM   2256  CE2 TYR L  87      36.065 -10.207  91.797  1.00 20.63           C  
ATOM   2257  CZ  TYR L  87      35.968 -10.056  93.173  1.00 19.90           C  
ATOM   2258  OH  TYR L  87      36.991  -9.460  93.904  1.00 20.92           O  
ATOM   2259  N   CYS L  88      30.776 -11.644  88.552  1.00 17.39           N  
ATOM   2260  CA  CYS L  88      29.934 -12.279  87.533  1.00 18.03           C  
ATOM   2261  C   CYS L  88      30.857 -13.385  86.953  1.00 18.65           C  
ATOM   2262  O   CYS L  88      32.082 -13.214  87.130  1.00 18.60           O  
ATOM   2263  CB  CYS L  88      29.449 -11.345  86.447  1.00 16.70           C  
ATOM   2264  SG  CYS L  88      30.683 -11.037  85.178  1.00 17.67           S  
ATOM   2265  N   SER L  89      30.251 -14.408  86.396  1.00 18.88           N  
ATOM   2266  CA  SER L  89      30.973 -15.520  85.791  1.00 19.15           C  
ATOM   2267  C   SER L  89      29.929 -16.134  84.822  1.00 19.62           C  
ATOM   2268  O   SER L  89      28.738 -16.054  85.161  1.00 19.98           O  
ATOM   2269  CB  SER L  89      31.402 -16.662  86.664  1.00 19.09           C  
ATOM   2270  OG  SER L  89      30.306 -17.552  86.862  1.00 19.19           O  
ATOM   2271  N   SER L  90      30.502 -16.714  83.795  1.00 19.69           N  
ATOM   2272  CA  SER L  90      29.819 -17.391  82.715  1.00 19.61           C  
ATOM   2273  C   SER L  90      30.517 -18.659  82.220  1.00 19.58           C  
ATOM   2274  O   SER L  90      31.731 -18.828  82.152  1.00 19.47           O  
ATOM   2275  CB  SER L  90      29.674 -16.498  81.470  1.00 19.32           C  
ATOM   2276  OG  SER L  90      29.115 -17.375  80.452  1.00 19.05           O  
ATOM   2277  N   TYR L  91      29.666 -19.588  81.830  1.00 19.65           N  
ATOM   2278  CA  TYR L  91      30.150 -20.866  81.257  1.00 19.35           C  
ATOM   2279  C   TYR L  91      30.799 -20.507  79.935  1.00 18.95           C  
ATOM   2280  O   TYR L  91      30.428 -19.475  79.339  1.00 18.37           O  
ATOM   2281  CB  TYR L  91      28.874 -21.737  81.049  1.00 19.91           C  
ATOM   2282  CG  TYR L  91      29.230 -23.118  80.555  1.00 19.37           C  
ATOM   2283  CD1 TYR L  91      30.202 -23.860  81.227  1.00 19.32           C  
ATOM   2284  CD2 TYR L  91      28.635 -23.648  79.423  1.00 18.96           C  
ATOM   2285  CE1 TYR L  91      30.546 -25.138  80.766  1.00 19.94           C  
ATOM   2286  CE2 TYR L  91      29.013 -24.907  78.938  1.00 19.47           C  
ATOM   2287  CZ  TYR L  91      29.952 -25.667  79.612  1.00 19.11           C  
ATOM   2288  OH  TYR L  91      30.260 -26.926  79.142  1.00 18.59           O  
ATOM   2289  N   GLU L  92      31.740 -21.322  79.485  1.00 19.25           N  
ATOM   2290  CA  GLU L  92      32.342 -21.057  78.148  1.00 19.43           C  
ATOM   2291  C   GLU L  92      32.674 -22.378  77.493  1.00 18.84           C  
ATOM   2292  O   GLU L  92      33.599 -22.505  76.676  1.00 18.67           O  
ATOM   2293  CB  GLU L  92      33.579 -20.210  78.155  1.00 21.46           C  
ATOM   2294  CG  GLU L  92      34.794 -20.757  78.902  1.00 22.85           C  
ATOM   2295  CD  GLU L  92      35.888 -19.740  79.093  1.00 23.81           C  
ATOM   2296  OE1 GLU L  92      35.692 -18.690  78.446  1.00 24.35           O  
ATOM   2297  OE2 GLU L  92      36.847 -19.985  79.790  1.00 24.30           O  
ATOM   2298  N   GLY L  93      31.938 -23.383  77.883  1.00 19.04           N  
ATOM   2299  CA  GLY L  93      32.152 -24.721  77.312  1.00 19.34           C  
ATOM   2300  C   GLY L  93      33.365 -25.452  77.830  1.00 19.62           C  
ATOM   2301  O   GLY L  93      34.301 -24.949  78.454  1.00 19.97           O  
ATOM   2302  N   SER L  94      33.317 -26.737  77.592  1.00 19.69           N  
ATOM   2303  CA  SER L  94      34.386 -27.663  77.963  1.00 20.62           C  
ATOM   2304  C   SER L  94      34.600 -27.734  79.464  1.00 20.61           C  
ATOM   2305  O   SER L  94      35.676 -28.073  79.953  1.00 20.09           O  
ATOM   2306  CB  SER L  94      35.582 -27.387  77.091  1.00 21.15           C  
ATOM   2307  OG  SER L  94      35.233 -27.507  75.684  1.00 22.19           O  
ATOM   2308  N   ASP L  95      33.482 -27.516  80.167  1.00 21.03           N  
ATOM   2309  CA  ASP L  95      33.339 -27.618  81.624  1.00 21.23           C  
ATOM   2310  C   ASP L  95      33.839 -26.437  82.431  1.00 21.56           C  
ATOM   2311  O   ASP L  95      33.699 -26.389  83.685  1.00 22.28           O  
ATOM   2312  CB  ASP L  95      33.973 -28.945  82.061  1.00 19.82           C  
ATOM   2313  CG  ASP L  95      33.185 -30.150  81.602  1.00 19.68           C  
ATOM   2314  OD1 ASP L  95      31.976 -30.085  81.312  1.00 19.88           O  
ATOM   2315  OD2 ASP L  95      33.805 -31.230  81.531  1.00 19.08           O  
ATOM   2316  N   ASN L  95A     34.377 -25.489  81.758  1.00 21.79           N  
ATOM   2317  CA  ASN L  95A     35.038 -24.259  82.106  1.00 21.91           C  
ATOM   2318  C   ASN L  95A     34.135 -23.060  82.375  1.00 21.39           C  
ATOM   2319  O   ASN L  95A     33.078 -22.931  81.737  1.00 22.09           O  
ATOM   2320  CB  ASN L  95A     36.060 -23.936  80.960  1.00 24.18           C  
ATOM   2321  CG  ASN L  95A     36.906 -25.151  80.558  1.00 25.41           C  
ATOM   2322  OD1 ASN L  95A     37.472 -25.843  81.449  1.00 25.99           O  
ATOM   2323  ND2 ASN L  95A     37.018 -25.432  79.252  1.00 25.47           N  
ATOM   2324  N   PHE L  96      34.616 -22.196  83.229  1.00 20.77           N  
ATOM   2325  CA  PHE L  96      34.095 -20.931  83.737  1.00 19.69           C  
ATOM   2326  C   PHE L  96      35.153 -19.826  83.712  1.00 19.66           C  
ATOM   2327  O   PHE L  96      36.345 -19.880  84.001  1.00 19.52           O  
ATOM   2328  CB  PHE L  96      33.471 -21.095  85.141  1.00 16.48           C  
ATOM   2329  CG  PHE L  96      32.224 -21.934  85.026  1.00 14.36           C  
ATOM   2330  CD1 PHE L  96      31.002 -21.328  84.766  1.00 13.83           C  
ATOM   2331  CD2 PHE L  96      32.293 -23.316  85.133  1.00 13.88           C  
ATOM   2332  CE1 PHE L  96      29.830 -22.040  84.602  1.00 13.63           C  
ATOM   2333  CE2 PHE L  96      31.116 -24.071  84.995  1.00 13.29           C  
ATOM   2334  CZ  PHE L  96      29.893 -23.449  84.722  1.00 13.10           C  
ATOM   2335  N   VAL L  97      34.667 -18.689  83.265  1.00 19.91           N  
ATOM   2336  CA  VAL L  97      35.399 -17.431  83.049  1.00 19.47           C  
ATOM   2337  C   VAL L  97      34.796 -16.479  84.049  1.00 19.85           C  
ATOM   2338  O   VAL L  97      33.567 -16.554  84.278  1.00 19.54           O  
ATOM   2339  CB  VAL L  97      35.338 -17.024  81.564  1.00 19.20           C  
ATOM   2340  CG1 VAL L  97      33.952 -16.876  80.975  1.00 18.14           C  
ATOM   2341  CG2 VAL L  97      36.193 -15.808  81.307  1.00 19.46           C  
ATOM   2342  N   PHE L  98      35.688 -15.704  84.665  1.00 20.25           N  
ATOM   2343  CA  PHE L  98      35.110 -14.816  85.728  1.00 20.49           C  
ATOM   2344  C   PHE L  98      35.307 -13.384  85.281  1.00 20.90           C  
ATOM   2345  O   PHE L  98      36.292 -13.159  84.556  1.00 20.54           O  
ATOM   2346  CB  PHE L  98      35.702 -15.169  87.063  1.00 19.76           C  
ATOM   2347  CG  PHE L  98      34.938 -16.132  87.891  1.00 20.11           C  
ATOM   2348  CD1 PHE L  98      35.129 -17.495  87.742  1.00 20.71           C  
ATOM   2349  CD2 PHE L  98      34.026 -15.663  88.847  1.00 20.57           C  
ATOM   2350  CE1 PHE L  98      34.435 -18.386  88.574  1.00 21.94           C  
ATOM   2351  CE2 PHE L  98      33.297 -16.541  89.654  1.00 20.87           C  
ATOM   2352  CZ  PHE L  98      33.517 -17.922  89.526  1.00 21.68           C  
ATOM   2353  N   GLY L  99      34.385 -12.556  85.757  1.00 21.34           N  
ATOM   2354  CA  GLY L  99      34.439 -11.115  85.416  1.00 22.27           C  
ATOM   2355  C   GLY L  99      35.413 -10.424  86.348  1.00 22.88           C  
ATOM   2356  O   GLY L  99      35.714 -11.010  87.412  1.00 23.14           O  
ATOM   2357  N   THR L 100      35.912  -9.272  85.935  1.00 23.68           N  
ATOM   2358  CA  THR L 100      36.826  -8.477  86.828  1.00 24.49           C  
ATOM   2359  C   THR L 100      35.994  -8.176  88.073  1.00 24.28           C  
ATOM   2360  O   THR L 100      34.766  -8.630  88.100  1.00 25.16           O  
ATOM   2361  CB  THR L 100      37.485  -7.261  86.095  1.00 25.81           C  
ATOM   2362  OG1 THR L 100      36.446  -6.368  85.574  1.00 27.20           O  
ATOM   2363  CG2 THR L 100      38.441  -7.644  84.952  1.00 26.09           C  
ATOM   2364  N   GLY L 101      36.368  -7.540  89.160  1.00 23.75           N  
ATOM   2365  CA  GLY L 101      35.252  -7.464  90.188  1.00 23.21           C  
ATOM   2366  C   GLY L 101      34.528  -6.135  90.024  1.00 23.12           C  
ATOM   2367  O   GLY L 101      34.846  -5.247  89.237  1.00 22.59           O  
ATOM   2368  N   THR L 102      33.498  -5.961  90.837  1.00 23.18           N  
ATOM   2369  CA  THR L 102      32.756  -4.727  90.909  1.00 23.35           C  
ATOM   2370  C   THR L 102      32.496  -4.438  92.414  1.00 23.10           C  
ATOM   2371  O   THR L 102      31.872  -5.279  93.057  1.00 22.78           O  
ATOM   2372  CB  THR L 102      31.431  -4.547  90.147  1.00 23.46           C  
ATOM   2373  OG1 THR L 102      31.847  -4.381  88.753  1.00 24.74           O  
ATOM   2374  CG2 THR L 102      30.712  -3.281  90.681  1.00 24.33           C  
ATOM   2375  N   LYS L 103      32.969  -3.259  92.757  1.00 23.06           N  
ATOM   2376  CA  LYS L 103      32.808  -2.802  94.164  1.00 22.85           C  
ATOM   2377  C   LYS L 103      31.723  -1.752  94.268  1.00 22.32           C  
ATOM   2378  O   LYS L 103      31.863  -0.656  93.692  1.00 21.88           O  
ATOM   2379  CB  LYS L 103      34.161  -2.310  94.651  1.00 24.18           C  
ATOM   2380  CG  LYS L 103      34.393  -2.576  96.132  1.00 25.63           C  
ATOM   2381  CD  LYS L 103      34.109  -1.292  96.889  1.00 27.33           C  
ATOM   2382  CE  LYS L 103      33.943  -1.564  98.375  1.00 29.82           C  
ATOM   2383  NZ  LYS L 103      33.163  -2.786  98.680  1.00 31.31           N  
ATOM   2384  N   VAL L 104      30.641  -2.127  94.959  1.00 22.14           N  
ATOM   2385  CA  VAL L 104      29.519  -1.225  95.145  1.00 22.11           C  
ATOM   2386  C   VAL L 104      29.486  -0.747  96.632  1.00 22.05           C  
ATOM   2387  O   VAL L 104      29.368  -1.568  97.529  1.00 21.36           O  
ATOM   2388  CB  VAL L 104      28.127  -1.644  94.717  1.00 22.02           C  
ATOM   2389  CG1 VAL L 104      28.023  -2.867  93.874  1.00 21.85           C  
ATOM   2390  CG2 VAL L 104      27.214  -1.707  95.976  1.00 22.39           C  
ATOM   2391  N   THR L 105      29.595   0.568  96.654  1.00 22.12           N  
ATOM   2392  CA  THR L 105      29.622   1.506  97.768  1.00 21.72           C  
ATOM   2393  C   THR L 105      28.229   2.111  98.021  1.00 21.49           C  
ATOM   2394  O   THR L 105      27.657   2.598  97.008  1.00 21.26           O  
ATOM   2395  CB  THR L 105      30.749   2.591  97.519  1.00 22.49           C  
ATOM   2396  OG1 THR L 105      30.187   3.884  97.156  1.00 22.91           O  
ATOM   2397  CG2 THR L 105      31.802   2.198  96.447  1.00 23.14           C  
ATOM   2398  N   VAL L 106      27.688   2.051  99.254  1.00 20.65           N  
ATOM   2399  CA  VAL L 106      26.342   2.606  99.578  1.00 19.59           C  
ATOM   2400  C   VAL L 106      26.666   3.936 100.290  1.00 19.38           C  
ATOM   2401  O   VAL L 106      27.434   3.961 101.247  1.00 18.57           O  
ATOM   2402  CB  VAL L 106      25.431   1.620 100.297  1.00 18.99           C  
ATOM   2403  CG1 VAL L 106      23.993   2.106 100.562  1.00 17.24           C  
ATOM   2404  CG2 VAL L 106      25.315   0.274  99.587  1.00 17.84           C  
ATOM   2405  N   LEU L 106A     26.131   4.976  99.673  1.00 19.11           N  
ATOM   2406  CA  LEU L 106A     26.285   6.403  99.986  1.00 18.40           C  
ATOM   2407  C   LEU L 106A     25.215   6.880 100.986  1.00 17.98           C  
ATOM   2408  O   LEU L 106A     24.118   6.319 101.129  1.00 17.77           O  
ATOM   2409  CB  LEU L 106A     26.284   7.276  98.750  1.00 18.18           C  
ATOM   2410  CG  LEU L 106A     27.275   7.708  97.757  1.00 16.48           C  
ATOM   2411  CD1 LEU L 106A     28.495   6.827  97.673  1.00 15.75           C  
ATOM   2412  CD2 LEU L 106A     26.611   7.689  96.323  1.00 15.77           C  
ATOM   2413  N   GLY L 107      25.624   7.968 101.662  1.00 17.36           N  
ATOM   2414  CA  GLY L 107      24.776   8.544 102.714  1.00 17.22           C  
ATOM   2415  C   GLY L 107      24.485   7.654 103.923  1.00 16.57           C  
ATOM   2416  O   GLY L 107      23.348   7.680 104.465  1.00 16.87           O  
ATOM   2417  N   GLN L 108      25.422   6.854 104.413  1.00 15.84           N  
ATOM   2418  CA  GLN L 108      25.173   5.981 105.602  1.00 14.34           C  
ATOM   2419  C   GLN L 108      25.412   6.947 106.775  1.00 13.07           C  
ATOM   2420  O   GLN L 108      26.323   7.770 106.669  1.00 13.40           O  
ATOM   2421  CB  GLN L 108      26.043   4.766 105.731  1.00 14.39           C  
ATOM   2422  CG  GLN L 108      25.533   3.504 105.054  1.00 14.70           C  
ATOM   2423  CD  GLN L 108      26.617   2.515 104.701  1.00 15.06           C  
ATOM   2424  OE1 GLN L 108      27.157   2.571 103.587  1.00 16.41           O  
ATOM   2425  NE2 GLN L 108      26.926   1.598 105.590  1.00 13.78           N  
ATOM   2426  N   PRO L 109      24.572   6.814 107.746  1.00 12.30           N  
ATOM   2427  CA  PRO L 109      24.650   7.670 108.931  1.00 11.79           C  
ATOM   2428  C   PRO L 109      25.948   7.452 109.672  1.00 11.17           C  
ATOM   2429  O   PRO L 109      26.521   6.376 109.641  1.00 10.98           O  
ATOM   2430  CB  PRO L 109      23.406   7.357 109.728  1.00 11.48           C  
ATOM   2431  CG  PRO L 109      22.851   6.104 109.210  1.00 11.45           C  
ATOM   2432  CD  PRO L 109      23.468   5.864 107.845  1.00 12.36           C  
TER    2433      PRO L 109                                                      
