# Supplementary material for: SARS-CoV-2 Spike Protein Interaction Space
Source: Int J Mol Sci. 2023 Jul 27;24(15):12058. doi: 10.3390/ijms241512058 (PMC10418891; doi:10.3390/ijms241512058)
Supplement: Supplementary file 1 [file ijms-24-12058-s001.zip › Supplementary Material File S1/1EEQ.pdb]

REMARK 950 NUMBERING  Kabat
REMARK 950 METHOD     X-ray crystal structure
REMARK 950 RESOLUTION 1.500
REMARK 950 R-FACTOR   0.211
REMARK 950 R-FREE     0.238
REMARK 950 CHAIN-TYPE LABEL ORIGINAL
REMARK 950 CHAIN L    L    A
REMARK 950 CHAIN L    L    B
REMARK 950 MOLECULE : A : KAPPA-4 IMMUNOGLOBULIN (LIGHT CHAIN)
REMARK 950 SPECIES  : A : HOMO SAPIENS
SEQRES   1 L 114  ASP ILE VAL LEU THR GLN SER PRO ASP SER LEU ALA VAL          
SEQRES   2 L 114  SER LEU GLY GLU ARG ALA THR ILE ASN CYS LYS SER SER          
SEQRES   3 L 114  GLN SER VAL LEU ASP SER SER ASN SER LYS ASN TYR LEU          
SEQRES   4 L 114  ALA TRP TYR GLN GLN LYS PRO GLY GLN PRO PRO LYS LEU          
SEQRES   5 L 114  LEU ILE TYR TRP ALA SER THR ARG GLU SER GLY VAL PRO          
SEQRES   6 L 114  ASP ARG PHE SER GLY SER GLY SER GLY THR ASP PHE THR          
SEQRES   7 L 114  LEU THR ILE SER SER LEU GLN ALA GLU ASP VAL ALA VAL          
SEQRES   8 L 114  TYR TYR CYS GLN GLN TYR TYR SER HIS PRO TYR SER PHE          
SEQRES   9 L 114  GLY GLN GLY THR LYS LEU GLU ILE LYS ARG                      
SEQRES   1 L 114  ASP ILE VAL LEU THR GLN SER PRO ASP SER LEU ALA VAL          
SEQRES   2 L 114  SER LEU GLY GLU ARG ALA THR ILE ASN CYS LYS SER SER          
SEQRES   3 L 114  GLN SER VAL LEU ASP SER SER ASN SER LYS ASN TYR LEU          
SEQRES   4 L 114  ALA TRP TYR GLN GLN LYS PRO GLY GLN PRO PRO LYS LEU          
SEQRES   5 L 114  LEU ILE TYR TRP ALA SER THR ARG GLU SER GLY VAL PRO          
SEQRES   6 L 114  ASP ARG PHE SER GLY SER GLY SER GLY THR ASP PHE THR          
SEQRES   7 L 114  LEU THR ILE SER SER LEU GLN ALA GLU ASP VAL ALA VAL          
SEQRES   8 L 114  TYR TYR CYS GLN GLN TYR TYR SER HIS PRO TYR SER PHE          
SEQRES   9 L 114  GLY GLN GLY THR LYS LEU GLU ILE LYS ARG                      
ATOM      1  N   ASP L   1      39.812  18.970  19.647  1.00 20.59           N  
ATOM      2  CA  ASP L   1      38.538  19.722  19.480  1.00 20.07           C  
ATOM      3  C   ASP L   1      37.665  19.021  18.454  1.00 19.48           C  
ATOM      4  O   ASP L   1      38.164  18.312  17.585  1.00 19.81           O  
ATOM      5  CB  ASP L   1      38.821  21.156  19.038  1.00 20.78           C  
ATOM      6  CG  ASP L   1      39.755  21.883  19.987  1.00 21.19           C  
ATOM      7  OD1 ASP L   1      39.766  21.548  21.190  1.00 22.21           O  
ATOM      8  OD2 ASP L   1      40.456  22.804  19.534  1.00 21.91           O  
ATOM      9  N   ILE L   2      36.358  19.231  18.554  1.00 18.63           N  
ATOM     10  CA  ILE L   2      35.418  18.583  17.654  1.00 17.99           C  
ATOM     11  C   ILE L   2      35.259  19.306  16.320  1.00 17.99           C  
ATOM     12  O   ILE L   2      35.023  20.516  16.272  1.00 18.00           O  
ATOM     13  CB  ILE L   2      34.042  18.437  18.336  1.00 17.19           C  
ATOM     14  CG1 ILE L   2      34.201  17.676  19.657  1.00 17.00           C  
ATOM     15  CG2 ILE L   2      33.088  17.682  17.421  1.00 16.81           C  
ATOM     16  CD1 ILE L   2      32.921  17.546  20.458  1.00 17.25           C  
ATOM     17  N   VAL L   3      35.402  18.545  15.239  1.00 17.82           N  
ATOM     18  CA  VAL L   3      35.285  19.066  13.882  1.00 18.13           C  
ATOM     19  C   VAL L   3      34.054  18.474  13.200  1.00 17.87           C  
ATOM     20  O   VAL L   3      33.831  17.261  13.250  1.00 17.90           O  
ATOM     21  CB  VAL L   3      36.543  18.715  13.052  1.00 18.30           C  
ATOM     22  CG1 VAL L   3      36.352  19.125  11.596  1.00 18.76           C  
ATOM     23  CG2 VAL L   3      37.765  19.419  13.646  1.00 18.81           C  
ATOM     24  N   LEU L   4      33.257  19.337  12.571  1.00 17.40           N  
ATOM     25  CA  LEU L   4      32.044  18.908  11.879  1.00 17.74           C  
ATOM     26  C   LEU L   4      32.221  18.966  10.369  1.00 17.81           C  
ATOM     27  O   LEU L   4      32.673  19.975   9.827  1.00 18.06           O  
ATOM     28  CB  LEU L   4      30.861  19.796  12.274  1.00 17.47           C  
ATOM     29  CG  LEU L   4      30.495  19.856  13.757  1.00 18.24           C  
ATOM     30  CD1 LEU L   4      29.245  20.706  13.934  1.00 18.28           C  
ATOM     31  CD2 LEU L   4      30.252  18.458  14.286  1.00 18.96           C  
ATOM     32  N   THR L   5      31.857  17.884   9.690  1.00 18.19           N  
ATOM     33  CA  THR L   5      31.972  17.821   8.239  1.00 18.82           C  
ATOM     34  C   THR L   5      30.601  17.566   7.635  1.00 18.90           C  
ATOM     35  O   THR L   5      29.965  16.550   7.928  1.00 18.78           O  
ATOM     36  CB  THR L   5      32.921  16.690   7.806  1.00 19.27           C  
ATOM     37  OG1 THR L   5      34.212  16.899   8.392  1.00 19.97           O  
ATOM     38  CG2 THR L   5      33.054  16.658   6.293  1.00 19.79           C  
ATOM     39  N   GLN L   6      30.143  18.487   6.794  1.00 19.12           N  
ATOM     40  CA  GLN L   6      28.838  18.343   6.167  1.00 19.81           C  
ATOM     41  C   GLN L   6      28.964  17.750   4.774  1.00 20.93           C  
ATOM     42  O   GLN L   6      30.024  17.819   4.146  1.00 21.05           O  
ATOM     43  CB  GLN L   6      28.133  19.698   6.071  1.00 19.07           C  
ATOM     44  CG  GLN L   6      28.048  20.444   7.389  1.00 18.63           C  
ATOM     45  CD  GLN L   6      27.258  21.732   7.283  1.00 17.80           C  
ATOM     46  OE1 GLN L   6      27.472  22.660   8.056  1.00 17.60           O  
ATOM     47  NE2 GLN L   6      26.320  21.784   6.342  1.00 18.05           N  
ATOM     48  N   SER L   7      27.873  17.162   4.301  1.00 22.19           N  
ATOM     49  CA  SER L   7      27.835  16.563   2.975  1.00 23.59           C  
ATOM     50  C   SER L   7      26.390  16.476   2.507  1.00 24.36           C  
ATOM     51  O   SER L   7      25.499  16.117   3.276  1.00 24.57           O  
ATOM     52  CB  SER L   7      28.457  15.165   3.006  1.00 23.91           C  
ATOM     53  OG  SER L   7      27.761  14.325   3.907  1.00 25.42           O  
ATOM     54  N   PRO L   8      26.134  16.831   1.240  1.00 25.12           N  
ATOM     55  CA  PRO L   8      27.119  17.303   0.263  1.00 25.76           C  
ATOM     56  C   PRO L   8      27.456  18.771   0.514  1.00 26.53           C  
ATOM     57  O   PRO L   8      26.926  19.386   1.440  1.00 26.30           O  
ATOM     58  CB  PRO L   8      26.381  17.114  -1.050  1.00 25.62           C  
ATOM     59  CG  PRO L   8      24.999  17.560  -0.656  1.00 25.58           C  
ATOM     60  CD  PRO L   8      24.810  16.723   0.601  1.00 25.26           C  
ATOM     61  N   ASP L   9      28.332  19.331  -0.314  1.00 27.53           N  
ATOM     62  CA  ASP L   9      28.705  20.736  -0.186  1.00 28.64           C  
ATOM     63  C   ASP L   9      27.636  21.601  -0.838  1.00 29.04           C  
ATOM     64  O   ASP L   9      27.416  22.746  -0.444  1.00 28.78           O  
ATOM     65  CB  ASP L   9      30.062  20.992  -0.846  1.00 29.51           C  
ATOM     66  CG  ASP L   9      31.201  20.337  -0.099  1.00 30.33           C  
ATOM     67  OD1 ASP L   9      31.423  20.703   1.076  1.00 30.97           O  
ATOM     68  OD2 ASP L   9      31.870  19.457  -0.678  1.00 31.18           O  
ATOM     69  N   SER L  10      26.970  21.038  -1.838  1.00 29.64           N  
ATOM     70  CA  SER L  10      25.907  21.734  -2.548  1.00 30.54           C  
ATOM     71  C   SER L  10      24.852  20.713  -2.950  1.00 31.04           C  
ATOM     72  O   SER L  10      25.176  19.579  -3.306  1.00 31.13           O  
ATOM     73  CB  SER L  10      26.465  22.432  -3.790  1.00 30.91           C  
ATOM     74  OG  SER L  10      27.084  21.500  -4.658  1.00 31.80           O  
ATOM     75  N   LEU L  11      23.589  21.116  -2.885  1.00 31.76           N  
ATOM     76  CA  LEU L  11      22.495  20.224  -3.233  1.00 32.39           C  
ATOM     77  C   LEU L  11      21.441  20.919  -4.081  1.00 32.65           C  
ATOM     78  O   LEU L  11      20.943  21.986  -3.723  1.00 32.66           O  
ATOM     79  CB  LEU L  11      21.844  19.672  -1.961  1.00 32.62           C  
ATOM     80  CG  LEU L  11      20.654  18.727  -2.146  1.00 32.92           C  
ATOM     81  CD1 LEU L  11      21.080  17.507  -2.953  1.00 33.21           C  
ATOM     82  CD2 LEU L  11      20.125  18.306  -0.783  1.00 33.02           C  
ATOM     83  N   ALA L  12      21.114  20.305  -5.213  1.00 32.84           N  
ATOM     84  CA  ALA L  12      20.106  20.834  -6.119  1.00 33.22           C  
ATOM     85  C   ALA L  12      18.902  19.905  -6.028  1.00 33.55           C  
ATOM     86  O   ALA L  12      19.004  18.720  -6.340  1.00 33.69           O  
ATOM     87  CB  ALA L  12      20.646  20.865  -7.541  1.00 33.10           C  
ATOM     88  N   VAL L  13      17.768  20.442  -5.595  1.00 33.77           N  
ATOM     89  CA  VAL L  13      16.562  19.636  -5.448  1.00 34.38           C  
ATOM     90  C   VAL L  13      15.347  20.278  -6.108  1.00 34.67           C  
ATOM     91  O   VAL L  13      15.141  21.488  -6.015  1.00 34.76           O  
ATOM     92  CB  VAL L  13      16.249  19.391  -3.953  1.00 34.47           C  
ATOM     93  CG1 VAL L  13      15.006  18.530  -3.810  1.00 34.77           C  
ATOM     94  CG2 VAL L  13      17.433  18.720  -3.280  1.00 34.51           C  
ATOM     95  N   SER L  14      14.545  19.454  -6.777  1.00 35.13           N  
ATOM     96  CA  SER L  14      13.346  19.937  -7.448  1.00 35.75           C  
ATOM     97  C   SER L  14      12.362  20.480  -6.419  1.00 35.94           C  
ATOM     98  O   SER L  14      12.310  20.006  -5.283  1.00 36.08           O  
ATOM     99  CB  SER L  14      12.691  18.804  -8.243  1.00 35.84           C  
ATOM    100  OG  SER L  14      13.575  18.288  -9.225  1.00 36.54           O  
ATOM    101  N   LEU L  15      11.581  21.475  -6.822  1.00 36.22           N  
ATOM    102  CA  LEU L  15      10.602  22.088  -5.935  1.00 36.41           C  
ATOM    103  C   LEU L  15       9.605  21.053  -5.416  1.00 36.52           C  
ATOM    104  O   LEU L  15       9.131  20.199  -6.167  1.00 36.54           O  
ATOM    105  CB  LEU L  15       9.857  23.203  -6.676  1.00 36.89           C  
ATOM    106  CG  LEU L  15       8.848  24.041  -5.886  1.00 36.95           C  
ATOM    107  CD1 LEU L  15       9.555  24.750  -4.738  1.00 37.19           C  
ATOM    108  CD2 LEU L  15       8.195  25.058  -6.813  1.00 37.28           C  
ATOM    109  N   GLY L  16       9.298  21.130  -4.124  1.00 36.46           N  
ATOM    110  CA  GLY L  16       8.356  20.200  -3.529  1.00 36.24           C  
ATOM    111  C   GLY L  16       8.962  18.871  -3.119  1.00 35.97           C  
ATOM    112  O   GLY L  16       8.312  18.074  -2.441  1.00 36.29           O  
ATOM    113  N   GLU L  17      10.203  18.624  -3.530  1.00 35.64           N  
ATOM    114  CA  GLU L  17      10.890  17.381  -3.193  1.00 35.12           C  
ATOM    115  C   GLU L  17      11.542  17.482  -1.816  1.00 34.86           C  
ATOM    116  O   GLU L  17      11.614  18.564  -1.233  1.00 34.89           O  
ATOM    117  CB  GLU L  17      11.956  17.061  -4.245  1.00 35.40           C  
ATOM    118  CG  GLU L  17      11.409  16.756  -5.635  1.00 35.42           C  
ATOM    119  CD  GLU L  17      10.586  15.480  -5.677  1.00 35.82           C  
ATOM    120  OE1 GLU L  17      11.130  14.407  -5.340  1.00 35.51           O  
ATOM    121  OE2 GLU L  17       9.396  15.548  -6.052  1.00 35.92           O  
ATOM    122  N   ARG L  18      12.015  16.352  -1.301  1.00 34.36           N  
ATOM    123  CA  ARG L  18      12.653  16.328   0.009  1.00 33.63           C  
ATOM    124  C   ARG L  18      14.151  16.585  -0.114  1.00 32.75           C  
ATOM    125  O   ARG L  18      14.805  16.084  -1.029  1.00 32.74           O  
ATOM    126  CB  ARG L  18      12.424  14.977   0.693  1.00 34.44           C  
ATOM    127  CG  ARG L  18      12.924  14.937   2.128  1.00 35.38           C  
ATOM    128  CD  ARG L  18      12.744  13.570   2.760  1.00 36.47           C  
ATOM    129  NE  ARG L  18      13.552  12.552   2.096  1.00 37.42           N  
ATOM    130  CZ  ARG L  18      13.630  11.285   2.493  1.00 38.17           C  
ATOM    131  NH1 ARG L  18      12.947  10.877   3.556  1.00 38.56           N  
ATOM    132  NH2 ARG L  18      14.391  10.425   1.828  1.00 38.56           N  
ATOM    133  N   ALA L  19      14.688  17.371   0.814  1.00 31.44           N  
ATOM    134  CA  ALA L  19      16.111  17.690   0.815  1.00 30.08           C  
ATOM    135  C   ALA L  19      16.762  17.103   2.061  1.00 29.25           C  
ATOM    136  O   ALA L  19      16.246  17.251   3.168  1.00 29.17           O  
ATOM    137  CB  ALA L  19      16.310  19.198   0.782  1.00 29.95           C  
ATOM    138  N   THR L  20      17.897  16.439   1.877  1.00 28.24           N  
ATOM    139  CA  THR L  20      18.606  15.826   2.992  1.00 27.28           C  
ATOM    140  C   THR L  20      20.067  16.263   3.046  1.00 26.25           C  
ATOM    141  O   THR L  20      20.815  16.084   2.086  1.00 26.25           O  
ATOM    142  CB  THR L  20      18.538  14.290   2.892  1.00 28.05           C  
ATOM    143  OG1 THR L  20      17.172  13.870   2.994  1.00 28.57           O  
ATOM    144  CG2 THR L  20      19.348  13.643   3.998  1.00 28.15           C  
ATOM    145  N   ILE L  21      20.463  16.841   4.177  1.00 24.91           N  
ATOM    146  CA  ILE L  21      21.833  17.306   4.376  1.00 23.90           C  
ATOM    147  C   ILE L  21      22.432  16.593   5.585  1.00 23.24           C  
ATOM    148  O   ILE L  21      21.801  16.501   6.637  1.00 22.78           O  
ATOM    149  CB  ILE L  21      21.869  18.831   4.609  1.00 23.90           C  
ATOM    150  CG1 ILE L  21      21.253  19.546   3.403  1.00 24.05           C  
ATOM    151  CG2 ILE L  21      23.308  19.297   4.835  1.00 24.10           C  
ATOM    152  CD1 ILE L  21      21.184  21.047   3.545  1.00 23.95           C  
ATOM    153  N   ASN L  22      23.653  16.096   5.434  1.00 22.69           N  
ATOM    154  CA  ASN L  22      24.309  15.367   6.511  1.00 22.49           C  
ATOM    155  C   ASN L  22      25.420  16.137   7.214  1.00 21.62           C  
ATOM    156  O   ASN L  22      26.054  17.015   6.631  1.00 21.12           O  
ATOM    157  CB  ASN L  22      24.872  14.053   5.967  1.00 23.65           C  
ATOM    158  CG  ASN L  22      23.808  13.195   5.311  1.00 24.60           C  
ATOM    159  OD1 ASN L  22      22.831  12.804   5.947  1.00 25.91           O  
ATOM    160  ND2 ASN L  22      23.992  12.903   4.030  1.00 25.86           N  
ATOM    161  N   CYS L  23      25.643  15.788   8.477  1.00 20.61           N  
ATOM    162  CA  CYS L  23      26.682  16.404   9.294  1.00 20.20           C  
ATOM    163  C   CYS L  23      27.320  15.306  10.138  1.00 19.91           C  
ATOM    164  O   CYS L  23      26.633  14.594  10.870  1.00 20.38           O  
ATOM    165  CB  CYS L  23      26.079  17.483  10.202  1.00 19.36           C  
ATOM    166  SG  CYS L  23      27.277  18.322  11.296  1.00 19.49           S  
ATOM    167  N   LYS L  24      28.633  15.152  10.014  1.00 19.83           N  
ATOM    168  CA  LYS L  24      29.352  14.136  10.775  1.00 19.53           C  
ATOM    169  C   LYS L  24      30.347  14.796  11.725  1.00 19.64           C  
ATOM    170  O   LYS L  24      31.139  15.641  11.313  1.00 19.72           O  
ATOM    171  CB  LYS L  24      30.083  13.188   9.825  1.00 20.04           C  
ATOM    172  N   SER L  25      30.294  14.423  12.999  1.00 19.41           N  
ATOM    173  CA  SER L  25      31.214  14.984  13.983  1.00 19.71           C  
ATOM    174  C   SER L  25      32.379  14.027  14.224  1.00 19.62           C  
ATOM    175  O   SER L  25      32.210  12.807  14.195  1.00 19.92           O  
ATOM    176  CB  SER L  25      30.486  15.279  15.301  1.00 19.90           C  
ATOM    177  OG  SER L  25      29.863  14.123  15.828  1.00 20.98           O  
ATOM    178  N   SER L  26      33.563  14.589  14.447  1.00 19.70           N  
ATOM    179  CA  SER L  26      34.761  13.788  14.682  1.00 20.04           C  
ATOM    180  C   SER L  26      34.682  13.063  16.018  1.00 20.65           C  
ATOM    181  O   SER L  26      35.344  12.044  16.227  1.00 21.08           O  
ATOM    182  CB  SER L  26      36.004  14.683  14.651  1.00 19.61           C  
ATOM    183  OG  SER L  26      35.911  15.713  15.618  1.00 19.34           O  
ATOM    184  N   GLN L  27      33.866  13.598  16.917  1.00 20.90           N  
ATOM    185  CA  GLN L  27      33.678  13.029  18.244  1.00 21.38           C  
ATOM    186  C   GLN L  27      32.189  13.061  18.574  1.00 20.88           C  
ATOM    187  O   GLN L  27      31.470  13.967  18.148  1.00 20.69           O  
ATOM    188  CB  GLN L  27      34.471  13.847  19.270  1.00 22.89           C  
ATOM    189  CG  GLN L  27      34.288  13.428  20.720  1.00 25.62           C  
ATOM    190  CD  GLN L  27      35.166  14.225  21.676  1.00 26.74           C  
ATOM    191  OE1 GLN L  27      35.071  14.078  22.896  1.00 28.59           O  
ATOM    192  NE2 GLN L  27      36.033  15.065  21.124  1.00 27.69           N  
ATOM    193  N   SER L  27A     31.725  12.067  19.323  1.00 20.23           N  
ATOM    194  CA  SER L  27A     30.318  12.002  19.697  1.00 19.48           C  
ATOM    195  C   SER L  27A     29.911  13.240  20.482  1.00 19.16           C  
ATOM    196  O   SER L  27A     30.668  13.736  21.313  1.00 19.29           O  
ATOM    197  CB  SER L  27A     30.053  10.758  20.547  1.00 19.72           C  
ATOM    198  OG  SER L  27A     28.703  10.714  20.978  1.00 19.76           O  
ATOM    199  N   VAL L  27B     28.717  13.752  20.203  1.00 18.29           N  
ATOM    200  CA  VAL L  27B     28.217  14.916  20.921  1.00 18.12           C  
ATOM    201  C   VAL L  27B     27.006  14.518  21.761  1.00 18.24           C  
ATOM    202  O   VAL L  27B     26.203  15.356  22.155  1.00 17.54           O  
ATOM    203  CB  VAL L  27B     27.840  16.075  19.961  1.00 17.75           C  
ATOM    204  CG1 VAL L  27B     29.089  16.588  19.255  1.00 17.53           C  
ATOM    205  CG2 VAL L  27B     26.807  15.613  18.948  1.00 17.94           C  
ATOM    206  N   LEU L  27C     26.891  13.222  22.033  1.00 18.91           N  
ATOM    207  CA  LEU L  27C     25.802  12.694  22.846  1.00 20.51           C  
ATOM    208  C   LEU L  27C     26.213  12.678  24.314  1.00 21.82           C  
ATOM    209  O   LEU L  27C     27.238  12.095  24.672  1.00 22.24           O  
ATOM    210  CB  LEU L  27C     25.451  11.270  22.400  1.00 20.36           C  
ATOM    211  CG  LEU L  27C     24.490  10.465  23.284  1.00 20.49           C  
ATOM    212  CD1 LEU L  27C     23.141  11.166  23.391  1.00 20.44           C  
ATOM    213  CD2 LEU L  27C     24.320   9.073  22.692  1.00 20.54           C  
ATOM    214  N   ASP L  27D     25.428  13.338  25.157  1.00 23.21           N  
ATOM    215  CA  ASP L  27D     25.702  13.366  26.588  1.00 25.15           C  
ATOM    216  C   ASP L  27D     25.003  12.146  27.175  1.00 25.94           C  
ATOM    217  O   ASP L  27D     23.779  12.122  27.286  1.00 25.89           O  
ATOM    218  CB  ASP L  27D     25.139  14.635  27.227  1.00 26.31           C  
ATOM    219  CG  ASP L  27D     25.427  14.712  28.713  1.00 27.53           C  
ATOM    220  OD1 ASP L  27D     25.124  13.732  29.423  1.00 28.38           O  
ATOM    221  OD2 ASP L  27D     25.949  15.748  29.175  1.00 28.85           O  
ATOM    222  N   SER L  27E     25.790  11.142  27.545  1.00 27.16           N  
ATOM    223  CA  SER L  27E     25.265   9.897  28.097  1.00 28.41           C  
ATOM    224  C   SER L  27E     24.381  10.045  29.334  1.00 28.78           C  
ATOM    225  O   SER L  27E     23.503   9.214  29.569  1.00 29.13           O  
ATOM    226  CB  SER L  27E     26.422   8.948  28.417  1.00 28.82           C  
ATOM    227  OG  SER L  27E     27.309   9.531  29.358  1.00 30.44           O  
ATOM    228  N   SER L  27F     24.598  11.092  30.124  1.00 29.11           N  
ATOM    229  CA  SER L  27F     23.801  11.280  31.333  1.00 29.04           C  
ATOM    230  C   SER L  27F     22.370  11.736  31.063  1.00 28.55           C  
ATOM    231  O   SER L  27F     21.427  11.183  31.629  1.00 28.83           O  
ATOM    232  CB  SER L  27F     24.483  12.271  32.285  1.00 29.75           C  
ATOM    233  OG  SER L  27F     24.591  13.564  31.715  1.00 30.94           O  
ATOM    234  N   ASN L  28      22.205  12.735  30.199  1.00 27.48           N  
ATOM    235  CA  ASN L  28      20.872  13.251  29.889  1.00 26.21           C  
ATOM    236  C   ASN L  28      20.309  12.814  28.535  1.00 25.12           C  
ATOM    237  O   ASN L  28      19.216  13.237  28.151  1.00 24.99           O  
ATOM    238  CB  ASN L  28      20.862  14.779  29.960  1.00 26.48           C  
ATOM    239  CG  ASN L  28      21.889  15.409  29.044  1.00 26.44           C  
ATOM    240  OD1 ASN L  28      22.067  14.974  27.909  1.00 26.64           O  
ATOM    241  ND2 ASN L  28      22.554  16.452  29.526  1.00 26.71           N  
ATOM    242  N   SER L  29      21.053  11.982  27.814  1.00 24.05           N  
ATOM    243  CA  SER L  29      20.612  11.477  26.515  1.00 23.25           C  
ATOM    244  C   SER L  29      20.431  12.556  25.447  1.00 22.44           C  
ATOM    245  O   SER L  29      19.747  12.334  24.449  1.00 22.71           O  
ATOM    246  CB  SER L  29      19.297  10.707  26.675  1.00 23.57           C  
ATOM    247  OG  SER L  29      19.448   9.629  27.583  1.00 24.71           O  
ATOM    248  N   LYS L  30      21.041  13.718  25.652  1.00 21.57           N  
ATOM    249  CA  LYS L  30      20.929  14.808  24.684  1.00 20.47           C  
ATOM    250  C   LYS L  30      22.131  14.908  23.749  1.00 19.30           C  
ATOM    251  O   LYS L  30      23.275  14.719  24.167  1.00 18.48           O  
ATOM    252  CB  LYS L  30      20.781  16.157  25.397  1.00 21.45           C  
ATOM    253  CG  LYS L  30      19.488  16.379  26.168  1.00 22.37           C  
ATOM    254  CD  LYS L  30      19.559  17.713  26.906  1.00 23.92           C  
ATOM    255  CE  LYS L  30      18.293  18.022  27.691  1.00 24.64           C  
ATOM    256  NZ  LYS L  30      17.116  18.252  26.814  1.00 25.43           N  
ATOM    257  N   ASN L  31      21.855  15.203  22.481  1.00 17.91           N  
ATOM    258  CA  ASN L  31      22.895  15.401  21.473  1.00 16.79           C  
ATOM    259  C   ASN L  31      23.003  16.917  21.339  1.00 16.03           C  
ATOM    260  O   ASN L  31      22.030  17.579  20.986  1.00 15.19           O  
ATOM    261  CB  ASN L  31      22.477  14.791  20.130  1.00 16.83           C  
ATOM    262  CG  ASN L  31      22.642  13.284  20.092  1.00 17.75           C  
ATOM    263  OD1 ASN L  31      23.759  12.775  19.987  1.00 17.63           O  
ATOM    264  ND2 ASN L  31      21.531  12.561  20.194  1.00 18.29           N  
ATOM    265  N   TYR L  32      24.180  17.466  21.624  1.00 15.42           N  
ATOM    266  CA  TYR L  32      24.386  18.909  21.554  1.00 15.48           C  
ATOM    267  C   TYR L  32      24.749  19.334  20.144  1.00 15.21           C  
ATOM    268  O   TYR L  32      25.886  19.711  19.859  1.00 14.50           O  
ATOM    269  CB  TYR L  32      25.478  19.334  22.543  1.00 17.08           C  
ATOM    270  CG  TYR L  32      25.082  19.144  23.990  1.00 18.46           C  
ATOM    271  CD1 TYR L  32      24.520  17.945  24.433  1.00 19.26           C  
ATOM    272  CD2 TYR L  32      25.242  20.175  24.913  1.00 19.22           C  
ATOM    273  CE1 TYR L  32      24.122  17.782  25.755  1.00 19.72           C  
ATOM    274  CE2 TYR L  32      24.847  20.020  26.239  1.00 20.17           C  
ATOM    275  CZ  TYR L  32      24.286  18.821  26.650  1.00 20.37           C  
ATOM    276  OH  TYR L  32      23.888  18.664  27.958  1.00 21.92           O  
ATOM    277  N   LEU L  33      23.751  19.284  19.270  1.00 14.30           N  
ATOM    278  CA  LEU L  33      23.926  19.610  17.864  1.00 14.66           C  
ATOM    279  C   LEU L  33      22.767  20.492  17.406  1.00 14.22           C  
ATOM    280  O   LEU L  33      21.601  20.221  17.723  1.00 14.06           O  
ATOM    281  CB  LEU L  33      23.963  18.296  17.071  1.00 15.69           C  
ATOM    282  CG  LEU L  33      24.376  18.178  15.598  1.00 17.22           C  
ATOM    283  CD1 LEU L  33      23.383  18.877  14.687  1.00 18.43           C  
ATOM    284  CD2 LEU L  33      25.780  18.733  15.437  1.00 17.27           C  
ATOM    285  N   ALA L  34      23.090  21.555  16.678  1.00 13.84           N  
ATOM    286  CA  ALA L  34      22.078  22.469  16.169  1.00 13.21           C  
ATOM    287  C   ALA L  34      22.228  22.662  14.664  1.00 13.17           C  
ATOM    288  O   ALA L  34      23.281  22.383  14.092  1.00 13.57           O  
ATOM    289  CB  ALA L  34      22.183  23.818  16.882  1.00 13.29           C  
ATOM    290  N   TRP L  35      21.153  23.110  14.025  1.00 12.57           N  
ATOM    291  CA  TRP L  35      21.163  23.386  12.593  1.00 12.77           C  
ATOM    292  C   TRP L  35      20.711  24.812  12.349  1.00 12.50           C  
ATOM    293  O   TRP L  35      19.744  25.277  12.958  1.00 12.45           O  
ATOM    294  CB  TRP L  35      20.227  22.454  11.818  1.00 12.66           C  
ATOM    295  CG  TRP L  35      20.703  21.054  11.668  1.00 13.48           C  
ATOM    296  CD1 TRP L  35      20.362  19.980  12.441  1.00 13.40           C  
ATOM    297  CD2 TRP L  35      21.597  20.559  10.663  1.00 13.45           C  
ATOM    298  NE1 TRP L  35      20.984  18.846  11.976  1.00 13.87           N  
ATOM    299  CE2 TRP L  35      21.748  19.171  10.886  1.00 13.94           C  
ATOM    300  CE3 TRP L  35      22.283  21.154   9.594  1.00 13.99           C  
ATOM    301  CZ2 TRP L  35      22.560  18.364  10.078  1.00 14.42           C  
ATOM    302  CZ3 TRP L  35      23.091  20.351   8.787  1.00 13.73           C  
ATOM    303  CH2 TRP L  35      23.221  18.970   9.035  1.00 14.33           C  
ATOM    304  N   TYR L  36      21.415  25.493  11.447  1.00 12.72           N  
ATOM    305  CA  TYR L  36      21.105  26.869  11.087  1.00 12.81           C  
ATOM    306  C   TYR L  36      20.905  27.041   9.594  1.00 12.93           C  
ATOM    307  O   TYR L  36      21.436  26.282   8.791  1.00 13.01           O  
ATOM    308  CB  TYR L  36      22.230  27.825  11.491  1.00 12.81           C  
ATOM    309  CG  TYR L  36      22.404  28.023  12.971  1.00 12.89           C  
ATOM    310  CD1 TYR L  36      23.065  27.078  13.754  1.00 13.06           C  
ATOM    311  CD2 TYR L  36      21.892  29.159  13.596  1.00 12.92           C  
ATOM    312  CE1 TYR L  36      23.212  27.264  15.125  1.00 14.18           C  
ATOM    313  CE2 TYR L  36      22.032  29.352  14.959  1.00 13.98           C  
ATOM    314  CZ  TYR L  36      22.693  28.406  15.717  1.00 14.66           C  
ATOM    315  OH  TYR L  36      22.843  28.616  17.071  1.00 17.53           O  
ATOM    316  N   GLN L  37      20.140  28.067   9.248  1.00 13.49           N  
ATOM    317  CA  GLN L  37      19.878  28.432   7.865  1.00 14.69           C  
ATOM    318  C   GLN L  37      20.409  29.855   7.713  1.00 14.81           C  
ATOM    319  O   GLN L  37      20.271  30.671   8.624  1.00 14.92           O  
ATOM    320  CB  GLN L  37      18.375  28.437   7.597  1.00 15.56           C  
ATOM    321  CG  GLN L  37      17.993  28.860   6.187  1.00 17.36           C  
ATOM    322  CD  GLN L  37      16.510  29.156   6.066  1.00 18.23           C  
ATOM    323  OE1 GLN L  37      16.008  30.110   6.660  1.00 19.59           O  
ATOM    324  NE2 GLN L  37      15.802  28.331   5.307  1.00 18.85           N  
ATOM    325  N   GLN L  38      21.026  30.162   6.580  1.00 14.78           N  
ATOM    326  CA  GLN L  38      21.500  31.521   6.374  1.00 15.22           C  
ATOM    327  C   GLN L  38      21.387  31.936   4.913  1.00 15.86           C  
ATOM    328  O   GLN L  38      21.852  31.233   4.011  1.00 16.30           O  
ATOM    329  CB  GLN L  38      22.941  31.692   6.865  1.00 14.45           C  
ATOM    330  CG  GLN L  38      23.465  33.117   6.687  1.00 13.26           C  
ATOM    331  CD  GLN L  38      24.837  33.325   7.295  1.00 13.00           C  
ATOM    332  OE1 GLN L  38      25.712  32.468   7.185  1.00 13.52           O  
ATOM    333  NE2 GLN L  38      25.039  34.483   7.921  1.00 13.22           N  
ATOM    334  N   LYS L  39      20.742  33.077   4.699  1.00 16.98           N  
ATOM    335  CA  LYS L  39      20.544  33.629   3.366  1.00 18.31           C  
ATOM    336  C   LYS L  39      21.482  34.824   3.205  1.00 18.76           C  
ATOM    337  O   LYS L  39      21.907  35.425   4.190  1.00 19.10           O  
ATOM    338  CB  LYS L  39      19.088  34.064   3.201  1.00 18.98           C  
ATOM    339  CG  LYS L  39      18.095  32.927   3.415  1.00 20.32           C  
ATOM    340  CD  LYS L  39      16.660  33.386   3.245  1.00 21.67           C  
ATOM    341  CE  LYS L  39      15.695  32.232   3.458  1.00 22.57           C  
ATOM    342  NZ  LYS L  39      14.279  32.656   3.278  1.00 24.09           N  
ATOM    343  N   PRO L  40      21.802  35.197   1.958  1.00 19.22           N  
ATOM    344  CA  PRO L  40      22.700  36.328   1.705  1.00 19.45           C  
ATOM    345  C   PRO L  40      22.301  37.624   2.399  1.00 19.45           C  
ATOM    346  O   PRO L  40      21.136  38.026   2.371  1.00 20.14           O  
ATOM    347  CB  PRO L  40      22.666  36.444   0.183  1.00 19.53           C  
ATOM    348  CG  PRO L  40      22.490  34.993  -0.233  1.00 19.75           C  
ATOM    349  CD  PRO L  40      21.336  34.635   0.680  1.00 19.65           C  
ATOM    350  N   GLY L  41      23.281  38.268   3.028  1.00 19.39           N  
ATOM    351  CA  GLY L  41      23.035  39.524   3.715  1.00 19.74           C  
ATOM    352  C   GLY L  41      22.211  39.425   4.985  1.00 19.26           C  
ATOM    353  O   GLY L  41      21.733  40.437   5.505  1.00 19.88           O  
ATOM    354  N   GLN L  42      22.038  38.212   5.495  1.00 18.65           N  
ATOM    355  CA  GLN L  42      21.262  38.019   6.712  1.00 18.21           C  
ATOM    356  C   GLN L  42      22.007  37.157   7.716  1.00 16.98           C  
ATOM    357  O   GLN L  42      22.899  36.389   7.358  1.00 16.05           O  
ATOM    358  CB  GLN L  42      19.928  37.345   6.394  1.00 19.58           C  
ATOM    359  CG  GLN L  42      19.066  38.095   5.401  1.00 22.15           C  
ATOM    360  CD  GLN L  42      17.757  37.386   5.121  1.00 23.69           C  
ATOM    361  OE1 GLN L  42      16.953  37.844   4.310  1.00 25.39           O  
ATOM    362  NE2 GLN L  42      17.536  36.257   5.791  1.00 24.63           N  
ATOM    363  N   PRO L  43      21.674  37.306   9.004  1.00 16.53           N  
ATOM    364  CA  PRO L  43      22.325  36.509  10.041  1.00 15.95           C  
ATOM    365  C   PRO L  43      21.819  35.070   9.982  1.00 15.70           C  
ATOM    366  O   PRO L  43      20.797  34.783   9.346  1.00 14.97           O  
ATOM    367  CB  PRO L  43      21.875  37.207  11.321  1.00 16.19           C  
ATOM    368  CG  PRO L  43      20.467  37.616  10.955  1.00 16.37           C  
ATOM    369  CD  PRO L  43      20.742  38.269   9.617  1.00 16.28           C  
ATOM    370  N   PRO L  44      22.535  34.143  10.630  1.00 15.36           N  
ATOM    371  CA  PRO L  44      22.134  32.736  10.654  1.00 15.32           C  
ATOM    372  C   PRO L  44      20.815  32.661  11.419  1.00 15.49           C  
ATOM    373  O   PRO L  44      20.517  33.537  12.231  1.00 15.81           O  
ATOM    374  CB  PRO L  44      23.275  32.071  11.427  1.00 15.64           C  
ATOM    375  CG  PRO L  44      24.451  32.992  11.155  1.00 15.61           C  
ATOM    376  CD  PRO L  44      23.785  34.322  11.387  1.00 15.34           C  
ATOM    377  N   LYS L  45      20.034  31.621  11.158  1.00 15.11           N  
ATOM    378  CA  LYS L  45      18.753  31.431  11.827  1.00 15.51           C  
ATOM    379  C   LYS L  45      18.680  29.998  12.344  1.00 14.49           C  
ATOM    380  O   LYS L  45      18.804  29.042  11.575  1.00 14.25           O  
ATOM    381  CB  LYS L  45      17.620  31.693  10.834  1.00 17.18           C  
ATOM    382  CG  LYS L  45      16.208  31.440  11.347  1.00 19.89           C  
ATOM    383  CD  LYS L  45      15.837  32.349  12.501  1.00 21.64           C  
ATOM    384  CE  LYS L  45      14.352  32.218  12.811  1.00 22.70           C  
ATOM    385  NZ  LYS L  45      13.959  32.988  14.021  1.00 24.28           N  
ATOM    386  N   LEU L  46      18.482  29.858  13.651  1.00 14.01           N  
ATOM    387  CA  LEU L  46      18.399  28.547  14.283  1.00 13.59           C  
ATOM    388  C   LEU L  46      17.132  27.817  13.859  1.00 13.37           C  
ATOM    389  O   LEU L  46      16.032  28.363  13.961  1.00 13.99           O  
ATOM    390  CB  LEU L  46      18.414  28.701  15.805  1.00 13.63           C  
ATOM    391  CG  LEU L  46      18.332  27.414  16.630  1.00 13.66           C  
ATOM    392  CD1 LEU L  46      19.569  26.552  16.374  1.00 14.37           C  
ATOM    393  CD2 LEU L  46      18.228  27.766  18.111  1.00 14.15           C  
ATOM    394  N   LEU L  47      17.299  26.583  13.397  1.00 13.30           N  
ATOM    395  CA  LEU L  47      16.180  25.757  12.947  1.00 13.64           C  
ATOM    396  C   LEU L  47      15.883  24.615  13.907  1.00 13.50           C  
ATOM    397  O   LEU L  47      14.727  24.354  14.255  1.00 13.03           O  
ATOM    398  CB  LEU L  47      16.501  25.127  11.593  1.00 14.14           C  
ATOM    399  CG  LEU L  47      16.844  26.006  10.391  1.00 15.11           C  
ATOM    400  CD1 LEU L  47      17.344  25.128   9.254  1.00 16.29           C  
ATOM    401  CD2 LEU L  47      15.623  26.812   9.978  1.00 16.07           C  
ATOM    402  N   ILE L  48      16.949  23.939  14.320  1.00 13.26           N  
ATOM    403  CA  ILE L  48      16.860  22.765  15.176  1.00 13.39           C  
ATOM    404  C   ILE L  48      17.946  22.766  16.249  1.00 13.40           C  
ATOM    405  O   ILE L  48      19.065  23.198  15.994  1.00 13.28           O  
ATOM    406  CB  ILE L  48      17.089  21.488  14.327  1.00 14.01           C  
ATOM    407  CG1 ILE L  48      16.115  21.437  13.142  1.00 14.29           C  
ATOM    408  CG2 ILE L  48      16.975  20.248  15.202  1.00 13.87           C  
ATOM    409  CD1 ILE L  48      14.655  21.272  13.513  1.00 14.87           C  
ATOM    410  N   TYR L  49      17.617  22.284  17.444  1.00 13.11           N  
ATOM    411  CA  TYR L  49      18.615  22.155  18.502  1.00 13.40           C  
ATOM    412  C   TYR L  49      18.414  20.805  19.195  1.00 13.62           C  
ATOM    413  O   TYR L  49      17.397  20.140  18.986  1.00 13.48           O  
ATOM    414  CB  TYR L  49      18.575  23.319  19.500  1.00 13.25           C  
ATOM    415  CG  TYR L  49      17.252  23.575  20.169  1.00 13.39           C  
ATOM    416  CD1 TYR L  49      16.242  24.294  19.527  1.00 13.72           C  
ATOM    417  CD2 TYR L  49      17.006  23.088  21.449  1.00 14.09           C  
ATOM    418  CE1 TYR L  49      15.018  24.521  20.151  1.00 14.06           C  
ATOM    419  CE2 TYR L  49      15.796  23.306  22.077  1.00 14.20           C  
ATOM    420  CZ  TYR L  49      14.803  24.021  21.428  1.00 14.15           C  
ATOM    421  OH  TYR L  49      13.598  24.216  22.069  1.00 14.17           O  
ATOM    422  N   TRP L  50      19.381  20.387  20.008  1.00 14.40           N  
ATOM    423  CA  TRP L  50      19.304  19.074  20.646  1.00 14.53           C  
ATOM    424  C   TRP L  50      19.156  18.050  19.517  1.00 14.39           C  
ATOM    425  O   TRP L  50      18.508  17.015  19.675  1.00 14.57           O  
ATOM    426  CB  TRP L  50      18.106  18.979  21.599  1.00 16.17           C  
ATOM    427  CG  TRP L  50      18.220  19.798  22.846  1.00 17.91           C  
ATOM    428  CD1 TRP L  50      17.208  20.471  23.470  1.00 18.63           C  
ATOM    429  CD2 TRP L  50      19.388  19.994  23.656  1.00 18.97           C  
ATOM    430  NE1 TRP L  50      17.671  21.075  24.609  1.00 18.87           N  
ATOM    431  CE2 TRP L  50      19.004  20.800  24.750  1.00 19.17           C  
ATOM    432  CE3 TRP L  50      20.720  19.568  23.564  1.00 19.45           C  
ATOM    433  CZ2 TRP L  50      19.905  21.190  25.747  1.00 19.59           C  
ATOM    434  CZ3 TRP L  50      21.616  19.957  24.558  1.00 19.80           C  
ATOM    435  CH2 TRP L  50      21.203  20.760  25.633  1.00 19.73           C  
ATOM    436  N   ALA L  51      19.746  18.371  18.365  1.00 14.24           N  
ATOM    437  CA  ALA L  51      19.727  17.505  17.189  1.00 14.13           C  
ATOM    438  C   ALA L  51      18.381  17.297  16.506  1.00 13.89           C  
ATOM    439  O   ALA L  51      18.329  17.151  15.284  1.00 14.02           O  
ATOM    440  CB  ALA L  51      20.331  16.137  17.539  1.00 14.91           C  
ATOM    441  N   SER L  52      17.296  17.288  17.273  1.00 13.44           N  
ATOM    442  CA  SER L  52      15.995  17.028  16.671  1.00 13.43           C  
ATOM    443  C   SER L  52      14.803  17.811  17.202  1.00 13.11           C  
ATOM    444  O   SER L  52      13.663  17.489  16.872  1.00 13.71           O  
ATOM    445  CB  SER L  52      15.698  15.531  16.770  1.00 14.29           C  
ATOM    446  OG  SER L  52      15.812  15.094  18.109  1.00 16.27           O  
ATOM    447  N   THR L  53      15.047  18.822  18.025  1.00 11.92           N  
ATOM    448  CA  THR L  53      13.949  19.628  18.541  1.00 12.00           C  
ATOM    449  C   THR L  53      13.821  20.861  17.658  1.00 12.08           C  
ATOM    450  O   THR L  53      14.807  21.538  17.379  1.00 12.39           O  
ATOM    451  CB  THR L  53      14.200  20.041  19.998  1.00 12.28           C  
ATOM    452  OG1 THR L  53      14.232  18.865  20.817  1.00 13.34           O  
ATOM    453  CG2 THR L  53      13.103  20.982  20.488  1.00 12.56           C  
ATOM    454  N   ARG L  54      12.609  21.144  17.198  1.00 11.68           N  
ATOM    455  CA  ARG L  54      12.402  22.295  16.334  1.00 12.42           C  
ATOM    456  C   ARG L  54      12.276  23.602  17.115  1.00 12.23           C  
ATOM    457  O   ARG L  54      11.626  23.665  18.157  1.00 12.46           O  
ATOM    458  CB  ARG L  54      11.164  22.060  15.459  1.00 12.85           C  
ATOM    459  CG  ARG L  54      10.844  23.169  14.468  1.00 14.69           C  
ATOM    460  CD  ARG L  54       9.827  22.678  13.440  1.00 15.53           C  
ATOM    461  NE  ARG L  54       8.571  22.227  14.044  1.00 17.60           N  
ATOM    462  CZ  ARG L  54       7.644  23.033  14.545  1.00 17.59           C  
ATOM    463  NH1 ARG L  54       7.807  24.349  14.493  1.00 18.97           N  
ATOM    464  NH2 ARG L  54       6.540  22.524  15.074  1.00 16.89           N  
ATOM    465  N   GLU L  55      12.939  24.636  16.608  1.00 12.48           N  
ATOM    466  CA  GLU L  55      12.926  25.967  17.197  1.00 13.71           C  
ATOM    467  C   GLU L  55      11.568  26.644  16.990  1.00 14.05           C  
ATOM    468  O   GLU L  55      10.861  26.365  16.019  1.00 13.77           O  
ATOM    469  CB  GLU L  55      14.029  26.808  16.542  1.00 13.95           C  
ATOM    470  CG  GLU L  55      13.949  28.306  16.803  1.00 16.12           C  
ATOM    471  CD  GLU L  55      14.340  28.709  18.206  1.00 16.42           C  
ATOM    472  OE1 GLU L  55      13.765  28.171  19.177  1.00 17.11           O  
ATOM    473  OE2 GLU L  55      15.222  29.590  18.334  1.00 17.39           O  
ATOM    474  N   SER L  56      11.221  27.540  17.907  1.00 15.20           N  
ATOM    475  CA  SER L  56       9.965  28.280  17.833  1.00 16.83           C  
ATOM    476  C   SER L  56       9.888  29.067  16.527  1.00 18.14           C  
ATOM    477  O   SER L  56      10.861  29.706  16.123  1.00 18.45           O  
ATOM    478  CB  SER L  56       9.864  29.270  18.996  1.00 16.80           C  
ATOM    479  OG  SER L  56       9.972  28.630  20.253  1.00 16.75           O  
ATOM    480  N   GLY L  57       8.731  29.022  15.875  1.00 19.37           N  
ATOM    481  CA  GLY L  57       8.546  29.766  14.640  1.00 20.33           C  
ATOM    482  C   GLY L  57       9.063  29.131  13.364  1.00 21.18           C  
ATOM    483  O   GLY L  57       8.784  29.623  12.270  1.00 22.26           O  
ATOM    484  N   VAL L  58       9.818  28.047  13.489  1.00 21.15           N  
ATOM    485  CA  VAL L  58      10.363  27.366  12.321  1.00 21.62           C  
ATOM    486  C   VAL L  58       9.327  26.436  11.693  1.00 22.06           C  
ATOM    487  O   VAL L  58       8.675  25.662  12.392  1.00 22.23           O  
ATOM    488  CB  VAL L  58      11.615  26.551  12.703  1.00 21.39           C  
ATOM    489  CG1 VAL L  58      12.124  25.772  11.505  1.00 21.42           C  
ATOM    490  CG2 VAL L  58      12.694  27.489  13.219  1.00 21.85           C  
ATOM    491  N   PRO L  59       9.167  26.496  10.359  1.00 22.75           N  
ATOM    492  CA  PRO L  59       8.199  25.649   9.656  1.00 23.03           C  
ATOM    493  C   PRO L  59       8.336  24.166   9.994  1.00 23.11           C  
ATOM    494  O   PRO L  59       9.441  23.660  10.187  1.00 22.80           O  
ATOM    495  CB  PRO L  59       8.502  25.951   8.190  1.00 23.20           C  
ATOM    496  CG  PRO L  59       8.879  27.413   8.255  1.00 23.10           C  
ATOM    497  CD  PRO L  59       9.888  27.338   9.388  1.00 22.90           C  
ATOM    498  N   ASP L  60       7.202  23.475  10.057  1.00 23.47           N  
ATOM    499  CA  ASP L  60       7.185  22.055  10.382  1.00 23.68           C  
ATOM    500  C   ASP L  60       7.918  21.169   9.376  1.00 23.43           C  
ATOM    501  O   ASP L  60       8.289  20.043   9.703  1.00 24.01           O  
ATOM    502  CB  ASP L  60       5.738  21.578  10.537  1.00 24.17           C  
ATOM    503  N   ARG L  61       8.133  21.664   8.158  1.00 22.81           N  
ATOM    504  CA  ARG L  61       8.821  20.871   7.143  1.00 22.12           C  
ATOM    505  C   ARG L  61      10.301  20.638   7.449  1.00 21.41           C  
ATOM    506  O   ARG L  61      10.956  19.829   6.794  1.00 20.94           O  
ATOM    507  CB  ARG L  61       8.672  21.512   5.755  1.00 22.62           C  
ATOM    508  CG  ARG L  61       9.158  22.946   5.641  1.00 22.98           C  
ATOM    509  CD  ARG L  61       9.087  23.424   4.191  1.00 23.78           C  
ATOM    510  NE  ARG L  61       9.490  24.820   4.051  1.00 23.91           N  
ATOM    511  CZ  ARG L  61       8.789  25.850   4.511  1.00 24.75           C  
ATOM    512  NH1 ARG L  61       7.632  25.645   5.126  1.00 25.37           N  
ATOM    513  NH2 ARG L  61       9.234  27.089   4.342  1.00 25.00           N  
ATOM    514  N   PHE L  62      10.822  21.357   8.439  1.00 21.19           N  
ATOM    515  CA  PHE L  62      12.217  21.205   8.845  1.00 20.70           C  
ATOM    516  C   PHE L  62      12.305  20.219  10.001  1.00 20.42           C  
ATOM    517  O   PHE L  62      11.596  20.358  10.996  1.00 20.44           O  
ATOM    518  CB  PHE L  62      12.799  22.550   9.294  1.00 20.70           C  
ATOM    519  CG  PHE L  62      13.070  23.509   8.165  1.00 20.85           C  
ATOM    520  CD1 PHE L  62      14.187  23.350   7.353  1.00 20.90           C  
ATOM    521  CD2 PHE L  62      12.200  24.563   7.911  1.00 21.16           C  
ATOM    522  CE1 PHE L  62      14.437  24.231   6.301  1.00 21.13           C  
ATOM    523  CE2 PHE L  62      12.438  25.449   6.862  1.00 21.18           C  
ATOM    524  CZ  PHE L  62      13.558  25.282   6.057  1.00 21.16           C  
ATOM    525  N   SER L  63      13.169  19.221   9.869  1.00 20.00           N  
ATOM    526  CA  SER L  63      13.337  18.246  10.938  1.00 20.27           C  
ATOM    527  C   SER L  63      14.771  17.754  11.008  1.00 20.14           C  
ATOM    528  O   SER L  63      15.464  17.656   9.993  1.00 20.28           O  
ATOM    529  CB  SER L  63      12.400  17.050  10.741  1.00 20.51           C  
ATOM    530  OG  SER L  63      12.754  16.302   9.596  1.00 22.05           O  
ATOM    531  N   GLY L  64      15.215  17.453  12.221  1.00 19.91           N  
ATOM    532  CA  GLY L  64      16.564  16.961  12.408  1.00 19.40           C  
ATOM    533  C   GLY L  64      16.536  15.580  13.023  1.00 19.53           C  
ATOM    534  O   GLY L  64      15.622  15.253  13.786  1.00 19.11           O  
ATOM    535  N   SER L  65      17.525  14.760  12.685  1.00 19.44           N  
ATOM    536  CA  SER L  65      17.606  13.411  13.226  1.00 20.07           C  
ATOM    537  C   SER L  65      19.061  13.000  13.391  1.00 19.63           C  
ATOM    538  O   SER L  65      19.975  13.718  12.974  1.00 19.14           O  
ATOM    539  CB  SER L  65      16.900  12.420  12.296  1.00 20.76           C  
ATOM    540  OG  SER L  65      17.544  12.358  11.034  1.00 22.41           O  
ATOM    541  N   GLY L  66      19.273  11.836  13.993  1.00 19.66           N  
ATOM    542  CA  GLY L  66      20.624  11.351  14.195  1.00 19.82           C  
ATOM    543  C   GLY L  66      21.046  11.339  15.651  1.00 19.90           C  
ATOM    544  O   GLY L  66      20.347  11.859  16.521  1.00 20.06           O  
ATOM    545  N   SER L  67      22.202  10.741  15.913  1.00 20.28           N  
ATOM    546  CA  SER L  67      22.726  10.655  17.267  1.00 20.50           C  
ATOM    547  C   SER L  67      24.205  10.308  17.224  1.00 20.30           C  
ATOM    548  O   SER L  67      24.691   9.735  16.248  1.00 20.95           O  
ATOM    549  CB  SER L  67      21.970   9.580  18.059  1.00 21.52           C  
ATOM    550  OG  SER L  67      22.457   9.481  19.388  1.00 22.91           O  
ATOM    551  N   GLY L  68      24.917  10.673  18.283  1.00 19.98           N  
ATOM    552  CA  GLY L  68      26.334  10.374  18.364  1.00 19.80           C  
ATOM    553  C   GLY L  68      27.210  11.230  17.475  1.00 19.51           C  
ATOM    554  O   GLY L  68      27.554  12.360  17.833  1.00 19.46           O  
ATOM    555  N   THR L  69      27.564  10.693  16.312  1.00 19.90           N  
ATOM    556  CA  THR L  69      28.431  11.390  15.365  1.00 20.46           C  
ATOM    557  C   THR L  69      27.805  11.645  13.997  1.00 20.62           C  
ATOM    558  O   THR L  69      28.382  12.354  13.171  1.00 20.89           O  
ATOM    559  CB  THR L  69      29.736  10.600  15.132  1.00 20.72           C  
ATOM    560  OG1 THR L  69      29.424   9.302  14.603  1.00 21.33           O  
ATOM    561  CG2 THR L  69      30.502  10.440  16.432  1.00 20.79           C  
ATOM    562  N   ASP L  70      26.635  11.071  13.747  1.00 20.57           N  
ATOM    563  CA  ASP L  70      25.981  11.248  12.457  1.00 20.77           C  
ATOM    564  C   ASP L  70      24.605  11.874  12.587  1.00 20.05           C  
ATOM    565  O   ASP L  70      23.721  11.335  13.257  1.00 20.12           O  
ATOM    566  CB  ASP L  70      25.889   9.903  11.740  1.00 22.77           C  
ATOM    567  CG  ASP L  70      27.252   9.304  11.471  1.00 24.48           C  
ATOM    568  OD1 ASP L  70      28.037   9.923  10.721  1.00 25.92           O  
ATOM    569  OD2 ASP L  70      27.543   8.221  12.017  1.00 26.59           O  
ATOM    570  N   PHE L  71      24.433  13.020  11.937  1.00 19.14           N  
ATOM    571  CA  PHE L  71      23.178  13.746  11.990  1.00 18.12           C  
ATOM    572  C   PHE L  71      22.691  14.152  10.610  1.00 18.20           C  
ATOM    573  O   PHE L  71      23.468  14.228   9.660  1.00 18.41           O  
ATOM    574  CB  PHE L  71      23.333  14.988  12.872  1.00 17.03           C  
ATOM    575  CG  PHE L  71      23.837  14.684  14.254  1.00 15.55           C  
ATOM    576  CD1 PHE L  71      25.200  14.536  14.499  1.00 15.54           C  
ATOM    577  CD2 PHE L  71      22.942  14.482  15.301  1.00 15.49           C  
ATOM    578  CE1 PHE L  71      25.664  14.189  15.764  1.00 14.99           C  
ATOM    579  CE2 PHE L  71      23.395  14.134  16.571  1.00 15.12           C  
ATOM    580  CZ  PHE L  71      24.758  13.986  16.805  1.00 14.51           C  
ATOM    581  N   THR L  72      21.396  14.420  10.509  1.00 18.61           N  
ATOM    582  CA  THR L  72      20.800  14.802   9.241  1.00 19.14           C  
ATOM    583  C   THR L  72      19.723  15.863   9.409  1.00 19.19           C  
ATOM    584  O   THR L  72      18.962  15.850  10.377  1.00 19.34           O  
ATOM    585  CB  THR L  72      20.154  13.581   8.544  1.00 19.54           C  
ATOM    586  OG1 THR L  72      21.147  12.575   8.317  1.00 20.80           O  
ATOM    587  CG2 THR L  72      19.543  13.984   7.214  1.00 20.39           C  
ATOM    588  N   LEU L  73      19.680  16.790   8.459  1.00 19.14           N  
ATOM    589  CA  LEU L  73      18.669  17.835   8.433  1.00 19.49           C  
ATOM    590  C   LEU L  73      17.804  17.474   7.236  1.00 19.96           C  
ATOM    591  O   LEU L  73      18.323  17.214   6.150  1.00 19.62           O  
ATOM    592  CB  LEU L  73      19.288  19.215   8.200  1.00 19.06           C  
ATOM    593  CG  LEU L  73      18.259  20.343   8.051  1.00 19.31           C  
ATOM    594  CD1 LEU L  73      17.490  20.510   9.346  1.00 19.02           C  
ATOM    595  CD2 LEU L  73      18.953  21.646   7.689  1.00 19.31           C  
ATOM    596  N   THR L  74      16.494  17.446   7.435  1.00 20.71           N  
ATOM    597  CA  THR L  74      15.588  17.109   6.350  1.00 21.94           C  
ATOM    598  C   THR L  74      14.515  18.166   6.155  1.00 22.54           C  
ATOM    599  O   THR L  74      13.935  18.666   7.117  1.00 21.97           O  
ATOM    600  CB  THR L  74      14.874  15.759   6.607  1.00 21.92           C  
ATOM    601  OG1 THR L  74      15.839  14.706   6.705  1.00 22.23           O  
ATOM    602  CG2 THR L  74      13.905  15.448   5.475  1.00 22.45           C  
ATOM    603  N   ILE L  75      14.272  18.515   4.897  1.00 24.08           N  
ATOM    604  CA  ILE L  75      13.224  19.462   4.554  1.00 25.71           C  
ATOM    605  C   ILE L  75      12.222  18.582   3.808  1.00 26.83           C  
ATOM    606  O   ILE L  75      12.489  18.147   2.688  1.00 27.50           O  
ATOM    607  CB  ILE L  75      13.736  20.578   3.621  1.00 25.63           C  
ATOM    608  CG1 ILE L  75      14.888  21.332   4.292  1.00 25.91           C  
ATOM    609  CG2 ILE L  75      12.607  21.545   3.306  1.00 25.81           C  
ATOM    610  CD1 ILE L  75      15.465  22.449   3.447  1.00 26.06           C  
ATOM    611  N   SER L  76      11.089  18.300   4.447  1.00 28.35           N  
ATOM    612  CA  SER L  76      10.061  17.438   3.863  1.00 29.91           C  
ATOM    613  C   SER L  76       9.631  17.842   2.458  1.00 30.92           C  
ATOM    614  O   SER L  76       9.691  17.036   1.527  1.00 31.55           O  
ATOM    615  CB  SER L  76       8.832  17.386   4.776  1.00 29.75           C  
ATOM    616  OG  SER L  76       8.257  18.670   4.941  1.00 30.48           O  
ATOM    617  N   SER L  77       9.187  19.086   2.313  1.00 31.70           N  
ATOM    618  CA  SER L  77       8.749  19.599   1.021  1.00 32.57           C  
ATOM    619  C   SER L  77       9.480  20.899   0.722  1.00 32.89           C  
ATOM    620  O   SER L  77       9.168  21.943   1.292  1.00 33.36           O  
ATOM    621  CB  SER L  77       7.240  19.848   1.032  1.00 32.71           C  
ATOM    622  OG  SER L  77       6.811  20.386  -0.207  1.00 33.52           O  
ATOM    623  N   LEU L  78      10.454  20.829  -0.178  1.00 33.29           N  
ATOM    624  CA  LEU L  78      11.244  21.998  -0.536  1.00 33.61           C  
ATOM    625  C   LEU L  78      10.414  23.122  -1.142  1.00 33.70           C  
ATOM    626  O   LEU L  78       9.644  22.906  -2.080  1.00 33.87           O  
ATOM    627  CB  LEU L  78      12.352  21.607  -1.518  1.00 33.90           C  
ATOM    628  CG  LEU L  78      13.315  22.725  -1.933  1.00 34.16           C  
ATOM    629  CD1 LEU L  78      14.060  23.234  -0.710  1.00 34.36           C  
ATOM    630  CD2 LEU L  78      14.299  22.205  -2.969  1.00 34.54           C  
ATOM    631  N   GLN L  79      10.569  24.320  -0.588  1.00 33.55           N  
ATOM    632  CA  GLN L  79       9.873  25.498  -1.086  1.00 33.45           C  
ATOM    633  C   GLN L  79      10.939  26.459  -1.601  1.00 33.05           C  
ATOM    634  O   GLN L  79      12.083  26.426  -1.145  1.00 33.07           O  
ATOM    635  CB  GLN L  79       9.060  26.172   0.021  1.00 33.85           C  
ATOM    636  CG  GLN L  79       7.951  25.310   0.607  1.00 34.76           C  
ATOM    637  CD  GLN L  79       7.072  26.075   1.581  1.00 35.31           C  
ATOM    638  OE1 GLN L  79       6.161  25.512   2.190  1.00 36.05           O  
ATOM    639  NE2 GLN L  79       7.337  27.368   1.726  1.00 35.81           N  
ATOM    640  N   ALA L  80      10.567  27.306  -2.554  1.00 32.48           N  
ATOM    641  CA  ALA L  80      11.504  28.262  -3.132  1.00 31.92           C  
ATOM    642  C   ALA L  80      12.264  29.046  -2.065  1.00 31.32           C  
ATOM    643  O   ALA L  80      13.456  29.318  -2.214  1.00 31.31           O  
ATOM    644  CB  ALA L  80      10.763  29.222  -4.055  1.00 31.89           C  
ATOM    645  N   GLU L  81      11.570  29.396  -0.987  1.00 30.61           N  
ATOM    646  CA  GLU L  81      12.170  30.160   0.099  1.00 29.98           C  
ATOM    647  C   GLU L  81      13.210  29.387   0.911  1.00 29.40           C  
ATOM    648  O   GLU L  81      13.909  29.974   1.738  1.00 29.58           O  
ATOM    649  CB  GLU L  81      11.078  30.681   1.025  1.00 30.13           C  
ATOM    650  N   ASP L  82      13.322  28.082   0.682  1.00 28.53           N  
ATOM    651  CA  ASP L  82      14.286  27.284   1.432  1.00 27.55           C  
ATOM    652  C   ASP L  82      15.687  27.325   0.838  1.00 26.98           C  
ATOM    653  O   ASP L  82      16.627  26.776   1.413  1.00 26.80           O  
ATOM    654  CB  ASP L  82      13.817  25.831   1.551  1.00 27.55           C  
ATOM    655  CG  ASP L  82      12.456  25.712   2.212  1.00 27.53           C  
ATOM    656  OD1 ASP L  82      12.185  26.474   3.163  1.00 27.56           O  
ATOM    657  OD2 ASP L  82      11.665  24.839   1.797  1.00 27.99           O  
ATOM    658  N   VAL L  83      15.829  27.969  -0.316  1.00 26.07           N  
ATOM    659  CA  VAL L  83      17.135  28.087  -0.950  1.00 25.20           C  
ATOM    660  C   VAL L  83      18.004  28.944  -0.036  1.00 24.07           C  
ATOM    661  O   VAL L  83      17.657  30.084   0.275  1.00 23.79           O  
ATOM    662  CB  VAL L  83      17.030  28.759  -2.337  1.00 25.66           C  
ATOM    663  CG1 VAL L  83      18.409  28.890  -2.963  1.00 26.08           C  
ATOM    664  CG2 VAL L  83      16.117  27.941  -3.235  1.00 26.08           C  
ATOM    665  N   ALA L  84      19.129  28.387   0.400  1.00 22.77           N  
ATOM    666  CA  ALA L  84      20.033  29.098   1.299  1.00 21.67           C  
ATOM    667  C   ALA L  84      21.167  28.176   1.714  1.00 20.39           C  
ATOM    668  O   ALA L  84      21.281  27.058   1.214  1.00 20.82           O  
ATOM    669  CB  ALA L  84      19.272  29.564   2.538  1.00 22.19           C  
ATOM    670  N   VAL L  85      22.008  28.653   2.628  1.00 19.47           N  
ATOM    671  CA  VAL L  85      23.117  27.851   3.130  1.00 18.47           C  
ATOM    672  C   VAL L  85      22.720  27.288   4.491  1.00 17.76           C  
ATOM    673  O   VAL L  85      22.146  27.996   5.318  1.00 18.12           O  
ATOM    674  CB  VAL L  85      24.398  28.691   3.293  1.00 18.66           C  
ATOM    675  CG1 VAL L  85      25.521  27.829   3.850  1.00 18.37           C  
ATOM    676  CG2 VAL L  85      24.806  29.271   1.948  1.00 18.94           C  
ATOM    677  N   TYR L  86      23.026  26.014   4.715  1.00 16.88           N  
ATOM    678  CA  TYR L  86      22.695  25.354   5.973  1.00 16.59           C  
ATOM    679  C   TYR L  86      23.951  24.907   6.704  1.00 15.89           C  
ATOM    680  O   TYR L  86      24.863  24.346   6.099  1.00 15.48           O  
ATOM    681  CB  TYR L  86      21.780  24.166   5.688  1.00 17.09           C  
ATOM    682  CG  TYR L  86      20.407  24.602   5.235  1.00 18.23           C  
ATOM    683  CD1 TYR L  86      19.419  24.930   6.162  1.00 18.29           C  
ATOM    684  CD2 TYR L  86      20.119  24.771   3.879  1.00 18.53           C  
ATOM    685  CE1 TYR L  86      18.178  25.416   5.755  1.00 19.07           C  
ATOM    686  CE2 TYR L  86      18.880  25.258   3.460  1.00 19.19           C  
ATOM    687  CZ  TYR L  86      17.916  25.579   4.402  1.00 19.18           C  
ATOM    688  OH  TYR L  86      16.693  26.077   4.005  1.00 19.75           O  
ATOM    689  N   TYR L  87      23.985  25.170   8.009  1.00 15.28           N  
ATOM    690  CA  TYR L  87      25.127  24.830   8.855  1.00 15.09           C  
ATOM    691  C   TYR L  87      24.747  23.990  10.059  1.00 14.96           C  
ATOM    692  O   TYR L  87      23.687  24.184  10.649  1.00 14.87           O  
ATOM    693  CB  TYR L  87      25.764  26.089   9.449  1.00 14.97           C  
ATOM    694  CG  TYR L  87      26.374  27.067   8.483  1.00 14.80           C  
ATOM    695  CD1 TYR L  87      27.583  26.792   7.850  1.00 15.46           C  
ATOM    696  CD2 TYR L  87      25.754  28.287   8.224  1.00 15.18           C  
ATOM    697  CE1 TYR L  87      28.163  27.714   6.983  1.00 15.49           C  
ATOM    698  CE2 TYR L  87      26.325  29.213   7.359  1.00 15.07           C  
ATOM    699  CZ  TYR L  87      27.528  28.919   6.745  1.00 15.86           C  
ATOM    700  OH  TYR L  87      28.098  29.839   5.897  1.00 17.30           O  
ATOM    701  N   CYS L  88      25.615  23.061  10.433  1.00 14.95           N  
ATOM    702  CA  CYS L  88      25.377  22.324  11.658  1.00 14.97           C  
ATOM    703  C   CYS L  88      26.378  22.936  12.635  1.00 14.48           C  
ATOM    704  O   CYS L  88      27.393  23.509  12.219  1.00 14.18           O  
ATOM    705  CB  CYS L  88      25.609  20.820  11.497  1.00 15.80           C  
ATOM    706  SG  CYS L  88      27.181  20.292  10.756  1.00 16.90           S  
ATOM    707  N   GLN L  89      26.080  22.853  13.924  1.00 13.67           N  
ATOM    708  CA  GLN L  89      26.952  23.407  14.959  1.00 13.82           C  
ATOM    709  C   GLN L  89      26.932  22.482  16.163  1.00 13.47           C  
ATOM    710  O   GLN L  89      25.883  21.941  16.500  1.00 13.27           O  
ATOM    711  CB  GLN L  89      26.441  24.783  15.403  1.00 14.55           C  
ATOM    712  CG  GLN L  89      27.135  25.319  16.668  1.00 16.28           C  
ATOM    713  CD  GLN L  89      26.359  26.434  17.358  1.00 17.46           C  
ATOM    714  OE1 GLN L  89      25.167  26.291  17.634  1.00 19.85           O  
ATOM    715  NE2 GLN L  89      27.038  27.533  17.665  1.00 19.50           N  
ATOM    716  N   GLN L  90      28.080  22.288  16.806  1.00 12.88           N  
ATOM    717  CA  GLN L  90      28.103  21.464  18.005  1.00 12.63           C  
ATOM    718  C   GLN L  90      28.440  22.356  19.188  1.00 12.49           C  
ATOM    719  O   GLN L  90      29.302  23.238  19.094  1.00 12.89           O  
ATOM    720  CB  GLN L  90      29.108  20.299  17.893  1.00 12.36           C  
ATOM    721  CG  GLN L  90      30.619  20.616  17.933  1.00 12.66           C  
ATOM    722  CD  GLN L  90      31.164  20.957  19.323  1.00 12.25           C  
ATOM    723  OE1 GLN L  90      30.627  20.530  20.349  1.00 12.89           O  
ATOM    724  NE2 GLN L  90      32.267  21.696  19.353  1.00 12.86           N  
ATOM    725  N   TYR L  91      27.724  22.149  20.290  1.00 13.17           N  
ATOM    726  CA  TYR L  91      27.942  22.922  21.503  1.00 13.34           C  
ATOM    727  C   TYR L  91      28.078  21.983  22.691  1.00 13.89           C  
ATOM    728  O   TYR L  91      27.674  22.294  23.814  1.00 14.10           O  
ATOM    729  CB  TYR L  91      26.804  23.939  21.694  1.00 13.36           C  
ATOM    730  CG  TYR L  91      25.400  23.376  21.617  1.00 13.60           C  
ATOM    731  CD1 TYR L  91      24.739  23.277  20.390  1.00 13.56           C  
ATOM    732  CD2 TYR L  91      24.728  22.960  22.761  1.00 14.29           C  
ATOM    733  CE1 TYR L  91      23.441  22.780  20.309  1.00 14.01           C  
ATOM    734  CE2 TYR L  91      23.424  22.462  22.691  1.00 14.95           C  
ATOM    735  CZ  TYR L  91      22.791  22.376  21.462  1.00 14.86           C  
ATOM    736  OH  TYR L  91      21.505  21.883  21.381  1.00 17.25           O  
ATOM    737  N   TYR L  92      28.674  20.830  22.407  1.00 15.05           N  
ATOM    738  CA  TYR L  92      28.928  19.782  23.389  1.00 15.98           C  
ATOM    739  C   TYR L  92      30.132  20.163  24.246  1.00 16.19           C  
ATOM    740  O   TYR L  92      30.118  20.014  25.462  1.00 16.47           O  
ATOM    741  CB  TYR L  92      29.228  18.467  22.669  1.00 17.63           C  
ATOM    742  CG  TYR L  92      29.550  17.313  23.589  1.00 18.89           C  
ATOM    743  CD1 TYR L  92      28.549  16.682  24.328  1.00 20.17           C  
ATOM    744  CD2 TYR L  92      30.860  16.857  23.726  1.00 19.61           C  
ATOM    745  CE1 TYR L  92      28.845  15.623  25.182  1.00 21.07           C  
ATOM    746  CE2 TYR L  92      31.169  15.799  24.578  1.00 20.63           C  
ATOM    747  CZ  TYR L  92      30.157  15.187  25.301  1.00 21.16           C  
ATOM    748  OH  TYR L  92      30.455  14.135  26.140  1.00 22.75           O  
ATOM    749  N   SER L  93      31.183  20.643  23.595  1.00 15.24           N  
ATOM    750  CA  SER L  93      32.385  21.040  24.309  1.00 15.65           C  
ATOM    751  C   SER L  93      33.071  22.208  23.619  1.00 15.19           C  
ATOM    752  O   SER L  93      33.044  22.334  22.393  1.00 15.09           O  
ATOM    753  CB  SER L  93      33.354  19.860  24.402  1.00 16.39           C  
ATOM    754  OG  SER L  93      33.753  19.433  23.114  1.00 19.59           O  
ATOM    755  N   HIS L  94      33.672  23.074  24.423  1.00 14.85           N  
ATOM    756  CA  HIS L  94      34.389  24.225  23.898  1.00 14.67           C  
ATOM    757  C   HIS L  94      35.731  23.752  23.350  1.00 14.77           C  
ATOM    758  O   HIS L  94      36.355  22.854  23.915  1.00 15.53           O  
ATOM    759  CB  HIS L  94      34.616  25.247  25.011  1.00 14.55           C  
ATOM    760  CG  HIS L  94      33.379  25.985  25.416  1.00 14.32           C  
ATOM    761  ND1 HIS L  94      32.795  26.946  24.619  1.00 14.62           N  
ATOM    762  CD2 HIS L  94      32.610  25.897  26.526  1.00 15.50           C  
ATOM    763  CE1 HIS L  94      31.719  27.420  25.222  1.00 14.82           C  
ATOM    764  NE2 HIS L  94      31.584  26.799  26.380  1.00 15.66           N  
ATOM    765  N   PRO L  95      36.195  24.351  22.244  1.00 14.72           N  
ATOM    766  CA  PRO L  95      35.540  25.425  21.491  1.00 14.85           C  
ATOM    767  C   PRO L  95      34.383  24.911  20.635  1.00 15.05           C  
ATOM    768  O   PRO L  95      34.497  23.873  19.976  1.00 15.04           O  
ATOM    769  CB  PRO L  95      36.684  25.967  20.638  1.00 14.38           C  
ATOM    770  CG  PRO L  95      37.409  24.686  20.282  1.00 14.54           C  
ATOM    771  CD  PRO L  95      37.520  24.063  21.661  1.00 14.75           C  
ATOM    772  N   TYR L  96      33.265  25.628  20.649  1.00 15.52           N  
ATOM    773  CA  TYR L  96      32.135  25.211  19.836  1.00 15.43           C  
ATOM    774  C   TYR L  96      32.560  25.347  18.375  1.00 15.69           C  
ATOM    775  O   TYR L  96      33.494  26.086  18.061  1.00 16.46           O  
ATOM    776  CB  TYR L  96      30.900  26.065  20.140  1.00 15.57           C  
ATOM    777  CG  TYR L  96      30.383  25.906  21.556  1.00 15.61           C  
ATOM    778  CD1 TYR L  96      30.768  24.819  22.343  1.00 16.47           C  
ATOM    779  CD2 TYR L  96      29.459  26.806  22.090  1.00 16.50           C  
ATOM    780  CE1 TYR L  96      30.249  24.629  23.621  1.00 17.04           C  
ATOM    781  CE2 TYR L  96      28.933  26.624  23.368  1.00 17.18           C  
ATOM    782  CZ  TYR L  96      29.333  25.533  24.128  1.00 17.66           C  
ATOM    783  OH  TYR L  96      28.820  25.344  25.391  1.00 19.55           O  
ATOM    784  N   SER L  97      31.893  24.633  17.480  1.00 15.28           N  
ATOM    785  CA  SER L  97      32.273  24.681  16.077  1.00 15.26           C  
ATOM    786  C   SER L  97      31.116  24.443  15.122  1.00 15.45           C  
ATOM    787  O   SER L  97      30.094  23.868  15.495  1.00 15.08           O  
ATOM    788  CB  SER L  97      33.366  23.644  15.817  1.00 15.46           C  
ATOM    789  OG  SER L  97      32.948  22.367  16.267  1.00 16.17           O  
ATOM    790  N   PHE L  98      31.294  24.908  13.888  1.00 16.00           N  
ATOM    791  CA  PHE L  98      30.303  24.761  12.826  1.00 16.38           C  
ATOM    792  C   PHE L  98      30.864  23.922  11.689  1.00 16.36           C  
ATOM    793  O   PHE L  98      32.083  23.824  11.514  1.00 17.24           O  
ATOM    794  CB  PHE L  98      29.925  26.116  12.211  1.00 16.68           C  
ATOM    795  CG  PHE L  98      29.057  26.975  13.074  1.00 17.63           C  
ATOM    796  CD1 PHE L  98      29.563  27.581  14.216  1.00 18.53           C  
ATOM    797  CD2 PHE L  98      27.732  27.211  12.720  1.00 17.79           C  
ATOM    798  CE1 PHE L  98      28.763  28.416  14.991  1.00 19.19           C  
ATOM    799  CE2 PHE L  98      26.924  28.046  13.492  1.00 18.81           C  
ATOM    800  CZ  PHE L  98      27.445  28.648  14.628  1.00 18.45           C  
ATOM    801  N   GLY L  99      29.961  23.327  10.915  1.00 16.14           N  
ATOM    802  CA  GLY L  99      30.361  22.568   9.744  1.00 15.90           C  
ATOM    803  C   GLY L  99      30.670  23.625   8.692  1.00 16.23           C  
ATOM    804  O   GLY L  99      30.431  24.810   8.939  1.00 15.40           O  
ATOM    805  N   GLN L 100      31.176  23.219   7.530  1.00 16.79           N  
ATOM    806  CA  GLN L 100      31.537  24.172   6.479  1.00 17.88           C  
ATOM    807  C   GLN L 100      30.343  24.764   5.744  1.00 18.13           C  
ATOM    808  O   GLN L 100      30.490  25.732   4.993  1.00 18.14           O  
ATOM    809  CB  GLN L 100      32.469  23.528   5.440  1.00 18.51           C  
ATOM    810  CG  GLN L 100      31.775  22.569   4.470  1.00 19.93           C  
ATOM    811  CD  GLN L 100      31.633  21.152   4.998  1.00 20.85           C  
ATOM    812  OE1 GLN L 100      31.383  20.933   6.179  1.00 20.59           O  
ATOM    813  NE2 GLN L 100      31.771  20.177   4.104  1.00 22.33           N  
ATOM    814  N   GLY L 101      29.168  24.174   5.943  1.00 18.11           N  
ATOM    815  CA  GLY L 101      27.973  24.668   5.283  1.00 18.75           C  
ATOM    816  C   GLY L 101      27.634  23.940   3.995  1.00 19.47           C  
ATOM    817  O   GLY L 101      28.522  23.472   3.277  1.00 19.59           O  
ATOM    818  N   THR L 102      26.337  23.845   3.716  1.00 20.10           N  
ATOM    819  CA  THR L 102      25.827  23.193   2.513  1.00 20.90           C  
ATOM    820  C   THR L 102      24.899  24.164   1.798  1.00 21.72           C  
ATOM    821  O   THR L 102      23.959  24.686   2.399  1.00 21.32           O  
ATOM    822  CB  THR L 102      25.017  21.923   2.853  1.00 20.70           C  
ATOM    823  OG1 THR L 102      25.861  20.976   3.512  1.00 21.08           O  
ATOM    824  CG2 THR L 102      24.450  21.290   1.580  1.00 20.76           C  
ATOM    825  N   LYS L 103      25.166  24.408   0.518  1.00 23.05           N  
ATOM    826  CA  LYS L 103      24.342  25.312  -0.272  1.00 24.60           C  
ATOM    827  C   LYS L 103      23.189  24.523  -0.879  1.00 25.76           C  
ATOM    828  O   LYS L 103      23.402  23.497  -1.520  1.00 25.96           O  
ATOM    829  CB  LYS L 103      25.175  25.958  -1.374  1.00 24.54           C  
ATOM    830  N   LEU L 104      21.970  25.005  -0.669  1.00 27.22           N  
ATOM    831  CA  LEU L 104      20.789  24.339  -1.197  1.00 28.84           C  
ATOM    832  C   LEU L 104      20.129  25.208  -2.262  1.00 29.98           C  
ATOM    833  O   LEU L 104      19.736  26.342  -1.993  1.00 29.84           O  
ATOM    834  CB  LEU L 104      19.799  24.061  -0.064  1.00 28.90           C  
ATOM    835  CG  LEU L 104      18.517  23.301  -0.407  1.00 29.36           C  
ATOM    836  CD1 LEU L 104      18.856  21.936  -0.981  1.00 29.44           C  
ATOM    837  CD2 LEU L 104      17.676  23.153   0.854  1.00 29.18           C  
ATOM    838  N   GLU L 105      20.022  24.676  -3.475  1.00 31.61           N  
ATOM    839  CA  GLU L 105      19.402  25.409  -4.573  1.00 33.47           C  
ATOM    840  C   GLU L 105      18.361  24.594  -5.324  1.00 34.20           C  
ATOM    841  O   GLU L 105      18.313  23.368  -5.215  1.00 34.35           O  
ATOM    842  CB  GLU L 105      20.462  25.912  -5.559  1.00 34.56           C  
ATOM    843  CG  GLU L 105      21.231  27.126  -5.075  1.00 36.22           C  
ATOM    844  CD  GLU L 105      22.200  27.661  -6.114  1.00 37.18           C  
ATOM    845  OE1 GLU L 105      21.767  27.906  -7.262  1.00 37.92           O  
ATOM    846  OE2 GLU L 105      23.389  27.852  -5.780  1.00 38.10           O  
ATOM    847  N   ILE L 106      17.523  25.294  -6.082  1.00 35.17           N  
ATOM    848  CA  ILE L 106      16.471  24.659  -6.865  1.00 36.03           C  
ATOM    849  C   ILE L 106      17.043  24.072  -8.147  1.00 36.77           C  
ATOM    850  O   ILE L 106      17.866  24.697  -8.815  1.00 37.06           O  
ATOM    851  CB  ILE L 106      15.369  25.668  -7.244  1.00 36.16           C  
ATOM    852  CG1 ILE L 106      14.766  26.284  -5.980  1.00 36.00           C  
ATOM    853  CG2 ILE L 106      14.293  24.974  -8.073  1.00 36.09           C  
ATOM    854  CD1 ILE L 106      14.148  25.272  -5.035  1.00 36.05           C  
ATOM    855  N   LYS L 107      16.603  22.865  -8.484  1.00 37.35           N  
ATOM    856  CA  LYS L 107      17.062  22.187  -9.689  1.00 38.07           C  
ATOM    857  C   LYS L 107      15.869  21.810 -10.557  1.00 38.46           C  
ATOM    858  O   LYS L 107      14.725  22.096 -10.141  1.00 39.29           O  
ATOM    859  CB  LYS L 107      17.849  20.942  -9.318  1.00 38.12           C  
TER     860      LYS L 107                                                      
ATOM    861  N   ASP L   1       9.192  37.561  21.750  1.00 20.84           N  
ATOM    862  CA  ASP L   1      10.423  37.354  20.937  1.00 19.94           C  
ATOM    863  C   ASP L   1      11.412  38.486  21.175  1.00 19.27           C  
ATOM    864  O   ASP L   1      11.112  39.650  20.917  1.00 19.75           O  
ATOM    865  CB  ASP L   1      10.066  37.295  19.452  1.00 21.44           C  
ATOM    866  CG  ASP L   1       9.276  36.053  19.086  1.00 22.19           C  
ATOM    867  OD1 ASP L   1       8.506  35.557  19.934  1.00 23.91           O  
ATOM    868  OD2 ASP L   1       9.410  35.586  17.938  1.00 23.36           O  
ATOM    869  N   ILE L   2      12.592  38.143  21.676  1.00 17.45           N  
ATOM    870  CA  ILE L   2      13.614  39.149  21.925  1.00 16.41           C  
ATOM    871  C   ILE L   2      14.315  39.487  20.618  1.00 16.29           C  
ATOM    872  O   ILE L   2      14.792  38.601  19.908  1.00 15.94           O  
ATOM    873  CB  ILE L   2      14.656  38.650  22.939  1.00 16.33           C  
ATOM    874  CG1 ILE L   2      13.965  38.335  24.268  1.00 16.16           C  
ATOM    875  CG2 ILE L   2      15.751  39.698  23.120  1.00 15.95           C  
ATOM    876  CD1 ILE L   2      14.900  37.840  25.351  1.00 16.55           C  
ATOM    877  N   VAL L   3      14.368  40.778  20.303  1.00 15.39           N  
ATOM    878  CA  VAL L   3      15.000  41.250  19.077  1.00 15.09           C  
ATOM    879  C   VAL L   3      16.304  41.966  19.398  1.00 14.12           C  
ATOM    880  O   VAL L   3      16.369  42.761  20.335  1.00 13.85           O  
ATOM    881  CB  VAL L   3      14.072  42.227  18.321  1.00 15.70           C  
ATOM    882  CG1 VAL L   3      14.752  42.720  17.046  1.00 16.52           C  
ATOM    883  CG2 VAL L   3      12.759  41.538  17.994  1.00 16.47           C  
ATOM    884  N   LEU L   4      17.347  41.669  18.626  1.00 13.36           N  
ATOM    885  CA  LEU L   4      18.644  42.307  18.827  1.00 13.05           C  
ATOM    886  C   LEU L   4      18.919  43.291  17.702  1.00 12.72           C  
ATOM    887  O   LEU L   4      18.726  42.972  16.532  1.00 13.75           O  
ATOM    888  CB  LEU L   4      19.770  41.266  18.847  1.00 13.13           C  
ATOM    889  CG  LEU L   4      19.684  40.153  19.888  1.00 14.02           C  
ATOM    890  CD1 LEU L   4      20.958  39.316  19.850  1.00 14.22           C  
ATOM    891  CD2 LEU L   4      19.503  40.751  21.264  1.00 14.49           C  
ATOM    892  N   THR L   5      19.375  44.485  18.061  1.00 12.52           N  
ATOM    893  CA  THR L   5      19.693  45.509  17.073  1.00 12.73           C  
ATOM    894  C   THR L   5      21.138  45.958  17.272  1.00 12.30           C  
ATOM    895  O   THR L   5      21.506  46.424  18.346  1.00 12.90           O  
ATOM    896  CB  THR L   5      18.757  46.734  17.217  1.00 13.31           C  
ATOM    897  OG1 THR L   5      17.395  46.309  17.087  1.00 15.31           O  
ATOM    898  CG2 THR L   5      19.053  47.769  16.138  1.00 14.36           C  
ATOM    899  N   GLN L   6      21.955  45.806  16.236  1.00 11.93           N  
ATOM    900  CA  GLN L   6      23.352  46.200  16.335  1.00 11.86           C  
ATOM    901  C   GLN L   6      23.560  47.587  15.768  1.00 12.16           C  
ATOM    902  O   GLN L   6      22.769  48.065  14.952  1.00 12.89           O  
ATOM    903  CB  GLN L   6      24.251  45.214  15.577  1.00 11.98           C  
ATOM    904  CG  GLN L   6      24.010  43.774  15.975  1.00 11.96           C  
ATOM    905  CD  GLN L   6      24.925  42.780  15.287  1.00 11.84           C  
ATOM    906  OE1 GLN L   6      24.587  41.604  15.181  1.00 11.93           O  
ATOM    907  NE2 GLN L   6      26.096  43.234  14.844  1.00 11.84           N  
ATOM    908  N   SER L   7      24.619  48.240  16.230  1.00 11.81           N  
ATOM    909  CA  SER L   7      24.976  49.561  15.736  1.00 12.26           C  
ATOM    910  C   SER L   7      26.484  49.697  15.880  1.00 11.64           C  
ATOM    911  O   SER L   7      27.049  49.340  16.913  1.00 11.61           O  
ATOM    912  CB  SER L   7      24.274  50.662  16.530  1.00 13.23           C  
ATOM    913  OG  SER L   7      24.541  51.925  15.938  1.00 16.10           O  
ATOM    914  N   PRO L   8      27.161  50.206  14.840  1.00 10.80           N  
ATOM    915  CA  PRO L   8      26.612  50.655  13.560  1.00 11.21           C  
ATOM    916  C   PRO L   8      26.327  49.456  12.657  1.00 11.73           C  
ATOM    917  O   PRO L   8      26.593  48.316  13.038  1.00 11.91           O  
ATOM    918  CB  PRO L   8      27.738  51.521  13.016  1.00 11.22           C  
ATOM    919  CG  PRO L   8      28.937  50.702  13.398  1.00 11.14           C  
ATOM    920  CD  PRO L   8      28.622  50.421  14.868  1.00 11.21           C  
ATOM    921  N   ASP L   9      25.788  49.711  11.470  1.00 11.96           N  
ATOM    922  CA  ASP L   9      25.522  48.633  10.526  1.00 13.00           C  
ATOM    923  C   ASP L   9      26.819  48.263   9.814  1.00 12.95           C  
ATOM    924  O   ASP L   9      27.009  47.126   9.385  1.00 12.56           O  
ATOM    925  CB  ASP L   9      24.451  49.062   9.521  1.00 14.50           C  
ATOM    926  CG  ASP L   9      23.082  49.176  10.157  1.00 16.36           C  
ATOM    927  OD1 ASP L   9      22.527  48.135  10.561  1.00 18.40           O  
ATOM    928  OD2 ASP L   9      22.566  50.305  10.264  1.00 18.37           O  
ATOM    929  N   SER L  10      27.708  49.243   9.676  1.00 13.04           N  
ATOM    930  CA  SER L  10      29.004  49.015   9.052  1.00 13.37           C  
ATOM    931  C   SER L  10      29.943  50.123   9.504  1.00 12.87           C  
ATOM    932  O   SER L  10      29.501  51.210   9.879  1.00 12.67           O  
ATOM    933  CB  SER L  10      28.894  49.011   7.523  1.00 14.25           C  
ATOM    934  OG  SER L  10      28.513  50.279   7.023  1.00 16.44           O  
ATOM    935  N   LEU L  11      31.239  49.835   9.500  1.00 12.55           N  
ATOM    936  CA  LEU L  11      32.230  50.822   9.905  1.00 12.49           C  
ATOM    937  C   LEU L  11      33.564  50.511   9.254  1.00 12.80           C  
ATOM    938  O   LEU L  11      33.842  49.360   8.898  1.00 13.12           O  
ATOM    939  CB  LEU L  11      32.406  50.839  11.432  1.00 12.97           C  
ATOM    940  CG  LEU L  11      33.028  49.626  12.137  1.00 12.70           C  
ATOM    941  CD1 LEU L  11      33.271  49.970  13.596  1.00 14.25           C  
ATOM    942  CD2 LEU L  11      32.122  48.403  12.016  1.00 13.04           C  
ATOM    943  N   ALA L  12      34.371  51.553   9.087  1.00 12.37           N  
ATOM    944  CA  ALA L  12      35.706  51.439   8.509  1.00 12.76           C  
ATOM    945  C   ALA L  12      36.650  51.947   9.586  1.00 13.13           C  
ATOM    946  O   ALA L  12      36.473  53.046  10.118  1.00 13.40           O  
ATOM    947  CB  ALA L  12      35.820  52.291   7.254  1.00 13.30           C  
ATOM    948  N   VAL L  13      37.654  51.140   9.900  1.00 13.68           N  
ATOM    949  CA  VAL L  13      38.610  51.461  10.941  1.00 15.22           C  
ATOM    950  C   VAL L  13      40.041  51.318  10.444  1.00 15.66           C  
ATOM    951  O   VAL L  13      40.303  50.594   9.486  1.00 16.58           O  
ATOM    952  CB  VAL L  13      38.381  50.530  12.144  1.00 15.47           C  
ATOM    953  CG1 VAL L  13      37.037  50.842  12.791  1.00 15.35           C  
ATOM    954  CG2 VAL L  13      38.363  49.091  11.671  1.00 17.29           C  
ATOM    955  N   SER L  14      40.962  52.022  11.092  1.00 16.29           N  
ATOM    956  CA  SER L  14      42.364  51.964  10.705  1.00 16.85           C  
ATOM    957  C   SER L  14      43.110  50.878  11.466  1.00 16.83           C  
ATOM    958  O   SER L  14      42.782  50.575  12.610  1.00 16.91           O  
ATOM    959  CB  SER L  14      43.040  53.313  10.961  1.00 17.56           C  
ATOM    960  OG  SER L  14      42.505  54.319  10.121  1.00 18.30           O  
ATOM    961  N   LEU L  15      44.117  50.294  10.824  1.00 17.16           N  
ATOM    962  CA  LEU L  15      44.918  49.255  11.457  1.00 17.74           C  
ATOM    963  C   LEU L  15      45.496  49.747  12.780  1.00 17.56           C  
ATOM    964  O   LEU L  15      45.972  50.882  12.878  1.00 17.60           O  
ATOM    965  CB  LEU L  15      46.069  48.831  10.537  1.00 18.92           C  
ATOM    966  CG  LEU L  15      45.747  48.112   9.226  1.00 20.20           C  
ATOM    967  CD1 LEU L  15      47.042  47.876   8.450  1.00 21.04           C  
ATOM    968  CD2 LEU L  15      45.057  46.788   9.518  1.00 20.73           C  
ATOM    969  N   GLY L  16      45.458  48.886  13.792  1.00 17.05           N  
ATOM    970  CA  GLY L  16      45.996  49.237  15.092  1.00 17.03           C  
ATOM    971  C   GLY L  16      45.071  50.000  16.022  1.00 17.30           C  
ATOM    972  O   GLY L  16      45.361  50.135  17.211  1.00 17.71           O  
ATOM    973  N   GLU L  17      43.955  50.498  15.498  1.00 17.50           N  
ATOM    974  CA  GLU L  17      43.016  51.247  16.323  1.00 18.09           C  
ATOM    975  C   GLU L  17      41.958  50.344  16.953  1.00 18.53           C  
ATOM    976  O   GLU L  17      41.962  49.133  16.741  1.00 18.69           O  
ATOM    977  CB  GLU L  17      42.358  52.358  15.503  1.00 17.86           C  
ATOM    978  CG  GLU L  17      43.341  53.395  14.947  1.00 18.60           C  
ATOM    979  CD  GLU L  17      44.305  53.921  15.999  1.00 18.88           C  
ATOM    980  OE1 GLU L  17      43.892  54.084  17.166  1.00 18.29           O  
ATOM    981  OE2 GLU L  17      45.476  54.197  15.654  1.00 20.16           O  
ATOM    982  N   ARG L  18      41.057  50.937  17.728  1.00 19.19           N  
ATOM    983  CA  ARG L  18      40.021  50.180  18.426  1.00 19.86           C  
ATOM    984  C   ARG L  18      38.654  50.261  17.745  1.00 19.75           C  
ATOM    985  O   ARG L  18      38.166  51.346  17.449  1.00 20.37           O  
ATOM    986  CB  ARG L  18      39.906  50.700  19.866  1.00 21.39           C  
ATOM    987  CG  ARG L  18      39.109  49.813  20.817  1.00 23.68           C  
ATOM    988  CD  ARG L  18      38.879  50.507  22.158  1.00 26.12           C  
ATOM    989  NE  ARG L  18      37.901  51.586  22.036  1.00 28.47           N  
ATOM    990  CZ  ARG L  18      37.566  52.422  23.017  1.00 29.55           C  
ATOM    991  NH1 ARG L  18      38.143  52.332  24.208  1.00 30.28           N  
ATOM    992  NH2 ARG L  18      36.661  53.367  22.797  1.00 30.24           N  
ATOM    993  N   ALA L  19      38.041  49.106  17.501  1.00 18.84           N  
ATOM    994  CA  ALA L  19      36.717  49.057  16.883  1.00 18.44           C  
ATOM    995  C   ALA L  19      35.698  48.724  17.973  1.00 18.09           C  
ATOM    996  O   ALA L  19      35.971  47.919  18.869  1.00 17.97           O  
ATOM    997  CB  ALA L  19      36.680  48.001  15.784  1.00 18.89           C  
ATOM    998  N   THR L  20      34.526  49.343  17.890  1.00 17.32           N  
ATOM    999  CA  THR L  20      33.465  49.132  18.871  1.00 17.60           C  
ATOM   1000  C   THR L  20      32.147  48.819  18.166  1.00 16.60           C  
ATOM   1001  O   THR L  20      31.740  49.543  17.256  1.00 16.45           O  
ATOM   1002  CB  THR L  20      33.268  50.391  19.741  1.00 18.69           C  
ATOM   1003  OG1 THR L  20      34.503  50.725  20.388  1.00 20.76           O  
ATOM   1004  CG2 THR L  20      32.207  50.150  20.795  1.00 20.15           C  
ATOM   1005  N   ILE L  21      31.490  47.739  18.584  1.00 15.19           N  
ATOM   1006  CA  ILE L  21      30.209  47.347  17.997  1.00 13.97           C  
ATOM   1007  C   ILE L  21      29.203  47.138  19.125  1.00 13.73           C  
ATOM   1008  O   ILE L  21      29.479  46.423  20.087  1.00 13.22           O  
ATOM   1009  CB  ILE L  21      30.352  46.049  17.167  1.00 13.52           C  
ATOM   1010  CG1 ILE L  21      31.380  46.267  16.056  1.00 14.06           C  
ATOM   1011  CG2 ILE L  21      28.998  45.653  16.567  1.00 13.60           C  
ATOM   1012  CD1 ILE L  21      31.688  45.028  15.246  1.00 14.30           C  
ATOM   1013  N   ASN L  22      28.039  47.767  19.008  1.00 13.36           N  
ATOM   1014  CA  ASN L  22      27.017  47.671  20.045  1.00 14.19           C  
ATOM   1015  C   ASN L  22      25.857  46.773  19.665  1.00 13.69           C  
ATOM   1016  O   ASN L  22      25.509  46.649  18.491  1.00 13.47           O  
ATOM   1017  CB  ASN L  22      26.494  49.075  20.384  1.00 16.29           C  
ATOM   1018  CG  ASN L  22      25.383  49.059  21.426  1.00 18.63           C  
ATOM   1019  OD1 ASN L  22      24.208  48.875  21.100  1.00 21.18           O  
ATOM   1020  ND2 ASN L  22      25.756  49.232  22.689  1.00 20.04           N  
ATOM   1021  N   CYS L  23      25.273  46.141  20.679  1.00 13.46           N  
ATOM   1022  CA  CYS L  23      24.126  45.268  20.485  1.00 14.15           C  
ATOM   1023  C   CYS L  23      23.088  45.614  21.544  1.00 14.60           C  
ATOM   1024  O   CYS L  23      23.391  45.637  22.736  1.00 15.63           O  
ATOM   1025  CB  CYS L  23      24.539  43.803  20.621  1.00 13.81           C  
ATOM   1026  SG  CYS L  23      23.186  42.604  20.366  1.00 15.76           S  
ATOM   1027  N   LYS L  24      21.874  45.913  21.098  1.00 14.94           N  
ATOM   1028  CA  LYS L  24      20.779  46.252  22.000  1.00 15.59           C  
ATOM   1029  C   LYS L  24      19.706  45.173  21.906  1.00 15.16           C  
ATOM   1030  O   LYS L  24      19.319  44.783  20.806  1.00 15.55           O  
ATOM   1031  CB  LYS L  24      20.176  47.603  21.604  1.00 16.66           C  
ATOM   1032  CG  LYS L  24      18.890  47.962  22.348  1.00 18.54           C  
ATOM   1033  CD  LYS L  24      18.302  49.281  21.862  1.00 19.90           C  
ATOM   1034  CE  LYS L  24      17.952  49.240  20.381  1.00 20.69           C  
ATOM   1035  NZ  LYS L  24      17.345  50.523  19.916  1.00 21.99           N  
ATOM   1036  N   SER L  25      19.246  44.679  23.053  1.00 15.36           N  
ATOM   1037  CA  SER L  25      18.188  43.669  23.072  1.00 16.27           C  
ATOM   1038  C   SER L  25      16.880  44.332  23.516  1.00 16.57           C  
ATOM   1039  O   SER L  25      16.879  45.187  24.403  1.00 17.00           O  
ATOM   1040  CB  SER L  25      18.559  42.512  24.013  1.00 16.84           C  
ATOM   1041  OG  SER L  25      18.776  42.953  25.338  1.00 18.26           O  
ATOM   1042  N   SER L  26      15.778  43.943  22.880  1.00 16.53           N  
ATOM   1043  CA  SER L  26      14.464  44.510  23.183  1.00 17.21           C  
ATOM   1044  C   SER L  26      14.019  44.202  24.606  1.00 18.05           C  
ATOM   1045  O   SER L  26      13.199  44.923  25.183  1.00 18.25           O  
ATOM   1046  CB  SER L  26      13.428  43.984  22.191  1.00 17.37           C  
ATOM   1047  OG  SER L  26      13.312  42.577  22.282  1.00 17.59           O  
ATOM   1048  N   GLN L  27      14.550  43.120  25.161  1.00 18.59           N  
ATOM   1049  CA  GLN L  27      14.241  42.721  26.527  1.00 19.16           C  
ATOM   1050  C   GLN L  27      15.545  42.243  27.149  1.00 18.63           C  
ATOM   1051  O   GLN L  27      16.450  41.801  26.438  1.00 17.85           O  
ATOM   1052  CB  GLN L  27      13.216  41.585  26.545  1.00 20.89           C  
ATOM   1053  CG  GLN L  27      11.924  41.885  25.806  1.00 24.12           C  
ATOM   1054  CD  GLN L  27      10.959  40.714  25.832  1.00 25.48           C  
ATOM   1055  OE1 GLN L  27       9.906  40.748  25.195  1.00 27.04           O  
ATOM   1056  NE2 GLN L  27      11.313  39.670  26.575  1.00 26.81           N  
ATOM   1057  N   SER L  27A     15.644  42.333  28.470  1.00 18.24           N  
ATOM   1058  CA  SER L  27A     16.851  41.912  29.171  1.00 17.95           C  
ATOM   1059  C   SER L  27A     17.158  40.427  28.987  1.00 17.56           C  
ATOM   1060  O   SER L  27A     16.259  39.584  29.029  1.00 17.57           O  
ATOM   1061  CB  SER L  27A     16.720  42.212  30.664  1.00 18.57           C  
ATOM   1062  OG  SER L  27A     17.887  41.815  31.360  1.00 19.00           O  
ATOM   1063  N   VAL L  27B     18.434  40.114  28.774  1.00 17.24           N  
ATOM   1064  CA  VAL L  27B     18.862  38.726  28.614  1.00 17.12           C  
ATOM   1065  C   VAL L  27B     19.710  38.318  29.818  1.00 17.85           C  
ATOM   1066  O   VAL L  27B     20.476  37.354  29.767  1.00 17.17           O  
ATOM   1067  CB  VAL L  27B     19.671  38.514  27.305  1.00 16.86           C  
ATOM   1068  CG1 VAL L  27B     18.799  38.839  26.106  1.00 16.24           C  
ATOM   1069  CG2 VAL L  27B     20.921  39.381  27.300  1.00 16.62           C  
ATOM   1070  N   LEU L  27C     19.556  39.069  30.905  1.00 18.96           N  
ATOM   1071  CA  LEU L  27C     20.271  38.808  32.150  1.00 20.14           C  
ATOM   1072  C   LEU L  27C     19.380  37.983  33.068  1.00 21.13           C  
ATOM   1073  O   LEU L  27C     18.285  38.418  33.427  1.00 21.39           O  
ATOM   1074  CB  LEU L  27C     20.627  40.127  32.842  1.00 20.31           C  
ATOM   1075  CG  LEU L  27C     21.236  40.052  34.246  1.00 20.82           C  
ATOM   1076  CD1 LEU L  27C     22.546  39.290  34.219  1.00 21.28           C  
ATOM   1077  CD2 LEU L  27C     21.459  41.464  34.765  1.00 21.33           C  
ATOM   1078  N   ASP L  27D     19.842  36.792  33.438  1.00 21.81           N  
ATOM   1079  CA  ASP L  27D     19.068  35.930  34.326  1.00 23.00           C  
ATOM   1080  C   ASP L  27D     19.397  36.321  35.761  1.00 23.47           C  
ATOM   1081  O   ASP L  27D     20.513  36.105  36.234  1.00 22.95           O  
ATOM   1082  CB  ASP L  27D     19.427  34.460  34.109  1.00 24.24           C  
ATOM   1083  CG  ASP L  27D     18.502  33.523  34.864  1.00 25.63           C  
ATOM   1084  OD1 ASP L  27D     18.257  33.770  36.063  1.00 26.30           O  
ATOM   1085  OD2 ASP L  27D     18.025  32.536  34.264  1.00 27.00           O  
ATOM   1086  N   SER L  27E     18.418  36.895  36.451  1.00 24.19           N  
ATOM   1087  CA  SER L  27E     18.609  37.338  37.825  1.00 24.94           C  
ATOM   1088  C   SER L  27E     18.867  36.210  38.820  1.00 25.00           C  
ATOM   1089  O   SER L  27E     19.338  36.464  39.929  1.00 25.39           O  
ATOM   1090  CB  SER L  27E     17.398  38.157  38.282  1.00 25.33           C  
ATOM   1091  OG  SER L  27E     16.207  37.389  38.217  1.00 26.81           O  
ATOM   1092  N   SER L  27F     18.573  34.971  38.434  1.00 24.84           N  
ATOM   1093  CA  SER L  27F     18.779  33.841  39.339  1.00 24.71           C  
ATOM   1094  C   SER L  27F     20.221  33.337  39.374  1.00 24.05           C  
ATOM   1095  O   SER L  27F     20.635  32.706  40.348  1.00 23.66           O  
ATOM   1096  CB  SER L  27F     17.845  32.678  38.977  1.00 25.39           C  
ATOM   1097  OG  SER L  27F     18.185  32.102  37.728  1.00 27.19           O  
ATOM   1098  N   ASN L  28      20.987  33.606  38.320  1.00 23.19           N  
ATOM   1099  CA  ASN L  28      22.376  33.160  38.273  1.00 22.73           C  
ATOM   1100  C   ASN L  28      23.369  34.239  37.841  1.00 22.24           C  
ATOM   1101  O   ASN L  28      24.563  33.974  37.728  1.00 22.72           O  
ATOM   1102  CB  ASN L  28      22.521  31.939  37.361  1.00 22.71           C  
ATOM   1103  CG  ASN L  28      21.979  32.183  35.972  1.00 22.71           C  
ATOM   1104  OD1 ASN L  28      22.250  33.216  35.362  1.00 22.13           O  
ATOM   1105  ND2 ASN L  28      21.225  31.219  35.453  1.00 23.41           N  
ATOM   1106  N   SER L  29      22.867  35.446  37.595  1.00 21.86           N  
ATOM   1107  CA  SER L  29      23.701  36.586  37.210  1.00 21.35           C  
ATOM   1108  C   SER L  29      24.383  36.476  35.850  1.00 20.87           C  
ATOM   1109  O   SER L  29      25.368  37.170  35.593  1.00 21.27           O  
ATOM   1110  CB  SER L  29      24.772  36.827  38.276  1.00 22.14           C  
ATOM   1111  OG  SER L  29      24.188  36.971  39.557  1.00 23.18           O  
ATOM   1112  N   LYS L  30      23.866  35.621  34.978  1.00 19.81           N  
ATOM   1113  CA  LYS L  30      24.469  35.454  33.662  1.00 19.22           C  
ATOM   1114  C   LYS L  30      23.690  36.109  32.527  1.00 17.76           C  
ATOM   1115  O   LYS L  30      22.458  36.121  32.519  1.00 17.37           O  
ATOM   1116  CB  LYS L  30      24.661  33.966  33.359  1.00 20.40           C  
ATOM   1117  CG  LYS L  30      25.592  33.264  34.335  1.00 22.13           C  
ATOM   1118  CD  LYS L  30      25.859  31.818  33.946  1.00 23.92           C  
ATOM   1119  CE  LYS L  30      24.590  30.978  33.937  1.00 25.12           C  
ATOM   1120  NZ  LYS L  30      24.898  29.536  33.689  1.00 26.25           N  
ATOM   1121  N   ASN L  31      24.434  36.677  31.582  1.00 16.88           N  
ATOM   1122  CA  ASN L  31      23.863  37.311  30.399  1.00 15.72           C  
ATOM   1123  C   ASN L  31      23.981  36.267  29.294  1.00 14.86           C  
ATOM   1124  O   ASN L  31      25.086  35.845  28.949  1.00 13.83           O  
ATOM   1125  CB  ASN L  31      24.660  38.564  30.029  1.00 16.17           C  
ATOM   1126  CG  ASN L  31      24.424  39.711  30.993  1.00 17.23           C  
ATOM   1127  OD1 ASN L  31      23.358  40.329  30.987  1.00 17.90           O  
ATOM   1128  ND2 ASN L  31      25.411  39.990  31.839  1.00 18.32           N  
ATOM   1129  N   TYR L  32      22.842  35.835  28.766  1.00 14.29           N  
ATOM   1130  CA  TYR L  32      22.806  34.821  27.714  1.00 14.05           C  
ATOM   1131  C   TYR L  32      22.984  35.508  26.370  1.00 13.17           C  
ATOM   1132  O   TYR L  32      22.062  35.576  25.550  1.00 12.70           O  
ATOM   1133  CB  TYR L  32      21.472  34.074  27.783  1.00 15.04           C  
ATOM   1134  CG  TYR L  32      21.342  33.195  29.011  1.00 16.73           C  
ATOM   1135  CD1 TYR L  32      21.250  33.749  30.290  1.00 17.85           C  
ATOM   1136  CD2 TYR L  32      21.369  31.808  28.896  1.00 17.64           C  
ATOM   1137  CE1 TYR L  32      21.191  32.937  31.428  1.00 18.87           C  
ATOM   1138  CE2 TYR L  32      21.312  30.989  30.024  1.00 18.71           C  
ATOM   1139  CZ  TYR L  32      21.226  31.560  31.285  1.00 19.09           C  
ATOM   1140  OH  TYR L  32      21.190  30.748  32.402  1.00 20.67           O  
ATOM   1141  N   LEU L  33      24.201  35.993  26.154  1.00 12.73           N  
ATOM   1142  CA  LEU L  33      24.542  36.747  24.957  1.00 12.93           C  
ATOM   1143  C   LEU L  33      25.907  36.313  24.431  1.00 12.49           C  
ATOM   1144  O   LEU L  33      26.853  36.147  25.205  1.00 12.88           O  
ATOM   1145  CB  LEU L  33      24.555  38.236  25.334  1.00 14.16           C  
ATOM   1146  CG  LEU L  33      24.676  39.401  24.344  1.00 14.78           C  
ATOM   1147  CD1 LEU L  33      26.051  39.420  23.687  1.00 14.83           C  
ATOM   1148  CD2 LEU L  33      23.564  39.300  23.319  1.00 14.72           C  
ATOM   1149  N   ALA L  34      26.002  36.142  23.117  1.00 11.54           N  
ATOM   1150  CA  ALA L  34      27.249  35.738  22.485  1.00 11.16           C  
ATOM   1151  C   ALA L  34      27.576  36.611  21.273  1.00 11.03           C  
ATOM   1152  O   ALA L  34      26.700  37.278  20.716  1.00 11.22           O  
ATOM   1153  CB  ALA L  34      27.159  34.279  22.066  1.00 11.08           C  
ATOM   1154  N   TRP L  35      28.852  36.629  20.895  1.00  9.72           N  
ATOM   1155  CA  TRP L  35      29.306  37.371  19.720  1.00  9.79           C  
ATOM   1156  C   TRP L  35      29.998  36.425  18.753  1.00 10.03           C  
ATOM   1157  O   TRP L  35      30.783  35.568  19.171  1.00 10.45           O  
ATOM   1158  CB  TRP L  35      30.300  38.479  20.088  1.00 10.27           C  
ATOM   1159  CG  TRP L  35      29.717  39.651  20.804  1.00 10.37           C  
ATOM   1160  CD1 TRP L  35      29.664  39.847  22.155  1.00 10.94           C  
ATOM   1161  CD2 TRP L  35      29.109  40.800  20.205  1.00 10.74           C  
ATOM   1162  NE1 TRP L  35      29.063  41.054  22.433  1.00 11.46           N  
ATOM   1163  CE2 TRP L  35      28.713  41.659  21.255  1.00 10.92           C  
ATOM   1164  CE3 TRP L  35      28.860  41.191  18.879  1.00 10.61           C  
ATOM   1165  CZ2 TRP L  35      28.081  42.887  21.021  1.00 11.18           C  
ATOM   1166  CZ3 TRP L  35      28.232  42.412  18.647  1.00 11.43           C  
ATOM   1167  CH2 TRP L  35      27.851  43.244  19.715  1.00 11.24           C  
ATOM   1168  N   TYR L  36      29.704  36.595  17.468  1.00 10.10           N  
ATOM   1169  CA  TYR L  36      30.295  35.792  16.405  1.00 10.57           C  
ATOM   1170  C   TYR L  36      30.953  36.649  15.340  1.00 10.89           C  
ATOM   1171  O   TYR L  36      30.583  37.811  15.133  1.00 10.41           O  
ATOM   1172  CB  TYR L  36      29.239  34.946  15.689  1.00 11.73           C  
ATOM   1173  CG  TYR L  36      28.694  33.795  16.482  1.00 12.56           C  
ATOM   1174  CD1 TYR L  36      27.698  33.977  17.442  1.00 13.79           C  
ATOM   1175  CD2 TYR L  36      29.201  32.514  16.290  1.00 13.30           C  
ATOM   1176  CE1 TYR L  36      27.223  32.893  18.190  1.00 15.34           C  
ATOM   1177  CE2 TYR L  36      28.743  31.441  17.022  1.00 14.81           C  
ATOM   1178  CZ  TYR L  36      27.758  31.631  17.968  1.00 15.49           C  
ATOM   1179  OH  TYR L  36      27.322  30.546  18.696  1.00 19.18           O  
ATOM   1180  N   GLN L  37      31.921  36.044  14.657  1.00 10.91           N  
ATOM   1181  CA  GLN L  37      32.638  36.664  13.547  1.00 11.34           C  
ATOM   1182  C   GLN L  37      32.371  35.772  12.338  1.00 12.00           C  
ATOM   1183  O   GLN L  37      32.381  34.548  12.471  1.00 13.11           O  
ATOM   1184  CB  GLN L  37      34.143  36.670  13.819  1.00 12.21           C  
ATOM   1185  CG  GLN L  37      34.986  37.217  12.676  1.00 13.27           C  
ATOM   1186  CD  GLN L  37      36.465  36.935  12.867  1.00 13.73           C  
ATOM   1187  OE1 GLN L  37      36.896  35.778  12.829  1.00 15.50           O  
ATOM   1188  NE2 GLN L  37      37.247  37.985  13.092  1.00 14.17           N  
ATOM   1189  N   GLN L  38      32.114  36.361  11.174  1.00 11.89           N  
ATOM   1190  CA  GLN L  38      31.894  35.552   9.976  1.00 12.96           C  
ATOM   1191  C   GLN L  38      32.475  36.197   8.727  1.00 14.33           C  
ATOM   1192  O   GLN L  38      32.207  37.356   8.427  1.00 14.25           O  
ATOM   1193  CB  GLN L  38      30.405  35.266   9.758  1.00 12.72           C  
ATOM   1194  CG  GLN L  38      30.133  34.423   8.513  1.00 12.73           C  
ATOM   1195  CD  GLN L  38      28.675  34.048   8.370  1.00 12.88           C  
ATOM   1196  OE1 GLN L  38      27.794  34.872   8.586  1.00 13.83           O  
ATOM   1197  NE2 GLN L  38      28.412  32.800   7.977  1.00 12.69           N  
ATOM   1198  N   LYS L  39      33.270  35.423   7.999  1.00 15.73           N  
ATOM   1199  CA  LYS L  39      33.896  35.899   6.775  1.00 17.23           C  
ATOM   1200  C   LYS L  39      33.189  35.262   5.585  1.00 18.42           C  
ATOM   1201  O   LYS L  39      32.579  34.204   5.712  1.00 18.30           O  
ATOM   1202  CB  LYS L  39      35.383  35.544   6.784  1.00 17.95           C  
ATOM   1203  CG  LYS L  39      36.123  36.168   7.954  1.00 18.60           C  
ATOM   1204  CD  LYS L  39      37.612  35.886   7.907  1.00 19.85           C  
ATOM   1205  CE  LYS L  39      38.315  36.560   9.075  1.00 20.35           C  
ATOM   1206  NZ  LYS L  39      39.785  36.314   9.073  1.00 21.32           N  
ATOM   1207  N   PRO L  40      33.267  35.896   4.406  1.00 19.41           N  
ATOM   1208  CA  PRO L  40      32.611  35.358   3.212  1.00 20.16           C  
ATOM   1209  C   PRO L  40      32.958  33.904   2.907  1.00 20.41           C  
ATOM   1210  O   PRO L  40      34.130  33.519   2.905  1.00 21.05           O  
ATOM   1211  CB  PRO L  40      33.080  36.317   2.119  1.00 20.42           C  
ATOM   1212  CG  PRO L  40      33.196  37.624   2.879  1.00 20.43           C  
ATOM   1213  CD  PRO L  40      33.995  37.131   4.065  1.00 20.17           C  
ATOM   1214  N   GLY L  41      31.928  33.102   2.657  1.00 20.87           N  
ATOM   1215  CA  GLY L  41      32.131  31.702   2.333  1.00 20.58           C  
ATOM   1216  C   GLY L  41      32.516  30.809   3.496  1.00 20.45           C  
ATOM   1217  O   GLY L  41      32.763  29.617   3.306  1.00 21.18           O  
ATOM   1218  N   GLN L  42      32.562  31.374   4.698  1.00 19.77           N  
ATOM   1219  CA  GLN L  42      32.929  30.618   5.894  1.00 19.14           C  
ATOM   1220  C   GLN L  42      31.788  30.641   6.904  1.00 17.73           C  
ATOM   1221  O   GLN L  42      30.966  31.553   6.903  1.00 16.85           O  
ATOM   1222  CB  GLN L  42      34.165  31.241   6.546  1.00 20.04           C  
ATOM   1223  CG  GLN L  42      35.374  31.347   5.636  1.00 22.66           C  
ATOM   1224  CD  GLN L  42      36.001  30.005   5.327  1.00 24.03           C  
ATOM   1225  OE1 GLN L  42      36.879  29.903   4.470  1.00 26.38           O  
ATOM   1226  NE2 GLN L  42      35.568  28.968   6.035  1.00 25.14           N  
ATOM   1227  N   PRO L  43      31.702  29.615   7.762  1.00 17.18           N  
ATOM   1228  CA  PRO L  43      30.633  29.598   8.760  1.00 16.29           C  
ATOM   1229  C   PRO L  43      30.977  30.585   9.874  1.00 15.57           C  
ATOM   1230  O   PRO L  43      32.099  31.082   9.954  1.00 14.45           O  
ATOM   1231  CB  PRO L  43      30.669  28.157   9.254  1.00 16.79           C  
ATOM   1232  CG  PRO L  43      32.150  27.886   9.250  1.00 17.25           C  
ATOM   1233  CD  PRO L  43      32.493  28.373   7.849  1.00 17.04           C  
ATOM   1234  N   PRO L  44      30.006  30.896  10.737  1.00 14.82           N  
ATOM   1235  CA  PRO L  44      30.254  31.822  11.843  1.00 14.94           C  
ATOM   1236  C   PRO L  44      31.273  31.198  12.795  1.00 14.81           C  
ATOM   1237  O   PRO L  44      31.416  29.972  12.847  1.00 14.89           O  
ATOM   1238  CB  PRO L  44      28.880  31.934  12.502  1.00 14.92           C  
ATOM   1239  CG  PRO L  44      27.931  31.652  11.350  1.00 15.44           C  
ATOM   1240  CD  PRO L  44      28.609  30.441  10.766  1.00 15.35           C  
ATOM   1241  N   LYS L  45      31.963  32.048  13.549  1.00 14.35           N  
ATOM   1242  CA  LYS L  45      32.959  31.623  14.526  1.00 14.46           C  
ATOM   1243  C   LYS L  45      32.654  32.305  15.864  1.00 13.41           C  
ATOM   1244  O   LYS L  45      32.606  33.534  15.936  1.00 12.54           O  
ATOM   1245  CB  LYS L  45      34.358  32.028  14.053  1.00 16.22           C  
ATOM   1246  CG  LYS L  45      35.453  31.770  15.065  1.00 18.88           C  
ATOM   1247  CD  LYS L  45      36.779  32.367  14.609  1.00 21.78           C  
ATOM   1248  CE  LYS L  45      37.843  32.243  15.692  1.00 23.62           C  
ATOM   1249  NZ  LYS L  45      39.094  32.973  15.327  1.00 25.60           N  
ATOM   1250  N   LEU L  46      32.449  31.513  16.914  1.00 12.44           N  
ATOM   1251  CA  LEU L  46      32.149  32.058  18.236  1.00 11.78           C  
ATOM   1252  C   LEU L  46      33.355  32.780  18.826  1.00 11.72           C  
ATOM   1253  O   LEU L  46      34.461  32.233  18.871  1.00 12.39           O  
ATOM   1254  CB  LEU L  46      31.716  30.944  19.193  1.00 11.90           C  
ATOM   1255  CG  LEU L  46      31.371  31.353  20.631  1.00 11.99           C  
ATOM   1256  CD1 LEU L  46      30.185  32.312  20.638  1.00 12.59           C  
ATOM   1257  CD2 LEU L  46      31.035  30.109  21.446  1.00 12.49           C  
ATOM   1258  N   LEU L  47      33.133  34.008  19.277  1.00 11.88           N  
ATOM   1259  CA  LEU L  47      34.186  34.826  19.877  1.00 11.92           C  
ATOM   1260  C   LEU L  47      34.027  34.953  21.390  1.00 12.00           C  
ATOM   1261  O   LEU L  47      34.975  34.733  22.154  1.00 11.67           O  
ATOM   1262  CB  LEU L  47      34.156  36.239  19.287  1.00 13.28           C  
ATOM   1263  CG  LEU L  47      34.362  36.430  17.785  1.00 13.05           C  
ATOM   1264  CD1 LEU L  47      34.059  37.882  17.415  1.00 14.40           C  
ATOM   1265  CD2 LEU L  47      35.786  36.053  17.403  1.00 14.27           C  
ATOM   1266  N   ILE L  48      32.819  35.320  21.810  1.00 12.13           N  
ATOM   1267  CA  ILE L  48      32.497  35.558  23.211  1.00 12.74           C  
ATOM   1268  C   ILE L  48      31.137  34.951  23.568  1.00 12.14           C  
ATOM   1269  O   ILE L  48      30.233  34.916  22.730  1.00 12.12           O  
ATOM   1270  CB  ILE L  48      32.362  37.088  23.486  1.00 13.38           C  
ATOM   1271  CG1 ILE L  48      33.578  37.860  22.955  1.00 15.09           C  
ATOM   1272  CG2 ILE L  48      32.178  37.336  24.976  1.00 14.47           C  
ATOM   1273  CD1 ILE L  48      34.867  37.566  23.667  1.00 16.29           C  
ATOM   1274  N   TYR L  49      30.998  34.464  24.801  1.00 12.38           N  
ATOM   1275  CA  TYR L  49      29.714  33.954  25.274  1.00 12.81           C  
ATOM   1276  C   TYR L  49      29.529  34.430  26.715  1.00 13.13           C  
ATOM   1277  O   TYR L  49      30.488  34.886  27.343  1.00 13.15           O  
ATOM   1278  CB  TYR L  49      29.609  32.427  25.162  1.00 12.97           C  
ATOM   1279  CG  TYR L  49      30.689  31.619  25.840  1.00 13.29           C  
ATOM   1280  CD1 TYR L  49      31.942  31.453  25.254  1.00 13.55           C  
ATOM   1281  CD2 TYR L  49      30.447  30.996  27.063  1.00 13.68           C  
ATOM   1282  CE1 TYR L  49      32.928  30.677  25.873  1.00 13.47           C  
ATOM   1283  CE2 TYR L  49      31.418  30.225  27.684  1.00 14.06           C  
ATOM   1284  CZ  TYR L  49      32.656  30.067  27.084  1.00 13.98           C  
ATOM   1285  OH  TYR L  49      33.618  29.290  27.694  1.00 15.41           O  
ATOM   1286  N   TRP L  50      28.306  34.341  27.237  1.00 13.65           N  
ATOM   1287  CA  TRP L  50      28.021  34.837  28.590  1.00 14.15           C  
ATOM   1288  C   TRP L  50      28.397  36.324  28.627  1.00 14.19           C  
ATOM   1289  O   TRP L  50      28.812  36.852  29.661  1.00 14.42           O  
ATOM   1290  CB  TRP L  50      28.834  34.082  29.647  1.00 15.56           C  
ATOM   1291  CG  TRP L  50      28.431  32.654  29.876  1.00 16.89           C  
ATOM   1292  CD1 TRP L  50      29.270  31.606  30.127  1.00 17.66           C  
ATOM   1293  CD2 TRP L  50      27.097  32.123  29.950  1.00 18.10           C  
ATOM   1294  NE1 TRP L  50      28.550  30.460  30.348  1.00 17.95           N  
ATOM   1295  CE2 TRP L  50      27.215  30.747  30.248  1.00 18.41           C  
ATOM   1296  CE3 TRP L  50      25.815  32.674  29.795  1.00 18.51           C  
ATOM   1297  CZ2 TRP L  50      26.101  29.910  30.394  1.00 18.97           C  
ATOM   1298  CZ3 TRP L  50      24.703  31.839  29.941  1.00 18.85           C  
ATOM   1299  CH2 TRP L  50      24.859  30.469  30.238  1.00 19.07           C  
ATOM   1300  N   ALA L  51      28.262  36.979  27.473  1.00 13.87           N  
ATOM   1301  CA  ALA L  51      28.556  38.399  27.292  1.00 13.54           C  
ATOM   1302  C   ALA L  51      30.023  38.814  27.376  1.00 13.41           C  
ATOM   1303  O   ALA L  51      30.456  39.703  26.638  1.00 13.35           O  
ATOM   1304  CB  ALA L  51      27.728  39.238  28.275  1.00 13.69           C  
ATOM   1305  N   SER L  52      30.797  38.169  28.245  1.00 13.48           N  
ATOM   1306  CA  SER L  52      32.197  38.553  28.415  1.00 14.01           C  
ATOM   1307  C   SER L  52      33.242  37.439  28.458  1.00 14.18           C  
ATOM   1308  O   SER L  52      34.432  37.719  28.606  1.00 14.21           O  
ATOM   1309  CB  SER L  52      32.338  39.391  29.688  1.00 14.10           C  
ATOM   1310  OG  SER L  52      31.970  38.631  30.826  1.00 16.43           O  
ATOM   1311  N   THR L  53      32.819  36.186  28.340  1.00 14.09           N  
ATOM   1312  CA  THR L  53      33.774  35.082  28.376  1.00 14.47           C  
ATOM   1313  C   THR L  53      34.298  34.810  26.975  1.00 14.27           C  
ATOM   1314  O   THR L  53      33.532  34.491  26.067  1.00 14.26           O  
ATOM   1315  CB  THR L  53      33.136  33.803  28.950  1.00 14.50           C  
ATOM   1316  OG1 THR L  53      32.694  34.054  30.293  1.00 15.79           O  
ATOM   1317  CG2 THR L  53      34.153  32.665  28.969  1.00 15.25           C  
ATOM   1318  N   ARG L  54      35.607  34.936  26.797  1.00 14.23           N  
ATOM   1319  CA  ARG L  54      36.203  34.720  25.489  1.00 14.69           C  
ATOM   1320  C   ARG L  54      36.449  33.239  25.220  1.00 14.21           C  
ATOM   1321  O   ARG L  54      37.005  32.528  26.055  1.00 14.31           O  
ATOM   1322  CB  ARG L  54      37.498  35.536  25.376  1.00 16.55           C  
ATOM   1323  CG  ARG L  54      38.220  35.413  24.045  1.00 19.18           C  
ATOM   1324  CD  ARG L  54      39.130  36.616  23.791  1.00 22.20           C  
ATOM   1325  NE  ARG L  54      40.011  36.935  24.911  1.00 25.92           N  
ATOM   1326  CZ  ARG L  54      40.981  36.145  25.357  1.00 26.96           C  
ATOM   1327  NH1 ARG L  54      41.211  34.979  24.773  1.00 29.24           N  
ATOM   1328  NH2 ARG L  54      41.728  36.526  26.384  1.00 28.42           N  
ATOM   1329  N   GLU L  55      36.017  32.778  24.052  1.00 13.18           N  
ATOM   1330  CA  GLU L  55      36.180  31.381  23.666  1.00 12.99           C  
ATOM   1331  C   GLU L  55      37.664  31.051  23.521  1.00 12.67           C  
ATOM   1332  O   GLU L  55      38.477  31.925  23.217  1.00 13.42           O  
ATOM   1333  CB  GLU L  55      35.440  31.118  22.339  1.00 13.12           C  
ATOM   1334  CG  GLU L  55      35.572  29.692  21.803  1.00 14.05           C  
ATOM   1335  CD  GLU L  55      34.946  28.652  22.719  1.00 14.81           C  
ATOM   1336  OE1 GLU L  55      35.590  28.298  23.726  1.00 15.41           O  
ATOM   1337  OE2 GLU L  55      33.811  28.196  22.451  1.00 15.34           O  
ATOM   1338  N   SER L  56      38.020  29.793  23.759  1.00 12.13           N  
ATOM   1339  CA  SER L  56      39.411  29.386  23.619  1.00 12.25           C  
ATOM   1340  C   SER L  56      39.819  29.535  22.153  1.00 12.46           C  
ATOM   1341  O   SER L  56      38.988  29.400  21.249  1.00 12.52           O  
ATOM   1342  CB  SER L  56      39.600  27.937  24.091  1.00 12.67           C  
ATOM   1343  OG  SER L  56      38.812  27.031  23.342  1.00 13.50           O  
ATOM   1344  N   GLY L  57      41.091  29.846  21.925  1.00 12.66           N  
ATOM   1345  CA  GLY L  57      41.590  30.016  20.572  1.00 12.88           C  
ATOM   1346  C   GLY L  57      41.378  31.407  19.999  1.00 13.40           C  
ATOM   1347  O   GLY L  57      41.901  31.734  18.932  1.00 14.04           O  
ATOM   1348  N   VAL L  58      40.618  32.233  20.707  1.00 13.17           N  
ATOM   1349  CA  VAL L  58      40.340  33.592  20.251  1.00 13.95           C  
ATOM   1350  C   VAL L  58      41.347  34.571  20.848  1.00 14.51           C  
ATOM   1351  O   VAL L  58      41.604  34.539  22.049  1.00 14.27           O  
ATOM   1352  CB  VAL L  58      38.913  34.016  20.666  1.00 13.39           C  
ATOM   1353  CG1 VAL L  58      38.636  35.459  20.241  1.00 12.76           C  
ATOM   1354  CG2 VAL L  58      37.898  33.071  20.044  1.00 12.96           C  
ATOM   1355  N   PRO L  59      41.937  35.453  20.013  1.00 15.85           N  
ATOM   1356  CA  PRO L  59      42.921  36.454  20.448  1.00 17.12           C  
ATOM   1357  C   PRO L  59      42.337  37.388  21.515  1.00 17.48           C  
ATOM   1358  O   PRO L  59      41.161  37.739  21.462  1.00 16.77           O  
ATOM   1359  CB  PRO L  59      43.238  37.196  19.150  1.00 17.94           C  
ATOM   1360  CG  PRO L  59      43.042  36.132  18.106  1.00 18.19           C  
ATOM   1361  CD  PRO L  59      41.716  35.571  18.562  1.00 16.78           C  
ATOM   1362  N   ASP L  60      43.161  37.815  22.467  1.00 18.00           N  
ATOM   1363  CA  ASP L  60      42.673  38.677  23.533  1.00 18.85           C  
ATOM   1364  C   ASP L  60      42.304  40.089  23.075  1.00 18.66           C  
ATOM   1365  O   ASP L  60      41.823  40.892  23.876  1.00 19.04           O  
ATOM   1366  CB  ASP L  60      43.697  38.737  24.675  1.00 20.86           C  
ATOM   1367  CG  ASP L  60      44.811  39.730  24.420  1.00 21.54           C  
ATOM   1368  OD1 ASP L  60      45.273  39.849  23.267  1.00 23.55           O  
ATOM   1369  OD2 ASP L  60      45.246  40.375  25.395  1.00 23.85           O  
ATOM   1370  N   ARG L  61      42.510  40.401  21.799  1.00 18.34           N  
ATOM   1371  CA  ARG L  61      42.144  41.733  21.333  1.00 17.62           C  
ATOM   1372  C   ARG L  61      40.624  41.850  21.240  1.00 16.86           C  
ATOM   1373  O   ARG L  61      40.080  42.945  21.103  1.00 16.51           O  
ATOM   1374  CB  ARG L  61      42.819  42.082  19.989  1.00 18.75           C  
ATOM   1375  CG  ARG L  61      42.539  41.182  18.791  1.00 19.58           C  
ATOM   1376  CD  ARG L  61      43.230  41.756  17.534  1.00 20.23           C  
ATOM   1377  NE  ARG L  61      43.012  40.966  16.323  1.00 20.66           N  
ATOM   1378  CZ  ARG L  61      43.589  39.798  16.069  1.00 20.80           C  
ATOM   1379  NH1 ARG L  61      44.434  39.268  16.945  1.00 21.59           N  
ATOM   1380  NH2 ARG L  61      43.319  39.155  14.941  1.00 21.35           N  
ATOM   1381  N   PHE L  62      39.941  40.713  21.334  1.00 15.69           N  
ATOM   1382  CA  PHE L  62      38.479  40.675  21.300  1.00 14.96           C  
ATOM   1383  C   PHE L  62      37.960  40.626  22.732  1.00 14.83           C  
ATOM   1384  O   PHE L  62      38.382  39.780  23.520  1.00 15.16           O  
ATOM   1385  CB  PHE L  62      37.992  39.423  20.570  1.00 14.16           C  
ATOM   1386  CG  PHE L  62      38.245  39.439  19.095  1.00 13.64           C  
ATOM   1387  CD1 PHE L  62      37.386  40.112  18.235  1.00 14.56           C  
ATOM   1388  CD2 PHE L  62      39.360  38.801  18.566  1.00 14.45           C  
ATOM   1389  CE1 PHE L  62      37.634  40.148  16.868  1.00 14.28           C  
ATOM   1390  CE2 PHE L  62      39.618  38.834  17.201  1.00 14.85           C  
ATOM   1391  CZ  PHE L  62      38.752  39.511  16.349  1.00 15.08           C  
ATOM   1392  N   SER L  63      37.052  41.529  23.081  1.00 14.71           N  
ATOM   1393  CA  SER L  63      36.494  41.520  24.427  1.00 15.27           C  
ATOM   1394  C   SER L  63      35.034  41.960  24.436  1.00 14.91           C  
ATOM   1395  O   SER L  63      34.629  42.851  23.680  1.00 15.20           O  
ATOM   1396  CB  SER L  63      37.318  42.419  25.355  1.00 16.47           C  
ATOM   1397  OG  SER L  63      37.299  43.762  24.916  1.00 19.58           O  
ATOM   1398  N   GLY L  64      34.243  41.319  25.289  1.00 14.72           N  
ATOM   1399  CA  GLY L  64      32.839  41.662  25.391  1.00 14.68           C  
ATOM   1400  C   GLY L  64      32.504  42.276  26.737  1.00 14.74           C  
ATOM   1401  O   GLY L  64      33.074  41.900  27.763  1.00 15.27           O  
ATOM   1402  N   SER L  65      31.578  43.227  26.725  1.00 14.58           N  
ATOM   1403  CA  SER L  65      31.139  43.900  27.940  1.00 14.99           C  
ATOM   1404  C   SER L  65      29.655  44.230  27.843  1.00 15.17           C  
ATOM   1405  O   SER L  65      29.021  44.015  26.804  1.00 14.38           O  
ATOM   1406  CB  SER L  65      31.938  45.191  28.153  1.00 15.26           C  
ATOM   1407  OG  SER L  65      31.759  46.088  27.068  1.00 16.64           O  
ATOM   1408  N   GLY L  66      29.101  44.755  28.929  1.00 15.61           N  
ATOM   1409  CA  GLY L  66      27.696  45.107  28.926  1.00 15.92           C  
ATOM   1410  C   GLY L  66      26.852  44.207  29.805  1.00 16.46           C  
ATOM   1411  O   GLY L  66      27.335  43.216  30.357  1.00 16.66           O  
ATOM   1412  N   SER L  67      25.576  44.548  29.926  1.00 17.07           N  
ATOM   1413  CA  SER L  67      24.669  43.777  30.756  1.00 17.72           C  
ATOM   1414  C   SER L  67      23.218  44.130  30.469  1.00 17.24           C  
ATOM   1415  O   SER L  67      22.917  45.223  29.987  1.00 17.72           O  
ATOM   1416  CB  SER L  67      24.978  44.046  32.231  1.00 18.81           C  
ATOM   1417  OG  SER L  67      24.120  43.307  33.080  1.00 21.00           O  
ATOM   1418  N   GLY L  68      22.326  43.190  30.760  1.00 16.91           N  
ATOM   1419  CA  GLY L  68      20.906  43.416  30.563  1.00 16.54           C  
ATOM   1420  C   GLY L  68      20.455  43.548  29.125  1.00 16.64           C  
ATOM   1421  O   GLY L  68      20.177  42.546  28.460  1.00 16.25           O  
ATOM   1422  N   THR L  69      20.374  44.786  28.642  1.00 16.49           N  
ATOM   1423  CA  THR L  69      19.932  45.042  27.278  1.00 16.25           C  
ATOM   1424  C   THR L  69      20.965  45.750  26.414  1.00 16.23           C  
ATOM   1425  O   THR L  69      20.700  46.027  25.250  1.00 16.40           O  
ATOM   1426  CB  THR L  69      18.666  45.920  27.255  1.00 16.53           C  
ATOM   1427  OG1 THR L  69      18.964  47.190  27.852  1.00 18.30           O  
ATOM   1428  CG2 THR L  69      17.534  45.252  28.020  1.00 17.42           C  
ATOM   1429  N   ASP L  70      22.131  46.054  26.973  1.00 15.90           N  
ATOM   1430  CA  ASP L  70      23.153  46.754  26.204  1.00 16.48           C  
ATOM   1431  C   ASP L  70      24.502  46.062  26.285  1.00 15.46           C  
ATOM   1432  O   ASP L  70      25.065  45.889  27.368  1.00 15.59           O  
ATOM   1433  CB  ASP L  70      23.258  48.205  26.685  1.00 18.47           C  
ATOM   1434  CG  ASP L  70      24.314  48.985  25.938  1.00 20.58           C  
ATOM   1435  OD1 ASP L  70      25.508  48.838  26.266  1.00 23.39           O  
ATOM   1436  OD2 ASP L  70      23.950  49.727  25.005  1.00 23.04           O  
ATOM   1437  N   PHE L  71      25.020  45.669  25.125  1.00 14.34           N  
ATOM   1438  CA  PHE L  71      26.293  44.964  25.065  1.00 13.59           C  
ATOM   1439  C   PHE L  71      27.234  45.557  24.035  1.00 13.35           C  
ATOM   1440  O   PHE L  71      26.803  46.159  23.049  1.00 13.49           O  
ATOM   1441  CB  PHE L  71      26.058  43.483  24.754  1.00 13.24           C  
ATOM   1442  CG  PHE L  71      25.118  42.815  25.711  1.00 12.52           C  
ATOM   1443  CD1 PHE L  71      23.739  42.924  25.547  1.00 12.66           C  
ATOM   1444  CD2 PHE L  71      25.608  42.161  26.834  1.00 12.21           C  
ATOM   1445  CE1 PHE L  71      22.862  42.395  26.493  1.00 12.53           C  
ATOM   1446  CE2 PHE L  71      24.738  41.629  27.789  1.00 12.44           C  
ATOM   1447  CZ  PHE L  71      23.366  41.748  27.618  1.00 12.09           C  
ATOM   1448  N   THR L  72      28.529  45.382  24.272  1.00 12.92           N  
ATOM   1449  CA  THR L  72      29.534  45.907  23.365  1.00 13.16           C  
ATOM   1450  C   THR L  72      30.662  44.923  23.083  1.00 12.74           C  
ATOM   1451  O   THR L  72      31.156  44.256  23.986  1.00 13.28           O  
ATOM   1452  CB  THR L  72      30.171  47.198  23.933  1.00 13.70           C  
ATOM   1453  OG1 THR L  72      29.154  48.185  24.137  1.00 15.46           O  
ATOM   1454  CG2 THR L  72      31.215  47.755  22.970  1.00 14.13           C  
ATOM   1455  N   LEU L  73      31.032  44.819  21.812  1.00 12.36           N  
ATOM   1456  CA  LEU L  73      32.154  43.990  21.398  1.00 12.64           C  
ATOM   1457  C   LEU L  73      33.237  44.999  21.048  1.00 13.18           C  
ATOM   1458  O   LEU L  73      33.023  45.880  20.206  1.00 12.77           O  
ATOM   1459  CB  LEU L  73      31.831  43.154  20.153  1.00 12.95           C  
ATOM   1460  CG  LEU L  73      33.056  42.400  19.611  1.00 12.64           C  
ATOM   1461  CD1 LEU L  73      33.482  41.340  20.609  1.00 12.98           C  
ATOM   1462  CD2 LEU L  73      32.736  41.762  18.265  1.00 13.04           C  
ATOM   1463  N   THR L  74      34.386  44.883  21.704  1.00 13.50           N  
ATOM   1464  CA  THR L  74      35.499  45.785  21.451  1.00 14.62           C  
ATOM   1465  C   THR L  74      36.647  45.007  20.824  1.00 15.06           C  
ATOM   1466  O   THR L  74      37.034  43.945  21.318  1.00 15.80           O  
ATOM   1467  CB  THR L  74      35.989  46.441  22.763  1.00 14.27           C  
ATOM   1468  OG1 THR L  74      34.934  47.233  23.322  1.00 15.66           O  
ATOM   1469  CG2 THR L  74      37.200  47.333  22.503  1.00 14.81           C  
ATOM   1470  N   ILE L  75      37.168  45.524  19.717  1.00 15.77           N  
ATOM   1471  CA  ILE L  75      38.290  44.898  19.035  1.00 17.00           C  
ATOM   1472  C   ILE L  75      39.431  45.900  19.119  1.00 17.49           C  
ATOM   1473  O   ILE L  75      39.391  46.958  18.486  1.00 17.27           O  
ATOM   1474  CB  ILE L  75      37.985  44.620  17.546  1.00 17.45           C  
ATOM   1475  CG1 ILE L  75      36.725  43.763  17.415  1.00 18.67           C  
ATOM   1476  CG2 ILE L  75      39.164  43.900  16.908  1.00 18.76           C  
ATOM   1477  CD1 ILE L  75      36.296  43.523  15.971  1.00 19.50           C  
ATOM   1478  N   SER L  76      40.436  45.582  19.920  1.00 17.83           N  
ATOM   1479  CA  SER L  76      41.577  46.471  20.075  1.00 19.38           C  
ATOM   1480  C   SER L  76      42.673  46.063  19.100  1.00 19.65           C  
ATOM   1481  O   SER L  76      42.710  44.919  18.637  1.00 20.06           O  
ATOM   1482  CB  SER L  76      42.091  46.403  21.511  1.00 19.59           C  
ATOM   1483  OG  SER L  76      41.073  46.782  22.423  1.00 21.42           O  
ATOM   1484  N   SER L  77      43.553  47.003  18.779  1.00 20.57           N  
ATOM   1485  CA  SER L  77      44.656  46.744  17.864  1.00 21.01           C  
ATOM   1486  C   SER L  77      44.164  46.013  16.619  1.00 20.70           C  
ATOM   1487  O   SER L  77      44.637  44.921  16.300  1.00 21.14           O  
ATOM   1488  CB  SER L  77      45.722  45.906  18.569  1.00 22.21           C  
ATOM   1489  OG  SER L  77      46.206  46.575  19.718  1.00 24.39           O  
ATOM   1490  N   LEU L  78      43.220  46.624  15.913  1.00 19.95           N  
ATOM   1491  CA  LEU L  78      42.655  46.017  14.716  1.00 19.60           C  
ATOM   1492  C   LEU L  78      43.711  45.508  13.740  1.00 19.21           C  
ATOM   1493  O   LEU L  78      44.708  46.184  13.482  1.00 18.65           O  
ATOM   1494  CB  LEU L  78      41.773  47.017  13.970  1.00 20.37           C  
ATOM   1495  CG  LEU L  78      41.114  46.337  12.772  1.00 21.14           C  
ATOM   1496  CD1 LEU L  78      39.879  45.588  13.258  1.00 21.85           C  
ATOM   1497  CD2 LEU L  78      40.738  47.358  11.728  1.00 22.09           C  
ATOM   1498  N   GLN L  79      43.475  44.318  13.195  1.00 18.82           N  
ATOM   1499  CA  GLN L  79      44.370  43.724  12.211  1.00 18.62           C  
ATOM   1500  C   GLN L  79      43.557  43.473  10.948  1.00 18.62           C  
ATOM   1501  O   GLN L  79      42.328  43.401  10.995  1.00 17.75           O  
ATOM   1502  CB  GLN L  79      44.953  42.403  12.720  1.00 19.16           C  
ATOM   1503  CG  GLN L  79      45.723  42.531  14.018  1.00 20.35           C  
ATOM   1504  CD  GLN L  79      46.462  41.263  14.395  1.00 20.79           C  
ATOM   1505  OE1 GLN L  79      47.005  41.158  15.493  1.00 22.28           O  
ATOM   1506  NE2 GLN L  79      46.497  40.298  13.483  1.00 22.12           N  
ATOM   1507  N   ALA L  80      44.239  43.343   9.816  1.00 18.63           N  
ATOM   1508  CA  ALA L  80      43.562  43.111   8.545  1.00 19.30           C  
ATOM   1509  C   ALA L  80      42.654  41.882   8.569  1.00 19.37           C  
ATOM   1510  O   ALA L  80      41.616  41.860   7.906  1.00 19.65           O  
ATOM   1511  CB  ALA L  80      44.592  42.972   7.430  1.00 19.70           C  
ATOM   1512  N   GLU L  81      43.046  40.868   9.335  1.00 20.02           N  
ATOM   1513  CA  GLU L  81      42.280  39.627   9.424  1.00 20.26           C  
ATOM   1514  C   GLU L  81      40.982  39.780  10.208  1.00 19.51           C  
ATOM   1515  O   GLU L  81      40.183  38.848  10.278  1.00 19.64           O  
ATOM   1516  CB  GLU L  81      43.130  38.522  10.060  1.00 21.93           C  
ATOM   1517  CG  GLU L  81      43.464  38.755  11.520  1.00 25.21           C  
ATOM   1518  CD  GLU L  81      44.365  37.680  12.090  1.00 27.31           C  
ATOM   1519  OE1 GLU L  81      43.978  36.492  12.050  1.00 29.04           O  
ATOM   1520  OE2 GLU L  81      45.464  38.025  12.579  1.00 29.04           O  
ATOM   1521  N   ASP L  82      40.772  40.949  10.802  1.00 18.01           N  
ATOM   1522  CA  ASP L  82      39.548  41.175  11.562  1.00 16.76           C  
ATOM   1523  C   ASP L  82      38.417  41.665  10.668  1.00 16.14           C  
ATOM   1524  O   ASP L  82      37.301  41.888  11.130  1.00 15.19           O  
ATOM   1525  CB  ASP L  82      39.784  42.171  12.701  1.00 17.10           C  
ATOM   1526  CG  ASP L  82      40.837  41.691  13.685  1.00 17.53           C  
ATOM   1527  OD1 ASP L  82      40.909  40.470  13.930  1.00 18.67           O  
ATOM   1528  OD2 ASP L  82      41.568  42.537  14.236  1.00 18.07           O  
ATOM   1529  N   VAL L  83      38.708  41.847   9.385  1.00 14.93           N  
ATOM   1530  CA  VAL L  83      37.685  42.274   8.443  1.00 15.10           C  
ATOM   1531  C   VAL L  83      36.679  41.136   8.347  1.00 14.80           C  
ATOM   1532  O   VAL L  83      37.035  40.014   7.986  1.00 15.19           O  
ATOM   1533  CB  VAL L  83      38.292  42.565   7.056  1.00 14.87           C  
ATOM   1534  CG1 VAL L  83      37.190  42.767   6.029  1.00 15.70           C  
ATOM   1535  CG2 VAL L  83      39.172  43.810   7.139  1.00 16.15           C  
ATOM   1536  N   ALA L  84      35.428  41.427   8.688  1.00 14.12           N  
ATOM   1537  CA  ALA L  84      34.371  40.422   8.673  1.00 13.60           C  
ATOM   1538  C   ALA L  84      33.067  41.054   9.120  1.00 13.26           C  
ATOM   1539  O   ALA L  84      32.987  42.260   9.352  1.00 12.82           O  
ATOM   1540  CB  ALA L  84      34.726  39.288   9.627  1.00 13.46           C  
ATOM   1541  N   VAL L  85      32.039  40.224   9.218  1.00 12.49           N  
ATOM   1542  CA  VAL L  85      30.739  40.655   9.708  1.00 12.00           C  
ATOM   1543  C   VAL L  85      30.671  40.101  11.118  1.00 11.79           C  
ATOM   1544  O   VAL L  85      31.051  38.953  11.360  1.00 12.33           O  
ATOM   1545  CB  VAL L  85      29.587  40.066   8.884  1.00 12.00           C  
ATOM   1546  CG1 VAL L  85      28.248  40.427   9.522  1.00 11.90           C  
ATOM   1547  CG2 VAL L  85      29.647  40.611   7.462  1.00 12.47           C  
ATOM   1548  N   TYR L  86      30.205  40.924  12.049  1.00 11.12           N  
ATOM   1549  CA  TYR L  86      30.087  40.525  13.446  1.00 10.82           C  
ATOM   1550  C   TYR L  86      28.626  40.489  13.849  1.00 10.55           C  
ATOM   1551  O   TYR L  86      27.851  41.371  13.481  1.00 11.01           O  
ATOM   1552  CB  TYR L  86      30.866  41.505  14.324  1.00 10.57           C  
ATOM   1553  CG  TYR L  86      32.356  41.391  14.111  1.00 10.96           C  
ATOM   1554  CD1 TYR L  86      33.106  40.453  14.816  1.00 10.61           C  
ATOM   1555  CD2 TYR L  86      32.997  42.142  13.127  1.00 10.98           C  
ATOM   1556  CE1 TYR L  86      34.460  40.260  14.546  1.00 11.58           C  
ATOM   1557  CE2 TYR L  86      34.349  41.957  12.844  1.00 11.38           C  
ATOM   1558  CZ  TYR L  86      35.073  41.013  13.556  1.00 11.93           C  
ATOM   1559  OH  TYR L  86      36.404  40.805  13.263  1.00 12.70           O  
ATOM   1560  N   TYR L  87      28.263  39.458  14.603  1.00 10.68           N  
ATOM   1561  CA  TYR L  87      26.886  39.279  15.053  1.00 10.43           C  
ATOM   1562  C   TYR L  87      26.792  39.051  16.540  1.00 11.37           C  
ATOM   1563  O   TYR L  87      27.662  38.415  17.138  1.00 11.46           O  
ATOM   1564  CB  TYR L  87      26.262  38.023  14.432  1.00 11.28           C  
ATOM   1565  CG  TYR L  87      26.105  38.001  12.939  1.00 11.10           C  
ATOM   1566  CD1 TYR L  87      25.087  38.716  12.319  1.00 11.30           C  
ATOM   1567  CD2 TYR L  87      26.967  37.247  12.144  1.00 11.47           C  
ATOM   1568  CE1 TYR L  87      24.927  38.679  10.940  1.00 12.23           C  
ATOM   1569  CE2 TYR L  87      26.819  37.204  10.768  1.00 11.87           C  
ATOM   1570  CZ  TYR L  87      25.796  37.922  10.174  1.00 12.10           C  
ATOM   1571  OH  TYR L  87      25.642  37.888   8.815  1.00 14.02           O  
ATOM   1572  N   CYS L  88      25.728  39.561  17.143  1.00 10.92           N  
ATOM   1573  CA  CYS L  88      25.481  39.242  18.537  1.00 11.41           C  
ATOM   1574  C   CYS L  88      24.322  38.245  18.467  1.00 11.29           C  
ATOM   1575  O   CYS L  88      23.554  38.229  17.497  1.00 11.76           O  
ATOM   1576  CB  CYS L  88      25.102  40.469  19.375  1.00 11.94           C  
ATOM   1577  SG  CYS L  88      23.783  41.535  18.721  1.00 12.48           S  
ATOM   1578  N   GLN L  89      24.224  37.393  19.477  1.00 11.51           N  
ATOM   1579  CA  GLN L  89      23.179  36.375  19.539  1.00 11.44           C  
ATOM   1580  C   GLN L  89      22.682  36.223  20.965  1.00 11.59           C  
ATOM   1581  O   GLN L  89      23.476  36.225  21.902  1.00 11.60           O  
ATOM   1582  CB  GLN L  89      23.734  35.021  19.087  1.00 12.56           C  
ATOM   1583  CG  GLN L  89      22.785  33.852  19.346  1.00 14.39           C  
ATOM   1584  CD  GLN L  89      23.488  32.502  19.301  1.00 15.10           C  
ATOM   1585  OE1 GLN L  89      24.540  32.319  19.918  1.00 17.53           O  
ATOM   1586  NE2 GLN L  89      22.898  31.546  18.594  1.00 17.20           N  
ATOM   1587  N   GLN L  90      21.371  36.095  21.140  1.00 11.22           N  
ATOM   1588  CA  GLN L  90      20.849  35.882  22.479  1.00 11.58           C  
ATOM   1589  C   GLN L  90      20.232  34.498  22.532  1.00 11.74           C  
ATOM   1590  O   GLN L  90      19.610  34.038  21.574  1.00 10.92           O  
ATOM   1591  CB  GLN L  90      19.832  36.968  22.888  1.00 11.56           C  
ATOM   1592  CG  GLN L  90      18.456  37.000  22.208  1.00 11.99           C  
ATOM   1593  CD  GLN L  90      17.508  35.908  22.680  1.00 13.15           C  
ATOM   1594  OE1 GLN L  90      17.568  35.463  23.829  1.00 12.16           O  
ATOM   1595  NE2 GLN L  90      16.597  35.502  21.802  1.00 12.92           N  
ATOM   1596  N   TYR L  91      20.461  33.820  23.648  1.00 12.27           N  
ATOM   1597  CA  TYR L  91      19.932  32.482  23.852  1.00 13.37           C  
ATOM   1598  C   TYR L  91      19.294  32.406  25.230  1.00 13.82           C  
ATOM   1599  O   TYR L  91      19.366  31.388  25.920  1.00 14.67           O  
ATOM   1600  CB  TYR L  91      21.047  31.437  23.661  1.00 13.95           C  
ATOM   1601  CG  TYR L  91      22.359  31.734  24.357  1.00 14.72           C  
ATOM   1602  CD1 TYR L  91      23.329  32.528  23.739  1.00 14.59           C  
ATOM   1603  CD2 TYR L  91      22.642  31.218  25.619  1.00 15.32           C  
ATOM   1604  CE1 TYR L  91      24.550  32.795  24.361  1.00 15.87           C  
ATOM   1605  CE2 TYR L  91      23.859  31.478  26.249  1.00 16.10           C  
ATOM   1606  CZ  TYR L  91      24.810  32.268  25.612  1.00 15.98           C  
ATOM   1607  OH  TYR L  91      26.018  32.523  26.232  1.00 18.20           O  
ATOM   1608  N   TYR L  92      18.651  33.513  25.599  1.00 14.37           N  
ATOM   1609  CA  TYR L  92      17.957  33.658  26.877  1.00 14.97           C  
ATOM   1610  C   TYR L  92      16.588  32.992  26.816  1.00 15.04           C  
ATOM   1611  O   TYR L  92      16.197  32.262  27.732  1.00 15.38           O  
ATOM   1612  CB  TYR L  92      17.769  35.140  27.194  1.00 15.88           C  
ATOM   1613  CG  TYR L  92      17.071  35.400  28.503  1.00 17.60           C  
ATOM   1614  CD1 TYR L  92      17.713  35.160  29.714  1.00 18.91           C  
ATOM   1615  CD2 TYR L  92      15.762  35.877  28.532  1.00 18.83           C  
ATOM   1616  CE1 TYR L  92      17.073  35.390  30.923  1.00 20.15           C  
ATOM   1617  CE2 TYR L  92      15.111  36.110  29.740  1.00 20.08           C  
ATOM   1618  CZ  TYR L  92      15.775  35.865  30.929  1.00 20.29           C  
ATOM   1619  OH  TYR L  92      15.138  36.096  32.127  1.00 22.38           O  
ATOM   1620  N   SER L  93      15.855  33.259  25.739  1.00 14.61           N  
ATOM   1621  CA  SER L  93      14.527  32.683  25.558  1.00 14.96           C  
ATOM   1622  C   SER L  93      14.268  32.396  24.084  1.00 14.85           C  
ATOM   1623  O   SER L  93      14.832  33.042  23.207  1.00 14.36           O  
ATOM   1624  CB  SER L  93      13.456  33.641  26.087  1.00 15.59           C  
ATOM   1625  OG  SER L  93      13.449  34.853  25.351  1.00 17.57           O  
ATOM   1626  N   HIS L  94      13.408  31.420  23.821  1.00 14.50           N  
ATOM   1627  CA  HIS L  94      13.061  31.041  22.455  1.00 14.67           C  
ATOM   1628  C   HIS L  94      11.996  31.966  21.869  1.00 14.53           C  
ATOM   1629  O   HIS L  94      11.107  32.430  22.577  1.00 15.40           O  
ATOM   1630  CB  HIS L  94      12.534  29.606  22.436  1.00 14.95           C  
ATOM   1631  CG  HIS L  94      13.556  28.581  22.811  1.00 15.89           C  
ATOM   1632  ND1 HIS L  94      14.498  28.109  21.923  1.00 16.23           N  
ATOM   1633  CD2 HIS L  94      13.810  27.969  23.991  1.00 16.64           C  
ATOM   1634  CE1 HIS L  94      15.288  27.247  22.539  1.00 16.17           C  
ATOM   1635  NE2 HIS L  94      14.892  27.145  23.795  1.00 16.47           N  
ATOM   1636  N   PRO L  95      12.095  32.269  20.568  1.00 14.51           N  
ATOM   1637  CA  PRO L  95      13.162  31.780  19.692  1.00 14.37           C  
ATOM   1638  C   PRO L  95      14.459  32.537  19.959  1.00 14.33           C  
ATOM   1639  O   PRO L  95      14.441  33.735  20.256  1.00 14.52           O  
ATOM   1640  CB  PRO L  95      12.609  32.076  18.302  1.00 14.84           C  
ATOM   1641  CG  PRO L  95      11.894  33.384  18.538  1.00 15.03           C  
ATOM   1642  CD  PRO L  95      11.111  33.041  19.785  1.00 14.97           C  
ATOM   1643  N   TYR L  96      15.579  31.830  19.881  1.00 13.76           N  
ATOM   1644  CA  TYR L  96      16.873  32.477  20.053  1.00 13.87           C  
ATOM   1645  C   TYR L  96      16.988  33.415  18.850  1.00 14.00           C  
ATOM   1646  O   TYR L  96      16.263  33.261  17.862  1.00 14.82           O  
ATOM   1647  CB  TYR L  96      17.985  31.425  20.058  1.00 13.86           C  
ATOM   1648  CG  TYR L  96      17.951  30.515  21.274  1.00 14.03           C  
ATOM   1649  CD1 TYR L  96      17.144  30.814  22.379  1.00 14.08           C  
ATOM   1650  CD2 TYR L  96      18.744  29.372  21.334  1.00 14.70           C  
ATOM   1651  CE1 TYR L  96      17.132  29.994  23.508  1.00 15.21           C  
ATOM   1652  CE2 TYR L  96      18.737  28.546  22.457  1.00 16.06           C  
ATOM   1653  CZ  TYR L  96      17.931  28.861  23.539  1.00 16.29           C  
ATOM   1654  OH  TYR L  96      17.918  28.037  24.644  1.00 17.97           O  
ATOM   1655  N   SER L  97      17.873  34.397  18.916  1.00 12.82           N  
ATOM   1656  CA  SER L  97      17.969  35.326  17.800  1.00 13.02           C  
ATOM   1657  C   SER L  97      19.321  35.999  17.636  1.00 12.70           C  
ATOM   1658  O   SER L  97      20.105  36.098  18.580  1.00 12.21           O  
ATOM   1659  CB  SER L  97      16.887  36.406  17.937  1.00 14.23           C  
ATOM   1660  OG  SER L  97      17.040  37.140  19.143  1.00 15.52           O  
ATOM   1661  N   PHE L  98      19.570  36.462  16.416  1.00 13.06           N  
ATOM   1662  CA  PHE L  98      20.796  37.165  16.062  1.00 13.22           C  
ATOM   1663  C   PHE L  98      20.489  38.603  15.692  1.00 13.44           C  
ATOM   1664  O   PHE L  98      19.373  38.929  15.280  1.00 13.66           O  
ATOM   1665  CB  PHE L  98      21.475  36.534  14.839  1.00 14.12           C  
ATOM   1666  CG  PHE L  98      22.319  35.334  15.143  1.00 15.26           C  
ATOM   1667  CD1 PHE L  98      21.745  34.129  15.529  1.00 16.87           C  
ATOM   1668  CD2 PHE L  98      23.702  35.405  15.011  1.00 16.41           C  
ATOM   1669  CE1 PHE L  98      22.541  33.012  15.776  1.00 17.19           C  
ATOM   1670  CE2 PHE L  98      24.502  34.293  15.256  1.00 16.96           C  
ATOM   1671  CZ  PHE L  98      23.918  33.096  15.638  1.00 17.37           C  
ATOM   1672  N   GLY L  99      21.494  39.458  15.850  1.00 13.03           N  
ATOM   1673  CA  GLY L  99      21.363  40.841  15.448  1.00 12.81           C  
ATOM   1674  C   GLY L  99      21.511  40.813  13.935  1.00 12.64           C  
ATOM   1675  O   GLY L  99      21.838  39.764  13.369  1.00 11.48           O  
ATOM   1676  N   GLN L 100      21.303  41.948  13.275  1.00 12.86           N  
ATOM   1677  CA  GLN L 100      21.369  42.004  11.815  1.00 13.10           C  
ATOM   1678  C   GLN L 100      22.782  41.937  11.243  1.00 13.19           C  
ATOM   1679  O   GLN L 100      22.963  41.763  10.035  1.00 13.45           O  
ATOM   1680  CB  GLN L 100      20.683  43.278  11.297  1.00 13.27           C  
ATOM   1681  CG  GLN L 100      21.526  44.560  11.425  1.00 15.44           C  
ATOM   1682  CD  GLN L 100      21.472  45.238  12.792  1.00 15.90           C  
ATOM   1683  OE1 GLN L 100      21.202  44.613  13.815  1.00 15.44           O  
ATOM   1684  NE2 GLN L 100      21.769  46.538  12.807  1.00 16.95           N  
ATOM   1685  N   GLY L 101      23.776  42.084  12.112  1.00 12.00           N  
ATOM   1686  CA  GLY L 101      25.162  42.043  11.676  1.00 12.84           C  
ATOM   1687  C   GLY L 101      25.789  43.407  11.452  1.00 12.71           C  
ATOM   1688  O   GLY L 101      25.111  44.366  11.084  1.00 13.86           O  
ATOM   1689  N   THR L 102      27.097  43.485  11.685  1.00 11.74           N  
ATOM   1690  CA  THR L 102      27.863  44.720  11.505  1.00 11.72           C  
ATOM   1691  C   THR L 102      29.081  44.399  10.651  1.00 11.71           C  
ATOM   1692  O   THR L 102      29.898  43.562  11.023  1.00 11.97           O  
ATOM   1693  CB  THR L 102      28.341  45.284  12.857  1.00 11.75           C  
ATOM   1694  OG1 THR L 102      27.205  45.686  13.634  1.00 12.23           O  
ATOM   1695  CG2 THR L 102      29.265  46.484  12.643  1.00 12.32           C  
ATOM   1696  N   LYS L 103      29.195  45.062   9.506  1.00 12.10           N  
ATOM   1697  CA  LYS L 103      30.310  44.824   8.599  1.00 13.02           C  
ATOM   1698  C   LYS L 103      31.485  45.739   8.919  1.00 12.27           C  
ATOM   1699  O   LYS L 103      31.364  46.964   8.878  1.00 12.25           O  
ATOM   1700  CB  LYS L 103      29.849  45.030   7.154  1.00 14.61           C  
ATOM   1701  CG  LYS L 103      30.868  44.650   6.089  1.00 18.07           C  
ATOM   1702  CD  LYS L 103      30.190  44.592   4.726  1.00 20.64           C  
ATOM   1703  CE  LYS L 103      31.140  44.142   3.631  1.00 21.47           C  
ATOM   1704  NZ  LYS L 103      32.255  45.105   3.446  1.00 23.37           N  
ATOM   1705  N   LEU L 104      32.618  45.131   9.254  1.00 12.58           N  
ATOM   1706  CA  LEU L 104      33.820  45.876   9.588  1.00 13.45           C  
ATOM   1707  C   LEU L 104      34.845  45.797   8.462  1.00 13.89           C  
ATOM   1708  O   LEU L 104      35.186  44.710   7.997  1.00 14.05           O  
ATOM   1709  CB  LEU L 104      34.417  45.336  10.892  1.00 14.22           C  
ATOM   1710  CG  LEU L 104      35.733  45.929  11.413  1.00 15.19           C  
ATOM   1711  CD1 LEU L 104      35.951  45.441  12.829  1.00 16.61           C  
ATOM   1712  CD2 LEU L 104      36.909  45.528  10.532  1.00 17.06           C  
ATOM   1713  N   GLU L 105      35.328  46.957   8.031  1.00 14.80           N  
ATOM   1714  CA  GLU L 105      36.324  47.046   6.970  1.00 16.44           C  
ATOM   1715  C   GLU L 105      37.476  47.936   7.407  1.00 16.67           C  
ATOM   1716  O   GLU L 105      37.374  48.663   8.397  1.00 15.18           O  
ATOM   1717  CB  GLU L 105      35.711  47.645   5.704  1.00 18.05           C  
ATOM   1718  CG  GLU L 105      34.583  46.834   5.105  1.00 21.95           C  
ATOM   1719  CD  GLU L 105      33.951  47.525   3.912  1.00 24.40           C  
ATOM   1720  OE1 GLU L 105      33.405  48.635   4.087  1.00 26.38           O  
ATOM   1721  OE2 GLU L 105      34.004  46.960   2.799  1.00 26.42           O  
ATOM   1722  N   ILE L 106      38.577  47.869   6.667  1.00 17.80           N  
ATOM   1723  CA  ILE L 106      39.738  48.700   6.956  1.00 19.42           C  
ATOM   1724  C   ILE L 106      39.571  49.981   6.144  1.00 20.80           C  
ATOM   1725  O   ILE L 106      39.241  49.926   4.959  1.00 20.68           O  
ATOM   1726  CB  ILE L 106      41.052  48.027   6.515  1.00 19.56           C  
ATOM   1727  CG1 ILE L 106      41.193  46.654   7.171  1.00 19.95           C  
ATOM   1728  CG2 ILE L 106      42.236  48.921   6.877  1.00 19.15           C  
ATOM   1729  CD1 ILE L 106      41.241  46.694   8.676  1.00 20.04           C  
ATOM   1730  N   LYS L 107      39.788  51.128   6.778  1.00 22.10           N  
ATOM   1731  CA  LYS L 107      39.659  52.406   6.085  1.00 24.45           C  
ATOM   1732  C   LYS L 107      40.486  52.394   4.804  1.00 25.07           C  
ATOM   1733  O   LYS L 107      39.901  52.574   3.714  1.00 26.14           O  
ATOM   1734  CB  LYS L 107      40.140  53.552   6.974  1.00 25.57           C  
ATOM   1735  CG  LYS L 107      40.113  54.904   6.273  1.00 27.01           C  
ATOM   1736  CD  LYS L 107      40.887  55.951   7.049  1.00 28.37           C  
ATOM   1737  CE  LYS L 107      40.920  57.271   6.292  1.00 29.20           C  
ATOM   1738  NZ  LYS L 107      41.750  58.286   6.993  1.00 30.17           N  
TER    1739      LYS L 107                                                      
