# Supplementary material for: SARS-CoV-2 Spike Protein Interaction Space
Source: Int J Mol Sci. 2023 Jul 27;24(15):12058. doi: 10.3390/ijms241512058 (PMC10418891; doi:10.3390/ijms241512058)
Supplement: Supplementary file 1 [file ijms-24-12058-s001.zip › Supplementary Material File S1/1EEU.pdb]

REMARK 950 NUMBERING  Kabat
REMARK 950 METHOD     X-ray crystal structure
REMARK 950 RESOLUTION 1.600
REMARK 950 R-FACTOR   0.194
REMARK 950 R-FREE     0.222
REMARK 950 CHAIN-TYPE LABEL ORIGINAL
REMARK 950 CHAIN L    L    A
REMARK 950 CHAIN L    L    B
REMARK 950 MOLECULE : A : KAPPA-4 IMMUNOGLOBULIN (LIGHT CHAIN)
REMARK 950 SPECIES  : A : HOMO SAPIENS
SEQRES   1 L 114  ASP ILE VAL LEU THR GLN SER PRO ASP SER LEU ALA VAL          
SEQRES   2 L 114  SER LEU GLY GLU ARG ALA THR ILE ASN CYS LYS SER SER          
SEQRES   3 L 114  GLN SER VAL LEU ASP SER SER ASN SER LYS ASN TYR LEU          
SEQRES   4 L 114  ALA TRP TYR GLN GLN LYS PRO GLY GLN PRO PRO LYS LEU          
SEQRES   5 L 114  LEU ILE TYR TRP ALA SER THR ARG GLU SER GLY VAL PRO          
SEQRES   6 L 114  ASP ARG PHE SER GLY SER GLY SER GLY THR ASP PHE THR          
SEQRES   7 L 114  LEU THR ILE SER SER LEU GLN ALA GLU ASP VAL ALA VAL          
SEQRES   8 L 114  TYR TYR CYS ASP GLN TYR TYR SER HIS PRO TYR SER PHE          
SEQRES   9 L 114  GLY GLN GLY THR LYS LEU GLU ILE LYS ARG                      
SEQRES   1 L 114  ASP ILE VAL LEU THR GLN SER PRO ASP SER LEU ALA VAL          
SEQRES   2 L 114  SER LEU GLY GLU ARG ALA THR ILE ASN CYS LYS SER SER          
SEQRES   3 L 114  GLN SER VAL LEU ASP SER SER ASN SER LYS ASN TYR LEU          
SEQRES   4 L 114  ALA TRP TYR GLN GLN LYS PRO GLY GLN PRO PRO LYS LEU          
SEQRES   5 L 114  LEU ILE TYR TRP ALA SER THR ARG GLU SER GLY VAL PRO          
SEQRES   6 L 114  ASP ARG PHE SER GLY SER GLY SER GLY THR ASP PHE THR          
SEQRES   7 L 114  LEU THR ILE SER SER LEU GLN ALA GLU ASP VAL ALA VAL          
SEQRES   8 L 114  TYR TYR CYS ASP GLN TYR TYR SER HIS PRO TYR SER PHE          
SEQRES   9 L 114  GLY GLN GLY THR LYS LEU GLU ILE LYS ARG                      
ATOM      1  N   ASP L   1      40.399  19.108  19.756  1.00 16.92           N  
ATOM      2  CA  ASP L   1      39.163  19.909  19.502  1.00 16.87           C  
ATOM      3  C   ASP L   1      38.235  19.182  18.530  1.00 16.61           C  
ATOM      4  O   ASP L   1      38.695  18.466  17.637  1.00 16.91           O  
ATOM      5  CB  ASP L   1      39.525  21.287  18.938  1.00 17.21           C  
ATOM      6  CG  ASP L   1      40.324  22.136  19.917  1.00 17.32           C  
ATOM      7  OD1 ASP L   1      40.383  21.787  21.113  1.00 17.58           O  
ATOM      8  OD2 ASP L   1      40.880  23.166  19.488  1.00 18.35           O  
ATOM      9  N   ILE L   2      36.931  19.377  18.699  1.00 16.08           N  
ATOM     10  CA  ILE L   2      35.946  18.723  17.845  1.00 15.75           C  
ATOM     11  C   ILE L   2      35.751  19.435  16.508  1.00 15.67           C  
ATOM     12  O   ILE L   2      35.541  20.650  16.459  1.00 15.83           O  
ATOM     13  CB  ILE L   2      34.582  18.611  18.566  1.00 15.86           C  
ATOM     14  CG1 ILE L   2      34.751  17.821  19.868  1.00 16.39           C  
ATOM     15  CG2 ILE L   2      33.567  17.931  17.659  1.00 16.19           C  
ATOM     16  CD1 ILE L   2      33.480  17.645  20.667  1.00 16.22           C  
ATOM     17  N   VAL L   3      35.826  18.666  15.425  1.00 15.34           N  
ATOM     18  CA  VAL L   3      35.656  19.194  14.075  1.00 15.64           C  
ATOM     19  C   VAL L   3      34.432  18.561  13.408  1.00 15.39           C  
ATOM     20  O   VAL L   3      34.234  17.346  13.482  1.00 15.52           O  
ATOM     21  CB  VAL L   3      36.902  18.905  13.208  1.00 15.75           C  
ATOM     22  CG1 VAL L   3      36.669  19.360  11.769  1.00 16.57           C  
ATOM     23  CG2 VAL L   3      38.115  19.615  13.796  1.00 16.18           C  
ATOM     24  N   LEU L   4      33.610  19.388  12.768  1.00 15.22           N  
ATOM     25  CA  LEU L   4      32.416  18.899  12.084  1.00 15.34           C  
ATOM     26  C   LEU L   4      32.611  18.967  10.578  1.00 15.50           C  
ATOM     27  O   LEU L   4      33.065  19.983  10.050  1.00 15.14           O  
ATOM     28  CB  LEU L   4      31.185  19.734  12.466  1.00 15.15           C  
ATOM     29  CG  LEU L   4      30.786  19.814  13.939  1.00 15.73           C  
ATOM     30  CD1 LEU L   4      29.455  20.556  14.053  1.00 15.08           C  
ATOM     31  CD2 LEU L   4      30.669  18.427  14.532  1.00 16.29           C  
ATOM     32  N   THR L   5      32.270  17.880   9.889  1.00 15.62           N  
ATOM     33  CA  THR L   5      32.398  17.824   8.435  1.00 16.37           C  
ATOM     34  C   THR L   5      31.047  17.487   7.818  1.00 16.25           C  
ATOM     35  O   THR L   5      30.463  16.444   8.120  1.00 16.66           O  
ATOM     36  CB  THR L   5      33.409  16.751   7.998  1.00 16.67           C  
ATOM     37  OG1 THR L   5      34.677  17.011   8.609  1.00 18.13           O  
ATOM     38  CG2 THR L   5      33.572  16.768   6.484  1.00 17.19           C  
ATOM     39  N   GLN L   6      30.560  18.369   6.950  1.00 16.45           N  
ATOM     40  CA  GLN L   6      29.273  18.167   6.296  1.00 16.61           C  
ATOM     41  C   GLN L   6      29.419  17.513   4.924  1.00 17.20           C  
ATOM     42  O   GLN L   6      30.455  17.639   4.263  1.00 17.16           O  
ATOM     43  CB  GLN L   6      28.536  19.505   6.161  1.00 16.41           C  
ATOM     44  CG  GLN L   6      28.444  20.269   7.478  1.00 15.66           C  
ATOM     45  CD  GLN L   6      27.648  21.564   7.394  1.00 15.58           C  
ATOM     46  OE1 GLN L   6      27.858  22.476   8.195  1.00 14.94           O  
ATOM     47  NE2 GLN L   6      26.720  21.644   6.444  1.00 15.58           N  
ATOM     48  N   SER L   7      28.372  16.802   4.518  1.00 17.84           N  
ATOM     49  CA  SER L   7      28.324  16.119   3.226  1.00 18.88           C  
ATOM     50  C   SER L   7      26.881  16.157   2.740  1.00 19.47           C  
ATOM     51  O   SER L   7      25.964  15.829   3.491  1.00 19.38           O  
ATOM     52  CB  SER L   7      28.765  14.657   3.367  1.00 19.38           C  
ATOM     53  OG  SER L   7      30.126  14.552   3.745  1.00 21.24           O  
ATOM     54  N   PRO L   8      26.652  16.578   1.485  1.00 19.88           N  
ATOM     55  CA  PRO L   8      27.637  17.021   0.495  1.00 20.55           C  
ATOM     56  C   PRO L   8      27.927  18.509   0.675  1.00 21.23           C  
ATOM     57  O   PRO L   8      27.336  19.157   1.539  1.00 21.14           O  
ATOM     58  CB  PRO L   8      26.930  16.733  -0.821  1.00 20.52           C  
ATOM     59  CG  PRO L   8      25.520  17.120  -0.495  1.00 20.41           C  
ATOM     60  CD  PRO L   8      25.306  16.505   0.882  1.00 20.16           C  
ATOM     61  N   ASP L   9      28.836  19.051  -0.132  1.00 22.19           N  
ATOM     62  CA  ASP L   9      29.164  20.472  -0.051  1.00 23.13           C  
ATOM     63  C   ASP L   9      28.074  21.296  -0.725  1.00 23.66           C  
ATOM     64  O   ASP L   9      27.809  22.436  -0.343  1.00 23.51           O  
ATOM     65  CB  ASP L   9      30.514  20.749  -0.717  1.00 23.88           C  
ATOM     66  CG  ASP L   9      31.679  20.240   0.106  1.00 24.63           C  
ATOM     67  OD1 ASP L   9      31.910  20.779   1.208  1.00 25.20           O  
ATOM     68  OD2 ASP L   9      32.362  19.298  -0.345  1.00 25.73           O  
ATOM     69  N   SER L  10      27.445  20.708  -1.735  1.00 24.09           N  
ATOM     70  CA  SER L  10      26.367  21.367  -2.457  1.00 24.91           C  
ATOM     71  C   SER L  10      25.347  20.311  -2.857  1.00 25.16           C  
ATOM     72  O   SER L  10      25.709  19.204  -3.255  1.00 25.14           O  
ATOM     73  CB  SER L  10      26.907  22.084  -3.699  1.00 25.13           C  
ATOM     74  OG  SER L  10      27.526  21.174  -4.590  1.00 26.59           O  
ATOM     75  N   LEU L  11      24.071  20.658  -2.738  1.00 25.72           N  
ATOM     76  CA  LEU L  11      22.988  19.745  -3.070  1.00 26.25           C  
ATOM     77  C   LEU L  11      21.933  20.458  -3.906  1.00 26.53           C  
ATOM     78  O   LEU L  11      21.540  21.584  -3.600  1.00 26.39           O  
ATOM     79  CB  LEU L  11      22.355  19.208  -1.782  1.00 26.81           C  
ATOM     80  CG  LEU L  11      21.215  18.194  -1.901  1.00 27.02           C  
ATOM     81  CD1 LEU L  11      21.692  16.965  -2.659  1.00 27.45           C  
ATOM     82  CD2 LEU L  11      20.737  17.808  -0.513  1.00 27.26           C  
ATOM     83  N   ALA L  12      21.487  19.802  -4.972  1.00 26.84           N  
ATOM     84  CA  ALA L  12      20.469  20.368  -5.844  1.00 27.32           C  
ATOM     85  C   ALA L  12      19.291  19.406  -5.889  1.00 27.61           C  
ATOM     86  O   ALA L  12      19.448  18.241  -6.253  1.00 27.88           O  
ATOM     87  CB  ALA L  12      21.032  20.577  -7.248  1.00 27.27           C  
ATOM     88  N   VAL L  13      18.116  19.894  -5.507  1.00 28.05           N  
ATOM     89  CA  VAL L  13      16.913  19.073  -5.508  1.00 28.57           C  
ATOM     90  C   VAL L  13      15.745  19.805  -6.162  1.00 28.76           C  
ATOM     91  O   VAL L  13      15.724  21.035  -6.222  1.00 28.80           O  
ATOM     92  CB  VAL L  13      16.516  18.664  -4.072  1.00 28.94           C  
ATOM     93  CG1 VAL L  13      17.586  17.761  -3.475  1.00 28.88           C  
ATOM     94  CG2 VAL L  13      16.344  19.896  -3.213  1.00 29.07           C  
ATOM     95  N   SER L  14      14.776  19.042  -6.659  1.00 28.90           N  
ATOM     96  CA  SER L  14      13.610  19.623  -7.313  1.00 29.14           C  
ATOM     97  C   SER L  14      12.581  20.108  -6.297  1.00 29.16           C  
ATOM     98  O   SER L  14      12.538  19.632  -5.162  1.00 29.05           O  
ATOM     99  CB  SER L  14      12.969  18.594  -8.250  1.00 29.29           C  
ATOM    100  OG  SER L  14      13.899  18.149  -9.224  1.00 29.94           O  
ATOM    101  N   LEU L  15      11.752  21.057  -6.716  1.00 29.33           N  
ATOM    102  CA  LEU L  15      10.719  21.621  -5.855  1.00 29.34           C  
ATOM    103  C   LEU L  15       9.761  20.548  -5.333  1.00 29.24           C  
ATOM    104  O   LEU L  15       9.164  19.801  -6.111  1.00 29.30           O  
ATOM    105  CB  LEU L  15       9.930  22.684  -6.625  1.00 29.79           C  
ATOM    106  CG  LEU L  15       8.905  23.516  -5.853  1.00 30.15           C  
ATOM    107  CD1 LEU L  15       9.614  24.355  -4.799  1.00 30.25           C  
ATOM    108  CD2 LEU L  15       8.145  24.417  -6.820  1.00 30.31           C  
ATOM    109  N   GLY L  16       9.620  20.476  -4.012  1.00 29.04           N  
ATOM    110  CA  GLY L  16       8.727  19.500  -3.412  1.00 28.73           C  
ATOM    111  C   GLY L  16       9.385  18.181  -3.054  1.00 28.64           C  
ATOM    112  O   GLY L  16       8.738  17.289  -2.505  1.00 28.87           O  
ATOM    113  N   GLU L  17      10.671  18.050  -3.361  1.00 28.30           N  
ATOM    114  CA  GLU L  17      11.393  16.822  -3.060  1.00 28.15           C  
ATOM    115  C   GLU L  17      12.072  16.893  -1.695  1.00 27.96           C  
ATOM    116  O   GLU L  17      12.152  17.957  -1.083  1.00 27.86           O  
ATOM    117  CB  GLU L  17      12.433  16.541  -4.149  1.00 28.52           C  
ATOM    118  CG  GLU L  17      11.837  16.287  -5.531  1.00 28.98           C  
ATOM    119  CD  GLU L  17      10.952  15.051  -5.577  1.00 29.24           C  
ATOM    120  OE1 GLU L  17      11.433  13.956  -5.212  1.00 29.40           O  
ATOM    121  OE2 GLU L  17       9.776  15.172  -5.989  1.00 29.45           O  
ATOM    122  N   ARG L  18      12.557  15.748  -1.229  1.00 27.79           N  
ATOM    123  CA  ARG L  18      13.227  15.646   0.063  1.00 27.56           C  
ATOM    124  C   ARG L  18      14.711  15.997  -0.041  1.00 26.84           C  
ATOM    125  O   ARG L  18      15.413  15.524  -0.937  1.00 26.87           O  
ATOM    126  CB  ARG L  18      13.056  14.224   0.605  1.00 28.52           C  
ATOM    127  CG  ARG L  18      13.806  13.907   1.889  1.00 29.87           C  
ATOM    128  CD  ARG L  18      13.474  12.490   2.337  1.00 30.99           C  
ATOM    129  NE  ARG L  18      14.277  12.041   3.471  1.00 32.38           N  
ATOM    130  CZ  ARG L  18      14.129  10.857   4.059  1.00 32.94           C  
ATOM    131  NH1 ARG L  18      13.206  10.010   3.620  1.00 33.31           N  
ATOM    132  NH2 ARG L  18      14.898  10.517   5.086  1.00 33.38           N  
ATOM    133  N   ALA L  19      15.180  16.837   0.879  1.00 25.86           N  
ATOM    134  CA  ALA L  19      16.580  17.247   0.905  1.00 24.70           C  
ATOM    135  C   ALA L  19      17.234  16.709   2.172  1.00 23.97           C  
ATOM    136  O   ALA L  19      16.706  16.876   3.269  1.00 23.57           O  
ATOM    137  CB  ALA L  19      16.687  18.767   0.864  1.00 24.87           C  
ATOM    138  N   THR L  20      18.386  16.070   2.012  1.00 23.14           N  
ATOM    139  CA  THR L  20      19.110  15.491   3.136  1.00 22.62           C  
ATOM    140  C   THR L  20      20.542  16.015   3.212  1.00 21.65           C  
ATOM    141  O   THR L  20      21.278  15.978   2.225  1.00 21.84           O  
ATOM    142  CB  THR L  20      19.148  13.957   3.012  1.00 23.07           C  
ATOM    143  OG1 THR L  20      17.808  13.462   2.888  1.00 24.15           O  
ATOM    144  CG2 THR L  20      19.811  13.332   4.229  1.00 23.60           C  
ATOM    145  N   ILE L  21      20.927  16.510   4.385  1.00 20.63           N  
ATOM    146  CA  ILE L  21      22.273  17.035   4.598  1.00 19.73           C  
ATOM    147  C   ILE L  21      22.887  16.326   5.805  1.00 19.33           C  
ATOM    148  O   ILE L  21      22.262  16.234   6.862  1.00 19.01           O  
ATOM    149  CB  ILE L  21      22.236  18.559   4.853  1.00 19.60           C  
ATOM    150  CG1 ILE L  21      21.641  19.267   3.634  1.00 19.79           C  
ATOM    151  CG2 ILE L  21      23.643  19.089   5.114  1.00 19.57           C  
ATOM    152  CD1 ILE L  21      21.472  20.761   3.815  1.00 19.87           C  
ATOM    153  N   ASN L  22      24.109  15.827   5.644  1.00 18.78           N  
ATOM    154  CA  ASN L  22      24.788  15.105   6.716  1.00 18.64           C  
ATOM    155  C   ASN L  22      25.880  15.909   7.415  1.00 18.05           C  
ATOM    156  O   ASN L  22      26.471  16.821   6.835  1.00 17.79           O  
ATOM    157  CB  ASN L  22      25.397  13.810   6.168  1.00 19.80           C  
ATOM    158  CG  ASN L  22      24.370  12.925   5.490  1.00 20.68           C  
ATOM    159  OD1 ASN L  22      23.430  12.445   6.122  1.00 21.82           O  
ATOM    160  ND2 ASN L  22      24.545  12.706   4.192  1.00 21.93           N  
ATOM    161  N   CYS L  23      26.138  15.552   8.668  1.00 17.48           N  
ATOM    162  CA  CYS L  23      27.166  16.200   9.476  1.00 17.26           C  
ATOM    163  C   CYS L  23      27.815  15.132  10.344  1.00 17.35           C  
ATOM    164  O   CYS L  23      27.128  14.420  11.080  1.00 17.10           O  
ATOM    165  CB  CYS L  23      26.539  17.276  10.363  1.00 16.60           C  
ATOM    166  SG  CYS L  23      27.665  18.158  11.505  1.00 16.75           S  
ATOM    167  N   LYS L  24      29.133  15.008  10.242  1.00 17.61           N  
ATOM    168  CA  LYS L  24      29.867  14.028  11.028  1.00 18.36           C  
ATOM    169  C   LYS L  24      30.835  14.737  11.965  1.00 18.38           C  
ATOM    170  O   LYS L  24      31.595  15.607  11.539  1.00 18.09           O  
ATOM    171  CB  LYS L  24      30.645  13.081  10.111  1.00 18.96           C  
ATOM    172  CG  LYS L  24      31.323  12.087  10.863  1.00 21.39           C  
ATOM    173  N   SER L  25      30.800  14.368  13.240  1.00 18.53           N  
ATOM    174  CA  SER L  25      31.684  14.970  14.231  1.00 19.09           C  
ATOM    175  C   SER L  25      32.874  14.055  14.497  1.00 19.31           C  
ATOM    176  O   SER L  25      32.726  12.832  14.541  1.00 19.26           O  
ATOM    177  CB  SER L  25      30.922  15.216  15.532  1.00 19.13           C  
ATOM    178  OG  SER L  25      31.755  15.826  16.498  1.00 20.43           O  
ATOM    179  N   SER L  26      34.051  14.648  14.674  1.00 19.38           N  
ATOM    180  CA  SER L  26      35.264  13.877  14.934  1.00 19.50           C  
ATOM    181  C   SER L  26      35.181  13.138  16.268  1.00 19.80           C  
ATOM    182  O   SER L  26      35.806  12.091  16.444  1.00 19.88           O  
ATOM    183  CB  SER L  26      36.490  14.797  14.905  1.00 19.52           C  
ATOM    184  OG  SER L  26      36.366  15.849  15.844  1.00 18.73           O  
ATOM    185  N   GLN L  27      34.412  13.690  17.201  1.00 20.01           N  
ATOM    186  CA  GLN L  27      34.207  13.085  18.515  1.00 20.45           C  
ATOM    187  C   GLN L  27      32.712  13.117  18.831  1.00 20.27           C  
ATOM    188  O   GLN L  27      31.977  13.956  18.309  1.00 20.10           O  
ATOM    189  CB  GLN L  27      34.971  13.847  19.607  1.00 21.35           C  
ATOM    190  CG  GLN L  27      36.467  13.544  19.706  1.00 22.81           C  
ATOM    191  CD  GLN L  27      37.292  14.228  18.633  1.00 23.59           C  
ATOM    192  OE1 GLN L  27      37.134  15.423  18.381  1.00 24.50           O  
ATOM    193  NE2 GLN L  27      38.194  13.478  18.009  1.00 23.92           N  
ATOM    194  N   SER L  27A     32.261  12.205  19.685  1.00 20.05           N  
ATOM    195  CA  SER L  27A     30.850  12.154  20.053  1.00 20.21           C  
ATOM    196  C   SER L  27A     30.433  13.391  20.842  1.00 20.26           C  
ATOM    197  O   SER L  27A     31.184  13.882  21.684  1.00 20.55           O  
ATOM    198  CB  SER L  27A     30.567  10.906  20.892  1.00 20.19           C  
ATOM    199  OG  SER L  27A     29.237  10.926  21.384  1.00 20.24           O  
ATOM    200  N   VAL L  27B     29.234  13.895  20.564  1.00 20.40           N  
ATOM    201  CA  VAL L  27B     28.720  15.064  21.268  1.00 20.45           C  
ATOM    202  C   VAL L  27B     27.492  14.691  22.088  1.00 21.38           C  
ATOM    203  O   VAL L  27B     26.672  15.544  22.423  1.00 21.22           O  
ATOM    204  CB  VAL L  27B     28.355  16.203  20.291  1.00 19.99           C  
ATOM    205  CG1 VAL L  27B     29.607  16.689  19.574  1.00 19.73           C  
ATOM    206  CG2 VAL L  27B     27.315  15.724  19.294  1.00 20.06           C  
ATOM    207  N   LEU L  27C     27.378  13.405  22.407  1.00 22.19           N  
ATOM    208  CA  LEU L  27C     26.265  12.900  23.201  1.00 23.54           C  
ATOM    209  C   LEU L  27C     26.644  12.860  24.676  1.00 24.70           C  
ATOM    210  O   LEU L  27C     27.623  12.215  25.053  1.00 24.85           O  
ATOM    211  CB  LEU L  27C     25.882  11.489  22.748  1.00 23.33           C  
ATOM    212  CG  LEU L  27C     24.910  10.718  23.650  1.00 23.31           C  
ATOM    213  CD1 LEU L  27C     23.573  11.438  23.714  1.00 23.33           C  
ATOM    214  CD2 LEU L  27C     24.730   9.306  23.114  1.00 23.33           C  
ATOM    215  N   ASP L  27D     25.874  13.556  25.505  1.00 25.85           N  
ATOM    216  CA  ASP L  27D     26.124  13.567  26.939  1.00 27.58           C  
ATOM    217  C   ASP L  27D     25.424  12.336  27.507  1.00 28.28           C  
ATOM    218  O   ASP L  27D     24.196  12.262  27.524  1.00 28.44           O  
ATOM    219  CB  ASP L  27D     25.557  14.840  27.570  1.00 28.22           C  
ATOM    220  CG  ASP L  27D     25.903  14.961  29.040  1.00 28.97           C  
ATOM    221  OD1 ASP L  27D     25.635  14.003  29.792  1.00 29.30           O  
ATOM    222  OD2 ASP L  27D     26.440  16.015  29.443  1.00 29.85           O  
ATOM    223  N   SER L  27E     26.213  11.371  27.965  1.00 29.17           N  
ATOM    224  CA  SER L  27E     25.678  10.126  28.507  1.00 29.79           C  
ATOM    225  C   SER L  27E     24.854  10.266  29.786  1.00 30.02           C  
ATOM    226  O   SER L  27E     24.100   9.357  30.138  1.00 30.47           O  
ATOM    227  CB  SER L  27E     26.821   9.137  28.744  1.00 30.15           C  
ATOM    228  OG  SER L  27E     27.807   9.698  29.594  1.00 30.65           O  
ATOM    229  N   SER L  27F     24.988  11.391  30.482  1.00 30.02           N  
ATOM    230  CA  SER L  27F     24.238  11.590  31.718  1.00 29.87           C  
ATOM    231  C   SER L  27F     22.808  12.073  31.478  1.00 29.47           C  
ATOM    232  O   SER L  27F     21.884  11.662  32.185  1.00 29.78           O  
ATOM    233  CB  SER L  27F     24.967  12.579  32.639  1.00 30.25           C  
ATOM    234  OG  SER L  27F     24.906  13.907  32.146  1.00 31.18           O  
ATOM    235  N   ASN L  28      22.621  12.941  30.485  1.00 28.58           N  
ATOM    236  CA  ASN L  28      21.291  13.465  30.187  1.00 27.62           C  
ATOM    237  C   ASN L  28      20.726  12.998  28.846  1.00 26.78           C  
ATOM    238  O   ASN L  28      19.636  13.411  28.448  1.00 26.90           O  
ATOM    239  CB  ASN L  28      21.297  14.997  30.235  1.00 27.75           C  
ATOM    240  CG  ASN L  28      22.327  15.608  29.307  1.00 27.98           C  
ATOM    241  OD1 ASN L  28      22.478  15.185  28.162  1.00 28.16           O  
ATOM    242  ND2 ASN L  28      23.030  16.622  29.793  1.00 28.25           N  
ATOM    243  N   SER L  29      21.471  12.141  28.155  1.00 25.80           N  
ATOM    244  CA  SER L  29      21.037  11.596  26.871  1.00 24.64           C  
ATOM    245  C   SER L  29      20.832  12.646  25.778  1.00 23.86           C  
ATOM    246  O   SER L  29      20.122  12.398  24.806  1.00 23.64           O  
ATOM    247  CB  SER L  29      19.738  10.805  27.055  1.00 25.01           C  
ATOM    248  OG  SER L  29      19.906   9.761  28.000  1.00 24.99           O  
ATOM    249  N   LYS L  30      21.456  13.810  25.927  1.00 22.82           N  
ATOM    250  CA  LYS L  30      21.312  14.865  24.927  1.00 21.46           C  
ATOM    251  C   LYS L  30      22.532  15.031  24.027  1.00 20.24           C  
ATOM    252  O   LYS L  30      23.672  14.920  24.480  1.00 19.67           O  
ATOM    253  CB  LYS L  30      21.021  16.207  25.601  1.00 22.31           C  
ATOM    254  CG  LYS L  30      19.673  16.293  26.293  1.00 23.57           C  
ATOM    255  CD  LYS L  30      19.396  17.709  26.762  1.00 24.78           C  
ATOM    256  CE  LYS L  30      17.979  17.847  27.293  1.00 25.59           C  
ATOM    257  NZ  LYS L  30      17.646  19.258  27.629  1.00 26.47           N  
ATOM    258  N   ASN L  31      22.274  15.291  22.748  1.00 18.84           N  
ATOM    259  CA  ASN L  31      23.328  15.525  21.762  1.00 17.71           C  
ATOM    260  C   ASN L  31      23.410  17.039  21.594  1.00 16.87           C  
ATOM    261  O   ASN L  31      22.441  17.672  21.179  1.00 16.18           O  
ATOM    262  CB  ASN L  31      22.970  14.882  20.418  1.00 17.64           C  
ATOM    263  CG  ASN L  31      23.148  13.377  20.420  1.00 18.12           C  
ATOM    264  OD1 ASN L  31      24.266  12.872  20.335  1.00 18.11           O  
ATOM    265  ND2 ASN L  31      22.041  12.652  20.523  1.00 18.21           N  
ATOM    266  N   TYR L  32      24.560  17.617  21.926  1.00 16.07           N  
ATOM    267  CA  TYR L  32      24.748  19.060  21.833  1.00 15.61           C  
ATOM    268  C   TYR L  32      25.111  19.450  20.408  1.00 15.12           C  
ATOM    269  O   TYR L  32      26.240  19.851  20.123  1.00 14.45           O  
ATOM    270  CB  TYR L  32      25.844  19.499  22.808  1.00 16.70           C  
ATOM    271  CG  TYR L  32      25.456  19.361  24.265  1.00 17.83           C  
ATOM    272  CD1 TYR L  32      25.024  18.138  24.785  1.00 18.54           C  
ATOM    273  CD2 TYR L  32      25.505  20.460  25.121  1.00 18.39           C  
ATOM    274  CE1 TYR L  32      24.648  18.015  26.126  1.00 19.22           C  
ATOM    275  CE2 TYR L  32      25.134  20.349  26.460  1.00 19.49           C  
ATOM    276  CZ  TYR L  32      24.707  19.126  26.953  1.00 19.41           C  
ATOM    277  OH  TYR L  32      24.349  19.018  28.276  1.00 20.70           O  
ATOM    278  N   LEU L  33      24.128  19.337  19.524  1.00 14.43           N  
ATOM    279  CA  LEU L  33      24.313  19.619  18.107  1.00 14.23           C  
ATOM    280  C   LEU L  33      23.151  20.462  17.590  1.00 13.89           C  
ATOM    281  O   LEU L  33      21.987  20.173  17.878  1.00 14.25           O  
ATOM    282  CB  LEU L  33      24.392  18.280  17.360  1.00 14.43           C  
ATOM    283  CG  LEU L  33      24.804  18.133  15.891  1.00 14.65           C  
ATOM    284  CD1 LEU L  33      23.712  18.649  14.974  1.00 15.03           C  
ATOM    285  CD2 LEU L  33      26.124  18.855  15.657  1.00 15.00           C  
ATOM    286  N   ALA L  34      23.467  21.508  16.836  1.00 13.15           N  
ATOM    287  CA  ALA L  34      22.437  22.385  16.284  1.00 12.41           C  
ATOM    288  C   ALA L  34      22.601  22.548  14.778  1.00 12.32           C  
ATOM    289  O   ALA L  34      23.678  22.314  14.236  1.00 12.04           O  
ATOM    290  CB  ALA L  34      22.499  23.750  16.960  1.00 12.36           C  
ATOM    291  N   TRP L  35      21.517  22.936  14.112  1.00 11.92           N  
ATOM    292  CA  TRP L  35      21.524  23.172  12.671  1.00 12.27           C  
ATOM    293  C   TRP L  35      21.071  24.597  12.420  1.00 12.30           C  
ATOM    294  O   TRP L  35      20.115  25.066  13.047  1.00 12.34           O  
ATOM    295  CB  TRP L  35      20.565  22.228  11.942  1.00 12.19           C  
ATOM    296  CG  TRP L  35      21.048  20.827  11.820  1.00 12.10           C  
ATOM    297  CD1 TRP L  35      20.731  19.775  12.631  1.00 11.98           C  
ATOM    298  CD2 TRP L  35      21.920  20.307  10.808  1.00 12.15           C  
ATOM    299  NE1 TRP L  35      21.347  18.633  12.184  1.00 12.08           N  
ATOM    300  CE2 TRP L  35      22.083  18.930  11.067  1.00 12.45           C  
ATOM    301  CE3 TRP L  35      22.577  20.872   9.706  1.00 12.21           C  
ATOM    302  CZ2 TRP L  35      22.878  18.102  10.262  1.00 12.33           C  
ATOM    303  CZ3 TRP L  35      23.369  20.048   8.902  1.00 12.45           C  
ATOM    304  CH2 TRP L  35      23.509  18.679   9.187  1.00 12.32           C  
ATOM    305  N   TYR L  36      21.755  25.278  11.503  1.00 12.43           N  
ATOM    306  CA  TYR L  36      21.428  26.658  11.150  1.00 12.48           C  
ATOM    307  C   TYR L  36      21.210  26.829   9.649  1.00 12.62           C  
ATOM    308  O   TYR L  36      21.768  26.089   8.843  1.00 12.45           O  
ATOM    309  CB  TYR L  36      22.564  27.607  11.553  1.00 12.41           C  
ATOM    310  CG  TYR L  36      22.635  27.949  13.020  1.00 12.74           C  
ATOM    311  CD1 TYR L  36      23.294  27.118  13.927  1.00 13.13           C  
ATOM    312  CD2 TYR L  36      22.053  29.121  13.499  1.00 12.67           C  
ATOM    313  CE1 TYR L  36      23.368  27.456  15.280  1.00 13.81           C  
ATOM    314  CE2 TYR L  36      22.121  29.465  14.836  1.00 13.13           C  
ATOM    315  CZ  TYR L  36      22.778  28.632  15.722  1.00 13.72           C  
ATOM    316  OH  TYR L  36      22.837  28.992  17.048  1.00 15.70           O  
ATOM    317  N   GLN L  37      20.404  27.824   9.294  1.00 12.70           N  
ATOM    318  CA  GLN L  37      20.139  28.166   7.899  1.00 13.17           C  
ATOM    319  C   GLN L  37      20.643  29.596   7.706  1.00 13.48           C  
ATOM    320  O   GLN L  37      20.462  30.438   8.585  1.00 13.77           O  
ATOM    321  CB  GLN L  37      18.635  28.127   7.615  1.00 13.66           C  
ATOM    322  CG  GLN L  37      18.257  28.582   6.207  1.00 15.06           C  
ATOM    323  CD  GLN L  37      16.775  28.886   6.078  1.00 15.79           C  
ATOM    324  OE1 GLN L  37      16.282  29.862   6.642  1.00 17.03           O  
ATOM    325  NE2 GLN L  37      16.052  28.038   5.345  1.00 16.57           N  
ATOM    326  N   GLN L  38      21.291  29.885   6.582  1.00 13.42           N  
ATOM    327  CA  GLN L  38      21.750  31.252   6.358  1.00 13.45           C  
ATOM    328  C   GLN L  38      21.618  31.669   4.898  1.00 13.97           C  
ATOM    329  O   GLN L  38      22.094  30.975   3.994  1.00 14.27           O  
ATOM    330  CB  GLN L  38      23.201  31.437   6.822  1.00 12.87           C  
ATOM    331  CG  GLN L  38      23.708  32.877   6.652  1.00 11.98           C  
ATOM    332  CD  GLN L  38      25.112  33.077   7.194  1.00 11.67           C  
ATOM    333  OE1 GLN L  38      25.969  32.205   7.054  1.00 11.74           O  
ATOM    334  NE2 GLN L  38      25.360  34.240   7.803  1.00 11.77           N  
ATOM    335  N   LYS L  39      20.959  32.804   4.682  1.00 14.85           N  
ATOM    336  CA  LYS L  39      20.756  33.346   3.341  1.00 15.78           C  
ATOM    337  C   LYS L  39      21.656  34.566   3.169  1.00 16.33           C  
ATOM    338  O   LYS L  39      22.058  35.187   4.151  1.00 16.57           O  
ATOM    339  CB  LYS L  39      19.287  33.732   3.154  1.00 16.12           C  
ATOM    340  CG  LYS L  39      18.337  32.552   3.336  1.00 16.67           C  
ATOM    341  CD  LYS L  39      16.882  32.947   3.171  1.00 18.00           C  
ATOM    342  CE  LYS L  39      15.985  31.729   3.313  1.00 18.70           C  
ATOM    343  NZ  LYS L  39      14.549  32.065   3.089  1.00 19.70           N  
ATOM    344  N   PRO L  40      22.002  34.914   1.918  1.00 16.71           N  
ATOM    345  CA  PRO L  40      22.866  36.070   1.660  1.00 17.05           C  
ATOM    346  C   PRO L  40      22.405  37.361   2.328  1.00 17.11           C  
ATOM    347  O   PRO L  40      21.224  37.712   2.279  1.00 17.56           O  
ATOM    348  CB  PRO L  40      22.850  36.171   0.137  1.00 17.21           C  
ATOM    349  CG  PRO L  40      22.751  34.729  -0.277  1.00 16.99           C  
ATOM    350  CD  PRO L  40      21.678  34.215   0.661  1.00 17.11           C  
ATOM    351  N   GLY L  41      23.349  38.060   2.956  1.00 17.08           N  
ATOM    352  CA  GLY L  41      23.045  39.318   3.616  1.00 17.09           C  
ATOM    353  C   GLY L  41      22.266  39.214   4.914  1.00 16.98           C  
ATOM    354  O   GLY L  41      21.791  40.223   5.441  1.00 17.41           O  
ATOM    355  N   GLN L  42      22.134  38.000   5.435  1.00 16.46           N  
ATOM    356  CA  GLN L  42      21.398  37.787   6.676  1.00 16.22           C  
ATOM    357  C   GLN L  42      22.198  36.927   7.646  1.00 15.15           C  
ATOM    358  O   GLN L  42      23.097  36.200   7.246  1.00 14.77           O  
ATOM    359  CB  GLN L  42      20.073  37.086   6.393  1.00 17.41           C  
ATOM    360  CG  GLN L  42      19.149  37.835   5.460  1.00 19.46           C  
ATOM    361  CD  GLN L  42      17.855  37.087   5.208  1.00 20.48           C  
ATOM    362  OE1 GLN L  42      16.990  37.558   4.472  1.00 22.05           O  
ATOM    363  NE2 GLN L  42      17.716  35.911   5.819  1.00 21.10           N  
ATOM    364  N   PRO L  43      21.873  37.005   8.945  1.00 14.49           N  
ATOM    365  CA  PRO L  43      22.586  36.205   9.942  1.00 14.18           C  
ATOM    366  C   PRO L  43      22.082  34.765   9.931  1.00 13.97           C  
ATOM    367  O   PRO L  43      21.038  34.465   9.351  1.00 13.90           O  
ATOM    368  CB  PRO L  43      22.231  36.900  11.252  1.00 14.18           C  
ATOM    369  CG  PRO L  43      20.818  37.345  10.993  1.00 14.50           C  
ATOM    370  CD  PRO L  43      20.916  37.922   9.595  1.00 14.19           C  
ATOM    371  N   PRO L  44      22.831  33.850  10.562  1.00 13.79           N  
ATOM    372  CA  PRO L  44      22.401  32.451  10.608  1.00 13.71           C  
ATOM    373  C   PRO L  44      21.116  32.416  11.433  1.00 13.67           C  
ATOM    374  O   PRO L  44      20.891  33.293  12.271  1.00 13.44           O  
ATOM    375  CB  PRO L  44      23.548  31.754  11.343  1.00 14.11           C  
ATOM    376  CG  PRO L  44      24.728  32.642  11.085  1.00 14.07           C  
ATOM    377  CD  PRO L  44      24.146  34.023  11.200  1.00 14.14           C  
ATOM    378  N   LYS L  45      20.281  31.411  11.191  1.00 13.41           N  
ATOM    379  CA  LYS L  45      19.026  31.248  11.916  1.00 13.52           C  
ATOM    380  C   LYS L  45      18.941  29.813  12.431  1.00 12.91           C  
ATOM    381  O   LYS L  45      19.045  28.863  11.660  1.00 12.88           O  
ATOM    382  CB  LYS L  45      17.840  31.537  10.987  1.00 14.74           C  
ATOM    383  CG  LYS L  45      16.482  31.251  11.610  1.00 17.29           C  
ATOM    384  CD  LYS L  45      16.247  32.122  12.832  1.00 19.01           C  
ATOM    385  CE  LYS L  45      14.918  31.804  13.503  1.00 19.95           C  
ATOM    386  NZ  LYS L  45      14.875  30.415  14.046  1.00 20.29           N  
ATOM    387  N   LEU L  46      18.748  29.663  13.738  1.00 12.27           N  
ATOM    388  CA  LEU L  46      18.662  28.341  14.354  1.00 11.87           C  
ATOM    389  C   LEU L  46      17.420  27.586  13.897  1.00 11.54           C  
ATOM    390  O   LEU L  46      16.311  28.122  13.940  1.00 12.44           O  
ATOM    391  CB  LEU L  46      18.651  28.479  15.884  1.00 11.39           C  
ATOM    392  CG  LEU L  46      18.596  27.170  16.675  1.00 10.86           C  
ATOM    393  CD1 LEU L  46      19.863  26.355  16.406  1.00 10.68           C  
ATOM    394  CD2 LEU L  46      18.461  27.474  18.169  1.00 11.20           C  
ATOM    395  N   LEU L  47      17.617  26.343  13.462  1.00 11.84           N  
ATOM    396  CA  LEU L  47      16.520  25.494  12.991  1.00 11.98           C  
ATOM    397  C   LEU L  47      16.225  24.369  13.973  1.00 12.06           C  
ATOM    398  O   LEU L  47      15.071  24.113  14.325  1.00 12.00           O  
ATOM    399  CB  LEU L  47      16.883  24.841  11.655  1.00 12.01           C  
ATOM    400  CG  LEU L  47      17.226  25.698  10.442  1.00 12.68           C  
ATOM    401  CD1 LEU L  47      17.893  24.830   9.384  1.00 12.90           C  
ATOM    402  CD2 LEU L  47      15.956  26.344   9.897  1.00 13.03           C  
ATOM    403  N   ILE L  48      17.295  23.704  14.397  1.00 12.01           N  
ATOM    404  CA  ILE L  48      17.224  22.545  15.280  1.00 12.39           C  
ATOM    405  C   ILE L  48      18.292  22.603  16.375  1.00 12.20           C  
ATOM    406  O   ILE L  48      19.409  23.049  16.128  1.00 12.01           O  
ATOM    407  CB  ILE L  48      17.496  21.248  14.463  1.00 12.90           C  
ATOM    408  CG1 ILE L  48      16.564  21.160  13.248  1.00 13.09           C  
ATOM    409  CG2 ILE L  48      17.374  20.023  15.356  1.00 12.29           C  
ATOM    410  CD1 ILE L  48      15.095  20.995  13.581  1.00 13.91           C  
ATOM    411  N   TYR L  49      17.948  22.164  17.584  1.00 11.97           N  
ATOM    412  CA  TYR L  49      18.934  22.097  18.660  1.00 12.21           C  
ATOM    413  C   TYR L  49      18.736  20.759  19.385  1.00 12.51           C  
ATOM    414  O   TYR L  49      17.725  20.092  19.174  1.00 11.99           O  
ATOM    415  CB  TYR L  49      18.846  23.309  19.603  1.00 12.26           C  
ATOM    416  CG  TYR L  49      17.518  23.536  20.274  1.00 12.50           C  
ATOM    417  CD1 TYR L  49      16.481  24.198  19.616  1.00 12.41           C  
ATOM    418  CD2 TYR L  49      17.297  23.092  21.574  1.00 12.58           C  
ATOM    419  CE1 TYR L  49      15.252  24.412  20.245  1.00 12.90           C  
ATOM    420  CE2 TYR L  49      16.077  23.299  22.209  1.00 12.43           C  
ATOM    421  CZ  TYR L  49      15.060  23.957  21.541  1.00 12.79           C  
ATOM    422  OH  TYR L  49      13.853  24.141  22.176  1.00 12.51           O  
ATOM    423  N   TRP L  50      19.698  20.352  20.214  1.00 13.03           N  
ATOM    424  CA  TRP L  50      19.633  19.043  20.878  1.00 13.74           C  
ATOM    425  C   TRP L  50      19.494  17.984  19.776  1.00 13.81           C  
ATOM    426  O   TRP L  50      18.866  16.936  19.969  1.00 14.00           O  
ATOM    427  CB  TRP L  50      18.441  18.941  21.844  1.00 14.66           C  
ATOM    428  CG  TRP L  50      18.532  19.813  23.077  1.00 15.98           C  
ATOM    429  CD1 TRP L  50      17.502  20.486  23.674  1.00 16.79           C  
ATOM    430  CD2 TRP L  50      19.697  20.083  23.872  1.00 16.97           C  
ATOM    431  NE1 TRP L  50      17.950  21.159  24.781  1.00 17.53           N  
ATOM    432  CE2 TRP L  50      19.292  20.931  24.930  1.00 17.14           C  
ATOM    433  CE3 TRP L  50      21.040  19.692  23.797  1.00 17.09           C  
ATOM    434  CZ2 TRP L  50      20.183  21.396  25.903  1.00 17.42           C  
ATOM    435  CZ3 TRP L  50      21.928  20.157  24.772  1.00 17.34           C  
ATOM    436  CH2 TRP L  50      21.492  20.999  25.806  1.00 17.84           C  
ATOM    437  N   ALA L  51      20.080  18.289  18.617  1.00 13.65           N  
ATOM    438  CA  ALA L  51      20.091  17.419  17.442  1.00 13.70           C  
ATOM    439  C   ALA L  51      18.756  17.149  16.761  1.00 13.72           C  
ATOM    440  O   ALA L  51      18.713  16.966  15.543  1.00 14.14           O  
ATOM    441  CB  ALA L  51      20.755  16.085  17.785  1.00 13.98           C  
ATOM    442  N   SER L  52      17.668  17.124  17.522  1.00 13.58           N  
ATOM    443  CA  SER L  52      16.376  16.817  16.920  1.00 13.64           C  
ATOM    444  C   SER L  52      15.174  17.618  17.413  1.00 13.56           C  
ATOM    445  O   SER L  52      14.037  17.312  17.044  1.00 14.16           O  
ATOM    446  CB  SER L  52      16.096  15.323  17.091  1.00 13.53           C  
ATOM    447  OG  SER L  52      16.288  14.930  18.440  1.00 14.21           O  
ATOM    448  N   THR L  53      15.412  18.629  18.242  1.00 12.82           N  
ATOM    449  CA  THR L  53      14.326  19.462  18.747  1.00 12.44           C  
ATOM    450  C   THR L  53      14.197  20.680  17.836  1.00 12.21           C  
ATOM    451  O   THR L  53      15.177  21.381  17.593  1.00 12.27           O  
ATOM    452  CB  THR L  53      14.605  19.924  20.195  1.00 12.75           C  
ATOM    453  OG1 THR L  53      14.670  18.778  21.052  1.00 12.35           O  
ATOM    454  CG2 THR L  53      13.497  20.856  20.687  1.00 12.59           C  
ATOM    455  N   ARG L  54      12.993  20.923  17.323  1.00 12.05           N  
ATOM    456  CA  ARG L  54      12.768  22.057  16.426  1.00 12.32           C  
ATOM    457  C   ARG L  54      12.615  23.373  17.182  1.00 12.58           C  
ATOM    458  O   ARG L  54      11.942  23.441  18.209  1.00 12.02           O  
ATOM    459  CB  ARG L  54      11.527  21.807  15.554  1.00 12.75           C  
ATOM    460  CG  ARG L  54      11.222  22.914  14.548  1.00 13.51           C  
ATOM    461  CD  ARG L  54      10.180  22.463  13.517  1.00 14.15           C  
ATOM    462  NE  ARG L  54       8.942  21.988  14.135  1.00 15.23           N  
ATOM    463  CZ  ARG L  54       7.980  22.775  14.604  1.00 15.79           C  
ATOM    464  NH1 ARG L  54       8.088  24.094  14.511  1.00 17.08           N  
ATOM    465  NH2 ARG L  54       6.898  22.242  15.154  1.00 16.29           N  
ATOM    466  N   GLU L  55      13.261  24.416  16.666  1.00 12.57           N  
ATOM    467  CA  GLU L  55      13.203  25.742  17.272  1.00 13.68           C  
ATOM    468  C   GLU L  55      11.880  26.443  16.947  1.00 13.99           C  
ATOM    469  O   GLU L  55      11.232  26.151  15.933  1.00 13.93           O  
ATOM    470  CB  GLU L  55      14.387  26.589  16.780  1.00 14.13           C  
ATOM    471  CG  GLU L  55      14.452  28.022  17.330  1.00 15.86           C  
ATOM    472  CD  GLU L  55      14.504  28.089  18.857  1.00 15.99           C  
ATOM    473  OE1 GLU L  55      13.490  27.771  19.501  1.00 17.91           O  
ATOM    474  OE2 GLU L  55      15.559  28.458  19.423  1.00 18.48           O  
ATOM    475  N   SER L  56      11.486  27.356  17.828  1.00 14.39           N  
ATOM    476  CA  SER L  56      10.252  28.121  17.675  1.00 15.68           C  
ATOM    477  C   SER L  56      10.249  28.891  16.357  1.00 16.15           C  
ATOM    478  O   SER L  56      11.258  29.495  15.987  1.00 16.47           O  
ATOM    479  CB  SER L  56      10.107  29.124  18.828  1.00 15.85           C  
ATOM    480  OG  SER L  56      10.163  28.489  20.094  1.00 16.81           O  
ATOM    481  N   GLY L  57       9.114  28.869  15.659  1.00 16.98           N  
ATOM    482  CA  GLY L  57       8.985  29.594  14.404  1.00 17.57           C  
ATOM    483  C   GLY L  57       9.454  28.878  13.153  1.00 18.00           C  
ATOM    484  O   GLY L  57       9.097  29.264  12.036  1.00 18.35           O  
ATOM    485  N   VAL L  58      10.251  27.833  13.329  1.00 17.80           N  
ATOM    486  CA  VAL L  58      10.777  27.074  12.203  1.00 18.12           C  
ATOM    487  C   VAL L  58       9.710  26.169  11.589  1.00 18.45           C  
ATOM    488  O   VAL L  58       8.987  25.480  12.308  1.00 18.20           O  
ATOM    489  CB  VAL L  58      11.979  26.204  12.653  1.00 17.54           C  
ATOM    490  CG1 VAL L  58      12.470  25.331  11.506  1.00 18.03           C  
ATOM    491  CG2 VAL L  58      13.103  27.100  13.146  1.00 17.94           C  
ATOM    492  N   PRO L  59       9.592  26.170  10.248  1.00 19.14           N  
ATOM    493  CA  PRO L  59       8.598  25.328   9.570  1.00 19.58           C  
ATOM    494  C   PRO L  59       8.749  23.857   9.955  1.00 19.97           C  
ATOM    495  O   PRO L  59       9.864  23.349  10.092  1.00 19.53           O  
ATOM    496  CB  PRO L  59       8.894  25.575   8.096  1.00 19.60           C  
ATOM    497  CG  PRO L  59       9.328  27.003   8.089  1.00 19.79           C  
ATOM    498  CD  PRO L  59      10.260  27.064   9.285  1.00 19.50           C  
ATOM    499  N   ASP L  60       7.625  23.168  10.115  1.00 20.68           N  
ATOM    500  CA  ASP L  60       7.649  21.764  10.502  1.00 21.25           C  
ATOM    501  C   ASP L  60       8.325  20.834   9.493  1.00 20.77           C  
ATOM    502  O   ASP L  60       8.657  19.698   9.827  1.00 20.96           O  
ATOM    503  CB  ASP L  60       6.224  21.276  10.784  1.00 22.82           C  
ATOM    504  CG  ASP L  60       6.188  19.847  11.286  1.00 24.17           C  
ATOM    505  OD1 ASP L  60       6.842  19.565  12.313  1.00 25.41           O  
ATOM    506  OD2 ASP L  60       5.507  19.006  10.658  1.00 25.39           O  
ATOM    507  N   ARG L  61       8.541  21.305   8.267  1.00 20.26           N  
ATOM    508  CA  ARG L  61       9.187  20.468   7.257  1.00 19.97           C  
ATOM    509  C   ARG L  61      10.674  20.269   7.545  1.00 19.74           C  
ATOM    510  O   ARG L  61      11.342  19.460   6.902  1.00 19.34           O  
ATOM    511  CB  ARG L  61       8.989  21.052   5.851  1.00 20.29           C  
ATOM    512  CG  ARG L  61       9.530  22.452   5.634  1.00 20.73           C  
ATOM    513  CD  ARG L  61       9.404  22.840   4.162  1.00 21.04           C  
ATOM    514  NE  ARG L  61       9.930  24.173   3.891  1.00 21.01           N  
ATOM    515  CZ  ARG L  61       9.312  25.305   4.207  1.00 21.22           C  
ATOM    516  NH1 ARG L  61       8.120  25.276   4.792  1.00 21.89           N  
ATOM    517  NH2 ARG L  61       9.876  26.471   3.921  1.00 21.99           N  
ATOM    518  N   PHE L  62      11.190  21.014   8.517  1.00 19.35           N  
ATOM    519  CA  PHE L  62      12.590  20.888   8.903  1.00 19.13           C  
ATOM    520  C   PHE L  62      12.674  19.925  10.078  1.00 19.05           C  
ATOM    521  O   PHE L  62      11.925  20.061  11.043  1.00 19.11           O  
ATOM    522  CB  PHE L  62      13.154  22.242   9.340  1.00 18.99           C  
ATOM    523  CG  PHE L  62      13.391  23.198   8.211  1.00 18.80           C  
ATOM    524  CD1 PHE L  62      14.552  23.118   7.449  1.00 18.95           C  
ATOM    525  CD2 PHE L  62      12.448  24.169   7.898  1.00 19.17           C  
ATOM    526  CE1 PHE L  62      14.769  23.994   6.389  1.00 18.88           C  
ATOM    527  CE2 PHE L  62      12.656  25.048   6.840  1.00 19.17           C  
ATOM    528  CZ  PHE L  62      13.821  24.959   6.084  1.00 19.29           C  
ATOM    529  N   SER L  63      13.574  18.952   9.997  1.00 18.89           N  
ATOM    530  CA  SER L  63      13.744  18.006  11.093  1.00 19.05           C  
ATOM    531  C   SER L  63      15.188  17.542  11.194  1.00 18.78           C  
ATOM    532  O   SER L  63      15.918  17.504  10.199  1.00 18.83           O  
ATOM    533  CB  SER L  63      12.812  16.795  10.931  1.00 18.99           C  
ATOM    534  OG  SER L  63      13.187  15.984   9.836  1.00 20.09           O  
ATOM    535  N   GLY L  64      15.601  17.208  12.411  1.00 18.60           N  
ATOM    536  CA  GLY L  64      16.955  16.741  12.631  1.00 18.22           C  
ATOM    537  C   GLY L  64      16.941  15.361  13.255  1.00 18.37           C  
ATOM    538  O   GLY L  64      16.009  15.012  13.975  1.00 18.12           O  
ATOM    539  N   SER L  65      17.970  14.572  12.972  1.00 18.49           N  
ATOM    540  CA  SER L  65      18.070  13.229  13.520  1.00 19.00           C  
ATOM    541  C   SER L  65      19.535  12.846  13.676  1.00 19.03           C  
ATOM    542  O   SER L  65      20.425  13.576  13.234  1.00 18.51           O  
ATOM    543  CB  SER L  65      17.372  12.230  12.593  1.00 19.25           C  
ATOM    544  OG  SER L  65      18.033  12.161  11.341  1.00 20.49           O  
ATOM    545  N   GLY L  66      19.782  11.699  14.300  1.00 19.35           N  
ATOM    546  CA  GLY L  66      21.148  11.247  14.494  1.00 19.55           C  
ATOM    547  C   GLY L  66      21.564  11.277  15.951  1.00 19.68           C  
ATOM    548  O   GLY L  66      20.861  11.831  16.793  1.00 19.98           O  
ATOM    549  N   SER L  67      22.715  10.687  16.254  1.00 19.97           N  
ATOM    550  CA  SER L  67      23.214  10.652  17.626  1.00 20.15           C  
ATOM    551  C   SER L  67      24.712  10.356  17.631  1.00 19.90           C  
ATOM    552  O   SER L  67      25.238   9.762  16.691  1.00 20.41           O  
ATOM    553  CB  SER L  67      22.469   9.576  18.426  1.00 20.89           C  
ATOM    554  OG  SER L  67      22.894   9.543  19.780  1.00 21.88           O  
ATOM    555  N   GLY L  68      25.397  10.789  18.684  1.00 19.66           N  
ATOM    556  CA  GLY L  68      26.824  10.543  18.791  1.00 19.30           C  
ATOM    557  C   GLY L  68      27.704  11.347  17.853  1.00 19.28           C  
ATOM    558  O   GLY L  68      28.069  12.480  18.164  1.00 18.87           O  
ATOM    559  N   THR L  69      28.042  10.764  16.705  1.00 19.40           N  
ATOM    560  CA  THR L  69      28.912  11.424  15.731  1.00 19.87           C  
ATOM    561  C   THR L  69      28.300  11.621  14.346  1.00 19.87           C  
ATOM    562  O   THR L  69      28.906  12.263  13.488  1.00 20.37           O  
ATOM    563  CB  THR L  69      30.226  10.636  15.536  1.00 19.88           C  
ATOM    564  OG1 THR L  69      29.921   9.309  15.084  1.00 20.02           O  
ATOM    565  CG2 THR L  69      31.012  10.560  16.835  1.00 20.08           C  
ATOM    566  N   ASP L  70      27.113  11.073  14.118  1.00 19.81           N  
ATOM    567  CA  ASP L  70      26.477  11.202  12.814  1.00 19.77           C  
ATOM    568  C   ASP L  70      25.092  11.809  12.910  1.00 19.01           C  
ATOM    569  O   ASP L  70      24.202  11.260  13.562  1.00 18.80           O  
ATOM    570  CB  ASP L  70      26.416   9.833  12.136  1.00 21.45           C  
ATOM    571  CG  ASP L  70      27.796   9.264  11.872  1.00 22.87           C  
ATOM    572  OD1 ASP L  70      28.538   9.862  11.065  1.00 23.80           O  
ATOM    573  OD2 ASP L  70      28.145   8.228  12.476  1.00 24.71           O  
ATOM    574  N   PHE L  71      24.917  12.948  12.247  1.00 17.82           N  
ATOM    575  CA  PHE L  71      23.650  13.663  12.274  1.00 17.10           C  
ATOM    576  C   PHE L  71      23.147  14.013  10.884  1.00 16.81           C  
ATOM    577  O   PHE L  71      23.922  14.089   9.934  1.00 17.14           O  
ATOM    578  CB  PHE L  71      23.807  14.932  13.116  1.00 15.83           C  
ATOM    579  CG  PHE L  71      24.309  14.664  14.500  1.00 14.91           C  
ATOM    580  CD1 PHE L  71      25.677  14.562  14.757  1.00 14.44           C  
ATOM    581  CD2 PHE L  71      23.415  14.432  15.537  1.00 14.22           C  
ATOM    582  CE1 PHE L  71      26.143  14.228  16.029  1.00 14.81           C  
ATOM    583  CE2 PHE L  71      23.868  14.098  16.810  1.00 14.29           C  
ATOM    584  CZ  PHE L  71      25.235  13.993  17.059  1.00 14.21           C  
ATOM    585  N   THR L  72      21.839  14.224  10.771  1.00 17.34           N  
ATOM    586  CA  THR L  72      21.240  14.561   9.489  1.00 17.75           C  
ATOM    587  C   THR L  72      20.139  15.608   9.610  1.00 17.83           C  
ATOM    588  O   THR L  72      19.328  15.571  10.535  1.00 17.77           O  
ATOM    589  CB  THR L  72      20.631  13.299   8.809  1.00 18.13           C  
ATOM    590  OG1 THR L  72      21.671  12.361   8.501  1.00 19.01           O  
ATOM    591  CG2 THR L  72      19.904  13.679   7.528  1.00 18.93           C  
ATOM    592  N   LEU L  73      20.131  16.554   8.675  1.00 17.52           N  
ATOM    593  CA  LEU L  73      19.099  17.579   8.624  1.00 18.03           C  
ATOM    594  C   LEU L  73      18.231  17.180   7.442  1.00 18.61           C  
ATOM    595  O   LEU L  73      18.748  16.899   6.357  1.00 18.23           O  
ATOM    596  CB  LEU L  73      19.689  18.969   8.363  1.00 17.64           C  
ATOM    597  CG  LEU L  73      18.636  20.059   8.131  1.00 17.77           C  
ATOM    598  CD1 LEU L  73      17.848  20.294   9.407  1.00 17.57           C  
ATOM    599  CD2 LEU L  73      19.308  21.345   7.684  1.00 17.58           C  
ATOM    600  N   THR L  74      16.921  17.148   7.650  1.00 19.24           N  
ATOM    601  CA  THR L  74      16.007  16.771   6.582  1.00 20.26           C  
ATOM    602  C   THR L  74      14.938  17.819   6.318  1.00 20.60           C  
ATOM    603  O   THR L  74      14.342  18.369   7.244  1.00 20.44           O  
ATOM    604  CB  THR L  74      15.294  15.432   6.898  1.00 20.37           C  
ATOM    605  OG1 THR L  74      16.258  14.379   6.983  1.00 20.95           O  
ATOM    606  CG2 THR L  74      14.281  15.089   5.806  1.00 20.85           C  
ATOM    607  N   ILE L  75      14.724  18.103   5.038  1.00 21.44           N  
ATOM    608  CA  ILE L  75      13.689  19.026   4.599  1.00 22.31           C  
ATOM    609  C   ILE L  75      12.759  18.087   3.835  1.00 23.06           C  
ATOM    610  O   ILE L  75      13.065  17.685   2.712  1.00 23.47           O  
ATOM    611  CB  ILE L  75      14.240  20.099   3.639  1.00 22.41           C  
ATOM    612  CG1 ILE L  75      15.284  20.958   4.356  1.00 22.39           C  
ATOM    613  CG2 ILE L  75      13.096  20.971   3.128  1.00 22.70           C  
ATOM    614  CD1 ILE L  75      15.895  22.034   3.477  1.00 22.59           C  
ATOM    615  N   SER L  76      11.642  17.723   4.459  1.00 23.77           N  
ATOM    616  CA  SER L  76      10.682  16.789   3.868  1.00 24.59           C  
ATOM    617  C   SER L  76      10.228  17.110   2.447  1.00 25.24           C  
ATOM    618  O   SER L  76      10.193  16.226   1.589  1.00 25.32           O  
ATOM    619  CB  SER L  76       9.454  16.658   4.774  1.00 24.27           C  
ATOM    620  OG  SER L  76       8.761  17.887   4.885  1.00 24.45           O  
ATOM    621  N   SER L  77       9.865  18.365   2.208  1.00 25.76           N  
ATOM    622  CA  SER L  77       9.408  18.803   0.894  1.00 26.50           C  
ATOM    623  C   SER L  77       9.976  20.193   0.642  1.00 26.57           C  
ATOM    624  O   SER L  77       9.530  21.171   1.238  1.00 26.83           O  
ATOM    625  CB  SER L  77       7.880  18.851   0.858  1.00 26.52           C  
ATOM    626  OG  SER L  77       7.412  19.226  -0.424  1.00 27.45           O  
ATOM    627  N   LEU L  78      10.958  20.272  -0.248  1.00 27.07           N  
ATOM    628  CA  LEU L  78      11.620  21.535  -0.551  1.00 27.54           C  
ATOM    629  C   LEU L  78      10.738  22.616  -1.161  1.00 27.72           C  
ATOM    630  O   LEU L  78       9.918  22.351  -2.041  1.00 27.75           O  
ATOM    631  CB  LEU L  78      12.809  21.297  -1.483  1.00 27.97           C  
ATOM    632  CG  LEU L  78      13.666  22.541  -1.728  1.00 28.46           C  
ATOM    633  CD1 LEU L  78      14.588  22.759  -0.541  1.00 28.80           C  
ATOM    634  CD2 LEU L  78      14.476  22.368  -2.992  1.00 28.85           C  
ATOM    635  N   GLN L  79      10.922  23.840  -0.680  1.00 27.77           N  
ATOM    636  CA  GLN L  79      10.192  24.993  -1.183  1.00 27.96           C  
ATOM    637  C   GLN L  79      11.232  26.008  -1.648  1.00 27.66           C  
ATOM    638  O   GLN L  79      12.364  26.011  -1.160  1.00 27.63           O  
ATOM    639  CB  GLN L  79       9.308  25.601  -0.090  1.00 28.47           C  
ATOM    640  CG  GLN L  79       8.212  24.667   0.408  1.00 29.57           C  
ATOM    641  CD  GLN L  79       7.218  25.361   1.323  1.00 30.31           C  
ATOM    642  OE1 GLN L  79       6.303  24.730   1.860  1.00 31.15           O  
ATOM    643  NE2 GLN L  79       7.388  26.667   1.501  1.00 30.99           N  
ATOM    644  N   ALA L  80      10.853  26.857  -2.597  1.00 27.23           N  
ATOM    645  CA  ALA L  80      11.762  27.860  -3.142  1.00 26.80           C  
ATOM    646  C   ALA L  80      12.524  28.648  -2.077  1.00 26.47           C  
ATOM    647  O   ALA L  80      13.715  28.919  -2.231  1.00 26.40           O  
ATOM    648  CB  ALA L  80      10.990  28.819  -4.041  1.00 26.71           C  
ATOM    649  N   GLU L  81      11.838  29.003  -0.997  1.00 26.10           N  
ATOM    650  CA  GLU L  81      12.449  29.778   0.076  1.00 25.72           C  
ATOM    651  C   GLU L  81      13.492  29.010   0.886  1.00 24.79           C  
ATOM    652  O   GLU L  81      14.159  29.585   1.746  1.00 24.92           O  
ATOM    653  CB  GLU L  81      11.367  30.306   1.021  1.00 26.75           C  
ATOM    654  CG  GLU L  81      10.616  29.220   1.774  1.00 28.44           C  
ATOM    655  CD  GLU L  81       9.542  29.778   2.694  1.00 29.64           C  
ATOM    656  OE1 GLU L  81       8.605  30.436   2.190  1.00 30.74           O  
ATOM    657  OE2 GLU L  81       9.632  29.560   3.922  1.00 30.45           O  
ATOM    658  N   ASP L  82      13.642  27.717   0.616  1.00 23.64           N  
ATOM    659  CA  ASP L  82      14.610  26.914   1.357  1.00 22.52           C  
ATOM    660  C   ASP L  82      16.013  26.959   0.762  1.00 21.84           C  
ATOM    661  O   ASP L  82      16.945  26.376   1.314  1.00 21.45           O  
ATOM    662  CB  ASP L  82      14.132  25.463   1.462  1.00 22.60           C  
ATOM    663  CG  ASP L  82      12.819  25.340   2.213  1.00 22.70           C  
ATOM    664  OD1 ASP L  82      12.571  26.171   3.112  1.00 22.53           O  
ATOM    665  OD2 ASP L  82      12.039  24.410   1.917  1.00 23.09           O  
ATOM    666  N   VAL L  83      16.162  27.645  -0.367  1.00 20.99           N  
ATOM    667  CA  VAL L  83      17.467  27.772  -1.003  1.00 20.34           C  
ATOM    668  C   VAL L  83      18.330  28.615  -0.074  1.00 19.64           C  
ATOM    669  O   VAL L  83      18.012  29.772   0.202  1.00 19.55           O  
ATOM    670  CB  VAL L  83      17.360  28.469  -2.380  1.00 20.63           C  
ATOM    671  CG1 VAL L  83      18.745  28.642  -2.991  1.00 21.09           C  
ATOM    672  CG2 VAL L  83      16.473  27.647  -3.310  1.00 21.45           C  
ATOM    673  N   ALA L  84      19.421  28.031   0.408  1.00 18.65           N  
ATOM    674  CA  ALA L  84      20.307  28.728   1.333  1.00 17.76           C  
ATOM    675  C   ALA L  84      21.469  27.827   1.708  1.00 17.07           C  
ATOM    676  O   ALA L  84      21.603  26.722   1.184  1.00 17.39           O  
ATOM    677  CB  ALA L  84      19.534  29.108   2.596  1.00 17.92           C  
ATOM    678  N   VAL L  85      22.314  28.313   2.614  1.00 16.23           N  
ATOM    679  CA  VAL L  85      23.446  27.535   3.104  1.00 15.12           C  
ATOM    680  C   VAL L  85      23.037  26.986   4.474  1.00 14.63           C  
ATOM    681  O   VAL L  85      22.429  27.697   5.277  1.00 14.42           O  
ATOM    682  CB  VAL L  85      24.717  28.404   3.260  1.00 15.45           C  
ATOM    683  CG1 VAL L  85      25.830  27.585   3.899  1.00 15.22           C  
ATOM    684  CG2 VAL L  85      25.169  28.917   1.899  1.00 15.74           C  
ATOM    685  N   TYR L  86      23.347  25.719   4.723  1.00 13.73           N  
ATOM    686  CA  TYR L  86      23.009  25.078   5.994  1.00 13.36           C  
ATOM    687  C   TYR L  86      24.262  24.632   6.740  1.00 12.96           C  
ATOM    688  O   TYR L  86      25.190  24.085   6.142  1.00 13.00           O  
ATOM    689  CB  TYR L  86      22.083  23.887   5.742  1.00 13.20           C  
ATOM    690  CG  TYR L  86      20.729  24.310   5.234  1.00 13.61           C  
ATOM    691  CD1 TYR L  86      20.518  24.537   3.877  1.00 13.83           C  
ATOM    692  CD2 TYR L  86      19.676  24.555   6.117  1.00 13.40           C  
ATOM    693  CE1 TYR L  86      19.292  25.001   3.409  1.00 14.27           C  
ATOM    694  CE2 TYR L  86      18.448  25.019   5.663  1.00 14.23           C  
ATOM    695  CZ  TYR L  86      18.264  25.241   4.310  1.00 14.11           C  
ATOM    696  OH  TYR L  86      17.052  25.714   3.867  1.00 14.81           O  
ATOM    697  N   TYR L  87      24.271  24.865   8.050  1.00 12.75           N  
ATOM    698  CA  TYR L  87      25.404  24.526   8.913  1.00 12.90           C  
ATOM    699  C   TYR L  87      25.015  23.713  10.135  1.00 12.94           C  
ATOM    700  O   TYR L  87      23.938  23.904  10.693  1.00 13.10           O  
ATOM    701  CB  TYR L  87      26.043  25.783   9.511  1.00 12.67           C  
ATOM    702  CG  TYR L  87      26.629  26.785   8.556  1.00 12.93           C  
ATOM    703  CD1 TYR L  87      27.870  26.565   7.968  1.00 13.34           C  
ATOM    704  CD2 TYR L  87      25.970  27.983   8.289  1.00 12.79           C  
ATOM    705  CE1 TYR L  87      28.447  27.522   7.139  1.00 13.33           C  
ATOM    706  CE2 TYR L  87      26.534  28.946   7.459  1.00 13.40           C  
ATOM    707  CZ  TYR L  87      27.775  28.707   6.891  1.00 13.49           C  
ATOM    708  OH  TYR L  87      28.361  29.654   6.089  1.00 14.63           O  
ATOM    709  N   CYS L  88      25.908  22.827  10.564  1.00 12.88           N  
ATOM    710  CA  CYS L  88      25.685  22.118  11.814  1.00 13.00           C  
ATOM    711  C   CYS L  88      26.658  22.809  12.764  1.00 12.88           C  
ATOM    712  O   CYS L  88      27.621  23.435  12.320  1.00 12.76           O  
ATOM    713  CB  CYS L  88      25.987  20.623  11.719  1.00 13.65           C  
ATOM    714  SG  CYS L  88      27.529  20.107  10.903  1.00 14.60           S  
ATOM    715  N   ASP L  89      26.399  22.709  14.061  1.00 12.68           N  
ATOM    716  CA  ASP L  89      27.228  23.367  15.060  1.00 12.74           C  
ATOM    717  C   ASP L  89      27.222  22.555  16.348  1.00 12.31           C  
ATOM    718  O   ASP L  89      26.165  22.116  16.796  1.00 12.27           O  
ATOM    719  CB  ASP L  89      26.654  24.771  15.303  1.00 13.41           C  
ATOM    720  CG  ASP L  89      27.314  25.496  16.457  1.00 14.49           C  
ATOM    721  OD1 ASP L  89      28.558  25.533  16.511  1.00 15.52           O  
ATOM    722  OD2 ASP L  89      26.574  26.042  17.303  1.00 16.14           O  
ATOM    723  N   GLN L  90      28.397  22.329  16.933  1.00 11.86           N  
ATOM    724  CA  GLN L  90      28.454  21.582  18.183  1.00 12.14           C  
ATOM    725  C   GLN L  90      28.797  22.496  19.346  1.00 12.22           C  
ATOM    726  O   GLN L  90      29.675  23.352  19.243  1.00 12.24           O  
ATOM    727  CB  GLN L  90      29.460  20.420  18.104  1.00 12.25           C  
ATOM    728  CG  GLN L  90      30.953  20.798  18.089  1.00 12.32           C  
ATOM    729  CD  GLN L  90      31.546  21.033  19.473  1.00 12.80           C  
ATOM    730  OE1 GLN L  90      31.003  20.587  20.492  1.00 13.29           O  
ATOM    731  NE2 GLN L  90      32.686  21.720  19.512  1.00 12.81           N  
ATOM    732  N   TYR L  91      28.072  22.319  20.447  1.00 12.39           N  
ATOM    733  CA  TYR L  91      28.282  23.105  21.651  1.00 12.85           C  
ATOM    734  C   TYR L  91      28.434  22.169  22.846  1.00 13.40           C  
ATOM    735  O   TYR L  91      28.011  22.470  23.967  1.00 13.33           O  
ATOM    736  CB  TYR L  91      27.123  24.099  21.849  1.00 12.81           C  
ATOM    737  CG  TYR L  91      25.725  23.516  21.747  1.00 12.94           C  
ATOM    738  CD1 TYR L  91      25.135  23.284  20.502  1.00 13.00           C  
ATOM    739  CD2 TYR L  91      24.982  23.231  22.892  1.00 13.46           C  
ATOM    740  CE1 TYR L  91      23.832  22.782  20.402  1.00 13.28           C  
ATOM    741  CE2 TYR L  91      23.680  22.732  22.804  1.00 13.83           C  
ATOM    742  CZ  TYR L  91      23.111  22.512  21.558  1.00 13.87           C  
ATOM    743  OH  TYR L  91      21.818  22.028  21.478  1.00 14.11           O  
ATOM    744  N   TYR L  92      29.070  21.034  22.580  1.00 13.97           N  
ATOM    745  CA  TYR L  92      29.321  20.015  23.590  1.00 14.90           C  
ATOM    746  C   TYR L  92      30.591  20.315  24.380  1.00 15.02           C  
ATOM    747  O   TYR L  92      30.621  20.209  25.610  1.00 15.31           O  
ATOM    748  CB  TYR L  92      29.479  18.650  22.924  1.00 15.87           C  
ATOM    749  CG  TYR L  92      29.797  17.551  23.908  1.00 17.14           C  
ATOM    750  CD1 TYR L  92      28.879  17.194  24.896  1.00 18.22           C  
ATOM    751  CD2 TYR L  92      31.019  16.879  23.866  1.00 17.99           C  
ATOM    752  CE1 TYR L  92      29.167  16.192  25.821  1.00 19.08           C  
ATOM    753  CE2 TYR L  92      31.318  15.874  24.788  1.00 18.82           C  
ATOM    754  CZ  TYR L  92      30.387  15.538  25.762  1.00 19.25           C  
ATOM    755  OH  TYR L  92      30.672  14.548  26.680  1.00 20.34           O  
ATOM    756  N   SER L  93      31.643  20.687  23.667  1.00 14.70           N  
ATOM    757  CA  SER L  93      32.911  20.964  24.316  1.00 14.53           C  
ATOM    758  C   SER L  93      33.633  22.125  23.650  1.00 14.18           C  
ATOM    759  O   SER L  93      33.703  22.205  22.423  1.00 13.95           O  
ATOM    760  CB  SER L  93      33.784  19.707  24.268  1.00 14.97           C  
ATOM    761  OG  SER L  93      34.976  19.884  25.004  1.00 16.25           O  
ATOM    762  N   HIS L  94      34.157  23.032  24.468  1.00 13.79           N  
ATOM    763  CA  HIS L  94      34.891  24.179  23.954  1.00 13.54           C  
ATOM    764  C   HIS L  94      36.211  23.704  23.347  1.00 13.25           C  
ATOM    765  O   HIS L  94      36.874  22.807  23.889  1.00 13.59           O  
ATOM    766  CB  HIS L  94      35.150  25.181  25.082  1.00 13.82           C  
ATOM    767  CG  HIS L  94      33.926  25.916  25.535  1.00 14.01           C  
ATOM    768  ND1 HIS L  94      33.315  26.886  24.769  1.00 13.71           N  
ATOM    769  CD2 HIS L  94      33.195  25.822  26.673  1.00 14.38           C  
ATOM    770  CE1 HIS L  94      32.263  27.358  25.414  1.00 14.30           C  
ATOM    771  NE2 HIS L  94      32.168  26.729  26.572  1.00 14.84           N  
ATOM    772  N   PRO L  95      36.619  24.298  22.217  1.00 12.55           N  
ATOM    773  CA  PRO L  95      35.914  25.371  21.502  1.00 12.42           C  
ATOM    774  C   PRO L  95      34.722  24.892  20.679  1.00 12.37           C  
ATOM    775  O   PRO L  95      34.802  23.888  19.967  1.00 12.46           O  
ATOM    776  CB  PRO L  95      37.008  25.968  20.627  1.00 12.14           C  
ATOM    777  CG  PRO L  95      37.834  24.748  20.274  1.00 12.49           C  
ATOM    778  CD  PRO L  95      37.935  24.033  21.603  1.00 12.61           C  
ATOM    779  N   TYR L  96      33.609  25.611  20.781  1.00 12.15           N  
ATOM    780  CA  TYR L  96      32.430  25.241  20.009  1.00 11.96           C  
ATOM    781  C   TYR L  96      32.789  25.465  18.539  1.00 12.39           C  
ATOM    782  O   TYR L  96      33.586  26.354  18.219  1.00 13.12           O  
ATOM    783  CB  TYR L  96      31.232  26.090  20.437  1.00 11.34           C  
ATOM    784  CG  TYR L  96      30.780  25.845  21.863  1.00 11.74           C  
ATOM    785  CD1 TYR L  96      31.243  24.747  22.592  1.00 11.85           C  
ATOM    786  CD2 TYR L  96      29.867  26.704  22.478  1.00 11.89           C  
ATOM    787  CE1 TYR L  96      30.807  24.510  23.900  1.00 12.22           C  
ATOM    788  CE2 TYR L  96      29.425  26.477  23.780  1.00 12.60           C  
ATOM    789  CZ  TYR L  96      29.898  25.380  24.484  1.00 12.77           C  
ATOM    790  OH  TYR L  96      29.460  25.153  25.768  1.00 13.71           O  
ATOM    791  N   SER L  97      32.198  24.678  17.644  1.00 12.47           N  
ATOM    792  CA  SER L  97      32.541  24.768  16.229  1.00 12.67           C  
ATOM    793  C   SER L  97      31.436  24.423  15.240  1.00 12.65           C  
ATOM    794  O   SER L  97      30.628  23.531  15.480  1.00 13.45           O  
ATOM    795  CB  SER L  97      33.721  23.842  15.952  1.00 12.54           C  
ATOM    796  OG  SER L  97      33.439  22.534  16.447  1.00 13.83           O  
ATOM    797  N   PHE L  98      31.451  25.125  14.110  1.00 13.07           N  
ATOM    798  CA  PHE L  98      30.500  24.937  13.015  1.00 13.07           C  
ATOM    799  C   PHE L  98      31.107  24.055  11.922  1.00 13.17           C  
ATOM    800  O   PHE L  98      32.333  23.984  11.780  1.00 13.10           O  
ATOM    801  CB  PHE L  98      30.174  26.283  12.350  1.00 13.00           C  
ATOM    802  CG  PHE L  98      29.025  27.026  12.965  1.00 12.95           C  
ATOM    803  CD1 PHE L  98      29.120  27.563  14.243  1.00 13.66           C  
ATOM    804  CD2 PHE L  98      27.852  27.224  12.239  1.00 12.95           C  
ATOM    805  CE1 PHE L  98      28.061  28.291  14.793  1.00 13.04           C  
ATOM    806  CE2 PHE L  98      26.789  27.949  12.777  1.00 13.31           C  
ATOM    807  CZ  PHE L  98      26.895  28.485  14.058  1.00 13.39           C  
ATOM    808  N   GLY L  99      30.236  23.402  11.152  1.00 13.33           N  
ATOM    809  CA  GLY L  99      30.672  22.600  10.020  1.00 13.52           C  
ATOM    810  C   GLY L  99      30.983  23.601   8.917  1.00 13.87           C  
ATOM    811  O   GLY L  99      30.727  24.793   9.093  1.00 13.06           O  
ATOM    812  N   GLN L 100      31.490  23.142   7.776  1.00 14.26           N  
ATOM    813  CA  GLN L 100      31.864  24.061   6.700  1.00 14.91           C  
ATOM    814  C   GLN L 100      30.712  24.639   5.887  1.00 15.30           C  
ATOM    815  O   GLN L 100      30.909  25.584   5.115  1.00 15.55           O  
ATOM    816  CB  GLN L 100      32.865  23.390   5.746  1.00 15.37           C  
ATOM    817  CG  GLN L 100      32.226  22.513   4.673  1.00 16.29           C  
ATOM    818  CD  GLN L 100      31.959  21.086   5.125  1.00 16.68           C  
ATOM    819  OE1 GLN L 100      31.810  20.805   6.314  1.00 16.64           O  
ATOM    820  NE2 GLN L 100      31.884  20.174   4.161  1.00 17.41           N  
ATOM    821  N   GLY L 101      29.520  24.069   6.052  1.00 15.58           N  
ATOM    822  CA  GLY L 101      28.359  24.549   5.327  1.00 16.48           C  
ATOM    823  C   GLY L 101      28.028  23.763   4.071  1.00 17.10           C  
ATOM    824  O   GLY L 101      28.918  23.254   3.393  1.00 17.12           O  
ATOM    825  N   THR L 102      26.736  23.666   3.773  1.00 17.64           N  
ATOM    826  CA  THR L 102      26.247  22.961   2.589  1.00 18.30           C  
ATOM    827  C   THR L 102      25.295  23.886   1.837  1.00 18.88           C  
ATOM    828  O   THR L 102      24.344  24.406   2.424  1.00 18.81           O  
ATOM    829  CB  THR L 102      25.477  21.675   2.977  1.00 17.97           C  
ATOM    830  OG1 THR L 102      26.379  20.731   3.571  1.00 17.94           O  
ATOM    831  CG2 THR L 102      24.822  21.043   1.748  1.00 18.16           C  
ATOM    832  N   LYS L 103      25.553  24.095   0.547  1.00 19.92           N  
ATOM    833  CA  LYS L 103      24.701  24.951  -0.276  1.00 20.96           C  
ATOM    834  C   LYS L 103      23.572  24.133  -0.897  1.00 21.50           C  
ATOM    835  O   LYS L 103      23.817  23.129  -1.559  1.00 21.94           O  
ATOM    836  CB  LYS L 103      25.517  25.614  -1.393  1.00 21.33           C  
ATOM    837  CG  LYS L 103      26.448  26.545  -0.869  1.00 23.03           C  
ATOM    838  N   LEU L 104      22.337  24.566  -0.674  1.00 22.18           N  
ATOM    839  CA  LEU L 104      21.175  23.877  -1.219  1.00 23.03           C  
ATOM    840  C   LEU L 104      20.545  24.754  -2.294  1.00 23.73           C  
ATOM    841  O   LEU L 104      20.197  25.907  -2.036  1.00 23.57           O  
ATOM    842  CB  LEU L 104      20.162  23.601  -0.107  1.00 23.20           C  
ATOM    843  CG  LEU L 104      18.923  22.774  -0.457  1.00 23.28           C  
ATOM    844  CD1 LEU L 104      19.331  21.369  -0.882  1.00 23.64           C  
ATOM    845  CD2 LEU L 104      18.012  22.711   0.757  1.00 23.11           C  
ATOM    846  N   GLU L 105      20.402  24.206  -3.498  1.00 24.44           N  
ATOM    847  CA  GLU L 105      19.823  24.943  -4.617  1.00 25.38           C  
ATOM    848  C   GLU L 105      18.728  24.130  -5.299  1.00 25.91           C  
ATOM    849  O   GLU L 105      18.634  22.920  -5.102  1.00 25.96           O  
ATOM    850  CB  GLU L 105      20.916  25.295  -5.624  1.00 25.46           C  
ATOM    851  N   ILE L 106      17.903  24.804  -6.099  1.00 26.65           N  
ATOM    852  CA  ILE L 106      16.819  24.141  -6.819  1.00 27.31           C  
ATOM    853  C   ILE L 106      17.360  23.524  -8.104  1.00 27.63           C  
ATOM    854  O   ILE L 106      18.312  24.102  -8.666  1.00 28.05           O  
ATOM    855  CB  ILE L 106      15.708  25.138  -7.208  1.00 27.52           C  
ATOM    856  CG1 ILE L 106      15.182  25.860  -5.965  1.00 27.67           C  
ATOM    857  CG2 ILE L 106      14.584  24.404  -7.928  1.00 27.60           C  
ATOM    858  CD1 ILE L 106      14.547  24.953  -4.945  1.00 28.01           C  
TER     859      ILE L 106                                                      
ATOM    860  N   ASP L   1       9.389  37.510  21.526  1.00 19.38           N  
ATOM    861  CA  ASP L   1      10.737  37.072  21.060  1.00 19.18           C  
ATOM    862  C   ASP L   1      11.759  38.177  21.301  1.00 18.70           C  
ATOM    863  O   ASP L   1      11.459  39.354  21.109  1.00 19.19           O  
ATOM    864  CB  ASP L   1      10.707  36.750  19.566  1.00 19.93           C  
ATOM    865  CG  ASP L   1       9.689  35.683  19.213  1.00 20.53           C  
ATOM    866  OD1 ASP L   1       9.139  35.043  20.136  1.00 21.21           O  
ATOM    867  OD2 ASP L   1       9.448  35.482  18.005  1.00 21.18           O  
ATOM    868  N   ILE L   2      12.963  37.800  21.717  1.00 17.94           N  
ATOM    869  CA  ILE L   2      14.011  38.787  21.955  1.00 17.21           C  
ATOM    870  C   ILE L   2      14.725  39.105  20.642  1.00 16.65           C  
ATOM    871  O   ILE L   2      15.190  38.204  19.940  1.00 16.32           O  
ATOM    872  CB  ILE L   2      15.036  38.278  22.999  1.00 17.60           C  
ATOM    873  CG1 ILE L   2      14.331  38.061  24.343  1.00 17.78           C  
ATOM    874  CG2 ILE L   2      16.184  39.283  23.147  1.00 17.55           C  
ATOM    875  CD1 ILE L   2      15.233  37.559  25.450  1.00 18.18           C  
ATOM    876  N   VAL L   3      14.797  40.393  20.316  1.00 15.62           N  
ATOM    877  CA  VAL L   3      15.434  40.851  19.084  1.00 15.18           C  
ATOM    878  C   VAL L   3      16.721  41.612  19.389  1.00 14.64           C  
ATOM    879  O   VAL L   3      16.750  42.446  20.291  1.00 14.50           O  
ATOM    880  CB  VAL L   3      14.476  41.771  18.294  1.00 15.40           C  
ATOM    881  CG1 VAL L   3      15.161  42.314  17.050  1.00 15.52           C  
ATOM    882  CG2 VAL L   3      13.226  41.002  17.919  1.00 15.99           C  
ATOM    883  N   LEU L   4      17.783  41.314  18.641  1.00 13.87           N  
ATOM    884  CA  LEU L   4      19.072  41.982  18.825  1.00 13.67           C  
ATOM    885  C   LEU L   4      19.339  42.927  17.661  1.00 13.59           C  
ATOM    886  O   LEU L   4      19.172  42.557  16.498  1.00 13.63           O  
ATOM    887  CB  LEU L   4      20.213  40.959  18.896  1.00 13.60           C  
ATOM    888  CG  LEU L   4      20.123  39.844  19.939  1.00 14.30           C  
ATOM    889  CD1 LEU L   4      21.415  39.045  19.922  1.00 13.99           C  
ATOM    890  CD2 LEU L   4      19.882  40.425  21.320  1.00 14.20           C  
ATOM    891  N   THR L   5      19.749  44.149  17.985  1.00 13.25           N  
ATOM    892  CA  THR L   5      20.047  45.150  16.970  1.00 13.39           C  
ATOM    893  C   THR L   5      21.470  45.643  17.178  1.00 12.73           C  
ATOM    894  O   THR L   5      21.821  46.119  18.257  1.00 12.92           O  
ATOM    895  CB  THR L   5      19.078  46.346  17.061  1.00 14.21           C  
ATOM    896  OG1 THR L   5      17.730  45.871  16.942  1.00 14.90           O  
ATOM    897  CG2 THR L   5      19.350  47.345  15.942  1.00 14.65           C  
ATOM    898  N   GLN L   6      22.291  45.517  16.141  1.00 11.94           N  
ATOM    899  CA  GLN L   6      23.677  45.952  16.228  1.00 11.83           C  
ATOM    900  C   GLN L   6      23.880  47.335  15.637  1.00 11.94           C  
ATOM    901  O   GLN L   6      23.109  47.790  14.785  1.00 12.14           O  
ATOM    902  CB  GLN L   6      24.582  44.957  15.497  1.00 11.06           C  
ATOM    903  CG  GLN L   6      24.360  43.519  15.927  1.00 11.49           C  
ATOM    904  CD  GLN L   6      25.265  42.524  15.226  1.00 11.54           C  
ATOM    905  OE1 GLN L   6      24.941  41.340  15.145  1.00 10.96           O  
ATOM    906  NE2 GLN L   6      26.409  42.991  14.732  1.00 11.34           N  
ATOM    907  N   SER L   7      24.920  48.008  16.110  1.00 11.89           N  
ATOM    908  CA  SER L   7      25.277  49.325  15.611  1.00 12.30           C  
ATOM    909  C   SER L   7      26.787  49.456  15.726  1.00 11.91           C  
ATOM    910  O   SER L   7      27.369  49.093  16.743  1.00 12.35           O  
ATOM    911  CB  SER L   7      24.604  50.427  16.422  1.00 13.03           C  
ATOM    912  OG  SER L   7      24.931  51.687  15.859  1.00 14.54           O  
ATOM    913  N   PRO L   8      27.446  49.952  14.673  1.00 11.68           N  
ATOM    914  CA  PRO L   8      26.872  50.389  13.398  1.00 11.91           C  
ATOM    915  C   PRO L   8      26.591  49.184  12.508  1.00 12.29           C  
ATOM    916  O   PRO L   8      26.858  48.052  12.900  1.00 12.75           O  
ATOM    917  CB  PRO L   8      27.974  51.269  12.826  1.00 12.19           C  
ATOM    918  CG  PRO L   8      29.209  50.525  13.244  1.00 11.62           C  
ATOM    919  CD  PRO L   8      28.910  50.135  14.682  1.00 11.86           C  
ATOM    920  N   ASP L   9      26.047  49.426  11.319  1.00 12.38           N  
ATOM    921  CA  ASP L   9      25.781  48.341  10.383  1.00 13.00           C  
ATOM    922  C   ASP L   9      27.081  48.001   9.663  1.00 12.98           C  
ATOM    923  O   ASP L   9      27.313  46.857   9.275  1.00 12.77           O  
ATOM    924  CB  ASP L   9      24.701  48.758   9.392  1.00 13.91           C  
ATOM    925  CG  ASP L   9      23.324  48.735  10.013  1.00 14.98           C  
ATOM    926  OD1 ASP L   9      22.732  47.636  10.105  1.00 16.19           O  
ATOM    927  OD2 ASP L   9      22.842  49.809  10.423  1.00 17.00           O  
ATOM    928  N   SER L  10      27.930  49.009   9.489  1.00 13.25           N  
ATOM    929  CA  SER L  10      29.228  48.819   8.856  1.00 13.63           C  
ATOM    930  C   SER L  10      30.168  49.914   9.343  1.00 13.35           C  
ATOM    931  O   SER L  10      29.724  50.978   9.776  1.00 12.80           O  
ATOM    932  CB  SER L  10      29.108  48.871   7.329  1.00 14.62           C  
ATOM    933  OG  SER L  10      28.747  50.163   6.888  1.00 16.32           O  
ATOM    934  N   LEU L  11      31.466  49.644   9.286  1.00 13.04           N  
ATOM    935  CA  LEU L  11      32.453  50.620   9.721  1.00 13.03           C  
ATOM    936  C   LEU L  11      33.801  50.335   9.091  1.00 13.31           C  
ATOM    937  O   LEU L  11      34.097  49.195   8.730  1.00 13.02           O  
ATOM    938  CB  LEU L  11      32.594  50.613  11.250  1.00 13.24           C  
ATOM    939  CG  LEU L  11      33.228  49.416  11.970  1.00 13.32           C  
ATOM    940  CD1 LEU L  11      33.414  49.751  13.444  1.00 14.07           C  
ATOM    941  CD2 LEU L  11      32.350  48.179  11.817  1.00 13.55           C  
ATOM    942  N   ALA L  12      34.595  51.389   8.938  1.00 13.48           N  
ATOM    943  CA  ALA L  12      35.936  51.285   8.381  1.00 14.00           C  
ATOM    944  C   ALA L  12      36.875  51.792   9.465  1.00 14.61           C  
ATOM    945  O   ALA L  12      36.689  52.888   9.998  1.00 14.36           O  
ATOM    946  CB  ALA L  12      36.059  52.135   7.119  1.00 14.00           C  
ATOM    947  N   VAL L  13      37.880  50.985   9.787  1.00 14.80           N  
ATOM    948  CA  VAL L  13      38.840  51.314  10.829  1.00 16.00           C  
ATOM    949  C   VAL L  13      40.261  51.164  10.294  1.00 16.73           C  
ATOM    950  O   VAL L  13      40.514  50.355   9.400  1.00 16.98           O  
ATOM    951  CB  VAL L  13      38.634  50.376  12.044  1.00 15.83           C  
ATOM    952  CG1 VAL L  13      39.688  50.634  13.107  1.00 16.39           C  
ATOM    953  CG2 VAL L  13      37.235  50.581  12.621  1.00 15.98           C  
ATOM    954  N   SER L  14      41.185  51.952  10.834  1.00 17.64           N  
ATOM    955  CA  SER L  14      42.572  51.894  10.394  1.00 18.38           C  
ATOM    956  C   SER L  14      43.328  50.797  11.125  1.00 18.70           C  
ATOM    957  O   SER L  14      43.031  50.489  12.279  1.00 18.65           O  
ATOM    958  CB  SER L  14      43.264  53.236  10.641  1.00 18.74           C  
ATOM    959  OG  SER L  14      42.661  54.270   9.886  1.00 19.26           O  
ATOM    960  N   LEU L  15      44.308  50.209  10.447  1.00 19.22           N  
ATOM    961  CA  LEU L  15      45.114  49.153  11.045  1.00 19.68           C  
ATOM    962  C   LEU L  15      45.763  49.634  12.339  1.00 19.88           C  
ATOM    963  O   LEU L  15      46.289  50.753  12.409  1.00 19.58           O  
ATOM    964  CB  LEU L  15      46.203  48.686  10.069  1.00 20.45           C  
ATOM    965  CG  LEU L  15      45.768  47.950   8.797  1.00 21.23           C  
ATOM    966  CD1 LEU L  15      47.003  47.541   8.003  1.00 21.80           C  
ATOM    967  CD2 LEU L  15      44.952  46.713   9.159  1.00 21.85           C  
ATOM    968  N   GLY L  16      45.713  48.787  13.362  1.00 19.49           N  
ATOM    969  CA  GLY L  16      46.306  49.123  14.642  1.00 19.73           C  
ATOM    970  C   GLY L  16      45.395  49.875  15.595  1.00 19.74           C  
ATOM    971  O   GLY L  16      45.720  50.014  16.772  1.00 20.20           O  
ATOM    972  N   GLU L  17      44.258  50.362  15.104  1.00 19.71           N  
ATOM    973  CA  GLU L  17      43.337  51.099  15.963  1.00 20.07           C  
ATOM    974  C   GLU L  17      42.292  50.187  16.600  1.00 20.36           C  
ATOM    975  O   GLU L  17      42.278  48.981  16.358  1.00 20.27           O  
ATOM    976  CB  GLU L  17      42.656  52.224  15.179  1.00 19.84           C  
ATOM    977  CG  GLU L  17      43.617  53.297  14.656  1.00 20.02           C  
ATOM    978  CD  GLU L  17      44.529  53.869  15.737  1.00 20.02           C  
ATOM    979  OE1 GLU L  17      44.076  54.022  16.890  1.00 20.09           O  
ATOM    980  OE2 GLU L  17      45.699  54.181  15.427  1.00 20.34           O  
ATOM    981  N   ARG L  18      41.421  50.773  17.414  1.00 20.77           N  
ATOM    982  CA  ARG L  18      40.392  50.021  18.124  1.00 21.20           C  
ATOM    983  C   ARG L  18      39.035  50.069  17.429  1.00 20.57           C  
ATOM    984  O   ARG L  18      38.559  51.137  17.061  1.00 21.04           O  
ATOM    985  CB  ARG L  18      40.256  50.577  19.546  1.00 22.84           C  
ATOM    986  CG  ARG L  18      39.497  49.685  20.517  1.00 24.95           C  
ATOM    987  CD  ARG L  18      39.339  50.374  21.872  1.00 26.91           C  
ATOM    988  NE  ARG L  18      38.205  51.296  21.890  1.00 28.37           N  
ATOM    989  CZ  ARG L  18      37.962  52.173  22.861  1.00 29.30           C  
ATOM    990  NH1 ARG L  18      38.787  52.277  23.895  1.00 29.67           N  
ATOM    991  NH2 ARG L  18      36.898  52.964  22.787  1.00 29.96           N  
ATOM    992  N   ALA L  19      38.416  48.905  17.259  1.00 19.51           N  
ATOM    993  CA  ALA L  19      37.102  48.813  16.626  1.00 18.70           C  
ATOM    994  C   ALA L  19      36.083  48.465  17.708  1.00 18.25           C  
ATOM    995  O   ALA L  19      36.337  47.604  18.550  1.00 17.99           O  
ATOM    996  CB  ALA L  19      37.111  47.735  15.550  1.00 18.78           C  
ATOM    997  N   THR L  20      34.938  49.141  17.693  1.00 17.18           N  
ATOM    998  CA  THR L  20      33.894  48.897  18.684  1.00 17.08           C  
ATOM    999  C   THR L  20      32.572  48.594  17.988  1.00 16.35           C  
ATOM   1000  O   THR L  20      32.165  49.309  17.078  1.00 16.22           O  
ATOM   1001  CB  THR L  20      33.706  50.126  19.605  1.00 17.84           C  
ATOM   1002  OG1 THR L  20      34.921  50.373  20.328  1.00 18.97           O  
ATOM   1003  CG2 THR L  20      32.577  49.886  20.599  1.00 18.73           C  
ATOM   1004  N   ILE L  21      31.910  47.522  18.415  1.00 15.30           N  
ATOM   1005  CA  ILE L  21      30.628  47.140  17.837  1.00 14.85           C  
ATOM   1006  C   ILE L  21      29.653  46.920  18.983  1.00 14.66           C  
ATOM   1007  O   ILE L  21      29.956  46.198  19.930  1.00 14.61           O  
ATOM   1008  CB  ILE L  21      30.750  45.852  17.011  1.00 14.62           C  
ATOM   1009  CG1 ILE L  21      31.774  46.063  15.892  1.00 14.90           C  
ATOM   1010  CG2 ILE L  21      29.393  45.477  16.435  1.00 14.82           C  
ATOM   1011  CD1 ILE L  21      32.087  44.815  15.079  1.00 14.81           C  
ATOM   1012  N   ASN L  22      28.486  47.545  18.893  1.00 14.55           N  
ATOM   1013  CA  ASN L  22      27.487  47.442  19.947  1.00 14.82           C  
ATOM   1014  C   ASN L  22      26.302  46.565  19.572  1.00 14.40           C  
ATOM   1015  O   ASN L  22      25.953  46.437  18.400  1.00 14.43           O  
ATOM   1016  CB  ASN L  22      26.987  48.840  20.320  1.00 16.48           C  
ATOM   1017  CG  ASN L  22      28.115  49.766  20.745  1.00 18.15           C  
ATOM   1018  OD1 ASN L  22      28.817  49.504  21.722  1.00 19.57           O  
ATOM   1019  ND2 ASN L  22      28.294  50.855  20.008  1.00 19.02           N  
ATOM   1020  N   CYS L  23      25.692  45.963  20.587  1.00 13.81           N  
ATOM   1021  CA  CYS L  23      24.532  45.099  20.403  1.00 14.18           C  
ATOM   1022  C   CYS L  23      23.524  45.403  21.501  1.00 14.55           C  
ATOM   1023  O   CYS L  23      23.862  45.406  22.687  1.00 14.42           O  
ATOM   1024  CB  CYS L  23      24.961  43.639  20.486  1.00 13.48           C  
ATOM   1025  SG  CYS L  23      23.649  42.381  20.315  1.00 14.45           S  
ATOM   1026  N   LYS L  24      22.293  45.680  21.090  1.00 15.22           N  
ATOM   1027  CA  LYS L  24      21.212  45.985  22.020  1.00 15.97           C  
ATOM   1028  C   LYS L  24      20.152  44.890  21.925  1.00 16.06           C  
ATOM   1029  O   LYS L  24      19.764  44.497  20.826  1.00 15.76           O  
ATOM   1030  CB  LYS L  24      20.588  47.337  21.659  1.00 17.05           C  
ATOM   1031  CG  LYS L  24      19.360  47.722  22.481  1.00 18.99           C  
ATOM   1032  CD  LYS L  24      18.673  48.965  21.913  1.00 20.46           C  
ATOM   1033  CE  LYS L  24      18.229  48.760  20.467  1.00 21.14           C  
ATOM   1034  NZ  LYS L  24      17.508  49.946  19.907  1.00 22.47           N  
ATOM   1035  N   SER L  25      19.706  44.382  23.070  1.00 16.12           N  
ATOM   1036  CA  SER L  25      18.664  43.357  23.082  1.00 16.94           C  
ATOM   1037  C   SER L  25      17.361  44.016  23.529  1.00 17.36           C  
ATOM   1038  O   SER L  25      17.365  44.868  24.419  1.00 17.93           O  
ATOM   1039  CB  SER L  25      19.036  42.198  24.020  1.00 16.97           C  
ATOM   1040  OG  SER L  25      19.209  42.620  25.359  1.00 18.15           O  
ATOM   1041  N   SER L  26      16.256  43.631  22.894  1.00 17.62           N  
ATOM   1042  CA  SER L  26      14.939  44.194  23.195  1.00 18.11           C  
ATOM   1043  C   SER L  26      14.476  43.894  24.616  1.00 18.61           C  
ATOM   1044  O   SER L  26      13.584  44.563  25.146  1.00 18.81           O  
ATOM   1045  CB  SER L  26      13.908  43.661  22.200  1.00 17.91           C  
ATOM   1046  OG  SER L  26      13.777  42.255  22.316  1.00 17.76           O  
ATOM   1047  N   GLN L  27      15.072  42.871  25.216  1.00 18.87           N  
ATOM   1048  CA  GLN L  27      14.764  42.466  26.584  1.00 19.62           C  
ATOM   1049  C   GLN L  27      16.055  41.930  27.192  1.00 19.41           C  
ATOM   1050  O   GLN L  27      16.920  41.430  26.473  1.00 19.08           O  
ATOM   1051  CB  GLN L  27      13.676  41.390  26.590  1.00 20.96           C  
ATOM   1052  CG  GLN L  27      12.355  41.867  25.998  1.00 23.34           C  
ATOM   1053  CD  GLN L  27      11.310  40.773  25.895  1.00 24.66           C  
ATOM   1054  OE1 GLN L  27      10.217  40.996  25.366  1.00 26.33           O  
ATOM   1055  NE2 GLN L  27      11.634  39.587  26.398  1.00 25.33           N  
ATOM   1056  N   SER L  27A     16.195  42.039  28.509  1.00 19.07           N  
ATOM   1057  CA  SER L  27A     17.409  41.575  29.178  1.00 18.89           C  
ATOM   1058  C   SER L  27A     17.700  40.090  28.976  1.00 18.99           C  
ATOM   1059  O   SER L  27A     16.795  39.257  29.026  1.00 18.70           O  
ATOM   1060  CB  SER L  27A     17.328  41.867  30.678  1.00 19.08           C  
ATOM   1061  OG  SER L  27A     18.513  41.461  31.339  1.00 19.13           O  
ATOM   1062  N   VAL L  27B     18.969  39.766  28.745  1.00 19.09           N  
ATOM   1063  CA  VAL L  27B     19.378  38.377  28.573  1.00 19.45           C  
ATOM   1064  C   VAL L  27B     20.225  37.954  29.769  1.00 19.99           C  
ATOM   1065  O   VAL L  27B     20.953  36.964  29.718  1.00 19.68           O  
ATOM   1066  CB  VAL L  27B     20.168  38.169  27.259  1.00 19.11           C  
ATOM   1067  CG1 VAL L  27B     19.254  38.457  26.069  1.00 18.87           C  
ATOM   1068  CG2 VAL L  27B     21.391  39.072  27.221  1.00 19.16           C  
ATOM   1069  N   LEU L  27C     20.115  38.724  30.850  1.00 20.60           N  
ATOM   1070  CA  LEU L  27C     20.839  38.437  32.084  1.00 21.51           C  
ATOM   1071  C   LEU L  27C     19.922  37.642  33.003  1.00 22.09           C  
ATOM   1072  O   LEU L  27C     18.841  38.107  33.364  1.00 22.37           O  
ATOM   1073  CB  LEU L  27C     21.253  39.738  32.781  1.00 21.61           C  
ATOM   1074  CG  LEU L  27C     21.849  39.611  34.190  1.00 21.89           C  
ATOM   1075  CD1 LEU L  27C     23.139  38.803  34.156  1.00 22.02           C  
ATOM   1076  CD2 LEU L  27C     22.109  41.002  34.746  1.00 22.26           C  
ATOM   1077  N   ASP L  27D     20.350  36.439  33.370  1.00 22.65           N  
ATOM   1078  CA  ASP L  27D     19.566  35.583  34.252  1.00 23.43           C  
ATOM   1079  C   ASP L  27D     19.898  35.965  35.692  1.00 23.65           C  
ATOM   1080  O   ASP L  27D     21.015  35.748  36.155  1.00 23.51           O  
ATOM   1081  CB  ASP L  27D     19.914  34.114  33.991  1.00 24.12           C  
ATOM   1082  CG  ASP L  27D     19.026  33.153  34.758  1.00 24.88           C  
ATOM   1083  OD1 ASP L  27D     18.320  33.591  35.693  1.00 25.50           O  
ATOM   1084  OD2 ASP L  27D     19.043  31.948  34.424  1.00 25.94           O  
ATOM   1085  N   SER L  27E     18.924  36.542  36.388  1.00 23.91           N  
ATOM   1086  CA  SER L  27E     19.121  36.979  37.767  1.00 24.18           C  
ATOM   1087  C   SER L  27E     19.342  35.835  38.749  1.00 24.30           C  
ATOM   1088  O   SER L  27E     19.830  36.050  39.860  1.00 24.51           O  
ATOM   1089  CB  SER L  27E     17.925  37.822  38.223  1.00 24.34           C  
ATOM   1090  OG  SER L  27E     16.715  37.090  38.114  1.00 24.94           O  
ATOM   1091  N   SER L  27F     18.989  34.620  38.346  1.00 24.21           N  
ATOM   1092  CA  SER L  27F     19.161  33.471  39.226  1.00 24.35           C  
ATOM   1093  C   SER L  27F     20.592  32.951  39.276  1.00 23.95           C  
ATOM   1094  O   SER L  27F     20.981  32.308  40.250  1.00 23.91           O  
ATOM   1095  CB  SER L  27F     18.213  32.338  38.822  1.00 24.70           C  
ATOM   1096  OG  SER L  27F     16.876  32.665  39.157  1.00 26.14           O  
ATOM   1097  N   ASN L  28      21.377  33.226  38.237  1.00 23.38           N  
ATOM   1098  CA  ASN L  28      22.761  32.764  38.210  1.00 23.02           C  
ATOM   1099  C   ASN L  28      23.778  33.821  37.780  1.00 22.75           C  
ATOM   1100  O   ASN L  28      24.967  33.525  37.659  1.00 22.80           O  
ATOM   1101  CB  ASN L  28      22.900  31.533  37.314  1.00 23.00           C  
ATOM   1102  CG  ASN L  28      22.458  31.794  35.895  1.00 23.17           C  
ATOM   1103  OD1 ASN L  28      22.721  32.859  35.335  1.00 22.86           O  
ATOM   1104  ND2 ASN L  28      21.797  30.813  35.294  1.00 23.48           N  
ATOM   1105  N   SER L  29      23.305  35.042  37.540  1.00 22.39           N  
ATOM   1106  CA  SER L  29      24.165  36.166  37.163  1.00 22.11           C  
ATOM   1107  C   SER L  29      24.864  36.060  35.808  1.00 21.93           C  
ATOM   1108  O   SER L  29      25.844  36.763  35.559  1.00 21.98           O  
ATOM   1109  CB  SER L  29      25.226  36.392  38.247  1.00 22.31           C  
ATOM   1110  OG  SER L  29      24.629  36.498  39.527  1.00 22.47           O  
ATOM   1111  N   LYS L  30      24.359  35.201  34.931  1.00 21.51           N  
ATOM   1112  CA  LYS L  30      24.968  35.029  33.613  1.00 20.95           C  
ATOM   1113  C   LYS L  30      24.213  35.722  32.481  1.00 19.79           C  
ATOM   1114  O   LYS L  30      22.984  35.732  32.453  1.00 19.65           O  
ATOM   1115  CB  LYS L  30      25.085  33.539  33.274  1.00 21.90           C  
ATOM   1116  CG  LYS L  30      26.123  32.768  34.076  1.00 23.02           C  
ATOM   1117  CD  LYS L  30      26.146  31.313  33.629  1.00 24.19           C  
ATOM   1118  CE  LYS L  30      27.200  30.505  34.359  1.00 25.15           C  
ATOM   1119  NZ  LYS L  30      27.125  29.063  33.986  1.00 26.04           N  
ATOM   1120  N   ASN L  31      24.969  36.306  31.551  1.00 18.62           N  
ATOM   1121  CA  ASN L  31      24.393  36.959  30.376  1.00 17.60           C  
ATOM   1122  C   ASN L  31      24.526  35.932  29.257  1.00 16.88           C  
ATOM   1123  O   ASN L  31      25.637  35.537  28.910  1.00 16.65           O  
ATOM   1124  CB  ASN L  31      25.185  38.215  30.001  1.00 17.89           C  
ATOM   1125  CG  ASN L  31      24.944  39.370  30.955  1.00 18.19           C  
ATOM   1126  OD1 ASN L  31      23.882  39.992  30.941  1.00 18.37           O  
ATOM   1127  ND2 ASN L  31      25.936  39.662  31.789  1.00 18.71           N  
ATOM   1128  N   TYR L  32      23.398  35.489  28.712  1.00 16.13           N  
ATOM   1129  CA  TYR L  32      23.400  34.494  27.642  1.00 15.94           C  
ATOM   1130  C   TYR L  32      23.551  35.215  26.315  1.00 15.17           C  
ATOM   1131  O   TYR L  32      22.630  35.258  25.500  1.00 15.07           O  
ATOM   1132  CB  TYR L  32      22.101  33.688  27.686  1.00 16.85           C  
ATOM   1133  CG  TYR L  32      22.017  32.779  28.893  1.00 18.18           C  
ATOM   1134  CD1 TYR L  32      22.012  33.301  30.189  1.00 18.92           C  
ATOM   1135  CD2 TYR L  32      21.992  31.393  28.741  1.00 18.54           C  
ATOM   1136  CE1 TYR L  32      21.990  32.460  31.304  1.00 19.57           C  
ATOM   1137  CE2 TYR L  32      21.969  30.546  29.845  1.00 19.64           C  
ATOM   1138  CZ  TYR L  32      21.969  31.085  31.120  1.00 19.90           C  
ATOM   1139  OH  TYR L  32      21.957  30.242  32.209  1.00 20.71           O  
ATOM   1140  N   LEU L  33      24.744  35.766  26.116  1.00 14.39           N  
ATOM   1141  CA  LEU L  33      25.065  36.552  24.930  1.00 13.77           C  
ATOM   1142  C   LEU L  33      26.423  36.122  24.376  1.00 13.16           C  
ATOM   1143  O   LEU L  33      27.387  35.968  25.127  1.00 13.23           O  
ATOM   1144  CB  LEU L  33      25.091  38.034  25.336  1.00 14.08           C  
ATOM   1145  CG  LEU L  33      25.107  39.200  24.338  1.00 13.85           C  
ATOM   1146  CD1 LEU L  33      26.467  39.329  23.664  1.00 13.88           C  
ATOM   1147  CD2 LEU L  33      23.991  39.000  23.320  1.00 14.30           C  
ATOM   1148  N   ALA L  34      26.493  35.919  23.064  1.00 12.44           N  
ATOM   1149  CA  ALA L  34      27.741  35.515  22.428  1.00 11.85           C  
ATOM   1150  C   ALA L  34      28.053  36.387  21.208  1.00 11.68           C  
ATOM   1151  O   ALA L  34      27.164  37.040  20.659  1.00 11.87           O  
ATOM   1152  CB  ALA L  34      27.660  34.041  22.009  1.00 11.88           C  
ATOM   1153  N   TRP L  35      29.321  36.405  20.807  1.00 11.28           N  
ATOM   1154  CA  TRP L  35      29.755  37.162  19.630  1.00 11.15           C  
ATOM   1155  C   TRP L  35      30.426  36.208  18.654  1.00 10.94           C  
ATOM   1156  O   TRP L  35      31.203  35.336  19.062  1.00 11.03           O  
ATOM   1157  CB  TRP L  35      30.762  38.259  19.995  1.00 11.12           C  
ATOM   1158  CG  TRP L  35      30.170  39.432  20.703  1.00 11.27           C  
ATOM   1159  CD1 TRP L  35      30.107  39.631  22.049  1.00 11.51           C  
ATOM   1160  CD2 TRP L  35      29.567  40.581  20.095  1.00 11.33           C  
ATOM   1161  NE1 TRP L  35      29.504  40.838  22.323  1.00 11.32           N  
ATOM   1162  CE2 TRP L  35      29.161  41.440  21.141  1.00 11.33           C  
ATOM   1163  CE3 TRP L  35      29.330  40.968  18.769  1.00 10.94           C  
ATOM   1164  CZ2 TRP L  35      28.532  42.667  20.902  1.00 10.92           C  
ATOM   1165  CZ3 TRP L  35      28.703  42.195  18.531  1.00 11.15           C  
ATOM   1166  CH2 TRP L  35      28.313  43.025  19.594  1.00 11.31           C  
ATOM   1167  N   TYR L  36      30.129  36.387  17.369  1.00 10.93           N  
ATOM   1168  CA  TYR L  36      30.692  35.565  16.301  1.00 11.16           C  
ATOM   1169  C   TYR L  36      31.350  36.408  15.215  1.00 10.97           C  
ATOM   1170  O   TYR L  36      30.970  37.559  14.988  1.00 10.86           O  
ATOM   1171  CB  TYR L  36      29.606  34.735  15.615  1.00 11.35           C  
ATOM   1172  CG  TYR L  36      29.148  33.512  16.361  1.00 12.34           C  
ATOM   1173  CD1 TYR L  36      28.150  33.587  17.331  1.00 13.20           C  
ATOM   1174  CD2 TYR L  36      29.705  32.268  16.081  1.00 12.90           C  
ATOM   1175  CE1 TYR L  36      27.713  32.436  18.003  1.00 13.96           C  
ATOM   1176  CE2 TYR L  36      29.280  31.122  16.743  1.00 13.83           C  
ATOM   1177  CZ  TYR L  36      28.287  31.212  17.696  1.00 14.01           C  
ATOM   1178  OH  TYR L  36      27.866  30.064  18.331  1.00 15.51           O  
ATOM   1179  N   GLN L  37      32.321  35.803  14.534  1.00 11.18           N  
ATOM   1180  CA  GLN L  37      33.030  36.431  13.419  1.00 11.81           C  
ATOM   1181  C   GLN L  37      32.751  35.552  12.194  1.00 12.22           C  
ATOM   1182  O   GLN L  37      32.746  34.326  12.307  1.00 12.67           O  
ATOM   1183  CB  GLN L  37      34.544  36.454  13.688  1.00 12.22           C  
ATOM   1184  CG  GLN L  37      35.373  37.042  12.546  1.00 12.92           C  
ATOM   1185  CD  GLN L  37      36.860  36.739  12.677  1.00 12.93           C  
ATOM   1186  OE1 GLN L  37      37.283  35.582  12.583  1.00 14.61           O  
ATOM   1187  NE2 GLN L  37      37.659  37.776  12.897  1.00 13.30           N  
ATOM   1188  N   GLN L  38      32.499  36.156  11.034  1.00 11.84           N  
ATOM   1189  CA  GLN L  38      32.262  35.359   9.828  1.00 12.57           C  
ATOM   1190  C   GLN L  38      32.836  35.990   8.560  1.00 13.44           C  
ATOM   1191  O   GLN L  38      32.581  37.155   8.258  1.00 13.32           O  
ATOM   1192  CB  GLN L  38      30.768  35.096   9.615  1.00 12.22           C  
ATOM   1193  CG  GLN L  38      30.489  34.235   8.378  1.00 12.27           C  
ATOM   1194  CD  GLN L  38      29.029  33.858   8.237  1.00 12.04           C  
ATOM   1195  OE1 GLN L  38      28.146  34.675   8.476  1.00 12.10           O  
ATOM   1196  NE2 GLN L  38      28.769  32.614   7.832  1.00 12.54           N  
ATOM   1197  N   LYS L  39      33.613  35.202   7.821  1.00 14.30           N  
ATOM   1198  CA  LYS L  39      34.211  35.665   6.574  1.00 15.16           C  
ATOM   1199  C   LYS L  39      33.508  34.968   5.410  1.00 15.86           C  
ATOM   1200  O   LYS L  39      32.923  33.898   5.582  1.00 15.56           O  
ATOM   1201  CB  LYS L  39      35.708  35.358   6.564  1.00 15.62           C  
ATOM   1202  CG  LYS L  39      36.437  35.946   7.760  1.00 16.12           C  
ATOM   1203  CD  LYS L  39      37.937  35.700   7.672  1.00 17.04           C  
ATOM   1204  CE  LYS L  39      38.660  36.353   8.838  1.00 17.89           C  
ATOM   1205  NZ  LYS L  39      40.136  36.276   8.689  1.00 18.37           N  
ATOM   1206  N   PRO L  40      33.550  35.569   4.210  1.00 16.33           N  
ATOM   1207  CA  PRO L  40      32.902  34.990   3.028  1.00 16.88           C  
ATOM   1208  C   PRO L  40      33.281  33.543   2.737  1.00 17.09           C  
ATOM   1209  O   PRO L  40      34.456  33.188   2.738  1.00 17.76           O  
ATOM   1210  CB  PRO L  40      33.335  35.928   1.904  1.00 17.11           C  
ATOM   1211  CG  PRO L  40      33.490  37.239   2.605  1.00 17.06           C  
ATOM   1212  CD  PRO L  40      34.210  36.841   3.870  1.00 16.67           C  
ATOM   1213  N   GLY L  41      32.274  32.714   2.486  1.00 17.34           N  
ATOM   1214  CA  GLY L  41      32.523  31.319   2.173  1.00 17.59           C  
ATOM   1215  C   GLY L  41      32.918  30.459   3.355  1.00 17.72           C  
ATOM   1216  O   GLY L  41      33.249  29.283   3.187  1.00 18.12           O  
ATOM   1217  N   GLN L  42      32.888  31.038   4.550  1.00 17.30           N  
ATOM   1218  CA  GLN L  42      33.245  30.301   5.758  1.00 16.72           C  
ATOM   1219  C   GLN L  42      32.118  30.369   6.775  1.00 15.86           C  
ATOM   1220  O   GLN L  42      31.283  31.276   6.739  1.00 15.25           O  
ATOM   1221  CB  GLN L  42      34.494  30.891   6.406  1.00 17.65           C  
ATOM   1222  CG  GLN L  42      35.734  30.918   5.541  1.00 19.62           C  
ATOM   1223  CD  GLN L  42      36.902  31.538   6.275  1.00 21.06           C  
ATOM   1224  OE1 GLN L  42      37.937  31.846   5.685  1.00 22.72           O  
ATOM   1225  NE2 GLN L  42      36.738  31.729   7.579  1.00 21.98           N  
ATOM   1226  N   PRO L  43      32.080  29.406   7.704  1.00 15.38           N  
ATOM   1227  CA  PRO L  43      31.024  29.421   8.714  1.00 14.72           C  
ATOM   1228  C   PRO L  43      31.358  30.414   9.818  1.00 14.30           C  
ATOM   1229  O   PRO L  43      32.482  30.910   9.907  1.00 13.69           O  
ATOM   1230  CB  PRO L  43      31.034  27.989   9.237  1.00 14.87           C  
ATOM   1231  CG  PRO L  43      32.497  27.640   9.165  1.00 15.32           C  
ATOM   1232  CD  PRO L  43      32.879  28.169   7.798  1.00 15.31           C  
ATOM   1233  N   PRO L  44      30.373  30.729  10.666  1.00 13.95           N  
ATOM   1234  CA  PRO L  44      30.594  31.661  11.774  1.00 13.76           C  
ATOM   1235  C   PRO L  44      31.587  31.014  12.744  1.00 13.28           C  
ATOM   1236  O   PRO L  44      31.654  29.782  12.843  1.00 13.26           O  
ATOM   1237  CB  PRO L  44      29.208  31.782  12.403  1.00 14.02           C  
ATOM   1238  CG  PRO L  44      28.282  31.535  11.252  1.00 14.24           C  
ATOM   1239  CD  PRO L  44      28.947  30.389  10.535  1.00 14.14           C  
ATOM   1240  N   LYS L  45      32.354  31.839  13.451  1.00 12.45           N  
ATOM   1241  CA  LYS L  45      33.328  31.355  14.425  1.00 11.91           C  
ATOM   1242  C   LYS L  45      33.083  32.053  15.764  1.00 11.63           C  
ATOM   1243  O   LYS L  45      33.086  33.277  15.836  1.00 11.46           O  
ATOM   1244  CB  LYS L  45      34.742  31.645  13.935  1.00 12.31           C  
ATOM   1245  N   LEU L  46      32.872  31.271  16.819  1.00 11.42           N  
ATOM   1246  CA  LEU L  46      32.615  31.820  18.152  1.00 11.62           C  
ATOM   1247  C   LEU L  46      33.810  32.564  18.732  1.00 11.87           C  
ATOM   1248  O   LEU L  46      34.911  32.021  18.812  1.00 12.02           O  
ATOM   1249  CB  LEU L  46      32.217  30.699  19.121  1.00 11.61           C  
ATOM   1250  CG  LEU L  46      31.861  31.145  20.544  1.00 11.72           C  
ATOM   1251  CD1 LEU L  46      30.631  32.032  20.502  1.00 12.10           C  
ATOM   1252  CD2 LEU L  46      31.599  29.928  21.430  1.00 11.78           C  
ATOM   1253  N   LEU L  47      33.583  33.808  19.147  1.00 11.57           N  
ATOM   1254  CA  LEU L  47      34.637  34.630  19.736  1.00 12.09           C  
ATOM   1255  C   LEU L  47      34.488  34.776  21.250  1.00 12.33           C  
ATOM   1256  O   LEU L  47      35.454  34.607  21.999  1.00 12.54           O  
ATOM   1257  CB  LEU L  47      34.612  36.036  19.134  1.00 12.31           C  
ATOM   1258  CG  LEU L  47      34.805  36.228  17.633  1.00 12.70           C  
ATOM   1259  CD1 LEU L  47      34.482  37.674  17.275  1.00 12.84           C  
ATOM   1260  CD2 LEU L  47      36.226  35.877  17.249  1.00 13.63           C  
ATOM   1261  N   ILE L  48      33.275  35.116  21.681  1.00 13.03           N  
ATOM   1262  CA  ILE L  48      32.962  35.357  23.094  1.00 13.48           C  
ATOM   1263  C   ILE L  48      31.626  34.733  23.497  1.00 13.29           C  
ATOM   1264  O   ILE L  48      30.684  34.726  22.705  1.00 13.04           O  
ATOM   1265  CB  ILE L  48      32.794  36.882  23.370  1.00 14.22           C  
ATOM   1266  CG1 ILE L  48      33.932  37.690  22.737  1.00 14.67           C  
ATOM   1267  CG2 ILE L  48      32.698  37.129  24.877  1.00 14.39           C  
ATOM   1268  CD1 ILE L  48      35.265  37.590  23.448  1.00 15.71           C  
ATOM   1269  N   TYR L  49      31.542  34.212  24.722  1.00 13.37           N  
ATOM   1270  CA  TYR L  49      30.277  33.679  25.231  1.00 13.63           C  
ATOM   1271  C   TYR L  49      30.104  34.167  26.676  1.00 14.06           C  
ATOM   1272  O   TYR L  49      31.068  34.624  27.297  1.00 13.82           O  
ATOM   1273  CB  TYR L  49      30.206  32.142  25.122  1.00 13.85           C  
ATOM   1274  CG  TYR L  49      31.295  31.374  25.825  1.00 13.95           C  
ATOM   1275  CD1 TYR L  49      32.557  31.217  25.248  1.00 14.31           C  
ATOM   1276  CD2 TYR L  49      31.062  30.793  27.068  1.00 14.19           C  
ATOM   1277  CE1 TYR L  49      33.559  30.494  25.896  1.00 14.79           C  
ATOM   1278  CE2 TYR L  49      32.052  30.077  27.723  1.00 14.58           C  
ATOM   1279  CZ  TYR L  49      33.295  29.930  27.137  1.00 14.83           C  
ATOM   1280  OH  TYR L  49      34.271  29.224  27.798  1.00 15.59           O  
ATOM   1281  N   TRP L  50      28.883  34.093  27.201  1.00 14.46           N  
ATOM   1282  CA  TRP L  50      28.591  34.589  28.551  1.00 15.11           C  
ATOM   1283  C   TRP L  50      28.940  36.078  28.574  1.00 15.08           C  
ATOM   1284  O   TRP L  50      29.309  36.626  29.613  1.00 15.51           O  
ATOM   1285  CB  TRP L  50      29.420  33.864  29.622  1.00 15.66           C  
ATOM   1286  CG  TRP L  50      29.073  32.420  29.857  1.00 16.47           C  
ATOM   1287  CD1 TRP L  50      29.951  31.406  30.120  1.00 16.76           C  
ATOM   1288  CD2 TRP L  50      27.764  31.835  29.896  1.00 16.93           C  
ATOM   1289  NE1 TRP L  50      29.274  30.228  30.317  1.00 17.09           N  
ATOM   1290  CE2 TRP L  50      27.930  30.461  30.187  1.00 17.05           C  
ATOM   1291  CE3 TRP L  50      26.468  32.336  29.716  1.00 17.24           C  
ATOM   1292  CZ2 TRP L  50      26.846  29.581  30.299  1.00 17.38           C  
ATOM   1293  CZ3 TRP L  50      25.390  31.460  29.829  1.00 17.25           C  
ATOM   1294  CH2 TRP L  50      25.589  30.097  30.117  1.00 17.55           C  
ATOM   1295  N   ALA L  51      28.838  36.711  27.407  1.00 14.83           N  
ATOM   1296  CA  ALA L  51      29.114  38.138  27.229  1.00 14.94           C  
ATOM   1297  C   ALA L  51      30.574  38.577  27.323  1.00 14.86           C  
ATOM   1298  O   ALA L  51      30.991  39.475  26.585  1.00 14.75           O  
ATOM   1299  CB  ALA L  51      28.269  38.957  28.210  1.00 14.99           C  
ATOM   1300  N   SER L  52      31.358  37.959  28.205  1.00 15.29           N  
ATOM   1301  CA  SER L  52      32.752  38.378  28.367  1.00 15.36           C  
ATOM   1302  C   SER L  52      33.822  37.290  28.395  1.00 15.15           C  
ATOM   1303  O   SER L  52      35.005  37.593  28.544  1.00 15.28           O  
ATOM   1304  CB  SER L  52      32.883  39.222  29.638  1.00 15.76           C  
ATOM   1305  OG  SER L  52      32.498  38.469  30.777  1.00 17.30           O  
ATOM   1306  N   THR L  53      33.423  36.031  28.263  1.00 15.01           N  
ATOM   1307  CA  THR L  53      34.392  34.944  28.274  1.00 15.11           C  
ATOM   1308  C   THR L  53      34.886  34.687  26.856  1.00 15.17           C  
ATOM   1309  O   THR L  53      34.109  34.318  25.974  1.00 15.06           O  
ATOM   1310  CB  THR L  53      33.772  33.653  28.848  1.00 15.19           C  
ATOM   1311  OG1 THR L  53      33.330  33.899  30.190  1.00 15.83           O  
ATOM   1312  CG2 THR L  53      34.798  32.524  28.864  1.00 15.60           C  
ATOM   1313  N   ARG L  54      36.179  34.899  26.636  1.00 15.21           N  
ATOM   1314  CA  ARG L  54      36.763  34.685  25.319  1.00 15.37           C  
ATOM   1315  C   ARG L  54      36.983  33.195  25.097  1.00 14.95           C  
ATOM   1316  O   ARG L  54      37.507  32.504  25.964  1.00 14.82           O  
ATOM   1317  CB  ARG L  54      38.089  35.446  25.196  1.00 16.95           C  
ATOM   1318  CG  ARG L  54      38.880  35.141  23.927  1.00 18.60           C  
ATOM   1319  CD  ARG L  54      39.823  36.284  23.553  1.00 21.13           C  
ATOM   1320  NE  ARG L  54      40.234  37.070  24.711  1.00 23.68           N  
ATOM   1321  CZ  ARG L  54      41.217  36.745  25.544  1.00 24.77           C  
ATOM   1322  NH1 ARG L  54      41.938  35.649  25.342  1.00 25.90           N  
ATOM   1323  NH2 ARG L  54      41.496  37.535  26.570  1.00 25.67           N  
ATOM   1324  N   GLU L  55      36.559  32.706  23.937  1.00 14.52           N  
ATOM   1325  CA  GLU L  55      36.710  31.296  23.594  1.00 14.20           C  
ATOM   1326  C   GLU L  55      38.196  30.947  23.455  1.00 14.26           C  
ATOM   1327  O   GLU L  55      39.020  31.809  23.140  1.00 14.25           O  
ATOM   1328  CB  GLU L  55      35.962  31.003  22.282  1.00 14.10           C  
ATOM   1329  CG  GLU L  55      36.050  29.559  21.808  1.00 14.07           C  
ATOM   1330  CD  GLU L  55      35.450  28.579  22.796  1.00 14.23           C  
ATOM   1331  OE1 GLU L  55      36.094  28.320  23.834  1.00 13.83           O  
ATOM   1332  OE2 GLU L  55      34.332  28.071  22.544  1.00 13.70           O  
ATOM   1333  N   SER L  56      38.549  29.692  23.708  1.00 14.26           N  
ATOM   1334  CA  SER L  56      39.944  29.290  23.578  1.00 14.10           C  
ATOM   1335  C   SER L  56      40.359  29.413  22.117  1.00 14.03           C  
ATOM   1336  O   SER L  56      39.536  29.259  21.215  1.00 13.72           O  
ATOM   1337  CB  SER L  56      40.147  27.849  24.072  1.00 14.13           C  
ATOM   1338  OG  SER L  56      39.336  26.917  23.371  1.00 14.49           O  
ATOM   1339  N   GLY L  57      41.635  29.708  21.890  1.00 13.78           N  
ATOM   1340  CA  GLY L  57      42.137  29.852  20.537  1.00 13.67           C  
ATOM   1341  C   GLY L  57      41.932  31.230  19.929  1.00 13.57           C  
ATOM   1342  O   GLY L  57      42.516  31.544  18.889  1.00 13.97           O  
ATOM   1343  N   VAL L  58      41.107  32.054  20.567  1.00 13.46           N  
ATOM   1344  CA  VAL L  58      40.829  33.401  20.068  1.00 13.95           C  
ATOM   1345  C   VAL L  58      41.832  34.403  20.631  1.00 14.51           C  
ATOM   1346  O   VAL L  58      42.091  34.417  21.833  1.00 14.18           O  
ATOM   1347  CB  VAL L  58      39.398  33.843  20.455  1.00 13.62           C  
ATOM   1348  CG1 VAL L  58      39.145  35.279  20.008  1.00 13.55           C  
ATOM   1349  CG2 VAL L  58      38.380  32.913  19.812  1.00 13.35           C  
ATOM   1350  N   PRO L  59      42.408  35.258  19.765  1.00 15.40           N  
ATOM   1351  CA  PRO L  59      43.393  36.278  20.154  1.00 16.12           C  
ATOM   1352  C   PRO L  59      42.856  37.212  21.241  1.00 16.77           C  
ATOM   1353  O   PRO L  59      41.666  37.524  21.269  1.00 16.55           O  
ATOM   1354  CB  PRO L  59      43.662  37.019  18.844  1.00 16.57           C  
ATOM   1355  CG  PRO L  59      43.396  35.987  17.797  1.00 16.31           C  
ATOM   1356  CD  PRO L  59      42.155  35.305  18.314  1.00 15.48           C  
ATOM   1357  N   ASP L  60      43.738  37.676  22.119  1.00 17.45           N  
ATOM   1358  CA  ASP L  60      43.317  38.543  23.211  1.00 18.20           C  
ATOM   1359  C   ASP L  60      42.888  39.944  22.775  1.00 18.00           C  
ATOM   1360  O   ASP L  60      42.401  40.725  23.595  1.00 18.55           O  
ATOM   1361  CB  ASP L  60      44.424  38.625  24.270  1.00 19.58           C  
ATOM   1362  CG  ASP L  60      45.478  39.667  23.948  1.00 20.45           C  
ATOM   1363  OD1 ASP L  60      45.802  39.871  22.758  1.00 21.73           O  
ATOM   1364  OD2 ASP L  60      45.999  40.271  24.908  1.00 21.93           O  
ATOM   1365  N   ARG L  61      43.050  40.270  21.496  1.00 17.58           N  
ATOM   1366  CA  ARG L  61      42.628  41.591  21.043  1.00 16.98           C  
ATOM   1367  C   ARG L  61      41.103  41.679  20.958  1.00 16.24           C  
ATOM   1368  O   ARG L  61      40.548  42.763  20.807  1.00 15.70           O  
ATOM   1369  CB  ARG L  61      43.277  41.966  19.700  1.00 17.97           C  
ATOM   1370  CG  ARG L  61      42.970  41.083  18.501  1.00 18.54           C  
ATOM   1371  CD  ARG L  61      43.700  41.629  17.265  1.00 19.32           C  
ATOM   1372  NE  ARG L  61      43.440  40.858  16.053  1.00 19.45           N  
ATOM   1373  CZ  ARG L  61      43.982  39.675  15.786  1.00 19.90           C  
ATOM   1374  NH1 ARG L  61      44.826  39.119  16.646  1.00 20.66           N  
ATOM   1375  NH2 ARG L  61      43.675  39.043  14.661  1.00 20.20           N  
ATOM   1376  N   PHE L  62      40.430  40.536  21.063  1.00 15.38           N  
ATOM   1377  CA  PHE L  62      38.966  40.501  21.035  1.00 14.86           C  
ATOM   1378  C   PHE L  62      38.455  40.479  22.473  1.00 15.16           C  
ATOM   1379  O   PHE L  62      38.901  39.665  23.281  1.00 15.43           O  
ATOM   1380  CB  PHE L  62      38.468  39.246  20.315  1.00 14.34           C  
ATOM   1381  CG  PHE L  62      38.720  39.253  18.839  1.00 13.90           C  
ATOM   1382  CD1 PHE L  62      37.833  39.886  17.972  1.00 13.76           C  
ATOM   1383  CD2 PHE L  62      39.852  38.642  18.312  1.00 13.87           C  
ATOM   1384  CE1 PHE L  62      38.075  39.908  16.597  1.00 13.92           C  
ATOM   1385  CE2 PHE L  62      40.101  38.660  16.938  1.00 13.98           C  
ATOM   1386  CZ  PHE L  62      39.211  39.294  16.083  1.00 14.09           C  
ATOM   1387  N   SER L  63      37.519  41.364  22.798  1.00 15.40           N  
ATOM   1388  CA  SER L  63      36.973  41.404  24.146  1.00 16.25           C  
ATOM   1389  C   SER L  63      35.501  41.790  24.173  1.00 15.89           C  
ATOM   1390  O   SER L  63      35.061  42.678  23.440  1.00 15.87           O  
ATOM   1391  CB  SER L  63      37.762  42.383  25.016  1.00 17.24           C  
ATOM   1392  OG  SER L  63      37.195  42.443  26.314  1.00 20.10           O  
ATOM   1393  N   GLY L  64      34.745  41.119  25.031  1.00 15.82           N  
ATOM   1394  CA  GLY L  64      33.332  41.411  25.151  1.00 15.94           C  
ATOM   1395  C   GLY L  64      33.012  42.015  26.505  1.00 16.23           C  
ATOM   1396  O   GLY L  64      33.605  41.641  27.521  1.00 16.07           O  
ATOM   1397  N   SER L  65      32.078  42.958  26.514  1.00 16.35           N  
ATOM   1398  CA  SER L  65      31.661  43.613  27.746  1.00 16.86           C  
ATOM   1399  C   SER L  65      30.169  43.935  27.689  1.00 17.14           C  
ATOM   1400  O   SER L  65      29.519  43.747  26.657  1.00 16.65           O  
ATOM   1401  CB  SER L  65      32.465  44.901  27.958  1.00 17.05           C  
ATOM   1402  OG  SER L  65      32.237  45.830  26.909  1.00 17.81           O  
ATOM   1403  N   GLY L  66      29.624  44.419  28.800  1.00 17.56           N  
ATOM   1404  CA  GLY L  66      28.211  44.747  28.825  1.00 17.88           C  
ATOM   1405  C   GLY L  66      27.394  43.821  29.704  1.00 17.99           C  
ATOM   1406  O   GLY L  66      27.900  42.818  30.217  1.00 18.12           O  
ATOM   1407  N   SER L  67      26.119  44.156  29.866  1.00 18.43           N  
ATOM   1408  CA  SER L  67      25.213  43.380  30.700  1.00 18.43           C  
ATOM   1409  C   SER L  67      23.751  43.744  30.448  1.00 18.29           C  
ATOM   1410  O   SER L  67      23.438  44.857  30.018  1.00 18.28           O  
ATOM   1411  CB  SER L  67      25.552  43.617  32.176  1.00 19.00           C  
ATOM   1412  OG  SER L  67      24.581  43.038  33.026  1.00 20.15           O  
ATOM   1413  N   GLY L  68      22.861  42.794  30.709  1.00 17.90           N  
ATOM   1414  CA  GLY L  68      21.440  43.034  30.534  1.00 17.91           C  
ATOM   1415  C   GLY L  68      20.948  43.202  29.108  1.00 17.74           C  
ATOM   1416  O   GLY L  68      20.628  42.218  28.434  1.00 17.62           O  
ATOM   1417  N   THR L  69      20.879  44.450  28.651  1.00 17.60           N  
ATOM   1418  CA  THR L  69      20.399  44.748  27.304  1.00 17.36           C  
ATOM   1419  C   THR L  69      21.411  45.437  26.394  1.00 17.40           C  
ATOM   1420  O   THR L  69      21.123  45.669  25.224  1.00 17.51           O  
ATOM   1421  CB  THR L  69      19.155  45.643  27.351  1.00 17.47           C  
ATOM   1422  OG1 THR L  69      19.494  46.891  27.971  1.00 17.80           O  
ATOM   1423  CG2 THR L  69      18.039  44.966  28.146  1.00 17.29           C  
ATOM   1424  N   ASP L  70      22.582  45.774  26.921  1.00 17.51           N  
ATOM   1425  CA  ASP L  70      23.593  46.450  26.110  1.00 17.52           C  
ATOM   1426  C   ASP L  70      24.943  45.760  26.204  1.00 16.72           C  
ATOM   1427  O   ASP L  70      25.491  45.575  27.291  1.00 16.42           O  
ATOM   1428  CB  ASP L  70      23.700  47.917  26.537  1.00 19.43           C  
ATOM   1429  CG  ASP L  70      22.432  48.699  26.233  1.00 21.48           C  
ATOM   1430  OD1 ASP L  70      22.184  49.002  25.043  1.00 22.91           O  
ATOM   1431  OD2 ASP L  70      21.674  49.001  27.181  1.00 23.11           O  
ATOM   1432  N   PHE L  71      25.476  45.380  25.046  1.00 15.49           N  
ATOM   1433  CA  PHE L  71      26.746  44.681  24.982  1.00 14.67           C  
ATOM   1434  C   PHE L  71      27.672  45.290  23.950  1.00 14.37           C  
ATOM   1435  O   PHE L  71      27.222  45.915  22.992  1.00 14.59           O  
ATOM   1436  CB  PHE L  71      26.496  43.209  24.656  1.00 14.54           C  
ATOM   1437  CG  PHE L  71      25.569  42.547  25.618  1.00 14.21           C  
ATOM   1438  CD1 PHE L  71      24.191  42.637  25.453  1.00 14.58           C  
ATOM   1439  CD2 PHE L  71      26.069  41.915  26.749  1.00 14.41           C  
ATOM   1440  CE1 PHE L  71      23.324  42.111  26.410  1.00 14.46           C  
ATOM   1441  CE2 PHE L  71      25.214  41.388  27.708  1.00 14.61           C  
ATOM   1442  CZ  PHE L  71      23.841  41.486  27.541  1.00 14.58           C  
ATOM   1443  N   THR L  72      28.970  45.093  24.149  1.00 13.91           N  
ATOM   1444  CA  THR L  72      29.961  45.636  23.239  1.00 13.95           C  
ATOM   1445  C   THR L  72      31.102  44.679  22.937  1.00 13.55           C  
ATOM   1446  O   THR L  72      31.619  44.008  23.835  1.00 13.90           O  
ATOM   1447  CB  THR L  72      30.579  46.930  23.816  1.00 14.04           C  
ATOM   1448  OG1 THR L  72      29.543  47.888  24.053  1.00 15.27           O  
ATOM   1449  CG2 THR L  72      31.606  47.513  22.854  1.00 14.41           C  
ATOM   1450  N   LEU L  73      31.479  44.613  21.662  1.00 13.16           N  
ATOM   1451  CA  LEU L  73      32.608  43.800  21.232  1.00 13.29           C  
ATOM   1452  C   LEU L  73      33.695  44.805  20.872  1.00 13.70           C  
ATOM   1453  O   LEU L  73      33.479  45.691  20.048  1.00 13.16           O  
ATOM   1454  CB  LEU L  73      32.276  42.964  19.988  1.00 13.16           C  
ATOM   1455  CG  LEU L  73      33.479  42.184  19.433  1.00 13.67           C  
ATOM   1456  CD1 LEU L  73      33.902  41.130  20.445  1.00 13.86           C  
ATOM   1457  CD2 LEU L  73      33.131  41.534  18.100  1.00 13.66           C  
ATOM   1458  N   THR L  74      34.857  44.677  21.496  1.00 14.25           N  
ATOM   1459  CA  THR L  74      35.952  45.585  21.204  1.00 15.58           C  
ATOM   1460  C   THR L  74      37.097  44.817  20.571  1.00 16.13           C  
ATOM   1461  O   THR L  74      37.480  43.747  21.053  1.00 16.43           O  
ATOM   1462  CB  THR L  74      36.473  46.266  22.484  1.00 15.65           C  
ATOM   1463  OG1 THR L  74      35.403  46.970  23.122  1.00 16.01           O  
ATOM   1464  CG2 THR L  74      37.579  47.258  22.147  1.00 16.17           C  
ATOM   1465  N   ILE L  75      37.631  45.352  19.481  1.00 16.74           N  
ATOM   1466  CA  ILE L  75      38.761  44.728  18.813  1.00 18.05           C  
ATOM   1467  C   ILE L  75      39.893  45.740  18.897  1.00 18.60           C  
ATOM   1468  O   ILE L  75      39.838  46.796  18.263  1.00 18.91           O  
ATOM   1469  CB  ILE L  75      38.476  44.431  17.324  1.00 18.19           C  
ATOM   1470  CG1 ILE L  75      37.188  43.617  17.183  1.00 18.72           C  
ATOM   1471  CG2 ILE L  75      39.641  43.659  16.724  1.00 19.01           C  
ATOM   1472  CD1 ILE L  75      36.764  43.381  15.742  1.00 18.92           C  
ATOM   1473  N   SER L  76      40.903  45.430  19.699  1.00 19.39           N  
ATOM   1474  CA  SER L  76      42.041  46.325  19.848  1.00 20.48           C  
ATOM   1475  C   SER L  76      43.095  45.942  18.814  1.00 20.71           C  
ATOM   1476  O   SER L  76      43.108  44.809  18.318  1.00 21.21           O  
ATOM   1477  CB  SER L  76      42.628  46.209  21.256  1.00 20.47           C  
ATOM   1478  OG  SER L  76      43.294  44.967  21.427  1.00 21.76           O  
ATOM   1479  N   SER L  77      43.962  46.892  18.482  1.00 21.16           N  
ATOM   1480  CA  SER L  77      45.035  46.667  17.520  1.00 21.57           C  
ATOM   1481  C   SER L  77      44.538  45.906  16.294  1.00 21.23           C  
ATOM   1482  O   SER L  77      45.003  44.803  16.005  1.00 21.59           O  
ATOM   1483  CB  SER L  77      46.168  45.884  18.186  1.00 22.20           C  
ATOM   1484  OG  SER L  77      46.603  46.532  19.371  1.00 23.56           O  
ATOM   1485  N   LEU L  78      43.601  46.510  15.571  1.00 20.76           N  
ATOM   1486  CA  LEU L  78      43.021  45.890  14.384  1.00 20.55           C  
ATOM   1487  C   LEU L  78      44.055  45.371  13.386  1.00 20.28           C  
ATOM   1488  O   LEU L  78      45.035  46.051  13.073  1.00 20.25           O  
ATOM   1489  CB  LEU L  78      42.096  46.887  13.675  1.00 20.96           C  
ATOM   1490  CG  LEU L  78      41.202  46.322  12.569  1.00 21.32           C  
ATOM   1491  CD1 LEU L  78      40.168  45.383  13.185  1.00 21.61           C  
ATOM   1492  CD2 LEU L  78      40.510  47.455  11.832  1.00 21.85           C  
ATOM   1493  N   GLN L  79      43.827  44.156  12.895  1.00 19.67           N  
ATOM   1494  CA  GLN L  79      44.704  43.538  11.909  1.00 19.60           C  
ATOM   1495  C   GLN L  79      43.903  43.296  10.635  1.00 19.11           C  
ATOM   1496  O   GLN L  79      42.677  43.214  10.670  1.00 18.63           O  
ATOM   1497  CB  GLN L  79      45.265  42.215  12.435  1.00 20.01           C  
ATOM   1498  CG  GLN L  79      46.132  42.368  13.673  1.00 21.25           C  
ATOM   1499  CD  GLN L  79      46.856  41.088  14.044  1.00 21.62           C  
ATOM   1500  OE1 GLN L  79      47.457  40.993  15.112  1.00 22.74           O  
ATOM   1501  NE2 GLN L  79      46.806  40.098  13.159  1.00 22.44           N  
ATOM   1502  N   ALA L  80      44.598  43.184   9.511  1.00 18.95           N  
ATOM   1503  CA  ALA L  80      43.942  42.971   8.228  1.00 19.08           C  
ATOM   1504  C   ALA L  80      43.008  41.765   8.208  1.00 18.99           C  
ATOM   1505  O   ALA L  80      41.959  41.801   7.564  1.00 18.93           O  
ATOM   1506  CB  ALA L  80      44.993  42.834   7.129  1.00 19.33           C  
ATOM   1507  N   GLU L  81      43.379  40.701   8.912  1.00 18.95           N  
ATOM   1508  CA  GLU L  81      42.557  39.496   8.929  1.00 18.96           C  
ATOM   1509  C   GLU L  81      41.308  39.611   9.800  1.00 18.28           C  
ATOM   1510  O   GLU L  81      40.532  38.661   9.909  1.00 18.43           O  
ATOM   1511  CB  GLU L  81      43.388  38.295   9.378  1.00 20.41           C  
ATOM   1512  CG  GLU L  81      43.893  38.385  10.799  1.00 22.35           C  
ATOM   1513  CD  GLU L  81      44.659  37.147  11.211  1.00 24.07           C  
ATOM   1514  OE1 GLU L  81      45.658  36.816  10.537  1.00 25.32           O  
ATOM   1515  OE2 GLU L  81      44.260  36.505  12.207  1.00 25.35           O  
ATOM   1516  N   ASP L  82      41.109  40.766  10.423  1.00 16.99           N  
ATOM   1517  CA  ASP L  82      39.931  40.957  11.256  1.00 15.84           C  
ATOM   1518  C   ASP L  82      38.761  41.444  10.410  1.00 15.16           C  
ATOM   1519  O   ASP L  82      37.647  41.613  10.908  1.00 14.77           O  
ATOM   1520  CB  ASP L  82      40.224  41.944  12.390  1.00 16.44           C  
ATOM   1521  CG  ASP L  82      41.307  41.442  13.329  1.00 16.80           C  
ATOM   1522  OD1 ASP L  82      41.450  40.209  13.470  1.00 16.91           O  
ATOM   1523  OD2 ASP L  82      42.007  42.278  13.939  1.00 17.41           O  
ATOM   1524  N   VAL L  83      39.022  41.678   9.126  1.00 14.16           N  
ATOM   1525  CA  VAL L  83      37.980  42.113   8.204  1.00 13.75           C  
ATOM   1526  C   VAL L  83      36.984  40.963   8.094  1.00 13.36           C  
ATOM   1527  O   VAL L  83      37.346  39.852   7.698  1.00 13.82           O  
ATOM   1528  CB  VAL L  83      38.565  42.440   6.817  1.00 13.77           C  
ATOM   1529  CG1 VAL L  83      37.450  42.586   5.790  1.00 14.13           C  
ATOM   1530  CG2 VAL L  83      39.380  43.723   6.902  1.00 14.02           C  
ATOM   1531  N   ALA L  84      35.734  41.240   8.452  1.00 12.42           N  
ATOM   1532  CA  ALA L  84      34.686  40.226   8.440  1.00 11.74           C  
ATOM   1533  C   ALA L  84      33.376  40.842   8.901  1.00 11.53           C  
ATOM   1534  O   ALA L  84      33.290  42.043   9.132  1.00 11.05           O  
ATOM   1535  CB  ALA L  84      35.067  39.102   9.388  1.00 12.41           C  
ATOM   1536  N   VAL L  85      32.354  40.003   9.021  1.00 11.20           N  
ATOM   1537  CA  VAL L  85      31.060  40.440   9.525  1.00 11.41           C  
ATOM   1538  C   VAL L  85      31.011  39.897  10.944  1.00 11.15           C  
ATOM   1539  O   VAL L  85      31.384  38.745  11.185  1.00 11.65           O  
ATOM   1540  CB  VAL L  85      29.888  39.836   8.725  1.00 11.68           C  
ATOM   1541  CG1 VAL L  85      28.566  40.081   9.462  1.00 12.11           C  
ATOM   1542  CG2 VAL L  85      29.839  40.460   7.346  1.00 12.50           C  
ATOM   1543  N   TYR L  86      30.577  40.727  11.884  1.00 10.62           N  
ATOM   1544  CA  TYR L  86      30.482  40.311  13.280  1.00 10.39           C  
ATOM   1545  C   TYR L  86      29.027  40.273  13.707  1.00 10.40           C  
ATOM   1546  O   TYR L  86      28.237  41.133  13.310  1.00 10.68           O  
ATOM   1547  CB  TYR L  86      31.272  41.272  14.170  1.00 10.68           C  
ATOM   1548  CG  TYR L  86      32.757  41.155  13.942  1.00 10.33           C  
ATOM   1549  CD1 TYR L  86      33.385  41.899  12.943  1.00 10.90           C  
ATOM   1550  CD2 TYR L  86      33.517  40.229  14.654  1.00 10.55           C  
ATOM   1551  CE1 TYR L  86      34.734  41.717  12.651  1.00 10.74           C  
ATOM   1552  CE2 TYR L  86      34.869  40.038  14.374  1.00 10.73           C  
ATOM   1553  CZ  TYR L  86      35.468  40.782  13.370  1.00 10.94           C  
ATOM   1554  OH  TYR L  86      36.791  40.562  13.064  1.00 11.13           O  
ATOM   1555  N   TYR L  87      28.685  39.275  14.517  1.00 10.08           N  
ATOM   1556  CA  TYR L  87      27.318  39.092  15.002  1.00 10.48           C  
ATOM   1557  C   TYR L  87      27.243  38.863  16.503  1.00 10.71           C  
ATOM   1558  O   TYR L  87      28.134  38.242  17.093  1.00 10.99           O  
ATOM   1559  CB  TYR L  87      26.686  37.826  14.403  1.00 10.22           C  
ATOM   1560  CG  TYR L  87      26.500  37.769  12.913  1.00 10.83           C  
ATOM   1561  CD1 TYR L  87      25.446  38.440  12.299  1.00 11.18           C  
ATOM   1562  CD2 TYR L  87      27.347  37.001  12.120  1.00 10.80           C  
ATOM   1563  CE1 TYR L  87      25.238  38.346  10.930  1.00 11.42           C  
ATOM   1564  CE2 TYR L  87      27.149  36.896  10.747  1.00 11.32           C  
ATOM   1565  CZ  TYR L  87      26.091  37.572  10.160  1.00 11.41           C  
ATOM   1566  OH  TYR L  87      25.881  37.465   8.805  1.00 12.16           O  
ATOM   1567  N   CYS L  88      26.176  39.356  17.122  1.00 11.08           N  
ATOM   1568  CA  CYS L  88      25.937  39.033  18.522  1.00 11.57           C  
ATOM   1569  C   CYS L  88      24.804  38.015  18.420  1.00 12.28           C  
ATOM   1570  O   CYS L  88      24.109  37.952  17.398  1.00 12.03           O  
ATOM   1571  CB  CYS L  88      25.509  40.239  19.354  1.00 12.23           C  
ATOM   1572  SG  CYS L  88      24.228  41.323  18.666  1.00 12.27           S  
ATOM   1573  N   ASP L  89      24.629  37.210  19.458  1.00 12.11           N  
ATOM   1574  CA  ASP L  89      23.612  36.166  19.445  1.00 13.11           C  
ATOM   1575  C   ASP L  89      23.155  35.894  20.871  1.00 12.83           C  
ATOM   1576  O   ASP L  89      23.979  35.784  21.778  1.00 13.42           O  
ATOM   1577  CB  ASP L  89      24.225  34.909  18.806  1.00 14.15           C  
ATOM   1578  CG  ASP L  89      23.370  33.668  18.977  1.00 15.66           C  
ATOM   1579  OD1 ASP L  89      22.160  33.727  18.701  1.00 16.91           O  
ATOM   1580  OD2 ASP L  89      23.930  32.623  19.369  1.00 17.42           O  
ATOM   1581  N   GLN L  90      21.843  35.804  21.076  1.00 12.80           N  
ATOM   1582  CA  GLN L  90      21.324  35.537  22.413  1.00 12.86           C  
ATOM   1583  C   GLN L  90      20.720  34.148  22.489  1.00 13.01           C  
ATOM   1584  O   GLN L  90      20.011  33.714  21.577  1.00 12.52           O  
ATOM   1585  CB  GLN L  90      20.284  36.594  22.826  1.00 13.12           C  
ATOM   1586  CG  GLN L  90      18.945  36.574  22.085  1.00 13.99           C  
ATOM   1587  CD  GLN L  90      17.961  35.538  22.629  1.00 14.22           C  
ATOM   1588  OE1 GLN L  90      18.028  35.145  23.797  1.00 14.75           O  
ATOM   1589  NE2 GLN L  90      17.030  35.108  21.783  1.00 14.87           N  
ATOM   1590  N   TYR L  91      21.033  33.448  23.575  1.00 13.29           N  
ATOM   1591  CA  TYR L  91      20.528  32.101  23.803  1.00 13.73           C  
ATOM   1592  C   TYR L  91      19.882  32.028  25.182  1.00 14.53           C  
ATOM   1593  O   TYR L  91      19.972  31.014  25.878  1.00 14.64           O  
ATOM   1594  CB  TYR L  91      21.658  31.067  23.662  1.00 13.92           C  
ATOM   1595  CG  TYR L  91      22.963  31.406  24.360  1.00 14.16           C  
ATOM   1596  CD1 TYR L  91      23.825  32.374  23.842  1.00 14.22           C  
ATOM   1597  CD2 TYR L  91      23.358  30.725  25.511  1.00 14.26           C  
ATOM   1598  CE1 TYR L  91      25.049  32.652  24.450  1.00 14.71           C  
ATOM   1599  CE2 TYR L  91      24.583  30.993  26.126  1.00 14.85           C  
ATOM   1600  CZ  TYR L  91      25.423  31.956  25.591  1.00 14.82           C  
ATOM   1601  OH  TYR L  91      26.635  32.214  26.196  1.00 15.90           O  
ATOM   1602  N   TYR L  92      19.223  33.126  25.550  1.00 15.30           N  
ATOM   1603  CA  TYR L  92      18.533  33.258  26.830  1.00 16.43           C  
ATOM   1604  C   TYR L  92      17.140  32.633  26.761  1.00 16.40           C  
ATOM   1605  O   TYR L  92      16.766  31.833  27.618  1.00 16.89           O  
ATOM   1606  CB  TYR L  92      18.402  34.739  27.197  1.00 17.75           C  
ATOM   1607  CG  TYR L  92      17.726  35.000  28.524  1.00 19.03           C  
ATOM   1608  CD1 TYR L  92      18.372  34.710  29.722  1.00 20.31           C  
ATOM   1609  CD2 TYR L  92      16.444  35.542  28.581  1.00 19.93           C  
ATOM   1610  CE1 TYR L  92      17.759  34.955  30.948  1.00 21.00           C  
ATOM   1611  CE2 TYR L  92      15.819  35.790  29.804  1.00 20.75           C  
ATOM   1612  CZ  TYR L  92      16.486  35.494  30.982  1.00 21.22           C  
ATOM   1613  OH  TYR L  92      15.887  35.739  32.201  1.00 22.73           O  
ATOM   1614  N   SER L  93      16.373  33.007  25.742  1.00 16.20           N  
ATOM   1615  CA  SER L  93      15.022  32.481  25.574  1.00 15.91           C  
ATOM   1616  C   SER L  93      14.727  32.171  24.114  1.00 15.71           C  
ATOM   1617  O   SER L  93      15.261  32.815  23.213  1.00 15.08           O  
ATOM   1618  CB  SER L  93      13.995  33.487  26.102  1.00 16.75           C  
ATOM   1619  OG  SER L  93      14.092  34.713  25.400  1.00 17.47           O  
ATOM   1620  N   HIS L  94      13.875  31.175  23.887  1.00 15.18           N  
ATOM   1621  CA  HIS L  94      13.506  30.768  22.535  1.00 14.90           C  
ATOM   1622  C   HIS L  94      12.453  31.704  21.952  1.00 14.78           C  
ATOM   1623  O   HIS L  94      11.553  32.152  22.655  1.00 15.00           O  
ATOM   1624  CB  HIS L  94      12.971  29.334  22.549  1.00 15.30           C  
ATOM   1625  CG  HIS L  94      13.991  28.314  22.950  1.00 15.83           C  
ATOM   1626  ND1 HIS L  94      14.960  27.852  22.085  1.00 16.03           N  
ATOM   1627  CD2 HIS L  94      14.209  27.686  24.130  1.00 16.11           C  
ATOM   1628  CE1 HIS L  94      15.731  26.983  22.715  1.00 16.18           C  
ATOM   1629  NE2 HIS L  94      15.297  26.864  23.957  1.00 16.77           N  
ATOM   1630  N   PRO L  95      12.561  32.016  20.652  1.00 14.88           N  
ATOM   1631  CA  PRO L  95      13.628  31.510  19.787  1.00 14.75           C  
ATOM   1632  C   PRO L  95      14.940  32.272  19.975  1.00 14.74           C  
ATOM   1633  O   PRO L  95      14.939  33.495  20.139  1.00 14.62           O  
ATOM   1634  CB  PRO L  95      13.047  31.700  18.389  1.00 15.08           C  
ATOM   1635  CG  PRO L  95      12.279  32.978  18.534  1.00 14.90           C  
ATOM   1636  CD  PRO L  95      11.581  32.801  19.877  1.00 14.84           C  
ATOM   1637  N   TYR L  96      16.051  31.542  19.972  1.00 14.76           N  
ATOM   1638  CA  TYR L  96      17.363  32.170  20.107  1.00 15.35           C  
ATOM   1639  C   TYR L  96      17.518  33.053  18.874  1.00 15.68           C  
ATOM   1640  O   TYR L  96      16.896  32.794  17.844  1.00 17.00           O  
ATOM   1641  CB  TYR L  96      18.454  31.101  20.164  1.00 15.46           C  
ATOM   1642  CG  TYR L  96      18.422  30.246  21.417  1.00 15.28           C  
ATOM   1643  CD1 TYR L  96      17.641  30.606  22.524  1.00 15.49           C  
ATOM   1644  CD2 TYR L  96      19.173  29.074  21.498  1.00 15.60           C  
ATOM   1645  CE1 TYR L  96      17.614  29.813  23.675  1.00 15.71           C  
ATOM   1646  CE2 TYR L  96      19.153  28.279  22.638  1.00 15.85           C  
ATOM   1647  CZ  TYR L  96      18.372  28.650  23.722  1.00 15.99           C  
ATOM   1648  OH  TYR L  96      18.345  27.842  24.837  1.00 16.83           O  
ATOM   1649  N   SER L  97      18.341  34.090  18.953  1.00 15.06           N  
ATOM   1650  CA  SER L  97      18.459  34.983  17.806  1.00 15.05           C  
ATOM   1651  C   SER L  97      19.766  35.741  17.658  1.00 14.66           C  
ATOM   1652  O   SER L  97      20.400  36.122  18.641  1.00 14.40           O  
ATOM   1653  CB  SER L  97      17.322  36.002  17.850  1.00 15.30           C  
ATOM   1654  OG  SER L  97      17.310  36.672  19.103  1.00 15.64           O  
ATOM   1655  N   PHE L  98      20.129  35.979  16.402  1.00 14.46           N  
ATOM   1656  CA  PHE L  98      21.333  36.721  16.036  1.00 13.81           C  
ATOM   1657  C   PHE L  98      20.981  38.161  15.678  1.00 13.79           C  
ATOM   1658  O   PHE L  98      19.851  38.455  15.274  1.00 13.77           O  
ATOM   1659  CB  PHE L  98      21.981  36.112  14.788  1.00 14.00           C  
ATOM   1660  CG  PHE L  98      22.963  35.011  15.063  1.00 14.09           C  
ATOM   1661  CD1 PHE L  98      22.553  33.795  15.599  1.00 14.27           C  
ATOM   1662  CD2 PHE L  98      24.302  35.174  14.727  1.00 14.10           C  
ATOM   1663  CE1 PHE L  98      23.462  32.759  15.790  1.00 14.57           C  
ATOM   1664  CE2 PHE L  98      25.220  34.146  14.914  1.00 14.61           C  
ATOM   1665  CZ  PHE L  98      24.797  32.932  15.448  1.00 14.40           C  
ATOM   1666  N   GLY L  99      21.961  39.051  15.825  1.00 13.15           N  
ATOM   1667  CA  GLY L  99      21.783  40.439  15.431  1.00 12.81           C  
ATOM   1668  C   GLY L  99      21.877  40.437  13.910  1.00 12.76           C  
ATOM   1669  O   GLY L  99      22.166  39.397  13.326  1.00 12.38           O  
ATOM   1670  N   GLN L 100      21.664  41.579  13.263  1.00 12.65           N  
ATOM   1671  CA  GLN L 100      21.691  41.633  11.801  1.00 12.91           C  
ATOM   1672  C   GLN L 100      23.086  41.562  11.181  1.00 12.66           C  
ATOM   1673  O   GLN L 100      23.227  41.349   9.970  1.00 12.85           O  
ATOM   1674  CB  GLN L 100      20.990  42.904  11.303  1.00 13.11           C  
ATOM   1675  CG  GLN L 100      21.857  44.163  11.335  1.00 14.19           C  
ATOM   1676  CD  GLN L 100      21.840  44.888  12.666  1.00 14.25           C  
ATOM   1677  OE1 GLN L 100      21.554  44.301  13.708  1.00 14.20           O  
ATOM   1678  NE2 GLN L 100      22.169  46.178  12.637  1.00 14.78           N  
ATOM   1679  N   GLY L 101      24.110  41.755  12.007  1.00 12.09           N  
ATOM   1680  CA  GLY L 101      25.476  41.715  11.515  1.00 12.05           C  
ATOM   1681  C   GLY L 101      26.075  43.089  11.274  1.00 12.00           C  
ATOM   1682  O   GLY L 101      25.373  44.017  10.871  1.00 12.18           O  
ATOM   1683  N   THR L 102      27.377  43.211  11.526  1.00 11.43           N  
ATOM   1684  CA  THR L 102      28.113  44.457  11.339  1.00 11.76           C  
ATOM   1685  C   THR L 102      29.325  44.152  10.460  1.00 11.91           C  
ATOM   1686  O   THR L 102      30.145  43.308  10.809  1.00 12.24           O  
ATOM   1687  CB  THR L 102      28.592  45.024  12.696  1.00 11.58           C  
ATOM   1688  OG1 THR L 102      27.455  45.413  13.481  1.00 11.73           O  
ATOM   1689  CG2 THR L 102      29.506  46.238  12.485  1.00 11.78           C  
ATOM   1690  N   LYS L 103      29.435  44.833   9.321  1.00 12.49           N  
ATOM   1691  CA  LYS L 103      30.552  44.597   8.409  1.00 13.45           C  
ATOM   1692  C   LYS L 103      31.718  45.521   8.728  1.00 13.34           C  
ATOM   1693  O   LYS L 103      31.585  46.741   8.674  1.00 13.57           O  
ATOM   1694  CB  LYS L 103      30.103  44.805   6.957  1.00 14.82           C  
ATOM   1695  CG  LYS L 103      31.157  44.431   5.918  1.00 17.09           C  
ATOM   1696  CD  LYS L 103      30.578  44.449   4.508  1.00 19.01           C  
ATOM   1697  CE  LYS L 103      31.594  43.951   3.489  1.00 20.27           C  
ATOM   1698  NZ  LYS L 103      31.029  43.904   2.108  1.00 21.86           N  
ATOM   1699  N   LEU L 104      32.861  44.927   9.059  1.00 13.49           N  
ATOM   1700  CA  LEU L 104      34.059  45.685   9.398  1.00 14.14           C  
ATOM   1701  C   LEU L 104      35.072  45.629   8.260  1.00 14.47           C  
ATOM   1702  O   LEU L 104      35.437  44.549   7.806  1.00 14.27           O  
ATOM   1703  CB  LEU L 104      34.687  45.117  10.675  1.00 14.55           C  
ATOM   1704  CG  LEU L 104      36.018  45.711  11.146  1.00 14.97           C  
ATOM   1705  CD1 LEU L 104      35.880  47.210  11.336  1.00 16.02           C  
ATOM   1706  CD2 LEU L 104      36.439  45.046  12.453  1.00 15.65           C  
ATOM   1707  N   GLU L 105      35.524  46.797   7.811  1.00 14.92           N  
ATOM   1708  CA  GLU L 105      36.507  46.881   6.734  1.00 15.74           C  
ATOM   1709  C   GLU L 105      37.672  47.756   7.170  1.00 16.65           C  
ATOM   1710  O   GLU L 105      37.575  48.489   8.150  1.00 16.10           O  
ATOM   1711  CB  GLU L 105      35.869  47.461   5.479  1.00 16.04           C  
ATOM   1712  N   ILE L 106      38.782  47.667   6.446  1.00 17.76           N  
ATOM   1713  CA  ILE L 106      39.945  48.480   6.769  1.00 19.41           C  
ATOM   1714  C   ILE L 106      39.864  49.794   6.005  1.00 20.16           C  
ATOM   1715  O   ILE L 106      39.542  49.812   4.816  1.00 20.29           O  
ATOM   1716  CB  ILE L 106      41.263  47.776   6.376  1.00 19.70           C  
ATOM   1717  CG1 ILE L 106      41.411  46.468   7.151  1.00 20.39           C  
ATOM   1718  CG2 ILE L 106      42.444  48.697   6.654  1.00 20.11           C  
ATOM   1719  CD1 ILE L 106      41.441  46.641   8.658  1.00 20.74           C  
ATOM   1720  N   LYS L 107      40.139  50.893   6.696  1.00 21.12           N  
ATOM   1721  CA  LYS L 107      40.124  52.201   6.061  1.00 22.62           C  
ATOM   1722  C   LYS L 107      41.480  52.366   5.383  1.00 23.10           C  
ATOM   1723  O   LYS L 107      42.498  52.130   6.065  1.00 23.41           O  
ATOM   1724  CB  LYS L 107      39.914  53.296   7.112  1.00 23.22           C  
ATOM   1725  CG  LYS L 107      39.822  54.713   6.557  1.00 24.52           C  
ATOM   1726  CD  LYS L 107      41.185  55.292   6.233  1.00 25.82           C  
ATOM   1727  CE  LYS L 107      41.069  56.741   5.781  1.00 26.45           C  
ATOM   1728  NZ  LYS L 107      42.400  57.350   5.515  1.00 27.21           N  
TER    1729      LYS L 107                                                      
