# Supplementary material for: SARS-CoV-2 Spike Protein Interaction Space
Source: Int J Mol Sci. 2023 Jul 27;24(15):12058. doi: 10.3390/ijms241512058 (PMC10418891; doi:10.3390/ijms241512058)
Supplement: Supplementary file 1 [file ijms-24-12058-s001.zip › Supplementary Material File S1/1EK3.pdb]

REMARK 950 NUMBERING  Kabat
REMARK 950 METHOD     X-ray crystal structure
REMARK 950 RESOLUTION 1.900
REMARK 950 R-FACTOR   0.187
REMARK 950 R-FREE     0.237
REMARK 950 CHAIN-TYPE LABEL ORIGINAL
REMARK 950 CHAIN L    L    A
REMARK 950 CHAIN L    L    B
REMARK 950 MOLECULE : A : KAPPA-4 IMMUNOGLOBULIN LIGHT CHAIN VL
REMARK 950 SPECIES  : A : HOMO SAPIENS
SEQRES   1 L 114  ASP ILE VAL MET THR GLN SER PRO ASP SER LEU ALA VAL          
SEQRES   2 L 114  SER PRO GLY GLU ARG ALA THR ILE ASN CYS LYS SER SER          
SEQRES   3 L 114  GLN ASN LEU LEU ASP SER SER PHE ASP THR ASN THR LEU          
SEQRES   4 L 114  ALA TRP TYR GLN GLN LYS PRO GLY GLN PRO PRO LYS LEU          
SEQRES   5 L 114  LEU ILE TYR TRP ALA SER SER ARG GLU SER GLY VAL PRO          
SEQRES   6 L 114  ASP ARG PHE SER GLY SER GLY SER GLY THR ASP PHE THR          
SEQRES   7 L 114  LEU THR ILE SER SER LEU GLN ALA GLU ASP VAL ALA VAL          
SEQRES   8 L 114  TYR TYR CYS GLN GLN TYR TYR SER THR PRO PRO THR PHE          
SEQRES   9 L 114  GLY GLY GLY THR LYS VAL GLU ILE LYS ARG                      
SEQRES   1 L 114  ASP ILE VAL MET THR GLN SER PRO ASP SER LEU ALA VAL          
SEQRES   2 L 114  SER PRO GLY GLU ARG ALA THR ILE ASN CYS LYS SER SER          
SEQRES   3 L 114  GLN ASN LEU LEU ASP SER SER PHE ASP THR ASN THR LEU          
SEQRES   4 L 114  ALA TRP TYR GLN GLN LYS PRO GLY GLN PRO PRO LYS LEU          
SEQRES   5 L 114  LEU ILE TYR TRP ALA SER SER ARG GLU SER GLY VAL PRO          
SEQRES   6 L 114  ASP ARG PHE SER GLY SER GLY SER GLY THR ASP PHE THR          
SEQRES   7 L 114  LEU THR ILE SER SER LEU GLN ALA GLU ASP VAL ALA VAL          
SEQRES   8 L 114  TYR TYR CYS GLN GLN TYR TYR SER THR PRO PRO THR PHE          
SEQRES   9 L 114  GLY GLY GLY THR LYS VAL GLU ILE LYS ARG                      
ATOM      1  N   ASP L   1      -4.966  40.940  55.902  1.00 29.09           N  
ATOM      2  CA  ASP L   1      -3.481  40.899  56.042  1.00 28.88           C  
ATOM      3  C   ASP L   1      -2.807  41.424  54.779  1.00 27.91           C  
ATOM      4  O   ASP L   1      -3.476  41.860  53.841  1.00 29.07           O  
ATOM      5  CB  ASP L   1      -3.028  39.470  56.319  1.00 29.22           C  
ATOM      6  N   ILE L   2      -1.479  41.384  54.759  1.00 26.32           N  
ATOM      7  CA  ILE L   2      -0.717  41.849  53.605  1.00 24.67           C  
ATOM      8  C   ILE L   2      -0.620  40.738  52.559  1.00 22.78           C  
ATOM      9  O   ILE L   2      -0.312  39.595  52.889  1.00 23.73           O  
ATOM     10  CB  ILE L   2       0.716  42.270  54.011  1.00 24.17           C  
ATOM     11  CG1 ILE L   2       0.660  43.406  55.034  1.00 24.26           C  
ATOM     12  CG2 ILE L   2       1.500  42.708  52.783  1.00 24.38           C  
ATOM     13  CD1 ILE L   2       2.025  43.801  55.586  1.00 23.34           C  
ATOM     14  N   VAL L   3      -0.889  41.080  51.303  1.00 21.08           N  
ATOM     15  CA  VAL L   3      -0.817  40.115  50.212  1.00 18.44           C  
ATOM     16  C   VAL L   3       0.470  40.308  49.414  1.00 16.72           C  
ATOM     17  O   VAL L   3       0.718  41.383  48.868  1.00 15.63           O  
ATOM     18  CB  VAL L   3      -2.016  40.258  49.241  1.00 18.97           C  
ATOM     19  CG1 VAL L   3      -1.880  39.256  48.097  1.00 17.93           C  
ATOM     20  CG2 VAL L   3      -3.325  40.037  49.987  1.00 18.89           C  
ATOM     21  N   MET L   4       1.289  39.263  49.356  1.00 15.83           N  
ATOM     22  CA  MET L   4       2.550  39.306  48.616  1.00 14.33           C  
ATOM     23  C   MET L   4       2.404  38.429  47.380  1.00 14.43           C  
ATOM     24  O   MET L   4       2.241  37.215  47.493  1.00 14.14           O  
ATOM     25  CB  MET L   4       3.695  38.788  49.485  1.00 14.03           C  
ATOM     26  CG  MET L   4       3.930  39.594  50.754  1.00 12.87           C  
ATOM     27  SD  MET L   4       4.329  41.323  50.423  1.00 11.71           S  
ATOM     28  CE  MET L   4       6.035  41.175  49.852  1.00 12.93           C  
ATOM     29  N   THR L   5       2.463  39.048  46.203  1.00 12.71           N  
ATOM     30  CA  THR L   5       2.307  38.321  44.947  1.00 13.25           C  
ATOM     31  C   THR L   5       3.564  38.351  44.086  1.00 12.05           C  
ATOM     32  O   THR L   5       4.105  39.416  43.810  1.00 12.78           O  
ATOM     33  CB  THR L   5       1.147  38.914  44.114  1.00 14.06           C  
ATOM     34  OG1 THR L   5      -0.049  38.940  44.905  1.00 19.20           O  
ATOM     35  CG2 THR L   5       0.899  38.072  42.870  1.00 16.35           C  
ATOM     36  N   GLN L   6       4.026  37.183  43.655  1.00 11.30           N  
ATOM     37  CA  GLN L   6       5.209  37.126  42.802  1.00  9.97           C  
ATOM     38  C   GLN L   6       4.805  36.735  41.383  1.00 10.11           C  
ATOM     39  O   GLN L   6       3.796  36.059  41.176  1.00 10.33           O  
ATOM     40  CB  GLN L   6       6.227  36.114  43.344  1.00 10.36           C  
ATOM     41  CG  GLN L   6       6.674  36.383  44.772  1.00 10.07           C  
ATOM     42  CD  GLN L   6       7.742  35.418  45.247  1.00 10.86           C  
ATOM     43  OE1 GLN L   6       7.881  35.174  46.445  1.00 12.11           O  
ATOM     44  NE2 GLN L   6       8.512  34.872  44.311  1.00 11.58           N  
ATOM     45  N   SER L   7       5.602  37.158  40.408  1.00 10.62           N  
ATOM     46  CA  SER L   7       5.330  36.843  39.010  1.00 10.73           C  
ATOM     47  C   SER L   7       6.640  36.727  38.234  1.00 10.93           C  
ATOM     48  O   SER L   7       7.498  37.603  38.327  1.00 12.17           O  
ATOM     49  CB  SER L   7       4.456  37.931  38.386  1.00 11.30           C  
ATOM     50  OG  SER L   7       4.165  37.632  37.030  1.00 15.26           O  
ATOM     51  N   PRO L   8       6.820  35.635  37.471  1.00 10.32           N  
ATOM     52  CA  PRO L   8       5.885  34.516  37.298  1.00  9.98           C  
ATOM     53  C   PRO L   8       6.086  33.516  38.435  1.00  9.76           C  
ATOM     54  O   PRO L   8       6.858  33.773  39.350  1.00  7.58           O  
ATOM     55  CB  PRO L   8       6.302  33.943  35.954  1.00  9.79           C  
ATOM     56  CG  PRO L   8       7.798  34.055  36.036  1.00  8.38           C  
ATOM     57  CD  PRO L   8       7.995  35.467  36.594  1.00 10.40           C  
ATOM     58  N   ASP L   9       5.400  32.378  38.372  1.00  9.38           N  
ATOM     59  CA  ASP L   9       5.536  31.361  39.407  1.00  9.77           C  
ATOM     60  C   ASP L   9       6.729  30.461  39.111  1.00  9.25           C  
ATOM     61  O   ASP L   9       7.295  29.843  40.013  1.00  8.61           O  
ATOM     62  CB  ASP L   9       4.256  30.531  39.495  1.00 12.50           C  
ATOM     63  CG  ASP L   9       3.063  31.359  39.922  1.00 14.65           C  
ATOM     64  OD1 ASP L   9       3.185  32.117  40.906  1.00 14.51           O  
ATOM     65  OD2 ASP L   9       2.001  31.252  39.274  1.00 19.76           O  
ATOM     66  N   SER L  10       7.101  30.392  37.836  1.00  8.91           N  
ATOM     67  CA  SER L  10       8.240  29.589  37.394  1.00  9.28           C  
ATOM     68  C   SER L  10       8.839  30.234  36.155  1.00  9.67           C  
ATOM     69  O   SER L  10       8.123  30.837  35.359  1.00  8.14           O  
ATOM     70  CB  SER L  10       7.804  28.162  37.030  1.00 10.04           C  
ATOM     71  OG  SER L  10       7.411  27.422  38.169  1.00 14.78           O  
ATOM     72  N   LEU L  11      10.153  30.116  35.998  1.00  8.85           N  
ATOM     73  CA  LEU L  11      10.812  30.660  34.819  1.00  9.23           C  
ATOM     74  C   LEU L  11      12.120  29.933  34.567  1.00  9.78           C  
ATOM     75  O   LEU L  11      12.726  29.374  35.484  1.00  9.72           O  
ATOM     76  CB  LEU L  11      11.068  32.161  34.976  1.00  9.47           C  
ATOM     77  CG  LEU L  11      12.121  32.640  35.978  1.00  9.84           C  
ATOM     78  CD1 LEU L  11      13.518  32.497  35.376  1.00 10.30           C  
ATOM     79  CD2 LEU L  11      11.854  34.097  36.316  1.00  8.73           C  
ATOM     80  N   ALA L  12      12.544  29.933  33.310  1.00  8.86           N  
ATOM     81  CA  ALA L  12      13.791  29.293  32.937  1.00  9.66           C  
ATOM     82  C   ALA L  12      14.471  30.129  31.862  1.00  9.35           C  
ATOM     83  O   ALA L  12      13.819  30.611  30.931  1.00  9.46           O  
ATOM     84  CB  ALA L  12      13.525  27.880  32.424  1.00  7.79           C  
ATOM     85  N   VAL L  13      15.775  30.327  32.010  1.00  9.17           N  
ATOM     86  CA  VAL L  13      16.543  31.079  31.026  1.00  8.97           C  
ATOM     87  C   VAL L  13      17.814  30.296  30.736  1.00  9.21           C  
ATOM     88  O   VAL L  13      18.200  29.407  31.504  1.00  9.62           O  
ATOM     89  CB  VAL L  13      16.913  32.501  31.525  1.00  9.77           C  
ATOM     90  CG1 VAL L  13      15.647  33.297  31.815  1.00  9.70           C  
ATOM     91  CG2 VAL L  13      17.787  32.419  32.767  1.00 12.10           C  
ATOM     92  N   SER L  14      18.453  30.616  29.619  1.00  8.46           N  
ATOM     93  CA  SER L  14      19.676  29.937  29.221  1.00  9.88           C  
ATOM     94  C   SER L  14      20.812  30.226  30.194  1.00 10.62           C  
ATOM     95  O   SER L  14      20.783  31.217  30.924  1.00 10.24           O  
ATOM     96  CB  SER L  14      20.085  30.394  27.816  1.00  9.82           C  
ATOM     97  OG  SER L  14      19.018  30.229  26.895  1.00  9.45           O  
ATOM     98  N   PRO L  15      21.830  29.354  30.223  1.00 11.49           N  
ATOM     99  CA  PRO L  15      22.961  29.574  31.126  1.00 11.14           C  
ATOM    100  C   PRO L  15      23.548  30.958  30.853  1.00 12.56           C  
ATOM    101  O   PRO L  15      23.709  31.351  29.694  1.00 10.76           O  
ATOM    102  CB  PRO L  15      23.930  28.463  30.736  1.00 12.30           C  
ATOM    103  CG  PRO L  15      23.008  27.348  30.320  1.00 12.28           C  
ATOM    104  CD  PRO L  15      21.970  28.077  29.497  1.00 11.27           C  
ATOM    105  N   GLY L  16      23.841  31.703  31.912  1.00 10.94           N  
ATOM    106  CA  GLY L  16      24.418  33.024  31.743  1.00 12.24           C  
ATOM    107  C   GLY L  16      23.455  34.150  31.405  1.00 12.52           C  
ATOM    108  O   GLY L  16      23.865  35.309  31.353  1.00 13.66           O  
ATOM    109  N   GLU L  17      22.186  33.831  31.162  1.00 11.94           N  
ATOM    110  CA  GLU L  17      21.210  34.869  30.839  1.00 12.51           C  
ATOM    111  C   GLU L  17      20.610  35.485  32.098  1.00 12.79           C  
ATOM    112  O   GLU L  17      20.691  34.916  33.187  1.00 10.18           O  
ATOM    113  CB  GLU L  17      20.074  34.319  29.970  1.00 13.41           C  
ATOM    114  CG  GLU L  17      20.501  33.819  28.599  1.00 16.35           C  
ATOM    115  CD  GLU L  17      19.317  33.590  27.667  1.00 18.44           C  
ATOM    116  OE1 GLU L  17      18.296  33.025  28.117  1.00 17.21           O  
ATOM    117  OE2 GLU L  17      19.412  33.969  26.480  1.00 22.85           O  
ATOM    118  N   ARG L  18      19.995  36.650  31.926  1.00 12.09           N  
ATOM    119  CA  ARG L  18      19.382  37.376  33.026  1.00 14.15           C  
ATOM    120  C   ARG L  18      18.013  36.798  33.380  1.00 13.88           C  
ATOM    121  O   ARG L  18      17.228  36.437  32.499  1.00 13.68           O  
ATOM    122  CB  ARG L  18      19.243  38.856  32.648  1.00 17.14           C  
ATOM    123  CG  ARG L  18      18.960  39.780  33.823  1.00 22.28           C  
ATOM    124  CD  ARG L  18      19.002  41.248  33.408  1.00 26.86           C  
ATOM    125  NE  ARG L  18      17.809  41.656  32.673  1.00 31.73           N  
ATOM    126  CZ  ARG L  18      17.583  42.894  32.240  1.00 34.80           C  
ATOM    127  NH1 ARG L  18      18.474  43.854  32.462  1.00 35.11           N  
ATOM    128  NH2 ARG L  18      16.459  43.179  31.595  1.00 35.28           N  
ATOM    129  N   ALA L  19      17.743  36.703  34.677  1.00 12.06           N  
ATOM    130  CA  ALA L  19      16.470  36.196  35.176  1.00 11.81           C  
ATOM    131  C   ALA L  19      15.852  37.306  36.021  1.00 11.49           C  
ATOM    132  O   ALA L  19      16.528  37.899  36.863  1.00  9.59           O  
ATOM    133  CB  ALA L  19      16.693  34.949  36.023  1.00 13.38           C  
ATOM    134  N   THR L  20      14.574  37.588  35.791  1.00 11.22           N  
ATOM    135  CA  THR L  20      13.881  38.644  36.526  1.00 11.96           C  
ATOM    136  C   THR L  20      12.625  38.129  37.226  1.00 10.83           C  
ATOM    137  O   THR L  20      11.801  37.444  36.622  1.00  9.06           O  
ATOM    138  CB  THR L  20      13.476  39.800  35.585  1.00 12.52           C  
ATOM    139  OG1 THR L  20      14.652  40.386  35.012  1.00 17.40           O  
ATOM    140  CG2 THR L  20      12.714  40.867  36.349  1.00 14.09           C  
ATOM    141  N   ILE L  21      12.491  38.471  38.503  1.00 10.34           N  
ATOM    142  CA  ILE L  21      11.343  38.057  39.294  1.00 10.75           C  
ATOM    143  C   ILE L  21      10.673  39.291  39.881  1.00 11.69           C  
ATOM    144  O   ILE L  21      11.333  40.153  40.459  1.00  9.57           O  
ATOM    145  CB  ILE L  21      11.761  37.126  40.449  1.00 12.54           C  
ATOM    146  CG1 ILE L  21      12.479  35.895  39.890  1.00 12.83           C  
ATOM    147  CG2 ILE L  21      10.529  36.715  41.257  1.00 11.49           C  
ATOM    148  CD1 ILE L  21      13.054  34.989  40.957  1.00 13.59           C  
ATOM    149  N   ASN L  22       9.357  39.368  39.732  1.00 11.51           N  
ATOM    150  CA  ASN L  22       8.603  40.505  40.241  1.00 11.63           C  
ATOM    151  C   ASN L  22       7.836  40.148  41.517  1.00 11.61           C  
ATOM    152  O   ASN L  22       7.409  39.008  41.702  1.00 10.37           O  
ATOM    153  CB  ASN L  22       7.642  40.999  39.153  1.00 14.75           C  
ATOM    154  CG  ASN L  22       6.836  42.212  39.583  1.00 19.24           C  
ATOM    155  OD1 ASN L  22       5.798  42.084  40.233  1.00 24.42           O  
ATOM    156  ND2 ASN L  22       7.316  43.399  39.228  1.00 22.14           N  
ATOM    157  N   CYS L  23       7.676  41.131  42.399  1.00 10.12           N  
ATOM    158  CA  CYS L  23       6.947  40.936  43.652  1.00 11.17           C  
ATOM    159  C   CYS L  23       6.119  42.175  43.928  1.00 12.01           C  
ATOM    160  O   CYS L  23       6.602  43.296  43.780  1.00 12.55           O  
ATOM    161  CB  CYS L  23       7.918  40.715  44.806  1.00 11.55           C  
ATOM    162  SG  CYS L  23       7.210  40.649  46.492  1.00 12.43           S  
ATOM    163  N   LYS L  24       4.872  41.970  44.331  1.00 12.49           N  
ATOM    164  CA  LYS L  24       3.982  43.086  44.619  1.00 14.31           C  
ATOM    165  C   LYS L  24       3.414  42.954  46.028  1.00 13.33           C  
ATOM    166  O   LYS L  24       2.973  41.875  46.428  1.00 14.20           O  
ATOM    167  CB  LYS L  24       2.845  43.106  43.596  1.00 17.48           C  
ATOM    168  CG  LYS L  24       1.892  44.288  43.713  1.00 22.76           C  
ATOM    169  CD  LYS L  24       0.674  44.074  42.823  1.00 26.32           C  
ATOM    170  CE  LYS L  24       1.089  43.768  41.388  1.00 29.06           C  
ATOM    171  NZ  LYS L  24      -0.038  43.226  40.577  1.00 31.64           N  
ATOM    172  N   SER L  25       3.443  44.048  46.781  1.00 12.65           N  
ATOM    173  CA  SER L  25       2.918  44.058  48.143  1.00 12.81           C  
ATOM    174  C   SER L  25       1.639  44.882  48.202  1.00 13.57           C  
ATOM    175  O   SER L  25       1.560  45.952  47.600  1.00 12.03           O  
ATOM    176  CB  SER L  25       3.941  44.658  49.113  1.00 13.17           C  
ATOM    177  OG  SER L  25       3.359  44.859  50.395  1.00 10.55           O  
ATOM    178  N   SER L  26       0.641  44.379  48.924  1.00 13.63           N  
ATOM    179  CA  SER L  26      -0.624  45.090  49.062  1.00 15.72           C  
ATOM    180  C   SER L  26      -0.429  46.233  50.052  1.00 16.88           C  
ATOM    181  O   SER L  26      -1.251  47.146  50.142  1.00 17.28           O  
ATOM    182  CB  SER L  26      -1.715  44.145  49.574  1.00 16.33           C  
ATOM    183  OG  SER L  26      -1.435  43.689  50.886  1.00 15.07           O  
ATOM    184  N   GLN L  27       0.680  46.170  50.782  1.00 15.28           N  
ATOM    185  CA  GLN L  27       1.025  47.170  51.785  1.00 15.26           C  
ATOM    186  C   GLN L  27       2.259  47.982  51.392  1.00 14.04           C  
ATOM    187  O   GLN L  27       3.253  47.430  50.935  1.00 12.54           O  
ATOM    188  CB  GLN L  27       1.289  46.471  53.122  1.00 15.80           C  
ATOM    189  CG  GLN L  27       1.960  47.341  54.187  1.00 18.20           C  
ATOM    190  CD  GLN L  27       1.003  48.324  54.815  1.00 20.00           C  
ATOM    191  OE1 GLN L  27      -0.039  47.933  55.340  1.00 18.90           O  
ATOM    192  NE2 GLN L  27       1.349  49.607  54.770  1.00 21.31           N  
ATOM    193  N   ASN L  27A      2.185  49.297  51.573  1.00 14.36           N  
ATOM    194  CA  ASN L  27A      3.308  50.176  51.278  1.00 12.99           C  
ATOM    195  C   ASN L  27A      4.400  49.838  52.297  1.00 11.91           C  
ATOM    196  O   ASN L  27A      4.218  50.028  53.498  1.00 12.14           O  
ATOM    197  CB  ASN L  27A      2.860  51.636  51.410  1.00 14.30           C  
ATOM    198  CG  ASN L  27A      4.014  52.609  51.388  1.00 15.31           C  
ATOM    199  OD1 ASN L  27A      5.042  52.359  50.759  1.00 15.52           O  
ATOM    200  ND2 ASN L  27A      3.845  53.740  52.067  1.00 16.49           N  
ATOM    201  N   LEU L  27B      5.530  49.331  51.814  1.00 11.70           N  
ATOM    202  CA  LEU L  27B      6.623  48.921  52.694  1.00 10.64           C  
ATOM    203  C   LEU L  27B      7.723  49.957  52.877  1.00 11.56           C  
ATOM    204  O   LEU L  27B      8.720  49.697  53.557  1.00 10.76           O  
ATOM    205  CB  LEU L  27B      7.239  47.622  52.165  1.00 11.10           C  
ATOM    206  CG  LEU L  27B      6.260  46.471  51.912  1.00 10.82           C  
ATOM    207  CD1 LEU L  27B      7.001  45.281  51.324  1.00  9.18           C  
ATOM    208  CD2 LEU L  27B      5.568  46.086  53.211  1.00  8.61           C  
ATOM    209  N   LEU L  27C      7.546  51.130  52.282  1.00 12.12           N  
ATOM    210  CA  LEU L  27C      8.551  52.180  52.377  1.00 12.93           C  
ATOM    211  C   LEU L  27C      8.345  53.175  53.510  1.00 14.04           C  
ATOM    212  O   LEU L  27C      7.267  53.753  53.661  1.00 14.38           O  
ATOM    213  CB  LEU L  27C      8.632  52.962  51.063  1.00 13.27           C  
ATOM    214  CG  LEU L  27C      9.532  54.205  51.083  1.00 14.35           C  
ATOM    215  CD1 LEU L  27C     10.978  53.800  51.323  1.00 13.57           C  
ATOM    216  CD2 LEU L  27C      9.404  54.957  49.767  1.00 15.06           C  
ATOM    217  N   ASP L  27D      9.392  53.365  54.305  1.00 14.56           N  
ATOM    218  CA  ASP L  27D      9.365  54.339  55.386  1.00 15.18           C  
ATOM    219  C   ASP L  27D     10.107  55.515  54.763  1.00 14.62           C  
ATOM    220  O   ASP L  27D     11.331  55.477  54.617  1.00 15.36           O  
ATOM    221  CB  ASP L  27D     10.130  53.830  56.608  1.00 16.09           C  
ATOM    222  CG  ASP L  27D     10.168  54.847  57.735  1.00 19.97           C  
ATOM    223  OD1 ASP L  27D     10.322  56.053  57.445  1.00 20.04           O  
ATOM    224  OD2 ASP L  27D     10.056  54.442  58.912  1.00 21.69           O  
ATOM    225  N   SER L  27E      9.368  56.548  54.378  1.00 13.70           N  
ATOM    226  CA  SER L  27E      9.966  57.712  53.731  1.00 14.39           C  
ATOM    227  C   SER L  27E     11.021  58.445  54.562  1.00 13.59           C  
ATOM    228  O   SER L  27E     11.967  59.007  54.008  1.00 14.76           O  
ATOM    229  CB  SER L  27E      8.868  58.685  53.306  1.00 15.21           C  
ATOM    230  N   SER L  27F     10.875  58.439  55.881  1.00 13.38           N  
ATOM    231  CA  SER L  27F     11.838  59.139  56.728  1.00 15.13           C  
ATOM    232  C   SER L  27F     13.210  58.469  56.749  1.00 15.67           C  
ATOM    233  O   SER L  27F     14.230  59.148  56.839  1.00 16.03           O  
ATOM    234  CB  SER L  27F     11.303  59.278  58.159  1.00 16.08           C  
ATOM    235  OG  SER L  27F     11.198  58.022  58.808  1.00 16.49           O  
ATOM    236  N   PHE L  28      13.240  57.142  56.656  1.00 15.97           N  
ATOM    237  CA  PHE L  28      14.510  56.420  56.670  1.00 17.28           C  
ATOM    238  C   PHE L  28      14.937  55.909  55.300  1.00 17.88           C  
ATOM    239  O   PHE L  28      16.046  55.398  55.147  1.00 16.27           O  
ATOM    240  CB  PHE L  28      14.447  55.233  57.633  1.00 19.66           C  
ATOM    241  CG  PHE L  28      14.370  55.624  59.077  1.00 21.73           C  
ATOM    242  CD1 PHE L  28      15.530  55.890  59.799  1.00 23.06           C  
ATOM    243  CD2 PHE L  28      13.143  55.722  59.720  1.00 22.65           C  
ATOM    244  CE1 PHE L  28      15.467  56.247  61.146  1.00 24.32           C  
ATOM    245  CE2 PHE L  28      13.069  56.077  61.064  1.00 24.36           C  
ATOM    246  CZ  PHE L  28      14.235  56.340  61.779  1.00 24.10           C  
ATOM    247  N   ASP L  29      14.055  56.048  54.314  1.00 17.05           N  
ATOM    248  CA  ASP L  29      14.320  55.587  52.954  1.00 18.12           C  
ATOM    249  C   ASP L  29      14.584  54.087  52.922  1.00 17.64           C  
ATOM    250  O   ASP L  29      15.404  53.607  52.144  1.00 18.31           O  
ATOM    251  CB  ASP L  29      15.516  56.324  52.343  1.00 19.98           C  
ATOM    252  CG  ASP L  29      15.238  57.797  52.121  1.00 21.82           C  
ATOM    253  OD1 ASP L  29      14.083  58.133  51.795  1.00 23.38           O  
ATOM    254  OD2 ASP L  29      16.174  58.614  52.256  1.00 21.88           O  
ATOM    255  N   THR L  30      13.886  53.345  53.771  1.00 16.01           N  
ATOM    256  CA  THR L  30      14.064  51.903  53.807  1.00 14.52           C  
ATOM    257  C   THR L  30      12.758  51.167  53.546  1.00 13.58           C  
ATOM    258  O   THR L  30      11.690  51.591  53.981  1.00 14.16           O  
ATOM    259  CB  THR L  30      14.644  51.442  55.161  1.00 13.70           C  
ATOM    260  OG1 THR L  30      13.898  52.031  56.231  1.00 13.31           O  
ATOM    261  CG2 THR L  30      16.109  51.842  55.277  1.00 14.72           C  
ATOM    262  N   ASN L  31      12.862  50.067  52.811  1.00 12.08           N  
ATOM    263  CA  ASN L  31      11.717  49.228  52.483  1.00 11.71           C  
ATOM    264  C   ASN L  31      11.856  47.926  53.259  1.00 10.57           C  
ATOM    265  O   ASN L  31      12.899  47.271  53.182  1.00  8.86           O  
ATOM    266  CB  ASN L  31      11.708  48.903  50.987  1.00 10.00           C  
ATOM    267  CG  ASN L  31      11.197  50.046  50.139  1.00 10.48           C  
ATOM    268  OD1 ASN L  31       9.992  50.221  49.983  1.00  7.79           O  
ATOM    269  ND2 ASN L  31      12.115  50.832  49.582  1.00 10.99           N  
ATOM    270  N   THR L  32      10.822  47.554  54.008  1.00  9.82           N  
ATOM    271  CA  THR L  32      10.861  46.304  54.758  1.00  9.66           C  
ATOM    272  C   THR L  32      10.537  45.169  53.794  1.00  8.99           C  
ATOM    273  O   THR L  32       9.558  44.443  53.964  1.00  7.70           O  
ATOM    274  CB  THR L  32       9.843  46.294  55.923  1.00 11.25           C  
ATOM    275  OG1 THR L  32       8.584  46.800  55.465  1.00 11.00           O  
ATOM    276  CG2 THR L  32      10.351  47.144  57.080  1.00 12.96           C  
ATOM    277  N   LEU L  33      11.374  45.033  52.772  1.00  8.46           N  
ATOM    278  CA  LEU L  33      11.202  44.002  51.755  1.00  7.32           C  
ATOM    279  C   LEU L  33      12.535  43.270  51.609  1.00  7.28           C  
ATOM    280  O   LEU L  33      13.591  43.897  51.485  1.00  7.28           O  
ATOM    281  CB  LEU L  33      10.797  44.651  50.423  1.00  7.23           C  
ATOM    282  CG  LEU L  33      10.408  43.808  49.198  1.00  7.31           C  
ATOM    283  CD1 LEU L  33      11.634  43.114  48.621  1.00  8.26           C  
ATOM    284  CD2 LEU L  33       9.334  42.800  49.588  1.00  6.47           C  
ATOM    285  N   ALA L  34      12.482  41.944  51.640  1.00  7.22           N  
ATOM    286  CA  ALA L  34      13.683  41.128  51.513  1.00  6.17           C  
ATOM    287  C   ALA L  34      13.463  40.020  50.489  1.00  6.21           C  
ATOM    288  O   ALA L  34      12.326  39.727  50.115  1.00  6.19           O  
ATOM    289  CB  ALA L  34      14.037  40.514  52.864  1.00  7.73           C  
ATOM    290  N   TRP L  35      14.560  39.425  50.031  1.00  6.35           N  
ATOM    291  CA  TRP L  35      14.510  38.319  49.083  1.00  6.91           C  
ATOM    292  C   TRP L  35      15.275  37.141  49.675  1.00  6.19           C  
ATOM    293  O   TRP L  35      16.354  37.312  50.238  1.00  9.27           O  
ATOM    294  CB  TRP L  35      15.140  38.701  47.739  1.00  5.69           C  
ATOM    295  CG  TRP L  35      14.335  39.668  46.933  1.00  5.04           C  
ATOM    296  CD1 TRP L  35      14.466  41.025  46.907  1.00  5.62           C  
ATOM    297  CD2 TRP L  35      13.252  39.350  46.050  1.00  6.30           C  
ATOM    298  NE1 TRP L  35      13.529  41.576  46.058  1.00  6.30           N  
ATOM    299  CE2 TRP L  35      12.772  40.569  45.521  1.00  5.75           C  
ATOM    300  CE3 TRP L  35      12.642  38.152  45.655  1.00  4.04           C  
ATOM    301  CZ2 TRP L  35      11.707  40.626  44.614  1.00  5.87           C  
ATOM    302  CZ3 TRP L  35      11.583  38.208  44.752  1.00  6.38           C  
ATOM    303  CH2 TRP L  35      11.127  39.437  44.243  1.00  6.47           C  
ATOM    304  N   TYR L  36      14.708  35.949  49.545  1.00  7.28           N  
ATOM    305  CA  TYR L  36      15.331  34.734  50.061  1.00  8.26           C  
ATOM    306  C   TYR L  36      15.495  33.694  48.962  1.00  7.90           C  
ATOM    307  O   TYR L  36      14.798  33.726  47.948  1.00  8.88           O  
ATOM    308  CB  TYR L  36      14.476  34.111  51.170  1.00  6.54           C  
ATOM    309  CG  TYR L  36      14.468  34.852  52.487  1.00  7.22           C  
ATOM    310  CD1 TYR L  36      13.873  36.112  52.602  1.00  7.24           C  
ATOM    311  CD2 TYR L  36      15.025  34.277  53.630  1.00  6.26           C  
ATOM    312  CE1 TYR L  36      13.829  36.777  53.826  1.00  7.62           C  
ATOM    313  CE2 TYR L  36      14.990  34.937  54.863  1.00  6.35           C  
ATOM    314  CZ  TYR L  36      14.388  36.182  54.952  1.00  7.16           C  
ATOM    315  OH  TYR L  36      14.323  36.822  56.170  1.00  7.35           O  
ATOM    316  N   GLN L  37      16.414  32.765  49.186  1.00  8.40           N  
ATOM    317  CA  GLN L  37      16.664  31.679  48.251  1.00  8.23           C  
ATOM    318  C   GLN L  37      16.433  30.361  48.985  1.00  7.89           C  
ATOM    319  O   GLN L  37      16.917  30.173  50.107  1.00  7.44           O  
ATOM    320  CB  GLN L  37      18.101  31.726  47.749  1.00  7.90           C  
ATOM    321  CG  GLN L  37      18.417  30.665  46.713  1.00  8.99           C  
ATOM    322  CD  GLN L  37      19.901  30.494  46.512  1.00 10.91           C  
ATOM    323  OE1 GLN L  37      20.618  30.123  47.440  1.00 12.33           O  
ATOM    324  NE2 GLN L  37      20.376  30.766  45.300  1.00 11.12           N  
ATOM    325  N   GLN L  38      15.700  29.450  48.354  1.00  7.42           N  
ATOM    326  CA  GLN L  38      15.417  28.154  48.967  1.00  8.10           C  
ATOM    327  C   GLN L  38      15.804  26.993  48.055  1.00  8.59           C  
ATOM    328  O   GLN L  38      15.248  26.835  46.966  1.00  8.09           O  
ATOM    329  CB  GLN L  38      13.926  28.035  49.324  1.00  7.92           C  
ATOM    330  CG  GLN L  38      13.553  26.667  49.907  1.00 10.55           C  
ATOM    331  CD  GLN L  38      12.064  26.510  50.167  1.00  9.55           C  
ATOM    332  OE1 GLN L  38      11.243  26.702  49.273  1.00  8.31           O  
ATOM    333  NE2 GLN L  38      11.711  26.151  51.398  1.00  9.66           N  
ATOM    334  N   LYS L  39      16.763  26.190  48.506  1.00 10.20           N  
ATOM    335  CA  LYS L  39      17.212  25.023  47.759  1.00 12.36           C  
ATOM    336  C   LYS L  39      16.310  23.860  48.175  1.00 14.59           C  
ATOM    337  O   LYS L  39      15.651  23.922  49.214  1.00 12.57           O  
ATOM    338  CB  LYS L  39      18.674  24.708  48.094  1.00 15.48           C  
ATOM    339  CG  LYS L  39      19.679  25.755  47.612  1.00 16.94           C  
ATOM    340  CD  LYS L  39      19.712  25.834  46.093  1.00 19.84           C  
ATOM    341  CE  LYS L  39      20.742  26.844  45.593  1.00 20.99           C  
ATOM    342  NZ  LYS L  39      22.149  26.446  45.910  1.00 22.94           N  
ATOM    343  N   PRO L  40      16.269  22.782  47.373  1.00 14.82           N  
ATOM    344  CA  PRO L  40      15.424  21.627  47.696  1.00 15.97           C  
ATOM    345  C   PRO L  40      15.612  21.071  49.108  1.00 14.25           C  
ATOM    346  O   PRO L  40      16.735  20.826  49.540  1.00 14.03           O  
ATOM    347  CB  PRO L  40      15.806  20.613  46.619  1.00 17.81           C  
ATOM    348  CG  PRO L  40      16.144  21.491  45.446  1.00 18.05           C  
ATOM    349  CD  PRO L  40      16.973  22.575  46.094  1.00 16.81           C  
ATOM    350  N   GLY L  41      14.503  20.890  49.819  1.00 14.31           N  
ATOM    351  CA  GLY L  41      14.547  20.343  51.166  1.00 12.95           C  
ATOM    352  C   GLY L  41      15.058  21.247  52.273  1.00 12.23           C  
ATOM    353  O   GLY L  41      15.059  20.845  53.437  1.00 12.29           O  
ATOM    354  N   GLN L  42      15.489  22.458  51.928  1.00 13.11           N  
ATOM    355  CA  GLN L  42      16.011  23.395  52.925  1.00 13.27           C  
ATOM    356  C   GLN L  42      15.070  24.570  53.178  1.00 12.02           C  
ATOM    357  O   GLN L  42      14.139  24.821  52.410  1.00 10.49           O  
ATOM    358  CB  GLN L  42      17.350  23.994  52.474  1.00 13.54           C  
ATOM    359  CG  GLN L  42      18.371  23.038  51.897  1.00 17.20           C  
ATOM    360  CD  GLN L  42      19.731  23.698  51.733  1.00 20.45           C  
ATOM    361  OE1 GLN L  42      19.827  24.893  51.431  1.00 20.53           O  
ATOM    362  NE2 GLN L  42      20.792  22.922  51.925  1.00 22.73           N  
ATOM    363  N   PRO L  43      15.298  25.304  54.278  1.00 10.86           N  
ATOM    364  CA  PRO L  43      14.436  26.457  54.556  1.00  9.68           C  
ATOM    365  C   PRO L  43      15.010  27.627  53.748  1.00  9.21           C  
ATOM    366  O   PRO L  43      16.135  27.544  53.251  1.00  9.09           O  
ATOM    367  CB  PRO L  43      14.591  26.650  56.062  1.00  9.69           C  
ATOM    368  CG  PRO L  43      15.999  26.208  56.315  1.00 12.09           C  
ATOM    369  CD  PRO L  43      16.140  24.973  55.444  1.00 11.55           C  
ATOM    370  N   PRO L  44      14.248  28.719  53.591  1.00  7.50           N  
ATOM    371  CA  PRO L  44      14.767  29.857  52.824  1.00  7.88           C  
ATOM    372  C   PRO L  44      15.864  30.633  53.557  1.00  8.37           C  
ATOM    373  O   PRO L  44      15.798  30.835  54.774  1.00  9.55           O  
ATOM    374  CB  PRO L  44      13.517  30.698  52.563  1.00  8.04           C  
ATOM    375  CG  PRO L  44      12.662  30.413  53.755  1.00  9.61           C  
ATOM    376  CD  PRO L  44      12.837  28.925  53.962  1.00  8.20           C  
ATOM    377  N   LYS L  45      16.879  31.053  52.806  1.00  8.75           N  
ATOM    378  CA  LYS L  45      18.000  31.806  53.358  1.00  7.91           C  
ATOM    379  C   LYS L  45      18.030  33.211  52.747  1.00  8.34           C  
ATOM    380  O   LYS L  45      17.757  33.391  51.558  1.00  7.11           O  
ATOM    381  CB  LYS L  45      19.313  31.060  53.090  1.00 11.10           C  
ATOM    382  CG  LYS L  45      19.356  29.663  53.730  1.00  9.73           C  
ATOM    383  CD  LYS L  45      20.684  28.957  53.484  1.00 13.19           C  
ATOM    384  CE  LYS L  45      20.673  27.539  54.053  1.00 14.93           C  
ATOM    385  NZ  LYS L  45      21.929  26.794  53.741  1.00 15.13           N  
ATOM    386  N   LEU L  46      18.352  34.200  53.575  1.00  7.56           N  
ATOM    387  CA  LEU L  46      18.385  35.602  53.161  1.00  8.83           C  
ATOM    388  C   LEU L  46      19.402  35.972  52.083  1.00  9.37           C  
ATOM    389  O   LEU L  46      20.577  35.619  52.170  1.00 10.25           O  
ATOM    390  CB  LEU L  46      18.623  36.495  54.382  1.00  8.57           C  
ATOM    391  CG  LEU L  46      18.669  38.003  54.127  1.00  8.29           C  
ATOM    392  CD1 LEU L  46      17.307  38.480  53.637  1.00  6.69           C  
ATOM    393  CD2 LEU L  46      19.055  38.725  55.413  1.00  5.78           C  
ATOM    394  N   LEU L  47      18.931  36.712  51.083  1.00  8.82           N  
ATOM    395  CA  LEU L  47      19.764  37.176  49.978  1.00  9.32           C  
ATOM    396  C   LEU L  47      19.905  38.693  50.020  1.00  8.96           C  
ATOM    397  O   LEU L  47      21.012  39.235  49.972  1.00  8.24           O  
ATOM    398  CB  LEU L  47      19.137  36.808  48.630  1.00 11.18           C  
ATOM    399  CG  LEU L  47      19.199  35.383  48.092  1.00 13.85           C  
ATOM    400  CD1 LEU L  47      18.471  35.327  46.755  1.00 13.93           C  
ATOM    401  CD2 LEU L  47      20.645  34.969  47.918  1.00 13.69           C  
ATOM    402  N   ILE L  48      18.761  39.367  50.100  1.00  7.19           N  
ATOM    403  CA  ILE L  48      18.709  40.820  50.100  1.00  8.04           C  
ATOM    404  C   ILE L  48      17.717  41.373  51.117  1.00  7.67           C  
ATOM    405  O   ILE L  48      16.639  40.814  51.315  1.00  8.43           O  
ATOM    406  CB  ILE L  48      18.301  41.332  48.693  1.00  8.74           C  
ATOM    407  CG1 ILE L  48      19.440  41.082  47.705  1.00 10.52           C  
ATOM    408  CG2 ILE L  48      17.923  42.803  48.748  1.00  6.31           C  
ATOM    409  CD1 ILE L  48      19.052  41.294  46.258  1.00 14.84           C  
ATOM    410  N   TYR L  49      18.093  42.476  51.754  1.00  8.21           N  
ATOM    411  CA  TYR L  49      17.232  43.136  52.727  1.00  8.33           C  
ATOM    412  C   TYR L  49      17.138  44.606  52.336  1.00  8.33           C  
ATOM    413  O   TYR L  49      17.952  45.097  51.552  1.00  8.31           O  
ATOM    414  CB  TYR L  49      17.783  42.991  54.150  1.00 10.08           C  
ATOM    415  CG  TYR L  49      19.159  43.575  54.363  1.00 13.16           C  
ATOM    416  CD1 TYR L  49      20.305  42.831  54.081  1.00 13.54           C  
ATOM    417  CD2 TYR L  49      19.318  44.876  54.849  1.00 13.63           C  
ATOM    418  CE1 TYR L  49      21.577  43.364  54.279  1.00 14.35           C  
ATOM    419  CE2 TYR L  49      20.588  45.422  55.048  1.00 13.34           C  
ATOM    420  CZ  TYR L  49      21.712  44.657  54.761  1.00 14.41           C  
ATOM    421  OH  TYR L  49      22.968  45.180  54.952  1.00 15.54           O  
ATOM    422  N   TRP L  50      16.157  45.306  52.895  1.00  8.36           N  
ATOM    423  CA  TRP L  50      15.929  46.707  52.560  1.00  9.76           C  
ATOM    424  C   TRP L  50      15.861  46.891  51.045  1.00  9.57           C  
ATOM    425  O   TRP L  50      16.387  47.859  50.488  1.00  9.72           O  
ATOM    426  CB  TRP L  50      17.009  47.610  53.169  1.00 11.07           C  
ATOM    427  CG  TRP L  50      16.760  47.911  54.623  1.00 14.80           C  
ATOM    428  CD1 TRP L  50      15.552  47.903  55.268  1.00 14.67           C  
ATOM    429  CD2 TRP L  50      17.731  48.307  55.599  1.00 16.37           C  
ATOM    430  NE1 TRP L  50      15.714  48.269  56.583  1.00 16.12           N  
ATOM    431  CE2 TRP L  50      17.040  48.523  56.813  1.00 16.77           C  
ATOM    432  CE3 TRP L  50      19.120  48.503  55.566  1.00 17.85           C  
ATOM    433  CZ2 TRP L  50      17.691  48.925  57.985  1.00 18.54           C  
ATOM    434  CZ3 TRP L  50      19.766  48.904  56.732  1.00 18.80           C  
ATOM    435  CH2 TRP L  50      19.049  49.110  57.925  1.00 19.61           C  
ATOM    436  N   ALA L  51      15.215  45.927  50.393  1.00  9.00           N  
ATOM    437  CA  ALA L  51      15.001  45.925  48.951  1.00  8.88           C  
ATOM    438  C   ALA L  51      16.215  45.765  48.039  1.00  9.83           C  
ATOM    439  O   ALA L  51      16.123  45.089  47.017  1.00  8.50           O  
ATOM    440  CB  ALA L  51      14.223  47.182  48.547  1.00 10.32           C  
ATOM    441  N   SER L  52      17.346  46.367  48.399  1.00 10.24           N  
ATOM    442  CA  SER L  52      18.528  46.300  47.543  1.00 12.19           C  
ATOM    443  C   SER L  52      19.865  45.961  48.201  1.00 12.46           C  
ATOM    444  O   SER L  52      20.864  45.806  47.503  1.00 13.90           O  
ATOM    445  CB  SER L  52      18.673  47.623  46.792  1.00 12.34           C  
ATOM    446  OG  SER L  52      18.700  48.705  47.708  1.00 12.74           O  
ATOM    447  N   SER L  53      19.896  45.847  49.525  1.00 12.75           N  
ATOM    448  CA  SER L  53      21.142  45.530  50.224  1.00 13.38           C  
ATOM    449  C   SER L  53      21.421  44.030  50.253  1.00 13.14           C  
ATOM    450  O   SER L  53      20.625  43.260  50.784  1.00 12.05           O  
ATOM    451  CB  SER L  53      21.096  46.062  51.659  1.00 12.37           C  
ATOM    452  OG  SER L  53      20.978  47.472  51.675  1.00 14.80           O  
ATOM    453  N   ARG L  54      22.554  43.620  49.684  1.00 14.78           N  
ATOM    454  CA  ARG L  54      22.923  42.205  49.655  1.00 15.19           C  
ATOM    455  C   ARG L  54      23.522  41.733  50.968  1.00 16.45           C  
ATOM    456  O   ARG L  54      24.313  42.440  51.593  1.00 15.33           O  
ATOM    457  CB  ARG L  54      23.936  41.925  48.539  1.00 16.06           C  
ATOM    458  CG  ARG L  54      23.337  41.616  47.181  1.00 16.02           C  
ATOM    459  CD  ARG L  54      24.443  41.252  46.195  1.00 19.96           C  
ATOM    460  NE  ARG L  54      25.302  42.393  45.883  1.00 21.49           N  
ATOM    461  CZ  ARG L  54      26.628  42.337  45.804  1.00 23.85           C  
ATOM    462  NH1 ARG L  54      27.265  41.191  46.020  1.00 25.46           N  
ATOM    463  NH2 ARG L  54      27.320  43.426  45.497  1.00 23.16           N  
ATOM    464  N   GLU L  55      23.143  40.528  51.381  1.00 16.85           N  
ATOM    465  CA  GLU L  55      23.673  39.947  52.606  1.00 17.65           C  
ATOM    466  C   GLU L  55      25.129  39.577  52.313  1.00 17.50           C  
ATOM    467  O   GLU L  55      25.478  39.279  51.171  1.00 15.16           O  
ATOM    468  CB  GLU L  55      22.878  38.691  52.983  1.00 18.94           C  
ATOM    469  CG  GLU L  55      23.347  38.021  54.257  1.00 22.50           C  
ATOM    470  CD  GLU L  55      22.958  38.790  55.501  1.00 22.81           C  
ATOM    471  OE1 GLU L  55      23.163  40.018  55.537  1.00 25.07           O  
ATOM    472  OE2 GLU L  55      22.448  38.161  56.447  1.00 27.61           O  
ATOM    473  N   SER L  56      25.982  39.609  53.328  1.00 18.47           N  
ATOM    474  CA  SER L  56      27.382  39.267  53.115  1.00 20.01           C  
ATOM    475  C   SER L  56      27.463  37.846  52.571  1.00 20.21           C  
ATOM    476  O   SER L  56      26.756  36.955  53.039  1.00 21.10           O  
ATOM    477  CB  SER L  56      28.165  39.378  54.427  1.00 22.68           C  
ATOM    478  OG  SER L  56      27.597  38.553  55.426  1.00 24.57           O  
ATOM    479  N   GLY L  57      28.306  37.641  51.563  1.00 18.79           N  
ATOM    480  CA  GLY L  57      28.451  36.315  50.990  1.00 18.57           C  
ATOM    481  C   GLY L  57      27.667  36.107  49.708  1.00 17.68           C  
ATOM    482  O   GLY L  57      27.966  35.201  48.930  1.00 17.98           O  
ATOM    483  N   VAL L  58      26.658  36.941  49.481  1.00 15.80           N  
ATOM    484  CA  VAL L  58      25.844  36.827  48.278  1.00 13.90           C  
ATOM    485  C   VAL L  58      26.578  37.437  47.086  1.00 13.42           C  
ATOM    486  O   VAL L  58      27.021  38.582  47.144  1.00 11.92           O  
ATOM    487  CB  VAL L  58      24.489  37.542  48.461  1.00 13.18           C  
ATOM    488  CG1 VAL L  58      23.655  37.417  47.195  1.00 13.34           C  
ATOM    489  CG2 VAL L  58      23.749  36.945  49.650  1.00 12.07           C  
ATOM    490  N   PRO L  59      26.719  36.672  45.987  1.00 13.38           N  
ATOM    491  CA  PRO L  59      27.406  37.142  44.775  1.00 12.86           C  
ATOM    492  C   PRO L  59      26.738  38.368  44.158  1.00 13.13           C  
ATOM    493  O   PRO L  59      25.521  38.537  44.255  1.00 10.61           O  
ATOM    494  CB  PRO L  59      27.373  35.919  43.857  1.00 13.05           C  
ATOM    495  CG  PRO L  59      26.154  35.170  44.317  1.00 14.45           C  
ATOM    496  CD  PRO L  59      26.245  35.288  45.819  1.00 12.69           C  
ATOM    497  N   ASP L  60      27.535  39.212  43.506  1.00 12.62           N  
ATOM    498  CA  ASP L  60      27.005  40.437  42.920  1.00 12.93           C  
ATOM    499  C   ASP L  60      26.075  40.273  41.722  1.00 11.98           C  
ATOM    500  O   ASP L  60      25.533  41.260  41.224  1.00  9.98           O  
ATOM    501  CB  ASP L  60      28.155  41.408  42.589  1.00 14.23           C  
ATOM    502  CG  ASP L  60      29.000  40.961  41.408  1.00 15.47           C  
ATOM    503  OD1 ASP L  60      28.913  39.788  40.993  1.00 15.77           O  
ATOM    504  OD2 ASP L  60      29.771  41.802  40.896  1.00 16.98           O  
ATOM    505  N   ARG L  61      25.873  39.042  41.256  1.00 10.35           N  
ATOM    506  CA  ARG L  61      24.969  38.842  40.130  1.00 10.37           C  
ATOM    507  C   ARG L  61      23.525  38.966  40.621  1.00  9.67           C  
ATOM    508  O   ARG L  61      22.590  39.037  39.826  1.00 10.39           O  
ATOM    509  CB  ARG L  61      25.207  37.480  39.454  1.00 10.53           C  
ATOM    510  CG  ARG L  61      25.184  36.262  40.368  1.00 12.11           C  
ATOM    511  CD  ARG L  61      25.243  34.972  39.542  1.00 12.07           C  
ATOM    512  NE  ARG L  61      25.167  33.768  40.368  1.00 12.04           N  
ATOM    513  CZ  ARG L  61      26.166  33.308  41.114  1.00 12.79           C  
ATOM    514  NH1 ARG L  61      27.326  33.947  41.139  1.00 12.61           N  
ATOM    515  NH2 ARG L  61      26.002  32.213  41.841  1.00 12.27           N  
ATOM    516  N   PHE L  62      23.361  39.001  41.943  1.00  8.81           N  
ATOM    517  CA  PHE L  62      22.047  39.151  42.568  1.00  9.32           C  
ATOM    518  C   PHE L  62      21.834  40.619  42.927  1.00  9.43           C  
ATOM    519  O   PHE L  62      22.696  41.237  43.550  1.00 10.36           O  
ATOM    520  CB  PHE L  62      21.964  38.326  43.855  1.00  9.03           C  
ATOM    521  CG  PHE L  62      21.774  36.859  43.629  1.00 10.24           C  
ATOM    522  CD1 PHE L  62      20.518  36.348  43.305  1.00 10.20           C  
ATOM    523  CD2 PHE L  62      22.848  35.981  43.741  1.00  9.37           C  
ATOM    524  CE1 PHE L  62      20.338  34.979  43.097  1.00 10.05           C  
ATOM    525  CE2 PHE L  62      22.677  34.619  43.535  1.00  9.66           C  
ATOM    526  CZ  PHE L  62      21.416  34.116  43.213  1.00  8.45           C  
ATOM    527  N   SER L  63      20.695  41.177  42.535  1.00 10.16           N  
ATOM    528  CA  SER L  63      20.396  42.571  42.855  1.00 10.89           C  
ATOM    529  C   SER L  63      18.895  42.779  42.980  1.00 10.28           C  
ATOM    530  O   SER L  63      18.109  42.184  42.243  1.00 12.28           O  
ATOM    531  CB  SER L  63      20.951  43.510  41.780  1.00 11.54           C  
ATOM    532  OG  SER L  63      20.221  43.392  40.571  1.00 13.18           O  
ATOM    533  N   GLY L  64      18.504  43.626  43.924  1.00 10.97           N  
ATOM    534  CA  GLY L  64      17.098  43.909  44.130  1.00  8.59           C  
ATOM    535  C   GLY L  64      16.809  45.381  43.901  1.00  9.14           C  
ATOM    536  O   GLY L  64      17.665  46.236  44.158  1.00  7.04           O  
ATOM    537  N   SER L  65      15.610  45.675  43.408  1.00  8.60           N  
ATOM    538  CA  SER L  65      15.197  47.049  43.155  1.00  9.39           C  
ATOM    539  C   SER L  65      13.711  47.218  43.461  1.00  9.54           C  
ATOM    540  O   SER L  65      13.013  46.249  43.751  1.00  9.01           O  
ATOM    541  CB  SER L  65      15.477  47.431  41.698  1.00 12.11           C  
ATOM    542  OG  SER L  65      14.797  46.575  40.799  1.00 13.73           O  
ATOM    543  N   GLY L  66      13.230  48.454  43.400  1.00 10.32           N  
ATOM    544  CA  GLY L  66      11.830  48.700  43.679  1.00 10.84           C  
ATOM    545  C   GLY L  66      11.634  49.457  44.974  1.00 12.76           C  
ATOM    546  O   GLY L  66      12.563  49.590  45.776  1.00 10.62           O  
ATOM    547  N   SER L  67      10.415  49.945  45.178  1.00 14.50           N  
ATOM    548  CA  SER L  67      10.074  50.712  46.369  1.00 16.41           C  
ATOM    549  C   SER L  67       8.564  50.703  46.594  1.00 16.46           C  
ATOM    550  O   SER L  67       7.782  50.524  45.657  1.00 18.12           O  
ATOM    551  CB  SER L  67      10.558  52.157  46.206  1.00 17.97           C  
ATOM    552  OG  SER L  67      10.315  52.918  47.376  1.00 21.52           O  
ATOM    553  N   GLY L  68       8.157  50.886  47.842  1.00 14.50           N  
ATOM    554  CA  GLY L  68       6.741  50.914  48.153  1.00 13.77           C  
ATOM    555  C   GLY L  68       5.993  49.598  48.054  1.00 12.37           C  
ATOM    556  O   GLY L  68       5.894  48.858  49.033  1.00 11.75           O  
ATOM    557  N   THR L  69       5.471  49.296  46.869  1.00 13.61           N  
ATOM    558  CA  THR L  69       4.694  48.077  46.676  1.00 14.31           C  
ATOM    559  C   THR L  69       5.179  47.150  45.568  1.00 14.89           C  
ATOM    560  O   THR L  69       4.799  45.981  45.532  1.00 15.72           O  
ATOM    561  CB  THR L  69       3.218  48.417  46.386  1.00 14.01           C  
ATOM    562  OG1 THR L  69       3.140  49.224  45.203  1.00 12.64           O  
ATOM    563  CG2 THR L  69       2.607  49.179  47.553  1.00 16.56           C  
ATOM    564  N   ASP L  70       6.005  47.665  44.663  1.00 15.74           N  
ATOM    565  CA  ASP L  70       6.509  46.860  43.551  1.00 15.55           C  
ATOM    566  C   ASP L  70       8.023  46.710  43.592  1.00 13.93           C  
ATOM    567  O   ASP L  70       8.758  47.699  43.580  1.00 13.94           O  
ATOM    568  CB  ASP L  70       6.078  47.481  42.221  1.00 19.98           C  
ATOM    569  CG  ASP L  70       4.571  47.433  42.019  1.00 25.12           C  
ATOM    570  OD1 ASP L  70       3.837  48.036  42.833  1.00 28.44           O  
ATOM    571  OD2 ASP L  70       4.118  46.786  41.049  1.00 28.94           O  
ATOM    572  N   PHE L  71       8.480  45.462  43.627  1.00 11.22           N  
ATOM    573  CA  PHE L  71       9.907  45.163  43.700  1.00  9.94           C  
ATOM    574  C   PHE L  71      10.329  44.120  42.685  1.00 10.65           C  
ATOM    575  O   PHE L  71       9.498  43.378  42.155  1.00 10.01           O  
ATOM    576  CB  PHE L  71      10.267  44.662  45.096  1.00  8.03           C  
ATOM    577  CG  PHE L  71       9.825  45.574  46.192  1.00 10.59           C  
ATOM    578  CD1 PHE L  71       8.504  45.567  46.629  1.00  8.33           C  
ATOM    579  CD2 PHE L  71      10.718  46.472  46.765  1.00  8.52           C  
ATOM    580  CE1 PHE L  71       8.080  46.444  47.622  1.00  9.70           C  
ATOM    581  CE2 PHE L  71      10.301  47.351  47.758  1.00 10.26           C  
ATOM    582  CZ  PHE L  71       8.980  47.336  48.186  1.00  8.26           C  
ATOM    583  N   THR L  72      11.634  44.054  42.438  1.00  8.76           N  
ATOM    584  CA  THR L  72      12.174  43.107  41.480  1.00  9.84           C  
ATOM    585  C   THR L  72      13.513  42.529  41.916  1.00 10.40           C  
ATOM    586  O   THR L  72      14.385  43.250  42.408  1.00 10.66           O  
ATOM    587  CB  THR L  72      12.395  43.774  40.099  1.00 11.24           C  
ATOM    588  OG1 THR L  72      11.170  44.351  39.633  1.00 11.86           O  
ATOM    589  CG2 THR L  72      12.875  42.751  39.088  1.00 11.77           C  
ATOM    590  N   LEU L  73      13.658  41.218  41.750  1.00  9.58           N  
ATOM    591  CA  LEU L  73      14.916  40.540  42.042  1.00  7.79           C  
ATOM    592  C   LEU L  73      15.465  40.207  40.665  1.00  9.10           C  
ATOM    593  O   LEU L  73      14.747  39.667  39.820  1.00  7.81           O  
ATOM    594  CB  LEU L  73      14.692  39.243  42.822  1.00  8.68           C  
ATOM    595  CG  LEU L  73      15.940  38.354  42.933  1.00  9.22           C  
ATOM    596  CD1 LEU L  73      17.028  39.077  43.724  1.00  8.79           C  
ATOM    597  CD2 LEU L  73      15.575  37.029  43.598  1.00  8.24           C  
ATOM    598  N   THR L  74      16.726  40.540  40.429  1.00  9.78           N  
ATOM    599  CA  THR L  74      17.344  40.267  39.142  1.00 10.43           C  
ATOM    600  C   THR L  74      18.616  39.456  39.320  1.00  9.95           C  
ATOM    601  O   THR L  74      19.436  39.762  40.183  1.00  9.26           O  
ATOM    602  CB  THR L  74      17.716  41.579  38.399  1.00 10.71           C  
ATOM    603  OG1 THR L  74      16.542  42.376  38.207  1.00 13.09           O  
ATOM    604  CG2 THR L  74      18.333  41.268  37.038  1.00 12.65           C  
ATOM    605  N   ILE L  75      18.756  38.403  38.523  1.00  9.11           N  
ATOM    606  CA  ILE L  75      19.959  37.583  38.545  1.00 10.24           C  
ATOM    607  C   ILE L  75      20.568  37.857  37.172  1.00  9.86           C  
ATOM    608  O   ILE L  75      20.075  37.360  36.161  1.00  8.52           O  
ATOM    609  CB  ILE L  75      19.641  36.077  38.684  1.00  9.33           C  
ATOM    610  CG1 ILE L  75      18.781  35.829  39.929  1.00  9.78           C  
ATOM    611  CG2 ILE L  75      20.940  35.295  38.840  1.00 10.94           C  
ATOM    612  CD1 ILE L  75      18.310  34.385  40.075  1.00  8.00           C  
ATOM    613  N   SER L  76      21.623  38.669  37.146  1.00 10.85           N  
ATOM    614  CA  SER L  76      22.281  39.069  35.898  1.00 12.06           C  
ATOM    615  C   SER L  76      22.785  37.944  34.989  1.00 11.89           C  
ATOM    616  O   SER L  76      22.585  37.987  33.773  1.00 13.10           O  
ATOM    617  CB  SER L  76      23.443  40.022  36.209  1.00 12.42           C  
ATOM    618  OG  SER L  76      24.468  39.357  36.925  1.00 14.48           O  
ATOM    619  N   SER L  77      23.446  36.949  35.574  1.00 12.31           N  
ATOM    620  CA  SER L  77      23.990  35.821  34.817  1.00 11.66           C  
ATOM    621  C   SER L  77      23.649  34.546  35.580  1.00 11.58           C  
ATOM    622  O   SER L  77      24.316  34.208  36.552  1.00  9.68           O  
ATOM    623  CB  SER L  77      25.513  35.967  34.692  1.00 11.93           C  
ATOM    624  OG  SER L  77      26.089  34.899  33.956  1.00 14.24           O  
ATOM    625  N   LEU L  78      22.619  33.832  35.136  1.00 10.54           N  
ATOM    626  CA  LEU L  78      22.197  32.627  35.840  1.00 11.05           C  
ATOM    627  C   LEU L  78      23.204  31.484  35.796  1.00 10.99           C  
ATOM    628  O   LEU L  78      23.672  31.087  34.725  1.00 11.06           O  
ATOM    629  CB  LEU L  78      20.844  32.143  35.303  1.00 12.79           C  
ATOM    630  CG  LEU L  78      20.119  31.131  36.197  1.00 12.80           C  
ATOM    631  CD1 LEU L  78      19.823  31.774  37.544  1.00 13.51           C  
ATOM    632  CD2 LEU L  78      18.825  30.679  35.535  1.00 13.94           C  
ATOM    633  N   GLN L  79      23.525  30.964  36.979  1.00 10.61           N  
ATOM    634  CA  GLN L  79      24.460  29.856  37.129  1.00 12.56           C  
ATOM    635  C   GLN L  79      23.680  28.653  37.643  1.00 13.68           C  
ATOM    636  O   GLN L  79      22.588  28.805  38.191  1.00 12.35           O  
ATOM    637  CB  GLN L  79      25.555  30.214  38.136  1.00 13.73           C  
ATOM    638  CG  GLN L  79      26.334  31.470  37.789  1.00 16.80           C  
ATOM    639  CD  GLN L  79      27.061  31.341  36.468  1.00 18.66           C  
ATOM    640  OE1 GLN L  79      27.841  30.408  36.269  1.00 18.02           O  
ATOM    641  NE2 GLN L  79      26.811  32.278  35.556  1.00 17.76           N  
ATOM    642  N   ALA L  80      24.244  27.463  37.474  1.00 12.03           N  
ATOM    643  CA  ALA L  80      23.583  26.245  37.926  1.00 12.88           C  
ATOM    644  C   ALA L  80      23.282  26.274  39.421  1.00 12.68           C  
ATOM    645  O   ALA L  80      22.225  25.805  39.855  1.00 10.45           O  
ATOM    646  CB  ALA L  80      24.443  25.028  37.588  1.00 14.96           C  
ATOM    647  N   GLU L  81      24.195  26.830  40.214  1.00 12.25           N  
ATOM    648  CA  GLU L  81      23.975  26.878  41.656  1.00 13.31           C  
ATOM    649  C   GLU L  81      22.818  27.794  42.052  1.00 12.83           C  
ATOM    650  O   GLU L  81      22.388  27.786  43.206  1.00 12.26           O  
ATOM    651  CB  GLU L  81      25.252  27.313  42.396  1.00 16.36           C  
ATOM    652  CG  GLU L  81      25.722  28.740  42.125  1.00 19.16           C  
ATOM    653  CD  GLU L  81      26.759  29.210  43.141  1.00 23.04           C  
ATOM    654  OE1 GLU L  81      26.981  28.497  44.144  1.00 24.62           O  
ATOM    655  OE2 GLU L  81      27.346  30.295  42.945  1.00 24.07           O  
ATOM    656  N   ASP L  82      22.308  28.570  41.099  1.00 11.38           N  
ATOM    657  CA  ASP L  82      21.210  29.490  41.381  1.00 11.85           C  
ATOM    658  C   ASP L  82      19.844  28.843  41.196  1.00 11.50           C  
ATOM    659  O   ASP L  82      18.817  29.441  41.534  1.00 11.23           O  
ATOM    660  CB  ASP L  82      21.293  30.733  40.487  1.00 11.30           C  
ATOM    661  CG  ASP L  82      22.601  31.483  40.640  1.00 12.61           C  
ATOM    662  OD1 ASP L  82      23.168  31.486  41.757  1.00 13.08           O  
ATOM    663  OD2 ASP L  82      23.054  32.085  39.639  1.00 11.83           O  
ATOM    664  N   VAL L  83      19.827  27.632  40.647  1.00  9.60           N  
ATOM    665  CA  VAL L  83      18.573  26.923  40.437  1.00  8.66           C  
ATOM    666  C   VAL L  83      17.944  26.678  41.803  1.00  9.55           C  
ATOM    667  O   VAL L  83      18.469  25.916  42.615  1.00  9.42           O  
ATOM    668  CB  VAL L  83      18.812  25.581  39.708  1.00  9.48           C  
ATOM    669  CG1 VAL L  83      17.503  24.823  39.553  1.00  8.00           C  
ATOM    670  CG2 VAL L  83      19.421  25.848  38.334  1.00  8.89           C  
ATOM    671  N   ALA L  84      16.825  27.347  42.058  1.00  9.44           N  
ATOM    672  CA  ALA L  84      16.134  27.228  43.337  1.00  9.78           C  
ATOM    673  C   ALA L  84      14.810  27.982  43.288  1.00  8.96           C  
ATOM    674  O   ALA L  84      14.396  28.464  42.234  1.00 10.15           O  
ATOM    675  CB  ALA L  84      17.006  27.809  44.445  1.00  9.47           C  
ATOM    676  N   VAL L  85      14.144  28.063  44.435  1.00  8.09           N  
ATOM    677  CA  VAL L  85      12.889  28.796  44.537  1.00  8.27           C  
ATOM    678  C   VAL L  85      13.236  30.088  45.262  1.00  8.71           C  
ATOM    679  O   VAL L  85      13.940  30.073  46.274  1.00  9.44           O  
ATOM    680  CB  VAL L  85      11.833  28.022  45.356  1.00  9.34           C  
ATOM    681  CG1 VAL L  85      10.606  28.903  45.592  1.00 11.01           C  
ATOM    682  CG2 VAL L  85      11.438  26.749  44.621  1.00 10.57           C  
ATOM    683  N   TYR L  86      12.763  31.207  44.730  1.00  8.39           N  
ATOM    684  CA  TYR L  86      13.033  32.505  45.329  1.00  7.43           C  
ATOM    685  C   TYR L  86      11.760  33.131  45.864  1.00  7.09           C  
ATOM    686  O   TYR L  86      10.719  33.091  45.210  1.00  6.08           O  
ATOM    687  CB  TYR L  86      13.675  33.428  44.292  1.00  8.62           C  
ATOM    688  CG  TYR L  86      15.060  32.975  43.900  1.00  9.43           C  
ATOM    689  CD1 TYR L  86      15.246  32.038  42.884  1.00  9.55           C  
ATOM    690  CD2 TYR L  86      16.181  33.439  44.582  1.00  8.90           C  
ATOM    691  CE1 TYR L  86      16.521  31.570  42.558  1.00  9.34           C  
ATOM    692  CE2 TYR L  86      17.456  32.980  44.268  1.00  8.10           C  
ATOM    693  CZ  TYR L  86      17.620  32.046  43.258  1.00  9.24           C  
ATOM    694  OH  TYR L  86      18.883  31.582  42.964  1.00  6.06           O  
ATOM    695  N   TYR L  87      11.856  33.699  47.064  1.00  6.65           N  
ATOM    696  CA  TYR L  87      10.725  34.347  47.715  1.00  7.98           C  
ATOM    697  C   TYR L  87      11.048  35.790  48.072  1.00  8.72           C  
ATOM    698  O   TYR L  87      12.184  36.108  48.432  1.00  6.65           O  
ATOM    699  CB  TYR L  87      10.394  33.668  49.046  1.00  9.48           C  
ATOM    700  CG  TYR L  87      10.021  32.208  48.999  1.00  9.15           C  
ATOM    701  CD1 TYR L  87       8.734  31.810  48.649  1.00  9.09           C  
ATOM    702  CD2 TYR L  87      10.940  31.224  49.368  1.00  8.59           C  
ATOM    703  CE1 TYR L  87       8.363  30.464  48.674  1.00  9.62           C  
ATOM    704  CE2 TYR L  87      10.582  29.879  49.395  1.00  9.53           C  
ATOM    705  CZ  TYR L  87       9.292  29.508  49.049  1.00  9.17           C  
ATOM    706  OH  TYR L  87       8.932  28.183  49.085  1.00 10.23           O  
ATOM    707  N   CYS L  88      10.050  36.661  47.970  1.00  8.97           N  
ATOM    708  CA  CYS L  88      10.230  38.026  48.425  1.00  9.37           C  
ATOM    709  C   CYS L  88       9.561  37.919  49.782  1.00  9.22           C  
ATOM    710  O   CYS L  88       8.729  37.033  49.992  1.00  7.78           O  
ATOM    711  CB  CYS L  88       9.509  39.054  47.551  1.00 10.15           C  
ATOM    712  SG  CYS L  88       7.757  38.790  47.122  1.00 11.66           S  
ATOM    713  N   GLN L  89       9.932  38.788  50.711  1.00  8.93           N  
ATOM    714  CA  GLN L  89       9.352  38.728  52.042  1.00  7.50           C  
ATOM    715  C   GLN L  89       9.160  40.113  52.615  1.00  8.10           C  
ATOM    716  O   GLN L  89      10.074  40.935  52.570  1.00  7.67           O  
ATOM    717  CB  GLN L  89      10.265  37.936  52.982  1.00  7.88           C  
ATOM    718  CG  GLN L  89       9.684  37.726  54.378  1.00  7.23           C  
ATOM    719  CD  GLN L  89      10.749  37.698  55.456  1.00  7.63           C  
ATOM    720  OE1 GLN L  89      11.304  38.737  55.817  1.00  8.21           O  
ATOM    721  NE2 GLN L  89      11.048  36.507  55.970  1.00  4.57           N  
ATOM    722  N   GLN L  90       7.967  40.382  53.137  1.00  8.19           N  
ATOM    723  CA  GLN L  90       7.719  41.672  53.760  1.00  8.91           C  
ATOM    724  C   GLN L  90       7.894  41.451  55.250  1.00  9.61           C  
ATOM    725  O   GLN L  90       7.369  40.481  55.800  1.00 10.34           O  
ATOM    726  CB  GLN L  90       6.299  42.188  53.462  1.00  9.75           C  
ATOM    727  CG  GLN L  90       5.119  41.359  53.998  1.00  8.47           C  
ATOM    728  CD  GLN L  90       4.863  41.514  55.499  1.00 10.46           C  
ATOM    729  OE1 GLN L  90       5.226  42.521  56.115  1.00 10.40           O  
ATOM    730  NE2 GLN L  90       4.216  40.519  56.085  1.00 10.32           N  
ATOM    731  N   TYR L  91       8.671  42.311  55.899  1.00  8.98           N  
ATOM    732  CA  TYR L  91       8.846  42.179  57.333  1.00 11.12           C  
ATOM    733  C   TYR L  91       8.337  43.433  58.029  1.00 12.46           C  
ATOM    734  O   TYR L  91       8.885  43.894  59.030  1.00 11.55           O  
ATOM    735  CB  TYR L  91      10.307  41.844  57.704  1.00  9.83           C  
ATOM    736  CG  TYR L  91      11.405  42.659  57.047  1.00  9.73           C  
ATOM    737  CD1 TYR L  91      11.842  42.363  55.753  1.00 11.11           C  
ATOM    738  CD2 TYR L  91      12.054  43.680  57.742  1.00  9.62           C  
ATOM    739  CE1 TYR L  91      12.900  43.057  55.170  1.00  9.15           C  
ATOM    740  CE2 TYR L  91      13.118  44.383  57.168  1.00  9.04           C  
ATOM    741  CZ  TYR L  91      13.534  44.063  55.882  1.00 10.33           C  
ATOM    742  OH  TYR L  91      14.587  44.738  55.311  1.00  9.79           O  
ATOM    743  N   TYR L  92       7.252  43.962  57.467  1.00 12.29           N  
ATOM    744  CA  TYR L  92       6.571  45.137  57.991  1.00 15.62           C  
ATOM    745  C   TYR L  92       5.789  44.661  59.208  1.00 15.43           C  
ATOM    746  O   TYR L  92       5.785  45.303  60.257  1.00 15.90           O  
ATOM    747  CB  TYR L  92       5.594  45.680  56.945  1.00 17.95           C  
ATOM    748  CG  TYR L  92       4.758  46.855  57.407  1.00 21.04           C  
ATOM    749  CD1 TYR L  92       5.267  48.153  57.378  1.00 23.04           C  
ATOM    750  CD2 TYR L  92       3.451  46.668  57.863  1.00 22.31           C  
ATOM    751  CE1 TYR L  92       4.495  49.239  57.788  1.00 25.51           C  
ATOM    752  CE2 TYR L  92       2.671  47.748  58.279  1.00 24.67           C  
ATOM    753  CZ  TYR L  92       3.201  49.029  58.236  1.00 25.50           C  
ATOM    754  OH  TYR L  92       2.439  50.101  58.637  1.00 28.33           O  
ATOM    755  N   SER L  93       5.134  43.514  59.053  1.00 15.07           N  
ATOM    756  CA  SER L  93       4.334  42.926  60.120  1.00 15.85           C  
ATOM    757  C   SER L  93       5.110  41.867  60.895  1.00 15.38           C  
ATOM    758  O   SER L  93       6.192  41.441  60.487  1.00 13.62           O  
ATOM    759  CB  SER L  93       3.083  42.276  59.536  1.00 18.16           C  
ATOM    760  OG  SER L  93       3.429  41.096  58.827  1.00 20.75           O  
ATOM    761  N   THR L  94       4.532  41.441  62.012  1.00 14.29           N  
ATOM    762  CA  THR L  94       5.121  40.418  62.864  1.00 14.51           C  
ATOM    763  C   THR L  94       4.091  39.302  63.002  1.00 14.16           C  
ATOM    764  O   THR L  94       3.002  39.519  63.533  1.00 14.28           O  
ATOM    765  CB  THR L  94       5.446  40.976  64.272  1.00 16.64           C  
ATOM    766  OG1 THR L  94       6.400  42.040  64.158  1.00 17.36           O  
ATOM    767  CG2 THR L  94       6.017  39.882  65.168  1.00 17.21           C  
ATOM    768  N   PRO L  95       4.414  38.095  62.507  1.00 12.13           N  
ATOM    769  CA  PRO L  95       5.673  37.747  61.840  1.00 10.81           C  
ATOM    770  C   PRO L  95       5.696  38.166  60.372  1.00 10.46           C  
ATOM    771  O   PRO L  95       4.672  38.552  59.808  1.00  9.60           O  
ATOM    772  CB  PRO L  95       5.722  36.232  61.985  1.00 11.01           C  
ATOM    773  CG  PRO L  95       4.272  35.859  61.807  1.00  9.68           C  
ATOM    774  CD  PRO L  95       3.563  36.900  62.671  1.00 12.10           C  
ATOM    775  N   PRO L  96       6.878  38.112  59.741  1.00  8.91           N  
ATOM    776  CA  PRO L  96       6.982  38.482  58.326  1.00  8.22           C  
ATOM    777  C   PRO L  96       6.267  37.393  57.520  1.00  7.61           C  
ATOM    778  O   PRO L  96       6.010  36.307  58.044  1.00  6.15           O  
ATOM    779  CB  PRO L  96       8.487  38.459  58.067  1.00  6.56           C  
ATOM    780  CG  PRO L  96       9.092  38.706  59.424  1.00  9.00           C  
ATOM    781  CD  PRO L  96       8.210  37.890  60.330  1.00  8.81           C  
ATOM    782  N   THR L  97       5.946  37.682  56.262  1.00  6.34           N  
ATOM    783  CA  THR L  97       5.297  36.700  55.397  1.00  5.86           C  
ATOM    784  C   THR L  97       5.973  36.705  54.029  1.00  6.94           C  
ATOM    785  O   THR L  97       6.466  37.740  53.568  1.00  6.89           O  
ATOM    786  CB  THR L  97       3.778  36.980  55.217  1.00  5.76           C  
ATOM    787  OG1 THR L  97       3.584  38.279  54.645  1.00  5.25           O  
ATOM    788  CG2 THR L  97       3.059  36.896  56.558  1.00  7.68           C  
ATOM    789  N   PHE L  98       6.004  35.536  53.397  1.00  7.10           N  
ATOM    790  CA  PHE L  98       6.627  35.372  52.091  1.00  8.09           C  
ATOM    791  C   PHE L  98       5.629  35.449  50.945  1.00  9.49           C  
ATOM    792  O   PHE L  98       4.419  35.252  51.128  1.00 10.32           O  
ATOM    793  CB  PHE L  98       7.306  34.001  51.974  1.00  8.30           C  
ATOM    794  CG  PHE L  98       8.483  33.806  52.876  1.00  7.97           C  
ATOM    795  CD1 PHE L  98       9.696  34.430  52.603  1.00  8.84           C  
ATOM    796  CD2 PHE L  98       8.399  32.946  53.967  1.00  9.14           C  
ATOM    797  CE1 PHE L  98      10.817  34.195  53.405  1.00  9.08           C  
ATOM    798  CE2 PHE L  98       9.514  32.703  54.776  1.00  8.65           C  
ATOM    799  CZ  PHE L  98      10.725  33.331  54.491  1.00  8.23           C  
ATOM    800  N   GLY L  99       6.157  35.715  49.754  1.00  8.54           N  
ATOM    801  CA  GLY L  99       5.329  35.731  48.565  1.00  7.97           C  
ATOM    802  C   GLY L  99       5.153  34.251  48.257  1.00  7.82           C  
ATOM    803  O   GLY L  99       5.635  33.408  49.016  1.00  7.19           O  
ATOM    804  N   GLY L 100       4.498  33.920  47.152  1.00  7.71           N  
ATOM    805  CA  GLY L 100       4.282  32.519  46.826  1.00  8.79           C  
ATOM    806  C   GLY L 100       5.510  31.744  46.374  1.00  9.02           C  
ATOM    807  O   GLY L 100       5.494  30.511  46.350  1.00  8.94           O  
ATOM    808  N   GLY L 101       6.570  32.460  46.016  1.00  8.69           N  
ATOM    809  CA  GLY L 101       7.785  31.808  45.555  1.00  8.64           C  
ATOM    810  C   GLY L 101       7.829  31.676  44.043  1.00  9.25           C  
ATOM    811  O   GLY L 101       6.791  31.531  43.388  1.00  7.62           O  
ATOM    812  N   THR L 102       9.034  31.742  43.485  1.00  8.61           N  
ATOM    813  CA  THR L 102       9.223  31.605  42.046  1.00  9.55           C  
ATOM    814  C   THR L 102      10.340  30.602  41.770  1.00 10.64           C  
ATOM    815  O   THR L 102      11.477  30.785  42.199  1.00  8.97           O  
ATOM    816  CB  THR L 102       9.584  32.953  41.390  1.00 11.14           C  
ATOM    817  OG1 THR L 102       8.511  33.887  41.585  1.00  8.81           O  
ATOM    818  CG2 THR L 102       9.826  32.767  39.895  1.00 10.46           C  
ATOM    819  N   LYS L 103      10.003  29.533  41.059  1.00 11.22           N  
ATOM    820  CA  LYS L 103      10.980  28.502  40.727  1.00 12.27           C  
ATOM    821  C   LYS L 103      11.817  28.976  39.544  1.00 12.14           C  
ATOM    822  O   LYS L 103      11.275  29.332  38.498  1.00 12.65           O  
ATOM    823  CB  LYS L 103      10.258  27.197  40.372  1.00 13.32           C  
ATOM    824  CG  LYS L 103      11.179  26.022  40.059  1.00 17.60           C  
ATOM    825  CD  LYS L 103      10.378  24.762  39.722  1.00 19.44           C  
ATOM    826  CE  LYS L 103       9.545  24.950  38.461  1.00 21.69           C  
ATOM    827  NZ  LYS L 103       8.678  23.769  38.164  1.00 23.17           N  
ATOM    828  N   VAL L 104      13.134  28.990  39.717  1.00 10.02           N  
ATOM    829  CA  VAL L 104      14.041  29.418  38.657  1.00 10.49           C  
ATOM    830  C   VAL L 104      14.877  28.229  38.194  1.00 10.99           C  
ATOM    831  O   VAL L 104      15.498  27.543  39.004  1.00 11.21           O  
ATOM    832  CB  VAL L 104      14.978  30.550  39.148  1.00  9.41           C  
ATOM    833  CG1 VAL L 104      16.013  30.893  38.074  1.00 11.34           C  
ATOM    834  CG2 VAL L 104      14.160  31.774  39.485  1.00  9.97           C  
ATOM    835  N   GLU L 105      14.877  27.981  36.890  1.00 11.42           N  
ATOM    836  CA  GLU L 105      15.636  26.867  36.332  1.00 12.21           C  
ATOM    837  C   GLU L 105      16.463  27.309  35.136  1.00 12.83           C  
ATOM    838  O   GLU L 105      16.257  28.390  34.582  1.00 10.53           O  
ATOM    839  CB  GLU L 105      14.695  25.752  35.870  1.00 13.65           C  
ATOM    840  CG  GLU L 105      13.863  25.108  36.955  1.00 18.07           C  
ATOM    841  CD  GLU L 105      12.877  24.107  36.387  1.00 20.53           C  
ATOM    842  OE1 GLU L 105      12.016  24.516  35.578  1.00 21.88           O  
ATOM    843  OE2 GLU L 105      12.962  22.914  36.740  1.00 22.75           O  
ATOM    844  N   ILE L 106      17.401  26.454  34.742  1.00 13.19           N  
ATOM    845  CA  ILE L 106      18.242  26.726  33.589  1.00 15.06           C  
ATOM    846  C   ILE L 106      17.625  26.026  32.386  1.00 17.07           C  
ATOM    847  O   ILE L 106      17.287  24.843  32.452  1.00 17.15           O  
ATOM    848  CB  ILE L 106      19.680  26.182  33.789  1.00 16.61           C  
ATOM    849  CG1 ILE L 106      20.448  27.070  34.769  1.00 16.13           C  
ATOM    850  CG2 ILE L 106      20.406  26.111  32.444  1.00 16.09           C  
ATOM    851  CD1 ILE L 106      20.813  28.422  34.205  1.00 20.60           C  
ATOM    852  N   LYS L 107      17.456  26.774  31.303  1.00 16.98           N  
ATOM    853  CA  LYS L 107      16.913  26.234  30.065  1.00 21.21           C  
ATOM    854  C   LYS L 107      18.161  25.828  29.295  1.00 22.31           C  
ATOM    855  O   LYS L 107      18.826  26.668  28.700  1.00 21.72           O  
ATOM    856  CB  LYS L 107      16.151  27.324  29.305  1.00 22.34           C  
ATOM    857  CG  LYS L 107      15.541  26.892  27.977  1.00 26.46           C  
ATOM    858  CD  LYS L 107      14.437  25.870  28.174  1.00 29.73           C  
ATOM    859  CE  LYS L 107      13.565  25.762  26.931  1.00 32.16           C  
ATOM    860  NZ  LYS L 107      14.359  25.457  25.709  1.00 35.47           N  
ATOM    861  N   ARG L 108      18.500  24.546  29.330  1.00 25.35           N  
ATOM    862  CA  ARG L 108      19.697  24.090  28.640  1.00 29.01           C  
ATOM    863  C   ARG L 108      19.405  23.759  27.178  1.00 29.60           C  
ATOM    864  O   ARG L 108      20.106  24.316  26.306  1.00 30.29           O  
ATOM    865  CB  ARG L 108      20.296  22.880  29.368  1.00 30.72           C  
ATOM    866  CG  ARG L 108      21.820  22.852  29.340  1.00 33.69           C  
ATOM    867  CD  ARG L 108      22.425  22.650  30.730  1.00 35.45           C  
ATOM    868  NE  ARG L 108      22.298  21.277  31.214  1.00 38.34           N  
ATOM    869  CZ  ARG L 108      22.884  20.815  32.317  1.00 38.20           C  
ATOM    870  NH1 ARG L 108      23.639  21.616  33.056  1.00 38.80           N  
ATOM    871  NH2 ARG L 108      22.729  19.546  32.675  1.00 37.38           N  
ATOM    872  OXT ARG L 108      18.481  22.960  26.919  1.00 30.56           O  
TER     873      ARG L 108                                                      
ATOM    874  N   ASP L   1      -4.864  25.624  56.807  1.00 25.59           N  
ATOM    875  CA  ASP L   1      -3.402  25.923  56.815  1.00 24.53           C  
ATOM    876  C   ASP L   1      -2.771  25.476  58.129  1.00 23.18           C  
ATOM    877  O   ASP L   1      -3.471  25.236  59.117  1.00 23.19           O  
ATOM    878  CB  ASP L   1      -3.176  27.420  56.609  1.00 26.28           C  
ATOM    879  N   ILE L   2      -1.445  25.368  58.137  1.00 20.63           N  
ATOM    880  CA  ILE L   2      -0.721  24.953  59.333  1.00 18.51           C  
ATOM    881  C   ILE L   2      -0.629  26.101  60.331  1.00 17.61           C  
ATOM    882  O   ILE L   2      -0.327  27.234  59.960  1.00 18.21           O  
ATOM    883  CB  ILE L   2       0.716  24.486  58.988  1.00 17.51           C  
ATOM    884  CG1 ILE L   2       0.666  23.246  58.089  1.00 16.99           C  
ATOM    885  CG2 ILE L   2       1.483  24.182  60.262  1.00 17.35           C  
ATOM    886  CD1 ILE L   2       2.033  22.792  57.582  1.00 16.68           C  
ATOM    887  N   VAL L   3      -0.893  25.799  61.598  1.00 16.48           N  
ATOM    888  CA  VAL L   3      -0.830  26.800  62.657  1.00 15.01           C  
ATOM    889  C   VAL L   3       0.450  26.614  63.470  1.00 13.80           C  
ATOM    890  O   VAL L   3       0.721  25.527  63.985  1.00 11.84           O  
ATOM    891  CB  VAL L   3      -2.052  26.691  63.604  1.00 15.15           C  
ATOM    892  CG1 VAL L   3      -1.948  27.730  64.713  1.00 17.00           C  
ATOM    893  CG2 VAL L   3      -3.342  26.887  62.813  1.00 15.52           C  
ATOM    894  N   MET L   4       1.236  27.681  63.572  1.00 12.05           N  
ATOM    895  CA  MET L   4       2.491  27.657  64.319  1.00 11.00           C  
ATOM    896  C   MET L   4       2.335  28.561  65.534  1.00 10.85           C  
ATOM    897  O   MET L   4       2.105  29.762  65.388  1.00 11.01           O  
ATOM    898  CB  MET L   4       3.632  28.162  63.437  1.00 10.40           C  
ATOM    899  CG  MET L   4       3.864  27.330  62.184  1.00 10.14           C  
ATOM    900  SD  MET L   4       4.338  25.625  62.556  1.00 11.28           S  
ATOM    901  CE  MET L   4       6.073  25.833  63.010  1.00 13.12           C  
ATOM    902  N   THR L   5       2.462  27.990  66.729  1.00 10.04           N  
ATOM    903  CA  THR L   5       2.293  28.762  67.957  1.00 11.48           C  
ATOM    904  C   THR L   5       3.503  28.701  68.881  1.00 10.59           C  
ATOM    905  O   THR L   5       3.953  27.620  69.253  1.00 11.66           O  
ATOM    906  CB  THR L   5       1.055  28.265  68.733  1.00 12.50           C  
ATOM    907  OG1 THR L   5      -0.088  28.309  67.869  1.00 15.21           O  
ATOM    908  CG2 THR L   5       0.798  29.140  69.962  1.00 12.86           C  
ATOM    909  N   GLN L   6       4.024  29.864  69.256  1.00  9.79           N  
ATOM    910  CA  GLN L   6       5.178  29.918  70.148  1.00  9.63           C  
ATOM    911  C   GLN L   6       4.759  30.322  71.563  1.00 10.30           C  
ATOM    912  O   GLN L   6       3.759  31.021  71.755  1.00 10.12           O  
ATOM    913  CB  GLN L   6       6.222  30.902  69.604  1.00 10.06           C  
ATOM    914  CG  GLN L   6       6.599  30.632  68.146  1.00  9.76           C  
ATOM    915  CD  GLN L   6       7.739  31.502  67.641  1.00 11.52           C  
ATOM    916  OE1 GLN L   6       7.912  31.669  66.434  1.00 12.66           O  
ATOM    917  NE2 GLN L   6       8.530  32.046  68.560  1.00 11.65           N  
ATOM    918  N   SER L   7       5.532  29.873  72.547  1.00 10.01           N  
ATOM    919  CA  SER L   7       5.262  30.173  73.948  1.00 10.64           C  
ATOM    920  C   SER L   7       6.572  30.247  74.724  1.00  9.98           C  
ATOM    921  O   SER L   7       7.402  29.342  74.641  1.00 10.08           O  
ATOM    922  CB  SER L   7       4.366  29.089  74.559  1.00 11.60           C  
ATOM    923  OG  SER L   7       4.151  29.324  75.943  1.00 14.41           O  
ATOM    924  N   PRO L   8       6.785  31.338  75.476  1.00  9.32           N  
ATOM    925  CA  PRO L   8       5.883  32.484  75.630  1.00  8.54           C  
ATOM    926  C   PRO L   8       6.079  33.457  74.471  1.00  8.67           C  
ATOM    927  O   PRO L   8       6.873  33.197  73.566  1.00  9.09           O  
ATOM    928  CB  PRO L   8       6.328  33.082  76.954  1.00  7.95           C  
ATOM    929  CG  PRO L   8       7.823  32.908  76.870  1.00  8.59           C  
ATOM    930  CD  PRO L   8       7.967  31.484  76.348  1.00  8.66           C  
ATOM    931  N   ASP L   9       5.366  34.577  74.502  1.00  9.16           N  
ATOM    932  CA  ASP L   9       5.495  35.575  73.446  1.00  9.48           C  
ATOM    933  C   ASP L   9       6.727  36.438  73.702  1.00  8.73           C  
ATOM    934  O   ASP L   9       7.317  36.981  72.767  1.00  8.23           O  
ATOM    935  CB  ASP L   9       4.242  36.450  73.389  1.00 10.41           C  
ATOM    936  CG  ASP L   9       3.026  35.692  72.890  1.00 12.66           C  
ATOM    937  OD1 ASP L   9       3.149  34.939  71.899  1.00 13.10           O  
ATOM    938  OD2 ASP L   9       1.943  35.856  73.485  1.00 12.74           O  
ATOM    939  N   SER L  10       7.099  36.561  74.976  1.00  8.08           N  
ATOM    940  CA  SER L  10       8.270  37.335  75.393  1.00  8.32           C  
ATOM    941  C   SER L  10       8.853  36.700  76.650  1.00  7.29           C  
ATOM    942  O   SER L  10       8.123  36.119  77.449  1.00  5.67           O  
ATOM    943  CB  SER L  10       7.886  38.783  75.734  1.00  9.42           C  
ATOM    944  OG  SER L  10       7.361  39.472  74.612  1.00 17.14           O  
ATOM    945  N   LEU L  11      10.163  36.817  76.829  1.00  7.58           N  
ATOM    946  CA  LEU L  11      10.800  36.270  78.021  1.00  8.20           C  
ATOM    947  C   LEU L  11      12.106  36.986  78.320  1.00  9.26           C  
ATOM    948  O   LEU L  11      12.739  37.569  77.433  1.00  8.91           O  
ATOM    949  CB  LEU L  11      11.047  34.764  77.864  1.00  8.33           C  
ATOM    950  CG  LEU L  11      12.096  34.262  76.869  1.00  7.79           C  
ATOM    951  CD1 LEU L  11      13.503  34.411  77.454  1.00  8.39           C  
ATOM    952  CD2 LEU L  11      11.817  32.800  76.563  1.00  9.40           C  
ATOM    953  N   ALA L  12      12.498  36.954  79.585  1.00  9.21           N  
ATOM    954  CA  ALA L  12      13.734  37.584  80.000  1.00  9.78           C  
ATOM    955  C   ALA L  12      14.410  36.727  81.054  1.00 10.21           C  
ATOM    956  O   ALA L  12      13.757  36.206  81.962  1.00 10.20           O  
ATOM    957  CB  ALA L  12      13.458  38.983  80.560  1.00 10.24           C  
ATOM    958  N   VAL L  13      15.720  36.566  80.910  1.00  9.98           N  
ATOM    959  CA  VAL L  13      16.518  35.813  81.864  1.00  9.58           C  
ATOM    960  C   VAL L  13      17.787  36.628  82.077  1.00  9.44           C  
ATOM    961  O   VAL L  13      18.110  37.506  81.272  1.00  9.59           O  
ATOM    962  CB  VAL L  13      16.878  34.396  81.346  1.00  8.69           C  
ATOM    963  CG1 VAL L  13      15.599  33.599  81.089  1.00  6.97           C  
ATOM    964  CG2 VAL L  13      17.721  34.488  80.076  1.00  8.12           C  
ATOM    965  N   SER L  14      18.490  36.354  83.168  1.00  9.67           N  
ATOM    966  CA  SER L  14      19.716  37.073  83.485  1.00 11.71           C  
ATOM    967  C   SER L  14      20.829  36.712  82.507  1.00 12.43           C  
ATOM    968  O   SER L  14      20.789  35.659  81.869  1.00 13.33           O  
ATOM    969  CB  SER L  14      20.160  36.733  84.909  1.00 13.58           C  
ATOM    970  OG  SER L  14      19.097  36.916  85.829  1.00 17.28           O  
ATOM    971  N   PRO L  15      21.842  37.587  82.371  1.00 12.83           N  
ATOM    972  CA  PRO L  15      22.944  37.295  81.452  1.00 11.44           C  
ATOM    973  C   PRO L  15      23.591  35.975  81.868  1.00 11.23           C  
ATOM    974  O   PRO L  15      23.768  35.718  83.061  1.00  9.62           O  
ATOM    975  CB  PRO L  15      23.894  38.478  81.654  1.00 13.11           C  
ATOM    976  CG  PRO L  15      22.980  39.588  82.088  1.00 14.53           C  
ATOM    977  CD  PRO L  15      22.045  38.882  83.043  1.00 12.91           C  
ATOM    978  N   GLY L  16      23.922  35.139  80.893  1.00  9.53           N  
ATOM    979  CA  GLY L  16      24.553  33.867  81.196  1.00 11.33           C  
ATOM    980  C   GLY L  16      23.595  32.740  81.533  1.00 11.73           C  
ATOM    981  O   GLY L  16      24.014  31.587  81.629  1.00 12.41           O  
ATOM    982  N   GLU L  17      22.316  33.058  81.722  1.00 11.77           N  
ATOM    983  CA  GLU L  17      21.332  32.031  82.046  1.00 12.62           C  
ATOM    984  C   GLU L  17      20.689  31.446  80.793  1.00 11.84           C  
ATOM    985  O   GLU L  17      20.738  32.046  79.718  1.00 10.15           O  
ATOM    986  CB  GLU L  17      20.255  32.592  82.979  1.00 15.48           C  
ATOM    987  CG  GLU L  17      20.784  33.013  84.344  1.00 20.96           C  
ATOM    988  CD  GLU L  17      21.665  31.950  84.983  1.00 25.99           C  
ATOM    989  OE1 GLU L  17      21.254  30.769  85.021  1.00 28.63           O  
ATOM    990  OE2 GLU L  17      22.770  32.294  85.455  1.00 30.14           O  
ATOM    991  N   ARG L  18      20.085  30.271  80.946  1.00 10.64           N  
ATOM    992  CA  ARG L  18      19.448  29.568  79.839  1.00 11.11           C  
ATOM    993  C   ARG L  18      18.050  30.091  79.532  1.00 11.03           C  
ATOM    994  O   ARG L  18      17.256  30.347  80.439  1.00 10.44           O  
ATOM    995  CB  ARG L  18      19.352  28.070  80.149  1.00 13.07           C  
ATOM    996  CG  ARG L  18      18.923  27.225  78.952  1.00 15.33           C  
ATOM    997  CD  ARG L  18      18.363  25.857  79.336  1.00 20.56           C  
ATOM    998  NE  ARG L  18      19.052  25.235  80.463  1.00 22.61           N  
ATOM    999  CZ  ARG L  18      18.795  25.506  81.739  1.00 26.72           C  
ATOM   1000  NH1 ARG L  18      17.860  26.392  82.060  1.00 30.90           N  
ATOM   1001  NH2 ARG L  18      19.474  24.896  82.699  1.00 27.86           N  
ATOM   1002  N   ALA L  19      17.753  30.238  78.245  1.00 10.50           N  
ATOM   1003  CA  ALA L  19      16.445  30.704  77.800  1.00 10.91           C  
ATOM   1004  C   ALA L  19      15.837  29.613  76.924  1.00 10.30           C  
ATOM   1005  O   ALA L  19      16.528  29.029  76.091  1.00  9.28           O  
ATOM   1006  CB  ALA L  19      16.587  31.993  77.006  1.00 12.28           C  
ATOM   1007  N   THR L  20      14.552  29.331  77.117  1.00 10.75           N  
ATOM   1008  CA  THR L  20      13.886  28.299  76.328  1.00 11.87           C  
ATOM   1009  C   THR L  20      12.614  28.821  75.677  1.00 12.31           C  
ATOM   1010  O   THR L  20      11.786  29.468  76.326  1.00 10.03           O  
ATOM   1011  CB  THR L  20      13.519  27.075  77.187  1.00 13.55           C  
ATOM   1012  OG1 THR L  20      12.483  27.429  78.108  1.00 18.63           O  
ATOM   1013  CG2 THR L  20      14.720  26.597  77.961  1.00 13.72           C  
ATOM   1014  N   ILE L  21      12.469  28.528  74.390  1.00 11.22           N  
ATOM   1015  CA  ILE L  21      11.313  28.953  73.618  1.00 12.05           C  
ATOM   1016  C   ILE L  21      10.628  27.724  73.029  1.00 12.80           C  
ATOM   1017  O   ILE L  21      11.280  26.878  72.421  1.00 11.67           O  
ATOM   1018  CB  ILE L  21      11.737  29.890  72.466  1.00 12.72           C  
ATOM   1019  CG1 ILE L  21      12.390  31.148  73.035  1.00 12.69           C  
ATOM   1020  CG2 ILE L  21      10.521  30.246  71.609  1.00 12.45           C  
ATOM   1021  CD1 ILE L  21      13.037  32.028  71.984  1.00 15.84           C  
ATOM   1022  N   ASN L  22       9.313  27.636  73.209  1.00 12.79           N  
ATOM   1023  CA  ASN L  22       8.538  26.505  72.705  1.00 13.39           C  
ATOM   1024  C   ASN L  22       7.768  26.858  71.429  1.00 12.34           C  
ATOM   1025  O   ASN L  22       7.331  27.995  71.241  1.00 11.11           O  
ATOM   1026  CB  ASN L  22       7.552  26.032  73.779  1.00 16.66           C  
ATOM   1027  CG  ASN L  22       6.764  24.802  73.356  1.00 21.09           C  
ATOM   1028  OD1 ASN L  22       7.314  23.703  73.233  1.00 25.21           O  
ATOM   1029  ND2 ASN L  22       5.467  24.983  73.127  1.00 23.77           N  
ATOM   1030  N   CYS L  23       7.599  25.869  70.562  1.00 10.59           N  
ATOM   1031  CA  CYS L  23       6.872  26.058  69.312  1.00 11.23           C  
ATOM   1032  C   CYS L  23       6.045  24.817  69.025  1.00 10.60           C  
ATOM   1033  O   CYS L  23       6.553  23.698  69.096  1.00 10.05           O  
ATOM   1034  CB  CYS L  23       7.851  26.293  68.166  1.00 11.86           C  
ATOM   1035  SG  CYS L  23       7.156  26.345  66.477  1.00 12.36           S  
ATOM   1036  N   LYS L  24       4.769  25.016  68.714  1.00 11.03           N  
ATOM   1037  CA  LYS L  24       3.894  23.894  68.405  1.00 12.90           C  
ATOM   1038  C   LYS L  24       3.308  24.043  67.006  1.00 12.63           C  
ATOM   1039  O   LYS L  24       2.879  25.130  66.603  1.00 10.51           O  
ATOM   1040  CB  LYS L  24       2.761  23.787  69.431  1.00 15.14           C  
ATOM   1041  CG  LYS L  24       1.860  22.573  69.202  1.00 20.00           C  
ATOM   1042  CD  LYS L  24       0.788  22.431  70.275  1.00 24.24           C  
ATOM   1043  CE  LYS L  24      -0.220  23.565  70.216  1.00 25.92           C  
ATOM   1044  NZ  LYS L  24      -1.341  23.350  71.180  1.00 29.47           N  
ATOM   1045  N   SER L  25       3.309  22.940  66.268  1.00 12.17           N  
ATOM   1046  CA  SER L  25       2.783  22.913  64.913  1.00 11.10           C  
ATOM   1047  C   SER L  25       1.495  22.103  64.914  1.00 12.23           C  
ATOM   1048  O   SER L  25       1.421  21.056  65.559  1.00 11.05           O  
ATOM   1049  CB  SER L  25       3.793  22.258  63.967  1.00 12.37           C  
ATOM   1050  OG  SER L  25       3.254  22.119  62.662  1.00 10.18           O  
ATOM   1051  N   SER L  26       0.484  22.590  64.198  1.00 12.63           N  
ATOM   1052  CA  SER L  26      -0.789  21.885  64.119  1.00 14.15           C  
ATOM   1053  C   SER L  26      -0.618  20.619  63.285  1.00 14.62           C  
ATOM   1054  O   SER L  26      -1.444  19.710  63.336  1.00 15.04           O  
ATOM   1055  CB  SER L  26      -1.862  22.786  63.501  1.00 14.37           C  
ATOM   1056  OG  SER L  26      -1.493  23.221  62.206  1.00 14.49           O  
ATOM   1057  N   GLN L  27       0.469  20.561  62.524  1.00 13.96           N  
ATOM   1058  CA  GLN L  27       0.753  19.403  61.686  1.00 15.10           C  
ATOM   1059  C   GLN L  27       2.110  18.786  62.019  1.00 14.75           C  
ATOM   1060  O   GLN L  27       3.075  19.499  62.299  1.00 14.13           O  
ATOM   1061  CB  GLN L  27       0.712  19.804  60.207  1.00 15.07           C  
ATOM   1062  CG  GLN L  27       1.383  18.802  59.275  1.00 16.72           C  
ATOM   1063  CD  GLN L  27       1.193  19.145  57.813  1.00 17.85           C  
ATOM   1064  OE1 GLN L  27       2.063  18.881  56.984  1.00 20.28           O  
ATOM   1065  NE2 GLN L  27       0.045  19.721  57.486  1.00 15.71           N  
ATOM   1066  N   ASN L  27A      2.177  17.457  61.993  1.00 14.60           N  
ATOM   1067  CA  ASN L  27A      3.421  16.754  62.279  1.00 14.69           C  
ATOM   1068  C   ASN L  27A      4.380  17.108  61.149  1.00 13.99           C  
ATOM   1069  O   ASN L  27A      4.079  16.889  59.976  1.00 14.08           O  
ATOM   1070  CB  ASN L  27A      3.174  15.243  62.335  1.00 14.22           C  
ATOM   1071  CG  ASN L  27A      4.378  14.482  62.834  1.00 13.42           C  
ATOM   1072  OD1 ASN L  27A      5.442  14.515  62.218  1.00 14.51           O  
ATOM   1073  ND2 ASN L  27A      4.222  13.795  63.962  1.00 13.76           N  
ATOM   1074  N   LEU L  27B      5.537  17.658  61.504  1.00 13.68           N  
ATOM   1075  CA  LEU L  27B      6.500  18.098  60.504  1.00 12.07           C  
ATOM   1076  C   LEU L  27B      7.550  17.090  60.048  1.00 12.31           C  
ATOM   1077  O   LEU L  27B      8.491  17.455  59.343  1.00 11.01           O  
ATOM   1078  CB  LEU L  27B      7.178  19.385  60.991  1.00 11.82           C  
ATOM   1079  CG  LEU L  27B      6.194  20.531  61.270  1.00 10.81           C  
ATOM   1080  CD1 LEU L  27B      6.931  21.737  61.822  1.00 10.94           C  
ATOM   1081  CD2 LEU L  27B      5.458  20.897  59.989  1.00 10.45           C  
ATOM   1082  N   LEU L  27C      7.404  15.829  60.441  1.00 11.55           N  
ATOM   1083  CA  LEU L  27C      8.353  14.813  60.000  1.00 13.54           C  
ATOM   1084  C   LEU L  27C      8.297  14.794  58.476  1.00 13.71           C  
ATOM   1085  O   LEU L  27C      7.226  14.952  57.894  1.00 14.59           O  
ATOM   1086  CB  LEU L  27C      7.969  13.437  60.552  1.00 13.62           C  
ATOM   1087  CG  LEU L  27C      8.418  13.143  61.985  1.00 15.03           C  
ATOM   1088  CD1 LEU L  27C      7.839  11.820  62.445  1.00 14.67           C  
ATOM   1089  CD2 LEU L  27C      9.943  13.108  62.039  1.00 15.49           C  
ATOM   1090  N   ASP L  27D      9.441  14.617  57.827  1.00 15.11           N  
ATOM   1091  CA  ASP L  27D      9.469  14.596  56.369  1.00 16.41           C  
ATOM   1092  C   ASP L  27D      9.425  13.166  55.843  1.00 17.10           C  
ATOM   1093  O   ASP L  27D     10.376  12.401  56.007  1.00 16.78           O  
ATOM   1094  CB  ASP L  27D     10.717  15.320  55.847  1.00 18.10           C  
ATOM   1095  CG  ASP L  27D     10.814  15.304  54.327  1.00 20.79           C  
ATOM   1096  OD1 ASP L  27D      9.780  15.500  53.655  1.00 22.58           O  
ATOM   1097  OD2 ASP L  27D     11.928  15.104  53.801  1.00 21.15           O  
ATOM   1098  N   SER L  27E      8.306  12.811  55.218  1.00 17.62           N  
ATOM   1099  CA  SER L  27E      8.125  11.471  54.665  1.00 19.31           C  
ATOM   1100  C   SER L  27E      8.431  10.400  55.715  1.00 17.77           C  
ATOM   1101  O   SER L  27E      7.860  10.414  56.800  1.00 16.90           O  
ATOM   1102  CB  SER L  27E      9.028  11.277  53.445  1.00 20.68           C  
ATOM   1103  OG  SER L  27E      8.747  10.044  52.802  1.00 26.39           O  
ATOM   1104  N   SER L  27F      9.330   9.473  55.393  1.00 16.77           N  
ATOM   1105  CA  SER L  27F      9.682   8.413  56.332  1.00 17.24           C  
ATOM   1106  C   SER L  27F     11.018   8.666  57.008  1.00 16.55           C  
ATOM   1107  O   SER L  27F     11.557   7.792  57.687  1.00 15.53           O  
ATOM   1108  CB  SER L  27F      9.713   7.057  55.622  1.00 16.92           C  
ATOM   1109  OG  SER L  27F      8.397   6.596  55.377  1.00 20.46           O  
ATOM   1110  N   PHE L  28      11.541   9.874  56.824  1.00 16.55           N  
ATOM   1111  CA  PHE L  28      12.819  10.261  57.405  1.00 16.64           C  
ATOM   1112  C   PHE L  28      12.638  10.739  58.842  1.00 15.66           C  
ATOM   1113  O   PHE L  28      11.518  10.976  59.294  1.00 15.11           O  
ATOM   1114  CB  PHE L  28      13.459  11.377  56.572  1.00 18.35           C  
ATOM   1115  CG  PHE L  28      13.656  11.018  55.124  1.00 20.91           C  
ATOM   1116  CD1 PHE L  28      14.413   9.907  54.764  1.00 22.56           C  
ATOM   1117  CD2 PHE L  28      13.082  11.790  54.119  1.00 22.01           C  
ATOM   1118  CE1 PHE L  28      14.595   9.568  53.420  1.00 22.76           C  
ATOM   1119  CE2 PHE L  28      13.257  11.462  52.774  1.00 21.87           C  
ATOM   1120  CZ  PHE L  28      14.016  10.348  52.424  1.00 22.31           C  
ATOM   1121  N   ASP L  29      13.749  10.878  59.556  1.00 15.37           N  
ATOM   1122  CA  ASP L  29      13.714  11.330  60.940  1.00 16.15           C  
ATOM   1123  C   ASP L  29      13.806  12.854  61.019  1.00 16.56           C  
ATOM   1124  O   ASP L  29      13.687  13.437  62.097  1.00 17.14           O  
ATOM   1125  CB  ASP L  29      14.870  10.710  61.720  1.00 16.28           C  
ATOM   1126  CG  ASP L  29      16.206  10.906  61.030  1.00 16.66           C  
ATOM   1127  OD1 ASP L  29      16.241  10.935  59.780  1.00 18.57           O  
ATOM   1128  OD2 ASP L  29      17.223  11.025  61.737  1.00 18.30           O  
ATOM   1129  N   THR L  30      14.007  13.490  59.870  1.00 15.99           N  
ATOM   1130  CA  THR L  30      14.130  14.942  59.802  1.00 16.31           C  
ATOM   1131  C   THR L  30      12.783  15.665  59.777  1.00 14.88           C  
ATOM   1132  O   THR L  30      11.827  15.204  59.155  1.00 14.12           O  
ATOM   1133  CB  THR L  30      14.940  15.365  58.557  1.00 18.00           C  
ATOM   1134  OG1 THR L  30      14.386  14.743  57.389  1.00 20.18           O  
ATOM   1135  CG2 THR L  30      16.393  14.955  58.701  1.00 18.70           C  
ATOM   1136  N   ASN L  31      12.723  16.802  60.464  1.00 13.39           N  
ATOM   1137  CA  ASN L  31      11.512  17.620  60.531  1.00 12.61           C  
ATOM   1138  C   ASN L  31      11.705  18.889  59.710  1.00 11.75           C  
ATOM   1139  O   ASN L  31      12.792  19.475  59.716  1.00 11.75           O  
ATOM   1140  CB  ASN L  31      11.223  18.031  61.979  1.00 12.67           C  
ATOM   1141  CG  ASN L  31      10.683  16.893  62.822  1.00 12.94           C  
ATOM   1142  OD1 ASN L  31       9.476  16.674  62.883  1.00 14.18           O  
ATOM   1143  ND2 ASN L  31      11.579  16.158  63.472  1.00 13.69           N  
ATOM   1144  N   THR L  32      10.661  19.319  59.010  1.00  9.77           N  
ATOM   1145  CA  THR L  32      10.752  20.552  58.236  1.00 10.42           C  
ATOM   1146  C   THR L  32      10.424  21.693  59.193  1.00  9.35           C  
ATOM   1147  O   THR L  32       9.410  22.378  59.053  1.00  8.30           O  
ATOM   1148  CB  THR L  32       9.761  20.568  57.053  1.00 11.08           C  
ATOM   1149  OG1 THR L  32       8.442  20.262  57.522  1.00 13.44           O  
ATOM   1150  CG2 THR L  32      10.179  19.552  56.004  1.00 12.24           C  
ATOM   1151  N   LEU L  33      11.295  21.872  60.181  1.00  9.14           N  
ATOM   1152  CA  LEU L  33      11.134  22.906  61.197  1.00  9.07           C  
ATOM   1153  C   LEU L  33      12.451  23.667  61.348  1.00  9.35           C  
ATOM   1154  O   LEU L  33      13.508  23.062  61.533  1.00  9.12           O  
ATOM   1155  CB  LEU L  33      10.743  22.250  62.529  1.00  8.46           C  
ATOM   1156  CG  LEU L  33      10.366  23.088  63.761  1.00 11.54           C  
ATOM   1157  CD1 LEU L  33      11.605  23.763  64.340  1.00 10.82           C  
ATOM   1158  CD2 LEU L  33       9.301  24.113  63.389  1.00  9.66           C  
ATOM   1159  N   ALA L  34      12.384  24.992  61.258  1.00  8.34           N  
ATOM   1160  CA  ALA L  34      13.573  25.828  61.387  1.00  7.38           C  
ATOM   1161  C   ALA L  34      13.358  26.911  62.436  1.00  6.90           C  
ATOM   1162  O   ALA L  34      12.227  27.188  62.833  1.00  7.11           O  
ATOM   1163  CB  ALA L  34      13.907  26.483  60.039  1.00  7.18           C  
ATOM   1164  N   TRP L  35      14.458  27.507  62.883  1.00  6.48           N  
ATOM   1165  CA  TRP L  35      14.426  28.596  63.850  1.00  6.84           C  
ATOM   1166  C   TRP L  35      15.216  29.751  63.245  1.00  7.24           C  
ATOM   1167  O   TRP L  35      16.273  29.539  62.640  1.00  7.04           O  
ATOM   1168  CB  TRP L  35      15.069  28.191  65.179  1.00  7.63           C  
ATOM   1169  CG  TRP L  35      14.261  27.237  65.989  1.00  7.57           C  
ATOM   1170  CD1 TRP L  35      14.385  25.883  66.027  1.00  7.67           C  
ATOM   1171  CD2 TRP L  35      13.202  27.571  66.890  1.00  9.07           C  
ATOM   1172  NE1 TRP L  35      13.470  25.346  66.903  1.00  8.91           N  
ATOM   1173  CE2 TRP L  35      12.731  26.363  67.446  1.00  9.73           C  
ATOM   1174  CE3 TRP L  35      12.605  28.775  67.283  1.00  9.37           C  
ATOM   1175  CZ2 TRP L  35      11.691  26.322  68.376  1.00  8.03           C  
ATOM   1176  CZ3 TRP L  35      11.566  28.735  68.212  1.00  9.20           C  
ATOM   1177  CH2 TRP L  35      11.122  27.515  68.747  1.00  9.12           C  
ATOM   1178  N   TYR L  36      14.688  30.962  63.401  1.00  6.23           N  
ATOM   1179  CA  TYR L  36      15.316  32.173  62.877  1.00  8.07           C  
ATOM   1180  C   TYR L  36      15.476  33.220  63.969  1.00  7.82           C  
ATOM   1181  O   TYR L  36      14.738  33.226  64.955  1.00  9.05           O  
ATOM   1182  CB  TYR L  36      14.462  32.795  61.763  1.00  6.38           C  
ATOM   1183  CG  TYR L  36      14.455  32.046  60.451  1.00  7.94           C  
ATOM   1184  CD1 TYR L  36      13.871  30.785  60.342  1.00  7.63           C  
ATOM   1185  CD2 TYR L  36      14.999  32.623  59.303  1.00  7.69           C  
ATOM   1186  CE1 TYR L  36      13.824  30.118  59.113  1.00  8.13           C  
ATOM   1187  CE2 TYR L  36      14.961  31.969  58.078  1.00  7.76           C  
ATOM   1188  CZ  TYR L  36      14.370  30.720  57.987  1.00  6.84           C  
ATOM   1189  OH  TYR L  36      14.300  30.098  56.760  1.00  6.17           O  
ATOM   1190  N   GLN L  37      16.433  34.116  63.768  1.00  7.00           N  
ATOM   1191  CA  GLN L  37      16.691  35.199  64.706  1.00  8.67           C  
ATOM   1192  C   GLN L  37      16.449  36.501  63.955  1.00  8.19           C  
ATOM   1193  O   GLN L  37      16.922  36.663  62.828  1.00  6.85           O  
ATOM   1194  CB  GLN L  37      18.141  35.157  65.177  1.00  8.58           C  
ATOM   1195  CG  GLN L  37      18.509  36.244  66.170  1.00 11.00           C  
ATOM   1196  CD  GLN L  37      20.006  36.357  66.345  1.00 11.67           C  
ATOM   1197  OE1 GLN L  37      20.725  36.663  65.395  1.00 13.53           O  
ATOM   1198  NE2 GLN L  37      20.487  36.102  67.554  1.00 11.55           N  
ATOM   1199  N   GLN L  38      15.712  37.418  64.574  1.00  8.35           N  
ATOM   1200  CA  GLN L  38      15.434  38.709  63.954  1.00  8.86           C  
ATOM   1201  C   GLN L  38      15.859  39.876  64.841  1.00  9.01           C  
ATOM   1202  O   GLN L  38      15.346  40.051  65.945  1.00  7.60           O  
ATOM   1203  CB  GLN L  38      13.943  38.843  63.622  1.00  9.02           C  
ATOM   1204  CG  GLN L  38      13.587  40.206  63.018  1.00 11.17           C  
ATOM   1205  CD  GLN L  38      12.106  40.372  62.743  1.00 10.37           C  
ATOM   1206  OE1 GLN L  38      11.269  40.090  63.601  1.00 10.72           O  
ATOM   1207  NE2 GLN L  38      11.774  40.849  61.547  1.00 11.17           N  
ATOM   1208  N   LYS L  39      16.809  40.665  64.347  1.00 10.75           N  
ATOM   1209  CA  LYS L  39      17.299  41.833  65.065  1.00 13.40           C  
ATOM   1210  C   LYS L  39      16.426  43.023  64.668  1.00 14.52           C  
ATOM   1211  O   LYS L  39      15.735  42.980  63.652  1.00 14.04           O  
ATOM   1212  CB  LYS L  39      18.762  42.106  64.697  1.00 15.56           C  
ATOM   1213  CG  LYS L  39      19.745  41.056  65.198  1.00 17.61           C  
ATOM   1214  CD  LYS L  39      19.755  40.993  66.717  1.00 20.19           C  
ATOM   1215  CE  LYS L  39      20.809  40.022  67.240  1.00 21.55           C  
ATOM   1216  NZ  LYS L  39      22.198  40.473  66.944  1.00 22.33           N  
ATOM   1217  N   PRO L  40      16.443  44.103  65.466  1.00 15.52           N  
ATOM   1218  CA  PRO L  40      15.629  45.283  65.153  1.00 15.14           C  
ATOM   1219  C   PRO L  40      15.863  45.841  63.746  1.00 14.96           C  
ATOM   1220  O   PRO L  40      17.004  46.047  63.334  1.00 13.41           O  
ATOM   1221  CB  PRO L  40      16.038  46.276  66.240  1.00 17.51           C  
ATOM   1222  CG  PRO L  40      16.384  45.379  67.401  1.00 15.74           C  
ATOM   1223  CD  PRO L  40      17.181  44.292  66.729  1.00 16.04           C  
ATOM   1224  N   GLY L  41      14.770  46.074  63.020  1.00 13.73           N  
ATOM   1225  CA  GLY L  41      14.847  46.626  61.676  1.00 13.75           C  
ATOM   1226  C   GLY L  41      15.375  45.690  60.604  1.00 12.84           C  
ATOM   1227  O   GLY L  41      15.546  46.095  59.452  1.00 13.69           O  
ATOM   1228  N   GLN L  42      15.626  44.440  60.977  1.00 12.38           N  
ATOM   1229  CA  GLN L  42      16.151  43.445  60.049  1.00 12.19           C  
ATOM   1230  C   GLN L  42      15.175  42.309  59.770  1.00 11.49           C  
ATOM   1231  O   GLN L  42      14.195  42.118  60.491  1.00  9.66           O  
ATOM   1232  CB  GLN L  42      17.435  42.822  60.612  1.00 14.51           C  
ATOM   1233  CG  GLN L  42      18.660  43.720  60.628  1.00 19.17           C  
ATOM   1234  CD  GLN L  42      19.849  43.052  61.303  1.00 22.06           C  
ATOM   1235  OE1 GLN L  42      20.038  41.835  61.199  1.00 22.35           O  
ATOM   1236  NE2 GLN L  42      20.664  43.848  61.992  1.00 25.31           N  
ATOM   1237  N   PRO L  43      15.420  41.554  58.688  1.00  9.83           N  
ATOM   1238  CA  PRO L  43      14.531  40.433  58.378  1.00  9.32           C  
ATOM   1239  C   PRO L  43      15.077  39.250  59.180  1.00  8.53           C  
ATOM   1240  O   PRO L  43      16.210  39.303  59.679  1.00  9.15           O  
ATOM   1241  CB  PRO L  43      14.705  40.257  56.872  1.00  8.70           C  
ATOM   1242  CG  PRO L  43      16.131  40.648  56.653  1.00 10.25           C  
ATOM   1243  CD  PRO L  43      16.291  41.872  57.541  1.00 10.07           C  
ATOM   1244  N   PRO L  44      14.287  38.181  59.333  1.00  7.54           N  
ATOM   1245  CA  PRO L  44      14.786  37.032  60.097  1.00  7.66           C  
ATOM   1246  C   PRO L  44      15.893  36.277  59.366  1.00  8.01           C  
ATOM   1247  O   PRO L  44      15.868  36.146  58.143  1.00  8.27           O  
ATOM   1248  CB  PRO L  44      13.528  36.191  60.317  1.00  7.02           C  
ATOM   1249  CG  PRO L  44      12.678  36.522  59.121  1.00  9.42           C  
ATOM   1250  CD  PRO L  44      12.867  38.010  58.975  1.00  7.25           C  
ATOM   1251  N   LYS L  45      16.876  35.797  60.122  1.00  8.27           N  
ATOM   1252  CA  LYS L  45      17.990  35.053  59.550  1.00  8.51           C  
ATOM   1253  C   LYS L  45      18.017  33.646  60.137  1.00  8.74           C  
ATOM   1254  O   LYS L  45      17.768  33.456  61.326  1.00  6.97           O  
ATOM   1255  CB  LYS L  45      19.308  35.784  59.821  1.00  9.43           C  
ATOM   1256  CG  LYS L  45      19.344  37.178  59.195  1.00  9.65           C  
ATOM   1257  CD  LYS L  45      20.678  37.869  59.411  1.00 10.42           C  
ATOM   1258  CE  LYS L  45      20.667  39.258  58.791  1.00 13.66           C  
ATOM   1259  NZ  LYS L  45      21.941  39.983  59.033  1.00 14.96           N  
ATOM   1260  N   LEU L  46      18.316  32.669  59.287  1.00  8.50           N  
ATOM   1261  CA  LEU L  46      18.342  31.263  59.681  1.00  8.81           C  
ATOM   1262  C   LEU L  46      19.358  30.892  60.749  1.00  9.74           C  
ATOM   1263  O   LEU L  46      20.529  31.272  60.680  1.00  7.99           O  
ATOM   1264  CB  LEU L  46      18.584  30.386  58.453  1.00  8.41           C  
ATOM   1265  CG  LEU L  46      18.539  28.872  58.675  1.00  7.46           C  
ATOM   1266  CD1 LEU L  46      17.124  28.443  59.077  1.00  5.29           C  
ATOM   1267  CD2 LEU L  46      18.972  28.173  57.397  1.00  5.90           C  
ATOM   1268  N   LEU L  47      18.894  30.125  61.730  1.00  8.46           N  
ATOM   1269  CA  LEU L  47      19.741  29.658  62.815  1.00  9.25           C  
ATOM   1270  C   LEU L  47      19.853  28.142  62.760  1.00  9.52           C  
ATOM   1271  O   LEU L  47      20.950  27.585  62.711  1.00  9.49           O  
ATOM   1272  CB  LEU L  47      19.147  30.041  64.174  1.00 11.85           C  
ATOM   1273  CG  LEU L  47      19.189  31.501  64.618  1.00 13.87           C  
ATOM   1274  CD1 LEU L  47      18.398  31.648  65.906  1.00 15.15           C  
ATOM   1275  CD2 LEU L  47      20.630  31.942  64.820  1.00 11.84           C  
ATOM   1276  N   ILE L  48      18.697  27.486  62.761  1.00  9.19           N  
ATOM   1277  CA  ILE L  48      18.632  26.032  62.770  1.00  9.58           C  
ATOM   1278  C   ILE L  48      17.629  25.462  61.770  1.00 10.08           C  
ATOM   1279  O   ILE L  48      16.553  26.022  61.567  1.00  9.31           O  
ATOM   1280  CB  ILE L  48      18.258  25.542  64.194  1.00 10.14           C  
ATOM   1281  CG1 ILE L  48      19.420  25.816  65.153  1.00 10.12           C  
ATOM   1282  CG2 ILE L  48      17.894  24.070  64.178  1.00 10.12           C  
ATOM   1283  CD1 ILE L  48      19.071  25.637  66.607  1.00 11.17           C  
ATOM   1284  N   TYR L  49      18.002  24.350  61.142  1.00 10.53           N  
ATOM   1285  CA  TYR L  49      17.132  23.665  60.192  1.00 12.11           C  
ATOM   1286  C   TYR L  49      17.033  22.212  60.646  1.00 12.32           C  
ATOM   1287  O   TYR L  49      17.864  21.747  61.434  1.00 12.84           O  
ATOM   1288  CB  TYR L  49      17.683  23.744  58.758  1.00 12.53           C  
ATOM   1289  CG  TYR L  49      19.046  23.119  58.554  1.00 14.44           C  
ATOM   1290  CD1 TYR L  49      20.213  23.841  58.809  1.00 13.98           C  
ATOM   1291  CD2 TYR L  49      19.170  21.800  58.107  1.00 14.39           C  
ATOM   1292  CE1 TYR L  49      21.473  23.265  58.625  1.00 15.22           C  
ATOM   1293  CE2 TYR L  49      20.424  21.214  57.921  1.00 15.00           C  
ATOM   1294  CZ  TYR L  49      21.570  21.954  58.183  1.00 16.53           C  
ATOM   1295  OH  TYR L  49      22.810  21.378  58.011  1.00 17.48           O  
ATOM   1296  N   TRP L  50      16.025  21.499  60.153  1.00 12.65           N  
ATOM   1297  CA  TRP L  50      15.802  20.111  60.546  1.00 12.73           C  
ATOM   1298  C   TRP L  50      15.755  19.971  62.068  1.00 11.84           C  
ATOM   1299  O   TRP L  50      16.284  19.014  62.641  1.00 11.46           O  
ATOM   1300  CB  TRP L  50      16.883  19.192  59.975  1.00 13.84           C  
ATOM   1301  CG  TRP L  50      16.671  18.831  58.536  1.00 16.26           C  
ATOM   1302  CD1 TRP L  50      15.507  18.928  57.826  1.00 16.81           C  
ATOM   1303  CD2 TRP L  50      17.634  18.254  57.650  1.00 19.12           C  
ATOM   1304  NE1 TRP L  50      15.687  18.445  56.552  1.00 18.30           N  
ATOM   1305  CE2 TRP L  50      16.983  18.024  56.417  1.00 18.66           C  
ATOM   1306  CE3 TRP L  50      18.987  17.904  57.778  1.00 19.86           C  
ATOM   1307  CZ2 TRP L  50      17.638  17.462  55.317  1.00 20.46           C  
ATOM   1308  CZ3 TRP L  50      19.638  17.343  56.682  1.00 21.91           C  
ATOM   1309  CH2 TRP L  50      18.961  17.129  55.468  1.00 22.22           C  
ATOM   1310  N   ALA L  51      15.128  20.954  62.707  1.00 11.83           N  
ATOM   1311  CA  ALA L  51      14.944  20.985  64.154  1.00 11.29           C  
ATOM   1312  C   ALA L  51      16.188  21.167  65.019  1.00 12.50           C  
ATOM   1313  O   ALA L  51      16.146  21.908  66.002  1.00 11.92           O  
ATOM   1314  CB  ALA L  51      14.191  19.723  64.605  1.00 12.36           C  
ATOM   1315  N   SER L  52      17.292  20.515  64.662  1.00 11.65           N  
ATOM   1316  CA  SER L  52      18.497  20.597  65.483  1.00 12.92           C  
ATOM   1317  C   SER L  52      19.818  20.934  64.802  1.00 13.67           C  
ATOM   1318  O   SER L  52      20.811  21.168  65.489  1.00 14.63           O  
ATOM   1319  CB  SER L  52      18.672  19.284  66.245  1.00 12.39           C  
ATOM   1320  OG  SER L  52      18.757  18.191  65.344  1.00 15.00           O  
ATOM   1321  N   SER L  53      19.843  20.955  63.473  1.00 13.49           N  
ATOM   1322  CA  SER L  53      21.075  21.258  62.749  1.00 14.51           C  
ATOM   1323  C   SER L  53      21.355  22.752  62.645  1.00 13.79           C  
ATOM   1324  O   SER L  53      20.543  23.508  62.114  1.00 12.41           O  
ATOM   1325  CB  SER L  53      21.026  20.645  61.349  1.00 14.19           C  
ATOM   1326  OG  SER L  53      20.937  19.237  61.430  1.00 15.98           O  
ATOM   1327  N   ARG L  54      22.510  23.168  63.159  1.00 14.32           N  
ATOM   1328  CA  ARG L  54      22.910  24.571  63.135  1.00 16.03           C  
ATOM   1329  C   ARG L  54      23.473  24.999  61.789  1.00 16.33           C  
ATOM   1330  O   ARG L  54      24.243  24.269  61.164  1.00 13.30           O  
ATOM   1331  CB  ARG L  54      23.986  24.852  64.188  1.00 19.13           C  
ATOM   1332  CG  ARG L  54      23.562  24.742  65.632  1.00 21.97           C  
ATOM   1333  CD  ARG L  54      24.756  25.079  66.522  1.00 25.17           C  
ATOM   1334  NE  ARG L  54      24.488  24.871  67.940  1.00 29.63           N  
ATOM   1335  CZ  ARG L  54      24.188  23.696  68.485  1.00 30.07           C  
ATOM   1336  NH1 ARG L  54      24.112  22.609  67.731  1.00 32.15           N  
ATOM   1337  NH2 ARG L  54      23.966  23.609  69.789  1.00 32.10           N  
ATOM   1338  N   GLU L  55      23.092  26.196  61.356  1.00 16.85           N  
ATOM   1339  CA  GLU L  55      23.593  26.748  60.109  1.00 17.52           C  
ATOM   1340  C   GLU L  55      25.047  27.136  60.382  1.00 17.90           C  
ATOM   1341  O   GLU L  55      25.398  27.517  61.501  1.00 15.06           O  
ATOM   1342  CB  GLU L  55      22.788  27.992  59.716  1.00 18.35           C  
ATOM   1343  CG  GLU L  55      23.275  28.665  58.446  1.00 22.66           C  
ATOM   1344  CD  GLU L  55      22.895  27.904  57.190  1.00 22.56           C  
ATOM   1345  OE1 GLU L  55      22.750  26.666  57.256  1.00 25.88           O  
ATOM   1346  OE2 GLU L  55      22.755  28.545  56.130  1.00 26.31           O  
ATOM   1347  N   SER L  56      25.898  27.028  59.372  1.00 18.66           N  
ATOM   1348  CA  SER L  56      27.300  27.379  59.549  1.00 19.93           C  
ATOM   1349  C   SER L  56      27.413  28.800  60.099  1.00 19.27           C  
ATOM   1350  O   SER L  56      26.742  29.710  59.618  1.00 20.53           O  
ATOM   1351  CB  SER L  56      28.039  27.276  58.212  1.00 22.58           C  
ATOM   1352  OG  SER L  56      29.418  27.566  58.371  1.00 25.89           O  
ATOM   1353  N   GLY L  57      28.245  28.982  61.121  1.00 18.27           N  
ATOM   1354  CA  GLY L  57      28.433  30.304  61.695  1.00 17.61           C  
ATOM   1355  C   GLY L  57      27.599  30.605  62.929  1.00 17.28           C  
ATOM   1356  O   GLY L  57      27.838  31.599  63.614  1.00 17.34           O  
ATOM   1357  N   VAL L  58      26.617  29.757  63.214  1.00 14.66           N  
ATOM   1358  CA  VAL L  58      25.756  29.951  64.377  1.00 13.53           C  
ATOM   1359  C   VAL L  58      26.435  29.418  65.640  1.00 12.75           C  
ATOM   1360  O   VAL L  58      26.897  28.280  65.671  1.00 13.21           O  
ATOM   1361  CB  VAL L  58      24.401  29.237  64.177  1.00 11.29           C  
ATOM   1362  CG1 VAL L  58      23.532  29.389  65.417  1.00 13.58           C  
ATOM   1363  CG2 VAL L  58      23.695  29.812  62.960  1.00 12.39           C  
ATOM   1364  N   PRO L  59      26.506  30.244  66.698  1.00 13.93           N  
ATOM   1365  CA  PRO L  59      27.129  29.868  67.972  1.00 13.46           C  
ATOM   1366  C   PRO L  59      26.543  28.585  68.561  1.00 14.36           C  
ATOM   1367  O   PRO L  59      25.345  28.328  68.445  1.00 12.30           O  
ATOM   1368  CB  PRO L  59      26.858  31.081  68.859  1.00 14.20           C  
ATOM   1369  CG  PRO L  59      26.839  32.208  67.885  1.00 15.02           C  
ATOM   1370  CD  PRO L  59      26.043  31.643  66.737  1.00 12.66           C  
ATOM   1371  N   ASP L  60      27.393  27.794  69.213  1.00 14.01           N  
ATOM   1372  CA  ASP L  60      26.968  26.534  69.813  1.00 15.05           C  
ATOM   1373  C   ASP L  60      25.939  26.702  70.930  1.00 14.96           C  
ATOM   1374  O   ASP L  60      25.248  25.744  71.282  1.00 15.10           O  
ATOM   1375  CB  ASP L  60      28.187  25.773  70.340  1.00 16.38           C  
ATOM   1376  N   ARG L  61      25.829  27.905  71.489  1.00 13.55           N  
ATOM   1377  CA  ARG L  61      24.868  28.127  72.567  1.00 12.71           C  
ATOM   1378  C   ARG L  61      23.428  28.039  72.080  1.00 12.65           C  
ATOM   1379  O   ARG L  61      22.490  28.018  72.882  1.00 12.56           O  
ATOM   1380  CB  ARG L  61      25.119  29.474  73.266  1.00 13.15           C  
ATOM   1381  CG  ARG L  61      25.064  30.718  72.385  1.00 12.73           C  
ATOM   1382  CD  ARG L  61      25.265  31.965  73.249  1.00 12.09           C  
ATOM   1383  NE  ARG L  61      25.239  33.208  72.480  1.00 11.23           N  
ATOM   1384  CZ  ARG L  61      26.219  33.623  71.683  1.00 11.76           C  
ATOM   1385  NH1 ARG L  61      27.322  32.899  71.541  1.00 10.42           N  
ATOM   1386  NH2 ARG L  61      26.092  34.764  71.024  1.00 11.46           N  
ATOM   1387  N   PHE L  62      23.259  27.986  70.761  1.00 10.95           N  
ATOM   1388  CA  PHE L  62      21.940  27.868  70.149  1.00 10.92           C  
ATOM   1389  C   PHE L  62      21.684  26.414  69.785  1.00 10.73           C  
ATOM   1390  O   PHE L  62      22.421  25.842  68.986  1.00 11.58           O  
ATOM   1391  CB  PHE L  62      21.868  28.702  68.872  1.00 11.31           C  
ATOM   1392  CG  PHE L  62      21.784  30.172  69.115  1.00 10.15           C  
ATOM   1393  CD1 PHE L  62      20.576  30.759  69.472  1.00 10.13           C  
ATOM   1394  CD2 PHE L  62      22.916  30.970  69.005  1.00 10.13           C  
ATOM   1395  CE1 PHE L  62      20.494  32.127  69.718  1.00 10.03           C  
ATOM   1396  CE2 PHE L  62      22.844  32.340  69.249  1.00 10.01           C  
ATOM   1397  CZ  PHE L  62      21.632  32.917  69.606  1.00  9.13           C  
ATOM   1398  N   SER L  63      20.647  25.813  70.359  1.00 11.20           N  
ATOM   1399  CA  SER L  63      20.338  24.424  70.034  1.00 11.76           C  
ATOM   1400  C   SER L  63      18.835  24.188  69.936  1.00 11.94           C  
ATOM   1401  O   SER L  63      18.048  24.780  70.679  1.00 12.09           O  
ATOM   1402  CB  SER L  63      20.950  23.473  71.069  1.00 12.19           C  
ATOM   1403  OG  SER L  63      20.332  23.607  72.336  1.00 14.48           O  
ATOM   1404  N   GLY L  64      18.445  23.323  69.005  1.00 11.46           N  
ATOM   1405  CA  GLY L  64      17.039  23.016  68.817  1.00  9.74           C  
ATOM   1406  C   GLY L  64      16.743  21.561  69.131  1.00 10.55           C  
ATOM   1407  O   GLY L  64      17.596  20.686  68.941  1.00  9.51           O  
ATOM   1408  N   SER L  65      15.538  21.298  69.624  1.00  9.63           N  
ATOM   1409  CA  SER L  65      15.134  19.938  69.956  1.00 10.01           C  
ATOM   1410  C   SER L  65      13.655  19.745  69.641  1.00 10.81           C  
ATOM   1411  O   SER L  65      12.925  20.713  69.408  1.00  8.68           O  
ATOM   1412  CB  SER L  65      15.394  19.655  71.439  1.00 10.97           C  
ATOM   1413  OG  SER L  65      14.620  20.508  72.262  1.00 13.20           O  
ATOM   1414  N   GLY L  66      13.219  18.491  69.622  1.00 11.89           N  
ATOM   1415  CA  GLY L  66      11.828  18.202  69.335  1.00 12.77           C  
ATOM   1416  C   GLY L  66      11.655  17.524  67.995  1.00 12.61           C  
ATOM   1417  O   GLY L  66      12.528  17.595  67.134  1.00 11.92           O  
ATOM   1418  N   SER L  67      10.516  16.866  67.822  1.00 14.27           N  
ATOM   1419  CA  SER L  67      10.208  16.159  66.588  1.00 14.68           C  
ATOM   1420  C   SER L  67       8.705  15.954  66.534  1.00 16.00           C  
ATOM   1421  O   SER L  67       8.073  15.682  67.556  1.00 17.13           O  
ATOM   1422  CB  SER L  67      10.916  14.802  66.562  1.00 15.25           C  
ATOM   1423  OG  SER L  67      10.675  14.121  65.340  1.00 14.62           O  
ATOM   1424  N   GLY L  68       8.131  16.089  65.345  1.00 14.76           N  
ATOM   1425  CA  GLY L  68       6.700  15.913  65.206  1.00 14.66           C  
ATOM   1426  C   GLY L  68       5.950  17.233  65.201  1.00 13.70           C  
ATOM   1427  O   GLY L  68       5.894  17.916  64.179  1.00 12.80           O  
ATOM   1428  N   THR L  69       5.391  17.598  66.350  1.00 13.84           N  
ATOM   1429  CA  THR L  69       4.621  18.832  66.474  1.00 14.79           C  
ATOM   1430  C   THR L  69       5.138  19.804  67.536  1.00 15.77           C  
ATOM   1431  O   THR L  69       4.816  20.992  67.500  1.00 17.22           O  
ATOM   1432  CB  THR L  69       3.149  18.516  66.794  1.00 15.25           C  
ATOM   1433  OG1 THR L  69       3.079  17.767  68.015  1.00 15.10           O  
ATOM   1434  CG2 THR L  69       2.522  17.703  65.672  1.00 14.98           C  
ATOM   1435  N   ASP L  70       5.932  19.310  68.479  1.00 16.15           N  
ATOM   1436  CA  ASP L  70       6.458  20.163  69.541  1.00 15.98           C  
ATOM   1437  C   ASP L  70       7.969  20.320  69.475  1.00 15.62           C  
ATOM   1438  O   ASP L  70       8.711  19.336  69.521  1.00 14.80           O  
ATOM   1439  CB  ASP L  70       6.047  19.613  70.903  1.00 20.75           C  
ATOM   1440  CG  ASP L  70       4.557  19.734  71.148  1.00 24.45           C  
ATOM   1441  OD1 ASP L  70       3.773  19.136  70.381  1.00 28.27           O  
ATOM   1442  OD2 ASP L  70       4.171  20.434  72.107  1.00 29.75           O  
ATOM   1443  N   PHE L  71       8.413  21.570  69.385  1.00 13.35           N  
ATOM   1444  CA  PHE L  71       9.834  21.875  69.284  1.00 11.75           C  
ATOM   1445  C   PHE L  71      10.280  22.904  70.299  1.00 11.91           C  
ATOM   1446  O   PHE L  71       9.469  23.657  70.841  1.00 10.10           O  
ATOM   1447  CB  PHE L  71      10.161  22.370  67.875  1.00 10.56           C  
ATOM   1448  CG  PHE L  71       9.712  21.435  66.800  1.00 11.56           C  
ATOM   1449  CD1 PHE L  71       8.382  21.417  66.391  1.00 10.91           C  
ATOM   1450  CD2 PHE L  71      10.600  20.524  66.242  1.00  9.88           C  
ATOM   1451  CE1 PHE L  71       7.941  20.500  65.442  1.00 11.30           C  
ATOM   1452  CE2 PHE L  71      10.169  19.604  65.293  1.00 12.83           C  
ATOM   1453  CZ  PHE L  71       8.836  19.593  64.895  1.00 10.69           C  
ATOM   1454  N   THR L  72      11.586  22.939  70.538  1.00 11.39           N  
ATOM   1455  CA  THR L  72      12.155  23.862  71.503  1.00 11.71           C  
ATOM   1456  C   THR L  72      13.487  24.439  71.045  1.00 12.60           C  
ATOM   1457  O   THR L  72      14.352  23.716  70.542  1.00 11.74           O  
ATOM   1458  CB  THR L  72      12.398  23.161  72.863  1.00 11.02           C  
ATOM   1459  OG1 THR L  72      11.169  22.613  73.358  1.00 12.49           O  
ATOM   1460  CG2 THR L  72      12.944  24.151  73.878  1.00 11.52           C  
ATOM   1461  N   LEU L  73      13.638  25.749  71.210  1.00 10.73           N  
ATOM   1462  CA  LEU L  73      14.890  26.418  70.892  1.00 10.05           C  
ATOM   1463  C   LEU L  73      15.464  26.793  72.249  1.00 11.68           C  
ATOM   1464  O   LEU L  73      14.760  27.353  73.095  1.00 10.29           O  
ATOM   1465  CB  LEU L  73      14.669  27.692  70.072  1.00  9.77           C  
ATOM   1466  CG  LEU L  73      15.927  28.559  69.903  1.00  8.87           C  
ATOM   1467  CD1 LEU L  73      16.950  27.838  69.033  1.00  8.28           C  
ATOM   1468  CD2 LEU L  73      15.553  29.899  69.282  1.00  8.71           C  
ATOM   1469  N   THR L  74      16.732  26.470  72.465  1.00 12.44           N  
ATOM   1470  CA  THR L  74      17.373  26.787  73.729  1.00 12.10           C  
ATOM   1471  C   THR L  74      18.627  27.609  73.515  1.00 12.42           C  
ATOM   1472  O   THR L  74      19.426  27.320  72.626  1.00 12.00           O  
ATOM   1473  CB  THR L  74      17.775  25.505  74.506  1.00 11.31           C  
ATOM   1474  OG1 THR L  74      16.608  24.726  74.790  1.00 11.50           O  
ATOM   1475  CG2 THR L  74      18.458  25.868  75.817  1.00 11.44           C  
ATOM   1476  N   ILE L  75      18.771  28.657  74.316  1.00 11.75           N  
ATOM   1477  CA  ILE L  75      19.958  29.494  74.280  1.00 11.49           C  
ATOM   1478  C   ILE L  75      20.549  29.173  75.649  1.00 10.17           C  
ATOM   1479  O   ILE L  75      20.101  29.703  76.662  1.00  9.52           O  
ATOM   1480  CB  ILE L  75      19.609  30.993  74.179  1.00 10.26           C  
ATOM   1481  CG1 ILE L  75      18.685  31.236  72.982  1.00 11.03           C  
ATOM   1482  CG2 ILE L  75      20.887  31.803  73.992  1.00 12.29           C  
ATOM   1483  CD1 ILE L  75      18.271  32.695  72.799  1.00 11.51           C  
ATOM   1484  N   SER L  76      21.529  28.272  75.670  1.00 11.20           N  
ATOM   1485  CA  SER L  76      22.147  27.810  76.914  1.00 10.33           C  
ATOM   1486  C   SER L  76      22.675  28.888  77.853  1.00 10.16           C  
ATOM   1487  O   SER L  76      22.518  28.783  79.072  1.00 10.61           O  
ATOM   1488  CB  SER L  76      23.264  26.812  76.598  1.00 10.13           C  
ATOM   1489  OG  SER L  76      24.316  27.430  75.886  1.00 12.76           O  
ATOM   1490  N   SER L  77      23.302  29.917  77.296  1.00 10.22           N  
ATOM   1491  CA  SER L  77      23.853  31.010  78.099  1.00 10.12           C  
ATOM   1492  C   SER L  77      23.594  32.305  77.325  1.00 10.60           C  
ATOM   1493  O   SER L  77      24.281  32.596  76.351  1.00  8.78           O  
ATOM   1494  CB  SER L  77      25.359  30.791  78.301  1.00 11.99           C  
ATOM   1495  OG  SER L  77      25.923  31.768  79.161  1.00 15.11           O  
ATOM   1496  N   LEU L  78      22.602  33.077  77.762  1.00  9.95           N  
ATOM   1497  CA  LEU L  78      22.235  34.310  77.065  1.00  9.98           C  
ATOM   1498  C   LEU L  78      23.285  35.417  77.118  1.00 10.51           C  
ATOM   1499  O   LEU L  78      23.777  35.767  78.194  1.00 10.98           O  
ATOM   1500  CB  LEU L  78      20.907  34.843  77.614  1.00 10.96           C  
ATOM   1501  CG  LEU L  78      20.208  35.912  76.764  1.00 11.43           C  
ATOM   1502  CD1 LEU L  78      19.758  35.291  75.453  1.00 11.17           C  
ATOM   1503  CD2 LEU L  78      19.019  36.475  77.504  1.00 11.23           C  
ATOM   1504  N   GLN L  79      23.617  35.963  75.948  1.00 10.90           N  
ATOM   1505  CA  GLN L  79      24.589  37.053  75.832  1.00 11.80           C  
ATOM   1506  C   GLN L  79      23.881  38.298  75.314  1.00 12.45           C  
ATOM   1507  O   GLN L  79      22.795  38.213  74.737  1.00  9.00           O  
ATOM   1508  CB  GLN L  79      25.703  36.710  74.843  1.00 12.74           C  
ATOM   1509  CG  GLN L  79      26.558  35.540  75.212  1.00 17.92           C  
ATOM   1510  CD  GLN L  79      27.735  35.381  74.269  1.00 18.06           C  
ATOM   1511  OE1 GLN L  79      28.465  34.395  74.336  1.00 21.81           O  
ATOM   1512  NE2 GLN L  79      27.931  36.362  73.388  1.00 18.26           N  
ATOM   1513  N   ALA L  80      24.514  39.452  75.498  1.00 12.92           N  
ATOM   1514  CA  ALA L  80      23.939  40.717  75.049  1.00 14.05           C  
ATOM   1515  C   ALA L  80      23.502  40.694  73.580  1.00 13.64           C  
ATOM   1516  O   ALA L  80      22.412  41.165  73.248  1.00 13.56           O  
ATOM   1517  CB  ALA L  80      24.941  41.850  75.278  1.00 12.66           C  
ATOM   1518  N   GLU L  81      24.339  40.143  72.702  1.00 13.74           N  
ATOM   1519  CA  GLU L  81      24.012  40.105  71.277  1.00 13.53           C  
ATOM   1520  C   GLU L  81      22.839  39.199  70.905  1.00 13.25           C  
ATOM   1521  O   GLU L  81      22.358  39.242  69.771  1.00 11.16           O  
ATOM   1522  CB  GLU L  81      25.241  39.697  70.449  1.00 16.45           C  
ATOM   1523  CG  GLU L  81      25.768  38.289  70.712  1.00 18.65           C  
ATOM   1524  CD  GLU L  81      26.838  37.867  69.712  1.00 21.35           C  
ATOM   1525  OE1 GLU L  81      27.147  38.652  68.791  1.00 23.58           O  
ATOM   1526  OE2 GLU L  81      27.371  36.747  69.842  1.00 22.42           O  
ATOM   1527  N   ASP L  82      22.369  38.393  71.852  1.00 11.80           N  
ATOM   1528  CA  ASP L  82      21.267  37.474  71.577  1.00 11.51           C  
ATOM   1529  C   ASP L  82      19.888  38.101  71.742  1.00 10.77           C  
ATOM   1530  O   ASP L  82      18.877  37.500  71.366  1.00 11.30           O  
ATOM   1531  CB  ASP L  82      21.371  36.231  72.472  1.00  9.74           C  
ATOM   1532  CG  ASP L  82      22.681  35.491  72.293  1.00 10.75           C  
ATOM   1533  OD1 ASP L  82      23.221  35.497  71.166  1.00 11.77           O  
ATOM   1534  OD2 ASP L  82      23.170  34.890  73.276  1.00  8.68           O  
ATOM   1535  N   VAL L  83      19.840  39.303  72.309  1.00  9.95           N  
ATOM   1536  CA  VAL L  83      18.567  39.983  72.499  1.00  8.59           C  
ATOM   1537  C   VAL L  83      17.981  40.225  71.115  1.00  9.61           C  
ATOM   1538  O   VAL L  83      18.575  40.919  70.286  1.00  8.11           O  
ATOM   1539  CB  VAL L  83      18.761  41.315  73.257  1.00  8.10           C  
ATOM   1540  CG1 VAL L  83      17.463  42.094  73.302  1.00  9.85           C  
ATOM   1541  CG2 VAL L  83      19.239  41.026  74.674  1.00  8.03           C  
ATOM   1542  N   ALA L  84      16.817  39.632  70.869  1.00 10.65           N  
ATOM   1543  CA  ALA L  84      16.153  39.740  69.576  1.00  9.82           C  
ATOM   1544  C   ALA L  84      14.847  38.955  69.611  1.00 10.01           C  
ATOM   1545  O   ALA L  84      14.432  38.468  70.662  1.00 11.15           O  
ATOM   1546  CB  ALA L  84      17.058  39.166  68.491  1.00 11.97           C  
ATOM   1547  N   VAL L  85      14.204  38.839  68.452  1.00  8.73           N  
ATOM   1548  CA  VAL L  85      12.964  38.086  68.333  1.00  8.31           C  
ATOM   1549  C   VAL L  85      13.311  36.786  67.613  1.00  8.65           C  
ATOM   1550  O   VAL L  85      14.001  36.794  66.592  1.00 10.48           O  
ATOM   1551  CB  VAL L  85      11.907  38.871  67.527  1.00  8.78           C  
ATOM   1552  CG1 VAL L  85      10.657  38.018  67.319  1.00  8.76           C  
ATOM   1553  CG2 VAL L  85      11.557  40.158  68.268  1.00  9.51           C  
ATOM   1554  N   TYR L  86      12.855  35.669  68.165  1.00  7.40           N  
ATOM   1555  CA  TYR L  86      13.127  34.361  67.586  1.00  6.72           C  
ATOM   1556  C   TYR L  86      11.851  33.741  67.051  1.00  7.15           C  
ATOM   1557  O   TYR L  86      10.824  33.750  67.723  1.00  7.28           O  
ATOM   1558  CB  TYR L  86      13.758  33.461  68.647  1.00  7.31           C  
ATOM   1559  CG  TYR L  86      15.140  33.924  69.041  1.00  6.61           C  
ATOM   1560  CD1 TYR L  86      15.317  34.869  70.049  1.00  6.85           C  
ATOM   1561  CD2 TYR L  86      16.267  33.466  68.362  1.00  8.52           C  
ATOM   1562  CE1 TYR L  86      16.592  35.356  70.370  1.00  7.56           C  
ATOM   1563  CE2 TYR L  86      17.543  33.940  68.674  1.00  6.14           C  
ATOM   1564  CZ  TYR L  86      17.697  34.885  69.675  1.00  8.89           C  
ATOM   1565  OH  TYR L  86      18.951  35.377  69.959  1.00  7.80           O  
ATOM   1566  N   TYR L  87      11.922  33.217  65.831  1.00  6.87           N  
ATOM   1567  CA  TYR L  87      10.775  32.595  65.184  1.00  5.87           C  
ATOM   1568  C   TYR L  87      11.046  31.147  64.845  1.00  6.76           C  
ATOM   1569  O   TYR L  87      12.168  30.793  64.487  1.00  5.11           O  
ATOM   1570  CB  TYR L  87      10.468  33.259  63.836  1.00  7.09           C  
ATOM   1571  CG  TYR L  87      10.080  34.712  63.865  1.00  7.62           C  
ATOM   1572  CD1 TYR L  87       8.789  35.103  64.206  1.00  6.62           C  
ATOM   1573  CD2 TYR L  87      11.000  35.698  63.511  1.00  7.96           C  
ATOM   1574  CE1 TYR L  87       8.418  36.451  64.188  1.00  7.63           C  
ATOM   1575  CE2 TYR L  87      10.645  37.041  63.494  1.00  7.25           C  
ATOM   1576  CZ  TYR L  87       9.354  37.410  63.830  1.00  7.88           C  
ATOM   1577  OH  TYR L  87       9.002  38.740  63.801  1.00  7.41           O  
ATOM   1578  N   CYS L  88      10.023  30.308  64.969  1.00  6.89           N  
ATOM   1579  CA  CYS L  88      10.163  28.942  64.512  1.00  8.29           C  
ATOM   1580  C   CYS L  88       9.497  29.048  63.143  1.00  7.64           C  
ATOM   1581  O   CYS L  88       8.717  29.973  62.900  1.00  7.63           O  
ATOM   1582  CB  CYS L  88       9.438  27.932  65.405  1.00  9.86           C  
ATOM   1583  SG  CYS L  88       7.687  28.198  65.833  1.00 10.47           S  
ATOM   1584  N   GLN L  89       9.815  28.136  62.239  1.00  7.30           N  
ATOM   1585  CA  GLN L  89       9.240  28.195  60.902  1.00  7.41           C  
ATOM   1586  C   GLN L  89       9.060  26.799  60.341  1.00  8.18           C  
ATOM   1587  O   GLN L  89       9.980  25.983  60.401  1.00  7.51           O  
ATOM   1588  CB  GLN L  89      10.168  28.974  59.963  1.00  6.01           C  
ATOM   1589  CG  GLN L  89       9.631  29.164  58.541  1.00  7.05           C  
ATOM   1590  CD  GLN L  89      10.733  29.183  57.494  1.00  9.38           C  
ATOM   1591  OE1 GLN L  89      11.279  28.137  57.135  1.00  8.66           O  
ATOM   1592  NE2 GLN L  89      11.076  30.375  57.009  1.00  8.63           N  
ATOM   1593  N   GLN L  90       7.874  26.511  59.814  1.00  7.79           N  
ATOM   1594  CA  GLN L  90       7.655  25.213  59.197  1.00  8.70           C  
ATOM   1595  C   GLN L  90       7.851  25.451  57.710  1.00  8.45           C  
ATOM   1596  O   GLN L  90       7.353  26.440  57.167  1.00  8.68           O  
ATOM   1597  CB  GLN L  90       6.237  24.679  59.472  1.00  9.49           C  
ATOM   1598  CG  GLN L  90       5.064  25.533  58.969  1.00  9.03           C  
ATOM   1599  CD  GLN L  90       4.780  25.392  57.475  1.00 10.29           C  
ATOM   1600  OE1 GLN L  90       5.149  24.401  56.844  1.00  7.83           O  
ATOM   1601  NE2 GLN L  90       4.094  26.382  56.913  1.00  9.82           N  
ATOM   1602  N   TYR L  91       8.617  24.586  57.057  1.00  7.79           N  
ATOM   1603  CA  TYR L  91       8.813  24.742  55.629  1.00  8.66           C  
ATOM   1604  C   TYR L  91       8.294  23.543  54.856  1.00 10.37           C  
ATOM   1605  O   TYR L  91       8.885  23.106  53.873  1.00 11.14           O  
ATOM   1606  CB  TYR L  91      10.281  25.053  55.283  1.00 10.15           C  
ATOM   1607  CG  TYR L  91      11.349  24.196  55.929  1.00 10.00           C  
ATOM   1608  CD1 TYR L  91      11.818  24.489  57.209  1.00 12.81           C  
ATOM   1609  CD2 TYR L  91      11.953  23.148  55.231  1.00 10.01           C  
ATOM   1610  CE1 TYR L  91      12.871  23.771  57.779  1.00 11.16           C  
ATOM   1611  CE2 TYR L  91      13.013  22.419  55.795  1.00 11.96           C  
ATOM   1612  CZ  TYR L  91      13.465  22.744  57.070  1.00 10.77           C  
ATOM   1613  OH  TYR L  91      14.527  22.069  57.631  1.00 11.83           O  
ATOM   1614  N   TYR L  92       7.165  23.016  55.324  1.00 10.71           N  
ATOM   1615  CA  TYR L  92       6.511  21.901  54.657  1.00 13.16           C  
ATOM   1616  C   TYR L  92       5.732  22.500  53.492  1.00 12.74           C  
ATOM   1617  O   TYR L  92       5.734  21.966  52.388  1.00 13.67           O  
ATOM   1618  CB  TYR L  92       5.545  21.183  55.608  1.00 14.76           C  
ATOM   1619  CG  TYR L  92       4.518  20.330  54.890  1.00 16.62           C  
ATOM   1620  CD1 TYR L  92       4.803  19.011  54.535  1.00 17.82           C  
ATOM   1621  CD2 TYR L  92       3.280  20.858  54.518  1.00 17.08           C  
ATOM   1622  CE1 TYR L  92       3.883  18.238  53.821  1.00 18.93           C  
ATOM   1623  CE2 TYR L  92       2.352  20.093  53.806  1.00 18.66           C  
ATOM   1624  CZ  TYR L  92       2.661  18.786  53.460  1.00 19.72           C  
ATOM   1625  OH  TYR L  92       1.754  18.029  52.750  1.00 20.48           O  
ATOM   1626  N   SER L  93       5.077  23.627  53.748  1.00 13.33           N  
ATOM   1627  CA  SER L  93       4.282  24.300  52.726  1.00 13.82           C  
ATOM   1628  C   SER L  93       5.093  25.262  51.864  1.00 14.21           C  
ATOM   1629  O   SER L  93       6.249  25.567  52.159  1.00 13.32           O  
ATOM   1630  CB  SER L  93       3.146  25.078  53.384  1.00 14.94           C  
ATOM   1631  OG  SER L  93       3.664  26.147  54.160  1.00 17.46           O  
ATOM   1632  N   THR L  94       4.466  25.733  50.790  1.00 13.32           N  
ATOM   1633  CA  THR L  94       5.076  26.690  49.877  1.00 13.62           C  
ATOM   1634  C   THR L  94       4.099  27.852  49.789  1.00 13.01           C  
ATOM   1635  O   THR L  94       3.014  27.711  49.232  1.00 13.85           O  
ATOM   1636  CB  THR L  94       5.268  26.097  48.463  1.00 14.84           C  
ATOM   1637  OG1 THR L  94       6.186  25.001  48.524  1.00 17.47           O  
ATOM   1638  CG2 THR L  94       5.814  27.150  47.510  1.00 16.03           C  
ATOM   1639  N   PRO L  95       4.462  29.013  50.357  1.00 11.94           N  
ATOM   1640  CA  PRO L  95       5.715  29.296  51.067  1.00 10.73           C  
ATOM   1641  C   PRO L  95       5.695  28.834  52.520  1.00 10.68           C  
ATOM   1642  O   PRO L  95       4.655  28.436  53.046  1.00  9.55           O  
ATOM   1643  CB  PRO L  95       5.804  30.809  50.986  1.00 11.37           C  
ATOM   1644  CG  PRO L  95       4.354  31.197  51.189  1.00  9.66           C  
ATOM   1645  CD  PRO L  95       3.640  30.235  50.254  1.00  9.84           C  
ATOM   1646  N   PRO L  96       6.861  28.869  53.182  1.00 10.51           N  
ATOM   1647  CA  PRO L  96       6.945  28.462  54.585  1.00  9.95           C  
ATOM   1648  C   PRO L  96       6.243  29.552  55.398  1.00 10.08           C  
ATOM   1649  O   PRO L  96       6.010  30.653  54.892  1.00  9.14           O  
ATOM   1650  CB  PRO L  96       8.450  28.454  54.858  1.00 10.03           C  
ATOM   1651  CG  PRO L  96       9.062  28.242  53.499  1.00 10.89           C  
ATOM   1652  CD  PRO L  96       8.203  29.107  52.623  1.00  9.96           C  
ATOM   1653  N   THR L  97       5.901  29.255  56.646  1.00  8.50           N  
ATOM   1654  CA  THR L  97       5.257  30.245  57.496  1.00  8.60           C  
ATOM   1655  C   THR L  97       5.915  30.231  58.873  1.00  8.74           C  
ATOM   1656  O   THR L  97       6.378  29.186  59.338  1.00  9.71           O  
ATOM   1657  CB  THR L  97       3.747  29.966  57.657  1.00  9.68           C  
ATOM   1658  OG1 THR L  97       3.561  28.677  58.253  1.00 10.18           O  
ATOM   1659  CG2 THR L  97       3.045  30.015  56.294  1.00  8.09           C  
ATOM   1660  N   PHE L  98       5.958  31.399  59.509  1.00  7.53           N  
ATOM   1661  CA  PHE L  98       6.560  31.557  60.831  1.00  8.36           C  
ATOM   1662  C   PHE L  98       5.546  31.525  61.959  1.00  9.57           C  
ATOM   1663  O   PHE L  98       4.354  31.776  61.751  1.00 10.77           O  
ATOM   1664  CB  PHE L  98       7.274  32.905  60.960  1.00  7.88           C  
ATOM   1665  CG  PHE L  98       8.448  33.077  60.055  1.00  8.67           C  
ATOM   1666  CD1 PHE L  98       9.665  32.473  60.352  1.00  9.32           C  
ATOM   1667  CD2 PHE L  98       8.356  33.889  58.929  1.00  9.22           C  
ATOM   1668  CE1 PHE L  98      10.780  32.678  59.540  1.00  9.95           C  
ATOM   1669  CE2 PHE L  98       9.466  34.102  58.111  1.00  9.57           C  
ATOM   1670  CZ  PHE L  98      10.679  33.495  58.419  1.00  8.95           C  
ATOM   1671  N   GLY L  99       6.045  31.239  63.160  1.00  8.31           N  
ATOM   1672  CA  GLY L  99       5.205  31.269  64.341  1.00  9.10           C  
ATOM   1673  C   GLY L  99       5.126  32.755  64.656  1.00  8.66           C  
ATOM   1674  O   GLY L  99       5.672  33.562  63.903  1.00  9.36           O  
ATOM   1675  N   GLY L 100       4.478  33.132  65.754  1.00  9.38           N  
ATOM   1676  CA  GLY L 100       4.357  34.546  66.085  1.00  8.07           C  
ATOM   1677  C   GLY L 100       5.628  35.233  66.553  1.00  9.51           C  
ATOM   1678  O   GLY L 100       5.692  36.469  66.617  1.00  7.60           O  
ATOM   1679  N   GLY L 101       6.640  34.439  66.883  1.00  7.74           N  
ATOM   1680  CA  GLY L 101       7.895  34.993  67.353  1.00  8.26           C  
ATOM   1681  C   GLY L 101       7.904  35.183  68.856  1.00  9.24           C  
ATOM   1682  O   GLY L 101       6.853  35.386  69.482  1.00  8.07           O  
ATOM   1683  N   THR L 102       9.091  35.103  69.445  1.00  7.63           N  
ATOM   1684  CA  THR L 102       9.240  35.286  70.883  1.00  8.90           C  
ATOM   1685  C   THR L 102      10.368  36.280  71.135  1.00  9.42           C  
ATOM   1686  O   THR L 102      11.507  36.057  70.731  1.00  8.42           O  
ATOM   1687  CB  THR L 102       9.570  33.954  71.591  1.00  9.25           C  
ATOM   1688  OG1 THR L 102       8.480  33.038  71.419  1.00  7.18           O  
ATOM   1689  CG2 THR L 102       9.810  34.182  73.087  1.00  9.66           C  
ATOM   1690  N   LYS L 103      10.037  37.388  71.787  1.00 10.08           N  
ATOM   1691  CA  LYS L 103      11.023  38.413  72.094  1.00 10.97           C  
ATOM   1692  C   LYS L 103      11.826  37.941  73.303  1.00 10.38           C  
ATOM   1693  O   LYS L 103      11.252  37.615  74.339  1.00  9.05           O  
ATOM   1694  CB  LYS L 103      10.319  39.731  72.425  1.00 14.30           C  
ATOM   1695  CG  LYS L 103      11.247  40.929  72.592  1.00 18.08           C  
ATOM   1696  CD  LYS L 103      10.492  42.163  73.090  1.00 20.69           C  
ATOM   1697  CE  LYS L 103       9.212  42.423  72.292  1.00 24.55           C  
ATOM   1698  NZ  LYS L 103       9.420  42.418  70.810  1.00 24.84           N  
ATOM   1699  N   VAL L 104      13.146  37.892  73.156  1.00  8.17           N  
ATOM   1700  CA  VAL L 104      14.034  37.469  74.238  1.00  9.19           C  
ATOM   1701  C   VAL L 104      14.852  38.669  74.704  1.00  9.59           C  
ATOM   1702  O   VAL L 104      15.493  39.342  73.895  1.00  9.65           O  
ATOM   1703  CB  VAL L 104      14.996  36.344  73.769  1.00  8.13           C  
ATOM   1704  CG1 VAL L 104      16.040  36.044  74.847  1.00 11.00           C  
ATOM   1705  CG2 VAL L 104      14.204  35.091  73.460  1.00  9.69           C  
ATOM   1706  N   GLU L 105      14.823  38.941  76.005  1.00 10.75           N  
ATOM   1707  CA  GLU L 105      15.569  40.067  76.556  1.00 12.24           C  
ATOM   1708  C   GLU L 105      16.404  39.666  77.765  1.00 12.56           C  
ATOM   1709  O   GLU L 105      16.220  38.588  78.339  1.00  9.26           O  
ATOM   1710  CB  GLU L 105      14.617  41.185  76.988  1.00 14.01           C  
ATOM   1711  CG  GLU L 105      13.618  41.627  75.938  1.00 18.83           C  
ATOM   1712  CD  GLU L 105      12.699  42.717  76.452  1.00 22.01           C  
ATOM   1713  OE1 GLU L 105      13.155  43.872  76.586  1.00 24.97           O  
ATOM   1714  OE2 GLU L 105      11.523  42.418  76.737  1.00 23.28           O  
ATOM   1715  N   ILE L 106      17.317  40.553  78.148  1.00 13.46           N  
ATOM   1716  CA  ILE L 106      18.161  40.334  79.314  1.00 15.97           C  
ATOM   1717  C   ILE L 106      17.429  40.903  80.529  1.00 17.13           C  
ATOM   1718  O   ILE L 106      16.939  42.034  80.495  1.00 16.44           O  
ATOM   1719  CB  ILE L 106      19.520  41.060  79.173  1.00 17.57           C  
ATOM   1720  CG1 ILE L 106      20.359  40.400  78.079  1.00 18.26           C  
ATOM   1721  CG2 ILE L 106      20.264  41.040  80.502  1.00 17.60           C  
ATOM   1722  CD1 ILE L 106      20.818  39.006  78.421  1.00 19.00           C  
ATOM   1723  N   LYS L 107      17.344  40.109  81.590  1.00 18.27           N  
ATOM   1724  CA  LYS L 107      16.683  40.532  82.820  1.00 20.85           C  
ATOM   1725  C   LYS L 107      17.599  41.501  83.561  1.00 22.80           C  
ATOM   1726  O   LYS L 107      18.757  41.187  83.829  1.00 22.94           O  
ATOM   1727  CB  LYS L 107      16.393  39.314  83.703  1.00 20.33           C  
ATOM   1728  CG  LYS L 107      15.787  39.627  85.073  1.00 22.46           C  
ATOM   1729  CD  LYS L 107      14.324  40.031  84.975  1.00 22.64           C  
ATOM   1730  CE  LYS L 107      13.684  40.121  86.357  1.00 24.26           C  
ATOM   1731  NZ  LYS L 107      12.217  40.414  86.291  1.00 22.14           N  
ATOM   1732  N   ARG L 108      17.071  42.677  83.887  1.00 25.14           N  
ATOM   1733  CA  ARG L 108      17.832  43.703  84.594  1.00 27.77           C  
ATOM   1734  C   ARG L 108      18.004  43.353  86.069  1.00 29.33           C  
ATOM   1735  O   ARG L 108      19.144  43.463  86.567  1.00 30.70           O  
ATOM   1736  CB  ARG L 108      17.137  45.053  84.455  1.00 28.41           C  
ATOM   1737  OXT ARG L 108      16.995  42.986  86.710  1.00 31.12           O  
TER    1738      ARG L 108                                                      
