# Supplementary material for: SARS-CoV-2 Spike Protein Interaction Space
Source: Int J Mol Sci. 2023 Jul 27;24(15):12058. doi: 10.3390/ijms241512058 (PMC10418891; doi:10.3390/ijms241512058)
Supplement: Supplementary file 1 [file ijms-24-12058-s001.zip › Supplementary Material File S1/1IVL.pdb]

REMARK 950 NUMBERING  Kabat
REMARK 950 METHOD     X-ray crystal structure
REMARK 950 RESOLUTION 2.170
REMARK 950 R-FACTOR   0.175
REMARK 950 R-FREE     0.000
REMARK 950 CHAIN-TYPE LABEL ORIGINAL
REMARK 950 CHAIN L    L    A
REMARK 950 CHAIN L    L    B
REMARK 950 MOLECULE : A : IGG-KAPPA M29B FV (LIGHT CHAIN)
REMARK 950 SPECIES  : A : MUS MUSCULUS
SEQRES   1 L 107  ASP ILE GLU LEU THR GLN SER PRO ALA THR LEU SER VAL          
SEQRES   2 L 107  THR PRO GLY ASN SER VAL SER ILE SER CYS ARG ALA SER          
SEQRES   3 L 107  GLN SER ILE GLY ASN ARG LEU PHE TRP TYR GLN GLN LYS          
SEQRES   4 L 107  SER HIS GLU SER PRO ARG LEU LEU ILE LYS TYR ALA SER          
SEQRES   5 L 107  GLN SER ILE SER GLY ILE PRO SER ARG PHE SER GLY SER          
SEQRES   6 L 107  GLY SER GLY THR ASP PHE THR LEU SER ILE ASN SER VAL          
SEQRES   7 L 107  GLU THR GLU ASP LEU ALA VAL TYR PHE CYS GLN GLN VAL          
SEQRES   8 L 107  SER GLU TRP PRO PHE THR PHE GLY GLY GLY THR LYS LEU          
SEQRES   9 L 107  GLU ILE LYS                                                  
SEQRES   1 L 107  ASP ILE GLU LEU THR GLN SER PRO ALA THR LEU SER VAL          
SEQRES   2 L 107  THR PRO GLY ASN SER VAL SER ILE SER CYS ARG ALA SER          
SEQRES   3 L 107  GLN SER ILE GLY ASN ARG LEU PHE TRP TYR GLN GLN LYS          
SEQRES   4 L 107  SER HIS GLU SER PRO ARG LEU LEU ILE LYS TYR ALA SER          
SEQRES   5 L 107  GLN SER ILE SER GLY ILE PRO SER ARG PHE SER GLY SER          
SEQRES   6 L 107  GLY SER GLY THR ASP PHE THR LEU SER ILE ASN SER VAL          
SEQRES   7 L 107  GLU THR GLU ASP LEU ALA VAL TYR PHE CYS GLN GLN VAL          
SEQRES   8 L 107  SER GLU TRP PRO PHE THR PHE GLY GLY GLY THR LYS LEU          
SEQRES   9 L 107  GLU ILE LYS                                                  
ATOM      1  N   ASP L   1      13.973  42.190  27.578  1.00 13.08           N  
ATOM      2  CA  ASP L   1      14.879  41.060  27.259  1.00 14.55           C  
ATOM      3  C   ASP L   1      15.219  41.265  25.822  1.00 13.21           C  
ATOM      4  O   ASP L   1      14.528  41.987  25.135  1.00 10.41           O  
ATOM      5  CB  ASP L   1      14.154  39.715  27.402  1.00 17.44           C  
ATOM      6  CG  ASP L   1      13.448  39.550  28.746  1.00 19.20           C  
ATOM      7  OD1 ASP L   1      13.786  40.290  29.703  1.00 20.36           O  
ATOM      8  OD2 ASP L   1      12.591  38.638  28.847  1.00 21.25           O  
ATOM      9  N   ILE L   2      16.305  40.665  25.381  1.00 14.01           N  
ATOM     10  CA  ILE L   2      16.603  40.625  23.968  1.00 15.24           C  
ATOM     11  C   ILE L   2      15.791  39.509  23.297  1.00 16.70           C  
ATOM     12  O   ILE L   2      15.814  38.366  23.723  1.00 17.17           O  
ATOM     13  CB  ILE L   2      18.111  40.432  23.739  1.00 14.51           C  
ATOM     14  CG1 ILE L   2      18.888  41.543  24.455  1.00 11.34           C  
ATOM     15  CG2 ILE L   2      18.420  40.472  22.240  1.00 16.47           C  
ATOM     16  CD1 ILE L   2      20.304  41.153  24.782  1.00  8.10           C  
ATOM     17  N   GLU L   3      14.885  39.900  22.416  1.00 18.89           N  
ATOM     18  CA  GLU L   3      14.043  38.923  21.750  1.00 20.39           C  
ATOM     19  C   GLU L   3      14.699  38.354  20.504  1.00 19.31           C  
ATOM     20  O   GLU L   3      15.437  39.060  19.792  1.00 19.28           O  
ATOM     21  CB  GLU L   3      12.712  39.546  21.404  1.00 23.54           C  
ATOM     22  CG  GLU L   3      11.718  39.300  22.480  1.00 32.12           C  
ATOM     23  CD  GLU L   3      10.829  40.495  22.738  1.00 37.20           C  
ATOM     24  OE1 GLU L   3      11.191  41.631  22.302  1.00 39.42           O  
ATOM     25  OE2 GLU L   3       9.758  40.286  23.381  1.00 40.43           O  
ATOM     26  N   LEU L   4      14.482  37.058  20.289  1.00 17.91           N  
ATOM     27  CA  LEU L   4      15.003  36.352  19.111  1.00 16.41           C  
ATOM     28  C   LEU L   4      13.826  35.879  18.292  1.00 15.59           C  
ATOM     29  O   LEU L   4      12.859  35.336  18.841  1.00 15.23           O  
ATOM     30  CB  LEU L   4      15.832  35.145  19.513  1.00 14.40           C  
ATOM     31  CG  LEU L   4      17.331  35.241  19.728  1.00 14.49           C  
ATOM     32  CD1 LEU L   4      17.788  36.641  19.999  1.00 13.24           C  
ATOM     33  CD2 LEU L   4      17.670  34.331  20.886  1.00 12.75           C  
ATOM     34  N   THR L   5      13.843  36.214  17.006  1.00 14.83           N  
ATOM     35  CA  THR L   5      12.813  35.731  16.097  1.00 15.13           C  
ATOM     36  C   THR L   5      13.434  34.777  15.094  1.00 13.73           C  
ATOM     37  O   THR L   5      14.473  35.065  14.518  1.00 12.32           O  
ATOM     38  CB  THR L   5      12.142  36.884  15.337  1.00 16.60           C  
ATOM     39  OG1 THR L   5      11.810  37.929  16.262  1.00 19.58           O  
ATOM     40  CG2 THR L   5      10.870  36.395  14.649  1.00 16.50           C  
ATOM     41  N   GLN L   6      12.850  33.595  14.994  1.00 13.50           N  
ATOM     42  CA  GLN L   6      13.347  32.556  14.116  1.00 14.34           C  
ATOM     43  C   GLN L   6      12.414  32.392  12.897  1.00 13.48           C  
ATOM     44  O   GLN L   6      11.192  32.507  13.007  1.00 11.61           O  
ATOM     45  CB  GLN L   6      13.463  31.226  14.872  1.00 13.45           C  
ATOM     46  CG  GLN L   6      14.869  30.902  15.290  1.00 16.19           C  
ATOM     47  CD  GLN L   6      15.000  29.534  15.962  1.00 15.67           C  
ATOM     48  OE1 GLN L   6      14.929  29.424  17.186  1.00 18.69           O  
ATOM     49  NE2 GLN L   6      15.301  28.517  15.178  1.00 14.90           N  
ATOM     50  N   SER L   7      13.011  32.054  11.757  1.00 13.54           N  
ATOM     51  CA  SER L   7      12.264  31.911  10.512  1.00 13.65           C  
ATOM     52  C   SER L   7      12.914  30.828   9.652  1.00 11.89           C  
ATOM     53  O   SER L   7      14.134  30.785   9.570  1.00 11.15           O  
ATOM     54  CB  SER L   7      12.295  33.227   9.741  1.00 15.21           C  
ATOM     55  OG  SER L   7      11.244  33.215   8.787  1.00 20.39           O  
ATOM     56  N   PRO L   8      12.115  30.029   8.912  1.00 10.86           N  
ATOM     57  CA  PRO L   8      10.662  29.939   8.988  1.00 11.73           C  
ATOM     58  C   PRO L   8      10.241  29.124  10.194  1.00 12.66           C  
ATOM     59  O   PRO L   8      11.085  28.669  10.963  1.00 11.98           O  
ATOM     60  CB  PRO L   8      10.291  29.216   7.687  1.00 11.61           C  
ATOM     61  CG  PRO L   8      11.420  28.321   7.478  1.00 10.45           C  
ATOM     62  CD  PRO L   8      12.636  29.108   7.883  1.00 11.44           C  
ATOM     63  N   ALA L   9       8.940  28.872  10.302  1.00 13.91           N  
ATOM     64  CA  ALA L   9       8.430  27.950  11.305  1.00 14.71           C  
ATOM     65  C   ALA L   9       8.810  26.499  10.920  1.00 16.01           C  
ATOM     66  O   ALA L   9       9.454  25.782  11.690  1.00 16.46           O  
ATOM     67  CB  ALA L   9       6.935  28.110  11.418  1.00 13.67           C  
ATOM     68  N   THR L  10       8.419  26.075   9.726  1.00 16.20           N  
ATOM     69  CA  THR L  10       8.858  24.795   9.179  1.00 17.06           C  
ATOM     70  C   THR L  10       9.326  25.027   7.732  1.00 17.09           C  
ATOM     71  O   THR L  10       8.948  26.013   7.091  1.00 16.41           O  
ATOM     72  CB  THR L  10       7.714  23.778   9.143  1.00 17.88           C  
ATOM     73  OG1 THR L  10       6.741  24.197   8.174  1.00 20.47           O  
ATOM     74  CG2 THR L  10       7.022  23.701  10.463  1.00 17.57           C  
ATOM     75  N   LEU L  11      10.193  24.163   7.237  1.00 16.79           N  
ATOM     76  CA  LEU L  11      10.502  24.181   5.821  1.00 16.74           C  
ATOM     77  C   LEU L  11      10.697  22.736   5.395  1.00 18.08           C  
ATOM     78  O   LEU L  11      10.922  21.837   6.241  1.00 18.41           O  
ATOM     79  CB  LEU L  11      11.760  25.012   5.537  1.00 15.82           C  
ATOM     80  CG  LEU L  11      13.119  24.485   6.003  1.00 15.91           C  
ATOM     81  CD1 LEU L  11      14.242  25.321   5.447  1.00 16.57           C  
ATOM     82  CD2 LEU L  11      13.193  24.529   7.512  1.00 17.94           C  
ATOM     83  N   SER L  12      10.581  22.513   4.096  1.00 16.92           N  
ATOM     84  CA  SER L  12      10.642  21.186   3.539  1.00 17.34           C  
ATOM     85  C   SER L  12      11.660  21.190   2.440  1.00 16.66           C  
ATOM     86  O   SER L  12      11.575  22.012   1.545  1.00 16.06           O  
ATOM     87  CB  SER L  12       9.303  20.855   2.943  1.00 17.66           C  
ATOM     88  OG  SER L  12       9.041  19.513   3.160  1.00 24.24           O  
ATOM     89  N   VAL L  13      12.577  20.244   2.468  1.00 17.62           N  
ATOM     90  CA  VAL L  13      13.510  20.035   1.364  1.00 19.61           C  
ATOM     91  C   VAL L  13      13.649  18.549   1.045  1.00 20.27           C  
ATOM     92  O   VAL L  13      13.151  17.701   1.784  1.00 20.89           O  
ATOM     93  CB  VAL L  13      14.913  20.583   1.679  1.00 20.60           C  
ATOM     94  CG1 VAL L  13      14.931  22.094   1.495  1.00 21.84           C  
ATOM     95  CG2 VAL L  13      15.316  20.188   3.105  1.00 20.55           C  
ATOM     96  N   THR L  14      14.287  18.238  -0.078  1.00 19.98           N  
ATOM     97  CA  THR L  14      14.521  16.859  -0.453  1.00 19.15           C  
ATOM     98  C   THR L  14      16.000  16.714  -0.193  1.00 18.68           C  
ATOM     99  O   THR L  14      16.732  17.705  -0.141  1.00 18.80           O  
ATOM    100  CB  THR L  14      14.192  16.580  -1.982  1.00 19.99           C  
ATOM    101  OG1 THR L  14      14.774  17.602  -2.791  1.00 21.11           O  
ATOM    102  CG2 THR L  14      12.694  16.594  -2.258  1.00 17.89           C  
ATOM    103  N   PRO L  15      16.431  15.508   0.173  1.00 18.68           N  
ATOM    104  CA  PRO L  15      17.822  15.321   0.577  1.00 17.68           C  
ATOM    105  C   PRO L  15      18.787  15.832  -0.492  1.00 18.43           C  
ATOM    106  O   PRO L  15      18.549  15.646  -1.693  1.00 19.34           O  
ATOM    107  CB  PRO L  15      17.925  13.818   0.756  1.00 17.71           C  
ATOM    108  CG  PRO L  15      16.555  13.384   1.071  1.00 18.44           C  
ATOM    109  CD  PRO L  15      15.653  14.261   0.269  1.00 18.27           C  
ATOM    110  N   GLY L  16      19.913  16.388  -0.060  1.00 17.82           N  
ATOM    111  CA  GLY L  16      20.890  16.909  -0.992  1.00 17.70           C  
ATOM    112  C   GLY L  16      20.743  18.389  -1.289  1.00 18.00           C  
ATOM    113  O   GLY L  16      21.665  19.000  -1.827  1.00 18.71           O  
ATOM    114  N   ASN L  17      19.582  18.966  -0.999  1.00 19.32           N  
ATOM    115  CA  ASN L  17      19.403  20.400  -1.178  1.00 20.36           C  
ATOM    116  C   ASN L  17      20.026  21.166  -0.003  1.00 21.10           C  
ATOM    117  O   ASN L  17      20.547  20.558   0.914  1.00 21.90           O  
ATOM    118  CB  ASN L  17      17.927  20.743  -1.320  1.00 20.49           C  
ATOM    119  CG  ASN L  17      17.687  21.930  -2.246  1.00 22.57           C  
ATOM    120  OD1 ASN L  17      18.563  22.802  -2.445  1.00 23.12           O  
ATOM    121  ND2 ASN L  17      16.493  21.985  -2.809  1.00 24.14           N  
ATOM    122  N   SER L  18      20.240  22.458  -0.187  1.00 20.56           N  
ATOM    123  CA  SER L  18      20.879  23.268   0.819  1.00 21.11           C  
ATOM    124  C   SER L  18      19.817  24.059   1.528  1.00 20.47           C  
ATOM    125  O   SER L  18      18.685  24.111   1.054  1.00 20.46           O  
ATOM    126  CB  SER L  18      21.882  24.193   0.175  1.00 22.56           C  
ATOM    127  OG  SER L  18      23.135  23.513   0.123  1.00 28.81           O  
ATOM    128  N   VAL L  19      20.101  24.481   2.753  1.00 19.34           N  
ATOM    129  CA  VAL L  19      19.057  25.105   3.564  1.00 19.21           C  
ATOM    130  C   VAL L  19      19.653  26.173   4.489  1.00 18.44           C  
ATOM    131  O   VAL L  19      20.845  26.175   4.763  1.00 17.81           O  
ATOM    132  CB  VAL L  19      18.257  23.983   4.320  1.00 18.98           C  
ATOM    133  CG1 VAL L  19      18.392  24.089   5.774  1.00 17.53           C  
ATOM    134  CG2 VAL L  19      16.830  24.020   3.914  1.00 19.89           C  
ATOM    135  N   SER L  20      18.857  27.195   4.773  1.00 20.02           N  
ATOM    136  CA  SER L  20      19.280  28.328   5.605  1.00 20.43           C  
ATOM    137  C   SER L  20      18.204  28.597   6.604  1.00 19.81           C  
ATOM    138  O   SER L  20      17.062  28.854   6.226  1.00 20.06           O  
ATOM    139  CB  SER L  20      19.451  29.589   4.777  1.00 19.50           C  
ATOM    140  OG  SER L  20      20.659  29.502   4.061  1.00 25.93           O  
ATOM    141  N   ILE L  21      18.608  28.735   7.854  1.00 18.98           N  
ATOM    142  CA  ILE L  21      17.650  28.983   8.920  1.00 18.79           C  
ATOM    143  C   ILE L  21      18.057  30.285   9.615  1.00 18.00           C  
ATOM    144  O   ILE L  21      19.238  30.526   9.802  1.00 18.76           O  
ATOM    145  CB  ILE L  21      17.692  27.820   9.892  1.00 18.49           C  
ATOM    146  CG1 ILE L  21      16.933  26.640   9.299  1.00 18.35           C  
ATOM    147  CG2 ILE L  21      17.129  28.247  11.240  1.00 20.91           C  
ATOM    148  CD1 ILE L  21      17.151  25.349  10.062  1.00 17.58           C  
ATOM    149  N   SER L  22      17.114  31.179   9.878  1.00 17.94           N  
ATOM    150  CA  SER L  22      17.511  32.475  10.379  1.00 17.76           C  
ATOM    151  C   SER L  22      17.004  32.710  11.787  1.00 17.56           C  
ATOM    152  O   SER L  22      15.970  32.177  12.190  1.00 17.38           O  
ATOM    153  CB  SER L  22      17.051  33.604   9.440  1.00 17.35           C  
ATOM    154  OG  SER L  22      15.757  34.063   9.766  1.00 19.35           O  
ATOM    155  N   CYS L  23      17.733  33.572  12.492  1.00 18.28           N  
ATOM    156  CA  CYS L  23      17.455  33.972  13.864  1.00 17.97           C  
ATOM    157  C   CYS L  23      17.940  35.427  14.036  1.00 17.17           C  
ATOM    158  O   CYS L  23      19.053  35.783  13.648  1.00 16.35           O  
ATOM    159  CB  CYS L  23      18.192  33.010  14.789  1.00 18.61           C  
ATOM    160  SG  CYS L  23      18.271  33.469  16.532  1.00 20.86           S  
ATOM    161  N   ARG L  24      16.993  36.298  14.349  1.00 18.46           N  
ATOM    162  CA  ARG L  24      17.228  37.741  14.422  1.00 19.60           C  
ATOM    163  C   ARG L  24      17.061  38.255  15.854  1.00 17.16           C  
ATOM    164  O   ARG L  24      16.021  38.022  16.472  1.00 16.59           O  
ATOM    165  CB  ARG L  24      16.219  38.445  13.520  1.00 23.36           C  
ATOM    166  CG  ARG L  24      16.758  38.772  12.162  1.00 30.53           C  
ATOM    167  CD  ARG L  24      17.311  37.550  11.443  0.00 35.57           C  
ATOM    168  NE  ARG L  24      17.199  37.748   9.998  0.00 41.18           N  
ATOM    169  CZ  ARG L  24      16.033  37.819   9.341  0.00 43.62           C  
ATOM    170  NH1 ARG L  24      14.976  37.131   9.788  0.00 44.16           N  
ATOM    171  NH2 ARG L  24      15.978  38.386   8.128  0.00 44.76           N  
ATOM    172  N   ALA L  25      18.107  38.883  16.395  1.00 15.95           N  
ATOM    173  CA  ALA L  25      18.058  39.515  17.728  1.00 13.75           C  
ATOM    174  C   ALA L  25      17.447  40.915  17.613  1.00 14.03           C  
ATOM    175  O   ALA L  25      17.789  41.675  16.701  1.00 14.85           O  
ATOM    176  CB  ALA L  25      19.454  39.626  18.286  1.00 12.04           C  
ATOM    177  N   SER L  26      16.620  41.311  18.567  1.00 13.28           N  
ATOM    178  CA  SER L  26      16.074  42.670  18.549  1.00 12.18           C  
ATOM    179  C   SER L  26      17.124  43.721  18.875  1.00 11.06           C  
ATOM    180  O   SER L  26      16.902  44.890  18.662  1.00 12.44           O  
ATOM    181  CB  SER L  26      14.917  42.806  19.538  1.00 11.42           C  
ATOM    182  OG  SER L  26      15.395  42.521  20.831  1.00 14.49           O  
ATOM    183  N   GLN L  27      18.260  43.328  19.409  1.00 10.49           N  
ATOM    184  CA  GLN L  27      19.291  44.307  19.751  1.00 10.81           C  
ATOM    185  C   GLN L  27      20.588  43.628  19.397  1.00 10.57           C  
ATOM    186  O   GLN L  27      20.643  42.408  19.425  1.00 12.63           O  
ATOM    187  CB  GLN L  27      19.280  44.625  21.256  1.00  9.76           C  
ATOM    188  CG  GLN L  27      17.999  45.223  21.755  1.00 10.63           C  
ATOM    189  CD  GLN L  27      17.857  45.189  23.275  1.00 12.47           C  
ATOM    190  OE1 GLN L  27      16.749  45.134  23.796  1.00 14.68           O  
ATOM    191  NE2 GLN L  27      18.960  45.233  23.980  1.00 11.08           N  
ATOM    192  N   SER L  28      21.650  44.392  19.171  1.00 10.17           N  
ATOM    193  CA  SER L  28      22.951  43.801  18.856  1.00 10.40           C  
ATOM    194  C   SER L  28      23.553  42.973  20.012  1.00 10.66           C  
ATOM    195  O   SER L  28      23.684  43.460  21.152  1.00 11.05           O  
ATOM    196  CB  SER L  28      23.936  44.874  18.415  1.00  8.34           C  
ATOM    197  OG  SER L  28      25.227  44.306  18.188  1.00 11.99           O  
ATOM    198  N   ILE L  29      23.965  41.750  19.681  1.00  9.89           N  
ATOM    199  CA  ILE L  29      24.558  40.832  20.622  1.00  9.66           C  
ATOM    200  C   ILE L  29      25.838  40.288  20.065  1.00 11.08           C  
ATOM    201  O   ILE L  29      26.366  39.315  20.607  1.00 12.33           O  
ATOM    202  CB  ILE L  29      23.650  39.618  20.968  1.00  9.66           C  
ATOM    203  CG1 ILE L  29      23.483  38.687  19.745  1.00  9.66           C  
ATOM    204  CG2 ILE L  29      22.308  40.105  21.531  1.00  6.69           C  
ATOM    205  CD1 ILE L  29      22.502  37.539  19.978  1.00  8.12           C  
ATOM    206  N   GLY L  30      26.392  40.946  19.040  1.00 10.79           N  
ATOM    207  CA  GLY L  30      27.706  40.536  18.546  1.00  9.12           C  
ATOM    208  C   GLY L  30      27.670  39.093  18.098  1.00  9.64           C  
ATOM    209  O   GLY L  30      26.715  38.696  17.421  1.00  9.54           O  
ATOM    210  N   ASN L  31      28.569  38.263  18.619  1.00 10.12           N  
ATOM    211  CA  ASN L  31      28.606  36.863  18.200  1.00 11.13           C  
ATOM    212  C   ASN L  31      27.988  35.923  19.245  1.00 11.97           C  
ATOM    213  O   ASN L  31      28.153  34.708  19.162  1.00 11.71           O  
ATOM    214  CB  ASN L  31      30.047  36.433  17.884  1.00 10.95           C  
ATOM    215  CG  ASN L  31      30.911  36.368  19.111  1.00 11.69           C  
ATOM    216  OD1 ASN L  31      30.494  36.754  20.177  1.00 14.14           O  
ATOM    217  ND2 ASN L  31      32.121  35.892  18.966  1.00 12.13           N  
ATOM    218  N   ARG L  32      27.203  36.462  20.173  1.00 11.21           N  
ATOM    219  CA  ARG L  32      26.874  35.709  21.390  1.00 11.68           C  
ATOM    220  C   ARG L  32      25.588  34.891  21.233  1.00 12.02           C  
ATOM    221  O   ARG L  32      24.574  35.138  21.902  1.00 11.97           O  
ATOM    222  CB  ARG L  32      26.833  36.664  22.600  1.00  9.56           C  
ATOM    223  CG  ARG L  32      28.244  37.128  22.963  1.00 10.18           C  
ATOM    224  CD  ARG L  32      28.295  38.145  24.095  1.00 10.79           C  
ATOM    225  NE  ARG L  32      27.653  39.429  23.771  1.00 10.53           N  
ATOM    226  CZ  ARG L  32      28.230  40.403  23.068  1.00  7.66           C  
ATOM    227  NH1 ARG L  32      29.465  40.265  22.652  1.00  5.21           N  
ATOM    228  NH2 ARG L  32      27.559  41.514  22.790  1.00  8.39           N  
ATOM    229  N   LEU L  33      25.651  33.895  20.351  1.00 11.91           N  
ATOM    230  CA  LEU L  33      24.454  33.216  19.861  1.00 11.83           C  
ATOM    231  C   LEU L  33      24.862  31.772  19.636  1.00 11.15           C  
ATOM    232  O   LEU L  33      25.926  31.519  19.070  1.00  9.50           O  
ATOM    233  CB  LEU L  33      23.996  33.854  18.538  1.00 12.81           C  
ATOM    234  CG  LEU L  33      22.652  33.635  17.840  1.00 13.89           C  
ATOM    235  CD1 LEU L  33      22.655  32.321  17.096  1.00 15.00           C  
ATOM    236  CD2 LEU L  33      21.508  33.732  18.803  1.00 13.26           C  
ATOM    237  N   PHE L  34      24.101  30.859  20.244  1.00 10.49           N  
ATOM    238  CA  PHE L  34      24.339  29.429  20.136  1.00 10.06           C  
ATOM    239  C   PHE L  34      23.237  28.780  19.297  1.00  8.44           C  
ATOM    240  O   PHE L  34      22.076  29.170  19.385  1.00  6.07           O  
ATOM    241  CB  PHE L  34      24.378  28.787  21.539  1.00 12.77           C  
ATOM    242  CG  PHE L  34      25.638  29.094  22.308  1.00 14.80           C  
ATOM    243  CD1 PHE L  34      26.394  30.222  22.019  1.00 16.18           C  
ATOM    244  CD2 PHE L  34      26.042  28.290  23.349  1.00 17.37           C  
ATOM    245  CE1 PHE L  34      27.527  30.543  22.737  1.00 16.57           C  
ATOM    246  CE2 PHE L  34      27.195  28.613  24.083  1.00 18.83           C  
ATOM    247  CZ  PHE L  34      27.934  29.738  23.765  1.00 17.80           C  
ATOM    248  N   TRP L  35      23.611  27.829  18.442  1.00  8.10           N  
ATOM    249  CA  TRP L  35      22.593  27.043  17.751  1.00  6.98           C  
ATOM    250  C   TRP L  35      22.508  25.627  18.318  1.00  6.95           C  
ATOM    251  O   TRP L  35      23.549  24.972  18.492  1.00  7.80           O  
ATOM    252  CB  TRP L  35      22.886  26.989  16.231  1.00  7.13           C  
ATOM    253  CG  TRP L  35      22.553  28.256  15.459  1.00  5.16           C  
ATOM    254  CD1 TRP L  35      23.438  29.208  15.037  1.00  5.74           C  
ATOM    255  CD2 TRP L  35      21.270  28.651  14.948  1.00  5.61           C  
ATOM    256  NE1 TRP L  35      22.791  30.156  14.282  1.00  6.92           N  
ATOM    257  CE2 TRP L  35      21.466  29.833  14.197  1.00  5.36           C  
ATOM    258  CE3 TRP L  35      19.976  28.110  15.037  1.00  5.04           C  
ATOM    259  CZ2 TRP L  35      20.423  30.474  13.522  1.00  5.93           C  
ATOM    260  CZ3 TRP L  35      18.951  28.741  14.386  1.00  5.45           C  
ATOM    261  CH2 TRP L  35      19.177  29.923  13.622  1.00  4.80           C  
ATOM    262  N   TYR L  36      21.277  25.117  18.456  1.00  8.27           N  
ATOM    263  CA  TYR L  36      21.023  23.738  18.908  1.00 10.38           C  
ATOM    264  C   TYR L  36      20.201  22.961  17.888  1.00 11.14           C  
ATOM    265  O   TYR L  36      19.328  23.525  17.193  1.00 10.24           O  
ATOM    266  CB  TYR L  36      20.221  23.698  20.227  1.00 11.83           C  
ATOM    267  CG  TYR L  36      20.878  24.376  21.416  1.00 14.67           C  
ATOM    268  CD1 TYR L  36      21.915  23.748  22.140  1.00 13.16           C  
ATOM    269  CD2 TYR L  36      20.519  25.683  21.768  1.00 15.12           C  
ATOM    270  CE1 TYR L  36      22.585  24.420  23.168  1.00 14.10           C  
ATOM    271  CE2 TYR L  36      21.187  26.362  22.788  1.00 15.75           C  
ATOM    272  CZ  TYR L  36      22.213  25.734  23.489  1.00 16.31           C  
ATOM    273  OH  TYR L  36      22.786  26.418  24.555  1.00 16.48           O  
ATOM    274  N   GLN L  37      20.313  21.635  17.990  1.00 11.52           N  
ATOM    275  CA  GLN L  37      19.461  20.720  17.232  1.00 11.22           C  
ATOM    276  C   GLN L  37      18.787  19.818  18.245  1.00 12.15           C  
ATOM    277  O   GLN L  37      19.455  19.351  19.146  1.00 12.85           O  
ATOM    278  CB  GLN L  37      20.338  19.877  16.296  1.00  9.77           C  
ATOM    279  CG  GLN L  37      19.640  18.737  15.614  1.00 11.15           C  
ATOM    280  CD  GLN L  37      20.641  17.871  14.862  1.00 12.71           C  
ATOM    281  OE1 GLN L  37      21.591  17.331  15.456  1.00 12.89           O  
ATOM    282  NE2 GLN L  37      20.524  17.850  13.548  1.00 11.97           N  
ATOM    283  N   GLN L  38      17.490  19.571  18.089  1.00 13.36           N  
ATOM    284  CA  GLN L  38      16.780  18.528  18.817  1.00 14.43           C  
ATOM    285  C   GLN L  38      16.054  17.572  17.896  1.00 15.78           C  
ATOM    286  O   GLN L  38      15.071  17.954  17.250  1.00 16.09           O  
ATOM    287  CB  GLN L  38      15.746  19.140  19.734  1.00 16.13           C  
ATOM    288  CG  GLN L  38      16.272  19.393  21.086  1.00 18.84           C  
ATOM    289  CD  GLN L  38      15.307  20.207  21.859  1.00 21.76           C  
ATOM    290  OE1 GLN L  38      14.683  21.113  21.295  1.00 23.68           O  
ATOM    291  NE2 GLN L  38      15.019  19.787  23.093  1.00 20.96           N  
ATOM    292  N   LYS L  39      16.485  16.317  17.861  1.00 16.63           N  
ATOM    293  CA  LYS L  39      15.826  15.350  16.997  1.00 16.83           C  
ATOM    294  C   LYS L  39      14.602  14.738  17.640  1.00 17.71           C  
ATOM    295  O   LYS L  39      13.851  14.041  16.978  1.00 17.94           O  
ATOM    296  CB  LYS L  39      16.805  14.257  16.583  1.00 16.35           C  
ATOM    297  CG  LYS L  39      17.932  14.765  15.703  1.00 16.34           C  
ATOM    298  CD  LYS L  39      18.887  13.659  15.265  1.00 16.52           C  
ATOM    299  CE  LYS L  39      19.698  14.131  14.079  1.00 15.53           C  
ATOM    300  NZ  LYS L  39      20.797  13.234  13.678  1.00 15.36           N  
ATOM    301  N   SER L  40      14.461  14.871  18.957  1.00 18.34           N  
ATOM    302  CA  SER L  40      13.252  14.373  19.621  1.00 18.25           C  
ATOM    303  C   SER L  40      13.097  15.127  20.947  1.00 19.22           C  
ATOM    304  O   SER L  40      13.753  16.145  21.140  1.00 19.20           O  
ATOM    305  CB  SER L  40      13.354  12.855  19.838  1.00 16.71           C  
ATOM    306  OG  SER L  40      12.092  12.326  20.196  1.00 16.33           O  
ATOM    307  N   HIS L  41      12.237  14.661  21.851  1.00 20.55           N  
ATOM    308  CA  HIS L  41      12.127  15.275  23.191  1.00 21.06           C  
ATOM    309  C   HIS L  41      13.278  14.805  24.048  1.00 19.95           C  
ATOM    310  O   HIS L  41      13.188  13.763  24.691  1.00 20.44           O  
ATOM    311  CB  HIS L  41      10.830  14.859  23.860  1.00 24.32           C  
ATOM    312  CG  HIS L  41       9.651  14.890  22.944  1.00 27.94           C  
ATOM    313  ND1 HIS L  41       9.413  15.937  22.079  1.00 29.60           N  
ATOM    314  CD2 HIS L  41       8.666  13.987  22.726  1.00 30.11           C  
ATOM    315  CE1 HIS L  41       8.331  15.680  21.367  1.00 29.84           C  
ATOM    316  NE2 HIS L  41       7.854  14.508  21.743  1.00 31.34           N  
ATOM    317  N   GLU L  42      14.385  15.533  23.985  1.00 17.97           N  
ATOM    318  CA  GLU L  42      15.650  15.116  24.574  1.00 16.01           C  
ATOM    319  C   GLU L  42      16.429  16.411  24.796  1.00 14.84           C  
ATOM    320  O   GLU L  42      16.014  17.463  24.318  1.00 14.93           O  
ATOM    321  CB  GLU L  42      16.410  14.209  23.599  1.00 15.84           C  
ATOM    322  CG  GLU L  42      16.897  14.955  22.322  1.00 16.36           C  
ATOM    323  CD  GLU L  42      16.997  14.078  21.096  1.00 15.26           C  
ATOM    324  OE1 GLU L  42      16.419  12.972  21.096  1.00 11.64           O  
ATOM    325  OE2 GLU L  42      17.624  14.534  20.120  1.00 16.10           O  
ATOM    326  N   SER L  43      17.549  16.346  25.493  1.00 12.78           N  
ATOM    327  CA  SER L  43      18.359  17.527  25.706  1.00 13.44           C  
ATOM    328  C   SER L  43      18.885  17.959  24.349  1.00 14.53           C  
ATOM    329  O   SER L  43      19.408  17.142  23.596  1.00 16.66           O  
ATOM    330  CB  SER L  43      19.540  17.211  26.633  1.00 12.39           C  
ATOM    331  OG  SER L  43      19.083  16.681  27.863  1.00 12.55           O  
ATOM    332  N   PRO L  44      18.941  19.262  24.102  1.00 14.61           N  
ATOM    333  CA  PRO L  44      19.497  19.740  22.828  1.00 14.32           C  
ATOM    334  C   PRO L  44      20.971  19.372  22.548  1.00 13.35           C  
ATOM    335  O   PRO L  44      21.818  19.426  23.431  1.00 13.27           O  
ATOM    336  CB  PRO L  44      19.299  21.253  22.908  1.00 14.27           C  
ATOM    337  CG  PRO L  44      19.222  21.506  24.412  1.00 14.38           C  
ATOM    338  CD  PRO L  44      18.376  20.367  24.882  1.00 14.36           C  
ATOM    339  N   ARG L  45      21.285  19.154  21.274  1.00 12.27           N  
ATOM    340  CA  ARG L  45      22.660  19.013  20.830  1.00 11.28           C  
ATOM    341  C   ARG L  45      23.176  20.380  20.351  1.00 10.89           C  
ATOM    342  O   ARG L  45      22.504  21.095  19.582  1.00 12.08           O  
ATOM    343  CB  ARG L  45      22.727  17.962  19.715  1.00 10.06           C  
ATOM    344  CG  ARG L  45      24.086  17.816  19.063  1.00 10.55           C  
ATOM    345  CD  ARG L  45      23.937  17.135  17.742  1.00 11.41           C  
ATOM    346  NE  ARG L  45      25.228  16.893  17.103  1.00 12.22           N  
ATOM    347  CZ  ARG L  45      25.348  16.309  15.918  1.00 10.39           C  
ATOM    348  NH1 ARG L  45      24.258  16.093  15.197  1.00 10.92           N  
ATOM    349  NH2 ARG L  45      26.537  16.105  15.394  1.00  9.87           N  
ATOM    350  N   LEU L  46      24.316  20.790  20.891  1.00 10.88           N  
ATOM    351  CA  LEU L  46      24.922  22.067  20.535  1.00 11.39           C  
ATOM    352  C   LEU L  46      25.689  21.884  19.231  1.00 12.71           C  
ATOM    353  O   LEU L  46      26.608  21.056  19.144  1.00 12.69           O  
ATOM    354  CB  LEU L  46      25.875  22.522  21.646  1.00  9.32           C  
ATOM    355  CG  LEU L  46      26.633  23.850  21.406  1.00 10.93           C  
ATOM    356  CD1 LEU L  46      25.647  25.010  21.228  1.00  8.89           C  
ATOM    357  CD2 LEU L  46      27.589  24.134  22.592  1.00  9.63           C  
ATOM    358  N   LEU L  47      25.294  22.644  18.210  1.00 14.43           N  
ATOM    359  CA  LEU L  47      25.924  22.569  16.883  1.00 13.93           C  
ATOM    360  C   LEU L  47      27.001  23.660  16.713  1.00 14.91           C  
ATOM    361  O   LEU L  47      28.161  23.372  16.365  1.00 14.96           O  
ATOM    362  CB  LEU L  47      24.855  22.735  15.792  1.00 12.77           C  
ATOM    363  CG  LEU L  47      23.846  21.602  15.547  1.00 12.66           C  
ATOM    364  CD1 LEU L  47      23.020  21.871  14.268  1.00 10.64           C  
ATOM    365  CD2 LEU L  47      24.621  20.279  15.434  1.00 11.04           C  
ATOM    366  N   ILE L  48      26.617  24.903  17.016  1.00 15.40           N  
ATOM    367  CA  ILE L  48      27.462  26.070  16.771  1.00 15.72           C  
ATOM    368  C   ILE L  48      27.462  26.928  18.025  1.00 15.04           C  
ATOM    369  O   ILE L  48      26.388  27.280  18.521  1.00 14.23           O  
ATOM    370  CB  ILE L  48      26.919  26.931  15.541  1.00 15.50           C  
ATOM    371  CG1 ILE L  48      27.543  26.438  14.222  1.00 17.77           C  
ATOM    372  CG2 ILE L  48      27.385  28.357  15.636  1.00 15.78           C  
ATOM    373  CD1 ILE L  48      26.561  25.791  13.348  1.00 18.06           C  
ATOM    374  N   LYS L  49      28.649  27.323  18.472  1.00 15.02           N  
ATOM    375  CA  LYS L  49      28.770  28.293  19.551  1.00 16.99           C  
ATOM    376  C   LYS L  49      29.341  29.620  19.040  1.00 17.49           C  
ATOM    377  O   LYS L  49      30.037  29.655  18.032  1.00 16.61           O  
ATOM    378  CB  LYS L  49      29.625  27.743  20.691  1.00 17.22           C  
ATOM    379  CG  LYS L  49      30.931  27.217  20.260  1.00 22.16           C  
ATOM    380  CD  LYS L  49      31.915  27.178  21.406  1.00 25.99           C  
ATOM    381  CE  LYS L  49      31.334  26.427  22.590  1.00 29.15           C  
ATOM    382  NZ  LYS L  49      32.197  26.595  23.815  1.00 33.05           N  
ATOM    383  N   TYR L  50      28.860  30.722  19.605  1.00 17.28           N  
ATOM    384  CA  TYR L  50      29.399  32.037  19.271  1.00 17.24           C  
ATOM    385  C   TYR L  50      29.228  32.350  17.791  1.00 14.79           C  
ATOM    386  O   TYR L  50      30.171  32.709  17.096  1.00 14.29           O  
ATOM    387  CB  TYR L  50      30.867  32.141  19.713  1.00 18.54           C  
ATOM    388  CG  TYR L  50      30.978  32.242  21.208  1.00 21.94           C  
ATOM    389  CD1 TYR L  50      30.257  33.203  21.900  1.00 22.62           C  
ATOM    390  CD2 TYR L  50      31.593  31.238  21.946  1.00 24.26           C  
ATOM    391  CE1 TYR L  50      30.121  33.146  23.264  1.00 24.55           C  
ATOM    392  CE2 TYR L  50      31.470  31.180  23.333  1.00 24.60           C  
ATOM    393  CZ  TYR L  50      30.726  32.138  23.983  1.00 25.86           C  
ATOM    394  OH  TYR L  50      30.587  32.104  25.363  1.00 27.41           O  
ATOM    395  N   ALA L  51      28.039  32.038  17.306  1.00 14.46           N  
ATOM    396  CA  ALA L  51      27.568  32.444  15.969  1.00 14.19           C  
ATOM    397  C   ALA L  51      28.090  31.563  14.851  1.00 12.72           C  
ATOM    398  O   ALA L  51      27.334  31.051  14.060  1.00 13.07           O  
ATOM    399  CB  ALA L  51      27.919  33.903  15.695  1.00 11.97           C  
ATOM    400  N   SER L  52      29.380  31.320  14.835  1.00 13.96           N  
ATOM    401  CA  SER L  52      29.972  30.740  13.667  1.00 15.07           C  
ATOM    402  C   SER L  52      31.027  29.695  13.990  1.00 17.14           C  
ATOM    403  O   SER L  52      31.660  29.199  13.073  1.00 18.53           O  
ATOM    404  CB  SER L  52      30.576  31.858  12.820  1.00 14.71           C  
ATOM    405  OG  SER L  52      31.474  32.635  13.586  1.00 14.50           O  
ATOM    406  N   GLN L  53      31.301  29.418  15.266  1.00 17.43           N  
ATOM    407  CA  GLN L  53      32.288  28.391  15.608  1.00 18.82           C  
ATOM    408  C   GLN L  53      31.603  27.037  15.771  1.00 19.08           C  
ATOM    409  O   GLN L  53      30.783  26.853  16.672  1.00 20.25           O  
ATOM    410  CB  GLN L  53      33.037  28.741  16.884  1.00 20.46           C  
ATOM    411  CG  GLN L  53      34.065  29.867  16.711  1.00 26.02           C  
ATOM    412  CD  GLN L  53      34.472  30.536  18.044  1.00 28.54           C  
ATOM    413  OE1 GLN L  53      34.634  31.770  18.121  1.00 29.71           O  
ATOM    414  NE2 GLN L  53      34.622  29.725  19.098  1.00 29.05           N  
ATOM    415  N   SER L  54      31.861  26.132  14.831  1.00 18.95           N  
ATOM    416  CA  SER L  54      31.278  24.791  14.841  1.00 19.60           C  
ATOM    417  C   SER L  54      31.932  23.953  15.916  1.00 18.53           C  
ATOM    418  O   SER L  54      33.135  24.038  16.113  1.00 17.46           O  
ATOM    419  CB  SER L  54      31.496  24.098  13.496  1.00 20.36           C  
ATOM    420  OG  SER L  54      30.685  24.674  12.497  1.00 22.49           O  
ATOM    421  N   ILE L  55      31.121  23.155  16.603  1.00 19.61           N  
ATOM    422  CA  ILE L  55      31.585  22.206  17.615  1.00 18.69           C  
ATOM    423  C   ILE L  55      32.418  21.111  16.941  1.00 18.90           C  
ATOM    424  O   ILE L  55      32.056  20.627  15.873  1.00 18.47           O  
ATOM    425  CB  ILE L  55      30.366  21.551  18.332  1.00 19.39           C  
ATOM    426  CG1 ILE L  55      29.547  22.619  19.070  1.00 16.97           C  
ATOM    427  CG2 ILE L  55      30.826  20.415  19.282  1.00 19.38           C  
ATOM    428  CD1 ILE L  55      30.344  23.623  19.787  1.00 14.93           C  
ATOM    429  N   SER L  56      33.588  20.831  17.506  1.00 18.94           N  
ATOM    430  CA  SER L  56      34.452  19.730  17.084  1.00 19.74           C  
ATOM    431  C   SER L  56      33.687  18.448  16.812  1.00 18.99           C  
ATOM    432  O   SER L  56      32.883  18.029  17.639  1.00 19.49           O  
ATOM    433  CB  SER L  56      35.472  19.448  18.170  1.00 21.20           C  
ATOM    434  OG  SER L  56      36.783  19.486  17.638  1.00 26.72           O  
ATOM    435  N   GLY L  57      33.835  17.914  15.600  1.00 18.11           N  
ATOM    436  CA  GLY L  57      33.166  16.677  15.243  1.00 16.31           C  
ATOM    437  C   GLY L  57      31.763  16.713  14.668  1.00 15.48           C  
ATOM    438  O   GLY L  57      31.239  15.661  14.303  1.00 14.96           O  
ATOM    439  N   ILE L  58      31.129  17.878  14.577  1.00 15.49           N  
ATOM    440  CA  ILE L  58      29.860  17.929  13.862  1.00 15.67           C  
ATOM    441  C   ILE L  58      30.129  17.887  12.367  1.00 15.32           C  
ATOM    442  O   ILE L  58      31.262  18.155  11.928  1.00 14.01           O  
ATOM    443  CB  ILE L  58      28.991  19.178  14.204  1.00 17.01           C  
ATOM    444  CG1 ILE L  58      29.460  20.398  13.421  1.00 18.60           C  
ATOM    445  CG2 ILE L  58      29.000  19.444  15.708  1.00 16.23           C  
ATOM    446  CD1 ILE L  58      28.473  21.557  13.504  1.00 18.95           C  
ATOM    447  N   PRO L  59      29.150  17.388  11.578  1.00 15.45           N  
ATOM    448  CA  PRO L  59      29.377  17.303  10.133  1.00 15.33           C  
ATOM    449  C   PRO L  59      29.754  18.669   9.542  1.00 16.28           C  
ATOM    450  O   PRO L  59      29.237  19.714   9.977  1.00 14.87           O  
ATOM    451  CB  PRO L  59      28.039  16.793   9.614  1.00 13.88           C  
ATOM    452  CG  PRO L  59      27.576  15.908  10.730  1.00 13.94           C  
ATOM    453  CD  PRO L  59      27.855  16.776  11.932  1.00 13.89           C  
ATOM    454  N   SER L  60      30.613  18.651   8.524  1.00 16.01           N  
ATOM    455  CA  SER L  60      31.037  19.888   7.887  1.00 16.79           C  
ATOM    456  C   SER L  60      29.962  20.538   7.026  1.00 15.78           C  
ATOM    457  O   SER L  60      30.062  21.730   6.713  1.00 16.48           O  
ATOM    458  CB  SER L  60      32.337  19.686   7.085  1.00 17.67           C  
ATOM    459  OG  SER L  60      32.280  18.548   6.241  1.00 21.99           O  
ATOM    460  N   ARG L  61      28.875  19.824   6.757  1.00 14.11           N  
ATOM    461  CA  ARG L  61      27.761  20.460   6.071  1.00 13.22           C  
ATOM    462  C   ARG L  61      27.044  21.541   6.924  1.00 14.24           C  
ATOM    463  O   ARG L  61      26.281  22.353   6.379  1.00 14.03           O  
ATOM    464  CB  ARG L  61      26.747  19.421   5.598  1.00 12.70           C  
ATOM    465  CG  ARG L  61      26.021  18.669   6.722  1.00 13.08           C  
ATOM    466  CD  ARG L  61      25.088  17.607   6.146  1.00 14.32           C  
ATOM    467  NE  ARG L  61      24.381  16.852   7.176  1.00 15.06           N  
ATOM    468  CZ  ARG L  61      24.841  15.730   7.741  1.00 14.06           C  
ATOM    469  NH1 ARG L  61      26.024  15.217   7.392  1.00 11.25           N  
ATOM    470  NH2 ARG L  61      24.089  15.101   8.637  1.00 14.06           N  
ATOM    471  N   PHE L  62      27.243  21.530   8.247  1.00 13.01           N  
ATOM    472  CA  PHE L  62      26.626  22.532   9.135  1.00 11.90           C  
ATOM    473  C   PHE L  62      27.543  23.744   9.259  1.00 11.26           C  
ATOM    474  O   PHE L  62      28.746  23.595   9.453  1.00 12.64           O  
ATOM    475  CB  PHE L  62      26.418  21.945  10.537  1.00 10.48           C  
ATOM    476  CG  PHE L  62      25.279  20.988  10.635  1.00  8.33           C  
ATOM    477  CD1 PHE L  62      23.998  21.439  10.675  1.00  7.73           C  
ATOM    478  CD2 PHE L  62      25.508  19.626  10.684  1.00  9.97           C  
ATOM    479  CE1 PHE L  62      22.940  20.564  10.768  1.00  8.75           C  
ATOM    480  CE2 PHE L  62      24.460  18.722  10.759  1.00  9.55           C  
ATOM    481  CZ  PHE L  62      23.168  19.199  10.807  1.00 10.28           C  
ATOM    482  N   SER L  63      27.001  24.948   9.168  1.00 11.97           N  
ATOM    483  CA  SER L  63      27.797  26.102   9.565  1.00 12.07           C  
ATOM    484  C   SER L  63      26.902  27.234   9.960  1.00 11.46           C  
ATOM    485  O   SER L  63      25.720  27.246   9.609  1.00 11.85           O  
ATOM    486  CB  SER L  63      28.702  26.568   8.442  1.00 13.54           C  
ATOM    487  OG  SER L  63      27.918  27.137   7.413  1.00 18.47           O  
ATOM    488  N   GLY L  64      27.463  28.174  10.713  1.00 11.06           N  
ATOM    489  CA  GLY L  64      26.692  29.320  11.153  1.00 10.46           C  
ATOM    490  C   GLY L  64      27.430  30.585  10.791  1.00 10.18           C  
ATOM    491  O   GLY L  64      28.644  30.589  10.704  1.00 10.74           O  
ATOM    492  N   SER L  65      26.710  31.673  10.584  1.00  9.96           N  
ATOM    493  CA  SER L  65      27.382  32.946  10.390  1.00 10.93           C  
ATOM    494  C   SER L  65      26.536  34.065  10.968  1.00  9.79           C  
ATOM    495  O   SER L  65      25.343  33.888  11.182  1.00  8.74           O  
ATOM    496  CB  SER L  65      27.576  33.190   8.906  1.00 12.29           C  
ATOM    497  OG  SER L  65      26.311  33.076   8.307  1.00 15.85           O  
ATOM    498  N   GLY L  66      27.135  35.243  11.077  1.00 10.07           N  
ATOM    499  CA  GLY L  66      26.412  36.391  11.579  1.00 10.71           C  
ATOM    500  C   GLY L  66      27.148  36.991  12.769  1.00 11.58           C  
ATOM    501  O   GLY L  66      28.063  36.364  13.360  1.00 10.95           O  
ATOM    502  N   SER L  67      26.909  38.284  12.957  1.00 12.23           N  
ATOM    503  CA  SER L  67      27.383  39.031  14.121  1.00 13.48           C  
ATOM    504  C   SER L  67      26.608  40.346  14.204  1.00 13.61           C  
ATOM    505  O   SER L  67      26.467  41.063  13.199  1.00 15.11           O  
ATOM    506  CB  SER L  67      28.890  39.287  14.052  1.00 13.21           C  
ATOM    507  OG  SER L  67      29.302  40.001  15.209  1.00 15.43           O  
ATOM    508  N   GLY L  68      25.923  40.535  15.328  1.00 11.50           N  
ATOM    509  CA  GLY L  68      25.095  41.695  15.507  1.00  8.54           C  
ATOM    510  C   GLY L  68      23.674  41.281  15.807  1.00 10.40           C  
ATOM    511  O   GLY L  68      23.337  40.944  16.957  1.00  9.73           O  
ATOM    512  N   THR L  69      22.832  41.317  14.780  1.00  9.94           N  
ATOM    513  CA  THR L  69      21.440  40.996  14.920  1.00 12.24           C  
ATOM    514  C   THR L  69      20.992  39.862  13.990  1.00 13.43           C  
ATOM    515  O   THR L  69      19.931  39.269  14.202  1.00 14.95           O  
ATOM    516  CB  THR L  69      20.579  42.241  14.645  1.00 13.84           C  
ATOM    517  OG1 THR L  69      20.877  42.751  13.338  1.00 15.92           O  
ATOM    518  CG2 THR L  69      20.900  43.337  15.663  1.00 14.77           C  
ATOM    519  N   ASP L  70      21.751  39.560  12.949  1.00 13.44           N  
ATOM    520  CA  ASP L  70      21.196  38.660  11.936  1.00 14.89           C  
ATOM    521  C   ASP L  70      22.047  37.415  11.836  1.00 12.72           C  
ATOM    522  O   ASP L  70      23.250  37.506  11.621  1.00 12.95           O  
ATOM    523  CB  ASP L  70      21.127  39.363  10.578  1.00 18.59           C  
ATOM    524  CG  ASP L  70      19.907  40.258  10.451  1.00 23.40           C  
ATOM    525  OD1 ASP L  70      19.940  41.412  10.928  1.00 26.33           O  
ATOM    526  OD2 ASP L  70      18.882  39.795   9.917  1.00 27.87           O  
ATOM    527  N   PHE L  71      21.463  36.278  12.181  1.00 11.10           N  
ATOM    528  CA  PHE L  71      22.249  35.061  12.264  1.00 10.45           C  
ATOM    529  C   PHE L  71      21.694  33.970  11.332  1.00  9.54           C  
ATOM    530  O   PHE L  71      20.493  33.862  11.140  1.00  9.45           O  
ATOM    531  CB  PHE L  71      22.327  34.575  13.730  1.00  9.45           C  
ATOM    532  CG  PHE L  71      22.989  35.562  14.661  1.00  8.74           C  
ATOM    533  CD1 PHE L  71      24.355  35.601  14.778  1.00  5.74           C  
ATOM    534  CD2 PHE L  71      22.233  36.523  15.335  1.00  7.52           C  
ATOM    535  CE1 PHE L  71      24.965  36.572  15.523  1.00  6.61           C  
ATOM    536  CE2 PHE L  71      22.840  37.479  16.082  1.00  4.37           C  
ATOM    537  CZ  PHE L  71      24.195  37.508  16.177  1.00  5.62           C  
ATOM    538  N   THR L  72      22.579  33.223  10.693  1.00  9.77           N  
ATOM    539  CA  THR L  72      22.101  32.188   9.818  1.00 12.62           C  
ATOM    540  C   THR L  72      22.761  30.865  10.141  1.00 11.77           C  
ATOM    541  O   THR L  72      23.952  30.815  10.419  1.00 11.76           O  
ATOM    542  CB  THR L  72      22.321  32.581   8.315  1.00 14.90           C  
ATOM    543  OG1 THR L  72      21.591  33.788   8.036  1.00 16.29           O  
ATOM    544  CG2 THR L  72      21.755  31.492   7.366  1.00 16.59           C  
ATOM    545  N   LEU L  73      21.938  29.833  10.279  1.00 11.00           N  
ATOM    546  CA  LEU L  73      22.443  28.469  10.318  1.00 11.69           C  
ATOM    547  C   LEU L  73      22.292  27.907   8.910  1.00 11.66           C  
ATOM    548  O   LEU L  73      21.181  27.855   8.390  1.00 12.08           O  
ATOM    549  CB  LEU L  73      21.611  27.606  11.298  1.00 11.27           C  
ATOM    550  CG  LEU L  73      21.938  26.103  11.320  1.00 11.18           C  
ATOM    551  CD1 LEU L  73      23.392  25.897  11.752  1.00 10.39           C  
ATOM    552  CD2 LEU L  73      20.964  25.379  12.234  1.00 12.29           C  
ATOM    553  N   SER L  74      23.363  27.357   8.363  1.00 12.46           N  
ATOM    554  CA  SER L  74      23.285  26.753   7.037  1.00 15.03           C  
ATOM    555  C   SER L  74      23.565  25.262   7.093  1.00 14.99           C  
ATOM    556  O   SER L  74      24.536  24.827   7.724  1.00 14.33           O  
ATOM    557  CB  SER L  74      24.295  27.418   6.105  1.00 15.49           C  
ATOM    558  OG  SER L  74      23.770  28.664   5.673  1.00 21.74           O  
ATOM    559  N   ILE L  75      22.672  24.477   6.509  1.00 16.02           N  
ATOM    560  CA  ILE L  75      23.034  23.114   6.149  1.00 18.70           C  
ATOM    561  C   ILE L  75      23.185  22.983   4.625  1.00 20.37           C  
ATOM    562  O   ILE L  75      22.253  23.192   3.846  1.00 19.56           O  
ATOM    563  CB  ILE L  75      22.027  22.078   6.673  1.00 17.86           C  
ATOM    564  CG1 ILE L  75      21.601  22.432   8.101  1.00 17.63           C  
ATOM    565  CG2 ILE L  75      22.662  20.699   6.620  1.00 15.92           C  
ATOM    566  CD1 ILE L  75      20.249  21.913   8.479  1.00 16.61           C  
ATOM    567  N   ASN L  76      24.415  22.780   4.215  1.00 23.28           N  
ATOM    568  CA  ASN L  76      24.719  22.748   2.814  1.00 27.82           C  
ATOM    569  C   ASN L  76      24.743  21.283   2.407  1.00 27.92           C  
ATOM    570  O   ASN L  76      25.674  20.562   2.781  1.00 30.14           O  
ATOM    571  CB  ASN L  76      26.074  23.412   2.589  1.00 30.99           C  
ATOM    572  CG  ASN L  76      26.923  22.651   1.627  1.00 35.83           C  
ATOM    573  OD1 ASN L  76      27.834  21.915   2.054  1.00 38.69           O  
ATOM    574  ND2 ASN L  76      26.474  22.597   0.358  1.00 37.73           N  
ATOM    575  N   SER L  77      23.639  20.825   1.830  1.00 26.81           N  
ATOM    576  CA  SER L  77      23.459  19.431   1.436  1.00 26.05           C  
ATOM    577  C   SER L  77      22.872  18.576   2.568  1.00 24.76           C  
ATOM    578  O   SER L  77      23.552  17.756   3.184  1.00 24.04           O  
ATOM    579  CB  SER L  77      24.783  18.841   0.921  1.00 26.05           C  
ATOM    580  OG  SER L  77      24.548  17.738   0.069  1.00 28.43           O  
ATOM    581  N   VAL L  78      21.563  18.692   2.740  1.00 23.41           N  
ATOM    582  CA  VAL L  78      20.858  18.023   3.821  1.00 22.66           C  
ATOM    583  C   VAL L  78      20.809  16.495   3.668  1.00 21.91           C  
ATOM    584  O   VAL L  78      20.634  15.952   2.562  1.00 20.92           O  
ATOM    585  CB  VAL L  78      19.407  18.570   3.973  1.00 22.97           C  
ATOM    586  CG1 VAL L  78      19.432  20.027   4.302  1.00 24.05           C  
ATOM    587  CG2 VAL L  78      18.634  18.383   2.698  1.00 24.80           C  
ATOM    588  N   GLU L  79      20.903  15.815   4.806  1.00 20.72           N  
ATOM    589  CA  GLU L  79      20.731  14.368   4.883  1.00 19.71           C  
ATOM    590  C   GLU L  79      19.417  14.116   5.602  1.00 18.27           C  
ATOM    591  O   GLU L  79      18.903  15.011   6.275  1.00 17.76           O  
ATOM    592  CB  GLU L  79      21.895  13.750   5.643  1.00 20.45           C  
ATOM    593  CG  GLU L  79      23.255  14.113   5.066  1.00 22.34           C  
ATOM    594  CD  GLU L  79      23.595  13.301   3.830  1.00 25.54           C  
ATOM    595  OE1 GLU L  79      23.025  12.205   3.664  1.00 27.69           O  
ATOM    596  OE2 GLU L  79      24.419  13.759   3.006  1.00 27.48           O  
ATOM    597  N   THR L  80      18.769  12.990   5.329  1.00 16.65           N  
ATOM    598  CA  THR L  80      17.479  12.755   5.955  1.00 16.00           C  
ATOM    599  C   THR L  80      17.666  12.676   7.478  1.00 15.21           C  
ATOM    600  O   THR L  80      16.750  12.942   8.219  1.00 15.07           O  
ATOM    601  CB  THR L  80      16.819  11.449   5.457  1.00 16.59           C  
ATOM    602  OG1 THR L  80      17.690  10.354   5.718  1.00 17.68           O  
ATOM    603  CG2 THR L  80      16.575  11.487   3.973  1.00 16.73           C  
ATOM    604  N   GLU L  81      18.878  12.397   7.942  1.00 15.12           N  
ATOM    605  CA  GLU L  81      19.111  12.336   9.378  1.00 16.80           C  
ATOM    606  C   GLU L  81      19.090  13.709  10.053  1.00 18.24           C  
ATOM    607  O   GLU L  81      19.245  13.803  11.274  1.00 20.14           O  
ATOM    608  CB  GLU L  81      20.425  11.611   9.691  1.00 14.35           C  
ATOM    609  CG  GLU L  81      21.693  12.343   9.325  1.00 14.18           C  
ATOM    610  CD  GLU L  81      22.908  11.433   9.327  1.00 14.99           C  
ATOM    611  OE1 GLU L  81      22.804  10.308   9.840  1.00 17.05           O  
ATOM    612  OE2 GLU L  81      23.998  11.854   8.899  1.00 15.20           O  
ATOM    613  N   ASP L  82      18.852  14.764   9.277  1.00 17.76           N  
ATOM    614  CA  ASP L  82      18.942  16.137   9.776  1.00 16.69           C  
ATOM    615  C   ASP L  82      17.566  16.638  10.137  1.00 16.16           C  
ATOM    616  O   ASP L  82      17.408  17.759  10.596  1.00 17.49           O  
ATOM    617  CB  ASP L  82      19.574  17.049   8.724  1.00 15.58           C  
ATOM    618  CG  ASP L  82      21.038  16.829   8.584  1.00 16.85           C  
ATOM    619  OD1 ASP L  82      21.639  16.260   9.519  1.00 15.96           O  
ATOM    620  OD2 ASP L  82      21.614  17.209   7.531  1.00 18.61           O  
ATOM    621  N   LEU L  83      16.564  15.816   9.879  1.00 15.32           N  
ATOM    622  CA  LEU L  83      15.226  16.089  10.326  1.00 16.87           C  
ATOM    623  C   LEU L  83      15.254  16.370  11.859  1.00 17.30           C  
ATOM    624  O   LEU L  83      15.743  15.537  12.648  1.00 18.14           O  
ATOM    625  CB  LEU L  83      14.341  14.882  10.001  1.00 17.69           C  
ATOM    626  CG  LEU L  83      12.950  14.960  10.609  1.00 20.04           C  
ATOM    627  CD1 LEU L  83      12.068  15.725   9.711  1.00 21.56           C  
ATOM    628  CD2 LEU L  83      12.387  13.577  10.821  1.00 21.39           C  
ATOM    629  N   ALA L  84      14.864  17.584  12.251  1.00 15.54           N  
ATOM    630  CA  ALA L  84      14.953  18.041  13.643  1.00 13.42           C  
ATOM    631  C   ALA L  84      14.312  19.415  13.794  1.00 13.32           C  
ATOM    632  O   ALA L  84      13.819  19.997  12.817  1.00 12.96           O  
ATOM    633  CB  ALA L  84      16.410  18.092  14.098  1.00 12.29           C  
ATOM    634  N   VAL L  85      14.191  19.866  15.041  1.00 12.59           N  
ATOM    635  CA  VAL L  85      13.885  21.256  15.343  1.00 11.51           C  
ATOM    636  C   VAL L  85      15.174  21.953  15.792  1.00 11.38           C  
ATOM    637  O   VAL L  85      16.040  21.335  16.455  1.00 11.95           O  
ATOM    638  CB  VAL L  85      12.767  21.349  16.434  1.00 12.60           C  
ATOM    639  CG1 VAL L  85      12.429  22.791  16.752  1.00 12.01           C  
ATOM    640  CG2 VAL L  85      11.512  20.674  15.932  1.00 12.19           C  
ATOM    641  N   TYR L  86      15.436  23.100  15.169  1.00 10.15           N  
ATOM    642  CA  TYR L  86      16.604  23.908  15.471  1.00  9.01           C  
ATOM    643  C   TYR L  86      16.198  25.179  16.217  1.00  9.57           C  
ATOM    644  O   TYR L  86      15.140  25.754  15.955  1.00 10.03           O  
ATOM    645  CB  TYR L  86      17.333  24.252  14.185  1.00  8.92           C  
ATOM    646  CG  TYR L  86      17.784  23.021  13.448  1.00  8.86           C  
ATOM    647  CD1 TYR L  86      16.891  22.247  12.717  1.00  9.56           C  
ATOM    648  CD2 TYR L  86      19.094  22.612  13.522  1.00  8.65           C  
ATOM    649  CE1 TYR L  86      17.323  21.091  12.047  1.00  9.36           C  
ATOM    650  CE2 TYR L  86      19.524  21.461  12.907  1.00  9.90           C  
ATOM    651  CZ  TYR L  86      18.642  20.706  12.159  1.00 10.24           C  
ATOM    652  OH  TYR L  86      19.129  19.565  11.545  1.00 11.61           O  
ATOM    653  N   PHE L  87      17.021  25.563  17.195  1.00  9.98           N  
ATOM    654  CA  PHE L  87      16.763  26.701  18.084  1.00  8.08           C  
ATOM    655  C   PHE L  87      18.052  27.487  18.178  1.00  6.91           C  
ATOM    656  O   PHE L  87      19.135  26.938  18.290  1.00  6.46           O  
ATOM    657  CB  PHE L  87      16.397  26.219  19.496  1.00  7.26           C  
ATOM    658  CG  PHE L  87      14.971  25.771  19.646  1.00  6.87           C  
ATOM    659  CD1 PHE L  87      13.977  26.675  19.991  1.00  8.58           C  
ATOM    660  CD2 PHE L  87      14.651  24.429  19.588  1.00  6.92           C  
ATOM    661  CE1 PHE L  87      12.688  26.259  20.280  1.00  6.93           C  
ATOM    662  CE2 PHE L  87      13.388  24.006  19.856  1.00  6.15           C  
ATOM    663  CZ  PHE L  87      12.397  24.913  20.199  1.00  8.09           C  
ATOM    664  N   CYS L  88      17.906  28.789  18.260  1.00  8.41           N  
ATOM    665  CA  CYS L  88      19.003  29.659  18.647  1.00  9.69           C  
ATOM    666  C   CYS L  88      18.747  30.210  20.063  1.00  7.70           C  
ATOM    667  O   CYS L  88      17.613  30.389  20.477  1.00  8.48           O  
ATOM    668  CB  CYS L  88      19.138  30.807  17.631  1.00  9.67           C  
ATOM    669  SG  CYS L  88      17.627  31.782  17.486  1.00 13.45           S  
ATOM    670  N   GLN L  89      19.819  30.497  20.778  1.00  9.08           N  
ATOM    671  CA  GLN L  89      19.736  31.052  22.136  1.00 10.33           C  
ATOM    672  C   GLN L  89      20.792  32.159  22.177  1.00 10.08           C  
ATOM    673  O   GLN L  89      21.928  31.971  21.720  1.00  8.83           O  
ATOM    674  CB  GLN L  89      20.099  29.989  23.199  1.00 10.32           C  
ATOM    675  CG  GLN L  89      20.003  30.477  24.657  1.00 11.60           C  
ATOM    676  CD  GLN L  89      20.531  29.473  25.718  1.00 11.61           C  
ATOM    677  OE1 GLN L  89      21.391  28.628  25.458  1.00 12.98           O  
ATOM    678  NE2 GLN L  89      20.049  29.626  26.931  1.00 13.49           N  
ATOM    679  N   GLN L  90      20.434  33.310  22.735  1.00 11.36           N  
ATOM    680  CA  GLN L  90      21.470  34.298  22.965  1.00 12.38           C  
ATOM    681  C   GLN L  90      21.990  34.122  24.380  1.00 12.47           C  
ATOM    682  O   GLN L  90      21.267  33.749  25.314  1.00 13.03           O  
ATOM    683  CB  GLN L  90      21.000  35.747  22.689  1.00 12.18           C  
ATOM    684  CG  GLN L  90      19.828  36.270  23.545  1.00 12.01           C  
ATOM    685  CD  GLN L  90      20.275  37.003  24.828  1.00 10.24           C  
ATOM    686  OE1 GLN L  90      19.445  37.348  25.658  1.00 13.03           O  
ATOM    687  NE2 GLN L  90      21.559  37.254  24.971  1.00  8.14           N  
ATOM    688  N   VAL L  91      23.238  34.495  24.522  1.00 11.75           N  
ATOM    689  CA  VAL L  91      23.994  34.218  25.698  1.00 13.09           C  
ATOM    690  C   VAL L  91      24.772  35.502  25.961  1.00 13.63           C  
ATOM    691  O   VAL L  91      25.821  35.497  26.564  1.00 14.92           O  
ATOM    692  CB  VAL L  91      24.810  32.972  25.374  1.00 12.41           C  
ATOM    693  CG1 VAL L  91      26.274  33.226  25.265  1.00 10.81           C  
ATOM    694  CG2 VAL L  91      24.401  31.879  26.292  1.00 14.32           C  
ATOM    695  N   SER L  92      24.123  36.627  25.645  1.00 14.27           N  
ATOM    696  CA  SER L  92      24.720  37.957  25.740  1.00 13.54           C  
ATOM    697  C   SER L  92      24.345  38.698  27.041  1.00 13.88           C  
ATOM    698  O   SER L  92      25.160  39.417  27.625  1.00 14.36           O  
ATOM    699  CB  SER L  92      24.268  38.811  24.569  1.00 12.53           C  
ATOM    700  OG  SER L  92      25.085  39.954  24.497  1.00 12.21           O  
ATOM    701  N   GLU L  93      23.068  38.654  27.380  1.00 13.86           N  
ATOM    702  CA  GLU L  93      22.573  39.335  28.545  1.00 14.14           C  
ATOM    703  C   GLU L  93      21.432  38.513  29.140  1.00 15.47           C  
ATOM    704  O   GLU L  93      20.592  37.991  28.392  1.00 16.18           O  
ATOM    705  CB  GLU L  93      22.058  40.703  28.146  1.00 13.35           C  
ATOM    706  CG  GLU L  93      21.858  41.650  29.317  1.00 11.75           C  
ATOM    707  CD  GLU L  93      21.491  43.034  28.844  1.00  9.63           C  
ATOM    708  OE1 GLU L  93      20.357  43.223  28.387  1.00  8.35           O  
ATOM    709  OE2 GLU L  93      22.350  43.922  28.906  1.00 10.54           O  
ATOM    710  N   TRP L  94      21.372  38.442  30.469  1.00 14.92           N  
ATOM    711  CA  TRP L  94      20.292  37.746  31.158  1.00 15.71           C  
ATOM    712  C   TRP L  94      18.990  38.515  31.002  1.00 15.29           C  
ATOM    713  O   TRP L  94      18.977  39.730  31.132  1.00 15.78           O  
ATOM    714  CB  TRP L  94      20.633  37.605  32.650  1.00 18.16           C  
ATOM    715  CG  TRP L  94      19.622  36.814  33.405  1.00 21.42           C  
ATOM    716  CD1 TRP L  94      18.581  37.294  34.127  1.00 22.72           C  
ATOM    717  CD2 TRP L  94      19.489  35.391  33.398  1.00 24.28           C  
ATOM    718  NE1 TRP L  94      17.799  36.254  34.580  1.00 25.01           N  
ATOM    719  CE2 TRP L  94      18.338  35.076  34.149  1.00 24.35           C  
ATOM    720  CE3 TRP L  94      20.215  34.350  32.788  1.00 26.53           C  
ATOM    721  CZ2 TRP L  94      17.894  33.776  34.326  1.00 26.49           C  
ATOM    722  CZ3 TRP L  94      19.768  33.051  32.949  1.00 27.53           C  
ATOM    723  CH2 TRP L  94      18.616  32.776  33.719  1.00 27.80           C  
ATOM    724  N   PRO L  95      17.857  37.814  30.818  1.00 15.05           N  
ATOM    725  CA  PRO L  95      17.726  36.360  30.658  1.00 15.43           C  
ATOM    726  C   PRO L  95      18.180  35.868  29.273  1.00 17.37           C  
ATOM    727  O   PRO L  95      18.070  36.594  28.280  1.00 18.18           O  
ATOM    728  CB  PRO L  95      16.239  36.117  30.890  1.00 14.27           C  
ATOM    729  CG  PRO L  95      15.602  37.366  30.540  1.00 12.86           C  
ATOM    730  CD  PRO L  95      16.546  38.469  30.854  1.00 13.32           C  
ATOM    731  N   PHE L  96      18.752  34.671  29.227  1.00 17.46           N  
ATOM    732  CA  PHE L  96      19.293  34.132  27.991  1.00 18.22           C  
ATOM    733  C   PHE L  96      18.191  33.536  27.126  1.00 17.77           C  
ATOM    734  O   PHE L  96      17.912  32.342  27.209  1.00 20.41           O  
ATOM    735  CB  PHE L  96      20.341  33.078  28.316  1.00 18.89           C  
ATOM    736  CG  PHE L  96      21.607  33.644  28.883  1.00 21.98           C  
ATOM    737  CD1 PHE L  96      21.870  35.010  28.813  1.00 21.53           C  
ATOM    738  CD2 PHE L  96      22.547  32.817  29.481  1.00 23.85           C  
ATOM    739  CE1 PHE L  96      23.019  35.537  29.312  1.00 21.58           C  
ATOM    740  CE2 PHE L  96      23.724  33.363  29.998  1.00 25.07           C  
ATOM    741  CZ  PHE L  96      23.951  34.725  29.909  1.00 23.55           C  
ATOM    742  N   THR L  97      17.575  34.368  26.296  1.00 16.39           N  
ATOM    743  CA  THR L  97      16.358  34.038  25.546  1.00 14.14           C  
ATOM    744  C   THR L  97      16.608  33.104  24.369  1.00 12.05           C  
ATOM    745  O   THR L  97      17.731  32.949  23.914  1.00 10.86           O  
ATOM    746  CB  THR L  97      15.722  35.310  25.018  1.00 13.85           C  
ATOM    747  OG1 THR L  97      16.744  36.102  24.397  1.00 14.08           O  
ATOM    748  CG2 THR L  97      15.142  36.103  26.179  1.00 13.48           C  
ATOM    749  N   PHE L  98      15.534  32.485  23.900  1.00 12.06           N  
ATOM    750  CA  PHE L  98      15.576  31.488  22.834  1.00 13.12           C  
ATOM    751  C   PHE L  98      14.655  31.963  21.683  1.00 12.92           C  
ATOM    752  O   PHE L  98      13.615  32.589  21.930  1.00 11.98           O  
ATOM    753  CB  PHE L  98      15.062  30.124  23.346  1.00 12.33           C  
ATOM    754  CG  PHE L  98      16.002  29.415  24.298  1.00 12.87           C  
ATOM    755  CD1 PHE L  98      15.886  29.588  25.665  1.00 13.96           C  
ATOM    756  CD2 PHE L  98      16.888  28.464  23.838  1.00 13.71           C  
ATOM    757  CE1 PHE L  98      16.636  28.844  26.543  1.00 13.15           C  
ATOM    758  CE2 PHE L  98      17.637  27.712  24.719  1.00 14.72           C  
ATOM    759  CZ  PHE L  98      17.509  27.915  26.078  1.00 14.44           C  
ATOM    760  N   GLY L  99      15.066  31.680  20.436  1.00 13.46           N  
ATOM    761  CA  GLY L  99      14.174  31.795  19.291  1.00 10.66           C  
ATOM    762  C   GLY L  99      12.984  30.842  19.392  1.00 11.32           C  
ATOM    763  O   GLY L  99      12.938  29.960  20.254  1.00 12.19           O  
ATOM    764  N   GLY L 100      12.018  31.001  18.493  1.00 10.64           N  
ATOM    765  CA  GLY L 100      10.851  30.150  18.491  1.00  9.78           C  
ATOM    766  C   GLY L 100      10.993  28.752  17.905  1.00 10.16           C  
ATOM    767  O   GLY L 100      10.033  27.967  17.984  1.00  9.95           O  
ATOM    768  N   GLY L 101      12.171  28.421  17.387  1.00  9.67           N  
ATOM    769  CA  GLY L 101      12.399  27.109  16.832  1.00 12.47           C  
ATOM    770  C   GLY L 101      12.070  27.010  15.340  1.00 13.70           C  
ATOM    771  O   GLY L 101      11.223  27.736  14.823  1.00 13.57           O  
ATOM    772  N   THR L 102      12.790  26.146  14.643  1.00 14.24           N  
ATOM    773  CA  THR L 102      12.497  25.852  13.248  1.00 15.12           C  
ATOM    774  C   THR L 102      12.558  24.339  13.035  1.00 15.92           C  
ATOM    775  O   THR L 102      13.613  23.733  13.218  1.00 14.72           O  
ATOM    776  CB  THR L 102      13.537  26.500  12.332  1.00 14.20           C  
ATOM    777  OG1 THR L 102      13.357  27.917  12.369  1.00 13.05           O  
ATOM    778  CG2 THR L 102      13.399  25.976  10.878  1.00 12.99           C  
ATOM    779  N   LYS L 103      11.463  23.781  12.527  1.00 16.96           N  
ATOM    780  CA  LYS L 103      11.369  22.362  12.161  1.00 18.80           C  
ATOM    781  C   LYS L 103      11.784  22.098  10.698  1.00 19.01           C  
ATOM    782  O   LYS L 103      11.060  22.479   9.767  1.00 18.48           O  
ATOM    783  CB  LYS L 103       9.929  21.882  12.383  1.00 19.94           C  
ATOM    784  CG  LYS L 103       9.539  20.658  11.580  1.00 23.91           C  
ATOM    785  CD  LYS L 103      10.470  19.496  11.861  1.00 28.21           C  
ATOM    786  CE  LYS L 103       9.816  18.503  12.784  1.00 31.18           C  
ATOM    787  NZ  LYS L 103       8.448  18.180  12.254  1.00 34.23           N  
ATOM    788  N   LEU L 104      12.920  21.428  10.519  1.00 18.40           N  
ATOM    789  CA  LEU L 104      13.395  20.986   9.210  1.00 20.30           C  
ATOM    790  C   LEU L 104      12.697  19.678   8.814  1.00 22.21           C  
ATOM    791  O   LEU L 104      12.947  18.639   9.428  1.00 22.04           O  
ATOM    792  CB  LEU L 104      14.903  20.732   9.258  1.00 19.86           C  
ATOM    793  CG  LEU L 104      15.749  20.901   7.985  1.00 21.04           C  
ATOM    794  CD1 LEU L 104      16.668  19.744   7.793  1.00 19.12           C  
ATOM    795  CD2 LEU L 104      14.837  21.071   6.768  1.00 21.17           C  
ATOM    796  N   GLU L 105      11.884  19.715   7.766  1.00 23.79           N  
ATOM    797  CA  GLU L 105      11.188  18.525   7.277  1.00 27.22           C  
ATOM    798  C   GLU L 105      11.801  18.082   5.966  1.00 27.94           C  
ATOM    799  O   GLU L 105      12.201  18.907   5.156  1.00 28.02           O  
ATOM    800  CB  GLU L 105       9.705  18.816   7.077  1.00 29.42           C  
ATOM    801  CG  GLU L 105       8.983  19.163   8.364  1.00 35.64           C  
ATOM    802  CD  GLU L 105       7.467  19.208   8.209  1.00 40.07           C  
ATOM    803  OE1 GLU L 105       6.974  19.436   7.066  1.00 41.82           O  
ATOM    804  OE2 GLU L 105       6.758  19.002   9.240  1.00 42.82           O  
ATOM    805  N   ILE L 106      12.005  16.789   5.800  1.00 29.15           N  
ATOM    806  CA  ILE L 106      12.699  16.344   4.613  1.00 32.23           C  
ATOM    807  C   ILE L 106      11.812  15.530   3.681  1.00 33.90           C  
ATOM    808  O   ILE L 106      11.282  14.506   4.075  1.00 35.01           O  
ATOM    809  CB  ILE L 106      13.967  15.558   4.958  1.00 31.71           C  
ATOM    810  CG1 ILE L 106      14.792  16.313   6.014  1.00 31.53           C  
ATOM    811  CG2 ILE L 106      14.759  15.307   3.674  1.00 31.92           C  
ATOM    812  CD1 ILE L 106      16.042  16.992   5.488  1.00 32.30           C  
ATOM    813  N   LYS L 107      11.416  16.164   2.589  1.00 36.15           N  
ATOM    814  CA  LYS L 107      10.715  15.512   1.494  1.00 38.67           C  
ATOM    815  C   LYS L 107      11.499  14.272   1.045  1.00 39.40           C  
ATOM    816  O   LYS L 107      10.939  13.158   1.149  1.00 40.40           O  
ATOM    817  CB  LYS L 107      10.590  16.475   0.303  1.00 39.92           C  
ATOM    818  CG  LYS L 107       9.584  17.616   0.447  1.00 42.12           C  
ATOM    819  CD  LYS L 107       9.764  18.679  -0.661  1.00 42.86           C  
ATOM    820  CE  LYS L 107       9.574  18.090  -2.077  1.00 44.04           C  
ATOM    821  NZ  LYS L 107      10.280  18.841  -3.185  1.00 44.02           N  
ATOM    822  OXT LYS L 107      12.652  14.428   0.575  1.00 39.88           O  
TER     823      LYS L 107                                                      
ATOM    824  N   ASP L   1       1.165  34.704  20.826  1.00 32.36           N  
ATOM    825  CA  ASP L   1       2.358  33.964  21.336  1.00 31.75           C  
ATOM    826  C   ASP L   1       2.050  33.615  22.789  1.00 31.63           C  
ATOM    827  O   ASP L   1       1.544  34.466  23.536  1.00 32.65           O  
ATOM    828  CB  ASP L   1       3.607  34.845  21.250  1.00 31.24           C  
ATOM    829  CG  ASP L   1       4.064  35.091  19.810  1.00 31.58           C  
ATOM    830  OD1 ASP L   1       3.239  34.955  18.874  1.00 32.41           O  
ATOM    831  OD2 ASP L   1       5.264  35.392  19.612  1.00 31.25           O  
ATOM    832  N   ILE L   2       2.128  32.331  23.121  1.00 30.24           N  
ATOM    833  CA  ILE L   2       1.781  31.903  24.466  1.00 28.27           C  
ATOM    834  C   ILE L   2       2.875  32.384  25.411  1.00 27.83           C  
ATOM    835  O   ILE L   2       4.058  32.344  25.083  1.00 27.66           O  
ATOM    836  CB  ILE L   2       1.640  30.380  24.535  1.00 27.32           C  
ATOM    837  CG1 ILE L   2       0.499  29.932  23.623  1.00 24.85           C  
ATOM    838  CG2 ILE L   2       1.459  29.918  25.997  1.00 27.45           C  
ATOM    839  CD1 ILE L   2       0.325  28.457  23.576  1.00 23.02           C  
ATOM    840  N   GLU L   3       2.472  32.978  26.517  1.00 27.49           N  
ATOM    841  CA  GLU L   3       3.449  33.508  27.446  1.00 28.15           C  
ATOM    842  C   GLU L   3       3.529  32.686  28.728  1.00 25.53           C  
ATOM    843  O   GLU L   3       2.524  32.190  29.227  1.00 24.62           O  
ATOM    844  CB  GLU L   3       3.133  34.969  27.745  1.00 31.73           C  
ATOM    845  CG  GLU L   3       3.100  35.793  26.470  1.00 39.36           C  
ATOM    846  CD  GLU L   3       2.452  37.153  26.653  1.00 42.93           C  
ATOM    847  OE1 GLU L   3       1.190  37.224  26.627  1.00 45.15           O  
ATOM    848  OE2 GLU L   3       3.212  38.146  26.805  1.00 45.22           O  
ATOM    849  N   LEU L   4       4.761  32.488  29.190  1.00 24.21           N  
ATOM    850  CA  LEU L   4       5.087  31.647  30.338  1.00 21.61           C  
ATOM    851  C   LEU L   4       5.688  32.486  31.467  1.00 19.45           C  
ATOM    852  O   LEU L   4       6.711  33.115  31.276  1.00 17.72           O  
ATOM    853  CB  LEU L   4       6.093  30.583  29.901  1.00 21.14           C  
ATOM    854  CG  LEU L   4       5.616  29.204  29.415  1.00 21.71           C  
ATOM    855  CD1 LEU L   4       4.155  29.176  29.040  1.00 21.02           C  
ATOM    856  CD2 LEU L   4       6.494  28.767  28.274  1.00 20.18           C  
ATOM    857  N   THR L   5       5.028  32.509  32.624  1.00 18.83           N  
ATOM    858  CA  THR L   5       5.519  33.252  33.791  1.00 18.83           C  
ATOM    859  C   THR L   5       6.002  32.266  34.855  1.00 16.91           C  
ATOM    860  O   THR L   5       5.261  31.384  35.278  1.00 13.78           O  
ATOM    861  CB  THR L   5       4.405  34.153  34.439  1.00 20.71           C  
ATOM    862  OG1 THR L   5       3.671  34.845  33.425  1.00 22.99           O  
ATOM    863  CG2 THR L   5       5.017  35.190  35.346  1.00 20.19           C  
ATOM    864  N   GLN L   6       7.289  32.346  35.165  1.00 17.02           N  
ATOM    865  CA  GLN L   6       7.896  31.535  36.215  1.00 18.28           C  
ATOM    866  C   GLN L   6       7.943  32.291  37.540  1.00 17.91           C  
ATOM    867  O   GLN L   6       8.141  33.510  37.570  1.00 17.57           O  
ATOM    868  CB  GLN L   6       9.331  31.120  35.847  1.00 17.24           C  
ATOM    869  CG  GLN L   6       9.367  30.109  34.748  1.00 19.61           C  
ATOM    870  CD  GLN L   6      10.725  29.583  34.503  1.00 17.53           C  
ATOM    871  OE1 GLN L   6      11.127  29.433  33.368  1.00 18.65           O  
ATOM    872  NE2 GLN L   6      11.451  29.288  35.565  1.00 18.11           N  
ATOM    873  N   SER L   7       7.959  31.513  38.616  1.00 17.80           N  
ATOM    874  CA  SER L   7       8.058  32.035  39.959  1.00 17.23           C  
ATOM    875  C   SER L   7       8.721  30.964  40.794  1.00 16.01           C  
ATOM    876  O   SER L   7       8.476  29.771  40.588  1.00 14.67           O  
ATOM    877  CB  SER L   7       6.661  32.338  40.493  1.00 18.65           C  
ATOM    878  OG  SER L   7       6.758  33.048  41.707  1.00 20.01           O  
ATOM    879  N   PRO L   8       9.640  31.367  41.694  1.00 16.39           N  
ATOM    880  CA  PRO L   8      10.052  32.764  41.878  1.00 15.53           C  
ATOM    881  C   PRO L   8      11.124  33.090  40.866  1.00 15.07           C  
ATOM    882  O   PRO L   8      11.454  32.253  40.042  1.00 15.03           O  
ATOM    883  CB  PRO L   8      10.606  32.765  43.295  1.00 15.41           C  
ATOM    884  CG  PRO L   8      11.280  31.420  43.387  1.00 14.60           C  
ATOM    885  CD  PRO L   8      10.306  30.491  42.688  1.00 16.18           C  
ATOM    886  N   ALA L   9      11.764  34.242  41.013  1.00 15.00           N  
ATOM    887  CA  ALA L   9      12.876  34.608  40.138  1.00 14.58           C  
ATOM    888  C   ALA L   9      14.122  33.890  40.616  1.00 15.17           C  
ATOM    889  O   ALA L   9      14.851  33.279  39.825  1.00 13.86           O  
ATOM    890  CB  ALA L   9      13.092  36.131  40.153  1.00 13.99           C  
ATOM    891  N   THR L  10      14.400  34.028  41.910  1.00 15.43           N  
ATOM    892  CA  THR L  10      15.495  33.318  42.536  1.00 16.32           C  
ATOM    893  C   THR L  10      14.982  32.687  43.811  1.00 14.92           C  
ATOM    894  O   THR L  10      14.001  33.164  44.386  1.00 13.63           O  
ATOM    895  CB  THR L  10      16.678  34.258  42.921  1.00 19.16           C  
ATOM    896  OG1 THR L  10      16.277  35.137  43.985  1.00 20.65           O  
ATOM    897  CG2 THR L  10      17.133  35.066  41.746  1.00 20.00           C  
ATOM    898  N   LEU L  11      15.687  31.662  44.277  1.00 15.28           N  
ATOM    899  CA  LEU L  11      15.450  31.102  45.601  1.00 16.60           C  
ATOM    900  C   LEU L  11      16.696  30.423  46.170  1.00 17.16           C  
ATOM    901  O   LEU L  11      17.644  30.131  45.432  1.00 15.91           O  
ATOM    902  CB  LEU L  11      14.212  30.170  45.599  1.00 17.94           C  
ATOM    903  CG  LEU L  11      14.111  28.717  45.087  1.00 19.24           C  
ATOM    904  CD1 LEU L  11      12.683  28.239  45.336  1.00 20.65           C  
ATOM    905  CD2 LEU L  11      14.389  28.626  43.606  1.00 19.92           C  
ATOM    906  N   SER L  12      16.789  30.432  47.499  1.00 17.19           N  
ATOM    907  CA  SER L  12      17.920  29.847  48.204  1.00 18.73           C  
ATOM    908  C   SER L  12      17.432  28.896  49.240  1.00 18.38           C  
ATOM    909  O   SER L  12      16.413  29.148  49.882  1.00 17.63           O  
ATOM    910  CB  SER L  12      18.738  30.915  48.897  1.00 19.34           C  
ATOM    911  OG  SER L  12      19.036  31.930  47.962  1.00 26.30           O  
ATOM    912  N   VAL L  13      18.129  27.772  49.345  1.00 19.19           N  
ATOM    913  CA  VAL L  13      17.868  26.736  50.349  1.00 20.04           C  
ATOM    914  C   VAL L  13      19.222  26.133  50.680  1.00 19.48           C  
ATOM    915  O   VAL L  13      20.219  26.384  50.000  1.00 19.84           O  
ATOM    916  CB  VAL L  13      16.989  25.555  49.805  1.00 21.90           C  
ATOM    917  CG1 VAL L  13      15.491  25.880  49.868  1.00 23.48           C  
ATOM    918  CG2 VAL L  13      17.445  25.148  48.384  1.00 22.53           C  
ATOM    919  N   THR L  14      19.259  25.307  51.707  1.00 19.39           N  
ATOM    920  CA  THR L  14      20.446  24.531  51.982  1.00 17.81           C  
ATOM    921  C   THR L  14      20.212  23.135  51.429  1.00 17.45           C  
ATOM    922  O   THR L  14      19.092  22.755  51.101  1.00 14.96           O  
ATOM    923  CB  THR L  14      20.698  24.461  53.479  1.00 18.34           C  
ATOM    924  OG1 THR L  14      19.488  24.084  54.140  1.00 19.00           O  
ATOM    925  CG2 THR L  14      21.150  25.823  53.997  1.00 18.71           C  
ATOM    926  N   PRO L  15      21.270  22.342  51.331  1.00 18.19           N  
ATOM    927  CA  PRO L  15      21.090  21.069  50.637  1.00 20.08           C  
ATOM    928  C   PRO L  15      20.198  20.192  51.490  1.00 20.19           C  
ATOM    929  O   PRO L  15      20.203  20.326  52.696  1.00 22.18           O  
ATOM    930  CB  PRO L  15      22.506  20.522  50.539  1.00 19.60           C  
ATOM    931  CG  PRO L  15      23.408  21.700  50.816  1.00 19.75           C  
ATOM    932  CD  PRO L  15      22.661  22.561  51.746  1.00 18.73           C  
ATOM    933  N   GLY L  16      19.389  19.348  50.884  1.00 20.16           N  
ATOM    934  CA  GLY L  16      18.541  18.502  51.687  1.00 20.50           C  
ATOM    935  C   GLY L  16      17.117  18.971  51.713  1.00 22.20           C  
ATOM    936  O   GLY L  16      16.230  18.160  51.940  1.00 22.75           O  
ATOM    937  N   ASN L  17      16.882  20.252  51.424  1.00 23.21           N  
ATOM    938  CA  ASN L  17      15.525  20.815  51.364  1.00 24.83           C  
ATOM    939  C   ASN L  17      14.754  20.466  50.093  1.00 24.65           C  
ATOM    940  O   ASN L  17      15.332  20.044  49.126  1.00 25.40           O  
ATOM    941  CB  ASN L  17      15.593  22.334  51.467  1.00 27.32           C  
ATOM    942  CG  ASN L  17      15.580  22.809  52.873  1.00 29.75           C  
ATOM    943  OD1 ASN L  17      16.597  22.728  53.567  1.00 32.03           O  
ATOM    944  ND2 ASN L  17      14.398  23.177  53.362  1.00 30.63           N  
ATOM    945  N   SER L  18      13.475  20.795  50.058  1.00 24.72           N  
ATOM    946  CA  SER L  18      12.654  20.630  48.867  1.00 25.73           C  
ATOM    947  C   SER L  18      12.383  21.992  48.275  1.00 25.50           C  
ATOM    948  O   SER L  18      12.593  22.983  48.958  1.00 26.08           O  
ATOM    949  CB  SER L  18      11.328  19.963  49.219  1.00 26.24           C  
ATOM    950  OG  SER L  18      11.551  18.562  49.299  1.00 30.28           O  
ATOM    951  N   VAL L  19      12.154  22.060  46.964  1.00 24.50           N  
ATOM    952  CA  VAL L  19      11.789  23.328  46.317  1.00 23.69           C  
ATOM    953  C   VAL L  19      10.816  23.034  45.209  1.00 23.68           C  
ATOM    954  O   VAL L  19      10.771  21.915  44.709  1.00 23.39           O  
ATOM    955  CB  VAL L  19      12.997  24.085  45.696  1.00 23.19           C  
ATOM    956  CG1 VAL L  19      14.094  24.271  46.717  1.00 22.81           C  
ATOM    957  CG2 VAL L  19      13.505  23.361  44.461  1.00 21.04           C  
ATOM    958  N   SER L  20       9.934  23.989  44.963  1.00 23.65           N  
ATOM    959  CA  SER L  20       8.991  23.916  43.872  1.00 24.16           C  
ATOM    960  C   SER L  20       9.127  25.193  43.082  1.00 23.26           C  
ATOM    961  O   SER L  20       9.404  26.261  43.657  1.00 24.87           O  
ATOM    962  CB  SER L  20       7.572  23.797  44.394  1.00 24.93           C  
ATOM    963  OG  SER L  20       7.392  22.530  44.999  1.00 29.70           O  
ATOM    964  N   ILE L  21       9.138  25.034  41.765  1.00 21.22           N  
ATOM    965  CA  ILE L  21       9.241  26.137  40.828  1.00 18.58           C  
ATOM    966  C   ILE L  21       8.001  26.085  39.956  1.00 17.64           C  
ATOM    967  O   ILE L  21       7.477  25.020  39.662  1.00 17.15           O  
ATOM    968  CB  ILE L  21      10.547  26.030  39.974  1.00 17.81           C  
ATOM    969  CG1 ILE L  21      11.763  26.205  40.891  1.00 16.92           C  
ATOM    970  CG2 ILE L  21      10.543  27.047  38.837  1.00 14.98           C  
ATOM    971  CD1 ILE L  21      13.097  25.893  40.245  1.00 16.03           C  
ATOM    972  N   SER L  22       7.369  27.233  39.816  1.00 17.48           N  
ATOM    973  CA  SER L  22       6.081  27.278  39.173  1.00 17.51           C  
ATOM    974  C   SER L  22       6.252  27.879  37.777  1.00 17.37           C  
ATOM    975  O   SER L  22       7.129  28.705  37.546  1.00 15.75           O  
ATOM    976  CB  SER L  22       5.157  28.128  40.027  1.00 17.18           C  
ATOM    977  OG  SER L  22       3.958  28.414  39.344  1.00 22.59           O  
ATOM    978  N   CYS L  23       5.381  27.493  36.863  1.00 18.09           N  
ATOM    979  CA  CYS L  23       5.358  28.094  35.544  1.00 19.49           C  
ATOM    980  C   CYS L  23       3.916  28.122  35.019  1.00 19.98           C  
ATOM    981  O   CYS L  23       3.178  27.147  35.153  1.00 20.13           O  
ATOM    982  CB  CYS L  23       6.318  27.291  34.644  1.00 21.24           C  
ATOM    983  SG  CYS L  23       6.245  27.649  32.870  1.00 23.29           S  
ATOM    984  N   ARG L  24       3.424  29.310  34.698  1.00 22.24           N  
ATOM    985  CA  ARG L  24       2.044  29.409  34.232  1.00 24.86           C  
ATOM    986  C   ARG L  24       1.942  29.988  32.825  1.00 24.18           C  
ATOM    987  O   ARG L  24       2.537  31.033  32.515  1.00 23.44           O  
ATOM    988  CB  ARG L  24       1.173  30.243  35.201  1.00 29.35           C  
ATOM    989  CG  ARG L  24       1.330  31.756  35.048  1.00 34.90           C  
ATOM    990  CD  ARG L  24       0.031  32.540  35.308  0.00 40.97           C  
ATOM    991  NE  ARG L  24      -0.024  33.773  34.500  0.00 45.02           N  
ATOM    992  CZ  ARG L  24      -0.870  33.966  33.481  0.00 46.58           C  
ATOM    993  NH1 ARG L  24      -1.909  33.133  33.284  0.00 47.90           N  
ATOM    994  NH2 ARG L  24      -0.719  35.029  32.694  0.00 47.26           N  
ATOM    995  N   ALA L  25       1.060  29.384  32.039  1.00 23.12           N  
ATOM    996  CA  ALA L  25       0.896  29.736  30.648  1.00 23.54           C  
ATOM    997  C   ALA L  25      -0.295  30.674  30.506  1.00 24.30           C  
ATOM    998  O   ALA L  25      -1.294  30.539  31.235  1.00 23.71           O  
ATOM    999  CB  ALA L  25       0.679  28.466  29.819  1.00 23.44           C  
ATOM   1000  N   SER L  26      -0.216  31.596  29.544  1.00 24.76           N  
ATOM   1001  CA  SER L  26      -1.306  32.543  29.317  1.00 24.84           C  
ATOM   1002  C   SER L  26      -2.505  31.900  28.646  1.00 26.03           C  
ATOM   1003  O   SER L  26      -3.541  32.550  28.495  1.00 26.15           O  
ATOM   1004  CB  SER L  26      -0.842  33.749  28.499  1.00 23.60           C  
ATOM   1005  OG  SER L  26      -0.226  33.328  27.299  1.00 24.64           O  
ATOM   1006  N   GLN L  27      -2.389  30.629  28.262  1.00 27.43           N  
ATOM   1007  CA  GLN L  27      -3.569  29.868  27.857  1.00 29.08           C  
ATOM   1008  C   GLN L  27      -3.339  28.395  28.073  1.00 28.96           C  
ATOM   1009  O   GLN L  27      -2.218  27.997  28.360  1.00 29.89           O  
ATOM   1010  CB  GLN L  27      -3.921  30.135  26.392  1.00 31.75           C  
ATOM   1011  CG  GLN L  27      -2.872  29.750  25.366  1.00 34.63           C  
ATOM   1012  CD  GLN L  27      -3.070  30.503  24.037  1.00 37.00           C  
ATOM   1013  OE1 GLN L  27      -3.205  29.901  22.970  1.00 38.19           O  
ATOM   1014  NE2 GLN L  27      -3.109  31.829  24.111  1.00 38.04           N  
ATOM   1015  N   SER L  28      -4.400  27.595  28.042  1.00 28.51           N  
ATOM   1016  CA  SER L  28      -4.231  26.162  28.230  1.00 28.47           C  
ATOM   1017  C   SER L  28      -3.337  25.570  27.141  1.00 28.37           C  
ATOM   1018  O   SER L  28      -3.531  25.819  25.951  1.00 28.38           O  
ATOM   1019  CB  SER L  28      -5.566  25.441  28.226  1.00 28.61           C  
ATOM   1020  OG  SER L  28      -5.374  24.025  28.290  1.00 31.93           O  
ATOM   1021  N   ILE L  29      -2.292  24.884  27.578  1.00 27.57           N  
ATOM   1022  CA  ILE L  29      -1.387  24.208  26.686  1.00 26.16           C  
ATOM   1023  C   ILE L  29      -1.461  22.737  27.015  1.00 26.49           C  
ATOM   1024  O   ILE L  29      -0.541  21.995  26.696  1.00 27.98           O  
ATOM   1025  CB  ILE L  29       0.059  24.674  26.903  1.00 25.89           C  
ATOM   1026  CG1 ILE L  29       0.386  24.694  28.395  1.00 25.73           C  
ATOM   1027  CG2 ILE L  29       0.271  26.052  26.335  1.00 25.04           C  
ATOM   1028  CD1 ILE L  29       1.849  24.988  28.687  1.00 25.58           C  
ATOM   1029  N   GLY L  30      -2.484  22.332  27.766  1.00 26.57           N  
ATOM   1030  CA  GLY L  30      -2.643  20.926  28.113  1.00 25.56           C  
ATOM   1031  C   GLY L  30      -1.505  20.372  28.963  1.00 25.58           C  
ATOM   1032  O   GLY L  30      -1.295  20.823  30.087  1.00 26.62           O  
ATOM   1033  N   ASN L  31      -0.826  19.338  28.478  1.00 24.35           N  
ATOM   1034  CA  ASN L  31       0.331  18.800  29.178  1.00 23.42           C  
ATOM   1035  C   ASN L  31       1.634  19.105  28.456  1.00 22.24           C  
ATOM   1036  O   ASN L  31       2.692  18.642  28.863  1.00 21.14           O  
ATOM   1037  CB  ASN L  31       0.176  17.294  29.359  1.00 24.49           C  
ATOM   1038  CG  ASN L  31       0.406  16.510  28.076  1.00 25.72           C  
ATOM   1039  OD1 ASN L  31       0.173  16.997  26.960  1.00 25.57           O  
ATOM   1040  ND2 ASN L  31       0.862  15.272  28.235  1.00 26.53           N  
ATOM   1041  N   ARG L  32       1.573  19.991  27.465  1.00 22.54           N  
ATOM   1042  CA  ARG L  32       2.701  20.221  26.555  1.00 22.12           C  
ATOM   1043  C   ARG L  32       3.719  21.253  27.102  1.00 21.00           C  
ATOM   1044  O   ARG L  32       4.026  22.267  26.454  1.00 19.84           O  
ATOM   1045  CB  ARG L  32       2.157  20.611  25.169  1.00 23.75           C  
ATOM   1046  CG  ARG L  32       1.219  19.541  24.600  1.00 27.48           C  
ATOM   1047  CD  ARG L  32       1.200  19.488  23.069  1.00 32.26           C  
ATOM   1048  NE  ARG L  32       2.550  19.533  22.456  1.00 38.00           N  
ATOM   1049  CZ  ARG L  32       3.001  18.710  21.491  1.00 38.95           C  
ATOM   1050  NH1 ARG L  32       2.280  17.655  21.094  1.00 39.79           N  
ATOM   1051  NH2 ARG L  32       4.219  18.894  20.974  1.00 38.71           N  
ATOM   1052  N   LEU L  33       4.313  20.915  28.250  1.00 19.69           N  
ATOM   1053  CA  LEU L  33       5.276  21.764  28.937  1.00 18.14           C  
ATOM   1054  C   LEU L  33       6.483  20.883  29.187  1.00 17.39           C  
ATOM   1055  O   LEU L  33       6.333  19.742  29.641  1.00 17.24           O  
ATOM   1056  CB  LEU L  33       4.685  22.243  30.281  1.00 18.89           C  
ATOM   1057  CG  LEU L  33       5.254  23.354  31.202  1.00 20.05           C  
ATOM   1058  CD1 LEU L  33       6.436  22.893  31.991  1.00 20.32           C  
ATOM   1059  CD2 LEU L  33       5.611  24.583  30.410  1.00 21.00           C  
ATOM   1060  N   PHE L  34       7.669  21.389  28.857  1.00 15.33           N  
ATOM   1061  CA  PHE L  34       8.901  20.687  29.140  1.00 15.04           C  
ATOM   1062  C   PHE L  34       9.653  21.531  30.173  1.00 14.79           C  
ATOM   1063  O   PHE L  34       9.567  22.766  30.152  1.00 14.43           O  
ATOM   1064  CB  PHE L  34       9.753  20.584  27.871  1.00 17.94           C  
ATOM   1065  CG  PHE L  34       9.214  19.633  26.802  1.00 19.48           C  
ATOM   1066  CD1 PHE L  34       7.868  19.309  26.721  1.00 21.08           C  
ATOM   1067  CD2 PHE L  34      10.090  19.000  25.935  1.00 21.11           C  
ATOM   1068  CE1 PHE L  34       7.398  18.355  25.812  1.00 20.86           C  
ATOM   1069  CE2 PHE L  34       9.623  18.049  25.028  1.00 23.12           C  
ATOM   1070  CZ  PHE L  34       8.263  17.730  24.983  1.00 21.54           C  
ATOM   1071  N   TRP L  35      10.425  20.880  31.036  1.00 13.69           N  
ATOM   1072  CA  TRP L  35      11.318  21.574  31.967  1.00 13.04           C  
ATOM   1073  C   TRP L  35      12.741  21.250  31.642  1.00 11.49           C  
ATOM   1074  O   TRP L  35      13.070  20.087  31.456  1.00 11.51           O  
ATOM   1075  CB  TRP L  35      11.057  21.148  33.425  1.00 13.06           C  
ATOM   1076  CG  TRP L  35       9.794  21.667  33.995  1.00 13.31           C  
ATOM   1077  CD1 TRP L  35       8.592  21.020  34.046  1.00 14.18           C  
ATOM   1078  CD2 TRP L  35       9.606  22.922  34.664  1.00 12.89           C  
ATOM   1079  NE1 TRP L  35       7.663  21.794  34.701  1.00 14.43           N  
ATOM   1080  CE2 TRP L  35       8.254  22.966  35.091  1.00 13.64           C  
ATOM   1081  CE3 TRP L  35      10.447  24.000  34.952  1.00 12.03           C  
ATOM   1082  CZ2 TRP L  35       7.719  24.051  35.785  1.00 12.15           C  
ATOM   1083  CZ3 TRP L  35       9.916  25.073  35.656  1.00 12.61           C  
ATOM   1084  CH2 TRP L  35       8.559  25.083  36.063  1.00 11.37           C  
ATOM   1085  N   TYR L  36      13.599  22.258  31.755  1.00 12.33           N  
ATOM   1086  CA  TYR L  36      15.040  22.166  31.463  1.00 13.70           C  
ATOM   1087  C   TYR L  36      15.839  22.735  32.661  1.00 14.43           C  
ATOM   1088  O   TYR L  36      15.426  23.728  33.299  1.00 14.16           O  
ATOM   1089  CB  TYR L  36      15.430  23.014  30.237  1.00 12.42           C  
ATOM   1090  CG  TYR L  36      14.854  22.546  28.925  1.00 14.35           C  
ATOM   1091  CD1 TYR L  36      13.577  22.947  28.513  1.00 12.03           C  
ATOM   1092  CD2 TYR L  36      15.595  21.695  28.081  1.00 13.82           C  
ATOM   1093  CE1 TYR L  36      13.046  22.510  27.302  1.00 13.56           C  
ATOM   1094  CE2 TYR L  36      15.051  21.243  26.864  1.00 14.31           C  
ATOM   1095  CZ  TYR L  36      13.790  21.649  26.492  1.00 13.25           C  
ATOM   1096  OH  TYR L  36      13.242  21.121  25.348  1.00 15.39           O  
ATOM   1097  N   GLN L  37      17.031  22.181  32.845  1.00 14.92           N  
ATOM   1098  CA  GLN L  37      18.056  22.722  33.717  1.00 16.69           C  
ATOM   1099  C   GLN L  37      19.129  23.346  32.791  1.00 18.51           C  
ATOM   1100  O   GLN L  37      19.430  22.802  31.719  1.00 18.42           O  
ATOM   1101  CB  GLN L  37      18.643  21.563  34.535  1.00 16.34           C  
ATOM   1102  CG  GLN L  37      19.792  21.931  35.433  1.00 19.04           C  
ATOM   1103  CD  GLN L  37      20.341  20.715  36.176  1.00 21.83           C  
ATOM   1104  OE1 GLN L  37      21.014  19.859  35.588  1.00 22.82           O  
ATOM   1105  NE2 GLN L  37      19.994  20.597  37.454  1.00 20.66           N  
ATOM   1106  N   GLN L  38      19.723  24.468  33.179  1.00 19.41           N  
ATOM   1107  CA  GLN L  38      20.941  24.896  32.496  1.00 19.74           C  
ATOM   1108  C   GLN L  38      21.954  25.481  33.499  1.00 20.82           C  
ATOM   1109  O   GLN L  38      21.643  26.421  34.229  1.00 20.44           O  
ATOM   1110  CB  GLN L  38      20.588  25.903  31.390  1.00 18.70           C  
ATOM   1111  CG  GLN L  38      21.794  26.428  30.621  1.00 19.60           C  
ATOM   1112  CD  GLN L  38      21.420  27.325  29.444  1.00 19.08           C  
ATOM   1113  OE1 GLN L  38      20.302  27.813  29.327  1.00 18.75           O  
ATOM   1114  NE2 GLN L  38      22.363  27.515  28.550  1.00 21.69           N  
ATOM   1115  N   LYS L  39      23.077  24.805  33.665  1.00 21.85           N  
ATOM   1116  CA  LYS L  39      24.126  25.272  34.553  1.00 25.36           C  
ATOM   1117  C   LYS L  39      25.017  26.177  33.737  1.00 28.42           C  
ATOM   1118  O   LYS L  39      24.943  26.157  32.510  1.00 29.15           O  
ATOM   1119  CB  LYS L  39      24.935  24.102  35.063  1.00 24.90           C  
ATOM   1120  CG  LYS L  39      24.085  22.957  35.528  1.00 26.14           C  
ATOM   1121  CD  LYS L  39      24.921  21.978  36.278  1.00 27.46           C  
ATOM   1122  CE  LYS L  39      24.160  21.434  37.453  1.00 28.24           C  
ATOM   1123  NZ  LYS L  39      24.903  20.262  38.036  1.00 29.79           N  
ATOM   1124  N   SER L  40      25.871  26.961  34.383  1.00 30.99           N  
ATOM   1125  CA  SER L  40      26.636  27.931  33.615  1.00 34.01           C  
ATOM   1126  C   SER L  40      27.706  27.253  32.760  1.00 35.55           C  
ATOM   1127  O   SER L  40      28.325  26.253  33.169  1.00 36.34           O  
ATOM   1128  CB  SER L  40      27.255  29.003  34.521  1.00 34.40           C  
ATOM   1129  OG  SER L  40      27.818  28.418  35.670  1.00 36.06           O  
ATOM   1130  N   HIS L  41      27.869  27.787  31.548  1.00 37.24           N  
ATOM   1131  CA  HIS L  41      28.721  27.211  30.505  1.00 37.83           C  
ATOM   1132  C   HIS L  41      28.257  25.826  30.052  1.00 37.06           C  
ATOM   1133  O   HIS L  41      29.066  25.031  29.560  1.00 38.39           O  
ATOM   1134  CB  HIS L  41      30.176  27.137  30.973  1.00 40.35           C  
ATOM   1135  CG  HIS L  41      30.713  28.449  31.448  1.00 43.66           C  
ATOM   1136  ND1 HIS L  41      30.922  29.513  30.593  1.00 44.95           N  
ATOM   1137  CD2 HIS L  41      30.910  28.927  32.702  1.00 44.36           C  
ATOM   1138  CE1 HIS L  41      31.201  30.595  31.302  1.00 45.56           C  
ATOM   1139  NE2 HIS L  41      31.195  30.266  32.583  1.00 45.74           N  
ATOM   1140  N   GLU L  42      26.961  25.548  30.154  1.00 34.32           N  
ATOM   1141  CA  GLU L  42      26.465  24.254  29.718  1.00 31.46           C  
ATOM   1142  C   GLU L  42      25.232  24.419  28.860  1.00 28.44           C  
ATOM   1143  O   GLU L  42      24.619  25.486  28.866  1.00 27.53           O  
ATOM   1144  CB  GLU L  42      26.164  23.369  30.920  1.00 32.27           C  
ATOM   1145  CG  GLU L  42      27.415  22.872  31.626  1.00 34.66           C  
ATOM   1146  CD  GLU L  42      27.150  21.715  32.603  1.00 36.46           C  
ATOM   1147  OE1 GLU L  42      26.086  21.061  32.523  1.00 37.83           O  
ATOM   1148  OE2 GLU L  42      28.008  21.462  33.474  1.00 38.65           O  
ATOM   1149  N   SER L  43      25.020  23.457  27.962  1.00 26.05           N  
ATOM   1150  CA  SER L  43      23.779  23.366  27.202  1.00 23.05           C  
ATOM   1151  C   SER L  43      22.693  22.995  28.172  1.00 20.90           C  
ATOM   1152  O   SER L  43      22.948  22.308  29.159  1.00 20.48           O  
ATOM   1153  CB  SER L  43      23.849  22.271  26.150  1.00 23.39           C  
ATOM   1154  OG  SER L  43      24.989  22.417  25.356  1.00 26.21           O  
ATOM   1155  N   PRO L  44      21.444  23.282  27.803  1.00 18.73           N  
ATOM   1156  CA  PRO L  44      20.313  22.848  28.611  1.00 17.78           C  
ATOM   1157  C   PRO L  44      20.178  21.317  28.677  1.00 17.90           C  
ATOM   1158  O   PRO L  44      20.487  20.608  27.722  1.00 19.02           O  
ATOM   1159  CB  PRO L  44      19.120  23.501  27.917  1.00 16.88           C  
ATOM   1160  CG  PRO L  44      19.692  24.645  27.146  1.00 16.63           C  
ATOM   1161  CD  PRO L  44      21.030  24.167  26.700  1.00 17.91           C  
ATOM   1162  N   ARG L  45      19.696  20.820  29.803  1.00 17.23           N  
ATOM   1163  CA  ARG L  45      19.364  19.420  29.964  1.00 16.75           C  
ATOM   1164  C   ARG L  45      17.877  19.286  30.252  1.00 15.18           C  
ATOM   1165  O   ARG L  45      17.298  20.087  31.006  1.00 13.18           O  
ATOM   1166  CB  ARG L  45      20.196  18.829  31.098  1.00 19.83           C  
ATOM   1167  CG  ARG L  45      19.496  17.742  31.878  1.00 26.06           C  
ATOM   1168  CD  ARG L  45      20.483  16.993  32.761  1.00 31.14           C  
ATOM   1169  NE  ARG L  45      20.717  15.634  32.256  1.00 37.16           N  
ATOM   1170  CZ  ARG L  45      20.964  14.573  33.028  1.00 39.00           C  
ATOM   1171  NH1 ARG L  45      21.090  14.713  34.357  1.00 39.70           N  
ATOM   1172  NH2 ARG L  45      21.083  13.370  32.468  1.00 39.98           N  
ATOM   1173  N   LEU L  46      17.233  18.390  29.511  1.00 13.71           N  
ATOM   1174  CA  LEU L  46      15.787  18.155  29.651  1.00 14.19           C  
ATOM   1175  C   LEU L  46      15.499  17.248  30.860  1.00 14.07           C  
ATOM   1176  O   LEU L  46      16.036  16.142  30.950  1.00 12.89           O  
ATOM   1177  CB  LEU L  46      15.200  17.498  28.381  1.00 13.12           C  
ATOM   1178  CG  LEU L  46      13.704  17.131  28.424  1.00 13.46           C  
ATOM   1179  CD1 LEU L  46      12.844  18.384  28.442  1.00 11.05           C  
ATOM   1180  CD2 LEU L  46      13.361  16.220  27.256  1.00 12.15           C  
ATOM   1181  N   LEU L  47      14.632  17.723  31.758  1.00 15.07           N  
ATOM   1182  CA  LEU L  47      14.351  17.043  33.031  1.00 15.27           C  
ATOM   1183  C   LEU L  47      13.041  16.298  32.926  1.00 15.62           C  
ATOM   1184  O   LEU L  47      12.952  15.119  33.272  1.00 16.25           O  
ATOM   1185  CB  LEU L  47      14.270  18.058  34.183  1.00 13.83           C  
ATOM   1186  CG  LEU L  47      15.524  18.885  34.420  1.00 14.23           C  
ATOM   1187  CD1 LEU L  47      15.201  19.971  35.411  1.00 14.64           C  
ATOM   1188  CD2 LEU L  47      16.655  18.016  34.904  1.00 11.74           C  
ATOM   1189  N   ILE L  48      12.052  16.969  32.358  1.00 16.55           N  
ATOM   1190  CA  ILE L  48      10.685  16.484  32.388  1.00 19.49           C  
ATOM   1191  C   ILE L  48      10.037  16.829  31.064  1.00 18.94           C  
ATOM   1192  O   ILE L  48      10.202  17.951  30.560  1.00 18.88           O  
ATOM   1193  CB  ILE L  48       9.817  17.115  33.623  1.00 20.30           C  
ATOM   1194  CG1 ILE L  48      10.007  16.313  34.936  1.00 21.20           C  
ATOM   1195  CG2 ILE L  48       8.297  17.030  33.336  1.00 19.74           C  
ATOM   1196  CD1 ILE L  48      11.219  16.644  35.689  1.00 21.20           C  
ATOM   1197  N   LYS L  49       9.322  15.857  30.501  1.00 19.34           N  
ATOM   1198  CA  LYS L  49       8.638  16.045  29.235  1.00 21.09           C  
ATOM   1199  C   LYS L  49       7.174  15.810  29.437  1.00 21.05           C  
ATOM   1200  O   LYS L  49       6.790  15.056  30.312  1.00 21.95           O  
ATOM   1201  CB  LYS L  49       9.169  15.097  28.155  1.00 22.54           C  
ATOM   1202  CG  LYS L  49       8.859  13.616  28.336  1.00 25.11           C  
ATOM   1203  CD  LYS L  49       9.614  12.835  27.250  1.00 27.96           C  
ATOM   1204  CE  LYS L  49       9.410  11.342  27.353  1.00 28.65           C  
ATOM   1205  NZ  LYS L  49       8.054  11.006  26.856  1.00 31.58           N  
ATOM   1206  N   TYR L  50       6.371  16.623  28.771  1.00 20.64           N  
ATOM   1207  CA  TYR L  50       4.944  16.508  28.868  1.00 21.75           C  
ATOM   1208  C   TYR L  50       4.465  16.656  30.308  1.00 22.04           C  
ATOM   1209  O   TYR L  50       3.640  15.870  30.787  1.00 22.40           O  
ATOM   1210  CB  TYR L  50       4.507  15.192  28.228  1.00 22.16           C  
ATOM   1211  CG  TYR L  50       4.738  15.224  26.732  1.00 23.73           C  
ATOM   1212  CD1 TYR L  50       4.064  16.147  25.951  1.00 23.78           C  
ATOM   1213  CD2 TYR L  50       5.764  14.493  26.143  1.00 24.69           C  
ATOM   1214  CE1 TYR L  50       4.396  16.365  24.654  1.00 25.71           C  
ATOM   1215  CE2 TYR L  50       6.110  14.705  24.827  1.00 26.18           C  
ATOM   1216  CZ  TYR L  50       5.413  15.654  24.088  1.00 26.79           C  
ATOM   1217  OH  TYR L  50       5.728  15.924  22.769  1.00 30.20           O  
ATOM   1218  N   ALA L  51       4.977  17.700  30.973  1.00 22.61           N  
ATOM   1219  CA  ALA L  51       4.523  18.142  32.309  1.00 21.70           C  
ATOM   1220  C   ALA L  51       4.953  17.229  33.477  1.00 22.07           C  
ATOM   1221  O   ALA L  51       5.533  17.712  34.452  1.00 21.83           O  
ATOM   1222  CB  ALA L  51       3.016  18.344  32.316  1.00 19.99           C  
ATOM   1223  N   SER L  52       4.819  15.910  33.305  1.00 22.75           N  
ATOM   1224  CA  SER L  52       5.061  14.970  34.389  1.00 23.41           C  
ATOM   1225  C   SER L  52       5.915  13.771  34.062  1.00 24.37           C  
ATOM   1226  O   SER L  52       6.173  12.966  34.956  1.00 26.09           O  
ATOM   1227  CB  SER L  52       3.742  14.469  34.982  1.00 22.62           C  
ATOM   1228  OG  SER L  52       2.899  13.933  33.978  1.00 22.35           O  
ATOM   1229  N   GLN L  53       6.434  13.645  32.844  1.00 24.83           N  
ATOM   1230  CA  GLN L  53       7.254  12.457  32.560  1.00 25.61           C  
ATOM   1231  C   GLN L  53       8.729  12.729  32.709  1.00 25.31           C  
ATOM   1232  O   GLN L  53       9.282  13.540  31.987  1.00 25.21           O  
ATOM   1233  CB  GLN L  53       7.002  11.919  31.162  1.00 27.03           C  
ATOM   1234  CG  GLN L  53       5.557  11.901  30.726  1.00 32.00           C  
ATOM   1235  CD  GLN L  53       5.401  11.266  29.343  1.00 34.19           C  
ATOM   1236  OE1 GLN L  53       6.189  10.397  28.955  1.00 36.21           O  
ATOM   1237  NE2 GLN L  53       4.417  11.722  28.586  1.00 34.69           N  
ATOM   1238  N   SER L  54       9.396  11.972  33.567  1.00 25.90           N  
ATOM   1239  CA  SER L  54      10.822  12.177  33.771  1.00 25.98           C  
ATOM   1240  C   SER L  54      11.617  11.458  32.696  1.00 25.70           C  
ATOM   1241  O   SER L  54      11.162  10.477  32.141  1.00 26.49           O  
ATOM   1242  CB  SER L  54      11.240  11.674  35.147  1.00 28.09           C  
ATOM   1243  OG  SER L  54      11.911  12.694  35.869  1.00 31.45           O  
ATOM   1244  N   ILE L  55      12.823  11.934  32.432  1.00 24.70           N  
ATOM   1245  CA  ILE L  55      13.656  11.382  31.391  1.00 22.68           C  
ATOM   1246  C   ILE L  55      14.535  10.282  32.001  1.00 22.51           C  
ATOM   1247  O   ILE L  55      15.081  10.453  33.104  1.00 20.83           O  
ATOM   1248  CB  ILE L  55      14.564  12.497  30.793  1.00 23.00           C  
ATOM   1249  CG1 ILE L  55      13.711  13.644  30.241  1.00 24.16           C  
ATOM   1250  CG2 ILE L  55      15.469  11.945  29.730  1.00 22.84           C  
ATOM   1251  CD1 ILE L  55      12.580  13.214  29.369  1.00 22.60           C  
ATOM   1252  N   SER L  56      14.797   9.224  31.224  1.00 20.14           N  
ATOM   1253  CA  SER L  56      15.718   8.198  31.661  1.00 18.23           C  
ATOM   1254  C   SER L  56      17.057   8.838  32.035  1.00 18.46           C  
ATOM   1255  O   SER L  56      17.643   9.617  31.257  1.00 17.88           O  
ATOM   1256  CB  SER L  56      15.918   7.159  30.563  1.00 17.54           C  
ATOM   1257  OG  SER L  56      16.877   6.177  30.939  1.00 18.07           O  
ATOM   1258  N   GLY L  57      17.496   8.573  33.262  1.00 18.35           N  
ATOM   1259  CA  GLY L  57      18.825   8.969  33.666  1.00 16.73           C  
ATOM   1260  C   GLY L  57      18.834  10.241  34.486  1.00 17.38           C  
ATOM   1261  O   GLY L  57      19.870  10.614  35.014  1.00 17.12           O  
ATOM   1262  N   ILE L  58      17.712  10.925  34.646  1.00 18.14           N  
ATOM   1263  CA  ILE L  58      17.786  12.032  35.600  1.00 20.25           C  
ATOM   1264  C   ILE L  58      17.256  11.577  36.970  1.00 20.04           C  
ATOM   1265  O   ILE L  58      16.460  10.626  37.050  1.00 20.32           O  
ATOM   1266  CB  ILE L  58      17.064  13.365  35.124  1.00 20.86           C  
ATOM   1267  CG1 ILE L  58      15.599  13.300  35.422  1.00 21.65           C  
ATOM   1268  CG2 ILE L  58      17.348  13.725  33.647  1.00 18.79           C  
ATOM   1269  CD1 ILE L  58      15.175  14.585  36.056  1.00 23.33           C  
ATOM   1270  N   PRO L  59      17.829  12.116  38.064  1.00 19.43           N  
ATOM   1271  CA  PRO L  59      17.526  11.603  39.397  1.00 18.59           C  
ATOM   1272  C   PRO L  59      16.049  11.604  39.641  1.00 18.91           C  
ATOM   1273  O   PRO L  59      15.336  12.527  39.230  1.00 17.14           O  
ATOM   1274  CB  PRO L  59      18.231  12.581  40.310  1.00 18.97           C  
ATOM   1275  CG  PRO L  59      19.409  12.953  39.557  1.00 20.02           C  
ATOM   1276  CD  PRO L  59      18.898  13.121  38.136  1.00 19.49           C  
ATOM   1277  N   SER L  60      15.613  10.589  40.375  1.00 20.41           N  
ATOM   1278  CA  SER L  60      14.237  10.458  40.869  1.00 21.69           C  
ATOM   1279  C   SER L  60      13.782  11.661  41.727  1.00 21.21           C  
ATOM   1280  O   SER L  60      12.587  11.817  41.963  1.00 22.21           O  
ATOM   1281  CB  SER L  60      14.144   9.204  41.730  1.00 23.26           C  
ATOM   1282  OG  SER L  60      15.295   9.146  42.590  1.00 25.17           O  
ATOM   1283  N   ARG L  61      14.720  12.453  42.257  1.00 19.56           N  
ATOM   1284  CA  ARG L  61      14.335  13.622  43.055  1.00 19.25           C  
ATOM   1285  C   ARG L  61      13.599  14.751  42.304  1.00 18.22           C  
ATOM   1286  O   ARG L  61      12.841  15.507  42.924  1.00 17.61           O  
ATOM   1287  CB  ARG L  61      15.545  14.179  43.825  1.00 18.62           C  
ATOM   1288  CG  ARG L  61      16.730  14.568  43.005  1.00 19.60           C  
ATOM   1289  CD  ARG L  61      17.715  15.295  43.881  1.00 19.09           C  
ATOM   1290  NE  ARG L  61      18.787  15.888  43.113  1.00 21.00           N  
ATOM   1291  CZ  ARG L  61      19.873  15.221  42.728  1.00 22.19           C  
ATOM   1292  NH1 ARG L  61      19.989  13.936  43.046  1.00 23.48           N  
ATOM   1293  NH2 ARG L  61      20.856  15.828  42.055  1.00 20.20           N  
ATOM   1294  N   PHE L  62      13.703  14.757  40.970  1.00 17.13           N  
ATOM   1295  CA  PHE L  62      12.980  15.712  40.129  1.00 16.00           C  
ATOM   1296  C   PHE L  62      11.657  15.113  39.760  1.00 15.89           C  
ATOM   1297  O   PHE L  62      11.622  14.006  39.275  1.00 17.60           O  
ATOM   1298  CB  PHE L  62      13.756  15.997  38.827  1.00 15.35           C  
ATOM   1299  CG  PHE L  62      15.044  16.755  39.024  1.00 13.29           C  
ATOM   1300  CD1 PHE L  62      15.050  18.142  39.068  1.00 12.49           C  
ATOM   1301  CD2 PHE L  62      16.249  16.084  39.174  1.00 13.43           C  
ATOM   1302  CE1 PHE L  62      16.236  18.852  39.252  1.00 10.84           C  
ATOM   1303  CE2 PHE L  62      17.447  16.792  39.366  1.00 12.91           C  
ATOM   1304  CZ  PHE L  62      17.432  18.180  39.400  1.00 12.41           C  
ATOM   1305  N   SER L  63      10.578  15.868  39.887  1.00 16.97           N  
ATOM   1306  CA  SER L  63       9.292  15.470  39.325  1.00 17.79           C  
ATOM   1307  C   SER L  63       8.458  16.695  38.936  1.00 17.66           C  
ATOM   1308  O   SER L  63       8.760  17.813  39.323  1.00 17.12           O  
ATOM   1309  CB  SER L  63       8.513  14.593  40.321  1.00 20.53           C  
ATOM   1310  OG  SER L  63       8.081  15.332  41.444  1.00 23.58           O  
ATOM   1311  N   GLY L  64       7.440  16.507  38.114  1.00 18.16           N  
ATOM   1312  CA  GLY L  64       6.621  17.642  37.769  1.00 18.55           C  
ATOM   1313  C   GLY L  64       5.164  17.311  37.877  1.00 19.08           C  
ATOM   1314  O   GLY L  64       4.773  16.164  37.702  1.00 20.17           O  
ATOM   1315  N   SER L  65       4.336  18.336  37.920  1.00 19.11           N  
ATOM   1316  CA  SER L  65       2.916  18.092  37.847  1.00 19.91           C  
ATOM   1317  C   SER L  65       2.263  19.287  37.223  1.00 20.03           C  
ATOM   1318  O   SER L  65       2.899  20.325  37.028  1.00 19.22           O  
ATOM   1319  CB  SER L  65       2.338  17.848  39.249  1.00 20.18           C  
ATOM   1320  OG  SER L  65       2.754  18.862  40.145  1.00 21.65           O  
ATOM   1321  N   GLY L  66       1.043  19.087  36.768  1.00 20.59           N  
ATOM   1322  CA  GLY L  66       0.255  20.214  36.343  1.00 22.58           C  
ATOM   1323  C   GLY L  66      -0.363  19.952  34.996  1.00 23.00           C  
ATOM   1324  O   GLY L  66       0.019  19.018  34.310  1.00 23.98           O  
ATOM   1325  N   SER L  67      -1.362  20.742  34.643  1.00 24.22           N  
ATOM   1326  CA  SER L  67      -1.982  20.621  33.349  1.00 25.23           C  
ATOM   1327  C   SER L  67      -2.776  21.887  33.111  1.00 25.16           C  
ATOM   1328  O   SER L  67      -3.009  22.665  34.045  1.00 26.47           O  
ATOM   1329  CB  SER L  67      -2.884  19.392  33.322  1.00 26.04           C  
ATOM   1330  OG  SER L  67      -4.166  19.706  33.826  1.00 29.22           O  
ATOM   1331  N   GLY L  68      -3.086  22.159  31.849  1.00 25.38           N  
ATOM   1332  CA  GLY L  68      -3.822  23.360  31.516  1.00 24.70           C  
ATOM   1333  C   GLY L  68      -2.876  24.532  31.585  1.00 25.47           C  
ATOM   1334  O   GLY L  68      -2.002  24.640  30.737  1.00 26.70           O  
ATOM   1335  N   THR L  69      -2.926  25.310  32.661  1.00 24.96           N  
ATOM   1336  CA  THR L  69      -2.138  26.525  32.717  1.00 24.39           C  
ATOM   1337  C   THR L  69      -1.137  26.603  33.858  1.00 24.73           C  
ATOM   1338  O   THR L  69      -0.207  27.411  33.784  1.00 25.15           O  
ATOM   1339  CB  THR L  69      -3.010  27.753  32.802  1.00 24.44           C  
ATOM   1340  OG1 THR L  69      -3.789  27.673  33.994  1.00 24.58           O  
ATOM   1341  CG2 THR L  69      -3.919  27.856  31.582  1.00 23.55           C  
ATOM   1342  N   ASP L  70      -1.224  25.700  34.841  1.00 24.83           N  
ATOM   1343  CA  ASP L  70      -0.315  25.767  36.001  1.00 23.09           C  
ATOM   1344  C   ASP L  70       0.504  24.536  36.154  1.00 20.08           C  
ATOM   1345  O   ASP L  70      -0.014  23.441  36.046  1.00 20.98           O  
ATOM   1346  CB  ASP L  70      -1.095  26.021  37.289  1.00 27.08           C  
ATOM   1347  CG  ASP L  70      -1.542  27.478  37.413  1.00 30.99           C  
ATOM   1348  OD1 ASP L  70      -0.704  28.339  37.820  1.00 35.03           O  
ATOM   1349  OD2 ASP L  70      -2.657  27.790  36.932  1.00 32.85           O  
ATOM   1350  N   PHE L  71       1.802  24.718  36.293  1.00 17.00           N  
ATOM   1351  CA  PHE L  71       2.743  23.616  36.228  1.00 15.96           C  
ATOM   1352  C   PHE L  71       3.795  23.861  37.297  1.00 15.08           C  
ATOM   1353  O   PHE L  71       4.180  24.999  37.524  1.00 15.60           O  
ATOM   1354  CB  PHE L  71       3.428  23.554  34.827  1.00 15.58           C  
ATOM   1355  CG  PHE L  71       2.454  23.382  33.656  1.00 15.41           C  
ATOM   1356  CD1 PHE L  71       1.859  24.493  33.051  1.00 14.99           C  
ATOM   1357  CD2 PHE L  71       2.091  22.121  33.211  1.00 14.43           C  
ATOM   1358  CE1 PHE L  71       0.906  24.332  32.051  1.00 14.23           C  
ATOM   1359  CE2 PHE L  71       1.145  21.963  32.190  1.00 13.96           C  
ATOM   1360  CZ  PHE L  71       0.559  23.062  31.624  1.00 13.27           C  
ATOM   1361  N   THR L  72       4.259  22.818  37.980  1.00 15.27           N  
ATOM   1362  CA  THR L  72       5.344  23.017  38.925  1.00 14.94           C  
ATOM   1363  C   THR L  72       6.373  21.920  38.836  1.00 14.27           C  
ATOM   1364  O   THR L  72       6.066  20.798  38.468  1.00 13.55           O  
ATOM   1365  CB  THR L  72       4.828  23.181  40.416  1.00 17.33           C  
ATOM   1366  OG1 THR L  72       5.052  21.980  41.156  1.00 20.76           O  
ATOM   1367  CG2 THR L  72       3.346  23.497  40.461  1.00 14.98           C  
ATOM   1368  N   LEU L  73       7.619  22.316  39.042  1.00 13.94           N  
ATOM   1369  CA  LEU L  73       8.760  21.441  39.094  1.00 14.33           C  
ATOM   1370  C   LEU L  73       9.092  21.254  40.583  1.00 16.19           C  
ATOM   1371  O   LEU L  73       9.333  22.235  41.277  1.00 16.32           O  
ATOM   1372  CB  LEU L  73       9.937  22.122  38.379  1.00 11.25           C  
ATOM   1373  CG  LEU L  73      11.251  21.348  38.411  1.00 11.24           C  
ATOM   1374  CD1 LEU L  73      11.080  20.016  37.727  1.00 13.42           C  
ATOM   1375  CD2 LEU L  73      12.327  22.114  37.755  1.00 11.10           C  
ATOM   1376  N   SER L  74       9.226  20.012  41.043  1.00 17.32           N  
ATOM   1377  CA  SER L  74       9.676  19.754  42.403  1.00 18.93           C  
ATOM   1378  C   SER L  74      11.012  19.055  42.400  1.00 20.19           C  
ATOM   1379  O   SER L  74      11.263  18.189  41.558  1.00 21.22           O  
ATOM   1380  CB  SER L  74       8.677  18.878  43.130  1.00 18.67           C  
ATOM   1381  OG  SER L  74       7.402  19.421  42.945  1.00 21.58           O  
ATOM   1382  N   ILE L  75      11.889  19.496  43.294  1.00 21.20           N  
ATOM   1383  CA  ILE L  75      13.110  18.791  43.629  1.00 23.01           C  
ATOM   1384  C   ILE L  75      12.990  18.450  45.104  1.00 26.12           C  
ATOM   1385  O   ILE L  75      12.829  19.343  45.942  1.00 25.40           O  
ATOM   1386  CB  ILE L  75      14.343  19.678  43.427  1.00 22.39           C  
ATOM   1387  CG1 ILE L  75      14.180  20.500  42.139  1.00 21.75           C  
ATOM   1388  CG2 ILE L  75      15.594  18.818  43.407  1.00 22.36           C  
ATOM   1389  CD1 ILE L  75      15.322  21.382  41.781  1.00 21.74           C  
ATOM   1390  N   ASN L  76      12.801  17.165  45.383  1.00 29.19           N  
ATOM   1391  CA  ASN L  76      12.719  16.688  46.761  1.00 31.74           C  
ATOM   1392  C   ASN L  76      14.124  16.512  47.263  1.00 31.90           C  
ATOM   1393  O   ASN L  76      14.912  15.838  46.621  1.00 33.95           O  
ATOM   1394  CB  ASN L  76      11.982  15.363  46.794  1.00 34.13           C  
ATOM   1395  CG  ASN L  76      10.609  15.464  46.152  1.00 38.35           C  
ATOM   1396  OD1 ASN L  76      10.129  14.513  45.505  1.00 41.47           O  
ATOM   1397  ND2 ASN L  76       9.979  16.639  46.279  1.00 38.91           N  
ATOM   1398  N   SER L  77      14.519  17.288  48.254  1.00 31.09           N  
ATOM   1399  CA  SER L  77      15.876  17.151  48.751  1.00 29.77           C  
ATOM   1400  C   SER L  77      16.921  17.550  47.701  1.00 28.61           C  
ATOM   1401  O   SER L  77      17.685  16.713  47.227  1.00 29.03           O  
ATOM   1402  CB  SER L  77      16.094  15.702  49.225  1.00 29.93           C  
ATOM   1403  OG  SER L  77      17.411  15.480  49.703  1.00 32.57           O  
ATOM   1404  N   VAL L  78      17.103  18.854  47.521  1.00 27.03           N  
ATOM   1405  CA  VAL L  78      18.091  19.375  46.584  1.00 25.82           C  
ATOM   1406  C   VAL L  78      19.518  18.990  46.957  1.00 26.32           C  
ATOM   1407  O   VAL L  78      19.827  18.746  48.128  1.00 26.89           O  
ATOM   1408  CB  VAL L  78      17.993  20.931  46.415  1.00 23.94           C  
ATOM   1409  CG1 VAL L  78      16.558  21.361  46.278  1.00 23.52           C  
ATOM   1410  CG2 VAL L  78      18.622  21.638  47.552  1.00 24.55           C  
ATOM   1411  N   GLU L  79      20.365  18.864  45.942  1.00 26.43           N  
ATOM   1412  CA  GLU L  79      21.763  18.526  46.137  1.00 27.33           C  
ATOM   1413  C   GLU L  79      22.571  19.726  45.731  1.00 26.69           C  
ATOM   1414  O   GLU L  79      22.043  20.663  45.165  1.00 25.68           O  
ATOM   1415  CB  GLU L  79      22.157  17.321  45.285  1.00 29.65           C  
ATOM   1416  CG  GLU L  79      21.534  15.998  45.746  1.00 34.89           C  
ATOM   1417  CD  GLU L  79      22.397  15.231  46.760  1.00 39.62           C  
ATOM   1418  OE1 GLU L  79      22.752  15.821  47.818  1.00 40.90           O  
ATOM   1419  OE2 GLU L  79      22.696  14.020  46.517  1.00 43.04           O  
ATOM   1420  N   THR L  80      23.837  19.761  46.094  1.00 26.98           N  
ATOM   1421  CA  THR L  80      24.617  20.942  45.781  1.00 28.39           C  
ATOM   1422  C   THR L  80      24.835  21.070  44.260  1.00 28.14           C  
ATOM   1423  O   THR L  80      24.831  22.176  43.713  1.00 28.08           O  
ATOM   1424  CB  THR L  80      25.942  20.930  46.568  1.00 28.83           C  
ATOM   1425  OG1 THR L  80      25.754  21.641  47.801  1.00 31.82           O  
ATOM   1426  CG2 THR L  80      27.054  21.575  45.781  1.00 29.95           C  
ATOM   1427  N   GLU L  81      24.805  19.930  43.571  1.00 27.94           N  
ATOM   1428  CA  GLU L  81      24.963  19.900  42.128  1.00 27.14           C  
ATOM   1429  C   GLU L  81      23.692  20.360  41.424  1.00 25.51           C  
ATOM   1430  O   GLU L  81      23.638  20.391  40.201  1.00 25.57           O  
ATOM   1431  CB  GLU L  81      25.317  18.492  41.668  1.00 30.03           C  
ATOM   1432  CG  GLU L  81      24.305  17.440  42.062  1.00 33.98           C  
ATOM   1433  CD  GLU L  81      24.430  16.179  41.218  1.00 37.84           C  
ATOM   1434  OE1 GLU L  81      25.381  16.084  40.391  1.00 39.50           O  
ATOM   1435  OE2 GLU L  81      23.576  15.270  41.384  1.00 40.40           O  
ATOM   1436  N   ASP L  82      22.660  20.700  42.188  1.00 22.49           N  
ATOM   1437  CA  ASP L  82      21.439  21.170  41.582  1.00 20.29           C  
ATOM   1438  C   ASP L  82      21.487  22.673  41.358  1.00 19.39           C  
ATOM   1439  O   ASP L  82      20.549  23.243  40.828  1.00 17.88           O  
ATOM   1440  CB  ASP L  82      20.235  20.802  42.444  1.00 20.45           C  
ATOM   1441  CG  ASP L  82      19.877  19.334  42.363  1.00 21.61           C  
ATOM   1442  OD1 ASP L  82      20.567  18.589  41.641  1.00 22.65           O  
ATOM   1443  OD2 ASP L  82      18.838  18.936  42.944  1.00 23.71           O  
ATOM   1444  N   LEU L  83      22.592  23.311  41.735  1.00 19.74           N  
ATOM   1445  CA  LEU L  83      22.732  24.758  41.553  1.00 19.72           C  
ATOM   1446  C   LEU L  83      22.694  25.129  40.055  1.00 18.48           C  
ATOM   1447  O   LEU L  83      23.686  24.934  39.356  1.00 19.38           O  
ATOM   1448  CB  LEU L  83      24.049  25.248  42.174  1.00 19.83           C  
ATOM   1449  CG  LEU L  83      24.177  26.780  42.303  1.00 22.30           C  
ATOM   1450  CD1 LEU L  83      25.259  27.096  43.308  1.00 24.59           C  
ATOM   1451  CD2 LEU L  83      24.513  27.440  40.979  1.00 22.28           C  
ATOM   1452  N   ALA L  84      21.660  25.841  39.622  1.00 16.06           N  
ATOM   1453  CA  ALA L  84      21.419  26.022  38.192  1.00 13.44           C  
ATOM   1454  C   ALA L  84      20.286  27.005  37.984  1.00 12.66           C  
ATOM   1455  O   ALA L  84      19.659  27.419  38.954  1.00 11.90           O  
ATOM   1456  CB  ALA L  84      21.053  24.682  37.557  1.00 12.44           C  
ATOM   1457  N   VAL L  85      20.020  27.369  36.723  1.00 12.08           N  
ATOM   1458  CA  VAL L  85      18.724  27.916  36.349  1.00 11.67           C  
ATOM   1459  C   VAL L  85      17.825  26.912  35.638  1.00 11.56           C  
ATOM   1460  O   VAL L  85      18.302  25.965  34.975  1.00 12.43           O  
ATOM   1461  CB  VAL L  85      18.802  29.318  35.556  1.00 14.11           C  
ATOM   1462  CG1 VAL L  85      20.231  29.906  35.570  1.00 11.58           C  
ATOM   1463  CG2 VAL L  85      18.170  29.219  34.166  1.00 11.76           C  
ATOM   1464  N   TYR L  86      16.534  27.028  35.936  1.00  9.97           N  
ATOM   1465  CA  TYR L  86      15.533  26.071  35.504  1.00 11.35           C  
ATOM   1466  C   TYR L  86      14.539  26.897  34.733  1.00 10.89           C  
ATOM   1467  O   TYR L  86      14.272  28.014  35.128  1.00 11.47           O  
ATOM   1468  CB  TYR L  86      14.840  25.400  36.723  1.00 10.09           C  
ATOM   1469  CG  TYR L  86      15.786  24.517  37.544  1.00 11.86           C  
ATOM   1470  CD1 TYR L  86      16.669  25.053  38.487  1.00 11.38           C  
ATOM   1471  CD2 TYR L  86      15.857  23.155  37.300  1.00 12.33           C  
ATOM   1472  CE1 TYR L  86      17.604  24.230  39.146  1.00 13.36           C  
ATOM   1473  CE2 TYR L  86      16.772  22.339  37.949  1.00 12.48           C  
ATOM   1474  CZ  TYR L  86      17.644  22.859  38.848  1.00 12.97           C  
ATOM   1475  OH  TYR L  86      18.634  22.010  39.309  1.00 11.49           O  
ATOM   1476  N   PHE L  87      14.074  26.398  33.589  1.00 11.08           N  
ATOM   1477  CA  PHE L  87      13.056  27.091  32.808  1.00 10.12           C  
ATOM   1478  C   PHE L  87      12.126  26.098  32.152  1.00  9.65           C  
ATOM   1479  O   PHE L  87      12.464  24.936  32.029  1.00  9.25           O  
ATOM   1480  CB  PHE L  87      13.694  28.029  31.757  1.00 10.78           C  
ATOM   1481  CG  PHE L  87      14.658  27.358  30.820  1.00 10.72           C  
ATOM   1482  CD1 PHE L  87      14.217  26.826  29.615  1.00 11.23           C  
ATOM   1483  CD2 PHE L  87      16.007  27.335  31.098  1.00  9.99           C  
ATOM   1484  CE1 PHE L  87      15.121  26.290  28.718  1.00 12.15           C  
ATOM   1485  CE2 PHE L  87      16.920  26.790  30.209  1.00 11.87           C  
ATOM   1486  CZ  PHE L  87      16.476  26.265  29.018  1.00 11.49           C  
ATOM   1487  N   CYS L  88      10.888  26.524  31.957  1.00 10.37           N  
ATOM   1488  CA  CYS L  88       9.876  25.738  31.271  1.00 12.46           C  
ATOM   1489  C   CYS L  88       9.754  26.228  29.825  1.00 11.88           C  
ATOM   1490  O   CYS L  88      10.226  27.315  29.483  1.00 11.55           O  
ATOM   1491  CB  CYS L  88       8.536  25.906  31.981  1.00 13.94           C  
ATOM   1492  SG  CYS L  88       8.152  27.663  32.262  1.00 18.20           S  
ATOM   1493  N   GLN L  89       9.077  25.443  29.002  1.00 11.82           N  
ATOM   1494  CA  GLN L  89       9.023  25.666  27.567  1.00 12.26           C  
ATOM   1495  C   GLN L  89       7.706  25.071  27.162  1.00 12.96           C  
ATOM   1496  O   GLN L  89       7.352  23.977  27.640  1.00 13.93           O  
ATOM   1497  CB  GLN L  89      10.165  24.906  26.846  1.00 13.26           C  
ATOM   1498  CG  GLN L  89       9.844  24.670  25.375  1.00 13.77           C  
ATOM   1499  CD  GLN L  89      10.845  23.821  24.655  1.00 15.03           C  
ATOM   1500  OE1 GLN L  89      11.055  22.661  25.007  1.00 14.48           O  
ATOM   1501  NE2 GLN L  89      11.332  24.326  23.532  1.00 13.74           N  
ATOM   1502  N   GLN L  90       6.922  25.806  26.390  1.00 12.59           N  
ATOM   1503  CA  GLN L  90       5.736  25.214  25.819  1.00 13.61           C  
ATOM   1504  C   GLN L  90       6.017  24.741  24.394  1.00 15.20           C  
ATOM   1505  O   GLN L  90       6.758  25.370  23.643  1.00 15.19           O  
ATOM   1506  CB  GLN L  90       4.573  26.189  25.836  1.00 12.88           C  
ATOM   1507  CG  GLN L  90       4.819  27.432  25.053  1.00 14.62           C  
ATOM   1508  CD  GLN L  90       4.315  27.338  23.616  1.00 15.57           C  
ATOM   1509  OE1 GLN L  90       4.741  28.096  22.747  1.00 17.20           O  
ATOM   1510  NE2 GLN L  90       3.401  26.428  23.368  1.00 16.18           N  
ATOM   1511  N   VAL L  91       5.477  23.581  24.064  1.00 17.15           N  
ATOM   1512  CA  VAL L  91       5.599  23.002  22.731  1.00 18.66           C  
ATOM   1513  C   VAL L  91       4.189  22.746  22.180  1.00 19.83           C  
ATOM   1514  O   VAL L  91       3.930  21.779  21.459  1.00 20.34           O  
ATOM   1515  CB  VAL L  91       6.407  21.684  22.778  1.00 18.24           C  
ATOM   1516  CG1 VAL L  91       7.861  21.999  23.053  1.00 17.53           C  
ATOM   1517  CG2 VAL L  91       5.815  20.699  23.834  1.00 18.31           C  
ATOM   1518  N   SER L  92       3.276  23.635  22.546  1.00 20.34           N  
ATOM   1519  CA  SER L  92       1.890  23.489  22.176  1.00 21.08           C  
ATOM   1520  C   SER L  92       1.584  24.218  20.871  1.00 22.23           C  
ATOM   1521  O   SER L  92       0.728  23.787  20.108  1.00 23.47           O  
ATOM   1522  CB  SER L  92       1.014  24.034  23.287  1.00 20.15           C  
ATOM   1523  OG  SER L  92      -0.339  23.967  22.916  1.00 22.18           O  
ATOM   1524  N   GLU L  93       2.345  25.261  20.569  1.00 22.50           N  
ATOM   1525  CA  GLU L  93       1.932  26.232  19.563  1.00 22.71           C  
ATOM   1526  C   GLU L  93       3.159  27.065  19.228  1.00 21.31           C  
ATOM   1527  O   GLU L  93       3.948  27.400  20.123  1.00 21.33           O  
ATOM   1528  CB  GLU L  93       0.827  27.110  20.147  1.00 25.59           C  
ATOM   1529  CG  GLU L  93       0.010  27.823  19.122  1.00 30.74           C  
ATOM   1530  CD  GLU L  93      -0.851  28.918  19.733  1.00 33.19           C  
ATOM   1531  OE1 GLU L  93      -1.935  28.593  20.263  1.00 33.68           O  
ATOM   1532  OE2 GLU L  93      -0.437  30.098  19.688  1.00 33.68           O  
ATOM   1533  N   TRP L  94       3.445  27.189  17.935  1.00 18.24           N  
ATOM   1534  CA  TRP L  94       4.620  27.908  17.469  1.00 15.03           C  
ATOM   1535  C   TRP L  94       4.243  29.390  17.447  1.00 15.00           C  
ATOM   1536  O   TRP L  94       3.096  29.725  17.234  1.00 15.20           O  
ATOM   1537  CB  TRP L  94       4.977  27.439  16.057  1.00 14.15           C  
ATOM   1538  CG  TRP L  94       6.254  27.975  15.574  1.00 11.05           C  
ATOM   1539  CD1 TRP L  94       7.493  27.503  15.853  1.00 11.06           C  
ATOM   1540  CD2 TRP L  94       6.433  29.181  14.843  1.00 10.19           C  
ATOM   1541  NE1 TRP L  94       8.450  28.364  15.360  1.00  9.98           N  
ATOM   1542  CE2 TRP L  94       7.817  29.404  14.737  1.00  9.92           C  
ATOM   1543  CE3 TRP L  94       5.558  30.109  14.290  1.00 10.27           C  
ATOM   1544  CZ2 TRP L  94       8.339  30.505  14.102  1.00 10.95           C  
ATOM   1545  CZ3 TRP L  94       6.073  31.196  13.676  1.00 11.11           C  
ATOM   1546  CH2 TRP L  94       7.448  31.394  13.580  1.00 10.94           C  
ATOM   1547  N   PRO L  95       5.186  30.295  17.730  1.00 15.09           N  
ATOM   1548  CA  PRO L  95       6.545  30.078  18.232  1.00 14.16           C  
ATOM   1549  C   PRO L  95       6.596  29.431  19.615  1.00 15.14           C  
ATOM   1550  O   PRO L  95       5.780  29.740  20.488  1.00 15.16           O  
ATOM   1551  CB  PRO L  95       7.143  31.480  18.236  1.00 14.19           C  
ATOM   1552  CG  PRO L  95       5.978  32.374  18.300  1.00 14.81           C  
ATOM   1553  CD  PRO L  95       4.933  31.716  17.462  1.00 14.02           C  
ATOM   1554  N   PHE L  96       7.476  28.450  19.751  1.00 15.28           N  
ATOM   1555  CA  PHE L  96       7.722  27.809  21.028  1.00 17.05           C  
ATOM   1556  C   PHE L  96       8.429  28.792  21.970  1.00 17.75           C  
ATOM   1557  O   PHE L  96       9.420  29.462  21.598  1.00 17.25           O  
ATOM   1558  CB  PHE L  96       8.570  26.549  20.838  1.00 17.18           C  
ATOM   1559  CG  PHE L  96       7.905  25.506  19.997  1.00 19.40           C  
ATOM   1560  CD1 PHE L  96       6.534  25.299  20.092  1.00 20.14           C  
ATOM   1561  CD2 PHE L  96       8.641  24.740  19.103  1.00 21.49           C  
ATOM   1562  CE1 PHE L  96       5.893  24.336  19.321  1.00 21.08           C  
ATOM   1563  CE2 PHE L  96       8.017  23.773  18.324  1.00 23.87           C  
ATOM   1564  CZ  PHE L  96       6.631  23.567  18.441  1.00 22.10           C  
ATOM   1565  N   THR L  97       7.828  28.950  23.147  1.00 17.53           N  
ATOM   1566  CA  THR L  97       8.183  30.014  24.071  1.00 16.79           C  
ATOM   1567  C   THR L  97       8.552  29.449  25.444  1.00 17.33           C  
ATOM   1568  O   THR L  97       8.272  28.274  25.739  1.00 17.46           O  
ATOM   1569  CB  THR L  97       7.037  31.016  24.201  1.00 15.59           C  
ATOM   1570  OG1 THR L  97       5.837  30.326  24.559  1.00 13.66           O  
ATOM   1571  CG2 THR L  97       6.822  31.752  22.869  1.00 14.92           C  
ATOM   1572  N   PHE L  98       9.378  30.214  26.158  1.00 17.06           N  
ATOM   1573  CA  PHE L  98      10.097  29.744  27.336  1.00 16.95           C  
ATOM   1574  C   PHE L  98       9.763  30.634  28.513  1.00 17.42           C  
ATOM   1575  O   PHE L  98       9.373  31.785  28.336  1.00 19.15           O  
ATOM   1576  CB  PHE L  98      11.597  29.781  27.078  1.00 16.61           C  
ATOM   1577  CG  PHE L  98      12.024  28.903  25.944  1.00 18.10           C  
ATOM   1578  CD1 PHE L  98      11.750  29.271  24.627  1.00 18.34           C  
ATOM   1579  CD2 PHE L  98      12.624  27.665  26.197  1.00 19.10           C  
ATOM   1580  CE1 PHE L  98      12.051  28.421  23.566  1.00 20.01           C  
ATOM   1581  CE2 PHE L  98      12.947  26.791  25.144  1.00 20.11           C  
ATOM   1582  CZ  PHE L  98      12.655  27.171  23.823  1.00 20.96           C  
ATOM   1583  N   GLY L  99       9.923  30.122  29.721  1.00 16.40           N  
ATOM   1584  CA  GLY L  99       9.748  30.976  30.872  1.00 13.88           C  
ATOM   1585  C   GLY L  99      10.978  31.828  30.992  1.00 13.04           C  
ATOM   1586  O   GLY L  99      12.019  31.518  30.410  1.00 12.07           O  
ATOM   1587  N   GLY L 100      10.937  32.764  31.919  1.00 11.52           N  
ATOM   1588  CA  GLY L 100      12.091  33.597  32.117  1.00 10.48           C  
ATOM   1589  C   GLY L 100      13.185  33.024  32.987  1.00 10.67           C  
ATOM   1590  O   GLY L 100      14.206  33.664  33.137  1.00 10.21           O  
ATOM   1591  N   GLY L 101      13.007  31.846  33.565  1.00 11.50           N  
ATOM   1592  CA  GLY L 101      14.083  31.301  34.372  1.00 12.76           C  
ATOM   1593  C   GLY L 101      13.946  31.568  35.875  1.00 14.28           C  
ATOM   1594  O   GLY L 101      13.357  32.575  36.307  1.00 14.82           O  
ATOM   1595  N   THR L 102      14.433  30.609  36.666  1.00 14.00           N  
ATOM   1596  CA  THR L 102      14.504  30.700  38.118  1.00 13.50           C  
ATOM   1597  C   THR L 102      15.904  30.280  38.498  1.00 14.06           C  
ATOM   1598  O   THR L 102      16.365  29.223  38.067  1.00 13.26           O  
ATOM   1599  CB  THR L 102      13.541  29.717  38.797  1.00 12.76           C  
ATOM   1600  OG1 THR L 102      12.192  30.036  38.465  1.00 12.92           O  
ATOM   1601  CG2 THR L 102      13.693  29.763  40.279  1.00 12.37           C  
ATOM   1602  N   LYS L 103      16.629  31.170  39.160  1.00 16.45           N  
ATOM   1603  CA  LYS L 103      17.903  30.820  39.800  1.00 19.06           C  
ATOM   1604  C   LYS L 103      17.690  30.118  41.149  1.00 19.91           C  
ATOM   1605  O   LYS L 103      17.133  30.704  42.094  1.00 17.84           O  
ATOM   1606  CB  LYS L 103      18.744  32.063  40.046  1.00 20.84           C  
ATOM   1607  CG  LYS L 103      19.791  32.311  39.010  1.00 25.98           C  
ATOM   1608  CD  LYS L 103      19.188  32.823  37.698  1.00 29.66           C  
ATOM   1609  CE  LYS L 103      20.020  33.974  37.105  1.00 31.70           C  
ATOM   1610  NZ  LYS L 103      19.738  35.268  37.815  1.00 33.21           N  
ATOM   1611  N   LEU L 104      18.128  28.859  41.209  1.00 21.65           N  
ATOM   1612  CA  LEU L 104      18.258  28.099  42.450  1.00 22.16           C  
ATOM   1613  C   LEU L 104      19.665  28.343  42.997  1.00 23.21           C  
ATOM   1614  O   LEU L 104      20.645  27.959  42.382  1.00 22.50           O  
ATOM   1615  CB  LEU L 104      18.063  26.597  42.151  1.00 21.68           C  
ATOM   1616  CG  LEU L 104      17.560  25.598  43.215  1.00 21.54           C  
ATOM   1617  CD1 LEU L 104      17.918  24.168  42.855  1.00 20.54           C  
ATOM   1618  CD2 LEU L 104      18.128  25.930  44.526  1.00 21.99           C  
ATOM   1619  N   GLU L 105      19.785  28.969  44.157  1.00 26.78           N  
ATOM   1620  CA  GLU L 105      21.076  28.961  44.851  1.00 30.06           C  
ATOM   1621  C   GLU L 105      21.037  28.056  46.083  1.00 31.00           C  
ATOM   1622  O   GLU L 105      20.010  27.945  46.763  1.00 30.37           O  
ATOM   1623  CB  GLU L 105      21.522  30.373  45.237  1.00 31.54           C  
ATOM   1624  CG  GLU L 105      20.431  31.414  45.229  1.00 36.21           C  
ATOM   1625  CD  GLU L 105      20.463  32.280  43.979  1.00 39.65           C  
ATOM   1626  OE1 GLU L 105      21.579  32.773  43.650  1.00 41.71           O  
ATOM   1627  OE2 GLU L 105      19.386  32.445  43.321  1.00 40.47           O  
ATOM   1628  N   ILE L 106      22.054  27.211  46.180  1.00 33.70           N  
ATOM   1629  CA  ILE L 106      22.176  26.264  47.291  1.00 36.60           C  
ATOM   1630  C   ILE L 106      23.143  26.886  48.294  1.00 38.71           C  
ATOM   1631  O   ILE L 106      24.328  26.990  48.007  1.00 39.38           O  
ATOM   1632  CB  ILE L 106      22.773  24.895  46.838  1.00 36.11           C  
ATOM   1633  CG1 ILE L 106      22.070  24.384  45.561  1.00 35.19           C  
ATOM   1634  CG2 ILE L 106      22.708  23.892  48.002  1.00 35.93           C  
ATOM   1635  CD1 ILE L 106      20.683  23.798  45.760  1.00 34.11           C  
ATOM   1636  N   LYS L 107      22.611  27.471  49.364  1.00 40.38           N  
ATOM   1637  CA  LYS L 107      23.449  28.099  50.371  1.00 41.85           C  
ATOM   1638  C   LYS L 107      24.044  27.039  51.304  1.00 42.88           C  
ATOM   1639  O   LYS L 107      23.323  26.074  51.656  1.00 43.77           O  
ATOM   1640  CB  LYS L 107      22.647  29.134  51.166  1.00 41.43           C  
ATOM   1641  CG  LYS L 107      21.221  28.718  51.521  1.00 41.75           C  
ATOM   1642  CD  LYS L 107      20.398  29.882  52.116  1.00 42.04           C  
ATOM   1643  CE  LYS L 107      20.711  30.115  53.602  1.00 42.50           C  
ATOM   1644  NZ  LYS L 107      20.276  31.456  54.132  1.00 42.35           N  
ATOM   1645  OXT LYS L 107      25.268  27.107  51.571  1.00 44.61           O  
TER    1646      LYS L 107                                                      
