# Supplementary material for: SARS-CoV-2 Spike Protein Interaction Space
Source: Int J Mol Sci. 2023 Jul 27;24(15):12058. doi: 10.3390/ijms241512058 (PMC10418891; doi:10.3390/ijms241512058)
Supplement: Supplementary file 1 [file ijms-24-12058-s001.zip › Supplementary Material File S1/1LGV.pdb]

REMARK 950 NUMBERING  Kabat
REMARK 950 METHOD     X-ray crystal structure
REMARK 950 RESOLUTION 1.950
REMARK 950 R-FACTOR   0.200
REMARK 950 R-FREE     0.245
REMARK 950 CHAIN-TYPE LABEL ORIGINAL
REMARK 950 CHAIN L    L    A
REMARK 950 CHAIN L    L    B
REMARK 950 MOLECULE : A : IMMUNOGLOBULIN LAMBDA LIGHT CHAIN
REMARK 950 SPECIES  : A : HOMO SAPIENS
SEQRES   1 L 216  PCA THR ALA LEU THR GLN PRO ALA SER VAL SER GLY SER          
SEQRES   2 L 216  PRO GLY GLN SER ILE THR VAL SER CYS THR GLY VAL SER          
SEQRES   3 L 216  SER ILE VAL GLY SER TYR ASN LEU VAL SER TRP TYR GLN          
SEQRES   4 L 216  GLN HIS PRO GLY LYS ALA PRO LYS LEU LEU THR TYR GLU          
SEQRES   5 L 216  VAL ASN LYS ARG PRO SER GLY VAL SER ASP ARG PHE SER          
SEQRES   6 L 216  GLY SER LYS SER GLY ASN SER ALA SER LEU THR ILE SER          
SEQRES   7 L 216  GLY LEU GLN ALA GLU ASP GLU ALA ASP TYR TYR CYS SER          
SEQRES   8 L 216  SER TYR ASP GLY SER SER THR SER VAL VAL PHE GLY GLY          
SEQRES   9 L 216  GLY THR LYS LEU THR VAL LEU GLY GLN PRO LYS ALA ALA          
SEQRES  10 L 216  PRO SER VAL THR LEU PHE PRO PRO SER SER GLU GLU LEU          
SEQRES  11 L 216  GLN ALA ASN LYS ALA THR LEU VAL CYS LEU ILE SER ASP          
SEQRES  12 L 216  PHE TYR PRO GLY ALA VAL THR VAL ALA TRP LYS ALA ASP          
SEQRES  13 L 216  SER SER PRO VAL LYS ALA GLY VAL GLU THR THR LYS PRO          
SEQRES  14 L 216  SER LYS GLN SER ASN ASN LYS TYR ALA ALA SER SER TYR          
SEQRES  15 L 216  LEU SER LEU THR PRO GLU GLN TRP LYS SER HIS ARG SER          
SEQRES  16 L 216  TYR SER CYS GLN VAL THR HIS GLU GLY SER THR VAL GLU          
SEQRES  17 L 216  LYS THR VAL ALA PRO THR ALA CYS                              
SEQRES   1 L 216  PCA THR ALA LEU THR GLN PRO ALA SER VAL SER GLY SER          
SEQRES   2 L 216  PRO GLY GLN SER ILE THR VAL SER CYS THR GLY VAL SER          
SEQRES   3 L 216  SER ILE VAL GLY SER TYR ASN LEU VAL SER TRP TYR GLN          
SEQRES   4 L 216  GLN HIS PRO GLY LYS ALA PRO LYS LEU LEU THR TYR GLU          
SEQRES   5 L 216  VAL ASN LYS ARG PRO SER GLY VAL SER ASP ARG PHE SER          
SEQRES   6 L 216  GLY SER LYS SER GLY ASN SER ALA SER LEU THR ILE SER          
SEQRES   7 L 216  GLY LEU GLN ALA GLU ASP GLU ALA ASP TYR TYR CYS SER          
SEQRES   8 L 216  SER TYR ASP GLY SER SER THR SER VAL VAL PHE GLY GLY          
SEQRES   9 L 216  GLY THR LYS LEU THR VAL LEU GLY GLN PRO LYS ALA ALA          
SEQRES  10 L 216  PRO SER VAL THR LEU PHE PRO PRO SER SER GLU GLU LEU          
SEQRES  11 L 216  GLN ALA ASN LYS ALA THR LEU VAL CYS LEU ILE SER ASP          
SEQRES  12 L 216  PHE TYR PRO GLY ALA VAL THR VAL ALA TRP LYS ALA ASP          
SEQRES  13 L 216  SER SER PRO VAL LYS ALA GLY VAL GLU THR THR LYS PRO          
SEQRES  14 L 216  SER LYS GLN SER ASN ASN LYS TYR ALA ALA SER SER TYR          
SEQRES  15 L 216  LEU SER LEU THR PRO GLU GLN TRP LYS SER HIS ARG SER          
SEQRES  16 L 216  TYR SER CYS GLN VAL THR HIS GLU GLY SER THR VAL GLU          
SEQRES  17 L 216  LYS THR VAL ALA PRO THR ALA CYS                              
ATOM      9  N   THR L   2       8.464  25.966  -2.298  1.00 33.64           N  
ATOM     10  CA  THR L   2       9.532  25.652  -3.216  1.00 32.07           C  
ATOM     11  C   THR L   2      10.865  26.045  -2.536  1.00 30.74           C  
ATOM     12  O   THR L   2      10.895  26.993  -1.795  1.00 29.27           O  
ATOM     13  CB  THR L   2       9.332  26.441  -4.516  1.00 35.21           C  
ATOM     14  OG1 THR L   2       8.127  25.960  -5.166  1.00 38.44           O  
ATOM     15  CG2 THR L   2      10.478  26.247  -5.434  1.00 32.26           C  
ATOM     16  N   ALA L   3      11.949  25.335  -2.803  1.00 28.23           N  
ATOM     17  CA  ALA L   3      13.218  25.706  -2.180  1.00 28.76           C  
ATOM     18  C   ALA L   3      14.300  25.162  -3.094  1.00 29.06           C  
ATOM     19  O   ALA L   3      14.000  24.364  -3.970  1.00 30.37           O  
ATOM     20  CB  ALA L   3      13.329  25.038  -0.745  1.00 28.44           C  
ATOM     21  N   LEU L   4      15.554  25.609  -2.912  1.00 27.39           N  
ATOM     22  CA  LEU L   4      16.703  25.096  -3.676  1.00 27.22           C  
ATOM     23  C   LEU L   4      16.986  23.771  -2.940  1.00 28.03           C  
ATOM     24  O   LEU L   4      16.622  23.634  -1.768  1.00 27.83           O  
ATOM     25  CB  LEU L   4      17.916  26.060  -3.540  1.00 27.95           C  
ATOM     26  CG  LEU L   4      17.606  27.492  -4.029  1.00 29.71           C  
ATOM     27  CD1 LEU L   4      18.830  28.420  -3.870  1.00 29.67           C  
ATOM     28  CD2 LEU L   4      17.199  27.397  -5.530  1.00 30.08           C  
ATOM     29  N   THR L   5      17.582  22.782  -3.617  1.00 28.10           N  
ATOM     30  CA  THR L   5      17.835  21.479  -2.997  1.00 27.07           C  
ATOM     31  C   THR L   5      19.208  21.346  -2.353  1.00 26.43           C  
ATOM     32  O   THR L   5      20.239  21.461  -3.017  1.00 25.74           O  
ATOM     33  CB  THR L   5      17.741  20.373  -4.063  1.00 27.55           C  
ATOM     34  OG1 THR L   5      16.481  20.508  -4.754  1.00 28.89           O  
ATOM     35  CG2 THR L   5      17.900  19.019  -3.427  1.00 29.75           C  
ATOM     36  N   GLN L   6      19.235  21.107  -1.055  1.00 26.31           N  
ATOM     37  CA  GLN L   6      20.514  20.981  -0.376  1.00 26.50           C  
ATOM     38  C   GLN L   6      20.441  19.686   0.395  1.00 29.08           C  
ATOM     39  O   GLN L   6      19.372  19.254   0.796  1.00 27.95           O  
ATOM     40  CB  GLN L   6      20.698  22.064   0.712  1.00 27.34           C  
ATOM     41  CG  GLN L   6      20.759  23.545   0.246  1.00 29.05           C  
ATOM     42  CD  GLN L   6      20.852  24.527   1.441  1.00 28.85           C  
ATOM     43  OE1 GLN L   6      20.115  25.525   1.488  1.00 28.11           O  
ATOM     44  NE2 GLN L   6      21.754  24.246   2.392  1.00 28.46           N  
ATOM     45  N   PRO L   7      21.586  19.107   0.716  1.00 30.81           N  
ATOM     46  CA  PRO L   7      21.531  17.855   1.491  1.00 30.90           C  
ATOM     47  C   PRO L   7      21.075  18.236   2.921  1.00 31.96           C  
ATOM     48  O   PRO L   7      21.372  19.307   3.409  1.00 29.41           O  
ATOM     49  CB  PRO L   7      22.982  17.380   1.484  1.00 32.79           C  
ATOM     50  CG  PRO L   7      23.788  18.735   1.376  1.00 33.48           C  
ATOM     51  CD  PRO L   7      22.955  19.424   0.261  1.00 29.46           C  
ATOM     52  N   ALA L   8      20.395  17.355   3.620  1.00 30.57           N  
ATOM     53  CA  ALA L   8      19.933  17.698   4.971  1.00 32.86           C  
ATOM     54  C   ALA L   8      21.062  17.845   5.965  1.00 31.74           C  
ATOM     55  O   ALA L   8      20.946  18.612   6.936  1.00 27.82           O  
ATOM     56  CB  ALA L   8      18.907  16.595   5.521  1.00 35.86           C  
ATOM     57  N   SER L   9      22.140  17.080   5.783  1.00 31.15           N  
ATOM     58  CA  SER L   9      23.214  17.198   6.727  1.00 34.96           C  
ATOM     59  C   SER L   9      24.564  16.773   6.209  1.00 33.66           C  
ATOM     60  O   SER L   9      24.665  16.010   5.256  1.00 35.61           O  
ATOM     61  CB  SER L   9      22.882  16.428   8.011  1.00 39.26           C  
ATOM     62  OG  SER L   9      22.946  15.045   7.770  1.00 45.21           O  
ATOM     63  N   VAL L  11      25.604  17.302   6.841  1.00 32.96           N  
ATOM     64  CA  VAL L  11      26.964  16.978   6.448  1.00 32.32           C  
ATOM     65  C   VAL L  11      27.748  16.957   7.721  1.00 33.41           C  
ATOM     66  O   VAL L  11      27.327  17.547   8.744  1.00 31.38           O  
ATOM     67  CB  VAL L  11      27.549  18.090   5.502  1.00 32.86           C  
ATOM     68  CG1 VAL L  11      26.729  18.149   4.241  1.00 29.97           C  
ATOM     69  CG2 VAL L  11      27.556  19.447   6.204  1.00 29.18           C  
ATOM     70  N   SER L  12      28.894  16.284   7.694  1.00 31.04           N  
ATOM     71  CA  SER L  12      29.717  16.269   8.896  1.00 34.85           C  
ATOM     72  C   SER L  12      31.158  16.049   8.503  1.00 34.29           C  
ATOM     73  O   SER L  12      31.431  15.484   7.459  1.00 36.05           O  
ATOM     74  CB  SER L  12      29.261  15.158   9.827  1.00 36.85           C  
ATOM     75  OG  SER L  12      29.202  13.974   9.064  1.00 40.12           O  
ATOM     76  N   GLY L  13      32.070  16.539   9.316  1.00 34.02           N  
ATOM     77  CA  GLY L  13      33.479  16.342   9.045  1.00 34.17           C  
ATOM     78  C   GLY L  13      34.221  16.617  10.350  1.00 35.36           C  
ATOM     79  O   GLY L  13      33.569  17.037  11.336  1.00 34.63           O  
ATOM     80  N   SER L  14      35.551  16.387  10.367  1.00 32.54           N  
ATOM     81  CA  SER L  14      36.407  16.595  11.545  1.00 32.51           C  
ATOM     82  C   SER L  14      37.178  17.896  11.434  1.00 29.77           C  
ATOM     83  O   SER L  14      37.292  18.424  10.340  1.00 30.28           O  
ATOM     84  CB  SER L  14      37.438  15.457  11.662  1.00 33.31           C  
ATOM     85  OG  SER L  14      36.698  14.274  11.793  1.00 42.08           O  
ATOM     86  N   PRO L  15      37.764  18.391  12.534  1.00 29.39           N  
ATOM     87  CA  PRO L  15      38.499  19.654  12.441  1.00 30.39           C  
ATOM     88  C   PRO L  15      39.634  19.605  11.443  1.00 30.83           C  
ATOM     89  O   PRO L  15      40.339  18.593  11.341  1.00 29.22           O  
ATOM     90  CB  PRO L  15      38.969  19.921  13.871  1.00 31.90           C  
ATOM     91  CG  PRO L  15      37.905  19.137  14.718  1.00 31.45           C  
ATOM     92  CD  PRO L  15      37.717  17.890  13.914  1.00 30.88           C  
ATOM     93  N   GLY L  16      39.812  20.693  10.693  1.00 29.28           N  
ATOM     94  CA  GLY L  16      40.869  20.672   9.695  1.00 30.60           C  
ATOM     95  C   GLY L  16      40.378  20.177   8.339  1.00 28.92           C  
ATOM     96  O   GLY L  16      41.007  20.494   7.298  1.00 29.25           O  
ATOM     97  N   GLN L  17      39.288  19.426   8.305  1.00 28.08           N  
ATOM     98  CA  GLN L  17      38.789  18.951   7.013  1.00 26.98           C  
ATOM     99  C   GLN L  17      38.025  20.036   6.230  1.00 27.85           C  
ATOM    100  O   GLN L  17      37.978  21.188   6.662  1.00 25.55           O  
ATOM    101  CB  GLN L  17      37.921  17.725   7.163  1.00 28.54           C  
ATOM    102  CG  GLN L  17      38.687  16.556   7.846  1.00 28.52           C  
ATOM    103  CD  GLN L  17      37.904  15.255   7.918  1.00 30.33           C  
ATOM    104  OE1 GLN L  17      36.654  15.256   7.936  1.00 31.37           O  
ATOM    105  NE2 GLN L  17      38.632  14.110   7.982  1.00 31.50           N  
ATOM    106  N   SER L  18      37.496  19.668   5.067  1.00 28.60           N  
ATOM    107  CA  SER L  18      36.750  20.598   4.227  1.00 29.98           C  
ATOM    108  C   SER L  18      35.393  19.938   3.941  1.00 30.09           C  
ATOM    109  O   SER L  18      35.292  18.696   3.848  1.00 30.90           O  
ATOM    110  CB  SER L  18      37.474  20.895   2.875  1.00 29.88           C  
ATOM    111  OG  SER L  18      38.594  21.802   3.028  1.00 27.61           O  
ATOM    112  N   ILE L  19      34.352  20.763   3.873  1.00 27.31           N  
ATOM    113  CA  ILE L  19      33.017  20.246   3.566  1.00 27.30           C  
ATOM    114  C   ILE L  19      32.478  21.146   2.455  1.00 27.81           C  
ATOM    115  O   ILE L  19      32.560  22.369   2.565  1.00 26.62           O  
ATOM    116  CB  ILE L  19      32.113  20.341   4.797  1.00 28.75           C  
ATOM    117  CG1 ILE L  19      32.474  19.208   5.798  1.00 31.38           C  
ATOM    118  CG2 ILE L  19      30.636  20.313   4.366  1.00 28.78           C  
ATOM    119  CD1 ILE L  19      31.629  19.257   7.065  1.00 34.74           C  
ATOM    120  N   THR L  20      31.894  20.549   1.424  1.00 27.08           N  
ATOM    121  CA  THR L  20      31.336  21.296   0.351  1.00 29.05           C  
ATOM    122  C   THR L  20      29.829  21.009   0.409  1.00 29.01           C  
ATOM    123  O   THR L  20      29.406  19.860   0.424  1.00 30.68           O  
ATOM    124  CB  THR L  20      31.950  20.822  -0.986  1.00 30.35           C  
ATOM    125  OG1 THR L  20      33.330  21.211  -1.017  1.00 31.70           O  
ATOM    126  CG2 THR L  20      31.205  21.433  -2.186  1.00 28.23           C  
ATOM    127  N   VAL L  21      29.038  22.043   0.523  1.00 27.78           N  
ATOM    128  CA  VAL L  21      27.556  21.886   0.549  1.00 26.99           C  
ATOM    129  C   VAL L  21      27.061  22.349  -0.813  1.00 28.16           C  
ATOM    130  O   VAL L  21      27.364  23.481  -1.253  1.00 28.04           O  
ATOM    131  CB  VAL L  21      26.944  22.827   1.614  1.00 26.66           C  
ATOM    132  CG1 VAL L  21      25.385  22.721   1.656  1.00 24.89           C  
ATOM    133  CG2 VAL L  21      27.530  22.448   2.979  1.00 29.52           C  
ATOM    134  N   SER L  22      26.274  21.509  -1.465  1.00 29.37           N  
ATOM    135  CA  SER L  22      25.746  21.807  -2.788  1.00 31.88           C  
ATOM    136  C   SER L  22      24.342  22.372  -2.697  1.00 31.89           C  
ATOM    137  O   SER L  22      23.663  22.178  -1.714  1.00 33.45           O  
ATOM    138  CB  SER L  22      25.672  20.536  -3.607  1.00 36.25           C  
ATOM    139  OG  SER L  22      24.687  19.702  -3.000  1.00 38.08           O  
ATOM    140  N   CYS L  23      23.925  23.089  -3.726  1.00 31.45           N  
ATOM    141  CA  CYS L  23      22.629  23.725  -3.771  1.00 32.66           C  
ATOM    142  C   CYS L  23      22.197  23.682  -5.251  1.00 35.27           C  
ATOM    143  O   CYS L  23      22.808  24.401  -6.073  1.00 36.00           O  
ATOM    144  CB  CYS L  23      22.853  25.142  -3.320  1.00 32.93           C  
ATOM    145  SG  CYS L  23      21.539  26.351  -3.468  1.00 35.67           S  
ATOM    146  N   THR L  24      21.192  22.862  -5.594  1.00 32.84           N  
ATOM    147  CA  THR L  24      20.760  22.797  -6.962  1.00 32.96           C  
ATOM    148  C   THR L  24      19.434  23.497  -7.160  1.00 31.58           C  
ATOM    149  O   THR L  24      18.702  23.739  -6.208  1.00 30.38           O  
ATOM    150  CB  THR L  24      20.766  21.311  -7.538  1.00 35.07           C  
ATOM    151  OG1 THR L  24      19.681  20.530  -6.988  1.00 39.93           O  
ATOM    152  CG2 THR L  24      22.081  20.599  -7.175  1.00 35.68           C  
ATOM    153  N   GLY L  25      19.184  23.888  -8.410  1.00 30.60           N  
ATOM    154  CA  GLY L  25      17.986  24.624  -8.784  1.00 33.99           C  
ATOM    155  C   GLY L  25      18.241  26.123  -8.795  1.00 36.66           C  
ATOM    156  O   GLY L  25      17.300  26.919  -8.759  1.00 33.30           O  
ATOM    157  N   VAL L  26      19.510  26.539  -8.814  1.00 41.97           N  
ATOM    158  CA  VAL L  26      19.778  27.969  -8.789  1.00 48.07           C  
ATOM    159  C   VAL L  26      19.494  28.740 -10.072  1.00 55.72           C  
ATOM    160  O   VAL L  26      18.999  29.870  -9.999  1.00 57.16           O  
ATOM    161  CB  VAL L  26      21.242  28.315  -8.369  1.00 46.65           C  
ATOM    162  CG1 VAL L  26      21.468  27.948  -6.925  1.00 41.94           C  
ATOM    163  CG2 VAL L  26      22.238  27.635  -9.280  1.00 39.89           C  
ATOM    164  N   SER L  27      19.780  28.152 -11.232  1.00 63.08           N  
ATOM    165  CA  SER L  27      19.569  28.857 -12.507  1.00 70.81           C  
ATOM    166  C   SER L  27      18.332  29.749 -12.536  1.00 74.29           C  
ATOM    167  O   SER L  27      17.197  29.267 -12.392  1.00 76.30           O  
ATOM    168  CB  SER L  27      19.473  27.875 -13.673  1.00 71.30           C  
ATOM    169  OG  SER L  27      20.726  27.318 -13.960  1.00 74.59           O  
ATOM    170  N   SER L  27A     18.543  31.049 -12.716  0.30 77.62           N  
ATOM    171  CA  SER L  27A     17.414  31.955 -12.774  0.30 80.13           C  
ATOM    172  C   SER L  27A     16.755  31.686 -14.105  0.30 81.75           C  
ATOM    173  O   SER L  27A     17.415  31.344 -15.093  0.30 81.95           O  
ATOM    174  CB  SER L  27A     17.855  33.414 -12.691  0.30 80.40           C  
ATOM    175  OG  SER L  27A     18.174  33.921 -13.972  0.30 80.69           O  
ATOM    176  N   ILE L  27B     15.445  31.836 -14.121  0.30 83.59           N  
ATOM    177  CA  ILE L  27B     14.678  31.590 -15.315  0.30 85.54           C  
ATOM    178  C   ILE L  27B     14.556  32.841 -16.172  0.30 87.50           C  
ATOM    179  O   ILE L  27B     15.001  32.828 -17.316  0.30 87.39           O  
ATOM    180  CB  ILE L  27B     13.344  31.003 -14.895  0.30 84.90           C  
ATOM    181  CG1 ILE L  27B     13.638  29.688 -14.166  0.30 84.49           C  
ATOM    182  CG2 ILE L  27B     12.385  30.911 -16.071  0.30 84.68           C  
ATOM    183  CD1 ILE L  27B     14.790  28.853 -14.774  0.50 84.04           C  
ATOM    184  N   VAL L  27C     13.963  33.914 -15.658  0.30 90.14           N  
ATOM    185  CA  VAL L  27C     13.926  35.115 -16.468  0.30 92.79           C  
ATOM    186  C   VAL L  27C     15.281  35.749 -16.237  0.30 95.21           C  
ATOM    187  O   VAL L  27C     15.608  36.129 -15.122  0.30 95.53           O  
ATOM    188  CB  VAL L  27C     12.838  36.138 -16.051  0.30 92.17           C  
ATOM    189  CG1 VAL L  27C     11.467  35.616 -16.400  0.30 91.84           C  
ATOM    190  CG2 VAL L  27C     12.949  36.484 -14.584  0.30 91.96           C  
ATOM    191  N   GLY L  28      16.077  35.837 -17.288  1.00 97.83           N  
ATOM    192  CA  GLY L  28      17.397  36.413 -17.152  1.00100.80           C  
ATOM    193  C   GLY L  28      18.441  35.331 -16.940  1.02100.26           C  
ATOM    194  O   GLY L  28      18.173  34.137 -17.120  1.03100.49           O  
ATOM    195  N   SER L  29      19.643  35.750 -16.563  1.02100.56           N  
ATOM    196  CA  SER L  29      20.731  34.809 -16.321  1.01100.72           C  
ATOM    197  C   SER L  29      21.453  35.242 -15.066  1.00 99.35           C  
ATOM    198  O   SER L  29      22.685  35.327 -15.011  1.00100.70           O  
ATOM    199  CB  SER L  29      21.701  34.786 -17.498  1.03100.30           C  
ATOM    200  OG  SER L  29      21.685  33.517 -18.123  1.03101.12           O  
ATOM    201  N   TYR L  30      20.650  35.516 -14.055  1.00 94.39           N  
ATOM    202  CA  TYR L  30      21.160  35.958 -12.787  1.00 88.02           C  
ATOM    203  C   TYR L  30      22.201  35.019 -12.184  1.00 83.50           C  
ATOM    204  O   TYR L  30      22.151  33.794 -12.334  1.00 82.75           O  
ATOM    205  CB  TYR L  30      19.981  36.167 -11.864  0.30 87.47           C  
ATOM    206  CG  TYR L  30      18.861  36.926 -12.546  0.30 85.94           C  
ATOM    207  CD1 TYR L  30      17.548  36.526 -12.404  0.30 85.20           C  
ATOM    208  CD2 TYR L  30      19.110  38.085 -13.271  0.30 85.30           C  
ATOM    209  CE1 TYR L  30      16.512  37.255 -12.946  0.30 84.49           C  
ATOM    210  CE2 TYR L  30      18.061  38.827 -13.823  0.30 84.50           C  
ATOM    211  CZ  TYR L  30      16.762  38.399 -13.643  0.30 84.27           C  
ATOM    212  OH  TYR L  30      15.686  39.121 -14.099  0.30 83.60           O  
ATOM    213  N   ASN L  31      23.162  35.639 -11.522  1.00 77.98           N  
ATOM    214  CA  ASN L  31      24.262  34.954 -10.882  1.00 72.11           C  
ATOM    215  C   ASN L  31      24.200  35.450  -9.437  1.00 66.37           C  
ATOM    216  O   ASN L  31      25.197  35.828  -8.826  1.00 64.87           O  
ATOM    217  CB  ASN L  31      25.547  35.403 -11.531  1.00 75.08           C  
ATOM    218  CG  ASN L  31      26.640  34.395 -11.384  1.00 77.74           C  
ATOM    219  OD1 ASN L  31      26.415  33.176 -11.533  1.00 78.65           O  
ATOM    220  ND2 ASN L  31      27.849  34.883 -11.103  1.00 80.17           N  
ATOM    221  N   LEU L  32      22.998  35.458  -8.903  1.00 58.62           N  
ATOM    222  CA  LEU L  32      22.855  35.959  -7.579  1.00 52.87           C  
ATOM    223  C   LEU L  32      22.649  34.828  -6.563  1.00 45.48           C  
ATOM    224  O   LEU L  32      21.532  34.628  -6.079  1.00 44.42           O  
ATOM    225  CB  LEU L  32      21.683  36.983  -7.538  1.00 56.23           C  
ATOM    226  CG  LEU L  32      21.359  37.696  -8.896  1.00 58.63           C  
ATOM    227  CD1 LEU L  32      20.282  38.816  -8.681  1.00 59.83           C  
ATOM    228  CD2 LEU L  32      22.616  38.295  -9.492  1.00 59.92           C  
ATOM    229  N   VAL L  33      23.719  34.097  -6.263  1.00 38.73           N  
ATOM    230  CA  VAL L  33      23.690  33.014  -5.262  1.00 32.70           C  
ATOM    231  C   VAL L  33      24.357  33.454  -3.967  1.00 30.57           C  
ATOM    232  O   VAL L  33      25.483  33.997  -3.955  1.00 28.45           O  
ATOM    233  CB  VAL L  33      24.397  31.746  -5.771  1.00 33.27           C  
ATOM    234  CG1 VAL L  33      24.368  30.650  -4.694  1.00 33.40           C  
ATOM    235  CG2 VAL L  33      23.690  31.256  -7.047  1.00 33.47           C  
ATOM    236  N   SER L  34      23.653  33.266  -2.874  1.00 28.38           N  
ATOM    237  CA  SER L  34      24.199  33.669  -1.567  1.00 28.71           C  
ATOM    238  C   SER L  34      24.134  32.503  -0.632  1.00 25.75           C  
ATOM    239  O   SER L  34      23.309  31.644  -0.829  1.00 27.75           O  
ATOM    240  CB  SER L  34      23.380  34.848  -0.974  1.00 28.20           C  
ATOM    241  OG  SER L  34      23.545  35.996  -1.827  1.00 30.33           O  
ATOM    242  N   TRP L  35      24.997  32.490   0.387  1.00 25.76           N  
ATOM    243  CA  TRP L  35      25.020  31.447   1.412  1.00 22.99           C  
ATOM    244  C   TRP L  35      24.966  32.123   2.798  1.00 21.54           C  
ATOM    245  O   TRP L  35      25.543  33.183   2.991  1.00 23.47           O  
ATOM    246  CB  TRP L  35      26.309  30.683   1.325  1.00 24.05           C  
ATOM    247  CG  TRP L  35      26.288  29.763   0.144  1.00 23.34           C  
ATOM    248  CD1 TRP L  35      26.735  30.006  -1.102  1.00 24.26           C  
ATOM    249  CD2 TRP L  35      25.793  28.442   0.161  1.00 25.27           C  
ATOM    250  NE1 TRP L  35      26.560  28.879  -1.908  1.00 24.36           N  
ATOM    251  CE2 TRP L  35      25.970  27.904  -1.134  1.00 25.69           C  
ATOM    252  CE3 TRP L  35      25.202  27.641   1.163  1.00 25.24           C  
ATOM    253  CZ2 TRP L  35      25.593  26.613  -1.457  1.00 25.65           C  
ATOM    254  CZ3 TRP L  35      24.823  26.352   0.835  1.00 26.41           C  
ATOM    255  CH2 TRP L  35      25.018  25.851  -0.460  1.00 25.44           C  
ATOM    256  N   TYR L  36      24.269  31.505   3.728  1.00 23.10           N  
ATOM    257  CA  TYR L  36      24.117  32.050   5.061  1.00 23.06           C  
ATOM    258  C   TYR L  36      24.417  30.950   6.066  1.00 22.73           C  
ATOM    259  O   TYR L  36      24.214  29.754   5.807  1.00 24.97           O  
ATOM    260  CB  TYR L  36      22.648  32.477   5.323  1.00 25.10           C  
ATOM    261  CG  TYR L  36      22.107  33.404   4.280  1.00 25.30           C  
ATOM    262  CD1 TYR L  36      21.733  32.923   3.050  1.00 27.24           C  
ATOM    263  CD2 TYR L  36      21.992  34.782   4.526  1.00 23.96           C  
ATOM    264  CE1 TYR L  36      21.251  33.786   2.046  1.00 29.24           C  
ATOM    265  CE2 TYR L  36      21.508  35.638   3.560  1.00 26.87           C  
ATOM    266  CZ  TYR L  36      21.140  35.137   2.316  1.00 31.01           C  
ATOM    267  OH  TYR L  36      20.685  35.994   1.309  1.00 33.25           O  
ATOM    268  N   GLN L  37      24.864  31.403   7.225  1.00 23.88           N  
ATOM    269  CA  GLN L  37      25.168  30.541   8.337  1.00 24.87           C  
ATOM    270  C   GLN L  37      24.178  30.950   9.451  1.00 24.26           C  
ATOM    271  O   GLN L  37      24.069  32.137   9.762  1.00 26.91           O  
ATOM    272  CB  GLN L  37      26.566  30.846   8.861  1.00 25.53           C  
ATOM    273  CG  GLN L  37      26.980  29.910  10.016  1.00 27.77           C  
ATOM    274  CD  GLN L  37      28.319  30.375  10.581  1.00 29.25           C  
ATOM    275  OE1 GLN L  37      28.425  31.511  11.052  1.00 29.97           O  
ATOM    276  NE2 GLN L  37      29.339  29.541  10.486  1.00 27.49           N  
ATOM    277  N   GLN L  38      23.585  29.959  10.104  1.00 26.61           N  
ATOM    278  CA  GLN L  38      22.699  30.231  11.194  1.00 26.98           C  
ATOM    279  C   GLN L  38      22.973  29.326  12.387  1.00 27.77           C  
ATOM    280  O   GLN L  38      22.850  28.073  12.305  1.00 27.41           O  
ATOM    281  CB  GLN L  38      21.220  30.073  10.805  1.00 26.13           C  
ATOM    282  CG  GLN L  38      20.351  30.599  11.962  1.00 27.71           C  
ATOM    283  CD  GLN L  38      18.819  30.382  11.767  1.00 34.90           C  
ATOM    284  OE1 GLN L  38      18.367  29.371  11.190  1.00 32.50           O  
ATOM    285  NE2 GLN L  38      18.026  31.315  12.308  1.00 34.20           N  
ATOM    286  N   HIS L  39      23.405  29.958  13.470  1.00 30.51           N  
ATOM    287  CA  HIS L  39      23.614  29.255  14.728  1.00 34.56           C  
ATOM    288  C   HIS L  39      22.253  29.273  15.466  1.00 38.82           C  
ATOM    289  O   HIS L  39      21.439  30.154  15.249  1.00 36.97           O  
ATOM    290  CB  HIS L  39      24.642  29.981  15.546  1.00 34.34           C  
ATOM    291  CG  HIS L  39      26.029  29.744  15.074  1.00 36.87           C  
ATOM    292  ND1 HIS L  39      26.691  30.624  14.251  1.00 35.98           N  
ATOM    293  CD2 HIS L  39      26.884  28.717  15.309  1.00 36.96           C  
ATOM    294  CE1 HIS L  39      27.903  30.155  14.005  1.00 39.38           C  
ATOM    295  NE2 HIS L  39      28.046  28.999  14.636  1.00 37.27           N  
ATOM    296  N   PRO L  40      22.007  28.296  16.345  1.00 42.89           N  
ATOM    297  CA  PRO L  40      20.753  28.155  17.128  1.00 44.59           C  
ATOM    298  C   PRO L  40      20.306  29.442  17.793  1.00 44.00           C  
ATOM    299  O   PRO L  40      21.085  30.096  18.485  1.00 43.29           O  
ATOM    300  CB  PRO L  40      21.106  27.084  18.173  1.00 46.66           C  
ATOM    301  CG  PRO L  40      22.278  26.317  17.535  1.00 46.33           C  
ATOM    302  CD  PRO L  40      23.069  27.412  16.871  1.00 44.70           C  
ATOM    303  N   GLY L  41      19.059  29.833  17.548  1.00 45.70           N  
ATOM    304  CA  GLY L  41      18.539  31.046  18.165  1.00 44.04           C  
ATOM    305  C   GLY L  41      19.138  32.370  17.719  1.00 44.34           C  
ATOM    306  O   GLY L  41      18.970  33.410  18.407  1.00 44.89           O  
ATOM    307  N   LYS L  42      19.873  32.364  16.609  1.00 40.94           N  
ATOM    308  CA  LYS L  42      20.426  33.627  16.121  1.00 40.20           C  
ATOM    309  C   LYS L  42      19.970  33.822  14.688  1.00 35.89           C  
ATOM    310  O   LYS L  42      19.493  32.883  14.076  1.00 33.91           O  
ATOM    311  CB  LYS L  42      21.933  33.612  16.200  1.00 44.99           C  
ATOM    312  CG  LYS L  42      22.445  33.412  17.614  1.00 53.93           C  
ATOM    313  CD  LYS L  42      23.801  34.052  17.757  1.00 61.24           C  
ATOM    314  CE  LYS L  42      23.648  35.563  17.690  1.00 67.21           C  
ATOM    315  NZ  LYS L  42      24.676  36.239  16.835  1.00 71.57           N  
ATOM    316  N   ALA L  43      20.096  35.033  14.170  1.00 33.13           N  
ATOM    317  CA  ALA L  43      19.684  35.365  12.795  1.00 31.41           C  
ATOM    318  C   ALA L  43      20.668  34.818  11.782  1.00 30.03           C  
ATOM    319  O   ALA L  43      21.840  34.743  12.065  1.00 31.79           O  
ATOM    320  CB  ALA L  43      19.680  36.871  12.620  1.00 31.03           C  
ATOM    321  N   PRO L  44      20.207  34.474  10.577  1.00 30.09           N  
ATOM    322  CA  PRO L  44      21.180  33.972   9.606  1.00 30.25           C  
ATOM    323  C   PRO L  44      22.169  35.106   9.326  1.00 30.56           C  
ATOM    324  O   PRO L  44      21.788  36.261   9.311  1.00 29.51           O  
ATOM    325  CB  PRO L  44      20.323  33.682   8.391  1.00 30.29           C  
ATOM    326  CG  PRO L  44      18.972  33.275   9.011  1.00 27.76           C  
ATOM    327  CD  PRO L  44      18.810  34.301  10.095  1.00 27.09           C  
ATOM    328  N   LYS L  45      23.432  34.750   9.099  1.00 32.48           N  
ATOM    329  CA  LYS L  45      24.476  35.709   8.808  1.00 30.36           C  
ATOM    330  C   LYS L  45      24.951  35.396   7.414  1.00 27.10           C  
ATOM    331  O   LYS L  45      25.238  34.251   7.099  1.00 23.49           O  
ATOM    332  CB  LYS L  45      25.624  35.506   9.798  1.00 38.02           C  
ATOM    333  CG  LYS L  45      26.964  36.079   9.333  1.00 43.56           C  
ATOM    334  CD  LYS L  45      28.209  35.675  10.216  1.00 46.07           C  
ATOM    335  CE  LYS L  45      29.447  36.498   9.725  1.00 48.24           C  
ATOM    336  NZ  LYS L  45      30.769  36.131  10.332  1.00 51.16           N  
ATOM    337  N   LEU L  46      25.144  36.430   6.609  1.00 25.92           N  
ATOM    338  CA  LEU L  46      25.575  36.272   5.204  1.00 28.17           C  
ATOM    339  C   LEU L  46      27.058  35.867   5.125  1.00 27.76           C  
ATOM    340  O   LEU L  46      27.883  36.530   5.719  1.00 26.90           O  
ATOM    341  CB  LEU L  46      25.402  37.637   4.471  1.00 26.60           C  
ATOM    342  CG  LEU L  46      25.738  37.697   2.972  1.00 30.46           C  
ATOM    343  CD1 LEU L  46      24.820  36.710   2.237  1.00 27.22           C  
ATOM    344  CD2 LEU L  46      25.546  39.130   2.450  1.00 27.85           C  
ATOM    345  N   LEU L  47      27.384  34.808   4.403  1.00 25.61           N  
ATOM    346  CA  LEU L  47      28.771  34.331   4.226  1.00 24.38           C  
ATOM    347  C   LEU L  47      29.297  34.657   2.863  1.00 24.45           C  
ATOM    348  O   LEU L  47      30.493  34.820   2.667  1.00 25.92           O  
ATOM    349  CB  LEU L  47      28.807  32.778   4.295  1.00 24.78           C  
ATOM    350  CG  LEU L  47      28.371  32.177   5.615  1.00 27.63           C  
ATOM    351  CD1 LEU L  47      28.207  30.686   5.475  1.00 29.66           C  
ATOM    352  CD2 LEU L  47      29.421  32.489   6.648  1.00 27.17           C  
ATOM    353  N   THR L  48      28.429  34.567   1.867  1.00 26.11           N  
ATOM    354  CA  THR L  48      28.926  34.828   0.530  1.00 29.34           C  
ATOM    355  C   THR L  48      27.801  35.336  -0.280  1.00 29.90           C  
ATOM    356  O   THR L  48      26.628  35.083   0.070  1.00 28.33           O  
ATOM    357  CB  THR L  48      29.575  33.545  -0.127  1.00 35.01           C  
ATOM    358  OG1 THR L  48      28.716  32.420  -0.003  1.00 34.95           O  
ATOM    359  CG2 THR L  48      30.914  33.192   0.573  1.00 36.92           C  
ATOM    360  N   TYR L  49      28.099  36.095  -1.332  1.00 28.83           N  
ATOM    361  CA  TYR L  49      27.047  36.612  -2.174  1.00 30.81           C  
ATOM    362  C   TYR L  49      27.533  36.757  -3.641  1.00 33.35           C  
ATOM    363  O   TYR L  49      28.755  36.693  -3.926  1.00 33.58           O  
ATOM    364  CB  TYR L  49      26.525  37.970  -1.618  1.00 31.05           C  
ATOM    365  CG  TYR L  49      27.585  39.095  -1.585  1.00 33.00           C  
ATOM    366  CD1 TYR L  49      28.594  39.133  -0.599  1.00 32.72           C  
ATOM    367  CD2 TYR L  49      27.559  40.113  -2.536  1.00 36.14           C  
ATOM    368  CE1 TYR L  49      29.565  40.177  -0.569  1.00 37.23           C  
ATOM    369  CE2 TYR L  49      28.516  41.164  -2.524  1.00 37.75           C  
ATOM    370  CZ  TYR L  49      29.505  41.182  -1.555  1.00 38.93           C  
ATOM    371  OH  TYR L  49      30.455  42.163  -1.638  1.00 40.50           O  
ATOM    372  N   GLU L  50      26.607  36.941  -4.563  1.00 32.87           N  
ATOM    373  CA  GLU L  50      26.991  37.081  -5.983  1.00 39.78           C  
ATOM    374  C   GLU L  50      27.945  35.911  -6.301  1.00 38.77           C  
ATOM    375  O   GLU L  50      29.022  36.082  -6.897  1.00 38.44           O  
ATOM    376  CB  GLU L  50      27.654  38.472  -6.222  1.00 40.38           C  
ATOM    377  CG  GLU L  50      26.608  39.553  -6.623  1.00 50.69           C  
ATOM    378  CD  GLU L  50      27.004  41.043  -6.338  1.00 55.16           C  
ATOM    379  OE1 GLU L  50      28.109  41.489  -6.761  1.00 57.54           O  
ATOM    380  OE2 GLU L  50      26.182  41.770  -5.700  1.00 56.08           O  
ATOM    381  N   VAL L  51      27.507  34.729  -5.868  1.00 38.16           N  
ATOM    382  CA  VAL L  51      28.212  33.465  -6.023  1.00 38.19           C  
ATOM    383  C   VAL L  51      29.508  33.303  -5.236  1.00 41.00           C  
ATOM    384  O   VAL L  51      29.647  32.318  -4.495  1.00 41.31           O  
ATOM    385  CB  VAL L  51      28.515  33.164  -7.503  1.00 38.25           C  
ATOM    386  CG1 VAL L  51      29.558  32.109  -7.609  1.00 36.40           C  
ATOM    387  CG2 VAL L  51      27.239  32.706  -8.206  1.00 37.36           C  
ATOM    388  N   ASN L  52      30.457  34.237  -5.382  1.00 40.04           N  
ATOM    389  CA  ASN L  52      31.745  34.080  -4.692  1.00 40.58           C  
ATOM    390  C   ASN L  52      32.378  35.297  -4.033  1.00 39.28           C  
ATOM    391  O   ASN L  52      33.593  35.336  -3.751  1.00 38.54           O  
ATOM    392  CB  ASN L  52      32.757  33.493  -5.667  1.00 44.89           C  
ATOM    393  CG  ASN L  52      32.880  34.343  -6.943  1.00 46.55           C  
ATOM    394  OD1 ASN L  52      32.562  35.530  -6.939  1.00 43.64           O  
ATOM    395  ND2 ASN L  52      33.352  33.727  -8.024  1.00 49.56           N  
ATOM    396  N   LYS L  53      31.592  36.312  -3.788  1.00 36.11           N  
ATOM    397  CA  LYS L  53      32.135  37.444  -3.102  1.00 36.84           C  
ATOM    398  C   LYS L  53      31.884  37.201  -1.620  1.00 38.26           C  
ATOM    399  O   LYS L  53      30.847  36.650  -1.236  1.00 35.45           O  
ATOM    400  CB  LYS L  53      31.395  38.697  -3.539  1.00 39.88           C  
ATOM    401  CG  LYS L  53      31.617  39.068  -4.989  1.00 42.78           C  
ATOM    402  CD  LYS L  53      31.165  40.529  -5.187  1.00 45.24           C  
ATOM    403  CE  LYS L  53      31.264  40.971  -6.651  1.00 50.55           C  
ATOM    404  NZ  LYS L  53      30.582  40.039  -7.625  1.00 53.60           N  
ATOM    405  N   ARG L  54      32.775  37.654  -0.758  1.00 36.75           N  
ATOM    406  CA  ARG L  54      32.550  37.436   0.648  1.00 40.08           C  
ATOM    407  C   ARG L  54      32.493  38.755   1.429  1.00 41.00           C  
ATOM    408  O   ARG L  54      33.292  39.639   1.189  1.00 41.82           O  
ATOM    409  CB  ARG L  54      33.666  36.504   1.149  1.00 42.30           C  
ATOM    410  CG  ARG L  54      33.956  36.545   2.646  1.00 47.09           C  
ATOM    411  CD  ARG L  54      34.936  35.399   2.989  1.00 48.52           C  
ATOM    412  NE  ARG L  54      35.947  35.313   1.950  1.00 52.33           N  
ATOM    413  CZ  ARG L  54      37.042  36.075   1.889  1.00 56.73           C  
ATOM    414  NH1 ARG L  54      37.311  36.988   2.834  1.00 56.08           N  
ATOM    415  NH2 ARG L  54      37.837  35.974   0.827  1.00 58.32           N  
ATOM    416  N   PRO L  55      31.524  38.917   2.340  1.00 42.09           N  
ATOM    417  CA  PRO L  55      31.425  40.149   3.132  1.00 43.03           C  
ATOM    418  C   PRO L  55      32.669  40.348   3.973  1.00 45.34           C  
ATOM    419  O   PRO L  55      33.354  39.388   4.344  1.00 43.53           O  
ATOM    420  CB  PRO L  55      30.253  39.878   4.060  1.00 42.44           C  
ATOM    421  CG  PRO L  55      29.369  38.950   3.222  1.00 40.92           C  
ATOM    422  CD  PRO L  55      30.409  38.005   2.658  1.00 42.57           C  
ATOM    423  N   SER L  56      32.943  41.591   4.339  1.00 48.83           N  
ATOM    424  CA  SER L  56      34.110  41.829   5.203  1.00 51.05           C  
ATOM    425  C   SER L  56      33.711  41.241   6.538  1.00 49.24           C  
ATOM    426  O   SER L  56      32.538  41.213   6.870  1.00 49.56           O  
ATOM    427  CB  SER L  56      34.390  43.338   5.340  1.00 54.70           C  
ATOM    428  OG  SER L  56      34.554  43.916   4.043  1.00 58.13           O  
ATOM    429  N   GLY L  57      34.673  40.741   7.291  1.00 48.15           N  
ATOM    430  CA  GLY L  57      34.346  40.146   8.567  1.00 45.76           C  
ATOM    431  C   GLY L  57      34.209  38.636   8.446  1.00 44.48           C  
ATOM    432  O   GLY L  57      34.282  37.900   9.465  1.00 46.19           O  
ATOM    433  N   VAL L  58      34.007  38.153   7.218  1.00 38.53           N  
ATOM    434  CA  VAL L  58      33.853  36.706   6.996  1.00 33.53           C  
ATOM    435  C   VAL L  58      35.158  36.046   6.596  1.00 31.97           C  
ATOM    436  O   VAL L  58      35.778  36.455   5.636  1.00 29.84           O  
ATOM    437  CB  VAL L  58      32.794  36.388   5.872  1.00 31.86           C  
ATOM    438  CG1 VAL L  58      32.695  34.868   5.699  1.00 30.10           C  
ATOM    439  CG2 VAL L  58      31.385  36.901   6.273  1.00 28.75           C  
ATOM    440  N   SER L  59      35.527  34.985   7.301  1.00 34.33           N  
ATOM    441  CA  SER L  59      36.759  34.236   7.017  1.00 35.42           C  
ATOM    442  C   SER L  59      36.828  33.759   5.574  1.00 35.50           C  
ATOM    443  O   SER L  59      35.819  33.373   4.976  1.00 33.30           O  
ATOM    444  CB  SER L  59      36.838  32.996   7.917  1.00 37.83           C  
ATOM    445  OG  SER L  59      38.007  32.261   7.598  1.00 40.69           O  
ATOM    446  N   ASP L  60      38.028  33.750   5.028  1.00 34.08           N  
ATOM    447  CA  ASP L  60      38.231  33.281   3.700  1.00 33.20           C  
ATOM    448  C   ASP L  60      38.209  31.751   3.713  1.00 29.60           C  
ATOM    449  O   ASP L  60      38.396  31.155   2.692  1.00 30.83           O  
ATOM    450  CB  ASP L  60      39.530  33.809   3.108  1.00 38.15           C  
ATOM    451  CG  ASP L  60      40.774  33.260   3.804  1.00 41.07           C  
ATOM    452  OD1 ASP L  60      40.680  32.631   4.883  1.00 42.83           O  
ATOM    453  OD2 ASP L  60      41.861  33.484   3.251  1.00 44.62           O  
ATOM    454  N   ARG L  61      37.979  31.127   4.860  1.00 27.99           N  
ATOM    455  CA  ARG L  61      37.793  29.664   4.833  1.00 28.16           C  
ATOM    456  C   ARG L  61      36.430  29.344   4.119  1.00 26.91           C  
ATOM    457  O   ARG L  61      36.189  28.185   3.739  1.00 28.17           O  
ATOM    458  CB  ARG L  61      37.700  29.083   6.267  1.00 28.24           C  
ATOM    459  CG  ARG L  61      38.960  29.129   7.019  1.00 31.91           C  
ATOM    460  CD  ARG L  61      38.886  28.413   8.373  1.00 29.53           C  
ATOM    461  NE  ARG L  61      37.852  28.984   9.264  1.00 31.93           N  
ATOM    462  CZ  ARG L  61      36.709  28.354   9.558  1.00 33.70           C  
ATOM    463  NH1 ARG L  61      36.436  27.149   9.034  1.00 29.12           N  
ATOM    464  NH2 ARG L  61      35.848  28.888  10.413  1.00 33.79           N  
ATOM    465  N   PHE L  62      35.555  30.348   3.959  1.00 26.65           N  
ATOM    466  CA  PHE L  62      34.254  30.133   3.323  1.00 24.74           C  
ATOM    467  C   PHE L  62      34.331  30.615   1.890  1.00 27.26           C  
ATOM    468  O   PHE L  62      34.636  31.795   1.644  1.00 27.54           O  
ATOM    469  CB  PHE L  62      33.165  30.936   4.007  1.00 26.61           C  
ATOM    470  CG  PHE L  62      32.916  30.510   5.409  1.00 26.35           C  
ATOM    471  CD1 PHE L  62      32.075  29.412   5.678  1.00 26.01           C  
ATOM    472  CD2 PHE L  62      33.566  31.146   6.448  1.00 28.47           C  
ATOM    473  CE1 PHE L  62      31.875  28.940   6.957  1.00 27.10           C  
ATOM    474  CE2 PHE L  62      33.393  30.682   7.746  1.00 28.43           C  
ATOM    475  CZ  PHE L  62      32.528  29.551   7.991  1.00 28.35           C  
ATOM    476  N   SER L  63      34.082  29.733   0.938  1.00 27.36           N  
ATOM    477  CA  SER L  63      34.120  30.224  -0.432  1.00 30.74           C  
ATOM    478  C   SER L  63      33.003  29.602  -1.284  1.00 30.12           C  
ATOM    479  O   SER L  63      32.731  28.389  -1.216  1.00 30.53           O  
ATOM    480  CB  SER L  63      35.491  29.948  -1.056  1.00 34.65           C  
ATOM    481  OG  SER L  63      35.600  28.594  -1.437  1.00 39.41           O  
ATOM    482  N   GLY L  64      32.369  30.442  -2.081  1.00 29.14           N  
ATOM    483  CA  GLY L  64      31.276  29.965  -2.911  1.00 31.64           C  
ATOM    484  C   GLY L  64      31.684  29.842  -4.380  1.00 33.56           C  
ATOM    485  O   GLY L  64      32.631  30.523  -4.813  1.00 31.86           O  
ATOM    486  N   SER L  65      31.031  28.929  -5.089  1.00 30.88           N  
ATOM    487  CA  SER L  65      31.230  28.737  -6.513  1.00 34.42           C  
ATOM    488  C   SER L  65      29.902  28.289  -7.100  1.00 35.11           C  
ATOM    489  O   SER L  65      28.941  28.023  -6.371  1.00 31.79           O  
ATOM    490  CB  SER L  65      32.266  27.664  -6.796  1.00 34.40           C  
ATOM    491  OG  SER L  65      31.916  26.493  -6.095  1.00 36.97           O  
ATOM    492  N   LYS L  66      29.869  28.188  -8.427  1.00 38.26           N  
ATOM    493  CA  LYS L  66      28.669  27.787  -9.131  1.00 42.83           C  
ATOM    494  C   LYS L  66      29.067  26.920 -10.311  1.00 45.51           C  
ATOM    495  O   LYS L  66      30.178  27.009 -10.848  1.00 45.14           O  
ATOM    496  CB  LYS L  66      27.906  29.019  -9.636  1.00 45.35           C  
ATOM    497  CG  LYS L  66      26.654  28.690 -10.476  1.00 52.66           C  
ATOM    498  CD  LYS L  66      25.784  29.888 -10.792  1.00 56.86           C  
ATOM    499  CE  LYS L  66      24.717  29.508 -11.729  1.00 65.52           C  
ATOM    500  NZ  LYS L  66      23.760  30.610 -12.010  1.00 69.25           N  
ATOM    501  N   SER L  67      28.172  26.051 -10.701  1.00 45.74           N  
ATOM    502  CA  SER L  67      28.450  25.226 -11.851  1.00 49.08           C  
ATOM    503  C   SER L  67      27.088  24.914 -12.418  1.00 48.47           C  
ATOM    504  O   SER L  67      26.399  24.029 -11.928  1.00 48.07           O  
ATOM    505  CB  SER L  67      29.177  23.968 -11.429  1.00 50.86           C  
ATOM    506  OG  SER L  67      29.593  23.256 -12.576  1.00 57.18           O  
ATOM    507  N   GLY L  68      26.690  25.708 -13.414  1.00 49.34           N  
ATOM    508  CA  GLY L  68      25.402  25.527 -14.070  1.00 48.05           C  
ATOM    509  C   GLY L  68      24.211  25.756 -13.164  1.00 47.95           C  
ATOM    510  O   GLY L  68      24.017  26.840 -12.609  1.00 47.91           O  
ATOM    511  N   ASN L  69      23.417  24.712 -12.990  1.00 45.67           N  
ATOM    512  CA  ASN L  69      22.215  24.803 -12.174  1.00 43.67           C  
ATOM    513  C   ASN L  69      22.537  24.494 -10.720  1.00 41.34           C  
ATOM    514  O   ASN L  69      21.628  24.351  -9.897  1.00 39.02           O  
ATOM    515  CB  ASN L  69      21.186  23.801 -12.685  1.00 43.96           C  
ATOM    516  CG  ASN L  69      19.862  23.936 -12.001  1.00 45.94           C  
ATOM    517  OD1 ASN L  69      19.365  25.046 -11.776  1.00 46.37           O  
ATOM    518  ND2 ASN L  69      19.269  22.802 -11.663  1.00 47.41           N  
ATOM    519  N   SER L  70      23.831  24.378 -10.418  1.00 38.65           N  
ATOM    520  CA  SER L  70      24.255  24.075  -9.068  1.00 38.16           C  
ATOM    521  C   SER L  70      25.268  25.052  -8.489  1.00 37.55           C  
ATOM    522  O   SER L  70      26.168  25.536  -9.214  1.00 37.19           O  
ATOM    523  CB  SER L  70      24.816  22.672  -9.035  1.00 40.32           C  
ATOM    524  OG  SER L  70      25.171  22.326  -7.718  1.00 45.76           O  
ATOM    525  N   ALA L  71      25.114  25.373  -7.198  1.00 33.45           N  
ATOM    526  CA  ALA L  71      26.067  26.259  -6.512  1.00 31.16           C  
ATOM    527  C   ALA L  71      26.633  25.484  -5.332  1.00 29.71           C  
ATOM    528  O   ALA L  71      26.046  24.475  -4.885  1.00 28.75           O  
ATOM    529  CB  ALA L  71      25.426  27.531  -6.051  1.00 29.16           C  
ATOM    530  N   SER L  72      27.791  25.931  -4.832  1.00 28.97           N  
ATOM    531  CA  SER L  72      28.409  25.203  -3.726  1.00 28.76           C  
ATOM    532  C   SER L  72      29.059  26.146  -2.763  1.00 27.10           C  
ATOM    533  O   SER L  72      29.624  27.147  -3.172  1.00 24.57           O  
ATOM    534  CB  SER L  72      29.564  24.309  -4.247  1.00 31.09           C  
ATOM    535  OG  SER L  72      29.034  23.357  -5.148  1.00 36.79           O  
ATOM    536  N   LEU L  73      29.012  25.771  -1.502  1.00 25.69           N  
ATOM    537  CA  LEU L  73      29.700  26.489  -0.471  1.00 24.18           C  
ATOM    538  C   LEU L  73      30.782  25.498   0.036  1.00 24.16           C  
ATOM    539  O   LEU L  73      30.470  24.358   0.454  1.00 25.56           O  
ATOM    540  CB  LEU L  73      28.752  26.857   0.708  1.00 22.75           C  
ATOM    541  CG  LEU L  73      29.557  27.365   1.924  1.00 25.75           C  
ATOM    542  CD1 LEU L  73      30.116  28.739   1.636  1.00 27.44           C  
ATOM    543  CD2 LEU L  73      28.670  27.400   3.160  1.00 25.50           C  
ATOM    544  N   THR L  74      32.050  25.901  -0.001  1.00 25.96           N  
ATOM    545  CA  THR L  74      33.084  25.033   0.529  1.00 25.24           C  
ATOM    546  C   THR L  74      33.629  25.648   1.815  1.00 25.81           C  
ATOM    547  O   THR L  74      34.005  26.816   1.830  1.00 26.42           O  
ATOM    548  CB  THR L  74      34.256  24.878  -0.460  1.00 28.06           C  
ATOM    549  OG1 THR L  74      33.791  24.149  -1.577  1.00 27.60           O  
ATOM    550  CG2 THR L  74      35.400  24.140   0.185  1.00 27.70           C  
ATOM    551  N   ILE L  75      33.596  24.896   2.914  1.00 25.16           N  
ATOM    552  CA  ILE L  75      34.164  25.420   4.160  1.00 25.38           C  
ATOM    553  C   ILE L  75      35.503  24.674   4.338  1.00 26.93           C  
ATOM    554  O   ILE L  75      35.503  23.443   4.519  1.00 28.68           O  
ATOM    555  CB  ILE L  75      33.238  25.108   5.316  1.00 24.13           C  
ATOM    556  CG1 ILE L  75      31.852  25.704   5.057  1.00 26.74           C  
ATOM    557  CG2 ILE L  75      33.759  25.735   6.610  1.00 27.53           C  
ATOM    558  CD1 ILE L  75      30.832  25.195   6.056  1.00 28.13           C  
ATOM    559  N   SER L  76      36.613  25.408   4.279  1.00 26.41           N  
ATOM    560  CA  SER L  76      37.944  24.833   4.380  1.00 30.18           C  
ATOM    561  C   SER L  76      38.451  24.888   5.839  1.00 31.67           C  
ATOM    562  O   SER L  76      38.139  25.844   6.568  1.00 32.96           O  
ATOM    563  CB  SER L  76      38.912  25.641   3.508  1.00 31.95           C  
ATOM    564  OG  SER L  76      38.600  25.573   2.096  1.00 37.83           O  
ATOM    565  N   GLY L  77      39.195  23.866   6.265  1.00 33.29           N  
ATOM    566  CA  GLY L  77      39.758  23.884   7.608  1.00 31.80           C  
ATOM    567  C   GLY L  77      38.685  24.022   8.678  1.00 31.92           C  
ATOM    568  O   GLY L  77      38.719  24.888   9.551  1.00 33.56           O  
ATOM    569  N   LEU L  78      37.768  23.085   8.663  1.00 30.69           N  
ATOM    570  CA  LEU L  78      36.636  23.112   9.576  1.00 32.25           C  
ATOM    571  C   LEU L  78      37.026  23.364  11.026  1.00 32.87           C  
ATOM    572  O   LEU L  78      37.980  22.739  11.495  1.00 29.64           O  
ATOM    573  CB  LEU L  78      35.964  21.769   9.472  1.00 32.93           C  
ATOM    574  CG  LEU L  78      34.490  21.475   9.600  1.00 38.01           C  
ATOM    575  CD1 LEU L  78      33.595  22.398   8.708  1.00 36.69           C  
ATOM    576  CD2 LEU L  78      34.359  19.986   9.169  1.00 32.97           C  
ATOM    577  N   GLN L  79      36.236  24.171  11.747  1.00 30.80           N  
ATOM    578  CA  GLN L  79      36.466  24.462  13.182  1.00 34.97           C  
ATOM    579  C   GLN L  79      35.176  24.132  13.909  1.00 34.32           C  
ATOM    580  O   GLN L  79      34.083  24.141  13.294  1.00 32.81           O  
ATOM    581  CB  GLN L  79      36.856  25.941  13.399  1.00 36.71           C  
ATOM    582  CG  GLN L  79      38.206  26.211  12.788  1.00 45.31           C  
ATOM    583  CD  GLN L  79      38.640  27.671  12.761  1.00 50.42           C  
ATOM    584  OE1 GLN L  79      39.664  27.997  12.155  1.00 53.72           O  
ATOM    585  NE2 GLN L  79      37.890  28.544  13.421  1.00 53.73           N  
ATOM    586  N   ALA L  80      35.267  23.836  15.207  1.00 33.55           N  
ATOM    587  CA  ALA L  80      34.062  23.444  15.925  1.00 33.73           C  
ATOM    588  C   ALA L  80      32.972  24.527  15.878  1.00 32.98           C  
ATOM    589  O   ALA L  80      31.787  24.209  15.851  1.00 33.41           O  
ATOM    590  CB  ALA L  80      34.407  23.030  17.427  1.00 37.53           C  
ATOM    591  N   GLU L  81      33.363  25.783  15.830  1.00 33.20           N  
ATOM    592  CA  GLU L  81      32.389  26.892  15.759  1.00 35.88           C  
ATOM    593  C   GLU L  81      31.580  26.833  14.451  1.00 36.06           C  
ATOM    594  O   GLU L  81      30.590  27.559  14.338  1.00 33.10           O  
ATOM    595  CB  GLU L  81      33.059  28.269  15.699  1.00 38.99           C  
ATOM    596  CG  GLU L  81      34.154  28.519  16.627  1.00 47.54           C  
ATOM    597  CD  GLU L  81      35.477  28.018  16.077  1.00 50.38           C  
ATOM    598  OE1 GLU L  81      36.129  28.702  15.228  1.00 52.12           O  
ATOM    599  OE2 GLU L  81      35.855  26.919  16.488  1.00 50.94           O  
ATOM    600  N   ASP L  82      31.981  26.000  13.476  1.00 32.31           N  
ATOM    601  CA  ASP L  82      31.242  25.998  12.194  1.00 32.08           C  
ATOM    602  C   ASP L  82      30.002  25.206  12.282  1.00 32.60           C  
ATOM    603  O   ASP L  82      29.213  25.164  11.336  1.00 29.80           O  
ATOM    604  CB  ASP L  82      32.104  25.419  11.060  1.00 29.06           C  
ATOM    605  CG  ASP L  82      33.330  26.229  10.810  1.00 30.92           C  
ATOM    606  OD1 ASP L  82      33.293  27.457  11.050  1.00 29.04           O  
ATOM    607  OD2 ASP L  82      34.361  25.644  10.374  1.00 29.41           O  
ATOM    608  N   GLU L  83      29.830  24.509  13.402  1.00 31.95           N  
ATOM    609  CA  GLU L  83      28.634  23.676  13.587  1.00 33.25           C  
ATOM    610  C   GLU L  83      27.452  24.676  13.602  1.00 31.41           C  
ATOM    611  O   GLU L  83      27.426  25.545  14.431  1.00 30.54           O  
ATOM    612  CB  GLU L  83      28.793  22.946  14.931  1.00 36.89           C  
ATOM    613  CG  GLU L  83      28.274  21.538  14.949  1.00 44.02           C  
ATOM    614  CD  GLU L  83      28.868  20.747  16.138  1.00 45.91           C  
ATOM    615  OE1 GLU L  83      29.100  21.344  17.223  1.00 46.92           O  
ATOM    616  OE2 GLU L  83      29.099  19.547  15.968  1.00 44.68           O  
ATOM    617  N   ALA L  84      26.500  24.517  12.688  1.00 30.09           N  
ATOM    618  CA  ALA L  84      25.417  25.469  12.497  1.00 30.51           C  
ATOM    619  C   ALA L  84      24.574  24.942  11.312  1.00 28.73           C  
ATOM    620  O   ALA L  84      24.856  23.866  10.796  1.00 28.23           O  
ATOM    621  CB  ALA L  84      26.048  26.809  12.106  1.00 27.44           C  
ATOM    622  N   ASP L  85      23.527  25.673  10.927  1.00 28.45           N  
ATOM    623  CA  ASP L  85      22.738  25.338   9.754  1.00 27.62           C  
ATOM    624  C   ASP L  85      23.214  26.297   8.631  1.00 26.30           C  
ATOM    625  O   ASP L  85      23.491  27.438   8.900  1.00 29.77           O  
ATOM    626  CB  ASP L  85      21.255  25.569  10.009  1.00 30.68           C  
ATOM    627  CG  ASP L  85      20.671  24.520  10.967  1.00 33.85           C  
ATOM    628  OD1 ASP L  85      21.024  23.328  10.788  1.00 34.63           O  
ATOM    629  OD2 ASP L  85      19.852  24.864  11.852  1.00 33.27           O  
ATOM    630  N   TYR L  86      23.284  25.835   7.397  1.00 24.67           N  
ATOM    631  CA  TYR L  86      23.753  26.675   6.305  1.00 22.61           C  
ATOM    632  C   TYR L  86      22.646  26.657   5.255  1.00 20.99           C  
ATOM    633  O   TYR L  86      21.999  25.609   5.020  1.00 24.46           O  
ATOM    634  CB  TYR L  86      25.026  26.106   5.707  1.00 22.15           C  
ATOM    635  CG  TYR L  86      26.137  26.269   6.630  1.00 20.05           C  
ATOM    636  CD1 TYR L  86      26.333  25.343   7.684  1.00 20.15           C  
ATOM    637  CD2 TYR L  86      26.997  27.348   6.513  1.00 18.31           C  
ATOM    638  CE1 TYR L  86      27.367  25.510   8.608  1.00 21.70           C  
ATOM    639  CE2 TYR L  86      28.043  27.508   7.412  1.00 23.00           C  
ATOM    640  CZ  TYR L  86      28.213  26.586   8.477  1.00 22.19           C  
ATOM    641  OH  TYR L  86      29.178  26.856   9.438  1.00 26.17           O  
ATOM    642  N   TYR L  87      22.469  27.798   4.595  1.00 22.74           N  
ATOM    643  CA  TYR L  87      21.367  27.901   3.604  1.00 23.34           C  
ATOM    644  C   TYR L  87      21.879  28.666   2.400  1.00 22.15           C  
ATOM    645  O   TYR L  87      22.648  29.630   2.554  1.00 25.10           O  
ATOM    646  CB  TYR L  87      20.261  28.766   4.198  1.00 23.48           C  
ATOM    647  CG  TYR L  87      19.492  28.188   5.340  1.00 26.61           C  
ATOM    648  CD1 TYR L  87      18.353  27.422   5.104  1.00 27.32           C  
ATOM    649  CD2 TYR L  87      19.908  28.356   6.658  1.00 27.27           C  
ATOM    650  CE1 TYR L  87      17.659  26.821   6.155  1.00 29.12           C  
ATOM    651  CE2 TYR L  87      19.217  27.759   7.741  1.00 27.17           C  
ATOM    652  CZ  TYR L  87      18.090  26.986   7.452  1.00 28.56           C  
ATOM    653  OH  TYR L  87      17.378  26.380   8.453  1.00 28.15           O  
ATOM    654  N   CYS L  88      21.442  28.272   1.218  1.00 24.26           N  
ATOM    655  CA  CYS L  88      21.814  29.055   0.069  1.00 22.91           C  
ATOM    656  C   CYS L  88      20.538  29.784  -0.329  1.00 24.75           C  
ATOM    657  O   CYS L  88      19.431  29.443   0.174  1.00 24.53           O  
ATOM    658  CB  CYS L  88      22.253  28.172  -1.097  1.00 25.97           C  
ATOM    659  SG  CYS L  88      21.083  26.783  -1.480  1.00 38.00           S  
ATOM    660  N   SER L  89      20.671  30.823  -1.153  1.00 23.15           N  
ATOM    661  CA  SER L  89      19.503  31.528  -1.691  1.00 27.03           C  
ATOM    662  C   SER L  89      19.919  31.911  -3.112  1.00 28.86           C  
ATOM    663  O   SER L  89      21.110  32.049  -3.411  1.00 26.25           O  
ATOM    664  CB  SER L  89      19.126  32.803  -0.915  1.00 29.38           C  
ATOM    665  OG  SER L  89      20.120  33.796  -1.040  1.00 32.75           O  
ATOM    666  N   SER L  90      18.919  32.069  -3.979  1.00 31.43           N  
ATOM    667  CA  SER L  90      19.160  32.423  -5.361  1.00 38.04           C  
ATOM    668  C   SER L  90      18.034  33.299  -5.873  1.00 43.69           C  
ATOM    669  O   SER L  90      16.901  33.131  -5.454  1.00 41.19           O  
ATOM    670  CB  SER L  90      19.217  31.198  -6.251  1.00 35.73           C  
ATOM    671  OG  SER L  90      19.608  31.592  -7.567  1.00 36.97           O  
ATOM    672  N   TYR L  91      18.334  34.247  -6.749  1.00 54.58           N  
ATOM    673  CA  TYR L  91      17.235  35.049  -7.237  1.00 67.70           C  
ATOM    674  C   TYR L  91      16.723  34.258  -8.424  1.00 72.22           C  
ATOM    675  O   TYR L  91      17.421  34.068  -9.444  1.00 73.41           O  
ATOM    676  CB  TYR L  91      17.633  36.467  -7.651  1.00 76.52           C  
ATOM    677  CG  TYR L  91      16.506  37.188  -8.399  1.00 86.97           C  
ATOM    678  CD1 TYR L  91      15.638  38.096  -7.767  1.00 91.65           C  
ATOM    679  CD2 TYR L  91      16.238  36.867  -9.718  1.00 91.71           C  
ATOM    680  CE1 TYR L  91      14.510  38.645  -8.471  1.00 95.78           C  
ATOM    681  CE2 TYR L  91      15.145  37.395 -10.401  1.00 96.21           C  
ATOM    682  CZ  TYR L  91      14.287  38.265  -9.796  1.00 97.31           C  
ATOM    683  OH  TYR L  91      13.205  38.697 -10.554  1.00 99.40           O  
ATOM    684  N   ASP L  92      15.502  33.758  -8.255  1.00 76.97           N  
ATOM    685  CA  ASP L  92      14.832  32.968  -9.268  1.00 81.68           C  
ATOM    686  C   ASP L  92      14.205  33.949 -10.246  1.00 84.40           C  
ATOM    687  O   ASP L  92      13.800  35.054  -9.852  1.00 84.34           O  
ATOM    688  CB  ASP L  92      13.730  32.125  -8.632  1.00 82.63           C  
ATOM    689  CG  ASP L  92      13.624  30.757  -9.260  1.00 83.79           C  
ATOM    690  OD1 ASP L  92      14.225  30.547 -10.341  1.00 84.08           O  
ATOM    691  OD2 ASP L  92      12.949  29.905  -8.672  1.00 85.28           O  
ATOM    692  N   GLY L  93      14.129  33.558 -11.511  1.00 87.29           N  
ATOM    693  CA  GLY L  93      13.519  34.431 -12.497  1.00 92.46           C  
ATOM    694  C   GLY L  93      12.135  33.915 -12.865  1.00 95.34           C  
ATOM    695  O   GLY L  93      11.248  34.674 -13.286  1.00 95.69           O  
ATOM    696  N   SER L  94      11.981  32.601 -12.688  1.00 97.81           N  
ATOM    697  CA  SER L  94      10.748  31.865 -12.952  1.00 99.76           C  
ATOM    698  C   SER L  94       9.645  32.321 -11.992  1.00 99.72           C  
ATOM    699  O   SER L  94       8.456  32.254 -12.322  1.00100.74           O  
ATOM    700  CB  SER L  94      10.996  30.362 -12.770  1.00101.66           C  
ATOM    701  OG  SER L  94      11.342  30.066 -11.424  1.00103.63           O  
ATOM    702  N   SER L  95      10.052  32.764 -10.799  1.00 98.40           N  
ATOM    703  CA  SER L  95       9.123  33.253  -9.784  1.00 96.48           C  
ATOM    704  C   SER L  95       9.311  34.747  -9.515  1.00 95.63           C  
ATOM    705  O   SER L  95       8.547  35.327  -8.753  1.00 96.27           O  
ATOM    706  CB  SER L  95       9.282  32.476  -8.470  1.00 95.86           C  
ATOM    707  OG  SER L  95      10.541  32.709  -7.860  1.00 94.34           O  
ATOM    708  N   THR L  95A     10.326  35.357 -10.130  1.00 93.90           N  
ATOM    709  CA  THR L  95A     10.619  36.794  -9.981  1.00 92.26           C  
ATOM    710  C   THR L  95A     11.029  37.229  -8.543  1.00 87.33           C  
ATOM    711  O   THR L  95A     11.271  38.422  -8.285  1.00 88.13           O  
ATOM    712  CB  THR L  95A      9.392  37.653 -10.512  1.00 95.62           C  
ATOM    713  OG1 THR L  95A      9.848  38.549 -11.535  1.00 98.42           O  
ATOM    714  CG2 THR L  95A      8.709  38.466  -9.394  1.00 98.92           C  
ATOM    715  N   SER L  95B     11.162  36.244  -7.641  1.00 80.26           N  
ATOM    716  CA  SER L  95B     11.518  36.452  -6.218  1.00 71.80           C  
ATOM    717  C   SER L  95B     12.798  35.682  -5.749  1.00 65.55           C  
ATOM    718  O   SER L  95B     13.520  35.100  -6.562  1.00 64.75           O  
ATOM    719  CB  SER L  95B     10.294  36.043  -5.385  1.00 73.25           C  
ATOM    720  OG  SER L  95B     10.501  36.085  -3.987  1.00 74.00           O  
ATOM    721  N   VAL L  96      13.088  35.670  -4.451  1.00 57.69           N  
ATOM    722  CA  VAL L  96      14.273  34.957  -3.958  1.00 49.94           C  
ATOM    723  C   VAL L  96      13.891  33.626  -3.367  1.00 44.44           C  
ATOM    724  O   VAL L  96      13.029  33.572  -2.496  1.00 42.38           O  
ATOM    725  CB  VAL L  96      14.940  35.669  -2.813  1.00 51.19           C  
ATOM    726  CG1 VAL L  96      13.917  35.884  -1.719  1.00 53.33           C  
ATOM    727  CG2 VAL L  96      16.078  34.797  -2.258  1.00 50.34           C  
ATOM    728  N   VAL L  97      14.552  32.567  -3.790  1.00 37.28           N  
ATOM    729  CA  VAL L  97      14.241  31.254  -3.267  1.00 32.75           C  
ATOM    730  C   VAL L  97      15.372  30.753  -2.353  1.00 32.43           C  
ATOM    731  O   VAL L  97      16.553  30.804  -2.763  1.00 31.32           O  
ATOM    732  CB  VAL L  97      14.167  30.243  -4.406  1.00 33.23           C  
ATOM    733  CG1 VAL L  97      13.802  28.881  -3.840  1.00 31.81           C  
ATOM    734  CG2 VAL L  97      13.112  30.693  -5.471  1.00 36.60           C  
ATOM    735  N   PHE L  98      15.035  30.224  -1.167  1.00 29.35           N  
ATOM    736  CA  PHE L  98      16.033  29.670  -0.264  1.00 27.89           C  
ATOM    737  C   PHE L  98      16.125  28.173  -0.335  1.00 28.85           C  
ATOM    738  O   PHE L  98      15.147  27.466  -0.679  1.00 29.80           O  
ATOM    739  CB  PHE L  98      15.716  29.967   1.200  1.00 28.91           C  
ATOM    740  CG  PHE L  98      16.108  31.341   1.636  1.00 28.10           C  
ATOM    741  CD1 PHE L  98      15.235  32.382   1.477  1.00 33.91           C  
ATOM    742  CD2 PHE L  98      17.341  31.585   2.201  1.00 30.29           C  
ATOM    743  CE1 PHE L  98      15.581  33.689   1.881  1.00 34.35           C  
ATOM    744  CE2 PHE L  98      17.719  32.865   2.607  1.00 30.83           C  
ATOM    745  CZ  PHE L  98      16.816  33.940   2.443  1.00 31.89           C  
ATOM    746  N   GLY L  99      17.286  27.656   0.049  1.00 26.63           N  
ATOM    747  CA  GLY L  99      17.420  26.222   0.132  1.00 25.34           C  
ATOM    748  C   GLY L  99      16.785  25.707   1.421  1.00 27.15           C  
ATOM    749  O   GLY L  99      16.477  26.458   2.339  1.00 27.54           O  
ATOM    750  N   GLY L 100      16.607  24.390   1.518  1.00 28.36           N  
ATOM    751  CA  GLY L 100      16.004  23.812   2.712  1.00 29.78           C  
ATOM    752  C   GLY L 100      16.909  23.768   3.922  1.00 29.26           C  
ATOM    753  O   GLY L 100      16.499  23.381   5.038  1.00 28.51           O  
ATOM    754  N   GLY L 101      18.173  24.157   3.760  1.00 27.61           N  
ATOM    755  CA  GLY L 101      19.051  24.130   4.932  1.00 26.80           C  
ATOM    756  C   GLY L 101      19.829  22.801   5.047  1.00 29.09           C  
ATOM    757  O   GLY L 101      19.334  21.705   4.676  1.00 29.47           O  
ATOM    758  N   THR L 102      21.055  22.909   5.524  1.00 26.81           N  
ATOM    759  CA  THR L 102      21.963  21.788   5.718  1.00 25.98           C  
ATOM    760  C   THR L 102      22.531  21.911   7.124  1.00 27.29           C  
ATOM    761  O   THR L 102      23.118  22.937   7.462  1.00 26.20           O  
ATOM    762  CB  THR L 102      23.150  21.892   4.754  1.00 24.70           C  
ATOM    763  OG1 THR L 102      22.674  21.712   3.419  1.00 25.28           O  
ATOM    764  CG2 THR L 102      24.197  20.845   5.082  1.00 25.14           C  
ATOM    765  N   LYS L 103      22.381  20.884   7.946  1.00 26.58           N  
ATOM    766  CA  LYS L 103      22.915  20.958   9.301  1.00 31.75           C  
ATOM    767  C   LYS L 103      24.350  20.430   9.318  1.00 30.47           C  
ATOM    768  O   LYS L 103      24.598  19.308   8.921  1.00 30.52           O  
ATOM    769  CB  LYS L 103      22.052  20.107  10.260  1.00 33.32           C  
ATOM    770  CG  LYS L 103      22.389  20.343  11.726  1.00 42.57           C  
ATOM    771  CD  LYS L 103      21.399  19.598  12.720  1.00 49.03           C  
ATOM    772  CE  LYS L 103      19.956  20.128  12.523  1.00 55.12           C  
ATOM    773  NZ  LYS L 103      19.868  21.612  12.863  1.00 57.75           N  
ATOM    774  N   LEU L 104      25.279  21.201   9.845  1.00 30.36           N  
ATOM    775  CA  LEU L 104      26.687  20.766   9.811  1.00 30.05           C  
ATOM    776  C   LEU L 104      27.157  20.396  11.199  1.00 30.33           C  
ATOM    777  O   LEU L 104      27.019  21.215  12.123  1.00 32.39           O  
ATOM    778  CB  LEU L 104      27.569  21.916   9.298  1.00 26.12           C  
ATOM    779  CG  LEU L 104      29.042  21.600   9.030  1.00 28.90           C  
ATOM    780  CD1 LEU L 104      29.600  22.650   8.100  1.00 32.94           C  
ATOM    781  CD2 LEU L 104      29.835  21.597  10.267  1.00 28.24           C  
ATOM    782  N   THR L 105      27.686  19.180  11.345  1.00 30.66           N  
ATOM    783  CA  THR L 105      28.202  18.716  12.644  1.00 32.71           C  
ATOM    784  C   THR L 105      29.704  18.509  12.496  1.00 33.17           C  
ATOM    785  O   THR L 105      30.156  17.979  11.483  1.00 30.52           O  
ATOM    786  CB  THR L 105      27.577  17.329  13.045  1.00 38.04           C  
ATOM    787  OG1 THR L 105      26.161  17.459  13.124  1.00 39.52           O  
ATOM    788  CG2 THR L 105      28.105  16.853  14.451  1.00 39.76           C  
ATOM    789  N   VAL L 106      30.460  18.962  13.473  1.00 31.45           N  
ATOM    790  CA  VAL L 106      31.894  18.770  13.473  1.00 33.18           C  
ATOM    791  C   VAL L 106      32.199  17.613  14.450  1.00 36.43           C  
ATOM    792  O   VAL L 106      32.152  17.806  15.673  1.00 36.93           O  
ATOM    793  CB  VAL L 106      32.577  20.027  13.928  1.00 31.75           C  
ATOM    794  CG1 VAL L 106      34.062  19.794  14.069  1.00 29.64           C  
ATOM    795  CG2 VAL L 106      32.308  21.143  12.862  1.00 32.18           C  
ATOM    796  N   LEU L 106A     32.440  16.428  13.889  1.00 38.21           N  
ATOM    797  CA  LEU L 106A     32.743  15.200  14.633  1.00 39.44           C  
ATOM    798  C   LEU L 106A     34.223  15.163  14.900  1.00 42.40           C  
ATOM    799  O   LEU L 106A     34.960  16.070  14.566  1.00 40.27           O  
ATOM    800  CB  LEU L 106A     32.441  13.962  13.794  1.00 40.22           C  
ATOM    801  CG  LEU L 106A     31.149  13.699  12.992  1.00 43.19           C  
ATOM    802  CD1 LEU L 106A     31.461  12.745  11.817  1.00 39.72           C  
ATOM    803  CD2 LEU L 106A     30.043  13.128  13.889  1.00 39.62           C  
ATOM    804  N   GLY L 107      34.659  14.062  15.488  1.00 45.17           N  
ATOM    805  CA  GLY L 107      36.067  13.892  15.784  1.00 46.92           C  
ATOM    806  C   GLY L 107      36.690  14.869  16.745  1.00 48.14           C  
ATOM    807  O   GLY L 107      37.913  14.958  16.813  1.00 48.57           O  
ATOM    808  N   GLN L 108      35.887  15.630  17.472  1.00 49.81           N  
ATOM    809  CA  GLN L 108      36.485  16.563  18.423  1.00 51.66           C  
ATOM    810  C   GLN L 108      36.980  15.751  19.656  1.00 53.13           C  
ATOM    811  O   GLN L 108      36.420  14.696  19.998  1.00 52.81           O  
ATOM    812  CB  GLN L 108      35.461  17.603  18.846  1.00 52.02           C  
ATOM    813  CG  GLN L 108      34.923  18.428  17.725  1.00 52.20           C  
ATOM    814  CD  GLN L 108      33.842  19.406  18.181  1.00 52.35           C  
ATOM    815  OE1 GLN L 108      34.088  20.259  19.012  1.00 54.52           O  
ATOM    816  NE2 GLN L 108      32.644  19.278  17.627  1.00 52.72           N  
ATOM    817  N   PRO L 109      38.007  16.249  20.348  1.00 54.33           N  
ATOM    818  CA  PRO L 109      38.557  15.553  21.521  1.00 56.23           C  
ATOM    819  C   PRO L 109      37.624  15.463  22.724  1.00 56.43           C  
ATOM    820  O   PRO L 109      37.033  16.461  23.128  1.00 57.31           O  
ATOM    821  CB  PRO L 109      39.791  16.380  21.839  1.00 55.33           C  
ATOM    822  CG  PRO L 109      39.260  17.774  21.629  1.00 56.45           C  
ATOM    823  CD  PRO L 109      38.450  17.659  20.329  1.00 54.89           C  
TER     824      PRO L 109                                                      
ATOM   1587  N   THR L   2      22.715  46.526  13.188  1.00 70.06           N  
ATOM   1588  CA  THR L   2      22.425  45.768  11.952  1.00 61.21           C  
ATOM   1589  C   THR L   2      21.484  46.553  11.071  1.00 54.31           C  
ATOM   1590  O   THR L   2      20.957  47.585  11.469  1.00 52.98           O  
ATOM   1591  CB  THR L   2      21.825  44.328  12.215  1.00 63.10           C  
ATOM   1592  OG1 THR L   2      20.671  44.412  13.076  1.00 63.64           O  
ATOM   1593  CG2 THR L   2      22.899  43.392  12.818  1.00 62.21           C  
ATOM   1594  N   ALA L   3      21.330  46.078   9.848  1.00 46.97           N  
ATOM   1595  CA  ALA L   3      20.479  46.725   8.855  1.00 41.07           C  
ATOM   1596  C   ALA L   3      19.013  46.786   9.327  1.00 38.30           C  
ATOM   1597  O   ALA L   3      18.362  47.804   9.144  1.00 39.39           O  
ATOM   1598  CB  ALA L   3      20.592  45.963   7.526  1.00 39.09           C  
ATOM   1599  N   LEU L   4      18.534  45.725   9.989  1.00 31.73           N  
ATOM   1600  CA  LEU L   4      17.133  45.611  10.479  1.00 30.05           C  
ATOM   1601  C   LEU L   4      17.139  45.322  11.988  1.00 29.66           C  
ATOM   1602  O   LEU L   4      17.794  44.389  12.422  1.00 28.91           O  
ATOM   1603  CB  LEU L   4      16.435  44.438   9.729  1.00 27.25           C  
ATOM   1604  CG  LEU L   4      16.305  44.692   8.215  1.00 27.72           C  
ATOM   1605  CD1 LEU L   4      15.775  43.418   7.441  1.00 27.02           C  
ATOM   1606  CD2 LEU L   4      15.289  45.905   8.044  1.00 24.66           C  
ATOM   1607  N   THR L   5      16.367  46.074  12.765  1.00 29.33           N  
ATOM   1608  CA  THR L   5      16.344  45.907  14.212  1.00 31.00           C  
ATOM   1609  C   THR L   5      14.950  45.655  14.727  1.00 29.38           C  
ATOM   1610  O   THR L   5      13.985  46.279  14.318  1.00 31.42           O  
ATOM   1611  CB  THR L   5      16.879  47.184  14.895  1.00 34.11           C  
ATOM   1612  OG1 THR L   5      18.208  47.419  14.443  1.00 36.75           O  
ATOM   1613  CG2 THR L   5      16.883  47.042  16.390  1.00 39.79           C  
ATOM   1614  N   GLN L   6      14.827  44.712  15.638  1.00 30.68           N  
ATOM   1615  CA  GLN L   6      13.530  44.381  16.179  1.00 29.95           C  
ATOM   1616  C   GLN L   6      13.760  44.034  17.656  1.00 31.05           C  
ATOM   1617  O   GLN L   6      14.847  43.745  18.071  1.00 29.71           O  
ATOM   1618  CB  GLN L   6      12.894  43.226  15.371  1.00 32.40           C  
ATOM   1619  CG  GLN L   6      13.717  42.004  15.228  1.00 31.71           C  
ATOM   1620  CD  GLN L   6      13.123  40.903  14.290  1.00 30.05           C  
ATOM   1621  OE1 GLN L   6      13.722  40.571  13.256  1.00 27.67           O  
ATOM   1622  NE2 GLN L   6      12.008  40.294  14.695  1.00 23.48           N  
ATOM   1623  N   PRO L   7      12.725  44.070  18.447  1.00 33.59           N  
ATOM   1624  CA  PRO L   7      12.832  43.768  19.899  1.00 34.03           C  
ATOM   1625  C   PRO L   7      13.334  42.327  20.171  1.00 34.27           C  
ATOM   1626  O   PRO L   7      12.991  41.386  19.424  1.00 30.00           O  
ATOM   1627  CB  PRO L   7      11.406  44.022  20.388  1.00 33.82           C  
ATOM   1628  CG  PRO L   7      10.547  43.675  19.125  1.00 37.13           C  
ATOM   1629  CD  PRO L   7      11.332  44.312  18.006  1.00 33.55           C  
ATOM   1630  N   ALA L   8      14.164  42.143  21.200  1.00 32.81           N  
ATOM   1631  CA  ALA L   8      14.662  40.778  21.472  1.00 35.52           C  
ATOM   1632  C   ALA L   8      13.508  39.836  21.832  1.00 35.34           C  
ATOM   1633  O   ALA L   8      13.541  38.652  21.511  1.00 35.09           O  
ATOM   1634  CB  ALA L   8      15.697  40.793  22.618  1.00 35.87           C  
ATOM   1635  N   SER L   9      12.495  40.356  22.501  1.00 35.15           N  
ATOM   1636  CA  SER L   9      11.383  39.504  22.884  1.00 41.14           C  
ATOM   1637  C   SER L   9      10.081  40.240  23.238  1.00 41.06           C  
ATOM   1638  O   SER L   9      10.079  41.424  23.564  1.00 40.82           O  
ATOM   1639  CB  SER L   9      11.800  38.590  24.058  1.00 43.62           C  
ATOM   1640  OG  SER L   9      12.166  39.356  25.197  1.00 48.80           O  
ATOM   1641  N   VAL L  11       8.967  39.518  23.145  1.00 41.01           N  
ATOM   1642  CA  VAL L  11       7.675  40.073  23.453  1.00 39.62           C  
ATOM   1643  C   VAL L  11       6.828  38.890  23.868  1.00 42.22           C  
ATOM   1644  O   VAL L  11       7.135  37.735  23.529  1.00 40.80           O  
ATOM   1645  CB  VAL L  11       7.007  40.706  22.233  1.00 39.21           C  
ATOM   1646  CG1 VAL L  11       7.836  41.906  21.763  1.00 41.41           C  
ATOM   1647  CG2 VAL L  11       6.874  39.639  21.083  1.00 37.23           C  
ATOM   1648  N   SER L  12       5.752  39.174  24.584  1.00 42.29           N  
ATOM   1649  CA  SER L  12       4.858  38.103  25.003  1.00 44.44           C  
ATOM   1650  C   SER L  12       3.418  38.599  24.936  1.00 44.25           C  
ATOM   1651  O   SER L  12       3.168  39.797  24.968  1.00 41.95           O  
ATOM   1652  CB  SER L  12       5.211  37.647  26.430  1.00 47.06           C  
ATOM   1653  OG  SER L  12       5.168  38.728  27.347  1.00 47.22           O  
ATOM   1654  N   GLY L  13       2.491  37.656  24.807  1.00 45.41           N  
ATOM   1655  CA  GLY L  13       1.071  37.979  24.723  1.00 46.66           C  
ATOM   1656  C   GLY L  13       0.268  36.795  25.207  1.00 46.60           C  
ATOM   1657  O   GLY L  13       0.810  35.704  25.353  1.00 47.89           O  
ATOM   1658  N   SER L  14      -1.026  36.978  25.444  1.00 47.68           N  
ATOM   1659  CA  SER L  14      -1.858  35.892  25.956  1.00 47.51           C  
ATOM   1660  C   SER L  14      -2.642  35.240  24.865  1.00 47.15           C  
ATOM   1661  O   SER L  14      -2.860  35.839  23.811  1.00 46.59           O  
ATOM   1662  CB  SER L  14      -2.852  36.422  26.994  1.00 50.19           C  
ATOM   1663  OG  SER L  14      -2.161  37.130  28.019  1.00 54.47           O  
ATOM   1664  N   PRO L  15      -3.084  33.993  25.097  1.00 46.17           N  
ATOM   1665  CA  PRO L  15      -3.868  33.334  24.048  1.00 48.13           C  
ATOM   1666  C   PRO L  15      -5.102  34.179  23.774  1.00 49.69           C  
ATOM   1667  O   PRO L  15      -5.760  34.661  24.698  1.00 50.05           O  
ATOM   1668  CB  PRO L  15      -4.218  31.987  24.666  1.00 47.18           C  
ATOM   1669  CG  PRO L  15      -3.023  31.713  25.555  1.00 44.75           C  
ATOM   1670  CD  PRO L  15      -2.839  33.075  26.224  1.00 44.93           C  
ATOM   1671  N   GLY L  16      -5.351  34.417  22.498  1.00 51.85           N  
ATOM   1672  CA  GLY L  16      -6.501  35.189  22.092  1.00 53.54           C  
ATOM   1673  C   GLY L  16      -6.203  36.635  21.771  1.00 55.24           C  
ATOM   1674  O   GLY L  16      -6.933  37.260  21.003  1.00 55.87           O  
ATOM   1675  N   GLN L  17      -5.151  37.200  22.344  1.00 55.31           N  
ATOM   1676  CA  GLN L  17      -4.893  38.592  22.036  1.00 55.43           C  
ATOM   1677  C   GLN L  17      -4.222  38.756  20.682  1.00 52.62           C  
ATOM   1678  O   GLN L  17      -3.964  37.796  19.944  1.00 51.02           O  
ATOM   1679  CB  GLN L  17      -3.980  39.223  23.078  1.00 59.44           C  
ATOM   1680  CG  GLN L  17      -4.295  38.835  24.509  1.00 67.12           C  
ATOM   1681  CD  GLN L  17      -3.326  39.487  25.497  1.00 72.00           C  
ATOM   1682  OE1 GLN L  17      -2.099  39.446  25.299  1.00 73.91           O  
ATOM   1683  NE2 GLN L  17      -3.870  40.091  26.568  1.00 74.34           N  
ATOM   1684  N   SER L  18      -3.981  40.012  20.364  1.00 50.01           N  
ATOM   1685  CA  SER L  18      -3.255  40.370  19.174  1.00 47.57           C  
ATOM   1686  C   SER L  18      -1.951  40.986  19.661  1.00 45.04           C  
ATOM   1687  O   SER L  18      -1.909  41.636  20.732  1.00 44.57           O  
ATOM   1688  CB  SER L  18      -4.024  41.385  18.345  1.00 47.18           C  
ATOM   1689  OG  SER L  18      -5.032  40.692  17.647  1.00 50.27           O  
ATOM   1690  N   ILE L  19      -0.899  40.778  18.877  1.00 41.20           N  
ATOM   1691  CA  ILE L  19       0.390  41.330  19.183  1.00 40.07           C  
ATOM   1692  C   ILE L  19       1.030  41.704  17.849  1.00 38.58           C  
ATOM   1693  O   ILE L  19       0.780  41.069  16.810  1.00 37.04           O  
ATOM   1694  CB  ILE L  19       1.226  40.307  19.895  1.00 41.09           C  
ATOM   1695  CG1 ILE L  19       2.485  40.947  20.440  1.00 42.93           C  
ATOM   1696  CG2 ILE L  19       1.577  39.167  18.931  1.00 42.78           C  
ATOM   1697  CD1 ILE L  19       3.224  39.997  21.408  1.00 45.50           C  
ATOM   1698  N   THR L  20       1.844  42.741  17.872  1.00 35.07           N  
ATOM   1699  CA  THR L  20       2.508  43.204  16.671  1.00 35.70           C  
ATOM   1700  C   THR L  20       4.006  43.229  16.930  1.00 35.00           C  
ATOM   1701  O   THR L  20       4.401  43.671  17.970  1.00 35.18           O  
ATOM   1702  CB  THR L  20       2.062  44.634  16.316  1.00 34.44           C  
ATOM   1703  OG1 THR L  20       0.710  44.586  15.922  1.00 33.97           O  
ATOM   1704  CG2 THR L  20       2.882  45.218  15.133  1.00 36.38           C  
ATOM   1705  N   VAL L  21       4.820  42.740  16.009  1.00 32.25           N  
ATOM   1706  CA  VAL L  21       6.265  42.795  16.199  1.00 32.00           C  
ATOM   1707  C   VAL L  21       6.730  43.709  15.062  1.00 32.24           C  
ATOM   1708  O   VAL L  21       6.279  43.549  13.926  1.00 31.30           O  
ATOM   1709  CB  VAL L  21       6.917  41.421  16.015  1.00 32.98           C  
ATOM   1710  CG1 VAL L  21       8.454  41.559  16.217  1.00 34.27           C  
ATOM   1711  CG2 VAL L  21       6.369  40.439  17.053  1.00 36.78           C  
ATOM   1712  N   SER L  22       7.622  44.643  15.353  1.00 32.93           N  
ATOM   1713  CA  SER L  22       8.069  45.580  14.345  1.00 34.84           C  
ATOM   1714  C   SER L  22       9.544  45.520  14.108  1.00 36.51           C  
ATOM   1715  O   SER L  22      10.314  45.256  15.014  1.00 36.31           O  
ATOM   1716  CB  SER L  22       7.706  47.033  14.728  1.00 37.13           C  
ATOM   1717  OG  SER L  22       6.302  47.242  14.643  1.00 39.43           O  
ATOM   1718  N   CYS L  23       9.920  45.814  12.875  1.00 33.83           N  
ATOM   1719  CA  CYS L  23      11.286  45.807  12.444  1.00 36.77           C  
ATOM   1720  C   CYS L  23      11.582  47.213  11.852  1.00 35.31           C  
ATOM   1721  O   CYS L  23      10.789  47.708  11.084  1.00 34.79           O  
ATOM   1722  CB  CYS L  23      11.295  44.750  11.405  1.00 39.11           C  
ATOM   1723  SG  CYS L  23      12.588  44.527  10.174  1.00 46.87           S  
ATOM   1724  N   THR L  24      12.676  47.866  12.212  1.00 34.70           N  
ATOM   1725  CA  THR L  24      12.949  49.181  11.622  1.00 33.51           C  
ATOM   1726  C   THR L  24      14.208  49.113  10.798  1.00 31.73           C  
ATOM   1727  O   THR L  24      15.095  48.319  11.099  1.00 30.80           O  
ATOM   1728  CB  THR L  24      13.146  50.294  12.664  1.00 38.50           C  
ATOM   1729  OG1 THR L  24      14.407  50.099  13.304  1.00 40.41           O  
ATOM   1730  CG2 THR L  24      12.015  50.271  13.730  1.00 39.38           C  
ATOM   1731  N   GLY L  25      14.264  49.937   9.743  1.00 32.01           N  
ATOM   1732  CA  GLY L  25      15.439  49.996   8.873  1.00 29.01           C  
ATOM   1733  C   GLY L  25      15.203  49.616   7.429  1.00 29.45           C  
ATOM   1734  O   GLY L  25      16.142  49.731   6.632  1.00 28.71           O  
ATOM   1735  N   VAL L  26      13.984  49.164   7.095  1.00 27.31           N  
ATOM   1736  CA  VAL L  26      13.703  48.720   5.736  1.00 30.88           C  
ATOM   1737  C   VAL L  26      13.969  49.778   4.653  1.00 32.46           C  
ATOM   1738  O   VAL L  26      14.351  49.437   3.531  1.00 31.50           O  
ATOM   1739  CB  VAL L  26      12.234  48.241   5.598  1.00 30.98           C  
ATOM   1740  CG1 VAL L  26      12.035  46.878   6.388  1.00 31.30           C  
ATOM   1741  CG2 VAL L  26      11.269  49.253   6.295  1.00 34.20           C  
ATOM   1742  N   SER L  27      13.743  51.053   4.970  1.00 31.72           N  
ATOM   1743  CA  SER L  27      13.934  52.093   3.937  1.00 33.50           C  
ATOM   1744  C   SER L  27      15.364  52.426   3.723  1.00 32.39           C  
ATOM   1745  O   SER L  27      15.716  52.924   2.669  1.00 36.94           O  
ATOM   1746  CB  SER L  27      13.137  53.380   4.287  1.00 31.99           C  
ATOM   1747  OG  SER L  27      11.752  53.071   4.239  1.00 33.21           O  
ATOM   1748  N   SER L  27A     16.217  52.107   4.667  1.00 31.21           N  
ATOM   1749  CA  SER L  27A     17.639  52.439   4.487  1.00 33.68           C  
ATOM   1750  C   SER L  27A     18.381  51.447   3.578  1.00 32.71           C  
ATOM   1751  O   SER L  27A     19.540  51.654   3.187  1.00 30.42           O  
ATOM   1752  CB  SER L  27A     18.344  52.444   5.855  1.00 31.73           C  
ATOM   1753  OG  SER L  27A     18.479  51.128   6.378  1.00 42.90           O  
ATOM   1754  N   ILE L  27B     17.723  50.337   3.317  1.00 29.62           N  
ATOM   1755  CA  ILE L  27B     18.329  49.281   2.510  1.00 29.27           C  
ATOM   1756  C   ILE L  27B     18.121  49.580   1.025  1.00 30.20           C  
ATOM   1757  O   ILE L  27B     16.976  49.667   0.531  1.00 27.19           O  
ATOM   1758  CB  ILE L  27B     17.667  47.929   2.881  1.00 28.23           C  
ATOM   1759  CG1 ILE L  27B     17.920  47.616   4.368  1.00 31.21           C  
ATOM   1760  CG2 ILE L  27B     18.270  46.809   2.073  1.00 27.25           C  
ATOM   1761  CD1 ILE L  27B     17.275  46.269   4.879  1.00 30.41           C  
ATOM   1762  N   VAL L  27C     19.224  49.715   0.308  1.00 30.93           N  
ATOM   1763  CA  VAL L  27C     19.126  50.009  -1.110  1.00 33.89           C  
ATOM   1764  C   VAL L  27C     18.411  48.919  -1.870  1.00 33.64           C  
ATOM   1765  O   VAL L  27C     18.695  47.757  -1.683  1.00 31.91           O  
ATOM   1766  CB  VAL L  27C     20.509  50.180  -1.750  1.00 36.51           C  
ATOM   1767  CG1 VAL L  27C     20.322  50.468  -3.276  1.00 39.60           C  
ATOM   1768  CG2 VAL L  27C     21.247  51.380  -1.067  1.00 39.59           C  
ATOM   1769  N   GLY L  28      17.488  49.306  -2.737  1.00 33.84           N  
ATOM   1770  CA  GLY L  28      16.771  48.327  -3.541  1.00 36.87           C  
ATOM   1771  C   GLY L  28      15.839  47.381  -2.796  1.00 37.98           C  
ATOM   1772  O   GLY L  28      15.499  46.318  -3.307  1.00 36.26           O  
ATOM   1773  N   SER L  29      15.430  47.724  -1.580  1.00 36.73           N  
ATOM   1774  CA  SER L  29      14.538  46.802  -0.861  1.00 38.48           C  
ATOM   1775  C   SER L  29      13.108  46.816  -1.376  1.00 38.79           C  
ATOM   1776  O   SER L  29      12.409  45.809  -1.277  1.00 37.33           O  
ATOM   1777  CB  SER L  29      14.511  47.132   0.607  1.00 37.32           C  
ATOM   1778  OG  SER L  29      14.130  48.472   0.743  1.00 38.05           O  
ATOM   1779  N   TYR L  30      12.662  47.976  -1.882  1.00 38.63           N  
ATOM   1780  CA  TYR L  30      11.324  48.106  -2.431  1.00 39.60           C  
ATOM   1781  C   TYR L  30      10.320  47.545  -1.495  1.00 37.59           C  
ATOM   1782  O   TYR L  30      10.289  47.944  -0.354  1.00 35.96           O  
ATOM   1783  CB  TYR L  30      11.262  47.401  -3.775  1.00 47.55           C  
ATOM   1784  CG  TYR L  30      11.921  48.266  -4.788  1.00 56.91           C  
ATOM   1785  CD1 TYR L  30      11.454  49.584  -4.987  1.00 61.18           C  
ATOM   1786  CD2 TYR L  30      13.081  47.855  -5.457  1.00 60.12           C  
ATOM   1787  CE1 TYR L  30      12.127  50.475  -5.815  1.00 64.84           C  
ATOM   1788  CE2 TYR L  30      13.774  48.744  -6.296  1.00 64.05           C  
ATOM   1789  CZ  TYR L  30      13.284  50.058  -6.467  1.00 65.95           C  
ATOM   1790  OH  TYR L  30      13.932  50.957  -7.288  1.00 67.94           O  
ATOM   1791  N   ASN L  31       9.491  46.612  -1.948  1.00 34.70           N  
ATOM   1792  CA  ASN L  31       8.540  46.029  -1.027  1.00 35.35           C  
ATOM   1793  C   ASN L  31       8.954  44.577  -0.702  1.00 32.69           C  
ATOM   1794  O   ASN L  31       8.126  43.819  -0.230  1.00 31.98           O  
ATOM   1795  CB  ASN L  31       7.156  45.999  -1.650  1.00 37.35           C  
ATOM   1796  CG  ASN L  31       7.109  45.073  -2.838  1.00 43.22           C  
ATOM   1797  OD1 ASN L  31       8.153  44.803  -3.472  1.00 43.45           O  
ATOM   1798  ND2 ASN L  31       5.925  44.559  -3.149  1.00 44.09           N  
ATOM   1799  N   LEU L  32      10.215  44.190  -0.931  1.00 30.87           N  
ATOM   1800  CA  LEU L  32      10.615  42.786  -0.663  1.00 30.43           C  
ATOM   1801  C   LEU L  32      10.889  42.484   0.805  1.00 27.72           C  
ATOM   1802  O   LEU L  32      12.022  42.088   1.196  1.00 27.02           O  
ATOM   1803  CB  LEU L  32      11.842  42.438  -1.487  1.00 32.01           C  
ATOM   1804  CG  LEU L  32      11.629  42.153  -2.974  1.00 37.09           C  
ATOM   1805  CD1 LEU L  32      10.206  42.312  -3.376  1.00 36.87           C  
ATOM   1806  CD2 LEU L  32      12.605  42.991  -3.765  1.00 35.93           C  
ATOM   1807  N   VAL L  33       9.878  42.732   1.626  1.00 25.46           N  
ATOM   1808  CA  VAL L  33       9.946  42.523   3.075  1.00 26.52           C  
ATOM   1809  C   VAL L  33       9.212  41.257   3.448  1.00 28.76           C  
ATOM   1810  O   VAL L  33       8.036  41.105   3.088  1.00 27.92           O  
ATOM   1811  CB  VAL L  33       9.266  43.684   3.824  1.00 27.72           C  
ATOM   1812  CG1 VAL L  33       9.310  43.473   5.354  1.00 25.06           C  
ATOM   1813  CG2 VAL L  33       9.973  44.956   3.452  1.00 28.79           C  
ATOM   1814  N   SER L  34       9.894  40.350   4.151  1.00 28.16           N  
ATOM   1815  CA  SER L  34       9.305  39.085   4.545  1.00 27.52           C  
ATOM   1816  C   SER L  34       9.405  38.848   6.051  1.00 27.46           C  
ATOM   1817  O   SER L  34      10.311  39.398   6.723  1.00 29.48           O  
ATOM   1818  CB  SER L  34      10.040  37.981   3.819  1.00 26.96           C  
ATOM   1819  OG  SER L  34       9.856  38.164   2.441  1.00 32.69           O  
ATOM   1820  N   TRP L  35       8.491  38.022   6.571  1.00 25.62           N  
ATOM   1821  CA  TRP L  35       8.546  37.635   7.956  1.00 24.13           C  
ATOM   1822  C   TRP L  35       8.615  36.116   7.989  1.00 28.68           C  
ATOM   1823  O   TRP L  35       7.875  35.433   7.233  1.00 27.80           O  
ATOM   1824  CB  TRP L  35       7.307  38.086   8.723  1.00 27.73           C  
ATOM   1825  CG  TRP L  35       7.394  39.546   9.075  1.00 28.00           C  
ATOM   1826  CD1 TRP L  35       6.882  40.600   8.362  1.00 30.21           C  
ATOM   1827  CD2 TRP L  35       7.993  40.089  10.237  1.00 28.04           C  
ATOM   1828  NE1 TRP L  35       7.132  41.790   9.029  1.00 29.56           N  
ATOM   1829  CE2 TRP L  35       7.808  41.501  10.188  1.00 29.99           C  
ATOM   1830  CE3 TRP L  35       8.650  39.530  11.340  1.00 28.58           C  
ATOM   1831  CZ2 TRP L  35       8.261  42.351  11.204  1.00 29.30           C  
ATOM   1832  CZ3 TRP L  35       9.096  40.384  12.366  1.00 29.10           C  
ATOM   1833  CH2 TRP L  35       8.896  41.773  12.279  1.00 29.85           C  
ATOM   1834  N   TYR L  36       9.480  35.607   8.871  1.00 27.65           N  
ATOM   1835  CA  TYR L  36       9.680  34.198   9.061  1.00 28.12           C  
ATOM   1836  C   TYR L  36       9.467  33.823  10.491  1.00 28.85           C  
ATOM   1837  O   TYR L  36       9.786  34.592  11.437  1.00 29.10           O  
ATOM   1838  CB  TYR L  36      11.121  33.765   8.719  1.00 25.75           C  
ATOM   1839  CG  TYR L  36      11.497  33.858   7.282  1.00 27.33           C  
ATOM   1840  CD1 TYR L  36      11.983  35.068   6.725  1.00 27.69           C  
ATOM   1841  CD2 TYR L  36      11.337  32.764   6.444  1.00 28.87           C  
ATOM   1842  CE1 TYR L  36      12.288  35.151   5.369  1.00 26.68           C  
ATOM   1843  CE2 TYR L  36      11.635  32.846   5.111  1.00 30.39           C  
ATOM   1844  CZ  TYR L  36      12.100  34.017   4.587  1.00 29.34           C  
ATOM   1845  OH  TYR L  36      12.337  34.078   3.253  1.00 32.64           O  
ATOM   1846  N   GLN L  37       8.915  32.621  10.643  1.00 29.89           N  
ATOM   1847  CA  GLN L  37       8.650  32.029  11.926  1.00 30.20           C  
ATOM   1848  C   GLN L  37       9.605  30.822  12.053  1.00 30.95           C  
ATOM   1849  O   GLN L  37       9.736  30.021  11.136  1.00 29.54           O  
ATOM   1850  CB  GLN L  37       7.225  31.494  11.945  1.00 29.20           C  
ATOM   1851  CG  GLN L  37       6.826  30.831  13.257  1.00 33.81           C  
ATOM   1852  CD  GLN L  37       5.468  30.112  13.089  1.00 36.19           C  
ATOM   1853  OE1 GLN L  37       5.378  29.213  12.262  1.00 36.23           O  
ATOM   1854  NE2 GLN L  37       4.439  30.521  13.839  1.00 35.68           N  
ATOM   1855  N   GLN L  38      10.233  30.645  13.191  1.00 33.32           N  
ATOM   1856  CA  GLN L  38      11.128  29.497  13.282  1.00 35.41           C  
ATOM   1857  C   GLN L  38      10.970  28.844  14.644  1.00 36.51           C  
ATOM   1858  O   GLN L  38      11.105  29.486  15.684  1.00 36.00           O  
ATOM   1859  CB  GLN L  38      12.583  29.911  13.031  1.00 34.81           C  
ATOM   1860  CG  GLN L  38      13.595  28.764  13.208  1.00 39.92           C  
ATOM   1861  CD  GLN L  38      15.037  29.160  12.810  1.00 42.41           C  
ATOM   1862  OE1 GLN L  38      15.534  30.243  13.156  1.00 41.24           O  
ATOM   1863  NE2 GLN L  38      15.705  28.266  12.088  1.00 44.47           N  
ATOM   1864  N   HIS L  39      10.601  27.569  14.606  1.00 39.97           N  
ATOM   1865  CA  HIS L  39      10.423  26.785  15.824  1.00 44.21           C  
ATOM   1866  C   HIS L  39      11.725  26.034  16.085  1.00 48.23           C  
ATOM   1867  O   HIS L  39      12.440  25.654  15.156  1.00 45.18           O  
ATOM   1868  CB  HIS L  39       9.284  25.767  15.664  1.00 41.13           C  
ATOM   1869  CG  HIS L  39       7.912  26.359  15.780  1.00 40.96           C  
ATOM   1870  ND1 HIS L  39       7.151  26.732  14.684  1.00 39.92           N  
ATOM   1871  CD2 HIS L  39       7.157  26.625  16.870  1.00 37.96           C  
ATOM   1872  CE1 HIS L  39       5.989  27.196  15.103  1.00 37.96           C  
ATOM   1873  NE2 HIS L  39       5.967  27.139  16.425  1.00 38.84           N  
ATOM   1874  N   PRO L  40      12.023  25.782  17.356  1.00 54.39           N  
ATOM   1875  CA  PRO L  40      13.259  25.066  17.682  1.00 58.90           C  
ATOM   1876  C   PRO L  40      13.533  23.871  16.757  1.00 61.28           C  
ATOM   1877  O   PRO L  40      12.663  23.030  16.495  1.00 61.00           O  
ATOM   1878  CB  PRO L  40      13.056  24.674  19.151  1.00 60.19           C  
ATOM   1879  CG  PRO L  40      11.517  24.615  19.308  1.00 61.34           C  
ATOM   1880  CD  PRO L  40      11.099  25.829  18.509  1.00 57.71           C  
ATOM   1881  N   GLY L  41      14.753  23.862  16.232  1.00 63.85           N  
ATOM   1882  CA  GLY L  41      15.223  22.806  15.359  1.00 64.73           C  
ATOM   1883  C   GLY L  41      14.679  22.751  13.945  1.00 65.13           C  
ATOM   1884  O   GLY L  41      15.278  22.076  13.083  1.00 67.15           O  
ATOM   1885  N   LYS L  42      13.556  23.423  13.688  1.00 62.35           N  
ATOM   1886  CA  LYS L  42      12.953  23.407  12.355  1.00 58.34           C  
ATOM   1887  C   LYS L  42      13.526  24.478  11.453  1.00 53.31           C  
ATOM   1888  O   LYS L  42      14.171  25.400  11.922  1.00 52.49           O  
ATOM   1889  CB  LYS L  42      11.442  23.606  12.452  1.00 62.12           C  
ATOM   1890  CG  LYS L  42      10.655  22.379  12.871  1.00 66.85           C  
ATOM   1891  CD  LYS L  42       9.154  22.648  12.742  1.00 71.93           C  
ATOM   1892  CE  LYS L  42       8.332  21.347  12.779  1.00 74.80           C  
ATOM   1893  NZ  LYS L  42       6.869  21.539  12.476  1.00 77.39           N  
ATOM   1894  N   ALA L  43      13.323  24.358  10.153  1.00 47.41           N  
ATOM   1895  CA  ALA L  43      13.817  25.419   9.297  1.00 45.77           C  
ATOM   1896  C   ALA L  43      12.849  26.586   9.446  1.00 43.65           C  
ATOM   1897  O   ALA L  43      11.710  26.425   9.905  1.00 43.85           O  
ATOM   1898  CB  ALA L  43      13.888  24.987   7.819  1.00 42.69           C  
ATOM   1899  N   PRO L  44      13.287  27.771   9.042  1.00 43.48           N  
ATOM   1900  CA  PRO L  44      12.384  28.911   9.174  1.00 42.38           C  
ATOM   1901  C   PRO L  44      11.220  28.736   8.190  1.00 41.55           C  
ATOM   1902  O   PRO L  44      11.425  28.258   7.085  1.00 41.22           O  
ATOM   1903  CB  PRO L  44      13.267  30.119   8.757  1.00 43.83           C  
ATOM   1904  CG  PRO L  44      14.713  29.570   8.820  1.00 44.67           C  
ATOM   1905  CD  PRO L  44      14.508  28.154   8.311  1.00 41.39           C  
ATOM   1906  N   LYS L  45      10.023  29.152   8.590  1.00 37.17           N  
ATOM   1907  CA  LYS L  45       8.851  29.106   7.711  1.00 34.43           C  
ATOM   1908  C   LYS L  45       8.474  30.551   7.279  1.00 32.47           C  
ATOM   1909  O   LYS L  45       8.261  31.414   8.171  1.00 29.27           O  
ATOM   1910  CB  LYS L  45       7.678  28.568   8.495  1.00 36.98           C  
ATOM   1911  CG  LYS L  45       6.378  28.620   7.762  1.00 42.67           C  
ATOM   1912  CD  LYS L  45       5.308  27.816   8.470  1.00 46.16           C  
ATOM   1913  CE  LYS L  45       4.029  27.705   7.608  1.00 48.33           C  
ATOM   1914  NZ  LYS L  45       2.943  27.138   8.450  1.00 51.28           N  
ATOM   1915  N   LEU L  46       8.341  30.774   5.969  1.00 28.70           N  
ATOM   1916  CA  LEU L  46       7.905  32.050   5.393  1.00 30.67           C  
ATOM   1917  C   LEU L  46       6.398  32.299   5.720  1.00 31.90           C  
ATOM   1918  O   LEU L  46       5.546  31.490   5.350  1.00 32.05           O  
ATOM   1919  CB  LEU L  46       8.089  32.010   3.875  1.00 30.07           C  
ATOM   1920  CG  LEU L  46       7.616  33.276   3.163  1.00 30.44           C  
ATOM   1921  CD1 LEU L  46       8.506  34.463   3.620  1.00 28.75           C  
ATOM   1922  CD2 LEU L  46       7.701  33.126   1.647  1.00 30.95           C  
ATOM   1923  N   LEU L  47       6.097  33.413   6.399  1.00 28.74           N  
ATOM   1924  CA  LEU L  47       4.738  33.802   6.800  1.00 30.19           C  
ATOM   1925  C   LEU L  47       4.169  34.852   5.872  1.00 31.28           C  
ATOM   1926  O   LEU L  47       3.010  34.750   5.488  1.00 33.21           O  
ATOM   1927  CB  LEU L  47       4.696  34.369   8.225  1.00 28.73           C  
ATOM   1928  CG  LEU L  47       5.110  33.477   9.354  1.00 31.52           C  
ATOM   1929  CD1 LEU L  47       5.191  34.296  10.643  1.00 34.24           C  
ATOM   1930  CD2 LEU L  47       4.135  32.363   9.561  1.00 31.62           C  
ATOM   1931  N   THR L  48       4.966  35.875   5.545  1.00 29.22           N  
ATOM   1932  CA  THR L  48       4.501  36.907   4.636  1.00 29.25           C  
ATOM   1933  C   THR L  48       5.652  37.356   3.779  1.00 30.00           C  
ATOM   1934  O   THR L  48       6.825  37.289   4.228  1.00 30.38           O  
ATOM   1935  CB  THR L  48       3.979  38.142   5.419  1.00 30.48           C  
ATOM   1936  OG1 THR L  48       5.034  38.668   6.235  1.00 31.01           O  
ATOM   1937  CG2 THR L  48       2.873  37.744   6.328  1.00 27.91           C  
ATOM   1938  N   TYR L  49       5.350  37.730   2.531  1.00 29.77           N  
ATOM   1939  CA  TYR L  49       6.352  38.262   1.626  1.00 31.74           C  
ATOM   1940  C   TYR L  49       5.728  39.447   0.875  1.00 30.15           C  
ATOM   1941  O   TYR L  49       4.514  39.604   0.870  1.00 31.74           O  
ATOM   1942  CB  TYR L  49       6.834  37.234   0.586  1.00 33.10           C  
ATOM   1943  CG  TYR L  49       5.769  36.769  -0.342  1.00 33.33           C  
ATOM   1944  CD1 TYR L  49       4.889  35.744   0.044  1.00 35.17           C  
ATOM   1945  CD2 TYR L  49       5.660  37.299  -1.616  1.00 36.92           C  
ATOM   1946  CE1 TYR L  49       3.910  35.245  -0.837  1.00 36.01           C  
ATOM   1947  CE2 TYR L  49       4.669  36.799  -2.521  1.00 38.06           C  
ATOM   1948  CZ  TYR L  49       3.815  35.782  -2.101  1.00 38.49           C  
ATOM   1949  OH  TYR L  49       2.822  35.329  -2.932  1.00 44.87           O  
ATOM   1950  N   GLU L  50       6.550  40.243   0.234  1.00 29.75           N  
ATOM   1951  CA  GLU L  50       6.057  41.463  -0.450  1.00 34.02           C  
ATOM   1952  C   GLU L  50       5.152  42.270   0.491  1.00 32.78           C  
ATOM   1953  O   GLU L  50       4.083  42.767   0.131  1.00 31.88           O  
ATOM   1954  CB  GLU L  50       5.313  41.093  -1.736  1.00 37.66           C  
ATOM   1955  CG  GLU L  50       6.245  40.954  -2.909  1.00 43.67           C  
ATOM   1956  CD  GLU L  50       5.561  40.349  -4.154  1.00 48.94           C  
ATOM   1957  OE1 GLU L  50       4.381  40.689  -4.402  1.00 50.51           O  
ATOM   1958  OE2 GLU L  50       6.218  39.544  -4.866  1.00 50.09           O  
ATOM   1959  N   VAL L  51       5.608  42.317   1.733  1.00 31.69           N  
ATOM   1960  CA  VAL L  51       5.008  42.997   2.841  1.00 30.44           C  
ATOM   1961  C   VAL L  51       3.758  42.332   3.330  1.00 32.08           C  
ATOM   1962  O   VAL L  51       3.686  41.885   4.487  1.00 29.84           O  
ATOM   1963  CB  VAL L  51       4.642  44.509   2.523  1.00 32.97           C  
ATOM   1964  CG1 VAL L  51       3.969  45.150   3.776  1.00 32.34           C  
ATOM   1965  CG2 VAL L  51       5.925  45.299   2.167  1.00 33.28           C  
ATOM   1966  N   ASN L  52       2.769  42.219   2.458  1.00 32.61           N  
ATOM   1967  CA  ASN L  52       1.499  41.707   2.921  1.00 34.57           C  
ATOM   1968  C   ASN L  52       0.932  40.428   2.336  1.00 35.56           C  
ATOM   1969  O   ASN L  52      -0.164  40.052   2.727  1.00 35.98           O  
ATOM   1970  CB  ASN L  52       0.435  42.808   2.753  1.00 39.22           C  
ATOM   1971  CG  ASN L  52       0.092  43.059   1.297  1.00 41.75           C  
ATOM   1972  OD1 ASN L  52      -1.005  43.511   0.987  1.00 48.07           O  
ATOM   1973  ND2 ASN L  52       1.006  42.751   0.407  1.00 41.80           N  
ATOM   1974  N   LYS L  53       1.606  39.787   1.394  1.00 34.14           N  
ATOM   1975  CA  LYS L  53       1.071  38.531   0.825  1.00 36.50           C  
ATOM   1976  C   LYS L  53       1.460  37.304   1.687  1.00 37.71           C  
ATOM   1977  O   LYS L  53       2.557  37.253   2.275  1.00 37.27           O  
ATOM   1978  CB  LYS L  53       1.600  38.310  -0.593  1.00 35.71           C  
ATOM   1979  CG  LYS L  53       1.522  39.547  -1.476  1.00 38.57           C  
ATOM   1980  CD  LYS L  53       1.631  39.182  -2.994  1.00 40.38           C  
ATOM   1981  CE  LYS L  53       1.469  40.452  -3.865  1.00 43.52           C  
ATOM   1982  NZ  LYS L  53       0.441  41.385  -3.262  0.50 44.63           N  
ATOM   1983  N   ARG L  54       0.559  36.328   1.790  1.00 37.74           N  
ATOM   1984  CA  ARG L  54       0.832  35.101   2.547  1.00 38.51           C  
ATOM   1985  C   ARG L  54       0.948  33.945   1.552  1.00 39.74           C  
ATOM   1986  O   ARG L  54       0.218  33.914   0.570  1.00 38.66           O  
ATOM   1987  CB  ARG L  54      -0.302  34.787   3.540  1.00 38.82           C  
ATOM   1988  CG  ARG L  54      -0.410  35.759   4.703  1.00 41.91           C  
ATOM   1989  CD  ARG L  54      -1.578  35.439   5.616  1.00 43.25           C  
ATOM   1990  NE  ARG L  54      -2.806  35.989   5.062  1.00 49.19           N  
ATOM   1991  CZ  ARG L  54      -3.819  35.252   4.606  1.00 54.84           C  
ATOM   1992  NH1 ARG L  54      -3.768  33.912   4.655  1.00 54.99           N  
ATOM   1993  NH2 ARG L  54      -4.865  35.852   4.038  1.00 56.53           N  
ATOM   1994  N   PRO L  55       1.893  33.007   1.756  1.00 40.53           N  
ATOM   1995  CA  PRO L  55       1.960  31.904   0.772  1.00 42.33           C  
ATOM   1996  C   PRO L  55       0.832  30.916   1.167  1.00 44.53           C  
ATOM   1997  O   PRO L  55       0.174  31.094   2.206  1.00 41.78           O  
ATOM   1998  CB  PRO L  55       3.347  31.270   1.030  1.00 41.33           C  
ATOM   1999  CG  PRO L  55       4.020  32.254   2.058  1.00 41.17           C  
ATOM   2000  CD  PRO L  55       2.899  32.844   2.813  1.00 39.77           C  
ATOM   2001  N   SER L  56       0.655  29.856   0.386  1.00 48.96           N  
ATOM   2002  CA  SER L  56      -0.376  28.860   0.686  1.00 53.43           C  
ATOM   2003  C   SER L  56      -0.241  28.247   2.072  1.00 54.72           C  
ATOM   2004  O   SER L  56       0.850  27.894   2.534  1.00 55.10           O  
ATOM   2005  CB  SER L  56      -0.345  27.714  -0.333  1.00 56.20           C  
ATOM   2006  OG  SER L  56      -0.250  28.211  -1.660  1.00 61.27           O  
ATOM   2007  N   GLY L  57      -1.370  28.121   2.742  1.00 55.68           N  
ATOM   2008  CA  GLY L  57      -1.338  27.506   4.049  1.00 56.47           C  
ATOM   2009  C   GLY L  57      -1.170  28.420   5.241  1.00 54.63           C  
ATOM   2010  O   GLY L  57      -1.586  28.054   6.339  1.00 55.85           O  
ATOM   2011  N   VAL L  58      -0.579  29.596   5.053  1.00 48.72           N  
ATOM   2012  CA  VAL L  58      -0.409  30.464   6.206  1.00 42.44           C  
ATOM   2013  C   VAL L  58      -1.720  31.099   6.596  1.00 39.67           C  
ATOM   2014  O   VAL L  58      -2.366  31.717   5.772  1.00 35.19           O  
ATOM   2015  CB  VAL L  58       0.632  31.555   5.936  1.00 40.30           C  
ATOM   2016  CG1 VAL L  58       0.745  32.482   7.148  1.00 38.00           C  
ATOM   2017  CG2 VAL L  58       1.954  30.882   5.643  1.00 36.81           C  
ATOM   2018  N   SER L  59      -2.082  30.940   7.860  1.00 37.12           N  
ATOM   2019  CA  SER L  59      -3.323  31.488   8.404  1.00 40.27           C  
ATOM   2020  C   SER L  59      -3.469  33.022   8.258  1.00 41.38           C  
ATOM   2021  O   SER L  59      -2.485  33.785   8.387  1.00 39.11           O  
ATOM   2022  CB  SER L  59      -3.428  31.149   9.885  1.00 39.59           C  
ATOM   2023  OG  SER L  59      -4.296  32.076  10.540  1.00 42.91           O  
ATOM   2024  N   ASP L  60      -4.692  33.482   7.989  1.00 41.47           N  
ATOM   2025  CA  ASP L  60      -4.878  34.923   7.849  1.00 41.67           C  
ATOM   2026  C   ASP L  60      -4.837  35.604   9.213  1.00 39.43           C  
ATOM   2027  O   ASP L  60      -5.125  36.786   9.344  1.00 38.72           O  
ATOM   2028  CB  ASP L  60      -6.147  35.281   7.063  1.00 44.48           C  
ATOM   2029  CG  ASP L  60      -7.429  34.700   7.642  1.00 46.51           C  
ATOM   2030  OD1 ASP L  60      -7.478  34.105   8.757  1.00 47.76           O  
ATOM   2031  OD2 ASP L  60      -8.435  34.901   6.935  1.00 49.66           O  
ATOM   2032  N   ARG L  61      -4.452  34.846  10.232  1.00 37.85           N  
ATOM   2033  CA  ARG L  61      -4.259  35.435  11.551  1.00 37.27           C  
ATOM   2034  C   ARG L  61      -2.967  36.279  11.507  1.00 36.81           C  
ATOM   2035  O   ARG L  61      -2.750  37.171  12.356  1.00 36.13           O  
ATOM   2036  CB  ARG L  61      -4.085  34.352  12.603  1.00 38.86           C  
ATOM   2037  CG  ARG L  61      -5.407  33.652  12.926  1.00 41.98           C  
ATOM   2038  CD  ARG L  61      -5.256  32.724  14.100  1.00 43.27           C  
ATOM   2039  NE  ARG L  61      -4.132  31.791  13.940  1.00 43.98           N  
ATOM   2040  CZ  ARG L  61      -3.038  31.798  14.693  1.00 44.14           C  
ATOM   2041  NH1 ARG L  61      -2.900  32.695  15.666  1.00 42.70           N  
ATOM   2042  NH2 ARG L  61      -2.095  30.888  14.487  1.00 43.39           N  
ATOM   2043  N   PHE L  62      -2.122  35.984  10.515  1.00 35.79           N  
ATOM   2044  CA  PHE L  62      -0.846  36.685  10.339  1.00 34.44           C  
ATOM   2045  C   PHE L  62      -0.975  37.765   9.305  1.00 34.91           C  
ATOM   2046  O   PHE L  62      -1.466  37.494   8.201  1.00 35.14           O  
ATOM   2047  CB  PHE L  62       0.219  35.705   9.867  1.00 34.56           C  
ATOM   2048  CG  PHE L  62       0.557  34.641  10.895  1.00 33.58           C  
ATOM   2049  CD1 PHE L  62       1.488  34.882  11.895  1.00 32.69           C  
ATOM   2050  CD2 PHE L  62      -0.074  33.396  10.855  1.00 33.90           C  
ATOM   2051  CE1 PHE L  62       1.802  33.887  12.864  1.00 32.71           C  
ATOM   2052  CE2 PHE L  62       0.223  32.394  11.821  1.00 33.39           C  
ATOM   2053  CZ  PHE L  62       1.164  32.651  12.823  1.00 34.09           C  
ATOM   2054  N   SER L  63      -0.563  38.993   9.606  1.00 33.75           N  
ATOM   2055  CA  SER L  63      -0.651  39.974   8.542  1.00 33.17           C  
ATOM   2056  C   SER L  63       0.545  40.897   8.606  1.00 31.98           C  
ATOM   2057  O   SER L  63       0.944  41.354   9.668  1.00 29.81           O  
ATOM   2058  CB  SER L  63      -1.965  40.762   8.603  1.00 35.60           C  
ATOM   2059  OG  SER L  63      -2.096  41.365   9.874  1.00 41.56           O  
ATOM   2060  N   GLY L  64       1.115  41.174   7.440  1.00 31.39           N  
ATOM   2061  CA  GLY L  64       2.280  42.027   7.419  1.00 33.26           C  
ATOM   2062  C   GLY L  64       1.890  43.412   6.917  1.00 33.34           C  
ATOM   2063  O   GLY L  64       0.994  43.539   6.103  1.00 33.89           O  
ATOM   2064  N   SER L  65       2.600  44.438   7.364  1.00 31.57           N  
ATOM   2065  CA  SER L  65       2.300  45.773   6.930  1.00 34.12           C  
ATOM   2066  C   SER L  65       3.605  46.544   6.905  1.00 34.07           C  
ATOM   2067  O   SER L  65       4.621  46.114   7.478  1.00 32.50           O  
ATOM   2068  CB  SER L  65       1.319  46.416   7.917  1.00 33.78           C  
ATOM   2069  OG  SER L  65       1.889  46.467   9.224  1.00 35.33           O  
ATOM   2070  N   LYS L  66       3.585  47.693   6.261  1.00 33.56           N  
ATOM   2071  CA  LYS L  66       4.791  48.486   6.200  1.00 38.25           C  
ATOM   2072  C   LYS L  66       4.413  49.949   6.223  1.00 40.21           C  
ATOM   2073  O   LYS L  66       3.481  50.340   5.556  1.00 42.15           O  
ATOM   2074  CB  LYS L  66       5.564  48.180   4.930  1.00 35.67           C  
ATOM   2075  CG  LYS L  66       6.944  48.834   4.893  1.00 36.11           C  
ATOM   2076  CD  LYS L  66       7.001  49.996   3.923  1.00 35.47           C  
ATOM   2077  CE  LYS L  66       8.359  50.568   3.856  1.00 31.03           C  
ATOM   2078  NZ  LYS L  66       9.285  49.960   2.880  1.00 29.99           N  
ATOM   2079  N   SER L  67       5.117  50.751   7.013  1.00 40.99           N  
ATOM   2080  CA  SER L  67       4.821  52.168   7.045  1.00 42.74           C  
ATOM   2081  C   SER L  67       6.133  52.881   7.208  1.00 41.00           C  
ATOM   2082  O   SER L  67       6.709  52.866   8.285  1.00 39.26           O  
ATOM   2083  CB  SER L  67       3.881  52.501   8.214  1.00 46.90           C  
ATOM   2084  OG  SER L  67       3.922  53.901   8.459  1.00 52.42           O  
ATOM   2085  N   GLY L  68       6.635  53.512   6.138  1.00 27.27           N  
ATOM   2086  CA  GLY L  68       7.923  54.194   6.283  1.00 26.80           C  
ATOM   2087  C   GLY L  68       9.116  53.285   6.478  1.00 25.66           C  
ATOM   2088  O   GLY L  68       9.234  52.257   5.810  1.00 26.26           O  
ATOM   2089  N   ASN L  69       9.959  53.588   7.458  1.00 35.42           N  
ATOM   2090  CA  ASN L  69      11.142  52.809   7.756  1.00 35.40           C  
ATOM   2091  C   ASN L  69      10.866  51.576   8.681  1.00 34.11           C  
ATOM   2092  O   ASN L  69      11.809  51.028   9.204  1.00 32.96           O  
ATOM   2093  CB  ASN L  69      12.196  53.712   8.431  1.00 33.03           C  
ATOM   2094  CG  ASN L  69      13.586  53.118   8.350  1.00 35.77           C  
ATOM   2095  OD1 ASN L  69      13.961  52.469   7.339  1.00 33.26           O  
ATOM   2096  ND2 ASN L  69      14.372  53.323   9.403  1.00 34.82           N  
ATOM   2097  N   SER L  70       9.599  51.200   8.889  1.00 34.07           N  
ATOM   2098  CA  SER L  70       9.232  50.050   9.752  1.00 33.94           C  
ATOM   2099  C   SER L  70       8.293  49.135   9.050  1.00 32.11           C  
ATOM   2100  O   SER L  70       7.455  49.590   8.288  1.00 34.11           O  
ATOM   2101  CB  SER L  70       8.481  50.494  11.019  1.00 34.70           C  
ATOM   2102  OG  SER L  70       9.380  51.202  11.845  1.00 42.93           O  
ATOM   2103  N   ALA L  71       8.398  47.858   9.347  1.00 29.79           N  
ATOM   2104  CA  ALA L  71       7.511  46.845   8.800  1.00 28.52           C  
ATOM   2105  C   ALA L  71       7.057  46.114  10.065  1.00 27.96           C  
ATOM   2106  O   ALA L  71       7.801  46.038  11.009  1.00 26.77           O  
ATOM   2107  CB  ALA L  71       8.304  45.918   7.865  1.00 29.73           C  
ATOM   2108  N   SER L  72       5.847  45.597  10.073  1.00 28.18           N  
ATOM   2109  CA  SER L  72       5.323  44.930  11.238  1.00 29.27           C  
ATOM   2110  C   SER L  72       4.611  43.634  10.837  1.00 29.65           C  
ATOM   2111  O   SER L  72       4.113  43.493   9.724  1.00 28.03           O  
ATOM   2112  CB  SER L  72       4.320  45.884  11.926  1.00 31.26           C  
ATOM   2113  OG  SER L  72       5.021  47.062  12.415  1.00 29.98           O  
ATOM   2114  N   LEU L  73       4.539  42.714  11.774  1.00 29.98           N  
ATOM   2115  CA  LEU L  73       3.857  41.439  11.579  1.00 29.79           C  
ATOM   2116  C   LEU L  73       2.893  41.479  12.731  1.00 28.09           C  
ATOM   2117  O   LEU L  73       3.312  41.704  13.878  1.00 25.83           O  
ATOM   2118  CB  LEU L  73       4.776  40.256  11.804  1.00 28.16           C  
ATOM   2119  CG  LEU L  73       4.053  38.880  11.770  1.00 27.96           C  
ATOM   2120  CD1 LEU L  73       3.453  38.653  10.396  1.00 29.48           C  
ATOM   2121  CD2 LEU L  73       5.082  37.764  12.038  1.00 31.84           C  
ATOM   2122  N   THR L  74       1.607  41.300  12.449  1.00 30.06           N  
ATOM   2123  CA  THR L  74       0.605  41.343  13.529  1.00 31.83           C  
ATOM   2124  C   THR L  74       0.010  39.980  13.607  1.00 34.13           C  
ATOM   2125  O   THR L  74      -0.354  39.406  12.571  1.00 32.73           O  
ATOM   2126  CB  THR L  74      -0.525  42.366  13.196  1.00 34.11           C  
ATOM   2127  OG1 THR L  74       0.049  43.673  13.219  1.00 31.37           O  
ATOM   2128  CG2 THR L  74      -1.708  42.295  14.222  1.00 34.26           C  
ATOM   2129  N   ILE L  75      -0.072  39.431  14.805  1.00 34.05           N  
ATOM   2130  CA  ILE L  75      -0.673  38.106  14.929  1.00 37.64           C  
ATOM   2131  C   ILE L  75      -1.957  38.224  15.725  1.00 38.97           C  
ATOM   2132  O   ILE L  75      -1.937  38.710  16.866  1.00 37.71           O  
ATOM   2133  CB  ILE L  75       0.227  37.126  15.672  1.00 37.78           C  
ATOM   2134  CG1 ILE L  75       1.583  37.069  14.987  1.00 35.46           C  
ATOM   2135  CG2 ILE L  75      -0.409  35.714  15.649  1.00 39.26           C  
ATOM   2136  CD1 ILE L  75       2.653  36.335  15.788  1.00 33.76           C  
ATOM   2137  N   SER L  76      -3.073  37.859  15.110  1.00 41.49           N  
ATOM   2138  CA  SER L  76      -4.345  37.929  15.835  1.00 45.38           C  
ATOM   2139  C   SER L  76      -4.704  36.545  16.378  1.00 46.40           C  
ATOM   2140  O   SER L  76      -4.174  35.515  15.912  1.00 46.74           O  
ATOM   2141  CB  SER L  76      -5.457  38.448  14.932  1.00 46.01           C  
ATOM   2142  OG  SER L  76      -5.629  37.587  13.823  1.00 50.01           O  
ATOM   2143  N   GLY L  77      -5.577  36.535  17.389  1.00 47.26           N  
ATOM   2144  CA  GLY L  77      -6.001  35.295  18.017  1.00 47.96           C  
ATOM   2145  C   GLY L  77      -4.804  34.428  18.315  1.00 49.44           C  
ATOM   2146  O   GLY L  77      -4.679  33.313  17.788  1.00 51.08           O  
ATOM   2147  N   LEU L  78      -3.914  34.961  19.146  1.00 48.32           N  
ATOM   2148  CA  LEU L  78      -2.678  34.282  19.532  1.00 47.03           C  
ATOM   2149  C   LEU L  78      -2.958  32.878  20.055  1.00 47.51           C  
ATOM   2150  O   LEU L  78      -3.832  32.689  20.903  1.00 48.25           O  
ATOM   2151  CB  LEU L  78      -1.992  35.134  20.603  1.00 45.43           C  
ATOM   2152  CG  LEU L  78      -0.478  35.237  20.709  1.00 44.71           C  
ATOM   2153  CD1 LEU L  78       0.208  35.297  19.336  1.00 40.30           C  
ATOM   2154  CD2 LEU L  78      -0.170  36.449  21.551  1.00 42.70           C  
ATOM   2155  N   GLN L  79      -2.232  31.899  19.530  1.00 47.71           N  
ATOM   2156  CA  GLN L  79      -2.345  30.502  19.941  1.00 48.67           C  
ATOM   2157  C   GLN L  79      -0.982  30.043  20.468  1.00 49.00           C  
ATOM   2158  O   GLN L  79       0.051  30.645  20.164  1.00 48.19           O  
ATOM   2159  CB  GLN L  79      -2.682  29.619  18.756  1.00 50.55           C  
ATOM   2160  CG  GLN L  79      -4.062  29.689  18.253  1.00 55.96           C  
ATOM   2161  CD  GLN L  79      -4.184  28.946  16.935  1.00 58.23           C  
ATOM   2162  OE1 GLN L  79      -3.427  27.992  16.651  1.00 59.09           O  
ATOM   2163  NE2 GLN L  79      -5.144  29.369  16.118  1.00 61.31           N  
ATOM   2164  N   ALA L  80      -0.979  28.958  21.235  1.00 48.35           N  
ATOM   2165  CA  ALA L  80       0.236  28.421  21.820  1.00 47.64           C  
ATOM   2166  C   ALA L  80       1.258  27.991  20.765  1.00 46.91           C  
ATOM   2167  O   ALA L  80       2.448  28.118  20.974  1.00 45.66           O  
ATOM   2168  CB  ALA L  80      -0.106  27.233  22.736  1.00 49.67           C  
ATOM   2169  N   GLU L  81       0.787  27.464  19.648  1.00 46.95           N  
ATOM   2170  CA  GLU L  81       1.663  27.056  18.557  1.00 48.08           C  
ATOM   2171  C   GLU L  81       2.384  28.263  17.953  1.00 46.19           C  
ATOM   2172  O   GLU L  81       3.271  28.070  17.147  1.00 45.46           O  
ATOM   2173  CB  GLU L  81       0.851  26.401  17.437  1.00 51.44           C  
ATOM   2174  CG  GLU L  81      -0.646  26.716  17.529  1.00 60.01           C  
ATOM   2175  CD  GLU L  81      -1.347  25.932  18.681  1.00 63.63           C  
ATOM   2176  OE1 GLU L  81      -1.646  24.732  18.457  1.00 66.85           O  
ATOM   2177  OE2 GLU L  81      -1.580  26.491  19.795  1.00 63.69           O  
ATOM   2178  N   ASP L  82       1.971  29.485  18.301  1.00 44.77           N  
ATOM   2179  CA  ASP L  82       2.610  30.711  17.770  1.00 44.27           C  
ATOM   2180  C   ASP L  82       3.890  31.056  18.524  1.00 42.85           C  
ATOM   2181  O   ASP L  82       4.631  31.958  18.132  1.00 42.16           O  
ATOM   2182  CB  ASP L  82       1.662  31.914  17.863  1.00 41.25           C  
ATOM   2183  CG  ASP L  82       0.398  31.742  17.013  1.00 43.15           C  
ATOM   2184  OD1 ASP L  82       0.427  30.971  16.004  1.00 40.61           O  
ATOM   2185  OD2 ASP L  82      -0.607  32.421  17.333  1.00 39.92           O  
ATOM   2186  N   GLU L  83       4.132  30.378  19.641  1.00 42.00           N  
ATOM   2187  CA  GLU L  83       5.353  30.661  20.387  1.00 40.63           C  
ATOM   2188  C   GLU L  83       6.483  30.176  19.487  1.00 37.62           C  
ATOM   2189  O   GLU L  83       6.504  29.014  19.068  1.00 34.48           O  
ATOM   2190  CB  GLU L  83       5.375  29.944  21.724  1.00 43.52           C  
ATOM   2191  CG  GLU L  83       6.481  30.431  22.581  1.00 50.46           C  
ATOM   2192  CD  GLU L  83       6.363  29.954  24.018  1.00 54.06           C  
ATOM   2193  OE1 GLU L  83       5.306  30.211  24.638  1.00 55.18           O  
ATOM   2194  OE2 GLU L  83       7.338  29.331  24.508  1.00 56.21           O  
ATOM   2195  N   ALA L  84       7.418  31.080  19.196  1.00 34.52           N  
ATOM   2196  CA  ALA L  84       8.460  30.779  18.245  1.00 32.70           C  
ATOM   2197  C   ALA L  84       9.324  32.029  18.072  1.00 32.53           C  
ATOM   2198  O   ALA L  84       9.037  33.046  18.685  1.00 28.80           O  
ATOM   2199  CB  ALA L  84       7.826  30.430  16.893  1.00 32.73           C  
ATOM   2200  N   ASP L  85      10.385  31.929  17.270  1.00 30.64           N  
ATOM   2201  CA  ASP L  85      11.223  33.121  17.006  1.00 31.04           C  
ATOM   2202  C   ASP L  85      10.743  33.704  15.711  1.00 29.35           C  
ATOM   2203  O   ASP L  85      10.484  32.942  14.744  1.00 28.71           O  
ATOM   2204  CB  ASP L  85      12.709  32.769  16.831  1.00 36.88           C  
ATOM   2205  CG  ASP L  85      13.356  32.240  18.115  1.00 42.76           C  
ATOM   2206  OD1 ASP L  85      13.084  32.775  19.220  1.00 48.17           O  
ATOM   2207  OD2 ASP L  85      14.145  31.283  17.997  1.00 44.80           O  
ATOM   2208  N   TYR L  86      10.641  35.026  15.633  1.00 26.71           N  
ATOM   2209  CA  TYR L  86      10.164  35.629  14.383  1.00 26.48           C  
ATOM   2210  C   TYR L  86      11.259  36.544  13.777  1.00 25.08           C  
ATOM   2211  O   TYR L  86      11.838  37.359  14.487  1.00 27.38           O  
ATOM   2212  CB  TYR L  86       8.879  36.428  14.688  1.00 28.19           C  
ATOM   2213  CG  TYR L  86       7.697  35.549  14.985  1.00 27.79           C  
ATOM   2214  CD1 TYR L  86       7.508  35.015  16.269  1.00 29.98           C  
ATOM   2215  CD2 TYR L  86       6.812  35.179  13.961  1.00 29.36           C  
ATOM   2216  CE1 TYR L  86       6.453  34.109  16.516  1.00 30.74           C  
ATOM   2217  CE2 TYR L  86       5.771  34.292  14.183  1.00 31.12           C  
ATOM   2218  CZ  TYR L  86       5.591  33.757  15.450  1.00 32.83           C  
ATOM   2219  OH  TYR L  86       4.558  32.882  15.661  1.00 30.09           O  
ATOM   2220  N   TYR L  87      11.528  36.436  12.487  1.00 25.78           N  
ATOM   2221  CA  TYR L  87      12.589  37.269  11.911  1.00 24.92           C  
ATOM   2222  C   TYR L  87      12.035  38.098  10.776  1.00 24.96           C  
ATOM   2223  O   TYR L  87      11.321  37.535   9.953  1.00 25.18           O  
ATOM   2224  CB  TYR L  87      13.702  36.356  11.284  1.00 27.72           C  
ATOM   2225  CG  TYR L  87      14.503  35.591  12.313  1.00 27.92           C  
ATOM   2226  CD1 TYR L  87      15.664  36.139  12.893  1.00 29.30           C  
ATOM   2227  CD2 TYR L  87      14.085  34.349  12.743  1.00 28.54           C  
ATOM   2228  CE1 TYR L  87      16.379  35.445  13.891  1.00 27.74           C  
ATOM   2229  CE2 TYR L  87      14.779  33.655  13.711  1.00 30.32           C  
ATOM   2230  CZ  TYR L  87      15.928  34.215  14.289  1.00 31.82           C  
ATOM   2231  OH  TYR L  87      16.571  33.500  15.270  1.00 33.70           O  
ATOM   2232  N   CYS L  88      12.300  39.408  10.735  1.00 25.56           N  
ATOM   2233  CA  CYS L  88      11.901  40.117   9.494  1.00 29.35           C  
ATOM   2234  C   CYS L  88      13.121  40.011   8.540  1.00 26.46           C  
ATOM   2235  O   CYS L  88      14.276  39.768   8.954  1.00 26.30           O  
ATOM   2236  CB  CYS L  88      11.600  41.604   9.715  1.00 32.34           C  
ATOM   2237  SG  CYS L  88      13.018  42.489  10.482  1.00 37.51           S  
ATOM   2238  N   SER L  89      12.897  40.185   7.249  1.00 28.69           N  
ATOM   2239  CA  SER L  89      14.028  40.183   6.353  1.00 27.39           C  
ATOM   2240  C   SER L  89      13.677  41.112   5.187  1.00 26.85           C  
ATOM   2241  O   SER L  89      12.506  41.424   4.965  1.00 26.30           O  
ATOM   2242  CB  SER L  89      14.275  38.772   5.781  1.00 31.49           C  
ATOM   2243  OG  SER L  89      13.214  38.439   4.890  1.00 31.44           O  
ATOM   2244  N   SER L  90      14.687  41.528   4.462  1.00 26.38           N  
ATOM   2245  CA  SER L  90      14.489  42.353   3.309  1.00 26.78           C  
ATOM   2246  C   SER L  90      15.509  42.024   2.228  1.00 27.09           C  
ATOM   2247  O   SER L  90      16.691  41.703   2.494  1.00 27.03           O  
ATOM   2248  CB  SER L  90      14.680  43.834   3.667  1.00 28.04           C  
ATOM   2249  OG  SER L  90      14.578  44.595   2.470  1.00 30.42           O  
ATOM   2250  N   TYR L  91      15.101  42.169   0.993  1.00 27.09           N  
ATOM   2251  CA  TYR L  91      16.088  42.024  -0.065  1.00 27.52           C  
ATOM   2252  C   TYR L  91      17.050  43.234   0.061  1.00 30.27           C  
ATOM   2253  O   TYR L  91      16.630  44.337   0.372  1.00 29.97           O  
ATOM   2254  CB  TYR L  91      15.440  42.113  -1.415  1.00 28.35           C  
ATOM   2255  CG  TYR L  91      16.413  42.080  -2.540  1.00 30.59           C  
ATOM   2256  CD1 TYR L  91      17.134  40.917  -2.822  1.00 29.60           C  
ATOM   2257  CD2 TYR L  91      16.609  43.225  -3.350  1.00 31.92           C  
ATOM   2258  CE1 TYR L  91      18.046  40.890  -3.897  1.00 32.01           C  
ATOM   2259  CE2 TYR L  91      17.481  43.205  -4.417  1.00 34.31           C  
ATOM   2260  CZ  TYR L  91      18.200  42.039  -4.672  1.00 34.16           C  
ATOM   2261  OH  TYR L  91      19.158  42.082  -5.634  1.00 36.67           O  
ATOM   2262  N   ASP L  92      18.315  43.044  -0.232  1.00 28.15           N  
ATOM   2263  CA  ASP L  92      19.267  44.133  -0.083  1.00 32.90           C  
ATOM   2264  C   ASP L  92      20.006  44.213  -1.382  1.00 31.88           C  
ATOM   2265  O   ASP L  92      20.822  43.361  -1.687  1.00 34.45           O  
ATOM   2266  CB  ASP L  92      20.231  43.849   1.055  1.00 31.23           C  
ATOM   2267  CG  ASP L  92      21.395  44.866   1.135  1.00 37.04           C  
ATOM   2268  OD1 ASP L  92      21.442  45.868   0.374  1.00 36.23           O  
ATOM   2269  OD2 ASP L  92      22.257  44.653   2.006  1.00 37.42           O  
ATOM   2270  N   GLY L  93      19.678  45.231  -2.157  1.00 33.71           N  
ATOM   2271  CA  GLY L  93      20.292  45.413  -3.466  1.00 36.16           C  
ATOM   2272  C   GLY L  93      21.771  45.606  -3.389  1.00 36.80           C  
ATOM   2273  O   GLY L  93      22.465  45.378  -4.362  1.00 37.76           O  
ATOM   2274  N   SER L  94      22.297  45.973  -2.234  1.00 37.54           N  
ATOM   2275  CA  SER L  94      23.747  46.177  -2.243  1.00 40.93           C  
ATOM   2276  C   SER L  94      24.565  44.872  -2.290  1.00 39.89           C  
ATOM   2277  O   SER L  94      25.717  44.852  -2.741  1.00 40.26           O  
ATOM   2278  CB  SER L  94      24.171  47.054  -1.053  1.00 42.31           C  
ATOM   2279  OG  SER L  94      24.172  46.364   0.188  1.00 48.84           O  
ATOM   2280  N   SER L  95      23.982  43.779  -1.837  1.00 37.36           N  
ATOM   2281  CA  SER L  95      24.712  42.523  -1.853  1.00 37.25           C  
ATOM   2282  C   SER L  95      23.950  41.472  -2.648  1.00 37.59           C  
ATOM   2283  O   SER L  95      24.348  40.277  -2.677  1.00 38.71           O  
ATOM   2284  CB  SER L  95      24.900  42.059  -0.404  1.00 38.14           C  
ATOM   2285  OG  SER L  95      23.608  41.941   0.198  1.00 39.93           O  
ATOM   2286  N   THR L  95A     22.859  41.897  -3.294  1.00 36.49           N  
ATOM   2287  CA  THR L  95A     21.990  41.005  -4.037  1.00 36.34           C  
ATOM   2288  C   THR L  95A     21.692  39.751  -3.136  1.00 36.15           C  
ATOM   2289  O   THR L  95A     21.610  38.587  -3.583  1.00 35.64           O  
ATOM   2290  CB  THR L  95A     22.614  40.626  -5.447  1.00 39.47           C  
ATOM   2291  OG1 THR L  95A     23.838  39.914  -5.272  1.00 41.04           O  
ATOM   2292  CG2 THR L  95A     22.975  41.894  -6.217  1.00 41.33           C  
ATOM   2293  N   SER L  95B     21.449  40.042  -1.863  1.00 33.00           N  
ATOM   2294  CA  SER L  95B     21.148  39.020  -0.838  1.00 32.88           C  
ATOM   2295  C   SER L  95B     19.986  39.490   0.047  1.00 30.52           C  
ATOM   2296  O   SER L  95B     19.621  40.667   0.013  1.00 31.82           O  
ATOM   2297  CB  SER L  95B     22.347  38.849   0.072  1.00 29.60           C  
ATOM   2298  OG  SER L  95B     23.480  38.460  -0.689  1.00 31.47           O  
ATOM   2299  N   VAL L  96      19.507  38.606   0.911  1.00 29.44           N  
ATOM   2300  CA  VAL L  96      18.420  38.919   1.822  1.00 27.18           C  
ATOM   2301  C   VAL L  96      19.154  39.240   3.081  1.00 28.36           C  
ATOM   2302  O   VAL L  96      20.166  38.597   3.362  1.00 27.08           O  
ATOM   2303  CB  VAL L  96      17.501  37.661   2.047  1.00 28.56           C  
ATOM   2304  CG1 VAL L  96      16.624  37.856   3.240  1.00 26.68           C  
ATOM   2305  CG2 VAL L  96      16.580  37.452   0.852  1.00 27.85           C  
ATOM   2306  N   VAL L  97      18.708  40.254   3.823  1.00 26.74           N  
ATOM   2307  CA  VAL L  97      19.347  40.535   5.089  1.00 28.07           C  
ATOM   2308  C   VAL L  97      18.246  40.317   6.118  1.00 26.94           C  
ATOM   2309  O   VAL L  97      17.058  40.622   5.847  1.00 24.18           O  
ATOM   2310  CB  VAL L  97      19.896  41.947   5.154  1.00 32.34           C  
ATOM   2311  CG1 VAL L  97      20.907  42.135   4.020  1.00 36.33           C  
ATOM   2312  CG2 VAL L  97      18.762  42.991   4.962  1.00 35.27           C  
ATOM   2313  N   PHE L  98      18.601  39.774   7.293  1.00 26.42           N  
ATOM   2314  CA  PHE L  98      17.591  39.495   8.340  1.00 24.18           C  
ATOM   2315  C   PHE L  98      17.713  40.343   9.574  1.00 26.23           C  
ATOM   2316  O   PHE L  98      18.821  40.740   9.908  1.00 25.82           O  
ATOM   2317  CB  PHE L  98      17.751  38.055   8.839  1.00 27.20           C  
ATOM   2318  CG  PHE L  98      17.444  37.030   7.812  1.00 25.13           C  
ATOM   2319  CD1 PHE L  98      18.406  36.657   6.880  1.00 26.97           C  
ATOM   2320  CD2 PHE L  98      16.179  36.461   7.777  1.00 26.45           C  
ATOM   2321  CE1 PHE L  98      18.127  35.698   5.893  1.00 25.09           C  
ATOM   2322  CE2 PHE L  98      15.836  35.498   6.804  1.00 25.90           C  
ATOM   2323  CZ  PHE L  98      16.838  35.109   5.844  1.00 28.77           C  
ATOM   2324  N   GLY L  99      16.592  40.590  10.258  1.00 24.65           N  
ATOM   2325  CA  GLY L  99      16.585  41.344  11.506  1.00 26.03           C  
ATOM   2326  C   GLY L  99      17.118  40.409  12.567  1.00 27.17           C  
ATOM   2327  O   GLY L  99      17.348  39.219  12.265  1.00 23.03           O  
ATOM   2328  N   GLY L 100      17.301  40.877  13.800  1.00 26.01           N  
ATOM   2329  CA  GLY L 100      17.918  39.990  14.758  1.00 26.54           C  
ATOM   2330  C   GLY L 100      17.038  38.958  15.388  1.00 28.34           C  
ATOM   2331  O   GLY L 100      17.525  38.106  16.115  1.00 28.59           O  
ATOM   2332  N   GLY L 101      15.746  38.991  15.103  1.00 27.70           N  
ATOM   2333  CA  GLY L 101      14.873  37.992  15.671  1.00 27.64           C  
ATOM   2334  C   GLY L 101      14.189  38.485  16.958  1.00 29.88           C  
ATOM   2335  O   GLY L 101      14.782  39.196  17.764  1.00 32.17           O  
ATOM   2336  N   THR L 102      12.938  38.092  17.122  1.00 28.61           N  
ATOM   2337  CA  THR L 102      12.139  38.407  18.295  1.00 30.16           C  
ATOM   2338  C   THR L 102      11.615  37.078  18.840  1.00 31.51           C  
ATOM   2339  O   THR L 102      10.960  36.313  18.117  1.00 31.17           O  
ATOM   2340  CB  THR L 102      10.923  39.295  17.930  1.00 30.99           C  
ATOM   2341  OG1 THR L 102      11.386  40.572  17.456  1.00 28.43           O  
ATOM   2342  CG2 THR L 102      10.010  39.505  19.149  1.00 30.74           C  
ATOM   2343  N   LYS L 103      11.956  36.780  20.091  1.00 34.03           N  
ATOM   2344  CA  LYS L 103      11.477  35.573  20.754  1.00 39.24           C  
ATOM   2345  C   LYS L 103      10.050  35.857  21.265  1.00 37.96           C  
ATOM   2346  O   LYS L 103       9.849  36.670  22.172  1.00 35.57           O  
ATOM   2347  CB  LYS L 103      12.380  35.190  21.939  1.00 46.11           C  
ATOM   2348  CG  LYS L 103      11.830  33.930  22.681  1.00 58.87           C  
ATOM   2349  CD  LYS L 103      12.666  33.419  23.880  1.00 67.77           C  
ATOM   2350  CE  LYS L 103      14.032  32.860  23.459  1.00 72.43           C  
ATOM   2351  NZ  LYS L 103      14.932  33.957  22.949  1.00 77.23           N  
ATOM   2352  N   LEU L 104       9.056  35.188  20.700  1.00 37.00           N  
ATOM   2353  CA  LEU L 104       7.691  35.473  21.131  1.00 36.16           C  
ATOM   2354  C   LEU L 104       7.161  34.403  22.045  1.00 35.25           C  
ATOM   2355  O   LEU L 104       7.093  33.267  21.663  1.00 34.13           O  
ATOM   2356  CB  LEU L 104       6.762  35.616  19.923  1.00 36.30           C  
ATOM   2357  CG  LEU L 104       5.310  35.958  20.295  1.00 38.50           C  
ATOM   2358  CD1 LEU L 104       4.699  36.913  19.245  1.00 39.89           C  
ATOM   2359  CD2 LEU L 104       4.503  34.692  20.435  1.00 38.45           C  
ATOM   2360  N   THR L 105       6.779  34.784  23.251  1.00 37.55           N  
ATOM   2361  CA  THR L 105       6.225  33.829  24.196  1.00 40.79           C  
ATOM   2362  C   THR L 105       4.715  33.975  24.275  1.00 43.23           C  
ATOM   2363  O   THR L 105       4.234  35.088  24.459  1.00 43.09           O  
ATOM   2364  CB  THR L 105       6.781  34.075  25.611  1.00 42.38           C  
ATOM   2365  OG1 THR L 105       8.184  33.793  25.608  1.00 42.52           O  
ATOM   2366  CG2 THR L 105       6.083  33.136  26.638  1.00 42.41           C  
ATOM   2367  N   VAL L 106       3.969  32.879  24.116  1.00 44.29           N  
ATOM   2368  CA  VAL L 106       2.522  32.948  24.273  1.00 47.03           C  
ATOM   2369  C   VAL L 106       2.340  32.561  25.732  1.00 49.77           C  
ATOM   2370  O   VAL L 106       2.550  31.393  26.087  1.00 48.76           O  
ATOM   2371  CB  VAL L 106       1.767  31.904  23.463  1.00 48.03           C  
ATOM   2372  CG1 VAL L 106       0.260  32.007  23.798  1.00 46.70           C  
ATOM   2373  CG2 VAL L 106       2.047  32.079  21.973  1.00 46.49           C  
ATOM   2374  N   LEU L 106A      1.973  33.528  26.575  1.00 51.28           N  
ATOM   2375  CA  LEU L 106A      1.814  33.271  28.007  1.00 54.38           C  
ATOM   2376  C   LEU L 106A      0.910  32.079  28.332  1.00 55.87           C  
ATOM   2377  O   LEU L 106A     -0.201  31.959  27.823  1.00 56.19           O  
ATOM   2378  CB  LEU L 106A      1.313  34.537  28.723  1.00 52.74           C  
ATOM   2379  CG  LEU L 106A      2.269  35.724  28.541  1.00 52.64           C  
ATOM   2380  CD1 LEU L 106A      1.784  36.962  29.318  1.00 52.07           C  
ATOM   2381  CD2 LEU L 106A      3.658  35.347  29.016  1.00 50.18           C  
ATOM   2382  N   GLY L 107       1.434  31.193  29.170  1.00 58.21           N  
ATOM   2383  CA  GLY L 107       0.725  30.000  29.603  1.00 60.11           C  
ATOM   2384  C   GLY L 107       0.578  29.938  31.119  1.00 60.52           C  
ATOM   2385  O   GLY L 107      -0.088  29.042  31.631  1.00 61.31           O  
ATOM   2386  N   GLN L 108       1.208  30.887  31.816  1.00 60.72           N  
ATOM   2387  CA  GLN L 108       1.171  31.023  33.282  1.00 60.57           C  
ATOM   2388  C   GLN L 108       1.555  32.470  33.561  1.00 60.04           C  
ATOM   2389  O   GLN L 108       2.030  33.151  32.672  1.00 58.18           O  
ATOM   2390  CB  GLN L 108       2.177  30.076  33.944  1.00 62.51           C  
ATOM   2391  CG  GLN L 108       3.614  30.315  33.572  1.00 64.99           C  
ATOM   2392  CD  GLN L 108       4.549  29.384  34.317  1.00 67.27           C  
ATOM   2393  OE1 GLN L 108       4.842  29.583  35.505  1.00 67.70           O  
ATOM   2394  NE2 GLN L 108       5.011  28.350  33.628  1.00 67.85           N  
ATOM   2395  N   PRO L 109       1.368  32.965  34.792  1.00 60.11           N  
ATOM   2396  CA  PRO L 109       1.745  34.365  35.001  1.00 60.34           C  
ATOM   2397  C   PRO L 109       3.232  34.596  34.861  1.00 60.88           C  
ATOM   2398  O   PRO L 109       4.041  33.691  35.072  1.00 60.29           O  
ATOM   2399  CB  PRO L 109       1.261  34.649  36.419  1.00 60.61           C  
ATOM   2400  CG  PRO L 109       0.085  33.715  36.564  1.00 60.85           C  
ATOM   2401  CD  PRO L 109       0.641  32.444  35.959  1.00 60.59           C  
TER    2402      PRO L 109                                                      
