# Supplementary material for: SARS-CoV-2 Spike Protein Interaction Space
Source: Int J Mol Sci. 2023 Jul 27;24(15):12058. doi: 10.3390/ijms241512058 (PMC10418891; doi:10.3390/ijms241512058)
Supplement: Supplementary file 1 [file ijms-24-12058-s001.zip › Supplementary Material File S1/1MAJ.pdb]

REMARK 950 NUMBERING  Kabat
REMARK 950 METHOD     NMR
REMARK 950 RESOLUTION 0.000
REMARK 950 R-FACTOR   0.000
REMARK 950 R-FREE     0.000
REMARK 950 CHAIN-TYPE LABEL ORIGINAL
REMARK 950 CHAIN L    L    A
REMARK 950 MOLECULE : A : IGG2A-KAPPA 26-10 FV (LIGHT CHAIN)
REMARK 950 SPECIES  : A : MUS MUSCULUS
SEQRES   1 L 113  ASP VAL VAL MET THR GLN THR PRO LEU SER LEU PRO VAL          
SEQRES   2 L 113  SER LEU GLY ASP GLN ALA SER ILE SER CYS ARG SER SER          
SEQRES   3 L 113  GLN SER LEU VAL HIS SER ASN GLY ASN THR TYR LEU ASN          
SEQRES   4 L 113  TRP TYR LEU GLN LYS ALA GLY GLN SER PRO LYS LEU LEU          
SEQRES   5 L 113  ILE TYR LYS VAL SER ASN ARG PHE SER GLY VAL PRO ASP          
SEQRES   6 L 113  ARG PHE SER GLY SER GLY SER GLY THR ASP PHE THR LEU          
SEQRES   7 L 113  LYS ILE SER ARG VAL GLU ALA GLU ASP LEU GLY ILE TYR          
SEQRES   8 L 113  PHE CYS SER GLN THR THR HIS VAL PRO PRO THR PHE GLY          
SEQRES   9 L 113  GLY GLY THR LYS LEU GLU ILE LYS ARG                          
ATOM      1  N   ASP L   1       1.694  -0.391  -1.319  1.00  0.00           N  
ATOM      2  CA  ASP L   1       2.802  -0.851  -2.198  1.00  0.00           C  
ATOM      3  C   ASP L   1       4.120  -0.276  -1.725  1.00  0.00           C  
ATOM      4  O   ASP L   1       4.203   0.312  -0.664  1.00  0.00           O  
ATOM      5  CB  ASP L   1       2.552  -0.407  -3.650  1.00  0.00           C  
ATOM      6  CG  ASP L   1       1.046  -0.272  -3.894  1.00  0.00           C  
ATOM      7  OD1 ASP L   1       0.349  -1.197  -3.506  1.00  0.00           O  
ATOM      8  OD2 ASP L   1       0.677   0.750  -4.446  1.00  0.00           O  
ATOM      9  H1  ASP L   1       1.976  -0.489  -0.324  1.00  0.00           H  
ATOM     10  H2  ASP L   1       1.483   0.607  -1.524  1.00  0.00           H  
ATOM     11  H3  ASP L   1       0.847  -0.968  -1.501  1.00  0.00           H  
ATOM     12  HA  ASP L   1       2.881  -1.928  -2.132  1.00  0.00           H  
ATOM     13  HB2 ASP L   1       3.029   0.546  -3.830  1.00  0.00           H  
ATOM     14  HB3 ASP L   1       2.956  -1.141  -4.331  1.00  0.00           H  
ATOM     15  N   VAL L   2       5.129  -0.463  -2.523  1.00  0.00           N  
ATOM     16  CA  VAL L   2       6.452   0.061  -2.139  1.00  0.00           C  
ATOM     17  C   VAL L   2       6.459   1.592  -2.126  1.00  0.00           C  
ATOM     18  O   VAL L   2       6.133   2.224  -3.113  1.00  0.00           O  
ATOM     19  CB  VAL L   2       7.486  -0.442  -3.160  1.00  0.00           C  
ATOM     20  CG1 VAL L   2       8.887   0.017  -2.742  1.00  0.00           C  
ATOM     21  CG2 VAL L   2       7.453  -1.974  -3.202  1.00  0.00           C  
ATOM     22  H   VAL L   2       5.011  -0.943  -3.368  1.00  0.00           H  
ATOM     23  HA  VAL L   2       6.673  -0.308  -1.148  1.00  0.00           H  
ATOM     24  HB  VAL L   2       7.252  -0.048  -4.138  1.00  0.00           H  
ATOM     25 HG11 VAL L   2       8.878   1.076  -2.529  1.00  0.00           H  
ATOM     26 HG12 VAL L   2       9.200  -0.521  -1.861  1.00  0.00           H  
ATOM     27 HG13 VAL L   2       9.585  -0.177  -3.542  1.00  0.00           H  
ATOM     28 HG21 VAL L   2       7.388  -2.366  -2.198  1.00  0.00           H  
ATOM     29 HG22 VAL L   2       6.595  -2.305  -3.769  1.00  0.00           H  
ATOM     30 HG23 VAL L   2       8.353  -2.345  -3.671  1.00  0.00           H  
ATOM     31  N   VAL L   3       6.824   2.156  -1.004  1.00  0.00           N  
ATOM     32  CA  VAL L   3       6.861   3.643  -0.903  1.00  0.00           C  
ATOM     33  C   VAL L   3       8.192   4.181  -1.428  1.00  0.00           C  
ATOM     34  O   VAL L   3       9.216   3.542  -1.285  1.00  0.00           O  
ATOM     35  CB  VAL L   3       6.722   4.038   0.577  1.00  0.00           C  
ATOM     36  CG1 VAL L   3       6.600   5.561   0.686  1.00  0.00           C  
ATOM     37  CG2 VAL L   3       5.465   3.387   1.164  1.00  0.00           C  
ATOM     38  H   VAL L   3       7.073   1.606  -0.233  1.00  0.00           H  
ATOM     39  HA  VAL L   3       6.052   4.060  -1.494  1.00  0.00           H  
ATOM     40  HB  VAL L   3       7.592   3.705   1.125  1.00  0.00           H  
ATOM     41 HG11 VAL L   3       5.857   5.920  -0.012  1.00  0.00           H  
ATOM     42 HG12 VAL L   3       6.303   5.833   1.689  1.00  0.00           H  
ATOM     43 HG13 VAL L   3       7.551   6.021   0.461  1.00  0.00           H  
ATOM     44 HG21 VAL L   3       4.632   3.530   0.492  1.00  0.00           H  
ATOM     45 HG22 VAL L   3       5.633   2.329   1.302  1.00  0.00           H  
ATOM     46 HG23 VAL L   3       5.233   3.837   2.118  1.00  0.00           H  
ATOM     47  N   MET L   4       8.152   5.343  -2.025  1.00  0.00           N  
ATOM     48  CA  MET L   4       9.405   5.937  -2.565  1.00  0.00           C  
ATOM     49  C   MET L   4       9.705   7.275  -1.889  1.00  0.00           C  
ATOM     50  O   MET L   4       9.152   8.296  -2.253  1.00  0.00           O  
ATOM     51  CB  MET L   4       9.226   6.165  -4.073  1.00  0.00           C  
ATOM     52  CG  MET L   4       9.631   4.895  -4.827  1.00  0.00           C  
ATOM     53  SD  MET L   4       9.979   5.056  -6.597  1.00  0.00           S  
ATOM     54  CE  MET L   4      11.784   4.928  -6.498  1.00  0.00           C  
ATOM     55  H   MET L   4       7.303   5.822  -2.114  1.00  0.00           H  
ATOM     56  HA  MET L   4      10.228   5.258  -2.373  1.00  0.00           H  
ATOM     57  HB2 MET L   4       8.193   6.398  -4.286  1.00  0.00           H  
ATOM     58  HB3 MET L   4       9.847   6.989  -4.393  1.00  0.00           H  
ATOM     59  HG2 MET L   4      10.514   4.490  -4.354  1.00  0.00           H  
ATOM     60  HG3 MET L   4       8.839   4.169  -4.714  1.00  0.00           H  
ATOM     61  HE1 MET L   4      12.054   4.170  -5.777  1.00  0.00           H  
ATOM     62  HE2 MET L   4      12.179   4.659  -7.468  1.00  0.00           H  
ATOM     63  HE3 MET L   4      12.196   5.878  -6.194  1.00  0.00           H  
ATOM     64  N   THR L   5      10.573   7.241  -0.915  1.00  0.00           N  
ATOM     65  CA  THR L   5      10.924   8.499  -0.200  1.00  0.00           C  
ATOM     66  C   THR L   5      11.997   9.272  -0.965  1.00  0.00           C  
ATOM     67  O   THR L   5      13.149   8.882  -0.985  1.00  0.00           O  
ATOM     68  CB  THR L   5      11.470   8.131   1.186  1.00  0.00           C  
ATOM     69  OG1 THR L   5      10.582   7.149   1.692  1.00  0.00           O  
ATOM     70  CG2 THR L   5      11.332   9.308   2.158  1.00  0.00           C  
ATOM     71  H   THR L   5      10.990   6.393  -0.655  1.00  0.00           H  
ATOM     72  HA  THR L   5      10.036   9.117  -0.114  1.00  0.00           H  
ATOM     73  HB  THR L   5      12.482   7.745   1.132  1.00  0.00           H  
ATOM     74  HG1 THR L   5      10.332   7.405   2.583  1.00  0.00           H  
ATOM     75 HG21 THR L   5      10.298   9.618   2.214  1.00  0.00           H  
ATOM     76 HG22 THR L   5      11.667   9.011   3.141  1.00  0.00           H  
ATOM     77 HG23 THR L   5      11.932  10.138   1.814  1.00  0.00           H  
ATOM     78  N   GLN L   6      11.595  10.351  -1.585  1.00  0.00           N  
ATOM     79  CA  GLN L   6      12.575  11.167  -2.358  1.00  0.00           C  
ATOM     80  C   GLN L   6      13.365  12.089  -1.431  1.00  0.00           C  
ATOM     81  O   GLN L   6      12.819  12.667  -0.511  1.00  0.00           O  
ATOM     82  CB  GLN L   6      11.799  12.028  -3.370  1.00  0.00           C  
ATOM     83  CG  GLN L   6      12.126  11.562  -4.794  1.00  0.00           C  
ATOM     84  CD  GLN L   6      13.032  12.589  -5.475  1.00  0.00           C  
ATOM     85  OE1 GLN L   6      14.237  12.453  -5.499  1.00  0.00           O  
ATOM     86  NE2 GLN L   6      12.493  13.629  -6.040  1.00  0.00           N  
ATOM     87  H   GLN L   6      10.655  10.622  -1.541  1.00  0.00           H  
ATOM     88  HA  GLN L   6      13.267  10.501  -2.864  1.00  0.00           H  
ATOM     89  HB2 GLN L   6      10.738  11.928  -3.191  1.00  0.00           H  
ATOM     90  HB3 GLN L   6      12.078  13.066  -3.254  1.00  0.00           H  
ATOM     91  HG2 GLN L   6      12.631  10.609  -4.762  1.00  0.00           H  
ATOM     92  HG3 GLN L   6      11.215  11.460  -5.364  1.00  0.00           H  
ATOM     93 HE21 GLN L   6      11.521  13.747  -6.027  1.00  0.00           H  
ATOM     94 HE22 GLN L   6      13.061  14.296  -6.476  1.00  0.00           H  
ATOM     95  N   THR L   7      14.640  12.199  -1.689  1.00  0.00           N  
ATOM     96  CA  THR L   7      15.498  13.076  -0.840  1.00  0.00           C  
ATOM     97  C   THR L   7      16.793  13.414  -1.579  1.00  0.00           C  
ATOM     98  O   THR L   7      17.193  12.706  -2.475  1.00  0.00           O  
ATOM     99  CB  THR L   7      15.856  12.327   0.459  1.00  0.00           C  
ATOM    100  OG1 THR L   7      15.302  11.028   0.329  1.00  0.00           O  
ATOM    101  CG2 THR L   7      15.124  12.932   1.666  1.00  0.00           C  
ATOM    102  H   THR L   7      15.034  11.706  -2.440  1.00  0.00           H  
ATOM    103  HA  THR L   7      14.960  13.993  -0.628  1.00  0.00           H  
ATOM    104  HB  THR L   7      16.929  12.270   0.606  1.00  0.00           H  
ATOM    105  HG1 THR L   7      14.348  11.119   0.258  1.00  0.00           H  
ATOM    106 HG21 THR L   7      14.344  13.598   1.327  1.00  0.00           H  
ATOM    107 HG22 THR L   7      14.684  12.143   2.258  1.00  0.00           H  
ATOM    108 HG23 THR L   7      15.823  13.484   2.275  1.00  0.00           H  
ATOM    109  N   PRO L   8      17.419  14.502  -1.194  1.00  0.00           N  
ATOM    110  CA  PRO L   8      16.924  15.387  -0.125  1.00  0.00           C  
ATOM    111  C   PRO L   8      15.756  16.236  -0.624  1.00  0.00           C  
ATOM    112  O   PRO L   8      15.390  16.169  -1.780  1.00  0.00           O  
ATOM    113  CB  PRO L   8      18.120  16.304   0.190  1.00  0.00           C  
ATOM    114  CG  PRO L   8      19.193  16.063  -0.901  1.00  0.00           C  
ATOM    115  CD  PRO L   8      18.698  14.915  -1.793  1.00  0.00           C  
ATOM    116  HA  PRO L   8      16.627  14.809   0.740  1.00  0.00           H  
ATOM    117  HB2 PRO L   8      17.809  17.338   0.178  1.00  0.00           H  
ATOM    118  HB3 PRO L   8      18.523  16.061   1.163  1.00  0.00           H  
ATOM    119  HG2 PRO L   8      19.323  16.958  -1.490  1.00  0.00           H  
ATOM    120  HG3 PRO L   8      20.133  15.794  -0.441  1.00  0.00           H  
ATOM    121  HD2 PRO L   8      18.537  15.259  -2.807  1.00  0.00           H  
ATOM    122  HD3 PRO L   8      19.399  14.092  -1.782  1.00  0.00           H  
ATOM    123  N   LEU L   9      15.194  17.017   0.254  1.00  0.00           N  
ATOM    124  CA  LEU L   9      14.051  17.874  -0.160  1.00  0.00           C  
ATOM    125  C   LEU L   9      14.541  19.062  -0.990  1.00  0.00           C  
ATOM    126  O   LEU L   9      13.811  19.601  -1.797  1.00  0.00           O  
ATOM    127  CB  LEU L   9      13.354  18.399   1.104  1.00  0.00           C  
ATOM    128  CG  LEU L   9      12.154  17.502   1.431  1.00  0.00           C  
ATOM    129  CD1 LEU L   9      12.650  16.097   1.789  1.00  0.00           C  
ATOM    130  CD2 LEU L   9      11.399  18.089   2.626  1.00  0.00           C  
ATOM    131  H   LEU L   9      15.521  17.036   1.178  1.00  0.00           H  
ATOM    132  HA  LEU L   9      13.367  17.283  -0.763  1.00  0.00           H  
ATOM    133  HB2 LEU L   9      14.049  18.391   1.931  1.00  0.00           H  
ATOM    134  HB3 LEU L   9      13.015  19.410   0.937  1.00  0.00           H  
ATOM    135  HG  LEU L   9      11.495  17.450   0.576  1.00  0.00           H  
ATOM    136 HD11 LEU L   9      13.574  16.166   2.344  1.00  0.00           H  
ATOM    137 HD12 LEU L   9      11.910  15.591   2.392  1.00  0.00           H  
ATOM    138 HD13 LEU L   9      12.820  15.529   0.886  1.00  0.00           H  
ATOM    139 HD21 LEU L   9      11.103  19.105   2.408  1.00  0.00           H  
ATOM    140 HD22 LEU L   9      10.518  17.498   2.826  1.00  0.00           H  
ATOM    141 HD23 LEU L   9      12.036  18.084   3.498  1.00  0.00           H  
ATOM    142  N   SER L  10      15.777  19.436  -0.780  1.00  0.00           N  
ATOM    143  CA  SER L  10      16.343  20.586  -1.542  1.00  0.00           C  
ATOM    144  C   SER L  10      17.771  20.285  -2.000  1.00  0.00           C  
ATOM    145  O   SER L  10      18.530  19.654  -1.289  1.00  0.00           O  
ATOM    146  CB  SER L  10      16.379  21.810  -0.615  1.00  0.00           C  
ATOM    147  OG  SER L  10      15.011  22.129  -0.398  1.00  0.00           O  
ATOM    148  H   SER L  10      16.330  18.959  -0.128  1.00  0.00           H  
ATOM    149  HA  SER L  10      15.723  20.774  -2.414  1.00  0.00           H  
ATOM    150  HB2 SER L  10      16.858  21.565   0.322  1.00  0.00           H  
ATOM    151  HB3 SER L  10      16.884  22.637  -1.092  1.00  0.00           H  
ATOM    152  HG  SER L  10      14.873  22.220   0.549  1.00  0.00           H  
ATOM    153  N   LEU L  11      18.111  20.747  -3.176  1.00  0.00           N  
ATOM    154  CA  LEU L  11      19.483  20.499  -3.699  1.00  0.00           C  
ATOM    155  C   LEU L  11      20.043  21.750  -4.392  1.00  0.00           C  
ATOM    156  O   LEU L  11      20.137  21.816  -5.603  1.00  0.00           O  
ATOM    157  CB  LEU L  11      19.396  19.351  -4.717  1.00  0.00           C  
ATOM    158  CG  LEU L  11      20.720  18.578  -4.724  1.00  0.00           C  
ATOM    159  CD1 LEU L  11      20.689  17.516  -3.622  1.00  0.00           C  
ATOM    160  CD2 LEU L  11      20.896  17.892  -6.080  1.00  0.00           C  
ATOM    161  H   LEU L  11      17.463  21.245  -3.715  1.00  0.00           H  
ATOM    162  HA  LEU L  11      20.135  20.233  -2.873  1.00  0.00           H  
ATOM    163  HB2 LEU L  11      18.590  18.687  -4.443  1.00  0.00           H  
ATOM    164  HB3 LEU L  11      19.201  19.752  -5.699  1.00  0.00           H  
ATOM    165  HG  LEU L  11      21.542  19.258  -4.552  1.00  0.00           H  
ATOM    166 HD11 LEU L  11      19.821  16.885  -3.747  1.00  0.00           H  
ATOM    167 HD12 LEU L  11      21.580  16.909  -3.675  1.00  0.00           H  
ATOM    168 HD13 LEU L  11      20.643  17.996  -2.656  1.00  0.00           H  
ATOM    169 HD21 LEU L  11      19.995  17.354  -6.336  1.00  0.00           H  
ATOM    170 HD22 LEU L  11      21.096  18.633  -6.839  1.00  0.00           H  
ATOM    171 HD23 LEU L  11      21.722  17.198  -6.033  1.00  0.00           H  
ATOM    172  N   PRO L  12      20.404  22.725  -3.591  1.00  0.00           N  
ATOM    173  CA  PRO L  12      20.960  23.990  -4.103  1.00  0.00           C  
ATOM    174  C   PRO L  12      22.341  23.778  -4.729  1.00  0.00           C  
ATOM    175  O   PRO L  12      23.315  23.570  -4.034  1.00  0.00           O  
ATOM    176  CB  PRO L  12      21.088  24.888  -2.859  1.00  0.00           C  
ATOM    177  CG  PRO L  12      20.723  24.031  -1.621  1.00  0.00           C  
ATOM    178  CD  PRO L  12      20.276  22.650  -2.123  1.00  0.00           C  
ATOM    179  HA  PRO L  12      20.282  24.420  -4.830  1.00  0.00           H  
ATOM    180  HB2 PRO L  12      22.101  25.253  -2.769  1.00  0.00           H  
ATOM    181  HB3 PRO L  12      20.410  25.724  -2.939  1.00  0.00           H  
ATOM    182  HG2 PRO L  12      21.585  23.927  -0.979  1.00  0.00           H  
ATOM    183  HG3 PRO L  12      19.921  24.501  -1.072  1.00  0.00           H  
ATOM    184  HD2 PRO L  12      20.921  21.876  -1.732  1.00  0.00           H  
ATOM    185  HD3 PRO L  12      19.250  22.459  -1.847  1.00  0.00           H  
ATOM    186  N   VAL L  13      22.395  23.839  -6.032  1.00  0.00           N  
ATOM    187  CA  VAL L  13      23.701  23.644  -6.730  1.00  0.00           C  
ATOM    188  C   VAL L  13      23.865  24.641  -7.875  1.00  0.00           C  
ATOM    189  O   VAL L  13      22.894  25.104  -8.436  1.00  0.00           O  
ATOM    190  CB  VAL L  13      23.732  22.226  -7.324  1.00  0.00           C  
ATOM    191  CG1 VAL L  13      23.398  21.202  -6.233  1.00  0.00           C  
ATOM    192  CG2 VAL L  13      22.694  22.127  -8.451  1.00  0.00           C  
ATOM    193  H   VAL L  13      21.582  24.012  -6.548  1.00  0.00           H  
ATOM    194  HA  VAL L  13      24.510  23.784  -6.021  1.00  0.00           H  
ATOM    195  HB  VAL L  13      24.716  22.022  -7.721  1.00  0.00           H  
ATOM    196 HG11 VAL L  13      23.913  21.461  -5.320  1.00  0.00           H  
ATOM    197 HG12 VAL L  13      22.334  21.195  -6.051  1.00  0.00           H  
ATOM    198 HG13 VAL L  13      23.710  20.218  -6.549  1.00  0.00           H  
ATOM    199 HG21 VAL L  13      21.754  22.545  -8.122  1.00  0.00           H  
ATOM    200 HG22 VAL L  13      23.041  22.676  -9.316  1.00  0.00           H  
ATOM    201 HG23 VAL L  13      22.547  21.092  -8.723  1.00  0.00           H  
ATOM    202  N   SER L  14      25.089  24.956  -8.199  1.00  0.00           N  
ATOM    203  CA  SER L  14      25.323  25.920  -9.308  1.00  0.00           C  
ATOM    204  C   SER L  14      25.258  25.187 -10.644  1.00  0.00           C  
ATOM    205  O   SER L  14      25.630  24.033 -10.732  1.00  0.00           O  
ATOM    206  CB  SER L  14      26.723  26.537  -9.153  1.00  0.00           C  
ATOM    207  OG  SER L  14      26.948  26.568  -7.749  1.00  0.00           O  
ATOM    208  H   SER L  14      25.847  24.562  -7.719  1.00  0.00           H  
ATOM    209  HA  SER L  14      24.552  26.685  -9.285  1.00  0.00           H  
ATOM    210  HB2 SER L  14      27.469  25.920  -9.636  1.00  0.00           H  
ATOM    211  HB3 SER L  14      26.746  27.539  -9.556  1.00  0.00           H  
ATOM    212  HG  SER L  14      27.680  25.973  -7.554  1.00  0.00           H  
ATOM    213  N   LEU L  15      24.787  25.858 -11.662  1.00  0.00           N  
ATOM    214  CA  LEU L  15      24.701  25.193 -12.990  1.00  0.00           C  
ATOM    215  C   LEU L  15      26.094  24.829 -13.494  1.00  0.00           C  
ATOM    216  O   LEU L  15      26.715  25.562 -14.242  1.00  0.00           O  
ATOM    217  CB  LEU L  15      24.034  26.145 -13.987  1.00  0.00           C  
ATOM    218  CG  LEU L  15      22.620  26.486 -13.500  1.00  0.00           C  
ATOM    219  CD1 LEU L  15      21.945  27.402 -14.520  1.00  0.00           C  
ATOM    220  CD2 LEU L  15      21.798  25.201 -13.362  1.00  0.00           C  
ATOM    221  H   LEU L  15      24.497  26.785 -11.553  1.00  0.00           H  
ATOM    222  HA  LEU L  15      24.124  24.281 -12.884  1.00  0.00           H  
ATOM    223  HB2 LEU L  15      24.618  27.050 -14.072  1.00  0.00           H  
ATOM    224  HB3 LEU L  15      23.981  25.666 -14.953  1.00  0.00           H  
ATOM    225  HG  LEU L  15      22.676  26.986 -12.544  1.00  0.00           H  
ATOM    226 HD11 LEU L  15      21.897  26.907 -15.478  1.00  0.00           H  
ATOM    227 HD12 LEU L  15      20.944  27.636 -14.191  1.00  0.00           H  
ATOM    228 HD13 LEU L  15      22.510  28.317 -14.619  1.00  0.00           H  
ATOM    229 HD21 LEU L  15      22.163  24.457 -14.053  1.00  0.00           H  
ATOM    230 HD22 LEU L  15      21.880  24.820 -12.355  1.00  0.00           H  
ATOM    231 HD23 LEU L  15      20.759  25.407 -13.580  1.00  0.00           H  
ATOM    232  N   GLY L  16      26.548  23.693 -13.061  1.00  0.00           N  
ATOM    233  CA  GLY L  16      27.897  23.216 -13.473  1.00  0.00           C  
ATOM    234  C   GLY L  16      28.397  22.170 -12.477  1.00  0.00           C  
ATOM    235  O   GLY L  16      29.109  21.257 -12.842  1.00  0.00           O  
ATOM    236  H   GLY L  16      25.996  23.150 -12.464  1.00  0.00           H  
ATOM    237  HA2 GLY L  16      27.839  22.778 -14.457  1.00  0.00           H  
ATOM    238  HA3 GLY L  16      28.584  24.050 -13.490  1.00  0.00           H  
ATOM    239  N   ASP L  17      28.006  22.328 -11.238  1.00  0.00           N  
ATOM    240  CA  ASP L  17      28.443  21.357 -10.198  1.00  0.00           C  
ATOM    241  C   ASP L  17      27.703  20.032 -10.354  1.00  0.00           C  
ATOM    242  O   ASP L  17      26.766  19.926 -11.124  1.00  0.00           O  
ATOM    243  CB  ASP L  17      28.107  21.930  -8.810  1.00  0.00           C  
ATOM    244  CG  ASP L  17      28.651  23.354  -8.671  1.00  0.00           C  
ATOM    245  OD1 ASP L  17      29.674  23.615  -9.285  1.00  0.00           O  
ATOM    246  OD2 ASP L  17      28.015  24.099  -7.947  1.00  0.00           O  
ATOM    247  H   ASP L  17      27.429  23.082 -10.996  1.00  0.00           H  
ATOM    248  HA  ASP L  17      29.509  21.182 -10.299  1.00  0.00           H  
ATOM    249  HB2 ASP L  17      27.036  21.949  -8.676  1.00  0.00           H  
ATOM    250  HB3 ASP L  17      28.547  21.309  -8.045  1.00  0.00           H  
ATOM    251  N   GLN L  18      28.136  19.049  -9.613  1.00  0.00           N  
ATOM    252  CA  GLN L  18      27.476  17.721  -9.699  1.00  0.00           C  
ATOM    253  C   GLN L  18      26.355  17.606  -8.666  1.00  0.00           C  
ATOM    254  O   GLN L  18      26.511  18.011  -7.531  1.00  0.00           O  
ATOM    255  CB  GLN L  18      28.522  16.637  -9.408  1.00  0.00           C  
ATOM    256  CG  GLN L  18      29.548  16.595 -10.548  1.00  0.00           C  
ATOM    257  CD  GLN L  18      30.681  15.633 -10.176  1.00  0.00           C  
ATOM    258  OE1 GLN L  18      30.849  14.592 -10.777  1.00  0.00           O  
ATOM    259  NE2 GLN L  18      31.481  15.942  -9.193  1.00  0.00           N  
ATOM    260  H   GLN L  18      28.891  19.186  -9.004  1.00  0.00           H  
ATOM    261  HA  GLN L  18      27.056  17.599 -10.691  1.00  0.00           H  
ATOM    262  HB2 GLN L  18      29.023  16.859  -8.477  1.00  0.00           H  
ATOM    263  HB3 GLN L  18      28.032  15.678  -9.325  1.00  0.00           H  
ATOM    264  HG2 GLN L  18      29.073  16.250 -11.456  1.00  0.00           H  
ATOM    265  HG3 GLN L  18      29.957  17.581 -10.712  1.00  0.00           H  
ATOM    266 HE21 GLN L  18      31.354  16.780  -8.703  1.00  0.00           H  
ATOM    267 HE22 GLN L  18      32.209  15.335  -8.946  1.00  0.00           H  
ATOM    268  N   ALA L  19      25.250  17.046  -9.080  1.00  0.00           N  
ATOM    269  CA  ALA L  19      24.100  16.891  -8.140  1.00  0.00           C  
ATOM    270  C   ALA L  19      23.700  15.422  -8.029  1.00  0.00           C  
ATOM    271  O   ALA L  19      23.636  14.725  -9.017  1.00  0.00           O  
ATOM    272  CB  ALA L  19      22.912  17.692  -8.688  1.00  0.00           C  
ATOM    273  H   ALA L  19      25.181  16.718 -10.002  1.00  0.00           H  
ATOM    274  HA  ALA L  19      24.390  17.253  -7.159  1.00  0.00           H  
ATOM    275  HB1 ALA L  19      22.996  17.783  -9.761  1.00  0.00           H  
ATOM    276  HB2 ALA L  19      21.989  17.187  -8.445  1.00  0.00           H  
ATOM    277  HB3 ALA L  19      22.904  18.678  -8.248  1.00  0.00           H  
ATOM    278  N   SER L  20      23.438  14.981  -6.827  1.00  0.00           N  
ATOM    279  CA  SER L  20      23.041  13.556  -6.628  1.00  0.00           C  
ATOM    280  C   SER L  20      21.775  13.455  -5.781  1.00  0.00           C  
ATOM    281  O   SER L  20      21.814  13.637  -4.580  1.00  0.00           O  
ATOM    282  CB  SER L  20      24.188  12.838  -5.902  1.00  0.00           C  
ATOM    283  OG  SER L  20      25.312  13.019  -6.755  1.00  0.00           O  
ATOM    284  H   SER L  20      23.497  15.587  -6.059  1.00  0.00           H  
ATOM    285  HA  SER L  20      22.852  13.095  -7.591  1.00  0.00           H  
ATOM    286  HB2 SER L  20      24.374  13.289  -4.938  1.00  0.00           H  
ATOM    287  HB3 SER L  20      23.971  11.786  -5.791  1.00  0.00           H  
ATOM    288  HG  SER L  20      25.143  13.782  -7.315  1.00  0.00           H  
ATOM    289  N   ILE L  21      20.673  13.173  -6.424  1.00  0.00           N  
ATOM    290  CA  ILE L  21      19.392  13.055  -5.673  1.00  0.00           C  
ATOM    291  C   ILE L  21      19.162  11.605  -5.268  1.00  0.00           C  
ATOM    292  O   ILE L  21      19.339  10.708  -6.064  1.00  0.00           O  
ATOM    293  CB  ILE L  21      18.247  13.505  -6.580  1.00  0.00           C  
ATOM    294  CG1 ILE L  21      18.518  14.919  -7.098  1.00  0.00           C  
ATOM    295  CG2 ILE L  21      16.950  13.522  -5.757  1.00  0.00           C  
ATOM    296  CD1 ILE L  21      18.499  14.908  -8.628  1.00  0.00           C  
ATOM    297  H   ILE L  21      20.691  13.028  -7.394  1.00  0.00           H  
ATOM    298  HA  ILE L  21      19.445  13.669  -4.777  1.00  0.00           H  
ATOM    299  HB  ILE L  21      18.166  12.820  -7.417  1.00  0.00           H  
ATOM    300 HG12 ILE L  21      17.758  15.593  -6.732  1.00  0.00           H  
ATOM    301 HG13 ILE L  21      19.483  15.255  -6.751  1.00  0.00           H  
ATOM    302 HG21 ILE L  21      17.107  14.070  -4.841  1.00  0.00           H  
ATOM    303 HG22 ILE L  21      16.163  13.996  -6.325  1.00  0.00           H  
ATOM    304 HG23 ILE L  21      16.656  12.510  -5.519  1.00  0.00           H  
ATOM    305 HD11 ILE L  21      19.102  14.091  -8.995  1.00  0.00           H  
ATOM    306 HD12 ILE L  21      17.484  14.786  -8.977  1.00  0.00           H  
ATOM    307 HD13 ILE L  21      18.894  15.840  -9.004  1.00  0.00           H  
ATOM    308  N   SER L  22      18.760  11.408  -4.045  1.00  0.00           N  
ATOM    309  CA  SER L  22      18.514  10.019  -3.560  1.00  0.00           C  
ATOM    310  C   SER L  22      17.034   9.628  -3.605  1.00  0.00           C  
ATOM    311  O   SER L  22      16.161  10.459  -3.772  1.00  0.00           O  
ATOM    312  CB  SER L  22      18.986   9.936  -2.102  1.00  0.00           C  
ATOM    313  OG  SER L  22      20.383  10.189  -2.170  1.00  0.00           O  
ATOM    314  H   SER L  22      18.618  12.170  -3.450  1.00  0.00           H  
ATOM    315  HA  SER L  22      19.074   9.329  -4.178  1.00  0.00           H  
ATOM    316  HB2 SER L  22      18.497  10.689  -1.498  1.00  0.00           H  
ATOM    317  HB3 SER L  22      18.805   8.952  -1.697  1.00  0.00           H  
ATOM    318  HG  SER L  22      20.776   9.908  -1.339  1.00  0.00           H  
ATOM    319  N   CYS L  23      16.800   8.348  -3.450  1.00  0.00           N  
ATOM    320  CA  CYS L  23      15.407   7.817  -3.468  1.00  0.00           C  
ATOM    321  C   CYS L  23      15.372   6.438  -2.805  1.00  0.00           C  
ATOM    322  O   CYS L  23      16.026   5.518  -3.255  1.00  0.00           O  
ATOM    323  CB  CYS L  23      14.947   7.683  -4.927  1.00  0.00           C  
ATOM    324  SG  CYS L  23      14.358   9.185  -5.752  1.00  0.00           S  
ATOM    325  H   CYS L  23      17.552   7.732  -3.322  1.00  0.00           H  
ATOM    326  HA  CYS L  23      14.762   8.494  -2.915  1.00  0.00           H  
ATOM    327  HB2 CYS L  23      15.771   7.294  -5.507  1.00  0.00           H  
ATOM    328  HB3 CYS L  23      14.149   6.956  -4.963  1.00  0.00           H  
ATOM    329  N   ARG L  24      14.618   6.322  -1.744  1.00  0.00           N  
ATOM    330  CA  ARG L  24      14.534   5.010  -1.040  1.00  0.00           C  
ATOM    331  C   ARG L  24      13.239   4.268  -1.376  1.00  0.00           C  
ATOM    332  O   ARG L  24      12.215   4.879  -1.608  1.00  0.00           O  
ATOM    333  CB  ARG L  24      14.571   5.286   0.470  1.00  0.00           C  
ATOM    334  CG  ARG L  24      16.029   5.460   0.914  1.00  0.00           C  
ATOM    335  CD  ARG L  24      16.087   6.430   2.099  1.00  0.00           C  
ATOM    336  NE  ARG L  24      17.180   6.000   3.017  1.00  0.00           N  
ATOM    337  CZ  ARG L  24      18.333   6.599   2.971  1.00  0.00           C  
ATOM    338  NH1 ARG L  24      19.059   6.475   1.905  1.00  0.00           N  
ATOM    339  NH2 ARG L  24      18.720   7.294   3.997  1.00  0.00           N  
ATOM    340  H   ARG L  24      14.113   7.094  -1.410  1.00  0.00           H  
ATOM    341  HA  ARG L  24      15.376   4.395  -1.337  1.00  0.00           H  
ATOM    342  HB2 ARG L  24      14.015   6.187   0.687  1.00  0.00           H  
ATOM    343  HB3 ARG L  24      14.125   4.458   1.003  1.00  0.00           H  
ATOM    344  HG2 ARG L  24      16.434   4.503   1.209  1.00  0.00           H  
ATOM    345  HG3 ARG L  24      16.615   5.853   0.095  1.00  0.00           H  
ATOM    346  HD2 ARG L  24      16.285   7.432   1.745  1.00  0.00           H  
ATOM    347  HD3 ARG L  24      15.147   6.418   2.632  1.00  0.00           H  
ATOM    348  HE  ARG L  24      17.034   5.265   3.646  1.00  0.00           H  
ATOM    349 HH11 ARG L  24      18.727   5.925   1.137  1.00  0.00           H  
ATOM    350 HH12 ARG L  24      19.952   6.919   1.851  1.00  0.00           H  
ATOM    351 HH21 ARG L  24      18.134   7.360   4.804  1.00  0.00           H  
ATOM    352 HH22 ARG L  24      19.602   7.760   3.980  1.00  0.00           H  
ATOM    353  N   SER L  25      13.316   2.957  -1.391  1.00  0.00           N  
ATOM    354  CA  SER L  25      12.107   2.137  -1.708  1.00  0.00           C  
ATOM    355  C   SER L  25      11.776   1.192  -0.547  1.00  0.00           C  
ATOM    356  O   SER L  25      12.585   0.363  -0.173  1.00  0.00           O  
ATOM    357  CB  SER L  25      12.400   1.307  -2.968  1.00  0.00           C  
ATOM    358  OG  SER L  25      12.672   2.279  -3.968  1.00  0.00           O  
ATOM    359  H   SER L  25      14.170   2.515  -1.196  1.00  0.00           H  
ATOM    360  HA  SER L  25      11.264   2.800  -1.871  1.00  0.00           H  
ATOM    361  HB2 SER L  25      13.262   0.674  -2.820  1.00  0.00           H  
ATOM    362  HB3 SER L  25      11.541   0.716  -3.248  1.00  0.00           H  
ATOM    363  HG  SER L  25      12.025   2.984  -3.881  1.00  0.00           H  
ATOM    364  N   SER L  26      10.584   1.341  -0.012  1.00  0.00           N  
ATOM    365  CA  SER L  26      10.132   0.483   1.134  1.00  0.00           C  
ATOM    366  C   SER L  26      10.841  -0.873   1.191  1.00  0.00           C  
ATOM    367  O   SER L  26      11.720  -1.076   2.006  1.00  0.00           O  
ATOM    368  CB  SER L  26       8.626   0.236   0.984  1.00  0.00           C  
ATOM    369  OG  SER L  26       8.031   1.467   1.365  1.00  0.00           O  
ATOM    370  H   SER L  26       9.979   2.024  -0.369  1.00  0.00           H  
ATOM    371  HA  SER L  26      10.333   1.012   2.059  1.00  0.00           H  
ATOM    372  HB2 SER L  26       8.377   0.003  -0.040  1.00  0.00           H  
ATOM    373  HB3 SER L  26       8.299  -0.557   1.641  1.00  0.00           H  
ATOM    374  HG  SER L  26       8.067   1.532   2.325  1.00  0.00           H  
ATOM    375  N   GLN L  27      10.435  -1.779   0.341  1.00  0.00           N  
ATOM    376  CA  GLN L  27      11.071  -3.117   0.334  1.00  0.00           C  
ATOM    377  C   GLN L  27      11.850  -3.345  -0.960  1.00  0.00           C  
ATOM    378  O   GLN L  27      11.741  -4.384  -1.582  1.00  0.00           O  
ATOM    379  CB  GLN L  27       9.952  -4.160   0.446  1.00  0.00           C  
ATOM    380  CG  GLN L  27      10.390  -5.245   1.424  1.00  0.00           C  
ATOM    381  CD  GLN L  27       9.996  -4.835   2.845  1.00  0.00           C  
ATOM    382  OE1 GLN L  27       9.070  -5.366   3.422  1.00  0.00           O  
ATOM    383  NE2 GLN L  27      10.671  -3.895   3.445  1.00  0.00           N  
ATOM    384  H   GLN L  27       9.711  -1.584  -0.281  1.00  0.00           H  
ATOM    385  HA  GLN L  27      11.755  -3.191   1.173  1.00  0.00           H  
ATOM    386  HB2 GLN L  27       9.049  -3.689   0.807  1.00  0.00           H  
ATOM    387  HB3 GLN L  27       9.759  -4.599  -0.522  1.00  0.00           H  
ATOM    388  HG2 GLN L  27       9.909  -6.176   1.172  1.00  0.00           H  
ATOM    389  HG3 GLN L  27      11.459  -5.366   1.371  1.00  0.00           H  
ATOM    390 HE21 GLN L  27      11.419  -3.459   2.987  1.00  0.00           H  
ATOM    391 HE22 GLN L  27      10.429  -3.626   4.355  1.00  0.00           H  
ATOM    392  N   SER L  27A     12.626  -2.360  -1.333  1.00  0.00           N  
ATOM    393  CA  SER L  27A     13.435  -2.472  -2.583  1.00  0.00           C  
ATOM    394  C   SER L  27A     12.542  -2.584  -3.814  1.00  0.00           C  
ATOM    395  O   SER L  27A     11.353  -2.811  -3.707  1.00  0.00           O  
ATOM    396  CB  SER L  27A     14.308  -3.734  -2.503  1.00  0.00           C  
ATOM    397  OG  SER L  27A     15.130  -3.659  -3.659  1.00  0.00           O  
ATOM    398  H   SER L  27A     12.675  -1.545  -0.789  1.00  0.00           H  
ATOM    399  HA  SER L  27A     14.050  -1.586  -2.680  1.00  0.00           H  
ATOM    400  HB2 SER L  27A     14.916  -3.726  -1.612  1.00  0.00           H  
ATOM    401  HB3 SER L  27A     13.700  -4.625  -2.536  1.00  0.00           H  
ATOM    402  HG  SER L  27A     15.012  -4.470  -4.159  1.00  0.00           H  
ATOM    403  N   LEU L  27B     13.139  -2.414  -4.963  1.00  0.00           N  
ATOM    404  CA  LEU L  27B     12.355  -2.506  -6.225  1.00  0.00           C  
ATOM    405  C   LEU L  27B     12.792  -3.724  -7.030  1.00  0.00           C  
ATOM    406  O   LEU L  27B     12.892  -3.673  -8.241  1.00  0.00           O  
ATOM    407  CB  LEU L  27B     12.616  -1.249  -7.062  1.00  0.00           C  
ATOM    408  CG  LEU L  27B     12.338  -0.002  -6.218  1.00  0.00           C  
ATOM    409  CD1 LEU L  27B     12.942   1.219  -6.913  1.00  0.00           C  
ATOM    410  CD2 LEU L  27B     10.827   0.192  -6.087  1.00  0.00           C  
ATOM    411  H   LEU L  27B     14.101  -2.227  -4.993  1.00  0.00           H  
ATOM    412  HA  LEU L  27B     11.302  -2.601  -5.985  1.00  0.00           H  
ATOM    413  HB2 LEU L  27B     13.641  -1.245  -7.393  1.00  0.00           H  
ATOM    414  HB3 LEU L  27B     11.968  -1.252  -7.927  1.00  0.00           H  
ATOM    415  HG  LEU L  27B     12.778  -0.117  -5.238  1.00  0.00           H  
ATOM    416 HD11 LEU L  27B     13.861   0.940  -7.406  1.00  0.00           H  
ATOM    417 HD12 LEU L  27B     12.249   1.603  -7.646  1.00  0.00           H  
ATOM    418 HD13 LEU L  27B     13.149   1.986  -6.183  1.00  0.00           H  
ATOM    419 HD21 LEU L  27B     10.374   0.199  -7.067  1.00  0.00           H  
ATOM    420 HD22 LEU L  27B     10.404  -0.615  -5.507  1.00  0.00           H  
ATOM    421 HD23 LEU L  27B     10.621   1.130  -5.593  1.00  0.00           H  
ATOM    422  N   VAL L  27C     13.052  -4.798  -6.338  1.00  0.00           N  
ATOM    423  CA  VAL L  27C     13.484  -6.033  -7.043  1.00  0.00           C  
ATOM    424  C   VAL L  27C     12.277  -6.909  -7.375  1.00  0.00           C  
ATOM    425  O   VAL L  27C     11.597  -7.394  -6.491  1.00  0.00           O  
ATOM    426  CB  VAL L  27C     14.437  -6.809  -6.121  1.00  0.00           C  
ATOM    427  CG1 VAL L  27C     14.773  -8.162  -6.758  1.00  0.00           C  
ATOM    428  CG2 VAL L  27C     15.730  -6.005  -5.943  1.00  0.00           C  
ATOM    429  H   VAL L  27C     12.961  -4.791  -5.362  1.00  0.00           H  
ATOM    430  HA  VAL L  27C     13.982  -5.756  -7.967  1.00  0.00           H  
ATOM    431  HB  VAL L  27C     13.969  -6.965  -5.160  1.00  0.00           H  
ATOM    432 HG11 VAL L  27C     14.909  -8.041  -7.823  1.00  0.00           H  
ATOM    433 HG12 VAL L  27C     15.681  -8.554  -6.326  1.00  0.00           H  
ATOM    434 HG13 VAL L  27C     13.966  -8.859  -6.581  1.00  0.00           H  
ATOM    435 HG21 VAL L  27C     15.498  -4.956  -5.835  1.00  0.00           H  
ATOM    436 HG22 VAL L  27C     16.254  -6.345  -5.061  1.00  0.00           H  
ATOM    437 HG23 VAL L  27C     16.366  -6.138  -6.806  1.00  0.00           H  
ATOM    438  N   HIS L  27D     12.034  -7.082  -8.646  1.00  0.00           N  
ATOM    439  CA  HIS L  27D     10.882  -7.918  -9.072  1.00  0.00           C  
ATOM    440  C   HIS L  27D     11.138  -9.392  -8.754  1.00  0.00           C  
ATOM    441  O   HIS L  27D     12.219  -9.760  -8.334  1.00  0.00           O  
ATOM    442  CB  HIS L  27D     10.712  -7.749 -10.590  1.00  0.00           C  
ATOM    443  CG  HIS L  27D      9.370  -8.341 -11.030  1.00  0.00           C  
ATOM    444  ND1 HIS L  27D      9.178  -9.572 -11.306  1.00  0.00           N  
ATOM    445  CD2 HIS L  27D      8.157  -7.715 -11.216  1.00  0.00           C  
ATOM    446  CE1 HIS L  27D      7.943  -9.728 -11.642  1.00  0.00           C  
ATOM    447  NE2 HIS L  27D      7.248  -8.606 -11.606  1.00  0.00           N  
ATOM    448  H   HIS L  27D     12.613  -6.666  -9.317  1.00  0.00           H  
ATOM    449  HA  HIS L  27D      9.992  -7.590  -8.543  1.00  0.00           H  
ATOM    450  HB2 HIS L  27D     10.737  -6.700 -10.845  1.00  0.00           H  
ATOM    451  HB3 HIS L  27D     11.511  -8.258 -11.106  1.00  0.00           H  
ATOM    452  HD2 HIS L  27D      7.972  -6.661 -11.072  1.00  0.00           H  
ATOM    453  HE1 HIS L  27D      7.520 -10.681 -11.925  1.00  0.00           H  
ATOM    454  N   SER L  27E     10.137 -10.206  -8.961  1.00  0.00           N  
ATOM    455  CA  SER L  27E     10.293 -11.661  -8.678  1.00  0.00           C  
ATOM    456  C   SER L  27E     11.235 -12.317  -9.689  1.00  0.00           C  
ATOM    457  O   SER L  27E     10.807 -13.041 -10.567  1.00  0.00           O  
ATOM    458  CB  SER L  27E      8.910 -12.319  -8.778  1.00  0.00           C  
ATOM    459  OG  SER L  27E      8.172 -11.739  -7.710  1.00  0.00           O  
ATOM    460  H   SER L  27E      9.288  -9.860  -9.309  1.00  0.00           H  
ATOM    461  HA  SER L  27E     10.706 -11.783  -7.682  1.00  0.00           H  
ATOM    462  HB2 SER L  27E      8.442 -12.090  -9.724  1.00  0.00           H  
ATOM    463  HB3 SER L  27E      8.984 -13.389  -8.643  1.00  0.00           H  
ATOM    464  HG  SER L  27E      8.413 -10.811  -7.650  1.00  0.00           H  
ATOM    465  N   ASN L  28      12.504 -12.045  -9.537  1.00  0.00           N  
ATOM    466  CA  ASN L  28      13.516 -12.628 -10.465  1.00  0.00           C  
ATOM    467  C   ASN L  28      14.911 -12.098 -10.134  1.00  0.00           C  
ATOM    468  O   ASN L  28      15.901 -12.757 -10.379  1.00  0.00           O  
ATOM    469  CB  ASN L  28      13.167 -12.225 -11.910  1.00  0.00           C  
ATOM    470  CG  ASN L  28      12.549 -10.826 -11.922  1.00  0.00           C  
ATOM    471  OD1 ASN L  28      13.129  -9.875 -11.439  1.00  0.00           O  
ATOM    472  ND2 ASN L  28      11.376 -10.657 -12.464  1.00  0.00           N  
ATOM    473  H   ASN L  28      12.792 -11.460  -8.806  1.00  0.00           H  
ATOM    474  HA  ASN L  28      13.516 -13.708 -10.353  1.00  0.00           H  
ATOM    475  HB2 ASN L  28      14.061 -12.223 -12.515  1.00  0.00           H  
ATOM    476  HB3 ASN L  28      12.460 -12.929 -12.324  1.00  0.00           H  
ATOM    477 HD21 ASN L  28      10.904 -11.420 -12.856  1.00  0.00           H  
ATOM    478 HD22 ASN L  28      10.964  -9.768 -12.471  1.00  0.00           H  
ATOM    479  N   GLY L  29      14.954 -10.911  -9.583  1.00  0.00           N  
ATOM    480  CA  GLY L  29      16.272 -10.305  -9.222  1.00  0.00           C  
ATOM    481  C   GLY L  29      16.586  -9.117 -10.135  1.00  0.00           C  
ATOM    482  O   GLY L  29      17.733  -8.754 -10.310  1.00  0.00           O  
ATOM    483  H   GLY L  29      14.124 -10.419  -9.411  1.00  0.00           H  
ATOM    484  HA2 GLY L  29      16.240  -9.967  -8.197  1.00  0.00           H  
ATOM    485  HA3 GLY L  29      17.050 -11.047  -9.326  1.00  0.00           H  
ATOM    486  N   ASN L  30      15.555  -8.535 -10.695  1.00  0.00           N  
ATOM    487  CA  ASN L  30      15.762  -7.370 -11.602  1.00  0.00           C  
ATOM    488  C   ASN L  30      15.047  -6.126 -11.073  1.00  0.00           C  
ATOM    489  O   ASN L  30      13.962  -6.214 -10.532  1.00  0.00           O  
ATOM    490  CB  ASN L  30      15.175  -7.726 -12.974  1.00  0.00           C  
ATOM    491  CG  ASN L  30      16.135  -8.661 -13.708  1.00  0.00           C  
ATOM    492  OD1 ASN L  30      16.267  -9.820 -13.376  1.00  0.00           O  
ATOM    493  ND2 ASN L  30      16.823  -8.197 -14.710  1.00  0.00           N  
ATOM    494  H   ASN L  30      14.650  -8.867 -10.524  1.00  0.00           H  
ATOM    495  HA  ASN L  30      16.824  -7.161 -11.678  1.00  0.00           H  
ATOM    496  HB2 ASN L  30      14.223  -8.221 -12.847  1.00  0.00           H  
ATOM    497  HB3 ASN L  30      15.035  -6.829 -13.558  1.00  0.00           H  
ATOM    498 HD21 ASN L  30      16.721  -7.262 -14.984  1.00  0.00           H  
ATOM    499 HD22 ASN L  30      17.443  -8.783 -15.190  1.00  0.00           H  
ATOM    500  N   THR L  31      15.672  -4.989 -11.246  1.00  0.00           N  
ATOM    501  CA  THR L  31      15.054  -3.720 -10.764  1.00  0.00           C  
ATOM    502  C   THR L  31      14.676  -2.820 -11.942  1.00  0.00           C  
ATOM    503  O   THR L  31      15.485  -2.562 -12.813  1.00  0.00           O  
ATOM    504  CB  THR L  31      16.077  -2.987  -9.888  1.00  0.00           C  
ATOM    505  OG1 THR L  31      16.193  -3.772  -8.715  1.00  0.00           O  
ATOM    506  CG2 THR L  31      15.521  -1.644  -9.396  1.00  0.00           C  
ATOM    507  H   THR L  31      16.546  -4.972 -11.689  1.00  0.00           H  
ATOM    508  HA  THR L  31      14.159  -3.955 -10.198  1.00  0.00           H  
ATOM    509  HB  THR L  31      17.037  -2.890 -10.383  1.00  0.00           H  
ATOM    510  HG1 THR L  31      15.366  -3.705  -8.230  1.00  0.00           H  
ATOM    511 HG21 THR L  31      14.442  -1.652  -9.452  1.00  0.00           H  
ATOM    512 HG22 THR L  31      15.822  -1.477  -8.372  1.00  0.00           H  
ATOM    513 HG23 THR L  31      15.902  -0.844 -10.013  1.00  0.00           H  
ATOM    514  N   TYR L  32      13.451  -2.356 -11.943  1.00  0.00           N  
ATOM    515  CA  TYR L  32      12.996  -1.470 -13.053  1.00  0.00           C  
ATOM    516  C   TYR L  32      12.655  -0.070 -12.534  1.00  0.00           C  
ATOM    517  O   TYR L  32      11.511   0.228 -12.248  1.00  0.00           O  
ATOM    518  CB  TYR L  32      11.732  -2.083 -13.676  1.00  0.00           C  
ATOM    519  CG  TYR L  32      11.987  -3.545 -14.053  1.00  0.00           C  
ATOM    520  CD1 TYR L  32      11.864  -4.544 -13.109  1.00  0.00           C  
ATOM    521  CD2 TYR L  32      12.320  -3.887 -15.348  1.00  0.00           C  
ATOM    522  CE1 TYR L  32      12.070  -5.863 -13.455  1.00  0.00           C  
ATOM    523  CE2 TYR L  32      12.526  -5.207 -15.693  1.00  0.00           C  
ATOM    524  CZ  TYR L  32      12.401  -6.205 -14.749  1.00  0.00           C  
ATOM    525  OH  TYR L  32      12.597  -7.525 -15.096  1.00  0.00           O  
ATOM    526  H   TYR L  32      12.836  -2.589 -11.216  1.00  0.00           H  
ATOM    527  HA  TYR L  32      13.788  -1.389 -13.791  1.00  0.00           H  
ATOM    528  HB2 TYR L  32      10.918  -2.037 -12.967  1.00  0.00           H  
ATOM    529  HB3 TYR L  32      11.462  -1.531 -14.564  1.00  0.00           H  
ATOM    530  HD1 TYR L  32      11.604  -4.292 -12.091  1.00  0.00           H  
ATOM    531  HD2 TYR L  32      12.419  -3.116 -16.098  1.00  0.00           H  
ATOM    532  HE1 TYR L  32      11.973  -6.635 -12.706  1.00  0.00           H  
ATOM    533  HE2 TYR L  32      12.785  -5.463 -16.709  1.00  0.00           H  
ATOM    534  HH  TYR L  32      11.773  -7.995 -14.947  1.00  0.00           H  
ATOM    535  N   LEU L  33      13.657   0.759 -12.421  1.00  0.00           N  
ATOM    536  CA  LEU L  33      13.419   2.144 -11.924  1.00  0.00           C  
ATOM    537  C   LEU L  33      13.178   3.109 -13.086  1.00  0.00           C  
ATOM    538  O   LEU L  33      13.436   2.784 -14.226  1.00  0.00           O  
ATOM    539  CB  LEU L  33      14.680   2.591 -11.168  1.00  0.00           C  
ATOM    540  CG  LEU L  33      14.293   3.498  -9.992  1.00  0.00           C  
ATOM    541  CD1 LEU L  33      15.285   3.273  -8.848  1.00  0.00           C  
ATOM    542  CD2 LEU L  33      14.356   4.966 -10.431  1.00  0.00           C  
ATOM    543  H   LEU L  33      14.563   0.470 -12.658  1.00  0.00           H  
ATOM    544  HA  LEU L  33      12.552   2.146 -11.272  1.00  0.00           H  
ATOM    545  HB2 LEU L  33      15.201   1.722 -10.794  1.00  0.00           H  
ATOM    546  HB3 LEU L  33      15.335   3.127 -11.840  1.00  0.00           H  
ATOM    547  HG  LEU L  33      13.292   3.259  -9.659  1.00  0.00           H  
ATOM    548 HD11 LEU L  33      16.295   3.283  -9.234  1.00  0.00           H  
ATOM    549 HD12 LEU L  33      15.176   4.055  -8.111  1.00  0.00           H  
ATOM    550 HD13 LEU L  33      15.093   2.318  -8.382  1.00  0.00           H  
ATOM    551 HD21 LEU L  33      14.663   5.028 -11.465  1.00  0.00           H  
ATOM    552 HD22 LEU L  33      13.383   5.421 -10.323  1.00  0.00           H  
ATOM    553 HD23 LEU L  33      15.069   5.502  -9.819  1.00  0.00           H  
ATOM    554  N   ASN L  34      12.680   4.274 -12.774  1.00  0.00           N  
ATOM    555  CA  ASN L  34      12.415   5.277 -13.843  1.00  0.00           C  
ATOM    556  C   ASN L  34      12.576   6.693 -13.292  1.00  0.00           C  
ATOM    557  O   ASN L  34      11.618   7.307 -12.859  1.00  0.00           O  
ATOM    558  CB  ASN L  34      10.971   5.102 -14.351  1.00  0.00           C  
ATOM    559  CG  ASN L  34      10.985   4.754 -15.841  1.00  0.00           C  
ATOM    560  OD1 ASN L  34      10.367   5.416 -16.649  1.00  0.00           O  
ATOM    561  ND2 ASN L  34      11.669   3.726 -16.248  1.00  0.00           N  
ATOM    562  H   ASN L  34      12.478   4.486 -11.838  1.00  0.00           H  
ATOM    563  HA  ASN L  34      13.129   5.133 -14.647  1.00  0.00           H  
ATOM    564  HB2 ASN L  34      10.481   4.311 -13.805  1.00  0.00           H  
ATOM    565  HB3 ASN L  34      10.423   6.022 -14.217  1.00  0.00           H  
ATOM    566 HD21 ASN L  34      12.167   3.182 -15.603  1.00  0.00           H  
ATOM    567 HD22 ASN L  34      11.689   3.499 -17.200  1.00  0.00           H  
ATOM    568  N   TRP L  35      13.787   7.185 -13.301  1.00  0.00           N  
ATOM    569  CA  TRP L  35      14.009   8.558 -12.779  1.00  0.00           C  
ATOM    570  C   TRP L  35      13.174   9.559 -13.573  1.00  0.00           C  
ATOM    571  O   TRP L  35      12.814   9.304 -14.705  1.00  0.00           O  
ATOM    572  CB  TRP L  35      15.496   8.899 -12.907  1.00  0.00           C  
ATOM    573  CG  TRP L  35      16.206   8.485 -11.614  1.00  0.00           C  
ATOM    574  CD1 TRP L  35      16.893   7.343 -11.440  1.00  0.00           C  
ATOM    575  CD2 TRP L  35      16.212   9.193 -10.487  1.00  0.00           C  
ATOM    576  NE1 TRP L  35      17.302   7.411 -10.172  1.00  0.00           N  
ATOM    577  CE2 TRP L  35      16.922   8.528  -9.506  1.00  0.00           C  
ATOM    578  CE3 TRP L  35      15.641  10.419 -10.211  1.00  0.00           C  
ATOM    579  CZ2 TRP L  35      17.061   9.086  -8.255  1.00  0.00           C  
ATOM    580  CZ3 TRP L  35      15.780  10.978  -8.958  1.00  0.00           C  
ATOM    581  CH2 TRP L  35      16.491  10.312  -7.980  1.00  0.00           C  
ATOM    582  H   TRP L  35      14.535   6.657 -13.651  1.00  0.00           H  
ATOM    583  HA  TRP L  35      13.693   8.590 -11.741  1.00  0.00           H  
ATOM    584  HB2 TRP L  35      15.924   8.365 -13.739  1.00  0.00           H  
ATOM    585  HB3 TRP L  35      15.622   9.960 -13.061  1.00  0.00           H  
ATOM    586  HD1 TRP L  35      17.051   6.545 -12.148  1.00  0.00           H  
ATOM    587  HE1 TRP L  35      17.839   6.707  -9.752  1.00  0.00           H  
ATOM    588  HE3 TRP L  35      15.084  10.940 -10.977  1.00  0.00           H  
ATOM    589  HZ2 TRP L  35      17.611   8.561  -7.488  1.00  0.00           H  
ATOM    590  HZ3 TRP L  35      15.329  11.936  -8.741  1.00  0.00           H  
ATOM    591  HH2 TRP L  35      16.610  10.756  -7.004  1.00  0.00           H  
ATOM    592  N   TYR L  36      12.892  10.683 -12.978  1.00  0.00           N  
ATOM    593  CA  TYR L  36      12.076  11.697 -13.698  1.00  0.00           C  
ATOM    594  C   TYR L  36      12.432  13.126 -13.279  1.00  0.00           C  
ATOM    595  O   TYR L  36      13.061  13.346 -12.261  1.00  0.00           O  
ATOM    596  CB  TYR L  36      10.610  11.426 -13.324  1.00  0.00           C  
ATOM    597  CG  TYR L  36       9.683  11.674 -14.516  1.00  0.00           C  
ATOM    598  CD1 TYR L  36       9.978  11.169 -15.767  1.00  0.00           C  
ATOM    599  CD2 TYR L  36       8.515  12.388 -14.342  1.00  0.00           C  
ATOM    600  CE1 TYR L  36       9.115  11.374 -16.825  1.00  0.00           C  
ATOM    601  CE2 TYR L  36       7.654  12.592 -15.399  1.00  0.00           C  
ATOM    602  CZ  TYR L  36       7.947  12.087 -16.648  1.00  0.00           C  
ATOM    603  OH  TYR L  36       7.079  12.285 -17.701  1.00  0.00           O  
ATOM    604  H   TYR L  36      13.219  10.860 -12.072  1.00  0.00           H  
ATOM    605  HA  TYR L  36      12.230  11.591 -14.766  1.00  0.00           H  
ATOM    606  HB2 TYR L  36      10.502  10.401 -13.003  1.00  0.00           H  
ATOM    607  HB3 TYR L  36      10.321  12.078 -12.517  1.00  0.00           H  
ATOM    608  HD1 TYR L  36      10.885  10.604 -15.917  1.00  0.00           H  
ATOM    609  HD2 TYR L  36       8.268  12.781 -13.366  1.00  0.00           H  
ATOM    610  HE1 TYR L  36       9.357  10.975 -17.798  1.00  0.00           H  
ATOM    611  HE2 TYR L  36       6.744  13.153 -15.248  1.00  0.00           H  
ATOM    612  HH  TYR L  36       6.266  11.813 -17.507  1.00  0.00           H  
ATOM    613  N   LEU L  37      12.010  14.062 -14.088  1.00  0.00           N  
ATOM    614  CA  LEU L  37      12.285  15.498 -13.802  1.00  0.00           C  
ATOM    615  C   LEU L  37      11.266  16.368 -14.541  1.00  0.00           C  
ATOM    616  O   LEU L  37      10.892  16.068 -15.661  1.00  0.00           O  
ATOM    617  CB  LEU L  37      13.711  15.825 -14.297  1.00  0.00           C  
ATOM    618  CG  LEU L  37      13.835  17.318 -14.642  1.00  0.00           C  
ATOM    619  CD1 LEU L  37      13.747  18.158 -13.361  1.00  0.00           C  
ATOM    620  CD2 LEU L  37      15.191  17.561 -15.311  1.00  0.00           C  
ATOM    621  H   LEU L  37      11.512  13.816 -14.895  1.00  0.00           H  
ATOM    622  HA  LEU L  37      12.192  15.671 -12.734  1.00  0.00           H  
ATOM    623  HB2 LEU L  37      14.424  15.575 -13.526  1.00  0.00           H  
ATOM    624  HB3 LEU L  37      13.928  15.237 -15.176  1.00  0.00           H  
ATOM    625  HG  LEU L  37      13.046  17.602 -15.321  1.00  0.00           H  
ATOM    626 HD11 LEU L  37      13.487  17.526 -12.525  1.00  0.00           H  
ATOM    627 HD12 LEU L  37      14.699  18.628 -13.165  1.00  0.00           H  
ATOM    628 HD13 LEU L  37      12.991  18.923 -13.475  1.00  0.00           H  
ATOM    629 HD21 LEU L  37      15.338  16.848 -16.109  1.00  0.00           H  
ATOM    630 HD22 LEU L  37      15.224  18.561 -15.717  1.00  0.00           H  
ATOM    631 HD23 LEU L  37      15.982  17.448 -14.584  1.00  0.00           H  
ATOM    632  N   GLN L  38      10.829  17.422 -13.901  1.00  0.00           N  
ATOM    633  CA  GLN L  38       9.833  18.317 -14.555  1.00  0.00           C  
ATOM    634  C   GLN L  38      10.003  19.762 -14.084  1.00  0.00           C  
ATOM    635  O   GLN L  38      10.344  20.014 -12.943  1.00  0.00           O  
ATOM    636  CB  GLN L  38       8.425  17.816 -14.179  1.00  0.00           C  
ATOM    637  CG  GLN L  38       7.369  18.881 -14.513  1.00  0.00           C  
ATOM    638  CD  GLN L  38       7.440  19.251 -15.999  1.00  0.00           C  
ATOM    639  OE1 GLN L  38       7.573  20.403 -16.357  1.00  0.00           O  
ATOM    640  NE2 GLN L  38       7.350  18.311 -16.894  1.00  0.00           N  
ATOM    641  H   GLN L  38      11.155  17.623 -12.998  1.00  0.00           H  
ATOM    642  HA  GLN L  38       9.981  18.279 -15.630  1.00  0.00           H  
ATOM    643  HB2 GLN L  38       8.209  16.911 -14.728  1.00  0.00           H  
ATOM    644  HB3 GLN L  38       8.393  17.598 -13.122  1.00  0.00           H  
ATOM    645  HG2 GLN L  38       6.384  18.496 -14.293  1.00  0.00           H  
ATOM    646  HG3 GLN L  38       7.542  19.764 -13.918  1.00  0.00           H  
ATOM    647 HE21 GLN L  38       7.240  17.379 -16.616  1.00  0.00           H  
ATOM    648 HE22 GLN L  38       7.391  18.538 -17.847  1.00  0.00           H  
ATOM    649  N   LYS L  39       9.765  20.680 -14.984  1.00  0.00           N  
ATOM    650  CA  LYS L  39       9.899  22.120 -14.635  1.00  0.00           C  
ATOM    651  C   LYS L  39       8.532  22.716 -14.293  1.00  0.00           C  
ATOM    652  O   LYS L  39       7.568  22.001 -14.108  1.00  0.00           O  
ATOM    653  CB  LYS L  39      10.466  22.850 -15.863  1.00  0.00           C  
ATOM    654  CG  LYS L  39      11.524  23.869 -15.421  1.00  0.00           C  
ATOM    655  CD  LYS L  39      12.905  23.405 -15.898  1.00  0.00           C  
ATOM    656  CE  LYS L  39      12.986  23.508 -17.425  1.00  0.00           C  
ATOM    657  NZ  LYS L  39      13.227  24.918 -17.842  1.00  0.00           N  
ATOM    658  H   LYS L  39       9.494  20.419 -15.888  1.00  0.00           H  
ATOM    659  HA  LYS L  39      10.558  22.222 -13.779  1.00  0.00           H  
ATOM    660  HB2 LYS L  39      10.913  22.130 -16.534  1.00  0.00           H  
ATOM    661  HB3 LYS L  39       9.669  23.361 -16.379  1.00  0.00           H  
ATOM    662  HG2 LYS L  39      11.298  24.835 -15.849  1.00  0.00           H  
ATOM    663  HG3 LYS L  39      11.523  23.952 -14.343  1.00  0.00           H  
ATOM    664  HD2 LYS L  39      13.669  24.025 -15.453  1.00  0.00           H  
ATOM    665  HD3 LYS L  39      13.067  22.380 -15.597  1.00  0.00           H  
ATOM    666  HE2 LYS L  39      13.794  22.890 -17.787  1.00  0.00           H  
ATOM    667  HE3 LYS L  39      12.060  23.165 -17.863  1.00  0.00           H  
ATOM    668  HZ1 LYS L  39      12.347  25.326 -18.218  1.00  0.00           H  
ATOM    669  HZ2 LYS L  39      13.544  25.474 -17.021  1.00  0.00           H  
ATOM    670  N   ALA L  40       8.471  24.017 -14.220  1.00  0.00           N  
ATOM    671  CA  ALA L  40       7.175  24.670 -13.892  1.00  0.00           C  
ATOM    672  C   ALA L  40       6.228  24.633 -15.096  1.00  0.00           C  
ATOM    673  O   ALA L  40       6.064  25.616 -15.793  1.00  0.00           O  
ATOM    674  CB  ALA L  40       7.457  26.132 -13.518  1.00  0.00           C  
ATOM    675  H   ALA L  40       9.272  24.559 -14.377  1.00  0.00           H  
ATOM    676  HA  ALA L  40       6.713  24.142 -13.064  1.00  0.00           H  
ATOM    677  HB1 ALA L  40       8.098  26.583 -14.262  1.00  0.00           H  
ATOM    678  HB2 ALA L  40       6.528  26.682 -13.470  1.00  0.00           H  
ATOM    679  HB3 ALA L  40       7.944  26.174 -12.556  1.00  0.00           H  
ATOM    680  N   GLY L  41       5.629  23.491 -15.321  1.00  0.00           N  
ATOM    681  CA  GLY L  41       4.688  23.365 -16.474  1.00  0.00           C  
ATOM    682  C   GLY L  41       5.460  23.292 -17.794  1.00  0.00           C  
ATOM    683  O   GLY L  41       5.288  24.123 -18.664  1.00  0.00           O  
ATOM    684  H   GLY L  41       5.801  22.722 -14.737  1.00  0.00           H  
ATOM    685  HA2 GLY L  41       4.098  22.468 -16.358  1.00  0.00           H  
ATOM    686  HA3 GLY L  41       4.030  24.222 -16.494  1.00  0.00           H  
ATOM    687  N   GLN L  42       6.300  22.300 -17.911  1.00  0.00           N  
ATOM    688  CA  GLN L  42       7.095  22.147 -19.158  1.00  0.00           C  
ATOM    689  C   GLN L  42       7.075  20.695 -19.637  1.00  0.00           C  
ATOM    690  O   GLN L  42       6.254  19.907 -19.206  1.00  0.00           O  
ATOM    691  CB  GLN L  42       8.541  22.553 -18.840  1.00  0.00           C  
ATOM    692  CG  GLN L  42       9.153  23.272 -20.049  1.00  0.00           C  
ATOM    693  CD  GLN L  42       9.046  24.788 -19.850  1.00  0.00           C  
ATOM    694  OE1 GLN L  42       9.977  25.527 -20.100  1.00  0.00           O  
ATOM    695  NE2 GLN L  42       7.930  25.289 -19.401  1.00  0.00           N  
ATOM    696  H   GLN L  42       6.413  21.660 -17.178  1.00  0.00           H  
ATOM    697  HA  GLN L  42       6.674  22.781 -19.931  1.00  0.00           H  
ATOM    698  HB2 GLN L  42       8.548  23.214 -17.986  1.00  0.00           H  
ATOM    699  HB3 GLN L  42       9.119  21.672 -18.605  1.00  0.00           H  
ATOM    700  HG2 GLN L  42      10.194  23.000 -20.149  1.00  0.00           H  
ATOM    701  HG3 GLN L  42       8.625  22.995 -20.950  1.00  0.00           H  
ATOM    702 HE21 GLN L  42       7.174  24.700 -19.196  1.00  0.00           H  
ATOM    703 HE22 GLN L  42       7.847  26.256 -19.268  1.00  0.00           H  
ATOM    704  N   SER L  43       7.981  20.367 -20.518  1.00  0.00           N  
ATOM    705  CA  SER L  43       8.028  18.972 -21.034  1.00  0.00           C  
ATOM    706  C   SER L  43       8.827  18.072 -20.084  1.00  0.00           C  
ATOM    707  O   SER L  43       9.967  18.355 -19.775  1.00  0.00           O  
ATOM    708  CB  SER L  43       8.725  18.986 -22.401  1.00  0.00           C  
ATOM    709  OG  SER L  43       8.127  17.907 -23.104  1.00  0.00           O  
ATOM    710  H   SER L  43       8.627  21.033 -20.834  1.00  0.00           H  
ATOM    711  HA  SER L  43       7.015  18.597 -21.122  1.00  0.00           H  
ATOM    712  HB2 SER L  43       8.541  19.918 -22.917  1.00  0.00           H  
ATOM    713  HB3 SER L  43       9.788  18.820 -22.292  1.00  0.00           H  
ATOM    714  HG  SER L  43       7.348  18.241 -23.556  1.00  0.00           H  
ATOM    715  N   PRO L  44       8.204  17.006 -19.631  1.00  0.00           N  
ATOM    716  CA  PRO L  44       8.856  16.056 -18.711  1.00  0.00           C  
ATOM    717  C   PRO L  44      10.090  15.406 -19.348  1.00  0.00           C  
ATOM    718  O   PRO L  44      10.201  15.326 -20.557  1.00  0.00           O  
ATOM    719  CB  PRO L  44       7.787  14.983 -18.435  1.00  0.00           C  
ATOM    720  CG  PRO L  44       6.510  15.374 -19.221  1.00  0.00           C  
ATOM    721  CD  PRO L  44       6.812  16.668 -19.991  1.00  0.00           C  
ATOM    722  HA  PRO L  44       9.140  16.567 -17.799  1.00  0.00           H  
ATOM    723  HB2 PRO L  44       8.140  14.018 -18.768  1.00  0.00           H  
ATOM    724  HB3 PRO L  44       7.571  14.942 -17.378  1.00  0.00           H  
ATOM    725  HG2 PRO L  44       6.249  14.587 -19.914  1.00  0.00           H  
ATOM    726  HG3 PRO L  44       5.690  15.536 -18.536  1.00  0.00           H  
ATOM    727  HD2 PRO L  44       6.732  16.504 -21.056  1.00  0.00           H  
ATOM    728  HD3 PRO L  44       6.144  17.459 -19.682  1.00  0.00           H  
ATOM    729  N   LYS L  45      10.992  14.953 -18.514  1.00  0.00           N  
ATOM    730  CA  LYS L  45      12.227  14.304 -19.040  1.00  0.00           C  
ATOM    731  C   LYS L  45      12.588  13.055 -18.226  1.00  0.00           C  
ATOM    732  O   LYS L  45      12.662  13.103 -17.012  1.00  0.00           O  
ATOM    733  CB  LYS L  45      13.377  15.321 -18.932  1.00  0.00           C  
ATOM    734  CG  LYS L  45      14.476  14.972 -19.946  1.00  0.00           C  
ATOM    735  CD  LYS L  45      14.647  16.134 -20.936  1.00  0.00           C  
ATOM    736  CE  LYS L  45      15.443  17.263 -20.271  1.00  0.00           C  
ATOM    737  NZ  LYS L  45      15.319  18.524 -21.062  1.00  0.00           N  
ATOM    738  H   LYS L  45      10.858  15.043 -17.547  1.00  0.00           H  
ATOM    739  HA  LYS L  45      12.063  14.015 -20.074  1.00  0.00           H  
ATOM    740  HB2 LYS L  45      12.999  16.313 -19.133  1.00  0.00           H  
ATOM    741  HB3 LYS L  45      13.787  15.298 -17.932  1.00  0.00           H  
ATOM    742  HG2 LYS L  45      15.407  14.801 -19.426  1.00  0.00           H  
ATOM    743  HG3 LYS L  45      14.204  14.076 -20.485  1.00  0.00           H  
ATOM    744  HD2 LYS L  45      15.177  15.787 -21.812  1.00  0.00           H  
ATOM    745  HD3 LYS L  45      13.677  16.503 -21.236  1.00  0.00           H  
ATOM    746  HE2 LYS L  45      15.064  17.434 -19.273  1.00  0.00           H  
ATOM    747  HE3 LYS L  45      16.485  16.985 -20.209  1.00  0.00           H  
ATOM    748  HZ1 LYS L  45      15.757  19.312 -20.539  1.00  0.00           H  
ATOM    749  HZ2 LYS L  45      15.801  18.411 -21.977  1.00  0.00           H  
ATOM    750  N   LEU L  46      12.794  11.960 -18.916  1.00  0.00           N  
ATOM    751  CA  LEU L  46      13.152  10.689 -18.219  1.00  0.00           C  
ATOM    752  C   LEU L  46      14.654  10.438 -18.340  1.00  0.00           C  
ATOM    753  O   LEU L  46      15.213  10.546 -19.415  1.00  0.00           O  
ATOM    754  CB  LEU L  46      12.383   9.534 -18.900  1.00  0.00           C  
ATOM    755  CG  LEU L  46      13.015   8.166 -18.561  1.00  0.00           C  
ATOM    756  CD1 LEU L  46      12.686   7.780 -17.111  1.00  0.00           C  
ATOM    757  CD2 LEU L  46      12.430   7.107 -19.500  1.00  0.00           C  
ATOM    758  H   LEU L  46      12.713  11.976 -19.892  1.00  0.00           H  
ATOM    759  HA  LEU L  46      12.888  10.769 -17.168  1.00  0.00           H  
ATOM    760  HB2 LEU L  46      11.355   9.544 -18.566  1.00  0.00           H  
ATOM    761  HB3 LEU L  46      12.399   9.678 -19.970  1.00  0.00           H  
ATOM    762  HG  LEU L  46      14.090   8.205 -18.693  1.00  0.00           H  
ATOM    763 HD11 LEU L  46      11.829   8.339 -16.765  1.00  0.00           H  
ATOM    764 HD12 LEU L  46      12.464   6.722 -17.053  1.00  0.00           H  
ATOM    765 HD13 LEU L  46      13.531   7.997 -16.475  1.00  0.00           H  
ATOM    766 HD21 LEU L  46      12.339   7.512 -20.497  1.00  0.00           H  
ATOM    767 HD22 LEU L  46      13.079   6.244 -19.525  1.00  0.00           H  
ATOM    768 HD23 LEU L  46      11.453   6.806 -19.148  1.00  0.00           H  
ATOM    769  N   LEU L  47      15.282  10.123 -17.239  1.00  0.00           N  
ATOM    770  CA  LEU L  47      16.741   9.865 -17.279  1.00  0.00           C  
ATOM    771  C   LEU L  47      16.973   8.357 -17.333  1.00  0.00           C  
ATOM    772  O   LEU L  47      17.003   7.771 -18.395  1.00  0.00           O  
ATOM    773  CB  LEU L  47      17.378  10.444 -15.998  1.00  0.00           C  
ATOM    774  CG  LEU L  47      17.071  11.948 -15.868  1.00  0.00           C  
ATOM    775  CD1 LEU L  47      17.163  12.629 -17.239  1.00  0.00           C  
ATOM    776  CD2 LEU L  47      15.663  12.146 -15.295  1.00  0.00           C  
ATOM    777  H   LEU L  47      14.794  10.039 -16.394  1.00  0.00           H  
ATOM    778  HA  LEU L  47      17.164  10.321 -18.170  1.00  0.00           H  
ATOM    779  HB2 LEU L  47      16.985   9.928 -15.135  1.00  0.00           H  
ATOM    780  HB3 LEU L  47      18.448  10.300 -16.033  1.00  0.00           H  
ATOM    781  HG  LEU L  47      17.788  12.399 -15.200  1.00  0.00           H  
ATOM    782 HD11 LEU L  47      18.068  12.319 -17.741  1.00  0.00           H  
ATOM    783 HD12 LEU L  47      16.310  12.357 -17.842  1.00  0.00           H  
ATOM    784 HD13 LEU L  47      17.178  13.702 -17.111  1.00  0.00           H  
ATOM    785 HD21 LEU L  47      15.269  11.202 -14.952  1.00  0.00           H  
ATOM    786 HD22 LEU L  47      15.703  12.837 -14.463  1.00  0.00           H  
ATOM    787 HD23 LEU L  47      15.010  12.547 -16.056  1.00  0.00           H  
ATOM    788  N   ILE L  48      17.136   7.763 -16.187  1.00  0.00           N  
ATOM    789  CA  ILE L  48      17.364   6.304 -16.128  1.00  0.00           C  
ATOM    790  C   ILE L  48      16.031   5.545 -16.171  1.00  0.00           C  
ATOM    791  O   ILE L  48      15.028   6.030 -15.688  1.00  0.00           O  
ATOM    792  CB  ILE L  48      18.053   6.032 -14.795  1.00  0.00           C  
ATOM    793  CG1 ILE L  48      19.490   6.548 -14.837  1.00  0.00           C  
ATOM    794  CG2 ILE L  48      18.086   4.516 -14.544  1.00  0.00           C  
ATOM    795  CD1 ILE L  48      19.520   8.066 -15.016  1.00  0.00           C  
ATOM    796  H   ILE L  48      17.152   8.282 -15.363  1.00  0.00           H  
ATOM    797  HA  ILE L  48      17.984   6.004 -16.965  1.00  0.00           H  
ATOM    798  HB  ILE L  48      17.513   6.544 -14.008  1.00  0.00           H  
ATOM    799 HG12 ILE L  48      19.984   6.294 -13.920  1.00  0.00           H  
ATOM    800 HG13 ILE L  48      20.005   6.089 -15.658  1.00  0.00           H  
ATOM    801 HG21 ILE L  48      18.296   3.995 -15.466  1.00  0.00           H  
ATOM    802 HG22 ILE L  48      18.854   4.285 -13.823  1.00  0.00           H  
ATOM    803 HG23 ILE L  48      17.130   4.190 -14.160  1.00  0.00           H  
ATOM    804 HD11 ILE L  48      18.740   8.523 -14.426  1.00  0.00           H  
ATOM    805 HD12 ILE L  48      20.481   8.448 -14.695  1.00  0.00           H  
ATOM    806 HD13 ILE L  48      19.374   8.310 -16.060  1.00  0.00           H  
ATOM    807  N   TYR L  49      16.052   4.366 -16.736  1.00  0.00           N  
ATOM    808  CA  TYR L  49      14.795   3.562 -16.819  1.00  0.00           C  
ATOM    809  C   TYR L  49      15.007   2.146 -16.271  1.00  0.00           C  
ATOM    810  O   TYR L  49      14.374   1.200 -16.706  1.00  0.00           O  
ATOM    811  CB  TYR L  49      14.377   3.473 -18.295  1.00  0.00           C  
ATOM    812  CG  TYR L  49      15.557   2.959 -19.118  1.00  0.00           C  
ATOM    813  CD1 TYR L  49      16.502   3.835 -19.606  1.00  0.00           C  
ATOM    814  CD2 TYR L  49      15.706   1.608 -19.360  1.00  0.00           C  
ATOM    815  CE1 TYR L  49      17.584   3.364 -20.323  1.00  0.00           C  
ATOM    816  CE2 TYR L  49      16.786   1.140 -20.076  1.00  0.00           C  
ATOM    817  CZ  TYR L  49      17.734   2.013 -20.562  1.00  0.00           C  
ATOM    818  OH  TYR L  49      18.820   1.543 -21.267  1.00  0.00           O  
ATOM    819  H   TYR L  49      16.890   4.013 -17.101  1.00  0.00           H  
ATOM    820  HA  TYR L  49      14.026   4.050 -16.232  1.00  0.00           H  
ATOM    821  HB2 TYR L  49      13.543   2.794 -18.401  1.00  0.00           H  
ATOM    822  HB3 TYR L  49      14.089   4.450 -18.654  1.00  0.00           H  
ATOM    823  HD1 TYR L  49      16.391   4.899 -19.428  1.00  0.00           H  
ATOM    824  HD2 TYR L  49      14.968   0.914 -18.988  1.00  0.00           H  
ATOM    825  HE1 TYR L  49      18.319   4.055 -20.701  1.00  0.00           H  
ATOM    826  HE2 TYR L  49      16.890   0.080 -20.260  1.00  0.00           H  
ATOM    827  HH  TYR L  49      18.669   1.721 -22.198  1.00  0.00           H  
ATOM    828  N   LYS L  50      15.892   2.032 -15.318  1.00  0.00           N  
ATOM    829  CA  LYS L  50      16.171   0.698 -14.718  1.00  0.00           C  
ATOM    830  C   LYS L  50      16.935   0.849 -13.405  1.00  0.00           C  
ATOM    831  O   LYS L  50      16.489   0.404 -12.367  1.00  0.00           O  
ATOM    832  CB  LYS L  50      17.035  -0.108 -15.699  1.00  0.00           C  
ATOM    833  CG  LYS L  50      16.815  -1.604 -15.449  1.00  0.00           C  
ATOM    834  CD  LYS L  50      17.067  -2.378 -16.748  1.00  0.00           C  
ATOM    835  CE  LYS L  50      15.748  -2.535 -17.507  1.00  0.00           C  
ATOM    836  NZ  LYS L  50      15.218  -1.201 -17.912  1.00  0.00           N  
ATOM    837  H   LYS L  50      16.367   2.825 -14.996  1.00  0.00           H  
ATOM    838  HA  LYS L  50      15.231   0.194 -14.523  1.00  0.00           H  
ATOM    839  HB2 LYS L  50      16.760   0.139 -16.713  1.00  0.00           H  
ATOM    840  HB3 LYS L  50      18.077   0.134 -15.549  1.00  0.00           H  
ATOM    841  HG2 LYS L  50      17.497  -1.948 -14.685  1.00  0.00           H  
ATOM    842  HG3 LYS L  50      15.800  -1.772 -15.117  1.00  0.00           H  
ATOM    843  HD2 LYS L  50      17.776  -1.841 -17.360  1.00  0.00           H  
ATOM    844  HD3 LYS L  50      17.470  -3.353 -16.516  1.00  0.00           H  
ATOM    845  HE2 LYS L  50      15.909  -3.134 -18.392  1.00  0.00           H  
ATOM    846  HE3 LYS L  50      15.023  -3.028 -16.876  1.00  0.00           H  
ATOM    847  HZ1 LYS L  50      14.275  -1.318 -18.333  1.00  0.00           H  
ATOM    848  HZ2 LYS L  50      15.149  -0.584 -17.075  1.00  0.00           H  
ATOM    849  N   VAL L  51      18.077   1.475 -13.488  1.00  0.00           N  
ATOM    850  CA  VAL L  51      18.904   1.678 -12.267  1.00  0.00           C  
ATOM    851  C   VAL L  51      20.072   2.621 -12.563  1.00  0.00           C  
ATOM    852  O   VAL L  51      20.466   3.403 -11.721  1.00  0.00           O  
ATOM    853  CB  VAL L  51      19.458   0.313 -11.816  1.00  0.00           C  
ATOM    854  CG1 VAL L  51      20.458  -0.210 -12.854  1.00  0.00           C  
ATOM    855  CG2 VAL L  51      20.167   0.475 -10.466  1.00  0.00           C  
ATOM    856  H   VAL L  51      18.388   1.812 -14.353  1.00  0.00           H  
ATOM    857  HA  VAL L  51      18.283   2.121 -11.490  1.00  0.00           H  
ATOM    858  HB  VAL L  51      18.644  -0.390 -11.713  1.00  0.00           H  
ATOM    859 HG11 VAL L  51      20.020  -0.163 -13.840  1.00  0.00           H  
ATOM    860 HG12 VAL L  51      21.357   0.389 -12.834  1.00  0.00           H  
ATOM    861 HG13 VAL L  51      20.713  -1.236 -12.629  1.00  0.00           H  
ATOM    862 HG21 VAL L  51      19.468   0.843  -9.729  1.00  0.00           H  
ATOM    863 HG22 VAL L  51      20.555  -0.479 -10.141  1.00  0.00           H  
ATOM    864 HG23 VAL L  51      20.984   1.177 -10.561  1.00  0.00           H  
ATOM    865  N   SER L  52      20.600   2.531 -13.763  1.00  0.00           N  
ATOM    866  CA  SER L  52      21.744   3.415 -14.133  1.00  0.00           C  
ATOM    867  C   SER L  52      21.738   3.760 -15.624  1.00  0.00           C  
ATOM    868  O   SER L  52      22.124   4.848 -16.005  1.00  0.00           O  
ATOM    869  CB  SER L  52      23.050   2.680 -13.801  1.00  0.00           C  
ATOM    870  OG  SER L  52      23.088   1.598 -14.722  1.00  0.00           O  
ATOM    871  H   SER L  52      20.247   1.883 -14.409  1.00  0.00           H  
ATOM    872  HA  SER L  52      21.670   4.339 -13.568  1.00  0.00           H  
ATOM    873  HB2 SER L  52      23.902   3.328 -13.949  1.00  0.00           H  
ATOM    874  HB3 SER L  52      23.032   2.308 -12.788  1.00  0.00           H  
ATOM    875  HG  SER L  52      23.858   1.714 -15.287  1.00  0.00           H  
ATOM    876  N   ASN L  53      21.313   2.827 -16.439  1.00  0.00           N  
ATOM    877  CA  ASN L  53      21.278   3.094 -17.907  1.00  0.00           C  
ATOM    878  C   ASN L  53      20.519   4.386 -18.206  1.00  0.00           C  
ATOM    879  O   ASN L  53      19.586   4.728 -17.512  1.00  0.00           O  
ATOM    880  CB  ASN L  53      20.561   1.926 -18.596  1.00  0.00           C  
ATOM    881  CG  ASN L  53      21.508   0.729 -18.680  1.00  0.00           C  
ATOM    882  OD1 ASN L  53      22.571   0.804 -19.260  1.00  0.00           O  
ATOM    883  ND2 ASN L  53      21.163  -0.393 -18.115  1.00  0.00           N  
ATOM    884  H   ASN L  53      21.025   1.960 -16.089  1.00  0.00           H  
ATOM    885  HA  ASN L  53      22.297   3.192 -18.270  1.00  0.00           H  
ATOM    886  HB2 ASN L  53      19.683   1.650 -18.032  1.00  0.00           H  
ATOM    887  HB3 ASN L  53      20.267   2.216 -19.594  1.00  0.00           H  
ATOM    888 HD21 ASN L  53      20.307  -0.461 -17.643  1.00  0.00           H  
ATOM    889 HD22 ASN L  53      21.760  -1.168 -18.164  1.00  0.00           H  
ATOM    890  N   ARG L  54      20.932   5.073 -19.237  1.00  0.00           N  
ATOM    891  CA  ARG L  54      20.245   6.348 -19.594  1.00  0.00           C  
ATOM    892  C   ARG L  54      19.316   6.166 -20.796  1.00  0.00           C  
ATOM    893  O   ARG L  54      19.690   5.570 -21.787  1.00  0.00           O  
ATOM    894  CB  ARG L  54      21.319   7.365 -19.956  1.00  0.00           C  
ATOM    895  CG  ARG L  54      22.182   7.621 -18.722  1.00  0.00           C  
ATOM    896  CD  ARG L  54      23.590   7.960 -19.180  1.00  0.00           C  
ATOM    897  NE  ARG L  54      24.281   6.705 -19.588  1.00  0.00           N  
ATOM    898  CZ  ARG L  54      25.415   6.778 -20.218  1.00  0.00           C  
ATOM    899  NH1 ARG L  54      25.413   7.091 -21.476  1.00  0.00           N  
ATOM    900  NH2 ARG L  54      26.510   6.531 -19.569  1.00  0.00           N  
ATOM    901  H   ARG L  54      21.686   4.752 -19.774  1.00  0.00           H  
ATOM    902  HA  ARG L  54      19.671   6.695 -18.739  1.00  0.00           H  
ATOM    903  HB2 ARG L  54      21.932   6.978 -20.758  1.00  0.00           H  
ATOM    904  HB3 ARG L  54      20.856   8.285 -20.275  1.00  0.00           H  
ATOM    905  HG2 ARG L  54      21.774   8.446 -18.156  1.00  0.00           H  
ATOM    906  HG3 ARG L  54      22.205   6.739 -18.099  1.00  0.00           H  
ATOM    907  HD2 ARG L  54      23.538   8.629 -20.021  1.00  0.00           H  
ATOM    908  HD3 ARG L  54      24.134   8.430 -18.377  1.00  0.00           H  
ATOM    909  HE  ARG L  54      23.883   5.833 -19.386  1.00  0.00           H  
ATOM    910 HH11 ARG L  54      24.549   7.268 -21.943  1.00  0.00           H  
ATOM    911 HH12 ARG L  54      26.276   7.174 -21.973  1.00  0.00           H  
ATOM    912 HH21 ARG L  54      26.471   6.287 -18.602  1.00  0.00           H  
ATOM    913 HH22 ARG L  54      27.391   6.593 -20.036  1.00  0.00           H  
ATOM    914  N   PHE L  55      18.126   6.695 -20.686  1.00  0.00           N  
ATOM    915  CA  PHE L  55      17.149   6.570 -21.806  1.00  0.00           C  
ATOM    916  C   PHE L  55      17.597   7.366 -23.036  1.00  0.00           C  
ATOM    917  O   PHE L  55      18.454   8.225 -22.948  1.00  0.00           O  
ATOM    918  CB  PHE L  55      15.800   7.122 -21.324  1.00  0.00           C  
ATOM    919  CG  PHE L  55      14.686   6.621 -22.250  1.00  0.00           C  
ATOM    920  CD1 PHE L  55      14.119   5.375 -22.055  1.00  0.00           C  
ATOM    921  CD2 PHE L  55      14.237   7.408 -23.295  1.00  0.00           C  
ATOM    922  CE1 PHE L  55      13.119   4.923 -22.892  1.00  0.00           C  
ATOM    923  CE2 PHE L  55      13.237   6.955 -24.132  1.00  0.00           C  
ATOM    924  CZ  PHE L  55      12.679   5.713 -23.930  1.00  0.00           C  
ATOM    925  H   PHE L  55      17.879   7.177 -19.872  1.00  0.00           H  
ATOM    926  HA  PHE L  55      17.059   5.523 -22.078  1.00  0.00           H  
ATOM    927  HB2 PHE L  55      15.605   6.783 -20.317  1.00  0.00           H  
ATOM    928  HB3 PHE L  55      15.819   8.202 -21.339  1.00  0.00           H  
ATOM    929  HD1 PHE L  55      14.460   4.751 -21.242  1.00  0.00           H  
ATOM    930  HD2 PHE L  55      14.672   8.383 -23.459  1.00  0.00           H  
ATOM    931  HE1 PHE L  55      12.682   3.948 -22.733  1.00  0.00           H  
ATOM    932  HE2 PHE L  55      12.893   7.576 -24.946  1.00  0.00           H  
ATOM    933  HZ  PHE L  55      11.896   5.358 -24.585  1.00  0.00           H  
ATOM    934  N   SER L  56      17.004   7.063 -24.161  1.00  0.00           N  
ATOM    935  CA  SER L  56      17.376   7.786 -25.411  1.00  0.00           C  
ATOM    936  C   SER L  56      17.111   9.285 -25.279  1.00  0.00           C  
ATOM    937  O   SER L  56      16.001   9.698 -25.004  1.00  0.00           O  
ATOM    938  CB  SER L  56      16.519   7.239 -26.560  1.00  0.00           C  
ATOM    939  OG  SER L  56      17.114   5.987 -26.869  1.00  0.00           O  
ATOM    940  H   SER L  56      16.320   6.362 -24.183  1.00  0.00           H  
ATOM    941  HA  SER L  56      18.431   7.630 -25.609  1.00  0.00           H  
ATOM    942  HB2 SER L  56      15.496   7.098 -26.242  1.00  0.00           H  
ATOM    943  HB3 SER L  56      16.561   7.896 -27.416  1.00  0.00           H  
ATOM    944  HG  SER L  56      16.872   5.757 -27.771  1.00  0.00           H  
ATOM    945  N   GLY L  57      18.138  10.068 -25.481  1.00  0.00           N  
ATOM    946  CA  GLY L  57      17.975  11.548 -25.373  1.00  0.00           C  
ATOM    947  C   GLY L  57      18.819  12.095 -24.220  1.00  0.00           C  
ATOM    948  O   GLY L  57      19.287  13.216 -24.271  1.00  0.00           O  
ATOM    949  H   GLY L  57      19.011   9.684 -25.704  1.00  0.00           H  
ATOM    950  HA2 GLY L  57      18.293  12.010 -26.296  1.00  0.00           H  
ATOM    951  HA3 GLY L  57      16.936  11.786 -25.196  1.00  0.00           H  
ATOM    952  N   VAL L  58      18.994  11.292 -23.203  1.00  0.00           N  
ATOM    953  CA  VAL L  58      19.804  11.746 -22.039  1.00  0.00           C  
ATOM    954  C   VAL L  58      21.231  12.105 -22.486  1.00  0.00           C  
ATOM    955  O   VAL L  58      21.920  11.298 -23.078  1.00  0.00           O  
ATOM    956  CB  VAL L  58      19.869  10.595 -21.023  1.00  0.00           C  
ATOM    957  CG1 VAL L  58      20.585  11.073 -19.757  1.00  0.00           C  
ATOM    958  CG2 VAL L  58      18.445  10.161 -20.653  1.00  0.00           C  
ATOM    959  H   VAL L  58      18.596  10.397 -23.208  1.00  0.00           H  
ATOM    960  HA  VAL L  58      19.331  12.618 -21.604  1.00  0.00           H  
ATOM    961  HB  VAL L  58      20.404   9.762 -21.455  1.00  0.00           H  
ATOM    962 HG11 VAL L  58      21.416  11.709 -20.023  1.00  0.00           H  
ATOM    963 HG12 VAL L  58      19.896  11.627 -19.135  1.00  0.00           H  
ATOM    964 HG13 VAL L  58      20.954  10.221 -19.206  1.00  0.00           H  
ATOM    965 HG21 VAL L  58      17.893   9.915 -21.547  1.00  0.00           H  
ATOM    966 HG22 VAL L  58      18.484   9.294 -20.011  1.00  0.00           H  
ATOM    967 HG23 VAL L  58      17.941  10.964 -20.136  1.00  0.00           H  
ATOM    968  N   PRO L  59      21.640  13.323 -22.189  1.00  0.00           N  
ATOM    969  CA  PRO L  59      22.987  13.819 -22.554  1.00  0.00           C  
ATOM    970  C   PRO L  59      24.133  13.080 -21.847  1.00  0.00           C  
ATOM    971  O   PRO L  59      25.228  13.602 -21.749  1.00  0.00           O  
ATOM    972  CB  PRO L  59      22.987  15.295 -22.111  1.00  0.00           C  
ATOM    973  CG  PRO L  59      21.613  15.599 -21.462  1.00  0.00           C  
ATOM    974  CD  PRO L  59      20.783  14.310 -21.500  1.00  0.00           C  
ATOM    975  HA  PRO L  59      23.118  13.739 -23.622  1.00  0.00           H  
ATOM    976  HB2 PRO L  59      23.774  15.463 -21.391  1.00  0.00           H  
ATOM    977  HB3 PRO L  59      23.140  15.937 -22.967  1.00  0.00           H  
ATOM    978  HG2 PRO L  59      21.751  15.918 -20.440  1.00  0.00           H  
ATOM    979  HG3 PRO L  59      21.109  16.378 -22.016  1.00  0.00           H  
ATOM    980  HD2 PRO L  59      20.557  13.973 -20.499  1.00  0.00           H  
ATOM    981  HD3 PRO L  59      19.871  14.464 -22.059  1.00  0.00           H  
ATOM    982  N   ASP L  60      23.866  11.892 -21.374  1.00  0.00           N  
ATOM    983  CA  ASP L  60      24.928  11.102 -20.671  1.00  0.00           C  
ATOM    984  C   ASP L  60      25.290  11.712 -19.306  1.00  0.00           C  
ATOM    985  O   ASP L  60      25.691  11.008 -18.398  1.00  0.00           O  
ATOM    986  CB  ASP L  60      26.186  11.072 -21.562  1.00  0.00           C  
ATOM    987  CG  ASP L  60      26.643   9.623 -21.762  1.00  0.00           C  
ATOM    988  OD1 ASP L  60      27.163   9.080 -20.802  1.00  0.00           O  
ATOM    989  OD2 ASP L  60      26.448   9.139 -22.865  1.00  0.00           O  
ATOM    990  H   ASP L  60      22.972  11.517 -21.489  1.00  0.00           H  
ATOM    991  HA  ASP L  60      24.556  10.099 -20.509  1.00  0.00           H  
ATOM    992  HB2 ASP L  60      25.963  11.507 -22.525  1.00  0.00           H  
ATOM    993  HB3 ASP L  60      26.981  11.633 -21.095  1.00  0.00           H  
ATOM    994  N   ARG L  61      25.127  13.005 -19.185  1.00  0.00           N  
ATOM    995  CA  ARG L  61      25.453  13.686 -17.897  1.00  0.00           C  
ATOM    996  C   ARG L  61      24.669  13.080 -16.731  1.00  0.00           C  
ATOM    997  O   ARG L  61      25.058  13.204 -15.587  1.00  0.00           O  
ATOM    998  CB  ARG L  61      25.059  15.168 -18.025  1.00  0.00           C  
ATOM    999  CG  ARG L  61      25.847  15.818 -19.171  1.00  0.00           C  
ATOM   1000  CD  ARG L  61      25.125  17.093 -19.626  1.00  0.00           C  
ATOM   1001  NE  ARG L  61      25.533  17.401 -21.031  1.00  0.00           N  
ATOM   1002  CZ  ARG L  61      25.133  18.505 -21.604  1.00  0.00           C  
ATOM   1003  NH1 ARG L  61      24.253  19.251 -21.007  1.00  0.00           N  
ATOM   1004  NH2 ARG L  61      25.631  18.821 -22.762  1.00  0.00           N  
ATOM   1005  H   ARG L  61      24.789  13.528 -19.938  1.00  0.00           H  
ATOM   1006  HA  ARG L  61      26.515  13.584 -17.700  1.00  0.00           H  
ATOM   1007  HB2 ARG L  61      24.000  15.244 -18.225  1.00  0.00           H  
ATOM   1008  HB3 ARG L  61      25.279  15.682 -17.100  1.00  0.00           H  
ATOM   1009  HG2 ARG L  61      26.841  16.068 -18.830  1.00  0.00           H  
ATOM   1010  HG3 ARG L  61      25.922  15.129 -19.999  1.00  0.00           H  
ATOM   1011  HD2 ARG L  61      24.055  16.944 -19.586  1.00  0.00           H  
ATOM   1012  HD3 ARG L  61      25.397  17.918 -18.983  1.00  0.00           H  
ATOM   1013  HE  ARG L  61      26.100  16.773 -21.522  1.00  0.00           H  
ATOM   1014 HH11 ARG L  61      23.888  18.980 -20.116  1.00  0.00           H  
ATOM   1015 HH12 ARG L  61      23.940  20.096 -21.436  1.00  0.00           H  
ATOM   1016 HH21 ARG L  61      26.304  18.224 -23.195  1.00  0.00           H  
ATOM   1017 HH22 ARG L  61      25.340  19.661 -23.218  1.00  0.00           H  
ATOM   1018  N   PHE L  62      23.579  12.435 -17.050  1.00  0.00           N  
ATOM   1019  CA  PHE L  62      22.747  11.812 -15.985  1.00  0.00           C  
ATOM   1020  C   PHE L  62      23.196  10.384 -15.694  1.00  0.00           C  
ATOM   1021  O   PHE L  62      23.400   9.596 -16.595  1.00  0.00           O  
ATOM   1022  CB  PHE L  62      21.300  11.779 -16.479  1.00  0.00           C  
ATOM   1023  CG  PHE L  62      20.760  13.207 -16.547  1.00  0.00           C  
ATOM   1024  CD1 PHE L  62      21.120  14.054 -17.582  1.00  0.00           C  
ATOM   1025  CD2 PHE L  62      19.903  13.668 -15.570  1.00  0.00           C  
ATOM   1026  CE1 PHE L  62      20.626  15.341 -17.634  1.00  0.00           C  
ATOM   1027  CE2 PHE L  62      19.410  14.951 -15.623  1.00  0.00           C  
ATOM   1028  CZ  PHE L  62      19.771  15.790 -16.653  1.00  0.00           C  
ATOM   1029  H   PHE L  62      23.314  12.358 -17.989  1.00  0.00           H  
ATOM   1030  HA  PHE L  62      22.829  12.401 -15.077  1.00  0.00           H  
ATOM   1031  HB2 PHE L  62      21.259  11.334 -17.460  1.00  0.00           H  
ATOM   1032  HB3 PHE L  62      20.693  11.198 -15.799  1.00  0.00           H  
ATOM   1033  HD1 PHE L  62      21.792  13.707 -18.353  1.00  0.00           H  
ATOM   1034  HD2 PHE L  62      19.619  13.018 -14.755  1.00  0.00           H  
ATOM   1035  HE1 PHE L  62      20.911  15.998 -18.442  1.00  0.00           H  
ATOM   1036  HE2 PHE L  62      18.735  15.297 -14.858  1.00  0.00           H  
ATOM   1037  HZ  PHE L  62      19.384  16.798 -16.692  1.00  0.00           H  
ATOM   1038  N   SER L  63      23.330  10.079 -14.434  1.00  0.00           N  
ATOM   1039  CA  SER L  63      23.763   8.713 -14.048  1.00  0.00           C  
ATOM   1040  C   SER L  63      22.965   8.230 -12.841  1.00  0.00           C  
ATOM   1041  O   SER L  63      22.793   8.953 -11.880  1.00  0.00           O  
ATOM   1042  CB  SER L  63      25.260   8.770 -13.695  1.00  0.00           C  
ATOM   1043  OG  SER L  63      25.433   7.805 -12.663  1.00  0.00           O  
ATOM   1044  H   SER L  63      23.146  10.750 -13.743  1.00  0.00           H  
ATOM   1045  HA  SER L  63      23.583   8.038 -14.879  1.00  0.00           H  
ATOM   1046  HB2 SER L  63      25.863   8.509 -14.553  1.00  0.00           H  
ATOM   1047  HB3 SER L  63      25.528   9.753 -13.335  1.00  0.00           H  
ATOM   1048  HG  SER L  63      25.801   7.010 -13.058  1.00  0.00           H  
ATOM   1049  N   GLY L  64      22.492   7.016 -12.918  1.00  0.00           N  
ATOM   1050  CA  GLY L  64      21.699   6.460 -11.784  1.00  0.00           C  
ATOM   1051  C   GLY L  64      22.416   5.261 -11.168  1.00  0.00           C  
ATOM   1052  O   GLY L  64      23.199   4.597 -11.818  1.00  0.00           O  
ATOM   1053  H   GLY L  64      22.662   6.471 -13.714  1.00  0.00           H  
ATOM   1054  HA2 GLY L  64      21.568   7.221 -11.031  1.00  0.00           H  
ATOM   1055  HA3 GLY L  64      20.732   6.147 -12.144  1.00  0.00           H  
ATOM   1056  N   SER L  65      22.141   5.023  -9.919  1.00  0.00           N  
ATOM   1057  CA  SER L  65      22.785   3.875  -9.223  1.00  0.00           C  
ATOM   1058  C   SER L  65      22.066   3.587  -7.909  1.00  0.00           C  
ATOM   1059  O   SER L  65      21.103   4.249  -7.577  1.00  0.00           O  
ATOM   1060  CB  SER L  65      24.244   4.248  -8.922  1.00  0.00           C  
ATOM   1061  OG  SER L  65      24.150   5.480  -8.218  1.00  0.00           O  
ATOM   1062  H   SER L  65      21.507   5.597  -9.439  1.00  0.00           H  
ATOM   1063  HA  SER L  65      22.728   2.995  -9.858  1.00  0.00           H  
ATOM   1064  HB2 SER L  65      24.714   3.498  -8.303  1.00  0.00           H  
ATOM   1065  HB3 SER L  65      24.801   4.384  -9.838  1.00  0.00           H  
ATOM   1066  HG  SER L  65      23.233   5.768  -8.244  1.00  0.00           H  
ATOM   1067  N   GLY L  66      22.544   2.608  -7.185  1.00  0.00           N  
ATOM   1068  CA  GLY L  66      21.888   2.274  -5.885  1.00  0.00           C  
ATOM   1069  C   GLY L  66      21.752   0.762  -5.706  1.00  0.00           C  
ATOM   1070  O   GLY L  66      22.032  -0.003  -6.608  1.00  0.00           O  
ATOM   1071  H   GLY L  66      23.320   2.096  -7.494  1.00  0.00           H  
ATOM   1072  HA2 GLY L  66      22.481   2.674  -5.076  1.00  0.00           H  
ATOM   1073  HA3 GLY L  66      20.906   2.720  -5.856  1.00  0.00           H  
ATOM   1074  N   SER L  67      21.332   0.372  -4.531  1.00  0.00           N  
ATOM   1075  CA  SER L  67      21.160  -1.078  -4.238  1.00  0.00           C  
ATOM   1076  C   SER L  67      19.715  -1.515  -4.501  1.00  0.00           C  
ATOM   1077  O   SER L  67      19.303  -1.646  -5.638  1.00  0.00           O  
ATOM   1078  CB  SER L  67      21.505  -1.306  -2.756  1.00  0.00           C  
ATOM   1079  OG  SER L  67      21.142  -2.659  -2.509  1.00  0.00           O  
ATOM   1080  H   SER L  67      21.123   1.039  -3.843  1.00  0.00           H  
ATOM   1081  HA  SER L  67      21.822  -1.649  -4.881  1.00  0.00           H  
ATOM   1082  HB2 SER L  67      22.562  -1.167  -2.584  1.00  0.00           H  
ATOM   1083  HB3 SER L  67      20.932  -0.644  -2.123  1.00  0.00           H  
ATOM   1084  HG  SER L  67      21.926  -3.203  -2.612  1.00  0.00           H  
ATOM   1085  N   GLY L  68      18.973  -1.731  -3.441  1.00  0.00           N  
ATOM   1086  CA  GLY L  68      17.552  -2.160  -3.599  1.00  0.00           C  
ATOM   1087  C   GLY L  68      16.609  -1.124  -2.982  1.00  0.00           C  
ATOM   1088  O   GLY L  68      15.781  -0.558  -3.664  1.00  0.00           O  
ATOM   1089  H   GLY L  68      19.355  -1.620  -2.545  1.00  0.00           H  
ATOM   1090  HA2 GLY L  68      17.324  -2.268  -4.649  1.00  0.00           H  
ATOM   1091  HA3 GLY L  68      17.410  -3.109  -3.105  1.00  0.00           H  
ATOM   1092  N   THR L  69      16.751  -0.903  -1.702  1.00  0.00           N  
ATOM   1093  CA  THR L  69      15.870   0.093  -1.023  1.00  0.00           C  
ATOM   1094  C   THR L  69      16.508   1.479  -1.029  1.00  0.00           C  
ATOM   1095  O   THR L  69      16.128   2.343  -0.263  1.00  0.00           O  
ATOM   1096  CB  THR L  69      15.663  -0.343   0.431  1.00  0.00           C  
ATOM   1097  OG1 THR L  69      16.959  -0.604   0.943  1.00  0.00           O  
ATOM   1098  CG2 THR L  69      14.946  -1.696   0.504  1.00  0.00           C  
ATOM   1099  H   THR L  69      17.430  -1.388  -1.189  1.00  0.00           H  
ATOM   1100  HA  THR L  69      14.925   0.145  -1.544  1.00  0.00           H  
ATOM   1101  HB  THR L  69      15.164   0.426   1.007  1.00  0.00           H  
ATOM   1102  HG1 THR L  69      16.916  -0.543   1.901  1.00  0.00           H  
ATOM   1103 HG21 THR L  69      14.998  -2.186  -0.454  1.00  0.00           H  
ATOM   1104 HG22 THR L  69      15.419  -2.320   1.248  1.00  0.00           H  
ATOM   1105 HG23 THR L  69      13.911  -1.546   0.773  1.00  0.00           H  
ATOM   1106  N   ASP L  70      17.451   1.667  -1.912  1.00  0.00           N  
ATOM   1107  CA  ASP L  70      18.137   2.985  -1.996  1.00  0.00           C  
ATOM   1108  C   ASP L  70      18.631   3.259  -3.420  1.00  0.00           C  
ATOM   1109  O   ASP L  70      19.178   2.386  -4.066  1.00  0.00           O  
ATOM   1110  CB  ASP L  70      19.346   2.946  -1.048  1.00  0.00           C  
ATOM   1111  CG  ASP L  70      19.271   4.124  -0.079  1.00  0.00           C  
ATOM   1112  OD1 ASP L  70      19.543   5.218  -0.540  1.00  0.00           O  
ATOM   1113  OD2 ASP L  70      18.947   3.866   1.067  1.00  0.00           O  
ATOM   1114  H   ASP L  70      17.700   0.943  -2.522  1.00  0.00           H  
ATOM   1115  HA  ASP L  70      17.442   3.767  -1.707  1.00  0.00           H  
ATOM   1116  HB2 ASP L  70      19.341   2.022  -0.488  1.00  0.00           H  
ATOM   1117  HB3 ASP L  70      20.261   3.012  -1.617  1.00  0.00           H  
ATOM   1118  N   PHE L  71      18.428   4.469  -3.876  1.00  0.00           N  
ATOM   1119  CA  PHE L  71      18.876   4.830  -5.254  1.00  0.00           C  
ATOM   1120  C   PHE L  71      19.380   6.273  -5.308  1.00  0.00           C  
ATOM   1121  O   PHE L  71      19.151   7.045  -4.397  1.00  0.00           O  
ATOM   1122  CB  PHE L  71      17.679   4.697  -6.207  1.00  0.00           C  
ATOM   1123  CG  PHE L  71      17.185   3.250  -6.202  1.00  0.00           C  
ATOM   1124  CD1 PHE L  71      17.847   2.280  -6.934  1.00  0.00           C  
ATOM   1125  CD2 PHE L  71      16.070   2.892  -5.465  1.00  0.00           C  
ATOM   1126  CE1 PHE L  71      17.402   0.974  -6.928  1.00  0.00           C  
ATOM   1127  CE2 PHE L  71      15.627   1.587  -5.461  1.00  0.00           C  
ATOM   1128  CZ  PHE L  71      16.293   0.628  -6.192  1.00  0.00           C  
ATOM   1129  H   PHE L  71      17.982   5.136  -3.314  1.00  0.00           H  
ATOM   1130  HA  PHE L  71      19.681   4.168  -5.550  1.00  0.00           H  
ATOM   1131  HB2 PHE L  71      16.880   5.348  -5.884  1.00  0.00           H  
ATOM   1132  HB3 PHE L  71      17.977   4.968  -7.209  1.00  0.00           H  
ATOM   1133  HD1 PHE L  71      18.720   2.546  -7.511  1.00  0.00           H  
ATOM   1134  HD2 PHE L  71      15.545   3.639  -4.888  1.00  0.00           H  
ATOM   1135  HE1 PHE L  71      17.927   0.223  -7.500  1.00  0.00           H  
ATOM   1136  HE2 PHE L  71      14.757   1.315  -4.881  1.00  0.00           H  
ATOM   1137  HZ  PHE L  71      15.947  -0.395  -6.184  1.00  0.00           H  
ATOM   1138  N   THR L  72      20.054   6.610  -6.381  1.00  0.00           N  
ATOM   1139  CA  THR L  72      20.583   8.000  -6.515  1.00  0.00           C  
ATOM   1140  C   THR L  72      20.746   8.405  -7.981  1.00  0.00           C  
ATOM   1141  O   THR L  72      20.909   7.567  -8.845  1.00  0.00           O  
ATOM   1142  CB  THR L  72      21.964   8.065  -5.855  1.00  0.00           C  
ATOM   1143  OG1 THR L  72      21.765   7.649  -4.517  1.00  0.00           O  
ATOM   1144  CG2 THR L  72      22.451   9.518  -5.741  1.00  0.00           C  
ATOM   1145  H   THR L  72      20.212   5.951  -7.090  1.00  0.00           H  
ATOM   1146  HA  THR L  72      19.895   8.683  -6.035  1.00  0.00           H  
ATOM   1147  HB  THR L  72      22.677   7.423  -6.357  1.00  0.00           H  
ATOM   1148  HG1 THR L  72      20.947   8.043  -4.200  1.00  0.00           H  
ATOM   1149 HG21 THR L  72      21.684  10.126  -5.282  1.00  0.00           H  
ATOM   1150 HG22 THR L  72      23.343   9.556  -5.134  1.00  0.00           H  
ATOM   1151 HG23 THR L  72      22.673   9.912  -6.725  1.00  0.00           H  
ATOM   1152  N   LEU L  73      20.702   9.690  -8.220  1.00  0.00           N  
ATOM   1153  CA  LEU L  73      20.853  10.202  -9.612  1.00  0.00           C  
ATOM   1154  C   LEU L  73      21.931  11.284  -9.647  1.00  0.00           C  
ATOM   1155  O   LEU L  73      21.669  12.428  -9.329  1.00  0.00           O  
ATOM   1156  CB  LEU L  73      19.512  10.818 -10.049  1.00  0.00           C  
ATOM   1157  CG  LEU L  73      19.463  10.977 -11.579  1.00  0.00           C  
ATOM   1158  CD1 LEU L  73      18.108  11.575 -11.966  1.00  0.00           C  
ATOM   1159  CD2 LEU L  73      20.579  11.919 -12.043  1.00  0.00           C  
ATOM   1160  H   LEU L  73      20.564  10.320  -7.482  1.00  0.00           H  
ATOM   1161  HA  LEU L  73      21.142   9.386 -10.266  1.00  0.00           H  
ATOM   1162  HB2 LEU L  73      18.705  10.178  -9.732  1.00  0.00           H  
ATOM   1163  HB3 LEU L  73      19.391  11.786  -9.583  1.00  0.00           H  
ATOM   1164  HG  LEU L  73      19.582  10.017 -12.057  1.00  0.00           H  
ATOM   1165 HD11 LEU L  73      17.590  11.911 -11.079  1.00  0.00           H  
ATOM   1166 HD12 LEU L  73      18.253  12.413 -12.631  1.00  0.00           H  
ATOM   1167 HD13 LEU L  73      17.509  10.827 -12.464  1.00  0.00           H  
ATOM   1168 HD21 LEU L  73      20.634  12.773 -11.384  1.00  0.00           H  
ATOM   1169 HD22 LEU L  73      21.525  11.399 -12.033  1.00  0.00           H  
ATOM   1170 HD23 LEU L  73      20.375  12.260 -13.046  1.00  0.00           H  
ATOM   1171  N   LYS L  74      23.125  10.904 -10.016  1.00  0.00           N  
ATOM   1172  CA  LYS L  74      24.218  11.912 -10.070  1.00  0.00           C  
ATOM   1173  C   LYS L  74      24.278  12.583 -11.440  1.00  0.00           C  
ATOM   1174  O   LYS L  74      24.141  11.935 -12.462  1.00  0.00           O  
ATOM   1175  CB  LYS L  74      25.568  11.247  -9.779  1.00  0.00           C  
ATOM   1176  CG  LYS L  74      25.697   9.922 -10.529  1.00  0.00           C  
ATOM   1177  CD  LYS L  74      26.317   8.904  -9.577  1.00  0.00           C  
ATOM   1178  CE  LYS L  74      25.226   7.987  -9.022  1.00  0.00           C  
ATOM   1179  NZ  LYS L  74      25.505   7.667  -7.593  1.00  0.00           N  
ATOM   1180  H   LYS L  74      23.293   9.972 -10.261  1.00  0.00           H  
ATOM   1181  HA  LYS L  74      24.017  12.667  -9.327  1.00  0.00           H  
ATOM   1182  HB2 LYS L  74      26.366  11.909 -10.083  1.00  0.00           H  
ATOM   1183  HB3 LYS L  74      25.653  11.070  -8.716  1.00  0.00           H  
ATOM   1184  HG2 LYS L  74      24.730   9.581 -10.856  1.00  0.00           H  
ATOM   1185  HG3 LYS L  74      26.336  10.053 -11.389  1.00  0.00           H  
ATOM   1186  HD2 LYS L  74      27.055   8.317 -10.102  1.00  0.00           H  
ATOM   1187  HD3 LYS L  74      26.794   9.428  -8.762  1.00  0.00           H  
ATOM   1188  HE2 LYS L  74      24.265   8.478  -9.092  1.00  0.00           H  
ATOM   1189  HE3 LYS L  74      25.198   7.070  -9.593  1.00  0.00           H  
ATOM   1190  HZ1 LYS L  74      25.104   8.409  -6.985  1.00  0.00           H  
ATOM   1191  HZ2 LYS L  74      25.075   6.750  -7.353  1.00  0.00           H  
ATOM   1192  N   ILE L  75      24.474  13.872 -11.425  1.00  0.00           N  
ATOM   1193  CA  ILE L  75      24.551  14.633 -12.700  1.00  0.00           C  
ATOM   1194  C   ILE L  75      25.919  15.257 -12.839  1.00  0.00           C  
ATOM   1195  O   ILE L  75      26.403  15.909 -11.936  1.00  0.00           O  
ATOM   1196  CB  ILE L  75      23.481  15.736 -12.673  1.00  0.00           C  
ATOM   1197  CG1 ILE L  75      22.095  15.111 -12.498  1.00  0.00           C  
ATOM   1198  CG2 ILE L  75      23.508  16.502 -14.007  1.00  0.00           C  
ATOM   1199  CD1 ILE L  75      21.084  16.206 -12.142  1.00  0.00           C  
ATOM   1200  H   ILE L  75      24.571  14.341 -10.571  1.00  0.00           H  
ATOM   1201  HA  ILE L  75      24.410  13.960 -13.531  1.00  0.00           H  
ATOM   1202  HB  ILE L  75      23.678  16.403 -11.837  1.00  0.00           H  
ATOM   1203 HG12 ILE L  75      21.796  14.625 -13.416  1.00  0.00           H  
ATOM   1204 HG13 ILE L  75      22.126  14.378 -11.705  1.00  0.00           H  
ATOM   1205 HG21 ILE L  75      24.386  16.228 -14.572  1.00  0.00           H  
ATOM   1206 HG22 ILE L  75      22.627  16.265 -14.586  1.00  0.00           H  
ATOM   1207 HG23 ILE L  75      23.529  17.566 -13.812  1.00  0.00           H  
ATOM   1208 HD11 ILE L  75      21.250  17.074 -12.763  1.00  0.00           H  
ATOM   1209 HD12 ILE L  75      20.080  15.842 -12.304  1.00  0.00           H  
ATOM   1210 HD13 ILE L  75      21.198  16.484 -11.105  1.00  0.00           H  
ATOM   1211  N   SER L  76      26.522  15.043 -13.974  1.00  0.00           N  
ATOM   1212  CA  SER L  76      27.865  15.616 -14.188  1.00  0.00           C  
ATOM   1213  C   SER L  76      27.850  17.134 -14.044  1.00  0.00           C  
ATOM   1214  O   SER L  76      28.775  17.720 -13.519  1.00  0.00           O  
ATOM   1215  CB  SER L  76      28.344  15.262 -15.599  1.00  0.00           C  
ATOM   1216  OG  SER L  76      28.707  13.894 -15.511  1.00  0.00           O  
ATOM   1217  H   SER L  76      26.092  14.506 -14.673  1.00  0.00           H  
ATOM   1218  HA  SER L  76      28.516  15.196 -13.441  1.00  0.00           H  
ATOM   1219  HB2 SER L  76      27.549  15.394 -16.318  1.00  0.00           H  
ATOM   1220  HB3 SER L  76      29.202  15.859 -15.870  1.00  0.00           H  
ATOM   1221  HG  SER L  76      29.013  13.610 -16.376  1.00  0.00           H  
ATOM   1222  N   ARG L  77      26.797  17.737 -14.518  1.00  0.00           N  
ATOM   1223  CA  ARG L  77      26.683  19.207 -14.430  1.00  0.00           C  
ATOM   1224  C   ARG L  77      25.219  19.613 -14.547  1.00  0.00           C  
ATOM   1225  O   ARG L  77      24.490  19.102 -15.377  1.00  0.00           O  
ATOM   1226  CB  ARG L  77      27.503  19.842 -15.573  1.00  0.00           C  
ATOM   1227  CG  ARG L  77      26.665  19.923 -16.857  1.00  0.00           C  
ATOM   1228  CD  ARG L  77      27.433  20.726 -17.909  1.00  0.00           C  
ATOM   1229  NE  ARG L  77      27.030  22.160 -17.807  1.00  0.00           N  
ATOM   1230  CZ  ARG L  77      27.634  23.048 -18.539  1.00  0.00           C  
ATOM   1231  NH1 ARG L  77      27.376  23.088 -19.811  1.00  0.00           N  
ATOM   1232  NH2 ARG L  77      28.473  23.863 -17.973  1.00  0.00           N  
ATOM   1233  H   ARG L  77      26.069  17.219 -14.911  1.00  0.00           H  
ATOM   1234  HA  ARG L  77      27.057  19.527 -13.461  1.00  0.00           H  
ATOM   1235  HB2 ARG L  77      27.810  20.836 -15.283  1.00  0.00           H  
ATOM   1236  HB3 ARG L  77      28.384  19.245 -15.757  1.00  0.00           H  
ATOM   1237  HG2 ARG L  77      26.470  18.927 -17.229  1.00  0.00           H  
ATOM   1238  HG3 ARG L  77      25.726  20.414 -16.651  1.00  0.00           H  
ATOM   1239  HD2 ARG L  77      28.496  20.637 -17.735  1.00  0.00           H  
ATOM   1240  HD3 ARG L  77      27.199  20.355 -18.897  1.00  0.00           H  
ATOM   1241  HE  ARG L  77      26.313  22.430 -17.194  1.00  0.00           H  
ATOM   1242 HH11 ARG L  77      26.723  22.443 -20.205  1.00  0.00           H  
ATOM   1243 HH12 ARG L  77      27.827  23.761 -20.393  1.00  0.00           H  
ATOM   1244 HH21 ARG L  77      28.642  23.799 -16.990  1.00  0.00           H  
ATOM   1245 HH22 ARG L  77      28.949  24.552 -18.519  1.00  0.00           H  
ATOM   1246  N   VAL L  78      24.814  20.494 -13.690  1.00  0.00           N  
ATOM   1247  CA  VAL L  78      23.405  20.958 -13.720  1.00  0.00           C  
ATOM   1248  C   VAL L  78      23.237  22.117 -14.704  1.00  0.00           C  
ATOM   1249  O   VAL L  78      24.101  22.966 -14.823  1.00  0.00           O  
ATOM   1250  CB  VAL L  78      23.033  21.428 -12.305  1.00  0.00           C  
ATOM   1251  CG1 VAL L  78      21.551  21.818 -12.263  1.00  0.00           C  
ATOM   1252  CG2 VAL L  78      23.277  20.278 -11.321  1.00  0.00           C  
ATOM   1253  H   VAL L  78      25.434  20.838 -13.019  1.00  0.00           H  
ATOM   1254  HA  VAL L  78      22.770  20.136 -14.033  1.00  0.00           H  
ATOM   1255  HB  VAL L  78      23.643  22.277 -12.030  1.00  0.00           H  
ATOM   1256 HG11 VAL L  78      21.300  22.405 -13.134  1.00  0.00           H  
ATOM   1257 HG12 VAL L  78      20.939  20.928 -12.247  1.00  0.00           H  
ATOM   1258 HG13 VAL L  78      21.353  22.400 -11.375  1.00  0.00           H  
ATOM   1259 HG21 VAL L  78      23.388  19.349 -11.864  1.00  0.00           H  
ATOM   1260 HG22 VAL L  78      24.177  20.467 -10.753  1.00  0.00           H  
ATOM   1261 HG23 VAL L  78      22.441  20.193 -10.642  1.00  0.00           H  
ATOM   1262  N   GLU L  79      22.131  22.116 -15.399  1.00  0.00           N  
ATOM   1263  CA  GLU L  79      21.868  23.201 -16.385  1.00  0.00           C  
ATOM   1264  C   GLU L  79      20.556  23.905 -16.056  1.00  0.00           C  
ATOM   1265  O   GLU L  79      19.781  23.423 -15.254  1.00  0.00           O  
ATOM   1266  CB  GLU L  79      21.747  22.570 -17.780  1.00  0.00           C  
ATOM   1267  CG  GLU L  79      23.143  22.192 -18.292  1.00  0.00           C  
ATOM   1268  CD  GLU L  79      23.122  20.764 -18.845  1.00  0.00           C  
ATOM   1269  OE1 GLU L  79      22.241  20.503 -19.649  1.00  0.00           O  
ATOM   1270  OE2 GLU L  79      23.993  20.014 -18.436  1.00  0.00           O  
ATOM   1271  H   GLU L  79      21.475  21.400 -15.270  1.00  0.00           H  
ATOM   1272  HA  GLU L  79      22.677  23.923 -16.352  1.00  0.00           H  
ATOM   1273  HB2 GLU L  79      21.128  21.686 -17.725  1.00  0.00           H  
ATOM   1274  HB3 GLU L  79      21.292  23.276 -18.460  1.00  0.00           H  
ATOM   1275  HG2 GLU L  79      23.439  22.871 -19.078  1.00  0.00           H  
ATOM   1276  HG3 GLU L  79      23.859  22.251 -17.485  1.00  0.00           H  
ATOM   1277  N   ALA L  80      20.328  25.031 -16.682  1.00  0.00           N  
ATOM   1278  CA  ALA L  80      19.067  25.777 -16.413  1.00  0.00           C  
ATOM   1279  C   ALA L  80      17.849  24.858 -16.543  1.00  0.00           C  
ATOM   1280  O   ALA L  80      16.924  24.937 -15.758  1.00  0.00           O  
ATOM   1281  CB  ALA L  80      18.948  26.907 -17.443  1.00  0.00           C  
ATOM   1282  H   ALA L  80      20.984  25.382 -17.320  1.00  0.00           H  
ATOM   1283  HA  ALA L  80      19.103  26.174 -15.403  1.00  0.00           H  
ATOM   1284  HB1 ALA L  80      19.093  26.512 -18.438  1.00  0.00           H  
ATOM   1285  HB2 ALA L  80      17.968  27.357 -17.379  1.00  0.00           H  
ATOM   1286  HB3 ALA L  80      19.697  27.659 -17.247  1.00  0.00           H  
ATOM   1287  N   GLU L  81      17.875  24.006 -17.536  1.00  0.00           N  
ATOM   1288  CA  GLU L  81      16.733  23.069 -17.741  1.00  0.00           C  
ATOM   1289  C   GLU L  81      16.618  22.090 -16.577  1.00  0.00           C  
ATOM   1290  O   GLU L  81      15.532  21.748 -16.149  1.00  0.00           O  
ATOM   1291  CB  GLU L  81      16.997  22.258 -19.016  1.00  0.00           C  
ATOM   1292  CG  GLU L  81      16.883  23.173 -20.239  1.00  0.00           C  
ATOM   1293  CD  GLU L  81      16.021  22.490 -21.307  1.00  0.00           C  
ATOM   1294  OE1 GLU L  81      16.359  21.363 -21.639  1.00  0.00           O  
ATOM   1295  OE2 GLU L  81      15.074  23.131 -21.728  1.00  0.00           O  
ATOM   1296  H   GLU L  81      18.644  23.982 -18.142  1.00  0.00           H  
ATOM   1297  HA  GLU L  81      15.813  23.638 -17.823  1.00  0.00           H  
ATOM   1298  HB2 GLU L  81      17.988  21.832 -18.975  1.00  0.00           H  
ATOM   1299  HB3 GLU L  81      16.273  21.459 -19.092  1.00  0.00           H  
ATOM   1300  HG2 GLU L  81      16.425  24.109 -19.955  1.00  0.00           H  
ATOM   1301  HG3 GLU L  81      17.865  23.364 -20.643  1.00  0.00           H  
ATOM   1302  N   ASP L  82      17.753  21.657 -16.099  1.00  0.00           N  
ATOM   1303  CA  ASP L  82      17.771  20.698 -14.963  1.00  0.00           C  
ATOM   1304  C   ASP L  82      17.013  21.254 -13.760  1.00  0.00           C  
ATOM   1305  O   ASP L  82      16.422  20.512 -12.998  1.00  0.00           O  
ATOM   1306  CB  ASP L  82      19.235  20.475 -14.563  1.00  0.00           C  
ATOM   1307  CG  ASP L  82      19.384  19.099 -13.917  1.00  0.00           C  
ATOM   1308  OD1 ASP L  82      19.104  19.021 -12.732  1.00  0.00           O  
ATOM   1309  OD2 ASP L  82      19.766  18.201 -14.646  1.00  0.00           O  
ATOM   1310  H   ASP L  82      18.596  21.969 -16.490  1.00  0.00           H  
ATOM   1311  HA  ASP L  82      17.310  19.767 -15.275  1.00  0.00           H  
ATOM   1312  HB2 ASP L  82      19.863  20.526 -15.439  1.00  0.00           H  
ATOM   1313  HB3 ASP L  82      19.542  21.235 -13.860  1.00  0.00           H  
ATOM   1314  N   LEU L  83      17.048  22.551 -13.617  1.00  0.00           N  
ATOM   1315  CA  LEU L  83      16.338  23.183 -12.475  1.00  0.00           C  
ATOM   1316  C   LEU L  83      14.863  22.782 -12.461  1.00  0.00           C  
ATOM   1317  O   LEU L  83      14.272  22.545 -13.498  1.00  0.00           O  
ATOM   1318  CB  LEU L  83      16.436  24.708 -12.625  1.00  0.00           C  
ATOM   1319  CG  LEU L  83      17.906  25.118 -12.774  1.00  0.00           C  
ATOM   1320  CD1 LEU L  83      17.985  26.630 -12.996  1.00  0.00           C  
ATOM   1321  CD2 LEU L  83      18.669  24.755 -11.496  1.00  0.00           C  
ATOM   1322  H   LEU L  83      17.540  23.103 -14.259  1.00  0.00           H  
ATOM   1323  HA  LEU L  83      16.800  22.853 -11.551  1.00  0.00           H  
ATOM   1324  HB2 LEU L  83      15.884  25.022 -13.499  1.00  0.00           H  
ATOM   1325  HB3 LEU L  83      16.014  25.185 -11.753  1.00  0.00           H  
ATOM   1326  HG  LEU L  83      18.345  24.605 -13.617  1.00  0.00           H  
ATOM   1327 HD11 LEU L  83      17.424  26.898 -13.879  1.00  0.00           H  
ATOM   1328 HD12 LEU L  83      17.570  27.146 -12.142  1.00  0.00           H  
ATOM   1329 HD13 LEU L  83      19.014  26.926 -13.125  1.00  0.00           H  
ATOM   1330 HD21 LEU L  83      17.970  24.512 -10.710  1.00  0.00           H  
ATOM   1331 HD22 LEU L  83      19.304  23.902 -11.681  1.00  0.00           H  
ATOM   1332 HD23 LEU L  83      19.278  25.590 -11.183  1.00  0.00           H  
ATOM   1333  N   GLY L  84      14.298  22.721 -11.286  1.00  0.00           N  
ATOM   1334  CA  GLY L  84      12.861  22.338 -11.177  1.00  0.00           C  
ATOM   1335  C   GLY L  84      12.670  21.326 -10.050  1.00  0.00           C  
ATOM   1336  O   GLY L  84      13.290  21.425  -9.006  1.00  0.00           O  
ATOM   1337  H   GLY L  84      14.814  22.929 -10.479  1.00  0.00           H  
ATOM   1338  HA2 GLY L  84      12.268  23.217 -10.975  1.00  0.00           H  
ATOM   1339  HA3 GLY L  84      12.537  21.894 -12.109  1.00  0.00           H  
ATOM   1340  N   ILE L  85      11.808  20.375 -10.284  1.00  0.00           N  
ATOM   1341  CA  ILE L  85      11.551  19.339  -9.251  1.00  0.00           C  
ATOM   1342  C   ILE L  85      11.925  17.964  -9.797  1.00  0.00           C  
ATOM   1343  O   ILE L  85      11.635  17.652 -10.938  1.00  0.00           O  
ATOM   1344  CB  ILE L  85      10.055  19.349  -8.906  1.00  0.00           C  
ATOM   1345  CG1 ILE L  85       9.533  20.788  -8.805  1.00  0.00           C  
ATOM   1346  CG2 ILE L  85       9.859  18.654  -7.548  1.00  0.00           C  
ATOM   1347  CD1 ILE L  85      10.301  21.557  -7.720  1.00  0.00           C  
ATOM   1348  H   ILE L  85      11.334  20.341 -11.142  1.00  0.00           H  
ATOM   1349  HA  ILE L  85      12.157  19.546  -8.375  1.00  0.00           H  
ATOM   1350  HB  ILE L  85       9.509  18.830  -9.688  1.00  0.00           H  
ATOM   1351 HG12 ILE L  85       9.658  21.285  -9.756  1.00  0.00           H  
ATOM   1352 HG13 ILE L  85       8.482  20.772  -8.556  1.00  0.00           H  
ATOM   1353 HG21 ILE L  85      10.274  17.657  -7.586  1.00  0.00           H  
ATOM   1354 HG22 ILE L  85      10.359  19.216  -6.773  1.00  0.00           H  
ATOM   1355 HG23 ILE L  85       8.806  18.591  -7.318  1.00  0.00           H  
ATOM   1356 HD11 ILE L  85      11.268  21.105  -7.561  1.00  0.00           H  
ATOM   1357 HD12 ILE L  85      10.437  22.583  -8.029  1.00  0.00           H  
ATOM   1358 HD13 ILE L  85       9.744  21.537  -6.795  1.00  0.00           H  
ATOM   1359  N   TYR L  86      12.568  17.171  -8.984  1.00  0.00           N  
ATOM   1360  CA  TYR L  86      12.964  15.815  -9.454  1.00  0.00           C  
ATOM   1361  C   TYR L  86      12.058  14.737  -8.871  1.00  0.00           C  
ATOM   1362  O   TYR L  86      11.421  14.935  -7.854  1.00  0.00           O  
ATOM   1363  CB  TYR L  86      14.407  15.547  -9.006  1.00  0.00           C  
ATOM   1364  CG  TYR L  86      15.346  15.789 -10.189  1.00  0.00           C  
ATOM   1365  CD1 TYR L  86      15.737  17.071 -10.513  1.00  0.00           C  
ATOM   1366  CD2 TYR L  86      15.802  14.734 -10.957  1.00  0.00           C  
ATOM   1367  CE1 TYR L  86      16.569  17.298 -11.586  1.00  0.00           C  
ATOM   1368  CE2 TYR L  86      16.637  14.962 -12.033  1.00  0.00           C  
ATOM   1369  CZ  TYR L  86      17.024  16.248 -12.353  1.00  0.00           C  
ATOM   1370  OH  TYR L  86      17.846  16.483 -13.428  1.00  0.00           O  
ATOM   1371  H   TYR L  86      12.788  17.467  -8.074  1.00  0.00           H  
ATOM   1372  HA  TYR L  86      12.888  15.784 -10.536  1.00  0.00           H  
ATOM   1373  HB2 TYR L  86      14.672  16.214  -8.199  1.00  0.00           H  
ATOM   1374  HB3 TYR L  86      14.508  14.524  -8.673  1.00  0.00           H  
ATOM   1375  HD1 TYR L  86      15.388  17.903  -9.921  1.00  0.00           H  
ATOM   1376  HD2 TYR L  86      15.501  13.725 -10.717  1.00  0.00           H  
ATOM   1377  HE1 TYR L  86      16.868  18.307 -11.829  1.00  0.00           H  
ATOM   1378  HE2 TYR L  86      16.992  14.128 -12.628  1.00  0.00           H  
ATOM   1379  HH  TYR L  86      18.428  17.217 -13.203  1.00  0.00           H  
ATOM   1380  N   PHE L  87      12.021  13.616  -9.540  1.00  0.00           N  
ATOM   1381  CA  PHE L  87      11.172  12.492  -9.063  1.00  0.00           C  
ATOM   1382  C   PHE L  87      11.779  11.153  -9.476  1.00  0.00           C  
ATOM   1383  O   PHE L  87      12.689  11.100 -10.280  1.00  0.00           O  
ATOM   1384  CB  PHE L  87       9.782  12.599  -9.714  1.00  0.00           C  
ATOM   1385  CG  PHE L  87       9.247  14.027  -9.598  1.00  0.00           C  
ATOM   1386  CD1 PHE L  87       9.554  14.973 -10.560  1.00  0.00           C  
ATOM   1387  CD2 PHE L  87       8.433  14.383  -8.541  1.00  0.00           C  
ATOM   1388  CE1 PHE L  87       9.052  16.254 -10.463  1.00  0.00           C  
ATOM   1389  CE2 PHE L  87       7.932  15.664  -8.444  1.00  0.00           C  
ATOM   1390  CZ  PHE L  87       8.241  16.599  -9.404  1.00  0.00           C  
ATOM   1391  H   PHE L  87      12.552  13.515 -10.360  1.00  0.00           H  
ATOM   1392  HA  PHE L  87      11.101  12.530  -7.981  1.00  0.00           H  
ATOM   1393  HB2 PHE L  87       9.847  12.331 -10.754  1.00  0.00           H  
ATOM   1394  HB3 PHE L  87       9.098  11.925  -9.220  1.00  0.00           H  
ATOM   1395  HD1 PHE L  87      10.189  14.707 -11.393  1.00  0.00           H  
ATOM   1396  HD2 PHE L  87       8.186  13.652  -7.786  1.00  0.00           H  
ATOM   1397  HE1 PHE L  87       9.297  16.988 -11.216  1.00  0.00           H  
ATOM   1398  HE2 PHE L  87       7.296  15.934  -7.613  1.00  0.00           H  
ATOM   1399  HZ  PHE L  87       7.846  17.600  -9.330  1.00  0.00           H  
ATOM   1400  N   CYS L  88      11.260  10.099  -8.916  1.00  0.00           N  
ATOM   1401  CA  CYS L  88      11.779   8.748  -9.254  1.00  0.00           C  
ATOM   1402  C   CYS L  88      10.642   7.736  -9.208  1.00  0.00           C  
ATOM   1403  O   CYS L  88      10.055   7.507  -8.171  1.00  0.00           O  
ATOM   1404  CB  CYS L  88      12.857   8.345  -8.235  1.00  0.00           C  
ATOM   1405  SG  CYS L  88      12.542   8.686  -6.487  1.00  0.00           S  
ATOM   1406  H   CYS L  88      10.525  10.196  -8.275  1.00  0.00           H  
ATOM   1407  HA  CYS L  88      12.186   8.770 -10.261  1.00  0.00           H  
ATOM   1408  HB2 CYS L  88      13.029   7.283  -8.333  1.00  0.00           H  
ATOM   1409  HB3 CYS L  88      13.775   8.848  -8.503  1.00  0.00           H  
ATOM   1410  N   SER L  89      10.344   7.161 -10.341  1.00  0.00           N  
ATOM   1411  CA  SER L  89       9.245   6.161 -10.394  1.00  0.00           C  
ATOM   1412  C   SER L  89       9.792   4.736 -10.439  1.00  0.00           C  
ATOM   1413  O   SER L  89      10.986   4.518 -10.378  1.00  0.00           O  
ATOM   1414  CB  SER L  89       8.429   6.415 -11.667  1.00  0.00           C  
ATOM   1415  OG  SER L  89       7.120   5.981 -11.327  1.00  0.00           O  
ATOM   1416  H   SER L  89      10.844   7.386 -11.153  1.00  0.00           H  
ATOM   1417  HA  SER L  89       8.623   6.270  -9.511  1.00  0.00           H  
ATOM   1418  HB2 SER L  89       8.422   7.466 -11.915  1.00  0.00           H  
ATOM   1419  HB3 SER L  89       8.813   5.834 -12.493  1.00  0.00           H  
ATOM   1420  HG  SER L  89       6.496   6.460 -11.881  1.00  0.00           H  
ATOM   1421  N   GLN L  90       8.896   3.794 -10.550  1.00  0.00           N  
ATOM   1422  CA  GLN L  90       9.318   2.368 -10.602  1.00  0.00           C  
ATOM   1423  C   GLN L  90       8.192   1.497 -11.156  1.00  0.00           C  
ATOM   1424  O   GLN L  90       7.048   1.642 -10.772  1.00  0.00           O  
ATOM   1425  CB  GLN L  90       9.647   1.896  -9.174  1.00  0.00           C  
ATOM   1426  CG  GLN L  90       8.556   2.378  -8.206  1.00  0.00           C  
ATOM   1427  CD  GLN L  90       7.899   1.179  -7.514  1.00  0.00           C  
ATOM   1428  OE1 GLN L  90       8.118   0.923  -6.347  1.00  0.00           O  
ATOM   1429  NE2 GLN L  90       7.082   0.425  -8.192  1.00  0.00           N  
ATOM   1430  H   GLN L  90       7.944   4.027 -10.602  1.00  0.00           H  
ATOM   1431  HA  GLN L  90      10.186   2.279 -11.249  1.00  0.00           H  
ATOM   1432  HB2 GLN L  90       9.703   0.817  -9.152  1.00  0.00           H  
ATOM   1433  HB3 GLN L  90      10.601   2.303  -8.872  1.00  0.00           H  
ATOM   1434  HG2 GLN L  90       8.993   3.021  -7.457  1.00  0.00           H  
ATOM   1435  HG3 GLN L  90       7.803   2.928  -8.749  1.00  0.00           H  
ATOM   1436 HE21 GLN L  90       6.893   0.628  -9.131  1.00  0.00           H  
ATOM   1437 HE22 GLN L  90       6.654  -0.342  -7.761  1.00  0.00           H  
ATOM   1438  N   THR L  91       8.535   0.610 -12.051  1.00  0.00           N  
ATOM   1439  CA  THR L  91       7.493  -0.279 -12.639  1.00  0.00           C  
ATOM   1440  C   THR L  91       7.659  -1.710 -12.122  1.00  0.00           C  
ATOM   1441  O   THR L  91       7.087  -2.642 -12.654  1.00  0.00           O  
ATOM   1442  CB  THR L  91       7.638  -0.251 -14.162  1.00  0.00           C  
ATOM   1443  OG1 THR L  91       6.536  -0.982 -14.669  1.00  0.00           O  
ATOM   1444  CG2 THR L  91       8.861  -1.044 -14.596  1.00  0.00           C  
ATOM   1445  H   THR L  91       9.471   0.529 -12.333  1.00  0.00           H  
ATOM   1446  HA  THR L  91       6.522   0.078 -12.347  1.00  0.00           H  
ATOM   1447  HB  THR L  91       7.636   0.763 -14.547  1.00  0.00           H  
ATOM   1448  HG1 THR L  91       6.542  -1.852 -14.261  1.00  0.00           H  
ATOM   1449 HG21 THR L  91       8.766  -2.062 -14.259  1.00  0.00           H  
ATOM   1450 HG22 THR L  91       8.945  -1.027 -15.671  1.00  0.00           H  
ATOM   1451 HG23 THR L  91       9.742  -0.604 -14.159  1.00  0.00           H  
ATOM   1452  N   THR L  92       8.442  -1.846 -11.083  1.00  0.00           N  
ATOM   1453  CA  THR L  92       8.675  -3.196 -10.497  1.00  0.00           C  
ATOM   1454  C   THR L  92       7.406  -3.745  -9.842  1.00  0.00           C  
ATOM   1455  O   THR L  92       6.980  -4.844 -10.135  1.00  0.00           O  
ATOM   1456  CB  THR L  92       9.761  -3.068  -9.420  1.00  0.00           C  
ATOM   1457  OG1 THR L  92      10.978  -2.900 -10.124  1.00  0.00           O  
ATOM   1458  CG2 THR L  92       9.945  -4.388  -8.660  1.00  0.00           C  
ATOM   1459  H   THR L  92       8.881  -1.060 -10.695  1.00  0.00           H  
ATOM   1460  HA  THR L  92       8.989  -3.874 -11.282  1.00  0.00           H  
ATOM   1461  HB  THR L  92       9.578  -2.226  -8.762  1.00  0.00           H  
ATOM   1462  HG1 THR L  92      11.669  -3.355  -9.632  1.00  0.00           H  
ATOM   1463 HG21 THR L  92       9.003  -4.699  -8.232  1.00  0.00           H  
ATOM   1464 HG22 THR L  92      10.298  -5.152  -9.335  1.00  0.00           H  
ATOM   1465 HG23 THR L  92      10.665  -4.252  -7.868  1.00  0.00           H  
ATOM   1466  N   HIS L  93       6.827  -2.964  -8.967  1.00  0.00           N  
ATOM   1467  CA  HIS L  93       5.586  -3.418  -8.277  1.00  0.00           C  
ATOM   1468  C   HIS L  93       4.336  -2.766  -8.869  1.00  0.00           C  
ATOM   1469  O   HIS L  93       4.418  -1.789  -9.589  1.00  0.00           O  
ATOM   1470  CB  HIS L  93       5.696  -3.022  -6.798  1.00  0.00           C  
ATOM   1471  CG  HIS L  93       7.076  -3.420  -6.273  1.00  0.00           C  
ATOM   1472  ND1 HIS L  93       7.335  -4.519  -5.679  1.00  0.00           N  
ATOM   1473  CD2 HIS L  93       8.265  -2.725  -6.329  1.00  0.00           C  
ATOM   1474  CE1 HIS L  93       8.588  -4.534  -5.378  1.00  0.00           C  
ATOM   1475  NE2 HIS L  93       9.228  -3.443  -5.755  1.00  0.00           N  
ATOM   1476  H   HIS L  93       7.208  -2.085  -8.765  1.00  0.00           H  
ATOM   1477  HA  HIS L  93       5.500  -4.495  -8.378  1.00  0.00           H  
ATOM   1478  HB2 HIS L  93       5.568  -1.955  -6.692  1.00  0.00           H  
ATOM   1479  HB3 HIS L  93       4.936  -3.532  -6.225  1.00  0.00           H  
ATOM   1480  HD2 HIS L  93       8.396  -1.751  -6.774  1.00  0.00           H  
ATOM   1481  HE1 HIS L  93       9.068  -5.359  -4.871  1.00  0.00           H  
ATOM   1482  N   VAL L  94       3.200  -3.330  -8.545  1.00  0.00           N  
ATOM   1483  CA  VAL L  94       1.917  -2.779  -9.064  1.00  0.00           C  
ATOM   1484  C   VAL L  94       0.929  -2.563  -7.909  1.00  0.00           C  
ATOM   1485  O   VAL L  94       0.864  -3.357  -6.990  1.00  0.00           O  
ATOM   1486  CB  VAL L  94       1.337  -3.804 -10.063  1.00  0.00           C  
ATOM   1487  CG1 VAL L  94      -0.196  -3.837  -9.972  1.00  0.00           C  
ATOM   1488  CG2 VAL L  94       1.743  -3.402 -11.483  1.00  0.00           C  
ATOM   1489  H   VAL L  94       3.192  -4.116  -7.959  1.00  0.00           H  
ATOM   1490  HA  VAL L  94       2.114  -1.832  -9.550  1.00  0.00           H  
ATOM   1491  HB  VAL L  94       1.731  -4.785  -9.841  1.00  0.00           H  
ATOM   1492 HG11 VAL L  94      -0.592  -2.837 -10.049  1.00  0.00           H  
ATOM   1493 HG12 VAL L  94      -0.595  -4.438 -10.776  1.00  0.00           H  
ATOM   1494 HG13 VAL L  94      -0.497  -4.267  -9.027  1.00  0.00           H  
ATOM   1495 HG21 VAL L  94       2.821  -3.379 -11.562  1.00  0.00           H  
ATOM   1496 HG22 VAL L  94       1.351  -4.117 -12.191  1.00  0.00           H  
ATOM   1497 HG23 VAL L  94       1.350  -2.422 -11.713  1.00  0.00           H  
ATOM   1498  N   PRO L  95       0.179  -1.483  -7.978  1.00  0.00           N  
ATOM   1499  CA  PRO L  95       0.260  -0.501  -9.079  1.00  0.00           C  
ATOM   1500  C   PRO L  95       1.540   0.342  -8.996  1.00  0.00           C  
ATOM   1501  O   PRO L  95       2.231   0.342  -7.996  1.00  0.00           O  
ATOM   1502  CB  PRO L  95      -0.960   0.416  -8.861  1.00  0.00           C  
ATOM   1503  CG  PRO L  95      -1.601   0.035  -7.503  1.00  0.00           C  
ATOM   1504  CD  PRO L  95      -0.846  -1.186  -6.960  1.00  0.00           C  
ATOM   1505  HA  PRO L  95       0.205  -1.008 -10.033  1.00  0.00           H  
ATOM   1506  HB2 PRO L  95      -0.647   1.450  -8.843  1.00  0.00           H  
ATOM   1507  HB3 PRO L  95      -1.675   0.271  -9.658  1.00  0.00           H  
ATOM   1508  HG2 PRO L  95      -1.514   0.859  -6.810  1.00  0.00           H  
ATOM   1509  HG3 PRO L  95      -2.644  -0.209  -7.643  1.00  0.00           H  
ATOM   1510  HD2 PRO L  95      -0.376  -0.954  -6.016  1.00  0.00           H  
ATOM   1511  HD3 PRO L  95      -1.514  -2.028  -6.847  1.00  0.00           H  
ATOM   1512  N   PRO L  96       1.828   1.037 -10.072  1.00  0.00           N  
ATOM   1513  CA  PRO L  96       3.022   1.897 -10.149  1.00  0.00           C  
ATOM   1514  C   PRO L  96       2.943   3.036  -9.130  1.00  0.00           C  
ATOM   1515  O   PRO L  96       1.871   3.525  -8.830  1.00  0.00           O  
ATOM   1516  CB  PRO L  96       2.995   2.473 -11.578  1.00  0.00           C  
ATOM   1517  CG  PRO L  96       1.733   1.917 -12.288  1.00  0.00           C  
ATOM   1518  CD  PRO L  96       0.999   1.009 -11.292  1.00  0.00           C  
ATOM   1519  HA  PRO L  96       3.914   1.305  -9.979  1.00  0.00           H  
ATOM   1520  HB2 PRO L  96       2.949   3.552 -11.540  1.00  0.00           H  
ATOM   1521  HB3 PRO L  96       3.882   2.170 -12.114  1.00  0.00           H  
ATOM   1522  HG2 PRO L  96       1.090   2.732 -12.587  1.00  0.00           H  
ATOM   1523  HG3 PRO L  96       2.022   1.349 -13.160  1.00  0.00           H  
ATOM   1524  HD2 PRO L  96       0.012   1.395 -11.080  1.00  0.00           H  
ATOM   1525  HD3 PRO L  96       0.933   0.001 -11.674  1.00  0.00           H  
ATOM   1526  N   THR L  97       4.078   3.443  -8.623  1.00  0.00           N  
ATOM   1527  CA  THR L  97       4.078   4.548  -7.622  1.00  0.00           C  
ATOM   1528  C   THR L  97       4.059   5.917  -8.302  1.00  0.00           C  
ATOM   1529  O   THR L  97       3.025   6.551  -8.383  1.00  0.00           O  
ATOM   1530  CB  THR L  97       5.347   4.437  -6.767  1.00  0.00           C  
ATOM   1531  OG1 THR L  97       6.419   4.317  -7.683  1.00  0.00           O  
ATOM   1532  CG2 THR L  97       5.369   3.120  -5.982  1.00  0.00           C  
ATOM   1533  H   THR L  97       4.922   3.030  -8.903  1.00  0.00           H  
ATOM   1534  HA  THR L  97       3.192   4.457  -7.003  1.00  0.00           H  
ATOM   1535  HB  THR L  97       5.480   5.306  -6.131  1.00  0.00           H  
ATOM   1536  HG1 THR L  97       7.101   3.783  -7.268  1.00  0.00           H  
ATOM   1537 HG21 THR L  97       5.244   2.288  -6.660  1.00  0.00           H  
ATOM   1538 HG22 THR L  97       6.312   3.019  -5.465  1.00  0.00           H  
ATOM   1539 HG23 THR L  97       4.566   3.113  -5.260  1.00  0.00           H  
ATOM   1540  N   PHE L  98       5.204   6.339  -8.785  1.00  0.00           N  
ATOM   1541  CA  PHE L  98       5.290   7.664  -9.465  1.00  0.00           C  
ATOM   1542  C   PHE L  98       4.962   8.794  -8.487  1.00  0.00           C  
ATOM   1543  O   PHE L  98       3.824   8.983  -8.108  1.00  0.00           O  
ATOM   1544  CB  PHE L  98       4.286   7.692 -10.630  1.00  0.00           C  
ATOM   1545  CG  PHE L  98       4.970   8.254 -11.881  1.00  0.00           C  
ATOM   1546  CD1 PHE L  98       5.605   9.483 -11.843  1.00  0.00           C  
ATOM   1547  CD2 PHE L  98       4.963   7.538 -13.065  1.00  0.00           C  
ATOM   1548  CE1 PHE L  98       6.221   9.988 -12.970  1.00  0.00           C  
ATOM   1549  CE2 PHE L  98       5.579   8.044 -14.192  1.00  0.00           C  
ATOM   1550  CZ  PHE L  98       6.207   9.269 -14.144  1.00  0.00           C  
ATOM   1551  H   PHE L  98       6.004   5.780  -8.702  1.00  0.00           H  
ATOM   1552  HA  PHE L  98       6.304   7.802  -9.827  1.00  0.00           H  
ATOM   1553  HB2 PHE L  98       3.935   6.691 -10.835  1.00  0.00           H  
ATOM   1554  HB3 PHE L  98       3.443   8.317 -10.374  1.00  0.00           H  
ATOM   1555  HD1 PHE L  98       5.619  10.052 -10.925  1.00  0.00           H  
ATOM   1556  HD2 PHE L  98       4.470   6.578 -13.108  1.00  0.00           H  
ATOM   1557  HE1 PHE L  98       6.712  10.949 -12.932  1.00  0.00           H  
ATOM   1558  HE2 PHE L  98       5.566   7.479 -15.112  1.00  0.00           H  
ATOM   1559  HZ  PHE L  98       6.686   9.665 -15.028  1.00  0.00           H  
ATOM   1560  N   GLY L  99       5.971   9.530  -8.097  1.00  0.00           N  
ATOM   1561  CA  GLY L  99       5.730  10.651  -7.141  1.00  0.00           C  
ATOM   1562  C   GLY L  99       7.053  11.224  -6.626  1.00  0.00           C  
ATOM   1563  O   GLY L  99       8.051  11.211  -7.321  1.00  0.00           O  
ATOM   1564  H   GLY L  99       6.874   9.354  -8.438  1.00  0.00           H  
ATOM   1565  HA2 GLY L  99       5.177  11.432  -7.642  1.00  0.00           H  
ATOM   1566  HA3 GLY L  99       5.151  10.288  -6.305  1.00  0.00           H  
ATOM   1567  N   GLY L 100       7.031  11.714  -5.413  1.00  0.00           N  
ATOM   1568  CA  GLY L 100       8.276  12.298  -4.824  1.00  0.00           C  
ATOM   1569  C   GLY L 100       8.376  13.782  -5.184  1.00  0.00           C  
ATOM   1570  O   GLY L 100       7.446  14.349  -5.726  1.00  0.00           O  
ATOM   1571  H   GLY L 100       6.201  11.702  -4.894  1.00  0.00           H  
ATOM   1572  HA2 GLY L 100       8.249  12.191  -3.750  1.00  0.00           H  
ATOM   1573  HA3 GLY L 100       9.137  11.775  -5.213  1.00  0.00           H  
ATOM   1574  N   GLY L 101       9.493  14.392  -4.874  1.00  0.00           N  
ATOM   1575  CA  GLY L 101       9.632  15.841  -5.209  1.00  0.00           C  
ATOM   1576  C   GLY L 101      10.885  16.462  -4.581  1.00  0.00           C  
ATOM   1577  O   GLY L 101      10.837  16.979  -3.482  1.00  0.00           O  
ATOM   1578  H   GLY L 101      10.219  13.909  -4.428  1.00  0.00           H  
ATOM   1579  HA2 GLY L 101       9.688  15.950  -6.282  1.00  0.00           H  
ATOM   1580  HA3 GLY L 101       8.762  16.370  -4.849  1.00  0.00           H  
ATOM   1581  N   THR L 102      11.981  16.394  -5.293  1.00  0.00           N  
ATOM   1582  CA  THR L 102      13.244  16.979  -4.758  1.00  0.00           C  
ATOM   1583  C   THR L 102      13.467  18.345  -5.401  1.00  0.00           C  
ATOM   1584  O   THR L 102      13.608  18.451  -6.605  1.00  0.00           O  
ATOM   1585  CB  THR L 102      14.412  16.045  -5.101  1.00  0.00           C  
ATOM   1586  OG1 THR L 102      14.207  14.896  -4.299  1.00  0.00           O  
ATOM   1587  CG2 THR L 102      15.749  16.619  -4.605  1.00  0.00           C  
ATOM   1588  H   THR L 102      11.972  15.958  -6.171  1.00  0.00           H  
ATOM   1589  HA  THR L 102      13.148  17.106  -3.683  1.00  0.00           H  
ATOM   1590  HB  THR L 102      14.429  15.784  -6.154  1.00  0.00           H  
ATOM   1591  HG1 THR L 102      14.757  14.187  -4.645  1.00  0.00           H  
ATOM   1592 HG21 THR L 102      15.565  17.423  -3.909  1.00  0.00           H  
ATOM   1593 HG22 THR L 102      16.320  15.845  -4.110  1.00  0.00           H  
ATOM   1594 HG23 THR L 102      16.315  16.997  -5.443  1.00  0.00           H  
ATOM   1595  N   LYS L 103      13.489  19.368  -4.586  1.00  0.00           N  
ATOM   1596  CA  LYS L 103      13.696  20.739  -5.127  1.00  0.00           C  
ATOM   1597  C   LYS L 103      15.126  20.960  -5.622  1.00  0.00           C  
ATOM   1598  O   LYS L 103      16.083  20.728  -4.910  1.00  0.00           O  
ATOM   1599  CB  LYS L 103      13.393  21.744  -4.003  1.00  0.00           C  
ATOM   1600  CG  LYS L 103      13.462  23.174  -4.553  1.00  0.00           C  
ATOM   1601  CD  LYS L 103      12.230  23.444  -5.425  1.00  0.00           C  
ATOM   1602  CE  LYS L 103      12.139  24.942  -5.729  1.00  0.00           C  
ATOM   1603  NZ  LYS L 103      10.845  25.495  -5.237  1.00  0.00           N  
ATOM   1604  H   LYS L 103      13.379  19.233  -3.620  1.00  0.00           H  
ATOM   1605  HA  LYS L 103      13.016  20.885  -5.960  1.00  0.00           H  
ATOM   1606  HB2 LYS L 103      12.405  21.555  -3.608  1.00  0.00           H  
ATOM   1607  HB3 LYS L 103      14.115  21.627  -3.209  1.00  0.00           H  
ATOM   1608  HG2 LYS L 103      13.485  23.876  -3.731  1.00  0.00           H  
ATOM   1609  HG3 LYS L 103      14.358  23.295  -5.144  1.00  0.00           H  
ATOM   1610  HD2 LYS L 103      12.313  22.892  -6.349  1.00  0.00           H  
ATOM   1611  HD3 LYS L 103      11.340  23.125  -4.902  1.00  0.00           H  
ATOM   1612  HE2 LYS L 103      12.953  25.463  -5.244  1.00  0.00           H  
ATOM   1613  HE3 LYS L 103      12.207  25.100  -6.796  1.00  0.00           H  
ATOM   1614  HZ1 LYS L 103      10.097  25.302  -5.934  1.00  0.00           H  
ATOM   1615  HZ2 LYS L 103      10.597  25.046  -4.330  1.00  0.00           H  
ATOM   1616  N   LEU L 104      15.225  21.401  -6.847  1.00  0.00           N  
ATOM   1617  CA  LEU L 104      16.558  21.664  -7.454  1.00  0.00           C  
ATOM   1618  C   LEU L 104      16.487  22.973  -8.233  1.00  0.00           C  
ATOM   1619  O   LEU L 104      16.348  22.975  -9.439  1.00  0.00           O  
ATOM   1620  CB  LEU L 104      16.903  20.516  -8.419  1.00  0.00           C  
ATOM   1621  CG  LEU L 104      18.430  20.402  -8.543  1.00  0.00           C  
ATOM   1622  CD1 LEU L 104      18.820  18.925  -8.642  1.00  0.00           C  
ATOM   1623  CD2 LEU L 104      18.895  21.129  -9.810  1.00  0.00           C  
ATOM   1624  H   LEU L 104      14.413  21.557  -7.374  1.00  0.00           H  
ATOM   1625  HA  LEU L 104      17.300  21.757  -6.667  1.00  0.00           H  
ATOM   1626  HB2 LEU L 104      16.499  19.590  -8.039  1.00  0.00           H  
ATOM   1627  HB3 LEU L 104      16.474  20.716  -9.392  1.00  0.00           H  
ATOM   1628  HG  LEU L 104      18.900  20.846  -7.676  1.00  0.00           H  
ATOM   1629 HD11 LEU L 104      18.314  18.469  -9.480  1.00  0.00           H  
ATOM   1630 HD12 LEU L 104      19.888  18.837  -8.781  1.00  0.00           H  
ATOM   1631 HD13 LEU L 104      18.538  18.411  -7.735  1.00  0.00           H  
ATOM   1632 HD21 LEU L 104      18.588  22.163  -9.770  1.00  0.00           H  
ATOM   1633 HD22 LEU L 104      19.971  21.081  -9.884  1.00  0.00           H  
ATOM   1634 HD23 LEU L 104      18.458  20.662 -10.681  1.00  0.00           H  
ATOM   1635  N   GLU L 105      16.572  24.062  -7.520  1.00  0.00           N  
ATOM   1636  CA  GLU L 105      16.509  25.389  -8.193  1.00  0.00           C  
ATOM   1637  C   GLU L 105      17.827  26.152  -8.081  1.00  0.00           C  
ATOM   1638  O   GLU L 105      17.874  27.236  -7.535  1.00  0.00           O  
ATOM   1639  CB  GLU L 105      15.396  26.205  -7.517  1.00  0.00           C  
ATOM   1640  CG  GLU L 105      14.975  27.363  -8.434  1.00  0.00           C  
ATOM   1641  CD  GLU L 105      14.614  26.820  -9.821  1.00  0.00           C  
ATOM   1642  OE1 GLU L 105      13.711  26.000  -9.863  1.00  0.00           O  
ATOM   1643  OE2 GLU L 105      15.263  27.254 -10.759  1.00  0.00           O  
ATOM   1644  H   GLU L 105      16.683  24.006  -6.548  1.00  0.00           H  
ATOM   1645  HA  GLU L 105      16.285  25.237  -9.244  1.00  0.00           H  
ATOM   1646  HB2 GLU L 105      14.545  25.566  -7.328  1.00  0.00           H  
ATOM   1647  HB3 GLU L 105      15.756  26.598  -6.577  1.00  0.00           H  
ATOM   1648  HG2 GLU L 105      14.116  27.865  -8.016  1.00  0.00           H  
ATOM   1649  HG3 GLU L 105      15.787  28.068  -8.530  1.00  0.00           H  
ATOM   1650  N   ILE L 106      18.872  25.570  -8.605  1.00  0.00           N  
ATOM   1651  CA  ILE L 106      20.202  26.239  -8.548  1.00  0.00           C  
ATOM   1652  C   ILE L 106      20.660  26.479  -7.103  1.00  0.00           C  
ATOM   1653  O   ILE L 106      19.936  26.221  -6.161  1.00  0.00           O  
ATOM   1654  CB  ILE L 106      20.090  27.577  -9.308  1.00  0.00           C  
ATOM   1655  CG1 ILE L 106      21.199  27.666 -10.355  1.00  0.00           C  
ATOM   1656  CG2 ILE L 106      20.247  28.758  -8.333  1.00  0.00           C  
ATOM   1657  CD1 ILE L 106      20.849  28.760 -11.369  1.00  0.00           C  
ATOM   1658  H   ILE L 106      18.781  24.694  -9.033  1.00  0.00           H  
ATOM   1659  HA  ILE L 106      20.924  25.594  -9.029  1.00  0.00           H  
ATOM   1660  HB  ILE L 106      19.127  27.617  -9.812  1.00  0.00           H  
ATOM   1661 HG12 ILE L 106      22.136  27.904  -9.873  1.00  0.00           H  
ATOM   1662 HG13 ILE L 106      21.294  26.718 -10.864  1.00  0.00           H  
ATOM   1663 HG21 ILE L 106      19.710  28.556  -7.418  1.00  0.00           H  
ATOM   1664 HG22 ILE L 106      21.291  28.907  -8.107  1.00  0.00           H  
ATOM   1665 HG23 ILE L 106      19.851  29.655  -8.784  1.00  0.00           H  
ATOM   1666 HD11 ILE L 106      19.904  28.533 -11.841  1.00  0.00           H  
ATOM   1667 HD12 ILE L 106      20.774  29.714 -10.868  1.00  0.00           H  
ATOM   1668 HD13 ILE L 106      21.619  28.817 -12.125  1.00  0.00           H  
ATOM   1669  N   LYS L 107      21.864  26.965  -6.964  1.00  0.00           N  
ATOM   1670  CA  LYS L 107      22.405  27.235  -5.605  1.00  0.00           C  
ATOM   1671  C   LYS L 107      22.040  28.647  -5.140  1.00  0.00           C  
ATOM   1672  O   LYS L 107      21.982  29.568  -5.932  1.00  0.00           O  
ATOM   1673  CB  LYS L 107      23.935  27.113  -5.676  1.00  0.00           C  
ATOM   1674  CG  LYS L 107      24.550  27.496  -4.327  1.00  0.00           C  
ATOM   1675  CD  LYS L 107      26.077  27.480  -4.455  1.00  0.00           C  
ATOM   1676  CE  LYS L 107      26.707  27.574  -3.063  1.00  0.00           C  
ATOM   1677  NZ  LYS L 107      27.851  26.626  -2.949  1.00  0.00           N  
ATOM   1678  H   LYS L 107      22.411  27.151  -7.754  1.00  0.00           H  
ATOM   1679  HA  LYS L 107      21.991  26.515  -4.908  1.00  0.00           H  
ATOM   1680  HB2 LYS L 107      24.204  26.096  -5.917  1.00  0.00           H  
ATOM   1681  HB3 LYS L 107      24.315  27.768  -6.446  1.00  0.00           H  
ATOM   1682  HG2 LYS L 107      24.221  28.485  -4.043  1.00  0.00           H  
ATOM   1683  HG3 LYS L 107      24.240  26.788  -3.572  1.00  0.00           H  
ATOM   1684  HD2 LYS L 107      26.390  26.564  -4.934  1.00  0.00           H  
ATOM   1685  HD3 LYS L 107      26.398  28.319  -5.056  1.00  0.00           H  
ATOM   1686  HE2 LYS L 107      27.062  28.581  -2.894  1.00  0.00           H  
ATOM   1687  HE3 LYS L 107      25.969  27.330  -2.312  1.00  0.00           H  
ATOM   1688  HZ1 LYS L 107      27.721  25.844  -3.623  1.00  0.00           H  
ATOM   1689  HZ2 LYS L 107      28.740  27.123  -3.161  1.00  0.00           H  
ATOM   1690  N   ARG L 108      21.806  28.781  -3.861  1.00  0.00           N  
ATOM   1691  CA  ARG L 108      21.443  30.115  -3.306  1.00  0.00           C  
ATOM   1692  C   ARG L 108      22.493  30.578  -2.291  1.00  0.00           C  
ATOM   1693  O   ARG L 108      22.488  31.766  -2.010  1.00  0.00           O  
ATOM   1694  CB  ARG L 108      20.084  29.988  -2.596  1.00  0.00           C  
ATOM   1695  CG  ARG L 108      18.969  30.452  -3.543  1.00  0.00           C  
ATOM   1696  CD  ARG L 108      17.694  29.649  -3.256  1.00  0.00           C  
ATOM   1697  NE  ARG L 108      16.597  30.137  -4.145  1.00  0.00           N  
ATOM   1698  CZ  ARG L 108      16.257  29.437  -5.189  1.00  0.00           C  
ATOM   1699  NH1 ARG L 108      17.128  29.257  -6.133  1.00  0.00           N  
ATOM   1700  NH2 ARG L 108      15.059  28.942  -5.252  1.00  0.00           N  
ATOM   1701  OXT ARG L 108      23.244  29.718  -1.855  1.00  0.00           O  
ATOM   1702  H   ARG L 108      21.872  28.006  -3.267  1.00  0.00           H  
ATOM   1703  HA  ARG L 108      21.394  30.838  -4.114  1.00  0.00           H  
ATOM   1704  HB2 ARG L 108      19.918  28.959  -2.316  1.00  0.00           H  
ATOM   1705  HB3 ARG L 108      20.082  30.601  -1.706  1.00  0.00           H  
ATOM   1706  HG2 ARG L 108      18.778  31.504  -3.389  1.00  0.00           H  
ATOM   1707  HG3 ARG L 108      19.273  30.295  -4.567  1.00  0.00           H  
ATOM   1708  HD2 ARG L 108      17.872  28.600  -3.446  1.00  0.00           H  
ATOM   1709  HD3 ARG L 108      17.403  29.781  -2.223  1.00  0.00           H  
ATOM   1710  HE  ARG L 108      16.137  30.980  -3.946  1.00  0.00           H  
ATOM   1711 HH11 ARG L 108      18.041  29.654  -6.051  1.00  0.00           H  
ATOM   1712 HH12 ARG L 108      16.889  28.715  -6.938  1.00  0.00           H  
ATOM   1713 HH21 ARG L 108      14.414  29.100  -4.507  1.00  0.00           H  
ATOM   1714 HH22 ARG L 108      14.783  28.404  -6.048  1.00  0.00           H  
TER    1715      ARG L 108                                                      
