# Supplementary material for: SARS-CoV-2 Spike Protein Interaction Space
Source: Int J Mol Sci. 2023 Jul 27;24(15):12058. doi: 10.3390/ijms241512058 (PMC10418891; doi:10.3390/ijms241512058)
Supplement: Supplementary file 1 [file ijms-24-12058-s001.zip › Supplementary Material File S1/1MCC.pdb]

REMARK 950 NUMBERING  Kabat
REMARK 950 METHOD     X-ray crystal structure
REMARK 950 RESOLUTION 2.700
REMARK 950 R-FACTOR   0.199
REMARK 950 R-FREE     0.000
REMARK 950 CHAIN-TYPE LABEL ORIGINAL
REMARK 950 CHAIN L    L    A
REMARK 950 CHAIN L    L    B
REMARK 950 CHAIN A    P    P
REMARK 950 MOLECULE : A : IMMUNOGLOBULIN LAMBDA DIMER MCG (LIGHT CHAIN)
REMARK 950 SPECIES  : A : HOMO SAPIENS
REMARK 950 MOLECULE : P : PEPTIDE N-ACETYL-L-GLN-D-PHE-L-HIS-D-PRO-NH2
REMARK 950 SPECIES  : P : 
SEQRES   1 L 216  PRO SER ALA LEU THR GLN PRO PRO SER ALA SER GLY SER          
SEQRES   2 L 216  LEU GLY GLN SER VAL THR ILE SER CYS THR GLY THR SER          
SEQRES   3 L 216  SER ASP VAL GLY GLY TYR ASN TYR VAL SER TRP TYR GLN          
SEQRES   4 L 216  GLN HIS ALA GLY LYS ALA PRO LYS VAL ILE ILE TYR GLU          
SEQRES   5 L 216  VAL ASN LYS ARG PRO SER GLY VAL PRO ASP ARG PHE SER          
SEQRES   6 L 216  GLY SER LYS SER GLY ASN THR ALA SER LEU THR VAL SER          
SEQRES   7 L 216  GLY LEU GLN ALA GLU ASP GLU ALA ASP TYR TYR CYS SER          
SEQRES   8 L 216  SER TYR GLU GLY SER ASP ASN PHE VAL PHE GLY THR GLY          
SEQRES   9 L 216  THR LYS VAL THR VAL LEU GLY GLN PRO LYS ALA ASN PRO          
SEQRES  10 L 216  THR VAL THR LEU PHE PRO PRO SER SER GLU GLU LEU GLN          
SEQRES  11 L 216  ALA ASN LYS ALA THR LEU VAL CYS LEU ILE SER ASP PHE          
SEQRES  12 L 216  TYR PRO GLY ALA VAL THR VAL ALA TRP LYS ALA ASP GLY          
SEQRES  13 L 216  SER PRO VAL LYS ALA GLY VAL GLU THR THR LYS PRO SER          
SEQRES  14 L 216  LYS GLN SER ASN ASN LYS TYR ALA ALA SER SER TYR LEU          
SEQRES  15 L 216  SER LEU THR PRO GLU GLN TRP LYS SER HIS ARG SER TYR          
SEQRES  16 L 216  SER CYS GLN VAL THR HIS GLU GLY SER THR VAL GLU LYS          
SEQRES  17 L 216  THR VAL ALA PRO THR GLU CYS SER                              
SEQRES   1 L 216  PRO SER ALA LEU THR GLN PRO PRO SER ALA SER GLY SER          
SEQRES   2 L 216  LEU GLY GLN SER VAL THR ILE SER CYS THR GLY THR SER          
SEQRES   3 L 216  SER ASP VAL GLY GLY TYR ASN TYR VAL SER TRP TYR GLN          
SEQRES   4 L 216  GLN HIS ALA GLY LYS ALA PRO LYS VAL ILE ILE TYR GLU          
SEQRES   5 L 216  VAL ASN LYS ARG PRO SER GLY VAL PRO ASP ARG PHE SER          
SEQRES   6 L 216  GLY SER LYS SER GLY ASN THR ALA SER LEU THR VAL SER          
SEQRES   7 L 216  GLY LEU GLN ALA GLU ASP GLU ALA ASP TYR TYR CYS SER          
SEQRES   8 L 216  SER TYR GLU GLY SER ASP ASN PHE VAL PHE GLY THR GLY          
SEQRES   9 L 216  THR LYS VAL THR VAL LEU GLY GLN PRO LYS ALA ASN PRO          
SEQRES  10 L 216  THR VAL THR LEU PHE PRO PRO SER SER GLU GLU LEU GLN          
SEQRES  11 L 216  ALA ASN LYS ALA THR LEU VAL CYS LEU ILE SER ASP PHE          
SEQRES  12 L 216  TYR PRO GLY ALA VAL THR VAL ALA TRP LYS ALA ASP GLY          
SEQRES  13 L 216  SER PRO VAL LYS ALA GLY VAL GLU THR THR LYS PRO SER          
SEQRES  14 L 216  LYS GLN SER ASN ASN LYS TYR ALA ALA SER SER TYR LEU          
SEQRES  15 L 216  SER LEU THR PRO GLU GLN TRP LYS SER HIS ARG SER TYR          
SEQRES  16 L 216  SER CYS GLN VAL THR HIS GLU GLY SER THR VAL GLU LYS          
SEQRES  17 L 216  THR VAL ALA PRO THR GLU CYS SER                              
SEQRES   1 P    6  ACE GLN DPN HIS DPR NH2                                      
ATOM      1  N   PRO L   1      42.837 -15.469  75.944  1.00  0.00           N  
ATOM      2  CA  PRO L   1      41.750 -15.626  76.909  1.00  0.00           C  
ATOM      3  C   PRO L   1      41.114 -14.279  77.234  1.00  0.00           C  
ATOM      4  O   PRO L   1      41.403 -13.258  76.576  1.00  0.00           O  
ATOM      5  CB  PRO L   1      42.492 -16.203  78.126  1.00  0.00           C  
ATOM      6  CG  PRO L   1      43.790 -15.399  78.113  1.00  0.00           C  
ATOM      7  CD  PRO L   1      44.131 -15.265  76.632  1.00  0.00           C  
ATOM      8  N   SER L   2      40.252 -14.308  78.249  1.00  0.00           N  
ATOM      9  CA  SER L   2      39.640 -13.102  78.810  1.00  0.00           C  
ATOM     10  C   SER L   2      38.678 -13.422  79.954  1.00  0.00           C  
ATOM     11  O   SER L   2      38.121 -14.526  80.058  1.00  0.00           O  
ATOM     12  CB  SER L   2      38.959 -12.269  77.725  1.00  0.00           C  
ATOM     13  OG  SER L   2      39.776 -11.163  77.355  1.00  0.00           O  
ATOM     14  N   ALA L   3      38.491 -12.403  80.792  1.00  0.00           N  
ATOM     15  CA  ALA L   3      37.696 -12.503  82.019  1.00  0.00           C  
ATOM     16  C   ALA L   3      36.702 -11.348  82.147  1.00  0.00           C  
ATOM     17  O   ALA L   3      37.076 -10.201  82.432  1.00  0.00           O  
ATOM     18  CB  ALA L   3      38.643 -12.543  83.213  1.00  0.00           C  
ATOM     19  N   LEU L   4      35.441 -11.694  81.991  1.00  0.00           N  
ATOM     20  CA  LEU L   4      34.297 -10.810  81.865  1.00  0.00           C  
ATOM     21  C   LEU L   4      34.500  -9.412  82.452  1.00  0.00           C  
ATOM     22  O   LEU L   4      35.045  -9.287  83.573  1.00  0.00           O  
ATOM     23  CB  LEU L   4      33.101 -11.498  82.556  1.00  0.00           C  
ATOM     24  CG  LEU L   4      32.315 -12.623  81.967  1.00  0.00           C  
ATOM     25  CD1 LEU L   4      33.067 -13.469  80.954  1.00  0.00           C  
ATOM     26  CD2 LEU L   4      31.876 -13.565  83.125  1.00  0.00           C  
ATOM     27  N   THR L   5      33.954  -8.409  81.750  1.00  0.00           N  
ATOM     28  CA  THR L   5      34.047  -7.045  82.320  1.00  0.00           C  
ATOM     29  C   THR L   5      32.910  -6.788  83.300  1.00  0.00           C  
ATOM     30  O   THR L   5      31.756  -7.204  83.157  1.00  0.00           O  
ATOM     31  CB  THR L   5      34.245  -5.913  81.279  1.00  0.00           C  
ATOM     32  OG1 THR L   5      35.638  -6.067  80.814  1.00  0.00           O  
ATOM     33  CG2 THR L   5      34.007  -4.483  81.813  1.00  0.00           C  
ATOM     34  N   GLN L   6      33.317  -6.111  84.354  1.00  0.00           N  
ATOM     35  CA  GLN L   6      32.477  -5.550  85.410  1.00  0.00           C  
ATOM     36  C   GLN L   6      33.006  -4.118  85.659  1.00  0.00           C  
ATOM     37  O   GLN L   6      34.221  -3.881  85.507  1.00  0.00           O  
ATOM     38  CB  GLN L   6      32.528  -6.357  86.696  1.00  0.00           C  
ATOM     39  CG  GLN L   6      31.417  -7.357  86.873  1.00  0.00           C  
ATOM     40  CD  GLN L   6      31.771  -8.426  87.882  1.00  0.00           C  
ATOM     41  OE1 GLN L   6      31.123  -8.595  88.907  1.00  0.00           O  
ATOM     42  NE2 GLN L   6      32.822  -9.172  87.555  1.00  0.00           N  
ATOM     43  N   PRO L   7      32.089  -3.240  85.995  1.00  0.00           N  
ATOM     44  CA  PRO L   7      32.446  -1.879  86.440  1.00  0.00           C  
ATOM     45  C   PRO L   7      32.904  -1.902  87.886  1.00  0.00           C  
ATOM     46  O   PRO L   7      32.064  -2.019  88.799  1.00  0.00           O  
ATOM     47  CB  PRO L   7      31.124  -1.143  86.250  1.00  0.00           C  
ATOM     48  CG  PRO L   7      30.059  -2.163  86.542  1.00  0.00           C  
ATOM     49  CD  PRO L   7      30.656  -3.512  86.206  1.00  0.00           C  
ATOM     50  N   PRO L   8      34.197  -1.756  88.131  1.00  0.00           N  
ATOM     51  CA  PRO L   8      34.834  -1.796  89.425  1.00  0.00           C  
ATOM     52  C   PRO L   8      34.207  -1.176  90.641  1.00  0.00           C  
ATOM     53  O   PRO L   8      34.787  -1.360  91.766  1.00  0.00           O  
ATOM     54  CB  PRO L   8      36.219  -1.120  89.199  1.00  0.00           C  
ATOM     55  CG  PRO L   8      36.108  -0.456  87.864  1.00  0.00           C  
ATOM     56  CD  PRO L   8      35.198  -1.411  87.068  1.00  0.00           C  
ATOM     57  N   SER L   9      33.056  -0.549  90.557  1.00  0.00           N  
ATOM     58  CA  SER L   9      32.465   0.172  91.699  1.00  0.00           C  
ATOM     59  C   SER L   9      31.106   0.743  91.344  1.00  0.00           C  
ATOM     60  O   SER L   9      30.965   1.413  90.305  1.00  0.00           O  
ATOM     61  CB  SER L   9      33.436   1.252  92.171  1.00  0.00           C  
ATOM     62  OG  SER L   9      34.416   1.552  91.191  1.00  0.00           O  
ATOM     63  N   ALA L  11      30.125   0.508  92.205  1.00  0.00           N  
ATOM     64  CA  ALA L  11      28.727   0.831  91.916  1.00  0.00           C  
ATOM     65  C   ALA L  11      27.996   1.277  93.181  1.00  0.00           C  
ATOM     66  O   ALA L  11      27.569   0.486  94.032  1.00  0.00           O  
ATOM     67  CB  ALA L  11      28.000  -0.333  91.271  1.00  0.00           C  
ATOM     68  N   SER L  12      27.866   2.589  93.236  1.00  0.00           N  
ATOM     69  CA  SER L  12      27.243   3.296  94.352  1.00  0.00           C  
ATOM     70  C   SER L  12      25.735   3.377  94.091  1.00  0.00           C  
ATOM     71  O   SER L  12      25.260   3.078  92.985  1.00  0.00           O  
ATOM     72  CB  SER L  12      27.845   4.685  94.504  1.00  0.00           C  
ATOM     73  OG  SER L  12      27.989   5.312  93.229  1.00  0.00           O  
ATOM     74  N   GLY L  13      25.054   3.729  95.158  1.00  0.00           N  
ATOM     75  CA  GLY L  13      23.597   4.029  95.119  1.00  0.00           C  
ATOM     76  C   GLY L  13      23.272   4.647  96.499  1.00  0.00           C  
ATOM     77  O   GLY L  13      24.036   4.397  97.454  1.00  0.00           O  
ATOM     78  N   SER L  14      22.225   5.434  96.553  1.00  0.00           N  
ATOM     79  CA  SER L  14      21.770   5.962  97.854  1.00  0.00           C  
ATOM     80  C   SER L  14      21.026   4.848  98.588  1.00  0.00           C  
ATOM     81  O   SER L  14      20.639   3.808  98.019  1.00  0.00           O  
ATOM     82  CB  SER L  14      20.924   7.202  97.705  1.00  0.00           C  
ATOM     83  OG  SER L  14      21.583   8.212  96.958  1.00  0.00           O  
ATOM     84  N   LEU L  15      20.818   5.126  99.867  1.00  0.00           N  
ATOM     85  CA  LEU L  15      20.066   4.206 100.743  1.00  0.00           C  
ATOM     86  C   LEU L  15      18.667   4.019 100.142  1.00  0.00           C  
ATOM     87  O   LEU L  15      18.098   4.971  99.572  1.00  0.00           O  
ATOM     88  CB  LEU L  15      20.096   4.788 102.152  1.00  0.00           C  
ATOM     89  CG  LEU L  15      20.353   3.868 103.331  1.00  0.00           C  
ATOM     90  CD1 LEU L  15      19.677   2.510 103.145  1.00  0.00           C  
ATOM     91  CD2 LEU L  15      21.861   3.657 103.504  1.00  0.00           C  
ATOM     92  N   GLY L  16      18.156   2.803 100.265  1.00  0.00           N  
ATOM     93  CA  GLY L  16      16.801   2.461  99.839  1.00  0.00           C  
ATOM     94  C   GLY L  16      16.658   2.496  98.326  1.00  0.00           C  
ATOM     95  O   GLY L  16      15.632   2.021  97.802  1.00  0.00           O  
ATOM     96  N   GLN L  17      17.699   3.010  97.677  1.00  0.00           N  
ATOM     97  CA  GLN L  17      17.585   3.235  96.188  1.00  0.00           C  
ATOM     98  C   GLN L  17      17.928   1.908  95.508  1.00  0.00           C  
ATOM     99  O   GLN L  17      17.512   0.807  95.962  1.00  0.00           O  
ATOM    100  CB  GLN L  17      18.502   4.378  95.848  1.00  0.00           C  
ATOM    101  CG  GLN L  17      18.396   5.185  94.601  1.00  0.00           C  
ATOM    102  CD  GLN L  17      19.773   5.626  94.108  1.00  0.00           C  
ATOM    103  OE1 GLN L  17      20.754   4.909  94.341  1.00  0.00           O  
ATOM    104  NE2 GLN L  17      19.874   6.774  93.459  1.00  0.00           N  
ATOM    105  N   SER L  18      18.784   2.032  94.493  1.00  0.00           N  
ATOM    106  CA  SER L  18      19.046   0.972  93.530  1.00  0.00           C  
ATOM    107  C   SER L  18      20.313   1.199  92.703  1.00  0.00           C  
ATOM    108  O   SER L  18      20.687   2.315  92.324  1.00  0.00           O  
ATOM    109  CB  SER L  18      17.873   0.910  92.522  1.00  0.00           C  
ATOM    110  OG  SER L  18      17.806   2.184  91.868  1.00  0.00           O  
ATOM    111  N   VAL L  19      20.907   0.066  92.370  1.00  0.00           N  
ATOM    112  CA  VAL L  19      22.071  -0.027  91.478  1.00  0.00           C  
ATOM    113  C   VAL L  19      21.909  -1.314  90.654  1.00  0.00           C  
ATOM    114  O   VAL L  19      21.149  -2.209  91.054  1.00  0.00           O  
ATOM    115  CB  VAL L  19      23.384   0.028  92.268  1.00  0.00           C  
ATOM    116  CG1 VAL L  19      23.588  -1.222  93.128  1.00  0.00           C  
ATOM    117  CG2 VAL L  19      24.577   0.289  91.359  1.00  0.00           C  
ATOM    118  N   THR L  20      22.586  -1.331  89.535  1.00  0.00           N  
ATOM    119  CA  THR L  20      22.574  -2.492  88.611  1.00  0.00           C  
ATOM    120  C   THR L  20      24.003  -2.635  88.124  1.00  0.00           C  
ATOM    121  O   THR L  20      24.616  -1.604  87.793  1.00  0.00           O  
ATOM    122  CB  THR L  20      21.497  -2.305  87.503  1.00  0.00           C  
ATOM    123  OG1 THR L  20      20.198  -2.290  88.208  1.00  0.00           O  
ATOM    124  CG2 THR L  20      21.491  -3.359  86.390  1.00  0.00           C  
ATOM    125  N   ILE L  21      24.549  -3.826  88.215  1.00  0.00           N  
ATOM    126  CA  ILE L  21      25.947  -4.068  87.823  1.00  0.00           C  
ATOM    127  C   ILE L  21      25.858  -4.901  86.536  1.00  0.00           C  
ATOM    128  O   ILE L  21      24.972  -5.770  86.451  1.00  0.00           O  
ATOM    129  CB  ILE L  21      26.810  -4.769  88.909  1.00  0.00           C  
ATOM    130  CG1 ILE L  21      26.821  -4.004  90.254  1.00  0.00           C  
ATOM    131  CG2 ILE L  21      28.281  -5.018  88.440  1.00  0.00           C  
ATOM    132  CD1 ILE L  21      25.928  -4.673  91.346  1.00  0.00           C  
ATOM    133  N   SER L  22      26.779  -4.623  85.637  1.00  0.00           N  
ATOM    134  CA  SER L  22      26.803  -5.308  84.345  1.00  0.00           C  
ATOM    135  C   SER L  22      27.976  -6.253  84.164  1.00  0.00           C  
ATOM    136  O   SER L  22      29.129  -5.821  83.984  1.00  0.00           O  
ATOM    137  CB  SER L  22      26.756  -4.253  83.233  1.00  0.00           C  
ATOM    138  OG  SER L  22      25.604  -3.436  83.456  1.00  0.00           O  
ATOM    139  N   CYS L  23      27.644  -7.539  84.179  1.00  0.00           N  
ATOM    140  CA  CYS L  23      28.602  -8.613  83.830  1.00  0.00           C  
ATOM    141  C   CYS L  23      28.565  -8.708  82.298  1.00  0.00           C  
ATOM    142  O   CYS L  23      27.533  -9.187  81.790  1.00  0.00           O  
ATOM    143  CB  CYS L  23      28.174  -9.940  84.432  1.00  0.00           C  
ATOM    144  SG  CYS L  23      29.342 -11.309  84.293  1.00  0.00           S  
ATOM    145  N   THR L  24      29.629  -8.266  81.644  1.00  0.00           N  
ATOM    146  CA  THR L  24      29.589  -8.231  80.171  1.00  0.00           C  
ATOM    147  C   THR L  24      30.635  -9.121  79.534  1.00  0.00           C  
ATOM    148  O   THR L  24      31.852  -8.966  79.727  1.00  0.00           O  
ATOM    149  CB  THR L  24      29.591  -6.774  79.610  1.00  0.00           C  
ATOM    150  OG1 THR L  24      28.437  -6.117  80.242  1.00  0.00           O  
ATOM    151  CG2 THR L  24      29.504  -6.711  78.078  1.00  0.00           C  
ATOM    152  N   GLY L  25      30.080 -10.036  78.716  1.00  0.00           N  
ATOM    153  CA  GLY L  25      30.804 -11.144  78.141  1.00  0.00           C  
ATOM    154  C   GLY L  25      31.131 -11.166  76.669  1.00  0.00           C  
ATOM    155  O   GLY L  25      31.585 -10.178  76.068  1.00  0.00           O  
ATOM    156  N   THR L  26      30.950 -12.356  76.100  1.00  0.00           N  
ATOM    157  CA  THR L  26      31.320 -12.682  74.717  1.00  0.00           C  
ATOM    158  C   THR L  26      30.438 -13.833  74.237  1.00  0.00           C  
ATOM    159  O   THR L  26      30.207 -14.771  75.013  1.00  0.00           O  
ATOM    160  CB  THR L  26      32.851 -13.078  74.611  1.00  0.00           C  
ATOM    161  OG1 THR L  26      33.471 -12.202  73.622  1.00  0.00           O  
ATOM    162  CG2 THR L  26      33.102 -14.553  74.260  1.00  0.00           C  
ATOM    163  N   SER L  27      30.004 -13.779  73.007  1.00  0.00           N  
ATOM    164  CA  SER L  27      29.287 -14.841  72.306  1.00  0.00           C  
ATOM    165  C   SER L  27      29.606 -16.268  72.720  1.00  0.00           C  
ATOM    166  O   SER L  27      28.656 -17.080  72.893  1.00  0.00           O  
ATOM    167  CB  SER L  27      29.496 -14.694  70.776  1.00  0.00           C  
ATOM    168  OG  SER L  27      28.551 -13.786  70.227  1.00  0.00           O  
ATOM    169  N   SER L  27A     30.873 -16.610  72.864  1.00  0.00           N  
ATOM    170  CA  SER L  27A     31.351 -17.920  73.293  1.00  0.00           C  
ATOM    171  C   SER L  27A     31.084 -18.325  74.730  1.00  0.00           C  
ATOM    172  O   SER L  27A     31.211 -19.537  75.057  1.00  0.00           O  
ATOM    173  CB  SER L  27A     32.866 -18.051  72.995  1.00  0.00           C  
ATOM    174  OG  SER L  27A     33.100 -18.460  71.642  1.00  0.00           O  
ATOM    175  N   ASP L  27B     30.756 -17.397  75.596  1.00  0.00           N  
ATOM    176  CA  ASP L  27B     30.429 -17.629  77.017  1.00  0.00           C  
ATOM    177  C   ASP L  27B     29.020 -17.070  77.292  1.00  0.00           C  
ATOM    178  O   ASP L  27B     28.023 -17.786  77.098  1.00  0.00           O  
ATOM    179  CB  ASP L  27B     31.505 -17.110  77.972  1.00  0.00           C  
ATOM    180  CG  ASP L  27B     32.212 -15.834  77.587  1.00  0.00           C  
ATOM    181  OD1 ASP L  27B     31.569 -14.764  77.675  1.00  0.00           O  
ATOM    182  OD2 ASP L  27B     33.404 -15.841  77.206  1.00  0.00           O  
ATOM    183  N   VAL L  27C     28.977 -15.822  77.721  1.00  0.00           N  
ATOM    184  CA  VAL L  27C     27.731 -15.062  77.866  1.00  0.00           C  
ATOM    185  C   VAL L  27C     27.052 -14.917  76.494  1.00  0.00           C  
ATOM    186  O   VAL L  27C     27.692 -14.504  75.507  1.00  0.00           O  
ATOM    187  CB  VAL L  27C     27.980 -13.677  78.506  1.00  0.00           C  
ATOM    188  CG1 VAL L  27C     26.679 -13.099  79.078  1.00  0.00           C  
ATOM    189  CG2 VAL L  27C     29.071 -13.670  79.547  1.00  0.00           C  
ATOM    190  N   GLY L  28      25.763 -15.240  76.479  1.00  0.00           N  
ATOM    191  CA  GLY L  28      24.989 -15.147  75.208  1.00  0.00           C  
ATOM    192  C   GLY L  28      25.176 -16.435  74.405  1.00  0.00           C  
ATOM    193  O   GLY L  28      24.386 -16.732  73.492  1.00  0.00           O  
ATOM    194  N   GLY L  29      26.223 -17.161  74.756  1.00  0.00           N  
ATOM    195  CA  GLY L  29      26.411 -18.536  74.273  1.00  0.00           C  
ATOM    196  C   GLY L  29      25.408 -19.464  74.964  1.00  0.00           C  
ATOM    197  O   GLY L  29      24.800 -20.335  74.327  1.00  0.00           O  
ATOM    198  N   TYR L  30      25.279 -19.264  76.262  1.00  0.00           N  
ATOM    199  CA  TYR L  30      24.438 -20.086  77.143  1.00  0.00           C  
ATOM    200  C   TYR L  30      23.785 -19.209  78.216  1.00  0.00           C  
ATOM    201  O   TYR L  30      24.282 -18.105  78.498  1.00  0.00           O  
ATOM    202  CB  TYR L  30      25.265 -21.210  77.803  1.00  0.00           C  
ATOM    203  CG  TYR L  30      26.500 -21.657  77.067  1.00  0.00           C  
ATOM    204  CD1 TYR L  30      27.571 -20.786  76.853  1.00  0.00           C  
ATOM    205  CD2 TYR L  30      26.627 -22.969  76.606  1.00  0.00           C  
ATOM    206  CE1 TYR L  30      28.706 -21.183  76.161  1.00  0.00           C  
ATOM    207  CE2 TYR L  30      27.767 -23.394  75.925  1.00  0.00           C  
ATOM    208  CZ  TYR L  30      28.807 -22.498  75.702  1.00  0.00           C  
ATOM    209  OH  TYR L  30      29.925 -22.927  75.031  1.00  0.00           O  
ATOM    210  N   ASN L  31      22.730 -19.697  78.812  1.00  0.00           N  
ATOM    211  CA  ASN L  31      21.991 -19.025  79.892  1.00  0.00           C  
ATOM    212  C   ASN L  31      22.493 -19.439  81.283  1.00  0.00           C  
ATOM    213  O   ASN L  31      21.639 -19.917  82.079  1.00  0.00           O  
ATOM    214  CB  ASN L  31      20.506 -19.376  79.757  1.00  0.00           C  
ATOM    215  CG  ASN L  31      19.554 -18.471  79.069  1.00  0.00           C  
ATOM    216  OD1 ASN L  31      19.474 -18.387  77.827  1.00  0.00           O  
ATOM    217  ND2 ASN L  31      18.686 -17.780  79.838  1.00  0.00           N  
ATOM    218  N   TYR L  32      23.755 -19.251  81.597  1.00  0.00           N  
ATOM    219  CA  TYR L  32      24.328 -19.743  82.865  1.00  0.00           C  
ATOM    220  C   TYR L  32      25.317 -18.753  83.493  1.00  0.00           C  
ATOM    221  O   TYR L  32      26.562 -18.942  83.525  1.00  0.00           O  
ATOM    222  CB  TYR L  32      24.975 -21.095  82.690  1.00  0.00           C  
ATOM    223  CG  TYR L  32      24.127 -22.327  82.796  1.00  0.00           C  
ATOM    224  CD1 TYR L  32      23.507 -22.671  83.993  1.00  0.00           C  
ATOM    225  CD2 TYR L  32      23.975 -23.198  81.705  1.00  0.00           C  
ATOM    226  CE1 TYR L  32      22.761 -23.838  84.116  1.00  0.00           C  
ATOM    227  CE2 TYR L  32      23.227 -24.365  81.813  1.00  0.00           C  
ATOM    228  CZ  TYR L  32      22.624 -24.683  83.021  1.00  0.00           C  
ATOM    229  OH  TYR L  32      21.867 -25.811  83.177  1.00  0.00           O  
ATOM    230  N   VAL L  33      24.710 -17.703  84.004  1.00  0.00           N  
ATOM    231  CA  VAL L  33      25.347 -16.606  84.709  1.00  0.00           C  
ATOM    232  C   VAL L  33      24.796 -16.638  86.165  1.00  0.00           C  
ATOM    233  O   VAL L  33      23.584 -16.571  86.390  1.00  0.00           O  
ATOM    234  CB  VAL L  33      25.107 -15.243  84.045  1.00  0.00           C  
ATOM    235  CG1 VAL L  33      26.406 -14.484  83.781  1.00  0.00           C  
ATOM    236  CG2 VAL L  33      24.274 -15.328  82.778  1.00  0.00           C  
ATOM    237  N   SER L  34      25.764 -16.806  87.037  1.00  0.00           N  
ATOM    238  CA  SER L  34      25.571 -16.713  88.488  1.00  0.00           C  
ATOM    239  C   SER L  34      26.192 -15.412  89.013  1.00  0.00           C  
ATOM    240  O   SER L  34      27.126 -14.869  88.388  1.00  0.00           O  
ATOM    241  CB  SER L  34      26.198 -17.913  89.191  1.00  0.00           C  
ATOM    242  OG  SER L  34      25.387 -19.069  89.089  1.00  0.00           O  
ATOM    243  N   TRP L  35      25.664 -14.975  90.152  1.00  0.00           N  
ATOM    244  CA  TRP L  35      26.189 -13.751  90.810  1.00  0.00           C  
ATOM    245  C   TRP L  35      26.555 -14.028  92.273  1.00  0.00           C  
ATOM    246  O   TRP L  35      25.823 -14.720  92.976  1.00  0.00           O  
ATOM    247  CB  TRP L  35      25.213 -12.591  90.747  1.00  0.00           C  
ATOM    248  CG  TRP L  35      25.094 -11.857  89.464  1.00  0.00           C  
ATOM    249  CD1 TRP L  35      24.068 -11.967  88.563  1.00  0.00           C  
ATOM    250  CD2 TRP L  35      25.992 -10.875  88.944  1.00  0.00           C  
ATOM    251  NE1 TRP L  35      24.274 -11.111  87.514  1.00  0.00           N  
ATOM    252  CE2 TRP L  35      25.446 -10.435  87.722  1.00  0.00           C  
ATOM    253  CE3 TRP L  35      27.181 -10.330  89.397  1.00  0.00           C  
ATOM    254  CZ2 TRP L  35      26.063  -9.476  86.934  1.00  0.00           C  
ATOM    255  CZ3 TRP L  35      27.804  -9.373  88.617  1.00  0.00           C  
ATOM    256  CH2 TRP L  35      27.259  -8.954  87.412  1.00  0.00           C  
ATOM    257  N   TYR L  36      27.639 -13.400  92.705  1.00  0.00           N  
ATOM    258  CA  TYR L  36      28.278 -13.664  93.980  1.00  0.00           C  
ATOM    259  C   TYR L  36      28.429 -12.413  94.844  1.00  0.00           C  
ATOM    260  O   TYR L  36      28.872 -11.358  94.363  1.00  0.00           O  
ATOM    261  CB  TYR L  36      29.677 -14.284  93.787  1.00  0.00           C  
ATOM    262  CG  TYR L  36      29.659 -15.541  92.948  1.00  0.00           C  
ATOM    263  CD1 TYR L  36      29.721 -15.459  91.558  1.00  0.00           C  
ATOM    264  CD2 TYR L  36      29.576 -16.795  93.539  1.00  0.00           C  
ATOM    265  CE1 TYR L  36      29.707 -16.601  90.769  1.00  0.00           C  
ATOM    266  CE2 TYR L  36      29.562 -17.949  92.762  1.00  0.00           C  
ATOM    267  CZ  TYR L  36      29.630 -17.846  91.374  1.00  0.00           C  
ATOM    268  OH  TYR L  36      29.616 -18.955  90.582  1.00  0.00           O  
ATOM    269  N   GLN L  37      28.099 -12.654  96.101  1.00  0.00           N  
ATOM    270  CA  GLN L  37      28.185 -11.561  97.133  1.00  0.00           C  
ATOM    271  C   GLN L  37      29.354 -12.020  98.018  1.00  0.00           C  
ATOM    272  O   GLN L  37      29.268 -13.071  98.679  1.00  0.00           O  
ATOM    273  CB  GLN L  37      26.893 -11.391  97.852  1.00  0.00           C  
ATOM    274  CG  GLN L  37      26.503 -10.101  98.512  1.00  0.00           C  
ATOM    275  CD  GLN L  37      25.498 -10.307  99.637  1.00  0.00           C  
ATOM    276  OE1 GLN L  37      25.536  -9.691 100.698  1.00  0.00           O  
ATOM    277  NE2 GLN L  37      24.569 -11.242  99.416  1.00  0.00           N  
ATOM    278  N   GLN L  38      30.441 -11.287  97.901  1.00  0.00           N  
ATOM    279  CA  GLN L  38      31.670 -11.553  98.666  1.00  0.00           C  
ATOM    280  C   GLN L  38      31.930 -10.381  99.620  1.00  0.00           C  
ATOM    281  O   GLN L  38      32.573  -9.372  99.302  1.00  0.00           O  
ATOM    282  CB  GLN L  38      32.844 -11.790  97.746  1.00  0.00           C  
ATOM    283  CG  GLN L  38      34.096 -12.253  98.471  1.00  0.00           C  
ATOM    284  CD  GLN L  38      35.221 -12.442  97.464  1.00  0.00           C  
ATOM    285  OE1 GLN L  38      35.696 -11.458  96.904  1.00  0.00           O  
ATOM    286  NE2 GLN L  38      35.585 -13.696  97.242  1.00  0.00           N  
ATOM    287  N   HIS L  39      31.402 -10.575 100.821  1.00  0.00           N  
ATOM    288  CA  HIS L  39      31.365  -9.609 101.910  1.00  0.00           C  
ATOM    289  C   HIS L  39      32.714  -9.257 102.518  1.00  0.00           C  
ATOM    290  O   HIS L  39      33.352  -9.972 103.319  1.00  0.00           O  
ATOM    291  CB  HIS L  39      30.396 -10.066 103.022  1.00  0.00           C  
ATOM    292  CG  HIS L  39      29.060  -9.400 102.862  1.00  0.00           C  
ATOM    293  ND1 HIS L  39      28.914  -8.046 102.753  1.00  0.00           N  
ATOM    294  CD2 HIS L  39      27.820  -9.938 102.836  1.00  0.00           C  
ATOM    295  CE1 HIS L  39      27.621  -7.781 102.667  1.00  0.00           C  
ATOM    296  NE2 HIS L  39      26.938  -8.895 102.713  1.00  0.00           N  
ATOM    297  N   ALA L  40      33.177  -8.121 102.014  1.00  0.00           N  
ATOM    298  CA  ALA L  40      34.400  -7.459 102.444  1.00  0.00           C  
ATOM    299  C   ALA L  40      35.483  -8.484 102.760  1.00  0.00           C  
ATOM    300  O   ALA L  40      36.153  -8.409 103.792  1.00  0.00           O  
ATOM    301  CB  ALA L  40      34.104  -6.541 103.619  1.00  0.00           C  
ATOM    302  N   GLY L  41      35.637  -9.396 101.810  1.00  0.00           N  
ATOM    303  CA  GLY L  41      36.603 -10.513 101.987  1.00  0.00           C  
ATOM    304  C   GLY L  41      35.955 -11.487 103.002  1.00  0.00           C  
ATOM    305  O   GLY L  41      36.046 -11.341 104.219  1.00  0.00           O  
ATOM    306  N   LYS L  42      35.243 -12.411 102.390  1.00  0.00           N  
ATOM    307  CA  LYS L  42      34.504 -13.481 103.043  1.00  0.00           C  
ATOM    308  C   LYS L  42      34.091 -14.617 102.106  1.00  0.00           C  
ATOM    309  O   LYS L  42      33.974 -14.490 100.869  1.00  0.00           O  
ATOM    310  CB  LYS L  42      33.207 -12.866 103.634  1.00  0.00           C  
ATOM    311  CG  LYS L  42      32.773 -13.424 104.976  1.00  0.00           C  
ATOM    312  CD  LYS L  42      31.691 -14.488 104.799  1.00  0.00           C  
ATOM    313  CE  LYS L  42      30.808 -14.601 106.019  1.00  0.00           C  
ATOM    314  NZ  LYS L  42      29.942 -13.413 106.192  1.00  0.00           N  
ATOM    315  N   ALA L  43      33.824 -15.753 102.747  1.00  0.00           N  
ATOM    316  CA  ALA L  43      33.137 -16.908 102.128  1.00  0.00           C  
ATOM    317  C   ALA L  43      31.934 -16.380 101.342  1.00  0.00           C  
ATOM    318  O   ALA L  43      30.924 -15.963 101.938  1.00  0.00           O  
ATOM    319  CB  ALA L  43      32.692 -17.859 103.236  1.00  0.00           C  
ATOM    320  N   PRO L  44      32.091 -16.387 100.031  1.00  0.00           N  
ATOM    321  CA  PRO L  44      31.141 -15.756  99.111  1.00  0.00           C  
ATOM    322  C   PRO L  44      29.898 -16.600  98.945  1.00  0.00           C  
ATOM    323  O   PRO L  44      29.999 -17.835  99.075  1.00  0.00           O  
ATOM    324  CB  PRO L  44      31.931 -15.693  97.798  1.00  0.00           C  
ATOM    325  CG  PRO L  44      32.750 -16.966  97.826  1.00  0.00           C  
ATOM    326  CD  PRO L  44      33.068 -17.228  99.293  1.00  0.00           C  
ATOM    327  N   LYS L  45      28.791 -15.941  98.635  1.00  0.00           N  
ATOM    328  CA  LYS L  45      27.573 -16.727  98.311  1.00  0.00           C  
ATOM    329  C   LYS L  45      27.085 -16.497  96.897  1.00  0.00           C  
ATOM    330  O   LYS L  45      27.583 -15.623  96.153  1.00  0.00           O  
ATOM    331  CB  LYS L  45      26.504 -16.544  99.364  1.00  0.00           C  
ATOM    332  CG  LYS L  45      26.302 -17.813 100.211  1.00  0.00           C  
ATOM    333  CD  LYS L  45      27.612 -18.490 100.581  1.00  0.00           C  
ATOM    334  CE  LYS L  45      27.415 -19.799 101.323  1.00  0.00           C  
ATOM    335  NZ  LYS L  45      27.386 -20.944 100.395  1.00  0.00           N  
ATOM    336  N   VAL L  46      26.139 -17.346  96.512  1.00  0.00           N  
ATOM    337  CA  VAL L  46      25.439 -17.263  95.224  1.00  0.00           C  
ATOM    338  C   VAL L  46      24.143 -16.467  95.463  1.00  0.00           C  
ATOM    339  O   VAL L  46      23.436 -16.658  96.449  1.00  0.00           O  
ATOM    340  CB  VAL L  46      25.220 -18.648  94.603  1.00  0.00           C  
ATOM    341  CG1 VAL L  46      23.880 -18.774  93.868  1.00  0.00           C  
ATOM    342  CG2 VAL L  46      26.354 -19.043  93.651  1.00  0.00           C  
ATOM    343  N   ILE L  47      23.864 -15.608  94.534  1.00  0.00           N  
ATOM    344  CA  ILE L  47      22.807 -14.608  94.564  1.00  0.00           C  
ATOM    345  C   ILE L  47      21.830 -14.823  93.415  1.00  0.00           C  
ATOM    346  O   ILE L  47      20.628 -14.528  93.521  1.00  0.00           O  
ATOM    347  CB  ILE L  47      23.511 -13.191  94.565  1.00  0.00           C  
ATOM    348  CG1 ILE L  47      23.440 -12.572  95.976  1.00  0.00           C  
ATOM    349  CG2 ILE L  47      22.968 -12.243  93.471  1.00  0.00           C  
ATOM    350  CD1 ILE L  47      24.027 -13.401  97.138  1.00  0.00           C  
ATOM    351  N   ILE L  48      22.357 -15.333  92.311  1.00  0.00           N  
ATOM    352  CA  ILE L  48      21.574 -15.774  91.141  1.00  0.00           C  
ATOM    353  C   ILE L  48      22.335 -16.945  90.509  1.00  0.00           C  
ATOM    354  O   ILE L  48      23.574 -16.956  90.680  1.00  0.00           O  
ATOM    355  CB  ILE L  48      21.327 -14.617  90.124  1.00  0.00           C  
ATOM    356  CG1 ILE L  48      19.803 -14.509  89.845  1.00  0.00           C  
ATOM    357  CG2 ILE L  48      22.112 -14.752  88.806  1.00  0.00           C  
ATOM    358  CD1 ILE L  48      19.055 -13.686  90.931  1.00  0.00           C  
ATOM    359  N   TYR L  49      21.597 -17.815  89.819  1.00  0.00           N  
ATOM    360  CA  TYR L  49      22.289 -18.947  89.169  1.00  0.00           C  
ATOM    361  C   TYR L  49      22.174 -19.014  87.644  1.00  0.00           C  
ATOM    362  O   TYR L  49      23.084 -19.559  86.975  1.00  0.00           O  
ATOM    363  CB  TYR L  49      21.892 -20.291  89.663  1.00  0.00           C  
ATOM    364  CG  TYR L  49      20.581 -20.810  90.109  1.00  0.00           C  
ATOM    365  CD1 TYR L  49      19.687 -20.067  90.875  1.00  0.00           C  
ATOM    366  CD2 TYR L  49      20.255 -22.177  89.885  1.00  0.00           C  
ATOM    367  CE1 TYR L  49      18.510 -20.612  91.383  1.00  0.00           C  
ATOM    368  CE2 TYR L  49      19.091 -22.742  90.388  1.00  0.00           C  
ATOM    369  CZ  TYR L  49      18.226 -21.950  91.141  1.00  0.00           C  
ATOM    370  OH  TYR L  49      17.074 -22.469  91.669  1.00  0.00           O  
ATOM    371  N   GLU L  50      21.013 -18.674  87.174  1.00  0.00           N  
ATOM    372  CA  GLU L  50      20.656 -18.783  85.750  1.00  0.00           C  
ATOM    373  C   GLU L  50      19.950 -17.472  85.419  1.00  0.00           C  
ATOM    374  O   GLU L  50      18.739 -17.319  85.644  1.00  0.00           O  
ATOM    375  CB  GLU L  50      19.763 -19.956  85.423  1.00  0.00           C  
ATOM    376  CG  GLU L  50      20.441 -21.331  85.233  1.00  0.00           C  
ATOM    377  CD  GLU L  50      19.585 -22.488  85.663  1.00  0.00           C  
ATOM    378  OE1 GLU L  50      18.405 -22.583  85.389  1.00  0.00           O  
ATOM    379  OE2 GLU L  50      20.198 -23.332  86.343  1.00  0.00           O  
ATOM    380  N   VAL L  51      20.847 -16.524  85.088  1.00  0.00           N  
ATOM    381  CA  VAL L  51      20.311 -15.239  84.547  1.00  0.00           C  
ATOM    382  C   VAL L  51      19.523 -14.494  85.607  1.00  0.00           C  
ATOM    383  O   VAL L  51      19.986 -13.424  86.036  1.00  0.00           O  
ATOM    384  CB  VAL L  51      19.510 -15.567  83.255  1.00  0.00           C  
ATOM    385  CG1 VAL L  51      18.498 -14.502  82.884  1.00  0.00           C  
ATOM    386  CG2 VAL L  51      20.437 -15.858  82.086  1.00  0.00           C  
ATOM    387  N   ASN L  52      18.375 -15.014  86.010  1.00  0.00           N  
ATOM    388  CA  ASN L  52      17.494 -14.327  86.960  1.00  0.00           C  
ATOM    389  C   ASN L  52      16.892 -15.287  87.972  1.00  0.00           C  
ATOM    390  O   ASN L  52      15.743 -14.992  88.403  1.00  0.00           O  
ATOM    391  CB  ASN L  52      16.406 -13.525  86.206  1.00  0.00           C  
ATOM    392  CG  ASN L  52      15.701 -12.466  87.031  1.00  0.00           C  
ATOM    393  OD1 ASN L  52      15.881 -12.335  88.258  1.00  0.00           O  
ATOM    394  ND2 ASN L  52      14.878 -11.634  86.380  1.00  0.00           N  
ATOM    395  N   LYS L  53      17.593 -16.365  88.321  1.00  0.00           N  
ATOM    396  CA  LYS L  53      16.995 -17.203  89.418  1.00  0.00           C  
ATOM    397  C   LYS L  53      17.673 -17.058  90.755  1.00  0.00           C  
ATOM    398  O   LYS L  53      18.860 -17.375  91.004  1.00  0.00           O  
ATOM    399  CB  LYS L  53      16.711 -18.620  88.975  1.00  0.00           C  
ATOM    400  CG  LYS L  53      15.354 -18.674  88.215  1.00  0.00           C  
ATOM    401  CD  LYS L  53      14.872 -20.070  87.944  1.00  0.00           C  
ATOM    402  CE  LYS L  53      15.840 -20.891  87.116  1.00  0.00           C  
ATOM    403  NZ  LYS L  53      15.143 -21.989  86.412  1.00  0.00           N  
ATOM    404  N   ARG L  54      16.875 -16.506  91.675  1.00  0.00           N  
ATOM    405  CA  ARG L  54      17.243 -16.189  93.054  1.00  0.00           C  
ATOM    406  C   ARG L  54      17.335 -17.483  93.874  1.00  0.00           C  
ATOM    407  O   ARG L  54      16.308 -18.145  94.116  1.00  0.00           O  
ATOM    408  CB  ARG L  54      16.214 -15.263  93.701  1.00  0.00           C  
ATOM    409  CG  ARG L  54      16.375 -13.779  93.461  1.00  0.00           C  
ATOM    410  CD  ARG L  54      15.325 -12.974  94.151  1.00  0.00           C  
ATOM    411  NE  ARG L  54      14.818 -13.565  95.389  1.00  0.00           N  
ATOM    412  CZ  ARG L  54      13.552 -13.958  95.562  1.00  0.00           C  
ATOM    413  NH1 ARG L  54      12.636 -13.786  94.605  1.00  0.00           N  
ATOM    414  NH2 ARG L  54      13.184 -14.581  96.688  1.00  0.00           N  
ATOM    415  N   PRO L  55      18.555 -17.820  94.255  1.00  0.00           N  
ATOM    416  CA  PRO L  55      18.857 -19.006  95.038  1.00  0.00           C  
ATOM    417  C   PRO L  55      18.100 -19.096  96.350  1.00  0.00           C  
ATOM    418  O   PRO L  55      17.787 -18.114  97.047  1.00  0.00           O  
ATOM    419  CB  PRO L  55      20.368 -18.987  95.248  1.00  0.00           C  
ATOM    420  CG  PRO L  55      20.820 -17.628  94.783  1.00  0.00           C  
ATOM    421  CD  PRO L  55      19.806 -17.226  93.718  1.00  0.00           C  
ATOM    422  N   SER L  56      17.863 -20.361  96.705  1.00  0.00           N  
ATOM    423  CA  SER L  56      16.950 -20.771  97.767  1.00  0.00           C  
ATOM    424  C   SER L  56      17.257 -20.086  99.085  1.00  0.00           C  
ATOM    425  O   SER L  56      17.839 -20.710 100.001  1.00  0.00           O  
ATOM    426  CB  SER L  56      16.948 -22.293  97.932  1.00  0.00           C  
ATOM    427  OG  SER L  56      15.694 -22.810  97.503  1.00  0.00           O  
ATOM    428  N   GLY L  57      16.819 -18.842  99.140  1.00  0.00           N  
ATOM    429  CA  GLY L  57      17.064 -17.995 100.328  1.00  0.00           C  
ATOM    430  C   GLY L  57      18.092 -16.919  99.938  1.00  0.00           C  
ATOM    431  O   GLY L  57      19.276 -16.983 100.291  1.00  0.00           O  
ATOM    432  N   VAL L  58      17.574 -16.002  99.135  1.00  0.00           N  
ATOM    433  CA  VAL L  58      18.314 -14.764  98.839  1.00  0.00           C  
ATOM    434  C   VAL L  58      17.454 -13.560  99.246  1.00  0.00           C  
ATOM    435  O   VAL L  58      16.262 -13.431  98.945  1.00  0.00           O  
ATOM    436  CB  VAL L  58      18.849 -14.747  97.402  1.00  0.00           C  
ATOM    437  CG1 VAL L  58      19.209 -13.372  96.865  1.00  0.00           C  
ATOM    438  CG2 VAL L  58      20.111 -15.605  97.296  1.00  0.00           C  
ATOM    439  N   PRO L  59      18.101 -12.697 100.016  1.00  0.00           N  
ATOM    440  CA  PRO L  59      17.782 -11.255 100.016  1.00  0.00           C  
ATOM    441  C   PRO L  59      16.885 -10.851  98.856  1.00  0.00           C  
ATOM    442  O   PRO L  59      17.148 -10.537  97.666  1.00  0.00           O  
ATOM    443  CB  PRO L  59      19.149 -10.638 100.076  1.00  0.00           C  
ATOM    444  CG  PRO L  59      20.102 -11.665 100.620  1.00  0.00           C  
ATOM    445  CD  PRO L  59      19.311 -12.945 100.828  1.00  0.00           C  
ATOM    446  N   ASP L  60      15.625 -10.870  99.267  1.00  0.00           N  
ATOM    447  CA  ASP L  60      14.424 -10.396  98.653  1.00  0.00           C  
ATOM    448  C   ASP L  60      14.460 -10.127  97.159  1.00  0.00           C  
ATOM    449  O   ASP L  60      13.766 -10.849  96.404  1.00  0.00           O  
ATOM    450  CB  ASP L  60      13.916  -9.158  99.471  1.00  0.00           C  
ATOM    451  CG  ASP L  60      13.617  -9.452 100.927  1.00  0.00           C  
ATOM    452  OD1 ASP L  60      13.754 -10.575 101.434  1.00  0.00           O  
ATOM    453  OD2 ASP L  60      13.209  -8.494 101.641  1.00  0.00           O  
ATOM    454  N   ARG L  61      15.180  -9.100  96.737  1.00  0.00           N  
ATOM    455  CA  ARG L  61      15.075  -8.611  95.357  1.00  0.00           C  
ATOM    456  C   ARG L  61      16.428  -8.348  94.696  1.00  0.00           C  
ATOM    457  O   ARG L  61      16.758  -7.222  94.274  1.00  0.00           O  
ATOM    458  CB  ARG L  61      14.162  -7.397  95.220  1.00  0.00           C  
ATOM    459  CG  ARG L  61      13.671  -7.180  93.768  1.00  0.00           C  
ATOM    460  CD  ARG L  61      13.434  -5.715  93.526  1.00  0.00           C  
ATOM    461  NE  ARG L  61      12.494  -5.178  94.517  1.00  0.00           N  
ATOM    462  CZ  ARG L  61      11.607  -4.225  94.203  1.00  0.00           C  
ATOM    463  NH1 ARG L  61      11.586  -3.659  92.998  1.00  0.00           N  
ATOM    464  NH2 ARG L  61      10.684  -3.893  95.103  1.00  0.00           N  
ATOM    465  N   PHE L  62      17.195  -9.440  94.686  1.00  0.00           N  
ATOM    466  CA  PHE L  62      18.374  -9.443  93.725  1.00  0.00           C  
ATOM    467  C   PHE L  62      17.708  -9.852  92.409  1.00  0.00           C  
ATOM    468  O   PHE L  62      17.009 -10.885  92.357  1.00  0.00           O  
ATOM    469  CB  PHE L  62      19.484 -10.290  94.257  1.00  0.00           C  
ATOM    470  CG  PHE L  62      20.260  -9.698  95.404  1.00  0.00           C  
ATOM    471  CD1 PHE L  62      19.781  -9.777  96.701  1.00  0.00           C  
ATOM    472  CD2 PHE L  62      21.466  -9.033  95.149  1.00  0.00           C  
ATOM    473  CE1 PHE L  62      20.505  -9.204  97.754  1.00  0.00           C  
ATOM    474  CE2 PHE L  62      22.196  -8.463  96.175  1.00  0.00           C  
ATOM    475  CZ  PHE L  62      21.713  -8.552  97.484  1.00  0.00           C  
ATOM    476  N   SER L  63      17.840  -8.973  91.437  1.00  0.00           N  
ATOM    477  CA  SER L  63      17.169  -9.179  90.128  1.00  0.00           C  
ATOM    478  C   SER L  63      18.247  -9.416  89.089  1.00  0.00           C  
ATOM    479  O   SER L  63      19.169  -8.603  88.975  1.00  0.00           O  
ATOM    480  CB  SER L  63      16.290  -7.998  89.784  1.00  0.00           C  
ATOM    481  OG  SER L  63      15.511  -7.609  90.914  1.00  0.00           O  
ATOM    482  N   GLY L  64      18.127 -10.522  88.381  1.00  0.00           N  
ATOM    483  CA  GLY L  64      19.078 -10.895  87.334  1.00  0.00           C  
ATOM    484  C   GLY L  64      18.512 -10.654  85.932  1.00  0.00           C  
ATOM    485  O   GLY L  64      17.352 -10.897  85.581  1.00  0.00           O  
ATOM    486  N   SER L  65      19.424 -10.187  85.096  1.00  0.00           N  
ATOM    487  CA  SER L  65      19.180  -9.775  83.731  1.00  0.00           C  
ATOM    488  C   SER L  65      20.320 -10.297  82.843  1.00  0.00           C  
ATOM    489  O   SER L  65      21.468 -10.471  83.253  1.00  0.00           O  
ATOM    490  CB  SER L  65      19.077  -8.266  83.579  1.00  0.00           C  
ATOM    491  OG  SER L  65      19.133  -7.889  82.209  1.00  0.00           O  
ATOM    492  N   LYS L  66      19.894 -10.571  81.642  1.00  0.00           N  
ATOM    493  CA  LYS L  66      20.731 -10.914  80.500  1.00  0.00           C  
ATOM    494  C   LYS L  66      20.059 -10.132  79.335  1.00  0.00           C  
ATOM    495  O   LYS L  66      18.888 -10.279  79.011  1.00  0.00           O  
ATOM    496  CB  LYS L  66      20.879 -12.354  80.154  1.00  0.00           C  
ATOM    497  CG  LYS L  66      22.108 -12.590  79.245  1.00  0.00           C  
ATOM    498  CD  LYS L  66      22.200 -14.045  78.861  1.00  0.00           C  
ATOM    499  CE  LYS L  66      20.883 -14.647  78.392  1.00  0.00           C  
ATOM    500  NZ  LYS L  66      21.091 -16.104  78.143  1.00  0.00           N  
ATOM    501  N   SER L  67      20.843  -9.200  78.922  1.00  0.00           N  
ATOM    502  CA  SER L  67      20.582  -8.204  77.903  1.00  0.00           C  
ATOM    503  C   SER L  67      21.605  -8.436  76.775  1.00  0.00           C  
ATOM    504  O   SER L  67      22.621  -7.725  76.689  1.00  0.00           O  
ATOM    505  CB  SER L  67      20.756  -6.812  78.524  1.00  0.00           C  
ATOM    506  OG  SER L  67      21.049  -6.914  79.924  1.00  0.00           O  
ATOM    507  N   GLY L  68      21.332  -9.480  76.003  1.00  0.00           N  
ATOM    508  CA  GLY L  68      22.242  -9.957  74.970  1.00  0.00           C  
ATOM    509  C   GLY L  68      23.471 -10.664  75.527  1.00  0.00           C  
ATOM    510  O   GLY L  68      23.411 -11.833  75.962  1.00  0.00           O  
ATOM    511  N   ASN L  69      24.597  -9.979  75.461  1.00  0.00           N  
ATOM    512  CA  ASN L  69      25.881 -10.461  75.968  1.00  0.00           C  
ATOM    513  C   ASN L  69      26.258  -9.701  77.247  1.00  0.00           C  
ATOM    514  O   ASN L  69      27.304  -9.997  77.866  1.00  0.00           O  
ATOM    515  CB  ASN L  69      26.994 -10.329  74.925  1.00  0.00           C  
ATOM    516  CG  ASN L  69      27.353 -11.650  74.271  1.00  0.00           C  
ATOM    517  OD1 ASN L  69      28.419 -11.754  73.624  1.00  0.00           O  
ATOM    518  ND2 ASN L  69      26.469 -12.640  74.410  1.00  0.00           N  
ATOM    519  N   THR L  70      25.453  -8.688  77.518  1.00  0.00           N  
ATOM    520  CA  THR L  70      25.562  -7.944  78.783  1.00  0.00           C  
ATOM    521  C   THR L  70      24.555  -8.594  79.734  1.00  0.00           C  
ATOM    522  O   THR L  70      23.388  -8.730  79.374  1.00  0.00           O  
ATOM    523  CB  THR L  70      25.306  -6.412  78.638  1.00  0.00           C  
ATOM    524  OG1 THR L  70      26.632  -5.788  78.656  1.00  0.00           O  
ATOM    525  CG2 THR L  70      24.382  -5.796  79.714  1.00  0.00           C  
ATOM    526  N   ALA L  71      25.055  -9.019  80.852  1.00  0.00           N  
ATOM    527  CA  ALA L  71      24.219  -9.465  81.982  1.00  0.00           C  
ATOM    528  C   ALA L  71      24.187  -8.306  82.982  1.00  0.00           C  
ATOM    529  O   ALA L  71      25.112  -7.468  82.975  1.00  0.00           O  
ATOM    530  CB  ALA L  71      24.770 -10.748  82.571  1.00  0.00           C  
ATOM    531  N   SER L  72      23.137  -8.279  83.783  1.00  0.00           N  
ATOM    532  CA  SER L  72      22.956  -7.215  84.785  1.00  0.00           C  
ATOM    533  C   SER L  72      22.299  -7.731  86.053  1.00  0.00           C  
ATOM    534  O   SER L  72      21.333  -8.517  85.986  1.00  0.00           O  
ATOM    535  CB  SER L  72      22.156  -6.072  84.146  1.00  0.00           C  
ATOM    536  OG  SER L  72      23.038  -5.212  83.430  1.00  0.00           O  
ATOM    537  N   LEU L  73      22.806  -7.306  87.204  1.00  0.00           N  
ATOM    538  CA  LEU L  73      22.187  -7.593  88.501  1.00  0.00           C  
ATOM    539  C   LEU L  73      21.706  -6.276  89.130  1.00  0.00           C  
ATOM    540  O   LEU L  73      22.482  -5.330  89.336  1.00  0.00           O  
ATOM    541  CB  LEU L  73      23.149  -8.376  89.399  1.00  0.00           C  
ATOM    542  CG  LEU L  73      22.721  -8.497  90.873  1.00  0.00           C  
ATOM    543  CD1 LEU L  73      21.912  -9.767  91.108  1.00  0.00           C  
ATOM    544  CD2 LEU L  73      23.961  -8.457  91.747  1.00  0.00           C  
ATOM    545  N   THR L  74      20.430  -6.261  89.440  1.00  0.00           N  
ATOM    546  CA  THR L  74      19.728  -5.070  89.922  1.00  0.00           C  
ATOM    547  C   THR L  74      19.419  -5.320  91.405  1.00  0.00           C  
ATOM    548  O   THR L  74      18.721  -6.271  91.768  1.00  0.00           O  
ATOM    549  CB  THR L  74      18.464  -4.684  89.076  1.00  0.00           C  
ATOM    550  OG1 THR L  74      18.886  -4.635  87.670  1.00  0.00           O  
ATOM    551  CG2 THR L  74      17.809  -3.346  89.444  1.00  0.00           C  
ATOM    552  N   VAL L  75      20.066  -4.483  92.197  1.00  0.00           N  
ATOM    553  CA  VAL L  75      19.845  -4.421  93.636  1.00  0.00           C  
ATOM    554  C   VAL L  75      19.050  -3.131  93.920  1.00  0.00           C  
ATOM    555  O   VAL L  75      19.448  -2.011  93.573  1.00  0.00           O  
ATOM    556  CB  VAL L  75      21.150  -4.525  94.430  1.00  0.00           C  
ATOM    557  CG1 VAL L  75      20.914  -5.124  95.824  1.00  0.00           C  
ATOM    558  CG2 VAL L  75      22.229  -5.311  93.710  1.00  0.00           C  
ATOM    559  N   SER L  76      17.911  -3.368  94.532  1.00  0.00           N  
ATOM    560  CA  SER L  76      16.964  -2.312  94.891  1.00  0.00           C  
ATOM    561  C   SER L  76      16.387  -2.618  96.272  1.00  0.00           C  
ATOM    562  O   SER L  76      16.207  -3.788  96.644  1.00  0.00           O  
ATOM    563  CB  SER L  76      15.853  -2.213  93.853  1.00  0.00           C  
ATOM    564  OG  SER L  76      15.340  -3.496  93.515  1.00  0.00           O  
ATOM    565  N   GLY L  77      16.078  -1.517  96.934  1.00  0.00           N  
ATOM    566  CA  GLY L  77      15.558  -1.637  98.349  1.00  0.00           C  
ATOM    567  C   GLY L  77      16.868  -1.556  99.183  1.00  0.00           C  
ATOM    568  O   GLY L  77      17.029  -2.176 100.228  1.00  0.00           O  
ATOM    569  N   LEU L  78      17.739  -0.753  98.555  1.00  0.00           N  
ATOM    570  CA  LEU L  78      19.114  -0.637  99.066  1.00  0.00           C  
ATOM    571  C   LEU L  78      19.165  -0.622 100.585  1.00  0.00           C  
ATOM    572  O   LEU L  78      18.570   0.222 101.262  1.00  0.00           O  
ATOM    573  CB  LEU L  78      19.718   0.575  98.349  1.00  0.00           C  
ATOM    574  CG  LEU L  78      21.087   0.409  97.709  1.00  0.00           C  
ATOM    575  CD1 LEU L  78      21.377  -1.048  97.343  1.00  0.00           C  
ATOM    576  CD2 LEU L  78      21.147   1.293  96.469  1.00  0.00           C  
ATOM    577  N   GLN L  79      19.897  -1.602 101.098  1.00  0.00           N  
ATOM    578  CA  GLN L  79      20.310  -1.758 102.492  1.00  0.00           C  
ATOM    579  C   GLN L  79      21.840  -1.582 102.615  1.00  0.00           C  
ATOM    580  O   GLN L  79      22.621  -1.848 101.682  1.00  0.00           O  
ATOM    581  CB  GLN L  79      19.979  -3.119 103.065  1.00  0.00           C  
ATOM    582  CG  GLN L  79      18.634  -3.396 103.662  1.00  0.00           C  
ATOM    583  CD  GLN L  79      18.647  -4.716 104.435  1.00  0.00           C  
ATOM    584  OE1 GLN L  79      18.452  -4.790 105.649  1.00  0.00           O  
ATOM    585  NE2 GLN L  79      18.983  -5.786 103.699  1.00  0.00           N  
ATOM    586  N   ALA L  80      22.259  -1.260 103.821  1.00  0.00           N  
ATOM    587  CA  ALA L  80      23.678  -1.029 104.145  1.00  0.00           C  
ATOM    588  C   ALA L  80      24.488  -2.300 103.900  1.00  0.00           C  
ATOM    589  O   ALA L  80      25.651  -2.309 103.427  1.00  0.00           O  
ATOM    590  CB  ALA L  80      23.782  -0.557 105.591  1.00  0.00           C  
ATOM    591  N   GLU L  81      23.824  -3.408 104.180  1.00  0.00           N  
ATOM    592  CA  GLU L  81      24.447  -4.730 104.147  1.00  0.00           C  
ATOM    593  C   GLU L  81      24.800  -5.156 102.732  1.00  0.00           C  
ATOM    594  O   GLU L  81      25.454  -6.210 102.581  1.00  0.00           O  
ATOM    595  CB  GLU L  81      23.567  -5.785 104.801  1.00  0.00           C  
ATOM    596  CG  GLU L  81      22.052  -5.612 104.725  1.00  0.00           C  
ATOM    597  CD  GLU L  81      21.365  -5.318 106.032  1.00  0.00           C  
ATOM    598  OE1 GLU L  81      20.979  -6.198 106.807  1.00  0.00           O  
ATOM    599  OE2 GLU L  81      21.201  -4.087 106.231  1.00  0.00           O  
ATOM    600  N   ASP L  82      24.382  -4.349 101.736  1.00  0.00           N  
ATOM    601  CA  ASP L  82      24.720  -4.746 100.345  1.00  0.00           C  
ATOM    602  C   ASP L  82      26.157  -4.369 100.025  1.00  0.00           C  
ATOM    603  O   ASP L  82      26.561  -4.651  98.873  1.00  0.00           O  
ATOM    604  CB  ASP L  82      23.724  -4.210  99.328  1.00  0.00           C  
ATOM    605  CG  ASP L  82      22.333  -4.780  99.512  1.00  0.00           C  
ATOM    606  OD1 ASP L  82      22.179  -5.925  99.958  1.00  0.00           O  
ATOM    607  OD2 ASP L  82      21.378  -4.038  99.230  1.00  0.00           O  
ATOM    608  N   GLU L  83      26.850  -3.721 100.968  1.00  0.00           N  
ATOM    609  CA  GLU L  83      28.297  -3.443 100.633  1.00  0.00           C  
ATOM    610  C   GLU L  83      29.010  -4.771 100.470  1.00  0.00           C  
ATOM    611  O   GLU L  83      29.011  -5.591 101.416  1.00  0.00           O  
ATOM    612  CB  GLU L  83      28.946  -2.555 101.669  1.00  0.00           C  
ATOM    613  CG  GLU L  83      28.613  -1.063 101.635  1.00  0.00           C  
ATOM    614  CD  GLU L  83      29.528  -0.072 102.269  1.00  0.00           C  
ATOM    615  OE1 GLU L  83      30.592  -0.528 102.736  1.00  0.00           O  
ATOM    616  OE2 GLU L  83      29.262   1.127 102.340  1.00  0.00           O  
ATOM    617  N   ALA L  84      29.584  -5.032  99.293  1.00  0.00           N  
ATOM    618  CA  ALA L  84      30.354  -6.265  99.072  1.00  0.00           C  
ATOM    619  C   ALA L  84      31.258  -6.194  97.852  1.00  0.00           C  
ATOM    620  O   ALA L  84      31.678  -5.134  97.382  1.00  0.00           O  
ATOM    621  CB  ALA L  84      29.397  -7.470  98.981  1.00  0.00           C  
ATOM    622  N   ASP L  85      31.649  -7.389  97.412  1.00  0.00           N  
ATOM    623  CA  ASP L  85      32.342  -7.590  96.127  1.00  0.00           C  
ATOM    624  C   ASP L  85      31.311  -8.421  95.322  1.00  0.00           C  
ATOM    625  O   ASP L  85      30.866  -9.457  95.837  1.00  0.00           O  
ATOM    626  CB  ASP L  85      33.676  -8.276  96.227  1.00  0.00           C  
ATOM    627  CG  ASP L  85      34.733  -7.465  96.960  1.00  0.00           C  
ATOM    628  OD1 ASP L  85      35.080  -6.395  96.404  1.00  0.00           O  
ATOM    629  OD2 ASP L  85      35.178  -7.894  98.046  1.00  0.00           O  
ATOM    630  N   TYR L  86      30.956  -7.848  94.196  1.00  0.00           N  
ATOM    631  CA  TYR L  86      29.981  -8.563  93.331  1.00  0.00           C  
ATOM    632  C   TYR L  86      30.758  -9.086  92.130  1.00  0.00           C  
ATOM    633  O   TYR L  86      31.448  -8.318  91.442  1.00  0.00           O  
ATOM    634  CB  TYR L  86      28.792  -7.712  93.013  1.00  0.00           C  
ATOM    635  CG  TYR L  86      27.927  -7.418  94.225  1.00  0.00           C  
ATOM    636  CD1 TYR L  86      28.194  -6.313  95.041  1.00  0.00           C  
ATOM    637  CD2 TYR L  86      26.867  -8.251  94.551  1.00  0.00           C  
ATOM    638  CE1 TYR L  86      27.393  -6.032  96.144  1.00  0.00           C  
ATOM    639  CE2 TYR L  86      26.058  -7.977  95.646  1.00  0.00           C  
ATOM    640  CZ  TYR L  86      26.324  -6.861  96.436  1.00  0.00           C  
ATOM    641  OH  TYR L  86      25.496  -6.626  97.503  1.00  0.00           O  
ATOM    642  N   TYR L  87      30.645 -10.416  92.039  1.00  0.00           N  
ATOM    643  CA  TYR L  87      31.277 -11.106  90.892  1.00  0.00           C  
ATOM    644  C   TYR L  87      30.202 -11.894  90.139  1.00  0.00           C  
ATOM    645  O   TYR L  87      29.170 -12.275  90.714  1.00  0.00           O  
ATOM    646  CB  TYR L  87      32.404 -12.027  91.312  1.00  0.00           C  
ATOM    647  CG  TYR L  87      33.469 -11.441  92.199  1.00  0.00           C  
ATOM    648  CD1 TYR L  87      34.349 -10.468  91.736  1.00  0.00           C  
ATOM    649  CD2 TYR L  87      33.608 -11.886  93.517  1.00  0.00           C  
ATOM    650  CE1 TYR L  87      35.346  -9.944  92.556  1.00  0.00           C  
ATOM    651  CE2 TYR L  87      34.592 -11.369  94.348  1.00  0.00           C  
ATOM    652  CZ  TYR L  87      35.459 -10.393  93.868  1.00  0.00           C  
ATOM    653  OH  TYR L  87      36.434  -9.861  94.666  1.00  0.00           O  
ATOM    654  N   CYS L  88      30.485 -12.108  88.862  1.00  0.00           N  
ATOM    655  CA  CYS L  88      29.665 -12.985  88.037  1.00  0.00           C  
ATOM    656  C   CYS L  88      30.529 -14.107  87.434  1.00  0.00           C  
ATOM    657  O   CYS L  88      31.781 -14.039  87.366  1.00  0.00           O  
ATOM    658  CB  CYS L  88      28.970 -12.228  86.886  1.00  0.00           C  
ATOM    659  SG  CYS L  88      29.985 -10.934  86.187  1.00  0.00           S  
ATOM    660  N   SER L  89      29.734 -15.072  86.958  1.00  0.00           N  
ATOM    661  CA  SER L  89      30.364 -16.179  86.209  1.00  0.00           C  
ATOM    662  C   SER L  89      29.392 -16.768  85.198  1.00  0.00           C  
ATOM    663  O   SER L  89      28.204 -17.028  85.456  1.00  0.00           O  
ATOM    664  CB  SER L  89      30.973 -17.185  87.148  1.00  0.00           C  
ATOM    665  OG  SER L  89      31.977 -17.964  86.512  1.00  0.00           O  
ATOM    666  N   SER L  90      29.977 -16.923  84.008  1.00  0.00           N  
ATOM    667  CA  SER L  90      29.253 -17.477  82.852  1.00  0.00           C  
ATOM    668  C   SER L  90      30.019 -18.728  82.400  1.00  0.00           C  
ATOM    669  O   SER L  90      31.263 -18.765  82.493  1.00  0.00           O  
ATOM    670  CB  SER L  90      29.089 -16.499  81.722  1.00  0.00           C  
ATOM    671  OG  SER L  90      30.309 -15.981  81.249  1.00  0.00           O  
ATOM    672  N   TYR L  91      29.195 -19.702  82.021  1.00  0.00           N  
ATOM    673  CA  TYR L  91      29.845 -20.912  81.402  1.00  0.00           C  
ATOM    674  C   TYR L  91      30.400 -20.441  80.047  1.00  0.00           C  
ATOM    675  O   TYR L  91      29.700 -19.743  79.311  1.00  0.00           O  
ATOM    676  CB  TYR L  91      28.917 -22.033  81.227  1.00  0.00           C  
ATOM    677  CG  TYR L  91      29.364 -23.425  80.915  1.00  0.00           C  
ATOM    678  CD1 TYR L  91      29.853 -24.265  81.922  1.00  0.00           C  
ATOM    679  CD2 TYR L  91      29.173 -23.972  79.645  1.00  0.00           C  
ATOM    680  CE1 TYR L  91      30.178 -25.595  81.662  1.00  0.00           C  
ATOM    681  CE2 TYR L  91      29.496 -25.293  79.366  1.00  0.00           C  
ATOM    682  CZ  TYR L  91      29.994 -26.101  80.379  1.00  0.00           C  
ATOM    683  OH  TYR L  91      30.275 -27.410  80.093  1.00  0.00           O  
ATOM    684  N   GLU L  92      31.644 -20.847  79.851  1.00  0.00           N  
ATOM    685  CA  GLU L  92      32.230 -20.688  78.467  1.00  0.00           C  
ATOM    686  C   GLU L  92      32.108 -22.084  77.892  1.00  0.00           C  
ATOM    687  O   GLU L  92      31.010 -22.671  78.093  1.00  0.00           O  
ATOM    688  CB  GLU L  92      33.635 -20.190  78.543  1.00  0.00           C  
ATOM    689  CG  GLU L  92      34.520 -20.696  79.671  1.00  0.00           C  
ATOM    690  CD  GLU L  92      35.868 -20.060  79.790  1.00  0.00           C  
ATOM    691  OE1 GLU L  92      35.938 -18.974  79.182  1.00  0.00           O  
ATOM    692  OE2 GLU L  92      36.789 -20.563  80.417  1.00  0.00           O  
ATOM    693  N   GLY L  93      33.134 -22.682  77.364  1.00  0.00           N  
ATOM    694  CA  GLY L  93      33.019 -23.955  76.673  1.00  0.00           C  
ATOM    695  C   GLY L  93      33.127 -25.183  77.557  1.00  0.00           C  
ATOM    696  O   GLY L  93      32.594 -25.364  78.656  1.00  0.00           O  
ATOM    697  N   SER L  94      33.881 -26.097  76.976  1.00  0.00           N  
ATOM    698  CA  SER L  94      34.180 -27.444  77.446  1.00  0.00           C  
ATOM    699  C   SER L  94      34.297 -27.479  78.959  1.00  0.00           C  
ATOM    700  O   SER L  94      35.293 -27.118  79.588  1.00  0.00           O  
ATOM    701  CB  SER L  94      35.436 -27.939  76.712  1.00  0.00           C  
ATOM    702  OG  SER L  94      35.425 -27.412  75.377  1.00  0.00           O  
ATOM    703  N   ASP L  95      33.183 -27.874  79.541  1.00  0.00           N  
ATOM    704  CA  ASP L  95      32.889 -28.049  80.937  1.00  0.00           C  
ATOM    705  C   ASP L  95      33.139 -26.893  81.876  1.00  0.00           C  
ATOM    706  O   ASP L  95      32.844 -27.128  83.090  1.00  0.00           O  
ATOM    707  CB  ASP L  95      33.588 -29.345  81.460  1.00  0.00           C  
ATOM    708  CG  ASP L  95      32.641 -30.508  81.644  1.00  0.00           C  
ATOM    709  OD1 ASP L  95      31.414 -30.272  81.597  1.00  0.00           O  
ATOM    710  OD2 ASP L  95      33.088 -31.646  81.870  1.00  0.00           O  
ATOM    711  N   ASN L  95A     33.561 -25.711  81.428  1.00  0.00           N  
ATOM    712  CA  ASN L  95A     34.140 -24.766  82.424  1.00  0.00           C  
ATOM    713  C   ASN L  95A     33.724 -23.319  82.339  1.00  0.00           C  
ATOM    714  O   ASN L  95A     33.390 -22.717  81.313  1.00  0.00           O  
ATOM    715  CB  ASN L  95A     35.659 -24.970  82.475  1.00  0.00           C  
ATOM    716  CG  ASN L  95A     36.408 -24.583  81.225  1.00  0.00           C  
ATOM    717  OD1 ASN L  95A     37.490 -25.150  80.946  1.00  0.00           O  
ATOM    718  ND2 ASN L  95A     35.899 -23.618  80.450  1.00  0.00           N  
ATOM    719  N   PHE L  96      33.834 -22.682  83.529  1.00  0.00           N  
ATOM    720  CA  PHE L  96      33.352 -21.352  83.848  1.00  0.00           C  
ATOM    721  C   PHE L  96      34.409 -20.249  83.859  1.00  0.00           C  
ATOM    722  O   PHE L  96      35.529 -20.420  84.361  1.00  0.00           O  
ATOM    723  CB  PHE L  96      32.671 -21.314  85.263  1.00  0.00           C  
ATOM    724  CG  PHE L  96      31.576 -22.333  85.332  1.00  0.00           C  
ATOM    725  CD1 PHE L  96      30.297 -21.994  84.901  1.00  0.00           C  
ATOM    726  CD2 PHE L  96      31.851 -23.627  85.748  1.00  0.00           C  
ATOM    727  CE1 PHE L  96      29.279 -22.937  84.915  1.00  0.00           C  
ATOM    728  CE2 PHE L  96      30.827 -24.588  85.778  1.00  0.00           C  
ATOM    729  CZ  PHE L  96      29.537 -24.231  85.362  1.00  0.00           C  
ATOM    730  N   VAL L  97      33.918 -19.102  83.389  1.00  0.00           N  
ATOM    731  CA  VAL L  97      34.717 -17.864  83.374  1.00  0.00           C  
ATOM    732  C   VAL L  97      34.061 -16.807  84.274  1.00  0.00           C  
ATOM    733  O   VAL L  97      32.836 -16.579  84.231  1.00  0.00           O  
ATOM    734  CB  VAL L  97      34.938 -17.397  81.926  1.00  0.00           C  
ATOM    735  CG1 VAL L  97      33.625 -17.146  81.186  1.00  0.00           C  
ATOM    736  CG2 VAL L  97      35.838 -16.171  81.870  1.00  0.00           C  
ATOM    737  N   PHE L  98      34.926 -16.189  85.079  1.00  0.00           N  
ATOM    738  CA  PHE L  98      34.561 -15.124  86.014  1.00  0.00           C  
ATOM    739  C   PHE L  98      34.686 -13.732  85.412  1.00  0.00           C  
ATOM    740  O   PHE L  98      35.022 -13.559  84.218  1.00  0.00           O  
ATOM    741  CB  PHE L  98      35.358 -15.263  87.336  1.00  0.00           C  
ATOM    742  CG  PHE L  98      34.613 -16.139  88.316  1.00  0.00           C  
ATOM    743  CD1 PHE L  98      34.798 -17.519  88.301  1.00  0.00           C  
ATOM    744  CD2 PHE L  98      33.704 -15.574  89.202  1.00  0.00           C  
ATOM    745  CE1 PHE L  98      34.097 -18.338  89.169  1.00  0.00           C  
ATOM    746  CE2 PHE L  98      32.982 -16.380  90.091  1.00  0.00           C  
ATOM    747  CZ  PHE L  98      33.187 -17.770  90.065  1.00  0.00           C  
ATOM    748  N   GLY L  99      34.342 -12.748  86.250  1.00  0.00           N  
ATOM    749  CA  GLY L  99      34.444 -11.328  85.804  1.00  0.00           C  
ATOM    750  C   GLY L  99      35.314 -10.506  86.730  1.00  0.00           C  
ATOM    751  O   GLY L  99      35.679 -10.971  87.815  1.00  0.00           O  
ATOM    752  N   THR L 100      35.589  -9.264  86.341  1.00  0.00           N  
ATOM    753  CA  THR L 100      36.510  -8.375  87.044  1.00  0.00           C  
ATOM    754  C   THR L 100      36.219  -8.192  88.514  1.00  0.00           C  
ATOM    755  O   THR L 100      37.070  -8.629  89.334  1.00  0.00           O  
ATOM    756  CB  THR L 100      36.726  -7.006  86.295  1.00  0.00           C  
ATOM    757  OG1 THR L 100      35.428  -6.377  86.127  1.00  0.00           O  
ATOM    758  CG2 THR L 100      37.472  -7.174  84.962  1.00  0.00           C  
ATOM    759  N   GLY L 101      35.134  -7.549  88.884  1.00  0.00           N  
ATOM    760  CA  GLY L 101      34.679  -7.481  90.280  1.00  0.00           C  
ATOM    761  C   GLY L 101      34.264  -6.091  90.725  1.00  0.00           C  
ATOM    762  O   GLY L 101      35.110  -5.185  90.909  1.00  0.00           O  
ATOM    763  N   THR L 102      32.964  -5.942  90.979  1.00  0.00           N  
ATOM    764  CA  THR L 102      32.386  -4.615  91.284  1.00  0.00           C  
ATOM    765  C   THR L 102      32.135  -4.376  92.759  1.00  0.00           C  
ATOM    766  O   THR L 102      31.358  -5.147  93.389  1.00  0.00           O  
ATOM    767  CB  THR L 102      31.077  -4.437  90.409  1.00  0.00           C  
ATOM    768  OG1 THR L 102      31.599  -4.327  89.042  1.00  0.00           O  
ATOM    769  CG2 THR L 102      30.173  -3.272  90.788  1.00  0.00           C  
ATOM    770  N   LYS L 103      32.759  -3.280  93.260  1.00  0.00           N  
ATOM    771  CA  LYS L 103      32.475  -2.961  94.701  1.00  0.00           C  
ATOM    772  C   LYS L 103      31.304  -2.015  94.857  1.00  0.00           C  
ATOM    773  O   LYS L 103      31.265  -0.891  94.320  1.00  0.00           O  
ATOM    774  CB  LYS L 103      33.736  -2.508  95.408  1.00  0.00           C  
ATOM    775  CG  LYS L 103      34.839  -3.597  95.409  1.00  0.00           C  
ATOM    776  CD  LYS L 103      36.041  -3.182  96.246  1.00  0.00           C  
ATOM    777  CE  LYS L 103      37.220  -4.130  96.084  1.00  0.00           C  
ATOM    778  NZ  LYS L 103      38.508  -3.412  96.332  1.00  0.00           N  
ATOM    779  N   VAL L 104      30.310  -2.461  95.636  1.00  0.00           N  
ATOM    780  CA  VAL L 104      29.024  -1.790  95.818  1.00  0.00           C  
ATOM    781  C   VAL L 104      29.070  -0.888  97.057  1.00  0.00           C  
ATOM    782  O   VAL L 104      29.497  -1.321  98.137  1.00  0.00           O  
ATOM    783  CB  VAL L 104      27.854  -2.791  95.863  1.00  0.00           C  
ATOM    784  CG1 VAL L 104      26.697  -2.329  96.752  1.00  0.00           C  
ATOM    785  CG2 VAL L 104      27.347  -3.125  94.458  1.00  0.00           C  
ATOM    786  N   THR L 105      28.568   0.326  96.822  1.00  0.00           N  
ATOM    787  CA  THR L 105      28.706   1.401  97.837  1.00  0.00           C  
ATOM    788  C   THR L 105      27.359   2.044  98.105  1.00  0.00           C  
ATOM    789  O   THR L 105      26.732   2.614  97.187  1.00  0.00           O  
ATOM    790  CB  THR L 105      29.770   2.460  97.373  1.00  0.00           C  
ATOM    791  OG1 THR L 105      30.493   1.838  96.255  1.00  0.00           O  
ATOM    792  CG2 THR L 105      30.711   2.913  98.484  1.00  0.00           C  
ATOM    793  N   VAL L 106      26.930   1.925  99.347  1.00  0.00           N  
ATOM    794  CA  VAL L 106      25.646   2.503  99.787  1.00  0.00           C  
ATOM    795  C   VAL L 106      25.935   3.870 100.403  1.00  0.00           C  
ATOM    796  O   VAL L 106      26.825   4.004 101.256  1.00  0.00           O  
ATOM    797  CB  VAL L 106      24.904   1.514 100.680  1.00  0.00           C  
ATOM    798  CG1 VAL L 106      23.429   1.851 100.879  1.00  0.00           C  
ATOM    799  CG2 VAL L 106      25.032   0.095 100.139  1.00  0.00           C  
ATOM    800  N   LEU L 106A     25.227   4.866  99.912  1.00  0.00           N  
ATOM    801  CA  LEU L 106A     25.297   6.241 100.406  1.00  0.00           C  
ATOM    802  C   LEU L 106A     24.060   6.496 101.282  1.00  0.00           C  
ATOM    803  O   LEU L 106A     23.041   5.811 101.133  1.00  0.00           O  
ATOM    804  CB  LEU L 106A     25.393   7.198  99.228  1.00  0.00           C  
ATOM    805  CG  LEU L 106A     26.545   7.156  98.261  1.00  0.00           C  
ATOM    806  CD1 LEU L 106A     27.894   6.987  98.960  1.00  0.00           C  
ATOM    807  CD2 LEU L 106A     26.340   6.008  97.278  1.00  0.00           C  
ATOM    808  N   GLY L 107      24.200   7.467 102.165  1.00  0.00           N  
ATOM    809  CA  GLY L 107      23.116   7.880 103.059  1.00  0.00           C  
ATOM    810  C   GLY L 107      23.177   7.177 104.407  1.00  0.00           C  
ATOM    811  O   GLY L 107      22.220   7.287 105.205  1.00  0.00           O  
ATOM    812  N   GLN L 108      24.271   6.470 104.630  1.00  0.00           N  
ATOM    813  CA  GLN L 108      24.490   5.734 105.890  1.00  0.00           C  
ATOM    814  C   GLN L 108      24.851   6.762 106.974  1.00  0.00           C  
ATOM    815  O   GLN L 108      25.820   7.515 106.807  1.00  0.00           O  
ATOM    816  CB  GLN L 108      25.562   4.660 105.777  1.00  0.00           C  
ATOM    817  CG  GLN L 108      25.524   3.747 104.567  1.00  0.00           C  
ATOM    818  CD  GLN L 108      26.355   2.490 104.706  1.00  0.00           C  
ATOM    819  OE1 GLN L 108      25.865   1.371 104.844  1.00  0.00           O  
ATOM    820  NE2 GLN L 108      27.678   2.639 104.678  1.00  0.00           N  
ATOM    821  N   PRO L 109      24.065   6.769 108.040  1.00  0.00           N  
ATOM    822  CA  PRO L 109      24.322   7.588 109.214  1.00  0.00           C  
ATOM    823  C   PRO L 109      25.687   7.308 109.830  1.00  0.00           C  
ATOM    824  O   PRO L 109      26.117   6.167 110.062  1.00  0.00           O  
ATOM    825  CB  PRO L 109      23.173   7.283 110.164  1.00  0.00           C  
ATOM    826  CG  PRO L 109      22.055   6.827 109.261  1.00  0.00           C  
ATOM    827  CD  PRO L 109      22.788   6.028 108.177  1.00  0.00           C  
TER     828      PRO L 109                                                      
ATOM   1607  N   PRO L   1      24.677 -22.984 104.753  1.00  0.00           N  
ATOM   1608  CA  PRO L   1      25.739 -22.025 105.054  1.00  0.00           C  
ATOM   1609  C   PRO L   1      27.105 -22.674 104.911  1.00  0.00           C  
ATOM   1610  O   PRO L   1      27.229 -23.788 104.377  1.00  0.00           O  
ATOM   1611  CB  PRO L   1      25.446 -21.607 106.500  1.00  0.00           C  
ATOM   1612  CG  PRO L   1      23.948 -21.622 106.556  1.00  0.00           C  
ATOM   1613  CD  PRO L   1      23.525 -22.770 105.638  1.00  0.00           C  
ATOM   1614  N   SER L   2      28.102 -21.927 105.379  1.00  0.00           N  
ATOM   1615  CA  SER L   2      29.450 -22.528 105.604  1.00  0.00           C  
ATOM   1616  C   SER L   2      29.190 -23.774 106.461  1.00  0.00           C  
ATOM   1617  O   SER L   2      29.124 -23.727 107.696  1.00  0.00           O  
ATOM   1618  CB  SER L   2      30.375 -21.522 106.240  1.00  0.00           C  
ATOM   1619  OG  SER L   2      29.627 -20.424 106.749  1.00  0.00           O  
ATOM   1620  N   ALA L   3      28.913 -24.828 105.727  1.00  0.00           N  
ATOM   1621  CA  ALA L   3      28.640 -26.165 106.279  1.00  0.00           C  
ATOM   1622  C   ALA L   3      29.760 -27.069 105.695  1.00  0.00           C  
ATOM   1623  O   ALA L   3      29.770 -28.296 105.762  1.00  0.00           O  
ATOM   1624  CB  ALA L   3      27.270 -26.650 105.909  1.00  0.00           C  
ATOM   1625  N   LEU L   4      30.667 -26.298 105.104  1.00  0.00           N  
ATOM   1626  CA  LEU L   4      31.928 -26.766 104.558  1.00  0.00           C  
ATOM   1627  C   LEU L   4      33.024 -26.051 105.400  1.00  0.00           C  
ATOM   1628  O   LEU L   4      33.422 -24.898 105.160  1.00  0.00           O  
ATOM   1629  CB  LEU L   4      32.023 -26.544 103.083  1.00  0.00           C  
ATOM   1630  CG  LEU L   4      31.057 -27.116 102.081  1.00  0.00           C  
ATOM   1631  CD1 LEU L   4      31.658 -27.057 100.672  1.00  0.00           C  
ATOM   1632  CD2 LEU L   4      30.741 -28.565 102.412  1.00  0.00           C  
ATOM   1633  N   THR L   5      33.379 -26.811 106.426  1.00  0.00           N  
ATOM   1634  CA  THR L   5      34.401 -26.432 107.394  1.00  0.00           C  
ATOM   1635  C   THR L   5      35.737 -26.494 106.645  1.00  0.00           C  
ATOM   1636  O   THR L   5      36.130 -27.559 106.141  1.00  0.00           O  
ATOM   1637  CB  THR L   5      34.412 -27.349 108.672  1.00  0.00           C  
ATOM   1638  OG1 THR L   5      33.125 -27.165 109.339  1.00  0.00           O  
ATOM   1639  CG2 THR L   5      35.570 -27.106 109.653  1.00  0.00           C  
ATOM   1640  N   GLN L   6      36.333 -25.325 106.595  1.00  0.00           N  
ATOM   1641  CA  GLN L   6      37.665 -25.141 105.996  1.00  0.00           C  
ATOM   1642  C   GLN L   6      38.623 -24.514 107.006  1.00  0.00           C  
ATOM   1643  O   GLN L   6      38.267 -23.563 107.718  1.00  0.00           O  
ATOM   1644  CB  GLN L   6      37.514 -24.256 104.751  1.00  0.00           C  
ATOM   1645  CG  GLN L   6      38.370 -24.707 103.583  1.00  0.00           C  
ATOM   1646  CD  GLN L   6      38.125 -23.854 102.355  1.00  0.00           C  
ATOM   1647  OE1 GLN L   6      36.994 -23.491 102.059  1.00  0.00           O  
ATOM   1648  NE2 GLN L   6      39.204 -23.526 101.667  1.00  0.00           N  
ATOM   1649  N   PRO L   7      39.825 -25.065 107.060  1.00  0.00           N  
ATOM   1650  CA  PRO L   7      40.932 -24.540 107.863  1.00  0.00           C  
ATOM   1651  C   PRO L   7      41.027 -23.029 107.764  1.00  0.00           C  
ATOM   1652  O   PRO L   7      40.517 -22.431 106.800  1.00  0.00           O  
ATOM   1653  CB  PRO L   7      42.167 -25.227 107.300  1.00  0.00           C  
ATOM   1654  CG  PRO L   7      41.689 -26.375 106.482  1.00  0.00           C  
ATOM   1655  CD  PRO L   7      40.173 -26.419 106.569  1.00  0.00           C  
ATOM   1656  N   PRO L   8      41.682 -22.440 108.761  1.00  0.00           N  
ATOM   1657  CA  PRO L   8      41.858 -20.981 108.787  1.00  0.00           C  
ATOM   1658  C   PRO L   8      43.078 -20.573 107.984  1.00  0.00           C  
ATOM   1659  O   PRO L   8      43.068 -19.548 107.285  1.00  0.00           O  
ATOM   1660  CB  PRO L   8      41.922 -20.619 110.254  1.00  0.00           C  
ATOM   1661  CG  PRO L   8      42.352 -21.868 110.954  1.00  0.00           C  
ATOM   1662  CD  PRO L   8      41.848 -23.019 110.114  1.00  0.00           C  
ATOM   1663  N   SER L   9      44.103 -21.392 108.086  1.00  0.00           N  
ATOM   1664  CA  SER L   9      45.415 -21.080 107.482  1.00  0.00           C  
ATOM   1665  C   SER L   9      46.046 -22.406 107.073  1.00  0.00           C  
ATOM   1666  O   SER L   9      45.868 -23.431 107.751  1.00  0.00           O  
ATOM   1667  CB  SER L   9      46.235 -20.264 108.441  1.00  0.00           C  
ATOM   1668  OG  SER L   9      47.565 -20.016 108.082  1.00  0.00           O  
ATOM   1669  N   ALA L  11      46.680 -22.355 105.920  1.00  0.00           N  
ATOM   1670  CA  ALA L  11      47.437 -23.490 105.357  1.00  0.00           C  
ATOM   1671  C   ALA L  11      48.681 -22.837 104.743  1.00  0.00           C  
ATOM   1672  O   ALA L  11      48.535 -21.885 103.942  1.00  0.00           O  
ATOM   1673  CB  ALA L  11      46.618 -24.273 104.374  1.00  0.00           C  
ATOM   1674  N   SER L  12      49.836 -23.265 105.206  1.00  0.00           N  
ATOM   1675  CA  SER L  12      51.088 -22.607 104.799  1.00  0.00           C  
ATOM   1676  C   SER L  12      52.178 -23.638 104.559  1.00  0.00           C  
ATOM   1677  O   SER L  12      52.182 -24.727 105.141  1.00  0.00           O  
ATOM   1678  CB  SER L  12      51.517 -21.535 105.773  1.00  0.00           C  
ATOM   1679  OG  SER L  12      51.771 -21.989 107.069  1.00  0.00           O  
ATOM   1680  N   GLY L  13      53.070 -23.243 103.656  1.00  0.00           N  
ATOM   1681  CA  GLY L  13      54.278 -24.041 103.385  1.00  0.00           C  
ATOM   1682  C   GLY L  13      55.401 -23.092 102.959  1.00  0.00           C  
ATOM   1683  O   GLY L  13      55.347 -21.870 103.161  1.00  0.00           O  
ATOM   1684  N   SER L  14      56.386 -23.734 102.379  1.00  0.00           N  
ATOM   1685  CA  SER L  14      57.539 -23.051 101.767  1.00  0.00           C  
ATOM   1686  C   SER L  14      57.642 -23.549 100.327  1.00  0.00           C  
ATOM   1687  O   SER L  14      56.979 -24.553  99.970  1.00  0.00           O  
ATOM   1688  CB  SER L  14      58.795 -23.353 102.565  1.00  0.00           C  
ATOM   1689  OG  SER L  14      58.432 -23.618 103.918  1.00  0.00           O  
ATOM   1690  N   LEU L  15      58.440 -22.839  99.553  1.00  0.00           N  
ATOM   1691  CA  LEU L  15      58.653 -23.220  98.144  1.00  0.00           C  
ATOM   1692  C   LEU L  15      59.181 -24.659  98.098  1.00  0.00           C  
ATOM   1693  O   LEU L  15      60.296 -24.935  98.585  1.00  0.00           O  
ATOM   1694  CB  LEU L  15      59.559 -22.197  97.484  1.00  0.00           C  
ATOM   1695  CG  LEU L  15      58.943 -20.976  96.841  1.00  0.00           C  
ATOM   1696  CD1 LEU L  15      57.679 -20.512  97.547  1.00  0.00           C  
ATOM   1697  CD2 LEU L  15      59.983 -19.848  96.886  1.00  0.00           C  
ATOM   1698  N   GLY L  16      58.341 -25.519  97.536  1.00  0.00           N  
ATOM   1699  CA  GLY L  16      58.781 -26.913  97.311  1.00  0.00           C  
ATOM   1700  C   GLY L  16      58.149 -27.834  98.332  1.00  0.00           C  
ATOM   1701  O   GLY L  16      58.319 -29.067  98.230  1.00  0.00           O  
ATOM   1702  N   GLN L  17      57.462 -27.240  99.302  1.00  0.00           N  
ATOM   1703  CA  GLN L  17      56.681 -28.025 100.276  1.00  0.00           C  
ATOM   1704  C   GLN L  17      55.225 -28.032  99.752  1.00  0.00           C  
ATOM   1705  O   GLN L  17      54.764 -27.027  99.219  1.00  0.00           O  
ATOM   1706  CB  GLN L  17      56.656 -27.544 101.684  1.00  0.00           C  
ATOM   1707  CG  GLN L  17      57.941 -27.228 102.381  1.00  0.00           C  
ATOM   1708  CD  GLN L  17      57.712 -26.397 103.628  1.00  0.00           C  
ATOM   1709  OE1 GLN L  17      58.666 -25.939 104.247  1.00  0.00           O  
ATOM   1710  NE2 GLN L  17      56.446 -26.186 103.983  1.00  0.00           N  
ATOM   1711  N   SER L  18      54.619 -29.168  99.981  1.00  0.00           N  
ATOM   1712  CA  SER L  18      53.222 -29.373  99.522  1.00  0.00           C  
ATOM   1713  C   SER L  18      52.302 -28.991 100.672  1.00  0.00           C  
ATOM   1714  O   SER L  18      52.737 -29.066 101.842  1.00  0.00           O  
ATOM   1715  CB  SER L  18      53.076 -30.800  99.031  1.00  0.00           C  
ATOM   1716  OG  SER L  18      54.131 -31.075  98.096  1.00  0.00           O  
ATOM   1717  N   VAL L  19      51.101 -28.544 100.306  1.00  0.00           N  
ATOM   1718  CA  VAL L  19      50.106 -28.153 101.321  1.00  0.00           C  
ATOM   1719  C   VAL L  19      48.735 -28.697 100.955  1.00  0.00           C  
ATOM   1720  O   VAL L  19      48.303 -28.590  99.793  1.00  0.00           O  
ATOM   1721  CB  VAL L  19      50.103 -26.633 101.533  1.00  0.00           C  
ATOM   1722  CG1 VAL L  19      51.480 -26.013 101.323  1.00  0.00           C  
ATOM   1723  CG2 VAL L  19      49.074 -25.921 100.670  1.00  0.00           C  
ATOM   1724  N   THR L  20      48.072 -29.263 101.955  1.00  0.00           N  
ATOM   1725  CA  THR L  20      46.691 -29.735 101.806  1.00  0.00           C  
ATOM   1726  C   THR L  20      45.768 -28.644 102.384  1.00  0.00           C  
ATOM   1727  O   THR L  20      46.060 -28.079 103.453  1.00  0.00           O  
ATOM   1728  CB  THR L  20      46.376 -31.126 102.444  1.00  0.00           C  
ATOM   1729  OG1 THR L  20      47.476 -32.022 102.145  1.00  0.00           O  
ATOM   1730  CG2 THR L  20      45.061 -31.749 101.931  1.00  0.00           C  
ATOM   1731  N   ILE L  21      44.776 -28.291 101.589  1.00  0.00           N  
ATOM   1732  CA  ILE L  21      43.610 -27.578 102.141  1.00  0.00           C  
ATOM   1733  C   ILE L  21      42.607 -28.748 102.264  1.00  0.00           C  
ATOM   1734  O   ILE L  21      42.891 -29.814 101.672  1.00  0.00           O  
ATOM   1735  CB  ILE L  21      43.079 -26.385 101.349  1.00  0.00           C  
ATOM   1736  CG1 ILE L  21      44.141 -25.305 101.044  1.00  0.00           C  
ATOM   1737  CG2 ILE L  21      41.887 -25.697 102.117  1.00  0.00           C  
ATOM   1738  CD1 ILE L  21      45.160 -25.602  99.927  1.00  0.00           C  
ATOM   1739  N   SER L  22      41.565 -28.519 102.987  1.00  0.00           N  
ATOM   1740  CA  SER L  22      40.578 -29.550 103.318  1.00  0.00           C  
ATOM   1741  C   SER L  22      39.225 -28.834 103.327  1.00  0.00           C  
ATOM   1742  O   SER L  22      39.188 -27.613 103.557  1.00  0.00           O  
ATOM   1743  CB  SER L  22      40.843 -30.190 104.664  1.00  0.00           C  
ATOM   1744  OG  SER L  22      40.679 -31.595 104.602  1.00  0.00           O  
ATOM   1745  N   CYS L  23      38.228 -29.631 103.052  1.00  0.00           N  
ATOM   1746  CA  CYS L  23      36.847 -29.063 102.996  1.00  0.00           C  
ATOM   1747  C   CYS L  23      35.934 -30.198 103.440  1.00  0.00           C  
ATOM   1748  O   CYS L  23      35.804 -31.243 102.790  1.00  0.00           O  
ATOM   1749  CB  CYS L  23      36.610 -28.375 101.702  1.00  0.00           C  
ATOM   1750  SG  CYS L  23      35.041 -28.326 100.907  1.00  0.00           S  
ATOM   1751  N   THR L  24      35.395 -29.952 104.645  1.00  0.00           N  
ATOM   1752  CA  THR L  24      34.530 -30.937 105.301  1.00  0.00           C  
ATOM   1753  C   THR L  24      33.074 -30.500 105.178  1.00  0.00           C  
ATOM   1754  O   THR L  24      32.768 -29.310 105.253  1.00  0.00           O  
ATOM   1755  CB  THR L  24      34.917 -31.173 106.809  1.00  0.00           C  
ATOM   1756  OG1 THR L  24      36.268 -30.622 106.984  1.00  0.00           O  
ATOM   1757  CG2 THR L  24      34.843 -32.647 107.233  1.00  0.00           C  
ATOM   1758  N   GLY L  25      32.229 -31.501 105.000  1.00  0.00           N  
ATOM   1759  CA  GLY L  25      30.781 -31.256 104.924  1.00  0.00           C  
ATOM   1760  C   GLY L  25      30.061 -31.861 106.132  1.00  0.00           C  
ATOM   1761  O   GLY L  25      30.342 -32.980 106.575  1.00  0.00           O  
ATOM   1762  N   THR L  26      29.144 -31.049 106.627  1.00  0.00           N  
ATOM   1763  CA  THR L  26      28.199 -31.488 107.688  1.00  0.00           C  
ATOM   1764  C   THR L  26      27.081 -32.285 106.989  1.00  0.00           C  
ATOM   1765  O   THR L  26      26.341 -33.113 107.495  1.00  0.00           O  
ATOM   1766  CB  THR L  26      27.581 -30.183 108.326  1.00  0.00           C  
ATOM   1767  OG1 THR L  26      27.143 -29.404 107.145  1.00  0.00           O  
ATOM   1768  CG2 THR L  26      28.536 -29.383 109.200  1.00  0.00           C  
ATOM   1769  N   SER L  27      26.995 -31.917 105.725  1.00  0.00           N  
ATOM   1770  CA  SER L  27      25.878 -32.196 104.825  1.00  0.00           C  
ATOM   1771  C   SER L  27      25.468 -33.650 104.829  1.00  0.00           C  
ATOM   1772  O   SER L  27      26.241 -34.571 104.546  1.00  0.00           O  
ATOM   1773  CB  SER L  27      26.251 -31.629 103.446  1.00  0.00           C  
ATOM   1774  OG  SER L  27      27.049 -30.429 103.663  1.00  0.00           O  
ATOM   1775  N   SER L  27A     24.218 -33.826 105.253  1.00  0.00           N  
ATOM   1776  CA  SER L  27A     23.511 -35.131 105.123  1.00  0.00           C  
ATOM   1777  C   SER L  27A     23.274 -35.195 103.596  1.00  0.00           C  
ATOM   1778  O   SER L  27A     22.266 -34.706 103.095  1.00  0.00           O  
ATOM   1779  CB  SER L  27A     22.227 -35.147 105.905  1.00  0.00           C  
ATOM   1780  OG  SER L  27A     22.358 -34.691 107.242  1.00  0.00           O  
ATOM   1781  N   ASP L  27B     24.272 -35.749 102.942  1.00  0.00           N  
ATOM   1782  CA  ASP L  27B     24.444 -35.446 101.468  1.00  0.00           C  
ATOM   1783  C   ASP L  27B     25.524 -36.428 101.007  1.00  0.00           C  
ATOM   1784  O   ASP L  27B     25.330 -37.364 100.230  1.00  0.00           O  
ATOM   1785  CB  ASP L  27B     24.833 -33.989 101.416  1.00  0.00           C  
ATOM   1786  CG  ASP L  27B     25.031 -33.215 100.174  1.00  0.00           C  
ATOM   1787  OD1 ASP L  27B     24.464 -33.573  99.120  1.00  0.00           O  
ATOM   1788  OD2 ASP L  27B     25.743 -32.162 100.195  1.00  0.00           O  
ATOM   1789  N   VAL L  27C     26.676 -36.158 101.579  1.00  0.00           N  
ATOM   1790  CA  VAL L  27C     27.940 -36.836 101.343  1.00  0.00           C  
ATOM   1791  C   VAL L  27C     27.780 -38.281 100.880  1.00  0.00           C  
ATOM   1792  O   VAL L  27C     26.983 -39.093 101.395  1.00  0.00           O  
ATOM   1793  CB  VAL L  27C     28.780 -36.666 102.647  1.00  0.00           C  
ATOM   1794  CG1 VAL L  27C     30.142 -37.303 102.559  1.00  0.00           C  
ATOM   1795  CG2 VAL L  27C     28.892 -35.186 103.026  1.00  0.00           C  
ATOM   1796  N   GLY L  28      28.611 -38.596  99.895  1.00  0.00           N  
ATOM   1797  CA  GLY L  28      28.588 -39.942  99.256  1.00  0.00           C  
ATOM   1798  C   GLY L  28      27.779 -39.696  97.967  1.00  0.00           C  
ATOM   1799  O   GLY L  28      28.311 -39.832  96.880  1.00  0.00           O  
ATOM   1800  N   GLY L  29      26.555 -39.256  98.231  1.00  0.00           N  
ATOM   1801  CA  GLY L  29      25.599 -38.931  97.125  1.00  0.00           C  
ATOM   1802  C   GLY L  29      26.132 -37.596  96.556  1.00  0.00           C  
ATOM   1803  O   GLY L  29      25.545 -36.539  96.737  1.00  0.00           O  
ATOM   1804  N   TYR L  30      27.297 -37.742  95.926  1.00  0.00           N  
ATOM   1805  CA  TYR L  30      28.168 -36.607  95.690  1.00  0.00           C  
ATOM   1806  C   TYR L  30      29.448 -36.870  94.926  1.00  0.00           C  
ATOM   1807  O   TYR L  30      30.207 -37.841  95.092  1.00  0.00           O  
ATOM   1808  CB  TYR L  30      28.516 -35.915  97.090  1.00  0.00           C  
ATOM   1809  CG  TYR L  30      28.150 -34.456  96.869  1.00  0.00           C  
ATOM   1810  CD1 TYR L  30      28.955 -33.695  96.019  1.00  0.00           C  
ATOM   1811  CD2 TYR L  30      26.969 -33.917  97.347  1.00  0.00           C  
ATOM   1812  CE1 TYR L  30      28.604 -32.388  95.703  1.00  0.00           C  
ATOM   1813  CE2 TYR L  30      26.615 -32.600  97.045  1.00  0.00           C  
ATOM   1814  CZ  TYR L  30      27.433 -31.841  96.214  1.00  0.00           C  
ATOM   1815  OH  TYR L  30      27.072 -30.564  95.898  1.00  0.00           O  
ATOM   1816  N   ASN L  31      29.691 -35.890  94.060  1.00  0.00           N  
ATOM   1817  CA  ASN L  31      30.926 -35.831  93.249  1.00  0.00           C  
ATOM   1818  C   ASN L  31      31.209 -34.338  93.076  1.00  0.00           C  
ATOM   1819  O   ASN L  31      32.368 -33.940  92.950  1.00  0.00           O  
ATOM   1820  CB  ASN L  31      30.686 -36.618  91.993  1.00  0.00           C  
ATOM   1821  CG  ASN L  31      31.798 -36.911  91.046  1.00  0.00           C  
ATOM   1822  OD1 ASN L  31      31.624 -37.779  90.150  1.00  0.00           O  
ATOM   1823  ND2 ASN L  31      32.961 -36.256  91.132  1.00  0.00           N  
ATOM   1824  N   TYR L  32      30.142 -33.552  93.136  1.00  0.00           N  
ATOM   1825  CA  TYR L  32      30.187 -32.143  92.734  1.00  0.00           C  
ATOM   1826  C   TYR L  32      30.829 -31.257  93.811  1.00  0.00           C  
ATOM   1827  O   TYR L  32      30.106 -30.445  94.428  1.00  0.00           O  
ATOM   1828  CB  TYR L  32      28.846 -31.559  92.385  1.00  0.00           C  
ATOM   1829  CG  TYR L  32      28.082 -31.780  91.132  1.00  0.00           C  
ATOM   1830  CD1 TYR L  32      28.301 -30.997  89.989  1.00  0.00           C  
ATOM   1831  CD2 TYR L  32      27.023 -32.704  91.080  1.00  0.00           C  
ATOM   1832  CE1 TYR L  32      27.534 -31.148  88.834  1.00  0.00           C  
ATOM   1833  CE2 TYR L  32      26.252 -32.875  89.931  1.00  0.00           C  
ATOM   1834  CZ  TYR L  32      26.511 -32.088  88.819  1.00  0.00           C  
ATOM   1835  OH  TYR L  32      25.760 -32.209  87.683  1.00  0.00           O  
ATOM   1836  N   VAL L  33      32.122 -31.371  93.956  1.00  0.00           N  
ATOM   1837  CA  VAL L  33      32.872 -30.516  94.906  1.00  0.00           C  
ATOM   1838  C   VAL L  33      33.869 -29.724  94.041  1.00  0.00           C  
ATOM   1839  O   VAL L  33      34.776 -30.399  93.484  1.00  0.00           O  
ATOM   1840  CB  VAL L  33      33.505 -31.369  96.014  1.00  0.00           C  
ATOM   1841  CG1 VAL L  33      34.314 -30.549  97.010  1.00  0.00           C  
ATOM   1842  CG2 VAL L  33      32.501 -32.224  96.755  1.00  0.00           C  
ATOM   1843  N   SER L  34      33.602 -28.403  93.972  1.00  0.00           N  
ATOM   1844  CA  SER L  34      34.561 -27.586  93.141  1.00  0.00           C  
ATOM   1845  C   SER L  34      35.384 -26.630  94.004  1.00  0.00           C  
ATOM   1846  O   SER L  34      34.857 -25.928  94.895  1.00  0.00           O  
ATOM   1847  CB  SER L  34      33.968 -26.894  91.963  1.00  0.00           C  
ATOM   1848  OG  SER L  34      32.851 -26.080  92.138  1.00  0.00           O  
ATOM   1849  N   TRP L  35      36.678 -26.601  93.679  1.00  0.00           N  
ATOM   1850  CA  TRP L  35      37.676 -25.791  94.400  1.00  0.00           C  
ATOM   1851  C   TRP L  35      38.019 -24.496  93.690  1.00  0.00           C  
ATOM   1852  O   TRP L  35      38.239 -24.531  92.456  1.00  0.00           O  
ATOM   1853  CB  TRP L  35      38.951 -26.658  94.571  1.00  0.00           C  
ATOM   1854  CG  TRP L  35      38.874 -27.605  95.718  1.00  0.00           C  
ATOM   1855  CD1 TRP L  35      38.470 -28.909  95.703  1.00  0.00           C  
ATOM   1856  CD2 TRP L  35      39.200 -27.294  97.079  1.00  0.00           C  
ATOM   1857  NE1 TRP L  35      38.517 -29.429  96.971  1.00  0.00           N  
ATOM   1858  CE2 TRP L  35      38.955 -28.463  97.832  1.00  0.00           C  
ATOM   1859  CE3 TRP L  35      39.665 -26.149  97.715  1.00  0.00           C  
ATOM   1860  CZ2 TRP L  35      39.166 -28.510  99.198  1.00  0.00           C  
ATOM   1861  CZ3 TRP L  35      39.877 -26.197  99.072  1.00  0.00           C  
ATOM   1862  CH2 TRP L  35      39.632 -27.352  99.806  1.00  0.00           C  
ATOM   1863  N   TYR L  36      38.136 -23.384  94.415  1.00  0.00           N  
ATOM   1864  CA  TYR L  36      38.499 -22.082  93.831  1.00  0.00           C  
ATOM   1865  C   TYR L  36      39.807 -21.483  94.374  1.00  0.00           C  
ATOM   1866  O   TYR L  36      39.982 -21.337  95.593  1.00  0.00           O  
ATOM   1867  CB  TYR L  36      37.408 -21.004  94.024  1.00  0.00           C  
ATOM   1868  CG  TYR L  36      36.031 -21.473  93.636  1.00  0.00           C  
ATOM   1869  CD1 TYR L  36      35.422 -22.503  94.350  1.00  0.00           C  
ATOM   1870  CD2 TYR L  36      35.341 -20.916  92.563  1.00  0.00           C  
ATOM   1871  CE1 TYR L  36      34.162 -22.973  94.008  1.00  0.00           C  
ATOM   1872  CE2 TYR L  36      34.073 -21.372  92.210  1.00  0.00           C  
ATOM   1873  CZ  TYR L  36      33.493 -22.406  92.937  1.00  0.00           C  
ATOM   1874  OH  TYR L  36      32.271 -22.922  92.614  1.00  0.00           O  
ATOM   1875  N   GLN L  37      40.651 -21.105  93.428  1.00  0.00           N  
ATOM   1876  CA  GLN L  37      41.883 -20.358  93.681  1.00  0.00           C  
ATOM   1877  C   GLN L  37      41.522 -18.867  93.599  1.00  0.00           C  
ATOM   1878  O   GLN L  37      40.899 -18.460  92.602  1.00  0.00           O  
ATOM   1879  CB  GLN L  37      43.027 -20.641  92.699  1.00  0.00           C  
ATOM   1880  CG  GLN L  37      44.357 -20.323  93.324  1.00  0.00           C  
ATOM   1881  CD  GLN L  37      45.434 -19.735  92.496  1.00  0.00           C  
ATOM   1882  OE1 GLN L  37      45.252 -19.021  91.509  1.00  0.00           O  
ATOM   1883  NE2 GLN L  37      46.682 -19.995  92.928  1.00  0.00           N  
ATOM   1884  N   GLN L  38      41.869 -18.137  94.645  1.00  0.00           N  
ATOM   1885  CA  GLN L  38      41.511 -16.719  94.688  1.00  0.00           C  
ATOM   1886  C   GLN L  38      42.574 -15.851  95.344  1.00  0.00           C  
ATOM   1887  O   GLN L  38      42.728 -15.852  96.560  1.00  0.00           O  
ATOM   1888  CB  GLN L  38      40.141 -16.437  95.344  1.00  0.00           C  
ATOM   1889  CG  GLN L  38      39.910 -14.910  95.383  1.00  0.00           C  
ATOM   1890  CD  GLN L  38      38.457 -14.540  95.404  1.00  0.00           C  
ATOM   1891  OE1 GLN L  38      37.617 -15.265  95.937  1.00  0.00           O  
ATOM   1892  NE2 GLN L  38      38.137 -13.391  94.805  1.00  0.00           N  
ATOM   1893  N   HIS L  39      43.200 -15.050  94.500  1.00  0.00           N  
ATOM   1894  CA  HIS L  39      44.190 -14.066  94.922  1.00  0.00           C  
ATOM   1895  C   HIS L  39      43.491 -12.794  95.417  1.00  0.00           C  
ATOM   1896  O   HIS L  39      42.405 -12.403  94.971  1.00  0.00           O  
ATOM   1897  CB  HIS L  39      45.189 -13.690  93.824  1.00  0.00           C  
ATOM   1898  CG  HIS L  39      46.092 -14.822  93.450  1.00  0.00           C  
ATOM   1899  ND1 HIS L  39      45.938 -15.635  92.361  1.00  0.00           N  
ATOM   1900  CD2 HIS L  39      47.212 -15.246  94.084  1.00  0.00           C  
ATOM   1901  CE1 HIS L  39      46.924 -16.512  92.333  1.00  0.00           C  
ATOM   1902  NE2 HIS L  39      47.711 -16.297  93.368  1.00  0.00           N  
ATOM   1903  N   ALA L  40      44.195 -12.177  96.358  1.00  0.00           N  
ATOM   1904  CA  ALA L  40      43.734 -10.904  96.934  1.00  0.00           C  
ATOM   1905  C   ALA L  40      43.818  -9.892  95.789  1.00  0.00           C  
ATOM   1906  O   ALA L  40      44.901  -9.768  95.192  1.00  0.00           O  
ATOM   1907  CB  ALA L  40      44.566 -10.509  98.129  1.00  0.00           C  
ATOM   1908  N   GLY L  41      42.687  -9.281  95.502  1.00  0.00           N  
ATOM   1909  CA  GLY L  41      42.560  -8.368  94.376  1.00  0.00           C  
ATOM   1910  C   GLY L  41      41.891  -8.995  93.166  1.00  0.00           C  
ATOM   1911  O   GLY L  41      41.201  -8.246  92.424  1.00  0.00           O  
ATOM   1912  N   LYS L  42      42.044 -10.298  92.961  1.00  0.00           N  
ATOM   1913  CA  LYS L  42      41.483 -10.925  91.742  1.00  0.00           C  
ATOM   1914  C   LYS L  42      40.085 -11.490  91.926  1.00  0.00           C  
ATOM   1915  O   LYS L  42      39.553 -11.684  93.028  1.00  0.00           O  
ATOM   1916  CB  LYS L  42      42.416 -11.992  91.182  1.00  0.00           C  
ATOM   1917  CG  LYS L  42      42.234 -13.424  91.673  1.00  0.00           C  
ATOM   1918  CD  LYS L  42      43.193 -14.381  90.953  1.00  0.00           C  
ATOM   1919  CE  LYS L  42      42.623 -15.768  90.781  1.00  0.00           C  
ATOM   1920  NZ  LYS L  42      43.610 -16.714  90.212  1.00  0.00           N  
ATOM   1921  N   ALA L  43      39.457 -11.753  90.779  1.00  0.00           N  
ATOM   1922  CA  ALA L  43      38.213 -12.562  90.714  1.00  0.00           C  
ATOM   1923  C   ALA L  43      38.556 -14.001  91.110  1.00  0.00           C  
ATOM   1924  O   ALA L  43      39.713 -14.436  90.937  1.00  0.00           O  
ATOM   1925  CB  ALA L  43      37.621 -12.500  89.316  1.00  0.00           C  
ATOM   1926  N   PRO L  44      37.555 -14.682  91.643  1.00  0.00           N  
ATOM   1927  CA  PRO L  44      37.699 -16.117  91.985  1.00  0.00           C  
ATOM   1928  C   PRO L  44      37.865 -16.914  90.702  1.00  0.00           C  
ATOM   1929  O   PRO L  44      37.205 -16.549  89.713  1.00  0.00           O  
ATOM   1930  CB  PRO L  44      36.438 -16.446  92.755  1.00  0.00           C  
ATOM   1931  CG  PRO L  44      35.945 -15.121  93.299  1.00  0.00           C  
ATOM   1932  CD  PRO L  44      36.357 -14.084  92.270  1.00  0.00           C  
ATOM   1933  N   LYS L  45      38.727 -17.928  90.712  1.00  0.00           N  
ATOM   1934  CA  LYS L  45      38.863 -18.812  89.529  1.00  0.00           C  
ATOM   1935  C   LYS L  45      38.924 -20.272  89.927  1.00  0.00           C  
ATOM   1936  O   LYS L  45      39.770 -20.651  90.762  1.00  0.00           O  
ATOM   1937  CB  LYS L  45      40.092 -18.462  88.713  1.00  0.00           C  
ATOM   1938  CG  LYS L  45      41.431 -18.773  89.370  1.00  0.00           C  
ATOM   1939  CD  LYS L  45      42.499 -19.077  88.336  1.00  0.00           C  
ATOM   1940  CE  LYS L  45      42.185 -20.318  87.529  1.00  0.00           C  
ATOM   1941  NZ  LYS L  45      41.952 -21.481  88.408  1.00  0.00           N  
ATOM   1942  N   VAL L  46      38.069 -21.086  89.319  1.00  0.00           N  
ATOM   1943  CA  VAL L  46      38.025 -22.526  89.680  1.00  0.00           C  
ATOM   1944  C   VAL L  46      39.305 -23.209  89.210  1.00  0.00           C  
ATOM   1945  O   VAL L  46      39.802 -22.935  88.109  1.00  0.00           O  
ATOM   1946  CB  VAL L  46      36.706 -23.181  89.256  1.00  0.00           C  
ATOM   1947  CG1 VAL L  46      35.884 -22.355  88.286  1.00  0.00           C  
ATOM   1948  CG2 VAL L  46      36.898 -24.598  88.738  1.00  0.00           C  
ATOM   1949  N   ILE L  47      39.839 -24.060  90.085  1.00  0.00           N  
ATOM   1950  CA  ILE L  47      41.008 -24.880  89.775  1.00  0.00           C  
ATOM   1951  C   ILE L  47      40.687 -26.374  89.875  1.00  0.00           C  
ATOM   1952  O   ILE L  47      41.585 -27.198  89.596  1.00  0.00           O  
ATOM   1953  CB  ILE L  47      42.266 -24.594  90.673  1.00  0.00           C  
ATOM   1954  CG1 ILE L  47      41.852 -24.521  92.160  1.00  0.00           C  
ATOM   1955  CG2 ILE L  47      43.089 -23.375  90.223  1.00  0.00           C  
ATOM   1956  CD1 ILE L  47      43.073 -24.553  93.115  1.00  0.00           C  
ATOM   1957  N   ILE L  48      39.505 -26.685  90.349  1.00  0.00           N  
ATOM   1958  CA  ILE L  48      39.048 -28.070  90.483  1.00  0.00           C  
ATOM   1959  C   ILE L  48      37.520 -28.061  90.303  1.00  0.00           C  
ATOM   1960  O   ILE L  48      36.843 -27.134  90.764  1.00  0.00           O  
ATOM   1961  CB  ILE L  48      39.466 -28.753  91.816  1.00  0.00           C  
ATOM   1962  CG1 ILE L  48      40.992 -28.717  92.026  1.00  0.00           C  
ATOM   1963  CG2 ILE L  48      38.939 -30.220  91.920  1.00  0.00           C  
ATOM   1964  CD1 ILE L  48      41.790 -29.785  91.236  1.00  0.00           C  
ATOM   1965  N   TYR L  49      37.071 -29.087  89.632  1.00  0.00           N  
ATOM   1966  CA  TYR L  49      35.662 -29.383  89.403  1.00  0.00           C  
ATOM   1967  C   TYR L  49      35.507 -30.902  89.522  1.00  0.00           C  
ATOM   1968  O   TYR L  49      36.468 -31.677  89.338  1.00  0.00           O  
ATOM   1969  CB  TYR L  49      35.137 -28.779  88.130  1.00  0.00           C  
ATOM   1970  CG  TYR L  49      35.341 -29.420  86.786  1.00  0.00           C  
ATOM   1971  CD1 TYR L  49      36.539 -29.283  86.081  1.00  0.00           C  
ATOM   1972  CD2 TYR L  49      34.306 -30.144  86.167  1.00  0.00           C  
ATOM   1973  CE1 TYR L  49      36.719 -29.871  84.837  1.00  0.00           C  
ATOM   1974  CE2 TYR L  49      34.471 -30.732  84.921  1.00  0.00           C  
ATOM   1975  CZ  TYR L  49      35.689 -30.598  84.261  1.00  0.00           C  
ATOM   1976  OH  TYR L  49      35.902 -31.174  83.032  1.00  0.00           O  
ATOM   1977  N   GLU L  50      34.319 -31.296  89.901  1.00  0.00           N  
ATOM   1978  CA  GLU L  50      33.931 -32.668  90.191  1.00  0.00           C  
ATOM   1979  C   GLU L  50      35.025 -33.524  90.786  1.00  0.00           C  
ATOM   1980  O   GLU L  50      35.524 -34.479  90.156  1.00  0.00           O  
ATOM   1981  CB  GLU L  50      33.366 -33.342  88.931  1.00  0.00           C  
ATOM   1982  CG  GLU L  50      31.964 -32.848  88.568  1.00  0.00           C  
ATOM   1983  CD  GLU L  50      31.582 -32.816  87.131  1.00  0.00           C  
ATOM   1984  OE1 GLU L  50      32.530 -32.608  86.343  1.00  0.00           O  
ATOM   1985  OE2 GLU L  50      30.419 -32.962  86.756  1.00  0.00           O  
ATOM   1986  N   VAL L  51      35.379 -33.168  92.045  1.00  0.00           N  
ATOM   1987  CA  VAL L  51      36.376 -33.903  92.822  1.00  0.00           C  
ATOM   1988  C   VAL L  51      37.781 -33.930  92.257  1.00  0.00           C  
ATOM   1989  O   VAL L  51      38.656 -33.424  93.034  1.00  0.00           O  
ATOM   1990  CB  VAL L  51      35.917 -35.318  93.249  1.00  0.00           C  
ATOM   1991  CG1 VAL L  51      37.049 -36.028  94.013  1.00  0.00           C  
ATOM   1992  CG2 VAL L  51      34.652 -35.321  94.077  1.00  0.00           C  
ATOM   1993  N   ASN L  52      38.055 -34.504  91.087  1.00  0.00           N  
ATOM   1994  CA  ASN L  52      39.465 -34.573  90.643  1.00  0.00           C  
ATOM   1995  C   ASN L  52      39.816 -33.878  89.347  1.00  0.00           C  
ATOM   1996  O   ASN L  52      41.060 -33.818  89.048  1.00  0.00           O  
ATOM   1997  CB  ASN L  52      40.039 -35.978  90.808  1.00  0.00           C  
ATOM   1998  CG  ASN L  52      39.734 -37.026  89.784  1.00  0.00           C  
ATOM   1999  OD1 ASN L  52      39.851 -36.839  88.563  1.00  0.00           O  
ATOM   2000  ND2 ASN L  52      39.346 -38.229  90.251  1.00  0.00           N  
ATOM   2001  N   LYS L  53      38.868 -33.284  88.639  1.00  0.00           N  
ATOM   2002  CA  LYS L  53      39.183 -32.686  87.319  1.00  0.00           C  
ATOM   2003  C   LYS L  53      39.531 -31.210  87.462  1.00  0.00           C  
ATOM   2004  O   LYS L  53      38.644 -30.418  87.845  1.00  0.00           O  
ATOM   2005  CB  LYS L  53      38.032 -32.801  86.336  1.00  0.00           C  
ATOM   2006  CG  LYS L  53      37.336 -34.153  86.282  1.00  0.00           C  
ATOM   2007  CD  LYS L  53      35.846 -33.964  86.003  1.00  0.00           C  
ATOM   2008  CE  LYS L  53      35.121 -35.290  85.908  1.00  0.00           C  
ATOM   2009  NZ  LYS L  53      33.660 -35.067  85.923  1.00  0.00           N  
ATOM   2010  N   ARG L  54      40.771 -30.853  87.170  1.00  0.00           N  
ATOM   2011  CA  ARG L  54      41.084 -29.410  87.022  1.00  0.00           C  
ATOM   2012  C   ARG L  54      40.564 -29.037  85.609  1.00  0.00           C  
ATOM   2013  O   ARG L  54      40.553 -29.885  84.709  1.00  0.00           O  
ATOM   2014  CB  ARG L  54      42.506 -29.005  87.135  1.00  0.00           C  
ATOM   2015  CG  ARG L  54      43.490 -29.865  87.864  1.00  0.00           C  
ATOM   2016  CD  ARG L  54      44.565 -30.291  86.897  1.00  0.00           C  
ATOM   2017  NE  ARG L  54      44.855 -31.709  87.100  1.00  0.00           N  
ATOM   2018  CZ  ARG L  54      45.984 -32.268  86.663  1.00  0.00           C  
ATOM   2019  NH1 ARG L  54      46.901 -31.559  86.003  1.00  0.00           N  
ATOM   2020  NH2 ARG L  54      46.182 -33.556  86.912  1.00  0.00           N  
ATOM   2021  N   PRO L  55      40.166 -27.778  85.523  1.00  0.00           N  
ATOM   2022  CA  PRO L  55      39.979 -27.119  84.239  1.00  0.00           C  
ATOM   2023  C   PRO L  55      41.270 -26.858  83.464  1.00  0.00           C  
ATOM   2024  O   PRO L  55      42.445 -27.035  83.845  1.00  0.00           O  
ATOM   2025  CB  PRO L  55      39.256 -25.816  84.583  1.00  0.00           C  
ATOM   2026  CG  PRO L  55      38.592 -26.094  85.901  1.00  0.00           C  
ATOM   2027  CD  PRO L  55      39.585 -26.989  86.641  1.00  0.00           C  
ATOM   2028  N   SER L  56      40.986 -26.335  82.272  1.00  0.00           N  
ATOM   2029  CA  SER L  56      41.976 -26.037  81.233  1.00  0.00           C  
ATOM   2030  C   SER L  56      42.914 -24.942  81.723  1.00  0.00           C  
ATOM   2031  O   SER L  56      42.499 -23.816  82.032  1.00  0.00           O  
ATOM   2032  CB  SER L  56      41.245 -25.680  79.935  1.00  0.00           C  
ATOM   2033  OG  SER L  56      40.120 -26.547  79.783  1.00  0.00           O  
ATOM   2034  N   GLY L  57      44.166 -25.329  81.842  1.00  0.00           N  
ATOM   2035  CA  GLY L  57      45.261 -24.426  82.183  1.00  0.00           C  
ATOM   2036  C   GLY L  57      45.591 -24.444  83.662  1.00  0.00           C  
ATOM   2037  O   GLY L  57      46.363 -23.563  84.105  1.00  0.00           O  
ATOM   2038  N   VAL L  58      44.980 -25.398  84.384  1.00  0.00           N  
ATOM   2039  CA  VAL L  58      45.363 -25.536  85.828  1.00  0.00           C  
ATOM   2040  C   VAL L  58      46.688 -26.303  85.821  1.00  0.00           C  
ATOM   2041  O   VAL L  58      46.728 -27.424  85.295  1.00  0.00           O  
ATOM   2042  CB  VAL L  58      44.268 -26.209  86.644  1.00  0.00           C  
ATOM   2043  CG1 VAL L  58      44.601 -26.248  88.131  1.00  0.00           C  
ATOM   2044  CG2 VAL L  58      42.896 -25.588  86.455  1.00  0.00           C  
ATOM   2045  N   PRO L  59      47.702 -25.656  86.386  1.00  0.00           N  
ATOM   2046  CA  PRO L  59      49.016 -26.320  86.514  1.00  0.00           C  
ATOM   2047  C   PRO L  59      48.818 -27.641  87.247  1.00  0.00           C  
ATOM   2048  O   PRO L  59      48.005 -27.812  88.159  1.00  0.00           O  
ATOM   2049  CB  PRO L  59      49.875 -25.311  87.217  1.00  0.00           C  
ATOM   2050  CG  PRO L  59      48.940 -24.475  88.031  1.00  0.00           C  
ATOM   2051  CD  PRO L  59      47.556 -24.625  87.445  1.00  0.00           C  
ATOM   2052  N   ASP L  60      49.546 -28.609  86.808  1.00  0.00           N  
ATOM   2053  CA  ASP L  60      49.577 -30.002  87.159  1.00  0.00           C  
ATOM   2054  C   ASP L  60      49.545 -30.328  88.643  1.00  0.00           C  
ATOM   2055  O   ASP L  60      49.036 -31.395  89.052  1.00  0.00           O  
ATOM   2056  CB  ASP L  60      50.884 -30.540  86.496  1.00  0.00           C  
ATOM   2057  CG  ASP L  60      50.904 -32.029  86.321  1.00  0.00           C  
ATOM   2058  OD1 ASP L  60      49.811 -32.592  86.103  1.00  0.00           O  
ATOM   2059  OD2 ASP L  60      51.998 -32.626  86.388  1.00  0.00           O  
ATOM   2060  N   ARG L  61      50.132 -29.442  89.422  1.00  0.00           N  
ATOM   2061  CA  ARG L  61      50.385 -29.588  90.842  1.00  0.00           C  
ATOM   2062  C   ARG L  61      49.131 -29.591  91.710  1.00  0.00           C  
ATOM   2063  O   ARG L  61      49.236 -30.023  92.879  1.00  0.00           O  
ATOM   2064  CB  ARG L  61      51.257 -28.453  91.411  1.00  0.00           C  
ATOM   2065  CG  ARG L  61      52.407 -27.982  90.570  1.00  0.00           C  
ATOM   2066  CD  ARG L  61      52.964 -26.693  91.074  1.00  0.00           C  
ATOM   2067  NE  ARG L  61      51.902 -25.710  91.275  1.00  0.00           N  
ATOM   2068  CZ  ARG L  61      52.048 -24.432  90.909  1.00  0.00           C  
ATOM   2069  NH1 ARG L  61      53.191 -23.997  90.370  1.00  0.00           N  
ATOM   2070  NH2 ARG L  61      51.025 -23.600  91.039  1.00  0.00           N  
ATOM   2071  N   PHE L  62      48.066 -29.024  91.208  1.00  0.00           N  
ATOM   2072  CA  PHE L  62      46.798 -28.989  91.970  1.00  0.00           C  
ATOM   2073  C   PHE L  62      46.163 -30.364  91.753  1.00  0.00           C  
ATOM   2074  O   PHE L  62      46.181 -30.848  90.610  1.00  0.00           O  
ATOM   2075  CB  PHE L  62      45.904 -27.841  91.591  1.00  0.00           C  
ATOM   2076  CG  PHE L  62      46.482 -26.478  91.851  1.00  0.00           C  
ATOM   2077  CD1 PHE L  62      47.454 -25.963  90.992  1.00  0.00           C  
ATOM   2078  CD2 PHE L  62      46.066 -25.733  92.946  1.00  0.00           C  
ATOM   2079  CE1 PHE L  62      48.000 -24.713  91.217  1.00  0.00           C  
ATOM   2080  CE2 PHE L  62      46.606 -24.466  93.182  1.00  0.00           C  
ATOM   2081  CZ  PHE L  62      47.577 -23.958  92.309  1.00  0.00           C  
ATOM   2082  N   SER L  63      45.750 -30.954  92.848  1.00  0.00           N  
ATOM   2083  CA  SER L  63      44.983 -32.228  92.725  1.00  0.00           C  
ATOM   2084  C   SER L  63      43.877 -32.124  93.770  1.00  0.00           C  
ATOM   2085  O   SER L  63      44.136 -31.535  94.831  1.00  0.00           O  
ATOM   2086  CB  SER L  63      45.845 -33.437  92.924  1.00  0.00           C  
ATOM   2087  OG  SER L  63      47.218 -33.139  93.110  1.00  0.00           O  
ATOM   2088  N   GLY L  64      42.725 -32.637  93.435  1.00  0.00           N  
ATOM   2089  CA  GLY L  64      41.606 -32.714  94.396  1.00  0.00           C  
ATOM   2090  C   GLY L  64      41.331 -34.189  94.709  1.00  0.00           C  
ATOM   2091  O   GLY L  64      41.673 -35.086  93.920  1.00  0.00           O  
ATOM   2092  N   SER L  65      40.742 -34.381  95.878  1.00  0.00           N  
ATOM   2093  CA  SER L  65      40.275 -35.710  96.328  1.00  0.00           C  
ATOM   2094  C   SER L  65      39.042 -35.475  97.215  1.00  0.00           C  
ATOM   2095  O   SER L  65      38.786 -34.335  97.629  1.00  0.00           O  
ATOM   2096  CB  SER L  65      41.313 -36.506  97.077  1.00  0.00           C  
ATOM   2097  OG  SER L  65      42.549 -36.588  96.404  1.00  0.00           O  
ATOM   2098  N   LYS L  66      38.314 -36.538  97.436  1.00  0.00           N  
ATOM   2099  CA  LYS L  66      37.139 -36.531  98.311  1.00  0.00           C  
ATOM   2100  C   LYS L  66      37.012 -37.948  98.869  1.00  0.00           C  
ATOM   2101  O   LYS L  66      37.017 -38.889  98.064  1.00  0.00           O  
ATOM   2102  CB  LYS L  66      35.855 -36.158  97.599  1.00  0.00           C  
ATOM   2103  CG  LYS L  66      34.594 -36.049  98.469  1.00  0.00           C  
ATOM   2104  CD  LYS L  66      33.851 -37.356  98.585  1.00  0.00           C  
ATOM   2105  CE  LYS L  66      32.632 -37.475  97.707  1.00  0.00           C  
ATOM   2106  NZ  LYS L  66      31.433 -36.853  98.328  1.00  0.00           N  
ATOM   2107  N   SER L  67      36.986 -38.049 100.176  1.00  0.00           N  
ATOM   2108  CA  SER L  67      36.562 -39.298 100.827  1.00  0.00           C  
ATOM   2109  C   SER L  67      36.032 -38.958 102.223  1.00  0.00           C  
ATOM   2110  O   SER L  67      36.484 -37.993 102.870  1.00  0.00           O  
ATOM   2111  CB  SER L  67      37.630 -40.370 100.875  1.00  0.00           C  
ATOM   2112  OG  SER L  67      37.054 -41.678 100.973  1.00  0.00           O  
ATOM   2113  N   GLY L  68      35.085 -39.794 102.619  1.00  0.00           N  
ATOM   2114  CA  GLY L  68      34.321 -39.529 103.860  1.00  0.00           C  
ATOM   2115  C   GLY L  68      33.446 -38.305 103.513  1.00  0.00           C  
ATOM   2116  O   GLY L  68      32.649 -38.371 102.568  1.00  0.00           O  
ATOM   2117  N   ASN L  69      33.694 -37.249 104.247  1.00  0.00           N  
ATOM   2118  CA  ASN L  69      32.959 -35.988 104.067  1.00  0.00           C  
ATOM   2119  C   ASN L  69      33.990 -34.903 103.715  1.00  0.00           C  
ATOM   2120  O   ASN L  69      33.666 -33.698 103.777  1.00  0.00           O  
ATOM   2121  CB  ASN L  69      32.173 -35.633 105.323  1.00  0.00           C  
ATOM   2122  CG  ASN L  69      31.363 -36.792 105.859  1.00  0.00           C  
ATOM   2123  OD1 ASN L  69      31.892 -37.885 106.132  1.00  0.00           O  
ATOM   2124  ND2 ASN L  69      30.058 -36.546 106.024  1.00  0.00           N  
ATOM   2125  N   THR L  70      35.189 -35.407 103.394  1.00  0.00           N  
ATOM   2126  CA  THR L  70      36.291 -34.461 103.176  1.00  0.00           C  
ATOM   2127  C   THR L  70      36.823 -34.517 101.752  1.00  0.00           C  
ATOM   2128  O   THR L  70      37.350 -35.516 101.267  1.00  0.00           O  
ATOM   2129  CB  THR L  70      37.418 -34.548 104.256  1.00  0.00           C  
ATOM   2130  OG1 THR L  70      36.957 -35.466 105.303  1.00  0.00           O  
ATOM   2131  CG2 THR L  70      37.761 -33.166 104.851  1.00  0.00           C  
ATOM   2132  N   ALA L  71      36.612 -33.370 101.111  1.00  0.00           N  
ATOM   2133  CA  ALA L  71      37.327 -33.043  99.864  1.00  0.00           C  
ATOM   2134  C   ALA L  71      38.654 -32.446 100.349  1.00  0.00           C  
ATOM   2135  O   ALA L  71      38.692 -31.955 101.500  1.00  0.00           O  
ATOM   2136  CB  ALA L  71      36.512 -32.067  99.059  1.00  0.00           C  
ATOM   2137  N   SER L  72      39.671 -32.536  99.538  1.00  0.00           N  
ATOM   2138  CA  SER L  72      41.011 -32.041  99.849  1.00  0.00           C  
ATOM   2139  C   SER L  72      41.622 -31.503  98.544  1.00  0.00           C  
ATOM   2140  O   SER L  72      41.307 -32.037  97.467  1.00  0.00           O  
ATOM   2141  CB  SER L  72      41.926 -33.113 100.410  1.00  0.00           C  
ATOM   2142  OG  SER L  72      41.365 -33.834 101.481  1.00  0.00           O  
ATOM   2143  N   LEU L  73      42.447 -30.484  98.730  1.00  0.00           N  
ATOM   2144  CA  LEU L  73      43.145 -29.890  97.579  1.00  0.00           C  
ATOM   2145  C   LEU L  73      44.633 -29.840  97.954  1.00  0.00           C  
ATOM   2146  O   LEU L  73      44.985 -29.191  98.955  1.00  0.00           O  
ATOM   2147  CB  LEU L  73      42.614 -28.522  97.190  1.00  0.00           C  
ATOM   2148  CG  LEU L  73      43.566 -27.760  96.237  1.00  0.00           C  
ATOM   2149  CD1 LEU L  73      43.126 -27.903  94.790  1.00  0.00           C  
ATOM   2150  CD2 LEU L  73      43.605 -26.313  96.661  1.00  0.00           C  
ATOM   2151  N   THR L  74      45.407 -30.529  97.135  1.00  0.00           N  
ATOM   2152  CA  THR L  74      46.848 -30.617  97.404  1.00  0.00           C  
ATOM   2153  C   THR L  74      47.560 -29.778  96.339  1.00  0.00           C  
ATOM   2154  O   THR L  74      47.444 -30.064  95.136  1.00  0.00           O  
ATOM   2155  CB  THR L  74      47.395 -32.068  97.512  1.00  0.00           C  
ATOM   2156  OG1 THR L  74      47.032 -32.551  98.852  1.00  0.00           O  
ATOM   2157  CG2 THR L  74      48.915 -32.182  97.270  1.00  0.00           C  
ATOM   2158  N   VAL L  75      48.159 -28.714  96.874  1.00  0.00           N  
ATOM   2159  CA  VAL L  75      49.186 -28.008  96.066  1.00  0.00           C  
ATOM   2160  C   VAL L  75      50.434 -28.889  96.313  1.00  0.00           C  
ATOM   2161  O   VAL L  75      50.945 -28.954  97.438  1.00  0.00           O  
ATOM   2162  CB  VAL L  75      49.354 -26.554  96.411  1.00  0.00           C  
ATOM   2163  CG1 VAL L  75      50.416 -25.881  95.538  1.00  0.00           C  
ATOM   2164  CG2 VAL L  75      48.056 -25.759  96.322  1.00  0.00           C  
ATOM   2165  N   SER L  76      50.731 -29.611  95.253  1.00  0.00           N  
ATOM   2166  CA  SER L  76      51.862 -30.557  95.240  1.00  0.00           C  
ATOM   2167  C   SER L  76      53.057 -29.783  94.677  1.00  0.00           C  
ATOM   2168  O   SER L  76      53.181 -29.622  93.450  1.00  0.00           O  
ATOM   2169  CB  SER L  76      51.523 -31.793  94.432  1.00  0.00           C  
ATOM   2170  OG  SER L  76      50.122 -32.031  94.281  1.00  0.00           O  
ATOM   2171  N   GLY L  77      53.858 -29.266  95.588  1.00  0.00           N  
ATOM   2172  CA  GLY L  77      55.052 -28.475  95.251  1.00  0.00           C  
ATOM   2173  C   GLY L  77      54.720 -26.991  95.151  1.00  0.00           C  
ATOM   2174  O   GLY L  77      54.289 -26.497  94.093  1.00  0.00           O  
ATOM   2175  N   LEU L  78      54.970 -26.280  96.240  1.00  0.00           N  
ATOM   2176  CA  LEU L  78      54.447 -24.912  96.410  1.00  0.00           C  
ATOM   2177  C   LEU L  78      55.334 -23.878  95.722  1.00  0.00           C  
ATOM   2178  O   LEU L  78      56.555 -23.814  95.941  1.00  0.00           O  
ATOM   2179  CB  LEU L  78      54.233 -24.655  97.902  1.00  0.00           C  
ATOM   2180  CG  LEU L  78      53.224 -23.627  98.378  1.00  0.00           C  
ATOM   2181  CD1 LEU L  78      51.803 -24.169  98.356  1.00  0.00           C  
ATOM   2182  CD2 LEU L  78      53.586 -23.227  99.812  1.00  0.00           C  
ATOM   2183  N   GLN L  79      54.669 -23.075  94.915  1.00  0.00           N  
ATOM   2184  CA  GLN L  79      55.255 -21.945  94.199  1.00  0.00           C  
ATOM   2185  C   GLN L  79      54.667 -20.644  94.757  1.00  0.00           C  
ATOM   2186  O   GLN L  79      53.544 -20.617  95.285  1.00  0.00           O  
ATOM   2187  CB  GLN L  79      55.002 -21.997  92.692  1.00  0.00           C  
ATOM   2188  CG  GLN L  79      56.268 -21.908  91.853  1.00  0.00           C  
ATOM   2189  CD  GLN L  79      56.938 -23.262  91.725  1.00  0.00           C  
ATOM   2190  OE1 GLN L  79      56.278 -24.298  91.714  1.00  0.00           O  
ATOM   2191  NE2 GLN L  79      58.260 -23.253  91.656  1.00  0.00           N  
ATOM   2192  N   ALA L  80      55.429 -19.587  94.573  1.00  0.00           N  
ATOM   2193  CA  ALA L  80      55.144 -18.270  95.134  1.00  0.00           C  
ATOM   2194  C   ALA L  80      53.676 -17.895  95.116  1.00  0.00           C  
ATOM   2195  O   ALA L  80      53.019 -17.800  96.183  1.00  0.00           O  
ATOM   2196  CB  ALA L  80      55.987 -17.217  94.407  1.00  0.00           C  
ATOM   2197  N   GLU L  81      53.134 -17.717  93.915  1.00  0.00           N  
ATOM   2198  CA  GLU L  81      51.760 -17.233  93.787  1.00  0.00           C  
ATOM   2199  C   GLU L  81      50.712 -18.302  93.874  1.00  0.00           C  
ATOM   2200  O   GLU L  81      49.591 -18.151  93.361  1.00  0.00           O  
ATOM   2201  CB  GLU L  81      51.556 -16.260  92.645  1.00  0.00           C  
ATOM   2202  CG  GLU L  81      51.715 -14.774  93.134  1.00  0.00           C  
ATOM   2203  CD  GLU L  81      51.645 -14.667  94.649  1.00  0.00           C  
ATOM   2204  OE1 GLU L  81      50.476 -14.612  95.086  1.00  0.00           O  
ATOM   2205  OE2 GLU L  81      52.639 -14.704  95.365  1.00  0.00           O  
ATOM   2206  N   ASP L  82      51.089 -19.372  94.593  1.00  0.00           N  
ATOM   2207  CA  ASP L  82      50.096 -20.374  95.062  1.00  0.00           C  
ATOM   2208  C   ASP L  82      49.489 -19.740  96.330  1.00  0.00           C  
ATOM   2209  O   ASP L  82      48.387 -20.073  96.748  1.00  0.00           O  
ATOM   2210  CB  ASP L  82      50.705 -21.747  95.276  1.00  0.00           C  
ATOM   2211  CG  ASP L  82      51.069 -22.464  93.984  1.00  0.00           C  
ATOM   2212  OD1 ASP L  82      50.802 -21.955  92.885  1.00  0.00           O  
ATOM   2213  OD2 ASP L  82      51.626 -23.575  94.058  1.00  0.00           O  
ATOM   2214  N   GLU L  83      50.286 -18.807  96.854  1.00  0.00           N  
ATOM   2215  CA  GLU L  83      49.780 -17.919  97.936  1.00  0.00           C  
ATOM   2216  C   GLU L  83      48.500 -17.236  97.479  1.00  0.00           C  
ATOM   2217  O   GLU L  83      48.541 -16.370  96.579  1.00  0.00           O  
ATOM   2218  CB  GLU L  83      50.832 -16.884  98.256  1.00  0.00           C  
ATOM   2219  CG  GLU L  83      50.740 -15.946  99.434  1.00  0.00           C  
ATOM   2220  CD  GLU L  83      52.061 -15.426  99.951  1.00  0.00           C  
ATOM   2221  OE1 GLU L  83      53.097 -15.429  99.304  1.00  0.00           O  
ATOM   2222  OE2 GLU L  83      51.972 -15.011 101.118  1.00  0.00           O  
ATOM   2223  N   ALA L  84      47.385 -17.668  98.059  1.00  0.00           N  
ATOM   2224  CA  ALA L  84      46.063 -17.052  97.821  1.00  0.00           C  
ATOM   2225  C   ALA L  84      45.023 -17.566  98.810  1.00  0.00           C  
ATOM   2226  O   ALA L  84      45.344 -18.393  99.680  1.00  0.00           O  
ATOM   2227  CB  ALA L  84      45.639 -17.293  96.380  1.00  0.00           C  
ATOM   2228  N   ASP L  85      43.801 -17.063  98.713  1.00  0.00           N  
ATOM   2229  CA  ASP L  85      42.648 -17.520  99.486  1.00  0.00           C  
ATOM   2230  C   ASP L  85      42.087 -18.742  98.717  1.00  0.00           C  
ATOM   2231  O   ASP L  85      42.031 -18.594  97.486  1.00  0.00           O  
ATOM   2232  CB  ASP L  85      41.488 -16.526  99.661  1.00  0.00           C  
ATOM   2233  CG  ASP L  85      41.797 -15.459 100.683  1.00  0.00           C  
ATOM   2234  OD1 ASP L  85      42.043 -15.760 101.856  1.00  0.00           O  
ATOM   2235  OD2 ASP L  85      41.844 -14.291 100.243  1.00  0.00           O  
ATOM   2236  N   TYR L  86      41.746 -19.763  99.507  1.00  0.00           N  
ATOM   2237  CA  TYR L  86      41.141 -20.923  98.711  1.00  0.00           C  
ATOM   2238  C   TYR L  86      39.779 -21.234  99.306  1.00  0.00           C  
ATOM   2239  O   TYR L  86      39.604 -21.103 100.524  1.00  0.00           O  
ATOM   2240  CB  TYR L  86      42.036 -22.105  98.557  1.00  0.00           C  
ATOM   2241  CG  TYR L  86      43.267 -22.013  97.698  1.00  0.00           C  
ATOM   2242  CD1 TYR L  86      43.830 -20.786  97.354  1.00  0.00           C  
ATOM   2243  CD2 TYR L  86      43.914 -23.165  97.235  1.00  0.00           C  
ATOM   2244  CE1 TYR L  86      44.991 -20.689  96.595  1.00  0.00           C  
ATOM   2245  CE2 TYR L  86      45.078 -23.091  96.477  1.00  0.00           C  
ATOM   2246  CZ  TYR L  86      45.612 -21.849  96.160  1.00  0.00           C  
ATOM   2247  OH  TYR L  86      46.754 -21.722  95.430  1.00  0.00           O  
ATOM   2248  N   TYR L  87      38.863 -21.615  98.408  1.00  0.00           N  
ATOM   2249  CA  TYR L  87      37.488 -21.942  98.884  1.00  0.00           C  
ATOM   2250  C   TYR L  87      37.045 -23.248  98.226  1.00  0.00           C  
ATOM   2251  O   TYR L  87      37.665 -23.693  97.246  1.00  0.00           O  
ATOM   2252  CB  TYR L  87      36.496 -20.835  98.566  1.00  0.00           C  
ATOM   2253  CG  TYR L  87      36.779 -19.436  99.020  1.00  0.00           C  
ATOM   2254  CD1 TYR L  87      37.792 -18.681  98.434  1.00  0.00           C  
ATOM   2255  CD2 TYR L  87      36.018 -18.838 100.027  1.00  0.00           C  
ATOM   2256  CE1 TYR L  87      38.058 -17.378  98.845  1.00  0.00           C  
ATOM   2257  CE2 TYR L  87      36.276 -17.534 100.459  1.00  0.00           C  
ATOM   2258  CZ  TYR L  87      37.293 -16.807  99.856  1.00  0.00           C  
ATOM   2259  OH  TYR L  87      37.580 -15.526 100.235  1.00  0.00           O  
ATOM   2260  N   CYS L  88      35.969 -23.801  98.767  1.00  0.00           N  
ATOM   2261  CA  CYS L  88      35.346 -25.002  98.218  1.00  0.00           C  
ATOM   2262  C   CYS L  88      33.822 -24.812  98.112  1.00  0.00           C  
ATOM   2263  O   CYS L  88      33.248 -23.810  98.575  1.00  0.00           O  
ATOM   2264  CB  CYS L  88      35.642 -26.281  99.023  1.00  0.00           C  
ATOM   2265  SG  CYS L  88      35.161 -26.163 100.724  1.00  0.00           S  
ATOM   2266  N   SER L  89      33.240 -25.859  97.503  1.00  0.00           N  
ATOM   2267  CA  SER L  89      31.861 -25.658  96.954  1.00  0.00           C  
ATOM   2268  C   SER L  89      31.126 -26.977  96.880  1.00  0.00           C  
ATOM   2269  O   SER L  89      31.794 -28.020  96.670  1.00  0.00           O  
ATOM   2270  CB  SER L  89      32.072 -25.020  95.573  1.00  0.00           C  
ATOM   2271  OG  SER L  89      30.932 -24.565  94.906  1.00  0.00           O  
ATOM   2272  N   SER L  90      29.797 -26.896  96.947  1.00  0.00           N  
ATOM   2273  CA  SER L  90      28.928 -28.047  96.670  1.00  0.00           C  
ATOM   2274  C   SER L  90      27.496 -27.708  96.265  1.00  0.00           C  
ATOM   2275  O   SER L  90      26.738 -27.008  96.964  1.00  0.00           O  
ATOM   2276  CB  SER L  90      28.939 -29.036  97.841  1.00  0.00           C  
ATOM   2277  OG  SER L  90      29.720 -30.164  97.456  1.00  0.00           O  
ATOM   2278  N   TYR L  91      27.121 -28.276  95.119  1.00  0.00           N  
ATOM   2279  CA  TYR L  91      25.817 -28.023  94.460  1.00  0.00           C  
ATOM   2280  C   TYR L  91      24.811 -29.067  94.974  1.00  0.00           C  
ATOM   2281  O   TYR L  91      24.784 -30.229  94.551  1.00  0.00           O  
ATOM   2282  CB  TYR L  91      25.920 -27.968  92.998  1.00  0.00           C  
ATOM   2283  CG  TYR L  91      25.056 -28.329  91.861  1.00  0.00           C  
ATOM   2284  CD1 TYR L  91      24.786 -29.659  91.502  1.00  0.00           C  
ATOM   2285  CD2 TYR L  91      24.595 -27.338  90.955  1.00  0.00           C  
ATOM   2286  CE1 TYR L  91      24.075 -30.001  90.359  1.00  0.00           C  
ATOM   2287  CE2 TYR L  91      23.876 -27.660  89.801  1.00  0.00           C  
ATOM   2288  CZ  TYR L  91      23.625 -29.001  89.515  1.00  0.00           C  
ATOM   2289  OH  TYR L  91      22.915 -29.360  88.394  1.00  0.00           O  
ATOM   2290  N   GLU L  92      24.068 -28.558  95.950  1.00  0.00           N  
ATOM   2291  CA  GLU L  92      22.879 -29.329  96.454  1.00  0.00           C  
ATOM   2292  C   GLU L  92      21.816 -29.050  95.391  1.00  0.00           C  
ATOM   2293  O   GLU L  92      20.901 -28.239  95.499  1.00  0.00           O  
ATOM   2294  CB  GLU L  92      22.562 -28.908  97.850  1.00  0.00           C  
ATOM   2295  CG  GLU L  92      23.720 -28.388  98.720  1.00  0.00           C  
ATOM   2296  CD  GLU L  92      24.924 -29.242  98.951  1.00  0.00           C  
ATOM   2297  OE1 GLU L  92      25.343 -29.831  97.919  1.00  0.00           O  
ATOM   2298  OE2 GLU L  92      25.509 -29.364 100.038  1.00  0.00           O  
ATOM   2299  N   GLY L  93      22.092 -29.718  94.257  1.00  0.00           N  
ATOM   2300  CA  GLY L  93      21.395 -29.530  92.983  1.00  0.00           C  
ATOM   2301  C   GLY L  93      21.410 -28.039  92.634  1.00  0.00           C  
ATOM   2302  O   GLY L  93      22.403 -27.336  92.855  1.00  0.00           O  
ATOM   2303  N   SER L  94      20.253 -27.615  92.167  1.00  0.00           N  
ATOM   2304  CA  SER L  94      19.990 -26.214  91.818  1.00  0.00           C  
ATOM   2305  C   SER L  94      19.179 -25.512  92.904  1.00  0.00           C  
ATOM   2306  O   SER L  94      18.105 -25.981  93.327  1.00  0.00           O  
ATOM   2307  CB  SER L  94      19.298 -26.165  90.453  1.00  0.00           C  
ATOM   2308  OG  SER L  94      20.275 -26.225  89.412  1.00  0.00           O  
ATOM   2309  N   ASP L  95      19.703 -24.381  93.352  1.00  0.00           N  
ATOM   2310  CA  ASP L  95      19.145 -23.528  94.381  1.00  0.00           C  
ATOM   2311  C   ASP L  95      20.095 -23.428  95.592  1.00  0.00           C  
ATOM   2312  O   ASP L  95      20.046 -22.413  96.317  1.00  0.00           O  
ATOM   2313  CB  ASP L  95      17.749 -23.990  94.872  1.00  0.00           C  
ATOM   2314  CG  ASP L  95      16.655 -22.955  94.725  1.00  0.00           C  
ATOM   2315  OD1 ASP L  95      17.001 -21.754  94.621  1.00  0.00           O  
ATOM   2316  OD2 ASP L  95      15.454 -23.293  94.699  1.00  0.00           O  
ATOM   2317  N   ASN L  95A     20.890 -24.464  95.792  1.00  0.00           N  
ATOM   2318  CA  ASN L  95A     21.586 -24.640  97.088  1.00  0.00           C  
ATOM   2319  C   ASN L  95A     23.085 -24.849  96.930  1.00  0.00           C  
ATOM   2320  O   ASN L  95A     23.580 -25.997  96.980  1.00  0.00           O  
ATOM   2321  CB  ASN L  95A     20.915 -25.778  97.852  1.00  0.00           C  
ATOM   2322  CG  ASN L  95A     20.527 -25.407  99.271  1.00  0.00           C  
ATOM   2323  OD1 ASN L  95A     21.137 -25.926 100.221  1.00  0.00           O  
ATOM   2324  ND2 ASN L  95A     19.518 -24.539  99.403  1.00  0.00           N  
ATOM   2325  N   PHE L  96      23.773 -23.726  96.811  1.00  0.00           N  
ATOM   2326  CA  PHE L  96      25.218 -23.747  96.473  1.00  0.00           C  
ATOM   2327  C   PHE L  96      25.991 -23.387  97.739  1.00  0.00           C  
ATOM   2328  O   PHE L  96      26.261 -22.225  98.042  1.00  0.00           O  
ATOM   2329  CB  PHE L  96      25.513 -22.893  95.246  1.00  0.00           C  
ATOM   2330  CG  PHE L  96      24.509 -23.050  94.132  1.00  0.00           C  
ATOM   2331  CD1 PHE L  96      24.062 -24.327  93.768  1.00  0.00           C  
ATOM   2332  CD2 PHE L  96      24.024 -21.940  93.454  1.00  0.00           C  
ATOM   2333  CE1 PHE L  96      23.141 -24.501  92.744  1.00  0.00           C  
ATOM   2334  CE2 PHE L  96      23.092 -22.086  92.418  1.00  0.00           C  
ATOM   2335  CZ  PHE L  96      22.656 -23.381  92.067  1.00  0.00           C  
ATOM   2336  N   VAL L  97      26.327 -24.459  98.449  1.00  0.00           N  
ATOM   2337  CA  VAL L  97      27.027 -24.351  99.739  1.00  0.00           C  
ATOM   2338  C   VAL L  97      28.515 -24.088  99.531  1.00  0.00           C  
ATOM   2339  O   VAL L  97      29.191 -24.852  98.823  1.00  0.00           O  
ATOM   2340  CB  VAL L  97      26.773 -25.628 100.563  1.00  0.00           C  
ATOM   2341  CG1 VAL L  97      27.175 -25.443 102.016  1.00  0.00           C  
ATOM   2342  CG2 VAL L  97      25.340 -26.112 100.436  1.00  0.00           C  
ATOM   2343  N   PHE L  98      28.985 -23.031 100.182  1.00  0.00           N  
ATOM   2344  CA  PHE L  98      30.403 -22.650 100.148  1.00  0.00           C  
ATOM   2345  C   PHE L  98      31.068 -23.059 101.470  1.00  0.00           C  
ATOM   2346  O   PHE L  98      30.406 -23.175 102.509  1.00  0.00           O  
ATOM   2347  CB  PHE L  98      30.636 -21.182  99.839  1.00  0.00           C  
ATOM   2348  CG  PHE L  98      30.837 -20.884  98.378  1.00  0.00           C  
ATOM   2349  CD1 PHE L  98      29.755 -20.940  97.495  1.00  0.00           C  
ATOM   2350  CD2 PHE L  98      32.108 -20.575  97.897  1.00  0.00           C  
ATOM   2351  CE1 PHE L  98      29.940 -20.671  96.136  1.00  0.00           C  
ATOM   2352  CE2 PHE L  98      32.302 -20.300  96.551  1.00  0.00           C  
ATOM   2353  CZ  PHE L  98      31.222 -20.350  95.670  1.00  0.00           C  
ATOM   2354  N   GLY L  99      32.360 -23.305 101.295  1.00  0.00           N  
ATOM   2355  CA  GLY L  99      33.244 -23.615 102.472  1.00  0.00           C  
ATOM   2356  C   GLY L  99      33.645 -22.240 103.015  1.00  0.00           C  
ATOM   2357  O   GLY L  99      33.151 -21.247 102.436  1.00  0.00           O  
ATOM   2358  N   THR L 100      34.466 -22.221 104.052  1.00  0.00           N  
ATOM   2359  CA  THR L 100      34.666 -20.917 104.732  1.00  0.00           C  
ATOM   2360  C   THR L 100      35.929 -20.214 104.297  1.00  0.00           C  
ATOM   2361  O   THR L 100      36.166 -19.092 104.831  1.00  0.00           O  
ATOM   2362  CB  THR L 100      34.606 -20.961 106.301  1.00  0.00           C  
ATOM   2363  OG1 THR L 100      33.760 -22.053 106.727  1.00  0.00           O  
ATOM   2364  CG2 THR L 100      34.089 -19.630 106.894  1.00  0.00           C  
ATOM   2365  N   GLY L 101      36.716 -20.814 103.437  1.00  0.00           N  
ATOM   2366  CA  GLY L 101      37.942 -20.155 102.931  1.00  0.00           C  
ATOM   2367  C   GLY L 101      39.152 -20.792 103.593  1.00  0.00           C  
ATOM   2368  O   GLY L 101      39.020 -21.679 104.431  1.00  0.00           O  
ATOM   2369  N   THR L 102      40.305 -20.371 103.163  1.00  0.00           N  
ATOM   2370  CA  THR L 102      41.619 -20.734 103.689  1.00  0.00           C  
ATOM   2371  C   THR L 102      42.585 -19.641 103.202  1.00  0.00           C  
ATOM   2372  O   THR L 102      42.147 -18.618 102.637  1.00  0.00           O  
ATOM   2373  CB  THR L 102      42.105 -22.144 103.243  1.00  0.00           C  
ATOM   2374  OG1 THR L 102      40.998 -23.064 103.476  1.00  0.00           O  
ATOM   2375  CG2 THR L 102      43.361 -22.665 103.955  1.00  0.00           C  
ATOM   2376  N   LYS L 103      43.843 -19.927 103.318  1.00  0.00           N  
ATOM   2377  CA  LYS L 103      44.925 -19.023 102.881  1.00  0.00           C  
ATOM   2378  C   LYS L 103      46.124 -19.948 102.654  1.00  0.00           C  
ATOM   2379  O   LYS L 103      46.257 -20.946 103.398  1.00  0.00           O  
ATOM   2380  CB  LYS L 103      45.258 -18.005 103.929  1.00  0.00           C  
ATOM   2381  CG  LYS L 103      45.637 -16.594 103.515  1.00  0.00           C  
ATOM   2382  CD  LYS L 103      45.728 -15.744 104.784  1.00  0.00           C  
ATOM   2383  CE  LYS L 103      45.792 -14.262 104.515  1.00  0.00           C  
ATOM   2384  NZ  LYS L 103      47.176 -13.758 104.654  1.00  0.00           N  
ATOM   2385  N   VAL L 104      46.855 -19.651 101.617  1.00  0.00           N  
ATOM   2386  CA  VAL L 104      48.169 -20.300 101.433  1.00  0.00           C  
ATOM   2387  C   VAL L 104      49.181 -19.187 101.749  1.00  0.00           C  
ATOM   2388  O   VAL L 104      49.160 -18.108 101.143  1.00  0.00           O  
ATOM   2389  CB  VAL L 104      48.332 -20.994 100.107  1.00  0.00           C  
ATOM   2390  CG1 VAL L 104      49.673 -21.723  99.984  1.00  0.00           C  
ATOM   2391  CG2 VAL L 104      47.199 -21.987  99.858  1.00  0.00           C  
ATOM   2392  N   THR L 105      49.917 -19.498 102.810  1.00  0.00           N  
ATOM   2393  CA  THR L 105      51.022 -18.584 103.182  1.00  0.00           C  
ATOM   2394  C   THR L 105      52.307 -19.308 102.808  1.00  0.00           C  
ATOM   2395  O   THR L 105      52.521 -20.481 103.160  1.00  0.00           O  
ATOM   2396  CB  THR L 105      50.949 -18.085 104.643  1.00  0.00           C  
ATOM   2397  OG1 THR L 105      49.513 -17.946 104.974  1.00  0.00           O  
ATOM   2398  CG2 THR L 105      51.710 -16.767 104.887  1.00  0.00           C  
ATOM   2399  N   VAL L 106      53.054 -18.611 101.972  1.00  0.00           N  
ATOM   2400  CA  VAL L 106      54.457 -19.065 101.706  1.00  0.00           C  
ATOM   2401  C   VAL L 106      55.222 -18.326 102.812  1.00  0.00           C  
ATOM   2402  O   VAL L 106      55.385 -17.105 102.726  1.00  0.00           O  
ATOM   2403  CB  VAL L 106      54.864 -18.820 100.269  1.00  0.00           C  
ATOM   2404  CG1 VAL L 106      56.377 -18.785 100.063  1.00  0.00           C  
ATOM   2405  CG2 VAL L 106      54.241 -19.852  99.317  1.00  0.00           C  
ATOM   2406  N   LEU L 106A     55.516 -19.108 103.846  1.00  0.00           N  
ATOM   2407  CA  LEU L 106A     56.183 -18.601 105.039  1.00  0.00           C  
ATOM   2408  C   LEU L 106A     57.585 -18.083 104.675  1.00  0.00           C  
ATOM   2409  O   LEU L 106A     58.281 -18.680 103.864  1.00  0.00           O  
ATOM   2410  CB  LEU L 106A     56.350 -19.693 106.080  1.00  0.00           C  
ATOM   2411  CG  LEU L 106A     55.249 -20.591 106.524  1.00  0.00           C  
ATOM   2412  CD1 LEU L 106A     55.843 -21.855 107.164  1.00  0.00           C  
ATOM   2413  CD2 LEU L 106A     54.348 -19.863 107.521  1.00  0.00           C  
ATOM   2414  N   GLY L 107      57.944 -17.057 105.381  1.00  0.00           N  
ATOM   2415  CA  GLY L 107      59.303 -16.469 105.322  1.00  0.00           C  
ATOM   2416  C   GLY L 107      59.450 -15.730 106.673  1.00  0.00           C  
ATOM   2417  O   GLY L 107      60.116 -14.725 106.801  1.00  0.00           O  
ATOM   2418  N   GLN L 108      58.731 -16.296 107.606  1.00  0.00           N  
ATOM   2419  CA  GLN L 108      58.691 -15.938 109.028  1.00  0.00           C  
ATOM   2420  C   GLN L 108      58.377 -17.253 109.761  1.00  0.00           C  
ATOM   2421  O   GLN L 108      57.680 -18.110 109.177  1.00  0.00           O  
ATOM   2422  CB  GLN L 108      57.612 -14.888 109.304  1.00  0.00           C  
ATOM   2423  CG  GLN L 108      57.756 -14.235 110.651  1.00  0.00           C  
ATOM   2424  CD  GLN L 108      56.811 -13.099 110.917  1.00  0.00           C  
ATOM   2425  OE1 GLN L 108      56.995 -11.973 110.454  1.00  0.00           O  
ATOM   2426  NE2 GLN L 108      55.781 -13.387 111.718  1.00  0.00           N  
ATOM   2427  N   PRO L 109      58.932 -17.392 110.945  1.00  0.00           N  
ATOM   2428  CA  PRO L 109      58.635 -18.599 111.765  1.00  0.00           C  
ATOM   2429  C   PRO L 109      57.169 -18.580 112.142  1.00  0.00           C  
ATOM   2430  O   PRO L 109      56.572 -17.475 112.230  1.00  0.00           O  
ATOM   2431  CB  PRO L 109      59.629 -18.529 112.878  1.00  0.00           C  
ATOM   2432  CG  PRO L 109      60.823 -17.827 112.261  1.00  0.00           C  
ATOM   2433  CD  PRO L 109      60.178 -16.740 111.391  1.00  0.00           C  
TER    2434      PRO L 109                                                      
ATOM   3216  N   GLN P   1      31.249 -24.255  88.862  1.00  0.00           N  
ATOM   3217  CA  GLN P   1      30.255 -23.291  89.288  1.00  0.00           C  
ATOM   3218  C   GLN P   1      28.908 -24.037  89.141  1.00  0.00           C  
ATOM   3219  O   GLN P   1      27.888 -23.571  88.615  1.00  0.00           O  
ATOM   3220  CB  GLN P   1      30.299 -22.020  88.477  1.00  0.00           C  
ATOM   3221  CG  GLN P   1      29.225 -21.018  88.817  1.00  0.00           C  
ATOM   3222  CD  GLN P   1      28.782 -20.185  87.644  1.00  0.00           C  
ATOM   3223  OE1 GLN P   1      27.598 -19.944  87.421  1.00  0.00           O  
ATOM   3224  NE2 GLN P   1      29.751 -19.715  86.862  1.00  0.00           N  
ATOM   3236  N   HIS P   3      27.094 -25.924  87.529  1.00  0.00           N  
ATOM   3237  CA  HIS P   3      25.990 -26.139  86.546  1.00  0.00           C  
ATOM   3238  C   HIS P   3      26.426 -26.515  85.166  1.00  0.00           C  
ATOM   3239  O   HIS P   3      26.961 -25.675  84.419  1.00  0.00           O  
ATOM   3240  CB  HIS P   3      24.909 -25.076  86.598  1.00  0.00           C  
ATOM   3241  CG  HIS P   3      25.340 -23.652  86.583  1.00  0.00           C  
ATOM   3242  ND1 HIS P   3      24.555 -22.612  87.048  1.00  0.00           N  
ATOM   3243  CD2 HIS P   3      26.474 -23.083  86.124  1.00  0.00           C  
ATOM   3244  CE1 HIS P   3      25.205 -21.473  86.864  1.00  0.00           C  
ATOM   3245  NE2 HIS P   3      26.370 -21.736  86.310  1.00  0.00           N  
TER    3246      HIS P   3                                                      
