# Supplementary material for: SARS-CoV-2 Spike Protein Interaction Space
Source: Int J Mol Sci. 2023 Jul 27;24(15):12058. doi: 10.3390/ijms241512058 (PMC10418891; doi:10.3390/ijms241512058)
Supplement: Supplementary file 1 [file ijms-24-12058-s001.zip › Supplementary Material File S1/1MCD.pdb]

REMARK 950 NUMBERING  Kabat
REMARK 950 METHOD     X-ray crystal structure
REMARK 950 RESOLUTION 2.700
REMARK 950 R-FACTOR   0.190
REMARK 950 R-FREE     0.000
REMARK 950 CHAIN-TYPE LABEL ORIGINAL
REMARK 950 CHAIN L    L    A
REMARK 950 CHAIN L    L    B
REMARK 950 MOLECULE : A : IMMUNOGLOBULIN LAMBDA DIMER MCG (LIGHT CHAIN)
REMARK 950 SPECIES  : A : HOMO SAPIENS
SEQRES   1 L 216  PRO SER ALA LEU THR GLN PRO PRO SER ALA SER GLY SER          
SEQRES   2 L 216  LEU GLY GLN SER VAL THR ILE SER CYS THR GLY THR SER          
SEQRES   3 L 216  SER ASP VAL GLY GLY TYR ASN TYR VAL SER TRP TYR GLN          
SEQRES   4 L 216  GLN HIS ALA GLY LYS ALA PRO LYS VAL ILE ILE TYR GLU          
SEQRES   5 L 216  VAL ASN LYS ARG PRO SER GLY VAL PRO ASP ARG PHE SER          
SEQRES   6 L 216  GLY SER LYS SER GLY ASN THR ALA SER LEU THR VAL SER          
SEQRES   7 L 216  GLY LEU GLN ALA GLU ASP GLU ALA ASP TYR TYR CYS SER          
SEQRES   8 L 216  SER TYR GLU GLY SER ASP ASN PHE VAL PHE GLY THR GLY          
SEQRES   9 L 216  THR LYS VAL THR VAL LEU GLY GLN PRO LYS ALA ASN PRO          
SEQRES  10 L 216  THR VAL THR LEU PHE PRO PRO SER SER GLU GLU LEU GLN          
SEQRES  11 L 216  ALA ASN LYS ALA THR LEU VAL CYS LEU ILE SER ASP PHE          
SEQRES  12 L 216  TYR PRO GLY ALA VAL THR VAL ALA TRP LYS ALA ASP GLY          
SEQRES  13 L 216  SER PRO VAL LYS ALA GLY VAL GLU THR THR LYS PRO SER          
SEQRES  14 L 216  LYS GLN SER ASN ASN LYS TYR ALA ALA SER SER TYR LEU          
SEQRES  15 L 216  SER LEU THR PRO GLU GLN TRP LYS SER HIS ARG SER TYR          
SEQRES  16 L 216  SER CYS GLN VAL THR HIS GLU GLY SER THR VAL GLU LYS          
SEQRES  17 L 216  THR VAL ALA PRO THR GLU CYS SER                              
SEQRES   1 L 216  PRO SER ALA LEU THR GLN PRO PRO SER ALA SER GLY SER          
SEQRES   2 L 216  LEU GLY GLN SER VAL THR ILE SER CYS THR GLY THR SER          
SEQRES   3 L 216  SER ASP VAL GLY GLY TYR ASN TYR VAL SER TRP TYR GLN          
SEQRES   4 L 216  GLN HIS ALA GLY LYS ALA PRO LYS VAL ILE ILE TYR GLU          
SEQRES   5 L 216  VAL ASN LYS ARG PRO SER GLY VAL PRO ASP ARG PHE SER          
SEQRES   6 L 216  GLY SER LYS SER GLY ASN THR ALA SER LEU THR VAL SER          
SEQRES   7 L 216  GLY LEU GLN ALA GLU ASP GLU ALA ASP TYR TYR CYS SER          
SEQRES   8 L 216  SER TYR GLU GLY SER ASP ASN PHE VAL PHE GLY THR GLY          
SEQRES   9 L 216  THR LYS VAL THR VAL LEU GLY GLN PRO LYS ALA ASN PRO          
SEQRES  10 L 216  THR VAL THR LEU PHE PRO PRO SER SER GLU GLU LEU GLN          
SEQRES  11 L 216  ALA ASN LYS ALA THR LEU VAL CYS LEU ILE SER ASP PHE          
SEQRES  12 L 216  TYR PRO GLY ALA VAL THR VAL ALA TRP LYS ALA ASP GLY          
SEQRES  13 L 216  SER PRO VAL LYS ALA GLY VAL GLU THR THR LYS PRO SER          
SEQRES  14 L 216  LYS GLN SER ASN ASN LYS TYR ALA ALA SER SER TYR LEU          
SEQRES  15 L 216  SER LEU THR PRO GLU GLN TRP LYS SER HIS ARG SER TYR          
SEQRES  16 L 216  SER CYS GLN VAL THR HIS GLU GLY SER THR VAL GLU LYS          
SEQRES  17 L 216  THR VAL ALA PRO THR GLU CYS SER                              
ATOM      1  N   PRO L   1      41.957 -13.338  75.572  1.00  0.00           N  
ATOM      2  CA  PRO L   1      42.717 -13.245  76.816  1.00  0.00           C  
ATOM      3  C   PRO L   1      41.785 -13.175  78.015  1.00  0.00           C  
ATOM      4  O   PRO L   1      42.138 -12.525  79.024  1.00  0.00           O  
ATOM      5  CB  PRO L   1      43.509 -11.931  76.669  1.00  0.00           C  
ATOM      6  CG  PRO L   1      42.614 -11.083  75.784  1.00  0.00           C  
ATOM      7  CD  PRO L   1      42.038 -12.093  74.780  1.00  0.00           C  
ATOM      8  N   SER L   2      40.668 -13.910  78.002  1.00  0.00           N  
ATOM      9  CA  SER L   2      39.487 -13.369  78.688  1.00  0.00           C  
ATOM     10  C   SER L   2      38.772 -14.057  79.809  1.00  0.00           C  
ATOM     11  O   SER L   2      38.712 -15.255  80.056  1.00  0.00           O  
ATOM     12  CB  SER L   2      38.471 -13.023  77.541  1.00  0.00           C  
ATOM     13  OG  SER L   2      39.211 -12.360  76.511  1.00  0.00           O  
ATOM     14  N   ALA L   3      38.092 -13.165  80.543  1.00  0.00           N  
ATOM     15  CA  ALA L   3      37.150 -13.379  81.629  1.00  0.00           C  
ATOM     16  C   ALA L   3      36.011 -12.356  81.417  1.00  0.00           C  
ATOM     17  O   ALA L   3      36.197 -11.423  80.608  1.00  0.00           O  
ATOM     18  CB  ALA L   3      37.825 -13.144  82.965  1.00  0.00           C  
ATOM     19  N   LEU L   4      34.896 -12.563  82.092  1.00  0.00           N  
ATOM     20  CA  LEU L   4      33.763 -11.627  82.034  1.00  0.00           C  
ATOM     21  C   LEU L   4      34.224 -10.249  82.525  1.00  0.00           C  
ATOM     22  O   LEU L   4      34.989 -10.144  83.523  1.00  0.00           O  
ATOM     23  CB  LEU L   4      32.595 -12.171  82.841  1.00  0.00           C  
ATOM     24  CG  LEU L   4      31.606 -13.129  82.231  1.00  0.00           C  
ATOM     25  CD1 LEU L   4      32.287 -14.184  81.363  1.00  0.00           C  
ATOM     26  CD2 LEU L   4      30.841 -13.836  83.358  1.00  0.00           C  
ATOM     27  N   THR L   5      33.695  -9.243  81.831  1.00  0.00           N  
ATOM     28  CA  THR L   5      34.053  -7.859  82.227  1.00  0.00           C  
ATOM     29  C   THR L   5      32.981  -7.247  83.112  1.00  0.00           C  
ATOM     30  O   THR L   5      31.762  -7.327  82.854  1.00  0.00           O  
ATOM     31  CB  THR L   5      34.433  -6.986  80.985  1.00  0.00           C  
ATOM     32  OG1 THR L   5      35.198  -7.869  80.106  1.00  0.00           O  
ATOM     33  CG2 THR L   5      35.231  -5.720  81.328  1.00  0.00           C  
ATOM     34  N   GLN L   6      33.481  -6.618  84.172  1.00  0.00           N  
ATOM     35  CA  GLN L   6      32.639  -5.894  85.138  1.00  0.00           C  
ATOM     36  C   GLN L   6      33.220  -4.508  85.434  1.00  0.00           C  
ATOM     37  O   GLN L   6      34.439  -4.288  85.376  1.00  0.00           O  
ATOM     38  CB  GLN L   6      32.472  -6.703  86.404  1.00  0.00           C  
ATOM     39  CG  GLN L   6      31.860  -8.095  86.246  1.00  0.00           C  
ATOM     40  CD  GLN L   6      31.537  -8.623  87.648  1.00  0.00           C  
ATOM     41  OE1 GLN L   6      32.354  -9.269  88.280  1.00  0.00           O  
ATOM     42  NE2 GLN L   6      30.362  -8.237  88.126  1.00  0.00           N  
ATOM     43  N   PRO L   7      32.313  -3.595  85.752  1.00  0.00           N  
ATOM     44  CA  PRO L   7      32.679  -2.227  86.180  1.00  0.00           C  
ATOM     45  C   PRO L   7      33.014  -2.262  87.669  1.00  0.00           C  
ATOM     46  O   PRO L   7      32.227  -2.772  88.485  1.00  0.00           O  
ATOM     47  CB  PRO L   7      31.439  -1.421  85.850  1.00  0.00           C  
ATOM     48  CG  PRO L   7      30.303  -2.391  86.066  1.00  0.00           C  
ATOM     49  CD  PRO L   7      30.850  -3.762  85.715  1.00  0.00           C  
ATOM     50  N   PRO L   8      34.173  -1.696  87.996  1.00  0.00           N  
ATOM     51  CA  PRO L   8      34.878  -2.007  89.236  1.00  0.00           C  
ATOM     52  C   PRO L   8      34.140  -1.580  90.487  1.00  0.00           C  
ATOM     53  O   PRO L   8      34.398  -2.123  91.587  1.00  0.00           O  
ATOM     54  CB  PRO L   8      36.226  -1.322  89.093  1.00  0.00           C  
ATOM     55  CG  PRO L   8      36.241  -0.608  87.789  1.00  0.00           C  
ATOM     56  CD  PRO L   8      34.823  -0.594  87.254  1.00  0.00           C  
ATOM     57  N   SER L   9      33.211  -0.653  90.308  1.00  0.00           N  
ATOM     58  CA  SER L   9      32.438  -0.092  91.413  1.00  0.00           C  
ATOM     59  C   SER L   9      31.122   0.502  90.926  1.00  0.00           C  
ATOM     60  O   SER L   9      31.035   1.104  89.862  1.00  0.00           O  
ATOM     61  CB  SER L   9      33.250   0.947  92.175  1.00  0.00           C  
ATOM     62  OG  SER L   9      34.277   1.504  91.366  1.00  0.00           O  
ATOM     63  N   ALA L  11      30.120   0.301  91.753  1.00  0.00           N  
ATOM     64  CA  ALA L  11      28.798   0.901  91.673  1.00  0.00           C  
ATOM     65  C   ALA L  11      28.556   1.645  93.000  1.00  0.00           C  
ATOM     66  O   ALA L  11      29.102   1.284  94.056  1.00  0.00           O  
ATOM     67  CB  ALA L  11      27.705  -0.124  91.440  1.00  0.00           C  
ATOM     68  N   SER L  12      27.772   2.685  92.881  1.00  0.00           N  
ATOM     69  CA  SER L  12      27.406   3.576  93.997  1.00  0.00           C  
ATOM     70  C   SER L  12      25.872   3.648  93.978  1.00  0.00           C  
ATOM     71  O   SER L  12      25.315   3.858  92.887  1.00  0.00           O  
ATOM     72  CB  SER L  12      28.004   4.969  93.837  1.00  0.00           C  
ATOM     73  OG  SER L  12      28.985   5.007  92.798  1.00  0.00           O  
ATOM     74  N   GLY L  13      25.296   3.424  95.140  1.00  0.00           N  
ATOM     75  CA  GLY L  13      23.804   3.525  95.250  1.00  0.00           C  
ATOM     76  C   GLY L  13      23.487   4.258  96.555  1.00  0.00           C  
ATOM     77  O   GLY L  13      24.428   4.643  97.270  1.00  0.00           O  
ATOM     78  N   SER L  14      22.208   4.413  96.828  1.00  0.00           N  
ATOM     79  CA  SER L  14      21.782   5.141  98.044  1.00  0.00           C  
ATOM     80  C   SER L  14      20.553   4.486  98.635  1.00  0.00           C  
ATOM     81  O   SER L  14      19.603   4.126  97.912  1.00  0.00           O  
ATOM     82  CB  SER L  14      21.603   6.606  97.681  1.00  0.00           C  
ATOM     83  OG  SER L  14      22.538   6.959  96.644  1.00  0.00           O  
ATOM     84  N   LEU L  15      20.565   4.322  99.949  1.00  0.00           N  
ATOM     85  CA  LEU L  15      19.614   3.608 100.762  1.00  0.00           C  
ATOM     86  C   LEU L  15      18.189   3.503 100.234  1.00  0.00           C  
ATOM     87  O   LEU L  15      17.409   4.456 100.447  1.00  0.00           O  
ATOM     88  CB  LEU L  15      19.547   4.265 102.174  1.00  0.00           C  
ATOM     89  CG  LEU L  15      20.595   4.022 103.208  1.00  0.00           C  
ATOM     90  CD1 LEU L  15      21.338   2.697 103.028  1.00  0.00           C  
ATOM     91  CD2 LEU L  15      21.602   5.166 103.165  1.00  0.00           C  
ATOM     92  N   GLY L  16      17.838   2.349  99.694  1.00  0.00           N  
ATOM     93  CA  GLY L  16      16.505   2.141  99.133  1.00  0.00           C  
ATOM     94  C   GLY L  16      16.375   2.283  97.644  1.00  0.00           C  
ATOM     95  O   GLY L  16      15.476   1.592  97.081  1.00  0.00           O  
ATOM     96  N   GLN L  17      17.144   3.147  96.997  1.00  0.00           N  
ATOM     97  CA  GLN L  17      17.126   3.225  95.510  1.00  0.00           C  
ATOM     98  C   GLN L  17      17.659   1.886  94.984  1.00  0.00           C  
ATOM     99  O   GLN L  17      17.865   0.930  95.757  1.00  0.00           O  
ATOM    100  CB  GLN L  17      17.804   4.459  94.950  1.00  0.00           C  
ATOM    101  CG  GLN L  17      19.217   4.477  94.480  1.00  0.00           C  
ATOM    102  CD  GLN L  17      19.768   5.685  93.774  1.00  0.00           C  
ATOM    103  OE1 GLN L  17      20.776   6.315  94.153  1.00  0.00           O  
ATOM    104  NE2 GLN L  17      19.159   6.055  92.630  1.00  0.00           N  
ATOM    105  N   SER L  18      17.830   1.805  93.675  1.00  0.00           N  
ATOM    106  CA  SER L  18      18.432   0.657  93.006  1.00  0.00           C  
ATOM    107  C   SER L  18      19.862   0.972  92.537  1.00  0.00           C  
ATOM    108  O   SER L  18      20.439   2.042  92.708  1.00  0.00           O  
ATOM    109  CB  SER L  18      17.626   0.185  91.801  1.00  0.00           C  
ATOM    110  OG  SER L  18      16.242   0.479  91.985  1.00  0.00           O  
ATOM    111  N   VAL L  19      20.368  -0.069  91.915  1.00  0.00           N  
ATOM    112  CA  VAL L  19      21.737  -0.170  91.368  1.00  0.00           C  
ATOM    113  C   VAL L  19      21.670  -1.403  90.444  1.00  0.00           C  
ATOM    114  O   VAL L  19      20.983  -2.377  90.825  1.00  0.00           O  
ATOM    115  CB  VAL L  19      22.765  -0.262  92.502  1.00  0.00           C  
ATOM    116  CG1 VAL L  19      22.935  -1.676  93.065  1.00  0.00           C  
ATOM    117  CG2 VAL L  19      24.107   0.332  92.102  1.00  0.00           C  
ATOM    118  N   THR L  20      22.266  -1.290  89.271  1.00  0.00           N  
ATOM    119  CA  THR L  20      22.350  -2.475  88.397  1.00  0.00           C  
ATOM    120  C   THR L  20      23.774  -2.717  87.920  1.00  0.00           C  
ATOM    121  O   THR L  20      24.341  -1.920  87.159  1.00  0.00           O  
ATOM    122  CB  THR L  20      21.299  -2.454  87.237  1.00  0.00           C  
ATOM    123  OG1 THR L  20      19.997  -2.113  87.821  1.00  0.00           O  
ATOM    124  CG2 THR L  20      21.218  -3.808  86.490  1.00  0.00           C  
ATOM    125  N   ILE L  21      24.320  -3.853  88.375  1.00  0.00           N  
ATOM    126  CA  ILE L  21      25.674  -4.258  87.996  1.00  0.00           C  
ATOM    127  C   ILE L  21      25.657  -5.156  86.758  1.00  0.00           C  
ATOM    128  O   ILE L  21      25.176  -6.290  86.778  1.00  0.00           O  
ATOM    129  CB  ILE L  21      26.439  -4.916  89.187  1.00  0.00           C  
ATOM    130  CG1 ILE L  21      26.614  -3.896  90.334  1.00  0.00           C  
ATOM    131  CG2 ILE L  21      27.823  -5.508  88.749  1.00  0.00           C  
ATOM    132  CD1 ILE L  21      25.341  -3.654  91.190  1.00  0.00           C  
ATOM    133  N   SER L  22      26.254  -4.628  85.709  1.00  0.00           N  
ATOM    134  CA  SER L  22      26.375  -5.270  84.404  1.00  0.00           C  
ATOM    135  C   SER L  22      27.688  -6.023  84.205  1.00  0.00           C  
ATOM    136  O   SER L  22      28.804  -5.492  84.328  1.00  0.00           O  
ATOM    137  CB  SER L  22      26.177  -4.205  83.319  1.00  0.00           C  
ATOM    138  OG  SER L  22      26.290  -2.891  83.859  1.00  0.00           O  
ATOM    139  N   CYS L  23      27.518  -7.286  83.889  1.00  0.00           N  
ATOM    140  CA  CYS L  23      28.616  -8.260  83.599  1.00  0.00           C  
ATOM    141  C   CYS L  23      28.506  -8.480  82.086  1.00  0.00           C  
ATOM    142  O   CYS L  23      27.358  -8.626  81.592  1.00  0.00           O  
ATOM    143  CB  CYS L  23      28.460  -9.451  84.486  1.00  0.00           C  
ATOM    144  SG  CYS L  23      28.918 -11.122  84.163  1.00  0.00           S  
ATOM    145  N   THR L  24      29.621  -8.383  81.374  1.00  0.00           N  
ATOM    146  CA  THR L  24      29.550  -8.484  79.909  1.00  0.00           C  
ATOM    147  C   THR L  24      30.539  -9.478  79.331  1.00  0.00           C  
ATOM    148  O   THR L  24      31.750  -9.403  79.599  1.00  0.00           O  
ATOM    149  CB  THR L  24      29.622  -7.094  79.190  1.00  0.00           C  
ATOM    150  OG1 THR L  24      29.615  -6.053  80.216  1.00  0.00           O  
ATOM    151  CG2 THR L  24      28.451  -6.893  78.204  1.00  0.00           C  
ATOM    152  N   GLY L  25      29.935 -10.373  78.517  1.00  0.00           N  
ATOM    153  CA  GLY L  25      30.747 -11.466  77.924  1.00  0.00           C  
ATOM    154  C   GLY L  25      30.793 -11.401  76.405  1.00  0.00           C  
ATOM    155  O   GLY L  25      30.631 -10.339  75.782  1.00  0.00           O  
ATOM    156  N   THR L  26      31.039 -12.570  75.821  1.00  0.00           N  
ATOM    157  CA  THR L  26      31.115 -12.809  74.384  1.00  0.00           C  
ATOM    158  C   THR L  26      30.238 -13.992  73.975  1.00  0.00           C  
ATOM    159  O   THR L  26      29.850 -14.827  74.793  1.00  0.00           O  
ATOM    160  CB  THR L  26      32.596 -13.082  73.914  1.00  0.00           C  
ATOM    161  OG1 THR L  26      32.997 -14.303  74.605  1.00  0.00           O  
ATOM    162  CG2 THR L  26      33.561 -11.938  74.178  1.00  0.00           C  
ATOM    163  N   SER L  27      29.956 -14.067  72.696  1.00  0.00           N  
ATOM    164  CA  SER L  27      29.082 -15.076  72.085  1.00  0.00           C  
ATOM    165  C   SER L  27      29.378 -16.498  72.538  1.00  0.00           C  
ATOM    166  O   SER L  27      28.510 -17.390  72.471  1.00  0.00           O  
ATOM    167  CB  SER L  27      29.242 -14.991  70.556  1.00  0.00           C  
ATOM    168  OG  SER L  27      30.612 -14.653  70.291  1.00  0.00           O  
ATOM    169  N   SER L  27A     30.617 -16.693  72.960  1.00  0.00           N  
ATOM    170  CA  SER L  27A     31.133 -17.967  73.449  1.00  0.00           C  
ATOM    171  C   SER L  27A     30.551 -18.380  74.793  1.00  0.00           C  
ATOM    172  O   SER L  27A     30.341 -19.586  75.040  1.00  0.00           O  
ATOM    173  CB  SER L  27A     32.665 -17.922  73.514  1.00  0.00           C  
ATOM    174  OG  SER L  27A     33.240 -17.879  72.209  1.00  0.00           O  
ATOM    175  N   ASP L  27B     30.273 -17.398  75.637  1.00  0.00           N  
ATOM    176  CA  ASP L  27B     29.913 -17.604  77.044  1.00  0.00           C  
ATOM    177  C   ASP L  27B     28.638 -16.896  77.461  1.00  0.00           C  
ATOM    178  O   ASP L  27B     27.560 -17.536  77.396  1.00  0.00           O  
ATOM    179  CB  ASP L  27B     31.104 -17.318  77.952  1.00  0.00           C  
ATOM    180  CG  ASP L  27B     31.888 -16.065  77.680  1.00  0.00           C  
ATOM    181  OD1 ASP L  27B     31.265 -14.989  77.641  1.00  0.00           O  
ATOM    182  OD2 ASP L  27B     33.125 -16.115  77.557  1.00  0.00           O  
ATOM    183  N   VAL L  27C     28.757 -15.682  77.974  1.00  0.00           N  
ATOM    184  CA  VAL L  27C     27.544 -14.898  78.346  1.00  0.00           C  
ATOM    185  C   VAL L  27C     26.763 -14.698  77.050  1.00  0.00           C  
ATOM    186  O   VAL L  27C     27.311 -14.080  76.111  1.00  0.00           O  
ATOM    187  CB  VAL L  27C     27.901 -13.617  79.076  1.00  0.00           C  
ATOM    188  CG1 VAL L  27C     26.711 -12.662  79.227  1.00  0.00           C  
ATOM    189  CG2 VAL L  27C     28.506 -13.915  80.446  1.00  0.00           C  
ATOM    190  N   GLY L  28      25.570 -15.266  77.020  1.00  0.00           N  
ATOM    191  CA  GLY L  28      24.767 -15.206  75.758  1.00  0.00           C  
ATOM    192  C   GLY L  28      25.436 -16.161  74.752  1.00  0.00           C  
ATOM    193  O   GLY L  28      26.356 -15.819  74.012  1.00  0.00           O  
ATOM    194  N   GLY L  29      24.904 -17.354  74.776  1.00  0.00           N  
ATOM    195  CA  GLY L  29      25.461 -18.551  74.113  1.00  0.00           C  
ATOM    196  C   GLY L  29      24.796 -19.728  74.897  1.00  0.00           C  
ATOM    197  O   GLY L  29      24.128 -20.589  74.340  1.00  0.00           O  
ATOM    198  N   TYR L  30      25.007 -19.637  76.206  1.00  0.00           N  
ATOM    199  CA  TYR L  30      24.300 -20.460  77.178  1.00  0.00           C  
ATOM    200  C   TYR L  30      23.607 -19.506  78.180  1.00  0.00           C  
ATOM    201  O   TYR L  30      23.943 -18.325  78.292  1.00  0.00           O  
ATOM    202  CB  TYR L  30      25.154 -21.443  77.937  1.00  0.00           C  
ATOM    203  CG  TYR L  30      26.380 -21.996  77.271  1.00  0.00           C  
ATOM    204  CD1 TYR L  30      27.522 -21.224  77.059  1.00  0.00           C  
ATOM    205  CD2 TYR L  30      26.424 -23.344  76.907  1.00  0.00           C  
ATOM    206  CE1 TYR L  30      28.661 -21.770  76.476  1.00  0.00           C  
ATOM    207  CE2 TYR L  30      27.556 -23.907  76.331  1.00  0.00           C  
ATOM    208  CZ  TYR L  30      28.671 -23.116  76.111  1.00  0.00           C  
ATOM    209  OH  TYR L  30      29.765 -23.697  75.531  1.00  0.00           O  
ATOM    210  N   ASN L  31      22.692 -20.114  78.890  1.00  0.00           N  
ATOM    211  CA  ASN L  31      21.858 -19.451  79.900  1.00  0.00           C  
ATOM    212  C   ASN L  31      22.365 -19.659  81.318  1.00  0.00           C  
ATOM    213  O   ASN L  31      21.568 -19.532  82.276  1.00  0.00           O  
ATOM    214  CB  ASN L  31      20.418 -19.967  79.647  1.00  0.00           C  
ATOM    215  CG  ASN L  31      19.376 -18.879  79.550  1.00  0.00           C  
ATOM    216  OD1 ASN L  31      19.467 -17.933  78.745  1.00  0.00           O  
ATOM    217  ND2 ASN L  31      18.333 -19.010  80.396  1.00  0.00           N  
ATOM    218  N   TYR L  32      23.654 -19.929  81.493  1.00  0.00           N  
ATOM    219  CA  TYR L  32      24.287 -20.132  82.794  1.00  0.00           C  
ATOM    220  C   TYR L  32      25.274 -19.023  83.196  1.00  0.00           C  
ATOM    221  O   TYR L  32      26.513 -19.138  83.147  1.00  0.00           O  
ATOM    222  CB  TYR L  32      24.956 -21.509  82.926  1.00  0.00           C  
ATOM    223  CG  TYR L  32      23.953 -22.637  82.898  1.00  0.00           C  
ATOM    224  CD1 TYR L  32      23.481 -23.128  81.679  1.00  0.00           C  
ATOM    225  CD2 TYR L  32      23.451 -23.187  84.068  1.00  0.00           C  
ATOM    226  CE1 TYR L  32      22.553 -24.165  81.629  1.00  0.00           C  
ATOM    227  CE2 TYR L  32      22.527 -24.230  84.040  1.00  0.00           C  
ATOM    228  CZ  TYR L  32      22.072 -24.710  82.818  1.00  0.00           C  
ATOM    229  OH  TYR L  32      21.156 -25.727  82.809  1.00  0.00           O  
ATOM    230  N   VAL L  33      24.648 -17.950  83.635  1.00  0.00           N  
ATOM    231  CA  VAL L  33      25.214 -16.747  84.196  1.00  0.00           C  
ATOM    232  C   VAL L  33      24.697 -16.646  85.653  1.00  0.00           C  
ATOM    233  O   VAL L  33      23.479 -16.728  85.871  1.00  0.00           O  
ATOM    234  CB  VAL L  33      24.829 -15.497  83.389  1.00  0.00           C  
ATOM    235  CG1 VAL L  33      25.193 -14.205  84.109  1.00  0.00           C  
ATOM    236  CG2 VAL L  33      25.429 -15.527  81.999  1.00  0.00           C  
ATOM    237  N   SER L  34      25.660 -16.501  86.540  1.00  0.00           N  
ATOM    238  CA  SER L  34      25.328 -16.468  87.986  1.00  0.00           C  
ATOM    239  C   SER L  34      26.005 -15.271  88.646  1.00  0.00           C  
ATOM    240  O   SER L  34      26.898 -14.648  88.027  1.00  0.00           O  
ATOM    241  CB  SER L  34      25.729 -17.776  88.654  1.00  0.00           C  
ATOM    242  OG  SER L  34      26.871 -18.324  87.998  1.00  0.00           O  
ATOM    243  N   TRP L  35      25.553 -14.990  89.871  1.00  0.00           N  
ATOM    244  CA  TRP L  35      26.108 -13.915  90.678  1.00  0.00           C  
ATOM    245  C   TRP L  35      26.323 -14.313  92.154  1.00  0.00           C  
ATOM    246  O   TRP L  35      25.568 -15.012  92.820  1.00  0.00           O  
ATOM    247  CB  TRP L  35      25.305 -12.630  90.632  1.00  0.00           C  
ATOM    248  CG  TRP L  35      25.069 -11.984  89.318  1.00  0.00           C  
ATOM    249  CD1 TRP L  35      24.064 -12.269  88.427  1.00  0.00           C  
ATOM    250  CD2 TRP L  35      25.802 -10.887  88.752  1.00  0.00           C  
ATOM    251  NE1 TRP L  35      24.137 -11.418  87.354  1.00  0.00           N  
ATOM    252  CE2 TRP L  35      25.186 -10.567  87.529  1.00  0.00           C  
ATOM    253  CE3 TRP L  35      26.907 -10.157  89.182  1.00  0.00           C  
ATOM    254  CZ2 TRP L  35      25.642  -9.548  86.719  1.00  0.00           C  
ATOM    255  CZ3 TRP L  35      27.367  -9.138  88.373  1.00  0.00           C  
ATOM    256  CH2 TRP L  35      26.742  -8.834  87.165  1.00  0.00           C  
ATOM    257  N   TYR L  36      27.380 -13.687  92.654  1.00  0.00           N  
ATOM    258  CA  TYR L  36      27.954 -13.852  93.976  1.00  0.00           C  
ATOM    259  C   TYR L  36      28.034 -12.503  94.707  1.00  0.00           C  
ATOM    260  O   TYR L  36      28.463 -11.498  94.106  1.00  0.00           O  
ATOM    261  CB  TYR L  36      29.378 -14.422  93.835  1.00  0.00           C  
ATOM    262  CG  TYR L  36      29.529 -15.655  92.982  1.00  0.00           C  
ATOM    263  CD1 TYR L  36      29.264 -15.663  91.619  1.00  0.00           C  
ATOM    264  CD2 TYR L  36      29.995 -16.841  93.562  1.00  0.00           C  
ATOM    265  CE1 TYR L  36      29.434 -16.808  90.847  1.00  0.00           C  
ATOM    266  CE2 TYR L  36      30.161 -18.001  92.807  1.00  0.00           C  
ATOM    267  CZ  TYR L  36      29.877 -17.978  91.446  1.00  0.00           C  
ATOM    268  OH  TYR L  36      30.040 -19.098  90.688  1.00  0.00           O  
ATOM    269  N   GLN L  37      27.636 -12.531  95.950  1.00  0.00           N  
ATOM    270  CA  GLN L  37      27.805 -11.431  96.926  1.00  0.00           C  
ATOM    271  C   GLN L  37      28.989 -11.832  97.813  1.00  0.00           C  
ATOM    272  O   GLN L  37      28.916 -12.930  98.406  1.00  0.00           O  
ATOM    273  CB  GLN L  37      26.540 -11.257  97.785  1.00  0.00           C  
ATOM    274  CG  GLN L  37      26.615 -10.177  98.813  1.00  0.00           C  
ATOM    275  CD  GLN L  37      25.462  -9.976  99.743  1.00  0.00           C  
ATOM    276  OE1 GLN L  37      25.411 -10.465 100.877  1.00  0.00           O  
ATOM    277  NE2 GLN L  37      24.486  -9.162  99.347  1.00  0.00           N  
ATOM    278  N   GLN L  38      30.044 -11.053  97.824  1.00  0.00           N  
ATOM    279  CA  GLN L  38      31.246 -11.411  98.601  1.00  0.00           C  
ATOM    280  C   GLN L  38      31.704 -10.175  99.384  1.00  0.00           C  
ATOM    281  O   GLN L  38      32.183  -9.176  98.858  1.00  0.00           O  
ATOM    282  CB  GLN L  38      32.385 -12.028  97.821  1.00  0.00           C  
ATOM    283  CG  GLN L  38      33.651 -12.260  98.629  1.00  0.00           C  
ATOM    284  CD  GLN L  38      34.812 -12.768  97.815  1.00  0.00           C  
ATOM    285  OE1 GLN L  38      35.036 -13.971  97.692  1.00  0.00           O  
ATOM    286  NE2 GLN L  38      35.599 -11.859  97.239  1.00  0.00           N  
ATOM    287  N   HIS L  39      31.519 -10.338 100.685  1.00  0.00           N  
ATOM    288  CA  HIS L  39      31.830  -9.335 101.698  1.00  0.00           C  
ATOM    289  C   HIS L  39      33.310  -9.363 102.059  1.00  0.00           C  
ATOM    290  O   HIS L  39      33.955 -10.426 102.042  1.00  0.00           O  
ATOM    291  CB  HIS L  39      30.977  -9.561 102.964  1.00  0.00           C  
ATOM    292  CG  HIS L  39      29.549  -9.175 102.723  1.00  0.00           C  
ATOM    293  ND1 HIS L  39      29.149  -7.923 102.355  1.00  0.00           N  
ATOM    294  CD2 HIS L  39      28.431  -9.921 102.832  1.00  0.00           C  
ATOM    295  CE1 HIS L  39      27.831  -7.915 102.238  1.00  0.00           C  
ATOM    296  NE2 HIS L  39      27.377  -9.108 102.537  1.00  0.00           N  
ATOM    297  N   ALA L  40      33.798  -8.189 102.409  1.00  0.00           N  
ATOM    298  CA  ALA L  40      35.214  -7.946 102.652  1.00  0.00           C  
ATOM    299  C   ALA L  40      35.918  -9.159 103.245  1.00  0.00           C  
ATOM    300  O   ALA L  40      35.786  -9.497 104.439  1.00  0.00           O  
ATOM    301  CB  ALA L  40      35.376  -6.712 103.530  1.00  0.00           C  
ATOM    302  N   GLY L  41      36.679  -9.804 102.373  1.00  0.00           N  
ATOM    303  CA  GLY L  41      37.511 -10.961 102.708  1.00  0.00           C  
ATOM    304  C   GLY L  41      36.746 -12.001 103.515  1.00  0.00           C  
ATOM    305  O   GLY L  41      37.164 -12.377 104.626  1.00  0.00           O  
ATOM    306  N   LYS L  42      35.655 -12.453 102.937  1.00  0.00           N  
ATOM    307  CA  LYS L  42      34.795 -13.486 103.543  1.00  0.00           C  
ATOM    308  C   LYS L  42      34.552 -14.543 102.466  1.00  0.00           C  
ATOM    309  O   LYS L  42      35.239 -14.498 101.423  1.00  0.00           O  
ATOM    310  CB  LYS L  42      33.474 -12.917 104.020  1.00  0.00           C  
ATOM    311  CG  LYS L  42      33.486 -11.825 105.071  1.00  0.00           C  
ATOM    312  CD  LYS L  42      33.295 -12.286 106.491  1.00  0.00           C  
ATOM    313  CE  LYS L  42      32.280 -13.377 106.701  1.00  0.00           C  
ATOM    314  NZ  LYS L  42      31.011 -13.117 105.980  1.00  0.00           N  
ATOM    315  N   ALA L  43      33.602 -15.415 102.706  1.00  0.00           N  
ATOM    316  CA  ALA L  43      33.142 -16.373 101.685  1.00  0.00           C  
ATOM    317  C   ALA L  43      32.036 -15.767 100.825  1.00  0.00           C  
ATOM    318  O   ALA L  43      31.160 -15.048 101.334  1.00  0.00           O  
ATOM    319  CB  ALA L  43      32.663 -17.646 102.364  1.00  0.00           C  
ATOM    320  N   PRO L  44      32.087 -16.087  99.529  1.00  0.00           N  
ATOM    321  CA  PRO L  44      31.069 -15.702  98.549  1.00  0.00           C  
ATOM    322  C   PRO L  44      29.767 -16.472  98.666  1.00  0.00           C  
ATOM    323  O   PRO L  44      29.762 -17.697  98.865  1.00  0.00           O  
ATOM    324  CB  PRO L  44      31.730 -16.004  97.190  1.00  0.00           C  
ATOM    325  CG  PRO L  44      32.614 -17.193  97.523  1.00  0.00           C  
ATOM    326  CD  PRO L  44      33.213 -16.809  98.882  1.00  0.00           C  
ATOM    327  N   LYS L  45      28.680 -15.760  98.499  1.00  0.00           N  
ATOM    328  CA  LYS L  45      27.307 -16.315  98.521  1.00  0.00           C  
ATOM    329  C   LYS L  45      26.773 -16.316  97.092  1.00  0.00           C  
ATOM    330  O   LYS L  45      26.981 -15.308  96.374  1.00  0.00           O  
ATOM    331  CB  LYS L  45      26.461 -15.449  99.432  1.00  0.00           C  
ATOM    332  CG  LYS L  45      25.057 -15.881  99.752  1.00  0.00           C  
ATOM    333  CD  LYS L  45      24.993 -16.905 100.888  1.00  0.00           C  
ATOM    334  CE  LYS L  45      23.683 -17.690 100.838  1.00  0.00           C  
ATOM    335  NZ  LYS L  45      23.573 -18.642 101.964  1.00  0.00           N  
ATOM    336  N   VAL L  46      26.164 -17.407  96.651  1.00  0.00           N  
ATOM    337  CA  VAL L  46      25.540 -17.420  95.309  1.00  0.00           C  
ATOM    338  C   VAL L  46      24.119 -16.872  95.441  1.00  0.00           C  
ATOM    339  O   VAL L  46      23.202 -17.598  95.828  1.00  0.00           O  
ATOM    340  CB  VAL L  46      25.653 -18.774  94.610  1.00  0.00           C  
ATOM    341  CG1 VAL L  46      24.818 -18.886  93.327  1.00  0.00           C  
ATOM    342  CG2 VAL L  46      27.109 -19.097  94.259  1.00  0.00           C  
ATOM    343  N   ILE L  47      23.985 -15.598  95.103  1.00  0.00           N  
ATOM    344  CA  ILE L  47      22.695 -14.921  95.058  1.00  0.00           C  
ATOM    345  C   ILE L  47      21.861 -15.180  93.829  1.00  0.00           C  
ATOM    346  O   ILE L  47      20.604 -15.075  93.965  1.00  0.00           O  
ATOM    347  CB  ILE L  47      22.896 -13.387  95.359  1.00  0.00           C  
ATOM    348  CG1 ILE L  47      23.713 -12.719  94.231  1.00  0.00           C  
ATOM    349  CG2 ILE L  47      23.539 -13.134  96.740  1.00  0.00           C  
ATOM    350  CD1 ILE L  47      23.905 -11.183  94.435  1.00  0.00           C  
ATOM    351  N   ILE L  48      22.417 -15.454  92.664  1.00  0.00           N  
ATOM    352  CA  ILE L  48      21.625 -15.811  91.454  1.00  0.00           C  
ATOM    353  C   ILE L  48      22.343 -16.890  90.656  1.00  0.00           C  
ATOM    354  O   ILE L  48      23.591 -16.801  90.600  1.00  0.00           O  
ATOM    355  CB  ILE L  48      21.302 -14.553  90.597  1.00  0.00           C  
ATOM    356  CG1 ILE L  48      19.785 -14.238  90.723  1.00  0.00           C  
ATOM    357  CG2 ILE L  48      21.726 -14.675  89.122  1.00  0.00           C  
ATOM    358  CD1 ILE L  48      19.453 -13.123  91.747  1.00  0.00           C  
ATOM    359  N   TYR L  49      21.581 -17.829  90.059  1.00  0.00           N  
ATOM    360  CA  TYR L  49      22.257 -18.963  89.407  1.00  0.00           C  
ATOM    361  C   TYR L  49      22.161 -19.082  87.888  1.00  0.00           C  
ATOM    362  O   TYR L  49      23.122 -19.629  87.278  1.00  0.00           O  
ATOM    363  CB  TYR L  49      21.911 -20.319  89.961  1.00  0.00           C  
ATOM    364  CG  TYR L  49      20.583 -20.750  90.478  1.00  0.00           C  
ATOM    365  CD1 TYR L  49      19.854 -19.977  91.390  1.00  0.00           C  
ATOM    366  CD2 TYR L  49      20.080 -22.034  90.182  1.00  0.00           C  
ATOM    367  CE1 TYR L  49      18.664 -20.433  91.944  1.00  0.00           C  
ATOM    368  CE2 TYR L  49      18.898 -22.502  90.730  1.00  0.00           C  
ATOM    369  CZ  TYR L  49      18.199 -21.699  91.615  1.00  0.00           C  
ATOM    370  OH  TYR L  49      17.053 -22.182  92.193  1.00  0.00           O  
ATOM    371  N   GLU L  50      21.050 -18.732  87.327  1.00  0.00           N  
ATOM    372  CA  GLU L  50      20.714 -19.063  85.930  1.00  0.00           C  
ATOM    373  C   GLU L  50      19.962 -17.872  85.354  1.00  0.00           C  
ATOM    374  O   GLU L  50      18.724 -17.840  85.402  1.00  0.00           O  
ATOM    375  CB  GLU L  50      19.802 -20.266  85.873  1.00  0.00           C  
ATOM    376  CG  GLU L  50      20.117 -21.363  84.843  1.00  0.00           C  
ATOM    377  CD  GLU L  50      20.156 -22.719  85.518  1.00  0.00           C  
ATOM    378  OE1 GLU L  50      20.975 -22.944  86.401  1.00  0.00           O  
ATOM    379  OE2 GLU L  50      19.268 -23.491  85.109  1.00  0.00           O  
ATOM    380  N   VAL L  51      20.784 -16.929  84.902  1.00  0.00           N  
ATOM    381  CA  VAL L  51      20.173 -15.628  84.432  1.00  0.00           C  
ATOM    382  C   VAL L  51      19.467 -15.040  85.642  1.00  0.00           C  
ATOM    383  O   VAL L  51      20.166 -14.327  86.419  1.00  0.00           O  
ATOM    384  CB  VAL L  51      19.385 -15.932  83.161  1.00  0.00           C  
ATOM    385  CG1 VAL L  51      18.755 -14.737  82.475  1.00  0.00           C  
ATOM    386  CG2 VAL L  51      20.284 -16.670  82.149  1.00  0.00           C  
ATOM    387  N   ASN L  52      18.179 -15.309  85.858  1.00  0.00           N  
ATOM    388  CA  ASN L  52      17.528 -14.900  87.074  1.00  0.00           C  
ATOM    389  C   ASN L  52      16.605 -15.960  87.704  1.00  0.00           C  
ATOM    390  O   ASN L  52      15.458 -16.195  87.345  1.00  0.00           O  
ATOM    391  CB  ASN L  52      16.795 -13.550  87.129  1.00  0.00           C  
ATOM    392  CG  ASN L  52      16.301 -13.356  88.598  1.00  0.00           C  
ATOM    393  OD1 ASN L  52      16.985 -12.717  89.418  1.00  0.00           O  
ATOM    394  ND2 ASN L  52      15.174 -13.978  88.925  1.00  0.00           N  
ATOM    395  N   LYS L  53      17.135 -16.391  88.814  1.00  0.00           N  
ATOM    396  CA  LYS L  53      16.629 -17.392  89.725  1.00  0.00           C  
ATOM    397  C   LYS L  53      17.519 -17.174  90.987  1.00  0.00           C  
ATOM    398  O   LYS L  53      18.760 -17.246  90.885  1.00  0.00           O  
ATOM    399  CB  LYS L  53      16.803 -18.817  89.284  1.00  0.00           C  
ATOM    400  CG  LYS L  53      15.694 -19.468  88.475  1.00  0.00           C  
ATOM    401  CD  LYS L  53      16.277 -20.548  87.577  1.00  0.00           C  
ATOM    402  CE  LYS L  53      15.234 -21.538  87.098  1.00  0.00           C  
ATOM    403  NZ  LYS L  53      15.919 -22.648  86.365  1.00  0.00           N  
ATOM    404  N   ARG L  54      16.818 -16.843  92.037  1.00  0.00           N  
ATOM    405  CA  ARG L  54      17.432 -16.643  93.350  1.00  0.00           C  
ATOM    406  C   ARG L  54      17.420 -17.982  94.108  1.00  0.00           C  
ATOM    407  O   ARG L  54      16.615 -18.894  93.848  1.00  0.00           O  
ATOM    408  CB  ARG L  54      16.682 -15.595  94.166  1.00  0.00           C  
ATOM    409  CG  ARG L  54      16.787 -14.185  93.619  1.00  0.00           C  
ATOM    410  CD  ARG L  54      15.709 -13.304  94.166  1.00  0.00           C  
ATOM    411  NE  ARG L  54      14.458 -13.444  93.443  1.00  0.00           N  
ATOM    412  CZ  ARG L  54      14.246 -12.968  92.216  1.00  0.00           C  
ATOM    413  NH1 ARG L  54      15.177 -12.287  91.558  1.00  0.00           N  
ATOM    414  NH2 ARG L  54      13.071 -13.201  91.610  1.00  0.00           N  
ATOM    415  N   PRO L  55      18.386 -18.026  95.017  1.00  0.00           N  
ATOM    416  CA  PRO L  55      18.311 -18.965  96.149  1.00  0.00           C  
ATOM    417  C   PRO L  55      17.191 -18.589  97.116  1.00  0.00           C  
ATOM    418  O   PRO L  55      16.913 -17.426  97.484  1.00  0.00           O  
ATOM    419  CB  PRO L  55      19.708 -18.911  96.744  1.00  0.00           C  
ATOM    420  CG  PRO L  55      20.564 -18.715  95.489  1.00  0.00           C  
ATOM    421  CD  PRO L  55      19.791 -17.589  94.766  1.00  0.00           C  
ATOM    422  N   SER L  56      16.502 -19.653  97.486  1.00  0.00           N  
ATOM    423  CA  SER L  56      15.474 -19.626  98.557  1.00  0.00           C  
ATOM    424  C   SER L  56      16.300 -19.327  99.819  1.00  0.00           C  
ATOM    425  O   SER L  56      17.142 -20.130 100.250  1.00  0.00           O  
ATOM    426  CB  SER L  56      14.730 -20.937  98.555  1.00  0.00           C  
ATOM    427  OG  SER L  56      14.673 -21.453  97.194  1.00  0.00           O  
ATOM    428  N   GLY L  57      16.076 -18.115 100.306  1.00  0.00           N  
ATOM    429  CA  GLY L  57      17.087 -17.445 101.172  1.00  0.00           C  
ATOM    430  C   GLY L  57      18.011 -16.689 100.172  1.00  0.00           C  
ATOM    431  O   GLY L  57      19.033 -17.196  99.702  1.00  0.00           O  
ATOM    432  N   VAL L  58      17.524 -15.566  99.735  1.00  0.00           N  
ATOM    433  CA  VAL L  58      18.270 -14.449  99.180  1.00  0.00           C  
ATOM    434  C   VAL L  58      17.213 -13.299  99.129  1.00  0.00           C  
ATOM    435  O   VAL L  58      16.074 -13.536  98.696  1.00  0.00           O  
ATOM    436  CB  VAL L  58      19.023 -14.642  97.880  1.00  0.00           C  
ATOM    437  CG1 VAL L  58      19.488 -13.295  97.267  1.00  0.00           C  
ATOM    438  CG2 VAL L  58      20.272 -15.521  97.982  1.00  0.00           C  
ATOM    439  N   PRO L  59      17.636 -12.134  99.607  1.00  0.00           N  
ATOM    440  CA  PRO L  59      16.678 -11.082  99.949  1.00  0.00           C  
ATOM    441  C   PRO L  59      16.058 -10.296  98.819  1.00  0.00           C  
ATOM    442  O   PRO L  59      15.966 -10.674  97.648  1.00  0.00           O  
ATOM    443  CB  PRO L  59      17.439 -10.201 100.953  1.00  0.00           C  
ATOM    444  CG  PRO L  59      18.413 -11.175 101.583  1.00  0.00           C  
ATOM    445  CD  PRO L  59      18.905 -11.974 100.379  1.00  0.00           C  
ATOM    446  N   ASP L  60      15.561  -9.131  99.209  1.00  0.00           N  
ATOM    447  CA  ASP L  60      14.858  -8.097  98.501  1.00  0.00           C  
ATOM    448  C   ASP L  60      14.955  -8.053  96.984  1.00  0.00           C  
ATOM    449  O   ASP L  60      14.341  -8.941  96.326  1.00  0.00           O  
ATOM    450  CB  ASP L  60      15.131  -6.715  99.144  1.00  0.00           C  
ATOM    451  CG  ASP L  60      16.581  -6.432  99.447  1.00  0.00           C  
ATOM    452  OD1 ASP L  60      17.039  -6.893 100.524  1.00  0.00           O  
ATOM    453  OD2 ASP L  60      17.262  -5.732  98.666  1.00  0.00           O  
ATOM    454  N   ARG L  61      15.561  -6.998  96.426  1.00  0.00           N  
ATOM    455  CA  ARG L  61      15.744  -6.973  94.976  1.00  0.00           C  
ATOM    456  C   ARG L  61      17.152  -7.423  94.573  1.00  0.00           C  
ATOM    457  O   ARG L  61      18.073  -6.651  94.329  1.00  0.00           O  
ATOM    458  CB  ARG L  61      15.379  -5.718  94.223  1.00  0.00           C  
ATOM    459  CG  ARG L  61      15.118  -6.007  92.718  1.00  0.00           C  
ATOM    460  CD  ARG L  61      13.886  -5.270  92.299  1.00  0.00           C  
ATOM    461  NE  ARG L  61      12.968  -5.079  93.415  1.00  0.00           N  
ATOM    462  CZ  ARG L  61      12.067  -5.976  93.826  1.00  0.00           C  
ATOM    463  NH1 ARG L  61      11.862  -7.128  93.184  1.00  0.00           N  
ATOM    464  NH2 ARG L  61      11.398  -5.726  94.963  1.00  0.00           N  
ATOM    465  N   PHE L  62      17.231  -8.730  94.513  1.00  0.00           N  
ATOM    466  CA  PHE L  62      18.350  -9.462  93.881  1.00  0.00           C  
ATOM    467  C   PHE L  62      17.646 -10.087  92.664  1.00  0.00           C  
ATOM    468  O   PHE L  62      16.815 -10.984  92.844  1.00  0.00           O  
ATOM    469  CB  PHE L  62      19.004 -10.463  94.824  1.00  0.00           C  
ATOM    470  CG  PHE L  62      19.696  -9.812  95.993  1.00  0.00           C  
ATOM    471  CD1 PHE L  62      20.908  -9.143  95.785  1.00  0.00           C  
ATOM    472  CD2 PHE L  62      19.119  -9.818  97.257  1.00  0.00           C  
ATOM    473  CE1 PHE L  62      21.555  -8.498  96.826  1.00  0.00           C  
ATOM    474  CE2 PHE L  62      19.766  -9.184  98.326  1.00  0.00           C  
ATOM    475  CZ  PHE L  62      20.988  -8.522  98.099  1.00  0.00           C  
ATOM    476  N   SER L  63      17.895  -9.448  91.530  1.00  0.00           N  
ATOM    477  CA  SER L  63      17.342  -9.977  90.260  1.00  0.00           C  
ATOM    478  C   SER L  63      18.376  -9.842  89.152  1.00  0.00           C  
ATOM    479  O   SER L  63      19.334  -9.056  89.254  1.00  0.00           O  
ATOM    480  CB  SER L  63      16.047  -9.271  89.914  1.00  0.00           C  
ATOM    481  OG  SER L  63      15.121  -9.313  90.985  1.00  0.00           O  
ATOM    482  N   GLY L  64      18.144 -10.600  88.089  1.00  0.00           N  
ATOM    483  CA  GLY L  64      19.030 -10.619  86.925  1.00  0.00           C  
ATOM    484  C   GLY L  64      18.259 -10.499  85.616  1.00  0.00           C  
ATOM    485  O   GLY L  64      17.121 -10.955  85.477  1.00  0.00           O  
ATOM    486  N   SER L  65      18.951  -9.889  84.664  1.00  0.00           N  
ATOM    487  CA  SER L  65      18.435  -9.628  83.322  1.00  0.00           C  
ATOM    488  C   SER L  65      19.597  -9.780  82.322  1.00  0.00           C  
ATOM    489  O   SER L  65      20.478  -8.916  82.177  1.00  0.00           O  
ATOM    490  CB  SER L  65      17.758  -8.286  83.196  1.00  0.00           C  
ATOM    491  OG  SER L  65      18.641  -7.175  83.257  1.00  0.00           O  
ATOM    492  N   LYS L  66      19.563 -10.969  81.722  1.00  0.00           N  
ATOM    493  CA  LYS L  66      20.442 -11.259  80.556  1.00  0.00           C  
ATOM    494  C   LYS L  66      19.766 -10.515  79.396  1.00  0.00           C  
ATOM    495  O   LYS L  66      18.619 -10.768  79.004  1.00  0.00           O  
ATOM    496  CB  LYS L  66      20.598 -12.721  80.320  1.00  0.00           C  
ATOM    497  CG  LYS L  66      21.698 -13.154  79.351  1.00  0.00           C  
ATOM    498  CD  LYS L  66      21.894 -14.666  79.474  1.00  0.00           C  
ATOM    499  CE  LYS L  66      22.084 -15.327  78.117  1.00  0.00           C  
ATOM    500  NZ  LYS L  66      21.894 -16.796  78.247  1.00  0.00           N  
ATOM    501  N   SER L  67      20.462  -9.488  79.004  1.00  0.00           N  
ATOM    502  CA  SER L  67      20.122  -8.563  77.931  1.00  0.00           C  
ATOM    503  C   SER L  67      21.227  -8.644  76.868  1.00  0.00           C  
ATOM    504  O   SER L  67      22.153  -7.822  76.723  1.00  0.00           O  
ATOM    505  CB  SER L  67      19.900  -7.167  78.496  1.00  0.00           C  
ATOM    506  OG  SER L  67      19.127  -7.185  79.710  1.00  0.00           O  
ATOM    507  N   GLY L  68      21.168  -9.795  76.187  1.00  0.00           N  
ATOM    508  CA  GLY L  68      22.020 -10.098  75.044  1.00  0.00           C  
ATOM    509  C   GLY L  68      23.321 -10.769  75.436  1.00  0.00           C  
ATOM    510  O   GLY L  68      23.346 -11.967  75.756  1.00  0.00           O  
ATOM    511  N   ASN L  69      24.389  -9.999  75.345  1.00  0.00           N  
ATOM    512  CA  ASN L  69      25.690 -10.388  75.931  1.00  0.00           C  
ATOM    513  C   ASN L  69      25.918  -9.657  77.256  1.00  0.00           C  
ATOM    514  O   ASN L  69      27.023  -9.782  77.853  1.00  0.00           O  
ATOM    515  CB  ASN L  69      26.811 -10.171  74.903  1.00  0.00           C  
ATOM    516  CG  ASN L  69      26.948 -11.417  74.027  1.00  0.00           C  
ATOM    517  OD1 ASN L  69      25.994 -12.215  73.988  1.00  0.00           O  
ATOM    518  ND2 ASN L  69      28.079 -11.590  73.364  1.00  0.00           N  
ATOM    519  N   THR L  70      24.883  -8.886  77.643  1.00  0.00           N  
ATOM    520  CA  THR L  70      25.003  -8.139  78.903  1.00  0.00           C  
ATOM    521  C   THR L  70      24.111  -8.838  79.935  1.00  0.00           C  
ATOM    522  O   THR L  70      22.933  -9.078  79.695  1.00  0.00           O  
ATOM    523  CB  THR L  70      24.692  -6.611  78.827  1.00  0.00           C  
ATOM    524  OG1 THR L  70      25.417  -6.034  77.701  1.00  0.00           O  
ATOM    525  CG2 THR L  70      25.057  -5.853  80.138  1.00  0.00           C  
ATOM    526  N   ALA L  71      24.744  -9.186  81.030  1.00  0.00           N  
ATOM    527  CA  ALA L  71      24.043  -9.710  82.212  1.00  0.00           C  
ATOM    528  C   ALA L  71      23.950  -8.496  83.155  1.00  0.00           C  
ATOM    529  O   ALA L  71      24.922  -7.721  83.198  1.00  0.00           O  
ATOM    530  CB  ALA L  71      24.799 -10.847  82.854  1.00  0.00           C  
ATOM    531  N   SER L  72      22.790  -8.364  83.770  1.00  0.00           N  
ATOM    532  CA  SER L  72      22.639  -7.270  84.759  1.00  0.00           C  
ATOM    533  C   SER L  72      22.002  -7.774  86.029  1.00  0.00           C  
ATOM    534  O   SER L  72      21.003  -8.505  86.003  1.00  0.00           O  
ATOM    535  CB  SER L  72      21.945  -6.091  84.120  1.00  0.00           C  
ATOM    536  OG  SER L  72      22.906  -5.486  83.237  1.00  0.00           O  
ATOM    537  N   LEU L  73      22.664  -7.418  87.137  1.00  0.00           N  
ATOM    538  CA  LEU L  73      22.179  -7.750  88.466  1.00  0.00           C  
ATOM    539  C   LEU L  73      21.601  -6.445  89.059  1.00  0.00           C  
ATOM    540  O   LEU L  73      22.329  -5.527  89.433  1.00  0.00           O  
ATOM    541  CB  LEU L  73      23.212  -8.395  89.368  1.00  0.00           C  
ATOM    542  CG  LEU L  73      22.690  -8.860  90.738  1.00  0.00           C  
ATOM    543  CD1 LEU L  73      21.750 -10.043  90.561  1.00  0.00           C  
ATOM    544  CD2 LEU L  73      23.871  -9.234  91.604  1.00  0.00           C  
ATOM    545  N   THR L  74      20.275  -6.469  89.054  1.00  0.00           N  
ATOM    546  CA  THR L  74      19.490  -5.406  89.635  1.00  0.00           C  
ATOM    547  C   THR L  74      19.321  -5.689  91.137  1.00  0.00           C  
ATOM    548  O   THR L  74      18.854  -6.744  91.565  1.00  0.00           O  
ATOM    549  CB  THR L  74      18.101  -5.160  88.979  1.00  0.00           C  
ATOM    550  OG1 THR L  74      18.388  -4.703  87.609  1.00  0.00           O  
ATOM    551  CG2 THR L  74      17.245  -4.159  89.780  1.00  0.00           C  
ATOM    552  N   VAL L  75      19.732  -4.645  91.829  1.00  0.00           N  
ATOM    553  CA  VAL L  75      19.752  -4.608  93.288  1.00  0.00           C  
ATOM    554  C   VAL L  75      19.087  -3.302  93.738  1.00  0.00           C  
ATOM    555  O   VAL L  75      19.587  -2.182  93.614  1.00  0.00           O  
ATOM    556  CB  VAL L  75      21.177  -4.863  93.781  1.00  0.00           C  
ATOM    557  CG1 VAL L  75      21.211  -5.981  94.826  1.00  0.00           C  
ATOM    558  CG2 VAL L  75      22.142  -5.211  92.649  1.00  0.00           C  
ATOM    559  N   SER L  76      17.882  -3.513  94.246  1.00  0.00           N  
ATOM    560  CA  SER L  76      16.950  -2.480  94.666  1.00  0.00           C  
ATOM    561  C   SER L  76      16.455  -2.795  96.082  1.00  0.00           C  
ATOM    562  O   SER L  76      16.193  -3.961  96.421  1.00  0.00           O  
ATOM    563  CB  SER L  76      15.740  -2.422  93.727  1.00  0.00           C  
ATOM    564  OG  SER L  76      16.082  -2.553  92.363  1.00  0.00           O  
ATOM    565  N   GLY L  77      16.301  -1.724  96.822  1.00  0.00           N  
ATOM    566  CA  GLY L  77      15.786  -1.806  98.218  1.00  0.00           C  
ATOM    567  C   GLY L  77      17.008  -1.671  99.144  1.00  0.00           C  
ATOM    568  O   GLY L  77      17.079  -2.248 100.224  1.00  0.00           O  
ATOM    569  N   LEU L  78      17.928  -0.860  98.640  1.00  0.00           N  
ATOM    570  CA  LEU L  78      19.275  -0.728  99.144  1.00  0.00           C  
ATOM    571  C   LEU L  78      19.383  -0.626 100.665  1.00  0.00           C  
ATOM    572  O   LEU L  78      18.940   0.321 101.315  1.00  0.00           O  
ATOM    573  CB  LEU L  78      19.967   0.436  98.406  1.00  0.00           C  
ATOM    574  CG  LEU L  78      20.660   0.106  97.097  1.00  0.00           C  
ATOM    575  CD1 LEU L  78      21.368   1.331  96.532  1.00  0.00           C  
ATOM    576  CD2 LEU L  78      21.673  -1.014  97.334  1.00  0.00           C  
ATOM    577  N   GLN L  79      20.062  -1.640 101.154  1.00  0.00           N  
ATOM    578  CA  GLN L  79      20.363  -1.843 102.574  1.00  0.00           C  
ATOM    579  C   GLN L  79      21.879  -1.896 102.743  1.00  0.00           C  
ATOM    580  O   GLN L  79      22.568  -2.615 102.003  1.00  0.00           O  
ATOM    581  CB  GLN L  79      19.678  -3.110 103.072  1.00  0.00           C  
ATOM    582  CG  GLN L  79      20.030  -4.417 102.451  1.00  0.00           C  
ATOM    583  CD  GLN L  79      19.621  -4.760 101.053  1.00  0.00           C  
ATOM    584  OE1 GLN L  79      19.429  -3.925 100.150  1.00  0.00           O  
ATOM    585  NE2 GLN L  79      19.565  -6.078 100.763  1.00  0.00           N  
ATOM    586  N   ALA L  80      22.401  -1.116 103.652  1.00  0.00           N  
ATOM    587  CA  ALA L  80      23.815  -1.086 104.028  1.00  0.00           C  
ATOM    588  C   ALA L  80      24.496  -2.429 103.821  1.00  0.00           C  
ATOM    589  O   ALA L  80      25.532  -2.550 103.158  1.00  0.00           O  
ATOM    590  CB  ALA L  80      23.935  -0.677 105.506  1.00  0.00           C  
ATOM    591  N   GLU L  81      23.885  -3.439 104.390  1.00  0.00           N  
ATOM    592  CA  GLU L  81      24.360  -4.823 104.426  1.00  0.00           C  
ATOM    593  C   GLU L  81      24.766  -5.357 103.072  1.00  0.00           C  
ATOM    594  O   GLU L  81      25.393  -6.441 103.005  1.00  0.00           O  
ATOM    595  CB  GLU L  81      23.335  -5.725 105.113  1.00  0.00           C  
ATOM    596  CG  GLU L  81      23.179  -7.184 104.894  1.00  0.00           C  
ATOM    597  CD  GLU L  81      23.138  -8.204 105.980  1.00  0.00           C  
ATOM    598  OE1 GLU L  81      23.750  -7.908 107.041  1.00  0.00           O  
ATOM    599  OE2 GLU L  81      22.582  -9.305 105.855  1.00  0.00           O  
ATOM    600  N   ASP L  82      24.493  -4.632 102.000  1.00  0.00           N  
ATOM    601  CA  ASP L  82      24.776  -5.029 100.633  1.00  0.00           C  
ATOM    602  C   ASP L  82      26.255  -4.813 100.267  1.00  0.00           C  
ATOM    603  O   ASP L  82      26.730  -5.516  99.354  1.00  0.00           O  
ATOM    604  CB  ASP L  82      23.935  -4.295  99.575  1.00  0.00           C  
ATOM    605  CG  ASP L  82      22.460  -4.570  99.700  1.00  0.00           C  
ATOM    606  OD1 ASP L  82      22.136  -5.740  99.971  1.00  0.00           O  
ATOM    607  OD2 ASP L  82      21.643  -3.645  99.548  1.00  0.00           O  
ATOM    608  N   GLU L  83      26.839  -3.808 100.923  1.00  0.00           N  
ATOM    609  CA  GLU L  83      28.205  -3.403 100.462  1.00  0.00           C  
ATOM    610  C   GLU L  83      29.045  -4.675 100.445  1.00  0.00           C  
ATOM    611  O   GLU L  83      29.148  -5.425 101.423  1.00  0.00           O  
ATOM    612  CB  GLU L  83      28.810  -2.310 101.258  1.00  0.00           C  
ATOM    613  CG  GLU L  83      28.112  -0.940 101.288  1.00  0.00           C  
ATOM    614  CD  GLU L  83      29.004   0.206 101.689  1.00  0.00           C  
ATOM    615  OE1 GLU L  83      30.225   0.152 101.637  1.00  0.00           O  
ATOM    616  OE2 GLU L  83      28.387   1.216 102.057  1.00  0.00           O  
ATOM    617  N   ALA L  84      29.539  -4.963  99.254  1.00  0.00           N  
ATOM    618  CA  ALA L  84      30.402  -6.110  99.005  1.00  0.00           C  
ATOM    619  C   ALA L  84      31.178  -5.893  97.703  1.00  0.00           C  
ATOM    620  O   ALA L  84      31.402  -4.773  97.194  1.00  0.00           O  
ATOM    621  CB  ALA L  84      29.573  -7.388  98.943  1.00  0.00           C  
ATOM    622  N   ASP L  85      31.569  -7.045  97.203  1.00  0.00           N  
ATOM    623  CA  ASP L  85      32.235  -7.229  95.910  1.00  0.00           C  
ATOM    624  C   ASP L  85      31.358  -8.283  95.214  1.00  0.00           C  
ATOM    625  O   ASP L  85      31.071  -9.320  95.833  1.00  0.00           O  
ATOM    626  CB  ASP L  85      33.693  -7.616  96.101  1.00  0.00           C  
ATOM    627  CG  ASP L  85      34.567  -6.415  96.436  1.00  0.00           C  
ATOM    628  OD1 ASP L  85      34.247  -5.612  97.321  1.00  0.00           O  
ATOM    629  OD2 ASP L  85      35.598  -6.255  95.759  1.00  0.00           O  
ATOM    630  N   TYR L  86      30.912  -7.947  94.030  1.00  0.00           N  
ATOM    631  CA  TYR L  86      29.984  -8.780  93.281  1.00  0.00           C  
ATOM    632  C   TYR L  86      30.645  -9.390  92.039  1.00  0.00           C  
ATOM    633  O   TYR L  86      31.203  -8.685  91.177  1.00  0.00           O  
ATOM    634  CB  TYR L  86      28.695  -8.027  92.898  1.00  0.00           C  
ATOM    635  CG  TYR L  86      27.783  -7.777  94.084  1.00  0.00           C  
ATOM    636  CD1 TYR L  86      28.000  -6.703  94.952  1.00  0.00           C  
ATOM    637  CD2 TYR L  86      26.737  -8.648  94.348  1.00  0.00           C  
ATOM    638  CE1 TYR L  86      27.178  -6.502  96.055  1.00  0.00           C  
ATOM    639  CE2 TYR L  86      25.907  -8.459  95.448  1.00  0.00           C  
ATOM    640  CZ  TYR L  86      26.126  -7.384  96.298  1.00  0.00           C  
ATOM    641  OH  TYR L  86      25.277  -7.232  97.358  1.00  0.00           O  
ATOM    642  N   TYR L  87      30.512 -10.725  92.058  1.00  0.00           N  
ATOM    643  CA  TYR L  87      31.029 -11.543  90.946  1.00  0.00           C  
ATOM    644  C   TYR L  87      29.890 -12.176  90.152  1.00  0.00           C  
ATOM    645  O   TYR L  87      28.764 -12.404  90.623  1.00  0.00           O  
ATOM    646  CB  TYR L  87      32.027 -12.584  91.470  1.00  0.00           C  
ATOM    647  CG  TYR L  87      33.164 -11.977  92.266  1.00  0.00           C  
ATOM    648  CD1 TYR L  87      33.865 -10.882  91.751  1.00  0.00           C  
ATOM    649  CD2 TYR L  87      33.533 -12.457  93.521  1.00  0.00           C  
ATOM    650  CE1 TYR L  87      34.908 -10.290  92.456  1.00  0.00           C  
ATOM    651  CE2 TYR L  87      34.573 -11.877  94.238  1.00  0.00           C  
ATOM    652  CZ  TYR L  87      35.263 -10.790  93.699  1.00  0.00           C  
ATOM    653  OH  TYR L  87      36.290 -10.178  94.370  1.00  0.00           O  
ATOM    654  N   CYS L  88      30.193 -12.400  88.886  1.00  0.00           N  
ATOM    655  CA  CYS L  88      29.305 -12.985  87.894  1.00  0.00           C  
ATOM    656  C   CYS L  88      30.139 -14.084  87.196  1.00  0.00           C  
ATOM    657  O   CYS L  88      31.381 -14.051  87.287  1.00  0.00           O  
ATOM    658  CB  CYS L  88      28.785 -12.024  86.812  1.00  0.00           C  
ATOM    659  SG  CYS L  88      30.070 -11.235  85.850  1.00  0.00           S  
ATOM    660  N   SER L  89      29.384 -14.958  86.566  1.00  0.00           N  
ATOM    661  CA  SER L  89      30.042 -16.132  85.951  1.00  0.00           C  
ATOM    662  C   SER L  89      29.223 -16.609  84.759  1.00  0.00           C  
ATOM    663  O   SER L  89      28.007 -16.389  84.705  1.00  0.00           O  
ATOM    664  CB  SER L  89      30.236 -17.254  86.955  1.00  0.00           C  
ATOM    665  OG  SER L  89      31.463 -17.914  86.707  1.00  0.00           O  
ATOM    666  N   SER L  90      29.956 -17.284  83.880  1.00  0.00           N  
ATOM    667  CA  SER L  90      29.358 -17.908  82.709  1.00  0.00           C  
ATOM    668  C   SER L  90      30.035 -19.241  82.380  1.00  0.00           C  
ATOM    669  O   SER L  90      31.263 -19.374  82.406  1.00  0.00           O  
ATOM    670  CB  SER L  90      29.376 -17.012  81.474  1.00  0.00           C  
ATOM    671  OG  SER L  90      28.171 -17.229  80.735  1.00  0.00           O  
ATOM    672  N   TYR L  91      29.133 -20.173  82.079  1.00  0.00           N  
ATOM    673  CA  TYR L  91      29.614 -21.433  81.428  1.00  0.00           C  
ATOM    674  C   TYR L  91      30.375 -20.997  80.184  1.00  0.00           C  
ATOM    675  O   TYR L  91      30.118 -19.869  79.690  1.00  0.00           O  
ATOM    676  CB  TYR L  91      28.389 -22.309  81.134  1.00  0.00           C  
ATOM    677  CG  TYR L  91      28.715 -23.715  80.684  1.00  0.00           C  
ATOM    678  CD1 TYR L  91      29.866 -24.359  81.168  1.00  0.00           C  
ATOM    679  CD2 TYR L  91      27.924 -24.397  79.766  1.00  0.00           C  
ATOM    680  CE1 TYR L  91      30.216 -25.632  80.746  1.00  0.00           C  
ATOM    681  CE2 TYR L  91      28.264 -25.678  79.340  1.00  0.00           C  
ATOM    682  CZ  TYR L  91      29.412 -26.289  79.838  1.00  0.00           C  
ATOM    683  OH  TYR L  91      29.770 -27.555  79.457  1.00  0.00           O  
ATOM    684  N   GLU L  92      31.300 -21.821  79.716  1.00  0.00           N  
ATOM    685  CA  GLU L  92      31.932 -21.585  78.398  1.00  0.00           C  
ATOM    686  C   GLU L  92      32.510 -22.864  77.827  1.00  0.00           C  
ATOM    687  O   GLU L  92      33.697 -22.952  77.466  1.00  0.00           O  
ATOM    688  CB  GLU L  92      33.048 -20.559  78.507  1.00  0.00           C  
ATOM    689  CG  GLU L  92      33.997 -20.696  79.703  1.00  0.00           C  
ATOM    690  CD  GLU L  92      35.368 -20.125  79.498  1.00  0.00           C  
ATOM    691  OE1 GLU L  92      35.576 -18.985  79.113  1.00  0.00           O  
ATOM    692  OE2 GLU L  92      36.267 -20.945  79.775  1.00  0.00           O  
ATOM    693  N   GLY L  93      31.680 -23.891  77.779  1.00  0.00           N  
ATOM    694  CA  GLY L  93      31.983 -25.189  77.228  1.00  0.00           C  
ATOM    695  C   GLY L  93      33.026 -26.008  77.970  1.00  0.00           C  
ATOM    696  O   GLY L  93      33.728 -25.600  78.892  1.00  0.00           O  
ATOM    697  N   SER L  94      33.114 -27.242  77.522  1.00  0.00           N  
ATOM    698  CA  SER L  94      34.015 -28.294  77.946  1.00  0.00           C  
ATOM    699  C   SER L  94      34.216 -28.370  79.441  1.00  0.00           C  
ATOM    700  O   SER L  94      35.286 -28.744  79.970  1.00  0.00           O  
ATOM    701  CB  SER L  94      35.309 -28.192  77.122  1.00  0.00           C  
ATOM    702  OG  SER L  94      34.975 -28.133  75.721  1.00  0.00           O  
ATOM    703  N   ASP L  95      33.134 -28.080  80.153  1.00  0.00           N  
ATOM    704  CA  ASP L  95      33.063 -28.001  81.608  1.00  0.00           C  
ATOM    705  C   ASP L  95      33.947 -26.904  82.190  1.00  0.00           C  
ATOM    706  O   ASP L  95      34.637 -27.201  83.198  1.00  0.00           O  
ATOM    707  CB  ASP L  95      33.363 -29.365  82.259  1.00  0.00           C  
ATOM    708  CG  ASP L  95      32.694 -30.559  81.631  1.00  0.00           C  
ATOM    709  OD1 ASP L  95      31.494 -30.544  81.322  1.00  0.00           O  
ATOM    710  OD2 ASP L  95      33.416 -31.577  81.443  1.00  0.00           O  
ATOM    711  N   ASN L  95A     33.925 -25.703  81.651  1.00  0.00           N  
ATOM    712  CA  ASN L  95A     34.687 -24.561  82.214  1.00  0.00           C  
ATOM    713  C   ASN L  95A     33.775 -23.361  82.467  1.00  0.00           C  
ATOM    714  O   ASN L  95A     32.786 -23.153  81.731  1.00  0.00           O  
ATOM    715  CB  ASN L  95A     35.905 -24.217  81.339  1.00  0.00           C  
ATOM    716  CG  ASN L  95A     36.666 -25.454  80.893  1.00  0.00           C  
ATOM    717  OD1 ASN L  95A     37.400 -26.079  81.668  1.00  0.00           O  
ATOM    718  ND2 ASN L  95A     36.488 -25.858  79.641  1.00  0.00           N  
ATOM    719  N   PHE L  96      34.143 -22.573  83.486  1.00  0.00           N  
ATOM    720  CA  PHE L  96      33.374 -21.406  83.938  1.00  0.00           C  
ATOM    721  C   PHE L  96      34.222 -20.150  84.183  1.00  0.00           C  
ATOM    722  O   PHE L  96      35.079 -20.189  85.083  1.00  0.00           O  
ATOM    723  CB  PHE L  96      32.649 -21.668  85.261  1.00  0.00           C  
ATOM    724  CG  PHE L  96      31.380 -22.430  85.174  1.00  0.00           C  
ATOM    725  CD1 PHE L  96      30.189 -21.776  84.873  1.00  0.00           C  
ATOM    726  CD2 PHE L  96      31.373 -23.806  85.425  1.00  0.00           C  
ATOM    727  CE1 PHE L  96      28.992 -22.480  84.813  1.00  0.00           C  
ATOM    728  CE2 PHE L  96      30.178 -24.533  85.362  1.00  0.00           C  
ATOM    729  CZ  PHE L  96      28.991 -23.857  85.051  1.00  0.00           C  
ATOM    730  N   VAL L  97      33.860 -19.061  83.516  1.00  0.00           N  
ATOM    731  CA  VAL L  97      34.558 -17.795  83.631  1.00  0.00           C  
ATOM    732  C   VAL L  97      33.873 -16.839  84.624  1.00  0.00           C  
ATOM    733  O   VAL L  97      32.646 -16.698  84.618  1.00  0.00           O  
ATOM    734  CB  VAL L  97      34.678 -17.012  82.298  1.00  0.00           C  
ATOM    735  CG1 VAL L  97      36.122 -16.647  81.991  1.00  0.00           C  
ATOM    736  CG2 VAL L  97      33.941 -17.661  81.160  1.00  0.00           C  
ATOM    737  N   PHE L  98      34.750 -16.116  85.319  1.00  0.00           N  
ATOM    738  CA  PHE L  98      34.324 -15.119  86.312  1.00  0.00           C  
ATOM    739  C   PHE L  98      34.454 -13.701  85.767  1.00  0.00           C  
ATOM    740  O   PHE L  98      35.051 -13.479  84.707  1.00  0.00           O  
ATOM    741  CB  PHE L  98      35.072 -15.306  87.639  1.00  0.00           C  
ATOM    742  CG  PHE L  98      34.441 -16.406  88.444  1.00  0.00           C  
ATOM    743  CD1 PHE L  98      33.346 -16.126  89.251  1.00  0.00           C  
ATOM    744  CD2 PHE L  98      34.900 -17.710  88.314  1.00  0.00           C  
ATOM    745  CE1 PHE L  98      32.729 -17.147  89.974  1.00  0.00           C  
ATOM    746  CE2 PHE L  98      34.303 -18.738  89.033  1.00  0.00           C  
ATOM    747  CZ  PHE L  98      33.220 -18.459  89.858  1.00  0.00           C  
ATOM    748  N   GLY L  99      33.849 -12.792  86.527  1.00  0.00           N  
ATOM    749  CA  GLY L  99      33.843 -11.356  86.170  1.00  0.00           C  
ATOM    750  C   GLY L  99      35.004 -10.678  86.901  1.00  0.00           C  
ATOM    751  O   GLY L  99      35.637 -11.326  87.765  1.00  0.00           O  
ATOM    752  N   THR L 100      35.267  -9.432  86.514  1.00  0.00           N  
ATOM    753  CA  THR L 100      36.326  -8.671  87.211  1.00  0.00           C  
ATOM    754  C   THR L 100      35.867  -8.077  88.531  1.00  0.00           C  
ATOM    755  O   THR L 100      36.699  -7.435  89.228  1.00  0.00           O  
ATOM    756  CB  THR L 100      36.955  -7.527  86.325  1.00  0.00           C  
ATOM    757  OG1 THR L 100      35.820  -6.730  85.865  1.00  0.00           O  
ATOM    758  CG2 THR L 100      37.852  -8.008  85.194  1.00  0.00           C  
ATOM    759  N   GLY L 101      34.598  -8.201  88.842  1.00  0.00           N  
ATOM    760  CA  GLY L 101      34.060  -7.805  90.150  1.00  0.00           C  
ATOM    761  C   GLY L 101      33.626  -6.346  90.173  1.00  0.00           C  
ATOM    762  O   GLY L 101      33.976  -5.543  89.291  1.00  0.00           O  
ATOM    763  N   THR L 102      32.823  -6.075  91.197  1.00  0.00           N  
ATOM    764  CA  THR L 102      32.318  -4.682  91.422  1.00  0.00           C  
ATOM    765  C   THR L 102      32.252  -4.460  92.924  1.00  0.00           C  
ATOM    766  O   THR L 102      31.851  -5.393  93.651  1.00  0.00           O  
ATOM    767  CB  THR L 102      30.938  -4.479  90.689  1.00  0.00           C  
ATOM    768  OG1 THR L 102      31.153  -4.898  89.290  1.00  0.00           O  
ATOM    769  CG2 THR L 102      30.340  -3.070  90.768  1.00  0.00           C  
ATOM    770  N   LYS L 103      32.687  -3.304  93.381  1.00  0.00           N  
ATOM    771  CA  LYS L 103      32.531  -2.930  94.813  1.00  0.00           C  
ATOM    772  C   LYS L 103      31.339  -1.979  94.889  1.00  0.00           C  
ATOM    773  O   LYS L 103      31.393  -0.816  94.452  1.00  0.00           O  
ATOM    774  CB  LYS L 103      33.798  -2.368  95.411  1.00  0.00           C  
ATOM    775  CG  LYS L 103      34.940  -3.389  95.458  1.00  0.00           C  
ATOM    776  CD  LYS L 103      36.275  -2.891  95.921  1.00  0.00           C  
ATOM    777  CE  LYS L 103      36.430  -2.759  97.419  1.00  0.00           C  
ATOM    778  NZ  LYS L 103      35.754  -1.537  97.928  1.00  0.00           N  
ATOM    779  N   VAL L 104      30.252  -2.573  95.398  1.00  0.00           N  
ATOM    780  CA  VAL L 104      28.987  -1.779  95.462  1.00  0.00           C  
ATOM    781  C   VAL L 104      28.955  -1.082  96.815  1.00  0.00           C  
ATOM    782  O   VAL L 104      28.782  -1.739  97.850  1.00  0.00           O  
ATOM    783  CB  VAL L 104      27.775  -2.636  95.132  1.00  0.00           C  
ATOM    784  CG1 VAL L 104      26.450  -1.902  95.372  1.00  0.00           C  
ATOM    785  CG2 VAL L 104      27.818  -3.172  93.701  1.00  0.00           C  
ATOM    786  N   THR L 105      29.175   0.232  96.752  1.00  0.00           N  
ATOM    787  CA  THR L 105      29.099   1.089  97.947  1.00  0.00           C  
ATOM    788  C   THR L 105      27.731   1.757  98.040  1.00  0.00           C  
ATOM    789  O   THR L 105      27.268   2.342  97.036  1.00  0.00           O  
ATOM    790  CB  THR L 105      30.234   2.176  97.979  1.00  0.00           C  
ATOM    791  OG1 THR L 105      31.511   1.477  98.005  1.00  0.00           O  
ATOM    792  CG2 THR L 105      30.110   3.133  99.180  1.00  0.00           C  
ATOM    793  N   VAL L 106      27.120   1.669  99.222  1.00  0.00           N  
ATOM    794  CA  VAL L 106      25.864   2.371  99.477  1.00  0.00           C  
ATOM    795  C   VAL L 106      26.045   3.620 100.334  1.00  0.00           C  
ATOM    796  O   VAL L 106      26.530   3.609 101.459  1.00  0.00           O  
ATOM    797  CB  VAL L 106      24.749   1.467  99.992  1.00  0.00           C  
ATOM    798  CG1 VAL L 106      23.563   2.280 100.524  1.00  0.00           C  
ATOM    799  CG2 VAL L 106      24.284   0.513  98.901  1.00  0.00           C  
ATOM    800  N   LEU L 106A     25.532   4.695  99.778  1.00  0.00           N  
ATOM    801  CA  LEU L 106A     25.636   6.062 100.252  1.00  0.00           C  
ATOM    802  C   LEU L 106A     24.414   6.487 101.053  1.00  0.00           C  
ATOM    803  O   LEU L 106A     23.311   5.939 100.908  1.00  0.00           O  
ATOM    804  CB  LEU L 106A     25.905   6.926  98.994  1.00  0.00           C  
ATOM    805  CG  LEU L 106A     26.904   6.305  98.019  1.00  0.00           C  
ATOM    806  CD1 LEU L 106A     27.029   7.145  96.768  1.00  0.00           C  
ATOM    807  CD2 LEU L 106A     28.258   6.192  98.713  1.00  0.00           C  
ATOM    808  N   GLY L 107      24.645   7.450 101.935  1.00  0.00           N  
ATOM    809  CA  GLY L 107      23.675   7.926 102.894  1.00  0.00           C  
ATOM    810  C   GLY L 107      23.612   7.182 104.204  1.00  0.00           C  
ATOM    811  O   GLY L 107      22.618   7.393 104.954  1.00  0.00           O  
ATOM    812  N   GLN L 108      24.581   6.348 104.524  1.00  0.00           N  
ATOM    813  CA  GLN L 108      24.570   5.591 105.792  1.00  0.00           C  
ATOM    814  C   GLN L 108      25.212   6.439 106.900  1.00  0.00           C  
ATOM    815  O   GLN L 108      26.325   6.961 106.747  1.00  0.00           O  
ATOM    816  CB  GLN L 108      25.165   4.210 105.760  1.00  0.00           C  
ATOM    817  CG  GLN L 108      26.093   3.888 104.610  1.00  0.00           C  
ATOM    818  CD  GLN L 108      26.377   2.400 104.548  1.00  0.00           C  
ATOM    819  OE1 GLN L 108      25.467   1.594 104.699  1.00  0.00           O  
ATOM    820  NE2 GLN L 108      27.643   2.054 104.379  1.00  0.00           N  
ATOM    821  N   PRO L 109      24.480   6.511 108.002  1.00  0.00           N  
ATOM    822  CA  PRO L 109      24.767   7.452 109.081  1.00  0.00           C  
ATOM    823  C   PRO L 109      26.071   7.155 109.794  1.00  0.00           C  
ATOM    824  O   PRO L 109      26.543   6.000 109.858  1.00  0.00           O  
ATOM    825  CB  PRO L 109      23.558   7.372 109.999  1.00  0.00           C  
ATOM    826  CG  PRO L 109      22.496   6.633 109.233  1.00  0.00           C  
ATOM    827  CD  PRO L 109      23.279   5.706 108.311  1.00  0.00           C  
TER     828      PRO L 109                                                      
ATOM   1607  N   PRO L   1      24.523 -23.083 103.801  1.00  0.00           N  
ATOM   1608  CA  PRO L   1      24.823 -22.247 104.978  1.00  0.00           C  
ATOM   1609  C   PRO L   1      26.280 -22.423 105.355  1.00  0.00           C  
ATOM   1610  O   PRO L   1      26.997 -23.160 104.645  1.00  0.00           O  
ATOM   1611  CB  PRO L   1      23.843 -22.753 106.026  1.00  0.00           C  
ATOM   1612  CG  PRO L   1      23.708 -24.223 105.690  1.00  0.00           C  
ATOM   1613  CD  PRO L   1      23.766 -24.286 104.171  1.00  0.00           C  
ATOM   1614  N   SER L   2      26.698 -21.766 106.426  1.00  0.00           N  
ATOM   1615  CA  SER L   2      28.106 -21.874 106.902  1.00  0.00           C  
ATOM   1616  C   SER L   2      28.374 -23.349 107.218  1.00  0.00           C  
ATOM   1617  O   SER L   2      28.366 -23.721 108.409  1.00  0.00           O  
ATOM   1618  CB  SER L   2      28.338 -21.003 108.125  1.00  0.00           C  
ATOM   1619  OG  SER L   2      27.589 -19.792 108.051  1.00  0.00           O  
ATOM   1620  N   ALA L   3      28.619 -24.139 106.169  1.00  0.00           N  
ATOM   1621  CA  ALA L   3      28.479 -25.592 106.303  1.00  0.00           C  
ATOM   1622  C   ALA L   3      29.589 -26.458 105.799  1.00  0.00           C  
ATOM   1623  O   ALA L   3      29.476 -27.717 106.015  1.00  0.00           O  
ATOM   1624  CB  ALA L   3      27.133 -25.990 105.669  1.00  0.00           C  
ATOM   1625  N   LEU L   4      30.589 -25.946 105.128  1.00  0.00           N  
ATOM   1626  CA  LEU L   4      31.782 -26.764 104.786  1.00  0.00           C  
ATOM   1627  C   LEU L   4      32.957 -26.111 105.508  1.00  0.00           C  
ATOM   1628  O   LEU L   4      33.156 -24.896 105.342  1.00  0.00           O  
ATOM   1629  CB  LEU L   4      31.922 -26.926 103.292  1.00  0.00           C  
ATOM   1630  CG  LEU L   4      31.296 -28.151 102.641  1.00  0.00           C  
ATOM   1631  CD1 LEU L   4      29.776 -28.029 102.607  1.00  0.00           C  
ATOM   1632  CD2 LEU L   4      31.813 -28.270 101.213  1.00  0.00           C  
ATOM   1633  N   THR L   5      33.639 -26.922 106.303  1.00  0.00           N  
ATOM   1634  CA  THR L   5      34.702 -26.340 107.151  1.00  0.00           C  
ATOM   1635  C   THR L   5      36.035 -26.574 106.471  1.00  0.00           C  
ATOM   1636  O   THR L   5      36.255 -27.658 105.913  1.00  0.00           O  
ATOM   1637  CB  THR L   5      34.665 -26.881 108.620  1.00  0.00           C  
ATOM   1638  OG1 THR L   5      33.259 -27.082 108.971  1.00  0.00           O  
ATOM   1639  CG2 THR L   5      35.335 -25.950 109.646  1.00  0.00           C  
ATOM   1640  N   GLN L   6      36.863 -25.550 106.532  1.00  0.00           N  
ATOM   1641  CA  GLN L   6      38.268 -25.629 106.101  1.00  0.00           C  
ATOM   1642  C   GLN L   6      39.174 -25.007 107.181  1.00  0.00           C  
ATOM   1643  O   GLN L   6      38.763 -24.081 107.889  1.00  0.00           O  
ATOM   1644  CB  GLN L   6      38.512 -24.904 104.797  1.00  0.00           C  
ATOM   1645  CG  GLN L   6      37.703 -25.302 103.585  1.00  0.00           C  
ATOM   1646  CD  GLN L   6      37.921 -24.250 102.496  1.00  0.00           C  
ATOM   1647  OE1 GLN L   6      37.081 -23.405 102.247  1.00  0.00           O  
ATOM   1648  NE2 GLN L   6      39.120 -24.281 101.940  1.00  0.00           N  
ATOM   1649  N   PRO L   7      40.396 -25.503 107.231  1.00  0.00           N  
ATOM   1650  CA  PRO L   7      41.482 -24.896 108.006  1.00  0.00           C  
ATOM   1651  C   PRO L   7      41.631 -23.417 107.701  1.00  0.00           C  
ATOM   1652  O   PRO L   7      41.703 -23.019 106.528  1.00  0.00           O  
ATOM   1653  CB  PRO L   7      42.730 -25.672 107.597  1.00  0.00           C  
ATOM   1654  CG  PRO L   7      42.318 -26.611 106.513  1.00  0.00           C  
ATOM   1655  CD  PRO L   7      40.814 -26.829 106.705  1.00  0.00           C  
ATOM   1656  N   PRO L   8      41.698 -22.631 108.768  1.00  0.00           N  
ATOM   1657  CA  PRO L   8      41.896 -21.185 108.668  1.00  0.00           C  
ATOM   1658  C   PRO L   8      43.121 -20.820 107.852  1.00  0.00           C  
ATOM   1659  O   PRO L   8      43.065 -19.882 107.036  1.00  0.00           O  
ATOM   1660  CB  PRO L   8      41.957 -20.699 110.105  1.00  0.00           C  
ATOM   1661  CG  PRO L   8      41.587 -21.835 110.984  1.00  0.00           C  
ATOM   1662  CD  PRO L   8      41.124 -22.963 110.097  1.00  0.00           C  
ATOM   1663  N   SER L   9      44.190 -21.559 108.032  1.00  0.00           N  
ATOM   1664  CA  SER L   9      45.515 -21.175 107.497  1.00  0.00           C  
ATOM   1665  C   SER L   9      46.239 -22.455 107.121  1.00  0.00           C  
ATOM   1666  O   SER L   9      46.341 -23.336 107.986  1.00  0.00           O  
ATOM   1667  CB  SER L   9      46.295 -20.390 108.541  1.00  0.00           C  
ATOM   1668  OG  SER L   9      47.579 -19.982 108.134  1.00  0.00           O  
ATOM   1669  N   ALA L  11      46.659 -22.543 105.887  1.00  0.00           N  
ATOM   1670  CA  ALA L  11      47.530 -23.645 105.426  1.00  0.00           C  
ATOM   1671  C   ALA L  11      48.740 -22.973 104.779  1.00  0.00           C  
ATOM   1672  O   ALA L  11      48.556 -21.970 104.072  1.00  0.00           O  
ATOM   1673  CB  ALA L  11      46.812 -24.566 104.485  1.00  0.00           C  
ATOM   1674  N   SER L  12      49.913 -23.476 105.061  1.00  0.00           N  
ATOM   1675  CA  SER L  12      51.157 -22.820 104.643  1.00  0.00           C  
ATOM   1676  C   SER L  12      52.270 -23.851 104.504  1.00  0.00           C  
ATOM   1677  O   SER L  12      52.139 -25.029 104.870  1.00  0.00           O  
ATOM   1678  CB  SER L  12      51.560 -21.707 105.587  1.00  0.00           C  
ATOM   1679  OG  SER L  12      52.005 -22.170 106.839  1.00  0.00           O  
ATOM   1680  N   GLY L  13      53.344 -23.335 103.926  1.00  0.00           N  
ATOM   1681  CA  GLY L  13      54.534 -24.156 103.658  1.00  0.00           C  
ATOM   1682  C   GLY L  13      55.591 -23.250 103.033  1.00  0.00           C  
ATOM   1683  O   GLY L  13      55.372 -22.054 102.786  1.00  0.00           O  
ATOM   1684  N   SER L  14      56.722 -23.872 102.832  1.00  0.00           N  
ATOM   1685  CA  SER L  14      57.867 -23.217 102.159  1.00  0.00           C  
ATOM   1686  C   SER L  14      57.893 -23.691 100.715  1.00  0.00           C  
ATOM   1687  O   SER L  14      57.347 -24.768 100.401  1.00  0.00           O  
ATOM   1688  CB  SER L  14      59.109 -23.583 102.961  1.00  0.00           C  
ATOM   1689  OG  SER L  14      58.694 -23.891 104.305  1.00  0.00           O  
ATOM   1690  N   LEU L  15      58.496 -22.887  99.860  1.00  0.00           N  
ATOM   1691  CA  LEU L  15      58.657 -23.163  98.443  1.00  0.00           C  
ATOM   1692  C   LEU L  15      59.143 -24.597  98.204  1.00  0.00           C  
ATOM   1693  O   LEU L  15      60.330 -24.887  98.458  1.00  0.00           O  
ATOM   1694  CB  LEU L  15      59.661 -22.170  97.839  1.00  0.00           C  
ATOM   1695  CG  LEU L  15      59.256 -20.807  97.376  1.00  0.00           C  
ATOM   1696  CD1 LEU L  15      57.868 -20.794  96.763  1.00  0.00           C  
ATOM   1697  CD2 LEU L  15      59.305 -19.838  98.566  1.00  0.00           C  
ATOM   1698  N   GLY L  16      58.251 -25.410  97.674  1.00  0.00           N  
ATOM   1699  CA  GLY L  16      58.631 -26.767  97.222  1.00  0.00           C  
ATOM   1700  C   GLY L  16      57.881 -27.801  98.044  1.00  0.00           C  
ATOM   1701  O   GLY L  16      57.796 -28.973  97.672  1.00  0.00           O  
ATOM   1702  N   GLN L  17      57.377 -27.315  99.166  1.00  0.00           N  
ATOM   1703  CA  GLN L  17      56.643 -28.197 100.107  1.00  0.00           C  
ATOM   1704  C   GLN L  17      55.240 -28.288  99.481  1.00  0.00           C  
ATOM   1705  O   GLN L  17      54.935 -27.440  98.642  1.00  0.00           O  
ATOM   1706  CB  GLN L  17      56.566 -27.675 101.507  1.00  0.00           C  
ATOM   1707  CG  GLN L  17      57.824 -27.552 102.323  1.00  0.00           C  
ATOM   1708  CD  GLN L  17      57.519 -27.055 103.732  1.00  0.00           C  
ATOM   1709  OE1 GLN L  17      56.433 -26.549 104.015  1.00  0.00           O  
ATOM   1710  NE2 GLN L  17      58.484 -27.227 104.623  1.00  0.00           N  
ATOM   1711  N   SER L  18      54.488 -29.236  99.957  1.00  0.00           N  
ATOM   1712  CA  SER L  18      53.155 -29.507  99.367  1.00  0.00           C  
ATOM   1713  C   SER L  18      52.120 -29.365 100.473  1.00  0.00           C  
ATOM   1714  O   SER L  18      52.164 -30.205 101.395  1.00  0.00           O  
ATOM   1715  CB  SER L  18      53.183 -30.902  98.748  1.00  0.00           C  
ATOM   1716  OG  SER L  18      54.484 -31.134  98.185  1.00  0.00           O  
ATOM   1717  N   VAL L  19      51.247 -28.365 100.328  1.00  0.00           N  
ATOM   1718  CA  VAL L  19      50.185 -28.282 101.407  1.00  0.00           C  
ATOM   1719  C   VAL L  19      48.934 -29.027 100.968  1.00  0.00           C  
ATOM   1720  O   VAL L  19      48.675 -29.185  99.761  1.00  0.00           O  
ATOM   1721  CB  VAL L  19      49.990 -26.860 101.918  1.00  0.00           C  
ATOM   1722  CG1 VAL L  19      50.750 -25.776 101.174  1.00  0.00           C  
ATOM   1723  CG2 VAL L  19      48.514 -26.472 102.018  1.00  0.00           C  
ATOM   1724  N   THR L  20      48.174 -29.517 101.959  1.00  0.00           N  
ATOM   1725  CA  THR L  20      46.840 -30.086 101.764  1.00  0.00           C  
ATOM   1726  C   THR L  20      45.799 -29.165 102.422  1.00  0.00           C  
ATOM   1727  O   THR L  20      46.101 -28.500 103.412  1.00  0.00           O  
ATOM   1728  CB  THR L  20      46.611 -31.539 102.282  1.00  0.00           C  
ATOM   1729  OG1 THR L  20      47.632 -32.368 101.680  1.00  0.00           O  
ATOM   1730  CG2 THR L  20      45.212 -32.101 101.972  1.00  0.00           C  
ATOM   1731  N   ILE L  21      44.643 -29.125 101.823  1.00  0.00           N  
ATOM   1732  CA  ILE L  21      43.492 -28.363 102.323  1.00  0.00           C  
ATOM   1733  C   ILE L  21      42.353 -29.391 102.312  1.00  0.00           C  
ATOM   1734  O   ILE L  21      42.296 -30.182 101.353  1.00  0.00           O  
ATOM   1735  CB  ILE L  21      43.178 -27.106 101.474  1.00  0.00           C  
ATOM   1736  CG1 ILE L  21      44.334 -26.071 101.544  1.00  0.00           C  
ATOM   1737  CG2 ILE L  21      41.823 -26.437 101.862  1.00  0.00           C  
ATOM   1738  CD1 ILE L  21      44.132 -24.870 100.581  1.00  0.00           C  
ATOM   1739  N   SER L  22      41.589 -29.412 103.370  1.00  0.00           N  
ATOM   1740  CA  SER L  22      40.448 -30.344 103.448  1.00  0.00           C  
ATOM   1741  C   SER L  22      39.188 -29.495 103.604  1.00  0.00           C  
ATOM   1742  O   SER L  22      39.267 -28.298 103.881  1.00  0.00           O  
ATOM   1743  CB  SER L  22      40.604 -31.389 104.500  1.00  0.00           C  
ATOM   1744  OG  SER L  22      41.641 -31.075 105.409  1.00  0.00           O  
ATOM   1745  N   CYS L  23      38.108 -30.165 103.312  1.00  0.00           N  
ATOM   1746  CA  CYS L  23      36.776 -29.460 103.197  1.00  0.00           C  
ATOM   1747  C   CYS L  23      35.882 -30.524 103.834  1.00  0.00           C  
ATOM   1748  O   CYS L  23      35.421 -31.460 103.204  1.00  0.00           O  
ATOM   1749  CB  CYS L  23      36.495 -28.996 101.816  1.00  0.00           C  
ATOM   1750  SG  CYS L  23      34.913 -28.378 101.302  1.00  0.00           S  
ATOM   1751  N   THR L  24      35.911 -30.387 105.162  1.00  0.00           N  
ATOM   1752  CA  THR L  24      35.173 -31.270 106.084  1.00  0.00           C  
ATOM   1753  C   THR L  24      33.772 -30.661 106.207  1.00  0.00           C  
ATOM   1754  O   THR L  24      33.507 -29.767 107.026  1.00  0.00           O  
ATOM   1755  CB  THR L  24      35.900 -31.399 107.458  1.00  0.00           C  
ATOM   1756  OG1 THR L  24      37.181 -30.689 107.316  1.00  0.00           O  
ATOM   1757  CG2 THR L  24      36.115 -32.852 107.913  1.00  0.00           C  
ATOM   1758  N   GLY L  25      32.968 -31.105 105.247  1.00  0.00           N  
ATOM   1759  CA  GLY L  25      31.603 -30.542 105.104  1.00  0.00           C  
ATOM   1760  C   GLY L  25      30.774 -31.229 106.197  1.00  0.00           C  
ATOM   1761  O   GLY L  25      31.129 -32.350 106.597  1.00  0.00           O  
ATOM   1762  N   THR L  26      29.737 -30.524 106.595  1.00  0.00           N  
ATOM   1763  CA  THR L  26      28.844 -30.998 107.668  1.00  0.00           C  
ATOM   1764  C   THR L  26      28.071 -32.238 107.257  1.00  0.00           C  
ATOM   1765  O   THR L  26      28.601 -33.166 106.625  1.00  0.00           O  
ATOM   1766  CB  THR L  26      27.855 -29.842 108.116  1.00  0.00           C  
ATOM   1767  OG1 THR L  26      27.451 -29.180 106.874  1.00  0.00           O  
ATOM   1768  CG2 THR L  26      28.470 -28.882 109.138  1.00  0.00           C  
ATOM   1769  N   SER L  27      26.796 -32.217 107.631  1.00  0.00           N  
ATOM   1770  CA  SER L  27      25.903 -33.383 107.385  1.00  0.00           C  
ATOM   1771  C   SER L  27      25.888 -33.602 105.870  1.00  0.00           C  
ATOM   1772  O   SER L  27      25.655 -34.683 105.329  1.00  0.00           O  
ATOM   1773  CB  SER L  27      24.533 -33.093 107.961  1.00  0.00           C  
ATOM   1774  OG  SER L  27      24.462 -31.705 108.341  1.00  0.00           O  
ATOM   1775  N   SER L  27A     26.159 -32.482 105.214  1.00  0.00           N  
ATOM   1776  CA  SER L  27A     26.418 -32.379 103.797  1.00  0.00           C  
ATOM   1777  C   SER L  27A     25.325 -33.012 102.931  1.00  0.00           C  
ATOM   1778  O   SER L  27A     24.186 -33.278 103.362  1.00  0.00           O  
ATOM   1779  CB  SER L  27A     27.798 -32.915 103.437  1.00  0.00           C  
ATOM   1780  OG  SER L  27A     28.382 -32.080 102.448  1.00  0.00           O  
ATOM   1781  N   ASP L  27B     25.733 -33.220 101.682  1.00  0.00           N  
ATOM   1782  CA  ASP L  27B     24.734 -33.409 100.594  1.00  0.00           C  
ATOM   1783  C   ASP L  27B     24.714 -34.865 100.187  1.00  0.00           C  
ATOM   1784  O   ASP L  27B     24.878 -35.227  99.014  1.00  0.00           O  
ATOM   1785  CB  ASP L  27B     25.050 -32.357  99.523  1.00  0.00           C  
ATOM   1786  CG  ASP L  27B     25.577 -31.061 100.154  1.00  0.00           C  
ATOM   1787  OD1 ASP L  27B     26.811 -30.997 100.330  1.00  0.00           O  
ATOM   1788  OD2 ASP L  27B     24.815 -30.148 100.485  1.00  0.00           O  
ATOM   1789  N   VAL L  27C     24.399 -35.724 101.161  1.00  0.00           N  
ATOM   1790  CA  VAL L  27C     24.579 -37.136 101.113  1.00  0.00           C  
ATOM   1791  C   VAL L  27C     23.509 -38.106 100.626  1.00  0.00           C  
ATOM   1792  O   VAL L  27C     22.481 -38.372 101.247  1.00  0.00           O  
ATOM   1793  CB  VAL L  27C     25.022 -37.698 102.518  1.00  0.00           C  
ATOM   1794  CG1 VAL L  27C     26.465 -38.139 102.459  1.00  0.00           C  
ATOM   1795  CG2 VAL L  27C     24.663 -36.737 103.621  1.00  0.00           C  
ATOM   1796  N   GLY L  28      23.926 -38.760  99.557  1.00  0.00           N  
ATOM   1797  CA  GLY L  28      23.450 -40.123  99.166  1.00  0.00           C  
ATOM   1798  C   GLY L  28      24.801 -40.720  98.618  1.00  0.00           C  
ATOM   1799  O   GLY L  28      25.260 -41.813  98.850  1.00  0.00           O  
ATOM   1800  N   GLY L  29      25.387 -39.796  97.910  1.00  0.00           N  
ATOM   1801  CA  GLY L  29      26.613 -39.930  97.084  1.00  0.00           C  
ATOM   1802  C   GLY L  29      26.626 -38.494  96.464  1.00  0.00           C  
ATOM   1803  O   GLY L  29      25.742 -38.176  95.660  1.00  0.00           O  
ATOM   1804  N   TYR L  30      27.452 -37.679  97.092  1.00  0.00           N  
ATOM   1805  CA  TYR L  30      27.545 -36.284  96.690  1.00  0.00           C  
ATOM   1806  C   TYR L  30      28.894 -36.011  96.045  1.00  0.00           C  
ATOM   1807  O   TYR L  30      29.937 -36.372  96.620  1.00  0.00           O  
ATOM   1808  CB  TYR L  30      27.213 -35.265  97.826  1.00  0.00           C  
ATOM   1809  CG  TYR L  30      27.168 -33.938  97.070  1.00  0.00           C  
ATOM   1810  CD1 TYR L  30      26.264 -33.817  96.004  1.00  0.00           C  
ATOM   1811  CD2 TYR L  30      28.158 -32.996  97.226  1.00  0.00           C  
ATOM   1812  CE1 TYR L  30      26.307 -32.707  95.158  1.00  0.00           C  
ATOM   1813  CE2 TYR L  30      28.200 -31.868  96.400  1.00  0.00           C  
ATOM   1814  CZ  TYR L  30      27.280 -31.734  95.376  1.00  0.00           C  
ATOM   1815  OH  TYR L  30      27.364 -30.632  94.584  1.00  0.00           O  
ATOM   1816  N   ASN L  31      28.856 -35.411  94.852  1.00  0.00           N  
ATOM   1817  CA  ASN L  31      30.075 -35.334  94.045  1.00  0.00           C  
ATOM   1818  C   ASN L  31      30.287 -34.052  93.286  1.00  0.00           C  
ATOM   1819  O   ASN L  31      31.174 -34.134  92.376  1.00  0.00           O  
ATOM   1820  CB  ASN L  31      30.185 -36.545  93.115  1.00  0.00           C  
ATOM   1821  CG  ASN L  31      30.217 -37.903  93.755  1.00  0.00           C  
ATOM   1822  OD1 ASN L  31      31.277 -38.558  93.790  1.00  0.00           O  
ATOM   1823  ND2 ASN L  31      29.059 -38.398  94.186  1.00  0.00           N  
ATOM   1824  N   TYR L  32      29.600 -32.977  93.567  1.00  0.00           N  
ATOM   1825  CA  TYR L  32      29.933 -31.716  92.838  1.00  0.00           C  
ATOM   1826  C   TYR L  32      30.648 -30.799  93.865  1.00  0.00           C  
ATOM   1827  O   TYR L  32      30.116 -29.776  94.292  1.00  0.00           O  
ATOM   1828  CB  TYR L  32      28.866 -31.024  92.149  1.00  0.00           C  
ATOM   1829  CG  TYR L  32      27.812 -31.585  91.268  1.00  0.00           C  
ATOM   1830  CD1 TYR L  32      28.026 -31.897  89.922  1.00  0.00           C  
ATOM   1831  CD2 TYR L  32      26.502 -31.689  91.758  1.00  0.00           C  
ATOM   1832  CE1 TYR L  32      26.986 -32.331  89.102  1.00  0.00           C  
ATOM   1833  CE2 TYR L  32      25.451 -32.116  90.953  1.00  0.00           C  
ATOM   1834  CZ  TYR L  32      25.706 -32.430  89.634  1.00  0.00           C  
ATOM   1835  OH  TYR L  32      24.639 -32.843  88.888  1.00  0.00           O  
ATOM   1836  N   VAL L  33      31.819 -31.293  94.212  1.00  0.00           N  
ATOM   1837  CA  VAL L  33      32.751 -30.511  95.040  1.00  0.00           C  
ATOM   1838  C   VAL L  33      33.682 -29.822  94.028  1.00  0.00           C  
ATOM   1839  O   VAL L  33      34.057 -30.460  93.032  1.00  0.00           O  
ATOM   1840  CB  VAL L  33      33.477 -31.406  96.042  1.00  0.00           C  
ATOM   1841  CG1 VAL L  33      33.994 -30.632  97.246  1.00  0.00           C  
ATOM   1842  CG2 VAL L  33      32.609 -32.590  96.454  1.00  0.00           C  
ATOM   1843  N   SER L  34      34.011 -28.598  94.342  1.00  0.00           N  
ATOM   1844  CA  SER L  34      34.722 -27.736  93.374  1.00  0.00           C  
ATOM   1845  C   SER L  34      35.675 -26.821  94.127  1.00  0.00           C  
ATOM   1846  O   SER L  34      35.260 -26.237  95.155  1.00  0.00           O  
ATOM   1847  CB  SER L  34      33.679 -26.954  92.597  1.00  0.00           C  
ATOM   1848  OG  SER L  34      34.145 -26.578  91.336  1.00  0.00           O  
ATOM   1849  N   TRP L  35      36.894 -26.714  93.612  1.00  0.00           N  
ATOM   1850  CA  TRP L  35      37.904 -25.872  94.275  1.00  0.00           C  
ATOM   1851  C   TRP L  35      38.081 -24.550  93.543  1.00  0.00           C  
ATOM   1852  O   TRP L  35      38.057 -24.472  92.311  1.00  0.00           O  
ATOM   1853  CB  TRP L  35      39.199 -26.646  94.484  1.00  0.00           C  
ATOM   1854  CG  TRP L  35      39.094 -27.706  95.534  1.00  0.00           C  
ATOM   1855  CD1 TRP L  35      38.811 -29.029  95.352  1.00  0.00           C  
ATOM   1856  CD2 TRP L  35      39.249 -27.515  96.949  1.00  0.00           C  
ATOM   1857  NE1 TRP L  35      38.788 -29.678  96.553  1.00  0.00           N  
ATOM   1858  CE2 TRP L  35      39.055 -28.778  97.545  1.00  0.00           C  
ATOM   1859  CE3 TRP L  35      39.547 -26.413  97.744  1.00  0.00           C  
ATOM   1860  CZ2 TRP L  35      39.142 -28.964  98.921  1.00  0.00           C  
ATOM   1861  CZ3 TRP L  35      39.639 -26.602  99.105  1.00  0.00           C  
ATOM   1862  CH2 TRP L  35      39.436 -27.849  99.693  1.00  0.00           C  
ATOM   1863  N   TYR L  36      38.235 -23.495  94.326  1.00  0.00           N  
ATOM   1864  CA  TYR L  36      38.456 -22.141  93.881  1.00  0.00           C  
ATOM   1865  C   TYR L  36      39.749 -21.605  94.536  1.00  0.00           C  
ATOM   1866  O   TYR L  36      40.040 -21.887  95.699  1.00  0.00           O  
ATOM   1867  CB  TYR L  36      37.340 -21.126  94.244  1.00  0.00           C  
ATOM   1868  CG  TYR L  36      35.970 -21.605  93.839  1.00  0.00           C  
ATOM   1869  CD1 TYR L  36      35.348 -22.605  94.595  1.00  0.00           C  
ATOM   1870  CD2 TYR L  36      35.317 -21.116  92.712  1.00  0.00           C  
ATOM   1871  CE1 TYR L  36      34.105 -23.112  94.225  1.00  0.00           C  
ATOM   1872  CE2 TYR L  36      34.064 -21.605  92.351  1.00  0.00           C  
ATOM   1873  CZ  TYR L  36      33.469 -22.612  93.104  1.00  0.00           C  
ATOM   1874  OH  TYR L  36      32.252 -23.133  92.773  1.00  0.00           O  
ATOM   1875  N   GLN L  37      40.394 -20.808  93.733  1.00  0.00           N  
ATOM   1876  CA  GLN L  37      41.628 -20.128  94.183  1.00  0.00           C  
ATOM   1877  C   GLN L  37      41.328 -18.653  93.928  1.00  0.00           C  
ATOM   1878  O   GLN L  37      40.982 -18.273  92.798  1.00  0.00           O  
ATOM   1879  CB  GLN L  37      42.850 -20.676  93.502  1.00  0.00           C  
ATOM   1880  CG  GLN L  37      43.369 -19.956  92.297  1.00  0.00           C  
ATOM   1881  CD  GLN L  37      44.779 -19.446  92.444  1.00  0.00           C  
ATOM   1882  OE1 GLN L  37      45.158 -18.435  91.859  1.00  0.00           O  
ATOM   1883  NE2 GLN L  37      45.590 -20.172  93.214  1.00  0.00           N  
ATOM   1884  N   GLN L  38      41.346 -17.916  95.017  1.00  0.00           N  
ATOM   1885  CA  GLN L  38      41.146 -16.449  94.915  1.00  0.00           C  
ATOM   1886  C   GLN L  38      42.433 -15.772  95.369  1.00  0.00           C  
ATOM   1887  O   GLN L  38      43.112 -16.266  96.279  1.00  0.00           O  
ATOM   1888  CB  GLN L  38      39.916 -16.021  95.685  1.00  0.00           C  
ATOM   1889  CG  GLN L  38      39.735 -14.517  95.752  1.00  0.00           C  
ATOM   1890  CD  GLN L  38      38.287 -14.114  95.844  1.00  0.00           C  
ATOM   1891  OE1 GLN L  38      37.774 -13.416  94.980  1.00  0.00           O  
ATOM   1892  NE2 GLN L  38      37.634 -14.569  96.908  1.00  0.00           N  
ATOM   1893  N   HIS L  39      42.748 -14.665  94.720  1.00  0.00           N  
ATOM   1894  CA  HIS L  39      43.970 -13.914  94.991  1.00  0.00           C  
ATOM   1895  C   HIS L  39      43.671 -12.479  95.458  1.00  0.00           C  
ATOM   1896  O   HIS L  39      42.583 -11.917  95.357  1.00  0.00           O  
ATOM   1897  CB  HIS L  39      44.893 -13.793  93.766  1.00  0.00           C  
ATOM   1898  CG  HIS L  39      45.863 -14.876  93.484  1.00  0.00           C  
ATOM   1899  ND1 HIS L  39      46.767 -15.414  94.354  1.00  0.00           N  
ATOM   1900  CD2 HIS L  39      46.118 -15.474  92.290  1.00  0.00           C  
ATOM   1901  CE1 HIS L  39      47.501 -16.318  93.733  1.00  0.00           C  
ATOM   1902  NE2 HIS L  39      47.124 -16.370  92.487  1.00  0.00           N  
ATOM   1903  N   ALA L  40      44.770 -11.877  95.883  1.00  0.00           N  
ATOM   1904  CA  ALA L  40      44.907 -10.503  96.283  1.00  0.00           C  
ATOM   1905  C   ALA L  40      44.071  -9.515  95.493  1.00  0.00           C  
ATOM   1906  O   ALA L  40      44.655  -8.715  94.718  1.00  0.00           O  
ATOM   1907  CB  ALA L  40      46.404 -10.100  96.142  1.00  0.00           C  
ATOM   1908  N   GLY L  41      42.772  -9.527  95.688  1.00  0.00           N  
ATOM   1909  CA  GLY L  41      41.884  -8.535  95.073  1.00  0.00           C  
ATOM   1910  C   GLY L  41      41.553  -8.874  93.629  1.00  0.00           C  
ATOM   1911  O   GLY L  41      40.746  -8.130  93.013  1.00  0.00           O  
ATOM   1912  N   LYS L  42      42.172  -9.943  93.114  1.00  0.00           N  
ATOM   1913  CA  LYS L  42      41.592 -10.486  91.816  1.00  0.00           C  
ATOM   1914  C   LYS L  42      40.377 -11.302  92.234  1.00  0.00           C  
ATOM   1915  O   LYS L  42      39.952 -11.151  93.405  1.00  0.00           O  
ATOM   1916  CB  LYS L  42      42.617 -11.167  90.987  1.00  0.00           C  
ATOM   1917  CG  LYS L  42      43.081 -12.563  91.375  1.00  0.00           C  
ATOM   1918  CD  LYS L  42      42.801 -13.589  90.293  1.00  0.00           C  
ATOM   1919  CE  LYS L  42      43.026 -15.017  90.721  1.00  0.00           C  
ATOM   1920  NZ  LYS L  42      41.810 -15.585  91.348  1.00  0.00           N  
ATOM   1921  N   ALA L  43      39.803 -12.113  91.374  1.00  0.00           N  
ATOM   1922  CA  ALA L  43      38.566 -12.854  91.690  1.00  0.00           C  
ATOM   1923  C   ALA L  43      38.696 -14.344  91.394  1.00  0.00           C  
ATOM   1924  O   ALA L  43      39.611 -14.793  90.678  1.00  0.00           O  
ATOM   1925  CB  ALA L  43      37.403 -12.209  90.946  1.00  0.00           C  
ATOM   1926  N   PRO L  44      37.731 -15.096  91.933  1.00  0.00           N  
ATOM   1927  CA  PRO L  44      37.829 -16.550  92.054  1.00  0.00           C  
ATOM   1928  C   PRO L  44      38.064 -17.226  90.717  1.00  0.00           C  
ATOM   1929  O   PRO L  44      37.387 -16.904  89.734  1.00  0.00           O  
ATOM   1930  CB  PRO L  44      36.524 -16.996  92.692  1.00  0.00           C  
ATOM   1931  CG  PRO L  44      35.839 -15.744  93.145  1.00  0.00           C  
ATOM   1932  CD  PRO L  44      36.357 -14.629  92.242  1.00  0.00           C  
ATOM   1933  N   LYS L  45      39.012 -18.140  90.719  1.00  0.00           N  
ATOM   1934  CA  LYS L  45      39.311 -18.972  89.528  1.00  0.00           C  
ATOM   1935  C   LYS L  45      39.170 -20.421  89.974  1.00  0.00           C  
ATOM   1936  O   LYS L  45      39.893 -20.838  90.894  1.00  0.00           O  
ATOM   1937  CB  LYS L  45      40.681 -18.647  88.996  1.00  0.00           C  
ATOM   1938  CG  LYS L  45      41.656 -19.781  88.754  1.00  0.00           C  
ATOM   1939  CD  LYS L  45      41.805 -20.110  87.276  1.00  0.00           C  
ATOM   1940  CE  LYS L  45      42.640 -21.363  87.048  1.00  0.00           C  
ATOM   1941  NZ  LYS L  45      42.343 -21.902  85.691  1.00  0.00           N  
ATOM   1942  N   VAL L  46      38.195 -21.103  89.405  1.00  0.00           N  
ATOM   1943  CA  VAL L  46      38.010 -22.554  89.673  1.00  0.00           C  
ATOM   1944  C   VAL L  46      39.307 -23.250  89.267  1.00  0.00           C  
ATOM   1945  O   VAL L  46      39.886 -22.833  88.252  1.00  0.00           O  
ATOM   1946  CB  VAL L  46      36.768 -23.056  88.925  1.00  0.00           C  
ATOM   1947  CG1 VAL L  46      36.658 -24.580  88.925  1.00  0.00           C  
ATOM   1948  CG2 VAL L  46      35.488 -22.438  89.455  1.00  0.00           C  
ATOM   1949  N   ILE L  47      39.736 -24.231  90.035  1.00  0.00           N  
ATOM   1950  CA  ILE L  47      41.016 -24.912  89.767  1.00  0.00           C  
ATOM   1951  C   ILE L  47      40.885 -26.431  89.793  1.00  0.00           C  
ATOM   1952  O   ILE L  47      41.803 -27.177  89.409  1.00  0.00           O  
ATOM   1953  CB  ILE L  47      42.144 -24.408  90.727  1.00  0.00           C  
ATOM   1954  CG1 ILE L  47      41.848 -24.857  92.171  1.00  0.00           C  
ATOM   1955  CG2 ILE L  47      42.374 -22.884  90.630  1.00  0.00           C  
ATOM   1956  CD1 ILE L  47      43.105 -25.394  92.909  1.00  0.00           C  
ATOM   1957  N   ILE L  48      39.753 -26.874  90.251  1.00  0.00           N  
ATOM   1958  CA  ILE L  48      39.353 -28.272  90.396  1.00  0.00           C  
ATOM   1959  C   ILE L  48      37.814 -28.226  90.359  1.00  0.00           C  
ATOM   1960  O   ILE L  48      37.236 -27.213  90.807  1.00  0.00           O  
ATOM   1961  CB  ILE L  48      39.921 -28.885  91.714  1.00  0.00           C  
ATOM   1962  CG1 ILE L  48      41.441 -29.130  91.623  1.00  0.00           C  
ATOM   1963  CG2 ILE L  48      39.182 -30.171  92.165  1.00  0.00           C  
ATOM   1964  CD1 ILE L  48      41.917 -30.189  90.610  1.00  0.00           C  
ATOM   1965  N   TYR L  49      37.217 -29.240  89.797  1.00  0.00           N  
ATOM   1966  CA  TYR L  49      35.765 -29.396  89.766  1.00  0.00           C  
ATOM   1967  C   TYR L  49      35.441 -30.892  89.773  1.00  0.00           C  
ATOM   1968  O   TYR L  49      36.350 -31.735  89.660  1.00  0.00           O  
ATOM   1969  CB  TYR L  49      35.114 -28.703  88.566  1.00  0.00           C  
ATOM   1970  CG  TYR L  49      35.414 -29.323  87.217  1.00  0.00           C  
ATOM   1971  CD1 TYR L  49      36.621 -29.035  86.587  1.00  0.00           C  
ATOM   1972  CD2 TYR L  49      34.524 -30.179  86.572  1.00  0.00           C  
ATOM   1973  CE1 TYR L  49      36.946 -29.578  85.352  1.00  0.00           C  
ATOM   1974  CE2 TYR L  49      34.827 -30.730  85.334  1.00  0.00           C  
ATOM   1975  CZ  TYR L  49      36.046 -30.420  84.728  1.00  0.00           C  
ATOM   1976  OH  TYR L  49      36.410 -30.927  83.508  1.00  0.00           O  
ATOM   1977  N   GLU L  50      34.151 -31.153  89.924  1.00  0.00           N  
ATOM   1978  CA  GLU L  50      33.642 -32.537  89.883  1.00  0.00           C  
ATOM   1979  C   GLU L  50      34.594 -33.431  90.663  1.00  0.00           C  
ATOM   1980  O   GLU L  50      35.035 -34.489  90.195  1.00  0.00           O  
ATOM   1981  CB  GLU L  50      33.601 -33.000  88.438  1.00  0.00           C  
ATOM   1982  CG  GLU L  50      32.434 -33.830  87.946  1.00  0.00           C  
ATOM   1983  CD  GLU L  50      31.237 -33.070  87.459  1.00  0.00           C  
ATOM   1984  OE1 GLU L  50      31.403 -32.614  86.310  1.00  0.00           O  
ATOM   1985  OE2 GLU L  50      30.218 -32.913  88.115  1.00  0.00           O  
ATOM   1986  N   VAL L  51      34.971 -32.941  91.844  1.00  0.00           N  
ATOM   1987  CA  VAL L  51      35.794 -33.649  92.812  1.00  0.00           C  
ATOM   1988  C   VAL L  51      37.255 -33.768  92.470  1.00  0.00           C  
ATOM   1989  O   VAL L  51      38.065 -33.413  93.376  1.00  0.00           O  
ATOM   1990  CB  VAL L  51      35.125 -34.997  93.177  1.00  0.00           C  
ATOM   1991  CG1 VAL L  51      35.987 -35.863  94.065  1.00  0.00           C  
ATOM   1992  CG2 VAL L  51      33.776 -34.751  93.822  1.00  0.00           C  
ATOM   1993  N   ASN L  52      37.630 -34.257  91.297  1.00  0.00           N  
ATOM   1994  CA  ASN L  52      39.062 -34.482  91.011  1.00  0.00           C  
ATOM   1995  C   ASN L  52      39.485 -33.990  89.645  1.00  0.00           C  
ATOM   1996  O   ASN L  52      40.700 -34.082  89.331  1.00  0.00           O  
ATOM   1997  CB  ASN L  52      39.506 -35.901  91.333  1.00  0.00           C  
ATOM   1998  CG  ASN L  52      39.353 -37.005  90.340  1.00  0.00           C  
ATOM   1999  OD1 ASN L  52      39.063 -38.177  90.708  1.00  0.00           O  
ATOM   2000  ND2 ASN L  52      39.554 -36.755  89.042  1.00  0.00           N  
ATOM   2001  N   LYS L  53      38.545 -33.473  88.886  1.00  0.00           N  
ATOM   2002  CA  LYS L  53      38.806 -33.032  87.498  1.00  0.00           C  
ATOM   2003  C   LYS L  53      39.272 -31.589  87.466  1.00  0.00           C  
ATOM   2004  O   LYS L  53      38.476 -30.681  87.789  1.00  0.00           O  
ATOM   2005  CB  LYS L  53      37.529 -33.175  86.652  1.00  0.00           C  
ATOM   2006  CG  LYS L  53      37.279 -34.602  86.168  1.00  0.00           C  
ATOM   2007  CD  LYS L  53      35.844 -35.040  86.328  1.00  0.00           C  
ATOM   2008  CE  LYS L  53      34.991 -34.823  85.090  1.00  0.00           C  
ATOM   2009  NZ  LYS L  53      33.551 -34.959  85.456  1.00  0.00           N  
ATOM   2010  N   ARG L  54      40.520 -31.384  87.092  1.00  0.00           N  
ATOM   2011  CA  ARG L  54      41.043 -29.994  86.944  1.00  0.00           C  
ATOM   2012  C   ARG L  54      40.723 -29.524  85.534  1.00  0.00           C  
ATOM   2013  O   ARG L  54      40.719 -30.337  84.594  1.00  0.00           O  
ATOM   2014  CB  ARG L  54      42.481 -29.904  87.336  1.00  0.00           C  
ATOM   2015  CG  ARG L  54      43.593 -29.750  86.336  1.00  0.00           C  
ATOM   2016  CD  ARG L  54      44.937 -29.825  87.042  1.00  0.00           C  
ATOM   2017  NE  ARG L  54      45.120 -31.178  87.587  1.00  0.00           N  
ATOM   2018  CZ  ARG L  54      45.536 -32.185  86.813  1.00  0.00           C  
ATOM   2019  NH1 ARG L  54      45.888 -31.971  85.542  1.00  0.00           N  
ATOM   2020  NH2 ARG L  54      45.568 -33.409  87.308  1.00  0.00           N  
ATOM   2021  N   PRO L  55      40.381 -28.244  85.412  1.00  0.00           N  
ATOM   2022  CA  PRO L  55      40.147 -27.613  84.112  1.00  0.00           C  
ATOM   2023  C   PRO L  55      41.421 -27.241  83.372  1.00  0.00           C  
ATOM   2024  O   PRO L  55      42.516 -27.077  83.941  1.00  0.00           O  
ATOM   2025  CB  PRO L  55      39.274 -26.407  84.436  1.00  0.00           C  
ATOM   2026  CG  PRO L  55      39.621 -26.070  85.862  1.00  0.00           C  
ATOM   2027  CD  PRO L  55      39.804 -27.432  86.522  1.00  0.00           C  
ATOM   2028  N   SER L  56      41.263 -27.088  82.053  1.00  0.00           N  
ATOM   2029  CA  SER L  56      42.364 -26.752  81.143  1.00  0.00           C  
ATOM   2030  C   SER L  56      42.906 -25.367  81.495  1.00  0.00           C  
ATOM   2031  O   SER L  56      42.170 -24.377  81.560  1.00  0.00           O  
ATOM   2032  CB  SER L  56      41.966 -26.861  79.684  1.00  0.00           C  
ATOM   2033  OG  SER L  56      42.371 -28.122  79.136  1.00  0.00           O  
ATOM   2034  N   GLY L  57      44.202 -25.354  81.740  1.00  0.00           N  
ATOM   2035  CA  GLY L  57      44.913 -24.205  82.296  1.00  0.00           C  
ATOM   2036  C   GLY L  57      45.571 -24.573  83.625  1.00  0.00           C  
ATOM   2037  O   GLY L  57      46.698 -24.094  83.886  1.00  0.00           O  
ATOM   2038  N   VAL L  58      44.883 -25.397  84.413  1.00  0.00           N  
ATOM   2039  CA  VAL L  58      45.428 -25.781  85.737  1.00  0.00           C  
ATOM   2040  C   VAL L  58      46.592 -26.750  85.523  1.00  0.00           C  
ATOM   2041  O   VAL L  58      46.485 -27.654  84.690  1.00  0.00           O  
ATOM   2042  CB  VAL L  58      44.331 -26.340  86.661  1.00  0.00           C  
ATOM   2043  CG1 VAL L  58      44.773 -26.365  88.122  1.00  0.00           C  
ATOM   2044  CG2 VAL L  58      43.003 -25.603  86.549  1.00  0.00           C  
ATOM   2045  N   PRO L  59      47.661 -26.524  86.280  1.00  0.00           N  
ATOM   2046  CA  PRO L  59      48.802 -27.452  86.360  1.00  0.00           C  
ATOM   2047  C   PRO L  59      48.560 -28.581  87.340  1.00  0.00           C  
ATOM   2048  O   PRO L  59      48.131 -28.338  88.488  1.00  0.00           O  
ATOM   2049  CB  PRO L  59      49.951 -26.544  86.797  1.00  0.00           C  
ATOM   2050  CG  PRO L  59      49.292 -25.488  87.646  1.00  0.00           C  
ATOM   2051  CD  PRO L  59      47.887 -25.322  87.109  1.00  0.00           C  
ATOM   2052  N   ASP L  60      48.879 -29.809  86.936  1.00  0.00           N  
ATOM   2053  CA  ASP L  60      48.615 -31.021  87.717  1.00  0.00           C  
ATOM   2054  C   ASP L  60      49.364 -31.007  89.054  1.00  0.00           C  
ATOM   2055  O   ASP L  60      49.351 -32.014  89.782  1.00  0.00           O  
ATOM   2056  CB  ASP L  60      48.845 -32.321  86.957  1.00  0.00           C  
ATOM   2057  CG  ASP L  60      50.109 -32.393  86.140  1.00  0.00           C  
ATOM   2058  OD1 ASP L  60      51.231 -32.227  86.654  1.00  0.00           O  
ATOM   2059  OD2 ASP L  60      49.960 -32.636  84.914  1.00  0.00           O  
ATOM   2060  N   ARG L  61      50.006 -29.897  89.321  1.00  0.00           N  
ATOM   2061  CA  ARG L  61      50.495 -29.559  90.671  1.00  0.00           C  
ATOM   2062  C   ARG L  61      49.337 -29.656  91.678  1.00  0.00           C  
ATOM   2063  O   ARG L  61      49.526 -30.083  92.827  1.00  0.00           O  
ATOM   2064  CB  ARG L  61      51.042 -28.125  90.673  1.00  0.00           C  
ATOM   2065  CG  ARG L  61      52.210 -27.839  91.599  1.00  0.00           C  
ATOM   2066  CD  ARG L  61      52.829 -26.515  91.249  1.00  0.00           C  
ATOM   2067  NE  ARG L  61      51.879 -25.420  91.366  1.00  0.00           N  
ATOM   2068  CZ  ARG L  61      51.949 -24.299  90.645  1.00  0.00           C  
ATOM   2069  NH1 ARG L  61      52.872 -24.129  89.697  1.00  0.00           N  
ATOM   2070  NH2 ARG L  61      51.113 -23.294  90.881  1.00  0.00           N  
ATOM   2071  N   PHE L  62      48.178 -29.231  91.212  1.00  0.00           N  
ATOM   2072  CA  PHE L  62      46.945 -29.217  92.013  1.00  0.00           C  
ATOM   2073  C   PHE L  62      46.222 -30.549  91.902  1.00  0.00           C  
ATOM   2074  O   PHE L  62      46.386 -31.236  90.877  1.00  0.00           O  
ATOM   2075  CB  PHE L  62      46.102 -28.030  91.610  1.00  0.00           C  
ATOM   2076  CG  PHE L  62      46.666 -26.688  91.970  1.00  0.00           C  
ATOM   2077  CD1 PHE L  62      46.825 -26.322  93.307  1.00  0.00           C  
ATOM   2078  CD2 PHE L  62      47.009 -25.784  90.978  1.00  0.00           C  
ATOM   2079  CE1 PHE L  62      47.326 -25.060  93.642  1.00  0.00           C  
ATOM   2080  CE2 PHE L  62      47.499 -24.528  91.282  1.00  0.00           C  
ATOM   2081  CZ  PHE L  62      47.665 -24.166  92.614  1.00  0.00           C  
ATOM   2082  N   SER L  63      45.495 -30.925  92.954  1.00  0.00           N  
ATOM   2083  CA  SER L  63      44.735 -32.200  92.928  1.00  0.00           C  
ATOM   2084  C   SER L  63      43.487 -32.103  93.798  1.00  0.00           C  
ATOM   2085  O   SER L  63      43.495 -31.394  94.824  1.00  0.00           O  
ATOM   2086  CB  SER L  63      45.601 -33.371  93.333  1.00  0.00           C  
ATOM   2087  OG  SER L  63      46.978 -33.115  93.208  1.00  0.00           O  
ATOM   2088  N   GLY L  64      42.460 -32.842  93.394  1.00  0.00           N  
ATOM   2089  CA  GLY L  64      41.153 -32.872  94.077  1.00  0.00           C  
ATOM   2090  C   GLY L  64      40.932 -34.257  94.696  1.00  0.00           C  
ATOM   2091  O   GLY L  64      41.523 -35.224  94.181  1.00  0.00           O  
ATOM   2092  N   SER L  65      40.164 -34.303  95.792  1.00  0.00           N  
ATOM   2093  CA  SER L  65      39.834 -35.637  96.382  1.00  0.00           C  
ATOM   2094  C   SER L  65      38.618 -35.594  97.278  1.00  0.00           C  
ATOM   2095  O   SER L  65      38.162 -34.479  97.603  1.00  0.00           O  
ATOM   2096  CB  SER L  65      41.058 -36.166  97.122  1.00  0.00           C  
ATOM   2097  OG  SER L  65      41.131 -37.581  97.021  1.00  0.00           O  
ATOM   2098  N   LYS L  66      38.072 -36.758  97.664  1.00  0.00           N  
ATOM   2099  CA  LYS L  66      37.037 -36.832  98.702  1.00  0.00           C  
ATOM   2100  C   LYS L  66      36.755 -38.214  99.272  1.00  0.00           C  
ATOM   2101  O   LYS L  66      36.762 -39.240  98.579  1.00  0.00           O  
ATOM   2102  CB  LYS L  66      35.684 -36.244  98.248  1.00  0.00           C  
ATOM   2103  CG  LYS L  66      34.685 -36.166  99.417  1.00  0.00           C  
ATOM   2104  CD  LYS L  66      33.519 -35.251  99.150  1.00  0.00           C  
ATOM   2105  CE  LYS L  66      32.645 -35.697  98.008  1.00  0.00           C  
ATOM   2106  NZ  LYS L  66      31.851 -36.893  98.350  1.00  0.00           N  
ATOM   2107  N   SER L  67      36.449 -38.213 100.574  1.00  0.00           N  
ATOM   2108  CA  SER L  67      35.998 -39.397 101.336  1.00  0.00           C  
ATOM   2109  C   SER L  67      34.841 -38.949 102.245  1.00  0.00           C  
ATOM   2110  O   SER L  67      34.949 -37.872 102.847  1.00  0.00           O  
ATOM   2111  CB  SER L  67      37.094 -39.994 102.193  1.00  0.00           C  
ATOM   2112  OG  SER L  67      37.980 -40.821 101.487  1.00  0.00           O  
ATOM   2113  N   GLY L  68      33.800 -39.744 102.319  1.00  0.00           N  
ATOM   2114  CA  GLY L  68      32.639 -39.533 103.174  1.00  0.00           C  
ATOM   2115  C   GLY L  68      32.247 -38.078 103.362  1.00  0.00           C  
ATOM   2116  O   GLY L  68      31.264 -37.585 102.775  1.00  0.00           O  
ATOM   2117  N   ASN L  69      33.027 -37.383 104.180  1.00  0.00           N  
ATOM   2118  CA  ASN L  69      32.756 -36.015 104.612  1.00  0.00           C  
ATOM   2119  C   ASN L  69      33.857 -35.004 104.381  1.00  0.00           C  
ATOM   2120  O   ASN L  69      33.587 -33.778 104.574  1.00  0.00           O  
ATOM   2121  CB  ASN L  69      32.315 -36.095 106.097  1.00  0.00           C  
ATOM   2122  CG  ASN L  69      31.183 -37.104 106.275  1.00  0.00           C  
ATOM   2123  OD1 ASN L  69      31.380 -38.226 106.770  1.00  0.00           O  
ATOM   2124  ND2 ASN L  69      29.979 -36.697 105.846  1.00  0.00           N  
ATOM   2125  N   THR L  70      35.047 -35.411 104.002  1.00  0.00           N  
ATOM   2126  CA  THR L  70      36.170 -34.500 103.734  1.00  0.00           C  
ATOM   2127  C   THR L  70      36.677 -34.626 102.295  1.00  0.00           C  
ATOM   2128  O   THR L  70      37.029 -35.700 101.777  1.00  0.00           O  
ATOM   2129  CB  THR L  70      37.283 -34.618 104.838  1.00  0.00           C  
ATOM   2130  OG1 THR L  70      37.951 -33.317 104.933  1.00  0.00           O  
ATOM   2131  CG2 THR L  70      38.317 -35.727 104.641  1.00  0.00           C  
ATOM   2132  N   ALA L  71      36.635 -33.468 101.630  1.00  0.00           N  
ATOM   2133  CA  ALA L  71      37.262 -33.240 100.323  1.00  0.00           C  
ATOM   2134  C   ALA L  71      38.709 -32.788 100.551  1.00  0.00           C  
ATOM   2135  O   ALA L  71      39.058 -32.446 101.698  1.00  0.00           O  
ATOM   2136  CB  ALA L  71      36.486 -32.195  99.544  1.00  0.00           C  
ATOM   2137  N   SER L  72      39.509 -32.790  99.505  1.00  0.00           N  
ATOM   2138  CA  SER L  72      40.934 -32.478  99.568  1.00  0.00           C  
ATOM   2139  C   SER L  72      41.385 -31.639  98.358  1.00  0.00           C  
ATOM   2140  O   SER L  72      40.836 -31.775  97.261  1.00  0.00           O  
ATOM   2141  CB  SER L  72      41.834 -33.712  99.536  1.00  0.00           C  
ATOM   2142  OG  SER L  72      41.844 -34.444 100.724  1.00  0.00           O  
ATOM   2143  N   LEU L  73      42.446 -30.906  98.598  1.00  0.00           N  
ATOM   2144  CA  LEU L  73      43.196 -30.150  97.627  1.00  0.00           C  
ATOM   2145  C   LEU L  73      44.687 -30.241  98.025  1.00  0.00           C  
ATOM   2146  O   LEU L  73      45.035 -29.797  99.127  1.00  0.00           O  
ATOM   2147  CB  LEU L  73      42.746 -28.686  97.545  1.00  0.00           C  
ATOM   2148  CG  LEU L  73      43.637 -27.847  96.612  1.00  0.00           C  
ATOM   2149  CD1 LEU L  73      43.213 -28.048  95.168  1.00  0.00           C  
ATOM   2150  CD2 LEU L  73      43.560 -26.400  97.019  1.00  0.00           C  
ATOM   2151  N   THR L  74      45.447 -30.793  97.090  1.00  0.00           N  
ATOM   2152  CA  THR L  74      46.926 -30.889  97.373  1.00  0.00           C  
ATOM   2153  C   THR L  74      47.658 -30.014  96.376  1.00  0.00           C  
ATOM   2154  O   THR L  74      47.380 -30.100  95.160  1.00  0.00           O  
ATOM   2155  CB  THR L  74      47.357 -32.379  97.434  1.00  0.00           C  
ATOM   2156  OG1 THR L  74      46.143 -33.133  97.808  1.00  0.00           O  
ATOM   2157  CG2 THR L  74      48.475 -32.690  98.441  1.00  0.00           C  
ATOM   2158  N   VAL L  75      48.488 -29.118  96.902  1.00  0.00           N  
ATOM   2159  CA  VAL L  75      49.335 -28.240  96.088  1.00  0.00           C  
ATOM   2160  C   VAL L  75      50.752 -28.868  96.200  1.00  0.00           C  
ATOM   2161  O   VAL L  75      51.562 -28.489  97.062  1.00  0.00           O  
ATOM   2162  CB  VAL L  75      49.353 -26.780  96.508  1.00  0.00           C  
ATOM   2163  CG1 VAL L  75      50.219 -25.941  95.551  1.00  0.00           C  
ATOM   2164  CG2 VAL L  75      47.985 -26.146  96.646  1.00  0.00           C  
ATOM   2165  N   SER L  76      50.914 -29.843  95.343  1.00  0.00           N  
ATOM   2166  CA  SER L  76      51.992 -30.797  95.317  1.00  0.00           C  
ATOM   2167  C   SER L  76      53.403 -30.338  95.084  1.00  0.00           C  
ATOM   2168  O   SER L  76      54.299 -31.238  95.045  1.00  0.00           O  
ATOM   2169  CB  SER L  76      51.593 -31.924  94.324  1.00  0.00           C  
ATOM   2170  OG  SER L  76      50.175 -32.155  94.385  1.00  0.00           O  
ATOM   2171  N   GLY L  77      53.695 -29.063  94.978  1.00  0.00           N  
ATOM   2172  CA  GLY L  77      55.089 -28.566  94.883  1.00  0.00           C  
ATOM   2173  C   GLY L  77      55.119 -27.040  94.930  1.00  0.00           C  
ATOM   2174  O   GLY L  77      55.522 -26.344  93.982  1.00  0.00           O  
ATOM   2175  N   LEU L  78      54.723 -26.507  96.071  1.00  0.00           N  
ATOM   2176  CA  LEU L  78      54.457 -25.115  96.320  1.00  0.00           C  
ATOM   2177  C   LEU L  78      55.412 -24.146  95.618  1.00  0.00           C  
ATOM   2178  O   LEU L  78      56.600 -24.033  95.917  1.00  0.00           O  
ATOM   2179  CB  LEU L  78      54.376 -24.865  97.830  1.00  0.00           C  
ATOM   2180  CG  LEU L  78      53.439 -23.794  98.345  1.00  0.00           C  
ATOM   2181  CD1 LEU L  78      52.014 -23.980  97.834  1.00  0.00           C  
ATOM   2182  CD2 LEU L  78      53.446 -23.865  99.878  1.00  0.00           C  
ATOM   2183  N   GLN L  79      54.793 -23.407  94.716  1.00  0.00           N  
ATOM   2184  CA  GLN L  79      55.332 -22.222  94.058  1.00  0.00           C  
ATOM   2185  C   GLN L  79      54.786 -20.986  94.772  1.00  0.00           C  
ATOM   2186  O   GLN L  79      53.663 -21.014  95.322  1.00  0.00           O  
ATOM   2187  CB  GLN L  79      54.950 -22.218  92.571  1.00  0.00           C  
ATOM   2188  CG  GLN L  79      55.223 -23.519  91.851  1.00  0.00           C  
ATOM   2189  CD  GLN L  79      56.681 -23.855  91.695  1.00  0.00           C  
ATOM   2190  OE1 GLN L  79      57.563 -23.004  91.578  1.00  0.00           O  
ATOM   2191  NE2 GLN L  79      56.973 -25.161  91.684  1.00  0.00           N  
ATOM   2192  N   ALA L  80      55.569 -19.927  94.790  1.00  0.00           N  
ATOM   2193  CA  ALA L  80      55.197 -18.648  95.404  1.00  0.00           C  
ATOM   2194  C   ALA L  80      53.819 -18.162  94.991  1.00  0.00           C  
ATOM   2195  O   ALA L  80      53.000 -17.740  95.848  1.00  0.00           O  
ATOM   2196  CB  ALA L  80      56.240 -17.575  95.067  1.00  0.00           C  
ATOM   2197  N   GLU L  81      53.542 -18.233  93.690  1.00  0.00           N  
ATOM   2198  CA  GLU L  81      52.307 -17.683  93.136  1.00  0.00           C  
ATOM   2199  C   GLU L  81      51.091 -18.412  93.695  1.00  0.00           C  
ATOM   2200  O   GLU L  81      49.956 -18.014  93.353  1.00  0.00           O  
ATOM   2201  CB  GLU L  81      52.198 -17.741  91.632  1.00  0.00           C  
ATOM   2202  CG  GLU L  81      52.051 -19.107  90.963  1.00  0.00           C  
ATOM   2203  CD  GLU L  81      53.241 -19.450  90.089  1.00  0.00           C  
ATOM   2204  OE1 GLU L  81      54.389 -19.158  90.407  1.00  0.00           O  
ATOM   2205  OE2 GLU L  81      52.897 -20.014  89.041  1.00  0.00           O  
ATOM   2206  N   ASP L  82      51.362 -19.432  94.504  1.00  0.00           N  
ATOM   2207  CA  ASP L  82      50.261 -20.305  94.973  1.00  0.00           C  
ATOM   2208  C   ASP L  82      49.625 -19.692  96.213  1.00  0.00           C  
ATOM   2209  O   ASP L  82      48.580 -20.182  96.670  1.00  0.00           O  
ATOM   2210  CB  ASP L  82      50.752 -21.726  95.183  1.00  0.00           C  
ATOM   2211  CG  ASP L  82      51.056 -22.446  93.885  1.00  0.00           C  
ATOM   2212  OD1 ASP L  82      50.421 -22.070  92.877  1.00  0.00           O  
ATOM   2213  OD2 ASP L  82      51.898 -23.349  93.853  1.00  0.00           O  
ATOM   2214  N   GLU L  83      50.317 -18.676  96.714  1.00  0.00           N  
ATOM   2215  CA  GLU L  83      49.807 -17.932  97.893  1.00  0.00           C  
ATOM   2216  C   GLU L  83      48.493 -17.248  97.549  1.00  0.00           C  
ATOM   2217  O   GLU L  83      48.436 -16.458  96.588  1.00  0.00           O  
ATOM   2218  CB  GLU L  83      50.831 -16.908  98.323  1.00  0.00           C  
ATOM   2219  CG  GLU L  83      51.030 -16.627  99.810  1.00  0.00           C  
ATOM   2220  CD  GLU L  83      51.914 -15.429 100.064  1.00  0.00           C  
ATOM   2221  OE1 GLU L  83      52.984 -15.290  99.494  1.00  0.00           O  
ATOM   2222  OE2 GLU L  83      51.413 -14.622 100.858  1.00  0.00           O  
ATOM   2223  N   ALA L  84      47.447 -17.557  98.300  1.00  0.00           N  
ATOM   2224  CA  ALA L  84      46.087 -17.070  98.038  1.00  0.00           C  
ATOM   2225  C   ALA L  84      45.054 -17.765  98.917  1.00  0.00           C  
ATOM   2226  O   ALA L  84      45.368 -18.681  99.691  1.00  0.00           O  
ATOM   2227  CB  ALA L  84      45.761 -17.317  96.555  1.00  0.00           C  
ATOM   2228  N   ASP L  85      43.813 -17.335  98.744  1.00  0.00           N  
ATOM   2229  CA  ASP L  85      42.637 -17.945  99.390  1.00  0.00           C  
ATOM   2230  C   ASP L  85      42.234 -19.155  98.520  1.00  0.00           C  
ATOM   2231  O   ASP L  85      42.565 -19.179  97.328  1.00  0.00           O  
ATOM   2232  CB  ASP L  85      41.493 -16.990  99.588  1.00  0.00           C  
ATOM   2233  CG  ASP L  85      41.597 -15.897 100.611  1.00  0.00           C  
ATOM   2234  OD1 ASP L  85      42.516 -15.899 101.455  1.00  0.00           O  
ATOM   2235  OD2 ASP L  85      40.744 -14.966 100.613  1.00  0.00           O  
ATOM   2236  N   TYR L  86      41.566 -20.097  99.139  1.00  0.00           N  
ATOM   2237  CA  TYR L  86      41.024 -21.274  98.462  1.00  0.00           C  
ATOM   2238  C   TYR L  86      39.695 -21.641  99.131  1.00  0.00           C  
ATOM   2239  O   TYR L  86      39.668 -21.744 100.364  1.00  0.00           O  
ATOM   2240  CB  TYR L  86      41.952 -22.480  98.497  1.00  0.00           C  
ATOM   2241  CG  TYR L  86      43.136 -22.443  97.571  1.00  0.00           C  
ATOM   2242  CD1 TYR L  86      44.269 -21.713  97.910  1.00  0.00           C  
ATOM   2243  CD2 TYR L  86      43.145 -23.134  96.363  1.00  0.00           C  
ATOM   2244  CE1 TYR L  86      45.383 -21.669  97.077  1.00  0.00           C  
ATOM   2245  CE2 TYR L  86      44.251 -23.099  95.515  1.00  0.00           C  
ATOM   2246  CZ  TYR L  86      45.369 -22.359  95.882  1.00  0.00           C  
ATOM   2247  OH  TYR L  86      46.482 -22.290  95.090  1.00  0.00           O  
ATOM   2248  N   TYR L  87      38.691 -21.832  98.298  1.00  0.00           N  
ATOM   2249  CA  TYR L  87      37.342 -22.180  98.780  1.00  0.00           C  
ATOM   2250  C   TYR L  87      36.904 -23.481  98.105  1.00  0.00           C  
ATOM   2251  O   TYR L  87      37.307 -23.737  96.962  1.00  0.00           O  
ATOM   2252  CB  TYR L  87      36.308 -21.064  98.477  1.00  0.00           C  
ATOM   2253  CG  TYR L  87      36.623 -19.723  99.085  1.00  0.00           C  
ATOM   2254  CD1 TYR L  87      37.635 -18.925  98.549  1.00  0.00           C  
ATOM   2255  CD2 TYR L  87      35.957 -19.258 100.222  1.00  0.00           C  
ATOM   2256  CE1 TYR L  87      37.981 -17.710  99.116  1.00  0.00           C  
ATOM   2257  CE2 TYR L  87      36.290 -18.035 100.806  1.00  0.00           C  
ATOM   2258  CZ  TYR L  87      37.306 -17.267 100.247  1.00  0.00           C  
ATOM   2259  OH  TYR L  87      37.673 -16.062 100.786  1.00  0.00           O  
ATOM   2260  N   CYS L  88      36.099 -24.256  98.806  1.00  0.00           N  
ATOM   2261  CA  CYS L  88      35.425 -25.412  98.215  1.00  0.00           C  
ATOM   2262  C   CYS L  88      33.964 -24.985  97.969  1.00  0.00           C  
ATOM   2263  O   CYS L  88      33.528 -23.943  98.468  1.00  0.00           O  
ATOM   2264  CB  CYS L  88      35.438 -26.670  99.092  1.00  0.00           C  
ATOM   2265  SG  CYS L  88      35.756 -26.431 100.821  1.00  0.00           S  
ATOM   2266  N   SER L  89      33.301 -25.833  97.213  1.00  0.00           N  
ATOM   2267  CA  SER L  89      31.864 -25.707  96.945  1.00  0.00           C  
ATOM   2268  C   SER L  89      31.312 -27.129  96.787  1.00  0.00           C  
ATOM   2269  O   SER L  89      32.023 -28.018  96.298  1.00  0.00           O  
ATOM   2270  CB  SER L  89      31.565 -24.868  95.724  1.00  0.00           C  
ATOM   2271  OG  SER L  89      31.075 -23.581  96.066  1.00  0.00           O  
ATOM   2272  N   SER L  90      30.104 -27.292  97.259  1.00  0.00           N  
ATOM   2273  CA  SER L  90      29.298 -28.505  97.077  1.00  0.00           C  
ATOM   2274  C   SER L  90      27.895 -28.006  96.692  1.00  0.00           C  
ATOM   2275  O   SER L  90      27.406 -27.057  97.313  1.00  0.00           O  
ATOM   2276  CB  SER L  90      29.236 -29.386  98.293  1.00  0.00           C  
ATOM   2277  OG  SER L  90      30.083 -30.521  98.166  1.00  0.00           O  
ATOM   2278  N   TYR L  91      27.365 -28.608  95.673  1.00  0.00           N  
ATOM   2279  CA  TYR L  91      26.022 -28.277  95.155  1.00  0.00           C  
ATOM   2280  C   TYR L  91      25.018 -29.269  95.709  1.00  0.00           C  
ATOM   2281  O   TYR L  91      24.785 -30.327  95.103  1.00  0.00           O  
ATOM   2282  CB  TYR L  91      26.123 -28.253  93.619  1.00  0.00           C  
ATOM   2283  CG  TYR L  91      24.866 -28.305  92.801  1.00  0.00           C  
ATOM   2284  CD1 TYR L  91      24.165 -27.144  92.461  1.00  0.00           C  
ATOM   2285  CD2 TYR L  91      24.364 -29.517  92.325  1.00  0.00           C  
ATOM   2286  CE1 TYR L  91      23.001 -27.185  91.704  1.00  0.00           C  
ATOM   2287  CE2 TYR L  91      23.208 -29.581  91.554  1.00  0.00           C  
ATOM   2288  CZ  TYR L  91      22.526 -28.406  91.251  1.00  0.00           C  
ATOM   2289  OH  TYR L  91      21.381 -28.429  90.500  1.00  0.00           O  
ATOM   2290  N   GLU L  92      24.433 -28.962  96.863  1.00  0.00           N  
ATOM   2291  CA  GLU L  92      23.430 -29.817  97.506  1.00  0.00           C  
ATOM   2292  C   GLU L  92      22.303 -30.073  96.491  1.00  0.00           C  
ATOM   2293  O   GLU L  92      22.145 -31.171  95.973  1.00  0.00           O  
ATOM   2294  CB  GLU L  92      22.738 -29.208  98.728  1.00  0.00           C  
ATOM   2295  CG  GLU L  92      21.755 -30.134  99.475  1.00  0.00           C  
ATOM   2296  CD  GLU L  92      20.421 -29.547  99.823  1.00  0.00           C  
ATOM   2297  OE1 GLU L  92      19.550 -29.267  99.001  1.00  0.00           O  
ATOM   2298  OE2 GLU L  92      20.269 -29.393 101.055  1.00  0.00           O  
ATOM   2299  N   GLY L  93      21.579 -28.994  96.279  1.00  0.00           N  
ATOM   2300  CA  GLY L  93      20.425 -28.953  95.361  1.00  0.00           C  
ATOM   2301  C   GLY L  93      20.433 -27.549  94.735  1.00  0.00           C  
ATOM   2302  O   GLY L  93      21.128 -26.665  95.264  1.00  0.00           O  
ATOM   2303  N   SER L  94      19.667 -27.377  93.681  1.00  0.00           N  
ATOM   2304  CA  SER L  94      19.721 -26.191  92.837  1.00  0.00           C  
ATOM   2305  C   SER L  94      19.708 -24.854  93.536  1.00  0.00           C  
ATOM   2306  O   SER L  94      20.435 -23.945  93.037  1.00  0.00           O  
ATOM   2307  CB  SER L  94      18.640 -26.234  91.742  1.00  0.00           C  
ATOM   2308  OG  SER L  94      19.175 -26.874  90.583  1.00  0.00           O  
ATOM   2309  N   ASP L  95      18.940 -24.682  94.591  1.00  0.00           N  
ATOM   2310  CA  ASP L  95      18.957 -23.411  95.350  1.00  0.00           C  
ATOM   2311  C   ASP L  95      20.334 -23.198  95.997  1.00  0.00           C  
ATOM   2312  O   ASP L  95      20.894 -22.089  95.919  1.00  0.00           O  
ATOM   2313  CB  ASP L  95      17.819 -23.314  96.365  1.00  0.00           C  
ATOM   2314  CG  ASP L  95      18.151 -22.590  97.653  1.00  0.00           C  
ATOM   2315  OD1 ASP L  95      18.764 -21.513  97.690  1.00  0.00           O  
ATOM   2316  OD2 ASP L  95      17.760 -23.153  98.720  1.00  0.00           O  
ATOM   2317  N   ASN L  95A     20.848 -24.260  96.609  1.00  0.00           N  
ATOM   2318  CA  ASN L  95A     21.912 -24.092  97.603  1.00  0.00           C  
ATOM   2319  C   ASN L  95A     23.255 -24.710  97.270  1.00  0.00           C  
ATOM   2320  O   ASN L  95A     23.623 -25.841  97.592  1.00  0.00           O  
ATOM   2321  CB  ASN L  95A     21.376 -24.479  98.990  1.00  0.00           C  
ATOM   2322  CG  ASN L  95A     20.478 -25.706  98.875  1.00  0.00           C  
ATOM   2323  OD1 ASN L  95A     20.883 -26.695  98.252  1.00  0.00           O  
ATOM   2324  ND2 ASN L  95A     19.290 -25.573  99.442  1.00  0.00           N  
ATOM   2325  N   PHE L  96      24.023 -23.831  96.666  1.00  0.00           N  
ATOM   2326  CA  PHE L  96      25.484 -24.001  96.411  1.00  0.00           C  
ATOM   2327  C   PHE L  96      26.148 -23.620  97.750  1.00  0.00           C  
ATOM   2328  O   PHE L  96      26.011 -22.462  98.179  1.00  0.00           O  
ATOM   2329  CB  PHE L  96      25.801 -23.118  95.250  1.00  0.00           C  
ATOM   2330  CG  PHE L  96      26.962 -23.108  94.357  1.00  0.00           C  
ATOM   2331  CD1 PHE L  96      28.111 -22.359  94.658  1.00  0.00           C  
ATOM   2332  CD2 PHE L  96      26.914 -23.751  93.104  1.00  0.00           C  
ATOM   2333  CE1 PHE L  96      29.190 -22.294  93.768  1.00  0.00           C  
ATOM   2334  CE2 PHE L  96      27.970 -23.695  92.212  1.00  0.00           C  
ATOM   2335  CZ  PHE L  96      29.104 -22.967  92.552  1.00  0.00           C  
ATOM   2336  N   VAL L  97      26.790 -24.577  98.388  1.00  0.00           N  
ATOM   2337  CA  VAL L  97      27.479 -24.359  99.661  1.00  0.00           C  
ATOM   2338  C   VAL L  97      28.996 -24.272  99.492  1.00  0.00           C  
ATOM   2339  O   VAL L  97      29.658 -25.185  98.979  1.00  0.00           O  
ATOM   2340  CB  VAL L  97      27.037 -25.405 100.702  1.00  0.00           C  
ATOM   2341  CG1 VAL L  97      27.525 -25.057 102.107  1.00  0.00           C  
ATOM   2342  CG2 VAL L  97      25.528 -25.591 100.737  1.00  0.00           C  
ATOM   2343  N   PHE L  98      29.541 -23.164  99.966  1.00  0.00           N  
ATOM   2344  CA  PHE L  98      30.971 -22.850  99.927  1.00  0.00           C  
ATOM   2345  C   PHE L  98      31.645 -23.246 101.245  1.00  0.00           C  
ATOM   2346  O   PHE L  98      30.974 -23.381 102.280  1.00  0.00           O  
ATOM   2347  CB  PHE L  98      31.209 -21.359  99.642  1.00  0.00           C  
ATOM   2348  CG  PHE L  98      31.312 -20.976  98.198  1.00  0.00           C  
ATOM   2349  CD1 PHE L  98      30.166 -20.765  97.430  1.00  0.00           C  
ATOM   2350  CD2 PHE L  98      32.566 -20.819  97.603  1.00  0.00           C  
ATOM   2351  CE1 PHE L  98      30.268 -20.386  96.090  1.00  0.00           C  
ATOM   2352  CE2 PHE L  98      32.679 -20.446  96.272  1.00  0.00           C  
ATOM   2353  CZ  PHE L  98      31.531 -20.230  95.517  1.00  0.00           C  
ATOM   2354  N   GLY L  99      32.954 -23.400 101.159  1.00  0.00           N  
ATOM   2355  CA  GLY L  99      33.797 -23.579 102.373  1.00  0.00           C  
ATOM   2356  C   GLY L  99      33.919 -22.226 103.082  1.00  0.00           C  
ATOM   2357  O   GLY L  99      33.100 -21.321 102.831  1.00  0.00           O  
ATOM   2358  N   THR L 100      34.911 -22.101 103.937  1.00  0.00           N  
ATOM   2359  CA  THR L 100      35.095 -20.875 104.723  1.00  0.00           C  
ATOM   2360  C   THR L 100      36.358 -20.162 104.268  1.00  0.00           C  
ATOM   2361  O   THR L 100      36.632 -19.038 104.730  1.00  0.00           O  
ATOM   2362  CB  THR L 100      35.034 -21.059 106.279  1.00  0.00           C  
ATOM   2363  OG1 THR L 100      35.293 -22.456 106.612  1.00  0.00           O  
ATOM   2364  CG2 THR L 100      33.706 -20.609 106.913  1.00  0.00           C  
ATOM   2365  N   GLY L 101      37.069 -20.802 103.355  1.00  0.00           N  
ATOM   2366  CA  GLY L 101      38.338 -20.232 102.840  1.00  0.00           C  
ATOM   2367  C   GLY L 101      39.505 -20.998 103.444  1.00  0.00           C  
ATOM   2368  O   GLY L 101      39.308 -21.812 104.353  1.00  0.00           O  
ATOM   2369  N   THR L 102      40.671 -20.816 102.879  1.00  0.00           N  
ATOM   2370  CA  THR L 102      41.936 -21.302 103.433  1.00  0.00           C  
ATOM   2371  C   THR L 102      43.060 -20.473 102.788  1.00  0.00           C  
ATOM   2372  O   THR L 102      43.209 -20.489 101.561  1.00  0.00           O  
ATOM   2373  CB  THR L 102      42.205 -22.829 103.267  1.00  0.00           C  
ATOM   2374  OG1 THR L 102      41.130 -23.563 103.909  1.00  0.00           O  
ATOM   2375  CG2 THR L 102      43.584 -23.238 103.833  1.00  0.00           C  
ATOM   2376  N   LYS L 103      43.753 -19.749 103.628  1.00  0.00           N  
ATOM   2377  CA  LYS L 103      44.882 -18.914 103.215  1.00  0.00           C  
ATOM   2378  C   LYS L 103      46.122 -19.795 103.096  1.00  0.00           C  
ATOM   2379  O   LYS L 103      46.558 -20.331 104.136  1.00  0.00           O  
ATOM   2380  CB  LYS L 103      45.169 -17.824 104.238  1.00  0.00           C  
ATOM   2381  CG  LYS L 103      44.521 -16.486 103.955  1.00  0.00           C  
ATOM   2382  CD  LYS L 103      45.221 -15.346 104.662  1.00  0.00           C  
ATOM   2383  CE  LYS L 103      46.716 -15.372 104.487  1.00  0.00           C  
ATOM   2384  NZ  LYS L 103      47.303 -14.035 104.725  1.00  0.00           N  
ATOM   2385  N   VAL L 104      46.635 -19.932 101.888  1.00  0.00           N  
ATOM   2386  CA  VAL L 104      47.914 -20.654 101.713  1.00  0.00           C  
ATOM   2387  C   VAL L 104      49.030 -19.614 101.773  1.00  0.00           C  
ATOM   2388  O   VAL L 104      48.950 -18.603 101.065  1.00  0.00           O  
ATOM   2389  CB  VAL L 104      47.925 -21.532 100.481  1.00  0.00           C  
ATOM   2390  CG1 VAL L 104      49.041 -22.585 100.555  1.00  0.00           C  
ATOM   2391  CG2 VAL L 104      46.592 -22.208 100.230  1.00  0.00           C  
ATOM   2392  N   THR L 105      49.999 -19.887 102.626  1.00  0.00           N  
ATOM   2393  CA  THR L 105      51.119 -18.949 102.864  1.00  0.00           C  
ATOM   2394  C   THR L 105      52.455 -19.574 102.539  1.00  0.00           C  
ATOM   2395  O   THR L 105      52.718 -20.684 103.065  1.00  0.00           O  
ATOM   2396  CB  THR L 105      51.092 -18.490 104.379  1.00  0.00           C  
ATOM   2397  OG1 THR L 105      49.665 -18.413 104.723  1.00  0.00           O  
ATOM   2398  CG2 THR L 105      51.823 -17.190 104.665  1.00  0.00           C  
ATOM   2399  N   VAL L 106      53.246 -18.922 101.693  1.00  0.00           N  
ATOM   2400  CA  VAL L 106      54.654 -19.399 101.513  1.00  0.00           C  
ATOM   2401  C   VAL L 106      55.398 -18.581 102.593  1.00  0.00           C  
ATOM   2402  O   VAL L 106      55.542 -17.372 102.500  1.00  0.00           O  
ATOM   2403  CB  VAL L 106      55.231 -19.395 100.124  1.00  0.00           C  
ATOM   2404  CG1 VAL L 106      54.436 -20.262  99.131  1.00  0.00           C  
ATOM   2405  CG2 VAL L 106      55.468 -18.025  99.503  1.00  0.00           C  
ATOM   2406  N   LEU L 106A     55.753 -19.306 103.632  1.00  0.00           N  
ATOM   2407  CA  LEU L 106A     56.006 -18.799 104.959  1.00  0.00           C  
ATOM   2408  C   LEU L 106A     56.708 -17.502 105.199  1.00  0.00           C  
ATOM   2409  O   LEU L 106A     56.111 -16.645 105.926  1.00  0.00           O  
ATOM   2410  CB  LEU L 106A     56.710 -19.972 105.718  1.00  0.00           C  
ATOM   2411  CG  LEU L 106A     55.770 -21.041 106.247  1.00  0.00           C  
ATOM   2412  CD1 LEU L 106A     56.557 -22.120 106.980  1.00  0.00           C  
ATOM   2413  CD2 LEU L 106A     54.760 -20.402 107.183  1.00  0.00           C  
ATOM   2414  N   GLY L 107      57.933 -17.318 104.764  1.00  0.00           N  
ATOM   2415  CA  GLY L 107      58.663 -16.065 105.007  1.00  0.00           C  
ATOM   2416  C   GLY L 107      59.349 -16.028 106.357  1.00  0.00           C  
ATOM   2417  O   GLY L 107      60.601 -16.140 106.392  1.00  0.00           O  
ATOM   2418  N   GLN L 108      58.589 -15.839 107.424  1.00  0.00           N  
ATOM   2419  CA  GLN L 108      59.143 -15.807 108.805  1.00  0.00           C  
ATOM   2420  C   GLN L 108      58.852 -17.134 109.490  1.00  0.00           C  
ATOM   2421  O   GLN L 108      58.254 -18.021 108.854  1.00  0.00           O  
ATOM   2422  CB  GLN L 108      58.581 -14.623 109.597  1.00  0.00           C  
ATOM   2423  CG  GLN L 108      57.086 -14.645 109.733  1.00  0.00           C  
ATOM   2424  CD  GLN L 108      56.441 -13.504 110.454  1.00  0.00           C  
ATOM   2425  OE1 GLN L 108      56.166 -13.597 111.650  1.00  0.00           O  
ATOM   2426  NE2 GLN L 108      56.099 -12.426 109.755  1.00  0.00           N  
ATOM   2427  N   PRO L 109      59.286 -17.269 110.737  1.00  0.00           N  
ATOM   2428  CA  PRO L 109      58.985 -18.469 111.536  1.00  0.00           C  
ATOM   2429  C   PRO L 109      57.526 -18.495 111.955  1.00  0.00           C  
ATOM   2430  O   PRO L 109      56.845 -17.449 112.007  1.00  0.00           O  
ATOM   2431  CB  PRO L 109      59.970 -18.434 112.685  1.00  0.00           C  
ATOM   2432  CG  PRO L 109      61.094 -17.557 112.228  1.00  0.00           C  
ATOM   2433  CD  PRO L 109      60.434 -16.526 111.313  1.00  0.00           C  
TER    2434      PRO L 109                                                      
