# Supplementary material for: SARS-CoV-2 Spike Protein Interaction Space
Source: Int J Mol Sci. 2023 Jul 27;24(15):12058. doi: 10.3390/ijms241512058 (PMC10418891; doi:10.3390/ijms241512058)
Supplement: Supplementary file 1 [file ijms-24-12058-s001.zip › Supplementary Material File S1/1MCI.pdb]

REMARK 950 NUMBERING  Kabat
REMARK 950 METHOD     X-ray crystal structure
REMARK 950 RESOLUTION 2.700
REMARK 950 R-FACTOR   0.177
REMARK 950 R-FREE     0.000
REMARK 950 CHAIN-TYPE LABEL ORIGINAL
REMARK 950 CHAIN L    L    A
REMARK 950 CHAIN L    L    B
REMARK 950 CHAIN A    P    P
REMARK 950 MOLECULE : A : IMMUNOGLOBULIN LAMBDA DIMER MCG (LIGHT CHAIN)
REMARK 950 SPECIES  : A : HOMO SAPIENS
REMARK 950 MOLECULE : P : PEPTIDE N-ACETYL-D-PHE-L-HIS-D-PRO-OH
REMARK 950 SPECIES  : P : 
SEQRES   1 L 216  PRO SER ALA LEU THR GLN PRO PRO SER ALA SER GLY SER          
SEQRES   2 L 216  LEU GLY GLN SER VAL THR ILE SER CYS THR GLY THR SER          
SEQRES   3 L 216  SER ASP VAL GLY GLY TYR ASN TYR VAL SER TRP TYR GLN          
SEQRES   4 L 216  GLN HIS ALA GLY LYS ALA PRO LYS VAL ILE ILE TYR GLU          
SEQRES   5 L 216  VAL ASN LYS ARG PRO SER GLY VAL PRO ASP ARG PHE SER          
SEQRES   6 L 216  GLY SER LYS SER GLY ASN THR ALA SER LEU THR VAL SER          
SEQRES   7 L 216  GLY LEU GLN ALA GLU ASP GLU ALA ASP TYR TYR CYS SER          
SEQRES   8 L 216  SER TYR GLU GLY SER ASP ASN PHE VAL PHE GLY THR GLY          
SEQRES   9 L 216  THR LYS VAL THR VAL LEU GLY GLN PRO LYS ALA ASN PRO          
SEQRES  10 L 216  THR VAL THR LEU PHE PRO PRO SER SER GLU GLU LEU GLN          
SEQRES  11 L 216  ALA ASN LYS ALA THR LEU VAL CYS LEU ILE SER ASP PHE          
SEQRES  12 L 216  TYR PRO GLY ALA VAL THR VAL ALA TRP LYS ALA ASP GLY          
SEQRES  13 L 216  SER PRO VAL LYS ALA GLY VAL GLU THR THR LYS PRO SER          
SEQRES  14 L 216  LYS GLN SER ASN ASN LYS TYR ALA ALA SER SER TYR LEU          
SEQRES  15 L 216  SER LEU THR PRO GLU GLN TRP LYS SER HIS ARG SER TYR          
SEQRES  16 L 216  SER CYS GLN VAL THR HIS GLU GLY SER THR VAL GLU LYS          
SEQRES  17 L 216  THR VAL ALA PRO THR GLU CYS SER                              
SEQRES   1 L 216  PRO SER ALA LEU THR GLN PRO PRO SER ALA SER GLY SER          
SEQRES   2 L 216  LEU GLY GLN SER VAL THR ILE SER CYS THR GLY THR SER          
SEQRES   3 L 216  SER ASP VAL GLY GLY TYR ASN TYR VAL SER TRP TYR GLN          
SEQRES   4 L 216  GLN HIS ALA GLY LYS ALA PRO LYS VAL ILE ILE TYR GLU          
SEQRES   5 L 216  VAL ASN LYS ARG PRO SER GLY VAL PRO ASP ARG PHE SER          
SEQRES   6 L 216  GLY SER LYS SER GLY ASN THR ALA SER LEU THR VAL SER          
SEQRES   7 L 216  GLY LEU GLN ALA GLU ASP GLU ALA ASP TYR TYR CYS SER          
SEQRES   8 L 216  SER TYR GLU GLY SER ASP ASN PHE VAL PHE GLY THR GLY          
SEQRES   9 L 216  THR LYS VAL THR VAL LEU GLY GLN PRO LYS ALA ASN PRO          
SEQRES  10 L 216  THR VAL THR LEU PHE PRO PRO SER SER GLU GLU LEU GLN          
SEQRES  11 L 216  ALA ASN LYS ALA THR LEU VAL CYS LEU ILE SER ASP PHE          
SEQRES  12 L 216  TYR PRO GLY ALA VAL THR VAL ALA TRP LYS ALA ASP GLY          
SEQRES  13 L 216  SER PRO VAL LYS ALA GLY VAL GLU THR THR LYS PRO SER          
SEQRES  14 L 216  LYS GLN SER ASN ASN LYS TYR ALA ALA SER SER TYR LEU          
SEQRES  15 L 216  SER LEU THR PRO GLU GLN TRP LYS SER HIS ARG SER TYR          
SEQRES  16 L 216  SER CYS GLN VAL THR HIS GLU GLY SER THR VAL GLU LYS          
SEQRES  17 L 216  THR VAL ALA PRO THR GLU CYS SER                              
SEQRES   1 P    4  ACE DPN HIS DPR                                              
ATOM      1  N   PRO L   1      40.878 -16.221  75.961  1.00  0.00           N  
ATOM      2  CA  PRO L   1      39.818 -15.327  76.455  1.00  0.00           C  
ATOM      3  C   PRO L   1      40.333 -14.504  77.619  1.00  0.00           C  
ATOM      4  O   PRO L   1      41.554 -14.238  77.678  1.00  0.00           O  
ATOM      5  CB  PRO L   1      38.683 -16.281  76.786  1.00  0.00           C  
ATOM      6  CG  PRO L   1      39.297 -17.621  77.037  1.00  0.00           C  
ATOM      7  CD  PRO L   1      40.739 -17.552  76.578  1.00  0.00           C  
ATOM      8  N   SER L   2      39.439 -14.141  78.526  1.00  0.00           N  
ATOM      9  CA  SER L   2      39.783 -13.210  79.638  1.00  0.00           C  
ATOM     10  C   SER L   2      38.855 -13.422  80.824  1.00  0.00           C  
ATOM     11  O   SER L   2      38.510 -14.596  81.117  1.00  0.00           O  
ATOM     12  CB  SER L   2      39.739 -11.783  79.080  1.00  0.00           C  
ATOM     13  OG  SER L   2      39.690 -11.812  77.641  1.00  0.00           O  
ATOM     14  N   ALA L   3      38.447 -12.359  81.506  1.00  0.00           N  
ATOM     15  CA  ALA L   3      37.409 -12.473  82.556  1.00  0.00           C  
ATOM     16  C   ALA L   3      36.262 -11.500  82.365  1.00  0.00           C  
ATOM     17  O   ALA L   3      36.446 -10.281  82.558  1.00  0.00           O  
ATOM     18  CB  ALA L   3      38.073 -12.290  83.919  1.00  0.00           C  
ATOM     19  N   LEU L   4      35.059 -12.009  82.106  1.00  0.00           N  
ATOM     20  CA  LEU L   4      33.931 -11.228  81.580  1.00  0.00           C  
ATOM     21  C   LEU L   4      33.577  -9.994  82.404  1.00  0.00           C  
ATOM     22  O   LEU L   4      32.964 -10.080  83.480  1.00  0.00           O  
ATOM     23  CB  LEU L   4      32.719 -12.142  81.383  1.00  0.00           C  
ATOM     24  CG  LEU L   4      32.410 -13.148  82.467  1.00  0.00           C  
ATOM     25  CD1 LEU L   4      30.960 -13.032  82.915  1.00  0.00           C  
ATOM     26  CD2 LEU L   4      32.684 -14.548  81.908  1.00  0.00           C  
ATOM     27  N   THR L   5      33.837  -8.829  81.835  1.00  0.00           N  
ATOM     28  CA  THR L   5      33.991  -7.591  82.553  1.00  0.00           C  
ATOM     29  C   THR L   5      32.836  -7.177  83.451  1.00  0.00           C  
ATOM     30  O   THR L   5      31.653  -7.185  83.112  1.00  0.00           O  
ATOM     31  CB  THR L   5      34.397  -6.388  81.597  1.00  0.00           C  
ATOM     32  OG1 THR L   5      33.232  -6.125  80.761  1.00  0.00           O  
ATOM     33  CG2 THR L   5      35.671  -6.654  80.796  1.00  0.00           C  
ATOM     34  N   GLN L   6      33.267  -6.738  84.622  1.00  0.00           N  
ATOM     35  CA  GLN L   6      32.462  -6.157  85.691  1.00  0.00           C  
ATOM     36  C   GLN L   6      33.001  -4.740  85.966  1.00  0.00           C  
ATOM     37  O   GLN L   6      34.228  -4.564  86.079  1.00  0.00           O  
ATOM     38  CB  GLN L   6      32.615  -7.016  86.945  1.00  0.00           C  
ATOM     39  CG  GLN L   6      31.351  -7.628  87.511  1.00  0.00           C  
ATOM     40  CD  GLN L   6      31.699  -8.557  88.665  1.00  0.00           C  
ATOM     41  OE1 GLN L   6      32.281  -9.615  88.455  1.00  0.00           O  
ATOM     42  NE2 GLN L   6      31.383  -8.122  89.877  1.00  0.00           N  
ATOM     43  N   PRO L   7      32.096  -3.786  86.083  1.00  0.00           N  
ATOM     44  CA  PRO L   7      32.416  -2.405  86.453  1.00  0.00           C  
ATOM     45  C   PRO L   7      32.938  -2.248  87.873  1.00  0.00           C  
ATOM     46  O   PRO L   7      32.261  -2.618  88.858  1.00  0.00           O  
ATOM     47  CB  PRO L   7      31.065  -1.692  86.308  1.00  0.00           C  
ATOM     48  CG  PRO L   7      30.072  -2.759  86.706  1.00  0.00           C  
ATOM     49  CD  PRO L   7      30.633  -4.022  86.081  1.00  0.00           C  
ATOM     50  N   PRO L   8      34.083  -1.573  87.990  1.00  0.00           N  
ATOM     51  CA  PRO L   8      34.939  -1.676  89.178  1.00  0.00           C  
ATOM     52  C   PRO L   8      34.327  -1.103  90.433  1.00  0.00           C  
ATOM     53  O   PRO L   8      34.776  -1.355  91.587  1.00  0.00           O  
ATOM     54  CB  PRO L   8      36.219  -0.968  88.728  1.00  0.00           C  
ATOM     55  CG  PRO L   8      35.738   0.101  87.788  1.00  0.00           C  
ATOM     56  CD  PRO L   8      34.531  -0.501  87.066  1.00  0.00           C  
ATOM     57  N   SER L   9      33.196  -0.438  90.253  1.00  0.00           N  
ATOM     58  CA  SER L   9      32.521   0.299  91.331  1.00  0.00           C  
ATOM     59  C   SER L   9      31.055   0.485  90.946  1.00  0.00           C  
ATOM     60  O   SER L   9      30.699   0.445  89.766  1.00  0.00           O  
ATOM     61  CB  SER L   9      33.214   1.627  91.597  1.00  0.00           C  
ATOM     62  OG  SER L   9      34.629   1.468  91.693  1.00  0.00           O  
ATOM     63  N   ALA L  11      30.245   0.612  91.978  1.00  0.00           N  
ATOM     64  CA  ALA L  11      28.806   0.882  91.836  1.00  0.00           C  
ATOM     65  C   ALA L  11      28.301   1.492  93.153  1.00  0.00           C  
ATOM     66  O   ALA L  11      28.853   1.249  94.249  1.00  0.00           O  
ATOM     67  CB  ALA L  11      28.018  -0.349  91.461  1.00  0.00           C  
ATOM     68  N   SER L  12      27.241   2.264  92.987  1.00  0.00           N  
ATOM     69  CA  SER L  12      26.691   3.059  94.073  1.00  0.00           C  
ATOM     70  C   SER L  12      25.165   3.103  94.043  1.00  0.00           C  
ATOM     71  O   SER L  12      24.582   3.581  93.058  1.00  0.00           O  
ATOM     72  CB  SER L  12      27.231   4.496  94.034  1.00  0.00           C  
ATOM     73  OG  SER L  12      28.603   4.565  94.352  1.00  0.00           O  
ATOM     74  N   GLY L  13      24.637   2.630  95.199  1.00  0.00           N  
ATOM     75  CA  GLY L  13      23.157   2.925  95.387  1.00  0.00           C  
ATOM     76  C   GLY L  13      23.066   3.867  96.584  1.00  0.00           C  
ATOM     77  O   GLY L  13      24.100   4.248  97.153  1.00  0.00           O  
ATOM     78  N   SER L  14      21.841   4.220  96.926  1.00  0.00           N  
ATOM     79  CA  SER L  14      21.565   5.079  98.094  1.00  0.00           C  
ATOM     80  C   SER L  14      20.231   4.674  98.717  1.00  0.00           C  
ATOM     81  O   SER L  14      19.141   5.128  98.334  1.00  0.00           O  
ATOM     82  CB  SER L  14      21.624   6.548  97.733  1.00  0.00           C  
ATOM     83  OG  SER L  14      22.885   6.879  97.146  1.00  0.00           O  
ATOM     84  N   LEU L  15      20.345   3.782  99.687  1.00  0.00           N  
ATOM     85  CA  LEU L  15      19.276   3.126 100.401  1.00  0.00           C  
ATOM     86  C   LEU L  15      17.871   3.612 100.070  1.00  0.00           C  
ATOM     87  O   LEU L  15      17.478   4.724 100.455  1.00  0.00           O  
ATOM     88  CB  LEU L  15      19.569   3.168 101.910  1.00  0.00           C  
ATOM     89  CG  LEU L  15      20.477   4.248 102.446  1.00  0.00           C  
ATOM     90  CD1 LEU L  15      19.730   5.560 102.637  1.00  0.00           C  
ATOM     91  CD2 LEU L  15      21.069   3.771 103.777  1.00  0.00           C  
ATOM     92  N   GLY L  16      17.128   2.713  99.440  1.00  0.00           N  
ATOM     93  CA  GLY L  16      15.769   3.030  98.936  1.00  0.00           C  
ATOM     94  C   GLY L  16      15.851   3.127  97.397  1.00  0.00           C  
ATOM     95  O   GLY L  16      15.058   2.534  96.661  1.00  0.00           O  
ATOM     96  N   GLN L  17      16.863   3.878  97.001  1.00  0.00           N  
ATOM     97  CA  GLN L  17      17.292   3.923  95.569  1.00  0.00           C  
ATOM     98  C   GLN L  17      17.760   2.508  95.235  1.00  0.00           C  
ATOM     99  O   GLN L  17      17.361   1.500  95.898  1.00  0.00           O  
ATOM    100  CB  GLN L  17      18.326   5.018  95.469  1.00  0.00           C  
ATOM    101  CG  GLN L  17      18.728   5.666  94.156  1.00  0.00           C  
ATOM    102  CD  GLN L  17      19.959   4.970  93.580  1.00  0.00           C  
ATOM    103  OE1 GLN L  17      20.913   4.721  94.316  1.00  0.00           O  
ATOM    104  NE2 GLN L  17      19.874   4.564  92.325  1.00  0.00           N  
ATOM    105  N   SER L  18      18.589   2.397  94.201  1.00  0.00           N  
ATOM    106  CA  SER L  18      19.105   1.096  93.761  1.00  0.00           C  
ATOM    107  C   SER L  18      20.399   1.205  92.970  1.00  0.00           C  
ATOM    108  O   SER L  18      21.040   2.254  92.883  1.00  0.00           O  
ATOM    109  CB  SER L  18      18.042   0.336  92.967  1.00  0.00           C  
ATOM    110  OG  SER L  18      18.269  -1.058  93.034  1.00  0.00           O  
ATOM    111  N   VAL L  19      20.755   0.056  92.411  1.00  0.00           N  
ATOM    112  CA  VAL L  19      21.993  -0.163  91.662  1.00  0.00           C  
ATOM    113  C   VAL L  19      21.858  -1.438  90.816  1.00  0.00           C  
ATOM    114  O   VAL L  19      21.305  -2.463  91.260  1.00  0.00           O  
ATOM    115  CB  VAL L  19      23.192  -0.204  92.641  1.00  0.00           C  
ATOM    116  CG1 VAL L  19      23.163  -1.426  93.547  1.00  0.00           C  
ATOM    117  CG2 VAL L  19      24.521  -0.115  91.911  1.00  0.00           C  
ATOM    118  N   THR L  20      22.362  -1.330  89.596  1.00  0.00           N  
ATOM    119  CA  THR L  20      22.345  -2.442  88.635  1.00  0.00           C  
ATOM    120  C   THR L  20      23.773  -2.640  88.143  1.00  0.00           C  
ATOM    121  O   THR L  20      24.477  -1.664  87.858  1.00  0.00           O  
ATOM    122  CB  THR L  20      21.323  -2.247  87.483  1.00  0.00           C  
ATOM    123  OG1 THR L  20      20.232  -1.439  88.027  1.00  0.00           O  
ATOM    124  CG2 THR L  20      20.769  -3.565  86.910  1.00  0.00           C  
ATOM    125  N   ILE L  21      24.156  -3.903  88.094  1.00  0.00           N  
ATOM    126  CA  ILE L  21      25.543  -4.288  87.815  1.00  0.00           C  
ATOM    127  C   ILE L  21      25.620  -5.145  86.559  1.00  0.00           C  
ATOM    128  O   ILE L  21      25.053  -6.244  86.453  1.00  0.00           O  
ATOM    129  CB  ILE L  21      26.183  -4.935  89.091  1.00  0.00           C  
ATOM    130  CG1 ILE L  21      25.711  -4.165  90.357  1.00  0.00           C  
ATOM    131  CG2 ILE L  21      27.729  -4.993  89.016  1.00  0.00           C  
ATOM    132  CD1 ILE L  21      26.017  -4.836  91.714  1.00  0.00           C  
ATOM    133  N   SER L  22      26.361  -4.586  85.607  1.00  0.00           N  
ATOM    134  CA  SER L  22      26.701  -5.183  84.330  1.00  0.00           C  
ATOM    135  C   SER L  22      27.817  -6.234  84.462  1.00  0.00           C  
ATOM    136  O   SER L  22      28.771  -6.125  85.235  1.00  0.00           O  
ATOM    137  CB  SER L  22      27.163  -4.129  83.326  1.00  0.00           C  
ATOM    138  OG  SER L  22      26.290  -3.035  83.213  1.00  0.00           O  
ATOM    139  N   CYS L  23      27.658  -7.269  83.666  1.00  0.00           N  
ATOM    140  CA  CYS L  23      28.542  -8.395  83.508  1.00  0.00           C  
ATOM    141  C   CYS L  23      28.650  -8.681  81.989  1.00  0.00           C  
ATOM    142  O   CYS L  23      27.978  -9.537  81.411  1.00  0.00           O  
ATOM    143  CB  CYS L  23      28.137  -9.648  84.268  1.00  0.00           C  
ATOM    144  SG  CYS L  23      29.606 -10.642  84.655  1.00  0.00           S  
ATOM    145  N   THR L  24      29.466  -7.826  81.417  1.00  0.00           N  
ATOM    146  CA  THR L  24      29.697  -7.768  79.967  1.00  0.00           C  
ATOM    147  C   THR L  24      30.634  -8.891  79.569  1.00  0.00           C  
ATOM    148  O   THR L  24      31.679  -9.033  80.233  1.00  0.00           O  
ATOM    149  CB  THR L  24      30.328  -6.349  79.658  1.00  0.00           C  
ATOM    150  OG1 THR L  24      29.892  -5.491  80.777  1.00  0.00           O  
ATOM    151  CG2 THR L  24      29.975  -5.789  78.294  1.00  0.00           C  
ATOM    152  N   GLY L  25      30.272  -9.656  78.548  1.00  0.00           N  
ATOM    153  CA  GLY L  25      31.143 -10.731  78.052  1.00  0.00           C  
ATOM    154  C   GLY L  25      31.033 -10.982  76.561  1.00  0.00           C  
ATOM    155  O   GLY L  25      30.342 -10.291  75.806  1.00  0.00           O  
ATOM    156  N   THR L  26      31.731 -12.019  76.130  1.00  0.00           N  
ATOM    157  CA  THR L  26      31.794 -12.573  74.793  1.00  0.00           C  
ATOM    158  C   THR L  26      30.671 -13.559  74.494  1.00  0.00           C  
ATOM    159  O   THR L  26      30.222 -14.375  75.325  1.00  0.00           O  
ATOM    160  CB  THR L  26      33.202 -13.299  74.600  1.00  0.00           C  
ATOM    161  OG1 THR L  26      34.056 -12.761  75.661  1.00  0.00           O  
ATOM    162  CG2 THR L  26      33.839 -13.128  73.230  1.00  0.00           C  
ATOM    163  N   SER L  27      30.247 -13.560  73.246  1.00  0.00           N  
ATOM    164  CA  SER L  27      29.143 -14.329  72.698  1.00  0.00           C  
ATOM    165  C   SER L  27      29.269 -15.835  72.823  1.00  0.00           C  
ATOM    166  O   SER L  27      28.469 -16.601  72.209  1.00  0.00           O  
ATOM    167  CB  SER L  27      28.955 -13.933  71.211  1.00  0.00           C  
ATOM    168  OG  SER L  27      30.153 -13.345  70.724  1.00  0.00           O  
ATOM    169  N   SER L  27A     30.226 -16.283  73.605  1.00  0.00           N  
ATOM    170  CA  SER L  27A     30.492 -17.732  73.767  1.00  0.00           C  
ATOM    171  C   SER L  27A     30.318 -18.145  75.224  1.00  0.00           C  
ATOM    172  O   SER L  27A     30.746 -19.244  75.611  1.00  0.00           O  
ATOM    173  CB  SER L  27A     31.876 -18.048  73.217  1.00  0.00           C  
ATOM    174  OG  SER L  27A     32.136 -17.273  72.042  1.00  0.00           O  
ATOM    175  N   ASP L  27B     29.681 -17.241  75.974  1.00  0.00           N  
ATOM    176  CA  ASP L  27B     29.592 -17.409  77.444  1.00  0.00           C  
ATOM    177  C   ASP L  27B     28.333 -16.737  77.983  1.00  0.00           C  
ATOM    178  O   ASP L  27B     27.330 -17.445  78.240  1.00  0.00           O  
ATOM    179  CB  ASP L  27B     30.886 -16.998  78.110  1.00  0.00           C  
ATOM    180  CG  ASP L  27B     31.487 -15.674  77.747  1.00  0.00           C  
ATOM    181  OD1 ASP L  27B     30.935 -14.595  77.996  1.00  0.00           O  
ATOM    182  OD2 ASP L  27B     32.612 -15.702  77.195  1.00  0.00           O  
ATOM    183  N   VAL L  27C     28.403 -15.438  78.234  1.00  0.00           N  
ATOM    184  CA  VAL L  27C     27.136 -14.689  78.504  1.00  0.00           C  
ATOM    185  C   VAL L  27C     26.461 -14.715  77.132  1.00  0.00           C  
ATOM    186  O   VAL L  27C     27.235 -14.642  76.141  1.00  0.00           O  
ATOM    187  CB  VAL L  27C     27.378 -13.312  79.089  1.00  0.00           C  
ATOM    188  CG1 VAL L  27C     28.316 -12.426  78.281  1.00  0.00           C  
ATOM    189  CG2 VAL L  27C     26.050 -12.563  79.294  1.00  0.00           C  
ATOM    190  N   GLY L  28      25.168 -14.877  77.096  1.00  0.00           N  
ATOM    191  CA  GLY L  28      24.465 -14.978  75.791  1.00  0.00           C  
ATOM    192  C   GLY L  28      25.188 -15.980  74.879  1.00  0.00           C  
ATOM    193  O   GLY L  28      26.030 -15.635  74.035  1.00  0.00           O  
ATOM    194  N   GLY L  29      24.806 -17.228  75.063  1.00  0.00           N  
ATOM    195  CA  GLY L  29      25.403 -18.387  74.373  1.00  0.00           C  
ATOM    196  C   GLY L  29      24.845 -19.642  75.083  1.00  0.00           C  
ATOM    197  O   GLY L  29      24.328 -20.560  74.453  1.00  0.00           O  
ATOM    198  N   TYR L  30      24.984 -19.596  76.401  1.00  0.00           N  
ATOM    199  CA  TYR L  30      24.319 -20.512  77.323  1.00  0.00           C  
ATOM    200  C   TYR L  30      23.562 -19.625  78.336  1.00  0.00           C  
ATOM    201  O   TYR L  30      23.942 -18.459  78.513  1.00  0.00           O  
ATOM    202  CB  TYR L  30      25.262 -21.438  78.089  1.00  0.00           C  
ATOM    203  CG  TYR L  30      26.570 -21.721  77.399  1.00  0.00           C  
ATOM    204  CD1 TYR L  30      27.479 -20.686  77.154  1.00  0.00           C  
ATOM    205  CD2 TYR L  30      26.908 -23.011  77.000  1.00  0.00           C  
ATOM    206  CE1 TYR L  30      28.681 -20.931  76.503  1.00  0.00           C  
ATOM    207  CE2 TYR L  30      28.111 -23.277  76.358  1.00  0.00           C  
ATOM    208  CZ  TYR L  30      28.996 -22.232  76.119  1.00  0.00           C  
ATOM    209  OH  TYR L  30      30.169 -22.502  75.477  1.00  0.00           O  
ATOM    210  N   ASN L  31      22.539 -20.220  78.920  1.00  0.00           N  
ATOM    211  CA  ASN L  31      21.761 -19.519  79.974  1.00  0.00           C  
ATOM    212  C   ASN L  31      22.313 -19.974  81.329  1.00  0.00           C  
ATOM    213  O   ASN L  31      21.665 -20.741  82.058  1.00  0.00           O  
ATOM    214  CB  ASN L  31      20.261 -19.705  79.766  1.00  0.00           C  
ATOM    215  CG  ASN L  31      19.509 -18.432  79.392  1.00  0.00           C  
ATOM    216  OD1 ASN L  31      19.370 -18.057  78.221  1.00  0.00           O  
ATOM    217  ND2 ASN L  31      18.986 -17.717  80.394  1.00  0.00           N  
ATOM    218  N   TYR L  32      23.527 -19.492  81.618  1.00  0.00           N  
ATOM    219  CA  TYR L  32      24.267 -19.930  82.796  1.00  0.00           C  
ATOM    220  C   TYR L  32      25.036 -18.838  83.512  1.00  0.00           C  
ATOM    221  O   TYR L  32      26.126 -19.091  84.083  1.00  0.00           O  
ATOM    222  CB  TYR L  32      25.174 -21.160  82.471  1.00  0.00           C  
ATOM    223  CG  TYR L  32      24.429 -22.470  82.686  1.00  0.00           C  
ATOM    224  CD1 TYR L  32      23.978 -22.823  83.958  1.00  0.00           C  
ATOM    225  CD2 TYR L  32      24.140 -23.317  81.621  1.00  0.00           C  
ATOM    226  CE1 TYR L  32      23.260 -23.995  84.170  1.00  0.00           C  
ATOM    227  CE2 TYR L  32      23.424 -24.494  81.813  1.00  0.00           C  
ATOM    228  CZ  TYR L  32      22.981 -24.829  83.092  1.00  0.00           C  
ATOM    229  OH  TYR L  32      22.253 -25.979  83.246  1.00  0.00           O  
ATOM    230  N   VAL L  33      24.440 -17.653  83.549  1.00  0.00           N  
ATOM    231  CA  VAL L  33      24.974 -16.515  84.319  1.00  0.00           C  
ATOM    232  C   VAL L  33      24.712 -16.754  85.806  1.00  0.00           C  
ATOM    233  O   VAL L  33      23.563 -17.040  86.178  1.00  0.00           O  
ATOM    234  CB  VAL L  33      24.372 -15.185  83.826  1.00  0.00           C  
ATOM    235  CG1 VAL L  33      24.447 -14.058  84.854  1.00  0.00           C  
ATOM    236  CG2 VAL L  33      25.039 -14.746  82.523  1.00  0.00           C  
ATOM    237  N   SER L  34      25.763 -16.608  86.585  1.00  0.00           N  
ATOM    238  CA  SER L  34      25.636 -16.626  88.059  1.00  0.00           C  
ATOM    239  C   SER L  34      26.254 -15.366  88.665  1.00  0.00           C  
ATOM    240  O   SER L  34      27.171 -14.762  88.083  1.00  0.00           O  
ATOM    241  CB  SER L  34      26.260 -17.892  88.632  1.00  0.00           C  
ATOM    242  OG  SER L  34      25.443 -19.035  88.453  1.00  0.00           O  
ATOM    243  N   TRP L  35      25.736 -14.977  89.823  1.00  0.00           N  
ATOM    244  CA  TRP L  35      26.304 -13.842  90.572  1.00  0.00           C  
ATOM    245  C   TRP L  35      26.558 -14.257  92.026  1.00  0.00           C  
ATOM    246  O   TRP L  35      25.787 -15.010  92.641  1.00  0.00           O  
ATOM    247  CB  TRP L  35      25.478 -12.584  90.465  1.00  0.00           C  
ATOM    248  CG  TRP L  35      25.595 -11.785  89.217  1.00  0.00           C  
ATOM    249  CD1 TRP L  35      24.912 -11.983  88.046  1.00  0.00           C  
ATOM    250  CD2 TRP L  35      26.407 -10.621  89.016  1.00  0.00           C  
ATOM    251  NE1 TRP L  35      25.254 -11.026  87.129  1.00  0.00           N  
ATOM    252  CE2 TRP L  35      26.168 -10.183  87.695  1.00  0.00           C  
ATOM    253  CE3 TRP L  35      27.291  -9.916  89.821  1.00  0.00           C  
ATOM    254  CZ2 TRP L  35      26.790  -9.063  87.163  1.00  0.00           C  
ATOM    255  CZ3 TRP L  35      27.922  -8.813  89.286  1.00  0.00           C  
ATOM    256  CH2 TRP L  35      27.683  -8.391  87.983  1.00  0.00           C  
ATOM    257  N   TYR L  36      27.652 -13.702  92.534  1.00  0.00           N  
ATOM    258  CA  TYR L  36      28.160 -14.027  93.870  1.00  0.00           C  
ATOM    259  C   TYR L  36      28.311 -12.759  94.727  1.00  0.00           C  
ATOM    260  O   TYR L  36      28.460 -11.641  94.183  1.00  0.00           O  
ATOM    261  CB  TYR L  36      29.512 -14.736  93.748  1.00  0.00           C  
ATOM    262  CG  TYR L  36      29.534 -15.996  92.928  1.00  0.00           C  
ATOM    263  CD1 TYR L  36      29.690 -15.981  91.545  1.00  0.00           C  
ATOM    264  CD2 TYR L  36      29.426 -17.239  93.563  1.00  0.00           C  
ATOM    265  CE1 TYR L  36      29.729 -17.159  90.803  1.00  0.00           C  
ATOM    266  CE2 TYR L  36      29.474 -18.426  92.833  1.00  0.00           C  
ATOM    267  CZ  TYR L  36      29.620 -18.377  91.454  1.00  0.00           C  
ATOM    268  OH  TYR L  36      29.669 -19.536  90.732  1.00  0.00           O  
ATOM    269  N   GLN L  37      28.332 -13.032  96.038  1.00  0.00           N  
ATOM    270  CA  GLN L  37      28.472 -11.943  97.036  1.00  0.00           C  
ATOM    271  C   GLN L  37      29.657 -12.215  97.962  1.00  0.00           C  
ATOM    272  O   GLN L  37      29.702 -13.332  98.533  1.00  0.00           O  
ATOM    273  CB  GLN L  37      27.230 -11.845  97.904  1.00  0.00           C  
ATOM    274  CG  GLN L  37      26.026 -11.136  97.350  1.00  0.00           C  
ATOM    275  CD  GLN L  37      25.142 -10.643  98.497  1.00  0.00           C  
ATOM    276  OE1 GLN L  37      25.078  -9.455  98.795  1.00  0.00           O  
ATOM    277  NE2 GLN L  37      24.511 -11.600  99.170  1.00  0.00           N  
ATOM    278  N   GLN L  38      30.509 -11.223  98.168  1.00  0.00           N  
ATOM    279  CA  GLN L  38      31.708 -11.415  99.014  1.00  0.00           C  
ATOM    280  C   GLN L  38      32.047 -10.202  99.880  1.00  0.00           C  
ATOM    281  O   GLN L  38      32.513  -9.134  99.434  1.00  0.00           O  
ATOM    282  CB  GLN L  38      32.907 -11.854  98.161  1.00  0.00           C  
ATOM    283  CG  GLN L  38      33.914 -12.704  98.908  1.00  0.00           C  
ATOM    284  CD  GLN L  38      35.233 -12.861  98.187  1.00  0.00           C  
ATOM    285  OE1 GLN L  38      36.030 -13.754  98.482  1.00  0.00           O  
ATOM    286  NE2 GLN L  38      35.489 -11.977  97.226  1.00  0.00           N  
ATOM    287  N   HIS L  39      31.789 -10.388 101.170  1.00  0.00           N  
ATOM    288  CA  HIS L  39      32.149  -9.396 102.210  1.00  0.00           C  
ATOM    289  C   HIS L  39      33.534  -9.854 102.693  1.00  0.00           C  
ATOM    290  O   HIS L  39      33.639 -10.924 103.316  1.00  0.00           O  
ATOM    291  CB  HIS L  39      31.164  -9.280 103.359  1.00  0.00           C  
ATOM    292  CG  HIS L  39      29.707  -9.136 103.063  1.00  0.00           C  
ATOM    293  ND1 HIS L  39      29.043  -7.951 102.860  1.00  0.00           N  
ATOM    294  CD2 HIS L  39      28.742 -10.104 103.013  1.00  0.00           C  
ATOM    295  CE1 HIS L  39      27.755  -8.196 102.663  1.00  0.00           C  
ATOM    296  NE2 HIS L  39      27.546  -9.487 102.753  1.00  0.00           N  
ATOM    297  N   ALA L  40      34.562  -9.168 102.262  1.00  0.00           N  
ATOM    298  CA  ALA L  40      35.920  -9.272 102.769  1.00  0.00           C  
ATOM    299  C   ALA L  40      36.520 -10.644 102.953  1.00  0.00           C  
ATOM    300  O   ALA L  40      37.441 -10.828 103.794  1.00  0.00           O  
ATOM    301  CB  ALA L  40      35.982  -8.475 104.098  1.00  0.00           C  
ATOM    302  N   GLY L  41      36.094 -11.599 102.167  1.00  0.00           N  
ATOM    303  CA  GLY L  41      36.550 -13.007 102.247  1.00  0.00           C  
ATOM    304  C   GLY L  41      35.293 -13.836 102.548  1.00  0.00           C  
ATOM    305  O   GLY L  41      34.444 -14.012 101.665  1.00  0.00           O  
ATOM    306  N   LYS L  42      35.201 -14.271 103.782  1.00  0.00           N  
ATOM    307  CA  LYS L  42      34.041 -14.954 104.340  1.00  0.00           C  
ATOM    308  C   LYS L  42      33.801 -16.300 103.662  1.00  0.00           C  
ATOM    309  O   LYS L  42      33.879 -17.381 104.242  1.00  0.00           O  
ATOM    310  CB  LYS L  42      32.769 -14.111 104.199  1.00  0.00           C  
ATOM    311  CG  LYS L  42      31.456 -14.867 104.396  1.00  0.00           C  
ATOM    312  CD  LYS L  42      31.031 -14.981 105.848  1.00  0.00           C  
ATOM    313  CE  LYS L  42      30.244 -13.786 106.342  1.00  0.00           C  
ATOM    314  NZ  LYS L  42      31.042 -12.542 106.180  1.00  0.00           N  
ATOM    315  N   ALA L  43      33.479 -16.177 102.412  1.00  0.00           N  
ATOM    316  CA  ALA L  43      32.984 -17.171 101.477  1.00  0.00           C  
ATOM    317  C   ALA L  43      32.016 -16.342 100.594  1.00  0.00           C  
ATOM    318  O   ALA L  43      31.396 -15.395 101.115  1.00  0.00           O  
ATOM    319  CB  ALA L  43      32.280 -18.322 102.133  1.00  0.00           C  
ATOM    320  N   PRO L  44      32.036 -16.651  99.319  1.00  0.00           N  
ATOM    321  CA  PRO L  44      31.060 -16.051  98.393  1.00  0.00           C  
ATOM    322  C   PRO L  44      29.755 -16.815  98.579  1.00  0.00           C  
ATOM    323  O   PRO L  44      29.814 -18.017  98.906  1.00  0.00           O  
ATOM    324  CB  PRO L  44      31.681 -16.246  97.034  1.00  0.00           C  
ATOM    325  CG  PRO L  44      32.528 -17.482  97.183  1.00  0.00           C  
ATOM    326  CD  PRO L  44      33.014 -17.496  98.620  1.00  0.00           C  
ATOM    327  N   LYS L  45      28.666 -16.100  98.406  1.00  0.00           N  
ATOM    328  CA  LYS L  45      27.336 -16.757  98.462  1.00  0.00           C  
ATOM    329  C   LYS L  45      26.647 -16.532  97.116  1.00  0.00           C  
ATOM    330  O   LYS L  45      26.387 -15.377  96.718  1.00  0.00           O  
ATOM    331  CB  LYS L  45      26.494 -16.267  99.598  1.00  0.00           C  
ATOM    332  CG  LYS L  45      25.173 -17.016  99.815  1.00  0.00           C  
ATOM    333  CD  LYS L  45      23.997 -16.057  99.919  1.00  0.00           C  
ATOM    334  CE  LYS L  45      24.296 -14.844 100.776  1.00  0.00           C  
ATOM    335  NZ  LYS L  45      23.256 -13.804 100.592  1.00  0.00           N  
ATOM    336  N   VAL L  46      26.497 -17.654  96.411  1.00  0.00           N  
ATOM    337  CA  VAL L  46      25.702 -17.671  95.166  1.00  0.00           C  
ATOM    338  C   VAL L  46      24.378 -16.980  95.554  1.00  0.00           C  
ATOM    339  O   VAL L  46      23.818 -17.367  96.594  1.00  0.00           O  
ATOM    340  CB  VAL L  46      25.482 -19.088  94.631  1.00  0.00           C  
ATOM    341  CG1 VAL L  46      24.310 -19.164  93.634  1.00  0.00           C  
ATOM    342  CG2 VAL L  46      26.724 -19.682  93.982  1.00  0.00           C  
ATOM    343  N   ILE L  47      24.022 -15.988  94.761  1.00  0.00           N  
ATOM    344  CA  ILE L  47      22.677 -15.395  94.969  1.00  0.00           C  
ATOM    345  C   ILE L  47      21.834 -15.517  93.721  1.00  0.00           C  
ATOM    346  O   ILE L  47      20.597 -15.364  93.777  1.00  0.00           O  
ATOM    347  CB  ILE L  47      22.829 -13.959  95.543  1.00  0.00           C  
ATOM    348  CG1 ILE L  47      23.863 -13.146  94.729  1.00  0.00           C  
ATOM    349  CG2 ILE L  47      23.196 -13.973  97.057  1.00  0.00           C  
ATOM    350  CD1 ILE L  47      23.783 -11.614  94.982  1.00  0.00           C  
ATOM    351  N   ILE L  48      22.491 -15.825  92.615  1.00  0.00           N  
ATOM    352  CA  ILE L  48      21.841 -15.978  91.290  1.00  0.00           C  
ATOM    353  C   ILE L  48      22.572 -17.036  90.479  1.00  0.00           C  
ATOM    354  O   ILE L  48      23.815 -16.958  90.362  1.00  0.00           O  
ATOM    355  CB  ILE L  48      21.794 -14.562  90.613  1.00  0.00           C  
ATOM    356  CG1 ILE L  48      20.335 -14.227  90.210  1.00  0.00           C  
ATOM    357  CG2 ILE L  48      22.778 -14.393  89.440  1.00  0.00           C  
ATOM    358  CD1 ILE L  48      19.437 -13.760  91.390  1.00  0.00           C  
ATOM    359  N   TYR L  49      21.823 -18.000  89.935  1.00  0.00           N  
ATOM    360  CA  TYR L  49      22.421 -19.129  89.225  1.00  0.00           C  
ATOM    361  C   TYR L  49      22.175 -19.231  87.737  1.00  0.00           C  
ATOM    362  O   TYR L  49      23.184 -19.543  87.014  1.00  0.00           O  
ATOM    363  CB  TYR L  49      22.197 -20.460  89.916  1.00  0.00           C  
ATOM    364  CG  TYR L  49      20.859 -21.059  90.188  1.00  0.00           C  
ATOM    365  CD1 TYR L  49      19.821 -20.366  90.812  1.00  0.00           C  
ATOM    366  CD2 TYR L  49      20.638 -22.423  89.907  1.00  0.00           C  
ATOM    367  CE1 TYR L  49      18.602 -20.977  91.095  1.00  0.00           C  
ATOM    368  CE2 TYR L  49      19.424 -23.041  90.178  1.00  0.00           C  
ATOM    369  CZ  TYR L  49      18.413 -22.317  90.775  1.00  0.00           C  
ATOM    370  OH  TYR L  49      17.230 -22.952  91.050  1.00  0.00           O  
ATOM    371  N   GLU L  50      20.961 -19.169  87.248  1.00  0.00           N  
ATOM    372  CA  GLU L  50      20.767 -18.933  85.795  1.00  0.00           C  
ATOM    373  C   GLU L  50      20.004 -17.605  85.692  1.00  0.00           C  
ATOM    374  O   GLU L  50      18.780 -17.578  85.497  1.00  0.00           O  
ATOM    375  CB  GLU L  50      20.057 -19.988  85.023  1.00  0.00           C  
ATOM    376  CG  GLU L  50      20.427 -21.470  85.098  1.00  0.00           C  
ATOM    377  CD  GLU L  50      19.524 -22.215  86.062  1.00  0.00           C  
ATOM    378  OE1 GLU L  50      19.973 -22.150  87.217  1.00  0.00           O  
ATOM    379  OE2 GLU L  50      18.471 -22.740  85.750  1.00  0.00           O  
ATOM    380  N   VAL L  51      20.784 -16.543  85.854  1.00  0.00           N  
ATOM    381  CA  VAL L  51      20.239 -15.177  85.949  1.00  0.00           C  
ATOM    382  C   VAL L  51      18.897 -15.240  86.687  1.00  0.00           C  
ATOM    383  O   VAL L  51      18.827 -15.762  87.802  1.00  0.00           O  
ATOM    384  CB  VAL L  51      20.174 -14.455  84.599  1.00  0.00           C  
ATOM    385  CG1 VAL L  51      21.165 -13.287  84.542  1.00  0.00           C  
ATOM    386  CG2 VAL L  51      20.356 -15.367  83.395  1.00  0.00           C  
ATOM    387  N   ASN L  52      17.869 -14.756  86.029  1.00  0.00           N  
ATOM    388  CA  ASN L  52      16.536 -14.581  86.570  1.00  0.00           C  
ATOM    389  C   ASN L  52      16.561 -14.602  88.118  1.00  0.00           C  
ATOM    390  O   ASN L  52      16.527 -13.576  88.801  1.00  0.00           O  
ATOM    391  CB  ASN L  52      15.546 -15.627  86.074  1.00  0.00           C  
ATOM    392  CG  ASN L  52      15.376 -15.765  84.592  1.00  0.00           C  
ATOM    393  OD1 ASN L  52      16.249 -15.409  83.793  1.00  0.00           O  
ATOM    394  ND2 ASN L  52      14.228 -16.335  84.183  1.00  0.00           N  
ATOM    395  N   LYS L  53      16.646 -15.846  88.606  1.00  0.00           N  
ATOM    396  CA  LYS L  53      16.148 -16.198  89.916  1.00  0.00           C  
ATOM    397  C   LYS L  53      17.094 -16.293  91.089  1.00  0.00           C  
ATOM    398  O   LYS L  53      18.187 -16.842  91.137  1.00  0.00           O  
ATOM    399  CB  LYS L  53      15.328 -17.507  89.834  1.00  0.00           C  
ATOM    400  CG  LYS L  53      16.104 -18.804  89.924  1.00  0.00           C  
ATOM    401  CD  LYS L  53      17.036 -19.049  88.765  1.00  0.00           C  
ATOM    402  CE  LYS L  53      16.896 -20.446  88.195  1.00  0.00           C  
ATOM    403  NZ  LYS L  53      15.652 -20.554  87.388  1.00  0.00           N  
ATOM    404  N   ARG L  54      16.516 -15.792  92.165  1.00  0.00           N  
ATOM    405  CA  ARG L  54      16.898 -15.714  93.550  1.00  0.00           C  
ATOM    406  C   ARG L  54      16.301 -16.929  94.266  1.00  0.00           C  
ATOM    407  O   ARG L  54      15.132 -17.291  94.019  1.00  0.00           O  
ATOM    408  CB  ARG L  54      16.189 -14.446  94.153  1.00  0.00           C  
ATOM    409  CG  ARG L  54      15.534 -13.607  93.056  1.00  0.00           C  
ATOM    410  CD  ARG L  54      14.354 -12.807  93.430  1.00  0.00           C  
ATOM    411  NE  ARG L  54      13.970 -11.817  92.428  1.00  0.00           N  
ATOM    412  CZ  ARG L  54      13.294 -12.032  91.299  1.00  0.00           C  
ATOM    413  NH1 ARG L  54      12.800 -13.222  90.961  1.00  0.00           N  
ATOM    414  NH2 ARG L  54      13.126 -11.021  90.427  1.00  0.00           N  
ATOM    415  N   PRO L  55      17.137 -17.557  95.069  1.00  0.00           N  
ATOM    416  CA  PRO L  55      16.687 -18.569  96.034  1.00  0.00           C  
ATOM    417  C   PRO L  55      16.367 -17.936  97.387  1.00  0.00           C  
ATOM    418  O   PRO L  55      17.069 -17.025  97.835  1.00  0.00           O  
ATOM    419  CB  PRO L  55      17.844 -19.542  96.121  1.00  0.00           C  
ATOM    420  CG  PRO L  55      19.019 -18.922  95.450  1.00  0.00           C  
ATOM    421  CD  PRO L  55      18.612 -17.543  94.961  1.00  0.00           C  
ATOM    422  N   SER L  56      15.342 -18.433  98.040  1.00  0.00           N  
ATOM    423  CA  SER L  56      14.880 -18.120  99.369  1.00  0.00           C  
ATOM    424  C   SER L  56      15.881 -17.981 100.498  1.00  0.00           C  
ATOM    425  O   SER L  56      15.440 -17.672 101.646  1.00  0.00           O  
ATOM    426  CB  SER L  56      13.839 -19.209  99.800  1.00  0.00           C  
ATOM    427  OG  SER L  56      12.969 -19.444  98.707  1.00  0.00           O  
ATOM    428  N   GLY L  57      17.146 -18.241 100.284  1.00  0.00           N  
ATOM    429  CA  GLY L  57      18.194 -17.976 101.299  1.00  0.00           C  
ATOM    430  C   GLY L  57      18.902 -16.680 100.879  1.00  0.00           C  
ATOM    431  O   GLY L  57      19.979 -16.310 101.345  1.00  0.00           O  
ATOM    432  N   VAL L  58      18.247 -16.022  99.955  1.00  0.00           N  
ATOM    433  CA  VAL L  58      18.640 -14.758  99.332  1.00  0.00           C  
ATOM    434  C   VAL L  58      17.378 -13.882  99.395  1.00  0.00           C  
ATOM    435  O   VAL L  58      16.269 -14.421  99.272  1.00  0.00           O  
ATOM    436  CB  VAL L  58      19.192 -14.977  97.915  1.00  0.00           C  
ATOM    437  CG1 VAL L  58      19.343 -13.707  97.090  1.00  0.00           C  
ATOM    438  CG2 VAL L  58      20.527 -15.723  97.962  1.00  0.00           C  
ATOM    439  N   PRO L  59      17.627 -12.613  99.670  1.00  0.00           N  
ATOM    440  CA  PRO L  59      16.561 -11.608  99.665  1.00  0.00           C  
ATOM    441  C   PRO L  59      16.155 -11.138  98.285  1.00  0.00           C  
ATOM    442  O   PRO L  59      16.927 -10.669  97.430  1.00  0.00           O  
ATOM    443  CB  PRO L  59      17.089 -10.495 100.563  1.00  0.00           C  
ATOM    444  CG  PRO L  59      18.063 -11.214 101.490  1.00  0.00           C  
ATOM    445  CD  PRO L  59      18.779 -12.171 100.531  1.00  0.00           C  
ATOM    446  N   ASP L  60      14.852 -11.177  98.060  1.00  0.00           N  
ATOM    447  CA  ASP L  60      14.143 -10.961  96.826  1.00  0.00           C  
ATOM    448  C   ASP L  60      14.491  -9.745  96.006  1.00  0.00           C  
ATOM    449  O   ASP L  60      14.055  -9.750  94.816  1.00  0.00           O  
ATOM    450  CB  ASP L  60      12.602 -11.016  97.077  1.00  0.00           C  
ATOM    451  CG  ASP L  60      12.129  -9.901  97.990  1.00  0.00           C  
ATOM    452  OD1 ASP L  60      12.172  -9.998  99.233  1.00  0.00           O  
ATOM    453  OD2 ASP L  60      11.676  -8.879  97.436  1.00  0.00           O  
ATOM    454  N   ARG L  61      15.171  -8.757  96.516  1.00  0.00           N  
ATOM    455  CA  ARG L  61      15.426  -7.522  95.740  1.00  0.00           C  
ATOM    456  C   ARG L  61      16.640  -7.778  94.824  1.00  0.00           C  
ATOM    457  O   ARG L  61      17.116  -6.871  94.125  1.00  0.00           O  
ATOM    458  CB  ARG L  61      15.655  -6.293  96.569  1.00  0.00           C  
ATOM    459  CG  ARG L  61      15.026  -6.102  97.906  1.00  0.00           C  
ATOM    460  CD  ARG L  61      13.537  -6.233  97.934  1.00  0.00           C  
ATOM    461  NE  ARG L  61      13.073  -6.434  99.302  1.00  0.00           N  
ATOM    462  CZ  ARG L  61      12.797  -5.430 100.141  1.00  0.00           C  
ATOM    463  NH1 ARG L  61      12.815  -4.161  99.737  1.00  0.00           N  
ATOM    464  NH2 ARG L  61      12.582  -5.708 101.440  1.00  0.00           N  
ATOM    465  N   PHE L  62      17.120  -9.009  94.950  1.00  0.00           N  
ATOM    466  CA  PHE L  62      18.255  -9.435  94.078  1.00  0.00           C  
ATOM    467  C   PHE L  62      17.582 -10.101  92.874  1.00  0.00           C  
ATOM    468  O   PHE L  62      16.902 -11.119  93.024  1.00  0.00           O  
ATOM    469  CB  PHE L  62      19.263 -10.273  94.807  1.00  0.00           C  
ATOM    470  CG  PHE L  62      20.066  -9.540  95.852  1.00  0.00           C  
ATOM    471  CD1 PHE L  62      21.014  -8.597  95.460  1.00  0.00           C  
ATOM    472  CD2 PHE L  62      19.863  -9.802  97.203  1.00  0.00           C  
ATOM    473  CE1 PHE L  62      21.771  -7.924  96.400  1.00  0.00           C  
ATOM    474  CE2 PHE L  62      20.614  -9.138  98.166  1.00  0.00           C  
ATOM    475  CZ  PHE L  62      21.573  -8.193  97.754  1.00  0.00           C  
ATOM    476  N   SER L  63      17.745  -9.411  91.760  1.00  0.00           N  
ATOM    477  CA  SER L  63      17.065  -9.894  90.515  1.00  0.00           C  
ATOM    478  C   SER L  63      18.032  -9.617  89.381  1.00  0.00           C  
ATOM    479  O   SER L  63      18.587  -8.502  89.342  1.00  0.00           O  
ATOM    480  CB  SER L  63      15.724  -9.205  90.370  1.00  0.00           C  
ATOM    481  OG  SER L  63      15.047  -9.113  91.619  1.00  0.00           O  
ATOM    482  N   GLY L  64      18.239 -10.613  88.539  1.00  0.00           N  
ATOM    483  CA  GLY L  64      19.206 -10.459  87.438  1.00  0.00           C  
ATOM    484  C   GLY L  64      18.650 -10.945  86.113  1.00  0.00           C  
ATOM    485  O   GLY L  64      17.911 -11.939  86.036  1.00  0.00           O  
ATOM    486  N   SER L  65      19.060 -10.226  85.068  1.00  0.00           N  
ATOM    487  CA  SER L  65      18.695 -10.582  83.696  1.00  0.00           C  
ATOM    488  C   SER L  65      19.748 -10.105  82.705  1.00  0.00           C  
ATOM    489  O   SER L  65      20.429  -9.087  82.885  1.00  0.00           O  
ATOM    490  CB  SER L  65      17.313 -10.072  83.333  1.00  0.00           C  
ATOM    491  OG  SER L  65      16.585 -11.132  82.718  1.00  0.00           O  
ATOM    492  N   LYS L  66      19.851 -10.920  81.657  1.00  0.00           N  
ATOM    493  CA  LYS L  66      20.793 -10.704  80.562  1.00  0.00           C  
ATOM    494  C   LYS L  66      20.026 -10.222  79.331  1.00  0.00           C  
ATOM    495  O   LYS L  66      18.942 -10.733  79.022  1.00  0.00           O  
ATOM    496  CB  LYS L  66      21.567 -11.961  80.205  1.00  0.00           C  
ATOM    497  CG  LYS L  66      20.722 -13.114  79.662  1.00  0.00           C  
ATOM    498  CD  LYS L  66      21.515 -13.906  78.628  1.00  0.00           C  
ATOM    499  CE  LYS L  66      21.107 -15.369  78.556  1.00  0.00           C  
ATOM    500  NZ  LYS L  66      21.995 -16.077  77.582  1.00  0.00           N  
ATOM    501  N   SER L  67      20.630  -9.259  78.675  1.00  0.00           N  
ATOM    502  CA  SER L  67      20.103  -8.639  77.463  1.00  0.00           C  
ATOM    503  C   SER L  67      21.190  -8.655  76.379  1.00  0.00           C  
ATOM    504  O   SER L  67      22.004  -7.730  76.210  1.00  0.00           O  
ATOM    505  CB  SER L  67      19.591  -7.236  77.730  1.00  0.00           C  
ATOM    506  OG  SER L  67      20.538  -6.466  78.467  1.00  0.00           O  
ATOM    507  N   GLY L  68      21.196  -9.795  75.702  1.00  0.00           N  
ATOM    508  CA  GLY L  68      22.051 -10.005  74.522  1.00  0.00           C  
ATOM    509  C   GLY L  68      23.433 -10.448  75.005  1.00  0.00           C  
ATOM    510  O   GLY L  68      23.768 -11.638  74.949  1.00  0.00           O  
ATOM    511  N   ASN L  69      24.182  -9.451  75.453  1.00  0.00           N  
ATOM    512  CA  ASN L  69      25.456  -9.723  76.139  1.00  0.00           C  
ATOM    513  C   ASN L  69      25.607  -8.865  77.386  1.00  0.00           C  
ATOM    514  O   ASN L  69      26.595  -9.119  78.119  1.00  0.00           O  
ATOM    515  CB  ASN L  69      26.637  -9.647  75.171  1.00  0.00           C  
ATOM    516  CG  ASN L  69      26.981 -11.002  74.568  1.00  0.00           C  
ATOM    517  OD1 ASN L  69      26.344 -12.017  74.879  1.00  0.00           O  
ATOM    518  ND2 ASN L  69      27.992 -11.030  73.700  1.00  0.00           N  
ATOM    519  N   THR L  70      24.693  -7.904  77.572  1.00  0.00           N  
ATOM    520  CA  THR L  70      24.815  -7.114  78.842  1.00  0.00           C  
ATOM    521  C   THR L  70      24.253  -8.075  79.894  1.00  0.00           C  
ATOM    522  O   THR L  70      23.024  -8.286  79.777  1.00  0.00           O  
ATOM    523  CB  THR L  70      24.080  -5.745  78.907  1.00  0.00           C  
ATOM    524  OG1 THR L  70      24.628  -4.849  77.888  1.00  0.00           O  
ATOM    525  CG2 THR L  70      24.177  -5.057  80.301  1.00  0.00           C  
ATOM    526  N   ALA L  71      25.118  -8.661  80.725  1.00  0.00           N  
ATOM    527  CA  ALA L  71      24.436  -9.360  81.885  1.00  0.00           C  
ATOM    528  C   ALA L  71      24.224  -8.252  82.913  1.00  0.00           C  
ATOM    529  O   ALA L  71      25.089  -7.361  83.012  1.00  0.00           O  
ATOM    530  CB  ALA L  71      25.218 -10.531  82.385  1.00  0.00           C  
ATOM    531  N   SER L  72      23.080  -8.288  83.577  1.00  0.00           N  
ATOM    532  CA  SER L  72      22.849  -7.309  84.663  1.00  0.00           C  
ATOM    533  C   SER L  72      22.151  -7.978  85.841  1.00  0.00           C  
ATOM    534  O   SER L  72      21.492  -9.016  85.713  1.00  0.00           O  
ATOM    535  CB  SER L  72      22.122  -6.079  84.144  1.00  0.00           C  
ATOM    536  OG  SER L  72      23.021  -5.050  83.761  1.00  0.00           O  
ATOM    537  N   LEU L  73      22.381  -7.342  86.986  1.00  0.00           N  
ATOM    538  CA  LEU L  73      21.730  -7.705  88.263  1.00  0.00           C  
ATOM    539  C   LEU L  73      21.303  -6.389  88.935  1.00  0.00           C  
ATOM    540  O   LEU L  73      22.161  -5.526  89.189  1.00  0.00           O  
ATOM    541  CB  LEU L  73      22.721  -8.513  89.076  1.00  0.00           C  
ATOM    542  CG  LEU L  73      22.422  -9.293  90.321  1.00  0.00           C  
ATOM    543  CD1 LEU L  73      23.531  -9.064  91.370  1.00  0.00           C  
ATOM    544  CD2 LEU L  73      21.079  -8.937  90.937  1.00  0.00           C  
ATOM    545  N   THR L  74      20.019  -6.252  89.189  1.00  0.00           N  
ATOM    546  CA  THR L  74      19.448  -5.195  90.005  1.00  0.00           C  
ATOM    547  C   THR L  74      19.460  -5.615  91.493  1.00  0.00           C  
ATOM    548  O   THR L  74      19.018  -6.725  91.829  1.00  0.00           O  
ATOM    549  CB  THR L  74      17.952  -4.812  89.667  1.00  0.00           C  
ATOM    550  OG1 THR L  74      17.295  -6.077  89.353  1.00  0.00           O  
ATOM    551  CG2 THR L  74      17.784  -3.741  88.604  1.00  0.00           C  
ATOM    552  N   VAL L  75      19.913  -4.664  92.281  1.00  0.00           N  
ATOM    553  CA  VAL L  75      19.879  -4.761  93.753  1.00  0.00           C  
ATOM    554  C   VAL L  75      18.882  -3.713  94.266  1.00  0.00           C  
ATOM    555  O   VAL L  75      19.281  -2.620  94.696  1.00  0.00           O  
ATOM    556  CB  VAL L  75      21.315  -4.558  94.279  1.00  0.00           C  
ATOM    557  CG1 VAL L  75      21.378  -4.431  95.800  1.00  0.00           C  
ATOM    558  CG2 VAL L  75      22.255  -5.658  93.814  1.00  0.00           C  
ATOM    559  N   SER L  76      17.610  -4.068  94.242  1.00  0.00           N  
ATOM    560  CA  SER L  76      16.515  -3.104  94.367  1.00  0.00           C  
ATOM    561  C   SER L  76      16.326  -2.528  95.752  1.00  0.00           C  
ATOM    562  O   SER L  76      16.531  -3.213  96.763  1.00  0.00           O  
ATOM    563  CB  SER L  76      15.193  -3.742  93.915  1.00  0.00           C  
ATOM    564  OG  SER L  76      15.206  -4.074  92.537  1.00  0.00           O  
ATOM    565  N   GLY L  77      15.921  -1.247  95.763  1.00  0.00           N  
ATOM    566  CA  GLY L  77      15.454  -0.580  96.986  1.00  0.00           C  
ATOM    567  C   GLY L  77      16.578  -0.361  97.986  1.00  0.00           C  
ATOM    568  O   GLY L  77      16.361   0.136  99.105  1.00  0.00           O  
ATOM    569  N   LEU L  78      17.770  -0.714  97.584  1.00  0.00           N  
ATOM    570  CA  LEU L  78      19.013  -0.655  98.289  1.00  0.00           C  
ATOM    571  C   LEU L  78      18.963  -0.558  99.802  1.00  0.00           C  
ATOM    572  O   LEU L  78      18.521   0.451 100.379  1.00  0.00           O  
ATOM    573  CB  LEU L  78      19.830   0.506  97.670  1.00  0.00           C  
ATOM    574  CG  LEU L  78      21.071   0.176  96.882  1.00  0.00           C  
ATOM    575  CD1 LEU L  78      22.280   0.875  97.519  1.00  0.00           C  
ATOM    576  CD2 LEU L  78      21.345  -1.321  96.850  1.00  0.00           C  
ATOM    577  N   GLN L  79      19.560  -1.577 100.431  1.00  0.00           N  
ATOM    578  CA  GLN L  79      19.532  -1.671 101.907  1.00  0.00           C  
ATOM    579  C   GLN L  79      20.874  -2.052 102.492  1.00  0.00           C  
ATOM    580  O   GLN L  79      21.211  -3.093 103.106  1.00  0.00           O  
ATOM    581  CB  GLN L  79      18.300  -2.459 102.344  1.00  0.00           C  
ATOM    582  CG  GLN L  79      16.983  -1.697 102.001  1.00  0.00           C  
ATOM    583  CD  GLN L  79      15.962  -2.612 101.366  1.00  0.00           C  
ATOM    584  OE1 GLN L  79      15.859  -2.736 100.144  1.00  0.00           O  
ATOM    585  NE2 GLN L  79      15.171  -3.305 102.193  1.00  0.00           N  
ATOM    586  N   ALA L  80      21.833  -1.146 102.219  1.00  0.00           N  
ATOM    587  CA  ALA L  80      23.079  -0.965 102.942  1.00  0.00           C  
ATOM    588  C   ALA L  80      23.874  -2.170 103.359  1.00  0.00           C  
ATOM    589  O   ALA L  80      25.128  -2.165 103.188  1.00  0.00           O  
ATOM    590  CB  ALA L  80      22.740  -0.128 104.210  1.00  0.00           C  
ATOM    591  N   GLU L  81      23.239  -3.155 103.976  1.00  0.00           N  
ATOM    592  CA  GLU L  81      23.954  -4.323 104.507  1.00  0.00           C  
ATOM    593  C   GLU L  81      24.666  -4.977 103.306  1.00  0.00           C  
ATOM    594  O   GLU L  81      25.700  -5.603 103.478  1.00  0.00           O  
ATOM    595  CB  GLU L  81      23.145  -5.394 105.156  1.00  0.00           C  
ATOM    596  CG  GLU L  81      21.926  -5.996 104.440  1.00  0.00           C  
ATOM    597  CD  GLU L  81      20.663  -5.578 105.173  1.00  0.00           C  
ATOM    598  OE1 GLU L  81      20.451  -6.314 106.151  1.00  0.00           O  
ATOM    599  OE2 GLU L  81      20.036  -4.590 104.872  1.00  0.00           O  
ATOM    600  N   ASP L  82      23.974  -4.737 102.174  1.00  0.00           N  
ATOM    601  CA  ASP L  82      24.545  -5.419 100.946  1.00  0.00           C  
ATOM    602  C   ASP L  82      25.741  -4.682 100.386  1.00  0.00           C  
ATOM    603  O   ASP L  82      26.044  -4.873  99.168  1.00  0.00           O  
ATOM    604  CB  ASP L  82      23.407  -5.624  99.947  1.00  0.00           C  
ATOM    605  CG  ASP L  82      22.262  -4.663 100.256  1.00  0.00           C  
ATOM    606  OD1 ASP L  82      22.351  -3.486  99.892  1.00  0.00           O  
ATOM    607  OD2 ASP L  82      21.340  -5.165 100.925  1.00  0.00           O  
ATOM    608  N   GLU L  83      26.356  -3.823 101.191  1.00  0.00           N  
ATOM    609  CA  GLU L  83      27.705  -3.286 100.780  1.00  0.00           C  
ATOM    610  C   GLU L  83      28.498  -4.577 100.598  1.00  0.00           C  
ATOM    611  O   GLU L  83      28.366  -5.459 101.485  1.00  0.00           O  
ATOM    612  CB  GLU L  83      28.274  -2.361 101.803  1.00  0.00           C  
ATOM    613  CG  GLU L  83      29.595  -1.644 101.650  1.00  0.00           C  
ATOM    614  CD  GLU L  83      29.715  -0.222 102.094  1.00  0.00           C  
ATOM    615  OE1 GLU L  83      28.826   0.525 101.628  1.00  0.00           O  
ATOM    616  OE2 GLU L  83      30.600   0.217 102.819  1.00  0.00           O  
ATOM    617  N   ALA L  84      29.135  -4.757  99.462  1.00  0.00           N  
ATOM    618  CA  ALA L  84      29.840  -6.021  99.183  1.00  0.00           C  
ATOM    619  C   ALA L  84      30.643  -5.966  97.893  1.00  0.00           C  
ATOM    620  O   ALA L  84      30.510  -5.052  97.058  1.00  0.00           O  
ATOM    621  CB  ALA L  84      28.841  -7.180  99.193  1.00  0.00           C  
ATOM    622  N   ASP L  85      31.540  -6.964  97.802  1.00  0.00           N  
ATOM    623  CA  ASP L  85      32.346  -7.162  96.595  1.00  0.00           C  
ATOM    624  C   ASP L  85      31.766  -8.419  95.906  1.00  0.00           C  
ATOM    625  O   ASP L  85      31.919  -9.522  96.424  1.00  0.00           O  
ATOM    626  CB  ASP L  85      33.832  -7.298  96.817  1.00  0.00           C  
ATOM    627  CG  ASP L  85      34.589  -7.566  95.512  1.00  0.00           C  
ATOM    628  OD1 ASP L  85      34.419  -6.829  94.519  1.00  0.00           O  
ATOM    629  OD2 ASP L  85      35.363  -8.537  95.514  1.00  0.00           O  
ATOM    630  N   TYR L  86      31.170  -8.112  94.764  1.00  0.00           N  
ATOM    631  CA  TYR L  86      30.456  -9.153  94.010  1.00  0.00           C  
ATOM    632  C   TYR L  86      31.362  -9.703  92.885  1.00  0.00           C  
ATOM    633  O   TYR L  86      32.370  -9.078  92.522  1.00  0.00           O  
ATOM    634  CB  TYR L  86      29.177  -8.613  93.374  1.00  0.00           C  
ATOM    635  CG  TYR L  86      28.112  -8.012  94.235  1.00  0.00           C  
ATOM    636  CD1 TYR L  86      28.381  -7.035  95.199  1.00  0.00           C  
ATOM    637  CD2 TYR L  86      26.774  -8.380  94.038  1.00  0.00           C  
ATOM    638  CE1 TYR L  86      27.364  -6.467  95.962  1.00  0.00           C  
ATOM    639  CE2 TYR L  86      25.743  -7.817  94.787  1.00  0.00           C  
ATOM    640  CZ  TYR L  86      26.044  -6.861  95.744  1.00  0.00           C  
ATOM    641  OH  TYR L  86      25.009  -6.328  96.467  1.00  0.00           O  
ATOM    642  N   TYR L  87      30.850 -10.827  92.359  1.00  0.00           N  
ATOM    643  CA  TYR L  87      31.424 -11.332  91.072  1.00  0.00           C  
ATOM    644  C   TYR L  87      30.287 -11.942  90.245  1.00  0.00           C  
ATOM    645  O   TYR L  87      29.157 -12.094  90.745  1.00  0.00           O  
ATOM    646  CB  TYR L  87      32.548 -12.316  91.266  1.00  0.00           C  
ATOM    647  CG  TYR L  87      33.759 -11.904  92.052  1.00  0.00           C  
ATOM    648  CD1 TYR L  87      33.798 -12.009  93.444  1.00  0.00           C  
ATOM    649  CD2 TYR L  87      34.904 -11.437  91.403  1.00  0.00           C  
ATOM    650  CE1 TYR L  87      34.933 -11.651  94.164  1.00  0.00           C  
ATOM    651  CE2 TYR L  87      36.043 -11.067  92.108  1.00  0.00           C  
ATOM    652  CZ  TYR L  87      36.057 -11.183  93.489  1.00  0.00           C  
ATOM    653  OH  TYR L  87      37.203 -10.833  94.156  1.00  0.00           O  
ATOM    654  N   CYS L  88      30.633 -12.317  89.033  1.00  0.00           N  
ATOM    655  CA  CYS L  88      29.658 -12.853  88.042  1.00  0.00           C  
ATOM    656  C   CYS L  88      30.312 -14.009  87.304  1.00  0.00           C  
ATOM    657  O   CYS L  88      31.556 -14.075  87.274  1.00  0.00           O  
ATOM    658  CB  CYS L  88      29.242 -11.708  87.131  1.00  0.00           C  
ATOM    659  SG  CYS L  88      28.458 -12.044  85.546  1.00  0.00           S  
ATOM    660  N   SER L  89      29.542 -14.909  86.730  1.00  0.00           N  
ATOM    661  CA  SER L  89      30.078 -16.042  85.979  1.00  0.00           C  
ATOM    662  C   SER L  89      29.148 -16.504  84.850  1.00  0.00           C  
ATOM    663  O   SER L  89      27.941 -16.251  84.826  1.00  0.00           O  
ATOM    664  CB  SER L  89      30.394 -17.245  86.864  1.00  0.00           C  
ATOM    665  OG  SER L  89      31.708 -17.263  87.362  1.00  0.00           O  
ATOM    666  N   SER L  90      29.819 -17.190  83.923  1.00  0.00           N  
ATOM    667  CA  SER L  90      29.096 -17.979  82.906  1.00  0.00           C  
ATOM    668  C   SER L  90      30.098 -19.011  82.370  1.00  0.00           C  
ATOM    669  O   SER L  90      31.303 -18.940  82.651  1.00  0.00           O  
ATOM    670  CB  SER L  90      28.452 -17.182  81.807  1.00  0.00           C  
ATOM    671  OG  SER L  90      27.369 -17.902  81.205  1.00  0.00           O  
ATOM    672  N   TYR L  91      29.529 -19.919  81.621  1.00  0.00           N  
ATOM    673  CA  TYR L  91      30.231 -21.116  81.114  1.00  0.00           C  
ATOM    674  C   TYR L  91      30.871 -20.840  79.762  1.00  0.00           C  
ATOM    675  O   TYR L  91      30.457 -20.021  78.942  1.00  0.00           O  
ATOM    676  CB  TYR L  91      29.227 -22.244  81.173  1.00  0.00           C  
ATOM    677  CG  TYR L  91      29.490 -23.603  80.638  1.00  0.00           C  
ATOM    678  CD1 TYR L  91      30.248 -24.550  81.324  1.00  0.00           C  
ATOM    679  CD2 TYR L  91      28.909 -23.997  79.422  1.00  0.00           C  
ATOM    680  CE1 TYR L  91      30.448 -25.829  80.818  1.00  0.00           C  
ATOM    681  CE2 TYR L  91      29.100 -25.272  78.896  1.00  0.00           C  
ATOM    682  CZ  TYR L  91      29.870 -26.186  79.606  1.00  0.00           C  
ATOM    683  OH  TYR L  91      30.067 -27.450  79.123  1.00  0.00           O  
ATOM    684  N   GLU L  92      31.971 -21.519  79.561  1.00  0.00           N  
ATOM    685  CA  GLU L  92      32.867 -21.499  78.400  1.00  0.00           C  
ATOM    686  C   GLU L  92      32.730 -22.890  77.755  1.00  0.00           C  
ATOM    687  O   GLU L  92      31.596 -23.382  77.593  1.00  0.00           O  
ATOM    688  CB  GLU L  92      34.301 -21.315  78.862  1.00  0.00           C  
ATOM    689  CG  GLU L  92      35.424 -20.662  78.150  1.00  0.00           C  
ATOM    690  CD  GLU L  92      36.168 -21.339  77.043  1.00  0.00           C  
ATOM    691  OE1 GLU L  92      36.256 -22.582  77.162  1.00  0.00           O  
ATOM    692  OE2 GLU L  92      36.665 -20.729  76.096  1.00  0.00           O  
ATOM    693  N   GLY L  93      33.857 -23.528  77.520  1.00  0.00           N  
ATOM    694  CA  GLY L  93      33.951 -24.795  76.832  1.00  0.00           C  
ATOM    695  C   GLY L  93      33.968 -26.010  77.747  1.00  0.00           C  
ATOM    696  O   GLY L  93      32.990 -26.335  78.433  1.00  0.00           O  
ATOM    697  N   SER L  94      35.107 -26.688  77.740  1.00  0.00           N  
ATOM    698  CA  SER L  94      35.313 -27.992  78.353  1.00  0.00           C  
ATOM    699  C   SER L  94      35.129 -28.040  79.857  1.00  0.00           C  
ATOM    700  O   SER L  94      36.090 -28.239  80.629  1.00  0.00           O  
ATOM    701  CB  SER L  94      36.687 -28.556  77.946  1.00  0.00           C  
ATOM    702  OG  SER L  94      37.670 -27.548  77.846  1.00  0.00           O  
ATOM    703  N   ASP L  95      33.869 -27.954  80.259  1.00  0.00           N  
ATOM    704  CA  ASP L  95      33.464 -27.882  81.681  1.00  0.00           C  
ATOM    705  C   ASP L  95      34.304 -26.796  82.372  1.00  0.00           C  
ATOM    706  O   ASP L  95      35.173 -27.138  83.196  1.00  0.00           O  
ATOM    707  CB  ASP L  95      33.610 -29.234  82.356  1.00  0.00           C  
ATOM    708  CG  ASP L  95      32.915 -30.381  81.673  1.00  0.00           C  
ATOM    709  OD1 ASP L  95      31.696 -30.355  81.447  1.00  0.00           O  
ATOM    710  OD2 ASP L  95      33.640 -31.361  81.380  1.00  0.00           O  
ATOM    711  N   ASN L  95A     34.072 -25.555  81.973  1.00  0.00           N  
ATOM    712  CA  ASN L  95A     34.867 -24.429  82.502  1.00  0.00           C  
ATOM    713  C   ASN L  95A     34.052 -23.124  82.450  1.00  0.00           C  
ATOM    714  O   ASN L  95A     33.232 -22.856  81.577  1.00  0.00           O  
ATOM    715  CB  ASN L  95A     36.255 -24.345  81.922  1.00  0.00           C  
ATOM    716  CG  ASN L  95A     36.487 -24.712  80.482  1.00  0.00           C  
ATOM    717  OD1 ASN L  95A     36.029 -24.051  79.534  1.00  0.00           O  
ATOM    718  ND2 ASN L  95A     37.286 -25.780  80.279  1.00  0.00           N  
ATOM    719  N   PHE L  96      34.332 -22.337  83.482  1.00  0.00           N  
ATOM    720  CA  PHE L  96      33.497 -21.192  83.887  1.00  0.00           C  
ATOM    721  C   PHE L  96      34.417 -19.987  84.071  1.00  0.00           C  
ATOM    722  O   PHE L  96      35.491 -20.163  84.690  1.00  0.00           O  
ATOM    723  CB  PHE L  96      32.759 -21.518  85.204  1.00  0.00           C  
ATOM    724  CG  PHE L  96      31.929 -22.761  85.241  1.00  0.00           C  
ATOM    725  CD1 PHE L  96      32.473 -24.014  84.967  1.00  0.00           C  
ATOM    726  CD2 PHE L  96      30.568 -22.675  85.566  1.00  0.00           C  
ATOM    727  CE1 PHE L  96      31.680 -25.161  84.986  1.00  0.00           C  
ATOM    728  CE2 PHE L  96      29.760 -23.805  85.598  1.00  0.00           C  
ATOM    729  CZ  PHE L  96      30.316 -25.051  85.310  1.00  0.00           C  
ATOM    730  N   VAL L  97      33.996 -18.839  83.566  1.00  0.00           N  
ATOM    731  CA  VAL L  97      34.748 -17.604  83.839  1.00  0.00           C  
ATOM    732  C   VAL L  97      33.877 -16.562  84.549  1.00  0.00           C  
ATOM    733  O   VAL L  97      32.665 -16.412  84.356  1.00  0.00           O  
ATOM    734  CB  VAL L  97      35.496 -17.052  82.625  1.00  0.00           C  
ATOM    735  CG1 VAL L  97      36.154 -15.688  82.908  1.00  0.00           C  
ATOM    736  CG2 VAL L  97      36.561 -18.021  82.125  1.00  0.00           C  
ATOM    737  N   PHE L  98      34.598 -15.836  85.393  1.00  0.00           N  
ATOM    738  CA  PHE L  98      34.186 -14.772  86.258  1.00  0.00           C  
ATOM    739  C   PHE L  98      34.312 -13.377  85.650  1.00  0.00           C  
ATOM    740  O   PHE L  98      35.122 -13.091  84.763  1.00  0.00           O  
ATOM    741  CB  PHE L  98      35.052 -14.802  87.581  1.00  0.00           C  
ATOM    742  CG  PHE L  98      34.560 -15.879  88.505  1.00  0.00           C  
ATOM    743  CD1 PHE L  98      34.755 -17.221  88.169  1.00  0.00           C  
ATOM    744  CD2 PHE L  98      33.851 -15.552  89.656  1.00  0.00           C  
ATOM    745  CE1 PHE L  98      34.259 -18.233  88.979  1.00  0.00           C  
ATOM    746  CE2 PHE L  98      33.347 -16.561  90.478  1.00  0.00           C  
ATOM    747  CZ  PHE L  98      33.556 -17.903  90.124  1.00  0.00           C  
ATOM    748  N   GLY L  99      33.467 -12.513  86.174  1.00  0.00           N  
ATOM    749  CA  GLY L  99      33.592 -11.048  86.012  1.00  0.00           C  
ATOM    750  C   GLY L  99      34.695 -10.623  86.999  1.00  0.00           C  
ATOM    751  O   GLY L  99      34.973 -11.386  87.942  1.00  0.00           O  
ATOM    752  N   THR L 100      35.259  -9.460  86.761  1.00  0.00           N  
ATOM    753  CA  THR L 100      36.452  -9.023  87.505  1.00  0.00           C  
ATOM    754  C   THR L 100      36.096  -8.321  88.799  1.00  0.00           C  
ATOM    755  O   THR L 100      36.960  -7.670  89.422  1.00  0.00           O  
ATOM    756  CB  THR L 100      37.371  -8.145  86.585  1.00  0.00           C  
ATOM    757  OG1 THR L 100      36.744  -6.828  86.551  1.00  0.00           O  
ATOM    758  CG2 THR L 100      37.526  -8.741  85.176  1.00  0.00           C  
ATOM    759  N   GLY L 101      34.841  -8.463  89.193  1.00  0.00           N  
ATOM    760  CA  GLY L 101      34.402  -7.996  90.528  1.00  0.00           C  
ATOM    761  C   GLY L 101      33.892  -6.554  90.394  1.00  0.00           C  
ATOM    762  O   GLY L 101      34.394  -5.766  89.578  1.00  0.00           O  
ATOM    763  N   THR L 102      32.862  -6.326  91.199  1.00  0.00           N  
ATOM    764  CA  THR L 102      32.305  -4.927  91.275  1.00  0.00           C  
ATOM    765  C   THR L 102      32.393  -4.633  92.775  1.00  0.00           C  
ATOM    766  O   THR L 102      31.943  -5.494  93.576  1.00  0.00           O  
ATOM    767  CB  THR L 102      30.922  -4.753  90.617  1.00  0.00           C  
ATOM    768  OG1 THR L 102      31.120  -5.008  89.174  1.00  0.00           O  
ATOM    769  CG2 THR L 102      30.230  -3.383  90.784  1.00  0.00           C  
ATOM    770  N   LYS L 103      33.141  -3.552  93.050  1.00  0.00           N  
ATOM    771  CA  LYS L 103      33.057  -3.114  94.489  1.00  0.00           C  
ATOM    772  C   LYS L 103      31.750  -2.317  94.513  1.00  0.00           C  
ATOM    773  O   LYS L 103      31.442  -1.614  93.517  1.00  0.00           O  
ATOM    774  CB  LYS L 103      34.247  -2.362  94.961  1.00  0.00           C  
ATOM    775  CG  LYS L 103      35.574  -3.113  95.066  1.00  0.00           C  
ATOM    776  CD  LYS L 103      35.624  -4.097  96.222  1.00  0.00           C  
ATOM    777  CE  LYS L 103      36.800  -5.052  96.120  1.00  0.00           C  
ATOM    778  NZ  LYS L 103      38.098  -4.334  96.166  1.00  0.00           N  
ATOM    779  N   VAL L 104      31.002  -2.523  95.584  1.00  0.00           N  
ATOM    780  CA  VAL L 104      29.690  -1.852  95.696  1.00  0.00           C  
ATOM    781  C   VAL L 104      29.570  -1.160  97.053  1.00  0.00           C  
ATOM    782  O   VAL L 104      30.121  -1.629  98.062  1.00  0.00           O  
ATOM    783  CB  VAL L 104      28.573  -2.872  95.415  1.00  0.00           C  
ATOM    784  CG1 VAL L 104      27.777  -3.230  96.672  1.00  0.00           C  
ATOM    785  CG2 VAL L 104      27.661  -2.404  94.296  1.00  0.00           C  
ATOM    786  N   THR L 105      28.810  -0.058  96.997  1.00  0.00           N  
ATOM    787  CA  THR L 105      28.492   0.651  98.261  1.00  0.00           C  
ATOM    788  C   THR L 105      27.041   1.068  98.350  1.00  0.00           C  
ATOM    789  O   THR L 105      26.162   0.846  97.477  1.00  0.00           O  
ATOM    790  CB  THR L 105      29.510   1.836  98.462  1.00  0.00           C  
ATOM    791  OG1 THR L 105      29.593   2.506  97.161  1.00  0.00           O  
ATOM    792  CG2 THR L 105      30.897   1.384  98.942  1.00  0.00           C  
ATOM    793  N   VAL L 106      26.766   1.701  99.483  1.00  0.00           N  
ATOM    794  CA  VAL L 106      25.468   2.292  99.795  1.00  0.00           C  
ATOM    795  C   VAL L 106      25.713   3.650 100.464  1.00  0.00           C  
ATOM    796  O   VAL L 106      26.346   3.745 101.527  1.00  0.00           O  
ATOM    797  CB  VAL L 106      24.607   1.338 100.635  1.00  0.00           C  
ATOM    798  CG1 VAL L 106      23.244   1.932 100.985  1.00  0.00           C  
ATOM    799  CG2 VAL L 106      24.438  -0.017  99.970  1.00  0.00           C  
ATOM    800  N   LEU L 106A     25.196   4.651  99.787  1.00  0.00           N  
ATOM    801  CA  LEU L 106A     25.262   6.044 100.274  1.00  0.00           C  
ATOM    802  C   LEU L 106A     24.044   6.282 101.163  1.00  0.00           C  
ATOM    803  O   LEU L 106A     23.035   5.561 101.016  1.00  0.00           O  
ATOM    804  CB  LEU L 106A     25.340   6.940  99.044  1.00  0.00           C  
ATOM    805  CG  LEU L 106A     26.641   7.041  98.272  1.00  0.00           C  
ATOM    806  CD1 LEU L 106A     27.417   5.734  98.222  1.00  0.00           C  
ATOM    807  CD2 LEU L 106A     26.288   7.496  96.850  1.00  0.00           C  
ATOM    808  N   GLY L 107      24.166   7.243 102.063  1.00  0.00           N  
ATOM    809  CA  GLY L 107      23.162   7.532 103.065  1.00  0.00           C  
ATOM    810  C   GLY L 107      23.197   6.717 104.335  1.00  0.00           C  
ATOM    811  O   GLY L 107      22.208   6.765 105.117  1.00  0.00           O  
ATOM    812  N   GLN L 108      24.255   5.980 104.582  1.00  0.00           N  
ATOM    813  CA  GLN L 108      24.466   5.290 105.879  1.00  0.00           C  
ATOM    814  C   GLN L 108      24.902   6.345 106.902  1.00  0.00           C  
ATOM    815  O   GLN L 108      25.887   7.060 106.668  1.00  0.00           O  
ATOM    816  CB  GLN L 108      25.476   4.155 105.777  1.00  0.00           C  
ATOM    817  CG  GLN L 108      25.122   2.987 104.888  1.00  0.00           C  
ATOM    818  CD  GLN L 108      25.905   1.719 105.134  1.00  0.00           C  
ATOM    819  OE1 GLN L 108      25.394   0.674 105.545  1.00  0.00           O  
ATOM    820  NE2 GLN L 108      27.210   1.776 104.862  1.00  0.00           N  
ATOM    821  N   PRO L 109      24.166   6.425 107.999  1.00  0.00           N  
ATOM    822  CA  PRO L 109      24.406   7.393 109.069  1.00  0.00           C  
ATOM    823  C   PRO L 109      25.710   7.095 109.796  1.00  0.00           C  
ATOM    824  O   PRO L 109      26.120   5.936 109.958  1.00  0.00           O  
ATOM    825  CB  PRO L 109      23.201   7.311 109.969  1.00  0.00           C  
ATOM    826  CG  PRO L 109      22.279   6.303 109.363  1.00  0.00           C  
ATOM    827  CD  PRO L 109      23.153   5.445 108.447  1.00  0.00           C  
TER     828      PRO L 109                                                      
ATOM   1607  N   PRO L   1      23.063 -25.750 102.721  1.00  0.00           N  
ATOM   1608  CA  PRO L   1      23.299 -24.360 103.122  1.00  0.00           C  
ATOM   1609  C   PRO L   1      24.508 -24.265 104.030  1.00  0.00           C  
ATOM   1610  O   PRO L   1      24.718 -25.161 104.866  1.00  0.00           O  
ATOM   1611  CB  PRO L   1      22.012 -23.960 103.842  1.00  0.00           C  
ATOM   1612  CG  PRO L   1      21.541 -25.258 104.467  1.00  0.00           C  
ATOM   1613  CD  PRO L   1      21.944 -26.343 103.470  1.00  0.00           C  
ATOM   1614  N   SER L   2      25.313 -23.243 103.825  1.00  0.00           N  
ATOM   1615  CA  SER L   2      26.414 -22.872 104.703  1.00  0.00           C  
ATOM   1616  C   SER L   2      27.400 -23.960 105.097  1.00  0.00           C  
ATOM   1617  O   SER L   2      28.635 -23.840 104.942  1.00  0.00           O  
ATOM   1618  CB  SER L   2      25.801 -22.261 105.998  1.00  0.00           C  
ATOM   1619  OG  SER L   2      24.399 -22.074 105.853  1.00  0.00           O  
ATOM   1620  N   ALA L   3      26.908 -25.024 105.677  1.00  0.00           N  
ATOM   1621  CA  ALA L   3      27.528 -26.122 106.331  1.00  0.00           C  
ATOM   1622  C   ALA L   3      28.702 -26.883 105.773  1.00  0.00           C  
ATOM   1623  O   ALA L   3      28.606 -28.148 105.745  1.00  0.00           O  
ATOM   1624  CB  ALA L   3      26.384 -27.167 106.636  1.00  0.00           C  
ATOM   1625  N   LEU L   4      29.796 -26.264 105.383  1.00  0.00           N  
ATOM   1626  CA  LEU L   4      31.059 -26.956 105.097  1.00  0.00           C  
ATOM   1627  C   LEU L   4      32.159 -26.241 105.926  1.00  0.00           C  
ATOM   1628  O   LEU L   4      32.115 -25.015 106.065  1.00  0.00           O  
ATOM   1629  CB  LEU L   4      31.431 -27.008 103.658  1.00  0.00           C  
ATOM   1630  CG  LEU L   4      30.681 -27.366 102.442  1.00  0.00           C  
ATOM   1631  CD1 LEU L   4      31.627 -27.383 101.224  1.00  0.00           C  
ATOM   1632  CD2 LEU L   4      30.029 -28.737 102.554  1.00  0.00           C  
ATOM   1633  N   THR L   5      33.116 -27.028 106.352  1.00  0.00           N  
ATOM   1634  CA  THR L   5      34.176 -26.556 107.257  1.00  0.00           C  
ATOM   1635  C   THR L   5      35.524 -26.665 106.558  1.00  0.00           C  
ATOM   1636  O   THR L   5      35.915 -27.742 106.097  1.00  0.00           O  
ATOM   1637  CB  THR L   5      34.108 -27.283 108.657  1.00  0.00           C  
ATOM   1638  OG1 THR L   5      33.430 -28.569 108.475  1.00  0.00           O  
ATOM   1639  CG2 THR L   5      33.384 -26.468 109.746  1.00  0.00           C  
ATOM   1640  N   GLN L   6      36.204 -25.536 106.482  1.00  0.00           N  
ATOM   1641  CA  GLN L   6      37.536 -25.401 105.840  1.00  0.00           C  
ATOM   1642  C   GLN L   6      38.469 -24.625 106.775  1.00  0.00           C  
ATOM   1643  O   GLN L   6      38.104 -23.540 107.272  1.00  0.00           O  
ATOM   1644  CB  GLN L   6      37.335 -24.704 104.511  1.00  0.00           C  
ATOM   1645  CG  GLN L   6      38.288 -24.898 103.364  1.00  0.00           C  
ATOM   1646  CD  GLN L   6      38.140 -23.762 102.358  1.00  0.00           C  
ATOM   1647  OE1 GLN L   6      37.045 -23.304 102.057  1.00  0.00           O  
ATOM   1648  NE2 GLN L   6      39.255 -23.260 101.868  1.00  0.00           N  
ATOM   1649  N   PRO L   7      39.669 -25.160 107.011  1.00  0.00           N  
ATOM   1650  CA  PRO L   7      40.698 -24.611 107.865  1.00  0.00           C  
ATOM   1651  C   PRO L   7      41.261 -23.224 107.619  1.00  0.00           C  
ATOM   1652  O   PRO L   7      41.663 -22.853 106.498  1.00  0.00           O  
ATOM   1653  CB  PRO L   7      41.859 -25.632 107.776  1.00  0.00           C  
ATOM   1654  CG  PRO L   7      41.495 -26.551 106.656  1.00  0.00           C  
ATOM   1655  CD  PRO L   7      39.970 -26.603 106.708  1.00  0.00           C  
ATOM   1656  N   PRO L   8      41.439 -22.475 108.720  1.00  0.00           N  
ATOM   1657  CA  PRO L   8      41.888 -21.087 108.707  1.00  0.00           C  
ATOM   1658  C   PRO L   8      43.133 -20.853 107.878  1.00  0.00           C  
ATOM   1659  O   PRO L   8      43.092 -20.246 106.800  1.00  0.00           O  
ATOM   1660  CB  PRO L   8      42.141 -20.743 110.183  1.00  0.00           C  
ATOM   1661  CG  PRO L   8      42.472 -22.083 110.796  1.00  0.00           C  
ATOM   1662  CD  PRO L   8      41.499 -23.038 110.101  1.00  0.00           C  
ATOM   1663  N   SER L   9      44.255 -21.291 108.419  1.00  0.00           N  
ATOM   1664  CA  SER L   9      45.556 -21.168 107.766  1.00  0.00           C  
ATOM   1665  C   SER L   9      45.768 -22.444 106.937  1.00  0.00           C  
ATOM   1666  O   SER L   9      45.179 -23.495 107.184  1.00  0.00           O  
ATOM   1667  CB  SER L   9      46.705 -20.974 108.724  1.00  0.00           C  
ATOM   1668  OG  SER L   9      47.933 -20.696 108.075  1.00  0.00           O  
ATOM   1669  N   ALA L  11      46.579 -22.250 105.941  1.00  0.00           N  
ATOM   1670  CA  ALA L  11      47.200 -23.319 105.138  1.00  0.00           C  
ATOM   1671  C   ALA L  11      48.510 -22.642 104.695  1.00  0.00           C  
ATOM   1672  O   ALA L  11      48.463 -21.431 104.377  1.00  0.00           O  
ATOM   1673  CB  ALA L  11      46.327 -23.772 104.024  1.00  0.00           C  
ATOM   1674  N   SER L  12      49.597 -23.357 104.805  1.00  0.00           N  
ATOM   1675  CA  SER L  12      50.921 -22.731 104.656  1.00  0.00           C  
ATOM   1676  C   SER L  12      51.974 -23.789 104.374  1.00  0.00           C  
ATOM   1677  O   SER L  12      51.849 -24.945 104.792  1.00  0.00           O  
ATOM   1678  CB  SER L  12      51.310 -21.968 105.922  1.00  0.00           C  
ATOM   1679  OG  SER L  12      50.515 -20.818 106.123  1.00  0.00           O  
ATOM   1680  N   GLY L  13      52.993 -23.311 103.693  1.00  0.00           N  
ATOM   1681  CA  GLY L  13      54.199 -24.126 103.440  1.00  0.00           C  
ATOM   1682  C   GLY L  13      55.303 -23.156 102.996  1.00  0.00           C  
ATOM   1683  O   GLY L  13      55.098 -21.933 102.957  1.00  0.00           O  
ATOM   1684  N   SER L  14      56.429 -23.759 102.721  1.00  0.00           N  
ATOM   1685  CA  SER L  14      57.564 -23.005 102.122  1.00  0.00           C  
ATOM   1686  C   SER L  14      57.331 -23.024 100.615  1.00  0.00           C  
ATOM   1687  O   SER L  14      56.156 -23.073 100.174  1.00  0.00           O  
ATOM   1688  CB  SER L  14      58.837 -23.661 102.596  1.00  0.00           C  
ATOM   1689  OG  SER L  14      58.679 -24.176 103.920  1.00  0.00           O  
ATOM   1690  N   LEU L  15      58.397 -22.935  99.843  1.00  0.00           N  
ATOM   1691  CA  LEU L  15      58.369 -23.334  98.421  1.00  0.00           C  
ATOM   1692  C   LEU L  15      58.768 -24.826  98.460  1.00  0.00           C  
ATOM   1693  O   LEU L  15      59.399 -25.213  99.457  1.00  0.00           O  
ATOM   1694  CB  LEU L  15      59.367 -22.548  97.616  1.00  0.00           C  
ATOM   1695  CG  LEU L  15      59.362 -21.060  97.501  1.00  0.00           C  
ATOM   1696  CD1 LEU L  15      58.051 -20.552  96.915  1.00  0.00           C  
ATOM   1697  CD2 LEU L  15      59.633 -20.440  98.875  1.00  0.00           C  
ATOM   1698  N   GLY L  16      58.458 -25.526  97.408  1.00  0.00           N  
ATOM   1699  CA  GLY L  16      58.814 -26.979  97.365  1.00  0.00           C  
ATOM   1700  C   GLY L  16      57.695 -27.719  98.105  1.00  0.00           C  
ATOM   1701  O   GLY L  16      57.009 -28.564  97.510  1.00  0.00           O  
ATOM   1702  N   GLN L  17      57.533 -27.333  99.362  1.00  0.00           N  
ATOM   1703  CA  GLN L  17      56.552 -27.949 100.261  1.00  0.00           C  
ATOM   1704  C   GLN L  17      55.172 -28.057  99.616  1.00  0.00           C  
ATOM   1705  O   GLN L  17      54.690 -27.152  98.923  1.00  0.00           O  
ATOM   1706  CB  GLN L  17      56.488 -27.215 101.605  1.00  0.00           C  
ATOM   1707  CG  GLN L  17      57.665 -27.526 102.513  1.00  0.00           C  
ATOM   1708  CD  GLN L  17      57.539 -27.008 103.920  1.00  0.00           C  
ATOM   1709  OE1 GLN L  17      56.750 -26.130 104.258  1.00  0.00           O  
ATOM   1710  NE2 GLN L  17      58.375 -27.557 104.801  1.00  0.00           N  
ATOM   1711  N   SER L  18      54.545 -29.199  99.856  1.00  0.00           N  
ATOM   1712  CA  SER L  18      53.181 -29.480  99.367  1.00  0.00           C  
ATOM   1713  C   SER L  18      52.169 -29.325 100.501  1.00  0.00           C  
ATOM   1714  O   SER L  18      52.354 -29.868 101.594  1.00  0.00           O  
ATOM   1715  CB  SER L  18      53.167 -30.855  98.720  1.00  0.00           C  
ATOM   1716  OG  SER L  18      54.335 -30.982  97.899  1.00  0.00           O  
ATOM   1717  N   VAL L  19      51.122 -28.555 100.195  1.00  0.00           N  
ATOM   1718  CA  VAL L  19      50.104 -28.192 101.208  1.00  0.00           C  
ATOM   1719  C   VAL L  19      48.748 -28.761 100.827  1.00  0.00           C  
ATOM   1720  O   VAL L  19      48.330 -28.586  99.661  1.00  0.00           O  
ATOM   1721  CB  VAL L  19      50.082 -26.658 101.364  1.00  0.00           C  
ATOM   1722  CG1 VAL L  19      49.302 -26.217 102.587  1.00  0.00           C  
ATOM   1723  CG2 VAL L  19      51.471 -26.062 101.381  1.00  0.00           C  
ATOM   1724  N   THR L  20      48.074 -29.410 101.760  1.00  0.00           N  
ATOM   1725  CA  THR L  20      46.718 -29.919 101.546  1.00  0.00           C  
ATOM   1726  C   THR L  20      45.693 -29.030 102.254  1.00  0.00           C  
ATOM   1727  O   THR L  20      45.884 -28.644 103.414  1.00  0.00           O  
ATOM   1728  CB  THR L  20      46.519 -31.415 101.977  1.00  0.00           C  
ATOM   1729  OG1 THR L  20      47.543 -32.194 101.297  1.00  0.00           O  
ATOM   1730  CG2 THR L  20      45.105 -31.947 101.661  1.00  0.00           C  
ATOM   1731  N   ILE L  21      44.635 -28.728 101.524  1.00  0.00           N  
ATOM   1732  CA  ILE L  21      43.495 -27.954 102.052  1.00  0.00           C  
ATOM   1733  C   ILE L  21      42.269 -28.859 101.953  1.00  0.00           C  
ATOM   1734  O   ILE L  21      42.057 -29.474 100.892  1.00  0.00           O  
ATOM   1735  CB  ILE L  21      43.333 -26.604 101.297  1.00  0.00           C  
ATOM   1736  CG1 ILE L  21      44.582 -25.710 101.431  1.00  0.00           C  
ATOM   1737  CG2 ILE L  21      42.060 -25.843 101.773  1.00  0.00           C  
ATOM   1738  CD1 ILE L  21      45.811 -26.064 100.572  1.00  0.00           C  
ATOM   1739  N   SER L  22      41.530 -28.968 103.035  1.00  0.00           N  
ATOM   1740  CA  SER L  22      40.363 -29.881 103.078  1.00  0.00           C  
ATOM   1741  C   SER L  22      39.083 -29.074 103.223  1.00  0.00           C  
ATOM   1742  O   SER L  22      39.109 -27.839 103.083  1.00  0.00           O  
ATOM   1743  CB  SER L  22      40.534 -30.949 104.117  1.00  0.00           C  
ATOM   1744  OG  SER L  22      40.979 -30.524 105.379  1.00  0.00           O  
ATOM   1745  N   CYS L  23      38.005 -29.792 103.455  1.00  0.00           N  
ATOM   1746  CA  CYS L  23      36.649 -29.162 103.595  1.00  0.00           C  
ATOM   1747  C   CYS L  23      35.688 -30.288 103.946  1.00  0.00           C  
ATOM   1748  O   CYS L  23      35.431 -31.195 103.130  1.00  0.00           O  
ATOM   1749  CB  CYS L  23      36.401 -28.306 102.401  1.00  0.00           C  
ATOM   1750  SG  CYS L  23      34.942 -28.243 101.425  1.00  0.00           S  
ATOM   1751  N   THR L  24      35.225 -30.296 105.193  1.00  0.00           N  
ATOM   1752  CA  THR L  24      34.354 -31.356 105.729  1.00  0.00           C  
ATOM   1753  C   THR L  24      32.915 -30.855 105.786  1.00  0.00           C  
ATOM   1754  O   THR L  24      32.678 -29.679 106.101  1.00  0.00           O  
ATOM   1755  CB  THR L  24      34.821 -31.897 107.123  1.00  0.00           C  
ATOM   1756  OG1 THR L  24      36.286 -31.932 107.101  1.00  0.00           O  
ATOM   1757  CG2 THR L  24      34.247 -33.276 107.480  1.00  0.00           C  
ATOM   1758  N   GLY L  25      31.988 -31.757 105.485  1.00  0.00           N  
ATOM   1759  CA  GLY L  25      30.559 -31.417 105.385  1.00  0.00           C  
ATOM   1760  C   GLY L  25      29.830 -31.431 106.708  1.00  0.00           C  
ATOM   1761  O   GLY L  25      29.579 -32.481 107.320  1.00  0.00           O  
ATOM   1762  N   THR L  26      29.439 -30.253 107.140  1.00  0.00           N  
ATOM   1763  CA  THR L  26      28.748 -29.998 108.400  1.00  0.00           C  
ATOM   1764  C   THR L  26      27.257 -30.329 108.283  1.00  0.00           C  
ATOM   1765  O   THR L  26      26.354 -29.519 108.525  1.00  0.00           O  
ATOM   1766  CB  THR L  26      29.012 -28.552 108.954  1.00  0.00           C  
ATOM   1767  OG1 THR L  26      30.470 -28.375 108.945  1.00  0.00           O  
ATOM   1768  CG2 THR L  26      28.455 -28.294 110.365  1.00  0.00           C  
ATOM   1769  N   SER L  27      27.041 -31.578 107.915  1.00  0.00           N  
ATOM   1770  CA  SER L  27      25.752 -32.259 107.876  1.00  0.00           C  
ATOM   1771  C   SER L  27      25.848 -33.270 106.712  1.00  0.00           C  
ATOM   1772  O   SER L  27      26.808 -33.213 105.933  1.00  0.00           O  
ATOM   1773  CB  SER L  27      24.542 -31.376 107.727  1.00  0.00           C  
ATOM   1774  OG  SER L  27      24.033 -30.833 108.924  1.00  0.00           O  
ATOM   1775  N   SER L  27A     24.863 -34.132 106.673  1.00  0.00           N  
ATOM   1776  CA  SER L  27A     24.794 -35.188 105.651  1.00  0.00           C  
ATOM   1777  C   SER L  27A     24.673 -34.546 104.271  1.00  0.00           C  
ATOM   1778  O   SER L  27A     23.781 -33.715 104.031  1.00  0.00           O  
ATOM   1779  CB  SER L  27A     23.653 -36.138 105.961  1.00  0.00           C  
ATOM   1780  OG  SER L  27A     22.750 -35.594 106.932  1.00  0.00           O  
ATOM   1781  N   ASP L  27B     25.620 -34.917 103.414  1.00  0.00           N  
ATOM   1782  CA  ASP L  27B     25.598 -34.512 102.001  1.00  0.00           C  
ATOM   1783  C   ASP L  27B     25.914 -35.710 101.107  1.00  0.00           C  
ATOM   1784  O   ASP L  27B     24.967 -36.318 100.566  1.00  0.00           O  
ATOM   1785  CB  ASP L  27B     26.468 -33.282 101.734  1.00  0.00           C  
ATOM   1786  CG  ASP L  27B     25.995 -32.547 100.475  1.00  0.00           C  
ATOM   1787  OD1 ASP L  27B     26.219 -33.048  99.356  1.00  0.00           O  
ATOM   1788  OD2 ASP L  27B     25.382 -31.472 100.661  1.00  0.00           O  
ATOM   1789  N   VAL L  27C     27.192 -36.021 100.957  1.00  0.00           N  
ATOM   1790  CA  VAL L  27C     27.651 -37.169 100.182  1.00  0.00           C  
ATOM   1791  C   VAL L  27C     26.669 -38.350 100.300  1.00  0.00           C  
ATOM   1792  O   VAL L  27C     26.102 -38.631 101.368  1.00  0.00           O  
ATOM   1793  CB  VAL L  27C     29.078 -37.602 100.566  1.00  0.00           C  
ATOM   1794  CG1 VAL L  27C     29.152 -38.179 101.987  1.00  0.00           C  
ATOM   1795  CG2 VAL L  27C     29.629 -38.598  99.544  1.00  0.00           C  
ATOM   1796  N   GLY L  28      26.610 -39.055  99.183  1.00  0.00           N  
ATOM   1797  CA  GLY L  28      25.515 -40.075  98.956  1.00  0.00           C  
ATOM   1798  C   GLY L  28      24.639 -39.207  97.973  1.00  0.00           C  
ATOM   1799  O   GLY L  28      24.559 -39.445  96.785  1.00  0.00           O  
ATOM   1800  N   GLY L  29      24.196 -38.136  98.631  1.00  0.00           N  
ATOM   1801  CA  GLY L  29      23.893 -36.892  97.854  1.00  0.00           C  
ATOM   1802  C   GLY L  29      25.281 -36.508  97.280  1.00  0.00           C  
ATOM   1803  O   GLY L  29      26.187 -37.349  97.153  1.00  0.00           O  
ATOM   1804  N   TYR L  30      25.476 -35.231  97.071  1.00  0.00           N  
ATOM   1805  CA  TYR L  30      26.427 -34.718  96.118  1.00  0.00           C  
ATOM   1806  C   TYR L  30      27.892 -34.997  96.155  1.00  0.00           C  
ATOM   1807  O   TYR L  30      28.611 -34.848  97.153  1.00  0.00           O  
ATOM   1808  CB  TYR L  30      26.168 -33.161  95.962  1.00  0.00           C  
ATOM   1809  CG  TYR L  30      25.556 -33.025  94.564  1.00  0.00           C  
ATOM   1810  CD1 TYR L  30      24.447 -33.805  94.210  1.00  0.00           C  
ATOM   1811  CD2 TYR L  30      26.149 -32.223  93.612  1.00  0.00           C  
ATOM   1812  CE1 TYR L  30      23.917 -33.732  92.930  1.00  0.00           C  
ATOM   1813  CE2 TYR L  30      25.617 -32.148  92.338  1.00  0.00           C  
ATOM   1814  CZ  TYR L  30      24.507 -32.892  91.989  1.00  0.00           C  
ATOM   1815  OH  TYR L  30      24.025 -32.781  90.717  1.00  0.00           O  
ATOM   1816  N   ASN L  31      28.392 -35.308  94.939  1.00  0.00           N  
ATOM   1817  CA  ASN L  31      29.773 -35.694  94.675  1.00  0.00           C  
ATOM   1818  C   ASN L  31      30.464 -34.767  93.688  1.00  0.00           C  
ATOM   1819  O   ASN L  31      31.557 -35.146  93.195  1.00  0.00           O  
ATOM   1820  CB  ASN L  31      29.800 -37.159  94.190  1.00  0.00           C  
ATOM   1821  CG  ASN L  31      31.142 -37.844  94.294  1.00  0.00           C  
ATOM   1822  OD1 ASN L  31      31.457 -38.504  95.305  1.00  0.00           O  
ATOM   1823  ND2 ASN L  31      31.970 -37.745  93.244  1.00  0.00           N  
ATOM   1824  N   TYR L  32      29.866 -33.624  93.381  1.00  0.00           N  
ATOM   1825  CA  TYR L  32      30.531 -32.677  92.442  1.00  0.00           C  
ATOM   1826  C   TYR L  32      30.808 -31.346  93.140  1.00  0.00           C  
ATOM   1827  O   TYR L  32      30.091 -30.361  92.980  1.00  0.00           O  
ATOM   1828  CB  TYR L  32      29.947 -32.607  91.102  1.00  0.00           C  
ATOM   1829  CG  TYR L  32      28.662 -32.207  90.507  1.00  0.00           C  
ATOM   1830  CD1 TYR L  32      28.082 -30.955  90.723  1.00  0.00           C  
ATOM   1831  CD2 TYR L  32      27.989 -33.054  89.595  1.00  0.00           C  
ATOM   1832  CE1 TYR L  32      26.914 -30.549  90.082  1.00  0.00           C  
ATOM   1833  CE2 TYR L  32      26.801 -32.684  88.975  1.00  0.00           C  
ATOM   1834  CZ  TYR L  32      26.267 -31.426  89.230  1.00  0.00           C  
ATOM   1835  OH  TYR L  32      25.088 -31.012  88.663  1.00  0.00           O  
ATOM   1836  N   VAL L  33      31.900 -31.387  93.896  1.00  0.00           N  
ATOM   1837  CA  VAL L  33      32.411 -30.271  94.705  1.00  0.00           C  
ATOM   1838  C   VAL L  33      33.455 -29.501  93.889  1.00  0.00           C  
ATOM   1839  O   VAL L  33      33.974 -30.110  92.924  1.00  0.00           O  
ATOM   1840  CB  VAL L  33      33.032 -30.778  96.034  1.00  0.00           C  
ATOM   1841  CG1 VAL L  33      32.123 -31.708  96.806  1.00  0.00           C  
ATOM   1842  CG2 VAL L  33      34.404 -31.416  95.807  1.00  0.00           C  
ATOM   1843  N   SER L  34      33.759 -28.277  94.331  1.00  0.00           N  
ATOM   1844  CA  SER L  34      34.694 -27.476  93.476  1.00  0.00           C  
ATOM   1845  C   SER L  34      35.628 -26.578  94.249  1.00  0.00           C  
ATOM   1846  O   SER L  34      35.204 -25.882  95.181  1.00  0.00           O  
ATOM   1847  CB  SER L  34      33.927 -26.718  92.400  1.00  0.00           C  
ATOM   1848  OG  SER L  34      32.700 -26.165  92.822  1.00  0.00           O  
ATOM   1849  N   TRP L  35      36.877 -26.525  93.759  1.00  0.00           N  
ATOM   1850  CA  TRP L  35      37.913 -25.673  94.385  1.00  0.00           C  
ATOM   1851  C   TRP L  35      38.130 -24.350  93.701  1.00  0.00           C  
ATOM   1852  O   TRP L  35      38.465 -24.342  92.487  1.00  0.00           O  
ATOM   1853  CB  TRP L  35      39.227 -26.511  94.441  1.00  0.00           C  
ATOM   1854  CG  TRP L  35      39.104 -27.485  95.569  1.00  0.00           C  
ATOM   1855  CD1 TRP L  35      38.468 -28.685  95.540  1.00  0.00           C  
ATOM   1856  CD2 TRP L  35      39.525 -27.263  96.917  1.00  0.00           C  
ATOM   1857  NE1 TRP L  35      38.495 -29.252  96.789  1.00  0.00           N  
ATOM   1858  CE2 TRP L  35      39.136 -28.406  97.648  1.00  0.00           C  
ATOM   1859  CE3 TRP L  35      40.203 -26.237  97.560  1.00  0.00           C  
ATOM   1860  CZ2 TRP L  35      39.407 -28.549  99.001  1.00  0.00           C  
ATOM   1861  CZ3 TRP L  35      40.474 -26.373  98.904  1.00  0.00           C  
ATOM   1862  CH2 TRP L  35      40.083 -27.506  99.618  1.00  0.00           C  
ATOM   1863  N   TYR L  36      38.011 -23.237  94.430  1.00  0.00           N  
ATOM   1864  CA  TYR L  36      38.189 -21.906  93.833  1.00  0.00           C  
ATOM   1865  C   TYR L  36      39.383 -21.158  94.454  1.00  0.00           C  
ATOM   1866  O   TYR L  36      39.331 -20.836  95.647  1.00  0.00           O  
ATOM   1867  CB  TYR L  36      37.003 -20.981  93.943  1.00  0.00           C  
ATOM   1868  CG  TYR L  36      35.638 -21.421  93.545  1.00  0.00           C  
ATOM   1869  CD1 TYR L  36      35.075 -22.594  94.039  1.00  0.00           C  
ATOM   1870  CD2 TYR L  36      34.846 -20.617  92.712  1.00  0.00           C  
ATOM   1871  CE1 TYR L  36      33.784 -22.975  93.703  1.00  0.00           C  
ATOM   1872  CE2 TYR L  36      33.549 -20.987  92.366  1.00  0.00           C  
ATOM   1873  CZ  TYR L  36      33.026 -22.173  92.872  1.00  0.00           C  
ATOM   1874  OH  TYR L  36      31.760 -22.583  92.550  1.00  0.00           O  
ATOM   1875  N   GLN L  37      40.325 -20.839  93.586  1.00  0.00           N  
ATOM   1876  CA  GLN L  37      41.502 -20.049  94.017  1.00  0.00           C  
ATOM   1877  C   GLN L  37      41.117 -18.571  93.937  1.00  0.00           C  
ATOM   1878  O   GLN L  37      40.597 -18.178  92.870  1.00  0.00           O  
ATOM   1879  CB  GLN L  37      42.725 -20.368  93.177  1.00  0.00           C  
ATOM   1880  CG  GLN L  37      43.738 -19.247  93.078  1.00  0.00           C  
ATOM   1881  CD  GLN L  37      44.971 -19.591  92.294  1.00  0.00           C  
ATOM   1882  OE1 GLN L  37      45.297 -18.978  91.277  1.00  0.00           O  
ATOM   1883  NE2 GLN L  37      45.715 -20.585  92.775  1.00  0.00           N  
ATOM   1884  N   GLN L  38      41.296 -17.840  95.047  1.00  0.00           N  
ATOM   1885  CA  GLN L  38      41.147 -16.362  94.898  1.00  0.00           C  
ATOM   1886  C   GLN L  38      42.429 -15.682  95.357  1.00  0.00           C  
ATOM   1887  O   GLN L  38      42.834 -15.858  96.508  1.00  0.00           O  
ATOM   1888  CB  GLN L  38      39.924 -15.802  95.593  1.00  0.00           C  
ATOM   1889  CG  GLN L  38      39.743 -14.313  95.354  1.00  0.00           C  
ATOM   1890  CD  GLN L  38      38.695 -13.669  96.218  1.00  0.00           C  
ATOM   1891  OE1 GLN L  38      37.734 -13.054  95.742  1.00  0.00           O  
ATOM   1892  NE2 GLN L  38      38.867 -13.796  97.540  1.00  0.00           N  
ATOM   1893  N   HIS L  39      43.055 -14.935  94.461  1.00  0.00           N  
ATOM   1894  CA  HIS L  39      44.192 -14.087  94.841  1.00  0.00           C  
ATOM   1895  C   HIS L  39      43.628 -12.709  95.257  1.00  0.00           C  
ATOM   1896  O   HIS L  39      42.546 -12.252  94.848  1.00  0.00           O  
ATOM   1897  CB  HIS L  39      45.281 -13.896  93.807  1.00  0.00           C  
ATOM   1898  CG  HIS L  39      46.094 -15.067  93.378  1.00  0.00           C  
ATOM   1899  ND1 HIS L  39      47.216 -15.539  94.008  1.00  0.00           N  
ATOM   1900  CD2 HIS L  39      45.956 -15.844  92.270  1.00  0.00           C  
ATOM   1901  CE1 HIS L  39      47.714 -16.561  93.337  1.00  0.00           C  
ATOM   1902  NE2 HIS L  39      46.966 -16.763  92.279  1.00  0.00           N  
ATOM   1903  N   ALA L  40      44.455 -12.053  96.049  1.00  0.00           N  
ATOM   1904  CA  ALA L  40      44.203 -10.765  96.651  1.00  0.00           C  
ATOM   1905  C   ALA L  40      43.805  -9.676  95.666  1.00  0.00           C  
ATOM   1906  O   ALA L  40      44.651  -8.996  95.064  1.00  0.00           O  
ATOM   1907  CB  ALA L  40      45.457 -10.339  97.430  1.00  0.00           C  
ATOM   1908  N   GLY L  41      42.502  -9.482  95.558  1.00  0.00           N  
ATOM   1909  CA  GLY L  41      41.919  -8.470  94.683  1.00  0.00           C  
ATOM   1910  C   GLY L  41      41.935  -8.914  93.225  1.00  0.00           C  
ATOM   1911  O   GLY L  41      42.382  -8.125  92.370  1.00  0.00           O  
ATOM   1912  N   LYS L  42      41.473 -10.151  92.983  1.00  0.00           N  
ATOM   1913  CA  LYS L  42      41.285 -10.580  91.574  1.00  0.00           C  
ATOM   1914  C   LYS L  42      40.517 -11.875  91.435  1.00  0.00           C  
ATOM   1915  O   LYS L  42      40.039 -12.490  92.400  1.00  0.00           O  
ATOM   1916  CB  LYS L  42      42.624 -10.653  90.862  1.00  0.00           C  
ATOM   1917  CG  LYS L  42      43.719 -11.444  91.563  1.00  0.00           C  
ATOM   1918  CD  LYS L  42      44.000 -12.747  90.820  1.00  0.00           C  
ATOM   1919  CE  LYS L  42      43.079 -13.854  91.292  1.00  0.00           C  
ATOM   1920  NZ  LYS L  42      43.203 -15.050  90.435  1.00  0.00           N  
ATOM   1921  N   ALA L  43      40.412 -12.328  90.189  1.00  0.00           N  
ATOM   1922  CA  ALA L  43      39.668 -13.471  89.713  1.00  0.00           C  
ATOM   1923  C   ALA L  43      39.768 -14.756  90.531  1.00  0.00           C  
ATOM   1924  O   ALA L  43      40.801 -15.447  90.559  1.00  0.00           O  
ATOM   1925  CB  ALA L  43      40.102 -13.788  88.258  1.00  0.00           C  
ATOM   1926  N   PRO L  44      38.644 -15.066  91.177  1.00  0.00           N  
ATOM   1927  CA  PRO L  44      38.355 -16.444  91.626  1.00  0.00           C  
ATOM   1928  C   PRO L  44      38.349 -17.337  90.385  1.00  0.00           C  
ATOM   1929  O   PRO L  44      37.524 -17.140  89.474  1.00  0.00           O  
ATOM   1930  CB  PRO L  44      36.997 -16.346  92.286  1.00  0.00           C  
ATOM   1931  CG  PRO L  44      36.906 -14.909  92.751  1.00  0.00           C  
ATOM   1932  CD  PRO L  44      37.634 -14.110  91.667  1.00  0.00           C  
ATOM   1933  N   LYS L  45      39.308 -18.242  90.355  1.00  0.00           N  
ATOM   1934  CA  LYS L  45      39.412 -19.207  89.241  1.00  0.00           C  
ATOM   1935  C   LYS L  45      39.213 -20.600  89.819  1.00  0.00           C  
ATOM   1936  O   LYS L  45      39.926 -20.999  90.758  1.00  0.00           O  
ATOM   1937  CB  LYS L  45      40.676 -19.071  88.451  1.00  0.00           C  
ATOM   1938  CG  LYS L  45      41.908 -19.860  88.830  1.00  0.00           C  
ATOM   1939  CD  LYS L  45      43.032 -19.658  87.819  1.00  0.00           C  
ATOM   1940  CE  LYS L  45      43.769 -18.349  88.020  1.00  0.00           C  
ATOM   1941  NZ  LYS L  45      43.487 -17.388  86.929  1.00  0.00           N  
ATOM   1942  N   VAL L  46      38.175 -21.250  89.327  1.00  0.00           N  
ATOM   1943  CA  VAL L  46      37.972 -22.686  89.635  1.00  0.00           C  
ATOM   1944  C   VAL L  46      39.251 -23.412  89.208  1.00  0.00           C  
ATOM   1945  O   VAL L  46      39.557 -23.407  87.999  1.00  0.00           O  
ATOM   1946  CB  VAL L  46      36.721 -23.181  88.903  1.00  0.00           C  
ATOM   1947  CG1 VAL L  46      36.518 -24.682  89.065  1.00  0.00           C  
ATOM   1948  CG2 VAL L  46      35.487 -22.390  89.297  1.00  0.00           C  
ATOM   1949  N   ILE L  47      39.958 -23.980  90.173  1.00  0.00           N  
ATOM   1950  CA  ILE L  47      41.213 -24.685  89.864  1.00  0.00           C  
ATOM   1951  C   ILE L  47      41.025 -26.193  89.875  1.00  0.00           C  
ATOM   1952  O   ILE L  47      41.894 -26.955  89.401  1.00  0.00           O  
ATOM   1953  CB  ILE L  47      42.374 -24.198  90.771  1.00  0.00           C  
ATOM   1954  CG1 ILE L  47      41.884 -24.064  92.238  1.00  0.00           C  
ATOM   1955  CG2 ILE L  47      43.012 -22.897  90.227  1.00  0.00           C  
ATOM   1956  CD1 ILE L  47      42.949 -24.584  93.264  1.00  0.00           C  
ATOM   1957  N   ILE L  48      39.898 -26.606  90.418  1.00  0.00           N  
ATOM   1958  CA  ILE L  48      39.426 -27.995  90.325  1.00  0.00           C  
ATOM   1959  C   ILE L  48      37.902 -27.954  90.143  1.00  0.00           C  
ATOM   1960  O   ILE L  48      37.199 -27.161  90.803  1.00  0.00           O  
ATOM   1961  CB  ILE L  48      39.889 -28.863  91.532  1.00  0.00           C  
ATOM   1962  CG1 ILE L  48      41.425 -29.030  91.543  1.00  0.00           C  
ATOM   1963  CG2 ILE L  48      39.170 -30.236  91.574  1.00  0.00           C  
ATOM   1964  CD1 ILE L  48      41.999 -30.293  90.870  1.00  0.00           C  
ATOM   1965  N   TYR L  49      37.461 -28.802  89.232  1.00  0.00           N  
ATOM   1966  CA  TYR L  49      36.036 -29.048  88.987  1.00  0.00           C  
ATOM   1967  C   TYR L  49      35.741 -30.530  89.262  1.00  0.00           C  
ATOM   1968  O   TYR L  49      36.554 -31.428  89.011  1.00  0.00           O  
ATOM   1969  CB  TYR L  49      35.542 -28.569  87.628  1.00  0.00           C  
ATOM   1970  CG  TYR L  49      35.756 -29.386  86.384  1.00  0.00           C  
ATOM   1971  CD1 TYR L  49      34.957 -30.494  86.075  1.00  0.00           C  
ATOM   1972  CD2 TYR L  49      36.752 -29.038  85.468  1.00  0.00           C  
ATOM   1973  CE1 TYR L  49      35.169 -31.240  84.923  1.00  0.00           C  
ATOM   1974  CE2 TYR L  49      36.976 -29.765  84.311  1.00  0.00           C  
ATOM   1975  CZ  TYR L  49      36.179 -30.868  84.044  1.00  0.00           C  
ATOM   1976  OH  TYR L  49      36.419 -31.570  82.891  1.00  0.00           O  
ATOM   1977  N   GLU L  50      34.567 -30.736  89.819  1.00  0.00           N  
ATOM   1978  CA  GLU L  50      34.039 -32.007  90.267  1.00  0.00           C  
ATOM   1979  C   GLU L  50      35.085 -32.899  90.920  1.00  0.00           C  
ATOM   1980  O   GLU L  50      35.542 -33.902  90.344  1.00  0.00           O  
ATOM   1981  CB  GLU L  50      33.372 -32.808  89.159  1.00  0.00           C  
ATOM   1982  CG  GLU L  50      32.106 -32.230  88.548  1.00  0.00           C  
ATOM   1983  CD  GLU L  50      31.546 -32.974  87.371  1.00  0.00           C  
ATOM   1984  OE1 GLU L  50      31.465 -34.194  87.340  1.00  0.00           O  
ATOM   1985  OE2 GLU L  50      31.189 -32.218  86.440  1.00  0.00           O  
ATOM   1986  N   VAL L  51      35.460 -32.503  92.130  1.00  0.00           N  
ATOM   1987  CA  VAL L  51      36.314 -33.319  92.996  1.00  0.00           C  
ATOM   1988  C   VAL L  51      37.747 -33.480  92.571  1.00  0.00           C  
ATOM   1989  O   VAL L  51      38.605 -33.501  93.513  1.00  0.00           O  
ATOM   1990  CB  VAL L  51      35.585 -34.668  93.273  1.00  0.00           C  
ATOM   1991  CG1 VAL L  51      36.462 -35.659  94.008  1.00  0.00           C  
ATOM   1992  CG2 VAL L  51      34.289 -34.417  94.021  1.00  0.00           C  
ATOM   1993  N   ASN L  52      38.071 -33.620  91.294  1.00  0.00           N  
ATOM   1994  CA  ASN L  52      39.483 -33.806  90.905  1.00  0.00           C  
ATOM   1995  C   ASN L  52      39.862 -33.275  89.541  1.00  0.00           C  
ATOM   1996  O   ASN L  52      41.080 -33.069  89.290  1.00  0.00           O  
ATOM   1997  CB  ASN L  52      39.864 -35.297  91.043  1.00  0.00           C  
ATOM   1998  CG  ASN L  52      39.132 -36.146  90.015  1.00  0.00           C  
ATOM   1999  OD1 ASN L  52      38.194 -35.663  89.357  1.00  0.00           O  
ATOM   2000  ND2 ASN L  52      39.567 -37.400  89.886  1.00  0.00           N  
ATOM   2001  N   LYS L  53      38.884 -33.101  88.680  1.00  0.00           N  
ATOM   2002  CA  LYS L  53      39.136 -32.723  87.278  1.00  0.00           C  
ATOM   2003  C   LYS L  53      39.715 -31.326  87.154  1.00  0.00           C  
ATOM   2004  O   LYS L  53      39.146 -30.334  87.628  1.00  0.00           O  
ATOM   2005  CB  LYS L  53      37.838 -32.894  86.479  1.00  0.00           C  
ATOM   2006  CG  LYS L  53      37.285 -34.335  86.575  1.00  0.00           C  
ATOM   2007  CD  LYS L  53      35.859 -34.399  86.057  1.00  0.00           C  
ATOM   2008  CE  LYS L  53      35.255 -35.783  86.150  1.00  0.00           C  
ATOM   2009  NZ  LYS L  53      33.785 -35.692  86.315  1.00  0.00           N  
ATOM   2010  N   ARG L  54      40.869 -31.242  86.505  1.00  0.00           N  
ATOM   2011  CA  ARG L  54      41.606 -30.008  86.258  1.00  0.00           C  
ATOM   2012  C   ARG L  54      41.150 -29.358  84.949  1.00  0.00           C  
ATOM   2013  O   ARG L  54      41.483 -29.854  83.852  1.00  0.00           O  
ATOM   2014  CB  ARG L  54      43.118 -30.271  86.142  1.00  0.00           C  
ATOM   2015  CG  ARG L  54      43.899 -30.281  87.431  1.00  0.00           C  
ATOM   2016  CD  ARG L  54      45.161 -31.070  87.336  1.00  0.00           C  
ATOM   2017  NE  ARG L  54      44.941 -32.465  86.979  1.00  0.00           N  
ATOM   2018  CZ  ARG L  54      44.906 -33.478  87.849  1.00  0.00           C  
ATOM   2019  NH1 ARG L  54      45.138 -33.327  89.150  1.00  0.00           N  
ATOM   2020  NH2 ARG L  54      44.571 -34.695  87.408  1.00  0.00           N  
ATOM   2021  N   PRO L  55      40.404 -28.271  85.079  1.00  0.00           N  
ATOM   2022  CA  PRO L  55      40.145 -27.363  83.964  1.00  0.00           C  
ATOM   2023  C   PRO L  55      41.392 -27.032  83.161  1.00  0.00           C  
ATOM   2024  O   PRO L  55      42.572 -27.127  83.575  1.00  0.00           O  
ATOM   2025  CB  PRO L  55      39.535 -26.127  84.622  1.00  0.00           C  
ATOM   2026  CG  PRO L  55      38.829 -26.683  85.826  1.00  0.00           C  
ATOM   2027  CD  PRO L  55      39.740 -27.816  86.312  1.00  0.00           C  
ATOM   2028  N   SER L  56      41.089 -26.586  81.939  1.00  0.00           N  
ATOM   2029  CA  SER L  56      42.106 -26.005  81.034  1.00  0.00           C  
ATOM   2030  C   SER L  56      42.760 -24.857  81.818  1.00  0.00           C  
ATOM   2031  O   SER L  56      42.125 -24.182  82.651  1.00  0.00           O  
ATOM   2032  CB  SER L  56      41.492 -25.600  79.719  1.00  0.00           C  
ATOM   2033  OG  SER L  56      41.064 -26.734  78.952  1.00  0.00           O  
ATOM   2034  N   GLY L  57      44.052 -24.731  81.597  1.00  0.00           N  
ATOM   2035  CA  GLY L  57      44.881 -23.746  82.287  1.00  0.00           C  
ATOM   2036  C   GLY L  57      45.554 -24.356  83.504  1.00  0.00           C  
ATOM   2037  O   GLY L  57      46.792 -24.256  83.586  1.00  0.00           O  
ATOM   2038  N   VAL L  58      44.750 -24.999  84.350  1.00  0.00           N  
ATOM   2039  CA  VAL L  58      45.317 -25.521  85.640  1.00  0.00           C  
ATOM   2040  C   VAL L  58      46.590 -26.327  85.395  1.00  0.00           C  
ATOM   2041  O   VAL L  58      46.713 -27.048  84.386  1.00  0.00           O  
ATOM   2042  CB  VAL L  58      44.209 -26.348  86.336  1.00  0.00           C  
ATOM   2043  CG1 VAL L  58      44.572 -26.743  87.754  1.00  0.00           C  
ATOM   2044  CG2 VAL L  58      42.854 -25.663  86.285  1.00  0.00           C  
ATOM   2045  N   PRO L  59      47.528 -26.217  86.326  1.00  0.00           N  
ATOM   2046  CA  PRO L  59      48.725 -27.079  86.373  1.00  0.00           C  
ATOM   2047  C   PRO L  59      48.367 -28.444  86.936  1.00  0.00           C  
ATOM   2048  O   PRO L  59      47.173 -28.670  87.241  1.00  0.00           O  
ATOM   2049  CB  PRO L  59      49.725 -26.300  87.182  1.00  0.00           C  
ATOM   2050  CG  PRO L  59      49.172 -24.903  87.297  1.00  0.00           C  
ATOM   2051  CD  PRO L  59      47.655 -25.087  87.273  1.00  0.00           C  
ATOM   2052  N   ASP L  60      49.335 -29.347  87.070  1.00  0.00           N  
ATOM   2053  CA  ASP L  60      49.109 -30.687  87.609  1.00  0.00           C  
ATOM   2054  C   ASP L  60      49.455 -30.855  89.085  1.00  0.00           C  
ATOM   2055  O   ASP L  60      49.069 -31.908  89.658  1.00  0.00           O  
ATOM   2056  CB  ASP L  60      49.794 -31.797  86.786  1.00  0.00           C  
ATOM   2057  CG  ASP L  60      51.286 -31.592  86.607  1.00  0.00           C  
ATOM   2058  OD1 ASP L  60      51.920 -31.101  87.563  1.00  0.00           O  
ATOM   2059  OD2 ASP L  60      51.822 -31.899  85.521  1.00  0.00           O  
ATOM   2060  N   ARG L  61      50.180 -29.917  89.656  1.00  0.00           N  
ATOM   2061  CA  ARG L  61      50.573 -29.969  91.076  1.00  0.00           C  
ATOM   2062  C   ARG L  61      49.435 -29.375  91.918  1.00  0.00           C  
ATOM   2063  O   ARG L  61      49.640 -28.701  92.930  1.00  0.00           O  
ATOM   2064  CB  ARG L  61      51.862 -29.232  91.375  1.00  0.00           C  
ATOM   2065  CG  ARG L  61      52.243 -28.110  90.446  1.00  0.00           C  
ATOM   2066  CD  ARG L  61      52.760 -26.912  91.165  1.00  0.00           C  
ATOM   2067  NE  ARG L  61      51.769 -25.830  91.186  1.00  0.00           N  
ATOM   2068  CZ  ARG L  61      52.144 -24.547  91.217  1.00  0.00           C  
ATOM   2069  NH1 ARG L  61      53.438 -24.238  91.279  1.00  0.00           N  
ATOM   2070  NH2 ARG L  61      51.238 -23.584  91.132  1.00  0.00           N  
ATOM   2071  N   PHE L  62      48.262 -29.646  91.429  1.00  0.00           N  
ATOM   2072  CA  PHE L  62      46.952 -29.276  91.950  1.00  0.00           C  
ATOM   2073  C   PHE L  62      46.133 -30.577  91.790  1.00  0.00           C  
ATOM   2074  O   PHE L  62      46.119 -31.131  90.673  1.00  0.00           O  
ATOM   2075  CB  PHE L  62      46.327 -28.100  91.216  1.00  0.00           C  
ATOM   2076  CG  PHE L  62      46.950 -26.792  91.630  1.00  0.00           C  
ATOM   2077  CD1 PHE L  62      48.160 -26.394  91.071  1.00  0.00           C  
ATOM   2078  CD2 PHE L  62      46.357 -26.021  92.621  1.00  0.00           C  
ATOM   2079  CE1 PHE L  62      48.764 -25.215  91.465  1.00  0.00           C  
ATOM   2080  CE2 PHE L  62      46.955 -24.826  93.041  1.00  0.00           C  
ATOM   2081  CZ  PHE L  62      48.166 -24.429  92.448  1.00  0.00           C  
ATOM   2082  N   SER L  63      45.652 -31.039  92.926  1.00  0.00           N  
ATOM   2083  CA  SER L  63      44.988 -32.381  92.918  1.00  0.00           C  
ATOM   2084  C   SER L  63      43.760 -32.311  93.800  1.00  0.00           C  
ATOM   2085  O   SER L  63      43.865 -31.831  94.941  1.00  0.00           O  
ATOM   2086  CB  SER L  63      45.977 -33.426  93.402  1.00  0.00           C  
ATOM   2087  OG  SER L  63      47.324 -33.004  93.177  1.00  0.00           O  
ATOM   2088  N   GLY L  64      42.640 -32.737  93.275  1.00  0.00           N  
ATOM   2089  CA  GLY L  64      41.384 -32.817  94.047  1.00  0.00           C  
ATOM   2090  C   GLY L  64      41.214 -34.293  94.445  1.00  0.00           C  
ATOM   2091  O   GLY L  64      41.702 -35.184  93.740  1.00  0.00           O  
ATOM   2092  N   SER L  65      40.560 -34.493  95.566  1.00  0.00           N  
ATOM   2093  CA  SER L  65      40.294 -35.841  96.095  1.00  0.00           C  
ATOM   2094  C   SER L  65      39.261 -35.705  97.209  1.00  0.00           C  
ATOM   2095  O   SER L  65      38.937 -34.573  97.605  1.00  0.00           O  
ATOM   2096  CB  SER L  65      41.582 -36.492  96.569  1.00  0.00           C  
ATOM   2097  OG  SER L  65      41.497 -37.909  96.566  1.00  0.00           O  
ATOM   2098  N   LYS L  66      38.755 -36.836  97.661  1.00  0.00           N  
ATOM   2099  CA  LYS L  66      37.874 -36.868  98.837  1.00  0.00           C  
ATOM   2100  C   LYS L  66      38.459 -37.714  99.958  1.00  0.00           C  
ATOM   2101  O   LYS L  66      39.671 -37.967 100.061  1.00  0.00           O  
ATOM   2102  CB  LYS L  66      36.465 -37.328  98.490  1.00  0.00           C  
ATOM   2103  CG  LYS L  66      35.619 -36.148  97.979  1.00  0.00           C  
ATOM   2104  CD  LYS L  66      34.182 -36.257  98.441  1.00  0.00           C  
ATOM   2105  CE  LYS L  66      33.388 -37.246  97.612  1.00  0.00           C  
ATOM   2106  NZ  LYS L  66      32.012 -37.364  98.146  1.00  0.00           N  
ATOM   2107  N   SER L  67      37.572 -38.054 100.877  1.00  0.00           N  
ATOM   2108  CA  SER L  67      37.826 -39.052 101.925  1.00  0.00           C  
ATOM   2109  C   SER L  67      36.507 -39.779 102.176  1.00  0.00           C  
ATOM   2110  O   SER L  67      36.420 -40.997 101.948  1.00  0.00           O  
ATOM   2111  CB  SER L  67      38.477 -38.467 103.147  1.00  0.00           C  
ATOM   2112  OG  SER L  67      39.903 -38.641 103.044  1.00  0.00           O  
ATOM   2113  N   GLY L  68      35.522 -39.002 102.594  1.00  0.00           N  
ATOM   2114  CA  GLY L  68      34.178 -39.524 102.886  1.00  0.00           C  
ATOM   2115  C   GLY L  68      33.240 -38.366 103.208  1.00  0.00           C  
ATOM   2116  O   GLY L  68      32.043 -38.412 102.884  1.00  0.00           O  
ATOM   2117  N   ASN L  69      33.802 -37.357 103.860  1.00  0.00           N  
ATOM   2118  CA  ASN L  69      33.083 -36.109 104.150  1.00  0.00           C  
ATOM   2119  C   ASN L  69      33.993 -34.885 103.961  1.00  0.00           C  
ATOM   2120  O   ASN L  69      33.562 -33.716 103.974  1.00  0.00           O  
ATOM   2121  CB  ASN L  69      32.453 -36.126 105.545  1.00  0.00           C  
ATOM   2122  CG  ASN L  69      31.357 -35.056 105.576  1.00  0.00           C  
ATOM   2123  OD1 ASN L  69      31.522 -34.015 106.190  1.00  0.00           O  
ATOM   2124  ND2 ASN L  69      30.285 -35.323 104.844  1.00  0.00           N  
ATOM   2125  N   THR L  70      35.262 -35.216 103.846  1.00  0.00           N  
ATOM   2126  CA  THR L  70      36.307 -34.241 103.561  1.00  0.00           C  
ATOM   2127  C   THR L  70      36.651 -34.334 102.067  1.00  0.00           C  
ATOM   2128  O   THR L  70      37.009 -35.402 101.565  1.00  0.00           O  
ATOM   2129  CB  THR L  70      37.580 -34.448 104.450  1.00  0.00           C  
ATOM   2130  OG1 THR L  70      37.107 -34.791 105.788  1.00  0.00           O  
ATOM   2131  CG2 THR L  70      38.496 -33.226 104.457  1.00  0.00           C  
ATOM   2132  N   ALA L  71      36.437 -33.208 101.420  1.00  0.00           N  
ATOM   2133  CA  ALA L  71      36.980 -33.002 100.061  1.00  0.00           C  
ATOM   2134  C   ALA L  71      38.311 -32.285 100.323  1.00  0.00           C  
ATOM   2135  O   ALA L  71      38.371 -31.513 101.301  1.00  0.00           O  
ATOM   2136  CB  ALA L  71      36.047 -32.181  99.219  1.00  0.00           C  
ATOM   2137  N   SER L  72      39.290 -32.582  99.509  1.00  0.00           N  
ATOM   2138  CA  SER L  72      40.650 -32.091  99.726  1.00  0.00           C  
ATOM   2139  C   SER L  72      41.339 -31.816  98.386  1.00  0.00           C  
ATOM   2140  O   SER L  72      41.179 -32.526  97.397  1.00  0.00           O  
ATOM   2141  CB  SER L  72      41.482 -33.071 100.553  1.00  0.00           C  
ATOM   2142  OG  SER L  72      40.991 -33.279 101.868  1.00  0.00           O  
ATOM   2143  N   LEU L  73      42.128 -30.769  98.447  1.00  0.00           N  
ATOM   2144  CA  LEU L  73      42.995 -30.296  97.358  1.00  0.00           C  
ATOM   2145  C   LEU L  73      44.437 -30.328  97.878  1.00  0.00           C  
ATOM   2146  O   LEU L  73      44.674 -30.212  99.100  1.00  0.00           O  
ATOM   2147  CB  LEU L  73      42.423 -28.968  96.932  1.00  0.00           C  
ATOM   2148  CG  LEU L  73      43.186 -27.866  96.270  1.00  0.00           C  
ATOM   2149  CD1 LEU L  73      43.910 -27.005  97.313  1.00  0.00           C  
ATOM   2150  CD2 LEU L  73      44.188 -28.424  95.263  1.00  0.00           C  
ATOM   2151  N   THR L  74      45.364 -30.532  96.960  1.00  0.00           N  
ATOM   2152  CA  THR L  74      46.773 -30.726  97.278  1.00  0.00           C  
ATOM   2153  C   THR L  74      47.685 -30.021  96.274  1.00  0.00           C  
ATOM   2154  O   THR L  74      47.774 -30.415  95.095  1.00  0.00           O  
ATOM   2155  CB  THR L  74      47.155 -32.247  97.395  1.00  0.00           C  
ATOM   2156  OG1 THR L  74      46.291 -32.801  98.432  1.00  0.00           O  
ATOM   2157  CG2 THR L  74      48.634 -32.483  97.718  1.00  0.00           C  
ATOM   2158  N   VAL L  75      48.319 -28.991  96.817  1.00  0.00           N  
ATOM   2159  CA  VAL L  75      49.262 -28.156  96.060  1.00  0.00           C  
ATOM   2160  C   VAL L  75      50.652 -28.789  96.294  1.00  0.00           C  
ATOM   2161  O   VAL L  75      51.409 -28.410  97.196  1.00  0.00           O  
ATOM   2162  CB  VAL L  75      49.188 -26.682  96.471  1.00  0.00           C  
ATOM   2163  CG1 VAL L  75      49.797 -25.759  95.408  1.00  0.00           C  
ATOM   2164  CG2 VAL L  75      47.774 -26.230  96.806  1.00  0.00           C  
ATOM   2165  N   SER L  76      50.884 -29.762  95.428  1.00  0.00           N  
ATOM   2166  CA  SER L  76      52.014 -30.673  95.527  1.00  0.00           C  
ATOM   2167  C   SER L  76      53.352 -30.175  95.051  1.00  0.00           C  
ATOM   2168  O   SER L  76      54.171 -31.028  94.625  1.00  0.00           O  
ATOM   2169  CB  SER L  76      51.644 -31.991  94.805  1.00  0.00           C  
ATOM   2170  OG  SER L  76      50.316 -32.366  95.172  1.00  0.00           O  
ATOM   2171  N   GLY L  77      53.631 -28.902  95.140  1.00  0.00           N  
ATOM   2172  CA  GLY L  77      54.969 -28.323  94.878  1.00  0.00           C  
ATOM   2173  C   GLY L  77      54.828 -26.801  94.941  1.00  0.00           C  
ATOM   2174  O   GLY L  77      54.539 -26.184  93.911  1.00  0.00           O  
ATOM   2175  N   LEU L  78      55.003 -26.227  96.123  1.00  0.00           N  
ATOM   2176  CA  LEU L  78      54.704 -24.824  96.382  1.00  0.00           C  
ATOM   2177  C   LEU L  78      55.617 -23.833  95.653  1.00  0.00           C  
ATOM   2178  O   LEU L  78      56.844 -23.932  95.616  1.00  0.00           O  
ATOM   2179  CB  LEU L  78      54.669 -24.573  97.889  1.00  0.00           C  
ATOM   2180  CG  LEU L  78      53.356 -24.429  98.626  1.00  0.00           C  
ATOM   2181  CD1 LEU L  78      52.994 -22.960  98.841  1.00  0.00           C  
ATOM   2182  CD2 LEU L  78      52.246 -25.131  97.837  1.00  0.00           C  
ATOM   2183  N   GLN L  79      54.945 -22.811  95.149  1.00  0.00           N  
ATOM   2184  CA  GLN L  79      55.498 -21.761  94.283  1.00  0.00           C  
ATOM   2185  C   GLN L  79      54.894 -20.420  94.681  1.00  0.00           C  
ATOM   2186  O   GLN L  79      53.691 -20.371  94.958  1.00  0.00           O  
ATOM   2187  CB  GLN L  79      55.171 -22.134  92.827  1.00  0.00           C  
ATOM   2188  CG  GLN L  79      56.322 -22.901  92.154  1.00  0.00           C  
ATOM   2189  CD  GLN L  79      57.302 -21.857  91.628  1.00  0.00           C  
ATOM   2190  OE1 GLN L  79      57.200 -21.443  90.478  1.00  0.00           O  
ATOM   2191  NE2 GLN L  79      58.176 -21.397  92.519  1.00  0.00           N  
ATOM   2192  N   ALA L  80      55.659 -19.360  94.722  1.00  0.00           N  
ATOM   2193  CA  ALA L  80      55.291 -18.072  95.303  1.00  0.00           C  
ATOM   2194  C   ALA L  80      53.926 -17.522  94.954  1.00  0.00           C  
ATOM   2195  O   ALA L  80      53.163 -17.035  95.857  1.00  0.00           O  
ATOM   2196  CB  ALA L  80      56.395 -17.049  94.989  1.00  0.00           C  
ATOM   2197  N   GLU L  81      53.548 -17.598  93.694  1.00  0.00           N  
ATOM   2198  CA  GLU L  81      52.222 -17.125  93.255  1.00  0.00           C  
ATOM   2199  C   GLU L  81      51.174 -18.204  93.469  1.00  0.00           C  
ATOM   2200  O   GLU L  81      50.152 -18.294  92.772  1.00  0.00           O  
ATOM   2201  CB  GLU L  81      52.223 -16.530  91.874  1.00  0.00           C  
ATOM   2202  CG  GLU L  81      52.169 -15.000  91.758  1.00  0.00           C  
ATOM   2203  CD  GLU L  81      53.266 -14.156  92.318  1.00  0.00           C  
ATOM   2204  OE1 GLU L  81      53.545 -14.043  93.517  1.00  0.00           O  
ATOM   2205  OE2 GLU L  81      53.902 -13.504  91.446  1.00  0.00           O  
ATOM   2206  N   ASP L  82      51.414 -19.029  94.489  1.00  0.00           N  
ATOM   2207  CA  ASP L  82      50.482 -20.018  95.015  1.00  0.00           C  
ATOM   2208  C   ASP L  82      49.720 -19.328  96.179  1.00  0.00           C  
ATOM   2209  O   ASP L  82      48.596 -19.726  96.486  1.00  0.00           O  
ATOM   2210  CB  ASP L  82      51.104 -21.318  95.480  1.00  0.00           C  
ATOM   2211  CG  ASP L  82      51.583 -22.248  94.393  1.00  0.00           C  
ATOM   2212  OD1 ASP L  82      51.240 -21.969  93.227  1.00  0.00           O  
ATOM   2213  OD2 ASP L  82      52.299 -23.233  94.662  1.00  0.00           O  
ATOM   2214  N   GLU L  83      50.424 -18.320  96.716  1.00  0.00           N  
ATOM   2215  CA  GLU L  83      49.767 -17.536  97.798  1.00  0.00           C  
ATOM   2216  C   GLU L  83      48.411 -16.997  97.384  1.00  0.00           C  
ATOM   2217  O   GLU L  83      48.316 -16.183  96.445  1.00  0.00           O  
ATOM   2218  CB  GLU L  83      50.623 -16.371  98.218  1.00  0.00           C  
ATOM   2219  CG  GLU L  83      51.540 -16.571  99.421  1.00  0.00           C  
ATOM   2220  CD  GLU L  83      51.657 -15.305 100.241  1.00  0.00           C  
ATOM   2221  OE1 GLU L  83      52.471 -14.441  99.996  1.00  0.00           O  
ATOM   2222  OE2 GLU L  83      50.787 -15.263 101.131  1.00  0.00           O  
ATOM   2223  N   ALA L  84      47.374 -17.431  98.099  1.00  0.00           N  
ATOM   2224  CA  ALA L  84      45.993 -17.013  97.850  1.00  0.00           C  
ATOM   2225  C   ALA L  84      44.986 -17.556  98.867  1.00  0.00           C  
ATOM   2226  O   ALA L  84      45.300 -18.164  99.893  1.00  0.00           O  
ATOM   2227  CB  ALA L  84      45.586 -17.411  96.423  1.00  0.00           C  
ATOM   2228  N   ASP L  85      43.724 -17.343  98.544  1.00  0.00           N  
ATOM   2229  CA  ASP L  85      42.532 -17.616  99.293  1.00  0.00           C  
ATOM   2230  C   ASP L  85      41.646 -18.694  98.663  1.00  0.00           C  
ATOM   2231  O   ASP L  85      40.598 -18.333  98.062  1.00  0.00           O  
ATOM   2232  CB  ASP L  85      41.687 -16.308  99.416  1.00  0.00           C  
ATOM   2233  CG  ASP L  85      42.093 -15.504 100.630  1.00  0.00           C  
ATOM   2234  OD1 ASP L  85      41.716 -15.956 101.730  1.00  0.00           O  
ATOM   2235  OD2 ASP L  85      42.769 -14.479 100.488  1.00  0.00           O  
ATOM   2236  N   TYR L  86      42.044 -19.942  98.862  1.00  0.00           N  
ATOM   2237  CA  TYR L  86      41.223 -21.036  98.263  1.00  0.00           C  
ATOM   2238  C   TYR L  86      39.904 -21.133  99.051  1.00  0.00           C  
ATOM   2239  O   TYR L  86      39.815 -20.758 100.235  1.00  0.00           O  
ATOM   2240  CB  TYR L  86      41.901 -22.379  98.157  1.00  0.00           C  
ATOM   2241  CG  TYR L  86      43.336 -22.403  97.709  1.00  0.00           C  
ATOM   2242  CD1 TYR L  86      43.765 -21.604  96.653  1.00  0.00           C  
ATOM   2243  CD2 TYR L  86      44.285 -23.198  98.352  1.00  0.00           C  
ATOM   2244  CE1 TYR L  86      45.092 -21.586  96.242  1.00  0.00           C  
ATOM   2245  CE2 TYR L  86      45.620 -23.193  97.947  1.00  0.00           C  
ATOM   2246  CZ  TYR L  86      46.017 -22.379  96.893  1.00  0.00           C  
ATOM   2247  OH  TYR L  86      47.317 -22.327  96.473  1.00  0.00           O  
ATOM   2248  N   TYR L  87      38.905 -21.623  98.332  1.00  0.00           N  
ATOM   2249  CA  TYR L  87      37.578 -21.939  98.878  1.00  0.00           C  
ATOM   2250  C   TYR L  87      37.138 -23.282  98.274  1.00  0.00           C  
ATOM   2251  O   TYR L  87      37.620 -23.632  97.185  1.00  0.00           O  
ATOM   2252  CB  TYR L  87      36.532 -20.899  98.546  1.00  0.00           C  
ATOM   2253  CG  TYR L  87      36.705 -19.502  99.066  1.00  0.00           C  
ATOM   2254  CD1 TYR L  87      37.524 -18.570  98.423  1.00  0.00           C  
ATOM   2255  CD2 TYR L  87      35.997 -19.079 100.191  1.00  0.00           C  
ATOM   2256  CE1 TYR L  87      37.641 -17.267  98.895  1.00  0.00           C  
ATOM   2257  CE2 TYR L  87      36.106 -17.783 100.674  1.00  0.00           C  
ATOM   2258  CZ  TYR L  87      36.925 -16.881 100.025  1.00  0.00           C  
ATOM   2259  OH  TYR L  87      37.005 -15.611 100.527  1.00  0.00           O  
ATOM   2260  N   CYS L  88      36.264 -23.960  98.982  1.00  0.00           N  
ATOM   2261  CA  CYS L  88      35.662 -25.216  98.492  1.00  0.00           C  
ATOM   2262  C   CYS L  88      34.172 -24.921  98.261  1.00  0.00           C  
ATOM   2263  O   CYS L  88      33.657 -23.948  98.850  1.00  0.00           O  
ATOM   2264  CB  CYS L  88      35.843 -26.395  99.457  1.00  0.00           C  
ATOM   2265  SG  CYS L  88      35.221 -26.109 101.107  1.00  0.00           S  
ATOM   2266  N   SER L  89      33.549 -25.761  97.454  1.00  0.00           N  
ATOM   2267  CA  SER L  89      32.184 -25.488  96.977  1.00  0.00           C  
ATOM   2268  C   SER L  89      31.382 -26.775  96.819  1.00  0.00           C  
ATOM   2269  O   SER L  89      31.946 -27.877  96.755  1.00  0.00           O  
ATOM   2270  CB  SER L  89      32.234 -24.741  95.653  1.00  0.00           C  
ATOM   2271  OG  SER L  89      30.970 -24.344  95.168  1.00  0.00           O  
ATOM   2272  N   SER L  90      30.077 -26.558  96.653  1.00  0.00           N  
ATOM   2273  CA  SER L  90      29.083 -27.616  96.575  1.00  0.00           C  
ATOM   2274  C   SER L  90      27.779 -27.238  95.863  1.00  0.00           C  
ATOM   2275  O   SER L  90      27.447 -26.075  95.575  1.00  0.00           O  
ATOM   2276  CB  SER L  90      28.724 -28.080  98.003  1.00  0.00           C  
ATOM   2277  OG  SER L  90      29.616 -29.112  98.395  1.00  0.00           O  
ATOM   2278  N   TYR L  91      26.967 -28.288  95.724  1.00  0.00           N  
ATOM   2279  CA  TYR L  91      25.641 -28.250  95.151  1.00  0.00           C  
ATOM   2280  C   TYR L  91      24.647 -29.199  95.835  1.00  0.00           C  
ATOM   2281  O   TYR L  91      24.843 -30.425  95.897  1.00  0.00           O  
ATOM   2282  CB  TYR L  91      25.712 -28.639  93.651  1.00  0.00           C  
ATOM   2283  CG  TYR L  91      24.387 -28.358  92.967  1.00  0.00           C  
ATOM   2284  CD1 TYR L  91      23.915 -27.045  92.905  1.00  0.00           C  
ATOM   2285  CD2 TYR L  91      23.615 -29.378  92.429  1.00  0.00           C  
ATOM   2286  CE1 TYR L  91      22.713 -26.749  92.279  1.00  0.00           C  
ATOM   2287  CE2 TYR L  91      22.406 -29.093  91.799  1.00  0.00           C  
ATOM   2288  CZ  TYR L  91      21.959 -27.772  91.729  1.00  0.00           C  
ATOM   2289  OH  TYR L  91      20.787 -27.455  91.106  1.00  0.00           O  
ATOM   2290  N   GLU L  92      23.577 -28.609  96.298  1.00  0.00           N  
ATOM   2291  CA  GLU L  92      22.398 -29.334  96.843  1.00  0.00           C  
ATOM   2292  C   GLU L  92      21.272 -29.001  95.865  1.00  0.00           C  
ATOM   2293  O   GLU L  92      21.553 -28.920  94.640  1.00  0.00           O  
ATOM   2294  CB  GLU L  92      22.099 -28.852  98.224  1.00  0.00           C  
ATOM   2295  CG  GLU L  92      21.573 -29.631  99.388  1.00  0.00           C  
ATOM   2296  CD  GLU L  92      21.486 -28.947 100.730  1.00  0.00           C  
ATOM   2297  OE1 GLU L  92      22.421 -28.149 100.962  1.00  0.00           O  
ATOM   2298  OE2 GLU L  92      20.578 -29.150 101.529  1.00  0.00           O  
ATOM   2299  N   GLY L  93      20.091 -28.682  96.343  1.00  0.00           N  
ATOM   2300  CA  GLY L  93      18.884 -28.623  95.549  1.00  0.00           C  
ATOM   2301  C   GLY L  93      18.609 -27.401  94.712  1.00  0.00           C  
ATOM   2302  O   GLY L  93      18.131 -26.363  95.224  1.00  0.00           O  
ATOM   2303  N   SER L  94      18.811 -27.558  93.400  1.00  0.00           N  
ATOM   2304  CA  SER L  94      18.537 -26.501  92.400  1.00  0.00           C  
ATOM   2305  C   SER L  94      19.362 -25.288  92.829  1.00  0.00           C  
ATOM   2306  O   SER L  94      20.507 -25.079  92.420  1.00  0.00           O  
ATOM   2307  CB  SER L  94      17.066 -26.199  92.297  1.00  0.00           C  
ATOM   2308  OG  SER L  94      16.320 -27.340  91.862  1.00  0.00           O  
ATOM   2309  N   ASP L  95      18.761 -24.578  93.755  1.00  0.00           N  
ATOM   2310  CA  ASP L  95      19.384 -23.418  94.409  1.00  0.00           C  
ATOM   2311  C   ASP L  95      19.877 -23.804  95.796  1.00  0.00           C  
ATOM   2312  O   ASP L  95      19.182 -23.493  96.781  1.00  0.00           O  
ATOM   2313  CB  ASP L  95      18.344 -22.283  94.374  1.00  0.00           C  
ATOM   2314  CG  ASP L  95      16.916 -22.817  94.495  1.00  0.00           C  
ATOM   2315  OD1 ASP L  95      16.612 -23.299  95.616  1.00  0.00           O  
ATOM   2316  OD2 ASP L  95      16.139 -22.768  93.526  1.00  0.00           O  
ATOM   2317  N   ASN L  95A     21.053 -24.446  95.850  1.00  0.00           N  
ATOM   2318  CA  ASN L  95A     21.644 -24.833  97.159  1.00  0.00           C  
ATOM   2319  C   ASN L  95A     23.146 -25.060  97.135  1.00  0.00           C  
ATOM   2320  O   ASN L  95A     23.642 -26.132  97.555  1.00  0.00           O  
ATOM   2321  CB  ASN L  95A     20.846 -26.025  97.689  1.00  0.00           C  
ATOM   2322  CG  ASN L  95A     20.573 -26.064  99.168  1.00  0.00           C  
ATOM   2323  OD1 ASN L  95A     21.378 -25.687 100.042  1.00  0.00           O  
ATOM   2324  ND2 ASN L  95A     19.376 -26.590  99.486  1.00  0.00           N  
ATOM   2325  N   PHE L  96      23.901 -24.041  96.789  1.00  0.00           N  
ATOM   2326  CA  PHE L  96      25.350 -24.106  96.549  1.00  0.00           C  
ATOM   2327  C   PHE L  96      26.132 -23.651  97.791  1.00  0.00           C  
ATOM   2328  O   PHE L  96      26.168 -22.465  98.148  1.00  0.00           O  
ATOM   2329  CB  PHE L  96      25.753 -23.305  95.307  1.00  0.00           C  
ATOM   2330  CG  PHE L  96      24.662 -23.114  94.287  1.00  0.00           C  
ATOM   2331  CD1 PHE L  96      23.531 -22.351  94.599  1.00  0.00           C  
ATOM   2332  CD2 PHE L  96      24.774 -23.684  93.017  1.00  0.00           C  
ATOM   2333  CE1 PHE L  96      22.517 -22.177  93.677  1.00  0.00           C  
ATOM   2334  CE2 PHE L  96      23.762 -23.516  92.074  1.00  0.00           C  
ATOM   2335  CZ  PHE L  96      22.631 -22.759  92.416  1.00  0.00           C  
ATOM   2336  N   VAL L  97      26.815 -24.664  98.345  1.00  0.00           N  
ATOM   2337  CA  VAL L  97      27.498 -24.472  99.661  1.00  0.00           C  
ATOM   2338  C   VAL L  97      28.974 -24.155  99.514  1.00  0.00           C  
ATOM   2339  O   VAL L  97      29.745 -24.973  98.977  1.00  0.00           O  
ATOM   2340  CB  VAL L  97      27.214 -25.709 100.550  1.00  0.00           C  
ATOM   2341  CG1 VAL L  97      27.987 -25.690 101.860  1.00  0.00           C  
ATOM   2342  CG2 VAL L  97      25.730 -25.886 100.838  1.00  0.00           C  
ATOM   2343  N   PHE L  98      29.373 -23.005 100.036  1.00  0.00           N  
ATOM   2344  CA  PHE L  98      30.761 -22.543 100.055  1.00  0.00           C  
ATOM   2345  C   PHE L  98      31.435 -22.675 101.429  1.00  0.00           C  
ATOM   2346  O   PHE L  98      30.895 -22.285 102.476  1.00  0.00           O  
ATOM   2347  CB  PHE L  98      30.899 -21.092  99.562  1.00  0.00           C  
ATOM   2348  CG  PHE L  98      30.908 -20.940  98.068  1.00  0.00           C  
ATOM   2349  CD1 PHE L  98      29.712 -21.027  97.350  1.00  0.00           C  
ATOM   2350  CD2 PHE L  98      32.104 -20.718  97.395  1.00  0.00           C  
ATOM   2351  CE1 PHE L  98      29.709 -20.885  95.962  1.00  0.00           C  
ATOM   2352  CE2 PHE L  98      32.119 -20.572  96.012  1.00  0.00           C  
ATOM   2353  CZ  PHE L  98      30.925 -20.652  95.294  1.00  0.00           C  
ATOM   2354  N   GLY L  99      32.659 -23.191 101.366  1.00  0.00           N  
ATOM   2355  CA  GLY L  99      33.523 -23.320 102.561  1.00  0.00           C  
ATOM   2356  C   GLY L  99      33.805 -21.910 103.082  1.00  0.00           C  
ATOM   2357  O   GLY L  99      33.588 -20.928 102.355  1.00  0.00           O  
ATOM   2358  N   THR L 100      34.283 -21.854 104.307  1.00  0.00           N  
ATOM   2359  CA  THR L 100      34.497 -20.587 105.013  1.00  0.00           C  
ATOM   2360  C   THR L 100      35.804 -19.925 104.598  1.00  0.00           C  
ATOM   2361  O   THR L 100      36.123 -18.809 105.060  1.00  0.00           O  
ATOM   2362  CB  THR L 100      34.408 -20.772 106.571  1.00  0.00           C  
ATOM   2363  OG1 THR L 100      35.422 -21.757 106.917  1.00  0.00           O  
ATOM   2364  CG2 THR L 100      33.023 -21.192 107.060  1.00  0.00           C  
ATOM   2365  N   GLY L 101      36.549 -20.624 103.755  1.00  0.00           N  
ATOM   2366  CA  GLY L 101      37.755 -20.082 103.130  1.00  0.00           C  
ATOM   2367  C   GLY L 101      39.032 -20.611 103.768  1.00  0.00           C  
ATOM   2368  O   GLY L 101      39.025 -21.339 104.768  1.00  0.00           O  
ATOM   2369  N   THR L 102      40.122 -20.230 103.121  1.00  0.00           N  
ATOM   2370  CA  THR L 102      41.477 -20.591 103.539  1.00  0.00           C  
ATOM   2371  C   THR L 102      42.448 -19.559 102.942  1.00  0.00           C  
ATOM   2372  O   THR L 102      42.170 -18.948 101.881  1.00  0.00           O  
ATOM   2373  CB  THR L 102      41.874 -22.056 103.134  1.00  0.00           C  
ATOM   2374  OG1 THR L 102      40.838 -22.961 103.610  1.00  0.00           O  
ATOM   2375  CG2 THR L 102      43.250 -22.496 103.656  1.00  0.00           C  
ATOM   2376  N   LYS L 103      43.557 -19.409 103.624  1.00  0.00           N  
ATOM   2377  CA  LYS L 103      44.718 -18.649 103.156  1.00  0.00           C  
ATOM   2378  C   LYS L 103      45.884 -19.631 102.990  1.00  0.00           C  
ATOM   2379  O   LYS L 103      46.102 -20.422 103.927  1.00  0.00           O  
ATOM   2380  CB  LYS L 103      45.146 -17.595 104.165  1.00  0.00           C  
ATOM   2381  CG  LYS L 103      44.309 -16.323 104.160  1.00  0.00           C  
ATOM   2382  CD  LYS L 103      45.071 -15.154 104.768  1.00  0.00           C  
ATOM   2383  CE  LYS L 103      46.420 -14.958 104.102  1.00  0.00           C  
ATOM   2384  NZ  LYS L 103      47.070 -13.724 104.587  1.00  0.00           N  
ATOM   2385  N   VAL L 104      46.555 -19.591 101.860  1.00  0.00           N  
ATOM   2386  CA  VAL L 104      47.812 -20.349 101.687  1.00  0.00           C  
ATOM   2387  C   VAL L 104      48.984 -19.370 101.723  1.00  0.00           C  
ATOM   2388  O   VAL L 104      49.075 -18.430 100.927  1.00  0.00           O  
ATOM   2389  CB  VAL L 104      47.726 -21.271 100.481  1.00  0.00           C  
ATOM   2390  CG1 VAL L 104      49.060 -21.594  99.825  1.00  0.00           C  
ATOM   2391  CG2 VAL L 104      47.055 -22.585 100.888  1.00  0.00           C  
ATOM   2392  N   THR L 105      49.849 -19.586 102.706  1.00  0.00           N  
ATOM   2393  CA  THR L 105      50.992 -18.713 102.963  1.00  0.00           C  
ATOM   2394  C   THR L 105      52.288 -19.454 102.626  1.00  0.00           C  
ATOM   2395  O   THR L 105      52.436 -20.634 102.981  1.00  0.00           O  
ATOM   2396  CB  THR L 105      51.072 -18.184 104.444  1.00  0.00           C  
ATOM   2397  OG1 THR L 105      49.754 -18.313 105.045  1.00  0.00           O  
ATOM   2398  CG2 THR L 105      51.611 -16.749 104.550  1.00  0.00           C  
ATOM   2399  N   VAL L 106      53.148 -18.744 101.920  1.00  0.00           N  
ATOM   2400  CA  VAL L 106      54.548 -19.207 101.778  1.00  0.00           C  
ATOM   2401  C   VAL L 106      55.247 -18.495 102.950  1.00  0.00           C  
ATOM   2402  O   VAL L 106      55.169 -17.265 103.046  1.00  0.00           O  
ATOM   2403  CB  VAL L 106      55.154 -18.986 100.416  1.00  0.00           C  
ATOM   2404  CG1 VAL L 106      56.582 -18.420 100.429  1.00  0.00           C  
ATOM   2405  CG2 VAL L 106      55.162 -20.296  99.613  1.00  0.00           C  
ATOM   2406  N   LEU L 106A     55.792 -19.334 103.803  1.00  0.00           N  
ATOM   2407  CA  LEU L 106A     56.463 -18.865 105.022  1.00  0.00           C  
ATOM   2408  C   LEU L 106A     57.775 -18.176 104.665  1.00  0.00           C  
ATOM   2409  O   LEU L 106A     58.699 -18.805 104.123  1.00  0.00           O  
ATOM   2410  CB  LEU L 106A     56.623 -20.092 105.926  1.00  0.00           C  
ATOM   2411  CG  LEU L 106A     55.563 -20.441 106.948  1.00  0.00           C  
ATOM   2412  CD1 LEU L 106A     54.242 -19.718 106.712  1.00  0.00           C  
ATOM   2413  CD2 LEU L 106A     55.325 -21.959 106.885  1.00  0.00           C  
ATOM   2414  N   GLY L 107      57.819 -16.902 104.959  1.00  0.00           N  
ATOM   2415  CA  GLY L 107      59.058 -16.087 104.820  1.00  0.00           C  
ATOM   2416  C   GLY L 107      59.153 -15.322 106.164  1.00  0.00           C  
ATOM   2417  O   GLY L 107      59.165 -14.098 106.229  1.00  0.00           O  
ATOM   2418  N   GLN L 108      59.140 -16.149 107.186  1.00  0.00           N  
ATOM   2419  CA  GLN L 108      59.024 -15.781 108.599  1.00  0.00           C  
ATOM   2420  C   GLN L 108      58.641 -17.087 109.330  1.00  0.00           C  
ATOM   2421  O   GLN L 108      58.019 -17.964 108.694  1.00  0.00           O  
ATOM   2422  CB  GLN L 108      57.971 -14.703 108.859  1.00  0.00           C  
ATOM   2423  CG  GLN L 108      58.072 -14.073 110.222  1.00  0.00           C  
ATOM   2424  CD  GLN L 108      57.279 -12.821 110.436  1.00  0.00           C  
ATOM   2425  OE1 GLN L 108      56.919 -12.058 109.551  1.00  0.00           O  
ATOM   2426  NE2 GLN L 108      56.990 -12.574 111.722  1.00  0.00           N  
ATOM   2427  N   PRO L 109      59.069 -17.164 110.586  1.00  0.00           N  
ATOM   2428  CA  PRO L 109      58.776 -18.353 111.410  1.00  0.00           C  
ATOM   2429  C   PRO L 109      57.335 -18.349 111.889  1.00  0.00           C  
ATOM   2430  O   PRO L 109      56.690 -17.285 111.969  1.00  0.00           O  
ATOM   2431  CB  PRO L 109      59.791 -18.326 112.527  1.00  0.00           C  
ATOM   2432  CG  PRO L 109      60.933 -17.517 111.973  1.00  0.00           C  
ATOM   2433  CD  PRO L 109      60.267 -16.452 111.103  1.00  0.00           C  
TER    2434      PRO L 109                                                      
ATOM   3227  N   HIS P   2      27.827 -25.608  88.174  1.00  0.00           N  
ATOM   3228  CA  HIS P   2      26.459 -25.975  87.840  1.00  0.00           C  
ATOM   3229  C   HIS P   2      26.390 -26.256  86.326  1.00  0.00           C  
ATOM   3230  O   HIS P   2      26.861 -25.468  85.523  1.00  0.00           O  
ATOM   3231  CB  HIS P   2      25.318 -25.081  88.260  1.00  0.00           C  
ATOM   3232  CG  HIS P   2      25.174 -23.766  87.572  1.00  0.00           C  
ATOM   3233  ND1 HIS P   2      26.209 -23.009  87.100  1.00  0.00           N  
ATOM   3234  CD2 HIS P   2      24.040 -23.040  87.360  1.00  0.00           C  
ATOM   3235  CE1 HIS P   2      25.725 -21.880  86.600  1.00  0.00           C  
ATOM   3236  NE2 HIS P   2      24.420 -21.878  86.747  1.00  0.00           N  
TER    3237      HIS P   2                                                      
