# Supplementary material for: SARS-CoV-2 Spike Protein Interaction Space
Source: Int J Mol Sci. 2023 Jul 27;24(15):12058. doi: 10.3390/ijms241512058 (PMC10418891; doi:10.3390/ijms241512058)
Supplement: Supplementary file 1 [file ijms-24-12058-s001.zip › Supplementary Material File S1/1MCJ.pdb]

REMARK 950 NUMBERING  Kabat
REMARK 950 METHOD     X-ray crystal structure
REMARK 950 RESOLUTION 2.700
REMARK 950 R-FACTOR   0.193
REMARK 950 R-FREE     0.000
REMARK 950 CHAIN-TYPE LABEL ORIGINAL
REMARK 950 CHAIN L    L    A
REMARK 950 CHAIN L    L    B
REMARK 950 MOLECULE : A : IMMUNOGLOBULIN LAMBDA DIMER MCG (LIGHT CHAIN)
REMARK 950 SPECIES  : A : HOMO SAPIENS
SEQRES   1 L 216  PRO SER ALA LEU THR GLN PRO PRO SER ALA SER GLY SER          
SEQRES   2 L 216  LEU GLY GLN SER VAL THR ILE SER CYS THR GLY THR SER          
SEQRES   3 L 216  SER ASP VAL GLY GLY TYR ASN TYR VAL SER TRP TYR GLN          
SEQRES   4 L 216  GLN HIS ALA GLY LYS ALA PRO LYS VAL ILE ILE TYR GLU          
SEQRES   5 L 216  VAL ASN LYS ARG PRO SER GLY VAL PRO ASP ARG PHE SER          
SEQRES   6 L 216  GLY SER LYS SER GLY ASN THR ALA SER LEU THR VAL SER          
SEQRES   7 L 216  GLY LEU GLN ALA GLU ASP GLU ALA ASP TYR TYR CYS SER          
SEQRES   8 L 216  SER TYR GLU GLY SER ASP ASN PHE VAL PHE GLY THR GLY          
SEQRES   9 L 216  THR LYS VAL THR VAL LEU GLY GLN PRO LYS ALA ASN PRO          
SEQRES  10 L 216  THR VAL THR LEU PHE PRO PRO SER SER GLU GLU LEU GLN          
SEQRES  11 L 216  ALA ASN LYS ALA THR LEU VAL CYS LEU ILE SER ASP PHE          
SEQRES  12 L 216  TYR PRO GLY ALA VAL THR VAL ALA TRP LYS ALA ASP GLY          
SEQRES  13 L 216  SER PRO VAL LYS ALA GLY VAL GLU THR THR LYS PRO SER          
SEQRES  14 L 216  LYS GLN SER ASN ASN LYS TYR ALA ALA SER SER TYR LEU          
SEQRES  15 L 216  SER LEU THR PRO GLU GLN TRP LYS SER HIS ARG SER TYR          
SEQRES  16 L 216  SER CYS GLN VAL THR HIS GLU GLY SER THR VAL GLU LYS          
SEQRES  17 L 216  THR VAL ALA PRO THR GLU CYS SER                              
SEQRES   1 L 216  PRO SER ALA LEU THR GLN PRO PRO SER ALA SER GLY SER          
SEQRES   2 L 216  LEU GLY GLN SER VAL THR ILE SER CYS THR GLY THR SER          
SEQRES   3 L 216  SER ASP VAL GLY GLY TYR ASN TYR VAL SER TRP TYR GLN          
SEQRES   4 L 216  GLN HIS ALA GLY LYS ALA PRO LYS VAL ILE ILE TYR GLU          
SEQRES   5 L 216  VAL ASN LYS ARG PRO SER GLY VAL PRO ASP ARG PHE SER          
SEQRES   6 L 216  GLY SER LYS SER GLY ASN THR ALA SER LEU THR VAL SER          
SEQRES   7 L 216  GLY LEU GLN ALA GLU ASP GLU ALA ASP TYR TYR CYS SER          
SEQRES   8 L 216  SER TYR GLU GLY SER ASP ASN PHE VAL PHE GLY THR GLY          
SEQRES   9 L 216  THR LYS VAL THR VAL LEU GLY GLN PRO LYS ALA ASN PRO          
SEQRES  10 L 216  THR VAL THR LEU PHE PRO PRO SER SER GLU GLU LEU GLN          
SEQRES  11 L 216  ALA ASN LYS ALA THR LEU VAL CYS LEU ILE SER ASP PHE          
SEQRES  12 L 216  TYR PRO GLY ALA VAL THR VAL ALA TRP LYS ALA ASP GLY          
SEQRES  13 L 216  SER PRO VAL LYS ALA GLY VAL GLU THR THR LYS PRO SER          
SEQRES  14 L 216  LYS GLN SER ASN ASN LYS TYR ALA ALA SER SER TYR LEU          
SEQRES  15 L 216  SER LEU THR PRO GLU GLN TRP LYS SER HIS ARG SER TYR          
SEQRES  16 L 216  SER CYS GLN VAL THR HIS GLU GLY SER THR VAL GLU LYS          
SEQRES  17 L 216  THR VAL ALA PRO THR GLU CYS SER                              
ATOM      1  N   PRO L   1      41.336 -17.057  77.048  1.00  0.00           N  
ATOM      2  CA  PRO L   1      40.220 -16.112  77.115  1.00  0.00           C  
ATOM      3  C   PRO L   1      40.140 -15.487  78.498  1.00  0.00           C  
ATOM      4  O   PRO L   1      40.356 -16.144  79.535  1.00  0.00           O  
ATOM      5  CB  PRO L   1      38.981 -16.913  76.753  1.00  0.00           C  
ATOM      6  CG  PRO L   1      39.506 -18.114  76.013  1.00  0.00           C  
ATOM      7  CD  PRO L   1      40.857 -18.402  76.671  1.00  0.00           C  
ATOM      8  N   SER L   2      39.793 -14.217  78.483  1.00  0.00           N  
ATOM      9  CA  SER L   2      39.857 -13.310  79.632  1.00  0.00           C  
ATOM     10  C   SER L   2      38.720 -13.452  80.630  1.00  0.00           C  
ATOM     11  O   SER L   2      38.003 -14.473  80.694  1.00  0.00           O  
ATOM     12  CB  SER L   2      39.944 -11.880  79.047  1.00  0.00           C  
ATOM     13  OG  SER L   2      40.170 -11.974  77.626  1.00  0.00           O  
ATOM     14  N   ALA L   3      38.562 -12.427  81.454  1.00  0.00           N  
ATOM     15  CA  ALA L   3      37.551 -12.346  82.514  1.00  0.00           C  
ATOM     16  C   ALA L   3      36.404 -11.436  82.106  1.00  0.00           C  
ATOM     17  O   ALA L   3      36.675 -10.368  81.510  1.00  0.00           O  
ATOM     18  CB  ALA L   3      38.211 -11.814  83.794  1.00  0.00           C  
ATOM     19  N   LEU L   4      35.174 -11.841  82.404  1.00  0.00           N  
ATOM     20  CA  LEU L   4      34.015 -10.984  82.075  1.00  0.00           C  
ATOM     21  C   LEU L   4      34.259  -9.643  82.813  1.00  0.00           C  
ATOM     22  O   LEU L   4      35.024  -9.606  83.794  1.00  0.00           O  
ATOM     23  CB  LEU L   4      32.693 -11.594  82.389  1.00  0.00           C  
ATOM     24  CG  LEU L   4      32.404 -13.050  82.540  1.00  0.00           C  
ATOM     25  CD1 LEU L   4      30.890 -13.284  82.698  1.00  0.00           C  
ATOM     26  CD2 LEU L   4      32.916 -13.833  81.337  1.00  0.00           C  
ATOM     27  N   THR L   5      33.563  -8.633  82.333  1.00  0.00           N  
ATOM     28  CA  THR L   5      33.790  -7.280  82.811  1.00  0.00           C  
ATOM     29  C   THR L   5      32.626  -6.754  83.642  1.00  0.00           C  
ATOM     30  O   THR L   5      31.432  -6.939  83.376  1.00  0.00           O  
ATOM     31  CB  THR L   5      34.239  -6.281  81.686  1.00  0.00           C  
ATOM     32  OG1 THR L   5      34.568  -7.054  80.491  1.00  0.00           O  
ATOM     33  CG2 THR L   5      35.449  -5.420  82.131  1.00  0.00           C  
ATOM     34  N   GLN L   6      33.055  -6.110  84.711  1.00  0.00           N  
ATOM     35  CA  GLN L   6      32.189  -5.353  85.629  1.00  0.00           C  
ATOM     36  C   GLN L   6      32.905  -4.000  85.804  1.00  0.00           C  
ATOM     37  O   GLN L   6      34.135  -3.937  85.603  1.00  0.00           O  
ATOM     38  CB  GLN L   6      32.015  -6.093  86.934  1.00  0.00           C  
ATOM     39  CG  GLN L   6      31.767  -7.589  86.843  1.00  0.00           C  
ATOM     40  CD  GLN L   6      31.689  -8.293  88.185  1.00  0.00           C  
ATOM     41  OE1 GLN L   6      32.000  -9.480  88.314  1.00  0.00           O  
ATOM     42  NE2 GLN L   6      31.278  -7.573  89.217  1.00  0.00           N  
ATOM     43  N   PRO L   7      32.125  -2.960  86.046  1.00  0.00           N  
ATOM     44  CA  PRO L   7      32.685  -1.721  86.637  1.00  0.00           C  
ATOM     45  C   PRO L   7      33.159  -2.025  88.059  1.00  0.00           C  
ATOM     46  O   PRO L   7      32.463  -2.692  88.860  1.00  0.00           O  
ATOM     47  CB  PRO L   7      31.547  -0.739  86.553  1.00  0.00           C  
ATOM     48  CG  PRO L   7      30.294  -1.551  86.536  1.00  0.00           C  
ATOM     49  CD  PRO L   7      30.662  -2.952  86.085  1.00  0.00           C  
ATOM     50  N   PRO L   8      34.352  -1.530  88.369  1.00  0.00           N  
ATOM     51  CA  PRO L   8      35.054  -1.909  89.602  1.00  0.00           C  
ATOM     52  C   PRO L   8      34.343  -1.480  90.868  1.00  0.00           C  
ATOM     53  O   PRO L   8      34.059  -2.362  91.721  1.00  0.00           O  
ATOM     54  CB  PRO L   8      36.446  -1.359  89.407  1.00  0.00           C  
ATOM     55  CG  PRO L   8      36.324  -0.264  88.386  1.00  0.00           C  
ATOM     56  CD  PRO L   8      35.140  -0.616  87.533  1.00  0.00           C  
ATOM     57  N   SER L   9      33.997  -0.219  91.007  1.00  0.00           N  
ATOM     58  CA  SER L   9      33.148   0.256  92.121  1.00  0.00           C  
ATOM     59  C   SER L   9      31.789   0.691  91.576  1.00  0.00           C  
ATOM     60  O   SER L   9      31.607   0.720  90.347  1.00  0.00           O  
ATOM     61  CB  SER L   9      33.855   1.357  92.896  1.00  0.00           C  
ATOM     62  OG  SER L   9      35.052   0.930  93.545  1.00  0.00           O  
ATOM     63  N   ALA L  11      30.853   1.004  92.465  1.00  0.00           N  
ATOM     64  CA  ALA L  11      29.480   1.406  92.087  1.00  0.00           C  
ATOM     65  C   ALA L  11      28.747   2.036  93.260  1.00  0.00           C  
ATOM     66  O   ALA L  11      29.377   2.146  94.342  1.00  0.00           O  
ATOM     67  CB  ALA L  11      28.743   0.202  91.511  1.00  0.00           C  
ATOM     68  N   SER L  12      27.474   2.430  93.108  1.00  0.00           N  
ATOM     69  CA  SER L  12      26.825   3.225  94.147  1.00  0.00           C  
ATOM     70  C   SER L  12      25.315   3.213  94.281  1.00  0.00           C  
ATOM     71  O   SER L  12      24.547   3.546  93.374  1.00  0.00           O  
ATOM     72  CB  SER L  12      27.261   4.709  94.028  1.00  0.00           C  
ATOM     73  OG  SER L  12      28.556   4.874  93.508  1.00  0.00           O  
ATOM     74  N   GLY L  13      24.888   2.984  95.530  1.00  0.00           N  
ATOM     75  CA  GLY L  13      23.457   2.942  95.889  1.00  0.00           C  
ATOM     76  C   GLY L  13      23.246   3.712  97.194  1.00  0.00           C  
ATOM     77  O   GLY L  13      24.022   3.546  98.140  1.00  0.00           O  
ATOM     78  N   SER L  14      22.223   4.540  97.194  1.00  0.00           N  
ATOM     79  CA  SER L  14      21.955   5.445  98.345  1.00  0.00           C  
ATOM     80  C   SER L  14      20.660   4.939  98.982  1.00  0.00           C  
ATOM     81  O   SER L  14      19.535   5.279  98.609  1.00  0.00           O  
ATOM     82  CB  SER L  14      21.947   6.872  97.891  1.00  0.00           C  
ATOM     83  OG  SER L  14      23.014   7.083  96.945  1.00  0.00           O  
ATOM     84  N   LEU L  15      20.900   4.041  99.923  1.00  0.00           N  
ATOM     85  CA  LEU L  15      19.915   3.206 100.585  1.00  0.00           C  
ATOM     86  C   LEU L  15      18.505   3.762 100.466  1.00  0.00           C  
ATOM     87  O   LEU L  15      18.187   4.854 100.953  1.00  0.00           O  
ATOM     88  CB  LEU L  15      20.399   2.919 101.996  1.00  0.00           C  
ATOM     89  CG  LEU L  15      20.336   3.898 103.124  1.00  0.00           C  
ATOM     90  CD1 LEU L  15      21.482   3.628 104.121  1.00  0.00           C  
ATOM     91  CD2 LEU L  15      20.463   5.340 102.641  1.00  0.00           C  
ATOM     92  N   GLY L  16      17.669   2.942  99.832  1.00  0.00           N  
ATOM     93  CA  GLY L  16      16.324   3.394  99.417  1.00  0.00           C  
ATOM     94  C   GLY L  16      16.303   3.498  97.893  1.00  0.00           C  
ATOM     95  O   GLY L  16      15.311   3.076  97.278  1.00  0.00           O  
ATOM     96  N   GLN L  17      17.374   4.044  97.347  1.00  0.00           N  
ATOM     97  CA  GLN L  17      17.605   4.098  95.870  1.00  0.00           C  
ATOM     98  C   GLN L  17      17.965   2.679  95.413  1.00  0.00           C  
ATOM     99  O   GLN L  17      17.872   1.728  96.216  1.00  0.00           O  
ATOM    100  CB  GLN L  17      18.712   5.095  95.517  1.00  0.00           C  
ATOM    101  CG  GLN L  17      18.684   5.886  94.238  1.00  0.00           C  
ATOM    102  CD  GLN L  17      19.537   5.345  93.110  1.00  0.00           C  
ATOM    103  OE1 GLN L  17      19.051   4.848  92.087  1.00  0.00           O  
ATOM    104  NE2 GLN L  17      20.856   5.419  93.279  1.00  0.00           N  
ATOM    105  N   SER L  18      18.404   2.557  94.175  1.00  0.00           N  
ATOM    106  CA  SER L  18      18.755   1.247  93.595  1.00  0.00           C  
ATOM    107  C   SER L  18      20.098   1.295  92.881  1.00  0.00           C  
ATOM    108  O   SER L  18      20.710   2.361  92.718  1.00  0.00           O  
ATOM    109  CB  SER L  18      17.643   0.751  92.682  1.00  0.00           C  
ATOM    110  OG  SER L  18      16.382   0.781  93.340  1.00  0.00           O  
ATOM    111  N   VAL L  19      20.555   0.118  92.498  1.00  0.00           N  
ATOM    112  CA  VAL L  19      21.829  -0.071  91.784  1.00  0.00           C  
ATOM    113  C   VAL L  19      21.650  -1.187  90.756  1.00  0.00           C  
ATOM    114  O   VAL L  19      20.762  -2.039  90.875  1.00  0.00           O  
ATOM    115  CB  VAL L  19      22.971  -0.247  92.794  1.00  0.00           C  
ATOM    116  CG1 VAL L  19      23.546  -1.648  92.892  1.00  0.00           C  
ATOM    117  CG2 VAL L  19      24.084   0.758  92.528  1.00  0.00           C  
ATOM    118  N   THR L  20      22.469  -1.121  89.728  1.00  0.00           N  
ATOM    119  CA  THR L  20      22.435  -2.077  88.591  1.00  0.00           C  
ATOM    120  C   THR L  20      23.872  -2.449  88.278  1.00  0.00           C  
ATOM    121  O   THR L  20      24.713  -1.517  88.215  1.00  0.00           O  
ATOM    122  CB  THR L  20      21.680  -1.398  87.401  1.00  0.00           C  
ATOM    123  OG1 THR L  20      22.350  -0.104  87.189  1.00  0.00           O  
ATOM    124  CG2 THR L  20      20.187  -1.175  87.674  1.00  0.00           C  
ATOM    125  N   ILE L  21      24.167  -3.736  88.157  1.00  0.00           N  
ATOM    126  CA  ILE L  21      25.532  -4.183  87.873  1.00  0.00           C  
ATOM    127  C   ILE L  21      25.613  -5.050  86.620  1.00  0.00           C  
ATOM    128  O   ILE L  21      24.901  -6.038  86.434  1.00  0.00           O  
ATOM    129  CB  ILE L  21      26.204  -4.882  89.098  1.00  0.00           C  
ATOM    130  CG1 ILE L  21      26.007  -4.043  90.381  1.00  0.00           C  
ATOM    131  CG2 ILE L  21      27.718  -5.154  88.847  1.00  0.00           C  
ATOM    132  CD1 ILE L  21      25.182  -4.771  91.491  1.00  0.00           C  
ATOM    133  N   SER L  22      26.595  -4.690  85.800  1.00  0.00           N  
ATOM    134  CA  SER L  22      26.833  -5.305  84.495  1.00  0.00           C  
ATOM    135  C   SER L  22      27.947  -6.349  84.581  1.00  0.00           C  
ATOM    136  O   SER L  22      28.956  -6.187  85.270  1.00  0.00           O  
ATOM    137  CB  SER L  22      27.205  -4.241  83.460  1.00  0.00           C  
ATOM    138  OG  SER L  22      28.349  -3.528  83.926  1.00  0.00           O  
ATOM    139  N   CYS L  23      27.710  -7.387  83.813  1.00  0.00           N  
ATOM    140  CA  CYS L  23      28.625  -8.541  83.677  1.00  0.00           C  
ATOM    141  C   CYS L  23      28.723  -8.831  82.170  1.00  0.00           C  
ATOM    142  O   CYS L  23      28.096  -9.730  81.595  1.00  0.00           O  
ATOM    143  CB  CYS L  23      28.123  -9.655  84.532  1.00  0.00           C  
ATOM    144  SG  CYS L  23      28.539 -11.336  84.146  1.00  0.00           S  
ATOM    145  N   THR L  24      29.519  -7.973  81.554  1.00  0.00           N  
ATOM    146  CA  THR L  24      29.785  -7.947  80.108  1.00  0.00           C  
ATOM    147  C   THR L  24      30.742  -9.029  79.660  1.00  0.00           C  
ATOM    148  O   THR L  24      31.855  -9.137  80.199  1.00  0.00           O  
ATOM    149  CB  THR L  24      30.341  -6.489  79.775  1.00  0.00           C  
ATOM    150  OG1 THR L  24      29.437  -5.579  80.498  1.00  0.00           O  
ATOM    151  CG2 THR L  24      30.440  -6.172  78.296  1.00  0.00           C  
ATOM    152  N   GLY L  25      30.362  -9.824  78.673  1.00  0.00           N  
ATOM    153  CA  GLY L  25      31.139 -10.947  78.160  1.00  0.00           C  
ATOM    154  C   GLY L  25      31.103 -11.117  76.650  1.00  0.00           C  
ATOM    155  O   GLY L  25      31.094 -10.138  75.877  1.00  0.00           O  
ATOM    156  N   THR L  26      31.060 -12.388  76.234  1.00  0.00           N  
ATOM    157  CA  THR L  26      31.334 -12.784  74.841  1.00  0.00           C  
ATOM    158  C   THR L  26      30.700 -14.074  74.380  1.00  0.00           C  
ATOM    159  O   THR L  26      31.183 -15.179  74.687  1.00  0.00           O  
ATOM    160  CB  THR L  26      32.926 -12.841  74.683  1.00  0.00           C  
ATOM    161  OG1 THR L  26      33.347 -11.455  74.486  1.00  0.00           O  
ATOM    162  CG2 THR L  26      33.444 -13.766  73.607  1.00  0.00           C  
ATOM    163  N   SER L  27      29.673 -14.012  73.574  1.00  0.00           N  
ATOM    164  CA  SER L  27      28.922 -15.045  72.904  1.00  0.00           C  
ATOM    165  C   SER L  27      29.540 -16.417  72.726  1.00  0.00           C  
ATOM    166  O   SER L  27      29.507 -17.012  71.614  1.00  0.00           O  
ATOM    167  CB  SER L  27      28.542 -14.518  71.473  1.00  0.00           C  
ATOM    168  OG  SER L  27      29.736 -14.351  70.713  1.00  0.00           O  
ATOM    169  N   SER L  27A     30.052 -16.977  73.778  1.00  0.00           N  
ATOM    170  CA  SER L  27A     30.910 -18.179  73.791  1.00  0.00           C  
ATOM    171  C   SER L  27A     30.936 -18.621  75.280  1.00  0.00           C  
ATOM    172  O   SER L  27A     31.193 -19.749  75.639  1.00  0.00           O  
ATOM    173  CB  SER L  27A     32.332 -17.899  73.362  1.00  0.00           C  
ATOM    174  OG  SER L  27A     32.498 -17.789  71.969  1.00  0.00           O  
ATOM    175  N   ASP L  27B     30.704 -17.570  76.041  1.00  0.00           N  
ATOM    176  CA  ASP L  27B     30.405 -17.665  77.483  1.00  0.00           C  
ATOM    177  C   ASP L  27B     28.968 -17.143  77.630  1.00  0.00           C  
ATOM    178  O   ASP L  27B     28.037 -17.968  77.513  1.00  0.00           O  
ATOM    179  CB  ASP L  27B     31.488 -17.031  78.284  1.00  0.00           C  
ATOM    180  CG  ASP L  27B     31.995 -15.665  77.924  1.00  0.00           C  
ATOM    181  OD1 ASP L  27B     31.180 -14.719  77.961  1.00  0.00           O  
ATOM    182  OD2 ASP L  27B     33.201 -15.483  77.669  1.00  0.00           O  
ATOM    183  N   VAL L  27C     28.805 -15.852  77.812  1.00  0.00           N  
ATOM    184  CA  VAL L  27C     27.458 -15.248  77.823  1.00  0.00           C  
ATOM    185  C   VAL L  27C     26.997 -14.965  76.388  1.00  0.00           C  
ATOM    186  O   VAL L  27C     27.774 -14.526  75.513  1.00  0.00           O  
ATOM    187  CB  VAL L  27C     27.419 -14.010  78.734  1.00  0.00           C  
ATOM    188  CG1 VAL L  27C     28.447 -12.960  78.340  1.00  0.00           C  
ATOM    189  CG2 VAL L  27C     26.032 -13.371  78.773  1.00  0.00           C  
ATOM    190  N   GLY L  28      25.702 -15.187  76.197  1.00  0.00           N  
ATOM    191  CA  GLY L  28      25.109 -15.089  74.830  1.00  0.00           C  
ATOM    192  C   GLY L  28      25.290 -16.478  74.189  1.00  0.00           C  
ATOM    193  O   GLY L  28      26.421 -16.936  73.994  1.00  0.00           O  
ATOM    194  N   GLY L  29      24.155 -17.092  73.938  1.00  0.00           N  
ATOM    195  CA  GLY L  29      24.107 -18.457  73.384  1.00  0.00           C  
ATOM    196  C   GLY L  29      23.814 -19.393  74.568  1.00  0.00           C  
ATOM    197  O   GLY L  29      22.841 -20.147  74.551  1.00  0.00           O  
ATOM    198  N   TYR L  30      24.685 -19.272  75.550  1.00  0.00           N  
ATOM    199  CA  TYR L  30      24.502 -19.865  76.885  1.00  0.00           C  
ATOM    200  C   TYR L  30      23.688 -18.889  77.762  1.00  0.00           C  
ATOM    201  O   TYR L  30      23.983 -17.681  77.775  1.00  0.00           O  
ATOM    202  CB  TYR L  30      25.839 -20.115  77.563  1.00  0.00           C  
ATOM    203  CG  TYR L  30      26.719 -21.242  77.130  1.00  0.00           C  
ATOM    204  CD1 TYR L  30      26.378 -22.569  77.399  1.00  0.00           C  
ATOM    205  CD2 TYR L  30      27.952 -20.999  76.505  1.00  0.00           C  
ATOM    206  CE1 TYR L  30      27.208 -23.625  77.020  1.00  0.00           C  
ATOM    207  CE2 TYR L  30      28.795 -22.041  76.132  1.00  0.00           C  
ATOM    208  CZ  TYR L  30      28.407 -23.354  76.384  1.00  0.00           C  
ATOM    209  OH  TYR L  30      29.214 -24.406  76.052  1.00  0.00           O  
ATOM    210  N   ASN L  31      22.751 -19.448  78.494  1.00  0.00           N  
ATOM    211  CA  ASN L  31      21.906 -18.662  79.416  1.00  0.00           C  
ATOM    212  C   ASN L  31      22.333 -18.879  80.870  1.00  0.00           C  
ATOM    213  O   ASN L  31      21.501 -18.730  81.785  1.00  0.00           O  
ATOM    214  CB  ASN L  31      20.435 -19.013  79.154  1.00  0.00           C  
ATOM    215  CG  ASN L  31      19.481 -17.841  79.188  1.00  0.00           C  
ATOM    216  OD1 ASN L  31      19.830 -16.693  78.864  1.00  0.00           O  
ATOM    217  ND2 ASN L  31      18.219 -18.105  79.554  1.00  0.00           N  
ATOM    218  N   TYR L  32      23.615 -19.118  81.091  1.00  0.00           N  
ATOM    219  CA  TYR L  32      24.047 -19.796  82.356  1.00  0.00           C  
ATOM    220  C   TYR L  32      25.233 -19.078  83.008  1.00  0.00           C  
ATOM    221  O   TYR L  32      26.411 -19.540  83.068  1.00  0.00           O  
ATOM    222  CB  TYR L  32      24.299 -21.225  82.036  1.00  0.00           C  
ATOM    223  CG  TYR L  32      23.601 -22.434  82.538  1.00  0.00           C  
ATOM    224  CD1 TYR L  32      24.073 -23.084  83.694  1.00  0.00           C  
ATOM    225  CD2 TYR L  32      22.580 -23.074  81.822  1.00  0.00           C  
ATOM    226  CE1 TYR L  32      23.520 -24.278  84.149  1.00  0.00           C  
ATOM    227  CE2 TYR L  32      22.010 -24.265  82.264  1.00  0.00           C  
ATOM    228  CZ  TYR L  32      22.481 -24.861  83.428  1.00  0.00           C  
ATOM    229  OH  TYR L  32      21.903 -26.024  83.876  1.00  0.00           O  
ATOM    230  N   VAL L  33      24.890 -17.895  83.512  1.00  0.00           N  
ATOM    231  CA  VAL L  33      25.759 -16.990  84.226  1.00  0.00           C  
ATOM    232  C   VAL L  33      25.062 -16.572  85.547  1.00  0.00           C  
ATOM    233  O   VAL L  33      23.861 -16.277  85.598  1.00  0.00           O  
ATOM    234  CB  VAL L  33      26.187 -15.759  83.423  1.00  0.00           C  
ATOM    235  CG1 VAL L  33      25.005 -14.997  82.833  1.00  0.00           C  
ATOM    236  CG2 VAL L  33      27.039 -14.815  84.267  1.00  0.00           C  
ATOM    237  N   SER L  34      25.944 -16.557  86.533  1.00  0.00           N  
ATOM    238  CA  SER L  34      25.546 -16.329  87.934  1.00  0.00           C  
ATOM    239  C   SER L  34      26.114 -15.038  88.500  1.00  0.00           C  
ATOM    240  O   SER L  34      26.890 -14.324  87.832  1.00  0.00           O  
ATOM    241  CB  SER L  34      26.014 -17.568  88.721  1.00  0.00           C  
ATOM    242  OG  SER L  34      25.907 -18.721  87.856  1.00  0.00           O  
ATOM    243  N   TRP L  35      25.734 -14.744  89.730  1.00  0.00           N  
ATOM    244  CA  TRP L  35      26.231 -13.600  90.515  1.00  0.00           C  
ATOM    245  C   TRP L  35      26.431 -14.005  91.989  1.00  0.00           C  
ATOM    246  O   TRP L  35      25.514 -14.410  92.718  1.00  0.00           O  
ATOM    247  CB  TRP L  35      25.332 -12.423  90.368  1.00  0.00           C  
ATOM    248  CG  TRP L  35      25.328 -11.547  89.178  1.00  0.00           C  
ATOM    249  CD1 TRP L  35      24.376 -11.495  88.187  1.00  0.00           C  
ATOM    250  CD2 TRP L  35      26.239 -10.470  88.897  1.00  0.00           C  
ATOM    251  NE1 TRP L  35      24.652 -10.475  87.315  1.00  0.00           N  
ATOM    252  CE2 TRP L  35      25.783  -9.835  87.724  1.00  0.00           C  
ATOM    253  CE3 TRP L  35      27.389 -10.003  89.533  1.00  0.00           C  
ATOM    254  CZ2 TRP L  35      26.440  -8.747  87.183  1.00  0.00           C  
ATOM    255  CZ3 TRP L  35      28.049  -8.926  88.977  1.00  0.00           C  
ATOM    256  CH2 TRP L  35      27.589  -8.308  87.834  1.00  0.00           C  
ATOM    257  N   TYR L  36      27.662 -13.909  92.424  1.00  0.00           N  
ATOM    258  CA  TYR L  36      28.224 -14.195  93.714  1.00  0.00           C  
ATOM    259  C   TYR L  36      28.354 -12.903  94.564  1.00  0.00           C  
ATOM    260  O   TYR L  36      29.102 -11.996  94.134  1.00  0.00           O  
ATOM    261  CB  TYR L  36      29.681 -14.715  93.601  1.00  0.00           C  
ATOM    262  CG  TYR L  36      29.971 -15.977  92.868  1.00  0.00           C  
ATOM    263  CD1 TYR L  36      29.322 -16.307  91.673  1.00  0.00           C  
ATOM    264  CD2 TYR L  36      30.953 -16.867  93.340  1.00  0.00           C  
ATOM    265  CE1 TYR L  36      29.603 -17.484  90.989  1.00  0.00           C  
ATOM    266  CE2 TYR L  36      31.243 -18.047  92.662  1.00  0.00           C  
ATOM    267  CZ  TYR L  36      30.553 -18.353  91.491  1.00  0.00           C  
ATOM    268  OH  TYR L  36      30.813 -19.497  90.792  1.00  0.00           O  
ATOM    269  N   GLN L  37      27.721 -12.900  95.725  1.00  0.00           N  
ATOM    270  CA  GLN L  37      27.848 -11.751  96.625  1.00  0.00           C  
ATOM    271  C   GLN L  37      28.980 -12.042  97.624  1.00  0.00           C  
ATOM    272  O   GLN L  37      28.953 -13.099  98.265  1.00  0.00           O  
ATOM    273  CB  GLN L  37      26.604 -11.337  97.425  1.00  0.00           C  
ATOM    274  CG  GLN L  37      26.939 -10.039  98.172  1.00  0.00           C  
ATOM    275  CD  GLN L  37      25.996  -9.674  99.265  1.00  0.00           C  
ATOM    276  OE1 GLN L  37      26.063 -10.177 100.390  1.00  0.00           O  
ATOM    277  NE2 GLN L  37      25.100  -8.732  98.949  1.00  0.00           N  
ATOM    278  N   GLN L  38      29.868 -11.075  97.741  1.00  0.00           N  
ATOM    279  CA  GLN L  38      31.021 -11.225  98.618  1.00  0.00           C  
ATOM    280  C   GLN L  38      31.132 -10.092  99.633  1.00  0.00           C  
ATOM    281  O   GLN L  38      31.639  -8.994  99.354  1.00  0.00           O  
ATOM    282  CB  GLN L  38      32.339 -11.433  97.860  1.00  0.00           C  
ATOM    283  CG  GLN L  38      33.106 -12.636  98.363  1.00  0.00           C  
ATOM    284  CD  GLN L  38      34.571 -12.659  98.040  1.00  0.00           C  
ATOM    285  OE1 GLN L  38      35.316 -13.501  98.566  1.00  0.00           O  
ATOM    286  NE2 GLN L  38      35.026 -11.753  97.179  1.00  0.00           N  
ATOM    287  N   HIS L  39      30.617 -10.431 100.827  1.00  0.00           N  
ATOM    288  CA  HIS L  39      30.907  -9.626 102.042  1.00  0.00           C  
ATOM    289  C   HIS L  39      32.372 -10.014 102.371  1.00  0.00           C  
ATOM    290  O   HIS L  39      32.747 -11.174 102.546  1.00  0.00           O  
ATOM    291  CB  HIS L  39      29.993  -9.783 103.214  1.00  0.00           C  
ATOM    292  CG  HIS L  39      28.576  -9.322 103.160  1.00  0.00           C  
ATOM    293  ND1 HIS L  39      28.137  -8.026 103.108  1.00  0.00           N  
ATOM    294  CD2 HIS L  39      27.435 -10.079 103.247  1.00  0.00           C  
ATOM    295  CE1 HIS L  39      26.813  -8.006 103.132  1.00  0.00           C  
ATOM    296  NE2 HIS L  39      26.365  -9.239 103.221  1.00  0.00           N  
ATOM    297  N   ALA L  40      33.190  -9.014 102.252  1.00  0.00           N  
ATOM    298  CA  ALA L  40      34.595  -8.897 102.386  1.00  0.00           C  
ATOM    299  C   ALA L  40      35.492 -10.106 102.377  1.00  0.00           C  
ATOM    300  O   ALA L  40      36.679  -9.979 102.805  1.00  0.00           O  
ATOM    301  CB  ALA L  40      34.884  -8.065 103.669  1.00  0.00           C  
ATOM    302  N   GLY L  41      35.041 -11.217 101.849  1.00  0.00           N  
ATOM    303  CA  GLY L  41      35.822 -12.478 101.873  1.00  0.00           C  
ATOM    304  C   GLY L  41      35.475 -13.211 103.182  1.00  0.00           C  
ATOM    305  O   GLY L  41      36.295 -13.335 104.091  1.00  0.00           O  
ATOM    306  N   LYS L  42      34.206 -13.595 103.236  1.00  0.00           N  
ATOM    307  CA  LYS L  42      33.693 -14.513 104.266  1.00  0.00           C  
ATOM    308  C   LYS L  42      33.246 -15.792 103.520  1.00  0.00           C  
ATOM    309  O   LYS L  42      32.638 -16.688 104.095  1.00  0.00           O  
ATOM    310  CB  LYS L  42      32.491 -13.970 105.011  1.00  0.00           C  
ATOM    311  CG  LYS L  42      32.756 -12.967 106.130  1.00  0.00           C  
ATOM    312  CD  LYS L  42      32.434 -11.545 105.701  1.00  0.00           C  
ATOM    313  CE  LYS L  42      33.061 -10.486 106.576  1.00  0.00           C  
ATOM    314  NZ  LYS L  42      34.455 -10.196 106.167  1.00  0.00           N  
ATOM    315  N   ALA L  43      33.607 -15.805 102.247  1.00  0.00           N  
ATOM    316  CA  ALA L  43      32.940 -16.626 101.215  1.00  0.00           C  
ATOM    317  C   ALA L  43      31.963 -15.685 100.483  1.00  0.00           C  
ATOM    318  O   ALA L  43      31.598 -14.627 101.020  1.00  0.00           O  
ATOM    319  CB  ALA L  43      32.215 -17.809 101.803  1.00  0.00           C  
ATOM    320  N   PRO L  44      31.602 -16.079  99.276  1.00  0.00           N  
ATOM    321  CA  PRO L  44      30.422 -15.521  98.588  1.00  0.00           C  
ATOM    322  C   PRO L  44      29.155 -16.304  98.903  1.00  0.00           C  
ATOM    323  O   PRO L  44      29.211 -17.506  99.226  1.00  0.00           O  
ATOM    324  CB  PRO L  44      30.807 -15.589  97.129  1.00  0.00           C  
ATOM    325  CG  PRO L  44      31.895 -16.605  97.014  1.00  0.00           C  
ATOM    326  CD  PRO L  44      32.315 -17.027  98.406  1.00  0.00           C  
ATOM    327  N   LYS L  45      28.027 -15.613  98.860  1.00  0.00           N  
ATOM    328  CA  LYS L  45      26.679 -16.238  98.863  1.00  0.00           C  
ATOM    329  C   LYS L  45      26.290 -16.214  97.365  1.00  0.00           C  
ATOM    330  O   LYS L  45      26.417 -15.135  96.748  1.00  0.00           O  
ATOM    331  CB  LYS L  45      25.643 -15.491  99.654  1.00  0.00           C  
ATOM    332  CG  LYS L  45      24.621 -16.223 100.483  1.00  0.00           C  
ATOM    333  CD  LYS L  45      23.285 -16.531  99.828  1.00  0.00           C  
ATOM    334  CE  LYS L  45      22.323 -17.159 100.830  1.00  0.00           C  
ATOM    335  NZ  LYS L  45      21.137 -17.767 100.200  1.00  0.00           N  
ATOM    336  N   VAL L  46      25.971 -17.381  96.858  1.00  0.00           N  
ATOM    337  CA  VAL L  46      25.595 -17.430  95.408  1.00  0.00           C  
ATOM    338  C   VAL L  46      24.161 -16.901  95.404  1.00  0.00           C  
ATOM    339  O   VAL L  46      23.251 -17.578  95.900  1.00  0.00           O  
ATOM    340  CB  VAL L  46      25.900 -18.773  94.792  1.00  0.00           C  
ATOM    341  CG1 VAL L  46      25.644 -18.855  93.285  1.00  0.00           C  
ATOM    342  CG2 VAL L  46      27.364 -19.190  95.041  1.00  0.00           C  
ATOM    343  N   ILE L  47      24.073 -15.647  94.948  1.00  0.00           N  
ATOM    344  CA  ILE L  47      22.786 -14.933  94.987  1.00  0.00           C  
ATOM    345  C   ILE L  47      21.978 -15.137  93.723  1.00  0.00           C  
ATOM    346  O   ILE L  47      20.747 -14.889  93.731  1.00  0.00           O  
ATOM    347  CB  ILE L  47      23.006 -13.441  95.415  1.00  0.00           C  
ATOM    348  CG1 ILE L  47      24.125 -12.747  94.608  1.00  0.00           C  
ATOM    349  CG2 ILE L  47      23.313 -13.308  96.941  1.00  0.00           C  
ATOM    350  CD1 ILE L  47      23.836 -11.254  94.261  1.00  0.00           C  
ATOM    351  N   ILE L  48      22.621 -15.608  92.664  1.00  0.00           N  
ATOM    352  CA  ILE L  48      21.977 -15.886  91.362  1.00  0.00           C  
ATOM    353  C   ILE L  48      22.867 -16.802  90.531  1.00  0.00           C  
ATOM    354  O   ILE L  48      24.095 -16.715  90.702  1.00  0.00           O  
ATOM    355  CB  ILE L  48      21.631 -14.563  90.606  1.00  0.00           C  
ATOM    356  CG1 ILE L  48      20.166 -14.653  90.102  1.00  0.00           C  
ATOM    357  CG2 ILE L  48      22.608 -14.245  89.446  1.00  0.00           C  
ATOM    358  CD1 ILE L  48      19.403 -13.300  90.115  1.00  0.00           C  
ATOM    359  N   TYR L  49      22.273 -17.606  89.660  1.00  0.00           N  
ATOM    360  CA  TYR L  49      23.007 -18.626  88.910  1.00  0.00           C  
ATOM    361  C   TYR L  49      22.541 -18.902  87.494  1.00  0.00           C  
ATOM    362  O   TYR L  49      23.386 -19.152  86.579  1.00  0.00           O  
ATOM    363  CB  TYR L  49      23.018 -19.949  89.706  1.00  0.00           C  
ATOM    364  CG  TYR L  49      21.656 -20.470  90.102  1.00  0.00           C  
ATOM    365  CD1 TYR L  49      20.810 -19.748  90.959  1.00  0.00           C  
ATOM    366  CD2 TYR L  49      21.229 -21.727  89.660  1.00  0.00           C  
ATOM    367  CE1 TYR L  49      19.565 -20.249  91.323  1.00  0.00           C  
ATOM    368  CE2 TYR L  49      19.995 -22.243  90.031  1.00  0.00           C  
ATOM    369  CZ  TYR L  49      19.164 -21.497  90.859  1.00  0.00           C  
ATOM    370  OH  TYR L  49      17.954 -22.030  91.203  1.00  0.00           O  
ATOM    371  N   GLU L  50      21.244 -18.968  87.300  1.00  0.00           N  
ATOM    372  CA  GLU L  50      20.664 -19.175  85.949  1.00  0.00           C  
ATOM    373  C   GLU L  50      20.047 -17.840  85.549  1.00  0.00           C  
ATOM    374  O   GLU L  50      18.827 -17.629  85.670  1.00  0.00           O  
ATOM    375  CB  GLU L  50      19.636 -20.277  85.956  1.00  0.00           C  
ATOM    376  CG  GLU L  50      20.074 -21.602  86.589  1.00  0.00           C  
ATOM    377  CD  GLU L  50      19.997 -22.783  85.665  1.00  0.00           C  
ATOM    378  OE1 GLU L  50      20.784 -22.972  84.759  1.00  0.00           O  
ATOM    379  OE2 GLU L  50      19.033 -23.533  85.919  1.00  0.00           O  
ATOM    380  N   VAL L  51      20.973 -16.947  85.163  1.00  0.00           N  
ATOM    381  CA  VAL L  51      20.577 -15.554  84.861  1.00  0.00           C  
ATOM    382  C   VAL L  51      19.778 -15.045  86.068  1.00  0.00           C  
ATOM    383  O   VAL L  51      20.394 -14.473  86.977  1.00  0.00           O  
ATOM    384  CB  VAL L  51      19.854 -15.408  83.512  1.00  0.00           C  
ATOM    385  CG1 VAL L  51      19.530 -13.947  83.164  1.00  0.00           C  
ATOM    386  CG2 VAL L  51      20.614 -16.004  82.337  1.00  0.00           C  
ATOM    387  N   ASN L  52      18.484 -15.316  86.094  1.00  0.00           N  
ATOM    388  CA  ASN L  52      17.581 -14.684  87.050  1.00  0.00           C  
ATOM    389  C   ASN L  52      17.066 -15.533  88.184  1.00  0.00           C  
ATOM    390  O   ASN L  52      16.406 -14.977  89.115  1.00  0.00           O  
ATOM    391  CB  ASN L  52      16.467 -13.953  86.267  1.00  0.00           C  
ATOM    392  CG  ASN L  52      16.371 -12.509  86.750  1.00  0.00           C  
ATOM    393  OD1 ASN L  52      16.428 -11.563  85.960  1.00  0.00           O  
ATOM    394  ND2 ASN L  52      16.253 -12.353  88.074  1.00  0.00           N  
ATOM    395  N   LYS L  53      17.365 -16.812  88.198  1.00  0.00           N  
ATOM    396  CA  LYS L  53      16.907 -17.751  89.236  1.00  0.00           C  
ATOM    397  C   LYS L  53      17.432 -17.372  90.613  1.00  0.00           C  
ATOM    398  O   LYS L  53      18.632 -17.493  90.907  1.00  0.00           O  
ATOM    399  CB  LYS L  53      17.319 -19.189  88.929  1.00  0.00           C  
ATOM    400  CG  LYS L  53      16.552 -19.865  87.791  1.00  0.00           C  
ATOM    401  CD  LYS L  53      15.583 -20.910  88.319  1.00  0.00           C  
ATOM    402  CE  LYS L  53      15.709 -22.220  87.564  1.00  0.00           C  
ATOM    403  NZ  LYS L  53      15.267 -22.058  86.159  1.00  0.00           N  
ATOM    404  N   ARG L  54      16.506 -16.941  91.444  1.00  0.00           N  
ATOM    405  CA  ARG L  54      16.751 -16.564  92.844  1.00  0.00           C  
ATOM    406  C   ARG L  54      16.659 -17.806  93.731  1.00  0.00           C  
ATOM    407  O   ARG L  54      15.694 -18.588  93.627  1.00  0.00           O  
ATOM    408  CB  ARG L  54      15.704 -15.547  93.316  1.00  0.00           C  
ATOM    409  CG  ARG L  54      16.205 -14.444  94.210  1.00  0.00           C  
ATOM    410  CD  ARG L  54      17.438 -13.803  93.660  1.00  0.00           C  
ATOM    411  NE  ARG L  54      17.252 -13.272  92.322  1.00  0.00           N  
ATOM    412  CZ  ARG L  54      16.672 -12.094  92.056  1.00  0.00           C  
ATOM    413  NH1 ARG L  54      16.175 -11.321  93.024  1.00  0.00           N  
ATOM    414  NH2 ARG L  54      16.628 -11.685  90.779  1.00  0.00           N  
ATOM    415  N   PRO L  55      17.679 -17.952  94.565  1.00  0.00           N  
ATOM    416  CA  PRO L  55      17.661 -18.946  95.653  1.00  0.00           C  
ATOM    417  C   PRO L  55      16.847 -18.432  96.837  1.00  0.00           C  
ATOM    418  O   PRO L  55      17.019 -17.288  97.280  1.00  0.00           O  
ATOM    419  CB  PRO L  55      19.118 -19.191  95.976  1.00  0.00           C  
ATOM    420  CG  PRO L  55      19.902 -18.624  94.822  1.00  0.00           C  
ATOM    421  CD  PRO L  55      19.058 -17.458  94.305  1.00  0.00           C  
ATOM    422  N   SER L  56      15.961 -19.282  97.324  1.00  0.00           N  
ATOM    423  CA  SER L  56      15.086 -19.014  98.473  1.00  0.00           C  
ATOM    424  C   SER L  56      15.916 -19.008  99.758  1.00  0.00           C  
ATOM    425  O   SER L  56      16.184 -20.066 100.353  1.00  0.00           O  
ATOM    426  CB  SER L  56      13.962 -20.040  98.577  1.00  0.00           C  
ATOM    427  OG  SER L  56      13.333 -20.257  97.313  1.00  0.00           O  
ATOM    428  N   GLY L  57      16.281 -17.804 100.154  1.00  0.00           N  
ATOM    429  CA  GLY L  57      17.266 -17.621 101.254  1.00  0.00           C  
ATOM    430  C   GLY L  57      18.196 -16.470 100.821  1.00  0.00           C  
ATOM    431  O   GLY L  57      19.103 -16.060 101.546  1.00  0.00           O  
ATOM    432  N   VAL L  58      17.937 -16.045  99.588  1.00  0.00           N  
ATOM    433  CA  VAL L  58      18.398 -14.718  99.127  1.00  0.00           C  
ATOM    434  C   VAL L  58      17.186 -13.767  99.204  1.00  0.00           C  
ATOM    435  O   VAL L  58      16.020 -14.191  99.094  1.00  0.00           O  
ATOM    436  CB  VAL L  58      19.040 -14.800  97.744  1.00  0.00           C  
ATOM    437  CG1 VAL L  58      19.633 -13.459  97.302  1.00  0.00           C  
ATOM    438  CG2 VAL L  58      20.090 -15.896  97.661  1.00  0.00           C  
ATOM    439  N   PRO L  59      17.520 -12.493  99.416  1.00  0.00           N  
ATOM    440  CA  PRO L  59      16.563 -11.405  99.330  1.00  0.00           C  
ATOM    441  C   PRO L  59      16.129 -10.916  97.960  1.00  0.00           C  
ATOM    442  O   PRO L  59      16.809 -10.124  97.281  1.00  0.00           O  
ATOM    443  CB  PRO L  59      17.227 -10.248 100.113  1.00  0.00           C  
ATOM    444  CG  PRO L  59      18.199 -10.945 101.033  1.00  0.00           C  
ATOM    445  CD  PRO L  59      18.739 -12.098 100.200  1.00  0.00           C  
ATOM    446  N   ASP L  60      14.930 -11.252  97.564  1.00  0.00           N  
ATOM    447  CA  ASP L  60      14.123 -10.788  96.480  1.00  0.00           C  
ATOM    448  C   ASP L  60      14.318  -9.463  95.789  1.00  0.00           C  
ATOM    449  O   ASP L  60      13.586  -9.280  94.742  1.00  0.00           O  
ATOM    450  CB  ASP L  60      12.603 -10.901  96.919  1.00  0.00           C  
ATOM    451  CG  ASP L  60      12.195  -9.755  97.821  1.00  0.00           C  
ATOM    452  OD1 ASP L  60      12.187  -8.605  97.332  1.00  0.00           O  
ATOM    453  OD2 ASP L  60      11.884  -9.984  99.008  1.00  0.00           O  
ATOM    454  N   ARG L  61      15.124  -8.539  96.224  1.00  0.00           N  
ATOM    455  CA  ARG L  61      15.349  -7.268  95.501  1.00  0.00           C  
ATOM    456  C   ARG L  61      16.655  -7.249  94.718  1.00  0.00           C  
ATOM    457  O   ARG L  61      17.165  -6.153  94.367  1.00  0.00           O  
ATOM    458  CB  ARG L  61      15.295  -6.082  96.486  1.00  0.00           C  
ATOM    459  CG  ARG L  61      14.061  -5.198  96.421  1.00  0.00           C  
ATOM    460  CD  ARG L  61      14.159  -3.983  97.291  1.00  0.00           C  
ATOM    461  NE  ARG L  61      14.305  -4.277  98.700  1.00  0.00           N  
ATOM    462  CZ  ARG L  61      14.135  -3.444  99.724  1.00  0.00           C  
ATOM    463  NH1 ARG L  61      13.803  -2.165  99.592  1.00  0.00           N  
ATOM    464  NH2 ARG L  61      14.276  -3.929 100.966  1.00  0.00           N  
ATOM    465  N   PHE L  62      17.195  -8.413  94.407  1.00  0.00           N  
ATOM    466  CA  PHE L  62      18.464  -8.583  93.712  1.00  0.00           C  
ATOM    467  C   PHE L  62      18.388  -8.954  92.238  1.00  0.00           C  
ATOM    468  O   PHE L  62      19.258  -9.763  91.790  1.00  0.00           O  
ATOM    469  CB  PHE L  62      19.322  -9.647  94.452  1.00  0.00           C  
ATOM    470  CG  PHE L  62      19.993  -9.152  95.696  1.00  0.00           C  
ATOM    471  CD1 PHE L  62      20.851  -8.051  95.636  1.00  0.00           C  
ATOM    472  CD2 PHE L  62      19.789  -9.795  96.913  1.00  0.00           C  
ATOM    473  CE1 PHE L  62      21.472  -7.573  96.770  1.00  0.00           C  
ATOM    474  CE2 PHE L  62      20.414  -9.333  98.068  1.00  0.00           C  
ATOM    475  CZ  PHE L  62      21.254  -8.216  97.992  1.00  0.00           C  
ATOM    476  N   SER L  63      17.483  -8.396  91.481  1.00  0.00           N  
ATOM    477  CA  SER L  63      17.221  -8.765  90.080  1.00  0.00           C  
ATOM    478  C   SER L  63      18.473  -8.894  89.228  1.00  0.00           C  
ATOM    479  O   SER L  63      19.286  -7.961  89.184  1.00  0.00           O  
ATOM    480  CB  SER L  63      16.274  -7.706  89.461  1.00  0.00           C  
ATOM    481  OG  SER L  63      16.158  -6.584  90.346  1.00  0.00           O  
ATOM    482  N   GLY L  64      18.628 -10.025  88.535  1.00  0.00           N  
ATOM    483  CA  GLY L  64      19.771 -10.243  87.637  1.00  0.00           C  
ATOM    484  C   GLY L  64      19.364 -10.753  86.271  1.00  0.00           C  
ATOM    485  O   GLY L  64      19.202 -11.976  86.079  1.00  0.00           O  
ATOM    486  N   SER L  65      19.285  -9.855  85.302  1.00  0.00           N  
ATOM    487  CA  SER L  65      18.844 -10.086  83.936  1.00  0.00           C  
ATOM    488  C   SER L  65      19.919 -10.124  82.854  1.00  0.00           C  
ATOM    489  O   SER L  65      20.916  -9.389  82.880  1.00  0.00           O  
ATOM    490  CB  SER L  65      17.827  -8.966  83.584  1.00  0.00           C  
ATOM    491  OG  SER L  65      18.474  -7.700  83.540  1.00  0.00           O  
ATOM    492  N   LYS L  66      19.693 -10.944  81.828  1.00  0.00           N  
ATOM    493  CA  LYS L  66      20.574 -11.076  80.666  1.00  0.00           C  
ATOM    494  C   LYS L  66      20.072 -10.199  79.517  1.00  0.00           C  
ATOM    495  O   LYS L  66      18.878 -10.204  79.197  1.00  0.00           O  
ATOM    496  CB  LYS L  66      20.718 -12.488  80.138  1.00  0.00           C  
ATOM    497  CG  LYS L  66      22.090 -12.773  79.524  1.00  0.00           C  
ATOM    498  CD  LYS L  66      22.240 -14.253  79.175  1.00  0.00           C  
ATOM    499  CE  LYS L  66      21.821 -14.562  77.743  1.00  0.00           C  
ATOM    500  NZ  LYS L  66      22.386 -15.874  77.318  1.00  0.00           N  
ATOM    501  N   SER L  67      21.032  -9.495  78.931  1.00  0.00           N  
ATOM    502  CA  SER L  67      20.718  -8.530  77.857  1.00  0.00           C  
ATOM    503  C   SER L  67      21.473  -8.906  76.593  1.00  0.00           C  
ATOM    504  O   SER L  67      21.220  -9.986  76.003  1.00  0.00           O  
ATOM    505  CB  SER L  67      20.976  -7.120  78.348  1.00  0.00           C  
ATOM    506  OG  SER L  67      21.635  -7.088  79.612  1.00  0.00           O  
ATOM    507  N   GLY L  68      22.366  -8.030  76.173  1.00  0.00           N  
ATOM    508  CA  GLY L  68      23.123  -8.240  74.908  1.00  0.00           C  
ATOM    509  C   GLY L  68      24.054  -9.440  75.154  1.00  0.00           C  
ATOM    510  O   GLY L  68      23.635 -10.600  75.113  1.00  0.00           O  
ATOM    511  N   ASN L  69      25.285  -9.080  75.453  1.00  0.00           N  
ATOM    512  CA  ASN L  69      26.269 -10.096  75.892  1.00  0.00           C  
ATOM    513  C   ASN L  69      26.649  -9.889  77.351  1.00  0.00           C  
ATOM    514  O   ASN L  69      27.803 -10.118  77.743  1.00  0.00           O  
ATOM    515  CB  ASN L  69      27.399 -10.144  74.862  1.00  0.00           C  
ATOM    516  CG  ASN L  69      27.422 -11.491  74.144  1.00  0.00           C  
ATOM    517  OD1 ASN L  69      28.368 -11.801  73.414  1.00  0.00           O  
ATOM    518  ND2 ASN L  69      26.390 -12.304  74.382  1.00  0.00           N  
ATOM    519  N   THR L  70      25.645  -9.529  78.165  1.00  0.00           N  
ATOM    520  CA  THR L  70      25.886  -9.168  79.561  1.00  0.00           C  
ATOM    521  C   THR L  70      24.758  -9.413  80.543  1.00  0.00           C  
ATOM    522  O   THR L  70      23.556  -9.254  80.275  1.00  0.00           O  
ATOM    523  CB  THR L  70      26.385  -7.651  79.610  1.00  0.00           C  
ATOM    524  OG1 THR L  70      26.230  -7.200  80.989  1.00  0.00           O  
ATOM    525  CG2 THR L  70      25.665  -6.778  78.576  1.00  0.00           C  
ATOM    526  N   ALA L  71      25.202  -9.778  81.755  1.00  0.00           N  
ATOM    527  CA  ALA L  71      24.322  -9.898  82.939  1.00  0.00           C  
ATOM    528  C   ALA L  71      24.141  -8.529  83.594  1.00  0.00           C  
ATOM    529  O   ALA L  71      24.980  -7.624  83.393  1.00  0.00           O  
ATOM    530  CB  ALA L  71      24.907 -10.906  83.913  1.00  0.00           C  
ATOM    531  N   SER L  72      23.058  -8.387  84.345  1.00  0.00           N  
ATOM    532  CA  SER L  72      22.647  -7.099  84.928  1.00  0.00           C  
ATOM    533  C   SER L  72      21.900  -7.315  86.241  1.00  0.00           C  
ATOM    534  O   SER L  72      20.721  -7.695  86.215  1.00  0.00           O  
ATOM    535  CB  SER L  72      21.766  -6.327  83.947  1.00  0.00           C  
ATOM    536  OG  SER L  72      22.369  -6.204  82.673  1.00  0.00           O  
ATOM    537  N   LEU L  73      22.555  -7.028  87.351  1.00  0.00           N  
ATOM    538  CA  LEU L  73      22.082  -7.206  88.721  1.00  0.00           C  
ATOM    539  C   LEU L  73      21.604  -5.874  89.308  1.00  0.00           C  
ATOM    540  O   LEU L  73      22.423  -5.102  89.847  1.00  0.00           O  
ATOM    541  CB  LEU L  73      23.264  -7.756  89.520  1.00  0.00           C  
ATOM    542  CG  LEU L  73      23.183  -8.666  90.699  1.00  0.00           C  
ATOM    543  CD1 LEU L  73      24.515  -8.638  91.483  1.00  0.00           C  
ATOM    544  CD2 LEU L  73      22.055  -8.298  91.654  1.00  0.00           C  
ATOM    545  N   THR L  74      20.331  -5.598  89.217  1.00  0.00           N  
ATOM    546  CA  THR L  74      19.634  -4.521  89.892  1.00  0.00           C  
ATOM    547  C   THR L  74      19.316  -4.892  91.351  1.00  0.00           C  
ATOM    548  O   THR L  74      18.490  -5.778  91.641  1.00  0.00           O  
ATOM    549  CB  THR L  74      18.288  -4.158  89.132  1.00  0.00           C  
ATOM    550  OG1 THR L  74      18.667  -3.562  87.860  1.00  0.00           O  
ATOM    551  CG2 THR L  74      17.336  -3.260  89.933  1.00  0.00           C  
ATOM    552  N   VAL L  75      20.003  -4.221  92.253  1.00  0.00           N  
ATOM    553  CA  VAL L  75      19.644  -4.182  93.677  1.00  0.00           C  
ATOM    554  C   VAL L  75      18.606  -3.044  93.777  1.00  0.00           C  
ATOM    555  O   VAL L  75      18.912  -1.927  93.326  1.00  0.00           O  
ATOM    556  CB  VAL L  75      20.863  -3.913  94.571  1.00  0.00           C  
ATOM    557  CG1 VAL L  75      20.471  -3.940  96.062  1.00  0.00           C  
ATOM    558  CG2 VAL L  75      22.036  -4.833  94.316  1.00  0.00           C  
ATOM    559  N   SER L  76      17.457  -3.370  94.322  1.00  0.00           N  
ATOM    560  CA  SER L  76      16.378  -2.368  94.450  1.00  0.00           C  
ATOM    561  C   SER L  76      16.301  -1.845  95.870  1.00  0.00           C  
ATOM    562  O   SER L  76      16.721  -2.523  96.819  1.00  0.00           O  
ATOM    563  CB  SER L  76      15.054  -2.955  93.984  1.00  0.00           C  
ATOM    564  OG  SER L  76      14.995  -2.982  92.558  1.00  0.00           O  
ATOM    565  N   GLY L  77      15.783  -0.637  96.002  1.00  0.00           N  
ATOM    566  CA  GLY L  77      15.486   0.040  97.248  1.00  0.00           C  
ATOM    567  C   GLY L  77      16.425  -0.173  98.414  1.00  0.00           C  
ATOM    568  O   GLY L  77      16.009  -0.433  99.564  1.00  0.00           O  
ATOM    569  N   LEU L  78      17.703   0.012  98.200  1.00  0.00           N  
ATOM    570  CA  LEU L  78      18.828  -0.356  98.994  1.00  0.00           C  
ATOM    571  C   LEU L  78      18.830  -0.318 100.511  1.00  0.00           C  
ATOM    572  O   LEU L  78      18.508   0.628 101.226  1.00  0.00           O  
ATOM    573  CB  LEU L  78      20.045   0.448  98.399  1.00  0.00           C  
ATOM    574  CG  LEU L  78      20.671  -0.283  97.202  1.00  0.00           C  
ATOM    575  CD1 LEU L  78      21.444   0.667  96.322  1.00  0.00           C  
ATOM    576  CD2 LEU L  78      21.597  -1.371  97.743  1.00  0.00           C  
ATOM    577  N   GLN L  79      19.367  -1.413 101.024  1.00  0.00           N  
ATOM    578  CA  GLN L  79      19.649  -1.756 102.418  1.00  0.00           C  
ATOM    579  C   GLN L  79      21.160  -1.751 102.619  1.00  0.00           C  
ATOM    580  O   GLN L  79      21.873  -2.654 102.139  1.00  0.00           O  
ATOM    581  CB  GLN L  79      19.027  -3.164 102.641  1.00  0.00           C  
ATOM    582  CG  GLN L  79      17.776  -3.380 101.777  1.00  0.00           C  
ATOM    583  CD  GLN L  79      17.891  -4.243 100.557  1.00  0.00           C  
ATOM    584  OE1 GLN L  79      18.164  -3.826  99.421  1.00  0.00           O  
ATOM    585  NE2 GLN L  79      17.609  -5.552 100.713  1.00  0.00           N  
ATOM    586  N   ALA L  80      21.704  -0.746 103.264  1.00  0.00           N  
ATOM    587  CA  ALA L  80      23.102  -0.476 103.535  1.00  0.00           C  
ATOM    588  C   ALA L  80      24.033  -1.616 103.898  1.00  0.00           C  
ATOM    589  O   ALA L  80      25.310  -1.530 103.853  1.00  0.00           O  
ATOM    590  CB  ALA L  80      23.179   0.615 104.636  1.00  0.00           C  
ATOM    591  N   GLU L  81      23.451  -2.764 104.176  1.00  0.00           N  
ATOM    592  CA  GLU L  81      24.179  -3.995 104.493  1.00  0.00           C  
ATOM    593  C   GLU L  81      24.908  -4.458 103.234  1.00  0.00           C  
ATOM    594  O   GLU L  81      26.007  -5.000 103.266  1.00  0.00           O  
ATOM    595  CB  GLU L  81      23.219  -5.112 104.892  1.00  0.00           C  
ATOM    596  CG  GLU L  81      21.721  -4.819 104.684  1.00  0.00           C  
ATOM    597  CD  GLU L  81      21.062  -4.159 105.868  1.00  0.00           C  
ATOM    598  OE1 GLU L  81      20.714  -4.791 106.855  1.00  0.00           O  
ATOM    599  OE2 GLU L  81      20.937  -2.926 105.740  1.00  0.00           O  
ATOM    600  N   ASP L  82      24.223  -4.196 102.122  1.00  0.00           N  
ATOM    601  CA  ASP L  82      24.585  -4.674 100.797  1.00  0.00           C  
ATOM    602  C   ASP L  82      26.012  -4.272 100.423  1.00  0.00           C  
ATOM    603  O   ASP L  82      26.454  -4.746  99.339  1.00  0.00           O  
ATOM    604  CB  ASP L  82      23.564  -4.231  99.728  1.00  0.00           C  
ATOM    605  CG  ASP L  82      22.156  -4.737  99.934  1.00  0.00           C  
ATOM    606  OD1 ASP L  82      21.990  -5.971 100.044  1.00  0.00           O  
ATOM    607  OD2 ASP L  82      21.203  -3.940  99.992  1.00  0.00           O  
ATOM    608  N   GLU L  83      26.614  -3.412 101.282  1.00  0.00           N  
ATOM    609  CA  GLU L  83      28.056  -3.124 100.871  1.00  0.00           C  
ATOM    610  C   GLU L  83      28.813  -4.417 100.685  1.00  0.00           C  
ATOM    611  O   GLU L  83      28.861  -5.263 101.605  1.00  0.00           O  
ATOM    612  CB  GLU L  83      28.714  -2.237 101.875  1.00  0.00           C  
ATOM    613  CG  GLU L  83      28.408  -0.727 101.745  1.00  0.00           C  
ATOM    614  CD  GLU L  83      29.401   0.081 102.548  1.00  0.00           C  
ATOM    615  OE1 GLU L  83      30.601   0.008 102.349  1.00  0.00           O  
ATOM    616  OE2 GLU L  83      28.838   0.744 103.431  1.00  0.00           O  
ATOM    617  N   ALA L  84      29.403  -4.595  99.497  1.00  0.00           N  
ATOM    618  CA  ALA L  84      30.184  -5.792  99.161  1.00  0.00           C  
ATOM    619  C   ALA L  84      30.744  -5.781  97.743  1.00  0.00           C  
ATOM    620  O   ALA L  84      30.299  -5.007  96.878  1.00  0.00           O  
ATOM    621  CB  ALA L  84      29.312  -7.037  99.382  1.00  0.00           C  
ATOM    622  N   ASP L  85      31.730  -6.673  97.521  1.00  0.00           N  
ATOM    623  CA  ASP L  85      32.199  -6.960  96.142  1.00  0.00           C  
ATOM    624  C   ASP L  85      31.322  -8.122  95.629  1.00  0.00           C  
ATOM    625  O   ASP L  85      31.004  -8.994  96.443  1.00  0.00           O  
ATOM    626  CB  ASP L  85      33.679  -7.242  96.047  1.00  0.00           C  
ATOM    627  CG  ASP L  85      34.442  -7.423  97.324  1.00  0.00           C  
ATOM    628  OD1 ASP L  85      33.965  -8.065  98.280  1.00  0.00           O  
ATOM    629  OD2 ASP L  85      35.583  -6.898  97.400  1.00  0.00           O  
ATOM    630  N   TYR L  86      30.949  -8.068  94.355  1.00  0.00           N  
ATOM    631  CA  TYR L  86      30.150  -9.142  93.736  1.00  0.00           C  
ATOM    632  C   TYR L  86      30.768  -9.577  92.387  1.00  0.00           C  
ATOM    633  O   TYR L  86      31.308  -8.734  91.641  1.00  0.00           O  
ATOM    634  CB  TYR L  86      28.719  -8.757  93.450  1.00  0.00           C  
ATOM    635  CG  TYR L  86      27.738  -8.249  94.435  1.00  0.00           C  
ATOM    636  CD1 TYR L  86      27.906  -7.041  95.127  1.00  0.00           C  
ATOM    637  CD2 TYR L  86      26.521  -8.936  94.623  1.00  0.00           C  
ATOM    638  CE1 TYR L  86      26.936  -6.562  96.002  1.00  0.00           C  
ATOM    639  CE2 TYR L  86      25.542  -8.468  95.499  1.00  0.00           C  
ATOM    640  CZ  TYR L  86      25.758  -7.283  96.181  1.00  0.00           C  
ATOM    641  OH  TYR L  86      24.778  -6.859  97.040  1.00  0.00           O  
ATOM    642  N   TYR L  87      30.545 -10.844  92.063  1.00  0.00           N  
ATOM    643  CA  TYR L  87      31.066 -11.478  90.855  1.00  0.00           C  
ATOM    644  C   TYR L  87      29.986 -12.172  90.028  1.00  0.00           C  
ATOM    645  O   TYR L  87      28.942 -12.576  90.522  1.00  0.00           O  
ATOM    646  CB  TYR L  87      32.175 -12.510  91.195  1.00  0.00           C  
ATOM    647  CG  TYR L  87      33.210 -11.909  92.119  1.00  0.00           C  
ATOM    648  CD1 TYR L  87      33.870 -10.744  91.740  1.00  0.00           C  
ATOM    649  CD2 TYR L  87      33.488 -12.456  93.374  1.00  0.00           C  
ATOM    650  CE1 TYR L  87      34.800 -10.140  92.582  1.00  0.00           C  
ATOM    651  CE2 TYR L  87      34.426 -11.868  94.214  1.00  0.00           C  
ATOM    652  CZ  TYR L  87      35.076 -10.703  93.813  1.00  0.00           C  
ATOM    653  OH  TYR L  87      36.006 -10.080  94.599  1.00  0.00           O  
ATOM    654  N   CYS L  88      30.262 -12.265  88.732  1.00  0.00           N  
ATOM    655  CA  CYS L  88      29.419 -13.032  87.797  1.00  0.00           C  
ATOM    656  C   CYS L  88      30.309 -14.138  87.209  1.00  0.00           C  
ATOM    657  O   CYS L  88      31.543 -13.980  87.252  1.00  0.00           O  
ATOM    658  CB  CYS L  88      28.791 -12.175  86.719  1.00  0.00           C  
ATOM    659  SG  CYS L  88      29.950 -11.371  85.600  1.00  0.00           S  
ATOM    660  N   SER L  89      29.640 -15.191  86.754  1.00  0.00           N  
ATOM    661  CA  SER L  89      30.438 -16.357  86.256  1.00  0.00           C  
ATOM    662  C   SER L  89      29.681 -16.948  85.072  1.00  0.00           C  
ATOM    663  O   SER L  89      28.488 -17.277  85.222  1.00  0.00           O  
ATOM    664  CB  SER L  89      30.723 -17.405  87.286  1.00  0.00           C  
ATOM    665  OG  SER L  89      31.662 -18.366  86.819  1.00  0.00           O  
ATOM    666  N   SER L  90      30.421 -17.029  83.977  1.00  0.00           N  
ATOM    667  CA  SER L  90      29.841 -17.499  82.709  1.00  0.00           C  
ATOM    668  C   SER L  90      30.345 -18.911  82.395  1.00  0.00           C  
ATOM    669  O   SER L  90      31.549 -19.204  82.573  1.00  0.00           O  
ATOM    670  CB  SER L  90      30.160 -16.553  81.556  1.00  0.00           C  
ATOM    671  OG  SER L  90      31.554 -16.463  81.290  1.00  0.00           O  
ATOM    672  N   TYR L  91      29.362 -19.713  81.954  1.00  0.00           N  
ATOM    673  CA  TYR L  91      29.771 -21.014  81.348  1.00  0.00           C  
ATOM    674  C   TYR L  91      30.431 -20.824  79.983  1.00  0.00           C  
ATOM    675  O   TYR L  91      29.980 -20.051  79.119  1.00  0.00           O  
ATOM    676  CB  TYR L  91      28.557 -21.947  81.287  1.00  0.00           C  
ATOM    677  CG  TYR L  91      28.899 -23.387  80.997  1.00  0.00           C  
ATOM    678  CD1 TYR L  91      30.128 -23.915  81.394  1.00  0.00           C  
ATOM    679  CD2 TYR L  91      28.015 -24.221  80.314  1.00  0.00           C  
ATOM    680  CE1 TYR L  91      30.468 -25.234  81.132  1.00  0.00           C  
ATOM    681  CE2 TYR L  91      28.343 -25.546  80.036  1.00  0.00           C  
ATOM    682  CZ  TYR L  91      29.574 -26.048  80.452  1.00  0.00           C  
ATOM    683  OH  TYR L  91      29.939 -27.349  80.216  1.00  0.00           O  
ATOM    684  N   GLU L  92      31.555 -21.507  79.805  1.00  0.00           N  
ATOM    685  CA  GLU L  92      32.127 -21.771  78.459  1.00  0.00           C  
ATOM    686  C   GLU L  92      31.712 -23.213  78.158  1.00  0.00           C  
ATOM    687  O   GLU L  92      30.471 -23.438  78.165  1.00  0.00           O  
ATOM    688  CB  GLU L  92      33.613 -21.587  78.387  1.00  0.00           C  
ATOM    689  CG  GLU L  92      34.308 -21.715  77.037  1.00  0.00           C  
ATOM    690  CD  GLU L  92      35.463 -22.664  76.935  1.00  0.00           C  
ATOM    691  OE1 GLU L  92      35.120 -23.867  76.957  1.00  0.00           O  
ATOM    692  OE2 GLU L  92      36.629 -22.305  76.816  1.00  0.00           O  
ATOM    693  N   GLY L  93      32.624 -24.171  78.041  1.00  0.00           N  
ATOM    694  CA  GLY L  93      32.246 -25.530  77.777  1.00  0.00           C  
ATOM    695  C   GLY L  93      33.155 -26.680  77.864  1.00  0.00           C  
ATOM    696  O   GLY L  93      32.861 -27.699  77.154  1.00  0.00           O  
ATOM    697  N   SER L  94      34.207 -26.662  78.656  1.00  0.00           N  
ATOM    698  CA  SER L  94      35.069 -27.869  78.833  1.00  0.00           C  
ATOM    699  C   SER L  94      34.756 -28.464  80.212  1.00  0.00           C  
ATOM    700  O   SER L  94      35.378 -29.421  80.684  1.00  0.00           O  
ATOM    701  CB  SER L  94      36.527 -27.559  78.658  1.00  0.00           C  
ATOM    702  OG  SER L  94      36.848 -26.208  78.931  1.00  0.00           O  
ATOM    703  N   ASP L  95      33.697 -27.880  80.774  1.00  0.00           N  
ATOM    704  CA  ASP L  95      33.524 -27.939  82.264  1.00  0.00           C  
ATOM    705  C   ASP L  95      34.696 -27.025  82.699  1.00  0.00           C  
ATOM    706  O   ASP L  95      35.748 -27.443  83.159  1.00  0.00           O  
ATOM    707  CB  ASP L  95      33.518 -29.347  82.755  1.00  0.00           C  
ATOM    708  CG  ASP L  95      32.665 -30.319  81.950  1.00  0.00           C  
ATOM    709  OD1 ASP L  95      31.436 -30.175  81.887  1.00  0.00           O  
ATOM    710  OD2 ASP L  95      33.278 -31.242  81.378  1.00  0.00           O  
ATOM    711  N   ASN L  95A     34.497 -25.781  82.302  1.00  0.00           N  
ATOM    712  CA  ASN L  95A     35.344 -24.627  82.610  1.00  0.00           C  
ATOM    713  C   ASN L  95A     34.350 -23.466  82.846  1.00  0.00           C  
ATOM    714  O   ASN L  95A     33.226 -23.567  82.307  1.00  0.00           O  
ATOM    715  CB  ASN L  95A     36.323 -24.313  81.467  1.00  0.00           C  
ATOM    716  CG  ASN L  95A     35.655 -23.460  80.383  1.00  0.00           C  
ATOM    717  OD1 ASN L  95A     34.759 -23.962  79.684  1.00  0.00           O  
ATOM    718  ND2 ASN L  95A     36.042 -22.195  80.270  1.00  0.00           N  
ATOM    719  N   PHE L  96      34.784 -22.466  83.579  1.00  0.00           N  
ATOM    720  CA  PHE L  96      33.886 -21.312  83.893  1.00  0.00           C  
ATOM    721  C   PHE L  96      34.745 -20.061  84.120  1.00  0.00           C  
ATOM    722  O   PHE L  96      35.823 -20.204  84.716  1.00  0.00           O  
ATOM    723  CB  PHE L  96      33.067 -21.628  85.086  1.00  0.00           C  
ATOM    724  CG  PHE L  96      31.704 -22.185  85.088  1.00  0.00           C  
ATOM    725  CD1 PHE L  96      30.592 -21.365  84.841  1.00  0.00           C  
ATOM    726  CD2 PHE L  96      31.483 -23.515  85.477  1.00  0.00           C  
ATOM    727  CE1 PHE L  96      29.301 -21.853  84.941  1.00  0.00           C  
ATOM    728  CE2 PHE L  96      30.183 -24.030  85.579  1.00  0.00           C  
ATOM    729  CZ  PHE L  96      29.099 -23.186  85.308  1.00  0.00           C  
ATOM    730  N   VAL L  97      34.216 -18.909  83.701  1.00  0.00           N  
ATOM    731  CA  VAL L  97      35.019 -17.661  83.778  1.00  0.00           C  
ATOM    732  C   VAL L  97      34.238 -16.483  84.354  1.00  0.00           C  
ATOM    733  O   VAL L  97      33.129 -16.114  83.941  1.00  0.00           O  
ATOM    734  CB  VAL L  97      35.708 -17.357  82.437  1.00  0.00           C  
ATOM    735  CG1 VAL L  97      37.231 -17.546  82.517  1.00  0.00           C  
ATOM    736  CG2 VAL L  97      35.156 -18.177  81.285  1.00  0.00           C  
ATOM    737  N   PHE L  98      34.887 -15.846  85.330  1.00  0.00           N  
ATOM    738  CA  PHE L  98      34.259 -14.919  86.284  1.00  0.00           C  
ATOM    739  C   PHE L  98      34.350 -13.479  85.823  1.00  0.00           C  
ATOM    740  O   PHE L  98      34.848 -13.233  84.720  1.00  0.00           O  
ATOM    741  CB  PHE L  98      34.862 -15.121  87.695  1.00  0.00           C  
ATOM    742  CG  PHE L  98      34.460 -16.424  88.332  1.00  0.00           C  
ATOM    743  CD1 PHE L  98      34.827 -17.635  87.741  1.00  0.00           C  
ATOM    744  CD2 PHE L  98      33.715 -16.435  89.503  1.00  0.00           C  
ATOM    745  CE1 PHE L  98      34.455 -18.845  88.308  1.00  0.00           C  
ATOM    746  CE2 PHE L  98      33.336 -17.651  90.089  1.00  0.00           C  
ATOM    747  CZ  PHE L  98      33.707 -18.859  89.485  1.00  0.00           C  
ATOM    748  N   GLY L  99      33.908 -12.562  86.668  1.00  0.00           N  
ATOM    749  CA  GLY L  99      33.815 -11.138  86.326  1.00  0.00           C  
ATOM    750  C   GLY L  99      34.952 -10.312  86.901  1.00  0.00           C  
ATOM    751  O   GLY L  99      35.816 -10.804  87.644  1.00  0.00           O  
ATOM    752  N   THR L 100      34.946  -9.035  86.540  1.00  0.00           N  
ATOM    753  CA  THR L 100      35.926  -8.054  87.018  1.00  0.00           C  
ATOM    754  C   THR L 100      35.832  -7.811  88.514  1.00  0.00           C  
ATOM    755  O   THR L 100      36.873  -7.542  89.148  1.00  0.00           O  
ATOM    756  CB  THR L 100      35.837  -6.701  86.194  1.00  0.00           C  
ATOM    757  OG1 THR L 100      35.787  -7.102  84.783  1.00  0.00           O  
ATOM    758  CG2 THR L 100      36.979  -5.704  86.436  1.00  0.00           C  
ATOM    759  N   GLY L 101      34.654  -7.930  89.085  1.00  0.00           N  
ATOM    760  CA  GLY L 101      34.374  -7.507  90.476  1.00  0.00           C  
ATOM    761  C   GLY L 101      33.552  -6.215  90.453  1.00  0.00           C  
ATOM    762  O   GLY L 101      33.710  -5.405  89.518  1.00  0.00           O  
ATOM    763  N   THR L 102      32.649  -6.081  91.426  1.00  0.00           N  
ATOM    764  CA  THR L 102      31.937  -4.779  91.591  1.00  0.00           C  
ATOM    765  C   THR L 102      31.663  -4.561  93.076  1.00  0.00           C  
ATOM    766  O   THR L 102      30.802  -5.185  93.712  1.00  0.00           O  
ATOM    767  CB  THR L 102      30.714  -4.597  90.652  1.00  0.00           C  
ATOM    768  OG1 THR L 102      31.224  -4.741  89.275  1.00  0.00           O  
ATOM    769  CG2 THR L 102      29.978  -3.246  90.758  1.00  0.00           C  
ATOM    770  N   LYS L 103      32.528  -3.709  93.621  1.00  0.00           N  
ATOM    771  CA  LYS L 103      32.510  -3.298  95.030  1.00  0.00           C  
ATOM    772  C   LYS L 103      31.492  -2.146  95.114  1.00  0.00           C  
ATOM    773  O   LYS L 103      31.708  -1.072  94.523  1.00  0.00           O  
ATOM    774  CB  LYS L 103      33.860  -2.815  95.525  1.00  0.00           C  
ATOM    775  CG  LYS L 103      35.055  -3.687  95.144  1.00  0.00           C  
ATOM    776  CD  LYS L 103      36.329  -3.247  95.863  1.00  0.00           C  
ATOM    777  CE  LYS L 103      37.456  -4.248  95.683  1.00  0.00           C  
ATOM    778  NZ  LYS L 103      38.734  -3.704  96.188  1.00  0.00           N  
ATOM    779  N   VAL L 104      30.401  -2.455  95.783  1.00  0.00           N  
ATOM    780  CA  VAL L 104      29.274  -1.521  95.883  1.00  0.00           C  
ATOM    781  C   VAL L 104      29.541  -0.601  97.073  1.00  0.00           C  
ATOM    782  O   VAL L 104      30.079  -1.036  98.109  1.00  0.00           O  
ATOM    783  CB  VAL L 104      27.947  -2.275  95.965  1.00  0.00           C  
ATOM    784  CG1 VAL L 104      26.797  -1.396  96.454  1.00  0.00           C  
ATOM    785  CG2 VAL L 104      27.601  -2.940  94.634  1.00  0.00           C  
ATOM    786  N   THR L 105      29.190   0.655  96.839  1.00  0.00           N  
ATOM    787  CA  THR L 105      29.266   1.640  97.940  1.00  0.00           C  
ATOM    788  C   THR L 105      27.863   2.188  98.146  1.00  0.00           C  
ATOM    789  O   THR L 105      27.212   2.706  97.224  1.00  0.00           O  
ATOM    790  CB  THR L 105      30.373   2.706  97.700  1.00  0.00           C  
ATOM    791  OG1 THR L 105      31.562   1.968  97.239  1.00  0.00           O  
ATOM    792  CG2 THR L 105      30.718   3.545  98.947  1.00  0.00           C  
ATOM    793  N   VAL L 106      27.395   1.955  99.367  1.00  0.00           N  
ATOM    794  CA  VAL L 106      26.131   2.563  99.815  1.00  0.00           C  
ATOM    795  C   VAL L 106      26.513   3.964 100.321  1.00  0.00           C  
ATOM    796  O   VAL L 106      27.597   4.174 100.875  1.00  0.00           O  
ATOM    797  CB  VAL L 106      25.358   1.688 100.776  1.00  0.00           C  
ATOM    798  CG1 VAL L 106      23.924   2.203 100.977  1.00  0.00           C  
ATOM    799  CG2 VAL L 106      25.316   0.222 100.351  1.00  0.00           C  
ATOM    800  N   LEU L 106A     25.643   4.883  99.999  1.00  0.00           N  
ATOM    801  CA  LEU L 106A     25.748   6.295 100.312  1.00  0.00           C  
ATOM    802  C   LEU L 106A     24.686   6.609 101.384  1.00  0.00           C  
ATOM    803  O   LEU L 106A     23.626   5.971 101.388  1.00  0.00           O  
ATOM    804  CB  LEU L 106A     25.468   7.100  99.046  1.00  0.00           C  
ATOM    805  CG  LEU L 106A     26.526   7.724  98.191  1.00  0.00           C  
ATOM    806  CD1 LEU L 106A     27.922   7.595  98.778  1.00  0.00           C  
ATOM    807  CD2 LEU L 106A     26.484   7.088  96.781  1.00  0.00           C  
ATOM    808  N   GLY L 107      25.022   7.580 102.212  1.00  0.00           N  
ATOM    809  CA  GLY L 107      24.136   8.132 103.212  1.00  0.00           C  
ATOM    810  C   GLY L 107      23.832   7.269 104.411  1.00  0.00           C  
ATOM    811  O   GLY L 107      22.725   7.405 104.993  1.00  0.00           O  
ATOM    812  N   GLN L 108      24.756   6.405 104.786  1.00  0.00           N  
ATOM    813  CA  GLN L 108      24.603   5.584 106.017  1.00  0.00           C  
ATOM    814  C   GLN L 108      25.058   6.484 107.181  1.00  0.00           C  
ATOM    815  O   GLN L 108      26.175   7.015 107.106  1.00  0.00           O  
ATOM    816  CB  GLN L 108      25.406   4.320 106.000  1.00  0.00           C  
ATOM    817  CG  GLN L 108      25.165   3.384 104.836  1.00  0.00           C  
ATOM    818  CD  GLN L 108      26.410   2.545 104.612  1.00  0.00           C  
ATOM    819  OE1 GLN L 108      27.363   3.028 104.007  1.00  0.00           O  
ATOM    820  NE2 GLN L 108      26.392   1.334 105.143  1.00  0.00           N  
ATOM    821  N   PRO L 109      24.187   6.629 108.158  1.00  0.00           N  
ATOM    822  CA  PRO L 109      24.450   7.593 109.239  1.00  0.00           C  
ATOM    823  C   PRO L 109      25.699   7.159 109.997  1.00  0.00           C  
ATOM    824  O   PRO L 109      26.093   5.977 110.014  1.00  0.00           O  
ATOM    825  CB  PRO L 109      23.189   7.654 110.045  1.00  0.00           C  
ATOM    826  CG  PRO L 109      22.260   6.615 109.523  1.00  0.00           C  
ATOM    827  CD  PRO L 109      22.788   6.182 108.160  1.00  0.00           C  
TER     828      PRO L 109                                                      
ATOM   1607  N   PRO L   1      23.761 -22.658 105.020  1.00  0.00           N  
ATOM   1608  CA  PRO L   1      24.891 -23.479 105.415  1.00  0.00           C  
ATOM   1609  C   PRO L   1      26.207 -22.872 104.954  1.00  0.00           C  
ATOM   1610  O   PRO L   1      26.267 -21.952 104.134  1.00  0.00           O  
ATOM   1611  CB  PRO L   1      24.649 -24.822 104.714  1.00  0.00           C  
ATOM   1612  CG  PRO L   1      23.946 -24.409 103.444  1.00  0.00           C  
ATOM   1613  CD  PRO L   1      23.042 -23.260 103.877  1.00  0.00           C  
ATOM   1614  N   SER L   2      27.247 -23.352 105.560  1.00  0.00           N  
ATOM   1615  CA  SER L   2      28.653 -23.228 105.104  1.00  0.00           C  
ATOM   1616  C   SER L   2      28.922 -24.762 105.019  1.00  0.00           C  
ATOM   1617  O   SER L   2      28.907 -25.367 103.968  1.00  0.00           O  
ATOM   1618  CB  SER L   2      29.550 -22.555 106.088  1.00  0.00           C  
ATOM   1619  OG  SER L   2      29.412 -22.998 107.443  1.00  0.00           O  
ATOM   1620  N   ALA L   3      28.878 -25.279 106.247  1.00  0.00           N  
ATOM   1621  CA  ALA L   3      28.904 -26.724 106.493  1.00  0.00           C  
ATOM   1622  C   ALA L   3      30.269 -27.244 106.032  1.00  0.00           C  
ATOM   1623  O   ALA L   3      30.910 -27.937 106.826  1.00  0.00           O  
ATOM   1624  CB  ALA L   3      27.734 -27.409 105.816  1.00  0.00           C  
ATOM   1625  N   LEU L   4      30.606 -26.927 104.794  1.00  0.00           N  
ATOM   1626  CA  LEU L   4      31.972 -27.109 104.281  1.00  0.00           C  
ATOM   1627  C   LEU L   4      32.859 -26.293 105.245  1.00  0.00           C  
ATOM   1628  O   LEU L   4      32.806 -25.067 105.283  1.00  0.00           O  
ATOM   1629  CB  LEU L   4      32.071 -26.668 102.845  1.00  0.00           C  
ATOM   1630  CG  LEU L   4      31.572 -27.508 101.697  1.00  0.00           C  
ATOM   1631  CD1 LEU L   4      32.257 -28.868 101.671  1.00  0.00           C  
ATOM   1632  CD2 LEU L   4      30.059 -27.675 101.819  1.00  0.00           C  
ATOM   1633  N   THR L   5      33.545 -27.037 106.050  1.00  0.00           N  
ATOM   1634  CA  THR L   5      34.492 -26.655 107.065  1.00  0.00           C  
ATOM   1635  C   THR L   5      35.888 -26.644 106.413  1.00  0.00           C  
ATOM   1636  O   THR L   5      36.224 -27.651 105.757  1.00  0.00           O  
ATOM   1637  CB  THR L   5      34.457 -27.724 108.253  1.00  0.00           C  
ATOM   1638  OG1 THR L   5      33.056 -27.933 108.612  1.00  0.00           O  
ATOM   1639  CG2 THR L   5      35.307 -27.357 109.467  1.00  0.00           C  
ATOM   1640  N   GLN L   6      36.602 -25.563 106.625  1.00  0.00           N  
ATOM   1641  CA  GLN L   6      37.970 -25.369 106.164  1.00  0.00           C  
ATOM   1642  C   GLN L   6      38.933 -24.802 107.236  1.00  0.00           C  
ATOM   1643  O   GLN L   6      38.738 -23.736 107.848  1.00  0.00           O  
ATOM   1644  CB  GLN L   6      37.995 -24.426 104.941  1.00  0.00           C  
ATOM   1645  CG  GLN L   6      36.942 -24.660 103.875  1.00  0.00           C  
ATOM   1646  CD  GLN L   6      37.169 -23.798 102.641  1.00  0.00           C  
ATOM   1647  OE1 GLN L   6      36.531 -22.776 102.422  1.00  0.00           O  
ATOM   1648  NE2 GLN L   6      38.140 -24.206 101.823  1.00  0.00           N  
ATOM   1649  N   PRO L   7      40.047 -25.511 107.409  1.00  0.00           N  
ATOM   1650  CA  PRO L   7      41.228 -25.117 108.157  1.00  0.00           C  
ATOM   1651  C   PRO L   7      41.745 -23.712 107.937  1.00  0.00           C  
ATOM   1652  O   PRO L   7      42.125 -23.309 106.818  1.00  0.00           O  
ATOM   1653  CB  PRO L   7      42.298 -26.129 107.714  1.00  0.00           C  
ATOM   1654  CG  PRO L   7      41.621 -27.161 106.883  1.00  0.00           C  
ATOM   1655  CD  PRO L   7      40.129 -26.982 107.101  1.00  0.00           C  
ATOM   1656  N   PRO L   8      41.917 -22.996 109.051  1.00  0.00           N  
ATOM   1657  CA  PRO L   8      41.955 -21.531 109.060  1.00  0.00           C  
ATOM   1658  C   PRO L   8      42.932 -20.926 108.067  1.00  0.00           C  
ATOM   1659  O   PRO L   8      42.666 -19.881 107.443  1.00  0.00           O  
ATOM   1660  CB  PRO L   8      42.310 -21.173 110.505  1.00  0.00           C  
ATOM   1661  CG  PRO L   8      43.111 -22.374 110.964  1.00  0.00           C  
ATOM   1662  CD  PRO L   8      42.328 -23.561 110.371  1.00  0.00           C  
ATOM   1663  N   SER L   9      44.058 -21.589 107.935  1.00  0.00           N  
ATOM   1664  CA  SER L   9      45.221 -21.066 107.233  1.00  0.00           C  
ATOM   1665  C   SER L   9      46.030 -22.284 106.777  1.00  0.00           C  
ATOM   1666  O   SER L   9      45.965 -23.322 107.439  1.00  0.00           O  
ATOM   1667  CB  SER L   9      46.078 -20.185 108.110  1.00  0.00           C  
ATOM   1668  OG  SER L   9      47.446 -20.592 108.060  1.00  0.00           O  
ATOM   1669  N   ALA L  11      46.765 -22.051 105.701  1.00  0.00           N  
ATOM   1670  CA  ALA L  11      47.681 -23.019 105.156  1.00  0.00           C  
ATOM   1671  C   ALA L  11      49.124 -22.711 105.022  1.00  0.00           C  
ATOM   1672  O   ALA L  11      49.745 -23.736 104.662  1.00  0.00           O  
ATOM   1673  CB  ALA L  11      47.094 -23.506 103.794  1.00  0.00           C  
ATOM   1674  N   SER L  12      49.822 -21.622 105.106  1.00  0.00           N  
ATOM   1675  CA  SER L  12      51.306 -21.617 105.058  1.00  0.00           C  
ATOM   1676  C   SER L  12      52.012 -22.893 104.595  1.00  0.00           C  
ATOM   1677  O   SER L  12      51.781 -24.047 105.020  1.00  0.00           O  
ATOM   1678  CB  SER L  12      51.797 -21.469 106.532  1.00  0.00           C  
ATOM   1679  OG  SER L  12      51.872 -20.157 106.958  1.00  0.00           O  
ATOM   1680  N   GLY L  13      53.117 -22.710 103.898  1.00  0.00           N  
ATOM   1681  CA  GLY L  13      54.037 -23.647 103.351  1.00  0.00           C  
ATOM   1682  C   GLY L  13      55.336 -23.034 102.834  1.00  0.00           C  
ATOM   1683  O   GLY L  13      55.447 -21.833 102.529  1.00  0.00           O  
ATOM   1684  N   SER L  14      56.329 -23.903 102.779  1.00  0.00           N  
ATOM   1685  CA  SER L  14      57.629 -23.635 102.156  1.00  0.00           C  
ATOM   1686  C   SER L  14      57.548 -23.863 100.639  1.00  0.00           C  
ATOM   1687  O   SER L  14      56.670 -24.600 100.135  1.00  0.00           O  
ATOM   1688  CB  SER L  14      58.702 -24.513 102.786  1.00  0.00           C  
ATOM   1689  OG  SER L  14      58.442 -24.871 104.126  1.00  0.00           O  
ATOM   1690  N   LEU L  15      58.465 -23.233  99.916  1.00  0.00           N  
ATOM   1691  CA  LEU L  15      58.552 -23.372  98.456  1.00  0.00           C  
ATOM   1692  C   LEU L  15      59.105 -24.747  98.086  1.00  0.00           C  
ATOM   1693  O   LEU L  15      60.323 -24.929  98.010  1.00  0.00           O  
ATOM   1694  CB  LEU L  15      59.364 -22.223  97.878  1.00  0.00           C  
ATOM   1695  CG  LEU L  15      58.598 -21.239  97.010  1.00  0.00           C  
ATOM   1696  CD1 LEU L  15      57.365 -20.741  97.741  1.00  0.00           C  
ATOM   1697  CD2 LEU L  15      59.521 -20.075  96.672  1.00  0.00           C  
ATOM   1698  N   GLY L  16      58.178 -25.654  97.837  1.00  0.00           N  
ATOM   1699  CA  GLY L  16      58.497 -27.070  97.616  1.00  0.00           C  
ATOM   1700  C   GLY L  16      57.480 -27.940  98.349  1.00  0.00           C  
ATOM   1701  O   GLY L  16      57.409 -29.159  98.099  1.00  0.00           O  
ATOM   1702  N   GLN L  17      56.671 -27.302  99.194  1.00  0.00           N  
ATOM   1703  CA  GLN L  17      55.781 -28.037 100.096  1.00  0.00           C  
ATOM   1704  C   GLN L  17      54.411 -28.397  99.538  1.00  0.00           C  
ATOM   1705  O   GLN L  17      53.642 -27.578  99.020  1.00  0.00           O  
ATOM   1706  CB  GLN L  17      55.650 -27.310 101.451  1.00  0.00           C  
ATOM   1707  CG  GLN L  17      56.724 -27.719 102.446  1.00  0.00           C  
ATOM   1708  CD  GLN L  17      56.451 -27.306 103.868  1.00  0.00           C  
ATOM   1709  OE1 GLN L  17      55.475 -26.643 104.217  1.00  0.00           O  
ATOM   1710  NE2 GLN L  17      57.359 -27.705 104.770  1.00  0.00           N  
ATOM   1711  N   SER L  18      54.090 -29.673  99.681  1.00  0.00           N  
ATOM   1712  CA  SER L  18      52.859 -30.361  99.427  1.00  0.00           C  
ATOM   1713  C   SER L  18      51.685 -30.073 100.369  1.00  0.00           C  
ATOM   1714  O   SER L  18      51.145 -31.016 101.005  1.00  0.00           O  
ATOM   1715  CB  SER L  18      53.096 -31.900  99.516  1.00  0.00           C  
ATOM   1716  OG  SER L  18      54.008 -32.383  98.575  1.00  0.00           O  
ATOM   1717  N   VAL L  19      51.218 -28.858 100.395  1.00  0.00           N  
ATOM   1718  CA  VAL L  19      50.109 -28.409 101.258  1.00  0.00           C  
ATOM   1719  C   VAL L  19      48.783 -28.983 100.791  1.00  0.00           C  
ATOM   1720  O   VAL L  19      48.263 -28.584  99.720  1.00  0.00           O  
ATOM   1721  CB  VAL L  19      50.153 -26.864 101.271  1.00  0.00           C  
ATOM   1722  CG1 VAL L  19      49.008 -26.209 101.998  1.00  0.00           C  
ATOM   1723  CG2 VAL L  19      51.503 -26.400 101.799  1.00  0.00           C  
ATOM   1724  N   THR L  20      48.259 -29.926 101.563  1.00  0.00           N  
ATOM   1725  CA  THR L  20      46.906 -30.480 101.330  1.00  0.00           C  
ATOM   1726  C   THR L  20      45.897 -29.482 101.890  1.00  0.00           C  
ATOM   1727  O   THR L  20      46.353 -28.585 102.621  1.00  0.00           O  
ATOM   1728  CB  THR L  20      46.727 -31.892 101.966  1.00  0.00           C  
ATOM   1729  OG1 THR L  20      47.787 -32.734 101.416  1.00  0.00           O  
ATOM   1730  CG2 THR L  20      45.335 -32.510 101.782  1.00  0.00           C  
ATOM   1731  N   ILE L  21      44.643 -29.609 101.513  1.00  0.00           N  
ATOM   1732  CA  ILE L  21      43.580 -28.711 102.065  1.00  0.00           C  
ATOM   1733  C   ILE L  21      42.277 -29.496 102.035  1.00  0.00           C  
ATOM   1734  O   ILE L  21      42.295 -30.604 101.440  1.00  0.00           O  
ATOM   1735  CB  ILE L  21      43.556 -27.355 101.312  1.00  0.00           C  
ATOM   1736  CG1 ILE L  21      44.831 -26.524 101.605  1.00  0.00           C  
ATOM   1737  CG2 ILE L  21      42.301 -26.491 101.615  1.00  0.00           C  
ATOM   1738  CD1 ILE L  21      45.014 -25.277 100.698  1.00  0.00           C  
ATOM   1739  N   SER L  22      41.190 -28.982 102.604  1.00  0.00           N  
ATOM   1740  CA  SER L  22      40.014 -29.837 102.873  1.00  0.00           C  
ATOM   1741  C   SER L  22      38.701 -29.116 103.083  1.00  0.00           C  
ATOM   1742  O   SER L  22      38.605 -27.888 103.070  1.00  0.00           O  
ATOM   1743  CB  SER L  22      40.338 -30.735 104.078  1.00  0.00           C  
ATOM   1744  OG  SER L  22      41.314 -30.098 104.890  1.00  0.00           O  
ATOM   1745  N   CYS L  23      37.653 -29.917 103.232  1.00  0.00           N  
ATOM   1746  CA  CYS L  23      36.269 -29.525 103.457  1.00  0.00           C  
ATOM   1747  C   CYS L  23      35.537 -30.688 104.117  1.00  0.00           C  
ATOM   1748  O   CYS L  23      35.910 -31.861 103.900  1.00  0.00           O  
ATOM   1749  CB  CYS L  23      35.566 -28.946 102.202  1.00  0.00           C  
ATOM   1750  SG  CYS L  23      36.302 -27.363 101.851  1.00  0.00           S  
ATOM   1751  N   THR L  24      34.654 -30.305 105.028  1.00  0.00           N  
ATOM   1752  CA  THR L  24      33.880 -31.355 105.811  1.00  0.00           C  
ATOM   1753  C   THR L  24      32.521 -30.732 106.058  1.00  0.00           C  
ATOM   1754  O   THR L  24      32.532 -29.473 106.035  1.00  0.00           O  
ATOM   1755  CB  THR L  24      34.644 -31.773 107.103  1.00  0.00           C  
ATOM   1756  OG1 THR L  24      35.993 -31.195 107.047  1.00  0.00           O  
ATOM   1757  CG2 THR L  24      34.754 -33.293 107.320  1.00  0.00           C  
ATOM   1758  N   GLY L  25      31.422 -31.431 106.307  1.00  0.00           N  
ATOM   1759  CA  GLY L  25      30.115 -30.794 106.130  1.00  0.00           C  
ATOM   1760  C   GLY L  25      29.026 -30.931 107.123  1.00  0.00           C  
ATOM   1761  O   GLY L  25      28.540 -32.056 107.376  1.00  0.00           O  
ATOM   1762  N   THR L  26      28.540 -29.764 107.627  1.00  0.00           N  
ATOM   1763  CA  THR L  26      27.429 -29.819 108.618  1.00  0.00           C  
ATOM   1764  C   THR L  26      26.117 -30.230 107.948  1.00  0.00           C  
ATOM   1765  O   THR L  26      25.962 -30.143 106.729  1.00  0.00           O  
ATOM   1766  CB  THR L  26      27.214 -28.526 109.469  1.00  0.00           C  
ATOM   1767  OG1 THR L  26      26.367 -27.641 108.672  1.00  0.00           O  
ATOM   1768  CG2 THR L  26      28.496 -27.846 109.954  1.00  0.00           C  
ATOM   1769  N   SER L  27      25.178 -30.651 108.781  1.00  0.00           N  
ATOM   1770  CA  SER L  27      23.882 -31.190 108.395  1.00  0.00           C  
ATOM   1771  C   SER L  27      24.025 -32.520 107.640  1.00  0.00           C  
ATOM   1772  O   SER L  27      23.907 -33.618 108.199  1.00  0.00           O  
ATOM   1773  CB  SER L  27      23.054 -30.202 107.580  1.00  0.00           C  
ATOM   1774  OG  SER L  27      23.582 -28.894 107.590  1.00  0.00           O  
ATOM   1775  N   SER L  27A     24.257 -32.376 106.355  1.00  0.00           N  
ATOM   1776  CA  SER L  27A     24.317 -33.423 105.346  1.00  0.00           C  
ATOM   1777  C   SER L  27A     24.058 -32.766 103.970  1.00  0.00           C  
ATOM   1778  O   SER L  27A     23.558 -31.641 103.896  1.00  0.00           O  
ATOM   1779  CB  SER L  27A     23.400 -34.603 105.565  1.00  0.00           C  
ATOM   1780  OG  SER L  27A     22.127 -34.341 106.119  1.00  0.00           O  
ATOM   1781  N   ASP L  27B     24.449 -33.493 102.950  1.00  0.00           N  
ATOM   1782  CA  ASP L  27B     24.260 -33.188 101.537  1.00  0.00           C  
ATOM   1783  C   ASP L  27B     25.133 -34.155 100.693  1.00  0.00           C  
ATOM   1784  O   ASP L  27B     24.735 -34.527  99.585  1.00  0.00           O  
ATOM   1785  CB  ASP L  27B     24.472 -31.749 101.120  1.00  0.00           C  
ATOM   1786  CG  ASP L  27B     25.847 -31.304 100.708  1.00  0.00           C  
ATOM   1787  OD1 ASP L  27B     26.832 -31.716 101.356  1.00  0.00           O  
ATOM   1788  OD2 ASP L  27B     26.011 -30.504  99.765  1.00  0.00           O  
ATOM   1789  N   VAL L  27C     26.295 -34.454 101.243  1.00  0.00           N  
ATOM   1790  CA  VAL L  27C     27.249 -35.374 100.589  1.00  0.00           C  
ATOM   1791  C   VAL L  27C     26.864 -36.784 101.048  1.00  0.00           C  
ATOM   1792  O   VAL L  27C     26.452 -36.976 102.208  1.00  0.00           O  
ATOM   1793  CB  VAL L  27C     28.711 -34.990 100.828  1.00  0.00           C  
ATOM   1794  CG1 VAL L  27C     29.038 -34.631 102.277  1.00  0.00           C  
ATOM   1795  CG2 VAL L  27C     29.680 -36.070 100.330  1.00  0.00           C  
ATOM   1796  N   GLY L  28      26.988 -37.683 100.107  1.00  0.00           N  
ATOM   1797  CA  GLY L  28      26.483 -39.077 100.256  1.00  0.00           C  
ATOM   1798  C   GLY L  28      25.452 -39.217  99.100  1.00  0.00           C  
ATOM   1799  O   GLY L  28      25.357 -40.224  98.410  1.00  0.00           O  
ATOM   1800  N   GLY L  29      24.710 -38.120  99.016  1.00  0.00           N  
ATOM   1801  CA  GLY L  29      23.895 -37.879  97.774  1.00  0.00           C  
ATOM   1802  C   GLY L  29      24.910 -37.129  96.859  1.00  0.00           C  
ATOM   1803  O   GLY L  29      25.408 -37.665  95.880  1.00  0.00           O  
ATOM   1804  N   TYR L  30      25.211 -35.931  97.361  1.00  0.00           N  
ATOM   1805  CA  TYR L  30      26.153 -35.061  96.698  1.00  0.00           C  
ATOM   1806  C   TYR L  30      27.580 -35.603  96.722  1.00  0.00           C  
ATOM   1807  O   TYR L  30      28.028 -36.461  97.475  1.00  0.00           O  
ATOM   1808  CB  TYR L  30      26.054 -33.570  97.131  1.00  0.00           C  
ATOM   1809  CG  TYR L  30      26.306 -32.713  95.883  1.00  0.00           C  
ATOM   1810  CD1 TYR L  30      25.565 -32.967  94.714  1.00  0.00           C  
ATOM   1811  CD2 TYR L  30      27.311 -31.773  95.846  1.00  0.00           C  
ATOM   1812  CE1 TYR L  30      25.824 -32.268  93.545  1.00  0.00           C  
ATOM   1813  CE2 TYR L  30      27.572 -31.051  94.681  1.00  0.00           C  
ATOM   1814  CZ  TYR L  30      26.838 -31.312  93.528  1.00  0.00           C  
ATOM   1815  OH  TYR L  30      27.144 -30.601  92.407  1.00  0.00           O  
ATOM   1816  N   ASN L  31      28.281 -35.077  95.763  1.00  0.00           N  
ATOM   1817  CA  ASN L  31      29.608 -35.446  95.240  1.00  0.00           C  
ATOM   1818  C   ASN L  31      29.853 -34.282  94.253  1.00  0.00           C  
ATOM   1819  O   ASN L  31      28.949 -33.408  94.268  1.00  0.00           O  
ATOM   1820  CB  ASN L  31      29.496 -36.800  94.554  1.00  0.00           C  
ATOM   1821  CG  ASN L  31      30.767 -37.511  94.209  1.00  0.00           C  
ATOM   1822  OD1 ASN L  31      31.732 -36.938  93.671  1.00  0.00           O  
ATOM   1823  ND2 ASN L  31      30.804 -38.822  94.491  1.00  0.00           N  
ATOM   1824  N   TYR L  32      30.905 -34.285  93.495  1.00  0.00           N  
ATOM   1825  CA  TYR L  32      30.989 -33.227  92.403  1.00  0.00           C  
ATOM   1826  C   TYR L  32      31.041 -31.862  93.069  1.00  0.00           C  
ATOM   1827  O   TYR L  32      30.071 -31.088  93.125  1.00  0.00           O  
ATOM   1828  CB  TYR L  32      29.854 -33.511  91.455  1.00  0.00           C  
ATOM   1829  CG  TYR L  32      29.081 -32.585  90.591  1.00  0.00           C  
ATOM   1830  CD1 TYR L  32      29.596 -31.381  90.111  1.00  0.00           C  
ATOM   1831  CD2 TYR L  32      27.759 -32.913  90.189  1.00  0.00           C  
ATOM   1832  CE1 TYR L  32      28.863 -30.535  89.293  1.00  0.00           C  
ATOM   1833  CE2 TYR L  32      27.007 -32.068  89.377  1.00  0.00           C  
ATOM   1834  CZ  TYR L  32      27.573 -30.873  88.929  1.00  0.00           C  
ATOM   1835  OH  TYR L  32      26.889 -29.995  88.126  1.00  0.00           O  
ATOM   1836  N   VAL L  33      32.231 -31.559  93.580  1.00  0.00           N  
ATOM   1837  CA  VAL L  33      32.529 -30.338  94.359  1.00  0.00           C  
ATOM   1838  C   VAL L  33      33.700 -29.561  93.748  1.00  0.00           C  
ATOM   1839  O   VAL L  33      34.645 -30.174  93.179  1.00  0.00           O  
ATOM   1840  CB  VAL L  33      32.725 -30.770  95.843  1.00  0.00           C  
ATOM   1841  CG1 VAL L  33      31.831 -31.945  96.231  1.00  0.00           C  
ATOM   1842  CG2 VAL L  33      34.164 -31.091  96.181  1.00  0.00           C  
ATOM   1843  N   SER L  34      33.665 -28.237  93.913  1.00  0.00           N  
ATOM   1844  CA  SER L  34      34.589 -27.342  93.182  1.00  0.00           C  
ATOM   1845  C   SER L  34      35.533 -26.502  94.034  1.00  0.00           C  
ATOM   1846  O   SER L  34      35.120 -25.697  94.908  1.00  0.00           O  
ATOM   1847  CB  SER L  34      33.764 -26.445  92.251  1.00  0.00           C  
ATOM   1848  OG  SER L  34      32.374 -26.529  92.535  1.00  0.00           O  
ATOM   1849  N   TRP L  35      36.830 -26.647  93.725  1.00  0.00           N  
ATOM   1850  CA  TRP L  35      37.930 -26.020  94.454  1.00  0.00           C  
ATOM   1851  C   TRP L  35      38.414 -24.742  93.761  1.00  0.00           C  
ATOM   1852  O   TRP L  35      38.847 -24.757  92.589  1.00  0.00           O  
ATOM   1853  CB  TRP L  35      39.116 -26.974  94.655  1.00  0.00           C  
ATOM   1854  CG  TRP L  35      39.057 -27.855  95.852  1.00  0.00           C  
ATOM   1855  CD1 TRP L  35      38.742 -29.187  95.863  1.00  0.00           C  
ATOM   1856  CD2 TRP L  35      39.316 -27.491  97.213  1.00  0.00           C  
ATOM   1857  NE1 TRP L  35      38.773 -29.670  97.151  1.00  0.00           N  
ATOM   1858  CE2 TRP L  35      39.120 -28.655  97.990  1.00  0.00           C  
ATOM   1859  CE3 TRP L  35      39.681 -26.305  97.834  1.00  0.00           C  
ATOM   1860  CZ2 TRP L  35      39.287 -28.669  99.365  1.00  0.00           C  
ATOM   1861  CZ3 TRP L  35      39.842 -26.313  99.202  1.00  0.00           C  
ATOM   1862  CH2 TRP L  35      39.650 -27.471  99.964  1.00  0.00           C  
ATOM   1863  N   TYR L  36      38.404 -23.659  94.538  1.00  0.00           N  
ATOM   1864  CA  TYR L  36      38.687 -22.321  94.021  1.00  0.00           C  
ATOM   1865  C   TYR L  36      40.046 -21.792  94.460  1.00  0.00           C  
ATOM   1866  O   TYR L  36      40.692 -22.304  95.383  1.00  0.00           O  
ATOM   1867  CB  TYR L  36      37.592 -21.295  94.446  1.00  0.00           C  
ATOM   1868  CG  TYR L  36      36.216 -21.707  93.959  1.00  0.00           C  
ATOM   1869  CD1 TYR L  36      35.464 -22.631  94.692  1.00  0.00           C  
ATOM   1870  CD2 TYR L  36      35.691 -21.221  92.764  1.00  0.00           C  
ATOM   1871  CE1 TYR L  36      34.213 -23.043  94.257  1.00  0.00           C  
ATOM   1872  CE2 TYR L  36      34.439 -21.629  92.320  1.00  0.00           C  
ATOM   1873  CZ  TYR L  36      33.700 -22.544  93.065  1.00  0.00           C  
ATOM   1874  OH  TYR L  36      32.466 -22.977  92.656  1.00  0.00           O  
ATOM   1875  N   GLN L  37      40.399 -20.703  93.798  1.00  0.00           N  
ATOM   1876  CA  GLN L  37      41.640 -19.956  94.071  1.00  0.00           C  
ATOM   1877  C   GLN L  37      41.240 -18.476  94.039  1.00  0.00           C  
ATOM   1878  O   GLN L  37      40.821 -18.026  92.946  1.00  0.00           O  
ATOM   1879  CB  GLN L  37      42.724 -20.234  93.032  1.00  0.00           C  
ATOM   1880  CG  GLN L  37      44.130 -20.142  93.549  1.00  0.00           C  
ATOM   1881  CD  GLN L  37      45.159 -19.538  92.638  1.00  0.00           C  
ATOM   1882  OE1 GLN L  37      44.907 -18.755  91.723  1.00  0.00           O  
ATOM   1883  NE2 GLN L  37      46.417 -19.897  92.924  1.00  0.00           N  
ATOM   1884  N   GLN L  38      41.251 -17.854  95.231  1.00  0.00           N  
ATOM   1885  CA  GLN L  38      41.105 -16.357  95.162  1.00  0.00           C  
ATOM   1886  C   GLN L  38      42.517 -15.809  95.346  1.00  0.00           C  
ATOM   1887  O   GLN L  38      43.300 -16.335  96.159  1.00  0.00           O  
ATOM   1888  CB  GLN L  38      40.090 -15.781  96.094  1.00  0.00           C  
ATOM   1889  CG  GLN L  38      38.658 -15.876  95.603  1.00  0.00           C  
ATOM   1890  CD  GLN L  38      37.674 -15.087  96.428  1.00  0.00           C  
ATOM   1891  OE1 GLN L  38      37.852 -13.904  96.696  1.00  0.00           O  
ATOM   1892  NE2 GLN L  38      36.578 -15.731  96.830  1.00  0.00           N  
ATOM   1893  N   HIS L  39      42.825 -14.833  94.523  1.00  0.00           N  
ATOM   1894  CA  HIS L  39      44.107 -14.105  94.634  1.00  0.00           C  
ATOM   1895  C   HIS L  39      43.796 -12.671  95.040  1.00  0.00           C  
ATOM   1896  O   HIS L  39      42.771 -12.111  94.612  1.00  0.00           O  
ATOM   1897  CB  HIS L  39      44.926 -14.194  93.348  1.00  0.00           C  
ATOM   1898  CG  HIS L  39      46.100 -15.124  93.469  1.00  0.00           C  
ATOM   1899  ND1 HIS L  39      46.430 -16.108  92.582  1.00  0.00           N  
ATOM   1900  CD2 HIS L  39      47.042 -15.166  94.450  1.00  0.00           C  
ATOM   1901  CE1 HIS L  39      47.524 -16.719  93.000  1.00  0.00           C  
ATOM   1902  NE2 HIS L  39      47.914 -16.165  94.127  1.00  0.00           N  
ATOM   1903  N   ALA L  40      44.632 -12.113  95.893  1.00  0.00           N  
ATOM   1904  CA  ALA L  40      44.524 -10.744  96.384  1.00  0.00           C  
ATOM   1905  C   ALA L  40      43.920  -9.747  95.400  1.00  0.00           C  
ATOM   1906  O   ALA L  40      44.619  -9.058  94.631  1.00  0.00           O  
ATOM   1907  CB  ALA L  40      45.915 -10.265  96.835  1.00  0.00           C  
ATOM   1908  N   GLY L  41      42.601  -9.632  95.473  1.00  0.00           N  
ATOM   1909  CA  GLY L  41      41.800  -8.716  94.673  1.00  0.00           C  
ATOM   1910  C   GLY L  41      41.954  -8.934  93.167  1.00  0.00           C  
ATOM   1911  O   GLY L  41      41.947  -7.991  92.359  1.00  0.00           O  
ATOM   1912  N   LYS L  42      42.010 -10.190  92.812  1.00  0.00           N  
ATOM   1913  CA  LYS L  42      42.260 -10.683  91.448  1.00  0.00           C  
ATOM   1914  C   LYS L  42      41.302 -11.843  91.169  1.00  0.00           C  
ATOM   1915  O   LYS L  42      40.555 -12.276  92.074  1.00  0.00           O  
ATOM   1916  CB  LYS L  42      43.697 -11.178  91.400  1.00  0.00           C  
ATOM   1917  CG  LYS L  42      44.524 -10.910  90.169  1.00  0.00           C  
ATOM   1918  CD  LYS L  42      45.302 -12.177  89.775  1.00  0.00           C  
ATOM   1919  CE  LYS L  42      44.376 -13.163  89.059  1.00  0.00           C  
ATOM   1920  NZ  LYS L  42      43.577 -13.963  90.022  1.00  0.00           N  
ATOM   1921  N   ALA L  43      41.347 -12.378  89.968  1.00  0.00           N  
ATOM   1922  CA  ALA L  43      40.491 -13.460  89.500  1.00  0.00           C  
ATOM   1923  C   ALA L  43      40.320 -14.642  90.451  1.00  0.00           C  
ATOM   1924  O   ALA L  43      41.280 -15.370  90.758  1.00  0.00           O  
ATOM   1925  CB  ALA L  43      41.056 -13.980  88.159  1.00  0.00           C  
ATOM   1926  N   PRO L  44      39.062 -14.853  90.857  1.00  0.00           N  
ATOM   1927  CA  PRO L  44      38.613 -16.081  91.513  1.00  0.00           C  
ATOM   1928  C   PRO L  44      38.448 -17.244  90.539  1.00  0.00           C  
ATOM   1929  O   PRO L  44      37.317 -17.461  90.035  1.00  0.00           O  
ATOM   1930  CB  PRO L  44      37.250 -15.708  92.128  1.00  0.00           C  
ATOM   1931  CG  PRO L  44      37.239 -14.208  92.188  1.00  0.00           C  
ATOM   1932  CD  PRO L  44      38.029 -13.780  90.955  1.00  0.00           C  
ATOM   1933  N   LYS L  45      39.503 -18.018  90.331  1.00  0.00           N  
ATOM   1934  CA  LYS L  45      39.480 -19.132  89.383  1.00  0.00           C  
ATOM   1935  C   LYS L  45      39.115 -20.482  89.994  1.00  0.00           C  
ATOM   1936  O   LYS L  45      39.731 -20.932  90.978  1.00  0.00           O  
ATOM   1937  CB  LYS L  45      40.817 -19.309  88.698  1.00  0.00           C  
ATOM   1938  CG  LYS L  45      41.854 -18.219  88.869  1.00  0.00           C  
ATOM   1939  CD  LYS L  45      43.184 -18.668  88.245  1.00  0.00           C  
ATOM   1940  CE  LYS L  45      43.029 -19.063  86.776  1.00  0.00           C  
ATOM   1941  NZ  LYS L  45      43.281 -17.893  85.908  1.00  0.00           N  
ATOM   1942  N   VAL L  46      38.188 -21.168  89.349  1.00  0.00           N  
ATOM   1943  CA  VAL L  46      37.775 -22.536  89.658  1.00  0.00           C  
ATOM   1944  C   VAL L  46      38.902 -23.518  89.316  1.00  0.00           C  
ATOM   1945  O   VAL L  46      38.737 -24.245  88.319  1.00  0.00           O  
ATOM   1946  CB  VAL L  46      36.494 -22.934  88.858  1.00  0.00           C  
ATOM   1947  CG1 VAL L  46      36.080 -24.384  89.120  1.00  0.00           C  
ATOM   1948  CG2 VAL L  46      35.313 -22.021  89.080  1.00  0.00           C  
ATOM   1949  N   ILE L  47      39.938 -23.593  90.119  1.00  0.00           N  
ATOM   1950  CA  ILE L  47      41.104 -24.424  89.779  1.00  0.00           C  
ATOM   1951  C   ILE L  47      40.852 -25.911  89.942  1.00  0.00           C  
ATOM   1952  O   ILE L  47      41.813 -26.713  89.806  1.00  0.00           O  
ATOM   1953  CB  ILE L  47      42.378 -23.920  90.546  1.00  0.00           C  
ATOM   1954  CG1 ILE L  47      42.104 -23.857  92.056  1.00  0.00           C  
ATOM   1955  CG2 ILE L  47      42.879 -22.550  90.020  1.00  0.00           C  
ATOM   1956  CD1 ILE L  47      41.897 -25.221  92.749  1.00  0.00           C  
ATOM   1957  N   ILE L  48      39.642 -26.307  90.284  1.00  0.00           N  
ATOM   1958  CA  ILE L  48      39.192 -27.691  90.288  1.00  0.00           C  
ATOM   1959  C   ILE L  48      37.651 -27.712  90.204  1.00  0.00           C  
ATOM   1960  O   ILE L  48      36.971 -26.880  90.808  1.00  0.00           O  
ATOM   1961  CB  ILE L  48      39.670 -28.601  91.465  1.00  0.00           C  
ATOM   1962  CG1 ILE L  48      41.024 -29.263  91.136  1.00  0.00           C  
ATOM   1963  CG2 ILE L  48      38.628 -29.723  91.805  1.00  0.00           C  
ATOM   1964  CD1 ILE L  48      41.432 -30.403  92.100  1.00  0.00           C  
ATOM   1965  N   TYR L  49      37.205 -28.712  89.477  1.00  0.00           N  
ATOM   1966  CA  TYR L  49      35.772 -29.001  89.308  1.00  0.00           C  
ATOM   1967  C   TYR L  49      35.597 -30.499  89.550  1.00  0.00           C  
ATOM   1968  O   TYR L  49      36.573 -31.281  89.526  1.00  0.00           O  
ATOM   1969  CB  TYR L  49      35.245 -28.462  87.975  1.00  0.00           C  
ATOM   1970  CG  TYR L  49      35.703 -29.155  86.717  1.00  0.00           C  
ATOM   1971  CD1 TYR L  49      36.937 -28.834  86.148  1.00  0.00           C  
ATOM   1972  CD2 TYR L  49      34.917 -30.132  86.087  1.00  0.00           C  
ATOM   1973  CE1 TYR L  49      37.398 -29.484  85.008  1.00  0.00           C  
ATOM   1974  CE2 TYR L  49      35.371 -30.787  84.949  1.00  0.00           C  
ATOM   1975  CZ  TYR L  49      36.612 -30.457  84.413  1.00  0.00           C  
ATOM   1976  OH  TYR L  49      37.115 -31.083  83.306  1.00  0.00           O  
ATOM   1977  N   GLU L  50      34.376 -30.865  89.866  1.00  0.00           N  
ATOM   1978  CA  GLU L  50      33.985 -32.203  90.305  1.00  0.00           C  
ATOM   1979  C   GLU L  50      35.120 -33.031  90.860  1.00  0.00           C  
ATOM   1980  O   GLU L  50      35.775 -33.809  90.145  1.00  0.00           O  
ATOM   1981  CB  GLU L  50      33.305 -32.938  89.132  1.00  0.00           C  
ATOM   1982  CG  GLU L  50      32.287 -32.081  88.390  1.00  0.00           C  
ATOM   1983  CD  GLU L  50      31.749 -32.485  87.068  1.00  0.00           C  
ATOM   1984  OE1 GLU L  50      32.079 -33.622  86.674  1.00  0.00           O  
ATOM   1985  OE2 GLU L  50      31.015 -31.753  86.395  1.00  0.00           O  
ATOM   1986  N   VAL L  51      35.405 -32.845  92.152  1.00  0.00           N  
ATOM   1987  CA  VAL L  51      36.359 -33.644  92.926  1.00  0.00           C  
ATOM   1988  C   VAL L  51      37.800 -33.663  92.485  1.00  0.00           C  
ATOM   1989  O   VAL L  51      38.645 -33.241  93.340  1.00  0.00           O  
ATOM   1990  CB  VAL L  51      35.774 -35.049  93.205  1.00  0.00           C  
ATOM   1991  CG1 VAL L  51      36.783 -35.972  93.879  1.00  0.00           C  
ATOM   1992  CG2 VAL L  51      34.505 -34.920  94.047  1.00  0.00           C  
ATOM   1993  N   ASN L  52      38.159 -34.183  91.312  1.00  0.00           N  
ATOM   1994  CA  ASN L  52      39.514 -34.000  90.771  1.00  0.00           C  
ATOM   1995  C   ASN L  52      39.599 -33.672  89.286  1.00  0.00           C  
ATOM   1996  O   ASN L  52      40.704 -33.907  88.697  1.00  0.00           O  
ATOM   1997  CB  ASN L  52      40.437 -35.194  91.084  1.00  0.00           C  
ATOM   1998  CG  ASN L  52      41.911 -34.831  90.948  1.00  0.00           C  
ATOM   1999  OD1 ASN L  52      42.776 -35.702  90.821  1.00  0.00           O  
ATOM   2000  ND2 ASN L  52      42.236 -33.539  90.961  1.00  0.00           N  
ATOM   2001  N   LYS L  53      38.551 -33.156  88.684  1.00  0.00           N  
ATOM   2002  CA  LYS L  53      38.671 -32.744  87.256  1.00  0.00           C  
ATOM   2003  C   LYS L  53      39.252 -31.341  87.219  1.00  0.00           C  
ATOM   2004  O   LYS L  53      38.630 -30.353  87.622  1.00  0.00           O  
ATOM   2005  CB  LYS L  53      37.395 -32.904  86.501  1.00  0.00           C  
ATOM   2006  CG  LYS L  53      36.993 -34.376  86.319  1.00  0.00           C  
ATOM   2007  CD  LYS L  53      35.509 -34.499  86.020  1.00  0.00           C  
ATOM   2008  CE  LYS L  53      35.089 -35.960  86.007  1.00  0.00           C  
ATOM   2009  NZ  LYS L  53      36.072 -36.732  85.189  1.00  0.00           N  
ATOM   2010  N   ARG L  54      40.518 -31.316  86.817  1.00  0.00           N  
ATOM   2011  CA  ARG L  54      41.248 -30.045  86.596  1.00  0.00           C  
ATOM   2012  C   ARG L  54      40.703 -29.475  85.287  1.00  0.00           C  
ATOM   2013  O   ARG L  54      40.536 -30.235  84.315  1.00  0.00           O  
ATOM   2014  CB  ARG L  54      42.746 -30.267  86.535  1.00  0.00           C  
ATOM   2015  CG  ARG L  54      43.160 -31.595  85.904  1.00  0.00           C  
ATOM   2016  CD  ARG L  54      44.614 -31.868  86.133  1.00  0.00           C  
ATOM   2017  NE  ARG L  54      44.870 -32.304  87.490  1.00  0.00           N  
ATOM   2018  CZ  ARG L  54      44.843 -33.575  87.884  1.00  0.00           C  
ATOM   2019  NH1 ARG L  54      44.634 -34.574  87.042  1.00  0.00           N  
ATOM   2020  NH2 ARG L  54      44.996 -33.835  89.193  1.00  0.00           N  
ATOM   2021  N   PRO L  55      40.334 -28.210  85.324  1.00  0.00           N  
ATOM   2022  CA  PRO L  55      40.009 -27.482  84.081  1.00  0.00           C  
ATOM   2023  C   PRO L  55      41.284 -27.187  83.309  1.00  0.00           C  
ATOM   2024  O   PRO L  55      42.413 -27.023  83.848  1.00  0.00           O  
ATOM   2025  CB  PRO L  55      39.211 -26.308  84.599  1.00  0.00           C  
ATOM   2026  CG  PRO L  55      39.647 -26.060  85.992  1.00  0.00           C  
ATOM   2027  CD  PRO L  55      40.375 -27.300  86.470  1.00  0.00           C  
ATOM   2028  N   SER L  56      41.138 -27.149  81.999  1.00  0.00           N  
ATOM   2029  CA  SER L  56      42.269 -26.885  81.075  1.00  0.00           C  
ATOM   2030  C   SER L  56      43.023 -25.635  81.526  1.00  0.00           C  
ATOM   2031  O   SER L  56      42.425 -24.644  82.000  1.00  0.00           O  
ATOM   2032  CB  SER L  56      41.743 -26.816  79.651  1.00  0.00           C  
ATOM   2033  OG  SER L  56      40.913 -27.966  79.385  1.00  0.00           O  
ATOM   2034  N   GLY L  57      44.345 -25.705  81.441  1.00  0.00           N  
ATOM   2035  CA  GLY L  57      45.222 -24.578  81.759  1.00  0.00           C  
ATOM   2036  C   GLY L  57      45.662 -24.594  83.220  1.00  0.00           C  
ATOM   2037  O   GLY L  57      46.561 -23.819  83.597  1.00  0.00           O  
ATOM   2038  N   VAL L  58      45.007 -25.461  83.990  1.00  0.00           N  
ATOM   2039  CA  VAL L  58      45.327 -25.575  85.441  1.00  0.00           C  
ATOM   2040  C   VAL L  58      46.411 -26.624  85.631  1.00  0.00           C  
ATOM   2041  O   VAL L  58      46.289 -27.748  85.096  1.00  0.00           O  
ATOM   2042  CB  VAL L  58      43.992 -25.877  86.153  1.00  0.00           C  
ATOM   2043  CG1 VAL L  58      44.160 -26.296  87.594  1.00  0.00           C  
ATOM   2044  CG2 VAL L  58      43.023 -24.708  85.992  1.00  0.00           C  
ATOM   2045  N   PRO L  59      47.456 -26.260  86.373  1.00  0.00           N  
ATOM   2046  CA  PRO L  59      48.604 -27.144  86.600  1.00  0.00           C  
ATOM   2047  C   PRO L  59      48.223 -28.391  87.380  1.00  0.00           C  
ATOM   2048  O   PRO L  59      47.358 -28.423  88.275  1.00  0.00           O  
ATOM   2049  CB  PRO L  59      49.664 -26.281  87.237  1.00  0.00           C  
ATOM   2050  CG  PRO L  59      49.262 -24.870  86.906  1.00  0.00           C  
ATOM   2051  CD  PRO L  59      47.734 -24.897  86.867  1.00  0.00           C  
ATOM   2052  N   ASP L  60      48.949 -29.450  87.055  1.00  0.00           N  
ATOM   2053  CA  ASP L  60      48.598 -30.826  87.445  1.00  0.00           C  
ATOM   2054  C   ASP L  60      48.855 -31.055  88.923  1.00  0.00           C  
ATOM   2055  O   ASP L  60      48.265 -31.972  89.529  1.00  0.00           O  
ATOM   2056  CB  ASP L  60      49.301 -31.789  86.479  1.00  0.00           C  
ATOM   2057  CG  ASP L  60      48.975 -33.247  86.706  1.00  0.00           C  
ATOM   2058  OD1 ASP L  60      47.794 -33.608  86.479  1.00  0.00           O  
ATOM   2059  OD2 ASP L  60      49.857 -34.033  87.103  1.00  0.00           O  
ATOM   2060  N   ARG L  61      49.714 -30.222  89.496  1.00  0.00           N  
ATOM   2061  CA  ARG L  61      50.001 -30.212  90.933  1.00  0.00           C  
ATOM   2062  C   ARG L  61      48.664 -30.072  91.701  1.00  0.00           C  
ATOM   2063  O   ARG L  61      48.506 -30.711  92.734  1.00  0.00           O  
ATOM   2064  CB  ARG L  61      50.886 -29.090  91.439  1.00  0.00           C  
ATOM   2065  CG  ARG L  61      52.120 -28.688  90.702  1.00  0.00           C  
ATOM   2066  CD  ARG L  61      52.621 -27.334  91.078  1.00  0.00           C  
ATOM   2067  NE  ARG L  61      51.603 -26.298  90.991  1.00  0.00           N  
ATOM   2068  CZ  ARG L  61      51.857 -24.987  91.020  1.00  0.00           C  
ATOM   2069  NH1 ARG L  61      53.082 -24.491  91.141  1.00  0.00           N  
ATOM   2070  NH2 ARG L  61      50.841 -24.131  90.924  1.00  0.00           N  
ATOM   2071  N   PHE L  62      47.812 -29.218  91.141  1.00  0.00           N  
ATOM   2072  CA  PHE L  62      46.540 -28.915  91.829  1.00  0.00           C  
ATOM   2073  C   PHE L  62      45.655 -30.152  91.872  1.00  0.00           C  
ATOM   2074  O   PHE L  62      44.598 -30.172  91.219  1.00  0.00           O  
ATOM   2075  CB  PHE L  62      45.860 -27.694  91.227  1.00  0.00           C  
ATOM   2076  CG  PHE L  62      46.303 -26.407  91.875  1.00  0.00           C  
ATOM   2077  CD1 PHE L  62      47.671 -26.124  91.970  1.00  0.00           C  
ATOM   2078  CD2 PHE L  62      45.370 -25.518  92.392  1.00  0.00           C  
ATOM   2079  CE1 PHE L  62      48.109 -24.955  92.574  1.00  0.00           C  
ATOM   2080  CE2 PHE L  62      45.792 -24.334  93.002  1.00  0.00           C  
ATOM   2081  CZ  PHE L  62      47.169 -24.056  93.089  1.00  0.00           C  
ATOM   2082  N   SER L  63      46.094 -31.108  92.701  1.00  0.00           N  
ATOM   2083  CA  SER L  63      45.253 -32.339  92.833  1.00  0.00           C  
ATOM   2084  C   SER L  63      44.142 -32.055  93.839  1.00  0.00           C  
ATOM   2085  O   SER L  63      44.227 -31.159  94.697  1.00  0.00           O  
ATOM   2086  CB  SER L  63      46.100 -33.539  93.143  1.00  0.00           C  
ATOM   2087  OG  SER L  63      47.263 -33.550  92.311  1.00  0.00           O  
ATOM   2088  N   GLY L  64      43.075 -32.808  93.662  1.00  0.00           N  
ATOM   2089  CA  GLY L  64      41.836 -32.731  94.446  1.00  0.00           C  
ATOM   2090  C   GLY L  64      41.415 -34.183  94.727  1.00  0.00           C  
ATOM   2091  O   GLY L  64      41.794 -35.086  93.963  1.00  0.00           O  
ATOM   2092  N   SER L  65      40.711 -34.357  95.828  1.00  0.00           N  
ATOM   2093  CA  SER L  65      40.333 -35.705  96.300  1.00  0.00           C  
ATOM   2094  C   SER L  65      39.109 -35.587  97.209  1.00  0.00           C  
ATOM   2095  O   SER L  65      38.622 -34.478  97.473  1.00  0.00           O  
ATOM   2096  CB  SER L  65      41.472 -36.391  97.040  1.00  0.00           C  
ATOM   2097  OG  SER L  65      42.753 -35.910  96.688  1.00  0.00           O  
ATOM   2098  N   LYS L  66      38.653 -36.743  97.644  1.00  0.00           N  
ATOM   2099  CA  LYS L  66      37.556 -36.827  98.648  1.00  0.00           C  
ATOM   2100  C   LYS L  66      37.723 -38.163  99.360  1.00  0.00           C  
ATOM   2101  O   LYS L  66      38.117 -39.154  98.705  1.00  0.00           O  
ATOM   2102  CB  LYS L  66      36.220 -36.659  97.990  1.00  0.00           C  
ATOM   2103  CG  LYS L  66      34.976 -37.197  98.639  1.00  0.00           C  
ATOM   2104  CD  LYS L  66      34.752 -38.681  98.362  1.00  0.00           C  
ATOM   2105  CE  LYS L  66      33.268 -38.993  98.272  1.00  0.00           C  
ATOM   2106  NZ  LYS L  66      32.645 -38.157  97.202  1.00  0.00           N  
ATOM   2107  N   SER L  67      37.474 -38.174 100.650  1.00  0.00           N  
ATOM   2108  CA  SER L  67      37.588 -39.361 101.488  1.00  0.00           C  
ATOM   2109  C   SER L  67      36.221 -39.886 101.905  1.00  0.00           C  
ATOM   2110  O   SER L  67      36.098 -41.111 102.100  1.00  0.00           O  
ATOM   2111  CB  SER L  67      38.440 -39.102 102.730  1.00  0.00           C  
ATOM   2112  OG  SER L  67      37.789 -38.216 103.628  1.00  0.00           O  
ATOM   2113  N   GLY L  68      35.245 -38.988 102.000  1.00  0.00           N  
ATOM   2114  CA  GLY L  68      33.892 -39.355 102.446  1.00  0.00           C  
ATOM   2115  C   GLY L  68      33.071 -38.159 102.890  1.00  0.00           C  
ATOM   2116  O   GLY L  68      31.877 -38.035 102.531  1.00  0.00           O  
ATOM   2117  N   ASN L  69      33.660 -37.320 103.717  1.00  0.00           N  
ATOM   2118  CA  ASN L  69      33.049 -36.049 104.147  1.00  0.00           C  
ATOM   2119  C   ASN L  69      34.150 -34.984 104.007  1.00  0.00           C  
ATOM   2120  O   ASN L  69      33.860 -33.824 103.727  1.00  0.00           O  
ATOM   2121  CB  ASN L  69      32.451 -36.097 105.537  1.00  0.00           C  
ATOM   2122  CG  ASN L  69      31.627 -34.895 105.954  1.00  0.00           C  
ATOM   2123  OD1 ASN L  69      31.930 -34.220 106.950  1.00  0.00           O  
ATOM   2124  ND2 ASN L  69      30.538 -34.576 105.251  1.00  0.00           N  
ATOM   2125  N   THR L  70      35.377 -35.476 104.236  1.00  0.00           N  
ATOM   2126  CA  THR L  70      36.559 -34.673 103.972  1.00  0.00           C  
ATOM   2127  C   THR L  70      36.921 -34.763 102.470  1.00  0.00           C  
ATOM   2128  O   THR L  70      37.289 -35.807 101.953  1.00  0.00           O  
ATOM   2129  CB  THR L  70      37.856 -34.966 104.790  1.00  0.00           C  
ATOM   2130  OG1 THR L  70      37.629 -36.089 105.669  1.00  0.00           O  
ATOM   2131  CG2 THR L  70      38.389 -33.699 105.485  1.00  0.00           C  
ATOM   2132  N   ALA L  71      36.821 -33.595 101.881  1.00  0.00           N  
ATOM   2133  CA  ALA L  71      37.108 -33.429 100.444  1.00  0.00           C  
ATOM   2134  C   ALA L  71      38.391 -32.602 100.416  1.00  0.00           C  
ATOM   2135  O   ALA L  71      38.429 -31.543 101.065  1.00  0.00           O  
ATOM   2136  CB  ALA L  71      35.938 -32.763  99.765  1.00  0.00           C  
ATOM   2137  N   SER L  72      39.377 -33.125  99.722  1.00  0.00           N  
ATOM   2138  CA  SER L  72      40.710 -32.540  99.732  1.00  0.00           C  
ATOM   2139  C   SER L  72      41.107 -31.847  98.436  1.00  0.00           C  
ATOM   2140  O   SER L  72      40.547 -31.974  97.352  1.00  0.00           O  
ATOM   2141  CB  SER L  72      41.740 -33.583 100.161  1.00  0.00           C  
ATOM   2142  OG  SER L  72      41.507 -33.899 101.544  1.00  0.00           O  
ATOM   2143  N   LEU L  73      42.097 -31.009  98.646  1.00  0.00           N  
ATOM   2144  CA  LEU L  73      42.919 -30.297  97.651  1.00  0.00           C  
ATOM   2145  C   LEU L  73      44.338 -30.716  98.077  1.00  0.00           C  
ATOM   2146  O   LEU L  73      44.408 -31.386  99.139  1.00  0.00           O  
ATOM   2147  CB  LEU L  73      42.587 -28.840  97.757  1.00  0.00           C  
ATOM   2148  CG  LEU L  73      42.938 -27.743  96.809  1.00  0.00           C  
ATOM   2149  CD1 LEU L  73      44.060 -26.857  97.371  1.00  0.00           C  
ATOM   2150  CD2 LEU L  73      43.365 -28.278  95.439  1.00  0.00           C  
ATOM   2151  N   THR L  74      45.346 -30.412  97.328  1.00  0.00           N  
ATOM   2152  CA  THR L  74      46.717 -30.880  97.579  1.00  0.00           C  
ATOM   2153  C   THR L  74      47.647 -30.266  96.514  1.00  0.00           C  
ATOM   2154  O   THR L  74      47.653 -30.706  95.344  1.00  0.00           O  
ATOM   2155  CB  THR L  74      46.879 -32.441  97.571  1.00  0.00           C  
ATOM   2156  OG1 THR L  74      45.638 -33.064  97.997  1.00  0.00           O  
ATOM   2157  CG2 THR L  74      48.066 -32.925  98.430  1.00  0.00           C  
ATOM   2158  N   VAL L  75      48.353 -29.241  96.954  1.00  0.00           N  
ATOM   2159  CA  VAL L  75      49.350 -28.548  96.110  1.00  0.00           C  
ATOM   2160  C   VAL L  75      50.707 -29.230  96.395  1.00  0.00           C  
ATOM   2161  O   VAL L  75      51.118 -29.353  97.562  1.00  0.00           O  
ATOM   2162  CB  VAL L  75      49.367 -27.036  96.358  1.00  0.00           C  
ATOM   2163  CG1 VAL L  75      50.652 -26.375  95.861  1.00  0.00           C  
ATOM   2164  CG2 VAL L  75      48.146 -26.338  95.778  1.00  0.00           C  
ATOM   2165  N   SER L  76      51.291 -29.675  95.298  1.00  0.00           N  
ATOM   2166  CA  SER L  76      52.556 -30.448  95.343  1.00  0.00           C  
ATOM   2167  C   SER L  76      53.621 -29.502  94.811  1.00  0.00           C  
ATOM   2168  O   SER L  76      53.447 -28.947  93.714  1.00  0.00           O  
ATOM   2169  CB  SER L  76      52.406 -31.716  94.549  1.00  0.00           C  
ATOM   2170  OG  SER L  76      51.037 -32.150  94.571  1.00  0.00           O  
ATOM   2171  N   GLY L  77      54.627 -29.248  95.618  1.00  0.00           N  
ATOM   2172  CA  GLY L  77      55.693 -28.303  95.315  1.00  0.00           C  
ATOM   2173  C   GLY L  77      55.171 -26.875  95.257  1.00  0.00           C  
ATOM   2174  O   GLY L  77      55.137 -26.287  94.166  1.00  0.00           O  
ATOM   2175  N   LEU L  78      54.783 -26.362  96.428  1.00  0.00           N  
ATOM   2176  CA  LEU L  78      54.454 -24.906  96.538  1.00  0.00           C  
ATOM   2177  C   LEU L  78      55.470 -24.064  95.753  1.00  0.00           C  
ATOM   2178  O   LEU L  78      56.697 -24.146  95.937  1.00  0.00           O  
ATOM   2179  CB  LEU L  78      54.389 -24.633  98.029  1.00  0.00           C  
ATOM   2180  CG  LEU L  78      53.447 -23.821  98.847  1.00  0.00           C  
ATOM   2181  CD1 LEU L  78      53.653 -22.307  98.718  1.00  0.00           C  
ATOM   2182  CD2 LEU L  78      51.978 -24.117  98.516  1.00  0.00           C  
ATOM   2183  N   GLN L  79      54.967 -23.224  94.874  1.00  0.00           N  
ATOM   2184  CA  GLN L  79      55.739 -22.249  94.095  1.00  0.00           C  
ATOM   2185  C   GLN L  79      55.304 -20.869  94.647  1.00  0.00           C  
ATOM   2186  O   GLN L  79      54.106 -20.724  94.917  1.00  0.00           O  
ATOM   2187  CB  GLN L  79      55.519 -22.247  92.608  1.00  0.00           C  
ATOM   2188  CG  GLN L  79      55.793 -23.271  91.589  1.00  0.00           C  
ATOM   2189  CD  GLN L  79      57.100 -23.994  91.632  1.00  0.00           C  
ATOM   2190  OE1 GLN L  79      58.184 -23.418  91.565  1.00  0.00           O  
ATOM   2191  NE2 GLN L  79      57.034 -25.317  91.788  1.00  0.00           N  
ATOM   2192  N   ALA L  80      56.200 -19.941  94.750  1.00  0.00           N  
ATOM   2193  CA  ALA L  80      55.949 -18.604  95.302  1.00  0.00           C  
ATOM   2194  C   ALA L  80      54.563 -18.036  95.053  1.00  0.00           C  
ATOM   2195  O   ALA L  80      53.758 -17.712  95.973  1.00  0.00           O  
ATOM   2196  CB  ALA L  80      57.016 -17.651  94.716  1.00  0.00           C  
ATOM   2197  N   GLU L  81      54.236 -17.961  93.764  1.00  0.00           N  
ATOM   2198  CA  GLU L  81      53.002 -17.331  93.285  1.00  0.00           C  
ATOM   2199  C   GLU L  81      51.769 -18.159  93.578  1.00  0.00           C  
ATOM   2200  O   GLU L  81      50.648 -17.837  93.127  1.00  0.00           O  
ATOM   2201  CB  GLU L  81      53.089 -16.922  91.820  1.00  0.00           C  
ATOM   2202  CG  GLU L  81      53.425 -15.453  91.517  1.00  0.00           C  
ATOM   2203  CD  GLU L  81      53.810 -14.568  92.667  1.00  0.00           C  
ATOM   2204  OE1 GLU L  81      54.692 -14.804  93.484  1.00  0.00           O  
ATOM   2205  OE2 GLU L  81      53.121 -13.520  92.731  1.00  0.00           O  
ATOM   2206  N   ASP L  82      51.941 -19.179  94.402  1.00  0.00           N  
ATOM   2207  CA  ASP L  82      50.917 -20.096  94.863  1.00  0.00           C  
ATOM   2208  C   ASP L  82      50.144 -19.555  96.075  1.00  0.00           C  
ATOM   2209  O   ASP L  82      48.944 -19.884  96.192  1.00  0.00           O  
ATOM   2210  CB  ASP L  82      51.487 -21.490  95.177  1.00  0.00           C  
ATOM   2211  CG  ASP L  82      51.484 -22.404  93.967  1.00  0.00           C  
ATOM   2212  OD1 ASP L  82      50.573 -22.215  93.138  1.00  0.00           O  
ATOM   2213  OD2 ASP L  82      52.343 -23.282  93.852  1.00  0.00           O  
ATOM   2214  N   GLU L  83      50.856 -18.773  96.887  1.00  0.00           N  
ATOM   2215  CA  GLU L  83      50.136 -18.186  98.075  1.00  0.00           C  
ATOM   2216  C   GLU L  83      48.839 -17.517  97.687  1.00  0.00           C  
ATOM   2217  O   GLU L  83      48.863 -16.491  96.969  1.00  0.00           O  
ATOM   2218  CB  GLU L  83      51.049 -17.201  98.772  1.00  0.00           C  
ATOM   2219  CG  GLU L  83      50.520 -16.188  99.761  1.00  0.00           C  
ATOM   2220  CD  GLU L  83      51.551 -15.260 100.345  1.00  0.00           C  
ATOM   2221  OE1 GLU L  83      52.668 -15.804 100.445  1.00  0.00           O  
ATOM   2222  OE2 GLU L  83      51.337 -14.111 100.669  1.00  0.00           O  
ATOM   2223  N   ALA L  84      47.702 -18.061  98.146  1.00  0.00           N  
ATOM   2224  CA  ALA L  84      46.377 -17.475  97.919  1.00  0.00           C  
ATOM   2225  C   ALA L  84      45.280 -17.923  98.875  1.00  0.00           C  
ATOM   2226  O   ALA L  84      45.478 -18.721  99.804  1.00  0.00           O  
ATOM   2227  CB  ALA L  84      45.957 -17.712  96.465  1.00  0.00           C  
ATOM   2228  N   ASP L  85      44.069 -17.425  98.626  1.00  0.00           N  
ATOM   2229  CA  ASP L  85      42.876 -17.618  99.449  1.00  0.00           C  
ATOM   2230  C   ASP L  85      41.945 -18.671  98.849  1.00  0.00           C  
ATOM   2231  O   ASP L  85      40.880 -18.288  98.296  1.00  0.00           O  
ATOM   2232  CB  ASP L  85      42.123 -16.268  99.564  1.00  0.00           C  
ATOM   2233  CG  ASP L  85      42.148 -15.648 100.936  1.00  0.00           C  
ATOM   2234  OD1 ASP L  85      41.789 -16.296 101.923  1.00  0.00           O  
ATOM   2235  OD2 ASP L  85      42.513 -14.456 101.031  1.00  0.00           O  
ATOM   2236  N   TYR L  86      42.313 -19.932  98.953  1.00  0.00           N  
ATOM   2237  CA  TYR L  86      41.612 -21.001  98.228  1.00  0.00           C  
ATOM   2238  C   TYR L  86      40.304 -21.389  98.942  1.00  0.00           C  
ATOM   2239  O   TYR L  86      40.253 -21.678 100.157  1.00  0.00           O  
ATOM   2240  CB  TYR L  86      42.453 -22.202  97.889  1.00  0.00           C  
ATOM   2241  CG  TYR L  86      43.829 -22.069  97.294  1.00  0.00           C  
ATOM   2242  CD1 TYR L  86      44.564 -20.887  97.298  1.00  0.00           C  
ATOM   2243  CD2 TYR L  86      44.467 -23.208  96.785  1.00  0.00           C  
ATOM   2244  CE1 TYR L  86      45.864 -20.829  96.822  1.00  0.00           C  
ATOM   2245  CE2 TYR L  86      45.767 -23.168  96.302  1.00  0.00           C  
ATOM   2246  CZ  TYR L  86      46.468 -21.976  96.328  1.00  0.00           C  
ATOM   2247  OH  TYR L  86      47.760 -21.972  95.870  1.00  0.00           O  
ATOM   2248  N   TYR L  87      39.274 -21.389  98.072  1.00  0.00           N  
ATOM   2249  CA  TYR L  87      37.907 -21.696  98.566  1.00  0.00           C  
ATOM   2250  C   TYR L  87      37.490 -23.106  98.150  1.00  0.00           C  
ATOM   2251  O   TYR L  87      38.217 -23.807  97.432  1.00  0.00           O  
ATOM   2252  CB  TYR L  87      36.874 -20.656  98.148  1.00  0.00           C  
ATOM   2253  CG  TYR L  87      36.945 -19.320  98.845  1.00  0.00           C  
ATOM   2254  CD1 TYR L  87      38.037 -18.470  98.663  1.00  0.00           C  
ATOM   2255  CD2 TYR L  87      35.915 -18.881  99.678  1.00  0.00           C  
ATOM   2256  CE1 TYR L  87      38.117 -17.235  99.298  1.00  0.00           C  
ATOM   2257  CE2 TYR L  87      35.976 -17.649 100.323  1.00  0.00           C  
ATOM   2258  CZ  TYR L  87      37.078 -16.826 100.131  1.00  0.00           C  
ATOM   2259  OH  TYR L  87      37.105 -15.609 100.760  1.00  0.00           O  
ATOM   2260  N   CYS L  88      36.317 -23.493  98.624  1.00  0.00           N  
ATOM   2261  CA  CYS L  88      35.775 -24.858  98.495  1.00  0.00           C  
ATOM   2262  C   CYS L  88      34.262 -24.729  98.319  1.00  0.00           C  
ATOM   2263  O   CYS L  88      33.730 -23.682  98.728  1.00  0.00           O  
ATOM   2264  CB  CYS L  88      36.113 -25.699  99.693  1.00  0.00           C  
ATOM   2265  SG  CYS L  88      34.816 -26.775 100.401  1.00  0.00           S  
ATOM   2266  N   SER L  89      33.680 -25.758  97.692  1.00  0.00           N  
ATOM   2267  CA  SER L  89      32.232 -25.632  97.348  1.00  0.00           C  
ATOM   2268  C   SER L  89      31.558 -26.940  96.986  1.00  0.00           C  
ATOM   2269  O   SER L  89      32.172 -27.886  96.473  1.00  0.00           O  
ATOM   2270  CB  SER L  89      32.092 -24.625  96.198  1.00  0.00           C  
ATOM   2271  OG  SER L  89      30.769 -24.209  95.982  1.00  0.00           O  
ATOM   2272  N   SER L  90      30.240 -26.931  97.196  1.00  0.00           N  
ATOM   2273  CA  SER L  90      29.329 -28.024  96.895  1.00  0.00           C  
ATOM   2274  C   SER L  90      27.884 -27.534  96.694  1.00  0.00           C  
ATOM   2275  O   SER L  90      27.307 -26.803  97.503  1.00  0.00           O  
ATOM   2276  CB  SER L  90      29.326 -29.108  97.964  1.00  0.00           C  
ATOM   2277  OG  SER L  90      30.473 -29.919  97.897  1.00  0.00           O  
ATOM   2278  N   TYR L  91      27.329 -27.987  95.605  1.00  0.00           N  
ATOM   2279  CA  TYR L  91      25.900 -27.817  95.233  1.00  0.00           C  
ATOM   2280  C   TYR L  91      25.072 -28.747  96.101  1.00  0.00           C  
ATOM   2281  O   TYR L  91      25.669 -29.663  96.731  1.00  0.00           O  
ATOM   2282  CB  TYR L  91      25.868 -28.094  93.714  1.00  0.00           C  
ATOM   2283  CG  TYR L  91      24.577 -28.298  92.991  1.00  0.00           C  
ATOM   2284  CD1 TYR L  91      23.865 -29.505  93.067  1.00  0.00           C  
ATOM   2285  CD2 TYR L  91      24.051 -27.290  92.177  1.00  0.00           C  
ATOM   2286  CE1 TYR L  91      22.657 -29.681  92.394  1.00  0.00           C  
ATOM   2287  CE2 TYR L  91      22.847 -27.449  91.496  1.00  0.00           C  
ATOM   2288  CZ  TYR L  91      22.157 -28.641  91.615  1.00  0.00           C  
ATOM   2289  OH  TYR L  91      20.962 -28.753  90.963  1.00  0.00           O  
ATOM   2290  N   GLU L  92      23.768 -28.516  96.253  1.00  0.00           N  
ATOM   2291  CA  GLU L  92      22.870 -29.494  96.895  1.00  0.00           C  
ATOM   2292  C   GLU L  92      21.803 -29.941  95.902  1.00  0.00           C  
ATOM   2293  O   GLU L  92      21.960 -31.058  95.352  1.00  0.00           O  
ATOM   2294  CB  GLU L  92      22.197 -29.113  98.200  1.00  0.00           C  
ATOM   2295  CG  GLU L  92      21.068 -29.991  98.707  1.00  0.00           C  
ATOM   2296  CD  GLU L  92      20.720 -30.179 100.131  1.00  0.00           C  
ATOM   2297  OE1 GLU L  92      21.202 -29.376 100.970  1.00  0.00           O  
ATOM   2298  OE2 GLU L  92      19.956 -31.085 100.518  1.00  0.00           O  
ATOM   2299  N   GLY L  93      20.797 -29.112  95.640  1.00  0.00           N  
ATOM   2300  CA  GLY L  93      19.675 -29.546  94.813  1.00  0.00           C  
ATOM   2301  C   GLY L  93      18.856 -28.466  94.166  1.00  0.00           C  
ATOM   2302  O   GLY L  93      18.004 -27.810  94.807  1.00  0.00           O  
ATOM   2303  N   SER L  94      19.068 -28.335  92.853  1.00  0.00           N  
ATOM   2304  CA  SER L  94      18.429 -27.325  92.002  1.00  0.00           C  
ATOM   2305  C   SER L  94      18.979 -25.927  92.281  1.00  0.00           C  
ATOM   2306  O   SER L  94      18.608 -24.908  91.675  1.00  0.00           O  
ATOM   2307  CB  SER L  94      16.917 -27.382  92.139  1.00  0.00           C  
ATOM   2308  OG  SER L  94      16.435 -28.635  91.652  1.00  0.00           O  
ATOM   2309  N   ASP L  95      19.913 -25.911  93.203  1.00  0.00           N  
ATOM   2310  CA  ASP L  95      20.586 -24.748  93.766  1.00  0.00           C  
ATOM   2311  C   ASP L  95      21.419 -25.308  94.945  1.00  0.00           C  
ATOM   2312  O   ASP L  95      21.760 -26.501  94.935  1.00  0.00           O  
ATOM   2313  CB  ASP L  95      19.585 -23.688  94.238  1.00  0.00           C  
ATOM   2314  CG  ASP L  95      18.342 -24.288  94.885  1.00  0.00           C  
ATOM   2315  OD1 ASP L  95      18.500 -25.339  95.541  1.00  0.00           O  
ATOM   2316  OD2 ASP L  95      17.236 -23.746  94.731  1.00  0.00           O  
ATOM   2317  N   ASN L  95A     21.609 -24.433  95.911  1.00  0.00           N  
ATOM   2318  CA  ASN L  95A     22.266 -24.762  97.187  1.00  0.00           C  
ATOM   2319  C   ASN L  95A     23.788 -24.828  96.913  1.00  0.00           C  
ATOM   2320  O   ASN L  95A     24.382 -25.898  97.032  1.00  0.00           O  
ATOM   2321  CB  ASN L  95A     21.785 -26.014  97.824  1.00  0.00           C  
ATOM   2322  CG  ASN L  95A     20.519 -26.137  98.579  1.00  0.00           C  
ATOM   2323  OD1 ASN L  95A     19.453 -26.453  98.012  1.00  0.00           O  
ATOM   2324  ND2 ASN L  95A     20.583 -26.007  99.919  1.00  0.00           N  
ATOM   2325  N   PHE L  96      24.282 -23.684  96.503  1.00  0.00           N  
ATOM   2326  CA  PHE L  96      25.739 -23.536  96.278  1.00  0.00           C  
ATOM   2327  C   PHE L  96      26.251 -23.114  97.666  1.00  0.00           C  
ATOM   2328  O   PHE L  96      26.001 -21.979  98.086  1.00  0.00           O  
ATOM   2329  CB  PHE L  96      26.108 -22.537  95.185  1.00  0.00           C  
ATOM   2330  CG  PHE L  96      25.035 -22.478  94.127  1.00  0.00           C  
ATOM   2331  CD1 PHE L  96      24.985 -23.438  93.128  1.00  0.00           C  
ATOM   2332  CD2 PHE L  96      24.018 -21.537  94.242  1.00  0.00           C  
ATOM   2333  CE1 PHE L  96      23.941 -23.420  92.197  1.00  0.00           C  
ATOM   2334  CE2 PHE L  96      22.983 -21.498  93.322  1.00  0.00           C  
ATOM   2335  CZ  PHE L  96      22.943 -22.448  92.303  1.00  0.00           C  
ATOM   2336  N   VAL L  97      26.819 -24.119  98.309  1.00  0.00           N  
ATOM   2337  CA  VAL L  97      27.469 -23.878  99.596  1.00  0.00           C  
ATOM   2338  C   VAL L  97      28.980 -24.071  99.475  1.00  0.00           C  
ATOM   2339  O   VAL L  97      29.537 -25.132  99.198  1.00  0.00           O  
ATOM   2340  CB  VAL L  97      26.756 -24.632 100.715  1.00  0.00           C  
ATOM   2341  CG1 VAL L  97      27.059 -26.113 100.830  1.00  0.00           C  
ATOM   2342  CG2 VAL L  97      27.013 -23.916 102.044  1.00  0.00           C  
ATOM   2343  N   PHE L  98      29.627 -22.940  99.691  1.00  0.00           N  
ATOM   2344  CA  PHE L  98      31.066 -22.748  99.767  1.00  0.00           C  
ATOM   2345  C   PHE L  98      31.546 -22.906 101.232  1.00  0.00           C  
ATOM   2346  O   PHE L  98      30.869 -22.470 102.178  1.00  0.00           O  
ATOM   2347  CB  PHE L  98      31.419 -21.337  99.258  1.00  0.00           C  
ATOM   2348  CG  PHE L  98      31.227 -21.028  97.815  1.00  0.00           C  
ATOM   2349  CD1 PHE L  98      30.178 -21.572  97.073  1.00  0.00           C  
ATOM   2350  CD2 PHE L  98      32.129 -20.164  97.174  1.00  0.00           C  
ATOM   2351  CE1 PHE L  98      30.023 -21.275  95.716  1.00  0.00           C  
ATOM   2352  CE2 PHE L  98      31.992 -19.852  95.828  1.00  0.00           C  
ATOM   2353  CZ  PHE L  98      30.939 -20.406  95.105  1.00  0.00           C  
ATOM   2354  N   GLY L  99      32.729 -23.481 101.356  1.00  0.00           N  
ATOM   2355  CA  GLY L  99      33.412 -23.640 102.648  1.00  0.00           C  
ATOM   2356  C   GLY L  99      33.935 -22.281 103.106  1.00  0.00           C  
ATOM   2357  O   GLY L  99      33.905 -21.317 102.325  1.00  0.00           O  
ATOM   2358  N   THR L 100      34.466 -22.246 104.320  1.00  0.00           N  
ATOM   2359  CA  THR L 100      34.828 -20.996 104.980  1.00  0.00           C  
ATOM   2360  C   THR L 100      35.983 -20.237 104.401  1.00  0.00           C  
ATOM   2361  O   THR L 100      35.781 -18.981 104.266  1.00  0.00           O  
ATOM   2362  CB  THR L 100      34.846 -21.125 106.554  1.00  0.00           C  
ATOM   2363  OG1 THR L 100      35.777 -22.171 106.952  1.00  0.00           O  
ATOM   2364  CG2 THR L 100      33.435 -21.396 107.129  1.00  0.00           C  
ATOM   2365  N   GLY L 101      37.163 -20.776 104.106  1.00  0.00           N  
ATOM   2366  CA  GLY L 101      38.144 -20.077 103.308  1.00  0.00           C  
ATOM   2367  C   GLY L 101      39.607 -20.157 103.438  1.00  0.00           C  
ATOM   2368  O   GLY L 101      40.309 -19.085 103.412  1.00  0.00           O  
ATOM   2369  N   THR L 102      40.230 -21.312 103.329  1.00  0.00           N  
ATOM   2370  CA  THR L 102      41.619 -21.609 103.574  1.00  0.00           C  
ATOM   2371  C   THR L 102      42.717 -20.776 102.951  1.00  0.00           C  
ATOM   2372  O   THR L 102      43.348 -21.222 101.962  1.00  0.00           O  
ATOM   2373  CB  THR L 102      41.890 -23.154 103.197  1.00  0.00           C  
ATOM   2374  OG1 THR L 102      40.631 -23.845 103.414  1.00  0.00           O  
ATOM   2375  CG2 THR L 102      43.032 -23.751 104.009  1.00  0.00           C  
ATOM   2376  N   LYS L 103      43.109 -19.695 103.569  1.00  0.00           N  
ATOM   2377  CA  LYS L 103      44.232 -18.834 103.217  1.00  0.00           C  
ATOM   2378  C   LYS L 103      45.608 -19.471 103.344  1.00  0.00           C  
ATOM   2379  O   LYS L 103      46.095 -19.734 104.461  1.00  0.00           O  
ATOM   2380  CB  LYS L 103      44.179 -17.613 104.165  1.00  0.00           C  
ATOM   2381  CG  LYS L 103      44.522 -16.287 103.518  1.00  0.00           C  
ATOM   2382  CD  LYS L 103      45.160 -15.306 104.483  1.00  0.00           C  
ATOM   2383  CE  LYS L 103      46.658 -15.499 104.550  1.00  0.00           C  
ATOM   2384  NZ  LYS L 103      47.002 -16.941 104.625  1.00  0.00           N  
ATOM   2385  N   VAL L 104      46.315 -19.634 102.234  1.00  0.00           N  
ATOM   2386  CA  VAL L 104      47.548 -20.444 102.104  1.00  0.00           C  
ATOM   2387  C   VAL L 104      48.808 -19.599 102.236  1.00  0.00           C  
ATOM   2388  O   VAL L 104      48.632 -18.413 101.830  1.00  0.00           O  
ATOM   2389  CB  VAL L 104      47.488 -21.119 100.696  1.00  0.00           C  
ATOM   2390  CG1 VAL L 104      48.759 -21.872 100.358  1.00  0.00           C  
ATOM   2391  CG2 VAL L 104      46.261 -21.990 100.589  1.00  0.00           C  
ATOM   2392  N   THR L 105      49.948 -20.208 102.773  1.00  0.00           N  
ATOM   2393  CA  THR L 105      51.043 -19.078 102.847  1.00  0.00           C  
ATOM   2394  C   THR L 105      52.417 -19.443 102.438  1.00  0.00           C  
ATOM   2395  O   THR L 105      52.819 -20.594 102.591  1.00  0.00           O  
ATOM   2396  CB  THR L 105      50.985 -18.368 104.243  1.00  0.00           C  
ATOM   2397  OG1 THR L 105      49.621 -17.876 104.442  1.00  0.00           O  
ATOM   2398  CG2 THR L 105      51.999 -17.212 104.427  1.00  0.00           C  
ATOM   2399  N   VAL L 106      53.209 -18.487 101.892  1.00  0.00           N  
ATOM   2400  CA  VAL L 106      54.658 -18.733 101.674  1.00  0.00           C  
ATOM   2401  C   VAL L 106      55.318 -18.222 102.976  1.00  0.00           C  
ATOM   2402  O   VAL L 106      55.050 -17.089 103.372  1.00  0.00           O  
ATOM   2403  CB  VAL L 106      55.299 -18.192 100.421  1.00  0.00           C  
ATOM   2404  CG1 VAL L 106      56.846 -18.255 100.477  1.00  0.00           C  
ATOM   2405  CG2 VAL L 106      54.849 -18.909  99.146  1.00  0.00           C  
ATOM   2406  N   LEU L 106A     56.083 -19.128 103.557  1.00  0.00           N  
ATOM   2407  CA  LEU L 106A     56.757 -18.826 104.827  1.00  0.00           C  
ATOM   2408  C   LEU L 106A     57.897 -17.834 104.704  1.00  0.00           C  
ATOM   2409  O   LEU L 106A     58.995 -18.147 104.223  1.00  0.00           O  
ATOM   2410  CB  LEU L 106A     57.153 -20.188 105.422  1.00  0.00           C  
ATOM   2411  CG  LEU L 106A     55.985 -21.140 105.686  1.00  0.00           C  
ATOM   2412  CD1 LEU L 106A     56.469 -22.423 106.339  1.00  0.00           C  
ATOM   2413  CD2 LEU L 106A     54.994 -20.415 106.597  1.00  0.00           C  
ATOM   2414  N   GLY L 107      57.624 -16.625 105.184  1.00  0.00           N  
ATOM   2415  CA  GLY L 107      58.635 -15.554 105.288  1.00  0.00           C  
ATOM   2416  C   GLY L 107      59.395 -15.758 106.608  1.00  0.00           C  
ATOM   2417  O   GLY L 107      60.547 -16.210 106.621  1.00  0.00           O  
ATOM   2418  N   GLN L 108      58.688 -15.459 107.673  1.00  0.00           N  
ATOM   2419  CA  GLN L 108      59.162 -15.557 109.073  1.00  0.00           C  
ATOM   2420  C   GLN L 108      58.661 -16.856 109.679  1.00  0.00           C  
ATOM   2421  O   GLN L 108      57.666 -17.411 109.168  1.00  0.00           O  
ATOM   2422  CB  GLN L 108      58.559 -14.347 109.859  1.00  0.00           C  
ATOM   2423  CG  GLN L 108      57.104 -14.139 109.471  1.00  0.00           C  
ATOM   2424  CD  GLN L 108      56.456 -12.826 109.763  1.00  0.00           C  
ATOM   2425  OE1 GLN L 108      55.234 -12.732 109.991  1.00  0.00           O  
ATOM   2426  NE2 GLN L 108      57.212 -11.726 109.739  1.00  0.00           N  
ATOM   2427  N   PRO L 109      59.290 -17.319 110.739  1.00  0.00           N  
ATOM   2428  CA  PRO L 109      58.942 -18.607 111.367  1.00  0.00           C  
ATOM   2429  C   PRO L 109      57.516 -18.561 111.897  1.00  0.00           C  
ATOM   2430  O   PRO L 109      56.956 -17.469 112.126  1.00  0.00           O  
ATOM   2431  CB  PRO L 109      59.997 -18.825 112.423  1.00  0.00           C  
ATOM   2432  CG  PRO L 109      61.068 -17.797 112.183  1.00  0.00           C  
ATOM   2433  CD  PRO L 109      60.350 -16.630 111.497  1.00  0.00           C  
TER    2434      PRO L 109                                                      
