# Supplementary material for: SARS-CoV-2 Spike Protein Interaction Space
Source: Int J Mol Sci. 2023 Jul 27;24(15):12058. doi: 10.3390/ijms241512058 (PMC10418891; doi:10.3390/ijms241512058)
Supplement: Supplementary file 1 [file ijms-24-12058-s001.zip › Supplementary Material File S1/1MCS.pdb]

REMARK 950 NUMBERING  Kabat
REMARK 950 METHOD     X-ray crystal structure
REMARK 950 RESOLUTION 2.700
REMARK 950 R-FACTOR   0.183
REMARK 950 R-FREE     0.000
REMARK 950 CHAIN-TYPE LABEL ORIGINAL
REMARK 950 CHAIN L    L    A
REMARK 950 CHAIN L    L    B
REMARK 950 CHAIN A    P    P
REMARK 950 MOLECULE : A : IMMUNOGLOBULIN LAMBDA DIMER MCG (LIGHT CHAIN)
REMARK 950 SPECIES  : A : HOMO SAPIENS
REMARK 950 MOLECULE : P : PEPTIDE  N-ACETYL-L-GLN-D-PHE-L-HIS-D-PRO-OH
REMARK 950 SPECIES  : P : 
SEQRES   1 L 216  PRO SER ALA LEU THR GLN PRO PRO SER ALA SER GLY SER          
SEQRES   2 L 216  LEU GLY GLN SER VAL THR ILE SER CYS THR GLY THR SER          
SEQRES   3 L 216  SER ASP VAL GLY GLY TYR ASN TYR VAL SER TRP TYR GLN          
SEQRES   4 L 216  GLN HIS ALA GLY LYS ALA PRO LYS VAL ILE ILE TYR GLU          
SEQRES   5 L 216  VAL ASN LYS ARG PRO SER GLY VAL PRO ASP ARG PHE SER          
SEQRES   6 L 216  GLY SER LYS SER GLY ASN THR ALA SER LEU THR VAL SER          
SEQRES   7 L 216  GLY LEU GLN ALA GLU ASP GLU ALA ASP TYR TYR CYS SER          
SEQRES   8 L 216  SER TYR GLU GLY SER ASP ASN PHE VAL PHE GLY THR GLY          
SEQRES   9 L 216  THR LYS VAL THR VAL LEU GLY GLN PRO LYS ALA ASN PRO          
SEQRES  10 L 216  THR VAL THR LEU PHE PRO PRO SER SER GLU GLU LEU GLN          
SEQRES  11 L 216  ALA ASN LYS ALA THR LEU VAL CYS LEU ILE SER ASP PHE          
SEQRES  12 L 216  TYR PRO GLY ALA VAL THR VAL ALA TRP LYS ALA ASP GLY          
SEQRES  13 L 216  SER PRO VAL LYS ALA GLY VAL GLU THR THR LYS PRO SER          
SEQRES  14 L 216  LYS GLN SER ASN ASN LYS TYR ALA ALA SER SER TYR LEU          
SEQRES  15 L 216  SER LEU THR PRO GLU GLN TRP LYS SER HIS ARG SER TYR          
SEQRES  16 L 216  SER CYS GLN VAL THR HIS GLU GLY SER THR VAL GLU LYS          
SEQRES  17 L 216  THR VAL ALA PRO THR GLU CYS SER                              
SEQRES   1 L 216  PRO SER ALA LEU THR GLN PRO PRO SER ALA SER GLY SER          
SEQRES   2 L 216  LEU GLY GLN SER VAL THR ILE SER CYS THR GLY THR SER          
SEQRES   3 L 216  SER ASP VAL GLY GLY TYR ASN TYR VAL SER TRP TYR GLN          
SEQRES   4 L 216  GLN HIS ALA GLY LYS ALA PRO LYS VAL ILE ILE TYR GLU          
SEQRES   5 L 216  VAL ASN LYS ARG PRO SER GLY VAL PRO ASP ARG PHE SER          
SEQRES   6 L 216  GLY SER LYS SER GLY ASN THR ALA SER LEU THR VAL SER          
SEQRES   7 L 216  GLY LEU GLN ALA GLU ASP GLU ALA ASP TYR TYR CYS SER          
SEQRES   8 L 216  SER TYR GLU GLY SER ASP ASN PHE VAL PHE GLY THR GLY          
SEQRES   9 L 216  THR LYS VAL THR VAL LEU GLY GLN PRO LYS ALA ASN PRO          
SEQRES  10 L 216  THR VAL THR LEU PHE PRO PRO SER SER GLU GLU LEU GLN          
SEQRES  11 L 216  ALA ASN LYS ALA THR LEU VAL CYS LEU ILE SER ASP PHE          
SEQRES  12 L 216  TYR PRO GLY ALA VAL THR VAL ALA TRP LYS ALA ASP GLY          
SEQRES  13 L 216  SER PRO VAL LYS ALA GLY VAL GLU THR THR LYS PRO SER          
SEQRES  14 L 216  LYS GLN SER ASN ASN LYS TYR ALA ALA SER SER TYR LEU          
SEQRES  15 L 216  SER LEU THR PRO GLU GLN TRP LYS SER HIS ARG SER TYR          
SEQRES  16 L 216  SER CYS GLN VAL THR HIS GLU GLY SER THR VAL GLU LYS          
SEQRES  17 L 216  THR VAL ALA PRO THR GLU CYS SER                              
SEQRES   1 P    5  ACE GLN DPN HIS DPR                                          
ATOM      1  N   PRO L   1      42.143 -16.127  77.526  1.00  0.00           N  
ATOM      2  CA  PRO L   1      41.233 -15.484  76.568  1.00  0.00           C  
ATOM      3  C   PRO L   1      40.727 -14.168  77.139  1.00  0.00           C  
ATOM      4  O   PRO L   1      41.327 -13.104  76.890  1.00  0.00           O  
ATOM      5  CB  PRO L   1      40.153 -16.521  76.338  1.00  0.00           C  
ATOM      6  CG  PRO L   1      40.267 -17.538  77.433  1.00  0.00           C  
ATOM      7  CD  PRO L   1      41.369 -17.072  78.362  1.00  0.00           C  
ATOM      8  N   SER L   2      39.650 -14.265  77.913  1.00  0.00           N  
ATOM      9  CA  SER L   2      39.032 -13.101  78.556  1.00  0.00           C  
ATOM     10  C   SER L   2      38.403 -13.491  79.896  1.00  0.00           C  
ATOM     11  O   SER L   2      38.135 -14.662  80.175  1.00  0.00           O  
ATOM     12  CB  SER L   2      37.999 -12.440  77.650  1.00  0.00           C  
ATOM     13  OG  SER L   2      38.510 -12.251  76.344  1.00  0.00           O  
ATOM     14  N   ALA L   3      38.205 -12.466  80.705  1.00  0.00           N  
ATOM     15  CA  ALA L   3      37.574 -12.545  82.028  1.00  0.00           C  
ATOM     16  C   ALA L   3      36.492 -11.456  82.040  1.00  0.00           C  
ATOM     17  O   ALA L   3      36.833 -10.270  81.867  1.00  0.00           O  
ATOM     18  CB  ALA L   3      38.589 -12.316  83.123  1.00  0.00           C  
ATOM     19  N   LEU L   4      35.258 -11.888  82.242  1.00  0.00           N  
ATOM     20  CA  LEU L   4      34.100 -11.019  81.987  1.00  0.00           C  
ATOM     21  C   LEU L   4      34.248  -9.601  82.512  1.00  0.00           C  
ATOM     22  O   LEU L   4      34.507  -9.372  83.714  1.00  0.00           O  
ATOM     23  CB  LEU L   4      32.851 -11.719  82.551  1.00  0.00           C  
ATOM     24  CG  LEU L   4      32.230 -12.789  81.668  1.00  0.00           C  
ATOM     25  CD1 LEU L   4      33.151 -14.003  81.571  1.00  0.00           C  
ATOM     26  CD2 LEU L   4      30.882 -13.181  82.261  1.00  0.00           C  
ATOM     27  N   THR L   5      33.955  -8.667  81.592  1.00  0.00           N  
ATOM     28  CA  THR L   5      34.070  -7.236  81.939  1.00  0.00           C  
ATOM     29  C   THR L   5      32.921  -6.810  82.848  1.00  0.00           C  
ATOM     30  O   THR L   5      31.739  -7.056  82.608  1.00  0.00           O  
ATOM     31  CB  THR L   5      34.256  -6.295  80.710  1.00  0.00           C  
ATOM     32  OG1 THR L   5      35.670  -6.415  80.327  1.00  0.00           O  
ATOM     33  CG2 THR L   5      33.896  -4.821  80.976  1.00  0.00           C  
ATOM     34  N   GLN L   6      33.352  -6.149  83.899  1.00  0.00           N  
ATOM     35  CA  GLN L   6      32.526  -5.655  85.018  1.00  0.00           C  
ATOM     36  C   GLN L   6      33.164  -4.327  85.449  1.00  0.00           C  
ATOM     37  O   GLN L   6      34.405  -4.220  85.349  1.00  0.00           O  
ATOM     38  CB  GLN L   6      32.612  -6.682  86.142  1.00  0.00           C  
ATOM     39  CG  GLN L   6      31.349  -7.009  86.886  1.00  0.00           C  
ATOM     40  CD  GLN L   6      31.560  -8.159  87.854  1.00  0.00           C  
ATOM     41  OE1 GLN L   6      32.526  -8.912  87.747  1.00  0.00           O  
ATOM     42  NE2 GLN L   6      30.658  -8.287  88.806  1.00  0.00           N  
ATOM     43  N   PRO L   7      32.354  -3.383  85.880  1.00  0.00           N  
ATOM     44  CA  PRO L   7      32.846  -2.093  86.395  1.00  0.00           C  
ATOM     45  C   PRO L   7      32.964  -2.087  87.910  1.00  0.00           C  
ATOM     46  O   PRO L   7      32.052  -2.543  88.632  1.00  0.00           O  
ATOM     47  CB  PRO L   7      31.793  -1.113  85.884  1.00  0.00           C  
ATOM     48  CG  PRO L   7      30.510  -1.895  85.958  1.00  0.00           C  
ATOM     49  CD  PRO L   7      30.889  -3.360  85.707  1.00  0.00           C  
ATOM     50  N   PRO L   8      34.085  -1.548  88.392  1.00  0.00           N  
ATOM     51  CA  PRO L   8      34.352  -1.427  89.836  1.00  0.00           C  
ATOM     52  C   PRO L   8      33.520  -0.317  90.468  1.00  0.00           C  
ATOM     53  O   PRO L   8      34.025   0.787  90.760  1.00  0.00           O  
ATOM     54  CB  PRO L   8      35.849  -1.163  89.914  1.00  0.00           C  
ATOM     55  CG  PRO L   8      36.219  -0.562  88.591  1.00  0.00           C  
ATOM     56  CD  PRO L   8      35.274  -1.201  87.585  1.00  0.00           C  
ATOM     57  N   SER L   9      32.231  -0.617  90.649  1.00  0.00           N  
ATOM     58  CA  SER L   9      31.264   0.295  91.225  1.00  0.00           C  
ATOM     59  C   SER L   9      29.811  -0.154  91.113  1.00  0.00           C  
ATOM     60  O   SER L   9      29.403  -1.156  90.539  1.00  0.00           O  
ATOM     61  CB  SER L   9      31.396   1.702  90.645  1.00  0.00           C  
ATOM     62  OG  SER L   9      32.097   2.515  91.571  1.00  0.00           O  
ATOM     63  N   ALA L  11      29.003   0.667  91.734  1.00  0.00           N  
ATOM     64  CA  ALA L  11      27.549   0.600  91.859  1.00  0.00           C  
ATOM     65  C   ALA L  11      27.335   1.331  93.216  1.00  0.00           C  
ATOM     66  O   ALA L  11      27.440   0.754  94.287  1.00  0.00           O  
ATOM     67  CB  ALA L  11      26.961  -0.769  91.814  1.00  0.00           C  
ATOM     68  N   SER L  12      27.267   2.630  93.036  1.00  0.00           N  
ATOM     69  CA  SER L  12      27.075   3.568  94.158  1.00  0.00           C  
ATOM     70  C   SER L  12      25.575   3.885  94.086  1.00  0.00           C  
ATOM     71  O   SER L  12      25.161   4.563  93.140  1.00  0.00           O  
ATOM     72  CB  SER L  12      27.939   4.784  94.006  1.00  0.00           C  
ATOM     73  OG  SER L  12      29.216   4.458  93.467  1.00  0.00           O  
ATOM     74  N   GLY L  13      24.867   3.249  95.004  1.00  0.00           N  
ATOM     75  CA  GLY L  13      23.407   3.556  95.131  1.00  0.00           C  
ATOM     76  C   GLY L  13      23.232   4.363  96.419  1.00  0.00           C  
ATOM     77  O   GLY L  13      24.228   4.856  96.993  1.00  0.00           O  
ATOM     78  N   SER L  14      21.978   4.463  96.848  1.00  0.00           N  
ATOM     79  CA  SER L  14      21.669   5.114  98.125  1.00  0.00           C  
ATOM     80  C   SER L  14      20.421   4.610  98.817  1.00  0.00           C  
ATOM     81  O   SER L  14      19.306   4.739  98.300  1.00  0.00           O  
ATOM     82  CB  SER L  14      21.589   6.630  97.867  1.00  0.00           C  
ATOM     83  OG  SER L  14      22.650   7.029  97.010  1.00  0.00           O  
ATOM     84  N   LEU L  15      20.582   4.094 100.025  1.00  0.00           N  
ATOM     85  CA  LEU L  15      19.538   3.677 100.951  1.00  0.00           C  
ATOM     86  C   LEU L  15      18.114   3.749 100.406  1.00  0.00           C  
ATOM     87  O   LEU L  15      17.476   4.825 100.505  1.00  0.00           O  
ATOM     88  CB  LEU L  15      19.670   4.559 102.219  1.00  0.00           C  
ATOM     89  CG  LEU L  15      20.578   4.163 103.347  1.00  0.00           C  
ATOM     90  CD1 LEU L  15      20.063   2.929 104.089  1.00  0.00           C  
ATOM     91  CD2 LEU L  15      21.992   3.894 102.818  1.00  0.00           C  
ATOM     92  N   GLY L  16      17.599   2.626  99.927  1.00  0.00           N  
ATOM     93  CA  GLY L  16      16.291   2.590  99.259  1.00  0.00           C  
ATOM     94  C   GLY L  16      16.413   2.636  97.743  1.00  0.00           C  
ATOM     95  O   GLY L  16      15.821   1.786  97.040  1.00  0.00           O  
ATOM     96  N   GLN L  17      17.128   3.620  97.233  1.00  0.00           N  
ATOM     97  CA  GLN L  17      17.412   3.824  95.805  1.00  0.00           C  
ATOM     98  C   GLN L  17      17.907   2.508  95.201  1.00  0.00           C  
ATOM     99  O   GLN L  17      18.252   1.562  95.934  1.00  0.00           O  
ATOM    100  CB  GLN L  17      18.425   4.953  95.549  1.00  0.00           C  
ATOM    101  CG  GLN L  17      18.986   5.094  94.160  1.00  0.00           C  
ATOM    102  CD  GLN L  17      20.013   6.161  93.932  1.00  0.00           C  
ATOM    103  OE1 GLN L  17      19.930   7.000  93.030  1.00  0.00           O  
ATOM    104  NE2 GLN L  17      21.080   6.174  94.725  1.00  0.00           N  
ATOM    105  N   SER L  18      17.946   2.480  93.876  1.00  0.00           N  
ATOM    106  CA  SER L  18      18.273   1.263  93.138  1.00  0.00           C  
ATOM    107  C   SER L  18      19.724   1.337  92.645  1.00  0.00           C  
ATOM    108  O   SER L  18      20.409   2.345  92.755  1.00  0.00           O  
ATOM    109  CB  SER L  18      17.341   1.002  91.968  1.00  0.00           C  
ATOM    110  OG  SER L  18      15.981   1.253  92.270  1.00  0.00           O  
ATOM    111  N   VAL L  19      20.118   0.169  92.169  1.00  0.00           N  
ATOM    112  CA  VAL L  19      21.370  -0.006  91.440  1.00  0.00           C  
ATOM    113  C   VAL L  19      21.256  -1.396  90.756  1.00  0.00           C  
ATOM    114  O   VAL L  19      20.678  -2.341  91.288  1.00  0.00           O  
ATOM    115  CB  VAL L  19      22.641   0.159  92.251  1.00  0.00           C  
ATOM    116  CG1 VAL L  19      23.257  -1.179  92.684  1.00  0.00           C  
ATOM    117  CG2 VAL L  19      23.691   0.986  91.487  1.00  0.00           C  
ATOM    118  N   THR L  20      21.834  -1.378  89.587  1.00  0.00           N  
ATOM    119  CA  THR L  20      21.744  -2.533  88.658  1.00  0.00           C  
ATOM    120  C   THR L  20      23.146  -2.672  88.105  1.00  0.00           C  
ATOM    121  O   THR L  20      23.821  -1.650  87.856  1.00  0.00           O  
ATOM    122  CB  THR L  20      20.566  -2.267  87.670  1.00  0.00           C  
ATOM    123  OG1 THR L  20      19.382  -2.834  88.353  1.00  0.00           O  
ATOM    124  CG2 THR L  20      20.692  -2.766  86.243  1.00  0.00           C  
ATOM    125  N   ILE L  21      23.624  -3.896  88.063  1.00  0.00           N  
ATOM    126  CA  ILE L  21      24.971  -4.211  87.648  1.00  0.00           C  
ATOM    127  C   ILE L  21      24.963  -5.146  86.434  1.00  0.00           C  
ATOM    128  O   ILE L  21      24.621  -6.328  86.486  1.00  0.00           O  
ATOM    129  CB  ILE L  21      25.865  -4.770  88.791  1.00  0.00           C  
ATOM    130  CG1 ILE L  21      25.090  -5.810  89.617  1.00  0.00           C  
ATOM    131  CG2 ILE L  21      26.482  -3.624  89.632  1.00  0.00           C  
ATOM    132  CD1 ILE L  21      24.386  -5.303  90.900  1.00  0.00           C  
ATOM    133  N   SER L  22      25.378  -4.491  85.358  1.00  0.00           N  
ATOM    134  CA  SER L  22      25.622  -5.169  84.079  1.00  0.00           C  
ATOM    135  C   SER L  22      27.024  -5.775  84.207  1.00  0.00           C  
ATOM    136  O   SER L  22      27.851  -5.358  85.033  1.00  0.00           O  
ATOM    137  CB  SER L  22      25.439  -4.216  82.924  1.00  0.00           C  
ATOM    138  OG  SER L  22      24.137  -3.616  82.967  1.00  0.00           O  
ATOM    139  N   CYS L  23      27.179  -6.830  83.464  1.00  0.00           N  
ATOM    140  CA  CYS L  23      28.402  -7.643  83.376  1.00  0.00           C  
ATOM    141  C   CYS L  23      28.334  -8.090  81.900  1.00  0.00           C  
ATOM    142  O   CYS L  23      27.304  -8.647  81.500  1.00  0.00           O  
ATOM    143  CB  CYS L  23      28.537  -8.725  84.384  1.00  0.00           C  
ATOM    144  SG  CYS L  23      28.197 -10.456  84.088  1.00  0.00           S  
ATOM    145  N   THR L  24      29.357  -7.679  81.183  1.00  0.00           N  
ATOM    146  CA  THR L  24      29.448  -7.946  79.746  1.00  0.00           C  
ATOM    147  C   THR L  24      30.338  -9.150  79.480  1.00  0.00           C  
ATOM    148  O   THR L  24      31.509  -9.205  79.907  1.00  0.00           O  
ATOM    149  CB  THR L  24      29.950  -6.680  78.972  1.00  0.00           C  
ATOM    150  OG1 THR L  24      29.393  -5.542  79.716  1.00  0.00           O  
ATOM    151  CG2 THR L  24      29.548  -6.658  77.498  1.00  0.00           C  
ATOM    152  N   GLY L  25      29.717 -10.077  78.757  1.00  0.00           N  
ATOM    153  CA  GLY L  25      30.324 -11.349  78.359  1.00  0.00           C  
ATOM    154  C   GLY L  25      30.498 -11.413  76.844  1.00  0.00           C  
ATOM    155  O   GLY L  25      30.587 -10.366  76.186  1.00  0.00           O  
ATOM    156  N   THR L  26      30.555 -12.630  76.325  1.00  0.00           N  
ATOM    157  CA  THR L  26      30.789 -12.879  74.903  1.00  0.00           C  
ATOM    158  C   THR L  26      30.006 -14.076  74.375  1.00  0.00           C  
ATOM    159  O   THR L  26      29.490 -14.926  75.098  1.00  0.00           O  
ATOM    160  CB  THR L  26      32.329 -13.021  74.559  1.00  0.00           C  
ATOM    161  OG1 THR L  26      32.481 -14.274  73.817  1.00  0.00           O  
ATOM    162  CG2 THR L  26      33.252 -12.977  75.778  1.00  0.00           C  
ATOM    163  N   SER L  27      29.961 -14.116  73.049  1.00  0.00           N  
ATOM    164  CA  SER L  27      29.264 -15.128  72.248  1.00  0.00           C  
ATOM    165  C   SER L  27      29.368 -16.474  72.960  1.00  0.00           C  
ATOM    166  O   SER L  27      28.406 -17.093  73.390  1.00  0.00           O  
ATOM    167  CB  SER L  27      29.913 -15.205  70.863  1.00  0.00           C  
ATOM    168  OG  SER L  27      30.393 -13.906  70.501  1.00  0.00           O  
ATOM    169  N   SER L  27A     30.613 -16.831  73.140  1.00  0.00           N  
ATOM    170  CA  SER L  27A     31.147 -18.060  73.663  1.00  0.00           C  
ATOM    171  C   SER L  27A     30.634 -18.510  75.013  1.00  0.00           C  
ATOM    172  O   SER L  27A     30.935 -19.651  75.440  1.00  0.00           O  
ATOM    173  CB  SER L  27A     32.705 -17.879  73.722  1.00  0.00           C  
ATOM    174  OG  SER L  27A     33.096 -16.940  72.700  1.00  0.00           O  
ATOM    175  N   ASP L  27B     29.907 -17.648  75.682  1.00  0.00           N  
ATOM    176  CA  ASP L  27B     29.501 -17.832  77.096  1.00  0.00           C  
ATOM    177  C   ASP L  27B     28.188 -17.060  77.266  1.00  0.00           C  
ATOM    178  O   ASP L  27B     27.119 -17.557  76.847  1.00  0.00           O  
ATOM    179  CB  ASP L  27B     30.631 -17.387  78.019  1.00  0.00           C  
ATOM    180  CG  ASP L  27B     31.435 -16.199  77.526  1.00  0.00           C  
ATOM    181  OD1 ASP L  27B     32.398 -16.361  76.753  1.00  0.00           O  
ATOM    182  OD2 ASP L  27B     31.084 -15.069  77.942  1.00  0.00           O  
ATOM    183  N   VAL L  27C     28.321 -15.849  77.788  1.00  0.00           N  
ATOM    184  CA  VAL L  27C     27.226 -14.869  77.814  1.00  0.00           C  
ATOM    185  C   VAL L  27C     26.831 -14.481  76.373  1.00  0.00           C  
ATOM    186  O   VAL L  27C     27.128 -13.383  75.877  1.00  0.00           O  
ATOM    187  CB  VAL L  27C     27.611 -13.628  78.641  1.00  0.00           C  
ATOM    188  CG1 VAL L  27C     26.379 -12.801  79.004  1.00  0.00           C  
ATOM    189  CG2 VAL L  27C     28.424 -13.977  79.859  1.00  0.00           C  
ATOM    190  N   GLY L  28      26.156 -15.412  75.749  1.00  0.00           N  
ATOM    191  CA  GLY L  28      25.730 -15.347  74.347  1.00  0.00           C  
ATOM    192  C   GLY L  28      24.981 -16.675  74.103  1.00  0.00           C  
ATOM    193  O   GLY L  28      23.759 -16.693  73.940  1.00  0.00           O  
ATOM    194  N   GLY L  29      25.759 -17.745  74.241  1.00  0.00           N  
ATOM    195  CA  GLY L  29      25.271 -19.076  73.910  1.00  0.00           C  
ATOM    196  C   GLY L  29      24.960 -19.988  75.053  1.00  0.00           C  
ATOM    197  O   GLY L  29      24.755 -21.212  74.793  1.00  0.00           O  
ATOM    198  N   TYR L  30      24.941 -19.515  76.288  1.00  0.00           N  
ATOM    199  CA  TYR L  30      24.527 -20.321  77.438  1.00  0.00           C  
ATOM    200  C   TYR L  30      23.892 -19.438  78.517  1.00  0.00           C  
ATOM    201  O   TYR L  30      24.216 -18.261  78.686  1.00  0.00           O  
ATOM    202  CB  TYR L  30      25.633 -21.161  78.059  1.00  0.00           C  
ATOM    203  CG  TYR L  30      26.739 -21.611  77.145  1.00  0.00           C  
ATOM    204  CD1 TYR L  30      27.607 -20.679  76.559  1.00  0.00           C  
ATOM    205  CD2 TYR L  30      26.955 -22.964  76.890  1.00  0.00           C  
ATOM    206  CE1 TYR L  30      28.638 -21.087  75.728  1.00  0.00           C  
ATOM    207  CE2 TYR L  30      27.994 -23.386  76.070  1.00  0.00           C  
ATOM    208  CZ  TYR L  30      28.834 -22.444  75.490  1.00  0.00           C  
ATOM    209  OH  TYR L  30      29.851 -22.881  74.682  1.00  0.00           O  
ATOM    210  N   ASN L  31      23.020 -20.112  79.260  1.00  0.00           N  
ATOM    211  CA  ASN L  31      22.177 -19.437  80.264  1.00  0.00           C  
ATOM    212  C   ASN L  31      22.663 -19.749  81.670  1.00  0.00           C  
ATOM    213  O   ASN L  31      21.854 -20.051  82.562  1.00  0.00           O  
ATOM    214  CB  ASN L  31      20.697 -19.805  79.995  1.00  0.00           C  
ATOM    215  CG  ASN L  31      19.883 -18.521  79.822  1.00  0.00           C  
ATOM    216  OD1 ASN L  31      19.933 -17.883  78.753  1.00  0.00           O  
ATOM    217  ND2 ASN L  31      19.197 -18.130  80.893  1.00  0.00           N  
ATOM    218  N   TYR L  32      23.986 -19.677  81.837  1.00  0.00           N  
ATOM    219  CA  TYR L  32      24.658 -20.065  83.075  1.00  0.00           C  
ATOM    220  C   TYR L  32      25.539 -18.922  83.597  1.00  0.00           C  
ATOM    221  O   TYR L  32      26.770 -18.910  83.469  1.00  0.00           O  
ATOM    222  CB  TYR L  32      25.468 -21.362  82.984  1.00  0.00           C  
ATOM    223  CG  TYR L  32      24.581 -22.589  82.913  1.00  0.00           C  
ATOM    224  CD1 TYR L  32      23.474 -22.697  83.755  1.00  0.00           C  
ATOM    225  CD2 TYR L  32      24.813 -23.602  81.986  1.00  0.00           C  
ATOM    226  CE1 TYR L  32      22.640 -23.806  83.701  1.00  0.00           C  
ATOM    227  CE2 TYR L  32      23.973 -24.705  81.904  1.00  0.00           C  
ATOM    228  CZ  TYR L  32      22.889 -24.803  82.768  1.00  0.00           C  
ATOM    229  OH  TYR L  32      22.026 -25.866  82.733  1.00  0.00           O  
ATOM    230  N   VAL L  33      24.800 -18.005  84.179  1.00  0.00           N  
ATOM    231  CA  VAL L  33      25.311 -16.771  84.759  1.00  0.00           C  
ATOM    232  C   VAL L  33      24.984 -16.844  86.263  1.00  0.00           C  
ATOM    233  O   VAL L  33      23.809 -16.963  86.637  1.00  0.00           O  
ATOM    234  CB  VAL L  33      24.701 -15.546  84.060  1.00  0.00           C  
ATOM    235  CG1 VAL L  33      24.481 -14.353  84.980  1.00  0.00           C  
ATOM    236  CG2 VAL L  33      25.539 -15.115  82.861  1.00  0.00           C  
ATOM    237  N   SER L  34      26.060 -16.816  87.025  1.00  0.00           N  
ATOM    238  CA  SER L  34      25.925 -16.739  88.492  1.00  0.00           C  
ATOM    239  C   SER L  34      26.541 -15.427  88.981  1.00  0.00           C  
ATOM    240  O   SER L  34      27.494 -14.881  88.416  1.00  0.00           O  
ATOM    241  CB  SER L  34      26.490 -17.980  89.148  1.00  0.00           C  
ATOM    242  OG  SER L  34      25.880 -19.164  88.628  1.00  0.00           O  
ATOM    243  N   TRP L  35      25.934 -14.941  90.046  1.00  0.00           N  
ATOM    244  CA  TRP L  35      26.259 -13.676  90.701  1.00  0.00           C  
ATOM    245  C   TRP L  35      26.558 -13.908  92.190  1.00  0.00           C  
ATOM    246  O   TRP L  35      25.709 -14.407  92.948  1.00  0.00           O  
ATOM    247  CB  TRP L  35      25.094 -12.712  90.520  1.00  0.00           C  
ATOM    248  CG  TRP L  35      25.013 -11.966  89.238  1.00  0.00           C  
ATOM    249  CD1 TRP L  35      24.113 -12.153  88.226  1.00  0.00           C  
ATOM    250  CD2 TRP L  35      25.840 -10.865  88.845  1.00  0.00           C  
ATOM    251  NE1 TRP L  35      24.331 -11.239  87.230  1.00  0.00           N  
ATOM    252  CE2 TRP L  35      25.384 -10.445  87.581  1.00  0.00           C  
ATOM    253  CE3 TRP L  35      26.909 -10.212  89.442  1.00  0.00           C  
ATOM    254  CZ2 TRP L  35      25.967  -9.387  86.905  1.00  0.00           C  
ATOM    255  CZ3 TRP L  35      27.488  -9.156  88.782  1.00  0.00           C  
ATOM    256  CH2 TRP L  35      27.026  -8.746  87.535  1.00  0.00           C  
ATOM    257  N   TYR L  36      27.752 -13.499  92.573  1.00  0.00           N  
ATOM    258  CA  TYR L  36      28.301 -13.685  93.909  1.00  0.00           C  
ATOM    259  C   TYR L  36      28.360 -12.346  94.657  1.00  0.00           C  
ATOM    260  O   TYR L  36      28.610 -11.279  94.069  1.00  0.00           O  
ATOM    261  CB  TYR L  36      29.703 -14.333  93.866  1.00  0.00           C  
ATOM    262  CG  TYR L  36      29.830 -15.526  92.952  1.00  0.00           C  
ATOM    263  CD1 TYR L  36      30.019 -15.344  91.585  1.00  0.00           C  
ATOM    264  CD2 TYR L  36      29.765 -16.832  93.435  1.00  0.00           C  
ATOM    265  CE1 TYR L  36      30.123 -16.427  90.715  1.00  0.00           C  
ATOM    266  CE2 TYR L  36      29.869 -17.932  92.586  1.00  0.00           C  
ATOM    267  CZ  TYR L  36      30.050 -17.722  91.219  1.00  0.00           C  
ATOM    268  OH  TYR L  36      30.164 -18.759  90.333  1.00  0.00           O  
ATOM    269  N   GLN L  37      28.187 -12.448  95.956  1.00  0.00           N  
ATOM    270  CA  GLN L  37      28.071 -11.311  96.869  1.00  0.00           C  
ATOM    271  C   GLN L  37      29.128 -11.366  97.964  1.00  0.00           C  
ATOM    272  O   GLN L  37      28.791 -11.596  99.144  1.00  0.00           O  
ATOM    273  CB  GLN L  37      26.663 -11.380  97.506  1.00  0.00           C  
ATOM    274  CG  GLN L  37      26.060 -10.048  97.748  1.00  0.00           C  
ATOM    275  CD  GLN L  37      26.088  -9.548  99.161  1.00  0.00           C  
ATOM    276  OE1 GLN L  37      26.951  -8.774  99.574  1.00  0.00           O  
ATOM    277  NE2 GLN L  37      25.077  -9.993  99.919  1.00  0.00           N  
ATOM    278  N   GLN L  38      30.365 -11.098  97.611  1.00  0.00           N  
ATOM    279  CA  GLN L  38      31.505 -11.269  98.508  1.00  0.00           C  
ATOM    280  C   GLN L  38      31.871 -10.007  99.282  1.00  0.00           C  
ATOM    281  O   GLN L  38      32.519  -9.089  98.748  1.00  0.00           O  
ATOM    282  CB  GLN L  38      32.725 -11.786  97.729  1.00  0.00           C  
ATOM    283  CG  GLN L  38      33.689 -12.577  98.586  1.00  0.00           C  
ATOM    284  CD  GLN L  38      35.079 -12.613  97.986  1.00  0.00           C  
ATOM    285  OE1 GLN L  38      35.650 -11.575  97.655  1.00  0.00           O  
ATOM    286  NE2 GLN L  38      35.617 -13.820  97.854  1.00  0.00           N  
ATOM    287  N   HIS L  39      31.490  -9.990 100.553  1.00  0.00           N  
ATOM    288  CA  HIS L  39      31.968  -9.011 101.539  1.00  0.00           C  
ATOM    289  C   HIS L  39      33.429  -9.343 101.905  1.00  0.00           C  
ATOM    290  O   HIS L  39      33.792 -10.469 102.277  1.00  0.00           O  
ATOM    291  CB  HIS L  39      31.153  -8.935 102.825  1.00  0.00           C  
ATOM    292  CG  HIS L  39      29.672  -9.033 102.749  1.00  0.00           C  
ATOM    293  ND1 HIS L  39      28.806  -7.969 102.661  1.00  0.00           N  
ATOM    294  CD2 HIS L  39      28.877 -10.138 102.818  1.00  0.00           C  
ATOM    295  CE1 HIS L  39      27.560  -8.406 102.663  1.00  0.00           C  
ATOM    296  NE2 HIS L  39      27.577  -9.713 102.756  1.00  0.00           N  
ATOM    297  N   ALA L  40      34.256  -8.331 101.806  1.00  0.00           N  
ATOM    298  CA  ALA L  40      35.672  -8.310 102.083  1.00  0.00           C  
ATOM    299  C   ALA L  40      36.266  -9.517 102.788  1.00  0.00           C  
ATOM    300  O   ALA L  40      36.118  -9.690 104.013  1.00  0.00           O  
ATOM    301  CB  ALA L  40      36.001  -7.050 102.929  1.00  0.00           C  
ATOM    302  N   GLY L  41      37.007 -10.315 102.031  1.00  0.00           N  
ATOM    303  CA  GLY L  41      37.773 -11.442 102.533  1.00  0.00           C  
ATOM    304  C   GLY L  41      36.946 -12.615 103.007  1.00  0.00           C  
ATOM    305  O   GLY L  41      37.532 -13.657 103.401  1.00  0.00           O  
ATOM    306  N   LYS L  42      35.629 -12.476 102.985  1.00  0.00           N  
ATOM    307  CA  LYS L  42      34.726 -13.575 103.366  1.00  0.00           C  
ATOM    308  C   LYS L  42      34.586 -14.580 102.215  1.00  0.00           C  
ATOM    309  O   LYS L  42      35.282 -14.519 101.191  1.00  0.00           O  
ATOM    310  CB  LYS L  42      33.350 -13.055 103.747  1.00  0.00           C  
ATOM    311  CG  LYS L  42      33.215 -12.392 105.112  1.00  0.00           C  
ATOM    312  CD  LYS L  42      31.757 -12.449 105.589  1.00  0.00           C  
ATOM    313  CE  LYS L  42      31.420 -11.347 106.573  1.00  0.00           C  
ATOM    314  NZ  LYS L  42      32.167 -11.532 107.841  1.00  0.00           N  
ATOM    315  N   ALA L  43      33.648 -15.496 102.422  1.00  0.00           N  
ATOM    316  CA  ALA L  43      33.249 -16.502 101.433  1.00  0.00           C  
ATOM    317  C   ALA L  43      32.117 -15.952 100.566  1.00  0.00           C  
ATOM    318  O   ALA L  43      31.333 -15.109 101.029  1.00  0.00           O  
ATOM    319  CB  ALA L  43      32.862 -17.787 102.133  1.00  0.00           C  
ATOM    320  N   PRO L  44      32.080 -16.413  99.323  1.00  0.00           N  
ATOM    321  CA  PRO L  44      31.145 -15.894  98.315  1.00  0.00           C  
ATOM    322  C   PRO L  44      29.865 -16.702  98.326  1.00  0.00           C  
ATOM    323  O   PRO L  44      29.932 -17.940  98.479  1.00  0.00           O  
ATOM    324  CB  PRO L  44      31.928 -16.078  97.016  1.00  0.00           C  
ATOM    325  CG  PRO L  44      32.620 -17.410  97.250  1.00  0.00           C  
ATOM    326  CD  PRO L  44      33.055 -17.338  98.711  1.00  0.00           C  
ATOM    327  N   LYS L  45      28.743 -16.022  98.174  1.00  0.00           N  
ATOM    328  CA  LYS L  45      27.447 -16.702  98.157  1.00  0.00           C  
ATOM    329  C   LYS L  45      26.726 -16.494  96.835  1.00  0.00           C  
ATOM    330  O   LYS L  45      26.863 -15.482  96.144  1.00  0.00           O  
ATOM    331  CB  LYS L  45      26.549 -16.335  99.323  1.00  0.00           C  
ATOM    332  CG  LYS L  45      26.845 -17.163 100.579  1.00  0.00           C  
ATOM    333  CD  LYS L  45      26.840 -18.655 100.289  1.00  0.00           C  
ATOM    334  CE  LYS L  45      27.875 -19.409 101.104  1.00  0.00           C  
ATOM    335  NZ  LYS L  45      29.229 -19.245 100.505  1.00  0.00           N  
ATOM    336  N   VAL L  46      25.964 -17.534  96.523  1.00  0.00           N  
ATOM    337  CA  VAL L  46      25.158 -17.584  95.303  1.00  0.00           C  
ATOM    338  C   VAL L  46      23.918 -16.705  95.489  1.00  0.00           C  
ATOM    339  O   VAL L  46      22.917 -17.183  96.053  1.00  0.00           O  
ATOM    340  CB  VAL L  46      24.830 -19.050  94.956  1.00  0.00           C  
ATOM    341  CG1 VAL L  46      23.829 -19.162  93.809  1.00  0.00           C  
ATOM    342  CG2 VAL L  46      26.075 -19.855  94.627  1.00  0.00           C  
ATOM    343  N   ILE L  47      24.036 -15.455  95.049  1.00  0.00           N  
ATOM    344  CA  ILE L  47      22.790 -14.654  94.926  1.00  0.00           C  
ATOM    345  C   ILE L  47      22.020 -15.141  93.705  1.00  0.00           C  
ATOM    346  O   ILE L  47      21.031 -15.886  93.874  1.00  0.00           O  
ATOM    347  CB  ILE L  47      23.042 -13.141  95.015  1.00  0.00           C  
ATOM    348  CG1 ILE L  47      23.589 -12.801  96.430  1.00  0.00           C  
ATOM    349  CG2 ILE L  47      21.768 -12.291  94.722  1.00  0.00           C  
ATOM    350  CD1 ILE L  47      22.632 -13.251  97.577  1.00  0.00           C  
ATOM    351  N   ILE L  48      22.440 -14.744  92.517  1.00  0.00           N  
ATOM    352  CA  ILE L  48      21.754 -15.167  91.282  1.00  0.00           C  
ATOM    353  C   ILE L  48      22.473 -16.417  90.784  1.00  0.00           C  
ATOM    354  O   ILE L  48      23.713 -16.424  90.803  1.00  0.00           O  
ATOM    355  CB  ILE L  48      21.676 -14.051  90.214  1.00  0.00           C  
ATOM    356  CG1 ILE L  48      20.461 -13.128  90.500  1.00  0.00           C  
ATOM    357  CG2 ILE L  48      21.605 -14.605  88.769  1.00  0.00           C  
ATOM    358  CD1 ILE L  48      19.088 -13.851  90.435  1.00  0.00           C  
ATOM    359  N   TYR L  49      21.667 -17.365  90.321  1.00  0.00           N  
ATOM    360  CA  TYR L  49      22.251 -18.657  89.894  1.00  0.00           C  
ATOM    361  C   TYR L  49      22.036 -19.056  88.461  1.00  0.00           C  
ATOM    362  O   TYR L  49      22.935 -19.744  87.888  1.00  0.00           O  
ATOM    363  CB  TYR L  49      21.911 -19.685  90.913  1.00  0.00           C  
ATOM    364  CG  TYR L  49      20.685 -20.505  91.037  1.00  0.00           C  
ATOM    365  CD1 TYR L  49      19.871 -20.880  89.983  1.00  0.00           C  
ATOM    366  CD2 TYR L  49      20.369 -21.033  92.314  1.00  0.00           C  
ATOM    367  CE1 TYR L  49      18.775 -21.721  90.156  1.00  0.00           C  
ATOM    368  CE2 TYR L  49      19.285 -21.874  92.498  1.00  0.00           C  
ATOM    369  CZ  TYR L  49      18.489 -22.218  91.413  1.00  0.00           C  
ATOM    370  OH  TYR L  49      17.411 -23.056  91.578  1.00  0.00           O  
ATOM    371  N   GLU L  50      20.916 -18.703  87.877  1.00  0.00           N  
ATOM    372  CA  GLU L  50      20.667 -18.912  86.425  1.00  0.00           C  
ATOM    373  C   GLU L  50      20.192 -17.576  85.856  1.00  0.00           C  
ATOM    374  O   GLU L  50      18.988 -17.377  85.640  1.00  0.00           O  
ATOM    375  CB  GLU L  50      19.603 -19.957  86.178  1.00  0.00           C  
ATOM    376  CG  GLU L  50      19.866 -21.143  85.248  1.00  0.00           C  
ATOM    377  CD  GLU L  50      19.823 -22.481  85.940  1.00  0.00           C  
ATOM    378  OE1 GLU L  50      18.810 -22.969  86.423  1.00  0.00           O  
ATOM    379  OE2 GLU L  50      20.944 -23.024  85.994  1.00  0.00           O  
ATOM    380  N   VAL L  51      21.134 -16.663  85.715  1.00  0.00           N  
ATOM    381  CA  VAL L  51      20.922 -15.308  85.179  1.00  0.00           C  
ATOM    382  C   VAL L  51      19.950 -14.483  86.007  1.00  0.00           C  
ATOM    383  O   VAL L  51      20.290 -13.350  86.419  1.00  0.00           O  
ATOM    384  CB  VAL L  51      20.633 -15.385  83.655  1.00  0.00           C  
ATOM    385  CG1 VAL L  51      19.166 -15.492  83.281  1.00  0.00           C  
ATOM    386  CG2 VAL L  51      21.296 -14.228  82.928  1.00  0.00           C  
ATOM    387  N   ASN L  52      18.753 -14.984  86.224  1.00  0.00           N  
ATOM    388  CA  ASN L  52      17.755 -14.464  87.154  1.00  0.00           C  
ATOM    389  C   ASN L  52      17.043 -15.702  87.754  1.00  0.00           C  
ATOM    390  O   ASN L  52      16.491 -16.498  86.994  1.00  0.00           O  
ATOM    391  CB  ASN L  52      16.730 -13.502  86.579  1.00  0.00           C  
ATOM    392  CG  ASN L  52      15.669 -13.066  87.592  1.00  0.00           C  
ATOM    393  OD1 ASN L  52      15.693 -13.441  88.777  1.00  0.00           O  
ATOM    394  ND2 ASN L  52      14.714 -12.253  87.115  1.00  0.00           N  
ATOM    395  N   LYS L  53      17.078 -15.744  89.061  1.00  0.00           N  
ATOM    396  CA  LYS L  53      16.650 -16.891  89.870  1.00  0.00           C  
ATOM    397  C   LYS L  53      17.699 -17.073  90.987  1.00  0.00           C  
ATOM    398  O   LYS L  53      18.890 -17.272  90.675  1.00  0.00           O  
ATOM    399  CB  LYS L  53      16.537 -18.200  89.109  1.00  0.00           C  
ATOM    400  CG  LYS L  53      15.129 -18.634  88.706  1.00  0.00           C  
ATOM    401  CD  LYS L  53      15.190 -19.444  87.421  1.00  0.00           C  
ATOM    402  CE  LYS L  53      14.189 -20.572  87.334  1.00  0.00           C  
ATOM    403  NZ  LYS L  53      14.816 -21.882  87.654  1.00  0.00           N  
ATOM    404  N   ARG L  54      17.233 -17.010  92.221  1.00  0.00           N  
ATOM    405  CA  ARG L  54      18.095 -17.071  93.402  1.00  0.00           C  
ATOM    406  C   ARG L  54      17.812 -18.276  94.300  1.00  0.00           C  
ATOM    407  O   ARG L  54      16.732 -18.885  94.283  1.00  0.00           O  
ATOM    408  CB  ARG L  54      17.945 -15.799  94.249  1.00  0.00           C  
ATOM    409  CG  ARG L  54      18.224 -14.488  93.547  1.00  0.00           C  
ATOM    410  CD  ARG L  54      16.967 -13.838  93.073  1.00  0.00           C  
ATOM    411  NE  ARG L  54      15.968 -13.786  94.125  1.00  0.00           N  
ATOM    412  CZ  ARG L  54      15.090 -12.792  94.266  1.00  0.00           C  
ATOM    413  NH1 ARG L  54      15.053 -11.766  93.418  1.00  0.00           N  
ATOM    414  NH2 ARG L  54      14.234 -12.817  95.292  1.00  0.00           N  
ATOM    415  N   PRO L  55      18.831 -18.579  95.112  1.00  0.00           N  
ATOM    416  CA  PRO L  55      18.712 -19.560  96.190  1.00  0.00           C  
ATOM    417  C   PRO L  55      17.580 -19.202  97.138  1.00  0.00           C  
ATOM    418  O   PRO L  55      17.341 -18.031  97.501  1.00  0.00           O  
ATOM    419  CB  PRO L  55      20.079 -19.552  96.852  1.00  0.00           C  
ATOM    420  CG  PRO L  55      21.002 -19.319  95.673  1.00  0.00           C  
ATOM    421  CD  PRO L  55      20.259 -18.284  94.842  1.00  0.00           C  
ATOM    422  N   SER L  56      16.884 -20.276  97.490  1.00  0.00           N  
ATOM    423  CA  SER L  56      15.783 -20.211  98.484  1.00  0.00           C  
ATOM    424  C   SER L  56      16.519 -19.983  99.815  1.00  0.00           C  
ATOM    425  O   SER L  56      16.883 -20.897 100.548  1.00  0.00           O  
ATOM    426  CB  SER L  56      14.925 -21.441  98.451  1.00  0.00           C  
ATOM    427  OG  SER L  56      14.274 -21.554  97.185  1.00  0.00           O  
ATOM    428  N   GLY L  57      16.799 -18.701  99.966  1.00  0.00           N  
ATOM    429  CA  GLY L  57      17.640 -18.155 101.037  1.00  0.00           C  
ATOM    430  C   GLY L  57      18.474 -17.018 100.406  1.00  0.00           C  
ATOM    431  O   GLY L  57      19.705 -17.040 100.481  1.00  0.00           O  
ATOM    432  N   VAL L  58      17.753 -16.137  99.717  1.00  0.00           N  
ATOM    433  CA  VAL L  58      18.319 -14.875  99.250  1.00  0.00           C  
ATOM    434  C   VAL L  58      17.255 -13.767  99.174  1.00  0.00           C  
ATOM    435  O   VAL L  58      16.177 -13.906  98.579  1.00  0.00           O  
ATOM    436  CB  VAL L  58      19.079 -15.000  97.921  1.00  0.00           C  
ATOM    437  CG1 VAL L  58      19.287 -13.626  97.261  1.00  0.00           C  
ATOM    438  CG2 VAL L  58      20.424 -15.685  98.081  1.00  0.00           C  
ATOM    439  N   PRO L  59      17.635 -12.647  99.767  1.00  0.00           N  
ATOM    440  CA  PRO L  59      16.990 -11.346  99.598  1.00  0.00           C  
ATOM    441  C   PRO L  59      16.041 -11.197  98.443  1.00  0.00           C  
ATOM    442  O   PRO L  59      16.269 -11.042  97.224  1.00  0.00           O  
ATOM    443  CB  PRO L  59      18.186 -10.408  99.631  1.00  0.00           C  
ATOM    444  CG  PRO L  59      19.131 -11.049 100.635  1.00  0.00           C  
ATOM    445  CD  PRO L  59      18.712 -12.505 100.788  1.00  0.00           C  
ATOM    446  N   ASP L  60      14.797 -11.182  98.884  1.00  0.00           N  
ATOM    447  CA  ASP L  60      13.535 -11.007  98.231  1.00  0.00           C  
ATOM    448  C   ASP L  60      13.590 -10.219  96.928  1.00  0.00           C  
ATOM    449  O   ASP L  60      12.901 -10.641  95.962  1.00  0.00           O  
ATOM    450  CB  ASP L  60      12.514 -10.435  99.254  1.00  0.00           C  
ATOM    451  CG  ASP L  60      12.783 -10.702 100.713  1.00  0.00           C  
ATOM    452  OD1 ASP L  60      13.838 -10.279 101.237  1.00  0.00           O  
ATOM    453  OD2 ASP L  60      11.948 -11.290 101.442  1.00  0.00           O  
ATOM    454  N   ARG L  61      14.294  -9.105  96.872  1.00  0.00           N  
ATOM    455  CA  ARG L  61      14.450  -8.359  95.620  1.00  0.00           C  
ATOM    456  C   ARG L  61      15.933  -8.118  95.339  1.00  0.00           C  
ATOM    457  O   ARG L  61      16.513  -7.085  95.670  1.00  0.00           O  
ATOM    458  CB  ARG L  61      13.655  -7.080  95.510  1.00  0.00           C  
ATOM    459  CG  ARG L  61      13.579  -6.480  94.106  1.00  0.00           C  
ATOM    460  CD  ARG L  61      12.560  -5.414  93.915  1.00  0.00           C  
ATOM    461  NE  ARG L  61      12.439  -4.519  95.056  1.00  0.00           N  
ATOM    462  CZ  ARG L  61      11.608  -4.778  96.084  1.00  0.00           C  
ATOM    463  NH1 ARG L  61      10.754  -5.805  96.029  1.00  0.00           N  
ATOM    464  NH2 ARG L  61      11.713  -4.096  97.226  1.00  0.00           N  
ATOM    465  N   PHE L  62      16.497  -9.174  94.777  1.00  0.00           N  
ATOM    466  CA  PHE L  62      17.875  -9.133  94.190  1.00  0.00           C  
ATOM    467  C   PHE L  62      17.650  -9.785  92.792  1.00  0.00           C  
ATOM    468  O   PHE L  62      17.783 -10.999  92.623  1.00  0.00           O  
ATOM    469  CB  PHE L  62      18.875  -9.863  94.984  1.00  0.00           C  
ATOM    470  CG  PHE L  62      19.932  -9.239  95.813  1.00  0.00           C  
ATOM    471  CD1 PHE L  62      21.182  -8.944  95.250  1.00  0.00           C  
ATOM    472  CD2 PHE L  62      19.739  -9.036  97.177  1.00  0.00           C  
ATOM    473  CE1 PHE L  62      22.208  -8.423  96.019  1.00  0.00           C  
ATOM    474  CE2 PHE L  62      20.760  -8.510  97.966  1.00  0.00           C  
ATOM    475  CZ  PHE L  62      21.995  -8.203  97.373  1.00  0.00           C  
ATOM    476  N   SER L  63      17.237  -8.909  91.920  1.00  0.00           N  
ATOM    477  CA  SER L  63      16.735  -9.348  90.589  1.00  0.00           C  
ATOM    478  C   SER L  63      17.911  -9.420  89.639  1.00  0.00           C  
ATOM    479  O   SER L  63      19.009  -8.917  89.968  1.00  0.00           O  
ATOM    480  CB  SER L  63      15.631  -8.379  90.195  1.00  0.00           C  
ATOM    481  OG  SER L  63      15.088  -7.798  91.411  1.00  0.00           O  
ATOM    482  N   GLY L  64      17.709 -10.103  88.531  1.00  0.00           N  
ATOM    483  CA  GLY L  64      18.784 -10.330  87.546  1.00  0.00           C  
ATOM    484  C   GLY L  64      18.186 -10.513  86.159  1.00  0.00           C  
ATOM    485  O   GLY L  64      16.951 -10.572  86.005  1.00  0.00           O  
ATOM    486  N   SER L  65      19.082 -10.570  85.179  1.00  0.00           N  
ATOM    487  CA  SER L  65      18.624 -10.734  83.781  1.00  0.00           C  
ATOM    488  C   SER L  65      19.823 -10.961  82.872  1.00  0.00           C  
ATOM    489  O   SER L  65      20.978 -10.972  83.315  1.00  0.00           O  
ATOM    490  CB  SER L  65      17.854  -9.498  83.307  1.00  0.00           C  
ATOM    491  OG  SER L  65      18.648  -8.716  82.413  1.00  0.00           O  
ATOM    492  N   LYS L  66      19.476 -11.080  81.606  1.00  0.00           N  
ATOM    493  CA  LYS L  66      20.420 -11.193  80.497  1.00  0.00           C  
ATOM    494  C   LYS L  66      19.836 -10.375  79.335  1.00  0.00           C  
ATOM    495  O   LYS L  66      18.646 -10.512  79.006  1.00  0.00           O  
ATOM    496  CB  LYS L  66      20.617 -12.635  80.049  1.00  0.00           C  
ATOM    497  CG  LYS L  66      21.677 -12.847  78.987  1.00  0.00           C  
ATOM    498  CD  LYS L  66      21.958 -14.323  78.717  1.00  0.00           C  
ATOM    499  CE  LYS L  66      23.003 -14.461  77.615  1.00  0.00           C  
ATOM    500  NZ  LYS L  66      23.795 -15.698  77.753  1.00  0.00           N  
ATOM    501  N   SER L  67      20.666  -9.507  78.805  1.00  0.00           N  
ATOM    502  CA  SER L  67      20.440  -8.869  77.509  1.00  0.00           C  
ATOM    503  C   SER L  67      21.585  -9.194  76.539  1.00  0.00           C  
ATOM    504  O   SER L  67      22.562  -8.440  76.366  1.00  0.00           O  
ATOM    505  CB  SER L  67      20.196  -7.375  77.623  1.00  0.00           C  
ATOM    506  OG  SER L  67      18.803  -7.065  77.502  1.00  0.00           O  
ATOM    507  N   GLY L  68      21.446 -10.368  75.931  1.00  0.00           N  
ATOM    508  CA  GLY L  68      22.286 -10.796  74.812  1.00  0.00           C  
ATOM    509  C   GLY L  68      23.696 -11.116  75.273  1.00  0.00           C  
ATOM    510  O   GLY L  68      23.943 -12.243  75.747  1.00  0.00           O  
ATOM    511  N   ASN L  69      24.585 -10.145  75.124  1.00  0.00           N  
ATOM    512  CA  ASN L  69      25.963 -10.308  75.615  1.00  0.00           C  
ATOM    513  C   ASN L  69      26.163  -9.717  77.000  1.00  0.00           C  
ATOM    514  O   ASN L  69      27.085 -10.202  77.712  1.00  0.00           O  
ATOM    515  CB  ASN L  69      26.974  -9.819  74.583  1.00  0.00           C  
ATOM    516  CG  ASN L  69      27.415 -10.914  73.626  1.00  0.00           C  
ATOM    517  OD1 ASN L  69      28.326 -10.715  72.810  1.00  0.00           O  
ATOM    518  ND2 ASN L  69      26.780 -12.079  73.715  1.00  0.00           N  
ATOM    519  N   THR L  70      25.349  -8.725  77.362  1.00  0.00           N  
ATOM    520  CA  THR L  70      25.454  -8.151  78.734  1.00  0.00           C  
ATOM    521  C   THR L  70      24.351  -8.754  79.589  1.00  0.00           C  
ATOM    522  O   THR L  70      23.280  -9.058  79.047  1.00  0.00           O  
ATOM    523  CB  THR L  70      25.393  -6.586  78.717  1.00  0.00           C  
ATOM    524  OG1 THR L  70      26.169  -6.110  79.863  1.00  0.00           O  
ATOM    525  CG2 THR L  70      23.969  -6.000  78.747  1.00  0.00           C  
ATOM    526  N   ALA L  71      24.604  -8.914  80.863  1.00  0.00           N  
ATOM    527  CA  ALA L  71      23.634  -9.519  81.813  1.00  0.00           C  
ATOM    528  C   ALA L  71      23.622  -8.607  83.036  1.00  0.00           C  
ATOM    529  O   ALA L  71      24.582  -7.804  83.144  1.00  0.00           O  
ATOM    530  CB  ALA L  71      24.027 -10.935  82.177  1.00  0.00           C  
ATOM    531  N   SER L  72      22.613  -8.726  83.886  1.00  0.00           N  
ATOM    532  CA  SER L  72      22.523  -7.785  85.008  1.00  0.00           C  
ATOM    533  C   SER L  72      21.976  -8.361  86.293  1.00  0.00           C  
ATOM    534  O   SER L  72      21.431  -9.465  86.395  1.00  0.00           O  
ATOM    535  CB  SER L  72      21.770  -6.523  84.599  1.00  0.00           C  
ATOM    536  OG  SER L  72      22.691  -5.600  84.019  1.00  0.00           O  
ATOM    537  N   LEU L  73      22.180  -7.515  87.302  1.00  0.00           N  
ATOM    538  CA  LEU L  73      21.702  -7.735  88.674  1.00  0.00           C  
ATOM    539  C   LEU L  73      21.067  -6.420  89.159  1.00  0.00           C  
ATOM    540  O   LEU L  73      21.707  -5.393  89.396  1.00  0.00           O  
ATOM    541  CB  LEU L  73      22.862  -8.269  89.492  1.00  0.00           C  
ATOM    542  CG  LEU L  73      22.705  -8.624  90.950  1.00  0.00           C  
ATOM    543  CD1 LEU L  73      21.787  -9.811  91.171  1.00  0.00           C  
ATOM    544  CD2 LEU L  73      24.094  -8.954  91.494  1.00  0.00           C  
ATOM    545  N   THR L  74      19.764  -6.485  89.249  1.00  0.00           N  
ATOM    546  CA  THR L  74      18.875  -5.463  89.766  1.00  0.00           C  
ATOM    547  C   THR L  74      18.806  -5.553  91.292  1.00  0.00           C  
ATOM    548  O   THR L  74      17.892  -6.184  91.844  1.00  0.00           O  
ATOM    549  CB  THR L  74      17.428  -5.635  89.133  1.00  0.00           C  
ATOM    550  OG1 THR L  74      17.625  -5.729  87.683  1.00  0.00           O  
ATOM    551  CG2 THR L  74      16.449  -4.535  89.531  1.00  0.00           C  
ATOM    552  N   VAL L  75      19.787  -4.933  91.928  1.00  0.00           N  
ATOM    553  CA  VAL L  75      19.825  -4.811  93.398  1.00  0.00           C  
ATOM    554  C   VAL L  75      18.971  -3.565  93.712  1.00  0.00           C  
ATOM    555  O   VAL L  75      19.368  -2.420  93.465  1.00  0.00           O  
ATOM    556  CB  VAL L  75      21.245  -4.772  93.948  1.00  0.00           C  
ATOM    557  CG1 VAL L  75      21.284  -4.523  95.458  1.00  0.00           C  
ATOM    558  CG2 VAL L  75      22.049  -6.028  93.651  1.00  0.00           C  
ATOM    559  N   SER L  76      17.784  -3.880  94.210  1.00  0.00           N  
ATOM    560  CA  SER L  76      16.709  -2.886  94.342  1.00  0.00           C  
ATOM    561  C   SER L  76      15.933  -3.145  95.631  1.00  0.00           C  
ATOM    562  O   SER L  76      14.885  -3.788  95.675  1.00  0.00           O  
ATOM    563  CB  SER L  76      15.811  -2.838  93.121  1.00  0.00           C  
ATOM    564  OG  SER L  76      15.096  -4.021  92.855  1.00  0.00           O  
ATOM    565  N   GLY L  77      16.490  -2.573  96.659  1.00  0.00           N  
ATOM    566  CA  GLY L  77      16.039  -2.721  98.068  1.00  0.00           C  
ATOM    567  C   GLY L  77      17.361  -2.365  98.823  1.00  0.00           C  
ATOM    568  O   GLY L  77      17.996  -3.207  99.455  1.00  0.00           O  
ATOM    569  N   LEU L  78      17.726  -1.110  98.529  1.00  0.00           N  
ATOM    570  CA  LEU L  78      19.032  -0.632  99.010  1.00  0.00           C  
ATOM    571  C   LEU L  78      18.974  -0.551 100.544  1.00  0.00           C  
ATOM    572  O   LEU L  78      18.366   0.280 101.195  1.00  0.00           O  
ATOM    573  CB  LEU L  78      19.512   0.555  98.228  1.00  0.00           C  
ATOM    574  CG  LEU L  78      20.919   0.457  97.614  1.00  0.00           C  
ATOM    575  CD1 LEU L  78      21.100  -0.840  96.843  1.00  0.00           C  
ATOM    576  CD2 LEU L  78      21.138   1.635  96.690  1.00  0.00           C  
ATOM    577  N   GLN L  79      19.557  -1.618 101.061  1.00  0.00           N  
ATOM    578  CA  GLN L  79      19.983  -1.763 102.464  1.00  0.00           C  
ATOM    579  C   GLN L  79      21.493  -1.507 102.409  1.00  0.00           C  
ATOM    580  O   GLN L  79      21.958  -1.113 101.308  1.00  0.00           O  
ATOM    581  CB  GLN L  79      19.625  -3.139 102.974  1.00  0.00           C  
ATOM    582  CG  GLN L  79      18.222  -3.376 103.427  1.00  0.00           C  
ATOM    583  CD  GLN L  79      17.062  -2.846 102.648  1.00  0.00           C  
ATOM    584  OE1 GLN L  79      16.127  -3.571 102.271  1.00  0.00           O  
ATOM    585  NE2 GLN L  79      17.021  -1.530 102.429  1.00  0.00           N  
ATOM    586  N   ALA L  80      22.204  -1.712 103.476  1.00  0.00           N  
ATOM    587  CA  ALA L  80      23.649  -1.396 103.505  1.00  0.00           C  
ATOM    588  C   ALA L  80      24.451  -2.654 103.810  1.00  0.00           C  
ATOM    589  O   ALA L  80      25.685  -2.712 103.637  1.00  0.00           O  
ATOM    590  CB  ALA L  80      23.920  -0.284 104.507  1.00  0.00           C  
ATOM    591  N   GLU L  81      23.696  -3.656 104.243  1.00  0.00           N  
ATOM    592  CA  GLU L  81      24.281  -4.943 104.652  1.00  0.00           C  
ATOM    593  C   GLU L  81      25.306  -5.346 103.580  1.00  0.00           C  
ATOM    594  O   GLU L  81      26.452  -5.715 103.820  1.00  0.00           O  
ATOM    595  CB  GLU L  81      23.232  -6.034 104.745  1.00  0.00           C  
ATOM    596  CG  GLU L  81      22.091  -5.897 105.747  1.00  0.00           C  
ATOM    597  CD  GLU L  81      20.730  -5.636 105.164  1.00  0.00           C  
ATOM    598  OE1 GLU L  81      20.416  -6.491 104.301  1.00  0.00           O  
ATOM    599  OE2 GLU L  81      20.008  -4.703 105.485  1.00  0.00           O  
ATOM    600  N   ASP L  82      24.836  -5.179 102.368  1.00  0.00           N  
ATOM    601  CA  ASP L  82      25.417  -5.561 101.118  1.00  0.00           C  
ATOM    602  C   ASP L  82      26.567  -4.744 100.576  1.00  0.00           C  
ATOM    603  O   ASP L  82      26.870  -4.946  99.352  1.00  0.00           O  
ATOM    604  CB  ASP L  82      24.242  -5.651 100.105  1.00  0.00           C  
ATOM    605  CG  ASP L  82      23.597  -4.341  99.735  1.00  0.00           C  
ATOM    606  OD1 ASP L  82      24.326  -3.381  99.399  1.00  0.00           O  
ATOM    607  OD2 ASP L  82      22.348  -4.253  99.711  1.00  0.00           O  
ATOM    608  N   GLU L  83      27.162  -3.866 101.362  1.00  0.00           N  
ATOM    609  CA  GLU L  83      28.380  -3.144 100.823  1.00  0.00           C  
ATOM    610  C   GLU L  83      29.428  -4.213 100.585  1.00  0.00           C  
ATOM    611  O   GLU L  83      29.761  -4.925 101.572  1.00  0.00           O  
ATOM    612  CB  GLU L  83      28.832  -2.085 101.784  1.00  0.00           C  
ATOM    613  CG  GLU L  83      29.696  -0.920 101.321  1.00  0.00           C  
ATOM    614  CD  GLU L  83      29.773   0.262 102.247  1.00  0.00           C  
ATOM    615  OE1 GLU L  83      28.969   1.180 102.234  1.00  0.00           O  
ATOM    616  OE2 GLU L  83      30.747   0.225 103.033  1.00  0.00           O  
ATOM    617  N   ALA L  84      29.918  -4.372  99.352  1.00  0.00           N  
ATOM    618  CA  ALA L  84      30.724  -5.571  99.016  1.00  0.00           C  
ATOM    619  C   ALA L  84      31.417  -5.560  97.672  1.00  0.00           C  
ATOM    620  O   ALA L  84      31.586  -4.517  97.014  1.00  0.00           O  
ATOM    621  CB  ALA L  84      29.789  -6.794  99.131  1.00  0.00           C  
ATOM    622  N   ASP L  85      31.862  -6.756  97.255  1.00  0.00           N  
ATOM    623  CA  ASP L  85      32.352  -7.025  95.891  1.00  0.00           C  
ATOM    624  C   ASP L  85      31.439  -8.120  95.279  1.00  0.00           C  
ATOM    625  O   ASP L  85      31.321  -9.205  95.863  1.00  0.00           O  
ATOM    626  CB  ASP L  85      33.805  -7.435  95.818  1.00  0.00           C  
ATOM    627  CG  ASP L  85      34.823  -6.827  96.724  1.00  0.00           C  
ATOM    628  OD1 ASP L  85      35.022  -5.601  96.819  1.00  0.00           O  
ATOM    629  OD2 ASP L  85      35.534  -7.633  97.397  1.00  0.00           O  
ATOM    630  N   TYR L  86      30.854  -7.823  94.136  1.00  0.00           N  
ATOM    631  CA  TYR L  86      29.981  -8.758  93.418  1.00  0.00           C  
ATOM    632  C   TYR L  86      30.639  -9.248  92.121  1.00  0.00           C  
ATOM    633  O   TYR L  86      31.330  -8.476  91.439  1.00  0.00           O  
ATOM    634  CB  TYR L  86      28.619  -8.163  93.121  1.00  0.00           C  
ATOM    635  CG  TYR L  86      27.807  -7.673  94.288  1.00  0.00           C  
ATOM    636  CD1 TYR L  86      28.233  -6.614  95.099  1.00  0.00           C  
ATOM    637  CD2 TYR L  86      26.551  -8.227  94.551  1.00  0.00           C  
ATOM    638  CE1 TYR L  86      27.448  -6.144  96.146  1.00  0.00           C  
ATOM    639  CE2 TYR L  86      25.754  -7.758  95.590  1.00  0.00           C  
ATOM    640  CZ  TYR L  86      26.208  -6.723  96.389  1.00  0.00           C  
ATOM    641  OH  TYR L  86      25.393  -6.285  97.395  1.00  0.00           O  
ATOM    642  N   TYR L  87      30.377 -10.528  91.823  1.00  0.00           N  
ATOM    643  CA  TYR L  87      31.005 -11.176  90.654  1.00  0.00           C  
ATOM    644  C   TYR L  87      29.972 -11.917  89.799  1.00  0.00           C  
ATOM    645  O   TYR L  87      28.992 -12.461  90.329  1.00  0.00           O  
ATOM    646  CB  TYR L  87      32.122 -12.141  91.054  1.00  0.00           C  
ATOM    647  CG  TYR L  87      33.213 -11.619  91.946  1.00  0.00           C  
ATOM    648  CD1 TYR L  87      32.948 -11.232  93.260  1.00  0.00           C  
ATOM    649  CD2 TYR L  87      34.534 -11.557  91.506  1.00  0.00           C  
ATOM    650  CE1 TYR L  87      33.958 -10.775  94.103  1.00  0.00           C  
ATOM    651  CE2 TYR L  87      35.553 -11.097  92.335  1.00  0.00           C  
ATOM    652  CZ  TYR L  87      35.265 -10.710  93.634  1.00  0.00           C  
ATOM    653  OH  TYR L  87      36.284 -10.267  94.435  1.00  0.00           O  
ATOM    654  N   CYS L  88      30.228 -11.912  88.494  1.00  0.00           N  
ATOM    655  CA  CYS L  88      29.404 -12.679  87.538  1.00  0.00           C  
ATOM    656  C   CYS L  88      30.247 -13.889  87.116  1.00  0.00           C  
ATOM    657  O   CYS L  88      31.452 -13.938  87.457  1.00  0.00           O  
ATOM    658  CB  CYS L  88      28.839 -11.860  86.399  1.00  0.00           C  
ATOM    659  SG  CYS L  88      29.834 -10.992  85.205  1.00  0.00           S  
ATOM    660  N   SER L  89      29.609 -14.831  86.449  1.00  0.00           N  
ATOM    661  CA  SER L  89      30.290 -16.062  85.992  1.00  0.00           C  
ATOM    662  C   SER L  89      29.424 -16.785  84.966  1.00  0.00           C  
ATOM    663  O   SER L  89      28.215 -16.987  85.189  1.00  0.00           O  
ATOM    664  CB  SER L  89      30.628 -16.970  87.161  1.00  0.00           C  
ATOM    665  OG  SER L  89      31.750 -17.785  86.892  1.00  0.00           O  
ATOM    666  N   SER L  90      30.080 -17.189  83.880  1.00  0.00           N  
ATOM    667  CA  SER L  90      29.367 -17.842  82.765  1.00  0.00           C  
ATOM    668  C   SER L  90      30.029 -19.142  82.328  1.00  0.00           C  
ATOM    669  O   SER L  90      31.270 -19.249  82.350  1.00  0.00           O  
ATOM    670  CB  SER L  90      29.233 -16.885  81.588  1.00  0.00           C  
ATOM    671  OG  SER L  90      30.438 -16.161  81.407  1.00  0.00           O  
ATOM    672  N   TYR L  91      29.149 -20.093  81.982  1.00  0.00           N  
ATOM    673  CA  TYR L  91      29.650 -21.337  81.298  1.00  0.00           C  
ATOM    674  C   TYR L  91      30.312 -20.822  80.013  1.00  0.00           C  
ATOM    675  O   TYR L  91      29.884 -19.741  79.578  1.00  0.00           O  
ATOM    676  CB  TYR L  91      28.554 -22.298  80.913  1.00  0.00           C  
ATOM    677  CG  TYR L  91      28.844 -23.752  80.679  1.00  0.00           C  
ATOM    678  CD1 TYR L  91      28.977 -24.634  81.763  1.00  0.00           C  
ATOM    679  CD2 TYR L  91      28.925 -24.298  79.396  1.00  0.00           C  
ATOM    680  CE1 TYR L  91      29.214 -25.990  81.571  1.00  0.00           C  
ATOM    681  CE2 TYR L  91      29.155 -25.653  79.184  1.00  0.00           C  
ATOM    682  CZ  TYR L  91      29.302 -26.499  80.270  1.00  0.00           C  
ATOM    683  OH  TYR L  91      29.524 -27.844  80.063  1.00  0.00           O  
ATOM    684  N   GLU L  92      31.282 -21.548  79.513  1.00  0.00           N  
ATOM    685  CA  GLU L  92      31.692 -21.267  78.095  1.00  0.00           C  
ATOM    686  C   GLU L  92      32.027 -22.580  77.429  1.00  0.00           C  
ATOM    687  O   GLU L  92      31.090 -23.314  77.020  1.00  0.00           O  
ATOM    688  CB  GLU L  92      32.757 -20.234  77.981  1.00  0.00           C  
ATOM    689  CG  GLU L  92      33.448 -19.684  79.229  1.00  0.00           C  
ATOM    690  CD  GLU L  92      34.826 -20.260  79.435  1.00  0.00           C  
ATOM    691  OE1 GLU L  92      35.019 -21.396  79.824  1.00  0.00           O  
ATOM    692  OE2 GLU L  92      35.721 -19.455  79.119  1.00  0.00           O  
ATOM    693  N   GLY L  93      33.295 -22.920  77.373  1.00  0.00           N  
ATOM    694  CA  GLY L  93      33.757 -24.143  76.695  1.00  0.00           C  
ATOM    695  C   GLY L  93      33.307 -25.371  77.491  1.00  0.00           C  
ATOM    696  O   GLY L  93      32.315 -25.357  78.230  1.00  0.00           O  
ATOM    697  N   SER L  94      34.088 -26.419  77.312  1.00  0.00           N  
ATOM    698  CA  SER L  94      33.867 -27.710  77.961  1.00  0.00           C  
ATOM    699  C   SER L  94      34.066 -27.615  79.469  1.00  0.00           C  
ATOM    700  O   SER L  94      35.193 -27.614  79.989  1.00  0.00           O  
ATOM    701  CB  SER L  94      34.772 -28.758  77.320  1.00  0.00           C  
ATOM    702  OG  SER L  94      34.795 -28.591  75.903  1.00  0.00           O  
ATOM    703  N   ASP L  95      32.944 -27.528  80.162  1.00  0.00           N  
ATOM    704  CA  ASP L  95      32.819 -27.509  81.612  1.00  0.00           C  
ATOM    705  C   ASP L  95      33.693 -26.427  82.266  1.00  0.00           C  
ATOM    706  O   ASP L  95      34.033 -26.558  83.458  1.00  0.00           O  
ATOM    707  CB  ASP L  95      33.072 -28.869  82.264  1.00  0.00           C  
ATOM    708  CG  ASP L  95      32.762 -30.088  81.447  1.00  0.00           C  
ATOM    709  OD1 ASP L  95      31.975 -30.083  80.491  1.00  0.00           O  
ATOM    710  OD2 ASP L  95      33.359 -31.133  81.805  1.00  0.00           O  
ATOM    711  N   ASN L  95A     33.996 -25.415  81.489  1.00  0.00           N  
ATOM    712  CA  ASN L  95A     34.816 -24.287  81.987  1.00  0.00           C  
ATOM    713  C   ASN L  95A     33.905 -23.106  82.290  1.00  0.00           C  
ATOM    714  O   ASN L  95A     32.923 -22.835  81.560  1.00  0.00           O  
ATOM    715  CB  ASN L  95A     35.965 -24.041  81.008  1.00  0.00           C  
ATOM    716  CG  ASN L  95A     36.849 -25.274  80.852  1.00  0.00           C  
ATOM    717  OD1 ASN L  95A     37.353 -25.831  81.841  1.00  0.00           O  
ATOM    718  ND2 ASN L  95A     37.044 -25.747  79.627  1.00  0.00           N  
ATOM    719  N   PHE L  96      34.228 -22.438  83.395  1.00  0.00           N  
ATOM    720  CA  PHE L  96      33.485 -21.299  83.925  1.00  0.00           C  
ATOM    721  C   PHE L  96      34.428 -20.092  84.123  1.00  0.00           C  
ATOM    722  O   PHE L  96      35.467 -20.257  84.785  1.00  0.00           O  
ATOM    723  CB  PHE L  96      32.843 -21.543  85.296  1.00  0.00           C  
ATOM    724  CG  PHE L  96      31.873 -22.664  85.367  1.00  0.00           C  
ATOM    725  CD1 PHE L  96      32.325 -23.982  85.347  1.00  0.00           C  
ATOM    726  CD2 PHE L  96      30.508 -22.401  85.434  1.00  0.00           C  
ATOM    727  CE1 PHE L  96      31.413 -25.039  85.382  1.00  0.00           C  
ATOM    728  CE2 PHE L  96      29.583 -23.431  85.481  1.00  0.00           C  
ATOM    729  CZ  PHE L  96      30.034 -24.751  85.455  1.00  0.00           C  
ATOM    730  N   VAL L  97      33.943 -18.954  83.627  1.00  0.00           N  
ATOM    731  CA  VAL L  97      34.768 -17.735  83.820  1.00  0.00           C  
ATOM    732  C   VAL L  97      33.974 -16.669  84.566  1.00  0.00           C  
ATOM    733  O   VAL L  97      32.786 -16.417  84.347  1.00  0.00           O  
ATOM    734  CB  VAL L  97      35.431 -17.286  82.527  1.00  0.00           C  
ATOM    735  CG1 VAL L  97      36.306 -16.041  82.740  1.00  0.00           C  
ATOM    736  CG2 VAL L  97      36.271 -18.398  81.896  1.00  0.00           C  
ATOM    737  N   PHE L  98      34.723 -16.060  85.477  1.00  0.00           N  
ATOM    738  CA  PHE L  98      34.279 -15.052  86.434  1.00  0.00           C  
ATOM    739  C   PHE L  98      34.519 -13.650  85.891  1.00  0.00           C  
ATOM    740  O   PHE L  98      35.170 -13.441  84.839  1.00  0.00           O  
ATOM    741  CB  PHE L  98      34.986 -15.261  87.817  1.00  0.00           C  
ATOM    742  CG  PHE L  98      34.518 -16.549  88.444  1.00  0.00           C  
ATOM    743  CD1 PHE L  98      34.845 -17.767  87.841  1.00  0.00           C  
ATOM    744  CD2 PHE L  98      33.708 -16.542  89.568  1.00  0.00           C  
ATOM    745  CE1 PHE L  98      34.372 -18.965  88.347  1.00  0.00           C  
ATOM    746  CE2 PHE L  98      33.236 -17.746  90.111  1.00  0.00           C  
ATOM    747  CZ  PHE L  98      33.567 -18.958  89.487  1.00  0.00           C  
ATOM    748  N   GLY L  99      33.933 -12.717  86.626  1.00  0.00           N  
ATOM    749  CA  GLY L  99      33.974 -11.297  86.222  1.00  0.00           C  
ATOM    750  C   GLY L  99      35.252 -10.644  86.754  1.00  0.00           C  
ATOM    751  O   GLY L  99      36.107 -11.307  87.356  1.00  0.00           O  
ATOM    752  N   THR L 100      35.332  -9.352  86.458  1.00  0.00           N  
ATOM    753  CA  THR L 100      36.381  -8.508  87.076  1.00  0.00           C  
ATOM    754  C   THR L 100      36.052  -8.420  88.574  1.00  0.00           C  
ATOM    755  O   THR L 100      36.818  -8.787  89.468  1.00  0.00           O  
ATOM    756  CB  THR L 100      36.448  -7.102  86.391  1.00  0.00           C  
ATOM    757  OG1 THR L 100      37.447  -7.211  85.330  1.00  0.00           O  
ATOM    758  CG2 THR L 100      36.761  -5.925  87.325  1.00  0.00           C  
ATOM    759  N   GLY L 101      34.823  -7.976  88.775  1.00  0.00           N  
ATOM    760  CA  GLY L 101      34.282  -7.630  90.089  1.00  0.00           C  
ATOM    761  C   GLY L 101      33.719  -6.195  90.007  1.00  0.00           C  
ATOM    762  O   GLY L 101      34.286  -5.295  89.379  1.00  0.00           O  
ATOM    763  N   THR L 102      32.560  -6.087  90.615  1.00  0.00           N  
ATOM    764  CA  THR L 102      31.920  -4.780  90.879  1.00  0.00           C  
ATOM    765  C   THR L 102      32.070  -4.600  92.398  1.00  0.00           C  
ATOM    766  O   THR L 102      32.123  -5.625  93.115  1.00  0.00           O  
ATOM    767  CB  THR L 102      30.432  -4.727  90.388  1.00  0.00           C  
ATOM    768  OG1 THR L 102      29.919  -3.382  90.649  1.00  0.00           O  
ATOM    769  CG2 THR L 102      29.493  -5.759  91.032  1.00  0.00           C  
ATOM    770  N   LYS L 103      32.203  -3.376  92.820  1.00  0.00           N  
ATOM    771  CA  LYS L 103      32.327  -3.069  94.262  1.00  0.00           C  
ATOM    772  C   LYS L 103      31.128  -2.185  94.586  1.00  0.00           C  
ATOM    773  O   LYS L 103      31.207  -0.971  94.315  1.00  0.00           O  
ATOM    774  CB  LYS L 103      33.630  -2.373  94.545  1.00  0.00           C  
ATOM    775  CG  LYS L 103      34.285  -2.640  95.898  1.00  0.00           C  
ATOM    776  CD  LYS L 103      35.784  -2.863  95.711  1.00  0.00           C  
ATOM    777  CE  LYS L 103      36.577  -2.822  96.999  1.00  0.00           C  
ATOM    778  NZ  LYS L 103      38.010  -3.138  96.724  1.00  0.00           N  
ATOM    779  N   VAL L 104      30.078  -2.811  95.112  1.00  0.00           N  
ATOM    780  CA  VAL L 104      28.872  -2.001  95.430  1.00  0.00           C  
ATOM    781  C   VAL L 104      29.146  -1.203  96.711  1.00  0.00           C  
ATOM    782  O   VAL L 104      29.752  -1.689  97.683  1.00  0.00           O  
ATOM    783  CB  VAL L 104      27.586  -2.813  95.456  1.00  0.00           C  
ATOM    784  CG1 VAL L 104      26.389  -1.974  95.932  1.00  0.00           C  
ATOM    785  CG2 VAL L 104      27.229  -3.433  94.104  1.00  0.00           C  
ATOM    786  N   THR L 105      28.678   0.029  96.655  1.00  0.00           N  
ATOM    787  CA  THR L 105      28.817   1.006  97.741  1.00  0.00           C  
ATOM    788  C   THR L 105      27.513   1.769  97.910  1.00  0.00           C  
ATOM    789  O   THR L 105      26.927   2.310  96.949  1.00  0.00           O  
ATOM    790  CB  THR L 105      30.070   1.919  97.501  1.00  0.00           C  
ATOM    791  OG1 THR L 105      30.750   1.381  96.315  1.00  0.00           O  
ATOM    792  CG2 THR L 105      31.054   1.935  98.681  1.00  0.00           C  
ATOM    793  N   VAL L 106      27.051   1.791  99.153  1.00  0.00           N  
ATOM    794  CA  VAL L 106      25.731   2.313  99.538  1.00  0.00           C  
ATOM    795  C   VAL L 106      25.825   3.630 100.295  1.00  0.00           C  
ATOM    796  O   VAL L 106      26.347   3.625 101.434  1.00  0.00           O  
ATOM    797  CB  VAL L 106      25.041   1.210 100.392  1.00  0.00           C  
ATOM    798  CG1 VAL L 106      23.629   1.597 100.788  1.00  0.00           C  
ATOM    799  CG2 VAL L 106      25.090  -0.127  99.683  1.00  0.00           C  
ATOM    800  N   LEU L 106A     25.251   4.706  99.754  1.00  0.00           N  
ATOM    801  CA  LEU L 106A     25.608   6.038 100.293  1.00  0.00           C  
ATOM    802  C   LEU L 106A     24.588   6.664 101.230  1.00  0.00           C  
ATOM    803  O   LEU L 106A     23.412   6.304 101.314  1.00  0.00           O  
ATOM    804  CB  LEU L 106A     25.985   6.919  99.107  1.00  0.00           C  
ATOM    805  CG  LEU L 106A     27.221   6.631  98.291  1.00  0.00           C  
ATOM    806  CD1 LEU L 106A     28.037   5.447  98.791  1.00  0.00           C  
ATOM    807  CD2 LEU L 106A     26.774   6.393  96.843  1.00  0.00           C  
ATOM    808  N   GLY L 107      25.096   7.675 101.948  1.00  0.00           N  
ATOM    809  CA  GLY L 107      24.297   8.492 102.871  1.00  0.00           C  
ATOM    810  C   GLY L 107      23.904   7.640 104.084  1.00  0.00           C  
ATOM    811  O   GLY L 107      22.754   7.621 104.526  1.00  0.00           O  
ATOM    812  N   GLN L 108      24.915   6.909 104.522  1.00  0.00           N  
ATOM    813  CA  GLN L 108      24.790   6.088 105.760  1.00  0.00           C  
ATOM    814  C   GLN L 108      25.040   7.105 106.870  1.00  0.00           C  
ATOM    815  O   GLN L 108      25.782   8.077 106.619  1.00  0.00           O  
ATOM    816  CB  GLN L 108      25.749   4.912 105.757  1.00  0.00           C  
ATOM    817  CG  GLN L 108      25.390   3.842 104.734  1.00  0.00           C  
ATOM    818  CD  GLN L 108      26.427   2.768 104.546  1.00  0.00           C  
ATOM    819  OE1 GLN L 108      26.248   1.597 104.905  1.00  0.00           O  
ATOM    820  NE2 GLN L 108      27.547   3.156 103.948  1.00  0.00           N  
ATOM    821  N   PRO L 109      24.374   6.911 107.984  1.00  0.00           N  
ATOM    822  CA  PRO L 109      24.475   7.840 109.114  1.00  0.00           C  
ATOM    823  C   PRO L 109      25.782   7.614 109.863  1.00  0.00           C  
ATOM    824  O   PRO L 109      26.319   6.498 109.956  1.00  0.00           O  
ATOM    825  CB  PRO L 109      23.225   7.596 109.926  1.00  0.00           C  
ATOM    826  CG  PRO L 109      22.306   6.773 109.056  1.00  0.00           C  
ATOM    827  CD  PRO L 109      23.260   5.954 108.185  1.00  0.00           C  
TER     828      PRO L 109                                                      
ATOM   1607  N   PRO L   1      25.070 -22.615 103.846  1.00  0.00           N  
ATOM   1608  CA  PRO L   1      26.012 -21.907 104.719  1.00  0.00           C  
ATOM   1609  C   PRO L   1      27.385 -22.559 104.695  1.00  0.00           C  
ATOM   1610  O   PRO L   1      27.722 -23.319 103.762  1.00  0.00           O  
ATOM   1611  CB  PRO L   1      25.364 -21.917 106.091  1.00  0.00           C  
ATOM   1612  CG  PRO L   1      23.907 -22.207 105.818  1.00  0.00           C  
ATOM   1613  CD  PRO L   1      23.915 -23.129 104.604  1.00  0.00           C  
ATOM   1614  N   SER L   2      28.170 -22.265 105.716  1.00  0.00           N  
ATOM   1615  CA  SER L   2      29.516 -22.813 105.907  1.00  0.00           C  
ATOM   1616  C   SER L   2      29.520 -24.276 106.322  1.00  0.00           C  
ATOM   1617  O   SER L   2      30.458 -24.736 107.021  1.00  0.00           O  
ATOM   1618  CB  SER L   2      30.269 -21.945 106.932  1.00  0.00           C  
ATOM   1619  OG  SER L   2      29.399 -21.559 107.991  1.00  0.00           O  
ATOM   1620  N   ALA L   3      28.539 -25.030 105.859  1.00  0.00           N  
ATOM   1621  CA  ALA L   3      28.284 -26.410 106.270  1.00  0.00           C  
ATOM   1622  C   ALA L   3      29.355 -27.401 105.824  1.00  0.00           C  
ATOM   1623  O   ALA L   3      29.132 -28.620 105.738  1.00  0.00           O  
ATOM   1624  CB  ALA L   3      26.909 -26.852 105.753  1.00  0.00           C  
ATOM   1625  N   LEU L   4      30.514 -26.879 105.539  1.00  0.00           N  
ATOM   1626  CA  LEU L   4      31.715 -27.508 105.022  1.00  0.00           C  
ATOM   1627  C   LEU L   4      32.859 -26.623 105.600  1.00  0.00           C  
ATOM   1628  O   LEU L   4      32.864 -25.413 105.309  1.00  0.00           O  
ATOM   1629  CB  LEU L   4      31.758 -27.504 103.502  1.00  0.00           C  
ATOM   1630  CG  LEU L   4      30.802 -28.298 102.654  1.00  0.00           C  
ATOM   1631  CD1 LEU L   4      29.758 -27.390 102.001  1.00  0.00           C  
ATOM   1632  CD2 LEU L   4      31.597 -29.045 101.578  1.00  0.00           C  
ATOM   1633  N   THR L   5      33.692 -27.240 106.389  1.00  0.00           N  
ATOM   1634  CA  THR L   5      34.725 -26.490 107.104  1.00  0.00           C  
ATOM   1635  C   THR L   5      36.094 -26.675 106.482  1.00  0.00           C  
ATOM   1636  O   THR L   5      36.447 -27.750 105.972  1.00  0.00           O  
ATOM   1637  CB  THR L   5      34.653 -26.810 108.647  1.00  0.00           C  
ATOM   1638  OG1 THR L   5      33.342 -27.402 108.926  1.00  0.00           O  
ATOM   1639  CG2 THR L   5      34.850 -25.557 109.516  1.00  0.00           C  
ATOM   1640  N   GLN L   6      36.877 -25.601 106.550  1.00  0.00           N  
ATOM   1641  CA  GLN L   6      38.235 -25.508 106.035  1.00  0.00           C  
ATOM   1642  C   GLN L   6      39.253 -24.960 107.054  1.00  0.00           C  
ATOM   1643  O   GLN L   6      38.952 -23.983 107.753  1.00  0.00           O  
ATOM   1644  CB  GLN L   6      38.296 -24.509 104.870  1.00  0.00           C  
ATOM   1645  CG  GLN L   6      37.970 -25.052 103.513  1.00  0.00           C  
ATOM   1646  CD  GLN L   6      37.567 -23.889 102.602  1.00  0.00           C  
ATOM   1647  OE1 GLN L   6      36.437 -23.428 102.652  1.00  0.00           O  
ATOM   1648  NE2 GLN L   6      38.538 -23.413 101.853  1.00  0.00           N  
ATOM   1649  N   PRO L   7      40.462 -25.504 106.987  1.00  0.00           N  
ATOM   1650  CA  PRO L   7      41.597 -25.026 107.789  1.00  0.00           C  
ATOM   1651  C   PRO L   7      41.840 -23.548 107.510  1.00  0.00           C  
ATOM   1652  O   PRO L   7      42.126 -23.183 106.353  1.00  0.00           O  
ATOM   1653  CB  PRO L   7      42.782 -25.874 107.348  1.00  0.00           C  
ATOM   1654  CG  PRO L   7      42.206 -27.028 106.591  1.00  0.00           C  
ATOM   1655  CD  PRO L   7      40.898 -26.519 106.011  1.00  0.00           C  
ATOM   1656  N   PRO L   8      41.749 -22.742 108.556  1.00  0.00           N  
ATOM   1657  CA  PRO L   8      41.743 -21.282 108.441  1.00  0.00           C  
ATOM   1658  C   PRO L   8      43.009 -20.810 107.742  1.00  0.00           C  
ATOM   1659  O   PRO L   8      42.985 -19.935 106.876  1.00  0.00           O  
ATOM   1660  CB  PRO L   8      41.644 -20.768 109.865  1.00  0.00           C  
ATOM   1661  CG  PRO L   8      41.226 -21.937 110.690  1.00  0.00           C  
ATOM   1662  CD  PRO L   8      41.775 -23.165 109.971  1.00  0.00           C  
ATOM   1663  N   SER L   9      44.106 -21.404 108.192  1.00  0.00           N  
ATOM   1664  CA  SER L   9      45.434 -21.140 107.632  1.00  0.00           C  
ATOM   1665  C   SER L   9      46.021 -22.486 107.197  1.00  0.00           C  
ATOM   1666  O   SER L   9      46.029 -23.410 108.015  1.00  0.00           O  
ATOM   1667  CB  SER L   9      46.346 -20.448 108.616  1.00  0.00           C  
ATOM   1668  OG  SER L   9      47.494 -19.926 107.947  1.00  0.00           O  
ATOM   1669  N   ALA L  11      46.427 -22.543 105.948  1.00  0.00           N  
ATOM   1670  CA  ALA L  11      47.160 -23.706 105.413  1.00  0.00           C  
ATOM   1671  C   ALA L  11      48.412 -23.142 104.732  1.00  0.00           C  
ATOM   1672  O   ALA L  11      48.312 -22.180 103.940  1.00  0.00           O  
ATOM   1673  CB  ALA L  11      46.321 -24.513 104.470  1.00  0.00           C  
ATOM   1674  N   SER L  12      49.554 -23.721 105.061  1.00  0.00           N  
ATOM   1675  CA  SER L  12      50.822 -23.079 104.682  1.00  0.00           C  
ATOM   1676  C   SER L  12      51.954 -24.074 104.559  1.00  0.00           C  
ATOM   1677  O   SER L  12      51.999 -25.131 105.180  1.00  0.00           O  
ATOM   1678  CB  SER L  12      51.190 -21.961 105.645  1.00  0.00           C  
ATOM   1679  OG  SER L  12      51.684 -22.388 106.902  1.00  0.00           O  
ATOM   1680  N   GLY L  13      52.883 -23.618 103.728  1.00  0.00           N  
ATOM   1681  CA  GLY L  13      54.153 -24.379 103.530  1.00  0.00           C  
ATOM   1682  C   GLY L  13      55.183 -23.336 103.067  1.00  0.00           C  
ATOM   1683  O   GLY L  13      55.158 -22.170 103.483  1.00  0.00           O  
ATOM   1684  N   SER L  14      56.003 -23.821 102.178  1.00  0.00           N  
ATOM   1685  CA  SER L  14      57.190 -23.056 101.734  1.00  0.00           C  
ATOM   1686  C   SER L  14      57.274 -23.245 100.226  1.00  0.00           C  
ATOM   1687  O   SER L  14      56.401 -23.948  99.657  1.00  0.00           O  
ATOM   1688  CB  SER L  14      58.399 -23.612 102.483  1.00  0.00           C  
ATOM   1689  OG  SER L  14      57.965 -24.214 103.714  1.00  0.00           O  
ATOM   1690  N   LEU L  15      58.284 -22.640  99.631  1.00  0.00           N  
ATOM   1691  CA  LEU L  15      58.601 -22.948  98.226  1.00  0.00           C  
ATOM   1692  C   LEU L  15      59.167 -24.381  98.304  1.00  0.00           C  
ATOM   1693  O   LEU L  15      60.365 -24.511  98.588  1.00  0.00           O  
ATOM   1694  CB  LEU L  15      59.580 -21.961  97.670  1.00  0.00           C  
ATOM   1695  CG  LEU L  15      59.346 -20.481  97.798  1.00  0.00           C  
ATOM   1696  CD1 LEU L  15      57.879 -20.123  97.596  1.00  0.00           C  
ATOM   1697  CD2 LEU L  15      59.854 -20.041  99.168  1.00  0.00           C  
ATOM   1698  N   GLY L  16      58.271 -25.322  98.125  1.00  0.00           N  
ATOM   1699  CA  GLY L  16      58.748 -26.741  98.107  1.00  0.00           C  
ATOM   1700  C   GLY L  16      57.764 -27.547  98.943  1.00  0.00           C  
ATOM   1701  O   GLY L  16      57.422 -28.670  98.547  1.00  0.00           O  
ATOM   1702  N   GLN L  17      57.331 -26.887 100.014  1.00  0.00           N  
ATOM   1703  CA  GLN L  17      56.318 -27.585 100.882  1.00  0.00           C  
ATOM   1704  C   GLN L  17      55.046 -27.774 100.057  1.00  0.00           C  
ATOM   1705  O   GLN L  17      54.503 -26.824  99.455  1.00  0.00           O  
ATOM   1706  CB  GLN L  17      56.132 -26.849 102.186  1.00  0.00           C  
ATOM   1707  CG  GLN L  17      56.845 -27.339 103.407  1.00  0.00           C  
ATOM   1708  CD  GLN L  17      58.333 -27.195 103.468  1.00  0.00           C  
ATOM   1709  OE1 GLN L  17      59.037 -27.156 102.461  1.00  0.00           O  
ATOM   1710  NE2 GLN L  17      58.889 -27.124 104.688  1.00  0.00           N  
ATOM   1711  N   SER L  18      54.621 -29.026  99.968  1.00  0.00           N  
ATOM   1712  CA  SER L  18      53.317 -29.381  99.338  1.00  0.00           C  
ATOM   1713  C   SER L  18      52.244 -29.294 100.423  1.00  0.00           C  
ATOM   1714  O   SER L  18      52.519 -29.673 101.578  1.00  0.00           O  
ATOM   1715  CB  SER L  18      53.421 -30.721  98.655  1.00  0.00           C  
ATOM   1716  OG  SER L  18      54.637 -30.804  97.897  1.00  0.00           O  
ATOM   1717  N   VAL L  19      51.070 -28.788 100.076  1.00  0.00           N  
ATOM   1718  CA  VAL L  19      50.080 -28.323 101.061  1.00  0.00           C  
ATOM   1719  C   VAL L  19      48.675 -28.844 100.808  1.00  0.00           C  
ATOM   1720  O   VAL L  19      48.058 -28.494  99.771  1.00  0.00           O  
ATOM   1721  CB  VAL L  19      50.119 -26.769 101.053  1.00  0.00           C  
ATOM   1722  CG1 VAL L  19      49.397 -26.189 102.251  1.00  0.00           C  
ATOM   1723  CG2 VAL L  19      51.529 -26.231 100.944  1.00  0.00           C  
ATOM   1724  N   THR L  20      48.164 -29.634 101.752  1.00  0.00           N  
ATOM   1725  CA  THR L  20      46.836 -30.239 101.650  1.00  0.00           C  
ATOM   1726  C   THR L  20      45.845 -29.383 102.455  1.00  0.00           C  
ATOM   1727  O   THR L  20      46.095 -29.075 103.623  1.00  0.00           O  
ATOM   1728  CB  THR L  20      46.700 -31.734 102.089  1.00  0.00           C  
ATOM   1729  OG1 THR L  20      47.563 -32.552 101.247  1.00  0.00           O  
ATOM   1730  CG2 THR L  20      45.245 -32.251 102.000  1.00  0.00           C  
ATOM   1731  N   ILE L  21      44.789 -29.018 101.764  1.00  0.00           N  
ATOM   1732  CA  ILE L  21      43.653 -28.304 102.375  1.00  0.00           C  
ATOM   1733  C   ILE L  21      42.527 -29.337 102.476  1.00  0.00           C  
ATOM   1734  O   ILE L  21      42.520 -30.311 101.678  1.00  0.00           O  
ATOM   1735  CB  ILE L  21      43.273 -27.048 101.535  1.00  0.00           C  
ATOM   1736  CG1 ILE L  21      44.499 -26.141 101.295  1.00  0.00           C  
ATOM   1737  CG2 ILE L  21      42.109 -26.237 102.154  1.00  0.00           C  
ATOM   1738  CD1 ILE L  21      45.147 -26.208  99.893  1.00  0.00           C  
ATOM   1739  N   SER L  22      41.632 -29.128 103.411  1.00  0.00           N  
ATOM   1740  CA  SER L  22      40.489 -30.007 103.656  1.00  0.00           C  
ATOM   1741  C   SER L  22      39.195 -29.187 103.652  1.00  0.00           C  
ATOM   1742  O   SER L  22      39.157 -28.109 104.264  1.00  0.00           O  
ATOM   1743  CB  SER L  22      40.568 -30.718 105.002  1.00  0.00           C  
ATOM   1744  OG  SER L  22      41.411 -31.842 104.957  1.00  0.00           O  
ATOM   1745  N   CYS L  23      38.224 -29.733 102.950  1.00  0.00           N  
ATOM   1746  CA  CYS L  23      36.836 -29.139 103.085  1.00  0.00           C  
ATOM   1747  C   CYS L  23      36.069 -30.351 103.596  1.00  0.00           C  
ATOM   1748  O   CYS L  23      35.916 -31.348 102.890  1.00  0.00           O  
ATOM   1749  CB  CYS L  23      36.432 -28.373 101.896  1.00  0.00           C  
ATOM   1750  SG  CYS L  23      35.019 -28.751 100.920  1.00  0.00           S  
ATOM   1751  N   THR L  24      35.822 -30.308 104.911  1.00  0.00           N  
ATOM   1752  CA  THR L  24      35.122 -31.382 105.630  1.00  0.00           C  
ATOM   1753  C   THR L  24      33.627 -31.059 105.638  1.00  0.00           C  
ATOM   1754  O   THR L  24      33.306 -29.893 105.909  1.00  0.00           O  
ATOM   1755  CB  THR L  24      35.599 -31.553 107.117  1.00  0.00           C  
ATOM   1756  OG1 THR L  24      37.047 -31.444 107.134  1.00  0.00           O  
ATOM   1757  CG2 THR L  24      35.104 -32.860 107.755  1.00  0.00           C  
ATOM   1758  N   GLY L  25      32.795 -32.067 105.377  1.00  0.00           N  
ATOM   1759  CA  GLY L  25      31.363 -31.782 105.260  1.00  0.00           C  
ATOM   1760  C   GLY L  25      30.486 -32.073 106.444  1.00  0.00           C  
ATOM   1761  O   GLY L  25      30.517 -33.148 107.069  1.00  0.00           O  
ATOM   1762  N   THR L  26      29.620 -31.105 106.736  1.00  0.00           N  
ATOM   1763  CA  THR L  26      28.488 -31.240 107.658  1.00  0.00           C  
ATOM   1764  C   THR L  26      27.429 -32.145 107.011  1.00  0.00           C  
ATOM   1765  O   THR L  26      26.648 -32.830 107.679  1.00  0.00           O  
ATOM   1766  CB  THR L  26      27.863 -29.846 108.028  1.00  0.00           C  
ATOM   1767  OG1 THR L  26      28.315 -29.537 109.384  1.00  0.00           O  
ATOM   1768  CG2 THR L  26      26.336 -29.778 107.913  1.00  0.00           C  
ATOM   1769  N   SER L  27      27.457 -32.118 105.686  1.00  0.00           N  
ATOM   1770  CA  SER L  27      26.382 -32.662 104.861  1.00  0.00           C  
ATOM   1771  C   SER L  27      26.128 -34.149 105.087  1.00  0.00           C  
ATOM   1772  O   SER L  27      26.983 -35.014 104.853  1.00  0.00           O  
ATOM   1773  CB  SER L  27      26.606 -32.362 103.373  1.00  0.00           C  
ATOM   1774  OG  SER L  27      26.578 -30.968 103.130  1.00  0.00           O  
ATOM   1775  N   SER L  27A     24.913 -34.391 105.582  1.00  0.00           N  
ATOM   1776  CA  SER L  27A     24.293 -35.747 105.461  1.00  0.00           C  
ATOM   1777  C   SER L  27A     23.748 -35.710 104.015  1.00  0.00           C  
ATOM   1778  O   SER L  27A     22.576 -35.457 103.760  1.00  0.00           O  
ATOM   1779  CB  SER L  27A     23.248 -35.945 106.504  1.00  0.00           C  
ATOM   1780  OG  SER L  27A     22.892 -37.294 106.731  1.00  0.00           O  
ATOM   1781  N   ASP L  27B     24.703 -35.850 103.111  1.00  0.00           N  
ATOM   1782  CA  ASP L  27B     24.544 -35.675 101.669  1.00  0.00           C  
ATOM   1783  C   ASP L  27B     25.834 -36.190 100.998  1.00  0.00           C  
ATOM   1784  O   ASP L  27B     25.806 -36.966 100.051  1.00  0.00           O  
ATOM   1785  CB  ASP L  27B     24.291 -34.210 101.301  1.00  0.00           C  
ATOM   1786  CG  ASP L  27B     24.959 -33.751 100.014  1.00  0.00           C  
ATOM   1787  OD1 ASP L  27B     24.380 -33.861  98.917  1.00  0.00           O  
ATOM   1788  OD2 ASP L  27B     26.108 -33.251 100.115  1.00  0.00           O  
ATOM   1789  N   VAL L  27C     26.922 -35.661 101.526  1.00  0.00           N  
ATOM   1790  CA  VAL L  27C     28.283 -35.975 101.057  1.00  0.00           C  
ATOM   1791  C   VAL L  27C     28.369 -37.462 100.745  1.00  0.00           C  
ATOM   1792  O   VAL L  27C     27.758 -38.286 101.444  1.00  0.00           O  
ATOM   1793  CB  VAL L  27C     29.275 -35.473 102.122  1.00  0.00           C  
ATOM   1794  CG1 VAL L  27C     29.524 -36.489 103.227  1.00  0.00           C  
ATOM   1795  CG2 VAL L  27C     30.570 -34.995 101.509  1.00  0.00           C  
ATOM   1796  N   GLY L  28      29.107 -37.770  99.698  1.00  0.00           N  
ATOM   1797  CA  GLY L  28      29.257 -39.178  99.235  1.00  0.00           C  
ATOM   1798  C   GLY L  28      28.207 -39.382  98.129  1.00  0.00           C  
ATOM   1799  O   GLY L  28      28.461 -39.996  97.097  1.00  0.00           O  
ATOM   1800  N   GLY L  29      27.043 -38.845  98.428  1.00  0.00           N  
ATOM   1801  CA  GLY L  29      25.946 -38.713  97.428  1.00  0.00           C  
ATOM   1802  C   GLY L  29      26.256 -37.342  96.763  1.00  0.00           C  
ATOM   1803  O   GLY L  29      25.490 -36.389  96.809  1.00  0.00           O  
ATOM   1804  N   TYR L  30      27.479 -37.334  96.252  1.00  0.00           N  
ATOM   1805  CA  TYR L  30      28.051 -36.230  95.532  1.00  0.00           C  
ATOM   1806  C   TYR L  30      29.447 -36.558  94.971  1.00  0.00           C  
ATOM   1807  O   TYR L  30      30.224 -37.384  95.450  1.00  0.00           O  
ATOM   1808  CB  TYR L  30      28.124 -34.917  96.348  1.00  0.00           C  
ATOM   1809  CG  TYR L  30      27.113 -33.889  95.878  1.00  0.00           C  
ATOM   1810  CD1 TYR L  30      26.782 -33.791  94.519  1.00  0.00           C  
ATOM   1811  CD2 TYR L  30      26.464 -33.046  96.774  1.00  0.00           C  
ATOM   1812  CE1 TYR L  30      25.839 -32.875  94.065  1.00  0.00           C  
ATOM   1813  CE2 TYR L  30      25.510 -32.126  96.333  1.00  0.00           C  
ATOM   1814  CZ  TYR L  30      25.202 -32.045  94.973  1.00  0.00           C  
ATOM   1815  OH  TYR L  30      24.265 -31.162  94.506  1.00  0.00           O  
ATOM   1816  N   ASN L  31      29.683 -35.828  93.893  1.00  0.00           N  
ATOM   1817  CA  ASN L  31      31.034 -35.715  93.303  1.00  0.00           C  
ATOM   1818  C   ASN L  31      31.358 -34.211  93.264  1.00  0.00           C  
ATOM   1819  O   ASN L  31      32.518 -33.785  93.288  1.00  0.00           O  
ATOM   1820  CB  ASN L  31      31.020 -36.414  91.954  1.00  0.00           C  
ATOM   1821  CG  ASN L  31      31.590 -37.815  91.954  1.00  0.00           C  
ATOM   1822  OD1 ASN L  31      32.031 -38.302  90.890  1.00  0.00           O  
ATOM   1823  ND2 ASN L  31      31.614 -38.494  93.097  1.00  0.00           N  
ATOM   1824  N   TYR L  32      30.290 -33.415  93.294  1.00  0.00           N  
ATOM   1825  CA  TYR L  32      30.322 -32.014  92.924  1.00  0.00           C  
ATOM   1826  C   TYR L  32      31.143 -31.063  93.749  1.00  0.00           C  
ATOM   1827  O   TYR L  32      30.841 -29.835  93.647  1.00  0.00           O  
ATOM   1828  CB  TYR L  32      28.864 -31.467  92.792  1.00  0.00           C  
ATOM   1829  CG  TYR L  32      28.253 -31.636  91.424  1.00  0.00           C  
ATOM   1830  CD1 TYR L  32      28.559 -30.752  90.383  1.00  0.00           C  
ATOM   1831  CD2 TYR L  32      27.354 -32.672  91.152  1.00  0.00           C  
ATOM   1832  CE1 TYR L  32      27.983 -30.875  89.122  1.00  0.00           C  
ATOM   1833  CE2 TYR L  32      26.784 -32.825  89.890  1.00  0.00           C  
ATOM   1834  CZ  TYR L  32      27.105 -31.915  88.881  1.00  0.00           C  
ATOM   1835  OH  TYR L  32      26.545 -32.025  87.639  1.00  0.00           O  
ATOM   1836  N   VAL L  33      32.132 -31.503  94.491  1.00  0.00           N  
ATOM   1837  CA  VAL L  33      33.031 -30.565  95.209  1.00  0.00           C  
ATOM   1838  C   VAL L  33      33.900 -29.829  94.181  1.00  0.00           C  
ATOM   1839  O   VAL L  33      34.448 -30.458  93.259  1.00  0.00           O  
ATOM   1840  CB  VAL L  33      33.810 -31.280  96.309  1.00  0.00           C  
ATOM   1841  CG1 VAL L  33      35.218 -30.721  96.523  1.00  0.00           C  
ATOM   1842  CG2 VAL L  33      33.049 -31.250  97.624  1.00  0.00           C  
ATOM   1843  N   SER L  34      33.984 -28.515  94.376  1.00  0.00           N  
ATOM   1844  CA  SER L  34      34.729 -27.663  93.411  1.00  0.00           C  
ATOM   1845  C   SER L  34      35.677 -26.752  94.170  1.00  0.00           C  
ATOM   1846  O   SER L  34      35.257 -26.181  95.190  1.00  0.00           O  
ATOM   1847  CB  SER L  34      33.772 -26.899  92.522  1.00  0.00           C  
ATOM   1848  OG  SER L  34      32.505 -26.696  93.112  1.00  0.00           O  
ATOM   1849  N   TRP L  35      36.900 -26.625  93.679  1.00  0.00           N  
ATOM   1850  CA  TRP L  35      37.901 -25.783  94.368  1.00  0.00           C  
ATOM   1851  C   TRP L  35      38.021 -24.448  93.677  1.00  0.00           C  
ATOM   1852  O   TRP L  35      38.270 -24.426  92.454  1.00  0.00           O  
ATOM   1853  CB  TRP L  35      39.236 -26.536  94.474  1.00  0.00           C  
ATOM   1854  CG  TRP L  35      39.186 -27.550  95.579  1.00  0.00           C  
ATOM   1855  CD1 TRP L  35      38.888 -28.877  95.473  1.00  0.00           C  
ATOM   1856  CD2 TRP L  35      39.366 -27.273  96.969  1.00  0.00           C  
ATOM   1857  NE1 TRP L  35      38.885 -29.454  96.714  1.00  0.00           N  
ATOM   1858  CE2 TRP L  35      39.172 -28.499  97.648  1.00  0.00           C  
ATOM   1859  CE3 TRP L  35      39.672 -26.126  97.689  1.00  0.00           C  
ATOM   1860  CZ2 TRP L  35      39.282 -28.603  99.029  1.00  0.00           C  
ATOM   1861  CZ3 TRP L  35      39.785 -26.225  99.061  1.00  0.00           C  
ATOM   1862  CH2 TRP L  35      39.590 -27.437  99.722  1.00  0.00           C  
ATOM   1863  N   TYR L  36      37.849 -23.369  94.432  1.00  0.00           N  
ATOM   1864  CA  TYR L  36      37.977 -22.009  93.870  1.00  0.00           C  
ATOM   1865  C   TYR L  36      39.199 -21.339  94.510  1.00  0.00           C  
ATOM   1866  O   TYR L  36      39.106 -21.043  95.716  1.00  0.00           O  
ATOM   1867  CB  TYR L  36      36.770 -21.120  94.117  1.00  0.00           C  
ATOM   1868  CG  TYR L  36      35.424 -21.589  93.643  1.00  0.00           C  
ATOM   1869  CD1 TYR L  36      35.028 -22.915  93.801  1.00  0.00           C  
ATOM   1870  CD2 TYR L  36      34.518 -20.703  93.037  1.00  0.00           C  
ATOM   1871  CE1 TYR L  36      33.785 -23.358  93.378  1.00  0.00           C  
ATOM   1872  CE2 TYR L  36      33.271 -21.135  92.602  1.00  0.00           C  
ATOM   1873  CZ  TYR L  36      32.914 -22.463  92.781  1.00  0.00           C  
ATOM   1874  OH  TYR L  36      31.696 -22.940  92.390  1.00  0.00           O  
ATOM   1875  N   GLN L  37      40.224 -21.129  93.690  1.00  0.00           N  
ATOM   1876  CA  GLN L  37      41.399 -20.410  94.300  1.00  0.00           C  
ATOM   1877  C   GLN L  37      41.071 -18.926  94.142  1.00  0.00           C  
ATOM   1878  O   GLN L  37      40.160 -18.606  93.355  1.00  0.00           O  
ATOM   1879  CB  GLN L  37      42.711 -20.786  93.673  1.00  0.00           C  
ATOM   1880  CG  GLN L  37      43.011 -20.021  92.403  1.00  0.00           C  
ATOM   1881  CD  GLN L  37      44.399 -19.454  92.333  1.00  0.00           C  
ATOM   1882  OE1 GLN L  37      44.680 -18.547  91.543  1.00  0.00           O  
ATOM   1883  NE2 GLN L  37      45.303 -19.974  93.156  1.00  0.00           N  
ATOM   1884  N   GLN L  38      41.751 -18.095  94.900  1.00  0.00           N  
ATOM   1885  CA  GLN L  38      41.467 -16.638  94.839  1.00  0.00           C  
ATOM   1886  C   GLN L  38      42.770 -15.906  95.132  1.00  0.00           C  
ATOM   1887  O   GLN L  38      43.505 -16.330  96.036  1.00  0.00           O  
ATOM   1888  CB  GLN L  38      40.373 -16.205  95.800  1.00  0.00           C  
ATOM   1889  CG  GLN L  38      39.988 -14.734  95.753  1.00  0.00           C  
ATOM   1890  CD  GLN L  38      38.490 -14.537  95.634  1.00  0.00           C  
ATOM   1891  OE1 GLN L  38      37.695 -15.462  95.791  1.00  0.00           O  
ATOM   1892  NE2 GLN L  38      38.069 -13.313  95.335  1.00  0.00           N  
ATOM   1893  N   HIS L  39      42.978 -14.843  94.385  1.00  0.00           N  
ATOM   1894  CA  HIS L  39      44.053 -13.897  94.705  1.00  0.00           C  
ATOM   1895  C   HIS L  39      43.538 -12.620  95.322  1.00  0.00           C  
ATOM   1896  O   HIS L  39      42.319 -12.368  95.467  1.00  0.00           O  
ATOM   1897  CB  HIS L  39      44.977 -13.645  93.498  1.00  0.00           C  
ATOM   1898  CG  HIS L  39      45.938 -14.816  93.450  1.00  0.00           C  
ATOM   1899  ND1 HIS L  39      45.778 -15.944  92.718  1.00  0.00           N  
ATOM   1900  CD2 HIS L  39      47.050 -14.982  94.203  1.00  0.00           C  
ATOM   1901  CE1 HIS L  39      46.793 -16.759  92.978  1.00  0.00           C  
ATOM   1902  NE2 HIS L  39      47.577 -16.193  93.872  1.00  0.00           N  
ATOM   1903  N   ALA L  40      44.499 -11.773  95.675  1.00  0.00           N  
ATOM   1904  CA  ALA L  40      44.248 -10.570  96.475  1.00  0.00           C  
ATOM   1905  C   ALA L  40      43.640  -9.476  95.612  1.00  0.00           C  
ATOM   1906  O   ALA L  40      44.374  -8.675  95.019  1.00  0.00           O  
ATOM   1907  CB  ALA L  40      45.528 -10.108  97.144  1.00  0.00           C  
ATOM   1908  N   GLY L  41      42.321  -9.455  95.633  1.00  0.00           N  
ATOM   1909  CA  GLY L  41      41.571  -8.487  94.781  1.00  0.00           C  
ATOM   1910  C   GLY L  41      41.718  -9.094  93.363  1.00  0.00           C  
ATOM   1911  O   GLY L  41      42.302  -8.494  92.465  1.00  0.00           O  
ATOM   1912  N   LYS L  42      41.267 -10.350  93.342  1.00  0.00           N  
ATOM   1913  CA  LYS L  42      41.126 -11.017  91.998  1.00  0.00           C  
ATOM   1914  C   LYS L  42      39.851 -11.824  92.102  1.00  0.00           C  
ATOM   1915  O   LYS L  42      39.272 -11.870  93.212  1.00  0.00           O  
ATOM   1916  CB  LYS L  42      42.346 -11.825  91.691  1.00  0.00           C  
ATOM   1917  CG  LYS L  42      42.347 -12.783  90.517  1.00  0.00           C  
ATOM   1918  CD  LYS L  42      42.358 -14.230  91.002  1.00  0.00           C  
ATOM   1919  CE  LYS L  42      42.669 -15.220  89.903  1.00  0.00           C  
ATOM   1920  NZ  LYS L  42      43.176 -16.492  90.478  1.00  0.00           N  
ATOM   1921  N   ALA L  43      39.423 -12.406  91.015  1.00  0.00           N  
ATOM   1922  CA  ALA L  43      38.180 -13.206  91.013  1.00  0.00           C  
ATOM   1923  C   ALA L  43      38.522 -14.615  91.483  1.00  0.00           C  
ATOM   1924  O   ALA L  43      39.658 -15.072  91.279  1.00  0.00           O  
ATOM   1925  CB  ALA L  43      37.566 -13.203  89.626  1.00  0.00           C  
ATOM   1926  N   PRO L  44      37.541 -15.231  92.121  1.00  0.00           N  
ATOM   1927  CA  PRO L  44      37.586 -16.693  92.355  1.00  0.00           C  
ATOM   1928  C   PRO L  44      37.883 -17.367  91.017  1.00  0.00           C  
ATOM   1929  O   PRO L  44      37.391 -16.904  89.966  1.00  0.00           O  
ATOM   1930  CB  PRO L  44      36.226 -17.012  92.928  1.00  0.00           C  
ATOM   1931  CG  PRO L  44      35.711 -15.724  93.508  1.00  0.00           C  
ATOM   1932  CD  PRO L  44      36.329 -14.621  92.667  1.00  0.00           C  
ATOM   1933  N   LYS L  45      38.657 -18.426  91.056  1.00  0.00           N  
ATOM   1934  CA  LYS L  45      39.186 -19.086  89.844  1.00  0.00           C  
ATOM   1935  C   LYS L  45      39.183 -20.597  90.048  1.00  0.00           C  
ATOM   1936  O   LYS L  45      40.084 -21.225  90.626  1.00  0.00           O  
ATOM   1937  CB  LYS L  45      40.553 -18.542  89.516  1.00  0.00           C  
ATOM   1938  CG  LYS L  45      41.394 -19.288  88.507  1.00  0.00           C  
ATOM   1939  CD  LYS L  45      42.816 -19.491  89.026  1.00  0.00           C  
ATOM   1940  CE  LYS L  45      43.785 -19.864  87.925  1.00  0.00           C  
ATOM   1941  NZ  LYS L  45      43.228 -20.947  87.068  1.00  0.00           N  
ATOM   1942  N   VAL L  46      38.105 -21.191  89.596  1.00  0.00           N  
ATOM   1943  CA  VAL L  46      37.674 -22.553  89.697  1.00  0.00           C  
ATOM   1944  C   VAL L  46      38.621 -23.680  89.336  1.00  0.00           C  
ATOM   1945  O   VAL L  46      38.250 -24.597  88.563  1.00  0.00           O  
ATOM   1946  CB  VAL L  46      36.324 -22.688  88.892  1.00  0.00           C  
ATOM   1947  CG1 VAL L  46      35.147 -22.237  89.725  1.00  0.00           C  
ATOM   1948  CG2 VAL L  46      36.392 -21.933  87.581  1.00  0.00           C  
ATOM   1949  N   ILE L  47      39.748 -23.762  90.009  1.00  0.00           N  
ATOM   1950  CA  ILE L  47      40.824 -24.697  89.792  1.00  0.00           C  
ATOM   1951  C   ILE L  47      40.532 -26.178  89.827  1.00  0.00           C  
ATOM   1952  O   ILE L  47      41.441 -26.954  89.401  1.00  0.00           O  
ATOM   1953  CB  ILE L  47      42.033 -24.369  90.768  1.00  0.00           C  
ATOM   1954  CG1 ILE L  47      41.494 -24.079  92.177  1.00  0.00           C  
ATOM   1955  CG2 ILE L  47      42.908 -23.230  90.221  1.00  0.00           C  
ATOM   1956  CD1 ILE L  47      42.533 -24.272  93.316  1.00  0.00           C  
ATOM   1957  N   ILE L  48      39.401 -26.617  90.316  1.00  0.00           N  
ATOM   1958  CA  ILE L  48      39.017 -28.041  90.301  1.00  0.00           C  
ATOM   1959  C   ILE L  48      37.494 -28.140  90.206  1.00  0.00           C  
ATOM   1960  O   ILE L  48      36.781 -27.360  90.864  1.00  0.00           O  
ATOM   1961  CB  ILE L  48      39.624 -28.845  91.487  1.00  0.00           C  
ATOM   1962  CG1 ILE L  48      41.071 -29.283  91.136  1.00  0.00           C  
ATOM   1963  CG2 ILE L  48      38.777 -30.081  91.905  1.00  0.00           C  
ATOM   1964  CD1 ILE L  48      41.947 -29.663  92.353  1.00  0.00           C  
ATOM   1965  N   TYR L  49      37.050 -29.055  89.351  1.00  0.00           N  
ATOM   1966  CA  TYR L  49      35.631 -29.328  89.182  1.00  0.00           C  
ATOM   1967  C   TYR L  49      35.377 -30.795  89.568  1.00  0.00           C  
ATOM   1968  O   TYR L  49      36.268 -31.647  89.555  1.00  0.00           O  
ATOM   1969  CB  TYR L  49      34.990 -28.963  87.881  1.00  0.00           C  
ATOM   1970  CG  TYR L  49      35.444 -29.411  86.536  1.00  0.00           C  
ATOM   1971  CD1 TYR L  49      35.156 -30.679  86.021  1.00  0.00           C  
ATOM   1972  CD2 TYR L  49      36.131 -28.517  85.704  1.00  0.00           C  
ATOM   1973  CE1 TYR L  49      35.563 -31.060  84.743  1.00  0.00           C  
ATOM   1974  CE2 TYR L  49      36.550 -28.877  84.426  1.00  0.00           C  
ATOM   1975  CZ  TYR L  49      36.260 -30.150  83.949  1.00  0.00           C  
ATOM   1976  OH  TYR L  49      36.686 -30.463  82.685  1.00  0.00           O  
ATOM   1977  N   GLU L  50      34.110 -30.982  89.899  1.00  0.00           N  
ATOM   1978  CA  GLU L  50      33.572 -32.182  90.504  1.00  0.00           C  
ATOM   1979  C   GLU L  50      34.653 -33.156  90.935  1.00  0.00           C  
ATOM   1980  O   GLU L  50      35.072 -34.057  90.202  1.00  0.00           O  
ATOM   1981  CB  GLU L  50      32.553 -32.892  89.639  1.00  0.00           C  
ATOM   1982  CG  GLU L  50      32.561 -32.662  88.133  1.00  0.00           C  
ATOM   1983  CD  GLU L  50      31.233 -32.269  87.538  1.00  0.00           C  
ATOM   1984  OE1 GLU L  50      30.166 -32.575  88.055  1.00  0.00           O  
ATOM   1985  OE2 GLU L  50      31.352 -31.601  86.486  1.00  0.00           O  
ATOM   1986  N   VAL L  51      35.100 -32.941  92.156  1.00  0.00           N  
ATOM   1987  CA  VAL L  51      36.106 -33.672  92.885  1.00  0.00           C  
ATOM   1988  C   VAL L  51      37.469 -33.807  92.253  1.00  0.00           C  
ATOM   1989  O   VAL L  51      38.458 -33.514  93.006  1.00  0.00           O  
ATOM   1990  CB  VAL L  51      35.525 -35.012  93.426  1.00  0.00           C  
ATOM   1991  CG1 VAL L  51      36.564 -36.097  93.647  1.00  0.00           C  
ATOM   1992  CG2 VAL L  51      34.791 -34.757  94.736  1.00  0.00           C  
ATOM   1993  N   ASN L  52      37.614 -34.210  91.007  1.00  0.00           N  
ATOM   1994  CA  ASN L  52      38.922 -34.578  90.461  1.00  0.00           C  
ATOM   1995  C   ASN L  52      39.449 -33.667  89.358  1.00  0.00           C  
ATOM   1996  O   ASN L  52      40.687 -33.470  89.321  1.00  0.00           O  
ATOM   1997  CB  ASN L  52      38.967 -36.032  89.966  1.00  0.00           C  
ATOM   1998  CG  ASN L  52      39.410 -37.082  90.948  1.00  0.00           C  
ATOM   1999  OD1 ASN L  52      39.526 -38.277  90.589  1.00  0.00           O  
ATOM   2000  ND2 ASN L  52      39.651 -36.712  92.203  1.00  0.00           N  
ATOM   2001  N   LYS L  53      38.573 -33.182  88.487  1.00  0.00           N  
ATOM   2002  CA  LYS L  53      39.049 -32.657  87.195  1.00  0.00           C  
ATOM   2003  C   LYS L  53      39.308 -31.158  87.178  1.00  0.00           C  
ATOM   2004  O   LYS L  53      38.383 -30.341  87.284  1.00  0.00           O  
ATOM   2005  CB  LYS L  53      38.114 -32.981  86.029  1.00  0.00           C  
ATOM   2006  CG  LYS L  53      37.241 -34.223  86.157  1.00  0.00           C  
ATOM   2007  CD  LYS L  53      36.470 -34.485  84.861  1.00  0.00           C  
ATOM   2008  CE  LYS L  53      35.226 -35.306  85.103  1.00  0.00           C  
ATOM   2009  NZ  LYS L  53      34.183 -34.493  85.782  1.00  0.00           N  
ATOM   2010  N   ARG L  54      40.570 -30.833  86.953  1.00  0.00           N  
ATOM   2011  CA  ARG L  54      41.023 -29.469  86.678  1.00  0.00           C  
ATOM   2012  C   ARG L  54      40.458 -29.067  85.296  1.00  0.00           C  
ATOM   2013  O   ARG L  54      40.414 -29.880  84.367  1.00  0.00           O  
ATOM   2014  CB  ARG L  54      42.533 -29.341  86.626  1.00  0.00           C  
ATOM   2015  CG  ARG L  54      43.329 -29.785  87.819  1.00  0.00           C  
ATOM   2016  CD  ARG L  54      44.480 -30.671  87.401  1.00  0.00           C  
ATOM   2017  NE  ARG L  54      44.257 -32.007  87.894  1.00  0.00           N  
ATOM   2018  CZ  ARG L  54      44.820 -33.140  87.509  1.00  0.00           C  
ATOM   2019  NH1 ARG L  54      45.730 -33.217  86.535  1.00  0.00           N  
ATOM   2020  NH2 ARG L  54      44.450 -34.273  88.139  1.00  0.00           N  
ATOM   2021  N   PRO L  55      40.034 -27.814  85.257  1.00  0.00           N  
ATOM   2022  CA  PRO L  55      39.825 -27.105  83.991  1.00  0.00           C  
ATOM   2023  C   PRO L  55      41.104 -26.429  83.510  1.00  0.00           C  
ATOM   2024  O   PRO L  55      42.044 -26.099  84.255  1.00  0.00           O  
ATOM   2025  CB  PRO L  55      38.709 -26.134  84.322  1.00  0.00           C  
ATOM   2026  CG  PRO L  55      38.893 -25.821  85.776  1.00  0.00           C  
ATOM   2027  CD  PRO L  55      39.468 -27.070  86.404  1.00  0.00           C  
ATOM   2028  N   SER L  56      41.128 -26.181  82.211  1.00  0.00           N  
ATOM   2029  CA  SER L  56      42.256 -25.715  81.428  1.00  0.00           C  
ATOM   2030  C   SER L  56      43.067 -24.617  82.097  1.00  0.00           C  
ATOM   2031  O   SER L  56      42.551 -23.573  82.517  1.00  0.00           O  
ATOM   2032  CB  SER L  56      41.789 -25.245  80.043  1.00  0.00           C  
ATOM   2033  OG  SER L  56      41.109 -26.270  79.340  1.00  0.00           O  
ATOM   2034  N   GLY L  57      44.365 -24.878  82.160  1.00  0.00           N  
ATOM   2035  CA  GLY L  57      45.354 -23.989  82.765  1.00  0.00           C  
ATOM   2036  C   GLY L  57      45.522 -24.226  84.257  1.00  0.00           C  
ATOM   2037  O   GLY L  57      46.203 -23.415  84.941  1.00  0.00           O  
ATOM   2038  N   VAL L  58      44.872 -25.281  84.752  1.00  0.00           N  
ATOM   2039  CA  VAL L  58      45.089 -25.658  86.185  1.00  0.00           C  
ATOM   2040  C   VAL L  58      46.118 -26.779  86.142  1.00  0.00           C  
ATOM   2041  O   VAL L  58      45.772 -27.875  85.679  1.00  0.00           O  
ATOM   2042  CB  VAL L  58      43.773 -26.040  86.836  1.00  0.00           C  
ATOM   2043  CG1 VAL L  58      43.982 -26.555  88.250  1.00  0.00           C  
ATOM   2044  CG2 VAL L  58      42.776 -24.891  86.836  1.00  0.00           C  
ATOM   2045  N   PRO L  59      47.334 -26.453  86.536  1.00  0.00           N  
ATOM   2046  CA  PRO L  59      48.451 -27.397  86.416  1.00  0.00           C  
ATOM   2047  C   PRO L  59      48.156 -28.658  87.211  1.00  0.00           C  
ATOM   2048  O   PRO L  59      47.706 -28.656  88.358  1.00  0.00           O  
ATOM   2049  CB  PRO L  59      49.676 -26.645  86.858  1.00  0.00           C  
ATOM   2050  CG  PRO L  59      49.175 -25.410  87.544  1.00  0.00           C  
ATOM   2051  CD  PRO L  59      47.813 -25.116  86.916  1.00  0.00           C  
ATOM   2052  N   ASP L  60      48.418 -29.758  86.553  1.00  0.00           N  
ATOM   2053  CA  ASP L  60      48.380 -31.127  87.012  1.00  0.00           C  
ATOM   2054  C   ASP L  60      48.925 -31.415  88.403  1.00  0.00           C  
ATOM   2055  O   ASP L  60      48.986 -32.614  88.793  1.00  0.00           O  
ATOM   2056  CB  ASP L  60      49.174 -31.962  85.938  1.00  0.00           C  
ATOM   2057  CG  ASP L  60      50.581 -31.408  85.756  1.00  0.00           C  
ATOM   2058  OD1 ASP L  60      51.373 -31.280  86.700  1.00  0.00           O  
ATOM   2059  OD2 ASP L  60      50.904 -31.099  84.590  1.00  0.00           O  
ATOM   2060  N   ARG L  61      49.355 -30.406  89.117  1.00  0.00           N  
ATOM   2061  CA  ARG L  61      49.944 -30.576  90.453  1.00  0.00           C  
ATOM   2062  C   ARG L  61      49.085 -29.842  91.483  1.00  0.00           C  
ATOM   2063  O   ARG L  61      49.515 -29.521  92.601  1.00  0.00           O  
ATOM   2064  CB  ARG L  61      51.395 -30.126  90.479  1.00  0.00           C  
ATOM   2065  CG  ARG L  61      51.653 -28.675  90.087  1.00  0.00           C  
ATOM   2066  CD  ARG L  61      51.766 -27.812  91.297  1.00  0.00           C  
ATOM   2067  NE  ARG L  61      51.564 -26.412  90.970  1.00  0.00           N  
ATOM   2068  CZ  ARG L  61      51.853 -25.428  91.825  1.00  0.00           C  
ATOM   2069  NH1 ARG L  61      52.363 -25.689  93.028  1.00  0.00           N  
ATOM   2070  NH2 ARG L  61      51.614 -24.171  91.459  1.00  0.00           N  
ATOM   2071  N   PHE L  62      47.894 -29.504  91.030  1.00  0.00           N  
ATOM   2072  CA  PHE L  62      46.774 -29.138  91.931  1.00  0.00           C  
ATOM   2073  C   PHE L  62      45.918 -30.426  91.822  1.00  0.00           C  
ATOM   2074  O   PHE L  62      45.813 -30.914  90.688  1.00  0.00           O  
ATOM   2075  CB  PHE L  62      46.024 -27.912  91.558  1.00  0.00           C  
ATOM   2076  CG  PHE L  62      46.525 -26.579  92.022  1.00  0.00           C  
ATOM   2077  CD1 PHE L  62      47.891 -26.349  92.179  1.00  0.00           C  
ATOM   2078  CD2 PHE L  62      45.620 -25.538  92.251  1.00  0.00           C  
ATOM   2079  CE1 PHE L  62      48.361 -25.107  92.563  1.00  0.00           C  
ATOM   2080  CE2 PHE L  62      46.078 -24.283  92.651  1.00  0.00           C  
ATOM   2081  CZ  PHE L  62      47.455 -24.076  92.803  1.00  0.00           C  
ATOM   2082  N   SER L  63      45.495 -30.905  92.954  1.00  0.00           N  
ATOM   2083  CA  SER L  63      44.798 -32.237  92.911  1.00  0.00           C  
ATOM   2084  C   SER L  63      43.520 -32.128  93.712  1.00  0.00           C  
ATOM   2085  O   SER L  63      43.402 -31.198  94.543  1.00  0.00           O  
ATOM   2086  CB  SER L  63      45.766 -33.293  93.407  1.00  0.00           C  
ATOM   2087  OG  SER L  63      47.123 -32.845  93.220  1.00  0.00           O  
ATOM   2088  N   GLY L  64      42.620 -33.044  93.485  1.00  0.00           N  
ATOM   2089  CA  GLY L  64      41.338 -33.125  94.199  1.00  0.00           C  
ATOM   2090  C   GLY L  64      41.135 -34.605  94.571  1.00  0.00           C  
ATOM   2091  O   GLY L  64      41.447 -35.493  93.761  1.00  0.00           O  
ATOM   2092  N   SER L  65      40.671 -34.786  95.791  1.00  0.00           N  
ATOM   2093  CA  SER L  65      40.406 -36.166  96.313  1.00  0.00           C  
ATOM   2094  C   SER L  65      39.270 -36.018  97.311  1.00  0.00           C  
ATOM   2095  O   SER L  65      39.190 -34.908  97.882  1.00  0.00           O  
ATOM   2096  CB  SER L  65      41.682 -36.703  96.926  1.00  0.00           C  
ATOM   2097  OG  SER L  65      42.840 -36.170  96.279  1.00  0.00           O  
ATOM   2098  N   LYS L  66      38.409 -36.998  97.482  1.00  0.00           N  
ATOM   2099  CA  LYS L  66      37.368 -36.913  98.523  1.00  0.00           C  
ATOM   2100  C   LYS L  66      36.971 -38.267  99.087  1.00  0.00           C  
ATOM   2101  O   LYS L  66      36.436 -39.138  98.380  1.00  0.00           O  
ATOM   2102  CB  LYS L  66      36.110 -36.196  98.057  1.00  0.00           C  
ATOM   2103  CG  LYS L  66      34.978 -36.201  99.103  1.00  0.00           C  
ATOM   2104  CD  LYS L  66      33.682 -35.766  98.436  1.00  0.00           C  
ATOM   2105  CE  LYS L  66      32.470 -36.354  99.120  1.00  0.00           C  
ATOM   2106  NZ  LYS L  66      31.253 -36.102  98.309  1.00  0.00           N  
ATOM   2107  N   SER L  67      37.171 -38.359 100.393  1.00  0.00           N  
ATOM   2108  CA  SER L  67      36.845 -39.595 101.141  1.00  0.00           C  
ATOM   2109  C   SER L  67      35.923 -39.207 102.295  1.00  0.00           C  
ATOM   2110  O   SER L  67      36.106 -38.159 102.955  1.00  0.00           O  
ATOM   2111  CB  SER L  67      38.112 -40.292 101.585  1.00  0.00           C  
ATOM   2112  OG  SER L  67      37.986 -41.688 101.737  1.00  0.00           O  
ATOM   2113  N   GLY L  68      34.917 -40.034 102.489  1.00  0.00           N  
ATOM   2114  CA  GLY L  68      33.916 -39.859 103.537  1.00  0.00           C  
ATOM   2115  C   GLY L  68      33.225 -38.507 103.431  1.00  0.00           C  
ATOM   2116  O   GLY L  68      32.247 -38.355 102.684  1.00  0.00           O  
ATOM   2117  N   ASN L  69      33.749 -37.549 104.171  1.00  0.00           N  
ATOM   2118  CA  ASN L  69      33.167 -36.208 104.286  1.00  0.00           C  
ATOM   2119  C   ASN L  69      34.128 -35.135 103.740  1.00  0.00           C  
ATOM   2120  O   ASN L  69      33.696 -34.057 103.293  1.00  0.00           O  
ATOM   2121  CB  ASN L  69      32.839 -35.901 105.757  1.00  0.00           C  
ATOM   2122  CG  ASN L  69      32.015 -36.995 106.396  1.00  0.00           C  
ATOM   2123  OD1 ASN L  69      32.234 -37.327 107.571  1.00  0.00           O  
ATOM   2124  ND2 ASN L  69      31.083 -37.564 105.632  1.00  0.00           N  
ATOM   2125  N   THR L  70      35.399 -35.484 103.911  1.00  0.00           N  
ATOM   2126  CA  THR L  70      36.474 -34.521 103.598  1.00  0.00           C  
ATOM   2127  C   THR L  70      36.800 -34.687 102.119  1.00  0.00           C  
ATOM   2128  O   THR L  70      37.165 -35.763 101.628  1.00  0.00           O  
ATOM   2129  CB  THR L  70      37.685 -34.628 104.567  1.00  0.00           C  
ATOM   2130  OG1 THR L  70      37.198 -34.067 105.838  1.00  0.00           O  
ATOM   2131  CG2 THR L  70      38.981 -33.933 104.139  1.00  0.00           C  
ATOM   2132  N   ALA L  71      36.467 -33.607 101.427  1.00  0.00           N  
ATOM   2133  CA  ALA L  71      37.050 -33.340 100.090  1.00  0.00           C  
ATOM   2134  C   ALA L  71      38.440 -32.800 100.470  1.00  0.00           C  
ATOM   2135  O   ALA L  71      38.592 -32.367 101.646  1.00  0.00           O  
ATOM   2136  CB  ALA L  71      36.213 -32.331  99.367  1.00  0.00           C  
ATOM   2137  N   SER L  72      39.365 -32.840  99.566  1.00  0.00           N  
ATOM   2138  CA  SER L  72      40.748 -32.432  99.817  1.00  0.00           C  
ATOM   2139  C   SER L  72      41.366 -31.929  98.508  1.00  0.00           C  
ATOM   2140  O   SER L  72      40.936 -32.327  97.410  1.00  0.00           O  
ATOM   2141  CB  SER L  72      41.578 -33.554 100.418  1.00  0.00           C  
ATOM   2142  OG  SER L  72      41.228 -33.811 101.771  1.00  0.00           O  
ATOM   2143  N   LEU L  73      42.338 -31.048  98.722  1.00  0.00           N  
ATOM   2144  CA  LEU L  73      43.070 -30.464  97.584  1.00  0.00           C  
ATOM   2145  C   LEU L  73      44.549 -30.465  97.977  1.00  0.00           C  
ATOM   2146  O   LEU L  73      44.828 -30.175  99.148  1.00  0.00           O  
ATOM   2147  CB  LEU L  73      42.575 -29.060  97.274  1.00  0.00           C  
ATOM   2148  CG  LEU L  73      43.648 -28.032  96.889  1.00  0.00           C  
ATOM   2149  CD1 LEU L  73      44.283 -28.350  95.543  1.00  0.00           C  
ATOM   2150  CD2 LEU L  73      42.993 -26.659  96.854  1.00  0.00           C  
ATOM   2151  N   THR L  74      45.368 -30.751  96.977  1.00  0.00           N  
ATOM   2152  CA  THR L  74      46.834 -30.717  97.293  1.00  0.00           C  
ATOM   2153  C   THR L  74      47.531 -29.842  96.268  1.00  0.00           C  
ATOM   2154  O   THR L  74      47.395 -30.076  95.049  1.00  0.00           O  
ATOM   2155  CB  THR L  74      47.432 -32.136  97.438  1.00  0.00           C  
ATOM   2156  OG1 THR L  74      46.470 -32.922  98.222  1.00  0.00           O  
ATOM   2157  CG2 THR L  74      48.823 -32.142  98.101  1.00  0.00           C  
ATOM   2158  N   VAL L  75      48.159 -28.788  96.822  1.00  0.00           N  
ATOM   2159  CA  VAL L  75      49.176 -28.063  95.991  1.00  0.00           C  
ATOM   2160  C   VAL L  75      50.395 -28.991  96.177  1.00  0.00           C  
ATOM   2161  O   VAL L  75      50.806 -29.195  97.334  1.00  0.00           O  
ATOM   2162  CB  VAL L  75      49.425 -26.651  96.443  1.00  0.00           C  
ATOM   2163  CG1 VAL L  75      50.547 -26.001  95.612  1.00  0.00           C  
ATOM   2164  CG2 VAL L  75      48.196 -25.761  96.428  1.00  0.00           C  
ATOM   2165  N   SER L  76      50.840 -29.548  95.079  1.00  0.00           N  
ATOM   2166  CA  SER L  76      51.722 -30.748  95.194  1.00  0.00           C  
ATOM   2167  C   SER L  76      53.167 -30.348  95.077  1.00  0.00           C  
ATOM   2168  O   SER L  76      54.042 -31.204  94.868  1.00  0.00           O  
ATOM   2169  CB  SER L  76      51.229 -31.811  94.229  1.00  0.00           C  
ATOM   2170  OG  SER L  76      49.839 -32.113  94.489  1.00  0.00           O  
ATOM   2171  N   GLY L  77      53.414 -29.054  95.266  1.00  0.00           N  
ATOM   2172  CA  GLY L  77      54.777 -28.496  95.287  1.00  0.00           C  
ATOM   2173  C   GLY L  77      54.769 -26.972  95.317  1.00  0.00           C  
ATOM   2174  O   GLY L  77      55.137 -26.322  94.320  1.00  0.00           O  
ATOM   2175  N   LEU L  78      54.419 -26.425  96.482  1.00  0.00           N  
ATOM   2176  CA  LEU L  78      54.097 -24.995  96.577  1.00  0.00           C  
ATOM   2177  C   LEU L  78      55.165 -24.112  95.921  1.00  0.00           C  
ATOM   2178  O   LEU L  78      56.373 -24.225  96.133  1.00  0.00           O  
ATOM   2179  CB  LEU L  78      53.837 -24.651  98.033  1.00  0.00           C  
ATOM   2180  CG  LEU L  78      52.807 -23.667  98.512  1.00  0.00           C  
ATOM   2181  CD1 LEU L  78      52.933 -22.306  97.834  1.00  0.00           C  
ATOM   2182  CD2 LEU L  78      51.409 -24.224  98.272  1.00  0.00           C  
ATOM   2183  N   GLN L  79      54.622 -23.173  95.173  1.00  0.00           N  
ATOM   2184  CA  GLN L  79      55.301 -22.101  94.454  1.00  0.00           C  
ATOM   2185  C   GLN L  79      54.691 -20.764  94.895  1.00  0.00           C  
ATOM   2186  O   GLN L  79      53.517 -20.694  95.298  1.00  0.00           O  
ATOM   2187  CB  GLN L  79      55.226 -22.307  92.941  1.00  0.00           C  
ATOM   2188  CG  GLN L  79      56.008 -23.515  92.446  1.00  0.00           C  
ATOM   2189  CD  GLN L  79      57.429 -23.226  92.037  1.00  0.00           C  
ATOM   2190  OE1 GLN L  79      58.070 -24.002  91.325  1.00  0.00           O  
ATOM   2191  NE2 GLN L  79      57.991 -22.102  92.474  1.00  0.00           N  
ATOM   2192  N   ALA L  80      55.472 -19.725  94.867  1.00  0.00           N  
ATOM   2193  CA  ALA L  80      55.232 -18.421  95.448  1.00  0.00           C  
ATOM   2194  C   ALA L  80      53.832 -17.852  95.417  1.00  0.00           C  
ATOM   2195  O   ALA L  80      53.155 -17.631  96.464  1.00  0.00           O  
ATOM   2196  CB  ALA L  80      56.188 -17.415  94.740  1.00  0.00           C  
ATOM   2197  N   GLU L  81      53.364 -17.569  94.197  1.00  0.00           N  
ATOM   2198  CA  GLU L  81      52.038 -16.995  94.002  1.00  0.00           C  
ATOM   2199  C   GLU L  81      50.946 -18.046  93.971  1.00  0.00           C  
ATOM   2200  O   GLU L  81      49.874 -17.828  93.376  1.00  0.00           O  
ATOM   2201  CB  GLU L  81      51.909 -16.018  92.850  1.00  0.00           C  
ATOM   2202  CG  GLU L  81      51.706 -14.548  93.314  1.00  0.00           C  
ATOM   2203  CD  GLU L  81      50.992 -14.447  94.644  1.00  0.00           C  
ATOM   2204  OE1 GLU L  81      49.814 -14.697  94.790  1.00  0.00           O  
ATOM   2205  OE2 GLU L  81      51.734 -14.123  95.592  1.00  0.00           O  
ATOM   2206  N   ASP L  82      51.223 -19.175  94.638  1.00  0.00           N  
ATOM   2207  CA  ASP L  82      50.128 -20.093  95.025  1.00  0.00           C  
ATOM   2208  C   ASP L  82      49.468 -19.440  96.263  1.00  0.00           C  
ATOM   2209  O   ASP L  82      48.397 -19.907  96.664  1.00  0.00           O  
ATOM   2210  CB  ASP L  82      50.556 -21.511  95.279  1.00  0.00           C  
ATOM   2211  CG  ASP L  82      51.151 -22.273  94.123  1.00  0.00           C  
ATOM   2212  OD1 ASP L  82      50.776 -22.081  92.961  1.00  0.00           O  
ATOM   2213  OD2 ASP L  82      52.039 -23.113  94.398  1.00  0.00           O  
ATOM   2214  N   GLU L  83      50.152 -18.418  96.785  1.00  0.00           N  
ATOM   2215  CA  GLU L  83      49.532 -17.640  97.884  1.00  0.00           C  
ATOM   2216  C   GLU L  83      48.150 -17.109  97.573  1.00  0.00           C  
ATOM   2217  O   GLU L  83      48.022 -16.154  96.780  1.00  0.00           O  
ATOM   2218  CB  GLU L  83      50.406 -16.453  98.261  1.00  0.00           C  
ATOM   2219  CG  GLU L  83      51.477 -16.746  99.308  1.00  0.00           C  
ATOM   2220  CD  GLU L  83      51.719 -15.637 100.286  1.00  0.00           C  
ATOM   2221  OE1 GLU L  83      50.722 -14.896 100.412  1.00  0.00           O  
ATOM   2222  OE2 GLU L  83      52.778 -15.503 100.877  1.00  0.00           O  
ATOM   2223  N   ALA L  84      47.129 -17.656  98.250  1.00  0.00           N  
ATOM   2224  CA  ALA L  84      45.722 -17.357  97.915  1.00  0.00           C  
ATOM   2225  C   ALA L  84      44.694 -17.973  98.841  1.00  0.00           C  
ATOM   2226  O   ALA L  84      44.972 -19.003  99.496  1.00  0.00           O  
ATOM   2227  CB  ALA L  84      45.541 -17.879  96.477  1.00  0.00           C  
ATOM   2228  N   ASP L  85      43.483 -17.393  98.862  1.00  0.00           N  
ATOM   2229  CA  ASP L  85      42.372 -17.949  99.681  1.00  0.00           C  
ATOM   2230  C   ASP L  85      41.593 -18.987  98.834  1.00  0.00           C  
ATOM   2231  O   ASP L  85      40.926 -18.606  97.850  1.00  0.00           O  
ATOM   2232  CB  ASP L  85      41.425 -16.931 100.235  1.00  0.00           C  
ATOM   2233  CG  ASP L  85      41.826 -15.663 100.877  1.00  0.00           C  
ATOM   2234  OD1 ASP L  85      42.781 -15.008 100.393  1.00  0.00           O  
ATOM   2235  OD2 ASP L  85      41.184 -15.209 101.860  1.00  0.00           O  
ATOM   2236  N   TYR L  86      41.643 -20.223  99.269  1.00  0.00           N  
ATOM   2237  CA  TYR L  86      41.005 -21.342  98.557  1.00  0.00           C  
ATOM   2238  C   TYR L  86      39.685 -21.744  99.211  1.00  0.00           C  
ATOM   2239  O   TYR L  86      39.705 -22.207 100.360  1.00  0.00           O  
ATOM   2240  CB  TYR L  86      41.949 -22.570  98.516  1.00  0.00           C  
ATOM   2241  CG  TYR L  86      43.215 -22.406  97.716  1.00  0.00           C  
ATOM   2242  CD1 TYR L  86      43.866 -21.178  97.653  1.00  0.00           C  
ATOM   2243  CD2 TYR L  86      43.776 -23.468  97.008  1.00  0.00           C  
ATOM   2244  CE1 TYR L  86      45.032 -21.002  96.921  1.00  0.00           C  
ATOM   2245  CE2 TYR L  86      44.947 -23.315  96.270  1.00  0.00           C  
ATOM   2246  CZ  TYR L  86      45.572 -22.071  96.227  1.00  0.00           C  
ATOM   2247  OH  TYR L  86      46.722 -21.850  95.508  1.00  0.00           O  
ATOM   2248  N   TYR L  87      38.594 -21.622  98.477  1.00  0.00           N  
ATOM   2249  CA  TYR L  87      37.258 -22.041  98.921  1.00  0.00           C  
ATOM   2250  C   TYR L  87      36.848 -23.363  98.283  1.00  0.00           C  
ATOM   2251  O   TYR L  87      37.430 -23.744  97.244  1.00  0.00           O  
ATOM   2252  CB  TYR L  87      36.202 -20.969  98.538  1.00  0.00           C  
ATOM   2253  CG  TYR L  87      36.496 -19.591  99.085  1.00  0.00           C  
ATOM   2254  CD1 TYR L  87      37.539 -18.837  98.547  1.00  0.00           C  
ATOM   2255  CD2 TYR L  87      35.754 -19.038 100.126  1.00  0.00           C  
ATOM   2256  CE1 TYR L  87      37.851 -17.575  99.033  1.00  0.00           C  
ATOM   2257  CE2 TYR L  87      36.052 -17.779 100.624  1.00  0.00           C  
ATOM   2258  CZ  TYR L  87      37.102 -17.046 100.077  1.00  0.00           C  
ATOM   2259  OH  TYR L  87      37.441 -15.798 100.542  1.00  0.00           O  
ATOM   2260  N   CYS L  88      35.851 -24.019  98.856  1.00  0.00           N  
ATOM   2261  CA  CYS L  88      35.286 -25.253  98.313  1.00  0.00           C  
ATOM   2262  C   CYS L  88      33.772 -25.136  98.148  1.00  0.00           C  
ATOM   2263  O   CYS L  88      33.082 -24.782  99.120  1.00  0.00           O  
ATOM   2264  CB  CYS L  88      35.596 -26.494  99.207  1.00  0.00           C  
ATOM   2265  SG  CYS L  88      34.516 -26.655 100.617  1.00  0.00           S  
ATOM   2266  N   SER L  89      33.260 -25.461  96.964  1.00  0.00           N  
ATOM   2267  CA  SER L  89      31.811 -25.509  96.737  1.00  0.00           C  
ATOM   2268  C   SER L  89      31.274 -26.940  96.729  1.00  0.00           C  
ATOM   2269  O   SER L  89      31.996 -27.914  96.434  1.00  0.00           O  
ATOM   2270  CB  SER L  89      31.410 -24.772  95.473  1.00  0.00           C  
ATOM   2271  OG  SER L  89      30.726 -23.562  95.783  1.00  0.00           O  
ATOM   2272  N   SER L  90      29.985 -27.018  97.096  1.00  0.00           N  
ATOM   2273  CA  SER L  90      29.183 -28.232  96.926  1.00  0.00           C  
ATOM   2274  C   SER L  90      27.743 -27.874  96.503  1.00  0.00           C  
ATOM   2275  O   SER L  90      27.021 -27.098  97.151  1.00  0.00           O  
ATOM   2276  CB  SER L  90      29.162 -29.159  98.114  1.00  0.00           C  
ATOM   2277  OG  SER L  90      28.482 -30.369  97.722  1.00  0.00           O  
ATOM   2278  N   TYR L  91      27.375 -28.479  95.387  1.00  0.00           N  
ATOM   2279  CA  TYR L  91      26.166 -28.257  94.621  1.00  0.00           C  
ATOM   2280  C   TYR L  91      24.895 -28.430  95.435  1.00  0.00           C  
ATOM   2281  O   TYR L  91      23.842 -27.894  95.041  1.00  0.00           O  
ATOM   2282  CB  TYR L  91      26.101 -29.204  93.394  1.00  0.00           C  
ATOM   2283  CG  TYR L  91      25.397 -28.728  92.147  1.00  0.00           C  
ATOM   2284  CD1 TYR L  91      24.839 -27.456  92.002  1.00  0.00           C  
ATOM   2285  CD2 TYR L  91      25.357 -29.579  91.020  1.00  0.00           C  
ATOM   2286  CE1 TYR L  91      24.251 -27.055  90.808  1.00  0.00           C  
ATOM   2287  CE2 TYR L  91      24.770 -29.189  89.825  1.00  0.00           C  
ATOM   2288  CZ  TYR L  91      24.210 -27.927  89.723  1.00  0.00           C  
ATOM   2289  OH  TYR L  91      23.648 -27.564  88.529  1.00  0.00           O  
ATOM   2290  N   GLU L  92      24.977 -29.198  96.491  1.00  0.00           N  
ATOM   2291  CA  GLU L  92      23.887 -29.472  97.406  1.00  0.00           C  
ATOM   2292  C   GLU L  92      22.560 -29.855  96.817  1.00  0.00           C  
ATOM   2293  O   GLU L  92      22.021 -30.914  97.270  1.00  0.00           O  
ATOM   2294  CB  GLU L  92      23.714 -28.304  98.395  1.00  0.00           C  
ATOM   2295  CG  GLU L  92      24.183 -28.531  99.834  1.00  0.00           C  
ATOM   2296  CD  GLU L  92      25.590 -28.983 100.068  1.00  0.00           C  
ATOM   2297  OE1 GLU L  92      26.583 -28.333  99.780  1.00  0.00           O  
ATOM   2298  OE2 GLU L  92      25.668 -30.115 100.617  1.00  0.00           O  
ATOM   2299  N   GLY L  93      21.957 -29.095  95.932  1.00  0.00           N  
ATOM   2300  CA  GLY L  93      20.697 -29.481  95.237  1.00  0.00           C  
ATOM   2301  C   GLY L  93      20.461 -28.522  94.062  1.00  0.00           C  
ATOM   2302  O   GLY L  93      20.892 -28.732  92.911  1.00  0.00           O  
ATOM   2303  N   SER L  94      19.780 -27.445  94.407  1.00  0.00           N  
ATOM   2304  CA  SER L  94      19.531 -26.260  93.575  1.00  0.00           C  
ATOM   2305  C   SER L  94      18.665 -25.297  94.417  1.00  0.00           C  
ATOM   2306  O   SER L  94      17.768 -25.738  95.158  1.00  0.00           O  
ATOM   2307  CB  SER L  94      18.949 -26.528  92.223  1.00  0.00           C  
ATOM   2308  OG  SER L  94      19.962 -26.496  91.223  1.00  0.00           O  
ATOM   2309  N   ASP L  95      19.042 -24.030  94.324  1.00  0.00           N  
ATOM   2310  CA  ASP L  95      18.606 -22.997  95.290  1.00  0.00           C  
ATOM   2311  C   ASP L  95      19.526 -23.036  96.530  1.00  0.00           C  
ATOM   2312  O   ASP L  95      19.254 -22.333  97.527  1.00  0.00           O  
ATOM   2313  CB  ASP L  95      17.141 -23.146  95.659  1.00  0.00           C  
ATOM   2314  CG  ASP L  95      16.082 -22.878  94.632  1.00  0.00           C  
ATOM   2315  OD1 ASP L  95      15.761 -21.674  94.437  1.00  0.00           O  
ATOM   2316  OD2 ASP L  95      15.482 -23.802  94.038  1.00  0.00           O  
ATOM   2317  N   ASN L  95A     20.550 -23.858  96.469  1.00  0.00           N  
ATOM   2318  CA  ASN L  95A     21.486 -24.077  97.592  1.00  0.00           C  
ATOM   2319  C   ASN L  95A     22.793 -24.662  97.017  1.00  0.00           C  
ATOM   2320  O   ASN L  95A     22.894 -25.814  96.595  1.00  0.00           O  
ATOM   2321  CB  ASN L  95A     20.885 -24.900  98.715  1.00  0.00           C  
ATOM   2322  CG  ASN L  95A     20.358 -24.130  99.905  1.00  0.00           C  
ATOM   2323  OD1 ASN L  95A     21.063 -23.898 100.905  1.00  0.00           O  
ATOM   2324  ND2 ASN L  95A     19.083 -23.732  99.843  1.00  0.00           N  
ATOM   2325  N   PHE L  96      23.764 -23.792  97.008  1.00  0.00           N  
ATOM   2326  CA  PHE L  96      25.090 -23.977  96.371  1.00  0.00           C  
ATOM   2327  C   PHE L  96      26.062 -23.387  97.417  1.00  0.00           C  
ATOM   2328  O   PHE L  96      26.230 -22.149  97.425  1.00  0.00           O  
ATOM   2329  CB  PHE L  96      25.137 -23.209  95.067  1.00  0.00           C  
ATOM   2330  CG  PHE L  96      24.328 -23.601  93.881  1.00  0.00           C  
ATOM   2331  CD1 PHE L  96      23.284 -24.520  93.956  1.00  0.00           C  
ATOM   2332  CD2 PHE L  96      24.617 -23.017  92.632  1.00  0.00           C  
ATOM   2333  CE1 PHE L  96      22.558 -24.889  92.835  1.00  0.00           C  
ATOM   2334  CE2 PHE L  96      23.894 -23.365  91.489  1.00  0.00           C  
ATOM   2335  CZ  PHE L  96      22.859 -24.303  91.599  1.00  0.00           C  
ATOM   2336  N   VAL L  97      26.602 -24.264  98.261  1.00  0.00           N  
ATOM   2337  CA  VAL L  97      27.318 -23.703  99.457  1.00  0.00           C  
ATOM   2338  C   VAL L  97      28.810 -23.912  99.462  1.00  0.00           C  
ATOM   2339  O   VAL L  97      29.353 -24.928  98.990  1.00  0.00           O  
ATOM   2340  CB  VAL L  97      26.570 -24.250 100.687  1.00  0.00           C  
ATOM   2341  CG1 VAL L  97      25.055 -24.116 100.518  1.00  0.00           C  
ATOM   2342  CG2 VAL L  97      26.953 -25.690 100.962  1.00  0.00           C  
ATOM   2343  N   PHE L  98      29.509 -22.957 100.083  1.00  0.00           N  
ATOM   2344  CA  PHE L  98      30.972 -22.883 100.098  1.00  0.00           C  
ATOM   2345  C   PHE L  98      31.554 -23.182 101.483  1.00  0.00           C  
ATOM   2346  O   PHE L  98      30.882 -23.053 102.511  1.00  0.00           O  
ATOM   2347  CB  PHE L  98      31.469 -21.526  99.592  1.00  0.00           C  
ATOM   2348  CG  PHE L  98      31.137 -21.170  98.176  1.00  0.00           C  
ATOM   2349  CD1 PHE L  98      29.832 -20.852  97.804  1.00  0.00           C  
ATOM   2350  CD2 PHE L  98      32.148 -21.123  97.215  1.00  0.00           C  
ATOM   2351  CE1 PHE L  98      29.535 -20.501  96.488  1.00  0.00           C  
ATOM   2352  CE2 PHE L  98      31.873 -20.776  95.904  1.00  0.00           C  
ATOM   2353  CZ  PHE L  98      30.567 -20.470  95.532  1.00  0.00           C  
ATOM   2354  N   GLY L  99      32.813 -23.590 101.474  1.00  0.00           N  
ATOM   2355  CA  GLY L  99      33.656 -23.682 102.676  1.00  0.00           C  
ATOM   2356  C   GLY L  99      34.005 -22.236 103.076  1.00  0.00           C  
ATOM   2357  O   GLY L  99      33.681 -21.318 102.295  1.00  0.00           O  
ATOM   2358  N   THR L 100      34.639 -22.070 104.217  1.00  0.00           N  
ATOM   2359  CA  THR L 100      34.885 -20.731 104.766  1.00  0.00           C  
ATOM   2360  C   THR L 100      36.173 -20.124 104.223  1.00  0.00           C  
ATOM   2361  O   THR L 100      36.520 -18.980 104.589  1.00  0.00           O  
ATOM   2362  CB  THR L 100      34.839 -20.684 106.337  1.00  0.00           C  
ATOM   2363  OG1 THR L 100      33.816 -21.620 106.788  1.00  0.00           O  
ATOM   2364  CG2 THR L 100      34.545 -19.277 106.892  1.00  0.00           C  
ATOM   2365  N   GLY L 101      36.860 -20.864 103.377  1.00  0.00           N  
ATOM   2366  CA  GLY L 101      38.080 -20.355 102.712  1.00  0.00           C  
ATOM   2367  C   GLY L 101      39.290 -20.700 103.574  1.00  0.00           C  
ATOM   2368  O   GLY L 101      39.248 -20.554 104.807  1.00  0.00           O  
ATOM   2369  N   THR L 102      40.307 -21.201 102.911  1.00  0.00           N  
ATOM   2370  CA  THR L 102      41.607 -21.469 103.565  1.00  0.00           C  
ATOM   2371  C   THR L 102      42.463 -20.235 103.347  1.00  0.00           C  
ATOM   2372  O   THR L 102      41.915 -19.116 103.299  1.00  0.00           O  
ATOM   2373  CB  THR L 102      42.226 -22.786 103.011  1.00  0.00           C  
ATOM   2374  OG1 THR L 102      41.162 -23.794 103.150  1.00  0.00           O  
ATOM   2375  CG2 THR L 102      43.511 -23.247 103.688  1.00  0.00           C  
ATOM   2376  N   LYS L 103      43.739 -20.422 103.228  1.00  0.00           N  
ATOM   2377  CA  LYS L 103      44.703 -19.345 102.918  1.00  0.00           C  
ATOM   2378  C   LYS L 103      46.039 -20.075 102.775  1.00  0.00           C  
ATOM   2379  O   LYS L 103      46.483 -20.601 103.818  1.00  0.00           O  
ATOM   2380  CB  LYS L 103      44.775 -18.338 104.030  1.00  0.00           C  
ATOM   2381  CG  LYS L 103      44.634 -16.888 103.591  1.00  0.00           C  
ATOM   2382  CD  LYS L 103      44.921 -15.963 104.766  1.00  0.00           C  
ATOM   2383  CE  LYS L 103      46.364 -16.110 105.229  1.00  0.00           C  
ATOM   2384  NZ  LYS L 103      47.256 -16.051 104.045  1.00  0.00           N  
ATOM   2385  N   VAL L 104      46.517 -20.217 101.553  1.00  0.00           N  
ATOM   2386  CA  VAL L 104      47.856 -20.850 101.414  1.00  0.00           C  
ATOM   2387  C   VAL L 104      48.841 -19.703 101.676  1.00  0.00           C  
ATOM   2388  O   VAL L 104      48.800 -18.728 100.907  1.00  0.00           O  
ATOM   2389  CB  VAL L 104      48.060 -21.560 100.098  1.00  0.00           C  
ATOM   2390  CG1 VAL L 104      49.532 -21.971  99.903  1.00  0.00           C  
ATOM   2391  CG2 VAL L 104      47.163 -22.783  99.944  1.00  0.00           C  
ATOM   2392  N   THR L 105      49.563 -19.815 102.786  1.00  0.00           N  
ATOM   2393  CA  THR L 105      50.674 -18.872 103.000  1.00  0.00           C  
ATOM   2394  C   THR L 105      51.980 -19.617 102.702  1.00  0.00           C  
ATOM   2395  O   THR L 105      52.135 -20.811 103.026  1.00  0.00           O  
ATOM   2396  CB  THR L 105      50.743 -18.191 104.394  1.00  0.00           C  
ATOM   2397  OG1 THR L 105      49.390 -18.024 104.911  1.00  0.00           O  
ATOM   2398  CG2 THR L 105      51.493 -16.840 104.374  1.00  0.00           C  
ATOM   2399  N   VAL L 106      52.865 -18.886 102.042  1.00  0.00           N  
ATOM   2400  CA  VAL L 106      54.276 -19.335 101.944  1.00  0.00           C  
ATOM   2401  C   VAL L 106      54.983 -18.632 103.115  1.00  0.00           C  
ATOM   2402  O   VAL L 106      54.961 -17.389 103.188  1.00  0.00           O  
ATOM   2403  CB  VAL L 106      54.869 -19.051 100.572  1.00  0.00           C  
ATOM   2404  CG1 VAL L 106      56.252 -19.679 100.397  1.00  0.00           C  
ATOM   2405  CG2 VAL L 106      53.969 -19.499  99.421  1.00  0.00           C  
ATOM   2406  N   LEU L 106A     55.547 -19.444 103.991  1.00  0.00           N  
ATOM   2407  CA  LEU L 106A     56.201 -18.944 105.197  1.00  0.00           C  
ATOM   2408  C   LEU L 106A     57.569 -18.339 104.885  1.00  0.00           C  
ATOM   2409  O   LEU L 106A     58.444 -18.966 104.297  1.00  0.00           O  
ATOM   2410  CB  LEU L 106A     56.297 -20.062 106.233  1.00  0.00           C  
ATOM   2411  CG  LEU L 106A     55.069 -20.918 106.435  1.00  0.00           C  
ATOM   2412  CD1 LEU L 106A     55.418 -22.137 107.268  1.00  0.00           C  
ATOM   2413  CD2 LEU L 106A     53.990 -20.093 107.114  1.00  0.00           C  
ATOM   2414  N   GLY L 107      57.697 -17.128 105.361  1.00  0.00           N  
ATOM   2415  CA  GLY L 107      58.923 -16.304 105.258  1.00  0.00           C  
ATOM   2416  C   GLY L 107      58.934 -15.525 106.608  1.00  0.00           C  
ATOM   2417  O   GLY L 107      58.664 -14.338 106.682  1.00  0.00           O  
ATOM   2418  N   GLN L 108      59.195 -16.323 107.610  1.00  0.00           N  
ATOM   2419  CA  GLN L 108      59.102 -15.979 109.043  1.00  0.00           C  
ATOM   2420  C   GLN L 108      58.865 -17.357 109.688  1.00  0.00           C  
ATOM   2421  O   GLN L 108      58.481 -18.270 108.928  1.00  0.00           O  
ATOM   2422  CB  GLN L 108      57.943 -15.039 109.324  1.00  0.00           C  
ATOM   2423  CG  GLN L 108      58.230 -13.937 110.311  1.00  0.00           C  
ATOM   2424  CD  GLN L 108      57.014 -13.171 110.776  1.00  0.00           C  
ATOM   2425  OE1 GLN L 108      56.068 -12.922 110.029  1.00  0.00           O  
ATOM   2426  NE2 GLN L 108      57.043 -12.770 112.044  1.00  0.00           N  
ATOM   2427  N   PRO L 109      59.142 -17.468 110.962  1.00  0.00           N  
ATOM   2428  CA  PRO L 109      58.807 -18.715 111.689  1.00  0.00           C  
ATOM   2429  C   PRO L 109      57.336 -18.658 112.062  1.00  0.00           C  
ATOM   2430  O   PRO L 109      56.802 -17.543 112.237  1.00  0.00           O  
ATOM   2431  CB  PRO L 109      59.765 -18.747 112.847  1.00  0.00           C  
ATOM   2432  CG  PRO L 109      60.847 -17.758 112.527  1.00  0.00           C  
ATOM   2433  CD  PRO L 109      60.126 -16.667 111.711  1.00  0.00           C  
TER    2434      PRO L 109                                                      
ATOM   3216  N   GLN P   1      30.124 -23.942  89.195  1.00  0.00           N  
ATOM   3217  CA  GLN P   1      28.890 -23.235  89.507  1.00  0.00           C  
ATOM   3218  C   GLN P   1      27.880 -24.337  89.916  1.00  0.00           C  
ATOM   3219  O   GLN P   1      27.195 -24.315  90.937  1.00  0.00           O  
ATOM   3220  CB  GLN P   1      28.301 -22.511  88.308  1.00  0.00           C  
ATOM   3221  CG  GLN P   1      28.733 -21.080  88.091  1.00  0.00           C  
ATOM   3222  CD  GLN P   1      28.204 -20.501  86.793  1.00  0.00           C  
ATOM   3223  OE1 GLN P   1      27.054 -20.698  86.388  1.00  0.00           O  
ATOM   3224  NE2 GLN P   1      29.104 -19.778  86.122  1.00  0.00           N  
ATOM   3236  N   HIS P   3      26.600 -26.179  86.944  1.00  0.00           N  
ATOM   3237  CA  HIS P   3      25.793 -26.265  85.726  1.00  0.00           C  
ATOM   3238  C   HIS P   3      26.171 -27.311  84.741  1.00  0.00           C  
ATOM   3239  O   HIS P   3      27.333 -27.579  84.386  1.00  0.00           O  
ATOM   3240  CB  HIS P   3      25.627 -24.817  85.176  1.00  0.00           C  
ATOM   3241  CG  HIS P   3      24.930 -24.007  86.261  1.00  0.00           C  
ATOM   3242  ND1 HIS P   3      25.357 -22.829  86.784  1.00  0.00           N  
ATOM   3243  CD2 HIS P   3      23.787 -24.335  86.927  1.00  0.00           C  
ATOM   3244  CE1 HIS P   3      24.493 -22.431  87.706  1.00  0.00           C  
ATOM   3245  NE2 HIS P   3      23.542 -23.330  87.814  1.00  0.00           N  
TER    3246      HIS P   3                                                      
