# Supplementary material for: SARS-CoV-2 Spike Protein Interaction Space
Source: Int J Mol Sci. 2023 Jul 27;24(15):12058. doi: 10.3390/ijms241512058 (PMC10418891; doi:10.3390/ijms241512058)
Supplement: Supplementary file 1 [file ijms-24-12058-s001.zip › Supplementary Material File S1/1MCW.pdb]

REMARK 950 NUMBERING  Kabat
REMARK 950 METHOD     X-ray crystal structure
REMARK 950 RESOLUTION 3.500
REMARK 950 R-FACTOR   0.170
REMARK 950 R-FREE     0.000
REMARK 950 CHAIN-TYPE LABEL ORIGINAL
REMARK 950 CHAIN L    L    M
REMARK 950 CHAIN L    L    W
REMARK 950 MOLECULE : M : IMMUNOGLOBULIN MCG (LIGHT CHAIN)
REMARK 950 SPECIES  : M : HOMO SAPIENS
SEQRES   1 L 216  PCA SER ALA LEU THR GLN PRO PRO SER ALA SER GLY SER          
SEQRES   2 L 216  LEU GLY GLN SER VAL THR ILE SER CYS THR GLY THR SER          
SEQRES   3 L 216  SER ASP VAL GLY GLY TYR ASN TYR VAL SER TRP TYR GLN          
SEQRES   4 L 216  GLN HIS ALA GLY LYS ALA PRO LYS VAL ILE ILE TYR GLU          
SEQRES   5 L 216  VAL ASN LYS ARG PRO SER GLY VAL PRO ASP ARG PHE SER          
SEQRES   6 L 216  GLY SER LYS SER GLY ASN THR ALA SER LEU THR VAL SER          
SEQRES   7 L 216  GLY LEU GLN ALA GLU ASP GLU ALA ASP TYR TYR CYS SER          
SEQRES   8 L 216  SER TYR GLU GLY SER ASP ASN PHE VAL PHE GLY THR GLY          
SEQRES   9 L 216  THR LYS VAL THR VAL LEU GLY GLN PRO LYS ALA ASN PRO          
SEQRES  10 L 216  THR VAL THR LEU PHE PRO PRO SER SER GLU GLU LEU GLN          
SEQRES  11 L 216  ALA ASN LYS ALA THR LEU VAL CYS LEU ILE SER ASP PHE          
SEQRES  12 L 216  TYR PRO GLY ALA VAL THR VAL ALA TRP LYS ALA ASP GLY          
SEQRES  13 L 216  SER PRO VAL LYS ALA GLY VAL GLU THR THR LYS PRO SER          
SEQRES  14 L 216  LYS GLN SER ASN ASN LYS TYR ALA ALA SER SER TYR LEU          
SEQRES  15 L 216  SER LEU THR PRO GLU GLN TRP LYS SER HIS ARG SER TYR          
SEQRES  16 L 216  SER CYS GLN VAL THR HIS GLU GLY SER THR VAL GLU LYS          
SEQRES  17 L 216  THR VAL ALA PRO THR GLU CYS SER                              
SEQRES   1 L 216  PCA SER ALA LEU THR GLN PRO PRO SER ALA SER GLY SER          
SEQRES   2 L 216  LEU GLY GLN SER VAL THR ILE SER CYS THR GLY THR SER          
SEQRES   3 L 216  SER ASP VAL GLY GLY TYR ASN TYR VAL SER TRP TYR GLN          
SEQRES   4 L 216  GLN HIS ALA GLY LYS ALA PRO LYS VAL ILE ILE TYR GLU          
SEQRES   5 L 216  VAL ASN LYS ARG PRO SER GLY VAL PRO ASP ARG PHE SER          
SEQRES   6 L 216  GLY SER LYS SER GLY ASN THR ALA SER LEU THR VAL SER          
SEQRES   7 L 216  GLY LEU GLN ALA GLU ASP GLU ALA ASP TYR TYR CYS SER          
SEQRES   8 L 216  SER TYR GLU GLY SER ASP ASN PHE VAL PHE GLY THR GLY          
SEQRES   9 L 216  THR LYS VAL THR VAL LEU GLY GLN PRO LYS ALA ASN PRO          
SEQRES  10 L 216  THR VAL THR LEU PHE PRO PRO SER SER GLU GLU LEU GLN          
SEQRES  11 L 216  ALA ASN LYS ALA THR LEU VAL CYS LEU ILE SER ASP PHE          
SEQRES  12 L 216  TYR PRO GLY ALA VAL THR VAL ALA TRP LYS ALA ASP GLY          
SEQRES  13 L 216  SER PRO VAL LYS ALA GLY VAL GLU THR THR LYS PRO SER          
SEQRES  14 L 216  LYS GLN SER ASN ASN LYS TYR ALA ALA SER SER TYR LEU          
SEQRES  15 L 216  SER LEU THR PRO GLU GLN TRP LYS SER HIS ARG SER TYR          
SEQRES  16 L 216  SER CYS GLN VAL THR HIS GLU GLY SER THR VAL GLU LYS          
SEQRES  17 L 216  THR VAL ALA PRO THR GLU CYS SER                              
ATOM   1621  N   SER L   2      41.936 -14.885  77.401  1.00  0.00           N  
ATOM   1622  CA  SER L   2      41.459 -13.481  77.303  1.00  0.00           C  
ATOM   1623  C   SER L   2      41.000 -12.855  78.569  1.00  0.00           C  
ATOM   1624  O   SER L   2      41.847 -12.011  79.061  1.00  0.00           O  
ATOM   1625  CB  SER L   2      40.466 -13.486  76.133  1.00  0.00           C  
ATOM   1626  OG  SER L   2      41.177 -14.163  75.078  1.00  0.00           O  
ATOM   1627  N   ALA L   3      39.778 -13.108  79.112  1.00  0.00           N  
ATOM   1628  CA  ALA L   3      39.325 -12.513  80.342  1.00  0.00           C  
ATOM   1629  C   ALA L   3      37.861 -12.449  80.749  1.00  0.00           C  
ATOM   1630  O   ALA L   3      37.345 -13.374  81.394  1.00  0.00           O  
ATOM   1631  CB  ALA L   3      39.863 -11.058  80.558  1.00  0.00           C  
ATOM   1632  N   LEU L   4      37.193 -11.321  80.643  1.00  0.00           N  
ATOM   1633  CA  LEU L   4      35.868 -10.907  80.902  1.00  0.00           C  
ATOM   1634  C   LEU L   4      35.759  -9.347  81.021  1.00  0.00           C  
ATOM   1635  O   LEU L   4      36.707  -8.659  80.666  1.00  0.00           O  
ATOM   1636  CB  LEU L   4      34.989 -11.565  81.963  1.00  0.00           C  
ATOM   1637  CG  LEU L   4      33.492 -11.118  81.880  1.00  0.00           C  
ATOM   1638  CD1 LEU L   4      32.762 -11.811  80.759  1.00  0.00           C  
ATOM   1639  CD2 LEU L   4      32.753 -11.352  83.157  1.00  0.00           C  
ATOM   1640  N   THR L   5      34.544  -8.875  81.367  1.00  0.00           N  
ATOM   1641  CA  THR L   5      34.340  -7.431  81.523  1.00  0.00           C  
ATOM   1642  C   THR L   5      33.254  -7.034  82.517  1.00  0.00           C  
ATOM   1643  O   THR L   5      32.055  -6.975  82.186  1.00  0.00           O  
ATOM   1644  CB  THR L   5      34.082  -6.718  80.128  1.00  0.00           C  
ATOM   1645  OG1 THR L   5      34.738  -7.463  79.069  1.00  0.00           O  
ATOM   1646  CG2 THR L   5      34.564  -5.251  80.082  1.00  0.00           C  
ATOM   1647  N   GLN L   6      33.705  -6.715  83.737  1.00  0.00           N  
ATOM   1648  CA  GLN L   6      32.813  -6.089  84.748  1.00  0.00           C  
ATOM   1649  C   GLN L   6      33.596  -5.023  85.542  1.00  0.00           C  
ATOM   1650  O   GLN L   6      34.761  -5.224  85.949  1.00  0.00           O  
ATOM   1651  CB  GLN L   6      32.047  -7.035  85.598  1.00  0.00           C  
ATOM   1652  CG  GLN L   6      32.568  -7.533  86.888  1.00  0.00           C  
ATOM   1653  CD  GLN L   6      31.461  -8.150  87.728  1.00  0.00           C  
ATOM   1654  OE1 GLN L   6      31.589  -8.340  88.910  1.00  0.00           O  
ATOM   1655  NE2 GLN L   6      30.368  -8.439  87.027  1.00  0.00           N  
ATOM   1656  N   PRO L   7      32.856  -3.906  85.776  1.00  0.00           N  
ATOM   1657  CA  PRO L   7      33.490  -2.706  86.367  1.00  0.00           C  
ATOM   1658  C   PRO L   7      33.902  -2.774  87.799  1.00  0.00           C  
ATOM   1659  O   PRO L   7      33.233  -3.389  88.628  1.00  0.00           O  
ATOM   1660  CB  PRO L   7      32.519  -1.547  86.133  1.00  0.00           C  
ATOM   1661  CG  PRO L   7      31.368  -2.162  85.401  1.00  0.00           C  
ATOM   1662  CD  PRO L   7      31.906  -3.394  84.711  1.00  0.00           C  
ATOM   1663  N   PRO L   8      35.042  -2.129  88.072  1.00  0.00           N  
ATOM   1664  CA  PRO L   8      35.653  -2.061  89.384  1.00  0.00           C  
ATOM   1665  C   PRO L   8      35.024  -0.921  90.175  1.00  0.00           C  
ATOM   1666  O   PRO L   8      35.668   0.105  90.418  1.00  0.00           O  
ATOM   1667  CB  PRO L   8      37.097  -1.714  89.070  1.00  0.00           C  
ATOM   1668  CG  PRO L   8      36.968  -0.733  87.938  1.00  0.00           C  
ATOM   1669  CD  PRO L   8      35.659  -1.072  87.228  1.00  0.00           C  
ATOM   1670  N   SER L   9      33.763  -1.099  90.478  1.00  0.00           N  
ATOM   1671  CA  SER L   9      32.975  -0.264  91.342  1.00  0.00           C  
ATOM   1672  C   SER L   9      31.594  -0.070  90.721  1.00  0.00           C  
ATOM   1673  O   SER L   9      31.396  -0.393  89.576  1.00  0.00           O  
ATOM   1674  CB  SER L   9      33.577   1.071  91.684  1.00  0.00           C  
ATOM   1675  OG  SER L   9      33.999   1.158  93.030  1.00  0.00           O  
ATOM   1676  N   ALA L  11      30.720   0.440  91.539  1.00  0.00           N  
ATOM   1677  CA  ALA L  11      29.370   0.864  91.195  1.00  0.00           C  
ATOM   1678  C   ALA L  11      28.788   1.513  92.457  1.00  0.00           C  
ATOM   1679  O   ALA L  11      28.529   0.805  93.413  1.00  0.00           O  
ATOM   1680  CB  ALA L  11      28.422  -0.188  90.699  1.00  0.00           C  
ATOM   1681  N   SER L  12      28.626   2.809  92.370  1.00  0.00           N  
ATOM   1682  CA  SER L  12      28.021   3.614  93.439  1.00  0.00           C  
ATOM   1683  C   SER L  12      26.490   3.677  93.288  1.00  0.00           C  
ATOM   1684  O   SER L  12      25.885   3.823  92.238  1.00  0.00           O  
ATOM   1685  CB  SER L  12      28.675   4.982  93.550  1.00  0.00           C  
ATOM   1686  OG  SER L  12      30.119   4.838  93.541  1.00  0.00           O  
ATOM   1687  N   GLY L  13      25.877   3.478  94.422  1.00  0.00           N  
ATOM   1688  CA  GLY L  13      24.411   3.495  94.597  1.00  0.00           C  
ATOM   1689  C   GLY L  13      24.254   4.350  95.857  1.00  0.00           C  
ATOM   1690  O   GLY L  13      25.249   5.007  96.196  1.00  0.00           O  
ATOM   1691  N   SER L  14      23.111   4.270  96.458  1.00  0.00           N  
ATOM   1692  CA  SER L  14      22.791   5.013  97.659  1.00  0.00           C  
ATOM   1693  C   SER L  14      21.728   4.294  98.492  1.00  0.00           C  
ATOM   1694  O   SER L  14      20.650   3.867  98.040  1.00  0.00           O  
ATOM   1695  CB  SER L  14      22.294   6.422  97.328  1.00  0.00           C  
ATOM   1696  OG  SER L  14      22.955   7.061  96.296  1.00  0.00           O  
ATOM   1697  N   LEU L  15      21.993   4.197  99.752  1.00  0.00           N  
ATOM   1698  CA  LEU L  15      21.194   3.595 100.784  1.00  0.00           C  
ATOM   1699  C   LEU L  15      19.708   3.744 100.369  1.00  0.00           C  
ATOM   1700  O   LEU L  15      19.103   4.794 100.297  1.00  0.00           O  
ATOM   1701  CB  LEU L  15      21.550   4.056 102.184  1.00  0.00           C  
ATOM   1702  CG  LEU L  15      21.533   2.962 103.245  1.00  0.00           C  
ATOM   1703  CD1 LEU L  15      22.891   2.268 103.364  1.00  0.00           C  
ATOM   1704  CD2 LEU L  15      21.159   3.493 104.593  1.00  0.00           C  
ATOM   1705  N   GLY L  16      19.211   2.566 100.083  1.00  0.00           N  
ATOM   1706  CA  GLY L  16      17.843   2.380  99.553  1.00  0.00           C  
ATOM   1707  C   GLY L  16      17.920   3.114  98.222  1.00  0.00           C  
ATOM   1708  O   GLY L  16      17.522   4.268  98.254  1.00  0.00           O  
ATOM   1709  N   GLN L  17      18.447   2.466  97.224  1.00  0.00           N  
ATOM   1710  CA  GLN L  17      18.516   3.039  95.898  1.00  0.00           C  
ATOM   1711  C   GLN L  17      18.179   2.052  94.792  1.00  0.00           C  
ATOM   1712  O   GLN L  17      17.000   1.661  94.608  1.00  0.00           O  
ATOM   1713  CB  GLN L  17      19.810   3.787  95.567  1.00  0.00           C  
ATOM   1714  CG  GLN L  17      19.504   5.293  95.621  1.00  0.00           C  
ATOM   1715  CD  GLN L  17      20.293   6.053  94.608  1.00  0.00           C  
ATOM   1716  OE1 GLN L  17      20.673   7.196  94.796  1.00  0.00           O  
ATOM   1717  NE2 GLN L  17      20.525   5.353  93.511  1.00  0.00           N  
ATOM   1718  N   SER L  18      19.180   1.848  93.930  1.00  0.00           N  
ATOM   1719  CA  SER L  18      19.121   0.770  92.928  1.00  0.00           C  
ATOM   1720  C   SER L  18      20.529   0.603  92.333  1.00  0.00           C  
ATOM   1721  O   SER L  18      21.294   1.545  92.203  1.00  0.00           O  
ATOM   1722  CB  SER L  18      18.050   0.774  91.889  1.00  0.00           C  
ATOM   1723  OG  SER L  18      16.976  -0.077  92.247  1.00  0.00           O  
ATOM   1724  N   VAL L  19      20.826  -0.608  91.952  1.00  0.00           N  
ATOM   1725  CA  VAL L  19      22.081  -1.126  91.476  1.00  0.00           C  
ATOM   1726  C   VAL L  19      21.984  -1.699  90.083  1.00  0.00           C  
ATOM   1727  O   VAL L  19      21.020  -2.452  89.849  1.00  0.00           O  
ATOM   1728  CB  VAL L  19      22.460  -2.250  92.508  1.00  0.00           C  
ATOM   1729  CG1 VAL L  19      23.915  -2.615  92.537  1.00  0.00           C  
ATOM   1730  CG2 VAL L  19      21.985  -1.835  93.878  1.00  0.00           C  
ATOM   1731  N   THR L  20      22.848  -1.276  89.180  1.00  0.00           N  
ATOM   1732  CA  THR L  20      23.005  -2.053  87.934  1.00  0.00           C  
ATOM   1733  C   THR L  20      24.406  -2.661  88.037  1.00  0.00           C  
ATOM   1734  O   THR L  20      25.299  -1.901  88.475  1.00  0.00           O  
ATOM   1735  CB  THR L  20      22.977  -1.163  86.667  1.00  0.00           C  
ATOM   1736  OG1 THR L  20      24.078  -0.225  86.968  1.00  0.00           O  
ATOM   1737  CG2 THR L  20      21.670  -0.493  86.310  1.00  0.00           C  
ATOM   1738  N   ILE L  21      24.587  -3.868  87.624  1.00  0.00           N  
ATOM   1739  CA  ILE L  21      25.905  -4.555  87.646  1.00  0.00           C  
ATOM   1740  C   ILE L  21      26.215  -5.133  86.285  1.00  0.00           C  
ATOM   1741  O   ILE L  21      25.423  -5.933  85.720  1.00  0.00           O  
ATOM   1742  CB  ILE L  21      25.870  -5.575  88.808  1.00  0.00           C  
ATOM   1743  CG1 ILE L  21      24.903  -4.990  89.892  1.00  0.00           C  
ATOM   1744  CG2 ILE L  21      27.220  -5.953  89.423  1.00  0.00           C  
ATOM   1745  CD1 ILE L  21      25.152  -5.620  91.290  1.00  0.00           C  
ATOM   1746  N   SER L  22      27.376  -4.793  85.754  1.00  0.00           N  
ATOM   1747  CA  SER L  22      27.825  -5.067  84.443  1.00  0.00           C  
ATOM   1748  C   SER L  22      28.720  -6.306  84.239  1.00  0.00           C  
ATOM   1749  O   SER L  22      29.468  -6.721  85.092  1.00  0.00           O  
ATOM   1750  CB  SER L  22      28.830  -4.015  83.880  1.00  0.00           C  
ATOM   1751  OG  SER L  22      30.090  -4.752  83.690  1.00  0.00           O  
ATOM   1752  N   CYS L  23      28.633  -6.730  82.989  1.00  0.00           N  
ATOM   1753  CA  CYS L  23      29.376  -7.877  82.497  1.00  0.00           C  
ATOM   1754  C   CYS L  23      29.223  -7.983  80.972  1.00  0.00           C  
ATOM   1755  O   CYS L  23      28.332  -8.686  80.484  1.00  0.00           O  
ATOM   1756  CB  CYS L  23      29.035  -9.219  83.133  1.00  0.00           C  
ATOM   1757  SG  CYS L  23      30.365 -10.068  84.097  1.00  0.00           S  
ATOM   1758  N   THR L  24      30.147  -7.261  80.344  1.00  0.00           N  
ATOM   1759  CA  THR L  24      30.363  -7.485  78.924  1.00  0.00           C  
ATOM   1760  C   THR L  24      31.182  -8.841  78.987  1.00  0.00           C  
ATOM   1761  O   THR L  24      31.851  -9.133  79.998  1.00  0.00           O  
ATOM   1762  CB  THR L  24      31.090  -6.493  78.015  1.00  0.00           C  
ATOM   1763  OG1 THR L  24      30.911  -5.141  78.522  1.00  0.00           O  
ATOM   1764  CG2 THR L  24      30.586  -6.502  76.548  1.00  0.00           C  
ATOM   1765  N   GLY L  25      30.954  -9.556  77.909  1.00  0.00           N  
ATOM   1766  CA  GLY L  25      31.607 -10.862  77.771  1.00  0.00           C  
ATOM   1767  C   GLY L  25      31.235 -11.391  76.394  1.00  0.00           C  
ATOM   1768  O   GLY L  25      30.505 -10.746  75.658  1.00  0.00           O  
ATOM   1769  N   THR L  26      31.735 -12.604  76.154  1.00  0.00           N  
ATOM   1770  CA  THR L  26      31.716 -13.211  74.858  1.00  0.00           C  
ATOM   1771  C   THR L  26      30.479 -13.962  74.386  1.00  0.00           C  
ATOM   1772  O   THR L  26      29.522 -14.275  75.061  1.00  0.00           O  
ATOM   1773  CB  THR L  26      32.976 -14.173  74.607  1.00  0.00           C  
ATOM   1774  OG1 THR L  26      32.365 -15.288  73.890  1.00  0.00           O  
ATOM   1775  CG2 THR L  26      33.778 -14.528  75.819  1.00  0.00           C  
ATOM   1776  N   SER L  27      30.618 -14.260  73.113  1.00  0.00           N  
ATOM   1777  CA  SER L  27      29.603 -14.916  72.302  1.00  0.00           C  
ATOM   1778  C   SER L  27      29.420 -16.372  72.622  1.00  0.00           C  
ATOM   1779  O   SER L  27      28.486 -16.974  72.033  1.00  0.00           O  
ATOM   1780  CB  SER L  27      29.929 -14.605  70.858  1.00  0.00           C  
ATOM   1781  OG  SER L  27      29.344 -15.516  69.982  1.00  0.00           O  
ATOM   1782  N   SER L  27A     30.260 -16.941  73.473  1.00  0.00           N  
ATOM   1783  CA  SER L  27A     30.061 -18.359  73.888  1.00  0.00           C  
ATOM   1784  C   SER L  27A     29.570 -18.318  75.334  1.00  0.00           C  
ATOM   1785  O   SER L  27A     28.854 -19.233  75.743  1.00  0.00           O  
ATOM   1786  CB  SER L  27A     31.085 -19.370  73.622  1.00  0.00           C  
ATOM   1787  OG  SER L  27A     32.439 -19.123  73.536  1.00  0.00           O  
ATOM   1788  N   ASP L  27B     29.983 -17.290  76.018  1.00  0.00           N  
ATOM   1789  CA  ASP L  27B     29.469 -17.012  77.372  1.00  0.00           C  
ATOM   1790  C   ASP L  27B     28.254 -16.089  77.228  1.00  0.00           C  
ATOM   1791  O   ASP L  27B     27.418 -16.224  76.332  1.00  0.00           O  
ATOM   1792  CB  ASP L  27B     30.634 -16.418  78.180  1.00  0.00           C  
ATOM   1793  CG  ASP L  27B     31.351 -15.225  77.559  1.00  0.00           C  
ATOM   1794  OD1 ASP L  27B     30.869 -14.709  76.548  1.00  0.00           O  
ATOM   1795  OD2 ASP L  27B     32.406 -14.786  78.087  1.00  0.00           O  
ATOM   1796  N   VAL L  27C     28.248 -15.057  78.041  1.00  0.00           N  
ATOM   1797  CA  VAL L  27C     27.206 -14.024  78.085  1.00  0.00           C  
ATOM   1798  C   VAL L  27C     26.616 -13.861  76.684  1.00  0.00           C  
ATOM   1799  O   VAL L  27C     25.386 -13.955  76.461  1.00  0.00           O  
ATOM   1800  CB  VAL L  27C     27.780 -12.682  78.606  1.00  0.00           C  
ATOM   1801  CG1 VAL L  27C     27.024 -12.088  79.770  1.00  0.00           C  
ATOM   1802  CG2 VAL L  27C     29.267 -12.819  78.876  1.00  0.00           C  
ATOM   1803  N   GLY L  28      27.539 -13.604  75.778  1.00  0.00           N  
ATOM   1804  CA  GLY L  28      27.221 -13.422  74.397  1.00  0.00           C  
ATOM   1805  C   GLY L  28      26.644 -14.600  73.685  1.00  0.00           C  
ATOM   1806  O   GLY L  28      26.405 -14.378  72.462  1.00  0.00           O  
ATOM   1807  N   GLY L  29      26.426 -15.765  74.291  1.00  0.00           N  
ATOM   1808  CA  GLY L  29      25.927 -16.917  73.572  1.00  0.00           C  
ATOM   1809  C   GLY L  29      25.243 -18.071  74.176  1.00  0.00           C  
ATOM   1810  O   GLY L  29      24.480 -18.802  73.499  1.00  0.00           O  
ATOM   1811  N   TYR L  30      25.462 -18.347  75.410  1.00  0.00           N  
ATOM   1812  CA  TYR L  30      24.953 -19.436  76.234  1.00  0.00           C  
ATOM   1813  C   TYR L  30      24.122 -18.797  77.329  1.00  0.00           C  
ATOM   1814  O   TYR L  30      24.147 -17.536  77.318  1.00  0.00           O  
ATOM   1815  CB  TYR L  30      26.150 -20.088  76.983  1.00  0.00           C  
ATOM   1816  CG  TYR L  30      26.834 -21.269  76.401  1.00  0.00           C  
ATOM   1817  CD1 TYR L  30      27.340 -21.273  75.105  1.00  0.00           C  
ATOM   1818  CD2 TYR L  30      27.043 -22.423  77.163  1.00  0.00           C  
ATOM   1819  CE1 TYR L  30      27.986 -22.388  74.577  1.00  0.00           C  
ATOM   1820  CE2 TYR L  30      27.681 -23.551  76.654  1.00  0.00           C  
ATOM   1821  CZ  TYR L  30      28.143 -23.525  75.369  1.00  0.00           C  
ATOM   1822  OH  TYR L  30      28.741 -24.653  74.881  1.00  0.00           O  
ATOM   1823  N   ASN L  31      23.537 -19.599  78.188  1.00  0.00           N  
ATOM   1824  CA  ASN L  31      22.803 -18.984  79.348  1.00  0.00           C  
ATOM   1825  C   ASN L  31      23.382 -19.786  80.534  1.00  0.00           C  
ATOM   1826  O   ASN L  31      22.935 -20.944  80.515  1.00  0.00           O  
ATOM   1827  CB  ASN L  31      21.342 -19.179  79.385  1.00  0.00           C  
ATOM   1828  CG  ASN L  31      20.251 -18.237  79.701  1.00  0.00           C  
ATOM   1829  OD1 ASN L  31      20.047 -17.293  78.896  1.00  0.00           O  
ATOM   1830  ND2 ASN L  31      19.443 -18.455  80.746  1.00  0.00           N  
ATOM   1831  N   TYR L  32      24.175 -19.207  81.329  1.00  0.00           N  
ATOM   1832  CA  TYR L  32      24.804 -19.959  82.415  1.00  0.00           C  
ATOM   1833  C   TYR L  32      25.543 -18.977  83.285  1.00  0.00           C  
ATOM   1834  O   TYR L  32      26.698 -19.192  83.713  1.00  0.00           O  
ATOM   1835  CB  TYR L  32      25.673 -21.147  81.828  1.00  0.00           C  
ATOM   1836  CG  TYR L  32      24.748 -22.270  81.383  1.00  0.00           C  
ATOM   1837  CD1 TYR L  32      24.539 -22.685  80.099  1.00  0.00           C  
ATOM   1838  CD2 TYR L  32      23.915 -22.835  82.365  1.00  0.00           C  
ATOM   1839  CE1 TYR L  32      23.575 -23.628  79.777  1.00  0.00           C  
ATOM   1840  CE2 TYR L  32      22.938 -23.778  82.067  1.00  0.00           C  
ATOM   1841  CZ  TYR L  32      22.773 -24.178  80.762  1.00  0.00           C  
ATOM   1842  OH  TYR L  32      21.802 -25.135  80.537  1.00  0.00           O  
ATOM   1843  N   VAL L  33      24.803 -17.874  83.618  1.00  0.00           N  
ATOM   1844  CA  VAL L  33      25.383 -16.725  84.302  1.00  0.00           C  
ATOM   1845  C   VAL L  33      24.893 -16.573  85.761  1.00  0.00           C  
ATOM   1846  O   VAL L  33      23.841 -16.955  86.194  1.00  0.00           O  
ATOM   1847  CB  VAL L  33      25.301 -15.302  83.716  1.00  0.00           C  
ATOM   1848  CG1 VAL L  33      25.122 -15.240  82.242  1.00  0.00           C  
ATOM   1849  CG2 VAL L  33      24.293 -14.462  84.488  1.00  0.00           C  
ATOM   1850  N   SER L  34      25.858 -15.911  86.416  1.00  0.00           N  
ATOM   1851  CA  SER L  34      25.830 -15.801  87.871  1.00  0.00           C  
ATOM   1852  C   SER L  34      26.350 -14.432  88.310  1.00  0.00           C  
ATOM   1853  O   SER L  34      27.147 -13.757  87.596  1.00  0.00           O  
ATOM   1854  CB  SER L  34      26.764 -16.862  88.483  1.00  0.00           C  
ATOM   1855  OG  SER L  34      26.291 -17.452  89.661  1.00  0.00           O  
ATOM   1856  N   TRP L  35      25.829 -14.110  89.481  1.00  0.00           N  
ATOM   1857  CA  TRP L  35      26.338 -12.864  90.148  1.00  0.00           C  
ATOM   1858  C   TRP L  35      26.708 -13.432  91.500  1.00  0.00           C  
ATOM   1859  O   TRP L  35      25.832 -14.184  91.937  1.00  0.00           O  
ATOM   1860  CB  TRP L  35      25.344 -11.701  90.156  1.00  0.00           C  
ATOM   1861  CG  TRP L  35      25.377 -11.029  88.827  1.00  0.00           C  
ATOM   1862  CD1 TRP L  35      24.624 -11.332  87.758  1.00  0.00           C  
ATOM   1863  CD2 TRP L  35      26.301 -10.008  88.423  1.00  0.00           C  
ATOM   1864  NE1 TRP L  35      24.986 -10.554  86.707  1.00  0.00           N  
ATOM   1865  CE2 TRP L  35      26.009  -9.730  87.079  1.00  0.00           C  
ATOM   1866  CE3 TRP L  35      27.310  -9.301  89.055  1.00  0.00           C  
ATOM   1867  CZ2 TRP L  35      26.708  -8.767  86.356  1.00  0.00           C  
ATOM   1868  CZ3 TRP L  35      28.004  -8.363  88.327  1.00  0.00           C  
ATOM   1869  CH2 TRP L  35      27.711  -8.092  87.010  1.00  0.00           C  
ATOM   1870  N   TYR L  36      27.893 -13.145  91.968  1.00  0.00           N  
ATOM   1871  CA  TYR L  36      28.249 -13.637  93.301  1.00  0.00           C  
ATOM   1872  C   TYR L  36      28.584 -12.478  94.259  1.00  0.00           C  
ATOM   1873  O   TYR L  36      29.257 -11.450  93.943  1.00  0.00           O  
ATOM   1874  CB  TYR L  36      29.344 -14.647  93.279  1.00  0.00           C  
ATOM   1875  CG  TYR L  36      29.185 -15.954  92.574  1.00  0.00           C  
ATOM   1876  CD1 TYR L  36      28.850 -17.147  93.244  1.00  0.00           C  
ATOM   1877  CD2 TYR L  36      29.446 -16.022  91.208  1.00  0.00           C  
ATOM   1878  CE1 TYR L  36      28.753 -18.345  92.569  1.00  0.00           C  
ATOM   1879  CE2 TYR L  36      29.358 -17.240  90.533  1.00  0.00           C  
ATOM   1880  CZ  TYR L  36      29.011 -18.391  91.223  1.00  0.00           C  
ATOM   1881  OH  TYR L  36      28.924 -19.539  90.504  1.00  0.00           O  
ATOM   1882  N   GLN L  37      28.100 -12.739  95.486  1.00  0.00           N  
ATOM   1883  CA  GLN L  37      28.185 -11.788  96.532  1.00  0.00           C  
ATOM   1884  C   GLN L  37      29.147 -12.115  97.663  1.00  0.00           C  
ATOM   1885  O   GLN L  37      28.659 -12.836  98.562  1.00  0.00           O  
ATOM   1886  CB  GLN L  37      26.872 -11.580  97.402  1.00  0.00           C  
ATOM   1887  CG  GLN L  37      27.398 -10.607  98.451  1.00  0.00           C  
ATOM   1888  CD  GLN L  37      26.706 -10.383  99.694  1.00  0.00           C  
ATOM   1889  OE1 GLN L  37      26.357  -9.210  99.984  1.00  0.00           O  
ATOM   1890  NE2 GLN L  37      26.495 -11.398 100.511  1.00  0.00           N  
ATOM   1891  N   GLN L  38      30.300 -11.473  97.592  1.00  0.00           N  
ATOM   1892  CA  GLN L  38      31.238 -11.774  98.737  1.00  0.00           C  
ATOM   1893  C   GLN L  38      30.642 -10.739  99.728  1.00  0.00           C  
ATOM   1894  O   GLN L  38      30.035  -9.758  99.187  1.00  0.00           O  
ATOM   1895  CB  GLN L  38      32.703 -11.582  98.581  1.00  0.00           C  
ATOM   1896  CG  GLN L  38      33.620 -12.221  99.575  1.00  0.00           C  
ATOM   1897  CD  GLN L  38      34.456 -13.375  99.113  1.00  0.00           C  
ATOM   1898  OE1 GLN L  38      34.585 -14.432  99.739  1.00  0.00           O  
ATOM   1899  NE2 GLN L  38      35.096 -13.183  97.971  1.00  0.00           N  
ATOM   1900  N   HIS L  39      30.748 -11.116 100.975  1.00  0.00           N  
ATOM   1901  CA  HIS L  39      30.560  -9.947 101.923  1.00  0.00           C  
ATOM   1902  C   HIS L  39      31.912  -9.236 101.856  1.00  0.00           C  
ATOM   1903  O   HIS L  39      32.025  -8.067 102.239  1.00  0.00           O  
ATOM   1904  CB  HIS L  39      29.935 -10.240 103.245  1.00  0.00           C  
ATOM   1905  CG  HIS L  39      28.574  -9.570 103.303  1.00  0.00           C  
ATOM   1906  ND1 HIS L  39      28.065  -8.856 104.338  1.00  0.00           N  
ATOM   1907  CD2 HIS L  39      27.676  -9.470 102.306  1.00  0.00           C  
ATOM   1908  CE1 HIS L  39      26.866  -8.405 103.985  1.00  0.00           C  
ATOM   1909  NE2 HIS L  39      26.604  -8.733 102.754  1.00  0.00           N  
ATOM   1910  N   ALA L  40      32.870  -9.874 101.198  1.00  0.00           N  
ATOM   1911  CA  ALA L  40      34.251  -9.413 101.141  1.00  0.00           C  
ATOM   1912  C   ALA L  40      35.188 -10.486 101.721  1.00  0.00           C  
ATOM   1913  O   ALA L  40      36.165 -10.929 101.107  1.00  0.00           O  
ATOM   1914  CB  ALA L  40      34.459  -8.127 101.929  1.00  0.00           C  
ATOM   1915  N   GLY L  41      34.858 -10.847 102.931  1.00  0.00           N  
ATOM   1916  CA  GLY L  41      35.576 -11.889 103.697  1.00  0.00           C  
ATOM   1917  C   GLY L  41      34.503 -12.815 104.297  1.00  0.00           C  
ATOM   1918  O   GLY L  41      33.758 -12.466 105.210  1.00  0.00           O  
ATOM   1919  N   LYS L  42      34.388 -13.966 103.686  1.00  0.00           N  
ATOM   1920  CA  LYS L  42      33.503 -15.067 104.013  1.00  0.00           C  
ATOM   1921  C   LYS L  42      33.495 -16.109 102.929  1.00  0.00           C  
ATOM   1922  O   LYS L  42      33.567 -17.303 103.366  1.00  0.00           O  
ATOM   1923  CB  LYS L  42      32.137 -14.713 104.621  1.00  0.00           C  
ATOM   1924  CG  LYS L  42      32.282 -14.920 106.106  1.00  0.00           C  
ATOM   1925  CD  LYS L  42      31.156 -15.057 107.047  1.00  0.00           C  
ATOM   1926  CE  LYS L  42      31.604 -15.155 108.482  1.00  0.00           C  
ATOM   1927  NZ  LYS L  42      30.604 -15.574 109.458  1.00  0.00           N  
ATOM   1928  N   ALA L  43      33.567 -15.812 101.665  1.00  0.00           N  
ATOM   1929  CA  ALA L  43      33.492 -16.787 100.598  1.00  0.00           C  
ATOM   1930  C   ALA L  43      32.311 -16.524  99.680  1.00  0.00           C  
ATOM   1931  O   ALA L  43      31.146 -16.608 100.118  1.00  0.00           O  
ATOM   1932  CB  ALA L  43      33.292 -18.219 101.109  1.00  0.00           C  
ATOM   1933  N   PRO L  44      32.609 -16.341  98.434  1.00  0.00           N  
ATOM   1934  CA  PRO L  44      31.648 -15.821  97.452  1.00  0.00           C  
ATOM   1935  C   PRO L  44      30.192 -15.967  97.759  1.00  0.00           C  
ATOM   1936  O   PRO L  44      29.630 -15.112  98.501  1.00  0.00           O  
ATOM   1937  CB  PRO L  44      32.122 -16.438  96.155  1.00  0.00           C  
ATOM   1938  CG  PRO L  44      33.620 -16.275  96.315  1.00  0.00           C  
ATOM   1939  CD  PRO L  44      33.923 -16.501  97.802  1.00  0.00           C  
ATOM   1940  N   LYS L  45      29.591 -16.996  97.166  1.00  0.00           N  
ATOM   1941  CA  LYS L  45      28.143 -17.244  97.439  1.00  0.00           C  
ATOM   1942  C   LYS L  45      27.354 -16.375  96.478  1.00  0.00           C  
ATOM   1943  O   LYS L  45      27.180 -15.132  96.571  1.00  0.00           O  
ATOM   1944  CB  LYS L  45      27.857 -17.011  98.884  1.00  0.00           C  
ATOM   1945  CG  LYS L  45      26.480 -16.489  99.272  1.00  0.00           C  
ATOM   1946  CD  LYS L  45      26.494 -14.999  99.568  1.00  0.00           C  
ATOM   1947  CE  LYS L  45      27.315 -14.672 100.799  1.00  0.00           C  
ATOM   1948  NZ  LYS L  45      26.780 -13.405 101.401  1.00  0.00           N  
ATOM   1949  N   VAL L  46      26.895 -17.086  95.473  1.00  0.00           N  
ATOM   1950  CA  VAL L  46      26.080 -16.563  94.389  1.00  0.00           C  
ATOM   1951  C   VAL L  46      24.811 -15.832  94.803  1.00  0.00           C  
ATOM   1952  O   VAL L  46      23.976 -16.195  95.640  1.00  0.00           O  
ATOM   1953  CB  VAL L  46      25.812 -17.835  93.537  1.00  0.00           C  
ATOM   1954  CG1 VAL L  46      25.091 -18.837  94.454  1.00  0.00           C  
ATOM   1955  CG2 VAL L  46      25.103 -17.593  92.258  1.00  0.00           C  
ATOM   1956  N   ILE L  47      24.619 -14.706  94.177  1.00  0.00           N  
ATOM   1957  CA  ILE L  47      23.484 -13.799  94.127  1.00  0.00           C  
ATOM   1958  C   ILE L  47      23.123 -13.645  92.656  1.00  0.00           C  
ATOM   1959  O   ILE L  47      23.808 -13.018  91.853  1.00  0.00           O  
ATOM   1960  CB  ILE L  47      23.874 -12.466  94.837  1.00  0.00           C  
ATOM   1961  CG1 ILE L  47      23.714 -11.306  93.866  1.00  0.00           C  
ATOM   1962  CG2 ILE L  47      25.302 -12.624  95.415  1.00  0.00           C  
ATOM   1963  CD1 ILE L  47      23.306  -9.934  94.393  1.00  0.00           C  
ATOM   1964  N   ILE L  48      22.004 -14.267  92.305  1.00  0.00           N  
ATOM   1965  CA  ILE L  48      21.478 -14.525  90.989  1.00  0.00           C  
ATOM   1966  C   ILE L  48      22.337 -15.652  90.336  1.00  0.00           C  
ATOM   1967  O   ILE L  48      23.578 -15.760  90.346  1.00  0.00           O  
ATOM   1968  CB  ILE L  48      20.986 -13.394  90.059  1.00  0.00           C  
ATOM   1969  CG1 ILE L  48      21.297 -13.588  88.602  1.00  0.00           C  
ATOM   1970  CG2 ILE L  48      21.342 -11.938  90.489  1.00  0.00           C  
ATOM   1971  CD1 ILE L  48      22.624 -13.980  88.009  1.00  0.00           C  
ATOM   1972  N   TYR L  49      21.521 -16.544  89.792  1.00  0.00           N  
ATOM   1973  CA  TYR L  49      21.959 -17.701  88.979  1.00  0.00           C  
ATOM   1974  C   TYR L  49      20.980 -17.991  87.849  1.00  0.00           C  
ATOM   1975  O   TYR L  49      19.873 -17.446  87.769  1.00  0.00           O  
ATOM   1976  CB  TYR L  49      22.224 -18.854  89.903  1.00  0.00           C  
ATOM   1977  CG  TYR L  49      21.013 -19.276  90.701  1.00  0.00           C  
ATOM   1978  CD1 TYR L  49      20.844 -18.857  92.006  1.00  0.00           C  
ATOM   1979  CD2 TYR L  49      20.052 -20.136  90.145  1.00  0.00           C  
ATOM   1980  CE1 TYR L  49      19.742 -19.303  92.721  1.00  0.00           C  
ATOM   1981  CE2 TYR L  49      18.952 -20.567  90.870  1.00  0.00           C  
ATOM   1982  CZ  TYR L  49      18.795 -20.138  92.167  1.00  0.00           C  
ATOM   1983  OH  TYR L  49      17.713 -20.547  92.874  1.00  0.00           O  
ATOM   1984  N   GLU L  50      21.410 -18.773  86.879  1.00  0.00           N  
ATOM   1985  CA  GLU L  50      20.682 -19.190  85.704  1.00  0.00           C  
ATOM   1986  C   GLU L  50      19.900 -18.107  84.966  1.00  0.00           C  
ATOM   1987  O   GLU L  50      19.124 -18.288  83.984  1.00  0.00           O  
ATOM   1988  CB  GLU L  50      19.825 -20.438  85.938  1.00  0.00           C  
ATOM   1989  CG  GLU L  50      20.442 -21.839  86.018  1.00  0.00           C  
ATOM   1990  CD  GLU L  50      19.808 -22.716  87.066  1.00  0.00           C  
ATOM   1991  OE1 GLU L  50      18.647 -23.065  87.228  1.00  0.00           O  
ATOM   1992  OE2 GLU L  50      20.654 -23.118  87.905  1.00  0.00           O  
ATOM   1993  N   VAL L  51      20.093 -16.881  85.330  1.00  0.00           N  
ATOM   1994  CA  VAL L  51      19.673 -15.612  84.845  1.00  0.00           C  
ATOM   1995  C   VAL L  51      19.358 -14.719  86.083  1.00  0.00           C  
ATOM   1996  O   VAL L  51      20.253 -14.194  86.706  1.00  0.00           O  
ATOM   1997  CB  VAL L  51      18.500 -15.440  83.908  1.00  0.00           C  
ATOM   1998  CG1 VAL L  51      17.148 -15.968  84.347  1.00  0.00           C  
ATOM   1999  CG2 VAL L  51      18.386 -13.915  83.614  1.00  0.00           C  
ATOM   2000  N   ASN L  52      18.055 -14.535  86.187  1.00  0.00           N  
ATOM   2001  CA  ASN L  52      17.523 -14.022  87.488  1.00  0.00           C  
ATOM   2002  C   ASN L  52      16.902 -15.392  87.934  1.00  0.00           C  
ATOM   2003  O   ASN L  52      15.846 -15.886  87.564  1.00  0.00           O  
ATOM   2004  CB  ASN L  52      16.848 -12.724  87.524  1.00  0.00           C  
ATOM   2005  CG  ASN L  52      16.278 -12.026  86.341  1.00  0.00           C  
ATOM   2006  OD1 ASN L  52      16.831 -12.029  85.230  1.00  0.00           O  
ATOM   2007  ND2 ASN L  52      15.100 -11.381  86.531  1.00  0.00           N  
ATOM   2008  N   LYS L  53      17.809 -16.052  88.635  1.00  0.00           N  
ATOM   2009  CA  LYS L  53      17.649 -17.338  89.284  1.00  0.00           C  
ATOM   2010  C   LYS L  53      18.192 -17.137  90.719  1.00  0.00           C  
ATOM   2011  O   LYS L  53      19.337 -17.323  91.046  1.00  0.00           O  
ATOM   2012  CB  LYS L  53      18.304 -18.559  88.765  1.00  0.00           C  
ATOM   2013  CG  LYS L  53      17.661 -19.629  87.936  1.00  0.00           C  
ATOM   2014  CD  LYS L  53      16.480 -19.075  87.200  1.00  0.00           C  
ATOM   2015  CE  LYS L  53      16.430 -19.184  85.728  1.00  0.00           C  
ATOM   2016  NZ  LYS L  53      15.552 -18.065  85.176  1.00  0.00           N  
ATOM   2017  N   ARG L  54      17.240 -16.762  91.548  1.00  0.00           N  
ATOM   2018  CA  ARG L  54      17.428 -16.382  92.909  1.00  0.00           C  
ATOM   2019  C   ARG L  54      17.365 -17.470  93.952  1.00  0.00           C  
ATOM   2020  O   ARG L  54      16.253 -17.718  94.469  1.00  0.00           O  
ATOM   2021  CB  ARG L  54      16.368 -15.323  93.322  1.00  0.00           C  
ATOM   2022  CG  ARG L  54      16.626 -13.986  92.664  1.00  0.00           C  
ATOM   2023  CD  ARG L  54      15.541 -13.057  92.928  1.00  0.00           C  
ATOM   2024  NE  ARG L  54      15.222 -12.839  94.307  1.00  0.00           N  
ATOM   2025  CZ  ARG L  54      14.586 -13.682  95.097  1.00  0.00           C  
ATOM   2026  NH1 ARG L  54      14.326 -14.904  94.673  1.00  0.00           N  
ATOM   2027  NH2 ARG L  54      13.983 -13.218  96.196  1.00  0.00           N  
ATOM   2028  N   PRO L  55      18.550 -17.948  94.315  1.00  0.00           N  
ATOM   2029  CA  PRO L  55      18.679 -19.001  95.281  1.00  0.00           C  
ATOM   2030  C   PRO L  55      17.938 -18.799  96.581  1.00  0.00           C  
ATOM   2031  O   PRO L  55      17.399 -17.732  96.932  1.00  0.00           O  
ATOM   2032  CB  PRO L  55      20.189 -19.042  95.629  1.00  0.00           C  
ATOM   2033  CG  PRO L  55      20.562 -17.583  95.508  1.00  0.00           C  
ATOM   2034  CD  PRO L  55      19.809 -17.093  94.287  1.00  0.00           C  
ATOM   2035  N   SER L  56      18.014 -19.920  97.306  1.00  0.00           N  
ATOM   2036  CA  SER L  56      17.405 -19.984  98.613  1.00  0.00           C  
ATOM   2037  C   SER L  56      17.643 -18.621  99.313  1.00  0.00           C  
ATOM   2038  O   SER L  56      18.754 -18.187  99.587  1.00  0.00           O  
ATOM   2039  CB  SER L  56      17.866 -21.147  99.429  1.00  0.00           C  
ATOM   2040  OG  SER L  56      17.299 -22.387  99.062  1.00  0.00           O  
ATOM   2041  N   GLY L  57      16.487 -17.946  99.466  1.00  0.00           N  
ATOM   2042  CA  GLY L  57      16.374 -16.866 100.466  1.00  0.00           C  
ATOM   2043  C   GLY L  57      17.325 -15.731 100.187  1.00  0.00           C  
ATOM   2044  O   GLY L  57      17.777 -15.043 101.066  1.00  0.00           O  
ATOM   2045  N   VAL L  58      17.590 -15.697  98.904  1.00  0.00           N  
ATOM   2046  CA  VAL L  58      18.297 -14.538  98.293  1.00  0.00           C  
ATOM   2047  C   VAL L  58      17.070 -13.618  98.021  1.00  0.00           C  
ATOM   2048  O   VAL L  58      16.385 -13.914  97.058  1.00  0.00           O  
ATOM   2049  CB  VAL L  58      19.045 -14.905  97.032  1.00  0.00           C  
ATOM   2050  CG1 VAL L  58      18.664 -14.030  95.824  1.00  0.00           C  
ATOM   2051  CG2 VAL L  58      20.580 -14.873  97.172  1.00  0.00           C  
ATOM   2052  N   PRO L  59      16.932 -12.685  98.912  1.00  0.00           N  
ATOM   2053  CA  PRO L  59      15.740 -11.807  98.880  1.00  0.00           C  
ATOM   2054  C   PRO L  59      15.776 -11.023  97.605  1.00  0.00           C  
ATOM   2055  O   PRO L  59      16.787 -10.389  97.222  1.00  0.00           O  
ATOM   2056  CB  PRO L  59      15.853 -11.081 100.163  1.00  0.00           C  
ATOM   2057  CG  PRO L  59      17.309 -11.075 100.529  1.00  0.00           C  
ATOM   2058  CD  PRO L  59      18.052 -11.967  99.572  1.00  0.00           C  
ATOM   2059  N   ASP L  60      14.650 -11.037  96.936  1.00  0.00           N  
ATOM   2060  CA  ASP L  60      14.457 -10.575  95.593  1.00  0.00           C  
ATOM   2061  C   ASP L  60      15.189  -9.416  94.986  1.00  0.00           C  
ATOM   2062  O   ASP L  60      15.710  -9.684  93.855  1.00  0.00           O  
ATOM   2063  CB  ASP L  60      12.911 -10.460  95.408  1.00  0.00           C  
ATOM   2064  CG  ASP L  60      12.543  -9.744  94.140  1.00  0.00           C  
ATOM   2065  OD1 ASP L  60      11.419  -9.162  94.082  1.00  0.00           O  
ATOM   2066  OD2 ASP L  60      13.392  -9.755  93.227  1.00  0.00           O  
ATOM   2067  N   ARG L  61      15.364  -8.260  95.610  1.00  0.00           N  
ATOM   2068  CA  ARG L  61      15.653  -7.052  94.800  1.00  0.00           C  
ATOM   2069  C   ARG L  61      16.878  -7.139  93.935  1.00  0.00           C  
ATOM   2070  O   ARG L  61      17.425  -6.054  93.645  1.00  0.00           O  
ATOM   2071  CB  ARG L  61      15.533  -5.682  95.432  1.00  0.00           C  
ATOM   2072  CG  ARG L  61      15.494  -5.618  96.913  1.00  0.00           C  
ATOM   2073  CD  ARG L  61      16.502  -6.499  97.484  1.00  0.00           C  
ATOM   2074  NE  ARG L  61      17.695  -6.026  98.077  1.00  0.00           N  
ATOM   2075  CZ  ARG L  61      17.811  -5.290  99.165  1.00  0.00           C  
ATOM   2076  NH1 ARG L  61      16.912  -4.660  99.905  1.00  0.00           N  
ATOM   2077  NH2 ARG L  61      18.961  -5.515  99.819  1.00  0.00           N  
ATOM   2078  N   PHE L  62      17.184  -8.340  93.487  1.00  0.00           N  
ATOM   2079  CA  PHE L  62      18.377  -8.515  92.595  1.00  0.00           C  
ATOM   2080  C   PHE L  62      17.801  -9.025  91.290  1.00  0.00           C  
ATOM   2081  O   PHE L  62      16.622  -9.467  91.294  1.00  0.00           O  
ATOM   2082  CB  PHE L  62      19.461  -9.277  93.281  1.00  0.00           C  
ATOM   2083  CG  PHE L  62      19.746  -8.879  94.692  1.00  0.00           C  
ATOM   2084  CD1 PHE L  62      18.919  -9.350  95.714  1.00  0.00           C  
ATOM   2085  CD2 PHE L  62      20.837  -8.050  94.991  1.00  0.00           C  
ATOM   2086  CE1 PHE L  62      19.171  -8.996  97.012  1.00  0.00           C  
ATOM   2087  CE2 PHE L  62      21.102  -7.694  96.307  1.00  0.00           C  
ATOM   2088  CZ  PHE L  62      20.265  -8.170  97.311  1.00  0.00           C  
ATOM   2089  N   SER L  63      18.611  -8.931  90.236  1.00  0.00           N  
ATOM   2090  CA  SER L  63      18.061  -9.175  88.912  1.00  0.00           C  
ATOM   2091  C   SER L  63      18.953  -9.303  87.709  1.00  0.00           C  
ATOM   2092  O   SER L  63      19.550  -8.307  87.228  1.00  0.00           O  
ATOM   2093  CB  SER L  63      17.146  -7.924  88.617  1.00  0.00           C  
ATOM   2094  OG  SER L  63      17.007  -7.042  89.700  1.00  0.00           O  
ATOM   2095  N   GLY L  64      18.911 -10.480  87.115  1.00  0.00           N  
ATOM   2096  CA  GLY L  64      19.594 -10.758  85.843  1.00  0.00           C  
ATOM   2097  C   GLY L  64      18.892 -10.046  84.690  1.00  0.00           C  
ATOM   2098  O   GLY L  64      17.857  -9.348  84.847  1.00  0.00           O  
ATOM   2099  N   SER L  65      19.565 -10.110  83.549  1.00  0.00           N  
ATOM   2100  CA  SER L  65      19.083  -9.558  82.281  1.00  0.00           C  
ATOM   2101  C   SER L  65      20.359  -9.106  81.521  1.00  0.00           C  
ATOM   2102  O   SER L  65      21.389  -8.792  82.112  1.00  0.00           O  
ATOM   2103  CB  SER L  65      18.043  -8.485  82.263  1.00  0.00           C  
ATOM   2104  OG  SER L  65      18.204  -7.219  81.723  1.00  0.00           O  
ATOM   2105  N   LYS L  66      20.213  -9.083  80.244  1.00  0.00           N  
ATOM   2106  CA  LYS L  66      21.301  -8.781  79.301  1.00  0.00           C  
ATOM   2107  C   LYS L  66      20.716  -8.752  77.896  1.00  0.00           C  
ATOM   2108  O   LYS L  66      19.886  -9.676  77.584  1.00  0.00           O  
ATOM   2109  CB  LYS L  66      22.395  -9.831  79.353  1.00  0.00           C  
ATOM   2110  CG  LYS L  66      22.955 -10.394  78.069  1.00  0.00           C  
ATOM   2111  CD  LYS L  66      23.744 -11.669  78.338  1.00  0.00           C  
ATOM   2112  CE  LYS L  66      23.222 -12.568  79.383  1.00  0.00           C  
ATOM   2113  NZ  LYS L  66      22.238 -13.597  78.957  1.00  0.00           N  
ATOM   2114  N   SER L  67      21.275  -7.816  77.126  1.00  0.00           N  
ATOM   2115  CA  SER L  67      20.486  -7.698  75.803  1.00  0.00           C  
ATOM   2116  C   SER L  67      21.178  -8.645  74.851  1.00  0.00           C  
ATOM   2117  O   SER L  67      20.609  -8.989  73.782  1.00  0.00           O  
ATOM   2118  CB  SER L  67      20.354  -6.233  75.501  1.00  0.00           C  
ATOM   2119  OG  SER L  67      20.065  -5.551  76.710  1.00  0.00           O  
ATOM   2120  N   GLY L  68      22.333  -9.197  75.336  1.00  0.00           N  
ATOM   2121  CA  GLY L  68      23.197  -9.951  74.462  1.00  0.00           C  
ATOM   2122  C   GLY L  68      24.466 -10.517  74.977  1.00  0.00           C  
ATOM   2123  O   GLY L  68      24.485 -11.507  75.702  1.00  0.00           O  
ATOM   2124  N   ASN L  69      25.586  -9.986  74.550  1.00  0.00           N  
ATOM   2125  CA  ASN L  69      26.979 -10.344  74.754  1.00  0.00           C  
ATOM   2126  C   ASN L  69      27.402  -9.830  76.148  1.00  0.00           C  
ATOM   2127  O   ASN L  69      28.217 -10.232  76.929  1.00  0.00           O  
ATOM   2128  CB  ASN L  69      27.899  -9.522  73.823  1.00  0.00           C  
ATOM   2129  CG  ASN L  69      28.426  -9.989  72.546  1.00  0.00           C  
ATOM   2130  OD1 ASN L  69      27.880  -9.807  71.449  1.00  0.00           O  
ATOM   2131  ND2 ASN L  69      29.618 -10.619  72.547  1.00  0.00           N  
ATOM   2132  N   THR L  70      26.753  -8.707  76.295  1.00  0.00           N  
ATOM   2133  CA  THR L  70      26.742  -7.750  77.373  1.00  0.00           C  
ATOM   2134  C   THR L  70      25.446  -7.994  78.169  1.00  0.00           C  
ATOM   2135  O   THR L  70      24.253  -8.113  77.714  1.00  0.00           O  
ATOM   2136  CB  THR L  70      26.914  -6.329  76.704  1.00  0.00           C  
ATOM   2137  OG1 THR L  70      27.406  -6.648  75.358  1.00  0.00           O  
ATOM   2138  CG2 THR L  70      27.878  -5.342  77.342  1.00  0.00           C  
ATOM   2139  N   ALA L  71      25.743  -8.103  79.472  1.00  0.00           N  
ATOM   2140  CA  ALA L  71      24.758  -8.438  80.467  1.00  0.00           C  
ATOM   2141  C   ALA L  71      24.941  -7.822  81.833  1.00  0.00           C  
ATOM   2142  O   ALA L  71      26.027  -7.730  82.422  1.00  0.00           O  
ATOM   2143  CB  ALA L  71      24.757  -9.993  80.642  1.00  0.00           C  
ATOM   2144  N   SER L  72      23.779  -7.490  82.387  1.00  0.00           N  
ATOM   2145  CA  SER L  72      23.641  -6.848  83.661  1.00  0.00           C  
ATOM   2146  C   SER L  72      22.611  -7.511  84.568  1.00  0.00           C  
ATOM   2147  O   SER L  72      21.918  -8.512  84.341  1.00  0.00           O  
ATOM   2148  CB  SER L  72      23.455  -5.347  83.521  1.00  0.00           C  
ATOM   2149  OG  SER L  72      22.691  -4.903  82.456  1.00  0.00           O  
ATOM   2150  N   LEU L  73      22.622  -6.877  85.739  1.00  0.00           N  
ATOM   2151  CA  LEU L  73      21.743  -7.208  86.852  1.00  0.00           C  
ATOM   2152  C   LEU L  73      21.516  -6.027  87.775  1.00  0.00           C  
ATOM   2153  O   LEU L  73      22.498  -5.401  88.217  1.00  0.00           O  
ATOM   2154  CB  LEU L  73      22.443  -8.392  87.544  1.00  0.00           C  
ATOM   2155  CG  LEU L  73      22.306  -8.517  89.026  1.00  0.00           C  
ATOM   2156  CD1 LEU L  73      22.866  -9.843  89.531  1.00  0.00           C  
ATOM   2157  CD2 LEU L  73      23.067  -7.377  89.699  1.00  0.00           C  
ATOM   2158  N   THR L  74      20.252  -5.786  88.120  1.00  0.00           N  
ATOM   2159  CA  THR L  74      19.905  -4.725  89.033  1.00  0.00           C  
ATOM   2160  C   THR L  74      19.441  -5.180  90.416  1.00  0.00           C  
ATOM   2161  O   THR L  74      18.871  -6.214  90.684  1.00  0.00           O  
ATOM   2162  CB  THR L  74      18.830  -3.659  88.563  1.00  0.00           C  
ATOM   2163  OG1 THR L  74      17.626  -4.434  88.275  1.00  0.00           O  
ATOM   2164  CG2 THR L  74      19.314  -2.699  87.498  1.00  0.00           C  
ATOM   2165  N   VAL L  75      19.710  -4.240  91.314  1.00  0.00           N  
ATOM   2166  CA  VAL L  75      19.364  -4.275  92.695  1.00  0.00           C  
ATOM   2167  C   VAL L  75      18.538  -3.039  93.075  1.00  0.00           C  
ATOM   2168  O   VAL L  75      19.030  -1.944  93.249  1.00  0.00           O  
ATOM   2169  CB  VAL L  75      20.644  -4.452  93.511  1.00  0.00           C  
ATOM   2170  CG1 VAL L  75      20.367  -5.047  94.872  1.00  0.00           C  
ATOM   2171  CG2 VAL L  75      21.662  -5.281  92.775  1.00  0.00           C  
ATOM   2172  N   SER L  76      17.236  -3.320  93.281  1.00  0.00           N  
ATOM   2173  CA  SER L  76      16.274  -2.278  93.643  1.00  0.00           C  
ATOM   2174  C   SER L  76      16.298  -2.071  95.149  1.00  0.00           C  
ATOM   2175  O   SER L  76      15.984  -2.955  95.952  1.00  0.00           O  
ATOM   2176  CB  SER L  76      14.847  -2.525  93.147  1.00  0.00           C  
ATOM   2177  OG  SER L  76      14.126  -1.254  93.147  1.00  0.00           O  
ATOM   2178  N   GLY L  77      16.784  -0.884  95.475  1.00  0.00           N  
ATOM   2179  CA  GLY L  77      16.739  -0.347  96.828  1.00  0.00           C  
ATOM   2180  C   GLY L  77      17.803  -1.019  97.659  1.00  0.00           C  
ATOM   2181  O   GLY L  77      17.671  -2.247  97.828  1.00  0.00           O  
ATOM   2182  N   LEU L  78      18.722  -0.251  98.187  1.00  0.00           N  
ATOM   2183  CA  LEU L  78      19.844  -0.838  98.945  1.00  0.00           C  
ATOM   2184  C   LEU L  78      19.637  -0.923 100.432  1.00  0.00           C  
ATOM   2185  O   LEU L  78      18.615  -0.577 101.029  1.00  0.00           O  
ATOM   2186  CB  LEU L  78      21.102  -0.232  98.393  1.00  0.00           C  
ATOM   2187  CG  LEU L  78      21.651   1.017  99.007  1.00  0.00           C  
ATOM   2188  CD1 LEU L  78      22.001   0.761 100.447  1.00  0.00           C  
ATOM   2189  CD2 LEU L  78      22.868   1.376  98.170  1.00  0.00           C  
ATOM   2190  N   GLN L  79      20.652  -1.491 101.065  1.00  0.00           N  
ATOM   2191  CA  GLN L  79      20.573  -1.963 102.448  1.00  0.00           C  
ATOM   2192  C   GLN L  79      21.929  -1.704 103.100  1.00  0.00           C  
ATOM   2193  O   GLN L  79      21.933  -1.436 104.295  1.00  0.00           O  
ATOM   2194  CB  GLN L  79      20.121  -3.379 102.632  1.00  0.00           C  
ATOM   2195  CG  GLN L  79      19.999  -4.561 101.836  1.00  0.00           C  
ATOM   2196  CD  GLN L  79      20.309  -5.962 102.230  1.00  0.00           C  
ATOM   2197  OE1 GLN L  79      20.216  -6.981 101.509  1.00  0.00           O  
ATOM   2198  NE2 GLN L  79      20.728  -6.234 103.453  1.00  0.00           N  
ATOM   2199  N   ALA L  80      22.961  -1.823 102.306  1.00  0.00           N  
ATOM   2200  CA  ALA L  80      24.336  -1.553 102.769  1.00  0.00           C  
ATOM   2201  C   ALA L  80      25.051  -2.897 102.899  1.00  0.00           C  
ATOM   2202  O   ALA L  80      26.272  -2.993 102.697  1.00  0.00           O  
ATOM   2203  CB  ALA L  80      24.324  -0.682 103.974  1.00  0.00           C  
ATOM   2204  N   GLU L  81      24.219  -3.900 103.225  1.00  0.00           N  
ATOM   2205  CA  GLU L  81      24.673  -5.305 103.204  1.00  0.00           C  
ATOM   2206  C   GLU L  81      24.804  -5.628 101.704  1.00  0.00           C  
ATOM   2207  O   GLU L  81      25.248  -6.670 101.267  1.00  0.00           O  
ATOM   2208  CB  GLU L  81      23.785  -6.348 103.753  1.00  0.00           C  
ATOM   2209  CG  GLU L  81      23.473  -6.407 105.240  1.00  0.00           C  
ATOM   2210  CD  GLU L  81      22.047  -5.986 105.495  1.00  0.00           C  
ATOM   2211  OE1 GLU L  81      21.669  -4.966 104.915  1.00  0.00           O  
ATOM   2212  OE2 GLU L  81      21.326  -6.717 106.180  1.00  0.00           O  
ATOM   2213  N   ASP L  82      24.383  -4.585 100.992  1.00  0.00           N  
ATOM   2214  CA  ASP L  82      24.353  -4.483  99.557  1.00  0.00           C  
ATOM   2215  C   ASP L  82      25.706  -4.071  98.943  1.00  0.00           C  
ATOM   2216  O   ASP L  82      26.060  -4.449  97.832  1.00  0.00           O  
ATOM   2217  CB  ASP L  82      23.302  -3.431  99.124  1.00  0.00           C  
ATOM   2218  CG  ASP L  82      21.995  -3.824  99.819  1.00  0.00           C  
ATOM   2219  OD1 ASP L  82      22.069  -3.916 101.029  1.00  0.00           O  
ATOM   2220  OD2 ASP L  82      21.066  -4.025  99.053  1.00  0.00           O  
ATOM   2221  N   GLU L  83      26.343  -3.217  99.715  1.00  0.00           N  
ATOM   2222  CA  GLU L  83      27.747  -2.861  99.380  1.00  0.00           C  
ATOM   2223  C   GLU L  83      28.418  -4.194  99.746  1.00  0.00           C  
ATOM   2224  O   GLU L  83      28.284  -4.520 100.933  1.00  0.00           O  
ATOM   2225  CB  GLU L  83      28.252  -1.774 100.202  1.00  0.00           C  
ATOM   2226  CG  GLU L  83      28.764  -2.019 101.645  1.00  0.00           C  
ATOM   2227  CD  GLU L  83      29.968  -1.066 101.721  1.00  0.00           C  
ATOM   2228  OE1 GLU L  83      30.140  -0.188 102.496  1.00  0.00           O  
ATOM   2229  OE2 GLU L  83      30.662  -1.309 100.709  1.00  0.00           O  
ATOM   2230  N   ALA L  84      28.881  -4.903  98.754  1.00  0.00           N  
ATOM   2231  CA  ALA L  84      29.783  -6.078  99.098  1.00  0.00           C  
ATOM   2232  C   ALA L  84      30.643  -6.293  97.880  1.00  0.00           C  
ATOM   2233  O   ALA L  84      30.941  -5.183  97.352  1.00  0.00           O  
ATOM   2234  CB  ALA L  84      29.150  -7.253  99.698  1.00  0.00           C  
ATOM   2235  N   ASP L  85      31.055  -7.498  97.555  1.00  0.00           N  
ATOM   2236  CA  ASP L  85      31.907  -7.549  96.283  1.00  0.00           C  
ATOM   2237  C   ASP L  85      30.992  -8.246  95.279  1.00  0.00           C  
ATOM   2238  O   ASP L  85      30.423  -9.326  95.646  1.00  0.00           O  
ATOM   2239  CB  ASP L  85      33.302  -8.040  96.497  1.00  0.00           C  
ATOM   2240  CG  ASP L  85      34.506  -7.167  96.733  1.00  0.00           C  
ATOM   2241  OD1 ASP L  85      35.243  -7.280  97.739  1.00  0.00           O  
ATOM   2242  OD2 ASP L  85      34.893  -6.277  95.934  1.00  0.00           O  
ATOM   2243  N   TYR L  86      30.870  -7.596  94.108  1.00  0.00           N  
ATOM   2244  CA  TYR L  86      29.936  -8.264  93.147  1.00  0.00           C  
ATOM   2245  C   TYR L  86      30.632  -8.728  91.911  1.00  0.00           C  
ATOM   2246  O   TYR L  86      31.216  -7.902  91.175  1.00  0.00           O  
ATOM   2247  CB  TYR L  86      28.648  -7.376  92.933  1.00  0.00           C  
ATOM   2248  CG  TYR L  86      27.837  -7.333  94.212  1.00  0.00           C  
ATOM   2249  CD1 TYR L  86      28.085  -6.357  95.168  1.00  0.00           C  
ATOM   2250  CD2 TYR L  86      26.901  -8.309  94.502  1.00  0.00           C  
ATOM   2251  CE1 TYR L  86      27.404  -6.348  96.367  1.00  0.00           C  
ATOM   2252  CE2 TYR L  86      26.212  -8.301  95.694  1.00  0.00           C  
ATOM   2253  CZ  TYR L  86      26.459  -7.322  96.627  1.00  0.00           C  
ATOM   2254  OH  TYR L  86      25.760  -7.361  97.787  1.00  0.00           O  
ATOM   2255  N   TYR L  87      30.572 -10.073  91.678  1.00  0.00           N  
ATOM   2256  CA  TYR L  87      31.148 -10.595  90.425  1.00  0.00           C  
ATOM   2257  C   TYR L  87      30.147 -11.286  89.496  1.00  0.00           C  
ATOM   2258  O   TYR L  87      29.056 -11.725  89.873  1.00  0.00           O  
ATOM   2259  CB  TYR L  87      32.268 -11.595  90.637  1.00  0.00           C  
ATOM   2260  CG  TYR L  87      33.191 -11.289  91.770  1.00  0.00           C  
ATOM   2261  CD1 TYR L  87      32.898 -11.661  93.075  1.00  0.00           C  
ATOM   2262  CD2 TYR L  87      34.394 -10.641  91.519  1.00  0.00           C  
ATOM   2263  CE1 TYR L  87      33.776 -11.375  94.097  1.00  0.00           C  
ATOM   2264  CE2 TYR L  87      35.283 -10.342  92.532  1.00  0.00           C  
ATOM   2265  CZ  TYR L  87      34.967 -10.706  93.818  1.00  0.00           C  
ATOM   2266  OH  TYR L  87      35.902 -10.381  94.764  1.00  0.00           O  
ATOM   2267  N   CYS L  88      30.663 -11.415  88.267  1.00  0.00           N  
ATOM   2268  CA  CYS L  88      29.811 -11.958  87.193  1.00  0.00           C  
ATOM   2269  C   CYS L  88      30.529 -13.012  86.354  1.00  0.00           C  
ATOM   2270  O   CYS L  88      31.737 -12.948  86.083  1.00  0.00           O  
ATOM   2271  CB  CYS L  88      29.173 -10.864  86.378  1.00  0.00           C  
ATOM   2272  SG  CYS L  88      28.648 -11.379  84.731  1.00  0.00           S  
ATOM   2273  N   SER L  89      29.645 -13.975  85.945  1.00  0.00           N  
ATOM   2274  CA  SER L  89      30.215 -15.203  85.343  1.00  0.00           C  
ATOM   2275  C   SER L  89      29.304 -15.925  84.373  1.00  0.00           C  
ATOM   2276  O   SER L  89      28.211 -16.406  84.783  1.00  0.00           O  
ATOM   2277  CB  SER L  89      30.528 -16.248  86.430  1.00  0.00           C  
ATOM   2278  OG  SER L  89      30.772 -15.749  87.704  1.00  0.00           O  
ATOM   2279  N   SER L  90      29.844 -16.040  83.162  1.00  0.00           N  
ATOM   2280  CA  SER L  90      29.104 -16.890  82.175  1.00  0.00           C  
ATOM   2281  C   SER L  90      29.880 -18.208  81.939  1.00  0.00           C  
ATOM   2282  O   SER L  90      31.106 -18.242  81.629  1.00  0.00           O  
ATOM   2283  CB  SER L  90      28.778 -16.184  80.893  1.00  0.00           C  
ATOM   2284  OG  SER L  90      27.930 -16.946  80.043  1.00  0.00           O  
ATOM   2285  N   TYR L  91      29.090 -19.294  82.129  1.00  0.00           N  
ATOM   2286  CA  TYR L  91      29.595 -20.617  81.647  1.00  0.00           C  
ATOM   2287  C   TYR L  91      30.032 -20.451  80.194  1.00  0.00           C  
ATOM   2288  O   TYR L  91      29.538 -19.633  79.403  1.00  0.00           O  
ATOM   2289  CB  TYR L  91      28.544 -21.701  81.759  1.00  0.00           C  
ATOM   2290  CG  TYR L  91      28.722 -22.967  80.974  1.00  0.00           C  
ATOM   2291  CD1 TYR L  91      29.995 -23.481  80.692  1.00  0.00           C  
ATOM   2292  CD2 TYR L  91      27.610 -23.727  80.576  1.00  0.00           C  
ATOM   2293  CE1 TYR L  91      30.172 -24.658  79.987  1.00  0.00           C  
ATOM   2294  CE2 TYR L  91      27.768 -24.924  79.889  1.00  0.00           C  
ATOM   2295  CZ  TYR L  91      29.051 -25.382  79.588  1.00  0.00           C  
ATOM   2296  OH  TYR L  91      29.164 -26.572  78.922  1.00  0.00           O  
ATOM   2297  N   GLU L  92      30.969 -21.288  79.829  1.00  0.00           N  
ATOM   2298  CA  GLU L  92      31.613 -21.430  78.567  1.00  0.00           C  
ATOM   2299  C   GLU L  92      31.196 -22.658  77.760  1.00  0.00           C  
ATOM   2300  O   GLU L  92      30.061 -23.155  77.693  1.00  0.00           O  
ATOM   2301  CB  GLU L  92      33.144 -21.520  78.783  1.00  0.00           C  
ATOM   2302  CG  GLU L  92      33.837 -20.400  79.554  1.00  0.00           C  
ATOM   2303  CD  GLU L  92      35.336 -20.418  79.612  1.00  0.00           C  
ATOM   2304  OE1 GLU L  92      35.982 -20.401  80.634  1.00  0.00           O  
ATOM   2305  OE2 GLU L  92      35.924 -20.440  78.515  1.00  0.00           O  
ATOM   2306  N   GLY L  93      32.158 -23.166  77.030  1.00  0.00           N  
ATOM   2307  CA  GLY L  93      32.169 -24.317  76.204  1.00  0.00           C  
ATOM   2308  C   GLY L  93      31.907 -25.690  76.736  1.00  0.00           C  
ATOM   2309  O   GLY L  93      31.283 -26.501  75.975  1.00  0.00           O  
ATOM   2310  N   SER L  94      32.393 -26.044  77.903  1.00  0.00           N  
ATOM   2311  CA  SER L  94      32.042 -27.347  78.504  1.00  0.00           C  
ATOM   2312  C   SER L  94      32.900 -27.687  79.701  1.00  0.00           C  
ATOM   2313  O   SER L  94      34.124 -27.943  79.588  1.00  0.00           O  
ATOM   2314  CB  SER L  94      32.019 -28.479  77.504  1.00  0.00           C  
ATOM   2315  OG  SER L  94      33.313 -28.871  77.072  1.00  0.00           O  
ATOM   2316  N   ASP L  95      32.182 -27.740  80.835  1.00  0.00           N  
ATOM   2317  CA  ASP L  95      32.909 -27.963  82.101  1.00  0.00           C  
ATOM   2318  C   ASP L  95      33.852 -26.790  82.322  1.00  0.00           C  
ATOM   2319  O   ASP L  95      35.053 -27.075  82.612  1.00  0.00           O  
ATOM   2320  CB  ASP L  95      33.742 -29.258  81.844  1.00  0.00           C  
ATOM   2321  CG  ASP L  95      32.804 -30.460  81.777  1.00  0.00           C  
ATOM   2322  OD1 ASP L  95      31.802 -30.396  82.515  1.00  0.00           O  
ATOM   2323  OD2 ASP L  95      33.157 -31.366  81.019  1.00  0.00           O  
ATOM   2324  N   ASN L  95A     33.371 -25.578  82.060  1.00  0.00           N  
ATOM   2325  CA  ASN L  95A     34.219 -24.376  82.212  1.00  0.00           C  
ATOM   2326  C   ASN L  95A     33.377 -23.101  82.032  1.00  0.00           C  
ATOM   2327  O   ASN L  95A     32.453 -23.107  81.248  1.00  0.00           O  
ATOM   2328  CB  ASN L  95A     35.474 -24.310  81.367  1.00  0.00           C  
ATOM   2329  CG  ASN L  95A     35.358 -24.690  79.933  1.00  0.00           C  
ATOM   2330  OD1 ASN L  95A     36.157 -25.523  79.443  1.00  0.00           O  
ATOM   2331  ND2 ASN L  95A     34.383 -24.112  79.253  1.00  0.00           N  
ATOM   2332  N   PHE L  96      33.806 -22.091  82.765  1.00  0.00           N  
ATOM   2333  CA  PHE L  96      33.117 -20.778  82.761  1.00  0.00           C  
ATOM   2334  C   PHE L  96      34.034 -19.631  83.201  1.00  0.00           C  
ATOM   2335  O   PHE L  96      35.174 -19.889  83.646  1.00  0.00           O  
ATOM   2336  CB  PHE L  96      31.850 -20.848  83.627  1.00  0.00           C  
ATOM   2337  CG  PHE L  96      32.073 -21.620  84.886  1.00  0.00           C  
ATOM   2338  CD1 PHE L  96      31.271 -22.704  85.198  1.00  0.00           C  
ATOM   2339  CD2 PHE L  96      33.129 -21.265  85.722  1.00  0.00           C  
ATOM   2340  CE1 PHE L  96      31.477 -23.415  86.354  1.00  0.00           C  
ATOM   2341  CE2 PHE L  96      33.349 -21.962  86.895  1.00  0.00           C  
ATOM   2342  CZ  PHE L  96      32.510 -23.045  87.206  1.00  0.00           C  
ATOM   2343  N   VAL L  97      33.460 -18.423  83.170  1.00  0.00           N  
ATOM   2344  CA  VAL L  97      34.347 -17.217  83.374  1.00  0.00           C  
ATOM   2345  C   VAL L  97      33.771 -16.077  84.155  1.00  0.00           C  
ATOM   2346  O   VAL L  97      32.598 -15.586  83.999  1.00  0.00           O  
ATOM   2347  CB  VAL L  97      34.812 -17.010  81.921  1.00  0.00           C  
ATOM   2348  CG1 VAL L  97      36.040 -17.846  81.610  1.00  0.00           C  
ATOM   2349  CG2 VAL L  97      33.704 -17.373  80.926  1.00  0.00           C  
ATOM   2350  N   PHE L  98      34.620 -15.529  85.049  1.00  0.00           N  
ATOM   2351  CA  PHE L  98      34.254 -14.491  86.007  1.00  0.00           C  
ATOM   2352  C   PHE L  98      34.863 -13.115  85.683  1.00  0.00           C  
ATOM   2353  O   PHE L  98      35.615 -12.901  84.754  1.00  0.00           O  
ATOM   2354  CB  PHE L  98      34.634 -14.827  87.412  1.00  0.00           C  
ATOM   2355  CG  PHE L  98      34.465 -16.097  88.120  1.00  0.00           C  
ATOM   2356  CD1 PHE L  98      34.649 -17.330  87.486  1.00  0.00           C  
ATOM   2357  CD2 PHE L  98      34.208 -16.105  89.483  1.00  0.00           C  
ATOM   2358  CE1 PHE L  98      34.530 -18.541  88.157  1.00  0.00           C  
ATOM   2359  CE2 PHE L  98      34.089 -17.316  90.182  1.00  0.00           C  
ATOM   2360  CZ  PHE L  98      34.256 -18.523  89.502  1.00  0.00           C  
ATOM   2361  N   GLY L  99      34.461 -12.178  86.527  1.00  0.00           N  
ATOM   2362  CA  GLY L  99      34.926 -10.758  86.477  1.00  0.00           C  
ATOM   2363  C   GLY L  99      34.387 -10.018  87.689  1.00  0.00           C  
ATOM   2364  O   GLY L  99      33.352 -10.480  88.263  1.00  0.00           O  
ATOM   2365  N   THR L 100      34.993  -8.869  87.999  1.00  0.00           N  
ATOM   2366  CA  THR L 100      34.687  -8.203  89.282  1.00  0.00           C  
ATOM   2367  C   THR L 100      34.321  -6.741  89.357  1.00  0.00           C  
ATOM   2368  O   THR L 100      34.820  -5.840  88.652  1.00  0.00           O  
ATOM   2369  CB  THR L 100      35.932  -8.574  90.228  1.00  0.00           C  
ATOM   2370  OG1 THR L 100      35.612  -8.137  91.550  1.00  0.00           O  
ATOM   2371  CG2 THR L 100      37.283  -8.059  89.758  1.00  0.00           C  
ATOM   2372  N   GLY L 101      33.369  -6.427  90.266  1.00  0.00           N  
ATOM   2373  CA  GLY L 101      32.903  -5.129  90.572  1.00  0.00           C  
ATOM   2374  C   GLY L 101      31.805  -4.792  91.517  1.00  0.00           C  
ATOM   2375  O   GLY L 101      31.628  -5.074  92.693  1.00  0.00           O  
ATOM   2376  N   THR L 102      30.855  -4.044  91.015  1.00  0.00           N  
ATOM   2377  CA  THR L 102      29.604  -3.481  91.216  1.00  0.00           C  
ATOM   2378  C   THR L 102      28.448  -3.775  92.132  1.00  0.00           C  
ATOM   2379  O   THR L 102      27.700  -4.771  91.902  1.00  0.00           O  
ATOM   2380  CB  THR L 102      28.816  -3.891  89.784  1.00  0.00           C  
ATOM   2381  OG1 THR L 102      29.827  -3.863  88.799  1.00  0.00           O  
ATOM   2382  CG2 THR L 102      27.610  -3.025  89.593  1.00  0.00           C  
ATOM   2383  N   LYS L 103      28.138  -2.848  93.013  1.00  0.00           N  
ATOM   2384  CA  LYS L 103      27.125  -3.049  94.069  1.00  0.00           C  
ATOM   2385  C   LYS L 103      27.900  -3.096  95.391  1.00  0.00           C  
ATOM   2386  O   LYS L 103      27.628  -3.731  96.419  1.00  0.00           O  
ATOM   2387  CB  LYS L 103      26.271  -4.250  93.844  1.00  0.00           C  
ATOM   2388  CG  LYS L 103      25.497  -4.910  94.904  1.00  0.00           C  
ATOM   2389  CD  LYS L 103      24.423  -4.134  95.636  1.00  0.00           C  
ATOM   2390  CE  LYS L 103      23.650  -5.012  96.594  1.00  0.00           C  
ATOM   2391  NZ  LYS L 103      22.411  -4.436  97.094  1.00  0.00           N  
ATOM   2392  N   VAL L 104      28.988  -2.304  95.320  1.00  0.00           N  
ATOM   2393  CA  VAL L 104      29.997  -2.133  96.346  1.00  0.00           C  
ATOM   2394  C   VAL L 104      29.743  -0.944  97.257  1.00  0.00           C  
ATOM   2395  O   VAL L 104      30.194  -0.984  98.388  1.00  0.00           O  
ATOM   2396  CB  VAL L 104      31.377  -2.025  95.644  1.00  0.00           C  
ATOM   2397  CG1 VAL L 104      31.581  -2.992  94.502  1.00  0.00           C  
ATOM   2398  CG2 VAL L 104      31.582  -0.617  95.136  1.00  0.00           C  
ATOM   2399  N   THR L 105      28.986   0.045  96.772  1.00  0.00           N  
ATOM   2400  CA  THR L 105      28.887   1.345  97.393  1.00  0.00           C  
ATOM   2401  C   THR L 105      27.502   1.878  97.778  1.00  0.00           C  
ATOM   2402  O   THR L 105      26.883   2.629  96.973  1.00  0.00           O  
ATOM   2403  CB  THR L 105      29.486   2.592  96.547  1.00  0.00           C  
ATOM   2404  OG1 THR L 105      30.839   2.423  96.112  1.00  0.00           O  
ATOM   2405  CG2 THR L 105      29.318   3.908  97.341  1.00  0.00           C  
ATOM   2406  N   VAL L 106      27.126   1.624  98.986  1.00  0.00           N  
ATOM   2407  CA  VAL L 106      25.906   2.191  99.561  1.00  0.00           C  
ATOM   2408  C   VAL L 106      26.334   3.287 100.520  1.00  0.00           C  
ATOM   2409  O   VAL L 106      26.875   2.922 101.555  1.00  0.00           O  
ATOM   2410  CB  VAL L 106      25.121   1.096 100.273  1.00  0.00           C  
ATOM   2411  CG1 VAL L 106      25.659  -0.260  99.817  1.00  0.00           C  
ATOM   2412  CG2 VAL L 106      25.090   1.227 101.743  1.00  0.00           C  
ATOM   2413  N   LEU L 106A     26.160   4.507 100.079  1.00  0.00           N  
ATOM   2414  CA  LEU L 106A     26.340   5.677 101.005  1.00  0.00           C  
ATOM   2415  C   LEU L 106A     24.873   5.859 101.421  1.00  0.00           C  
ATOM   2416  O   LEU L 106A     24.160   5.016 100.853  1.00  0.00           O  
ATOM   2417  CB  LEU L 106A     27.051   6.809 100.453  1.00  0.00           C  
ATOM   2418  CG  LEU L 106A     27.328   7.185  99.068  1.00  0.00           C  
ATOM   2419  CD1 LEU L 106A     28.785   7.717  98.995  1.00  0.00           C  
ATOM   2420  CD2 LEU L 106A     27.203   6.014  98.111  1.00  0.00           C  
ATOM   2421  N   GLY L 107      24.535   6.815 102.202  1.00  0.00           N  
ATOM   2422  CA  GLY L 107      23.125   6.769 102.769  1.00  0.00           C  
ATOM   2423  C   GLY L 107      23.287   5.976 104.085  1.00  0.00           C  
ATOM   2424  O   GLY L 107      22.344   5.702 104.790  1.00  0.00           O  
ATOM   2425  N   GLN L 108      24.557   5.667 104.325  1.00  0.00           N  
ATOM   2426  CA  GLN L 108      24.998   4.946 105.513  1.00  0.00           C  
ATOM   2427  C   GLN L 108      25.252   6.057 106.541  1.00  0.00           C  
ATOM   2428  O   GLN L 108      25.984   6.993 106.218  1.00  0.00           O  
ATOM   2429  CB  GLN L 108      26.242   4.120 105.322  1.00  0.00           C  
ATOM   2430  CG  GLN L 108      26.351   2.794 105.987  1.00  0.00           C  
ATOM   2431  CD  GLN L 108      26.393   2.691 107.452  1.00  0.00           C  
ATOM   2432  OE1 GLN L 108      27.269   3.111 108.186  1.00  0.00           O  
ATOM   2433  NE2 GLN L 108      25.351   2.041 108.010  1.00  0.00           N  
ATOM   2434  N   PRO L 109      24.624   5.889 107.670  1.00  0.00           N  
ATOM   2435  CA  PRO L 109      24.673   6.843 108.751  1.00  0.00           C  
ATOM   2436  C   PRO L 109      25.922   6.632 109.584  1.00  0.00           C  
ATOM   2437  O   PRO L 109      26.282   5.519 109.932  1.00  0.00           O  
ATOM   2438  CB  PRO L 109      23.420   6.558 109.545  1.00  0.00           C  
ATOM   2439  CG  PRO L 109      23.122   5.112 109.313  1.00  0.00           C  
ATOM   2440  CD  PRO L 109      23.895   4.682 108.099  1.00  0.00           C  
TER    2441      PRO L 109                                                      
ATOM      9  N   SER L   2      23.980 -25.213 102.864  1.00  0.00           N  
ATOM     10  CA  SER L   2      25.266 -24.642 103.342  1.00  0.00           C  
ATOM     11  C   SER L   2      25.695 -25.675 104.375  1.00  0.00           C  
ATOM     12  O   SER L   2      24.813 -26.420 104.816  1.00  0.00           O  
ATOM     13  CB  SER L   2      25.113 -23.279 103.929  1.00  0.00           C  
ATOM     14  OG  SER L   2      26.268 -22.489 104.100  1.00  0.00           O  
ATOM     15  N   ALA L   3      26.936 -25.687 104.686  1.00  0.00           N  
ATOM     16  CA  ALA L   3      27.514 -26.598 105.656  1.00  0.00           C  
ATOM     17  C   ALA L   3      28.737 -27.256 105.006  1.00  0.00           C  
ATOM     18  O   ALA L   3      28.644 -28.381 104.519  1.00  0.00           O  
ATOM     19  CB  ALA L   3      26.533 -27.603 106.194  1.00  0.00           C  
ATOM     20  N   LEU L   4      29.815 -26.460 105.020  1.00  0.00           N  
ATOM     21  CA  LEU L   4      31.115 -26.937 104.576  1.00  0.00           C  
ATOM     22  C   LEU L   4      32.318 -26.339 105.305  1.00  0.00           C  
ATOM     23  O   LEU L   4      32.852 -25.238 105.058  1.00  0.00           O  
ATOM     24  CB  LEU L   4      31.186 -26.828 103.057  1.00  0.00           C  
ATOM     25  CG  LEU L   4      30.937 -28.092 102.264  1.00  0.00           C  
ATOM     26  CD1 LEU L   4      29.653 -28.026 101.474  1.00  0.00           C  
ATOM     27  CD2 LEU L   4      32.110 -28.306 101.334  1.00  0.00           C  
ATOM     28  N   THR L   5      32.851 -27.205 106.173  1.00  0.00           N  
ATOM     29  CA  THR L   5      34.054 -26.925 106.950  1.00  0.00           C  
ATOM     30  C   THR L   5      35.300 -27.321 106.158  1.00  0.00           C  
ATOM     31  O   THR L   5      35.478 -28.526 105.904  1.00  0.00           O  
ATOM     32  CB  THR L   5      34.095 -27.690 108.318  1.00  0.00           C  
ATOM     33  OG1 THR L   5      32.729 -27.605 108.850  1.00  0.00           O  
ATOM     34  CG2 THR L   5      35.175 -27.170 109.266  1.00  0.00           C  
ATOM     35  N   GLN L   6      36.063 -26.289 105.848  1.00  0.00           N  
ATOM     36  CA  GLN L   6      37.363 -26.533 105.123  1.00  0.00           C  
ATOM     37  C   GLN L   6      38.457 -25.838 105.928  1.00  0.00           C  
ATOM     38  O   GLN L   6      38.243 -24.715 106.426  1.00  0.00           O  
ATOM     39  CB  GLN L   6      37.232 -26.161 103.704  1.00  0.00           C  
ATOM     40  CG  GLN L   6      37.619 -24.756 103.306  1.00  0.00           C  
ATOM     41  CD  GLN L   6      37.069 -24.479 101.931  1.00  0.00           C  
ATOM     42  OE1 GLN L   6      37.659 -23.760 101.174  1.00  0.00           O  
ATOM     43  NE2 GLN L   6      35.909 -25.119 101.743  1.00  0.00           N  
ATOM     44  N   PRO L   7      39.640 -26.477 105.959  1.00  0.00           N  
ATOM     45  CA  PRO L   7      40.642 -26.084 106.980  1.00  0.00           C  
ATOM     46  C   PRO L   7      40.985 -24.624 106.909  1.00  0.00           C  
ATOM     47  O   PRO L   7      41.085 -23.970 105.887  1.00  0.00           O  
ATOM     48  CB  PRO L   7      41.693 -27.164 106.900  1.00  0.00           C  
ATOM     49  CG  PRO L   7      40.928 -28.385 106.459  1.00  0.00           C  
ATOM     50  CD  PRO L   7      39.909 -27.826 105.469  1.00  0.00           C  
ATOM     51  N   ALA L   8      41.049 -24.039 108.108  1.00  0.00           N  
ATOM     52  CA  ALA L   8      41.421 -22.646 108.365  1.00  0.00           C  
ATOM     53  C   ALA L   8      42.936 -22.431 108.346  1.00  0.00           C  
ATOM     54  O   ALA L   8      43.625 -22.460 109.371  1.00  0.00           O  
ATOM     55  CB  ALA L   8      40.790 -22.230 109.687  1.00  0.00           C  
ATOM     56  N   SER L   9      43.481 -22.285 107.158  1.00  0.00           N  
ATOM     57  CA  SER L   9      44.863 -21.965 106.892  1.00  0.00           C  
ATOM     58  C   SER L   9      45.642 -22.791 105.926  1.00  0.00           C  
ATOM     59  O   SER L   9      45.859 -22.217 104.810  1.00  0.00           O  
ATOM     60  CB  SER L   9      45.666 -21.755 108.168  1.00  0.00           C  
ATOM     61  OG  SER L   9      46.779 -20.883 107.854  1.00  0.00           O  
ATOM     62  N   VAL L  11      46.133 -23.955 106.194  1.00  0.00           N  
ATOM     63  CA  VAL L  11      46.904 -24.785 105.270  1.00  0.00           C  
ATOM     64  C   VAL L  11      48.251 -24.072 104.924  1.00  0.00           C  
ATOM     65  O   VAL L  11      48.468 -23.114 104.206  1.00  0.00           O  
ATOM     66  CB  VAL L  11      46.178 -25.392 104.072  1.00  0.00           C  
ATOM     67  CG1 VAL L  11      44.792 -25.952 104.385  1.00  0.00           C  
ATOM     68  CG2 VAL L  11      46.153 -24.517 102.855  1.00  0.00           C  
ATOM     69  N   SER L  12      49.251 -24.706 105.528  1.00  0.00           N  
ATOM     70  CA  SER L  12      50.623 -24.326 105.625  1.00  0.00           C  
ATOM     71  C   SER L  12      51.432 -24.474 104.366  1.00  0.00           C  
ATOM     72  O   SER L  12      51.582 -25.606 103.901  1.00  0.00           O  
ATOM     73  CB  SER L  12      51.364 -25.144 106.697  1.00  0.00           C  
ATOM     74  OG  SER L  12      51.129 -24.613 107.965  1.00  0.00           O  
ATOM     75  N   GLY L  13      51.959 -23.321 103.953  1.00  0.00           N  
ATOM     76  CA  GLY L  13      52.869 -23.325 102.790  1.00  0.00           C  
ATOM     77  C   GLY L  13      54.307 -23.537 103.295  1.00  0.00           C  
ATOM     78  O   GLY L  13      54.552 -23.161 104.446  1.00  0.00           O  
ATOM     79  N   SER L  14      55.116 -24.231 102.476  1.00  0.00           N  
ATOM     80  CA  SER L  14      56.568 -24.186 102.747  1.00  0.00           C  
ATOM     81  C   SER L  14      57.307 -23.622 101.539  1.00  0.00           C  
ATOM     82  O   SER L  14      57.341 -22.371 101.388  1.00  0.00           O  
ATOM     83  CB  SER L  14      57.283 -25.322 103.353  1.00  0.00           C  
ATOM     84  OG  SER L  14      57.440 -25.293 104.725  1.00  0.00           O  
ATOM     85  N   PRO L  15      57.903 -24.521 100.795  1.00  0.00           N  
ATOM     86  CA  PRO L  15      58.745 -24.113  99.642  1.00  0.00           C  
ATOM     87  C   PRO L  15      58.337 -25.053  98.518  1.00  0.00           C  
ATOM     88  O   PRO L  15      57.356 -24.789  97.847  1.00  0.00           O  
ATOM     89  CB  PRO L  15      60.138 -24.442 100.133  1.00  0.00           C  
ATOM     90  CG  PRO L  15      59.967 -25.632 101.046  1.00  0.00           C  
ATOM     91  CD  PRO L  15      58.465 -25.809 101.310  1.00  0.00           C  
ATOM     92  N   GLY L  16      59.194 -26.044  98.362  1.00  0.00           N  
ATOM     93  CA  GLY L  16      58.679 -27.267  97.629  1.00  0.00           C  
ATOM     94  C   GLY L  16      57.989 -27.992  98.830  1.00  0.00           C  
ATOM     95  O   GLY L  16      58.606 -28.063  99.912  1.00  0.00           O  
ATOM     96  N   GLN L  17      56.776 -28.395  98.600  1.00  0.00           N  
ATOM     97  CA  GLN L  17      56.070 -29.259  99.618  1.00  0.00           C  
ATOM     98  C   GLN L  17      54.767 -29.518  98.884  1.00  0.00           C  
ATOM     99  O   GLN L  17      54.691 -29.035  97.729  1.00  0.00           O  
ATOM    100  CB  GLN L  17      56.055 -28.599 100.920  1.00  0.00           C  
ATOM    101  CG  GLN L  17      55.777 -29.182 102.258  1.00  0.00           C  
ATOM    102  CD  GLN L  17      55.331 -28.124 103.267  1.00  0.00           C  
ATOM    103  OE1 GLN L  17      54.525 -28.223 104.188  1.00  0.00           O  
ATOM    104  NE2 GLN L  17      55.894 -26.938 103.048  1.00  0.00           N  
ATOM    105  N   SER L  18      53.854 -30.255  99.451  1.00  0.00           N  
ATOM    106  CA  SER L  18      52.488 -30.420  98.897  1.00  0.00           C  
ATOM    107  C   SER L  18      51.470 -29.988  99.962  1.00  0.00           C  
ATOM    108  O   SER L  18      51.880 -29.994 101.156  1.00  0.00           O  
ATOM    109  CB  SER L  18      52.223 -31.847  98.449  1.00  0.00           C  
ATOM    110  OG  SER L  18      53.336 -32.649  98.155  1.00  0.00           O  
ATOM    111  N   ILE L  19      50.264 -29.563  99.581  1.00  0.00           N  
ATOM    112  CA  ILE L  19      49.253 -29.355 100.643  1.00  0.00           C  
ATOM    113  C   ILE L  19      47.876 -29.898 100.308  1.00  0.00           C  
ATOM    114  O   ILE L  19      47.479 -30.137  99.193  1.00  0.00           O  
ATOM    115  CB  ILE L  19      49.378 -28.060 101.468  1.00  0.00           C  
ATOM    116  CG1 ILE L  19      48.125 -27.157 101.403  1.00  0.00           C  
ATOM    117  CG2 ILE L  19      50.735 -27.339 101.223  1.00  0.00           C  
ATOM    118  CD1 ILE L  19      47.760 -26.573 100.025  1.00  0.00           C  
ATOM    119  N   THR L  20      47.167 -30.241 101.405  1.00  0.00           N  
ATOM    120  CA  THR L  20      45.873 -30.844 101.420  1.00  0.00           C  
ATOM    121  C   THR L  20      44.933 -30.234 102.440  1.00  0.00           C  
ATOM    122  O   THR L  20      45.343 -29.839 103.498  1.00  0.00           O  
ATOM    123  CB  THR L  20      45.852 -32.409 101.624  1.00  0.00           C  
ATOM    124  OG1 THR L  20      45.652 -32.987 100.304  1.00  0.00           O  
ATOM    125  CG2 THR L  20      44.785 -32.875 102.619  1.00  0.00           C  
ATOM    126  N   VAL L  21      43.673 -30.275 102.080  1.00  0.00           N  
ATOM    127  CA  VAL L  21      42.531 -29.747 102.788  1.00  0.00           C  
ATOM    128  C   VAL L  21      41.476 -30.831 102.989  1.00  0.00           C  
ATOM    129  O   VAL L  21      41.657 -31.968 102.615  1.00  0.00           O  
ATOM    130  CB  VAL L  21      41.914 -28.582 101.942  1.00  0.00           C  
ATOM    131  CG1 VAL L  21      41.512 -29.073 100.579  1.00  0.00           C  
ATOM    132  CG2 VAL L  21      40.791 -27.837 102.621  1.00  0.00           C  
ATOM    133  N   SER L  22      40.333 -30.442 103.463  1.00  0.00           N  
ATOM    134  CA  SER L  22      39.086 -30.965 103.727  1.00  0.00           C  
ATOM    135  C   SER L  22      38.010 -29.807 103.613  1.00  0.00           C  
ATOM    136  O   SER L  22      38.251 -28.631 103.517  1.00  0.00           O  
ATOM    137  CB  SER L  22      38.718 -31.642 105.015  1.00  0.00           C  
ATOM    138  OG  SER L  22      37.390 -31.238 105.364  1.00  0.00           O  
ATOM    139  N   CYS L  23      36.809 -30.268 103.624  1.00  0.00           N  
ATOM    140  CA  CYS L  23      35.549 -29.601 103.494  1.00  0.00           C  
ATOM    141  C   CYS L  23      34.471 -30.660 103.931  1.00  0.00           C  
ATOM    142  O   CYS L  23      34.618 -31.834 103.517  1.00  0.00           O  
ATOM    143  CB  CYS L  23      35.178 -29.137 102.128  1.00  0.00           C  
ATOM    144  SG  CYS L  23      36.294 -28.237 101.113  1.00  0.00           S  
ATOM    145  N   ALA L  24      33.498 -30.138 104.671  1.00  0.00           N  
ATOM    146  CA  ALA L  24      32.550 -31.107 105.218  1.00  0.00           C  
ATOM    147  C   ALA L  24      31.267 -30.639 105.827  1.00  0.00           C  
ATOM    148  O   ALA L  24      31.182 -29.777 106.679  1.00  0.00           O  
ATOM    149  CB  ALA L  24      33.358 -31.936 106.249  1.00  0.00           C  
ATOM    150  N   GLY L  25      30.225 -31.353 105.370  1.00  0.00           N  
ATOM    151  CA  GLY L  25      28.837 -31.207 105.798  1.00  0.00           C  
ATOM    152  C   GLY L  25      28.262 -32.628 106.004  1.00  0.00           C  
ATOM    153  O   GLY L  25      28.952 -33.609 106.301  1.00  0.00           O  
ATOM    154  N   HIS L  26      26.955 -32.702 105.818  1.00  0.00           N  
ATOM    155  CA  HIS L  26      26.101 -33.825 105.920  1.00  0.00           C  
ATOM    156  C   HIS L  26      26.016 -34.880 104.805  1.00  0.00           C  
ATOM    157  O   HIS L  26      26.028 -34.625 103.615  1.00  0.00           O  
ATOM    158  CB  HIS L  26      24.545 -33.408 105.794  1.00  0.00           C  
ATOM    159  CG  HIS L  26      23.849 -33.051 107.026  1.00  0.00           C  
ATOM    160  ND1 HIS L  26      23.417 -33.925 107.997  1.00  0.00           N  
ATOM    161  CD2 HIS L  26      23.455 -31.783 107.426  1.00  0.00           C  
ATOM    162  CE1 HIS L  26      22.810 -33.207 108.936  1.00  0.00           C  
ATOM    163  NE2 HIS L  26      22.816 -31.903 108.629  1.00  0.00           N  
ATOM    164  N   THR L  27      25.670 -36.026 105.327  1.00  0.00           N  
ATOM    165  CA  THR L  27      25.244 -37.218 104.572  1.00  0.00           C  
ATOM    166  C   THR L  27      24.595 -36.750 103.295  1.00  0.00           C  
ATOM    167  O   THR L  27      25.277 -36.177 102.442  1.00  0.00           O  
ATOM    168  CB  THR L  27      24.108 -37.760 105.554  1.00  0.00           C  
ATOM    169  OG1 THR L  27      23.311 -36.533 105.822  1.00  0.00           O  
ATOM    170  CG2 THR L  27      24.658 -38.297 106.852  1.00  0.00           C  
ATOM    171  N   SER L  27A     23.276 -36.981 103.241  1.00  0.00           N  
ATOM    172  CA  SER L  27A     22.469 -36.264 102.215  1.00  0.00           C  
ATOM    173  C   SER L  27A     23.426 -35.897 101.104  1.00  0.00           C  
ATOM    174  O   SER L  27A     24.112 -36.781 100.607  1.00  0.00           O  
ATOM    175  CB  SER L  27A     22.035 -34.942 102.862  1.00  0.00           C  
ATOM    176  OG  SER L  27A     21.854 -34.809 104.243  1.00  0.00           O  
ATOM    177  N   ASP L  27B     23.521 -34.622 100.821  1.00  0.00           N  
ATOM    178  CA  ASP L  27B     24.557 -34.057  99.957  1.00  0.00           C  
ATOM    179  C   ASP L  27B     25.958 -34.665 100.170  1.00  0.00           C  
ATOM    180  O   ASP L  27B     26.198 -35.799  99.693  1.00  0.00           O  
ATOM    181  CB  ASP L  27B     24.605 -32.502 100.126  1.00  0.00           C  
ATOM    182  CG  ASP L  27B     23.675 -31.778  99.180  1.00  0.00           C  
ATOM    183  OD1 ASP L  27B     24.036 -31.430  98.053  1.00  0.00           O  
ATOM    184  OD2 ASP L  27B     22.513 -31.547  99.602  1.00  0.00           O  
ATOM    185  N   VAL L  27C     26.790 -33.999 100.957  1.00  0.00           N  
ATOM    186  CA  VAL L  27C     28.235 -34.406 100.964  1.00  0.00           C  
ATOM    187  C   VAL L  27C     28.404 -35.899 100.921  1.00  0.00           C  
ATOM    188  O   VAL L  27C     29.144 -36.327  99.951  1.00  0.00           O  
ATOM    189  CB  VAL L  27C     29.065 -33.453 101.834  1.00  0.00           C  
ATOM    190  CG1 VAL L  27C     28.235 -32.519 102.726  1.00  0.00           C  
ATOM    191  CG2 VAL L  27C     30.204 -34.059 102.630  1.00  0.00           C  
ATOM    192  N   ALA L  28      27.795 -36.745 101.680  1.00  0.00           N  
ATOM    193  CA  ALA L  28      28.034 -38.175 101.730  1.00  0.00           C  
ATOM    194  C   ALA L  28      27.255 -39.145 100.864  1.00  0.00           C  
ATOM    195  O   ALA L  28      27.811 -40.249 100.555  1.00  0.00           O  
ATOM    196  CB  ALA L  28      27.879 -38.687 103.173  1.00  0.00           C  
ATOM    197  N   ASP L  29      25.995 -38.857 100.620  1.00  0.00           N  
ATOM    198  CA  ASP L  29      25.216 -39.605  99.641  1.00  0.00           C  
ATOM    199  C   ASP L  29      25.353 -38.842  98.313  1.00  0.00           C  
ATOM    200  O   ASP L  29      24.417 -38.100  97.956  1.00  0.00           O  
ATOM    201  CB  ASP L  29      23.738 -39.827  99.945  1.00  0.00           C  
ATOM    202  CG  ASP L  29      23.534 -41.064 100.802  1.00  0.00           C  
ATOM    203  OD1 ASP L  29      24.530 -41.329 101.516  1.00  0.00           O  
ATOM    204  OD2 ASP L  29      22.450 -41.669 100.713  1.00  0.00           O  
ATOM    205  N   SER L  30      26.468 -39.092  97.672  1.00  0.00           N  
ATOM    206  CA  SER L  30      26.734 -38.397  96.410  1.00  0.00           C  
ATOM    207  C   SER L  30      28.081 -37.671  96.478  1.00  0.00           C  
ATOM    208  O   SER L  30      28.744 -37.525  97.501  1.00  0.00           O  
ATOM    209  CB  SER L  30      25.580 -37.453  96.129  1.00  0.00           C  
ATOM    210  OG  SER L  30      25.920 -36.252  95.519  1.00  0.00           O  
ATOM    211  N   ASN L  31      28.440 -37.246  95.313  1.00  0.00           N  
ATOM    212  CA  ASN L  31      29.721 -36.496  95.105  1.00  0.00           C  
ATOM    213  C   ASN L  31      29.171 -35.173  94.621  1.00  0.00           C  
ATOM    214  O   ASN L  31      28.292 -35.130  93.753  1.00  0.00           O  
ATOM    215  CB  ASN L  31      30.601 -37.439  94.335  1.00  0.00           C  
ATOM    216  CG  ASN L  31      30.334 -38.911  94.631  1.00  0.00           C  
ATOM    217  OD1 ASN L  31      30.393 -39.469  95.725  1.00  0.00           O  
ATOM    218  ND2 ASN L  31      29.983 -39.720  93.621  1.00  0.00           N  
ATOM    219  N   SER L  32      29.549 -34.110  95.285  1.00  0.00           N  
ATOM    220  CA  SER L  32      29.228 -32.706  94.995  1.00  0.00           C  
ATOM    221  C   SER L  32      30.089 -31.870  95.956  1.00  0.00           C  
ATOM    222  O   SER L  32      30.114 -32.132  97.142  1.00  0.00           O  
ATOM    223  CB  SER L  32      27.767 -32.390  95.036  1.00  0.00           C  
ATOM    224  OG  SER L  32      27.410 -31.514  93.963  1.00  0.00           O  
ATOM    225  N   ILE L  33      30.762 -30.895  95.465  1.00  0.00           N  
ATOM    226  CA  ILE L  33      31.844 -30.131  96.075  1.00  0.00           C  
ATOM    227  C   ILE L  33      32.807 -29.902  94.876  1.00  0.00           C  
ATOM    228  O   ILE L  33      32.968 -30.808  94.039  1.00  0.00           O  
ATOM    229  CB  ILE L  33      32.513 -30.626  97.339  1.00  0.00           C  
ATOM    230  CG1 ILE L  33      32.688 -32.148  97.492  1.00  0.00           C  
ATOM    231  CG2 ILE L  33      31.788 -30.044  98.585  1.00  0.00           C  
ATOM    232  CD1 ILE L  33      33.351 -32.903  96.326  1.00  0.00           C  
ATOM    233  N   SER L  34      33.381 -28.749  94.822  1.00  0.00           N  
ATOM    234  CA  SER L  34      34.081 -28.268  93.608  1.00  0.00           C  
ATOM    235  C   SER L  34      34.800 -27.014  94.095  1.00  0.00           C  
ATOM    236  O   SER L  34      34.190 -26.061  94.610  1.00  0.00           O  
ATOM    237  CB  SER L  34      33.057 -28.118  92.543  1.00  0.00           C  
ATOM    238  OG  SER L  34      33.121 -26.974  91.751  1.00  0.00           O  
ATOM    239  N   TRP L  35      36.121 -27.119  93.969  1.00  0.00           N  
ATOM    240  CA  TRP L  35      37.045 -26.142  94.532  1.00  0.00           C  
ATOM    241  C   TRP L  35      37.363 -24.981  93.567  1.00  0.00           C  
ATOM    242  O   TRP L  35      37.368 -25.002  92.344  1.00  0.00           O  
ATOM    243  CB  TRP L  35      38.317 -26.685  95.088  1.00  0.00           C  
ATOM    244  CG  TRP L  35      38.297 -27.318  96.400  1.00  0.00           C  
ATOM    245  CD1 TRP L  35      37.729 -28.522  96.724  1.00  0.00           C  
ATOM    246  CD2 TRP L  35      38.940 -26.863  97.583  1.00  0.00           C  
ATOM    247  NE1 TRP L  35      37.967 -28.833  98.034  1.00  0.00           N  
ATOM    248  CE2 TRP L  35      38.720 -27.832  98.572  1.00  0.00           C  
ATOM    249  CE3 TRP L  35      39.679 -25.729  97.888  1.00  0.00           C  
ATOM    250  CZ2 TRP L  35      39.207 -27.691  99.843  1.00  0.00           C  
ATOM    251  CZ3 TRP L  35      40.167 -25.594  99.155  1.00  0.00           C  
ATOM    252  CH2 TRP L  35      39.940 -26.553 100.115  1.00  0.00           C  
ATOM    253  N   PHE L  36      37.652 -23.907  94.300  1.00  0.00           N  
ATOM    254  CA  PHE L  36      37.963 -22.616  93.761  1.00  0.00           C  
ATOM    255  C   PHE L  36      39.313 -22.134  94.342  1.00  0.00           C  
ATOM    256  O   PHE L  36      39.698 -22.276  95.484  1.00  0.00           O  
ATOM    257  CB  PHE L  36      36.865 -21.580  93.982  1.00  0.00           C  
ATOM    258  CG  PHE L  36      35.589 -21.912  93.279  1.00  0.00           C  
ATOM    259  CD1 PHE L  36      35.615 -22.166  91.922  1.00  0.00           C  
ATOM    260  CD2 PHE L  36      34.379 -21.952  93.948  1.00  0.00           C  
ATOM    261  CE1 PHE L  36      34.449 -22.470  91.240  1.00  0.00           C  
ATOM    262  CE2 PHE L  36      33.196 -22.244  93.273  1.00  0.00           C  
ATOM    263  CZ  PHE L  36      33.241 -22.512  91.916  1.00  0.00           C  
ATOM    264  N   GLN L  37      39.969 -21.577  93.355  1.00  0.00           N  
ATOM    265  CA  GLN L  37      41.158 -20.709  93.616  1.00  0.00           C  
ATOM    266  C   GLN L  37      40.425 -19.354  93.842  1.00  0.00           C  
ATOM    267  O   GLN L  37      39.512 -18.974  93.076  1.00  0.00           O  
ATOM    268  CB  GLN L  37      42.085 -20.755  92.454  1.00  0.00           C  
ATOM    269  CG  GLN L  37      43.196 -19.787  92.301  1.00  0.00           C  
ATOM    270  CD  GLN L  37      44.569 -20.161  92.772  1.00  0.00           C  
ATOM    271  OE1 GLN L  37      45.587 -19.602  92.318  1.00  0.00           O  
ATOM    272  NE2 GLN L  37      44.671 -21.116  93.682  1.00  0.00           N  
ATOM    273  N   GLN L  38      40.651 -18.779  94.997  1.00  0.00           N  
ATOM    274  CA  GLN L  38      40.364 -17.316  95.149  1.00  0.00           C  
ATOM    275  C   GLN L  38      41.776 -16.841  95.599  1.00  0.00           C  
ATOM    276  O   GLN L  38      42.396 -17.730  96.227  1.00  0.00           O  
ATOM    277  CB  GLN L  38      39.294 -16.861  96.042  1.00  0.00           C  
ATOM    278  CG  GLN L  38      39.188 -15.298  96.114  1.00  0.00           C  
ATOM    279  CD  GLN L  38      37.983 -14.966  96.990  1.00  0.00           C  
ATOM    280  OE1 GLN L  38      38.128 -15.000  98.207  1.00  0.00           O  
ATOM    281  NE2 GLN L  38      36.832 -14.710  96.378  1.00  0.00           N  
ATOM    282  N   HIS L  39      42.209 -15.697  95.155  1.00  0.00           N  
ATOM    283  CA  HIS L  39      43.480 -15.183  95.737  1.00  0.00           C  
ATOM    284  C   HIS L  39      43.315 -13.656  95.802  1.00  0.00           C  
ATOM    285  O   HIS L  39      42.591 -13.047  94.997  1.00  0.00           O  
ATOM    286  CB  HIS L  39      44.808 -15.620  95.244  1.00  0.00           C  
ATOM    287  CG  HIS L  39      45.277 -15.494  93.876  1.00  0.00           C  
ATOM    288  ND1 HIS L  39      45.490 -16.576  93.041  1.00  0.00           N  
ATOM    289  CD2 HIS L  39      45.605 -14.375  93.162  1.00  0.00           C  
ATOM    290  CE1 HIS L  39      45.909 -16.121  91.868  1.00  0.00           C  
ATOM    291  NE2 HIS L  39      45.986 -14.792  91.913  1.00  0.00           N  
ATOM    292  N   PRO L  40      43.960 -13.149  96.850  1.00  0.00           N  
ATOM    293  CA  PRO L  40      44.000 -11.707  97.127  1.00  0.00           C  
ATOM    294  C   PRO L  40      43.077 -10.795  96.378  1.00  0.00           C  
ATOM    295  O   PRO L  40      43.604  -9.799  95.818  1.00  0.00           O  
ATOM    296  CB  PRO L  40      45.459 -11.306  96.733  1.00  0.00           C  
ATOM    297  CG  PRO L  40      46.034 -12.577  96.164  1.00  0.00           C  
ATOM    298  CD  PRO L  40      45.400 -13.642  97.125  1.00  0.00           C  
ATOM    299  N   ASP L  41      41.801 -11.034  96.380  1.00  0.00           N  
ATOM    300  CA  ASP L  41      40.831 -10.378  95.547  1.00  0.00           C  
ATOM    301  C   ASP L  41      41.087 -10.632  94.052  1.00  0.00           C  
ATOM    302  O   ASP L  41      41.804  -9.855  93.430  1.00  0.00           O  
ATOM    303  CB  ASP L  41      40.566  -8.880  95.804  1.00  0.00           C  
ATOM    304  CG  ASP L  41      41.773  -8.141  96.324  1.00  0.00           C  
ATOM    305  OD1 ASP L  41      41.793  -7.773  97.506  1.00  0.00           O  
ATOM    306  OD2 ASP L  41      42.735  -7.972  95.532  1.00  0.00           O  
ATOM    307  N   LYS L  42      40.592 -11.759  93.580  1.00  0.00           N  
ATOM    308  CA  LYS L  42      40.341 -11.877  92.128  1.00  0.00           C  
ATOM    309  C   LYS L  42      39.057 -12.769  92.086  1.00  0.00           C  
ATOM    310  O   LYS L  42      38.585 -13.275  93.130  1.00  0.00           O  
ATOM    311  CB  LYS L  42      41.374 -12.221  91.180  1.00  0.00           C  
ATOM    312  CG  LYS L  42      41.291 -11.558  89.769  1.00  0.00           C  
ATOM    313  CD  LYS L  42      42.235 -12.305  88.849  1.00  0.00           C  
ATOM    314  CE  LYS L  42      43.112 -11.632  87.866  1.00  0.00           C  
ATOM    315  NZ  LYS L  42      44.333 -12.424  87.453  1.00  0.00           N  
ATOM    316  N   ALA L  43      38.501 -12.793  90.901  1.00  0.00           N  
ATOM    317  CA  ALA L  43      37.290 -13.637  90.706  1.00  0.00           C  
ATOM    318  C   ALA L  43      37.907 -15.040  90.632  1.00  0.00           C  
ATOM    319  O   ALA L  43      38.755 -15.323  89.786  1.00  0.00           O  
ATOM    320  CB  ALA L  43      36.470 -13.180  89.581  1.00  0.00           C  
ATOM    321  N   PRO L  44      37.503 -15.825  91.604  1.00  0.00           N  
ATOM    322  CA  PRO L  44      37.959 -17.224  91.721  1.00  0.00           C  
ATOM    323  C   PRO L  44      38.150 -17.872  90.390  1.00  0.00           C  
ATOM    324  O   PRO L  44      37.759 -17.387  89.340  1.00  0.00           O  
ATOM    325  CB  PRO L  44      36.889 -17.847  92.602  1.00  0.00           C  
ATOM    326  CG  PRO L  44      36.552 -16.737  93.569  1.00  0.00           C  
ATOM    327  CD  PRO L  44      36.829 -15.408  92.851  1.00  0.00           C  
ATOM    328  N   LYS L  45      38.827 -18.990  90.427  1.00  0.00           N  
ATOM    329  CA  LYS L  45      39.146 -19.887  89.340  1.00  0.00           C  
ATOM    330  C   LYS L  45      38.262 -21.152  89.466  1.00  0.00           C  
ATOM    331  O   LYS L  45      37.113 -21.075  89.925  1.00  0.00           O  
ATOM    332  CB  LYS L  45      40.591 -20.368  89.344  1.00  0.00           C  
ATOM    333  CG  LYS L  45      41.519 -19.582  88.451  1.00  0.00           C  
ATOM    334  CD  LYS L  45      42.972 -20.003  88.658  1.00  0.00           C  
ATOM    335  CE  LYS L  45      43.935 -18.869  88.366  1.00  0.00           C  
ATOM    336  NZ  LYS L  45      43.961 -17.966  89.548  1.00  0.00           N  
ATOM    337  N   LEU L  46      38.848 -22.244  89.029  1.00  0.00           N  
ATOM    338  CA  LEU L  46      38.251 -23.563  89.141  1.00  0.00           C  
ATOM    339  C   LEU L  46      39.392 -24.568  89.295  1.00  0.00           C  
ATOM    340  O   LEU L  46      40.069 -24.756  88.280  1.00  0.00           O  
ATOM    341  CB  LEU L  46      37.392 -23.851  87.916  1.00  0.00           C  
ATOM    342  CG  LEU L  46      36.676 -25.204  88.024  1.00  0.00           C  
ATOM    343  CD1 LEU L  46      36.110 -25.365  89.409  1.00  0.00           C  
ATOM    344  CD2 LEU L  46      35.615 -25.292  86.962  1.00  0.00           C  
ATOM    345  N   LEU L  47      39.545 -25.112  90.474  1.00  0.00           N  
ATOM    346  CA  LEU L  47      40.631 -26.095  90.695  1.00  0.00           C  
ATOM    347  C   LEU L  47      40.141 -27.502  90.425  1.00  0.00           C  
ATOM    348  O   LEU L  47      40.810 -28.221  89.669  1.00  0.00           O  
ATOM    349  CB  LEU L  47      41.225 -25.869  92.054  1.00  0.00           C  
ATOM    350  CG  LEU L  47      42.611 -25.238  92.126  1.00  0.00           C  
ATOM    351  CD1 LEU L  47      42.696 -23.919  91.387  1.00  0.00           C  
ATOM    352  CD2 LEU L  47      42.953 -25.047  93.586  1.00  0.00           C  
ATOM    353  N   ILE L  48      39.067 -27.869  91.100  1.00  0.00           N  
ATOM    354  CA  ILE L  48      38.387 -29.179  90.727  1.00  0.00           C  
ATOM    355  C   ILE L  48      37.101 -28.751  90.028  1.00  0.00           C  
ATOM    356  O   ILE L  48      36.630 -27.608  90.256  1.00  0.00           O  
ATOM    357  CB  ILE L  48      38.422 -30.235  91.809  1.00  0.00           C  
ATOM    358  CG1 ILE L  48      37.555 -30.050  93.058  1.00  0.00           C  
ATOM    359  CG2 ILE L  48      39.922 -30.435  92.329  1.00  0.00           C  
ATOM    360  CD1 ILE L  48      38.038 -31.048  94.188  1.00  0.00           C  
ATOM    361  N   TYR L  49      36.658 -29.577  89.094  1.00  0.00           N  
ATOM    362  CA  TYR L  49      35.410 -29.296  88.366  1.00  0.00           C  
ATOM    363  C   TYR L  49      34.644 -30.624  88.308  1.00  0.00           C  
ATOM    364  O   TYR L  49      34.479 -31.281  87.306  1.00  0.00           O  
ATOM    365  CB  TYR L  49      35.518 -28.622  87.022  1.00  0.00           C  
ATOM    366  CG  TYR L  49      35.631 -29.529  85.841  1.00  0.00           C  
ATOM    367  CD1 TYR L  49      34.517 -30.254  85.419  1.00  0.00           C  
ATOM    368  CD2 TYR L  49      36.817 -29.701  85.127  1.00  0.00           C  
ATOM    369  CE1 TYR L  49      34.581 -31.143  84.363  1.00  0.00           C  
ATOM    370  CE2 TYR L  49      36.908 -30.562  84.062  1.00  0.00           C  
ATOM    371  CZ  TYR L  49      35.787 -31.275  83.668  1.00  0.00           C  
ATOM    372  OH  TYR L  49      35.842 -32.139  82.610  1.00  0.00           O  
ATOM    373  N   ALA L  50      34.232 -31.009  89.481  1.00  0.00           N  
ATOM    374  CA  ALA L  50      33.314 -32.163  89.684  1.00  0.00           C  
ATOM    375  C   ALA L  50      34.028 -33.114  90.621  1.00  0.00           C  
ATOM    376  O   ALA L  50      33.472 -34.091  91.128  1.00  0.00           O  
ATOM    377  CB  ALA L  50      32.847 -32.764  88.401  1.00  0.00           C  
ATOM    378  N   VAL L  51      35.278 -32.752  90.860  1.00  0.00           N  
ATOM    379  CA  VAL L  51      36.237 -33.401  91.710  1.00  0.00           C  
ATOM    380  C   VAL L  51      37.416 -33.856  90.790  1.00  0.00           C  
ATOM    381  O   VAL L  51      38.178 -33.043  90.331  1.00  0.00           O  
ATOM    382  CB  VAL L  51      35.871 -34.575  92.606  1.00  0.00           C  
ATOM    383  CG1 VAL L  51      35.479 -35.849  91.879  1.00  0.00           C  
ATOM    384  CG2 VAL L  51      37.020 -34.906  93.554  1.00  0.00           C  
ATOM    385  N   THR L  52      37.366 -35.144  90.574  1.00  0.00           N  
ATOM    386  CA  THR L  52      38.425 -35.858  89.890  1.00  0.00           C  
ATOM    387  C   THR L  52      38.744 -35.390  88.524  1.00  0.00           C  
ATOM    388  O   THR L  52      39.431 -36.169  87.815  1.00  0.00           O  
ATOM    389  CB  THR L  52      38.332 -37.392  90.210  1.00  0.00           C  
ATOM    390  OG1 THR L  52      38.934 -37.482  91.565  1.00  0.00           O  
ATOM    391  CG2 THR L  52      39.021 -38.393  89.318  1.00  0.00           C  
ATOM    392  N   PHE L  53      38.365 -34.180  88.150  1.00  0.00           N  
ATOM    393  CA  PHE L  53      38.929 -33.615  86.871  1.00  0.00           C  
ATOM    394  C   PHE L  53      39.211 -32.138  87.087  1.00  0.00           C  
ATOM    395  O   PHE L  53      38.508 -31.398  87.819  1.00  0.00           O  
ATOM    396  CB  PHE L  53      38.191 -34.089  85.685  1.00  0.00           C  
ATOM    397  CG  PHE L  53      36.720 -34.280  85.858  1.00  0.00           C  
ATOM    398  CD1 PHE L  53      35.864 -34.046  84.806  1.00  0.00           C  
ATOM    399  CD2 PHE L  53      36.199 -34.655  87.079  1.00  0.00           C  
ATOM    400  CE1 PHE L  53      34.482 -34.185  84.951  1.00  0.00           C  
ATOM    401  CE2 PHE L  53      34.820 -34.816  87.256  1.00  0.00           C  
ATOM    402  CZ  PHE L  53      33.956 -34.564  86.176  1.00  0.00           C  
ATOM    403  N   ARG L  54      40.314 -31.705  86.497  1.00  0.00           N  
ATOM    404  CA  ARG L  54      40.843 -30.341  86.620  1.00  0.00           C  
ATOM    405  C   ARG L  54      40.294 -29.516  85.479  1.00  0.00           C  
ATOM    406  O   ARG L  54      40.252 -30.052  84.365  1.00  0.00           O  
ATOM    407  CB  ARG L  54      42.369 -30.375  86.525  1.00  0.00           C  
ATOM    408  CG  ARG L  54      43.065 -31.475  87.269  1.00  0.00           C  
ATOM    409  CD  ARG L  54      44.441 -31.807  86.724  1.00  0.00           C  
ATOM    410  NE  ARG L  54      44.740 -33.211  87.103  1.00  0.00           N  
ATOM    411  CZ  ARG L  54      45.009 -33.470  88.377  1.00  0.00           C  
ATOM    412  NH1 ARG L  54      45.119 -32.481  89.249  1.00  0.00           N  
ATOM    413  NH2 ARG L  54      45.033 -34.727  88.821  1.00  0.00           N  
ATOM    414  N   PRO L  55      39.877 -28.304  85.813  1.00  0.00           N  
ATOM    415  CA  PRO L  55      39.423 -27.318  84.828  1.00  0.00           C  
ATOM    416  C   PRO L  55      40.572 -26.933  83.908  1.00  0.00           C  
ATOM    417  O   PRO L  55      41.388 -26.062  84.205  1.00  0.00           O  
ATOM    418  CB  PRO L  55      38.998 -26.112  85.624  1.00  0.00           C  
ATOM    419  CG  PRO L  55      38.727 -26.625  86.966  1.00  0.00           C  
ATOM    420  CD  PRO L  55      39.263 -28.019  87.135  1.00  0.00           C  
ATOM    421  N   SER L  56      40.586 -27.614  82.802  1.00  0.00           N  
ATOM    422  CA  SER L  56      41.665 -27.632  81.829  1.00  0.00           C  
ATOM    423  C   SER L  56      42.413 -26.307  81.842  1.00  0.00           C  
ATOM    424  O   SER L  56      41.747 -25.261  81.982  1.00  0.00           O  
ATOM    425  CB  SER L  56      41.136 -27.938  80.446  1.00  0.00           C  
ATOM    426  OG  SER L  56      40.536 -26.700  80.008  1.00  0.00           O  
ATOM    427  N   GLY L  57      43.721 -26.422  81.629  1.00  0.00           N  
ATOM    428  CA  GLY L  57      44.603 -25.245  81.870  1.00  0.00           C  
ATOM    429  C   GLY L  57      44.806 -25.151  83.382  1.00  0.00           C  
ATOM    430  O   GLY L  57      44.985 -24.056  83.917  1.00  0.00           O  
ATOM    431  N   ILE L  58      44.713 -26.261  84.084  1.00  0.00           N  
ATOM    432  CA  ILE L  58      45.026 -26.385  85.466  1.00  0.00           C  
ATOM    433  C   ILE L  58      46.108 -27.507  85.644  1.00  0.00           C  
ATOM    434  O   ILE L  58      45.873 -28.693  85.408  1.00  0.00           O  
ATOM    435  CB  ILE L  58      43.912 -26.650  86.523  1.00  0.00           C  
ATOM    436  CG1 ILE L  58      44.641 -27.145  87.782  1.00  0.00           C  
ATOM    437  CG2 ILE L  58      42.842 -27.636  86.025  1.00  0.00           C  
ATOM    438  CD1 ILE L  58      43.980 -27.615  89.029  1.00  0.00           C  
ATOM    439  N   PRO L  59      47.242 -27.005  86.077  1.00  0.00           N  
ATOM    440  CA  PRO L  59      48.339 -27.892  86.516  1.00  0.00           C  
ATOM    441  C   PRO L  59      47.800 -29.102  87.247  1.00  0.00           C  
ATOM    442  O   PRO L  59      46.908 -28.800  88.087  1.00  0.00           O  
ATOM    443  CB  PRO L  59      49.102 -26.960  87.457  1.00  0.00           C  
ATOM    444  CG  PRO L  59      48.468 -25.595  87.418  1.00  0.00           C  
ATOM    445  CD  PRO L  59      47.623 -25.580  86.185  1.00  0.00           C  
ATOM    446  N   LEU L  60      48.185 -30.336  86.994  1.00  0.00           N  
ATOM    447  CA  LEU L  60      47.791 -31.439  87.884  1.00  0.00           C  
ATOM    448  C   LEU L  60      48.581 -31.688  89.143  1.00  0.00           C  
ATOM    449  O   LEU L  60      49.235 -32.764  89.295  1.00  0.00           O  
ATOM    450  CB  LEU L  60      47.634 -32.712  87.031  1.00  0.00           C  
ATOM    451  CG  LEU L  60      48.226 -34.049  87.429  1.00  0.00           C  
ATOM    452  CD1 LEU L  60      47.729 -34.643  88.724  1.00  0.00           C  
ATOM    453  CD2 LEU L  60      47.995 -35.050  86.300  1.00  0.00           C  
ATOM    454  N   ARG L  61      48.524 -30.792  90.108  1.00  0.00           N  
ATOM    455  CA  ARG L  61      49.125 -31.028  91.433  1.00  0.00           C  
ATOM    456  C   ARG L  61      47.927 -31.142  92.409  1.00  0.00           C  
ATOM    457  O   ARG L  61      47.745 -32.031  93.238  1.00  0.00           O  
ATOM    458  CB  ARG L  61      50.174 -30.109  91.902  1.00  0.00           C  
ATOM    459  CG  ARG L  61      50.277 -28.641  91.758  1.00  0.00           C  
ATOM    460  CD  ARG L  61      51.677 -28.150  92.091  1.00  0.00           C  
ATOM    461  NE  ARG L  61      52.128 -27.079  91.234  1.00  0.00           N  
ATOM    462  CZ  ARG L  61      52.218 -25.779  91.424  1.00  0.00           C  
ATOM    463  NH1 ARG L  61      51.951 -25.204  92.584  1.00  0.00           N  
ATOM    464  NH2 ARG L  61      52.434 -24.972  90.375  1.00  0.00           N  
ATOM    465  N   PHE L  62      47.080 -30.160  92.231  1.00  0.00           N  
ATOM    466  CA  PHE L  62      45.819 -29.929  92.905  1.00  0.00           C  
ATOM    467  C   PHE L  62      44.957 -31.160  92.757  1.00  0.00           C  
ATOM    468  O   PHE L  62      44.794 -31.522  91.565  1.00  0.00           O  
ATOM    469  CB  PHE L  62      45.120 -28.731  92.208  1.00  0.00           C  
ATOM    470  CG  PHE L  62      45.933 -27.474  92.192  1.00  0.00           C  
ATOM    471  CD1 PHE L  62      46.190 -26.807  93.376  1.00  0.00           C  
ATOM    472  CD2 PHE L  62      46.429 -26.952  91.026  1.00  0.00           C  
ATOM    473  CE1 PHE L  62      46.940 -25.658  93.418  1.00  0.00           C  
ATOM    474  CE2 PHE L  62      47.201 -25.781  91.035  1.00  0.00           C  
ATOM    475  CZ  PHE L  62      47.440 -25.143  92.245  1.00  0.00           C  
ATOM    476  N   SER L  63      44.430 -31.724  93.801  1.00  0.00           N  
ATOM    477  CA  SER L  63      43.562 -32.905  93.703  1.00  0.00           C  
ATOM    478  C   SER L  63      42.543 -32.937  94.837  1.00  0.00           C  
ATOM    479  O   SER L  63      42.848 -32.485  95.923  1.00  0.00           O  
ATOM    480  CB  SER L  63      44.393 -34.171  93.917  1.00  0.00           C  
ATOM    481  OG  SER L  63      44.803 -33.968  95.292  1.00  0.00           O  
ATOM    482  N   GLY L  64      41.447 -33.593  94.554  1.00  0.00           N  
ATOM    483  CA  GLY L  64      40.264 -33.581  95.415  1.00  0.00           C  
ATOM    484  C   GLY L  64      39.918 -34.944  96.008  1.00  0.00           C  
ATOM    485  O   GLY L  64      40.043 -35.972  95.309  1.00  0.00           O  
ATOM    486  N   SER L  65      39.448 -34.859  97.280  1.00  0.00           N  
ATOM    487  CA  SER L  65      39.333 -36.171  97.951  1.00  0.00           C  
ATOM    488  C   SER L  65      38.456 -36.335  99.122  1.00  0.00           C  
ATOM    489  O   SER L  65      38.896 -36.104 100.250  1.00  0.00           O  
ATOM    490  CB  SER L  65      40.791 -36.536  98.365  1.00  0.00           C  
ATOM    491  OG  SER L  65      41.657 -36.067  97.345  1.00  0.00           O  
ATOM    492  N   LYS L  66      37.280 -36.891  98.849  1.00  0.00           N  
ATOM    493  CA  LYS L  66      36.280 -37.201  99.878  1.00  0.00           C  
ATOM    494  C   LYS L  66      36.531 -38.654 100.313  1.00  0.00           C  
ATOM    495  O   LYS L  66      36.996 -39.465  99.514  1.00  0.00           O  
ATOM    496  CB  LYS L  66      34.850 -36.930  99.484  1.00  0.00           C  
ATOM    497  CG  LYS L  66      34.330 -37.352  98.140  1.00  0.00           C  
ATOM    498  CD  LYS L  66      33.005 -38.097  98.326  1.00  0.00           C  
ATOM    499  CE  LYS L  66      32.914 -39.331  97.460  1.00  0.00           C  
ATOM    500  NZ  LYS L  66      32.347 -40.495  98.205  1.00  0.00           N  
ATOM    501  N   SER L  67      36.266 -38.869 101.587  1.00  0.00           N  
ATOM    502  CA  SER L  67      36.397 -40.254 102.128  1.00  0.00           C  
ATOM    503  C   SER L  67      34.962 -40.802 101.907  1.00  0.00           C  
ATOM    504  O   SER L  67      34.724 -41.982 101.743  1.00  0.00           O  
ATOM    505  CB  SER L  67      36.786 -40.343 103.541  1.00  0.00           C  
ATOM    506  OG  SER L  67      38.165 -40.517 103.779  1.00  0.00           O  
ATOM    507  N   GLY L  68      34.109 -39.793 101.816  1.00  0.00           N  
ATOM    508  CA  GLY L  68      32.712 -40.042 101.330  1.00  0.00           C  
ATOM    509  C   GLY L  68      31.854 -39.063 102.143  1.00  0.00           C  
ATOM    510  O   GLY L  68      30.755 -38.692 101.736  1.00  0.00           O  
ATOM    511  N   ASN L  69      32.509 -38.735 103.251  1.00  0.00           N  
ATOM    512  CA  ASN L  69      31.766 -37.873 104.221  1.00  0.00           C  
ATOM    513  C   ASN L  69      32.237 -36.438 104.030  1.00  0.00           C  
ATOM    514  O   ASN L  69      31.495 -35.465 104.299  1.00  0.00           O  
ATOM    515  CB  ASN L  69      31.917 -38.485 105.578  1.00  0.00           C  
ATOM    516  CG  ASN L  69      30.956 -37.841 106.569  1.00  0.00           C  
ATOM    517  OD1 ASN L  69      29.792 -38.243 106.634  1.00  0.00           O  
ATOM    518  ND2 ASN L  69      31.561 -36.866 107.255  1.00  0.00           N  
ATOM    519  N   THR L  70      33.460 -36.377 103.492  1.00  0.00           N  
ATOM    520  CA  THR L  70      34.156 -35.092 103.353  1.00  0.00           C  
ATOM    521  C   THR L  70      35.141 -35.082 102.215  1.00  0.00           C  
ATOM    522  O   THR L  70      35.358 -36.157 101.689  1.00  0.00           O  
ATOM    523  CB  THR L  70      35.066 -34.940 104.638  1.00  0.00           C  
ATOM    524  OG1 THR L  70      35.893 -36.166 104.528  1.00  0.00           O  
ATOM    525  CG2 THR L  70      34.250 -34.826 105.889  1.00  0.00           C  
ATOM    526  N   ALA L  71      35.711 -33.900 101.996  1.00  0.00           N  
ATOM    527  CA  ALA L  71      36.701 -33.738 100.951  1.00  0.00           C  
ATOM    528  C   ALA L  71      37.945 -32.940 101.373  1.00  0.00           C  
ATOM    529  O   ALA L  71      38.109 -32.133 102.265  1.00  0.00           O  
ATOM    530  CB  ALA L  71      36.131 -33.204  99.670  1.00  0.00           C  
ATOM    531  N   SER L  72      38.972 -33.280 100.589  1.00  0.00           N  
ATOM    532  CA  SER L  72      40.331 -32.833 100.695  1.00  0.00           C  
ATOM    533  C   SER L  72      40.809 -32.179  99.406  1.00  0.00           C  
ATOM    534  O   SER L  72      40.077 -32.217  98.445  1.00  0.00           O  
ATOM    535  CB  SER L  72      41.319 -34.026 100.819  1.00  0.00           C  
ATOM    536  OG  SER L  72      42.254 -33.835  99.745  1.00  0.00           O  
ATOM    537  N   LEU L  73      42.042 -31.701  99.566  1.00  0.00           N  
ATOM    538  CA  LEU L  73      42.760 -31.243  98.356  1.00  0.00           C  
ATOM    539  C   LEU L  73      44.283 -31.100  98.570  1.00  0.00           C  
ATOM    540  O   LEU L  73      44.745 -30.584  99.572  1.00  0.00           O  
ATOM    541  CB  LEU L  73      42.229 -29.960  97.698  1.00  0.00           C  
ATOM    542  CG  LEU L  73      43.363 -29.184  96.960  1.00  0.00           C  
ATOM    543  CD1 LEU L  73      42.934 -28.757  95.605  1.00  0.00           C  
ATOM    544  CD2 LEU L  73      43.754 -28.017  97.865  1.00  0.00           C  
ATOM    545  N   THR L  74      44.961 -31.465  97.484  1.00  0.00           N  
ATOM    546  CA  THR L  74      46.439 -31.388  97.510  1.00  0.00           C  
ATOM    547  C   THR L  74      47.017 -30.709  96.309  1.00  0.00           C  
ATOM    548  O   THR L  74      46.505 -30.772  95.201  1.00  0.00           O  
ATOM    549  CB  THR L  74      47.023 -32.790  97.923  1.00  0.00           C  
ATOM    550  OG1 THR L  74      48.102 -33.061  97.003  1.00  0.00           O  
ATOM    551  CG2 THR L  74      46.002 -33.923  98.005  1.00  0.00           C  
ATOM    552  N   ILE L  75      48.094 -29.954  96.577  1.00  0.00           N  
ATOM    553  CA  ILE L  75      48.900 -29.271  95.575  1.00  0.00           C  
ATOM    554  C   ILE L  75      50.342 -29.769  95.856  1.00  0.00           C  
ATOM    555  O   ILE L  75      50.905 -29.504  96.910  1.00  0.00           O  
ATOM    556  CB  ILE L  75      48.778 -27.737  95.473  1.00  0.00           C  
ATOM    557  CG1 ILE L  75      49.800 -26.985  96.372  1.00  0.00           C  
ATOM    558  CG2 ILE L  75      47.384 -27.144  95.779  1.00  0.00           C  
ATOM    559  CD1 ILE L  75      50.934 -26.291  95.571  1.00  0.00           C  
ATOM    560  N   SER L  76      50.845 -30.468  94.859  1.00  0.00           N  
ATOM    561  CA  SER L  76      52.145 -31.145  94.947  1.00  0.00           C  
ATOM    562  C   SER L  76      53.265 -30.347  94.277  1.00  0.00           C  
ATOM    563  O   SER L  76      53.623 -30.430  93.119  1.00  0.00           O  
ATOM    564  CB  SER L  76      52.048 -32.562  94.381  1.00  0.00           C  
ATOM    565  OG  SER L  76      53.188 -32.801  93.569  1.00  0.00           O  
ATOM    566  N   GLY L  77      53.816 -29.514  95.136  1.00  0.00           N  
ATOM    567  CA  GLY L  77      54.975 -28.655  94.855  1.00  0.00           C  
ATOM    568  C   GLY L  77      54.529 -27.243  95.233  1.00  0.00           C  
ATOM    569  O   GLY L  77      54.010 -26.600  94.307  1.00  0.00           O  
ATOM    570  N   LEU L  78      54.797 -26.882  96.464  1.00  0.00           N  
ATOM    571  CA  LEU L  78      54.243 -25.552  96.900  1.00  0.00           C  
ATOM    572  C   LEU L  78      54.770 -24.473  95.989  1.00  0.00           C  
ATOM    573  O   LEU L  78      55.358 -24.856  94.947  1.00  0.00           O  
ATOM    574  CB  LEU L  78      54.247 -25.457  98.380  1.00  0.00           C  
ATOM    575  CG  LEU L  78      53.128 -26.173  99.142  1.00  0.00           C  
ATOM    576  CD1 LEU L  78      52.720 -25.364 100.351  1.00  0.00           C  
ATOM    577  CD2 LEU L  78      51.905 -26.409  98.302  1.00  0.00           C  
ATOM    578  N   LEU L  79      54.507 -23.206  96.311  1.00  0.00           N  
ATOM    579  CA  LEU L  79      54.874 -22.131  95.350  1.00  0.00           C  
ATOM    580  C   LEU L  79      54.228 -20.805  95.651  1.00  0.00           C  
ATOM    581  O   LEU L  79      53.387 -20.672  96.530  1.00  0.00           O  
ATOM    582  CB  LEU L  79      54.675 -22.821  94.017  1.00  0.00           C  
ATOM    583  CG  LEU L  79      54.307 -22.027  92.812  1.00  0.00           C  
ATOM    584  CD1 LEU L  79      54.465 -22.835  91.561  1.00  0.00           C  
ATOM    585  CD2 LEU L  79      52.879 -21.542  93.058  1.00  0.00           C  
ATOM    586  N   PRO L  80      54.689 -19.778  94.932  1.00  0.00           N  
ATOM    587  CA  PRO L  80      54.296 -18.390  95.123  1.00  0.00           C  
ATOM    588  C   PRO L  80      52.854 -18.191  94.670  1.00  0.00           C  
ATOM    589  O   PRO L  80      51.964 -17.865  95.478  1.00  0.00           O  
ATOM    590  CB  PRO L  80      55.332 -17.552  94.394  1.00  0.00           C  
ATOM    591  CG  PRO L  80      56.087 -18.440  93.482  1.00  0.00           C  
ATOM    592  CD  PRO L  80      55.715 -19.843  93.874  1.00  0.00           C  
ATOM    593  N   ASP L  81      52.675 -18.409  93.404  1.00  0.00           N  
ATOM    594  CA  ASP L  81      51.331 -18.288  92.801  1.00  0.00           C  
ATOM    595  C   ASP L  81      50.370 -19.247  93.476  1.00  0.00           C  
ATOM    596  O   ASP L  81      49.509 -19.765  92.751  1.00  0.00           O  
ATOM    597  CB  ASP L  81      51.461 -18.357  91.323  1.00  0.00           C  
ATOM    598  CG  ASP L  81      52.318 -19.334  90.611  1.00  0.00           C  
ATOM    599  OD1 ASP L  81      52.776 -19.061  89.466  1.00  0.00           O  
ATOM    600  OD2 ASP L  81      52.582 -20.466  91.063  1.00  0.00           O  
ATOM    601  N   ASP L  82      50.483 -19.425  94.777  1.00  0.00           N  
ATOM    602  CA  ASP L  82      49.626 -20.384  95.493  1.00  0.00           C  
ATOM    603  C   ASP L  82      48.904 -19.897  96.724  1.00  0.00           C  
ATOM    604  O   ASP L  82      48.011 -20.642  97.220  1.00  0.00           O  
ATOM    605  CB  ASP L  82      50.333 -21.738  95.690  1.00  0.00           C  
ATOM    606  CG  ASP L  82      50.322 -22.602  94.467  1.00  0.00           C  
ATOM    607  OD1 ASP L  82      50.115 -22.174  93.346  1.00  0.00           O  
ATOM    608  OD2 ASP L  82      50.567 -23.813  94.608  1.00  0.00           O  
ATOM    609  N   GLU L  83      49.218 -18.751  97.231  1.00  0.00           N  
ATOM    610  CA  GLU L  83      48.462 -18.077  98.319  1.00  0.00           C  
ATOM    611  C   GLU L  83      47.162 -17.668  97.648  1.00  0.00           C  
ATOM    612  O   GLU L  83      47.307 -17.122  96.519  1.00  0.00           O  
ATOM    613  CB  GLU L  83      49.215 -16.846  98.776  1.00  0.00           C  
ATOM    614  CG  GLU L  83      49.384 -16.427 100.200  1.00  0.00           C  
ATOM    615  CD  GLU L  83      50.804 -16.171 100.663  1.00  0.00           C  
ATOM    616  OE1 GLU L  83      51.790 -16.545 100.033  1.00  0.00           O  
ATOM    617  OE2 GLU L  83      50.844 -15.577 101.756  1.00  0.00           O  
ATOM    618  N   ALA L  84      46.014 -17.915  98.228  1.00  0.00           N  
ATOM    619  CA  ALA L  84      44.743 -17.623  97.527  1.00  0.00           C  
ATOM    620  C   ALA L  84      43.524 -17.397  98.380  1.00  0.00           C  
ATOM    621  O   ALA L  84      43.040 -16.263  98.607  1.00  0.00           O  
ATOM    622  CB  ALA L  84      44.510 -18.770  96.530  1.00  0.00           C  
ATOM    623  N   ASP L  85      42.957 -18.492  98.797  1.00  0.00           N  
ATOM    624  CA  ASP L  85      41.757 -18.620  99.642  1.00  0.00           C  
ATOM    625  C   ASP L  85      40.989 -19.631  98.784  1.00  0.00           C  
ATOM    626  O   ASP L  85      40.462 -19.139  97.774  1.00  0.00           O  
ATOM    627  CB  ASP L  85      41.083 -17.310  99.958  1.00  0.00           C  
ATOM    628  CG  ASP L  85      41.440 -16.747 101.315  1.00  0.00           C  
ATOM    629  OD1 ASP L  85      42.108 -15.707 101.498  1.00  0.00           O  
ATOM    630  OD2 ASP L  85      41.034 -17.432 102.280  1.00  0.00           O  
ATOM    631  N   TYR L  86      41.027 -20.877  99.153  1.00  0.00           N  
ATOM    632  CA  TYR L  86      40.471 -21.931  98.244  1.00  0.00           C  
ATOM    633  C   TYR L  86      39.074 -22.208  98.769  1.00  0.00           C  
ATOM    634  O   TYR L  86      38.904 -22.421  99.968  1.00  0.00           O  
ATOM    635  CB  TYR L  86      41.341 -23.151  98.144  1.00  0.00           C  
ATOM    636  CG  TYR L  86      42.769 -23.056  97.698  1.00  0.00           C  
ATOM    637  CD1 TYR L  86      43.234 -23.694  96.558  1.00  0.00           C  
ATOM    638  CD2 TYR L  86      43.702 -22.300  98.419  1.00  0.00           C  
ATOM    639  CE1 TYR L  86      44.563 -23.575  96.147  1.00  0.00           C  
ATOM    640  CE2 TYR L  86      45.025 -22.177  98.027  1.00  0.00           C  
ATOM    641  CZ  TYR L  86      45.455 -22.815  96.891  1.00  0.00           C  
ATOM    642  OH  TYR L  86      46.760 -22.679  96.529  1.00  0.00           O  
ATOM    643  N   PHE L  87      38.125 -22.202  97.845  1.00  0.00           N  
ATOM    644  CA  PHE L  87      36.694 -22.292  98.191  1.00  0.00           C  
ATOM    645  C   PHE L  87      35.967 -23.556  97.780  1.00  0.00           C  
ATOM    646  O   PHE L  87      36.314 -24.027  96.692  1.00  0.00           O  
ATOM    647  CB  PHE L  87      35.907 -21.112  97.527  1.00  0.00           C  
ATOM    648  CG  PHE L  87      36.335 -19.859  98.231  1.00  0.00           C  
ATOM    649  CD1 PHE L  87      36.628 -18.711  97.529  1.00  0.00           C  
ATOM    650  CD2 PHE L  87      36.508 -19.914  99.602  1.00  0.00           C  
ATOM    651  CE1 PHE L  87      37.030 -17.567  98.189  1.00  0.00           C  
ATOM    652  CE2 PHE L  87      36.942 -18.778 100.276  1.00  0.00           C  
ATOM    653  CZ  PHE L  87      37.196 -17.588  99.557  1.00  0.00           C  
ATOM    654  N   CYS L  88      34.975 -23.932  98.663  1.00  0.00           N  
ATOM    655  CA  CYS L  88      34.377 -25.258  98.181  1.00  0.00           C  
ATOM    656  C   CYS L  88      32.938 -25.477  98.109  1.00  0.00           C  
ATOM    657  O   CYS L  88      32.282 -25.384  99.135  1.00  0.00           O  
ATOM    658  CB  CYS L  88      35.183 -26.239  99.088  1.00  0.00           C  
ATOM    659  SG  CYS L  88      36.901 -25.498  99.109  1.00  0.00           S  
ATOM    660  N   MET L  89      32.429 -25.868  96.912  1.00  0.00           N  
ATOM    661  CA  MET L  89      30.990 -26.203  96.863  1.00  0.00           C  
ATOM    662  C   MET L  89      30.537 -27.604  96.415  1.00  0.00           C  
ATOM    663  O   MET L  89      30.840 -28.217  95.411  1.00  0.00           O  
ATOM    664  CB  MET L  89      30.115 -25.153  96.168  1.00  0.00           C  
ATOM    665  CG  MET L  89      30.258 -25.163  94.703  1.00  0.00           C  
ATOM    666  SD  MET L  89      31.655 -24.052  94.277  1.00  0.00           S  
ATOM    667  CE  MET L  89      32.400 -25.028  92.980  1.00  0.00           C  
ATOM    668  N   SER L  90      29.695 -28.119  97.326  1.00  0.00           N  
ATOM    669  CA  SER L  90      28.697 -29.189  96.884  1.00  0.00           C  
ATOM    670  C   SER L  90      27.696 -28.266  96.166  1.00  0.00           C  
ATOM    671  O   SER L  90      27.899 -26.981  96.227  1.00  0.00           O  
ATOM    672  CB  SER L  90      28.196 -29.814  98.131  1.00  0.00           C  
ATOM    673  OG  SER L  90      29.052 -29.381  99.204  1.00  0.00           O  
ATOM    674  N   TYR L  91      26.714 -28.850  95.519  1.00  0.00           N  
ATOM    675  CA  TYR L  91      25.631 -28.015  94.900  1.00  0.00           C  
ATOM    676  C   TYR L  91      24.395 -28.104  95.781  1.00  0.00           C  
ATOM    677  O   TYR L  91      24.552 -28.503  96.938  1.00  0.00           O  
ATOM    678  CB  TYR L  91      25.411 -28.326  93.478  1.00  0.00           C  
ATOM    679  CG  TYR L  91      24.440 -29.239  92.842  1.00  0.00           C  
ATOM    680  CD1 TYR L  91      24.079 -30.476  93.385  1.00  0.00           C  
ATOM    681  CD2 TYR L  91      23.899 -28.929  91.589  1.00  0.00           C  
ATOM    682  CE1 TYR L  91      23.181 -31.338  92.762  1.00  0.00           C  
ATOM    683  CE2 TYR L  91      23.002 -29.774  90.950  1.00  0.00           C  
ATOM    684  CZ  TYR L  91      22.637 -30.972  91.545  1.00  0.00           C  
ATOM    685  OH  TYR L  91      21.748 -31.796  90.909  1.00  0.00           O  
ATOM    686  N   LEU L  92      23.272 -27.671  95.253  1.00  0.00           N  
ATOM    687  CA  LEU L  92      21.980 -27.929  95.954  1.00  0.00           C  
ATOM    688  C   LEU L  92      20.718 -27.635  95.157  1.00  0.00           C  
ATOM    689  O   LEU L  92      20.621 -27.305  93.976  1.00  0.00           O  
ATOM    690  CB  LEU L  92      22.117 -27.448  97.380  1.00  0.00           C  
ATOM    691  CG  LEU L  92      22.380 -28.492  98.451  1.00  0.00           C  
ATOM    692  CD1 LEU L  92      23.308 -27.958  99.529  1.00  0.00           C  
ATOM    693  CD2 LEU L  92      21.058 -28.953  99.077  1.00  0.00           C  
ATOM    694  N   SER L  93      19.595 -27.883  95.824  1.00  0.00           N  
ATOM    695  CA  SER L  93      18.226 -27.831  95.443  1.00  0.00           C  
ATOM    696  C   SER L  93      17.928 -26.627  94.526  1.00  0.00           C  
ATOM    697  O   SER L  93      17.079 -25.781  94.854  1.00  0.00           O  
ATOM    698  CB  SER L  93      17.139 -27.833  96.497  1.00  0.00           C  
ATOM    699  OG  SER L  93      16.433 -26.590  96.622  1.00  0.00           O  
ATOM    700  N   ASP L  94      18.684 -26.717  93.437  1.00  0.00           N  
ATOM    701  CA  ASP L  94      18.201 -25.900  92.240  1.00  0.00           C  
ATOM    702  C   ASP L  94      18.461 -24.439  92.550  1.00  0.00           C  
ATOM    703  O   ASP L  94      18.474 -23.471  91.770  1.00  0.00           O  
ATOM    704  CB  ASP L  94      16.786 -26.469  92.002  1.00  0.00           C  
ATOM    705  CG  ASP L  94      16.535 -27.887  92.524  1.00  0.00           C  
ATOM    706  OD1 ASP L  94      15.392 -28.424  92.554  1.00  0.00           O  
ATOM    707  OD2 ASP L  94      17.455 -28.627  92.991  1.00  0.00           O  
ATOM    708  N   ALA L  95      18.908 -24.257  93.779  1.00  0.00           N  
ATOM    709  CA  ALA L  95      18.943 -23.017  94.504  1.00  0.00           C  
ATOM    710  C   ALA L  95      19.451 -23.302  95.915  1.00  0.00           C  
ATOM    711  O   ALA L  95      18.960 -22.580  96.832  1.00  0.00           O  
ATOM    712  CB  ALA L  95      17.515 -22.441  94.571  1.00  0.00           C  
ATOM    713  N   SER L  95A     20.139 -24.428  96.086  1.00  0.00           N  
ATOM    714  CA  SER L  95A     21.074 -24.386  97.278  1.00  0.00           C  
ATOM    715  C   SER L  95A     22.366 -24.541  96.512  1.00  0.00           C  
ATOM    716  O   SER L  95A     22.140 -24.359  95.287  1.00  0.00           O  
ATOM    717  CB  SER L  95A     20.812 -25.221  98.408  1.00  0.00           C  
ATOM    718  OG  SER L  95A     21.439 -24.555  99.522  1.00  0.00           O  
ATOM    719  N   PHE L  96      23.498 -24.841  97.001  1.00  0.00           N  
ATOM    720  CA  PHE L  96      24.764 -24.928  96.296  1.00  0.00           C  
ATOM    721  C   PHE L  96      25.830 -24.384  97.302  1.00  0.00           C  
ATOM    722  O   PHE L  96      25.961 -23.114  97.179  1.00  0.00           O  
ATOM    723  CB  PHE L  96      25.036 -24.018  95.088  1.00  0.00           C  
ATOM    724  CG  PHE L  96      25.906 -24.624  94.038  1.00  0.00           C  
ATOM    725  CD1 PHE L  96      26.842 -25.603  94.367  1.00  0.00           C  
ATOM    726  CD2 PHE L  96      25.811 -24.171  92.731  1.00  0.00           C  
ATOM    727  CE1 PHE L  96      27.627 -26.211  93.405  1.00  0.00           C  
ATOM    728  CE2 PHE L  96      26.606 -24.769  91.744  1.00  0.00           C  
ATOM    729  CZ  PHE L  96      27.511 -25.800  92.086  1.00  0.00           C  
ATOM    730  N   VAL L  97      26.512 -25.235  98.010  1.00  0.00           N  
ATOM    731  CA  VAL L  97      27.239 -24.576  99.114  1.00  0.00           C  
ATOM    732  C   VAL L  97      28.725 -24.796  99.116  1.00  0.00           C  
ATOM    733  O   VAL L  97      29.334 -25.778  98.797  1.00  0.00           O  
ATOM    734  CB  VAL L  97      26.510 -24.672 100.432  1.00  0.00           C  
ATOM    735  CG1 VAL L  97      25.314 -23.697 100.477  1.00  0.00           C  
ATOM    736  CG2 VAL L  97      26.091 -26.060 100.827  1.00  0.00           C  
ATOM    737  N   PHE L  98      29.325 -23.657  99.522  1.00  0.00           N  
ATOM    738  CA  PHE L  98      30.755 -23.406  99.613  1.00  0.00           C  
ATOM    739  C   PHE L  98      31.021 -23.454 101.163  1.00  0.00           C  
ATOM    740  O   PHE L  98      30.231 -23.078 101.992  1.00  0.00           O  
ATOM    741  CB  PHE L  98      31.360 -22.151  99.174  1.00  0.00           C  
ATOM    742  CG  PHE L  98      31.295 -21.257  98.042  1.00  0.00           C  
ATOM    743  CD1 PHE L  98      30.131 -21.078  97.307  1.00  0.00           C  
ATOM    744  CD2 PHE L  98      32.398 -20.438  97.733  1.00  0.00           C  
ATOM    745  CE1 PHE L  98      30.058 -20.183  96.265  1.00  0.00           C  
ATOM    746  CE2 PHE L  98      32.356 -19.519  96.692  1.00  0.00           C  
ATOM    747  CZ  PHE L  98      31.171 -19.395  95.969  1.00  0.00           C  
ATOM    748  N   GLY L  99      32.234 -23.909 101.336  1.00  0.00           N  
ATOM    749  CA  GLY L  99      32.869 -24.073 102.606  1.00  0.00           C  
ATOM    750  C   GLY L  99      34.004 -23.019 102.648  1.00  0.00           C  
ATOM    751  O   GLY L  99      34.875 -23.082 101.767  1.00  0.00           O  
ATOM    752  N   SER L 100      33.760 -21.999 103.427  1.00  0.00           N  
ATOM    753  CA  SER L 100      34.814 -21.208 104.028  1.00  0.00           C  
ATOM    754  C   SER L 100      35.970 -20.532 103.385  1.00  0.00           C  
ATOM    755  O   SER L 100      35.991 -19.316 103.188  1.00  0.00           O  
ATOM    756  CB  SER L 100      35.469 -22.202 105.071  1.00  0.00           C  
ATOM    757  OG  SER L 100      34.735 -22.592 106.138  1.00  0.00           O  
ATOM    758  N   GLY L 101      37.074 -21.259 103.215  1.00  0.00           N  
ATOM    759  CA  GLY L 101      38.314 -20.876 102.596  1.00  0.00           C  
ATOM    760  C   GLY L 101      39.483 -21.609 103.262  1.00  0.00           C  
ATOM    761  O   GLY L 101      39.261 -22.287 104.264  1.00  0.00           O  
ATOM    762  N   THR L 102      40.660 -21.403 102.648  1.00  0.00           N  
ATOM    763  CA  THR L 102      41.916 -21.940 103.236  1.00  0.00           C  
ATOM    764  C   THR L 102      43.072 -21.002 103.031  1.00  0.00           C  
ATOM    765  O   THR L 102      43.376 -20.312 104.045  1.00  0.00           O  
ATOM    766  CB  THR L 102      42.121 -23.460 102.898  1.00  0.00           C  
ATOM    767  OG1 THR L 102      42.847 -24.149 103.948  1.00  0.00           O  
ATOM    768  CG2 THR L 102      42.798 -23.728 101.565  1.00  0.00           C  
ATOM    769  N   LYS L 103      43.710 -20.848 101.923  1.00  0.00           N  
ATOM    770  CA  LYS L 103      44.938 -20.056 101.741  1.00  0.00           C  
ATOM    771  C   LYS L 103      46.235 -20.868 101.620  1.00  0.00           C  
ATOM    772  O   LYS L 103      46.209 -22.067 101.968  1.00  0.00           O  
ATOM    773  CB  LYS L 103      45.190 -19.066 102.884  1.00  0.00           C  
ATOM    774  CG  LYS L 103      46.121 -17.902 102.507  1.00  0.00           C  
ATOM    775  CD  LYS L 103      45.341 -16.651 102.096  1.00  0.00           C  
ATOM    776  CE  LYS L 103      46.181 -15.456 101.750  1.00  0.00           C  
ATOM    777  NZ  LYS L 103      47.025 -15.020 102.888  1.00  0.00           N  
ATOM    778  N   VAL L 104      47.310 -20.220 101.098  1.00  0.00           N  
ATOM    779  CA  VAL L 104      48.621 -20.954 101.176  1.00  0.00           C  
ATOM    780  C   VAL L 104      49.847 -20.106 101.178  1.00  0.00           C  
ATOM    781  O   VAL L 104      49.674 -18.888 101.329  1.00  0.00           O  
ATOM    782  CB  VAL L 104      48.495 -22.324 100.538  1.00  0.00           C  
ATOM    783  CG1 VAL L 104      47.698 -22.379  99.261  1.00  0.00           C  
ATOM    784  CG2 VAL L 104      49.853 -23.050 100.414  1.00  0.00           C  
ATOM    785  N   THR L 105      51.080 -20.683 101.228  1.00  0.00           N  
ATOM    786  CA  THR L 105      52.329 -20.041 101.468  1.00  0.00           C  
ATOM    787  C   THR L 105      53.644 -20.660 100.979  1.00  0.00           C  
ATOM    788  O   THR L 105      53.705 -21.883 101.044  1.00  0.00           O  
ATOM    789  CB  THR L 105      52.870 -20.217 103.005  1.00  0.00           C  
ATOM    790  OG1 THR L 105      51.916 -20.897 103.773  1.00  0.00           O  
ATOM    791  CG2 THR L 105      53.432 -18.880 103.470  1.00  0.00           C  
ATOM    792  N   VAL L 106      54.673 -19.830 100.851  1.00  0.00           N  
ATOM    793  CA  VAL L 106      55.996 -20.351 100.369  1.00  0.00           C  
ATOM    794  C   VAL L 106      57.081 -19.319 100.142  1.00  0.00           C  
ATOM    795  O   VAL L 106      57.524 -19.118  98.964  1.00  0.00           O  
ATOM    796  CB  VAL L 106      55.637 -21.264  99.161  1.00  0.00           C  
ATOM    797  CG1 VAL L 106      56.586 -21.303  97.995  1.00  0.00           C  
ATOM    798  CG2 VAL L 106      55.397 -22.719  99.587  1.00  0.00           C  
ATOM    799  N   LEU L 106A     57.580 -18.615 101.163  1.00  0.00           N  
ATOM    800  CA  LEU L 106A     58.673 -17.668 100.999  1.00  0.00           C  
ATOM    801  C   LEU L 106A     59.722 -17.552 102.102  1.00  0.00           C  
ATOM    802  O   LEU L 106A     60.580 -18.434 102.368  1.00  0.00           O  
ATOM    803  CB  LEU L 106A     58.124 -16.243 100.656  1.00  0.00           C  
ATOM    804  CG  LEU L 106A     59.243 -15.397 100.012  1.00  0.00           C  
ATOM    805  CD1 LEU L 106A     58.897 -15.070  98.573  1.00  0.00           C  
ATOM    806  CD2 LEU L 106A     59.578 -14.158 100.797  1.00  0.00           C  
ATOM    807  N   ARG L 107      59.775 -16.306 102.600  1.00  0.00           N  
ATOM    808  CA  ARG L 107      60.454 -16.073 103.894  1.00  0.00           C  
ATOM    809  C   ARG L 107      59.176 -16.002 104.805  1.00  0.00           C  
ATOM    810  O   ARG L 107      58.284 -15.140 104.593  1.00  0.00           O  
ATOM    811  CB  ARG L 107      61.311 -14.921 104.089  1.00  0.00           C  
ATOM    812  CG  ARG L 107      62.025 -14.295 102.909  1.00  0.00           C  
ATOM    813  CD  ARG L 107      61.941 -12.816 103.219  1.00  0.00           C  
ATOM    814  NE  ARG L 107      62.800 -12.421 104.353  1.00  0.00           N  
ATOM    815  CZ  ARG L 107      62.495 -11.295 105.043  1.00  0.00           C  
ATOM    816  NH1 ARG L 107      61.361 -10.605 104.898  1.00  0.00           N  
ATOM    817  NH2 ARG L 107      63.532 -10.729 105.688  1.00  0.00           N  
ATOM    818  N   GLN L 108      59.207 -16.970 105.701  1.00  0.00           N  
ATOM    819  CA  GLN L 108      57.994 -17.133 106.536  1.00  0.00           C  
ATOM    820  C   GLN L 108      58.303 -17.830 107.818  1.00  0.00           C  
ATOM    821  O   GLN L 108      58.843 -18.943 107.815  1.00  0.00           O  
ATOM    822  CB  GLN L 108      56.935 -17.894 105.732  1.00  0.00           C  
ATOM    823  CG  GLN L 108      57.477 -18.530 104.481  1.00  0.00           C  
ATOM    824  CD  GLN L 108      56.929 -19.912 104.258  1.00  0.00           C  
ATOM    825  OE1 GLN L 108      57.467 -20.727 103.543  1.00  0.00           O  
ATOM    826  NE2 GLN L 108      55.833 -20.124 104.961  1.00  0.00           N  
ATOM    827  N   PRO L 109      57.973 -17.128 108.859  1.00  0.00           N  
ATOM    828  CA  PRO L 109      58.087 -17.679 110.213  1.00  0.00           C  
ATOM    829  C   PRO L 109      57.492 -19.073 110.215  1.00  0.00           C  
ATOM    830  O   PRO L 109      57.661 -19.889 109.317  1.00  0.00           O  
ATOM    831  CB  PRO L 109      57.324 -16.631 110.997  1.00  0.00           C  
ATOM    832  CG  PRO L 109      57.152 -15.411 110.142  1.00  0.00           C  
ATOM    833  CD  PRO L 109      58.036 -15.619 108.934  1.00  0.00           C  
TER     834      PRO L 109                                                      
