# Supplementary material for: SARS-CoV-2 Spike Protein Interaction Space
Source: Int J Mol Sci. 2023 Jul 27;24(15):12058. doi: 10.3390/ijms241512058 (PMC10418891; doi:10.3390/ijms241512058)
Supplement: Supplementary file 1 [file ijms-24-12058-s001.zip › Supplementary Material File S1/1QAC.pdb]

REMARK 950 NUMBERING  Kabat
REMARK 950 METHOD     X-ray crystal structure
REMARK 950 RESOLUTION 1.800
REMARK 950 R-FACTOR   0.193
REMARK 950 R-FREE     0.226
REMARK 950 CHAIN-TYPE LABEL ORIGINAL
REMARK 950 CHAIN L    L    A
REMARK 950 CHAIN L    L    B
REMARK 950 MOLECULE : A : IMMUNOGLOBULIN LIGHT CHAIN VARIABLE DOMAIN
REMARK 950 SPECIES  : A : HOMO SAPIENS
SEQRES   1 L 114  ASP ILE VAL MET THR GLN SER PRO ASP SER LEU ALA VAL          
SEQRES   2 L 114  SER LEU GLY GLU ARG ALA THR ILE ASN CYS LYS SER SER          
SEQRES   3 L 114  GLN SER VAL LEU TYR SER SER ASN SER LYS ASN TYR LEU          
SEQRES   4 L 114  ALA TRP TYR GLN GLN LYS PRO GLY GLN PRO PRO LYS LEU          
SEQRES   5 L 114  LEU ILE TYR TRP ALA SER THR ARG GLU SER GLY VAL PRO          
SEQRES   6 L 114  ASP ARG PHE SER GLY SER GLY SER GLY THR ASP PHE THR          
SEQRES   7 L 114  LEU THR ILE SER SER LEU GLN ALA GLU ASP VAL ALA VAL          
SEQRES   8 L 114  TYR TYR CYS LEU GLN TYR TYR SER THR PRO TYR SER PHE          
SEQRES   9 L 114  GLY GLN GLY THR LYS LEU GLU ILE LYS ARG                      
SEQRES   1 L 114  ASP ILE VAL MET THR GLN SER PRO ASP SER LEU ALA VAL          
SEQRES   2 L 114  SER LEU GLY GLU ARG ALA THR ILE ASN CYS LYS SER SER          
SEQRES   3 L 114  GLN SER VAL LEU TYR SER SER ASN SER LYS ASN TYR LEU          
SEQRES   4 L 114  ALA TRP TYR GLN GLN LYS PRO GLY GLN PRO PRO LYS LEU          
SEQRES   5 L 114  LEU ILE TYR TRP ALA SER THR ARG GLU SER GLY VAL PRO          
SEQRES   6 L 114  ASP ARG PHE SER GLY SER GLY SER GLY THR ASP PHE THR          
SEQRES   7 L 114  LEU THR ILE SER SER LEU GLN ALA GLU ASP VAL ALA VAL          
SEQRES   8 L 114  TYR TYR CYS LEU GLN TYR TYR SER THR PRO TYR SER PHE          
SEQRES   9 L 114  GLY GLN GLY THR LYS LEU GLU ILE LYS ARG                      
ATOM      1  N   ASP L   1     -13.639   8.063   2.440  1.00 25.38           N  
ATOM      2  CA  ASP L   1     -13.015   6.770   2.850  1.00 24.94           C  
ATOM      3  C   ASP L   1     -12.238   6.139   1.713  1.00 24.42           C  
ATOM      4  O   ASP L   1     -12.817   5.649   0.740  1.00 25.24           O  
ATOM      5  CB  ASP L   1     -14.085   5.792   3.334  1.00 25.33           C  
ATOM      6  CG  ASP L   1     -14.625   6.155   4.700  1.00 25.49           C  
ATOM      7  OD1 ASP L   1     -14.919   7.350   4.921  1.00 25.58           O  
ATOM      8  OD2 ASP L   1     -14.765   5.245   5.543  1.00 25.37           O  
ATOM      9  N   ILE L   2     -10.920   6.147   1.849  1.00 22.91           N  
ATOM     10  CA  ILE L   2     -10.054   5.573   0.839  1.00 21.13           C  
ATOM     11  C   ILE L   2     -10.032   4.053   0.969  1.00 20.51           C  
ATOM     12  O   ILE L   2      -9.846   3.511   2.062  1.00 20.74           O  
ATOM     13  CB  ILE L   2      -8.634   6.147   0.970  1.00 21.20           C  
ATOM     14  CG1 ILE L   2      -8.685   7.664   0.750  1.00 21.01           C  
ATOM     15  CG2 ILE L   2      -7.697   5.468  -0.023  1.00 20.31           C  
ATOM     16  CD1 ILE L   2      -7.363   8.366   0.914  1.00 21.12           C  
ATOM     17  N   VAL L   3     -10.245   3.371  -0.151  1.00 19.42           N  
ATOM     18  CA  VAL L   3     -10.249   1.912  -0.180  1.00 18.92           C  
ATOM     19  C   VAL L   3      -8.934   1.414  -0.771  1.00 18.20           C  
ATOM     20  O   VAL L   3      -8.491   1.907  -1.809  1.00 17.08           O  
ATOM     21  CB  VAL L   3     -11.426   1.377  -1.027  1.00 18.99           C  
ATOM     22  CG1 VAL L   3     -11.354  -0.136  -1.139  1.00 18.96           C  
ATOM     23  CG2 VAL L   3     -12.743   1.785  -0.391  1.00 20.02           C  
ATOM     24  N   MET L   4      -8.311   0.449  -0.098  1.00 17.06           N  
ATOM     25  CA  MET L   4      -7.045  -0.116  -0.556  1.00 16.41           C  
ATOM     26  C   MET L   4      -7.304  -1.502  -1.124  1.00 16.45           C  
ATOM     27  O   MET L   4      -7.956  -2.332  -0.491  1.00 16.65           O  
ATOM     28  CB  MET L   4      -6.051  -0.209   0.608  1.00 15.43           C  
ATOM     29  CG  MET L   4      -5.873   1.105   1.344  1.00 14.89           C  
ATOM     30  SD  MET L   4      -5.248   2.408   0.266  1.00 13.82           S  
ATOM     31  CE  MET L   4      -3.558   1.826  -0.033  1.00 13.78           C  
ATOM     32  N   THR L   5      -6.794  -1.751  -2.323  1.00 16.56           N  
ATOM     33  CA  THR L   5      -6.993  -3.041  -2.968  1.00 16.11           C  
ATOM     34  C   THR L   5      -5.660  -3.708  -3.278  1.00 15.36           C  
ATOM     35  O   THR L   5      -4.855  -3.168  -4.038  1.00 15.44           O  
ATOM     36  CB  THR L   5      -7.770  -2.878  -4.285  1.00 16.84           C  
ATOM     37  OG1 THR L   5      -8.974  -2.140  -4.040  1.00 18.29           O  
ATOM     38  CG2 THR L   5      -8.124  -4.239  -4.857  1.00 17.58           C  
ATOM     39  N   GLN L   6      -5.422  -4.876  -2.691  1.00 14.48           N  
ATOM     40  CA  GLN L   6      -4.177  -5.585  -2.955  1.00 14.76           C  
ATOM     41  C   GLN L   6      -4.420  -6.754  -3.892  1.00 15.04           C  
ATOM     42  O   GLN L   6      -5.552  -7.228  -4.052  1.00 14.80           O  
ATOM     43  CB  GLN L   6      -3.547  -6.130  -1.669  1.00 14.64           C  
ATOM     44  CG  GLN L   6      -3.334  -5.124  -0.588  1.00 13.87           C  
ATOM     45  CD  GLN L   6      -2.541  -5.693   0.570  1.00 12.00           C  
ATOM     46  OE1 GLN L   6      -2.677  -5.239   1.703  1.00 13.92           O  
ATOM     47  NE2 GLN L   6      -1.683  -6.670   0.287  1.00 12.12           N  
ATOM     48  N   SER L   7      -3.342  -7.209  -4.515  1.00 14.76           N  
ATOM     49  CA  SER L   7      -3.394  -8.338  -5.422  1.00 15.58           C  
ATOM     50  C   SER L   7      -1.968  -8.799  -5.679  1.00 15.09           C  
ATOM     51  O   SER L   7      -1.052  -7.980  -5.807  1.00 15.01           O  
ATOM     52  CB  SER L   7      -4.054  -7.944  -6.744  1.00 16.05           C  
ATOM     53  OG  SER L   7      -3.295  -6.959  -7.417  1.00 18.40           O  
ATOM     54  N   PRO L   8      -1.753 -10.118  -5.737  1.00 14.99           N  
ATOM     55  CA  PRO L   8      -2.749 -11.185  -5.577  1.00 14.45           C  
ATOM     56  C   PRO L   8      -3.095 -11.373  -4.103  1.00 14.50           C  
ATOM     57  O   PRO L   8      -2.410 -10.847  -3.230  1.00 13.73           O  
ATOM     58  CB  PRO L   8      -2.017 -12.391  -6.138  1.00 14.55           C  
ATOM     59  CG  PRO L   8      -0.621 -12.136  -5.605  1.00 14.06           C  
ATOM     60  CD  PRO L   8      -0.438 -10.703  -6.053  1.00 14.39           C  
ATOM     61  N   ASP L   9      -4.156 -12.127  -3.823  1.00 14.92           N  
ATOM     62  CA  ASP L   9      -4.542 -12.376  -2.436  1.00 15.58           C  
ATOM     63  C   ASP L   9      -3.585 -13.403  -1.850  1.00 15.07           C  
ATOM     64  O   ASP L   9      -3.314 -13.410  -0.650  1.00 14.38           O  
ATOM     65  CB  ASP L   9      -5.971 -12.922  -2.350  1.00 16.95           C  
ATOM     66  CG  ASP L   9      -6.994 -11.975  -2.938  1.00 19.02           C  
ATOM     67  OD1 ASP L   9      -6.883 -10.752  -2.700  1.00 19.38           O  
ATOM     68  OD2 ASP L   9      -7.928 -12.460  -3.617  1.00 21.31           O  
ATOM     69  N   SER L  10      -3.084 -14.271  -2.723  1.00 15.12           N  
ATOM     70  CA  SER L  10      -2.151 -15.325  -2.348  1.00 15.29           C  
ATOM     71  C   SER L  10      -1.014 -15.362  -3.360  1.00 14.47           C  
ATOM     72  O   SER L  10      -1.244 -15.242  -4.560  1.00 14.99           O  
ATOM     73  CB  SER L  10      -2.864 -16.677  -2.332  1.00 15.50           C  
ATOM     74  OG  SER L  10      -1.938 -17.725  -2.110  1.00 18.59           O  
ATOM     75  N   LEU L  11       0.210 -15.536  -2.874  1.00 13.76           N  
ATOM     76  CA  LEU L  11       1.369 -15.576  -3.750  1.00 13.31           C  
ATOM     77  C   LEU L  11       2.354 -16.658  -3.318  1.00 13.31           C  
ATOM     78  O   LEU L  11       2.757 -16.719  -2.155  1.00 12.95           O  
ATOM     79  CB  LEU L  11       2.067 -14.212  -3.747  1.00 14.04           C  
ATOM     80  CG  LEU L  11       3.278 -14.040  -4.662  1.00 14.05           C  
ATOM     81  CD1 LEU L  11       2.896 -14.331  -6.101  1.00 15.46           C  
ATOM     82  CD2 LEU L  11       3.800 -12.616  -4.532  1.00 14.68           C  
ATOM     83  N   ALA L  12       2.732 -17.507  -4.267  1.00 12.41           N  
ATOM     84  CA  ALA L  12       3.674 -18.589  -4.011  1.00 13.01           C  
ATOM     85  C   ALA L  12       4.939 -18.315  -4.821  1.00 13.20           C  
ATOM     86  O   ALA L  12       4.904 -18.290  -6.054  1.00 13.62           O  
ATOM     87  CB  ALA L  12       3.052 -19.928  -4.414  1.00 12.93           C  
ATOM     88  N   VAL L  13       6.052 -18.108  -4.119  1.00 12.98           N  
ATOM     89  CA  VAL L  13       7.330 -17.801  -4.755  1.00 13.26           C  
ATOM     90  C   VAL L  13       8.439 -18.741  -4.280  1.00 13.16           C  
ATOM     91  O   VAL L  13       8.454 -19.164  -3.125  1.00 13.43           O  
ATOM     92  CB  VAL L  13       7.731 -16.339  -4.448  1.00 13.08           C  
ATOM     93  CG1 VAL L  13       9.059 -15.993  -5.116  1.00 13.60           C  
ATOM     94  CG2 VAL L  13       6.630 -15.406  -4.914  1.00 14.06           C  
ATOM     95  N   SER L  14       9.359 -19.076  -5.180  1.00 13.57           N  
ATOM     96  CA  SER L  14      10.459 -19.966  -4.830  1.00 13.52           C  
ATOM     97  C   SER L  14      11.582 -19.219  -4.137  1.00 14.00           C  
ATOM     98  O   SER L  14      11.810 -18.036  -4.391  1.00 13.66           O  
ATOM     99  CB  SER L  14      11.011 -20.670  -6.078  1.00 13.87           C  
ATOM    100  OG  SER L  14      10.056 -21.559  -6.628  1.00 14.18           O  
ATOM    101  N   LEU L  15      12.272 -19.919  -3.246  1.00 14.12           N  
ATOM    102  CA  LEU L  15      13.385 -19.331  -2.518  1.00 14.38           C  
ATOM    103  C   LEU L  15      14.363 -18.745  -3.528  1.00 14.36           C  
ATOM    104  O   LEU L  15      14.616 -19.340  -4.577  1.00 14.77           O  
ATOM    105  CB  LEU L  15      14.085 -20.408  -1.673  1.00 14.41           C  
ATOM    106  CG  LEU L  15      13.271 -21.019  -0.525  1.00 15.42           C  
ATOM    107  CD1 LEU L  15      14.029 -22.189   0.086  1.00 15.85           C  
ATOM    108  CD2 LEU L  15      12.992 -19.951   0.529  1.00 15.31           C  
ATOM    109  N   GLY L  16      14.895 -17.569  -3.221  1.00 13.98           N  
ATOM    110  CA  GLY L  16      15.848 -16.948  -4.116  1.00 14.08           C  
ATOM    111  C   GLY L  16      15.230 -16.183  -5.265  1.00 14.34           C  
ATOM    112  O   GLY L  16      15.940 -15.491  -5.986  1.00 14.42           O  
ATOM    113  N   GLU L  17      13.918 -16.292  -5.456  1.00 14.40           N  
ATOM    114  CA  GLU L  17      13.296 -15.567  -6.554  1.00 14.90           C  
ATOM    115  C   GLU L  17      12.567 -14.302  -6.095  1.00 14.25           C  
ATOM    116  O   GLU L  17      12.431 -14.048  -4.897  1.00 13.84           O  
ATOM    117  CB  GLU L  17      12.380 -16.499  -7.356  1.00 16.37           C  
ATOM    118  CG  GLU L  17      13.142 -17.718  -7.869  1.00 19.37           C  
ATOM    119  CD  GLU L  17      12.417 -18.499  -8.950  1.00 22.22           C  
ATOM    120  OE1 GLU L  17      11.273 -18.952  -8.724  1.00 23.50           O  
ATOM    121  OE2 GLU L  17      13.011 -18.670 -10.038  1.00 24.32           O  
ATOM    122  N   ARG L  18      12.107 -13.516  -7.063  1.00 13.15           N  
ATOM    123  CA  ARG L  18      11.444 -12.238  -6.814  1.00 13.12           C  
ATOM    124  C   ARG L  18       9.938 -12.360  -6.538  1.00 12.23           C  
ATOM    125  O   ARG L  18       9.242 -13.139  -7.184  1.00 11.98           O  
ATOM    126  CB  ARG L  18      11.689 -11.348  -8.044  1.00 14.86           C  
ATOM    127  CG  ARG L  18      11.387  -9.861  -7.921  1.00 18.15           C  
ATOM    128  CD  ARG L  18      11.479  -9.234  -9.318  1.00 20.23           C  
ATOM    129  NE  ARG L  18      11.372  -7.775  -9.347  1.00 22.46           N  
ATOM    130  CZ  ARG L  18      12.364  -6.944  -9.039  1.00 22.97           C  
ATOM    131  NH1 ARG L  18      12.169  -5.631  -9.094  1.00 23.62           N  
ATOM    132  NH2 ARG L  18      13.554  -7.421  -8.695  1.00 22.70           N  
ATOM    133  N   ALA L  19       9.442 -11.604  -5.563  1.00 11.07           N  
ATOM    134  CA  ALA L  19       8.014 -11.608  -5.257  1.00 10.28           C  
ATOM    135  C   ALA L  19       7.515 -10.190  -5.508  1.00 10.03           C  
ATOM    136  O   ALA L  19       8.178  -9.228  -5.133  1.00 10.47           O  
ATOM    137  CB  ALA L  19       7.768 -11.999  -3.808  1.00  9.70           C  
ATOM    138  N   THR L  20       6.354 -10.063  -6.145  1.00  9.32           N  
ATOM    139  CA  THR L  20       5.787  -8.752  -6.437  1.00  8.75           C  
ATOM    140  C   THR L  20       4.387  -8.685  -5.847  1.00  8.35           C  
ATOM    141  O   THR L  20       3.581  -9.587  -6.063  1.00  7.40           O  
ATOM    142  CB  THR L  20       5.705  -8.498  -7.968  1.00  9.19           C  
ATOM    143  OG1 THR L  20       7.024  -8.492  -8.527  1.00 10.15           O  
ATOM    144  CG2 THR L  20       5.038  -7.165  -8.258  1.00  9.23           C  
ATOM    145  N   ILE L  21       4.111  -7.625  -5.093  1.00  7.20           N  
ATOM    146  CA  ILE L  21       2.804  -7.444  -4.469  1.00  8.36           C  
ATOM    147  C   ILE L  21       2.261  -6.064  -4.817  1.00  8.14           C  
ATOM    148  O   ILE L  21       2.950  -5.054  -4.654  1.00  8.43           O  
ATOM    149  CB  ILE L  21       2.900  -7.599  -2.935  1.00  8.11           C  
ATOM    150  CG1 ILE L  21       3.396  -9.006  -2.591  1.00  8.57           C  
ATOM    151  CG2 ILE L  21       1.532  -7.352  -2.295  1.00  8.89           C  
ATOM    152  CD1 ILE L  21       3.613  -9.233  -1.105  1.00  9.41           C  
ATOM    153  N   ASN L  22       1.020  -6.020  -5.287  1.00  8.35           N  
ATOM    154  CA  ASN L  22       0.420  -4.759  -5.688  1.00  8.49           C  
ATOM    155  C   ASN L  22      -0.638  -4.233  -4.730  1.00  9.54           C  
ATOM    156  O   ASN L  22      -1.337  -4.998  -4.068  1.00  9.57           O  
ATOM    157  CB  ASN L  22      -0.204  -4.898  -7.078  1.00  8.80           C  
ATOM    158  CG  ASN L  22       0.735  -5.544  -8.070  1.00  9.21           C  
ATOM    159  OD1 ASN L  22       0.700  -6.756  -8.282  1.00 10.99           O  
ATOM    160  ND2 ASN L  22       1.610  -4.739  -8.658  1.00  9.27           N  
ATOM    161  N   CYS L  23      -0.743  -2.911  -4.681  1.00 10.31           N  
ATOM    162  CA  CYS L  23      -1.713  -2.226  -3.843  1.00 11.70           C  
ATOM    163  C   CYS L  23      -2.196  -0.984  -4.586  1.00 11.90           C  
ATOM    164  O   CYS L  23      -1.395  -0.208  -5.102  1.00 11.76           O  
ATOM    165  CB  CYS L  23      -1.071  -1.831  -2.509  1.00 12.74           C  
ATOM    166  SG  CYS L  23      -2.141  -0.825  -1.426  1.00 15.27           S  
ATOM    167  N   LYS L  24      -3.508  -0.804  -4.645  1.00 12.83           N  
ATOM    168  CA  LYS L  24      -4.090   0.350  -5.320  1.00 14.08           C  
ATOM    169  C   LYS L  24      -4.964   1.128  -4.344  1.00 13.68           C  
ATOM    170  O   LYS L  24      -5.734   0.532  -3.606  1.00 15.09           O  
ATOM    171  CB  LYS L  24      -4.956  -0.097  -6.504  1.00 15.08           C  
ATOM    172  CG  LYS L  24      -5.656   1.063  -7.207  1.00 17.45           C  
ATOM    173  CD  LYS L  24      -6.544   0.610  -8.365  1.00 19.73           C  
ATOM    174  CE  LYS L  24      -7.724  -0.232  -7.892  1.00 21.26           C  
ATOM    175  NZ  LYS L  24      -8.636  -0.604  -9.021  1.00 22.94           N  
ATOM    176  N   SER L  25      -4.831   2.449  -4.330  1.00 13.64           N  
ATOM    177  CA  SER L  25      -5.664   3.270  -3.455  1.00 13.61           C  
ATOM    178  C   SER L  25      -6.754   3.895  -4.319  1.00 13.77           C  
ATOM    179  O   SER L  25      -6.508   4.274  -5.469  1.00 13.28           O  
ATOM    180  CB  SER L  25      -4.837   4.358  -2.774  1.00 12.78           C  
ATOM    181  OG  SER L  25      -4.227   5.212  -3.722  1.00 12.33           O  
ATOM    182  N   SER L  26      -7.961   3.987  -3.769  1.00 14.16           N  
ATOM    183  CA  SER L  26      -9.092   4.544  -4.501  1.00 15.21           C  
ATOM    184  C   SER L  26      -8.946   6.040  -4.754  1.00 15.76           C  
ATOM    185  O   SER L  26      -9.650   6.606  -5.586  1.00 16.29           O  
ATOM    186  CB  SER L  26     -10.394   4.266  -3.744  1.00 14.84           C  
ATOM    187  OG  SER L  26     -10.369   4.850  -2.455  1.00 15.58           O  
ATOM    188  N   GLN L  27      -8.038   6.681  -4.029  1.00 17.09           N  
ATOM    189  CA  GLN L  27      -7.790   8.109  -4.189  1.00 17.53           C  
ATOM    190  C   GLN L  27      -6.293   8.300  -4.009  1.00 17.60           C  
ATOM    191  O   GLN L  27      -5.660   7.568  -3.248  1.00 17.91           O  
ATOM    192  CB  GLN L  27      -8.507   8.917  -3.102  1.00 19.13           C  
ATOM    193  CG  GLN L  27      -9.986   8.632  -2.946  1.00 21.61           C  
ATOM    194  CD  GLN L  27     -10.609   9.430  -1.809  1.00 22.69           C  
ATOM    195  OE1 GLN L  27     -11.783   9.252  -1.478  1.00 24.41           O  
ATOM    196  NE2 GLN L  27      -9.824  10.319  -1.209  1.00 23.61           N  
ATOM    197  N   SER L  27A     -5.728   9.277  -4.702  1.00 16.65           N  
ATOM    198  CA  SER L  27A     -4.306   9.557  -4.575  1.00 16.62           C  
ATOM    199  C   SER L  27A     -3.942   9.818  -3.114  1.00 16.39           C  
ATOM    200  O   SER L  27A     -4.703  10.450  -2.387  1.00 15.99           O  
ATOM    201  CB  SER L  27A     -3.945  10.779  -5.413  1.00 16.63           C  
ATOM    202  OG  SER L  27A     -2.647  11.250  -5.099  1.00 17.78           O  
ATOM    203  N   VAL L  27B     -2.785   9.318  -2.686  1.00 15.67           N  
ATOM    204  CA  VAL L  27B     -2.319   9.538  -1.322  1.00 14.98           C  
ATOM    205  C   VAL L  27B     -1.038  10.372  -1.355  1.00 15.03           C  
ATOM    206  O   VAL L  27B     -0.268  10.395  -0.395  1.00 14.78           O  
ATOM    207  CB  VAL L  27B     -2.059   8.208  -0.567  1.00 15.10           C  
ATOM    208  CG1 VAL L  27B     -3.372   7.457  -0.368  1.00 14.59           C  
ATOM    209  CG2 VAL L  27B     -1.067   7.352  -1.339  1.00 14.54           C  
ATOM    210  N   LEU L  27C     -0.830  11.054  -2.480  1.00 15.24           N  
ATOM    211  CA  LEU L  27C      0.321  11.929  -2.685  1.00 15.55           C  
ATOM    212  C   LEU L  27C     -0.096  13.333  -2.263  1.00 16.31           C  
ATOM    213  O   LEU L  27C     -1.035  13.893  -2.827  1.00 16.01           O  
ATOM    214  CB  LEU L  27C      0.718  11.944  -4.162  1.00 15.31           C  
ATOM    215  CG  LEU L  27C      1.773  12.961  -4.596  1.00 15.78           C  
ATOM    216  CD1 LEU L  27C      3.119  12.632  -3.965  1.00 15.81           C  
ATOM    217  CD2 LEU L  27C      1.879  12.949  -6.113  1.00 16.16           C  
ATOM    218  N   TYR L  27D      0.604  13.901  -1.284  1.00 16.79           N  
ATOM    219  CA  TYR L  27D      0.274  15.233  -0.787  1.00 17.38           C  
ATOM    220  C   TYR L  27D      1.123  16.260  -1.532  1.00 18.28           C  
ATOM    221  O   TYR L  27D      2.356  16.183  -1.529  1.00 18.35           O  
ATOM    222  CB  TYR L  27D      0.523  15.281   0.726  1.00 16.80           C  
ATOM    223  CG  TYR L  27D     -0.329  16.278   1.492  1.00 16.64           C  
ATOM    224  CD1 TYR L  27D     -1.679  16.451   1.186  1.00 16.11           C  
ATOM    225  CD2 TYR L  27D      0.185  16.962   2.593  1.00 16.16           C  
ATOM    226  CE1 TYR L  27D     -2.503  17.282   1.961  1.00 15.62           C  
ATOM    227  CE2 TYR L  27D     -0.633  17.793   3.377  1.00 16.41           C  
ATOM    228  CZ  TYR L  27D     -1.976  17.943   3.051  1.00 15.26           C  
ATOM    229  OH  TYR L  27D     -2.787  18.739   3.835  1.00 14.63           O  
ATOM    230  N   SER L  27E      0.454  17.218  -2.171  1.00 19.53           N  
ATOM    231  CA  SER L  27E      1.130  18.241  -2.965  1.00 20.60           C  
ATOM    232  C   SER L  27E      2.161  19.095  -2.222  1.00 20.83           C  
ATOM    233  O   SER L  27E      3.249  19.356  -2.745  1.00 21.29           O  
ATOM    234  CB  SER L  27E      0.093  19.159  -3.625  1.00 21.29           C  
ATOM    235  OG  SER L  27E     -0.634  19.891  -2.658  1.00 23.03           O  
ATOM    236  N   SER L  27F      1.828  19.528  -1.012  1.00 20.97           N  
ATOM    237  CA  SER L  27F      2.736  20.370  -0.238  1.00 21.22           C  
ATOM    238  C   SER L  27F      4.136  19.797  -0.002  1.00 21.09           C  
ATOM    239  O   SER L  27F      5.133  20.512  -0.145  1.00 21.35           O  
ATOM    240  CB  SER L  27F      2.097  20.743   1.105  1.00 21.58           C  
ATOM    241  OG  SER L  27F      1.738  19.596   1.852  1.00 23.11           O  
ATOM    242  N   ASN L  28       4.220  18.519   0.350  1.00 20.23           N  
ATOM    243  CA  ASN L  28       5.518  17.898   0.607  1.00 19.74           C  
ATOM    244  C   ASN L  28       5.875  16.777  -0.362  1.00 19.32           C  
ATOM    245  O   ASN L  28       6.941  16.165  -0.249  1.00 19.21           O  
ATOM    246  CB  ASN L  28       5.568  17.362   2.036  1.00 19.94           C  
ATOM    247  CG  ASN L  28       4.358  16.517   2.381  1.00 20.15           C  
ATOM    248  OD1 ASN L  28       3.904  15.705   1.578  1.00 18.72           O  
ATOM    249  ND2 ASN L  28       3.839  16.695   3.591  1.00 21.07           N  
ATOM    250  N   SER L  29       4.984  16.508  -1.308  1.00 18.91           N  
ATOM    251  CA  SER L  29       5.213  15.469  -2.305  1.00 18.57           C  
ATOM    252  C   SER L  29       5.499  14.106  -1.674  1.00 18.01           C  
ATOM    253  O   SER L  29       6.360  13.359  -2.147  1.00 17.87           O  
ATOM    254  CB  SER L  29       6.377  15.866  -3.217  1.00 19.60           C  
ATOM    255  OG  SER L  29       6.106  17.088  -3.886  1.00 20.63           O  
ATOM    256  N   LYS L  30       4.782  13.786  -0.603  1.00 17.02           N  
ATOM    257  CA  LYS L  30       4.959  12.500   0.063  1.00 15.89           C  
ATOM    258  C   LYS L  30       3.723  11.634  -0.100  1.00 14.84           C  
ATOM    259  O   LYS L  30       2.601  12.131  -0.048  1.00 14.13           O  
ATOM    260  CB  LYS L  30       5.226  12.674   1.560  1.00 16.92           C  
ATOM    261  CG  LYS L  30       6.558  13.303   1.922  1.00 17.82           C  
ATOM    262  CD  LYS L  30       6.725  13.312   3.431  1.00 19.82           C  
ATOM    263  CE  LYS L  30       8.066  13.886   3.845  1.00 20.92           C  
ATOM    264  NZ  LYS L  30       8.212  13.883   5.325  1.00 22.16           N  
ATOM    265  N   ASN L  31       3.944  10.338  -0.309  1.00 13.51           N  
ATOM    266  CA  ASN L  31       2.862   9.365  -0.441  1.00 12.74           C  
ATOM    267  C   ASN L  31       2.647   8.774   0.947  1.00 12.50           C  
ATOM    268  O   ASN L  31       3.545   8.133   1.498  1.00 12.20           O  
ATOM    269  CB  ASN L  31       3.256   8.243  -1.413  1.00 12.61           C  
ATOM    270  CG  ASN L  31       3.159   8.663  -2.872  1.00 12.00           C  
ATOM    271  OD1 ASN L  31       2.064   8.775  -3.422  1.00 12.45           O  
ATOM    272  ND2 ASN L  31       4.306   8.906  -3.500  1.00 12.02           N  
ATOM    273  N   TYR L  32       1.466   8.998   1.514  1.00 11.69           N  
ATOM    274  CA  TYR L  32       1.158   8.479   2.840  1.00 11.64           C  
ATOM    275  C   TYR L  32       0.758   7.019   2.693  1.00 10.99           C  
ATOM    276  O   TYR L  32      -0.371   6.624   2.983  1.00  9.99           O  
ATOM    277  CB  TYR L  32       0.047   9.321   3.486  1.00 12.68           C  
ATOM    278  CG  TYR L  32       0.512  10.726   3.848  1.00 13.85           C  
ATOM    279  CD1 TYR L  32       0.990  11.601   2.869  1.00 13.57           C  
ATOM    280  CD2 TYR L  32       0.526  11.158   5.174  1.00 14.24           C  
ATOM    281  CE1 TYR L  32       1.476  12.868   3.205  1.00 14.20           C  
ATOM    282  CE2 TYR L  32       1.006  12.423   5.520  1.00 14.42           C  
ATOM    283  CZ  TYR L  32       1.482  13.270   4.533  1.00 14.57           C  
ATOM    284  OH  TYR L  32       1.983  14.507   4.873  1.00 14.85           O  
ATOM    285  N   LEU L  33       1.721   6.225   2.235  1.00 10.26           N  
ATOM    286  CA  LEU L  33       1.517   4.804   1.983  1.00  9.42           C  
ATOM    287  C   LEU L  33       2.576   3.987   2.707  1.00  8.68           C  
ATOM    288  O   LEU L  33       3.762   4.302   2.633  1.00  8.34           O  
ATOM    289  CB  LEU L  33       1.608   4.556   0.470  1.00  9.13           C  
ATOM    290  CG  LEU L  33       1.281   3.198  -0.150  1.00  9.21           C  
ATOM    291  CD1 LEU L  33       2.301   2.138   0.244  1.00  9.41           C  
ATOM    292  CD2 LEU L  33      -0.130   2.814   0.263  1.00  9.25           C  
ATOM    293  N   ALA L  34       2.147   2.939   3.403  1.00  8.35           N  
ATOM    294  CA  ALA L  34       3.079   2.083   4.132  1.00  8.13           C  
ATOM    295  C   ALA L  34       2.810   0.607   3.868  1.00  8.20           C  
ATOM    296  O   ALA L  34       1.704   0.232   3.481  1.00  8.17           O  
ATOM    297  CB  ALA L  34       2.977   2.361   5.637  1.00  8.29           C  
ATOM    298  N   TRP L  35       3.833  -0.225   4.067  1.00  7.78           N  
ATOM    299  CA  TRP L  35       3.691  -1.670   3.902  1.00  8.17           C  
ATOM    300  C   TRP L  35       4.008  -2.367   5.218  1.00  8.18           C  
ATOM    301  O   TRP L  35       4.970  -2.003   5.906  1.00  8.44           O  
ATOM    302  CB  TRP L  35       4.630  -2.227   2.821  1.00  7.52           C  
ATOM    303  CG  TRP L  35       4.260  -1.866   1.414  1.00  8.80           C  
ATOM    304  CD1 TRP L  35       4.719  -0.807   0.689  1.00  8.16           C  
ATOM    305  CD2 TRP L  35       3.370  -2.587   0.556  1.00  8.51           C  
ATOM    306  NE1 TRP L  35       4.177  -0.826  -0.576  1.00  8.27           N  
ATOM    307  CE2 TRP L  35       3.345  -1.911  -0.683  1.00  8.27           C  
ATOM    308  CE3 TRP L  35       2.594  -3.745   0.713  1.00  8.84           C  
ATOM    309  CZ2 TRP L  35       2.572  -2.352  -1.764  1.00  8.42           C  
ATOM    310  CZ3 TRP L  35       1.822  -4.187  -0.364  1.00 10.04           C  
ATOM    311  CH2 TRP L  35       1.819  -3.489  -1.586  1.00  9.21           C  
ATOM    312  N   TYR L  36       3.195  -3.362   5.557  1.00  7.77           N  
ATOM    313  CA  TYR L  36       3.373  -4.137   6.781  1.00  7.83           C  
ATOM    314  C   TYR L  36       3.577  -5.617   6.524  1.00  8.30           C  
ATOM    315  O   TYR L  36       3.050  -6.187   5.558  1.00  7.50           O  
ATOM    316  CB  TYR L  36       2.175  -3.970   7.730  1.00  8.86           C  
ATOM    317  CG  TYR L  36       2.085  -2.600   8.372  1.00  9.24           C  
ATOM    318  CD1 TYR L  36       1.676  -1.487   7.635  1.00 10.10           C  
ATOM    319  CD2 TYR L  36       2.470  -2.408   9.702  1.00  9.81           C  
ATOM    320  CE1 TYR L  36       1.659  -0.224   8.194  1.00 11.11           C  
ATOM    321  CE2 TYR L  36       2.457  -1.141  10.276  1.00  9.50           C  
ATOM    322  CZ  TYR L  36       2.054  -0.052   9.513  1.00 10.61           C  
ATOM    323  OH  TYR L  36       2.078   1.211  10.053  1.00 11.50           O  
ATOM    324  N   GLN L  37       4.342  -6.235   7.419  1.00  8.00           N  
ATOM    325  CA  GLN L  37       4.636  -7.654   7.355  1.00  8.06           C  
ATOM    326  C   GLN L  37       4.127  -8.289   8.643  1.00  7.99           C  
ATOM    327  O   GLN L  37       4.498  -7.859   9.739  1.00  8.29           O  
ATOM    328  CB  GLN L  37       6.145  -7.865   7.250  1.00  8.43           C  
ATOM    329  CG  GLN L  37       6.566  -9.315   7.227  1.00  9.77           C  
ATOM    330  CD  GLN L  37       8.070  -9.451   7.299  1.00 10.35           C  
ATOM    331  OE1 GLN L  37       8.695  -8.976   8.248  1.00 11.10           O  
ATOM    332  NE2 GLN L  37       8.661 -10.092   6.300  1.00 10.92           N  
ATOM    333  N   GLN L  38       3.267  -9.292   8.515  1.00  8.31           N  
ATOM    334  CA  GLN L  38       2.746  -9.981   9.685  1.00  9.10           C  
ATOM    335  C   GLN L  38       3.163 -11.445   9.613  1.00  9.50           C  
ATOM    336  O   GLN L  38       2.519 -12.261   8.946  1.00  8.92           O  
ATOM    337  CB  GLN L  38       1.218  -9.873   9.753  1.00  9.86           C  
ATOM    338  CG  GLN L  38       0.650 -10.207  11.130  1.00 11.56           C  
ATOM    339  CD  GLN L  38      -0.861 -10.050  11.199  1.00 12.66           C  
ATOM    340  OE1 GLN L  38      -1.417  -9.082  10.681  1.00 14.30           O  
ATOM    341  NE2 GLN L  38      -1.528 -10.985  11.869  1.00 14.01           N  
ATOM    342  N   LYS L  39       4.259 -11.777  10.285  1.00 10.07           N  
ATOM    343  CA  LYS L  39       4.727 -13.152  10.290  1.00 11.51           C  
ATOM    344  C   LYS L  39       3.881 -13.989  11.237  1.00 12.62           C  
ATOM    345  O   LYS L  39       3.202 -13.457  12.113  1.00 12.88           O  
ATOM    346  CB  LYS L  39       6.197 -13.218  10.702  1.00 11.78           C  
ATOM    347  CG  LYS L  39       7.145 -12.634   9.675  1.00 12.59           C  
ATOM    348  CD  LYS L  39       8.587 -12.848  10.092  1.00 14.06           C  
ATOM    349  CE  LYS L  39       9.541 -12.345   9.030  1.00 14.65           C  
ATOM    350  NZ  LYS L  39      10.961 -12.600   9.405  1.00 15.16           N  
ATOM    351  N   PRO L  40       3.916 -15.317  11.076  1.00 13.45           N  
ATOM    352  CA  PRO L  40       3.136 -16.210  11.936  1.00 14.02           C  
ATOM    353  C   PRO L  40       3.387 -15.966  13.424  1.00 13.86           C  
ATOM    354  O   PRO L  40       4.536 -15.858  13.859  1.00 14.56           O  
ATOM    355  CB  PRO L  40       3.600 -17.592  11.477  1.00 14.35           C  
ATOM    356  CG  PRO L  40       3.851 -17.355  10.010  1.00 14.22           C  
ATOM    357  CD  PRO L  40       4.697 -16.111  10.113  1.00 13.78           C  
ATOM    358  N   GLY L  41       2.304 -15.868  14.192  1.00 14.03           N  
ATOM    359  CA  GLY L  41       2.405 -15.650  15.626  1.00 13.34           C  
ATOM    360  C   GLY L  41       2.913 -14.284  16.053  1.00 13.44           C  
ATOM    361  O   GLY L  41       3.249 -14.084  17.219  1.00 12.72           O  
ATOM    362  N   GLN L  42       2.960 -13.337  15.119  1.00 13.08           N  
ATOM    363  CA  GLN L  42       3.441 -11.998  15.421  1.00 13.52           C  
ATOM    364  C   GLN L  42       2.474 -10.925  14.952  1.00 12.92           C  
ATOM    365  O   GLN L  42       1.642 -11.159  14.080  1.00 11.92           O  
ATOM    366  CB  GLN L  42       4.791 -11.748  14.744  1.00 14.91           C  
ATOM    367  CG  GLN L  42       5.889 -12.707  15.147  1.00 17.49           C  
ATOM    368  CD  GLN L  42       7.200 -12.402  14.444  1.00 19.19           C  
ATOM    369  OE1 GLN L  42       8.190 -13.114  14.616  1.00 20.72           O  
ATOM    370  NE2 GLN L  42       7.213 -11.334  13.647  1.00 20.05           N  
ATOM    371  N   PRO L  43       2.559  -9.735  15.554  1.00 12.85           N  
ATOM    372  CA  PRO L  43       1.693  -8.619  15.181  1.00 12.93           C  
ATOM    373  C   PRO L  43       2.256  -8.050  13.881  1.00 12.45           C  
ATOM    374  O   PRO L  43       3.405  -8.326  13.532  1.00 13.02           O  
ATOM    375  CB  PRO L  43       1.888  -7.660  16.344  1.00 13.30           C  
ATOM    376  CG  PRO L  43       3.378  -7.825  16.595  1.00 13.52           C  
ATOM    377  CD  PRO L  43       3.431  -9.343  16.677  1.00 13.70           C  
ATOM    378  N   PRO L  44       1.452  -7.278  13.133  1.00 12.57           N  
ATOM    379  CA  PRO L  44       1.960  -6.701  11.887  1.00 12.14           C  
ATOM    380  C   PRO L  44       3.092  -5.727  12.241  1.00 12.11           C  
ATOM    381  O   PRO L  44       3.003  -5.002  13.231  1.00 12.47           O  
ATOM    382  CB  PRO L  44       0.726  -6.001  11.315  1.00 12.36           C  
ATOM    383  CG  PRO L  44      -0.016  -5.591  12.577  1.00 12.67           C  
ATOM    384  CD  PRO L  44       0.043  -6.901  13.329  1.00 12.82           C  
ATOM    385  N   LYS L  45       4.155  -5.735  11.443  1.00 12.16           N  
ATOM    386  CA  LYS L  45       5.317  -4.877  11.672  1.00 11.90           C  
ATOM    387  C   LYS L  45       5.553  -3.979  10.461  1.00 10.95           C  
ATOM    388  O   LYS L  45       5.452  -4.433   9.324  1.00  9.69           O  
ATOM    389  CB  LYS L  45       6.557  -5.740  11.889  1.00 13.98           C  
ATOM    390  CG  LYS L  45       6.398  -6.788  12.978  1.00 16.95           C  
ATOM    391  CD  LYS L  45       6.262  -6.184  14.360  1.00 19.54           C  
ATOM    392  CE  LYS L  45       7.537  -5.480  14.775  1.00 21.71           C  
ATOM    393  NZ  LYS L  45       7.455  -5.055  16.195  1.00 23.91           N  
ATOM    394  N   LEU L  46       5.899  -2.720  10.712  1.00 10.47           N  
ATOM    395  CA  LEU L  46       6.141  -1.747   9.644  1.00 10.49           C  
ATOM    396  C   LEU L  46       7.401  -2.044   8.824  1.00 11.10           C  
ATOM    397  O   LEU L  46       8.505  -2.123   9.373  1.00 12.07           O  
ATOM    398  CB  LEU L  46       6.249  -0.338  10.239  1.00 10.32           C  
ATOM    399  CG  LEU L  46       6.476   0.794   9.232  1.00 10.05           C  
ATOM    400  CD1 LEU L  46       5.265   0.899   8.296  1.00  9.19           C  
ATOM    401  CD2 LEU L  46       6.687   2.109   9.969  1.00 10.46           C  
ATOM    402  N   LEU L  47       7.234  -2.202   7.512  1.00 10.64           N  
ATOM    403  CA  LEU L  47       8.366  -2.475   6.622  1.00 11.03           C  
ATOM    404  C   LEU L  47       8.838  -1.220   5.901  1.00 10.76           C  
ATOM    405  O   LEU L  47      10.022  -0.890   5.903  1.00 10.67           O  
ATOM    406  CB  LEU L  47       7.996  -3.490   5.533  1.00 11.86           C  
ATOM    407  CG  LEU L  47       7.724  -4.977   5.750  1.00 13.03           C  
ATOM    408  CD1 LEU L  47       7.329  -5.582   4.408  1.00 13.08           C  
ATOM    409  CD2 LEU L  47       8.965  -5.674   6.285  1.00 13.89           C  
ATOM    410  N   ILE L  48       7.888  -0.540   5.269  1.00 10.53           N  
ATOM    411  CA  ILE L  48       8.170   0.645   4.474  1.00 10.23           C  
ATOM    412  C   ILE L  48       7.082   1.702   4.655  1.00 10.13           C  
ATOM    413  O   ILE L  48       5.908   1.372   4.812  1.00  8.96           O  
ATOM    414  CB  ILE L  48       8.245   0.258   2.966  1.00 10.53           C  
ATOM    415  CG1 ILE L  48       9.415  -0.711   2.742  1.00 12.00           C  
ATOM    416  CG2 ILE L  48       8.360   1.513   2.089  1.00 10.78           C  
ATOM    417  CD1 ILE L  48       9.557  -1.199   1.311  1.00 13.80           C  
ATOM    418  N   TYR L  49       7.484   2.969   4.648  1.00  9.98           N  
ATOM    419  CA  TYR L  49       6.539   4.072   4.760  1.00 10.37           C  
ATOM    420  C   TYR L  49       6.926   5.129   3.726  1.00 10.22           C  
ATOM    421  O   TYR L  49       8.008   5.049   3.138  1.00  8.60           O  
ATOM    422  CB  TYR L  49       6.511   4.658   6.180  1.00 11.69           C  
ATOM    423  CG  TYR L  49       7.855   5.003   6.764  1.00 13.43           C  
ATOM    424  CD1 TYR L  49       8.701   4.011   7.261  1.00 13.91           C  
ATOM    425  CD2 TYR L  49       8.295   6.325   6.803  1.00 13.68           C  
ATOM    426  CE1 TYR L  49       9.958   4.334   7.784  1.00 15.20           C  
ATOM    427  CE2 TYR L  49       9.546   6.654   7.321  1.00 15.38           C  
ATOM    428  CZ  TYR L  49      10.367   5.657   7.807  1.00 15.32           C  
ATOM    429  OH  TYR L  49      11.601   5.995   8.313  1.00 17.31           O  
ATOM    430  N   TRP L  50       6.049   6.104   3.500  1.00 10.02           N  
ATOM    431  CA  TRP L  50       6.290   7.134   2.488  1.00 10.02           C  
ATOM    432  C   TRP L  50       6.508   6.415   1.153  1.00  9.74           C  
ATOM    433  O   TRP L  50       7.252   6.885   0.293  1.00  9.93           O  
ATOM    434  CB  TRP L  50       7.531   7.973   2.833  1.00 10.96           C  
ATOM    435  CG  TRP L  50       7.430   8.781   4.105  1.00 11.79           C  
ATOM    436  CD1 TRP L  50       8.439   9.020   4.996  1.00 12.63           C  
ATOM    437  CD2 TRP L  50       6.278   9.472   4.612  1.00 11.61           C  
ATOM    438  NE1 TRP L  50       7.987   9.810   6.026  1.00 12.06           N  
ATOM    439  CE2 TRP L  50       6.665  10.102   5.817  1.00 11.78           C  
ATOM    440  CE3 TRP L  50       4.957   9.621   4.167  1.00 12.15           C  
ATOM    441  CZ2 TRP L  50       5.781  10.867   6.584  1.00 11.93           C  
ATOM    442  CZ3 TRP L  50       4.074  10.385   4.933  1.00 12.59           C  
ATOM    443  CH2 TRP L  50       4.493  10.996   6.127  1.00 12.71           C  
ATOM    444  N   ALA L  51       5.863   5.261   0.998  1.00  9.24           N  
ATOM    445  CA  ALA L  51       5.950   4.452  -0.221  1.00  8.81           C  
ATOM    446  C   ALA L  51       7.261   3.713  -0.478  1.00  8.95           C  
ATOM    447  O   ALA L  51       7.248   2.601  -1.008  1.00  8.35           O  
ATOM    448  CB  ALA L  51       5.619   5.313  -1.451  1.00  8.82           C  
ATOM    449  N   SER L  52       8.390   4.317  -0.116  1.00  9.85           N  
ATOM    450  CA  SER L  52       9.678   3.685  -0.395  1.00 10.35           C  
ATOM    451  C   SER L  52      10.757   3.760   0.680  1.00 10.68           C  
ATOM    452  O   SER L  52      11.872   3.288   0.458  1.00 11.22           O  
ATOM    453  CB  SER L  52      10.251   4.271  -1.681  1.00 10.76           C  
ATOM    454  OG  SER L  52      10.446   5.668  -1.533  1.00 12.01           O  
ATOM    455  N   THR L  53      10.454   4.366   1.820  1.00 10.89           N  
ATOM    456  CA  THR L  53      11.442   4.465   2.890  1.00 11.28           C  
ATOM    457  C   THR L  53      11.391   3.234   3.791  1.00 11.63           C  
ATOM    458  O   THR L  53      10.367   2.960   4.418  1.00 10.75           O  
ATOM    459  CB  THR L  53      11.198   5.696   3.766  1.00 12.18           C  
ATOM    460  OG1 THR L  53      11.257   6.875   2.956  1.00 12.65           O  
ATOM    461  CG2 THR L  53      12.255   5.777   4.878  1.00 12.35           C  
ATOM    462  N   ARG L  54      12.499   2.499   3.860  1.00 12.28           N  
ATOM    463  CA  ARG L  54      12.562   1.307   4.700  1.00 13.34           C  
ATOM    464  C   ARG L  54      12.678   1.662   6.180  1.00 13.35           C  
ATOM    465  O   ARG L  54      13.410   2.579   6.552  1.00 13.73           O  
ATOM    466  CB  ARG L  54      13.765   0.433   4.325  1.00 15.09           C  
ATOM    467  CG  ARG L  54      13.806  -0.027   2.885  1.00 17.71           C  
ATOM    468  CD  ARG L  54      14.978  -0.979   2.656  1.00 19.94           C  
ATOM    469  NE  ARG L  54      15.062  -1.406   1.263  1.00 22.32           N  
ATOM    470  CZ  ARG L  54      15.384  -0.609   0.249  1.00 23.30           C  
ATOM    471  NH1 ARG L  54      15.430  -1.094  -0.985  1.00 24.08           N  
ATOM    472  NH2 ARG L  54      15.687   0.666   0.470  1.00 23.79           N  
ATOM    473  N   GLU L  55      11.947   0.932   7.014  1.00 12.70           N  
ATOM    474  CA  GLU L  55      11.991   1.121   8.461  1.00 13.84           C  
ATOM    475  C   GLU L  55      13.352   0.556   8.868  1.00 13.70           C  
ATOM    476  O   GLU L  55      13.794  -0.441   8.301  1.00 13.16           O  
ATOM    477  CB  GLU L  55      10.870   0.307   9.106  1.00 14.71           C  
ATOM    478  CG  GLU L  55      10.785   0.348  10.622  1.00 17.68           C  
ATOM    479  CD  GLU L  55      10.505   1.732  11.159  1.00 19.26           C  
ATOM    480  OE1 GLU L  55       9.702   2.456  10.537  1.00 21.45           O  
ATOM    481  OE2 GLU L  55      11.061   2.090  12.217  1.00 21.38           O  
ATOM    482  N   SER L  56      14.031   1.178   9.828  1.00 14.04           N  
ATOM    483  CA  SER L  56      15.339   0.662  10.229  1.00 15.10           C  
ATOM    484  C   SER L  56      15.209  -0.805  10.624  1.00 14.26           C  
ATOM    485  O   SER L  56      14.240  -1.200  11.275  1.00 14.71           O  
ATOM    486  CB  SER L  56      15.908   1.470  11.401  1.00 16.17           C  
ATOM    487  OG  SER L  56      15.057   1.388  12.530  1.00 18.71           O  
ATOM    488  N   GLY L  57      16.177  -1.615  10.215  1.00 13.80           N  
ATOM    489  CA  GLY L  57      16.131  -3.028  10.543  1.00 13.48           C  
ATOM    490  C   GLY L  57      15.621  -3.888   9.401  1.00 12.81           C  
ATOM    491  O   GLY L  57      15.940  -5.067   9.332  1.00 13.28           O  
ATOM    492  N   VAL L  58      14.823  -3.306   8.508  1.00 12.97           N  
ATOM    493  CA  VAL L  58      14.292  -4.046   7.361  1.00 12.40           C  
ATOM    494  C   VAL L  58      15.368  -4.237   6.288  1.00 12.28           C  
ATOM    495  O   VAL L  58      16.009  -3.278   5.859  1.00 11.93           O  
ATOM    496  CB  VAL L  58      13.087  -3.310   6.729  1.00 12.73           C  
ATOM    497  CG1 VAL L  58      12.624  -4.048   5.482  1.00 12.51           C  
ATOM    498  CG2 VAL L  58      11.951  -3.219   7.737  1.00 12.63           C  
ATOM    499  N   PRO L  59      15.572  -5.483   5.831  1.00 12.73           N  
ATOM    500  CA  PRO L  59      16.572  -5.801   4.809  1.00 13.84           C  
ATOM    501  C   PRO L  59      16.342  -5.054   3.504  1.00 14.59           C  
ATOM    502  O   PRO L  59      15.202  -4.751   3.137  1.00 14.36           O  
ATOM    503  CB  PRO L  59      16.410  -7.309   4.640  1.00 13.47           C  
ATOM    504  CG  PRO L  59      15.954  -7.738   6.006  1.00 13.39           C  
ATOM    505  CD  PRO L  59      14.871  -6.714   6.225  1.00 13.06           C  
ATOM    506  N   ASP L  60      17.430  -4.776   2.796  1.00 14.82           N  
ATOM    507  CA  ASP L  60      17.343  -4.056   1.538  1.00 15.53           C  
ATOM    508  C   ASP L  60      16.602  -4.827   0.444  1.00 14.17           C  
ATOM    509  O   ASP L  60      16.162  -4.228  -0.531  1.00 13.12           O  
ATOM    510  CB  ASP L  60      18.741  -3.664   1.050  1.00 18.25           C  
ATOM    511  CG  ASP L  60      19.676  -4.849   0.940  1.00 21.15           C  
ATOM    512  OD1 ASP L  60      19.325  -5.835   0.259  1.00 23.40           O  
ATOM    513  OD2 ASP L  60      20.778  -4.790   1.528  1.00 24.25           O  
ATOM    514  N   ARG L  61      16.455  -6.140   0.603  1.00 12.83           N  
ATOM    515  CA  ARG L  61      15.742  -6.922  -0.403  1.00 12.44           C  
ATOM    516  C   ARG L  61      14.265  -6.533  -0.468  1.00 11.62           C  
ATOM    517  O   ARG L  61      13.571  -6.884  -1.426  1.00 10.89           O  
ATOM    518  CB  ARG L  61      15.892  -8.434  -0.161  1.00 12.71           C  
ATOM    519  CG  ARG L  61      15.349  -8.973   1.150  1.00 13.54           C  
ATOM    520  CD  ARG L  61      15.412 -10.495   1.121  1.00 14.20           C  
ATOM    521  NE  ARG L  61      14.903 -11.113   2.336  1.00 15.07           N  
ATOM    522  CZ  ARG L  61      15.528 -11.101   3.506  1.00 14.57           C  
ATOM    523  NH1 ARG L  61      16.706 -10.499   3.630  1.00 14.48           N  
ATOM    524  NH2 ARG L  61      14.969 -11.690   4.553  1.00 15.21           N  
ATOM    525  N   PHE L  62      13.779  -5.817   0.546  1.00 11.27           N  
ATOM    526  CA  PHE L  62      12.396  -5.342   0.526  1.00 11.04           C  
ATOM    527  C   PHE L  62      12.451  -3.943  -0.052  1.00 10.99           C  
ATOM    528  O   PHE L  62      13.174  -3.081   0.452  1.00 11.25           O  
ATOM    529  CB  PHE L  62      11.765  -5.270   1.924  1.00 10.63           C  
ATOM    530  CG  PHE L  62      11.555  -6.608   2.569  1.00 11.04           C  
ATOM    531  CD1 PHE L  62      12.601  -7.255   3.219  1.00 11.31           C  
ATOM    532  CD2 PHE L  62      10.313  -7.239   2.498  1.00 11.41           C  
ATOM    533  CE1 PHE L  62      12.415  -8.511   3.791  1.00 11.22           C  
ATOM    534  CE2 PHE L  62      10.115  -8.498   3.065  1.00 11.69           C  
ATOM    535  CZ  PHE L  62      11.170  -9.136   3.714  1.00 11.31           C  
ATOM    536  N   SER L  63      11.695  -3.709  -1.115  1.00 10.99           N  
ATOM    537  CA  SER L  63      11.703  -2.401  -1.735  1.00 10.82           C  
ATOM    538  C   SER L  63      10.304  -1.955  -2.119  1.00  9.62           C  
ATOM    539  O   SER L  63       9.501  -2.749  -2.603  1.00  8.54           O  
ATOM    540  CB  SER L  63      12.596  -2.419  -2.971  1.00 11.51           C  
ATOM    541  OG  SER L  63      12.618  -1.146  -3.579  1.00 15.47           O  
ATOM    542  N   GLY L  64      10.027  -0.677  -1.897  1.00  8.62           N  
ATOM    543  CA  GLY L  64       8.725  -0.136  -2.231  1.00  7.89           C  
ATOM    544  C   GLY L  64       8.831   0.860  -3.367  1.00  8.38           C  
ATOM    545  O   GLY L  64       9.800   1.616  -3.457  1.00  7.85           O  
ATOM    546  N   SER L  65       7.836   0.854  -4.246  1.00  8.25           N  
ATOM    547  CA  SER L  65       7.810   1.773  -5.378  1.00  8.76           C  
ATOM    548  C   SER L  65       6.370   2.179  -5.636  1.00  9.09           C  
ATOM    549  O   SER L  65       5.434   1.569  -5.109  1.00  9.14           O  
ATOM    550  CB  SER L  65       8.375   1.109  -6.635  1.00  8.92           C  
ATOM    551  OG  SER L  65       7.612  -0.035  -6.989  1.00  9.93           O  
ATOM    552  N   GLY L  66       6.196   3.212  -6.449  1.00 10.07           N  
ATOM    553  CA  GLY L  66       4.860   3.668  -6.759  1.00 10.95           C  
ATOM    554  C   GLY L  66       4.612   5.065  -6.252  1.00 12.00           C  
ATOM    555  O   GLY L  66       5.380   5.603  -5.454  1.00 11.34           O  
ATOM    556  N   SER L  67       3.520   5.654  -6.719  1.00 12.63           N  
ATOM    557  CA  SER L  67       3.166   6.999  -6.323  1.00 13.65           C  
ATOM    558  C   SER L  67       1.717   7.241  -6.696  1.00 13.81           C  
ATOM    559  O   SER L  67       1.189   6.613  -7.616  1.00 14.59           O  
ATOM    560  CB  SER L  67       4.065   8.010  -7.041  1.00 13.64           C  
ATOM    561  OG  SER L  67       3.792   9.331  -6.605  1.00 14.92           O  
ATOM    562  N   GLY L  68       1.074   8.144  -5.969  1.00 13.62           N  
ATOM    563  CA  GLY L  68      -0.311   8.463  -6.251  1.00 14.11           C  
ATOM    564  C   GLY L  68      -1.305   7.405  -5.820  1.00 13.70           C  
ATOM    565  O   GLY L  68      -1.751   7.400  -4.676  1.00 14.39           O  
ATOM    566  N   THR L  69      -1.648   6.497  -6.731  1.00 14.10           N  
ATOM    567  CA  THR L  69      -2.623   5.451  -6.431  1.00 13.43           C  
ATOM    568  C   THR L  69      -2.138   4.039  -6.760  1.00 12.97           C  
ATOM    569  O   THR L  69      -2.848   3.067  -6.515  1.00 12.94           O  
ATOM    570  CB  THR L  69      -3.922   5.671  -7.229  1.00 14.23           C  
ATOM    571  OG1 THR L  69      -3.637   5.540  -8.627  1.00 14.36           O  
ATOM    572  CG2 THR L  69      -4.490   7.062  -6.969  1.00 13.97           C  
ATOM    573  N   ASP L  70      -0.944   3.919  -7.328  1.00 12.90           N  
ATOM    574  CA  ASP L  70      -0.423   2.606  -7.694  1.00 12.37           C  
ATOM    575  C   ASP L  70       0.901   2.330  -6.993  1.00 11.69           C  
ATOM    576  O   ASP L  70       1.901   2.995  -7.263  1.00 11.64           O  
ATOM    577  CB  ASP L  70      -0.246   2.537  -9.213  1.00 13.72           C  
ATOM    578  CG  ASP L  70       0.192   1.171  -9.689  1.00 15.50           C  
ATOM    579  OD1 ASP L  70       1.342   0.763  -9.387  1.00 16.55           O  
ATOM    580  OD2 ASP L  70      -0.626   0.503 -10.362  1.00 16.16           O  
ATOM    581  N   PHE L  71       0.901   1.359  -6.086  1.00 11.20           N  
ATOM    582  CA  PHE L  71       2.116   1.021  -5.349  1.00 10.55           C  
ATOM    583  C   PHE L  71       2.509  -0.444  -5.487  1.00  9.91           C  
ATOM    584  O   PHE L  71       1.667  -1.313  -5.728  1.00  9.41           O  
ATOM    585  CB  PHE L  71       1.964   1.397  -3.872  1.00 10.93           C  
ATOM    586  CG  PHE L  71       1.590   2.835  -3.659  1.00 10.26           C  
ATOM    587  CD1 PHE L  71       0.252   3.226  -3.652  1.00 10.77           C  
ATOM    588  CD2 PHE L  71       2.577   3.815  -3.555  1.00 10.87           C  
ATOM    589  CE1 PHE L  71      -0.097   4.574  -3.548  1.00 10.69           C  
ATOM    590  CE2 PHE L  71       2.239   5.166  -3.453  1.00 10.02           C  
ATOM    591  CZ  PHE L  71       0.898   5.546  -3.451  1.00 10.70           C  
ATOM    592  N   THR L  72       3.800  -0.711  -5.324  1.00  8.69           N  
ATOM    593  CA  THR L  72       4.317  -2.060  -5.472  1.00  9.03           C  
ATOM    594  C   THR L  72       5.340  -2.397  -4.386  1.00  8.63           C  
ATOM    595  O   THR L  72       6.172  -1.557  -4.028  1.00  8.34           O  
ATOM    596  CB  THR L  72       5.006  -2.221  -6.856  1.00  9.61           C  
ATOM    597  OG1 THR L  72       4.088  -1.867  -7.900  1.00 10.47           O  
ATOM    598  CG2 THR L  72       5.466  -3.652  -7.065  1.00 10.19           C  
ATOM    599  N   LEU L  73       5.251  -3.612  -3.849  1.00  7.30           N  
ATOM    600  CA  LEU L  73       6.208  -4.087  -2.851  1.00  7.40           C  
ATOM    601  C   LEU L  73       6.962  -5.213  -3.538  1.00  7.31           C  
ATOM    602  O   LEU L  73       6.354  -6.169  -4.040  1.00  6.00           O  
ATOM    603  CB  LEU L  73       5.512  -4.643  -1.605  1.00  7.75           C  
ATOM    604  CG  LEU L  73       6.439  -5.339  -0.592  1.00  8.08           C  
ATOM    605  CD1 LEU L  73       7.469  -4.350  -0.050  1.00  7.36           C  
ATOM    606  CD2 LEU L  73       5.612  -5.926   0.540  1.00  7.34           C  
ATOM    607  N   THR L  74       8.282  -5.107  -3.566  1.00  7.12           N  
ATOM    608  CA  THR L  74       9.075  -6.133  -4.205  1.00  8.05           C  
ATOM    609  C   THR L  74      10.050  -6.724  -3.202  1.00  8.93           C  
ATOM    610  O   THR L  74      10.706  -5.996  -2.457  1.00  8.45           O  
ATOM    611  CB  THR L  74       9.858  -5.563  -5.407  1.00  8.34           C  
ATOM    612  OG1 THR L  74       8.949  -4.933  -6.319  1.00  8.63           O  
ATOM    613  CG2 THR L  74      10.596  -6.683  -6.150  1.00  8.41           C  
ATOM    614  N   ILE L  75      10.103  -8.049  -3.156  1.00  9.36           N  
ATOM    615  CA  ILE L  75      11.031  -8.731  -2.273  1.00 11.12           C  
ATOM    616  C   ILE L  75      11.917  -9.498  -3.227  1.00 12.24           C  
ATOM    617  O   ILE L  75      11.455 -10.407  -3.923  1.00 12.05           O  
ATOM    618  CB  ILE L  75      10.348  -9.749  -1.342  1.00 11.70           C  
ATOM    619  CG1 ILE L  75       9.198  -9.093  -0.582  1.00 11.93           C  
ATOM    620  CG2 ILE L  75      11.375 -10.291  -0.342  1.00 12.80           C  
ATOM    621  CD1 ILE L  75       8.405 -10.063   0.274  1.00 13.69           C  
ATOM    622  N   SER L  76      13.178  -9.104  -3.301  1.00 12.76           N  
ATOM    623  CA  SER L  76      14.104  -9.796  -4.169  1.00 14.77           C  
ATOM    624  C   SER L  76      14.720 -10.914  -3.329  1.00 15.27           C  
ATOM    625  O   SER L  76      14.723 -10.841  -2.099  1.00 16.95           O  
ATOM    626  CB  SER L  76      15.182  -8.829  -4.666  1.00 14.60           C  
ATOM    627  OG  SER L  76      15.950  -8.326  -3.589  1.00 16.07           O  
ATOM    628  N   SER L  77      15.208 -11.957  -3.986  1.00 16.56           N  
ATOM    629  CA  SER L  77      15.838 -13.078  -3.295  1.00 16.95           C  
ATOM    630  C   SER L  77      15.003 -13.513  -2.092  1.00 16.21           C  
ATOM    631  O   SER L  77      15.410 -13.311  -0.951  1.00 16.37           O  
ATOM    632  CB  SER L  77      17.226 -12.665  -2.809  1.00 18.64           C  
ATOM    633  OG  SER L  77      17.959 -12.015  -3.834  1.00 21.86           O  
ATOM    634  N   LEU L  78      13.844 -14.112  -2.336  1.00 15.02           N  
ATOM    635  CA  LEU L  78      12.993 -14.540  -1.234  1.00 14.89           C  
ATOM    636  C   LEU L  78      13.701 -15.525  -0.300  1.00 14.69           C  
ATOM    637  O   LEU L  78      14.390 -16.443  -0.749  1.00 14.46           O  
ATOM    638  CB  LEU L  78      11.710 -15.179  -1.771  1.00 15.07           C  
ATOM    639  CG  LEU L  78      10.632 -15.521  -0.738  1.00 16.39           C  
ATOM    640  CD1 LEU L  78      10.197 -14.256  -0.028  1.00 15.88           C  
ATOM    641  CD2 LEU L  78       9.436 -16.171  -1.426  1.00 17.62           C  
ATOM    642  N   GLN L  79      13.534 -15.321   1.002  1.00 15.02           N  
ATOM    643  CA  GLN L  79      14.128 -16.206   2.002  1.00 15.65           C  
ATOM    644  C   GLN L  79      12.991 -16.863   2.767  1.00 15.87           C  
ATOM    645  O   GLN L  79      11.867 -16.364   2.761  1.00 15.40           O  
ATOM    646  CB  GLN L  79      15.013 -15.432   2.982  1.00 16.98           C  
ATOM    647  CG  GLN L  79      16.219 -14.757   2.355  1.00 19.15           C  
ATOM    648  CD  GLN L  79      17.167 -14.185   3.397  1.00 20.33           C  
ATOM    649  OE1 GLN L  79      18.126 -13.485   3.069  1.00 21.10           O  
ATOM    650  NE2 GLN L  79      16.907 -14.495   4.664  1.00 21.82           N  
ATOM    651  N   ALA L  80      13.283 -17.979   3.426  1.00 15.44           N  
ATOM    652  CA  ALA L  80      12.268 -18.704   4.181  1.00 15.84           C  
ATOM    653  C   ALA L  80      11.590 -17.830   5.238  1.00 15.63           C  
ATOM    654  O   ALA L  80      10.375 -17.908   5.436  1.00 15.47           O  
ATOM    655  CB  ALA L  80      12.893 -19.931   4.842  1.00 16.49           C  
ATOM    656  N   GLU L  81      12.376 -16.996   5.910  1.00 15.33           N  
ATOM    657  CA  GLU L  81      11.839 -16.134   6.953  1.00 15.25           C  
ATOM    658  C   GLU L  81      10.861 -15.087   6.421  1.00 14.76           C  
ATOM    659  O   GLU L  81      10.142 -14.473   7.199  1.00 14.31           O  
ATOM    660  CB  GLU L  81      12.960 -15.404   7.695  1.00 15.95           C  
ATOM    661  CG  GLU L  81      13.658 -14.329   6.872  1.00 17.28           C  
ATOM    662  CD  GLU L  81      14.375 -13.309   7.738  1.00 18.93           C  
ATOM    663  OE1 GLU L  81      13.733 -12.780   8.671  1.00 21.03           O  
ATOM    664  OE2 GLU L  81      15.563 -13.016   7.485  1.00 19.97           O  
ATOM    665  N   ASP L  82      10.821 -14.882   5.108  1.00 14.86           N  
ATOM    666  CA  ASP L  82       9.918 -13.868   4.560  1.00 14.47           C  
ATOM    667  C   ASP L  82       8.471 -14.328   4.412  1.00 14.26           C  
ATOM    668  O   ASP L  82       7.605 -13.553   3.992  1.00 14.53           O  
ATOM    669  CB  ASP L  82      10.432 -13.349   3.213  1.00 14.90           C  
ATOM    670  CG  ASP L  82      11.853 -12.817   3.294  1.00 15.97           C  
ATOM    671  OD1 ASP L  82      12.218 -12.237   4.345  1.00 15.38           O  
ATOM    672  OD2 ASP L  82      12.598 -12.957   2.296  1.00 15.42           O  
ATOM    673  N   VAL L  83       8.203 -15.583   4.757  1.00 13.54           N  
ATOM    674  CA  VAL L  83       6.846 -16.110   4.676  1.00 12.86           C  
ATOM    675  C   VAL L  83       5.976 -15.348   5.668  1.00 12.54           C  
ATOM    676  O   VAL L  83       6.268 -15.312   6.862  1.00 12.67           O  
ATOM    677  CB  VAL L  83       6.813 -17.621   4.999  1.00 12.87           C  
ATOM    678  CG1 VAL L  83       5.373 -18.091   5.185  1.00 13.17           C  
ATOM    679  CG2 VAL L  83       7.464 -18.395   3.862  1.00 12.88           C  
ATOM    680  N   ALA L  84       4.914 -14.727   5.166  1.00 11.67           N  
ATOM    681  CA  ALA L  84       4.021 -13.951   6.014  1.00 11.28           C  
ATOM    682  C   ALA L  84       2.902 -13.360   5.188  1.00 10.89           C  
ATOM    683  O   ALA L  84       2.800 -13.609   3.990  1.00 11.44           O  
ATOM    684  CB  ALA L  84       4.792 -12.821   6.690  1.00 11.62           C  
ATOM    685  N   VAL L  85       2.060 -12.571   5.842  1.00 10.92           N  
ATOM    686  CA  VAL L  85       0.973 -11.899   5.154  1.00 10.33           C  
ATOM    687  C   VAL L  85       1.405 -10.437   5.110  1.00 10.40           C  
ATOM    688  O   VAL L  85       1.785  -9.864   6.136  1.00 11.09           O  
ATOM    689  CB  VAL L  85      -0.355 -12.011   5.919  1.00 11.02           C  
ATOM    690  CG1 VAL L  85      -1.471 -11.355   5.110  1.00 10.63           C  
ATOM    691  CG2 VAL L  85      -0.677 -13.470   6.187  1.00 11.20           C  
ATOM    692  N   TYR L  86       1.376  -9.845   3.922  1.00  9.36           N  
ATOM    693  CA  TYR L  86       1.777  -8.453   3.769  1.00  9.11           C  
ATOM    694  C   TYR L  86       0.574  -7.573   3.530  1.00  9.59           C  
ATOM    695  O   TYR L  86      -0.328  -7.945   2.783  1.00  9.57           O  
ATOM    696  CB  TYR L  86       2.762  -8.297   2.611  1.00  8.58           C  
ATOM    697  CG  TYR L  86       4.065  -9.017   2.844  1.00  9.00           C  
ATOM    698  CD1 TYR L  86       4.166 -10.398   2.664  1.00  9.10           C  
ATOM    699  CD2 TYR L  86       5.176  -8.330   3.320  1.00  8.67           C  
ATOM    700  CE1 TYR L  86       5.346 -11.078   2.957  1.00  9.06           C  
ATOM    701  CE2 TYR L  86       6.366  -8.999   3.619  1.00  9.45           C  
ATOM    702  CZ  TYR L  86       6.439 -10.370   3.437  1.00  9.37           C  
ATOM    703  OH  TYR L  86       7.595 -11.036   3.755  1.00  9.61           O  
ATOM    704  N   TYR L  87       0.569  -6.404   4.165  1.00  9.74           N  
ATOM    705  CA  TYR L  87      -0.536  -5.465   4.022  1.00  9.67           C  
ATOM    706  C   TYR L  87      -0.082  -4.064   3.684  1.00 10.16           C  
ATOM    707  O   TYR L  87       0.945  -3.599   4.179  1.00 10.40           O  
ATOM    708  CB  TYR L  87      -1.337  -5.330   5.318  1.00 10.34           C  
ATOM    709  CG  TYR L  87      -1.975  -6.585   5.836  1.00 10.29           C  
ATOM    710  CD1 TYR L  87      -1.254  -7.495   6.600  1.00  9.65           C  
ATOM    711  CD2 TYR L  87      -3.318  -6.858   5.572  1.00 11.38           C  
ATOM    712  CE1 TYR L  87      -1.855  -8.651   7.097  1.00 11.21           C  
ATOM    713  CE2 TYR L  87      -3.923  -8.004   6.060  1.00 11.25           C  
ATOM    714  CZ  TYR L  87      -3.188  -8.896   6.823  1.00 11.94           C  
ATOM    715  OH  TYR L  87      -3.798 -10.026   7.317  1.00 12.25           O  
ATOM    716  N   CYS L  88      -0.857  -3.382   2.848  1.00  9.93           N  
ATOM    717  CA  CYS L  88      -0.537  -2.002   2.559  1.00 10.04           C  
ATOM    718  C   CYS L  88      -1.494  -1.191   3.426  1.00 10.11           C  
ATOM    719  O   CYS L  88      -2.587  -1.657   3.779  1.00  8.88           O  
ATOM    720  CB  CYS L  88      -0.697  -1.652   1.075  1.00 11.05           C  
ATOM    721  SG  CYS L  88      -2.317  -1.910   0.294  1.00 11.89           S  
ATOM    722  N   LEU L  89      -1.058   0.001   3.806  1.00  9.09           N  
ATOM    723  CA  LEU L  89      -1.855   0.884   4.647  1.00  9.57           C  
ATOM    724  C   LEU L  89      -1.780   2.297   4.109  1.00  9.61           C  
ATOM    725  O   LEU L  89      -0.719   2.736   3.664  1.00 10.03           O  
ATOM    726  CB  LEU L  89      -1.309   0.889   6.086  1.00  9.91           C  
ATOM    727  CG  LEU L  89      -1.865   1.923   7.077  1.00  9.92           C  
ATOM    728  CD1 LEU L  89      -3.312   1.607   7.402  1.00 10.43           C  
ATOM    729  CD2 LEU L  89      -1.038   1.916   8.356  1.00 10.95           C  
ATOM    730  N   GLN L  90      -2.908   3.000   4.124  1.00 10.59           N  
ATOM    731  CA  GLN L  90      -2.916   4.394   3.709  1.00 10.64           C  
ATOM    732  C   GLN L  90      -3.196   5.153   4.996  1.00 11.17           C  
ATOM    733  O   GLN L  90      -4.130   4.820   5.734  1.00 11.16           O  
ATOM    734  CB  GLN L  90      -3.992   4.685   2.639  1.00 10.78           C  
ATOM    735  CG  GLN L  90      -5.469   4.685   3.058  1.00 10.28           C  
ATOM    736  CD  GLN L  90      -5.900   5.918   3.862  1.00 10.62           C  
ATOM    737  OE1 GLN L  90      -5.280   6.981   3.791  1.00  9.98           O  
ATOM    738  NE2 GLN L  90      -6.994   5.782   4.597  1.00 10.53           N  
ATOM    739  N   TYR L  91      -2.348   6.134   5.287  1.00 11.36           N  
ATOM    740  CA  TYR L  91      -2.488   6.952   6.484  1.00 12.45           C  
ATOM    741  C   TYR L  91      -2.495   8.416   6.066  1.00 13.04           C  
ATOM    742  O   TYR L  91      -1.995   9.295   6.769  1.00 13.28           O  
ATOM    743  CB  TYR L  91      -1.349   6.650   7.465  1.00 11.32           C  
ATOM    744  CG  TYR L  91       0.051   6.821   6.909  1.00 11.19           C  
ATOM    745  CD1 TYR L  91       0.743   8.025   7.049  1.00 11.08           C  
ATOM    746  CD2 TYR L  91       0.698   5.763   6.273  1.00 10.86           C  
ATOM    747  CE1 TYR L  91       2.055   8.164   6.576  1.00 11.17           C  
ATOM    748  CE2 TYR L  91       1.998   5.891   5.799  1.00 10.76           C  
ATOM    749  CZ  TYR L  91       2.673   7.090   5.958  1.00 10.82           C  
ATOM    750  OH  TYR L  91       3.978   7.193   5.536  1.00 12.11           O  
ATOM    751  N   TYR L  92      -3.084   8.645   4.894  1.00 13.97           N  
ATOM    752  CA  TYR L  92      -3.218   9.968   4.291  1.00 14.80           C  
ATOM    753  C   TYR L  92      -4.385  10.687   4.957  1.00 15.58           C  
ATOM    754  O   TYR L  92      -4.264  11.834   5.402  1.00 14.87           O  
ATOM    755  CB  TYR L  92      -3.498   9.807   2.794  1.00 15.50           C  
ATOM    756  CG  TYR L  92      -3.672  11.098   2.021  1.00 15.90           C  
ATOM    757  CD1 TYR L  92      -2.585  11.928   1.743  1.00 16.49           C  
ATOM    758  CD2 TYR L  92      -4.928  11.482   1.556  1.00 16.75           C  
ATOM    759  CE1 TYR L  92      -2.750  13.110   1.014  1.00 16.33           C  
ATOM    760  CE2 TYR L  92      -5.102  12.656   0.832  1.00 17.21           C  
ATOM    761  CZ  TYR L  92      -4.013  13.463   0.563  1.00 16.74           C  
ATOM    762  OH  TYR L  92      -4.200  14.621  -0.158  1.00 17.66           O  
ATOM    763  N   SER L  93      -5.519  10.000   5.023  1.00 15.75           N  
ATOM    764  CA  SER L  93      -6.706  10.570   5.636  1.00 17.66           C  
ATOM    765  C   SER L  93      -7.493   9.541   6.439  1.00 17.80           C  
ATOM    766  O   SER L  93      -7.674   8.400   6.016  1.00 17.51           O  
ATOM    767  CB  SER L  93      -7.603  11.196   4.560  1.00 18.44           C  
ATOM    768  OG  SER L  93      -7.945  10.248   3.564  1.00 20.65           O  
ATOM    769  N   THR L  94      -7.959   9.959   7.610  1.00 18.31           N  
ATOM    770  CA  THR L  94      -8.735   9.090   8.477  1.00 18.92           C  
ATOM    771  C   THR L  94     -10.126   8.891   7.885  1.00 19.08           C  
ATOM    772  O   THR L  94     -10.667   9.789   7.250  1.00 19.86           O  
ATOM    773  CB  THR L  94      -8.873   9.712   9.878  1.00 19.10           C  
ATOM    774  OG1 THR L  94      -9.463  11.015   9.758  1.00 19.52           O  
ATOM    775  CG2 THR L  94      -7.501   9.837  10.544  1.00 19.76           C  
ATOM    776  N   PRO L  95     -10.714   7.700   8.068  1.00 19.11           N  
ATOM    777  CA  PRO L  95     -10.145   6.559   8.785  1.00 18.92           C  
ATOM    778  C   PRO L  95      -9.047   5.892   7.960  1.00 18.78           C  
ATOM    779  O   PRO L  95      -9.214   5.684   6.753  1.00 18.67           O  
ATOM    780  CB  PRO L  95     -11.352   5.649   8.955  1.00 18.81           C  
ATOM    781  CG  PRO L  95     -12.065   5.867   7.645  1.00 19.04           C  
ATOM    782  CD  PRO L  95     -12.085   7.378   7.631  1.00 19.57           C  
ATOM    783  N   TYR L  96      -7.924   5.574   8.599  1.00 17.75           N  
ATOM    784  CA  TYR L  96      -6.844   4.907   7.893  1.00 17.23           C  
ATOM    785  C   TYR L  96      -7.352   3.512   7.548  1.00 16.39           C  
ATOM    786  O   TYR L  96      -8.159   2.943   8.282  1.00 16.88           O  
ATOM    787  CB  TYR L  96      -5.593   4.830   8.765  1.00 17.80           C  
ATOM    788  CG  TYR L  96      -5.103   6.183   9.240  1.00 18.63           C  
ATOM    789  CD1 TYR L  96      -5.170   7.300   8.407  1.00 18.53           C  
ATOM    790  CD2 TYR L  96      -4.528   6.338  10.502  1.00 19.04           C  
ATOM    791  CE1 TYR L  96      -4.679   8.532   8.812  1.00 19.68           C  
ATOM    792  CE2 TYR L  96      -4.030   7.573  10.918  1.00 20.20           C  
ATOM    793  CZ  TYR L  96      -4.111   8.665  10.065  1.00 19.71           C  
ATOM    794  OH  TYR L  96      -3.624   9.888  10.455  1.00 21.93           O  
ATOM    795  N   SER L  97      -6.891   2.957   6.434  1.00 15.80           N  
ATOM    796  CA  SER L  97      -7.365   1.645   6.017  1.00 15.21           C  
ATOM    797  C   SER L  97      -6.282   0.780   5.388  1.00 14.69           C  
ATOM    798  O   SER L  97      -5.383   1.283   4.723  1.00 13.92           O  
ATOM    799  CB  SER L  97      -8.519   1.818   5.031  1.00 14.77           C  
ATOM    800  OG  SER L  97      -8.121   2.618   3.932  1.00 15.27           O  
ATOM    801  N   PHE L  98      -6.386  -0.527   5.606  1.00 15.32           N  
ATOM    802  CA  PHE L  98      -5.419  -1.473   5.061  1.00 14.75           C  
ATOM    803  C   PHE L  98      -5.988  -2.168   3.841  1.00 14.70           C  
ATOM    804  O   PHE L  98      -7.191  -2.098   3.568  1.00 14.44           O  
ATOM    805  CB  PHE L  98      -5.082  -2.592   6.053  1.00 14.86           C  
ATOM    806  CG  PHE L  98      -4.437  -2.137   7.325  1.00 15.60           C  
ATOM    807  CD1 PHE L  98      -5.195  -1.588   8.353  1.00 15.79           C  
ATOM    808  CD2 PHE L  98      -3.071  -2.326   7.524  1.00 15.46           C  
ATOM    809  CE1 PHE L  98      -4.605  -1.245   9.563  1.00 15.35           C  
ATOM    810  CE2 PHE L  98      -2.470  -1.984   8.731  1.00 15.59           C  
ATOM    811  CZ  PHE L  98      -3.241  -1.444   9.754  1.00 14.66           C  
ATOM    812  N   GLY L  99      -5.107  -2.852   3.121  1.00 14.05           N  
ATOM    813  CA  GLY L  99      -5.535  -3.633   1.980  1.00 13.47           C  
ATOM    814  C   GLY L  99      -5.988  -4.930   2.631  1.00 13.29           C  
ATOM    815  O   GLY L  99      -5.801  -5.098   3.839  1.00 11.87           O  
ATOM    816  N   GLN L 100      -6.568  -5.850   1.868  1.00 13.56           N  
ATOM    817  CA  GLN L 100      -7.035  -7.106   2.453  1.00 13.98           C  
ATOM    818  C   GLN L 100      -5.900  -8.106   2.695  1.00 13.45           C  
ATOM    819  O   GLN L 100      -6.122  -9.201   3.222  1.00 13.64           O  
ATOM    820  CB  GLN L 100      -8.135  -7.727   1.578  1.00 15.81           C  
ATOM    821  CG  GLN L 100      -7.706  -8.409   0.273  1.00 17.77           C  
ATOM    822  CD  GLN L 100      -6.825  -7.554  -0.618  1.00 19.36           C  
ATOM    823  OE1 GLN L 100      -7.038  -6.346  -0.767  1.00 19.62           O  
ATOM    824  NE2 GLN L 100      -5.839  -8.190  -1.242  1.00 20.12           N  
ATOM    825  N   GLY L 101      -4.686  -7.718   2.311  1.00 12.35           N  
ATOM    826  CA  GLY L 101      -3.524  -8.566   2.517  1.00 11.93           C  
ATOM    827  C   GLY L 101      -3.178  -9.572   1.433  1.00 11.05           C  
ATOM    828  O   GLY L 101      -4.040 -10.028   0.690  1.00 11.36           O  
ATOM    829  N   THR L 102      -1.897  -9.913   1.356  1.00 10.61           N  
ATOM    830  CA  THR L 102      -1.393 -10.893   0.397  1.00 10.75           C  
ATOM    831  C   THR L 102      -0.629 -11.944   1.192  1.00 11.22           C  
ATOM    832  O   THR L 102       0.365 -11.632   1.850  1.00 11.23           O  
ATOM    833  CB  THR L 102      -0.434 -10.251  -0.634  1.00 10.58           C  
ATOM    834  OG1 THR L 102      -1.157  -9.316  -1.443  1.00 11.29           O  
ATOM    835  CG2 THR L 102       0.186 -11.320  -1.540  1.00 10.28           C  
ATOM    836  N   LYS L 103      -1.104 -13.185   1.143  1.00 11.41           N  
ATOM    837  CA  LYS L 103      -0.458 -14.273   1.867  1.00 12.06           C  
ATOM    838  C   LYS L 103       0.678 -14.836   1.018  1.00 11.66           C  
ATOM    839  O   LYS L 103       0.447 -15.369  -0.064  1.00 10.97           O  
ATOM    840  CB  LYS L 103      -1.481 -15.368   2.181  1.00 13.20           C  
ATOM    841  CG  LYS L 103      -2.646 -14.883   3.033  1.00 16.02           C  
ATOM    842  CD  LYS L 103      -3.693 -15.970   3.251  1.00 17.14           C  
ATOM    843  CE  LYS L 103      -4.846 -15.438   4.097  1.00 18.77           C  
ATOM    844  NZ  LYS L 103      -5.893 -16.468   4.359  1.00 20.02           N  
ATOM    845  N   LEU L 104       1.906 -14.700   1.510  1.00 11.76           N  
ATOM    846  CA  LEU L 104       3.078 -15.183   0.791  1.00 11.89           C  
ATOM    847  C   LEU L 104       3.571 -16.508   1.364  1.00 12.19           C  
ATOM    848  O   LEU L 104       3.839 -16.608   2.562  1.00 11.89           O  
ATOM    849  CB  LEU L 104       4.202 -14.143   0.864  1.00 11.65           C  
ATOM    850  CG  LEU L 104       5.504 -14.478   0.132  1.00 11.45           C  
ATOM    851  CD1 LEU L 104       5.229 -14.693  -1.345  1.00 11.20           C  
ATOM    852  CD2 LEU L 104       6.493 -13.339   0.329  1.00 11.63           C  
ATOM    853  N   GLU L 105       3.702 -17.510   0.495  1.00 12.64           N  
ATOM    854  CA  GLU L 105       4.155 -18.842   0.894  1.00 13.69           C  
ATOM    855  C   GLU L 105       5.262 -19.302  -0.059  1.00 13.50           C  
ATOM    856  O   GLU L 105       5.390 -18.787  -1.171  1.00 12.93           O  
ATOM    857  CB  GLU L 105       2.987 -19.840   0.805  1.00 14.46           C  
ATOM    858  CG  GLU L 105       2.703 -20.325  -0.621  1.00 15.18           C  
ATOM    859  CD  GLU L 105       1.415 -21.136  -0.747  1.00 16.31           C  
ATOM    860  OE1 GLU L 105       1.094 -21.920   0.174  1.00 17.22           O  
ATOM    861  OE2 GLU L 105       0.735 -21.010  -1.791  1.00 16.88           O  
ATOM    862  N   ILE L 106       6.065 -20.270   0.369  1.00 14.12           N  
ATOM    863  CA  ILE L 106       7.113 -20.780  -0.508  1.00 14.56           C  
ATOM    864  C   ILE L 106       6.431 -21.728  -1.485  1.00 15.60           C  
ATOM    865  O   ILE L 106       5.611 -22.554  -1.083  1.00 15.65           O  
ATOM    866  CB  ILE L 106       8.197 -21.547   0.269  1.00 15.47           C  
ATOM    867  CG1 ILE L 106       8.835 -20.633   1.317  1.00 15.24           C  
ATOM    868  CG2 ILE L 106       9.247 -22.079  -0.702  1.00 15.27           C  
ATOM    869  CD1 ILE L 106       9.426 -19.359   0.747  1.00 17.27           C  
ATOM    870  N   LYS L 107       6.762 -21.598  -2.765  1.00 16.30           N  
ATOM    871  CA  LYS L 107       6.159 -22.425  -3.801  1.00 17.69           C  
ATOM    872  C   LYS L 107       6.542 -23.895  -3.688  1.00 18.55           C  
ATOM    873  O   LYS L 107       7.709 -24.238  -3.490  1.00 17.98           O  
ATOM    874  CB  LYS L 107       6.535 -21.891  -5.188  1.00 18.03           C  
ATOM    875  CG  LYS L 107       5.805 -22.586  -6.321  1.00 18.86           C  
ATOM    876  CD  LYS L 107       6.081 -21.930  -7.661  1.00 20.56           C  
ATOM    877  CE  LYS L 107       7.541 -22.044  -8.052  1.00 21.64           C  
ATOM    878  NZ  LYS L 107       7.778 -21.511  -9.421  1.00 23.47           N  
ATOM    879  N   ARG L 108       5.542 -24.761  -3.812  1.00 19.64           N  
ATOM    880  CA  ARG L 108       5.762 -26.197  -3.724  1.00 21.14           C  
ATOM    881  C   ARG L 108       6.639 -26.689  -4.875  1.00 21.96           C  
ATOM    882  O   ARG L 108       7.601 -27.440  -4.597  1.00 22.67           O  
ATOM    883  CB  ARG L 108       4.419 -26.940  -3.709  1.00 21.68           C  
ATOM    884  CG  ARG L 108       3.546 -26.731  -4.939  1.00 22.64           C  
ATOM    885  CD  ARG L 108       2.180 -27.376  -4.732  1.00 23.60           C  
ATOM    886  NE  ARG L 108       1.300 -27.215  -5.886  1.00 24.15           N  
ATOM    887  CZ  ARG L 108       1.494 -27.800  -7.062  1.00 24.56           C  
ATOM    888  NH1 ARG L 108       0.641 -27.593  -8.054  1.00 25.09           N  
ATOM    889  NH2 ARG L 108       2.534 -28.602  -7.242  1.00 24.91           N  
ATOM    890  OXT ARG L 108       6.353 -26.325  -6.037  1.00 22.46           O  
TER     891      ARG L 108                                                      
ATOM    892  N   ASP L   1     -17.708  -6.935   9.963  1.00 14.01           N  
ATOM    893  CA  ASP L   1     -16.297  -6.566  10.281  1.00 13.85           C  
ATOM    894  C   ASP L   1     -16.204  -5.975  11.675  1.00 13.61           C  
ATOM    895  O   ASP L   1     -17.160  -5.366  12.166  1.00 13.95           O  
ATOM    896  CB  ASP L   1     -15.763  -5.556   9.268  1.00 14.20           C  
ATOM    897  CG  ASP L   1     -15.923  -6.028   7.837  1.00 14.93           C  
ATOM    898  OD1 ASP L   1     -15.830  -7.252   7.590  1.00 14.84           O  
ATOM    899  OD2 ASP L   1     -16.117  -5.168   6.960  1.00 15.70           O  
ATOM    900  N   ILE L   2     -15.049  -6.144  12.313  1.00 12.28           N  
ATOM    901  CA  ILE L   2     -14.870  -5.626  13.659  1.00 11.69           C  
ATOM    902  C   ILE L   2     -14.726  -4.111  13.669  1.00 11.83           C  
ATOM    903  O   ILE L   2     -13.926  -3.531  12.923  1.00 11.70           O  
ATOM    904  CB  ILE L   2     -13.649  -6.273  14.354  1.00 11.57           C  
ATOM    905  CG1 ILE L   2     -13.812  -7.796  14.351  1.00 11.26           C  
ATOM    906  CG2 ILE L   2     -13.541  -5.760  15.785  1.00 10.96           C  
ATOM    907  CD1 ILE L   2     -12.707  -8.556  15.036  1.00 10.98           C  
ATOM    908  N   VAL L   3     -15.521  -3.487  14.531  1.00 11.88           N  
ATOM    909  CA  VAL L   3     -15.563  -2.039  14.698  1.00 12.50           C  
ATOM    910  C   VAL L   3     -14.880  -1.622  15.996  1.00 12.23           C  
ATOM    911  O   VAL L   3     -15.151  -2.188  17.058  1.00 11.89           O  
ATOM    912  CB  VAL L   3     -17.025  -1.548  14.753  1.00 12.53           C  
ATOM    913  CG1 VAL L   3     -17.068  -0.040  14.909  1.00 13.18           C  
ATOM    914  CG2 VAL L   3     -17.763  -1.987  13.494  1.00 13.06           C  
ATOM    915  N   MET L   4     -14.015  -0.620  15.909  1.00 12.68           N  
ATOM    916  CA  MET L   4     -13.298  -0.122  17.078  1.00 13.47           C  
ATOM    917  C   MET L   4     -13.842   1.239  17.511  1.00 13.91           C  
ATOM    918  O   MET L   4     -13.748   2.218  16.770  1.00 14.31           O  
ATOM    919  CB  MET L   4     -11.806  -0.006  16.764  1.00 13.20           C  
ATOM    920  CG  MET L   4     -11.193  -1.301  16.243  1.00 13.00           C  
ATOM    921  SD  MET L   4     -11.308  -2.670  17.402  1.00 12.71           S  
ATOM    922  CE  MET L   4     -10.179  -2.145  18.660  1.00 12.53           C  
ATOM    923  N   THR L   5     -14.412   1.290  18.713  1.00 14.57           N  
ATOM    924  CA  THR L   5     -14.969   2.528  19.254  1.00 14.52           C  
ATOM    925  C   THR L   5     -13.997   3.090  20.282  1.00 14.67           C  
ATOM    926  O   THR L   5     -13.892   2.578  21.400  1.00 14.89           O  
ATOM    927  CB  THR L   5     -16.331   2.268  19.915  1.00 14.98           C  
ATOM    928  OG1 THR L   5     -17.210   1.672  18.956  1.00 15.52           O  
ATOM    929  CG2 THR L   5     -16.944   3.570  20.419  1.00 15.51           C  
ATOM    930  N   GLN L   6     -13.299   4.153  19.898  1.00 14.71           N  
ATOM    931  CA  GLN L   6     -12.302   4.779  20.758  1.00 15.54           C  
ATOM    932  C   GLN L   6     -12.802   6.077  21.389  1.00 15.96           C  
ATOM    933  O   GLN L   6     -13.637   6.776  20.819  1.00 15.46           O  
ATOM    934  CB  GLN L   6     -11.048   5.065  19.931  1.00 15.72           C  
ATOM    935  CG  GLN L   6      -9.822   5.421  20.730  1.00 15.97           C  
ATOM    936  CD  GLN L   6      -8.631   5.714  19.838  1.00 15.48           C  
ATOM    937  OE1 GLN L   6      -8.405   5.022  18.844  1.00 15.18           O  
ATOM    938  NE2 GLN L   6      -7.848   6.721  20.202  1.00 15.54           N  
ATOM    939  N   SER L   7     -12.276   6.406  22.562  1.00 16.04           N  
ATOM    940  CA  SER L   7     -12.677   7.631  23.242  1.00 17.11           C  
ATOM    941  C   SER L   7     -11.661   8.016  24.308  1.00 17.61           C  
ATOM    942  O   SER L   7     -10.968   7.155  24.855  1.00 17.14           O  
ATOM    943  CB  SER L   7     -14.059   7.451  23.884  1.00 17.01           C  
ATOM    944  OG  SER L   7     -14.044   6.432  24.873  1.00 18.33           O  
ATOM    945  N   PRO L   8     -11.541   9.323  24.602  1.00 18.12           N  
ATOM    946  CA  PRO L   8     -12.281  10.441  24.000  1.00 18.64           C  
ATOM    947  C   PRO L   8     -11.652  10.851  22.664  1.00 19.28           C  
ATOM    948  O   PRO L   8     -10.586  10.358  22.298  1.00 19.14           O  
ATOM    949  CB  PRO L   8     -12.135  11.527  25.054  1.00 18.27           C  
ATOM    950  CG  PRO L   8     -10.701  11.340  25.438  1.00 18.56           C  
ATOM    951  CD  PRO L   8     -10.687   9.825  25.693  1.00 18.30           C  
ATOM    952  N   ASP L   9     -12.302  11.761  21.943  1.00 20.25           N  
ATOM    953  CA  ASP L   9     -11.779  12.218  20.656  1.00 21.02           C  
ATOM    954  C   ASP L   9     -10.619  13.183  20.870  1.00 21.01           C  
ATOM    955  O   ASP L   9      -9.651  13.203  20.106  1.00 20.61           O  
ATOM    956  CB  ASP L   9     -12.881  12.911  19.857  1.00 23.10           C  
ATOM    957  CG  ASP L   9     -14.144  12.084  19.785  1.00 24.77           C  
ATOM    958  OD1 ASP L   9     -14.058  10.907  19.368  1.00 26.00           O  
ATOM    959  OD2 ASP L   9     -15.220  12.611  20.147  1.00 25.87           O  
ATOM    960  N   SER L  10     -10.724  13.983  21.924  1.00 20.78           N  
ATOM    961  CA  SER L  10      -9.689  14.948  22.257  1.00 20.99           C  
ATOM    962  C   SER L  10      -9.360  14.872  23.736  1.00 20.49           C  
ATOM    963  O   SER L  10     -10.231  14.598  24.559  1.00 20.72           O  
ATOM    964  CB  SER L  10     -10.153  16.368  21.927  1.00 21.39           C  
ATOM    965  OG  SER L  10      -9.198  17.311  22.375  1.00 22.98           O  
ATOM    966  N   LEU L  11      -8.103  15.127  24.071  1.00 20.24           N  
ATOM    967  CA  LEU L  11      -7.678  15.096  25.460  1.00 20.64           C  
ATOM    968  C   LEU L  11      -6.627  16.172  25.730  1.00 20.48           C  
ATOM    969  O   LEU L  11      -5.541  16.151  25.156  1.00 19.88           O  
ATOM    970  CB  LEU L  11      -7.114  13.713  25.800  1.00 20.84           C  
ATOM    971  CG  LEU L  11      -6.778  13.435  27.267  1.00 21.12           C  
ATOM    972  CD1 LEU L  11      -8.030  13.588  28.125  1.00 21.15           C  
ATOM    973  CD2 LEU L  11      -6.219  12.026  27.398  1.00 21.63           C  
ATOM    974  N   ALA L  12      -6.971  17.122  26.595  1.00 20.78           N  
ATOM    975  CA  ALA L  12      -6.059  18.195  26.964  1.00 21.26           C  
ATOM    976  C   ALA L  12      -5.400  17.767  28.268  1.00 21.77           C  
ATOM    977  O   ALA L  12      -6.079  17.573  29.276  1.00 21.69           O  
ATOM    978  CB  ALA L  12      -6.827  19.500  27.157  1.00 21.20           C  
ATOM    979  N   VAL L  13      -4.080  17.619  28.245  1.00 22.75           N  
ATOM    980  CA  VAL L  13      -3.336  17.180  29.420  1.00 23.80           C  
ATOM    981  C   VAL L  13      -2.242  18.152  29.835  1.00 24.18           C  
ATOM    982  O   VAL L  13      -1.877  19.048  29.082  1.00 24.26           O  
ATOM    983  CB  VAL L  13      -2.656  15.812  29.166  1.00 23.84           C  
ATOM    984  CG1 VAL L  13      -3.694  14.762  28.807  1.00 24.13           C  
ATOM    985  CG2 VAL L  13      -1.630  15.948  28.049  1.00 24.08           C  
ATOM    986  N   SER L  14      -1.723  17.957  31.045  1.00 24.86           N  
ATOM    987  CA  SER L  14      -0.638  18.777  31.569  1.00 25.22           C  
ATOM    988  C   SER L  14       0.566  17.858  31.718  1.00 25.10           C  
ATOM    989  O   SER L  14       0.411  16.670  32.005  1.00 25.12           O  
ATOM    990  CB  SER L  14      -1.000  19.358  32.939  1.00 25.87           C  
ATOM    991  OG  SER L  14      -2.145  20.184  32.865  1.00 26.98           O  
ATOM    992  N   LEU L  15       1.762  18.399  31.520  1.00 24.91           N  
ATOM    993  CA  LEU L  15       2.979  17.610  31.648  1.00 24.91           C  
ATOM    994  C   LEU L  15       3.046  16.935  33.016  1.00 24.61           C  
ATOM    995  O   LEU L  15       2.674  17.529  34.030  1.00 24.09           O  
ATOM    996  CB  LEU L  15       4.203  18.503  31.458  1.00 25.86           C  
ATOM    997  CG  LEU L  15       4.362  19.151  30.083  1.00 26.69           C  
ATOM    998  CD1 LEU L  15       5.526  20.129  30.110  1.00 27.65           C  
ATOM    999  CD2 LEU L  15       4.586  18.072  29.034  1.00 26.62           C  
ATOM   1000  N   GLY L  16       3.518  15.692  33.034  1.00 23.83           N  
ATOM   1001  CA  GLY L  16       3.630  14.960  34.282  1.00 23.64           C  
ATOM   1002  C   GLY L  16       2.333  14.307  34.725  1.00 23.51           C  
ATOM   1003  O   GLY L  16       2.319  13.522  35.675  1.00 23.21           O  
ATOM   1004  N   GLU L  17       1.240  14.627  34.040  1.00 22.79           N  
ATOM   1005  CA  GLU L  17      -0.058  14.063  34.380  1.00 22.51           C  
ATOM   1006  C   GLU L  17      -0.268  12.708  33.710  1.00 22.13           C  
ATOM   1007  O   GLU L  17       0.505  12.301  32.842  1.00 21.99           O  
ATOM   1008  CB  GLU L  17      -1.162  15.026  33.972  1.00 22.61           C  
ATOM   1009  N   ARG L  18      -1.320  12.014  34.124  1.00 21.95           N  
ATOM   1010  CA  ARG L  18      -1.643  10.710  33.567  1.00 21.34           C  
ATOM   1011  C   ARG L  18      -2.803  10.796  32.582  1.00 20.45           C  
ATOM   1012  O   ARG L  18      -3.869  11.317  32.912  1.00 20.68           O  
ATOM   1013  CB  ARG L  18      -1.984   9.731  34.693  1.00 22.60           C  
ATOM   1014  CG  ARG L  18      -2.572   8.424  34.198  1.00 23.74           C  
ATOM   1015  CD  ARG L  18      -2.601   7.360  35.270  1.00 24.77           C  
ATOM   1016  NE  ARG L  18      -1.248   7.062  35.725  1.00 25.47           N  
ATOM   1017  CZ  ARG L  18      -0.899   5.942  36.342  1.00 26.14           C  
ATOM   1018  NH1 ARG L  18      -1.811   5.010  36.575  1.00 26.37           N  
ATOM   1019  NH2 ARG L  18       0.360   5.752  36.719  1.00 26.12           N  
ATOM   1020  N   ALA L  19      -2.589  10.285  31.373  1.00 18.99           N  
ATOM   1021  CA  ALA L  19      -3.617  10.294  30.337  1.00 17.25           C  
ATOM   1022  C   ALA L  19      -4.166   8.889  30.144  1.00 16.60           C  
ATOM   1023  O   ALA L  19      -3.413   7.913  30.163  1.00 15.77           O  
ATOM   1024  CB  ALA L  19      -3.039  10.809  29.026  1.00 17.76           C  
ATOM   1025  N   THR L  20      -5.478   8.797  29.956  1.00 15.08           N  
ATOM   1026  CA  THR L  20      -6.145   7.515  29.765  1.00 14.65           C  
ATOM   1027  C   THR L  20      -6.988   7.546  28.493  1.00 14.39           C  
ATOM   1028  O   THR L  20      -7.813   8.440  28.316  1.00 14.60           O  
ATOM   1029  CB  THR L  20      -7.085   7.195  30.953  1.00 14.50           C  
ATOM   1030  OG1 THR L  20      -6.336   7.176  32.175  1.00 13.98           O  
ATOM   1031  CG2 THR L  20      -7.750   5.846  30.757  1.00 15.24           C  
ATOM   1032  N   ILE L  21      -6.775   6.569  27.614  1.00 13.38           N  
ATOM   1033  CA  ILE L  21      -7.526   6.464  26.363  1.00 12.83           C  
ATOM   1034  C   ILE L  21      -8.242   5.115  26.355  1.00 12.62           C  
ATOM   1035  O   ILE L  21      -7.651   4.098  26.716  1.00 11.90           O  
ATOM   1036  CB  ILE L  21      -6.585   6.555  25.136  1.00 13.58           C  
ATOM   1037  CG1 ILE L  21      -5.856   7.905  25.149  1.00 13.72           C  
ATOM   1038  CG2 ILE L  21      -7.387   6.383  23.842  1.00 12.89           C  
ATOM   1039  CD1 ILE L  21      -4.938   8.139  23.964  1.00 14.39           C  
ATOM   1040  N   ASN L  22      -9.509   5.102  25.949  1.00 12.33           N  
ATOM   1041  CA  ASN L  22     -10.277   3.861  25.926  1.00 12.52           C  
ATOM   1042  C   ASN L  22     -10.664   3.414  24.521  1.00 12.93           C  
ATOM   1043  O   ASN L  22     -10.861   4.233  23.621  1.00 12.44           O  
ATOM   1044  CB  ASN L  22     -11.524   4.003  26.809  1.00 13.40           C  
ATOM   1045  CG  ASN L  22     -12.379   2.748  26.826  1.00 14.48           C  
ATOM   1046  OD1 ASN L  22     -13.219   2.539  25.946  1.00 15.51           O  
ATOM   1047  ND2 ASN L  22     -12.154   1.892  27.820  1.00 14.60           N  
ATOM   1048  N   CYS L  23     -10.767   2.102  24.343  1.00 13.19           N  
ATOM   1049  CA  CYS L  23     -11.120   1.528  23.054  1.00 13.55           C  
ATOM   1050  C   CYS L  23     -11.854   0.201  23.232  1.00 13.15           C  
ATOM   1051  O   CYS L  23     -11.401  -0.674  23.968  1.00 12.52           O  
ATOM   1052  CB  CYS L  23      -9.843   1.359  22.220  1.00 14.47           C  
ATOM   1053  SG  CYS L  23     -10.024   0.410  20.679  1.00 18.42           S  
ATOM   1054  N   LYS L  24     -12.995   0.058  22.562  1.00 12.94           N  
ATOM   1055  CA  LYS L  24     -13.789  -1.160  22.671  1.00 12.83           C  
ATOM   1056  C   LYS L  24     -13.991  -1.795  21.307  1.00 12.90           C  
ATOM   1057  O   LYS L  24     -14.270  -1.100  20.329  1.00 13.15           O  
ATOM   1058  CB  LYS L  24     -15.160  -0.844  23.284  1.00 13.38           C  
ATOM   1059  CG  LYS L  24     -15.087  -0.041  24.577  1.00 15.85           C  
ATOM   1060  CD  LYS L  24     -16.469   0.280  25.141  1.00 16.25           C  
ATOM   1061  CE  LYS L  24     -16.368   1.240  26.331  1.00 16.75           C  
ATOM   1062  NZ  LYS L  24     -15.481   0.716  27.413  1.00 17.67           N  
ATOM   1063  N   SER L  25     -13.854  -3.115  21.238  1.00 12.58           N  
ATOM   1064  CA  SER L  25     -14.051  -3.825  19.977  1.00 12.91           C  
ATOM   1065  C   SER L  25     -15.461  -4.410  19.929  1.00 12.97           C  
ATOM   1066  O   SER L  25     -15.974  -4.920  20.928  1.00 13.08           O  
ATOM   1067  CB  SER L  25     -13.012  -4.934  19.816  1.00 12.17           C  
ATOM   1068  OG  SER L  25     -13.063  -5.852  20.893  1.00 12.11           O  
ATOM   1069  N   SER L  26     -16.084  -4.334  18.760  1.00 13.54           N  
ATOM   1070  CA  SER L  26     -17.446  -4.836  18.580  1.00 14.08           C  
ATOM   1071  C   SER L  26     -17.548  -6.346  18.783  1.00 14.27           C  
ATOM   1072  O   SER L  26     -18.643  -6.885  18.970  1.00 14.52           O  
ATOM   1073  CB  SER L  26     -17.954  -4.464  17.183  1.00 13.66           C  
ATOM   1074  OG  SER L  26     -17.136  -5.039  16.182  1.00 13.70           O  
ATOM   1075  N   GLN L  27     -16.404  -7.022  18.732  1.00 14.62           N  
ATOM   1076  CA  GLN L  27     -16.322  -8.467  18.920  1.00 15.22           C  
ATOM   1077  C   GLN L  27     -15.041  -8.729  19.697  1.00 14.53           C  
ATOM   1078  O   GLN L  27     -14.113  -7.923  19.648  1.00 15.22           O  
ATOM   1079  CB  GLN L  27     -16.207  -9.193  17.580  1.00 16.87           C  
ATOM   1080  CG  GLN L  27     -17.290  -8.862  16.588  1.00 20.44           C  
ATOM   1081  CD  GLN L  27     -17.134  -9.630  15.293  1.00 20.74           C  
ATOM   1082  OE1 GLN L  27     -17.855  -9.385  14.331  1.00 23.10           O  
ATOM   1083  NE2 GLN L  27     -16.196 -10.575  15.265  1.00 21.99           N  
ATOM   1084  N   SER L  27A    -14.982  -9.852  20.402  1.00 12.97           N  
ATOM   1085  CA  SER L  27A    -13.781 -10.185  21.156  1.00 12.30           C  
ATOM   1086  C   SER L  27A    -12.618 -10.380  20.189  1.00 11.25           C  
ATOM   1087  O   SER L  27A    -12.789 -10.969  19.124  1.00 10.72           O  
ATOM   1088  CB  SER L  27A    -13.989 -11.465  21.963  1.00 12.78           C  
ATOM   1089  OG  SER L  27A    -12.757 -11.927  22.496  1.00 13.86           O  
ATOM   1090  N   VAL L  27B    -11.448  -9.865  20.555  1.00 10.23           N  
ATOM   1091  CA  VAL L  27B    -10.264 -10.017  19.725  1.00 10.01           C  
ATOM   1092  C   VAL L  27B     -9.284 -10.959  20.412  1.00 10.89           C  
ATOM   1093  O   VAL L  27B     -8.097 -10.984  20.084  1.00 10.00           O  
ATOM   1094  CB  VAL L  27B     -9.581  -8.662  19.438  1.00  8.86           C  
ATOM   1095  CG1 VAL L  27B    -10.484  -7.805  18.564  1.00  8.67           C  
ATOM   1096  CG2 VAL L  27B     -9.275  -7.931  20.744  1.00  8.60           C  
ATOM   1097  N   LEU L  27C     -9.808 -11.738  21.357  1.00 11.71           N  
ATOM   1098  CA  LEU L  27C     -9.032 -12.724  22.105  1.00 13.58           C  
ATOM   1099  C   LEU L  27C     -9.074 -14.056  21.362  1.00 15.07           C  
ATOM   1100  O   LEU L  27C    -10.139 -14.659  21.207  1.00 15.40           O  
ATOM   1101  CB  LEU L  27C     -9.620 -12.896  23.510  1.00 14.16           C  
ATOM   1102  CG  LEU L  27C     -9.009 -13.975  24.406  1.00 13.88           C  
ATOM   1103  CD1 LEU L  27C     -7.529 -13.701  24.616  1.00 14.40           C  
ATOM   1104  CD2 LEU L  27C     -9.742 -13.997  25.741  1.00 14.90           C  
ATOM   1105  N   TYR L  27D     -7.915 -14.506  20.896  1.00 16.14           N  
ATOM   1106  CA  TYR L  27D     -7.807 -15.755  20.152  1.00 17.98           C  
ATOM   1107  C   TYR L  27D     -7.572 -16.893  21.149  1.00 19.46           C  
ATOM   1108  O   TYR L  27D     -6.637 -16.856  21.947  1.00 19.54           O  
ATOM   1109  CB  TYR L  27D     -6.652 -15.634  19.153  1.00 17.64           C  
ATOM   1110  CG  TYR L  27D     -6.577 -16.710  18.097  1.00 18.03           C  
ATOM   1111  CD1 TYR L  27D     -7.715 -17.098  17.387  1.00 18.06           C  
ATOM   1112  CD2 TYR L  27D     -5.353 -17.270  17.737  1.00 18.08           C  
ATOM   1113  CE1 TYR L  27D     -7.636 -18.013  16.340  1.00 17.94           C  
ATOM   1114  CE2 TYR L  27D     -5.260 -18.187  16.689  1.00 18.80           C  
ATOM   1115  CZ  TYR L  27D     -6.406 -18.551  15.996  1.00 19.13           C  
ATOM   1116  OH  TYR L  27D     -6.324 -19.452  14.961  1.00 19.19           O  
ATOM   1117  N   SER L  27E     -8.430 -17.905  21.098  1.00 21.11           N  
ATOM   1118  CA  SER L  27E     -8.336 -19.032  22.018  1.00 22.67           C  
ATOM   1119  C   SER L  27E     -7.005 -19.781  22.075  1.00 22.99           C  
ATOM   1120  O   SER L  27E     -6.407 -19.904  23.147  1.00 23.83           O  
ATOM   1121  CB  SER L  27E     -9.461 -20.027  21.723  1.00 23.73           C  
ATOM   1122  OG  SER L  27E    -10.726 -19.403  21.873  1.00 25.98           O  
ATOM   1123  N   SER L  27F     -6.533 -20.273  20.932  1.00 23.01           N  
ATOM   1124  CA  SER L  27F     -5.295 -21.051  20.888  1.00 22.37           C  
ATOM   1125  C   SER L  27F     -4.086 -20.460  21.612  1.00 21.97           C  
ATOM   1126  O   SER L  27F     -3.408 -21.169  22.352  1.00 22.62           O  
ATOM   1127  CB  SER L  27F     -4.918 -21.372  19.438  1.00 22.78           C  
ATOM   1128  OG  SER L  27F     -4.682 -20.198  18.688  1.00 23.01           O  
ATOM   1129  N   ASN L  28      -3.800 -19.178  21.406  1.00 20.55           N  
ATOM   1130  CA  ASN L  28      -2.656 -18.569  22.080  1.00 19.43           C  
ATOM   1131  C   ASN L  28      -3.063 -17.632  23.213  1.00 18.85           C  
ATOM   1132  O   ASN L  28      -2.207 -17.051  23.885  1.00 18.22           O  
ATOM   1133  CB  ASN L  28      -1.775 -17.806  21.088  1.00 18.46           C  
ATOM   1134  CG  ASN L  28      -2.559 -16.835  20.235  1.00 17.82           C  
ATOM   1135  OD1 ASN L  28      -3.546 -16.252  20.680  1.00 17.67           O  
ATOM   1136  ND2 ASN L  28      -2.105 -16.635  19.010  1.00 17.02           N  
ATOM   1137  N   SER L  29      -4.368 -17.496  23.422  1.00 18.69           N  
ATOM   1138  CA  SER L  29      -4.899 -16.632  24.473  1.00 18.43           C  
ATOM   1139  C   SER L  29      -4.379 -15.202  24.356  1.00 17.38           C  
ATOM   1140  O   SER L  29      -4.200 -14.517  25.361  1.00 18.08           O  
ATOM   1141  CB  SER L  29      -4.544 -17.190  25.853  1.00 19.25           C  
ATOM   1142  OG  SER L  29      -5.180 -18.434  26.084  1.00 21.51           O  
ATOM   1143  N   LYS L  30      -4.143 -14.751  23.129  1.00 16.05           N  
ATOM   1144  CA  LYS L  30      -3.645 -13.399  22.907  1.00 14.51           C  
ATOM   1145  C   LYS L  30      -4.688 -12.483  22.280  1.00 12.95           C  
ATOM   1146  O   LYS L  30      -5.478 -12.909  21.452  1.00 11.98           O  
ATOM   1147  CB  LYS L  30      -2.401 -13.437  22.018  1.00 16.23           C  
ATOM   1148  CG  LYS L  30      -1.228 -14.131  22.677  1.00 17.90           C  
ATOM   1149  CD  LYS L  30      -0.015 -14.193  21.771  1.00 20.37           C  
ATOM   1150  CE  LYS L  30       1.150 -14.830  22.508  1.00 20.61           C  
ATOM   1151  NZ  LYS L  30       2.355 -14.946  21.656  1.00 22.14           N  
ATOM   1152  N   ASN L  31      -4.681 -11.224  22.701  1.00 11.78           N  
ATOM   1153  CA  ASN L  31      -5.590 -10.214  22.174  1.00 11.02           C  
ATOM   1154  C   ASN L  31      -4.899  -9.556  20.979  1.00 10.66           C  
ATOM   1155  O   ASN L  31      -3.808  -8.994  21.119  1.00 11.14           O  
ATOM   1156  CB  ASN L  31      -5.875  -9.159  23.248  1.00  9.78           C  
ATOM   1157  CG  ASN L  31      -6.735  -9.691  24.375  1.00 10.36           C  
ATOM   1158  OD1 ASN L  31      -7.949  -9.832  24.226  1.00 10.33           O  
ATOM   1159  ND2 ASN L  31      -6.108 -10.017  25.501  1.00  8.45           N  
ATOM   1160  N   TYR L  32      -5.517  -9.647  19.806  1.00 10.38           N  
ATOM   1161  CA  TYR L  32      -4.956  -9.048  18.601  1.00  9.23           C  
ATOM   1162  C   TYR L  32      -5.351  -7.580  18.593  1.00  9.28           C  
ATOM   1163  O   TYR L  32      -6.127  -7.120  17.745  1.00  9.22           O  
ATOM   1164  CB  TYR L  32      -5.476  -9.784  17.358  1.00  9.60           C  
ATOM   1165  CG  TYR L  32      -4.826 -11.140  17.189  1.00  9.31           C  
ATOM   1166  CD1 TYR L  32      -4.940 -12.116  18.178  1.00 10.43           C  
ATOM   1167  CD2 TYR L  32      -4.024 -11.416  16.080  1.00  9.88           C  
ATOM   1168  CE1 TYR L  32      -4.260 -13.333  18.073  1.00 10.41           C  
ATOM   1169  CE2 TYR L  32      -3.341 -12.631  15.965  1.00 11.54           C  
ATOM   1170  CZ  TYR L  32      -3.461 -13.578  16.967  1.00 10.40           C  
ATOM   1171  OH  TYR L  32      -2.760 -14.757  16.883  1.00 13.67           O  
ATOM   1172  N   LEU L  33      -4.801  -6.859  19.565  1.00  8.57           N  
ATOM   1173  CA  LEU L  33      -5.093  -5.445  19.770  1.00  8.11           C  
ATOM   1174  C   LEU L  33      -3.789  -4.679  19.953  1.00  7.41           C  
ATOM   1175  O   LEU L  33      -2.927  -5.081  20.745  1.00  7.02           O  
ATOM   1176  CB  LEU L  33      -5.973  -5.293  21.023  1.00  8.69           C  
ATOM   1177  CG  LEU L  33      -6.610  -3.957  21.445  1.00  9.84           C  
ATOM   1178  CD1 LEU L  33      -5.556  -2.945  21.874  1.00  9.18           C  
ATOM   1179  CD2 LEU L  33      -7.452  -3.423  20.293  1.00 10.17           C  
ATOM   1180  N   ALA L  34      -3.653  -3.576  19.226  1.00  7.10           N  
ATOM   1181  CA  ALA L  34      -2.450  -2.756  19.311  1.00  8.02           C  
ATOM   1182  C   ALA L  34      -2.769  -1.277  19.487  1.00  8.07           C  
ATOM   1183  O   ALA L  34      -3.883  -0.830  19.213  1.00  7.81           O  
ATOM   1184  CB  ALA L  34      -1.608  -2.947  18.053  1.00  7.07           C  
ATOM   1185  N   TRP L  35      -1.775  -0.529  19.958  1.00  8.92           N  
ATOM   1186  CA  TRP L  35      -1.897   0.909  20.134  1.00  9.61           C  
ATOM   1187  C   TRP L  35      -0.784   1.576  19.350  1.00 10.35           C  
ATOM   1188  O   TRP L  35       0.382   1.168  19.435  1.00 10.34           O  
ATOM   1189  CB  TRP L  35      -1.778   1.327  21.603  1.00  9.26           C  
ATOM   1190  CG  TRP L  35      -2.926   0.911  22.457  1.00  9.03           C  
ATOM   1191  CD1 TRP L  35      -3.033  -0.232  23.197  1.00  9.08           C  
ATOM   1192  CD2 TRP L  35      -4.155   1.624  22.636  1.00  8.80           C  
ATOM   1193  NE1 TRP L  35      -4.253  -0.274  23.826  1.00  9.11           N  
ATOM   1194  CE2 TRP L  35      -4.963   0.852  23.499  1.00  9.01           C  
ATOM   1195  CE3 TRP L  35      -4.653   2.840  22.149  1.00  9.44           C  
ATOM   1196  CZ2 TRP L  35      -6.247   1.256  23.890  1.00  9.21           C  
ATOM   1197  CZ3 TRP L  35      -5.934   3.244  22.537  1.00  8.36           C  
ATOM   1198  CH2 TRP L  35      -6.713   2.451  23.400  1.00  7.88           C  
ATOM   1199  N   TYR L  36      -1.151   2.605  18.594  1.00 10.48           N  
ATOM   1200  CA  TYR L  36      -0.190   3.345  17.794  1.00 12.75           C  
ATOM   1201  C   TYR L  36      -0.148   4.809  18.165  1.00 13.60           C  
ATOM   1202  O   TYR L  36      -1.130   5.378  18.649  1.00 13.59           O  
ATOM   1203  CB  TYR L  36      -0.504   3.234  16.301  1.00 11.92           C  
ATOM   1204  CG  TYR L  36      -0.271   1.866  15.719  1.00 12.32           C  
ATOM   1205  CD1 TYR L  36      -1.127   0.806  16.009  1.00 12.68           C  
ATOM   1206  CD2 TYR L  36       0.835   1.617  14.903  1.00 11.48           C  
ATOM   1207  CE1 TYR L  36      -0.890  -0.472  15.503  1.00 12.45           C  
ATOM   1208  CE2 TYR L  36       1.081   0.346  14.393  1.00 11.64           C  
ATOM   1209  CZ  TYR L  36       0.213  -0.694  14.699  1.00 12.30           C  
ATOM   1210  OH  TYR L  36       0.443  -1.956  14.199  1.00 12.40           O  
ATOM   1211  N   GLN L  37       1.011   5.407  17.929  1.00 15.25           N  
ATOM   1212  CA  GLN L  37       1.234   6.816  18.195  1.00 17.17           C  
ATOM   1213  C   GLN L  37       1.580   7.455  16.863  1.00 18.45           C  
ATOM   1214  O   GLN L  37       2.327   6.887  16.067  1.00 18.40           O  
ATOM   1215  CB  GLN L  37       2.410   7.000  19.154  1.00 17.68           C  
ATOM   1216  CG  GLN L  37       2.764   8.454  19.427  1.00 18.90           C  
ATOM   1217  CD  GLN L  37       4.084   8.596  20.154  1.00 19.40           C  
ATOM   1218  OE1 GLN L  37       5.128   8.165  19.655  1.00 19.98           O  
ATOM   1219  NE2 GLN L  37       4.051   9.203  21.336  1.00 18.75           N  
ATOM   1220  N   GLN L  38       1.030   8.631  16.606  1.00 19.83           N  
ATOM   1221  CA  GLN L  38       1.346   9.310  15.369  1.00 21.28           C  
ATOM   1222  C   GLN L  38       1.671  10.772  15.609  1.00 22.21           C  
ATOM   1223  O   GLN L  38       0.772  11.612  15.729  1.00 22.54           O  
ATOM   1224  CB  GLN L  38       0.202   9.174  14.372  1.00 20.98           C  
ATOM   1225  CG  GLN L  38       0.492   9.854  13.053  1.00 21.76           C  
ATOM   1226  CD  GLN L  38      -0.409   9.362  11.959  1.00 21.44           C  
ATOM   1227  OE1 GLN L  38      -1.631   9.371  12.092  1.00 22.19           O  
ATOM   1228  NE2 GLN L  38       0.190   8.927  10.859  1.00 22.54           N  
ATOM   1229  N   LYS L  39       2.969  11.054  15.701  1.00 23.56           N  
ATOM   1230  CA  LYS L  39       3.460  12.408  15.915  1.00 24.66           C  
ATOM   1231  C   LYS L  39       3.350  13.151  14.591  1.00 25.18           C  
ATOM   1232  O   LYS L  39       3.163  12.538  13.539  1.00 25.58           O  
ATOM   1233  CB  LYS L  39       4.921  12.383  16.372  1.00 25.27           C  
ATOM   1234  CG  LYS L  39       5.160  11.660  17.688  1.00 26.47           C  
ATOM   1235  CD  LYS L  39       6.635  11.690  18.069  1.00 27.41           C  
ATOM   1236  CE  LYS L  39       6.892  10.952  19.377  1.00 28.39           C  
ATOM   1237  NZ  LYS L  39       8.331  10.986  19.757  1.00 29.09           N  
ATOM   1238  N   PRO L  40       3.448  14.486  14.621  1.00 25.58           N  
ATOM   1239  CA  PRO L  40       3.351  15.253  13.379  1.00 25.44           C  
ATOM   1240  C   PRO L  40       4.430  14.879  12.359  1.00 25.27           C  
ATOM   1241  O   PRO L  40       5.582  14.633  12.723  1.00 25.36           O  
ATOM   1242  CB  PRO L  40       3.484  16.694  13.875  1.00 25.52           C  
ATOM   1243  CG  PRO L  40       2.875  16.610  15.273  1.00 25.72           C  
ATOM   1244  CD  PRO L  40       3.624  15.400  15.762  1.00 25.57           C  
ATOM   1245  N   GLY L  41       4.040  14.827  11.088  1.00 24.97           N  
ATOM   1246  CA  GLY L  41       4.974  14.511  10.016  1.00 24.65           C  
ATOM   1247  C   GLY L  41       5.598  13.127  10.014  1.00 24.55           C  
ATOM   1248  O   GLY L  41       6.573  12.879   9.298  1.00 24.16           O  
ATOM   1249  N   GLN L  42       5.034  12.217  10.800  1.00 24.21           N  
ATOM   1250  CA  GLN L  42       5.558  10.861  10.888  1.00 23.60           C  
ATOM   1251  C   GLN L  42       4.487   9.815  10.612  1.00 22.53           C  
ATOM   1252  O   GLN L  42       3.293  10.067  10.789  1.00 22.19           O  
ATOM   1253  CB  GLN L  42       6.120  10.616  12.290  1.00 24.71           C  
ATOM   1254  CG  GLN L  42       7.230  11.569  12.709  1.00 26.49           C  
ATOM   1255  CD  GLN L  42       8.514  11.352  11.933  1.00 27.66           C  
ATOM   1256  OE1 GLN L  42       9.488  12.087  12.107  1.00 29.03           O  
ATOM   1257  NE2 GLN L  42       8.526  10.335  11.076  1.00 28.53           N  
ATOM   1258  N   PRO L  43       4.901   8.633  10.135  1.00 21.12           N  
ATOM   1259  CA  PRO L  43       3.939   7.563   9.861  1.00 20.05           C  
ATOM   1260  C   PRO L  43       3.505   7.024  11.228  1.00 19.57           C  
ATOM   1261  O   PRO L  43       4.166   7.291  12.238  1.00 19.35           O  
ATOM   1262  CB  PRO L  43       4.781   6.555   9.091  1.00 20.00           C  
ATOM   1263  CG  PRO L  43       6.131   6.694   9.786  1.00 20.57           C  
ATOM   1264  CD  PRO L  43       6.257   8.210   9.740  1.00 20.57           C  
ATOM   1265  N   PRO L  44       2.381   6.293  11.296  1.00 18.27           N  
ATOM   1266  CA  PRO L  44       1.990   5.780  12.611  1.00 17.42           C  
ATOM   1267  C   PRO L  44       3.101   4.900  13.187  1.00 16.43           C  
ATOM   1268  O   PRO L  44       3.798   4.211  12.447  1.00 16.80           O  
ATOM   1269  CB  PRO L  44       0.704   5.007  12.302  1.00 17.89           C  
ATOM   1270  CG  PRO L  44       0.912   4.590  10.842  1.00 18.69           C  
ATOM   1271  CD  PRO L  44       1.384   5.907  10.284  1.00 18.81           C  
ATOM   1272  N   LYS L  45       3.272   4.949  14.504  1.00 14.97           N  
ATOM   1273  CA  LYS L  45       4.303   4.174  15.194  1.00 14.87           C  
ATOM   1274  C   LYS L  45       3.702   3.228  16.235  1.00 13.54           C  
ATOM   1275  O   LYS L  45       2.966   3.660  17.116  1.00 13.09           O  
ATOM   1276  CB  LYS L  45       5.281   5.117  15.895  1.00 16.59           C  
ATOM   1277  CG  LYS L  45       6.301   4.387  16.760  1.00 19.00           C  
ATOM   1278  CD  LYS L  45       7.111   5.348  17.612  1.00 20.87           C  
ATOM   1279  CE  LYS L  45       8.020   4.582  18.566  1.00 22.22           C  
ATOM   1280  NZ  LYS L  45       8.741   5.507  19.471  1.00 23.22           N  
ATOM   1281  N   LEU L  46       4.036   1.945  16.137  1.00 13.02           N  
ATOM   1282  CA  LEU L  46       3.525   0.940  17.070  1.00 11.76           C  
ATOM   1283  C   LEU L  46       4.078   1.108  18.487  1.00 12.45           C  
ATOM   1284  O   LEU L  46       5.293   1.171  18.689  1.00 12.19           O  
ATOM   1285  CB  LEU L  46       3.870  -0.464  16.562  1.00 11.32           C  
ATOM   1286  CG  LEU L  46       3.486  -1.636  17.474  1.00 10.41           C  
ATOM   1287  CD1 LEU L  46       1.971  -1.700  17.624  1.00  9.78           C  
ATOM   1288  CD2 LEU L  46       4.022  -2.938  16.897  1.00 10.50           C  
ATOM   1289  N   LEU L  47       3.183   1.168  19.470  1.00 11.81           N  
ATOM   1290  CA  LEU L  47       3.591   1.312  20.865  1.00 12.45           C  
ATOM   1291  C   LEU L  47       3.409   0.012  21.631  1.00 12.18           C  
ATOM   1292  O   LEU L  47       4.312  -0.448  22.333  1.00 12.21           O  
ATOM   1293  CB  LEU L  47       2.756   2.385  21.568  1.00 13.06           C  
ATOM   1294  CG  LEU L  47       2.782   3.821  21.053  1.00 14.12           C  
ATOM   1295  CD1 LEU L  47       1.829   4.649  21.885  1.00 14.92           C  
ATOM   1296  CD2 LEU L  47       4.191   4.388  21.133  1.00 14.99           C  
ATOM   1297  N   ILE L  48       2.227  -0.579  21.480  1.00 11.39           N  
ATOM   1298  CA  ILE L  48       1.874  -1.796  22.198  1.00 11.00           C  
ATOM   1299  C   ILE L  48       1.075  -2.795  21.363  1.00 10.06           C  
ATOM   1300  O   ILE L  48       0.210  -2.407  20.579  1.00 10.10           O  
ATOM   1301  CB  ILE L  48       1.035  -1.417  23.450  1.00 10.64           C  
ATOM   1302  CG1 ILE L  48       1.902  -0.595  24.414  1.00 11.50           C  
ATOM   1303  CG2 ILE L  48       0.448  -2.661  24.108  1.00  9.83           C  
ATOM   1304  CD1 ILE L  48       1.145  -0.021  25.581  1.00 13.20           C  
ATOM   1305  N   TYR L  49       1.380  -4.080  21.525  1.00  9.75           N  
ATOM   1306  CA  TYR L  49       0.647  -5.135  20.823  1.00  9.91           C  
ATOM   1307  C   TYR L  49       0.301  -6.233  21.831  1.00  9.81           C  
ATOM   1308  O   TYR L  49       0.821  -6.234  22.944  1.00  9.54           O  
ATOM   1309  CB  TYR L  49       1.444  -5.699  19.634  1.00 10.19           C  
ATOM   1310  CG  TYR L  49       2.833  -6.187  19.955  1.00 11.52           C  
ATOM   1311  CD1 TYR L  49       3.879  -5.290  20.175  1.00 12.39           C  
ATOM   1312  CD2 TYR L  49       3.098  -7.547  20.067  1.00 11.92           C  
ATOM   1313  CE1 TYR L  49       5.155  -5.743  20.502  1.00 13.12           C  
ATOM   1314  CE2 TYR L  49       4.368  -8.008  20.394  1.00 13.27           C  
ATOM   1315  CZ  TYR L  49       5.388  -7.104  20.610  1.00 13.19           C  
ATOM   1316  OH  TYR L  49       6.639  -7.575  20.944  1.00 14.45           O  
ATOM   1317  N   TRP L  50      -0.577  -7.157  21.452  1.00  9.29           N  
ATOM   1318  CA  TRP L  50      -1.018  -8.210  22.370  1.00  9.09           C  
ATOM   1319  C   TRP L  50      -1.638  -7.510  23.588  1.00  8.43           C  
ATOM   1320  O   TRP L  50      -1.529  -7.985  24.721  1.00  8.43           O  
ATOM   1321  CB  TRP L  50       0.163  -9.083  22.819  1.00  9.43           C  
ATOM   1322  CG  TRP L  50       0.828  -9.888  21.716  1.00  9.74           C  
ATOM   1323  CD1 TRP L  50       2.141 -10.271  21.670  1.00  9.47           C  
ATOM   1324  CD2 TRP L  50       0.214 -10.430  20.533  1.00  9.73           C  
ATOM   1325  NE1 TRP L  50       2.383 -11.010  20.538  1.00  9.93           N  
ATOM   1326  CE2 TRP L  50       1.220 -11.124  19.821  1.00  9.76           C  
ATOM   1327  CE3 TRP L  50      -1.086 -10.397  20.004  1.00  9.63           C  
ATOM   1328  CZ2 TRP L  50       0.968 -11.778  18.609  1.00 10.45           C  
ATOM   1329  CZ3 TRP L  50      -1.334 -11.046  18.798  1.00 10.48           C  
ATOM   1330  CH2 TRP L  50      -0.311 -11.728  18.115  1.00  9.42           C  
ATOM   1331  N   ALA L  51      -2.268  -6.364  23.337  1.00  8.07           N  
ATOM   1332  CA  ALA L  51      -2.917  -5.567  24.374  1.00  8.33           C  
ATOM   1333  C   ALA L  51      -2.003  -4.919  25.418  1.00  8.89           C  
ATOM   1334  O   ALA L  51      -2.250  -3.790  25.837  1.00  8.80           O  
ATOM   1335  CB  ALA L  51      -3.981  -6.406  25.088  1.00  8.99           C  
ATOM   1336  N   SER L  52      -0.950  -5.613  25.839  1.00 10.75           N  
ATOM   1337  CA  SER L  52      -0.087  -5.061  26.881  1.00 10.97           C  
ATOM   1338  C   SER L  52       1.420  -5.192  26.667  1.00 11.37           C  
ATOM   1339  O   SER L  52       2.205  -4.759  27.515  1.00 11.50           O  
ATOM   1340  CB  SER L  52      -0.450  -5.699  28.223  1.00 11.11           C  
ATOM   1341  OG  SER L  52      -0.294  -7.105  28.160  1.00 12.25           O  
ATOM   1342  N   THR L  53       1.831  -5.790  25.557  1.00 10.87           N  
ATOM   1343  CA  THR L  53       3.254  -5.945  25.286  1.00 11.62           C  
ATOM   1344  C   THR L  53       3.810  -4.695  24.623  1.00 12.60           C  
ATOM   1345  O   THR L  53       3.338  -4.278  23.565  1.00 12.69           O  
ATOM   1346  CB  THR L  53       3.525  -7.158  24.377  1.00 10.87           C  
ATOM   1347  OG1 THR L  53       3.112  -8.355  25.046  1.00 10.56           O  
ATOM   1348  CG2 THR L  53       5.014  -7.257  24.040  1.00 11.65           C  
ATOM   1349  N   ARG L  54       4.809  -4.089  25.256  1.00 14.08           N  
ATOM   1350  CA  ARG L  54       5.437  -2.890  24.713  1.00 15.55           C  
ATOM   1351  C   ARG L  54       6.422  -3.218  23.605  1.00 16.21           C  
ATOM   1352  O   ARG L  54       7.130  -4.227  23.657  1.00 14.53           O  
ATOM   1353  CB  ARG L  54       6.190  -2.112  25.799  1.00 16.59           C  
ATOM   1354  CG  ARG L  54       5.395  -1.038  26.505  1.00 19.27           C  
ATOM   1355  CD  ARG L  54       6.288  -0.293  27.490  1.00 20.63           C  
ATOM   1356  NE  ARG L  54       6.693  -1.151  28.596  1.00 22.65           N  
ATOM   1357  CZ  ARG L  54       5.900  -1.487  29.609  1.00 23.62           C  
ATOM   1358  NH1 ARG L  54       4.654  -1.035  29.662  1.00 23.77           N  
ATOM   1359  NH2 ARG L  54       6.351  -2.289  30.565  1.00 25.14           N  
ATOM   1360  N   GLU L  55       6.453  -2.352  22.599  1.00 16.99           N  
ATOM   1361  CA  GLU L  55       7.366  -2.513  21.485  1.00 19.08           C  
ATOM   1362  C   GLU L  55       8.731  -2.093  22.010  1.00 19.56           C  
ATOM   1363  O   GLU L  55       8.823  -1.225  22.874  1.00 19.35           O  
ATOM   1364  CB  GLU L  55       6.963  -1.592  20.334  1.00 19.93           C  
ATOM   1365  CG  GLU L  55       7.941  -1.593  19.173  1.00 23.07           C  
ATOM   1366  CD  GLU L  55       7.921  -2.882  18.383  1.00 23.92           C  
ATOM   1367  OE1 GLU L  55       8.090  -3.964  18.982  1.00 25.49           O  
ATOM   1368  OE2 GLU L  55       7.743  -2.806  17.151  1.00 25.94           O  
ATOM   1369  N   SER L  56       9.785  -2.707  21.492  1.00 21.04           N  
ATOM   1370  CA  SER L  56      11.139  -2.371  21.920  1.00 21.88           C  
ATOM   1371  C   SER L  56      11.402  -0.871  21.772  1.00 22.31           C  
ATOM   1372  O   SER L  56      11.026  -0.262  20.770  1.00 22.55           O  
ATOM   1373  CB  SER L  56      12.155  -3.154  21.091  1.00 22.64           C  
ATOM   1374  OG  SER L  56      13.476  -2.782  21.439  1.00 24.42           O  
ATOM   1375  N   GLY L  57      12.038  -0.277  22.778  1.00 22.16           N  
ATOM   1376  CA  GLY L  57      12.343   1.140  22.723  1.00 22.16           C  
ATOM   1377  C   GLY L  57      11.238   2.041  23.238  1.00 22.38           C  
ATOM   1378  O   GLY L  57      11.495   3.176  23.637  1.00 22.82           O  
ATOM   1379  N   VAL L  58      10.002   1.550  23.224  1.00 22.39           N  
ATOM   1380  CA  VAL L  58       8.881   2.345  23.708  1.00 22.71           C  
ATOM   1381  C   VAL L  58       9.024   2.572  25.212  1.00 23.00           C  
ATOM   1382  O   VAL L  58       9.282   1.635  25.968  1.00 23.07           O  
ATOM   1383  CB  VAL L  58       7.538   1.646  23.418  1.00 22.39           C  
ATOM   1384  CG1 VAL L  58       6.389   2.457  24.001  1.00 22.81           C  
ATOM   1385  CG2 VAL L  58       7.361   1.484  21.914  1.00 22.11           C  
ATOM   1386  N   PRO L  59       8.855   3.827  25.662  1.00 23.69           N  
ATOM   1387  CA  PRO L  59       8.961   4.212  27.072  1.00 23.92           C  
ATOM   1388  C   PRO L  59       8.053   3.390  27.980  1.00 23.96           C  
ATOM   1389  O   PRO L  59       6.930   3.056  27.611  1.00 24.15           O  
ATOM   1390  CB  PRO L  59       8.576   5.689  27.041  1.00 24.01           C  
ATOM   1391  CG  PRO L  59       9.088   6.120  25.684  1.00 24.18           C  
ATOM   1392  CD  PRO L  59       8.502   5.007  24.853  1.00 23.81           C  
ATOM   1393  N   ASP L  60       8.545   3.072  29.171  1.00 23.60           N  
ATOM   1394  CA  ASP L  60       7.779   2.285  30.126  1.00 23.08           C  
ATOM   1395  C   ASP L  60       6.551   3.021  30.654  1.00 21.70           C  
ATOM   1396  O   ASP L  60       5.665   2.408  31.258  1.00 21.00           O  
ATOM   1397  CB  ASP L  60       8.673   1.875  31.293  1.00 24.80           C  
ATOM   1398  CG  ASP L  60       9.875   1.075  30.843  1.00 26.67           C  
ATOM   1399  OD1 ASP L  60       9.679  -0.003  30.237  1.00 28.07           O  
ATOM   1400  OD2 ASP L  60      11.015   1.527  31.086  1.00 27.83           O  
ATOM   1401  N   ARG L  61       6.492   4.331  30.430  1.00 20.46           N  
ATOM   1402  CA  ARG L  61       5.348   5.103  30.899  1.00 19.38           C  
ATOM   1403  C   ARG L  61       4.098   4.816  30.061  1.00 18.01           C  
ATOM   1404  O   ARG L  61       3.005   5.279  30.392  1.00 17.14           O  
ATOM   1405  CB  ARG L  61       5.666   6.606  30.915  1.00 20.40           C  
ATOM   1406  CG  ARG L  61       6.064   7.218  29.576  1.00 22.10           C  
ATOM   1407  CD  ARG L  61       6.285   8.719  29.730  1.00 23.02           C  
ATOM   1408  NE  ARG L  61       6.533   9.394  28.458  1.00 23.99           N  
ATOM   1409  CZ  ARG L  61       7.634   9.250  27.727  1.00 23.97           C  
ATOM   1410  NH1 ARG L  61       7.758   9.910  26.583  1.00 24.68           N  
ATOM   1411  NH2 ARG L  61       8.616   8.464  28.145  1.00 24.74           N  
ATOM   1412  N   PHE L  62       4.263   4.062  28.974  1.00 16.42           N  
ATOM   1413  CA  PHE L  62       3.121   3.687  28.140  1.00 15.53           C  
ATOM   1414  C   PHE L  62       2.720   2.282  28.557  1.00 14.69           C  
ATOM   1415  O   PHE L  62       3.549   1.372  28.585  1.00 14.63           O  
ATOM   1416  CB  PHE L  62       3.459   3.665  26.643  1.00 15.58           C  
ATOM   1417  CG  PHE L  62       3.733   5.016  26.049  1.00 15.81           C  
ATOM   1418  CD1 PHE L  62       5.017   5.556  26.060  1.00 15.80           C  
ATOM   1419  CD2 PHE L  62       2.703   5.746  25.465  1.00 14.45           C  
ATOM   1420  CE1 PHE L  62       5.269   6.807  25.493  1.00 15.66           C  
ATOM   1421  CE2 PHE L  62       2.943   6.996  24.898  1.00 15.30           C  
ATOM   1422  CZ  PHE L  62       4.231   7.528  24.912  1.00 14.91           C  
ATOM   1423  N   SER L  63       1.448   2.092  28.875  1.00 13.94           N  
ATOM   1424  CA  SER L  63       1.000   0.779  29.297  1.00 13.32           C  
ATOM   1425  C   SER L  63      -0.402   0.477  28.788  1.00 12.04           C  
ATOM   1426  O   SER L  63      -1.276   1.347  28.770  1.00 11.09           O  
ATOM   1427  CB  SER L  63       1.029   0.674  30.822  1.00 14.06           C  
ATOM   1428  OG  SER L  63       0.166   1.634  31.404  1.00 18.47           O  
ATOM   1429  N   GLY L  64      -0.596  -0.766  28.374  1.00 10.96           N  
ATOM   1430  CA  GLY L  64      -1.890  -1.179  27.869  1.00 10.16           C  
ATOM   1431  C   GLY L  64      -2.511  -2.165  28.828  1.00  9.37           C  
ATOM   1432  O   GLY L  64      -1.813  -2.958  29.467  1.00  9.57           O  
ATOM   1433  N   SER L  65      -3.829  -2.112  28.939  1.00  8.29           N  
ATOM   1434  CA  SER L  65      -4.547  -3.020  29.814  1.00  8.51           C  
ATOM   1435  C   SER L  65      -5.848  -3.410  29.134  1.00  8.01           C  
ATOM   1436  O   SER L  65      -6.240  -2.800  28.138  1.00  7.82           O  
ATOM   1437  CB  SER L  65      -4.827  -2.351  31.164  1.00  8.27           C  
ATOM   1438  OG  SER L  65      -5.527  -1.131  30.993  1.00 10.29           O  
ATOM   1439  N   GLY L  66      -6.499  -4.432  29.676  1.00  8.30           N  
ATOM   1440  CA  GLY L  66      -7.749  -4.916  29.118  1.00  8.83           C  
ATOM   1441  C   GLY L  66      -7.569  -6.237  28.393  1.00  8.73           C  
ATOM   1442  O   GLY L  66      -6.473  -6.577  27.931  1.00  8.04           O  
ATOM   1443  N   SER L  67      -8.652  -6.998  28.296  1.00  9.15           N  
ATOM   1444  CA  SER L  67      -8.616  -8.284  27.603  1.00  9.46           C  
ATOM   1445  C   SER L  67     -10.025  -8.610  27.129  1.00  9.90           C  
ATOM   1446  O   SER L  67     -10.987  -8.488  27.891  1.00 10.24           O  
ATOM   1447  CB  SER L  67      -8.106  -9.388  28.541  1.00  9.67           C  
ATOM   1448  OG  SER L  67      -8.041 -10.651  27.882  1.00  8.94           O  
ATOM   1449  N   GLY L  68     -10.145  -9.011  25.868  1.00  9.99           N  
ATOM   1450  CA  GLY L  68     -11.448  -9.342  25.323  1.00 10.21           C  
ATOM   1451  C   GLY L  68     -11.962  -8.270  24.381  1.00  9.45           C  
ATOM   1452  O   GLY L  68     -11.712  -8.319  23.177  1.00  9.22           O  
ATOM   1453  N   THR L  69     -12.670  -7.288  24.925  1.00  9.91           N  
ATOM   1454  CA  THR L  69     -13.224  -6.217  24.104  1.00 10.70           C  
ATOM   1455  C   THR L  69     -12.976  -4.800  24.610  1.00 11.13           C  
ATOM   1456  O   THR L  69     -13.065  -3.856  23.838  1.00 12.11           O  
ATOM   1457  CB  THR L  69     -14.750  -6.368  23.946  1.00 11.39           C  
ATOM   1458  OG1 THR L  69     -15.370  -6.263  25.234  1.00 11.86           O  
ATOM   1459  CG2 THR L  69     -15.095  -7.717  23.332  1.00 11.30           C  
ATOM   1460  N   ASP L  70     -12.658  -4.646  25.893  1.00 11.51           N  
ATOM   1461  CA  ASP L  70     -12.460  -3.318  26.474  1.00 11.93           C  
ATOM   1462  C   ASP L  70     -10.996  -3.042  26.825  1.00 10.98           C  
ATOM   1463  O   ASP L  70     -10.461  -3.581  27.794  1.00 11.56           O  
ATOM   1464  CB  ASP L  70     -13.365  -3.195  27.703  1.00 13.62           C  
ATOM   1465  CG  ASP L  70     -13.426  -1.789  28.255  1.00 15.83           C  
ATOM   1466  OD1 ASP L  70     -13.147  -0.831  27.501  1.00 16.08           O  
ATOM   1467  OD2 ASP L  70     -13.791  -1.643  29.442  1.00 17.08           O  
ATOM   1468  N   PHE L  71     -10.355  -2.189  26.033  1.00 10.11           N  
ATOM   1469  CA  PHE L  71      -8.947  -1.890  26.234  1.00  9.27           C  
ATOM   1470  C   PHE L  71      -8.635  -0.459  26.640  1.00  9.39           C  
ATOM   1471  O   PHE L  71      -9.360   0.478  26.307  1.00  8.56           O  
ATOM   1472  CB  PHE L  71      -8.172  -2.258  24.975  1.00  9.76           C  
ATOM   1473  CG  PHE L  71      -8.444  -3.648  24.506  1.00  9.18           C  
ATOM   1474  CD1 PHE L  71      -9.557  -3.926  23.719  1.00  8.90           C  
ATOM   1475  CD2 PHE L  71      -7.633  -4.696  24.914  1.00  8.59           C  
ATOM   1476  CE1 PHE L  71      -9.858  -5.233  23.345  1.00  8.34           C  
ATOM   1477  CE2 PHE L  71      -7.923  -6.005  24.550  1.00  8.30           C  
ATOM   1478  CZ  PHE L  71      -9.036  -6.278  23.764  1.00  9.54           C  
ATOM   1479  N   THR L  72      -7.524  -0.305  27.348  1.00  8.55           N  
ATOM   1480  CA  THR L  72      -7.112   0.993  27.847  1.00  9.44           C  
ATOM   1481  C   THR L  72      -5.626   1.239  27.642  1.00  9.25           C  
ATOM   1482  O   THR L  72      -4.804   0.352  27.868  1.00  8.97           O  
ATOM   1483  CB  THR L  72      -7.406   1.101  29.361  1.00 10.10           C  
ATOM   1484  OG1 THR L  72      -8.808   0.929  29.589  1.00  9.79           O  
ATOM   1485  CG2 THR L  72      -6.964   2.451  29.909  1.00 10.79           C  
ATOM   1486  N   LEU L  73      -5.301   2.443  27.188  1.00  8.62           N  
ATOM   1487  CA  LEU L  73      -3.918   2.855  27.002  1.00  9.17           C  
ATOM   1488  C   LEU L  73      -3.701   3.926  28.052  1.00  9.62           C  
ATOM   1489  O   LEU L  73      -4.471   4.882  28.137  1.00  9.04           O  
ATOM   1490  CB  LEU L  73      -3.694   3.464  25.618  1.00  9.46           C  
ATOM   1491  CG  LEU L  73      -2.323   4.129  25.438  1.00 10.38           C  
ATOM   1492  CD1 LEU L  73      -1.207   3.091  25.609  1.00 11.09           C  
ATOM   1493  CD2 LEU L  73      -2.254   4.779  24.067  1.00 11.83           C  
ATOM   1494  N   THR L  74      -2.660   3.766  28.855  1.00 10.10           N  
ATOM   1495  CA  THR L  74      -2.369   4.737  29.890  1.00 11.38           C  
ATOM   1496  C   THR L  74      -0.992   5.345  29.661  1.00 12.44           C  
ATOM   1497  O   THR L  74      -0.028   4.637  29.369  1.00 12.26           O  
ATOM   1498  CB  THR L  74      -2.385   4.088  31.289  1.00 11.38           C  
ATOM   1499  OG1 THR L  74      -3.654   3.458  31.519  1.00 11.40           O  
ATOM   1500  CG2 THR L  74      -2.152   5.137  32.362  1.00 12.02           C  
ATOM   1501  N   ILE L  75      -0.911   6.663  29.776  1.00 13.50           N  
ATOM   1502  CA  ILE L  75       0.360   7.355  29.623  1.00 14.49           C  
ATOM   1503  C   ILE L  75       0.596   8.099  30.931  1.00 15.70           C  
ATOM   1504  O   ILE L  75      -0.101   9.073  31.226  1.00 15.60           O  
ATOM   1505  CB  ILE L  75       0.327   8.390  28.481  1.00 14.63           C  
ATOM   1506  CG1 ILE L  75      -0.052   7.716  27.160  1.00 14.56           C  
ATOM   1507  CG2 ILE L  75       1.702   9.050  28.350  1.00 13.79           C  
ATOM   1508  CD1 ILE L  75      -0.198   8.695  26.007  1.00 14.05           C  
ATOM   1509  N   SER L  76       1.552   7.629  31.725  1.00 17.08           N  
ATOM   1510  CA  SER L  76       1.858   8.280  32.997  1.00 19.05           C  
ATOM   1511  C   SER L  76       3.031   9.224  32.790  1.00 20.41           C  
ATOM   1512  O   SER L  76       3.749   9.112  31.794  1.00 21.17           O  
ATOM   1513  CB  SER L  76       2.216   7.243  34.063  1.00 19.09           C  
ATOM   1514  OG  SER L  76       3.381   6.521  33.711  1.00 18.50           O  
ATOM   1515  N   SER L  77       3.221  10.146  33.732  1.00 22.00           N  
ATOM   1516  CA  SER L  77       4.306  11.123  33.658  1.00 22.91           C  
ATOM   1517  C   SER L  77       4.428  11.643  32.230  1.00 23.42           C  
ATOM   1518  O   SER L  77       5.485  11.548  31.608  1.00 23.63           O  
ATOM   1519  CB  SER L  77       5.618  10.484  34.105  1.00 23.76           C  
ATOM   1520  N   LEU L  78       3.324  12.184  31.726  1.00 23.93           N  
ATOM   1521  CA  LEU L  78       3.229  12.728  30.373  1.00 24.73           C  
ATOM   1522  C   LEU L  78       4.370  13.698  30.047  1.00 25.26           C  
ATOM   1523  O   LEU L  78       4.778  14.499  30.888  1.00 25.30           O  
ATOM   1524  CB  LEU L  78       1.876  13.437  30.222  1.00 24.66           C  
ATOM   1525  CG  LEU L  78       1.327  13.905  28.868  1.00 25.35           C  
ATOM   1526  CD1 LEU L  78       2.218  14.972  28.249  1.00 25.17           C  
ATOM   1527  CD2 LEU L  78       1.200  12.703  27.948  1.00 25.24           C  
ATOM   1528  N   GLN L  79       4.880  13.616  28.821  1.00 25.79           N  
ATOM   1529  CA  GLN L  79       5.958  14.490  28.361  1.00 26.70           C  
ATOM   1530  C   GLN L  79       5.570  15.223  27.077  1.00 27.19           C  
ATOM   1531  O   GLN L  79       4.675  14.789  26.353  1.00 27.41           O  
ATOM   1532  CB  GLN L  79       7.238  13.683  28.135  1.00 26.87           C  
ATOM   1533  CG  GLN L  79       7.909  13.227  29.423  1.00 27.43           C  
ATOM   1534  CD  GLN L  79       9.124  12.354  29.180  1.00 27.86           C  
ATOM   1535  OE1 GLN L  79      10.010  12.702  28.399  1.00 28.55           O  
ATOM   1536  NE2 GLN L  79       9.182  11.218  29.865  1.00 28.32           N  
ATOM   1537  N   ALA L  80       6.247  16.337  26.803  1.00 27.38           N  
ATOM   1538  CA  ALA L  80       5.970  17.137  25.612  1.00 27.32           C  
ATOM   1539  C   ALA L  80       5.995  16.259  24.370  1.00 26.99           C  
ATOM   1540  O   ALA L  80       5.178  16.418  23.463  1.00 27.04           O  
ATOM   1541  CB  ALA L  80       6.996  18.255  25.484  1.00 27.25           C  
ATOM   1542  N   GLU L  81       6.944  15.332  24.344  1.00 26.84           N  
ATOM   1543  CA  GLU L  81       7.100  14.402  23.233  1.00 26.87           C  
ATOM   1544  C   GLU L  81       5.865  13.531  22.993  1.00 26.10           C  
ATOM   1545  O   GLU L  81       5.633  13.076  21.871  1.00 25.43           O  
ATOM   1546  CB  GLU L  81       8.309  13.499  23.485  1.00 27.52           C  
ATOM   1547  CG  GLU L  81       8.366  12.286  22.579  1.00 29.26           C  
ATOM   1548  CD  GLU L  81       9.509  11.355  22.920  1.00 30.29           C  
ATOM   1549  OE1 GLU L  81       9.654  11.003  24.111  1.00 30.97           O  
ATOM   1550  OE2 GLU L  81      10.253  10.960  21.995  1.00 30.83           O  
ATOM   1551  N   ASP L  82       5.077  13.301  24.040  1.00 25.40           N  
ATOM   1552  CA  ASP L  82       3.891  12.455  23.920  1.00 24.90           C  
ATOM   1553  C   ASP L  82       2.693  13.133  23.264  1.00 24.78           C  
ATOM   1554  O   ASP L  82       1.701  12.475  22.952  1.00 24.43           O  
ATOM   1555  CB  ASP L  82       3.467  11.916  25.290  1.00 25.12           C  
ATOM   1556  CG  ASP L  82       4.609  11.275  26.046  1.00 25.72           C  
ATOM   1557  OD1 ASP L  82       5.436  10.582  25.418  1.00 26.00           O  
ATOM   1558  OD2 ASP L  82       4.666  11.448  27.281  1.00 26.18           O  
ATOM   1559  N   VAL L  83       2.771  14.443  23.058  1.00 24.55           N  
ATOM   1560  CA  VAL L  83       1.675  15.162  22.420  1.00 24.32           C  
ATOM   1561  C   VAL L  83       1.522  14.681  20.978  1.00 24.03           C  
ATOM   1562  O   VAL L  83       2.307  15.049  20.100  1.00 24.14           O  
ATOM   1563  CB  VAL L  83       1.920  16.692  22.440  1.00 24.57           C  
ATOM   1564  CG1 VAL L  83       0.834  17.408  21.655  1.00 24.73           C  
ATOM   1565  CG2 VAL L  83       1.930  17.190  23.879  1.00 24.93           C  
ATOM   1566  N   ALA L  84       0.509  13.848  20.746  1.00 23.13           N  
ATOM   1567  CA  ALA L  84       0.245  13.293  19.423  1.00 22.41           C  
ATOM   1568  C   ALA L  84      -1.153  12.690  19.364  1.00 21.51           C  
ATOM   1569  O   ALA L  84      -1.940  12.836  20.300  1.00 21.50           O  
ATOM   1570  CB  ALA L  84       1.280  12.222  19.096  1.00 22.86           C  
ATOM   1571  N   VAL L  85      -1.457  12.018  18.257  1.00 20.36           N  
ATOM   1572  CA  VAL L  85      -2.751  11.371  18.082  1.00 18.76           C  
ATOM   1573  C   VAL L  85      -2.540   9.879  18.303  1.00 18.26           C  
ATOM   1574  O   VAL L  85      -1.566   9.306  17.810  1.00 18.76           O  
ATOM   1575  CB  VAL L  85      -3.319  11.595  16.665  1.00 19.03           C  
ATOM   1576  CG1 VAL L  85      -4.670  10.912  16.539  1.00 18.67           C  
ATOM   1577  CG2 VAL L  85      -3.461  13.089  16.383  1.00 19.32           C  
ATOM   1578  N   TYR L  86      -3.442   9.253  19.052  1.00 16.45           N  
ATOM   1579  CA  TYR L  86      -3.316   7.831  19.337  1.00 14.53           C  
ATOM   1580  C   TYR L  86      -4.473   7.020  18.798  1.00 13.65           C  
ATOM   1581  O   TYR L  86      -5.632   7.435  18.882  1.00 13.10           O  
ATOM   1582  CB  TYR L  86      -3.190   7.600  20.844  1.00 14.84           C  
ATOM   1583  CG  TYR L  86      -1.958   8.228  21.450  1.00 14.18           C  
ATOM   1584  CD1 TYR L  86      -1.897   9.600  21.705  1.00 14.47           C  
ATOM   1585  CD2 TYR L  86      -0.834   7.454  21.730  1.00 14.55           C  
ATOM   1586  CE1 TYR L  86      -0.740  10.182  22.227  1.00 14.28           C  
ATOM   1587  CE2 TYR L  86       0.324   8.025  22.249  1.00 14.63           C  
ATOM   1588  CZ  TYR L  86       0.365   9.387  22.494  1.00 14.85           C  
ATOM   1589  OH  TYR L  86       1.519   9.943  22.994  1.00 14.62           O  
ATOM   1590  N   TYR L  87      -4.153   5.853  18.245  1.00 12.78           N  
ATOM   1591  CA  TYR L  87      -5.176   4.973  17.694  1.00 12.37           C  
ATOM   1592  C   TYR L  87      -5.025   3.545  18.205  1.00 11.86           C  
ATOM   1593  O   TYR L  87      -3.910   3.075  18.429  1.00 10.62           O  
ATOM   1594  CB  TYR L  87      -5.090   4.901  16.165  1.00 13.69           C  
ATOM   1595  CG  TYR L  87      -5.095   6.223  15.438  1.00 15.09           C  
ATOM   1596  CD1 TYR L  87      -3.950   7.011  15.379  1.00 15.82           C  
ATOM   1597  CD2 TYR L  87      -6.248   6.685  14.806  1.00 16.71           C  
ATOM   1598  CE1 TYR L  87      -3.952   8.226  14.705  1.00 17.14           C  
ATOM   1599  CE2 TYR L  87      -6.261   7.901  14.129  1.00 17.31           C  
ATOM   1600  CZ  TYR L  87      -5.109   8.663  14.083  1.00 17.16           C  
ATOM   1601  OH  TYR L  87      -5.107   9.864  13.416  1.00 19.65           O  
ATOM   1602  N   CYS L  88      -6.149   2.865  18.408  1.00 11.37           N  
ATOM   1603  CA  CYS L  88      -6.091   1.465  18.792  1.00 11.40           C  
ATOM   1604  C   CYS L  88      -6.341   0.757  17.465  1.00 10.76           C  
ATOM   1605  O   CYS L  88      -7.024   1.293  16.584  1.00 10.23           O  
ATOM   1606  CB  CYS L  88      -7.174   1.083  19.813  1.00 13.11           C  
ATOM   1607  SG  CYS L  88      -8.891   1.407  19.312  1.00 14.70           S  
ATOM   1608  N   LEU L  89      -5.767  -0.428  17.312  1.00  9.69           N  
ATOM   1609  CA  LEU L  89      -5.912  -1.205  16.091  1.00  9.60           C  
ATOM   1610  C   LEU L  89      -6.226  -2.645  16.423  1.00  9.26           C  
ATOM   1611  O   LEU L  89      -5.652  -3.205  17.356  1.00  9.14           O  
ATOM   1612  CB  LEU L  89      -4.605  -1.196  15.288  1.00  9.19           C  
ATOM   1613  CG  LEU L  89      -4.517  -2.183  14.112  1.00  9.66           C  
ATOM   1614  CD1 LEU L  89      -5.448  -1.753  12.994  1.00  7.73           C  
ATOM   1615  CD2 LEU L  89      -3.088  -2.252  13.589  1.00  8.18           C  
ATOM   1616  N   GLN L  90      -7.144  -3.241  15.672  1.00  9.37           N  
ATOM   1617  CA  GLN L  90      -7.430  -4.648  15.864  1.00  8.65           C  
ATOM   1618  C   GLN L  90      -6.894  -5.323  14.610  1.00  8.83           C  
ATOM   1619  O   GLN L  90      -7.186  -4.897  13.485  1.00  8.89           O  
ATOM   1620  CB  GLN L  90      -8.932  -4.917  16.045  1.00  9.48           C  
ATOM   1621  CG  GLN L  90      -9.850  -4.742  14.836  1.00  8.76           C  
ATOM   1622  CD  GLN L  90      -9.750  -5.868  13.810  1.00  7.29           C  
ATOM   1623  OE1 GLN L  90      -9.344  -6.988  14.128  1.00  7.48           O  
ATOM   1624  NE2 GLN L  90     -10.161  -5.580  12.580  1.00  6.87           N  
ATOM   1625  N   TYR L  91      -6.057  -6.334  14.803  1.00  8.19           N  
ATOM   1626  CA  TYR L  91      -5.493  -7.075  13.679  1.00  8.08           C  
ATOM   1627  C   TYR L  91      -5.862  -8.536  13.856  1.00  9.09           C  
ATOM   1628  O   TYR L  91      -5.085  -9.447  13.551  1.00  8.93           O  
ATOM   1629  CB  TYR L  91      -3.972  -6.882  13.616  1.00  8.78           C  
ATOM   1630  CG  TYR L  91      -3.222  -7.176  14.898  1.00  7.29           C  
ATOM   1631  CD1 TYR L  91      -2.600  -8.413  15.110  1.00  8.04           C  
ATOM   1632  CD2 TYR L  91      -3.113  -6.207  15.894  1.00  9.07           C  
ATOM   1633  CE1 TYR L  91      -1.876  -8.666  16.298  1.00  7.15           C  
ATOM   1634  CE2 TYR L  91      -2.398  -6.450  17.080  1.00  6.71           C  
ATOM   1635  CZ  TYR L  91      -1.787  -7.673  17.270  1.00  7.43           C  
ATOM   1636  OH  TYR L  91      -1.087  -7.891  18.432  1.00  7.82           O  
ATOM   1637  N   TYR L  92      -7.077  -8.736  14.357  1.00  8.44           N  
ATOM   1638  CA  TYR L  92      -7.619 -10.057  14.607  1.00  9.74           C  
ATOM   1639  C   TYR L  92      -8.075 -10.659  13.286  1.00  9.85           C  
ATOM   1640  O   TYR L  92      -7.712 -11.780  12.948  1.00  9.81           O  
ATOM   1641  CB  TYR L  92      -8.816  -9.960  15.547  1.00 10.73           C  
ATOM   1642  CG  TYR L  92      -9.381 -11.299  15.952  1.00 12.25           C  
ATOM   1643  CD1 TYR L  92      -8.822 -12.025  17.002  1.00 12.96           C  
ATOM   1644  CD2 TYR L  92     -10.462 -11.852  15.268  1.00 13.30           C  
ATOM   1645  CE1 TYR L  92      -9.330 -13.270  17.365  1.00 13.49           C  
ATOM   1646  CE2 TYR L  92     -10.977 -13.095  15.620  1.00 14.38           C  
ATOM   1647  CZ  TYR L  92     -10.408 -13.796  16.668  1.00 14.41           C  
ATOM   1648  OH  TYR L  92     -10.925 -15.020  17.030  1.00 15.88           O  
ATOM   1649  N   SER L  93      -8.886  -9.903  12.547  1.00 11.40           N  
ATOM   1650  CA  SER L  93      -9.379 -10.362  11.255  1.00 11.92           C  
ATOM   1651  C   SER L  93      -9.559  -9.201  10.281  1.00 12.16           C  
ATOM   1652  O   SER L  93      -9.885  -8.078  10.674  1.00 11.21           O  
ATOM   1653  CB  SER L  93     -10.709 -11.100  11.421  1.00 13.11           C  
ATOM   1654  OG  SER L  93     -11.692 -10.232  11.945  1.00 14.19           O  
ATOM   1655  N   THR L  94      -9.346  -9.485   9.003  1.00 12.26           N  
ATOM   1656  CA  THR L  94      -9.491  -8.474   7.969  1.00 12.99           C  
ATOM   1657  C   THR L  94     -10.965  -8.190   7.709  1.00 13.28           C  
ATOM   1658  O   THR L  94     -11.806  -9.084   7.819  1.00 13.68           O  
ATOM   1659  CB  THR L  94      -8.828  -8.933   6.658  1.00 13.29           C  
ATOM   1660  OG1 THR L  94      -9.418 -10.168   6.232  1.00 13.30           O  
ATOM   1661  CG2 THR L  94      -7.334  -9.135   6.870  1.00 12.86           C  
ATOM   1662  N   PRO L  95     -11.295  -6.934   7.371  1.00 12.90           N  
ATOM   1663  CA  PRO L  95     -10.328  -5.837   7.243  1.00 12.46           C  
ATOM   1664  C   PRO L  95      -9.887  -5.330   8.612  1.00 11.95           C  
ATOM   1665  O   PRO L  95     -10.712  -5.187   9.516  1.00 11.46           O  
ATOM   1666  CB  PRO L  95     -11.129  -4.789   6.487  1.00 14.19           C  
ATOM   1667  CG  PRO L  95     -12.486  -4.962   7.118  1.00 14.08           C  
ATOM   1668  CD  PRO L  95     -12.642  -6.463   7.005  1.00 13.89           C  
ATOM   1669  N   TYR L  96      -8.593  -5.067   8.779  1.00 11.30           N  
ATOM   1670  CA  TYR L  96      -8.118  -4.547  10.051  1.00 10.85           C  
ATOM   1671  C   TYR L  96      -8.715  -3.156  10.217  1.00 10.84           C  
ATOM   1672  O   TYR L  96      -9.016  -2.479   9.234  1.00 10.98           O  
ATOM   1673  CB  TYR L  96      -6.585  -4.469  10.084  1.00 10.42           C  
ATOM   1674  CG  TYR L  96      -5.889  -5.811  10.042  1.00 10.37           C  
ATOM   1675  CD1 TYR L  96      -6.579  -6.995  10.327  1.00 11.16           C  
ATOM   1676  CD2 TYR L  96      -4.519  -5.893   9.795  1.00 11.41           C  
ATOM   1677  CE1 TYR L  96      -5.920  -8.222  10.369  1.00 10.93           C  
ATOM   1678  CE2 TYR L  96      -3.852  -7.112   9.835  1.00 10.70           C  
ATOM   1679  CZ  TYR L  96      -4.552  -8.270  10.123  1.00 11.63           C  
ATOM   1680  OH  TYR L  96      -3.883  -9.472  10.179  1.00 12.40           O  
ATOM   1681  N   SER L  97      -8.892  -2.723  11.456  1.00 10.49           N  
ATOM   1682  CA  SER L  97      -9.490  -1.422  11.680  1.00 11.35           C  
ATOM   1683  C   SER L  97      -8.955  -0.689  12.895  1.00 11.29           C  
ATOM   1684  O   SER L  97      -8.643  -1.307  13.911  1.00 10.72           O  
ATOM   1685  CB  SER L  97     -10.997  -1.589  11.821  1.00 11.99           C  
ATOM   1686  OG  SER L  97     -11.286  -2.538  12.831  1.00 12.76           O  
ATOM   1687  N   PHE L  98      -8.850   0.632  12.773  1.00 11.51           N  
ATOM   1688  CA  PHE L  98      -8.383   1.481  13.868  1.00 12.09           C  
ATOM   1689  C   PHE L  98      -9.575   2.146  14.539  1.00 12.86           C  
ATOM   1690  O   PHE L  98     -10.675   2.182  13.986  1.00 12.94           O  
ATOM   1691  CB  PHE L  98      -7.494   2.632  13.380  1.00 12.86           C  
ATOM   1692  CG  PHE L  98      -6.196   2.213  12.765  1.00 13.69           C  
ATOM   1693  CD1 PHE L  98      -6.106   1.949  11.404  1.00 14.01           C  
ATOM   1694  CD2 PHE L  98      -5.040   2.149  13.540  1.00 14.09           C  
ATOM   1695  CE1 PHE L  98      -4.882   1.640  10.821  1.00 14.24           C  
ATOM   1696  CE2 PHE L  98      -3.808   1.838  12.967  1.00 14.23           C  
ATOM   1697  CZ  PHE L  98      -3.729   1.584  11.602  1.00 14.23           C  
ATOM   1698  N   GLY L  99      -9.346   2.680  15.731  1.00 13.22           N  
ATOM   1699  CA  GLY L  99     -10.396   3.404  16.415  1.00 13.82           C  
ATOM   1700  C   GLY L  99     -10.379   4.788  15.784  1.00 14.54           C  
ATOM   1701  O   GLY L  99      -9.475   5.092  14.992  1.00 13.50           O  
ATOM   1702  N   GLN L 100     -11.364   5.619  16.119  1.00 15.29           N  
ATOM   1703  CA  GLN L 100     -11.458   6.972  15.577  1.00 16.54           C  
ATOM   1704  C   GLN L 100     -10.204   7.796  15.869  1.00 17.15           C  
ATOM   1705  O   GLN L 100      -9.838   8.675  15.092  1.00 18.36           O  
ATOM   1706  CB  GLN L 100     -12.686   7.674  16.145  1.00 16.23           C  
ATOM   1707  N   GLY L 101      -9.554   7.515  16.994  1.00 17.28           N  
ATOM   1708  CA  GLY L 101      -8.351   8.244  17.348  1.00 17.07           C  
ATOM   1709  C   GLY L 101      -8.578   9.256  18.454  1.00 17.14           C  
ATOM   1710  O   GLY L 101      -9.688   9.766  18.625  1.00 17.51           O  
ATOM   1711  N   THR L 102      -7.529   9.526  19.223  1.00 16.59           N  
ATOM   1712  CA  THR L 102      -7.596  10.493  20.311  1.00 16.53           C  
ATOM   1713  C   THR L 102      -6.480  11.516  20.127  1.00 16.83           C  
ATOM   1714  O   THR L 102      -5.302  11.160  20.108  1.00 16.06           O  
ATOM   1715  CB  THR L 102      -7.410   9.822  21.697  1.00 15.59           C  
ATOM   1716  OG1 THR L 102      -8.445   8.855  21.917  1.00 15.94           O  
ATOM   1717  CG2 THR L 102      -7.469  10.871  22.797  1.00 15.29           C  
ATOM   1718  N   LYS L 103      -6.855  12.784  19.992  1.00 17.82           N  
ATOM   1719  CA  LYS L 103      -5.878  13.853  19.816  1.00 18.64           C  
ATOM   1720  C   LYS L 103      -5.443  14.371  21.179  1.00 19.24           C  
ATOM   1721  O   LYS L 103      -6.259  14.864  21.956  1.00 19.17           O  
ATOM   1722  CB  LYS L 103      -6.478  14.986  18.993  1.00 19.10           C  
ATOM   1723  N   LEU L 104      -4.152  14.270  21.463  1.00 19.65           N  
ATOM   1724  CA  LEU L 104      -3.635  14.715  22.745  1.00 20.57           C  
ATOM   1725  C   LEU L 104      -2.971  16.079  22.598  1.00 20.98           C  
ATOM   1726  O   LEU L 104      -2.157  16.290  21.699  1.00 21.00           O  
ATOM   1727  CB  LEU L 104      -2.642  13.681  23.283  1.00 21.32           C  
ATOM   1728  CG  LEU L 104      -2.202  13.831  24.734  1.00 21.94           C  
ATOM   1729  CD1 LEU L 104      -3.431  13.834  25.625  1.00 23.11           C  
ATOM   1730  CD2 LEU L 104      -1.266  12.691  25.118  1.00 22.06           C  
ATOM   1731  N   GLU L 105      -3.339  17.006  23.478  1.00 21.11           N  
ATOM   1732  CA  GLU L 105      -2.794  18.360  23.456  1.00 21.46           C  
ATOM   1733  C   GLU L 105      -2.570  18.889  24.865  1.00 21.28           C  
ATOM   1734  O   GLU L 105      -3.183  18.422  25.823  1.00 21.30           O  
ATOM   1735  CB  GLU L 105      -3.753  19.304  22.731  1.00 22.05           C  
ATOM   1736  CG  GLU L 105      -5.173  19.213  23.261  1.00 23.81           C  
ATOM   1737  CD  GLU L 105      -6.096  20.270  22.688  1.00 24.51           C  
ATOM   1738  OE1 GLU L 105      -5.955  20.619  21.497  1.00 25.34           O  
ATOM   1739  OE2 GLU L 105      -6.985  20.729  23.428  1.00 25.15           O  
ATOM   1740  N   ILE L 106      -1.693  19.877  24.979  1.00 21.57           N  
ATOM   1741  CA  ILE L 106      -1.393  20.485  26.266  1.00 22.10           C  
ATOM   1742  C   ILE L 106      -2.484  21.489  26.636  1.00 22.55           C  
ATOM   1743  O   ILE L 106      -2.896  22.303  25.808  1.00 22.86           O  
ATOM   1744  CB  ILE L 106      -0.035  21.209  26.230  1.00 22.03           C  
ATOM   1745  CG1 ILE L 106       1.077  20.202  25.921  1.00 21.78           C  
ATOM   1746  CG2 ILE L 106       0.216  21.913  27.558  1.00 21.57           C  
ATOM   1747  CD1 ILE L 106       2.466  20.806  25.868  1.00 22.07           C  
ATOM   1748  N   LYS L 107      -2.953  21.417  27.879  1.00 22.82           N  
ATOM   1749  CA  LYS L 107      -3.992  22.320  28.366  1.00 23.47           C  
ATOM   1750  C   LYS L 107      -3.507  23.763  28.242  1.00 23.53           C  
ATOM   1751  O   LYS L 107      -2.326  24.042  28.438  1.00 24.07           O  
ATOM   1752  CB  LYS L 107      -4.326  21.993  29.823  1.00 23.16           C  
ATOM   1753  N   ARG L 108      -4.415  24.677  27.914  1.00 23.43           N  
ATOM   1754  CA  ARG L 108      -4.049  26.080  27.754  1.00 23.26           C  
ATOM   1755  C   ARG L 108      -3.416  26.670  29.012  1.00 24.23           C  
ATOM   1756  O   ARG L 108      -2.314  27.247  28.886  1.00 24.73           O  
ATOM   1757  CB  ARG L 108      -5.267  26.919  27.348  1.00 21.49           C  
ATOM   1758  CG  ARG L 108      -5.912  26.496  26.027  1.00 19.04           C  
ATOM   1759  CD  ARG L 108      -6.821  27.593  25.493  1.00 17.76           C  
ATOM   1760  NE  ARG L 108      -7.864  27.959  26.445  1.00 15.56           N  
ATOM   1761  CZ  ARG L 108      -8.916  27.199  26.735  1.00 15.37           C  
ATOM   1762  NH1 ARG L 108      -9.074  26.024  26.146  1.00 15.03           N  
ATOM   1763  NH2 ARG L 108      -9.806  27.612  27.622  1.00 14.69           N  
ATOM   1764  OXT ARG L 108      -4.029  26.562  30.098  1.00 25.65           O  
TER    1765      ARG L 108                                                      
