# Supplementary material for: SARS-CoV-2 Spike Protein Interaction Space
Source: Int J Mol Sci. 2023 Jul 27;24(15):12058. doi: 10.3390/ijms241512058 (PMC10418891; doi:10.3390/ijms241512058)
Supplement: Supplementary file 1 [file ijms-24-12058-s001.zip › Supplementary Material File S1/1QP1.pdb]

REMARK 950 NUMBERING  Kabat
REMARK 950 METHOD     X-ray crystal structure
REMARK 950 RESOLUTION 2.060
REMARK 950 R-FACTOR   10.000
REMARK 950 R-FREE     0.234
REMARK 950 CHAIN-TYPE LABEL ORIGINAL
REMARK 950 CHAIN L    L    B
REMARK 950 CHAIN L    L    C
REMARK 950 MOLECULE : B : BENCE-JONES KAPPA I ANTIBODY BRE (LIGHT CHAIN)
REMARK 950 SPECIES  : B : HOMO SAPIENS
SEQRES   1 L 107  ASP ILE GLN MET THR GLN SER PRO SER SER LEU SER ALA          
SEQRES   2 L 107  SER VAL GLY ASP ARG VAL THR ILE THR CYS GLN ALA SER          
SEQRES   3 L 107  GLN ASP ILE SER ASP TYR LEU ILE TRP TYR GLN GLN LYS          
SEQRES   4 L 107  LEU GLY LYS ALA PRO ASN LEU LEU ILE TYR ASP ALA SER          
SEQRES   5 L 107  THR LEU GLU THR GLY VAL PRO SER ARG PHE SER GLY SER          
SEQRES   6 L 107  GLY SER GLY THR GLU TYR THR PHE THR ILE SER SER LEU          
SEQRES   7 L 107  GLN PRO GLU ASP ILE ALA THR TYR TYR CYS GLN GLN TYR          
SEQRES   8 L 107  ASP ASP LEU PRO TYR THR PHE GLY GLN GLY THR LYS VAL          
SEQRES   9 L 107  GLU ILE LYS                                                  
SEQRES   1 L 107  ASP ILE GLN MET THR GLN SER PRO SER SER LEU SER ALA          
SEQRES   2 L 107  SER VAL GLY ASP ARG VAL THR ILE THR CYS GLN ALA SER          
SEQRES   3 L 107  GLN ASP ILE SER ASP TYR LEU ILE TRP TYR GLN GLN LYS          
SEQRES   4 L 107  LEU GLY LYS ALA PRO ASN LEU LEU ILE TYR ASP ALA SER          
SEQRES   5 L 107  THR LEU GLU THR GLY VAL PRO SER ARG PHE SER GLY SER          
SEQRES   6 L 107  GLY SER GLY THR GLU TYR THR PHE THR ILE SER SER LEU          
SEQRES   7 L 107  GLN PRO GLU ASP ILE ALA THR TYR TYR CYS GLN GLN TYR          
SEQRES   8 L 107  ASP ASP LEU PRO TYR THR PHE GLY GLN GLY THR LYS VAL          
SEQRES   9 L 107  GLU ILE LYS                                                  
ATOM    831  N   ASP L   1      44.600 -25.655  16.829  1.00 35.25           N  
ATOM    832  CA  ASP L   1      43.529 -25.180  17.730  1.00 40.23           C  
ATOM    833  C   ASP L   1      42.410 -26.222  17.808  1.00 33.33           C  
ATOM    834  O   ASP L   1      41.946 -26.700  16.764  0.50 33.16           O  
ATOM    835  CB  ASP L   1      42.995 -23.844  17.223  1.00 45.15           C  
ATOM    836  CG  ASP L   1      43.369 -22.660  18.087  1.00 49.61           C  
ATOM    837  OD1 ASP L   1      44.570 -22.493  18.403  1.00 55.30           O  
ATOM    838  OD2 ASP L   1      42.467 -21.866  18.453  1.00 50.69           O  
ATOM    839  N   ILE L   2      41.990 -26.594  19.010  1.00 26.30           N  
ATOM    840  CA  ILE L   2      40.960 -27.611  19.198  1.00 22.22           C  
ATOM    841  C   ILE L   2      39.568 -27.053  19.400  1.00 21.85           C  
ATOM    842  O   ILE L   2      39.336 -26.288  20.349  1.00 31.00           O  
ATOM    843  CB  ILE L   2      41.330 -28.523  20.390  1.00 17.02           C  
ATOM    844  CG1 ILE L   2      42.695 -29.200  20.227  1.00 14.24           C  
ATOM    845  CG2 ILE L   2      40.246 -29.564  20.615  1.00 11.79           C  
ATOM    846  CD1 ILE L   2      43.236 -29.800  21.500  1.00 13.27           C  
ATOM    847  N   GLN L   3      38.597 -27.403  18.555  1.00 20.60           N  
ATOM    848  CA  GLN L   3      37.246 -26.911  18.668  1.00 22.00           C  
ATOM    849  C   GLN L   3      36.345 -27.797  19.519  1.00 21.17           C  
ATOM    850  O   GLN L   3      36.238 -29.002  19.297  1.00 26.54           O  
ATOM    851  CB  GLN L   3      36.606 -26.665  17.303  0.50 23.36           C  
ATOM    852  CG  GLN L   3      37.303 -25.603  16.474  0.50 26.26           C  
ATOM    853  CD  GLN L   3      37.514 -24.307  17.230  0.50 29.80           C  
ATOM    854  OE1 GLN L   3      36.560 -23.684  17.705  0.50 33.99           O  
ATOM    855  NE2 GLN L   3      38.768 -23.872  17.334  0.50 28.69           N  
ATOM    856  N   MET L   4      35.684 -27.199  20.508  1.00 18.74           N  
ATOM    857  CA  MET L   4      34.772 -27.977  21.366  1.00 12.19           C  
ATOM    858  C   MET L   4      33.349 -27.686  20.849  1.00 12.18           C  
ATOM    859  O   MET L   4      33.034 -26.536  20.555  1.00 16.97           O  
ATOM    860  CB  MET L   4      34.835 -27.424  22.807  1.00 12.53           C  
ATOM    861  CG  MET L   4      36.129 -27.724  23.525  1.00 10.93           C  
ATOM    862  SD  MET L   4      36.746 -29.375  23.085  1.00 13.04           S  
ATOM    863  CE  MET L   4      35.894 -30.355  24.313  1.00  3.50           C  
ATOM    864  N   THR L   5      32.536 -28.710  20.737  1.00 13.21           N  
ATOM    865  CA  THR L   5      31.155 -28.423  20.253  1.00 13.16           C  
ATOM    866  C   THR L   5      30.182 -28.948  21.308  1.00 10.40           C  
ATOM    867  O   THR L   5      30.205 -30.140  21.604  1.00 15.87           O  
ATOM    868  CB  THR L   5      30.925 -29.086  18.896  1.00 15.28           C  
ATOM    869  OG1 THR L   5      31.756 -28.424  17.899  1.00 23.89           O  
ATOM    870  CG2 THR L   5      29.499 -28.889  18.425  1.00  4.41           C  
ATOM    871  N   GLN L   6      29.418 -28.056  21.917  1.00  9.22           N  
ATOM    872  CA  GLN L   6      28.504 -28.363  22.984  1.00  9.33           C  
ATOM    873  C   GLN L   6      27.034 -28.258  22.570  1.00 10.47           C  
ATOM    874  O   GLN L   6      26.660 -27.382  21.800  1.00  9.22           O  
ATOM    875  CB  GLN L   6      28.760 -27.429  24.177  1.00  9.78           C  
ATOM    876  CG  GLN L   6      27.948 -27.796  25.414  1.00  8.11           C  
ATOM    877  CD  GLN L   6      28.487 -27.102  26.655  1.00  8.62           C  
ATOM    878  OE1 GLN L   6      29.620 -26.619  26.665  1.00 13.51           O  
ATOM    879  NE2 GLN L   6      27.642 -26.997  27.663  1.00 11.86           N  
ATOM    880  N   SER L   7      26.208 -29.135  23.130  1.00 10.80           N  
ATOM    881  CA  SER L   7      24.782 -29.129  22.824  1.00 13.50           C  
ATOM    882  C   SER L   7      23.957 -29.735  23.958  1.00 11.89           C  
ATOM    883  O   SER L   7      24.455 -30.605  24.692  1.00 20.38           O  
ATOM    884  CB  SER L   7      24.554 -29.922  21.533  1.00 17.51           C  
ATOM    885  OG  SER L   7      23.187 -29.896  21.164  1.00 29.04           O  
ATOM    886  N   PRO L   8      22.740 -29.298  24.156  1.00 11.54           N  
ATOM    887  CA  PRO L   8      22.128 -28.247  23.328  1.00 13.03           C  
ATOM    888  C   PRO L   8      22.575 -26.865  23.864  1.00 12.24           C  
ATOM    889  O   PRO L   8      23.387 -26.847  24.798  1.00 12.23           O  
ATOM    890  CB  PRO L   8      20.638 -28.419  23.584  1.00 10.00           C  
ATOM    891  CG  PRO L   8      20.484 -29.549  24.521  1.00  8.32           C  
ATOM    892  CD  PRO L   8      21.806 -29.731  25.216  1.00  7.84           C  
ATOM    893  N   SER L   9      22.056 -25.803  23.299  1.00  8.80           N  
ATOM    894  CA  SER L   9      22.413 -24.444  23.786  1.00  9.96           C  
ATOM    895  C   SER L   9      21.621 -24.194  25.062  1.00 11.60           C  
ATOM    896  O   SER L   9      22.013 -23.601  26.038  1.00 11.25           O  
ATOM    897  CB  SER L   9      21.924 -23.409  22.738  1.00 12.16           C  
ATOM    898  OG  SER L   9      22.566 -23.685  21.496  1.00 31.23           O  
ATOM    899  N   SER L  10      20.357 -24.698  25.034  1.00 11.94           N  
ATOM    900  CA  SER L  10      19.637 -24.480  26.303  1.00 15.10           C  
ATOM    901  C   SER L  10      18.570 -25.559  26.453  1.00 16.95           C  
ATOM    902  O   SER L  10      18.061 -26.071  25.461  1.00 17.75           O  
ATOM    903  CB  SER L  10      18.996 -23.106  26.317  1.00 20.51           C  
ATOM    904  OG  SER L  10      17.794 -23.121  25.557  1.00 25.68           O  
ATOM    905  N   LEU L  11      18.261 -25.858  27.711  1.00 19.20           N  
ATOM    906  CA  LEU L  11      17.224 -26.798  28.021  1.00 20.84           C  
ATOM    907  C   LEU L  11      16.333 -26.372  29.175  1.00 22.49           C  
ATOM    908  O   LEU L  11      16.724 -25.595  30.051  1.00 20.19           O  
ATOM    909  CB  LEU L  11      17.692 -28.224  28.120  1.00 15.90           C  
ATOM    910  CG  LEU L  11      18.523 -28.615  29.340  1.00 15.35           C  
ATOM    911  CD1 LEU L  11      17.601 -29.136  30.441  1.00 13.55           C  
ATOM    912  CD2 LEU L  11      19.564 -29.668  28.960  1.00 11.00           C  
ATOM    913  N   SER L  12      15.105 -26.881  29.173  1.00 19.92           N  
ATOM    914  CA  SER L  12      14.168 -26.675  30.229  1.00 19.03           C  
ATOM    915  C   SER L  12      13.589 -28.000  30.694  1.00 18.93           C  
ATOM    916  O   SER L  12      13.296 -28.894  29.894  1.00 13.02           O  
ATOM    917  CB  SER L  12      13.205 -25.568  30.091  1.00 21.87           C  
ATOM    918  OG  SER L  12      11.859 -25.959  29.939  1.00 31.55           O  
ATOM    919  N   ALA L  13      13.559 -28.185  32.012  1.00 20.19           N  
ATOM    920  CA  ALA L  13      13.091 -29.477  32.530  1.00 16.90           C  
ATOM    921  C   ALA L  13      12.412 -29.275  33.874  1.00 21.77           C  
ATOM    922  O   ALA L  13      12.258 -28.130  34.330  1.00 29.44           O  
ATOM    923  CB  ALA L  13      14.236 -30.437  32.586  1.00  4.94           C  
ATOM    924  N   SER L  14      11.957 -30.360  34.498  1.00 23.51           N  
ATOM    925  CA  SER L  14      11.300 -30.220  35.796  1.00 23.13           C  
ATOM    926  C   SER L  14      12.165 -30.917  36.869  1.00 20.49           C  
ATOM    927  O   SER L  14      12.917 -31.826  36.506  1.00 20.34           O  
ATOM    928  CB  SER L  14       9.906 -30.813  35.808  1.00 26.15           C  
ATOM    929  OG  SER L  14       9.510 -31.367  34.576  1.00 31.58           O  
ATOM    930  N   VAL L  15      12.022 -30.467  38.090  1.00 19.66           N  
ATOM    931  CA  VAL L  15      12.735 -31.006  39.246  1.00 21.09           C  
ATOM    932  C   VAL L  15      12.692 -32.546  39.192  1.00 19.65           C  
ATOM    933  O   VAL L  15      11.610 -33.078  38.947  1.00 35.21           O  
ATOM    934  CB  VAL L  15      11.937 -30.627  40.543  1.00 24.38           C  
ATOM    935  CG1 VAL L  15      12.887 -30.043  41.558  1.00 25.32           C  
ATOM    936  CG2 VAL L  15      10.853 -29.625  40.160  1.00 31.64           C  
ATOM    937  N   GLY L  16      13.800 -33.191  39.416  1.00 18.62           N  
ATOM    938  CA  GLY L  16      13.919 -34.635  39.388  1.00 16.87           C  
ATOM    939  C   GLY L  16      14.185 -35.160  38.002  1.00 21.39           C  
ATOM    940  O   GLY L  16      14.527 -36.329  37.800  1.00 39.22           O  
ATOM    941  N   ASP L  17      14.048 -34.293  36.978  1.00 20.99           N  
ATOM    942  CA  ASP L  17      14.304 -34.798  35.631  1.00 22.73           C  
ATOM    943  C   ASP L  17      15.783 -35.045  35.401  1.00 22.54           C  
ATOM    944  O   ASP L  17      16.657 -34.350  35.929  1.00 21.28           O  
ATOM    945  CB  ASP L  17      13.746 -33.848  34.578  1.00 27.54           C  
ATOM    946  CG  ASP L  17      12.389 -34.265  34.046  1.00 31.66           C  
ATOM    947  OD1 ASP L  17      11.912 -35.364  34.396  1.00 29.85           O  
ATOM    948  OD2 ASP L  17      11.776 -33.469  33.291  1.00 37.51           O  
ATOM    949  N   ARG L  18      16.072 -36.043  34.570  1.00 24.25           N  
ATOM    950  CA  ARG L  18      17.455 -36.328  34.217  1.00 27.79           C  
ATOM    951  C   ARG L  18      17.866 -35.415  33.021  1.00 29.52           C  
ATOM    952  O   ARG L  18      17.148 -35.376  32.024  1.00 22.31           O  
ATOM    953  CB  ARG L  18      17.591 -37.771  33.729  1.00 30.11           C  
ATOM    954  CG  ARG L  18      18.827 -37.969  32.848  1.00 35.42           C  
ATOM    955  CD  ARG L  18      19.450 -39.313  33.196  1.00 46.06           C  
ATOM    956  NE  ARG L  18      19.247 -40.277  32.110  1.00 57.16           N  
ATOM    957  CZ  ARG L  18      20.218 -41.108  31.718  1.00 65.89           C  
ATOM    958  NH1 ARG L  18      21.383 -41.082  32.359  1.00 74.02           N  
ATOM    959  NH2 ARG L  18      20.023 -41.948  30.717  1.00 79.78           N  
ATOM    960  N   VAL L  19      19.000 -34.774  33.177  1.00 25.83           N  
ATOM    961  CA  VAL L  19      19.526 -33.860  32.162  1.00 23.12           C  
ATOM    962  C   VAL L  19      20.784 -34.444  31.524  1.00 19.69           C  
ATOM    963  O   VAL L  19      21.628 -34.993  32.226  1.00 22.84           O  
ATOM    964  CB  VAL L  19      19.889 -32.522  32.858  1.00 24.81           C  
ATOM    965  CG1 VAL L  19      20.763 -31.667  31.999  1.00 22.09           C  
ATOM    966  CG2 VAL L  19      18.585 -31.819  33.254  1.00 28.93           C  
ATOM    967  N   THR L  20      20.904 -34.344  30.214  1.00 17.84           N  
ATOM    968  CA  THR L  20      22.031 -34.900  29.481  1.00 16.28           C  
ATOM    969  C   THR L  20      22.662 -33.845  28.562  1.00 19.82           C  
ATOM    970  O   THR L  20      21.981 -33.301  27.691  1.00 22.13           O  
ATOM    971  CB  THR L  20      21.503 -36.025  28.528  1.00 20.15           C  
ATOM    972  OG1 THR L  20      20.890 -37.029  29.347  1.00 38.33           O  
ATOM    973  CG2 THR L  20      22.669 -36.653  27.809  1.00 17.72           C  
ATOM    974  N   ILE L  21      23.950 -33.598  28.762  1.00 17.62           N  
ATOM    975  CA  ILE L  21      24.652 -32.615  27.926  1.00 15.32           C  
ATOM    976  C   ILE L  21      25.882 -33.260  27.318  1.00 15.62           C  
ATOM    977  O   ILE L  21      26.527 -34.120  27.932  1.00 10.96           O  
ATOM    978  CB  ILE L  21      25.075 -31.398  28.781  1.00 15.76           C  
ATOM    979  CG1 ILE L  21      23.878 -30.532  29.218  1.00 15.72           C  
ATOM    980  CG2 ILE L  21      26.073 -30.536  28.019  1.00 13.27           C  
ATOM    981  CD1 ILE L  21      24.131 -29.737  30.478  1.00 14.81           C  
ATOM    982  N   THR L  22      26.219 -32.892  26.068  1.00 14.39           N  
ATOM    983  CA  THR L  22      27.390 -33.584  25.491  1.00 17.14           C  
ATOM    984  C   THR L  22      28.360 -32.574  24.870  1.00 15.30           C  
ATOM    985  O   THR L  22      27.951 -31.514  24.409  1.00 14.32           O  
ATOM    986  CB  THR L  22      26.923 -34.502  24.320  1.00 20.57           C  
ATOM    987  OG1 THR L  22      26.184 -33.690  23.397  1.00 22.45           O  
ATOM    988  CG2 THR L  22      26.017 -35.597  24.820  1.00 18.13           C  
ATOM    989  N   CYS L  23      29.630 -32.977  24.810  1.00 12.39           N  
ATOM    990  CA  CYS L  23      30.633 -32.181  24.176  1.00 13.91           C  
ATOM    991  C   CYS L  23      31.451 -33.013  23.183  1.00 13.72           C  
ATOM    992  O   CYS L  23      31.821 -34.140  23.517  1.00 12.31           O  
ATOM    993  CB  CYS L  23      31.567 -31.484  25.180  1.00 16.23           C  
ATOM    994  SG  CYS L  23      31.036 -29.825  25.599  1.00 25.97           S  
ATOM    995  N   GLN L  24      31.692 -32.441  22.023  1.00 17.01           N  
ATOM    996  CA  GLN L  24      32.457 -32.967  20.964  1.00 27.55           C  
ATOM    997  C   GLN L  24      33.744 -32.219  20.634  1.00 22.44           C  
ATOM    998  O   GLN L  24      33.718 -31.043  20.266  1.00 24.94           O  
ATOM    999  CB  GLN L  24      31.679 -33.334  19.718  1.00 41.08           C  
ATOM   1000  CG  GLN L  24      32.336 -34.477  18.921  1.00 53.33           C  
ATOM   1001  CD  GLN L  24      31.989 -34.416  17.447  1.00 61.50           C  
ATOM   1002  OE1 GLN L  24      32.843 -34.108  16.613  1.00 71.91           O  
ATOM   1003  NE2 GLN L  24      30.728 -34.702  17.130  1.00 70.29           N  
ATOM   1004  N   ALA L  25      34.874 -32.907  20.775  1.00 16.42           N  
ATOM   1005  CA  ALA L  25      36.178 -32.368  20.518  1.00 17.30           C  
ATOM   1006  C   ALA L  25      36.605 -32.661  19.068  1.00 18.21           C  
ATOM   1007  O   ALA L  25      36.256 -33.736  18.583  1.00 22.82           O  
ATOM   1008  CB  ALA L  25      37.231 -32.982  21.450  1.00 16.91           C  
ATOM   1009  N   SER L  26      37.329 -31.732  18.478  1.00 15.94           N  
ATOM   1010  CA  SER L  26      37.811 -31.833  17.117  1.00 15.53           C  
ATOM   1011  C   SER L  26      39.050 -32.697  16.992  1.00 18.03           C  
ATOM   1012  O   SER L  26      39.576 -32.912  15.897  1.00 24.73           O  
ATOM   1013  CB  SER L  26      38.035 -30.442  16.516  1.00 16.00           C  
ATOM   1014  OG  SER L  26      39.113 -29.785  17.163  1.00 19.40           O  
ATOM   1015  N   GLN L  27      39.550 -33.224  18.098  1.00 19.62           N  
ATOM   1016  CA  GLN L  27      40.686 -34.118  18.107  1.00 23.65           C  
ATOM   1017  C   GLN L  27      40.652 -34.966  19.391  1.00 23.51           C  
ATOM   1018  O   GLN L  27      39.973 -34.568  20.340  1.00 22.40           O  
ATOM   1019  CB  GLN L  27      42.002 -33.339  18.117  1.00 34.17           C  
ATOM   1020  CG  GLN L  27      42.332 -32.674  16.786  1.00 43.95           C  
ATOM   1021  CD  GLN L  27      42.705 -31.209  17.002  1.00 50.11           C  
ATOM   1022  OE1 GLN L  27      43.786 -30.956  17.535  1.00 56.69           O  
ATOM   1023  NE2 GLN L  27      41.797 -30.315  16.636  1.00 50.33           N  
ATOM   1024  N   ASP L  28      41.406 -36.061  19.419  1.00 22.99           N  
ATOM   1025  CA  ASP L  28      41.400 -36.829  20.694  1.00 28.62           C  
ATOM   1026  C   ASP L  28      42.044 -35.921  21.764  1.00 29.45           C  
ATOM   1027  O   ASP L  28      43.145 -35.418  21.534  1.00 26.12           O  
ATOM   1028  CB  ASP L  28      42.206 -38.115  20.561  1.00 31.14           C  
ATOM   1029  CG  ASP L  28      41.981 -39.082  21.710  1.00 31.23           C  
ATOM   1030  OD1 ASP L  28      42.111 -40.303  21.493  0.50 35.63           O  
ATOM   1031  OD2 ASP L  28      41.653 -38.629  22.827  0.50 31.12           O  
ATOM   1032  N   ILE L  29      41.335 -35.724  22.868  1.00 28.42           N  
ATOM   1033  CA  ILE L  29      41.818 -34.885  23.942  1.00 25.05           C  
ATOM   1034  C   ILE L  29      42.270 -35.691  25.148  1.00 25.82           C  
ATOM   1035  O   ILE L  29      42.670 -35.126  26.172  1.00 24.01           O  
ATOM   1036  CB  ILE L  29      40.880 -33.761  24.325  1.00 20.96           C  
ATOM   1037  CG1 ILE L  29      39.437 -34.186  24.617  1.00 19.09           C  
ATOM   1038  CG2 ILE L  29      40.894 -32.635  23.298  1.00 12.98           C  
ATOM   1039  CD1 ILE L  29      38.777 -33.291  25.648  1.00 23.32           C  
ATOM   1040  N   SER L  30      42.250 -37.016  25.007  1.00 25.00           N  
ATOM   1041  CA  SER L  30      42.729 -37.916  26.025  1.00 24.04           C  
ATOM   1042  C   SER L  30      42.083 -37.724  27.379  1.00 25.50           C  
ATOM   1043  O   SER L  30      42.757 -37.864  28.413  1.00 31.70           O  
ATOM   1044  CB  SER L  30      44.262 -37.781  26.167  1.00 24.33           C  
ATOM   1045  OG  SER L  30      44.798 -37.238  24.967  1.00 31.68           O  
ATOM   1046  N   ASP L  31      40.790 -37.415  27.414  1.00 25.66           N  
ATOM   1047  CA  ASP L  31      40.095 -37.271  28.676  1.00 27.48           C  
ATOM   1048  C   ASP L  31      40.494 -36.010  29.423  1.00 20.66           C  
ATOM   1049  O   ASP L  31      40.077 -35.824  30.571  1.00 15.89           O  
ATOM   1050  CB  ASP L  31      40.283 -38.505  29.555  1.00 36.97           C  
ATOM   1051  CG  ASP L  31      39.810 -39.773  28.855  1.00 45.70           C  
ATOM   1052  OD1 ASP L  31      38.665 -39.789  28.353  1.00 49.57           O  
ATOM   1053  OD2 ASP L  31      40.601 -40.740  28.780  1.00 62.36           O  
ATOM   1054  N   TYR L  32      41.249 -35.149  28.764  1.00 17.39           N  
ATOM   1055  CA  TYR L  32      41.647 -33.870  29.349  1.00 16.56           C  
ATOM   1056  C   TYR L  32      40.493 -32.858  29.176  1.00 15.88           C  
ATOM   1057  O   TYR L  32      40.711 -31.855  28.506  1.00 21.52           O  
ATOM   1058  CB  TYR L  32      42.851 -33.317  28.532  1.00 17.93           C  
ATOM   1059  CG  TYR L  32      44.105 -34.084  28.923  1.00 25.61           C  
ATOM   1060  CD1 TYR L  32      45.064 -34.431  28.000  1.00 29.37           C  
ATOM   1061  CD2 TYR L  32      44.268 -34.480  30.250  1.00 27.48           C  
ATOM   1062  CE1 TYR L  32      46.190 -35.139  28.387  1.00 31.04           C  
ATOM   1063  CE2 TYR L  32      45.385 -35.182  30.645  1.00 28.88           C  
ATOM   1064  CZ  TYR L  32      46.338 -35.507  29.705  1.00 31.47           C  
ATOM   1065  OH  TYR L  32      47.462 -36.207  30.097  1.00 41.59           O  
ATOM   1066  N   LEU L  33      39.374 -33.175  29.789  1.00 12.53           N  
ATOM   1067  CA  LEU L  33      38.156 -32.444  29.760  1.00 14.77           C  
ATOM   1068  C   LEU L  33      37.601 -32.061  31.121  1.00 16.37           C  
ATOM   1069  O   LEU L  33      37.584 -32.862  32.058  1.00 21.58           O  
ATOM   1070  CB  LEU L  33      37.052 -33.178  28.962  1.00 12.02           C  
ATOM   1071  CG  LEU L  33      35.799 -32.308  28.702  1.00 10.60           C  
ATOM   1072  CD1 LEU L  33      36.075 -31.398  27.501  1.00 13.01           C  
ATOM   1073  CD2 LEU L  33      34.610 -33.204  28.404  1.00 11.93           C  
ATOM   1074  N   ILE L  34      37.091 -30.823  31.218  1.00 13.76           N  
ATOM   1075  CA  ILE L  34      36.521 -30.390  32.501  1.00  8.47           C  
ATOM   1076  C   ILE L  34      35.086 -29.927  32.300  1.00 10.61           C  
ATOM   1077  O   ILE L  34      34.763 -29.383  31.237  1.00 12.22           O  
ATOM   1078  CB  ILE L  34      37.345 -29.198  33.038  1.00 12.07           C  
ATOM   1079  CG1 ILE L  34      38.777 -29.591  33.425  1.00 15.65           C  
ATOM   1080  CG2 ILE L  34      36.645 -28.509  34.187  1.00 14.86           C  
ATOM   1081  CD1 ILE L  34      39.580 -28.394  33.925  1.00 21.90           C  
ATOM   1082  N   TRP L  35      34.255 -30.094  33.326  1.00  8.23           N  
ATOM   1083  CA  TRP L  35      32.914 -29.547  33.280  1.00  9.24           C  
ATOM   1084  C   TRP L  35      32.778 -28.471  34.384  1.00 12.00           C  
ATOM   1085  O   TRP L  35      33.132 -28.725  35.530  1.00 13.43           O  
ATOM   1086  CB  TRP L  35      31.856 -30.632  33.563  1.00 10.68           C  
ATOM   1087  CG  TRP L  35      31.745 -31.582  32.417  1.00 12.37           C  
ATOM   1088  CD1 TRP L  35      32.325 -32.809  32.290  1.00 11.70           C  
ATOM   1089  CD2 TRP L  35      31.012 -31.342  31.211  1.00 12.20           C  
ATOM   1090  NE1 TRP L  35      31.979 -33.355  31.078  1.00 13.64           N  
ATOM   1091  CE2 TRP L  35      31.175 -32.479  30.398  1.00 11.46           C  
ATOM   1092  CE3 TRP L  35      30.226 -30.277  30.762  1.00 11.79           C  
ATOM   1093  CZ2 TRP L  35      30.581 -32.585  29.144  1.00 11.82           C  
ATOM   1094  CZ3 TRP L  35      29.637 -30.387  29.514  1.00 13.75           C  
ATOM   1095  CH2 TRP L  35      29.818 -31.532  28.721  1.00 14.48           C  
ATOM   1096  N   TYR L  36      32.248 -27.327  33.995  1.00 10.29           N  
ATOM   1097  CA  TYR L  36      32.043 -26.237  34.916  1.00  9.94           C  
ATOM   1098  C   TYR L  36      30.526 -25.918  34.997  1.00 10.97           C  
ATOM   1099  O   TYR L  36      29.829 -26.124  34.020  1.00 16.09           O  
ATOM   1100  CB  TYR L  36      32.706 -24.946  34.434  1.00 10.39           C  
ATOM   1101  CG  TYR L  36      34.199 -24.951  34.388  1.00 13.77           C  
ATOM   1102  CD1 TYR L  36      34.878 -25.199  33.190  1.00 12.65           C  
ATOM   1103  CD2 TYR L  36      34.965 -24.666  35.516  1.00 16.49           C  
ATOM   1104  CE1 TYR L  36      36.260 -25.191  33.132  1.00 10.51           C  
ATOM   1105  CE2 TYR L  36      36.350 -24.637  35.462  1.00 15.47           C  
ATOM   1106  CZ  TYR L  36      36.990 -24.894  34.265  1.00 11.79           C  
ATOM   1107  OH  TYR L  36      38.356 -24.887  34.208  1.00  9.89           O  
ATOM   1108  N   GLN L  37      30.171 -25.349  36.125  1.00 12.26           N  
ATOM   1109  CA  GLN L  37      28.827 -24.827  36.351  1.00 11.22           C  
ATOM   1110  C   GLN L  37      28.962 -23.311  36.559  1.00 10.23           C  
ATOM   1111  O   GLN L  37      29.818 -22.872  37.333  1.00 13.55           O  
ATOM   1112  CB  GLN L  37      28.199 -25.455  37.592  1.00  9.38           C  
ATOM   1113  CG  GLN L  37      26.926 -24.777  38.068  1.00 11.46           C  
ATOM   1114  CD  GLN L  37      26.450 -25.298  39.415  1.00 14.63           C  
ATOM   1115  OE1 GLN L  37      27.066 -25.039  40.456  1.00 23.97           O  
ATOM   1116  NE2 GLN L  37      25.368 -26.061  39.405  1.00 17.46           N  
ATOM   1117  N   GLN L  38      28.171 -22.525  35.854  1.00  7.70           N  
ATOM   1118  CA  GLN L  38      28.231 -21.100  36.055  1.00  6.10           C  
ATOM   1119  C   GLN L  38      26.904 -20.534  36.479  1.00 12.43           C  
ATOM   1120  O   GLN L  38      25.945 -20.409  35.703  1.00 12.04           O  
ATOM   1121  CB  GLN L  38      28.835 -20.333  34.903  1.00  7.50           C  
ATOM   1122  CG  GLN L  38      29.244 -18.902  35.297  1.00  9.19           C  
ATOM   1123  CD  GLN L  38      29.786 -18.143  34.101  1.00 14.37           C  
ATOM   1124  OE1 GLN L  38      29.444 -18.450  32.959  1.00 23.28           O  
ATOM   1125  NE2 GLN L  38      30.624 -17.146  34.363  1.00 11.90           N  
ATOM   1126  N   LYS L  39      26.802 -20.201  37.777  1.00 16.73           N  
ATOM   1127  CA  LYS L  39      25.478 -19.626  38.159  1.00 19.60           C  
ATOM   1128  C   LYS L  39      25.437 -18.191  37.682  1.00 20.14           C  
ATOM   1129  O   LYS L  39      26.489 -17.603  37.397  1.00 20.82           O  
ATOM   1130  CB  LYS L  39      25.299 -19.757  39.665  1.00 19.84           C  
ATOM   1131  CG  LYS L  39      25.036 -21.206  40.071  1.00 20.38           C  
ATOM   1132  CD  LYS L  39      24.672 -21.341  41.523  1.00 26.70           C  
ATOM   1133  CE  LYS L  39      23.611 -22.446  41.704  1.00 29.10           C  
ATOM   1134  NZ  LYS L  39      22.238 -21.867  41.523  0.50 29.42           N  
ATOM   1135  N   LEU L  40      24.252 -17.626  37.515  1.00 23.06           N  
ATOM   1136  CA  LEU L  40      24.160 -16.263  37.024  1.00 26.80           C  
ATOM   1137  C   LEU L  40      24.988 -15.297  37.858  1.00 29.21           C  
ATOM   1138  O   LEU L  40      24.942 -15.323  39.094  1.00 34.27           O  
ATOM   1139  CB  LEU L  40      22.737 -15.794  36.851  1.00 28.37           C  
ATOM   1140  CG  LEU L  40      22.478 -14.534  36.026  1.00 29.23           C  
ATOM   1141  CD1 LEU L  40      23.232 -14.556  34.707  0.50 25.46           C  
ATOM   1142  CD2 LEU L  40      20.983 -14.363  35.788  0.50 27.27           C  
ATOM   1143  N   GLY L  41      25.756 -14.465  37.166  1.00 30.38           N  
ATOM   1144  CA  GLY L  41      26.614 -13.486  37.742  1.00 32.37           C  
ATOM   1145  C   GLY L  41      27.829 -14.001  38.454  1.00 33.74           C  
ATOM   1146  O   GLY L  41      28.470 -13.257  39.218  1.00 53.30           O  
ATOM   1147  N   LYS L  42      28.204 -15.276  38.295  1.00 28.63           N  
ATOM   1148  CA  LYS L  42      29.348 -15.782  39.044  1.00 23.99           C  
ATOM   1149  C   LYS L  42      30.400 -16.434  38.206  1.00 17.15           C  
ATOM   1150  O   LYS L  42      30.246 -16.745  37.026  1.00 13.98           O  
ATOM   1151  CB  LYS L  42      28.868 -16.703  40.170  1.00 28.81           C  
ATOM   1152  CG  LYS L  42      27.656 -16.160  40.917  1.00 38.01           C  
ATOM   1153  CD  LYS L  42      27.627 -16.591  42.362  1.00 46.80           C  
ATOM   1154  CE  LYS L  42      28.497 -15.703  43.243  1.00 51.97           C  
ATOM   1155  NZ  LYS L  42      27.859 -15.446  44.570  0.50 56.85           N  
ATOM   1156  N   ALA L  43      31.581 -16.696  38.796  1.00 16.01           N  
ATOM   1157  CA  ALA L  43      32.614 -17.352  37.985  1.00 14.29           C  
ATOM   1158  C   ALA L  43      32.267 -18.834  37.782  1.00 13.53           C  
ATOM   1159  O   ALA L  43      31.479 -19.391  38.555  1.00 19.54           O  
ATOM   1160  CB  ALA L  43      33.935 -17.279  38.771  1.00 10.93           C  
ATOM   1161  N   PRO L  44      32.892 -19.467  36.806  1.00 10.77           N  
ATOM   1162  CA  PRO L  44      32.692 -20.902  36.570  1.00 12.13           C  
ATOM   1163  C   PRO L  44      33.307 -21.720  37.731  1.00 12.57           C  
ATOM   1164  O   PRO L  44      34.295 -21.307  38.329  1.00 11.35           O  
ATOM   1165  CB  PRO L  44      33.477 -21.185  35.296  1.00  9.84           C  
ATOM   1166  CG  PRO L  44      33.729 -19.854  34.683  1.00 10.78           C  
ATOM   1167  CD  PRO L  44      33.834 -18.878  35.845  1.00  9.11           C  
ATOM   1168  N   ASN L  45      32.681 -22.830  38.037  1.00 12.98           N  
ATOM   1169  CA  ASN L  45      33.125 -23.684  39.153  1.00 11.74           C  
ATOM   1170  C   ASN L  45      33.427 -25.082  38.606  1.00  9.32           C  
ATOM   1171  O   ASN L  45      32.557 -25.633  37.906  1.00 17.73           O  
ATOM   1172  CB  ASN L  45      31.846 -23.822  40.062  1.00 21.62           C  
ATOM   1173  CG  ASN L  45      32.209 -23.357  41.462  1.00 31.42           C  
ATOM   1174  OD1 ASN L  45      33.015 -24.028  42.116  1.00 50.53           O  
ATOM   1175  ND2 ASN L  45      31.691 -22.212  41.864  1.00 38.20           N  
ATOM   1176  N   LEU L  46      34.592 -25.620  38.854  1.00 12.41           N  
ATOM   1177  CA  LEU L  46      34.953 -26.940  38.290  1.00 12.61           C  
ATOM   1178  C   LEU L  46      34.163 -28.032  38.989  1.00 15.89           C  
ATOM   1179  O   LEU L  46      34.291 -28.197  40.204  1.00 22.85           O  
ATOM   1180  CB  LEU L  46      36.445 -27.192  38.466  1.00  9.84           C  
ATOM   1181  CG  LEU L  46      37.043 -28.436  37.817  1.00  9.78           C  
ATOM   1182  CD1 LEU L  46      38.475 -28.157  37.366  1.00  4.20           C  
ATOM   1183  CD2 LEU L  46      37.041 -29.611  38.794  1.00 13.48           C  
ATOM   1184  N   LEU L  47      33.383 -28.816  38.247  1.00 16.47           N  
ATOM   1185  CA  LEU L  47      32.648 -29.895  38.946  1.00 15.25           C  
ATOM   1186  C   LEU L  47      33.409 -31.223  38.749  1.00 19.78           C  
ATOM   1187  O   LEU L  47      33.560 -31.976  39.698  1.00 26.58           O  
ATOM   1188  CB  LEU L  47      31.272 -30.043  38.303  1.00 14.67           C  
ATOM   1189  CG  LEU L  47      30.311 -28.872  38.504  1.00 16.56           C  
ATOM   1190  CD1 LEU L  47      29.105 -29.046  37.591  1.00 19.42           C  
ATOM   1191  CD2 LEU L  47      29.882 -28.780  39.965  1.00 14.96           C  
ATOM   1192  N   ILE L  48      33.807 -31.455  37.514  1.00 21.07           N  
ATOM   1193  CA  ILE L  48      34.489 -32.655  37.085  1.00 16.93           C  
ATOM   1194  C   ILE L  48      35.717 -32.280  36.230  1.00 17.94           C  
ATOM   1195  O   ILE L  48      35.670 -31.292  35.503  1.00 16.49           O  
ATOM   1196  CB  ILE L  48      33.569 -33.525  36.201  1.00 18.51           C  
ATOM   1197  CG1 ILE L  48      32.350 -34.081  36.917  1.00 21.58           C  
ATOM   1198  CG2 ILE L  48      34.318 -34.587  35.441  1.00 11.60           C  
ATOM   1199  CD1 ILE L  48      31.126 -34.237  36.039  1.00 33.68           C  
ATOM   1200  N   TYR L  49      36.737 -33.094  36.354  1.00 18.69           N  
ATOM   1201  CA  TYR L  49      37.948 -33.035  35.598  1.00 18.96           C  
ATOM   1202  C   TYR L  49      38.367 -34.458  35.205  1.00 20.48           C  
ATOM   1203  O   TYR L  49      37.790 -35.431  35.705  1.00 17.81           O  
ATOM   1204  CB  TYR L  49      39.077 -32.333  36.323  1.00 18.67           C  
ATOM   1205  CG  TYR L  49      39.531 -33.077  37.555  1.00 21.93           C  
ATOM   1206  CD1 TYR L  49      38.833 -32.980  38.745  1.00 23.75           C  
ATOM   1207  CD2 TYR L  49      40.654 -33.894  37.504  1.00 24.59           C  
ATOM   1208  CE1 TYR L  49      39.256 -33.674  39.865  1.00 25.62           C  
ATOM   1209  CE2 TYR L  49      41.085 -34.587  38.613  1.00 24.21           C  
ATOM   1210  CZ  TYR L  49      40.378 -34.472  39.791  1.00 26.53           C  
ATOM   1211  OH  TYR L  49      40.813 -35.162  40.900  1.00 36.89           O  
ATOM   1212  N   ASP L  50      39.321 -34.536  34.287  1.00 20.47           N  
ATOM   1213  CA  ASP L  50      39.714 -35.823  33.753  1.00 21.99           C  
ATOM   1214  C   ASP L  50      38.477 -36.589  33.255  1.00 18.71           C  
ATOM   1215  O   ASP L  50      38.401 -37.807  33.415  1.00 18.76           O  
ATOM   1216  CB  ASP L  50      40.572 -36.633  34.676  1.00 30.48           C  
ATOM   1217  CG  ASP L  50      42.008 -36.765  34.171  1.00 40.07           C  
ATOM   1218  OD1 ASP L  50      42.223 -37.574  33.235  1.00 46.10           O  
ATOM   1219  OD2 ASP L  50      42.886 -36.023  34.665  1.00 52.95           O  
ATOM   1220  N   ALA L  51      37.556 -35.836  32.681  1.00 14.28           N  
ATOM   1221  CA  ALA L  51      36.352 -36.223  32.077  1.00 19.06           C  
ATOM   1222  C   ALA L  51      35.329 -36.955  32.916  1.00 22.45           C  
ATOM   1223  O   ALA L  51      34.110 -36.760  32.717  1.00 19.45           O  
ATOM   1224  CB  ALA L  51      36.593 -36.938  30.742  1.00 16.18           C  
ATOM   1225  N   SER L  52      35.750 -37.813  33.835  1.00 25.72           N  
ATOM   1226  CA  SER L  52      34.903 -38.631  34.658  1.00 24.53           C  
ATOM   1227  C   SER L  52      35.083 -38.418  36.155  1.00 24.28           C  
ATOM   1228  O   SER L  52      34.317 -38.984  36.948  1.00 27.75           O  
ATOM   1229  CB  SER L  52      35.099 -40.127  34.340  1.00 25.30           C  
ATOM   1230  OG  SER L  52      36.460 -40.525  34.422  1.00 22.35           O  
ATOM   1231  N   THR L  53      36.067 -37.633  36.563  1.00 24.37           N  
ATOM   1232  CA  THR L  53      36.431 -37.401  37.910  1.00 22.41           C  
ATOM   1233  C   THR L  53      35.760 -36.276  38.654  1.00 20.88           C  
ATOM   1234  O   THR L  53      35.941 -35.096  38.316  1.00 27.33           O  
ATOM   1235  CB  THR L  53      37.972 -37.265  38.105  1.00 21.68           C  
ATOM   1236  OG1 THR L  53      38.596 -38.471  37.627  1.00 29.49           O  
ATOM   1237  CG2 THR L  53      38.243 -37.231  39.615  1.00 12.75           C  
ATOM   1238  N   LEU L  54      35.050 -36.593  39.735  1.00 17.65           N  
ATOM   1239  CA  LEU L  54      34.376 -35.616  40.543  1.00 20.48           C  
ATOM   1240  C   LEU L  54      35.304 -34.864  41.500  1.00 25.31           C  
ATOM   1241  O   LEU L  54      36.127 -35.463  42.192  1.00 32.91           O  
ATOM   1242  CB  LEU L  54      33.269 -36.270  41.388  1.00 22.28           C  
ATOM   1243  CG  LEU L  54      31.909 -36.472  40.788  1.00 24.42           C  
ATOM   1244  CD1 LEU L  54      30.840 -36.681  41.855  1.00 24.13           C  
ATOM   1245  CD2 LEU L  54      31.507 -35.370  39.834  1.00 36.07           C  
ATOM   1246  N   GLU L  55      35.116 -33.548  41.583  1.00 26.34           N  
ATOM   1247  CA  GLU L  55      35.897 -32.761  42.566  1.00 28.10           C  
ATOM   1248  C   GLU L  55      35.182 -32.882  43.918  1.00 28.59           C  
ATOM   1249  O   GLU L  55      33.950 -33.022  43.952  1.00 30.08           O  
ATOM   1250  CB  GLU L  55      35.955 -31.309  42.112  0.50 27.86           C  
ATOM   1251  CG  GLU L  55      36.414 -30.318  43.150  0.50 27.88           C  
ATOM   1252  CD  GLU L  55      37.821 -30.547  43.644  0.50 27.58           C  
ATOM   1253  OE1 GLU L  55      38.271 -29.779  44.528  0.50 30.27           O  
ATOM   1254  OE2 GLU L  55      38.486 -31.487  43.171  1.00 28.59           O  
ATOM   1255  N   THR L  56      35.928 -32.907  45.018  1.00 27.75           N  
ATOM   1256  CA  THR L  56      35.305 -33.107  46.318  1.00 26.14           C  
ATOM   1257  C   THR L  56      34.334 -31.999  46.683  1.00 24.69           C  
ATOM   1258  O   THR L  56      34.602 -30.817  46.498  1.00 21.60           O  
ATOM   1259  CB  THR L  56      36.316 -33.304  47.446  1.00 27.50           C  
ATOM   1260  OG1 THR L  56      36.771 -32.014  47.888  1.00 31.45           O  
ATOM   1261  CG2 THR L  56      37.547 -34.044  46.937  1.00 33.79           C  
ATOM   1262  N   GLY L  57      33.176 -32.394  47.215  1.00 26.82           N  
ATOM   1263  CA  GLY L  57      32.144 -31.441  47.579  1.00 29.30           C  
ATOM   1264  C   GLY L  57      31.042 -31.390  46.520  1.00 31.35           C  
ATOM   1265  O   GLY L  57      30.044 -30.703  46.701  1.00 39.71           O  
ATOM   1266  N   VAL L  58      31.253 -32.106  45.417  1.00 30.81           N  
ATOM   1267  CA  VAL L  58      30.276 -32.091  44.324  1.00 29.47           C  
ATOM   1268  C   VAL L  58      29.336 -33.305  44.450  1.00 27.21           C  
ATOM   1269  O   VAL L  58      29.833 -34.427  44.495  1.00 32.39           O  
ATOM   1270  CB  VAL L  58      31.016 -32.154  42.968  1.00 26.59           C  
ATOM   1271  CG1 VAL L  58      30.048 -32.076  41.808  1.00 24.74           C  
ATOM   1272  CG2 VAL L  58      32.047 -31.038  42.890  1.00 18.83           C  
ATOM   1273  N   PRO L  59      28.041 -33.044  44.536  1.00 23.82           N  
ATOM   1274  CA  PRO L  59      26.996 -34.048  44.658  1.00 21.01           C  
ATOM   1275  C   PRO L  59      27.148 -35.203  43.674  1.00 23.97           C  
ATOM   1276  O   PRO L  59      27.482 -34.971  42.512  1.00 18.68           O  
ATOM   1277  CB  PRO L  59      25.726 -33.275  44.286  1.00 21.06           C  
ATOM   1278  CG  PRO L  59      26.015 -31.861  44.611  1.00 23.26           C  
ATOM   1279  CD  PRO L  59      27.495 -31.667  44.541  1.00 24.23           C  
ATOM   1280  N   SER L  60      26.868 -36.429  44.117  1.00 29.99           N  
ATOM   1281  CA  SER L  60      27.009 -37.590  43.248  1.00 29.67           C  
ATOM   1282  C   SER L  60      25.988 -37.627  42.135  1.00 23.92           C  
ATOM   1283  O   SER L  60      26.076 -38.424  41.198  0.50 23.18           O  
ATOM   1284  CB  SER L  60      27.103 -38.886  44.010  0.50 30.73           C  
ATOM   1285  OG  SER L  60      28.263 -39.628  43.649  0.50 33.14           O  
ATOM   1286  N   ARG L  61      25.022 -36.711  42.183  1.00 22.34           N  
ATOM   1287  CA  ARG L  61      24.041 -36.604  41.117  1.00 20.96           C  
ATOM   1288  C   ARG L  61      24.661 -36.079  39.834  1.00 22.97           C  
ATOM   1289  O   ARG L  61      24.088 -36.169  38.742  1.00 23.57           O  
ATOM   1290  CB  ARG L  61      22.824 -35.836  41.553  1.00 15.86           C  
ATOM   1291  CG  ARG L  61      22.956 -34.333  41.605  1.00 15.27           C  
ATOM   1292  CD  ARG L  61      21.640 -33.666  41.940  1.00 15.80           C  
ATOM   1293  NE  ARG L  61      21.768 -32.240  42.170  1.00 19.43           N  
ATOM   1294  CZ  ARG L  61      22.274 -31.697  43.277  1.00 24.11           C  
ATOM   1295  NH1 ARG L  61      22.720 -32.486  44.247  1.00 30.56           N  
ATOM   1296  NH2 ARG L  61      22.287 -30.382  43.437  1.00 26.69           N  
ATOM   1297  N   PHE L  62      25.889 -35.538  39.925  1.00 19.12           N  
ATOM   1298  CA  PHE L  62      26.555 -35.086  38.709  1.00 14.92           C  
ATOM   1299  C   PHE L  62      27.451 -36.205  38.195  1.00 19.73           C  
ATOM   1300  O   PHE L  62      27.965 -37.012  38.967  1.00 20.98           O  
ATOM   1301  CB  PHE L  62      27.427 -33.851  38.962  1.00 11.89           C  
ATOM   1302  CG  PHE L  62      26.586 -32.610  39.198  1.00 15.87           C  
ATOM   1303  CD1 PHE L  62      26.464 -32.064  40.454  1.00 16.12           C  
ATOM   1304  CD2 PHE L  62      25.874 -32.054  38.151  1.00 18.87           C  
ATOM   1305  CE1 PHE L  62      25.622 -30.982  40.669  1.00 16.29           C  
ATOM   1306  CE2 PHE L  62      25.060 -30.953  38.349  1.00 17.55           C  
ATOM   1307  CZ  PHE L  62      24.915 -30.434  39.625  1.00 15.19           C  
ATOM   1308  N   SER L  63      27.660 -36.247  36.878  1.00 19.64           N  
ATOM   1309  CA  SER L  63      28.532 -37.381  36.439  1.00 19.04           C  
ATOM   1310  C   SER L  63      28.966 -37.112  35.016  1.00 18.99           C  
ATOM   1311  O   SER L  63      28.249 -36.470  34.241  1.00 21.72           O  
ATOM   1312  CB  SER L  63      27.703 -38.662  36.546  1.00 21.97           C  
ATOM   1313  OG  SER L  63      28.028 -39.590  35.537  1.00 35.19           O  
ATOM   1314  N   GLY L  64      30.177 -37.559  34.668  1.00 18.54           N  
ATOM   1315  CA  GLY L  64      30.639 -37.316  33.308  1.00 19.45           C  
ATOM   1316  C   GLY L  64      31.202 -38.587  32.693  1.00 24.11           C  
ATOM   1317  O   GLY L  64      31.646 -39.481  33.419  1.00 24.68           O  
ATOM   1318  N   SER L  65      31.208 -38.641  31.366  1.00 28.07           N  
ATOM   1319  CA  SER L  65      31.776 -39.775  30.660  1.00 32.11           C  
ATOM   1320  C   SER L  65      32.206 -39.391  29.253  1.00 31.21           C  
ATOM   1321  O   SER L  65      32.087 -38.244  28.831  1.00 36.96           O  
ATOM   1322  CB  SER L  65      30.810 -40.954  30.621  1.00 36.61           C  
ATOM   1323  OG  SER L  65      29.953 -40.912  29.501  1.00 44.46           O  
ATOM   1324  N   GLY L  66      32.686 -40.381  28.503  1.00 31.16           N  
ATOM   1325  CA  GLY L  66      33.071 -40.091  27.123  1.00 32.82           C  
ATOM   1326  C   GLY L  66      34.532 -40.460  26.918  1.00 35.09           C  
ATOM   1327  O   GLY L  66      35.142 -41.004  27.837  1.00 31.10           O  
ATOM   1328  N   SER L  67      35.068 -40.132  25.751  1.00 40.16           N  
ATOM   1329  CA  SER L  67      36.459 -40.438  25.468  1.00 45.40           C  
ATOM   1330  C   SER L  67      36.825 -40.112  24.027  1.00 44.26           C  
ATOM   1331  O   SER L  67      35.982 -40.015  23.135  1.00 44.56           O  
ATOM   1332  CB  SER L  67      36.713 -41.940  25.723  1.00 53.69           C  
ATOM   1333  OG  SER L  67      35.598 -42.691  25.230  1.00 71.22           O  
ATOM   1334  N   GLY L  68      38.140 -39.966  23.805  1.00 42.82           N  
ATOM   1335  CA  GLY L  68      38.572 -39.634  22.442  1.00 40.85           C  
ATOM   1336  C   GLY L  68      37.992 -38.264  22.070  1.00 37.13           C  
ATOM   1337  O   GLY L  68      38.572 -37.258  22.474  1.00 34.51           O  
ATOM   1338  N   THR L  69      36.854 -38.279  21.390  1.00 34.71           N  
ATOM   1339  CA  THR L  69      36.211 -37.059  20.953  1.00 30.93           C  
ATOM   1340  C   THR L  69      34.874 -36.772  21.586  1.00 28.86           C  
ATOM   1341  O   THR L  69      34.468 -35.597  21.673  1.00 22.78           O  
ATOM   1342  CB  THR L  69      36.017 -37.103  19.397  1.00 26.33           C  
ATOM   1343  OG1 THR L  69      35.768 -38.479  19.055  0.50 24.23           O  
ATOM   1344  CG2 THR L  69      37.350 -36.751  18.740  1.00 17.97           C  
ATOM   1345  N   GLU L  70      34.124 -37.785  22.012  1.00 29.06           N  
ATOM   1346  CA  GLU L  70      32.793 -37.552  22.535  1.00 26.66           C  
ATOM   1347  C   GLU L  70      32.670 -37.655  24.033  1.00 25.64           C  
ATOM   1348  O   GLU L  70      33.062 -38.653  24.653  1.00 30.71           O  
ATOM   1349  CB  GLU L  70      31.774 -38.430  21.811  0.50 27.18           C  
ATOM   1350  CG  GLU L  70      30.411 -37.799  21.659  0.50 32.39           C  
ATOM   1351  CD  GLU L  70      29.976 -37.576  20.233  0.50 37.57           C  
ATOM   1352  OE1 GLU L  70      29.187 -36.625  19.993  0.50 43.42           O  
ATOM   1353  OE2 GLU L  70      30.386 -38.348  19.338  0.50 42.86           O  
ATOM   1354  N   TYR L  71      32.115 -36.618  24.676  1.00 20.29           N  
ATOM   1355  CA  TYR L  71      31.915 -36.587  26.092  1.00 14.28           C  
ATOM   1356  C   TYR L  71      30.506 -36.193  26.504  1.00 17.20           C  
ATOM   1357  O   TYR L  71      29.818 -35.416  25.844  1.00 20.62           O  
ATOM   1358  CB  TYR L  71      32.907 -35.628  26.793  1.00  9.82           C  
ATOM   1359  CG  TYR L  71      34.320 -36.054  26.534  1.00 10.52           C  
ATOM   1360  CD1 TYR L  71      34.957 -35.684  25.350  1.00  9.66           C  
ATOM   1361  CD2 TYR L  71      34.985 -36.877  27.428  1.00 13.30           C  
ATOM   1362  CE1 TYR L  71      36.258 -36.105  25.118  1.00  8.26           C  
ATOM   1363  CE2 TYR L  71      36.290 -37.296  27.188  1.00  9.27           C  
ATOM   1364  CZ  TYR L  71      36.909 -36.905  26.030  1.00  7.66           C  
ATOM   1365  OH  TYR L  71      38.204 -37.319  25.769  1.00 18.90           O  
ATOM   1366  N   THR L  72      30.096 -36.718  27.661  1.00 15.74           N  
ATOM   1367  CA  THR L  72      28.744 -36.473  28.141  1.00 11.96           C  
ATOM   1368  C   THR L  72      28.746 -36.075  29.624  1.00 12.90           C  
ATOM   1369  O   THR L  72      29.445 -36.724  30.406  1.00 12.97           O  
ATOM   1370  CB  THR L  72      28.012 -37.883  28.136  1.00 12.24           C  
ATOM   1371  OG1 THR L  72      28.075 -38.335  26.775  1.00 21.80           O  
ATOM   1372  CG2 THR L  72      26.565 -37.662  28.496  1.00 16.39           C  
ATOM   1373  N   PHE L  73      27.922 -35.101  29.935  1.00 10.63           N  
ATOM   1374  CA  PHE L  73      27.752 -34.653  31.322  1.00 10.63           C  
ATOM   1375  C   PHE L  73      26.301 -34.919  31.719  1.00 12.76           C  
ATOM   1376  O   PHE L  73      25.382 -34.597  30.961  1.00 13.37           O  
ATOM   1377  CB  PHE L  73      28.075 -33.179  31.449  1.00 12.03           C  
ATOM   1378  CG  PHE L  73      27.688 -32.549  32.775  1.00 13.30           C  
ATOM   1379  CD1 PHE L  73      26.597 -31.703  32.862  1.00 13.92           C  
ATOM   1380  CD2 PHE L  73      28.438 -32.799  33.917  1.00 11.96           C  
ATOM   1381  CE1 PHE L  73      26.247 -31.107  34.068  1.00 12.23           C  
ATOM   1382  CE2 PHE L  73      28.122 -32.186  35.114  1.00  9.58           C  
ATOM   1383  CZ  PHE L  73      27.056 -31.307  35.174  1.00 11.81           C  
ATOM   1384  N   THR L  74      26.100 -35.531  32.880  1.00 17.50           N  
ATOM   1385  CA  THR L  74      24.725 -35.887  33.249  1.00 20.93           C  
ATOM   1386  C   THR L  74      24.366 -35.398  34.661  1.00 18.84           C  
ATOM   1387  O   THR L  74      25.194 -35.509  35.573  1.00 22.85           O  
ATOM   1388  CB  THR L  74      24.582 -37.441  33.245  1.00 23.62           C  
ATOM   1389  OG1 THR L  74      25.682 -38.000  32.496  1.00 38.13           O  
ATOM   1390  CG2 THR L  74      23.320 -37.860  32.535  1.00 20.26           C  
ATOM   1391  N   ILE L  75      23.152 -34.944  34.799  1.00 14.74           N  
ATOM   1392  CA  ILE L  75      22.506 -34.582  36.046  1.00 17.13           C  
ATOM   1393  C   ILE L  75      21.316 -35.563  36.233  1.00 21.72           C  
ATOM   1394  O   ILE L  75      20.270 -35.410  35.610  1.00 21.50           O  
ATOM   1395  CB  ILE L  75      21.926 -33.154  36.010  1.00 18.33           C  
ATOM   1396  CG1 ILE L  75      22.954 -32.069  35.681  1.00 21.76           C  
ATOM   1397  CG2 ILE L  75      21.192 -32.835  37.291  1.00  6.68           C  
ATOM   1398  CD1 ILE L  75      22.456 -30.653  35.933  1.00 14.74           C  
ATOM   1399  N   SER L  76      21.549 -36.596  37.026  1.00 25.30           N  
ATOM   1400  CA  SER L  76      20.569 -37.621  37.256  1.00 26.98           C  
ATOM   1401  C   SER L  76      19.263 -37.168  37.812  1.00 25.88           C  
ATOM   1402  O   SER L  76      18.176 -37.683  37.485  1.00 26.06           O  
ATOM   1403  CB  SER L  76      21.140 -38.868  37.868  1.00 28.54           C  
ATOM   1404  OG  SER L  76      21.251 -38.802  39.270  1.00 33.12           O  
ATOM   1405  N   SER L  77      19.253 -36.147  38.686  1.00 23.98           N  
ATOM   1406  CA  SER L  77      17.954 -35.679  39.170  1.00 23.35           C  
ATOM   1407  C   SER L  77      17.991 -34.163  39.316  1.00 20.61           C  
ATOM   1408  O   SER L  77      18.556 -33.630  40.262  1.00 24.85           O  
ATOM   1409  CB  SER L  77      17.569 -36.341  40.485  1.00 27.00           C  
ATOM   1410  OG  SER L  77      16.481 -35.616  41.085  1.00 30.96           O  
ATOM   1411  N   LEU L  78      17.452 -33.458  38.330  1.00 19.22           N  
ATOM   1412  CA  LEU L  78      17.528 -32.025  38.339  1.00 22.63           C  
ATOM   1413  C   LEU L  78      17.050 -31.376  39.616  1.00 24.96           C  
ATOM   1414  O   LEU L  78      15.871 -31.459  39.976  1.00 35.68           O  
ATOM   1415  CB  LEU L  78      16.871 -31.434  37.103  1.00 25.31           C  
ATOM   1416  CG  LEU L  78      17.188 -29.951  36.844  1.00 26.37           C  
ATOM   1417  CD1 LEU L  78      18.695 -29.736  36.957  1.00 20.22           C  
ATOM   1418  CD2 LEU L  78      16.657 -29.535  35.492  1.00 28.97           C  
ATOM   1419  N   GLN L  79      17.942 -30.696  40.341  1.00 21.31           N  
ATOM   1420  CA  GLN L  79      17.553 -30.015  41.567  1.00 19.00           C  
ATOM   1421  C   GLN L  79      17.443 -28.499  41.312  1.00 24.47           C  
ATOM   1422  O   GLN L  79      18.101 -27.985  40.409  1.00 31.56           O  
ATOM   1423  CB  GLN L  79      18.600 -30.228  42.662  1.00 16.58           C  
ATOM   1424  CG  GLN L  79      18.614 -31.639  43.214  1.00 15.67           C  
ATOM   1425  CD  GLN L  79      17.234 -32.078  43.671  1.00 16.84           C  
ATOM   1426  OE1 GLN L  79      16.669 -31.490  44.594  1.00 21.35           O  
ATOM   1427  NE2 GLN L  79      16.712 -33.101  43.012  1.00 17.34           N  
ATOM   1428  N   PRO L  80      16.628 -27.834  42.114  1.00 25.78           N  
ATOM   1429  CA  PRO L  80      16.436 -26.390  41.966  1.00 27.14           C  
ATOM   1430  C   PRO L  80      17.784 -25.655  42.039  1.00 26.66           C  
ATOM   1431  O   PRO L  80      17.988 -24.630  41.407  1.00 22.42           O  
ATOM   1432  CB  PRO L  80      15.553 -26.010  43.137  1.00 27.60           C  
ATOM   1433  CG  PRO L  80      15.297 -27.230  43.926  1.00 26.67           C  
ATOM   1434  CD  PRO L  80      15.838 -28.405  43.204  1.00 24.70           C  
ATOM   1435  N   GLU L  81      18.687 -26.222  42.823  1.00 26.50           N  
ATOM   1436  CA  GLU L  81      20.009 -25.678  43.011  1.00 28.02           C  
ATOM   1437  C   GLU L  81      20.834 -25.744  41.718  1.00 29.41           C  
ATOM   1438  O   GLU L  81      21.800 -24.990  41.579  1.00 33.86           O  
ATOM   1439  CB  GLU L  81      20.752 -26.468  44.115  1.00 26.74           C  
ATOM   1440  CG  GLU L  81      20.316 -27.906  44.257  0.50 29.37           C  
ATOM   1441  CD  GLU L  81      19.094 -28.081  45.135  0.50 32.75           C  
ATOM   1442  OE1 GLU L  81      18.617 -29.227  45.276  0.50 41.92           O  
ATOM   1443  OE2 GLU L  81      18.586 -27.069  45.665  0.50 36.18           O  
ATOM   1444  N   ASP L  82      20.489 -26.637  40.812  1.00 25.57           N  
ATOM   1445  CA  ASP L  82      21.218 -26.906  39.606  1.00 18.90           C  
ATOM   1446  C   ASP L  82      21.002 -25.940  38.470  1.00 16.61           C  
ATOM   1447  O   ASP L  82      21.657 -26.057  37.413  1.00 16.29           O  
ATOM   1448  CB  ASP L  82      20.957 -28.354  39.155  1.00 20.93           C  
ATOM   1449  CG  ASP L  82      21.292 -29.326  40.282  1.00 25.51           C  
ATOM   1450  OD1 ASP L  82      20.929 -30.508  40.176  1.00 32.13           O  
ATOM   1451  OD2 ASP L  82      21.938 -28.885  41.255  1.00 28.18           O  
ATOM   1452  N   ILE L  83      20.131 -24.961  38.635  1.00 14.39           N  
ATOM   1453  CA  ILE L  83      19.870 -23.962  37.614  1.00 17.94           C  
ATOM   1454  C   ILE L  83      21.097 -23.088  37.361  1.00 21.10           C  
ATOM   1455  O   ILE L  83      21.472 -22.276  38.211  1.00 19.08           O  
ATOM   1456  CB  ILE L  83      18.693 -23.043  38.024  1.00 19.15           C  
ATOM   1457  CG1 ILE L  83      17.371 -23.843  38.174  1.00 20.99           C  
ATOM   1458  CG2 ILE L  83      18.486 -21.948  36.990  1.00 12.44           C  
ATOM   1459  CD1 ILE L  83      16.208 -23.108  37.541  1.00 33.21           C  
ATOM   1460  N   ALA L  84      21.723 -23.280  36.203  1.00 18.71           N  
ATOM   1461  CA  ALA L  84      22.937 -22.484  35.901  1.00 14.34           C  
ATOM   1462  C   ALA L  84      23.296 -22.715  34.419  1.00 15.44           C  
ATOM   1463  O   ALA L  84      22.540 -23.372  33.712  1.00 15.95           O  
ATOM   1464  CB  ALA L  84      24.097 -23.130  36.714  1.00 11.87           C  
ATOM   1465  N   THR L  85      24.480 -22.250  34.034  1.00 16.96           N  
ATOM   1466  CA  THR L  85      24.977 -22.577  32.690  1.00 11.10           C  
ATOM   1467  C   THR L  85      26.123 -23.566  32.825  1.00  8.53           C  
ATOM   1468  O   THR L  85      26.937 -23.452  33.752  1.00 13.61           O  
ATOM   1469  CB  THR L  85      25.365 -21.385  31.861  1.00 10.54           C  
ATOM   1470  OG1 THR L  85      24.338 -20.390  31.811  1.00 11.52           O  
ATOM   1471  CG2 THR L  85      25.671 -21.793  30.420  1.00 12.89           C  
ATOM   1472  N   TYR L  86      26.177 -24.604  31.989  1.00  9.73           N  
ATOM   1473  CA  TYR L  86      27.297 -25.563  32.173  1.00  9.12           C  
ATOM   1474  C   TYR L  86      28.218 -25.512  30.980  1.00  6.53           C  
ATOM   1475  O   TYR L  86      27.763 -25.257  29.857  1.00 17.17           O  
ATOM   1476  CB  TYR L  86      26.714 -26.980  32.363  1.00 11.98           C  
ATOM   1477  CG  TYR L  86      25.911 -27.061  33.660  1.00 15.32           C  
ATOM   1478  CD1 TYR L  86      26.513 -27.527  34.828  1.00 17.75           C  
ATOM   1479  CD2 TYR L  86      24.604 -26.623  33.715  1.00 13.63           C  
ATOM   1480  CE1 TYR L  86      25.787 -27.586  36.016  1.00 16.60           C  
ATOM   1481  CE2 TYR L  86      23.875 -26.668  34.895  1.00 13.10           C  
ATOM   1482  CZ  TYR L  86      24.483 -27.156  36.039  1.00 14.23           C  
ATOM   1483  OH  TYR L  86      23.763 -27.198  37.215  1.00 17.08           O  
ATOM   1484  N   TYR L  87      29.518 -25.703  31.177  1.00  7.94           N  
ATOM   1485  CA  TYR L  87      30.430 -25.638  30.022  1.00  9.06           C  
ATOM   1486  C   TYR L  87      31.411 -26.832  30.138  1.00  8.81           C  
ATOM   1487  O   TYR L  87      31.774 -27.183  31.251  1.00 15.70           O  
ATOM   1488  CB  TYR L  87      31.336 -24.376  30.180  1.00  9.00           C  
ATOM   1489  CG  TYR L  87      30.655 -23.071  29.909  1.00  7.16           C  
ATOM   1490  CD1 TYR L  87      30.433 -22.609  28.623  1.00  7.30           C  
ATOM   1491  CD2 TYR L  87      30.235 -22.268  30.975  1.00  8.57           C  
ATOM   1492  CE1 TYR L  87      29.800 -21.395  28.395  1.00  9.22           C  
ATOM   1493  CE2 TYR L  87      29.603 -21.066  30.754  1.00  9.46           C  
ATOM   1494  CZ  TYR L  87      29.389 -20.635  29.463  1.00 10.01           C  
ATOM   1495  OH  TYR L  87      28.764 -19.430  29.261  1.00  9.34           O  
ATOM   1496  N   CYS L  88      31.857 -27.316  29.000  1.00  9.11           N  
ATOM   1497  CA  CYS L  88      32.974 -28.300  29.053  1.00 10.35           C  
ATOM   1498  C   CYS L  88      34.197 -27.480  28.542  1.00 10.97           C  
ATOM   1499  O   CYS L  88      33.972 -26.533  27.784  1.00  7.81           O  
ATOM   1500  CB  CYS L  88      32.735 -29.421  28.050  1.00 10.21           C  
ATOM   1501  SG  CYS L  88      32.625 -28.829  26.324  1.00 13.32           S  
ATOM   1502  N   GLN L  89      35.374 -27.795  29.012  1.00 14.09           N  
ATOM   1503  CA  GLN L  89      36.567 -27.081  28.572  1.00 13.87           C  
ATOM   1504  C   GLN L  89      37.688 -28.087  28.335  1.00 13.49           C  
ATOM   1505  O   GLN L  89      37.896 -28.991  29.153  1.00  8.06           O  
ATOM   1506  CB  GLN L  89      37.025 -26.029  29.592  1.00 14.14           C  
ATOM   1507  CG  GLN L  89      38.441 -25.513  29.300  1.00 15.20           C  
ATOM   1508  CD  GLN L  89      39.114 -24.864  30.480  1.00 17.91           C  
ATOM   1509  OE1 GLN L  89      39.202 -25.401  31.590  1.00 22.64           O  
ATOM   1510  NE2 GLN L  89      39.653 -23.669  30.276  1.00 23.92           N  
ATOM   1511  N   GLN L  90      38.413 -27.923  27.218  1.00 10.77           N  
ATOM   1512  CA  GLN L  90      39.518 -28.857  27.016  1.00 11.57           C  
ATOM   1513  C   GLN L  90      40.791 -28.300  27.637  1.00 10.64           C  
ATOM   1514  O   GLN L  90      41.086 -27.108  27.504  1.00  9.22           O  
ATOM   1515  CB  GLN L  90      39.712 -29.294  25.601  1.00 13.48           C  
ATOM   1516  CG  GLN L  90      40.225 -28.311  24.591  1.00 12.43           C  
ATOM   1517  CD  GLN L  90      41.729 -28.184  24.526  1.00 13.59           C  
ATOM   1518  OE1 GLN L  90      42.453 -29.026  25.070  1.00 16.86           O  
ATOM   1519  NE2 GLN L  90      42.209 -27.050  24.029  1.00 16.07           N  
ATOM   1520  N   TYR L  91      41.609 -29.185  28.198  1.00 10.37           N  
ATOM   1521  CA  TYR L  91      42.891 -28.713  28.709  1.00 12.53           C  
ATOM   1522  C   TYR L  91      44.003 -29.603  28.188  1.00 19.41           C  
ATOM   1523  O   TYR L  91      45.069 -29.753  28.767  1.00 19.01           O  
ATOM   1524  CB  TYR L  91      42.907 -28.530  30.181  1.00 12.14           C  
ATOM   1525  CG  TYR L  91      42.675 -29.749  31.037  1.00 13.68           C  
ATOM   1526  CD1 TYR L  91      41.398 -30.250  31.234  1.00 16.31           C  
ATOM   1527  CD2 TYR L  91      43.734 -30.392  31.669  1.00 15.46           C  
ATOM   1528  CE1 TYR L  91      41.177 -31.363  32.024  1.00 16.97           C  
ATOM   1529  CE2 TYR L  91      43.521 -31.500  32.472  1.00 17.09           C  
ATOM   1530  CZ  TYR L  91      42.238 -31.979  32.644  1.00 18.08           C  
ATOM   1531  OH  TYR L  91      42.016 -33.090  33.434  1.00 26.61           O  
ATOM   1532  N   ASP L  92      43.738 -30.227  27.013  1.00 21.53           N  
ATOM   1533  CA  ASP L  92      44.830 -31.079  26.491  1.00 25.07           C  
ATOM   1534  C   ASP L  92      45.944 -30.192  25.953  1.00 26.48           C  
ATOM   1535  O   ASP L  92      47.126 -30.522  26.060  1.00 32.26           O  
ATOM   1536  CB  ASP L  92      44.300 -32.036  25.449  1.00 27.65           C  
ATOM   1537  CG  ASP L  92      45.332 -32.929  24.806  1.00 29.85           C  
ATOM   1538  OD1 ASP L  92      45.406 -32.931  23.554  1.00 31.39           O  
ATOM   1539  OD2 ASP L  92      46.070 -33.651  25.511  1.00 32.09           O  
ATOM   1540  N   ASP L  93      45.574 -29.045  25.378  1.00 27.06           N  
ATOM   1541  CA  ASP L  93      46.566 -28.159  24.805  1.00 27.30           C  
ATOM   1542  C   ASP L  93      46.137 -26.702  24.805  1.00 20.87           C  
ATOM   1543  O   ASP L  93      44.978 -26.377  24.576  1.00 13.11           O  
ATOM   1544  CB  ASP L  93      46.867 -28.592  23.356  1.00 36.66           C  
ATOM   1545  CG  ASP L  93      48.306 -28.312  22.967  1.00 46.06           C  
ATOM   1546  OD1 ASP L  93      48.655 -28.557  21.791  1.00 57.14           O  
ATOM   1547  OD2 ASP L  93      49.091 -27.865  23.832  1.00 54.94           O  
ATOM   1548  N   LEU L  94      47.101 -25.805  25.038  1.00 17.33           N  
ATOM   1549  CA  LEU L  94      46.787 -24.375  24.973  1.00 14.61           C  
ATOM   1550  C   LEU L  94      46.557 -23.997  23.507  1.00 13.86           C  
ATOM   1551  O   LEU L  94      47.218 -24.592  22.644  1.00 24.63           O  
ATOM   1552  CB  LEU L  94      47.945 -23.552  25.541  1.00 14.33           C  
ATOM   1553  CG  LEU L  94      48.177 -23.713  27.051  1.00 14.73           C  
ATOM   1554  CD1 LEU L  94      49.483 -23.033  27.446  1.00 18.63           C  
ATOM   1555  CD2 LEU L  94      47.025 -23.131  27.847  1.00 19.50           C  
ATOM   1556  N   PRO L  95      45.690 -23.062  23.192  1.00 13.12           N  
ATOM   1557  CA  PRO L  95      44.872 -22.383  24.190  1.00 15.13           C  
ATOM   1558  C   PRO L  95      43.724 -23.298  24.655  1.00 17.21           C  
ATOM   1559  O   PRO L  95      43.222 -24.086  23.861  1.00 13.06           O  
ATOM   1560  CB  PRO L  95      44.311 -21.181  23.445  1.00 14.85           C  
ATOM   1561  CG  PRO L  95      44.352 -21.559  22.005  1.00 15.87           C  
ATOM   1562  CD  PRO L  95      45.488 -22.527  21.838  1.00 13.83           C  
ATOM   1563  N   TYR L  96      43.437 -23.245  25.943  1.00 17.24           N  
ATOM   1564  CA  TYR L  96      42.344 -24.096  26.489  1.00 11.32           C  
ATOM   1565  C   TYR L  96      41.024 -23.496  25.982  1.00 16.06           C  
ATOM   1566  O   TYR L  96      40.847 -22.274  26.061  1.00 26.62           O  
ATOM   1567  CB  TYR L  96      42.434 -24.018  28.015  1.00  8.27           C  
ATOM   1568  CG  TYR L  96      43.672 -24.715  28.556  1.00 12.73           C  
ATOM   1569  CD1 TYR L  96      44.449 -25.532  27.738  1.00 14.31           C  
ATOM   1570  CD2 TYR L  96      44.073 -24.563  29.865  1.00 14.68           C  
ATOM   1571  CE1 TYR L  96      45.571 -26.160  28.235  1.00 15.96           C  
ATOM   1572  CE2 TYR L  96      45.190 -25.196  30.380  1.00 15.10           C  
ATOM   1573  CZ  TYR L  96      45.943 -25.993  29.550  1.00 15.78           C  
ATOM   1574  OH  TYR L  96      47.052 -26.635  30.050  0.50 20.77           O  
ATOM   1575  N   THR L  97      40.195 -24.314  25.356  1.00 15.15           N  
ATOM   1576  CA  THR L  97      38.982 -23.872  24.708  1.00 12.39           C  
ATOM   1577  C   THR L  97      37.724 -24.508  25.309  1.00 10.61           C  
ATOM   1578  O   THR L  97      37.709 -25.674  25.660  1.00 17.71           O  
ATOM   1579  CB  THR L  97      38.982 -24.241  23.198  1.00 12.80           C  
ATOM   1580  OG1 THR L  97      39.486 -25.575  23.058  1.00 10.53           O  
ATOM   1581  CG2 THR L  97      39.930 -23.321  22.447  1.00  7.80           C  
ATOM   1582  N   PHE L  98      36.681 -23.700  25.360  1.00  6.57           N  
ATOM   1583  CA  PHE L  98      35.431 -24.031  25.965  1.00  9.35           C  
ATOM   1584  C   PHE L  98      34.358 -24.431  24.927  1.00 11.70           C  
ATOM   1585  O   PHE L  98      34.389 -23.929  23.812  1.00 12.37           O  
ATOM   1586  CB  PHE L  98      34.882 -22.711  26.625  1.00 10.77           C  
ATOM   1587  CG  PHE L  98      35.479 -22.433  27.988  1.00 11.03           C  
ATOM   1588  CD1 PHE L  98      36.655 -21.747  28.134  1.00 10.61           C  
ATOM   1589  CD2 PHE L  98      34.807 -22.843  29.138  1.00 13.68           C  
ATOM   1590  CE1 PHE L  98      37.170 -21.467  29.385  1.00 11.03           C  
ATOM   1591  CE2 PHE L  98      35.310 -22.568  30.389  1.00 13.26           C  
ATOM   1592  CZ  PHE L  98      36.492 -21.862  30.521  1.00 11.98           C  
ATOM   1593  N   GLY L  99      33.388 -25.207  25.382  1.00  9.33           N  
ATOM   1594  CA  GLY L  99      32.189 -25.495  24.601  1.00  5.43           C  
ATOM   1595  C   GLY L  99      31.239 -24.301  24.753  1.00  9.12           C  
ATOM   1596  O   GLY L  99      31.430 -23.454  25.640  1.00 11.06           O  
ATOM   1597  N   GLN L 100      30.240 -24.186  23.915  1.00 10.25           N  
ATOM   1598  CA  GLN L 100      29.378 -23.037  23.898  1.00 14.25           C  
ATOM   1599  C   GLN L 100      28.514 -22.875  25.099  1.00 14.01           C  
ATOM   1600  O   GLN L 100      27.781 -21.890  25.238  1.00 10.96           O  
ATOM   1601  CB  GLN L 100      28.552 -22.973  22.607  1.00 23.75           C  
ATOM   1602  CG  GLN L 100      29.374 -23.090  21.338  1.00 32.51           C  
ATOM   1603  CD  GLN L 100      29.800 -24.502  20.986  1.00 36.27           C  
ATOM   1604  OE1 GLN L 100      29.358 -25.479  21.599  1.00 41.04           O  
ATOM   1605  NE2 GLN L 100      30.703 -24.626  20.015  1.00 42.00           N  
ATOM   1606  N   GLY L 101      28.497 -23.853  26.023  1.00 15.10           N  
ATOM   1607  CA  GLY L 101      27.617 -23.626  27.175  1.00 12.72           C  
ATOM   1608  C   GLY L 101      26.210 -24.121  26.952  1.00 11.50           C  
ATOM   1609  O   GLY L 101      25.660 -24.082  25.853  1.00 16.47           O  
ATOM   1610  N   THR L 102      25.576 -24.589  28.026  1.00  9.06           N  
ATOM   1611  CA  THR L 102      24.192 -25.027  27.956  1.00 10.35           C  
ATOM   1612  C   THR L 102      23.462 -24.403  29.185  1.00 12.13           C  
ATOM   1613  O   THR L 102      23.950 -24.640  30.286  1.00  6.34           O  
ATOM   1614  CB  THR L 102      24.053 -26.554  28.086  1.00 10.26           C  
ATOM   1615  OG1 THR L 102      24.773 -27.181  27.017  1.00 16.10           O  
ATOM   1616  CG2 THR L 102      22.596 -26.973  27.932  1.00 12.63           C  
ATOM   1617  N   LYS L 103      22.422 -23.651  28.910  1.00 12.90           N  
ATOM   1618  CA  LYS L 103      21.613 -22.993  29.910  1.00 16.21           C  
ATOM   1619  C   LYS L 103      20.494 -23.939  30.374  1.00 15.45           C  
ATOM   1620  O   LYS L 103      19.619 -24.275  29.581  1.00 14.28           O  
ATOM   1621  CB  LYS L 103      21.015 -21.683  29.424  1.00 20.63           C  
ATOM   1622  CG  LYS L 103      19.847 -21.177  30.255  1.00 24.65           C  
ATOM   1623  CD  LYS L 103      20.238 -20.030  31.164  0.50 23.97           C  
ATOM   1624  CE  LYS L 103      19.424 -20.051  32.455  0.50 23.80           C  
ATOM   1625  NZ  LYS L 103      19.763 -21.229  33.301  0.50 20.65           N  
ATOM   1626  N   VAL L 104      20.604 -24.363  31.611  1.00 16.45           N  
ATOM   1627  CA  VAL L 104      19.688 -25.304  32.215  1.00 18.22           C  
ATOM   1628  C   VAL L 104      18.611 -24.617  33.027  1.00 19.74           C  
ATOM   1629  O   VAL L 104      18.869 -23.846  33.945  1.00 11.79           O  
ATOM   1630  CB  VAL L 104      20.423 -26.365  33.041  1.00 17.10           C  
ATOM   1631  CG1 VAL L 104      19.432 -27.292  33.721  1.00 16.03           C  
ATOM   1632  CG2 VAL L 104      21.368 -27.171  32.145  1.00  8.76           C  
ATOM   1633  N   GLU L 105      17.346 -24.836  32.642  1.00 22.63           N  
ATOM   1634  CA  GLU L 105      16.255 -24.156  33.319  1.00 23.35           C  
ATOM   1635  C   GLU L 105      15.174 -25.104  33.772  1.00 25.35           C  
ATOM   1636  O   GLU L 105      15.043 -26.240  33.296  1.00 22.54           O  
ATOM   1637  CB  GLU L 105      15.715 -23.003  32.505  1.00 22.61           C  
ATOM   1638  CG  GLU L 105      14.663 -22.148  33.170  0.50 24.01           C  
ATOM   1639  CD  GLU L 105      15.229 -21.126  34.130  0.50 25.19           C  
ATOM   1640  OE1 GLU L 105      14.747 -21.060  35.282  0.50 21.57           O  
ATOM   1641  OE2 GLU L 105      16.156 -20.385  33.735  0.50 33.27           O  
ATOM   1642  N   ILE L 106      14.381 -24.671  34.762  1.00 27.45           N  
ATOM   1643  CA  ILE L 106      13.310 -25.557  35.227  1.00 29.29           C  
ATOM   1644  C   ILE L 106      11.960 -25.034  34.786  1.00 28.81           C  
ATOM   1645  O   ILE L 106      11.663 -23.839  34.939  1.00 37.88           O  
ATOM   1646  CB  ILE L 106      13.364 -25.790  36.735  1.00 29.65           C  
ATOM   1647  CG1 ILE L 106      13.903 -27.175  37.126  1.00 32.06           C  
ATOM   1648  CG2 ILE L 106      11.991 -25.568  37.360  1.00 20.24           C  
ATOM   1649  CD1 ILE L 106      14.752 -27.195  38.363  1.00 31.32           C  
ATOM   1650  N   LYS L 107      11.146 -25.886  34.153  0.50 25.35           N  
ATOM   1651  CA  LYS L 107       9.866 -25.392  33.666  0.50 25.10           C  
ATOM   1652  C   LYS L 107       8.784 -25.471  34.719  0.50 24.85           C  
ATOM   1653  O   LYS L 107       8.792 -26.418  35.534  0.50 22.73           O  
ATOM   1654  CB  LYS L 107       9.476 -26.003  32.351  0.50 26.25           C  
ATOM   1655  CG  LYS L 107       9.042 -27.456  32.403  0.50 30.19           C  
ATOM   1656  CD  LYS L 107       7.620 -27.610  31.878  0.50 34.16           C  
ATOM   1657  CE  LYS L 107       7.294 -29.064  31.588  0.50 37.41           C  
ATOM   1658  NZ  LYS L 107       6.083 -29.523  32.329  0.50 45.05           N  
ATOM   1659  OXT LYS L 107       7.931 -24.560  34.783  0.50 28.91           O  
TER    1660      LYS L 107                                                      
ATOM   1661  N   ASP L   1      44.220 -26.100  47.617  0.50 40.79           N  
ATOM   1662  CA  ASP L   1      43.345 -25.452  46.636  1.00 42.24           C  
ATOM   1663  C   ASP L   1      43.701 -23.961  46.526  1.00 36.47           C  
ATOM   1664  O   ASP L   1      43.512 -23.232  47.503  1.00 35.27           O  
ATOM   1665  CB  ASP L   1      41.881 -25.582  47.053  1.00 48.55           C  
ATOM   1666  CG  ASP L   1      41.113 -26.588  46.214  1.00 54.53           C  
ATOM   1667  OD1 ASP L   1      41.669 -27.673  45.930  1.00 57.81           O  
ATOM   1668  OD2 ASP L   1      39.944 -26.306  45.861  1.00 62.50           O  
ATOM   1669  N   ILE L   2      44.197 -23.559  45.368  1.00 30.33           N  
ATOM   1670  CA  ILE L   2      44.627 -22.213  45.100  1.00 23.59           C  
ATOM   1671  C   ILE L   2      43.485 -21.214  45.026  1.00 22.15           C  
ATOM   1672  O   ILE L   2      42.657 -21.272  44.127  1.00 24.45           O  
ATOM   1673  CB  ILE L   2      45.460 -22.095  43.805  1.00 22.04           C  
ATOM   1674  CG1 ILE L   2      46.541 -23.173  43.686  1.00 23.94           C  
ATOM   1675  CG2 ILE L   2      46.102 -20.700  43.740  1.00  8.20           C  
ATOM   1676  CD1 ILE L   2      46.196 -24.278  42.723  1.00 33.77           C  
ATOM   1677  N   GLN L   3      43.461 -20.262  45.942  1.00 21.93           N  
ATOM   1678  CA  GLN L   3      42.442 -19.235  45.942  1.00 23.88           C  
ATOM   1679  C   GLN L   3      42.888 -18.083  45.003  1.00 21.60           C  
ATOM   1680  O   GLN L   3      44.023 -17.652  45.135  1.00 17.86           O  
ATOM   1681  CB  GLN L   3      42.305 -18.660  47.364  1.00 34.33           C  
ATOM   1682  CG  GLN L   3      41.793 -19.658  48.379  1.00 44.31           C  
ATOM   1683  CD  GLN L   3      42.819 -20.646  48.872  0.50 48.55           C  
ATOM   1684  OE1 GLN L   3      43.926 -20.757  48.343  0.50 58.50           O  
ATOM   1685  NE2 GLN L   3      42.469 -21.408  49.914  0.50 49.16           N  
ATOM   1686  N   MET L   4      41.998 -17.658  44.151  1.00 21.75           N  
ATOM   1687  CA  MET L   4      42.188 -16.542  43.234  1.00 19.61           C  
ATOM   1688  C   MET L   4      41.199 -15.421  43.680  1.00 23.83           C  
ATOM   1689  O   MET L   4      40.005 -15.696  43.784  1.00 26.23           O  
ATOM   1690  CB  MET L   4      41.772 -16.947  41.802  1.00 13.96           C  
ATOM   1691  CG  MET L   4      42.677 -17.965  41.157  1.00 10.12           C  
ATOM   1692  SD  MET L   4      44.417 -17.724  41.564  1.00 24.55           S  
ATOM   1693  CE  MET L   4      44.875 -16.409  40.453  1.00 11.27           C  
ATOM   1694  N   THR L   5      41.727 -14.251  43.963  1.00 22.66           N  
ATOM   1695  CA  THR L   5      40.907 -13.119  44.342  1.00 23.45           C  
ATOM   1696  C   THR L   5      41.056 -12.019  43.292  1.00 19.39           C  
ATOM   1697  O   THR L   5      42.161 -11.637  42.930  1.00 27.19           O  
ATOM   1698  CB  THR L   5      41.111 -12.579  45.732  1.00 27.95           C  
ATOM   1699  OG1 THR L   5      41.740 -13.508  46.603  1.00 31.19           O  
ATOM   1700  CG2 THR L   5      39.773 -12.195  46.378  0.50 28.95           C  
ATOM   1701  N   GLN L   6      39.945 -11.561  42.742  1.00 16.64           N  
ATOM   1702  CA  GLN L   6      40.103 -10.567  41.647  1.00 16.54           C  
ATOM   1703  C   GLN L   6      39.488  -9.248  42.110  1.00 17.18           C  
ATOM   1704  O   GLN L   6      38.532  -9.255  42.888  1.00 13.29           O  
ATOM   1705  CB  GLN L   6      39.330 -11.114  40.444  1.00 15.74           C  
ATOM   1706  CG  GLN L   6      39.655 -10.481  39.116  1.00 14.50           C  
ATOM   1707  CD  GLN L   6      38.995 -11.224  37.959  1.00 12.11           C  
ATOM   1708  OE1 GLN L   6      38.842 -12.433  38.025  1.00 14.66           O  
ATOM   1709  NE2 GLN L   6      38.582 -10.485  36.947  1.00  5.98           N  
ATOM   1710  N   SER L   7      40.044  -8.137  41.658  1.00 17.91           N  
ATOM   1711  CA  SER L   7      39.448  -6.840  42.061  1.00 22.93           C  
ATOM   1712  C   SER L   7      39.715  -5.824  40.933  1.00 20.66           C  
ATOM   1713  O   SER L   7      40.753  -5.941  40.265  1.00 17.16           O  
ATOM   1714  CB  SER L   7      40.118  -6.344  43.345  1.00 27.27           C  
ATOM   1715  OG  SER L   7      40.076  -4.923  43.419  1.00 40.47           O  
ATOM   1716  N   PRO L   8      38.805  -4.900  40.720  1.00 16.81           N  
ATOM   1717  CA  PRO L   8      37.577  -4.824  41.513  1.00 15.29           C  
ATOM   1718  C   PRO L   8      36.524  -5.783  40.967  1.00 13.67           C  
ATOM   1719  O   PRO L   8      36.748  -6.480  39.975  1.00 12.09           O  
ATOM   1720  CB  PRO L   8      37.122  -3.373  41.251  1.00 17.65           C  
ATOM   1721  CG  PRO L   8      37.581  -3.107  39.846  1.00 16.27           C  
ATOM   1722  CD  PRO L   8      38.853  -3.868  39.668  1.00 15.93           C  
ATOM   1723  N   SER L   9      35.359  -5.839  41.624  1.00  9.44           N  
ATOM   1724  CA  SER L   9      34.358  -6.770  41.081  1.00 11.36           C  
ATOM   1725  C   SER L   9      33.641  -6.134  39.918  1.00 15.73           C  
ATOM   1726  O   SER L   9      32.985  -6.759  39.093  1.00 12.08           O  
ATOM   1727  CB  SER L   9      33.470  -7.322  42.155  1.00 11.01           C  
ATOM   1728  OG  SER L   9      32.453  -6.406  42.526  1.00 19.24           O  
ATOM   1729  N   SER L  10      33.838  -4.810  39.745  1.00 20.44           N  
ATOM   1730  CA  SER L  10      33.248  -4.179  38.573  1.00 20.43           C  
ATOM   1731  C   SER L  10      33.646  -2.713  38.451  1.00 20.56           C  
ATOM   1732  O   SER L  10      33.879  -2.032  39.443  1.00 20.92           O  
ATOM   1733  CB  SER L  10      31.724  -4.274  38.604  1.00 21.45           C  
ATOM   1734  OG  SER L  10      31.175  -3.016  39.003  1.00 27.48           O  
ATOM   1735  N   LEU L  11      33.667  -2.225  37.208  1.00 20.85           N  
ATOM   1736  CA  LEU L  11      33.966  -0.833  36.969  1.00 22.03           C  
ATOM   1737  C   LEU L  11      33.299  -0.329  35.681  1.00 23.13           C  
ATOM   1738  O   LEU L  11      32.916  -1.126  34.828  1.00 21.46           O  
ATOM   1739  CB  LEU L  11      35.470  -0.581  36.876  1.00 21.63           C  
ATOM   1740  CG  LEU L  11      36.214  -1.332  35.768  1.00 20.36           C  
ATOM   1741  CD1 LEU L  11      36.466  -0.439  34.568  1.00  8.79           C  
ATOM   1742  CD2 LEU L  11      37.534  -1.873  36.315  1.00 24.09           C  
ATOM   1743  N   SER L  12      33.207   0.987  35.575  1.00 22.37           N  
ATOM   1744  CA  SER L  12      32.703   1.635  34.368  1.00 22.52           C  
ATOM   1745  C   SER L  12      33.664   2.772  33.994  1.00 21.33           C  
ATOM   1746  O   SER L  12      34.129   3.496  34.890  1.00 17.21           O  
ATOM   1747  CB  SER L  12      31.285   2.134  34.529  1.00 22.91           C  
ATOM   1748  OG  SER L  12      31.243   3.205  35.455  1.00 37.73           O  
ATOM   1749  N   ALA L  13      34.025   2.849  32.727  1.00 18.65           N  
ATOM   1750  CA  ALA L  13      34.976   3.844  32.264  1.00 17.55           C  
ATOM   1751  C   ALA L  13      34.585   4.405  30.917  1.00 17.24           C  
ATOM   1752  O   ALA L  13      33.564   4.037  30.338  1.00 19.49           O  
ATOM   1753  CB  ALA L  13      36.396   3.301  32.261  1.00 13.37           C  
ATOM   1754  N   SER L  14      35.389   5.330  30.373  1.00 17.50           N  
ATOM   1755  CA  SER L  14      34.950   5.904  29.087  1.00 18.60           C  
ATOM   1756  C   SER L  14      35.779   5.305  27.953  1.00 16.86           C  
ATOM   1757  O   SER L  14      36.875   4.827  28.206  1.00 11.36           O  
ATOM   1758  CB  SER L  14      35.274   7.426  29.131  1.00 21.09           C  
ATOM   1759  OG  SER L  14      34.408   8.049  30.068  1.00 32.25           O  
ATOM   1760  N   VAL L  15      35.266   5.444  26.735  1.00 17.77           N  
ATOM   1761  CA  VAL L  15      36.052   4.998  25.572  1.00 21.33           C  
ATOM   1762  C   VAL L  15      37.420   5.706  25.605  1.00 22.05           C  
ATOM   1763  O   VAL L  15      37.485   6.902  25.893  1.00 26.63           O  
ATOM   1764  CB  VAL L  15      35.341   5.417  24.258  1.00 21.96           C  
ATOM   1765  CG1 VAL L  15      36.171   4.993  23.056  1.00 21.28           C  
ATOM   1766  CG2 VAL L  15      33.952   4.793  24.206  1.00 18.43           C  
ATOM   1767  N   GLY L  16      38.474   4.962  25.318  1.00 19.21           N  
ATOM   1768  CA  GLY L  16      39.807   5.481  25.297  1.00 21.52           C  
ATOM   1769  C   GLY L  16      40.558   5.334  26.605  1.00 23.79           C  
ATOM   1770  O   GLY L  16      41.803   5.366  26.607  1.00 25.93           O  
ATOM   1771  N   ASP L  17      39.846   5.176  27.710  1.00 23.24           N  
ATOM   1772  CA  ASP L  17      40.444   5.047  29.017  1.00 22.83           C  
ATOM   1773  C   ASP L  17      41.393   3.867  29.159  1.00 22.22           C  
ATOM   1774  O   ASP L  17      41.292   2.858  28.467  1.00 18.51           O  
ATOM   1775  CB  ASP L  17      39.307   4.831  30.069  1.00 24.59           C  
ATOM   1776  CG  ASP L  17      38.797   6.183  30.543  1.00 23.47           C  
ATOM   1777  OD1 ASP L  17      39.281   7.183  29.976  1.00 21.37           O  
ATOM   1778  OD2 ASP L  17      37.949   6.221  31.450  1.00 27.98           O  
ATOM   1779  N   ARG L  18      42.288   3.975  30.149  1.00 24.90           N  
ATOM   1780  CA  ARG L  18      43.156   2.844  30.470  1.00 25.11           C  
ATOM   1781  C   ARG L  18      42.535   2.104  31.677  1.00 23.99           C  
ATOM   1782  O   ARG L  18      42.298   2.728  32.713  1.00 24.59           O  
ATOM   1783  CB  ARG L  18      44.565   3.286  30.808  1.00 28.11           C  
ATOM   1784  CG  ARG L  18      45.499   2.131  31.160  1.00 37.35           C  
ATOM   1785  CD  ARG L  18      46.618   2.592  32.085  1.00 46.06           C  
ATOM   1786  NE  ARG L  18      46.394   2.192  33.468  1.00 52.31           N  
ATOM   1787  CZ  ARG L  18      45.396   2.604  34.242  0.50 52.90           C  
ATOM   1788  NH1 ARG L  18      44.502   3.475  33.795  0.50 51.39           N  
ATOM   1789  NH2 ARG L  18      45.278   2.132  35.482  0.50 49.13           N  
ATOM   1790  N   VAL L  19      42.227   0.831  31.487  1.00 19.34           N  
ATOM   1791  CA  VAL L  19      41.627   0.036  32.542  1.00 17.19           C  
ATOM   1792  C   VAL L  19      42.555  -0.994  33.107  1.00 16.46           C  
ATOM   1793  O   VAL L  19      43.363  -1.650  32.435  1.00 16.74           O  
ATOM   1794  CB  VAL L  19      40.263  -0.531  32.175  1.00 17.55           C  
ATOM   1795  CG1 VAL L  19      40.103  -1.974  32.595  1.00 23.48           C  
ATOM   1796  CG2 VAL L  19      39.142   0.325  32.753  1.00 21.22           C  
ATOM   1797  N   THR L  20      42.505  -1.182  34.439  1.00 18.55           N  
ATOM   1798  CA  THR L  20      43.409  -2.184  34.994  1.00 22.15           C  
ATOM   1799  C   THR L  20      42.740  -3.121  35.976  1.00 21.94           C  
ATOM   1800  O   THR L  20      41.853  -2.708  36.737  1.00 17.67           O  
ATOM   1801  CB  THR L  20      44.634  -1.514  35.623  1.00 25.55           C  
ATOM   1802  OG1 THR L  20      45.628  -1.370  34.585  1.00 36.37           O  
ATOM   1803  CG2 THR L  20      45.229  -2.407  36.693  1.00 26.52           C  
ATOM   1804  N   ILE L  21      43.121  -4.400  35.943  1.00 17.45           N  
ATOM   1805  CA  ILE L  21      42.489  -5.402  36.808  1.00 12.97           C  
ATOM   1806  C   ILE L  21      43.538  -6.323  37.427  1.00 12.09           C  
ATOM   1807  O   ILE L  21      44.518  -6.684  36.755  1.00  9.60           O  
ATOM   1808  CB  ILE L  21      41.467  -6.216  35.996  1.00 14.25           C  
ATOM   1809  CG1 ILE L  21      40.336  -5.366  35.407  1.00 14.88           C  
ATOM   1810  CG2 ILE L  21      40.899  -7.378  36.787  1.00 17.39           C  
ATOM   1811  CD1 ILE L  21      39.387  -6.164  34.530  1.00 19.34           C  
ATOM   1812  N   THR L  22      43.381  -6.642  38.710  1.00 11.05           N  
ATOM   1813  CA  THR L  22      44.295  -7.443  39.459  1.00 10.12           C  
ATOM   1814  C   THR L  22      43.677  -8.783  39.904  1.00 11.17           C  
ATOM   1815  O   THR L  22      42.499  -8.854  40.213  1.00 11.01           O  
ATOM   1816  CB  THR L  22      44.859  -6.776  40.727  1.00 12.07           C  
ATOM   1817  OG1 THR L  22      43.818  -6.349  41.597  1.00 26.32           O  
ATOM   1818  CG2 THR L  22      45.709  -5.574  40.421  1.00 16.42           C  
ATOM   1819  N   CYS L  23      44.530  -9.780  39.983  1.00 15.95           N  
ATOM   1820  CA  CYS L  23      44.254 -11.086  40.510  1.00 13.78           C  
ATOM   1821  C   CYS L  23      45.446 -11.540  41.385  1.00 13.76           C  
ATOM   1822  O   CYS L  23      46.585 -11.433  40.934  1.00 10.37           O  
ATOM   1823  CB  CYS L  23      44.059 -12.141  39.413  1.00 11.49           C  
ATOM   1824  SG  CYS L  23      42.312 -12.419  39.042  1.00 28.36           S  
ATOM   1825  N   GLN L  24      45.138 -11.958  42.589  1.00 15.05           N  
ATOM   1826  CA  GLN L  24      46.178 -12.435  43.492  1.00 20.69           C  
ATOM   1827  C   GLN L  24      45.983 -13.914  43.792  1.00 19.40           C  
ATOM   1828  O   GLN L  24      44.860 -14.377  44.017  1.00 16.73           O  
ATOM   1829  CB  GLN L  24      46.252 -11.591  44.752  1.00 22.82           C  
ATOM   1830  CG  GLN L  24      46.378 -12.390  46.040  0.50 24.12           C  
ATOM   1831  CD  GLN L  24      47.645 -12.076  46.803  0.50 25.56           C  
ATOM   1832  OE1 GLN L  24      47.590 -11.506  47.893  0.50 31.25           O  
ATOM   1833  NE2 GLN L  24      48.789 -12.447  46.240  0.50 24.78           N  
ATOM   1834  N   ALA L  25      47.066 -14.691  43.743  1.00 18.66           N  
ATOM   1835  CA  ALA L  25      46.911 -16.131  44.036  1.00 18.16           C  
ATOM   1836  C   ALA L  25      47.254 -16.359  45.512  1.00 18.17           C  
ATOM   1837  O   ALA L  25      48.000 -15.573  46.093  1.00 22.10           O  
ATOM   1838  CB  ALA L  25      47.906 -16.915  43.176  1.00 11.66           C  
ATOM   1839  N   SER L  26      46.745 -17.427  46.099  1.00 17.42           N  
ATOM   1840  CA  SER L  26      47.085 -17.689  47.499  1.00 17.28           C  
ATOM   1841  C   SER L  26      48.401 -18.460  47.594  1.00 17.99           C  
ATOM   1842  O   SER L  26      48.815 -18.785  48.713  1.00 23.19           O  
ATOM   1843  CB  SER L  26      45.952 -18.480  48.160  1.00 19.93           C  
ATOM   1844  OG  SER L  26      45.835 -19.758  47.544  1.00 22.85           O  
ATOM   1845  N   GLN L  27      49.058 -18.707  46.473  1.00 20.02           N  
ATOM   1846  CA  GLN L  27      50.348 -19.414  46.446  1.00 24.36           C  
ATOM   1847  C   GLN L  27      51.138 -18.984  45.198  1.00 22.63           C  
ATOM   1848  O   GLN L  27      50.546 -18.551  44.214  1.00 27.87           O  
ATOM   1849  CB  GLN L  27      50.081 -20.923  46.244  1.00 33.74           C  
ATOM   1850  CG  GLN L  27      49.607 -21.681  47.456  1.00 43.47           C  
ATOM   1851  CD  GLN L  27      49.370 -23.159  47.116  1.00 51.33           C  
ATOM   1852  OE1 GLN L  27      50.094 -23.713  46.282  1.00 56.01           O  
ATOM   1853  NE2 GLN L  27      48.366 -23.751  47.741  1.00 61.91           N  
ATOM   1854  N   ASP L  28      52.451 -19.232  45.151  1.00 20.66           N  
ATOM   1855  CA  ASP L  28      53.092 -18.867  43.842  1.00 20.85           C  
ATOM   1856  C   ASP L  28      52.598 -19.828  42.780  1.00 17.75           C  
ATOM   1857  O   ASP L  28      52.738 -21.043  42.915  1.00 25.31           O  
ATOM   1858  CB  ASP L  28      54.587 -18.838  43.955  1.00 21.16           C  
ATOM   1859  CG  ASP L  28      55.332 -18.952  42.646  1.00 24.56           C  
ATOM   1860  OD1 ASP L  28      56.026 -17.988  42.255  1.00 29.97           O  
ATOM   1861  OD2 ASP L  28      55.277 -20.031  42.010  0.50 31.37           O  
ATOM   1862  N   ILE L  29      51.989 -19.330  41.702  1.00 14.58           N  
ATOM   1863  CA  ILE L  29      51.503 -20.310  40.704  1.00 16.79           C  
ATOM   1864  C   ILE L  29      52.458 -20.358  39.511  1.00 21.24           C  
ATOM   1865  O   ILE L  29      52.095 -20.818  38.430  1.00 23.98           O  
ATOM   1866  CB  ILE L  29      50.106 -19.922  40.221  1.00 14.37           C  
ATOM   1867  CG1 ILE L  29      50.013 -18.437  39.821  1.00 13.89           C  
ATOM   1868  CG2 ILE L  29      49.055 -20.240  41.285  1.00  9.05           C  
ATOM   1869  CD1 ILE L  29      48.908 -18.183  38.813  1.00 20.90           C  
ATOM   1870  N   SER L  30      53.677 -19.894  39.730  1.00 25.07           N  
ATOM   1871  CA  SER L  30      54.728 -19.891  38.749  1.00 27.17           C  
ATOM   1872  C   SER L  30      54.322 -19.384  37.387  1.00 25.68           C  
ATOM   1873  O   SER L  30      54.731 -19.931  36.354  1.00 29.56           O  
ATOM   1874  CB  SER L  30      55.401 -21.271  38.655  1.00 27.40           C  
ATOM   1875  OG  SER L  30      55.064 -22.050  39.809  0.50 24.29           O  
ATOM   1876  N   ASP L  31      53.536 -18.311  37.321  1.00 24.05           N  
ATOM   1877  CA  ASP L  31      53.131 -17.715  36.086  1.00 23.84           C  
ATOM   1878  C   ASP L  31      52.120 -18.476  35.276  1.00 23.49           C  
ATOM   1879  O   ASP L  31      51.885 -18.157  34.085  1.00 17.95           O  
ATOM   1880  CB  ASP L  31      54.299 -17.244  35.245  1.00 27.28           C  
ATOM   1881  CG  ASP L  31      54.966 -15.981  35.750  1.00 31.13           C  
ATOM   1882  OD1 ASP L  31      54.972 -15.737  36.974  1.00 36.43           O  
ATOM   1883  OD2 ASP L  31      55.495 -15.227  34.898  1.00 36.36           O  
ATOM   1884  N   TYR L  32      51.460 -19.495  35.844  1.00 21.63           N  
ATOM   1885  CA  TYR L  32      50.441 -20.200  35.050  1.00 15.14           C  
ATOM   1886  C   TYR L  32      49.061 -19.569  35.318  1.00 11.21           C  
ATOM   1887  O   TYR L  32      48.305 -20.133  36.090  1.00  8.60           O  
ATOM   1888  CB  TYR L  32      50.368 -21.673  35.529  1.00 15.78           C  
ATOM   1889  CG  TYR L  32      51.639 -22.352  35.054  1.00 21.37           C  
ATOM   1890  CD1 TYR L  32      51.891 -22.416  33.691  1.00 25.21           C  
ATOM   1891  CD2 TYR L  32      52.575 -22.801  35.951  1.00 25.98           C  
ATOM   1892  CE1 TYR L  32      53.055 -23.003  33.231  1.00 29.11           C  
ATOM   1893  CE2 TYR L  32      53.742 -23.397  35.496  1.00 28.72           C  
ATOM   1894  CZ  TYR L  32      53.967 -23.489  34.142  1.00 30.68           C  
ATOM   1895  OH  TYR L  32      55.134 -24.069  33.695  1.00 47.53           O  
ATOM   1896  N   LEU L  33      48.828 -18.471  34.633  1.00  9.28           N  
ATOM   1897  CA  LEU L  33      47.620 -17.705  34.691  1.00  9.46           C  
ATOM   1898  C   LEU L  33      47.082 -17.372  33.298  1.00 12.12           C  
ATOM   1899  O   LEU L  33      47.842 -17.134  32.361  1.00 19.68           O  
ATOM   1900  CB  LEU L  33      47.883 -16.391  35.459  1.00 10.99           C  
ATOM   1901  CG  LEU L  33      46.605 -15.641  35.865  1.00 12.72           C  
ATOM   1902  CD1 LEU L  33      46.147 -16.077  37.246  1.00 10.39           C  
ATOM   1903  CD2 LEU L  33      46.840 -14.148  35.794  1.00 20.34           C  
ATOM   1904  N   ILE L  34      45.768 -17.351  33.152  1.00 11.09           N  
ATOM   1905  CA  ILE L  34      45.184 -17.003  31.840  1.00  8.87           C  
ATOM   1906  C   ILE L  34      44.180 -15.865  32.067  1.00  7.25           C  
ATOM   1907  O   ILE L  34      43.531 -15.816  33.110  1.00  4.95           O  
ATOM   1908  CB  ILE L  34      44.377 -18.201  31.313  1.00 11.65           C  
ATOM   1909  CG1 ILE L  34      45.171 -19.310  30.678  1.00 14.73           C  
ATOM   1910  CG2 ILE L  34      43.153 -17.821  30.545  1.00  9.45           C  
ATOM   1911  CD1 ILE L  34      44.577 -20.687  30.928  1.00 23.91           C  
ATOM   1912  N   TRP L  35      44.014 -15.006  31.067  1.00  6.84           N  
ATOM   1913  CA  TRP L  35      42.913 -14.025  31.226  1.00  7.05           C  
ATOM   1914  C   TRP L  35      41.855 -14.391  30.165  1.00  8.67           C  
ATOM   1915  O   TRP L  35      42.247 -14.704  29.037  1.00  7.77           O  
ATOM   1916  CB  TRP L  35      43.405 -12.625  31.073  1.00  6.36           C  
ATOM   1917  CG  TRP L  35      44.284 -12.154  32.208  1.00  8.87           C  
ATOM   1918  CD1 TRP L  35      45.634 -12.195  32.301  1.00 11.45           C  
ATOM   1919  CD2 TRP L  35      43.809 -11.561  33.427  1.00  7.52           C  
ATOM   1920  NE1 TRP L  35      46.050 -11.654  33.520  1.00 10.41           N  
ATOM   1921  CE2 TRP L  35      44.930 -11.267  34.214  1.00  9.88           C  
ATOM   1922  CE3 TRP L  35      42.526 -11.271  33.911  1.00  8.88           C  
ATOM   1923  CZ2 TRP L  35      44.811 -10.676  35.475  1.00 11.43           C  
ATOM   1924  CZ3 TRP L  35      42.409 -10.688  35.157  1.00  9.17           C  
ATOM   1925  CH2 TRP L  35      43.545 -10.401  35.921  1.00 11.21           C  
ATOM   1926  N   TYR L  36      40.604 -14.428  30.562  1.00  4.40           N  
ATOM   1927  CA  TYR L  36      39.507 -14.748  29.666  1.00  2.93           C  
ATOM   1928  C   TYR L  36      38.545 -13.509  29.628  1.00  7.78           C  
ATOM   1929  O   TYR L  36      38.420 -12.838  30.648  1.00 12.23           O  
ATOM   1930  CB  TYR L  36      38.650 -15.876  30.222  1.00  5.67           C  
ATOM   1931  CG  TYR L  36      39.269 -17.226  30.293  1.00 11.32           C  
ATOM   1932  CD1 TYR L  36      39.649 -17.779  31.517  1.00 15.63           C  
ATOM   1933  CD2 TYR L  36      39.449 -17.997  29.154  1.00 14.39           C  
ATOM   1934  CE1 TYR L  36      40.209 -19.044  31.593  1.00 17.13           C  
ATOM   1935  CE2 TYR L  36      40.010 -19.263  29.223  1.00 16.39           C  
ATOM   1936  CZ  TYR L  36      40.389 -19.780  30.440  1.00 17.01           C  
ATOM   1937  OH  TYR L  36      40.943 -21.040  30.507  1.00 14.97           O  
ATOM   1938  N   GLN L  37      37.890 -13.380  28.512  1.00 12.02           N  
ATOM   1939  CA  GLN L  37      36.847 -12.347  28.329  1.00 13.63           C  
ATOM   1940  C   GLN L  37      35.528 -13.104  28.086  1.00 10.78           C  
ATOM   1941  O   GLN L  37      35.518 -14.026  27.280  1.00  4.19           O  
ATOM   1942  CB  GLN L  37      37.164 -11.534  27.058  1.00 12.97           C  
ATOM   1943  CG  GLN L  37      36.046 -10.592  26.650  1.00 12.79           C  
ATOM   1944  CD  GLN L  37      36.331  -9.919  25.320  1.00 15.71           C  
ATOM   1945  OE1 GLN L  37      36.232 -10.540  24.267  1.00 22.23           O  
ATOM   1946  NE2 GLN L  37      36.692  -8.640  25.373  1.00 23.16           N  
ATOM   1947  N   GLN L  38      34.479 -12.745  28.793  1.00 15.68           N  
ATOM   1948  CA  GLN L  38      33.201 -13.393  28.599  1.00 14.98           C  
ATOM   1949  C   GLN L  38      32.116 -12.360  28.282  1.00 16.41           C  
ATOM   1950  O   GLN L  38      31.678 -11.626  29.162  1.00 13.11           O  
ATOM   1951  CB  GLN L  38      32.776 -14.306  29.726  1.00 14.01           C  
ATOM   1952  CG  GLN L  38      31.517 -15.123  29.400  1.00 15.35           C  
ATOM   1953  CD  GLN L  38      31.053 -15.977  30.550  1.00 15.71           C  
ATOM   1954  OE1 GLN L  38      31.373 -15.731  31.707  1.00 19.68           O  
ATOM   1955  NE2 GLN L  38      30.297 -17.035  30.247  1.00 17.06           N  
ATOM   1956  N   LYS L  39      31.738 -12.326  27.009  1.00 16.26           N  
ATOM   1957  CA  LYS L  39      30.667 -11.448  26.563  1.00 16.01           C  
ATOM   1958  C   LYS L  39      29.332 -12.017  27.074  1.00 19.94           C  
ATOM   1959  O   LYS L  39      29.233 -13.243  27.229  1.00 19.24           O  
ATOM   1960  CB  LYS L  39      30.651 -11.327  25.048  1.00 16.50           C  
ATOM   1961  CG  LYS L  39      31.933 -10.735  24.461  1.00 19.47           C  
ATOM   1962  CD  LYS L  39      31.624  -9.520  23.614  1.00 24.36           C  
ATOM   1963  CE  LYS L  39      32.823  -9.034  22.824  1.00 30.47           C  
ATOM   1964  NZ  LYS L  39      33.457 -10.146  22.041  1.00 46.03           N  
ATOM   1965  N   LEU L  40      28.383 -11.155  27.360  1.00 24.74           N  
ATOM   1966  CA  LEU L  40      27.078 -11.558  27.870  1.00 30.74           C  
ATOM   1967  C   LEU L  40      26.491 -12.717  27.055  1.00 29.34           C  
ATOM   1968  O   LEU L  40      26.324 -12.585  25.843  1.00 33.96           O  
ATOM   1969  CB  LEU L  40      26.104 -10.393  27.876  1.00 36.50           C  
ATOM   1970  CG  LEU L  40      24.840 -10.465  28.682  1.00 43.98           C  
ATOM   1971  CD1 LEU L  40      23.672 -11.054  27.923  1.00 57.71           C  
ATOM   1972  CD2 LEU L  40      25.011 -11.054  30.054  1.00 49.42           C  
ATOM   1973  N   GLY L  41      26.184 -13.808  27.735  1.00 27.72           N  
ATOM   1974  CA  GLY L  41      25.604 -14.979  27.174  1.00 29.13           C  
ATOM   1975  C   GLY L  41      26.511 -15.812  26.305  1.00 30.45           C  
ATOM   1976  O   GLY L  41      26.016 -16.669  25.550  1.00 31.42           O  
ATOM   1977  N   LYS L  42      27.824 -15.616  26.390  1.00 27.86           N  
ATOM   1978  CA  LYS L  42      28.746 -16.397  25.569  1.00 24.92           C  
ATOM   1979  C   LYS L  42      29.782 -17.103  26.419  1.00 16.87           C  
ATOM   1980  O   LYS L  42      29.942 -16.828  27.605  1.00 19.63           O  
ATOM   1981  CB  LYS L  42      29.447 -15.482  24.553  1.00 34.04           C  
ATOM   1982  CG  LYS L  42      28.657 -15.351  23.249  1.00 43.44           C  
ATOM   1983  CD  LYS L  42      27.787 -14.109  23.280  1.00 53.02           C  
ATOM   1984  CE  LYS L  42      28.578 -12.887  22.812  1.00 61.40           C  
ATOM   1985  NZ  LYS L  42      27.862 -12.162  21.717  1.00 79.29           N  
ATOM   1986  N   ALA L  43      30.514 -18.052  25.817  1.00 12.68           N  
ATOM   1987  CA  ALA L  43      31.527 -18.740  26.634  1.00 10.93           C  
ATOM   1988  C   ALA L  43      32.799 -17.892  26.695  1.00 13.33           C  
ATOM   1989  O   ALA L  43      33.120 -17.141  25.778  1.00 17.80           O  
ATOM   1990  CB  ALA L  43      31.841 -20.094  26.017  1.00  6.18           C  
ATOM   1991  N   PRO L  44      33.546 -18.055  27.771  1.00 14.27           N  
ATOM   1992  CA  PRO L  44      34.789 -17.307  27.950  1.00 14.87           C  
ATOM   1993  C   PRO L  44      35.761 -17.558  26.778  1.00 16.68           C  
ATOM   1994  O   PRO L  44      35.826 -18.691  26.297  1.00 20.06           O  
ATOM   1995  CB  PRO L  44      35.388 -17.927  29.218  1.00 14.36           C  
ATOM   1996  CG  PRO L  44      34.246 -18.578  29.916  1.00 16.28           C  
ATOM   1997  CD  PRO L  44      33.256 -18.983  28.864  1.00 12.44           C  
ATOM   1998  N   ASN L  45      36.494 -16.538  26.389  1.00 15.74           N  
ATOM   1999  CA  ASN L  45      37.474 -16.646  25.282  1.00 13.83           C  
ATOM   2000  C   ASN L  45      38.866 -16.313  25.851  1.00 10.40           C  
ATOM   2001  O   ASN L  45      39.023 -15.331  26.574  1.00  6.33           O  
ATOM   2002  CB  ASN L  45      37.112 -15.588  24.224  1.00 17.56           C  
ATOM   2003  CG  ASN L  45      36.889 -16.155  22.850  0.50 20.05           C  
ATOM   2004  OD1 ASN L  45      37.643 -17.013  22.379  0.50 20.71           O  
ATOM   2005  ND2 ASN L  45      35.864 -15.650  22.161  0.50 21.16           N  
ATOM   2006  N   LEU L  46      39.840 -17.154  25.585  1.00 10.27           N  
ATOM   2007  CA  LEU L  46      41.182 -16.950  26.131  1.00  8.06           C  
ATOM   2008  C   LEU L  46      41.817 -15.724  25.464  1.00 12.98           C  
ATOM   2009  O   LEU L  46      41.720 -15.588  24.246  1.00 18.58           O  
ATOM   2010  CB  LEU L  46      42.034 -18.189  25.866  1.00 10.07           C  
ATOM   2011  CG  LEU L  46      43.348 -18.297  26.631  1.00 16.47           C  
ATOM   2012  CD1 LEU L  46      43.667 -19.745  26.967  1.00 15.73           C  
ATOM   2013  CD2 LEU L  46      44.492 -17.667  25.838  1.00 18.34           C  
ATOM   2014  N   LEU L  47      42.427 -14.866  26.252  1.00 13.60           N  
ATOM   2015  CA  LEU L  47      43.091 -13.661  25.724  1.00 11.80           C  
ATOM   2016  C   LEU L  47      44.607 -13.800  25.947  1.00 16.82           C  
ATOM   2017  O   LEU L  47      45.434 -13.638  25.072  1.00 18.50           O  
ATOM   2018  CB  LEU L  47      42.645 -12.484  26.661  1.00 10.97           C  
ATOM   2019  CG  LEU L  47      41.236 -11.984  26.374  1.00 12.88           C  
ATOM   2020  CD1 LEU L  47      40.988 -10.651  27.043  1.00 10.58           C  
ATOM   2021  CD2 LEU L  47      40.999 -11.921  24.877  1.00 13.85           C  
ATOM   2022  N   ILE L  48      44.950 -14.084  27.214  1.00 18.35           N  
ATOM   2023  CA  ILE L  48      46.368 -14.178  27.537  1.00 15.74           C  
ATOM   2024  C   ILE L  48      46.657 -15.471  28.309  1.00 15.10           C  
ATOM   2025  O   ILE L  48      45.857 -15.884  29.141  1.00 15.43           O  
ATOM   2026  CB  ILE L  48      46.781 -12.993  28.441  1.00 13.59           C  
ATOM   2027  CG1 ILE L  48      46.741 -11.648  27.710  1.00 13.94           C  
ATOM   2028  CG2 ILE L  48      48.132 -13.242  29.075  1.00  5.55           C  
ATOM   2029  CD1 ILE L  48      46.731 -10.463  28.652  1.00 22.07           C  
ATOM   2030  N   TYR L  49      47.795 -16.053  27.993  1.00 11.41           N  
ATOM   2031  CA  TYR L  49      48.267 -17.238  28.669  1.00 16.86           C  
ATOM   2032  C   TYR L  49      49.699 -16.983  29.178  1.00 17.81           C  
ATOM   2033  O   TYR L  49      50.294 -15.991  28.742  1.00 18.95           O  
ATOM   2034  CB  TYR L  49      48.159 -18.493  27.863  1.00 20.69           C  
ATOM   2035  CG  TYR L  49      48.940 -18.585  26.584  1.00 24.31           C  
ATOM   2036  CD1 TYR L  49      50.194 -19.196  26.551  1.00 24.73           C  
ATOM   2037  CD2 TYR L  49      48.434 -18.081  25.392  1.00 26.82           C  
ATOM   2038  CE1 TYR L  49      50.910 -19.285  25.374  1.00 27.09           C  
ATOM   2039  CE2 TYR L  49      49.150 -18.172  24.216  1.00 28.56           C  
ATOM   2040  CZ  TYR L  49      50.386 -18.772  24.206  1.00 28.50           C  
ATOM   2041  OH  TYR L  49      51.104 -18.863  23.025  1.00 32.56           O  
ATOM   2042  N   ASP L  50      50.176 -17.808  30.081  1.00 19.23           N  
ATOM   2043  CA  ASP L  50      51.489 -17.666  30.670  1.00 23.28           C  
ATOM   2044  C   ASP L  50      51.708 -16.301  31.274  1.00 22.13           C  
ATOM   2045  O   ASP L  50      52.778 -15.707  31.230  1.00 16.44           O  
ATOM   2046  CB  ASP L  50      52.598 -18.102  29.743  1.00 30.59           C  
ATOM   2047  CG  ASP L  50      52.979 -19.563  29.995  1.00 38.13           C  
ATOM   2048  OD1 ASP L  50      52.463 -20.451  29.300  0.50 35.88           O  
ATOM   2049  OD2 ASP L  50      53.748 -19.783  30.959  1.00 55.49           O  
ATOM   2050  N   ALA L  51      50.614 -15.758  31.844  1.00 20.18           N  
ATOM   2051  CA  ALA L  51      50.656 -14.470  32.473  1.00 16.51           C  
ATOM   2052  C   ALA L  51      50.762 -13.318  31.507  1.00 11.25           C  
ATOM   2053  O   ALA L  51      50.097 -12.295  31.704  1.00 13.14           O  
ATOM   2054  CB  ALA L  51      51.755 -14.401  33.527  1.00 18.93           C  
ATOM   2055  N   SER L  52      51.618 -13.413  30.487  1.00 11.55           N  
ATOM   2056  CA  SER L  52      51.797 -12.246  29.626  1.00 15.65           C  
ATOM   2057  C   SER L  52      51.878 -12.556  28.162  1.00 19.21           C  
ATOM   2058  O   SER L  52      52.263 -11.692  27.353  1.00 26.54           O  
ATOM   2059  CB  SER L  52      53.111 -11.533  30.061  1.00 14.46           C  
ATOM   2060  OG  SER L  52      54.189 -12.425  29.743  1.00 19.12           O  
ATOM   2061  N   THR L  53      51.503 -13.756  27.717  1.00 20.08           N  
ATOM   2062  CA  THR L  53      51.549 -13.990  26.268  1.00 17.10           C  
ATOM   2063  C   THR L  53      50.143 -13.854  25.665  1.00 16.26           C  
ATOM   2064  O   THR L  53      49.234 -14.579  26.079  1.00 21.75           O  
ATOM   2065  CB  THR L  53      52.002 -15.437  25.971  1.00 17.11           C  
ATOM   2066  OG1 THR L  53      53.302 -15.648  26.474  1.00 22.78           O  
ATOM   2067  CG2 THR L  53      52.007 -15.664  24.471  1.00  9.98           C  
ATOM   2068  N   LEU L  54      50.003 -12.975  24.699  1.00 15.77           N  
ATOM   2069  CA  LEU L  54      48.689 -12.772  24.060  1.00 18.28           C  
ATOM   2070  C   LEU L  54      48.407 -13.993  23.158  1.00 20.29           C  
ATOM   2071  O   LEU L  54      49.365 -14.450  22.531  1.00 27.32           O  
ATOM   2072  CB  LEU L  54      48.854 -11.584  23.054  1.00 21.08           C  
ATOM   2073  CG  LEU L  54      48.691 -10.203  23.661  1.00 25.72           C  
ATOM   2074  CD1 LEU L  54      47.550  -9.454  22.987  1.00 28.98           C  
ATOM   2075  CD2 LEU L  54      48.477 -10.287  25.163  1.00 35.44           C  
ATOM   2076  N   GLU L  55      47.162 -14.403  23.060  1.00 20.97           N  
ATOM   2077  CA  GLU L  55      46.838 -15.485  22.095  1.00 21.44           C  
ATOM   2078  C   GLU L  55      46.846 -14.816  20.694  1.00 23.75           C  
ATOM   2079  O   GLU L  55      46.489 -13.637  20.596  1.00 17.67           O  
ATOM   2080  CB  GLU L  55      45.463 -16.059  22.350  1.00 21.75           C  
ATOM   2081  CG  GLU L  55      45.347 -17.554  22.457  1.00 27.37           C  
ATOM   2082  CD  GLU L  55      46.229 -18.354  21.538  1.00 28.25           C  
ATOM   2083  OE1 GLU L  55      46.406 -17.980  20.362  0.50 24.60           O  
ATOM   2084  OE2 GLU L  55      46.762 -19.403  21.986  0.50 36.85           O  
ATOM   2085  N   THR L  56      47.269 -15.570  19.699  1.00 27.07           N  
ATOM   2086  CA  THR L  56      47.324 -15.052  18.330  1.00 28.85           C  
ATOM   2087  C   THR L  56      45.965 -14.444  17.955  1.00 32.64           C  
ATOM   2088  O   THR L  56      44.950 -15.137  18.066  1.00 28.77           O  
ATOM   2089  CB  THR L  56      47.524 -16.252  17.339  1.00 29.32           C  
ATOM   2090  OG1 THR L  56      48.818 -16.801  17.584  1.00 48.92           O  
ATOM   2091  CG2 THR L  56      47.529 -15.681  15.927  1.00 28.21           C  
ATOM   2092  N   GLY L  57      45.966 -13.198  17.501  1.00 35.18           N  
ATOM   2093  CA  GLY L  57      44.702 -12.584  17.080  1.00 34.83           C  
ATOM   2094  C   GLY L  57      44.124 -11.631  18.083  1.00 33.76           C  
ATOM   2095  O   GLY L  57      43.168 -10.890  17.820  1.00 37.57           O  
ATOM   2096  N   VAL L  58      44.685 -11.593  19.298  1.00 30.71           N  
ATOM   2097  CA  VAL L  58      44.123 -10.630  20.271  1.00 24.35           C  
ATOM   2098  C   VAL L  58      44.718  -9.247  20.008  1.00 21.47           C  
ATOM   2099  O   VAL L  58      45.909  -9.151  19.718  1.00 20.88           O  
ATOM   2100  CB  VAL L  58      44.567 -11.097  21.690  1.00 21.12           C  
ATOM   2101  CG1 VAL L  58      44.207 -10.039  22.713  1.00 22.84           C  
ATOM   2102  CG2 VAL L  58      43.859 -12.416  21.992  1.00 17.89           C  
ATOM   2103  N   PRO L  59      43.910  -8.204  20.069  1.00 20.21           N  
ATOM   2104  CA  PRO L  59      44.423  -6.844  19.862  1.00 19.47           C  
ATOM   2105  C   PRO L  59      45.515  -6.529  20.906  1.00 21.79           C  
ATOM   2106  O   PRO L  59      45.358  -6.917  22.063  1.00 20.58           O  
ATOM   2107  CB  PRO L  59      43.207  -5.972  20.158  1.00 17.63           C  
ATOM   2108  CG  PRO L  59      42.037  -6.851  19.882  1.00 19.32           C  
ATOM   2109  CD  PRO L  59      42.460  -8.243  20.242  1.00 19.26           C  
ATOM   2110  N   SER L  60      46.538  -5.819  20.482  1.00 24.71           N  
ATOM   2111  CA  SER L  60      47.659  -5.434  21.319  1.00 26.48           C  
ATOM   2112  C   SER L  60      47.286  -4.389  22.352  1.00 20.95           C  
ATOM   2113  O   SER L  60      48.093  -3.982  23.202  1.00 20.41           O  
ATOM   2114  CB  SER L  60      48.799  -4.888  20.430  1.00 33.38           C  
ATOM   2115  OG  SER L  60      48.269  -3.788  19.669  1.00 53.51           O  
ATOM   2116  N   ARG L  61      46.030  -3.957  22.347  1.00 15.02           N  
ATOM   2117  CA  ARG L  61      45.589  -3.035  23.404  1.00 11.72           C  
ATOM   2118  C   ARG L  61      45.437  -3.811  24.713  1.00 16.85           C  
ATOM   2119  O   ARG L  61      45.318  -3.256  25.799  1.00 19.09           O  
ATOM   2120  CB  ARG L  61      44.352  -2.321  22.978  1.00  9.48           C  
ATOM   2121  CG  ARG L  61      43.021  -2.811  23.433  1.00 13.52           C  
ATOM   2122  CD  ARG L  61      41.879  -1.945  22.883  1.00 13.78           C  
ATOM   2123  NE  ARG L  61      40.608  -2.688  22.876  1.00 13.89           N  
ATOM   2124  CZ  ARG L  61      40.086  -3.207  21.772  1.00 15.49           C  
ATOM   2125  NH1 ARG L  61      40.722  -3.041  20.620  1.00 28.88           N  
ATOM   2126  NH2 ARG L  61      38.979  -3.918  21.790  1.00 21.04           N  
ATOM   2127  N   PHE L  62      45.489  -5.141  24.608  1.00 20.25           N  
ATOM   2128  CA  PHE L  62      45.413  -6.034  25.737  1.00 19.44           C  
ATOM   2129  C   PHE L  62      46.784  -6.460  26.224  1.00 17.85           C  
ATOM   2130  O   PHE L  62      47.693  -6.795  25.468  1.00 18.74           O  
ATOM   2131  CB  PHE L  62      44.592  -7.284  25.413  1.00 22.50           C  
ATOM   2132  CG  PHE L  62      43.115  -7.009  25.196  1.00 26.87           C  
ATOM   2133  CD1 PHE L  62      42.281  -6.745  26.269  1.00 29.63           C  
ATOM   2134  CD2 PHE L  62      42.574  -7.013  23.925  1.00 28.13           C  
ATOM   2135  CE1 PHE L  62      40.940  -6.499  26.078  1.00 31.01           C  
ATOM   2136  CE2 PHE L  62      41.231  -6.778  23.727  1.00 28.86           C  
ATOM   2137  CZ  PHE L  62      40.407  -6.503  24.800  1.00 29.95           C  
ATOM   2138  N   SER L  63      46.958  -6.462  27.552  1.00 17.61           N  
ATOM   2139  CA  SER L  63      48.261  -6.878  28.044  1.00 12.88           C  
ATOM   2140  C   SER L  63      48.159  -7.348  29.493  1.00 13.05           C  
ATOM   2141  O   SER L  63      47.283  -6.904  30.240  1.00 14.90           O  
ATOM   2142  CB  SER L  63      49.298  -5.794  27.876  1.00 13.62           C  
ATOM   2143  OG  SER L  63      49.518  -5.090  29.085  1.00 21.06           O  
ATOM   2144  N   GLY L  64      49.055  -8.259  29.830  1.00 11.21           N  
ATOM   2145  CA  GLY L  64      49.156  -8.819  31.147  1.00 14.39           C  
ATOM   2146  C   GLY L  64      50.615  -8.862  31.613  1.00 16.32           C  
ATOM   2147  O   GLY L  64      51.536  -9.000  30.804  1.00 16.71           O  
ATOM   2148  N   SER L  65      50.799  -8.746  32.908  1.00 17.28           N  
ATOM   2149  CA  SER L  65      52.123  -8.822  33.501  1.00 19.66           C  
ATOM   2150  C   SER L  65      51.943  -9.279  34.981  1.00 21.00           C  
ATOM   2151  O   SER L  65      50.813  -9.358  35.438  1.00 16.46           O  
ATOM   2152  CB  SER L  65      52.743  -7.405  33.574  1.00 20.97           C  
ATOM   2153  OG  SER L  65      52.208  -6.758  34.739  1.00 29.10           O  
ATOM   2154  N   GLY L  66      53.067  -9.477  35.617  1.00 25.02           N  
ATOM   2155  CA  GLY L  66      53.153  -9.881  36.994  1.00 27.61           C  
ATOM   2156  C   GLY L  66      53.860 -11.223  37.138  1.00 29.92           C  
ATOM   2157  O   GLY L  66      54.256 -11.836  36.147  1.00 27.26           O  
ATOM   2158  N   SER L  67      54.003 -11.672  38.372  1.00 33.39           N  
ATOM   2159  CA  SER L  67      54.650 -12.982  38.604  1.00 36.63           C  
ATOM   2160  C   SER L  67      54.513 -13.294  40.102  1.00 33.37           C  
ATOM   2161  O   SER L  67      54.232 -12.364  40.874  1.00 31.39           O  
ATOM   2162  CB  SER L  67      56.144 -12.858  38.253  1.00 42.88           C  
ATOM   2163  OG  SER L  67      56.802 -12.043  39.226  1.00 56.69           O  
ATOM   2164  N   GLY L  68      54.700 -14.548  40.483  1.00 30.14           N  
ATOM   2165  CA  GLY L  68      54.583 -14.874  41.917  1.00 27.24           C  
ATOM   2166  C   GLY L  68      53.128 -15.026  42.312  1.00 23.33           C  
ATOM   2167  O   GLY L  68      52.486 -15.985  41.858  1.00 25.20           O  
ATOM   2168  N   THR L  69      52.583 -14.101  43.103  1.00 18.87           N  
ATOM   2169  CA  THR L  69      51.176 -14.228  43.485  1.00 17.85           C  
ATOM   2170  C   THR L  69      50.320 -13.071  43.014  1.00 17.43           C  
ATOM   2171  O   THR L  69      49.094 -13.107  43.232  1.00 19.55           O  
ATOM   2172  CB  THR L  69      51.064 -14.267  45.053  1.00 17.20           C  
ATOM   2173  OG1 THR L  69      51.671 -13.050  45.513  1.00 22.44           O  
ATOM   2174  CG2 THR L  69      51.958 -15.401  45.559  1.00 13.40           C  
ATOM   2175  N   GLU L  70      50.893 -12.039  42.413  1.00 19.19           N  
ATOM   2176  CA  GLU L  70      50.111 -10.880  41.981  1.00 20.26           C  
ATOM   2177  C   GLU L  70      50.166 -10.677  40.477  1.00 19.90           C  
ATOM   2178  O   GLU L  70      51.249 -10.459  39.912  1.00 21.32           O  
ATOM   2179  CB  GLU L  70      50.622  -9.623  42.705  1.00 21.70           C  
ATOM   2180  CG  GLU L  70      49.799  -8.371  42.404  0.50 24.24           C  
ATOM   2181  CD  GLU L  70      50.604  -7.110  42.681  0.50 27.30           C  
ATOM   2182  OE1 GLU L  70      50.842  -6.826  43.871  0.50 27.03           O  
ATOM   2183  OE2 GLU L  70      51.017  -6.451  41.709  0.50 32.40           O  
ATOM   2184  N   TYR L  71      49.014 -10.722  39.797  1.00 17.09           N  
ATOM   2185  CA  TYR L  71      48.989 -10.530  38.358  1.00 15.63           C  
ATOM   2186  C   TYR L  71      48.178  -9.360  37.890  1.00 16.32           C  
ATOM   2187  O   TYR L  71      47.271  -8.878  38.572  1.00 21.40           O  
ATOM   2188  CB  TYR L  71      48.585 -11.822  37.634  1.00 12.51           C  
ATOM   2189  CG  TYR L  71      49.655 -12.887  37.847  1.00  7.59           C  
ATOM   2190  CD1 TYR L  71      49.647 -13.655  38.997  1.00  6.93           C  
ATOM   2191  CD2 TYR L  71      50.656 -13.064  36.914  1.00  7.43           C  
ATOM   2192  CE1 TYR L  71      50.634 -14.620  39.195  1.00  9.55           C  
ATOM   2193  CE2 TYR L  71      51.642 -14.013  37.103  1.00 11.25           C  
ATOM   2194  CZ  TYR L  71      51.619 -14.785  38.245  1.00 11.92           C  
ATOM   2195  OH  TYR L  71      52.594 -15.733  38.438  1.00 14.34           O  
ATOM   2196  N   THR L  72      48.499  -8.837  36.696  1.00 15.92           N  
ATOM   2197  CA  THR L  72      47.826  -7.647  36.227  1.00 16.02           C  
ATOM   2198  C   THR L  72      47.375  -7.750  34.763  1.00 13.57           C  
ATOM   2199  O   THR L  72      48.172  -8.082  33.903  1.00 13.93           O  
ATOM   2200  CB  THR L  72      48.867  -6.455  36.257  1.00 21.57           C  
ATOM   2201  OG1 THR L  72      50.103  -7.027  36.747  1.00 44.02           O  
ATOM   2202  CG2 THR L  72      48.421  -5.457  37.296  1.00 20.04           C  
ATOM   2203  N   PHE L  73      46.125  -7.383  34.545  1.00 13.01           N  
ATOM   2204  CA  PHE L  73      45.509  -7.321  33.241  1.00 11.91           C  
ATOM   2205  C   PHE L  73      45.239  -5.854  32.888  1.00 12.08           C  
ATOM   2206  O   PHE L  73      44.620  -5.132  33.678  1.00 10.98           O  
ATOM   2207  CB  PHE L  73      44.156  -8.059  33.238  1.00  8.47           C  
ATOM   2208  CG  PHE L  73      43.453  -7.986  31.893  1.00 11.73           C  
ATOM   2209  CD1 PHE L  73      42.201  -7.410  31.774  1.00 14.92           C  
ATOM   2210  CD2 PHE L  73      44.047  -8.506  30.753  1.00 13.00           C  
ATOM   2211  CE1 PHE L  73      41.535  -7.359  30.559  1.00 14.34           C  
ATOM   2212  CE2 PHE L  73      43.397  -8.453  29.527  1.00 13.09           C  
ATOM   2213  CZ  PHE L  73      42.144  -7.872  29.426  1.00 14.33           C  
ATOM   2214  N   THR L  74      45.701  -5.405  31.721  1.00  9.94           N  
ATOM   2215  CA  THR L  74      45.424  -3.960  31.461  1.00 10.65           C  
ATOM   2216  C   THR L  74      44.789  -3.812  30.072  1.00 10.10           C  
ATOM   2217  O   THR L  74      45.232  -4.489  29.147  1.00 12.59           O  
ATOM   2218  CB  THR L  74      46.790  -3.205  31.362  1.00 12.98           C  
ATOM   2219  OG1 THR L  74      47.307  -3.019  32.673  1.00 22.01           O  
ATOM   2220  CG2 THR L  74      46.551  -1.810  30.790  1.00 11.47           C  
ATOM   2221  N   ILE L  75      43.873  -2.869  29.969  1.00  9.00           N  
ATOM   2222  CA  ILE L  75      43.336  -2.479  28.672  1.00 10.11           C  
ATOM   2223  C   ILE L  75      43.719  -0.990  28.450  1.00 12.34           C  
ATOM   2224  O   ILE L  75      43.134  -0.115  29.084  1.00 13.57           O  
ATOM   2225  CB  ILE L  75      41.836  -2.634  28.542  1.00  9.02           C  
ATOM   2226  CG1 ILE L  75      41.254  -3.931  29.098  1.00 11.38           C  
ATOM   2227  CG2 ILE L  75      41.399  -2.443  27.095  1.00 13.39           C  
ATOM   2228  CD1 ILE L  75      39.732  -3.989  28.983  1.00 17.02           C  
ATOM   2229  N   SER L  76      44.710  -0.788  27.626  1.00 17.15           N  
ATOM   2230  CA  SER L  76      45.311   0.471  27.324  1.00 20.52           C  
ATOM   2231  C   SER L  76      44.386   1.501  26.752  1.00 18.46           C  
ATOM   2232  O   SER L  76      44.556   2.708  26.994  1.00 22.98           O  
ATOM   2233  CB  SER L  76      46.631   0.363  26.581  1.00 23.93           C  
ATOM   2234  OG  SER L  76      46.447   0.349  25.176  1.00 34.48           O  
ATOM   2235  N   SER L  77      43.361   1.072  26.015  1.00 16.36           N  
ATOM   2236  CA  SER L  77      42.403   2.090  25.500  1.00 16.84           C  
ATOM   2237  C   SER L  77      41.076   1.371  25.216  1.00 17.78           C  
ATOM   2238  O   SER L  77      40.980   0.598  24.264  1.00 17.57           O  
ATOM   2239  CB  SER L  77      42.988   2.739  24.269  1.00 17.73           C  
ATOM   2240  OG  SER L  77      42.082   2.817  23.196  1.00 30.27           O  
ATOM   2241  N   LEU L  78      40.099   1.565  26.072  1.00 19.10           N  
ATOM   2242  CA  LEU L  78      38.808   0.940  26.067  1.00 16.80           C  
ATOM   2243  C   LEU L  78      37.977   1.160  24.813  1.00 16.28           C  
ATOM   2244  O   LEU L  78      37.741   2.296  24.398  1.00 19.84           O  
ATOM   2245  CB  LEU L  78      38.013   1.350  27.301  1.00 14.15           C  
ATOM   2246  CG  LEU L  78      36.822   0.549  27.743  1.00 13.43           C  
ATOM   2247  CD1 LEU L  78      37.161  -0.896  28.067  1.00 16.91           C  
ATOM   2248  CD2 LEU L  78      36.158   1.210  28.953  1.00  8.20           C  
ATOM   2249  N   GLN L  79      37.505   0.069  24.230  1.00 13.54           N  
ATOM   2250  CA  GLN L  79      36.646   0.127  23.050  1.00 13.85           C  
ATOM   2251  C   GLN L  79      35.244  -0.336  23.476  1.00 18.13           C  
ATOM   2252  O   GLN L  79      35.154  -1.128  24.419  1.00 24.43           O  
ATOM   2253  CB  GLN L  79      37.168  -0.897  22.008  1.00 16.17           C  
ATOM   2254  CG  GLN L  79      38.420  -0.406  21.289  1.00 19.15           C  
ATOM   2255  CD  GLN L  79      38.619   1.085  21.487  1.00 25.00           C  
ATOM   2256  OE1 GLN L  79      37.735   1.881  21.180  1.00 38.58           O  
ATOM   2257  NE2 GLN L  79      39.772   1.476  22.011  1.00 31.92           N  
ATOM   2258  N   PRO L  80      34.202   0.120  22.831  1.00 21.04           N  
ATOM   2259  CA  PRO L  80      32.857  -0.357  23.209  1.00 20.69           C  
ATOM   2260  C   PRO L  80      32.771  -1.876  23.136  1.00 23.01           C  
ATOM   2261  O   PRO L  80      32.047  -2.523  23.888  1.00 25.90           O  
ATOM   2262  CB  PRO L  80      31.965   0.289  22.165  1.00 21.69           C  
ATOM   2263  CG  PRO L  80      32.716   1.518  21.739  1.00 23.68           C  
ATOM   2264  CD  PRO L  80      34.173   1.106  21.755  1.00 21.44           C  
ATOM   2265  N   GLU L  81      33.529  -2.498  22.233  1.00 24.60           N  
ATOM   2266  CA  GLU L  81      33.485  -3.945  22.113  1.00 24.05           C  
ATOM   2267  C   GLU L  81      34.142  -4.670  23.277  1.00 22.15           C  
ATOM   2268  O   GLU L  81      34.096  -5.908  23.345  1.00 24.80           O  
ATOM   2269  CB  GLU L  81      34.196  -4.365  20.811  1.00 26.25           C  
ATOM   2270  CG  GLU L  81      35.582  -3.754  20.674  0.50 31.07           C  
ATOM   2271  CD  GLU L  81      35.962  -3.635  19.199  0.50 36.59           C  
ATOM   2272  OE1 GLU L  81      35.365  -2.771  18.528  0.50 49.12           O  
ATOM   2273  OE2 GLU L  81      36.786  -4.450  18.742  0.50 39.98           O  
ATOM   2274  N   ASP L  82      34.791  -3.970  24.189  1.00 19.82           N  
ATOM   2275  CA  ASP L  82      35.446  -4.679  25.309  1.00 16.96           C  
ATOM   2276  C   ASP L  82      34.502  -4.781  26.493  1.00 16.00           C  
ATOM   2277  O   ASP L  82      34.856  -5.268  27.562  1.00 16.87           O  
ATOM   2278  CB  ASP L  82      36.688  -3.835  25.706  1.00 16.36           C  
ATOM   2279  CG  ASP L  82      37.618  -3.759  24.486  1.00 16.50           C  
ATOM   2280  OD1 ASP L  82      38.503  -2.911  24.474  1.00 23.04           O  
ATOM   2281  OD2 ASP L  82      37.398  -4.578  23.569  1.00 13.48           O  
ATOM   2282  N   ILE L  83      33.276  -4.284  26.309  1.00 17.30           N  
ATOM   2283  CA  ILE L  83      32.301  -4.398  27.421  1.00 21.11           C  
ATOM   2284  C   ILE L  83      32.005  -5.888  27.652  1.00 23.32           C  
ATOM   2285  O   ILE L  83      31.399  -6.555  26.813  1.00 17.00           O  
ATOM   2286  CB  ILE L  83      31.011  -3.668  27.100  1.00 18.35           C  
ATOM   2287  CG1 ILE L  83      31.127  -2.167  26.883  1.00 18.74           C  
ATOM   2288  CG2 ILE L  83      29.854  -4.033  27.984  1.00 17.34           C  
ATOM   2289  CD1 ILE L  83      29.817  -1.549  26.399  1.00 30.06           C  
ATOM   2290  N   ALA L  84      32.479  -6.404  28.776  1.00 22.71           N  
ATOM   2291  CA  ALA L  84      32.245  -7.845  29.047  1.00 20.30           C  
ATOM   2292  C   ALA L  84      32.650  -8.098  30.518  1.00 19.15           C  
ATOM   2293  O   ALA L  84      32.956  -7.139  31.224  1.00 19.40           O  
ATOM   2294  CB  ALA L  84      33.274  -8.626  28.175  1.00 13.79           C  
ATOM   2295  N   THR L  85      32.708  -9.362  30.887  1.00 15.66           N  
ATOM   2296  CA  THR L  85      33.228  -9.708  32.224  1.00  9.88           C  
ATOM   2297  C   THR L  85      34.593 -10.391  31.998  1.00 10.04           C  
ATOM   2298  O   THR L  85      34.703 -11.169  31.048  1.00  6.17           O  
ATOM   2299  CB  THR L  85      32.301 -10.691  32.942  1.00  8.03           C  
ATOM   2300  OG1 THR L  85      31.097 -10.014  33.313  1.00 11.52           O  
ATOM   2301  CG2 THR L  85      32.945 -11.193  34.219  1.00  5.46           C  
ATOM   2302  N   TYR L  86      35.587 -10.026  32.776  1.00 12.53           N  
ATOM   2303  CA  TYR L  86      36.927 -10.583  32.634  1.00 10.04           C  
ATOM   2304  C   TYR L  86      37.240 -11.511  33.784  1.00 10.49           C  
ATOM   2305  O   TYR L  86      36.775 -11.309  34.908  1.00  5.51           O  
ATOM   2306  CB  TYR L  86      37.965  -9.439  32.537  1.00  7.01           C  
ATOM   2307  CG  TYR L  86      37.737  -8.706  31.218  1.00 10.60           C  
ATOM   2308  CD1 TYR L  86      38.404  -9.102  30.069  1.00 11.63           C  
ATOM   2309  CD2 TYR L  86      36.793  -7.699  31.140  1.00 10.67           C  
ATOM   2310  CE1 TYR L  86      38.180  -8.459  28.862  1.00 12.36           C  
ATOM   2311  CE2 TYR L  86      36.562  -7.051  29.935  1.00 11.89           C  
ATOM   2312  CZ  TYR L  86      37.255  -7.436  28.809  1.00 13.70           C  
ATOM   2313  OH  TYR L  86      37.008  -6.793  27.607  1.00 17.00           O  
ATOM   2314  N   TYR L  87      37.984 -12.576  33.482  1.00  8.66           N  
ATOM   2315  CA  TYR L  87      38.340 -13.524  34.502  1.00  4.68           C  
ATOM   2316  C   TYR L  87      39.815 -13.918  34.400  1.00  9.37           C  
ATOM   2317  O   TYR L  87      40.346 -14.119  33.312  1.00 15.80           O  
ATOM   2318  CB  TYR L  87      37.537 -14.816  34.383  1.00  4.03           C  
ATOM   2319  CG  TYR L  87      36.080 -14.738  34.685  1.00  8.61           C  
ATOM   2320  CD1 TYR L  87      35.605 -14.802  35.993  1.00 11.44           C  
ATOM   2321  CD2 TYR L  87      35.132 -14.629  33.662  1.00  5.86           C  
ATOM   2322  CE1 TYR L  87      34.257 -14.727  36.283  1.00  9.34           C  
ATOM   2323  CE2 TYR L  87      33.795 -14.571  33.945  1.00  6.88           C  
ATOM   2324  CZ  TYR L  87      33.354 -14.622  35.249  1.00 10.68           C  
ATOM   2325  OH  TYR L  87      31.999 -14.581  35.521  1.00 13.56           O  
ATOM   2326  N   CYS L  88      40.405 -14.163  35.570  1.00  9.23           N  
ATOM   2327  CA  CYS L  88      41.760 -14.763  35.515  1.00 10.77           C  
ATOM   2328  C   CYS L  88      41.591 -16.206  36.035  1.00 12.14           C  
ATOM   2329  O   CYS L  88      40.723 -16.470  36.864  1.00 12.92           O  
ATOM   2330  CB  CYS L  88      42.680 -13.992  36.480  1.00 10.69           C  
ATOM   2331  SG  CYS L  88      42.206 -14.213  38.215  1.00 21.27           S  
ATOM   2332  N   GLN L  89      42.400 -17.126  35.528  1.00 15.43           N  
ATOM   2333  CA  GLN L  89      42.292 -18.503  36.043  1.00 13.83           C  
ATOM   2334  C   GLN L  89      43.677 -19.076  36.257  1.00 13.02           C  
ATOM   2335  O   GLN L  89      44.613 -18.870  35.480  1.00  7.80           O  
ATOM   2336  CB  GLN L  89      41.445 -19.346  35.114  1.00 15.20           C  
ATOM   2337  CG  GLN L  89      41.476 -20.836  35.380  1.00 17.96           C  
ATOM   2338  CD  GLN L  89      41.153 -21.667  34.155  1.00 21.24           C  
ATOM   2339  OE1 GLN L  89      41.703 -21.460  33.071  1.00 27.43           O  
ATOM   2340  NE2 GLN L  89      40.275 -22.644  34.331  1.00 22.99           N  
ATOM   2341  N   GLN L  90      43.869 -19.799  37.379  1.00  9.95           N  
ATOM   2342  CA  GLN L  90      45.197 -20.390  37.544  1.00 10.64           C  
ATOM   2343  C   GLN L  90      45.158 -21.791  36.905  1.00 11.88           C  
ATOM   2344  O   GLN L  90      44.199 -22.521  37.168  1.00 12.21           O  
ATOM   2345  CB  GLN L  90      45.619 -20.482  38.998  1.00 13.04           C  
ATOM   2346  CG  GLN L  90      44.711 -21.267  39.922  1.00 12.19           C  
ATOM   2347  CD  GLN L  90      45.065 -22.726  40.041  1.00 13.07           C  
ATOM   2348  OE1 GLN L  90      46.154 -23.141  39.612  1.00 16.60           O  
ATOM   2349  NE2 GLN L  90      44.142 -23.537  40.540  1.00 12.18           N  
ATOM   2350  N   TYR L  91      46.197 -22.130  36.165  1.00 12.30           N  
ATOM   2351  CA  TYR L  91      46.339 -23.455  35.630  1.00 14.19           C  
ATOM   2352  C   TYR L  91      47.635 -24.092  36.138  1.00 16.42           C  
ATOM   2353  O   TYR L  91      48.171 -24.981  35.488  1.00 19.79           O  
ATOM   2354  CB  TYR L  91      46.192 -23.609  34.161  1.00 13.35           C  
ATOM   2355  CG  TYR L  91      47.223 -22.934  33.299  1.00 13.38           C  
ATOM   2356  CD1 TYR L  91      47.308 -21.547  33.250  1.00 14.42           C  
ATOM   2357  CD2 TYR L  91      48.098 -23.664  32.506  1.00 13.15           C  
ATOM   2358  CE1 TYR L  91      48.237 -20.922  32.442  1.00 13.49           C  
ATOM   2359  CE2 TYR L  91      49.035 -23.047  31.706  1.00 11.32           C  
ATOM   2360  CZ  TYR L  91      49.101 -21.671  31.679  1.00 13.20           C  
ATOM   2361  OH  TYR L  91      50.038 -21.033  30.894  1.00 24.68           O  
ATOM   2362  N   ASP L  92      48.105 -23.616  37.288  1.00 18.81           N  
ATOM   2363  CA  ASP L  92      49.305 -24.200  37.875  1.00 21.93           C  
ATOM   2364  C   ASP L  92      48.999 -25.581  38.463  1.00 28.87           C  
ATOM   2365  O   ASP L  92      49.906 -26.417  38.545  1.00 35.41           O  
ATOM   2366  CB  ASP L  92      49.902 -23.289  38.937  1.00 21.80           C  
ATOM   2367  CG  ASP L  92      51.090 -23.920  39.639  1.00 23.79           C  
ATOM   2368  OD1 ASP L  92      52.027 -24.349  38.938  1.00 29.58           O  
ATOM   2369  OD2 ASP L  92      51.074 -24.024  40.884  1.00 27.45           O  
ATOM   2370  N   ASP L  93      47.753 -25.841  38.852  1.00 33.73           N  
ATOM   2371  CA  ASP L  93      47.364 -27.129  39.421  1.00 36.23           C  
ATOM   2372  C   ASP L  93      45.837 -27.297  39.443  1.00 29.04           C  
ATOM   2373  O   ASP L  93      45.090 -26.331  39.462  1.00 23.44           O  
ATOM   2374  CB  ASP L  93      47.888 -27.272  40.847  1.00 46.98           C  
ATOM   2375  CG  ASP L  93      48.075 -28.667  41.364  1.00 55.77           C  
ATOM   2376  OD1 ASP L  93      48.100 -29.656  40.597  1.00 61.72           O  
ATOM   2377  OD2 ASP L  93      48.247 -28.812  42.617  1.00 64.06           O  
ATOM   2378  N   LEU L  94      45.406 -28.561  39.499  1.00 23.91           N  
ATOM   2379  CA  LEU L  94      44.009 -28.890  39.631  1.00 20.86           C  
ATOM   2380  C   LEU L  94      43.585 -28.904  41.094  1.00 24.10           C  
ATOM   2381  O   LEU L  94      44.366 -29.337  41.954  1.00 38.84           O  
ATOM   2382  CB  LEU L  94      43.647 -30.203  38.949  1.00 17.79           C  
ATOM   2383  CG  LEU L  94      43.815 -30.160  37.411  1.00 17.89           C  
ATOM   2384  CD1 LEU L  94      43.933 -31.555  36.864  1.00 14.42           C  
ATOM   2385  CD2 LEU L  94      42.650 -29.399  36.785  1.00 10.29           C  
ATOM   2386  N   PRO L  95      42.400 -28.409  41.419  1.00 21.02           N  
ATOM   2387  CA  PRO L  95      41.492 -27.861  40.437  1.00 20.07           C  
ATOM   2388  C   PRO L  95      41.871 -26.441  39.979  1.00 18.86           C  
ATOM   2389  O   PRO L  95      42.248 -25.598  40.781  1.00 21.69           O  
ATOM   2390  CB  PRO L  95      40.159 -27.763  41.209  1.00 18.39           C  
ATOM   2391  CG  PRO L  95      40.549 -27.668  42.629  1.00 18.00           C  
ATOM   2392  CD  PRO L  95      41.856 -28.386  42.786  1.00 18.23           C  
ATOM   2393  N   TYR L  96      41.748 -26.236  38.680  1.00 17.09           N  
ATOM   2394  CA  TYR L  96      41.959 -24.892  38.113  1.00 16.46           C  
ATOM   2395  C   TYR L  96      40.857 -23.964  38.681  1.00 15.67           C  
ATOM   2396  O   TYR L  96      39.687 -24.280  38.570  1.00 20.65           O  
ATOM   2397  CB  TYR L  96      41.682 -25.015  36.588  1.00 16.24           C  
ATOM   2398  CG  TYR L  96      42.793 -25.785  35.913  1.00 19.15           C  
ATOM   2399  CD1 TYR L  96      43.932 -26.139  36.639  1.00 19.42           C  
ATOM   2400  CD2 TYR L  96      42.711 -26.128  34.580  1.00 21.11           C  
ATOM   2401  CE1 TYR L  96      44.953 -26.835  36.035  1.00 20.52           C  
ATOM   2402  CE2 TYR L  96      43.743 -26.815  33.962  1.00 23.15           C  
ATOM   2403  CZ  TYR L  96      44.850 -27.163  34.700  1.00 23.61           C  
ATOM   2404  OH  TYR L  96      45.878 -27.852  34.081  1.00 42.69           O  
ATOM   2405  N   THR L  97      41.267 -22.864  39.277  1.00 14.30           N  
ATOM   2406  CA  THR L  97      40.307 -21.961  39.912  1.00  9.74           C  
ATOM   2407  C   THR L  97      40.296 -20.605  39.207  1.00  7.88           C  
ATOM   2408  O   THR L  97      41.293 -20.220  38.614  1.00 12.50           O  
ATOM   2409  CB  THR L  97      40.803 -21.694  41.387  1.00 10.50           C  
ATOM   2410  OG1 THR L  97      42.275 -21.724  41.299  1.00 11.50           O  
ATOM   2411  CG2 THR L  97      40.435 -22.961  42.178  1.00  7.10           C  
ATOM   2412  N   PHE L  98      39.152 -19.949  39.287  1.00 10.82           N  
ATOM   2413  CA  PHE L  98      38.938 -18.678  38.639  1.00 14.88           C  
ATOM   2414  C   PHE L  98      38.865 -17.545  39.692  1.00 18.31           C  
ATOM   2415  O   PHE L  98      38.435 -17.798  40.809  1.00 17.46           O  
ATOM   2416  CB  PHE L  98      37.572 -18.694  37.918  1.00 13.44           C  
ATOM   2417  CG  PHE L  98      37.550 -19.400  36.590  1.00 16.34           C  
ATOM   2418  CD1 PHE L  98      37.523 -20.780  36.505  1.00 17.36           C  
ATOM   2419  CD2 PHE L  98      37.516 -18.668  35.404  1.00 18.24           C  
ATOM   2420  CE1 PHE L  98      37.440 -21.423  35.283  1.00 15.89           C  
ATOM   2421  CE2 PHE L  98      37.428 -19.299  34.179  1.00 16.90           C  
ATOM   2422  CZ  PHE L  98      37.409 -20.684  34.112  1.00 15.08           C  
ATOM   2423  N   GLY L  99      39.191 -16.344  39.245  1.00 17.84           N  
ATOM   2424  CA  GLY L  99      38.962 -15.146  40.065  1.00 15.67           C  
ATOM   2425  C   GLY L  99      37.446 -14.867  40.048  1.00 14.86           C  
ATOM   2426  O   GLY L  99      36.739 -15.524  39.264  1.00 12.97           O  
ATOM   2427  N   GLN L 100      36.938 -13.985  40.875  1.00 14.84           N  
ATOM   2428  CA  GLN L 100      35.473 -13.772  40.924  1.00 12.57           C  
ATOM   2429  C   GLN L 100      34.990 -13.089  39.667  1.00 11.28           C  
ATOM   2430  O   GLN L 100      33.794 -13.030  39.377  1.00 12.45           O  
ATOM   2431  CB  GLN L 100      35.116 -12.971  42.170  1.00 18.04           C  
ATOM   2432  CG  GLN L 100      35.453 -13.598  43.492  1.00 26.83           C  
ATOM   2433  CD  GLN L 100      36.863 -13.409  43.995  1.00 35.39           C  
ATOM   2434  OE1 GLN L 100      37.707 -12.711  43.425  1.00 36.78           O  
ATOM   2435  NE2 GLN L 100      37.176 -14.054  45.138  1.00 44.46           N  
ATOM   2436  N   GLY L 101      35.929 -12.565  38.864  1.00 11.53           N  
ATOM   2437  CA  GLY L 101      35.508 -11.926  37.624  1.00 12.96           C  
ATOM   2438  C   GLY L 101      35.308 -10.434  37.803  1.00 15.10           C  
ATOM   2439  O   GLY L 101      34.931  -9.991  38.896  1.00 13.70           O  
ATOM   2440  N   THR L 102      35.556  -9.662  36.744  1.00 13.51           N  
ATOM   2441  CA  THR L 102      35.376  -8.214  36.822  1.00 13.89           C  
ATOM   2442  C   THR L 102      34.479  -7.710  35.703  1.00 12.57           C  
ATOM   2443  O   THR L 102      34.827  -7.806  34.521  1.00 21.24           O  
ATOM   2444  CB  THR L 102      36.750  -7.484  36.638  1.00 14.38           C  
ATOM   2445  OG1 THR L 102      37.575  -7.755  37.773  1.00 13.79           O  
ATOM   2446  CG2 THR L 102      36.469  -5.982  36.617  1.00  6.72           C  
ATOM   2447  N   LYS L 103      33.333  -7.115  36.030  1.00  7.98           N  
ATOM   2448  CA  LYS L 103      32.506  -6.656  34.893  1.00  9.91           C  
ATOM   2449  C   LYS L 103      32.965  -5.291  34.418  1.00 13.64           C  
ATOM   2450  O   LYS L 103      33.081  -4.339  35.201  1.00 15.75           O  
ATOM   2451  CB  LYS L 103      31.061  -6.672  35.306  1.00 15.53           C  
ATOM   2452  CG  LYS L 103      30.055  -6.709  34.179  1.00 26.12           C  
ATOM   2453  CD  LYS L 103      28.643  -6.478  34.714  1.00 35.97           C  
ATOM   2454  CE  LYS L 103      27.819  -5.675  33.706  1.00 42.71           C  
ATOM   2455  NZ  LYS L 103      26.416  -6.197  33.620  1.00 56.55           N  
ATOM   2456  N   VAL L 104      33.248  -5.155  33.129  1.00 12.15           N  
ATOM   2457  CA  VAL L 104      33.690  -3.856  32.606  1.00 10.91           C  
ATOM   2458  C   VAL L 104      32.582  -3.211  31.788  1.00 15.25           C  
ATOM   2459  O   VAL L 104      32.008  -3.827  30.889  1.00 13.01           O  
ATOM   2460  CB  VAL L 104      34.939  -4.043  31.724  1.00  9.45           C  
ATOM   2461  CG1 VAL L 104      35.269  -2.774  30.975  1.00  5.46           C  
ATOM   2462  CG2 VAL L 104      36.114  -4.464  32.609  1.00  9.65           C  
ATOM   2463  N   GLU L 105      32.222  -1.974  32.129  1.00 19.69           N  
ATOM   2464  CA  GLU L 105      31.169  -1.268  31.425  1.00 19.43           C  
ATOM   2465  C   GLU L 105      31.663   0.088  30.899  1.00 23.35           C  
ATOM   2466  O   GLU L 105      32.709   0.569  31.336  1.00 20.47           O  
ATOM   2467  CB  GLU L 105      29.966  -1.018  32.328  1.00 21.39           C  
ATOM   2468  CG  GLU L 105      28.928  -2.139  32.263  1.00 26.20           C  
ATOM   2469  CD  GLU L 105      28.173  -2.260  33.577  0.50 29.05           C  
ATOM   2470  OE1 GLU L 105      26.946  -2.450  33.523  1.00 37.32           O  
ATOM   2471  OE2 GLU L 105      28.819  -2.144  34.639  0.50 32.50           O  
ATOM   2472  N   ILE L 106      30.880   0.670  30.003  1.00 26.29           N  
ATOM   2473  CA  ILE L 106      31.169   1.942  29.391  1.00 26.99           C  
ATOM   2474  C   ILE L 106      30.212   3.056  29.793  1.00 25.54           C  
ATOM   2475  O   ILE L 106      28.989   2.911  29.722  0.50 22.86           O  
ATOM   2476  CB  ILE L 106      31.309   1.858  27.870  1.00 25.42           C  
ATOM   2477  CG1 ILE L 106      32.733   1.493  27.406  1.00 24.78           C  
ATOM   2478  CG2 ILE L 106      30.843   3.123  27.185  1.00 20.78           C  
ATOM   2479  CD1 ILE L 106      32.894   1.538  25.903  0.50 22.93           C  
ATOM   2480  N   LYS L 107      30.771   4.183  30.229  0.50 23.04           N  
ATOM   2481  CA  LYS L 107      29.962   5.337  30.608  0.50 22.35           C  
ATOM   2482  C   LYS L 107      30.503   5.951  31.913  0.50 22.66           C  
ATOM   2483  O   LYS L 107      31.535   6.635  31.851  0.50 24.17           O  
ATOM   2484  CB  LYS L 107      28.647   4.718  31.145  0.50 22.24           C  
ATOM   2485  CG  LYS L 107      27.423   5.178  30.380  0.50 24.71           C  
ATOM   2486  CD  LYS L 107      27.628   6.127  29.211  0.50 28.77           C  
ATOM   2487  CE  LYS L 107      26.829   7.418  29.343  0.50 30.78           C  
ATOM   2488  NZ  LYS L 107      25.601   7.212  30.176  0.50 37.57           N  
ATOM   2489  OXT LYS L 107      29.870   5.751  32.961  0.50 22.25           O  
TER    2490      LYS L 107                                                      
