# Supplementary material for: SARS-CoV-2 Spike Protein Interaction Space
Source: Int J Mol Sci. 2023 Jul 27;24(15):12058. doi: 10.3390/ijms241512058 (PMC10418891; doi:10.3390/ijms241512058)
Supplement: Supplementary file 1 [file ijms-24-12058-s001.zip › Supplementary Material File S1/1REI.pdb]

REMARK 950 NUMBERING  Kabat
REMARK 950 METHOD     X-ray crystal structure
REMARK 950 RESOLUTION 2.000
REMARK 950 R-FACTOR   0.000
REMARK 950 R-FREE     0.000
REMARK 950 CHAIN-TYPE LABEL ORIGINAL
REMARK 950 CHAIN L    L    A
REMARK 950 CHAIN L    L    B
REMARK 950 MOLECULE : A : BENCE-JONES PROTEIN REI (LIGHT CHAIN)
REMARK 950 SPECIES  : A : HOMO SAPIENS
SEQRES   1 L 107  ASP ILE GLN MET THR GLN SER PRO SER SER LEU SER ALA          
SEQRES   2 L 107  SER VAL GLY ASP ARG VAL THR ILE THR CYS GLN ALA SER          
SEQRES   3 L 107  GLN ASP ILE ILE LYS TYR LEU ASN TRP TYR GLN GLN THR          
SEQRES   4 L 107  PRO GLY LYS ALA PRO LYS LEU LEU ILE TYR GLU ALA SER          
SEQRES   5 L 107  ASN LEU GLN ALA GLY VAL PRO SER ARG PHE SER GLY SER          
SEQRES   6 L 107  GLY SER GLY THR ASP TYR THR PHE THR ILE SER SER LEU          
SEQRES   7 L 107  GLN PRO GLU ASP ILE ALA THR TYR TYR CYS GLN GLN TYR          
SEQRES   8 L 107  GLN SER LEU PRO TYR THR PHE GLY GLN GLY THR LYS LEU          
SEQRES   9 L 107  GLN ILE THR                                                  
SEQRES   1 L 107  ASP ILE GLN MET THR GLN SER PRO SER SER LEU SER ALA          
SEQRES   2 L 107  SER VAL GLY ASP ARG VAL THR ILE THR CYS GLN ALA SER          
SEQRES   3 L 107  GLN ASP ILE ILE LYS TYR LEU ASN TRP TYR GLN GLN THR          
SEQRES   4 L 107  PRO GLY LYS ALA PRO LYS LEU LEU ILE TYR GLU ALA SER          
SEQRES   5 L 107  ASN LEU GLN ALA GLY VAL PRO SER ARG PHE SER GLY SER          
SEQRES   6 L 107  GLY SER GLY THR ASP TYR THR PHE THR ILE SER SER LEU          
SEQRES   7 L 107  GLN PRO GLU ASP ILE ALA THR TYR TYR CYS GLN GLN TYR          
SEQRES   8 L 107  GLN SER LEU PRO TYR THR PHE GLY GLN GLY THR LYS LEU          
SEQRES   9 L 107  GLN ILE THR                                                  
ATOM      1  N   ASP L   1     -12.301  44.328   2.041  1.00  0.00           N  
ATOM      2  CA  ASP L   1     -12.237  45.794   2.097  1.00  0.00           C  
ATOM      3  C   ASP L   1     -10.838  46.354   1.824  1.00  0.00           C  
ATOM      4  O   ASP L   1     -10.434  46.517   0.664  1.00  0.00           O  
ATOM      5  CB  ASP L   1     -12.711  46.284   3.481  1.00  0.00           C  
ATOM      6  CG  ASP L   1     -11.625  46.146   4.515  1.00  0.00           C  
ATOM      7  OD1 ASP L   1     -10.896  45.177   4.634  1.00  0.00           O  
ATOM      8  OD2 ASP L   1     -11.457  47.103   5.220  1.00  0.00           O  
ATOM      9  N   ILE L   2     -10.122  46.639   2.897  1.00  0.00           N  
ATOM     10  CA  ILE L   2      -8.711  47.035   2.781  1.00  0.00           C  
ATOM     11  C   ILE L   2      -8.158  45.625   2.981  1.00  0.00           C  
ATOM     12  O   ILE L   2      -8.548  44.914   3.921  1.00  0.00           O  
ATOM     13  CB  ILE L   2      -8.314  48.064   3.868  1.00  0.00           C  
ATOM     14  CG1 ILE L   2      -8.838  49.491   3.562  1.00  0.00           C  
ATOM     15  CG2 ILE L   2      -6.794  47.892   3.917  1.00  0.00           C  
ATOM     16  CD1 ILE L   2      -8.122  50.599   4.363  1.00  0.00           C  
ATOM     17  N   GLN L   3      -7.259  45.239   2.094  1.00  0.00           N  
ATOM     18  CA  GLN L   3      -6.652  43.931   2.178  1.00  0.00           C  
ATOM     19  C   GLN L   3      -5.301  44.093   2.881  1.00  0.00           C  
ATOM     20  O   GLN L   3      -4.587  45.081   2.666  1.00  0.00           O  
ATOM     21  CB  GLN L   3      -6.529  43.379   0.783  1.00  0.00           C  
ATOM     22  CG  GLN L   3      -6.554  41.912   0.731  1.00  0.00           C  
ATOM     23  CD  GLN L   3      -5.221  41.251   0.352  1.00  0.00           C  
ATOM     24  OE1 GLN L   3      -5.231  40.013   0.029  1.00  0.00           O  
ATOM     25  NE2 GLN L   3      -4.183  41.973   0.316  1.00  0.00           N  
ATOM     26  N   MET L   4      -4.974  43.121   3.711  1.00  0.00           N  
ATOM     27  CA  MET L   4      -3.774  43.219   4.556  1.00  0.00           C  
ATOM     28  C   MET L   4      -2.874  42.022   4.246  1.00  0.00           C  
ATOM     29  O   MET L   4      -3.299  40.861   4.356  1.00  0.00           O  
ATOM     30  CB  MET L   4      -4.175  43.241   6.052  1.00  0.00           C  
ATOM     31  CG  MET L   4      -5.166  44.349   6.332  1.00  0.00           C  
ATOM     32  SD  MET L   4      -4.338  45.899   6.547  1.00  0.00           S  
ATOM     33  CE  MET L   4      -2.689  45.358   6.635  1.00  0.00           C  
ATOM     34  N   THR L   5      -1.645  42.320   3.862  1.00  0.00           N  
ATOM     35  CA  THR L   5      -0.687  41.264   3.506  1.00  0.00           C  
ATOM     36  C   THR L   5       0.422  41.096   4.547  1.00  0.00           C  
ATOM     37  O   THR L   5       1.231  42.007   4.768  1.00  0.00           O  
ATOM     38  CB  THR L   5      -0.107  41.619   2.124  1.00  0.00           C  
ATOM     39  OG1 THR L   5      -1.181  41.373   1.222  1.00  0.00           O  
ATOM     40  CG2 THR L   5       1.085  40.772   1.766  1.00  0.00           C  
ATOM     41  N   GLN L   6       0.443  39.935   5.171  1.00  0.00           N  
ATOM     42  CA  GLN L   6       1.368  39.694   6.288  1.00  0.00           C  
ATOM     43  C   GLN L   6       2.457  38.718   5.837  1.00  0.00           C  
ATOM     44  O   GLN L   6       2.174  37.721   5.155  1.00  0.00           O  
ATOM     45  CB  GLN L   6       0.572  39.163   7.425  1.00  0.00           C  
ATOM     46  CG  GLN L   6       1.354  39.044   8.659  1.00  0.00           C  
ATOM     47  CD  GLN L   6       0.528  39.049   9.953  1.00  0.00           C  
ATOM     48  OE1 GLN L   6       1.107  38.698  11.037  1.00  0.00           O  
ATOM     49  NE2 GLN L   6      -0.670  39.458   9.900  1.00  0.00           N  
ATOM     50  N   SER L   7       3.685  39.021   6.223  1.00  0.00           N  
ATOM     51  CA  SER L   7       4.824  38.163   5.865  1.00  0.00           C  
ATOM     52  C   SER L   7       5.949  38.232   6.898  1.00  0.00           C  
ATOM     53  O   SER L   7       6.175  39.279   7.495  1.00  0.00           O  
ATOM     54  CB  SER L   7       5.381  38.555   4.515  1.00  0.00           C  
ATOM     55  OG  SER L   7       6.257  37.563   3.989  1.00  0.00           O  
ATOM     56  N   PRO L   8       6.635  37.118   7.046  1.00  0.00           N  
ATOM     57  CA  PRO L   8       6.045  35.837   6.685  1.00  0.00           C  
ATOM     58  C   PRO L   8       4.859  35.133   7.316  1.00  0.00           C  
ATOM     59  O   PRO L   8       4.233  35.669   8.237  1.00  0.00           O  
ATOM     60  CB  PRO L   8       7.126  34.841   6.955  1.00  0.00           C  
ATOM     61  CG  PRO L   8       7.966  35.462   8.023  1.00  0.00           C  
ATOM     62  CD  PRO L   8       7.892  36.958   7.754  1.00  0.00           C  
ATOM     63  N   SER L   9       4.567  33.946   6.853  1.00  0.00           N  
ATOM     64  CA  SER L   9       3.308  33.281   7.170  1.00  0.00           C  
ATOM     65  C   SER L   9       3.745  32.268   8.225  1.00  0.00           C  
ATOM     66  O   SER L   9       2.934  31.821   9.048  1.00  0.00           O  
ATOM     67  CB  SER L   9       2.688  32.647   5.963  1.00  0.00           C  
ATOM     68  OG  SER L   9       3.078  31.288   5.812  1.00  0.00           O  
ATOM     69  N   SER L  10       5.019  31.918   8.186  1.00  0.00           N  
ATOM     70  CA  SER L  10       5.614  31.104   9.253  1.00  0.00           C  
ATOM     71  C   SER L  10       7.126  31.342   9.287  1.00  0.00           C  
ATOM     72  O   SER L  10       7.715  31.801   8.299  1.00  0.00           O  
ATOM     73  CB  SER L  10       5.319  29.634   9.017  1.00  0.00           C  
ATOM     74  OG  SER L  10       6.509  28.867   8.878  1.00  0.00           O  
ATOM     75  N   LEU L  11       7.728  31.028  10.422  1.00  0.00           N  
ATOM     76  CA  LEU L  11       9.049  31.582  10.761  1.00  0.00           C  
ATOM     77  C   LEU L  11       9.526  30.603  11.836  1.00  0.00           C  
ATOM     78  O   LEU L  11       8.794  30.304  12.788  1.00  0.00           O  
ATOM     79  CB  LEU L  11       8.908  33.036  11.243  1.00  0.00           C  
ATOM     80  CG  LEU L  11      10.158  33.884  11.304  1.00  0.00           C  
ATOM     81  CD1 LEU L  11       9.779  35.340  11.219  1.00  0.00           C  
ATOM     82  CD2 LEU L  11      10.916  33.622  12.580  1.00  0.00           C  
ATOM     83  N   SER L  12      10.744  30.119  11.665  1.00  0.00           N  
ATOM     84  CA  SER L  12      11.574  29.729  12.815  1.00  0.00           C  
ATOM     85  C   SER L  12      12.883  30.373  13.280  1.00  0.00           C  
ATOM     86  O   SER L  12      13.800  30.594  12.478  1.00  0.00           O  
ATOM     87  CB  SER L  12      12.019  28.287  12.680  1.00  0.00           C  
ATOM     88  OG  SER L  12      10.936  27.419  12.354  1.00  0.00           O  
ATOM     89  N   ALA L  13      12.950  30.667  14.568  1.00  0.00           N  
ATOM     90  CA  ALA L  13      14.149  31.299  15.146  1.00  0.00           C  
ATOM     91  C   ALA L  13      14.430  30.473  16.401  1.00  0.00           C  
ATOM     92  O   ALA L  13      13.751  29.470  16.664  1.00  0.00           O  
ATOM     93  CB  ALA L  13      13.877  32.730  15.624  1.00  0.00           C  
ATOM     94  N   SER L  14      15.428  30.906  17.157  1.00  0.00           N  
ATOM     95  CA  SER L  14      15.772  30.233  18.420  1.00  0.00           C  
ATOM     96  C   SER L  14      16.044  31.447  19.313  1.00  0.00           C  
ATOM     97  O   SER L  14      16.134  32.583  18.828  1.00  0.00           O  
ATOM     98  CB  SER L  14      16.953  29.314  18.225  1.00  0.00           C  
ATOM     99  OG  SER L  14      17.993  29.935  17.482  1.00  0.00           O  
ATOM    100  N   VAL L  15      16.168  31.190  20.604  1.00  0.00           N  
ATOM    101  CA  VAL L  15      15.736  32.164  21.621  1.00  0.00           C  
ATOM    102  C   VAL L  15      17.027  32.984  21.608  1.00  0.00           C  
ATOM    103  O   VAL L  15      18.109  32.456  21.319  1.00  0.00           O  
ATOM    104  CB  VAL L  15      15.370  31.442  22.904  1.00  0.00           C  
ATOM    105  CG1 VAL L  15      15.225  29.905  22.772  1.00  0.00           C  
ATOM    106  CG2 VAL L  15      16.260  31.839  24.047  1.00  0.00           C  
ATOM    107  N   GLY L  16      16.897  34.262  21.918  1.00  0.00           N  
ATOM    108  CA  GLY L  16      17.751  35.284  21.296  1.00  0.00           C  
ATOM    109  C   GLY L  16      17.747  35.993  19.945  1.00  0.00           C  
ATOM    110  O   GLY L  16      18.363  37.054  19.778  1.00  0.00           O  
ATOM    111  N   ASP L  17      17.053  35.398  18.998  1.00  0.00           N  
ATOM    112  CA  ASP L  17      17.210  35.907  17.575  1.00  0.00           C  
ATOM    113  C   ASP L  17      16.393  37.194  17.460  1.00  0.00           C  
ATOM    114  O   ASP L  17      15.526  37.473  18.299  1.00  0.00           O  
ATOM    115  CB  ASP L  17      16.644  34.709  16.667  1.00  0.00           C  
ATOM    116  CG  ASP L  17      17.706  33.673  16.408  1.00  0.00           C  
ATOM    117  OD1 ASP L  17      18.891  33.818  16.639  1.00  0.00           O  
ATOM    118  OD2 ASP L  17      17.307  32.615  15.993  1.00  0.00           O  
ATOM    119  N   ARG L  18      16.683  37.959  16.427  1.00  0.00           N  
ATOM    120  CA  ARG L  18      15.790  39.047  16.024  1.00  0.00           C  
ATOM    121  C   ARG L  18      14.862  38.425  14.988  1.00  0.00           C  
ATOM    122  O   ARG L  18      15.313  37.756  14.045  1.00  0.00           O  
ATOM    123  CB  ARG L  18      16.587  40.242  15.449  1.00  0.00           C  
ATOM    124  CG  ARG L  18      15.825  41.578  15.456  1.00  0.00           C  
ATOM    125  CD  ARG L  18      16.582  42.612  14.648  1.00  0.00           C  
ATOM    126  NE  ARG L  18      16.586  42.267  13.217  1.00  0.00           N  
ATOM    127  CZ  ARG L  18      17.059  43.093  12.258  1.00  0.00           C  
ATOM    128  NH1 ARG L  18      17.180  42.637  11.025  1.00  0.00           N  
ATOM    129  NH2 ARG L  18      17.410  44.353  12.547  1.00  0.00           N  
ATOM    130  N   VAL L  19      13.578  38.652  15.173  1.00  0.00           N  
ATOM    131  CA  VAL L  19      12.586  38.223  14.177  1.00  0.00           C  
ATOM    132  C   VAL L  19      11.927  39.537  13.758  1.00  0.00           C  
ATOM    133  O   VAL L  19      11.686  40.425  14.587  1.00  0.00           O  
ATOM    134  CB  VAL L  19      11.631  37.218  14.804  1.00  0.00           C  
ATOM    135  CG1 VAL L  19      10.198  37.221  14.213  1.00  0.00           C  
ATOM    136  CG2 VAL L  19      12.221  35.834  14.859  1.00  0.00           C  
ATOM    137  N   THR L  20      11.645  39.643  12.476  1.00  0.00           N  
ATOM    138  CA  THR L  20      10.919  40.812  11.955  1.00  0.00           C  
ATOM    139  C   THR L  20       9.800  40.240  11.091  1.00  0.00           C  
ATOM    140  O   THR L  20      10.051  39.485  10.137  1.00  0.00           O  
ATOM    141  CB  THR L  20      11.939  41.683  11.197  1.00  0.00           C  
ATOM    142  OG1 THR L  20      12.677  42.325  12.227  1.00  0.00           O  
ATOM    143  CG2 THR L  20      11.277  42.701  10.307  1.00  0.00           C  
ATOM    144  N   ILE L  21       8.580  40.606  11.434  1.00  0.00           N  
ATOM    145  CA  ILE L  21       7.369  40.229  10.630  1.00  0.00           C  
ATOM    146  C   ILE L  21       6.785  41.568  10.180  1.00  0.00           C  
ATOM    147  O   ILE L  21       6.692  42.521  10.964  1.00  0.00           O  
ATOM    148  CB  ILE L  21       6.386  39.413  11.405  1.00  0.00           C  
ATOM    149  CG1 ILE L  21       5.154  40.252  11.839  1.00  0.00           C  
ATOM    150  CG2 ILE L  21       7.245  38.836  12.531  1.00  0.00           C  
ATOM    151  CD1 ILE L  21       3.904  40.026  10.954  1.00  0.00           C  
ATOM    152  N   THR L  22       6.402  41.622   8.922  1.00  0.00           N  
ATOM    153  CA  THR L  22       5.718  42.809   8.388  1.00  0.00           C  
ATOM    154  C   THR L  22       4.255  42.781   7.950  1.00  0.00           C  
ATOM    155  O   THR L  22       3.661  41.705   7.780  1.00  0.00           O  
ATOM    156  CB  THR L  22       6.524  43.291   7.169  1.00  0.00           C  
ATOM    157  OG1 THR L  22       6.523  42.169   6.315  1.00  0.00           O  
ATOM    158  CG2 THR L  22       7.933  43.679   7.521  1.00  0.00           C  
ATOM    159  N   CYS L  23       3.697  43.964   7.772  1.00  0.00           N  
ATOM    160  CA  CYS L  23       2.356  44.085   7.184  1.00  0.00           C  
ATOM    161  C   CYS L  23       2.185  45.232   6.217  1.00  0.00           C  
ATOM    162  O   CYS L  23       2.471  46.395   6.530  1.00  0.00           O  
ATOM    163  CB  CYS L  23       1.320  44.212   8.274  1.00  0.00           C  
ATOM    164  SG  CYS L  23       0.519  42.666   8.807  1.00  0.00           S  
ATOM    165  N   GLN L  24       1.726  44.888   5.031  1.00  0.00           N  
ATOM    166  CA  GLN L  24       1.214  45.901   4.096  1.00  0.00           C  
ATOM    167  C   GLN L  24      -0.287  46.096   3.891  1.00  0.00           C  
ATOM    168  O   GLN L  24      -1.050  45.121   3.808  1.00  0.00           O  
ATOM    169  CB  GLN L  24       1.783  45.615   2.734  1.00  0.00           C  
ATOM    170  CG  GLN L  24       3.211  45.932   2.623  1.00  0.00           C  
ATOM    171  CD  GLN L  24       4.079  44.821   2.012  1.00  0.00           C  
ATOM    172  OE1 GLN L  24       5.343  45.006   1.957  1.00  0.00           O  
ATOM    173  NE2 GLN L  24       3.515  43.748   1.648  1.00  0.00           N  
ATOM    174  N   ALA L  25      -0.689  47.352   3.815  1.00  0.00           N  
ATOM    175  CA  ALA L  25      -2.092  47.661   3.593  1.00  0.00           C  
ATOM    176  C   ALA L  25      -2.182  48.047   2.116  1.00  0.00           C  
ATOM    177  O   ALA L  25      -1.187  48.449   1.501  1.00  0.00           O  
ATOM    178  CB  ALA L  25      -2.518  48.904   4.386  1.00  0.00           C  
ATOM    179  N   SER L  26      -3.375  47.917   1.569  1.00  0.00           N  
ATOM    180  CA  SER L  26      -3.560  48.062   0.118  1.00  0.00           C  
ATOM    181  C   SER L  26      -4.010  49.505  -0.130  1.00  0.00           C  
ATOM    182  O   SER L  26      -4.358  49.875  -1.260  1.00  0.00           O  
ATOM    183  CB  SER L  26      -4.584  47.065  -0.386  1.00  0.00           C  
ATOM    184  OG  SER L  26      -5.897  47.369   0.074  1.00  0.00           O  
ATOM    185  N   GLN L  27      -3.995  50.297   0.929  1.00  0.00           N  
ATOM    186  CA  GLN L  27      -4.521  51.669   0.858  1.00  0.00           C  
ATOM    187  C   GLN L  27      -3.753  52.240   2.053  1.00  0.00           C  
ATOM    188  O   GLN L  27      -3.563  51.553   3.069  1.00  0.00           O  
ATOM    189  CB  GLN L  27      -6.019  51.602   0.953  1.00  0.00           C  
ATOM    190  CG  GLN L  27      -6.660  52.920   0.969  1.00  0.00           C  
ATOM    191  CD  GLN L  27      -8.081  52.961   0.386  1.00  0.00           C  
ATOM    192  OE1 GLN L  27      -8.213  53.217  -0.859  1.00  0.00           O  
ATOM    193  NE2 GLN L  27      -9.051  52.680   1.150  1.00  0.00           N  
ATOM    194  N   ASP L  28      -3.323  53.484   1.915  1.00  0.00           N  
ATOM    195  CA  ASP L  28      -3.075  54.337   3.088  1.00  0.00           C  
ATOM    196  C   ASP L  28      -4.012  54.301   4.295  1.00  0.00           C  
ATOM    197  O   ASP L  28      -5.147  54.793   4.234  1.00  0.00           O  
ATOM    198  CB  ASP L  28      -3.039  55.817   2.659  1.00  0.00           C  
ATOM    199  CG  ASP L  28      -2.280  56.654   3.652  1.00  0.00           C  
ATOM    200  OD1 ASP L  28      -2.197  57.867   3.618  1.00  0.00           O  
ATOM    201  OD2 ASP L  28      -1.779  56.051   4.563  1.00  0.00           O  
ATOM    202  N   ILE L  29      -3.525  53.717   5.372  1.00  0.00           N  
ATOM    203  CA  ILE L  29      -4.332  53.589   6.596  1.00  0.00           C  
ATOM    204  C   ILE L  29      -3.618  54.519   7.556  1.00  0.00           C  
ATOM    205  O   ILE L  29      -3.923  54.527   8.756  1.00  0.00           O  
ATOM    206  CB  ILE L  29      -4.370  52.126   7.081  1.00  0.00           C  
ATOM    207  CG1 ILE L  29      -3.016  51.390   6.898  1.00  0.00           C  
ATOM    208  CG2 ILE L  29      -5.559  51.547   6.330  1.00  0.00           C  
ATOM    209  CD1 ILE L  29      -3.007  49.945   7.450  1.00  0.00           C  
ATOM    210  N   ILE L  30      -2.677  55.288   7.046  1.00  0.00           N  
ATOM    211  CA  ILE L  30      -2.302  56.562   7.664  1.00  0.00           C  
ATOM    212  C   ILE L  30      -1.381  56.330   8.864  1.00  0.00           C  
ATOM    213  O   ILE L  30      -0.159  56.510   8.771  1.00  0.00           O  
ATOM    214  CB  ILE L  30      -3.543  57.336   8.171  1.00  0.00           C  
ATOM    215  CG1 ILE L  30      -4.422  57.885   7.017  1.00  0.00           C  
ATOM    216  CG2 ILE L  30      -2.905  58.373   9.092  1.00  0.00           C  
ATOM    217  CD1 ILE L  30      -5.793  58.426   7.479  1.00  0.00           C  
ATOM    218  N   LYS L  31      -1.980  55.932   9.971  1.00  0.00           N  
ATOM    219  CA  LYS L  31      -1.281  55.080  10.943  1.00  0.00           C  
ATOM    220  C   LYS L  31      -1.880  53.977  11.816  1.00  0.00           C  
ATOM    221  O   LYS L  31      -1.305  53.594  12.844  1.00  0.00           O  
ATOM    222  CB  LYS L  31      -0.610  55.910  12.030  1.00  0.00           C  
ATOM    223  CG  LYS L  31      -1.564  56.735  12.870  1.00  0.00           C  
ATOM    224  CD  LYS L  31      -0.964  58.097  13.191  1.00  0.00           C  
ATOM    225  CE  LYS L  31      -2.012  59.049  13.741  1.00  0.00           C  
ATOM    226  NZ  LYS L  31      -1.989  59.056  15.220  1.00  0.00           N  
ATOM    227  N   TYR L  32      -3.026  53.483  11.393  1.00  0.00           N  
ATOM    228  CA  TYR L  32      -4.000  52.920  12.338  1.00  0.00           C  
ATOM    229  C   TYR L  32      -3.849  51.412  12.151  1.00  0.00           C  
ATOM    230  O   TYR L  32      -4.549  50.798  11.331  1.00  0.00           O  
ATOM    231  CB  TYR L  32      -5.397  53.472  12.004  1.00  0.00           C  
ATOM    232  CG  TYR L  32      -5.487  54.996  12.151  1.00  0.00           C  
ATOM    233  CD1 TYR L  32      -5.314  55.543  13.434  1.00  0.00           C  
ATOM    234  CD2 TYR L  32      -5.801  55.800  11.090  1.00  0.00           C  
ATOM    235  CE1 TYR L  32      -5.407  56.988  13.588  1.00  0.00           C  
ATOM    236  CE2 TYR L  32      -5.897  57.217  11.231  1.00  0.00           C  
ATOM    237  CZ  TYR L  32      -5.725  57.746  12.518  1.00  0.00           C  
ATOM    238  OH  TYR L  32      -5.838  59.112  12.669  1.00  0.00           O  
ATOM    239  N   LEU L  33      -2.935  50.838  12.913  1.00  0.00           N  
ATOM    240  CA  LEU L  33      -2.674  49.397  12.819  1.00  0.00           C  
ATOM    241  C   LEU L  33      -2.357  48.763  14.174  1.00  0.00           C  
ATOM    242  O   LEU L  33      -1.551  49.291  14.951  1.00  0.00           O  
ATOM    243  CB  LEU L  33      -1.496  49.130  11.861  1.00  0.00           C  
ATOM    244  CG  LEU L  33      -1.261  47.703  11.403  1.00  0.00           C  
ATOM    245  CD1 LEU L  33      -1.480  47.609   9.909  1.00  0.00           C  
ATOM    246  CD2 LEU L  33       0.126  47.280  11.743  1.00  0.00           C  
ATOM    247  N   ASN L  34      -2.996  47.642  14.439  1.00  0.00           N  
ATOM    248  CA  ASN L  34      -2.934  47.031  15.775  1.00  0.00           C  
ATOM    249  C   ASN L  34      -2.194  45.748  15.526  1.00  0.00           C  
ATOM    250  O   ASN L  34      -2.372  45.101  14.481  1.00  0.00           O  
ATOM    251  CB  ASN L  34      -4.366  46.849  16.325  1.00  0.00           C  
ATOM    252  CG  ASN L  34      -4.879  48.115  16.954  1.00  0.00           C  
ATOM    253  OD1 ASN L  34      -6.256  48.175  17.137  1.00  0.00           O  
ATOM    254  ND2 ASN L  34      -4.191  49.073  17.247  1.00  0.00           N  
ATOM    255  N   TRP L  35      -1.364  45.380  16.487  1.00  0.00           N  
ATOM    256  CA  TRP L  35      -0.682  44.080  16.439  1.00  0.00           C  
ATOM    257  C   TRP L  35      -1.207  43.179  17.559  1.00  0.00           C  
ATOM    258  O   TRP L  35      -1.294  43.593  18.723  1.00  0.00           O  
ATOM    259  CB  TRP L  35       0.825  44.304  16.547  1.00  0.00           C  
ATOM    260  CG  TRP L  35       1.551  44.832  15.256  1.00  0.00           C  
ATOM    261  CD1 TRP L  35       1.963  46.071  14.962  1.00  0.00           C  
ATOM    262  CD2 TRP L  35       1.955  44.046  14.168  1.00  0.00           C  
ATOM    263  NE1 TRP L  35       2.569  46.087  13.643  1.00  0.00           N  
ATOM    264  CE2 TRP L  35       2.595  44.886  13.213  1.00  0.00           C  
ATOM    265  CE3 TRP L  35       1.836  42.700  13.905  1.00  0.00           C  
ATOM    266  CZ2 TRP L  35       3.137  44.458  11.997  1.00  0.00           C  
ATOM    267  CZ3 TRP L  35       2.373  42.282  12.670  1.00  0.00           C  
ATOM    268  CH2 TRP L  35       3.029  43.117  11.779  1.00  0.00           C  
ATOM    269  N   TYR L  36      -1.550  41.962  17.191  1.00  0.00           N  
ATOM    270  CA  TYR L  36      -2.208  41.041  18.134  1.00  0.00           C  
ATOM    271  C   TYR L  36      -1.292  39.836  18.356  1.00  0.00           C  
ATOM    272  O   TYR L  36      -0.531  39.442  17.459  1.00  0.00           O  
ATOM    273  CB  TYR L  36      -3.578  40.641  17.563  1.00  0.00           C  
ATOM    274  CG  TYR L  36      -4.650  41.723  17.763  1.00  0.00           C  
ATOM    275  CD1 TYR L  36      -4.863  42.642  16.717  1.00  0.00           C  
ATOM    276  CD2 TYR L  36      -5.329  41.850  18.943  1.00  0.00           C  
ATOM    277  CE1 TYR L  36      -5.868  43.681  16.902  1.00  0.00           C  
ATOM    278  CE2 TYR L  36      -6.315  42.865  19.134  1.00  0.00           C  
ATOM    279  CZ  TYR L  36      -6.510  43.774  18.086  1.00  0.00           C  
ATOM    280  OH  TYR L  36      -7.430  44.749  18.270  1.00  0.00           O  
ATOM    281  N   GLN L  37      -1.378  39.270  19.547  1.00  0.00           N  
ATOM    282  CA  GLN L  37      -0.732  37.981  19.820  1.00  0.00           C  
ATOM    283  C   GLN L  37      -1.809  36.979  20.233  1.00  0.00           C  
ATOM    284  O   GLN L  37      -2.717  37.303  21.012  1.00  0.00           O  
ATOM    285  CB  GLN L  37       0.307  38.186  20.885  1.00  0.00           C  
ATOM    286  CG  GLN L  37       0.835  36.932  21.431  1.00  0.00           C  
ATOM    287  CD  GLN L  37       1.672  37.080  22.706  1.00  0.00           C  
ATOM    288  OE1 GLN L  37       1.059  37.305  23.804  1.00  0.00           O  
ATOM    289  NE2 GLN L  37       2.922  36.911  22.623  1.00  0.00           N  
ATOM    290  N   GLN L  38      -1.695  35.778  19.704  1.00  0.00           N  
ATOM    291  CA  GLN L  38      -2.632  34.707  20.060  1.00  0.00           C  
ATOM    292  C   GLN L  38      -1.886  33.396  20.313  1.00  0.00           C  
ATOM    293  O   GLN L  38      -1.398  32.751  19.373  1.00  0.00           O  
ATOM    294  CB  GLN L  38      -3.632  34.567  18.941  1.00  0.00           C  
ATOM    295  CG  GLN L  38      -4.642  33.530  19.187  1.00  0.00           C  
ATOM    296  CD  GLN L  38      -5.692  33.364  18.076  1.00  0.00           C  
ATOM    297  OE1 GLN L  38      -5.294  33.008  16.913  1.00  0.00           O  
ATOM    298  NE2 GLN L  38      -6.912  33.525  18.374  1.00  0.00           N  
ATOM    299  N   THR L  39      -1.809  33.022  21.579  1.00  0.00           N  
ATOM    300  CA  THR L  39      -1.337  31.679  21.943  1.00  0.00           C  
ATOM    301  C   THR L  39      -2.491  30.693  21.779  1.00  0.00           C  
ATOM    302  O   THR L  39      -3.668  31.086  21.751  1.00  0.00           O  
ATOM    303  CB  THR L  39      -0.807  31.752  23.385  1.00  0.00           C  
ATOM    304  OG1 THR L  39      -0.962  33.120  23.740  1.00  0.00           O  
ATOM    305  CG2 THR L  39       0.635  31.337  23.488  1.00  0.00           C  
ATOM    306  N   PRO L  40      -2.141  29.429  21.672  1.00  0.00           N  
ATOM    307  CA  PRO L  40      -3.059  28.441  21.096  1.00  0.00           C  
ATOM    308  C   PRO L  40      -4.236  28.280  22.060  1.00  0.00           C  
ATOM    309  O   PRO L  40      -4.049  28.116  23.273  1.00  0.00           O  
ATOM    310  CB  PRO L  40      -2.158  27.396  20.514  1.00  0.00           C  
ATOM    311  CG  PRO L  40      -0.745  27.632  21.000  1.00  0.00           C  
ATOM    312  CD  PRO L  40      -0.743  29.088  21.455  1.00  0.00           C  
ATOM    313  N   GLY L  41      -5.430  28.327  21.508  1.00  0.00           N  
ATOM    314  CA  GLY L  41      -6.646  28.312  22.332  1.00  0.00           C  
ATOM    315  C   GLY L  41      -7.145  29.380  23.307  1.00  0.00           C  
ATOM    316  O   GLY L  41      -8.172  29.198  23.977  1.00  0.00           O  
ATOM    317  N   LYS L  42      -6.410  30.479  23.376  1.00  0.00           N  
ATOM    318  CA  LYS L  42      -6.753  31.564  24.308  1.00  0.00           C  
ATOM    319  C   LYS L  42      -7.142  32.764  23.445  1.00  0.00           C  
ATOM    320  O   LYS L  42      -7.144  32.683  22.207  1.00  0.00           O  
ATOM    321  CB  LYS L  42      -5.579  31.904  25.218  1.00  0.00           C  
ATOM    322  CG  LYS L  42      -4.837  30.700  25.763  1.00  0.00           C  
ATOM    323  CD  LYS L  42      -5.735  29.874  26.677  1.00  0.00           C  
ATOM    324  CE  LYS L  42      -4.930  28.880  27.500  1.00  0.00           C  
ATOM    325  NZ  LYS L  42      -3.492  28.962  27.165  1.00  0.00           N  
ATOM    326  N   ALA L  43      -7.470  33.859  24.110  1.00  0.00           N  
ATOM    327  CA  ALA L  43      -8.253  34.927  23.472  1.00  0.00           C  
ATOM    328  C   ALA L  43      -6.966  35.621  23.019  1.00  0.00           C  
ATOM    329  O   ALA L  43      -5.987  35.701  23.773  1.00  0.00           O  
ATOM    330  CB  ALA L  43      -8.970  35.917  24.398  1.00  0.00           C  
ATOM    331  N   PRO L  44      -6.985  36.110  21.795  1.00  0.00           N  
ATOM    332  CA  PRO L  44      -6.166  37.274  21.433  1.00  0.00           C  
ATOM    333  C   PRO L  44      -5.869  38.421  22.403  1.00  0.00           C  
ATOM    334  O   PRO L  44      -6.742  38.842  23.174  1.00  0.00           O  
ATOM    335  CB  PRO L  44      -6.833  37.818  20.206  1.00  0.00           C  
ATOM    336  CG  PRO L  44      -8.273  37.336  20.242  1.00  0.00           C  
ATOM    337  CD  PRO L  44      -8.203  36.010  20.995  1.00  0.00           C  
ATOM    338  N   LYS L  45      -4.641  38.909  22.351  1.00  0.00           N  
ATOM    339  CA  LYS L  45      -4.225  40.012  23.232  1.00  0.00           C  
ATOM    340  C   LYS L  45      -3.642  41.120  22.353  1.00  0.00           C  
ATOM    341  O   LYS L  45      -2.773  40.869  21.506  1.00  0.00           O  
ATOM    342  CB  LYS L  45      -3.193  39.548  24.251  1.00  0.00           C  
ATOM    343  CG  LYS L  45      -2.814  40.592  25.281  1.00  0.00           C  
ATOM    344  CD  LYS L  45      -1.437  40.302  25.867  1.00  0.00           C  
ATOM    345  CE  LYS L  45      -0.983  41.416  26.791  1.00  0.00           C  
ATOM    346  NZ  LYS L  45      -0.937  40.951  28.194  1.00  0.00           N  
ATOM    347  N   LEU L  46      -4.130  42.329  22.565  1.00  0.00           N  
ATOM    348  CA  LEU L  46      -3.437  43.526  22.065  1.00  0.00           C  
ATOM    349  C   LEU L  46      -2.046  43.896  22.587  1.00  0.00           C  
ATOM    350  O   LEU L  46      -1.885  44.274  23.754  1.00  0.00           O  
ATOM    351  CB  LEU L  46      -4.289  44.782  22.324  1.00  0.00           C  
ATOM    352  CG  LEU L  46      -3.893  46.039  21.607  1.00  0.00           C  
ATOM    353  CD1 LEU L  46      -4.260  45.925  20.145  1.00  0.00           C  
ATOM    354  CD2 LEU L  46      -4.596  47.223  22.221  1.00  0.00           C  
ATOM    355  N   LEU L  47      -1.063  43.782  21.715  1.00  0.00           N  
ATOM    356  CA  LEU L  47       0.318  44.135  22.078  1.00  0.00           C  
ATOM    357  C   LEU L  47       0.771  45.561  21.761  1.00  0.00           C  
ATOM    358  O   LEU L  47       1.564  46.157  22.501  1.00  0.00           O  
ATOM    359  CB  LEU L  47       1.309  43.191  21.368  1.00  0.00           C  
ATOM    360  CG  LEU L  47       1.147  41.699  21.579  1.00  0.00           C  
ATOM    361  CD1 LEU L  47       2.251  40.964  20.855  1.00  0.00           C  
ATOM    362  CD2 LEU L  47       1.183  41.365  23.048  1.00  0.00           C  
ATOM    363  N   ILE L  48       0.263  46.086  20.665  1.00  0.00           N  
ATOM    364  CA  ILE L  48       0.786  47.349  20.117  1.00  0.00           C  
ATOM    365  C   ILE L  48      -0.392  48.007  19.438  1.00  0.00           C  
ATOM    366  O   ILE L  48      -1.147  47.388  18.675  1.00  0.00           O  
ATOM    367  CB  ILE L  48       1.922  47.094  19.092  1.00  0.00           C  
ATOM    368  CG1 ILE L  48       3.300  46.866  19.764  1.00  0.00           C  
ATOM    369  CG2 ILE L  48       1.802  48.322  18.186  1.00  0.00           C  
ATOM    370  CD1 ILE L  48       4.049  45.617  19.241  1.00  0.00           C  
ATOM    371  N   TYR L  49      -0.554  49.289  19.723  1.00  0.00           N  
ATOM    372  CA  TYR L  49      -1.786  49.991  19.359  1.00  0.00           C  
ATOM    373  C   TYR L  49      -1.313  51.193  18.539  1.00  0.00           C  
ATOM    374  O   TYR L  49      -0.252  51.771  18.809  1.00  0.00           O  
ATOM    375  CB  TYR L  49      -2.551  50.362  20.645  1.00  0.00           C  
ATOM    376  CG  TYR L  49      -3.445  51.598  20.472  1.00  0.00           C  
ATOM    377  CD1 TYR L  49      -4.699  51.425  19.853  1.00  0.00           C  
ATOM    378  CD2 TYR L  49      -3.018  52.846  20.830  1.00  0.00           C  
ATOM    379  CE1 TYR L  49      -5.551  52.594  19.675  1.00  0.00           C  
ATOM    380  CE2 TYR L  49      -3.844  53.997  20.656  1.00  0.00           C  
ATOM    381  CZ  TYR L  49      -5.087  53.808  20.037  1.00  0.00           C  
ATOM    382  OH  TYR L  49      -5.882  54.918  19.846  1.00  0.00           O  
ATOM    383  N   GLU L  50      -2.107  51.547  17.548  1.00  0.00           N  
ATOM    384  CA  GLU L  50      -1.724  52.621  16.619  1.00  0.00           C  
ATOM    385  C   GLU L  50      -0.282  52.581  16.109  1.00  0.00           C  
ATOM    386  O   GLU L  50       0.494  53.522  16.318  1.00  0.00           O  
ATOM    387  CB  GLU L  50      -1.886  54.026  17.260  1.00  0.00           C  
ATOM    388  CG  GLU L  50      -2.616  55.089  16.413  1.00  0.00           C  
ATOM    389  CD  GLU L  50      -2.789  56.486  17.115  1.00  0.00           C  
ATOM    390  OE1 GLU L  50      -1.851  57.163  17.399  1.00  0.00           O  
ATOM    391  OE2 GLU L  50      -3.994  56.686  17.268  1.00  0.00           O  
ATOM    392  N   ALA L  51       0.053  51.493  15.451  1.00  0.00           N  
ATOM    393  CA  ALA L  51       1.429  51.270  15.016  1.00  0.00           C  
ATOM    394  C   ALA L  51       2.637  51.167  15.949  1.00  0.00           C  
ATOM    395  O   ALA L  51       3.433  50.223  15.855  1.00  0.00           O  
ATOM    396  CB  ALA L  51       1.705  52.495  14.115  1.00  0.00           C  
ATOM    397  N   SER L  52       2.756  52.142  16.836  1.00  0.00           N  
ATOM    398  CA  SER L  52       3.857  52.150  17.812  1.00  0.00           C  
ATOM    399  C   SER L  52       3.785  51.859  19.313  1.00  0.00           C  
ATOM    400  O   SER L  52       4.796  51.524  19.944  1.00  0.00           O  
ATOM    401  CB  SER L  52       4.526  53.503  17.845  1.00  0.00           C  
ATOM    402  OG  SER L  52       3.690  54.524  17.314  1.00  0.00           O  
ATOM    403  N   ASN L  53       2.591  51.992  19.861  1.00  0.00           N  
ATOM    404  CA  ASN L  53       2.441  52.235  21.305  1.00  0.00           C  
ATOM    405  C   ASN L  53       2.164  50.929  22.048  1.00  0.00           C  
ATOM    406  O   ASN L  53       1.066  50.359  21.945  1.00  0.00           O  
ATOM    407  CB  ASN L  53       1.300  53.243  21.546  1.00  0.00           C  
ATOM    408  CG  ASN L  53       1.597  54.570  20.901  1.00  0.00           C  
ATOM    409  OD1 ASN L  53       2.690  55.251  21.416  1.00  0.00           O  
ATOM    410  ND2 ASN L  53       0.924  55.084  20.025  1.00  0.00           N  
ATOM    411  N   LEU L  54       3.098  50.357  22.721  1.00  0.00           N  
ATOM    412  CA  LEU L  54       3.208  49.202  23.945  1.00  0.00           C  
ATOM    413  C   LEU L  54       1.968  49.395  24.799  1.00  0.00           C  
ATOM    414  O   LEU L  54       1.701  50.506  25.270  1.00  0.00           O  
ATOM    415  CB  LEU L  54       4.303  49.034  24.402  1.00  0.00           C  
ATOM    416  CG  LEU L  54       5.526  48.663  23.591  1.00  0.00           C  
ATOM    417  CD1 LEU L  54       6.526  47.966  24.481  1.00  0.00           C  
ATOM    418  CD2 LEU L  54       5.149  47.761  22.439  1.00  0.00           C  
ATOM    419  N   GLN L  55       1.211  48.344  24.983  1.00  0.00           N  
ATOM    420  CA  GLN L  55       0.003  48.388  25.800  1.00  0.00           C  
ATOM    421  C   GLN L  55       0.528  47.803  27.099  1.00  0.00           C  
ATOM    422  O   GLN L  55       1.658  47.298  27.143  1.00  0.00           O  
ATOM    423  CB  GLN L  55      -1.082  47.624  25.085  1.00  0.00           C  
ATOM    424  CG  GLN L  55      -2.276  48.424  24.803  1.00  0.00           C  
ATOM    425  CD  GLN L  55      -2.002  49.828  24.249  1.00  0.00           C  
ATOM    426  OE1 GLN L  55      -1.276  50.617  24.944  1.00  0.00           O  
ATOM    427  NE2 GLN L  55      -2.455  50.120  23.103  1.00  0.00           N  
ATOM    428  N   ALA L  56      -0.286  47.861  28.135  1.00  0.00           N  
ATOM    429  CA  ALA L  56       0.184  47.543  29.492  1.00  0.00           C  
ATOM    430  C   ALA L  56       0.705  46.119  29.689  1.00  0.00           C  
ATOM    431  O   ALA L  56       0.089  45.147  29.222  1.00  0.00           O  
ATOM    432  CB  ALA L  56      -1.012  47.675  30.432  1.00  0.00           C  
ATOM    433  N   GLY L  57       1.830  46.016  30.376  1.00  0.00           N  
ATOM    434  CA  GLY L  57       2.516  44.724  30.512  1.00  0.00           C  
ATOM    435  C   GLY L  57       3.197  43.904  29.418  1.00  0.00           C  
ATOM    436  O   GLY L  57       3.674  42.786  29.663  1.00  0.00           O  
ATOM    437  N   VAL L  58       3.232  44.469  28.228  1.00  0.00           N  
ATOM    438  CA  VAL L  58       3.740  43.737  27.061  1.00  0.00           C  
ATOM    439  C   VAL L  58       5.237  44.037  27.162  1.00  0.00           C  
ATOM    440  O   VAL L  58       5.640  45.175  27.438  1.00  0.00           O  
ATOM    441  CB  VAL L  58       3.055  44.244  25.798  1.00  0.00           C  
ATOM    442  CG1 VAL L  58       3.800  43.923  24.478  1.00  0.00           C  
ATOM    443  CG2 VAL L  58       1.601  43.852  25.742  1.00  0.00           C  
ATOM    444  N   PRO L  59       6.038  43.013  26.939  1.00  0.00           N  
ATOM    445  CA  PRO L  59       7.464  43.075  27.286  1.00  0.00           C  
ATOM    446  C   PRO L  59       8.052  44.138  26.359  1.00  0.00           C  
ATOM    447  O   PRO L  59       7.434  44.511  25.349  1.00  0.00           O  
ATOM    448  CB  PRO L  59       7.908  41.646  27.260  1.00  0.00           C  
ATOM    449  CG  PRO L  59       6.897  40.864  26.438  1.00  0.00           C  
ATOM    450  CD  PRO L  59       5.605  41.666  26.580  1.00  0.00           C  
ATOM    451  N   SER L  60       9.235  44.610  26.713  1.00  0.00           N  
ATOM    452  CA  SER L  60       9.848  45.734  25.990  1.00  0.00           C  
ATOM    453  C   SER L  60      10.757  45.328  24.830  1.00  0.00           C  
ATOM    454  O   SER L  60      11.216  46.177  24.053  1.00  0.00           O  
ATOM    455  CB  SER L  60      10.676  46.581  26.927  1.00  0.00           C  
ATOM    456  OG  SER L  60      10.424  47.970  26.749  1.00  0.00           O  
ATOM    457  N   ARG L  61      11.005  44.038  24.731  1.00  0.00           N  
ATOM    458  CA  ARG L  61      11.280  43.432  23.424  1.00  0.00           C  
ATOM    459  C   ARG L  61      10.444  43.415  22.146  1.00  0.00           C  
ATOM    460  O   ARG L  61      10.965  43.176  21.046  1.00  0.00           O  
ATOM    461  CB  ARG L  61      11.482  41.898  23.553  1.00  0.00           C  
ATOM    462  CG  ARG L  61      11.773  41.412  24.982  1.00  0.00           C  
ATOM    463  CD  ARG L  61      11.878  39.899  25.006  1.00  0.00           C  
ATOM    464  NE  ARG L  61      10.879  39.312  25.914  1.00  0.00           N  
ATOM    465  CZ  ARG L  61       9.834  38.566  25.489  1.00  0.00           C  
ATOM    466  NH1 ARG L  61       8.902  38.217  26.357  1.00  0.00           N  
ATOM    467  NH2 ARG L  61       9.740  38.176  24.208  1.00  0.00           N  
ATOM    468  N   PHE L  62       9.160  43.667  22.310  1.00  0.00           N  
ATOM    469  CA  PHE L  62       8.340  44.154  21.193  1.00  0.00           C  
ATOM    470  C   PHE L  62       8.332  45.660  20.922  1.00  0.00           C  
ATOM    471  O   PHE L  62       8.188  46.472  21.846  1.00  0.00           O  
ATOM    472  CB  PHE L  62       6.899  43.730  21.407  1.00  0.00           C  
ATOM    473  CG  PHE L  62       6.714  42.296  21.815  1.00  0.00           C  
ATOM    474  CD1 PHE L  62       6.435  41.368  20.867  1.00  0.00           C  
ATOM    475  CD2 PHE L  62       6.897  41.882  23.108  1.00  0.00           C  
ATOM    476  CE1 PHE L  62       6.265  39.990  21.189  1.00  0.00           C  
ATOM    477  CE2 PHE L  62       6.767  40.484  23.416  1.00  0.00           C  
ATOM    478  CZ  PHE L  62       6.427  39.587  22.474  1.00  0.00           C  
ATOM    479  N   SER L  63       8.485  46.009  19.660  1.00  0.00           N  
ATOM    480  CA  SER L  63       8.266  47.395  19.229  1.00  0.00           C  
ATOM    481  C   SER L  63       7.492  47.248  17.921  1.00  0.00           C  
ATOM    482  O   SER L  63       7.592  46.220  17.234  1.00  0.00           O  
ATOM    483  CB  SER L  63       9.586  48.112  19.051  1.00  0.00           C  
ATOM    484  OG  SER L  63      10.692  47.222  19.148  1.00  0.00           O  
ATOM    485  N   GLY L  64       6.731  48.276  17.598  1.00  0.00           N  
ATOM    486  CA  GLY L  64       6.231  48.441  16.227  1.00  0.00           C  
ATOM    487  C   GLY L  64       6.752  49.741  15.615  1.00  0.00           C  
ATOM    488  O   GLY L  64       7.032  50.715  16.323  1.00  0.00           O  
ATOM    489  N   SER L  65       6.874  49.737  14.302  1.00  0.00           N  
ATOM    490  CA  SER L  65       6.886  50.994  13.540  1.00  0.00           C  
ATOM    491  C   SER L  65       6.188  51.045  12.184  1.00  0.00           C  
ATOM    492  O   SER L  65       5.936  50.004  11.557  1.00  0.00           O  
ATOM    493  CB  SER L  65       8.305  51.430  13.258  1.00  0.00           C  
ATOM    494  OG  SER L  65       9.099  50.365  12.745  1.00  0.00           O  
ATOM    495  N   GLY L  66       5.893  52.233  11.752  1.00  0.00           N  
ATOM    496  CA  GLY L  66       5.127  52.423  10.515  1.00  0.00           C  
ATOM    497  C   GLY L  66       4.344  53.714  10.273  1.00  0.00           C  
ATOM    498  O   GLY L  66       3.917  54.387  11.219  1.00  0.00           O  
ATOM    499  N   SER L  67       4.169  54.044   9.008  1.00  0.00           N  
ATOM    500  CA  SER L  67       3.235  55.114   8.625  1.00  0.00           C  
ATOM    501  C   SER L  67       2.882  54.495   7.276  1.00  0.00           C  
ATOM    502  O   SER L  67       3.637  53.674   6.760  1.00  0.00           O  
ATOM    503  CB  SER L  67       3.938  56.451   8.604  1.00  0.00           C  
ATOM    504  OG  SER L  67       5.213  56.372   7.978  1.00  0.00           O  
ATOM    505  N   GLY L  68       1.738  54.898   6.774  1.00  0.00           N  
ATOM    506  CA  GLY L  68       1.324  54.448   5.439  1.00  0.00           C  
ATOM    507  C   GLY L  68       0.753  53.097   5.020  1.00  0.00           C  
ATOM    508  O   GLY L  68      -0.384  52.748   5.373  1.00  0.00           O  
ATOM    509  N   THR L  69       1.545  52.342   4.293  1.00  0.00           N  
ATOM    510  CA  THR L  69       1.072  51.060   3.754  1.00  0.00           C  
ATOM    511  C   THR L  69       1.959  50.006   4.417  1.00  0.00           C  
ATOM    512  O   THR L  69       1.596  48.832   4.468  1.00  0.00           O  
ATOM    513  CB  THR L  69       1.190  51.137   2.219  1.00  0.00           C  
ATOM    514  OG1 THR L  69       2.475  51.706   1.998  1.00  0.00           O  
ATOM    515  CG2 THR L  69       0.119  51.995   1.601  1.00  0.00           C  
ATOM    516  N   ASP L  70       3.099  50.454   4.912  1.00  0.00           N  
ATOM    517  CA  ASP L  70       4.087  49.539   5.475  1.00  0.00           C  
ATOM    518  C   ASP L  70       4.391  49.605   6.971  1.00  0.00           C  
ATOM    519  O   ASP L  70       4.875  50.626   7.463  1.00  0.00           O  
ATOM    520  CB  ASP L  70       5.438  49.729   4.755  1.00  0.00           C  
ATOM    521  CG  ASP L  70       5.355  49.308   3.311  1.00  0.00           C  
ATOM    522  OD1 ASP L  70       4.352  48.880   2.766  1.00  0.00           O  
ATOM    523  OD2 ASP L  70       6.354  49.474   2.667  1.00  0.00           O  
ATOM    524  N   TYR L  71       4.103  48.515   7.643  1.00  0.00           N  
ATOM    525  CA  TYR L  71       4.447  48.404   9.067  1.00  0.00           C  
ATOM    526  C   TYR L  71       5.309  47.201   9.453  1.00  0.00           C  
ATOM    527  O   TYR L  71       5.297  46.167   8.768  1.00  0.00           O  
ATOM    528  CB  TYR L  71       3.149  48.361   9.894  1.00  0.00           C  
ATOM    529  CG  TYR L  71       2.218  49.526   9.592  1.00  0.00           C  
ATOM    530  CD1 TYR L  71       1.404  49.445   8.446  1.00  0.00           C  
ATOM    531  CD2 TYR L  71       2.219  50.656  10.360  1.00  0.00           C  
ATOM    532  CE1 TYR L  71       0.517  50.561   8.146  1.00  0.00           C  
ATOM    533  CE2 TYR L  71       1.356  51.757  10.073  1.00  0.00           C  
ATOM    534  CZ  TYR L  71       0.555  51.661   8.927  1.00  0.00           C  
ATOM    535  OH  TYR L  71      -0.265  52.729   8.629  1.00  0.00           O  
ATOM    536  N   THR L  72       6.041  47.351  10.543  1.00  0.00           N  
ATOM    537  CA  THR L  72       6.978  46.305  10.975  1.00  0.00           C  
ATOM    538  C   THR L  72       6.752  45.997  12.456  1.00  0.00           C  
ATOM    539  O   THR L  72       6.402  46.886  13.244  1.00  0.00           O  
ATOM    540  CB  THR L  72       8.401  46.815  10.683  1.00  0.00           C  
ATOM    541  OG1 THR L  72       8.428  46.976   9.269  1.00  0.00           O  
ATOM    542  CG2 THR L  72       9.463  45.843  11.122  1.00  0.00           C  
ATOM    543  N   PHE L  73       6.952  44.742  12.812  1.00  0.00           N  
ATOM    544  CA  PHE L  73       6.781  44.314  14.207  1.00  0.00           C  
ATOM    545  C   PHE L  73       8.123  43.601  14.387  1.00  0.00           C  
ATOM    546  O   PHE L  73       8.484  42.719  13.594  1.00  0.00           O  
ATOM    547  CB  PHE L  73       5.532  43.460  14.320  1.00  0.00           C  
ATOM    548  CG  PHE L  73       5.369  42.751  15.633  1.00  0.00           C  
ATOM    549  CD1 PHE L  73       5.729  41.449  15.727  1.00  0.00           C  
ATOM    550  CD2 PHE L  73       4.944  43.404  16.759  1.00  0.00           C  
ATOM    551  CE1 PHE L  73       5.615  40.726  16.948  1.00  0.00           C  
ATOM    552  CE2 PHE L  73       4.874  42.678  17.997  1.00  0.00           C  
ATOM    553  CZ  PHE L  73       5.174  41.367  18.059  1.00  0.00           C  
ATOM    554  N   THR L  74       8.841  43.993  15.426  1.00  0.00           N  
ATOM    555  CA  THR L  74      10.098  43.317  15.776  1.00  0.00           C  
ATOM    556  C   THR L  74      10.041  42.663  17.157  1.00  0.00           C  
ATOM    557  O   THR L  74       9.377  43.167  18.072  1.00  0.00           O  
ATOM    558  CB  THR L  74      11.221  44.367  15.699  1.00  0.00           C  
ATOM    559  OG1 THR L  74      11.202  44.796  14.341  1.00  0.00           O  
ATOM    560  CG2 THR L  74      12.568  43.797  16.052  1.00  0.00           C  
ATOM    561  N   ILE L  75      10.737  41.549  17.286  1.00  0.00           N  
ATOM    562  CA  ILE L  75      10.869  40.886  18.592  1.00  0.00           C  
ATOM    563  C   ILE L  75      12.396  40.919  18.697  1.00  0.00           C  
ATOM    564  O   ILE L  75      13.096  40.171  17.996  1.00  0.00           O  
ATOM    565  CB  ILE L  75      10.265  39.459  18.573  1.00  0.00           C  
ATOM    566  CG1 ILE L  75       8.722  39.460  18.399  1.00  0.00           C  
ATOM    567  CG2 ILE L  75      10.800  38.876  19.882  1.00  0.00           C  
ATOM    568  CD1 ILE L  75       8.093  38.047  18.405  1.00  0.00           C  
ATOM    569  N   SER L  76      12.889  41.784  19.567  1.00  0.00           N  
ATOM    570  CA  SER L  76      14.339  41.901  19.781  1.00  0.00           C  
ATOM    571  C   SER L  76      15.168  40.716  20.277  1.00  0.00           C  
ATOM    572  O   SER L  76      16.227  40.402  19.718  1.00  0.00           O  
ATOM    573  CB  SER L  76      14.642  42.989  20.784  1.00  0.00           C  
ATOM    574  OG  SER L  76      15.053  42.456  22.038  1.00  0.00           O  
ATOM    575  N   SER L  77      14.671  40.074  21.319  1.00  0.00           N  
ATOM    576  CA  SER L  77      15.188  38.757  21.709  1.00  0.00           C  
ATOM    577  C   SER L  77      14.040  37.773  21.937  1.00  0.00           C  
ATOM    578  O   SER L  77      13.260  37.912  22.891  1.00  0.00           O  
ATOM    579  CB  SER L  77      16.012  38.861  22.972  1.00  0.00           C  
ATOM    580  OG  SER L  77      15.641  37.882  23.936  1.00  0.00           O  
ATOM    581  N   LEU L  78      13.953  36.795  21.059  1.00  0.00           N  
ATOM    582  CA  LEU L  78      12.909  35.770  21.177  1.00  0.00           C  
ATOM    583  C   LEU L  78      13.075  34.956  22.461  1.00  0.00           C  
ATOM    584  O   LEU L  78      14.200  34.665  22.890  1.00  0.00           O  
ATOM    585  CB  LEU L  78      12.952  34.826  19.957  1.00  0.00           C  
ATOM    586  CG  LEU L  78      11.699  34.045  19.616  1.00  0.00           C  
ATOM    587  CD1 LEU L  78      10.617  34.997  19.166  1.00  0.00           C  
ATOM    588  CD2 LEU L  78      11.979  33.036  18.527  1.00  0.00           C  
ATOM    589  N   GLN L  79      11.952  34.601  23.057  1.00  0.00           N  
ATOM    590  CA  GLN L  79      11.968  33.764  24.265  1.00  0.00           C  
ATOM    591  C   GLN L  79      11.007  32.584  24.119  1.00  0.00           C  
ATOM    592  O   GLN L  79      10.249  32.498  23.141  1.00  0.00           O  
ATOM    593  CB  GLN L  79      11.606  34.625  25.441  1.00  0.00           C  
ATOM    594  CG  GLN L  79      12.580  35.689  25.702  1.00  0.00           C  
ATOM    595  CD  GLN L  79      13.978  35.205  26.110  1.00  0.00           C  
ATOM    596  OE1 GLN L  79      14.063  34.168  26.852  1.00  0.00           O  
ATOM    597  NE2 GLN L  79      14.983  35.815  25.640  1.00  0.00           N  
ATOM    598  N   PRO L  80      11.054  31.694  25.094  1.00  0.00           N  
ATOM    599  CA  PRO L  80      10.126  30.556  25.118  1.00  0.00           C  
ATOM    600  C   PRO L  80       8.631  30.861  25.016  1.00  0.00           C  
ATOM    601  O   PRO L  80       7.850  30.053  24.489  1.00  0.00           O  
ATOM    602  CB  PRO L  80      10.771  29.575  26.044  1.00  0.00           C  
ATOM    603  CG  PRO L  80      12.069  30.141  26.585  1.00  0.00           C  
ATOM    604  CD  PRO L  80      12.327  31.375  25.722  1.00  0.00           C  
ATOM    605  N   GLU L  81       8.254  32.022  25.523  1.00  0.00           N  
ATOM    606  CA  GLU L  81       6.831  32.346  25.690  1.00  0.00           C  
ATOM    607  C   GLU L  81       6.354  33.339  24.632  1.00  0.00           C  
ATOM    608  O   GLU L  81       5.266  33.922  24.750  1.00  0.00           O  
ATOM    609  CB  GLU L  81       6.538  32.968  27.082  1.00  0.00           C  
ATOM    610  CG  GLU L  81       7.289  34.268  27.430  1.00  0.00           C  
ATOM    611  CD  GLU L  81       8.722  34.059  28.046  1.00  0.00           C  
ATOM    612  OE1 GLU L  81       9.158  34.790  28.883  1.00  0.00           O  
ATOM    613  OE2 GLU L  81       9.222  33.067  27.518  1.00  0.00           O  
ATOM    614  N   ASP L  82       7.220  33.586  23.655  1.00  0.00           N  
ATOM    615  CA  ASP L  82       6.771  34.287  22.437  1.00  0.00           C  
ATOM    616  C   ASP L  82       6.170  33.448  21.312  1.00  0.00           C  
ATOM    617  O   ASP L  82       5.759  33.980  20.270  1.00  0.00           O  
ATOM    618  CB  ASP L  82       8.016  35.101  21.882  1.00  0.00           C  
ATOM    619  CG  ASP L  82       8.526  36.127  22.854  1.00  0.00           C  
ATOM    620  OD1 ASP L  82       9.648  36.600  22.840  1.00  0.00           O  
ATOM    621  OD2 ASP L  82       7.722  36.526  23.651  1.00  0.00           O  
ATOM    622  N   ILE L  83       6.127  32.150  21.538  1.00  0.00           N  
ATOM    623  CA  ILE L  83       5.493  31.246  20.579  1.00  0.00           C  
ATOM    624  C   ILE L  83       3.976  31.408  20.505  1.00  0.00           C  
ATOM    625  O   ILE L  83       3.265  31.210  21.501  1.00  0.00           O  
ATOM    626  CB  ILE L  83       5.751  29.755  20.936  1.00  0.00           C  
ATOM    627  CG1 ILE L  83       7.262  29.409  21.008  1.00  0.00           C  
ATOM    628  CG2 ILE L  83       4.940  29.027  19.859  1.00  0.00           C  
ATOM    629  CD1 ILE L  83       7.545  27.905  21.223  1.00  0.00           C  
ATOM    630  N   ALA L  84       3.505  31.770  19.331  1.00  0.00           N  
ATOM    631  CA  ALA L  84       2.134  32.284  19.190  1.00  0.00           C  
ATOM    632  C   ALA L  84       1.945  32.553  17.699  1.00  0.00           C  
ATOM    633  O   ALA L  84       2.876  32.391  16.897  1.00  0.00           O  
ATOM    634  CB  ALA L  84       1.972  33.638  19.899  1.00  0.00           C  
ATOM    635  N   THR L  85       0.742  32.960  17.347  1.00  0.00           N  
ATOM    636  CA  THR L  85       0.495  33.473  15.987  1.00  0.00           C  
ATOM    637  C   THR L  85       0.264  34.971  16.207  1.00  0.00           C  
ATOM    638  O   THR L  85      -0.352  35.381  17.200  1.00  0.00           O  
ATOM    639  CB  THR L  85      -0.721  32.669  15.437  1.00  0.00           C  
ATOM    640  OG1 THR L  85      -0.225  31.342  15.283  1.00  0.00           O  
ATOM    641  CG2 THR L  85      -1.203  33.204  14.115  1.00  0.00           C  
ATOM    642  N   TYR L  86       0.762  35.764  15.278  1.00  0.00           N  
ATOM    643  CA  TYR L  86       0.722  37.217  15.406  1.00  0.00           C  
ATOM    644  C   TYR L  86      -0.104  37.832  14.279  1.00  0.00           C  
ATOM    645  O   TYR L  86      -0.038  37.385  13.122  1.00  0.00           O  
ATOM    646  CB  TYR L  86       2.172  37.759  15.439  1.00  0.00           C  
ATOM    647  CG  TYR L  86       2.930  37.409  16.724  1.00  0.00           C  
ATOM    648  CD1 TYR L  86       2.977  38.376  17.741  1.00  0.00           C  
ATOM    649  CD2 TYR L  86       3.608  36.228  16.858  1.00  0.00           C  
ATOM    650  CE1 TYR L  86       3.704  38.061  18.964  1.00  0.00           C  
ATOM    651  CE2 TYR L  86       4.325  35.909  18.051  1.00  0.00           C  
ATOM    652  CZ  TYR L  86       4.365  36.887  19.055  1.00  0.00           C  
ATOM    653  OH  TYR L  86       5.074  36.598  20.202  1.00  0.00           O  
ATOM    654  N   TYR L  87      -0.874  38.847  14.630  1.00  0.00           N  
ATOM    655  CA  TYR L  87      -1.863  39.429  13.674  1.00  0.00           C  
ATOM    656  C   TYR L  87      -1.710  40.950  13.594  1.00  0.00           C  
ATOM    657  O   TYR L  87      -1.487  41.621  14.609  1.00  0.00           O  
ATOM    658  CB  TYR L  87      -3.254  39.051  14.093  1.00  0.00           C  
ATOM    659  CG  TYR L  87      -3.541  37.550  13.926  1.00  0.00           C  
ATOM    660  CD1 TYR L  87      -3.733  37.053  12.622  1.00  0.00           C  
ATOM    661  CD2 TYR L  87      -3.688  36.723  15.006  1.00  0.00           C  
ATOM    662  CE1 TYR L  87      -4.017  35.633  12.453  1.00  0.00           C  
ATOM    663  CE2 TYR L  87      -3.967  35.330  14.852  1.00  0.00           C  
ATOM    664  CZ  TYR L  87      -4.158  34.855  13.547  1.00  0.00           C  
ATOM    665  OH  TYR L  87      -4.451  33.516  13.390  1.00  0.00           O  
ATOM    666  N   CYS L  88      -1.833  41.470  12.389  1.00  0.00           N  
ATOM    667  CA  CYS L  88      -2.051  42.913  12.207  1.00  0.00           C  
ATOM    668  C   CYS L  88      -3.502  43.171  11.807  1.00  0.00           C  
ATOM    669  O   CYS L  88      -4.133  42.342  11.131  1.00  0.00           O  
ATOM    670  CB  CYS L  88      -1.030  43.521  11.277  1.00  0.00           C  
ATOM    671  SG  CYS L  88      -1.280  43.217   9.496  1.00  0.00           S  
ATOM    672  N   GLN L  89      -4.009  44.316  12.227  1.00  0.00           N  
ATOM    673  CA  GLN L  89      -5.384  44.705  11.883  1.00  0.00           C  
ATOM    674  C   GLN L  89      -5.283  46.187  11.601  1.00  0.00           C  
ATOM    675  O   GLN L  89      -4.699  46.948  12.382  1.00  0.00           O  
ATOM    676  CB  GLN L  89      -6.279  44.331  13.033  1.00  0.00           C  
ATOM    677  CG  GLN L  89      -6.912  45.468  13.665  1.00  0.00           C  
ATOM    678  CD  GLN L  89      -8.256  45.167  14.346  1.00  0.00           C  
ATOM    679  OE1 GLN L  89      -9.126  44.486  13.696  1.00  0.00           O  
ATOM    680  NE2 GLN L  89      -8.421  45.551  15.538  1.00  0.00           N  
ATOM    681  N   GLN L  90      -5.861  46.589  10.487  1.00  0.00           N  
ATOM    682  CA  GLN L  90      -6.058  48.021  10.209  1.00  0.00           C  
ATOM    683  C   GLN L  90      -7.438  48.328  10.793  1.00  0.00           C  
ATOM    684  O   GLN L  90      -8.336  47.471  10.781  1.00  0.00           O  
ATOM    685  CB  GLN L  90      -5.938  48.229   8.724  1.00  0.00           C  
ATOM    686  CG  GLN L  90      -7.037  47.626   7.958  1.00  0.00           C  
ATOM    687  CD  GLN L  90      -8.291  48.498   7.821  1.00  0.00           C  
ATOM    688  OE1 GLN L  90      -8.179  49.752   8.038  1.00  0.00           O  
ATOM    689  NE2 GLN L  90      -9.367  47.947   7.436  1.00  0.00           N  
ATOM    690  N   TYR L  91      -7.586  49.545  11.293  1.00  0.00           N  
ATOM    691  CA  TYR L  91      -8.910  50.042  11.696  1.00  0.00           C  
ATOM    692  C   TYR L  91      -9.174  51.478  11.234  1.00  0.00           C  
ATOM    693  O   TYR L  91      -9.734  52.293  11.980  1.00  0.00           O  
ATOM    694  CB  TYR L  91      -9.036  49.947  13.225  1.00  0.00           C  
ATOM    695  CG  TYR L  91      -7.978  50.778  13.961  1.00  0.00           C  
ATOM    696  CD1 TYR L  91      -6.761  50.151  14.287  1.00  0.00           C  
ATOM    697  CD2 TYR L  91      -8.226  52.059  14.360  1.00  0.00           C  
ATOM    698  CE1 TYR L  91      -5.752  50.927  14.995  1.00  0.00           C  
ATOM    699  CE2 TYR L  91      -7.246  52.827  15.056  1.00  0.00           C  
ATOM    700  CZ  TYR L  91      -6.040  52.189  15.378  1.00  0.00           C  
ATOM    701  OH  TYR L  91      -5.097  52.917  16.069  1.00  0.00           O  
ATOM    702  N   GLN L  92      -8.768  51.767  10.013  1.00  0.00           N  
ATOM    703  CA  GLN L  92      -8.962  53.111   9.447  1.00  0.00           C  
ATOM    704  C   GLN L  92     -10.389  53.171   8.901  1.00  0.00           C  
ATOM    705  O   GLN L  92     -11.139  54.117   9.174  1.00  0.00           O  
ATOM    706  CB  GLN L  92      -7.913  53.331   8.393  1.00  0.00           C  
ATOM    707  CG  GLN L  92      -7.902  54.696   7.860  1.00  0.00           C  
ATOM    708  CD  GLN L  92      -8.657  54.884   6.557  1.00  0.00           C  
ATOM    709  OE1 GLN L  92      -9.089  56.049   6.270  1.00  0.00           O  
ATOM    710  NE2 GLN L  92      -8.763  53.889   5.780  1.00  0.00           N  
ATOM    711  N   SER L  93     -10.742  52.158   8.139  1.00  0.00           N  
ATOM    712  CA  SER L  93     -12.124  52.019   7.668  1.00  0.00           C  
ATOM    713  C   SER L  93     -12.718  50.619   7.814  1.00  0.00           C  
ATOM    714  O   SER L  93     -11.987  49.618   7.877  1.00  0.00           O  
ATOM    715  CB  SER L  93     -12.226  52.391   6.224  1.00  0.00           C  
ATOM    716  OG  SER L  93     -11.440  51.538   5.397  1.00  0.00           O  
ATOM    717  N   LEU L  94     -14.037  50.568   7.866  1.00  0.00           N  
ATOM    718  CA  LEU L  94     -14.730  49.281   8.030  1.00  0.00           C  
ATOM    719  C   LEU L  94     -15.033  48.552   6.746  1.00  0.00           C  
ATOM    720  O   LEU L  94     -15.165  49.175   5.683  1.00  0.00           O  
ATOM    721  CB  LEU L  94     -16.066  49.501   8.778  1.00  0.00           C  
ATOM    722  CG  LEU L  94     -16.029  50.222  10.107  1.00  0.00           C  
ATOM    723  CD1 LEU L  94     -17.335  50.946  10.320  1.00  0.00           C  
ATOM    724  CD2 LEU L  94     -15.793  49.244  11.233  1.00  0.00           C  
ATOM    725  N   PRO L  95     -15.139  47.243   6.841  1.00  0.00           N  
ATOM    726  CA  PRO L  95     -14.424  46.562   7.909  1.00  0.00           C  
ATOM    727  C   PRO L  95     -12.978  46.454   8.396  1.00  0.00           C  
ATOM    728  O   PRO L  95     -12.031  46.531   7.600  1.00  0.00           O  
ATOM    729  CB  PRO L  95     -14.651  45.106   7.626  1.00  0.00           C  
ATOM    730  CG  PRO L  95     -14.936  45.009   6.161  1.00  0.00           C  
ATOM    731  CD  PRO L  95     -15.623  46.326   5.822  1.00  0.00           C  
ATOM    732  N   TYR L  96     -12.829  46.277   9.697  1.00  0.00           N  
ATOM    733  CA  TYR L  96     -11.502  46.026  10.278  1.00  0.00           C  
ATOM    734  C   TYR L  96     -11.095  44.641   9.785  1.00  0.00           C  
ATOM    735  O   TYR L  96     -11.734  43.630  10.123  1.00  0.00           O  
ATOM    736  CB  TYR L  96     -11.598  46.133  11.809  1.00  0.00           C  
ATOM    737  CG  TYR L  96     -12.053  47.521  12.279  1.00  0.00           C  
ATOM    738  CD1 TYR L  96     -12.002  48.580  11.353  1.00  0.00           C  
ATOM    739  CD2 TYR L  96     -12.426  47.751  13.574  1.00  0.00           C  
ATOM    740  CE1 TYR L  96     -12.420  49.905  11.792  1.00  0.00           C  
ATOM    741  CE2 TYR L  96     -12.836  49.045  14.015  1.00  0.00           C  
ATOM    742  CZ  TYR L  96     -12.773  50.090  13.082  1.00  0.00           C  
ATOM    743  OH  TYR L  96     -13.145  51.349  13.504  1.00  0.00           O  
ATOM    744  N   THR L  97     -10.040  44.611   8.994  1.00  0.00           N  
ATOM    745  CA  THR L  97      -9.591  43.352   8.385  1.00  0.00           C  
ATOM    746  C   THR L  97      -8.259  43.027   9.030  1.00  0.00           C  
ATOM    747  O   THR L  97      -7.488  43.910   9.421  1.00  0.00           O  
ATOM    748  CB  THR L  97      -9.523  43.582   6.881  1.00  0.00           C  
ATOM    749  OG1 THR L  97      -8.886  44.847   6.752  1.00  0.00           O  
ATOM    750  CG2 THR L  97     -10.885  43.606   6.240  1.00  0.00           C  
ATOM    751  N   PHE L  98      -7.993  41.739   9.130  1.00  0.00           N  
ATOM    752  CA  PHE L  98      -6.730  41.272   9.721  1.00  0.00           C  
ATOM    753  C   PHE L  98      -5.817  40.897   8.554  1.00  0.00           C  
ATOM    754  O   PHE L  98      -6.290  40.631   7.436  1.00  0.00           O  
ATOM    755  CB  PHE L  98      -7.014  40.103  10.647  1.00  0.00           C  
ATOM    756  CG  PHE L  98      -7.510  40.487  12.009  1.00  0.00           C  
ATOM    757  CD1 PHE L  98      -8.837  40.689  12.192  1.00  0.00           C  
ATOM    758  CD2 PHE L  98      -6.673  40.558  13.090  1.00  0.00           C  
ATOM    759  CE1 PHE L  98      -9.373  41.040  13.465  1.00  0.00           C  
ATOM    760  CE2 PHE L  98      -7.229  40.870  14.378  1.00  0.00           C  
ATOM    761  CZ  PHE L  98      -8.540  41.134  14.532  1.00  0.00           C  
ATOM    762  N   GLY L  99      -4.524  40.883   8.828  1.00  0.00           N  
ATOM    763  CA  GLY L  99      -3.583  40.108   8.011  1.00  0.00           C  
ATOM    764  C   GLY L  99      -3.776  38.624   8.323  1.00  0.00           C  
ATOM    765  O   GLY L  99      -4.467  38.260   9.285  1.00  0.00           O  
ATOM    766  N   GLN L 100      -3.164  37.791   7.505  1.00  0.00           N  
ATOM    767  CA  GLN L 100      -3.322  36.344   7.642  1.00  0.00           C  
ATOM    768  C   GLN L 100      -2.691  35.524   8.771  1.00  0.00           C  
ATOM    769  O   GLN L 100      -3.020  34.343   8.958  1.00  0.00           O  
ATOM    770  CB  GLN L 100      -2.852  35.685   6.399  1.00  0.00           C  
ATOM    771  CG  GLN L 100      -1.594  36.246   5.898  1.00  0.00           C  
ATOM    772  CD  GLN L 100      -0.647  35.235   5.240  1.00  0.00           C  
ATOM    773  OE1 GLN L 100       0.453  35.667   4.753  1.00  0.00           O  
ATOM    774  NE2 GLN L 100      -0.970  34.013   5.264  1.00  0.00           N  
ATOM    775  N   GLY L 101      -1.792  36.163   9.504  1.00  0.00           N  
ATOM    776  CA  GLY L 101      -1.066  35.473  10.581  1.00  0.00           C  
ATOM    777  C   GLY L 101       0.411  35.131  10.377  1.00  0.00           C  
ATOM    778  O   GLY L 101       0.809  34.651   9.304  1.00  0.00           O  
ATOM    779  N   THR L 102       1.201  35.383  11.409  1.00  0.00           N  
ATOM    780  CA  THR L 102       2.558  34.822  11.477  1.00  0.00           C  
ATOM    781  C   THR L 102       2.643  33.832  12.641  1.00  0.00           C  
ATOM    782  O   THR L 102       2.748  34.229  13.809  1.00  0.00           O  
ATOM    783  CB  THR L 102       3.536  36.002  11.625  1.00  0.00           C  
ATOM    784  OG1 THR L 102       3.222  36.851  10.525  1.00  0.00           O  
ATOM    785  CG2 THR L 102       4.974  35.567  11.561  1.00  0.00           C  
ATOM    786  N   LYS L 103       2.594  32.559  12.305  1.00  0.00           N  
ATOM    787  CA  LYS L 103       3.175  31.527  13.176  1.00  0.00           C  
ATOM    788  C   LYS L 103       4.671  31.562  13.503  1.00  0.00           C  
ATOM    789  O   LYS L 103       5.518  31.379  12.618  1.00  0.00           O  
ATOM    790  CB  LYS L 103       2.955  30.133  12.594  1.00  0.00           C  
ATOM    791  CG  LYS L 103       1.575  29.549  12.841  1.00  0.00           C  
ATOM    792  CD  LYS L 103       1.091  28.751  11.633  1.00  0.00           C  
ATOM    793  CE  LYS L 103       0.138  29.562  10.768  1.00  0.00           C  
ATOM    794  NZ  LYS L 103       0.881  30.500   9.899  1.00  0.00           N  
ATOM    795  N   LEU L 104       4.972  31.799  14.769  1.00  0.00           N  
ATOM    796  CA  LEU L 104       6.365  31.750  15.241  1.00  0.00           C  
ATOM    797  C   LEU L 104       6.649  30.423  15.945  1.00  0.00           C  
ATOM    798  O   LEU L 104       5.864  29.973  16.793  1.00  0.00           O  
ATOM    799  CB  LEU L 104       6.644  32.918  16.201  1.00  0.00           C  
ATOM    800  CG  LEU L 104       7.805  33.834  15.882  1.00  0.00           C  
ATOM    801  CD1 LEU L 104       7.727  35.064  16.749  1.00  0.00           C  
ATOM    802  CD2 LEU L 104       9.117  33.125  16.108  1.00  0.00           C  
ATOM    803  N   GLN L 105       7.763  29.814  15.582  1.00  0.00           N  
ATOM    804  CA  GLN L 105       8.143  28.520  16.166  1.00  0.00           C  
ATOM    805  C   GLN L 105       9.566  28.711  16.697  1.00  0.00           C  
ATOM    806  O   GLN L 105      10.289  29.622  16.267  1.00  0.00           O  
ATOM    807  CB  GLN L 105       8.018  27.469  15.096  1.00  0.00           C  
ATOM    808  CG  GLN L 105       6.683  26.860  15.027  1.00  0.00           C  
ATOM    809  CD  GLN L 105       6.314  25.964  16.217  1.00  0.00           C  
ATOM    810  OE1 GLN L 105       5.086  25.643  16.373  1.00  0.00           O  
ATOM    811  NE2 GLN L 105       7.247  25.532  16.955  1.00  0.00           N  
ATOM    812  N   ILE L 106       9.947  27.851  17.624  1.00  0.00           N  
ATOM    813  CA  ILE L 106      11.273  27.953  18.255  1.00  0.00           C  
ATOM    814  C   ILE L 106      12.080  26.776  17.704  1.00  0.00           C  
ATOM    815  O   ILE L 106      11.586  25.640  17.638  1.00  0.00           O  
ATOM    816  CB  ILE L 106      11.181  27.869  19.797  1.00  0.00           C  
ATOM    817  CG1 ILE L 106      11.665  29.166  20.498  1.00  0.00           C  
ATOM    818  CG2 ILE L 106      11.983  26.598  20.088  1.00  0.00           C  
ATOM    819  CD1 ILE L 106      10.611  30.298  20.509  1.00  0.00           C  
ATOM    820  N   THR L 107      13.309  27.064  17.316  1.00  0.00           N  
ATOM    821  CA  THR L 107      14.084  26.119  16.501  1.00  0.00           C  
ATOM    822  C   THR L 107      14.983  25.276  17.406  1.00  0.00           C  
ATOM    823  O   THR L 107      15.770  25.812  18.200  1.00  0.00           O  
ATOM    824  CB  THR L 107      14.880  26.946  15.473  1.00  0.00           C  
ATOM    825  OG1 THR L 107      14.368  26.521  14.213  1.00  0.00           O  
ATOM    826  CG2 THR L 107      16.361  26.691  15.552  1.00  0.00           C  
ATOM    827  OXT THR L 107      14.853  23.969  17.275  1.00  0.00           O  
TER     828      THR L 107                                                      
ATOM    829  N   ASP L   1      -7.899  44.742  31.844  1.00  0.00           N  
ATOM    830  CA  ASP L   1      -8.376  46.016  32.401  1.00  0.00           C  
ATOM    831  C   ASP L   1      -9.873  46.292  32.556  1.00  0.00           C  
ATOM    832  O   ASP L   1     -10.376  46.469  33.674  1.00  0.00           O  
ATOM    833  CB  ASP L   1      -7.843  47.187  31.550  1.00  0.00           C  
ATOM    834  CG  ASP L   1      -8.957  47.870  30.803  1.00  0.00           C  
ATOM    835  OD1 ASP L   1      -9.889  48.453  31.325  1.00  0.00           O  
ATOM    836  OD2 ASP L   1      -8.854  47.866  29.605  1.00  0.00           O  
ATOM    837  N   ILE L   2     -10.561  46.324  31.433  1.00  0.00           N  
ATOM    838  CA  ILE L   2     -12.026  46.209  31.444  1.00  0.00           C  
ATOM    839  C   ILE L   2     -12.072  44.710  31.158  1.00  0.00           C  
ATOM    840  O   ILE L   2     -11.712  44.258  30.058  1.00  0.00           O  
ATOM    841  CB  ILE L   2     -12.677  47.102  30.358  1.00  0.00           C  
ATOM    842  CG1 ILE L   2     -12.783  48.587  30.786  1.00  0.00           C  
ATOM    843  CG2 ILE L   2     -14.001  46.370  30.104  1.00  0.00           C  
ATOM    844  CD1 ILE L   2     -13.836  49.389  29.985  1.00  0.00           C  
ATOM    845  N   GLN L   3     -12.513  43.961  32.150  1.00  0.00           N  
ATOM    846  CA  GLN L   3     -12.728  42.522  31.966  1.00  0.00           C  
ATOM    847  C   GLN L   3     -14.021  42.177  31.233  1.00  0.00           C  
ATOM    848  O   GLN L   3     -15.104  42.672  31.577  1.00  0.00           O  
ATOM    849  CB  GLN L   3     -12.720  41.864  33.319  1.00  0.00           C  
ATOM    850  CG  GLN L   3     -11.871  42.550  34.292  1.00  0.00           C  
ATOM    851  CD  GLN L   3     -11.194  41.652  35.311  1.00  0.00           C  
ATOM    852  OE1 GLN L   3     -10.710  42.172  36.369  1.00  0.00           O  
ATOM    853  NE2 GLN L   3     -11.185  40.410  35.090  1.00  0.00           N  
ATOM    854  N   MET L   4     -13.891  41.333  30.232  1.00  0.00           N  
ATOM    855  CA  MET L   4     -15.059  40.629  29.682  1.00  0.00           C  
ATOM    856  C   MET L   4     -15.158  39.143  29.902  1.00  0.00           C  
ATOM    857  O   MET L   4     -14.206  38.403  29.614  1.00  0.00           O  
ATOM    858  CB  MET L   4     -15.140  40.845  28.151  1.00  0.00           C  
ATOM    859  CG  MET L   4     -14.495  42.150  27.750  1.00  0.00           C  
ATOM    860  SD  MET L   4     -15.598  43.531  28.002  1.00  0.00           S  
ATOM    861  CE  MET L   4     -17.147  42.690  27.826  1.00  0.00           C  
ATOM    862  N   THR L   5     -16.292  38.706  30.408  1.00  0.00           N  
ATOM    863  CA  THR L   5     -16.582  37.273  30.491  1.00  0.00           C  
ATOM    864  C   THR L   5     -17.601  36.859  29.432  1.00  0.00           C  
ATOM    865  O   THR L   5     -18.615  37.501  29.239  1.00  0.00           O  
ATOM    866  CB  THR L   5     -17.085  36.985  31.919  1.00  0.00           C  
ATOM    867  OG1 THR L   5     -18.362  37.568  31.957  1.00  0.00           O  
ATOM    868  CG2 THR L   5     -16.197  37.581  32.971  1.00  0.00           C  
ATOM    869  N   GLN L   6     -17.301  35.766  28.761  1.00  0.00           N  
ATOM    870  CA  GLN L   6     -18.144  35.321  27.648  1.00  0.00           C  
ATOM    871  C   GLN L   6     -18.728  33.948  27.981  1.00  0.00           C  
ATOM    872  O   GLN L   6     -18.019  33.050  28.457  1.00  0.00           O  
ATOM    873  CB  GLN L   6     -17.293  35.288  26.401  1.00  0.00           C  
ATOM    874  CG  GLN L   6     -18.079  35.260  25.160  1.00  0.00           C  
ATOM    875  CD  GLN L   6     -17.258  35.344  23.863  1.00  0.00           C  
ATOM    876  OE1 GLN L   6     -16.144  35.967  23.893  1.00  0.00           O  
ATOM    877  NE2 GLN L   6     -17.691  34.739  22.835  1.00  0.00           N  
ATOM    878  N   SER L   7     -20.013  33.806  27.726  1.00  0.00           N  
ATOM    879  CA  SER L   7     -20.721  32.571  28.088  1.00  0.00           C  
ATOM    880  C   SER L   7     -21.607  32.188  26.906  1.00  0.00           C  
ATOM    881  O   SER L   7     -22.098  33.055  26.166  1.00  0.00           O  
ATOM    882  CB  SER L   7     -21.545  32.777  29.339  1.00  0.00           C  
ATOM    883  OG  SER L   7     -21.957  31.541  29.916  1.00  0.00           O  
ATOM    884  N   PRO L   8     -21.800  30.894  26.744  1.00  0.00           N  
ATOM    885  CA  PRO L   8     -20.830  29.910  27.269  1.00  0.00           C  
ATOM    886  C   PRO L   8     -19.423  29.927  26.667  1.00  0.00           C  
ATOM    887  O   PRO L   8     -19.096  30.792  25.842  1.00  0.00           O  
ATOM    888  CB  PRO L   8     -21.494  28.592  26.992  1.00  0.00           C  
ATOM    889  CG  PRO L   8     -22.304  28.835  25.732  1.00  0.00           C  
ATOM    890  CD  PRO L   8     -22.781  30.276  25.861  1.00  0.00           C  
ATOM    891  N   SER L   9     -18.615  28.970  27.086  1.00  0.00           N  
ATOM    892  CA  SER L   9     -17.225  28.896  26.618  1.00  0.00           C  
ATOM    893  C   SER L   9     -17.112  27.709  25.665  1.00  0.00           C  
ATOM    894  O   SER L   9     -16.128  27.578  24.923  1.00  0.00           O  
ATOM    895  CB  SER L   9     -16.278  28.736  27.786  1.00  0.00           C  
ATOM    896  OG  SER L   9     -16.071  27.368  28.121  1.00  0.00           O  
ATOM    897  N   SER L  10     -18.120  26.861  25.701  1.00  0.00           N  
ATOM    898  CA  SER L  10     -18.247  25.802  24.695  1.00  0.00           C  
ATOM    899  C   SER L  10     -19.742  25.516  24.591  1.00  0.00           C  
ATOM    900  O   SER L  10     -20.487  25.636  25.574  1.00  0.00           O  
ATOM    901  CB  SER L  10     -17.463  24.575  25.112  1.00  0.00           C  
ATOM    902  OG  SER L  10     -17.027  23.811  23.990  1.00  0.00           O  
ATOM    903  N   LEU L  11     -20.162  25.143  23.401  1.00  0.00           N  
ATOM    904  CA  LEU L  11     -21.575  25.273  23.025  1.00  0.00           C  
ATOM    905  C   LEU L  11     -21.493  24.120  22.031  1.00  0.00           C  
ATOM    906  O   LEU L  11     -20.547  24.023  21.237  1.00  0.00           O  
ATOM    907  CB  LEU L  11     -21.855  26.686  22.479  1.00  0.00           C  
ATOM    908  CG  LEU L  11     -23.266  27.022  22.061  1.00  0.00           C  
ATOM    909  CD1 LEU L  11     -23.789  25.926  21.189  1.00  0.00           C  
ATOM    910  CD2 LEU L  11     -24.131  27.208  23.274  1.00  0.00           C  
ATOM    911  N   SER L  12     -22.468  23.271  22.088  1.00  0.00           N  
ATOM    912  CA  SER L  12     -22.621  22.229  21.069  1.00  0.00           C  
ATOM    913  C   SER L  12     -24.084  22.002  20.692  1.00  0.00           C  
ATOM    914  O   SER L  12     -24.934  21.750  21.556  1.00  0.00           O  
ATOM    915  CB  SER L  12     -22.040  20.918  21.552  1.00  0.00           C  
ATOM    916  OG  SER L  12     -22.238  19.864  20.613  1.00  0.00           O  
ATOM    917  N   ALA L  13     -24.357  22.096  19.407  1.00  0.00           N  
ATOM    918  CA  ALA L  13     -25.725  22.372  18.942  1.00  0.00           C  
ATOM    919  C   ALA L  13     -25.819  21.818  17.522  1.00  0.00           C  
ATOM    920  O   ALA L  13     -24.803  21.449  16.912  1.00  0.00           O  
ATOM    921  CB  ALA L  13     -25.980  23.879  18.838  1.00  0.00           C  
ATOM    922  N   SER L  14     -27.036  21.766  17.015  1.00  0.00           N  
ATOM    923  CA  SER L  14     -27.314  20.989  15.803  1.00  0.00           C  
ATOM    924  C   SER L  14     -27.717  21.948  14.683  1.00  0.00           C  
ATOM    925  O   SER L  14     -28.108  23.096  14.938  1.00  0.00           O  
ATOM    926  CB  SER L  14     -28.417  19.984  16.054  1.00  0.00           C  
ATOM    927  OG  SER L  14     -27.904  18.707  16.415  1.00  0.00           O  
ATOM    928  N   VAL L  15     -27.615  21.464  13.462  1.00  0.00           N  
ATOM    929  CA  VAL L  15     -27.771  22.332  12.280  1.00  0.00           C  
ATOM    930  C   VAL L  15     -29.249  22.722  12.272  1.00  0.00           C  
ATOM    931  O   VAL L  15     -30.129  21.884  12.510  1.00  0.00           O  
ATOM    932  CB  VAL L  15     -27.326  21.595  11.035  1.00  0.00           C  
ATOM    933  CG1 VAL L  15     -27.013  20.093  11.240  1.00  0.00           C  
ATOM    934  CG2 VAL L  15     -28.259  21.832   9.876  1.00  0.00           C  
ATOM    935  N   GLY L  16     -29.499  23.989  11.998  1.00  0.00           N  
ATOM    936  CA  GLY L  16     -30.794  24.595  12.337  1.00  0.00           C  
ATOM    937  C   GLY L  16     -31.106  25.422  13.587  1.00  0.00           C  
ATOM    938  O   GLY L  16     -31.923  26.353  13.545  1.00  0.00           O  
ATOM    939  N   ASP L  17     -30.452  25.070  14.681  1.00  0.00           N  
ATOM    940  CA  ASP L  17     -30.748  25.699  15.980  1.00  0.00           C  
ATOM    941  C   ASP L  17     -30.470  27.200  16.069  1.00  0.00           C  
ATOM    942  O   ASP L  17     -29.551  27.716  15.417  1.00  0.00           O  
ATOM    943  CB  ASP L  17     -29.938  25.003  17.089  1.00  0.00           C  
ATOM    944  CG  ASP L  17     -30.390  23.580  17.290  1.00  0.00           C  
ATOM    945  OD1 ASP L  17     -29.747  22.720  17.863  1.00  0.00           O  
ATOM    946  OD2 ASP L  17     -31.493  23.326  16.888  1.00  0.00           O  
ATOM    947  N   ARG L  18     -31.268  27.878  16.877  1.00  0.00           N  
ATOM    948  CA  ARG L  18     -30.883  29.203  17.386  1.00  0.00           C  
ATOM    949  C   ARG L  18     -29.788  28.995  18.436  1.00  0.00           C  
ATOM    950  O   ARG L  18     -29.920  28.154  19.335  1.00  0.00           O  
ATOM    951  CB  ARG L  18     -32.071  29.916  18.004  1.00  0.00           C  
ATOM    952  CG  ARG L  18     -32.095  31.431  17.731  1.00  0.00           C  
ATOM    953  CD  ARG L  18     -33.268  32.068  18.447  1.00  0.00           C  
ATOM    954  NE  ARG L  18     -34.173  31.045  18.990  1.00  0.00           N  
ATOM    955  CZ  ARG L  18     -34.597  31.037  20.272  1.00  0.00           C  
ATOM    956  NH1 ARG L  18     -35.540  30.183  20.628  1.00  0.00           N  
ATOM    957  NH2 ARG L  18     -34.078  31.883  21.173  1.00  0.00           N  
ATOM    958  N   VAL L  19     -28.723  29.763  18.306  1.00  0.00           N  
ATOM    959  CA  VAL L  19     -27.623  29.707  19.283  1.00  0.00           C  
ATOM    960  C   VAL L  19     -27.514  31.166  19.731  1.00  0.00           C  
ATOM    961  O   VAL L  19     -27.641  32.083  18.915  1.00  0.00           O  
ATOM    962  CB  VAL L  19     -26.374  29.149  18.612  1.00  0.00           C  
ATOM    963  CG1 VAL L  19     -25.038  29.669  19.192  1.00  0.00           C  
ATOM    964  CG2 VAL L  19     -26.408  27.647  18.508  1.00  0.00           C  
ATOM    965  N   THR L  20     -27.276  31.351  21.019  1.00  0.00           N  
ATOM    966  CA  THR L  20     -27.200  32.685  21.594  1.00  0.00           C  
ATOM    967  C   THR L  20     -26.029  32.582  22.520  1.00  0.00           C  
ATOM    968  O   THR L  20     -25.960  31.738  23.407  1.00  0.00           O  
ATOM    969  CB  THR L  20     -28.560  32.951  22.266  1.00  0.00           C  
ATOM    970  OG1 THR L  20     -28.362  34.178  22.957  1.00  0.00           O  
ATOM    971  CG2 THR L  20     -28.953  31.862  23.227  1.00  0.00           C  
ATOM    972  N   ILE L  21     -25.059  33.451  22.294  1.00  0.00           N  
ATOM    973  CA  ILE L  21     -23.916  33.570  23.212  1.00  0.00           C  
ATOM    974  C   ILE L  21     -23.906  34.977  23.754  1.00  0.00           C  
ATOM    975  O   ILE L  21     -24.230  35.925  23.027  1.00  0.00           O  
ATOM    976  CB  ILE L  21     -22.574  33.285  22.487  1.00  0.00           C  
ATOM    977  CG1 ILE L  21     -21.637  34.521  22.455  1.00  0.00           C  
ATOM    978  CG2 ILE L  21     -23.054  32.763  21.127  1.00  0.00           C  
ATOM    979  CD1 ILE L  21     -20.186  34.210  22.881  1.00  0.00           C  
ATOM    980  N   THR L  22     -23.549  35.113  25.021  1.00  0.00           N  
ATOM    981  CA  THR L  22     -23.377  36.434  25.585  1.00  0.00           C  
ATOM    982  C   THR L  22     -22.028  36.950  26.094  1.00  0.00           C  
ATOM    983  O   THR L  22     -21.067  36.182  26.229  1.00  0.00           O  
ATOM    984  CB  THR L  22     -24.320  36.493  26.859  1.00  0.00           C  
ATOM    985  OG1 THR L  22     -23.756  35.541  27.756  1.00  0.00           O  
ATOM    986  CG2 THR L  22     -25.740  36.122  26.526  1.00  0.00           C  
ATOM    987  N   CYS L  23     -21.977  38.247  26.366  1.00  0.00           N  
ATOM    988  CA  CYS L  23     -20.701  38.910  26.671  1.00  0.00           C  
ATOM    989  C   CYS L  23     -21.083  39.972  27.708  1.00  0.00           C  
ATOM    990  O   CYS L  23     -21.943  40.825  27.451  1.00  0.00           O  
ATOM    991  CB  CYS L  23     -20.048  39.436  25.418  1.00  0.00           C  
ATOM    992  SG  CYS L  23     -18.457  40.284  25.638  1.00  0.00           S  
ATOM    993  N   GLN L  24     -20.440  39.904  28.861  1.00  0.00           N  
ATOM    994  CA  GLN L  24     -20.645  40.919  29.909  1.00  0.00           C  
ATOM    995  C   GLN L  24     -19.327  41.655  30.165  1.00  0.00           C  
ATOM    996  O   GLN L  24     -18.293  41.025  30.429  1.00  0.00           O  
ATOM    997  CB  GLN L  24     -21.160  40.224  31.138  1.00  0.00           C  
ATOM    998  CG  GLN L  24     -22.526  39.707  30.987  1.00  0.00           C  
ATOM    999  CD  GLN L  24     -23.355  39.673  32.277  1.00  0.00           C  
ATOM   1000  OE1 GLN L  24     -24.609  39.445  32.184  1.00  0.00           O  
ATOM   1001  NE2 GLN L  24     -22.751  39.811  33.381  1.00  0.00           N  
ATOM   1002  N   ALA L  25     -19.383  42.974  30.082  1.00  0.00           N  
ATOM   1003  CA  ALA L  25     -18.328  43.819  30.665  1.00  0.00           C  
ATOM   1004  C   ALA L  25     -18.539  44.324  32.096  1.00  0.00           C  
ATOM   1005  O   ALA L  25     -19.680  44.506  32.541  1.00  0.00           O  
ATOM   1006  CB  ALA L  25     -18.244  45.072  29.780  1.00  0.00           C  
ATOM   1007  N   SER L  26     -17.435  44.540  32.794  1.00  0.00           N  
ATOM   1008  CA  SER L  26     -17.451  45.387  33.998  1.00  0.00           C  
ATOM   1009  C   SER L  26     -17.368  46.873  34.360  1.00  0.00           C  
ATOM   1010  O   SER L  26     -17.687  47.268  35.487  1.00  0.00           O  
ATOM   1011  CB  SER L  26     -16.322  45.002  34.927  1.00  0.00           C  
ATOM   1012  OG  SER L  26     -15.119  44.726  34.217  1.00  0.00           O  
ATOM   1013  N   GLN L  27     -16.940  47.672  33.402  1.00  0.00           N  
ATOM   1014  CA  GLN L  27     -17.455  49.044  33.269  1.00  0.00           C  
ATOM   1015  C   GLN L  27     -18.556  48.992  32.213  1.00  0.00           C  
ATOM   1016  O   GLN L  27     -18.660  48.016  31.451  1.00  0.00           O  
ATOM   1017  CB  GLN L  27     -16.310  49.943  32.899  1.00  0.00           C  
ATOM   1018  CG  GLN L  27     -15.218  49.916  33.873  1.00  0.00           C  
ATOM   1019  CD  GLN L  27     -14.187  51.043  33.721  1.00  0.00           C  
ATOM   1020  OE1 GLN L  27     -13.707  51.565  34.782  1.00  0.00           O  
ATOM   1021  NE2 GLN L  27     -13.813  51.362  32.554  1.00  0.00           N  
ATOM   1022  N   ASP L  28     -19.361  50.040  32.181  1.00  0.00           N  
ATOM   1023  CA  ASP L  28     -20.338  50.207  31.098  1.00  0.00           C  
ATOM   1024  C   ASP L  28     -19.491  50.731  29.939  1.00  0.00           C  
ATOM   1025  O   ASP L  28     -18.762  51.721  30.076  1.00  0.00           O  
ATOM   1026  CB  ASP L  28     -21.456  51.170  31.543  1.00  0.00           C  
ATOM   1027  CG  ASP L  28     -22.119  51.825  30.359  1.00  0.00           C  
ATOM   1028  OD1 ASP L  28     -21.533  52.249  29.378  1.00  0.00           O  
ATOM   1029  OD2 ASP L  28     -23.318  51.865  30.394  1.00  0.00           O  
ATOM   1030  N   ILE L  29     -19.598  50.057  28.813  1.00  0.00           N  
ATOM   1031  CA  ILE L  29     -18.658  50.282  27.710  1.00  0.00           C  
ATOM   1032  C   ILE L  29     -19.634  50.911  26.715  1.00  0.00           C  
ATOM   1033  O   ILE L  29     -19.320  51.060  25.525  1.00  0.00           O  
ATOM   1034  CB  ILE L  29     -18.027  48.953  27.218  1.00  0.00           C  
ATOM   1035  CG1 ILE L  29     -19.088  47.884  26.838  1.00  0.00           C  
ATOM   1036  CG2 ILE L  29     -17.094  48.596  28.378  1.00  0.00           C  
ATOM   1037  CD1 ILE L  29     -18.486  46.498  26.528  1.00  0.00           C  
ATOM   1038  N   ILE L  30     -20.803  51.269  27.215  1.00  0.00           N  
ATOM   1039  CA  ILE L  30     -21.700  52.169  26.475  1.00  0.00           C  
ATOM   1040  C   ILE L  30     -22.404  51.619  25.239  1.00  0.00           C  
ATOM   1041  O   ILE L  30     -23.634  51.467  25.219  1.00  0.00           O  
ATOM   1042  CB  ILE L  30     -20.951  53.415  25.944  1.00  0.00           C  
ATOM   1043  CG1 ILE L  30     -19.924  53.976  26.959  1.00  0.00           C  
ATOM   1044  CG2 ILE L  30     -22.111  54.337  25.568  1.00  0.00           C  
ATOM   1045  CD1 ILE L  30     -20.524  55.005  27.938  1.00  0.00           C  
ATOM   1046  N   LYS L  31     -21.615  51.328  24.225  1.00  0.00           N  
ATOM   1047  CA  LYS L  31     -22.070  50.444  23.148  1.00  0.00           C  
ATOM   1048  C   LYS L  31     -20.910  49.943  22.293  1.00  0.00           C  
ATOM   1049  O   LYS L  31     -21.110  49.489  21.157  1.00  0.00           O  
ATOM   1050  CB  LYS L  31     -23.064  51.146  22.230  1.00  0.00           C  
ATOM   1051  CG  LYS L  31     -22.579  52.466  21.666  1.00  0.00           C  
ATOM   1052  CD  LYS L  31     -23.692  53.174  20.898  1.00  0.00           C  
ATOM   1053  CE  LYS L  31     -23.173  54.403  20.175  1.00  0.00           C  
ATOM   1054  NZ  LYS L  31     -22.070  54.046  19.255  1.00  0.00           N  
ATOM   1055  N   TYR L  32     -19.714  50.031  22.850  1.00  0.00           N  
ATOM   1056  CA  TYR L  32     -18.496  49.877  22.045  1.00  0.00           C  
ATOM   1057  C   TYR L  32     -18.033  48.425  22.164  1.00  0.00           C  
ATOM   1058  O   TYR L  32     -17.070  48.118  22.879  1.00  0.00           O  
ATOM   1059  CB  TYR L  32     -17.434  50.870  22.546  1.00  0.00           C  
ATOM   1060  CG  TYR L  32     -17.834  52.332  22.316  1.00  0.00           C  
ATOM   1061  CD1 TYR L  32     -17.894  53.179  23.434  1.00  0.00           C  
ATOM   1062  CD2 TYR L  32     -18.203  52.789  21.079  1.00  0.00           C  
ATOM   1063  CE1 TYR L  32     -18.283  54.567  23.230  1.00  0.00           C  
ATOM   1064  CE2 TYR L  32     -18.588  54.147  20.869  1.00  0.00           C  
ATOM   1065  CZ  TYR L  32     -18.644  54.978  21.996  1.00  0.00           C  
ATOM   1066  OH  TYR L  32     -19.037  56.285  21.807  1.00  0.00           O  
ATOM   1067  N   LEU L  33     -18.726  47.555  21.464  1.00  0.00           N  
ATOM   1068  CA  LEU L  33     -18.392  46.128  21.493  1.00  0.00           C  
ATOM   1069  C   LEU L  33     -18.451  45.580  20.072  1.00  0.00           C  
ATOM   1070  O   LEU L  33     -19.520  45.551  19.445  1.00  0.00           O  
ATOM   1071  CB  LEU L  33     -19.367  45.366  22.409  1.00  0.00           C  
ATOM   1072  CG  LEU L  33     -19.096  43.900  22.676  1.00  0.00           C  
ATOM   1073  CD1 LEU L  33     -18.691  43.718  24.118  1.00  0.00           C  
ATOM   1074  CD2 LEU L  33     -20.320  43.065  22.379  1.00  0.00           C  
ATOM   1075  N   ASN L  34     -17.302  45.153  19.583  1.00  0.00           N  
ATOM   1076  CA  ASN L  34     -17.267  44.245  18.433  1.00  0.00           C  
ATOM   1077  C   ASN L  34     -17.392  42.736  18.622  1.00  0.00           C  
ATOM   1078  O   ASN L  34     -17.030  42.192  19.672  1.00  0.00           O  
ATOM   1079  CB  ASN L  34     -15.947  44.435  17.655  1.00  0.00           C  
ATOM   1080  CG  ASN L  34     -15.690  45.885  17.360  1.00  0.00           C  
ATOM   1081  OD1 ASN L  34     -16.806  46.626  16.996  1.00  0.00           O  
ATOM   1082  ND2 ASN L  34     -14.593  46.411  17.362  1.00  0.00           N  
ATOM   1083  N   TRP L  35     -17.901  42.083  17.600  1.00  0.00           N  
ATOM   1084  CA  TRP L  35     -17.927  40.618  17.584  1.00  0.00           C  
ATOM   1085  C   TRP L  35     -17.063  40.032  16.470  1.00  0.00           C  
ATOM   1086  O   TRP L  35     -17.189  40.417  15.300  1.00  0.00           O  
ATOM   1087  CB  TRP L  35     -19.375  40.148  17.439  1.00  0.00           C  
ATOM   1088  CG  TRP L  35     -20.292  40.303  18.705  1.00  0.00           C  
ATOM   1089  CD1 TRP L  35     -21.184  41.258  18.987  1.00  0.00           C  
ATOM   1090  CD2 TRP L  35     -20.376  39.396  19.766  1.00  0.00           C  
ATOM   1091  NE1 TRP L  35     -21.783  40.998  20.284  1.00  0.00           N  
ATOM   1092  CE2 TRP L  35     -21.331  39.881  20.704  1.00  0.00           C  
ATOM   1093  CE3 TRP L  35     -19.727  38.210  20.021  1.00  0.00           C  
ATOM   1094  CZ2 TRP L  35     -21.688  39.244  21.893  1.00  0.00           C  
ATOM   1095  CZ3 TRP L  35     -20.084  37.583  21.233  1.00  0.00           C  
ATOM   1096  CH2 TRP L  35     -21.051  38.059  22.105  1.00  0.00           C  
ATOM   1097  N   TYR L  36     -16.200  39.111  16.850  1.00  0.00           N  
ATOM   1098  CA  TYR L  36     -15.400  38.403  15.866  1.00  0.00           C  
ATOM   1099  C   TYR L  36     -15.718  36.920  15.698  1.00  0.00           C  
ATOM   1100  O   TYR L  36     -16.114  36.239  16.651  1.00  0.00           O  
ATOM   1101  CB  TYR L  36     -13.916  38.537  16.239  1.00  0.00           C  
ATOM   1102  CG  TYR L  36     -13.401  39.978  16.126  1.00  0.00           C  
ATOM   1103  CD1 TYR L  36     -13.433  40.762  17.274  1.00  0.00           C  
ATOM   1104  CD2 TYR L  36     -12.983  40.497  14.932  1.00  0.00           C  
ATOM   1105  CE1 TYR L  36     -12.956  42.135  17.177  1.00  0.00           C  
ATOM   1106  CE2 TYR L  36     -12.504  41.820  14.825  1.00  0.00           C  
ATOM   1107  CZ  TYR L  36     -12.558  42.611  15.981  1.00  0.00           C  
ATOM   1108  OH  TYR L  36     -12.130  43.917  15.882  1.00  0.00           O  
ATOM   1109  N   GLN L  37     -15.543  36.440  14.484  1.00  0.00           N  
ATOM   1110  CA  GLN L  37     -15.510  34.993  14.243  1.00  0.00           C  
ATOM   1111  C   GLN L  37     -14.123  34.554  13.772  1.00  0.00           C  
ATOM   1112  O   GLN L  37     -13.538  35.163  12.866  1.00  0.00           O  
ATOM   1113  CB  GLN L  37     -16.568  34.659  13.227  1.00  0.00           C  
ATOM   1114  CG  GLN L  37     -16.399  33.334  12.619  1.00  0.00           C  
ATOM   1115  CD  GLN L  37     -17.168  33.113  11.306  1.00  0.00           C  
ATOM   1116  OE1 GLN L  37     -16.905  33.877  10.316  1.00  0.00           O  
ATOM   1117  NE2 GLN L  37     -17.983  32.145  11.241  1.00  0.00           N  
ATOM   1118  N   GLN L  38     -13.619  33.503  14.392  1.00  0.00           N  
ATOM   1119  CA  GLN L  38     -12.395  32.852  13.905  1.00  0.00           C  
ATOM   1120  C   GLN L  38     -12.543  31.387  13.499  1.00  0.00           C  
ATOM   1121  O   GLN L  38     -12.766  30.510  14.345  1.00  0.00           O  
ATOM   1122  CB  GLN L  38     -11.346  32.955  14.974  1.00  0.00           C  
ATOM   1123  CG  GLN L  38     -10.020  32.517  14.527  1.00  0.00           C  
ATOM   1124  CD  GLN L  38      -8.884  32.766  15.526  1.00  0.00           C  
ATOM   1125  OE1 GLN L  38      -7.751  33.138  15.069  1.00  0.00           O  
ATOM   1126  NE2 GLN L  38      -9.139  32.651  16.757  1.00  0.00           N  
ATOM   1127  N   THR L  39     -12.420  31.145  12.209  1.00  0.00           N  
ATOM   1128  CA  THR L  39     -12.554  29.782  11.686  1.00  0.00           C  
ATOM   1129  C   THR L  39     -11.189  29.167  11.998  1.00  0.00           C  
ATOM   1130  O   THR L  39     -10.180  29.876  12.101  1.00  0.00           O  
ATOM   1131  CB  THR L  39     -12.918  29.899  10.191  1.00  0.00           C  
ATOM   1132  OG1 THR L  39     -14.325  30.124  10.191  1.00  0.00           O  
ATOM   1133  CG2 THR L  39     -12.589  28.651   9.414  1.00  0.00           C  
ATOM   1134  N   PRO L  40     -11.178  27.856  12.144  1.00  0.00           N  
ATOM   1135  CA  PRO L  40      -9.929  27.138  12.436  1.00  0.00           C  
ATOM   1136  C   PRO L  40      -8.847  27.349  11.378  1.00  0.00           C  
ATOM   1137  O   PRO L  40      -9.042  27.019  10.197  1.00  0.00           O  
ATOM   1138  CB  PRO L  40     -10.387  25.820  12.981  1.00  0.00           C  
ATOM   1139  CG  PRO L  40     -11.892  25.688  12.815  1.00  0.00           C  
ATOM   1140  CD  PRO L  40     -12.364  27.118  12.565  1.00  0.00           C  
ATOM   1141  N   GLY L  41      -7.723  27.895  11.814  1.00  0.00           N  
ATOM   1142  CA  GLY L  41      -6.601  28.150  10.900  1.00  0.00           C  
ATOM   1143  C   GLY L  41      -6.530  29.501  10.188  1.00  0.00           C  
ATOM   1144  O   GLY L  41      -5.484  29.880   9.646  1.00  0.00           O  
ATOM   1145  N   LYS L  42      -7.645  30.207  10.199  1.00  0.00           N  
ATOM   1146  CA  LYS L  42      -7.711  31.522   9.547  1.00  0.00           C  
ATOM   1147  C   LYS L  42      -7.584  32.668  10.555  1.00  0.00           C  
ATOM   1148  O   LYS L  42      -7.373  32.440  11.752  1.00  0.00           O  
ATOM   1149  CB  LYS L  42      -9.027  31.697   8.789  1.00  0.00           C  
ATOM   1150  CG  LYS L  42      -9.167  30.829   7.551  1.00  0.00           C  
ATOM   1151  CD  LYS L  42      -7.814  30.608   6.889  1.00  0.00           C  
ATOM   1152  CE  LYS L  42      -7.962  29.923   5.555  1.00  0.00           C  
ATOM   1153  NZ  LYS L  42      -6.642  29.739   4.911  1.00  0.00           N  
ATOM   1154  N   ALA L  43      -7.713  33.883  10.053  1.00  0.00           N  
ATOM   1155  CA  ALA L  43      -7.507  35.075  10.889  1.00  0.00           C  
ATOM   1156  C   ALA L  43      -8.961  35.366  11.259  1.00  0.00           C  
ATOM   1157  O   ALA L  43      -9.893  34.858  10.618  1.00  0.00           O  
ATOM   1158  CB  ALA L  43      -7.009  36.304  10.112  1.00  0.00           C  
ATOM   1159  N   PRO L  44      -9.132  36.178  12.289  1.00  0.00           N  
ATOM   1160  CA  PRO L  44     -10.446  36.772  12.570  1.00  0.00           C  
ATOM   1161  C   PRO L  44     -11.239  37.641  11.596  1.00  0.00           C  
ATOM   1162  O   PRO L  44     -10.665  38.438  10.840  1.00  0.00           O  
ATOM   1163  CB  PRO L  44     -10.313  37.320  13.953  1.00  0.00           C  
ATOM   1164  CG  PRO L  44      -8.838  37.409  14.282  1.00  0.00           C  
ATOM   1165  CD  PRO L  44      -8.186  36.370  13.373  1.00  0.00           C  
ATOM   1166  N   LYS L  45     -12.546  37.473  11.624  1.00  0.00           N  
ATOM   1167  CA  LYS L  45     -13.421  38.213  10.705  1.00  0.00           C  
ATOM   1168  C   LYS L  45     -14.331  39.052  11.604  1.00  0.00           C  
ATOM   1169  O   LYS L  45     -14.972  38.528  12.525  1.00  0.00           O  
ATOM   1170  CB  LYS L  45     -14.220  37.263   9.817  1.00  0.00           C  
ATOM   1171  CG  LYS L  45     -14.968  37.938   8.683  1.00  0.00           C  
ATOM   1172  CD  LYS L  45     -16.006  36.997   8.073  1.00  0.00           C  
ATOM   1173  CE  LYS L  45     -15.463  36.285   6.869  1.00  0.00           C  
ATOM   1174  NZ  LYS L  45     -16.121  34.972   6.687  1.00  0.00           N  
ATOM   1175  N   LEU L  46     -14.366  40.324  11.322  1.00  0.00           N  
ATOM   1176  CA  LEU L  46     -15.289  41.224  12.033  1.00  0.00           C  
ATOM   1177  C   LEU L  46     -16.715  40.945  11.566  1.00  0.00           C  
ATOM   1178  O   LEU L  46     -17.013  40.997  10.363  1.00  0.00           O  
ATOM   1179  CB  LEU L  46     -14.911  42.692  11.766  1.00  0.00           C  
ATOM   1180  CG  LEU L  46     -15.768  43.766  12.396  1.00  0.00           C  
ATOM   1181  CD1 LEU L  46     -15.716  43.632  13.898  1.00  0.00           C  
ATOM   1182  CD2 LEU L  46     -15.289  45.134  11.983  1.00  0.00           C  
ATOM   1183  N   LEU L  47     -17.577  40.653  12.523  1.00  0.00           N  
ATOM   1184  CA  LEU L  47     -18.967  40.302  12.206  1.00  0.00           C  
ATOM   1185  C   LEU L  47     -19.914  41.480  12.447  1.00  0.00           C  
ATOM   1186  O   LEU L  47     -20.845  41.714  11.663  1.00  0.00           O  
ATOM   1187  CB  LEU L  47     -19.420  39.100  13.057  1.00  0.00           C  
ATOM   1188  CG  LEU L  47     -18.815  37.742  12.751  1.00  0.00           C  
ATOM   1189  CD1 LEU L  47     -19.629  36.684  13.439  1.00  0.00           C  
ATOM   1190  CD2 LEU L  47     -18.793  37.497  11.262  1.00  0.00           C  
ATOM   1191  N   ILE L  48     -19.664  42.202  13.528  1.00  0.00           N  
ATOM   1192  CA  ILE L  48     -20.680  43.109  14.086  1.00  0.00           C  
ATOM   1193  C   ILE L  48     -19.847  44.208  14.752  1.00  0.00           C  
ATOM   1194  O   ILE L  48     -18.968  43.924  15.575  1.00  0.00           O  
ATOM   1195  CB  ILE L  48     -21.591  42.386  15.108  1.00  0.00           C  
ATOM   1196  CG1 ILE L  48     -22.792  41.660  14.440  1.00  0.00           C  
ATOM   1197  CG2 ILE L  48     -21.936  43.518  16.072  1.00  0.00           C  
ATOM   1198  CD1 ILE L  48     -23.379  40.510  15.290  1.00  0.00           C  
ATOM   1199  N   TYR L  49     -20.136  45.445  14.387  1.00  0.00           N  
ATOM   1200  CA  TYR L  49     -19.353  46.588  14.883  1.00  0.00           C  
ATOM   1201  C   TYR L  49     -20.370  47.325  15.758  1.00  0.00           C  
ATOM   1202  O   TYR L  49     -21.583  47.250  15.515  1.00  0.00           O  
ATOM   1203  CB  TYR L  49     -18.814  47.382  13.681  1.00  0.00           C  
ATOM   1204  CG  TYR L  49     -18.272  48.762  14.074  1.00  0.00           C  
ATOM   1205  CD1 TYR L  49     -18.937  49.896  13.576  1.00  0.00           C  
ATOM   1206  CD2 TYR L  49     -17.133  48.897  14.817  1.00  0.00           C  
ATOM   1207  CE1 TYR L  49     -18.425  51.211  13.933  1.00  0.00           C  
ATOM   1208  CE2 TYR L  49     -16.621  50.182  15.172  1.00  0.00           C  
ATOM   1209  CZ  TYR L  49     -17.295  51.301  14.666  1.00  0.00           C  
ATOM   1210  OH  TYR L  49     -16.795  52.546  14.984  1.00  0.00           O  
ATOM   1211  N   GLU L  50     -19.863  48.024  16.759  1.00  0.00           N  
ATOM   1212  CA  GLU L  50     -20.735  48.676  17.749  1.00  0.00           C  
ATOM   1213  C   GLU L  50     -21.995  48.015  18.306  1.00  0.00           C  
ATOM   1214  O   GLU L  50     -23.091  48.589  18.258  1.00  0.00           O  
ATOM   1215  CB  GLU L  50     -21.310  50.017  17.214  1.00  0.00           C  
ATOM   1216  CG  GLU L  50     -20.747  51.304  17.837  1.00  0.00           C  
ATOM   1217  CD  GLU L  50     -21.556  52.612  17.501  1.00  0.00           C  
ATOM   1218  OE1 GLU L  50     -22.747  52.615  17.433  1.00  0.00           O  
ATOM   1219  OE2 GLU L  50     -20.749  53.528  17.351  1.00  0.00           O  
ATOM   1220  N   ALA L  51     -21.822  46.815  18.826  1.00  0.00           N  
ATOM   1221  CA  ALA L  51     -22.966  46.027  19.302  1.00  0.00           C  
ATOM   1222  C   ALA L  51     -23.968  45.552  18.253  1.00  0.00           C  
ATOM   1223  O   ALA L  51     -24.287  44.356  18.174  1.00  0.00           O  
ATOM   1224  CB  ALA L  51     -23.751  46.941  20.258  1.00  0.00           C  
ATOM   1225  N   SER L  52     -24.450  46.497  17.464  1.00  0.00           N  
ATOM   1226  CA  SER L  52     -25.508  46.197  16.491  1.00  0.00           C  
ATOM   1227  C   SER L  52     -25.339  46.166  14.975  1.00  0.00           C  
ATOM   1228  O   SER L  52     -26.183  45.614  14.252  1.00  0.00           O  
ATOM   1229  CB  SER L  52     -26.654  47.172  16.630  1.00  0.00           C  
ATOM   1230  OG  SER L  52     -27.031  47.357  17.987  1.00  0.00           O  
ATOM   1231  N   ASN L  53     -24.252  46.759  14.515  1.00  0.00           N  
ATOM   1232  CA  ASN L  53     -24.089  47.024  13.080  1.00  0.00           C  
ATOM   1233  C   ASN L  53     -23.398  45.973  12.216  1.00  0.00           C  
ATOM   1234  O   ASN L  53     -22.162  45.902  12.161  1.00  0.00           O  
ATOM   1235  CB  ASN L  53     -23.293  48.330  12.875  1.00  0.00           C  
ATOM   1236  CG  ASN L  53     -24.099  49.530  13.291  1.00  0.00           C  
ATOM   1237  OD1 ASN L  53     -23.661  50.168  14.441  1.00  0.00           O  
ATOM   1238  ND2 ASN L  53     -25.108  49.918  12.729  1.00  0.00           N  
ATOM   1239  N   LEU L  54     -24.205  45.172  11.554  1.00  0.00           N  
ATOM   1240  CA  LEU L  54     -23.672  44.061  10.760  1.00  0.00           C  
ATOM   1241  C   LEU L  54     -22.851  44.527   9.558  1.00  0.00           C  
ATOM   1242  O   LEU L  54     -23.140  45.569   8.955  1.00  0.00           O  
ATOM   1243  CB  LEU L  54     -24.825  43.168  10.251  1.00  0.00           C  
ATOM   1244  CG  LEU L  54     -24.501  41.740   9.859  1.00  0.00           C  
ATOM   1245  CD1 LEU L  54     -24.145  40.945  11.092  1.00  0.00           C  
ATOM   1246  CD2 LEU L  54     -25.675  41.098   9.157  1.00  0.00           C  
ATOM   1247  N   GLN L  55     -21.839  43.748   9.229  1.00  0.00           N  
ATOM   1248  CA  GLN L  55     -20.656  44.293   8.547  1.00  0.00           C  
ATOM   1249  C   GLN L  55     -21.019  43.749   7.169  1.00  0.00           C  
ATOM   1250  O   GLN L  55     -21.945  42.933   7.034  1.00  0.00           O  
ATOM   1251  CB  GLN L  55     -19.430  43.757   9.232  1.00  0.00           C  
ATOM   1252  CG  GLN L  55     -18.328  44.719   9.283  1.00  0.00           C  
ATOM   1253  CD  GLN L  55     -18.695  46.092   9.855  1.00  0.00           C  
ATOM   1254  OE1 GLN L  55     -19.702  46.168  10.639  1.00  0.00           O  
ATOM   1255  NE2 GLN L  55     -17.951  47.073   9.573  1.00  0.00           N  
ATOM   1256  N   ALA L  56     -20.288  44.205   6.193  1.00  0.00           N  
ATOM   1257  CA  ALA L  56     -20.563  43.802   4.809  1.00  0.00           C  
ATOM   1258  C   ALA L  56     -20.050  42.378   4.609  1.00  0.00           C  
ATOM   1259  O   ALA L  56     -18.960  42.020   5.078  1.00  0.00           O  
ATOM   1260  CB  ALA L  56     -19.771  44.681   3.830  1.00  0.00           C  
ATOM   1261  N   GLY L  57     -20.842  41.586   3.915  1.00  0.00           N  
ATOM   1262  CA  GLY L  57     -20.474  40.188   3.663  1.00  0.00           C  
ATOM   1263  C   GLY L  57     -20.948  39.102   4.626  1.00  0.00           C  
ATOM   1264  O   GLY L  57     -21.011  37.916   4.266  1.00  0.00           O  
ATOM   1265  N   VAL L  58     -21.275  39.522   5.835  1.00  0.00           N  
ATOM   1266  CA  VAL L  58     -21.573  38.565   6.907  1.00  0.00           C  
ATOM   1267  C   VAL L  58     -23.043  38.168   6.768  1.00  0.00           C  
ATOM   1268  O   VAL L  58     -23.904  39.006   6.468  1.00  0.00           O  
ATOM   1269  CB  VAL L  58     -21.281  39.199   8.239  1.00  0.00           C  
ATOM   1270  CG1 VAL L  58     -21.840  38.423   9.457  1.00  0.00           C  
ATOM   1271  CG2 VAL L  58     -19.824  39.542   8.397  1.00  0.00           C  
ATOM   1272  N   PRO L  59     -23.308  36.898   6.979  1.00  0.00           N  
ATOM   1273  CA  PRO L  59     -24.658  36.367   6.796  1.00  0.00           C  
ATOM   1274  C   PRO L  59     -25.688  37.121   7.617  1.00  0.00           C  
ATOM   1275  O   PRO L  59     -25.379  37.605   8.713  1.00  0.00           O  
ATOM   1276  CB  PRO L  59     -24.501  34.886   6.949  1.00  0.00           C  
ATOM   1277  CG  PRO L  59     -23.193  34.646   7.658  1.00  0.00           C  
ATOM   1278  CD  PRO L  59     -22.343  35.864   7.319  1.00  0.00           C  
ATOM   1279  N   SER L  60     -26.895  37.210   7.098  1.00  0.00           N  
ATOM   1280  CA  SER L  60     -27.954  37.985   7.758  1.00  0.00           C  
ATOM   1281  C   SER L  60     -28.627  37.166   8.860  1.00  0.00           C  
ATOM   1282  O   SER L  60     -29.438  37.688   9.632  1.00  0.00           O  
ATOM   1283  CB  SER L  60     -29.000  38.419   6.776  1.00  0.00           C  
ATOM   1284  OG  SER L  60     -29.583  37.316   6.119  1.00  0.00           O  
ATOM   1285  N   ARG L  61     -28.276  35.899   8.916  1.00  0.00           N  
ATOM   1286  CA  ARG L  61     -28.558  35.095  10.100  1.00  0.00           C  
ATOM   1287  C   ARG L  61     -27.968  35.444  11.455  1.00  0.00           C  
ATOM   1288  O   ARG L  61     -28.559  35.231  12.508  1.00  0.00           O  
ATOM   1289  CB  ARG L  61     -28.138  33.623   9.890  1.00  0.00           C  
ATOM   1290  CG  ARG L  61     -28.735  32.958   8.633  1.00  0.00           C  
ATOM   1291  CD  ARG L  61     -27.790  31.935   8.088  1.00  0.00           C  
ATOM   1292  NE  ARG L  61     -26.593  31.822   8.934  1.00  0.00           N  
ATOM   1293  CZ  ARG L  61     -25.533  31.051   8.613  1.00  0.00           C  
ATOM   1294  NH1 ARG L  61     -24.356  31.586   8.582  1.00  0.00           N  
ATOM   1295  NH2 ARG L  61     -25.682  29.752   8.323  1.00  0.00           N  
ATOM   1296  N   PHE L  62     -26.770  35.997  11.411  1.00  0.00           N  
ATOM   1297  CA  PHE L  62     -26.255  36.792  12.538  1.00  0.00           C  
ATOM   1298  C   PHE L  62     -26.769  38.156  13.006  1.00  0.00           C  
ATOM   1299  O   PHE L  62     -26.877  39.099  12.212  1.00  0.00           O  
ATOM   1300  CB  PHE L  62     -24.782  37.066  12.324  1.00  0.00           C  
ATOM   1301  CG  PHE L  62     -23.954  35.854  12.000  1.00  0.00           C  
ATOM   1302  CD1 PHE L  62     -24.500  34.622  12.150  1.00  0.00           C  
ATOM   1303  CD2 PHE L  62     -22.688  35.955  11.480  1.00  0.00           C  
ATOM   1304  CE1 PHE L  62     -23.785  33.457  11.846  1.00  0.00           C  
ATOM   1305  CE2 PHE L  62     -21.992  34.776  11.136  1.00  0.00           C  
ATOM   1306  CZ  PHE L  62     -22.526  33.559  11.354  1.00  0.00           C  
ATOM   1307  N   SER L  63     -27.081  38.241  14.289  1.00  0.00           N  
ATOM   1308  CA  SER L  63     -27.459  39.526  14.897  1.00  0.00           C  
ATOM   1309  C   SER L  63     -26.749  39.830  16.216  1.00  0.00           C  
ATOM   1310  O   SER L  63     -26.212  38.923  16.869  1.00  0.00           O  
ATOM   1311  CB  SER L  63     -28.948  39.569  15.160  1.00  0.00           C  
ATOM   1312  OG  SER L  63     -29.614  40.497  14.311  1.00  0.00           O  
ATOM   1313  N   GLY L  64     -26.755  41.100  16.591  1.00  0.00           N  
ATOM   1314  CA  GLY L  64     -26.106  41.529  17.839  1.00  0.00           C  
ATOM   1315  C   GLY L  64     -26.937  42.628  18.509  1.00  0.00           C  
ATOM   1316  O   GLY L  64     -27.437  43.542  17.838  1.00  0.00           O  
ATOM   1317  N   SER L  65     -27.074  42.522  19.819  1.00  0.00           N  
ATOM   1318  CA  SER L  65     -27.501  43.672  20.636  1.00  0.00           C  
ATOM   1319  C   SER L  65     -26.941  43.855  22.049  1.00  0.00           C  
ATOM   1320  O   SER L  65     -26.158  43.024  22.533  1.00  0.00           O  
ATOM   1321  CB  SER L  65     -29.003  43.656  20.823  1.00  0.00           C  
ATOM   1322  OG  SER L  65     -29.490  42.351  21.118  1.00  0.00           O  
ATOM   1323  N   GLY L  66     -27.350  44.939  22.689  1.00  0.00           N  
ATOM   1324  CA  GLY L  66     -26.657  45.418  23.894  1.00  0.00           C  
ATOM   1325  C   GLY L  66     -26.623  46.923  24.176  1.00  0.00           C  
ATOM   1326  O   GLY L  66     -26.524  47.738  23.250  1.00  0.00           O  
ATOM   1327  N   SER L  67     -26.708  47.268  25.452  1.00  0.00           N  
ATOM   1328  CA  SER L  67     -26.484  48.657  25.879  1.00  0.00           C  
ATOM   1329  C   SER L  67     -25.748  48.327  27.180  1.00  0.00           C  
ATOM   1330  O   SER L  67     -26.024  47.303  27.823  1.00  0.00           O  
ATOM   1331  CB  SER L  67     -27.801  49.386  26.021  1.00  0.00           C  
ATOM   1332  OG  SER L  67     -28.326  49.286  27.339  1.00  0.00           O  
ATOM   1333  N   GLY L  68     -24.822  49.197  27.549  1.00  0.00           N  
ATOM   1334  CA  GLY L  68     -24.261  49.174  28.907  1.00  0.00           C  
ATOM   1335  C   GLY L  68     -23.241  48.046  29.053  1.00  0.00           C  
ATOM   1336  O   GLY L  68     -22.091  48.165  28.607  1.00  0.00           O  
ATOM   1337  N   THR L  69     -23.676  46.968  29.674  1.00  0.00           N  
ATOM   1338  CA  THR L  69     -22.745  46.082  30.339  1.00  0.00           C  
ATOM   1339  C   THR L  69     -22.967  44.733  29.660  1.00  0.00           C  
ATOM   1340  O   THR L  69     -22.049  43.903  29.574  1.00  0.00           O  
ATOM   1341  CB  THR L  69     -23.090  46.113  31.840  1.00  0.00           C  
ATOM   1342  OG1 THR L  69     -21.849  45.851  32.486  1.00  0.00           O  
ATOM   1343  CG2 THR L  69     -24.109  45.070  32.220  1.00  0.00           C  
ATOM   1344  N   ASP L  70     -24.183  44.532  29.190  1.00  0.00           N  
ATOM   1345  CA  ASP L  70     -24.547  43.250  28.564  1.00  0.00           C  
ATOM   1346  C   ASP L  70     -24.952  43.040  27.107  1.00  0.00           C  
ATOM   1347  O   ASP L  70     -25.859  43.712  26.593  1.00  0.00           O  
ATOM   1348  CB  ASP L  70     -25.737  42.624  29.315  1.00  0.00           C  
ATOM   1349  CG  ASP L  70     -25.469  42.534  30.793  1.00  0.00           C  
ATOM   1350  OD1 ASP L  70     -24.651  41.792  31.310  1.00  0.00           O  
ATOM   1351  OD2 ASP L  70     -26.085  43.305  31.477  1.00  0.00           O  
ATOM   1352  N   TYR L  71     -24.275  42.113  26.460  1.00  0.00           N  
ATOM   1353  CA  TYR L  71     -24.458  41.914  25.017  1.00  0.00           C  
ATOM   1354  C   TYR L  71     -24.768  40.465  24.650  1.00  0.00           C  
ATOM   1355  O   TYR L  71     -24.421  39.531  25.389  1.00  0.00           O  
ATOM   1356  CB  TYR L  71     -23.188  42.382  24.282  1.00  0.00           C  
ATOM   1357  CG  TYR L  71     -22.859  43.857  24.542  1.00  0.00           C  
ATOM   1358  CD1 TYR L  71     -22.071  44.166  25.665  1.00  0.00           C  
ATOM   1359  CD2 TYR L  71     -23.373  44.855  23.760  1.00  0.00           C  
ATOM   1360  CE1 TYR L  71     -21.761  45.565  25.930  1.00  0.00           C  
ATOM   1361  CE2 TYR L  71     -23.077  46.229  24.012  1.00  0.00           C  
ATOM   1362  CZ  TYR L  71     -22.295  46.520  25.137  1.00  0.00           C  
ATOM   1363  OH  TYR L  71     -22.022  47.845  25.401  1.00  0.00           O  
ATOM   1364  N   THR L  72     -25.418  40.297  23.516  1.00  0.00           N  
ATOM   1365  CA  THR L  72     -25.653  38.954  22.975  1.00  0.00           C  
ATOM   1366  C   THR L  72     -25.432  38.890  21.465  1.00  0.00           C  
ATOM   1367  O   THR L  72     -25.555  39.901  20.758  1.00  0.00           O  
ATOM   1368  CB  THR L  72     -27.093  38.554  23.349  1.00  0.00           C  
ATOM   1369  OG1 THR L  72     -27.905  39.333  22.476  1.00  0.00           O  
ATOM   1370  CG2 THR L  72     -27.422  38.856  24.785  1.00  0.00           C  
ATOM   1371  N   PHE L  73     -25.107  37.705  20.991  1.00  0.00           N  
ATOM   1372  CA  PHE L  73     -24.837  37.513  19.561  1.00  0.00           C  
ATOM   1373  C   PHE L  73     -25.760  36.323  19.309  1.00  0.00           C  
ATOM   1374  O   PHE L  73     -25.689  35.300  20.006  1.00  0.00           O  
ATOM   1375  CB  PHE L  73     -23.352  37.274  19.358  1.00  0.00           C  
ATOM   1376  CG  PHE L  73     -22.973  36.791  17.987  1.00  0.00           C  
ATOM   1377  CD1 PHE L  73     -22.880  35.459  17.758  1.00  0.00           C  
ATOM   1378  CD2 PHE L  73     -22.796  37.655  16.936  1.00  0.00           C  
ATOM   1379  CE1 PHE L  73     -22.548  34.952  16.477  1.00  0.00           C  
ATOM   1380  CE2 PHE L  73     -22.496  37.117  15.639  1.00  0.00           C  
ATOM   1381  CZ  PHE L  73     -22.344  35.794  15.446  1.00  0.00           C  
ATOM   1382  N   THR L  74     -26.615  36.474  18.316  1.00  0.00           N  
ATOM   1383  CA  THR L  74     -27.479  35.366  17.893  1.00  0.00           C  
ATOM   1384  C   THR L  74     -27.118  34.845  16.504  1.00  0.00           C  
ATOM   1385  O   THR L  74     -26.875  35.626  15.573  1.00  0.00           O  
ATOM   1386  CB  THR L  74     -28.920  35.881  17.939  1.00  0.00           C  
ATOM   1387  OG1 THR L  74     -29.107  36.265  19.295  1.00  0.00           O  
ATOM   1388  CG2 THR L  74     -29.914  34.819  17.549  1.00  0.00           C  
ATOM   1389  N   ILE L  75     -27.074  33.543  16.385  1.00  0.00           N  
ATOM   1390  CA  ILE L  75     -27.090  32.906  15.064  1.00  0.00           C  
ATOM   1391  C   ILE L  75     -28.510  32.340  15.010  1.00  0.00           C  
ATOM   1392  O   ILE L  75     -28.840  31.377  15.703  1.00  0.00           O  
ATOM   1393  CB  ILE L  75     -26.020  31.811  14.948  1.00  0.00           C  
ATOM   1394  CG1 ILE L  75     -24.592  32.344  15.162  1.00  0.00           C  
ATOM   1395  CG2 ILE L  75     -26.321  31.223  13.568  1.00  0.00           C  
ATOM   1396  CD1 ILE L  75     -23.536  31.233  15.364  1.00  0.00           C  
ATOM   1397  N   SER L  76     -29.336  32.959  14.187  1.00  0.00           N  
ATOM   1398  CA  SER L  76     -30.737  32.534  14.061  1.00  0.00           C  
ATOM   1399  C   SER L  76     -30.951  31.099  13.583  1.00  0.00           C  
ATOM   1400  O   SER L  76     -31.839  30.387  14.075  1.00  0.00           O  
ATOM   1401  CB  SER L  76     -31.478  33.429  13.093  1.00  0.00           C  
ATOM   1402  OG  SER L  76     -31.253  33.054  11.737  1.00  0.00           O  
ATOM   1403  N   SER L  77     -30.142  30.705  12.631  1.00  0.00           N  
ATOM   1404  CA  SER L  77     -30.193  29.327  12.132  1.00  0.00           C  
ATOM   1405  C   SER L  77     -28.794  28.830  11.765  1.00  0.00           C  
ATOM   1406  O   SER L  77     -28.130  29.393  10.880  1.00  0.00           O  
ATOM   1407  CB  SER L  77     -31.092  29.234  10.917  1.00  0.00           C  
ATOM   1408  OG  SER L  77     -31.458  27.889  10.623  1.00  0.00           O  
ATOM   1409  N   LEU L  78     -28.367  27.784  12.448  1.00  0.00           N  
ATOM   1410  CA  LEU L  78     -26.958  27.373  12.395  1.00  0.00           C  
ATOM   1411  C   LEU L  78     -26.723  26.570  11.115  1.00  0.00           C  
ATOM   1412  O   LEU L  78     -27.541  25.718  10.737  1.00  0.00           O  
ATOM   1413  CB  LEU L  78     -26.602  26.532  13.636  1.00  0.00           C  
ATOM   1414  CG  LEU L  78     -25.138  26.275  13.922  1.00  0.00           C  
ATOM   1415  CD1 LEU L  78     -24.507  27.529  14.478  1.00  0.00           C  
ATOM   1416  CD2 LEU L  78     -24.979  25.140  14.903  1.00  0.00           C  
ATOM   1417  N   GLN L  79     -25.610  26.854  10.467  1.00  0.00           N  
ATOM   1418  CA  GLN L  79     -25.301  26.212   9.183  1.00  0.00           C  
ATOM   1419  C   GLN L  79     -23.886  25.726   9.497  1.00  0.00           C  
ATOM   1420  O   GLN L  79     -23.263  26.164  10.475  1.00  0.00           O  
ATOM   1421  CB  GLN L  79     -25.449  27.238   8.094  1.00  0.00           C  
ATOM   1422  CG  GLN L  79     -26.844  27.592   7.812  1.00  0.00           C  
ATOM   1423  CD  GLN L  79     -27.063  28.442   6.569  1.00  0.00           C  
ATOM   1424  OE1 GLN L  79     -28.232  28.911   6.353  1.00  0.00           O  
ATOM   1425  NE2 GLN L  79     -26.064  28.692   5.834  1.00  0.00           N  
ATOM   1426  N   PRO L  80     -23.399  24.827   8.663  1.00  0.00           N  
ATOM   1427  CA  PRO L  80     -22.054  24.266   8.860  1.00  0.00           C  
ATOM   1428  C   PRO L  80     -20.813  25.135   8.881  1.00  0.00           C  
ATOM   1429  O   PRO L  80     -19.818  24.806   9.543  1.00  0.00           O  
ATOM   1430  CB  PRO L  80     -22.077  22.988   8.076  1.00  0.00           C  
ATOM   1431  CG  PRO L  80     -23.385  22.867   7.315  1.00  0.00           C  
ATOM   1432  CD  PRO L  80     -24.292  23.907   7.968  1.00  0.00           C  
ATOM   1433  N   GLU L  81     -20.878  26.236   8.156  1.00  0.00           N  
ATOM   1434  CA  GLU L  81     -19.750  27.177   8.107  1.00  0.00           C  
ATOM   1435  C   GLU L  81     -19.707  28.142   9.295  1.00  0.00           C  
ATOM   1436  O   GLU L  81     -18.991  29.153   9.267  1.00  0.00           O  
ATOM   1437  CB  GLU L  81     -19.786  28.053   6.836  1.00  0.00           C  
ATOM   1438  CG  GLU L  81     -20.787  27.634   5.738  1.00  0.00           C  
ATOM   1439  CD  GLU L  81     -22.199  28.330   5.824  1.00  0.00           C  
ATOM   1440  OE1 GLU L  81     -22.309  29.512   5.954  1.00  0.00           O  
ATOM   1441  OE2 GLU L  81     -23.062  27.456   5.726  1.00  0.00           O  
ATOM   1442  N   ASP L  82     -20.500  27.829  10.299  1.00  0.00           N  
ATOM   1443  CA  ASP L  82     -20.472  28.610  11.554  1.00  0.00           C  
ATOM   1444  C   ASP L  82     -19.615  27.998  12.665  1.00  0.00           C  
ATOM   1445  O   ASP L  82     -19.331  28.647  13.680  1.00  0.00           O  
ATOM   1446  CB  ASP L  82     -21.955  28.800  12.036  1.00  0.00           C  
ATOM   1447  CG  ASP L  82     -22.790  29.587  11.057  1.00  0.00           C  
ATOM   1448  OD1 ASP L  82     -22.346  30.226  10.117  1.00  0.00           O  
ATOM   1449  OD2 ASP L  82     -23.980  29.510  11.208  1.00  0.00           O  
ATOM   1450  N   ILE L  83     -19.218  26.758  12.456  1.00  0.00           N  
ATOM   1451  CA  ILE L  83     -18.265  26.109  13.366  1.00  0.00           C  
ATOM   1452  C   ILE L  83     -16.955  26.888  13.482  1.00  0.00           C  
ATOM   1453  O   ILE L  83     -16.126  26.875  12.560  1.00  0.00           O  
ATOM   1454  CB  ILE L  83     -17.907  24.675  12.887  1.00  0.00           C  
ATOM   1455  CG1 ILE L  83     -19.157  23.780  12.665  1.00  0.00           C  
ATOM   1456  CG2 ILE L  83     -16.932  24.217  13.971  1.00  0.00           C  
ATOM   1457  CD1 ILE L  83     -18.836  22.401  12.040  1.00  0.00           C  
ATOM   1458  N   ALA L  84     -16.786  27.556  14.611  1.00  0.00           N  
ATOM   1459  CA  ALA L  84     -15.747  28.586  14.733  1.00  0.00           C  
ATOM   1460  C   ALA L  84     -15.729  28.980  16.211  1.00  0.00           C  
ATOM   1461  O   ALA L  84     -16.592  28.555  16.991  1.00  0.00           O  
ATOM   1462  CB  ALA L  84     -16.122  29.858  13.959  1.00  0.00           C  
ATOM   1463  N   THR L  85     -14.745  29.785  16.575  1.00  0.00           N  
ATOM   1464  CA  THR L  85     -14.758  30.454  17.886  1.00  0.00           C  
ATOM   1465  C   THR L  85     -15.158  31.915  17.680  1.00  0.00           C  
ATOM   1466  O   THR L  85     -14.734  32.559  16.710  1.00  0.00           O  
ATOM   1467  CB  THR L  85     -13.353  30.289  18.498  1.00  0.00           C  
ATOM   1468  OG1 THR L  85     -13.143  28.880  18.503  1.00  0.00           O  
ATOM   1469  CG2 THR L  85     -13.266  30.840  19.894  1.00  0.00           C  
ATOM   1470  N   TYR L  86     -15.968  32.416  18.593  1.00  0.00           N  
ATOM   1471  CA  TYR L  86     -16.552  33.755  18.436  1.00  0.00           C  
ATOM   1472  C   TYR L  86     -15.994  34.563  19.612  1.00  0.00           C  
ATOM   1473  O   TYR L  86     -15.997  34.097  20.759  1.00  0.00           O  
ATOM   1474  CB  TYR L  86     -18.086  33.633  18.422  1.00  0.00           C  
ATOM   1475  CG  TYR L  86     -18.625  32.990  17.133  1.00  0.00           C  
ATOM   1476  CD1 TYR L  86     -18.998  33.842  16.075  1.00  0.00           C  
ATOM   1477  CD2 TYR L  86     -18.817  31.638  17.029  1.00  0.00           C  
ATOM   1478  CE1 TYR L  86     -19.520  33.245  14.855  1.00  0.00           C  
ATOM   1479  CE2 TYR L  86     -19.330  31.043  15.836  1.00  0.00           C  
ATOM   1480  CZ  TYR L  86     -19.698  31.908  14.799  1.00  0.00           C  
ATOM   1481  OH  TYR L  86     -20.216  31.344  13.652  1.00  0.00           O  
ATOM   1482  N   TYR L  87     -15.524  35.760  19.309  1.00  0.00           N  
ATOM   1483  CA  TYR L  87     -14.968  36.643  20.348  1.00  0.00           C  
ATOM   1484  C   TYR L  87     -15.779  37.938  20.414  1.00  0.00           C  
ATOM   1485  O   TYR L  87     -16.214  38.466  19.380  1.00  0.00           O  
ATOM   1486  CB  TYR L  87     -13.488  36.915  20.030  1.00  0.00           C  
ATOM   1487  CG  TYR L  87     -12.610  35.659  20.150  1.00  0.00           C  
ATOM   1488  CD1 TYR L  87     -12.241  35.235  21.437  1.00  0.00           C  
ATOM   1489  CD2 TYR L  87     -12.131  35.007  19.044  1.00  0.00           C  
ATOM   1490  CE1 TYR L  87     -11.399  34.052  21.565  1.00  0.00           C  
ATOM   1491  CE2 TYR L  87     -11.304  33.848  19.158  1.00  0.00           C  
ATOM   1492  CZ  TYR L  87     -10.943  33.444  20.450  1.00  0.00           C  
ATOM   1493  OH  TYR L  87     -10.126  32.339  20.567  1.00  0.00           O  
ATOM   1494  N   CYS L  88     -15.967  38.430  21.628  1.00  0.00           N  
ATOM   1495  CA  CYS L  88     -16.299  39.826  21.828  1.00  0.00           C  
ATOM   1496  C   CYS L  88     -15.073  40.653  22.217  1.00  0.00           C  
ATOM   1497  O   CYS L  88     -14.152  40.149  22.872  1.00  0.00           O  
ATOM   1498  CB  CYS L  88     -17.430  39.981  22.811  1.00  0.00           C  
ATOM   1499  SG  CYS L  88     -17.144  39.308  24.476  1.00  0.00           S  
ATOM   1500  N   GLN L  89     -15.077  41.910  21.804  1.00  0.00           N  
ATOM   1501  CA  GLN L  89     -14.014  42.846  22.207  1.00  0.00           C  
ATOM   1502  C   GLN L  89     -14.629  44.216  22.508  1.00  0.00           C  
ATOM   1503  O   GLN L  89     -15.472  44.713  21.744  1.00  0.00           O  
ATOM   1504  CB  GLN L  89     -12.999  42.903  21.098  1.00  0.00           C  
ATOM   1505  CG  GLN L  89     -12.215  44.142  21.092  1.00  0.00           C  
ATOM   1506  CD  GLN L  89     -11.561  44.493  19.746  1.00  0.00           C  
ATOM   1507  OE1 GLN L  89     -10.289  44.412  19.654  1.00  0.00           O  
ATOM   1508  NE2 GLN L  89     -12.313  44.783  18.769  1.00  0.00           N  
ATOM   1509  N   GLN L  90     -14.201  44.806  23.614  1.00  0.00           N  
ATOM   1510  CA  GLN L  90     -14.631  46.171  23.965  1.00  0.00           C  
ATOM   1511  C   GLN L  90     -13.494  47.082  23.498  1.00  0.00           C  
ATOM   1512  O   GLN L  90     -12.317  46.696  23.529  1.00  0.00           O  
ATOM   1513  CB  GLN L  90     -14.893  46.215  25.442  1.00  0.00           C  
ATOM   1514  CG  GLN L  90     -13.672  46.122  26.250  1.00  0.00           C  
ATOM   1515  CD  GLN L  90     -12.979  47.460  26.536  1.00  0.00           C  
ATOM   1516  OE1 GLN L  90     -11.827  47.434  27.085  1.00  0.00           O  
ATOM   1517  NE2 GLN L  90     -13.551  48.522  26.156  1.00  0.00           N  
ATOM   1518  N   TYR L  91     -13.862  48.278  23.071  1.00  0.00           N  
ATOM   1519  CA  TYR L  91     -12.864  49.275  22.656  1.00  0.00           C  
ATOM   1520  C   TYR L  91     -13.340  50.633  23.180  1.00  0.00           C  
ATOM   1521  O   TYR L  91     -13.252  51.651  22.482  1.00  0.00           O  
ATOM   1522  CB  TYR L  91     -12.728  49.229  21.121  1.00  0.00           C  
ATOM   1523  CG  TYR L  91     -14.018  49.641  20.394  1.00  0.00           C  
ATOM   1524  CD1 TYR L  91     -14.908  48.620  19.998  1.00  0.00           C  
ATOM   1525  CD2 TYR L  91     -14.272  50.941  20.062  1.00  0.00           C  
ATOM   1526  CE1 TYR L  91     -16.129  48.997  19.298  1.00  0.00           C  
ATOM   1527  CE2 TYR L  91     -15.464  51.322  19.375  1.00  0.00           C  
ATOM   1528  CZ  TYR L  91     -16.335  50.295  18.988  1.00  0.00           C  
ATOM   1529  OH  TYR L  91     -17.478  50.650  18.304  1.00  0.00           O  
ATOM   1530  N   GLN L  92     -13.841  50.626  24.404  1.00  0.00           N  
ATOM   1531  CA  GLN L  92     -14.206  51.881  25.082  1.00  0.00           C  
ATOM   1532  C   GLN L  92     -12.916  52.562  25.549  1.00  0.00           C  
ATOM   1533  O   GLN L  92     -12.731  53.771  25.356  1.00  0.00           O  
ATOM   1534  CB  GLN L  92     -15.135  51.546  26.216  1.00  0.00           C  
ATOM   1535  CG  GLN L  92     -14.798  52.234  27.463  1.00  0.00           C  
ATOM   1536  CD  GLN L  92     -15.568  53.536  27.714  1.00  0.00           C  
ATOM   1537  OE1 GLN L  92     -15.574  54.012  28.898  1.00  0.00           O  
ATOM   1538  NE2 GLN L  92     -16.110  54.112  26.724  1.00  0.00           N  
ATOM   1539  N   SER L  93     -12.046  51.778  26.157  1.00  0.00           N  
ATOM   1540  CA  SER L  93     -10.750  52.299  26.618  1.00  0.00           C  
ATOM   1541  C   SER L  93      -9.661  51.229  26.539  1.00  0.00           C  
ATOM   1542  O   SER L  93      -9.946  50.024  26.636  1.00  0.00           O  
ATOM   1543  CB  SER L  93     -10.852  52.792  28.041  1.00  0.00           C  
ATOM   1544  OG  SER L  93     -10.815  51.722  28.981  1.00  0.00           O  
ATOM   1545  N   LEU L  94      -8.432  51.682  26.366  1.00  0.00           N  
ATOM   1546  CA  LEU L  94      -7.295  50.756  26.265  1.00  0.00           C  
ATOM   1547  C   LEU L  94      -7.029  50.221  27.673  1.00  0.00           C  
ATOM   1548  O   LEU L  94      -7.241  50.921  28.672  1.00  0.00           O  
ATOM   1549  CB  LEU L  94      -6.066  51.484  25.689  1.00  0.00           C  
ATOM   1550  CG  LEU L  94      -6.231  52.229  24.380  1.00  0.00           C  
ATOM   1551  CD1 LEU L  94      -5.108  53.223  24.222  1.00  0.00           C  
ATOM   1552  CD2 LEU L  94      -6.233  51.267  23.212  1.00  0.00           C  
ATOM   1553  N   PRO L  95      -6.570  48.988  27.734  1.00  0.00           N  
ATOM   1554  CA  PRO L  95      -6.446  48.241  26.479  1.00  0.00           C  
ATOM   1555  C   PRO L  95      -7.730  47.577  25.987  1.00  0.00           C  
ATOM   1556  O   PRO L  95      -8.744  47.539  26.700  1.00  0.00           O  
ATOM   1557  CB  PRO L  95      -5.491  47.132  26.810  1.00  0.00           C  
ATOM   1558  CG  PRO L  95      -5.454  47.011  28.318  1.00  0.00           C  
ATOM   1559  CD  PRO L  95      -5.802  48.408  28.820  1.00  0.00           C  
ATOM   1560  N   TYR L  96      -7.669  47.062  24.777  1.00  0.00           N  
ATOM   1561  CA  TYR L  96      -8.860  46.485  24.146  1.00  0.00           C  
ATOM   1562  C   TYR L  96      -8.642  45.098  24.750  1.00  0.00           C  
ATOM   1563  O   TYR L  96      -7.520  44.569  24.744  1.00  0.00           O  
ATOM   1564  CB  TYR L  96      -8.752  46.658  22.619  1.00  0.00           C  
ATOM   1565  CG  TYR L  96      -8.875  48.121  22.174  1.00  0.00           C  
ATOM   1566  CD1 TYR L  96      -9.363  49.052  23.108  1.00  0.00           C  
ATOM   1567  CD2 TYR L  96      -8.597  48.507  20.891  1.00  0.00           C  
ATOM   1568  CE1 TYR L  96      -9.494  50.444  22.695  1.00  0.00           C  
ATOM   1569  CE2 TYR L  96      -8.724  49.867  20.476  1.00  0.00           C  
ATOM   1570  CZ  TYR L  96      -9.214  50.781  21.418  1.00  0.00           C  
ATOM   1571  OH  TYR L  96      -9.362  52.093  21.021  1.00  0.00           O  
ATOM   1572  N   THR L  97      -9.717  44.531  25.264  1.00  0.00           N  
ATOM   1573  CA  THR L  97      -9.643  43.202  25.883  1.00  0.00           C  
ATOM   1574  C   THR L  97     -10.667  42.339  25.150  1.00  0.00           C  
ATOM   1575  O   THR L  97     -11.745  42.814  24.763  1.00  0.00           O  
ATOM   1576  CB  THR L  97      -9.923  43.378  27.387  1.00  0.00           C  
ATOM   1577  OG1 THR L  97     -11.030  44.271  27.431  1.00  0.00           O  
ATOM   1578  CG2 THR L  97      -8.747  43.956  28.125  1.00  0.00           C  
ATOM   1579  N   PHE L  98     -10.326  41.101  24.970  1.00  0.00           N  
ATOM   1580  CA  PHE L  98     -11.233  40.155  24.312  1.00  0.00           C  
ATOM   1581  C   PHE L  98     -11.886  39.364  25.447  1.00  0.00           C  
ATOM   1582  O   PHE L  98     -11.287  39.164  26.513  1.00  0.00           O  
ATOM   1583  CB  PHE L  98     -10.442  39.287  23.349  1.00  0.00           C  
ATOM   1584  CG  PHE L  98     -10.265  39.871  21.976  1.00  0.00           C  
ATOM   1585  CD1 PHE L  98      -9.249  40.737  21.756  1.00  0.00           C  
ATOM   1586  CD2 PHE L  98     -11.051  39.491  20.916  1.00  0.00           C  
ATOM   1587  CE1 PHE L  98      -9.017  41.314  20.474  1.00  0.00           C  
ATOM   1588  CE2 PHE L  98     -10.781  40.045  19.617  1.00  0.00           C  
ATOM   1589  CZ  PHE L  98      -9.807  40.955  19.432  1.00  0.00           C  
ATOM   1590  N   GLY L  99     -13.104  38.927  25.204  1.00  0.00           N  
ATOM   1591  CA  GLY L  99     -13.669  37.799  25.959  1.00  0.00           C  
ATOM   1592  C   GLY L  99     -12.789  36.578  25.688  1.00  0.00           C  
ATOM   1593  O   GLY L  99     -11.911  36.607  24.813  1.00  0.00           O  
ATOM   1594  N   GLN L 100     -13.037  35.524  26.443  1.00  0.00           N  
ATOM   1595  CA  GLN L 100     -12.220  34.308  26.333  1.00  0.00           C  
ATOM   1596  C   GLN L 100     -12.646  33.361  25.213  1.00  0.00           C  
ATOM   1597  O   GLN L 100     -11.944  32.389  24.897  1.00  0.00           O  
ATOM   1598  CB  GLN L 100     -12.269  33.584  27.649  1.00  0.00           C  
ATOM   1599  CG  GLN L 100     -13.386  32.637  27.748  1.00  0.00           C  
ATOM   1600  CD  GLN L 100     -14.648  33.185  28.433  1.00  0.00           C  
ATOM   1601  OE1 GLN L 100     -15.740  32.542  28.287  1.00  0.00           O  
ATOM   1602  NE2 GLN L 100     -14.537  34.212  29.164  1.00  0.00           N  
ATOM   1603  N   GLY L 101     -13.791  33.656  24.632  1.00  0.00           N  
ATOM   1604  CA  GLY L 101     -14.273  32.880  23.483  1.00  0.00           C  
ATOM   1605  C   GLY L 101     -15.344  31.805  23.665  1.00  0.00           C  
ATOM   1606  O   GLY L 101     -15.340  31.060  24.654  1.00  0.00           O  
ATOM   1607  N   THR L 102     -16.246  31.742  22.711  1.00  0.00           N  
ATOM   1608  CA  THR L 102     -17.149  30.588  22.604  1.00  0.00           C  
ATOM   1609  C   THR L 102     -16.800  29.632  21.466  1.00  0.00           C  
ATOM   1610  O   THR L 102     -16.780  30.023  20.289  1.00  0.00           O  
ATOM   1611  CB  THR L 102     -18.577  31.143  22.428  1.00  0.00           C  
ATOM   1612  OG1 THR L 102     -18.732  32.051  23.511  1.00  0.00           O  
ATOM   1613  CG2 THR L 102     -19.627  30.064  22.490  1.00  0.00           C  
ATOM   1614  N   LYS L 103     -16.530  28.393  21.830  1.00  0.00           N  
ATOM   1615  CA  LYS L 103     -16.180  27.375  20.836  1.00  0.00           C  
ATOM   1616  C   LYS L 103     -17.552  26.788  20.509  1.00  0.00           C  
ATOM   1617  O   LYS L 103     -18.220  26.201  21.374  1.00  0.00           O  
ATOM   1618  CB  LYS L 103     -15.204  26.352  21.399  1.00  0.00           C  
ATOM   1619  CG  LYS L 103     -14.683  25.347  20.387  1.00  0.00           C  
ATOM   1620  CD  LYS L 103     -13.795  24.305  21.060  1.00  0.00           C  
ATOM   1621  CE  LYS L 103     -13.093  23.425  20.036  1.00  0.00           C  
ATOM   1622  NZ  LYS L 103     -12.218  22.438  20.705  1.00  0.00           N  
ATOM   1623  N   LEU L 104     -17.953  26.954  19.265  1.00  0.00           N  
ATOM   1624  CA  LEU L 104     -19.235  26.406  18.810  1.00  0.00           C  
ATOM   1625  C   LEU L 104     -18.879  25.153  18.013  1.00  0.00           C  
ATOM   1626  O   LEU L 104     -18.121  25.214  17.033  1.00  0.00           O  
ATOM   1627  CB  LEU L 104     -19.991  27.447  17.960  1.00  0.00           C  
ATOM   1628  CG  LEU L 104     -21.437  27.162  17.603  1.00  0.00           C  
ATOM   1629  CD1 LEU L 104     -22.006  28.330  16.833  1.00  0.00           C  
ATOM   1630  CD2 LEU L 104     -21.542  25.903  16.777  1.00  0.00           C  
ATOM   1631  N   GLN L 105     -19.430  24.035  18.443  1.00  0.00           N  
ATOM   1632  CA  GLN L 105     -19.305  22.790  17.677  1.00  0.00           C  
ATOM   1633  C   GLN L 105     -20.647  22.294  17.158  1.00  0.00           C  
ATOM   1634  O   GLN L 105     -21.711  22.737  17.615  1.00  0.00           O  
ATOM   1635  CB  GLN L 105     -18.660  21.754  18.554  1.00  0.00           C  
ATOM   1636  CG  GLN L 105     -17.260  22.054  18.871  1.00  0.00           C  
ATOM   1637  CD  GLN L 105     -16.930  22.109  20.369  1.00  0.00           C  
ATOM   1638  OE1 GLN L 105     -15.703  22.069  20.718  1.00  0.00           O  
ATOM   1639  NE2 GLN L 105     -17.884  22.253  21.189  1.00  0.00           N  
ATOM   1640  N   ILE L 106     -20.584  21.380  16.210  1.00  0.00           N  
ATOM   1641  CA  ILE L 106     -21.807  20.784  15.655  1.00  0.00           C  
ATOM   1642  C   ILE L 106     -21.880  19.266  15.828  1.00  0.00           C  
ATOM   1643  O   ILE L 106     -21.385  18.505  14.983  1.00  0.00           O  
ATOM   1644  CB  ILE L 106     -21.932  21.052  14.133  1.00  0.00           C  
ATOM   1645  CG1 ILE L 106     -22.056  22.562  13.795  1.00  0.00           C  
ATOM   1646  CG2 ILE L 106     -23.127  20.172  13.758  1.00  0.00           C  
ATOM   1647  CD1 ILE L 106     -23.489  23.000  13.420  1.00  0.00           C  
ATOM   1648  N   THR L 107     -22.496  18.850  16.919  1.00  0.00           N  
ATOM   1649  CA  THR L 107     -22.950  17.458  17.045  1.00  0.00           C  
ATOM   1650  C   THR L 107     -23.638  16.607  15.977  1.00  0.00           C  
ATOM   1651  O   THR L 107     -24.841  16.762  15.716  1.00  0.00           O  
ATOM   1652  CB  THR L 107     -23.933  17.401  18.229  1.00  0.00           C  
ATOM   1653  OG1 THR L 107     -24.885  18.420  17.939  1.00  0.00           O  
ATOM   1654  CG2 THR L 107     -23.261  17.670  19.549  1.00  0.00           C  
ATOM   1655  OXT THR L 107     -22.867  15.722  15.374  1.00  0.00           O  
TER    1656      THR L 107                                                      
