# Supplementary material for: SARS-CoV-2 Spike Protein Interaction Space
Source: Int J Mol Sci. 2023 Jul 27;24(15):12058. doi: 10.3390/ijms241512058 (PMC10418891; doi:10.3390/ijms241512058)
Supplement: Supplementary file 1 [file ijms-24-12058-s001.zip › Supplementary Material File S1/2KQM.pdb]

REMARK 950 NUMBERING  Kabat
REMARK 950 METHOD     NMR
REMARK 950 RESOLUTION 0.000
REMARK 950 R-FACTOR   0.000
REMARK 950 R-FREE     0.000
REMARK 950 CHAIN-TYPE LABEL ORIGINAL
REMARK 950 CHAIN L    L    A
REMARK 950 CHAIN L    L    B
REMARK 950 MOLECULE : A : IG KAPPA CHAIN V-I REGION AU
REMARK 950 SPECIES  : A : HOMO SAPIENS
SEQRES   1 L 110  SER THR ASP ILE GLN MET THR GLN SER PRO SER SER LEU          
SEQRES   2 L 110  SER ALA SER VAL GLY ASP ARG VAL THR ILE THR CYS GLN          
SEQRES   3 L 110  ALA SER GLN ASP ILE SER ASN TYR LEU ASN TRP TYR GLN          
SEQRES   4 L 110  GLN LYS PRO GLY LYS ALA PRO LYS LEU LEU ILE TYR ASP          
SEQRES   5 L 110  ALA SER ASN LEU GLU THR GLY VAL PRO SER ARG PHE SER          
SEQRES   6 L 110  GLY SER GLY SER GLY THR ASP PHE THR PHE THR ILE SER          
SEQRES   7 L 110  SER LEU GLN PRO GLU ASP ILE ALA THR TYR HIS CYS GLN          
SEQRES   8 L 110  GLN TYR ASP ASN LEU PRO TYR THR PHE GLY GLN GLY THR          
SEQRES   9 L 110  LYS LEU GLU ILE LYS ARG                                      
SEQRES   1 L 110  SER THR ASP ILE GLN MET THR GLN SER PRO SER SER LEU          
SEQRES   2 L 110  SER ALA SER VAL GLY ASP ARG VAL THR ILE THR CYS GLN          
SEQRES   3 L 110  ALA SER GLN ASP ILE SER ASN TYR LEU ASN TRP TYR GLN          
SEQRES   4 L 110  GLN LYS PRO GLY LYS ALA PRO LYS LEU LEU ILE TYR ASP          
SEQRES   5 L 110  ALA SER ASN LEU GLU THR GLY VAL PRO SER ARG PHE SER          
SEQRES   6 L 110  GLY SER GLY SER GLY THR ASP PHE THR PHE THR ILE SER          
SEQRES   7 L 110  SER LEU GLN PRO GLU ASP ILE ALA THR TYR HIS CYS GLN          
SEQRES   8 L 110  GLN TYR ASP ASN LEU PRO TYR THR PHE GLY GLN GLY THR          
SEQRES   9 L 110  LYS LEU GLU ILE LYS ARG                                      
ATOM      1  N   ASP L   1       2.177   2.596  16.186  1.00  4.00           N  
ATOM      2  CA  ASP L   1       2.854   2.339  14.920  1.00  0.02           C  
ATOM      3  C   ASP L   1       4.007   1.395  15.159  1.00 53.41           C  
ATOM      4  O   ASP L   1       4.678   1.460  16.190  1.00 72.40           O  
ATOM      5  CB  ASP L   1       3.363   3.646  14.294  1.00 61.12           C  
ATOM      6  CG  ASP L   1       4.416   4.329  15.128  1.00 62.10           C  
ATOM      7  OD1 ASP L   1       4.104   4.745  16.256  1.00 21.13           O  
ATOM      8  OD2 ASP L   1       5.557   4.480  14.653  1.00 73.35           O  
ATOM      9  H   ASP L   1       1.363   3.227  16.071  1.00 38.49           H  
ATOM     10  HA  ASP L   1       2.153   1.864  14.251  1.00 24.15           H  
ATOM     11  HB2 ASP L   1       3.786   3.440  13.323  1.00 38.49           H  
ATOM     12  HB3 ASP L   1       2.531   4.325  14.179  1.00 38.49           H  
ATOM     13  N   ILE L   2       4.204   0.506  14.237  1.00 63.44           N  
ATOM     14  CA  ILE L   2       5.251  -0.489  14.311  1.00 74.41           C  
ATOM     15  C   ILE L   2       6.394  -0.075  13.391  1.00 34.23           C  
ATOM     16  O   ILE L   2       6.147   0.308  12.254  1.00 41.31           O  
ATOM     17  CB  ILE L   2       4.680  -1.848  13.861  1.00 43.40           C  
ATOM     18  CG1 ILE L   2       3.523  -2.264  14.778  1.00 62.11           C  
ATOM     19  CG2 ILE L   2       5.767  -2.929  13.842  1.00 43.04           C  
ATOM     20  CD1 ILE L   2       2.705  -3.406  14.242  1.00 22.22           C  
ATOM     21  H   ILE L   2       3.641   0.505  13.435  1.00 38.49           H  
ATOM     22  HA  ILE L   2       5.599  -0.569  15.330  1.00 11.12           H  
ATOM     23  HB  ILE L   2       4.294  -1.715  12.863  1.00 71.43           H  
ATOM     24 HG12 ILE L   2       3.933  -2.583  15.725  1.00 38.49           H  
ATOM     25 HG13 ILE L   2       2.862  -1.432  14.960  1.00 38.49           H  
ATOM     26 HG21 ILE L   2       5.336  -3.869  13.530  1.00 38.49           H  
ATOM     27 HG22 ILE L   2       6.186  -3.037  14.832  1.00 38.49           H  
ATOM     28 HG23 ILE L   2       6.546  -2.643  13.151  1.00 38.49           H  
ATOM     29 HD11 ILE L   2       1.977  -3.695  14.984  1.00 38.49           H  
ATOM     30 HD12 ILE L   2       3.360  -4.236  14.032  1.00 38.49           H  
ATOM     31 HD13 ILE L   2       2.189  -3.074  13.351  1.00 38.49           H  
ATOM     32  N   GLN L   3       7.612  -0.142  13.879  1.00 11.24           N  
ATOM     33  CA  GLN L   3       8.776   0.217  13.093  1.00 33.21           C  
ATOM     34  C   GLN L   3       9.285  -0.953  12.284  1.00 43.15           C  
ATOM     35  O   GLN L   3       9.280  -2.090  12.745  1.00 35.51           O  
ATOM     36  CB  GLN L   3       9.897   0.795  13.957  1.00 41.00           C  
ATOM     37  CG  GLN L   3       9.661   2.222  14.409  1.00 11.25           C  
ATOM     38  CD  GLN L   3      10.808   2.769  15.230  1.00 44.42           C  
ATOM     39  OE1 GLN L   3      11.775   3.324  14.686  1.00 61.24           O  
ATOM     40  NE2 GLN L   3      10.721   2.641  16.530  1.00 55.10           N  
ATOM     41  H   GLN L   3       7.764  -0.483  14.788  1.00 38.49           H  
ATOM     42  HA  GLN L   3       8.453   0.982  12.401  1.00 12.23           H  
ATOM     43  HB2 GLN L   3       9.970   0.182  14.843  1.00 38.49           H  
ATOM     44  HB3 GLN L   3      10.833   0.739  13.426  1.00 38.49           H  
ATOM     45  HG2 GLN L   3       9.546   2.841  13.531  1.00 38.49           H  
ATOM     46  HG3 GLN L   3       8.758   2.260  15.000  1.00 38.49           H  
ATOM     47 HE21 GLN L   3       9.927   2.196  16.898  1.00 38.49           H  
ATOM     48 HE22 GLN L   3      11.437   3.011  17.091  1.00 38.49           H  
ATOM     49  N   MET L   4       9.705  -0.662  11.081  1.00 34.13           N  
ATOM     50  CA  MET L   4      10.234  -1.653  10.176  1.00  0.03           C  
ATOM     51  C   MET L   4      11.652  -1.232   9.791  1.00 25.22           C  
ATOM     52  O   MET L   4      11.886  -0.074   9.452  1.00 75.20           O  
ATOM     53  CB  MET L   4       9.351  -1.757   8.921  1.00 30.31           C  
ATOM     54  CG  MET L   4       7.878  -2.056   9.191  1.00 25.34           C  
ATOM     55  SD  MET L   4       7.595  -3.625  10.045  1.00 22.45           S  
ATOM     56  CE  MET L   4       8.216  -4.794   8.846  1.00 74.41           C  
ATOM     57  H   MET L   4       9.668   0.269  10.771  1.00 38.49           H  
ATOM     58  HA  MET L   4      10.261  -2.605  10.686  1.00 45.13           H  
ATOM     59  HB2 MET L   4       9.402  -0.816   8.394  1.00 38.49           H  
ATOM     60  HB3 MET L   4       9.746  -2.532   8.281  1.00 38.49           H  
ATOM     61  HG2 MET L   4       7.471  -1.263   9.801  1.00 38.49           H  
ATOM     62  HG3 MET L   4       7.354  -2.077   8.247  1.00 38.49           H  
ATOM     63  HE1 MET L   4       7.677  -4.677   7.917  1.00 38.49           H  
ATOM     64  HE2 MET L   4       8.082  -5.800   9.214  1.00 38.49           H  
ATOM     65  HE3 MET L   4       9.267  -4.613   8.677  1.00 38.49           H  
ATOM     66  N   THR L   5      12.591  -2.125   9.893  1.00 65.15           N  
ATOM     67  CA  THR L   5      13.974  -1.808   9.586  1.00 53.41           C  
ATOM     68  C   THR L   5      14.480  -2.627   8.386  1.00 21.40           C  
ATOM     69  O   THR L   5      14.512  -3.844   8.455  1.00 52.25           O  
ATOM     70  CB  THR L   5      14.853  -2.117  10.815  1.00 11.34           C  
ATOM     71  OG1 THR L   5      14.337  -1.407  11.954  1.00 11.25           O  
ATOM     72  CG2 THR L   5      16.297  -1.698  10.576  1.00 43.10           C  
ATOM     73  H   THR L   5      12.350  -3.035  10.186  1.00 38.49           H  
ATOM     74  HA  THR L   5      14.043  -0.752   9.375  1.00  1.53           H  
ATOM     75  HB  THR L   5      14.815  -3.177  11.015  1.00 43.05           H  
ATOM     76  HG1 THR L   5      13.417  -1.197  11.752  1.00 62.44           H  
ATOM     77 HG21 THR L   5      16.685  -2.217   9.712  1.00 38.49           H  
ATOM     78 HG22 THR L   5      16.891  -1.940  11.445  1.00 38.49           H  
ATOM     79 HG23 THR L   5      16.331  -0.633  10.405  1.00 38.49           H  
ATOM     80  N   GLN L   6      14.870  -1.958   7.298  1.00 72.51           N  
ATOM     81  CA  GLN L   6      15.413  -2.660   6.134  1.00 65.20           C  
ATOM     82  C   GLN L   6      16.915  -2.643   6.103  1.00 51.13           C  
ATOM     83  O   GLN L   6      17.548  -1.581   6.148  1.00  3.31           O  
ATOM     84  CB  GLN L   6      14.885  -2.142   4.801  1.00 71.40           C  
ATOM     85  CG  GLN L   6      13.438  -2.448   4.541  1.00 33.35           C  
ATOM     86  CD  GLN L   6      13.017  -2.094   3.136  1.00 71.43           C  
ATOM     87  OE1 GLN L   6      13.075  -2.902   2.236  1.00 32.41           O  
ATOM     88  NE2 GLN L   6      12.599  -0.893   2.943  1.00 42.45           N  
ATOM     89  H   GLN L   6      14.811  -0.977   7.277  1.00 38.49           H  
ATOM     90  HA  GLN L   6      15.110  -3.692   6.237  1.00 74.12           H  
ATOM     91  HB2 GLN L   6      14.994  -1.066   4.811  1.00 38.49           H  
ATOM     92  HB3 GLN L   6      15.485  -2.532   3.996  1.00 38.49           H  
ATOM     93  HG2 GLN L   6      13.277  -3.506   4.686  1.00 38.49           H  
ATOM     94  HG3 GLN L   6      12.828  -1.891   5.237  1.00 38.49           H  
ATOM     95 HE21 GLN L   6      12.574  -0.292   3.725  1.00 38.49           H  
ATOM     96 HE22 GLN L   6      12.382  -0.665   2.014  1.00 38.49           H  
ATOM     97  N   SER L   7      17.474  -3.806   6.013  1.00 53.43           N  
ATOM     98  CA  SER L   7      18.878  -3.997   5.918  1.00 52.12           C  
ATOM     99  C   SER L   7      19.118  -5.096   4.879  1.00 12.33           C  
ATOM    100  O   SER L   7      18.587  -6.197   5.005  1.00 24.11           O  
ATOM    101  CB  SER L   7      19.450  -4.391   7.293  1.00 32.22           C  
ATOM    102  OG  SER L   7      20.865  -4.547   7.261  1.00 24.22           O  
ATOM    103  H   SER L   7      16.897  -4.606   5.992  1.00 38.49           H  
ATOM    104  HA  SER L   7      19.322  -3.070   5.583  1.00 52.52           H  
ATOM    105  HB2 SER L   7      19.202  -3.630   8.017  1.00 38.49           H  
ATOM    106  HB3 SER L   7      19.003  -5.326   7.593  1.00 38.49           H  
ATOM    107  HG  SER L   7      21.044  -5.444   7.566  1.00 45.11           H  
ATOM    108  N   PRO L   8      19.876  -4.813   3.820  1.00 74.32           N  
ATOM    109  CA  PRO L   8      20.504  -3.514   3.605  1.00 52.34           C  
ATOM    110  C   PRO L   8      19.503  -2.447   3.139  1.00  2.44           C  
ATOM    111  O   PRO L   8      18.493  -2.755   2.499  1.00 31.13           O  
ATOM    112  CB  PRO L   8      21.527  -3.799   2.507  1.00 22.30           C  
ATOM    113  CG  PRO L   8      20.958  -4.939   1.744  1.00 54.12           C  
ATOM    114  CD  PRO L   8      20.172  -5.758   2.728  1.00 40.25           C  
ATOM    115  HA  PRO L   8      21.014  -3.171   4.494  1.00 12.13           H  
ATOM    116  HB2 PRO L   8      21.643  -2.924   1.885  1.00 38.49           H  
ATOM    117  HB3 PRO L   8      22.477  -4.061   2.949  1.00 38.49           H  
ATOM    118  HG2 PRO L   8      20.307  -4.569   0.964  1.00 38.49           H  
ATOM    119  HG3 PRO L   8      21.756  -5.530   1.320  1.00 38.49           H  
ATOM    120  HD2 PRO L   8      19.260  -6.114   2.274  1.00 38.49           H  
ATOM    121  HD3 PRO L   8      20.755  -6.592   3.089  1.00 38.49           H  
ATOM    122  N   SER L   9      19.789  -1.208   3.471  1.00 11.23           N  
ATOM    123  CA  SER L   9      18.957  -0.087   3.093  1.00 71.24           C  
ATOM    124  C   SER L   9      19.266   0.341   1.640  1.00 30.21           C  
ATOM    125  O   SER L   9      18.608   1.220   1.070  1.00 63.32           O  
ATOM    126  CB  SER L   9      19.206   1.064   4.060  1.00 52.43           C  
ATOM    127  OG  SER L   9      18.990   0.651   5.408  1.00 53.43           O  
ATOM    128  H   SER L   9      20.593  -1.027   4.004  1.00 38.49           H  
ATOM    129  HA  SER L   9      17.924  -0.393   3.163  1.00 12.03           H  
ATOM    130  HB2 SER L   9      20.229   1.395   3.957  1.00 38.49           H  
ATOM    131  HB3 SER L   9      18.536   1.879   3.832  1.00 38.49           H  
ATOM    132  HG  SER L   9      18.440  -0.145   5.421  1.00 24.42           H  
ATOM    133  N   SER L  10      20.264  -0.279   1.063  1.00 53.21           N  
ATOM    134  CA  SER L  10      20.641  -0.053  -0.313  1.00 72.30           C  
ATOM    135  C   SER L  10      21.461  -1.234  -0.807  1.00 71.23           C  
ATOM    136  O   SER L  10      22.233  -1.818  -0.038  1.00 52.24           O  
ATOM    137  CB  SER L  10      21.401   1.276  -0.456  1.00 71.10           C  
ATOM    138  OG  SER L  10      22.453   1.370   0.496  1.00 63.44           O  
ATOM    139  H   SER L  10      20.794  -0.926   1.576  1.00 38.49           H  
ATOM    140  HA  SER L  10      19.723  -0.006  -0.883  1.00 43.44           H  
ATOM    141  HB2 SER L  10      21.827   1.329  -1.447  1.00 38.49           H  
ATOM    142  HB3 SER L  10      20.718   2.101  -0.311  1.00 38.49           H  
ATOM    143  HG  SER L  10      22.127   1.951   1.196  1.00 21.24           H  
ATOM    144  N   LEU L  11      21.281  -1.611  -2.056  1.00 41.43           N  
ATOM    145  CA  LEU L  11      21.979  -2.756  -2.593  1.00 62.25           C  
ATOM    146  C   LEU L  11      22.114  -2.623  -4.100  1.00 35.52           C  
ATOM    147  O   LEU L  11      21.195  -2.161  -4.777  1.00 61.24           O  
ATOM    148  CB  LEU L  11      21.232  -4.071  -2.166  1.00 62.33           C  
ATOM    149  CG  LEU L  11      21.848  -5.450  -2.548  1.00 61.13           C  
ATOM    150  CD1 LEU L  11      21.193  -6.537  -1.737  1.00 15.31           C  
ATOM    151  CD2 LEU L  11      21.638  -5.778  -4.018  1.00 23.42           C  
ATOM    152  H   LEU L  11      20.676  -1.117  -2.653  1.00 38.49           H  
ATOM    153  HA  LEU L  11      22.967  -2.764  -2.155  1.00 23.52           H  
ATOM    154  HB2 LEU L  11      21.136  -4.052  -1.091  1.00 38.49           H  
ATOM    155  HB3 LEU L  11      20.236  -4.023  -2.582  1.00 38.49           H  
ATOM    156  HG  LEU L  11      22.906  -5.449  -2.337  1.00 53.40           H  
ATOM    157 HD11 LEU L  11      20.132  -6.551  -1.934  1.00 38.49           H  
ATOM    158 HD12 LEU L  11      21.363  -6.355  -0.686  1.00 38.49           H  
ATOM    159 HD13 LEU L  11      21.620  -7.491  -2.006  1.00 38.49           H  
ATOM    160 HD21 LEU L  11      20.582  -5.793  -4.241  1.00 38.49           H  
ATOM    161 HD22 LEU L  11      22.069  -6.743  -4.237  1.00 38.49           H  
ATOM    162 HD23 LEU L  11      22.121  -5.024  -4.623  1.00 38.49           H  
ATOM    163  N   SER L  12      23.259  -2.991  -4.602  1.00 35.55           N  
ATOM    164  CA  SER L  12      23.511  -2.999  -6.005  1.00 75.33           C  
ATOM    165  C   SER L  12      23.802  -4.425  -6.464  1.00 74.14           C  
ATOM    166  O   SER L  12      24.651  -5.113  -5.895  1.00 72.23           O  
ATOM    167  CB  SER L  12      24.655  -2.043  -6.352  1.00 44.44           C  
ATOM    168  OG  SER L  12      25.817  -2.314  -5.571  1.00 14.11           O  
ATOM    169  H   SER L  12      23.982  -3.292  -4.013  1.00 38.49           H  
ATOM    170  HA  SER L  12      22.609  -2.662  -6.494  1.00 12.32           H  
ATOM    171  HB2 SER L  12      24.897  -2.158  -7.399  1.00 38.49           H  
ATOM    172  HB3 SER L  12      24.337  -1.028  -6.172  1.00 38.49           H  
ATOM    173  HG  SER L  12      25.663  -1.965  -4.684  1.00  3.34           H  
ATOM    174  N   ALA L  13      23.085  -4.869  -7.459  1.00 21.54           N  
ATOM    175  CA  ALA L  13      23.239  -6.214  -7.983  1.00 50.11           C  
ATOM    176  C   ALA L  13      23.241  -6.164  -9.487  1.00 10.01           C  
ATOM    177  O   ALA L  13      22.728  -5.233 -10.061  1.00 64.43           O  
ATOM    178  CB  ALA L  13      22.136  -7.123  -7.470  1.00 63.13           C  
ATOM    179  H   ALA L  13      22.420  -4.262  -7.867  1.00 38.49           H  
ATOM    180  HA  ALA L  13      24.191  -6.591  -7.643  1.00 54.05           H  
ATOM    181  HB1 ALA L  13      22.281  -8.120  -7.857  1.00 38.49           H  
ATOM    182  HB2 ALA L  13      21.181  -6.741  -7.798  1.00 38.49           H  
ATOM    183  HB3 ALA L  13      22.162  -7.147  -6.391  1.00 38.49           H  
ATOM    184  N   SER L  14      23.855  -7.121 -10.116  1.00 73.32           N  
ATOM    185  CA  SER L  14      23.915  -7.152 -11.556  1.00 22.20           C  
ATOM    186  C   SER L  14      22.658  -7.811 -12.133  1.00 72.21           C  
ATOM    187  O   SER L  14      21.903  -8.471 -11.402  1.00 31.01           O  
ATOM    188  CB  SER L  14      25.174  -7.877 -11.993  1.00 53.10           C  
ATOM    189  OG  SER L  14      26.323  -7.232 -11.457  1.00 44.35           O  
ATOM    190  H   SER L  14      24.279  -7.856  -9.627  1.00 38.49           H  
ATOM    191  HA  SER L  14      23.961  -6.131 -11.900  1.00 31.41           H  
ATOM    192  HB2 SER L  14      25.144  -8.890 -11.623  1.00 38.49           H  
ATOM    193  HB3 SER L  14      25.245  -7.873 -13.070  1.00 38.49           H  
ATOM    194  HG  SER L  14      26.227  -6.309 -11.741  1.00 54.34           H  
ATOM    195  N   VAL L  15      22.418  -7.611 -13.423  1.00 51.53           N  
ATOM    196  CA  VAL L  15      21.253  -8.174 -14.081  1.00 14.12           C  
ATOM    197  C   VAL L  15      21.270  -9.687 -13.991  1.00  2.02           C  
ATOM    198  O   VAL L  15      22.213 -10.354 -14.443  1.00 72.23           O  
ATOM    199  CB  VAL L  15      21.148  -7.737 -15.570  1.00 73.12           C  
ATOM    200  CG1 VAL L  15      19.947  -8.390 -16.246  1.00 44.20           C  
ATOM    201  CG2 VAL L  15      21.022  -6.237 -15.660  1.00 65.33           C  
ATOM    202  H   VAL L  15      23.048  -7.078 -13.956  1.00 38.49           H  
ATOM    203  HA  VAL L  15      20.382  -7.814 -13.554  1.00 25.52           H  
ATOM    204  HB  VAL L  15      22.045  -8.038 -16.091  1.00 22.34           H  
ATOM    205 HG11 VAL L  15      20.060  -9.464 -16.208  1.00 38.49           H  
ATOM    206 HG12 VAL L  15      19.893  -8.070 -17.276  1.00 38.49           H  
ATOM    207 HG13 VAL L  15      19.042  -8.105 -15.731  1.00 38.49           H  
ATOM    208 HG21 VAL L  15      20.941  -5.938 -16.694  1.00 38.49           H  
ATOM    209 HG22 VAL L  15      21.880  -5.772 -15.199  1.00 38.49           H  
ATOM    210 HG23 VAL L  15      20.122  -5.961 -15.132  1.00 38.49           H  
ATOM    211  N   GLY L  16      20.244 -10.215 -13.405  1.00 23.20           N  
ATOM    212  CA  GLY L  16      20.131 -11.639 -13.248  1.00 53.13           C  
ATOM    213  C   GLY L  16      20.509 -12.102 -11.858  1.00 22.11           C  
ATOM    214  O   GLY L  16      20.293 -13.266 -11.510  1.00 61.20           O  
ATOM    215  H   GLY L  16      19.552  -9.589 -13.090  1.00 38.49           H  
ATOM    216  HA2 GLY L  16      19.108 -11.927 -13.445  1.00 38.49           H  
ATOM    217  HA3 GLY L  16      20.773 -12.126 -13.966  1.00 38.49           H  
ATOM    218  N   ASP L  17      21.070 -11.212 -11.060  1.00 61.02           N  
ATOM    219  CA  ASP L  17      21.429 -11.551  -9.693  1.00 60.43           C  
ATOM    220  C   ASP L  17      20.233 -11.575  -8.797  1.00 13.41           C  
ATOM    221  O   ASP L  17      19.202 -10.952  -9.089  1.00 44.13           O  
ATOM    222  CB  ASP L  17      22.513 -10.638  -9.103  1.00 42.42           C  
ATOM    223  CG  ASP L  17      23.919 -11.032  -9.483  1.00  2.44           C  
ATOM    224  OD1 ASP L  17      24.524 -11.842  -8.737  1.00 44.12           O  
ATOM    225  OD2 ASP L  17      24.461 -10.529 -10.480  1.00 53.24           O  
ATOM    226  H   ASP L  17      21.238 -10.294 -11.369  1.00 38.49           H  
ATOM    227  HA  ASP L  17      21.820 -12.557  -9.729  1.00 40.21           H  
ATOM    228  HB2 ASP L  17      22.348  -9.632  -9.458  1.00 38.49           H  
ATOM    229  HB3 ASP L  17      22.428 -10.646  -8.026  1.00 38.49           H  
ATOM    230  N   ARG L  18      20.357 -12.292  -7.719  1.00 14.35           N  
ATOM    231  CA  ARG L  18      19.312 -12.415  -6.771  1.00 14.42           C  
ATOM    232  C   ARG L  18      19.506 -11.377  -5.669  1.00 70.32           C  
ATOM    233  O   ARG L  18      20.475 -11.432  -4.917  1.00 34.55           O  
ATOM    234  CB  ARG L  18      19.300 -13.817  -6.178  1.00 42.05           C  
ATOM    235  CG  ARG L  18      18.133 -14.065  -5.259  1.00 43.25           C  
ATOM    236  CD  ARG L  18      18.200 -15.422  -4.601  1.00  0.00           C  
ATOM    237  NE  ARG L  18      18.259 -16.532  -5.562  1.00 51.33           N  
ATOM    238  CZ  ARG L  18      19.108 -17.572  -5.496  1.00 72.24           C  
ATOM    239  NH1 ARG L  18      20.086 -17.596  -4.589  1.00 15.33           N  
ATOM    240  NH2 ARG L  18      18.989 -18.570  -6.363  1.00 45.11           N  
ATOM    241  H   ARG L  18      21.202 -12.758  -7.541  1.00 38.49           H  
ATOM    242  HA  ARG L  18      18.372 -12.236  -7.272  1.00 11.04           H  
ATOM    243  HB2 ARG L  18      19.263 -14.540  -6.979  1.00 38.49           H  
ATOM    244  HB3 ARG L  18      20.211 -13.961  -5.617  1.00 38.49           H  
ATOM    245  HG2 ARG L  18      18.134 -13.306  -4.491  1.00 38.49           H  
ATOM    246  HG3 ARG L  18      17.216 -13.986  -5.818  1.00 38.49           H  
ATOM    247  HD2 ARG L  18      19.030 -15.467  -3.914  1.00 38.49           H  
ATOM    248  HD3 ARG L  18      17.263 -15.492  -4.064  1.00 38.49           H  
ATOM    249  HE  ARG L  18      17.578 -16.509  -6.273  1.00 54.31           H  
ATOM    250 HH11 ARG L  18      20.226 -16.848  -3.935  1.00 38.49           H  
ATOM    251 HH12 ARG L  18      20.727 -18.366  -4.507  1.00 38.49           H  
ATOM    252 HH21 ARG L  18      18.274 -18.567  -7.068  1.00 38.49           H  
ATOM    253 HH22 ARG L  18      19.611 -19.356  -6.359  1.00 38.49           H  
ATOM    254  N   VAL L  19      18.606 -10.436  -5.606  1.00 20.11           N  
ATOM    255  CA  VAL L  19      18.645  -9.365  -4.616  1.00 53.43           C  
ATOM    256  C   VAL L  19      18.211  -9.890  -3.249  1.00  4.32           C  
ATOM    257  O   VAL L  19      17.302 -10.717  -3.164  1.00  2.00           O  
ATOM    258  CB  VAL L  19      17.711  -8.200  -5.040  1.00 55.14           C  
ATOM    259  CG1 VAL L  19      17.700  -7.080  -4.006  1.00 61.30           C  
ATOM    260  CG2 VAL L  19      18.117  -7.665  -6.398  1.00  0.21           C  
ATOM    261  H   VAL L  19      17.880 -10.484  -6.269  1.00 38.49           H  
ATOM    262  HA  VAL L  19      19.657  -8.994  -4.550  1.00 65.22           H  
ATOM    263  HB  VAL L  19      16.706  -8.585  -5.115  1.00 55.51           H  
ATOM    264 HG11 VAL L  19      17.041  -6.292  -4.338  1.00 38.49           H  
ATOM    265 HG12 VAL L  19      18.699  -6.689  -3.884  1.00 38.49           H  
ATOM    266 HG13 VAL L  19      17.346  -7.472  -3.065  1.00 38.49           H  
ATOM    267 HG21 VAL L  19      19.136  -7.307  -6.357  1.00 38.49           H  
ATOM    268 HG22 VAL L  19      17.463  -6.853  -6.674  1.00 38.49           H  
ATOM    269 HG23 VAL L  19      18.046  -8.454  -7.134  1.00 38.49           H  
ATOM    270  N   THR L  20      18.865  -9.428  -2.201  1.00 23.42           N  
ATOM    271  CA  THR L  20      18.526  -9.819  -0.857  1.00  1.40           C  
ATOM    272  C   THR L  20      18.216  -8.570  -0.004  1.00 21.05           C  
ATOM    273  O   THR L  20      19.068  -7.718   0.189  1.00 31.44           O  
ATOM    274  CB  THR L  20      19.711 -10.571  -0.219  1.00 30.44           C  
ATOM    275  OG1 THR L  20      20.089 -11.682  -1.060  1.00 60.15           O  
ATOM    276  CG2 THR L  20      19.345 -11.081   1.164  1.00 41.25           C  
ATOM    277  H   THR L  20      19.613  -8.803  -2.314  1.00 38.49           H  
ATOM    278  HA  THR L  20      17.669 -10.475  -0.882  1.00  1.43           H  
ATOM    279  HB  THR L  20      20.547  -9.891  -0.142  1.00 44.00           H  
ATOM    280  HG1 THR L  20      19.290 -12.128  -1.377  1.00  4.22           H  
ATOM    281 HG21 THR L  20      20.199 -11.582   1.594  1.00 38.49           H  
ATOM    282 HG22 THR L  20      18.516 -11.769   1.090  1.00 38.49           H  
ATOM    283 HG23 THR L  20      19.066 -10.246   1.789  1.00 38.49           H  
ATOM    284  N   ILE L  21      17.008  -8.478   0.484  1.00 55.11           N  
ATOM    285  CA  ILE L  21      16.596  -7.380   1.344  1.00 50.02           C  
ATOM    286  C   ILE L  21      15.956  -7.962   2.599  1.00  4.43           C  
ATOM    287  O   ILE L  21      15.057  -8.778   2.503  1.00 64.30           O  
ATOM    288  CB  ILE L  21      15.561  -6.449   0.626  1.00 61.21           C  
ATOM    289  CG1 ILE L  21      16.179  -5.810  -0.636  1.00 14.11           C  
ATOM    290  CG2 ILE L  21      15.073  -5.372   1.586  1.00 14.33           C  
ATOM    291  CD1 ILE L  21      15.215  -4.976  -1.482  1.00 62.30           C  
ATOM    292  H   ILE L  21      16.330  -9.157   0.265  1.00 38.49           H  
ATOM    293  HA  ILE L  21      17.469  -6.805   1.613  1.00 24.51           H  
ATOM    294  HB  ILE L  21      14.713  -7.052   0.339  1.00 33.22           H  
ATOM    295 HG12 ILE L  21      16.946  -5.131  -0.300  1.00 38.49           H  
ATOM    296 HG13 ILE L  21      16.615  -6.577  -1.257  1.00 38.49           H  
ATOM    297 HG21 ILE L  21      15.915  -4.782   1.918  1.00 38.49           H  
ATOM    298 HG22 ILE L  21      14.615  -5.856   2.437  1.00 38.49           H  
ATOM    299 HG23 ILE L  21      14.352  -4.739   1.090  1.00 38.49           H  
ATOM    300 HD11 ILE L  21      15.759  -4.536  -2.304  1.00 38.49           H  
ATOM    301 HD12 ILE L  21      14.792  -4.183  -0.884  1.00 38.49           H  
ATOM    302 HD13 ILE L  21      14.422  -5.583  -1.896  1.00 38.49           H  
ATOM    303  N   THR L  22      16.424  -7.587   3.759  1.00 12.44           N  
ATOM    304  CA  THR L  22      15.837  -8.084   4.974  1.00 41.12           C  
ATOM    305  C   THR L  22      15.151  -6.928   5.688  1.00 21.54           C  
ATOM    306  O   THR L  22      15.644  -5.803   5.662  1.00  3.51           O  
ATOM    307  CB  THR L  22      16.913  -8.674   5.905  1.00 31.53           C  
ATOM    308  OG1 THR L  22      17.772  -9.546   5.145  1.00 74.13           O  
ATOM    309  CG2 THR L  22      16.276  -9.489   7.029  1.00 33.53           C  
ATOM    310  H   THR L  22      17.165  -6.946   3.850  1.00 38.49           H  
ATOM    311  HA  THR L  22      15.113  -8.847   4.732  1.00 12.40           H  
ATOM    312  HB  THR L  22      17.459  -7.849   6.336  1.00 61.31           H  
ATOM    313  HG1 THR L  22      17.742  -9.213   4.241  1.00 61.10           H  
ATOM    314 HG21 THR L  22      15.695 -10.293   6.601  1.00 38.49           H  
ATOM    315 HG22 THR L  22      15.631  -8.851   7.615  1.00 38.49           H  
ATOM    316 HG23 THR L  22      17.049  -9.901   7.660  1.00 38.49           H  
ATOM    317  N   CYS L  23      14.032  -7.188   6.274  1.00 64.11           N  
ATOM    318  CA  CYS L  23      13.353  -6.200   7.040  1.00 60.11           C  
ATOM    319  C   CYS L  23      12.949  -6.808   8.352  1.00 35.12           C  
ATOM    320  O   CYS L  23      12.478  -7.945   8.388  1.00 55.02           O  
ATOM    321  CB  CYS L  23      12.120  -5.671   6.292  1.00  4.23           C  
ATOM    322  SG  CYS L  23      11.175  -4.405   7.218  1.00 31.10           S  
ATOM    323  H   CYS L  23      13.645  -8.090   6.214  1.00 38.49           H  
ATOM    324  HA  CYS L  23      14.035  -5.382   7.221  1.00 23.42           H  
ATOM    325  HB2 CYS L  23      12.425  -5.239   5.351  1.00 38.49           H  
ATOM    326  HB3 CYS L  23      11.454  -6.498   6.096  1.00 38.49           H  
ATOM    327  N   GLN L  24      13.162  -6.084   9.419  1.00 23.11           N  
ATOM    328  CA  GLN L  24      12.767  -6.546  10.721  1.00 52.13           C  
ATOM    329  C   GLN L  24      11.673  -5.655  11.259  1.00 43.22           C  
ATOM    330  O   GLN L  24      11.732  -4.429  11.107  1.00  1.40           O  
ATOM    331  CB  GLN L  24      13.925  -6.568  11.745  1.00 34.21           C  
ATOM    332  CG  GLN L  24      15.177  -7.369  11.371  1.00 54.34           C  
ATOM    333  CD  GLN L  24      16.103  -6.644  10.410  1.00  3.44           C  
ATOM    334  OE1 GLN L  24      16.011  -6.770   9.191  1.00 61.22           O  
ATOM    335  NE2 GLN L  24      17.005  -5.872  10.965  1.00 61.35           N  
ATOM    336  H   GLN L  24      13.613  -5.218   9.304  1.00 38.49           H  
ATOM    337  HA  GLN L  24      12.377  -7.547  10.610  1.00 61.43           H  
ATOM    338  HB2 GLN L  24      14.240  -5.550  11.919  1.00 38.49           H  
ATOM    339  HB3 GLN L  24      13.539  -6.960  12.675  1.00 38.49           H  
ATOM    340  HG2 GLN L  24      15.734  -7.588  12.268  1.00 38.49           H  
ATOM    341  HG3 GLN L  24      14.866  -8.297  10.915  1.00 38.49           H  
ATOM    342 HE21 GLN L  24      17.017  -5.822  11.948  1.00 38.49           H  
ATOM    343 HE22 GLN L  24      17.628  -5.386  10.389  1.00 38.49           H  
ATOM    344  N   ALA L  25      10.687  -6.258  11.858  1.00 62.14           N  
ATOM    345  CA  ALA L  25       9.600  -5.530  12.476  1.00 52.13           C  
ATOM    346  C   ALA L  25       9.898  -5.336  13.956  1.00 31.02           C  
ATOM    347  O   ALA L  25      10.426  -6.249  14.606  1.00 43.43           O  
ATOM    348  CB  ALA L  25       8.301  -6.297  12.302  1.00 64.21           C  
ATOM    349  H   ALA L  25      10.694  -7.240  11.876  1.00 38.49           H  
ATOM    350  HA  ALA L  25       9.507  -4.568  11.995  1.00  2.52           H  
ATOM    351  HB1 ALA L  25       7.490  -5.743  12.754  1.00 38.49           H  
ATOM    352  HB2 ALA L  25       8.385  -7.259  12.785  1.00 38.49           H  
ATOM    353  HB3 ALA L  25       8.101  -6.436  11.251  1.00 38.49           H  
ATOM    354  N   SER L  26       9.587  -4.160  14.490  1.00 74.23           N  
ATOM    355  CA  SER L  26       9.831  -3.866  15.897  1.00  5.21           C  
ATOM    356  C   SER L  26       8.901  -4.690  16.791  1.00 21.23           C  
ATOM    357  O   SER L  26       9.240  -5.038  17.928  1.00 11.31           O  
ATOM    358  CB  SER L  26       9.628  -2.370  16.174  1.00 22.52           C  
ATOM    359  OG  SER L  26       8.287  -1.957  15.897  1.00  4.31           O  
ATOM    360  H   SER L  26       9.207  -3.452  13.920  1.00 38.49           H  
ATOM    361  HA  SER L  26      10.860  -4.117  16.101  1.00 13.54           H  
ATOM    362  HB2 SER L  26       9.848  -2.168  17.212  1.00 38.49           H  
ATOM    363  HB3 SER L  26      10.303  -1.806  15.548  1.00 38.49           H  
ATOM    364  HG  SER L  26       7.867  -1.799  16.753  1.00 41.32           H  
ATOM    365  N   GLN L  27       7.749  -5.000  16.261  1.00 13.01           N  
ATOM    366  CA  GLN L  27       6.742  -5.744  16.956  1.00  1.42           C  
ATOM    367  C   GLN L  27       6.325  -6.895  16.065  1.00 70.10           C  
ATOM    368  O   GLN L  27       6.402  -6.775  14.848  1.00 42.55           O  
ATOM    369  CB  GLN L  27       5.546  -4.823  17.259  1.00 32.21           C  
ATOM    370  CG  GLN L  27       4.426  -5.460  18.067  1.00 12.20           C  
ATOM    371  CD  GLN L  27       3.300  -4.497  18.356  1.00 44.25           C  
ATOM    372  OE1 GLN L  27       3.315  -3.781  19.363  1.00 53.35           O  
ATOM    373  NE2 GLN L  27       2.307  -4.489  17.509  1.00  0.51           N  
ATOM    374  H   GLN L  27       7.572  -4.727  15.336  1.00 38.49           H  
ATOM    375  HA  GLN L  27       7.158  -6.114  17.881  1.00 74.20           H  
ATOM    376  HB2 GLN L  27       5.908  -3.970  17.814  1.00 38.49           H  
ATOM    377  HB3 GLN L  27       5.134  -4.477  16.321  1.00 38.49           H  
ATOM    378  HG2 GLN L  27       4.013  -6.253  17.463  1.00 38.49           H  
ATOM    379  HG3 GLN L  27       4.815  -5.851  18.996  1.00 38.49           H  
ATOM    380 HE21 GLN L  27       2.332  -5.100  16.743  1.00 38.49           H  
ATOM    381 HE22 GLN L  27       1.566  -3.867  17.675  1.00 38.49           H  
ATOM    382  N   ASP L  28       5.924  -7.996  16.659  1.00  2.04           N  
ATOM    383  CA  ASP L  28       5.498  -9.169  15.914  1.00 20.30           C  
ATOM    384  C   ASP L  28       4.275  -8.859  15.086  1.00 74.14           C  
ATOM    385  O   ASP L  28       3.196  -8.605  15.620  1.00 61.11           O  
ATOM    386  CB  ASP L  28       5.195 -10.348  16.845  1.00  1.12           C  
ATOM    387  CG  ASP L  28       6.406 -10.902  17.550  1.00 23.31           C  
ATOM    388  OD1 ASP L  28       6.764 -10.401  18.638  1.00 11.24           O  
ATOM    389  OD2 ASP L  28       7.013 -11.862  17.042  1.00 52.33           O  
ATOM    390  H   ASP L  28       5.897  -8.031  17.638  1.00 38.49           H  
ATOM    391  HA  ASP L  28       6.304  -9.450  15.253  1.00 24.23           H  
ATOM    392  HB2 ASP L  28       4.493 -10.023  17.597  1.00 38.49           H  
ATOM    393  HB3 ASP L  28       4.741 -11.135  16.263  1.00 38.49           H  
ATOM    394  N   ILE L  29       4.442  -8.861  13.788  1.00 14.04           N  
ATOM    395  CA  ILE L  29       3.341  -8.571  12.883  1.00 61.35           C  
ATOM    396  C   ILE L  29       2.858  -9.842  12.231  1.00 22.24           C  
ATOM    397  O   ILE L  29       1.951  -9.819  11.395  1.00 21.12           O  
ATOM    398  CB  ILE L  29       3.752  -7.571  11.778  1.00 13.10           C  
ATOM    399  CG1 ILE L  29       4.875  -8.154  10.907  1.00 55.42           C  
ATOM    400  CG2 ILE L  29       4.178  -6.260  12.409  1.00 30.22           C  
ATOM    401  CD1 ILE L  29       5.288  -7.270   9.749  1.00 60.34           C  
ATOM    402  H   ILE L  29       5.339  -9.049  13.430  1.00 38.49           H  
ATOM    403  HA  ILE L  29       2.534  -8.142  13.458  1.00 31.12           H  
ATOM    404  HB  ILE L  29       2.887  -7.381  11.158  1.00 71.13           H  
ATOM    405 HG12 ILE L  29       5.749  -8.319  11.520  1.00 38.49           H  
ATOM    406 HG13 ILE L  29       4.545  -9.100  10.505  1.00 38.49           H  
ATOM    407 HG21 ILE L  29       5.010  -6.432  13.074  1.00 38.49           H  
ATOM    408 HG22 ILE L  29       3.345  -5.864  12.969  1.00 38.49           H  
ATOM    409 HG23 ILE L  29       4.464  -5.559  11.640  1.00 38.49           H  
ATOM    410 HD11 ILE L  29       4.432  -7.059   9.125  1.00 38.49           H  
ATOM    411 HD12 ILE L  29       6.047  -7.774   9.169  1.00 38.49           H  
ATOM    412 HD13 ILE L  29       5.704  -6.354  10.140  1.00 38.49           H  
ATOM    413  N   SER L  30       3.462 -10.944  12.640  1.00 61.45           N  
ATOM    414  CA  SER L  30       3.191 -12.261  12.082  1.00 42.35           C  
ATOM    415  C   SER L  30       3.615 -12.238  10.597  1.00 53.43           C  
ATOM    416  O   SER L  30       4.617 -11.620  10.258  1.00  4.31           O  
ATOM    417  CB  SER L  30       1.687 -12.618  12.270  1.00 33.32           C  
ATOM    418  OG  SER L  30       1.380 -13.926  11.816  1.00 62.21           O  
ATOM    419  H   SER L  30       4.120 -10.806  13.349  1.00 38.49           H  
ATOM    420  HA  SER L  30       3.814 -12.974  12.602  1.00  1.51           H  
ATOM    421  HB2 SER L  30       1.435 -12.558  13.318  1.00 38.49           H  
ATOM    422  HB3 SER L  30       1.090 -11.907  11.717  1.00 38.49           H  
ATOM    423  HG  SER L  30       1.336 -14.485  12.605  1.00  2.55           H  
ATOM    424  N   ASN L  31       2.889 -12.900   9.741  1.00 51.23           N  
ATOM    425  CA  ASN L  31       3.227 -12.943   8.314  1.00 73.21           C  
ATOM    426  C   ASN L  31       2.536 -11.810   7.554  1.00 71.20           C  
ATOM    427  O   ASN L  31       2.559 -11.771   6.322  1.00 15.21           O  
ATOM    428  CB  ASN L  31       2.816 -14.300   7.714  1.00 71.54           C  
ATOM    429  CG  ASN L  31       1.314 -14.564   7.796  1.00 52.03           C  
ATOM    430  OD1 ASN L  31       0.816 -15.104   8.790  1.00 12.21           O  
ATOM    431  ND2 ASN L  31       0.591 -14.206   6.775  1.00 30.45           N  
ATOM    432  H   ASN L  31       2.103 -13.388  10.076  1.00 38.49           H  
ATOM    433  HA  ASN L  31       4.296 -12.830   8.217  1.00 71.31           H  
ATOM    434  HB2 ASN L  31       3.103 -14.325   6.672  1.00 38.49           H  
ATOM    435  HB3 ASN L  31       3.331 -15.089   8.242  1.00 38.49           H  
ATOM    436 HD21 ASN L  31       1.018 -13.780   5.996  1.00 38.49           H  
ATOM    437 HD22 ASN L  31      -0.376 -14.352   6.762  1.00 38.49           H  
ATOM    438  N   TYR L  32       1.951 -10.878   8.286  1.00 43.51           N  
ATOM    439  CA  TYR L  32       1.242  -9.780   7.670  1.00 14.35           C  
ATOM    440  C   TYR L  32       2.214  -8.660   7.266  1.00 53.25           C  
ATOM    441  O   TYR L  32       2.450  -7.714   8.030  1.00 33.20           O  
ATOM    442  CB  TYR L  32       0.130  -9.240   8.591  1.00 72.15           C  
ATOM    443  CG  TYR L  32      -0.868 -10.293   9.049  1.00  3.13           C  
ATOM    444  CD1 TYR L  32      -1.838 -10.795   8.191  1.00  0.52           C  
ATOM    445  CD2 TYR L  32      -0.835 -10.776  10.341  1.00  0.34           C  
ATOM    446  CE1 TYR L  32      -2.741 -11.751   8.616  1.00 45.43           C  
ATOM    447  CE2 TYR L  32      -1.730 -11.730  10.775  1.00 53.40           C  
ATOM    448  CZ  TYR L  32      -2.679 -12.218   9.910  1.00 52.20           C  
ATOM    449  OH  TYR L  32      -3.576 -13.178  10.345  1.00 61.22           O  
ATOM    450  H   TYR L  32       2.013 -10.923   9.263  1.00 38.49           H  
ATOM    451  HA  TYR L  32       0.791 -10.166   6.768  1.00 45.41           H  
ATOM    452  HB2 TYR L  32       0.585  -8.811   9.472  1.00 38.49           H  
ATOM    453  HB3 TYR L  32      -0.413  -8.467   8.065  1.00 38.49           H  
ATOM    454  HD1 TYR L  32      -1.881 -10.431   7.176  1.00 13.32           H  
ATOM    455  HD2 TYR L  32      -0.089 -10.388  11.016  1.00 24.20           H  
ATOM    456  HE1 TYR L  32      -3.488 -12.129   7.934  1.00 25.20           H  
ATOM    457  HE2 TYR L  32      -1.675 -12.092  11.790  1.00  5.22           H  
ATOM    458  HH  TYR L  32      -3.530 -13.917   9.722  1.00 75.30           H  
ATOM    459  N   LEU L  33       2.784  -8.792   6.080  1.00 52.45           N  
ATOM    460  CA  LEU L  33       3.770  -7.846   5.570  1.00 21.32           C  
ATOM    461  C   LEU L  33       3.536  -7.562   4.088  1.00 21.30           C  
ATOM    462  O   LEU L  33       3.252  -8.482   3.320  1.00 53.33           O  
ATOM    463  CB  LEU L  33       5.159  -8.462   5.700  1.00 25.44           C  
ATOM    464  CG  LEU L  33       6.313  -7.625   5.162  1.00 50.45           C  
ATOM    465  CD1 LEU L  33       6.586  -6.427   6.027  1.00  0.21           C  
ATOM    466  CD2 LEU L  33       7.538  -8.456   4.984  1.00 63.23           C  
ATOM    467  H   LEU L  33       2.542  -9.565   5.527  1.00 38.49           H  
ATOM    468  HA  LEU L  33       3.743  -6.936   6.149  1.00 24.33           H  
ATOM    469  HB2 LEU L  33       5.342  -8.657   6.746  1.00 38.49           H  
ATOM    470  HB3 LEU L  33       5.159  -9.406   5.177  1.00 38.49           H  
ATOM    471  HG  LEU L  33       6.024  -7.248   4.192  1.00 42.43           H  
ATOM    472 HD11 LEU L  33       5.699  -5.814   6.090  1.00 38.49           H  
ATOM    473 HD12 LEU L  33       7.378  -5.857   5.568  1.00 38.49           H  
ATOM    474 HD13 LEU L  33       6.888  -6.742   7.016  1.00 38.49           H  
ATOM    475 HD21 LEU L  33       7.832  -8.877   5.933  1.00 38.49           H  
ATOM    476 HD22 LEU L  33       8.339  -7.839   4.606  1.00 38.49           H  
ATOM    477 HD23 LEU L  33       7.338  -9.251   4.280  1.00 38.49           H  
ATOM    478  N   ASN L  34       3.638  -6.301   3.692  1.00 60.40           N  
ATOM    479  CA  ASN L  34       3.576  -5.924   2.274  1.00 53.23           C  
ATOM    480  C   ASN L  34       4.923  -5.393   1.814  1.00 13.25           C  
ATOM    481  O   ASN L  34       5.688  -4.829   2.611  1.00 52.43           O  
ATOM    482  CB  ASN L  34       2.487  -4.861   1.986  1.00  1.11           C  
ATOM    483  CG  ASN L  34       1.066  -5.354   2.049  1.00 11.32           C  
ATOM    484  OD1 ASN L  34       0.194  -4.857   1.371  1.00 53.11           O  
ATOM    485  ND2 ASN L  34       0.827  -6.310   2.848  1.00 52.31           N  
ATOM    486  H   ASN L  34       3.757  -5.563   4.339  1.00 38.49           H  
ATOM    487  HA  ASN L  34       3.353  -6.819   1.712  1.00 74.12           H  
ATOM    488  HB2 ASN L  34       2.540  -4.152   2.797  1.00 38.49           H  
ATOM    489  HB3 ASN L  34       2.663  -4.381   1.036  1.00 38.49           H  
ATOM    490 HD21 ASN L  34       1.574  -6.660   3.374  1.00 38.49           H  
ATOM    491 HD22 ASN L  34      -0.085  -6.664   2.891  1.00 38.49           H  
ATOM    492  N   TRP L  35       5.218  -5.591   0.549  1.00 15.25           N  
ATOM    493  CA  TRP L  35       6.443  -5.091  -0.063  1.00 23.50           C  
ATOM    494  C   TRP L  35       6.109  -4.129  -1.160  1.00 12.13           C  
ATOM    495  O   TRP L  35       5.314  -4.441  -2.000  1.00  3.45           O  
ATOM    496  CB  TRP L  35       7.298  -6.229  -0.621  1.00  4.30           C  
ATOM    497  CG  TRP L  35       7.965  -7.028   0.433  1.00 63.13           C  
ATOM    498  CD1 TRP L  35       7.573  -8.229   0.965  1.00 41.23           C  
ATOM    499  CD2 TRP L  35       9.167  -6.657   1.093  1.00 24.23           C  
ATOM    500  NE1 TRP L  35       8.480  -8.617   1.927  1.00 52.31           N  
ATOM    501  CE2 TRP L  35       9.470  -7.658   2.022  1.00 24.11           C  
ATOM    502  CE3 TRP L  35      10.017  -5.553   0.971  1.00 13.04           C  
ATOM    503  CZ2 TRP L  35      10.603  -7.589   2.844  1.00 22.24           C  
ATOM    504  CZ3 TRP L  35      11.132  -5.473   1.763  1.00 63.52           C  
ATOM    505  CH2 TRP L  35      11.426  -6.487   2.698  1.00 11.31           C  
ATOM    506  H   TRP L  35       4.575  -6.085  -0.008  1.00 38.49           H  
ATOM    507  HA  TRP L  35       7.003  -4.570   0.698  1.00 13.12           H  
ATOM    508  HB2 TRP L  35       6.684  -6.886  -1.214  1.00 38.49           H  
ATOM    509  HB3 TRP L  35       8.062  -5.806  -1.256  1.00 38.49           H  
ATOM    510  HD1 TRP L  35       6.691  -8.783   0.667  1.00 44.32           H  
ATOM    511  HE1 TRP L  35       8.417  -9.444   2.450  1.00 11.21           H  
ATOM    512  HE3 TRP L  35       9.805  -4.769   0.261  1.00 74.30           H  
ATOM    513  HZ2 TRP L  35      10.840  -8.360   3.563  1.00 70.35           H  
ATOM    514  HZ3 TRP L  35      11.774  -4.608   1.638  1.00 43.13           H  
ATOM    515  HH2 TRP L  35      12.312  -6.387   3.306  1.00 54.04           H  
ATOM    516  N   TYR L  36       6.748  -2.982  -1.167  1.00 21.44           N  
ATOM    517  CA  TYR L  36       6.461  -1.924  -2.150  1.00 41.30           C  
ATOM    518  C   TYR L  36       7.660  -1.551  -2.990  1.00  4.23           C  
ATOM    519  O   TYR L  36       8.789  -1.560  -2.517  1.00  0.20           O  
ATOM    520  CB  TYR L  36       5.968  -0.637  -1.469  1.00 55.12           C  
ATOM    521  CG  TYR L  36       4.558  -0.658  -0.932  1.00 72.22           C  
ATOM    522  CD1 TYR L  36       4.147  -1.566   0.030  1.00  4.13           C  
ATOM    523  CD2 TYR L  36       3.647   0.278  -1.370  1.00 72.44           C  
ATOM    524  CE1 TYR L  36       2.867  -1.529   0.530  1.00 40.21           C  
ATOM    525  CE2 TYR L  36       2.371   0.315  -0.882  1.00 64.14           C  
ATOM    526  CZ  TYR L  36       1.985  -0.588   0.069  1.00 21.00           C  
ATOM    527  OH  TYR L  36       0.720  -0.535   0.572  1.00 42.43           O  
ATOM    528  H   TYR L  36       7.422  -2.857  -0.466  1.00 38.49           H  
ATOM    529  HA  TYR L  36       5.668  -2.296  -2.780  1.00 24.53           H  
ATOM    530  HB2 TYR L  36       6.635  -0.371  -0.660  1.00 38.49           H  
ATOM    531  HB3 TYR L  36       6.045   0.181  -2.172  1.00 38.49           H  
ATOM    532  HD1 TYR L  36       4.837  -2.316   0.388  1.00 41.52           H  
ATOM    533  HD2 TYR L  36       3.951   0.987  -2.124  1.00 24.23           H  
ATOM    534  HE1 TYR L  36       2.565  -2.246   1.280  1.00 15.04           H  
ATOM    535  HE2 TYR L  36       1.674   1.056  -1.244  1.00  1.12           H  
ATOM    536  HH  TYR L  36       0.139  -0.334  -0.175  1.00 71.45           H  
ATOM    537  N   GLN L  37       7.375  -1.210  -4.229  1.00 53.11           N  
ATOM    538  CA  GLN L  37       8.331  -0.707  -5.188  1.00  2.14           C  
ATOM    539  C   GLN L  37       7.924   0.718  -5.521  1.00 53.55           C  
ATOM    540  O   GLN L  37       6.795   0.957  -5.951  1.00 75.54           O  
ATOM    541  CB  GLN L  37       8.282  -1.544  -6.480  1.00 54.32           C  
ATOM    542  CG  GLN L  37       9.222  -1.073  -7.567  1.00 41.05           C  
ATOM    543  CD  GLN L  37       9.041  -1.830  -8.873  1.00 74.42           C  
ATOM    544  OE1 GLN L  37       8.238  -1.437  -9.721  1.00 14.02           O  
ATOM    545  NE2 GLN L  37       9.792  -2.878  -9.070  1.00  5.41           N  
ATOM    546  H   GLN L  37       6.445  -1.304  -4.547  1.00 38.49           H  
ATOM    547  HA  GLN L  37       9.324  -0.734  -4.766  1.00 74.11           H  
ATOM    548  HB2 GLN L  37       8.578  -2.556  -6.260  1.00 38.49           H  
ATOM    549  HB3 GLN L  37       7.279  -1.532  -6.876  1.00 38.49           H  
ATOM    550  HG2 GLN L  37       9.063  -0.018  -7.735  1.00 38.49           H  
ATOM    551  HG3 GLN L  37      10.230  -1.226  -7.208  1.00 38.49           H  
ATOM    552 HE21 GLN L  37      10.455  -3.165  -8.395  1.00 38.49           H  
ATOM    553 HE22 GLN L  37       9.672  -3.369  -9.910  1.00 38.49           H  
ATOM    554  N   GLN L  38       8.797   1.650  -5.291  1.00 31.15           N  
ATOM    555  CA  GLN L  38       8.504   3.025  -5.592  1.00 54.54           C  
ATOM    556  C   GLN L  38       9.508   3.539  -6.591  1.00 52.54           C  
ATOM    557  O   GLN L  38      10.717   3.523  -6.338  1.00 24.54           O  
ATOM    558  CB  GLN L  38       8.470   3.864  -4.290  1.00 41.43           C  
ATOM    559  CG  GLN L  38       8.012   5.337  -4.425  1.00 50.31           C  
ATOM    560  CD  GLN L  38       9.022   6.277  -5.075  1.00 41.11           C  
ATOM    561  OE1 GLN L  38      10.236   6.096  -4.951  1.00 50.44           O  
ATOM    562  NE2 GLN L  38       8.534   7.268  -5.768  1.00 22.21           N  
ATOM    563  H   GLN L  38       9.673   1.415  -4.911  1.00 38.49           H  
ATOM    564  HA  GLN L  38       7.527   3.049  -6.053  1.00  1.20           H  
ATOM    565  HB2 GLN L  38       7.813   3.373  -3.588  1.00 38.49           H  
ATOM    566  HB3 GLN L  38       9.467   3.854  -3.878  1.00 38.49           H  
ATOM    567  HG2 GLN L  38       7.114   5.362  -5.025  1.00 38.49           H  
ATOM    568  HG3 GLN L  38       7.778   5.708  -3.438  1.00 38.49           H  
ATOM    569 HE21 GLN L  38       7.562   7.358  -5.841  1.00 38.49           H  
ATOM    570 HE22 GLN L  38       9.156   7.900  -6.181  1.00 38.49           H  
ATOM    571  N   LYS L  39       9.011   3.931  -7.730  1.00 74.22           N  
ATOM    572  CA  LYS L  39       9.800   4.478  -8.781  1.00 72.23           C  
ATOM    573  C   LYS L  39       9.249   5.840  -9.186  1.00 61.22           C  
ATOM    574  O   LYS L  39       8.044   6.088  -9.051  1.00 11.24           O  
ATOM    575  CB  LYS L  39       9.881   3.541  -9.973  1.00 65.33           C  
ATOM    576  CG  LYS L  39       8.565   3.196 -10.603  1.00 34.21           C  
ATOM    577  CD  LYS L  39       8.774   2.428 -11.880  1.00 14.13           C  
ATOM    578  CE  LYS L  39       9.547   1.134 -11.635  1.00 14.12           C  
ATOM    579  NZ  LYS L  39       9.724   0.334 -12.870  1.00 11.13           N  
ATOM    580  H   LYS L  39       8.048   3.871  -7.899  1.00 38.49           H  
ATOM    581  HA  LYS L  39      10.790   4.625  -8.378  1.00 42.14           H  
ATOM    582  HB2 LYS L  39      10.488   3.998 -10.736  1.00 38.49           H  
ATOM    583  HB3 LYS L  39      10.351   2.627  -9.645  1.00 38.49           H  
ATOM    584  HG2 LYS L  39       7.990   2.595  -9.914  1.00 38.49           H  
ATOM    585  HG3 LYS L  39       8.035   4.110 -10.823  1.00 38.49           H  
ATOM    586  HD2 LYS L  39       7.809   2.249 -12.330  1.00 38.49           H  
ATOM    587  HD3 LYS L  39       9.364   3.079 -12.509  1.00 38.49           H  
ATOM    588  HE2 LYS L  39      10.520   1.404 -11.254  1.00 38.49           H  
ATOM    589  HE3 LYS L  39       9.034   0.567 -10.879  1.00 38.49           H  
ATOM    590  HZ1 LYS L  39      10.318  -0.502 -12.692  1.00 38.49           H  
ATOM    591  HZ2 LYS L  39      10.207   0.897 -13.601  1.00 38.49           H  
ATOM    592  HZ3 LYS L  39       8.819   0.010 -13.264  1.00 38.49           H  
ATOM    593  N   PRO L  40      10.113   6.738  -9.658  1.00  4.33           N  
ATOM    594  CA  PRO L  40       9.721   8.104 -10.030  1.00 12.32           C  
ATOM    595  C   PRO L  40       8.679   8.124 -11.169  1.00 54.32           C  
ATOM    596  O   PRO L  40       8.880   7.519 -12.232  1.00 33.22           O  
ATOM    597  CB  PRO L  40      11.040   8.755 -10.478  1.00 23.33           C  
ATOM    598  CG  PRO L  40      11.948   7.617 -10.810  1.00  4.45           C  
ATOM    599  CD  PRO L  40      11.536   6.476  -9.922  1.00 63.24           C  
ATOM    600  HA  PRO L  40       9.316   8.634  -9.180  1.00 61.34           H  
ATOM    601  HB2 PRO L  40      10.859   9.384 -11.336  1.00 38.49           H  
ATOM    602  HB3 PRO L  40      11.440   9.351  -9.671  1.00 38.49           H  
ATOM    603  HG2 PRO L  40      11.828   7.342 -11.847  1.00 38.49           H  
ATOM    604  HG3 PRO L  40      12.974   7.892 -10.613  1.00 38.49           H  
ATOM    605  HD2 PRO L  40      11.629   5.525 -10.430  1.00 38.49           H  
ATOM    606  HD3 PRO L  40      12.091   6.446  -9.000  1.00 38.49           H  
ATOM    607  N   GLY L  41       7.572   8.793 -10.926  1.00  0.12           N  
ATOM    608  CA  GLY L  41       6.509   8.882 -11.911  1.00 42.21           C  
ATOM    609  C   GLY L  41       5.449   7.817 -11.708  1.00 10.03           C  
ATOM    610  O   GLY L  41       4.418   7.801 -12.394  1.00 32.01           O  
ATOM    611  H   GLY L  41       7.466   9.249 -10.062  1.00 38.49           H  
ATOM    612  HA2 GLY L  41       6.050   9.856 -11.838  1.00 38.49           H  
ATOM    613  HA3 GLY L  41       6.936   8.768 -12.896  1.00 38.49           H  
ATOM    614  N   LYS L  42       5.689   6.937 -10.767  1.00 74.35           N  
ATOM    615  CA  LYS L  42       4.747   5.903 -10.415  1.00 51.41           C  
ATOM    616  C   LYS L  42       4.401   6.107  -8.952  1.00 52.14           C  
ATOM    617  O   LYS L  42       5.021   6.932  -8.269  1.00 14.22           O  
ATOM    618  CB  LYS L  42       5.395   4.507 -10.597  1.00 35.45           C  
ATOM    619  CG  LYS L  42       4.474   3.280 -10.376  1.00  5.32           C  
ATOM    620  CD  LYS L  42       3.321   3.179 -11.374  1.00  4.53           C  
ATOM    621  CE  LYS L  42       3.807   2.880 -12.782  1.00 72.53           C  
ATOM    622  NZ  LYS L  42       2.684   2.750 -13.736  1.00 42.22           N  
ATOM    623  H   LYS L  42       6.534   6.979 -10.266  1.00 38.49           H  
ATOM    624  HA  LYS L  42       3.880   5.987 -11.051  1.00 65.41           H  
ATOM    625  HB2 LYS L  42       5.902   4.408 -11.543  1.00 38.49           H  
ATOM    626  HB3 LYS L  42       6.114   4.484  -9.793  1.00 38.49           H  
ATOM    627  HG2 LYS L  42       5.071   2.385 -10.463  1.00 38.49           H  
ATOM    628  HG3 LYS L  42       4.074   3.333  -9.374  1.00 38.49           H  
ATOM    629  HD2 LYS L  42       2.659   2.383 -11.063  1.00 38.49           H  
ATOM    630  HD3 LYS L  42       2.775   4.110 -11.379  1.00 38.49           H  
ATOM    631  HE2 LYS L  42       4.464   3.670 -13.107  1.00 38.49           H  
ATOM    632  HE3 LYS L  42       4.358   1.951 -12.762  1.00 38.49           H  
ATOM    633  HZ1 LYS L  42       3.022   2.550 -14.697  1.00 38.49           H  
ATOM    634  HZ2 LYS L  42       2.115   3.616 -13.771  1.00 38.49           H  
ATOM    635  HZ3 LYS L  42       2.050   1.972 -13.464  1.00 38.49           H  
ATOM    636  N   ALA L  43       3.429   5.411  -8.494  1.00 42.32           N  
ATOM    637  CA  ALA L  43       3.086   5.393  -7.111  1.00 42.24           C  
ATOM    638  C   ALA L  43       3.825   4.215  -6.491  1.00 23.43           C  
ATOM    639  O   ALA L  43       4.254   3.322  -7.227  1.00 32.32           O  
ATOM    640  CB  ALA L  43       1.603   5.177  -7.002  1.00  1.22           C  
ATOM    641  H   ALA L  43       2.901   4.855  -9.102  1.00 38.49           H  
ATOM    642  HA  ALA L  43       3.359   6.328  -6.645  1.00 13.14           H  
ATOM    643  HB1 ALA L  43       1.091   6.018  -7.444  1.00 38.49           H  
ATOM    644  HB2 ALA L  43       1.323   5.050  -5.967  1.00 38.49           H  
ATOM    645  HB3 ALA L  43       1.392   4.287  -7.575  1.00 38.49           H  
ATOM    646  N   PRO L  44       4.027   4.174  -5.167  1.00 51.22           N  
ATOM    647  CA  PRO L  44       4.641   3.025  -4.558  1.00 25.25           C  
ATOM    648  C   PRO L  44       3.654   1.884  -4.638  1.00  4.14           C  
ATOM    649  O   PRO L  44       2.581   1.937  -4.049  1.00  0.45           O  
ATOM    650  CB  PRO L  44       4.872   3.452  -3.086  1.00 73.24           C  
ATOM    651  CG  PRO L  44       4.612   4.913  -3.063  1.00 44.41           C  
ATOM    652  CD  PRO L  44       3.672   5.188  -4.193  1.00 62.24           C  
ATOM    653  HA  PRO L  44       5.568   2.752  -5.037  1.00 21.43           H  
ATOM    654  HB2 PRO L  44       4.181   2.942  -2.433  1.00 38.49           H  
ATOM    655  HB3 PRO L  44       5.886   3.241  -2.773  1.00 38.49           H  
ATOM    656  HG2 PRO L  44       4.160   5.190  -2.123  1.00 38.49           H  
ATOM    657  HG3 PRO L  44       5.535   5.455  -3.205  1.00 38.49           H  
ATOM    658  HD2 PRO L  44       2.649   5.069  -3.870  1.00 38.49           H  
ATOM    659  HD3 PRO L  44       3.834   6.180  -4.586  1.00 38.49           H  
ATOM    660  N   LYS L  45       4.003   0.877  -5.362  1.00 11.21           N  
ATOM    661  CA  LYS L  45       3.109  -0.204  -5.575  1.00 53.44           C  
ATOM    662  C   LYS L  45       3.655  -1.448  -4.988  1.00 20.21           C  
ATOM    663  O   LYS L  45       4.848  -1.734  -5.103  1.00  2.24           O  
ATOM    664  CB  LYS L  45       2.759  -0.367  -7.053  1.00  1.54           C  
ATOM    665  CG  LYS L  45       1.789  -1.500  -7.318  1.00 44.20           C  
ATOM    666  CD  LYS L  45       1.293  -1.484  -8.734  1.00 75.32           C  
ATOM    667  CE  LYS L  45       0.329  -2.618  -8.977  1.00 71.12           C  
ATOM    668  NZ  LYS L  45      -0.338  -2.482 -10.274  1.00 31.22           N  
ATOM    669  H   LYS L  45       4.898   0.859  -5.772  1.00 38.49           H  
ATOM    670  HA  LYS L  45       2.204   0.036  -5.038  1.00 41.42           H  
ATOM    671  HB2 LYS L  45       2.317   0.551  -7.411  1.00 38.49           H  
ATOM    672  HB3 LYS L  45       3.665  -0.558  -7.609  1.00 38.49           H  
ATOM    673  HG2 LYS L  45       2.288  -2.439  -7.134  1.00 38.49           H  
ATOM    674  HG3 LYS L  45       0.949  -1.401  -6.647  1.00 38.49           H  
ATOM    675  HD2 LYS L  45       0.788  -0.549  -8.916  1.00 38.49           H  
ATOM    676  HD3 LYS L  45       2.132  -1.584  -9.409  1.00 38.49           H  
ATOM    677  HE2 LYS L  45       0.879  -3.547  -8.957  1.00 38.49           H  
ATOM    678  HE3 LYS L  45      -0.413  -2.621  -8.191  1.00 38.49           H  
ATOM    679  HZ1 LYS L  45       0.342  -2.382 -11.055  1.00 38.49           H  
ATOM    680  HZ2 LYS L  45      -0.933  -1.624 -10.248  1.00 38.49           H  
ATOM    681  HZ3 LYS L  45      -0.953  -3.297 -10.462  1.00 38.49           H  
ATOM    682  N   LEU L  46       2.814  -2.169  -4.326  1.00 74.13           N  
ATOM    683  CA  LEU L  46       3.234  -3.327  -3.662  1.00 62.13           C  
ATOM    684  C   LEU L  46       3.361  -4.509  -4.599  1.00 14.41           C  
ATOM    685  O   LEU L  46       2.590  -4.670  -5.546  1.00 70.14           O  
ATOM    686  CB  LEU L  46       2.374  -3.587  -2.422  1.00 74.31           C  
ATOM    687  CG  LEU L  46       0.939  -4.005  -2.626  1.00 52.53           C  
ATOM    688  CD1 LEU L  46       0.860  -5.483  -2.846  1.00 44.11           C  
ATOM    689  CD2 LEU L  46       0.103  -3.559  -1.468  1.00 61.32           C  
ATOM    690  H   LEU L  46       1.871  -1.910  -4.293  1.00 38.49           H  
ATOM    691  HA  LEU L  46       4.239  -3.144  -3.329  1.00 43.11           H  
ATOM    692  HB2 LEU L  46       2.857  -4.358  -1.839  1.00 38.49           H  
ATOM    693  HB3 LEU L  46       2.382  -2.680  -1.836  1.00 38.49           H  
ATOM    694  HG  LEU L  46       0.545  -3.571  -3.529  1.00 65.42           H  
ATOM    695 HD11 LEU L  46      -0.157  -5.807  -3.005  1.00 38.49           H  
ATOM    696 HD12 LEU L  46       1.303  -5.944  -1.974  1.00 38.49           H  
ATOM    697 HD13 LEU L  46       1.483  -5.708  -3.700  1.00 38.49           H  
ATOM    698 HD21 LEU L  46       0.512  -4.003  -0.572  1.00 38.49           H  
ATOM    699 HD22 LEU L  46      -0.927  -3.853  -1.600  1.00 38.49           H  
ATOM    700 HD23 LEU L  46       0.194  -2.485  -1.397  1.00 38.49           H  
ATOM    701  N   LEU L  47       4.362  -5.290  -4.339  1.00 74.23           N  
ATOM    702  CA  LEU L  47       4.671  -6.466  -5.100  1.00 41.42           C  
ATOM    703  C   LEU L  47       4.075  -7.636  -4.391  1.00 20.14           C  
ATOM    704  O   LEU L  47       3.623  -8.596  -4.994  1.00 75.10           O  
ATOM    705  CB  LEU L  47       6.205  -6.701  -5.164  1.00 13.35           C  
ATOM    706  CG  LEU L  47       7.090  -5.577  -5.700  1.00 72.33           C  
ATOM    707  CD1 LEU L  47       6.600  -5.046  -7.039  1.00 74.43           C  
ATOM    708  CD2 LEU L  47       7.263  -4.488  -4.675  1.00 11.43           C  
ATOM    709  H   LEU L  47       4.924  -5.035  -3.572  1.00 38.49           H  
ATOM    710  HA  LEU L  47       4.289  -6.362  -6.103  1.00 43.45           H  
ATOM    711  HB2 LEU L  47       6.530  -6.880  -4.149  1.00 38.49           H  
ATOM    712  HB3 LEU L  47       6.401  -7.595  -5.737  1.00 38.49           H  
ATOM    713  HG  LEU L  47       8.064  -6.001  -5.884  1.00 70.12           H  
ATOM    714 HD11 LEU L  47       6.605  -5.851  -7.761  1.00 38.49           H  
ATOM    715 HD12 LEU L  47       7.246  -4.251  -7.382  1.00 38.49           H  
ATOM    716 HD13 LEU L  47       5.591  -4.674  -6.935  1.00 38.49           H  
ATOM    717 HD21 LEU L  47       7.638  -4.929  -3.763  1.00 38.49           H  
ATOM    718 HD22 LEU L  47       6.305  -4.034  -4.466  1.00 38.49           H  
ATOM    719 HD23 LEU L  47       7.969  -3.750  -5.012  1.00 38.49           H  
ATOM    720  N   ILE L  48       4.063  -7.521  -3.094  1.00 12.02           N  
ATOM    721  CA  ILE L  48       3.653  -8.571  -2.225  1.00 53.21           C  
ATOM    722  C   ILE L  48       2.752  -7.975  -1.180  1.00 14.21           C  
ATOM    723  O   ILE L  48       3.018  -6.879  -0.695  1.00 20.41           O  
ATOM    724  CB  ILE L  48       4.902  -9.206  -1.537  1.00  2.21           C  
ATOM    725  CG1 ILE L  48       5.858  -9.789  -2.595  1.00 50.35           C  
ATOM    726  CG2 ILE L  48       4.501 -10.263  -0.525  1.00 52.10           C  
ATOM    727  CD1 ILE L  48       7.116 -10.389  -2.048  1.00 74.44           C  
ATOM    728  H   ILE L  48       4.302  -6.659  -2.695  1.00 38.49           H  
ATOM    729  HA  ILE L  48       3.136  -9.332  -2.789  1.00 43.43           H  
ATOM    730  HB  ILE L  48       5.417  -8.422  -1.005  1.00 75.10           H  
ATOM    731 HG12 ILE L  48       5.360 -10.579  -3.129  1.00 38.49           H  
ATOM    732 HG13 ILE L  48       6.136  -9.010  -3.289  1.00 38.49           H  
ATOM    733 HG21 ILE L  48       5.385 -10.684  -0.069  1.00 38.49           H  
ATOM    734 HG22 ILE L  48       3.946 -11.045  -1.024  1.00 38.49           H  
ATOM    735 HG23 ILE L  48       3.881  -9.815   0.238  1.00 38.49           H  
ATOM    736 HD11 ILE L  48       7.677  -9.630  -1.524  1.00 38.49           H  
ATOM    737 HD12 ILE L  48       7.695 -10.770  -2.876  1.00 38.49           H  
ATOM    738 HD13 ILE L  48       6.854 -11.195  -1.379  1.00 38.49           H  
ATOM    739  N   TYR L  49       1.717  -8.688  -0.830  1.00 34.41           N  
ATOM    740  CA  TYR L  49       0.744  -8.194   0.134  1.00 42.51           C  
ATOM    741  C   TYR L  49       0.614  -9.100   1.346  1.00 43.14           C  
ATOM    742  O   TYR L  49      -0.137  -8.810   2.259  1.00 24.34           O  
ATOM    743  CB  TYR L  49      -0.626  -7.931  -0.514  1.00 40.13           C  
ATOM    744  CG  TYR L  49      -1.207  -9.113  -1.243  1.00 25.23           C  
ATOM    745  CD1 TYR L  49      -1.723 -10.198  -0.550  1.00 51.03           C  
ATOM    746  CD2 TYR L  49      -1.225  -9.151  -2.625  1.00 25.20           C  
ATOM    747  CE1 TYR L  49      -2.240 -11.281  -1.209  1.00  2.02           C  
ATOM    748  CE2 TYR L  49      -1.746 -10.237  -3.287  1.00 75.52           C  
ATOM    749  CZ  TYR L  49      -2.247 -11.296  -2.580  1.00 31.41           C  
ATOM    750  OH  TYR L  49      -2.769 -12.380  -3.252  1.00 52.11           O  
ATOM    751  H   TYR L  49       1.622  -9.571  -1.249  1.00 38.49           H  
ATOM    752  HA  TYR L  49       1.131  -7.248   0.487  1.00 55.45           H  
ATOM    753  HB2 TYR L  49      -1.325  -7.654   0.262  1.00 38.49           H  
ATOM    754  HB3 TYR L  49      -0.538  -7.113  -1.214  1.00 38.49           H  
ATOM    755  HD1 TYR L  49      -1.713 -10.178   0.530  1.00 34.11           H  
ATOM    756  HD2 TYR L  49      -0.831  -8.314  -3.188  1.00 24.24           H  
ATOM    757  HE1 TYR L  49      -2.627 -12.114  -0.642  1.00 43.21           H  
ATOM    758  HE2 TYR L  49      -1.754 -10.268  -4.362  1.00 32.45           H  
ATOM    759  HH  TYR L  49      -2.175 -12.606  -3.980  1.00 33.20           H  
ATOM    760  N   ASP L  50       1.314 -10.202   1.341  1.00 10.34           N  
ATOM    761  CA  ASP L  50       1.318 -11.066   2.509  1.00 72.42           C  
ATOM    762  C   ASP L  50       2.557 -11.887   2.541  1.00 73.04           C  
ATOM    763  O   ASP L  50       2.541 -13.036   2.083  1.00 20.10           O  
ATOM    764  CB  ASP L  50       0.088 -11.980   2.587  1.00  2.25           C  
ATOM    765  CG  ASP L  50       0.057 -12.796   3.865  1.00 32.41           C  
ATOM    766  OD1 ASP L  50      -0.400 -12.273   4.891  1.00  3.41           O  
ATOM    767  OD2 ASP L  50       0.488 -13.978   3.850  1.00 51.13           O  
ATOM    768  H   ASP L  50       1.836 -10.437   0.549  1.00 38.49           H  
ATOM    769  HA  ASP L  50       1.323 -10.421   3.375  1.00 41.02           H  
ATOM    770  HB2 ASP L  50      -0.812 -11.396   2.515  1.00 38.49           H  
ATOM    771  HB3 ASP L  50       0.111 -12.663   1.753  1.00 38.49           H  
ATOM    772  N   ALA L  51       3.653 -11.249   2.973  1.00 13.13           N  
ATOM    773  CA  ALA L  51       4.997 -11.862   3.156  1.00 60.33           C  
ATOM    774  C   ALA L  51       5.593 -12.435   1.861  1.00 13.44           C  
ATOM    775  O   ALA L  51       6.624 -11.975   1.384  1.00 72.53           O  
ATOM    776  CB  ALA L  51       4.978 -12.918   4.258  1.00 65.11           C  
ATOM    777  H   ALA L  51       3.554 -10.291   3.176  1.00 38.49           H  
ATOM    778  HA  ALA L  51       5.649 -11.062   3.477  1.00 54.44           H  
ATOM    779  HB1 ALA L  51       5.988 -13.243   4.457  1.00 38.49           H  
ATOM    780  HB2 ALA L  51       4.383 -13.760   3.938  1.00 38.49           H  
ATOM    781  HB3 ALA L  51       4.551 -12.494   5.156  1.00 38.49           H  
ATOM    782  N   SER L  52       4.925 -13.408   1.318  1.00 64.14           N  
ATOM    783  CA  SER L  52       5.343 -14.114   0.153  1.00 34.44           C  
ATOM    784  C   SER L  52       4.330 -13.977  -0.999  1.00 51.25           C  
ATOM    785  O   SER L  52       4.677 -14.183  -2.155  1.00 73.41           O  
ATOM    786  CB  SER L  52       5.509 -15.578   0.537  1.00  2.53           C  
ATOM    787  OG  SER L  52       4.337 -16.055   1.203  1.00 12.24           O  
ATOM    788  H   SER L  52       4.073 -13.659   1.744  1.00 38.49           H  
ATOM    789  HA  SER L  52       6.307 -13.744  -0.159  1.00 51.03           H  
ATOM    790  HB2 SER L  52       5.670 -16.166  -0.353  1.00 38.49           H  
ATOM    791  HB3 SER L  52       6.354 -15.684   1.201  1.00 38.49           H  
ATOM    792  HG  SER L  52       4.462 -17.006   1.315  1.00 74.21           H  
ATOM    793  N   ASN L  53       3.087 -13.622  -0.674  1.00  2.42           N  
ATOM    794  CA  ASN L  53       2.014 -13.558  -1.677  1.00 52.44           C  
ATOM    795  C   ASN L  53       2.141 -12.367  -2.605  1.00 33.21           C  
ATOM    796  O   ASN L  53       1.983 -11.214  -2.172  1.00 21.32           O  
ATOM    797  CB  ASN L  53       0.619 -13.563  -1.030  1.00 72.32           C  
ATOM    798  CG  ASN L  53       0.283 -14.852  -0.305  1.00  1.23           C  
ATOM    799  OD1 ASN L  53      -0.221 -15.789  -0.907  1.00 60.25           O  
ATOM    800  ND2 ASN L  53       0.534 -14.907   0.982  1.00 72.10           N  
ATOM    801  H   ASN L  53       2.889 -13.392   0.258  1.00 38.49           H  
ATOM    802  HA  ASN L  53       2.104 -14.452  -2.275  1.00 21.21           H  
ATOM    803  HB2 ASN L  53       0.560 -12.752  -0.320  1.00 38.49           H  
ATOM    804  HB3 ASN L  53      -0.121 -13.400  -1.800  1.00 38.49           H  
ATOM    805 HD21 ASN L  53       0.930 -14.145   1.456  1.00 38.49           H  
ATOM    806 HD22 ASN L  53       0.299 -15.727   1.467  1.00 38.49           H  
ATOM    807  N   LEU L  54       2.404 -12.653  -3.876  1.00 12.31           N  
ATOM    808  CA  LEU L  54       2.540 -11.632  -4.923  1.00 51.13           C  
ATOM    809  C   LEU L  54       1.205 -11.054  -5.302  1.00  0.31           C  
ATOM    810  O   LEU L  54       0.175 -11.747  -5.276  1.00 14.31           O  
ATOM    811  CB  LEU L  54       3.223 -12.183  -6.213  1.00 11.22           C  
ATOM    812  CG  LEU L  54       4.746 -12.458  -6.221  1.00 13.21           C  
ATOM    813  CD1 LEU L  54       5.537 -11.191  -6.019  1.00 54.21           C  
ATOM    814  CD2 LEU L  54       5.154 -13.514  -5.217  1.00 40.01           C  
ATOM    815  H   LEU L  54       2.498 -13.596  -4.134  1.00 38.49           H  
ATOM    816  HA  LEU L  54       3.131 -10.816  -4.542  1.00 53.23           H  
ATOM    817  HB2 LEU L  54       2.741 -13.118  -6.456  1.00 38.49           H  
ATOM    818  HB3 LEU L  54       3.005 -11.490  -7.013  1.00 38.49           H  
ATOM    819  HG  LEU L  54       5.002 -12.815  -7.209  1.00 54.23           H  
ATOM    820 HD11 LEU L  54       6.589 -11.433  -5.994  1.00 38.49           H  
ATOM    821 HD12 LEU L  54       5.247 -10.708  -5.099  1.00 38.49           H  
ATOM    822 HD13 LEU L  54       5.354 -10.531  -6.855  1.00 38.49           H  
ATOM    823 HD21 LEU L  54       4.663 -14.445  -5.453  1.00 38.49           H  
ATOM    824 HD22 LEU L  54       4.875 -13.192  -4.224  1.00 38.49           H  
ATOM    825 HD23 LEU L  54       6.225 -13.640  -5.265  1.00 38.49           H  
ATOM    826  N   GLU L  55       1.223  -9.789  -5.637  1.00 74.31           N  
ATOM    827  CA  GLU L  55       0.055  -9.097  -6.121  1.00 74.31           C  
ATOM    828  C   GLU L  55      -0.139  -9.425  -7.601  1.00  4.12           C  
ATOM    829  O   GLU L  55       0.828  -9.736  -8.305  1.00 43.25           O  
ATOM    830  CB  GLU L  55       0.179  -7.580  -5.861  1.00 51.21           C  
ATOM    831  CG  GLU L  55      -1.021  -6.748  -6.299  1.00 72.42           C  
ATOM    832  CD  GLU L  55      -2.320  -7.161  -5.642  1.00 70.24           C  
ATOM    833  OE1 GLU L  55      -3.006  -8.060  -6.187  1.00 73.02           O  
ATOM    834  OE2 GLU L  55      -2.689  -6.591  -4.600  1.00 31.13           O  
ATOM    835  H   GLU L  55       2.082  -9.309  -5.551  1.00 38.49           H  
ATOM    836  HA  GLU L  55      -0.812  -9.479  -5.614  1.00 10.52           H  
ATOM    837  HB2 GLU L  55       0.325  -7.420  -4.804  1.00 38.49           H  
ATOM    838  HB3 GLU L  55       1.050  -7.215  -6.385  1.00 38.49           H  
ATOM    839  HG2 GLU L  55      -0.845  -5.704  -6.086  1.00 38.49           H  
ATOM    840  HG3 GLU L  55      -1.122  -6.900  -7.361  1.00 38.49           H  
ATOM    841  N   THR L  56      -1.367  -9.384  -8.058  1.00 21.51           N  
ATOM    842  CA  THR L  56      -1.677  -9.745  -9.417  1.00 45.50           C  
ATOM    843  C   THR L  56      -1.039  -8.769 -10.409  1.00 52.34           C  
ATOM    844  O   THR L  56      -1.267  -7.559 -10.353  1.00  2.30           O  
ATOM    845  CB  THR L  56      -3.202  -9.842  -9.627  1.00 52.20           C  
ATOM    846  OG1 THR L  56      -3.739 -10.777  -8.668  1.00 25.14           O  
ATOM    847  CG2 THR L  56      -3.534 -10.334 -11.034  1.00 31.32           C  
ATOM    848  H   THR L  56      -2.084  -9.079  -7.454  1.00 38.49           H  
ATOM    849  HA  THR L  56      -1.241 -10.715  -9.589  1.00 73.43           H  
ATOM    850  HB  THR L  56      -3.644  -8.868  -9.468  1.00 33.34           H  
ATOM    851  HG1 THR L  56      -3.093 -11.497  -8.605  1.00 75.14           H  
ATOM    852 HG21 THR L  56      -3.095 -11.309 -11.187  1.00 38.49           H  
ATOM    853 HG22 THR L  56      -3.130  -9.643 -11.760  1.00 38.49           H  
ATOM    854 HG23 THR L  56      -4.605 -10.399 -11.155  1.00 38.49           H  
ATOM    855  N   GLY L  57      -0.218  -9.308 -11.289  1.00 74.31           N  
ATOM    856  CA  GLY L  57       0.461  -8.503 -12.264  1.00 52.25           C  
ATOM    857  C   GLY L  57       1.921  -8.366 -11.934  1.00 55.44           C  
ATOM    858  O   GLY L  57       2.731  -7.982 -12.780  1.00  4.34           O  
ATOM    859  H   GLY L  57      -0.065 -10.279 -11.266  1.00 38.49           H  
ATOM    860  HA2 GLY L  57       0.358  -8.965 -13.235  1.00 38.49           H  
ATOM    861  HA3 GLY L  57       0.013  -7.520 -12.284  1.00 38.49           H  
ATOM    862  N   VAL L  58       2.260  -8.684 -10.705  1.00 61.53           N  
ATOM    863  CA  VAL L  58       3.614  -8.617 -10.249  1.00 63.11           C  
ATOM    864  C   VAL L  58       4.345  -9.910 -10.612  1.00  1.31           C  
ATOM    865  O   VAL L  58       3.886 -11.009 -10.265  1.00 51.34           O  
ATOM    866  CB  VAL L  58       3.664  -8.390  -8.727  1.00 72.33           C  
ATOM    867  CG1 VAL L  58       5.090  -8.290  -8.244  1.00 34.50           C  
ATOM    868  CG2 VAL L  58       2.881  -7.138  -8.362  1.00 72.52           C  
ATOM    869  H   VAL L  58       1.586  -8.982 -10.056  1.00 38.49           H  
ATOM    870  HA  VAL L  58       4.079  -7.778 -10.744  1.00 42.12           H  
ATOM    871  HB  VAL L  58       3.196  -9.232  -8.238  1.00 73.45           H  
ATOM    872 HG11 VAL L  58       5.620  -9.196  -8.494  1.00 38.49           H  
ATOM    873 HG12 VAL L  58       5.090  -8.157  -7.173  1.00 38.49           H  
ATOM    874 HG13 VAL L  58       5.573  -7.448  -8.717  1.00 38.49           H  
ATOM    875 HG21 VAL L  58       3.316  -6.280  -8.852  1.00 38.49           H  
ATOM    876 HG22 VAL L  58       2.901  -6.999  -7.293  1.00 38.49           H  
ATOM    877 HG23 VAL L  58       1.858  -7.265  -8.685  1.00 38.49           H  
ATOM    878  N   PRO L  59       5.470  -9.797 -11.343  1.00 13.24           N  
ATOM    879  CA  PRO L  59       6.256 -10.951 -11.790  1.00  1.11           C  
ATOM    880  C   PRO L  59       6.792 -11.817 -10.641  1.00 65.33           C  
ATOM    881  O   PRO L  59       7.103 -11.320  -9.548  1.00 54.33           O  
ATOM    882  CB  PRO L  59       7.421 -10.332 -12.559  1.00 64.11           C  
ATOM    883  CG  PRO L  59       7.454  -8.905 -12.158  1.00 62.45           C  
ATOM    884  CD  PRO L  59       6.053  -8.530 -11.808  1.00 22.13           C  
ATOM    885  HA  PRO L  59       5.681 -11.577 -12.457  1.00 74.12           H  
ATOM    886  HB2 PRO L  59       8.316 -10.845 -12.244  1.00 38.49           H  
ATOM    887  HB3 PRO L  59       7.273 -10.452 -13.622  1.00 38.49           H  
ATOM    888  HG2 PRO L  59       8.100  -8.792 -11.300  1.00 38.49           H  
ATOM    889  HG3 PRO L  59       7.816  -8.301 -12.977  1.00 38.49           H  
ATOM    890  HD2 PRO L  59       6.064  -7.794 -11.019  1.00 38.49           H  
ATOM    891  HD3 PRO L  59       5.527  -8.155 -12.674  1.00 38.49           H  
ATOM    892  N   SER L  60       6.945 -13.097 -10.928  1.00  2.51           N  
ATOM    893  CA  SER L  60       7.382 -14.104  -9.969  1.00 14.01           C  
ATOM    894  C   SER L  60       8.857 -13.932  -9.549  1.00 22.10           C  
ATOM    895  O   SER L  60       9.343 -14.636  -8.662  1.00 64.32           O  
ATOM    896  CB  SER L  60       7.155 -15.478 -10.571  1.00 35.14           C  
ATOM    897  OG  SER L  60       5.807 -15.602 -11.018  1.00 72.01           O  
ATOM    898  H   SER L  60       6.744 -13.422 -11.831  1.00 38.49           H  
ATOM    899  HA  SER L  60       6.760 -14.017  -9.091  1.00 64.23           H  
ATOM    900  HB2 SER L  60       7.822 -15.621 -11.408  1.00 38.49           H  
ATOM    901  HB3 SER L  60       7.344 -16.232  -9.823  1.00 38.49           H  
ATOM    902  HG  SER L  60       5.542 -16.516 -10.860  1.00 35.45           H  
ATOM    903  N   ARG L  61       9.563 -12.994 -10.191  1.00 44.21           N  
ATOM    904  CA  ARG L  61      10.953 -12.715  -9.859  1.00 32.11           C  
ATOM    905  C   ARG L  61      11.048 -12.064  -8.485  1.00 73.45           C  
ATOM    906  O   ARG L  61      12.109 -12.047  -7.876  1.00 64.32           O  
ATOM    907  CB  ARG L  61      11.608 -11.835 -10.933  1.00 35.42           C  
ATOM    908  CG  ARG L  61      11.076 -10.426 -11.085  1.00 41.42           C  
ATOM    909  CD  ARG L  61      11.728  -9.775 -12.290  1.00 54.43           C  
ATOM    910  NE  ARG L  61      11.347  -8.392 -12.470  1.00 22.44           N  
ATOM    911  CZ  ARG L  61      10.725  -7.893 -13.537  1.00 11.44           C  
ATOM    912  NH1 ARG L  61      10.283  -8.689 -14.516  1.00 62.13           N  
ATOM    913  NH2 ARG L  61      10.542  -6.604 -13.607  1.00 61.04           N  
ATOM    914  H   ARG L  61       9.119 -12.502 -10.910  1.00 38.49           H  
ATOM    915  HA  ARG L  61      11.514 -13.643  -9.799  1.00 63.24           H  
ATOM    916  HB2 ARG L  61      12.662 -11.755 -10.711  1.00 38.49           H  
ATOM    917  HB3 ARG L  61      11.509 -12.339 -11.884  1.00 38.49           H  
ATOM    918  HG2 ARG L  61      10.005 -10.456 -11.213  1.00 38.49           H  
ATOM    919  HG3 ARG L  61      11.323  -9.855 -10.202  1.00 38.49           H  
ATOM    920  HD2 ARG L  61      12.802  -9.820 -12.175  1.00 38.49           H  
ATOM    921  HD3 ARG L  61      11.455 -10.331 -13.173  1.00 38.49           H  
ATOM    922  HE  ARG L  61      11.639  -7.769 -11.759  1.00 52.43           H  
ATOM    923 HH11 ARG L  61      10.398  -9.685 -14.486  1.00 38.49           H  
ATOM    924 HH12 ARG L  61       9.822  -8.332 -15.332  1.00 38.49           H  
ATOM    925 HH21 ARG L  61      10.897  -6.055 -12.834  1.00 38.49           H  
ATOM    926 HH22 ARG L  61      10.090  -6.117 -14.367  1.00 38.49           H  
ATOM    927  N   PHE L  62       9.930 -11.545  -8.004  1.00 22.31           N  
ATOM    928  CA  PHE L  62       9.856 -10.999  -6.673  1.00  4.15           C  
ATOM    929  C   PHE L  62       9.349 -12.083  -5.748  1.00 42.42           C  
ATOM    930  O   PHE L  62       8.451 -12.839  -6.114  1.00 23.11           O  
ATOM    931  CB  PHE L  62       8.909  -9.799  -6.611  1.00 22.30           C  
ATOM    932  CG  PHE L  62       9.312  -8.641  -7.467  1.00  4.25           C  
ATOM    933  CD1 PHE L  62      10.372  -7.839  -7.107  1.00 51.20           C  
ATOM    934  CD2 PHE L  62       8.616  -8.341  -8.620  1.00  1.53           C  
ATOM    935  CE1 PHE L  62      10.732  -6.761  -7.880  1.00 23.11           C  
ATOM    936  CE2 PHE L  62       8.974  -7.262  -9.399  1.00 52.32           C  
ATOM    937  CZ  PHE L  62      10.034  -6.472  -9.026  1.00 54.45           C  
ATOM    938  H   PHE L  62       9.111 -11.552  -8.544  1.00 38.49           H  
ATOM    939  HA  PHE L  62      10.847 -10.696  -6.369  1.00 51.25           H  
ATOM    940  HB2 PHE L  62       7.932 -10.114  -6.946  1.00 38.49           H  
ATOM    941  HB3 PHE L  62       8.833  -9.458  -5.589  1.00 38.49           H  
ATOM    942  HD1 PHE L  62      10.926  -8.067  -6.209  1.00  1.53           H  
ATOM    943  HD2 PHE L  62       7.785  -8.968  -8.906  1.00 21.05           H  
ATOM    944  HE1 PHE L  62      11.564  -6.140  -7.586  1.00 23.32           H  
ATOM    945  HE2 PHE L  62       8.424  -7.033 -10.300  1.00 22.22           H  
ATOM    946  HZ  PHE L  62      10.321  -5.625  -9.630  1.00 14.52           H  
ATOM    947  N   SER L  63       9.932 -12.195  -4.592  1.00  2.25           N  
ATOM    948  CA  SER L  63       9.533 -13.185  -3.620  1.00 21.23           C  
ATOM    949  C   SER L  63       9.942 -12.704  -2.233  1.00 30.55           C  
ATOM    950  O   SER L  63      10.909 -11.962  -2.098  1.00 22.31           O  
ATOM    951  CB  SER L  63      10.219 -14.535  -3.927  1.00 62.13           C  
ATOM    952  OG  SER L  63       9.935 -14.978  -5.256  1.00 73.32           O  
ATOM    953  H   SER L  63      10.672 -11.599  -4.342  1.00 38.49           H  
ATOM    954  HA  SER L  63       8.462 -13.310  -3.667  1.00 21.43           H  
ATOM    955  HB2 SER L  63      11.288 -14.424  -3.824  1.00 38.49           H  
ATOM    956  HB3 SER L  63       9.867 -15.281  -3.230  1.00 38.49           H  
ATOM    957  HG  SER L  63       9.352 -14.317  -5.661  1.00  3.15           H  
ATOM    958  N   GLY L  64       9.201 -13.084  -1.229  1.00 40.33           N  
ATOM    959  CA  GLY L  64       9.552 -12.735   0.112  1.00 71.30           C  
ATOM    960  C   GLY L  64       9.242 -13.864   1.046  1.00 53.52           C  
ATOM    961  O   GLY L  64       8.425 -14.719   0.723  1.00  3.22           O  
ATOM    962  H   GLY L  64       8.384 -13.608  -1.356  1.00 38.49           H  
ATOM    963  HA2 GLY L  64      10.611 -12.524   0.144  1.00 38.49           H  
ATOM    964  HA3 GLY L  64       9.004 -11.857   0.414  1.00 38.49           H  
ATOM    965  N   SER L  65       9.912 -13.915   2.158  1.00 12.14           N  
ATOM    966  CA  SER L  65       9.682 -14.947   3.144  1.00 51.52           C  
ATOM    967  C   SER L  65       9.853 -14.382   4.551  1.00 74.00           C  
ATOM    968  O   SER L  65      10.612 -13.421   4.754  1.00  1.41           O  
ATOM    969  CB  SER L  65      10.651 -16.109   2.907  1.00 31.24           C  
ATOM    970  OG  SER L  65      10.500 -16.611   1.584  1.00 50.32           O  
ATOM    971  H   SER L  65      10.604 -13.237   2.328  1.00 38.49           H  
ATOM    972  HA  SER L  65       8.671 -15.304   3.018  1.00 40.14           H  
ATOM    973  HB2 SER L  65      11.666 -15.764   3.038  1.00 38.49           H  
ATOM    974  HB3 SER L  65      10.440 -16.902   3.608  1.00 38.49           H  
ATOM    975  HG  SER L  65       9.632 -16.302   1.286  1.00 75.43           H  
ATOM    976  N   GLY L  66       9.148 -14.945   5.499  1.00 22.20           N  
ATOM    977  CA  GLY L  66       9.270 -14.520   6.857  1.00  2.21           C  
ATOM    978  C   GLY L  66       7.945 -14.497   7.566  1.00 32.43           C  
ATOM    979  O   GLY L  66       6.898 -14.323   6.940  1.00 62.22           O  
ATOM    980  H   GLY L  66       8.513 -15.662   5.277  1.00 38.49           H  
ATOM    981  HA2 GLY L  66       9.930 -15.206   7.368  1.00 38.49           H  
ATOM    982  HA3 GLY L  66       9.699 -13.530   6.882  1.00 38.49           H  
ATOM    983  N   SER L  67       7.973 -14.695   8.857  1.00 63.34           N  
ATOM    984  CA  SER L  67       6.783 -14.664   9.675  1.00 31.32           C  
ATOM    985  C   SER L  67       7.140 -14.266  11.107  1.00 40.01           C  
ATOM    986  O   SER L  67       7.889 -14.969  11.790  1.00 33.01           O  
ATOM    987  CB  SER L  67       6.077 -16.033   9.660  1.00 10.13           C  
ATOM    988  OG  SER L  67       5.668 -16.394   8.335  1.00 72.51           O  
ATOM    989  H   SER L  67       8.831 -14.875   9.301  1.00 38.49           H  
ATOM    990  HA  SER L  67       6.116 -13.922   9.261  1.00 10.42           H  
ATOM    991  HB2 SER L  67       6.755 -16.788  10.030  1.00 38.49           H  
ATOM    992  HB3 SER L  67       5.206 -15.987  10.295  1.00 38.49           H  
ATOM    993  HG  SER L  67       5.964 -15.681   7.747  1.00  0.15           H  
ATOM    994  N   GLY L  68       6.648 -13.128  11.541  1.00 61.53           N  
ATOM    995  CA  GLY L  68       6.880 -12.699  12.895  1.00 61.24           C  
ATOM    996  C   GLY L  68       7.611 -11.389  12.961  1.00 13.11           C  
ATOM    997  O   GLY L  68       6.987 -10.326  13.072  1.00 34.05           O  
ATOM    998  H   GLY L  68       6.123 -12.548  10.940  1.00 38.49           H  
ATOM    999  HA2 GLY L  68       5.929 -12.591  13.397  1.00 38.49           H  
ATOM   1000  HA3 GLY L  68       7.464 -13.452  13.404  1.00 38.49           H  
ATOM   1001  N   THR L  69       8.926 -11.456  12.881  1.00 73.32           N  
ATOM   1002  CA  THR L  69       9.769 -10.273  12.962  1.00 51.25           C  
ATOM   1003  C   THR L  69      10.802 -10.179  11.827  1.00 23.05           C  
ATOM   1004  O   THR L  69      11.083  -9.087  11.346  1.00 21.34           O  
ATOM   1005  CB  THR L  69      10.467 -10.165  14.337  1.00 34.21           C  
ATOM   1006  OG1 THR L  69      11.042 -11.439  14.697  1.00 54.23           O  
ATOM   1007  CG2 THR L  69       9.500  -9.699  15.418  1.00 51.20           C  
ATOM   1008  H   THR L  69       9.343 -12.335  12.763  1.00 38.49           H  
ATOM   1009  HA  THR L  69       9.106  -9.425  12.864  1.00 21.34           H  
ATOM   1010  HB  THR L  69      11.271  -9.448  14.243  1.00  4.33           H  
ATOM   1011  HG1 THR L  69      10.310 -11.987  15.008  1.00 73.10           H  
ATOM   1012 HG21 THR L  69      10.022  -9.629  16.360  1.00 38.49           H  
ATOM   1013 HG22 THR L  69       8.687 -10.403  15.507  1.00 38.49           H  
ATOM   1014 HG23 THR L  69       9.106  -8.728  15.154  1.00 38.49           H  
ATOM   1015  N   ASP L  70      11.360 -11.311  11.401  1.00 35.30           N  
ATOM   1016  CA  ASP L  70      12.355 -11.301  10.315  1.00  5.24           C  
ATOM   1017  C   ASP L  70      11.677 -11.534   8.988  1.00  3.33           C  
ATOM   1018  O   ASP L  70      10.870 -12.464   8.847  1.00 72.13           O  
ATOM   1019  CB  ASP L  70      13.394 -12.409  10.540  1.00 64.51           C  
ATOM   1020  CG  ASP L  70      14.391 -12.550   9.396  1.00 42.21           C  
ATOM   1021  OD1 ASP L  70      14.081 -13.235   8.401  1.00 62.33           O  
ATOM   1022  OD2 ASP L  70      15.497 -12.004   9.486  1.00 63.23           O  
ATOM   1023  H   ASP L  70      11.113 -12.170  11.802  1.00 38.49           H  
ATOM   1024  HA  ASP L  70      12.858 -10.346  10.307  1.00  1.13           H  
ATOM   1025  HB2 ASP L  70      13.951 -12.192  11.439  1.00 38.49           H  
ATOM   1026  HB3 ASP L  70      12.882 -13.352  10.666  1.00 38.49           H  
ATOM   1027  N   PHE L  71      12.005 -10.719   8.012  1.00 41.12           N  
ATOM   1028  CA  PHE L  71      11.432 -10.834   6.693  1.00 22.35           C  
ATOM   1029  C   PHE L  71      12.499 -10.655   5.656  1.00  2.34           C  
ATOM   1030  O   PHE L  71      13.354  -9.804   5.799  1.00 11.10           O  
ATOM   1031  CB  PHE L  71      10.326  -9.806   6.499  1.00 51.24           C  
ATOM   1032  CG  PHE L  71       9.218  -9.946   7.498  1.00 42.33           C  
ATOM   1033  CD1 PHE L  71       8.251 -10.920   7.339  1.00 72.10           C  
ATOM   1034  CD2 PHE L  71       9.158  -9.120   8.603  1.00 74.14           C  
ATOM   1035  CE1 PHE L  71       7.247 -11.065   8.261  1.00  1.54           C  
ATOM   1036  CE2 PHE L  71       8.158  -9.266   9.528  1.00 22.20           C  
ATOM   1037  CZ  PHE L  71       7.201 -10.240   9.356  1.00 44.01           C  
ATOM   1038  H   PHE L  71      12.659  -9.997   8.165  1.00 38.49           H  
ATOM   1039  HA  PHE L  71      11.010 -11.823   6.597  1.00 30.23           H  
ATOM   1040  HB2 PHE L  71      10.743  -8.815   6.600  1.00 38.49           H  
ATOM   1041  HB3 PHE L  71       9.904  -9.917   5.511  1.00 38.49           H  
ATOM   1042  HD1 PHE L  71       8.291 -11.569   6.477  1.00 71.41           H  
ATOM   1043  HD2 PHE L  71       9.907  -8.353   8.737  1.00 31.24           H  
ATOM   1044  HE1 PHE L  71       6.494 -11.829   8.128  1.00 32.41           H  
ATOM   1045  HE2 PHE L  71       8.120  -8.615  10.389  1.00 14.53           H  
ATOM   1046  HZ  PHE L  71       6.412 -10.356  10.085  1.00 62.33           H  
ATOM   1047  N   THR L  72      12.465 -11.439   4.632  1.00 60.22           N  
ATOM   1048  CA  THR L  72      13.447 -11.342   3.595  1.00  2.44           C  
ATOM   1049  C   THR L  72      12.775 -11.286   2.233  1.00 61.20           C  
ATOM   1050  O   THR L  72      11.994 -12.155   1.884  1.00 53.33           O  
ATOM   1051  CB  THR L  72      14.423 -12.534   3.664  1.00 40.10           C  
ATOM   1052  OG1 THR L  72      14.969 -12.593   4.989  1.00 14.13           O  
ATOM   1053  CG2 THR L  72      15.566 -12.366   2.663  1.00  4.11           C  
ATOM   1054  H   THR L  72      11.758 -12.118   4.549  1.00 38.49           H  
ATOM   1055  HA  THR L  72      14.008 -10.429   3.740  1.00 12.11           H  
ATOM   1056  HB  THR L  72      13.886 -13.448   3.454  1.00 12.25           H  
ATOM   1057  HG1 THR L  72      14.572 -11.862   5.478  1.00 21.23           H  
ATOM   1058 HG21 THR L  72      16.235 -13.212   2.730  1.00 38.49           H  
ATOM   1059 HG22 THR L  72      16.107 -11.460   2.886  1.00 38.49           H  
ATOM   1060 HG23 THR L  72      15.162 -12.305   1.663  1.00 38.49           H  
ATOM   1061  N   PHE L  73      13.067 -10.248   1.517  1.00 25.10           N  
ATOM   1062  CA  PHE L  73      12.586 -10.025   0.184  1.00 32.24           C  
ATOM   1063  C   PHE L  73      13.705 -10.304  -0.772  1.00 22.40           C  
ATOM   1064  O   PHE L  73      14.845  -9.873  -0.553  1.00 12.23           O  
ATOM   1065  CB  PHE L  73      12.133  -8.584   0.049  1.00 30.41           C  
ATOM   1066  CG  PHE L  73      11.782  -8.128  -1.334  1.00 14.42           C  
ATOM   1067  CD1 PHE L  73      10.528  -8.343  -1.876  1.00 70.20           C  
ATOM   1068  CD2 PHE L  73      12.718  -7.457  -2.076  1.00  4.22           C  
ATOM   1069  CE1 PHE L  73      10.233  -7.886  -3.144  1.00 51.22           C  
ATOM   1070  CE2 PHE L  73      12.439  -7.006  -3.328  1.00  0.25           C  
ATOM   1071  CZ  PHE L  73      11.201  -7.214  -3.868  1.00 73.22           C  
ATOM   1072  H   PHE L  73      13.680  -9.576   1.895  1.00 38.49           H  
ATOM   1073  HA  PHE L  73      11.754 -10.684  -0.013  1.00 22.53           H  
ATOM   1074  HB2 PHE L  73      11.253  -8.438   0.660  1.00 38.49           H  
ATOM   1075  HB3 PHE L  73      12.915  -7.941   0.425  1.00 38.49           H  
ATOM   1076  HD1 PHE L  73       9.778  -8.869  -1.305  1.00 52.22           H  
ATOM   1077  HD2 PHE L  73      13.693  -7.304  -1.641  1.00 32.13           H  
ATOM   1078  HE1 PHE L  73       9.254  -8.053  -3.568  1.00 35.33           H  
ATOM   1079  HE2 PHE L  73      13.195  -6.480  -3.893  1.00 74.35           H  
ATOM   1080  HZ  PHE L  73      11.019  -6.835  -4.861  1.00 65.12           H  
ATOM   1081  N   THR L  74      13.421 -11.032  -1.779  1.00 24.12           N  
ATOM   1082  CA  THR L  74      14.395 -11.359  -2.721  1.00 43.25           C  
ATOM   1083  C   THR L  74      13.881 -11.147  -4.151  1.00 53.21           C  
ATOM   1084  O   THR L  74      12.707 -11.408  -4.452  1.00 62.21           O  
ATOM   1085  CB  THR L  74      14.892 -12.814  -2.501  1.00 43.21           C  
ATOM   1086  OG1 THR L  74      15.964 -13.105  -3.388  1.00 44.21           O  
ATOM   1087  CG2 THR L  74      13.770 -13.829  -2.703  1.00 54.33           C  
ATOM   1088  H   THR L  74      12.503 -11.367  -1.910  1.00 38.49           H  
ATOM   1089  HA  THR L  74      15.235 -10.700  -2.558  1.00 62.14           H  
ATOM   1090  HB  THR L  74      15.255 -12.892  -1.487  1.00 12.31           H  
ATOM   1091  HG1 THR L  74      16.516 -12.307  -3.401  1.00 31.15           H  
ATOM   1092 HG21 THR L  74      13.402 -13.752  -3.715  1.00 38.49           H  
ATOM   1093 HG22 THR L  74      12.965 -13.626  -2.009  1.00 38.49           H  
ATOM   1094 HG23 THR L  74      14.156 -14.823  -2.535  1.00 38.49           H  
ATOM   1095  N   ILE L  75      14.729 -10.627  -5.007  1.00  2.24           N  
ATOM   1096  CA  ILE L  75      14.414 -10.561  -6.406  1.00 33.55           C  
ATOM   1097  C   ILE L  75      15.306 -11.585  -7.074  1.00 20.44           C  
ATOM   1098  O   ILE L  75      16.508 -11.421  -7.095  1.00 73.31           O  
ATOM   1099  CB  ILE L  75      14.705  -9.159  -7.009  1.00 52.44           C  
ATOM   1100  CG1 ILE L  75      13.920  -8.082  -6.265  1.00 13.11           C  
ATOM   1101  CG2 ILE L  75      14.363  -9.132  -8.500  1.00 62.05           C  
ATOM   1102  CD1 ILE L  75      14.201  -6.669  -6.742  1.00 12.13           C  
ATOM   1103  H   ILE L  75      15.593 -10.285  -4.691  1.00 38.49           H  
ATOM   1104  HA  ILE L  75      13.377 -10.829  -6.548  1.00 63.40           H  
ATOM   1105  HB  ILE L  75      15.758  -8.954  -6.903  1.00 22.44           H  
ATOM   1106 HG12 ILE L  75      12.866  -8.271  -6.398  1.00 38.49           H  
ATOM   1107 HG13 ILE L  75      14.159  -8.136  -5.212  1.00 38.49           H  
ATOM   1108 HG21 ILE L  75      14.575  -8.151  -8.898  1.00 38.49           H  
ATOM   1109 HG22 ILE L  75      13.316  -9.358  -8.635  1.00 38.49           H  
ATOM   1110 HG23 ILE L  75      14.962  -9.870  -9.016  1.00 38.49           H  
ATOM   1111 HD11 ILE L  75      13.953  -6.590  -7.790  1.00 38.49           H  
ATOM   1112 HD12 ILE L  75      15.249  -6.445  -6.604  1.00 38.49           H  
ATOM   1113 HD13 ILE L  75      13.603  -5.969  -6.179  1.00 38.49           H  
ATOM   1114  N   SER L  76      14.724 -12.633  -7.584  1.00 31.34           N  
ATOM   1115  CA  SER L  76      15.479 -13.708  -8.164  1.00 75.23           C  
ATOM   1116  C   SER L  76      16.050 -13.350  -9.536  1.00 41.53           C  
ATOM   1117  O   SER L  76      17.216 -13.619  -9.814  1.00 15.25           O  
ATOM   1118  CB  SER L  76      14.580 -14.926  -8.253  1.00 64.14           C  
ATOM   1119  OG  SER L  76      14.062 -15.253  -6.957  1.00 22.40           O  
ATOM   1120  H   SER L  76      13.744 -12.687  -7.551  1.00 38.49           H  
ATOM   1121  HA  SER L  76      16.293 -13.950  -7.498  1.00 31.13           H  
ATOM   1122  HB2 SER L  76      13.755 -14.710  -8.917  1.00 38.49           H  
ATOM   1123  HB3 SER L  76      15.142 -15.766  -8.629  1.00 38.49           H  
ATOM   1124  HG  SER L  76      14.371 -14.575  -6.344  1.00 62.42           H  
ATOM   1125  N   SER L  77      15.264 -12.738 -10.373  1.00 24.54           N  
ATOM   1126  CA  SER L  77      15.761 -12.338 -11.643  1.00 30.31           C  
ATOM   1127  C   SER L  77      15.732 -10.823 -11.824  1.00 53.42           C  
ATOM   1128  O   SER L  77      14.798 -10.279 -12.403  1.00  3.23           O  
ATOM   1129  CB  SER L  77      15.124 -13.133 -12.792  1.00 24.03           C  
ATOM   1130  OG  SER L  77      13.711 -13.113 -12.706  1.00 35.44           O  
ATOM   1131  H   SER L  77      14.331 -12.536 -10.162  1.00 38.49           H  
ATOM   1132  HA  SER L  77      16.791 -12.636 -11.563  1.00  1.04           H  
ATOM   1133  HB2 SER L  77      15.421 -12.699 -13.736  1.00 38.49           H  
ATOM   1134  HB3 SER L  77      15.461 -14.159 -12.750  1.00 38.49           H  
ATOM   1135  HG  SER L  77      13.351 -13.897 -13.140  1.00 63.42           H  
ATOM   1136  N   LEU L  78      16.733 -10.149 -11.269  1.00  2.04           N  
ATOM   1137  CA  LEU L  78      16.794  -8.686 -11.300  1.00  1.03           C  
ATOM   1138  C   LEU L  78      16.914  -8.155 -12.723  1.00 32.21           C  
ATOM   1139  O   LEU L  78      17.837  -8.534 -13.458  1.00 73.41           O  
ATOM   1140  CB  LEU L  78      17.982  -8.196 -10.473  1.00 60.41           C  
ATOM   1141  CG  LEU L  78      18.144  -6.679 -10.373  1.00 71.35           C  
ATOM   1142  CD1 LEU L  78      16.931  -6.057  -9.712  1.00 64.22           C  
ATOM   1143  CD2 LEU L  78      19.396  -6.334  -9.607  1.00 52.11           C  
ATOM   1144  H   LEU L  78      17.452 -10.636 -10.813  1.00 38.49           H  
ATOM   1145  HA  LEU L  78      15.888  -8.307 -10.853  1.00 51.34           H  
ATOM   1146  HB2 LEU L  78      17.911  -8.606  -9.478  1.00 38.49           H  
ATOM   1147  HB3 LEU L  78      18.879  -8.592 -10.929  1.00 38.49           H  
ATOM   1148  HG  LEU L  78      18.229  -6.267 -11.368  1.00 21.00           H  
ATOM   1149 HD11 LEU L  78      17.057  -4.986  -9.659  1.00 38.49           H  
ATOM   1150 HD12 LEU L  78      16.817  -6.458  -8.716  1.00 38.49           H  
ATOM   1151 HD13 LEU L  78      16.051  -6.287 -10.294  1.00 38.49           H  
ATOM   1152 HD21 LEU L  78      20.254  -6.776 -10.090  1.00 38.49           H  
ATOM   1153 HD22 LEU L  78      19.305  -6.736  -8.609  1.00 38.49           H  
ATOM   1154 HD23 LEU L  78      19.519  -5.261  -9.559  1.00 38.49           H  
ATOM   1155  N   GLN L  79      15.986  -7.289 -13.099  1.00 10.43           N  
ATOM   1156  CA  GLN L  79      15.968  -6.646 -14.401  1.00 33.11           C  
ATOM   1157  C   GLN L  79      16.133  -5.133 -14.245  1.00 74.30           C  
ATOM   1158  O   GLN L  79      15.852  -4.589 -13.184  1.00 40.31           O  
ATOM   1159  CB  GLN L  79      14.650  -6.936 -15.145  1.00 24.25           C  
ATOM   1160  CG  GLN L  79      14.402  -8.395 -15.483  1.00 41.42           C  
ATOM   1161  CD  GLN L  79      15.497  -9.001 -16.345  1.00 51.22           C  
ATOM   1162  OE1 GLN L  79      15.447  -8.947 -17.574  1.00 24.42           O  
ATOM   1163  NE2 GLN L  79      16.479  -9.578 -15.719  1.00  3.31           N  
ATOM   1164  H   GLN L  79      15.247  -7.051 -12.482  1.00 38.49           H  
ATOM   1165  HA  GLN L  79      16.791  -7.042 -14.977  1.00 50.13           H  
ATOM   1166  HB2 GLN L  79      13.829  -6.598 -14.528  1.00 38.49           H  
ATOM   1167  HB3 GLN L  79      14.642  -6.368 -16.064  1.00 38.49           H  
ATOM   1168  HG2 GLN L  79      14.351  -8.952 -14.559  1.00 38.49           H  
ATOM   1169  HG3 GLN L  79      13.462  -8.479 -16.005  1.00 38.49           H  
ATOM   1170 HE21 GLN L  79      16.466  -9.580 -14.738  1.00 38.49           H  
ATOM   1171 HE22 GLN L  79      17.196 -10.016 -16.226  1.00 38.49           H  
ATOM   1172  N   PRO L  80      16.612  -4.434 -15.302  1.00 52.42           N  
ATOM   1173  CA  PRO L  80      16.767  -2.959 -15.307  1.00 21.12           C  
ATOM   1174  C   PRO L  80      15.505  -2.206 -14.863  1.00 60.54           C  
ATOM   1175  O   PRO L  80      15.587  -1.142 -14.265  1.00 63.43           O  
ATOM   1176  CB  PRO L  80      17.073  -2.656 -16.767  1.00 12.54           C  
ATOM   1177  CG  PRO L  80      17.768  -3.875 -17.243  1.00 41.11           C  
ATOM   1178  CD  PRO L  80      17.084  -5.024 -16.571  1.00 11.53           C  
ATOM   1179  HA  PRO L  80      17.596  -2.641 -14.692  1.00 11.35           H  
ATOM   1180  HB2 PRO L  80      16.150  -2.482 -17.303  1.00 38.49           H  
ATOM   1181  HB3 PRO L  80      17.709  -1.787 -16.838  1.00 38.49           H  
ATOM   1182  HG2 PRO L  80      17.682  -3.962 -18.316  1.00 38.49           H  
ATOM   1183  HG3 PRO L  80      18.807  -3.838 -16.951  1.00 38.49           H  
ATOM   1184  HD2 PRO L  80      16.261  -5.383 -17.169  1.00 38.49           H  
ATOM   1185  HD3 PRO L  80      17.792  -5.818 -16.383  1.00 38.49           H  
ATOM   1186  N   GLU L  81      14.347  -2.772 -15.146  1.00 54.51           N  
ATOM   1187  CA  GLU L  81      13.074  -2.146 -14.792  1.00 50.01           C  
ATOM   1188  C   GLU L  81      12.754  -2.278 -13.292  1.00 71.45           C  
ATOM   1189  O   GLU L  81      11.748  -1.725 -12.804  1.00 33.14           O  
ATOM   1190  CB  GLU L  81      11.941  -2.739 -15.618  1.00  1.13           C  
ATOM   1191  CG  GLU L  81      11.820  -4.243 -15.499  1.00 42.33           C  
ATOM   1192  CD  GLU L  81      10.620  -4.789 -16.220  1.00  1.12           C  
ATOM   1193  OE1 GLU L  81      10.695  -5.014 -17.438  1.00 71.34           O  
ATOM   1194  OE2 GLU L  81       9.578  -5.017 -15.566  1.00 75.40           O  
ATOM   1195  H   GLU L  81      14.353  -3.639 -15.603  1.00 38.49           H  
ATOM   1196  HA  GLU L  81      13.155  -1.095 -15.030  1.00  0.44           H  
ATOM   1197  HB2 GLU L  81      11.009  -2.302 -15.291  1.00 38.49           H  
ATOM   1198  HB3 GLU L  81      12.105  -2.494 -16.656  1.00 38.49           H  
ATOM   1199  HG2 GLU L  81      12.706  -4.697 -15.916  1.00 38.49           H  
ATOM   1200  HG3 GLU L  81      11.744  -4.505 -14.454  1.00 38.49           H  
ATOM   1201  N   ASP L  82      13.592  -3.005 -12.566  1.00 73.13           N  
ATOM   1202  CA  ASP L  82      13.381  -3.210 -11.137  1.00 70.30           C  
ATOM   1203  C   ASP L  82      14.164  -2.204 -10.336  1.00 54.02           C  
ATOM   1204  O   ASP L  82      14.227  -2.289  -9.110  1.00 73.42           O  
ATOM   1205  CB  ASP L  82      13.767  -4.624 -10.691  1.00 25.11           C  
ATOM   1206  CG  ASP L  82      12.996  -5.704 -11.392  1.00 42.43           C  
ATOM   1207  OD1 ASP L  82      11.741  -5.642 -11.415  1.00 33.23           O  
ATOM   1208  OD2 ASP L  82      13.616  -6.638 -11.910  1.00 23.15           O  
ATOM   1209  H   ASP L  82      14.378  -3.429 -12.977  1.00 38.49           H  
ATOM   1210  HA  ASP L  82      12.332  -3.057 -10.937  1.00  1.51           H  
ATOM   1211  HB2 ASP L  82      14.814  -4.772 -10.906  1.00 38.49           H  
ATOM   1212  HB3 ASP L  82      13.612  -4.716  -9.627  1.00 38.49           H  
ATOM   1213  N   ILE L  83      14.767  -1.249 -11.020  1.00 33.02           N  
ATOM   1214  CA  ILE L  83      15.486  -0.197 -10.342  1.00 20.23           C  
ATOM   1215  C   ILE L  83      14.489   0.764  -9.732  1.00 30.53           C  
ATOM   1216  O   ILE L  83      13.909   1.614 -10.425  1.00 74.34           O  
ATOM   1217  CB  ILE L  83      16.477   0.570 -11.272  1.00 53.41           C  
ATOM   1218  CG1 ILE L  83      17.512  -0.394 -11.862  1.00  1.33           C  
ATOM   1219  CG2 ILE L  83      17.185   1.689 -10.499  1.00 31.50           C  
ATOM   1220  CD1 ILE L  83      18.328  -1.099 -10.827  1.00 10.03           C  
ATOM   1221  H   ILE L  83      14.715  -1.260 -11.997  1.00 38.49           H  
ATOM   1222  HA  ILE L  83      16.035  -0.656  -9.533  1.00  1.52           H  
ATOM   1223  HB  ILE L  83      15.911   1.016 -12.075  1.00 52.43           H  
ATOM   1224 HG12 ILE L  83      16.998  -1.157 -12.427  1.00 38.49           H  
ATOM   1225 HG13 ILE L  83      18.202   0.115 -12.520  1.00 38.49           H  
ATOM   1226 HG21 ILE L  83      17.730   1.250  -9.675  1.00 38.49           H  
ATOM   1227 HG22 ILE L  83      16.453   2.380 -10.112  1.00 38.49           H  
ATOM   1228 HG23 ILE L  83      17.873   2.206 -11.152  1.00 38.49           H  
ATOM   1229 HD11 ILE L  83      18.771  -0.381 -10.154  1.00 38.49           H  
ATOM   1230 HD12 ILE L  83      19.103  -1.647 -11.335  1.00 38.49           H  
ATOM   1231 HD13 ILE L  83      17.700  -1.786 -10.280  1.00 38.49           H  
ATOM   1232  N   ALA L  84      14.245   0.574  -8.467  1.00 65.41           N  
ATOM   1233  CA  ALA L  84      13.327   1.366  -7.715  1.00  2.31           C  
ATOM   1234  C   ALA L  84      13.589   1.131  -6.255  1.00 22.24           C  
ATOM   1235  O   ALA L  84      14.383   0.257  -5.900  1.00 11.31           O  
ATOM   1236  CB  ALA L  84      11.904   0.983  -8.061  1.00 43.35           C  
ATOM   1237  H   ALA L  84      14.701  -0.149  -7.982  1.00 38.49           H  
ATOM   1238  HA  ALA L  84      13.482   2.406  -7.960  1.00 54.11           H  
ATOM   1239  HB1 ALA L  84      11.733   1.148  -9.115  1.00 38.49           H  
ATOM   1240  HB2 ALA L  84      11.215   1.582  -7.483  1.00 38.49           H  
ATOM   1241  HB3 ALA L  84      11.761  -0.062  -7.834  1.00 38.49           H  
ATOM   1242  N   THR L  85      12.943   1.881  -5.422  1.00 72.00           N  
ATOM   1243  CA  THR L  85      13.139   1.767  -4.015  1.00 15.13           C  
ATOM   1244  C   THR L  85      12.102   0.794  -3.412  1.00  2.22           C  
ATOM   1245  O   THR L  85      10.893   0.939  -3.637  1.00 44.24           O  
ATOM   1246  CB  THR L  85      13.012   3.157  -3.385  1.00 12.55           C  
ATOM   1247  OG1 THR L  85      13.885   4.059  -4.100  1.00 11.13           O  
ATOM   1248  CG2 THR L  85      13.414   3.136  -1.919  1.00 33.43           C  
ATOM   1249  H   THR L  85      12.305   2.548  -5.764  1.00 38.49           H  
ATOM   1250  HA  THR L  85      14.136   1.394  -3.834  1.00 73.41           H  
ATOM   1251  HB  THR L  85      11.990   3.488  -3.481  1.00 42.33           H  
ATOM   1252  HG1 THR L  85      14.513   3.522  -4.602  1.00 74.12           H  
ATOM   1253 HG21 THR L  85      13.318   4.129  -1.507  1.00 38.49           H  
ATOM   1254 HG22 THR L  85      14.440   2.810  -1.832  1.00 38.49           H  
ATOM   1255 HG23 THR L  85      12.774   2.455  -1.378  1.00 38.49           H  
ATOM   1256  N   TYR L  86      12.579  -0.171  -2.647  1.00 51.12           N  
ATOM   1257  CA  TYR L  86      11.730  -1.198  -2.044  1.00 73.33           C  
ATOM   1258  C   TYR L  86      11.476  -0.928  -0.594  1.00 63.04           C  
ATOM   1259  O   TYR L  86      12.312  -0.386   0.105  1.00  3.14           O  
ATOM   1260  CB  TYR L  86      12.302  -2.592  -2.285  1.00 31.21           C  
ATOM   1261  CG  TYR L  86      12.269  -2.947  -3.746  1.00  2.11           C  
ATOM   1262  CD1 TYR L  86      13.328  -2.639  -4.586  1.00 64.12           C  
ATOM   1263  CD2 TYR L  86      11.152  -3.554  -4.295  1.00 43.45           C  
ATOM   1264  CE1 TYR L  86      13.270  -2.926  -5.931  1.00  3.31           C  
ATOM   1265  CE2 TYR L  86      11.091  -3.852  -5.632  1.00 43.23           C  
ATOM   1266  CZ  TYR L  86      12.149  -3.532  -6.447  1.00 74.31           C  
ATOM   1267  OH  TYR L  86      12.081  -3.809  -7.782  1.00 74.42           O  
ATOM   1268  H   TYR L  86      13.551  -0.196  -2.499  1.00 38.49           H  
ATOM   1269  HA  TYR L  86      10.752  -1.155  -2.495  1.00  0.21           H  
ATOM   1270  HB2 TYR L  86      13.327  -2.625  -1.948  1.00 38.49           H  
ATOM   1271  HB3 TYR L  86      11.716  -3.323  -1.749  1.00 38.49           H  
ATOM   1272  HD1 TYR L  86      14.206  -2.164  -4.174  1.00  1.44           H  
ATOM   1273  HD2 TYR L  86      10.322  -3.802  -3.651  1.00 43.14           H  
ATOM   1274  HE1 TYR L  86      14.104  -2.680  -6.572  1.00 62.22           H  
ATOM   1275  HE2 TYR L  86      10.213  -4.327  -6.044  1.00 44.12           H  
ATOM   1276  HH  TYR L  86      12.947  -4.120  -8.066  1.00 45.13           H  
ATOM   1277  N   HIS L  87      10.286  -1.252  -0.153  1.00 21.52           N  
ATOM   1278  CA  HIS L  87       9.867  -0.924   1.188  1.00 74.31           C  
ATOM   1279  C   HIS L  87       9.118  -2.076   1.783  1.00 43.42           C  
ATOM   1280  O   HIS L  87       8.333  -2.719   1.095  1.00 14.02           O  
ATOM   1281  CB  HIS L  87       8.877   0.249   1.180  1.00  3.05           C  
ATOM   1282  CG  HIS L  87       9.258   1.464   0.388  1.00 13.51           C  
ATOM   1283  ND1 HIS L  87       9.649   2.650   0.958  1.00 62.34           N  
ATOM   1284  CD2 HIS L  87       9.197   1.699  -0.948  1.00 75.10           C  
ATOM   1285  CE1 HIS L  87       9.794   3.545   0.014  1.00 74.53           C  
ATOM   1286  NE2 HIS L  87       9.534   2.999  -1.139  1.00 31.32           N  
ATOM   1287  H   HIS L  87       9.683  -1.741  -0.756  1.00 38.49           H  
ATOM   1288  HA  HIS L  87      10.711  -0.649   1.800  1.00  0.21           H  
ATOM   1289  HB2 HIS L  87       7.933  -0.097   0.794  1.00 38.49           H  
ATOM   1290  HB3 HIS L  87       8.723   0.556   2.205  1.00 38.49           H  
ATOM   1291  HD1 HIS L  87       9.844   2.845   1.902  1.00 24.14           H  
ATOM   1292  HD2 HIS L  87       8.930   0.984  -1.713  1.00 42.20           H  
ATOM   1293  HE1 HIS L  87      10.039   4.580   0.142  1.00 20.54           H  
ATOM   1294  HE2 HIS L  87       9.837   3.422  -1.975  1.00 38.49           H  
ATOM   1295  N   CYS L  88       9.346  -2.325   3.030  1.00  5.42           N  
ATOM   1296  CA  CYS L  88       8.574  -3.289   3.769  1.00 22.30           C  
ATOM   1297  C   CYS L  88       7.569  -2.512   4.610  1.00 44.23           C  
ATOM   1298  O   CYS L  88       7.910  -1.447   5.130  1.00  0.32           O  
ATOM   1299  CB  CYS L  88       9.506  -4.109   4.672  1.00 23.32           C  
ATOM   1300  SG  CYS L  88      10.508  -3.098   5.811  1.00 52.51           S  
ATOM   1301  H   CYS L  88      10.067  -1.866   3.509  1.00 38.49           H  
ATOM   1302  HA  CYS L  88       8.059  -3.938   3.077  1.00 73.22           H  
ATOM   1303  HB2 CYS L  88       8.928  -4.789   5.276  1.00 38.49           H  
ATOM   1304  HB3 CYS L  88      10.188  -4.672   4.053  1.00 38.49           H  
ATOM   1305  N   GLN L  89       6.346  -2.976   4.696  1.00 71.20           N  
ATOM   1306  CA  GLN L  89       5.354  -2.310   5.516  1.00 34.13           C  
ATOM   1307  C   GLN L  89       4.531  -3.347   6.244  1.00  3.23           C  
ATOM   1308  O   GLN L  89       4.280  -4.432   5.708  1.00 63.32           O  
ATOM   1309  CB  GLN L  89       4.475  -1.335   4.680  1.00 71.22           C  
ATOM   1310  CG  GLN L  89       3.447  -1.938   3.723  1.00 23.30           C  
ATOM   1311  CD  GLN L  89       2.109  -2.328   4.373  1.00 34.31           C  
ATOM   1312  OE1 GLN L  89       1.906  -3.444   4.828  1.00  4.01           O  
ATOM   1313  NE2 GLN L  89       1.195  -1.397   4.408  1.00 54.55           N  
ATOM   1314  H   GLN L  89       6.060  -3.776   4.197  1.00 38.49           H  
ATOM   1315  HA  GLN L  89       5.918  -1.734   6.239  1.00 65.34           H  
ATOM   1316  HB2 GLN L  89       3.938  -0.686   5.354  1.00 38.49           H  
ATOM   1317  HB3 GLN L  89       5.150  -0.725   4.097  1.00 38.49           H  
ATOM   1318  HG2 GLN L  89       3.251  -1.242   2.927  1.00 38.49           H  
ATOM   1319  HG3 GLN L  89       3.896  -2.817   3.292  1.00 38.49           H  
ATOM   1320 HE21 GLN L  89       1.402  -0.522   4.024  1.00 38.49           H  
ATOM   1321 HE22 GLN L  89       0.343  -1.634   4.825  1.00 38.49           H  
ATOM   1322  N   GLN L  90       4.182  -3.065   7.454  1.00 65.33           N  
ATOM   1323  CA  GLN L  90       3.378  -3.970   8.243  1.00 14.02           C  
ATOM   1324  C   GLN L  90       1.896  -3.652   8.154  1.00 63.43           C  
ATOM   1325  O   GLN L  90       1.525  -2.515   7.968  1.00 73.21           O  
ATOM   1326  CB  GLN L  90       3.861  -4.022   9.703  1.00  1.50           C  
ATOM   1327  CG  GLN L  90       4.325  -2.686  10.336  1.00  3.50           C  
ATOM   1328  CD  GLN L  90       3.318  -1.554  10.310  1.00 71.12           C  
ATOM   1329  OE1 GLN L  90       3.284  -0.799   9.384  1.00 61.00           O  
ATOM   1330  NE2 GLN L  90       2.536  -1.410  11.346  1.00  2.42           N  
ATOM   1331  H   GLN L  90       4.437  -2.198   7.835  1.00 38.49           H  
ATOM   1332  HA  GLN L  90       3.517  -4.951   7.812  1.00 74.43           H  
ATOM   1333  HB2 GLN L  90       3.053  -4.412  10.304  1.00 38.49           H  
ATOM   1334  HB3 GLN L  90       4.686  -4.717   9.742  1.00 38.49           H  
ATOM   1335  HG2 GLN L  90       4.582  -2.890  11.364  1.00 38.49           H  
ATOM   1336  HG3 GLN L  90       5.223  -2.372   9.822  1.00 38.49           H  
ATOM   1337 HE21 GLN L  90       2.641  -2.025  12.093  1.00 38.49           H  
ATOM   1338 HE22 GLN L  90       1.859  -0.698  11.323  1.00 38.49           H  
ATOM   1339  N   TYR L  91       1.041  -4.666   8.263  1.00 31.24           N  
ATOM   1340  CA  TYR L  91      -0.384  -4.384   8.274  1.00 55.20           C  
ATOM   1341  C   TYR L  91      -1.095  -5.024   9.462  1.00 12.04           C  
ATOM   1342  O   TYR L  91      -2.312  -5.215   9.461  1.00 22.42           O  
ATOM   1343  CB  TYR L  91      -1.090  -4.647   6.921  1.00 63.20           C  
ATOM   1344  CG  TYR L  91      -1.206  -6.071   6.433  1.00 34.34           C  
ATOM   1345  CD1 TYR L  91      -0.207  -6.654   5.704  1.00 22.02           C  
ATOM   1346  CD2 TYR L  91      -2.360  -6.803   6.666  1.00 22.22           C  
ATOM   1347  CE1 TYR L  91      -0.332  -7.936   5.216  1.00 32.43           C  
ATOM   1348  CE2 TYR L  91      -2.509  -8.078   6.183  1.00 33.44           C  
ATOM   1349  CZ  TYR L  91      -1.498  -8.651   5.458  1.00 24.32           C  
ATOM   1350  OH  TYR L  91      -1.669  -9.931   4.961  1.00 62.13           O  
ATOM   1351  H   TYR L  91       1.378  -5.587   8.310  1.00 38.49           H  
ATOM   1352  HA  TYR L  91      -0.425  -3.323   8.477  1.00 13.44           H  
ATOM   1353  HB2 TYR L  91      -2.098  -4.266   6.986  1.00 38.49           H  
ATOM   1354  HB3 TYR L  91      -0.570  -4.075   6.165  1.00 38.49           H  
ATOM   1355  HD1 TYR L  91       0.699  -6.095   5.516  1.00 31.33           H  
ATOM   1356  HD2 TYR L  91      -3.154  -6.351   7.237  1.00 43.13           H  
ATOM   1357  HE1 TYR L  91       0.505  -8.323   4.650  1.00 70.13           H  
ATOM   1358  HE2 TYR L  91      -3.418  -8.627   6.379  1.00 31.55           H  
ATOM   1359  HH  TYR L  91      -0.914 -10.529   5.084  1.00 50.31           H  
ATOM   1360  N   ASP L  92      -0.333  -5.282  10.499  1.00 12.44           N  
ATOM   1361  CA  ASP L  92      -0.880  -5.828  11.740  1.00 43.14           C  
ATOM   1362  C   ASP L  92      -1.540  -4.732  12.606  1.00 63.25           C  
ATOM   1363  O   ASP L  92      -2.590  -4.953  13.226  1.00 14.32           O  
ATOM   1364  CB  ASP L  92       0.208  -6.596  12.538  1.00 33.32           C  
ATOM   1365  CG  ASP L  92      -0.241  -6.976  13.937  1.00 13.42           C  
ATOM   1366  OD1 ASP L  92      -0.931  -7.995  14.089  1.00 40.21           O  
ATOM   1367  OD2 ASP L  92       0.084  -6.253  14.895  1.00 31.35           O  
ATOM   1368  H   ASP L  92       0.624  -5.096  10.422  1.00 38.49           H  
ATOM   1369  HA  ASP L  92      -1.654  -6.526  11.455  1.00 41.42           H  
ATOM   1370  HB2 ASP L  92       0.380  -7.525  12.012  1.00 38.49           H  
ATOM   1371  HB3 ASP L  92       1.157  -6.085  12.596  1.00 38.49           H  
ATOM   1372  N   ASN L  93      -0.952  -3.554  12.609  1.00 71.44           N  
ATOM   1373  CA  ASN L  93      -1.420  -2.440  13.443  1.00 61.24           C  
ATOM   1374  C   ASN L  93      -1.207  -1.110  12.743  1.00 53.12           C  
ATOM   1375  O   ASN L  93      -0.187  -0.917  12.072  1.00 54.53           O  
ATOM   1376  CB  ASN L  93      -0.655  -2.466  14.789  1.00 15.11           C  
ATOM   1377  CG  ASN L  93      -0.789  -1.200  15.628  1.00 63.12           C  
ATOM   1378  OD1 ASN L  93       0.034  -0.286  15.514  1.00 24.34           O  
ATOM   1379  ND2 ASN L  93      -1.789  -1.134  16.464  1.00 23.50           N  
ATOM   1380  H   ASN L  93      -0.184  -3.391  12.026  1.00 38.49           H  
ATOM   1381  HA  ASN L  93      -2.471  -2.579  13.644  1.00 44.43           H  
ATOM   1382  HB2 ASN L  93      -1.004  -3.296  15.385  1.00 38.49           H  
ATOM   1383  HB3 ASN L  93       0.389  -2.615  14.566  1.00 38.49           H  
ATOM   1384 HD21 ASN L  93      -2.425  -1.878  16.532  1.00 38.49           H  
ATOM   1385 HD22 ASN L  93      -1.846  -0.315  17.003  1.00 38.49           H  
ATOM   1386  N   LEU L  94      -2.166  -0.204  12.881  1.00  2.24           N  
ATOM   1387  CA  LEU L  94      -2.035   1.126  12.316  1.00 44.42           C  
ATOM   1388  C   LEU L  94      -1.438   2.133  13.304  1.00 13.02           C  
ATOM   1389  O   LEU L  94      -1.535   1.957  14.515  1.00 13.23           O  
ATOM   1390  CB  LEU L  94      -3.350   1.701  11.729  1.00 42.10           C  
ATOM   1391  CG  LEU L  94      -3.836   1.147  10.407  1.00 61.01           C  
ATOM   1392  CD1 LEU L  94      -4.543  -0.171  10.552  1.00 72.33           C  
ATOM   1393  CD2 LEU L  94      -4.673   2.165   9.680  1.00 30.11           C  
ATOM   1394  H   LEU L  94      -2.987  -0.429  13.368  1.00 38.49           H  
ATOM   1395  HA  LEU L  94      -1.328   0.990  11.512  1.00 38.49           H  
ATOM   1396  HB2 LEU L  94      -4.132   1.489  12.443  1.00 38.49           H  
ATOM   1397  HB3 LEU L  94      -3.275   2.774  11.639  1.00 38.49           H  
ATOM   1398  HG  LEU L  94      -2.963   0.956   9.802  1.00 42.44           H  
ATOM   1399 HD11 LEU L  94      -4.815  -0.475   9.547  1.00 38.49           H  
ATOM   1400 HD12 LEU L  94      -5.424  -0.063  11.165  1.00 38.49           H  
ATOM   1401 HD13 LEU L  94      -3.865  -0.901  10.967  1.00 38.49           H  
ATOM   1402 HD21 LEU L  94      -5.517   2.447  10.292  1.00 38.49           H  
ATOM   1403 HD22 LEU L  94      -5.026   1.745   8.750  1.00 38.49           H  
ATOM   1404 HD23 LEU L  94      -4.073   3.038   9.472  1.00 38.49           H  
ATOM   1405  N   PRO L  95      -0.821   3.216  12.786  1.00 12.44           N  
ATOM   1406  CA  PRO L  95      -0.667   3.435  11.346  1.00 63.01           C  
ATOM   1407  C   PRO L  95       0.379   2.518  10.741  1.00  3.15           C  
ATOM   1408  O   PRO L  95       1.369   2.149  11.403  1.00 15.05           O  
ATOM   1409  CB  PRO L  95      -0.230   4.898  11.241  1.00 22.50           C  
ATOM   1410  CG  PRO L  95       0.436   5.183  12.538  1.00 73.33           C  
ATOM   1411  CD  PRO L  95      -0.257   4.324  13.567  1.00 42.42           C  
ATOM   1412  HA  PRO L  95      -1.595   3.289  10.813  1.00  3.42           H  
ATOM   1413  HB2 PRO L  95       0.450   5.012  10.411  1.00 38.49           H  
ATOM   1414  HB3 PRO L  95      -1.095   5.527  11.098  1.00 38.49           H  
ATOM   1415  HG2 PRO L  95       1.482   4.923  12.469  1.00 38.49           H  
ATOM   1416  HG3 PRO L  95       0.329   6.229  12.785  1.00 38.49           H  
ATOM   1417  HD2 PRO L  95       0.450   3.954  14.293  1.00 38.49           H  
ATOM   1418  HD3 PRO L  95      -1.040   4.885  14.055  1.00 38.49           H  
ATOM   1419  N   TYR L  96       0.143   2.116   9.517  1.00 54.55           N  
ATOM   1420  CA  TYR L  96       1.083   1.293   8.817  1.00 70.22           C  
ATOM   1421  C   TYR L  96       2.219   2.176   8.389  1.00 31.45           C  
ATOM   1422  O   TYR L  96       1.984   3.271   7.879  1.00 11.31           O  
ATOM   1423  CB  TYR L  96       0.462   0.643   7.573  1.00 35.10           C  
ATOM   1424  CG  TYR L  96      -0.770  -0.215   7.798  1.00 20.11           C  
ATOM   1425  CD1 TYR L  96      -0.902  -1.021   8.913  1.00 22.12           C  
ATOM   1426  CD2 TYR L  96      -1.799  -0.223   6.868  1.00 23.31           C  
ATOM   1427  CE1 TYR L  96      -2.021  -1.806   9.087  1.00 53.31           C  
ATOM   1428  CE2 TYR L  96      -2.909  -1.002   7.031  1.00 35.35           C  
ATOM   1429  CZ  TYR L  96      -3.021  -1.791   8.134  1.00 31.24           C  
ATOM   1430  OH  TYR L  96      -4.133  -2.578   8.287  1.00 53.13           O  
ATOM   1431  H   TYR L  96      -0.676   2.391   9.060  1.00 38.49           H  
ATOM   1432  HA  TYR L  96       1.447   0.528   9.486  1.00 13.23           H  
ATOM   1433  HB2 TYR L  96       0.177   1.425   6.885  1.00 38.49           H  
ATOM   1434  HB3 TYR L  96       1.213   0.029   7.097  1.00 38.49           H  
ATOM   1435  HD1 TYR L  96      -0.120  -1.031   9.658  1.00 63.53           H  
ATOM   1436  HD2 TYR L  96      -1.732   0.396   5.987  1.00 34.22           H  
ATOM   1437  HE1 TYR L  96      -2.105  -2.433   9.963  1.00 14.25           H  
ATOM   1438  HE2 TYR L  96      -3.693  -0.986   6.289  1.00 74.45           H  
ATOM   1439  HH  TYR L  96      -4.415  -2.579   9.207  1.00 11.11           H  
ATOM   1440  N   THR L  97       3.418   1.747   8.617  1.00 53.20           N  
ATOM   1441  CA  THR L  97       4.547   2.531   8.242  1.00 21.42           C  
ATOM   1442  C   THR L  97       5.451   1.689   7.366  1.00 12.12           C  
ATOM   1443  O   THR L  97       5.292   0.465   7.285  1.00  5.24           O  
ATOM   1444  CB  THR L  97       5.348   3.067   9.478  1.00 53.12           C  
ATOM   1445  OG1 THR L  97       6.045   2.000  10.137  1.00 45.13           O  
ATOM   1446  CG2 THR L  97       4.411   3.714  10.491  1.00 61.31           C  
ATOM   1447  H   THR L  97       3.540   0.854   9.019  1.00 38.49           H  
ATOM   1448  HA  THR L  97       4.186   3.371   7.666  1.00 54.42           H  
ATOM   1449  HB  THR L  97       6.060   3.807   9.144  1.00 74.34           H  
ATOM   1450  HG1 THR L  97       5.437   1.320  10.450  1.00 50.24           H  
ATOM   1451 HG21 THR L  97       3.847   4.508  10.024  1.00 38.49           H  
ATOM   1452 HG22 THR L  97       4.978   4.097  11.326  1.00 38.49           H  
ATOM   1453 HG23 THR L  97       3.733   2.951  10.851  1.00 38.49           H  
ATOM   1454  N   PHE L  98       6.384   2.319   6.728  1.00  1.15           N  
ATOM   1455  CA  PHE L  98       7.300   1.635   5.854  1.00 43.42           C  
ATOM   1456  C   PHE L  98       8.659   1.613   6.483  1.00 21.13           C  
ATOM   1457  O   PHE L  98       9.018   2.529   7.210  1.00 43.13           O  
ATOM   1458  CB  PHE L  98       7.386   2.342   4.498  1.00 31.15           C  
ATOM   1459  CG  PHE L  98       6.180   2.221   3.590  1.00 21.11           C  
ATOM   1460  CD1 PHE L  98       4.889   2.114   4.083  1.00 63.22           C  
ATOM   1461  CD2 PHE L  98       6.359   2.234   2.228  1.00 30.34           C  
ATOM   1462  CE1 PHE L  98       3.815   2.016   3.229  1.00 12.45           C  
ATOM   1463  CE2 PHE L  98       5.299   2.139   1.370  1.00  1.12           C  
ATOM   1464  CZ  PHE L  98       4.019   2.030   1.866  1.00 51.24           C  
ATOM   1465  H   PHE L  98       6.477   3.285   6.862  1.00 38.49           H  
ATOM   1466  HA  PHE L  98       6.948   0.626   5.701  1.00 72.41           H  
ATOM   1467  HB2 PHE L  98       7.512   3.391   4.705  1.00 38.49           H  
ATOM   1468  HB3 PHE L  98       8.255   1.981   3.969  1.00 38.49           H  
ATOM   1469  HD1 PHE L  98       4.733   2.104   5.151  1.00 63.12           H  
ATOM   1470  HD2 PHE L  98       7.360   2.318   1.831  1.00 23.31           H  
ATOM   1471  HE1 PHE L  98       2.816   1.928   3.629  1.00 63.21           H  
ATOM   1472  HE2 PHE L  98       5.497   2.162   0.307  1.00 43.11           H  
ATOM   1473  HZ  PHE L  98       3.180   1.953   1.189  1.00 72.13           H  
ATOM   1474  N   GLY L  99       9.400   0.577   6.222  1.00 21.45           N  
ATOM   1475  CA  GLY L  99      10.723   0.453   6.764  1.00 31.12           C  
ATOM   1476  C   GLY L  99      11.740   1.150   5.934  1.00 55.34           C  
ATOM   1477  O   GLY L  99      12.522   0.506   5.252  1.00 13.41           O  
ATOM   1478  H   GLY L  99       9.027  -0.141   5.662  1.00 38.49           H  
ATOM   1479  HA2 GLY L  99      10.738   0.874   7.759  1.00 38.49           H  
ATOM   1480  HA3 GLY L  99      10.980  -0.594   6.823  1.00 38.49           H  
ATOM   1481  N   GLN L 100      11.715   2.466   5.982  1.00 72.31           N  
ATOM   1482  CA  GLN L 100      12.615   3.330   5.233  1.00 30.55           C  
ATOM   1483  C   GLN L 100      12.456   3.102   3.721  1.00 74.34           C  
ATOM   1484  O   GLN L 100      11.543   3.632   3.087  1.00 54.32           O  
ATOM   1485  CB  GLN L 100      14.091   3.125   5.662  1.00 35.54           C  
ATOM   1486  CG  GLN L 100      15.084   4.087   5.019  1.00 53.51           C  
ATOM   1487  CD  GLN L 100      16.533   3.675   5.229  1.00 62.13           C  
ATOM   1488  OE1 GLN L 100      17.399   3.987   4.408  1.00 65.22           O  
ATOM   1489  NE2 GLN L 100      16.804   2.935   6.273  1.00  1.53           N  
ATOM   1490  H   GLN L 100      11.041   2.889   6.560  1.00 38.49           H  
ATOM   1491  HA  GLN L 100      12.331   4.350   5.442  1.00 43.33           H  
ATOM   1492  HB2 GLN L 100      14.151   3.258   6.732  1.00 38.49           H  
ATOM   1493  HB3 GLN L 100      14.389   2.114   5.425  1.00 38.49           H  
ATOM   1494  HG2 GLN L 100      14.890   4.115   3.957  1.00 38.49           H  
ATOM   1495  HG3 GLN L 100      14.936   5.071   5.440  1.00 38.49           H  
ATOM   1496 HE21 GLN L 100      16.077   2.669   6.879  1.00 38.49           H  
ATOM   1497 HE22 GLN L 100      17.729   2.645   6.429  1.00 38.49           H  
ATOM   1498  N   GLY L 101      13.267   2.231   3.190  1.00 11.45           N  
ATOM   1499  CA  GLY L 101      13.294   1.986   1.801  1.00 53.14           C  
ATOM   1500  C   GLY L 101      14.681   1.638   1.357  1.00 51.04           C  
ATOM   1501  O   GLY L 101      15.650   2.310   1.736  1.00 72.11           O  
ATOM   1502  H   GLY L 101      13.874   1.729   3.775  1.00 38.49           H  
ATOM   1503  HA2 GLY L 101      12.623   1.171   1.576  1.00 38.49           H  
ATOM   1504  HA3 GLY L 101      12.971   2.870   1.272  1.00 38.49           H  
ATOM   1505  N   THR L 102      14.785   0.612   0.583  1.00 72.10           N  
ATOM   1506  CA  THR L 102      16.036   0.180   0.074  1.00 45.12           C  
ATOM   1507  C   THR L 102      16.166   0.636  -1.356  1.00  1.12           C  
ATOM   1508  O   THR L 102      15.312   0.341  -2.200  1.00  0.43           O  
ATOM   1509  CB  THR L 102      16.144  -1.359   0.157  1.00 72.42           C  
ATOM   1510  OG1 THR L 102      16.046  -1.763   1.529  1.00 11.54           O  
ATOM   1511  CG2 THR L 102      17.455  -1.868  -0.436  1.00 54.51           C  
ATOM   1512  H   THR L 102      13.985   0.098   0.338  1.00 38.49           H  
ATOM   1513  HA  THR L 102      16.824   0.614   0.671  1.00 43.34           H  
ATOM   1514  HB  THR L 102      15.315  -1.775  -0.397  1.00  2.24           H  
ATOM   1515  HG1 THR L 102      16.832  -2.259   1.790  1.00 45.24           H  
ATOM   1516 HG21 THR L 102      17.530  -1.560  -1.469  1.00 38.49           H  
ATOM   1517 HG22 THR L 102      17.487  -2.946  -0.375  1.00 38.49           H  
ATOM   1518 HG23 THR L 102      18.280  -1.456   0.126  1.00 38.49           H  
ATOM   1519  N   LYS L 103      17.216   1.366  -1.615  1.00 74.41           N  
ATOM   1520  CA  LYS L 103      17.479   1.884  -2.923  1.00 64.45           C  
ATOM   1521  C   LYS L 103      18.300   0.831  -3.668  1.00 22.54           C  
ATOM   1522  O   LYS L 103      19.421   0.487  -3.257  1.00 31.15           O  
ATOM   1523  CB  LYS L 103      18.196   3.266  -2.783  1.00 21.30           C  
ATOM   1524  CG  LYS L 103      18.325   4.111  -4.060  1.00 64.22           C  
ATOM   1525  CD  LYS L 103      19.326   3.559  -5.047  1.00 32.13           C  
ATOM   1526  CE  LYS L 103      20.747   3.656  -4.515  1.00 71.53           C  
ATOM   1527  NZ  LYS L 103      21.154   5.059  -4.282  1.00 74.23           N  
ATOM   1528  H   LYS L 103      17.837   1.554  -0.878  1.00 38.49           H  
ATOM   1529  HA  LYS L 103      16.532   2.010  -3.426  1.00 75.51           H  
ATOM   1530  HB2 LYS L 103      17.634   3.860  -2.080  1.00 38.49           H  
ATOM   1531  HB3 LYS L 103      19.182   3.101  -2.378  1.00 38.49           H  
ATOM   1532  HG2 LYS L 103      17.361   4.164  -4.541  1.00 38.49           H  
ATOM   1533  HG3 LYS L 103      18.621   5.112  -3.777  1.00 38.49           H  
ATOM   1534  HD2 LYS L 103      19.081   2.519  -5.198  1.00 38.49           H  
ATOM   1535  HD3 LYS L 103      19.244   4.103  -5.976  1.00 38.49           H  
ATOM   1536  HE2 LYS L 103      20.826   3.103  -3.592  1.00 38.49           H  
ATOM   1537  HE3 LYS L 103      21.412   3.221  -5.246  1.00 38.49           H  
ATOM   1538  HZ1 LYS L 103      20.551   5.525  -3.576  1.00 38.49           H  
ATOM   1539  HZ2 LYS L 103      21.083   5.613  -5.161  1.00 38.49           H  
ATOM   1540  HZ3 LYS L 103      22.137   5.132  -3.954  1.00 38.49           H  
ATOM   1541  N   LEU L 104      17.727   0.309  -4.720  1.00 15.01           N  
ATOM   1542  CA  LEU L 104      18.302  -0.793  -5.455  1.00 52.32           C  
ATOM   1543  C   LEU L 104      18.984  -0.267  -6.714  1.00 22.22           C  
ATOM   1544  O   LEU L 104      18.445   0.613  -7.402  1.00 74.50           O  
ATOM   1545  CB  LEU L 104      17.151  -1.797  -5.792  1.00 63.21           C  
ATOM   1546  CG  LEU L 104      17.497  -3.201  -6.372  1.00 73.55           C  
ATOM   1547  CD1 LEU L 104      18.045  -3.140  -7.783  1.00  3.21           C  
ATOM   1548  CD2 LEU L 104      18.462  -3.936  -5.460  1.00 21.12           C  
ATOM   1549  H   LEU L 104      16.880   0.689  -5.041  1.00 38.49           H  
ATOM   1550  HA  LEU L 104      19.025  -1.292  -4.827  1.00 65.45           H  
ATOM   1551  HB2 LEU L 104      16.564  -1.944  -4.900  1.00 38.49           H  
ATOM   1552  HB3 LEU L 104      16.506  -1.301  -6.502  1.00 38.49           H  
ATOM   1553  HG  LEU L 104      16.586  -3.780  -6.416  1.00 72.44           H  
ATOM   1554 HD11 LEU L 104      18.285  -4.140  -8.114  1.00 38.49           H  
ATOM   1555 HD12 LEU L 104      18.934  -2.527  -7.801  1.00 38.49           H  
ATOM   1556 HD13 LEU L 104      17.295  -2.717  -8.433  1.00 38.49           H  
ATOM   1557 HD21 LEU L 104      18.664  -4.914  -5.873  1.00 38.49           H  
ATOM   1558 HD22 LEU L 104      18.017  -4.051  -4.482  1.00 38.49           H  
ATOM   1559 HD23 LEU L 104      19.384  -3.383  -5.379  1.00 38.49           H  
ATOM   1560  N   GLU L 105      20.173  -0.780  -6.994  1.00 40.21           N  
ATOM   1561  CA  GLU L 105      20.903  -0.415  -8.190  1.00 63.04           C  
ATOM   1562  C   GLU L 105      21.401  -1.640  -8.899  1.00 24.42           C  
ATOM   1563  O   GLU L 105      21.523  -2.711  -8.301  1.00 40.43           O  
ATOM   1564  CB  GLU L 105      22.115   0.455  -7.885  1.00 11.01           C  
ATOM   1565  CG  GLU L 105      21.803   1.717  -7.167  1.00 62.13           C  
ATOM   1566  CD  GLU L 105      22.990   2.634  -7.077  1.00  4.12           C  
ATOM   1567  OE1 GLU L 105      23.198   3.433  -8.012  1.00 63.11           O  
ATOM   1568  OE2 GLU L 105      23.730   2.587  -6.064  1.00 71.13           O  
ATOM   1569  H   GLU L 105      20.569  -1.435  -6.375  1.00 38.49           H  
ATOM   1570  HA  GLU L 105      20.236   0.142  -8.830  1.00 41.32           H  
ATOM   1571  HB2 GLU L 105      22.801  -0.113  -7.275  1.00 38.49           H  
ATOM   1572  HB3 GLU L 105      22.606   0.701  -8.815  1.00 38.49           H  
ATOM   1573  HG2 GLU L 105      20.981   2.212  -7.661  1.00 38.49           H  
ATOM   1574  HG3 GLU L 105      21.519   1.409  -6.172  1.00 38.49           H  
ATOM   1575  N   ILE L 106      21.690  -1.486 -10.155  1.00 40.00           N  
ATOM   1576  CA  ILE L 106      22.310  -2.524 -10.923  1.00 52.51           C  
ATOM   1577  C   ILE L 106      23.767  -2.193 -11.159  1.00 63.15           C  
ATOM   1578  O   ILE L 106      24.102  -1.169 -11.764  1.00 64.43           O  
ATOM   1579  CB  ILE L 106      21.545  -2.849 -12.250  1.00 52.11           C  
ATOM   1580  CG1 ILE L 106      20.323  -3.729 -11.942  1.00 12.12           C  
ATOM   1581  CG2 ILE L 106      22.451  -3.546 -13.275  1.00  4.23           C  
ATOM   1582  CD1 ILE L 106      19.410  -3.931 -13.113  1.00  3.04           C  
ATOM   1583  H   ILE L 106      21.490  -0.630 -10.596  1.00 38.49           H  
ATOM   1584  HA  ILE L 106      22.291  -3.400 -10.290  1.00 74.41           H  
ATOM   1585  HB  ILE L 106      21.189  -1.914 -12.664  1.00 53.23           H  
ATOM   1586 HG12 ILE L 106      20.687  -4.716 -11.690  1.00 38.49           H  
ATOM   1587 HG13 ILE L 106      19.751  -3.356 -11.108  1.00 38.49           H  
ATOM   1588 HG21 ILE L 106      21.891  -3.736 -14.179  1.00 38.49           H  
ATOM   1589 HG22 ILE L 106      22.795  -4.485 -12.866  1.00 38.49           H  
ATOM   1590 HG23 ILE L 106      23.301  -2.917 -13.496  1.00 38.49           H  
ATOM   1591 HD11 ILE L 106      19.043  -2.965 -13.426  1.00 38.49           H  
ATOM   1592 HD12 ILE L 106      18.579  -4.562 -12.834  1.00 38.49           H  
ATOM   1593 HD13 ILE L 106      19.965  -4.382 -13.922  1.00 38.49           H  
ATOM   1594  N   LYS L 107      24.621  -3.050 -10.663  1.00 74.40           N  
ATOM   1595  CA  LYS L 107      26.040  -2.875 -10.777  1.00 63.23           C  
ATOM   1596  C   LYS L 107      26.559  -3.724 -11.908  1.00 12.25           C  
ATOM   1597  O   LYS L 107      25.943  -4.726 -12.267  1.00 61.32           O  
ATOM   1598  CB  LYS L 107      26.742  -3.265  -9.471  1.00 41.24           C  
ATOM   1599  CG  LYS L 107      26.563  -4.698  -9.082  1.00 65.11           C  
ATOM   1600  CD  LYS L 107      27.316  -5.021  -7.824  1.00  4.31           C  
ATOM   1601  CE  LYS L 107      27.232  -6.491  -7.552  1.00  3.13           C  
ATOM   1602  NZ  LYS L 107      27.951  -6.892  -6.322  1.00 34.52           N  
ATOM   1603  H   LYS L 107      24.262  -3.851 -10.226  1.00 38.49           H  
ATOM   1604  HA  LYS L 107      26.249  -1.839 -10.986  1.00 51.12           H  
ATOM   1605  HB2 LYS L 107      27.806  -3.137  -9.590  1.00 38.49           H  
ATOM   1606  HB3 LYS L 107      26.389  -2.645  -8.661  1.00 38.49           H  
ATOM   1607  HG2 LYS L 107      25.512  -4.887  -8.922  1.00 38.49           H  
ATOM   1608  HG3 LYS L 107      26.923  -5.326  -9.884  1.00 38.49           H  
ATOM   1609  HD2 LYS L 107      28.347  -4.729  -7.947  1.00 38.49           H  
ATOM   1610  HD3 LYS L 107      26.876  -4.479  -6.999  1.00 38.49           H  
ATOM   1611  HE2 LYS L 107      26.188  -6.751  -7.495  1.00 38.49           H  
ATOM   1612  HE3 LYS L 107      27.679  -6.953  -8.419  1.00 38.49           H  
ATOM   1613  HZ1 LYS L 107      27.532  -6.453  -5.478  1.00 38.49           H  
ATOM   1614  HZ2 LYS L 107      28.952  -6.614  -6.383  1.00 38.49           H  
ATOM   1615  HZ3 LYS L 107      27.919  -7.927  -6.211  1.00 38.49           H  
ATOM   1616  N   ARG L 108      27.660  -3.340 -12.466  1.00  2.45           N  
ATOM   1617  CA  ARG L 108      28.273  -4.091 -13.542  1.00  3.23           C  
ATOM   1618  C   ARG L 108      29.762  -4.282 -13.292  1.00 74.53           C  
ATOM   1619  O   ARG L 108      30.169  -4.601 -12.156  1.00  5.11           O  
ATOM   1620  CB  ARG L 108      28.031  -3.438 -14.902  1.00  2.53           C  
ATOM   1621  CG  ARG L 108      26.597  -3.459 -15.399  1.00 52.34           C  
ATOM   1622  CD  ARG L 108      26.499  -2.724 -16.721  1.00 12.54           C  
ATOM   1623  NE  ARG L 108      25.171  -2.817 -17.343  1.00 43.30           N  
ATOM   1624  CZ  ARG L 108      24.661  -1.903 -18.186  1.00 11.44           C  
ATOM   1625  NH1 ARG L 108      25.271  -0.735 -18.351  1.00 41.42           N  
ATOM   1626  NH2 ARG L 108      23.529  -2.150 -18.825  1.00 52.30           N  
ATOM   1627  H   ARG L 108      28.107  -2.527 -12.151  1.00 38.49           H  
ATOM   1628  HA  ARG L 108      27.791  -5.054 -13.524  1.00 24.30           H  
ATOM   1629  HB2 ARG L 108      28.338  -2.406 -14.856  1.00 38.49           H  
ATOM   1630  HB3 ARG L 108      28.641  -3.952 -15.629  1.00 38.49           H  
ATOM   1631  HG2 ARG L 108      26.285  -4.486 -15.535  1.00 38.49           H  
ATOM   1632  HG3 ARG L 108      25.959  -2.974 -14.675  1.00 38.49           H  
ATOM   1633  HD2 ARG L 108      26.731  -1.684 -16.551  1.00 38.49           H  
ATOM   1634  HD3 ARG L 108      27.232  -3.139 -17.396  1.00 38.49           H  
ATOM   1635  HE  ARG L 108      24.684  -3.649 -17.151  1.00  5.12           H  
ATOM   1636 HH11 ARG L 108      26.110  -0.495 -17.862  1.00 38.49           H  
ATOM   1637 HH12 ARG L 108      24.921  -0.033 -18.979  1.00 38.49           H  
ATOM   1638 HH21 ARG L 108      23.035  -3.013 -18.701  1.00 38.49           H  
ATOM   1639 HH22 ARG L 108      23.119  -1.492 -19.465  1.00 38.49           H  
TER    1640      ARG L 108                                                      
ATOM   1641  N   ASP L   1       6.768  12.347   9.027  1.00 73.41           N  
ATOM   1642  CA  ASP L   1       5.514  11.648   8.804  1.00 63.44           C  
ATOM   1643  C   ASP L   1       4.385  12.623   8.571  1.00 21.15           C  
ATOM   1644  O   ASP L   1       4.277  13.658   9.244  1.00  1.13           O  
ATOM   1645  CB  ASP L   1       5.156  10.705   9.973  1.00 25.12           C  
ATOM   1646  CG  ASP L   1       4.975  11.411  11.303  1.00 12.50           C  
ATOM   1647  OD1 ASP L   1       5.968  11.555  12.049  1.00 73.32           O  
ATOM   1648  OD2 ASP L   1       3.845  11.812  11.638  1.00 55.55           O  
ATOM   1649  H   ASP L   1       6.700  13.322   8.936  1.00 38.49           H  
ATOM   1650  HA  ASP L   1       5.632  11.053   7.910  1.00 52.45           H  
ATOM   1651  HB2 ASP L   1       4.232  10.196   9.744  1.00 38.49           H  
ATOM   1652  HB3 ASP L   1       5.940   9.972  10.081  1.00 38.49           H  
ATOM   1653  N   ILE L   2       3.584  12.321   7.601  1.00 64.45           N  
ATOM   1654  CA  ILE L   2       2.414  13.096   7.294  1.00 33.52           C  
ATOM   1655  C   ILE L   2       1.243  12.344   7.854  1.00 15.55           C  
ATOM   1656  O   ILE L   2       1.161  11.147   7.685  1.00 22.32           O  
ATOM   1657  CB  ILE L   2       2.266  13.270   5.768  1.00 54.13           C  
ATOM   1658  CG1 ILE L   2       3.468  14.034   5.204  1.00  3.12           C  
ATOM   1659  CG2 ILE L   2       0.959  13.982   5.409  1.00 42.53           C  
ATOM   1660  CD1 ILE L   2       3.500  14.075   3.706  1.00 75.11           C  
ATOM   1661  H   ILE L   2       3.767  11.522   7.063  1.00 38.49           H  
ATOM   1662  HA  ILE L   2       2.464  14.059   7.779  1.00 73.21           H  
ATOM   1663  HB  ILE L   2       2.256  12.281   5.334  1.00 35.23           H  
ATOM   1664 HG12 ILE L   2       3.414  15.055   5.548  1.00 38.49           H  
ATOM   1665 HG13 ILE L   2       4.395  13.605   5.549  1.00 38.49           H  
ATOM   1666 HG21 ILE L   2       0.943  14.959   5.869  1.00 38.49           H  
ATOM   1667 HG22 ILE L   2       0.122  13.402   5.773  1.00 38.49           H  
ATOM   1668 HG23 ILE L   2       0.885  14.085   4.337  1.00 38.49           H  
ATOM   1669 HD11 ILE L   2       4.339  14.668   3.378  1.00 38.49           H  
ATOM   1670 HD12 ILE L   2       2.580  14.517   3.356  1.00 38.49           H  
ATOM   1671 HD13 ILE L   2       3.601  13.064   3.336  1.00 38.49           H  
ATOM   1672  N   GLN L   3       0.374  13.020   8.534  1.00 45.11           N  
ATOM   1673  CA  GLN L   3      -0.718  12.363   9.178  1.00 60.11           C  
ATOM   1674  C   GLN L   3      -1.955  12.455   8.312  1.00 71.21           C  
ATOM   1675  O   GLN L   3      -2.252  13.514   7.761  1.00 73.10           O  
ATOM   1676  CB  GLN L   3      -0.993  12.998  10.520  1.00 32.10           C  
ATOM   1677  CG  GLN L   3      -1.854  12.131  11.406  1.00 62.21           C  
ATOM   1678  CD  GLN L   3      -2.111  12.739  12.751  1.00 72.13           C  
ATOM   1679  OE1 GLN L   3      -3.079  13.460  12.934  1.00 53.24           O  
ATOM   1680  NE2 GLN L   3      -1.257  12.458  13.698  1.00 51.43           N  
ATOM   1681  H   GLN L   3       0.457  13.999   8.584  1.00 38.49           H  
ATOM   1682  HA  GLN L   3      -0.455  11.327   9.328  1.00 42.32           H  
ATOM   1683  HB2 GLN L   3      -0.082  13.313  11.003  1.00 38.49           H  
ATOM   1684  HB3 GLN L   3      -1.555  13.897  10.316  1.00 38.49           H  
ATOM   1685  HG2 GLN L   3      -2.797  11.966  10.906  1.00 38.49           H  
ATOM   1686  HG3 GLN L   3      -1.340  11.190  11.532  1.00 38.49           H  
ATOM   1687 HE21 GLN L   3      -0.496  11.871  13.494  1.00 38.49           H  
ATOM   1688 HE22 GLN L   3      -1.404  12.854  14.586  1.00 38.49           H  
ATOM   1689  N   MET L   4      -2.665  11.358   8.194  1.00 74.14           N  
ATOM   1690  CA  MET L   4      -3.860  11.313   7.392  1.00 74.32           C  
ATOM   1691  C   MET L   4      -5.081  11.135   8.310  1.00 71.54           C  
ATOM   1692  O   MET L   4      -5.337  10.044   8.840  1.00 62.02           O  
ATOM   1693  CB  MET L   4      -3.771  10.169   6.366  1.00 33.10           C  
ATOM   1694  CG  MET L   4      -2.502  10.187   5.506  1.00 32.01           C  
ATOM   1695  SD  MET L   4      -2.287  11.701   4.538  1.00 60.31           S  
ATOM   1696  CE  MET L   4      -3.668  11.606   3.408  1.00 42.42           C  
ATOM   1697  H   MET L   4      -2.384  10.544   8.659  1.00 38.49           H  
ATOM   1698  HA  MET L   4      -3.945  12.256   6.870  1.00  2.50           H  
ATOM   1699  HB2 MET L   4      -3.797   9.228   6.896  1.00 38.49           H  
ATOM   1700  HB3 MET L   4      -4.627  10.221   5.709  1.00 38.49           H  
ATOM   1701  HG2 MET L   4      -1.647  10.085   6.158  1.00 38.49           H  
ATOM   1702  HG3 MET L   4      -2.532   9.344   4.830  1.00 38.49           H  
ATOM   1703  HE1 MET L   4      -4.594  11.595   3.965  1.00 38.49           H  
ATOM   1704  HE2 MET L   4      -3.592  10.701   2.825  1.00 38.49           H  
ATOM   1705  HE3 MET L   4      -3.657  12.458   2.744  1.00 38.49           H  
ATOM   1706  N   THR L   5      -5.791  12.202   8.529  1.00 60.12           N  
ATOM   1707  CA  THR L   5      -6.955  12.202   9.389  1.00 24.23           C  
ATOM   1708  C   THR L   5      -8.199  11.878   8.572  1.00 50.35           C  
ATOM   1709  O   THR L   5      -8.420  12.474   7.535  1.00  4.42           O  
ATOM   1710  CB  THR L   5      -7.123  13.589  10.048  1.00 40.44           C  
ATOM   1711  OG1 THR L   5      -5.941  13.906  10.802  1.00 43.55           O  
ATOM   1712  CG2 THR L   5      -8.340  13.626  10.969  1.00 31.43           C  
ATOM   1713  H   THR L   5      -5.529  13.037   8.081  1.00 38.49           H  
ATOM   1714  HA  THR L   5      -6.816  11.461  10.162  1.00 34.14           H  
ATOM   1715  HB  THR L   5      -7.242  14.325   9.267  1.00 74.42           H  
ATOM   1716  HG1 THR L   5      -5.632  14.756  10.462  1.00 23.54           H  
ATOM   1717 HG21 THR L   5      -8.227  12.892  11.752  1.00 38.49           H  
ATOM   1718 HG22 THR L   5      -9.226  13.406  10.394  1.00 38.49           H  
ATOM   1719 HG23 THR L   5      -8.430  14.609  11.407  1.00 38.49           H  
ATOM   1720  N   GLN L   6      -8.993  10.930   9.026  1.00 13.20           N  
ATOM   1721  CA  GLN L   6     -10.197  10.572   8.310  1.00  2.32           C  
ATOM   1722  C   GLN L   6     -11.428  10.793   9.132  1.00  2.30           C  
ATOM   1723  O   GLN L   6     -11.492  10.408  10.300  1.00 40.40           O  
ATOM   1724  CB  GLN L   6     -10.177   9.138   7.817  1.00  2.13           C  
ATOM   1725  CG  GLN L   6      -9.108   8.836   6.804  1.00 60.33           C  
ATOM   1726  CD  GLN L   6      -9.211   7.431   6.294  1.00 74.21           C  
ATOM   1727  OE1 GLN L   6      -9.862   7.157   5.306  1.00 50.11           O  
ATOM   1728  NE2 GLN L   6      -8.569   6.529   6.964  1.00 44.04           N  
ATOM   1729  H   GLN L   6      -8.792  10.474   9.869  1.00 38.49           H  
ATOM   1730  HA  GLN L   6     -10.252  11.221   7.447  1.00 21.44           H  
ATOM   1731  HB2 GLN L   6     -10.015   8.492   8.667  1.00 38.49           H  
ATOM   1732  HB3 GLN L   6     -11.137   8.904   7.386  1.00 38.49           H  
ATOM   1733  HG2 GLN L   6      -9.214   9.516   5.971  1.00 38.49           H  
ATOM   1734  HG3 GLN L   6      -8.133   8.970   7.249  1.00 38.49           H  
ATOM   1735 HE21 GLN L   6      -8.056   6.822   7.742  1.00 38.49           H  
ATOM   1736 HE22 GLN L   6      -8.677   5.608   6.654  1.00 38.49           H  
ATOM   1737  N   SER L   7     -12.379  11.413   8.524  1.00 30.34           N  
ATOM   1738  CA  SER L   7     -13.665  11.625   9.089  1.00 32.12           C  
ATOM   1739  C   SER L   7     -14.656  11.432   7.954  1.00  1.21           C  
ATOM   1740  O   SER L   7     -14.405  11.899   6.838  1.00 31.13           O  
ATOM   1741  CB  SER L   7     -13.767  13.042   9.695  1.00 44.03           C  
ATOM   1742  OG  SER L   7     -15.030  13.262  10.319  1.00 62.53           O  
ATOM   1743  H   SER L   7     -12.229  11.746   7.609  1.00 38.49           H  
ATOM   1744  HA  SER L   7     -13.856  10.873   9.845  1.00 60.51           H  
ATOM   1745  HB2 SER L   7     -12.991  13.170  10.435  1.00 38.49           H  
ATOM   1746  HB3 SER L   7     -13.635  13.771   8.910  1.00 38.49           H  
ATOM   1747  HG  SER L   7     -15.581  13.739   9.684  1.00 54.50           H  
ATOM   1748  N   PRO L   8     -15.748  10.709   8.166  1.00 61.44           N  
ATOM   1749  CA  PRO L   8     -16.080  10.061   9.446  1.00 22.42           C  
ATOM   1750  C   PRO L   8     -15.151   8.885   9.761  1.00 33.41           C  
ATOM   1751  O   PRO L   8     -14.573   8.291   8.858  1.00 40.14           O  
ATOM   1752  CB  PRO L   8     -17.501   9.565   9.220  1.00 12.41           C  
ATOM   1753  CG  PRO L   8     -17.593   9.370   7.756  1.00 32.40           C  
ATOM   1754  CD  PRO L   8     -16.769  10.451   7.147  1.00 22.31           C  
ATOM   1755  HA  PRO L   8     -16.059  10.764  10.264  1.00 13.14           H  
ATOM   1756  HB2 PRO L   8     -17.647   8.637   9.754  1.00 38.49           H  
ATOM   1757  HB3 PRO L   8     -18.209  10.303   9.565  1.00 38.49           H  
ATOM   1758  HG2 PRO L   8     -17.166   8.412   7.502  1.00 38.49           H  
ATOM   1759  HG3 PRO L   8     -18.619   9.439   7.426  1.00 38.49           H  
ATOM   1760  HD2 PRO L   8     -16.315  10.107   6.229  1.00 38.49           H  
ATOM   1761  HD3 PRO L   8     -17.358  11.337   6.963  1.00 38.49           H  
ATOM   1762  N   SER L   9     -14.976   8.586  11.035  1.00 42.01           N  
ATOM   1763  CA  SER L   9     -14.139   7.469  11.452  1.00  1.24           C  
ATOM   1764  C   SER L   9     -14.828   6.126  11.129  1.00  2.04           C  
ATOM   1765  O   SER L   9     -14.201   5.063  11.088  1.00 52.14           O  
ATOM   1766  CB  SER L   9     -13.823   7.596  12.943  1.00  1.31           C  
ATOM   1767  OG  SER L   9     -15.018   7.718  13.707  1.00 65.23           O  
ATOM   1768  H   SER L   9     -15.410   9.113  11.740  1.00 38.49           H  
ATOM   1769  HA  SER L   9     -13.219   7.524  10.888  1.00  5.11           H  
ATOM   1770  HB2 SER L   9     -13.281   6.724  13.272  1.00 38.49           H  
ATOM   1771  HB3 SER L   9     -13.217   8.476  13.105  1.00 38.49           H  
ATOM   1772  HG  SER L   9     -14.962   8.550  14.193  1.00 20.43           H  
ATOM   1773  N   SER L  10     -16.118   6.192  10.915  1.00 45.55           N  
ATOM   1774  CA  SER L  10     -16.937   5.062  10.513  1.00 54.02           C  
ATOM   1775  C   SER L  10     -18.145   5.635   9.777  1.00 23.33           C  
ATOM   1776  O   SER L  10     -18.671   6.685  10.178  1.00 34.20           O  
ATOM   1777  CB  SER L  10     -17.386   4.238  11.740  1.00 35.53           C  
ATOM   1778  OG  SER L  10     -16.268   3.812  12.511  1.00 43.52           O  
ATOM   1779  H   SER L  10     -16.551   7.066  11.027  1.00 38.49           H  
ATOM   1780  HA  SER L  10     -16.357   4.448   9.833  1.00  2.22           H  
ATOM   1781  HB2 SER L  10     -18.049   4.808  12.370  1.00 38.49           H  
ATOM   1782  HB3 SER L  10     -17.889   3.350  11.384  1.00 38.49           H  
ATOM   1783  HG  SER L  10     -15.491   4.306  12.226  1.00  4.24           H  
ATOM   1784  N   LEU L  11     -18.559   4.999   8.715  1.00 21.43           N  
ATOM   1785  CA  LEU L  11     -19.626   5.511   7.896  1.00 13.20           C  
ATOM   1786  C   LEU L  11     -20.532   4.372   7.478  1.00 45.22           C  
ATOM   1787  O   LEU L  11     -20.064   3.346   6.989  1.00 43.53           O  
ATOM   1788  CB  LEU L  11     -18.995   6.200   6.660  1.00 32.32           C  
ATOM   1789  CG  LEU L  11     -19.891   7.028   5.703  1.00 34.42           C  
ATOM   1790  CD1 LEU L  11     -19.012   7.768   4.740  1.00 14.13           C  
ATOM   1791  CD2 LEU L  11     -20.856   6.164   4.904  1.00 40.32           C  
ATOM   1792  H   LEU L  11     -18.154   4.142   8.439  1.00 38.49           H  
ATOM   1793  HA  LEU L  11     -20.176   6.249   8.459  1.00 32.34           H  
ATOM   1794  HB2 LEU L  11     -18.215   6.852   7.016  1.00 38.49           H  
ATOM   1795  HB3 LEU L  11     -18.519   5.424   6.079  1.00 38.49           H  
ATOM   1796  HG  LEU L  11     -20.453   7.752   6.276  1.00 20.23           H  
ATOM   1797 HD11 LEU L  11     -18.357   8.431   5.286  1.00 38.49           H  
ATOM   1798 HD12 LEU L  11     -19.621   8.344   4.060  1.00 38.49           H  
ATOM   1799 HD13 LEU L  11     -18.416   7.061   4.182  1.00 38.49           H  
ATOM   1800 HD21 LEU L  11     -21.449   6.790   4.254  1.00 38.49           H  
ATOM   1801 HD22 LEU L  11     -21.506   5.630   5.582  1.00 38.49           H  
ATOM   1802 HD23 LEU L  11     -20.298   5.453   4.311  1.00 38.49           H  
ATOM   1803  N   SER L  12     -21.807   4.552   7.664  1.00 14.54           N  
ATOM   1804  CA  SER L  12     -22.757   3.570   7.250  1.00 35.24           C  
ATOM   1805  C   SER L  12     -23.599   4.127   6.111  1.00 31.02           C  
ATOM   1806  O   SER L  12     -24.175   5.203   6.229  1.00 12.31           O  
ATOM   1807  CB  SER L  12     -23.644   3.164   8.409  1.00 70.24           C  
ATOM   1808  OG  SER L  12     -22.870   2.719   9.517  1.00 31.01           O  
ATOM   1809  H   SER L  12     -22.123   5.380   8.084  1.00 38.49           H  
ATOM   1810  HA  SER L  12     -22.215   2.705   6.899  1.00 30.11           H  
ATOM   1811  HB2 SER L  12     -24.268   3.997   8.697  1.00 38.49           H  
ATOM   1812  HB3 SER L  12     -24.256   2.348   8.055  1.00 38.49           H  
ATOM   1813  HG  SER L  12     -23.440   2.208  10.103  1.00 33.20           H  
ATOM   1814  N   ALA L  13     -23.659   3.412   5.026  1.00 74.12           N  
ATOM   1815  CA  ALA L  13     -24.431   3.831   3.857  1.00 33.00           C  
ATOM   1816  C   ALA L  13     -25.211   2.652   3.303  1.00 21.42           C  
ATOM   1817  O   ALA L  13     -24.843   1.526   3.538  1.00 21.34           O  
ATOM   1818  CB  ALA L  13     -23.515   4.423   2.799  1.00 30.40           C  
ATOM   1819  H   ALA L  13     -23.157   2.561   5.011  1.00 38.49           H  
ATOM   1820  HA  ALA L  13     -25.132   4.586   4.182  1.00 30.52           H  
ATOM   1821  HB1 ALA L  13     -24.103   4.766   1.961  1.00 38.49           H  
ATOM   1822  HB2 ALA L  13     -22.818   3.667   2.471  1.00 38.49           H  
ATOM   1823  HB3 ALA L  13     -22.970   5.254   3.222  1.00 38.49           H  
ATOM   1824  N   SER L  14     -26.303   2.910   2.627  1.00 35.50           N  
ATOM   1825  CA  SER L  14     -27.129   1.849   2.066  1.00 42.35           C  
ATOM   1826  C   SER L  14     -26.544   1.284   0.759  1.00  1.21           C  
ATOM   1827  O   SER L  14     -25.664   1.897   0.146  1.00 41.03           O  
ATOM   1828  CB  SER L  14     -28.561   2.355   1.879  1.00 44.13           C  
ATOM   1829  OG  SER L  14     -28.587   3.606   1.187  1.00 73.21           O  
ATOM   1830  H   SER L  14     -26.592   3.831   2.463  1.00 38.49           H  
ATOM   1831  HA  SER L  14     -27.142   1.052   2.795  1.00 21.12           H  
ATOM   1832  HB2 SER L  14     -29.125   1.633   1.306  1.00 38.49           H  
ATOM   1833  HB3 SER L  14     -29.020   2.482   2.849  1.00 38.49           H  
ATOM   1834  HG  SER L  14     -28.627   3.435   0.236  1.00 33.11           H  
ATOM   1835  N   VAL L  15     -27.021   0.107   0.345  1.00 22.40           N  
ATOM   1836  CA  VAL L  15     -26.563  -0.511  -0.894  1.00  3.42           C  
ATOM   1837  C   VAL L  15     -26.893   0.387  -2.069  1.00 62.51           C  
ATOM   1838  O   VAL L  15     -28.056   0.761  -2.282  1.00 72.44           O  
ATOM   1839  CB  VAL L  15     -27.185  -1.926  -1.122  1.00 73.12           C  
ATOM   1840  CG1 VAL L  15     -26.760  -2.506  -2.469  1.00 64.34           C  
ATOM   1841  CG2 VAL L  15     -26.760  -2.863  -0.017  1.00 11.44           C  
ATOM   1842  H   VAL L  15     -27.710  -0.350   0.874  1.00 38.49           H  
ATOM   1843  HA  VAL L  15     -25.489  -0.606  -0.833  1.00 20.12           H  
ATOM   1844  HB  VAL L  15     -28.262  -1.845  -1.108  1.00 54.21           H  
ATOM   1845 HG11 VAL L  15     -25.684  -2.595  -2.498  1.00 38.49           H  
ATOM   1846 HG12 VAL L  15     -27.088  -1.854  -3.265  1.00 38.49           H  
ATOM   1847 HG13 VAL L  15     -27.203  -3.483  -2.597  1.00 38.49           H  
ATOM   1848 HG21 VAL L  15     -27.195  -3.837  -0.178  1.00 38.49           H  
ATOM   1849 HG22 VAL L  15     -27.072  -2.463   0.936  1.00 38.49           H  
ATOM   1850 HG23 VAL L  15     -25.684  -2.940  -0.063  1.00 38.49           H  
ATOM   1851  N   GLY L  16     -25.880   0.755  -2.798  1.00 33.33           N  
ATOM   1852  CA  GLY L  16     -26.067   1.610  -3.948  1.00 73.03           C  
ATOM   1853  C   GLY L  16     -25.874   3.081  -3.635  1.00 41.43           C  
ATOM   1854  O   GLY L  16     -25.896   3.921  -4.539  1.00 33.15           O  
ATOM   1855  H   GLY L  16     -24.995   0.405  -2.539  1.00 38.49           H  
ATOM   1856  HA2 GLY L  16     -25.351   1.328  -4.705  1.00 38.49           H  
ATOM   1857  HA3 GLY L  16     -27.064   1.463  -4.337  1.00 38.49           H  
ATOM   1858  N   ASP L  17     -25.692   3.400  -2.370  1.00  5.14           N  
ATOM   1859  CA  ASP L  17     -25.538   4.793  -1.956  1.00 72.42           C  
ATOM   1860  C   ASP L  17     -24.132   5.262  -2.241  1.00 72.30           C  
ATOM   1861  O   ASP L  17     -23.199   4.453  -2.276  1.00 71.43           O  
ATOM   1862  CB  ASP L  17     -25.854   4.946  -0.475  1.00 13.22           C  
ATOM   1863  CG  ASP L  17     -25.896   6.398  -0.012  1.00 24.24           C  
ATOM   1864  OD1 ASP L  17     -26.791   7.156  -0.469  1.00 12.24           O  
ATOM   1865  OD2 ASP L  17     -25.073   6.795   0.828  1.00 33.33           O  
ATOM   1866  H   ASP L  17     -25.643   2.702  -1.681  1.00 38.49           H  
ATOM   1867  HA  ASP L  17     -26.231   5.390  -2.529  1.00 62.42           H  
ATOM   1868  HB2 ASP L  17     -26.781   4.434  -0.286  1.00 38.49           H  
ATOM   1869  HB3 ASP L  17     -25.084   4.424   0.073  1.00 38.49           H  
ATOM   1870  N   ARG L  18     -23.974   6.543  -2.460  1.00 71.40           N  
ATOM   1871  CA  ARG L  18     -22.695   7.076  -2.762  1.00 25.20           C  
ATOM   1872  C   ARG L  18     -21.994   7.509  -1.493  1.00 11.25           C  
ATOM   1873  O   ARG L  18     -22.330   8.529  -0.884  1.00 15.14           O  
ATOM   1874  CB  ARG L  18     -22.798   8.218  -3.765  1.00 33.41           C  
ATOM   1875  CG  ARG L  18     -21.456   8.740  -4.228  1.00  2.15           C  
ATOM   1876  CD  ARG L  18     -21.598   9.803  -5.297  1.00 50.44           C  
ATOM   1877  NE  ARG L  18     -22.357   9.312  -6.465  1.00 52.14           N  
ATOM   1878  CZ  ARG L  18     -21.961   9.406  -7.744  1.00 41.43           C  
ATOM   1879  NH1 ARG L  18     -20.798   9.958  -8.044  1.00 30.35           N  
ATOM   1880  NH2 ARG L  18     -22.747   8.959  -8.719  1.00 41.31           N  
ATOM   1881  H   ARG L  18     -24.745   7.141  -2.392  1.00 38.49           H  
ATOM   1882  HA  ARG L  18     -22.120   6.277  -3.208  1.00 53.33           H  
ATOM   1883  HB2 ARG L  18     -23.340   7.868  -4.630  1.00 38.49           H  
ATOM   1884  HB3 ARG L  18     -23.342   9.033  -3.312  1.00 38.49           H  
ATOM   1885  HG2 ARG L  18     -20.915   9.140  -3.385  1.00 38.49           H  
ATOM   1886  HG3 ARG L  18     -20.879   7.919  -4.619  1.00 38.49           H  
ATOM   1887  HD2 ARG L  18     -22.106  10.655  -4.873  1.00 38.49           H  
ATOM   1888  HD3 ARG L  18     -20.608  10.092  -5.617  1.00 38.49           H  
ATOM   1889  HE  ARG L  18     -23.228   8.913  -6.247  1.00  3.11           H  
ATOM   1890 HH11 ARG L  18     -20.183  10.321  -7.342  1.00 38.49           H  
ATOM   1891 HH12 ARG L  18     -20.473  10.038  -8.993  1.00 38.49           H  
ATOM   1892 HH21 ARG L  18     -23.645   8.544  -8.550  1.00 38.49           H  
ATOM   1893 HH22 ARG L  18     -22.466   9.030  -9.681  1.00 38.49           H  
ATOM   1894  N   VAL L  19     -21.025   6.733  -1.123  1.00 53.55           N  
ATOM   1895  CA  VAL L  19     -20.249   6.935   0.077  1.00 70.11           C  
ATOM   1896  C   VAL L  19     -19.287   8.089  -0.120  1.00 71.55           C  
ATOM   1897  O   VAL L  19     -18.777   8.286  -1.221  1.00 15.43           O  
ATOM   1898  CB  VAL L  19     -19.445   5.652   0.395  1.00 71.30           C  
ATOM   1899  CG1 VAL L  19     -18.605   5.806   1.651  1.00 21.43           C  
ATOM   1900  CG2 VAL L  19     -20.378   4.462   0.511  1.00 34.41           C  
ATOM   1901  H   VAL L  19     -20.833   5.975  -1.720  1.00 38.49           H  
ATOM   1902  HA  VAL L  19     -20.914   7.139   0.902  1.00  5.13           H  
ATOM   1903  HB  VAL L  19     -18.772   5.469  -0.429  1.00 31.32           H  
ATOM   1904 HG11 VAL L  19     -19.256   6.006   2.488  1.00 38.49           H  
ATOM   1905 HG12 VAL L  19     -17.915   6.627   1.520  1.00 38.49           H  
ATOM   1906 HG13 VAL L  19     -18.050   4.897   1.830  1.00 38.49           H  
ATOM   1907 HG21 VAL L  19     -20.925   4.346  -0.413  1.00 38.49           H  
ATOM   1908 HG22 VAL L  19     -21.077   4.631   1.317  1.00 38.49           H  
ATOM   1909 HG23 VAL L  19     -19.807   3.568   0.704  1.00 38.49           H  
ATOM   1910  N   THR L  20     -19.076   8.871   0.907  1.00 13.33           N  
ATOM   1911  CA  THR L  20     -18.135   9.950   0.853  1.00 11.33           C  
ATOM   1912  C   THR L  20     -17.231   9.919   2.100  1.00 32.23           C  
ATOM   1913  O   THR L  20     -17.702  10.074   3.220  1.00 34.43           O  
ATOM   1914  CB  THR L  20     -18.900  11.283   0.777  1.00 63.44           C  
ATOM   1915  OG1 THR L  20     -19.784  11.236  -0.360  1.00 62.51           O  
ATOM   1916  CG2 THR L  20     -17.949  12.454   0.626  1.00 73.21           C  
ATOM   1917  H   THR L  20     -19.575   8.746   1.747  1.00 38.49           H  
ATOM   1918  HA  THR L  20     -17.533   9.839  -0.036  1.00 21.12           H  
ATOM   1919  HB  THR L  20     -19.485  11.398   1.678  1.00 74.41           H  
ATOM   1920  HG1 THR L  20     -19.671  10.355  -0.736  1.00 30.34           H  
ATOM   1921 HG21 THR L  20     -17.273  12.477   1.467  1.00 38.49           H  
ATOM   1922 HG22 THR L  20     -18.509  13.377   0.584  1.00 38.49           H  
ATOM   1923 HG23 THR L  20     -17.384  12.337  -0.287  1.00 38.49           H  
ATOM   1924  N   ILE L  21     -15.953   9.717   1.882  1.00 43.33           N  
ATOM   1925  CA  ILE L  21     -14.961   9.668   2.943  1.00 43.23           C  
ATOM   1926  C   ILE L  21     -13.987  10.817   2.755  1.00 40.31           C  
ATOM   1927  O   ILE L  21     -13.438  10.988   1.667  1.00 13.31           O  
ATOM   1928  CB  ILE L  21     -14.159   8.320   2.909  1.00  4.33           C  
ATOM   1929  CG1 ILE L  21     -15.085   7.119   3.177  1.00 14.45           C  
ATOM   1930  CG2 ILE L  21     -13.013   8.354   3.918  1.00 64.31           C  
ATOM   1931  CD1 ILE L  21     -14.428   5.751   3.028  1.00 21.15           C  
ATOM   1932  H   ILE L  21     -15.642   9.595   0.956  1.00 38.49           H  
ATOM   1933  HA  ILE L  21     -15.459   9.761   3.897  1.00 20.34           H  
ATOM   1934  HB  ILE L  21     -13.730   8.223   1.924  1.00 32.24           H  
ATOM   1935 HG12 ILE L  21     -15.364   7.186   4.216  1.00 38.49           H  
ATOM   1936 HG13 ILE L  21     -15.959   7.162   2.543  1.00 38.49           H  
ATOM   1937 HG21 ILE L  21     -12.468   7.423   3.889  1.00 38.49           H  
ATOM   1938 HG22 ILE L  21     -13.414   8.524   4.907  1.00 38.49           H  
ATOM   1939 HG23 ILE L  21     -12.358   9.172   3.651  1.00 38.49           H  
ATOM   1940 HD11 ILE L  21     -13.611   5.664   3.729  1.00 38.49           H  
ATOM   1941 HD12 ILE L  21     -14.056   5.603   2.023  1.00 38.49           H  
ATOM   1942 HD13 ILE L  21     -15.154   4.978   3.231  1.00 38.49           H  
ATOM   1943  N   THR L  22     -13.779  11.598   3.778  1.00 62.12           N  
ATOM   1944  CA  THR L  22     -12.851  12.687   3.692  1.00 13.50           C  
ATOM   1945  C   THR L  22     -11.597  12.436   4.523  1.00 43.02           C  
ATOM   1946  O   THR L  22     -11.674  12.080   5.714  1.00  2.51           O  
ATOM   1947  CB  THR L  22     -13.508  14.052   4.024  1.00 61.55           C  
ATOM   1948  OG1 THR L  22     -14.304  13.957   5.226  1.00 12.51           O  
ATOM   1949  CG2 THR L  22     -14.374  14.529   2.875  1.00  3.24           C  
ATOM   1950  H   THR L  22     -14.241  11.449   4.631  1.00 38.49           H  
ATOM   1951  HA  THR L  22     -12.531  12.712   2.659  1.00 13.12           H  
ATOM   1952  HB  THR L  22     -12.715  14.768   4.189  1.00 73.13           H  
ATOM   1953  HG1 THR L  22     -13.974  13.220   5.764  1.00 21.23           H  
ATOM   1954 HG21 THR L  22     -13.764  14.649   1.992  1.00 38.49           H  
ATOM   1955 HG22 THR L  22     -14.826  15.476   3.131  1.00 38.49           H  
ATOM   1956 HG23 THR L  22     -15.145  13.798   2.684  1.00 38.49           H  
ATOM   1957  N   CYS L  23     -10.463  12.595   3.887  1.00 55.40           N  
ATOM   1958  CA  CYS L  23      -9.185  12.398   4.508  1.00 63.33           C  
ATOM   1959  C   CYS L  23      -8.388  13.690   4.401  1.00 12.51           C  
ATOM   1960  O   CYS L  23      -8.377  14.329   3.346  1.00 33.21           O  
ATOM   1961  CB  CYS L  23      -8.443  11.233   3.805  1.00 62.43           C  
ATOM   1962  SG  CYS L  23      -6.752  10.898   4.423  1.00 52.12           S  
ATOM   1963  H   CYS L  23     -10.485  12.882   2.946  1.00 38.49           H  
ATOM   1964  HA  CYS L  23      -9.338  12.146   5.547  1.00 35.42           H  
ATOM   1965  HB2 CYS L  23      -9.014  10.325   3.930  1.00 38.49           H  
ATOM   1966  HB3 CYS L  23      -8.371  11.454   2.750  1.00 38.49           H  
ATOM   1967  N   GLN L  24      -7.754  14.079   5.489  1.00 62.31           N  
ATOM   1968  CA  GLN L  24      -6.971  15.292   5.540  1.00 71.10           C  
ATOM   1969  C   GLN L  24      -5.522  14.969   5.813  1.00 54.02           C  
ATOM   1970  O   GLN L  24      -5.199  14.331   6.826  1.00  4.42           O  
ATOM   1971  CB  GLN L  24      -7.449  16.273   6.644  1.00 51.23           C  
ATOM   1972  CG  GLN L  24      -8.859  16.873   6.521  1.00 12.24           C  
ATOM   1973  CD  GLN L  24      -9.996  15.883   6.706  1.00 51.15           C  
ATOM   1974  OE1 GLN L  24     -10.499  15.295   5.758  1.00 44.15           O  
ATOM   1975  NE2 GLN L  24     -10.396  15.686   7.930  1.00  2.10           N  
ATOM   1976  H   GLN L  24      -7.832  13.514   6.291  1.00 38.49           H  
ATOM   1977  HA  GLN L  24      -7.051  15.788   4.585  1.00 62.13           H  
ATOM   1978  HB2 GLN L  24      -7.416  15.751   7.588  1.00 38.49           H  
ATOM   1979  HB3 GLN L  24      -6.738  17.084   6.689  1.00 38.49           H  
ATOM   1980  HG2 GLN L  24      -8.970  17.652   7.261  1.00 38.49           H  
ATOM   1981  HG3 GLN L  24      -8.936  17.313   5.537  1.00 38.49           H  
ATOM   1982 HE21 GLN L  24      -9.952  16.176   8.657  1.00 38.49           H  
ATOM   1983 HE22 GLN L  24     -11.134  15.062   8.078  1.00 38.49           H  
ATOM   1984  N   ALA L  25      -4.665  15.407   4.940  1.00 65.12           N  
ATOM   1985  CA  ALA L  25      -3.238  15.244   5.118  1.00 53.12           C  
ATOM   1986  C   ALA L  25      -2.701  16.410   5.938  1.00 31.10           C  
ATOM   1987  O   ALA L  25      -3.175  17.543   5.795  1.00  2.20           O  
ATOM   1988  CB  ALA L  25      -2.538  15.185   3.768  1.00 35.51           C  
ATOM   1989  H   ALA L  25      -5.024  15.859   4.143  1.00 38.49           H  
ATOM   1990  HA  ALA L  25      -3.061  14.321   5.650  1.00 73.43           H  
ATOM   1991  HB1 ALA L  25      -2.940  14.371   3.183  1.00 38.49           H  
ATOM   1992  HB2 ALA L  25      -1.481  15.022   3.920  1.00 38.49           H  
ATOM   1993  HB3 ALA L  25      -2.679  16.115   3.241  1.00 38.49           H  
ATOM   1994  N   SER L  26      -1.743  16.144   6.805  1.00 55.41           N  
ATOM   1995  CA  SER L  26      -1.154  17.179   7.643  1.00 53.44           C  
ATOM   1996  C   SER L  26      -0.280  18.147   6.819  1.00 71.22           C  
ATOM   1997  O   SER L  26      -0.019  19.286   7.229  1.00 43.33           O  
ATOM   1998  CB  SER L  26      -0.334  16.537   8.756  1.00  3.12           C  
ATOM   1999  OG  SER L  26       0.676  15.697   8.225  1.00 15.22           O  
ATOM   2000  H   SER L  26      -1.430  15.217   6.913  1.00 38.49           H  
ATOM   2001  HA  SER L  26      -1.977  17.709   8.098  1.00 60.03           H  
ATOM   2002  HB2 SER L  26       0.138  17.312   9.341  1.00 38.49           H  
ATOM   2003  HB3 SER L  26      -0.981  15.948   9.390  1.00 38.49           H  
ATOM   2004  HG  SER L  26       1.505  15.974   8.640  1.00 23.34           H  
ATOM   2005  N   GLN L  27       0.142  17.692   5.659  1.00 65.14           N  
ATOM   2006  CA  GLN L  27       1.005  18.444   4.777  1.00  0.42           C  
ATOM   2007  C   GLN L  27       0.526  18.209   3.352  1.00  3.34           C  
ATOM   2008  O   GLN L  27      -0.053  17.161   3.078  1.00 73.42           O  
ATOM   2009  CB  GLN L  27       2.454  17.952   4.964  1.00 53.21           C  
ATOM   2010  CG  GLN L  27       3.505  18.679   4.146  1.00 54.41           C  
ATOM   2011  CD  GLN L  27       4.903  18.175   4.426  1.00 31.33           C  
ATOM   2012  OE1 GLN L  27       5.585  18.662   5.322  1.00 65.21           O  
ATOM   2013  NE2 GLN L  27       5.363  17.233   3.641  1.00 20.02           N  
ATOM   2014  H   GLN L  27      -0.149  16.808   5.355  1.00 38.49           H  
ATOM   2015  HA  GLN L  27       0.939  19.492   5.024  1.00 10.43           H  
ATOM   2016  HB2 GLN L  27       2.714  18.079   6.004  1.00 38.49           H  
ATOM   2017  HB3 GLN L  27       2.493  16.901   4.720  1.00 38.49           H  
ATOM   2018  HG2 GLN L  27       3.293  18.471   3.108  1.00 38.49           H  
ATOM   2019  HG3 GLN L  27       3.457  19.740   4.339  1.00 38.49           H  
ATOM   2020 HE21 GLN L  27       4.789  16.909   2.912  1.00 38.49           H  
ATOM   2021 HE22 GLN L  27       6.263  16.883   3.814  1.00 38.49           H  
ATOM   2022  N   ASP L  28       0.740  19.169   2.463  1.00 25.44           N  
ATOM   2023  CA  ASP L  28       0.266  19.051   1.086  1.00 61.42           C  
ATOM   2024  C   ASP L  28       1.050  18.003   0.332  1.00 12.31           C  
ATOM   2025  O   ASP L  28       2.236  18.178   0.030  1.00  0.01           O  
ATOM   2026  CB  ASP L  28       0.327  20.386   0.332  1.00 70.54           C  
ATOM   2027  CG  ASP L  28      -0.561  21.465   0.909  1.00 24.43           C  
ATOM   2028  OD1 ASP L  28      -1.742  21.583   0.490  1.00 64.35           O  
ATOM   2029  OD2 ASP L  28      -0.089  22.227   1.778  1.00 21.32           O  
ATOM   2030  H   ASP L  28       1.240  19.975   2.710  1.00 38.49           H  
ATOM   2031  HA  ASP L  28      -0.764  18.728   1.135  1.00 12.23           H  
ATOM   2032  HB2 ASP L  28       1.344  20.750   0.328  1.00 38.49           H  
ATOM   2033  HB3 ASP L  28       0.022  20.198  -0.683  1.00 38.49           H  
ATOM   2034  N   ILE L  29       0.390  16.924   0.017  1.00 54.24           N  
ATOM   2035  CA  ILE L  29       1.015  15.805  -0.664  1.00 40.33           C  
ATOM   2036  C   ILE L  29       0.684  15.826  -2.138  1.00 21.13           C  
ATOM   2037  O   ILE L  29       0.960  14.856  -2.856  1.00 71.03           O  
ATOM   2038  CB  ILE L  29       0.535  14.453  -0.074  1.00  3.04           C  
ATOM   2039  CG1 ILE L  29      -0.977  14.283  -0.263  1.00  5.24           C  
ATOM   2040  CG2 ILE L  29       0.906  14.364   1.389  1.00 15.25           C  
ATOM   2041  CD1 ILE L  29      -1.526  12.968   0.242  1.00 32.41           C  
ATOM   2042  H   ILE L  29      -0.562  16.870   0.266  1.00 38.49           H  
ATOM   2043  HA  ILE L  29       2.084  15.874  -0.532  1.00 55.32           H  
ATOM   2044  HB  ILE L  29       1.045  13.656  -0.596  1.00  0.40           H  
ATOM   2045 HG12 ILE L  29      -1.490  15.075   0.264  1.00 38.49           H  
ATOM   2046 HG13 ILE L  29      -1.205  14.361  -1.316  1.00 38.49           H  
ATOM   2047 HG21 ILE L  29       0.447  15.180   1.927  1.00 38.49           H  
ATOM   2048 HG22 ILE L  29       1.980  14.429   1.479  1.00 38.49           H  
ATOM   2049 HG23 ILE L  29       0.564  13.422   1.794  1.00 38.49           H  
ATOM   2050 HD11 ILE L  29      -2.585  12.912   0.038  1.00 38.49           H  
ATOM   2051 HD12 ILE L  29      -1.358  12.907   1.306  1.00 38.49           H  
ATOM   2052 HD13 ILE L  29      -1.023  12.153  -0.259  1.00 38.49           H  
ATOM   2053  N   SER L  30       0.107  16.944  -2.590  1.00 53.12           N  
ATOM   2054  CA  SER L  30      -0.352  17.083  -3.963  1.00 54.40           C  
ATOM   2055  C   SER L  30      -1.463  16.020  -4.185  1.00 61.34           C  
ATOM   2056  O   SER L  30      -2.179  15.681  -3.244  1.00  2.03           O  
ATOM   2057  CB  SER L  30       0.851  16.913  -4.937  1.00 55.40           C  
ATOM   2058  OG  SER L  30       0.478  17.133  -6.288  1.00 30.23           O  
ATOM   2059  H   SER L  30      -0.006  17.684  -1.960  1.00 38.49           H  
ATOM   2060  HA  SER L  30      -0.792  18.064  -4.069  1.00 22.22           H  
ATOM   2061  HB2 SER L  30       1.625  17.619  -4.677  1.00 38.49           H  
ATOM   2062  HB3 SER L  30       1.241  15.911  -4.841  1.00 38.49           H  
ATOM   2063  HG  SER L  30       1.267  17.373  -6.791  1.00 31.12           H  
ATOM   2064  N   ASN L  31      -1.618  15.529  -5.377  1.00 73.21           N  
ATOM   2065  CA  ASN L  31      -2.643  14.520  -5.662  1.00 34.02           C  
ATOM   2066  C   ASN L  31      -2.083  13.107  -5.492  1.00 13.14           C  
ATOM   2067  O   ASN L  31      -2.716  12.120  -5.876  1.00 42.40           O  
ATOM   2068  CB  ASN L  31      -3.215  14.689  -7.084  1.00 75.22           C  
ATOM   2069  CG  ASN L  31      -2.177  14.542  -8.190  1.00 74.42           C  
ATOM   2070  OD1 ASN L  31      -1.004  14.878  -8.023  1.00 42.14           O  
ATOM   2071  ND2 ASN L  31      -2.594  14.041  -9.312  1.00 23.24           N  
ATOM   2072  H   ASN L  31      -1.035  15.837  -6.109  1.00 38.49           H  
ATOM   2073  HA  ASN L  31      -3.441  14.657  -4.947  1.00 32.14           H  
ATOM   2074  HB2 ASN L  31      -3.973  13.935  -7.243  1.00 38.49           H  
ATOM   2075  HB3 ASN L  31      -3.669  15.665  -7.165  1.00 38.49           H  
ATOM   2076 HD21 ASN L  31      -3.539  13.787  -9.388  1.00 38.49           H  
ATOM   2077 HD22 ASN L  31      -1.951  13.923 -10.041  1.00 38.49           H  
ATOM   2078  N   TYR L  32      -0.914  13.008  -4.889  1.00 62.31           N  
ATOM   2079  CA  TYR L  32      -0.285  11.729  -4.674  1.00  2.13           C  
ATOM   2080  C   TYR L  32      -0.881  11.018  -3.452  1.00 12.42           C  
ATOM   2081  O   TYR L  32      -0.392  11.168  -2.326  1.00 51.35           O  
ATOM   2082  CB  TYR L  32       1.230  11.884  -4.530  1.00 52.11           C  
ATOM   2083  CG  TYR L  32       1.874  12.593  -5.697  1.00 61.51           C  
ATOM   2084  CD1 TYR L  32       1.787  12.082  -6.983  1.00 72.45           C  
ATOM   2085  CD2 TYR L  32       2.571  13.771  -5.509  1.00 52.53           C  
ATOM   2086  CE1 TYR L  32       2.371  12.728  -8.047  1.00 23.22           C  
ATOM   2087  CE2 TYR L  32       3.159  14.423  -6.567  1.00 55.54           C  
ATOM   2088  CZ  TYR L  32       3.055  13.900  -7.836  1.00 51.42           C  
ATOM   2089  OH  TYR L  32       3.647  14.551  -8.899  1.00 15.30           O  
ATOM   2090  H   TYR L  32      -0.460  13.822  -4.582  1.00 38.49           H  
ATOM   2091  HA  TYR L  32      -0.488  11.122  -5.544  1.00 60.55           H  
ATOM   2092  HB2 TYR L  32       1.445  12.450  -3.635  1.00 38.49           H  
ATOM   2093  HB3 TYR L  32       1.678  10.904  -4.443  1.00 38.49           H  
ATOM   2094  HD1 TYR L  32       1.245  11.162  -7.147  1.00  1.24           H  
ATOM   2095  HD2 TYR L  32       2.654  14.180  -4.514  1.00 73.33           H  
ATOM   2096  HE1 TYR L  32       2.290  12.314  -9.040  1.00 52.54           H  
ATOM   2097  HE2 TYR L  32       3.692  15.345  -6.391  1.00 71.15           H  
ATOM   2098  HH  TYR L  32       4.579  14.684  -8.685  1.00 21.54           H  
ATOM   2099  N   LEU L  33      -1.942  10.266  -3.682  1.00 22.53           N  
ATOM   2100  CA  LEU L  33      -2.672   9.594  -2.622  1.00 24.51           C  
ATOM   2101  C   LEU L  33      -3.122   8.198  -3.063  1.00 74.32           C  
ATOM   2102  O   LEU L  33      -3.609   8.035  -4.192  1.00 35.15           O  
ATOM   2103  CB  LEU L  33      -3.925  10.409  -2.322  1.00 11.43           C  
ATOM   2104  CG  LEU L  33      -4.853   9.849  -1.260  1.00 31.21           C  
ATOM   2105  CD1 LEU L  33      -4.237   9.935   0.107  1.00  4.34           C  
ATOM   2106  CD2 LEU L  33      -6.182  10.536  -1.298  1.00 32.20           C  
ATOM   2107  H   LEU L  33      -2.262  10.170  -4.603  1.00 38.49           H  
ATOM   2108  HA  LEU L  33      -2.073   9.550  -1.726  1.00 72.41           H  
ATOM   2109  HB2 LEU L  33      -3.617  11.398  -2.011  1.00 38.49           H  
ATOM   2110  HB3 LEU L  33      -4.483  10.504  -3.241  1.00 38.49           H  
ATOM   2111  HG  LEU L  33      -5.014   8.802  -1.469  1.00 14.22           H  
ATOM   2112 HD11 LEU L  33      -3.331   9.348   0.142  1.00 38.49           H  
ATOM   2113 HD12 LEU L  33      -4.953   9.542   0.809  1.00 38.49           H  
ATOM   2114 HD13 LEU L  33      -4.022  10.965   0.346  1.00 38.49           H  
ATOM   2115 HD21 LEU L  33      -6.050  11.592  -1.117  1.00 38.49           H  
ATOM   2116 HD22 LEU L  33      -6.822  10.119  -0.534  1.00 38.49           H  
ATOM   2117 HD23 LEU L  33      -6.633  10.392  -2.269  1.00 38.49           H  
ATOM   2118  N   ASN L  34      -2.956   7.194  -2.193  1.00 15.11           N  
ATOM   2119  CA  ASN L  34      -3.480   5.846  -2.464  1.00 72.43           C  
ATOM   2120  C   ASN L  34      -4.595   5.499  -1.497  1.00 64.21           C  
ATOM   2121  O   ASN L  34      -4.595   5.950  -0.339  1.00 13.23           O  
ATOM   2122  CB  ASN L  34      -2.404   4.729  -2.407  1.00 62.22           C  
ATOM   2123  CG  ASN L  34      -1.407   4.723  -3.551  1.00 34.02           C  
ATOM   2124  OD1 ASN L  34      -0.920   3.677  -3.956  1.00 13.15           O  
ATOM   2125  ND2 ASN L  34      -1.095   5.858  -4.060  1.00 70.33           N  
ATOM   2126  H   ASN L  34      -2.480   7.315  -1.334  1.00 38.49           H  
ATOM   2127  HA  ASN L  34      -3.902   5.875  -3.459  1.00 14.23           H  
ATOM   2128  HB2 ASN L  34      -1.826   4.859  -1.505  1.00 38.49           H  
ATOM   2129  HB3 ASN L  34      -2.898   3.770  -2.372  1.00 38.49           H  
ATOM   2130 HD21 ASN L  34      -1.512   6.654  -3.673  1.00 38.49           H  
ATOM   2131 HD22 ASN L  34      -0.471   5.877  -4.814  1.00 38.49           H  
ATOM   2132  N   TRP L  35      -5.549   4.721  -1.967  1.00 33.43           N  
ATOM   2133  CA  TRP L  35      -6.642   4.252  -1.134  1.00 31.31           C  
ATOM   2134  C   TRP L  35      -6.620   2.738  -1.010  1.00 13.41           C  
ATOM   2135  O   TRP L  35      -6.544   2.028  -2.009  1.00 74.14           O  
ATOM   2136  CB  TRP L  35      -8.009   4.702  -1.678  1.00 44.31           C  
ATOM   2137  CG  TRP L  35      -8.278   6.167  -1.535  1.00  1.32           C  
ATOM   2138  CD1 TRP L  35      -8.101   7.156  -2.476  1.00 52.02           C  
ATOM   2139  CD2 TRP L  35      -8.797   6.811  -0.361  1.00 61.22           C  
ATOM   2140  NE1 TRP L  35      -8.472   8.368  -1.942  1.00 43.24           N  
ATOM   2141  CE2 TRP L  35      -8.901   8.181  -0.642  1.00 61.32           C  
ATOM   2142  CE3 TRP L  35      -9.185   6.345   0.911  1.00 22.45           C  
ATOM   2143  CZ2 TRP L  35      -9.375   9.103   0.303  1.00 21.43           C  
ATOM   2144  CZ3 TRP L  35      -9.658   7.251   1.845  1.00 20.25           C  
ATOM   2145  CH2 TRP L  35      -9.749   8.617   1.536  1.00 60.32           C  
ATOM   2146  H   TRP L  35      -5.498   4.450  -2.911  1.00 38.49           H  
ATOM   2147  HA  TRP L  35      -6.507   4.677  -0.150  1.00 14.11           H  
ATOM   2148  HB2 TRP L  35      -8.070   4.458  -2.728  1.00 38.49           H  
ATOM   2149  HB3 TRP L  35      -8.787   4.166  -1.155  1.00 38.49           H  
ATOM   2150  HD1 TRP L  35      -7.730   7.014  -3.486  1.00 24.10           H  
ATOM   2151  HE1 TRP L  35      -8.436   9.226  -2.415  1.00 22.02           H  
ATOM   2152  HE3 TRP L  35      -9.116   5.298   1.163  1.00 64.33           H  
ATOM   2153  HZ2 TRP L  35      -9.456  10.160   0.090  1.00 53.23           H  
ATOM   2154  HZ3 TRP L  35      -9.969   6.902   2.824  1.00 73.33           H  
ATOM   2155  HH2 TRP L  35     -10.125   9.291   2.292  1.00 64.55           H  
ATOM   2156  N   TYR L  36      -6.699   2.264   0.212  1.00  0.12           N  
ATOM   2157  CA  TYR L  36      -6.734   0.853   0.523  1.00 72.04           C  
ATOM   2158  C   TYR L  36      -7.983   0.463   1.294  1.00 61.25           C  
ATOM   2159  O   TYR L  36      -8.518   1.243   2.101  1.00 33.42           O  
ATOM   2160  CB  TYR L  36      -5.497   0.436   1.332  1.00  1.25           C  
ATOM   2161  CG  TYR L  36      -4.209   0.479   0.557  1.00 62.34           C  
ATOM   2162  CD1 TYR L  36      -3.521   1.664   0.370  1.00 52.21           C  
ATOM   2163  CD2 TYR L  36      -3.683  -0.676   0.007  1.00 32.22           C  
ATOM   2164  CE1 TYR L  36      -2.347   1.694  -0.343  1.00 73.41           C  
ATOM   2165  CE2 TYR L  36      -2.513  -0.657  -0.704  1.00 32.41           C  
ATOM   2166  CZ  TYR L  36      -1.847   0.528  -0.878  1.00 31.30           C  
ATOM   2167  OH  TYR L  36      -0.681   0.549  -1.595  1.00 32.32           O  
ATOM   2168  H   TYR L  36      -6.698   2.900   0.949  1.00 38.49           H  
ATOM   2169  HA  TYR L  36      -6.719   0.308  -0.408  1.00 55.23           H  
ATOM   2170  HB2 TYR L  36      -5.395   1.093   2.184  1.00 38.49           H  
ATOM   2171  HB3 TYR L  36      -5.640  -0.570   1.700  1.00 38.49           H  
ATOM   2172  HD1 TYR L  36      -3.919   2.575   0.793  1.00 50.43           H  
ATOM   2173  HD2 TYR L  36      -4.209  -1.609   0.144  1.00  4.13           H  
ATOM   2174  HE1 TYR L  36      -1.834   2.636  -0.475  1.00 13.53           H  
ATOM   2175  HE2 TYR L  36      -2.121  -1.572  -1.124  1.00  0.32           H  
ATOM   2176  HH  TYR L  36      -0.827   0.120  -2.444  1.00 72.01           H  
ATOM   2177  N   GLN L  37      -8.394  -0.755   1.061  1.00 31.43           N  
ATOM   2178  CA  GLN L  37      -9.510  -1.401   1.704  1.00 44.10           C  
ATOM   2179  C   GLN L  37      -8.948  -2.523   2.547  1.00 75.41           C  
ATOM   2180  O   GLN L  37      -8.294  -3.428   2.030  1.00 32.25           O  
ATOM   2181  CB  GLN L  37     -10.415  -2.023   0.628  1.00 30.13           C  
ATOM   2182  CG  GLN L  37     -11.561  -2.861   1.159  1.00 52.04           C  
ATOM   2183  CD  GLN L  37     -12.274  -3.629   0.063  1.00 34.22           C  
ATOM   2184  OE1 GLN L  37     -11.901  -4.768  -0.252  1.00 41.43           O  
ATOM   2185  NE2 GLN L  37     -13.289  -3.051  -0.507  1.00 71.12           N  
ATOM   2186  H   GLN L  37      -7.918  -1.260   0.359  1.00 38.49           H  
ATOM   2187  HA  GLN L  37     -10.075  -0.696   2.296  1.00 54.41           H  
ATOM   2188  HB2 GLN L  37     -10.869  -1.220   0.069  1.00 38.49           H  
ATOM   2189  HB3 GLN L  37      -9.818  -2.637  -0.031  1.00 38.49           H  
ATOM   2190  HG2 GLN L  37     -11.177  -3.563   1.883  1.00 38.49           H  
ATOM   2191  HG3 GLN L  37     -12.271  -2.201   1.636  1.00 38.49           H  
ATOM   2192 HE21 GLN L  37     -13.582  -2.150  -0.229  1.00 38.49           H  
ATOM   2193 HE22 GLN L  37     -13.763  -3.519  -1.224  1.00 38.49           H  
ATOM   2194  N   GLN L  38      -9.160  -2.455   3.816  1.00 61.54           N  
ATOM   2195  CA  GLN L  38      -8.654  -3.441   4.723  1.00 35.03           C  
ATOM   2196  C   GLN L  38      -9.809  -4.085   5.441  1.00 11.12           C  
ATOM   2197  O   GLN L  38     -10.585  -3.413   6.097  1.00 21.41           O  
ATOM   2198  CB  GLN L  38      -7.648  -2.766   5.693  1.00 34.44           C  
ATOM   2199  CG  GLN L  38      -6.901  -3.689   6.683  1.00 15.42           C  
ATOM   2200  CD  GLN L  38      -7.749  -4.183   7.847  1.00 40.35           C  
ATOM   2201  OE1 GLN L  38      -8.664  -3.500   8.298  1.00 13.15           O  
ATOM   2202  NE2 GLN L  38      -7.451  -5.350   8.337  1.00 52.55           N  
ATOM   2203  H   GLN L  38      -9.694  -1.714   4.189  1.00 38.49           H  
ATOM   2204  HA  GLN L  38      -8.131  -4.190   4.146  1.00 64.11           H  
ATOM   2205  HB2 GLN L  38      -6.923  -2.231   5.103  1.00 38.49           H  
ATOM   2206  HB3 GLN L  38      -8.199  -2.034   6.267  1.00 38.49           H  
ATOM   2207  HG2 GLN L  38      -6.543  -4.552   6.141  1.00 38.49           H  
ATOM   2208  HG3 GLN L  38      -6.052  -3.147   7.074  1.00 38.49           H  
ATOM   2209 HE21 GLN L  38      -6.707  -5.858   7.949  1.00 38.49           H  
ATOM   2210 HE22 GLN L  38      -7.978  -5.688   9.090  1.00 38.49           H  
ATOM   2211  N   LYS L  39      -9.951  -5.357   5.269  1.00  0.14           N  
ATOM   2212  CA  LYS L  39     -10.955  -6.091   5.954  1.00 23.44           C  
ATOM   2213  C   LYS L  39     -10.292  -7.179   6.761  1.00 62.33           C  
ATOM   2214  O   LYS L  39      -9.222  -7.669   6.374  1.00 10.51           O  
ATOM   2215  CB  LYS L  39     -11.993  -6.682   5.010  1.00 24.12           C  
ATOM   2216  CG  LYS L  39     -11.466  -7.692   4.035  1.00 74.43           C  
ATOM   2217  CD  LYS L  39     -12.594  -8.344   3.279  1.00 72.14           C  
ATOM   2218  CE  LYS L  39     -13.428  -7.303   2.512  1.00 72.41           C  
ATOM   2219  NZ  LYS L  39     -14.482  -7.908   1.657  1.00 40.42           N  
ATOM   2220  H   LYS L  39      -9.370  -5.865   4.666  1.00 38.49           H  
ATOM   2221  HA  LYS L  39     -11.438  -5.406   6.635  1.00 12.15           H  
ATOM   2222  HB2 LYS L  39     -12.755  -7.168   5.597  1.00 38.49           H  
ATOM   2223  HB3 LYS L  39     -12.439  -5.871   4.456  1.00 38.49           H  
ATOM   2224  HG2 LYS L  39     -10.809  -7.198   3.335  1.00 38.49           H  
ATOM   2225  HG3 LYS L  39     -10.924  -8.448   4.582  1.00 38.49           H  
ATOM   2226  HD2 LYS L  39     -12.150  -9.092   2.639  1.00 38.49           H  
ATOM   2227  HD3 LYS L  39     -13.201  -8.813   4.042  1.00 38.49           H  
ATOM   2228  HE2 LYS L  39     -13.921  -6.694   3.257  1.00 38.49           H  
ATOM   2229  HE3 LYS L  39     -12.766  -6.679   1.937  1.00 38.49           H  
ATOM   2230  HZ1 LYS L  39     -15.172  -8.444   2.222  1.00 38.49           H  
ATOM   2231  HZ2 LYS L  39     -14.065  -8.563   0.965  1.00 38.49           H  
ATOM   2232  HZ3 LYS L  39     -15.007  -7.193   1.110  1.00 38.49           H  
ATOM   2233  N   PRO L  40     -10.882  -7.551   7.888  1.00 21.14           N  
ATOM   2234  CA  PRO L  40     -10.309  -8.551   8.767  1.00 53.10           C  
ATOM   2235  C   PRO L  40     -10.119  -9.885   8.045  1.00 52.50           C  
ATOM   2236  O   PRO L  40     -11.071 -10.441   7.465  1.00 34.41           O  
ATOM   2237  CB  PRO L  40     -11.320  -8.682   9.914  1.00 44.21           C  
ATOM   2238  CG  PRO L  40     -12.577  -8.052   9.417  1.00 23.02           C  
ATOM   2239  CD  PRO L  40     -12.178  -7.057   8.365  1.00 13.04           C  
ATOM   2240  HA  PRO L  40      -9.356  -8.218   9.147  1.00 10.23           H  
ATOM   2241  HB2 PRO L  40     -11.464  -9.728  10.140  1.00 38.49           H  
ATOM   2242  HB3 PRO L  40     -10.941  -8.171  10.787  1.00 38.49           H  
ATOM   2243  HG2 PRO L  40     -13.217  -8.811   8.991  1.00 38.49           H  
ATOM   2244  HG3 PRO L  40     -13.083  -7.557  10.231  1.00 38.49           H  
ATOM   2245  HD2 PRO L  40     -12.871  -7.060   7.533  1.00 38.49           H  
ATOM   2246  HD3 PRO L  40     -12.079  -6.057   8.753  1.00 38.49           H  
ATOM   2247  N   GLY L  41      -8.903 -10.378   8.066  1.00  2.53           N  
ATOM   2248  CA  GLY L  41      -8.583 -11.625   7.421  1.00 73.02           C  
ATOM   2249  C   GLY L  41      -8.023 -11.444   6.019  1.00 51.42           C  
ATOM   2250  O   GLY L  41      -7.622 -12.425   5.376  1.00 13.12           O  
ATOM   2251  H   GLY L  41      -8.190  -9.876   8.519  1.00 38.49           H  
ATOM   2252  HA2 GLY L  41      -7.848 -12.141   8.021  1.00 38.49           H  
ATOM   2253  HA3 GLY L  41      -9.477 -12.228   7.364  1.00 38.49           H  
ATOM   2254  N   LYS L  42      -7.986 -10.205   5.542  1.00 61.34           N  
ATOM   2255  CA  LYS L  42      -7.394  -9.897   4.265  1.00 42.01           C  
ATOM   2256  C   LYS L  42      -6.385  -8.790   4.346  1.00 62.42           C  
ATOM   2257  O   LYS L  42      -6.401  -7.986   5.290  1.00 34.33           O  
ATOM   2258  CB  LYS L  42      -8.404  -9.574   3.209  1.00 51.43           C  
ATOM   2259  CG  LYS L  42      -9.142 -10.792   2.750  1.00 53.00           C  
ATOM   2260  CD  LYS L  42      -9.943 -10.518   1.529  1.00 22.20           C  
ATOM   2261  CE  LYS L  42      -9.067 -10.142   0.330  1.00 33.23           C  
ATOM   2262  NZ  LYS L  42      -9.871  -9.875  -0.881  1.00 63.43           N  
ATOM   2263  H   LYS L  42      -8.359  -9.461   6.065  1.00 38.49           H  
ATOM   2264  HA  LYS L  42      -6.946 -10.831   3.963  1.00 55.32           H  
ATOM   2265  HB2 LYS L  42      -9.106  -8.853   3.601  1.00 38.49           H  
ATOM   2266  HB3 LYS L  42      -7.881  -9.145   2.368  1.00 38.49           H  
ATOM   2267  HG2 LYS L  42      -8.430 -11.573   2.528  1.00 38.49           H  
ATOM   2268  HG3 LYS L  42      -9.800 -11.122   3.542  1.00 38.49           H  
ATOM   2269  HD2 LYS L  42     -10.472 -11.429   1.325  1.00 38.49           H  
ATOM   2270  HD3 LYS L  42     -10.594  -9.701   1.785  1.00 38.49           H  
ATOM   2271  HE2 LYS L  42      -8.505  -9.248   0.554  1.00 38.49           H  
ATOM   2272  HE3 LYS L  42      -8.385 -10.955   0.125  1.00 38.49           H  
ATOM   2273  HZ1 LYS L  42     -10.554  -9.111  -0.694  1.00 38.49           H  
ATOM   2274  HZ2 LYS L  42     -10.401 -10.721  -1.177  1.00 38.49           H  
ATOM   2275  HZ3 LYS L  42      -9.260  -9.604  -1.677  1.00 38.49           H  
ATOM   2276  N   ALA L  43      -5.509  -8.738   3.374  1.00 12.44           N  
ATOM   2277  CA  ALA L  43      -4.521  -7.690   3.295  1.00 31.32           C  
ATOM   2278  C   ALA L  43      -5.160  -6.450   2.692  1.00 41.24           C  
ATOM   2279  O   ALA L  43      -6.136  -6.570   1.931  1.00 12.31           O  
ATOM   2280  CB  ALA L  43      -3.341  -8.144   2.449  1.00 35.33           C  
ATOM   2281  H   ALA L  43      -5.526  -9.429   2.677  1.00 38.49           H  
ATOM   2282  HA  ALA L  43      -4.176  -7.470   4.295  1.00  3.14           H  
ATOM   2283  HB1 ALA L  43      -3.669  -8.374   1.447  1.00 38.49           H  
ATOM   2284  HB2 ALA L  43      -2.896  -9.017   2.903  1.00 38.49           H  
ATOM   2285  HB3 ALA L  43      -2.602  -7.355   2.420  1.00 38.49           H  
ATOM   2286  N   PRO L  44      -4.662  -5.243   3.031  1.00 72.12           N  
ATOM   2287  CA  PRO L  44      -5.187  -4.004   2.478  1.00 53.23           C  
ATOM   2288  C   PRO L  44      -5.067  -3.994   0.958  1.00 24.21           C  
ATOM   2289  O   PRO L  44      -3.975  -4.096   0.405  1.00 65.42           O  
ATOM   2290  CB  PRO L  44      -4.306  -2.908   3.110  1.00 70.03           C  
ATOM   2291  CG  PRO L  44      -3.093  -3.621   3.592  1.00 60.22           C  
ATOM   2292  CD  PRO L  44      -3.553  -4.997   3.964  1.00  5.32           C  
ATOM   2293  HA  PRO L  44      -6.222  -3.861   2.753  1.00 25.24           H  
ATOM   2294  HB2 PRO L  44      -4.058  -2.160   2.370  1.00 38.49           H  
ATOM   2295  HB3 PRO L  44      -4.834  -2.442   3.929  1.00 38.49           H  
ATOM   2296  HG2 PRO L  44      -2.359  -3.670   2.801  1.00 38.49           H  
ATOM   2297  HG3 PRO L  44      -2.683  -3.115   4.453  1.00 38.49           H  
ATOM   2298  HD2 PRO L  44      -2.756  -5.711   3.826  1.00 38.49           H  
ATOM   2299  HD3 PRO L  44      -3.901  -5.016   4.986  1.00 38.49           H  
ATOM   2300  N   LYS L  45      -6.182  -3.888   0.298  1.00 32.54           N  
ATOM   2301  CA  LYS L  45      -6.193  -3.920  -1.129  1.00 13.43           C  
ATOM   2302  C   LYS L  45      -6.356  -2.519  -1.640  1.00 54.12           C  
ATOM   2303  O   LYS L  45      -7.156  -1.757  -1.117  1.00 12.54           O  
ATOM   2304  CB  LYS L  45      -7.324  -4.810  -1.644  1.00 73.33           C  
ATOM   2305  CG  LYS L  45      -7.286  -5.014  -3.145  1.00 52.21           C  
ATOM   2306  CD  LYS L  45      -8.408  -5.907  -3.619  1.00 22.21           C  
ATOM   2307  CE  LYS L  45      -8.277  -6.187  -5.103  1.00 44.35           C  
ATOM   2308  NZ  LYS L  45      -7.014  -6.887  -5.409  1.00 40.34           N  
ATOM   2309  H   LYS L  45      -7.026  -3.779   0.788  1.00 38.49           H  
ATOM   2310  HA  LYS L  45      -5.248  -4.321  -1.457  1.00 50.24           H  
ATOM   2311  HB2 LYS L  45      -7.266  -5.775  -1.163  1.00 38.49           H  
ATOM   2312  HB3 LYS L  45      -8.267  -4.350  -1.391  1.00 38.49           H  
ATOM   2313  HG2 LYS L  45      -7.377  -4.054  -3.631  1.00 38.49           H  
ATOM   2314  HG3 LYS L  45      -6.341  -5.462  -3.415  1.00 38.49           H  
ATOM   2315  HD2 LYS L  45      -8.374  -6.841  -3.077  1.00 38.49           H  
ATOM   2316  HD3 LYS L  45      -9.352  -5.415  -3.435  1.00 38.49           H  
ATOM   2317  HE2 LYS L  45      -9.102  -6.803  -5.427  1.00 38.49           H  
ATOM   2318  HE3 LYS L  45      -8.296  -5.249  -5.639  1.00 38.49           H  
ATOM   2319  HZ1 LYS L  45      -6.973  -7.794  -4.902  1.00 38.49           H  
ATOM   2320  HZ2 LYS L  45      -6.168  -6.347  -5.142  1.00 38.49           H  
ATOM   2321  HZ3 LYS L  45      -6.926  -7.121  -6.418  1.00 38.49           H  
ATOM   2322  N   LEU L  46      -5.585  -2.181  -2.612  1.00 60.41           N  
ATOM   2323  CA  LEU L  46      -5.574  -0.869  -3.176  1.00 55.13           C  
ATOM   2324  C   LEU L  46      -6.641  -0.691  -4.219  1.00 61.44           C  
ATOM   2325  O   LEU L  46      -6.878  -1.563  -5.045  1.00  1.25           O  
ATOM   2326  CB  LEU L  46      -4.201  -0.622  -3.733  1.00 53.55           C  
ATOM   2327  CG  LEU L  46      -3.945   0.600  -4.548  1.00 23.11           C  
ATOM   2328  CD1 LEU L  46      -3.851   1.775  -3.647  1.00 52.55           C  
ATOM   2329  CD2 LEU L  46      -2.686   0.428  -5.369  1.00 34.31           C  
ATOM   2330  H   LEU L  46      -4.964  -2.835  -3.004  1.00 38.49           H  
ATOM   2331  HA  LEU L  46      -5.766  -0.138  -2.406  1.00 62.44           H  
ATOM   2332  HB2 LEU L  46      -3.782  -0.292  -2.788  1.00 38.49           H  
ATOM   2333  HB3 LEU L  46      -3.720  -1.501  -4.133  1.00 38.49           H  
ATOM   2334  HG  LEU L  46      -4.772   0.758  -5.225  1.00 51.12           H  
ATOM   2335 HD11 LEU L  46      -4.776   1.877  -3.099  1.00 38.49           H  
ATOM   2336 HD12 LEU L  46      -3.680   2.662  -4.239  1.00 38.49           H  
ATOM   2337 HD13 LEU L  46      -3.036   1.631  -2.954  1.00 38.49           H  
ATOM   2338 HD21 LEU L  46      -2.806  -0.440  -6.000  1.00 38.49           H  
ATOM   2339 HD22 LEU L  46      -1.850   0.272  -4.705  1.00 38.49           H  
ATOM   2340 HD23 LEU L  46      -2.526   1.300  -5.986  1.00 38.49           H  
ATOM   2341  N   LEU L  47      -7.292   0.439  -4.141  1.00 63.04           N  
ATOM   2342  CA  LEU L  47      -8.331   0.798  -5.063  1.00 13.51           C  
ATOM   2343  C   LEU L  47      -7.833   1.892  -5.976  1.00 54.02           C  
ATOM   2344  O   LEU L  47      -8.086   1.888  -7.177  1.00 74.52           O  
ATOM   2345  CB  LEU L  47      -9.591   1.327  -4.325  1.00  2.20           C  
ATOM   2346  CG  LEU L  47     -10.270   0.414  -3.293  1.00 54.03           C  
ATOM   2347  CD1 LEU L  47     -10.601  -0.950  -3.857  1.00 14.22           C  
ATOM   2348  CD2 LEU L  47      -9.478   0.318  -2.019  1.00 62.23           C  
ATOM   2349  H   LEU L  47      -7.054   1.046  -3.405  1.00 38.49           H  
ATOM   2350  HA  LEU L  47      -8.608  -0.074  -5.634  1.00 53.55           H  
ATOM   2351  HB2 LEU L  47      -9.310   2.235  -3.813  1.00 38.49           H  
ATOM   2352  HB3 LEU L  47     -10.322   1.588  -5.077  1.00 38.49           H  
ATOM   2353  HG  LEU L  47     -11.215   0.870  -3.051  1.00 44.35           H  
ATOM   2354 HD11 LEU L  47     -11.293  -0.829  -4.677  1.00 38.49           H  
ATOM   2355 HD12 LEU L  47     -11.051  -1.561  -3.088  1.00 38.49           H  
ATOM   2356 HD13 LEU L  47      -9.698  -1.421  -4.215  1.00 38.49           H  
ATOM   2357 HD21 LEU L  47      -8.491  -0.063  -2.236  1.00 38.49           H  
ATOM   2358 HD22 LEU L  47      -9.985  -0.348  -1.342  1.00 38.49           H  
ATOM   2359 HD23 LEU L  47      -9.399   1.301  -1.577  1.00 38.49           H  
ATOM   2360  N   ILE L  48      -7.096   2.827  -5.398  1.00 22.33           N  
ATOM   2361  CA  ILE L  48      -6.679   4.021  -6.121  1.00 61.15           C  
ATOM   2362  C   ILE L  48      -5.237   4.322  -5.802  1.00  4.30           C  
ATOM   2363  O   ILE L  48      -4.863   4.282  -4.662  1.00 50.51           O  
ATOM   2364  CB  ILE L  48      -7.546   5.237  -5.672  1.00  1.00           C  
ATOM   2365  CG1 ILE L  48      -9.027   4.984  -5.971  1.00 24.14           C  
ATOM   2366  CG2 ILE L  48      -7.066   6.530  -6.315  1.00 50.10           C  
ATOM   2367  CD1 ILE L  48      -9.950   6.089  -5.553  1.00 13.01           C  
ATOM   2368  H   ILE L  48      -6.780   2.684  -4.477  1.00 38.49           H  
ATOM   2369  HA  ILE L  48      -6.814   3.875  -7.182  1.00 60.41           H  
ATOM   2370  HB  ILE L  48      -7.420   5.334  -4.604  1.00 72.50           H  
ATOM   2371 HG12 ILE L  48      -9.148   4.857  -7.033  1.00 38.49           H  
ATOM   2372 HG13 ILE L  48      -9.340   4.083  -5.461  1.00 38.49           H  
ATOM   2373 HG21 ILE L  48      -7.130   6.441  -7.390  1.00 38.49           H  
ATOM   2374 HG22 ILE L  48      -6.040   6.714  -6.033  1.00 38.49           H  
ATOM   2375 HG23 ILE L  48      -7.683   7.352  -5.984  1.00 38.49           H  
ATOM   2376 HD11 ILE L  48     -10.958   5.807  -5.818  1.00 38.49           H  
ATOM   2377 HD12 ILE L  48      -9.677   6.994  -6.076  1.00 38.49           H  
ATOM   2378 HD13 ILE L  48      -9.875   6.234  -4.486  1.00 38.49           H  
ATOM   2379  N   TYR L  49      -4.474   4.712  -6.795  1.00 15.13           N  
ATOM   2380  CA  TYR L  49      -3.034   4.945  -6.606  1.00 41.41           C  
ATOM   2381  C   TYR L  49      -2.618   6.382  -6.908  1.00 41.45           C  
ATOM   2382  O   TYR L  49      -1.480   6.771  -6.672  1.00 22.43           O  
ATOM   2383  CB  TYR L  49      -2.191   3.947  -7.426  1.00 61.21           C  
ATOM   2384  CG  TYR L  49      -2.501   3.937  -8.905  1.00 64.11           C  
ATOM   2385  CD1 TYR L  49      -1.997   4.915  -9.751  1.00 12.43           C  
ATOM   2386  CD2 TYR L  49      -3.308   2.953  -9.454  1.00 73.32           C  
ATOM   2387  CE1 TYR L  49      -2.290   4.912 -11.091  1.00  2.55           C  
ATOM   2388  CE2 TYR L  49      -3.603   2.947 -10.789  1.00 45.24           C  
ATOM   2389  CZ  TYR L  49      -3.098   3.926 -11.608  1.00 32.33           C  
ATOM   2390  OH  TYR L  49      -3.397   3.922 -12.958  1.00 40.31           O  
ATOM   2391  H   TYR L  49      -4.916   4.840  -7.662  1.00 38.49           H  
ATOM   2392  HA  TYR L  49      -2.835   4.768  -5.559  1.00  1.51           H  
ATOM   2393  HB2 TYR L  49      -1.145   4.191  -7.312  1.00 38.49           H  
ATOM   2394  HB3 TYR L  49      -2.361   2.953  -7.043  1.00 38.49           H  
ATOM   2395  HD1 TYR L  49      -1.360   5.686  -9.343  1.00 61.34           H  
ATOM   2396  HD2 TYR L  49      -3.716   2.171  -8.827  1.00 11.35           H  
ATOM   2397  HE1 TYR L  49      -1.891   5.688 -11.727  1.00 14.33           H  
ATOM   2398  HE2 TYR L  49      -4.232   2.163 -11.174  1.00 22.21           H  
ATOM   2399  HH  TYR L  49      -4.359   3.940 -13.052  1.00 74.32           H  
ATOM   2400  N   ASP L  50      -3.518   7.155  -7.436  1.00 51.33           N  
ATOM   2401  CA  ASP L  50      -3.222   8.547  -7.734  1.00  2.05           C  
ATOM   2402  C   ASP L  50      -4.481   9.334  -7.654  1.00 70.12           C  
ATOM   2403  O   ASP L  50      -5.076   9.633  -8.680  1.00 31.45           O  
ATOM   2404  CB  ASP L  50      -2.575   8.713  -9.129  1.00 10.43           C  
ATOM   2405  CG  ASP L  50      -2.154  10.144  -9.465  1.00  4.34           C  
ATOM   2406  OD1 ASP L  50      -2.976  10.904 -10.030  1.00  4.21           O  
ATOM   2407  OD2 ASP L  50      -0.991  10.501  -9.211  1.00 31.14           O  
ATOM   2408  H   ASP L  50      -4.409   6.795  -7.618  1.00 38.49           H  
ATOM   2409  HA  ASP L  50      -2.537   8.908  -6.980  1.00 21.11           H  
ATOM   2410  HB2 ASP L  50      -1.711   8.078  -9.204  1.00 38.49           H  
ATOM   2411  HB3 ASP L  50      -3.285   8.392  -9.875  1.00 38.49           H  
ATOM   2412  N   ALA L  51      -4.953   9.525  -6.410  1.00 62.10           N  
ATOM   2413  CA  ALA L  51      -6.163  10.315  -6.038  1.00  0.51           C  
ATOM   2414  C   ALA L  51      -7.465   9.875  -6.737  1.00 21.31           C  
ATOM   2415  O   ALA L  51      -8.417   9.477  -6.079  1.00  3.13           O  
ATOM   2416  CB  ALA L  51      -5.932  11.804  -6.192  1.00 50.31           C  
ATOM   2417  H   ALA L  51      -4.456   9.097  -5.676  1.00 38.49           H  
ATOM   2418  HA  ALA L  51      -6.308  10.117  -4.986  1.00 51.32           H  
ATOM   2419  HB1 ALA L  51      -5.868  12.046  -7.240  1.00 38.49           H  
ATOM   2420  HB2 ALA L  51      -5.010  12.076  -5.701  1.00 38.49           H  
ATOM   2421  HB3 ALA L  51      -6.755  12.343  -5.745  1.00 38.49           H  
ATOM   2422  N   SER L  52      -7.493   9.946  -8.040  1.00 72.33           N  
ATOM   2423  CA  SER L  52      -8.657   9.595  -8.809  1.00 43.33           C  
ATOM   2424  C   SER L  52      -8.388   8.356  -9.685  1.00 73.14           C  
ATOM   2425  O   SER L  52      -9.312   7.772 -10.243  1.00 34.24           O  
ATOM   2426  CB  SER L  52      -9.053  10.776  -9.692  1.00 54.30           C  
ATOM   2427  OG  SER L  52      -9.219  11.958  -8.914  1.00 73.20           O  
ATOM   2428  H   SER L  52      -6.668  10.242  -8.495  1.00 38.49           H  
ATOM   2429  HA  SER L  52      -9.467   9.387  -8.127  1.00 21.55           H  
ATOM   2430  HB2 SER L  52      -8.301  10.944 -10.447  1.00 38.49           H  
ATOM   2431  HB3 SER L  52     -10.000  10.536 -10.153  1.00 38.49           H  
ATOM   2432  HG  SER L  52      -9.802  11.713  -8.179  1.00 23.24           H  
ATOM   2433  N   ASN L  53      -7.126   7.961  -9.798  1.00 34.44           N  
ATOM   2434  CA  ASN L  53      -6.759   6.830 -10.650  1.00  3.12           C  
ATOM   2435  C   ASN L  53      -6.994   5.494  -9.992  1.00 41.44           C  
ATOM   2436  O   ASN L  53      -6.289   5.126  -9.039  1.00 21.30           O  
ATOM   2437  CB  ASN L  53      -5.312   6.913 -11.136  1.00 22.33           C  
ATOM   2438  CG  ASN L  53      -5.069   8.018 -12.141  1.00 23.25           C  
ATOM   2439  OD1 ASN L  53      -5.199   7.804 -13.345  1.00 43.51           O  
ATOM   2440  ND2 ASN L  53      -4.706   9.184 -11.674  1.00 34.44           N  
ATOM   2441  H   ASN L  53      -6.427   8.436  -9.299  1.00 38.49           H  
ATOM   2442  HA  ASN L  53      -7.400   6.894 -11.516  1.00 73.51           H  
ATOM   2443  HB2 ASN L  53      -4.670   7.072 -10.284  1.00 38.49           H  
ATOM   2444  HB3 ASN L  53      -5.046   5.969 -11.590  1.00 38.49           H  
ATOM   2445 HD21 ASN L  53      -4.596   9.340 -10.709  1.00 38.49           H  
ATOM   2446 HD22 ASN L  53      -4.531   9.903 -12.316  1.00 38.49           H  
ATOM   2447  N   LEU L  54      -7.969   4.772 -10.510  1.00 15.00           N  
ATOM   2448  CA  LEU L  54      -8.305   3.424 -10.057  1.00 41.30           C  
ATOM   2449  C   LEU L  54      -7.266   2.432 -10.534  1.00 53.21           C  
ATOM   2450  O   LEU L  54      -6.716   2.565 -11.638  1.00 54.44           O  
ATOM   2451  CB  LEU L  54      -9.696   2.967 -10.580  1.00 25.42           C  
ATOM   2452  CG  LEU L  54     -10.975   3.557  -9.946  1.00 25.23           C  
ATOM   2453  CD1 LEU L  54     -11.080   3.185  -8.490  1.00 75.42           C  
ATOM   2454  CD2 LEU L  54     -11.083   5.055 -10.133  1.00  5.04           C  
ATOM   2455  H   LEU L  54      -8.489   5.159 -11.247  1.00 38.49           H  
ATOM   2456  HA  LEU L  54      -8.321   3.418  -8.978  1.00 70.13           H  
ATOM   2457  HB2 LEU L  54      -9.734   3.194 -11.634  1.00 38.49           H  
ATOM   2458  HB3 LEU L  54      -9.739   1.893 -10.477  1.00 38.49           H  
ATOM   2459  HG  LEU L  54     -11.820   3.091 -10.433  1.00 25.31           H  
ATOM   2460 HD11 LEU L  54     -11.958   3.656  -8.073  1.00 38.49           H  
ATOM   2461 HD12 LEU L  54     -10.196   3.492  -7.953  1.00 38.49           H  
ATOM   2462 HD13 LEU L  54     -11.196   2.114  -8.413  1.00 38.49           H  
ATOM   2463 HD21 LEU L  54     -10.235   5.538  -9.672  1.00 38.49           H  
ATOM   2464 HD22 LEU L  54     -11.992   5.395  -9.659  1.00 38.49           H  
ATOM   2465 HD23 LEU L  54     -11.110   5.286 -11.187  1.00 38.49           H  
ATOM   2466  N   GLU L  55      -6.997   1.459  -9.713  1.00 41.12           N  
ATOM   2467  CA  GLU L  55      -6.059   0.408 -10.043  1.00 43.15           C  
ATOM   2468  C   GLU L  55      -6.769  -0.690 -10.859  1.00 24.11           C  
ATOM   2469  O   GLU L  55      -8.005  -0.791 -10.848  1.00 62.23           O  
ATOM   2470  CB  GLU L  55      -5.398  -0.134  -8.745  1.00 31.23           C  
ATOM   2471  CG  GLU L  55      -4.357  -1.237  -8.940  1.00 22.21           C  
ATOM   2472  CD  GLU L  55      -3.212  -0.878  -9.875  1.00 10.54           C  
ATOM   2473  OE1 GLU L  55      -3.362  -1.068 -11.098  1.00 60.12           O  
ATOM   2474  OE2 GLU L  55      -2.139  -0.463  -9.412  1.00  4.55           O  
ATOM   2475  H   GLU L  55      -7.458   1.452  -8.841  1.00 38.49           H  
ATOM   2476  HA  GLU L  55      -5.299   0.812 -10.688  1.00 44.31           H  
ATOM   2477  HB2 GLU L  55      -4.945   0.675  -8.195  1.00 38.49           H  
ATOM   2478  HB3 GLU L  55      -6.189  -0.536  -8.130  1.00 38.49           H  
ATOM   2479  HG2 GLU L  55      -3.934  -1.510  -7.986  1.00 38.49           H  
ATOM   2480  HG3 GLU L  55      -4.886  -2.073  -9.366  1.00 38.49           H  
ATOM   2481  N   THR L  56      -6.002  -1.460 -11.592  1.00 75.15           N  
ATOM   2482  CA  THR L  56      -6.526  -2.523 -12.406  1.00 41.10           C  
ATOM   2483  C   THR L  56      -7.114  -3.613 -11.516  1.00 21.21           C  
ATOM   2484  O   THR L  56      -6.478  -4.056 -10.563  1.00 45.53           O  
ATOM   2485  CB  THR L  56      -5.420  -3.100 -13.311  1.00 42.12           C  
ATOM   2486  OG1 THR L  56      -4.844  -2.027 -14.080  1.00 75.32           O  
ATOM   2487  CG2 THR L  56      -5.974  -4.151 -14.270  1.00  1.10           C  
ATOM   2488  H   THR L  56      -5.027  -1.308 -11.572  1.00 38.49           H  
ATOM   2489  HA  THR L  56      -7.307  -2.110 -13.022  1.00 12.22           H  
ATOM   2490  HB  THR L  56      -4.667  -3.549 -12.681  1.00 53.54           H  
ATOM   2491  HG1 THR L  56      -3.892  -2.018 -13.917  1.00 60.24           H  
ATOM   2492 HG21 THR L  56      -6.726  -3.707 -14.906  1.00 38.49           H  
ATOM   2493 HG22 THR L  56      -6.413  -4.957 -13.701  1.00 38.49           H  
ATOM   2494 HG23 THR L  56      -5.173  -4.538 -14.883  1.00 38.49           H  
ATOM   2495  N   GLY L  57      -8.329  -4.008 -11.810  1.00 31.23           N  
ATOM   2496  CA  GLY L  57      -8.990  -5.005 -11.010  1.00  3.21           C  
ATOM   2497  C   GLY L  57      -9.956  -4.365 -10.055  1.00 14.14           C  
ATOM   2498  O   GLY L  57     -10.753  -5.043  -9.400  1.00  3.34           O  
ATOM   2499  H   GLY L  57      -8.790  -3.618 -12.585  1.00 38.49           H  
ATOM   2500  HA2 GLY L  57      -9.520  -5.690 -11.656  1.00 38.49           H  
ATOM   2501  HA3 GLY L  57      -8.250  -5.550 -10.444  1.00 38.49           H  
ATOM   2502  N   VAL L  58      -9.882  -3.058  -9.972  1.00 10.23           N  
ATOM   2503  CA  VAL L  58     -10.735  -2.290  -9.113  1.00 34.24           C  
ATOM   2504  C   VAL L  58     -11.893  -1.715  -9.926  1.00 62.14           C  
ATOM   2505  O   VAL L  58     -11.680  -1.134 -10.999  1.00 73.14           O  
ATOM   2506  CB  VAL L  58      -9.945  -1.145  -8.451  1.00 33.30           C  
ATOM   2507  CG1 VAL L  58     -10.829  -0.341  -7.518  1.00 60.22           C  
ATOM   2508  CG2 VAL L  58      -8.743  -1.703  -7.708  1.00 40.11           C  
ATOM   2509  H   VAL L  58      -9.220  -2.573 -10.509  1.00 38.49           H  
ATOM   2510  HA  VAL L  58     -11.110  -2.947  -8.343  1.00 53.05           H  
ATOM   2511  HB  VAL L  58      -9.584  -0.487  -9.229  1.00 44.12           H  
ATOM   2512 HG11 VAL L  58     -11.199  -0.986  -6.736  1.00 38.49           H  
ATOM   2513 HG12 VAL L  58     -11.668   0.053  -8.074  1.00 38.49           H  
ATOM   2514 HG13 VAL L  58     -10.262   0.470  -7.084  1.00 38.49           H  
ATOM   2515 HG21 VAL L  58      -8.153  -0.884  -7.326  1.00 38.49           H  
ATOM   2516 HG22 VAL L  58      -8.140  -2.274  -8.399  1.00 38.49           H  
ATOM   2517 HG23 VAL L  58      -9.069  -2.334  -6.896  1.00 38.49           H  
ATOM   2518  N   PRO L  59     -13.127  -1.917  -9.465  1.00 62.24           N  
ATOM   2519  CA  PRO L  59     -14.314  -1.399 -10.139  1.00 63.53           C  
ATOM   2520  C   PRO L  59     -14.423   0.133 -10.105  1.00 33.00           C  
ATOM   2521  O   PRO L  59     -13.954   0.793  -9.171  1.00 55.42           O  
ATOM   2522  CB  PRO L  59     -15.476  -2.009  -9.369  1.00 45.21           C  
ATOM   2523  CG  PRO L  59     -14.918  -2.413  -8.050  1.00 64.33           C  
ATOM   2524  CD  PRO L  59     -13.466  -2.701  -8.263  1.00 61.13           C  
ATOM   2525  HA  PRO L  59     -14.351  -1.735 -11.164  1.00 72.44           H  
ATOM   2526  HB2 PRO L  59     -16.219  -1.235  -9.253  1.00 38.49           H  
ATOM   2527  HB3 PRO L  59     -15.889  -2.844  -9.913  1.00 38.49           H  
ATOM   2528  HG2 PRO L  59     -15.034  -1.605  -7.344  1.00 38.49           H  
ATOM   2529  HG3 PRO L  59     -15.428  -3.294  -7.689  1.00 38.49           H  
ATOM   2530  HD2 PRO L  59     -12.897  -2.367  -7.409  1.00 38.49           H  
ATOM   2531  HD3 PRO L  59     -13.309  -3.756  -8.432  1.00 38.49           H  
ATOM   2532  N   SER L  60     -15.088   0.667 -11.108  1.00  2.33           N  
ATOM   2533  CA  SER L  60     -15.318   2.096 -11.277  1.00 51.51           C  
ATOM   2534  C   SER L  60     -16.271   2.677 -10.216  1.00  1.25           C  
ATOM   2535  O   SER L  60     -16.513   3.888 -10.181  1.00 74.41           O  
ATOM   2536  CB  SER L  60     -15.823   2.363 -12.683  1.00 74.30           C  
ATOM   2537  OG  SER L  60     -14.865   1.912 -13.634  1.00 51.10           O  
ATOM   2538  H   SER L  60     -15.452   0.072 -11.801  1.00 38.49           H  
ATOM   2539  HA  SER L  60     -14.361   2.584 -11.165  1.00 50.51           H  
ATOM   2540  HB2 SER L  60     -16.747   1.825 -12.836  1.00 38.49           H  
ATOM   2541  HB3 SER L  60     -15.988   3.420 -12.822  1.00 38.49           H  
ATOM   2542  HG  SER L  60     -14.081   1.632 -13.138  1.00 53.12           H  
ATOM   2543  N   ARG L  61     -16.826   1.805  -9.365  1.00 13.53           N  
ATOM   2544  CA  ARG L  61     -17.705   2.246  -8.293  1.00  3.50           C  
ATOM   2545  C   ARG L  61     -16.907   3.016  -7.245  1.00 60.43           C  
ATOM   2546  O   ARG L  61     -17.475   3.730  -6.445  1.00 20.12           O  
ATOM   2547  CB  ARG L  61     -18.460   1.057  -7.659  1.00 72.10           C  
ATOM   2548  CG  ARG L  61     -17.638   0.050  -6.867  1.00 44.04           C  
ATOM   2549  CD  ARG L  61     -18.531  -1.116  -6.453  1.00 34.24           C  
ATOM   2550  NE  ARG L  61     -17.875  -2.081  -5.572  1.00 52.33           N  
ATOM   2551  CZ  ARG L  61     -17.676  -3.374  -5.852  1.00 64.03           C  
ATOM   2552  NH1 ARG L  61     -17.959  -3.866  -7.061  1.00 32.34           N  
ATOM   2553  NH2 ARG L  61     -17.195  -4.167  -4.916  1.00  5.13           N  
ATOM   2554  H   ARG L  61     -16.628   0.855  -9.486  1.00 38.49           H  
ATOM   2555  HA  ARG L  61     -18.437   2.940  -8.691  1.00 31.02           H  
ATOM   2556  HB2 ARG L  61     -19.206   1.453  -6.988  1.00 38.49           H  
ATOM   2557  HB3 ARG L  61     -18.973   0.530  -8.450  1.00 38.49           H  
ATOM   2558  HG2 ARG L  61     -16.827  -0.311  -7.480  1.00 38.49           H  
ATOM   2559  HG3 ARG L  61     -17.246   0.527  -5.982  1.00 38.49           H  
ATOM   2560  HD2 ARG L  61     -19.393  -0.721  -5.935  1.00 38.49           H  
ATOM   2561  HD3 ARG L  61     -18.863  -1.623  -7.347  1.00 38.49           H  
ATOM   2562  HE  ARG L  61     -17.632  -1.751  -4.672  1.00 11.14           H  
ATOM   2563 HH11 ARG L  61     -18.329  -3.302  -7.804  1.00 38.49           H  
ATOM   2564 HH12 ARG L  61     -17.818  -4.833  -7.291  1.00 38.49           H  
ATOM   2565 HH21 ARG L  61     -16.994  -3.750  -4.012  1.00 38.49           H  
ATOM   2566 HH22 ARG L  61     -17.021  -5.152  -5.011  1.00 38.49           H  
ATOM   2567  N   PHE L  62     -15.587   2.873  -7.274  1.00  3.41           N  
ATOM   2568  CA  PHE L  62     -14.717   3.628  -6.392  1.00 22.24           C  
ATOM   2569  C   PHE L  62     -14.151   4.810  -7.155  1.00 43.34           C  
ATOM   2570  O   PHE L  62     -13.967   4.727  -8.366  1.00 72.30           O  
ATOM   2571  CB  PHE L  62     -13.555   2.769  -5.885  1.00 54.02           C  
ATOM   2572  CG  PHE L  62     -13.956   1.573  -5.093  1.00 22.34           C  
ATOM   2573  CD1 PHE L  62     -14.345   1.706  -3.782  1.00 10.21           C  
ATOM   2574  CD2 PHE L  62     -13.935   0.316  -5.657  1.00 14.02           C  
ATOM   2575  CE1 PHE L  62     -14.707   0.609  -3.039  1.00 31.44           C  
ATOM   2576  CE2 PHE L  62     -14.296  -0.791  -4.917  1.00  0.32           C  
ATOM   2577  CZ  PHE L  62     -14.681  -0.640  -3.606  1.00 15.44           C  
ATOM   2578  H   PHE L  62     -15.172   2.265  -7.923  1.00 38.49           H  
ATOM   2579  HA  PHE L  62     -15.296   3.980  -5.549  1.00 45.30           H  
ATOM   2580  HB2 PHE L  62     -12.979   2.412  -6.725  1.00 38.49           H  
ATOM   2581  HB3 PHE L  62     -12.915   3.381  -5.265  1.00 38.49           H  
ATOM   2582  HD1 PHE L  62     -14.366   2.692  -3.343  1.00 21.12           H  
ATOM   2583  HD2 PHE L  62     -13.628   0.212  -6.688  1.00 11.21           H  
ATOM   2584  HE1 PHE L  62     -15.008   0.727  -2.009  1.00 61.32           H  
ATOM   2585  HE2 PHE L  62     -14.276  -1.775  -5.362  1.00 43.32           H  
ATOM   2586  HZ  PHE L  62     -14.966  -1.501  -3.020  1.00 14.42           H  
ATOM   2587  N   SER L  63     -13.902   5.897  -6.465  1.00 32.11           N  
ATOM   2588  CA  SER L  63     -13.313   7.071  -7.067  1.00 31.13           C  
ATOM   2589  C   SER L  63     -12.857   8.016  -5.955  1.00 55.31           C  
ATOM   2590  O   SER L  63     -13.349   7.931  -4.832  1.00 52.22           O  
ATOM   2591  CB  SER L  63     -14.349   7.768  -7.976  1.00 63.14           C  
ATOM   2592  OG  SER L  63     -13.776   8.858  -8.685  1.00  1.44           O  
ATOM   2593  H   SER L  63     -14.136   5.952  -5.513  1.00 38.49           H  
ATOM   2594  HA  SER L  63     -12.462   6.767  -7.658  1.00 23.32           H  
ATOM   2595  HB2 SER L  63     -14.730   7.054  -8.691  1.00 38.49           H  
ATOM   2596  HB3 SER L  63     -15.164   8.133  -7.369  1.00 38.49           H  
ATOM   2597  HG  SER L  63     -13.316   8.435  -9.424  1.00 42.04           H  
ATOM   2598  N   GLY L  64     -11.901   8.876  -6.243  1.00 44.53           N  
ATOM   2599  CA  GLY L  64     -11.466   9.832  -5.270  1.00  3.01           C  
ATOM   2600  C   GLY L  64     -11.187  11.173  -5.902  1.00 13.22           C  
ATOM   2601  O   GLY L  64     -11.011  11.264  -7.111  1.00 21.13           O  
ATOM   2602  H   GLY L  64     -11.459   8.878  -7.118  1.00 38.49           H  
ATOM   2603  HA2 GLY L  64     -12.241   9.949  -4.527  1.00 38.49           H  
ATOM   2604  HA3 GLY L  64     -10.567   9.474  -4.793  1.00 38.49           H  
ATOM   2605  N   SER L  65     -11.181  12.202  -5.104  1.00 32.02           N  
ATOM   2606  CA  SER L  65     -10.896  13.550  -5.543  1.00 12.53           C  
ATOM   2607  C   SER L  65     -10.077  14.267  -4.475  1.00 20.25           C  
ATOM   2608  O   SER L  65     -10.005  13.800  -3.329  1.00  2.44           O  
ATOM   2609  CB  SER L  65     -12.205  14.310  -5.781  1.00 33.12           C  
ATOM   2610  OG  SER L  65     -12.999  13.670  -6.768  1.00  3.24           O  
ATOM   2611  H   SER L  65     -11.387  12.064  -4.151  1.00 38.49           H  
ATOM   2612  HA  SER L  65     -10.337  13.506  -6.466  1.00 73.14           H  
ATOM   2613  HB2 SER L  65     -12.768  14.353  -4.861  1.00 38.49           H  
ATOM   2614  HB3 SER L  65     -11.979  15.312  -6.113  1.00 38.49           H  
ATOM   2615  HG  SER L  65     -12.765  12.732  -6.790  1.00 52.13           H  
ATOM   2616  N   GLY L  66      -9.465  15.372  -4.842  1.00 31.32           N  
ATOM   2617  CA  GLY L  66      -8.699  16.141  -3.900  1.00 60.43           C  
ATOM   2618  C   GLY L  66      -7.249  16.228  -4.285  1.00 10.15           C  
ATOM   2619  O   GLY L  66      -6.741  15.376  -5.032  1.00 53.20           O  
ATOM   2620  H   GLY L  66      -9.513  15.685  -5.771  1.00 38.49           H  
ATOM   2621  HA2 GLY L  66      -9.109  17.139  -3.847  1.00 38.49           H  
ATOM   2622  HA3 GLY L  66      -8.772  15.677  -2.929  1.00 38.49           H  
ATOM   2623  N   SER L  67      -6.585  17.254  -3.809  1.00 55.41           N  
ATOM   2624  CA  SER L  67      -5.171  17.465  -4.058  1.00 11.34           C  
ATOM   2625  C   SER L  67      -4.606  18.355  -2.959  1.00 31.32           C  
ATOM   2626  O   SER L  67      -5.196  19.381  -2.626  1.00 10.13           O  
ATOM   2627  CB  SER L  67      -4.954  18.139  -5.422  1.00 55.33           C  
ATOM   2628  OG  SER L  67      -5.568  17.396  -6.476  1.00 62.21           O  
ATOM   2629  H   SER L  67      -7.051  17.911  -3.246  1.00 38.49           H  
ATOM   2630  HA  SER L  67      -4.668  16.509  -4.044  1.00 74.14           H  
ATOM   2631  HB2 SER L  67      -5.366  19.136  -5.409  1.00 38.49           H  
ATOM   2632  HB3 SER L  67      -3.895  18.197  -5.614  1.00 38.49           H  
ATOM   2633  HG  SER L  67      -5.861  16.555  -6.096  1.00 53.33           H  
ATOM   2634  N   GLY L  68      -3.508  17.956  -2.383  1.00 44.44           N  
ATOM   2635  CA  GLY L  68      -2.890  18.754  -1.368  1.00 44.53           C  
ATOM   2636  C   GLY L  68      -3.124  18.196   0.001  1.00 74.34           C  
ATOM   2637  O   GLY L  68      -2.367  17.343   0.461  1.00 65.13           O  
ATOM   2638  H   GLY L  68      -3.108  17.091  -2.630  1.00 38.49           H  
ATOM   2639  HA2 GLY L  68      -1.826  18.796  -1.551  1.00 38.49           H  
ATOM   2640  HA3 GLY L  68      -3.295  19.754  -1.410  1.00 38.49           H  
ATOM   2641  N   THR L  69      -4.167  18.654   0.644  1.00 71.53           N  
ATOM   2642  CA  THR L  69      -4.480  18.222   1.984  1.00 10.43           C  
ATOM   2643  C   THR L  69      -5.852  17.560   2.093  1.00 14.03           C  
ATOM   2644  O   THR L  69      -6.001  16.572   2.806  1.00  1.40           O  
ATOM   2645  CB  THR L  69      -4.401  19.385   2.975  1.00 52.33           C  
ATOM   2646  OG1 THR L  69      -5.196  20.475   2.488  1.00 73.53           O  
ATOM   2647  CG2 THR L  69      -2.968  19.836   3.188  1.00 42.22           C  
ATOM   2648  H   THR L  69      -4.745  19.315   0.212  1.00 38.49           H  
ATOM   2649  HA  THR L  69      -3.729  17.500   2.268  1.00 71.43           H  
ATOM   2650  HB  THR L  69      -4.816  19.053   3.916  1.00 64.41           H  
ATOM   2651  HG1 THR L  69      -4.627  21.246   2.378  1.00 43.15           H  
ATOM   2652 HG21 THR L  69      -2.548  20.153   2.244  1.00 38.49           H  
ATOM   2653 HG22 THR L  69      -2.384  19.019   3.584  1.00 38.49           H  
ATOM   2654 HG23 THR L  69      -2.952  20.663   3.883  1.00 38.49           H  
ATOM   2655  N   ASP L  70      -6.849  18.099   1.404  1.00 73.43           N  
ATOM   2656  CA  ASP L  70      -8.198  17.544   1.495  1.00 34.03           C  
ATOM   2657  C   ASP L  70      -8.414  16.514   0.414  1.00 30.54           C  
ATOM   2658  O   ASP L  70      -8.117  16.755  -0.766  1.00 34.52           O  
ATOM   2659  CB  ASP L  70      -9.229  18.668   1.348  1.00 25.32           C  
ATOM   2660  CG  ASP L  70     -10.662  18.182   1.430  1.00 72.45           C  
ATOM   2661  OD1 ASP L  70     -11.174  18.018   2.557  1.00 40.31           O  
ATOM   2662  OD2 ASP L  70     -11.305  17.994   0.362  1.00 73.32           O  
ATOM   2663  H   ASP L  70      -6.691  18.873   0.825  1.00 38.49           H  
ATOM   2664  HA  ASP L  70      -8.320  17.085   2.464  1.00 43.24           H  
ATOM   2665  HB2 ASP L  70      -9.074  19.397   2.127  1.00 38.49           H  
ATOM   2666  HB3 ASP L  70      -9.083  19.143   0.389  1.00 38.49           H  
ATOM   2667  N   PHE L  71      -8.936  15.376   0.801  1.00 42.03           N  
ATOM   2668  CA  PHE L  71      -9.194  14.294  -0.115  1.00 44.03           C  
ATOM   2669  C   PHE L  71     -10.536  13.674   0.149  1.00  5.40           C  
ATOM   2670  O   PHE L  71     -10.897  13.433   1.294  1.00 64.45           O  
ATOM   2671  CB  PHE L  71      -8.098  13.238  -0.032  1.00 21.34           C  
ATOM   2672  CG  PHE L  71      -6.750  13.770  -0.390  1.00 73.24           C  
ATOM   2673  CD1 PHE L  71      -6.387  13.918  -1.715  1.00 23.31           C  
ATOM   2674  CD2 PHE L  71      -5.850  14.132   0.592  1.00 74.11           C  
ATOM   2675  CE1 PHE L  71      -5.156  14.417  -2.052  1.00 32.10           C  
ATOM   2676  CE2 PHE L  71      -4.619  14.630   0.260  1.00 52.54           C  
ATOM   2677  CZ  PHE L  71      -4.273  14.774  -1.066  1.00 71.45           C  
ATOM   2678  H   PHE L  71      -9.148  15.237   1.752  1.00 38.49           H  
ATOM   2679  HA  PHE L  71      -9.195  14.703  -1.114  1.00 32.22           H  
ATOM   2680  HB2 PHE L  71      -8.052  12.856   0.977  1.00 38.49           H  
ATOM   2681  HB3 PHE L  71      -8.331  12.430  -0.710  1.00 38.49           H  
ATOM   2682  HD1 PHE L  71      -7.085  13.638  -2.490  1.00 42.33           H  
ATOM   2683  HD2 PHE L  71      -6.122  14.018   1.631  1.00 25.23           H  
ATOM   2684  HE1 PHE L  71      -4.883  14.528  -3.090  1.00 42.34           H  
ATOM   2685  HE2 PHE L  71      -3.923  14.914   1.036  1.00 21.24           H  
ATOM   2686  HZ  PHE L  71      -3.304  15.167  -1.333  1.00  2.55           H  
ATOM   2687  N   THR L  72     -11.259  13.413  -0.891  1.00 41.53           N  
ATOM   2688  CA  THR L  72     -12.557  12.825  -0.785  1.00 31.42           C  
ATOM   2689  C   THR L  72     -12.632  11.546  -1.613  1.00 32.01           C  
ATOM   2690  O   THR L  72     -12.426  11.561  -2.813  1.00 43.12           O  
ATOM   2691  CB  THR L  72     -13.642  13.819  -1.249  1.00 51.45           C  
ATOM   2692  OG1 THR L  72     -13.594  14.996  -0.429  1.00 73.33           O  
ATOM   2693  CG2 THR L  72     -15.026  13.201  -1.164  1.00 52.51           C  
ATOM   2694  H   THR L  72     -10.908  13.626  -1.786  1.00 38.49           H  
ATOM   2695  HA  THR L  72     -12.740  12.574   0.251  1.00 44.02           H  
ATOM   2696  HB  THR L  72     -13.435  14.093  -2.273  1.00 61.12           H  
ATOM   2697  HG1 THR L  72     -12.725  15.395  -0.553  1.00 43.31           H  
ATOM   2698 HG21 THR L  72     -15.066  12.321  -1.790  1.00 38.49           H  
ATOM   2699 HG22 THR L  72     -15.763  13.916  -1.498  1.00 38.49           H  
ATOM   2700 HG23 THR L  72     -15.229  12.922  -0.141  1.00 38.49           H  
ATOM   2701  N   PHE L  73     -12.888  10.468  -0.951  1.00 42.12           N  
ATOM   2702  CA  PHE L  73     -13.073   9.178  -1.569  1.00 61.20           C  
ATOM   2703  C   PHE L  73     -14.550   8.905  -1.655  1.00 32.05           C  
ATOM   2704  O   PHE L  73     -15.282   9.124  -0.686  1.00  4.22           O  
ATOM   2705  CB  PHE L  73     -12.378   8.119  -0.726  1.00 61.31           C  
ATOM   2706  CG  PHE L  73     -12.657   6.693  -1.088  1.00 62.24           C  
ATOM   2707  CD1 PHE L  73     -11.949   6.036  -2.084  1.00 51.24           C  
ATOM   2708  CD2 PHE L  73     -13.621   6.003  -0.395  1.00 42.43           C  
ATOM   2709  CE1 PHE L  73     -12.216   4.711  -2.365  1.00 32.42           C  
ATOM   2710  CE2 PHE L  73     -13.894   4.700  -0.669  1.00 30.40           C  
ATOM   2711  CZ  PHE L  73     -13.197   4.047  -1.646  1.00 13.42           C  
ATOM   2712  H   PHE L  73     -12.981  10.547   0.026  1.00 38.49           H  
ATOM   2713  HA  PHE L  73     -12.642   9.193  -2.559  1.00 43.42           H  
ATOM   2714  HB2 PHE L  73     -11.311   8.258  -0.810  1.00 38.49           H  
ATOM   2715  HB3 PHE L  73     -12.657   8.265   0.306  1.00 38.49           H  
ATOM   2716  HD1 PHE L  73     -11.184   6.555  -2.644  1.00 14.34           H  
ATOM   2717  HD2 PHE L  73     -14.172   6.527   0.371  1.00  2.32           H  
ATOM   2718  HE1 PHE L  73     -11.661   4.205  -3.143  1.00 42.01           H  
ATOM   2719  HE2 PHE L  73     -14.658   4.181  -0.109  1.00 35.42           H  
ATOM   2720  HZ  PHE L  73     -13.447   3.012  -1.822  1.00 65.41           H  
ATOM   2721  N   THR L  74     -14.999   8.464  -2.778  1.00 71.22           N  
ATOM   2722  CA  THR L  74     -16.374   8.232  -2.948  1.00 45.11           C  
ATOM   2723  C   THR L  74     -16.633   6.852  -3.581  1.00 32.54           C  
ATOM   2724  O   THR L  74     -15.899   6.411  -4.470  1.00 75.31           O  
ATOM   2725  CB  THR L  74     -17.024   9.386  -3.783  1.00 51.34           C  
ATOM   2726  OG1 THR L  74     -18.440   9.280  -3.767  1.00 10.23           O  
ATOM   2727  CG2 THR L  74     -16.541   9.380  -5.230  1.00  1.23           C  
ATOM   2728  H   THR L  74     -14.393   8.273  -3.532  1.00 38.49           H  
ATOM   2729  HA  THR L  74     -16.825   8.241  -1.967  1.00 24.22           H  
ATOM   2730  HB  THR L  74     -16.744  10.325  -3.327  1.00 11.04           H  
ATOM   2731  HG1 THR L  74     -18.686   8.894  -2.914  1.00 13.14           H  
ATOM   2732 HG21 THR L  74     -16.996  10.197  -5.769  1.00 38.49           H  
ATOM   2733 HG22 THR L  74     -16.824   8.442  -5.687  1.00 38.49           H  
ATOM   2734 HG23 THR L  74     -15.464   9.477  -5.251  1.00 38.49           H  
ATOM   2735  N   ILE L  75     -17.625   6.157  -3.076  1.00 43.10           N  
ATOM   2736  CA  ILE L  75     -18.070   4.931  -3.684  1.00 45.10           C  
ATOM   2737  C   ILE L  75     -19.433   5.234  -4.270  1.00 33.03           C  
ATOM   2738  O   ILE L  75     -20.354   5.508  -3.531  1.00 33.40           O  
ATOM   2739  CB  ILE L  75     -18.202   3.776  -2.646  1.00 31.13           C  
ATOM   2740  CG1 ILE L  75     -16.873   3.539  -1.930  1.00 11.41           C  
ATOM   2741  CG2 ILE L  75     -18.670   2.491  -3.327  1.00 60.31           C  
ATOM   2742  CD1 ILE L  75     -16.936   2.477  -0.843  1.00 32.54           C  
ATOM   2743  H   ILE L  75     -18.089   6.479  -2.274  1.00 38.49           H  
ATOM   2744  HA  ILE L  75     -17.384   4.657  -4.472  1.00  3.44           H  
ATOM   2745  HB  ILE L  75     -18.942   4.058  -1.915  1.00  4.13           H  
ATOM   2746 HG12 ILE L  75     -16.143   3.223  -2.658  1.00 38.49           H  
ATOM   2747 HG13 ILE L  75     -16.545   4.464  -1.479  1.00 38.49           H  
ATOM   2748 HG21 ILE L  75     -18.760   1.704  -2.594  1.00 38.49           H  
ATOM   2749 HG22 ILE L  75     -17.954   2.200  -4.082  1.00 38.49           H  
ATOM   2750 HG23 ILE L  75     -19.631   2.660  -3.791  1.00 38.49           H  
ATOM   2751 HD11 ILE L  75     -17.244   1.539  -1.281  1.00 38.49           H  
ATOM   2752 HD12 ILE L  75     -17.652   2.771  -0.091  1.00 38.49           H  
ATOM   2753 HD13 ILE L  75     -15.962   2.358  -0.393  1.00 38.49           H  
ATOM   2754  N   SER L  76     -19.548   5.217  -5.573  1.00 23.33           N  
ATOM   2755  CA  SER L  76     -20.785   5.581  -6.231  1.00 53.22           C  
ATOM   2756  C   SER L  76     -21.843   4.493  -6.091  1.00 30.01           C  
ATOM   2757  O   SER L  76     -23.015   4.785  -5.814  1.00 21.10           O  
ATOM   2758  CB  SER L  76     -20.506   5.861  -7.701  1.00 21.24           C  
ATOM   2759  OG  SER L  76     -19.524   6.877  -7.842  1.00 34.44           O  
ATOM   2760  H   SER L  76     -18.761   4.959  -6.101  1.00 38.49           H  
ATOM   2761  HA  SER L  76     -21.155   6.489  -5.782  1.00 41.32           H  
ATOM   2762  HB2 SER L  76     -20.150   4.960  -8.180  1.00 38.49           H  
ATOM   2763  HB3 SER L  76     -21.416   6.189  -8.179  1.00 38.49           H  
ATOM   2764  HG  SER L  76     -18.766   6.543  -8.332  1.00 11.13           H  
ATOM   2765  N   SER L  77     -21.445   3.260  -6.280  1.00 44.32           N  
ATOM   2766  CA  SER L  77     -22.336   2.167  -6.089  1.00 14.33           C  
ATOM   2767  C   SER L  77     -21.857   1.239  -4.980  1.00 44.42           C  
ATOM   2768  O   SER L  77     -21.013   0.377  -5.210  1.00  4.24           O  
ATOM   2769  CB  SER L  77     -22.657   1.456  -7.406  1.00  1.52           C  
ATOM   2770  OG  SER L  77     -21.483   1.129  -8.136  1.00 44.12           O  
ATOM   2771  H   SER L  77     -20.527   3.057  -6.546  1.00 38.49           H  
ATOM   2772  HA  SER L  77     -23.226   2.661  -5.745  1.00 42.13           H  
ATOM   2773  HB2 SER L  77     -23.181   0.538  -7.191  1.00 38.49           H  
ATOM   2774  HB3 SER L  77     -23.281   2.095  -8.012  1.00 38.49           H  
ATOM   2775  HG  SER L  77     -21.751   1.062  -9.062  1.00 32.32           H  
ATOM   2776  N   LEU L  78     -22.357   1.441  -3.774  1.00 14.21           N  
ATOM   2777  CA  LEU L  78     -21.904   0.655  -2.641  1.00 11.31           C  
ATOM   2778  C   LEU L  78     -22.447  -0.779  -2.680  1.00 52.31           C  
ATOM   2779  O   LEU L  78     -23.660  -0.985  -2.769  1.00 55.21           O  
ATOM   2780  CB  LEU L  78     -22.297   1.347  -1.343  1.00 73.25           C  
ATOM   2781  CG  LEU L  78     -21.838   0.667  -0.067  1.00 41.15           C  
ATOM   2782  CD1 LEU L  78     -20.323   0.544  -0.064  1.00 43.11           C  
ATOM   2783  CD2 LEU L  78     -22.316   1.458   1.138  1.00 11.12           C  
ATOM   2784  H   LEU L  78     -23.038   2.134  -3.612  1.00 38.49           H  
ATOM   2785  HA  LEU L  78     -20.826   0.620  -2.696  1.00 61.31           H  
ATOM   2786  HB2 LEU L  78     -21.888   2.346  -1.358  1.00 38.49           H  
ATOM   2787  HB3 LEU L  78     -23.374   1.419  -1.316  1.00 38.49           H  
ATOM   2788  HG  LEU L  78     -22.259  -0.326  -0.015  1.00 52.52           H  
ATOM   2789 HD11 LEU L  78     -20.001   0.007  -0.944  1.00 38.49           H  
ATOM   2790 HD12 LEU L  78     -20.011  -0.022   0.801  1.00 38.49           H  
ATOM   2791 HD13 LEU L  78     -19.875   1.526  -0.055  1.00 38.49           H  
ATOM   2792 HD21 LEU L  78     -21.893   2.452   1.089  1.00 38.49           H  
ATOM   2793 HD22 LEU L  78     -22.012   0.987   2.062  1.00 38.49           H  
ATOM   2794 HD23 LEU L  78     -23.393   1.539   1.117  1.00 38.49           H  
ATOM   2795  N   GLN L  79     -21.547  -1.758  -2.624  1.00  1.31           N  
ATOM   2796  CA  GLN L  79     -21.915  -3.170  -2.637  1.00 41.15           C  
ATOM   2797  C   GLN L  79     -21.656  -3.808  -1.265  1.00 61.15           C  
ATOM   2798  O   GLN L  79     -20.781  -3.359  -0.531  1.00  2.21           O  
ATOM   2799  CB  GLN L  79     -21.104  -3.917  -3.710  1.00 12.24           C  
ATOM   2800  CG  GLN L  79     -21.354  -3.439  -5.126  1.00 31.23           C  
ATOM   2801  CD  GLN L  79     -22.778  -3.668  -5.570  1.00  4.12           C  
ATOM   2802  OE1 GLN L  79     -23.102  -4.707  -6.126  1.00 14.00           O  
ATOM   2803  NE2 GLN L  79     -23.634  -2.714  -5.324  1.00  0.43           N  
ATOM   2804  H   GLN L  79     -20.578  -1.565  -2.575  1.00 38.49           H  
ATOM   2805  HA  GLN L  79     -22.963  -3.235  -2.883  1.00 65.41           H  
ATOM   2806  HB2 GLN L  79     -20.053  -3.793  -3.495  1.00 38.49           H  
ATOM   2807  HB3 GLN L  79     -21.348  -4.967  -3.656  1.00 38.49           H  
ATOM   2808  HG2 GLN L  79     -21.145  -2.381  -5.177  1.00 38.49           H  
ATOM   2809  HG3 GLN L  79     -20.693  -3.969  -5.795  1.00 38.49           H  
ATOM   2810 HE21 GLN L  79     -23.329  -1.898  -4.870  1.00 38.49           H  
ATOM   2811 HE22 GLN L  79     -24.568  -2.850  -5.589  1.00 38.49           H  
ATOM   2812  N   PRO L  80     -22.426  -4.867  -0.898  1.00 10.42           N  
ATOM   2813  CA  PRO L  80     -22.250  -5.603   0.379  1.00 72.40           C  
ATOM   2814  C   PRO L  80     -20.812  -6.108   0.600  1.00 70.45           C  
ATOM   2815  O   PRO L  80     -20.339  -6.199   1.734  1.00 33.15           O  
ATOM   2816  CB  PRO L  80     -23.213  -6.784   0.242  1.00 40.24           C  
ATOM   2817  CG  PRO L  80     -24.269  -6.291  -0.680  1.00  2.22           C  
ATOM   2818  CD  PRO L  80     -23.568  -5.402  -1.672  1.00 15.32           C  
ATOM   2819  HA  PRO L  80     -22.536  -4.997   1.224  1.00 43.52           H  
ATOM   2820  HB2 PRO L  80     -22.686  -7.632  -0.168  1.00 38.49           H  
ATOM   2821  HB3 PRO L  80     -23.622  -7.037   1.209  1.00 38.49           H  
ATOM   2822  HG2 PRO L  80     -24.736  -7.124  -1.183  1.00 38.49           H  
ATOM   2823  HG3 PRO L  80     -25.006  -5.726  -0.129  1.00 38.49           H  
ATOM   2824  HD2 PRO L  80     -23.235  -5.970  -2.527  1.00 38.49           H  
ATOM   2825  HD3 PRO L  80     -24.227  -4.606  -1.981  1.00 38.49           H  
ATOM   2826  N   GLU L  81     -20.130  -6.424  -0.485  1.00 22.40           N  
ATOM   2827  CA  GLU L  81     -18.760  -6.929  -0.428  1.00 72.20           C  
ATOM   2828  C   GLU L  81     -17.747  -5.829  -0.061  1.00 12.41           C  
ATOM   2829  O   GLU L  81     -16.599  -6.126   0.316  1.00 10.24           O  
ATOM   2830  CB  GLU L  81     -18.379  -7.581  -1.762  1.00 41.24           C  
ATOM   2831  CG  GLU L  81     -18.567  -6.672  -2.967  1.00 32.40           C  
ATOM   2832  CD  GLU L  81     -18.106  -7.300  -4.255  1.00 70.50           C  
ATOM   2833  OE1 GLU L  81     -18.829  -8.136  -4.816  1.00 51.41           O  
ATOM   2834  OE2 GLU L  81     -16.997  -6.955  -4.727  1.00 14.23           O  
ATOM   2835  H   GLU L  81     -20.571  -6.309  -1.353  1.00 38.49           H  
ATOM   2836  HA  GLU L  81     -18.727  -7.687   0.341  1.00 14.42           H  
ATOM   2837  HB2 GLU L  81     -17.340  -7.873  -1.723  1.00 38.49           H  
ATOM   2838  HB3 GLU L  81     -18.984  -8.465  -1.906  1.00 38.49           H  
ATOM   2839  HG2 GLU L  81     -19.617  -6.435  -3.062  1.00 38.49           H  
ATOM   2840  HG3 GLU L  81     -18.010  -5.761  -2.803  1.00 38.49           H  
ATOM   2841  N   ASP L  82     -18.186  -4.572  -0.127  1.00 14.11           N  
ATOM   2842  CA  ASP L  82     -17.300  -3.429   0.119  1.00 75.42           C  
ATOM   2843  C   ASP L  82     -17.219  -3.106   1.589  1.00 24.31           C  
ATOM   2844  O   ASP L  82     -16.589  -2.124   1.979  1.00 64.45           O  
ATOM   2845  CB  ASP L  82     -17.739  -2.170  -0.655  1.00 53.13           C  
ATOM   2846  CG  ASP L  82     -17.734  -2.338  -2.152  1.00 12.12           C  
ATOM   2847  OD1 ASP L  82     -16.711  -2.788  -2.715  1.00 62.34           O  
ATOM   2848  OD2 ASP L  82     -18.736  -1.996  -2.794  1.00 31.21           O  
ATOM   2849  H   ASP L  82     -19.129  -4.386  -0.329  1.00 38.49           H  
ATOM   2850  HA  ASP L  82     -16.314  -3.713  -0.219  1.00 34.52           H  
ATOM   2851  HB2 ASP L  82     -18.747  -1.920  -0.359  1.00 38.49           H  
ATOM   2852  HB3 ASP L  82     -17.086  -1.351  -0.398  1.00 38.49           H  
ATOM   2853  N   ILE L  83     -17.858  -3.920   2.407  1.00 41.34           N  
ATOM   2854  CA  ILE L  83     -17.804  -3.745   3.843  1.00 14.53           C  
ATOM   2855  C   ILE L  83     -16.401  -4.068   4.342  1.00 52.42           C  
ATOM   2856  O   ILE L  83     -15.980  -5.242   4.354  1.00 61.00           O  
ATOM   2857  CB  ILE L  83     -18.856  -4.624   4.581  1.00 64.02           C  
ATOM   2858  CG1 ILE L  83     -20.281  -4.233   4.155  1.00 24.03           C  
ATOM   2859  CG2 ILE L  83     -18.701  -4.493   6.098  1.00 53.41           C  
ATOM   2860  CD1 ILE L  83     -20.610  -2.808   4.430  1.00 25.33           C  
ATOM   2861  H   ILE L  83     -18.373  -4.655   2.015  1.00 38.49           H  
ATOM   2862  HA  ILE L  83     -17.999  -2.704   4.053  1.00 55.12           H  
ATOM   2863  HB  ILE L  83     -18.676  -5.649   4.294  1.00 62.14           H  
ATOM   2864 HG12 ILE L  83     -20.379  -4.368   3.089  1.00 38.49           H  
ATOM   2865 HG13 ILE L  83     -21.040  -4.829   4.642  1.00 38.49           H  
ATOM   2866 HG21 ILE L  83     -17.715  -4.831   6.382  1.00 38.49           H  
ATOM   2867 HG22 ILE L  83     -19.454  -5.079   6.603  1.00 38.49           H  
ATOM   2868 HG23 ILE L  83     -18.806  -3.450   6.366  1.00 38.49           H  
ATOM   2869 HD11 ILE L  83     -21.664  -2.650   4.266  1.00 38.49           H  
ATOM   2870 HD12 ILE L  83     -20.024  -2.152   3.806  1.00 38.49           H  
ATOM   2871 HD13 ILE L  83     -20.375  -2.614   5.466  1.00 38.49           H  
ATOM   2872  N   ALA L  84     -15.679  -3.029   4.710  1.00 51.30           N  
ATOM   2873  CA  ALA L  84     -14.313  -3.130   5.174  1.00 41.23           C  
ATOM   2874  C   ALA L  84     -13.896  -1.803   5.776  1.00 33.10           C  
ATOM   2875  O   ALA L  84     -14.735  -0.914   5.970  1.00 63.15           O  
ATOM   2876  CB  ALA L  84     -13.399  -3.477   4.012  1.00 23.12           C  
ATOM   2877  H   ALA L  84     -16.081  -2.134   4.671  1.00 38.49           H  
ATOM   2878  HA  ALA L  84     -14.250  -3.910   5.917  1.00 10.53           H  
ATOM   2879  HB1 ALA L  84     -13.462  -2.693   3.272  1.00 38.49           H  
ATOM   2880  HB2 ALA L  84     -13.718  -4.409   3.571  1.00 38.49           H  
ATOM   2881  HB3 ALA L  84     -12.380  -3.563   4.360  1.00 38.49           H  
ATOM   2882  N   THR L  85     -12.634  -1.665   6.074  1.00 74.44           N  
ATOM   2883  CA  THR L  85     -12.119  -0.461   6.620  1.00 71.12           C  
ATOM   2884  C   THR L  85     -11.262   0.253   5.556  1.00 53.04           C  
ATOM   2885  O   THR L  85     -10.308  -0.325   5.019  1.00 12.03           O  
ATOM   2886  CB  THR L  85     -11.266  -0.773   7.860  1.00 61.44           C  
ATOM   2887  OG1 THR L  85     -12.029  -1.588   8.766  1.00  4.40           O  
ATOM   2888  CG2 THR L  85     -10.876   0.503   8.564  1.00 41.13           C  
ATOM   2889  H   THR L  85     -11.984  -2.394   5.949  1.00 38.49           H  
ATOM   2890  HA  THR L  85     -12.947   0.170   6.908  1.00  2.20           H  
ATOM   2891  HB  THR L  85     -10.375  -1.302   7.554  1.00 42.23           H  
ATOM   2892  HG1 THR L  85     -11.480  -2.333   9.034  1.00 24.11           H  
ATOM   2893 HG21 THR L  85     -11.776   1.029   8.852  1.00 38.49           H  
ATOM   2894 HG22 THR L  85     -10.300   1.124   7.893  1.00 38.49           H  
ATOM   2895 HG23 THR L  85     -10.289   0.271   9.439  1.00 38.49           H  
ATOM   2896  N   TYR L  86     -11.596   1.482   5.260  1.00 34.43           N  
ATOM   2897  CA  TYR L  86     -10.893   2.242   4.243  1.00 24.03           C  
ATOM   2898  C   TYR L  86      -9.959   3.240   4.847  1.00 14.53           C  
ATOM   2899  O   TYR L  86     -10.241   3.840   5.885  1.00 63.20           O  
ATOM   2900  CB  TYR L  86     -11.866   2.915   3.274  1.00 52.25           C  
ATOM   2901  CG  TYR L  86     -12.629   1.929   2.430  1.00 50.23           C  
ATOM   2902  CD1 TYR L  86     -13.754   1.292   2.922  1.00 14.11           C  
ATOM   2903  CD2 TYR L  86     -12.212   1.624   1.142  1.00 43.52           C  
ATOM   2904  CE1 TYR L  86     -14.441   0.380   2.160  1.00 11.41           C  
ATOM   2905  CE2 TYR L  86     -12.901   0.712   0.372  1.00 52.32           C  
ATOM   2906  CZ  TYR L  86     -14.009   0.096   0.889  1.00  3.21           C  
ATOM   2907  OH  TYR L  86     -14.685  -0.810   0.132  1.00 50.45           O  
ATOM   2908  H   TYR L  86     -12.337   1.900   5.757  1.00 38.49           H  
ATOM   2909  HA  TYR L  86     -10.280   1.558   3.676  1.00 42.55           H  
ATOM   2910  HB2 TYR L  86     -12.579   3.501   3.836  1.00 38.49           H  
ATOM   2911  HB3 TYR L  86     -11.313   3.566   2.614  1.00 38.49           H  
ATOM   2912  HD1 TYR L  86     -14.087   1.523   3.923  1.00 45.54           H  
ATOM   2913  HD2 TYR L  86     -11.336   2.112   0.740  1.00 73.41           H  
ATOM   2914  HE1 TYR L  86     -15.316  -0.106   2.566  1.00  4.14           H  
ATOM   2915  HE2 TYR L  86     -12.578   0.472  -0.630  1.00 44.50           H  
ATOM   2916  HH  TYR L  86     -15.630  -0.690   0.271  1.00  4.10           H  
ATOM   2917  N   HIS L  87      -8.819   3.373   4.233  1.00 62.01           N  
ATOM   2918  CA  HIS L  87      -7.813   4.293   4.678  1.00 31.42           C  
ATOM   2919  C   HIS L  87      -6.905   4.786   3.596  1.00 34.21           C  
ATOM   2920  O   HIS L  87      -6.423   4.017   2.756  1.00 43.22           O  
ATOM   2921  CB  HIS L  87      -7.054   3.850   5.956  1.00 41.22           C  
ATOM   2922  CG  HIS L  87      -6.711   2.402   6.060  1.00 23.04           C  
ATOM   2923  ND1 HIS L  87      -6.883   1.694   7.222  1.00 71.23           N  
ATOM   2924  CD2 HIS L  87      -6.187   1.532   5.169  1.00 11.33           C  
ATOM   2925  CE1 HIS L  87      -6.486   0.475   7.059  1.00 53.12           C  
ATOM   2926  NE2 HIS L  87      -6.057   0.330   5.819  1.00 23.05           N  
ATOM   2927  H   HIS L  87      -8.655   2.839   3.422  1.00 38.49           H  
ATOM   2928  HA  HIS L  87      -8.391   5.166   4.945  1.00 65.33           H  
ATOM   2929  HB2 HIS L  87      -6.112   4.376   5.982  1.00 38.49           H  
ATOM   2930  HB3 HIS L  87      -7.625   4.128   6.829  1.00 38.49           H  
ATOM   2931  HD1 HIS L  87      -7.244   2.007   8.085  1.00 61.41           H  
ATOM   2932  HD2 HIS L  87      -5.923   1.742   4.142  1.00 33.02           H  
ATOM   2933  HE1 HIS L  87      -6.508  -0.259   7.845  1.00 73.34           H  
ATOM   2934  HE2 HIS L  87      -5.961  -0.543   5.386  1.00 38.49           H  
ATOM   2935  N   CYS L  88      -6.711   6.068   3.632  1.00 24.45           N  
ATOM   2936  CA  CYS L  88      -5.863   6.811   2.741  1.00 23.41           C  
ATOM   2937  C   CYS L  88      -4.400   6.694   3.169  1.00 35.24           C  
ATOM   2938  O   CYS L  88      -4.116   6.527   4.357  1.00  4.30           O  
ATOM   2939  CB  CYS L  88      -6.321   8.278   2.812  1.00 11.14           C  
ATOM   2940  SG  CYS L  88      -6.593   8.863   4.533  1.00 74.35           S  
ATOM   2941  H   CYS L  88      -7.173   6.601   4.314  1.00 38.49           H  
ATOM   2942  HA  CYS L  88      -5.996   6.465   1.727  1.00 61.31           H  
ATOM   2943  HB2 CYS L  88      -5.538   8.901   2.411  1.00 38.49           H  
ATOM   2944  HB3 CYS L  88      -7.242   8.415   2.264  1.00 38.49           H  
ATOM   2945  N   GLN L  89      -3.492   6.728   2.212  1.00 74.23           N  
ATOM   2946  CA  GLN L  89      -2.072   6.748   2.495  1.00 72.04           C  
ATOM   2947  C   GLN L  89      -1.412   7.768   1.595  1.00 62.11           C  
ATOM   2948  O   GLN L  89      -1.855   7.969   0.456  1.00 43.33           O  
ATOM   2949  CB  GLN L  89      -1.425   5.337   2.378  1.00 42.23           C  
ATOM   2950  CG  GLN L  89      -1.312   4.713   0.980  1.00 53.53           C  
ATOM   2951  CD  GLN L  89      -0.113   5.203   0.143  1.00 54.04           C  
ATOM   2952  OE1 GLN L  89      -0.194   6.159  -0.614  1.00 43.34           O  
ATOM   2953  NE2 GLN L  89       1.003   4.537   0.286  1.00 63.12           N  
ATOM   2954  H   GLN L  89      -3.748   6.720   1.261  1.00 38.49           H  
ATOM   2955  HA  GLN L  89      -1.981   7.101   3.514  1.00 24.11           H  
ATOM   2956  HB2 GLN L  89      -0.423   5.392   2.775  1.00 38.49           H  
ATOM   2957  HB3 GLN L  89      -1.992   4.664   3.005  1.00 38.49           H  
ATOM   2958  HG2 GLN L  89      -1.234   3.645   1.084  1.00 38.49           H  
ATOM   2959  HG3 GLN L  89      -2.225   4.939   0.452  1.00 38.49           H  
ATOM   2960 HE21 GLN L  89       1.015   3.776   0.902  1.00 38.49           H  
ATOM   2961 HE22 GLN L  89       1.770   4.843  -0.236  1.00 38.49           H  
ATOM   2962  N   GLN L  90      -0.445   8.459   2.107  1.00 33.54           N  
ATOM   2963  CA  GLN L  90       0.269   9.447   1.332  1.00  2.10           C  
ATOM   2964  C   GLN L  90       1.585   8.905   0.790  1.00 62.21           C  
ATOM   2965  O   GLN L  90       2.140   7.970   1.338  1.00 71.02           O  
ATOM   2966  CB  GLN L  90       0.454  10.759   2.126  1.00 51.01           C  
ATOM   2967  CG  GLN L  90       0.836  10.624   3.616  1.00 72.02           C  
ATOM   2968  CD  GLN L  90       2.109   9.866   3.891  1.00 62.32           C  
ATOM   2969  OE1 GLN L  90       2.085   8.684   4.061  1.00 61.04           O  
ATOM   2970  NE2 GLN L  90       3.215  10.553   3.950  1.00 34.53           N  
ATOM   2971  H   GLN L  90      -0.162   8.285   3.030  1.00 38.49           H  
ATOM   2972  HA  GLN L  90      -0.358   9.656   0.478  1.00 13.52           H  
ATOM   2973  HB2 GLN L  90       1.229  11.335   1.643  1.00 38.49           H  
ATOM   2974  HB3 GLN L  90      -0.472  11.312   2.067  1.00 38.49           H  
ATOM   2975  HG2 GLN L  90       0.939  11.618   4.025  1.00 38.49           H  
ATOM   2976  HG3 GLN L  90       0.018  10.134   4.124  1.00 38.49           H  
ATOM   2977 HE21 GLN L  90       3.168  11.518   3.822  1.00 38.49           H  
ATOM   2978 HE22 GLN L  90       4.054  10.069   4.117  1.00 38.49           H  
ATOM   2979  N   TYR L  91       2.070   9.463  -0.314  1.00 71.14           N  
ATOM   2980  CA  TYR L  91       3.360   9.021  -0.814  1.00  0.45           C  
ATOM   2981  C   TYR L  91       4.270  10.165  -1.243  1.00 50.44           C  
ATOM   2982  O   TYR L  91       5.276   9.963  -1.922  1.00 32.44           O  
ATOM   2983  CB  TYR L  91       3.259   7.910  -1.873  1.00 32.10           C  
ATOM   2984  CG  TYR L  91       2.628   8.234  -3.214  1.00 63.40           C  
ATOM   2985  CD1 TYR L  91       1.273   8.057  -3.433  1.00 63.53           C  
ATOM   2986  CD2 TYR L  91       3.416   8.650  -4.282  1.00 64.33           C  
ATOM   2987  CE1 TYR L  91       0.722   8.285  -4.682  1.00 13.22           C  
ATOM   2988  CE2 TYR L  91       2.873   8.891  -5.521  1.00 14.13           C  
ATOM   2989  CZ  TYR L  91       1.526   8.703  -5.720  1.00 44.15           C  
ATOM   2990  OH  TYR L  91       0.986   8.922  -6.966  1.00 15.24           O  
ATOM   2991  H   TYR L  91       1.543  10.138  -0.794  1.00 38.49           H  
ATOM   2992  HA  TYR L  91       3.838   8.601   0.059  1.00 40.15           H  
ATOM   2993  HB2 TYR L  91       4.257   7.559  -2.090  1.00 38.49           H  
ATOM   2994  HB3 TYR L  91       2.710   7.088  -1.437  1.00 38.49           H  
ATOM   2995  HD1 TYR L  91       0.647   7.736  -2.615  1.00 33.21           H  
ATOM   2996  HD2 TYR L  91       4.474   8.798  -4.126  1.00 54.24           H  
ATOM   2997  HE1 TYR L  91      -0.340   8.143  -4.831  1.00 24.22           H  
ATOM   2998  HE2 TYR L  91       3.505   9.218  -6.332  1.00 42.32           H  
ATOM   2999  HH  TYR L  91       0.158   9.411  -6.892  1.00 64.12           H  
ATOM   3000  N   ASP L  92       3.954  11.348  -0.788  1.00 52.22           N  
ATOM   3001  CA  ASP L  92       4.776  12.519  -1.093  1.00 71.22           C  
ATOM   3002  C   ASP L  92       6.024  12.589  -0.205  1.00 44.33           C  
ATOM   3003  O   ASP L  92       7.081  13.056  -0.638  1.00 42.41           O  
ATOM   3004  CB  ASP L  92       3.955  13.810  -0.964  1.00 34.55           C  
ATOM   3005  CG  ASP L  92       4.793  15.073  -1.105  1.00 31.33           C  
ATOM   3006  OD1 ASP L  92       5.047  15.517  -2.243  1.00 45.04           O  
ATOM   3007  OD2 ASP L  92       5.200  15.642  -0.079  1.00 32.13           O  
ATOM   3008  H   ASP L  92       3.152  11.440  -0.237  1.00 38.49           H  
ATOM   3009  HA  ASP L  92       5.101  12.421  -2.119  1.00 25.41           H  
ATOM   3010  HB2 ASP L  92       3.210  13.825  -1.745  1.00 38.49           H  
ATOM   3011  HB3 ASP L  92       3.453  13.837  -0.007  1.00 38.49           H  
ATOM   3012  N   ASN L  93       5.911  12.112   1.019  1.00 32.52           N  
ATOM   3013  CA  ASN L  93       7.011  12.227   1.973  1.00 63.01           C  
ATOM   3014  C   ASN L  93       7.026  11.015   2.894  1.00 50.00           C  
ATOM   3015  O   ASN L  93       5.965  10.523   3.273  1.00 13.33           O  
ATOM   3016  CB  ASN L  93       6.799  13.503   2.800  1.00 51.31           C  
ATOM   3017  CG  ASN L  93       7.925  13.830   3.751  1.00 51.12           C  
ATOM   3018  OD1 ASN L  93       7.927  13.403   4.902  1.00 41.54           O  
ATOM   3019  ND2 ASN L  93       8.870  14.610   3.287  1.00 15.11           N  
ATOM   3020  H   ASN L  93       5.096  11.650   1.300  1.00 38.49           H  
ATOM   3021  HA  ASN L  93       7.944  12.308   1.437  1.00  1.41           H  
ATOM   3022  HB2 ASN L  93       6.647  14.347   2.146  1.00 38.49           H  
ATOM   3023  HB3 ASN L  93       5.901  13.360   3.383  1.00 38.49           H  
ATOM   3024 HD21 ASN L  93       8.802  14.934   2.364  1.00 38.49           H  
ATOM   3025 HD22 ASN L  93       9.606  14.853   3.889  1.00 38.49           H  
ATOM   3026  N   LEU L  94       8.209  10.526   3.231  1.00 74.30           N  
ATOM   3027  CA  LEU L  94       8.331   9.415   4.161  1.00 30.24           C  
ATOM   3028  C   LEU L  94       8.566   9.876   5.594  1.00 61.11           C  
ATOM   3029  O   LEU L  94       9.134  10.950   5.825  1.00 25.03           O  
ATOM   3030  CB  LEU L  94       9.403   8.378   3.762  1.00 22.42           C  
ATOM   3031  CG  LEU L  94       9.074   7.458   2.600  1.00  4.42           C  
ATOM   3032  CD1 LEU L  94       9.217   8.126   1.262  1.00 53.05           C  
ATOM   3033  CD2 LEU L  94       9.856   6.184   2.678  1.00 32.43           C  
ATOM   3034  H   LEU L  94       9.032  10.904   2.858  1.00 38.49           H  
ATOM   3035  HA  LEU L  94       7.364   8.932   4.139  1.00  3.34           H  
ATOM   3036  HB2 LEU L  94      10.290   8.932   3.491  1.00 38.49           H  
ATOM   3037  HB3 LEU L  94       9.650   7.773   4.621  1.00 38.49           H  
ATOM   3038  HG  LEU L  94       8.029   7.207   2.693  1.00 70.25           H  
ATOM   3039 HD11 LEU L  94       8.565   8.984   1.235  1.00 38.49           H  
ATOM   3040 HD12 LEU L  94       8.877   7.399   0.533  1.00 38.49           H  
ATOM   3041 HD13 LEU L  94      10.245   8.402   1.083  1.00 38.49           H  
ATOM   3042 HD21 LEU L  94       9.580   5.548   1.851  1.00 38.49           H  
ATOM   3043 HD22 LEU L  94       9.629   5.677   3.604  1.00 38.49           H  
ATOM   3044 HD23 LEU L  94      10.912   6.400   2.632  1.00 38.49           H  
ATOM   3045  N   PRO L  95       8.169   9.047   6.585  1.00 63.14           N  
ATOM   3046  CA  PRO L  95       7.542   7.733   6.344  1.00 41.21           C  
ATOM   3047  C   PRO L  95       6.111   7.836   5.841  1.00 53.23           C  
ATOM   3048  O   PRO L  95       5.406   8.822   6.106  1.00 54.22           O  
ATOM   3049  CB  PRO L  95       7.561   7.067   7.719  1.00 43.22           C  
ATOM   3050  CG  PRO L  95       7.548   8.198   8.679  1.00 51.22           C  
ATOM   3051  CD  PRO L  95       8.310   9.321   8.025  1.00  3.52           C  
ATOM   3052  HA  PRO L  95       8.109   7.138   5.642  1.00 23.34           H  
ATOM   3053  HB2 PRO L  95       6.683   6.447   7.828  1.00 38.49           H  
ATOM   3054  HB3 PRO L  95       8.445   6.461   7.838  1.00 38.49           H  
ATOM   3055  HG2 PRO L  95       6.525   8.492   8.860  1.00 38.49           H  
ATOM   3056  HG3 PRO L  95       8.024   7.904   9.603  1.00 38.49           H  
ATOM   3057  HD2 PRO L  95       7.877  10.278   8.277  1.00 38.49           H  
ATOM   3058  HD3 PRO L  95       9.349   9.286   8.319  1.00 38.49           H  
ATOM   3059  N   TYR L  96       5.702   6.835   5.097  1.00 31.12           N  
ATOM   3060  CA  TYR L  96       4.352   6.767   4.635  1.00 40.44           C  
ATOM   3061  C   TYR L  96       3.517   6.211   5.735  1.00 61.34           C  
ATOM   3062  O   TYR L  96       3.917   5.237   6.390  1.00 15.21           O  
ATOM   3063  CB  TYR L  96       4.203   5.879   3.407  1.00  4.30           C  
ATOM   3064  CG  TYR L  96       4.979   6.304   2.187  1.00 52.42           C  
ATOM   3065  CD1 TYR L  96       5.211   7.636   1.896  1.00  0.25           C  
ATOM   3066  CD2 TYR L  96       5.466   5.358   1.317  1.00  2.43           C  
ATOM   3067  CE1 TYR L  96       5.910   7.992   0.764  1.00 62.10           C  
ATOM   3068  CE2 TYR L  96       6.155   5.699   0.189  1.00  4.33           C  
ATOM   3069  CZ  TYR L  96       6.377   7.010  -0.089  1.00 40.10           C  
ATOM   3070  OH  TYR L  96       7.055   7.350  -1.230  1.00 31.01           O  
ATOM   3071  H   TYR L  96       6.313   6.109   4.867  1.00 38.49           H  
ATOM   3072  HA  TYR L  96       4.015   7.766   4.402  1.00 52.14           H  
ATOM   3073  HB2 TYR L  96       4.532   4.883   3.660  1.00 38.49           H  
ATOM   3074  HB3 TYR L  96       3.156   5.836   3.138  1.00 38.49           H  
ATOM   3075  HD1 TYR L  96       4.844   8.399   2.569  1.00 30.30           H  
ATOM   3076  HD2 TYR L  96       5.290   4.315   1.535  1.00 30.14           H  
ATOM   3077  HE1 TYR L  96       6.087   9.035   0.544  1.00 45.42           H  
ATOM   3078  HE2 TYR L  96       6.524   4.930  -0.473  1.00 74.43           H  
ATOM   3079  HH  TYR L  96       7.681   8.063  -1.063  1.00 43.51           H  
ATOM   3080  N   THR L  97       2.410   6.816   5.964  1.00 51.10           N  
ATOM   3081  CA  THR L  97       1.532   6.381   6.984  1.00 61.54           C  
ATOM   3082  C   THR L  97       0.176   6.093   6.375  1.00 41.11           C  
ATOM   3083  O   THR L  97      -0.018   6.208   5.157  1.00 62.11           O  
ATOM   3084  CB  THR L  97       1.372   7.461   8.075  1.00 10.44           C  
ATOM   3085  OG1 THR L  97       0.753   8.608   7.502  1.00 44.44           O  
ATOM   3086  CG2 THR L  97       2.729   7.856   8.663  1.00 74.11           C  
ATOM   3087  H   THR L  97       2.154   7.594   5.413  1.00 38.49           H  
ATOM   3088  HA  THR L  97       1.916   5.481   7.438  1.00  0.32           H  
ATOM   3089  HB  THR L  97       0.742   7.071   8.861  1.00 25.31           H  
ATOM   3090  HG1 THR L  97       1.240   9.426   7.665  1.00  1.50           H  
ATOM   3091 HG21 THR L  97       2.590   8.599   9.434  1.00 38.49           H  
ATOM   3092 HG22 THR L  97       3.352   8.262   7.878  1.00 38.49           H  
ATOM   3093 HG23 THR L  97       3.216   6.985   9.077  1.00 38.49           H  
ATOM   3094  N   PHE L  98      -0.743   5.728   7.207  1.00 43.53           N  
ATOM   3095  CA  PHE L  98      -2.078   5.459   6.807  1.00 73.31           C  
ATOM   3096  C   PHE L  98      -3.029   6.226   7.653  1.00 44.50           C  
ATOM   3097  O   PHE L  98      -2.742   6.511   8.821  1.00 42.20           O  
ATOM   3098  CB  PHE L  98      -2.403   3.976   6.920  1.00 72.42           C  
ATOM   3099  CG  PHE L  98      -2.001   3.126   5.756  1.00 13.24           C  
ATOM   3100  CD1 PHE L  98      -0.681   2.982   5.369  1.00 34.40           C  
ATOM   3101  CD2 PHE L  98      -2.970   2.444   5.065  1.00 61.14           C  
ATOM   3102  CE1 PHE L  98      -0.349   2.167   4.302  1.00 32.44           C  
ATOM   3103  CE2 PHE L  98      -2.657   1.637   4.011  1.00  2.12           C  
ATOM   3104  CZ  PHE L  98      -1.341   1.490   3.621  1.00 54.51           C  
ATOM   3105  H   PHE L  98      -0.523   5.663   8.157  1.00 38.49           H  
ATOM   3106  HA  PHE L  98      -2.175   5.750   5.772  1.00 11.35           H  
ATOM   3107  HB2 PHE L  98      -1.886   3.590   7.784  1.00 38.49           H  
ATOM   3108  HB3 PHE L  98      -3.467   3.864   7.073  1.00 38.49           H  
ATOM   3109  HD1 PHE L  98       0.091   3.513   5.905  1.00 72.23           H  
ATOM   3110  HD2 PHE L  98      -4.001   2.554   5.365  1.00 24.50           H  
ATOM   3111  HE1 PHE L  98       0.682   2.060   4.007  1.00 53.23           H  
ATOM   3112  HE2 PHE L  98      -3.470   1.124   3.519  1.00 71.31           H  
ATOM   3113  HZ  PHE L  98      -1.088   0.853   2.786  1.00 24.33           H  
ATOM   3114  N   GLY L  99      -4.144   6.573   7.069  1.00 34.02           N  
ATOM   3115  CA  GLY L  99      -5.181   7.214   7.792  1.00 32.04           C  
ATOM   3116  C   GLY L  99      -5.778   6.285   8.804  1.00 35.02           C  
ATOM   3117  O   GLY L  99      -5.679   5.064   8.650  1.00 24.22           O  
ATOM   3118  H   GLY L  99      -4.239   6.400   6.106  1.00 38.49           H  
ATOM   3119  HA2 GLY L  99      -4.781   8.078   8.302  1.00 38.49           H  
ATOM   3120  HA3 GLY L  99      -5.958   7.527   7.110  1.00 38.49           H  
ATOM   3121  N   GLN L 100      -6.418   6.867   9.809  1.00 21.40           N  
ATOM   3122  CA  GLN L 100      -7.033   6.153  10.946  1.00 52.42           C  
ATOM   3123  C   GLN L 100      -7.731   4.845  10.523  1.00 42.33           C  
ATOM   3124  O   GLN L 100      -7.454   3.779  11.066  1.00 22.22           O  
ATOM   3125  CB  GLN L 100      -8.049   7.075  11.617  1.00 73.33           C  
ATOM   3126  CG  GLN L 100      -8.731   6.480  12.838  1.00 53.23           C  
ATOM   3127  CD  GLN L 100      -9.819   7.373  13.393  1.00 64.30           C  
ATOM   3128  OE1 GLN L 100     -10.787   6.896  13.963  1.00 53.22           O  
ATOM   3129  NE2 GLN L 100      -9.672   8.667  13.233  1.00 70.42           N  
ATOM   3130  H   GLN L 100      -6.454   7.847   9.795  1.00 38.49           H  
ATOM   3131  HA  GLN L 100      -6.260   5.926  11.664  1.00  2.02           H  
ATOM   3132  HB2 GLN L 100      -7.542   7.978  11.921  1.00 38.49           H  
ATOM   3133  HB3 GLN L 100      -8.809   7.332  10.895  1.00 38.49           H  
ATOM   3134  HG2 GLN L 100      -9.167   5.531  12.566  1.00 38.49           H  
ATOM   3135  HG3 GLN L 100      -7.986   6.322  13.604  1.00 38.49           H  
ATOM   3136 HE21 GLN L 100      -8.880   9.020  12.777  1.00 38.49           H  
ATOM   3137 HE22 GLN L 100     -10.386   9.246  13.580  1.00 38.49           H  
ATOM   3138  N   GLY L 101      -8.613   4.942   9.562  1.00 12.25           N  
ATOM   3139  CA  GLY L 101      -9.335   3.795   9.113  1.00 53.03           C  
ATOM   3140  C   GLY L 101     -10.795   3.985   9.362  1.00 12.41           C  
ATOM   3141  O   GLY L 101     -11.233   4.008  10.510  1.00 71.13           O  
ATOM   3142  H   GLY L 101      -8.806   5.812   9.158  1.00 38.49           H  
ATOM   3143  HA2 GLY L 101      -9.149   3.633   8.061  1.00 38.49           H  
ATOM   3144  HA3 GLY L 101      -8.998   2.916   9.642  1.00 38.49           H  
ATOM   3145  N   THR L 102     -11.536   4.126   8.316  1.00 61.44           N  
ATOM   3146  CA  THR L 102     -12.939   4.353   8.408  1.00 24.42           C  
ATOM   3147  C   THR L 102     -13.686   3.071   8.126  1.00 25.12           C  
ATOM   3148  O   THR L 102     -13.376   2.357   7.170  1.00 54.32           O  
ATOM   3149  CB  THR L 102     -13.361   5.430   7.387  1.00  5.30           C  
ATOM   3150  OG1 THR L 102     -12.689   6.664   7.680  1.00 11.23           O  
ATOM   3151  CG2 THR L 102     -14.875   5.646   7.370  1.00 42.02           C  
ATOM   3152  H   THR L 102     -11.148   4.086   7.413  1.00 38.49           H  
ATOM   3153  HA  THR L 102     -13.178   4.711   9.398  1.00 10.14           H  
ATOM   3154  HB  THR L 102     -13.042   5.083   6.416  1.00 22.30           H  
ATOM   3155  HG1 THR L 102     -13.345   7.296   8.006  1.00 54.30           H  
ATOM   3156 HG21 THR L 102     -15.125   6.401   6.638  1.00 38.49           H  
ATOM   3157 HG22 THR L 102     -15.203   5.969   8.347  1.00 38.49           H  
ATOM   3158 HG23 THR L 102     -15.368   4.720   7.116  1.00 38.49           H  
ATOM   3159  N   LYS L 103     -14.655   2.776   8.958  1.00 51.25           N  
ATOM   3160  CA  LYS L 103     -15.468   1.609   8.765  1.00 63.33           C  
ATOM   3161  C   LYS L 103     -16.496   1.880   7.772  1.00 34.25           C  
ATOM   3162  O   LYS L 103     -17.197   2.871   7.858  1.00 43.33           O  
ATOM   3163  CB  LYS L 103     -16.177   1.186  10.043  1.00 54.14           C  
ATOM   3164  CG  LYS L 103     -15.302   0.599  11.089  1.00 63.34           C  
ATOM   3165  CD  LYS L 103     -14.628  -0.663  10.590  1.00 14.13           C  
ATOM   3166  CE  LYS L 103     -15.646  -1.747  10.201  1.00  3.34           C  
ATOM   3167  NZ  LYS L 103     -16.431  -2.212  11.363  1.00 74.20           N  
ATOM   3168  H   LYS L 103     -14.819   3.370   9.721  1.00 38.49           H  
ATOM   3169  HA  LYS L 103     -14.851   0.791   8.434  1.00  1.32           H  
ATOM   3170  HB2 LYS L 103     -16.622   2.071  10.468  1.00 38.49           H  
ATOM   3171  HB3 LYS L 103     -16.966   0.488   9.806  1.00 38.49           H  
ATOM   3172  HG2 LYS L 103     -14.570   1.346  11.339  1.00 38.49           H  
ATOM   3173  HG3 LYS L 103     -15.920   0.374  11.942  1.00 38.49           H  
ATOM   3174  HD2 LYS L 103     -14.029  -0.400   9.734  1.00 38.49           H  
ATOM   3175  HD3 LYS L 103     -13.998  -1.026  11.387  1.00 38.49           H  
ATOM   3176  HE2 LYS L 103     -16.332  -1.339   9.470  1.00 38.49           H  
ATOM   3177  HE3 LYS L 103     -15.123  -2.585   9.766  1.00 38.49           H  
ATOM   3178  HZ1 LYS L 103     -16.929  -1.432  11.834  1.00 38.49           H  
ATOM   3179  HZ2 LYS L 103     -15.793  -2.629  12.073  1.00 38.49           H  
ATOM   3180  HZ3 LYS L 103     -17.136  -2.936  11.111  1.00 38.49           H  
ATOM   3181  N   LEU L 104     -16.585   1.035   6.833  1.00 71.31           N  
ATOM   3182  CA  LEU L 104     -17.618   1.143   5.897  1.00 60.23           C  
ATOM   3183  C   LEU L 104     -18.640   0.139   6.306  1.00  3.51           C  
ATOM   3184  O   LEU L 104     -18.343  -1.052   6.414  1.00 25.01           O  
ATOM   3185  CB  LEU L 104     -17.101   0.889   4.475  1.00 31.24           C  
ATOM   3186  CG  LEU L 104     -18.043   1.267   3.307  1.00  2.23           C  
ATOM   3187  CD1 LEU L 104     -19.270   0.386   3.243  1.00 55.05           C  
ATOM   3188  CD2 LEU L 104     -18.449   2.724   3.409  1.00  4.24           C  
ATOM   3189  H   LEU L 104     -15.931   0.301   6.776  1.00 38.49           H  
ATOM   3190  HA  LEU L 104     -18.033   2.137   5.970  1.00 62.14           H  
ATOM   3191  HB2 LEU L 104     -16.170   1.418   4.356  1.00 38.49           H  
ATOM   3192  HB3 LEU L 104     -16.885  -0.166   4.395  1.00 38.49           H  
ATOM   3193  HG  LEU L 104     -17.509   1.144   2.379  1.00 52.22           H  
ATOM   3194 HD11 LEU L 104     -19.761   0.394   4.204  1.00 38.49           H  
ATOM   3195 HD12 LEU L 104     -18.996  -0.620   2.962  1.00 38.49           H  
ATOM   3196 HD13 LEU L 104     -19.944   0.803   2.510  1.00 38.49           H  
ATOM   3197 HD21 LEU L 104     -18.989   2.887   4.331  1.00 38.49           H  
ATOM   3198 HD22 LEU L 104     -19.088   2.971   2.575  1.00 38.49           H  
ATOM   3199 HD23 LEU L 104     -17.567   3.348   3.393  1.00 38.49           H  
ATOM   3200  N   GLU L 105     -19.810   0.604   6.555  1.00 61.31           N  
ATOM   3201  CA  GLU L 105     -20.871  -0.233   6.982  1.00 21.34           C  
ATOM   3202  C   GLU L 105     -22.086   0.038   6.126  1.00  1.25           C  
ATOM   3203  O   GLU L 105     -22.251   1.140   5.623  1.00  4.13           O  
ATOM   3204  CB  GLU L 105     -21.206   0.044   8.444  1.00  3.43           C  
ATOM   3205  CG  GLU L 105     -20.040  -0.134   9.405  1.00 42.13           C  
ATOM   3206  CD  GLU L 105     -20.466   0.020  10.830  1.00 22.01           C  
ATOM   3207  OE1 GLU L 105     -21.162  -0.880  11.347  1.00 74.33           O  
ATOM   3208  OE2 GLU L 105     -20.143   1.046  11.461  1.00 22.10           O  
ATOM   3209  H   GLU L 105     -19.973   1.568   6.440  1.00 38.49           H  
ATOM   3210  HA  GLU L 105     -20.515  -1.250   6.897  1.00  0.35           H  
ATOM   3211  HB2 GLU L 105     -21.560   1.060   8.532  1.00 38.49           H  
ATOM   3212  HB3 GLU L 105     -21.998  -0.626   8.746  1.00 38.49           H  
ATOM   3213  HG2 GLU L 105     -19.596  -1.107   9.264  1.00 38.49           H  
ATOM   3214  HG3 GLU L 105     -19.300   0.623   9.182  1.00 38.49           H  
ATOM   3215  N   ILE L 106     -22.914  -0.945   5.939  1.00 41.32           N  
ATOM   3216  CA  ILE L 106     -24.130  -0.753   5.189  1.00 14.32           C  
ATOM   3217  C   ILE L 106     -25.342  -0.663   6.100  1.00 22.44           C  
ATOM   3218  O   ILE L 106     -25.638  -1.590   6.866  1.00 33.03           O  
ATOM   3219  CB  ILE L 106     -24.317  -1.805   4.047  1.00 33.44           C  
ATOM   3220  CG1 ILE L 106     -23.380  -1.470   2.876  1.00 61.40           C  
ATOM   3221  CG2 ILE L 106     -25.770  -1.848   3.556  1.00 20.04           C  
ATOM   3222  CD1 ILE L 106     -23.361  -2.512   1.796  1.00 42.43           C  
ATOM   3223  H   ILE L 106     -22.704  -1.830   6.311  1.00 38.49           H  
ATOM   3224  HA  ILE L 106     -24.026   0.223   4.733  1.00 33.11           H  
ATOM   3225  HB  ILE L 106     -24.032  -2.774   4.438  1.00 23.31           H  
ATOM   3226 HG12 ILE L 106     -23.756  -0.574   2.401  1.00 38.49           H  
ATOM   3227 HG13 ILE L 106     -22.369  -1.286   3.204  1.00 38.49           H  
ATOM   3228 HG21 ILE L 106     -26.041  -0.881   3.158  1.00 38.49           H  
ATOM   3229 HG22 ILE L 106     -26.425  -2.090   4.378  1.00 38.49           H  
ATOM   3230 HG23 ILE L 106     -25.865  -2.595   2.782  1.00 38.49           H  
ATOM   3231 HD11 ILE L 106     -23.035  -3.439   2.239  1.00 38.49           H  
ATOM   3232 HD12 ILE L 106     -22.682  -2.224   1.009  1.00 38.49           H  
ATOM   3233 HD13 ILE L 106     -24.359  -2.631   1.404  1.00 38.49           H  
ATOM   3234  N   LYS L 107     -26.009   0.462   6.043  1.00 32.01           N  
ATOM   3235  CA  LYS L 107     -27.193   0.695   6.824  1.00 60.23           C  
ATOM   3236  C   LYS L 107     -28.416   0.581   5.944  1.00 71.02           C  
ATOM   3237  O   LYS L 107     -28.333   0.783   4.733  1.00 42.23           O  
ATOM   3238  CB  LYS L 107     -27.173   2.082   7.469  1.00 13.33           C  
ATOM   3239  CG  LYS L 107     -27.132   3.220   6.501  1.00 74.41           C  
ATOM   3240  CD  LYS L 107     -27.281   4.537   7.214  1.00 65.01           C  
ATOM   3241  CE  LYS L 107     -27.341   5.648   6.214  1.00 30.03           C  
ATOM   3242  NZ  LYS L 107     -27.558   6.971   6.839  1.00 32.33           N  
ATOM   3243  H   LYS L 107     -25.709   1.155   5.417  1.00 38.49           H  
ATOM   3244  HA  LYS L 107     -27.239  -0.046   7.602  1.00 40.25           H  
ATOM   3245  HB2 LYS L 107     -28.091   2.222   8.015  1.00 38.49           H  
ATOM   3246  HB3 LYS L 107     -26.328   2.171   8.135  1.00 38.49           H  
ATOM   3247  HG2 LYS L 107     -26.184   3.203   5.985  1.00 38.49           H  
ATOM   3248  HG3 LYS L 107     -27.936   3.106   5.789  1.00 38.49           H  
ATOM   3249  HD2 LYS L 107     -28.190   4.525   7.796  1.00 38.49           H  
ATOM   3250  HD3 LYS L 107     -26.431   4.690   7.862  1.00 38.49           H  
ATOM   3251  HE2 LYS L 107     -26.410   5.624   5.669  1.00 38.49           H  
ATOM   3252  HE3 LYS L 107     -28.160   5.387   5.562  1.00 38.49           H  
ATOM   3253  HZ1 LYS L 107     -27.602   7.724   6.123  1.00 38.49           H  
ATOM   3254  HZ2 LYS L 107     -26.792   7.214   7.502  1.00 38.49           H  
ATOM   3255  HZ3 LYS L 107     -28.453   6.994   7.368  1.00 38.49           H  
ATOM   3256  N   ARG L 108     -29.525   0.245   6.533  1.00 44.10           N  
ATOM   3257  CA  ARG L 108     -30.772   0.213   5.836  1.00 75.14           C  
ATOM   3258  C   ARG L 108     -31.822   0.875   6.685  1.00 12.44           C  
ATOM   3259  O   ARG L 108     -31.996   2.095   6.569  1.00 38.49           O  
ATOM   3260  CB  ARG L 108     -31.203  -1.211   5.458  1.00 43.31           C  
ATOM   3261  CG  ARG L 108     -30.255  -1.928   4.521  1.00 63.02           C  
ATOM   3262  CD  ARG L 108     -30.805  -3.274   4.122  1.00 43.43           C  
ATOM   3263  NE  ARG L 108     -29.888  -4.001   3.249  1.00 35.33           N  
ATOM   3264  CZ  ARG L 108     -30.225  -5.043   2.490  1.00 24.34           C  
ATOM   3265  NH1 ARG L 108     -31.482  -5.477   2.460  1.00 15.20           N  
ATOM   3266  NH2 ARG L 108     -29.301  -5.643   1.752  1.00 54.12           N  
ATOM   3267  OXT ARG L 108     -32.464   0.185   7.498  1.00 38.49           O  
ATOM   3268  H   ARG L 108     -29.531   0.005   7.482  1.00 38.49           H  
ATOM   3269  HA  ARG L 108     -30.626   0.793   4.941  1.00 71.11           H  
ATOM   3270  HB2 ARG L 108     -31.290  -1.798   6.361  1.00 38.49           H  
ATOM   3271  HB3 ARG L 108     -32.174  -1.161   4.987  1.00 38.49           H  
ATOM   3272  HG2 ARG L 108     -30.117  -1.326   3.635  1.00 38.49           H  
ATOM   3273  HG3 ARG L 108     -29.305  -2.064   5.016  1.00 38.49           H  
ATOM   3274  HD2 ARG L 108     -30.979  -3.862   5.010  1.00 38.49           H  
ATOM   3275  HD3 ARG L 108     -31.738  -3.126   3.600  1.00 38.49           H  
ATOM   3276  HE  ARG L 108     -28.957  -3.681   3.257  1.00  2.03           H  
ATOM   3277 HH11 ARG L 108     -32.220  -5.047   2.989  1.00 38.49           H  
ATOM   3278 HH12 ARG L 108     -31.761  -6.267   1.908  1.00 38.49           H  
ATOM   3279 HH21 ARG L 108     -28.341  -5.347   1.737  1.00 38.49           H  
ATOM   3280 HH22 ARG L 108     -29.487  -6.429   1.156  1.00 38.49           H  
TER    3281      ARG L 108                                                      
