# Supplementary material for: SARS-CoV-2 Spike Protein Interaction Space
Source: Int J Mol Sci. 2023 Jul 27;24(15):12058. doi: 10.3390/ijms241512058 (PMC10418891; doi:10.3390/ijms241512058)
Supplement: Supplementary file 1 [file ijms-24-12058-s001.zip › Supplementary Material File S1/2KQN.pdb]

REMARK 950 NUMBERING  Kabat
REMARK 950 METHOD     NMR
REMARK 950 RESOLUTION 0.000
REMARK 950 R-FACTOR   0.000
REMARK 950 R-FREE     0.000
REMARK 950 CHAIN-TYPE LABEL ORIGINAL
REMARK 950 CHAIN L    L    A
REMARK 950 CHAIN L    L    B
REMARK 950 MOLECULE : A : IG KAPPA CHAIN V-I REGION AU
REMARK 950 SPECIES  : A : HOMO SAPIENS
SEQRES   1 L 110  SER THR ASP ILE GLN MET THR GLN SER PRO SER SER LEU          
SEQRES   2 L 110  SER ALA SER VAL GLY ASP ARG VAL THR ILE THR CYS GLN          
SEQRES   3 L 110  ALA SER GLN ASP ILE ASN ASN TYR LEU ILE TRP TYR GLN          
SEQRES   4 L 110  GLN LYS PRO GLY GLN ALA PRO LYS LEU LEU ILE TYR ASP          
SEQRES   5 L 110  ALA SER THR LEU GLU THR GLY VAL PRO SER ARG PHE SER          
SEQRES   6 L 110  GLY SER GLY SER GLY THR GLU PHE THR PHE THR ILE SER          
SEQRES   7 L 110  SER LEU GLN PRO GLU ASP LEU ALA THR TYR TYR CYS GLN          
SEQRES   8 L 110  GLN TYR ASP ASN LEU PRO TYR THR PHE GLY GLN GLY THR          
SEQRES   9 L 110  LYS LEU GLU ILE LYS ARG                                      
SEQRES   1 L 110  SER THR ASP ILE GLN MET THR GLN SER PRO SER SER LEU          
SEQRES   2 L 110  SER ALA SER VAL GLY ASP ARG VAL THR ILE THR CYS GLN          
SEQRES   3 L 110  ALA SER GLN ASP ILE ASN ASN TYR LEU ILE TRP TYR GLN          
SEQRES   4 L 110  GLN LYS PRO GLY GLN ALA PRO LYS LEU LEU ILE TYR ASP          
SEQRES   5 L 110  ALA SER THR LEU GLU THR GLY VAL PRO SER ARG PHE SER          
SEQRES   6 L 110  GLY SER GLY SER GLY THR GLU PHE THR PHE THR ILE SER          
SEQRES   7 L 110  SER LEU GLN PRO GLU ASP LEU ALA THR TYR TYR CYS GLN          
SEQRES   8 L 110  GLN TYR ASP ASN LEU PRO TYR THR PHE GLY GLN GLY THR          
SEQRES   9 L 110  LYS LEU GLU ILE LYS ARG                                      
ATOM      1  N   ASP L   1       1.166  17.630   0.868  1.00  4.00           N  
ATOM      2  CA  ASP L   1       0.783  16.261   0.505  1.00  0.02           C  
ATOM      3  C   ASP L   1      -0.640  15.990   0.908  1.00  3.25           C  
ATOM      4  O   ASP L   1      -1.161  16.633   1.798  1.00 60.24           O  
ATOM      5  CB  ASP L   1       1.732  15.225   1.128  1.00 61.52           C  
ATOM      6  CG  ASP L   1       1.814  15.287   2.629  1.00 53.52           C  
ATOM      7  OD1 ASP L   1       2.508  16.170   3.154  1.00 60.32           O  
ATOM      8  OD2 ASP L   1       1.215  14.441   3.308  1.00 41.01           O  
ATOM      9  H   ASP L   1       1.073  17.757   1.896  1.00 37.74           H  
ATOM     10  HA  ASP L   1       0.828  16.182  -0.571  1.00  1.55           H  
ATOM     11  HB2 ASP L   1       1.384  14.238   0.865  1.00 37.74           H  
ATOM     12  HB3 ASP L   1       2.725  15.353   0.728  1.00 37.74           H  
ATOM     13  N   ILE L   2      -1.267  15.052   0.236  1.00 11.15           N  
ATOM     14  CA  ILE L   2      -2.656  14.717   0.480  1.00 32.12           C  
ATOM     15  C   ILE L   2      -2.780  13.734   1.641  1.00 53.42           C  
ATOM     16  O   ILE L   2      -2.211  12.645   1.609  1.00 62.44           O  
ATOM     17  CB  ILE L   2      -3.304  14.086  -0.788  1.00 13.43           C  
ATOM     18  CG1 ILE L   2      -3.323  15.076  -1.961  1.00 24.34           C  
ATOM     19  CG2 ILE L   2      -4.724  13.625  -0.483  1.00 23.44           C  
ATOM     20  CD1 ILE L   2      -3.394  14.401  -3.298  1.00  2.14           C  
ATOM     21  H   ILE L   2      -0.779  14.541  -0.445  1.00 37.74           H  
ATOM     22  HA  ILE L   2      -3.189  15.627   0.717  1.00 54.33           H  
ATOM     23  HB  ILE L   2      -2.721  13.221  -1.066  1.00 42.32           H  
ATOM     24 HG12 ILE L   2      -4.269  15.611  -1.924  1.00 37.74           H  
ATOM     25 HG13 ILE L   2      -2.473  15.741  -1.948  1.00 37.74           H  
ATOM     26 HG21 ILE L   2      -4.680  12.848   0.269  1.00 37.74           H  
ATOM     27 HG22 ILE L   2      -5.197  13.259  -1.381  1.00 37.74           H  
ATOM     28 HG23 ILE L   2      -5.290  14.458  -0.097  1.00 37.74           H  
ATOM     29 HD11 ILE L   2      -4.295  13.813  -3.364  1.00 37.74           H  
ATOM     30 HD12 ILE L   2      -2.533  13.758  -3.420  1.00 37.74           H  
ATOM     31 HD13 ILE L   2      -3.376  15.149  -4.075  1.00 37.74           H  
ATOM     32  N   GLN L   3      -3.493  14.144   2.659  1.00 61.32           N  
ATOM     33  CA  GLN L   3      -3.811  13.291   3.783  1.00 22.33           C  
ATOM     34  C   GLN L   3      -4.997  12.401   3.464  1.00 41.21           C  
ATOM     35  O   GLN L   3      -5.946  12.835   2.809  1.00 72.40           O  
ATOM     36  CB  GLN L   3      -4.122  14.116   5.063  1.00 61.44           C  
ATOM     37  CG  GLN L   3      -2.914  14.751   5.746  1.00 64.43           C  
ATOM     38  CD  GLN L   3      -2.241  15.814   4.913  1.00 23.22           C  
ATOM     39  OE1 GLN L   3      -2.878  16.505   4.139  1.00 73.33           O  
ATOM     40  NE2 GLN L   3      -0.958  15.929   5.042  1.00 15.41           N  
ATOM     41  H   GLN L   3      -3.794  15.076   2.682  1.00 37.74           H  
ATOM     42  HA  GLN L   3      -2.948  12.673   3.977  1.00  3.01           H  
ATOM     43  HB2 GLN L   3      -4.755  14.927   4.741  1.00 37.74           H  
ATOM     44  HB3 GLN L   3      -4.708  13.559   5.774  1.00 37.74           H  
ATOM     45  HG2 GLN L   3      -3.242  15.207   6.670  1.00 37.74           H  
ATOM     46  HG3 GLN L   3      -2.197  13.977   5.970  1.00 37.74           H  
ATOM     47 HE21 GLN L   3      -0.493  15.336   5.668  1.00 37.74           H  
ATOM     48 HE22 GLN L   3      -0.508  16.603   4.489  1.00 37.74           H  
ATOM     49  N   MET L   4      -4.920  11.167   3.903  1.00 63.23           N  
ATOM     50  CA  MET L   4      -6.011  10.218   3.786  1.00 42.15           C  
ATOM     51  C   MET L   4      -6.573   9.979   5.176  1.00 75.15           C  
ATOM     52  O   MET L   4      -5.945   9.317   6.011  1.00 73.13           O  
ATOM     53  CB  MET L   4      -5.520   8.887   3.176  1.00 53.24           C  
ATOM     54  CG  MET L   4      -5.085   8.961   1.707  1.00 14.35           C  
ATOM     55  SD  MET L   4      -6.339   8.402   0.501  1.00 34.44           S  
ATOM     56  CE  MET L   4      -7.739   9.461   0.809  1.00 62.11           C  
ATOM     57  H   MET L   4      -4.089  10.868   4.336  1.00 37.74           H  
ATOM     58  HA  MET L   4      -6.776  10.651   3.157  1.00 53.12           H  
ATOM     59  HB2 MET L   4      -4.678   8.534   3.755  1.00 37.74           H  
ATOM     60  HB3 MET L   4      -6.316   8.161   3.257  1.00 37.74           H  
ATOM     61  HG2 MET L   4      -4.843   9.988   1.479  1.00 37.74           H  
ATOM     62  HG3 MET L   4      -4.195   8.361   1.584  1.00 37.74           H  
ATOM     63  HE1 MET L   4      -8.127   9.235   1.795  1.00 37.74           H  
ATOM     64  HE2 MET L   4      -8.510   9.174   0.103  1.00 37.74           H  
ATOM     65  HE3 MET L   4      -7.500  10.508   0.718  1.00 37.74           H  
ATOM     66  N   THR L   5      -7.702  10.558   5.442  1.00 54.20           N  
ATOM     67  CA  THR L   5      -8.352  10.434   6.719  1.00 70.23           C  
ATOM     68  C   THR L   5      -9.470   9.414   6.601  1.00 21.10           C  
ATOM     69  O   THR L   5     -10.417   9.628   5.865  1.00 32.11           O  
ATOM     70  CB  THR L   5      -8.945  11.796   7.129  1.00 33.14           C  
ATOM     71  OG1 THR L   5      -7.903  12.795   7.112  1.00 15.34           O  
ATOM     72  CG2 THR L   5      -9.567  11.728   8.517  1.00 53.34           C  
ATOM     73  H   THR L   5      -8.147  11.103   4.751  1.00 37.74           H  
ATOM     74  HA  THR L   5      -7.632  10.123   7.462  1.00 12.13           H  
ATOM     75  HB  THR L   5      -9.701  12.068   6.407  1.00 33.15           H  
ATOM     76  HG1 THR L   5      -7.074  12.337   6.936  1.00 55.51           H  
ATOM     77 HG21 THR L   5     -10.388  11.027   8.491  1.00 37.74           H  
ATOM     78 HG22 THR L   5      -9.946  12.705   8.785  1.00 37.74           H  
ATOM     79 HG23 THR L   5      -8.833  11.406   9.240  1.00 37.74           H  
ATOM     80  N   GLN L   6      -9.357   8.312   7.287  1.00 32.42           N  
ATOM     81  CA  GLN L   6     -10.370   7.307   7.180  1.00 40.22           C  
ATOM     82  C   GLN L   6     -11.136   7.222   8.503  1.00 10.31           C  
ATOM     83  O   GLN L   6     -10.533   7.230   9.582  1.00 72.43           O  
ATOM     84  CB  GLN L   6      -9.735   5.968   6.836  1.00 74.33           C  
ATOM     85  CG  GLN L   6     -10.662   5.024   6.088  1.00 14.45           C  
ATOM     86  CD  GLN L   6     -10.083   3.636   5.904  1.00 44.10           C  
ATOM     87  OE1 GLN L   6     -10.802   2.662   5.785  1.00 73.24           O  
ATOM     88  NE2 GLN L   6      -8.798   3.531   5.941  1.00 50.13           N  
ATOM     89  H   GLN L   6      -8.588   8.155   7.875  1.00 37.74           H  
ATOM     90  HA  GLN L   6     -11.053   7.592   6.394  1.00 73.21           H  
ATOM     91  HB2 GLN L   6      -8.863   6.145   6.224  1.00 37.74           H  
ATOM     92  HB3 GLN L   6      -9.427   5.484   7.751  1.00 37.74           H  
ATOM     93  HG2 GLN L   6     -11.554   4.929   6.686  1.00 37.74           H  
ATOM     94  HG3 GLN L   6     -10.906   5.445   5.123  1.00 37.74           H  
ATOM     95 HE21 GLN L   6      -8.280   4.340   6.072  1.00 37.74           H  
ATOM     96 HE22 GLN L   6      -8.445   2.614   5.868  1.00 37.74           H  
ATOM     97  N   SER L   7     -12.441   7.185   8.415  1.00 74.53           N  
ATOM     98  CA  SER L   7     -13.305   7.105   9.569  1.00 14.13           C  
ATOM     99  C   SER L   7     -14.349   6.005   9.342  1.00  3.33           C  
ATOM    100  O   SER L   7     -14.789   5.798   8.203  1.00 54.03           O  
ATOM    101  CB  SER L   7     -14.010   8.445   9.765  1.00 22.52           C  
ATOM    102  OG  SER L   7     -13.070   9.499   9.906  1.00 52.15           O  
ATOM    103  H   SER L   7     -12.869   7.211   7.529  1.00 37.74           H  
ATOM    104  HA  SER L   7     -12.710   6.883  10.442  1.00 44.11           H  
ATOM    105  HB2 SER L   7     -14.635   8.649   8.907  1.00 37.74           H  
ATOM    106  HB3 SER L   7     -14.623   8.400  10.653  1.00 37.74           H  
ATOM    107  HG  SER L   7     -12.207   9.099  10.070  1.00 34.10           H  
ATOM    108  N   PRO L   8     -14.799   5.305  10.402  1.00 44.44           N  
ATOM    109  CA  PRO L   8     -14.383   5.543  11.804  1.00  0.31           C  
ATOM    110  C   PRO L   8     -13.027   4.911  12.112  1.00 12.22           C  
ATOM    111  O   PRO L   8     -12.401   4.348  11.230  1.00 54.04           O  
ATOM    112  CB  PRO L   8     -15.484   4.827  12.614  1.00 72.34           C  
ATOM    113  CG  PRO L   8     -16.496   4.370  11.609  1.00 70.32           C  
ATOM    114  CD  PRO L   8     -15.749   4.211  10.330  1.00 73.11           C  
ATOM    115  HA  PRO L   8     -14.370   6.593  12.052  1.00 34.50           H  
ATOM    116  HB2 PRO L   8     -15.051   3.989  13.139  1.00 37.74           H  
ATOM    117  HB3 PRO L   8     -15.915   5.516  13.320  1.00 37.74           H  
ATOM    118  HG2 PRO L   8     -16.925   3.428  11.918  1.00 37.74           H  
ATOM    119  HG3 PRO L   8     -17.268   5.117  11.504  1.00 37.74           H  
ATOM    120  HD2 PRO L   8     -15.242   3.258  10.300  1.00 37.74           H  
ATOM    121  HD3 PRO L   8     -16.405   4.322   9.478  1.00 37.74           H  
ATOM    122  N   SER L   9     -12.597   4.989  13.364  1.00 32.50           N  
ATOM    123  CA  SER L   9     -11.324   4.420  13.768  1.00  2.14           C  
ATOM    124  C   SER L   9     -11.403   2.898  13.731  1.00 42.54           C  
ATOM    125  O   SER L   9     -10.440   2.205  13.365  1.00 32.42           O  
ATOM    126  CB  SER L   9     -10.968   4.901  15.171  1.00 12.24           C  
ATOM    127  OG  SER L   9     -10.954   6.330  15.231  1.00 31.13           O  
ATOM    128  H   SER L   9     -13.136   5.428  14.058  1.00 37.74           H  
ATOM    129  HA  SER L   9     -10.565   4.751  13.075  1.00 54.42           H  
ATOM    130  HB2 SER L   9     -11.697   4.529  15.875  1.00 37.74           H  
ATOM    131  HB3 SER L   9      -9.990   4.533  15.444  1.00 37.74           H  
ATOM    132  HG  SER L   9     -10.488   6.638  14.441  1.00 74.43           H  
ATOM    133  N   SER L  10     -12.556   2.394  14.068  1.00 64.15           N  
ATOM    134  CA  SER L  10     -12.819   1.000  14.034  1.00 54.44           C  
ATOM    135  C   SER L  10     -14.291   0.764  14.142  1.00 72.51           C  
ATOM    136  O   SER L  10     -14.983   1.456  14.889  1.00 11.31           O  
ATOM    137  CB  SER L  10     -12.052   0.267  15.149  1.00 14.24           C  
ATOM    138  OG  SER L  10     -12.325   0.827  16.432  1.00 63.15           O  
ATOM    139  H   SER L  10     -13.279   2.991  14.365  1.00 37.74           H  
ATOM    140  HA  SER L  10     -12.480   0.624  13.081  1.00  2.22           H  
ATOM    141  HB2 SER L  10     -12.335  -0.775  15.158  1.00 37.74           H  
ATOM    142  HB3 SER L  10     -10.995   0.350  14.951  1.00 37.74           H  
ATOM    143  HG  SER L  10     -13.045   1.464  16.342  1.00 61.14           H  
ATOM    144  N   LEU L  11     -14.772  -0.162  13.387  1.00 13.45           N  
ATOM    145  CA  LEU L  11     -16.150  -0.518  13.427  1.00 71.02           C  
ATOM    146  C   LEU L  11     -16.243  -1.996  13.269  1.00 53.13           C  
ATOM    147  O   LEU L  11     -15.451  -2.607  12.539  1.00 44.04           O  
ATOM    148  CB  LEU L  11     -17.019   0.232  12.368  1.00 62.54           C  
ATOM    149  CG  LEU L  11     -16.821  -0.083  10.864  1.00 61.52           C  
ATOM    150  CD1 LEU L  11     -17.776   0.755  10.036  1.00 53.04           C  
ATOM    151  CD2 LEU L  11     -15.394   0.158  10.410  1.00 20.34           C  
ATOM    152  H   LEU L  11     -14.186  -0.662  12.773  1.00 37.74           H  
ATOM    153  HA  LEU L  11     -16.504  -0.271  14.418  1.00 22.15           H  
ATOM    154  HB2 LEU L  11     -18.054   0.033  12.599  1.00 37.74           H  
ATOM    155  HB3 LEU L  11     -16.855   1.290  12.512  1.00 37.74           H  
ATOM    156  HG  LEU L  11     -17.074  -1.119  10.696  1.00 30.21           H  
ATOM    157 HD11 LEU L  11     -17.610   0.566   8.985  1.00 37.74           H  
ATOM    158 HD12 LEU L  11     -17.606   1.801  10.241  1.00 37.74           H  
ATOM    159 HD13 LEU L  11     -18.794   0.499  10.290  1.00 37.74           H  
ATOM    160 HD21 LEU L  11     -15.302  -0.069   9.358  1.00 37.74           H  
ATOM    161 HD22 LEU L  11     -14.747  -0.493  10.978  1.00 37.74           H  
ATOM    162 HD23 LEU L  11     -15.124   1.187  10.594  1.00 37.74           H  
ATOM    163  N   SER L  12     -17.142  -2.572  13.950  1.00 52.25           N  
ATOM    164  CA  SER L  12     -17.272  -3.972  13.937  1.00  3.54           C  
ATOM    165  C   SER L  12     -18.579  -4.344  13.286  1.00 43.23           C  
ATOM    166  O   SER L  12     -19.579  -3.679  13.484  1.00 63.32           O  
ATOM    167  CB  SER L  12     -17.209  -4.485  15.353  1.00 60.13           C  
ATOM    168  OG  SER L  12     -16.070  -3.949  16.020  1.00 71.34           O  
ATOM    169  H   SER L  12     -17.770  -2.035  14.477  1.00 37.74           H  
ATOM    170  HA  SER L  12     -16.451  -4.394  13.377  1.00 73.25           H  
ATOM    171  HB2 SER L  12     -18.108  -4.216  15.885  1.00 37.74           H  
ATOM    172  HB3 SER L  12     -17.097  -5.557  15.298  1.00 37.74           H  
ATOM    173  HG  SER L  12     -16.193  -2.989  16.022  1.00 64.31           H  
ATOM    174  N   ALA L  13     -18.562  -5.370  12.511  1.00 34.33           N  
ATOM    175  CA  ALA L  13     -19.729  -5.835  11.812  1.00 43.52           C  
ATOM    176  C   ALA L  13     -19.716  -7.333  11.803  1.00 13.14           C  
ATOM    177  O   ALA L  13     -18.681  -7.924  11.623  1.00  2.13           O  
ATOM    178  CB  ALA L  13     -19.703  -5.306  10.400  1.00 53.31           C  
ATOM    179  H   ALA L  13     -17.711  -5.852  12.378  1.00 37.74           H  
ATOM    180  HA  ALA L  13     -20.614  -5.469  12.307  1.00 73.14           H  
ATOM    181  HB1 ALA L  13     -19.708  -4.227  10.427  1.00 37.74           H  
ATOM    182  HB2 ALA L  13     -20.564  -5.661   9.852  1.00 37.74           H  
ATOM    183  HB3 ALA L  13     -18.802  -5.645   9.912  1.00 37.74           H  
ATOM    184  N   SER L  14     -20.835  -7.952  12.034  1.00 50.01           N  
ATOM    185  CA  SER L  14     -20.870  -9.390  12.034  1.00 24.21           C  
ATOM    186  C   SER L  14     -21.158  -9.866  10.629  1.00 22.12           C  
ATOM    187  O   SER L  14     -21.599  -9.086   9.802  1.00 32.24           O  
ATOM    188  CB  SER L  14     -21.940  -9.922  13.009  1.00 21.14           C  
ATOM    189  OG  SER L  14     -21.857 -11.339  13.154  1.00 30.35           O  
ATOM    190  H   SER L  14     -21.669  -7.453  12.175  1.00 37.74           H  
ATOM    191  HA  SER L  14     -19.898  -9.736  12.343  1.00 13.10           H  
ATOM    192  HB2 SER L  14     -21.802  -9.487  13.985  1.00 37.74           H  
ATOM    193  HB3 SER L  14     -22.921  -9.676  12.633  1.00 37.74           H  
ATOM    194  HG  SER L  14     -21.265 -11.499  13.900  1.00 31.35           H  
ATOM    195  N   VAL L  15     -20.846 -11.111  10.351  1.00  1.51           N  
ATOM    196  CA  VAL L  15     -21.206 -11.737   9.078  1.00 32.12           C  
ATOM    197  C   VAL L  15     -22.692 -11.439   8.752  1.00 44.43           C  
ATOM    198  O   VAL L  15     -23.586 -11.783   9.527  1.00 23.42           O  
ATOM    199  CB  VAL L  15     -21.009 -13.275   9.166  1.00 43.10           C  
ATOM    200  CG1 VAL L  15     -21.342 -13.958   7.846  1.00 61.22           C  
ATOM    201  CG2 VAL L  15     -19.594 -13.615   9.609  1.00 14.22           C  
ATOM    202  H   VAL L  15     -20.325 -11.605  11.019  1.00 37.74           H  
ATOM    203  HA  VAL L  15     -20.573 -11.339   8.298  1.00 65.33           H  
ATOM    204  HB  VAL L  15     -21.695 -13.653   9.908  1.00 52.42           H  
ATOM    205 HG11 VAL L  15     -22.378 -13.771   7.602  1.00 37.74           H  
ATOM    206 HG12 VAL L  15     -21.177 -15.022   7.929  1.00 37.74           H  
ATOM    207 HG13 VAL L  15     -20.716 -13.556   7.065  1.00 37.74           H  
ATOM    208 HG21 VAL L  15     -19.404 -13.189  10.584  1.00 37.74           H  
ATOM    209 HG22 VAL L  15     -18.885 -13.216   8.897  1.00 37.74           H  
ATOM    210 HG23 VAL L  15     -19.486 -14.687   9.663  1.00 37.74           H  
ATOM    211  N   GLY L  16     -22.922 -10.783   7.631  1.00 44.43           N  
ATOM    212  CA  GLY L  16     -24.263 -10.419   7.232  1.00 34.14           C  
ATOM    213  C   GLY L  16     -24.591  -8.952   7.503  1.00 21.34           C  
ATOM    214  O   GLY L  16     -25.603  -8.437   7.021  1.00 60.42           O  
ATOM    215  H   GLY L  16     -22.151 -10.561   7.063  1.00 37.74           H  
ATOM    216  HA2 GLY L  16     -24.363 -10.599   6.172  1.00 37.74           H  
ATOM    217  HA3 GLY L  16     -24.969 -11.038   7.766  1.00 37.74           H  
ATOM    218  N   ASP L  17     -23.737  -8.283   8.253  1.00 63.43           N  
ATOM    219  CA  ASP L  17     -23.945  -6.875   8.628  1.00 31.34           C  
ATOM    220  C   ASP L  17     -23.371  -5.960   7.542  1.00 40.45           C  
ATOM    221  O   ASP L  17     -22.500  -6.379   6.766  1.00 40.05           O  
ATOM    222  CB  ASP L  17     -23.286  -6.609   9.997  1.00 72.42           C  
ATOM    223  CG  ASP L  17     -23.562  -5.241  10.614  1.00 14.02           C  
ATOM    224  OD1 ASP L  17     -24.691  -4.720  10.487  1.00 31.13           O  
ATOM    225  OD2 ASP L  17     -22.676  -4.707  11.307  1.00 53.23           O  
ATOM    226  H   ASP L  17     -22.929  -8.733   8.591  1.00 37.74           H  
ATOM    227  HA  ASP L  17     -25.009  -6.705   8.703  1.00  5.43           H  
ATOM    228  HB2 ASP L  17     -23.561  -7.381  10.695  1.00 37.74           H  
ATOM    229  HB3 ASP L  17     -22.221  -6.702   9.850  1.00 37.74           H  
ATOM    230  N   ARG L  18     -23.864  -4.739   7.476  1.00 65.41           N  
ATOM    231  CA  ARG L  18     -23.464  -3.786   6.453  1.00 41.33           C  
ATOM    232  C   ARG L  18     -22.444  -2.813   7.031  1.00 75.01           C  
ATOM    233  O   ARG L  18     -22.600  -2.341   8.147  1.00 23.25           O  
ATOM    234  CB  ARG L  18     -24.691  -3.015   5.966  1.00 54.15           C  
ATOM    235  CG  ARG L  18     -24.423  -2.108   4.787  1.00 62.00           C  
ATOM    236  CD  ARG L  18     -25.649  -1.309   4.406  1.00  2.42           C  
ATOM    237  NE  ARG L  18     -25.411  -0.533   3.188  1.00 42.30           N  
ATOM    238  CZ  ARG L  18     -25.807   0.725   2.971  1.00 62.33           C  
ATOM    239  NH1 ARG L  18     -26.415   1.426   3.930  1.00 44.24           N  
ATOM    240  NH2 ARG L  18     -25.574   1.279   1.792  1.00 75.53           N  
ATOM    241  H   ARG L  18     -24.509  -4.450   8.156  1.00 37.74           H  
ATOM    242  HA  ARG L  18     -23.021  -4.309   5.618  1.00 62.44           H  
ATOM    243  HB2 ARG L  18     -25.455  -3.725   5.686  1.00 37.74           H  
ATOM    244  HB3 ARG L  18     -25.062  -2.413   6.783  1.00 37.74           H  
ATOM    245  HG2 ARG L  18     -23.629  -1.422   5.045  1.00 37.74           H  
ATOM    246  HG3 ARG L  18     -24.117  -2.709   3.943  1.00 37.74           H  
ATOM    247  HD2 ARG L  18     -26.469  -1.989   4.240  1.00 37.74           H  
ATOM    248  HD3 ARG L  18     -25.895  -0.635   5.211  1.00 37.74           H  
ATOM    249  HE  ARG L  18     -24.938  -1.021   2.477  1.00 63.22           H  
ATOM    250 HH11 ARG L  18     -26.612   1.065   4.845  1.00 37.74           H  
ATOM    251 HH12 ARG L  18     -26.701   2.380   3.793  1.00 37.74           H  
ATOM    252 HH21 ARG L  18     -25.105   0.766   1.068  1.00 37.74           H  
ATOM    253 HH22 ARG L  18     -25.859   2.210   1.547  1.00 37.74           H  
ATOM    254  N   VAL L  19     -21.420  -2.512   6.275  1.00 70.20           N  
ATOM    255  CA  VAL L  19     -20.344  -1.637   6.732  1.00 21.33           C  
ATOM    256  C   VAL L  19     -20.242  -0.414   5.854  1.00 23.51           C  
ATOM    257  O   VAL L  19     -20.346  -0.519   4.648  1.00 24.31           O  
ATOM    258  CB  VAL L  19     -18.983  -2.371   6.668  1.00 54.11           C  
ATOM    259  CG1 VAL L  19     -17.837  -1.495   7.151  1.00 21.34           C  
ATOM    260  CG2 VAL L  19     -19.038  -3.629   7.461  1.00 42.11           C  
ATOM    261  H   VAL L  19     -21.385  -2.890   5.366  1.00 37.74           H  
ATOM    262  HA  VAL L  19     -20.527  -1.349   7.756  1.00 32.15           H  
ATOM    263  HB  VAL L  19     -18.784  -2.627   5.639  1.00 22.25           H  
ATOM    264 HG11 VAL L  19     -18.007  -1.239   8.186  1.00 37.74           H  
ATOM    265 HG12 VAL L  19     -17.802  -0.594   6.556  1.00 37.74           H  
ATOM    266 HG13 VAL L  19     -16.904  -2.030   7.059  1.00 37.74           H  
ATOM    267 HG21 VAL L  19     -18.085  -4.133   7.394  1.00 37.74           H  
ATOM    268 HG22 VAL L  19     -19.811  -4.271   7.065  1.00 37.74           H  
ATOM    269 HG23 VAL L  19     -19.254  -3.391   8.491  1.00 37.74           H  
ATOM    270  N   THR L  20     -20.038   0.725   6.459  1.00 61.10           N  
ATOM    271  CA  THR L  20     -19.797   1.936   5.732  1.00 65.12           C  
ATOM    272  C   THR L  20     -18.579   2.646   6.335  1.00 71.52           C  
ATOM    273  O   THR L  20     -18.564   2.968   7.527  1.00 14.13           O  
ATOM    274  CB  THR L  20     -21.038   2.871   5.760  1.00 32.12           C  
ATOM    275  OG1 THR L  20     -22.169   2.195   5.164  1.00 54.42           O  
ATOM    276  CG2 THR L  20     -20.770   4.165   5.000  1.00 61.32           C  
ATOM    277  H   THR L  20     -20.045   0.776   7.436  1.00 37.74           H  
ATOM    278  HA  THR L  20     -19.571   1.674   4.708  1.00 54.35           H  
ATOM    279  HB  THR L  20     -21.269   3.099   6.789  1.00 40.45           H  
ATOM    280  HG1 THR L  20     -22.245   2.495   4.248  1.00 63.30           H  
ATOM    281 HG21 THR L  20     -19.930   4.678   5.445  1.00 37.74           H  
ATOM    282 HG22 THR L  20     -21.646   4.796   5.047  1.00 37.74           H  
ATOM    283 HG23 THR L  20     -20.551   3.937   3.968  1.00 37.74           H  
ATOM    284  N   ILE L  21     -17.570   2.839   5.522  1.00 55.30           N  
ATOM    285  CA  ILE L  21     -16.357   3.530   5.903  1.00 33.15           C  
ATOM    286  C   ILE L  21     -16.256   4.784   5.039  1.00 25.43           C  
ATOM    287  O   ILE L  21     -16.696   4.778   3.887  1.00 43.13           O  
ATOM    288  CB  ILE L  21     -15.088   2.653   5.643  1.00 63.51           C  
ATOM    289  CG1 ILE L  21     -15.159   1.314   6.383  1.00 32.32           C  
ATOM    290  CG2 ILE L  21     -13.828   3.396   6.042  1.00 20.31           C  
ATOM    291  CD1 ILE L  21     -13.943   0.423   6.141  1.00  3.00           C  
ATOM    292  H   ILE L  21     -17.630   2.505   4.597  1.00 37.74           H  
ATOM    293  HA  ILE L  21     -16.412   3.796   6.948  1.00 31.03           H  
ATOM    294  HB  ILE L  21     -15.026   2.462   4.584  1.00 34.10           H  
ATOM    295 HG12 ILE L  21     -15.232   1.497   7.444  1.00 37.74           H  
ATOM    296 HG13 ILE L  21     -16.036   0.779   6.051  1.00 37.74           H  
ATOM    297 HG21 ILE L  21     -13.748   4.309   5.469  1.00 37.74           H  
ATOM    298 HG22 ILE L  21     -12.968   2.772   5.843  1.00 37.74           H  
ATOM    299 HG23 ILE L  21     -13.864   3.633   7.095  1.00 37.74           H  
ATOM    300 HD11 ILE L  21     -13.880   0.186   5.088  1.00 37.74           H  
ATOM    301 HD12 ILE L  21     -14.034  -0.490   6.711  1.00 37.74           H  
ATOM    302 HD13 ILE L  21     -13.043   0.953   6.424  1.00 37.74           H  
ATOM    303  N   THR L  22     -15.707   5.832   5.571  1.00 34.42           N  
ATOM    304  CA  THR L  22     -15.565   7.049   4.839  1.00 53.41           C  
ATOM    305  C   THR L  22     -14.108   7.500   4.873  1.00 50.51           C  
ATOM    306  O   THR L  22     -13.501   7.566   5.932  1.00 11.14           O  
ATOM    307  CB  THR L  22     -16.470   8.141   5.443  1.00 53.33           C  
ATOM    308  OG1 THR L  22     -17.814   7.638   5.509  1.00 63.13           O  
ATOM    309  CG2 THR L  22     -16.453   9.404   4.585  1.00  4.44           C  
ATOM    310  H   THR L  22     -15.359   5.798   6.492  1.00 37.74           H  
ATOM    311  HA  THR L  22     -15.866   6.875   3.817  1.00 54.11           H  
ATOM    312  HB  THR L  22     -16.121   8.375   6.438  1.00 51.25           H  
ATOM    313  HG1 THR L  22     -17.768   6.787   5.963  1.00 71.03           H  
ATOM    314 HG21 THR L  22     -16.813   9.170   3.594  1.00 37.74           H  
ATOM    315 HG22 THR L  22     -15.444   9.783   4.521  1.00 37.74           H  
ATOM    316 HG23 THR L  22     -17.092  10.152   5.033  1.00 37.74           H  
ATOM    317  N   CYS L  23     -13.563   7.787   3.731  1.00 20.42           N  
ATOM    318  CA  CYS L  23     -12.209   8.263   3.636  1.00 42.13           C  
ATOM    319  C   CYS L  23     -12.250   9.640   3.039  1.00 41.02           C  
ATOM    320  O   CYS L  23     -13.001   9.885   2.094  1.00 42.21           O  
ATOM    321  CB  CYS L  23     -11.342   7.325   2.775  1.00  2.30           C  
ATOM    322  SG  CYS L  23      -9.601   7.783   2.659  1.00 42.03           S  
ATOM    323  H   CYS L  23     -14.094   7.696   2.905  1.00 37.74           H  
ATOM    324  HA  CYS L  23     -11.801   8.324   4.634  1.00 32.33           H  
ATOM    325  HB2 CYS L  23     -11.317   6.335   3.192  1.00 37.74           H  
ATOM    326  HB3 CYS L  23     -11.730   7.292   1.768  1.00 37.74           H  
ATOM    327  N   GLN L  24     -11.507  10.536   3.613  1.00 62.23           N  
ATOM    328  CA  GLN L  24     -11.474  11.893   3.171  1.00 72.01           C  
ATOM    329  C   GLN L  24     -10.058  12.294   2.828  1.00 15.22           C  
ATOM    330  O   GLN L  24      -9.129  12.074   3.617  1.00 12.01           O  
ATOM    331  CB  GLN L  24     -12.029  12.814   4.254  1.00 32.44           C  
ATOM    332  CG  GLN L  24     -13.436  12.455   4.699  1.00 20.33           C  
ATOM    333  CD  GLN L  24     -13.974  13.400   5.739  1.00 14.24           C  
ATOM    334  OE1 GLN L  24     -13.624  14.582   5.770  1.00 24.31           O  
ATOM    335  NE2 GLN L  24     -14.823  12.908   6.591  1.00  1.13           N  
ATOM    336  H   GLN L  24     -10.948  10.273   4.379  1.00 37.74           H  
ATOM    337  HA  GLN L  24     -12.095  11.982   2.294  1.00 45.41           H  
ATOM    338  HB2 GLN L  24     -11.380  12.776   5.115  1.00 37.74           H  
ATOM    339  HB3 GLN L  24     -12.045  13.825   3.872  1.00 37.74           H  
ATOM    340  HG2 GLN L  24     -14.098  12.451   3.848  1.00 37.74           H  
ATOM    341  HG3 GLN L  24     -13.389  11.466   5.130  1.00 37.74           H  
ATOM    342 HE21 GLN L  24     -15.073  11.963   6.526  1.00 37.74           H  
ATOM    343 HE22 GLN L  24     -15.187  13.504   7.281  1.00 37.74           H  
ATOM    344  N   ALA L  25      -9.890  12.847   1.660  1.00 33.52           N  
ATOM    345  CA  ALA L  25      -8.609  13.329   1.214  1.00 64.40           C  
ATOM    346  C   ALA L  25      -8.456  14.788   1.622  1.00 70.33           C  
ATOM    347  O   ALA L  25      -9.456  15.488   1.799  1.00 52.13           O  
ATOM    348  CB  ALA L  25      -8.489  13.180  -0.294  1.00 54.33           C  
ATOM    349  H   ALA L  25     -10.674  12.937   1.076  1.00 37.74           H  
ATOM    350  HA  ALA L  25      -7.836  12.742   1.689  1.00 52.33           H  
ATOM    351  HB1 ALA L  25      -9.247  13.777  -0.777  1.00 37.74           H  
ATOM    352  HB2 ALA L  25      -8.619  12.143  -0.569  1.00 37.74           H  
ATOM    353  HB3 ALA L  25      -7.512  13.515  -0.612  1.00 37.74           H  
ATOM    354  N   SER L  26      -7.231  15.233   1.805  1.00 14.33           N  
ATOM    355  CA  SER L  26      -6.983  16.612   2.183  1.00 12.44           C  
ATOM    356  C   SER L  26      -7.264  17.551   1.001  1.00 41.50           C  
ATOM    357  O   SER L  26      -7.844  18.621   1.165  1.00 23.24           O  
ATOM    358  CB  SER L  26      -5.543  16.780   2.637  1.00 22.20           C  
ATOM    359  OG  SER L  26      -5.285  18.091   3.112  1.00 41.23           O  
ATOM    360  H   SER L  26      -6.491  14.598   1.711  1.00 37.74           H  
ATOM    361  HA  SER L  26      -7.631  16.781   3.030  1.00 12.24           H  
ATOM    362  HB2 SER L  26      -5.348  16.086   3.437  1.00 37.74           H  
ATOM    363  HB3 SER L  26      -4.883  16.570   1.809  1.00 37.74           H  
ATOM    364  HG  SER L  26      -6.133  18.547   3.207  1.00 71.23           H  
ATOM    365  N   GLN L  27      -6.859  17.122  -0.182  1.00 75.44           N  
ATOM    366  CA  GLN L  27      -7.041  17.886  -1.395  1.00 11.41           C  
ATOM    367  C   GLN L  27      -7.759  16.996  -2.371  1.00 10.04           C  
ATOM    368  O   GLN L  27      -7.591  15.769  -2.320  1.00 51.35           O  
ATOM    369  CB  GLN L  27      -5.678  18.324  -1.977  1.00 21.15           C  
ATOM    370  CG  GLN L  27      -5.785  19.231  -3.203  1.00 64.55           C  
ATOM    371  CD  GLN L  27      -4.441  19.653  -3.790  1.00 50.23           C  
ATOM    372  OE1 GLN L  27      -4.315  20.743  -4.343  1.00 42.24           O  
ATOM    373  NE2 GLN L  27      -3.448  18.795  -3.718  1.00 62.52           N  
ATOM    374  H   GLN L  27      -6.452  16.238  -0.265  1.00 37.74           H  
ATOM    375  HA  GLN L  27      -7.645  18.754  -1.174  1.00 70.11           H  
ATOM    376  HB2 GLN L  27      -5.143  18.864  -1.211  1.00 37.74           H  
ATOM    377  HB3 GLN L  27      -5.115  17.445  -2.249  1.00 37.74           H  
ATOM    378  HG2 GLN L  27      -6.327  18.697  -3.967  1.00 37.74           H  
ATOM    379  HG3 GLN L  27      -6.339  20.116  -2.928  1.00 37.74           H  
ATOM    380 HE21 GLN L  27      -3.591  17.923  -3.299  1.00 37.74           H  
ATOM    381 HE22 GLN L  27      -2.591  19.072  -4.105  1.00 37.74           H  
ATOM    382  N   ASP L  28      -8.554  17.576  -3.235  1.00 73.44           N  
ATOM    383  CA  ASP L  28      -9.338  16.785  -4.168  1.00 70.11           C  
ATOM    384  C   ASP L  28      -8.473  16.156  -5.240  1.00 23.33           C  
ATOM    385  O   ASP L  28      -7.656  16.825  -5.899  1.00 12.44           O  
ATOM    386  CB  ASP L  28     -10.545  17.540  -4.786  1.00 70.34           C  
ATOM    387  CG  ASP L  28     -11.599  17.995  -3.786  1.00  2.43           C  
ATOM    388  OD1 ASP L  28     -12.556  17.233  -3.513  1.00 12.41           O  
ATOM    389  OD2 ASP L  28     -11.492  19.128  -3.271  1.00 64.34           O  
ATOM    390  H   ASP L  28      -8.607  18.555  -3.243  1.00 37.74           H  
ATOM    391  HA  ASP L  28      -9.694  15.972  -3.559  1.00 23.05           H  
ATOM    392  HB2 ASP L  28     -10.194  18.418  -5.306  1.00 37.74           H  
ATOM    393  HB3 ASP L  28     -11.020  16.886  -5.502  1.00 37.74           H  
ATOM    394  N   ILE L  29      -8.658  14.873  -5.392  1.00 23.01           N  
ATOM    395  CA  ILE L  29      -7.897  14.039  -6.314  1.00 60.21           C  
ATOM    396  C   ILE L  29      -8.743  13.614  -7.514  1.00 60.02           C  
ATOM    397  O   ILE L  29      -8.471  12.574  -8.131  1.00 22.55           O  
ATOM    398  CB  ILE L  29      -7.455  12.766  -5.576  1.00 73.31           C  
ATOM    399  CG1 ILE L  29      -8.677  12.034  -5.000  1.00 20.23           C  
ATOM    400  CG2 ILE L  29      -6.465  13.111  -4.490  1.00 52.21           C  
ATOM    401  CD1 ILE L  29      -8.348  10.822  -4.198  1.00 51.14           C  
ATOM    402  H   ILE L  29      -9.341  14.453  -4.824  1.00 37.74           H  
ATOM    403  HA  ILE L  29      -7.009  14.573  -6.620  1.00 55.13           H  
ATOM    404  HB  ILE L  29      -6.966  12.115  -6.285  1.00 20.43           H  
ATOM    405 HG12 ILE L  29      -9.220  12.689  -4.334  1.00 37.74           H  
ATOM    406 HG13 ILE L  29      -9.334  11.728  -5.801  1.00 37.74           H  
ATOM    407 HG21 ILE L  29      -5.609  13.577  -4.951  1.00 37.74           H  
ATOM    408 HG22 ILE L  29      -6.171  12.204  -3.983  1.00 37.74           H  
ATOM    409 HG23 ILE L  29      -6.928  13.795  -3.795  1.00 37.74           H  
ATOM    410 HD11 ILE L  29      -9.279  10.428  -3.820  1.00 37.74           H  
ATOM    411 HD12 ILE L  29      -7.729  11.126  -3.368  1.00 37.74           H  
ATOM    412 HD13 ILE L  29      -7.846  10.093  -4.816  1.00 37.74           H  
ATOM    413  N   ASN L  30      -9.737  14.429  -7.854  1.00 41.31           N  
ATOM    414  CA  ASN L  30     -10.711  14.148  -8.938  1.00 61.44           C  
ATOM    415  C   ASN L  30     -11.549  12.911  -8.599  1.00 13.20           C  
ATOM    416  O   ASN L  30     -12.698  13.037  -8.175  1.00 41.24           O  
ATOM    417  CB  ASN L  30     -10.027  13.999 -10.329  1.00 20.25           C  
ATOM    418  CG  ASN L  30     -11.002  13.842 -11.514  1.00 40.34           C  
ATOM    419  OD1 ASN L  30     -12.128  13.348 -11.377  1.00  3.41           O  
ATOM    420  ND2 ASN L  30     -10.565  14.245 -12.685  1.00 24.03           N  
ATOM    421  H   ASN L  30      -9.819  15.285  -7.376  1.00 37.74           H  
ATOM    422  HA  ASN L  30     -11.390  14.990  -8.961  1.00 20.21           H  
ATOM    423  HB2 ASN L  30      -9.444  14.888 -10.513  1.00 37.74           H  
ATOM    424  HB3 ASN L  30      -9.367  13.144 -10.307  1.00 37.74           H  
ATOM    425 HD21 ASN L  30      -9.659  14.620 -12.757  1.00 37.74           H  
ATOM    426 HD22 ASN L  30     -11.160  14.142 -13.459  1.00 37.74           H  
ATOM    427  N   ASN L  31     -10.968  11.736  -8.752  1.00 74.13           N  
ATOM    428  CA  ASN L  31     -11.671  10.484  -8.469  1.00  1.43           C  
ATOM    429  C   ASN L  31     -10.644   9.359  -8.283  1.00 50.23           C  
ATOM    430  O   ASN L  31     -10.995   8.193  -8.132  1.00 41.24           O  
ATOM    431  CB  ASN L  31     -12.571  10.126  -9.662  1.00 14.11           C  
ATOM    432  CG  ASN L  31     -13.603   9.092  -9.344  1.00 34.31           C  
ATOM    433  OD1 ASN L  31     -14.094   9.007  -8.229  1.00  2.53           O  
ATOM    434  ND2 ASN L  31     -13.945   8.310 -10.319  1.00  4.41           N  
ATOM    435  H   ASN L  31     -10.041  11.720  -9.068  1.00 37.74           H  
ATOM    436  HA  ASN L  31     -12.276  10.595  -7.582  1.00 62.22           H  
ATOM    437  HB2 ASN L  31     -13.084  10.982 -10.065  1.00 37.74           H  
ATOM    438  HB3 ASN L  31     -11.939   9.682 -10.418  1.00 37.74           H  
ATOM    439 HD21 ASN L  31     -13.526   8.434 -11.198  1.00 37.74           H  
ATOM    440 HD22 ASN L  31     -14.588   7.596 -10.134  1.00 37.74           H  
ATOM    441  N   TYR L  32      -9.364   9.711  -8.264  1.00  3.12           N  
ATOM    442  CA  TYR L  32      -8.335   8.689  -8.251  1.00  2.34           C  
ATOM    443  C   TYR L  32      -8.060   8.194  -6.842  1.00 31.21           C  
ATOM    444  O   TYR L  32      -7.127   8.652  -6.175  1.00  2.20           O  
ATOM    445  CB  TYR L  32      -7.049   9.211  -8.896  1.00 43.54           C  
ATOM    446  CG  TYR L  32      -7.258   9.780 -10.281  1.00  2.53           C  
ATOM    447  CD1 TYR L  32      -7.550   8.959 -11.356  1.00 10.31           C  
ATOM    448  CD2 TYR L  32      -7.183  11.145 -10.503  1.00 31.21           C  
ATOM    449  CE1 TYR L  32      -7.755   9.474 -12.614  1.00 21.01           C  
ATOM    450  CE2 TYR L  32      -7.390  11.673 -11.759  1.00 14.22           C  
ATOM    451  CZ  TYR L  32      -7.676  10.831 -12.811  1.00 32.21           C  
ATOM    452  OH  TYR L  32      -7.882  11.351 -14.063  1.00 41.12           O  
ATOM    453  H   TYR L  32      -9.087  10.651  -8.233  1.00 37.74           H  
ATOM    454  HA  TYR L  32      -8.697   7.858  -8.839  1.00 72.41           H  
ATOM    455  HB2 TYR L  32      -6.637   9.991  -8.272  1.00 37.74           H  
ATOM    456  HB3 TYR L  32      -6.336   8.402  -8.969  1.00 37.74           H  
ATOM    457  HD1 TYR L  32      -7.610   7.893 -11.196  1.00 52.34           H  
ATOM    458  HD2 TYR L  32      -6.957  11.796  -9.669  1.00 21.34           H  
ATOM    459  HE1 TYR L  32      -7.978   8.812 -13.437  1.00 12.10           H  
ATOM    460  HE2 TYR L  32      -7.327  12.738 -11.916  1.00  1.32           H  
ATOM    461  HH  TYR L  32      -7.182  12.001 -14.207  1.00 41.11           H  
ATOM    462  N   LEU L  33      -8.898   7.290  -6.391  1.00 13.42           N  
ATOM    463  CA  LEU L  33      -8.797   6.724  -5.072  1.00 52.20           C  
ATOM    464  C   LEU L  33      -8.870   5.204  -5.185  1.00 62.51           C  
ATOM    465  O   LEU L  33      -9.669   4.670  -5.970  1.00 14.51           O  
ATOM    466  CB  LEU L  33      -9.952   7.297  -4.212  1.00 23.44           C  
ATOM    467  CG  LEU L  33      -9.955   7.053  -2.683  1.00 55.23           C  
ATOM    468  CD1 LEU L  33     -10.152   5.618  -2.316  1.00 21.25           C  
ATOM    469  CD2 LEU L  33      -8.698   7.569  -2.063  1.00 20.42           C  
ATOM    470  H   LEU L  33      -9.638   7.001  -6.967  1.00 37.74           H  
ATOM    471  HA  LEU L  33      -7.852   7.016  -4.638  1.00 10.52           H  
ATOM    472  HB2 LEU L  33      -9.986   8.364  -4.366  1.00 37.74           H  
ATOM    473  HB3 LEU L  33     -10.865   6.883  -4.612  1.00 37.74           H  
ATOM    474  HG  LEU L  33     -10.775   7.599  -2.245  1.00 35.13           H  
ATOM    475 HD11 LEU L  33      -9.350   5.024  -2.732  1.00 37.74           H  
ATOM    476 HD12 LEU L  33     -11.096   5.274  -2.709  1.00 37.74           H  
ATOM    477 HD13 LEU L  33     -10.154   5.512  -1.242  1.00 37.74           H  
ATOM    478 HD21 LEU L  33      -7.855   7.025  -2.460  1.00 37.74           H  
ATOM    479 HD22 LEU L  33      -8.773   7.390  -1.002  1.00 37.74           H  
ATOM    480 HD23 LEU L  33      -8.604   8.626  -2.261  1.00 37.74           H  
ATOM    481  N   ILE L  34      -8.047   4.524  -4.432  1.00 41.24           N  
ATOM    482  CA  ILE L  34      -8.013   3.074  -4.434  1.00 63.15           C  
ATOM    483  C   ILE L  34      -8.296   2.566  -3.011  1.00 42.21           C  
ATOM    484  O   ILE L  34      -7.869   3.178  -2.041  1.00 20.23           O  
ATOM    485  CB  ILE L  34      -6.611   2.581  -4.816  1.00 32.23           C  
ATOM    486  CG1 ILE L  34      -6.077   3.352  -6.002  1.00 33.32           C  
ATOM    487  CG2 ILE L  34      -6.675   1.103  -5.178  1.00  3.35           C  
ATOM    488  CD1 ILE L  34      -4.612   3.133  -6.210  1.00 14.54           C  
ATOM    489  H   ILE L  34      -7.417   5.010  -3.851  1.00 37.74           H  
ATOM    490  HA  ILE L  34      -8.735   2.683  -5.133  1.00 43.45           H  
ATOM    491  HB  ILE L  34      -5.936   2.700  -3.983  1.00 73.52           H  
ATOM    492 HG12 ILE L  34      -6.595   3.039  -6.897  1.00 37.74           H  
ATOM    493 HG13 ILE L  34      -6.243   4.407  -5.841  1.00 37.74           H  
ATOM    494 HG21 ILE L  34      -7.356   0.961  -6.005  1.00 37.74           H  
ATOM    495 HG22 ILE L  34      -7.015   0.534  -4.325  1.00 37.74           H  
ATOM    496 HG23 ILE L  34      -5.686   0.774  -5.467  1.00 37.74           H  
ATOM    497 HD11 ILE L  34      -4.116   3.533  -5.335  1.00 37.74           H  
ATOM    498 HD12 ILE L  34      -4.275   3.667  -7.086  1.00 37.74           H  
ATOM    499 HD13 ILE L  34      -4.407   2.077  -6.293  1.00 37.74           H  
ATOM    500  N   TRP L  35      -9.012   1.474  -2.905  1.00 64.20           N  
ATOM    501  CA  TRP L  35      -9.299   0.833  -1.636  1.00 63.53           C  
ATOM    502  C   TRP L  35      -8.630  -0.507  -1.582  1.00 13.24           C  
ATOM    503  O   TRP L  35      -8.700  -1.278  -2.547  1.00 53.42           O  
ATOM    504  CB  TRP L  35     -10.807   0.654  -1.424  1.00 43.40           C  
ATOM    505  CG  TRP L  35     -11.531   1.937  -1.274  1.00 35.12           C  
ATOM    506  CD1 TRP L  35     -12.086   2.693  -2.257  1.00  2.42           C  
ATOM    507  CD2 TRP L  35     -11.776   2.618  -0.045  1.00 65.34           C  
ATOM    508  NE1 TRP L  35     -12.637   3.832  -1.713  1.00 11.21           N  
ATOM    509  CE2 TRP L  35     -12.463   3.800  -0.350  1.00  2.44           C  
ATOM    510  CE3 TRP L  35     -11.468   2.335   1.287  1.00  3.32           C  
ATOM    511  CZ2 TRP L  35     -12.848   4.706   0.634  1.00 33.44           C  
ATOM    512  CZ3 TRP L  35     -11.855   3.227   2.260  1.00 31.14           C  
ATOM    513  CH2 TRP L  35     -12.534   4.399   1.929  1.00 52.11           C  
ATOM    514  H   TRP L  35      -9.365   1.054  -3.723  1.00 37.74           H  
ATOM    515  HA  TRP L  35      -8.909   1.459  -0.848  1.00 52.24           H  
ATOM    516  HB2 TRP L  35     -11.221   0.122  -2.267  1.00 37.74           H  
ATOM    517  HB3 TRP L  35     -10.965   0.068  -0.531  1.00 37.74           H  
ATOM    518  HD1 TRP L  35     -12.063   2.416  -3.303  1.00 72.11           H  
ATOM    519  HE1 TRP L  35     -13.080   4.550  -2.212  1.00 12.24           H  
ATOM    520  HE3 TRP L  35     -10.941   1.430   1.549  1.00  4.34           H  
ATOM    521  HZ2 TRP L  35     -13.363   5.629   0.409  1.00 25.02           H  
ATOM    522  HZ3 TRP L  35     -11.626   3.024   3.296  1.00 33.42           H  
ATOM    523  HH2 TRP L  35     -12.821   5.070   2.725  1.00 23.51           H  
ATOM    524  N   TYR L  36      -7.976  -0.785  -0.487  1.00 72.50           N  
ATOM    525  CA  TYR L  36      -7.324  -2.064  -0.306  1.00 32.04           C  
ATOM    526  C   TYR L  36      -7.807  -2.706   0.964  1.00 40.50           C  
ATOM    527  O   TYR L  36      -8.366  -2.031   1.840  1.00 51.50           O  
ATOM    528  CB  TYR L  36      -5.813  -1.897  -0.178  1.00 74.14           C  
ATOM    529  CG  TYR L  36      -5.168  -1.204  -1.313  1.00 52.01           C  
ATOM    530  CD1 TYR L  36      -5.086   0.169  -1.326  1.00 33.12           C  
ATOM    531  CD2 TYR L  36      -4.636  -1.912  -2.366  1.00 21.21           C  
ATOM    532  CE1 TYR L  36      -4.489   0.828  -2.344  1.00 34.35           C  
ATOM    533  CE2 TYR L  36      -4.030  -1.260  -3.413  1.00 22.13           C  
ATOM    534  CZ  TYR L  36      -3.952   0.111  -3.400  1.00 54.12           C  
ATOM    535  OH  TYR L  36      -3.331   0.764  -4.437  1.00 14.33           O  
ATOM    536  H   TYR L  36      -7.919  -0.096   0.216  1.00 37.74           H  
ATOM    537  HA  TYR L  36      -7.528  -2.689  -1.167  1.00 52.44           H  
ATOM    538  HB2 TYR L  36      -5.556  -1.346   0.713  1.00 37.74           H  
ATOM    539  HB3 TYR L  36      -5.377  -2.883  -0.110  1.00 37.74           H  
ATOM    540  HD1 TYR L  36      -5.504   0.724  -0.501  1.00 62.50           H  
ATOM    541  HD2 TYR L  36      -4.712  -2.996  -2.358  1.00 34.55           H  
ATOM    542  HE1 TYR L  36      -4.475   1.910  -2.288  1.00 74.14           H  
ATOM    543  HE2 TYR L  36      -3.612  -1.823  -4.235  1.00 14.24           H  
ATOM    544  HH  TYR L  36      -3.636   0.379  -5.263  1.00 34.44           H  
ATOM    545  N   GLN L  37      -7.565  -3.981   1.082  1.00 33.30           N  
ATOM    546  CA  GLN L  37      -7.883  -4.695   2.277  1.00 13.51           C  
ATOM    547  C   GLN L  37      -6.603  -5.344   2.780  1.00 15.13           C  
ATOM    548  O   GLN L  37      -5.938  -6.117   2.068  1.00 50.01           O  
ATOM    549  CB  GLN L  37      -9.020  -5.723   2.047  1.00 23.33           C  
ATOM    550  CG  GLN L  37      -8.682  -6.898   1.149  1.00 33.24           C  
ATOM    551  CD  GLN L  37      -9.885  -7.772   0.801  1.00 11.11           C  
ATOM    552  OE1 GLN L  37      -9.916  -8.386  -0.256  1.00 41.14           O  
ATOM    553  NE2 GLN L  37     -10.886  -7.813   1.660  1.00 62.13           N  
ATOM    554  H   GLN L  37      -7.165  -4.451   0.318  1.00 37.74           H  
ATOM    555  HA  GLN L  37      -8.194  -3.962   3.007  1.00 61.03           H  
ATOM    556  HB2 GLN L  37      -9.324  -6.121   3.004  1.00 37.74           H  
ATOM    557  HB3 GLN L  37      -9.860  -5.198   1.616  1.00 37.74           H  
ATOM    558  HG2 GLN L  37      -8.233  -6.533   0.237  1.00 37.74           H  
ATOM    559  HG3 GLN L  37      -7.970  -7.501   1.694  1.00 37.74           H  
ATOM    560 HE21 GLN L  37     -10.860  -7.296   2.495  1.00 37.74           H  
ATOM    561 HE22 GLN L  37     -11.660  -8.370   1.431  1.00 37.74           H  
ATOM    562  N   GLN L  38      -6.229  -4.985   3.964  1.00 30.12           N  
ATOM    563  CA  GLN L  38      -5.001  -5.425   4.536  1.00 24.51           C  
ATOM    564  C   GLN L  38      -5.233  -6.541   5.528  1.00 41.21           C  
ATOM    565  O   GLN L  38      -5.793  -6.327   6.607  1.00  2.14           O  
ATOM    566  CB  GLN L  38      -4.301  -4.252   5.227  1.00 61.41           C  
ATOM    567  CG  GLN L  38      -2.956  -4.594   5.845  1.00 35.34           C  
ATOM    568  CD  GLN L  38      -1.924  -4.969   4.810  1.00 42.01           C  
ATOM    569  OE1 GLN L  38      -1.210  -4.121   4.315  1.00 31.15           O  
ATOM    570  NE2 GLN L  38      -1.859  -6.217   4.459  1.00 63.30           N  
ATOM    571  H   GLN L  38      -6.811  -4.392   4.496  1.00 37.74           H  
ATOM    572  HA  GLN L  38      -4.359  -5.775   3.742  1.00  1.43           H  
ATOM    573  HB2 GLN L  38      -4.140  -3.475   4.493  1.00 37.74           H  
ATOM    574  HB3 GLN L  38      -4.948  -3.865   5.998  1.00 37.74           H  
ATOM    575  HG2 GLN L  38      -2.596  -3.739   6.396  1.00 37.74           H  
ATOM    576  HG3 GLN L  38      -3.090  -5.427   6.520  1.00 37.74           H  
ATOM    577 HE21 GLN L  38      -2.468  -6.863   4.864  1.00 37.74           H  
ATOM    578 HE22 GLN L  38      -1.187  -6.495   3.800  1.00 37.74           H  
ATOM    579  N   LYS L  39      -4.849  -7.724   5.148  1.00 64.23           N  
ATOM    580  CA  LYS L  39      -4.882  -8.854   6.038  1.00  5.14           C  
ATOM    581  C   LYS L  39      -3.479  -9.071   6.579  1.00 71.50           C  
ATOM    582  O   LYS L  39      -2.520  -9.044   5.802  1.00 22.22           O  
ATOM    583  CB  LYS L  39      -5.366 -10.110   5.313  1.00 12.33           C  
ATOM    584  CG  LYS L  39      -6.789 -10.028   4.797  1.00 42.25           C  
ATOM    585  CD  LYS L  39      -7.195 -11.323   4.124  1.00 23.41           C  
ATOM    586  CE  LYS L  39      -8.612 -11.257   3.595  1.00 51.41           C  
ATOM    587  NZ  LYS L  39      -9.007 -12.512   2.927  1.00 44.20           N  
ATOM    588  H   LYS L  39      -4.517  -7.850   4.236  1.00 37.74           H  
ATOM    589  HA  LYS L  39      -5.560  -8.614   6.844  1.00  1.52           H  
ATOM    590  HB2 LYS L  39      -4.719 -10.274   4.464  1.00 37.74           H  
ATOM    591  HB3 LYS L  39      -5.288 -10.956   5.979  1.00 37.74           H  
ATOM    592  HG2 LYS L  39      -7.454  -9.839   5.625  1.00 37.74           H  
ATOM    593  HG3 LYS L  39      -6.858  -9.219   4.084  1.00 37.74           H  
ATOM    594  HD2 LYS L  39      -6.523 -11.518   3.301  1.00 37.74           H  
ATOM    595  HD3 LYS L  39      -7.125 -12.126   4.844  1.00 37.74           H  
ATOM    596  HE2 LYS L  39      -9.287 -11.073   4.418  1.00 37.74           H  
ATOM    597  HE3 LYS L  39      -8.682 -10.444   2.887  1.00 37.74           H  
ATOM    598  HZ1 LYS L  39      -8.984 -13.314   3.587  1.00 37.74           H  
ATOM    599  HZ2 LYS L  39      -8.366 -12.721   2.135  1.00 37.74           H  
ATOM    600  HZ3 LYS L  39      -9.964 -12.429   2.531  1.00 37.74           H  
ATOM    601  N   PRO L  40      -3.319  -9.244   7.900  1.00  4.15           N  
ATOM    602  CA  PRO L  40      -2.004  -9.476   8.502  1.00 60.32           C  
ATOM    603  C   PRO L  40      -1.388 -10.785   8.011  1.00 21.51           C  
ATOM    604  O   PRO L  40      -1.937 -11.866   8.250  1.00 55.01           O  
ATOM    605  CB  PRO L  40      -2.295  -9.560  10.013  1.00 12.20           C  
ATOM    606  CG  PRO L  40      -3.645  -8.952  10.186  1.00 43.40           C  
ATOM    607  CD  PRO L  40      -4.391  -9.219   8.912  1.00 74.54           C  
ATOM    608  HA  PRO L  40      -1.326  -8.660   8.297  1.00 33.02           H  
ATOM    609  HB2 PRO L  40      -2.284 -10.594  10.322  1.00 37.74           H  
ATOM    610  HB3 PRO L  40      -1.543  -9.010  10.559  1.00 37.74           H  
ATOM    611  HG2 PRO L  40      -4.152  -9.411  11.023  1.00 37.74           H  
ATOM    612  HG3 PRO L  40      -3.547  -7.889  10.346  1.00 37.74           H  
ATOM    613  HD2 PRO L  40      -4.902 -10.167   8.967  1.00 37.74           H  
ATOM    614  HD3 PRO L  40      -5.083  -8.411   8.727  1.00 37.74           H  
ATOM    615  N   GLY L  41      -0.286 -10.682   7.301  1.00 54.20           N  
ATOM    616  CA  GLY L  41       0.376 -11.860   6.793  1.00 55.33           C  
ATOM    617  C   GLY L  41       0.556 -11.800   5.296  1.00 24.50           C  
ATOM    618  O   GLY L  41       1.416 -12.474   4.734  1.00 73.13           O  
ATOM    619  H   GLY L  41       0.091  -9.794   7.108  1.00 37.74           H  
ATOM    620  HA2 GLY L  41       1.344 -11.954   7.261  1.00 37.74           H  
ATOM    621  HA3 GLY L  41      -0.221 -12.726   7.037  1.00 37.74           H  
ATOM    622  N   GLN L  42      -0.247 -10.994   4.651  1.00 74.23           N  
ATOM    623  CA  GLN L  42      -0.163 -10.834   3.215  1.00 51.43           C  
ATOM    624  C   GLN L  42      -0.124  -9.368   2.870  1.00 10.55           C  
ATOM    625  O   GLN L  42      -0.363  -8.513   3.733  1.00 11.12           O  
ATOM    626  CB  GLN L  42      -1.332 -11.504   2.483  1.00 73.03           C  
ATOM    627  CG  GLN L  42      -2.689 -10.903   2.782  1.00 33.24           C  
ATOM    628  CD  GLN L  42      -3.788 -11.496   1.928  1.00 25.05           C  
ATOM    629  OE1 GLN L  42      -3.733 -12.656   1.530  1.00 45.34           O  
ATOM    630  NE2 GLN L  42      -4.773 -10.699   1.612  1.00 35.41           N  
ATOM    631  H   GLN L  42      -0.911 -10.471   5.151  1.00 37.74           H  
ATOM    632  HA  GLN L  42       0.762 -11.288   2.894  1.00  2.42           H  
ATOM    633  HB2 GLN L  42      -1.162 -11.426   1.420  1.00 37.74           H  
ATOM    634  HB3 GLN L  42      -1.355 -12.549   2.755  1.00 37.74           H  
ATOM    635  HG2 GLN L  42      -2.920 -11.088   3.821  1.00 37.74           H  
ATOM    636  HG3 GLN L  42      -2.642  -9.837   2.606  1.00 37.74           H  
ATOM    637 HE21 GLN L  42      -4.741  -9.777   1.935  1.00 37.74           H  
ATOM    638 HE22 GLN L  42      -5.506 -11.058   1.064  1.00 37.74           H  
ATOM    639  N   ALA L  43       0.209  -9.069   1.644  1.00 22.54           N  
ATOM    640  CA  ALA L  43       0.201  -7.707   1.171  1.00 54.42           C  
ATOM    641  C   ALA L  43      -1.249  -7.251   0.997  1.00 11.32           C  
ATOM    642  O   ALA L  43      -2.157  -8.088   0.897  1.00 72.00           O  
ATOM    643  CB  ALA L  43       0.951  -7.614  -0.144  1.00 22.12           C  
ATOM    644  H   ALA L  43       0.450  -9.787   1.022  1.00 37.74           H  
ATOM    645  HA  ALA L  43       0.687  -7.085   1.906  1.00 32.23           H  
ATOM    646  HB1 ALA L  43       1.963  -7.947   0.028  1.00 37.74           H  
ATOM    647  HB2 ALA L  43       0.964  -6.594  -0.499  1.00 37.74           H  
ATOM    648  HB3 ALA L  43       0.486  -8.252  -0.880  1.00 37.74           H  
ATOM    649  N   PRO L  44      -1.508  -5.947   0.998  1.00 12.11           N  
ATOM    650  CA  PRO L  44      -2.854  -5.441   0.826  1.00 70.44           C  
ATOM    651  C   PRO L  44      -3.373  -5.678  -0.592  1.00 31.14           C  
ATOM    652  O   PRO L  44      -2.663  -5.467  -1.578  1.00 31.33           O  
ATOM    653  CB  PRO L  44      -2.710  -3.960   1.114  1.00 33.24           C  
ATOM    654  CG  PRO L  44      -1.301  -3.644   0.762  1.00 62.41           C  
ATOM    655  CD  PRO L  44      -0.521  -4.849   1.167  1.00 54.44           C  
ATOM    656  HA  PRO L  44      -3.535  -5.892   1.532  1.00 44.04           H  
ATOM    657  HB2 PRO L  44      -3.437  -3.400   0.554  1.00 37.74           H  
ATOM    658  HB3 PRO L  44      -2.884  -3.793   2.164  1.00 37.74           H  
ATOM    659  HG2 PRO L  44      -1.215  -3.474  -0.302  1.00 37.74           H  
ATOM    660  HG3 PRO L  44      -0.966  -2.778   1.311  1.00 37.74           H  
ATOM    661  HD2 PRO L  44       0.336  -4.977   0.524  1.00 37.74           H  
ATOM    662  HD3 PRO L  44      -0.215  -4.768   2.199  1.00 37.74           H  
ATOM    663  N   LYS L  45      -4.591  -6.121  -0.686  1.00 45.21           N  
ATOM    664  CA  LYS L  45      -5.186  -6.426  -1.959  1.00 50.34           C  
ATOM    665  C   LYS L  45      -6.049  -5.278  -2.431  1.00 53.12           C  
ATOM    666  O   LYS L  45      -6.863  -4.758  -1.659  1.00 63.43           O  
ATOM    667  CB  LYS L  45      -6.017  -7.709  -1.869  1.00 71.32           C  
ATOM    668  CG  LYS L  45      -6.742  -8.065  -3.149  1.00 13.43           C  
ATOM    669  CD  LYS L  45      -7.478  -9.382  -3.002  1.00 31.31           C  
ATOM    670  CE  LYS L  45      -8.297  -9.720  -4.241  1.00 32.41           C  
ATOM    671  NZ  LYS L  45      -8.966 -11.034  -4.113  1.00 53.02           N  
ATOM    672  H   LYS L  45      -5.117  -6.239   0.132  1.00 37.74           H  
ATOM    673  HA  LYS L  45      -4.392  -6.582  -2.673  1.00 54.40           H  
ATOM    674  HB2 LYS L  45      -5.398  -8.552  -1.598  1.00 37.74           H  
ATOM    675  HB3 LYS L  45      -6.764  -7.576  -1.099  1.00 37.74           H  
ATOM    676  HG2 LYS L  45      -7.432  -7.263  -3.368  1.00 37.74           H  
ATOM    677  HG3 LYS L  45      -6.014  -8.135  -3.945  1.00 37.74           H  
ATOM    678  HD2 LYS L  45      -6.746 -10.160  -2.839  1.00 37.74           H  
ATOM    679  HD3 LYS L  45      -8.123  -9.311  -2.139  1.00 37.74           H  
ATOM    680  HE2 LYS L  45      -9.047  -8.957  -4.383  1.00 37.74           H  
ATOM    681  HE3 LYS L  45      -7.639  -9.739  -5.099  1.00 37.74           H  
ATOM    682  HZ1 LYS L  45      -8.248 -11.779  -4.010  1.00 37.74           H  
ATOM    683  HZ2 LYS L  45      -9.560 -11.288  -4.926  1.00 37.74           H  
ATOM    684  HZ3 LYS L  45      -9.566 -11.089  -3.265  1.00 37.74           H  
ATOM    685  N   LEU L  46      -5.844  -4.867  -3.678  1.00 34.23           N  
ATOM    686  CA  LEU L  46      -6.645  -3.830  -4.295  1.00 54.43           C  
ATOM    687  C   LEU L  46      -8.053  -4.369  -4.430  1.00 70.23           C  
ATOM    688  O   LEU L  46      -8.268  -5.431  -5.017  1.00  2.22           O  
ATOM    689  CB  LEU L  46      -6.029  -3.449  -5.673  1.00 54.42           C  
ATOM    690  CG  LEU L  46      -6.610  -2.228  -6.456  1.00  3.30           C  
ATOM    691  CD1 LEU L  46      -5.749  -1.930  -7.668  1.00  4.23           C  
ATOM    692  CD2 LEU L  46      -8.040  -2.457  -6.926  1.00 23.21           C  
ATOM    693  H   LEU L  46      -5.134  -5.285  -4.203  1.00 37.74           H  
ATOM    694  HA  LEU L  46      -6.652  -2.968  -3.644  1.00 35.40           H  
ATOM    695  HB2 LEU L  46      -4.990  -3.235  -5.475  1.00 37.74           H  
ATOM    696  HB3 LEU L  46      -6.084  -4.325  -6.303  1.00 37.74           H  
ATOM    697  HG  LEU L  46      -6.587  -1.361  -5.812  1.00 33.21           H  
ATOM    698 HD11 LEU L  46      -5.733  -2.789  -8.322  1.00 37.74           H  
ATOM    699 HD12 LEU L  46      -4.740  -1.704  -7.352  1.00 37.74           H  
ATOM    700 HD13 LEU L  46      -6.157  -1.085  -8.203  1.00 37.74           H  
ATOM    701 HD21 LEU L  46      -8.063  -3.271  -7.635  1.00 37.74           H  
ATOM    702 HD22 LEU L  46      -8.385  -1.557  -7.411  1.00 37.74           H  
ATOM    703 HD23 LEU L  46      -8.677  -2.685  -6.085  1.00 37.74           H  
ATOM    704  N   LEU L  47      -8.983  -3.669  -3.869  1.00  5.30           N  
ATOM    705  CA  LEU L  47     -10.331  -4.119  -3.854  1.00  1.40           C  
ATOM    706  C   LEU L  47     -11.189  -3.211  -4.751  1.00 42.15           C  
ATOM    707  O   LEU L  47     -11.932  -3.675  -5.610  1.00 53.23           O  
ATOM    708  CB  LEU L  47     -10.825  -4.100  -2.405  1.00 23.41           C  
ATOM    709  CG  LEU L  47     -12.124  -4.825  -2.105  1.00 13.41           C  
ATOM    710  CD1 LEU L  47     -11.972  -6.317  -2.367  1.00 31.55           C  
ATOM    711  CD2 LEU L  47     -12.512  -4.595  -0.673  1.00 55.43           C  
ATOM    712  H   LEU L  47      -8.753  -2.814  -3.438  1.00 37.74           H  
ATOM    713  HA  LEU L  47     -10.362  -5.133  -4.221  1.00 64.15           H  
ATOM    714  HB2 LEU L  47     -10.054  -4.534  -1.784  1.00 37.74           H  
ATOM    715  HB3 LEU L  47     -10.941  -3.067  -2.110  1.00 37.74           H  
ATOM    716  HG  LEU L  47     -12.912  -4.442  -2.737  1.00  4.40           H  
ATOM    717 HD11 LEU L  47     -11.188  -6.715  -1.740  1.00 37.74           H  
ATOM    718 HD12 LEU L  47     -11.723  -6.486  -3.403  1.00 37.74           H  
ATOM    719 HD13 LEU L  47     -12.901  -6.817  -2.135  1.00 37.74           H  
ATOM    720 HD21 LEU L  47     -11.740  -4.995  -0.033  1.00 37.74           H  
ATOM    721 HD22 LEU L  47     -13.441  -5.109  -0.475  1.00 37.74           H  
ATOM    722 HD23 LEU L  47     -12.632  -3.536  -0.495  1.00 37.74           H  
ATOM    723  N   ILE L  48     -11.068  -1.920  -4.566  1.00  4.03           N  
ATOM    724  CA  ILE L  48     -11.841  -0.978  -5.353  1.00 12.11           C  
ATOM    725  C   ILE L  48     -10.916   0.112  -5.853  1.00 23.13           C  
ATOM    726  O   ILE L  48      -9.983   0.484  -5.162  1.00 70.04           O  
ATOM    727  CB  ILE L  48     -12.997  -0.330  -4.511  1.00 50.04           C  
ATOM    728  CG1 ILE L  48     -13.869  -1.416  -3.878  1.00 71.52           C  
ATOM    729  CG2 ILE L  48     -13.855   0.610  -5.366  1.00 71.42           C  
ATOM    730  CD1 ILE L  48     -15.061  -0.894  -3.132  1.00  3.25           C  
ATOM    731  H   ILE L  48     -10.434  -1.575  -3.902  1.00 37.74           H  
ATOM    732  HA  ILE L  48     -12.268  -1.504  -6.194  1.00 14.41           H  
ATOM    733  HB  ILE L  48     -12.555   0.263  -3.726  1.00 10.02           H  
ATOM    734 HG12 ILE L  48     -14.218  -2.098  -4.638  1.00 37.74           H  
ATOM    735 HG13 ILE L  48     -13.270  -1.976  -3.176  1.00 37.74           H  
ATOM    736 HG21 ILE L  48     -13.241   1.408  -5.759  1.00 37.74           H  
ATOM    737 HG22 ILE L  48     -14.652   1.024  -4.763  1.00 37.74           H  
ATOM    738 HG23 ILE L  48     -14.290   0.056  -6.183  1.00 37.74           H  
ATOM    739 HD11 ILE L  48     -15.696  -0.368  -3.831  1.00 37.74           H  
ATOM    740 HD12 ILE L  48     -14.745  -0.224  -2.349  1.00 37.74           H  
ATOM    741 HD13 ILE L  48     -15.610  -1.725  -2.716  1.00 37.74           H  
ATOM    742  N   TYR L  49     -11.145   0.593  -7.038  1.00 33.55           N  
ATOM    743  CA  TYR L  49     -10.351   1.682  -7.571  1.00 13.52           C  
ATOM    744  C   TYR L  49     -11.244   2.687  -8.264  1.00 31.34           C  
ATOM    745  O   TYR L  49     -12.425   2.407  -8.504  1.00 24.33           O  
ATOM    746  CB  TYR L  49      -9.229   1.195  -8.511  1.00 11.42           C  
ATOM    747  CG  TYR L  49      -9.693   0.483  -9.767  1.00 41.15           C  
ATOM    748  CD1 TYR L  49     -10.020   1.198 -10.907  1.00 74.32           C  
ATOM    749  CD2 TYR L  49      -9.783  -0.896  -9.817  1.00 40.12           C  
ATOM    750  CE1 TYR L  49     -10.422   0.564 -12.055  1.00 73.23           C  
ATOM    751  CE2 TYR L  49     -10.185  -1.538 -10.960  1.00 43.21           C  
ATOM    752  CZ  TYR L  49     -10.503  -0.805 -12.078  1.00 22.10           C  
ATOM    753  OH  TYR L  49     -10.900  -1.447 -13.235  1.00 60.41           O  
ATOM    754  H   TYR L  49     -11.886   0.217  -7.568  1.00 37.74           H  
ATOM    755  HA  TYR L  49      -9.906   2.181  -6.723  1.00 72.13           H  
ATOM    756  HB2 TYR L  49      -8.646   2.048  -8.826  1.00 37.74           H  
ATOM    757  HB3 TYR L  49      -8.584   0.525  -7.962  1.00 37.74           H  
ATOM    758  HD1 TYR L  49      -9.954   2.275 -10.882  1.00 51.32           H  
ATOM    759  HD2 TYR L  49      -9.541  -1.479  -8.944  1.00 14.15           H  
ATOM    760  HE1 TYR L  49     -10.674   1.144 -12.930  1.00 55.53           H  
ATOM    761  HE2 TYR L  49     -10.235  -2.616 -10.960  1.00 73.21           H  
ATOM    762  HH  TYR L  49     -11.567  -2.111 -13.006  1.00 53.52           H  
ATOM    763  N   ASP L  50     -10.689   3.873  -8.548  1.00 15.32           N  
ATOM    764  CA  ASP L  50     -11.413   4.978  -9.233  1.00 51.34           C  
ATOM    765  C   ASP L  50     -12.599   5.394  -8.360  1.00 62.32           C  
ATOM    766  O   ASP L  50     -13.604   5.906  -8.830  1.00 25.24           O  
ATOM    767  CB  ASP L  50     -11.866   4.529 -10.642  1.00 12.23           C  
ATOM    768  CG  ASP L  50     -12.399   5.642 -11.527  1.00 24.41           C  
ATOM    769  OD1 ASP L  50     -11.598   6.474 -11.990  1.00 15.32           O  
ATOM    770  OD2 ASP L  50     -13.624   5.660 -11.812  1.00 24.21           O  
ATOM    771  H   ASP L  50      -9.759   4.026  -8.274  1.00 37.74           H  
ATOM    772  HA  ASP L  50     -10.732   5.814  -9.304  1.00 23.31           H  
ATOM    773  HB2 ASP L  50     -11.068   4.035 -11.170  1.00 37.74           H  
ATOM    774  HB3 ASP L  50     -12.678   3.838 -10.489  1.00 37.74           H  
ATOM    775  N   ALA L  51     -12.440   5.133  -7.046  1.00 14.14           N  
ATOM    776  CA  ALA L  51     -13.399   5.497  -6.004  1.00 24.11           C  
ATOM    777  C   ALA L  51     -14.790   4.885  -6.214  1.00 51.30           C  
ATOM    778  O   ALA L  51     -15.737   5.280  -5.544  1.00 15.53           O  
ATOM    779  CB  ALA L  51     -13.496   7.009  -5.910  1.00 20.14           C  
ATOM    780  H   ALA L  51     -11.610   4.678  -6.788  1.00 37.74           H  
ATOM    781  HA  ALA L  51     -13.005   5.139  -5.065  1.00 40.20           H  
ATOM    782  HB1 ALA L  51     -13.860   7.408  -6.846  1.00 37.74           H  
ATOM    783  HB2 ALA L  51     -12.522   7.429  -5.707  1.00 37.74           H  
ATOM    784  HB3 ALA L  51     -14.185   7.273  -5.122  1.00 37.74           H  
ATOM    785  N   SER L  52     -14.903   3.907  -7.094  1.00 61.32           N  
ATOM    786  CA  SER L  52     -16.198   3.346  -7.402  1.00 34.13           C  
ATOM    787  C   SER L  52     -16.116   1.942  -8.010  1.00 14.33           C  
ATOM    788  O   SER L  52     -16.849   1.030  -7.602  1.00 64.10           O  
ATOM    789  CB  SER L  52     -16.927   4.298  -8.365  1.00 35.13           C  
ATOM    790  OG  SER L  52     -18.207   3.814  -8.752  1.00 32.34           O  
ATOM    791  H   SER L  52     -14.097   3.588  -7.544  1.00 37.74           H  
ATOM    792  HA  SER L  52     -16.775   3.307  -6.490  1.00 12.04           H  
ATOM    793  HB2 SER L  52     -17.057   5.252  -7.879  1.00 37.74           H  
ATOM    794  HB3 SER L  52     -16.316   4.421  -9.247  1.00 37.74           H  
ATOM    795  HG  SER L  52     -18.739   4.592  -8.973  1.00 53.33           H  
ATOM    796  N   THR L  53     -15.235   1.770  -8.957  1.00 73.21           N  
ATOM    797  CA  THR L  53     -15.166   0.554  -9.732  1.00 72.30           C  
ATOM    798  C   THR L  53     -14.457  -0.600  -9.009  1.00 11.41           C  
ATOM    799  O   THR L  53     -13.355  -0.444  -8.462  1.00 13.04           O  
ATOM    800  CB  THR L  53     -14.506   0.853 -11.081  1.00 53.43           C  
ATOM    801  OG1 THR L  53     -15.256   1.907 -11.704  1.00 71.14           O  
ATOM    802  CG2 THR L  53     -14.516  -0.367 -11.992  1.00 35.15           C  
ATOM    803  H   THR L  53     -14.584   2.469  -9.170  1.00 37.74           H  
ATOM    804  HA  THR L  53     -16.182   0.248  -9.933  1.00 32.50           H  
ATOM    805  HB  THR L  53     -13.492   1.181 -10.912  1.00  2.54           H  
ATOM    806  HG1 THR L  53     -14.678   2.351 -12.334  1.00 31.41           H  
ATOM    807 HG21 THR L  53     -14.037  -0.121 -12.929  1.00 37.74           H  
ATOM    808 HG22 THR L  53     -15.535  -0.670 -12.179  1.00 37.74           H  
ATOM    809 HG23 THR L  53     -13.983  -1.177 -11.516  1.00 37.74           H  
ATOM    810  N   LEU L  54     -15.113  -1.744  -9.012  1.00 33.25           N  
ATOM    811  CA  LEU L  54     -14.602  -2.956  -8.413  1.00 64.03           C  
ATOM    812  C   LEU L  54     -13.638  -3.631  -9.364  1.00 54.51           C  
ATOM    813  O   LEU L  54     -13.903  -3.730 -10.567  1.00 42.45           O  
ATOM    814  CB  LEU L  54     -15.747  -3.931  -8.096  1.00 22.35           C  
ATOM    815  CG  LEU L  54     -16.844  -3.431  -7.161  1.00 60.45           C  
ATOM    816  CD1 LEU L  54     -17.900  -4.498  -6.955  1.00 42.52           C  
ATOM    817  CD2 LEU L  54     -16.268  -3.009  -5.839  1.00 64.32           C  
ATOM    818  H   LEU L  54     -15.993  -1.779  -9.444  1.00 37.74           H  
ATOM    819  HA  LEU L  54     -14.092  -2.706  -7.496  1.00 25.14           H  
ATOM    820  HB2 LEU L  54     -16.211  -4.215  -9.028  1.00 37.74           H  
ATOM    821  HB3 LEU L  54     -15.313  -4.817  -7.658  1.00 37.74           H  
ATOM    822  HG  LEU L  54     -17.299  -2.567  -7.620  1.00  2.41           H  
ATOM    823 HD11 LEU L  54     -17.450  -5.374  -6.511  1.00 37.74           H  
ATOM    824 HD12 LEU L  54     -18.334  -4.767  -7.905  1.00 37.74           H  
ATOM    825 HD13 LEU L  54     -18.670  -4.122  -6.300  1.00 37.74           H  
ATOM    826 HD21 LEU L  54     -17.062  -2.686  -5.183  1.00 37.74           H  
ATOM    827 HD22 LEU L  54     -15.590  -2.188  -6.012  1.00 37.74           H  
ATOM    828 HD23 LEU L  54     -15.738  -3.837  -5.391  1.00 37.74           H  
ATOM    829  N   GLU L  55     -12.534  -4.062  -8.837  1.00 71.50           N  
ATOM    830  CA  GLU L  55     -11.528  -4.780  -9.600  1.00 50.25           C  
ATOM    831  C   GLU L  55     -12.041  -6.195  -9.934  1.00 55.20           C  
ATOM    832  O   GLU L  55     -12.875  -6.747  -9.204  1.00 71.11           O  
ATOM    833  CB  GLU L  55     -10.197  -4.793  -8.820  1.00 50.41           C  
ATOM    834  CG  GLU L  55      -9.050  -5.551  -9.478  1.00 42.52           C  
ATOM    835  CD  GLU L  55      -8.811  -5.130 -10.914  1.00 41.52           C  
ATOM    836  OE1 GLU L  55      -8.379  -4.008 -11.157  1.00 54.34           O  
ATOM    837  OE2 GLU L  55      -9.062  -5.952 -11.821  1.00 42.24           O  
ATOM    838  H   GLU L  55     -12.381  -3.907  -7.880  1.00 37.74           H  
ATOM    839  HA  GLU L  55     -11.396  -4.252 -10.531  1.00 41.14           H  
ATOM    840  HB2 GLU L  55      -9.877  -3.770  -8.688  1.00 37.74           H  
ATOM    841  HB3 GLU L  55     -10.375  -5.223  -7.844  1.00 37.74           H  
ATOM    842  HG2 GLU L  55      -8.148  -5.378  -8.911  1.00 37.74           H  
ATOM    843  HG3 GLU L  55      -9.283  -6.606  -9.458  1.00 37.74           H  
ATOM    844  N   THR L  56     -11.603  -6.741 -11.053  1.00 61.12           N  
ATOM    845  CA  THR L  56     -12.028  -8.050 -11.483  1.00 50.14           C  
ATOM    846  C   THR L  56     -11.669  -9.100 -10.409  1.00 43.14           C  
ATOM    847  O   THR L  56     -10.494  -9.281 -10.063  1.00 33.32           O  
ATOM    848  CB  THR L  56     -11.339  -8.408 -12.820  1.00  2.54           C  
ATOM    849  OG1 THR L  56     -11.600  -7.360 -13.773  1.00 14.30           O  
ATOM    850  CG2 THR L  56     -11.871  -9.724 -13.373  1.00 50.24           C  
ATOM    851  H   THR L  56     -10.942  -6.262 -11.604  1.00 37.74           H  
ATOM    852  HA  THR L  56     -13.097  -8.033 -11.635  1.00 24.34           H  
ATOM    853  HB  THR L  56     -10.274  -8.487 -12.657  1.00 53.22           H  
ATOM    854  HG1 THR L  56     -10.764  -7.056 -14.156  1.00 10.43           H  
ATOM    855 HG21 THR L  56     -11.690 -10.516 -12.660  1.00 37.74           H  
ATOM    856 HG22 THR L  56     -11.373  -9.954 -14.302  1.00 37.74           H  
ATOM    857 HG23 THR L  56     -12.934  -9.635 -13.547  1.00 37.74           H  
ATOM    858  N   GLY L  57     -12.688  -9.765  -9.888  1.00 25.22           N  
ATOM    859  CA  GLY L  57     -12.488 -10.751  -8.853  1.00 13.14           C  
ATOM    860  C   GLY L  57     -13.093 -10.306  -7.535  1.00 71.31           C  
ATOM    861  O   GLY L  57     -13.333 -11.117  -6.647  1.00 21.44           O  
ATOM    862  H   GLY L  57     -13.598  -9.575 -10.205  1.00 37.74           H  
ATOM    863  HA2 GLY L  57     -12.947 -11.679  -9.159  1.00 37.74           H  
ATOM    864  HA3 GLY L  57     -11.428 -10.906  -8.717  1.00 37.74           H  
ATOM    865  N   VAL L  58     -13.346  -9.017  -7.421  1.00  1.44           N  
ATOM    866  CA  VAL L  58     -13.926  -8.437  -6.218  1.00  1.54           C  
ATOM    867  C   VAL L  58     -15.425  -8.733  -6.134  1.00  2.22           C  
ATOM    868  O   VAL L  58     -16.171  -8.458  -7.083  1.00 10.32           O  
ATOM    869  CB  VAL L  58     -13.684  -6.907  -6.174  1.00  5.43           C  
ATOM    870  CG1 VAL L  58     -14.356  -6.270  -4.964  1.00 23.24           C  
ATOM    871  CG2 VAL L  58     -12.191  -6.629  -6.161  1.00 33.13           C  
ATOM    872  H   VAL L  58     -13.143  -8.417  -8.173  1.00 37.74           H  
ATOM    873  HA  VAL L  58     -13.430  -8.882  -5.368  1.00 74.51           H  
ATOM    874  HB  VAL L  58     -14.101  -6.464  -7.066  1.00 41.21           H  
ATOM    875 HG11 VAL L  58     -15.423  -6.428  -5.019  1.00 37.74           H  
ATOM    876 HG12 VAL L  58     -14.147  -5.210  -4.945  1.00 37.74           H  
ATOM    877 HG13 VAL L  58     -13.977  -6.722  -4.060  1.00 37.74           H  
ATOM    878 HG21 VAL L  58     -11.731  -7.115  -5.314  1.00 37.74           H  
ATOM    879 HG22 VAL L  58     -12.025  -5.562  -6.106  1.00 37.74           H  
ATOM    880 HG23 VAL L  58     -11.753  -7.007  -7.074  1.00 37.74           H  
ATOM    881  N   PRO L  59     -15.877  -9.342  -5.015  1.00 74.22           N  
ATOM    882  CA  PRO L  59     -17.297  -9.642  -4.786  1.00 22.45           C  
ATOM    883  C   PRO L  59     -18.166  -8.389  -4.798  1.00 32.02           C  
ATOM    884  O   PRO L  59     -17.724  -7.305  -4.401  1.00  4.43           O  
ATOM    885  CB  PRO L  59     -17.315 -10.258  -3.380  1.00 74.14           C  
ATOM    886  CG  PRO L  59     -15.933 -10.750  -3.157  1.00 72.31           C  
ATOM    887  CD  PRO L  59     -15.033  -9.808  -3.896  1.00 60.22           C  
ATOM    888  HA  PRO L  59     -17.679 -10.356  -5.500  1.00 70.52           H  
ATOM    889  HB2 PRO L  59     -17.581  -9.494  -2.665  1.00 37.74           H  
ATOM    890  HB3 PRO L  59     -18.035 -11.061  -3.337  1.00 37.74           H  
ATOM    891  HG2 PRO L  59     -15.707 -10.744  -2.101  1.00 37.74           H  
ATOM    892  HG3 PRO L  59     -15.830 -11.752  -3.547  1.00 37.74           H  
ATOM    893  HD2 PRO L  59     -14.734  -8.987  -3.260  1.00 37.74           H  
ATOM    894  HD3 PRO L  59     -14.171 -10.345  -4.263  1.00 37.74           H  
ATOM    895  N   SER L  60     -19.410  -8.558  -5.213  1.00 33.20           N  
ATOM    896  CA  SER L  60     -20.388  -7.478  -5.313  1.00 52.23           C  
ATOM    897  C   SER L  60     -20.768  -6.923  -3.931  1.00 62.13           C  
ATOM    898  O   SER L  60     -21.496  -5.938  -3.831  1.00 53.13           O  
ATOM    899  CB  SER L  60     -21.635  -8.000  -6.012  1.00 71.42           C  
ATOM    900  OG  SER L  60     -21.292  -8.614  -7.243  1.00 25.22           O  
ATOM    901  H   SER L  60     -19.711  -9.449  -5.494  1.00 37.74           H  
ATOM    902  HA  SER L  60     -19.964  -6.688  -5.915  1.00 24.41           H  
ATOM    903  HB2 SER L  60     -22.121  -8.726  -5.380  1.00 37.74           H  
ATOM    904  HB3 SER L  60     -22.307  -7.178  -6.206  1.00 37.74           H  
ATOM    905  HG  SER L  60     -20.781  -7.970  -7.750  1.00  3.32           H  
ATOM    906  N   ARG L  61     -20.293  -7.581  -2.870  1.00 73.42           N  
ATOM    907  CA  ARG L  61     -20.562  -7.138  -1.514  1.00 64.43           C  
ATOM    908  C   ARG L  61     -19.899  -5.797  -1.260  1.00 50.11           C  
ATOM    909  O   ARG L  61     -20.376  -5.009  -0.471  1.00 12.42           O  
ATOM    910  CB  ARG L  61     -20.071  -8.162  -0.477  1.00 30.22           C  
ATOM    911  CG  ARG L  61     -20.623  -9.556  -0.695  1.00 71.21           C  
ATOM    912  CD  ARG L  61     -20.205 -10.536   0.396  1.00 21.21           C  
ATOM    913  NE  ARG L  61     -18.740 -10.666   0.563  1.00 52.51           N  
ATOM    914  CZ  ARG L  61     -17.999 -11.695   0.106  1.00 73.35           C  
ATOM    915  NH1 ARG L  61     -18.546 -12.620  -0.679  1.00 20.40           N  
ATOM    916  NH2 ARG L  61     -16.722 -11.792   0.438  1.00 65.20           N  
ATOM    917  H   ARG L  61     -19.757  -8.382  -3.040  1.00 37.74           H  
ATOM    918  HA  ARG L  61     -21.632  -7.022  -1.411  1.00 60.32           H  
ATOM    919  HB2 ARG L  61     -18.992  -8.212  -0.505  1.00 37.74           H  
ATOM    920  HB3 ARG L  61     -20.387  -7.821   0.498  1.00 37.74           H  
ATOM    921  HG2 ARG L  61     -21.700  -9.509  -0.726  1.00 37.74           H  
ATOM    922  HG3 ARG L  61     -20.252  -9.913  -1.643  1.00 37.74           H  
ATOM    923  HD2 ARG L  61     -20.619 -10.197   1.334  1.00 37.74           H  
ATOM    924  HD3 ARG L  61     -20.619 -11.506   0.164  1.00 37.74           H  
ATOM    925  HE  ARG L  61     -18.300  -9.980   1.122  1.00 34.44           H  
ATOM    926 HH11 ARG L  61     -19.507 -12.594  -0.959  1.00 37.74           H  
ATOM    927 HH12 ARG L  61     -18.014 -13.404  -1.020  1.00 37.74           H  
ATOM    928 HH21 ARG L  61     -16.275 -11.105   1.040  1.00 37.74           H  
ATOM    929 HH22 ARG L  61     -16.127 -12.540   0.134  1.00 37.74           H  
ATOM    930  N   PHE L  62     -18.799  -5.554  -1.926  1.00 30.00           N  
ATOM    931  CA  PHE L  62     -18.089  -4.309  -1.776  1.00 44.21           C  
ATOM    932  C   PHE L  62     -18.569  -3.301  -2.779  1.00 41.32           C  
ATOM    933  O   PHE L  62     -18.944  -3.647  -3.897  1.00 73.12           O  
ATOM    934  CB  PHE L  62     -16.606  -4.531  -1.959  1.00 61.03           C  
ATOM    935  CG  PHE L  62     -16.094  -5.580  -1.065  1.00 52.54           C  
ATOM    936  CD1 PHE L  62     -15.775  -5.294   0.244  1.00 74.53           C  
ATOM    937  CD2 PHE L  62     -15.957  -6.868  -1.524  1.00 65.01           C  
ATOM    938  CE1 PHE L  62     -15.324  -6.279   1.075  1.00 64.21           C  
ATOM    939  CE2 PHE L  62     -15.515  -7.850  -0.702  1.00 33.02           C  
ATOM    940  CZ  PHE L  62     -15.196  -7.558   0.594  1.00 31.32           C  
ATOM    941  H   PHE L  62     -18.434  -6.229  -2.536  1.00 37.74           H  
ATOM    942  HA  PHE L  62     -18.258  -3.935  -0.776  1.00 14.33           H  
ATOM    943  HB2 PHE L  62     -16.411  -4.827  -2.979  1.00 37.74           H  
ATOM    944  HB3 PHE L  62     -16.078  -3.615  -1.740  1.00 37.74           H  
ATOM    945  HD1 PHE L  62     -15.881  -4.282   0.606  1.00  3.43           H  
ATOM    946  HD2 PHE L  62     -16.205  -7.095  -2.549  1.00 51.13           H  
ATOM    947  HE1 PHE L  62     -15.070  -6.056   2.101  1.00 73.43           H  
ATOM    948  HE2 PHE L  62     -15.415  -8.857  -1.074  1.00 51.34           H  
ATOM    949  HZ  PHE L  62     -14.853  -8.354   1.230  1.00 54.53           H  
ATOM    950  N   SER L  63     -18.590  -2.077  -2.374  1.00 43.41           N  
ATOM    951  CA  SER L  63     -18.935  -0.985  -3.226  1.00 45.45           C  
ATOM    952  C   SER L  63     -18.269   0.264  -2.730  1.00  1.11           C  
ATOM    953  O   SER L  63     -18.146   0.476  -1.516  1.00 22.45           O  
ATOM    954  CB  SER L  63     -20.442  -0.777  -3.271  1.00 34.54           C  
ATOM    955  OG  SER L  63     -21.105  -1.933  -3.789  1.00  4.00           O  
ATOM    956  H   SER L  63     -18.372  -1.873  -1.437  1.00 37.74           H  
ATOM    957  HA  SER L  63     -18.580  -1.208  -4.220  1.00 21.22           H  
ATOM    958  HB2 SER L  63     -20.791  -0.548  -2.277  1.00 37.74           H  
ATOM    959  HB3 SER L  63     -20.626   0.070  -3.918  1.00 37.74           H  
ATOM    960  HG  SER L  63     -20.435  -2.632  -3.870  1.00 41.51           H  
ATOM    961  N   GLY L  64     -17.804   1.055  -3.641  1.00 43.01           N  
ATOM    962  CA  GLY L  64     -17.220   2.295  -3.304  1.00 43.15           C  
ATOM    963  C   GLY L  64     -17.870   3.377  -4.086  1.00 31.14           C  
ATOM    964  O   GLY L  64     -18.260   3.161  -5.232  1.00 40.01           O  
ATOM    965  H   GLY L  64     -17.847   0.808  -4.590  1.00 37.74           H  
ATOM    966  HA2 GLY L  64     -17.352   2.478  -2.248  1.00 37.74           H  
ATOM    967  HA3 GLY L  64     -16.166   2.278  -3.542  1.00 37.74           H  
ATOM    968  N   SER L  65     -18.063   4.493  -3.479  1.00 72.24           N  
ATOM    969  CA  SER L  65     -18.611   5.636  -4.155  1.00 31.14           C  
ATOM    970  C   SER L  65     -17.997   6.903  -3.577  1.00 65.32           C  
ATOM    971  O   SER L  65     -17.983   7.085  -2.359  1.00  4.00           O  
ATOM    972  CB  SER L  65     -20.127   5.658  -3.968  1.00 42.22           C  
ATOM    973  OG  SER L  65     -20.712   4.431  -4.401  1.00 33.11           O  
ATOM    974  H   SER L  65     -17.846   4.547  -2.520  1.00 37.74           H  
ATOM    975  HA  SER L  65     -18.385   5.561  -5.209  1.00 43.45           H  
ATOM    976  HB2 SER L  65     -20.354   5.802  -2.922  1.00 37.74           H  
ATOM    977  HB3 SER L  65     -20.547   6.466  -4.547  1.00 37.74           H  
ATOM    978  HG  SER L  65     -20.034   3.974  -4.919  1.00 41.43           H  
ATOM    979  N   GLY L  66     -17.459   7.746  -4.420  1.00 31.14           N  
ATOM    980  CA  GLY L  66     -16.929   8.993  -3.947  1.00 30.43           C  
ATOM    981  C   GLY L  66     -16.273   9.763  -5.040  1.00 72.13           C  
ATOM    982  O   GLY L  66     -16.278   9.319  -6.180  1.00 42.32           O  
ATOM    983  H   GLY L  66     -17.374   7.537  -5.379  1.00 37.74           H  
ATOM    984  HA2 GLY L  66     -17.727   9.585  -3.523  1.00 37.74           H  
ATOM    985  HA3 GLY L  66     -16.195   8.788  -3.184  1.00 37.74           H  
ATOM    986  N   SER L  67     -15.708  10.912  -4.699  1.00 43.53           N  
ATOM    987  CA  SER L  67     -15.029  11.751  -5.659  1.00 52.43           C  
ATOM    988  C   SER L  67     -14.254  12.891  -4.968  1.00 71.23           C  
ATOM    989  O   SER L  67     -14.786  13.568  -4.074  1.00 63.33           O  
ATOM    990  CB  SER L  67     -16.040  12.321  -6.670  1.00 13.13           C  
ATOM    991  OG  SER L  67     -17.076  13.050  -6.009  1.00 61.32           O  
ATOM    992  H   SER L  67     -15.744  11.200  -3.757  1.00 37.74           H  
ATOM    993  HA  SER L  67     -14.324  11.132  -6.194  1.00 73.01           H  
ATOM    994  HB2 SER L  67     -15.526  12.984  -7.352  1.00 37.74           H  
ATOM    995  HB3 SER L  67     -16.484  11.507  -7.223  1.00 37.74           H  
ATOM    996  HG  SER L  67     -17.254  12.597  -5.172  1.00 21.34           H  
ATOM    997  N   GLY L  68     -12.995  13.064  -5.367  1.00  0.42           N  
ATOM    998  CA  GLY L  68     -12.166  14.164  -4.906  1.00 64.23           C  
ATOM    999  C   GLY L  68     -11.708  14.066  -3.474  1.00 43.22           C  
ATOM   1000  O   GLY L  68     -10.544  13.788  -3.221  1.00  4.14           O  
ATOM   1001  H   GLY L  68     -12.612  12.423  -6.001  1.00 37.74           H  
ATOM   1002  HA2 GLY L  68     -11.285  14.200  -5.528  1.00 37.74           H  
ATOM   1003  HA3 GLY L  68     -12.698  15.087  -5.040  1.00 37.74           H  
ATOM   1004  N   THR L  69     -12.599  14.314  -2.559  1.00 65.35           N  
ATOM   1005  CA  THR L  69     -12.279  14.291  -1.161  1.00  0.10           C  
ATOM   1006  C   THR L  69     -13.096  13.288  -0.369  1.00 65.54           C  
ATOM   1007  O   THR L  69     -12.566  12.641   0.519  1.00 45.42           O  
ATOM   1008  CB  THR L  69     -12.341  15.691  -0.525  1.00 53.01           C  
ATOM   1009  OG1 THR L  69     -13.480  16.408  -1.027  1.00  0.54           O  
ATOM   1010  CG2 THR L  69     -11.067  16.475  -0.779  1.00 51.02           C  
ATOM   1011  H   THR L  69     -13.516  14.519  -2.846  1.00 37.74           H  
ATOM   1012  HA  THR L  69     -11.252  13.959  -1.107  1.00 23.32           H  
ATOM   1013  HB  THR L  69     -12.471  15.562   0.541  1.00 10.31           H  
ATOM   1014  HG1 THR L  69     -13.194  16.782  -1.880  1.00 72.40           H  
ATOM   1015 HG21 THR L  69     -11.150  17.455  -0.335  1.00 37.74           H  
ATOM   1016 HG22 THR L  69     -10.921  16.576  -1.843  1.00 37.74           H  
ATOM   1017 HG23 THR L  69     -10.227  15.953  -0.344  1.00 37.74           H  
ATOM   1018  N   GLU L  70     -14.369  13.138  -0.688  1.00 11.21           N  
ATOM   1019  CA  GLU L  70     -15.181  12.180   0.032  1.00 10.23           C  
ATOM   1020  C   GLU L  70     -15.230  10.878  -0.683  1.00  2.33           C  
ATOM   1021  O   GLU L  70     -15.538  10.826  -1.872  1.00 65.00           O  
ATOM   1022  CB  GLU L  70     -16.593  12.650   0.267  1.00 42.22           C  
ATOM   1023  CG  GLU L  70     -16.739  13.865   1.127  1.00 62.43           C  
ATOM   1024  CD  GLU L  70     -18.177  14.084   1.480  1.00 71.15           C  
ATOM   1025  OE1 GLU L  70     -18.912  14.710   0.699  1.00 53.42           O  
ATOM   1026  OE2 GLU L  70     -18.609  13.588   2.535  1.00 60.43           O  
ATOM   1027  H   GLU L  70     -14.765  13.651  -1.423  1.00 37.74           H  
ATOM   1028  HA  GLU L  70     -14.707  12.024   0.991  1.00 43.34           H  
ATOM   1029  HB2 GLU L  70     -17.048  12.860  -0.689  1.00 37.74           H  
ATOM   1030  HB3 GLU L  70     -17.133  11.837   0.730  1.00 37.74           H  
ATOM   1031  HG2 GLU L  70     -16.164  13.732   2.030  1.00 37.74           H  
ATOM   1032  HG3 GLU L  70     -16.381  14.725   0.582  1.00 37.74           H  
ATOM   1033  N   PHE L  71     -14.913   9.832   0.022  1.00 30.33           N  
ATOM   1034  CA  PHE L  71     -14.964   8.507  -0.511  1.00 32.52           C  
ATOM   1035  C   PHE L  71     -15.676   7.613   0.467  1.00  5.51           C  
ATOM   1036  O   PHE L  71     -15.360   7.607   1.651  1.00 62.23           O  
ATOM   1037  CB  PHE L  71     -13.546   7.997  -0.805  1.00 42.45           C  
ATOM   1038  CG  PHE L  71     -12.808   8.910  -1.733  1.00 52.42           C  
ATOM   1039  CD1 PHE L  71     -13.138   8.949  -3.066  1.00 63.21           C  
ATOM   1040  CD2 PHE L  71     -11.819   9.760  -1.266  1.00 73.32           C  
ATOM   1041  CE1 PHE L  71     -12.503   9.803  -3.924  1.00 12.20           C  
ATOM   1042  CE2 PHE L  71     -11.185  10.621  -2.122  1.00 20.43           C  
ATOM   1043  CZ  PHE L  71     -11.534  10.638  -3.455  1.00 11.43           C  
ATOM   1044  H   PHE L  71     -14.607   9.947   0.949  1.00 37.74           H  
ATOM   1045  HA  PHE L  71     -15.529   8.532  -1.428  1.00 55.43           H  
ATOM   1046  HB2 PHE L  71     -12.992   7.931   0.119  1.00 37.74           H  
ATOM   1047  HB3 PHE L  71     -13.605   7.022  -1.267  1.00 37.74           H  
ATOM   1048  HD1 PHE L  71     -13.902   8.290  -3.445  1.00 10.22           H  
ATOM   1049  HD2 PHE L  71     -11.537   9.752  -0.225  1.00 61.01           H  
ATOM   1050  HE1 PHE L  71     -12.772   9.820  -4.970  1.00 33.23           H  
ATOM   1051  HE2 PHE L  71     -10.412  11.283  -1.758  1.00 22.10           H  
ATOM   1052  HZ  PHE L  71     -11.042  11.317  -4.136  1.00 64.31           H  
ATOM   1053  N   THR L  72     -16.632   6.879  -0.007  1.00 74.20           N  
ATOM   1054  CA  THR L  72     -17.417   6.029   0.833  1.00 13.34           C  
ATOM   1055  C   THR L  72     -17.219   4.590   0.399  1.00 42.50           C  
ATOM   1056  O   THR L  72     -17.338   4.261  -0.781  1.00 34.23           O  
ATOM   1057  CB  THR L  72     -18.911   6.387   0.702  1.00 20.41           C  
ATOM   1058  OG1 THR L  72     -19.081   7.810   0.901  1.00  5.12           O  
ATOM   1059  CG2 THR L  72     -19.738   5.648   1.746  1.00 14.31           C  
ATOM   1060  H   THR L  72     -16.861   6.894  -0.966  1.00 37.74           H  
ATOM   1061  HA  THR L  72     -17.114   6.160   1.861  1.00 64.21           H  
ATOM   1062  HB  THR L  72     -19.228   6.080  -0.285  1.00 13.04           H  
ATOM   1063  HG1 THR L  72     -18.204   8.182   1.042  1.00  3.21           H  
ATOM   1064 HG21 THR L  72     -19.621   4.584   1.602  1.00 37.74           H  
ATOM   1065 HG22 THR L  72     -20.779   5.915   1.637  1.00 37.74           H  
ATOM   1066 HG23 THR L  72     -19.396   5.919   2.734  1.00 37.74           H  
ATOM   1067  N   PHE L  73     -16.888   3.773   1.339  1.00 11.12           N  
ATOM   1068  CA  PHE L  73     -16.670   2.375   1.128  1.00 60.31           C  
ATOM   1069  C   PHE L  73     -17.737   1.632   1.877  1.00  2.54           C  
ATOM   1070  O   PHE L  73     -17.948   1.870   3.055  1.00  4.31           O  
ATOM   1071  CB  PHE L  73     -15.283   2.013   1.644  1.00 64.12           C  
ATOM   1072  CG  PHE L  73     -14.911   0.577   1.526  1.00  5.00           C  
ATOM   1073  CD1 PHE L  73     -14.387   0.087   0.355  1.00 21.14           C  
ATOM   1074  CD2 PHE L  73     -15.078  -0.282   2.596  1.00 35.34           C  
ATOM   1075  CE1 PHE L  73     -14.032  -1.230   0.242  1.00 22.13           C  
ATOM   1076  CE2 PHE L  73     -14.726  -1.601   2.496  1.00  0.30           C  
ATOM   1077  CZ  PHE L  73     -14.203  -2.082   1.316  1.00 52.55           C  
ATOM   1078  H   PHE L  73     -16.791   4.121   2.256  1.00 37.74           H  
ATOM   1079  HA  PHE L  73     -16.749   2.135   0.079  1.00 15.33           H  
ATOM   1080  HB2 PHE L  73     -14.546   2.580   1.095  1.00 37.74           H  
ATOM   1081  HB3 PHE L  73     -15.224   2.294   2.683  1.00 37.74           H  
ATOM   1082  HD1 PHE L  73     -14.254   0.754  -0.484  1.00 54.44           H  
ATOM   1083  HD2 PHE L  73     -15.492   0.095   3.518  1.00 21.32           H  
ATOM   1084  HE1 PHE L  73     -13.623  -1.575  -0.698  1.00 12.34           H  
ATOM   1085  HE2 PHE L  73     -14.866  -2.249   3.347  1.00 73.44           H  
ATOM   1086  HZ  PHE L  73     -13.922  -3.122   1.237  1.00 21.33           H  
ATOM   1087  N   THR L  74     -18.437   0.796   1.211  1.00 25.41           N  
ATOM   1088  CA  THR L  74     -19.494   0.092   1.821  1.00 31.53           C  
ATOM   1089  C   THR L  74     -19.405  -1.407   1.555  1.00 53.31           C  
ATOM   1090  O   THR L  74     -19.146  -1.834   0.427  1.00 71.22           O  
ATOM   1091  CB  THR L  74     -20.836   0.661   1.320  1.00 64.15           C  
ATOM   1092  OG1 THR L  74     -20.878   2.067   1.631  1.00 52.32           O  
ATOM   1093  CG2 THR L  74     -22.028  -0.036   1.966  1.00  2.41           C  
ATOM   1094  H   THR L  74     -18.270   0.621   0.257  1.00 37.74           H  
ATOM   1095  HA  THR L  74     -19.445   0.266   2.886  1.00 60.22           H  
ATOM   1096  HB  THR L  74     -20.866   0.538   0.249  1.00 32.44           H  
ATOM   1097  HG1 THR L  74     -20.037   2.260   2.059  1.00  1.54           H  
ATOM   1098 HG21 THR L  74     -21.972   0.081   3.040  1.00 37.74           H  
ATOM   1099 HG22 THR L  74     -22.011  -1.090   1.726  1.00 37.74           H  
ATOM   1100 HG23 THR L  74     -22.948   0.404   1.611  1.00 37.74           H  
ATOM   1101  N   ILE L  75     -19.572  -2.185   2.599  1.00 22.11           N  
ATOM   1102  CA  ILE L  75     -19.687  -3.603   2.461  1.00  0.45           C  
ATOM   1103  C   ILE L  75     -21.155  -3.923   2.684  1.00 13.13           C  
ATOM   1104  O   ILE L  75     -21.673  -3.711   3.782  1.00 24.02           O  
ATOM   1105  CB  ILE L  75     -18.848  -4.414   3.502  1.00 33.15           C  
ATOM   1106  CG1 ILE L  75     -17.362  -4.045   3.455  1.00  1.20           C  
ATOM   1107  CG2 ILE L  75     -19.014  -5.912   3.250  1.00 25.52           C  
ATOM   1108  CD1 ILE L  75     -16.509  -4.811   4.471  1.00 45.34           C  
ATOM   1109  H   ILE L  75     -19.650  -1.763   3.483  1.00 37.74           H  
ATOM   1110  HA  ILE L  75     -19.368  -3.824   1.452  1.00 21.00           H  
ATOM   1111  HB  ILE L  75     -19.239  -4.212   4.488  1.00 32.14           H  
ATOM   1112 HG12 ILE L  75     -16.979  -4.263   2.469  1.00 37.74           H  
ATOM   1113 HG13 ILE L  75     -17.253  -2.989   3.652  1.00 37.74           H  
ATOM   1114 HG21 ILE L  75     -18.432  -6.465   3.974  1.00 37.74           H  
ATOM   1115 HG22 ILE L  75     -18.669  -6.146   2.254  1.00 37.74           H  
ATOM   1116 HG23 ILE L  75     -20.055  -6.178   3.344  1.00 37.74           H  
ATOM   1117 HD11 ILE L  75     -15.475  -4.517   4.381  1.00 37.74           H  
ATOM   1118 HD12 ILE L  75     -16.593  -5.877   4.309  1.00 37.74           H  
ATOM   1119 HD13 ILE L  75     -16.855  -4.599   5.473  1.00 37.74           H  
ATOM   1120  N   SER L  76     -21.814  -4.380   1.666  1.00 62.12           N  
ATOM   1121  CA  SER L  76     -23.221  -4.686   1.726  1.00 12.51           C  
ATOM   1122  C   SER L  76     -23.507  -5.934   2.595  1.00 43.21           C  
ATOM   1123  O   SER L  76     -24.564  -6.046   3.217  1.00 52.50           O  
ATOM   1124  CB  SER L  76     -23.757  -4.842   0.305  1.00 35.01           C  
ATOM   1125  OG  SER L  76     -23.503  -3.651  -0.447  1.00 31.21           O  
ATOM   1126  H   SER L  76     -21.349  -4.506   0.806  1.00 37.74           H  
ATOM   1127  HA  SER L  76     -23.709  -3.840   2.182  1.00 22.23           H  
ATOM   1128  HB2 SER L  76     -23.263  -5.672  -0.178  1.00 37.74           H  
ATOM   1129  HB3 SER L  76     -24.820  -5.015   0.327  1.00 37.74           H  
ATOM   1130  HG  SER L  76     -23.518  -3.863  -1.391  1.00 32.20           H  
ATOM   1131  N   SER L  77     -22.569  -6.854   2.641  1.00 63.12           N  
ATOM   1132  CA  SER L  77     -22.717  -8.048   3.446  1.00 74.22           C  
ATOM   1133  C   SER L  77     -21.350  -8.531   3.906  1.00 75.45           C  
ATOM   1134  O   SER L  77     -20.528  -8.939   3.094  1.00 13.00           O  
ATOM   1135  CB  SER L  77     -23.446  -9.142   2.655  1.00 62.54           C  
ATOM   1136  OG  SER L  77     -24.741  -8.696   2.251  1.00 20.20           O  
ATOM   1137  H   SER L  77     -21.743  -6.738   2.129  1.00 37.74           H  
ATOM   1138  HA  SER L  77     -23.304  -7.790   4.316  1.00 15.13           H  
ATOM   1139  HB2 SER L  77     -22.872  -9.392   1.777  1.00 37.74           H  
ATOM   1140  HB3 SER L  77     -23.557 -10.018   3.277  1.00 37.74           H  
ATOM   1141  HG  SER L  77     -24.885  -7.849   2.698  1.00  2.10           H  
ATOM   1142  N   LEU L  78     -21.105  -8.433   5.199  1.00  4.14           N  
ATOM   1143  CA  LEU L  78     -19.839  -8.842   5.791  1.00 14.04           C  
ATOM   1144  C   LEU L  78     -19.741 -10.371   5.725  1.00 32.34           C  
ATOM   1145  O   LEU L  78     -20.673 -11.060   6.123  1.00 54.00           O  
ATOM   1146  CB  LEU L  78     -19.839  -8.436   7.278  1.00 63.31           C  
ATOM   1147  CG  LEU L  78     -18.495  -8.114   7.962  1.00  4.14           C  
ATOM   1148  CD1 LEU L  78     -17.439  -9.160   7.742  1.00 34.00           C  
ATOM   1149  CD2 LEU L  78     -18.006  -6.782   7.534  1.00 41.24           C  
ATOM   1150  H   LEU L  78     -21.786  -8.040   5.788  1.00 37.74           H  
ATOM   1151  HA  LEU L  78     -19.010  -8.368   5.289  1.00 33.41           H  
ATOM   1152  HB2 LEU L  78     -20.478  -7.572   7.394  1.00 37.74           H  
ATOM   1153  HB3 LEU L  78     -20.290  -9.252   7.826  1.00 37.74           H  
ATOM   1154  HG  LEU L  78     -18.665  -8.064   9.027  1.00 24.12           H  
ATOM   1155 HD11 LEU L  78     -16.552  -8.884   8.291  1.00 37.74           H  
ATOM   1156 HD12 LEU L  78     -17.203  -9.150   6.687  1.00 37.74           H  
ATOM   1157 HD13 LEU L  78     -17.794 -10.133   8.048  1.00 37.74           H  
ATOM   1158 HD21 LEU L  78     -18.793  -6.079   7.771  1.00 37.74           H  
ATOM   1159 HD22 LEU L  78     -17.820  -6.767   6.471  1.00 37.74           H  
ATOM   1160 HD23 LEU L  78     -17.120  -6.536   8.096  1.00 37.74           H  
ATOM   1161  N   GLN L  79     -18.668 -10.881   5.201  1.00  3.41           N  
ATOM   1162  CA  GLN L  79     -18.400 -12.306   5.231  1.00 13.34           C  
ATOM   1163  C   GLN L  79     -17.111 -12.543   6.022  1.00  0.22           C  
ATOM   1164  O   GLN L  79     -16.284 -11.649   6.106  1.00 73.41           O  
ATOM   1165  CB  GLN L  79     -18.290 -12.868   3.818  1.00 30.02           C  
ATOM   1166  CG  GLN L  79     -19.586 -12.809   3.021  1.00 23.32           C  
ATOM   1167  CD  GLN L  79     -20.683 -13.706   3.576  1.00 72.01           C  
ATOM   1168  OE1 GLN L  79     -20.797 -14.866   3.194  1.00 42.11           O  
ATOM   1169  NE2 GLN L  79     -21.489 -13.186   4.464  1.00 73.04           N  
ATOM   1170  H   GLN L  79     -18.007 -10.311   4.747  1.00 37.74           H  
ATOM   1171  HA  GLN L  79     -19.222 -12.773   5.752  1.00 32.31           H  
ATOM   1172  HB2 GLN L  79     -17.532 -12.316   3.281  1.00 37.74           H  
ATOM   1173  HB3 GLN L  79     -17.985 -13.900   3.895  1.00 37.74           H  
ATOM   1174  HG2 GLN L  79     -19.944 -11.791   3.038  1.00 37.74           H  
ATOM   1175  HG3 GLN L  79     -19.381 -13.095   2.000  1.00 37.74           H  
ATOM   1176 HE21 GLN L  79     -21.345 -12.252   4.734  1.00 37.74           H  
ATOM   1177 HE22 GLN L  79     -22.212 -13.740   4.825  1.00 37.74           H  
ATOM   1178  N   PRO L  80     -16.920 -13.739   6.624  1.00 45.12           N  
ATOM   1179  CA  PRO L  80     -15.724 -14.048   7.449  1.00  3.25           C  
ATOM   1180  C   PRO L  80     -14.400 -13.785   6.712  1.00 41.31           C  
ATOM   1181  O   PRO L  80     -13.384 -13.445   7.325  1.00 33.41           O  
ATOM   1182  CB  PRO L  80     -15.875 -15.538   7.746  1.00 41.34           C  
ATOM   1183  CG  PRO L  80     -17.334 -15.786   7.653  1.00 73.23           C  
ATOM   1184  CD  PRO L  80     -17.834 -14.897   6.554  1.00  2.23           C  
ATOM   1185  HA  PRO L  80     -15.731 -13.486   8.374  1.00 51.03           H  
ATOM   1186  HB2 PRO L  80     -15.331 -16.104   7.004  1.00 37.74           H  
ATOM   1187  HB3 PRO L  80     -15.495 -15.760   8.731  1.00 37.74           H  
ATOM   1188  HG2 PRO L  80     -17.520 -16.821   7.416  1.00 37.74           H  
ATOM   1189  HG3 PRO L  80     -17.810 -15.527   8.588  1.00 37.74           H  
ATOM   1190  HD2 PRO L  80     -17.759 -15.399   5.600  1.00 37.74           H  
ATOM   1191  HD3 PRO L  80     -18.853 -14.598   6.751  1.00 37.74           H  
ATOM   1192  N   GLU L  81     -14.426 -13.935   5.399  1.00 44.23           N  
ATOM   1193  CA  GLU L  81     -13.251 -13.732   4.570  1.00 71.30           C  
ATOM   1194  C   GLU L  81     -12.964 -12.241   4.356  1.00 22.20           C  
ATOM   1195  O   GLU L  81     -11.899 -11.875   3.839  1.00 11.00           O  
ATOM   1196  CB  GLU L  81     -13.444 -14.397   3.208  1.00 24.22           C  
ATOM   1197  CG  GLU L  81     -13.689 -15.893   3.257  1.00 55.03           C  
ATOM   1198  CD  GLU L  81     -13.869 -16.473   1.877  1.00  5.20           C  
ATOM   1199  OE1 GLU L  81     -15.009 -16.488   1.373  1.00  0.31           O  
ATOM   1200  OE2 GLU L  81     -12.870 -16.884   1.263  1.00 20.12           O  
ATOM   1201  H   GLU L  81     -15.275 -14.192   4.982  1.00 37.74           H  
ATOM   1202  HA  GLU L  81     -12.403 -14.189   5.055  1.00 53.41           H  
ATOM   1203  HB2 GLU L  81     -14.290 -13.940   2.718  1.00 37.74           H  
ATOM   1204  HB3 GLU L  81     -12.561 -14.218   2.613  1.00 37.74           H  
ATOM   1205  HG2 GLU L  81     -12.841 -16.373   3.726  1.00 37.74           H  
ATOM   1206  HG3 GLU L  81     -14.581 -16.084   3.834  1.00 37.74           H  
ATOM   1207  N   ASP L  82     -13.900 -11.387   4.742  1.00 52.40           N  
ATOM   1208  CA  ASP L  82     -13.779  -9.941   4.507  1.00 55.11           C  
ATOM   1209  C   ASP L  82     -13.244  -9.226   5.733  1.00 70.24           C  
ATOM   1210  O   ASP L  82     -13.204  -7.998   5.775  1.00  4.43           O  
ATOM   1211  CB  ASP L  82     -15.129  -9.309   4.108  1.00 31.04           C  
ATOM   1212  CG  ASP L  82     -15.769  -9.936   2.889  1.00 22.33           C  
ATOM   1213  OD1 ASP L  82     -15.050 -10.276   1.914  1.00 61.21           O  
ATOM   1214  OD2 ASP L  82     -17.002 -10.077   2.870  1.00 41.23           O  
ATOM   1215  H   ASP L  82     -14.710 -11.710   5.201  1.00 37.74           H  
ATOM   1216  HA  ASP L  82     -13.081  -9.799   3.695  1.00 75.41           H  
ATOM   1217  HB2 ASP L  82     -15.820  -9.412   4.930  1.00 37.74           H  
ATOM   1218  HB3 ASP L  82     -14.977  -8.258   3.913  1.00 37.74           H  
ATOM   1219  N   LEU L  83     -12.834  -9.980   6.724  1.00 72.23           N  
ATOM   1220  CA  LEU L  83     -12.276  -9.389   7.927  1.00 44.12           C  
ATOM   1221  C   LEU L  83     -10.837  -8.951   7.641  1.00 71.32           C  
ATOM   1222  O   LEU L  83      -9.998  -9.784   7.263  1.00 51.50           O  
ATOM   1223  CB  LEU L  83     -12.303 -10.421   9.070  1.00 10.14           C  
ATOM   1224  CG  LEU L  83     -11.772  -9.957  10.430  1.00 20.10           C  
ATOM   1225  CD1 LEU L  83     -12.601  -8.813  10.969  1.00 33.10           C  
ATOM   1226  CD2 LEU L  83     -11.755 -11.109  11.419  1.00 75.34           C  
ATOM   1227  H   LEU L  83     -12.901 -10.953   6.640  1.00 37.74           H  
ATOM   1228  HA  LEU L  83     -12.863  -8.525   8.202  1.00 63.30           H  
ATOM   1229  HB2 LEU L  83     -13.324 -10.744   9.202  1.00 37.74           H  
ATOM   1230  HB3 LEU L  83     -11.720 -11.274   8.757  1.00 37.74           H  
ATOM   1231  HG  LEU L  83     -10.759  -9.601  10.307  1.00 42.14           H  
ATOM   1232 HD11 LEU L  83     -12.202  -8.521  11.929  1.00 37.74           H  
ATOM   1233 HD12 LEU L  83     -13.626  -9.135  11.087  1.00 37.74           H  
ATOM   1234 HD13 LEU L  83     -12.556  -7.975  10.292  1.00 37.74           H  
ATOM   1235 HD21 LEU L  83     -12.757 -11.491  11.548  1.00 37.74           H  
ATOM   1236 HD22 LEU L  83     -11.387 -10.742  12.365  1.00 37.74           H  
ATOM   1237 HD23 LEU L  83     -11.106 -11.894  11.058  1.00 37.74           H  
ATOM   1238  N   ALA L  84     -10.552  -7.663   7.838  1.00 45.13           N  
ATOM   1239  CA  ALA L  84      -9.238  -7.095   7.544  1.00 75.54           C  
ATOM   1240  C   ALA L  84      -9.192  -5.636   7.981  1.00 62.41           C  
ATOM   1241  O   ALA L  84     -10.167  -5.105   8.516  1.00 31.43           O  
ATOM   1242  CB  ALA L  84      -8.947  -7.179   6.031  1.00 44.31           C  
ATOM   1243  H   ALA L  84     -11.233  -7.053   8.196  1.00 37.74           H  
ATOM   1244  HA  ALA L  84      -8.483  -7.659   8.072  1.00 54.52           H  
ATOM   1245  HB1 ALA L  84      -8.984  -8.209   5.710  1.00 37.74           H  
ATOM   1246  HB2 ALA L  84      -7.969  -6.780   5.815  1.00 37.74           H  
ATOM   1247  HB3 ALA L  84      -9.687  -6.612   5.484  1.00 37.74           H  
ATOM   1248  N   THR L  85      -8.061  -5.008   7.776  1.00  2.21           N  
ATOM   1249  CA  THR L  85      -7.907  -3.598   8.004  1.00 34.15           C  
ATOM   1250  C   THR L  85      -8.134  -2.920   6.640  1.00 35.51           C  
ATOM   1251  O   THR L  85      -7.670  -3.433   5.620  1.00 70.11           O  
ATOM   1252  CB  THR L  85      -6.471  -3.314   8.494  1.00 32.32           C  
ATOM   1253  OG1 THR L  85      -6.202  -4.133   9.643  1.00 30.44           O  
ATOM   1254  CG2 THR L  85      -6.291  -1.850   8.869  1.00 40.22           C  
ATOM   1255  H   THR L  85      -7.283  -5.508   7.439  1.00 37.74           H  
ATOM   1256  HA  THR L  85      -8.626  -3.273   8.744  1.00 42.22           H  
ATOM   1257  HB  THR L  85      -5.775  -3.577   7.711  1.00 44.40           H  
ATOM   1258  HG1 THR L  85      -6.868  -4.832   9.677  1.00 61.14           H  
ATOM   1259 HG21 THR L  85      -6.494  -1.230   8.008  1.00 37.74           H  
ATOM   1260 HG22 THR L  85      -5.276  -1.685   9.198  1.00 37.74           H  
ATOM   1261 HG23 THR L  85      -6.973  -1.593   9.667  1.00 37.74           H  
ATOM   1262  N   TYR L  86      -8.844  -1.823   6.599  1.00  3.43           N  
ATOM   1263  CA  TYR L  86      -9.152  -1.202   5.320  1.00 55.20           C  
ATOM   1264  C   TYR L  86      -8.538   0.125   5.172  1.00  2.32           C  
ATOM   1265  O   TYR L  86      -8.334   0.837   6.153  1.00 40.54           O  
ATOM   1266  CB  TYR L  86     -10.662  -1.161   5.040  1.00 31.02           C  
ATOM   1267  CG  TYR L  86     -11.207  -2.515   4.725  1.00 72.45           C  
ATOM   1268  CD1 TYR L  86     -11.567  -3.397   5.724  1.00 74.10           C  
ATOM   1269  CD2 TYR L  86     -11.310  -2.928   3.409  1.00 73.03           C  
ATOM   1270  CE1 TYR L  86     -12.011  -4.668   5.410  1.00 23.20           C  
ATOM   1271  CE2 TYR L  86     -11.764  -4.179   3.091  1.00 61.23           C  
ATOM   1272  CZ  TYR L  86     -12.108  -5.049   4.086  1.00 32.23           C  
ATOM   1273  OH  TYR L  86     -12.525  -6.312   3.760  1.00 41.21           O  
ATOM   1274  H   TYR L  86      -9.153  -1.374   7.415  1.00 37.74           H  
ATOM   1275  HA  TYR L  86      -8.697  -1.824   4.564  1.00 53.54           H  
ATOM   1276  HB2 TYR L  86     -11.178  -0.786   5.911  1.00 37.74           H  
ATOM   1277  HB3 TYR L  86     -10.859  -0.515   4.198  1.00 37.74           H  
ATOM   1278  HD1 TYR L  86     -11.492  -3.063   6.751  1.00 32.33           H  
ATOM   1279  HD2 TYR L  86     -11.038  -2.240   2.623  1.00 13.54           H  
ATOM   1280  HE1 TYR L  86     -12.291  -5.352   6.199  1.00 54.12           H  
ATOM   1281  HE2 TYR L  86     -11.843  -4.478   2.056  1.00 10.51           H  
ATOM   1282  HH  TYR L  86     -13.223  -6.600   4.365  1.00 34.22           H  
ATOM   1283  N   TYR L  87      -8.178   0.445   3.951  1.00 62.14           N  
ATOM   1284  CA  TYR L  87      -7.640   1.717   3.646  1.00 73.14           C  
ATOM   1285  C   TYR L  87      -7.829   2.168   2.236  1.00 32.41           C  
ATOM   1286  O   TYR L  87      -8.208   1.399   1.349  1.00 54.54           O  
ATOM   1287  CB  TYR L  87      -6.232   1.963   4.177  1.00  4.44           C  
ATOM   1288  CG  TYR L  87      -5.179   0.935   3.886  1.00 32.11           C  
ATOM   1289  CD1 TYR L  87      -4.622   0.802   2.629  1.00 73.35           C  
ATOM   1290  CD2 TYR L  87      -4.693   0.135   4.909  1.00 61.34           C  
ATOM   1291  CE1 TYR L  87      -3.606  -0.098   2.400  1.00 51.44           C  
ATOM   1292  CE2 TYR L  87      -3.691  -0.772   4.685  1.00 41.30           C  
ATOM   1293  CZ  TYR L  87      -3.147  -0.882   3.433  1.00 31.32           C  
ATOM   1294  OH  TYR L  87      -2.121  -1.754   3.215  1.00 53.45           O  
ATOM   1295  H   TYR L  87      -8.297  -0.203   3.220  1.00 37.74           H  
ATOM   1296  HA  TYR L  87      -8.293   2.383   4.194  1.00 34.14           H  
ATOM   1297  HB2 TYR L  87      -5.867   2.892   3.767  1.00 37.74           H  
ATOM   1298  HB3 TYR L  87      -6.298   2.081   5.250  1.00 37.74           H  
ATOM   1299  HD1 TYR L  87      -4.995   1.420   1.825  1.00 63.14           H  
ATOM   1300  HD2 TYR L  87      -5.128   0.224   5.893  1.00 61.34           H  
ATOM   1301  HE1 TYR L  87      -3.179  -0.191   1.412  1.00 75.33           H  
ATOM   1302  HE2 TYR L  87      -3.330  -1.390   5.495  1.00 53.54           H  
ATOM   1303  HH  TYR L  87      -2.238  -2.605   3.654  1.00 52.14           H  
ATOM   1304  N   CYS L  88      -7.526   3.407   2.052  1.00 31.40           N  
ATOM   1305  CA  CYS L  88      -7.699   4.137   0.847  1.00 11.40           C  
ATOM   1306  C   CYS L  88      -6.379   4.807   0.504  1.00 41.32           C  
ATOM   1307  O   CYS L  88      -5.646   5.199   1.415  1.00 45.14           O  
ATOM   1308  CB  CYS L  88      -8.787   5.194   1.130  1.00 64.44           C  
ATOM   1309  SG  CYS L  88      -8.574   6.025   2.773  1.00 23.22           S  
ATOM   1310  H   CYS L  88      -7.142   3.916   2.795  1.00 37.74           H  
ATOM   1311  HA  CYS L  88      -8.037   3.492   0.052  1.00 42.24           H  
ATOM   1312  HB2 CYS L  88      -8.746   5.952   0.364  1.00 37.74           H  
ATOM   1313  HB3 CYS L  88      -9.759   4.721   1.121  1.00 37.74           H  
ATOM   1314  N   GLN L  89      -6.041   4.867  -0.779  1.00 11.30           N  
ATOM   1315  CA  GLN L  89      -4.833   5.530  -1.209  1.00 21.23           C  
ATOM   1316  C   GLN L  89      -5.116   6.312  -2.468  1.00  0.14           C  
ATOM   1317  O   GLN L  89      -5.893   5.867  -3.328  1.00 74.10           O  
ATOM   1318  CB  GLN L  89      -3.658   4.521  -1.346  1.00 11.02           C  
ATOM   1319  CG  GLN L  89      -3.378   3.857  -2.707  1.00 32.11           C  
ATOM   1320  CD  GLN L  89      -2.584   4.714  -3.684  1.00 14.54           C  
ATOM   1321  OE1 GLN L  89      -3.126   5.419  -4.501  1.00 22.05           O  
ATOM   1322  NE2 GLN L  89      -1.284   4.661  -3.570  1.00  4.11           N  
ATOM   1323  H   GLN L  89      -6.600   4.446  -1.468  1.00 37.74           H  
ATOM   1324  HA  GLN L  89      -4.580   6.264  -0.465  1.00 21.22           H  
ATOM   1325  HB2 GLN L  89      -2.739   4.975  -1.015  1.00 37.74           H  
ATOM   1326  HB3 GLN L  89      -3.912   3.726  -0.652  1.00 37.74           H  
ATOM   1327  HG2 GLN L  89      -2.831   2.938  -2.571  1.00 37.74           H  
ATOM   1328  HG3 GLN L  89      -4.337   3.660  -3.164  1.00 37.74           H  
ATOM   1329 HE21 GLN L  89      -0.900   4.086  -2.877  1.00 37.74           H  
ATOM   1330 HE22 GLN L  89      -0.767   5.222  -4.181  1.00 37.74           H  
ATOM   1331  N   GLN L  90      -4.563   7.482  -2.544  1.00 22.32           N  
ATOM   1332  CA  GLN L  90      -4.735   8.349  -3.682  1.00  3.43           C  
ATOM   1333  C   GLN L  90      -3.523   8.356  -4.606  1.00 63.13           C  
ATOM   1334  O   GLN L  90      -2.408   8.358  -4.163  1.00 53.52           O  
ATOM   1335  CB  GLN L  90      -5.160   9.764  -3.252  1.00 44.55           C  
ATOM   1336  CG  GLN L  90      -4.486  10.340  -1.991  1.00 64.04           C  
ATOM   1337  CD  GLN L  90      -2.973  10.300  -2.007  1.00 42.33           C  
ATOM   1338  OE1 GLN L  90      -2.370   9.355  -1.532  1.00 32.53           O  
ATOM   1339  NE2 GLN L  90      -2.362  11.295  -2.575  1.00  2.11           N  
ATOM   1340  H   GLN L  90      -3.986   7.784  -1.808  1.00 37.74           H  
ATOM   1341  HA  GLN L  90      -5.537   7.924  -4.261  1.00  3.13           H  
ATOM   1342  HB2 GLN L  90      -4.949  10.439  -4.067  1.00 37.74           H  
ATOM   1343  HB3 GLN L  90      -6.228   9.751  -3.086  1.00 37.74           H  
ATOM   1344  HG2 GLN L  90      -4.812  11.361  -1.869  1.00 37.74           H  
ATOM   1345  HG3 GLN L  90      -4.842   9.770  -1.145  1.00 37.74           H  
ATOM   1346 HE21 GLN L  90      -2.888  12.024  -2.956  1.00 37.74           H  
ATOM   1347 HE22 GLN L  90      -1.383  11.249  -2.606  1.00 37.74           H  
ATOM   1348  N   TYR L  91      -3.750   8.332  -5.902  1.00 75.23           N  
ATOM   1349  CA  TYR L  91      -2.629   8.326  -6.841  1.00  3.21           C  
ATOM   1350  C   TYR L  91      -2.609   9.559  -7.744  1.00 45.44           C  
ATOM   1351  O   TYR L  91      -1.953   9.573  -8.793  1.00  4.00           O  
ATOM   1352  CB  TYR L  91      -2.573   7.019  -7.655  1.00 15.31           C  
ATOM   1353  CG  TYR L  91      -3.777   6.716  -8.539  1.00 35.13           C  
ATOM   1354  CD1 TYR L  91      -4.864   6.003  -8.057  1.00 51.14           C  
ATOM   1355  CD2 TYR L  91      -3.804   7.119  -9.861  1.00 63.14           C  
ATOM   1356  CE1 TYR L  91      -5.945   5.703  -8.871  1.00 55.43           C  
ATOM   1357  CE2 TYR L  91      -4.868   6.822 -10.677  1.00 63.42           C  
ATOM   1358  CZ  TYR L  91      -5.938   6.115 -10.182  1.00 10.32           C  
ATOM   1359  OH  TYR L  91      -6.999   5.808 -11.011  1.00 74.24           O  
ATOM   1360  H   TYR L  91      -4.681   8.281  -6.206  1.00 37.74           H  
ATOM   1361  HA  TYR L  91      -1.739   8.380  -6.230  1.00 11.34           H  
ATOM   1362  HB2 TYR L  91      -1.710   7.070  -8.302  1.00 37.74           H  
ATOM   1363  HB3 TYR L  91      -2.429   6.202  -6.962  1.00 37.74           H  
ATOM   1364  HD1 TYR L  91      -4.864   5.683  -7.027  1.00 13.22           H  
ATOM   1365  HD2 TYR L  91      -2.967   7.676 -10.256  1.00 24.42           H  
ATOM   1366  HE1 TYR L  91      -6.784   5.150  -8.478  1.00 63.40           H  
ATOM   1367  HE2 TYR L  91      -4.859   7.153 -11.704  1.00 71.32           H  
ATOM   1368  HH  TYR L  91      -6.601   5.582 -11.861  1.00 44.12           H  
ATOM   1369  N   ASP L  92      -3.274  10.601  -7.304  1.00 44.24           N  
ATOM   1370  CA  ASP L  92      -3.339  11.851  -8.068  1.00 25.24           C  
ATOM   1371  C   ASP L  92      -2.115  12.741  -7.827  1.00 64.32           C  
ATOM   1372  O   ASP L  92      -1.658  13.430  -8.732  1.00 61.32           O  
ATOM   1373  CB  ASP L  92      -4.632  12.611  -7.750  1.00  5.32           C  
ATOM   1374  CG  ASP L  92      -4.732  13.964  -8.448  1.00 11.24           C  
ATOM   1375  OD1 ASP L  92      -4.981  14.003  -9.675  1.00 21.15           O  
ATOM   1376  OD2 ASP L  92      -4.597  15.006  -7.769  1.00 62.50           O  
ATOM   1377  H   ASP L  92      -3.735  10.522  -6.444  1.00 37.74           H  
ATOM   1378  HA  ASP L  92      -3.351  11.582  -9.115  1.00 63.51           H  
ATOM   1379  HB2 ASP L  92      -5.477  12.012  -8.056  1.00 37.74           H  
ATOM   1380  HB3 ASP L  92      -4.682  12.770  -6.684  1.00 37.74           H  
ATOM   1381  N   ASN L  93      -1.569  12.705  -6.626  1.00 33.45           N  
ATOM   1382  CA  ASN L  93      -0.435  13.569  -6.287  1.00 11.24           C  
ATOM   1383  C   ASN L  93       0.485  12.895  -5.284  1.00 24.44           C  
ATOM   1384  O   ASN L  93       0.023  12.318  -4.301  1.00 51.31           O  
ATOM   1385  CB  ASN L  93      -0.945  14.920  -5.739  1.00 32.31           C  
ATOM   1386  CG  ASN L  93       0.154  15.888  -5.311  1.00 10.52           C  
ATOM   1387  OD1 ASN L  93       0.576  15.898  -4.158  1.00 52.34           O  
ATOM   1388  ND2 ASN L  93       0.600  16.719  -6.221  1.00 13.31           N  
ATOM   1389  H   ASN L  93      -1.902  12.089  -5.944  1.00 37.74           H  
ATOM   1390  HA  ASN L  93       0.118  13.756  -7.196  1.00 51.11           H  
ATOM   1391  HB2 ASN L  93      -1.553  15.408  -6.482  1.00 37.74           H  
ATOM   1392  HB3 ASN L  93      -1.556  14.709  -4.876  1.00 37.74           H  
ATOM   1393 HD21 ASN L  93       0.206  16.681  -7.120  1.00 37.74           H  
ATOM   1394 HD22 ASN L  93       1.305  17.349  -5.970  1.00 37.74           H  
ATOM   1395  N   LEU L  94       1.771  12.962  -5.556  1.00 40.35           N  
ATOM   1396  CA  LEU L  94       2.813  12.401  -4.691  1.00 43.41           C  
ATOM   1397  C   LEU L  94       3.107  13.358  -3.559  1.00 73.23           C  
ATOM   1398  O   LEU L  94       3.101  14.572  -3.766  1.00 20.25           O  
ATOM   1399  CB  LEU L  94       4.119  12.178  -5.483  1.00 61.50           C  
ATOM   1400  CG  LEU L  94       4.144  11.042  -6.502  1.00 72.41           C  
ATOM   1401  CD1 LEU L  94       5.417  11.115  -7.328  1.00 13.21           C  
ATOM   1402  CD2 LEU L  94       4.104   9.710  -5.777  1.00 31.05           C  
ATOM   1403  H   LEU L  94       2.015  13.431  -6.381  1.00 37.74           H  
ATOM   1404  HA  LEU L  94       2.474  11.454  -4.299  1.00 31.34           H  
ATOM   1405  HB2 LEU L  94       4.343  13.095  -6.009  1.00 37.74           H  
ATOM   1406  HB3 LEU L  94       4.911  12.008  -4.768  1.00 37.74           H  
ATOM   1407  HG  LEU L  94       3.287  11.101  -7.155  1.00 72.34           H  
ATOM   1408 HD11 LEU L  94       6.275  11.030  -6.678  1.00 37.74           H  
ATOM   1409 HD12 LEU L  94       5.454  12.057  -7.854  1.00 37.74           H  
ATOM   1410 HD13 LEU L  94       5.427  10.302  -8.040  1.00 37.74           H  
ATOM   1411 HD21 LEU L  94       4.136   8.907  -6.500  1.00 37.74           H  
ATOM   1412 HD22 LEU L  94       3.193   9.635  -5.203  1.00 37.74           H  
ATOM   1413 HD23 LEU L  94       4.954   9.633  -5.115  1.00 37.74           H  
ATOM   1414  N   PRO L  95       3.405  12.859  -2.353  1.00 44.33           N  
ATOM   1415  CA  PRO L  95       3.468  11.418  -2.030  1.00 52.54           C  
ATOM   1416  C   PRO L  95       2.093  10.780  -1.796  1.00 74.35           C  
ATOM   1417  O   PRO L  95       1.119  11.463  -1.451  1.00 44.24           O  
ATOM   1418  CB  PRO L  95       4.267  11.400  -0.742  1.00 24.25           C  
ATOM   1419  CG  PRO L  95       3.908  12.678  -0.081  1.00 51.24           C  
ATOM   1420  CD  PRO L  95       3.734  13.680  -1.186  1.00 32.13           C  
ATOM   1421  HA  PRO L  95       3.998  10.862  -2.790  1.00 43.42           H  
ATOM   1422  HB2 PRO L  95       3.978  10.546  -0.147  1.00 37.74           H  
ATOM   1423  HB3 PRO L  95       5.324  11.357  -0.963  1.00 37.74           H  
ATOM   1424  HG2 PRO L  95       2.983  12.560   0.464  1.00 37.74           H  
ATOM   1425  HG3 PRO L  95       4.698  12.991   0.586  1.00 37.74           H  
ATOM   1426  HD2 PRO L  95       2.922  14.359  -0.973  1.00 37.74           H  
ATOM   1427  HD3 PRO L  95       4.652  14.225  -1.351  1.00 37.74           H  
ATOM   1428  N   TYR L  96       2.029   9.482  -2.003  1.00 21.13           N  
ATOM   1429  CA  TYR L  96       0.806   8.729  -1.816  1.00 25.23           C  
ATOM   1430  C   TYR L  96       0.728   8.238  -0.394  1.00  1.44           C  
ATOM   1431  O   TYR L  96       1.726   7.766   0.161  1.00 32.20           O  
ATOM   1432  CB  TYR L  96       0.746   7.541  -2.779  1.00  2.34           C  
ATOM   1433  CG  TYR L  96       0.844   7.926  -4.235  1.00 60.44           C  
ATOM   1434  CD1 TYR L  96       0.329   9.130  -4.683  1.00 63.14           C  
ATOM   1435  CD2 TYR L  96       1.452   7.092  -5.157  1.00 73.13           C  
ATOM   1436  CE1 TYR L  96       0.404   9.498  -5.991  1.00 51.51           C  
ATOM   1437  CE2 TYR L  96       1.531   7.461  -6.487  1.00  3.20           C  
ATOM   1438  CZ  TYR L  96       0.998   8.673  -6.890  1.00 11.50           C  
ATOM   1439  OH  TYR L  96       1.065   9.056  -8.197  1.00 64.33           O  
ATOM   1440  H   TYR L  96       2.830   8.988  -2.266  1.00 37.74           H  
ATOM   1441  HA  TYR L  96      -0.035   9.379  -2.004  1.00 13.15           H  
ATOM   1442  HB2 TYR L  96       1.565   6.871  -2.559  1.00 37.74           H  
ATOM   1443  HB3 TYR L  96      -0.186   7.015  -2.632  1.00 37.74           H  
ATOM   1444  HD1 TYR L  96      -0.148   9.795  -3.980  1.00 51.41           H  
ATOM   1445  HD2 TYR L  96       1.866   6.150  -4.825  1.00 35.32           H  
ATOM   1446  HE1 TYR L  96      -0.010  10.442  -6.311  1.00 11.22           H  
ATOM   1447  HE2 TYR L  96       2.005   6.808  -7.205  1.00 54.03           H  
ATOM   1448  HH  TYR L  96       0.780   8.317  -8.745  1.00  3.20           H  
ATOM   1449  N   THR L  97      -0.424   8.350   0.193  1.00  2.41           N  
ATOM   1450  CA  THR L  97      -0.615   7.961   1.555  1.00 32.43           C  
ATOM   1451  C   THR L  97      -1.763   6.948   1.662  1.00 42.43           C  
ATOM   1452  O   THR L  97      -2.735   7.024   0.912  1.00 33.32           O  
ATOM   1453  CB  THR L  97      -0.927   9.213   2.434  1.00 75.13           C  
ATOM   1454  OG1 THR L  97      -2.098   9.881   1.942  1.00 10.24           O  
ATOM   1455  CG2 THR L  97       0.235  10.202   2.416  1.00 34.41           C  
ATOM   1456  H   THR L  97      -1.208   8.703  -0.290  1.00 37.74           H  
ATOM   1457  HA  THR L  97       0.299   7.512   1.916  1.00 64.23           H  
ATOM   1458  HB  THR L  97      -1.102   8.891   3.449  1.00 55.54           H  
ATOM   1459  HG1 THR L  97      -1.882  10.794   1.719  1.00 54.53           H  
ATOM   1460 HG21 THR L  97       1.130   9.736   2.797  1.00 37.74           H  
ATOM   1461 HG22 THR L  97      -0.018  11.057   3.025  1.00 37.74           H  
ATOM   1462 HG23 THR L  97       0.397  10.542   1.403  1.00 37.74           H  
ATOM   1463  N   PHE L  98      -1.619   5.961   2.532  1.00 14.11           N  
ATOM   1464  CA  PHE L  98      -2.714   5.039   2.788  1.00 22.14           C  
ATOM   1465  C   PHE L  98      -3.428   5.455   4.057  1.00 23.14           C  
ATOM   1466  O   PHE L  98      -2.782   5.854   5.023  1.00 54.41           O  
ATOM   1467  CB  PHE L  98      -2.199   3.612   2.978  1.00 75.15           C  
ATOM   1468  CG  PHE L  98      -1.415   3.083   1.830  1.00 62.21           C  
ATOM   1469  CD1 PHE L  98      -0.059   3.261   1.786  1.00 42.34           C  
ATOM   1470  CD2 PHE L  98      -2.029   2.404   0.800  1.00 12.30           C  
ATOM   1471  CE1 PHE L  98       0.675   2.783   0.751  1.00  2.43           C  
ATOM   1472  CE2 PHE L  98      -1.297   1.913  -0.256  1.00 53.34           C  
ATOM   1473  CZ  PHE L  98       0.061   2.105  -0.283  1.00 61.41           C  
ATOM   1474  H   PHE L  98      -0.762   5.828   2.993  1.00 37.74           H  
ATOM   1475  HA  PHE L  98      -3.399   5.065   1.955  1.00 33.41           H  
ATOM   1476  HB2 PHE L  98      -1.565   3.577   3.850  1.00 37.74           H  
ATOM   1477  HB3 PHE L  98      -3.043   2.956   3.139  1.00 37.74           H  
ATOM   1478  HD1 PHE L  98       0.434   3.790   2.588  1.00 53.02           H  
ATOM   1479  HD2 PHE L  98      -3.100   2.257   0.827  1.00 42.12           H  
ATOM   1480  HE1 PHE L  98       1.739   2.956   0.768  1.00  1.13           H  
ATOM   1481  HE2 PHE L  98      -1.790   1.385  -1.058  1.00 64.01           H  
ATOM   1482  HZ  PHE L  98       0.646   1.724  -1.107  1.00 31.31           H  
ATOM   1483  N   GLY L  99      -4.751   5.375   4.050  1.00 23.01           N  
ATOM   1484  CA  GLY L  99      -5.544   5.662   5.246  1.00 10.31           C  
ATOM   1485  C   GLY L  99      -5.113   4.793   6.421  1.00 30.42           C  
ATOM   1486  O   GLY L  99      -4.991   3.592   6.293  1.00 55.52           O  
ATOM   1487  H   GLY L  99      -5.170   5.147   3.191  1.00 37.74           H  
ATOM   1488  HA2 GLY L  99      -5.416   6.702   5.508  1.00 37.74           H  
ATOM   1489  HA3 GLY L  99      -6.586   5.474   5.035  1.00 37.74           H  
ATOM   1490  N   GLN L 100      -4.885   5.392   7.552  1.00  3.43           N  
ATOM   1491  CA  GLN L 100      -4.369   4.654   8.683  1.00 40.23           C  
ATOM   1492  C   GLN L 100      -5.460   4.496   9.733  1.00 35.14           C  
ATOM   1493  O   GLN L 100      -5.219   3.933  10.808  1.00 33.51           O  
ATOM   1494  CB  GLN L 100      -3.201   5.421   9.376  1.00 63.02           C  
ATOM   1495  CG  GLN L 100      -2.174   6.155   8.488  1.00 35.54           C  
ATOM   1496  CD  GLN L 100      -2.638   7.568   8.063  1.00 14.41           C  
ATOM   1497  OE1 GLN L 100      -2.398   8.537   8.771  1.00  1.03           O  
ATOM   1498  NE2 GLN L 100      -3.246   7.697   6.921  1.00 43.33           N  
ATOM   1499  H   GLN L 100      -5.072   6.350   7.654  1.00 37.74           H  
ATOM   1500  HA  GLN L 100      -4.005   3.692   8.359  1.00 72.13           H  
ATOM   1501  HB2 GLN L 100      -3.635   6.165  10.027  1.00 37.74           H  
ATOM   1502  HB3 GLN L 100      -2.669   4.717   9.999  1.00 37.74           H  
ATOM   1503  HG2 GLN L 100      -1.245   6.248   9.031  1.00 37.74           H  
ATOM   1504  HG3 GLN L 100      -2.008   5.566   7.597  1.00 37.74           H  
ATOM   1505 HE21 GLN L 100      -3.383   6.898   6.365  1.00 37.74           H  
ATOM   1506 HE22 GLN L 100      -3.540   8.594   6.645  1.00 37.74           H  
ATOM   1507  N   GLY L 101      -6.653   4.968   9.419  1.00 13.31           N  
ATOM   1508  CA  GLY L 101      -7.633   5.137  10.445  1.00  1.04           C  
ATOM   1509  C   GLY L 101      -8.766   4.135  10.574  1.00 21.41           C  
ATOM   1510  O   GLY L 101      -9.596   4.346  11.421  1.00 70.14           O  
ATOM   1511  H   GLY L 101      -6.873   5.210   8.497  1.00 37.74           H  
ATOM   1512  HA2 GLY L 101      -7.113   5.143  11.390  1.00 37.74           H  
ATOM   1513  HA3 GLY L 101      -8.057   6.121  10.312  1.00 37.74           H  
ATOM   1514  N   THR L 102      -8.841   3.066   9.795  1.00 33.23           N  
ATOM   1515  CA  THR L 102     -10.005   2.182   9.970  1.00 41.41           C  
ATOM   1516  C   THR L 102      -9.662   0.697  10.131  1.00 73.21           C  
ATOM   1517  O   THR L 102      -8.972   0.090   9.303  1.00 44.21           O  
ATOM   1518  CB  THR L 102     -11.065   2.375   8.866  1.00 13.42           C  
ATOM   1519  OG1 THR L 102     -11.419   3.764   8.807  1.00  3.13           O  
ATOM   1520  CG2 THR L 102     -12.324   1.588   9.200  1.00  1.22           C  
ATOM   1521  H   THR L 102      -8.162   2.849   9.124  1.00 37.74           H  
ATOM   1522  HA  THR L 102     -10.455   2.491  10.904  1.00 72.45           H  
ATOM   1523  HB  THR L 102     -10.671   2.020   7.921  1.00 32.21           H  
ATOM   1524  HG1 THR L 102     -11.612   4.045   9.713  1.00 13.13           H  
ATOM   1525 HG21 THR L 102     -13.062   1.744   8.428  1.00 37.74           H  
ATOM   1526 HG22 THR L 102     -12.717   1.928  10.146  1.00 37.74           H  
ATOM   1527 HG23 THR L 102     -12.088   0.535   9.269  1.00 37.74           H  
ATOM   1528  N   LYS L 103     -10.153   0.131  11.219  1.00  1.54           N  
ATOM   1529  CA  LYS L 103     -10.013  -1.275  11.513  1.00 33.45           C  
ATOM   1530  C   LYS L 103     -11.414  -1.915  11.495  1.00  1.41           C  
ATOM   1531  O   LYS L 103     -12.345  -1.380  12.110  1.00 65.33           O  
ATOM   1532  CB  LYS L 103      -9.395  -1.450  12.900  1.00 53.10           C  
ATOM   1533  CG  LYS L 103      -9.061  -2.891  13.263  1.00 23.23           C  
ATOM   1534  CD  LYS L 103      -7.923  -3.451  12.419  1.00 63.24           C  
ATOM   1535  CE  LYS L 103      -6.608  -2.700  12.662  1.00 11.40           C  
ATOM   1536  NZ  LYS L 103      -6.174  -2.760  14.081  1.00 45.33           N  
ATOM   1537  H   LYS L 103     -10.630   0.700  11.862  1.00 37.74           H  
ATOM   1538  HA  LYS L 103      -9.381  -1.730  10.768  1.00 71.32           H  
ATOM   1539  HB2 LYS L 103      -8.497  -0.855  12.967  1.00 37.74           H  
ATOM   1540  HB3 LYS L 103     -10.102  -1.080  13.626  1.00 37.74           H  
ATOM   1541  HG2 LYS L 103      -8.755  -2.932  14.295  1.00 37.74           H  
ATOM   1542  HG3 LYS L 103      -9.939  -3.502  13.119  1.00 37.74           H  
ATOM   1543  HD2 LYS L 103      -7.780  -4.493  12.664  1.00 37.74           H  
ATOM   1544  HD3 LYS L 103      -8.187  -3.366  11.376  1.00 37.74           H  
ATOM   1545  HE2 LYS L 103      -5.841  -3.146  12.048  1.00 37.74           H  
ATOM   1546  HE3 LYS L 103      -6.736  -1.669  12.370  1.00 37.74           H  
ATOM   1547  HZ1 LYS L 103      -5.252  -2.289  14.195  1.00 37.74           H  
ATOM   1548  HZ2 LYS L 103      -6.052  -3.749  14.379  1.00 37.74           H  
ATOM   1549  HZ3 LYS L 103      -6.852  -2.307  14.723  1.00 37.74           H  
ATOM   1550  N   LEU L 104     -11.568  -3.015  10.790  1.00 22.35           N  
ATOM   1551  CA  LEU L 104     -12.853  -3.695  10.707  1.00 20.20           C  
ATOM   1552  C   LEU L 104     -12.818  -4.954  11.546  1.00 61.14           C  
ATOM   1553  O   LEU L 104     -11.908  -5.758  11.407  1.00 73.43           O  
ATOM   1554  CB  LEU L 104     -13.145  -4.082   9.259  1.00 25.04           C  
ATOM   1555  CG  LEU L 104     -14.511  -4.700   8.989  1.00 61.45           C  
ATOM   1556  CD1 LEU L 104     -15.605  -3.683   9.225  1.00 23.24           C  
ATOM   1557  CD2 LEU L 104     -14.577  -5.248   7.581  1.00  1.12           C  
ATOM   1558  H   LEU L 104     -10.817  -3.421  10.309  1.00 37.74           H  
ATOM   1559  HA  LEU L 104     -13.652  -3.071  11.079  1.00 42.31           H  
ATOM   1560  HB2 LEU L 104     -13.036  -3.208   8.637  1.00 37.74           H  
ATOM   1561  HB3 LEU L 104     -12.395  -4.797   8.955  1.00 37.74           H  
ATOM   1562  HG  LEU L 104     -14.666  -5.514   9.681  1.00 32.52           H  
ATOM   1563 HD11 LEU L 104     -15.584  -3.354  10.253  1.00 37.74           H  
ATOM   1564 HD12 LEU L 104     -16.566  -4.111   8.990  1.00 37.74           H  
ATOM   1565 HD13 LEU L 104     -15.410  -2.840   8.580  1.00 37.74           H  
ATOM   1566 HD21 LEU L 104     -14.351  -4.464   6.875  1.00 37.74           H  
ATOM   1567 HD22 LEU L 104     -15.561  -5.642   7.381  1.00 37.74           H  
ATOM   1568 HD23 LEU L 104     -13.854  -6.045   7.478  1.00 37.74           H  
ATOM   1569  N   GLU L 105     -13.799  -5.115  12.395  1.00  5.00           N  
ATOM   1570  CA  GLU L 105     -13.913  -6.288  13.247  1.00 20.25           C  
ATOM   1571  C   GLU L 105     -15.246  -6.971  13.012  1.00 42.11           C  
ATOM   1572  O   GLU L 105     -16.110  -6.425  12.340  1.00 10.23           O  
ATOM   1573  CB  GLU L 105     -13.800  -5.900  14.715  1.00  1.12           C  
ATOM   1574  CG  GLU L 105     -12.445  -5.372  15.130  1.00 33.41           C  
ATOM   1575  CD  GLU L 105     -11.350  -6.409  14.999  1.00 24.30           C  
ATOM   1576  OE1 GLU L 105     -11.327  -7.371  15.801  1.00 11.32           O  
ATOM   1577  OE2 GLU L 105     -10.484  -6.276  14.121  1.00 53.33           O  
ATOM   1578  H   GLU L 105     -14.489  -4.417  12.452  1.00 37.74           H  
ATOM   1579  HA  GLU L 105     -13.112  -6.970  13.001  1.00 44.23           H  
ATOM   1580  HB2 GLU L 105     -14.530  -5.128  14.913  1.00 37.74           H  
ATOM   1581  HB3 GLU L 105     -14.039  -6.761  15.321  1.00 37.74           H  
ATOM   1582  HG2 GLU L 105     -12.212  -4.543  14.481  1.00 37.74           H  
ATOM   1583  HG3 GLU L 105     -12.506  -5.042  16.155  1.00 37.74           H  
ATOM   1584  N   ILE L 106     -15.410  -8.149  13.562  1.00 22.22           N  
ATOM   1585  CA  ILE L 106     -16.659  -8.875  13.468  1.00 30.53           C  
ATOM   1586  C   ILE L 106     -17.374  -8.924  14.815  1.00 13.20           C  
ATOM   1587  O   ILE L 106     -16.788  -9.332  15.828  1.00 71.00           O  
ATOM   1588  CB  ILE L 106     -16.489 -10.313  12.813  1.00 73.50           C  
ATOM   1589  CG1 ILE L 106     -16.419 -10.197  11.278  1.00 11.30           C  
ATOM   1590  CG2 ILE L 106     -17.582 -11.286  13.230  1.00 51.11           C  
ATOM   1591  CD1 ILE L 106     -16.197 -11.505  10.546  1.00 51.34           C  
ATOM   1592  H   ILE L 106     -14.669  -8.548  14.069  1.00 37.74           H  
ATOM   1593  HA  ILE L 106     -17.282  -8.279  12.817  1.00 51.32           H  
ATOM   1594  HB  ILE L 106     -15.553 -10.729  13.156  1.00 11.55           H  
ATOM   1595 HG12 ILE L 106     -17.376  -9.823  10.945  1.00 37.74           H  
ATOM   1596 HG13 ILE L 106     -15.671  -9.493  10.968  1.00 37.74           H  
ATOM   1597 HG21 ILE L 106     -17.584 -11.385  14.306  1.00 37.74           H  
ATOM   1598 HG22 ILE L 106     -17.385 -12.249  12.784  1.00 37.74           H  
ATOM   1599 HG23 ILE L 106     -18.546 -10.935  12.899  1.00 37.74           H  
ATOM   1600 HD11 ILE L 106     -16.198 -11.313   9.483  1.00 37.74           H  
ATOM   1601 HD12 ILE L 106     -17.006 -12.182  10.781  1.00 37.74           H  
ATOM   1602 HD13 ILE L 106     -15.254 -11.943  10.839  1.00 37.74           H  
ATOM   1603  N   LYS L 107     -18.637  -8.465  14.834  1.00 53.42           N  
ATOM   1604  CA  LYS L 107     -19.447  -8.513  16.055  1.00 75.34           C  
ATOM   1605  C   LYS L 107     -19.819  -9.962  16.326  1.00 61.41           C  
ATOM   1606  O   LYS L 107     -19.875 -10.780  15.376  1.00 50.02           O  
ATOM   1607  CB  LYS L 107     -20.773  -7.712  15.953  1.00 23.00           C  
ATOM   1608  CG  LYS L 107     -20.711  -6.226  15.619  1.00 73.15           C  
ATOM   1609  CD  LYS L 107     -22.120  -5.624  15.799  1.00 70.25           C  
ATOM   1610  CE  LYS L 107     -22.232  -4.145  15.432  1.00 15.53           C  
ATOM   1611  NZ  LYS L 107     -22.125  -3.893  13.978  1.00 13.14           N  
ATOM   1612  H   LYS L 107     -19.004  -8.103  14.002  1.00 37.74           H  
ATOM   1613  HA  LYS L 107     -18.856  -8.141  16.878  1.00 54.15           H  
ATOM   1614  HB2 LYS L 107     -21.406  -8.160  15.206  1.00 37.74           H  
ATOM   1615  HB3 LYS L 107     -21.272  -7.814  16.904  1.00 37.74           H  
ATOM   1616  HG2 LYS L 107     -20.012  -5.738  16.285  1.00 37.74           H  
ATOM   1617  HG3 LYS L 107     -20.401  -6.095  14.592  1.00 37.74           H  
ATOM   1618  HD2 LYS L 107     -22.813  -6.171  15.183  1.00 37.74           H  
ATOM   1619  HD3 LYS L 107     -22.412  -5.751  16.830  1.00 37.74           H  
ATOM   1620  HE2 LYS L 107     -23.179  -3.761  15.779  1.00 37.74           H  
ATOM   1621  HE3 LYS L 107     -21.430  -3.621  15.934  1.00 37.74           H  
ATOM   1622  HZ1 LYS L 107     -22.300  -2.880  13.827  1.00 37.74           H  
ATOM   1623  HZ2 LYS L 107     -22.815  -4.410  13.394  1.00 37.74           H  
ATOM   1624  HZ3 LYS L 107     -21.162  -4.052  13.617  1.00 37.74           H  
ATOM   1625  N   ARG L 108     -20.063 -10.289  17.595  1.00 44.11           N  
ATOM   1626  CA  ARG L 108     -20.461 -11.648  18.012  1.00 40.13           C  
ATOM   1627  C   ARG L 108     -19.294 -12.626  17.850  1.00 40.40           C  
ATOM   1628  O   ARG L 108     -18.117 -12.196  17.754  1.00 52.35           O  
ATOM   1629  CB  ARG L 108     -21.699 -12.113  17.207  1.00 62.42           C  
ATOM   1630  CG  ARG L 108     -22.211 -13.504  17.511  1.00  2.33           C  
ATOM   1631  CD  ARG L 108     -23.368 -13.834  16.587  1.00 35.23           C  
ATOM   1632  NE  ARG L 108     -23.946 -15.153  16.827  1.00  0.43           N  
ATOM   1633  CZ  ARG L 108     -24.852 -15.738  16.019  1.00 11.14           C  
ATOM   1634  NH1 ARG L 108     -25.274 -15.114  14.917  1.00 73.51           N  
ATOM   1635  NH2 ARG L 108     -25.347 -16.925  16.327  1.00 63.43           N  
ATOM   1636  H   ARG L 108     -19.968  -9.602  18.292  1.00 37.74           H  
ATOM   1637  HA  ARG L 108     -20.720 -11.597  19.059  1.00 73.14           H  
ATOM   1638  HB2 ARG L 108     -22.509 -11.427  17.404  1.00 37.74           H  
ATOM   1639  HB3 ARG L 108     -21.458 -12.058  16.156  1.00 37.74           H  
ATOM   1640  HG2 ARG L 108     -21.416 -14.219  17.365  1.00 37.74           H  
ATOM   1641  HG3 ARG L 108     -22.556 -13.537  18.534  1.00 37.74           H  
ATOM   1642  HD2 ARG L 108     -24.143 -13.098  16.728  1.00 37.74           H  
ATOM   1643  HD3 ARG L 108     -23.016 -13.785  15.566  1.00 37.74           H  
ATOM   1644  HE  ARG L 108     -23.631 -15.604  17.647  1.00 21.42           H  
ATOM   1645 HH11 ARG L 108     -24.937 -14.209  14.655  1.00 37.74           H  
ATOM   1646 HH12 ARG L 108     -25.944 -15.532  14.299  1.00 37.74           H  
ATOM   1647 HH21 ARG L 108     -25.058 -17.413  17.155  1.00 37.74           H  
ATOM   1648 HH22 ARG L 108     -26.034 -17.386  15.759  1.00 37.74           H  
TER    1649      ARG L 108                                                      
ATOM   1650  N   ASP L   1      -2.615  -5.623 -17.117  1.00 24.44           N  
ATOM   1651  CA  ASP L   1      -2.227  -5.546 -15.714  1.00 51.10           C  
ATOM   1652  C   ASP L   1      -0.732  -5.593 -15.578  1.00 34.43           C  
ATOM   1653  O   ASP L   1      -0.047  -6.317 -16.305  1.00 23.14           O  
ATOM   1654  CB  ASP L   1      -2.877  -6.663 -14.864  1.00 22.12           C  
ATOM   1655  CG  ASP L   1      -2.583  -8.073 -15.359  1.00 21.00           C  
ATOM   1656  OD1 ASP L   1      -1.566  -8.673 -14.949  1.00 41.43           O  
ATOM   1657  OD2 ASP L   1      -3.385  -8.608 -16.159  1.00 53.35           O  
ATOM   1658  H   ASP L   1      -1.902  -5.924 -17.724  1.00 37.74           H  
ATOM   1659  HA  ASP L   1      -2.566  -4.589 -15.344  1.00 50.51           H  
ATOM   1660  HB2 ASP L   1      -2.490  -6.588 -13.858  1.00 37.74           H  
ATOM   1661  HB3 ASP L   1      -3.947  -6.523 -14.824  1.00 37.74           H  
ATOM   1662  N   ILE L   2      -0.215  -4.788 -14.704  1.00 30.43           N  
ATOM   1663  CA  ILE L   2       1.184  -4.791 -14.451  1.00 51.30           C  
ATOM   1664  C   ILE L   2       1.476  -5.542 -13.161  1.00 70.13           C  
ATOM   1665  O   ILE L   2       1.170  -5.071 -12.075  1.00 13.05           O  
ATOM   1666  CB  ILE L   2       1.778  -3.365 -14.405  1.00 53.11           C  
ATOM   1667  CG1 ILE L   2       1.613  -2.669 -15.766  1.00 32.54           C  
ATOM   1668  CG2 ILE L   2       3.256  -3.440 -14.035  1.00  3.45           C  
ATOM   1669  CD1 ILE L   2       1.841  -1.194 -15.735  1.00 64.35           C  
ATOM   1670  H   ILE L   2      -0.798  -4.181 -14.199  1.00 37.74           H  
ATOM   1671  HA  ILE L   2       1.637  -5.329 -15.270  1.00 43.12           H  
ATOM   1672  HB  ILE L   2       1.258  -2.796 -13.650  1.00 53.14           H  
ATOM   1673 HG12 ILE L   2       2.443  -2.999 -16.379  1.00 37.74           H  
ATOM   1674 HG13 ILE L   2       0.654  -2.873 -16.218  1.00 37.74           H  
ATOM   1675 HG21 ILE L   2       3.769  -4.071 -14.745  1.00 37.74           H  
ATOM   1676 HG22 ILE L   2       3.343  -3.861 -13.043  1.00 37.74           H  
ATOM   1677 HG23 ILE L   2       3.681  -2.448 -14.056  1.00 37.74           H  
ATOM   1678 HD11 ILE L   2       1.144  -0.733 -15.045  1.00 37.74           H  
ATOM   1679 HD12 ILE L   2       1.706  -0.782 -16.724  1.00 37.74           H  
ATOM   1680 HD13 ILE L   2       2.854  -1.028 -15.406  1.00 37.74           H  
ATOM   1681  N   GLN L   3       2.034  -6.710 -13.316  1.00 64.01           N  
ATOM   1682  CA  GLN L   3       2.439  -7.556 -12.213  1.00 43.23           C  
ATOM   1683  C   GLN L   3       3.786  -7.108 -11.666  1.00 11.52           C  
ATOM   1684  O   GLN L   3       4.766  -7.011 -12.414  1.00 60.01           O  
ATOM   1685  CB  GLN L   3       2.542  -9.009 -12.698  1.00 71.03           C  
ATOM   1686  CG  GLN L   3       1.221  -9.628 -13.102  1.00  0.24           C  
ATOM   1687  CD  GLN L   3       1.361 -11.054 -13.592  1.00 42.31           C  
ATOM   1688  OE1 GLN L   3       2.249 -11.796 -13.166  1.00 64.15           O  
ATOM   1689  NE2 GLN L   3       0.499 -11.450 -14.490  1.00 61.11           N  
ATOM   1690  H   GLN L   3       2.160  -7.042 -14.226  1.00 37.74           H  
ATOM   1691  HA  GLN L   3       1.688  -7.504 -11.439  1.00 74.12           H  
ATOM   1692  HB2 GLN L   3       3.171  -9.005 -13.574  1.00 37.74           H  
ATOM   1693  HB3 GLN L   3       3.045  -9.642 -11.991  1.00 37.74           H  
ATOM   1694  HG2 GLN L   3       0.559  -9.623 -12.249  1.00 37.74           H  
ATOM   1695  HG3 GLN L   3       0.788  -9.031 -13.891  1.00 37.74           H  
ATOM   1696 HE21 GLN L   3      -0.179 -10.805 -14.789  1.00 37.74           H  
ATOM   1697 HE22 GLN L   3       0.550 -12.372 -14.818  1.00 37.74           H  
ATOM   1698  N   MET L   4       3.821  -6.809 -10.394  1.00  4.15           N  
ATOM   1699  CA  MET L   4       5.047  -6.433  -9.713  1.00 73.10           C  
ATOM   1700  C   MET L   4       5.664  -7.668  -9.072  1.00 44.15           C  
ATOM   1701  O   MET L   4       5.048  -8.315  -8.222  1.00  2.53           O  
ATOM   1702  CB  MET L   4       4.756  -5.380  -8.638  1.00 25.45           C  
ATOM   1703  CG  MET L   4       4.224  -4.054  -9.166  1.00 75.23           C  
ATOM   1704  SD  MET L   4       5.404  -2.681  -9.020  1.00 32.30           S  
ATOM   1705  CE  MET L   4       6.800  -3.235  -9.996  1.00 41.43           C  
ATOM   1706  H   MET L   4       2.989  -6.830  -9.873  1.00 37.74           H  
ATOM   1707  HA  MET L   4       5.735  -6.025 -10.438  1.00  4.24           H  
ATOM   1708  HB2 MET L   4       4.028  -5.785  -7.951  1.00 37.74           H  
ATOM   1709  HB3 MET L   4       5.668  -5.186  -8.092  1.00 37.74           H  
ATOM   1710  HG2 MET L   4       3.975  -4.181 -10.208  1.00 37.74           H  
ATOM   1711  HG3 MET L   4       3.325  -3.802  -8.620  1.00 37.74           H  
ATOM   1712  HE1 MET L   4       7.229  -4.106  -9.516  1.00 37.74           H  
ATOM   1713  HE2 MET L   4       7.553  -2.457  -9.970  1.00 37.74           H  
ATOM   1714  HE3 MET L   4       6.522  -3.461 -11.012  1.00 37.74           H  
ATOM   1715  N   THR L   5       6.836  -8.015  -9.502  1.00 43.03           N  
ATOM   1716  CA  THR L   5       7.539  -9.154  -8.975  1.00 54.43           C  
ATOM   1717  C   THR L   5       8.737  -8.684  -8.170  1.00 22.31           C  
ATOM   1718  O   THR L   5       9.647  -8.093  -8.723  1.00 40.34           O  
ATOM   1719  CB  THR L   5       8.045 -10.046 -10.126  1.00 13.24           C  
ATOM   1720  OG1 THR L   5       6.938 -10.471 -10.935  1.00  1.42           O  
ATOM   1721  CG2 THR L   5       8.786 -11.262  -9.591  1.00  4.15           C  
ATOM   1722  H   THR L   5       7.271  -7.494 -10.214  1.00 37.74           H  
ATOM   1723  HA  THR L   5       6.870  -9.732  -8.357  1.00  0.02           H  
ATOM   1724  HB  THR L   5       8.717  -9.461 -10.738  1.00 45.43           H  
ATOM   1725  HG1 THR L   5       6.976 -11.434 -11.008  1.00 34.13           H  
ATOM   1726 HG21 THR L   5       8.124 -11.850  -8.974  1.00 37.74           H  
ATOM   1727 HG22 THR L   5       9.631 -10.929  -9.005  1.00 37.74           H  
ATOM   1728 HG23 THR L   5       9.137 -11.854 -10.421  1.00 37.74           H  
ATOM   1729  N   GLN L   6       8.739  -8.925  -6.891  1.00 33.13           N  
ATOM   1730  CA  GLN L   6       9.858  -8.517  -6.088  1.00  3.05           C  
ATOM   1731  C   GLN L   6      10.701  -9.758  -5.776  1.00 23.44           C  
ATOM   1732  O   GLN L   6      10.160 -10.859  -5.621  1.00 15.11           O  
ATOM   1733  CB  GLN L   6       9.388  -7.834  -4.803  1.00 22.10           C  
ATOM   1734  CG  GLN L   6      10.466  -6.977  -4.142  1.00 51.22           C  
ATOM   1735  CD  GLN L   6      10.090  -6.465  -2.762  1.00 51.24           C  
ATOM   1736  OE1 GLN L   6      10.926  -6.209  -1.925  1.00 21.34           O  
ATOM   1737  NE2 GLN L   6       8.866  -6.347  -2.504  1.00 22.23           N  
ATOM   1738  H   GLN L   6       7.985  -9.396  -6.475  1.00 37.74           H  
ATOM   1739  HA  GLN L   6      10.457  -7.834  -6.672  1.00 44.41           H  
ATOM   1740  HB2 GLN L   6       8.566  -7.187  -5.072  1.00 37.74           H  
ATOM   1741  HB3 GLN L   6       9.023  -8.564  -4.095  1.00 37.74           H  
ATOM   1742  HG2 GLN L   6      11.363  -7.569  -4.047  1.00 37.74           H  
ATOM   1743  HG3 GLN L   6      10.670  -6.132  -4.782  1.00 37.74           H  
ATOM   1744 HE21 GLN L   6       8.176  -6.561  -3.170  1.00 37.74           H  
ATOM   1745 HE22 GLN L   6       8.657  -6.066  -1.585  1.00 37.74           H  
ATOM   1746  N   SER L   7      11.990  -9.603  -5.747  1.00 44.33           N  
ATOM   1747  CA  SER L   7      12.899 -10.694  -5.490  1.00 21.30           C  
ATOM   1748  C   SER L   7      14.067 -10.195  -4.624  1.00 41.15           C  
ATOM   1749  O   SER L   7      14.434  -9.013  -4.711  1.00  2.31           O  
ATOM   1750  CB  SER L   7      13.417 -11.220  -6.827  1.00 53.41           C  
ATOM   1751  OG  SER L   7      12.335 -11.600  -7.674  1.00 14.24           O  
ATOM   1752  H   SER L   7      12.381  -8.716  -5.910  1.00 37.74           H  
ATOM   1753  HA  SER L   7      12.366 -11.483  -4.979  1.00  3.22           H  
ATOM   1754  HB2 SER L   7      13.981 -10.439  -7.316  1.00 37.74           H  
ATOM   1755  HB3 SER L   7      14.053 -12.078  -6.664  1.00 37.74           H  
ATOM   1756  HG  SER L   7      11.550 -11.654  -7.115  1.00 15.31           H  
ATOM   1757  N   PRO L   8      14.674 -11.067  -3.777  1.00 72.40           N  
ATOM   1758  CA  PRO L   8      14.295 -12.489  -3.643  1.00 12.04           C  
ATOM   1759  C   PRO L   8      13.090 -12.683  -2.707  1.00 42.31           C  
ATOM   1760  O   PRO L   8      12.646 -11.735  -2.075  1.00  2.25           O  
ATOM   1761  CB  PRO L   8      15.550 -13.107  -3.035  1.00 13.13           C  
ATOM   1762  CG  PRO L   8      16.133 -12.021  -2.198  1.00  4.11           C  
ATOM   1763  CD  PRO L   8      15.792 -10.716  -2.883  1.00 20.55           C  
ATOM   1764  HA  PRO L   8      14.085 -12.941  -4.602  1.00 54.14           H  
ATOM   1765  HB2 PRO L   8      15.277 -13.963  -2.437  1.00 37.74           H  
ATOM   1766  HB3 PRO L   8      16.231 -13.404  -3.819  1.00 37.74           H  
ATOM   1767  HG2 PRO L   8      15.695 -12.052  -1.211  1.00 37.74           H  
ATOM   1768  HG3 PRO L   8      17.204 -12.142  -2.132  1.00 37.74           H  
ATOM   1769  HD2 PRO L   8      15.485  -9.975  -2.161  1.00 37.74           H  
ATOM   1770  HD3 PRO L   8      16.638 -10.358  -3.451  1.00 37.74           H  
ATOM   1771  N   SER L   9      12.588 -13.919  -2.608  1.00 63.14           N  
ATOM   1772  CA  SER L   9      11.397 -14.228  -1.811  1.00 23.11           C  
ATOM   1773  C   SER L   9      11.564 -13.867  -0.334  1.00  4.33           C  
ATOM   1774  O   SER L   9      10.616 -13.410   0.322  1.00 22.12           O  
ATOM   1775  CB  SER L   9      11.026 -15.693  -1.982  1.00 51.51           C  
ATOM   1776  OG  SER L   9      10.817 -15.983  -3.357  1.00 75.23           O  
ATOM   1777  H   SER L   9      13.019 -14.657  -3.090  1.00 37.74           H  
ATOM   1778  HA  SER L   9      10.584 -13.627  -2.192  1.00 32.23           H  
ATOM   1779  HB2 SER L   9      11.827 -16.312  -1.607  1.00 37.74           H  
ATOM   1780  HB3 SER L   9      10.116 -15.905  -1.439  1.00 37.74           H  
ATOM   1781  HG  SER L   9      10.655 -15.142  -3.806  1.00 63.15           H  
ATOM   1782  N   SER L  10      12.756 -14.036   0.169  1.00 21.32           N  
ATOM   1783  CA  SER L  10      13.067 -13.692   1.525  1.00 70.31           C  
ATOM   1784  C   SER L  10      14.555 -13.749   1.727  1.00 12.44           C  
ATOM   1785  O   SER L  10      15.235 -14.618   1.157  1.00  2.01           O  
ATOM   1786  CB  SER L  10      12.324 -14.613   2.523  1.00 33.01           C  
ATOM   1787  OG  SER L  10      12.573 -15.994   2.251  1.00 14.00           O  
ATOM   1788  H   SER L  10      13.474 -14.416  -0.381  1.00 37.74           H  
ATOM   1789  HA  SER L  10      12.741 -12.674   1.683  1.00  3.44           H  
ATOM   1790  HB2 SER L  10      12.659 -14.387   3.524  1.00 37.74           H  
ATOM   1791  HB3 SER L  10      11.261 -14.424   2.457  1.00 37.74           H  
ATOM   1792  HG  SER L  10      11.721 -16.399   2.043  1.00 44.13           H  
ATOM   1793  N   LEU L  11      15.071 -12.822   2.476  1.00 51.30           N  
ATOM   1794  CA  LEU L  11      16.471 -12.791   2.783  1.00 60.45           C  
ATOM   1795  C   LEU L  11      16.646 -12.150   4.123  1.00 25.52           C  
ATOM   1796  O   LEU L  11      15.868 -11.264   4.510  1.00 35.11           O  
ATOM   1797  CB  LEU L  11      17.335 -12.067   1.701  1.00  4.41           C  
ATOM   1798  CG  LEU L  11      17.218 -10.529   1.543  1.00 44.14           C  
ATOM   1799  CD1 LEU L  11      18.173 -10.049   0.467  1.00  0.22           C  
ATOM   1800  CD2 LEU L  11      15.808 -10.088   1.214  1.00 74.55           C  
ATOM   1801  H   LEU L  11      14.507 -12.118   2.869  1.00 37.74           H  
ATOM   1802  HA  LEU L  11      16.795 -13.818   2.867  1.00 53.02           H  
ATOM   1803  HB2 LEU L  11      18.370 -12.285   1.915  1.00 37.74           H  
ATOM   1804  HB3 LEU L  11      17.095 -12.521   0.750  1.00 37.74           H  
ATOM   1805  HG  LEU L  11      17.525 -10.068   2.471  1.00 52.43           H  
ATOM   1806 HD11 LEU L  11      17.950 -10.564  -0.457  1.00 37.74           H  
ATOM   1807 HD12 LEU L  11      19.192 -10.248   0.763  1.00 37.74           H  
ATOM   1808 HD13 LEU L  11      18.043  -8.989   0.315  1.00 37.74           H  
ATOM   1809 HD21 LEU L  11      15.494 -10.545   0.289  1.00 37.74           H  
ATOM   1810 HD22 LEU L  11      15.789  -9.011   1.113  1.00 37.74           H  
ATOM   1811 HD23 LEU L  11      15.153 -10.395   2.015  1.00 37.74           H  
ATOM   1812  N   SER L  12      17.609 -12.593   4.831  1.00 73.22           N  
ATOM   1813  CA  SER L  12      17.854 -12.084   6.126  1.00 34.32           C  
ATOM   1814  C   SER L  12      19.142 -11.302   6.112  1.00 21.44           C  
ATOM   1815  O   SER L  12      20.086 -11.686   5.446  1.00 31.42           O  
ATOM   1816  CB  SER L  12      17.934 -13.220   7.123  1.00 13.11           C  
ATOM   1817  OG  SER L  12      16.787 -14.050   7.040  1.00 44.50           O  
ATOM   1818  H   SER L  12      18.205 -13.281   4.469  1.00 37.74           H  
ATOM   1819  HA  SER L  12      17.039 -11.433   6.401  1.00 52.14           H  
ATOM   1820  HB2 SER L  12      18.824 -13.802   6.947  1.00 37.74           H  
ATOM   1821  HB3 SER L  12      17.958 -12.765   8.102  1.00 37.74           H  
ATOM   1822  HG  SER L  12      16.860 -14.557   6.223  1.00 72.53           H  
ATOM   1823  N   ALA L  13      19.167 -10.215   6.813  1.00 13.30           N  
ATOM   1824  CA  ALA L  13      20.318  -9.362   6.899  1.00 63.55           C  
ATOM   1825  C   ALA L  13      20.454  -8.880   8.314  1.00 21.01           C  
ATOM   1826  O   ALA L  13      19.477  -8.749   8.998  1.00 11.32           O  
ATOM   1827  CB  ALA L  13      20.154  -8.193   5.967  1.00  2.13           C  
ATOM   1828  H   ALA L  13      18.360  -9.959   7.317  1.00 37.74           H  
ATOM   1829  HA  ALA L  13      21.197  -9.920   6.612  1.00 52.44           H  
ATOM   1830  HB1 ALA L  13      20.056  -8.558   4.955  1.00 37.74           H  
ATOM   1831  HB2 ALA L  13      21.013  -7.544   6.038  1.00 37.74           H  
ATOM   1832  HB3 ALA L  13      19.262  -7.646   6.236  1.00 37.74           H  
ATOM   1833  N   SER L  14      21.644  -8.652   8.757  1.00 14.55           N  
ATOM   1834  CA  SER L  14      21.849  -8.195  10.114  1.00 31.42           C  
ATOM   1835  C   SER L  14      21.966  -6.683  10.072  1.00 55.13           C  
ATOM   1836  O   SER L  14      22.229  -6.137   9.020  1.00  1.20           O  
ATOM   1837  CB  SER L  14      23.152  -8.799  10.673  1.00  4.35           C  
ATOM   1838  OG  SER L  14      23.284  -8.578  12.063  1.00 65.14           O  
ATOM   1839  H   SER L  14      22.419  -8.753   8.166  1.00 37.74           H  
ATOM   1840  HA  SER L  14      21.010  -8.494  10.724  1.00 12.45           H  
ATOM   1841  HB2 SER L  14      23.231  -9.855  10.477  1.00 37.74           H  
ATOM   1842  HB3 SER L  14      23.975  -8.309  10.180  1.00 37.74           H  
ATOM   1843  HG  SER L  14      23.334  -9.453  12.471  1.00 51.30           H  
ATOM   1844  N   VAL L  15      21.721  -6.013  11.180  1.00 53.13           N  
ATOM   1845  CA  VAL L  15      21.960  -4.563  11.259  1.00 70.12           C  
ATOM   1846  C   VAL L  15      23.390  -4.234  10.747  1.00 45.21           C  
ATOM   1847  O   VAL L  15      24.385  -4.761  11.252  1.00 71.35           O  
ATOM   1848  CB  VAL L  15      21.785  -4.040  12.708  1.00 20.14           C  
ATOM   1849  CG1 VAL L  15      22.014  -2.534  12.789  1.00 23.03           C  
ATOM   1850  CG2 VAL L  15      20.410  -4.404  13.240  1.00 22.12           C  
ATOM   1851  H   VAL L  15      21.339  -6.504  11.939  1.00 37.74           H  
ATOM   1852  HA  VAL L  15      21.245  -4.075  10.614  1.00 62.14           H  
ATOM   1853  HB  VAL L  15      22.526  -4.506  13.335  1.00 75.41           H  
ATOM   1854 HG11 VAL L  15      23.021  -2.306  12.471  1.00 37.74           H  
ATOM   1855 HG12 VAL L  15      21.868  -2.195  13.803  1.00 37.74           H  
ATOM   1856 HG13 VAL L  15      21.313  -2.032  12.138  1.00 37.74           H  
ATOM   1857 HG21 VAL L  15      20.290  -5.477  13.233  1.00 37.74           H  
ATOM   1858 HG22 VAL L  15      19.652  -3.953  12.616  1.00 37.74           H  
ATOM   1859 HG23 VAL L  15      20.310  -4.041  14.251  1.00 37.74           H  
ATOM   1860  N   GLY L  16      23.460  -3.406   9.715  1.00 62.35           N  
ATOM   1861  CA  GLY L  16      24.735  -3.050   9.108  1.00 70.03           C  
ATOM   1862  C   GLY L  16      25.016  -3.840   7.829  1.00  1.15           C  
ATOM   1863  O   GLY L  16      25.900  -3.484   7.044  1.00 65.22           O  
ATOM   1864  H   GLY L  16      22.623  -3.019   9.380  1.00 37.74           H  
ATOM   1865  HA2 GLY L  16      24.716  -1.997   8.869  1.00 37.74           H  
ATOM   1866  HA3 GLY L  16      25.528  -3.235   9.817  1.00 37.74           H  
ATOM   1867  N   ASP L  17      24.256  -4.896   7.619  1.00 24.41           N  
ATOM   1868  CA  ASP L  17      24.413  -5.772   6.451  1.00 33.21           C  
ATOM   1869  C   ASP L  17      23.640  -5.177   5.278  1.00 64.32           C  
ATOM   1870  O   ASP L  17      22.618  -4.505   5.481  1.00 34.44           O  
ATOM   1871  CB  ASP L  17      23.881  -7.175   6.813  1.00 55.22           C  
ATOM   1872  CG  ASP L  17      24.089  -8.250   5.773  1.00  3.45           C  
ATOM   1873  OD1 ASP L  17      25.149  -8.279   5.123  1.00 72.43           O  
ATOM   1874  OD2 ASP L  17      23.225  -9.139   5.649  1.00  4.40           O  
ATOM   1875  H   ASP L  17      23.548  -5.116   8.264  1.00 37.74           H  
ATOM   1876  HA  ASP L  17      25.461  -5.836   6.202  1.00 20.44           H  
ATOM   1877  HB2 ASP L  17      24.289  -7.502   7.753  1.00 37.74           H  
ATOM   1878  HB3 ASP L  17      22.818  -7.066   6.969  1.00 37.74           H  
ATOM   1879  N   ARG L  18      24.127  -5.382   4.072  1.00 60.55           N  
ATOM   1880  CA  ARG L  18      23.489  -4.815   2.890  1.00 51.22           C  
ATOM   1881  C   ARG L  18      22.430  -5.727   2.323  1.00  5.43           C  
ATOM   1882  O   ARG L  18      22.560  -6.959   2.345  1.00 43.22           O  
ATOM   1883  CB  ARG L  18      24.503  -4.474   1.810  1.00 61.23           C  
ATOM   1884  CG  ARG L  18      25.490  -3.413   2.212  1.00 41.14           C  
ATOM   1885  CD  ARG L  18      26.470  -3.135   1.101  1.00  3.24           C  
ATOM   1886  NE  ARG L  18      27.436  -2.098   1.454  1.00 25.53           N  
ATOM   1887  CZ  ARG L  18      28.317  -1.568   0.606  1.00 75.22           C  
ATOM   1888  NH1 ARG L  18      28.343  -1.965  -0.668  1.00  3.14           N  
ATOM   1889  NH2 ARG L  18      29.166  -0.647   1.024  1.00 74.41           N  
ATOM   1890  H   ARG L  18      24.937  -5.927   3.971  1.00 37.74           H  
ATOM   1891  HA  ARG L  18      23.007  -3.898   3.199  1.00 12.41           H  
ATOM   1892  HB2 ARG L  18      25.052  -5.367   1.553  1.00 37.74           H  
ATOM   1893  HB3 ARG L  18      23.973  -4.129   0.934  1.00 37.74           H  
ATOM   1894  HG2 ARG L  18      24.949  -2.506   2.443  1.00 37.74           H  
ATOM   1895  HG3 ARG L  18      26.015  -3.753   3.089  1.00 37.74           H  
ATOM   1896  HD2 ARG L  18      27.009  -4.044   0.881  1.00 37.74           H  
ATOM   1897  HD3 ARG L  18      25.920  -2.819   0.225  1.00 37.74           H  
ATOM   1898  HE  ARG L  18      27.413  -1.802   2.392  1.00 11.22           H  
ATOM   1899 HH11 ARG L  18      27.710  -2.661  -1.019  1.00 37.74           H  
ATOM   1900 HH12 ARG L  18      28.998  -1.592  -1.329  1.00 37.74           H  
ATOM   1901 HH21 ARG L  18      29.193  -0.303   1.967  1.00 37.74           H  
ATOM   1902 HH22 ARG L  18      29.846  -0.235   0.412  1.00 37.74           H  
ATOM   1903  N   VAL L  19      21.402  -5.128   1.810  1.00 41.42           N  
ATOM   1904  CA  VAL L  19      20.282  -5.852   1.231  1.00  4.32           C  
ATOM   1905  C   VAL L  19      20.022  -5.353  -0.159  1.00 63.51           C  
ATOM   1906  O   VAL L  19      19.846  -4.155  -0.357  1.00 41.23           O  
ATOM   1907  CB  VAL L  19      18.990  -5.642   2.058  1.00 21.12           C  
ATOM   1908  CG1 VAL L  19      17.813  -6.392   1.458  1.00 23.14           C  
ATOM   1909  CG2 VAL L  19      19.202  -6.080   3.462  1.00 34.13           C  
ATOM   1910  H   VAL L  19      21.406  -4.145   1.819  1.00 37.74           H  
ATOM   1911  HA  VAL L  19      20.512  -6.908   1.215  1.00 74.33           H  
ATOM   1912  HB  VAL L  19      18.752  -4.589   2.061  1.00 14.14           H  
ATOM   1913 HG11 VAL L  19      17.679  -6.086   0.432  1.00 37.74           H  
ATOM   1914 HG12 VAL L  19      16.921  -6.163   2.022  1.00 37.74           H  
ATOM   1915 HG13 VAL L  19      18.005  -7.451   1.504  1.00 37.74           H  
ATOM   1916 HG21 VAL L  19      19.451  -7.130   3.472  1.00 37.74           H  
ATOM   1917 HG22 VAL L  19      18.297  -5.920   4.027  1.00 37.74           H  
ATOM   1918 HG23 VAL L  19      20.015  -5.510   3.890  1.00 37.74           H  
ATOM   1919  N   THR L  20      19.998  -6.240  -1.113  1.00 11.14           N  
ATOM   1920  CA  THR L  20      19.675  -5.856  -2.440  1.00 43.33           C  
ATOM   1921  C   THR L  20      18.390  -6.574  -2.868  1.00 41.32           C  
ATOM   1922  O   THR L  20      18.326  -7.809  -2.908  1.00 14.02           O  
ATOM   1923  CB  THR L  20      20.837  -6.177  -3.412  1.00 61.32           C  
ATOM   1924  OG1 THR L  20      22.039  -5.512  -2.958  1.00 64.13           O  
ATOM   1925  CG2 THR L  20      20.515  -5.698  -4.818  1.00 53.35           C  
ATOM   1926  H   THR L  20      20.189  -7.189  -0.944  1.00 37.74           H  
ATOM   1927  HA  THR L  20      19.496  -4.790  -2.442  1.00 61.20           H  
ATOM   1928  HB  THR L  20      20.999  -7.244  -3.423  1.00 14.32           H  
ATOM   1929  HG1 THR L  20      22.545  -6.162  -2.456  1.00 31.43           H  
ATOM   1930 HG21 THR L  20      20.369  -4.627  -4.811  1.00 37.74           H  
ATOM   1931 HG22 THR L  20      19.619  -6.185  -5.172  1.00 37.74           H  
ATOM   1932 HG23 THR L  20      21.344  -5.940  -5.466  1.00 37.74           H  
ATOM   1933  N   ILE L  21      17.393  -5.793  -3.162  1.00 74.45           N  
ATOM   1934  CA  ILE L  21      16.113  -6.270  -3.596  1.00 72.53           C  
ATOM   1935  C   ILE L  21      15.873  -5.758  -5.020  1.00  4.02           C  
ATOM   1936  O   ILE L  21      16.355  -4.684  -5.386  1.00 12.34           O  
ATOM   1937  CB  ILE L  21      14.978  -5.731  -2.669  1.00 22.24           C  
ATOM   1938  CG1 ILE L  21      15.188  -6.154  -1.203  1.00 23.34           C  
ATOM   1939  CG2 ILE L  21      13.640  -6.197  -3.157  1.00 60.33           C  
ATOM   1940  CD1 ILE L  21      14.115  -5.633  -0.235  1.00  1.43           C  
ATOM   1941  H   ILE L  21      17.491  -4.816  -3.081  1.00 37.74           H  
ATOM   1942  HA  ILE L  21      16.109  -7.351  -3.577  1.00 52.13           H  
ATOM   1943  HB  ILE L  21      14.977  -4.654  -2.720  1.00 72.23           H  
ATOM   1944 HG12 ILE L  21      15.198  -7.233  -1.143  1.00 37.74           H  
ATOM   1945 HG13 ILE L  21      16.144  -5.775  -0.875  1.00 37.74           H  
ATOM   1946 HG21 ILE L  21      13.615  -7.276  -3.153  1.00 37.74           H  
ATOM   1947 HG22 ILE L  21      13.476  -5.832  -4.160  1.00 37.74           H  
ATOM   1948 HG23 ILE L  21      12.866  -5.819  -2.504  1.00 37.74           H  
ATOM   1949 HD11 ILE L  21      14.091  -4.553  -0.243  1.00 37.74           H  
ATOM   1950 HD12 ILE L  21      14.328  -5.971   0.767  1.00 37.74           H  
ATOM   1951 HD13 ILE L  21      13.138  -5.992  -0.524  1.00 37.74           H  
ATOM   1952  N   THR L  22      15.188  -6.516  -5.816  1.00 10.34           N  
ATOM   1953  CA  THR L  22      14.858  -6.101  -7.150  1.00 61.14           C  
ATOM   1954  C   THR L  22      13.375  -6.352  -7.424  1.00  0.00           C  
ATOM   1955  O   THR L  22      12.850  -7.395  -7.078  1.00 54.32           O  
ATOM   1956  CB  THR L  22      15.739  -6.843  -8.185  1.00 73.21           C  
ATOM   1957  OG1 THR L  22      17.119  -6.585  -7.875  1.00 21.44           O  
ATOM   1958  CG2 THR L  22      15.449  -6.357  -9.604  1.00 71.42           C  
ATOM   1959  H   THR L  22      14.879  -7.398  -5.502  1.00 37.74           H  
ATOM   1960  HA  THR L  22      15.052  -5.041  -7.224  1.00 24.23           H  
ATOM   1961  HB  THR L  22      15.547  -7.904  -8.115  1.00 63.42           H  
ATOM   1962  HG1 THR L  22      17.116  -6.073  -7.057  1.00 12.45           H  
ATOM   1963 HG21 THR L  22      14.408  -6.528  -9.834  1.00 37.74           H  
ATOM   1964 HG22 THR L  22      16.066  -6.896 -10.308  1.00 37.74           H  
ATOM   1965 HG23 THR L  22      15.665  -5.302  -9.675  1.00 37.74           H  
ATOM   1966  N   CYS L  23      12.716  -5.391  -8.011  1.00 41.50           N  
ATOM   1967  CA  CYS L  23      11.332  -5.530  -8.361  1.00  5.55           C  
ATOM   1968  C   CYS L  23      11.232  -5.405  -9.860  1.00 13.13           C  
ATOM   1969  O   CYS L  23      11.848  -4.517 -10.452  1.00 15.43           O  
ATOM   1970  CB  CYS L  23      10.478  -4.443  -7.675  1.00 32.40           C  
ATOM   1971  SG  CYS L  23       8.686  -4.613  -7.894  1.00  3.14           S  
ATOM   1972  H   CYS L  23      13.186  -4.556  -8.241  1.00 37.74           H  
ATOM   1973  HA  CYS L  23      10.989  -6.508  -8.060  1.00 52.15           H  
ATOM   1974  HB2 CYS L  23      10.640  -4.432  -6.614  1.00 37.74           H  
ATOM   1975  HB3 CYS L  23      10.757  -3.481  -8.082  1.00 37.74           H  
ATOM   1976  N   GLN L  24      10.507  -6.300 -10.464  1.00 44.23           N  
ATOM   1977  CA  GLN L  24      10.336  -6.314 -11.884  1.00 33.24           C  
ATOM   1978  C   GLN L  24       8.875  -6.116 -12.221  1.00 32.52           C  
ATOM   1979  O   GLN L  24       7.999  -6.749 -11.623  1.00 43.33           O  
ATOM   1980  CB  GLN L  24      10.853  -7.631 -12.489  1.00  0.22           C  
ATOM   1981  CG  GLN L  24      12.322  -7.923 -12.188  1.00 32.11           C  
ATOM   1982  CD  GLN L  24      12.826  -9.191 -12.858  1.00  0.43           C  
ATOM   1983  OE1 GLN L  24      12.363  -9.577 -13.931  1.00 73.43           O  
ATOM   1984  NE2 GLN L  24      13.783  -9.839 -12.245  1.00 32.23           N  
ATOM   1985  H   GLN L  24      10.059  -6.987  -9.919  1.00 37.74           H  
ATOM   1986  HA  GLN L  24      10.908  -5.494 -12.296  1.00 43.14           H  
ATOM   1987  HB2 GLN L  24      10.261  -8.448 -12.106  1.00 37.74           H  
ATOM   1988  HB3 GLN L  24      10.727  -7.587 -13.560  1.00 37.74           H  
ATOM   1989  HG2 GLN L  24      12.929  -7.094 -12.519  1.00 37.74           H  
ATOM   1990  HG3 GLN L  24      12.418  -8.040 -11.119  1.00 37.74           H  
ATOM   1991 HE21 GLN L  24      14.137  -9.499 -11.396  1.00 37.74           H  
ATOM   1992 HE22 GLN L  24      14.126 -10.670 -12.641  1.00 37.74           H  
ATOM   1993  N   ALA L  25       8.614  -5.229 -13.135  1.00 12.24           N  
ATOM   1994  CA  ALA L  25       7.269  -4.954 -13.571  1.00 15.53           C  
ATOM   1995  C   ALA L  25       6.946  -5.773 -14.808  1.00 40.30           C  
ATOM   1996  O   ALA L  25       7.811  -6.000 -15.647  1.00 73.23           O  
ATOM   1997  CB  ALA L  25       7.091  -3.471 -13.850  1.00 23.32           C  
ATOM   1998  H   ALA L  25       9.376  -4.742 -13.519  1.00 37.74           H  
ATOM   1999  HA  ALA L  25       6.596  -5.240 -12.776  1.00 11.21           H  
ATOM   2000  HB1 ALA L  25       7.729  -3.180 -14.671  1.00 37.74           H  
ATOM   2001  HB2 ALA L  25       7.358  -2.903 -12.972  1.00 37.74           H  
ATOM   2002  HB3 ALA L  25       6.060  -3.272 -14.109  1.00 37.74           H  
ATOM   2003  N   SER L  26       5.713  -6.233 -14.897  1.00 44.32           N  
ATOM   2004  CA  SER L  26       5.241  -7.021 -16.024  1.00 70.03           C  
ATOM   2005  C   SER L  26       5.384  -6.229 -17.329  1.00 61.32           C  
ATOM   2006  O   SER L  26       5.843  -6.747 -18.347  1.00  2.12           O  
ATOM   2007  CB  SER L  26       3.775  -7.348 -15.813  1.00 53.45           C  
ATOM   2008  OG  SER L  26       3.258  -8.193 -16.809  1.00  4.25           O  
ATOM   2009  H   SER L  26       5.111  -6.056 -14.143  1.00 37.74           H  
ATOM   2010  HA  SER L  26       5.798  -7.949 -16.000  1.00 21.51           H  
ATOM   2011  HB2 SER L  26       3.664  -7.819 -14.852  1.00 37.74           H  
ATOM   2012  HB3 SER L  26       3.222  -6.421 -15.815  1.00 37.74           H  
ATOM   2013  HG  SER L  26       3.664  -9.064 -16.716  1.00 53.35           H  
ATOM   2014  N   GLN L  27       5.003  -4.966 -17.268  1.00 12.44           N  
ATOM   2015  CA  GLN L  27       5.021  -4.069 -18.396  1.00 51.43           C  
ATOM   2016  C   GLN L  27       5.605  -2.763 -17.904  1.00 31.23           C  
ATOM   2017  O   GLN L  27       5.507  -2.475 -16.703  1.00 75.23           O  
ATOM   2018  CB  GLN L  27       3.576  -3.876 -18.913  1.00 32.11           C  
ATOM   2019  CG  GLN L  27       3.424  -3.008 -20.160  1.00 32.45           C  
ATOM   2020  CD  GLN L  27       1.966  -2.883 -20.612  1.00 70.41           C  
ATOM   2021  OE1 GLN L  27       1.682  -2.749 -21.800  1.00 10.20           O  
ATOM   2022  NE2 GLN L  27       1.037  -2.898 -19.675  1.00 33.42           N  
ATOM   2023  H   GLN L  27       4.721  -4.578 -16.414  1.00 37.74           H  
ATOM   2024  HA  GLN L  27       5.641  -4.487 -19.173  1.00 25.44           H  
ATOM   2025  HB2 GLN L  27       3.161  -4.845 -19.141  1.00 37.74           H  
ATOM   2026  HB3 GLN L  27       2.986  -3.434 -18.126  1.00 37.74           H  
ATOM   2027  HG2 GLN L  27       3.802  -2.020 -19.939  1.00 37.74           H  
ATOM   2028  HG3 GLN L  27       4.001  -3.444 -20.964  1.00 37.74           H  
ATOM   2029 HE21 GLN L  27       1.292  -2.977 -18.735  1.00 37.74           H  
ATOM   2030 HE22 GLN L  27       0.098  -2.846 -19.951  1.00 37.74           H  
ATOM   2031  N   ASP L  28       6.222  -2.001 -18.792  1.00 15.31           N  
ATOM   2032  CA  ASP L  28       6.873  -0.743 -18.409  1.00 13.42           C  
ATOM   2033  C   ASP L  28       5.929   0.258 -17.816  1.00 72.14           C  
ATOM   2034  O   ASP L  28       4.782   0.393 -18.243  1.00 21.50           O  
ATOM   2035  CB  ASP L  28       7.680  -0.090 -19.539  1.00 45.41           C  
ATOM   2036  CG  ASP L  28       8.932  -0.830 -19.914  1.00 50.03           C  
ATOM   2037  OD1 ASP L  28       8.855  -1.768 -20.734  1.00 21.34           O  
ATOM   2038  OD2 ASP L  28      10.013  -0.472 -19.409  1.00 21.41           O  
ATOM   2039  H   ASP L  28       6.245  -2.288 -19.729  1.00 37.74           H  
ATOM   2040  HA  ASP L  28       7.553  -1.025 -17.623  1.00 64.11           H  
ATOM   2041  HB2 ASP L  28       7.057  -0.037 -20.418  1.00 37.74           H  
ATOM   2042  HB3 ASP L  28       7.947   0.913 -19.239  1.00 37.74           H  
ATOM   2043  N   ILE L  29       6.432   0.947 -16.823  1.00 34.31           N  
ATOM   2044  CA  ILE L  29       5.700   1.964 -16.100  1.00 14.43           C  
ATOM   2045  C   ILE L  29       6.480   3.267 -16.122  1.00 52.01           C  
ATOM   2046  O   ILE L  29       6.274   4.134 -15.269  1.00 50.22           O  
ATOM   2047  CB  ILE L  29       5.543   1.536 -14.626  1.00 34.44           C  
ATOM   2048  CG1 ILE L  29       6.909   1.299 -13.984  1.00 53.52           C  
ATOM   2049  CG2 ILE L  29       4.693   0.303 -14.527  1.00 25.03           C  
ATOM   2050  CD1 ILE L  29       6.838   0.844 -12.560  1.00  1.41           C  
ATOM   2051  H   ILE L  29       7.348   0.744 -16.541  1.00 37.74           H  
ATOM   2052  HA  ILE L  29       4.716   2.060 -16.537  1.00  5.31           H  
ATOM   2053  HB  ILE L  29       5.046   2.333 -14.093  1.00  1.01           H  
ATOM   2054 HG12 ILE L  29       7.439   0.535 -14.534  1.00 37.74           H  
ATOM   2055 HG13 ILE L  29       7.482   2.214 -14.012  1.00 37.74           H  
ATOM   2056 HG21 ILE L  29       3.714   0.555 -14.904  1.00 37.74           H  
ATOM   2057 HG22 ILE L  29       4.640  -0.015 -13.496  1.00 37.74           H  
ATOM   2058 HG23 ILE L  29       5.132  -0.474 -15.134  1.00 37.74           H  
ATOM   2059 HD11 ILE L  29       6.351   1.595 -11.957  1.00 37.74           H  
ATOM   2060 HD12 ILE L  29       7.853   0.695 -12.218  1.00 37.74           H  
ATOM   2061 HD13 ILE L  29       6.304  -0.093 -12.526  1.00 37.74           H  
ATOM   2062  N   ASN L  30       7.356   3.405 -17.112  1.00 62.45           N  
ATOM   2063  CA  ASN L  30       8.293   4.546 -17.218  1.00 33.52           C  
ATOM   2064  C   ASN L  30       9.234   4.611 -16.029  1.00 43.41           C  
ATOM   2065  O   ASN L  30      10.349   4.115 -16.096  1.00 31.22           O  
ATOM   2066  CB  ASN L  30       7.586   5.900 -17.466  1.00 33.42           C  
ATOM   2067  CG  ASN L  30       6.976   5.998 -18.845  1.00 11.23           C  
ATOM   2068  OD1 ASN L  30       7.482   5.401 -19.803  1.00 55.43           O  
ATOM   2069  ND2 ASN L  30       5.910   6.734 -18.967  1.00 54.12           N  
ATOM   2070  H   ASN L  30       7.353   2.721 -17.816  1.00 37.74           H  
ATOM   2071  HA  ASN L  30       8.913   4.317 -18.074  1.00 30.03           H  
ATOM   2072  HB2 ASN L  30       6.796   6.016 -16.738  1.00 37.74           H  
ATOM   2073  HB3 ASN L  30       8.294   6.705 -17.341  1.00 37.74           H  
ATOM   2074 HD21 ASN L  30       5.537   7.191 -18.185  1.00 37.74           H  
ATOM   2075 HD22 ASN L  30       5.510   6.828 -19.858  1.00 37.74           H  
ATOM   2076  N   ASN L  31       8.786   5.187 -14.945  1.00 61.41           N  
ATOM   2077  CA  ASN L  31       9.586   5.234 -13.738  1.00 70.13           C  
ATOM   2078  C   ASN L  31       8.643   5.372 -12.548  1.00  4.14           C  
ATOM   2079  O   ASN L  31       9.054   5.650 -11.427  1.00 15.53           O  
ATOM   2080  CB  ASN L  31      10.542   6.439 -13.773  1.00 52.34           C  
ATOM   2081  CG  ASN L  31      11.691   6.292 -12.804  1.00 74.03           C  
ATOM   2082  OD1 ASN L  31      12.147   5.191 -12.544  1.00 21.22           O  
ATOM   2083  ND2 ASN L  31      12.153   7.382 -12.267  1.00  5.31           N  
ATOM   2084  H   ASN L  31       7.898   5.600 -14.954  1.00 37.74           H  
ATOM   2085  HA  ASN L  31      10.154   4.320 -13.655  1.00 20.34           H  
ATOM   2086  HB2 ASN L  31      10.944   6.573 -14.765  1.00 37.74           H  
ATOM   2087  HB3 ASN L  31       9.987   7.323 -13.486  1.00 37.74           H  
ATOM   2088 HD21 ASN L  31      11.738   8.232 -12.515  1.00 37.74           H  
ATOM   2089 HD22 ASN L  31      12.890   7.310 -11.627  1.00 37.74           H  
ATOM   2090  N   TYR L  32       7.356   5.134 -12.787  1.00 63.23           N  
ATOM   2091  CA  TYR L  32       6.370   5.357 -11.753  1.00 62.31           C  
ATOM   2092  C   TYR L  32       6.273   4.147 -10.822  1.00 32.32           C  
ATOM   2093  O   TYR L  32       5.403   3.290 -10.984  1.00 32.42           O  
ATOM   2094  CB  TYR L  32       4.996   5.669 -12.376  1.00 32.44           C  
ATOM   2095  CG  TYR L  32       5.010   6.819 -13.369  1.00 33.44           C  
ATOM   2096  CD1 TYR L  32       5.363   8.099 -12.976  1.00 54.22           C  
ATOM   2097  CD2 TYR L  32       4.687   6.613 -14.703  1.00  1.15           C  
ATOM   2098  CE1 TYR L  32       5.389   9.140 -13.877  1.00 71.31           C  
ATOM   2099  CE2 TYR L  32       4.717   7.650 -15.614  1.00 33.15           C  
ATOM   2100  CZ  TYR L  32       5.067   8.912 -15.194  1.00 15.55           C  
ATOM   2101  OH  TYR L  32       5.106   9.953 -16.095  1.00 73.05           O  
ATOM   2102  H   TYR L  32       7.071   4.782 -13.658  1.00 37.74           H  
ATOM   2103  HA  TYR L  32       6.687   6.212 -11.177  1.00 22.23           H  
ATOM   2104  HB2 TYR L  32       4.637   4.790 -12.892  1.00 37.74           H  
ATOM   2105  HB3 TYR L  32       4.304   5.919 -11.586  1.00 37.74           H  
ATOM   2106  HD1 TYR L  32       5.616   8.279 -11.943  1.00 31.43           H  
ATOM   2107  HD2 TYR L  32       4.410   5.621 -15.029  1.00 52.14           H  
ATOM   2108  HE1 TYR L  32       5.663  10.131 -13.546  1.00 14.11           H  
ATOM   2109  HE2 TYR L  32       4.465   7.469 -16.648  1.00 63.12           H  
ATOM   2110  HH  TYR L  32       4.299   9.949 -16.623  1.00 61.42           H  
ATOM   2111  N   LEU L  33       7.194   4.082  -9.882  1.00 52.21           N  
ATOM   2112  CA  LEU L  33       7.274   3.001  -8.927  1.00 40.40           C  
ATOM   2113  C   LEU L  33       7.407   3.587  -7.508  1.00  4.13           C  
ATOM   2114  O   LEU L  33       8.065   4.607  -7.326  1.00 53.30           O  
ATOM   2115  CB  LEU L  33       8.514   2.148  -9.322  1.00  2.21           C  
ATOM   2116  CG  LEU L  33       8.791   0.811  -8.605  1.00 74.10           C  
ATOM   2117  CD1 LEU L  33       9.175   0.985  -7.174  1.00 64.41           C  
ATOM   2118  CD2 LEU L  33       7.615  -0.086  -8.703  1.00  2.14           C  
ATOM   2119  H   LEU L  33       7.893   4.772  -9.841  1.00 37.74           H  
ATOM   2120  HA  LEU L  33       6.388   2.388  -9.002  1.00 25.14           H  
ATOM   2121  HB2 LEU L  33       8.440   1.930 -10.376  1.00 37.74           H  
ATOM   2122  HB3 LEU L  33       9.382   2.780  -9.189  1.00 37.74           H  
ATOM   2123  HG  LEU L  33       9.613   0.313  -9.093  1.00 33.12           H  
ATOM   2124 HD11 LEU L  33       8.380   1.488  -6.641  1.00 37.74           H  
ATOM   2125 HD12 LEU L  33      10.079   1.572  -7.119  1.00 37.74           H  
ATOM   2126 HD13 LEU L  33       9.351   0.017  -6.727  1.00 37.74           H  
ATOM   2127 HD21 LEU L  33       7.908  -1.024  -8.259  1.00 37.74           H  
ATOM   2128 HD22 LEU L  33       7.359  -0.246  -9.739  1.00 37.74           H  
ATOM   2129 HD23 LEU L  33       6.790   0.342  -8.153  1.00 37.74           H  
ATOM   2130  N   ILE L  34       6.777   2.973  -6.525  1.00 55.02           N  
ATOM   2131  CA  ILE L  34       6.940   3.408  -5.133  1.00 63.43           C  
ATOM   2132  C   ILE L  34       7.324   2.197  -4.271  1.00 63.44           C  
ATOM   2133  O   ILE L  34       6.822   1.090  -4.493  1.00 25.35           O  
ATOM   2134  CB  ILE L  34       5.651   4.075  -4.494  1.00 13.52           C  
ATOM   2135  CG1 ILE L  34       5.035   5.165  -5.350  1.00 44.14           C  
ATOM   2136  CG2 ILE L  34       5.954   4.668  -3.146  1.00 43.43           C  
ATOM   2137  CD1 ILE L  34       4.232   4.647  -6.478  1.00 74.14           C  
ATOM   2138  H   ILE L  34       6.185   2.215  -6.735  1.00 37.74           H  
ATOM   2139  HA  ILE L  34       7.760   4.111  -5.111  1.00 15.22           H  
ATOM   2140  HB  ILE L  34       4.923   3.293  -4.343  1.00 11.52           H  
ATOM   2141 HG12 ILE L  34       4.388   5.781  -4.742  1.00 37.74           H  
ATOM   2142 HG13 ILE L  34       5.824   5.779  -5.756  1.00 37.74           H  
ATOM   2143 HG21 ILE L  34       6.277   3.895  -2.466  1.00 37.74           H  
ATOM   2144 HG22 ILE L  34       5.036   5.122  -2.797  1.00 37.74           H  
ATOM   2145 HG23 ILE L  34       6.712   5.429  -3.244  1.00 37.74           H  
ATOM   2146 HD11 ILE L  34       4.862   4.078  -7.145  1.00 37.74           H  
ATOM   2147 HD12 ILE L  34       3.824   5.494  -7.007  1.00 37.74           H  
ATOM   2148 HD13 ILE L  34       3.431   4.026  -6.101  1.00 37.74           H  
ATOM   2149  N   TRP L  35       8.213   2.410  -3.324  1.00 53.42           N  
ATOM   2150  CA  TRP L  35       8.649   1.386  -2.391  1.00 24.55           C  
ATOM   2151  C   TRP L  35       8.074   1.666  -1.030  1.00 72.31           C  
ATOM   2152  O   TRP L  35       8.153   2.807  -0.536  1.00 74.52           O  
ATOM   2153  CB  TRP L  35      10.182   1.342  -2.286  1.00 53.24           C  
ATOM   2154  CG  TRP L  35      10.849   0.953  -3.554  1.00 21.43           C  
ATOM   2155  CD1 TRP L  35      11.295   1.787  -4.537  1.00  1.43           C  
ATOM   2156  CD2 TRP L  35      11.149  -0.380  -3.976  1.00 54.33           C  
ATOM   2157  NE1 TRP L  35      11.831   1.041  -5.565  1.00 60.42           N  
ATOM   2158  CE2 TRP L  35      11.753  -0.293  -5.238  1.00 20.12           C  
ATOM   2159  CE3 TRP L  35      10.953  -1.643  -3.406  1.00 44.31           C  
ATOM   2160  CZ2 TRP L  35      12.163  -1.421  -5.945  1.00 41.54           C  
ATOM   2161  CZ3 TRP L  35      11.366  -2.757  -4.103  1.00 55.20           C  
ATOM   2162  CH2 TRP L  35      11.962  -2.637  -5.360  1.00 71.00           C  
ATOM   2163  H   TRP L  35       8.592   3.314  -3.223  1.00 37.74           H  
ATOM   2164  HA  TRP L  35       8.293   0.430  -2.745  1.00 64.43           H  
ATOM   2165  HB2 TRP L  35      10.543   2.318  -2.001  1.00 37.74           H  
ATOM   2166  HB3 TRP L  35      10.459   0.629  -1.523  1.00 37.74           H  
ATOM   2167  HD1 TRP L  35      11.212   2.865  -4.493  1.00 72.13           H  
ATOM   2168  HE1 TRP L  35      12.203   1.407  -6.396  1.00 41.11           H  
ATOM   2169  HE3 TRP L  35      10.495  -1.753  -2.434  1.00 11.32           H  
ATOM   2170  HZ2 TRP L  35      12.611  -1.371  -6.925  1.00 75.14           H  
ATOM   2171  HZ3 TRP L  35      11.226  -3.741  -3.679  1.00 12.11           H  
ATOM   2172  HH2 TRP L  35      12.274  -3.535  -5.873  1.00 70.52           H  
ATOM   2173  N   TYR L  36       7.503   0.665  -0.418  1.00 74.13           N  
ATOM   2174  CA  TYR L  36       6.949   0.822   0.911  1.00  4.41           C  
ATOM   2175  C   TYR L  36       7.554  -0.185   1.844  1.00 30.52           C  
ATOM   2176  O   TYR L  36       8.008  -1.258   1.417  1.00 33.22           O  
ATOM   2177  CB  TYR L  36       5.433   0.605   0.905  1.00 33.11           C  
ATOM   2178  CG  TYR L  36       4.703   1.472  -0.048  1.00 23.23           C  
ATOM   2179  CD1 TYR L  36       4.522   1.063  -1.352  1.00 23.33           C  
ATOM   2180  CD2 TYR L  36       4.194   2.695   0.342  1.00 34.42           C  
ATOM   2181  CE1 TYR L  36       3.862   1.831  -2.250  1.00 13.21           C  
ATOM   2182  CE2 TYR L  36       3.517   3.491  -0.560  1.00 60.01           C  
ATOM   2183  CZ  TYR L  36       3.352   3.053  -1.858  1.00 14.22           C  
ATOM   2184  OH  TYR L  36       2.677   3.837  -2.770  1.00 22.31           O  
ATOM   2185  H   TYR L  36       7.423  -0.200  -0.893  1.00 37.74           H  
ATOM   2186  HA  TYR L  36       7.148   1.827   1.257  1.00 25.31           H  
ATOM   2187  HB2 TYR L  36       5.197  -0.417   0.647  1.00 37.74           H  
ATOM   2188  HB3 TYR L  36       5.051   0.809   1.894  1.00 37.74           H  
ATOM   2189  HD1 TYR L  36       4.921   0.106  -1.658  1.00 30.11           H  
ATOM   2190  HD2 TYR L  36       4.339   3.016   1.368  1.00  4.53           H  
ATOM   2191  HE1 TYR L  36       3.762   1.456  -3.258  1.00 25.05           H  
ATOM   2192  HE2 TYR L  36       3.121   4.447  -0.253  1.00 70.34           H  
ATOM   2193  HH  TYR L  36       2.104   3.281  -3.302  1.00 52.54           H  
ATOM   2194  N   GLN L  37       7.550   0.144   3.105  1.00 33.12           N  
ATOM   2195  CA  GLN L  37       8.024  -0.743   4.119  1.00  4.21           C  
ATOM   2196  C   GLN L  37       6.891  -0.929   5.115  1.00 34.44           C  
ATOM   2197  O   GLN L  37       6.288   0.051   5.592  1.00  4.24           O  
ATOM   2198  CB  GLN L  37       9.312  -0.189   4.818  1.00 30.31           C  
ATOM   2199  CG  GLN L  37       9.105   1.042   5.699  1.00 20.50           C  
ATOM   2200  CD  GLN L  37      10.394   1.637   6.292  1.00 22.50           C  
ATOM   2201  OE1 GLN L  37      10.461   2.837   6.546  1.00 14.52           O  
ATOM   2202  NE2 GLN L  37      11.416   0.826   6.501  1.00 73.03           N  
ATOM   2203  H   GLN L  37       7.207   1.033   3.355  1.00 37.74           H  
ATOM   2204  HA  GLN L  37       8.239  -1.694   3.652  1.00 54.13           H  
ATOM   2205  HB2 GLN L  37       9.728  -0.969   5.439  1.00 37.74           H  
ATOM   2206  HB3 GLN L  37      10.033   0.058   4.054  1.00 37.74           H  
ATOM   2207  HG2 GLN L  37       8.597   1.808   5.135  1.00 37.74           H  
ATOM   2208  HG3 GLN L  37       8.477   0.716   6.516  1.00 37.74           H  
ATOM   2209 HE21 GLN L  37      11.369  -0.129   6.279  1.00 37.74           H  
ATOM   2210 HE22 GLN L  37      12.243   1.199   6.888  1.00 37.74           H  
ATOM   2211  N   GLN L  38       6.539  -2.147   5.374  1.00 73.43           N  
ATOM   2212  CA  GLN L  38       5.488  -2.406   6.308  1.00 30.20           C  
ATOM   2213  C   GLN L  38       6.035  -2.995   7.574  1.00 44.44           C  
ATOM   2214  O   GLN L  38       6.451  -4.163   7.610  1.00 72.03           O  
ATOM   2215  CB  GLN L  38       4.393  -3.274   5.701  1.00 65.25           C  
ATOM   2216  CG  GLN L  38       3.237  -3.550   6.646  1.00 63.11           C  
ATOM   2217  CD  GLN L  38       2.093  -4.234   5.955  1.00 71.35           C  
ATOM   2218  OE1 GLN L  38       2.013  -5.460   5.894  1.00 43.03           O  
ATOM   2219  NE2 GLN L  38       1.205  -3.440   5.425  1.00 72.30           N  
ATOM   2220  H   GLN L  38       6.990  -2.896   4.919  1.00 37.74           H  
ATOM   2221  HA  GLN L  38       5.063  -1.444   6.556  1.00 55.03           H  
ATOM   2222  HB2 GLN L  38       4.003  -2.781   4.823  1.00 37.74           H  
ATOM   2223  HB3 GLN L  38       4.823  -4.220   5.408  1.00 37.74           H  
ATOM   2224  HG2 GLN L  38       3.586  -4.182   7.450  1.00 37.74           H  
ATOM   2225  HG3 GLN L  38       2.889  -2.613   7.053  1.00 37.74           H  
ATOM   2226 HE21 GLN L  38       1.346  -2.477   5.521  1.00 37.74           H  
ATOM   2227 HE22 GLN L  38       0.429  -3.816   4.946  1.00 37.74           H  
ATOM   2228  N   LYS L  39       6.080  -2.168   8.587  1.00  4.24           N  
ATOM   2229  CA  LYS L  39       6.548  -2.554   9.888  1.00 14.54           C  
ATOM   2230  C   LYS L  39       5.360  -3.040  10.700  1.00 34.43           C  
ATOM   2231  O   LYS L  39       4.295  -2.403  10.667  1.00 43.25           O  
ATOM   2232  CB  LYS L  39       7.221  -1.368  10.593  1.00 64.23           C  
ATOM   2233  CG  LYS L  39       8.411  -0.784   9.844  1.00 10.23           C  
ATOM   2234  CD  LYS L  39       9.055   0.349  10.626  1.00 50.32           C  
ATOM   2235  CE  LYS L  39      10.235   0.947   9.869  1.00 73.31           C  
ATOM   2236  NZ  LYS L  39      10.929   1.988  10.658  1.00 40.24           N  
ATOM   2237  H   LYS L  39       5.762  -1.251   8.462  1.00 37.74           H  
ATOM   2238  HA  LYS L  39       7.265  -3.352   9.761  1.00 34.44           H  
ATOM   2239  HB2 LYS L  39       6.491  -0.585  10.721  1.00 37.74           H  
ATOM   2240  HB3 LYS L  39       7.560  -1.694  11.567  1.00 37.74           H  
ATOM   2241  HG2 LYS L  39       9.147  -1.563   9.700  1.00 37.74           H  
ATOM   2242  HG3 LYS L  39       8.081  -0.412   8.886  1.00 37.74           H  
ATOM   2243  HD2 LYS L  39       8.319   1.119  10.797  1.00 37.74           H  
ATOM   2244  HD3 LYS L  39       9.403  -0.032  11.576  1.00 37.74           H  
ATOM   2245  HE2 LYS L  39      10.932   0.156   9.639  1.00 37.74           H  
ATOM   2246  HE3 LYS L  39       9.876   1.381   8.947  1.00 37.74           H  
ATOM   2247  HZ1 LYS L  39      11.750   2.376  10.151  1.00 37.74           H  
ATOM   2248  HZ2 LYS L  39      11.266   1.604  11.563  1.00 37.74           H  
ATOM   2249  HZ3 LYS L  39      10.294   2.780  10.879  1.00 37.74           H  
ATOM   2250  N   PRO L  40       5.508  -4.180  11.403  1.00 52.23           N  
ATOM   2251  CA  PRO L  40       4.427  -4.783  12.199  1.00 71.43           C  
ATOM   2252  C   PRO L  40       3.722  -3.781  13.120  1.00 24.31           C  
ATOM   2253  O   PRO L  40       4.332  -3.203  14.027  1.00  5.40           O  
ATOM   2254  CB  PRO L  40       5.152  -5.842  13.027  1.00 33.44           C  
ATOM   2255  CG  PRO L  40       6.315  -6.230  12.190  1.00 41.32           C  
ATOM   2256  CD  PRO L  40       6.752  -4.979  11.484  1.00 14.11           C  
ATOM   2257  HA  PRO L  40       3.693  -5.261  11.566  1.00  4.10           H  
ATOM   2258  HB2 PRO L  40       5.461  -5.412  13.968  1.00 37.74           H  
ATOM   2259  HB3 PRO L  40       4.498  -6.683  13.203  1.00 37.74           H  
ATOM   2260  HG2 PRO L  40       7.109  -6.602  12.820  1.00 37.74           H  
ATOM   2261  HG3 PRO L  40       6.019  -6.981  11.472  1.00 37.74           H  
ATOM   2262  HD2 PRO L  40       7.507  -4.462  12.059  1.00 37.74           H  
ATOM   2263  HD3 PRO L  40       7.119  -5.222  10.499  1.00 37.74           H  
ATOM   2264  N   GLY L  41       2.456  -3.543  12.844  1.00 14.20           N  
ATOM   2265  CA  GLY L  41       1.669  -2.679  13.672  1.00 35.32           C  
ATOM   2266  C   GLY L  41       1.134  -1.484  12.925  1.00 11.13           C  
ATOM   2267  O   GLY L  41       0.048  -0.976  13.239  1.00 63.43           O  
ATOM   2268  H   GLY L  41       2.054  -3.951  12.045  1.00 37.74           H  
ATOM   2269  HA2 GLY L  41       0.838  -3.242  14.067  1.00 37.74           H  
ATOM   2270  HA3 GLY L  41       2.279  -2.333  14.494  1.00 37.74           H  
ATOM   2271  N   GLN L  42       1.856  -1.039  11.920  1.00 23.10           N  
ATOM   2272  CA  GLN L  42       1.459   0.152  11.197  1.00 25.13           C  
ATOM   2273  C   GLN L  42       1.145  -0.149   9.738  1.00  2.14           C  
ATOM   2274  O   GLN L  42       1.474  -1.230   9.220  1.00 22.43           O  
ATOM   2275  CB  GLN L  42       2.538   1.239  11.295  1.00 11.42           C  
ATOM   2276  CG  GLN L  42       3.867   0.866  10.658  1.00 60.11           C  
ATOM   2277  CD  GLN L  42       4.906   1.958  10.786  1.00 35.52           C  
ATOM   2278  OE1 GLN L  42       4.913   2.727  11.753  1.00  3.45           O  
ATOM   2279  NE2 GLN L  42       5.770   2.060   9.810  1.00 22.30           N  
ATOM   2280  H   GLN L  42       2.662  -1.528  11.641  1.00 37.74           H  
ATOM   2281  HA  GLN L  42       0.561   0.524  11.666  1.00 25.43           H  
ATOM   2282  HB2 GLN L  42       2.174   2.131  10.804  1.00 37.74           H  
ATOM   2283  HB3 GLN L  42       2.712   1.461  12.337  1.00 37.74           H  
ATOM   2284  HG2 GLN L  42       4.239  -0.026  11.140  1.00 37.74           H  
ATOM   2285  HG3 GLN L  42       3.701   0.662   9.610  1.00 37.74           H  
ATOM   2286 HE21 GLN L  42       5.689   1.436   9.062  1.00 37.74           H  
ATOM   2287 HE22 GLN L  42       6.469   2.750   9.860  1.00 37.74           H  
ATOM   2288  N   ALA L  43       0.496   0.801   9.095  1.00 33.30           N  
ATOM   2289  CA  ALA L  43       0.161   0.731   7.689  1.00 71.40           C  
ATOM   2290  C   ALA L  43       1.447   0.867   6.850  1.00 73.21           C  
ATOM   2291  O   ALA L  43       2.475   1.330   7.367  1.00  1.12           O  
ATOM   2292  CB  ALA L  43      -0.829   1.856   7.356  1.00 35.44           C  
ATOM   2293  H   ALA L  43       0.225   1.604   9.591  1.00 37.74           H  
ATOM   2294  HA  ALA L  43      -0.308  -0.221   7.488  1.00 54.44           H  
ATOM   2295  HB1 ALA L  43      -1.725   1.730   7.946  1.00 37.74           H  
ATOM   2296  HB2 ALA L  43      -1.082   1.845   6.307  1.00 37.74           H  
ATOM   2297  HB3 ALA L  43      -0.380   2.807   7.600  1.00 37.74           H  
ATOM   2298  N   PRO L  44       1.426   0.449   5.558  1.00 42.54           N  
ATOM   2299  CA  PRO L  44       2.593   0.561   4.683  1.00 72.05           C  
ATOM   2300  C   PRO L  44       3.090   2.000   4.585  1.00 63.31           C  
ATOM   2301  O   PRO L  44       2.326   2.924   4.255  1.00 43.33           O  
ATOM   2302  CB  PRO L  44       2.083   0.078   3.317  1.00 53.11           C  
ATOM   2303  CG  PRO L  44       0.599   0.107   3.418  1.00 25.30           C  
ATOM   2304  CD  PRO L  44       0.279  -0.152   4.855  1.00 24.35           C  
ATOM   2305  HA  PRO L  44       3.398  -0.074   5.023  1.00 31.00           H  
ATOM   2306  HB2 PRO L  44       2.440   0.736   2.540  1.00 37.74           H  
ATOM   2307  HB3 PRO L  44       2.441  -0.925   3.132  1.00 37.74           H  
ATOM   2308  HG2 PRO L  44       0.233   1.079   3.124  1.00 37.74           H  
ATOM   2309  HG3 PRO L  44       0.169  -0.663   2.793  1.00 37.74           H  
ATOM   2310  HD2 PRO L  44      -0.650   0.328   5.122  1.00 37.74           H  
ATOM   2311  HD3 PRO L  44       0.217  -1.213   5.048  1.00 37.74           H  
ATOM   2312  N   LYS L  45       4.343   2.188   4.889  1.00 31.33           N  
ATOM   2313  CA  LYS L  45       4.931   3.491   4.857  1.00 31.31           C  
ATOM   2314  C   LYS L  45       5.723   3.663   3.594  1.00 35.15           C  
ATOM   2315  O   LYS L  45       6.526   2.792   3.241  1.00 15.00           O  
ATOM   2316  CB  LYS L  45       5.838   3.721   6.065  1.00 21.34           C  
ATOM   2317  CG  LYS L  45       6.524   5.062   6.032  1.00 13.21           C  
ATOM   2318  CD  LYS L  45       7.390   5.267   7.246  1.00 14.31           C  
ATOM   2319  CE  LYS L  45       8.157   6.570   7.149  1.00 75.22           C  
ATOM   2320  NZ  LYS L  45       9.005   6.806   8.331  1.00 11.31           N  
ATOM   2321  H   LYS L  45       4.909   1.424   5.126  1.00 37.74           H  
ATOM   2322  HA  LYS L  45       4.135   4.220   4.880  1.00 63.41           H  
ATOM   2323  HB2 LYS L  45       5.295   3.655   6.995  1.00 37.74           H  
ATOM   2324  HB3 LYS L  45       6.611   2.965   6.057  1.00 37.74           H  
ATOM   2325  HG2 LYS L  45       7.122   5.100   5.133  1.00 37.74           H  
ATOM   2326  HG3 LYS L  45       5.766   5.829   5.983  1.00 37.74           H  
ATOM   2327  HD2 LYS L  45       6.749   5.296   8.115  1.00 37.74           H  
ATOM   2328  HD3 LYS L  45       8.071   4.435   7.320  1.00 37.74           H  
ATOM   2329  HE2 LYS L  45       8.785   6.539   6.272  1.00 37.74           H  
ATOM   2330  HE3 LYS L  45       7.448   7.380   7.054  1.00 37.74           H  
ATOM   2331  HZ1 LYS L  45       8.448   6.842   9.208  1.00 37.74           H  
ATOM   2332  HZ2 LYS L  45       9.498   7.714   8.229  1.00 37.74           H  
ATOM   2333  HZ3 LYS L  45       9.751   6.087   8.419  1.00 37.74           H  
ATOM   2334  N   LEU L  46       5.487   4.758   2.914  1.00 25.41           N  
ATOM   2335  CA  LEU L  46       6.204   5.086   1.713  1.00 21.54           C  
ATOM   2336  C   LEU L  46       7.641   5.403   2.095  1.00  5.03           C  
ATOM   2337  O   LEU L  46       7.890   6.225   2.980  1.00 63.02           O  
ATOM   2338  CB  LEU L  46       5.499   6.281   1.010  1.00 52.40           C  
ATOM   2339  CG  LEU L  46       5.982   6.706  -0.403  1.00 32.23           C  
ATOM   2340  CD1 LEU L  46       5.028   7.730  -0.987  1.00 13.21           C  
ATOM   2341  CD2 LEU L  46       7.377   7.301  -0.379  1.00 22.02           C  
ATOM   2342  H   LEU L  46       4.806   5.385   3.236  1.00 37.74           H  
ATOM   2343  HA  LEU L  46       6.192   4.225   1.061  1.00 21.05           H  
ATOM   2344  HB2 LEU L  46       4.456   6.017   0.925  1.00 37.74           H  
ATOM   2345  HB3 LEU L  46       5.577   7.135   1.666  1.00 37.74           H  
ATOM   2346  HG  LEU L  46       5.982   5.840  -1.047  1.00 63.32           H  
ATOM   2347 HD11 LEU L  46       5.000   8.600  -0.349  1.00 37.74           H  
ATOM   2348 HD12 LEU L  46       4.038   7.303  -1.060  1.00 37.74           H  
ATOM   2349 HD13 LEU L  46       5.366   8.018  -1.972  1.00 37.74           H  
ATOM   2350 HD21 LEU L  46       8.047   6.605   0.104  1.00 37.74           H  
ATOM   2351 HD22 LEU L  46       7.371   8.229   0.174  1.00 37.74           H  
ATOM   2352 HD23 LEU L  46       7.718   7.458  -1.389  1.00 37.74           H  
ATOM   2353  N   LEU L  47       8.567   4.734   1.463  1.00 12.01           N  
ATOM   2354  CA  LEU L  47       9.955   4.942   1.754  1.00 51.32           C  
ATOM   2355  C   LEU L  47      10.622   5.649   0.568  1.00 51.14           C  
ATOM   2356  O   LEU L  47      11.291   6.662   0.720  1.00 33.33           O  
ATOM   2357  CB  LEU L  47      10.626   3.592   2.044  1.00 31.42           C  
ATOM   2358  CG  LEU L  47      12.058   3.635   2.580  1.00  2.23           C  
ATOM   2359  CD1 LEU L  47      12.097   4.322   3.934  1.00 52.03           C  
ATOM   2360  CD2 LEU L  47      12.617   2.240   2.695  1.00 35.41           C  
ATOM   2361  H   LEU L  47       8.304   4.078   0.780  1.00 37.74           H  
ATOM   2362  HA  LEU L  47      10.024   5.568   2.631  1.00 41.42           H  
ATOM   2363  HB2 LEU L  47      10.018   3.063   2.762  1.00 37.74           H  
ATOM   2364  HB3 LEU L  47      10.631   3.023   1.124  1.00 37.74           H  
ATOM   2365  HG  LEU L  47      12.680   4.199   1.901  1.00 43.20           H  
ATOM   2366 HD11 LEU L  47      11.735   5.333   3.842  1.00 37.74           H  
ATOM   2367 HD12 LEU L  47      13.112   4.329   4.303  1.00 37.74           H  
ATOM   2368 HD13 LEU L  47      11.471   3.778   4.627  1.00 37.74           H  
ATOM   2369 HD21 LEU L  47      12.608   1.764   1.727  1.00 37.74           H  
ATOM   2370 HD22 LEU L  47      12.008   1.673   3.383  1.00 37.74           H  
ATOM   2371 HD23 LEU L  47      13.630   2.294   3.067  1.00 37.74           H  
ATOM   2372  N   ILE L  48      10.412   5.129  -0.616  1.00 41.51           N  
ATOM   2373  CA  ILE L  48      10.994   5.714  -1.811  1.00 20.54           C  
ATOM   2374  C   ILE L  48       9.911   5.804  -2.867  1.00 74.31           C  
ATOM   2375  O   ILE L  48       9.117   4.895  -3.001  1.00 31.00           O  
ATOM   2376  CB  ILE L  48      12.185   4.848  -2.347  1.00 21.12           C  
ATOM   2377  CG1 ILE L  48      13.226   4.636  -1.243  1.00  1.03           C  
ATOM   2378  CG2 ILE L  48      12.841   5.495  -3.575  1.00 72.34           C  
ATOM   2379  CD1 ILE L  48      14.435   3.864  -1.684  1.00 64.35           C  
ATOM   2380  H   ILE L  48       9.837   4.340  -0.715  1.00 37.74           H  
ATOM   2381  HA  ILE L  48      11.347   6.706  -1.572  1.00 61.13           H  
ATOM   2382  HB  ILE L  48      11.795   3.887  -2.645  1.00 24.03           H  
ATOM   2383 HG12 ILE L  48      13.559   5.592  -0.870  1.00 37.74           H  
ATOM   2384 HG13 ILE L  48      12.766   4.092  -0.432  1.00 37.74           H  
ATOM   2385 HG21 ILE L  48      13.209   6.474  -3.306  1.00 37.74           H  
ATOM   2386 HG22 ILE L  48      12.124   5.584  -4.375  1.00 37.74           H  
ATOM   2387 HG23 ILE L  48      13.673   4.882  -3.898  1.00 37.74           H  
ATOM   2388 HD11 ILE L  48      14.903   4.420  -2.483  1.00 37.74           H  
ATOM   2389 HD12 ILE L  48      14.133   2.893  -2.045  1.00 37.74           H  
ATOM   2390 HD13 ILE L  48      15.121   3.765  -0.856  1.00 37.74           H  
ATOM   2391  N   TYR L  49       9.877   6.879  -3.601  1.00 21.20           N  
ATOM   2392  CA  TYR L  49       8.858   7.064  -4.627  1.00  0.30           C  
ATOM   2393  C   TYR L  49       9.482   7.482  -5.935  1.00 73.04           C  
ATOM   2394  O   TYR L  49      10.621   7.926  -5.958  1.00 12.13           O  
ATOM   2395  CB  TYR L  49       7.747   8.060  -4.203  1.00 53.14           C  
ATOM   2396  CG  TYR L  49       8.200   9.486  -3.912  1.00 41.54           C  
ATOM   2397  CD1 TYR L  49       8.371  10.404  -4.938  1.00 54.14           C  
ATOM   2398  CD2 TYR L  49       8.431   9.912  -2.614  1.00 50.34           C  
ATOM   2399  CE1 TYR L  49       8.761  11.699  -4.680  1.00 20.20           C  
ATOM   2400  CE2 TYR L  49       8.820  11.199  -2.345  1.00 65.13           C  
ATOM   2401  CZ  TYR L  49       8.987  12.095  -3.376  1.00 33.15           C  
ATOM   2402  OH  TYR L  49       9.375  13.392  -3.101  1.00 42.43           O  
ATOM   2403  H   TYR L  49      10.590   7.544  -3.469  1.00 37.74           H  
ATOM   2404  HA  TYR L  49       8.409   6.095  -4.785  1.00 21.34           H  
ATOM   2405  HB2 TYR L  49       7.022   8.121  -5.002  1.00 37.74           H  
ATOM   2406  HB3 TYR L  49       7.247   7.678  -3.325  1.00 37.74           H  
ATOM   2407  HD1 TYR L  49       8.195  10.089  -5.955  1.00 21.32           H  
ATOM   2408  HD2 TYR L  49       8.307   9.223  -1.794  1.00 35.34           H  
ATOM   2409  HE1 TYR L  49       8.889  12.384  -5.505  1.00 74.10           H  
ATOM   2410  HE2 TYR L  49       8.990  11.489  -1.322  1.00 12.21           H  
ATOM   2411  HH  TYR L  49      10.057  13.345  -2.419  1.00 35.55           H  
ATOM   2412  N   ASP L  50       8.722   7.311  -7.020  1.00 74.22           N  
ATOM   2413  CA  ASP L  50       9.155   7.644  -8.400  1.00 11.00           C  
ATOM   2414  C   ASP L  50      10.448   6.861  -8.686  1.00 42.11           C  
ATOM   2415  O   ASP L  50      11.353   7.313  -9.381  1.00 31.13           O  
ATOM   2416  CB  ASP L  50       9.348   9.168  -8.554  1.00 64.54           C  
ATOM   2417  CG  ASP L  50       9.357   9.635 -10.006  1.00 62.42           C  
ATOM   2418  OD1 ASP L  50       8.256   9.876 -10.556  1.00 52.20           O  
ATOM   2419  OD2 ASP L  50      10.446   9.822 -10.593  1.00 23.44           O  
ATOM   2420  H   ASP L  50       7.830   6.924  -6.901  1.00 37.74           H  
ATOM   2421  HA  ASP L  50       8.386   7.285  -9.072  1.00 52.31           H  
ATOM   2422  HB2 ASP L  50       8.555   9.692  -8.043  1.00 37.74           H  
ATOM   2423  HB3 ASP L  50      10.294   9.445  -8.113  1.00 37.74           H  
ATOM   2424  N   ALA L  51      10.486   5.663  -8.091  1.00 53.24           N  
ATOM   2425  CA  ALA L  51      11.557   4.680  -8.188  1.00 33.31           C  
ATOM   2426  C   ALA L  51      12.850   5.072  -7.479  1.00 23.43           C  
ATOM   2427  O   ALA L  51      13.396   4.274  -6.719  1.00 52.02           O  
ATOM   2428  CB  ALA L  51      11.815   4.260  -9.616  1.00 21.22           C  
ATOM   2429  H   ALA L  51       9.704   5.431  -7.543  1.00 37.74           H  
ATOM   2430  HA  ALA L  51      11.184   3.812  -7.667  1.00  2.23           H  
ATOM   2431  HB1 ALA L  51      10.878   3.982 -10.074  1.00 37.74           H  
ATOM   2432  HB2 ALA L  51      12.491   3.420  -9.628  1.00 37.74           H  
ATOM   2433  HB3 ALA L  51      12.250   5.085 -10.160  1.00 37.74           H  
ATOM   2434  N   SER L  52      13.342   6.270  -7.712  1.00 30.30           N  
ATOM   2435  CA  SER L  52      14.620   6.643  -7.158  1.00 10.33           C  
ATOM   2436  C   SER L  52      14.548   7.847  -6.196  1.00 14.34           C  
ATOM   2437  O   SER L  52      15.543   8.180  -5.528  1.00 74.42           O  
ATOM   2438  CB  SER L  52      15.605   6.917  -8.302  1.00 74.12           C  
ATOM   2439  OG  SER L  52      16.925   7.123  -7.824  1.00 60.13           O  
ATOM   2440  H   SER L  52      12.833   6.881  -8.289  1.00 37.74           H  
ATOM   2441  HA  SER L  52      14.995   5.792  -6.609  1.00  1.22           H  
ATOM   2442  HB2 SER L  52      15.608   6.077  -8.980  1.00 37.74           H  
ATOM   2443  HB3 SER L  52      15.283   7.804  -8.827  1.00 37.74           H  
ATOM   2444  HG  SER L  52      17.104   6.366  -7.247  1.00 60.04           H  
ATOM   2445  N   THR L  53      13.415   8.477  -6.093  1.00 71.34           N  
ATOM   2446  CA  THR L  53      13.316   9.663  -5.279  1.00 53.13           C  
ATOM   2447  C   THR L  53      12.996   9.314  -3.808  1.00 71.14           C  
ATOM   2448  O   THR L  53      12.002   8.646  -3.509  1.00 11.01           O  
ATOM   2449  CB  THR L  53      12.267  10.626  -5.860  1.00 61.41           C  
ATOM   2450  OG1 THR L  53      12.587  10.862  -7.244  1.00 71.11           O  
ATOM   2451  CG2 THR L  53      12.290  11.957  -5.119  1.00 25.52           C  
ATOM   2452  H   THR L  53      12.602   8.156  -6.541  1.00 37.74           H  
ATOM   2453  HA  THR L  53      14.281  10.147  -5.313  1.00 11.43           H  
ATOM   2454  HB  THR L  53      11.286  10.182  -5.780  1.00 74.33           H  
ATOM   2455  HG1 THR L  53      13.541  10.735  -7.330  1.00 35.53           H  
ATOM   2456 HG21 THR L  53      11.546  12.617  -5.541  1.00 37.74           H  
ATOM   2457 HG22 THR L  53      13.267  12.408  -5.215  1.00 37.74           H  
ATOM   2458 HG23 THR L  53      12.072  11.793  -4.075  1.00 37.74           H  
ATOM   2459  N   LEU L  54      13.838   9.774  -2.907  1.00  5.14           N  
ATOM   2460  CA  LEU L  54      13.686   9.498  -1.492  1.00 34.40           C  
ATOM   2461  C   LEU L  54      12.671  10.416  -0.861  1.00 62.34           C  
ATOM   2462  O   LEU L  54      12.654  11.629  -1.123  1.00 45.41           O  
ATOM   2463  CB  LEU L  54      15.022   9.641  -0.745  1.00 24.43           C  
ATOM   2464  CG  LEU L  54      16.136   8.674  -1.129  1.00 34.34           C  
ATOM   2465  CD1 LEU L  54      17.408   8.985  -0.360  1.00 62.15           C  
ATOM   2466  CD2 LEU L  54      15.713   7.245  -0.878  1.00 32.03           C  
ATOM   2467  H   LEU L  54      14.594  10.331  -3.197  1.00 37.74           H  
ATOM   2468  HA  LEU L  54      13.346   8.479  -1.384  1.00 35.13           H  
ATOM   2469  HB2 LEU L  54      15.386  10.644  -0.913  1.00 37.74           H  
ATOM   2470  HB3 LEU L  54      14.827   9.528   0.311  1.00 37.74           H  
ATOM   2471  HG  LEU L  54      16.329   8.787  -2.181  1.00 74.43           H  
ATOM   2472 HD11 LEU L  54      17.731   9.989  -0.589  1.00 37.74           H  
ATOM   2473 HD12 LEU L  54      18.182   8.286  -0.644  1.00 37.74           H  
ATOM   2474 HD13 LEU L  54      17.215   8.902   0.699  1.00 37.74           H  
ATOM   2475 HD21 LEU L  54      14.863   7.009  -1.500  1.00 37.74           H  
ATOM   2476 HD22 LEU L  54      15.453   7.120   0.162  1.00 37.74           H  
ATOM   2477 HD23 LEU L  54      16.533   6.585  -1.123  1.00 37.74           H  
ATOM   2478  N   GLU L  55      11.815   9.837  -0.059  1.00 24.24           N  
ATOM   2479  CA  GLU L  55      10.838  10.574   0.703  1.00 31.12           C  
ATOM   2480  C   GLU L  55      11.556  11.349   1.803  1.00 11.30           C  
ATOM   2481  O   GLU L  55      12.633  10.949   2.254  1.00 62.24           O  
ATOM   2482  CB  GLU L  55       9.781   9.608   1.278  1.00 74.01           C  
ATOM   2483  CG  GLU L  55       8.734  10.241   2.191  1.00 13.21           C  
ATOM   2484  CD  GLU L  55       7.962  11.353   1.532  1.00 64.32           C  
ATOM   2485  OE1 GLU L  55       6.922  11.092   0.937  1.00 13.03           O  
ATOM   2486  OE2 GLU L  55       8.391  12.533   1.637  1.00 74.13           O  
ATOM   2487  H   GLU L  55      11.836   8.860   0.050  1.00 37.74           H  
ATOM   2488  HA  GLU L  55      10.361  11.282   0.046  1.00  2.43           H  
ATOM   2489  HB2 GLU L  55       9.264   9.146   0.450  1.00 37.74           H  
ATOM   2490  HB3 GLU L  55      10.291   8.832   1.830  1.00 37.74           H  
ATOM   2491  HG2 GLU L  55       8.034   9.481   2.502  1.00 37.74           H  
ATOM   2492  HG3 GLU L  55       9.239  10.636   3.061  1.00 37.74           H  
ATOM   2493  N   THR L  56      11.011  12.469   2.178  1.00 21.01           N  
ATOM   2494  CA  THR L  56      11.593  13.275   3.193  1.00 60.31           C  
ATOM   2495  C   THR L  56      11.529  12.528   4.537  1.00  4.33           C  
ATOM   2496  O   THR L  56      10.438  12.166   5.012  1.00 10.25           O  
ATOM   2497  CB  THR L  56      10.856  14.609   3.299  1.00 72.00           C  
ATOM   2498  OG1 THR L  56      10.850  15.255   2.004  1.00 72.41           O  
ATOM   2499  CG2 THR L  56      11.550  15.503   4.302  1.00  3.04           C  
ATOM   2500  H   THR L  56      10.146  12.728   1.776  1.00 37.74           H  
ATOM   2501  HA  THR L  56      12.625  13.462   2.931  1.00 53.52           H  
ATOM   2502  HB  THR L  56       9.839  14.432   3.617  1.00 51.40           H  
ATOM   2503  HG1 THR L  56      11.013  14.578   1.332  1.00 22.11           H  
ATOM   2504 HG21 THR L  56      12.574  15.649   3.992  1.00 37.74           H  
ATOM   2505 HG22 THR L  56      11.538  15.029   5.272  1.00 37.74           H  
ATOM   2506 HG23 THR L  56      11.047  16.455   4.357  1.00 37.74           H  
ATOM   2507  N   GLY L  57      12.679  12.293   5.126  1.00 54.44           N  
ATOM   2508  CA  GLY L  57      12.735  11.547   6.352  1.00 60.13           C  
ATOM   2509  C   GLY L  57      13.212  10.137   6.103  1.00 54.21           C  
ATOM   2510  O   GLY L  57      13.013   9.241   6.932  1.00 42.12           O  
ATOM   2511  H   GLY L  57      13.513  12.629   4.726  1.00 37.74           H  
ATOM   2512  HA2 GLY L  57      13.405  12.040   7.038  1.00 37.74           H  
ATOM   2513  HA3 GLY L  57      11.746  11.507   6.784  1.00 37.74           H  
ATOM   2514  N   VAL L  58      13.804   9.930   4.945  1.00 41.42           N  
ATOM   2515  CA  VAL L  58      14.369   8.651   4.577  1.00 12.32           C  
ATOM   2516  C   VAL L  58      15.875   8.771   4.502  1.00 51.45           C  
ATOM   2517  O   VAL L  58      16.396   9.547   3.699  1.00 33.32           O  
ATOM   2518  CB  VAL L  58      13.824   8.142   3.206  1.00  3.52           C  
ATOM   2519  CG1 VAL L  58      14.466   6.813   2.820  1.00 31.31           C  
ATOM   2520  CG2 VAL L  58      12.318   7.996   3.276  1.00 32.44           C  
ATOM   2521  H   VAL L  58      13.877  10.661   4.295  1.00 37.74           H  
ATOM   2522  HA  VAL L  58      14.103   7.936   5.342  1.00 62.35           H  
ATOM   2523  HB  VAL L  58      14.066   8.847   2.420  1.00 75.22           H  
ATOM   2524 HG11 VAL L  58      15.535   6.939   2.737  1.00 37.74           H  
ATOM   2525 HG12 VAL L  58      14.068   6.477   1.874  1.00 37.74           H  
ATOM   2526 HG13 VAL L  58      14.251   6.079   3.583  1.00 37.74           H  
ATOM   2527 HG21 VAL L  58      11.950   7.607   2.336  1.00 37.74           H  
ATOM   2528 HG22 VAL L  58      11.872   8.961   3.465  1.00 37.74           H  
ATOM   2529 HG23 VAL L  58      12.059   7.324   4.081  1.00 37.74           H  
ATOM   2530  N   PRO L  59      16.593   8.046   5.367  1.00 41.32           N  
ATOM   2531  CA  PRO L  59      18.054   8.016   5.352  1.00 72.31           C  
ATOM   2532  C   PRO L  59      18.582   7.518   4.006  1.00 12.22           C  
ATOM   2533  O   PRO L  59      17.958   6.664   3.365  1.00 12.51           O  
ATOM   2534  CB  PRO L  59      18.397   7.000   6.449  1.00 14.33           C  
ATOM   2535  CG  PRO L  59      17.216   6.997   7.339  1.00 71.41           C  
ATOM   2536  CD  PRO L  59      16.037   7.214   6.448  1.00 22.32           C  
ATOM   2537  HA  PRO L  59      18.483   8.979   5.587  1.00 40.43           H  
ATOM   2538  HB2 PRO L  59      18.558   6.028   6.006  1.00 37.74           H  
ATOM   2539  HB3 PRO L  59      19.284   7.310   6.982  1.00 37.74           H  
ATOM   2540  HG2 PRO L  59      17.143   6.047   7.844  1.00 37.74           H  
ATOM   2541  HG3 PRO L  59      17.302   7.800   8.055  1.00 37.74           H  
ATOM   2542  HD2 PRO L  59      15.662   6.275   6.069  1.00 37.74           H  
ATOM   2543  HD3 PRO L  59      15.266   7.747   6.986  1.00 37.74           H  
ATOM   2544  N   SER L  60      19.749   8.004   3.609  1.00 61.40           N  
ATOM   2545  CA  SER L  60      20.352   7.653   2.333  1.00 61.43           C  
ATOM   2546  C   SER L  60      20.800   6.185   2.302  1.00 71.21           C  
ATOM   2547  O   SER L  60      21.236   5.669   1.267  1.00 35.32           O  
ATOM   2548  CB  SER L  60      21.499   8.610   2.017  1.00 42.41           C  
ATOM   2549  OG  SER L  60      22.430   8.662   3.090  1.00 30.21           O  
ATOM   2550  H   SER L  60      20.256   8.612   4.190  1.00 37.74           H  
ATOM   2551  HA  SER L  60      19.585   7.774   1.582  1.00 45.44           H  
ATOM   2552  HB2 SER L  60      22.012   8.275   1.128  1.00 37.74           H  
ATOM   2553  HB3 SER L  60      21.101   9.600   1.854  1.00 37.74           H  
ATOM   2554  HG  SER L  60      23.008   7.892   3.014  1.00 64.32           H  
ATOM   2555  N   ARG L  61      20.708   5.531   3.461  1.00 12.22           N  
ATOM   2556  CA  ARG L  61      20.973   4.108   3.581  1.00 32.53           C  
ATOM   2557  C   ARG L  61      20.050   3.320   2.667  1.00 53.24           C  
ATOM   2558  O   ARG L  61      20.412   2.261   2.184  1.00 13.34           O  
ATOM   2559  CB  ARG L  61      20.797   3.638   5.027  1.00 75.41           C  
ATOM   2560  CG  ARG L  61      21.782   4.256   5.988  1.00 42.15           C  
ATOM   2561  CD  ARG L  61      21.568   3.784   7.415  1.00 61.21           C  
ATOM   2562  NE  ARG L  61      20.268   4.197   7.979  1.00 31.23           N  
ATOM   2563  CZ  ARG L  61      20.122   4.875   9.140  1.00 22.33           C  
ATOM   2564  NH1 ARG L  61      21.184   5.362   9.765  1.00 41.54           N  
ATOM   2565  NH2 ARG L  61      18.913   5.078   9.653  1.00 30.24           N  
ATOM   2566  H   ARG L  61      20.460   6.074   4.238  1.00 37.74           H  
ATOM   2567  HA  ARG L  61      21.997   3.939   3.280  1.00 52.43           H  
ATOM   2568  HB2 ARG L  61      19.799   3.891   5.354  1.00 37.74           H  
ATOM   2569  HB3 ARG L  61      20.914   2.566   5.058  1.00 37.74           H  
ATOM   2570  HG2 ARG L  61      22.781   3.982   5.679  1.00 37.74           H  
ATOM   2571  HG3 ARG L  61      21.679   5.330   5.950  1.00 37.74           H  
ATOM   2572  HD2 ARG L  61      21.590   2.705   7.403  1.00 37.74           H  
ATOM   2573  HD3 ARG L  61      22.368   4.140   8.042  1.00 37.74           H  
ATOM   2574  HE  ARG L  61      19.475   3.897   7.484  1.00 52.00           H  
ATOM   2575 HH11 ARG L  61      22.124   5.264   9.421  1.00 37.74           H  
ATOM   2576 HH12 ARG L  61      21.111   5.865  10.630  1.00 37.74           H  
ATOM   2577 HH21 ARG L  61      18.055   4.761   9.237  1.00 37.74           H  
ATOM   2578 HH22 ARG L  61      18.800   5.565  10.524  1.00 37.74           H  
ATOM   2579  N   PHE L  62      18.862   3.833   2.461  1.00  1.32           N  
ATOM   2580  CA  PHE L  62      17.917   3.231   1.557  1.00  4.14           C  
ATOM   2581  C   PHE L  62      18.045   3.911   0.226  1.00 44.14           C  
ATOM   2582  O   PHE L  62      18.115   5.135   0.158  1.00 65.55           O  
ATOM   2583  CB  PHE L  62      16.501   3.419   2.089  1.00 63.24           C  
ATOM   2584  CG  PHE L  62      16.377   2.962   3.492  1.00 15.33           C  
ATOM   2585  CD1 PHE L  62      16.179   1.633   3.784  1.00 72.22           C  
ATOM   2586  CD2 PHE L  62      16.502   3.866   4.525  1.00 41.03           C  
ATOM   2587  CE1 PHE L  62      16.102   1.215   5.085  1.00 25.30           C  
ATOM   2588  CE2 PHE L  62      16.435   3.457   5.818  1.00 53.12           C  
ATOM   2589  CZ  PHE L  62      16.235   2.133   6.102  1.00  1.21           C  
ATOM   2590  H   PHE L  62      18.581   4.651   2.925  1.00 37.74           H  
ATOM   2591  HA  PHE L  62      18.130   2.178   1.463  1.00 52.23           H  
ATOM   2592  HB2 PHE L  62      16.236   4.464   2.046  1.00 37.74           H  
ATOM   2593  HB3 PHE L  62      15.813   2.847   1.485  1.00 37.74           H  
ATOM   2594  HD1 PHE L  62      16.075   0.926   2.975  1.00 20.14           H  
ATOM   2595  HD2 PHE L  62      16.658   4.911   4.298  1.00 65.13           H  
ATOM   2596  HE1 PHE L  62      15.946   0.169   5.305  1.00 63.12           H  
ATOM   2597  HE2 PHE L  62      16.535   4.178   6.615  1.00 23.43           H  
ATOM   2598  HZ  PHE L  62      16.191   1.826   7.132  1.00 54.14           H  
ATOM   2599  N   SER L  63      18.133   3.153  -0.817  1.00  3.44           N  
ATOM   2600  CA  SER L  63      18.224   3.713  -2.130  1.00 63.01           C  
ATOM   2601  C   SER L  63      17.505   2.845  -3.127  1.00 32.31           C  
ATOM   2602  O   SER L  63      17.497   1.609  -3.005  1.00  1.34           O  
ATOM   2603  CB  SER L  63      19.677   3.883  -2.538  1.00 74.44           C  
ATOM   2604  OG  SER L  63      20.364   4.701  -1.597  1.00 51.31           O  
ATOM   2605  H   SER L  63      18.149   2.174  -0.731  1.00 37.74           H  
ATOM   2606  HA  SER L  63      17.760   4.687  -2.107  1.00 60.43           H  
ATOM   2607  HB2 SER L  63      20.143   2.912  -2.603  1.00 37.74           H  
ATOM   2608  HB3 SER L  63      19.690   4.362  -3.506  1.00 37.74           H  
ATOM   2609  HG  SER L  63      19.709   4.924  -0.916  1.00  4.33           H  
ATOM   2610  N   GLY L  64      16.889   3.485  -4.077  1.00 73.43           N  
ATOM   2611  CA  GLY L  64      16.211   2.804  -5.120  1.00 52.31           C  
ATOM   2612  C   GLY L  64      16.605   3.381  -6.440  1.00 62.12           C  
ATOM   2613  O   GLY L  64      16.752   4.593  -6.563  1.00 22.22           O  
ATOM   2614  H   GLY L  64      16.891   4.470  -4.088  1.00 37.74           H  
ATOM   2615  HA2 GLY L  64      16.475   1.757  -5.090  1.00 37.74           H  
ATOM   2616  HA3 GLY L  64      15.145   2.917  -4.994  1.00 37.74           H  
ATOM   2617  N   SER L  65      16.858   2.549  -7.393  1.00 15.22           N  
ATOM   2618  CA  SER L  65      17.185   2.989  -8.727  1.00 12.33           C  
ATOM   2619  C   SER L  65      16.651   1.992  -9.746  1.00 74.10           C  
ATOM   2620  O   SER L  65      16.612   0.791  -9.479  1.00 51.45           O  
ATOM   2621  CB  SER L  65      18.701   3.162  -8.880  1.00 33.11           C  
ATOM   2622  OG  SER L  65      19.200   4.123  -7.952  1.00 71.45           O  
ATOM   2623  H   SER L  65      16.832   1.584  -7.198  1.00 37.74           H  
ATOM   2624  HA  SER L  65      16.704   3.942  -8.888  1.00 62.12           H  
ATOM   2625  HB2 SER L  65      19.191   2.216  -8.712  1.00 37.74           H  
ATOM   2626  HB3 SER L  65      18.913   3.501  -9.882  1.00 37.74           H  
ATOM   2627  HG  SER L  65      18.530   4.204  -7.261  1.00 13.14           H  
ATOM   2628  N   GLY L  66      16.212   2.482 -10.873  1.00 54.04           N  
ATOM   2629  CA  GLY L  66      15.720   1.623 -11.916  1.00 23.45           C  
ATOM   2630  C   GLY L  66      14.784   2.365 -12.815  1.00 72.13           C  
ATOM   2631  O   GLY L  66      14.642   3.578 -12.665  1.00 14.03           O  
ATOM   2632  H   GLY L  66      16.187   3.451 -11.036  1.00 37.74           H  
ATOM   2633  HA2 GLY L  66      16.557   1.258 -12.495  1.00 37.74           H  
ATOM   2634  HA3 GLY L  66      15.199   0.786 -11.481  1.00 37.74           H  
ATOM   2635  N   SER L  67      14.144   1.659 -13.736  1.00 43.51           N  
ATOM   2636  CA  SER L  67      13.211   2.277 -14.660  1.00 21.21           C  
ATOM   2637  C   SER L  67      12.399   1.232 -15.427  1.00 32.41           C  
ATOM   2638  O   SER L  67      12.938   0.191 -15.833  1.00 70.22           O  
ATOM   2639  CB  SER L  67      13.965   3.186 -15.643  1.00 22.52           C  
ATOM   2640  OG  SER L  67      14.995   2.463 -16.323  1.00 21.33           O  
ATOM   2641  H   SER L  67      14.295   0.688 -13.795  1.00 37.74           H  
ATOM   2642  HA  SER L  67      12.535   2.891 -14.084  1.00 30.23           H  
ATOM   2643  HB2 SER L  67      13.267   3.552 -16.381  1.00 37.74           H  
ATOM   2644  HB3 SER L  67      14.410   4.011 -15.107  1.00 37.74           H  
ATOM   2645  HG  SER L  67      15.414   1.888 -15.668  1.00 71.33           H  
ATOM   2646  N   GLY L  68      11.110   1.513 -15.594  1.00 22.03           N  
ATOM   2647  CA  GLY L  68      10.215   0.708 -16.405  1.00 11.41           C  
ATOM   2648  C   GLY L  68       9.912  -0.662 -15.871  1.00 32.31           C  
ATOM   2649  O   GLY L  68       8.831  -0.894 -15.351  1.00 24.43           O  
ATOM   2650  H   GLY L  68      10.742   2.311 -15.155  1.00 37.74           H  
ATOM   2651  HA2 GLY L  68       9.274   1.231 -16.497  1.00 37.74           H  
ATOM   2652  HA3 GLY L  68      10.630   0.607 -17.391  1.00 37.74           H  
ATOM   2653  N   THR L  69      10.844  -1.563 -16.022  1.00 40.13           N  
ATOM   2654  CA  THR L  69      10.652  -2.916 -15.603  1.00  5.54           C  
ATOM   2655  C   THR L  69      11.575  -3.321 -14.461  1.00 51.43           C  
ATOM   2656  O   THR L  69      11.136  -3.976 -13.529  1.00 30.42           O  
ATOM   2657  CB  THR L  69      10.748  -3.903 -16.789  1.00 24.11           C  
ATOM   2658  OG1 THR L  69      11.925  -3.626 -17.574  1.00 34.41           O  
ATOM   2659  CG2 THR L  69       9.511  -3.817 -17.671  1.00  1.22           C  
ATOM   2660  H   THR L  69      11.699  -1.295 -16.420  1.00 37.74           H  
ATOM   2661  HA  THR L  69       9.643  -2.967 -15.221  1.00  4.13           H  
ATOM   2662  HB  THR L  69      10.823  -4.903 -16.385  1.00 30.33           H  
ATOM   2663  HG1 THR L  69      11.707  -2.874 -18.137  1.00 50.54           H  
ATOM   2664 HG21 THR L  69       9.427  -2.819 -18.077  1.00 37.74           H  
ATOM   2665 HG22 THR L  69       8.633  -4.045 -17.087  1.00 37.74           H  
ATOM   2666 HG23 THR L  69       9.598  -4.528 -18.479  1.00 37.74           H  
ATOM   2667  N   GLU L  70      12.834  -2.917 -14.511  1.00  5.12           N  
ATOM   2668  CA  GLU L  70      13.770  -3.294 -13.465  1.00 42.14           C  
ATOM   2669  C   GLU L  70      13.962  -2.184 -12.455  1.00 34.42           C  
ATOM   2670  O   GLU L  70      14.383  -1.079 -12.802  1.00 45.24           O  
ATOM   2671  CB  GLU L  70      15.118  -3.713 -14.038  1.00 74.04           C  
ATOM   2672  CG  GLU L  70      15.069  -4.948 -14.915  1.00 34.40           C  
ATOM   2673  CD  GLU L  70      16.439  -5.366 -15.371  1.00  5.44           C  
ATOM   2674  OE1 GLU L  70      17.151  -6.035 -14.597  1.00 15.25           O  
ATOM   2675  OE2 GLU L  70      16.838  -5.031 -16.516  1.00 64.42           O  
ATOM   2676  H   GLU L  70      13.148  -2.353 -15.248  1.00 37.74           H  
ATOM   2677  HA  GLU L  70      13.342  -4.141 -12.950  1.00 13.42           H  
ATOM   2678  HB2 GLU L  70      15.515  -2.900 -14.628  1.00 37.74           H  
ATOM   2679  HB3 GLU L  70      15.791  -3.908 -13.216  1.00 37.74           H  
ATOM   2680  HG2 GLU L  70      14.628  -5.758 -14.355  1.00 37.74           H  
ATOM   2681  HG3 GLU L  70      14.461  -4.738 -15.783  1.00 37.74           H  
ATOM   2682  N   PHE L  71      13.635  -2.470 -11.217  1.00 50.12           N  
ATOM   2683  CA  PHE L  71      13.833  -1.538 -10.128  1.00 24.21           C  
ATOM   2684  C   PHE L  71      14.633  -2.213  -9.051  1.00  1.44           C  
ATOM   2685  O   PHE L  71      14.343  -3.341  -8.679  1.00 60.52           O  
ATOM   2686  CB  PHE L  71      12.493  -1.054  -9.565  1.00 53.24           C  
ATOM   2687  CG  PHE L  71      11.636  -0.417 -10.597  1.00 32.34           C  
ATOM   2688  CD1 PHE L  71      11.816   0.908 -10.944  1.00  1.33           C  
ATOM   2689  CD2 PHE L  71      10.664  -1.152 -11.245  1.00 42.34           C  
ATOM   2690  CE1 PHE L  71      11.052   1.485 -11.917  1.00 23.24           C  
ATOM   2691  CE2 PHE L  71       9.891  -0.577 -12.212  1.00 31.44           C  
ATOM   2692  CZ  PHE L  71      10.092   0.749 -12.551  1.00 13.14           C  
ATOM   2693  H   PHE L  71      13.223  -3.343 -11.016  1.00 37.74           H  
ATOM   2694  HA  PHE L  71      14.391  -0.693 -10.497  1.00 43.25           H  
ATOM   2695  HB2 PHE L  71      11.955  -1.894  -9.152  1.00 37.74           H  
ATOM   2696  HB3 PHE L  71      12.680  -0.327  -8.787  1.00 37.74           H  
ATOM   2697  HD1 PHE L  71      12.567   1.505 -10.451  1.00 21.53           H  
ATOM   2698  HD2 PHE L  71      10.514  -2.186 -10.969  1.00 30.45           H  
ATOM   2699  HE1 PHE L  71      11.201   2.522 -12.179  1.00 63.11           H  
ATOM   2700  HE2 PHE L  71       9.129  -1.154 -12.717  1.00  1.43           H  
ATOM   2701  HZ  PHE L  71       9.491   1.208 -13.322  1.00 53.23           H  
ATOM   2702  N   THR L  72      15.615  -1.543  -8.551  1.00 22.41           N  
ATOM   2703  CA  THR L  72      16.470  -2.107  -7.555  1.00  1.21           C  
ATOM   2704  C   THR L  72      16.380  -1.280  -6.291  1.00 52.24           C  
ATOM   2705  O   THR L  72      16.350  -0.054  -6.342  1.00 51.14           O  
ATOM   2706  CB  THR L  72      17.927  -2.131  -8.048  1.00 14.41           C  
ATOM   2707  OG1 THR L  72      17.968  -2.757  -9.342  1.00 12.44           O  
ATOM   2708  CG2 THR L  72      18.809  -2.931  -7.091  1.00 42.34           C  
ATOM   2709  H   THR L  72      15.797  -0.620  -8.837  1.00 37.74           H  
ATOM   2710  HA  THR L  72      16.156  -3.121  -7.354  1.00 34.14           H  
ATOM   2711  HB  THR L  72      18.282  -1.111  -8.092  1.00  4.03           H  
ATOM   2712  HG1 THR L  72      17.217  -2.407  -9.834  1.00 13.41           H  
ATOM   2713 HG21 THR L  72      19.826  -2.931  -7.455  1.00 37.74           H  
ATOM   2714 HG22 THR L  72      18.447  -3.946  -7.033  1.00 37.74           H  
ATOM   2715 HG23 THR L  72      18.776  -2.482  -6.109  1.00 37.74           H  
ATOM   2716  N   PHE L  73      16.307  -1.956  -5.193  1.00 34.14           N  
ATOM   2717  CA  PHE L  73      16.211  -1.363  -3.899  1.00  1.44           C  
ATOM   2718  C   PHE L  73      17.327  -1.925  -3.055  1.00 74.32           C  
ATOM   2719  O   PHE L  73      17.470  -3.134  -2.928  1.00 31.41           O  
ATOM   2720  CB  PHE L  73      14.844  -1.701  -3.312  1.00 55.40           C  
ATOM   2721  CG  PHE L  73      14.600  -1.225  -1.919  1.00 33.21           C  
ATOM   2722  CD1 PHE L  73      14.071   0.024  -1.685  1.00 63.51           C  
ATOM   2723  CD2 PHE L  73      14.883  -2.044  -0.844  1.00 14.10           C  
ATOM   2724  CE1 PHE L  73      13.831   0.453  -0.403  1.00 64.21           C  
ATOM   2725  CE2 PHE L  73      14.646  -1.631   0.436  1.00 42.43           C  
ATOM   2726  CZ  PHE L  73      14.118  -0.379   0.665  1.00 33.34           C  
ATOM   2727  H   PHE L  73      16.330  -2.940  -5.235  1.00 37.74           H  
ATOM   2728  HA  PHE L  73      16.329  -0.291  -3.967  1.00 55.12           H  
ATOM   2729  HB2 PHE L  73      14.083  -1.255  -3.937  1.00 37.74           H  
ATOM   2730  HB3 PHE L  73      14.713  -2.772  -3.333  1.00 37.74           H  
ATOM   2731  HD1 PHE L  73      13.849   0.669  -2.522  1.00 30.20           H  
ATOM   2732  HD2 PHE L  73      15.299  -3.023  -1.027  1.00 52.31           H  
ATOM   2733  HE1 PHE L  73      13.415   1.438  -0.248  1.00 74.21           H  
ATOM   2734  HE2 PHE L  73      14.880  -2.296   1.253  1.00 12.15           H  
ATOM   2735  HZ  PHE L  73      13.929  -0.061   1.679  1.00 22.43           H  
ATOM   2736  N   THR L  74      18.129  -1.081  -2.526  1.00 51.25           N  
ATOM   2737  CA  THR L  74      19.240  -1.510  -1.758  1.00  0.54           C  
ATOM   2738  C   THR L  74      19.307  -0.795  -0.418  1.00 22.13           C  
ATOM   2739  O   THR L  74      19.142   0.429  -0.347  1.00  1.41           O  
ATOM   2740  CB  THR L  74      20.540  -1.290  -2.563  1.00 24.11           C  
ATOM   2741  OG1 THR L  74      20.466  -2.068  -3.771  1.00  3.34           O  
ATOM   2742  CG2 THR L  74      21.780  -1.693  -1.768  1.00 13.33           C  
ATOM   2743  H   THR L  74      17.989  -0.112  -2.641  1.00 37.74           H  
ATOM   2744  HA  THR L  74      19.140  -2.571  -1.585  1.00 33.21           H  
ATOM   2745  HB  THR L  74      20.588  -0.243  -2.825  1.00 53.12           H  
ATOM   2746  HG1 THR L  74      19.700  -2.641  -3.651  1.00 74.13           H  
ATOM   2747 HG21 THR L  74      21.829  -1.112  -0.859  1.00 37.74           H  
ATOM   2748 HG22 THR L  74      22.665  -1.510  -2.360  1.00 37.74           H  
ATOM   2749 HG23 THR L  74      21.724  -2.743  -1.521  1.00 37.74           H  
ATOM   2750  N   ILE L  75      19.500  -1.559   0.635  1.00 74.12           N  
ATOM   2751  CA  ILE L  75      19.741  -0.986   1.919  1.00 61.11           C  
ATOM   2752  C   ILE L  75      21.243  -1.086   2.158  1.00 41.30           C  
ATOM   2753  O   ILE L  75      21.786  -2.194   2.253  1.00 32.12           O  
ATOM   2754  CB  ILE L  75      19.003  -1.711   3.092  1.00 14.34           C  
ATOM   2755  CG1 ILE L  75      17.488  -1.802   2.841  1.00  5.15           C  
ATOM   2756  CG2 ILE L  75      19.262  -0.953   4.399  1.00 54.32           C  
ATOM   2757  CD1 ILE L  75      16.717  -2.514   3.958  1.00 25.30           C  
ATOM   2758  H   ILE L  75      19.498  -2.535   0.513  1.00 37.74           H  
ATOM   2759  HA  ILE L  75      19.423   0.045   1.847  1.00 31.32           H  
ATOM   2760  HB  ILE L  75      19.416  -2.704   3.196  1.00 34.10           H  
ATOM   2761 HG12 ILE L  75      17.090  -0.802   2.747  1.00 37.74           H  
ATOM   2762 HG13 ILE L  75      17.314  -2.338   1.920  1.00 37.74           H  
ATOM   2763 HG21 ILE L  75      18.745  -1.440   5.212  1.00 37.74           H  
ATOM   2764 HG22 ILE L  75      18.911   0.065   4.314  1.00 37.74           H  
ATOM   2765 HG23 ILE L  75      20.321  -0.930   4.613  1.00 37.74           H  
ATOM   2766 HD11 ILE L  75      17.070  -3.529   4.053  1.00 37.74           H  
ATOM   2767 HD12 ILE L  75      15.661  -2.523   3.727  1.00 37.74           H  
ATOM   2768 HD13 ILE L  75      16.869  -2.011   4.903  1.00 37.74           H  
ATOM   2769  N   SER L  76      21.898   0.043   2.216  1.00 15.31           N  
ATOM   2770  CA  SER L  76      23.331   0.110   2.407  1.00 74.44           C  
ATOM   2771  C   SER L  76      23.713  -0.338   3.830  1.00 42.52           C  
ATOM   2772  O   SER L  76      24.795  -0.893   4.061  1.00 22.34           O  
ATOM   2773  CB  SER L  76      23.817   1.546   2.126  1.00 62.23           C  
ATOM   2774  OG  SER L  76      25.225   1.661   2.224  1.00 61.23           O  
ATOM   2775  H   SER L  76      21.387   0.879   2.106  1.00 37.74           H  
ATOM   2776  HA  SER L  76      23.790  -0.558   1.695  1.00 11.53           H  
ATOM   2777  HB2 SER L  76      23.519   1.835   1.128  1.00 37.74           H  
ATOM   2778  HB3 SER L  76      23.361   2.215   2.839  1.00 37.74           H  
ATOM   2779  HG  SER L  76      25.425   2.464   2.726  1.00 52.42           H  
ATOM   2780  N   SER L  77      22.831  -0.099   4.774  1.00 54.35           N  
ATOM   2781  CA  SER L  77      23.056  -0.491   6.145  1.00 70.12           C  
ATOM   2782  C   SER L  77      21.725  -0.793   6.810  1.00 34.32           C  
ATOM   2783  O   SER L  77      20.929   0.122   7.055  1.00 64.04           O  
ATOM   2784  CB  SER L  77      23.793   0.619   6.901  1.00 62.15           C  
ATOM   2785  OG  SER L  77      25.026   0.932   6.265  1.00 33.54           O  
ATOM   2786  H   SER L  77      21.990   0.351   4.551  1.00 37.74           H  
ATOM   2787  HA  SER L  77      23.664  -1.384   6.145  1.00 33.02           H  
ATOM   2788  HB2 SER L  77      23.178   1.507   6.916  1.00 37.74           H  
ATOM   2789  HB3 SER L  77      23.989   0.297   7.911  1.00 37.74           H  
ATOM   2790  HG  SER L  77      25.173   0.254   5.595  1.00 65.50           H  
ATOM   2791  N   LEU L  78      21.466  -2.078   7.038  1.00 54.32           N  
ATOM   2792  CA  LEU L  78      20.228  -2.551   7.673  1.00  4.41           C  
ATOM   2793  C   LEU L  78      20.132  -1.904   9.064  1.00 62.52           C  
ATOM   2794  O   LEU L  78      21.144  -1.772   9.744  1.00 54.11           O  
ATOM   2795  CB  LEU L  78      20.336  -4.079   7.843  1.00 63.32           C  
ATOM   2796  CG  LEU L  78      19.052  -4.930   7.883  1.00 24.12           C  
ATOM   2797  CD1 LEU L  78      18.030  -4.454   8.877  1.00 62.14           C  
ATOM   2798  CD2 LEU L  78      18.465  -5.030   6.524  1.00 31.42           C  
ATOM   2799  H   LEU L  78      22.118  -2.755   6.754  1.00 37.74           H  
ATOM   2800  HA  LEU L  78      19.369  -2.306   7.068  1.00 73.01           H  
ATOM   2801  HB2 LEU L  78      20.942  -4.458   7.033  1.00 37.74           H  
ATOM   2802  HB3 LEU L  78      20.878  -4.265   8.758  1.00 37.74           H  
ATOM   2803  HG  LEU L  78      19.328  -5.932   8.182  1.00 14.34           H  
ATOM   2804 HD11 LEU L  78      17.183  -5.123   8.871  1.00 37.74           H  
ATOM   2805 HD12 LEU L  78      17.697  -3.475   8.562  1.00 37.74           H  
ATOM   2806 HD13 LEU L  78      18.463  -4.403   9.865  1.00 37.74           H  
ATOM   2807 HD21 LEU L  78      17.627  -5.707   6.553  1.00 37.74           H  
ATOM   2808 HD22 LEU L  78      19.234  -5.457   5.893  1.00 37.74           H  
ATOM   2809 HD23 LEU L  78      18.173  -4.057   6.160  1.00 37.74           H  
ATOM   2810  N   GLN L  79      18.953  -1.491   9.460  1.00 74.45           N  
ATOM   2811  CA  GLN L  79      18.741  -0.892  10.773  1.00 32.02           C  
ATOM   2812  C   GLN L  79      17.670  -1.695  11.526  1.00 73.11           C  
ATOM   2813  O   GLN L  79      16.793  -2.274  10.893  1.00 62.40           O  
ATOM   2814  CB  GLN L  79      18.302   0.562  10.620  1.00 30.45           C  
ATOM   2815  CG  GLN L  79      19.317   1.478   9.961  1.00 60.51           C  
ATOM   2816  CD  GLN L  79      20.566   1.683  10.800  1.00 73.31           C  
ATOM   2817  OE1 GLN L  79      20.635   2.596  11.618  1.00 52.42           O  
ATOM   2818  NE2 GLN L  79      21.544   0.847  10.619  1.00 71.35           N  
ATOM   2819  H   GLN L  79      18.169  -1.594   8.882  1.00 37.74           H  
ATOM   2820  HA  GLN L  79      19.677  -0.944  11.311  1.00 63.24           H  
ATOM   2821  HB2 GLN L  79      17.388   0.604  10.049  1.00 37.74           H  
ATOM   2822  HB3 GLN L  79      18.114   0.938  11.614  1.00 37.74           H  
ATOM   2823  HG2 GLN L  79      19.610   1.049   9.017  1.00 37.74           H  
ATOM   2824  HG3 GLN L  79      18.857   2.440   9.786  1.00 37.74           H  
ATOM   2825 HE21 GLN L  79      21.433   0.123   9.965  1.00 37.74           H  
ATOM   2826 HE22 GLN L  79      22.372   0.975  11.134  1.00 37.74           H  
ATOM   2827  N   PRO L  80      17.717  -1.724  12.881  1.00 51.24           N  
ATOM   2828  CA  PRO L  80      16.809  -2.556  13.706  1.00 11.44           C  
ATOM   2829  C   PRO L  80      15.319  -2.275  13.473  1.00 41.15           C  
ATOM   2830  O   PRO L  80      14.517  -3.206  13.329  1.00 63.22           O  
ATOM   2831  CB  PRO L  80      17.185  -2.182  15.145  1.00 21.41           C  
ATOM   2832  CG  PRO L  80      18.564  -1.635  15.052  1.00 12.04           C  
ATOM   2833  CD  PRO L  80      18.647  -0.947  13.725  1.00  3.32           C  
ATOM   2834  HA  PRO L  80      16.998  -3.608  13.552  1.00 74.34           H  
ATOM   2835  HB2 PRO L  80      16.490  -1.443  15.515  1.00 37.74           H  
ATOM   2836  HB3 PRO L  80      17.151  -3.060  15.776  1.00 37.74           H  
ATOM   2837  HG2 PRO L  80      18.729  -0.928  15.851  1.00 37.74           H  
ATOM   2838  HG3 PRO L  80      19.284  -2.436  15.106  1.00 37.74           H  
ATOM   2839  HD2 PRO L  80      18.322   0.081  13.812  1.00 37.74           H  
ATOM   2840  HD3 PRO L  80      19.655  -0.998  13.342  1.00 37.74           H  
ATOM   2841  N   GLU L  81      14.950  -1.007  13.390  1.00 22.43           N  
ATOM   2842  CA  GLU L  81      13.543  -0.649  13.237  1.00 61.11           C  
ATOM   2843  C   GLU L  81      13.081  -0.861  11.817  1.00  0.41           C  
ATOM   2844  O   GLU L  81      11.895  -0.910  11.550  1.00 64.25           O  
ATOM   2845  CB  GLU L  81      13.300   0.802  13.598  1.00 44.11           C  
ATOM   2846  CG  GLU L  81      13.676   1.199  15.003  1.00 63.24           C  
ATOM   2847  CD  GLU L  81      13.468   2.671  15.213  1.00 15.22           C  
ATOM   2848  OE1 GLU L  81      12.303   3.095  15.386  1.00 51.33           O  
ATOM   2849  OE2 GLU L  81      14.462   3.434  15.179  1.00 13.12           O  
ATOM   2850  H   GLU L  81      15.626  -0.296  13.431  1.00 37.74           H  
ATOM   2851  HA  GLU L  81      12.960  -1.272  13.899  1.00 12.51           H  
ATOM   2852  HB2 GLU L  81      13.812   1.445  12.903  1.00 37.74           H  
ATOM   2853  HB3 GLU L  81      12.241   0.976  13.481  1.00 37.74           H  
ATOM   2854  HG2 GLU L  81      13.056   0.654  15.701  1.00 37.74           H  
ATOM   2855  HG3 GLU L  81      14.717   0.965  15.174  1.00 37.74           H  
ATOM   2856  N   ASP L  82      14.020  -0.995  10.910  1.00 12.44           N  
ATOM   2857  CA  ASP L  82      13.702  -1.114   9.496  1.00 72.02           C  
ATOM   2858  C   ASP L  82      13.528  -2.534   9.060  1.00 33.52           C  
ATOM   2859  O   ASP L  82      13.540  -2.848   7.872  1.00 34.40           O  
ATOM   2860  CB  ASP L  82      14.681  -0.336   8.634  1.00 43.21           C  
ATOM   2861  CG  ASP L  82      14.521   1.147   8.864  1.00 60.43           C  
ATOM   2862  OD1 ASP L  82      13.650   1.773   8.213  1.00 73.43           O  
ATOM   2863  OD2 ASP L  82      15.240   1.714   9.725  1.00 52.53           O  
ATOM   2864  H   ASP L  82      14.959  -1.027  11.190  1.00 37.74           H  
ATOM   2865  HA  ASP L  82      12.730  -0.664   9.374  1.00 63.32           H  
ATOM   2866  HB2 ASP L  82      15.691  -0.628   8.887  1.00 37.74           H  
ATOM   2867  HB3 ASP L  82      14.493  -0.547   7.590  1.00 37.74           H  
ATOM   2868  N   LEU L  83      13.334  -3.389  10.026  1.00 74.12           N  
ATOM   2869  CA  LEU L  83      12.944  -4.737   9.763  1.00 74.21           C  
ATOM   2870  C   LEU L  83      11.468  -4.677   9.378  1.00 10.25           C  
ATOM   2871  O   LEU L  83      10.643  -4.172  10.158  1.00  3.21           O  
ATOM   2872  CB  LEU L  83      13.141  -5.571  11.036  1.00 15.12           C  
ATOM   2873  CG  LEU L  83      12.727  -7.035  10.968  1.00 12.43           C  
ATOM   2874  CD1 LEU L  83      13.494  -7.754   9.889  1.00 52.40           C  
ATOM   2875  CD2 LEU L  83      12.950  -7.705  12.312  1.00 44.42           C  
ATOM   2876  H   LEU L  83      13.449  -3.086  10.950  1.00 37.74           H  
ATOM   2877  HA  LEU L  83      13.536  -5.134   8.953  1.00 62.40           H  
ATOM   2878  HB2 LEU L  83      14.188  -5.534  11.299  1.00 37.74           H  
ATOM   2879  HB3 LEU L  83      12.581  -5.099  11.830  1.00 37.74           H  
ATOM   2880  HG  LEU L  83      11.674  -7.099  10.732  1.00 52.31           H  
ATOM   2881 HD11 LEU L  83      14.552  -7.707  10.097  1.00 37.74           H  
ATOM   2882 HD12 LEU L  83      13.288  -7.297   8.931  1.00 37.74           H  
ATOM   2883 HD13 LEU L  83      13.178  -8.786   9.868  1.00 37.74           H  
ATOM   2884 HD21 LEU L  83      12.351  -7.216  13.066  1.00 37.74           H  
ATOM   2885 HD22 LEU L  83      13.995  -7.636  12.580  1.00 37.74           H  
ATOM   2886 HD23 LEU L  83      12.668  -8.745  12.244  1.00 37.74           H  
ATOM   2887  N   ALA L  84      11.129  -5.164   8.200  1.00 75.11           N  
ATOM   2888  CA  ALA L  84       9.777  -5.018   7.702  1.00 24.25           C  
ATOM   2889  C   ALA L  84       9.558  -5.868   6.470  1.00 61.54           C  
ATOM   2890  O   ALA L  84      10.462  -6.569   6.008  1.00 42.31           O  
ATOM   2891  CB  ALA L  84       9.528  -3.540   7.344  1.00 62.53           C  
ATOM   2892  H   ALA L  84      11.783  -5.632   7.642  1.00 37.74           H  
ATOM   2893  HA  ALA L  84       9.076  -5.290   8.477  1.00 52.10           H  
ATOM   2894  HB1 ALA L  84      10.201  -3.236   6.556  1.00 37.74           H  
ATOM   2895  HB2 ALA L  84       9.700  -2.916   8.208  1.00 37.74           H  
ATOM   2896  HB3 ALA L  84       8.509  -3.406   7.010  1.00 37.74           H  
ATOM   2897  N   THR L  85       8.358  -5.819   5.955  1.00  0.11           N  
ATOM   2898  CA  THR L  85       8.043  -6.438   4.709  1.00 41.31           C  
ATOM   2899  C   THR L  85       8.166  -5.344   3.648  1.00 44.05           C  
ATOM   2900  O   THR L  85       7.553  -4.273   3.793  1.00 51.21           O  
ATOM   2901  CB  THR L  85       6.594  -6.959   4.724  1.00 33.04           C  
ATOM   2902  OG1 THR L  85       6.424  -7.816   5.868  1.00  5.01           O  
ATOM   2903  CG2 THR L  85       6.290  -7.749   3.448  1.00 62.12           C  
ATOM   2904  H   THR L  85       7.649  -5.326   6.429  1.00 37.74           H  
ATOM   2905  HA  THR L  85       8.730  -7.260   4.538  1.00 10.52           H  
ATOM   2906  HB  THR L  85       5.919  -6.120   4.798  1.00 70.11           H  
ATOM   2907  HG1 THR L  85       7.089  -7.564   6.516  1.00 34.25           H  
ATOM   2908 HG21 THR L  85       6.438  -7.118   2.584  1.00 37.74           H  
ATOM   2909 HG22 THR L  85       5.270  -8.100   3.468  1.00 37.74           H  
ATOM   2910 HG23 THR L  85       6.957  -8.596   3.379  1.00 37.74           H  
ATOM   2911  N   TYR L  86       8.961  -5.571   2.641  1.00 51.54           N  
ATOM   2912  CA  TYR L  86       9.164  -4.577   1.615  1.00 22.13           C  
ATOM   2913  C   TYR L  86       8.386  -4.898   0.392  1.00 40.21           C  
ATOM   2914  O   TYR L  86       8.198  -6.067   0.068  1.00 11.24           O  
ATOM   2915  CB  TYR L  86      10.661  -4.363   1.315  1.00 55.24           C  
ATOM   2916  CG  TYR L  86      11.349  -3.629   2.429  1.00 14.33           C  
ATOM   2917  CD1 TYR L  86      11.864  -4.286   3.541  1.00 43.44           C  
ATOM   2918  CD2 TYR L  86      11.435  -2.252   2.386  1.00 21.42           C  
ATOM   2919  CE1 TYR L  86      12.438  -3.567   4.573  1.00  3.42           C  
ATOM   2920  CE2 TYR L  86      12.016  -1.540   3.398  1.00 50.42           C  
ATOM   2921  CZ  TYR L  86      12.509  -2.192   4.490  1.00 32.53           C  
ATOM   2922  OH  TYR L  86      13.058  -1.467   5.513  1.00 53.15           O  
ATOM   2923  H   TYR L  86       9.418  -6.431   2.531  1.00 37.74           H  
ATOM   2924  HA  TYR L  86       8.771  -3.652   2.002  1.00 51.44           H  
ATOM   2925  HB2 TYR L  86      11.152  -5.316   1.187  1.00 37.74           H  
ATOM   2926  HB3 TYR L  86      10.779  -3.772   0.418  1.00 37.74           H  
ATOM   2927  HD1 TYR L  86      11.818  -5.367   3.594  1.00 50.13           H  
ATOM   2928  HD2 TYR L  86      11.044  -1.734   1.522  1.00 71.12           H  
ATOM   2929  HE1 TYR L  86      12.835  -4.080   5.434  1.00 14.43           H  
ATOM   2930  HE2 TYR L  86      12.072  -0.463   3.335  1.00 53.41           H  
ATOM   2931  HH  TYR L  86      13.805  -1.937   5.902  1.00 72.44           H  
ATOM   2932  N   TYR L  87       7.870  -3.873  -0.252  1.00 62.22           N  
ATOM   2933  CA  TYR L  87       7.156  -4.032  -1.492  1.00  5.12           C  
ATOM   2934  C   TYR L  87       7.182  -2.820  -2.386  1.00 34.44           C  
ATOM   2935  O   TYR L  87       7.512  -1.712  -1.957  1.00  2.44           O  
ATOM   2936  CB  TYR L  87       5.763  -4.706  -1.371  1.00 54.01           C  
ATOM   2937  CG  TYR L  87       4.830  -4.193  -0.309  1.00 12.04           C  
ATOM   2938  CD1 TYR L  87       4.103  -3.026  -0.472  1.00 50.11           C  
ATOM   2939  CD2 TYR L  87       4.641  -4.926   0.854  1.00 45.41           C  
ATOM   2940  CE1 TYR L  87       3.212  -2.606   0.498  1.00 24.35           C  
ATOM   2941  CE2 TYR L  87       3.768  -4.514   1.824  1.00 32.33           C  
ATOM   2942  CZ  TYR L  87       3.053  -3.359   1.647  1.00 14.24           C  
ATOM   2943  OH  TYR L  87       2.164  -2.964   2.606  1.00 65.22           O  
ATOM   2944  H   TYR L  87       7.979  -2.966   0.110  1.00 37.74           H  
ATOM   2945  HA  TYR L  87       7.792  -4.714  -2.039  1.00 12.42           H  
ATOM   2946  HB2 TYR L  87       5.246  -4.611  -2.314  1.00 37.74           H  
ATOM   2947  HB3 TYR L  87       5.915  -5.763  -1.203  1.00 37.74           H  
ATOM   2948  HD1 TYR L  87       4.240  -2.444  -1.371  1.00  3.42           H  
ATOM   2949  HD2 TYR L  87       5.208  -5.835   0.995  1.00  5.52           H  
ATOM   2950  HE1 TYR L  87       2.650  -1.695   0.358  1.00 23.40           H  
ATOM   2951  HE2 TYR L  87       3.643  -5.105   2.720  1.00  1.21           H  
ATOM   2952  HH  TYR L  87       2.532  -3.143   3.475  1.00 31.34           H  
ATOM   2953  N   CYS L  88       6.816  -3.048  -3.609  1.00 42.24           N  
ATOM   2954  CA  CYS L  88       6.867  -2.081  -4.676  1.00 31.52           C  
ATOM   2955  C   CYS L  88       5.510  -2.022  -5.352  1.00 45.33           C  
ATOM   2956  O   CYS L  88       4.832  -3.045  -5.441  1.00 61.55           O  
ATOM   2957  CB  CYS L  88       7.959  -2.551  -5.666  1.00 33.24           C  
ATOM   2958  SG  CYS L  88       7.884  -4.366  -6.032  1.00 54.30           S  
ATOM   2959  H   CYS L  88       6.487  -3.938  -3.852  1.00 37.74           H  
ATOM   2960  HA  CYS L  88       7.143  -1.114  -4.286  1.00 21.22           H  
ATOM   2961  HB2 CYS L  88       7.837  -2.022  -6.599  1.00 37.74           H  
ATOM   2962  HB3 CYS L  88       8.935  -2.337  -5.256  1.00 37.74           H  
ATOM   2963  N   GLN L  89       5.083  -0.835  -5.767  1.00 72.35           N  
ATOM   2964  CA  GLN L  89       3.794  -0.688  -6.415  1.00 71.13           C  
ATOM   2965  C   GLN L  89       3.918   0.310  -7.544  1.00 22.04           C  
ATOM   2966  O   GLN L  89       4.664   1.302  -7.430  1.00 15.24           O  
ATOM   2967  CB  GLN L  89       2.710  -0.286  -5.375  1.00  1.54           C  
ATOM   2968  CG  GLN L  89       2.433   1.215  -5.116  1.00 52.30           C  
ATOM   2969  CD  GLN L  89       1.472   1.873  -6.103  1.00 64.32           C  
ATOM   2970  OE1 GLN L  89       1.867   2.439  -7.094  1.00 23.54           O  
ATOM   2971  NE2 GLN L  89       0.199   1.779  -5.821  1.00 61.41           N  
ATOM   2972  H   GLN L  89       5.624  -0.025  -5.632  1.00 37.74           H  
ATOM   2973  HA  GLN L  89       3.542  -1.648  -6.839  1.00 11.22           H  
ATOM   2974  HB2 GLN L  89       1.767  -0.758  -5.606  1.00 37.74           H  
ATOM   2975  HB3 GLN L  89       3.085  -0.699  -4.442  1.00 37.74           H  
ATOM   2976  HG2 GLN L  89       2.025   1.367  -4.131  1.00 37.74           H  
ATOM   2977  HG3 GLN L  89       3.379   1.730  -5.218  1.00 37.74           H  
ATOM   2978 HE21 GLN L  89      -0.083   1.303  -5.014  1.00 37.74           H  
ATOM   2979 HE22 GLN L  89      -0.418   2.194  -6.458  1.00 37.74           H  
ATOM   2980  N   GLN L  90       3.267   0.028  -8.638  1.00 70.53           N  
ATOM   2981  CA  GLN L  90       3.276   0.903  -9.779  1.00 24.44           C  
ATOM   2982  C   GLN L  90       1.952   1.632  -9.987  1.00 70.12           C  
ATOM   2983  O   GLN L  90       0.902   1.108  -9.712  1.00 23.41           O  
ATOM   2984  CB  GLN L  90       3.751   0.186 -11.046  1.00 73.05           C  
ATOM   2985  CG  GLN L  90       3.207  -1.229 -11.297  1.00 61.21           C  
ATOM   2986  CD  GLN L  90       1.699  -1.357 -11.242  1.00  2.23           C  
ATOM   2987  OE1 GLN L  90       1.135  -1.665 -10.204  1.00 62.12           O  
ATOM   2988  NE2 GLN L  90       1.046  -1.097 -12.336  1.00 62.01           N  
ATOM   2989  H   GLN L  90       2.736  -0.798  -8.685  1.00 37.74           H  
ATOM   2990  HA  GLN L  90       3.995   1.673  -9.550  1.00 55.22           H  
ATOM   2991  HB2 GLN L  90       3.469   0.792 -11.894  1.00 37.74           H  
ATOM   2992  HB3 GLN L  90       4.830   0.133 -11.012  1.00 37.74           H  
ATOM   2993  HG2 GLN L  90       3.557  -1.557 -12.265  1.00 37.74           H  
ATOM   2994  HG3 GLN L  90       3.640  -1.878 -10.550  1.00 37.74           H  
ATOM   2995 HE21 GLN L  90       1.549  -0.841 -13.134  1.00 37.74           H  
ATOM   2996 HE22 GLN L  90       0.068  -1.162 -12.294  1.00 37.74           H  
ATOM   2997  N   TYR L  91       2.018   2.861 -10.451  1.00 71.01           N  
ATOM   2998  CA  TYR L  91       0.794   3.630 -10.705  1.00  3.10           C  
ATOM   2999  C   TYR L  91       0.644   4.047 -12.162  1.00 24.14           C  
ATOM   3000  O   TYR L  91      -0.080   4.988 -12.472  1.00 61.42           O  
ATOM   3001  CB  TYR L  91       0.673   4.846  -9.768  1.00 52.34           C  
ATOM   3002  CG  TYR L  91       1.781   5.879  -9.853  1.00  4.44           C  
ATOM   3003  CD1 TYR L  91       2.952   5.686  -9.181  1.00 23.00           C  
ATOM   3004  CD2 TYR L  91       1.632   7.055 -10.573  1.00 70.53           C  
ATOM   3005  CE1 TYR L  91       3.965   6.617  -9.201  1.00 13.25           C  
ATOM   3006  CE2 TYR L  91       2.642   8.004 -10.595  1.00 20.43           C  
ATOM   3007  CZ  TYR L  91       3.806   7.770  -9.902  1.00 34.11           C  
ATOM   3008  OH  TYR L  91       4.809   8.701  -9.902  1.00 51.34           O  
ATOM   3009  H   TYR L  91       2.913   3.243 -10.573  1.00 37.74           H  
ATOM   3010  HA  TYR L  91      -0.024   2.961 -10.488  1.00 34.21           H  
ATOM   3011  HB2 TYR L  91      -0.251   5.358  -9.988  1.00 37.74           H  
ATOM   3012  HB3 TYR L  91       0.629   4.487  -8.751  1.00 37.74           H  
ATOM   3013  HD1 TYR L  91       3.074   4.766  -8.629  1.00 33.01           H  
ATOM   3014  HD2 TYR L  91       0.715   7.234 -11.114  1.00  2.24           H  
ATOM   3015  HE1 TYR L  91       4.879   6.434  -8.657  1.00 24.41           H  
ATOM   3016  HE2 TYR L  91       2.524   8.917 -11.156  1.00 33.40           H  
ATOM   3017  HH  TYR L  91       5.661   8.269 -10.016  1.00 30.13           H  
ATOM   3018  N   ASP L  92       1.264   3.327 -13.050  1.00 73.15           N  
ATOM   3019  CA  ASP L  92       1.170   3.671 -14.469  1.00 43.55           C  
ATOM   3020  C   ASP L  92      -0.109   3.109 -15.118  1.00 63.25           C  
ATOM   3021  O   ASP L  92      -0.845   3.836 -15.792  1.00 70.42           O  
ATOM   3022  CB  ASP L  92       2.396   3.185 -15.221  1.00 61.14           C  
ATOM   3023  CG  ASP L  92       2.322   3.475 -16.705  1.00 14.44           C  
ATOM   3024  OD1 ASP L  92       2.715   4.574 -17.127  1.00  1.04           O  
ATOM   3025  OD2 ASP L  92       1.869   2.605 -17.460  1.00 25.53           O  
ATOM   3026  H   ASP L  92       1.788   2.557 -12.750  1.00 37.74           H  
ATOM   3027  HA  ASP L  92       1.131   4.748 -14.534  1.00 73.33           H  
ATOM   3028  HB2 ASP L  92       3.277   3.663 -14.820  1.00 37.74           H  
ATOM   3029  HB3 ASP L  92       2.476   2.118 -15.085  1.00 37.74           H  
ATOM   3030  N   ASN L  93      -0.396   1.846 -14.866  1.00 64.11           N  
ATOM   3031  CA  ASN L  93      -1.543   1.172 -15.488  1.00 34.32           C  
ATOM   3032  C   ASN L  93      -2.268   0.304 -14.475  1.00 13.54           C  
ATOM   3033  O   ASN L  93      -1.635  -0.408 -13.691  1.00 60.05           O  
ATOM   3034  CB  ASN L  93      -1.077   0.334 -16.703  1.00 60.30           C  
ATOM   3035  CG  ASN L  93      -2.175  -0.497 -17.362  1.00  3.33           C  
ATOM   3036  OD1 ASN L  93      -2.395  -1.654 -17.007  1.00 61.23           O  
ATOM   3037  ND2 ASN L  93      -2.840   0.065 -18.329  1.00 51.42           N  
ATOM   3038  H   ASN L  93       0.152   1.332 -14.240  1.00 37.74           H  
ATOM   3039  HA  ASN L  93      -2.222   1.936 -15.834  1.00 63.32           H  
ATOM   3040  HB2 ASN L  93      -0.663   0.990 -17.454  1.00 37.74           H  
ATOM   3041  HB3 ASN L  93      -0.306  -0.340 -16.367  1.00 37.74           H  
ATOM   3042 HD21 ASN L  93      -2.588   0.983 -18.572  1.00 37.74           H  
ATOM   3043 HD22 ASN L  93      -3.561  -0.436 -18.768  1.00 37.74           H  
ATOM   3044  N   LEU L  94      -3.576   0.401 -14.488  1.00 74.10           N  
ATOM   3045  CA  LEU L  94      -4.467  -0.342 -13.586  1.00  3.11           C  
ATOM   3046  C   LEU L  94      -4.731  -1.747 -14.107  1.00  3.10           C  
ATOM   3047  O   LEU L  94      -4.795  -1.956 -15.321  1.00 33.24           O  
ATOM   3048  CB  LEU L  94      -5.808   0.403 -13.449  1.00 54.41           C  
ATOM   3049  CG  LEU L  94      -5.804   1.699 -12.640  1.00 31.20           C  
ATOM   3050  CD1 LEU L  94      -7.107   2.449 -12.846  1.00 71.25           C  
ATOM   3051  CD2 LEU L  94      -5.655   1.374 -11.164  1.00 55.22           C  
ATOM   3052  H   LEU L  94      -3.960   0.995 -15.167  1.00 37.74           H  
ATOM   3053  HA  LEU L  94      -4.004  -0.395 -12.613  1.00  2.51           H  
ATOM   3054  HB2 LEU L  94      -6.161   0.633 -14.444  1.00 37.74           H  
ATOM   3055  HB3 LEU L  94      -6.515  -0.275 -12.994  1.00 37.74           H  
ATOM   3056  HG  LEU L  94      -4.976   2.328 -12.934  1.00 12.25           H  
ATOM   3057 HD11 LEU L  94      -7.935   1.832 -12.531  1.00 37.74           H  
ATOM   3058 HD12 LEU L  94      -7.218   2.701 -13.892  1.00 37.74           H  
ATOM   3059 HD13 LEU L  94      -7.090   3.356 -12.260  1.00 37.74           H  
ATOM   3060 HD21 LEU L  94      -6.476   0.748 -10.845  1.00 37.74           H  
ATOM   3061 HD22 LEU L  94      -5.660   2.289 -10.593  1.00 37.74           H  
ATOM   3062 HD23 LEU L  94      -4.721   0.857 -10.998  1.00 37.74           H  
ATOM   3063  N   PRO L  95      -4.899  -2.743 -13.210  1.00 62.13           N  
ATOM   3064  CA  PRO L  95      -4.785  -2.572 -11.741  1.00 41.32           C  
ATOM   3065  C   PRO L  95      -3.346  -2.388 -11.248  1.00 25.32           C  
ATOM   3066  O   PRO L  95      -2.377  -2.824 -11.894  1.00 33.33           O  
ATOM   3067  CB  PRO L  95      -5.328  -3.889 -11.196  1.00 54.42           C  
ATOM   3068  CG  PRO L  95      -5.054  -4.868 -12.276  1.00 45.23           C  
ATOM   3069  CD  PRO L  95      -5.287  -4.121 -13.552  1.00 54.52           C  
ATOM   3070  HA  PRO L  95      -5.397  -1.760 -11.381  1.00 61.33           H  
ATOM   3071  HB2 PRO L  95      -4.815  -4.143 -10.281  1.00 37.74           H  
ATOM   3072  HB3 PRO L  95      -6.390  -3.800 -11.012  1.00 37.74           H  
ATOM   3073  HG2 PRO L  95      -4.026  -5.196 -12.216  1.00 37.74           H  
ATOM   3074  HG3 PRO L  95      -5.725  -5.710 -12.202  1.00 37.74           H  
ATOM   3075  HD2 PRO L  95      -4.675  -4.510 -14.350  1.00 37.74           H  
ATOM   3076  HD3 PRO L  95      -6.338  -4.158 -13.806  1.00 37.74           H  
ATOM   3077  N   TYR L  96      -3.222  -1.738 -10.108  1.00  2.04           N  
ATOM   3078  CA  TYR L  96      -1.943  -1.536  -9.469  1.00 62.01           C  
ATOM   3079  C   TYR L  96      -1.712  -2.687  -8.518  1.00 15.33           C  
ATOM   3080  O   TYR L  96      -2.594  -3.017  -7.714  1.00 23.41           O  
ATOM   3081  CB  TYR L  96      -1.918  -0.212  -8.687  1.00  2.41           C  
ATOM   3082  CG  TYR L  96      -2.207   1.031  -9.512  1.00 41.54           C  
ATOM   3083  CD1 TYR L  96      -1.898   1.089 -10.864  1.00 74.11           C  
ATOM   3084  CD2 TYR L  96      -2.789   2.145  -8.932  1.00 14.33           C  
ATOM   3085  CE1 TYR L  96      -2.160   2.215 -11.608  1.00 13.31           C  
ATOM   3086  CE2 TYR L  96      -3.054   3.281  -9.675  1.00  5.15           C  
ATOM   3087  CZ  TYR L  96      -2.734   3.308 -11.013  1.00 21.01           C  
ATOM   3088  OH  TYR L  96      -2.994   4.431 -11.762  1.00 25.33           O  
ATOM   3089  H   TYR L  96      -4.023  -1.400  -9.663  1.00 37.74           H  
ATOM   3090  HA  TYR L  96      -1.169  -1.530 -10.222  1.00 73.32           H  
ATOM   3091  HB2 TYR L  96      -2.659  -0.260  -7.904  1.00 37.74           H  
ATOM   3092  HB3 TYR L  96      -0.943  -0.095  -8.234  1.00 37.74           H  
ATOM   3093  HD1 TYR L  96      -1.446   0.232 -11.342  1.00 45.03           H  
ATOM   3094  HD2 TYR L  96      -3.039   2.118  -7.880  1.00 22.23           H  
ATOM   3095  HE1 TYR L  96      -1.911   2.236 -12.657  1.00 54.31           H  
ATOM   3096  HE2 TYR L  96      -3.508   4.141  -9.205  1.00  2.24           H  
ATOM   3097  HH  TYR L  96      -2.689   5.221 -11.300  1.00 33.33           H  
ATOM   3098  N   THR L  97      -0.573  -3.298  -8.597  1.00 61.31           N  
ATOM   3099  CA  THR L  97      -0.296  -4.443  -7.776  1.00 43.03           C  
ATOM   3100  C   THR L  97       0.897  -4.155  -6.879  1.00 45.22           C  
ATOM   3101  O   THR L  97       1.749  -3.333  -7.225  1.00 70.34           O  
ATOM   3102  CB  THR L  97       0.007  -5.711  -8.653  1.00 71.51           C  
ATOM   3103  OG1 THR L  97       1.197  -5.509  -9.439  1.00 14.22           O  
ATOM   3104  CG2 THR L  97      -1.149  -6.011  -9.606  1.00  0.11           C  
ATOM   3105  H   THR L  97       0.128  -2.959  -9.198  1.00 37.74           H  
ATOM   3106  HA  THR L  97      -1.165  -4.647  -7.168  1.00 40.10           H  
ATOM   3107  HB  THR L  97       0.153  -6.559  -8.001  1.00 44.15           H  
ATOM   3108  HG1 THR L  97       0.945  -5.139 -10.297  1.00 64.45           H  
ATOM   3109 HG21 THR L  97      -0.904  -6.877 -10.205  1.00 37.74           H  
ATOM   3110 HG22 THR L  97      -1.282  -5.163 -10.262  1.00 37.74           H  
ATOM   3111 HG23 THR L  97      -2.059  -6.193  -9.055  1.00 37.74           H  
ATOM   3112  N   PHE L  98       0.946  -4.774  -5.711  1.00 75.34           N  
ATOM   3113  CA  PHE L  98       2.141  -4.673  -4.918  1.00 51.25           C  
ATOM   3114  C   PHE L  98       2.977  -5.896  -5.157  1.00 51.41           C  
ATOM   3115  O   PHE L  98       2.453  -7.021  -5.206  1.00 62.51           O  
ATOM   3116  CB  PHE L  98       1.822  -4.607  -3.420  1.00 75.20           C  
ATOM   3117  CG  PHE L  98       0.955  -3.471  -3.030  1.00  4.31           C  
ATOM   3118  CD1 PHE L  98       1.493  -2.229  -2.767  1.00 40.14           C  
ATOM   3119  CD2 PHE L  98      -0.399  -3.641  -2.936  1.00 53.33           C  
ATOM   3120  CE1 PHE L  98       0.682  -1.176  -2.412  1.00 73.14           C  
ATOM   3121  CE2 PHE L  98      -1.207  -2.611  -2.592  1.00 11.25           C  
ATOM   3122  CZ  PHE L  98      -0.676  -1.367  -2.325  1.00 52.30           C  
ATOM   3123  H   PHE L  98       0.166  -5.256  -5.364  1.00 37.74           H  
ATOM   3124  HA  PHE L  98       2.685  -3.786  -5.206  1.00 71.43           H  
ATOM   3125  HB2 PHE L  98       1.316  -5.516  -3.130  1.00 37.74           H  
ATOM   3126  HB3 PHE L  98       2.747  -4.532  -2.866  1.00 37.74           H  
ATOM   3127  HD1 PHE L  98       2.560  -2.087  -2.836  1.00 74.43           H  
ATOM   3128  HD2 PHE L  98      -0.843  -4.605  -3.132  1.00 13.05           H  
ATOM   3129  HE1 PHE L  98       1.113  -0.208  -2.207  1.00  4.10           H  
ATOM   3130  HE2 PHE L  98      -2.268  -2.807  -2.539  1.00 44.31           H  
ATOM   3131  HZ  PHE L  98      -1.323  -0.549  -2.050  1.00 54.24           H  
ATOM   3132  N   GLY L  99       4.245  -5.690  -5.292  1.00 22.30           N  
ATOM   3133  CA  GLY L  99       5.160  -6.770  -5.436  1.00 65.32           C  
ATOM   3134  C   GLY L  99       5.615  -7.188  -4.093  1.00 71.31           C  
ATOM   3135  O   GLY L  99       6.542  -6.651  -3.586  1.00 35.34           O  
ATOM   3136  H   GLY L  99       4.558  -4.757  -5.317  1.00 37.74           H  
ATOM   3137  HA2 GLY L  99       4.673  -7.589  -5.945  1.00 37.74           H  
ATOM   3138  HA3 GLY L  99       6.015  -6.448  -6.010  1.00 37.74           H  
ATOM   3139  N   GLN L 100       4.952  -8.142  -3.523  1.00 44.11           N  
ATOM   3140  CA  GLN L 100       5.198  -8.566  -2.142  1.00 42.24           C  
ATOM   3141  C   GLN L 100       6.169  -9.719  -2.046  1.00 25.44           C  
ATOM   3142  O   GLN L 100       6.245 -10.396  -1.022  1.00 30.33           O  
ATOM   3143  CB  GLN L 100       3.861  -8.897  -1.458  1.00 45.22           C  
ATOM   3144  CG  GLN L 100       2.901  -9.846  -2.225  1.00 72.43           C  
ATOM   3145  CD  GLN L 100       3.466 -11.225  -2.525  1.00 55.34           C  
ATOM   3146  OE1 GLN L 100       3.335 -12.151  -1.729  1.00 22.15           O  
ATOM   3147  NE2 GLN L 100       4.068 -11.374  -3.677  1.00 70.41           N  
ATOM   3148  H   GLN L 100       4.275  -8.596  -4.068  1.00 37.74           H  
ATOM   3149  HA  GLN L 100       5.634  -7.727  -1.624  1.00 52.31           H  
ATOM   3150  HB2 GLN L 100       4.065  -9.340  -0.495  1.00 37.74           H  
ATOM   3151  HB3 GLN L 100       3.353  -7.954  -1.310  1.00 37.74           H  
ATOM   3152  HG2 GLN L 100       2.012  -9.980  -1.630  1.00 37.74           H  
ATOM   3153  HG3 GLN L 100       2.625  -9.371  -3.155  1.00 37.74           H  
ATOM   3154 HE21 GLN L 100       4.118 -10.602  -4.283  1.00 37.74           H  
ATOM   3155 HE22 GLN L 100       4.451 -12.243  -3.917  1.00 37.74           H  
ATOM   3156  N   GLY L 101       6.944  -9.885  -3.070  1.00  4.33           N  
ATOM   3157  CA  GLY L 101       7.822 -11.007  -3.180  1.00 61.25           C  
ATOM   3158  C   GLY L 101       9.036 -10.998  -2.269  1.00 35.41           C  
ATOM   3159  O   GLY L 101       9.847 -11.884  -2.384  1.00 21.31           O  
ATOM   3160  H   GLY L 101       6.915  -9.227  -3.796  1.00 37.74           H  
ATOM   3161  HA2 GLY L 101       7.256 -11.901  -2.967  1.00 37.74           H  
ATOM   3162  HA3 GLY L 101       8.158 -11.063  -4.206  1.00 37.74           H  
ATOM   3163  N   THR L 102       9.185 -10.029  -1.381  1.00 34.55           N  
ATOM   3164  CA  THR L 102      10.351 -10.026  -0.518  1.00  3.54           C  
ATOM   3165  C   THR L 102       9.993  -9.855   0.957  1.00 34.15           C  
ATOM   3166  O   THR L 102       9.172  -9.001   1.334  1.00 42.44           O  
ATOM   3167  CB  THR L 102      11.388  -8.962  -0.954  1.00 24.52           C  
ATOM   3168  OG1 THR L 102      11.765  -9.218  -2.311  1.00 34.23           O  
ATOM   3169  CG2 THR L 102      12.635  -9.030  -0.084  1.00 40.43           C  
ATOM   3170  H   THR L 102       8.526  -9.312  -1.278  1.00 37.74           H  
ATOM   3171  HA  THR L 102      10.809 -10.998  -0.629  1.00 33.02           H  
ATOM   3172  HB  THR L 102      10.954  -7.974  -0.876  1.00 44.11           H  
ATOM   3173  HG1 THR L 102      11.997 -10.155  -2.349  1.00 54.40           H  
ATOM   3174 HG21 THR L 102      13.340  -8.277  -0.402  1.00 37.74           H  
ATOM   3175 HG22 THR L 102      13.085 -10.008  -0.173  1.00 37.74           H  
ATOM   3176 HG23 THR L 102      12.361  -8.855   0.947  1.00 37.74           H  
ATOM   3177  N   LYS L 103      10.568 -10.705   1.776  1.00 71.51           N  
ATOM   3178  CA  LYS L 103      10.430 -10.621   3.200  1.00 12.51           C  
ATOM   3179  C   LYS L 103      11.814 -10.448   3.797  1.00 25.31           C  
ATOM   3180  O   LYS L 103      12.742 -11.186   3.444  1.00 22.52           O  
ATOM   3181  CB  LYS L 103       9.772 -11.878   3.766  1.00 24.01           C  
ATOM   3182  CG  LYS L 103       9.494 -11.812   5.273  1.00  4.31           C  
ATOM   3183  CD  LYS L 103       8.482 -10.735   5.632  1.00 33.24           C  
ATOM   3184  CE  LYS L 103       7.111 -11.031   5.029  1.00 51.24           C  
ATOM   3185  NZ  LYS L 103       6.524 -12.293   5.540  1.00 70.30           N  
ATOM   3186  H   LYS L 103      11.112 -11.428   1.397  1.00 37.74           H  
ATOM   3187  HA  LYS L 103       9.826  -9.755   3.428  1.00 61.45           H  
ATOM   3188  HB2 LYS L 103       8.846 -12.069   3.245  1.00 37.74           H  
ATOM   3189  HB3 LYS L 103      10.438 -12.710   3.588  1.00 37.74           H  
ATOM   3190  HG2 LYS L 103       9.069 -12.749   5.584  1.00 37.74           H  
ATOM   3191  HG3 LYS L 103      10.417 -11.623   5.802  1.00 37.74           H  
ATOM   3192  HD2 LYS L 103       8.384 -10.695   6.708  1.00 37.74           H  
ATOM   3193  HD3 LYS L 103       8.834  -9.783   5.265  1.00 37.74           H  
ATOM   3194  HE2 LYS L 103       6.441 -10.213   5.245  1.00 37.74           H  
ATOM   3195  HE3 LYS L 103       7.242 -11.117   3.961  1.00 37.74           H  
ATOM   3196  HZ1 LYS L 103       7.114 -13.115   5.300  1.00 37.74           H  
ATOM   3197  HZ2 LYS L 103       5.592 -12.437   5.100  1.00 37.74           H  
ATOM   3198  HZ3 LYS L 103       6.381 -12.263   6.568  1.00 37.74           H  
ATOM   3199  N   LEU L 104      11.959  -9.483   4.660  1.00 60.34           N  
ATOM   3200  CA  LEU L 104      13.232  -9.186   5.265  1.00 23.31           C  
ATOM   3201  C   LEU L 104      13.254  -9.691   6.690  1.00 34.10           C  
ATOM   3202  O   LEU L 104      12.287  -9.502   7.440  1.00 44.51           O  
ATOM   3203  CB  LEU L 104      13.456  -7.672   5.256  1.00 62.43           C  
ATOM   3204  CG  LEU L 104      14.797  -7.180   5.782  1.00  4.32           C  
ATOM   3205  CD1 LEU L 104      15.916  -7.615   4.862  1.00 35.12           C  
ATOM   3206  CD2 LEU L 104      14.783  -5.673   5.951  1.00  3.13           C  
ATOM   3207  H   LEU L 104      11.196  -8.935   4.937  1.00 37.74           H  
ATOM   3208  HA  LEU L 104      14.050  -9.667   4.744  1.00  5.10           H  
ATOM   3209  HB2 LEU L 104      13.348  -7.323   4.239  1.00 37.74           H  
ATOM   3210  HB3 LEU L 104      12.675  -7.220   5.850  1.00 37.74           H  
ATOM   3211  HG  LEU L 104      14.968  -7.628   6.748  1.00 70.30           H  
ATOM   3212 HD11 LEU L 104      16.861  -7.253   5.236  1.00 37.74           H  
ATOM   3213 HD12 LEU L 104      15.720  -7.197   3.886  1.00 37.74           H  
ATOM   3214 HD13 LEU L 104      15.934  -8.693   4.794  1.00 37.74           H  
ATOM   3215 HD21 LEU L 104      14.603  -5.208   4.992  1.00 37.74           H  
ATOM   3216 HD22 LEU L 104      15.728  -5.331   6.343  1.00 37.74           H  
ATOM   3217 HD23 LEU L 104      13.998  -5.401   6.639  1.00 37.74           H  
ATOM   3218  N   GLU L 105      14.333 -10.334   7.038  1.00 10.54           N  
ATOM   3219  CA  GLU L 105      14.574 -10.819   8.376  1.00 62.11           C  
ATOM   3220  C   GLU L 105      15.916 -10.294   8.843  1.00 61.11           C  
ATOM   3221  O   GLU L 105      16.760  -9.948   8.021  1.00 12.00           O  
ATOM   3222  CB  GLU L 105      14.632 -12.343   8.386  1.00 34.14           C  
ATOM   3223  CG  GLU L 105      13.346 -13.063   8.038  1.00 15.11           C  
ATOM   3224  CD  GLU L 105      12.266 -12.840   9.056  1.00  3.04           C  
ATOM   3225  OE1 GLU L 105      12.442 -13.252  10.227  1.00 33.12           O  
ATOM   3226  OE2 GLU L 105      11.211 -12.296   8.711  1.00 62.12           O  
ATOM   3227  H   GLU L 105      15.027 -10.499   6.361  1.00 37.74           H  
ATOM   3228  HA  GLU L 105      13.781 -10.486   9.029  1.00 33.50           H  
ATOM   3229  HB2 GLU L 105      15.379 -12.649   7.669  1.00 37.74           H  
ATOM   3230  HB3 GLU L 105      14.956 -12.662   9.367  1.00 37.74           H  
ATOM   3231  HG2 GLU L 105      12.999 -12.691   7.086  1.00 37.74           H  
ATOM   3232  HG3 GLU L 105      13.546 -14.121   7.958  1.00 37.74           H  
ATOM   3233  N   ILE L 106      16.115 -10.219  10.127  1.00 64.24           N  
ATOM   3234  CA  ILE L 106      17.412  -9.847  10.655  1.00 32.52           C  
ATOM   3235  C   ILE L 106      18.198 -11.064  11.089  1.00 11.12           C  
ATOM   3236  O   ILE L 106      17.673 -11.941  11.788  1.00 12.21           O  
ATOM   3237  CB  ILE L 106      17.371  -8.723  11.778  1.00 51.34           C  
ATOM   3238  CG1 ILE L 106      17.267  -7.332  11.134  1.00 62.21           C  
ATOM   3239  CG2 ILE L 106      18.591  -8.774  12.702  1.00 12.30           C  
ATOM   3240  CD1 ILE L 106      17.088  -6.189  12.111  1.00 61.33           C  
ATOM   3241  H   ILE L 106      15.379 -10.431  10.742  1.00 37.74           H  
ATOM   3242  HA  ILE L 106      17.945  -9.452   9.800  1.00 53.34           H  
ATOM   3243  HB  ILE L 106      16.490  -8.885  12.381  1.00 12.03           H  
ATOM   3244 HG12 ILE L 106      18.221  -7.160  10.653  1.00 37.74           H  
ATOM   3245 HG13 ILE L 106      16.518  -7.275  10.369  1.00 37.74           H  
ATOM   3246 HG21 ILE L 106      18.502  -8.014  13.464  1.00 37.74           H  
ATOM   3247 HG22 ILE L 106      19.482  -8.590  12.121  1.00 37.74           H  
ATOM   3248 HG23 ILE L 106      18.662  -9.748  13.163  1.00 37.74           H  
ATOM   3249 HD11 ILE L 106      17.062  -5.260  11.558  1.00 37.74           H  
ATOM   3250 HD12 ILE L 106      17.925  -6.171  12.791  1.00 37.74           H  
ATOM   3251 HD13 ILE L 106      16.168  -6.310  12.661  1.00 37.74           H  
ATOM   3252  N   LYS L 107      19.442 -11.133  10.633  1.00 20.52           N  
ATOM   3253  CA  LYS L 107      20.340 -12.194  11.041  1.00 33.22           C  
ATOM   3254  C   LYS L 107      20.706 -11.937  12.491  1.00 30.23           C  
ATOM   3255  O   LYS L 107      21.123 -10.816  12.824  1.00 32.24           O  
ATOM   3256  CB  LYS L 107      21.654 -12.187  10.236  1.00 64.45           C  
ATOM   3257  CG  LYS L 107      21.595 -12.423   8.726  1.00 41.05           C  
ATOM   3258  CD  LYS L 107      23.041 -12.456   8.184  1.00  2.11           C  
ATOM   3259  CE  LYS L 107      23.156 -12.797   6.692  1.00 44.11           C  
ATOM   3260  NZ  LYS L 107      22.653 -11.742   5.788  1.00 35.35           N  
ATOM   3261  H   LYS L 107      19.731 -10.425  10.021  1.00 37.74           H  
ATOM   3262  HA  LYS L 107      19.845 -13.145  10.934  1.00  4.30           H  
ATOM   3263  HB2 LYS L 107      22.081 -11.212  10.376  1.00 37.74           H  
ATOM   3264  HB3 LYS L 107      22.322 -12.911  10.675  1.00 37.74           H  
ATOM   3265  HG2 LYS L 107      21.102 -13.363   8.528  1.00 37.74           H  
ATOM   3266  HG3 LYS L 107      21.060 -11.613   8.252  1.00 37.74           H  
ATOM   3267  HD2 LYS L 107      23.487 -11.485   8.338  1.00 37.74           H  
ATOM   3268  HD3 LYS L 107      23.597 -13.184   8.755  1.00 37.74           H  
ATOM   3269  HE2 LYS L 107      24.188 -12.992   6.446  1.00 37.74           H  
ATOM   3270  HE3 LYS L 107      22.574 -13.690   6.531  1.00 37.74           H  
ATOM   3271  HZ1 LYS L 107      22.848 -12.042   4.811  1.00 37.74           H  
ATOM   3272  HZ2 LYS L 107      23.102 -10.804   5.905  1.00 37.74           H  
ATOM   3273  HZ3 LYS L 107      21.619 -11.637   5.826  1.00 37.74           H  
ATOM   3274  N   ARG L 108      20.545 -12.955  13.323  1.00 53.11           N  
ATOM   3275  CA  ARG L 108      20.818 -12.888  14.764  1.00 24.51           C  
ATOM   3276  C   ARG L 108      19.757 -12.058  15.489  1.00 43.02           C  
ATOM   3277  O   ARG L 108      19.908 -10.829  15.628  1.00 37.74           O  
ATOM   3278  CB  ARG L 108      22.231 -12.375  15.056  1.00 44.01           C  
ATOM   3279  CG  ARG L 108      22.577 -12.279  16.521  1.00 12.33           C  
ATOM   3280  CD  ARG L 108      23.950 -11.698  16.687  1.00 71.13           C  
ATOM   3281  NE  ARG L 108      24.319 -11.536  18.084  1.00 61.34           N  
ATOM   3282  CZ  ARG L 108      25.276 -10.710  18.513  1.00 72.42           C  
ATOM   3283  NH1 ARG L 108      25.955  -9.961  17.645  1.00 40.22           N  
ATOM   3284  NH2 ARG L 108      25.550 -10.629  19.800  1.00 24.45           N  
ATOM   3285  OXT ARG L 108      18.744 -12.644  15.913  1.00 37.74           O  
ATOM   3286  H   ARG L 108      20.211 -13.795  12.949  1.00 37.74           H  
ATOM   3287  HA  ARG L 108      20.729 -13.902  15.124  1.00 21.04           H  
ATOM   3288  HB2 ARG L 108      22.943 -13.041  14.593  1.00 37.74           H  
ATOM   3289  HB3 ARG L 108      22.338 -11.395  14.615  1.00 37.74           H  
ATOM   3290  HG2 ARG L 108      21.859 -11.642  17.013  1.00 37.74           H  
ATOM   3291  HG3 ARG L 108      22.554 -13.268  16.958  1.00 37.74           H  
ATOM   3292  HD2 ARG L 108      24.664 -12.356  16.213  1.00 37.74           H  
ATOM   3293  HD3 ARG L 108      23.977 -10.732  16.204  1.00 37.74           H  
ATOM   3294  HE  ARG L 108      23.807 -12.092  18.715  1.00 11.21           H  
ATOM   3295 HH11 ARG L 108      25.780  -9.987  16.656  1.00 37.74           H  
ATOM   3296 HH12 ARG L 108      26.678  -9.326  17.928  1.00 37.74           H  
ATOM   3297 HH21 ARG L 108      25.066 -11.170  20.492  1.00 37.74           H  
ATOM   3298 HH22 ARG L 108      26.262 -10.012  20.144  1.00 37.74           H  
TER    3299      ARG L 108                                                      
