# Supplementary material for: SARS-CoV-2 Spike Protein Interaction Space
Source: Int J Mol Sci. 2023 Jul 27;24(15):12058. doi: 10.3390/ijms241512058 (PMC10418891; doi:10.3390/ijms241512058)
Supplement: Supplementary file 1 [file ijms-24-12058-s001.zip › Supplementary Material File S1/2MCG.pdb]

REMARK 950 NUMBERING  Kabat
REMARK 950 METHOD     X-ray crystal structure
REMARK 950 RESOLUTION 2.000
REMARK 950 R-FACTOR   0.187
REMARK 950 R-FREE     0.000
REMARK 950 CHAIN-TYPE LABEL ORIGINAL
REMARK 950 CHAIN L    L    1
REMARK 950 CHAIN L    L    2
REMARK 950 MOLECULE : 1 : IMMUNOGLOBULIN LAMBDA DIMER MCG (LIGHT CHAIN)
REMARK 950 SPECIES  : 1 : HOMO SAPIENS
SEQRES L 1  216  PCA SER ALA LEU THR GLN PRO PRO SER ALA SER GLY SER          
SEQRES   2 L 216  LEU GLY GLN SER VAL THR ILE SER CYS THR GLY THR SER          
SEQRES   3 L 216  SER ASP VAL GLY GLY TYR ASN TYR VAL SER TRP TYR GLN          
SEQRES   4 L 216  GLN HIS ALA GLY LYS ALA PRO LYS VAL ILE ILE TYR GLU          
SEQRES   5 L 216  VAL ASN LYS ARG PRO SER GLY VAL PRO ASP ARG PHE SER          
SEQRES   6 L 216  GLY SER LYS SER GLY ASN THR ALA SER LEU THR VAL SER          
SEQRES   7 L 216  GLY LEU GLN ALA GLU ASP GLU ALA ASP TYR TYR CYS SER          
SEQRES   8 L 216  SER TYR GLU GLY SER ASP ASN PHE VAL PHE GLY THR GLY          
SEQRES   9 L 216  THR LYS VAL THR VAL LEU GLY GLN PRO LYS ALA ASN PRO          
SEQRES  10 L 216  THR VAL THR LEU PHE PRO PRO SER SER GLU GLU LEU GLN          
SEQRES  11 L 216  ALA ASN LYS ALA THR LEU VAL CYS LEU ILE SER ASP PHE          
SEQRES  12 L 216  TYR PRO GLY ALA VAL THR VAL ALA TRP LYS ALA ASP GLY          
SEQRES  13 L 216  SER PRO VAL LYS ALA GLY VAL GLU THR THR LYS PRO SER          
SEQRES  14 L 216  LYS GLN SER ASN ASN LYS TYR ALA ALA SER SER TYR LEU          
SEQRES  15 L 216  SER LEU THR PRO GLU GLN TRP LYS SER HIS ARG SER TYR          
SEQRES  16 L 216  SER CYS GLN VAL THR HIS GLU GLY SER THR VAL GLU LYS          
SEQRES  17 L 216  THR VAL ALA PRO THR GLU CYS SER                              
SEQRES L 2  216  PCA SER ALA LEU THR GLN PRO PRO SER ALA SER GLY SER          
SEQRES L 1  216  PCA SER ALA LEU THR GLN PRO PRO SER ALA SER GLY SER          
SEQRES   2 L 216  LEU GLY GLN SER VAL THR ILE SER CYS THR GLY THR SER          
SEQRES   3 L 216  SER ASP VAL GLY GLY TYR ASN TYR VAL SER TRP TYR GLN          
SEQRES   4 L 216  GLN HIS ALA GLY LYS ALA PRO LYS VAL ILE ILE TYR GLU          
SEQRES   5 L 216  VAL ASN LYS ARG PRO SER GLY VAL PRO ASP ARG PHE SER          
SEQRES   6 L 216  GLY SER LYS SER GLY ASN THR ALA SER LEU THR VAL SER          
SEQRES   7 L 216  GLY LEU GLN ALA GLU ASP GLU ALA ASP TYR TYR CYS SER          
SEQRES   8 L 216  SER TYR GLU GLY SER ASP ASN PHE VAL PHE GLY THR GLY          
SEQRES   9 L 216  THR LYS VAL THR VAL LEU GLY GLN PRO LYS ALA ASN PRO          
SEQRES  10 L 216  THR VAL THR LEU PHE PRO PRO SER SER GLU GLU LEU GLN          
SEQRES  11 L 216  ALA ASN LYS ALA THR LEU VAL CYS LEU ILE SER ASP PHE          
SEQRES  12 L 216  TYR PRO GLY ALA VAL THR VAL ALA TRP LYS ALA ASP GLY          
SEQRES  13 L 216  SER PRO VAL LYS ALA GLY VAL GLU THR THR LYS PRO SER          
SEQRES  14 L 216  LYS GLN SER ASN ASN LYS TYR ALA ALA SER SER TYR LEU          
SEQRES  15 L 216  SER LEU THR PRO GLU GLN TRP LYS SER HIS ARG SER TYR          
SEQRES  16 L 216  SER CYS GLN VAL THR HIS GLU GLY SER THR VAL GLU LYS          
SEQRES  17 L 216  THR VAL ALA PRO THR GLU CYS SER                              
SEQRES L 2  216  PCA SER ALA LEU THR GLN PRO PRO SER ALA SER GLY SER          
ATOM      9  N   SER L   2      25.548 -22.930 103.333  1.00 16.05           N  
ATOM     10  CA  SER L   2      26.608 -22.758 104.327  1.00 15.38           C  
ATOM     11  C   SER L   2      27.351 -24.076 104.604  1.00 14.81           C  
ATOM     12  O   SER L   2      27.530 -24.949 103.740  1.00 15.00           O  
ATOM     13  CB  SER L   2      25.887 -22.406 105.682  1.00 15.73           C  
ATOM     14  OG  SER L   2      25.193 -23.586 106.117  1.00 15.14           O  
ATOM     15  N   ALA L   3      27.758 -24.228 105.876  1.00 13.72           N  
ATOM     16  CA  ALA L   3      28.328 -25.397 106.456  1.00 12.33           C  
ATOM     17  C   ALA L   3      29.255 -26.303 105.686  1.00 11.58           C  
ATOM     18  O   ALA L   3      29.033 -27.552 105.641  1.00 11.28           O  
ATOM     19  CB  ALA L   3      27.101 -26.228 106.998  1.00 12.39           C  
ATOM     20  N   LEU L   4      30.279 -25.716 105.041  1.00 10.60           N  
ATOM     21  CA  LEU L   4      31.406 -26.518 104.496  1.00  9.39           C  
ATOM     22  C   LEU L   4      32.658 -25.786 105.165  1.00  8.90           C  
ATOM     23  O   LEU L   4      32.890 -24.586 104.967  1.00  8.74           O  
ATOM     24  CB  LEU L   4      31.615 -26.794 103.141  1.00  8.79           C  
ATOM     25  CG  LEU L   4      31.552 -27.440 101.860  1.00  8.37           C  
ATOM     26  CD1 LEU L   4      32.732 -26.945 100.970  1.00  7.99           C  
ATOM     27  CD2 LEU L   4      31.706 -28.963 102.016  1.00  8.09           C  
ATOM     28  N   THR L   5      33.344 -26.654 105.840  1.00  8.27           N  
ATOM     29  CA  THR L   5      34.362 -26.107 106.820  1.00  7.76           C  
ATOM     30  C   THR L   5      35.732 -26.341 106.299  1.00  7.69           C  
ATOM     31  O   THR L   5      36.032 -27.394 105.679  1.00  7.65           O  
ATOM     32  CB  THR L   5      33.819 -26.681 108.192  1.00  7.39           C  
ATOM     33  OG1 THR L   5      33.133 -25.616 108.904  1.00  6.49           O  
ATOM     34  CG2 THR L   5      34.812 -27.439 109.019  1.00  7.62           C  
ATOM     35  N   GLN L   6      36.613 -25.336 106.497  1.00  7.49           N  
ATOM     36  CA  GLN L   6      38.001 -25.354 106.015  1.00  7.19           C  
ATOM     37  C   GLN L   6      38.985 -24.804 107.051  1.00  7.14           C  
ATOM     38  O   GLN L   6      38.673 -23.779 107.683  1.00  7.21           O  
ATOM     39  CB  GLN L   6      38.118 -24.501 104.749  1.00  6.83           C  
ATOM     40  CG  GLN L   6      37.717 -25.202 103.474  1.00  6.58           C  
ATOM     41  CD  GLN L   6      37.629 -24.205 102.342  1.00  6.25           C  
ATOM     42  OE1 GLN L   6      36.622 -24.044 101.669  1.00  6.66           O  
ATOM     43  NE2 GLN L   6      38.753 -23.518 102.152  1.00  6.36           N  
ATOM     44  N   PRO L   7      40.117 -25.492 107.181  1.00  6.97           N  
ATOM     45  CA  PRO L   7      41.209 -25.003 108.028  1.00  6.86           C  
ATOM     46  C   PRO L   7      41.527 -23.536 107.675  1.00  6.52           C  
ATOM     47  O   PRO L   7      41.646 -23.225 106.469  1.00  6.76           O  
ATOM     48  CB  PRO L   7      42.412 -25.885 107.714  1.00  6.99           C  
ATOM     49  CG  PRO L   7      41.890 -27.020 106.872  1.00  7.10           C  
ATOM     50  CD  PRO L   7      40.627 -26.461 106.184  1.00  7.01           C  
ATOM     51  N   PRO L   8      41.571 -22.733 108.720  1.00  6.07           N  
ATOM     52  CA  PRO L   8      41.973 -21.341 108.566  1.00  6.06           C  
ATOM     53  C   PRO L   8      43.428 -21.257 108.233  1.00  5.91           C  
ATOM     54  O   PRO L   8      44.106 -21.875 109.142  1.00  6.10           O  
ATOM     55  CB  PRO L   8      41.796 -20.805 110.027  1.00  6.16           C  
ATOM     56  CG  PRO L   8      40.865 -21.704 110.742  1.00  5.97           C  
ATOM     57  CD  PRO L   8      40.586 -22.887 109.859  1.00  6.07           C  
ATOM     58  N   SER L   9      43.950 -20.630 107.257  1.00  5.71           N  
ATOM     59  CA  SER L   9      45.431 -20.664 107.030  1.00  5.87           C  
ATOM     60  C   SER L   9      46.093 -22.037 107.002  1.00  5.54           C  
ATOM     61  O   SER L   9      46.050 -22.782 107.969  1.00  5.78           O  
ATOM     62  CB  SER L   9      46.148 -19.839 108.145  1.00  5.80           C  
ATOM     63  OG  SER L   9      47.548 -19.834 108.103  1.00  4.68           O  
ATOM     64  N   ALA L  11      46.795 -22.332 105.946  1.00  5.61           N  
ATOM     65  CA  ALA L  11      47.616 -23.535 105.753  1.00  5.61           C  
ATOM     66  C   ALA L  11      48.945 -23.026 105.178  1.00  5.63           C  
ATOM     67  O   ALA L  11      48.907 -22.277 104.178  1.00  5.99           O  
ATOM     68  CB  ALA L  11      46.998 -24.535 104.820  1.00  5.60           C  
ATOM     69  N   SER L  12      50.030 -23.451 105.727  1.00  5.60           N  
ATOM     70  CA  SER L  12      51.353 -22.860 105.413  1.00  5.35           C  
ATOM     71  C   SER L  12      52.256 -23.877 104.764  1.00  5.37           C  
ATOM     72  O   SER L  12      52.036 -25.094 104.851  1.00  5.26           O  
ATOM     73  CB  SER L  12      51.925 -22.283 106.688  1.00  5.54           C  
ATOM     74  OG  SER L  12      51.241 -22.865 107.846  1.00  4.84           O  
ATOM     75  N   GLY L  13      53.281 -23.334 104.154  1.00  5.35           N  
ATOM     76  CA  GLY L  13      54.216 -24.171 103.340  1.00  5.28           C  
ATOM     77  C   GLY L  13      55.516 -23.404 103.167  1.00  4.89           C  
ATOM     78  O   GLY L  13      55.523 -22.182 103.253  1.00  5.07           O  
ATOM     79  N   SER L  14      56.518 -24.151 102.873  1.00  5.06           N  
ATOM     80  CA  SER L  14      57.909 -23.713 102.866  1.00  5.25           C  
ATOM     81  C   SER L  14      58.329 -22.932 101.641  1.00  5.32           C  
ATOM     82  O   SER L  14      59.126 -21.982 101.769  1.00  5.37           O  
ATOM     83  CB  SER L  14      58.788 -24.980 103.029  1.00  5.86           C  
ATOM     84  OG  SER L  14      58.227 -25.998 103.870  1.00  5.43           O  
ATOM     85  N   LEU L  15      57.800 -23.306 100.485  1.00  5.12           N  
ATOM     86  CA  LEU L  15      58.248 -22.901  99.168  1.00  4.86           C  
ATOM     87  C   LEU L  15      59.018 -24.163  98.624  1.00  5.09           C  
ATOM     88  O   LEU L  15      60.232 -24.253  98.811  1.00  5.00           O  
ATOM     89  CB  LEU L  15      59.199 -21.723  98.953  1.00  3.66           C  
ATOM     90  CG  LEU L  15      59.446 -21.436  97.426  1.00  2.92           C  
ATOM     91  CD1 LEU L  15      58.436 -20.371  97.014  1.00  2.36           C  
ATOM     92  CD2 LEU L  15      60.824 -20.982  97.066  1.00  2.00           C  
ATOM     93  N   GLY L  16      58.256 -25.034  98.040  1.00  5.36           N  
ATOM     94  CA  GLY L  16      58.838 -26.289  97.495  1.00  5.59           C  
ATOM     95  C   GLY L  16      58.042 -27.419  98.153  1.00  5.94           C  
ATOM     96  O   GLY L  16      58.065 -28.531  97.603  1.00  6.20           O  
ATOM     97  N   GLN L  17      57.353 -27.063  99.265  1.00  6.21           N  
ATOM     98  CA  GLN L  17      56.734 -28.227  99.992  1.00  6.30           C  
ATOM     99  C   GLN L  17      55.362 -28.450  99.447  1.00  6.34           C  
ATOM    100  O   GLN L  17      55.011 -27.708  98.494  1.00  6.28           O  
ATOM    101  CB  GLN L  17      57.068 -28.336 101.433  1.00  7.73           C  
ATOM    102  CG  GLN L  17      58.014 -29.639 101.544  1.00  8.67           C  
ATOM    103  CD  GLN L  17      56.952 -30.766 101.572  1.00  9.68           C  
ATOM    104  OE1 GLN L  17      56.345 -30.900 102.660  1.00  9.96           O  
ATOM    105  NE2 GLN L  17      56.753 -31.400 100.442  1.00  9.39           N  
ATOM    106  N   SER L  18      54.714 -29.531  99.847  1.00  6.02           N  
ATOM    107  CA  SER L  18      53.361 -29.829  99.393  1.00  5.86           C  
ATOM    108  C   SER L  18      52.398 -29.591 100.583  1.00  5.94           C  
ATOM    109  O   SER L  18      52.681 -29.984 101.752  1.00  5.86           O  
ATOM    110  CB  SER L  18      53.212 -31.251  98.945  1.00  5.99           C  
ATOM    111  OG  SER L  18      52.390 -31.977  99.873  1.00  5.82           O  
ATOM    112  N   VAL L  19      51.288 -29.001 100.232  1.00  5.74           N  
ATOM    113  CA  VAL L  19      50.275 -28.626 101.243  1.00  5.84           C  
ATOM    114  C   VAL L  19      48.993 -29.385 100.901  1.00  5.66           C  
ATOM    115  O   VAL L  19      48.950 -30.074  99.849  1.00  5.76           O  
ATOM    116  CB  VAL L  19      50.156 -27.113 101.381  1.00  5.75           C  
ATOM    117  CG1 VAL L  19      49.013 -26.526 100.544  1.00  6.24           C  
ATOM    118  CG2 VAL L  19      50.037 -26.742 102.840  1.00  5.98           C  
ATOM    119  N   THR L  20      48.075 -29.300 101.812  1.00  5.46           N  
ATOM    120  CA  THR L  20      46.762 -29.916 101.704  1.00  5.49           C  
ATOM    121  C   THR L  20      45.843 -29.013 102.557  1.00  5.44           C  
ATOM    122  O   THR L  20      46.269 -28.529 103.595  1.00  5.27           O  
ATOM    123  CB  THR L  20      46.696 -31.374 102.226  1.00  6.14           C  
ATOM    124  OG1 THR L  20      48.060 -31.915 101.990  1.00  7.33           O  
ATOM    125  CG2 THR L  20      45.600 -32.256 101.635  1.00  6.13           C  
ATOM    126  N   ILE L  21      44.672 -28.805 102.013  1.00  5.27           N  
ATOM    127  CA  ILE L  21      43.598 -28.034 102.604  1.00  4.88           C  
ATOM    128  C   ILE L  21      42.427 -29.046 102.567  1.00  4.99           C  
ATOM    129  O   ILE L  21      42.344 -29.719 101.513  1.00  5.09           O  
ATOM    130  CB  ILE L  21      43.164 -26.789 101.769  1.00  4.31           C  
ATOM    131  CG1 ILE L  21      44.356 -25.934 101.271  1.00  4.23           C  
ATOM    132  CG2 ILE L  21      42.079 -25.931 102.451  1.00  3.94           C  
ATOM    133  CD1 ILE L  21      45.762 -26.324 101.672  1.00  3.20           C  
ATOM    134  N   SER L  22      41.665 -29.091 103.600  1.00  5.13           N  
ATOM    135  CA  SER L  22      40.527 -30.025 103.665  1.00  5.42           C  
ATOM    136  C   SER L  22      39.248 -29.222 103.448  1.00  5.77           C  
ATOM    137  O   SER L  22      39.331 -27.993 103.264  1.00  5.85           O  
ATOM    138  CB  SER L  22      40.515 -30.753 104.987  1.00  5.32           C  
ATOM    139  OG  SER L  22      40.136 -29.890 106.063  1.00  5.28           O  
ATOM    140  N   CYS L  23      38.127 -29.909 103.455  1.00  6.09           N  
ATOM    141  CA  CYS L  23      36.813 -29.250 103.297  1.00  6.60           C  
ATOM    142  C   CYS L  23      35.795 -30.258 103.799  1.00  7.38           C  
ATOM    143  O   CYS L  23      35.586 -31.157 102.951  1.00  7.56           O  
ATOM    144  CB  CYS L  23      36.668 -28.849 101.853  1.00  6.02           C  
ATOM    145  SG  CYS L  23      35.203 -28.149 101.172  1.00  5.50           S  
ATOM    146  N   THR L  24      35.234 -30.092 104.998  1.00  7.95           N  
ATOM    147  CA  THR L  24      34.220 -31.108 105.402  1.00  9.26           C  
ATOM    148  C   THR L  24      32.833 -30.582 105.498  1.00  9.95           C  
ATOM    149  O   THR L  24      32.717 -29.362 105.251  1.00  9.93           O  
ATOM    150  CB  THR L  24      34.745 -31.793 106.721  1.00  9.85           C  
ATOM    151  OG1 THR L  24      36.210 -31.730 106.565  1.00 10.55           O  
ATOM    152  CG2 THR L  24      34.181 -33.225 106.900  1.00 10.20           C  
ATOM    153  N   GLY L  25      31.818 -31.410 105.807  1.00 10.83           N  
ATOM    154  CA  GLY L  25      30.438 -30.926 105.980  1.00 12.17           C  
ATOM    155  C   GLY L  25      29.458 -31.709 106.818  1.00 13.15           C  
ATOM    156  O   GLY L  25      29.722 -32.349 107.852  1.00 13.10           O  
ATOM    157  N   THR L  26      28.175 -31.617 106.476  1.00 14.25           N  
ATOM    158  CA  THR L  26      27.000 -32.292 106.956  1.00 15.59           C  
ATOM    159  C   THR L  26      26.367 -33.199 105.816  1.00 16.32           C  
ATOM    160  O   THR L  26      25.731 -33.052 104.753  1.00 16.63           O  
ATOM    161  CB  THR L  26      25.892 -31.612 107.774  1.00 16.11           C  
ATOM    162  OG1 THR L  26      24.941 -32.764 108.108  1.00 16.09           O  
ATOM    163  CG2 THR L  26      25.107 -30.426 107.205  1.00 16.36           C  
ATOM    164  N   SER L  27      26.719 -34.432 106.076  1.00 17.06           N  
ATOM    165  CA  SER L  27      26.669 -35.699 105.502  1.00 17.84           C  
ATOM    166  C   SER L  27      25.911 -35.958 104.221  1.00 18.15           C  
ATOM    167  O   SER L  27      26.491 -35.914 103.154  1.00 18.09           O  
ATOM    168  CB  SER L  27      26.119 -36.762 106.532  1.00 18.17           C  
ATOM    169  OG  SER L  27      26.198 -38.036 105.857  1.00 18.79           O  
ATOM    170  N   SER L  27A     24.687 -36.353 104.431  1.00 18.75           N  
ATOM    171  CA  SER L  27A     23.738 -36.734 103.370  1.00 19.38           C  
ATOM    172  C   SER L  27A     23.781 -35.627 102.323  1.00 19.65           C  
ATOM    173  O   SER L  27A     22.745 -34.983 102.037  1.00 20.04           O  
ATOM    174  CB  SER L  27A     22.328 -36.983 103.892  1.00 19.45           C  
ATOM    175  OG  SER L  27A     22.327 -37.554 105.193  1.00 19.42           O  
ATOM    176  N   ASP L  27B     24.988 -35.287 101.933  1.00 19.88           N  
ATOM    177  CA  ASP L  27B     25.215 -34.326 100.825  1.00 19.90           C  
ATOM    178  C   ASP L  27B     26.692 -33.907 100.929  1.00 20.12           C  
ATOM    179  O   ASP L  27B     27.512 -34.203 100.038  1.00 20.20           O  
ATOM    180  CB  ASP L  27B     24.196 -33.227 100.795  1.00 19.60           C  
ATOM    181  CG  ASP L  27B     24.567 -31.854 100.323  1.00 19.66           C  
ATOM    182  OD1 ASP L  27B     23.747 -30.916 100.468  1.00 19.59           O  
ATOM    183  OD2 ASP L  27B     25.680 -31.641  99.782  1.00 19.44           O  
ATOM    184  N   VAL L  27C     26.940 -33.252 102.109  1.00 19.97           N  
ATOM    185  CA  VAL L  27C     28.336 -32.740 102.269  1.00 19.97           C  
ATOM    186  C   VAL L  27C     29.272 -33.937 101.975  1.00 19.77           C  
ATOM    187  O   VAL L  27C     29.465 -34.857 102.751  1.00 19.72           O  
ATOM    188  CB  VAL L  27C     28.611 -32.028 103.569  1.00 20.08           C  
ATOM    189  CG1 VAL L  27C     27.530 -31.003 103.864  1.00 20.02           C  
ATOM    190  CG2 VAL L  27C     28.875 -33.096 104.615  1.00 20.12           C  
ATOM    191  N   GLY L  28      29.783 -33.805 100.767  1.00 19.68           N  
ATOM    192  CA  GLY L  28      30.724 -34.735 100.155  1.00 19.43           C  
ATOM    193  C   GLY L  28      29.914 -35.836  99.497  1.00 19.26           C  
ATOM    194  O   GLY L  28      30.174 -36.124  98.308  1.00 19.45           O  
ATOM    195  N   GLY L  29      28.958 -36.306 100.273  1.00 19.02           N  
ATOM    196  CA  GLY L  29      28.092 -37.455  99.761  1.00 18.78           C  
ATOM    197  C   GLY L  29      27.812 -36.948  98.306  1.00 18.62           C  
ATOM    198  O   GLY L  29      27.556 -37.615  97.345  1.00 18.42           O  
ATOM    199  N   TYR L  30      27.952 -35.618  98.298  1.00 18.43           N  
ATOM    200  CA  TYR L  30      27.832 -34.706  97.242  1.00 17.94           C  
ATOM    201  C   TYR L  30      28.769 -34.739  96.082  1.00 17.29           C  
ATOM    202  O   TYR L  30      28.553 -33.773  95.259  1.00 17.42           O  
ATOM    203  CB  TYR L  30      27.719 -33.171  97.713  1.00 18.84           C  
ATOM    204  CG  TYR L  30      26.226 -32.973  97.421  1.00 19.71           C  
ATOM    205  CD1 TYR L  30      25.297 -33.606  98.224  1.00 19.88           C  
ATOM    206  CD2 TYR L  30      25.782 -32.370  96.246  1.00 20.14           C  
ATOM    207  CE1 TYR L  30      23.932 -33.494  97.992  1.00 20.45           C  
ATOM    208  CE2 TYR L  30      24.433 -32.267  95.956  1.00 20.58           C  
ATOM    209  CZ  TYR L  30      23.505 -32.811  96.852  1.00 20.95           C  
ATOM    210  OH  TYR L  30      22.161 -32.699  96.571  1.00 21.64           O  
ATOM    211  N   ASN L  31      29.739 -35.577  96.040  1.00 16.41           N  
ATOM    212  CA  ASN L  31      30.461 -35.819  94.759  1.00 15.53           C  
ATOM    213  C   ASN L  31      30.626 -34.737  93.727  1.00 14.89           C  
ATOM    214  O   ASN L  31      31.061 -35.004  92.580  1.00 14.77           O  
ATOM    215  CB  ASN L  31      29.651 -37.079  94.248  1.00 15.57           C  
ATOM    216  CG  ASN L  31      30.053 -38.293  95.125  1.00 15.32           C  
ATOM    217  OD1 ASN L  31      30.749 -38.137  96.147  1.00 15.15           O  
ATOM    218  ND2 ASN L  31      29.630 -39.472  94.645  1.00 14.91           N  
ATOM    219  N   TYR L  32      30.242 -33.514  94.000  1.00 14.29           N  
ATOM    220  CA  TYR L  32      30.557 -32.306  93.277  1.00 13.60           C  
ATOM    221  C   TYR L  32      31.628 -31.761  94.268  1.00 13.14           C  
ATOM    222  O   TYR L  32      32.184 -32.682  94.989  1.00 13.43           O  
ATOM    223  CB  TYR L  32      29.545 -31.269  92.814  1.00 14.21           C  
ATOM    224  CG  TYR L  32      29.787 -30.986  91.322  1.00 14.98           C  
ATOM    225  CD1 TYR L  32      28.943 -31.549  90.342  1.00 15.42           C  
ATOM    226  CD2 TYR L  32      30.910 -30.274  90.896  1.00 15.14           C  
ATOM    227  CE1 TYR L  32      29.187 -31.374  88.975  1.00 15.35           C  
ATOM    228  CE2 TYR L  32      31.175 -30.092  89.544  1.00 15.62           C  
ATOM    229  CZ  TYR L  32      30.301 -30.641  88.572  1.00 15.53           C  
ATOM    230  OH  TYR L  32      30.616 -30.421  87.261  1.00 15.29           O  
ATOM    231  N   VAL L  33      31.933 -30.531  94.311  1.00 12.25           N  
ATOM    232  CA  VAL L  33      32.955 -30.003  95.186  1.00 11.08           C  
ATOM    233  C   VAL L  33      34.036 -29.552  94.153  1.00 10.59           C  
ATOM    234  O   VAL L  33      34.647 -30.463  93.614  1.00 10.34           O  
ATOM    235  CB  VAL L  33      33.606 -30.953  96.175  1.00 10.98           C  
ATOM    236  CG1 VAL L  33      34.694 -30.200  97.001  1.00 10.82           C  
ATOM    237  CG2 VAL L  33      32.710 -31.696  97.133  1.00 10.84           C  
ATOM    238  N   SER L  34      34.088 -28.264  94.036  1.00 10.09           N  
ATOM    239  CA  SER L  34      35.165 -27.685  93.141  1.00  9.42           C  
ATOM    240  C   SER L  34      35.916 -26.605  93.896  1.00  8.87           C  
ATOM    241  O   SER L  34      35.250 -25.892  94.697  1.00  8.89           O  
ATOM    242  CB  SER L  34      34.431 -27.155  91.918  1.00  9.30           C  
ATOM    243  OG  SER L  34      33.173 -26.621  92.426  1.00  9.68           O  
ATOM    244  N   TRP L  35      37.194 -26.434  93.653  1.00  8.23           N  
ATOM    245  CA  TRP L  35      38.006 -25.469  94.432  1.00  7.51           C  
ATOM    246  C   TRP L  35      38.213 -24.221  93.591  1.00  7.05           C  
ATOM    247  O   TRP L  35      38.191 -24.356  92.348  1.00  7.30           O  
ATOM    248  CB  TRP L  35      39.323 -26.059  94.880  1.00  7.67           C  
ATOM    249  CG  TRP L  35      39.237 -27.220  95.798  1.00  7.51           C  
ATOM    250  CD1 TRP L  35      39.077 -28.535  95.450  1.00  7.71           C  
ATOM    251  CD2 TRP L  35      39.295 -27.190  97.228  1.00  7.62           C  
ATOM    252  NE1 TRP L  35      39.031 -29.328  96.573  1.00  7.59           N  
ATOM    253  CE2 TRP L  35      39.156 -28.529  97.672  1.00  7.64           C  
ATOM    254  CE3 TRP L  35      39.463 -26.171  98.150  1.00  7.53           C  
ATOM    255  CZ2 TRP L  35      39.172 -28.872  99.018  1.00  7.82           C  
ATOM    256  CZ3 TRP L  35      39.467 -26.506  99.494  1.00  7.97           C  
ATOM    257  CH2 TRP L  35      39.325 -27.827  99.932  1.00  7.61           C  
ATOM    258  N   TYR L  36      38.367 -23.101  94.233  1.00  6.39           N  
ATOM    259  CA  TYR L  36      38.566 -21.825  93.534  1.00  5.71           C  
ATOM    260  C   TYR L  36      39.758 -21.194  94.296  1.00  5.53           C  
ATOM    261  O   TYR L  36      39.696 -21.157  95.564  1.00  5.40           O  
ATOM    262  CB  TYR L  36      37.431 -20.810  93.465  1.00  5.80           C  
ATOM    263  CG  TYR L  36      36.072 -21.381  93.101  1.00  6.23           C  
ATOM    264  CD1 TYR L  36      35.395 -21.042  91.924  1.00  6.25           C  
ATOM    265  CD2 TYR L  36      35.445 -22.271  93.982  1.00  6.37           C  
ATOM    266  CE1 TYR L  36      34.162 -21.592  91.625  1.00  6.45           C  
ATOM    267  CE2 TYR L  36      34.206 -22.826  93.688  1.00  6.54           C  
ATOM    268  CZ  TYR L  36      33.567 -22.487  92.506  1.00  6.60           C  
ATOM    269  OH  TYR L  36      32.356 -23.092  92.257  1.00  6.89           O  
ATOM    270  N   GLN L  37      40.723 -20.801  93.517  1.00  4.56           N  
ATOM    271  CA  GLN L  37      41.877 -20.088  94.095  1.00  4.26           C  
ATOM    272  C   GLN L  37      41.475 -18.641  94.021  1.00  4.24           C  
ATOM    273  O   GLN L  37      40.857 -18.300  92.978  1.00  4.58           O  
ATOM    274  CB  GLN L  37      43.080 -20.455  93.251  1.00  3.52           C  
ATOM    275  CG  GLN L  37      44.237 -19.593  93.625  1.00  3.24           C  
ATOM    276  CD  GLN L  37      45.385 -19.715  92.695  1.00  3.38           C  
ATOM    277  OE1 GLN L  37      46.144 -20.674  92.833  1.00  3.62           O  
ATOM    278  NE2 GLN L  37      45.518 -18.747  91.771  1.00  3.39           N  
ATOM    279  N   GLN L  38      41.673 -17.837  95.021  1.00  4.34           N  
ATOM    280  CA  GLN L  38      41.423 -16.396  94.937  1.00  4.39           C  
ATOM    281  C   GLN L  38      42.572 -15.563  95.491  1.00  4.65           C  
ATOM    282  O   GLN L  38      42.977 -15.588  96.648  1.00  4.68           O  
ATOM    283  CB  GLN L  38      40.104 -15.989  95.532  1.00  4.18           C  
ATOM    284  CG  GLN L  38      40.011 -14.491  95.434  1.00  3.86           C  
ATOM    285  CD  GLN L  38      38.602 -14.096  95.725  1.00  4.10           C  
ATOM    286  OE1 GLN L  38      38.188 -13.139  95.062  1.00  4.85           O  
ATOM    287  NE2 GLN L  38      37.958 -14.767  96.661  1.00  4.63           N  
ATOM    288  N   HIS L  39      43.158 -14.802  94.631  1.00  4.82           N  
ATOM    289  CA  HIS L  39      44.278 -13.918  94.658  1.00  5.01           C  
ATOM    290  C   HIS L  39      43.969 -12.528  95.092  1.00  5.12           C  
ATOM    291  O   HIS L  39      42.935 -12.005  94.599  1.00  5.29           O  
ATOM    292  CB  HIS L  39      44.720 -13.793  93.110  1.00  5.59           C  
ATOM    293  CG  HIS L  39      46.009 -14.571  92.998  1.00  5.89           C  
ATOM    294  ND1 HIS L  39      47.100 -14.117  92.335  1.00  5.81           N  
ATOM    295  CD2 HIS L  39      46.370 -15.707  93.603  1.00  6.07           C  
ATOM    296  CE1 HIS L  39      48.073 -15.000  92.528  1.00  6.29           C  
ATOM    297  NE2 HIS L  39      47.667 -15.982  93.277  1.00  5.88           N  
ATOM    298  N   ALA L  40      44.778 -11.898  95.898  1.00  5.30           N  
ATOM    299  CA  ALA L  40      44.468 -10.542  96.411  1.00  5.51           C  
ATOM    300  C   ALA L  40      43.115 -10.096  95.857  1.00  5.69           C  
ATOM    301  O   ALA L  40      42.074 -10.750  96.205  1.00  5.96           O  
ATOM    302  CB  ALA L  40      45.572  -9.553  96.196  1.00  5.45           C  
ATOM    303  N   GLY L  41      43.107  -9.085  95.019  1.00  5.62           N  
ATOM    304  CA  GLY L  41      41.865  -8.467  94.545  1.00  5.59           C  
ATOM    305  C   GLY L  41      41.422  -8.941  93.177  1.00  5.70           C  
ATOM    306  O   GLY L  41      40.631  -8.281  92.467  1.00  5.88           O  
ATOM    307  N   LYS L  42      41.982 -10.053  92.760  1.00  5.65           N  
ATOM    308  CA  LYS L  42      41.546 -10.796  91.559  1.00  5.29           C  
ATOM    309  C   LYS L  42      40.290 -11.589  91.894  1.00  5.20           C  
ATOM    310  O   LYS L  42      39.818 -11.717  93.050  1.00  5.09           O  
ATOM    311  CB  LYS L  42      42.709 -11.648  91.067  1.00  5.63           C  
ATOM    312  CG  LYS L  42      43.910 -10.678  90.764  1.00  5.78           C  
ATOM    313  CD  LYS L  42      44.673 -11.222  89.541  1.00  6.44           C  
ATOM    314  CE  LYS L  42      45.437 -12.487  89.832  1.00  6.20           C  
ATOM    315  NZ  LYS L  42      45.717 -13.307  88.658  1.00  5.99           N  
ATOM    316  N   ALA L  43      39.654 -12.107  90.887  1.00  4.95           N  
ATOM    317  CA  ALA L  43      38.431 -12.882  90.890  1.00  4.87           C  
ATOM    318  C   ALA L  43      38.771 -14.307  91.240  1.00  4.87           C  
ATOM    319  O   ALA L  43      39.868 -14.743  90.825  1.00  5.02           O  
ATOM    320  CB  ALA L  43      37.884 -12.882  89.427  1.00  4.79           C  
ATOM    321  N   PRO L  44      37.894 -14.965  91.950  1.00  4.90           N  
ATOM    322  CA  PRO L  44      38.115 -16.407  92.247  1.00  5.08           C  
ATOM    323  C   PRO L  44      38.348 -17.045  90.900  1.00  5.15           C  
ATOM    324  O   PRO L  44      37.534 -16.544  90.067  1.00  5.74           O  
ATOM    325  CB  PRO L  44      36.810 -16.849  92.877  1.00  4.99           C  
ATOM    326  CG  PRO L  44      35.811 -15.773  92.604  1.00  4.96           C  
ATOM    327  CD  PRO L  44      36.617 -14.472  92.450  1.00  4.95           C  
ATOM    328  N   LYS L  45      39.326 -17.887  90.669  1.00  5.13           N  
ATOM    329  CA  LYS L  45      39.282 -18.634  89.329  1.00  4.78           C  
ATOM    330  C   LYS L  45      38.863 -20.038  89.712  1.00  4.76           C  
ATOM    331  O   LYS L  45      38.617 -20.172  90.940  1.00  4.76           O  
ATOM    332  CB  LYS L  45      40.544 -18.524  88.617  1.00  4.32           C  
ATOM    333  CG  LYS L  45      41.646 -19.539  88.888  1.00  4.20           C  
ATOM    334  CD  LYS L  45      43.018 -18.845  88.609  1.00  3.89           C  
ATOM    335  CE  LYS L  45      42.823 -18.003  87.354  1.00  4.32           C  
ATOM    336  NZ  LYS L  45      41.897 -18.767  86.438  1.00  4.25           N  
ATOM    337  N   VAL L  46      38.731 -20.990  88.869  1.00  4.78           N  
ATOM    338  CA  VAL L  46      38.290 -22.368  89.206  1.00  4.85           C  
ATOM    339  C   VAL L  46      39.448 -23.335  89.076  1.00  5.12           C  
ATOM    340  O   VAL L  46      39.813 -23.498  87.890  1.00  4.81           O  
ATOM    341  CB  VAL L  46      37.094 -22.761  88.308  1.00  4.74           C  
ATOM    342  CG1 VAL L  46      36.660 -24.200  88.449  1.00  4.17           C  
ATOM    343  CG2 VAL L  46      35.919 -21.798  88.552  1.00  4.23           C  
ATOM    344  N   ILE L  47      39.956 -23.886  90.204  1.00  5.51           N  
ATOM    345  CA  ILE L  47      41.168 -24.727  90.037  1.00  6.21           C  
ATOM    346  C   ILE L  47      40.864 -26.224  89.907  1.00  6.47           C  
ATOM    347  O   ILE L  47      41.690 -26.924  89.236  1.00  6.14           O  
ATOM    348  CB  ILE L  47      42.449 -24.404  90.875  1.00  6.17           C  
ATOM    349  CG1 ILE L  47      42.312 -24.607  92.370  1.00  6.07           C  
ATOM    350  CG2 ILE L  47      43.053 -22.980  90.494  1.00  6.10           C  
ATOM    351  CD1 ILE L  47      43.426 -24.019  93.272  1.00  5.74           C  
ATOM    352  N   ILE L  48      39.751 -26.645  90.429  1.00  6.81           N  
ATOM    353  CA  ILE L  48      39.357 -28.062  90.373  1.00  7.37           C  
ATOM    354  C   ILE L  48      37.827 -28.117  90.290  1.00  7.52           C  
ATOM    355  O   ILE L  48      37.211 -27.219  90.939  1.00  7.85           O  
ATOM    356  CB  ILE L  48      39.822 -28.808  91.684  1.00  7.45           C  
ATOM    357  CG1 ILE L  48      41.340 -28.953  91.825  1.00  7.88           C  
ATOM    358  CG2 ILE L  48      39.075 -30.182  91.849  1.00  7.44           C  
ATOM    359  CD1 ILE L  48      42.123 -30.133  91.258  1.00  7.61           C  
ATOM    360  N   TYR L  49      37.294 -29.108  89.617  1.00  7.46           N  
ATOM    361  CA  TYR L  49      35.850 -29.296  89.535  1.00  7.56           C  
ATOM    362  C   TYR L  49      35.381 -30.743  89.518  1.00  7.67           C  
ATOM    363  O   TYR L  49      36.023 -31.714  89.085  1.00  7.72           O  
ATOM    364  CB  TYR L  49      35.343 -28.529  88.308  1.00  7.90           C  
ATOM    365  CG  TYR L  49      35.768 -29.077  86.953  1.00  8.37           C  
ATOM    366  CD1 TYR L  49      35.029 -30.073  86.325  1.00  8.34           C  
ATOM    367  CD2 TYR L  49      36.876 -28.574  86.274  1.00  8.23           C  
ATOM    368  CE1 TYR L  49      35.393 -30.580  85.086  1.00  8.58           C  
ATOM    369  CE2 TYR L  49      37.249 -29.043  85.040  1.00  8.37           C  
ATOM    370  CZ  TYR L  49      36.506 -30.056  84.449  1.00  8.65           C  
ATOM    371  OH  TYR L  49      36.910 -30.539  83.220  1.00  9.47           O  
ATOM    372  N   GLU L  50      34.155 -30.914  90.030  1.00  7.84           N  
ATOM    373  CA  GLU L  50      33.463 -32.214  90.065  1.00  7.76           C  
ATOM    374  C   GLU L  50      34.339 -33.252  90.777  1.00  8.03           C  
ATOM    375  O   GLU L  50      34.070 -34.474  90.728  1.00  8.01           O  
ATOM    376  CB  GLU L  50      33.257 -32.698  88.689  1.00  7.30           C  
ATOM    377  CG  GLU L  50      32.151 -33.711  88.377  1.00  7.51           C  
ATOM    378  CD  GLU L  50      32.260 -33.874  86.852  1.00  7.75           C  
ATOM    379  OE1 GLU L  50      31.889 -32.947  86.183  1.00  8.01           O  
ATOM    380  OE2 GLU L  50      32.871 -34.876  86.483  1.00  8.32           O  
ATOM    381  N   VAL L  51      35.416 -32.748  91.392  1.00  7.91           N  
ATOM    382  CA  VAL L  51      36.261 -33.387  92.309  1.00  7.53           C  
ATOM    383  C   VAL L  51      37.747 -33.433  92.056  1.00  7.51           C  
ATOM    384  O   VAL L  51      38.414 -32.972  93.011  1.00  7.65           O  
ATOM    385  CB  VAL L  51      35.912 -34.862  92.653  1.00  7.85           C  
ATOM    386  CG1 VAL L  51      34.717 -34.983  93.573  1.00  8.13           C  
ATOM    387  CG2 VAL L  51      35.839 -35.638  91.357  1.00  7.83           C  
ATOM    388  N   ASN L  52      38.175 -34.064  90.985  1.00  7.10           N  
ATOM    389  CA  ASN L  52      39.635 -34.230  90.764  1.00  6.69           C  
ATOM    390  C   ASN L  52      39.984 -33.787  89.325  1.00  6.59           C  
ATOM    391  O   ASN L  52      41.013 -34.216  88.788  1.00  6.57           O  
ATOM    392  CB  ASN L  52      40.018 -35.718  90.888  1.00  5.84           C  
ATOM    393  CG  ASN L  52      39.045 -36.512  90.037  1.00  5.08           C  
ATOM    394  OD1 ASN L  52      38.341 -35.955  89.180  1.00  5.25           O  
ATOM    395  ND2 ASN L  52      38.967 -37.773  90.320  1.00  4.97           N  
ATOM    396  N   LYS L  53      39.087 -32.975  88.845  1.00  6.45           N  
ATOM    397  CA  LYS L  53      39.084 -32.666  87.377  1.00  6.47           C  
ATOM    398  C   LYS L  53      39.640 -31.259  87.306  1.00  6.25           C  
ATOM    399  O   LYS L  53      39.013 -30.329  87.771  1.00  6.42           O  
ATOM    400  CB  LYS L  53      37.725 -32.828  86.867  1.00  6.96           C  
ATOM    401  CG  LYS L  53      36.850 -33.326  85.854  1.00  7.09           C  
ATOM    402  CD  LYS L  53      36.191 -34.690  85.951  1.00  7.36           C  
ATOM    403  CE  LYS L  53      37.157 -35.812  85.525  1.00  7.26           C  
ATOM    404  NZ  LYS L  53      38.426 -35.663  86.276  1.00  6.50           N  
ATOM    405  N   ARG L  54      40.820 -31.210  86.784  1.00  6.57           N  
ATOM    406  CA  ARG L  54      41.502 -29.902  86.494  1.00  6.88           C  
ATOM    407  C   ARG L  54      40.902 -29.444  85.155  1.00  7.17           C  
ATOM    408  O   ARG L  54      40.542 -30.286  84.287  1.00  7.22           O  
ATOM    409  CB  ARG L  54      42.967 -29.957  86.596  1.00  6.19           C  
ATOM    410  CG  ARG L  54      43.853 -30.778  85.774  1.00  5.98           C  
ATOM    411  CD  ARG L  54      45.309 -30.358  86.025  1.00  6.11           C  
ATOM    412  NE  ARG L  54      45.662 -30.881  87.340  1.00  6.07           N  
ATOM    413  CZ  ARG L  54      45.981 -32.165  87.472  1.00  6.25           C  
ATOM    414  NH1 ARG L  54      45.968 -32.994  86.414  1.00  6.51           N  
ATOM    415  NH2 ARG L  54      46.344 -32.607  88.656  1.00  6.52           N  
ATOM    416  N   PRO L  55      40.765 -28.133  85.059  1.00  7.38           N  
ATOM    417  CA  PRO L  55      40.070 -27.533  83.893  1.00  7.52           C  
ATOM    418  C   PRO L  55      40.986 -26.934  82.867  1.00  7.54           C  
ATOM    419  O   PRO L  55      40.466 -26.273  81.917  1.00  7.71           O  
ATOM    420  CB  PRO L  55      39.103 -26.576  84.555  1.00  7.55           C  
ATOM    421  CG  PRO L  55      39.923 -26.032  85.718  1.00  7.51           C  
ATOM    422  CD  PRO L  55      40.786 -27.184  86.196  1.00  7.40           C  
ATOM    423  N   SER L  56      42.279 -27.095  83.012  1.00  7.47           N  
ATOM    424  CA  SER L  56      43.272 -26.821  82.010  1.00  7.72           C  
ATOM    425  C   SER L  56      43.981 -25.556  81.776  1.00  7.64           C  
ATOM    426  O   SER L  56      44.972 -25.906  80.939  1.00  7.94           O  
ATOM    427  CB  SER L  56      42.788 -27.271  80.562  1.00  8.17           C  
ATOM    428  OG  SER L  56      43.388 -28.554  80.337  1.00  8.77           O  
ATOM    429  N   GLY L  57      43.673 -24.323  81.965  1.00  7.45           N  
ATOM    430  CA  GLY L  57      44.870 -23.354  81.993  1.00  7.48           C  
ATOM    431  C   GLY L  57      45.780 -23.789  83.175  1.00  7.59           C  
ATOM    432  O   GLY L  57      46.970 -23.415  83.276  1.00  7.71           O  
ATOM    433  N   VAL L  58      45.250 -24.640  84.045  1.00  7.34           N  
ATOM    434  CA  VAL L  58      45.743 -25.049  85.349  1.00  6.93           C  
ATOM    435  C   VAL L  58      46.798 -26.127  85.414  1.00  7.06           C  
ATOM    436  O   VAL L  58      46.602 -27.332  85.101  1.00  6.99           O  
ATOM    437  CB  VAL L  58      44.412 -25.416  86.159  1.00  6.33           C  
ATOM    438  CG1 VAL L  58      44.230 -26.823  86.605  1.00  5.34           C  
ATOM    439  CG2 VAL L  58      44.076 -24.501  87.315  1.00  5.90           C  
ATOM    440  N   PRO L  59      47.983 -25.733  85.895  1.00  7.15           N  
ATOM    441  CA  PRO L  59      49.161 -26.650  86.021  1.00  7.12           C  
ATOM    442  C   PRO L  59      48.833 -27.915  86.741  1.00  7.17           C  
ATOM    443  O   PRO L  59      47.794 -27.834  87.453  1.00  7.69           O  
ATOM    444  CB  PRO L  59      50.178 -25.769  86.743  1.00  7.05           C  
ATOM    445  CG  PRO L  59      49.304 -24.820  87.568  1.00  7.02           C  
ATOM    446  CD  PRO L  59      48.196 -24.442  86.629  1.00  6.97           C  
ATOM    447  N   ASP L  60      49.573 -28.987  86.784  1.00  7.15           N  
ATOM    448  CA  ASP L  60      49.194 -30.228  87.440  1.00  7.05           C  
ATOM    449  C   ASP L  60      49.559 -30.495  88.883  1.00  7.08           C  
ATOM    450  O   ASP L  60      49.373 -31.737  89.284  1.00  7.09           O  
ATOM    451  CB  ASP L  60      49.557 -31.402  86.510  1.00  7.99           C  
ATOM    452  CG  ASP L  60      50.902 -31.284  85.836  1.00  8.81           C  
ATOM    453  OD1 ASP L  60      51.119 -30.495  84.856  1.00  9.35           O  
ATOM    454  OD2 ASP L  60      51.788 -32.075  86.291  1.00  8.93           O  
ATOM    455  N   ARG L  61      49.927 -29.507  89.691  1.00  6.56           N  
ATOM    456  CA  ARG L  61      50.310 -29.785  91.085  1.00  6.20           C  
ATOM    457  C   ARG L  61      49.001 -29.820  91.894  1.00  5.96           C  
ATOM    458  O   ARG L  61      48.934 -30.540  92.892  1.00  5.95           O  
ATOM    459  CB  ARG L  61      51.218 -28.849  91.831  1.00  6.40           C  
ATOM    460  CG  ARG L  61      52.201 -28.009  91.017  1.00  6.57           C  
ATOM    461  CD  ARG L  61      52.446 -26.683  91.691  1.00  6.33           C  
ATOM    462  NE  ARG L  61      52.329 -25.665  90.773  1.00  6.58           N  
ATOM    463  CZ  ARG L  61      52.235 -24.470  90.381  1.00  7.09           C  
ATOM    464  NH1 ARG L  61      52.224 -23.383  91.145  1.00  6.22           N  
ATOM    465  NH2 ARG L  61      52.118 -24.164  89.044  1.00  7.52           N  
ATOM    466  N   PHE L  62      48.105 -29.006  91.392  1.00  5.80           N  
ATOM    467  CA  PHE L  62      46.742 -28.969  92.007  1.00  5.58           C  
ATOM    468  C   PHE L  62      46.258 -30.401  91.913  1.00  5.69           C  
ATOM    469  O   PHE L  62      46.577 -31.074  90.903  1.00  5.59           O  
ATOM    470  CB  PHE L  62      45.953 -27.855  91.327  1.00  6.07           C  
ATOM    471  CG  PHE L  62      46.480 -26.483  91.693  1.00  6.17           C  
ATOM    472  CD1 PHE L  62      46.022 -25.866  92.868  1.00  6.41           C  
ATOM    473  CD2 PHE L  62      47.467 -25.866  90.957  1.00  5.93           C  
ATOM    474  CE1 PHE L  62      46.543 -24.627  93.272  1.00  6.31           C  
ATOM    475  CE2 PHE L  62      48.028 -24.657  91.362  1.00  5.49           C  
ATOM    476  CZ  PHE L  62      47.549 -24.032  92.496  1.00  5.78           C  
ATOM    477  N   SER L  63      45.670 -30.924  93.011  1.00  5.59           N  
ATOM    478  CA  SER L  63      44.950 -32.231  92.894  1.00  5.29           C  
ATOM    479  C   SER L  63      43.831 -32.207  93.913  1.00  5.39           C  
ATOM    480  O   SER L  63      44.095 -31.623  94.943  1.00  5.12           O  
ATOM    481  CB  SER L  63      45.871 -33.381  93.136  1.00  5.14           C  
ATOM    482  OG  SER L  63      47.204 -32.839  93.244  1.00  5.99           O  
ATOM    483  N   GLY L  64      42.701 -32.826  93.640  1.00  5.72           N  
ATOM    484  CA  GLY L  64      41.545 -32.903  94.521  1.00  5.98           C  
ATOM    485  C   GLY L  64      41.179 -34.324  94.906  1.00  6.21           C  
ATOM    486  O   GLY L  64      41.727 -35.289  94.372  1.00  6.22           O  
ATOM    487  N   SER L  65      40.325 -34.461  95.895  1.00  6.81           N  
ATOM    488  CA  SER L  65      39.844 -35.803  96.382  1.00  7.47           C  
ATOM    489  C   SER L  65      38.755 -35.693  97.449  1.00  7.95           C  
ATOM    490  O   SER L  65      38.364 -34.552  97.778  1.00  7.88           O  
ATOM    491  CB  SER L  65      40.984 -36.675  96.793  1.00  7.07           C  
ATOM    492  OG  SER L  65      42.260 -36.060  96.772  1.00  7.41           O  
ATOM    493  N   LYS L  66      38.176 -36.812  97.845  1.00  8.58           N  
ATOM    494  CA  LYS L  66      37.272 -36.804  99.036  1.00  9.61           C  
ATOM    495  C   LYS L  66      37.472 -38.143  99.730  1.00 10.17           C  
ATOM    496  O   LYS L  66      37.462 -39.147  98.988  1.00 10.38           O  
ATOM    497  CB  LYS L  66      35.855 -36.442  98.746  1.00  9.67           C  
ATOM    498  CG  LYS L  66      34.960 -37.510  98.244  1.00 10.40           C  
ATOM    499  CD  LYS L  66      35.403 -38.184  97.001  1.00 11.71           C  
ATOM    500  CE  LYS L  66      36.693 -38.884  96.798  1.00 11.95           C  
ATOM    501  NZ  LYS L  66      36.804 -39.484  95.378  1.00 12.99           N  
ATOM    502  N   SER L  67      37.744 -38.130 101.074  1.00 10.74           N  
ATOM    503  CA  SER L  67      37.861 -39.468 101.711  1.00 11.46           C  
ATOM    504  C   SER L  67      36.466 -39.754 102.370  1.00 11.80           C  
ATOM    505  O   SER L  67      36.358 -40.892 102.853  1.00 12.08           O  
ATOM    506  CB  SER L  67      38.943 -39.874 102.639  1.00 11.78           C  
ATOM    507  OG  SER L  67      39.143 -41.322 102.516  1.00 11.80           O  
ATOM    508  N   GLY L  68      35.563 -38.781 102.251  1.00 11.87           N  
ATOM    509  CA  GLY L  68      34.165 -39.170 102.466  1.00 12.15           C  
ATOM    510  C   GLY L  68      33.179 -38.037 102.565  1.00 12.54           C  
ATOM    511  O   GLY L  68      32.252 -37.732 101.760  1.00 12.69           O  
ATOM    512  N   ASN L  69      33.340 -37.402 103.723  1.00 12.57           N  
ATOM    513  CA  ASN L  69      32.493 -36.276 104.191  1.00 12.20           C  
ATOM    514  C   ASN L  69      33.412 -35.059 104.080  1.00 11.58           C  
ATOM    515  O   ASN L  69      33.052 -33.913 104.361  1.00 11.78           O  
ATOM    516  CB  ASN L  69      32.060 -36.787 105.589  1.00 13.36           C  
ATOM    517  CG  ASN L  69      30.818 -36.056 106.078  1.00 13.94           C  
ATOM    518  OD1 ASN L  69      31.015 -35.021 106.779  1.00 14.46           O  
ATOM    519  ND2 ASN L  69      29.662 -36.575 105.677  1.00 14.01           N  
ATOM    520  N   THR L  70      34.635 -35.362 103.608  1.00 10.69           N  
ATOM    521  CA  THR L  70      35.679 -34.372 103.478  1.00  9.70           C  
ATOM    522  C   THR L  70      36.539 -34.481 102.221  1.00  9.34           C  
ATOM    523  O   THR L  70      37.217 -35.470 101.957  1.00  9.42           O  
ATOM    524  CB  THR L  70      36.635 -34.358 104.770  1.00  8.74           C  
ATOM    525  OG1 THR L  70      37.826 -34.890 104.173  1.00  8.39           O  
ATOM    526  CG2 THR L  70      36.087 -35.151 105.900  1.00  8.03           C  
ATOM    527  N   ALA L  71      36.548 -33.349 101.522  1.00  8.72           N  
ATOM    528  CA  ALA L  71      37.225 -33.163 100.245  1.00  8.42           C  
ATOM    529  C   ALA L  71      38.607 -32.575 100.486  1.00  8.01           C  
ATOM    530  O   ALA L  71      38.680 -31.807 101.449  1.00  8.04           O  
ATOM    531  CB  ALA L  71      36.390 -32.251  99.336  1.00  8.49           C  
ATOM    532  N   SER L  72      39.586 -32.922  99.670  1.00  7.52           N  
ATOM    533  CA  SER L  72      40.947 -32.478  99.847  1.00  6.92           C  
ATOM    534  C   SER L  72      41.582 -31.853  98.631  1.00  6.70           C  
ATOM    535  O   SER L  72      41.551 -32.466  97.540  1.00  6.65           O  
ATOM    536  CB  SER L  72      41.873 -33.647 100.234  1.00  7.09           C  
ATOM    537  OG  SER L  72      41.787 -33.818 101.669  1.00  7.66           O  
ATOM    538  N   LEU L  73      42.164 -30.693  98.862  1.00  6.24           N  
ATOM    539  CA  LEU L  73      42.915 -30.024  97.748  1.00  5.96           C  
ATOM    540  C   LEU L  73      44.393 -30.054  98.105  1.00  5.79           C  
ATOM    541  O   LEU L  73      44.656 -29.522  99.213  1.00  5.74           O  
ATOM    542  CB  LEU L  73      42.259 -28.666  97.529  1.00  5.95           C  
ATOM    543  CG  LEU L  73      42.966 -27.599  96.731  1.00  6.15           C  
ATOM    544  CD1 LEU L  73      44.510 -27.690  96.887  1.00  6.24           C  
ATOM    545  CD2 LEU L  73      42.633 -27.726  95.251  1.00  6.29           C  
ATOM    546  N   THR L  74      45.263 -30.653  97.287  1.00  5.51           N  
ATOM    547  CA  THR L  74      46.684 -30.542  97.581  1.00  5.59           C  
ATOM    548  C   THR L  74      47.603 -30.010  96.488  1.00  5.71           C  
ATOM    549  O   THR L  74      47.570 -30.323  95.268  1.00  5.79           O  
ATOM    550  CB  THR L  74      47.305 -31.822  98.270  1.00  5.49           C  
ATOM    551  OG1 THR L  74      47.889 -32.657  97.317  1.00  4.99           O  
ATOM    552  CG2 THR L  74      46.247 -32.546  99.122  1.00  5.82           C  
ATOM    553  N   VAL L  75      48.508 -29.155  97.027  1.00  5.76           N  
ATOM    554  CA  VAL L  75      49.506 -28.454  96.198  1.00  5.84           C  
ATOM    555  C   VAL L  75      50.889 -29.135  96.411  1.00  5.90           C  
ATOM    556  O   VAL L  75      51.308 -29.484  97.503  1.00  5.58           O  
ATOM    557  CB  VAL L  75      49.626 -26.945  96.367  1.00  5.95           C  
ATOM    558  CG1 VAL L  75      50.850 -26.409  95.631  1.00  5.95           C  
ATOM    559  CG2 VAL L  75      48.413 -26.164  95.843  1.00  6.76           C  
ATOM    560  N   SER L  76      51.510 -29.254  95.231  1.00  5.80           N  
ATOM    561  CA  SER L  76      52.818 -29.959  95.136  1.00  5.90           C  
ATOM    562  C   SER L  76      53.780 -28.882  94.647  1.00  5.73           C  
ATOM    563  O   SER L  76      53.316 -27.971  93.924  1.00  6.00           O  
ATOM    564  CB  SER L  76      52.699 -31.123  94.222  1.00  6.28           C  
ATOM    565  OG  SER L  76      51.322 -31.551  94.090  1.00  7.04           O  
ATOM    566  N   GLY L  77      54.990 -28.954  95.084  1.00  5.54           N  
ATOM    567  CA  GLY L  77      56.022 -27.970  94.736  1.00  5.29           C  
ATOM    568  C   GLY L  77      55.468 -26.554  94.852  1.00  5.09           C  
ATOM    569  O   GLY L  77      55.255 -25.892  93.824  1.00  4.91           O  
ATOM    570  N   LEU L  78      55.288 -26.164  96.134  1.00  4.89           N  
ATOM    571  CA  LEU L  78      54.754 -24.792  96.384  1.00  4.43           C  
ATOM    572  C   LEU L  78      55.563 -23.833  95.476  1.00  4.29           C  
ATOM    573  O   LEU L  78      56.731 -23.894  95.231  1.00  4.08           O  
ATOM    574  CB  LEU L  78      54.583 -24.352  97.789  1.00  4.02           C  
ATOM    575  CG  LEU L  78      53.245 -24.065  98.441  1.00  3.76           C  
ATOM    576  CD1 LEU L  78      52.864 -24.949  99.642  1.00  3.48           C  
ATOM    577  CD2 LEU L  78      53.385 -22.619  98.929  1.00  3.59           C  
ATOM    578  N   GLN L  79      54.768 -22.974  94.887  1.00  4.40           N  
ATOM    579  CA  GLN L  79      55.058 -21.910  93.980  1.00  4.20           C  
ATOM    580  C   GLN L  79      54.703 -20.605  94.750  1.00  4.21           C  
ATOM    581  O   GLN L  79      53.803 -20.566  95.620  1.00  3.86           O  
ATOM    582  CB  GLN L  79      54.267 -21.915  92.666  1.00  4.48           C  
ATOM    583  CG  GLN L  79      54.992 -22.646  91.556  1.00  5.00           C  
ATOM    584  CD  GLN L  79      56.480 -22.298  91.574  1.00  5.58           C  
ATOM    585  OE1 GLN L  79      56.865 -21.108  91.639  1.00  5.94           O  
ATOM    586  NE2 GLN L  79      57.292 -23.351  91.556  1.00  4.90           N  
ATOM    587  N   ALA L  80      55.469 -19.621  94.331  1.00  4.14           N  
ATOM    588  CA  ALA L  80      55.330 -18.294  94.989  1.00  4.32           C  
ATOM    589  C   ALA L  80      53.961 -17.777  94.673  1.00  4.45           C  
ATOM    590  O   ALA L  80      53.349 -17.279  95.642  1.00  4.77           O  
ATOM    591  CB  ALA L  80      56.582 -17.514  94.718  1.00  3.88           C  
ATOM    592  N   GLU L  81      53.416 -17.933  93.487  1.00  4.87           N  
ATOM    593  CA  GLU L  81      52.102 -17.359  93.143  1.00  5.09           C  
ATOM    594  C   GLU L  81      50.965 -18.261  93.578  1.00  5.14           C  
ATOM    595  O   GLU L  81      49.754 -17.990  93.268  1.00  5.52           O  
ATOM    596  CB  GLU L  81      51.966 -16.951  91.717  1.00  6.20           C  
ATOM    597  CG  GLU L  81      52.479 -17.879  90.589  1.00  7.87           C  
ATOM    598  CD  GLU L  81      53.310 -17.118  89.574  1.00  8.29           C  
ATOM    599  OE1 GLU L  81      52.949 -16.000  89.243  1.00  8.82           O  
ATOM    600  OE2 GLU L  81      54.339 -17.722  89.184  1.00  8.79           O  
ATOM    601  N   ASP L  82      51.337 -19.291  94.326  1.00  4.82           N  
ATOM    602  CA  ASP L  82      50.372 -20.257  94.887  1.00  4.43           C  
ATOM    603  C   ASP L  82      49.813 -19.668  96.188  1.00  4.20           C  
ATOM    604  O   ASP L  82      48.902 -20.266  96.726  1.00  4.01           O  
ATOM    605  CB  ASP L  82      50.944 -21.655  95.095  1.00  4.13           C  
ATOM    606  CG  ASP L  82      51.217 -22.376  93.744  1.00  3.81           C  
ATOM    607  OD1 ASP L  82      50.539 -22.070  92.764  1.00  4.11           O  
ATOM    608  OD2 ASP L  82      52.094 -23.233  93.783  1.00  3.93           O  
ATOM    609  N   GLU L  83      50.447 -18.583  96.627  1.00  4.13           N  
ATOM    610  CA  GLU L  83      49.887 -17.803  97.731  1.00  4.39           C  
ATOM    611  C   GLU L  83      48.493 -17.291  97.293  1.00  4.28           C  
ATOM    612  O   GLU L  83      48.320 -16.787  96.159  1.00  4.40           O  
ATOM    613  CB  GLU L  83      50.644 -16.575  98.235  1.00  4.92           C  
ATOM    614  CG  GLU L  83      51.778 -16.700  99.228  1.00  4.71           C  
ATOM    615  CD  GLU L  83      52.136 -15.656 100.221  1.00  4.55           C  
ATOM    616  OE1 GLU L  83      51.350 -14.909 100.788  1.00  4.79           O  
ATOM    617  OE2 GLU L  83      53.336 -15.663 100.557  1.00  4.32           O  
ATOM    618  N   ALA L  84      47.552 -17.474  98.226  1.00  4.39           N  
ATOM    619  CA  ALA L  84      46.188 -16.983  97.997  1.00  4.17           C  
ATOM    620  C   ALA L  84      45.179 -17.606  98.938  1.00  4.24           C  
ATOM    621  O   ALA L  84      45.539 -18.439  99.743  1.00  4.37           O  
ATOM    622  CB  ALA L  84      45.735 -17.289  96.577  1.00  4.46           C  
ATOM    623  N   ASP L  85      43.949 -17.241  98.711  1.00  4.32           N  
ATOM    624  CA  ASP L  85      42.791 -17.768  99.488  1.00  4.69           C  
ATOM    625  C   ASP L  85      42.217 -18.890  98.653  1.00  4.88           C  
ATOM    626  O   ASP L  85      42.446 -18.731  97.438  1.00  4.92           O  
ATOM    627  CB  ASP L  85      41.866 -16.610  99.700  1.00  5.29           C  
ATOM    628  CG  ASP L  85      42.061 -15.949 101.061  1.00  5.74           C  
ATOM    629  OD1 ASP L  85      41.689 -14.789 101.079  1.00  5.88           O  
ATOM    630  OD2 ASP L  85      42.521 -16.665 102.000  1.00  5.92           O  
ATOM    631  N   TYR L  86      41.617 -19.900  99.200  1.00  5.05           N  
ATOM    632  CA  TYR L  86      41.148 -21.060  98.453  1.00  5.06           C  
ATOM    633  C   TYR L  86      39.825 -21.535  99.096  1.00  5.46           C  
ATOM    634  O   TYR L  86      39.675 -21.709 100.312  1.00  5.20           O  
ATOM    635  CB  TYR L  86      42.107 -22.225  98.362  1.00  4.89           C  
ATOM    636  CG  TYR L  86      43.397 -22.050  97.594  1.00  4.98           C  
ATOM    637  CD1 TYR L  86      43.696 -22.794  96.411  1.00  4.64           C  
ATOM    638  CD2 TYR L  86      44.306 -21.108  98.014  1.00  4.26           C  
ATOM    639  CE1 TYR L  86      44.880 -22.568  95.735  1.00  4.78           C  
ATOM    640  CE2 TYR L  86      45.498 -20.870  97.337  1.00  4.50           C  
ATOM    641  CZ  TYR L  86      45.791 -21.613  96.214  1.00  4.60           C  
ATOM    642  OH  TYR L  86      46.994 -21.344  95.636  1.00  5.04           O  
ATOM    643  N   TYR L  87      38.890 -21.738  98.176  1.00  5.63           N  
ATOM    644  CA  TYR L  87      37.508 -22.053  98.479  1.00  6.11           C  
ATOM    645  C   TYR L  87      36.934 -23.326  97.908  1.00  6.35           C  
ATOM    646  O   TYR L  87      37.106 -23.489  96.679  1.00  6.28           O  
ATOM    647  CB  TYR L  87      36.612 -20.897  97.815  1.00  5.58           C  
ATOM    648  CG  TYR L  87      36.884 -19.640  98.614  1.00  4.88           C  
ATOM    649  CD1 TYR L  87      36.297 -19.440  99.865  1.00  4.54           C  
ATOM    650  CD2 TYR L  87      37.747 -18.698  98.105  1.00  4.73           C  
ATOM    651  CE1 TYR L  87      36.594 -18.298 100.594  1.00  4.98           C  
ATOM    652  CE2 TYR L  87      38.041 -17.536  98.845  1.00  5.08           C  
ATOM    653  CZ  TYR L  87      37.479 -17.350 100.079  1.00  4.90           C  
ATOM    654  OH  TYR L  87      37.797 -16.200 100.741  1.00  6.01           O  
ATOM    655  N   CYS L  88      36.254 -24.087  98.797  1.00  6.76           N  
ATOM    656  CA  CYS L  88      35.564 -25.292  98.246  1.00  7.34           C  
ATOM    657  C   CYS L  88      34.093 -24.878  98.027  1.00  8.01           C  
ATOM    658  O   CYS L  88      33.552 -24.124  98.793  1.00  7.89           O  
ATOM    659  CB  CYS L  88      35.654 -26.560  99.023  1.00  6.63           C  
ATOM    660  SG  CYS L  88      35.962 -26.446 100.758  1.00  5.24           S  
ATOM    661  N   SER L  89      33.585 -25.407  96.938  1.00  8.88           N  
ATOM    662  CA  SER L  89      32.176 -25.158  96.549  1.00  9.95           C  
ATOM    663  C   SER L  89      31.565 -26.563  96.614  1.00 10.83           C  
ATOM    664  O   SER L  89      32.256 -27.540  96.250  1.00 11.01           O  
ATOM    665  CB  SER L  89      32.040 -24.531  95.196  1.00  9.61           C  
ATOM    666  OG  SER L  89      30.948 -23.665  95.053  1.00  9.11           O  
ATOM    667  N   SER L  90      30.384 -26.639  97.084  1.00 11.92           N  
ATOM    668  CA  SER L  90      29.559 -27.816  97.159  1.00 13.45           C  
ATOM    669  C   SER L  90      28.237 -27.396  96.486  1.00 14.52           C  
ATOM    670  O   SER L  90      28.187 -26.226  96.073  1.00 14.69           O  
ATOM    671  CB  SER L  90      29.473 -28.639  98.356  1.00 13.25           C  
ATOM    672  OG  SER L  90      28.989 -29.934  97.904  1.00 13.63           O  
ATOM    673  N   TYR L  91      27.325 -28.306  96.361  1.00 15.79           N  
ATOM    674  CA  TYR L  91      26.153 -28.071  95.469  1.00 17.18           C  
ATOM    675  C   TYR L  91      24.827 -28.363  96.086  1.00 18.08           C  
ATOM    676  O   TYR L  91      24.549 -29.527  96.506  1.00 18.47           O  
ATOM    677  CB  TYR L  91      26.538 -28.988  94.266  1.00 17.39           C  
ATOM    678  CG  TYR L  91      25.329 -29.241  93.387  1.00 18.16           C  
ATOM    679  CD1 TYR L  91      24.420 -30.289  93.617  1.00 18.06           C  
ATOM    680  CD2 TYR L  91      25.111 -28.389  92.303  1.00 18.11           C  
ATOM    681  CE1 TYR L  91      23.328 -30.462  92.770  1.00 18.48           C  
ATOM    682  CE2 TYR L  91      24.016 -28.573  91.457  1.00 18.12           C  
ATOM    683  CZ  TYR L  91      23.137 -29.594  91.690  1.00 18.15           C  
ATOM    684  OH  TYR L  91      22.088 -29.700  90.840  1.00 18.84           O  
ATOM    685  N   GLU L  92      23.922 -27.373  96.140  1.00 18.98           N  
ATOM    686  CA  GLU L  92      22.625 -27.566  96.841  1.00 20.07           C  
ATOM    687  C   GLU L  92      21.446 -27.742  95.904  1.00 20.41           C  
ATOM    688  O   GLU L  92      21.523 -28.067  94.699  1.00 20.57           O  
ATOM    689  CB  GLU L  92      22.310 -26.672  97.975  1.00 20.46           C  
ATOM    690  CG  GLU L  92      21.063 -26.751  98.863  1.00 21.17           C  
ATOM    691  CD  GLU L  92      21.369 -26.231 100.269  1.00 21.74           C  
ATOM    692  OE1 GLU L  92      22.521 -26.365 100.709  1.00 21.94           O  
ATOM    693  OE2 GLU L  92      20.460 -25.610 100.851  1.00 21.67           O  
ATOM    694  N   GLY L  93      20.299 -27.625  96.579  1.00 20.88           N  
ATOM    695  CA  GLY L  93      18.966 -27.820  95.969  1.00 21.26           C  
ATOM    696  C   GLY L  93      18.854 -27.122  94.618  1.00 21.31           C  
ATOM    697  O   GLY L  93      17.831 -26.427  94.378  1.00 21.45           O  
ATOM    698  N   SER L  94      19.895 -27.312  93.801  1.00 21.24           N  
ATOM    699  CA  SER L  94      19.906 -26.670  92.472  1.00 20.98           C  
ATOM    700  C   SER L  94      19.814 -25.164  92.619  1.00 20.78           C  
ATOM    701  O   SER L  94      20.276 -24.384  91.784  1.00 20.88           O  
ATOM    702  CB  SER L  94      18.768 -27.293  91.667  1.00 20.98           C  
ATOM    703  OG  SER L  94      17.526 -27.424  92.325  1.00 20.63           O  
ATOM    704  N   ASP L  95      19.209 -24.731  93.684  1.00 20.64           N  
ATOM    705  CA  ASP L  95      18.907 -23.340  94.069  1.00 20.26           C  
ATOM    706  C   ASP L  95      19.719 -23.205  95.389  1.00 19.77           C  
ATOM    707  O   ASP L  95      19.091 -23.422  96.439  1.00 19.71           O  
ATOM    708  CB  ASP L  95      17.431 -23.125  94.300  1.00 21.39           C  
ATOM    709  CG  ASP L  95      16.311 -23.984  93.850  1.00 22.12           C  
ATOM    710  OD1 ASP L  95      15.865 -24.128  92.675  1.00 22.54           O  
ATOM    711  OD2 ASP L  95      15.653 -24.684  94.727  1.00 22.88           O  
ATOM    712  N   ASN L  95A     21.018 -22.959  95.231  1.00 19.08           N  
ATOM    713  CA  ASN L  95A     21.905 -23.024  96.404  1.00 18.12           C  
ATOM    714  C   ASN L  95A     23.310 -23.528  96.194  1.00 17.41           C  
ATOM    715  O   ASN L  95A     23.454 -24.744  96.560  1.00 17.31           O  
ATOM    716  CB  ASN L  95A     21.164 -24.098  97.326  1.00 18.61           C  
ATOM    717  CG  ASN L  95A     21.513 -23.993  98.772  1.00 18.78           C  
ATOM    718  OD1 ASN L  95A     20.621 -23.640  99.574  1.00 19.34           O  
ATOM    719  ND2 ASN L  95A     22.739 -24.350  99.222  1.00 18.95           N  
ATOM    720  N   PHE L  96      24.270 -22.779  95.707  1.00 16.48           N  
ATOM    721  CA  PHE L  96      25.653 -23.354  95.601  1.00 15.44           C  
ATOM    722  C   PHE L  96      26.385 -23.033  96.900  1.00 14.74           C  
ATOM    723  O   PHE L  96      26.363 -21.857  97.328  1.00 15.10           O  
ATOM    724  CB  PHE L  96      26.380 -22.971  94.339  1.00 15.67           C  
ATOM    725  CG  PHE L  96      27.415 -24.010  93.943  1.00 15.65           C  
ATOM    726  CD1 PHE L  96      26.992 -25.337  93.766  1.00 15.59           C  
ATOM    727  CD2 PHE L  96      28.731 -23.667  93.721  1.00 15.53           C  
ATOM    728  CE1 PHE L  96      27.883 -26.314  93.376  1.00 15.56           C  
ATOM    729  CE2 PHE L  96      29.644 -24.655  93.327  1.00 15.88           C  
ATOM    730  CZ  PHE L  96      29.216 -25.986  93.151  1.00 15.55           C  
ATOM    731  N   VAL L  97      27.076 -24.005  97.480  1.00 13.87           N  
ATOM    732  CA  VAL L  97      27.571 -23.861  98.852  1.00 12.41           C  
ATOM    733  C   VAL L  97      29.050 -23.677  98.906  1.00 12.03           C  
ATOM    734  O   VAL L  97      29.717 -24.665  98.665  1.00 11.88           O  
ATOM    735  CB  VAL L  97      27.119 -25.067  99.724  1.00 12.15           C  
ATOM    736  CG1 VAL L  97      26.010 -24.713 100.700  1.00 11.49           C  
ATOM    737  CG2 VAL L  97      26.718 -26.289  98.914  1.00 11.69           C  
ATOM    738  N   PHE L  98      29.499 -22.514  99.388  1.00 11.40           N  
ATOM    739  CA  PHE L  98      30.948 -22.213  99.473  1.00 10.37           C  
ATOM    740  C   PHE L  98      31.517 -22.345 100.884  1.00  9.91           C  
ATOM    741  O   PHE L  98      31.028 -21.568 101.711  1.00 10.11           O  
ATOM    742  CB  PHE L  98      31.197 -20.765  99.059  1.00  9.72           C  
ATOM    743  CG  PHE L  98      31.472 -20.480  97.609  1.00  9.20           C  
ATOM    744  CD1 PHE L  98      30.442 -19.967  96.793  1.00  8.85           C  
ATOM    745  CD2 PHE L  98      32.753 -20.637  97.079  1.00  8.51           C  
ATOM    746  CE1 PHE L  98      30.671 -19.637  95.480  1.00  8.65           C  
ATOM    747  CE2 PHE L  98      33.022 -20.279  95.783  1.00  8.84           C  
ATOM    748  CZ  PHE L  98      31.963 -19.769  94.960  1.00  8.76           C  
ATOM    749  N   GLY L  99      32.496 -23.180 101.102  1.00  9.15           N  
ATOM    750  CA  GLY L  99      33.140 -23.406 102.377  1.00  8.55           C  
ATOM    751  C   GLY L  99      34.045 -22.225 102.700  1.00  8.06           C  
ATOM    752  O   GLY L  99      34.293 -21.430 101.762  1.00  8.40           O  
ATOM    753  N   THR L 100      34.489 -22.049 103.885  1.00  7.50           N  
ATOM    754  CA  THR L 100      35.227 -20.970 104.468  1.00  6.90           C  
ATOM    755  C   THR L 100      36.496 -20.394 103.892  1.00  6.65           C  
ATOM    756  O   THR L 100      36.968 -19.296 104.329  1.00  6.73           O  
ATOM    757  CB  THR L 100      35.605 -21.376 106.004  1.00  6.58           C  
ATOM    758  OG1 THR L 100      36.897 -22.040 105.931  1.00  6.29           O  
ATOM    759  CG2 THR L 100      34.576 -22.284 106.673  1.00  6.17           C  
ATOM    760  N   GLY L 101      37.161 -21.015 103.020  1.00  6.49           N  
ATOM    761  CA  GLY L 101      38.383 -20.644 102.358  1.00  6.45           C  
ATOM    762  C   GLY L 101      39.577 -20.682 103.316  1.00  6.32           C  
ATOM    763  O   GLY L 101      39.581 -20.220 104.453  1.00  6.52           O  
ATOM    764  N   THR L 102      40.632 -21.229 102.792  1.00  6.07           N  
ATOM    765  CA  THR L 102      41.943 -21.406 103.360  1.00  5.89           C  
ATOM    766  C   THR L 102      42.815 -20.297 102.819  1.00  6.16           C  
ATOM    767  O   THR L 102      42.524 -19.868 101.693  1.00  6.28           O  
ATOM    768  CB  THR L 102      42.410 -22.863 102.920  1.00  5.35           C  
ATOM    769  OG1 THR L 102      41.406 -23.703 103.606  1.00  4.98           O  
ATOM    770  CG2 THR L 102      43.835 -23.243 103.128  1.00  4.31           C  
ATOM    771  N   LYS L 103      43.733 -19.778 103.598  1.00  6.27           N  
ATOM    772  CA  LYS L 103      44.731 -18.835 103.115  1.00  6.57           C  
ATOM    773  C   LYS L 103      46.021 -19.674 102.976  1.00  6.33           C  
ATOM    774  O   LYS L 103      46.421 -20.274 104.037  1.00  6.50           O  
ATOM    775  CB  LYS L 103      45.061 -17.666 104.054  1.00  7.29           C  
ATOM    776  CG  LYS L 103      44.166 -17.674 105.283  1.00  8.65           C  
ATOM    777  CD  LYS L 103      42.974 -16.722 105.173  1.00  9.57           C  
ATOM    778  CE  LYS L 103      42.053 -16.804 106.383  1.00 10.23           C  
ATOM    779  NZ  LYS L 103      41.116 -17.966 106.368  1.00 10.15           N  
ATOM    780  N   VAL L 104      46.537 -19.775 101.806  1.00  5.93           N  
ATOM    781  CA  VAL L 104      47.861 -20.419 101.658  1.00  5.91           C  
ATOM    782  C   VAL L 104      48.791 -19.184 101.684  1.00  5.86           C  
ATOM    783  O   VAL L 104      48.466 -18.202 101.003  1.00  5.92           O  
ATOM    784  CB  VAL L 104      48.068 -21.375 100.540  1.00  5.43           C  
ATOM    785  CG1 VAL L 104      49.490 -21.942 100.512  1.00  5.15           C  
ATOM    786  CG2 VAL L 104      47.090 -22.549 100.670  1.00  5.44           C  
ATOM    787  N   THR L 105      49.791 -19.306 102.505  1.00  5.83           N  
ATOM    788  CA  THR L 105      50.848 -18.358 102.695  1.00  5.95           C  
ATOM    789  C   THR L 105      52.177 -19.060 102.332  1.00  5.90           C  
ATOM    790  O   THR L 105      52.225 -20.281 102.591  1.00  6.12           O  
ATOM    791  CB  THR L 105      51.010 -17.862 104.197  1.00  6.08           C  
ATOM    792  OG1 THR L 105      49.723 -17.403 104.727  1.00  6.03           O  
ATOM    793  CG2 THR L 105      52.097 -16.768 104.336  1.00  5.69           C  
ATOM    794  N   VAL L 106      53.104 -18.315 101.752  1.00  5.93           N  
ATOM    795  CA  VAL L 106      54.464 -18.959 101.648  1.00  6.16           C  
ATOM    796  C   VAL L 106      55.236 -18.366 102.866  1.00  6.12           C  
ATOM    797  O   VAL L 106      55.516 -17.157 102.751  1.00  6.16           O  
ATOM    798  CB  VAL L 106      55.216 -18.855 100.341  1.00  6.42           C  
ATOM    799  CG1 VAL L 106      56.727 -18.559 100.542  1.00  6.26           C  
ATOM    800  CG2 VAL L 106      55.084 -20.068  99.432  1.00  6.34           C  
ATOM    801  N   LEU L 106A     55.541 -19.239 103.836  1.00  5.76           N  
ATOM    802  CA  LEU L 106A     56.197 -18.763 105.033  1.00  5.55           C  
ATOM    803  C   LEU L 106A     57.452 -17.906 104.783  1.00  5.51           C  
ATOM    804  O   LEU L 106A     58.506 -18.459 104.470  1.00  5.10           O  
ATOM    805  CB  LEU L 106A     56.626 -19.926 105.887  1.00  6.03           C  
ATOM    806  CG  LEU L 106A     55.861 -20.867 106.703  1.00  6.17           C  
ATOM    807  CD1 LEU L 106A     54.420 -20.412 106.984  1.00  6.77           C  
ATOM    808  CD2 LEU L 106A     55.829 -22.241 106.019  1.00  7.01           C  
ATOM    809  N   GLY L 107      57.349 -16.639 105.017  1.00  5.34           N  
ATOM    810  CA  GLY L 107      58.310 -15.603 104.909  1.00  5.54           C  
ATOM    811  C   GLY L 107      58.942 -15.130 106.247  1.00  5.46           C  
ATOM    812  O   GLY L 107      59.744 -14.173 106.352  1.00  5.48           O  
ATOM    813  N   GLN L 108      58.485 -15.809 107.298  1.00  5.23           N  
ATOM    814  CA  GLN L 108      59.077 -15.656 108.623  1.00  4.47           C  
ATOM    815  C   GLN L 108      58.500 -16.871 109.397  1.00  4.03           C  
ATOM    816  O   GLN L 108      57.725 -17.607 108.804  1.00  3.77           O  
ATOM    817  CB  GLN L 108      58.689 -14.424 109.404  1.00  4.63           C  
ATOM    818  CG  GLN L 108      57.618 -14.896 110.373  1.00  5.32           C  
ATOM    819  CD  GLN L 108      56.825 -13.851 111.047  1.00  5.64           C  
ATOM    820  OE1 GLN L 108      56.761 -12.709 110.624  1.00  5.50           O  
ATOM    821  NE2 GLN L 108      56.189 -14.331 112.142  1.00  6.15           N  
ATOM    822  N   PRO L 109      58.891 -16.881 110.650  1.00  3.76           N  
ATOM    823  CA  PRO L 109      58.465 -17.981 111.520  1.00  3.61           C  
ATOM    824  C   PRO L 109      56.988 -18.067 111.847  1.00  3.11           C  
ATOM    825  O   PRO L 109      56.235 -17.124 111.940  1.00  2.75           O  
ATOM    826  CB  PRO L 109      59.384 -17.862 112.756  1.00  3.95           C  
ATOM    827  CG  PRO L 109      60.726 -17.420 112.105  1.00  3.80           C  
ATOM    828  CD  PRO L 109      60.265 -16.418 111.075  1.00  3.94           C  
TER     829      PRO L 109                                                      
ATOM   1616  N   SER L   2      40.929 -13.551  78.807  1.00 15.86           N  
ATOM   1617  CA  SER L   2      39.823 -12.657  78.522  1.00 15.56           C  
ATOM   1618  C   SER L   2      38.737 -12.727  79.617  1.00 15.16           C  
ATOM   1619  O   SER L   2      37.559 -13.059  79.277  1.00 15.47           O  
ATOM   1620  CB  SER L   2      39.228 -12.811  77.132  1.00 15.72           C  
ATOM   1621  OG  SER L   2      38.773 -11.510  76.691  1.00 16.03           O  
ATOM   1622  N   ALA L   3      39.131 -12.464  80.852  1.00 14.40           N  
ATOM   1623  CA  ALA L   3      38.102 -12.357  81.902  1.00 13.60           C  
ATOM   1624  C   ALA L   3      36.960 -11.553  81.277  1.00 13.33           C  
ATOM   1625  O   ALA L   3      37.253 -10.667  80.448  1.00 13.07           O  
ATOM   1626  CB  ALA L   3      38.710 -11.503  82.997  1.00 13.67           C  
ATOM   1627  N   LEU L   4      35.754 -11.831  81.696  1.00 13.02           N  
ATOM   1628  CA  LEU L   4      34.553 -11.028  81.320  1.00 12.54           C  
ATOM   1629  C   LEU L   4      34.813  -9.644  81.900  1.00 12.18           C  
ATOM   1630  O   LEU L   4      35.571  -9.698  82.924  1.00 12.43           O  
ATOM   1631  CB  LEU L   4      33.325 -11.669  81.971  1.00 12.69           C  
ATOM   1632  CG  LEU L   4      32.684 -12.902  81.393  1.00 12.70           C  
ATOM   1633  CD1 LEU L   4      33.770 -13.833  80.859  1.00 12.89           C  
ATOM   1634  CD2 LEU L   4      31.844 -13.633  82.443  1.00 12.83           C  
ATOM   1635  N   THR L   5      34.242  -8.580  81.437  1.00 11.70           N  
ATOM   1636  CA  THR L   5      34.678  -7.234  81.878  1.00 11.15           C  
ATOM   1637  C   THR L   5      33.634  -6.571  82.733  1.00 10.95           C  
ATOM   1638  O   THR L   5      32.477  -6.539  82.313  1.00 10.89           O  
ATOM   1639  CB  THR L   5      34.917  -6.338  80.591  1.00 11.04           C  
ATOM   1640  OG1 THR L   5      33.843  -5.332  80.634  1.00 11.23           O  
ATOM   1641  CG2 THR L   5      34.855  -7.163  79.318  1.00 10.96           C  
ATOM   1642  N   GLN L   6      34.049  -5.984  83.807  1.00 10.84           N  
ATOM   1643  CA  GLN L   6      33.183  -5.385  84.841  1.00 10.59           C  
ATOM   1644  C   GLN L   6      33.631  -3.980  85.224  1.00 10.31           C  
ATOM   1645  O   GLN L   6      34.745  -3.485  84.982  1.00  9.80           O  
ATOM   1646  CB  GLN L   6      33.144  -6.352  86.021  1.00 11.13           C  
ATOM   1647  CG  GLN L   6      31.828  -6.487  86.773  1.00 12.30           C  
ATOM   1648  CD  GLN L   6      31.752  -7.907  87.334  1.00 13.09           C  
ATOM   1649  OE1 GLN L   6      32.575  -8.743  86.914  1.00 13.67           O  
ATOM   1650  NE2 GLN L   6      30.822  -8.185  88.210  1.00 13.54           N  
ATOM   1651  N   PRO L   7      32.688  -3.298  85.878  1.00 10.35           N  
ATOM   1652  CA  PRO L   7      32.813  -1.880  86.300  1.00 10.21           C  
ATOM   1653  C   PRO L   7      33.454  -1.783  87.648  1.00 10.27           C  
ATOM   1654  O   PRO L   7      32.890  -2.394  88.609  1.00 10.23           O  
ATOM   1655  CB  PRO L   7      31.355  -1.425  86.388  1.00 10.28           C  
ATOM   1656  CG  PRO L   7      30.500  -2.671  86.269  1.00 10.37           C  
ATOM   1657  CD  PRO L   7      31.427  -3.853  86.453  1.00 10.26           C  
ATOM   1658  N   PRO L   8      34.510  -0.994  87.780  1.00 10.04           N  
ATOM   1659  CA  PRO L   8      35.319  -1.056  89.031  1.00  9.75           C  
ATOM   1660  C   PRO L   8      34.740  -0.234  90.130  1.00  9.73           C  
ATOM   1661  O   PRO L   8      35.565   0.268  90.931  1.00 10.12           O  
ATOM   1662  CB  PRO L   8      36.666  -0.531  88.581  1.00  9.74           C  
ATOM   1663  CG  PRO L   8      36.652  -0.541  87.072  1.00  9.81           C  
ATOM   1664  CD  PRO L   8      35.172  -0.279  86.707  1.00  9.92           C  
ATOM   1665  N   SER L   9      33.439  -0.095  90.217  1.00  9.58           N  
ATOM   1666  CA  SER L   9      32.820   0.857  91.188  1.00  9.33           C  
ATOM   1667  C   SER L   9      31.362   1.053  90.812  1.00  9.13           C  
ATOM   1668  O   SER L   9      30.974   0.935  89.626  1.00  9.42           O  
ATOM   1669  CB  SER L   9      33.706   2.080  91.156  1.00  9.86           C  
ATOM   1670  OG  SER L   9      33.341   3.353  91.511  1.00 10.12           O  
ATOM   1671  N   ALA L  11      30.545   1.353  91.788  1.00  8.77           N  
ATOM   1672  CA  ALA L  11      29.108   1.527  91.612  1.00  8.64           C  
ATOM   1673  C   ALA L  11      28.400   1.913  92.894  1.00  8.67           C  
ATOM   1674  O   ALA L  11      27.800   1.123  93.643  1.00  9.03           O  
ATOM   1675  CB  ALA L  11      28.598   0.249  90.944  1.00  7.85           C  
ATOM   1676  N   SER L  12      28.422   3.188  93.197  1.00  8.57           N  
ATOM   1677  CA  SER L  12      27.826   3.905  94.288  1.00  8.17           C  
ATOM   1678  C   SER L  12      26.328   3.960  94.056  1.00  8.38           C  
ATOM   1679  O   SER L  12      25.835   3.952  92.920  1.00  7.99           O  
ATOM   1680  CB  SER L  12      28.407   5.326  94.294  1.00  8.05           C  
ATOM   1681  OG  SER L  12      29.698   5.206  93.580  1.00  8.32           O  
ATOM   1682  N   GLY L  13      25.634   3.972  95.168  1.00  8.30           N  
ATOM   1683  CA  GLY L  13      24.144   4.050  95.214  1.00  8.56           C  
ATOM   1684  C   GLY L  13      23.903   4.640  96.620  1.00  8.77           C  
ATOM   1685  O   GLY L  13      24.949   4.774  97.302  1.00  8.57           O  
ATOM   1686  N   SER L  14      22.687   4.926  96.952  1.00  8.82           N  
ATOM   1687  CA  SER L  14      22.470   5.553  98.313  1.00  9.03           C  
ATOM   1688  C   SER L  14      21.280   4.848  98.869  1.00  9.02           C  
ATOM   1689  O   SER L  14      20.414   4.583  98.012  1.00  9.05           O  
ATOM   1690  CB  SER L  14      22.329   7.017  97.997  1.00  9.57           C  
ATOM   1691  OG  SER L  14      22.968   7.180  96.679  1.00 10.54           O  
ATOM   1692  N   LEU L  15      21.259   4.472 100.102  1.00  9.05           N  
ATOM   1693  CA  LEU L  15      20.083   3.779 100.695  1.00  9.33           C  
ATOM   1694  C   LEU L  15      18.886   4.052  99.804  1.00  9.32           C  
ATOM   1695  O   LEU L  15      18.696   5.221  99.412  1.00  9.57           O  
ATOM   1696  CB  LEU L  15      19.984   4.345 102.111  1.00  9.24           C  
ATOM   1697  CG  LEU L  15      21.143   4.042 103.046  1.00  9.64           C  
ATOM   1698  CD1 LEU L  15      22.452   3.983 102.243  1.00  9.89           C  
ATOM   1699  CD2 LEU L  15      21.240   5.096 104.156  1.00  9.11           C  
ATOM   1700  N   GLY L  16      18.093   3.037  99.548  1.00  9.49           N  
ATOM   1701  CA  GLY L  16      16.979   3.080  98.570  1.00  9.41           C  
ATOM   1702  C   GLY L  16      17.433   3.764  97.309  1.00  9.38           C  
ATOM   1703  O   GLY L  16      17.545   5.010  97.410  1.00  9.65           O  
ATOM   1704  N   GLN L  17      17.764   3.121  96.222  1.00  9.56           N  
ATOM   1705  CA  GLN L  17      18.165   3.742  94.976  1.00  9.50           C  
ATOM   1706  C   GLN L  17      18.437   2.816  93.820  1.00  9.42           C  
ATOM   1707  O   GLN L  17      18.549   3.387  92.692  1.00  9.58           O  
ATOM   1708  CB  GLN L  17      19.317   4.796  94.971  1.00  9.86           C  
ATOM   1709  CG  GLN L  17      18.771   6.158  94.571  1.00 10.34           C  
ATOM   1710  CD  GLN L  17      19.629   7.378  94.512  1.00 10.48           C  
ATOM   1711  OE1 GLN L  17      19.446   8.376  95.266  1.00  9.99           O  
ATOM   1712  NE2 GLN L  17      20.576   7.380  93.560  1.00 10.09           N  
ATOM   1713  N   SER L  18      18.515   1.530  94.023  1.00  9.51           N  
ATOM   1714  CA  SER L  18      18.725   0.633  92.831  1.00  9.26           C  
ATOM   1715  C   SER L  18      20.081   0.998  92.188  1.00  8.98           C  
ATOM   1716  O   SER L  18      20.556   2.138  92.279  1.00  8.66           O  
ATOM   1717  CB  SER L  18      17.647   0.885  91.786  1.00  9.16           C  
ATOM   1718  OG  SER L  18      16.601   1.675  92.305  1.00  9.04           O  
ATOM   1719  N   VAL L  19      20.590  -0.028  91.532  1.00  8.90           N  
ATOM   1720  CA  VAL L  19      21.929   0.083  90.887  1.00  8.65           C  
ATOM   1721  C   VAL L  19      22.106  -1.058  89.877  1.00  8.58           C  
ATOM   1722  O   VAL L  19      21.378  -2.076  89.892  1.00  8.42           O  
ATOM   1723  CB  VAL L  19      22.951   0.331  91.991  1.00  8.17           C  
ATOM   1724  CG1 VAL L  19      23.929  -0.746  92.350  1.00  8.05           C  
ATOM   1725  CG2 VAL L  19      23.680   1.654  91.703  1.00  8.34           C  
ATOM   1726  N   THR L  20      23.066  -0.796  88.981  1.00  8.57           N  
ATOM   1727  CA  THR L  20      23.319  -1.719  87.884  1.00  8.71           C  
ATOM   1728  C   THR L  20      24.727  -1.648  87.340  1.00  9.07           C  
ATOM   1729  O   THR L  20      25.381  -0.727  86.858  1.00  8.99           O  
ATOM   1730  CB  THR L  20      22.225  -1.613  86.787  1.00  8.77           C  
ATOM   1731  OG1 THR L  20      21.012  -1.622  87.600  1.00  8.97           O  
ATOM   1732  CG2 THR L  20      22.217  -2.751  85.763  1.00  9.08           C  
ATOM   1733  N   ILE L  21      25.234  -2.868  87.414  1.00  9.43           N  
ATOM   1734  CA  ILE L  21      26.586  -3.349  87.115  1.00  9.65           C  
ATOM   1735  C   ILE L  21      26.494  -4.267  85.897  1.00  9.69           C  
ATOM   1736  O   ILE L  21      25.674  -5.216  85.880  1.00  9.39           O  
ATOM   1737  CB  ILE L  21      27.013  -4.145  88.433  1.00  9.30           C  
ATOM   1738  CG1 ILE L  21      27.146  -3.125  89.595  1.00  9.19           C  
ATOM   1739  CG2 ILE L  21      28.236  -5.047  88.308  1.00  9.32           C  
ATOM   1740  CD1 ILE L  21      27.024  -3.801  90.979  1.00  9.33           C  
ATOM   1741  N   SER L  22      27.372  -3.956  84.975  1.00 10.01           N  
ATOM   1742  CA  SER L  22      27.389  -4.776  83.694  1.00 10.47           C  
ATOM   1743  C   SER L  22      28.444  -5.858  83.822  1.00 10.27           C  
ATOM   1744  O   SER L  22      29.184  -5.909  84.830  1.00 10.33           O  
ATOM   1745  CB  SER L  22      27.620  -3.782  82.566  1.00 11.09           C  
ATOM   1746  OG  SER L  22      29.039  -3.637  82.311  1.00 12.62           O  
ATOM   1747  N   CYS L  23      28.537  -6.713  82.874  1.00 10.24           N  
ATOM   1748  CA  CYS L  23      29.510  -7.815  82.828  1.00 10.28           C  
ATOM   1749  C   CYS L  23      29.532  -8.242  81.355  1.00 10.48           C  
ATOM   1750  O   CYS L  23      28.771  -9.108  80.844  1.00 10.68           O  
ATOM   1751  CB  CYS L  23      29.202  -8.895  83.822  1.00  9.44           C  
ATOM   1752  SG  CYS L  23      29.630 -10.562  83.313  1.00  9.29           S  
ATOM   1753  N   THR L  24      30.436  -7.502  80.721  1.00 10.70           N  
ATOM   1754  CA  THR L  24      30.660  -7.700  79.249  1.00 10.59           C  
ATOM   1755  C   THR L  24      31.300  -9.050  79.082  1.00 10.67           C  
ATOM   1756  O   THR L  24      32.253  -9.448  79.744  1.00 10.61           O  
ATOM   1757  CB  THR L  24      31.381  -6.437  78.710  1.00 10.76           C  
ATOM   1758  OG1 THR L  24      30.508  -5.347  79.236  1.00 10.26           O  
ATOM   1759  CG2 THR L  24      31.625  -6.383  77.204  1.00 10.35           C  
ATOM   1760  N   GLY L  25      30.701  -9.790  78.186  1.00 10.97           N  
ATOM   1761  CA  GLY L  25      31.012 -11.140  77.756  1.00 11.08           C  
ATOM   1762  C   GLY L  25      31.161 -11.295  76.236  1.00 11.08           C  
ATOM   1763  O   GLY L  25      31.487 -10.346  75.509  1.00 11.17           O  
ATOM   1764  N   THR L  26      30.935 -12.512  75.749  1.00 11.03           N  
ATOM   1765  CA  THR L  26      31.085 -12.918  74.392  1.00 11.04           C  
ATOM   1766  C   THR L  26      29.980 -13.884  73.882  1.00 11.04           C  
ATOM   1767  O   THR L  26      29.169 -14.466  74.563  1.00 10.99           O  
ATOM   1768  CB  THR L  26      32.418 -13.668  73.932  1.00 10.77           C  
ATOM   1769  OG1 THR L  26      33.559 -12.994  74.466  1.00 10.44           O  
ATOM   1770  CG2 THR L  26      32.533 -13.711  72.382  1.00 10.74           C  
ATOM   1771  N   SER L  27      30.140 -14.002  72.560  1.00 11.23           N  
ATOM   1772  CA  SER L  27      29.230 -14.781  71.702  1.00 11.06           C  
ATOM   1773  C   SER L  27      29.461 -16.212  72.231  1.00 11.11           C  
ATOM   1774  O   SER L  27      28.593 -17.067  72.265  1.00 11.17           O  
ATOM   1775  CB  SER L  27      29.555 -14.550  70.248  1.00 11.03           C  
ATOM   1776  OG  SER L  27      30.051 -13.231  69.932  1.00  9.77           O  
ATOM   1777  N   SER L  27A     30.673 -16.363  72.726  1.00 11.01           N  
ATOM   1778  CA  SER L  27A     31.246 -17.573  73.265  1.00 11.04           C  
ATOM   1779  C   SER L  27A     31.320 -17.680  74.750  1.00 11.17           C  
ATOM   1780  O   SER L  27A     31.555 -18.799  75.228  1.00 11.15           O  
ATOM   1781  CB  SER L  27A     32.663 -17.709  72.657  1.00 11.46           C  
ATOM   1782  OG  SER L  27A     33.459 -18.673  73.285  1.00 12.16           O  
ATOM   1783  N   ASP L  27B     31.286 -16.593  75.487  1.00 11.32           N  
ATOM   1784  CA  ASP L  27B     31.253 -16.524  76.972  1.00 11.06           C  
ATOM   1785  C   ASP L  27B     30.097 -15.560  77.236  1.00 10.80           C  
ATOM   1786  O   ASP L  27B     30.430 -14.375  76.901  1.00 10.98           O  
ATOM   1787  CB  ASP L  27B     32.543 -16.045  77.637  1.00 11.07           C  
ATOM   1788  CG  ASP L  27B     32.839 -14.583  77.701  1.00 11.32           C  
ATOM   1789  OD1 ASP L  27B     31.940 -13.734  77.857  1.00 11.43           O  
ATOM   1790  OD2 ASP L  27B     34.008 -14.086  77.634  1.00 11.47           O  
ATOM   1791  N   VAL L  27C     28.929 -15.934  77.597  1.00 10.34           N  
ATOM   1792  CA  VAL L  27C     27.855 -14.935  77.836  1.00  9.91           C  
ATOM   1793  C   VAL L  27C     26.786 -14.852  76.801  1.00  9.63           C  
ATOM   1794  O   VAL L  27C     25.629 -14.651  77.366  1.00  9.62           O  
ATOM   1795  CB  VAL L  27C     28.482 -13.604  78.312  1.00  9.62           C  
ATOM   1796  CG1 VAL L  27C     27.445 -12.551  78.686  1.00  9.54           C  
ATOM   1797  CG2 VAL L  27C     29.380 -13.797  79.548  1.00  9.61           C  
ATOM   1798  N   GLY L  28      26.898 -14.920  75.526  1.00  9.41           N  
ATOM   1799  CA  GLY L  28      25.652 -14.947  74.648  1.00  9.03           C  
ATOM   1800  C   GLY L  28      25.813 -16.272  73.888  1.00  9.16           C  
ATOM   1801  O   GLY L  28      25.863 -16.223  72.648  1.00  9.05           O  
ATOM   1802  N   GLY L  29      26.151 -17.297  74.615  1.00  8.97           N  
ATOM   1803  CA  GLY L  29      26.478 -18.604  74.024  1.00  9.17           C  
ATOM   1804  C   GLY L  29      25.674 -19.662  74.762  1.00  9.37           C  
ATOM   1805  O   GLY L  29      25.424 -20.772  74.247  1.00  9.69           O  
ATOM   1806  N   TYR L  30      25.332 -19.304  75.983  1.00  9.45           N  
ATOM   1807  CA  TYR L  30      24.560 -20.125  76.899  1.00  9.48           C  
ATOM   1808  C   TYR L  30      23.821 -19.110  77.773  1.00  9.28           C  
ATOM   1809  O   TYR L  30      23.695 -17.959  77.338  1.00  9.26           O  
ATOM   1810  CB  TYR L  30      25.386 -21.122  77.721  1.00 10.68           C  
ATOM   1811  CG  TYR L  30      26.689 -21.433  76.979  1.00 11.72           C  
ATOM   1812  CD1 TYR L  30      27.617 -20.385  76.775  1.00 11.78           C  
ATOM   1813  CD2 TYR L  30      26.992 -22.697  76.503  1.00 11.78           C  
ATOM   1814  CE1 TYR L  30      28.790 -20.608  76.098  1.00 12.41           C  
ATOM   1815  CE2 TYR L  30      28.181 -22.942  75.829  1.00 12.58           C  
ATOM   1816  CZ  TYR L  30      29.081 -21.901  75.626  1.00 12.83           C  
ATOM   1817  OH  TYR L  30      30.242 -22.156  74.931  1.00 13.63           O  
ATOM   1818  N   ASN L  31      23.409 -19.597  78.903  1.00  9.08           N  
ATOM   1819  CA  ASN L  31      22.516 -18.757  79.783  1.00  8.79           C  
ATOM   1820  C   ASN L  31      22.863 -19.254  81.175  1.00  8.52           C  
ATOM   1821  O   ASN L  31      22.057 -19.701  81.993  1.00  8.49           O  
ATOM   1822  CB  ASN L  31      21.141 -18.914  79.210  1.00  9.64           C  
ATOM   1823  CG  ASN L  31      20.809 -18.033  78.009  1.00 10.17           C  
ATOM   1824  OD1 ASN L  31      21.535 -17.126  77.561  1.00 10.70           O  
ATOM   1825  ND2 ASN L  31      19.604 -18.285  77.461  1.00 10.38           N  
ATOM   1826  N   TYR L  32      24.200 -19.202  81.374  1.00  8.09           N  
ATOM   1827  CA  TYR L  32      24.873 -19.623  82.599  1.00  7.34           C  
ATOM   1828  C   TYR L  32      25.848 -18.549  83.101  1.00  6.82           C  
ATOM   1829  O   TYR L  32      27.075 -18.710  83.053  1.00  6.57           O  
ATOM   1830  CB  TYR L  32      25.714 -20.889  82.413  1.00  7.61           C  
ATOM   1831  CG  TYR L  32      24.952 -22.030  81.815  1.00  7.88           C  
ATOM   1832  CD1 TYR L  32      25.203 -22.456  80.519  1.00  7.78           C  
ATOM   1833  CD2 TYR L  32      23.961 -22.682  82.564  1.00  7.90           C  
ATOM   1834  CE1 TYR L  32      24.522 -23.550  79.967  1.00  8.02           C  
ATOM   1835  CE2 TYR L  32      23.249 -23.762  82.019  1.00  8.24           C  
ATOM   1836  CZ  TYR L  32      23.549 -24.195  80.723  1.00  7.93           C  
ATOM   1837  OH  TYR L  32      22.838 -25.239  80.234  1.00  7.94           O  
ATOM   1838  N   VAL L  33      25.229 -17.486  83.510  1.00  6.46           N  
ATOM   1839  CA  VAL L  33      25.878 -16.336  84.164  1.00  6.05           C  
ATOM   1840  C   VAL L  33      25.413 -16.397  85.646  1.00  5.88           C  
ATOM   1841  O   VAL L  33      24.203 -16.412  85.960  1.00  5.59           O  
ATOM   1842  CB  VAL L  33      25.587 -15.031  83.410  1.00  5.78           C  
ATOM   1843  CG1 VAL L  33      25.512 -13.755  84.242  1.00  5.29           C  
ATOM   1844  CG2 VAL L  33      26.642 -14.864  82.309  1.00  5.44           C  
ATOM   1845  N   SER L  34      26.409 -16.519  86.484  1.00  5.54           N  
ATOM   1846  CA  SER L  34      26.208 -16.421  87.944  1.00  5.54           C  
ATOM   1847  C   SER L  34      26.824 -15.101  88.448  1.00  5.60           C  
ATOM   1848  O   SER L  34      27.864 -14.564  87.916  1.00  5.73           O  
ATOM   1849  CB  SER L  34      26.769 -17.647  88.609  1.00  5.18           C  
ATOM   1850  OG  SER L  34      25.955 -18.718  88.185  1.00  4.96           O  
ATOM   1851  N   TRP L  35      26.095 -14.566  89.412  1.00  5.61           N  
ATOM   1852  CA  TRP L  35      26.564 -13.334  90.089  1.00  5.55           C  
ATOM   1853  C   TRP L  35      26.896 -13.765  91.554  1.00  5.91           C  
ATOM   1854  O   TRP L  35      26.089 -14.411  92.240  1.00  5.99           O  
ATOM   1855  CB  TRP L  35      25.626 -12.230  89.985  1.00  4.55           C  
ATOM   1856  CG  TRP L  35      25.373 -11.600  88.676  1.00  4.37           C  
ATOM   1857  CD1 TRP L  35      24.396 -11.925  87.758  1.00  4.65           C  
ATOM   1858  CD2 TRP L  35      26.099 -10.508  88.094  1.00  3.92           C  
ATOM   1859  NE1 TRP L  35      24.463 -11.098  86.661  1.00  4.52           N  
ATOM   1860  CE2 TRP L  35      25.502 -10.229  86.858  1.00  4.34           C  
ATOM   1861  CE3 TRP L  35      27.190  -9.778  88.507  1.00  3.89           C  
ATOM   1862  CZ2 TRP L  35      25.957  -9.212  86.016  1.00  4.76           C  
ATOM   1863  CZ3 TRP L  35      27.665  -8.784  87.700  1.00  4.30           C  
ATOM   1864  CH2 TRP L  35      27.059  -8.484  86.475  1.00  4.57           C  
ATOM   1865  N   TYR L  36      28.135 -13.391  91.868  1.00  6.31           N  
ATOM   1866  CA  TYR L  36      28.625 -13.671  93.236  1.00  7.14           C  
ATOM   1867  C   TYR L  36      28.822 -12.320  93.980  1.00  7.46           C  
ATOM   1868  O   TYR L  36      29.107 -11.260  93.437  1.00  7.28           O  
ATOM   1869  CB  TYR L  36      29.803 -14.538  93.372  1.00  6.97           C  
ATOM   1870  CG  TYR L  36      29.827 -15.802  92.571  1.00  7.49           C  
ATOM   1871  CD1 TYR L  36      29.543 -17.040  93.108  1.00  7.58           C  
ATOM   1872  CD2 TYR L  36      30.207 -15.747  91.229  1.00  7.82           C  
ATOM   1873  CE1 TYR L  36      29.597 -18.204  92.333  1.00  8.26           C  
ATOM   1874  CE2 TYR L  36      30.276 -16.889  90.424  1.00  8.01           C  
ATOM   1875  CZ  TYR L  36      29.976 -18.109  90.987  1.00  7.90           C  
ATOM   1876  OH  TYR L  36      30.088 -19.228  90.215  1.00  8.51           O  
ATOM   1877  N   GLN L  37      28.597 -12.532  95.283  1.00  8.17           N  
ATOM   1878  CA  GLN L  37      28.703 -11.430  96.252  1.00  8.90           C  
ATOM   1879  C   GLN L  37      30.143 -11.230  96.666  1.00  9.00           C  
ATOM   1880  O   GLN L  37      30.885 -10.636  95.787  1.00  9.46           O  
ATOM   1881  CB  GLN L  37      27.671 -11.381  97.350  1.00  9.40           C  
ATOM   1882  CG  GLN L  37      26.575 -10.311  96.973  1.00 10.22           C  
ATOM   1883  CD  GLN L  37      26.008  -9.818  98.293  1.00 11.07           C  
ATOM   1884  OE1 GLN L  37      26.748  -9.376  99.202  1.00 11.56           O  
ATOM   1885  NE2 GLN L  37      24.709 -10.008  98.412  1.00 11.15           N  
ATOM   1886  N   GLN L  38      30.542 -11.391  97.852  1.00  9.11           N  
ATOM   1887  CA  GLN L  38      31.917 -11.204  98.309  1.00  9.04           C  
ATOM   1888  C   GLN L  38      31.767 -10.021  99.302  1.00  9.03           C  
ATOM   1889  O   GLN L  38      32.203  -8.951  98.934  1.00  8.98           O  
ATOM   1890  CB  GLN L  38      32.992 -10.793  97.311  1.00  8.93           C  
ATOM   1891  CG  GLN L  38      34.395 -11.004  97.921  1.00  9.25           C  
ATOM   1892  CD  GLN L  38      34.827 -12.463  97.910  1.00  9.41           C  
ATOM   1893  OE1 GLN L  38      35.908 -12.879  97.413  1.00  8.56           O  
ATOM   1894  NE2 GLN L  38      33.934 -13.297  98.466  1.00  9.36           N  
ATOM   1895  N   HIS L  39      31.122 -10.329 100.405  1.00  9.03           N  
ATOM   1896  CA  HIS L  39      31.028  -9.341 101.457  1.00  9.12           C  
ATOM   1897  C   HIS L  39      32.379  -8.808 101.862  1.00  9.40           C  
ATOM   1898  O   HIS L  39      32.320  -7.752 102.533  1.00  9.77           O  
ATOM   1899  CB  HIS L  39      30.379  -9.839 102.819  1.00  8.02           C  
ATOM   1900  CG  HIS L  39      29.129  -8.958 102.723  1.00  7.15           C  
ATOM   1901  ND1 HIS L  39      29.299  -7.628 102.474  1.00  6.41           N  
ATOM   1902  CD2 HIS L  39      27.827  -9.256 102.706  1.00  7.01           C  
ATOM   1903  CE1 HIS L  39      28.062  -7.142 102.403  1.00  7.07           C  
ATOM   1904  NE2 HIS L  39      27.153  -8.093 102.548  1.00  6.51           N  
ATOM   1905  N   ALA L  40      33.451  -9.520 101.626  1.00  9.46           N  
ATOM   1906  CA  ALA L  40      34.785  -9.095 101.914  1.00  9.55           C  
ATOM   1907  C   ALA L  40      35.455  -9.796 103.102  1.00  9.83           C  
ATOM   1908  O   ALA L  40      35.087  -9.760 104.277  1.00  9.86           O  
ATOM   1909  CB  ALA L  40      35.000  -7.623 102.178  1.00  9.25           C  
ATOM   1910  N   GLY L  41      36.593 -10.334 102.656  1.00 10.11           N  
ATOM   1911  CA  GLY L  41      37.459 -11.159 103.576  1.00 10.25           C  
ATOM   1912  C   GLY L  41      36.502 -12.307 103.998  1.00 10.19           C  
ATOM   1913  O   GLY L  41      36.465 -12.548 105.205  1.00 10.47           O  
ATOM   1914  N   LYS L  42      35.783 -12.830 102.979  1.00  9.88           N  
ATOM   1915  CA  LYS L  42      34.858 -13.925 103.264  1.00  9.41           C  
ATOM   1916  C   LYS L  42      34.645 -14.925 102.119  1.00  9.20           C  
ATOM   1917  O   LYS L  42      35.377 -15.082 101.163  1.00  8.80           O  
ATOM   1918  CB  LYS L  42      33.439 -13.409 103.556  1.00  9.20           C  
ATOM   1919  CG  LYS L  42      32.999 -13.827 104.989  1.00  9.08           C  
ATOM   1920  CD  LYS L  42      33.320 -12.632 105.864  1.00  8.62           C  
ATOM   1921  CE  LYS L  42      33.202 -12.822 107.331  1.00  8.75           C  
ATOM   1922  NZ  LYS L  42      34.367 -12.024 107.947  1.00  8.70           N  
ATOM   1923  N   ALA L  43      33.546 -15.646 102.262  1.00  9.14           N  
ATOM   1924  CA  ALA L  43      32.996 -16.578 101.295  1.00  9.11           C  
ATOM   1925  C   ALA L  43      32.405 -15.748 100.161  1.00  9.09           C  
ATOM   1926  O   ALA L  43      31.780 -14.737 100.479  1.00  9.15           O  
ATOM   1927  CB  ALA L  43      31.804 -17.293 101.920  1.00  9.79           C  
ATOM   1928  N   PRO L  44      32.564 -16.239  98.958  1.00  9.23           N  
ATOM   1929  CA  PRO L  44      31.987 -15.606  97.772  1.00  9.13           C  
ATOM   1930  C   PRO L  44      30.496 -15.400  97.915  1.00  9.36           C  
ATOM   1931  O   PRO L  44      30.027 -14.205  97.945  1.00  9.57           O  
ATOM   1932  CB  PRO L  44      32.353 -16.524  96.642  1.00  9.08           C  
ATOM   1933  CG  PRO L  44      33.537 -17.298  97.083  1.00  8.93           C  
ATOM   1934  CD  PRO L  44      33.473 -17.357  98.592  1.00  9.20           C  
ATOM   1935  N   LYS L  45      29.746 -16.495  97.958  1.00  9.18           N  
ATOM   1936  CA  LYS L  45      28.283 -16.430  98.057  1.00  9.17           C  
ATOM   1937  C   LYS L  45      27.665 -16.146  96.692  1.00  8.85           C  
ATOM   1938  O   LYS L  45      27.956 -15.062  96.203  1.00  8.71           O  
ATOM   1939  CB  LYS L  45      27.821 -15.300  98.990  1.00  9.81           C  
ATOM   1940  CG  LYS L  45      26.276 -15.229  99.116  1.00 10.69           C  
ATOM   1941  CD  LYS L  45      25.844 -13.757  99.059  1.00 11.79           C  
ATOM   1942  CE  LYS L  45      24.465 -13.459  99.646  1.00 11.91           C  
ATOM   1943  NZ  LYS L  45      24.671 -12.716 100.951  1.00 12.37           N  
ATOM   1944  N   VAL L  46      26.879 -17.047  96.170  1.00  8.76           N  
ATOM   1945  CA  VAL L  46      26.188 -16.881  94.872  1.00  8.71           C  
ATOM   1946  C   VAL L  46      24.823 -16.228  95.079  1.00  8.63           C  
ATOM   1947  O   VAL L  46      24.073 -16.760  95.945  1.00  8.70           O  
ATOM   1948  CB  VAL L  46      26.064 -18.261  94.168  1.00  8.58           C  
ATOM   1949  CG1 VAL L  46      25.980 -18.072  92.667  1.00  9.17           C  
ATOM   1950  CG2 VAL L  46      27.154 -19.277  94.454  1.00  8.46           C  
ATOM   1951  N   ILE L  47      24.501 -15.182  94.385  1.00  8.45           N  
ATOM   1952  CA  ILE L  47      23.203 -14.504  94.575  1.00  8.91           C  
ATOM   1953  C   ILE L  47      22.447 -14.415  93.272  1.00  9.12           C  
ATOM   1954  O   ILE L  47      21.904 -13.320  92.926  1.00  9.50           O  
ATOM   1955  CB  ILE L  47      23.428 -13.080  95.218  1.00  9.00           C  
ATOM   1956  CG1 ILE L  47      24.362 -12.205  94.363  1.00  8.83           C  
ATOM   1957  CG2 ILE L  47      23.922 -13.127  96.694  1.00  9.07           C  
ATOM   1958  CD1 ILE L  47      24.071 -10.689  94.398  1.00  8.70           C  
ATOM   1959  N   ILE L  48      22.403 -15.505  92.530  1.00  9.28           N  
ATOM   1960  CA  ILE L  48      21.834 -15.485  91.160  1.00  9.24           C  
ATOM   1961  C   ILE L  48      22.637 -16.429  90.264  1.00  8.84           C  
ATOM   1962  O   ILE L  48      23.884 -16.270  90.193  1.00  8.26           O  
ATOM   1963  CB  ILE L  48      21.873 -14.026  90.570  1.00  9.80           C  
ATOM   1964  CG1 ILE L  48      20.555 -13.753  89.806  1.00 10.19           C  
ATOM   1965  CG2 ILE L  48      23.098 -13.873  89.632  1.00 10.07           C  
ATOM   1966  CD1 ILE L  48      19.303 -13.749  90.728  1.00  9.96           C  
ATOM   1967  N   TYR L  49      21.871 -17.321  89.641  1.00  8.93           N  
ATOM   1968  CA  TYR L  49      22.523 -18.345  88.814  1.00  8.64           C  
ATOM   1969  C   TYR L  49      21.674 -18.534  87.557  1.00  8.84           C  
ATOM   1970  O   TYR L  49      20.508 -18.152  87.535  1.00  8.41           O  
ATOM   1971  CB  TYR L  49      22.711 -19.772  89.423  1.00  8.18           C  
ATOM   1972  CG  TYR L  49      21.494 -20.456  89.998  1.00  8.01           C  
ATOM   1973  CD1 TYR L  49      21.266 -20.412  91.390  1.00  8.12           C  
ATOM   1974  CD2 TYR L  49      20.553 -21.139  89.232  1.00  7.80           C  
ATOM   1975  CE1 TYR L  49      20.121 -20.991  91.957  1.00  7.89           C  
ATOM   1976  CE2 TYR L  49      19.441 -21.745  89.790  1.00  7.37           C  
ATOM   1977  CZ  TYR L  49      19.219 -21.663  91.145  1.00  7.46           C  
ATOM   1978  OH  TYR L  49      18.098 -22.213  91.703  1.00  7.19           O  
ATOM   1979  N   GLU L  50      22.367 -19.169  86.626  1.00  9.14           N  
ATOM   1980  CA  GLU L  50      21.621 -19.657  85.419  1.00 10.01           C  
ATOM   1981  C   GLU L  50      20.762 -18.569  84.821  1.00 10.48           C  
ATOM   1982  O   GLU L  50      19.734 -18.912  84.257  1.00 10.45           O  
ATOM   1983  CB  GLU L  50      20.614 -20.694  85.886  1.00  9.81           C  
ATOM   1984  CG  GLU L  50      20.813 -22.190  85.600  1.00  9.11           C  
ATOM   1985  CD  GLU L  50      19.385 -22.705  85.375  1.00  9.28           C  
ATOM   1986  OE1 GLU L  50      18.630 -22.075  84.637  1.00  9.04           O  
ATOM   1987  OE2 GLU L  50      19.174 -23.681  86.075  1.00  9.11           O  
ATOM   1988  N   VAL L  51      21.120 -17.326  85.059  1.00 11.17           N  
ATOM   1989  CA  VAL L  51      20.551 -16.137  84.518  1.00 11.78           C  
ATOM   1990  C   VAL L  51      19.809 -15.160  85.406  1.00 12.19           C  
ATOM   1991  O   VAL L  51      20.458 -14.100  85.715  1.00 12.13           O  
ATOM   1992  CB  VAL L  51      19.817 -16.462  83.187  1.00 11.67           C  
ATOM   1993  CG1 VAL L  51      18.447 -17.048  83.311  1.00 11.98           C  
ATOM   1994  CG2 VAL L  51      19.765 -15.173  82.376  1.00 12.28           C  
ATOM   1995  N   ASN L  52      18.580 -15.401  85.784  1.00 12.67           N  
ATOM   1996  CA  ASN L  52      17.815 -14.404  86.603  1.00 13.23           C  
ATOM   1997  C   ASN L  52      17.138 -15.003  87.843  1.00 13.48           C  
ATOM   1998  O   ASN L  52      16.092 -14.640  88.459  1.00 13.31           O  
ATOM   1999  CB  ASN L  52      16.908 -13.744  85.538  1.00 13.83           C  
ATOM   2000  CG  ASN L  52      16.010 -14.775  84.854  1.00 14.18           C  
ATOM   2001  OD1 ASN L  52      16.459 -15.722  84.202  1.00 14.07           O  
ATOM   2002  ND2 ASN L  52      14.702 -14.553  85.055  1.00 14.29           N  
ATOM   2003  N   LYS L  53      17.852 -15.989  88.358  1.00 13.73           N  
ATOM   2004  CA  LYS L  53      17.424 -16.976  89.353  1.00 13.92           C  
ATOM   2005  C   LYS L  53      18.060 -16.701  90.728  1.00 13.98           C  
ATOM   2006  O   LYS L  53      19.266 -16.873  90.985  1.00 13.16           O  
ATOM   2007  CB  LYS L  53      17.746 -18.368  88.855  1.00 14.45           C  
ATOM   2008  CG  LYS L  53      16.932 -19.276  88.052  1.00 14.63           C  
ATOM   2009  CD  LYS L  53      15.931 -20.207  88.715  1.00 14.98           C  
ATOM   2010  CE  LYS L  53      16.013 -21.631  88.174  1.00 15.18           C  
ATOM   2011  NZ  LYS L  53      15.966 -21.629  86.668  1.00 15.81           N  
ATOM   2012  N   ARG L  54      17.121 -16.266  91.593  1.00 14.12           N  
ATOM   2013  CA  ARG L  54      17.388 -15.836  92.937  1.00 14.41           C  
ATOM   2014  C   ARG L  54      17.199 -16.930  93.991  1.00 14.48           C  
ATOM   2015  O   ARG L  54      16.124 -17.037  94.593  1.00 14.43           O  
ATOM   2016  CB  ARG L  54      16.543 -14.638  93.400  1.00 14.92           C  
ATOM   2017  CG  ARG L  54      17.346 -13.334  93.444  1.00 15.38           C  
ATOM   2018  CD  ARG L  54      16.480 -12.173  93.223  1.00 16.44           C  
ATOM   2019  NE  ARG L  54      15.301 -12.285  92.385  1.00 17.10           N  
ATOM   2020  CZ  ARG L  54      14.017 -12.418  92.703  1.00 17.40           C  
ATOM   2021  NH1 ARG L  54      13.484 -12.556  93.928  1.00 17.33           N  
ATOM   2022  NH2 ARG L  54      13.131 -12.235  91.695  1.00 17.56           N  
ATOM   2023  N   PRO L  55      18.307 -17.619  94.231  1.00 14.54           N  
ATOM   2024  CA  PRO L  55      18.374 -18.733  95.151  1.00 14.67           C  
ATOM   2025  C   PRO L  55      17.504 -18.637  96.389  1.00 14.75           C  
ATOM   2026  O   PRO L  55      16.871 -17.626  96.662  1.00 14.60           O  
ATOM   2027  CB  PRO L  55      19.859 -18.762  95.614  1.00 14.54           C  
ATOM   2028  CG  PRO L  55      20.364 -17.377  95.259  1.00 14.44           C  
ATOM   2029  CD  PRO L  55      19.700 -17.132  93.900  1.00 14.45           C  
ATOM   2030  N   SER L  56      17.555 -19.727  97.135  1.00 14.97           N  
ATOM   2031  CA  SER L  56      16.894 -19.847  98.449  1.00 15.41           C  
ATOM   2032  C   SER L  56      17.423 -18.947  99.562  1.00 15.44           C  
ATOM   2033  O   SER L  56      18.414 -19.286 100.287  1.00 15.61           O  
ATOM   2034  CB  SER L  56      17.075 -21.319  98.876  1.00 15.59           C  
ATOM   2035  OG  SER L  56      16.043 -22.136  98.389  1.00 16.50           O  
ATOM   2036  N   GLY L  57      16.776 -17.796  99.748  1.00 15.36           N  
ATOM   2037  CA  GLY L  57      17.108 -16.832 100.788  1.00 14.97           C  
ATOM   2038  C   GLY L  57      18.044 -15.711 100.414  1.00 14.86           C  
ATOM   2039  O   GLY L  57      19.099 -15.520 101.001  1.00 14.56           O  
ATOM   2040  N   VAL L  58      17.718 -14.963  99.410  1.00 14.76           N  
ATOM   2041  CA  VAL L  58      18.303 -13.772  98.865  1.00 14.89           C  
ATOM   2042  C   VAL L  58      16.945 -12.967  98.739  1.00 15.08           C  
ATOM   2043  O   VAL L  58      15.966 -13.717  98.769  1.00 15.06           O  
ATOM   2044  CB  VAL L  58      18.867 -13.817  97.456  1.00 14.91           C  
ATOM   2045  CG1 VAL L  58      20.032 -14.720  97.138  1.00 14.84           C  
ATOM   2046  CG2 VAL L  58      17.653 -14.068  96.530  1.00 14.90           C  
ATOM   2047  N   PRO L  59      17.077 -11.674  98.559  1.00 15.16           N  
ATOM   2048  CA  PRO L  59      15.862 -10.873  98.655  1.00 15.05           C  
ATOM   2049  C   PRO L  59      15.335 -10.553  97.274  1.00 15.07           C  
ATOM   2050  O   PRO L  59      16.100 -10.411  96.313  1.00 15.03           O  
ATOM   2051  CB  PRO L  59      16.228  -9.545  99.304  1.00 15.09           C  
ATOM   2052  CG  PRO L  59      17.684  -9.445  98.845  1.00 15.24           C  
ATOM   2053  CD  PRO L  59      18.229 -10.887  99.114  1.00 15.13           C  
ATOM   2054  N   ASP L  60      14.031 -10.396  97.296  1.00 15.05           N  
ATOM   2055  CA  ASP L  60      13.201 -10.083  96.174  1.00 14.81           C  
ATOM   2056  C   ASP L  60      13.785  -9.038  95.237  1.00 14.51           C  
ATOM   2057  O   ASP L  60      13.305  -8.872  94.106  1.00 14.66           O  
ATOM   2058  CB  ASP L  60      11.842  -9.504  96.746  1.00 15.53           C  
ATOM   2059  CG  ASP L  60      11.160  -9.177  95.400  1.00 16.10           C  
ATOM   2060  OD1 ASP L  60      10.896  -8.100  94.932  1.00 16.22           O  
ATOM   2061  OD2 ASP L  60      11.074 -10.292  94.777  1.00 17.12           O  
ATOM   2062  N   ARG L  61      14.820  -8.398  95.685  1.00 14.18           N  
ATOM   2063  CA  ARG L  61      15.472  -7.268  95.054  1.00 13.98           C  
ATOM   2064  C   ARG L  61      16.755  -7.429  94.288  1.00 13.74           C  
ATOM   2065  O   ARG L  61      17.232  -6.372  93.714  1.00 13.50           O  
ATOM   2066  CB  ARG L  61      15.691  -6.262  96.248  1.00 14.75           C  
ATOM   2067  CG  ARG L  61      14.622  -6.430  97.332  1.00 15.49           C  
ATOM   2068  CD  ARG L  61      13.267  -6.817  96.845  1.00 15.50           C  
ATOM   2069  NE  ARG L  61      12.788  -6.187  95.659  1.00 15.60           N  
ATOM   2070  CZ  ARG L  61      11.986  -5.165  95.422  1.00 15.42           C  
ATOM   2071  NH1 ARG L  61      11.779  -4.825  94.136  1.00 15.61           N  
ATOM   2072  NH2 ARG L  61      11.342  -4.464  96.361  1.00 15.41           N  
ATOM   2073  N   PHE L  62      17.340  -8.649  94.329  1.00 13.39           N  
ATOM   2074  CA  PHE L  62      18.597  -8.804  93.487  1.00 12.74           C  
ATOM   2075  C   PHE L  62      18.036  -9.087  92.100  1.00 12.72           C  
ATOM   2076  O   PHE L  62      16.898  -9.642  92.123  1.00 12.82           O  
ATOM   2077  CB  PHE L  62      19.614  -9.789  94.000  1.00 12.09           C  
ATOM   2078  CG  PHE L  62      20.320  -9.272  95.248  1.00 11.73           C  
ATOM   2079  CD1 PHE L  62      19.772  -9.558  96.516  1.00 10.97           C  
ATOM   2080  CD2 PHE L  62      21.459  -8.487  95.129  1.00 10.98           C  
ATOM   2081  CE1 PHE L  62      20.385  -9.063  97.650  1.00 10.77           C  
ATOM   2082  CE2 PHE L  62      22.081  -8.011  96.289  1.00 11.08           C  
ATOM   2083  CZ  PHE L  62      21.519  -8.274  97.560  1.00 10.82           C  
ATOM   2084  N   SER L  63      18.714  -8.658  91.039  1.00 12.15           N  
ATOM   2085  CA  SER L  63      18.231  -8.976  89.691  1.00 11.65           C  
ATOM   2086  C   SER L  63      19.398  -9.113  88.685  1.00 11.45           C  
ATOM   2087  O   SER L  63      20.423  -8.415  88.769  1.00 11.25           O  
ATOM   2088  CB  SER L  63      17.320  -7.926  89.076  1.00 11.44           C  
ATOM   2089  OG  SER L  63      16.062  -7.840  89.656  1.00 11.33           O  
ATOM   2090  N   GLY L  64      19.136 -10.024  87.758  1.00 11.25           N  
ATOM   2091  CA  GLY L  64      20.044 -10.146  86.589  1.00 10.95           C  
ATOM   2092  C   GLY L  64      19.193 -10.214  85.311  1.00 10.94           C  
ATOM   2093  O   GLY L  64      18.035 -10.683  85.293  1.00 10.87           O  
ATOM   2094  N   SER L  65      19.828  -9.648  84.278  1.00 10.89           N  
ATOM   2095  CA  SER L  65      19.255  -9.850  82.898  1.00 10.80           C  
ATOM   2096  C   SER L  65      20.459  -9.591  81.973  1.00 11.07           C  
ATOM   2097  O   SER L  65      21.308  -8.766  82.395  1.00 11.01           O  
ATOM   2098  CB  SER L  65      18.100  -9.063  82.471  1.00 10.09           C  
ATOM   2099  OG  SER L  65      18.380  -7.741  82.225  1.00  9.38           O  
ATOM   2100  N   LYS L  66      20.456 -10.336  80.878  1.00 11.20           N  
ATOM   2101  CA  LYS L  66      21.591 -10.093  79.915  1.00 11.62           C  
ATOM   2102  C   LYS L  66      20.902  -9.549  78.667  1.00 11.53           C  
ATOM   2103  O   LYS L  66      19.670  -9.773  78.638  1.00 11.74           O  
ATOM   2104  CB  LYS L  66      22.406 -11.313  79.511  1.00 11.29           C  
ATOM   2105  CG  LYS L  66      21.479 -12.483  79.216  1.00 11.76           C  
ATOM   2106  CD  LYS L  66      22.204 -13.804  79.102  1.00 12.12           C  
ATOM   2107  CE  LYS L  66      22.736 -13.991  77.693  1.00 12.80           C  
ATOM   2108  NZ  LYS L  66      23.433 -12.743  77.236  1.00 13.03           N  
ATOM   2109  N   SER L  67      21.636  -8.844  77.842  1.00 11.66           N  
ATOM   2110  CA  SER L  67      20.986  -8.599  76.498  1.00 11.74           C  
ATOM   2111  C   SER L  67      21.775  -9.418  75.479  1.00 11.89           C  
ATOM   2112  O   SER L  67      21.388 -10.573  75.159  1.00 11.88           O  
ATOM   2113  CB  SER L  67      20.614  -7.222  76.173  1.00 11.73           C  
ATOM   2114  OG  SER L  67      19.146  -7.160  76.186  1.00 12.11           O  
ATOM   2115  N   GLY L  68      22.778  -8.783  74.957  1.00 11.96           N  
ATOM   2116  CA  GLY L  68      23.666  -9.393  73.944  1.00 12.33           C  
ATOM   2117  C   GLY L  68      24.814  -9.939  74.819  1.00 12.37           C  
ATOM   2118  O   GLY L  68      24.481 -10.128  75.996  1.00 12.78           O  
ATOM   2119  N   ASN L  69      26.004 -10.034  74.265  1.00 12.55           N  
ATOM   2120  CA  ASN L  69      27.033 -10.704  75.063  1.00 12.48           C  
ATOM   2121  C   ASN L  69      27.340  -9.908  76.310  1.00 12.55           C  
ATOM   2122  O   ASN L  69      28.388 -10.243  76.899  1.00 12.66           O  
ATOM   2123  CB  ASN L  69      28.087 -11.421  74.353  1.00 13.31           C  
ATOM   2124  CG  ASN L  69      28.540 -10.815  73.059  1.00 13.84           C  
ATOM   2125  OD1 ASN L  69      29.139 -11.557  72.261  1.00 13.78           O  
ATOM   2126  ND2 ASN L  69      28.247  -9.505  72.921  1.00 14.28           N  
ATOM   2127  N   THR L  70      26.403  -9.140  76.806  1.00 12.15           N  
ATOM   2128  CA  THR L  70      26.547  -8.423  78.058  1.00 12.04           C  
ATOM   2129  C   THR L  70      25.464  -8.808  79.069  1.00 11.70           C  
ATOM   2130  O   THR L  70      24.298  -8.713  78.641  1.00 11.55           O  
ATOM   2131  CB  THR L  70      26.455  -6.841  77.851  1.00 12.42           C  
ATOM   2132  OG1 THR L  70      25.575  -6.283  78.889  1.00 12.60           O  
ATOM   2133  CG2 THR L  70      25.974  -6.470  76.450  1.00 12.97           C  
ATOM   2134  N   ALA L  71      25.916  -9.135  80.279  1.00 11.26           N  
ATOM   2135  CA  ALA L  71      24.877  -9.375  81.337  1.00 11.14           C  
ATOM   2136  C   ALA L  71      24.960  -8.232  82.363  1.00 11.05           C  
ATOM   2137  O   ALA L  71      25.959  -7.457  82.343  1.00 11.26           O  
ATOM   2138  CB  ALA L  71      24.959 -10.716  82.004  1.00 10.91           C  
ATOM   2139  N   SER L  72      23.931  -8.139  83.187  1.00 10.73           N  
ATOM   2140  CA  SER L  72      23.978  -7.102  84.255  1.00 10.60           C  
ATOM   2141  C   SER L  72      23.201  -7.426  85.494  1.00 10.52           C  
ATOM   2142  O   SER L  72      22.144  -8.113  85.505  1.00 10.34           O  
ATOM   2143  CB  SER L  72      23.446  -5.876  83.469  1.00 10.11           C  
ATOM   2144  OG  SER L  72      22.354  -6.549  82.761  1.00 10.08           O  
ATOM   2145  N   LEU L  73      23.729  -6.848  86.585  1.00 10.57           N  
ATOM   2146  CA  LEU L  73      23.188  -6.963  87.964  1.00 10.65           C  
ATOM   2147  C   LEU L  73      22.540  -5.641  88.416  1.00 10.65           C  
ATOM   2148  O   LEU L  73      23.065  -4.517  88.265  1.00 10.39           O  
ATOM   2149  CB  LEU L  73      24.299  -7.493  88.873  1.00 10.03           C  
ATOM   2150  CG  LEU L  73      23.991  -8.244  90.145  1.00 10.04           C  
ATOM   2151  CD1 LEU L  73      24.257  -7.431  91.405  1.00  9.85           C  
ATOM   2152  CD2 LEU L  73      22.517  -8.649  90.188  1.00  9.96           C  
ATOM   2153  N   THR L  74      21.315  -5.821  88.964  1.00 10.67           N  
ATOM   2154  CA  THR L  74      20.501  -4.741  89.477  1.00 10.67           C  
ATOM   2155  C   THR L  74      19.980  -4.950  90.898  1.00 10.81           C  
ATOM   2156  O   THR L  74      19.297  -5.920  91.295  1.00 10.96           O  
ATOM   2157  CB  THR L  74      19.254  -4.390  88.542  1.00 10.87           C  
ATOM   2158  OG1 THR L  74      19.708  -4.390  87.189  1.00 10.19           O  
ATOM   2159  CG2 THR L  74      18.609  -3.053  89.018  1.00 10.73           C  
ATOM   2160  N   VAL L  75      20.223  -3.898  91.658  1.00 10.81           N  
ATOM   2161  CA  VAL L  75      19.971  -3.852  93.132  1.00 10.87           C  
ATOM   2162  C   VAL L  75      19.138  -2.632  93.471  1.00 11.01           C  
ATOM   2163  O   VAL L  75      19.673  -1.525  93.697  1.00 10.68           O  
ATOM   2164  CB  VAL L  75      21.431  -3.809  93.647  1.00 10.72           C  
ATOM   2165  CG1 VAL L  75      21.949  -2.364  93.640  1.00 10.83           C  
ATOM   2166  CG2 VAL L  75      21.708  -4.535  94.913  1.00 10.75           C  
ATOM   2167  N   SER L  76      17.817  -2.840  93.511  1.00 11.20           N  
ATOM   2168  CA  SER L  76      16.853  -1.769  93.785  1.00 11.31           C  
ATOM   2169  C   SER L  76      16.846  -1.504  95.277  1.00 11.26           C  
ATOM   2170  O   SER L  76      17.127  -2.400  96.084  1.00 11.25           O  
ATOM   2171  CB  SER L  76      15.436  -2.008  93.337  1.00 11.98           C  
ATOM   2172  OG  SER L  76      15.284  -1.570  91.944  1.00 13.46           O  
ATOM   2173  N   GLY L  77      16.477  -0.251  95.540  1.00 11.26           N  
ATOM   2174  CA  GLY L  77      16.529   0.234  96.965  1.00 10.87           C  
ATOM   2175  C   GLY L  77      17.639  -0.421  97.767  1.00 10.61           C  
ATOM   2176  O   GLY L  77      17.445  -1.436  98.449  1.00 10.65           O  
ATOM   2177  N   LEU L  78      18.831   0.175  97.752  1.00 10.25           N  
ATOM   2178  CA  LEU L  78      20.046  -0.191  98.404  1.00  9.48           C  
ATOM   2179  C   LEU L  78      19.956  -0.425  99.914  1.00  9.31           C  
ATOM   2180  O   LEU L  78      19.581   0.394 100.747  1.00  8.78           O  
ATOM   2181  CB  LEU L  78      21.124   0.877  98.038  1.00  9.15           C  
ATOM   2182  CG  LEU L  78      21.690   0.682  96.622  1.00  8.97           C  
ATOM   2183  CD1 LEU L  78      22.366   1.920  96.114  1.00  8.63           C  
ATOM   2184  CD2 LEU L  78      22.699  -0.473  96.698  1.00  8.85           C  
ATOM   2185  N   GLN L  79      20.367  -1.669 100.191  1.00  9.22           N  
ATOM   2186  CA  GLN L  79      20.337  -2.277 101.542  1.00  9.27           C  
ATOM   2187  C   GLN L  79      21.335  -1.505 102.345  1.00  9.13           C  
ATOM   2188  O   GLN L  79      20.778  -0.425 102.710  1.00  9.58           O  
ATOM   2189  CB  GLN L  79      20.433  -3.781 101.578  1.00  9.72           C  
ATOM   2190  CG  GLN L  79      20.009  -4.568 100.341  1.00 10.01           C  
ATOM   2191  CD  GLN L  79      19.075  -5.739 100.551  1.00 10.23           C  
ATOM   2192  OE1 GLN L  79      19.189  -6.542 101.468  1.00  9.54           O  
ATOM   2193  NE2 GLN L  79      18.089  -5.802  99.596  1.00 10.19           N  
ATOM   2194  N   ALA L  80      22.530  -1.809 102.594  1.00  9.04           N  
ATOM   2195  CA  ALA L  80      23.463  -0.959 103.379  1.00  9.05           C  
ATOM   2196  C   ALA L  80      24.690  -1.878 103.632  1.00  9.11           C  
ATOM   2197  O   ALA L  80      25.841  -1.498 103.855  1.00  8.88           O  
ATOM   2198  CB  ALA L  80      22.901  -0.363 104.613  1.00  9.06           C  
ATOM   2199  N   GLU L  81      24.298  -3.148 103.544  1.00  9.18           N  
ATOM   2200  CA  GLU L  81      25.271  -4.242 103.494  1.00  9.45           C  
ATOM   2201  C   GLU L  81      25.500  -4.723 102.057  1.00  9.22           C  
ATOM   2202  O   GLU L  81      26.239  -5.726 101.894  1.00  9.50           O  
ATOM   2203  CB  GLU L  81      24.783  -5.442 104.284  1.00  9.91           C  
ATOM   2204  CG  GLU L  81      23.643  -6.133 103.472  1.00 10.80           C  
ATOM   2205  CD  GLU L  81      22.355  -5.965 104.240  1.00 11.50           C  
ATOM   2206  OE1 GLU L  81      22.371  -5.486 105.363  1.00 11.79           O  
ATOM   2207  OE2 GLU L  81      21.391  -6.443 103.583  1.00 12.29           O  
ATOM   2208  N   ASP L  82      24.951  -4.110 101.053  1.00  8.93           N  
ATOM   2209  CA  ASP L  82      25.182  -4.533  99.659  1.00  8.34           C  
ATOM   2210  C   ASP L  82      26.577  -4.087  99.285  1.00  8.22           C  
ATOM   2211  O   ASP L  82      26.986  -4.308  98.146  1.00  8.09           O  
ATOM   2212  CB  ASP L  82      24.058  -4.046  98.763  1.00  8.70           C  
ATOM   2213  CG  ASP L  82      22.763  -4.189  99.574  1.00  8.88           C  
ATOM   2214  OD1 ASP L  82      22.648  -5.159 100.353  1.00  9.59           O  
ATOM   2215  OD2 ASP L  82      21.912  -3.300  99.455  1.00  9.19           O  
ATOM   2216  N   GLU L  83      27.214  -3.421 100.226  1.00  8.21           N  
ATOM   2217  CA  GLU L  83      28.642  -2.975  99.932  1.00  7.97           C  
ATOM   2218  C   GLU L  83      29.302  -4.335 100.012  1.00  7.97           C  
ATOM   2219  O   GLU L  83      29.111  -5.005 101.053  1.00  8.00           O  
ATOM   2220  CB  GLU L  83      29.128  -1.987 100.910  1.00  8.24           C  
ATOM   2221  CG  GLU L  83      29.725  -0.631 100.542  1.00  8.36           C  
ATOM   2222  CD  GLU L  83      29.705   0.424 101.633  1.00  8.33           C  
ATOM   2223  OE1 GLU L  83      30.224   0.224 102.710  1.00  8.44           O  
ATOM   2224  OE2 GLU L  83      29.154   1.528 101.369  1.00  7.95           O  
ATOM   2225  N   ALA L  84      29.920  -4.781  98.990  1.00  7.96           N  
ATOM   2226  CA  ALA L  84      30.609  -6.069  98.863  1.00  7.93           C  
ATOM   2227  C   ALA L  84      31.250  -6.023  97.493  1.00  7.73           C  
ATOM   2228  O   ALA L  84      31.051  -4.926  96.932  1.00  7.90           O  
ATOM   2229  CB  ALA L  84      29.640  -7.238  99.010  1.00  8.35           C  
ATOM   2230  N   ASP L  85      31.876  -7.028  97.029  1.00  7.88           N  
ATOM   2231  CA  ASP L  85      32.488  -6.968  95.651  1.00  7.90           C  
ATOM   2232  C   ASP L  85      31.508  -7.854  94.857  1.00  7.70           C  
ATOM   2233  O   ASP L  85      30.906  -8.699  95.532  1.00  7.52           O  
ATOM   2234  CB  ASP L  85      33.953  -7.259  95.608  1.00  8.66           C  
ATOM   2235  CG  ASP L  85      34.806  -6.308  96.417  1.00  9.25           C  
ATOM   2236  OD1 ASP L  85      34.505  -5.119  96.584  1.00  9.81           O  
ATOM   2237  OD2 ASP L  85      35.821  -6.760  96.986  1.00  9.74           O  
ATOM   2238  N   TYR L  86      31.358  -7.550  93.591  1.00  7.37           N  
ATOM   2239  CA  TYR L  86      30.408  -8.378  92.781  1.00  6.98           C  
ATOM   2240  C   TYR L  86      31.116  -8.980  91.591  1.00  6.74           C  
ATOM   2241  O   TYR L  86      31.883  -8.274  90.918  1.00  6.69           O  
ATOM   2242  CB  TYR L  86      29.216  -7.532  92.498  1.00  6.49           C  
ATOM   2243  CG  TYR L  86      28.382  -7.208  93.718  1.00  6.04           C  
ATOM   2244  CD1 TYR L  86      28.487  -5.993  94.372  1.00  5.94           C  
ATOM   2245  CD2 TYR L  86      27.438  -8.132  94.181  1.00  5.90           C  
ATOM   2246  CE1 TYR L  86      27.680  -5.692  95.473  1.00  5.69           C  
ATOM   2247  CE2 TYR L  86      26.617  -7.847  95.253  1.00  5.60           C  
ATOM   2248  CZ  TYR L  86      26.762  -6.631  95.908  1.00  5.93           C  
ATOM   2249  OH  TYR L  86      25.930  -6.395  96.978  1.00  6.47           O  
ATOM   2250  N   TYR L  87      30.859 -10.282  91.413  1.00  6.69           N  
ATOM   2251  CA  TYR L  87      31.554 -10.986  90.286  1.00  6.67           C  
ATOM   2252  C   TYR L  87      30.603 -11.600  89.275  1.00  6.47           C  
ATOM   2253  O   TYR L  87      29.520 -12.113  89.689  1.00  6.56           O  
ATOM   2254  CB  TYR L  87      32.501 -12.059  90.840  1.00  6.74           C  
ATOM   2255  CG  TYR L  87      33.552 -11.436  91.723  1.00  7.05           C  
ATOM   2256  CD1 TYR L  87      33.324 -11.342  93.099  1.00  7.11           C  
ATOM   2257  CD2 TYR L  87      34.733 -10.900  91.212  1.00  7.33           C  
ATOM   2258  CE1 TYR L  87      34.275 -10.775  93.946  1.00  7.26           C  
ATOM   2259  CE2 TYR L  87      35.687 -10.322  92.056  1.00  7.42           C  
ATOM   2260  CZ  TYR L  87      35.451 -10.268  93.417  1.00  7.08           C  
ATOM   2261  OH  TYR L  87      36.393  -9.723  94.248  1.00  7.56           O  
ATOM   2262  N   CYS L  88      31.047 -11.448  88.003  1.00  6.49           N  
ATOM   2263  CA  CYS L  88      30.174 -12.261  87.016  1.00  6.45           C  
ATOM   2264  C   CYS L  88      31.060 -13.470  86.667  1.00  6.21           C  
ATOM   2265  O   CYS L  88      32.337 -13.399  86.754  1.00  6.21           O  
ATOM   2266  CB  CYS L  88      29.708 -11.489  85.852  1.00  6.81           C  
ATOM   2267  SG  CYS L  88      31.019 -10.660  84.992  1.00  6.77           S  
ATOM   2268  N   SER L  89      30.332 -14.516  86.339  1.00  5.84           N  
ATOM   2269  CA  SER L  89      31.043 -15.773  85.960  1.00  5.34           C  
ATOM   2270  C   SER L  89      30.037 -16.348  84.938  1.00  5.33           C  
ATOM   2271  O   SER L  89      28.842 -16.356  85.215  1.00  4.96           O  
ATOM   2272  CB  SER L  89      31.329 -16.750  87.025  1.00  5.06           C  
ATOM   2273  OG  SER L  89      30.401 -17.768  87.319  1.00  3.81           O  
ATOM   2274  N   SER L  90      30.677 -16.727  83.835  1.00  5.47           N  
ATOM   2275  CA  SER L  90      29.908 -17.362  82.752  1.00  5.32           C  
ATOM   2276  C   SER L  90      30.592 -18.696  82.330  1.00  5.47           C  
ATOM   2277  O   SER L  90      31.809 -18.964  82.391  1.00  5.05           O  
ATOM   2278  CB  SER L  90      29.681 -16.490  81.558  1.00  5.59           C  
ATOM   2279  OG  SER L  90      28.847 -17.188  80.601  1.00  6.00           O  
ATOM   2280  N   TYR L  91      29.587 -19.550  81.948  1.00  5.52           N  
ATOM   2281  CA  TYR L  91      29.969 -20.824  81.296  1.00  5.52           C  
ATOM   2282  C   TYR L  91      30.675 -20.363  79.996  1.00  5.55           C  
ATOM   2283  O   TYR L  91      30.385 -19.203  79.543  1.00  5.68           O  
ATOM   2284  CB  TYR L  91      28.759 -21.676  80.984  1.00  5.70           C  
ATOM   2285  CG  TYR L  91      29.195 -23.052  80.502  1.00  5.79           C  
ATOM   2286  CD1 TYR L  91      29.730 -23.943  81.469  1.00  5.81           C  
ATOM   2287  CD2 TYR L  91      29.116 -23.464  79.190  1.00  5.57           C  
ATOM   2288  CE1 TYR L  91      30.129 -25.230  81.090  1.00  5.61           C  
ATOM   2289  CE2 TYR L  91      29.523 -24.736  78.822  1.00  5.16           C  
ATOM   2290  CZ  TYR L  91      30.038 -25.602  79.751  1.00  5.31           C  
ATOM   2291  OH  TYR L  91      30.441 -26.851  79.372  1.00  5.40           O  
ATOM   2292  N   GLU L  92      31.581 -21.165  79.517  1.00  5.35           N  
ATOM   2293  CA  GLU L  92      32.284 -20.807  78.264  1.00  5.36           C  
ATOM   2294  C   GLU L  92      32.625 -22.089  77.530  1.00  5.42           C  
ATOM   2295  O   GLU L  92      33.653 -22.083  76.849  1.00  5.88           O  
ATOM   2296  CB  GLU L  92      33.552 -20.066  78.467  1.00  5.07           C  
ATOM   2297  CG  GLU L  92      34.554 -20.541  79.526  1.00  6.03           C  
ATOM   2298  CD  GLU L  92      35.945 -19.978  79.320  1.00  6.41           C  
ATOM   2299  OE1 GLU L  92      36.917 -20.068  80.063  1.00  7.03           O  
ATOM   2300  OE2 GLU L  92      36.027 -19.362  78.230  1.00  6.78           O  
ATOM   2301  N   GLY L  93      31.766 -23.092  77.626  1.00  5.30           N  
ATOM   2302  CA  GLY L  93      31.919 -24.359  76.996  1.00  4.84           C  
ATOM   2303  C   GLY L  93      33.065 -25.183  77.541  1.00  4.88           C  
ATOM   2304  O   GLY L  93      34.195 -24.704  77.740  1.00  4.70           O  
ATOM   2305  N   SER L  94      32.732 -26.439  77.803  1.00  4.92           N  
ATOM   2306  CA  SER L  94      33.689 -27.470  78.158  1.00  5.11           C  
ATOM   2307  C   SER L  94      33.964 -27.566  79.623  1.00  5.05           C  
ATOM   2308  O   SER L  94      35.128 -27.336  79.954  1.00  5.30           O  
ATOM   2309  CB  SER L  94      35.033 -27.156  77.438  1.00  5.26           C  
ATOM   2310  OG  SER L  94      34.799 -27.268  76.016  1.00  6.62           O  
ATOM   2311  N   ASP L  95      33.024 -27.943  80.431  1.00  5.19           N  
ATOM   2312  CA  ASP L  95      33.100 -28.097  81.874  1.00  4.88           C  
ATOM   2313  C   ASP L  95      33.773 -26.851  82.434  1.00  5.04           C  
ATOM   2314  O   ASP L  95      34.478 -26.960  83.430  1.00  5.09           O  
ATOM   2315  CB  ASP L  95      33.698 -29.412  82.346  1.00  4.59           C  
ATOM   2316  CG  ASP L  95      33.091 -30.681  81.803  1.00  5.21           C  
ATOM   2317  OD1 ASP L  95      31.897 -30.738  81.422  1.00  4.85           O  
ATOM   2318  OD2 ASP L  95      33.841 -31.734  81.686  1.00  5.12           O  
ATOM   2319  N   ASN L  95A     33.451 -25.710  81.811  1.00  5.41           N  
ATOM   2320  CA  ASN L  95A     34.290 -24.503  82.255  1.00  5.81           C  
ATOM   2321  C   ASN L  95A     33.703 -23.146  82.066  1.00  5.67           C  
ATOM   2322  O   ASN L  95A     32.782 -22.858  81.322  1.00  5.69           O  
ATOM   2323  CB  ASN L  95A     35.667 -24.915  81.841  1.00  6.78           C  
ATOM   2324  CG  ASN L  95A     36.608 -23.864  81.394  1.00  7.42           C  
ATOM   2325  OD1 ASN L  95A     37.438 -24.216  80.513  1.00  8.30           O  
ATOM   2326  ND2 ASN L  95A     36.525 -22.681  82.008  1.00  7.93           N  
ATOM   2327  N   PHE L  96      34.235 -22.217  82.900  1.00  5.54           N  
ATOM   2328  CA  PHE L  96      33.788 -20.884  83.140  1.00  5.22           C  
ATOM   2329  C   PHE L  96      34.998 -19.939  83.348  1.00  5.13           C  
ATOM   2330  O   PHE L  96      36.079 -20.222  83.750  1.00  4.83           O  
ATOM   2331  CB  PHE L  96      32.959 -20.612  84.410  1.00  5.26           C  
ATOM   2332  CG  PHE L  96      31.835 -21.550  84.702  1.00  5.23           C  
ATOM   2333  CD1 PHE L  96      30.518 -21.175  84.462  1.00  5.09           C  
ATOM   2334  CD2 PHE L  96      32.108 -22.825  85.204  1.00  5.36           C  
ATOM   2335  CE1 PHE L  96      29.476 -22.055  84.700  1.00  5.29           C  
ATOM   2336  CE2 PHE L  96      31.053 -23.714  85.494  1.00  5.36           C  
ATOM   2337  CZ  PHE L  96      29.746 -23.324  85.217  1.00  5.27           C  
ATOM   2338  N   VAL L  97      34.562 -18.740  83.025  1.00  5.29           N  
ATOM   2339  CA  VAL L  97      35.367 -17.482  82.969  1.00  5.24           C  
ATOM   2340  C   VAL L  97      34.782 -16.581  84.038  1.00  5.34           C  
ATOM   2341  O   VAL L  97      33.558 -16.765  84.389  1.00  5.65           O  
ATOM   2342  CB  VAL L  97      35.218 -17.029  81.495  1.00  4.80           C  
ATOM   2343  CG1 VAL L  97      33.758 -17.091  81.036  1.00  4.33           C  
ATOM   2344  CG2 VAL L  97      35.782 -15.670  81.223  1.00  4.98           C  
ATOM   2345  N   PHE L  98      35.512 -15.605  84.501  1.00  5.56           N  
ATOM   2346  CA  PHE L  98      35.084 -14.938  85.808  1.00  5.67           C  
ATOM   2347  C   PHE L  98      35.370 -13.495  85.674  1.00  5.64           C  
ATOM   2348  O   PHE L  98      36.465 -13.171  86.261  1.00  5.86           O  
ATOM   2349  CB  PHE L  98      35.976 -15.652  86.923  1.00  6.00           C  
ATOM   2350  CG  PHE L  98      35.027 -16.218  87.940  1.00  6.27           C  
ATOM   2351  CD1 PHE L  98      34.512 -17.494  87.743  1.00  6.34           C  
ATOM   2352  CD2 PHE L  98      34.547 -15.425  88.975  1.00  6.47           C  
ATOM   2353  CE1 PHE L  98      33.561 -18.005  88.613  1.00  6.81           C  
ATOM   2354  CE2 PHE L  98      33.574 -15.922  89.851  1.00  6.43           C  
ATOM   2355  CZ  PHE L  98      33.090 -17.214  89.673  1.00  6.51           C  
ATOM   2356  N   GLY L  99      34.545 -12.679  85.112  1.00  5.47           N  
ATOM   2357  CA  GLY L  99      35.029 -11.263  84.828  1.00  5.42           C  
ATOM   2358  C   GLY L  99      34.918 -10.522  86.140  1.00  5.56           C  
ATOM   2359  O   GLY L  99      33.796 -10.472  86.700  1.00  5.69           O  
ATOM   2360  N   THR L 100      36.001  -9.945  86.535  1.00  5.98           N  
ATOM   2361  CA  THR L 100      36.233  -9.317  87.845  1.00  6.69           C  
ATOM   2362  C   THR L 100      35.112  -8.859  88.760  1.00  6.93           C  
ATOM   2363  O   THR L 100      33.887  -9.151  88.702  1.00  7.01           O  
ATOM   2364  CB  THR L 100      37.358  -8.144  87.722  1.00  6.42           C  
ATOM   2365  OG1 THR L 100      37.268  -7.311  88.922  1.00  5.64           O  
ATOM   2366  CG2 THR L 100      37.355  -7.340  86.416  1.00  5.87           C  
ATOM   2367  N   GLY L 101      35.548  -8.048  89.749  1.00  7.17           N  
ATOM   2368  CA  GLY L 101      34.741  -7.648  90.909  1.00  7.40           C  
ATOM   2369  C   GLY L 101      33.674  -6.621  90.673  1.00  7.32           C  
ATOM   2370  O   GLY L 101      33.258  -6.524  89.498  1.00  7.79           O  
ATOM   2371  N   THR L 102      33.057  -6.099  91.742  1.00  7.17           N  
ATOM   2372  CA  THR L 102      32.383  -4.770  91.530  1.00  7.05           C  
ATOM   2373  C   THR L 102      32.661  -3.915  92.740  1.00  6.89           C  
ATOM   2374  O   THR L 102      33.532  -2.997  92.548  1.00  6.82           O  
ATOM   2375  CB  THR L 102      31.097  -4.732  90.732  1.00  7.15           C  
ATOM   2376  OG1 THR L 102      31.808  -4.484  89.397  1.00  7.71           O  
ATOM   2377  CG2 THR L 102      30.015  -3.667  90.851  1.00  6.50           C  
ATOM   2378  N   LYS L 103      32.153  -4.225  93.868  1.00  6.85           N  
ATOM   2379  CA  LYS L 103      32.368  -3.374  95.075  1.00  6.76           C  
ATOM   2380  C   LYS L 103      31.657  -2.060  94.720  1.00  6.37           C  
ATOM   2381  O   LYS L 103      32.263  -1.285  94.028  1.00  6.34           O  
ATOM   2382  CB  LYS L 103      33.799  -3.057  95.352  1.00  7.63           C  
ATOM   2383  CG  LYS L 103      34.126  -2.347  96.701  1.00  7.45           C  
ATOM   2384  CD  LYS L 103      35.619  -1.912  96.562  1.00  7.92           C  
ATOM   2385  CE  LYS L 103      36.420  -3.154  96.159  1.00  8.37           C  
ATOM   2386  NZ  LYS L 103      36.818  -3.911  97.391  1.00  8.97           N  
ATOM   2387  N   VAL L 104      30.474  -1.939  95.142  1.00  6.32           N  
ATOM   2388  CA  VAL L 104      29.677  -0.719  94.973  1.00  6.55           C  
ATOM   2389  C   VAL L 104      29.973  -0.038  96.302  1.00  6.72           C  
ATOM   2390  O   VAL L 104      30.841  -0.525  97.029  1.00  6.90           O  
ATOM   2391  CB  VAL L 104      28.232  -1.260  94.969  1.00  7.04           C  
ATOM   2392  CG1 VAL L 104      28.112  -2.502  94.114  1.00  6.86           C  
ATOM   2393  CG2 VAL L 104      27.809  -1.511  96.428  1.00  7.11           C  
ATOM   2394  N   THR L 105      29.197   0.942  96.610  1.00  6.83           N  
ATOM   2395  CA  THR L 105      29.225   1.629  97.902  1.00  6.79           C  
ATOM   2396  C   THR L 105      27.808   2.240  97.947  1.00  6.83           C  
ATOM   2397  O   THR L 105      27.344   2.809  96.951  1.00  6.69           O  
ATOM   2398  CB  THR L 105      30.423   2.509  98.237  1.00  6.79           C  
ATOM   2399  OG1 THR L 105      31.269   2.611  97.055  1.00  7.68           O  
ATOM   2400  CG2 THR L 105      31.337   1.962  99.395  1.00  7.17           C  
ATOM   2401  N   VAL L 106      27.174   1.821  99.051  1.00  6.54           N  
ATOM   2402  CA  VAL L 106      25.884   2.539  99.393  1.00  6.31           C  
ATOM   2403  C   VAL L 106      26.555   3.789 100.003  1.00  6.23           C  
ATOM   2404  O   VAL L 106      27.760   3.678 100.395  1.00  6.52           O  
ATOM   2405  CB  VAL L 106      25.026   1.663 100.230  1.00  6.32           C  
ATOM   2406  CG1 VAL L 106      24.223   0.600  99.488  1.00  6.02           C  
ATOM   2407  CG2 VAL L 106      25.888   0.953 101.306  1.00  6.62           C  
ATOM   2408  N   LEU L 106A     25.913   4.908  99.945  1.00  6.18           N  
ATOM   2409  CA  LEU L 106A     26.392   6.196 100.334  1.00  5.63           C  
ATOM   2410  C   LEU L 106A     25.170   6.910 101.007  1.00  5.34           C  
ATOM   2411  O   LEU L 106A     24.065   6.783 100.511  1.00  5.41           O  
ATOM   2412  CB  LEU L 106A     26.904   7.126  99.211  1.00  5.46           C  
ATOM   2413  CG  LEU L 106A     28.201   6.822  98.540  1.00  5.01           C  
ATOM   2414  CD1 LEU L 106A     27.981   5.613  97.614  1.00  5.11           C  
ATOM   2415  CD2 LEU L 106A     28.744   7.976  97.709  1.00  5.10           C  
ATOM   2416  N   GLY L 107      25.550   7.651 101.992  1.00  4.84           N  
ATOM   2417  CA  GLY L 107      24.593   8.417 102.816  1.00  4.41           C  
ATOM   2418  C   GLY L 107      24.335   7.490 104.045  1.00  3.83           C  
ATOM   2419  O   GLY L 107      23.209   7.351 104.463  1.00  3.50           O  
ATOM   2420  N   GLN L 108      25.481   6.869 104.388  1.00  3.49           N  
ATOM   2421  CA  GLN L 108      25.427   5.916 105.541  1.00  2.97           C  
ATOM   2422  C   GLN L 108      25.556   6.858 106.757  1.00  2.49           C  
ATOM   2423  O   GLN L 108      26.313   7.844 106.647  1.00  2.37           O  
ATOM   2424  CB  GLN L 108      26.328   4.742 105.478  1.00  3.36           C  
ATOM   2425  CG  GLN L 108      25.901   3.704 104.461  1.00  3.69           C  
ATOM   2426  CD  GLN L 108      26.884   2.573 104.467  1.00  4.28           C  
ATOM   2427  OE1 GLN L 108      26.941   1.709 105.372  1.00  4.84           O  
ATOM   2428  NE2 GLN L 108      27.697   2.627 103.444  1.00  5.38           N  
ATOM   2429  N   PRO L 109      24.759   6.529 107.736  1.00  2.11           N  
ATOM   2430  CA  PRO L 109      24.664   7.475 108.900  1.00  2.13           C  
ATOM   2431  C   PRO L 109      25.939   7.305 109.668  1.00  2.01           C  
ATOM   2432  O   PRO L 109      26.405   6.131 109.568  1.00  2.10           O  
ATOM   2433  CB  PRO L 109      23.366   7.079 109.538  1.00  2.14           C  
ATOM   2434  CG  PRO L 109      23.077   5.688 109.088  1.00  2.13           C  
ATOM   2435  CD  PRO L 109      23.674   5.566 107.722  1.00  2.04           C  
TER    2436      PRO L 109                                                      
