# Supplementary material for: SARS-CoV-2 Spike Protein Interaction Space
Source: Int J Mol Sci. 2023 Jul 27;24(15):12058. doi: 10.3390/ijms241512058 (PMC10418891; doi:10.3390/ijms241512058)
Supplement: Supplementary file 1 [file ijms-24-12058-s001.zip › Supplementary Material File S1/2OMB.pdb]

REMARK 950 NUMBERING  Kabat
REMARK 950 METHOD     X-ray crystal structure
REMARK 950 RESOLUTION 2.900
REMARK 950 R-FACTOR   0.235
REMARK 950 R-FREE     0.284
REMARK 950 CHAIN-TYPE LABEL ORIGINAL
REMARK 950 CHAIN L    L    C
REMARK 950 CHAIN L    L    D
REMARK 950 MOLECULE : C : BENCE JONES KWR PROTEIN - IMMUNOGLOBULIN LIGHT CHAIN
REMARK 950 SPECIES  : C : HOMO SAPIENS
SEQRES   1 L 217  PCA SER ALA LEU PRO GLN PRO ALA SER VAL SER GLY SER          
SEQRES   2 L 217  PRO GLY GLN SER ILE THR ILE SER CYS THR GLY THR SER          
SEQRES   3 L 217  SER ASP VAL GLY GLY TYR ASP LEU VAL SER TRP TYR GLN          
SEQRES   4 L 217  HIS HIS PRO GLY GLY ALA PRO LYS LEU ILE ILE TYR GLU          
SEQRES   5 L 217  VAL THR ASN ARG PRO SER GLY VAL SER ASP ARG PHE SER          
SEQRES   6 L 217  GLY SER LYS SER GLY ASN THR ALA SER LEU THR ILE SER          
SEQRES   7 L 217  GLY LEU GLN ALA GLU ASP GLU ALA ASP TYR TYR CYS SER          
SEQRES   8 L 217  SER TYR ALA SER GLY SER THR PRO ARG ILE PHE GLY GLY          
SEQRES   9 L 217  GLY THR ARG LEU THR VAL LEU GLY GLN PRO LYS ALA ALA          
SEQRES  10 L 217  PRO SER VAL THR LEU PHE PRO PRO SER SER GLU GLU LEU          
SEQRES  11 L 217  GLN ALA ASN LYS ALA THR LEU VAL CYS LEU ILE SER ASP          
SEQRES  12 L 217  PHE TYR PRO GLY ALA VAL THR VAL ALA TRP LYS ALA ASP          
SEQRES  13 L 217  SER SER PRO VAL LYS ALA GLY VAL GLU THR THR THR PRO          
SEQRES  14 L 217  SER LYS GLN SER ASN ASN LYS TYR ALA ALA SER SER TYR          
SEQRES  15 L 217  LEU SER LEU THR PRO GLU GLN TRP LYS SER HIS ARG SER          
SEQRES  16 L 217  TYR SER CYS GLN VAL THR HIS GLU GLY SER THR VAL GLU          
SEQRES  17 L 217  LYS THR VAL ALA PRO THR GLU CYS SER                          
SEQRES   1 L 217  PCA SER ALA LEU PRO GLN PRO ALA SER VAL SER GLY SER          
SEQRES   2 L 217  PRO GLY GLN SER ILE THR ILE SER CYS THR GLY THR SER          
SEQRES   3 L 217  SER ASP VAL GLY GLY TYR ASP LEU VAL SER TRP TYR GLN          
SEQRES   4 L 217  HIS HIS PRO GLY GLY ALA PRO LYS LEU ILE ILE TYR GLU          
SEQRES   5 L 217  VAL THR ASN ARG PRO SER GLY VAL SER ASP ARG PHE SER          
SEQRES   6 L 217  GLY SER LYS SER GLY ASN THR ALA SER LEU THR ILE SER          
SEQRES   7 L 217  GLY LEU GLN ALA GLU ASP GLU ALA ASP TYR TYR CYS SER          
SEQRES   8 L 217  SER TYR ALA SER GLY SER THR PRO ARG ILE PHE GLY GLY          
SEQRES   9 L 217  GLY THR ARG LEU THR VAL LEU GLY GLN PRO LYS ALA ALA          
SEQRES  10 L 217  PRO SER VAL THR LEU PHE PRO PRO SER SER GLU GLU LEU          
SEQRES  11 L 217  GLN ALA ASN LYS ALA THR LEU VAL CYS LEU ILE SER ASP          
SEQRES  12 L 217  PHE TYR PRO GLY ALA VAL THR VAL ALA TRP LYS ALA ASP          
SEQRES  13 L 217  SER SER PRO VAL LYS ALA GLY VAL GLU THR THR THR PRO          
SEQRES  14 L 217  SER LYS GLN SER ASN ASN LYS TYR ALA ALA SER SER TYR          
SEQRES  15 L 217  LEU SER LEU THR PRO GLU GLN TRP LYS SER HIS ARG SER          
SEQRES  16 L 217  TYR SER CYS GLN VAL THR HIS GLU GLY SER THR VAL GLU          
SEQRES  17 L 217  LYS THR VAL ALA PRO THR GLU CYS SER                          
ATOM   3203  N   SER L   2      84.325 -28.543  -2.476  1.00 73.67           N  
ATOM   3204  CA  SER L   2      83.042 -29.081  -2.931  1.00 71.33           C  
ATOM   3205  C   SER L   2      82.442 -29.910  -1.780  1.00 68.95           C  
ATOM   3206  O   SER L   2      82.970 -30.968  -1.412  1.00 67.35           O  
ATOM   3207  CB  SER L   2      83.239 -29.950  -4.184  1.00 72.50           C  
ATOM   3208  OG  SER L   2      82.027 -30.088  -4.919  1.00 72.34           O  
ATOM   3209  N   ALA L   3      81.338 -29.406  -1.225  1.00 64.76           N  
ATOM   3210  CA  ALA L   3      80.638 -30.013  -0.093  1.00 60.67           C  
ATOM   3211  C   ALA L   3      80.388 -31.529  -0.066  1.00 58.31           C  
ATOM   3212  O   ALA L   3      80.687 -32.275  -1.003  1.00 57.49           O  
ATOM   3213  CB  ALA L   3      79.314 -29.284   0.120  1.00 58.63           C  
ATOM   3214  N   LEU L   4      79.824 -31.955   1.057  1.00 55.23           N  
ATOM   3215  CA  LEU L   4      79.473 -33.339   1.314  1.00 52.02           C  
ATOM   3216  C   LEU L   4      77.951 -33.389   1.404  1.00 50.67           C  
ATOM   3217  O   LEU L   4      77.345 -32.850   2.336  1.00 50.17           O  
ATOM   3218  CB  LEU L   4      80.068 -33.779   2.643  1.00 51.61           C  
ATOM   3219  CG  LEU L   4      81.582 -33.861   2.728  1.00 49.59           C  
ATOM   3220  CD1 LEU L   4      82.041 -33.761   4.160  1.00 48.12           C  
ATOM   3221  CD2 LEU L   4      82.010 -35.163   2.112  1.00 52.07           C  
ATOM   3222  N   PRO L   5      77.312 -34.042   0.436  1.00 49.08           N  
ATOM   3223  CA  PRO L   5      75.854 -34.143   0.427  1.00 47.35           C  
ATOM   3224  C   PRO L   5      75.359 -34.649   1.765  1.00 46.13           C  
ATOM   3225  O   PRO L   5      75.875 -35.621   2.312  1.00 47.87           O  
ATOM   3226  CB  PRO L   5      75.590 -35.115  -0.709  1.00 47.75           C  
ATOM   3227  CG  PRO L   5      76.793 -36.011  -0.652  1.00 48.96           C  
ATOM   3228  CD  PRO L   5      77.915 -35.031  -0.470  1.00 49.07           C  
ATOM   3229  N   GLN L   6      74.347 -33.984   2.289  1.00 44.59           N  
ATOM   3230  CA  GLN L   6      73.795 -34.334   3.590  1.00 41.85           C  
ATOM   3231  C   GLN L   6      72.296 -34.087   3.474  1.00 40.55           C  
ATOM   3232  O   GLN L   6      71.873 -33.159   2.793  1.00 40.25           O  
ATOM   3233  CB  GLN L   6      74.408 -33.391   4.621  1.00 40.70           C  
ATOM   3234  CG  GLN L   6      74.547 -33.895   6.021  1.00 37.05           C  
ATOM   3235  CD  GLN L   6      75.193 -32.843   6.902  1.00 37.18           C  
ATOM   3236  OE1 GLN L   6      76.313 -32.418   6.657  1.00 34.42           O  
ATOM   3237  NE2 GLN L   6      74.477 -32.406   7.922  1.00 38.06           N  
ATOM   3238  N   PRO L   7      71.473 -34.907   4.130  1.00 39.47           N  
ATOM   3239  CA  PRO L   7      70.037 -34.644   3.999  1.00 39.95           C  
ATOM   3240  C   PRO L   7      69.636 -33.302   4.657  1.00 39.73           C  
ATOM   3241  O   PRO L   7      70.187 -32.921   5.683  1.00 40.49           O  
ATOM   3242  CB  PRO L   7      69.400 -35.873   4.670  1.00 39.80           C  
ATOM   3243  CG  PRO L   7      70.409 -36.242   5.723  1.00 38.94           C  
ATOM   3244  CD  PRO L   7      71.734 -36.064   5.004  1.00 40.14           C  
ATOM   3245  N   ALA L   8      68.690 -32.585   4.061  1.00 38.34           N  
ATOM   3246  CA  ALA L   8      68.270 -31.315   4.622  1.00 37.76           C  
ATOM   3247  C   ALA L   8      67.613 -31.499   5.980  1.00 39.06           C  
ATOM   3248  O   ALA L   8      68.140 -31.050   6.996  1.00 41.21           O  
ATOM   3249  CB  ALA L   8      67.325 -30.631   3.690  1.00 36.70           C  
ATOM   3250  N   SER L   9      66.462 -32.160   6.007  1.00 39.66           N  
ATOM   3251  CA  SER L   9      65.768 -32.376   7.266  1.00 40.23           C  
ATOM   3252  C   SER L   9      65.727 -33.837   7.686  1.00 39.15           C  
ATOM   3253  O   SER L   9      66.110 -34.734   6.953  1.00 41.00           O  
ATOM   3254  CB  SER L   9      64.339 -31.830   7.185  1.00 43.12           C  
ATOM   3255  OG  SER L   9      63.686 -31.870   8.456  1.00 47.56           O  
ATOM   3256  N   VAL L  11      65.260 -34.063   8.895  1.00 37.20           N  
ATOM   3257  CA  VAL L  11      65.149 -35.394   9.434  1.00 37.04           C  
ATOM   3258  C   VAL L  11      64.373 -35.202  10.739  1.00 37.73           C  
ATOM   3259  O   VAL L  11      64.582 -34.217  11.461  1.00 38.80           O  
ATOM   3260  CB  VAL L  11      66.570 -36.031   9.660  1.00 36.28           C  
ATOM   3261  CG1 VAL L  11      67.457 -35.093  10.423  1.00 37.44           C  
ATOM   3262  CG2 VAL L  11      66.463 -37.327  10.432  1.00 37.16           C  
ATOM   3263  N   SER L  12      63.443 -36.107  11.017  1.00 36.84           N  
ATOM   3264  CA  SER L  12      62.655 -36.007  12.228  1.00 38.69           C  
ATOM   3265  C   SER L  12      62.667 -37.327  12.957  1.00 38.91           C  
ATOM   3266  O   SER L  12      62.882 -38.368  12.348  1.00 39.69           O  
ATOM   3267  CB  SER L  12      61.227 -35.615  11.889  1.00 40.15           C  
ATOM   3268  OG  SER L  12      60.742 -36.417  10.838  1.00 42.59           O  
ATOM   3269  N   GLY L  13      62.453 -37.280  14.266  1.00 38.99           N  
ATOM   3270  CA  GLY L  13      62.443 -38.496  15.049  1.00 38.95           C  
ATOM   3271  C   GLY L  13      61.543 -38.326  16.244  1.00 40.52           C  
ATOM   3272  O   GLY L  13      61.412 -37.225  16.773  1.00 41.61           O  
ATOM   3273  N   SER L  14      60.913 -39.415  16.665  1.00 41.17           N  
ATOM   3274  CA  SER L  14      60.005 -39.383  17.802  1.00 41.63           C  
ATOM   3275  C   SER L  14      60.803 -39.340  19.095  1.00 41.74           C  
ATOM   3276  O   SER L  14      61.840 -39.996  19.222  1.00 42.24           O  
ATOM   3277  CB  SER L  14      59.102 -40.619  17.776  1.00 44.00           C  
ATOM   3278  OG  SER L  14      58.207 -40.601  16.664  1.00 45.79           O  
ATOM   3279  N   PRO L  15      60.343 -38.552  20.075  1.00 41.80           N  
ATOM   3280  CA  PRO L  15      61.046 -38.444  21.356  1.00 41.86           C  
ATOM   3281  C   PRO L  15      61.469 -39.787  21.917  1.00 42.09           C  
ATOM   3282  O   PRO L  15      60.694 -40.732  21.906  1.00 43.17           O  
ATOM   3283  CB  PRO L  15      60.031 -37.735  22.232  1.00 39.28           C  
ATOM   3284  CG  PRO L  15      59.462 -36.749  21.266  1.00 40.22           C  
ATOM   3285  CD  PRO L  15      59.223 -37.599  20.023  1.00 42.29           C  
ATOM   3286  N   GLY L  16      62.710 -39.870  22.383  1.00 41.96           N  
ATOM   3287  CA  GLY L  16      63.198 -41.108  22.960  1.00 42.01           C  
ATOM   3288  C   GLY L  16      63.709 -42.153  21.986  1.00 42.62           C  
ATOM   3289  O   GLY L  16      64.179 -43.205  22.409  1.00 40.63           O  
ATOM   3290  N   GLN L  17      63.631 -41.878  20.690  1.00 43.96           N  
ATOM   3291  CA  GLN L  17      64.101 -42.838  19.707  1.00 45.16           C  
ATOM   3292  C   GLN L  17      65.362 -42.331  19.035  1.00 46.03           C  
ATOM   3293  O   GLN L  17      65.922 -41.322  19.457  1.00 47.12           O  
ATOM   3294  CB  GLN L  17      63.013 -43.085  18.682  1.00 47.93           C  
ATOM   3295  CG  GLN L  17      61.649 -43.326  19.321  1.00 53.43           C  
ATOM   3296  CD  GLN L  17      61.651 -44.460  20.351  1.00 55.30           C  
ATOM   3297  OE1 GLN L  17      62.005 -45.601  20.037  1.00 56.92           O  
ATOM   3298  NE2 GLN L  17      61.243 -44.150  21.582  1.00 54.65           N  
ATOM   3299  N   SER L  18      65.800 -43.022  17.985  1.00 45.46           N  
ATOM   3300  CA  SER L  18      67.033 -42.661  17.273  1.00 44.26           C  
ATOM   3301  C   SER L  18      66.904 -42.228  15.824  1.00 43.03           C  
ATOM   3302  O   SER L  18      65.893 -42.471  15.171  1.00 42.71           O  
ATOM   3303  CB  SER L  18      68.016 -43.835  17.289  1.00 42.23           C  
ATOM   3304  OG  SER L  18      68.473 -44.120  18.594  1.00 43.87           O  
ATOM   3305  N   ILE L  19      67.959 -41.580  15.341  1.00 41.05           N  
ATOM   3306  CA  ILE L  19      68.070 -41.157  13.950  1.00 40.77           C  
ATOM   3307  C   ILE L  19      69.548 -41.142  13.659  1.00 40.07           C  
ATOM   3308  O   ILE L  19      70.360 -41.001  14.569  1.00 40.58           O  
ATOM   3309  CB  ILE L  19      67.518 -39.756  13.679  1.00 41.38           C  
ATOM   3310  CG1 ILE L  19      68.048 -38.780  14.722  1.00 42.39           C  
ATOM   3311  CG2 ILE L  19      66.016 -39.796  13.602  1.00 42.78           C  
ATOM   3312  CD1 ILE L  19      69.371 -38.146  14.339  1.00 41.96           C  
ATOM   3313  N   THR L  20      69.900 -41.327  12.398  1.00 39.08           N  
ATOM   3314  CA  THR L  20      71.290 -41.320  12.005  1.00 38.87           C  
ATOM   3315  C   THR L  20      71.357 -40.471  10.773  1.00 39.25           C  
ATOM   3316  O   THR L  20      70.538 -40.603   9.874  1.00 40.77           O  
ATOM   3317  CB  THR L  20      71.800 -42.715  11.664  1.00 38.77           C  
ATOM   3318  OG1 THR L  20      71.017 -43.266  10.602  1.00 40.01           O  
ATOM   3319  CG2 THR L  20      71.701 -43.612  12.866  1.00 39.34           C  
ATOM   3320  N   ILE L  21      72.314 -39.564  10.750  1.00 38.90           N  
ATOM   3321  CA  ILE L  21      72.476 -38.699   9.614  1.00 37.13           C  
ATOM   3322  C   ILE L  21      73.748 -39.173   8.963  1.00 39.15           C  
ATOM   3323  O   ILE L  21      74.720 -39.488   9.651  1.00 40.52           O  
ATOM   3324  CB  ILE L  21      72.641 -37.240  10.047  1.00 33.90           C  
ATOM   3325  CG1 ILE L  21      71.464 -36.827  10.924  1.00 30.63           C  
ATOM   3326  CG2 ILE L  21      72.725 -36.344   8.828  1.00 33.69           C  
ATOM   3327  CD1 ILE L  21      71.405 -35.344  11.189  1.00 27.98           C  
ATOM   3328  N   SER L  22      73.738 -39.267   7.641  1.00 40.33           N  
ATOM   3329  CA  SER L  22      74.931 -39.687   6.932  1.00 40.50           C  
ATOM   3330  C   SER L  22      75.534 -38.481   6.245  1.00 41.54           C  
ATOM   3331  O   SER L  22      74.898 -37.442   6.081  1.00 42.72           O  
ATOM   3332  CB  SER L  22      74.616 -40.785   5.913  1.00 41.44           C  
ATOM   3333  OG  SER L  22      74.325 -42.022   6.562  1.00 43.39           O  
ATOM   3334  N   CYS L  23      76.781 -38.644   5.851  1.00 43.05           N  
ATOM   3335  CA  CYS L  23      77.570 -37.612   5.209  1.00 42.96           C  
ATOM   3336  C   CYS L  23      78.457 -38.464   4.304  1.00 44.75           C  
ATOM   3337  O   CYS L  23      79.108 -39.411   4.766  1.00 43.49           O  
ATOM   3338  CB  CYS L  23      78.363 -36.936   6.315  1.00 43.09           C  
ATOM   3339  SG  CYS L  23      79.577 -35.647   5.957  1.00 43.53           S  
ATOM   3340  N   THR L  24      78.469 -38.166   3.015  1.00 46.83           N  
ATOM   3341  CA  THR L  24      79.276 -38.981   2.130  1.00 49.82           C  
ATOM   3342  C   THR L  24      80.225 -38.230   1.207  1.00 50.85           C  
ATOM   3343  O   THR L  24      79.836 -37.306   0.493  1.00 52.67           O  
ATOM   3344  CB  THR L  24      78.393 -39.894   1.284  1.00 49.87           C  
ATOM   3345  OG1 THR L  24      79.229 -40.786   0.537  1.00 50.73           O  
ATOM   3346  CG2 THR L  24      77.526 -39.068   0.333  1.00 50.03           C  
ATOM   3347  N   GLY L  25      81.481 -38.658   1.227  1.00 50.97           N  
ATOM   3348  CA  GLY L  25      82.488 -38.037   0.400  1.00 51.52           C  
ATOM   3349  C   GLY L  25      83.252 -39.080  -0.378  1.00 52.03           C  
ATOM   3350  O   GLY L  25      82.739 -40.165  -0.634  1.00 50.98           O  
ATOM   3351  N   THR L  26      84.486 -38.752  -0.743  1.00 53.12           N  
ATOM   3352  CA  THR L  26      85.322 -39.647  -1.520  1.00 53.98           C  
ATOM   3353  C   THR L  26      86.424 -40.314  -0.718  1.00 55.26           C  
ATOM   3354  O   THR L  26      86.424 -40.308   0.511  1.00 55.58           O  
ATOM   3355  CB  THR L  26      85.994 -38.902  -2.691  1.00 53.85           C  
ATOM   3356  OG1 THR L  26      86.865 -37.884  -2.177  1.00 53.19           O  
ATOM   3357  CG2 THR L  26      84.957 -38.270  -3.590  1.00 52.62           C  
ATOM   3358  N   SER L  27      87.370 -40.884  -1.451  1.00 56.95           N  
ATOM   3359  CA  SER L  27      88.507 -41.570  -0.867  1.00 57.57           C  
ATOM   3360  C   SER L  27      89.591 -40.564  -0.516  1.00 58.02           C  
ATOM   3361  O   SER L  27      90.653 -40.929  -0.020  1.00 58.67           O  
ATOM   3362  CB  SER L  27      89.051 -42.593  -1.864  1.00 57.63           C  
ATOM   3363  OG  SER L  27      87.993 -43.337  -2.447  1.00 58.05           O  
ATOM   3364  N   SER L  27A     89.331 -39.292  -0.796  1.00 57.65           N  
ATOM   3365  CA  SER L  27A     90.298 -38.257  -0.477  1.00 56.83           C  
ATOM   3366  C   SER L  27A     89.875 -37.466   0.745  1.00 56.77           C  
ATOM   3367  O   SER L  27A     90.633 -36.630   1.239  1.00 57.34           O  
ATOM   3368  CB  SER L  27A     90.503 -37.333  -1.663  1.00 56.00           C  
ATOM   3369  OG  SER L  27A     91.333 -37.973  -2.605  1.00 55.28           O  
ATOM   3370  N   ASP L  27B     88.657 -37.718   1.223  1.00 55.87           N  
ATOM   3371  CA  ASP L  27B     88.169 -37.057   2.427  1.00 54.51           C  
ATOM   3372  C   ASP L  27B     87.783 -38.134   3.412  1.00 53.13           C  
ATOM   3373  O   ASP L  27B     88.642 -38.798   3.983  1.00 52.58           O  
ATOM   3374  CB  ASP L  27B     86.944 -36.166   2.180  1.00 55.05           C  
ATOM   3375  CG  ASP L  27B     86.487 -36.170   0.745  1.00 57.04           C  
ATOM   3376  OD1 ASP L  27B     87.232 -35.659  -0.123  1.00 60.11           O  
ATOM   3377  OD2 ASP L  27B     85.376 -36.673   0.492  1.00 55.30           O  
ATOM   3378  N   VAL L  27C     86.482 -38.305   3.596  1.00 52.04           N  
ATOM   3379  CA  VAL L  27C     85.958 -39.286   4.530  1.00 51.98           C  
ATOM   3380  C   VAL L  27C     86.675 -40.634   4.419  1.00 52.19           C  
ATOM   3381  O   VAL L  27C     87.091 -41.214   5.425  1.00 51.57           O  
ATOM   3382  CB  VAL L  27C     84.433 -39.474   4.314  1.00 51.08           C  
ATOM   3383  CG1 VAL L  27C     83.830 -40.267   5.461  1.00 50.07           C  
ATOM   3384  CG2 VAL L  27C     83.763 -38.117   4.202  1.00 48.69           C  
ATOM   3385  N   GLY L  28      86.832 -41.115   3.189  1.00 52.88           N  
ATOM   3386  CA  GLY L  28      87.493 -42.389   2.965  1.00 52.23           C  
ATOM   3387  C   GLY L  28      88.974 -42.231   2.694  1.00 51.02           C  
ATOM   3388  O   GLY L  28      89.601 -43.091   2.080  1.00 52.17           O  
ATOM   3389  N   GLY L  29      89.534 -41.125   3.160  1.00 49.50           N  
ATOM   3390  CA  GLY L  29      90.942 -40.875   2.963  1.00 47.41           C  
ATOM   3391  C   GLY L  29      91.621 -40.780   4.305  1.00 47.19           C  
ATOM   3392  O   GLY L  29      92.815 -41.048   4.431  1.00 48.55           O  
ATOM   3393  N   TYR L  30      90.850 -40.402   5.317  1.00 45.98           N  
ATOM   3394  CA  TYR L  30      91.376 -40.259   6.669  1.00 45.14           C  
ATOM   3395  C   TYR L  30      90.310 -40.635   7.689  1.00 44.91           C  
ATOM   3396  O   TYR L  30      89.163 -40.924   7.346  1.00 44.64           O  
ATOM   3397  CB  TYR L  30      91.773 -38.808   6.940  1.00 44.21           C  
ATOM   3398  CG  TYR L  30      92.504 -38.133   5.816  1.00 46.17           C  
ATOM   3399  CD1 TYR L  30      93.888 -38.007   5.843  1.00 47.40           C  
ATOM   3400  CD2 TYR L  30      91.815 -37.632   4.708  1.00 46.19           C  
ATOM   3401  CE1 TYR L  30      94.574 -37.405   4.803  1.00 47.94           C  
ATOM   3402  CE2 TYR L  30      92.497 -37.028   3.657  1.00 46.38           C  
ATOM   3403  CZ  TYR L  30      93.877 -36.922   3.713  1.00 47.86           C  
ATOM   3404  OH  TYR L  30      94.578 -36.355   2.673  1.00 48.81           O  
ATOM   3405  N   ASP L  31      90.710 -40.621   8.952  1.00 44.31           N  
ATOM   3406  CA  ASP L  31      89.800 -40.889  10.040  1.00 44.29           C  
ATOM   3407  C   ASP L  31      89.667 -39.561  10.749  1.00 43.38           C  
ATOM   3408  O   ASP L  31      89.801 -39.454  11.972  1.00 43.55           O  
ATOM   3409  CB  ASP L  31      90.364 -41.959  10.957  1.00 46.12           C  
ATOM   3410  CG  ASP L  31      90.282 -43.331  10.338  1.00 48.68           C  
ATOM   3411  OD1 ASP L  31      90.791 -44.287  10.954  1.00 52.02           O  
ATOM   3412  OD2 ASP L  31      89.708 -43.456   9.231  1.00 48.03           O  
ATOM   3413  N   LEU L  32      89.398 -38.545   9.937  1.00 41.17           N  
ATOM   3414  CA  LEU L  32      89.249 -37.190  10.416  1.00 38.42           C  
ATOM   3415  C   LEU L  32      87.896 -36.591  10.045  1.00 39.32           C  
ATOM   3416  O   LEU L  32      87.832 -35.601   9.318  1.00 42.16           O  
ATOM   3417  CB  LEU L  32      90.371 -36.348   9.844  1.00 33.00           C  
ATOM   3418  CG  LEU L  32      91.732 -36.839  10.328  1.00 31.13           C  
ATOM   3419  CD1 LEU L  32      92.807 -36.309   9.411  1.00 31.03           C  
ATOM   3420  CD2 LEU L  32      91.970 -36.394  11.769  1.00 28.80           C  
ATOM   3421  N   VAL L  33      86.823 -37.203  10.546  1.00 38.33           N  
ATOM   3422  CA  VAL L  33      85.458 -36.739  10.302  1.00 37.34           C  
ATOM   3423  C   VAL L  33      84.944 -36.082  11.581  1.00 38.28           C  
ATOM   3424  O   VAL L  33      85.025 -36.677  12.653  1.00 41.94           O  
ATOM   3425  CB  VAL L  33      84.509 -37.902   9.986  1.00 35.12           C  
ATOM   3426  CG1 VAL L  33      83.132 -37.371   9.687  1.00 34.09           C  
ATOM   3427  CG2 VAL L  33      85.025 -38.700   8.835  1.00 36.24           C  
ATOM   3428  N   SER L  34      84.420 -34.867  11.483  1.00 36.30           N  
ATOM   3429  CA  SER L  34      83.903 -34.199  12.667  1.00 35.43           C  
ATOM   3430  C   SER L  34      82.425 -33.918  12.487  1.00 34.73           C  
ATOM   3431  O   SER L  34      81.945 -33.802  11.365  1.00 35.45           O  
ATOM   3432  CB  SER L  34      84.634 -32.872  12.923  1.00 36.91           C  
ATOM   3433  OG  SER L  34      85.981 -33.068  13.316  1.00 36.21           O  
ATOM   3434  N   TRP L  35      81.708 -33.826  13.598  1.00 32.87           N  
ATOM   3435  CA  TRP L  35      80.290 -33.521  13.574  1.00 32.60           C  
ATOM   3436  C   TRP L  35      80.035 -32.381  14.536  1.00 33.54           C  
ATOM   3437  O   TRP L  35      80.501 -32.402  15.678  1.00 36.23           O  
ATOM   3438  CB  TRP L  35      79.467 -34.721  14.000  1.00 32.99           C  
ATOM   3439  CG  TRP L  35      79.425 -35.781  12.991  1.00 31.79           C  
ATOM   3440  CD1 TRP L  35      80.273 -36.834  12.874  1.00 31.85           C  
ATOM   3441  CD2 TRP L  35      78.470 -35.910  11.942  1.00 31.34           C  
ATOM   3442  NE1 TRP L  35      79.908 -37.623  11.816  1.00 31.67           N  
ATOM   3443  CE2 TRP L  35      78.798 -37.077  11.225  1.00 32.28           C  
ATOM   3444  CE3 TRP L  35      77.365 -35.151  11.537  1.00 29.79           C  
ATOM   3445  CZ2 TRP L  35      78.058 -37.509  10.123  1.00 30.47           C  
ATOM   3446  CZ3 TRP L  35      76.635 -35.575  10.447  1.00 29.53           C  
ATOM   3447  CH2 TRP L  35      76.985 -36.747   9.751  1.00 30.53           C  
ATOM   3448  N   TYR L  36      79.292 -31.383  14.081  1.00 32.47           N  
ATOM   3449  CA  TYR L  36      79.012 -30.234  14.919  1.00 30.34           C  
ATOM   3450  C   TYR L  36      77.547 -30.091  15.193  1.00 31.14           C  
ATOM   3451  O   TYR L  36      76.713 -30.359  14.330  1.00 32.68           O  
ATOM   3452  CB  TYR L  36      79.483 -28.960  14.238  1.00 26.85           C  
ATOM   3453  CG  TYR L  36      80.848 -29.078  13.644  1.00 26.46           C  
ATOM   3454  CD1 TYR L  36      81.053 -29.766  12.458  1.00 26.83           C  
ATOM   3455  CD2 TYR L  36      81.943 -28.539  14.287  1.00 26.30           C  
ATOM   3456  CE1 TYR L  36      82.328 -29.916  11.926  1.00 28.65           C  
ATOM   3457  CE2 TYR L  36      83.210 -28.676  13.776  1.00 27.58           C  
ATOM   3458  CZ  TYR L  36      83.409 -29.365  12.594  1.00 29.97           C  
ATOM   3459  OH  TYR L  36      84.699 -29.492  12.085  1.00 32.00           O  
ATOM   3460  N   GLN L  37      77.231 -29.677  16.408  1.00 31.31           N  
ATOM   3461  CA  GLN L  37      75.850 -29.422  16.763  1.00 30.14           C  
ATOM   3462  C   GLN L  37      75.712 -27.924  16.679  1.00 30.63           C  
ATOM   3463  O   GLN L  37      76.601 -27.204  17.113  1.00 32.54           O  
ATOM   3464  CB  GLN L  37      75.550 -29.840  18.183  1.00 28.83           C  
ATOM   3465  CG  GLN L  37      74.102 -29.619  18.531  1.00 28.33           C  
ATOM   3466  CD  GLN L  37      73.773 -30.104  19.906  1.00 27.87           C  
ATOM   3467  OE1 GLN L  37      72.705 -30.651  20.127  1.00 32.07           O  
ATOM   3468  NE2 GLN L  37      74.688 -29.913  20.844  1.00 27.05           N  
ATOM   3469  N   HIS L  38      74.615 -27.443  16.120  1.00 31.49           N  
ATOM   3470  CA  HIS L  38      74.435 -26.011  16.021  1.00 32.43           C  
ATOM   3471  C   HIS L  38      73.000 -25.540  16.120  1.00 33.01           C  
ATOM   3472  O   HIS L  38      72.171 -25.842  15.265  1.00 32.60           O  
ATOM   3473  CB  HIS L  38      75.018 -25.485  14.715  1.00 33.81           C  
ATOM   3474  CG  HIS L  38      74.914 -23.995  14.573  1.00 36.84           C  
ATOM   3475  ND1 HIS L  38      74.693 -23.371  13.363  1.00 38.08           N  
ATOM   3476  CD2 HIS L  38      74.971 -23.009  15.499  1.00 35.82           C  
ATOM   3477  CE1 HIS L  38      74.611 -22.066  13.551  1.00 36.13           C  
ATOM   3478  NE2 HIS L  38      74.776 -21.820  14.838  1.00 36.10           N  
ATOM   3479  N   HIS L  39      72.714 -24.797  17.178  1.00 35.10           N  
ATOM   3480  CA  HIS L  39      71.399 -24.206  17.365  1.00 36.31           C  
ATOM   3481  C   HIS L  39      71.609 -22.837  16.707  1.00 37.21           C  
ATOM   3482  O   HIS L  39      72.398 -22.023  17.192  1.00 37.22           O  
ATOM   3483  CB  HIS L  39      71.094 -24.074  18.861  1.00 36.38           C  
ATOM   3484  CG  HIS L  39      71.053 -25.384  19.592  1.00 38.13           C  
ATOM   3485  ND1 HIS L  39      70.008 -26.279  19.468  1.00 39.28           N  
ATOM   3486  CD2 HIS L  39      71.934 -25.959  20.447  1.00 38.20           C  
ATOM   3487  CE1 HIS L  39      70.249 -27.342  20.214  1.00 38.10           C  
ATOM   3488  NE2 HIS L  39      71.412 -27.173  20.820  1.00 37.73           N  
ATOM   3489  N   PRO L  40      70.941 -22.584  15.567  1.00 38.62           N  
ATOM   3490  CA  PRO L  40      71.080 -21.312  14.855  1.00 39.08           C  
ATOM   3491  C   PRO L  40      71.016 -20.136  15.789  1.00 40.67           C  
ATOM   3492  O   PRO L  40      70.165 -20.073  16.661  1.00 41.05           O  
ATOM   3493  CB  PRO L  40      69.936 -21.351  13.869  1.00 39.39           C  
ATOM   3494  CG  PRO L  40      69.911 -22.814  13.488  1.00 39.77           C  
ATOM   3495  CD  PRO L  40      69.994 -23.465  14.861  1.00 40.42           C  
ATOM   3496  N   GLY L  41      71.939 -19.206  15.606  1.00 42.88           N  
ATOM   3497  CA  GLY L  41      71.994 -18.053  16.472  1.00 43.60           C  
ATOM   3498  C   GLY L  41      72.720 -18.505  17.715  1.00 44.07           C  
ATOM   3499  O   GLY L  41      72.204 -18.415  18.822  1.00 47.00           O  
ATOM   3500  N   GLY L  42      73.924 -19.019  17.527  1.00 42.10           N  
ATOM   3501  CA  GLY L  42      74.696 -19.498  18.655  1.00 38.35           C  
ATOM   3502  C   GLY L  42      75.936 -20.156  18.110  1.00 35.48           C  
ATOM   3503  O   GLY L  42      75.981 -20.470  16.921  1.00 36.74           O  
ATOM   3504  N   ALA L  43      76.940 -20.367  18.951  1.00 32.33           N  
ATOM   3505  CA  ALA L  43      78.172 -20.976  18.477  1.00 31.12           C  
ATOM   3506  C   ALA L  43      78.025 -22.469  18.256  1.00 30.52           C  
ATOM   3507  O   ALA L  43      77.334 -23.166  18.995  1.00 29.04           O  
ATOM   3508  CB  ALA L  43      79.302 -20.700  19.440  1.00 30.72           C  
ATOM   3509  N   PRO L  44      78.675 -22.979  17.216  1.00 30.43           N  
ATOM   3510  CA  PRO L  44      78.616 -24.398  16.891  1.00 31.40           C  
ATOM   3511  C   PRO L  44      79.432 -25.204  17.886  1.00 31.25           C  
ATOM   3512  O   PRO L  44      80.522 -24.794  18.284  1.00 33.76           O  
ATOM   3513  CB  PRO L  44      79.200 -24.437  15.486  1.00 33.85           C  
ATOM   3514  CG  PRO L  44      80.282 -23.405  15.570  1.00 32.77           C  
ATOM   3515  CD  PRO L  44      79.576 -22.263  16.297  1.00 32.50           C  
ATOM   3516  N   LYS L  45      78.904 -26.351  18.286  1.00 29.58           N  
ATOM   3517  CA  LYS L  45      79.589 -27.208  19.236  1.00 28.10           C  
ATOM   3518  C   LYS L  45      80.215 -28.429  18.567  1.00 28.85           C  
ATOM   3519  O   LYS L  45      79.651 -29.013  17.643  1.00 29.41           O  
ATOM   3520  CB  LYS L  45      78.609 -27.663  20.298  1.00 28.11           C  
ATOM   3521  CG  LYS L  45      79.210 -28.611  21.297  1.00 30.50           C  
ATOM   3522  CD  LYS L  45      78.186 -28.975  22.342  1.00 33.16           C  
ATOM   3523  CE  LYS L  45      78.852 -29.649  23.512  1.00 36.60           C  
ATOM   3524  NZ  LYS L  45      77.866 -29.960  24.580  1.00 40.77           N  
ATOM   3525  N   LEU L  46      81.398 -28.815  19.010  1.00 29.03           N  
ATOM   3526  CA  LEU L  46      82.000 -29.987  18.425  1.00 30.83           C  
ATOM   3527  C   LEU L  46      81.476 -31.169  19.243  1.00 31.50           C  
ATOM   3528  O   LEU L  46      81.631 -31.175  20.458  1.00 32.80           O  
ATOM   3529  CB  LEU L  46      83.520 -29.917  18.521  1.00 31.88           C  
ATOM   3530  CG  LEU L  46      84.115 -31.155  17.841  1.00 34.01           C  
ATOM   3531  CD1 LEU L  46      83.718 -31.111  16.357  1.00 34.83           C  
ATOM   3532  CD2 LEU L  46      85.629 -31.226  18.020  1.00 31.62           C  
ATOM   3533  N   ILE L  47      80.838 -32.149  18.602  1.00 30.87           N  
ATOM   3534  CA  ILE L  47      80.319 -33.298  19.345  1.00 30.42           C  
ATOM   3535  C   ILE L  47      81.027 -34.604  18.998  1.00 32.89           C  
ATOM   3536  O   ILE L  47      81.058 -35.536  19.813  1.00 31.79           O  
ATOM   3537  CB  ILE L  47      78.786 -33.488  19.149  1.00 27.92           C  
ATOM   3538  CG1 ILE L  47      78.452 -33.747  17.685  1.00 24.77           C  
ATOM   3539  CG2 ILE L  47      78.058 -32.274  19.652  1.00 27.89           C  
ATOM   3540  CD1 ILE L  47      76.973 -33.847  17.417  1.00 23.78           C  
ATOM   3541  N   ILE L  48      81.600 -34.664  17.796  1.00 32.91           N  
ATOM   3542  CA  ILE L  48      82.318 -35.846  17.341  1.00 32.52           C  
ATOM   3543  C   ILE L  48      83.482 -35.445  16.470  1.00 34.48           C  
ATOM   3544  O   ILE L  48      83.316 -34.636  15.562  1.00 37.65           O  
ATOM   3545  CB  ILE L  48      81.430 -36.778  16.501  1.00 30.40           C  
ATOM   3546  CG1 ILE L  48      80.283 -37.320  17.340  1.00 30.13           C  
ATOM   3547  CG2 ILE L  48      82.252 -37.951  15.994  1.00 29.38           C  
ATOM   3548  CD1 ILE L  48      80.720 -38.254  18.411  1.00 30.38           C  
ATOM   3549  N   TYR L  49      84.655 -36.011  16.746  1.00 34.61           N  
ATOM   3550  CA  TYR L  49      85.847 -35.733  15.955  1.00 32.81           C  
ATOM   3551  C   TYR L  49      86.629 -37.025  15.738  1.00 33.01           C  
ATOM   3552  O   TYR L  49      86.434 -37.997  16.453  1.00 32.74           O  
ATOM   3553  CB  TYR L  49      86.705 -34.658  16.633  1.00 31.31           C  
ATOM   3554  CG  TYR L  49      87.534 -35.084  17.820  1.00 32.51           C  
ATOM   3555  CD1 TYR L  49      88.925 -35.123  17.734  1.00 35.26           C  
ATOM   3556  CD2 TYR L  49      86.950 -35.365  19.049  1.00 34.83           C  
ATOM   3557  CE1 TYR L  49      89.714 -35.422  18.838  1.00 36.06           C  
ATOM   3558  CE2 TYR L  49      87.733 -35.668  20.168  1.00 37.09           C  
ATOM   3559  CZ  TYR L  49      89.113 -35.695  20.050  1.00 37.76           C  
ATOM   3560  OH  TYR L  49      89.902 -36.024  21.133  1.00 40.86           O  
ATOM   3561  N   GLU L  50      87.500 -37.050  14.738  1.00 33.54           N  
ATOM   3562  CA  GLU L  50      88.270 -38.255  14.452  1.00 34.41           C  
ATOM   3563  C   GLU L  50      87.326 -39.449  14.256  1.00 34.38           C  
ATOM   3564  O   GLU L  50      87.528 -40.535  14.789  1.00 34.16           O  
ATOM   3565  CB  GLU L  50      89.292 -38.500  15.571  1.00 35.48           C  
ATOM   3566  CG  GLU L  50      90.503 -37.553  15.451  1.00 43.28           C  
ATOM   3567  CD  GLU L  50      91.506 -37.604  16.616  1.00 46.84           C  
ATOM   3568  OE1 GLU L  50      92.494 -36.838  16.574  1.00 47.37           O  
ATOM   3569  OE2 GLU L  50      91.318 -38.395  17.568  1.00 50.84           O  
ATOM   3570  N   VAL L  51      86.275 -39.212  13.480  1.00 32.78           N  
ATOM   3571  CA  VAL L  51      85.279 -40.222  13.156  1.00 31.58           C  
ATOM   3572  C   VAL L  51      84.435 -40.711  14.321  1.00 33.84           C  
ATOM   3573  O   VAL L  51      83.200 -40.687  14.243  1.00 35.70           O  
ATOM   3574  CB  VAL L  51      85.911 -41.481  12.482  1.00 29.33           C  
ATOM   3575  CG1 VAL L  51      84.809 -42.426  12.016  1.00 25.30           C  
ATOM   3576  CG2 VAL L  51      86.776 -41.093  11.300  1.00 25.09           C  
ATOM   3577  N   THR L  52      85.075 -41.152  15.400  1.00 32.91           N  
ATOM   3578  CA  THR L  52      84.312 -41.686  16.523  1.00 33.42           C  
ATOM   3579  C   THR L  52      84.662 -41.133  17.874  1.00 33.20           C  
ATOM   3580  O   THR L  52      84.126 -41.578  18.876  1.00 34.59           O  
ATOM   3581  CB  THR L  52      84.500 -43.187  16.640  1.00 35.36           C  
ATOM   3582  OG1 THR L  52      85.877 -43.462  16.954  1.00 37.34           O  
ATOM   3583  CG2 THR L  52      84.122 -43.881  15.332  1.00 35.94           C  
ATOM   3584  N   ASN L  53      85.575 -40.180  17.924  1.00 34.27           N  
ATOM   3585  CA  ASN L  53      85.972 -39.631  19.207  1.00 34.91           C  
ATOM   3586  C   ASN L  53      84.874 -38.686  19.676  1.00 35.68           C  
ATOM   3587  O   ASN L  53      84.119 -38.166  18.867  1.00 35.87           O  
ATOM   3588  CB  ASN L  53      87.306 -38.901  19.071  1.00 36.83           C  
ATOM   3589  CG  ASN L  53      88.231 -39.154  20.243  1.00 37.93           C  
ATOM   3590  OD1 ASN L  53      87.784 -39.496  21.331  1.00 39.28           O  
ATOM   3591  ND2 ASN L  53      89.528 -38.966  20.028  1.00 37.55           N  
ATOM   3592  N   ARG L  54      84.794 -38.459  20.980  1.00 36.16           N  
ATOM   3593  CA  ARG L  54      83.758 -37.613  21.535  1.00 37.52           C  
ATOM   3594  C   ARG L  54      84.287 -36.710  22.660  1.00 38.52           C  
ATOM   3595  O   ARG L  54      84.625 -37.190  23.742  1.00 41.43           O  
ATOM   3596  CB  ARG L  54      82.645 -38.519  22.044  1.00 37.54           C  
ATOM   3597  CG  ARG L  54      81.513 -37.827  22.746  1.00 42.45           C  
ATOM   3598  CD  ARG L  54      80.642 -38.826  23.506  1.00 45.89           C  
ATOM   3599  NE  ARG L  54      79.996 -39.817  22.642  1.00 49.54           N  
ATOM   3600  CZ  ARG L  54      80.306 -41.114  22.607  1.00 50.59           C  
ATOM   3601  NH1 ARG L  54      81.266 -41.601  23.383  1.00 49.60           N  
ATOM   3602  NH2 ARG L  54      79.629 -41.937  21.818  1.00 50.69           N  
ATOM   3603  N   PRO L  55      84.359 -35.381  22.420  1.00 37.27           N  
ATOM   3604  CA  PRO L  55      84.849 -34.434  23.422  1.00 35.48           C  
ATOM   3605  C   PRO L  55      84.216 -34.675  24.778  1.00 35.60           C  
ATOM   3606  O   PRO L  55      83.090 -35.176  24.861  1.00 36.13           O  
ATOM   3607  CB  PRO L  55      84.440 -33.085  22.845  1.00 34.15           C  
ATOM   3608  CG  PRO L  55      84.543 -33.306  21.415  1.00 35.21           C  
ATOM   3609  CD  PRO L  55      83.897 -34.652  21.228  1.00 36.42           C  
ATOM   3610  N   SER L  56      84.933 -34.312  25.839  1.00 34.81           N  
ATOM   3611  CA  SER L  56      84.412 -34.488  27.184  1.00 35.73           C  
ATOM   3612  C   SER L  56      83.127 -33.685  27.299  1.00 35.27           C  
ATOM   3613  O   SER L  56      82.884 -32.776  26.520  1.00 37.32           O  
ATOM   3614  CB  SER L  56      85.434 -34.020  28.228  1.00 36.21           C  
ATOM   3615  OG  SER L  56      85.756 -32.648  28.063  1.00 39.42           O  
ATOM   3616  N   GLY L  57      82.287 -34.030  28.253  1.00 34.62           N  
ATOM   3617  CA  GLY L  57      81.060 -33.285  28.401  1.00 36.03           C  
ATOM   3618  C   GLY L  57      80.026 -33.598  27.349  1.00 36.72           C  
ATOM   3619  O   GLY L  57      78.925 -33.053  27.382  1.00 39.49           O  
ATOM   3620  N   VAL L  58      80.374 -34.457  26.400  1.00 37.08           N  
ATOM   3621  CA  VAL L  58      79.432 -34.847  25.355  1.00 38.18           C  
ATOM   3622  C   VAL L  58      78.896 -36.221  25.755  1.00 40.15           C  
ATOM   3623  O   VAL L  58      79.671 -37.100  26.115  1.00 44.18           O  
ATOM   3624  CB  VAL L  58      80.128 -34.915  23.979  1.00 36.57           C  
ATOM   3625  CG1 VAL L  58      79.256 -35.657  22.987  1.00 35.86           C  
ATOM   3626  CG2 VAL L  58      80.404 -33.505  23.472  1.00 34.08           C  
ATOM   3627  N   SER L  59      77.583 -36.417  25.699  1.00 40.34           N  
ATOM   3628  CA  SER L  59      77.003 -37.697  26.106  1.00 40.30           C  
ATOM   3629  C   SER L  59      77.085 -38.849  25.116  1.00 41.65           C  
ATOM   3630  O   SER L  59      77.303 -38.670  23.916  1.00 41.22           O  
ATOM   3631  CB  SER L  59      75.535 -37.526  26.471  1.00 40.70           C  
ATOM   3632  OG  SER L  59      74.763 -37.236  25.313  1.00 40.08           O  
ATOM   3633  N   ASP L  60      76.858 -40.035  25.670  1.00 42.63           N  
ATOM   3634  CA  ASP L  60      76.848 -41.300  24.962  1.00 42.82           C  
ATOM   3635  C   ASP L  60      75.698 -41.383  23.965  1.00 42.74           C  
ATOM   3636  O   ASP L  60      75.617 -42.345  23.203  1.00 43.46           O  
ATOM   3637  CB  ASP L  60      76.719 -42.447  25.969  1.00 46.10           C  
ATOM   3638  CG  ASP L  60      75.569 -42.236  26.965  1.00 49.54           C  
ATOM   3639  OD1 ASP L  60      75.615 -41.256  27.745  1.00 52.28           O  
ATOM   3640  OD2 ASP L  60      74.617 -43.052  26.980  1.00 50.68           O  
ATOM   3641  N   ARG L  61      74.802 -40.395  23.983  1.00 40.30           N  
ATOM   3642  CA  ARG L  61      73.675 -40.380  23.062  1.00 37.28           C  
ATOM   3643  C   ARG L  61      74.108 -39.971  21.669  1.00 36.45           C  
ATOM   3644  O   ARG L  61      73.337 -40.089  20.724  1.00 39.27           O  
ATOM   3645  CB  ARG L  61      72.596 -39.418  23.534  1.00 35.92           C  
ATOM   3646  CG  ARG L  61      72.106 -39.720  24.918  1.00 40.11           C  
ATOM   3647  CD  ARG L  61      70.773 -39.044  25.243  1.00 40.66           C  
ATOM   3648  NE  ARG L  61      70.842 -37.589  25.246  1.00 38.10           N  
ATOM   3649  CZ  ARG L  61      70.527 -36.828  24.211  1.00 36.43           C  
ATOM   3650  NH1 ARG L  61      70.118 -37.382  23.079  1.00 37.75           N  
ATOM   3651  NH2 ARG L  61      70.607 -35.514  24.319  1.00 35.75           N  
ATOM   3652  N   PHE L  62      75.332 -39.476  21.534  1.00 33.36           N  
ATOM   3653  CA  PHE L  62      75.839 -39.058  20.229  1.00 31.17           C  
ATOM   3654  C   PHE L  62      77.012 -39.941  19.829  1.00 30.17           C  
ATOM   3655  O   PHE L  62      77.917 -40.180  20.638  1.00 29.38           O  
ATOM   3656  CB  PHE L  62      76.311 -37.599  20.291  1.00 31.10           C  
ATOM   3657  CG  PHE L  62      75.208 -36.612  20.543  1.00 31.54           C  
ATOM   3658  CD1 PHE L  62      74.539 -36.011  19.490  1.00 32.15           C  
ATOM   3659  CD2 PHE L  62      74.807 -36.312  21.832  1.00 32.39           C  
ATOM   3660  CE1 PHE L  62      73.500 -35.141  19.714  1.00 30.13           C  
ATOM   3661  CE2 PHE L  62      73.756 -35.437  22.055  1.00 30.31           C  
ATOM   3662  CZ  PHE L  62      73.109 -34.857  20.993  1.00 29.84           C  
ATOM   3663  N   SER L  63      77.005 -40.446  18.601  1.00 27.88           N  
ATOM   3664  CA  SER L  63      78.136 -41.257  18.173  1.00 28.58           C  
ATOM   3665  C   SER L  63      78.380 -41.263  16.688  1.00 27.85           C  
ATOM   3666  O   SER L  63      77.454 -41.253  15.899  1.00 27.66           O  
ATOM   3667  CB  SER L  63      78.031 -42.696  18.700  1.00 26.76           C  
ATOM   3668  OG  SER L  63      76.785 -43.272  18.417  1.00 28.98           O  
ATOM   3669  N   GLY L  64      79.656 -41.252  16.324  1.00 30.23           N  
ATOM   3670  CA  GLY L  64      80.038 -41.256  14.926  1.00 33.27           C  
ATOM   3671  C   GLY L  64      80.631 -42.569  14.450  1.00 34.32           C  
ATOM   3672  O   GLY L  64      81.086 -43.392  15.239  1.00 35.12           O  
ATOM   3673  N   SER L  65      80.622 -42.764  13.141  1.00 35.15           N  
ATOM   3674  CA  SER L  65      81.168 -43.966  12.560  1.00 35.60           C  
ATOM   3675  C   SER L  65      81.232 -43.713  11.092  1.00 36.69           C  
ATOM   3676  O   SER L  65      80.723 -42.702  10.613  1.00 37.14           O  
ATOM   3677  CB  SER L  65      80.235 -45.132  12.766  1.00 37.34           C  
ATOM   3678  OG  SER L  65      79.261 -45.137  11.730  1.00 40.99           O  
ATOM   3679  N   LYS L  66      81.848 -44.648  10.381  1.00 37.98           N  
ATOM   3680  CA  LYS L  66      81.964 -44.574   8.932  1.00 39.40           C  
ATOM   3681  C   LYS L  66      82.448 -45.907   8.398  1.00 40.10           C  
ATOM   3682  O   LYS L  66      82.828 -46.798   9.152  1.00 41.70           O  
ATOM   3683  CB  LYS L  66      82.945 -43.484   8.504  1.00 38.16           C  
ATOM   3684  CG  LYS L  66      84.366 -43.796   8.823  1.00 37.90           C  
ATOM   3685  CD  LYS L  66      85.289 -43.299   7.730  1.00 41.48           C  
ATOM   3686  CE  LYS L  66      86.739 -43.685   8.043  1.00 43.72           C  
ATOM   3687  NZ  LYS L  66      87.718 -43.206   7.028  1.00 46.13           N  
ATOM   3688  N   SER L  67      82.412 -46.042   7.085  1.00 40.21           N  
ATOM   3689  CA  SER L  67      82.867 -47.244   6.413  1.00 41.24           C  
ATOM   3690  C   SER L  67      82.788 -46.815   4.978  1.00 41.81           C  
ATOM   3691  O   SER L  67      81.763 -46.282   4.546  1.00 43.38           O  
ATOM   3692  CB  SER L  67      81.924 -48.418   6.658  1.00 41.88           C  
ATOM   3693  OG  SER L  67      80.675 -48.191   6.036  1.00 42.85           O  
ATOM   3694  N   GLY L  68      83.871 -47.018   4.243  1.00 41.79           N  
ATOM   3695  CA  GLY L  68      83.876 -46.597   2.862  1.00 43.45           C  
ATOM   3696  C   GLY L  68      84.056 -45.093   2.838  1.00 45.53           C  
ATOM   3697  O   GLY L  68      84.931 -44.551   3.525  1.00 47.09           O  
ATOM   3698  N   ASN L  69      83.230 -44.409   2.059  1.00 46.10           N  
ATOM   3699  CA  ASN L  69      83.337 -42.968   1.968  1.00 47.67           C  
ATOM   3700  C   ASN L  69      82.143 -42.298   2.640  1.00 47.03           C  
ATOM   3701  O   ASN L  69      81.962 -41.077   2.565  1.00 46.53           O  
ATOM   3702  CB  ASN L  69      83.446 -42.551   0.500  1.00 51.00           C  
ATOM   3703  CG  ASN L  69      84.611 -43.223  -0.218  1.00 53.04           C  
ATOM   3704  OD1 ASN L  69      85.634 -43.533   0.392  1.00 53.67           O  
ATOM   3705  ND2 ASN L  69      84.465 -43.431  -1.524  1.00 54.57           N  
ATOM   3706  N   THR L  70      81.336 -43.107   3.314  1.00 45.37           N  
ATOM   3707  CA  THR L  70      80.169 -42.586   4.001  1.00 45.79           C  
ATOM   3708  C   THR L  70      80.310 -42.603   5.517  1.00 45.52           C  
ATOM   3709  O   THR L  70      80.595 -43.645   6.114  1.00 45.40           O  
ATOM   3710  CB  THR L  70      78.896 -43.371   3.618  1.00 44.96           C  
ATOM   3711  OG1 THR L  70      78.341 -42.826   2.415  1.00 45.00           O  
ATOM   3712  CG2 THR L  70      77.865 -43.285   4.723  1.00 44.70           C  
ATOM   3713  N   ALA L  71      80.105 -41.441   6.132  1.00 44.20           N  
ATOM   3714  CA  ALA L  71      80.174 -41.326   7.581  1.00 43.13           C  
ATOM   3715  C   ALA L  71      78.765 -41.076   8.129  1.00 42.62           C  
ATOM   3716  O   ALA L  71      77.917 -40.505   7.438  1.00 42.96           O  
ATOM   3717  CB  ALA L  71      81.089 -40.198   7.960  1.00 42.43           C  
ATOM   3718  N   SER L  72      78.506 -41.499   9.362  1.00 40.67           N  
ATOM   3719  CA  SER L  72      77.186 -41.296   9.940  1.00 39.24           C  
ATOM   3720  C   SER L  72      77.187 -40.909  11.402  1.00 37.66           C  
ATOM   3721  O   SER L  72      77.878 -41.520  12.213  1.00 37.33           O  
ATOM   3722  CB  SER L  72      76.337 -42.555   9.790  1.00 40.05           C  
ATOM   3723  OG  SER L  72      75.917 -42.749   8.454  1.00 43.95           O  
ATOM   3724  N   LEU L  73      76.404 -39.885  11.731  1.00 35.61           N  
ATOM   3725  CA  LEU L  73      76.263 -39.437  13.111  1.00 32.30           C  
ATOM   3726  C   LEU L  73      75.018 -40.116  13.620  1.00 32.06           C  
ATOM   3727  O   LEU L  73      74.056 -40.268  12.878  1.00 32.73           O  
ATOM   3728  CB  LEU L  73      76.045 -37.934  13.191  1.00 30.21           C  
ATOM   3729  CG  LEU L  73      75.465 -37.457  14.526  1.00 27.98           C  
ATOM   3730  CD1 LEU L  73      76.389 -37.838  15.645  1.00 27.02           C  
ATOM   3731  CD2 LEU L  73      75.281 -35.964  14.515  1.00 27.17           C  
ATOM   3732  N   THR L  74      75.024 -40.531  14.876  1.00 31.79           N  
ATOM   3733  CA  THR L  74      73.848 -41.183  15.428  1.00 32.18           C  
ATOM   3734  C   THR L  74      73.454 -40.552  16.749  1.00 34.08           C  
ATOM   3735  O   THR L  74      74.308 -40.230  17.585  1.00 36.58           O  
ATOM   3736  CB  THR L  74      74.064 -42.698  15.648  1.00 30.68           C  
ATOM   3737  OG1 THR L  74      74.263 -43.348  14.386  1.00 30.32           O  
ATOM   3738  CG2 THR L  74      72.860 -43.303  16.328  1.00 27.86           C  
ATOM   3739  N   ILE L  75      72.149 -40.377  16.923  1.00 33.01           N  
ATOM   3740  CA  ILE L  75      71.612 -39.788  18.123  1.00 31.19           C  
ATOM   3741  C   ILE L  75      70.480 -40.665  18.639  1.00 34.92           C  
ATOM   3742  O   ILE L  75      69.473 -40.879  17.947  1.00 37.38           O  
ATOM   3743  CB  ILE L  75      71.056 -38.411  17.839  1.00 26.64           C  
ATOM   3744  CG1 ILE L  75      71.963 -37.685  16.862  1.00 23.76           C  
ATOM   3745  CG2 ILE L  75      70.929 -37.661  19.123  1.00 27.71           C  
ATOM   3746  CD1 ILE L  75      71.745 -36.202  16.819  1.00 23.55           C  
ATOM   3747  N   SER L  76      70.641 -41.169  19.855  1.00 34.63           N  
ATOM   3748  CA  SER L  76      69.636 -42.014  20.466  1.00 33.28           C  
ATOM   3749  C   SER L  76      69.058 -41.300  21.680  1.00 35.47           C  
ATOM   3750  O   SER L  76      69.598 -40.287  22.122  1.00 34.81           O  
ATOM   3751  CB  SER L  76      70.278 -43.316  20.902  1.00 31.68           C  
ATOM   3752  OG  SER L  76      71.165 -43.080  21.981  1.00 31.62           O  
ATOM   3753  N   GLY L  77      67.964 -41.826  22.227  1.00 37.02           N  
ATOM   3754  CA  GLY L  77      67.370 -41.201  23.397  1.00 39.17           C  
ATOM   3755  C   GLY L  77      67.026 -39.757  23.108  1.00 41.52           C  
ATOM   3756  O   GLY L  77      67.200 -38.882  23.968  1.00 41.45           O  
ATOM   3757  N   LEU L  78      66.516 -39.536  21.890  1.00 42.45           N  
ATOM   3758  CA  LEU L  78      66.136 -38.222  21.380  1.00 42.14           C  
ATOM   3759  C   LEU L  78      65.335 -37.358  22.311  1.00 42.70           C  
ATOM   3760  O   LEU L  78      64.199 -37.673  22.637  1.00 43.19           O  
ATOM   3761  CB  LEU L  78      65.377 -38.363  20.066  1.00 42.12           C  
ATOM   3762  CG  LEU L  78      66.257 -38.268  18.818  1.00 42.45           C  
ATOM   3763  CD1 LEU L  78      65.449 -38.580  17.572  1.00 42.10           C  
ATOM   3764  CD2 LEU L  78      66.849 -36.882  18.729  1.00 40.04           C  
ATOM   3765  N   GLN L  79      65.958 -36.258  22.722  1.00 44.62           N  
ATOM   3766  CA  GLN L  79      65.371 -35.260  23.612  1.00 46.12           C  
ATOM   3767  C   GLN L  79      64.884 -34.140  22.700  1.00 44.61           C  
ATOM   3768  O   GLN L  79      65.222 -34.115  21.522  1.00 44.86           O  
ATOM   3769  CB  GLN L  79      66.447 -34.688  24.545  1.00 50.42           C  
ATOM   3770  CG  GLN L  79      67.204 -35.709  25.367  1.00 55.78           C  
ATOM   3771  CD  GLN L  79      66.600 -35.897  26.735  1.00 60.15           C  
ATOM   3772  OE1 GLN L  79      66.628 -34.983  27.575  1.00 62.24           O  
ATOM   3773  NE2 GLN L  79      66.034 -37.081  26.974  1.00 61.66           N  
ATOM   3774  N   ALA L  80      64.111 -33.207  23.239  1.00 42.76           N  
ATOM   3775  CA  ALA L  80      63.626 -32.099  22.437  1.00 40.48           C  
ATOM   3776  C   ALA L  80      64.753 -31.108  22.216  1.00 40.64           C  
ATOM   3777  O   ALA L  80      64.861 -30.506  21.146  1.00 40.01           O  
ATOM   3778  CB  ALA L  80      62.489 -31.423  23.128  1.00 38.83           C  
ATOM   3779  N   GLU L  81      65.593 -30.938  23.233  1.00 41.32           N  
ATOM   3780  CA  GLU L  81      66.706 -30.004  23.136  1.00 43.55           C  
ATOM   3781  C   GLU L  81      67.656 -30.375  22.006  1.00 43.70           C  
ATOM   3782  O   GLU L  81      68.348 -29.507  21.469  1.00 45.21           O  
ATOM   3783  CB  GLU L  81      67.472 -29.936  24.458  1.00 46.23           C  
ATOM   3784  CG  GLU L  81      67.715 -31.301  25.097  1.00 55.91           C  
ATOM   3785  CD  GLU L  81      68.943 -31.329  26.008  1.00 59.54           C  
ATOM   3786  OE1 GLU L  81      69.206 -32.383  26.646  1.00 59.63           O  
ATOM   3787  OE2 GLU L  81      69.644 -30.292  26.073  1.00 61.56           O  
ATOM   3788  N   ASP L  82      67.673 -31.657  21.635  1.00 43.39           N  
ATOM   3789  CA  ASP L  82      68.549 -32.149  20.570  1.00 41.11           C  
ATOM   3790  C   ASP L  82      68.248 -31.476  19.253  1.00 40.09           C  
ATOM   3791  O   ASP L  82      69.070 -31.482  18.346  1.00 39.81           O  
ATOM   3792  CB  ASP L  82      68.406 -33.658  20.394  1.00 41.76           C  
ATOM   3793  CG  ASP L  82      68.936 -34.442  21.576  1.00 44.21           C  
ATOM   3794  OD1 ASP L  82      69.855 -33.946  22.261  1.00 47.08           O  
ATOM   3795  OD2 ASP L  82      68.450 -35.568  21.811  1.00 46.04           O  
ATOM   3796  N   GLU L  83      67.053 -30.903  19.157  1.00 40.58           N  
ATOM   3797  CA  GLU L  83      66.604 -30.201  17.961  1.00 39.42           C  
ATOM   3798  C   GLU L  83      67.594 -29.086  17.631  1.00 37.88           C  
ATOM   3799  O   GLU L  83      67.735 -28.118  18.385  1.00 38.00           O  
ATOM   3800  CB  GLU L  83      65.217 -29.641  18.217  1.00 40.63           C  
ATOM   3801  CG  GLU L  83      64.252 -29.961  17.128  1.00 45.92           C  
ATOM   3802  CD  GLU L  83      62.821 -29.846  17.584  1.00 48.99           C  
ATOM   3803  OE1 GLU L  83      62.470 -28.793  18.156  1.00 50.79           O  
ATOM   3804  OE2 GLU L  83      62.047 -30.806  17.367  1.00 50.35           O  
ATOM   3805  N   ALA L  84      68.285 -29.239  16.506  1.00 36.33           N  
ATOM   3806  CA  ALA L  84      69.301 -28.289  16.082  1.00 35.12           C  
ATOM   3807  C   ALA L  84      69.763 -28.605  14.671  1.00 34.71           C  
ATOM   3808  O   ALA L  84      69.092 -29.330  13.940  1.00 37.14           O  
ATOM   3809  CB  ALA L  84      70.481 -28.369  17.027  1.00 35.72           C  
ATOM   3810  N   ASP L  85      70.904 -28.047  14.285  1.00 33.34           N  
ATOM   3811  CA  ASP L  85      71.470 -28.305  12.970  1.00 33.27           C  
ATOM   3812  C   ASP L  85      72.753 -29.081  13.159  1.00 32.85           C  
ATOM   3813  O   ASP L  85      73.624 -28.678  13.926  1.00 34.12           O  
ATOM   3814  CB  ASP L  85      71.777 -27.011  12.239  1.00 35.89           C  
ATOM   3815  CG  ASP L  85      70.549 -26.372  11.672  1.00 40.79           C  
ATOM   3816  OD1 ASP L  85      70.687 -25.421  10.879  1.00 43.61           O  
ATOM   3817  OD2 ASP L  85      69.439 -26.814  12.028  1.00 44.77           O  
ATOM   3818  N   TYR L  86      72.879 -30.195  12.458  1.00 31.44           N  
ATOM   3819  CA  TYR L  86      74.066 -31.028  12.588  1.00 31.15           C  
ATOM   3820  C   TYR L  86      74.841 -31.007  11.299  1.00 32.64           C  
ATOM   3821  O   TYR L  86      74.300 -31.264  10.231  1.00 33.47           O  
ATOM   3822  CB  TYR L  86      73.660 -32.461  12.950  1.00 27.83           C  
ATOM   3823  CG  TYR L  86      73.028 -32.466  14.305  1.00 25.21           C  
ATOM   3824  CD1 TYR L  86      73.806 -32.569  15.442  1.00 26.06           C  
ATOM   3825  CD2 TYR L  86      71.653 -32.367  14.462  1.00 24.91           C  
ATOM   3826  CE1 TYR L  86      73.239 -32.532  16.708  1.00 27.48           C  
ATOM   3827  CE2 TYR L  86      71.072 -32.326  15.731  1.00 25.31           C  
ATOM   3828  CZ  TYR L  86      71.877 -32.394  16.847  1.00 26.37           C  
ATOM   3829  OH  TYR L  86      71.311 -32.329  18.106  1.00 25.77           O  
ATOM   3830  N   TYR L  87      76.137 -30.719  11.403  1.00 32.28           N  
ATOM   3831  CA  TYR L  87      76.997 -30.670  10.238  1.00 32.07           C  
ATOM   3832  C   TYR L  87      78.091 -31.706  10.367  1.00 33.60           C  
ATOM   3833  O   TYR L  87      78.312 -32.274  11.439  1.00 34.35           O  
ATOM   3834  CB  TYR L  87      77.615 -29.294  10.105  1.00 31.62           C  
ATOM   3835  CG  TYR L  87      76.597 -28.210   9.947  1.00 34.72           C  
ATOM   3836  CD1 TYR L  87      76.447 -27.537   8.741  1.00 35.32           C  
ATOM   3837  CD2 TYR L  87      75.795 -27.831  11.019  1.00 36.46           C  
ATOM   3838  CE1 TYR L  87      75.528 -26.511   8.610  1.00 37.85           C  
ATOM   3839  CE2 TYR L  87      74.876 -26.810  10.903  1.00 38.18           C  
ATOM   3840  CZ  TYR L  87      74.742 -26.147   9.698  1.00 39.88           C  
ATOM   3841  OH  TYR L  87      73.824 -25.112   9.600  1.00 42.26           O  
ATOM   3842  N   CYS L  88      78.778 -31.957   9.266  1.00 33.58           N  
ATOM   3843  CA  CYS L  88      79.858 -32.914   9.278  1.00 36.17           C  
ATOM   3844  C   CYS L  88      80.955 -32.340   8.435  1.00 36.58           C  
ATOM   3845  O   CYS L  88      80.704 -31.532   7.552  1.00 38.18           O  
ATOM   3846  CB  CYS L  88      79.410 -34.246   8.682  1.00 37.81           C  
ATOM   3847  SG  CYS L  88      78.792 -34.087   6.986  1.00 41.42           S  
ATOM   3848  N   SER L  89      82.178 -32.747   8.723  1.00 36.51           N  
ATOM   3849  CA  SER L  89      83.314 -32.293   7.960  1.00 36.33           C  
ATOM   3850  C   SER L  89      84.314 -33.446   7.912  1.00 38.01           C  
ATOM   3851  O   SER L  89      84.178 -34.442   8.628  1.00 38.81           O  
ATOM   3852  CB  SER L  89      83.935 -31.055   8.611  1.00 33.41           C  
ATOM   3853  OG  SER L  89      84.412 -31.329   9.914  1.00 31.38           O  
ATOM   3854  N   SER L  90      85.313 -33.315   7.054  1.00 37.99           N  
ATOM   3855  CA  SER L  90      86.337 -34.331   6.924  1.00 38.22           C  
ATOM   3856  C   SER L  90      87.589 -33.617   6.480  1.00 40.08           C  
ATOM   3857  O   SER L  90      87.526 -32.453   6.086  1.00 41.30           O  
ATOM   3858  CB  SER L  90      85.927 -35.361   5.870  1.00 36.96           C  
ATOM   3859  OG  SER L  90      87.055 -36.008   5.311  1.00 32.36           O  
ATOM   3860  N   TYR L  91      88.721 -34.307   6.550  1.00 41.10           N  
ATOM   3861  CA  TYR L  91      89.970 -33.729   6.106  1.00 42.51           C  
ATOM   3862  C   TYR L  91      89.985 -33.906   4.597  1.00 43.96           C  
ATOM   3863  O   TYR L  91      89.258 -34.739   4.055  1.00 44.29           O  
ATOM   3864  CB  TYR L  91      91.169 -34.446   6.722  1.00 43.56           C  
ATOM   3865  CG  TYR L  91      92.410 -33.582   6.733  1.00 44.65           C  
ATOM   3866  CD1 TYR L  91      92.460 -32.426   7.515  1.00 43.43           C  
ATOM   3867  CD2 TYR L  91      93.513 -33.886   5.928  1.00 44.45           C  
ATOM   3868  CE1 TYR L  91      93.563 -31.595   7.499  1.00 44.27           C  
ATOM   3869  CE2 TYR L  91      94.633 -33.052   5.906  1.00 45.63           C  
ATOM   3870  CZ  TYR L  91      94.648 -31.909   6.698  1.00 45.99           C  
ATOM   3871  OH  TYR L  91      95.754 -31.083   6.721  1.00 47.44           O  
ATOM   3872  N   ALA L  92      90.800 -33.107   3.922  1.00 45.39           N  
ATOM   3873  CA  ALA L  92      90.902 -33.167   2.475  1.00 46.69           C  
ATOM   3874  C   ALA L  92      92.366 -33.217   2.063  1.00 47.67           C  
ATOM   3875  O   ALA L  92      93.262 -32.968   2.873  1.00 48.34           O  
ATOM   3876  CB  ALA L  92      90.230 -31.951   1.862  1.00 47.40           C  
ATOM   3877  N   SER L  93      92.607 -33.535   0.798  1.00 48.02           N  
ATOM   3878  CA  SER L  93      93.964 -33.615   0.292  1.00 49.07           C  
ATOM   3879  C   SER L  93      94.231 -32.443  -0.637  1.00 51.16           C  
ATOM   3880  O   SER L  93      95.370 -32.205  -1.023  1.00 52.49           O  
ATOM   3881  CB  SER L  93      94.159 -34.919  -0.480  1.00 47.46           C  
ATOM   3882  OG  SER L  93      93.671 -36.027   0.247  1.00 45.72           O  
ATOM   3883  N   GLY L  94      93.179 -31.710  -0.990  1.00 52.74           N  
ATOM   3884  CA  GLY L  94      93.323 -30.590  -1.902  1.00 53.89           C  
ATOM   3885  C   GLY L  94      93.787 -29.286  -1.288  1.00 55.58           C  
ATOM   3886  O   GLY L  94      94.531 -29.270  -0.309  1.00 54.96           O  
ATOM   3887  N   SER L  95      93.359 -28.180  -1.888  1.00 57.86           N  
ATOM   3888  CA  SER L  95      93.717 -26.853  -1.393  1.00 58.77           C  
ATOM   3889  C   SER L  95      93.238 -26.783   0.045  1.00 57.96           C  
ATOM   3890  O   SER L  95      94.032 -26.790   0.987  1.00 57.37           O  
ATOM   3891  CB  SER L  95      93.023 -25.765  -2.233  1.00 59.86           C  
ATOM   3892  OG  SER L  95      91.654 -26.078  -2.454  1.00 60.73           O  
ATOM   3893  N   THR L  95A     91.920 -26.738   0.191  1.00 56.93           N  
ATOM   3894  CA  THR L  95A     91.284 -26.687   1.494  1.00 54.47           C  
ATOM   3895  C   THR L  95A     91.486 -28.007   2.232  1.00 51.62           C  
ATOM   3896  O   THR L  95A     91.203 -29.093   1.701  1.00 50.61           O  
ATOM   3897  CB  THR L  95A     89.777 -26.436   1.359  1.00 54.58           C  
ATOM   3898  OG1 THR L  95A     89.450 -26.251  -0.025  1.00 54.23           O  
ATOM   3899  CG2 THR L  95A     89.369 -25.200   2.161  1.00 55.70           C  
ATOM   3900  N   PRO L  95B     91.993 -27.925   3.468  1.00 48.50           N  
ATOM   3901  CA  PRO L  95B     92.252 -29.078   4.333  1.00 45.82           C  
ATOM   3902  C   PRO L  95B     90.981 -29.712   4.893  1.00 44.13           C  
ATOM   3903  O   PRO L  95B     90.978 -30.873   5.263  1.00 42.75           O  
ATOM   3904  CB  PRO L  95B     93.131 -28.491   5.426  1.00 46.53           C  
ATOM   3905  CG  PRO L  95B     92.654 -27.068   5.503  1.00 48.00           C  
ATOM   3906  CD  PRO L  95B     92.505 -26.680   4.067  1.00 46.86           C  
ATOM   3907  N   ARG L  96      89.895 -28.955   4.950  1.00 43.74           N  
ATOM   3908  CA  ARG L  96      88.655 -29.501   5.479  1.00 44.53           C  
ATOM   3909  C   ARG L  96      87.370 -29.077   4.752  1.00 45.28           C  
ATOM   3910  O   ARG L  96      87.138 -27.896   4.507  1.00 45.12           O  
ATOM   3911  CB  ARG L  96      88.556 -29.168   6.967  1.00 44.21           C  
ATOM   3912  CG  ARG L  96      87.206 -29.433   7.587  1.00 43.26           C  
ATOM   3913  CD  ARG L  96      87.367 -29.898   9.003  1.00 44.53           C  
ATOM   3914  NE  ARG L  96      87.836 -31.274   9.017  1.00 47.83           N  
ATOM   3915  CZ  ARG L  96      88.117 -31.963  10.114  1.00 48.35           C  
ATOM   3916  NH1 ARG L  96      87.982 -31.401  11.302  1.00 51.85           N  
ATOM   3917  NH2 ARG L  96      88.515 -33.220  10.017  1.00 48.91           N  
ATOM   3918  N   ILE L  97      86.538 -30.067   4.424  1.00 44.79           N  
ATOM   3919  CA  ILE L  97      85.272 -29.844   3.739  1.00 43.90           C  
ATOM   3920  C   ILE L  97      84.111 -30.054   4.710  1.00 43.12           C  
ATOM   3921  O   ILE L  97      84.258 -30.764   5.704  1.00 44.08           O  
ATOM   3922  CB  ILE L  97      85.059 -30.844   2.620  1.00 44.39           C  
ATOM   3923  CG1 ILE L  97      86.317 -31.005   1.793  1.00 43.69           C  
ATOM   3924  CG2 ILE L  97      83.943 -30.359   1.723  1.00 49.79           C  
ATOM   3925  CD1 ILE L  97      86.181 -32.128   0.787  1.00 44.03           C  
ATOM   3926  N   PHE L  98      82.953 -29.467   4.401  1.00 41.31           N  
ATOM   3927  CA  PHE L  98      81.773 -29.592   5.254  1.00 38.57           C  
ATOM   3928  C   PHE L  98      80.541 -30.050   4.486  1.00 37.86           C  
ATOM   3929  O   PHE L  98      80.504 -29.949   3.265  1.00 38.97           O  
ATOM   3930  CB  PHE L  98      81.472 -28.248   5.920  1.00 36.92           C  
ATOM   3931  CG  PHE L  98      82.517 -27.817   6.899  1.00 35.32           C  
ATOM   3932  CD1 PHE L  98      82.426 -28.178   8.238  1.00 33.63           C  
ATOM   3933  CD2 PHE L  98      83.627 -27.097   6.474  1.00 34.33           C  
ATOM   3934  CE1 PHE L  98      83.426 -27.832   9.144  1.00 32.15           C  
ATOM   3935  CE2 PHE L  98      84.630 -26.750   7.373  1.00 34.86           C  
ATOM   3936  CZ  PHE L  98      84.529 -27.118   8.708  1.00 33.60           C  
ATOM   3937  N   GLY L  99      79.552 -30.573   5.213  1.00 36.32           N  
ATOM   3938  CA  GLY L  99      78.309 -30.997   4.605  1.00 34.78           C  
ATOM   3939  C   GLY L  99      77.408 -29.774   4.640  1.00 35.02           C  
ATOM   3940  O   GLY L  99      77.726 -28.793   5.304  1.00 35.68           O  
ATOM   3941  N   GLY L 100      76.289 -29.801   3.934  1.00 35.14           N  
ATOM   3942  CA  GLY L 100      75.417 -28.638   3.946  1.00 34.51           C  
ATOM   3943  C   GLY L 100      74.545 -28.557   5.179  1.00 34.67           C  
ATOM   3944  O   GLY L 100      73.651 -27.715   5.256  1.00 34.93           O  
ATOM   3945  N   GLY L 101      74.795 -29.442   6.141  1.00 33.73           N  
ATOM   3946  CA  GLY L 101      74.019 -29.449   7.364  1.00 32.68           C  
ATOM   3947  C   GLY L 101      72.684 -30.161   7.264  1.00 33.00           C  
ATOM   3948  O   GLY L 101      72.170 -30.391   6.169  1.00 34.84           O  
ATOM   3949  N   THR L 102      72.118 -30.495   8.419  1.00 31.82           N  
ATOM   3950  CA  THR L 102      70.842 -31.183   8.498  1.00 31.83           C  
ATOM   3951  C   THR L 102      70.051 -30.674   9.684  1.00 33.85           C  
ATOM   3952  O   THR L 102      70.521 -30.743  10.817  1.00 35.85           O  
ATOM   3953  CB  THR L 102      71.049 -32.678   8.724  1.00 32.68           C  
ATOM   3954  OG1 THR L 102      71.807 -33.217   7.640  1.00 34.07           O  
ATOM   3955  CG2 THR L 102      69.718 -33.402   8.829  1.00 31.59           C  
ATOM   3956  N   ARG L 103      68.843 -30.181   9.450  1.00 34.89           N  
ATOM   3957  CA  ARG L 103      68.030 -29.709  10.565  1.00 35.55           C  
ATOM   3958  C   ARG L 103      67.251 -30.860  11.201  1.00 36.00           C  
ATOM   3959  O   ARG L 103      66.484 -31.553  10.528  1.00 37.24           O  
ATOM   3960  CB  ARG L 103      67.064 -28.648  10.087  1.00 36.63           C  
ATOM   3961  CG  ARG L 103      66.267 -28.031  11.197  1.00 39.74           C  
ATOM   3962  CD  ARG L 103      66.037 -26.555  10.889  1.00 43.33           C  
ATOM   3963  NE  ARG L 103      67.289 -25.796  10.912  1.00 44.06           N  
ATOM   3964  CZ  ARG L 103      67.382 -24.504  10.622  1.00 44.15           C  
ATOM   3965  NH1 ARG L 103      66.293 -23.827  10.282  1.00 43.37           N  
ATOM   3966  NH2 ARG L 103      68.559 -23.890  10.687  1.00 43.24           N  
ATOM   3967  N   LEU L 104      67.442 -31.075  12.495  1.00 34.75           N  
ATOM   3968  CA  LEU L 104      66.737 -32.160  13.169  1.00 34.72           C  
ATOM   3969  C   LEU L 104      65.441 -31.668  13.760  1.00 34.12           C  
ATOM   3970  O   LEU L 104      65.384 -30.545  14.242  1.00 34.86           O  
ATOM   3971  CB  LEU L 104      67.596 -32.736  14.302  1.00 35.71           C  
ATOM   3972  CG  LEU L 104      66.954 -33.791  15.218  1.00 35.37           C  
ATOM   3973  CD1 LEU L 104      66.546 -34.998  14.396  1.00 35.58           C  
ATOM   3974  CD2 LEU L 104      67.926 -34.208  16.292  1.00 34.46           C  
ATOM   3975  N   THR L 105      64.399 -32.493  13.720  1.00 34.21           N  
ATOM   3976  CA  THR L 105      63.122 -32.112  14.328  1.00 35.60           C  
ATOM   3977  C   THR L 105      62.633 -33.276  15.177  1.00 37.45           C  
ATOM   3978  O   THR L 105      62.396 -34.368  14.670  1.00 36.47           O  
ATOM   3979  CB  THR L 105      62.020 -31.792  13.293  1.00 35.54           C  
ATOM   3980  OG1 THR L 105      62.554 -30.996  12.221  1.00 36.23           O  
ATOM   3981  CG2 THR L 105      60.895 -31.034  13.970  1.00 31.78           C  
ATOM   3982  N   VAL L 106      62.512 -33.051  16.479  1.00 39.84           N  
ATOM   3983  CA  VAL L 106      62.043 -34.094  17.384  1.00 41.47           C  
ATOM   3984  C   VAL L 106      60.534 -33.920  17.491  1.00 43.07           C  
ATOM   3985  O   VAL L 106      60.050 -33.073  18.237  1.00 44.11           O  
ATOM   3986  CB  VAL L 106      62.720 -33.970  18.775  1.00 40.01           C  
ATOM   3987  CG1 VAL L 106      62.248 -35.075  19.702  1.00 40.04           C  
ATOM   3988  CG2 VAL L 106      64.216 -34.076  18.615  1.00 39.38           C  
ATOM   3989  N   LEU L 106A     59.803 -34.723  16.723  1.00 44.62           N  
ATOM   3990  CA  LEU L 106A     58.343 -34.658  16.664  1.00 46.41           C  
ATOM   3991  C   LEU L 106A     57.651 -34.368  17.990  1.00 47.25           C  
ATOM   3992  O   LEU L 106A     57.743 -35.143  18.942  1.00 47.76           O  
ATOM   3993  CB  LEU L 106A     57.804 -35.947  16.036  1.00 44.28           C  
ATOM   3994  CG  LEU L 106A     58.363 -36.101  14.623  1.00 42.83           C  
ATOM   3995  CD1 LEU L 106A     58.002 -37.435  14.062  1.00 43.66           C  
ATOM   3996  CD2 LEU L 106A     57.836 -34.987  13.750  1.00 41.75           C  
ATOM   3997  N   GLY L 107      56.961 -33.235  18.044  1.00 47.62           N  
ATOM   3998  CA  GLY L 107      56.270 -32.854  19.260  1.00 50.12           C  
ATOM   3999  C   GLY L 107      54.775 -33.072  19.180  1.00 52.19           C  
ATOM   4000  O   GLY L 107      54.117 -33.366  20.176  1.00 53.80           O  
ATOM   4001  N   GLN L 108      54.237 -32.924  17.980  1.00 53.43           N  
ATOM   4002  CA  GLN L 108      52.818 -33.100  17.732  1.00 53.87           C  
ATOM   4003  C   GLN L 108      52.721 -34.016  16.522  1.00 54.15           C  
ATOM   4004  O   GLN L 108      53.707 -34.207  15.827  1.00 56.34           O  
ATOM   4005  CB  GLN L 108      52.208 -31.750  17.395  1.00 53.86           C  
ATOM   4006  CG  GLN L 108      53.081 -30.960  16.446  1.00 55.53           C  
ATOM   4007  CD  GLN L 108      52.323 -29.896  15.688  1.00 58.79           C  
ATOM   4008  OE1 GLN L 108      51.347 -30.194  14.988  1.00 61.96           O  
ATOM   4009  NE2 GLN L 108      52.766 -28.645  15.813  1.00 57.16           N  
ATOM   4010  N   PRO L 109      51.545 -34.611  16.261  1.00 53.42           N  
ATOM   4011  CA  PRO L 109      51.475 -35.478  15.083  1.00 51.88           C  
ATOM   4012  C   PRO L 109      51.903 -34.715  13.837  1.00 51.09           C  
ATOM   4013  O   PRO L 109      51.735 -33.496  13.751  1.00 51.41           O  
ATOM   4014  CB  PRO L 109      50.012 -35.875  15.050  1.00 50.67           C  
ATOM   4015  CG  PRO L 109      49.706 -36.025  16.500  1.00 50.82           C  
ATOM   4016  CD  PRO L 109      50.335 -34.771  17.088  1.00 51.94           C  
TER    4017      PRO L 109                                                      
ATOM   4800  N   SER L   2      82.740 -22.308  26.693  1.00 84.85           N  
ATOM   4801  CA  SER L   2      83.521 -21.073  26.676  1.00 81.44           C  
ATOM   4802  C   SER L   2      83.593 -20.502  25.253  1.00 77.79           C  
ATOM   4803  O   SER L   2      84.645 -20.523  24.612  1.00 77.37           O  
ATOM   4804  CB  SER L   2      84.933 -21.342  27.222  1.00 82.07           C  
ATOM   4805  OG  SER L   2      85.539 -22.453  26.576  1.00 81.60           O  
ATOM   4806  N   ALA L   3      82.463 -19.996  24.769  1.00 73.28           N  
ATOM   4807  CA  ALA L   3      82.387 -19.430  23.428  1.00 68.15           C  
ATOM   4808  C   ALA L   3      83.408 -18.318  23.261  1.00 64.42           C  
ATOM   4809  O   ALA L   3      83.848 -17.724  24.241  1.00 63.48           O  
ATOM   4810  CB  ALA L   3      80.985 -18.890  23.165  1.00 67.26           C  
ATOM   4811  N   LEU L   4      83.789 -18.062  22.014  1.00 59.94           N  
ATOM   4812  CA  LEU L   4      84.733 -17.006  21.687  1.00 55.27           C  
ATOM   4813  C   LEU L   4      83.865 -15.861  21.192  1.00 54.30           C  
ATOM   4814  O   LEU L   4      83.396 -15.884  20.056  1.00 54.72           O  
ATOM   4815  CB  LEU L   4      85.667 -17.430  20.555  1.00 52.52           C  
ATOM   4816  CG  LEU L   4      86.538 -18.661  20.738  1.00 49.69           C  
ATOM   4817  CD1 LEU L   4      87.261 -18.979  19.445  1.00 46.75           C  
ATOM   4818  CD2 LEU L   4      87.503 -18.412  21.857  1.00 49.40           C  
ATOM   4819  N   PRO L   5      83.618 -14.858  22.047  1.00 52.75           N  
ATOM   4820  CA  PRO L   5      82.805 -13.685  21.729  1.00 51.10           C  
ATOM   4821  C   PRO L   5      83.117 -12.995  20.400  1.00 50.23           C  
ATOM   4822  O   PRO L   5      84.258 -12.590  20.137  1.00 51.55           O  
ATOM   4823  CB  PRO L   5      83.061 -12.778  22.922  1.00 50.84           C  
ATOM   4824  CG  PRO L   5      83.134 -13.752  24.031  1.00 51.33           C  
ATOM   4825  CD  PRO L   5      84.026 -14.825  23.462  1.00 52.70           C  
ATOM   4826  N   GLN L   6      82.094 -12.878  19.561  1.00 47.23           N  
ATOM   4827  CA  GLN L   6      82.230 -12.212  18.279  1.00 45.00           C  
ATOM   4828  C   GLN L   6      81.124 -11.183  18.248  1.00 45.82           C  
ATOM   4829  O   GLN L   6      80.143 -11.289  18.979  1.00 45.85           O  
ATOM   4830  CB  GLN L   6      81.981 -13.150  17.094  1.00 42.37           C  
ATOM   4831  CG  GLN L   6      82.740 -14.450  17.036  1.00 40.05           C  
ATOM   4832  CD  GLN L   6      82.651 -15.061  15.655  1.00 37.88           C  
ATOM   4833  OE1 GLN L   6      82.700 -16.271  15.483  1.00 36.50           O  
ATOM   4834  NE2 GLN L   6      82.533 -14.209  14.657  1.00 37.47           N  
ATOM   4835  N   PRO L   7      81.266 -10.156  17.408  1.00 46.55           N  
ATOM   4836  CA  PRO L   7      80.176  -9.185  17.381  1.00 45.86           C  
ATOM   4837  C   PRO L   7      78.962  -9.860  16.729  1.00 45.91           C  
ATOM   4838  O   PRO L   7      79.096 -10.566  15.736  1.00 45.96           O  
ATOM   4839  CB  PRO L   7      80.753  -8.056  16.529  1.00 45.97           C  
ATOM   4840  CG  PRO L   7      81.705  -8.767  15.613  1.00 45.46           C  
ATOM   4841  CD  PRO L   7      82.389  -9.721  16.556  1.00 46.00           C  
ATOM   4842  N   ALA L   8      77.781  -9.655  17.289  1.00 47.16           N  
ATOM   4843  CA  ALA L   8      76.585 -10.255  16.721  1.00 48.47           C  
ATOM   4844  C   ALA L   8      76.448  -9.957  15.228  1.00 50.16           C  
ATOM   4845  O   ALA L   8      76.094 -10.842  14.449  1.00 52.55           O  
ATOM   4846  CB  ALA L   8      75.363  -9.778  17.458  1.00 48.56           C  
ATOM   4847  N   SER L   9      76.714  -8.725  14.809  1.00 50.25           N  
ATOM   4848  CA  SER L   9      76.609  -8.435  13.386  1.00 51.10           C  
ATOM   4849  C   SER L   9      77.365  -7.216  12.884  1.00 51.36           C  
ATOM   4850  O   SER L   9      77.728  -6.308  13.644  1.00 51.33           O  
ATOM   4851  CB  SER L   9      75.146  -8.337  12.977  1.00 51.28           C  
ATOM   4852  OG  SER L   9      74.439  -7.540  13.896  1.00 54.62           O  
ATOM   4853  N   VAL L  11      77.593  -7.220  11.575  1.00 50.27           N  
ATOM   4854  CA  VAL L  11      78.321  -6.163  10.898  1.00 48.41           C  
ATOM   4855  C   VAL L  11      77.711  -5.917   9.531  1.00 47.93           C  
ATOM   4856  O   VAL L  11      77.490  -6.858   8.763  1.00 47.92           O  
ATOM   4857  CB  VAL L  11      79.790  -6.570  10.707  1.00 48.44           C  
ATOM   4858  CG1 VAL L  11      80.514  -5.562   9.831  1.00 47.51           C  
ATOM   4859  CG2 VAL L  11      80.459  -6.698  12.061  1.00 47.54           C  
ATOM   4860  N   SER L  12      77.433  -4.654   9.232  1.00 46.79           N  
ATOM   4861  CA  SER L  12      76.868  -4.295   7.940  1.00 46.35           C  
ATOM   4862  C   SER L  12      77.847  -3.325   7.295  1.00 45.53           C  
ATOM   4863  O   SER L  12      78.511  -2.570   7.992  1.00 45.80           O  
ATOM   4864  CB  SER L  12      75.509  -3.634   8.132  1.00 46.98           C  
ATOM   4865  OG  SER L  12      74.879  -4.116   9.306  1.00 47.95           O  
ATOM   4866  N   GLY L  13      77.953  -3.355   5.975  1.00 45.96           N  
ATOM   4867  CA  GLY L  13      78.881  -2.465   5.302  1.00 47.76           C  
ATOM   4868  C   GLY L  13      78.472  -2.168   3.874  1.00 49.67           C  
ATOM   4869  O   GLY L  13      77.649  -2.881   3.290  1.00 50.49           O  
ATOM   4870  N   SER L  14      79.034  -1.107   3.302  1.00 50.80           N  
ATOM   4871  CA  SER L  14      78.699  -0.744   1.923  1.00 50.07           C  
ATOM   4872  C   SER L  14      79.743  -1.329   0.988  1.00 49.96           C  
ATOM   4873  O   SER L  14      80.932  -1.372   1.321  1.00 50.75           O  
ATOM   4874  CB  SER L  14      78.647   0.776   1.752  1.00 48.57           C  
ATOM   4875  OG  SER L  14      77.570   1.337   2.483  1.00 46.10           O  
ATOM   4876  N   PRO L  15      79.308  -1.804  -0.188  1.00 48.73           N  
ATOM   4877  CA  PRO L  15      80.216  -2.394  -1.173  1.00 48.83           C  
ATOM   4878  C   PRO L  15      81.556  -1.674  -1.217  1.00 49.68           C  
ATOM   4879  O   PRO L  15      81.645  -0.500  -0.870  1.00 52.02           O  
ATOM   4880  CB  PRO L  15      79.425  -2.271  -2.468  1.00 48.48           C  
ATOM   4881  CG  PRO L  15      78.019  -2.567  -1.996  1.00 48.02           C  
ATOM   4882  CD  PRO L  15      77.924  -1.763  -0.699  1.00 47.80           C  
ATOM   4883  N   GLY L  16      82.599  -2.380  -1.631  1.00 50.16           N  
ATOM   4884  CA  GLY L  16      83.911  -1.768  -1.693  1.00 50.95           C  
ATOM   4885  C   GLY L  16      84.565  -1.625  -0.329  1.00 52.27           C  
ATOM   4886  O   GLY L  16      85.746  -1.938  -0.170  1.00 54.33           O  
ATOM   4887  N   GLN L  17      83.817  -1.157   0.663  1.00 52.44           N  
ATOM   4888  CA  GLN L  17      84.371  -0.988   2.006  1.00 53.74           C  
ATOM   4889  C   GLN L  17      85.090  -2.236   2.530  1.00 53.29           C  
ATOM   4890  O   GLN L  17      85.011  -3.319   1.934  1.00 52.61           O  
ATOM   4891  CB  GLN L  17      83.259  -0.608   2.977  1.00 56.70           C  
ATOM   4892  CG  GLN L  17      82.533   0.659   2.613  1.00 59.79           C  
ATOM   4893  CD  GLN L  17      83.486   1.821   2.447  1.00 61.36           C  
ATOM   4894  OE1 GLN L  17      84.359   2.052   3.289  1.00 61.27           O  
ATOM   4895  NE2 GLN L  17      83.321   2.563   1.359  1.00 62.29           N  
ATOM   4896  N   SER L  18      85.779  -2.075   3.657  1.00 52.54           N  
ATOM   4897  CA  SER L  18      86.519  -3.174   4.284  1.00 52.43           C  
ATOM   4898  C   SER L  18      86.169  -3.418   5.757  1.00 53.39           C  
ATOM   4899  O   SER L  18      86.541  -2.640   6.644  1.00 53.25           O  
ATOM   4900  CB  SER L  18      88.022  -2.932   4.184  1.00 50.13           C  
ATOM   4901  OG  SER L  18      88.658  -3.390   5.362  1.00 46.44           O  
ATOM   4902  N   ILE L  19      85.483  -4.524   6.020  1.00 53.65           N  
ATOM   4903  CA  ILE L  19      85.096  -4.852   7.384  1.00 54.44           C  
ATOM   4904  C   ILE L  19      86.110  -5.745   8.094  1.00 52.22           C  
ATOM   4905  O   ILE L  19      86.918  -6.420   7.460  1.00 49.88           O  
ATOM   4906  CB  ILE L  19      83.738  -5.574   7.429  1.00 56.63           C  
ATOM   4907  CG1 ILE L  19      83.862  -6.922   6.710  1.00 58.48           C  
ATOM   4908  CG2 ILE L  19      82.654  -4.703   6.793  1.00 56.44           C  
ATOM   4909  CD1 ILE L  19      82.830  -7.947   7.125  1.00 58.29           C  
ATOM   4910  N   THR L  20      86.030  -5.736   9.421  1.00 50.92           N  
ATOM   4911  CA  THR L  20      86.892  -6.534  10.269  1.00 50.95           C  
ATOM   4912  C   THR L  20      86.118  -7.155  11.415  1.00 52.21           C  
ATOM   4913  O   THR L  20      85.534  -6.445  12.222  1.00 53.43           O  
ATOM   4914  CB  THR L  20      87.996  -5.704  10.878  1.00 49.07           C  
ATOM   4915  OG1 THR L  20      88.972  -5.418   9.875  1.00 49.39           O  
ATOM   4916  CG2 THR L  20      88.639  -6.456  12.020  1.00 47.09           C  
ATOM   4917  N   ILE L  21      86.121  -8.481  11.490  1.00 53.25           N  
ATOM   4918  CA  ILE L  21      85.425  -9.171  12.568  1.00 53.36           C  
ATOM   4919  C   ILE L  21      86.457  -9.717  13.552  1.00 53.31           C  
ATOM   4920  O   ILE L  21      87.499 -10.236  13.147  1.00 53.01           O  
ATOM   4921  CB  ILE L  21      84.575 -10.340  12.046  1.00 53.32           C  
ATOM   4922  CG1 ILE L  21      83.723  -9.898  10.860  1.00 52.44           C  
ATOM   4923  CG2 ILE L  21      83.649 -10.821  13.150  1.00 53.69           C  
ATOM   4924  CD1 ILE L  21      82.813 -10.989  10.335  1.00 52.89           C  
ATOM   4925  N   SER L  22      86.162  -9.599  14.841  1.00 52.85           N  
ATOM   4926  CA  SER L  22      87.077 -10.065  15.867  1.00 54.39           C  
ATOM   4927  C   SER L  22      86.588 -11.354  16.507  1.00 55.20           C  
ATOM   4928  O   SER L  22      85.403 -11.677  16.462  1.00 56.17           O  
ATOM   4929  CB  SER L  22      87.228  -9.004  16.942  1.00 55.39           C  
ATOM   4930  OG  SER L  22      85.957  -8.722  17.501  1.00 59.06           O  
ATOM   4931  N   CYS L  23      87.522 -12.072  17.118  1.00 54.51           N  
ATOM   4932  CA  CYS L  23      87.266 -13.344  17.781  1.00 53.03           C  
ATOM   4933  C   CYS L  23      87.992 -13.177  19.104  1.00 53.65           C  
ATOM   4934  O   CYS L  23      89.215 -13.263  19.158  1.00 54.16           O  
ATOM   4935  CB  CYS L  23      87.897 -14.454  16.942  1.00 51.40           C  
ATOM   4936  SG  CYS L  23      87.598 -16.189  17.395  1.00 50.69           S  
ATOM   4937  N   THR L  24      87.248 -12.921  20.170  1.00 54.58           N  
ATOM   4938  CA  THR L  24      87.866 -12.697  21.472  1.00 56.46           C  
ATOM   4939  C   THR L  24      88.220 -13.939  22.277  1.00 57.31           C  
ATOM   4940  O   THR L  24      87.394 -14.463  23.028  1.00 59.28           O  
ATOM   4941  CB  THR L  24      86.973 -11.843  22.332  1.00 56.37           C  
ATOM   4942  OG1 THR L  24      86.499 -10.744  21.552  1.00 59.46           O  
ATOM   4943  CG2 THR L  24      87.744 -11.320  23.519  1.00 56.87           C  
ATOM   4944  N   GLY L  25      89.461 -14.392  22.145  1.00 56.22           N  
ATOM   4945  CA  GLY L  25      89.885 -15.571  22.872  1.00 55.19           C  
ATOM   4946  C   GLY L  25      90.701 -15.195  24.084  1.00 54.48           C  
ATOM   4947  O   GLY L  25      90.479 -14.139  24.669  1.00 55.05           O  
ATOM   4948  N   THR L  26      91.636 -16.060  24.467  1.00 53.08           N  
ATOM   4949  CA  THR L  26      92.489 -15.799  25.615  1.00 51.57           C  
ATOM   4950  C   THR L  26      93.822 -16.503  25.442  1.00 53.18           C  
ATOM   4951  O   THR L  26      94.100 -17.086  24.397  1.00 54.40           O  
ATOM   4952  CB  THR L  26      91.866 -16.290  26.933  1.00 49.52           C  
ATOM   4953  OG1 THR L  26      91.951 -17.714  27.003  1.00 47.24           O  
ATOM   4954  CG2 THR L  26      90.417 -15.881  27.027  1.00 48.02           C  
ATOM   4955  N   SER L  27      94.641 -16.439  26.481  1.00 53.32           N  
ATOM   4956  CA  SER L  27      95.958 -17.054  26.477  1.00 53.81           C  
ATOM   4957  C   SER L  27      95.915 -18.544  26.137  1.00 53.99           C  
ATOM   4958  O   SER L  27      96.865 -19.091  25.573  1.00 53.35           O  
ATOM   4959  CB  SER L  27      96.590 -16.881  27.854  1.00 54.96           C  
ATOM   4960  OG  SER L  27      95.720 -17.395  28.855  1.00 56.73           O  
ATOM   4961  N   SER L  27A     94.815 -19.198  26.494  1.00 53.01           N  
ATOM   4962  CA  SER L  27A     94.663 -20.625  26.253  1.00 52.46           C  
ATOM   4963  C   SER L  27A     93.958 -20.953  24.957  1.00 52.56           C  
ATOM   4964  O   SER L  27A     93.779 -22.119  24.620  1.00 53.88           O  
ATOM   4965  CB  SER L  27A     93.909 -21.249  27.409  1.00 51.54           C  
ATOM   4966  OG  SER L  27A     93.142 -20.252  28.050  1.00 54.51           O  
ATOM   4967  N   ASP L  27B     93.563 -19.920  24.229  1.00 52.00           N  
ATOM   4968  CA  ASP L  27B     92.870 -20.101  22.963  1.00 52.32           C  
ATOM   4969  C   ASP L  27B     93.728 -19.492  21.863  1.00 53.04           C  
ATOM   4970  O   ASP L  27B     94.827 -19.960  21.549  1.00 51.58           O  
ATOM   4971  CB  ASP L  27B     91.527 -19.363  22.980  1.00 51.43           C  
ATOM   4972  CG  ASP L  27B     90.738 -19.618  24.231  1.00 51.54           C  
ATOM   4973  OD1 ASP L  27B     89.722 -18.931  24.439  1.00 52.21           O  
ATOM   4974  OD2 ASP L  27B     91.122 -20.508  25.009  1.00 53.94           O  
ATOM   4975  N   VAL L  27C     93.190 -18.414  21.305  1.00 53.77           N  
ATOM   4976  CA  VAL L  27C     93.817 -17.664  20.242  1.00 52.45           C  
ATOM   4977  C   VAL L  27C     95.211 -17.227  20.646  1.00 51.01           C  
ATOM   4978  O   VAL L  27C     96.133 -17.263  19.835  1.00 50.31           O  
ATOM   4979  CB  VAL L  27C     92.984 -16.427  19.927  1.00 53.13           C  
ATOM   4980  CG1 VAL L  27C     93.515 -15.760  18.667  1.00 55.41           C  
ATOM   4981  CG2 VAL L  27C     91.524 -16.821  19.775  1.00 52.35           C  
ATOM   4982  N   GLY L  28      95.353 -16.807  21.900  1.00 49.48           N  
ATOM   4983  CA  GLY L  28      96.644 -16.369  22.389  1.00 48.44           C  
ATOM   4984  C   GLY L  28      97.600 -17.512  22.686  1.00 48.28           C  
ATOM   4985  O   GLY L  28      98.804 -17.307  22.784  1.00 50.11           O  
ATOM   4986  N   GLY L  29      97.082 -18.727  22.809  1.00 46.91           N  
ATOM   4987  CA  GLY L  29      97.949 -19.842  23.123  1.00 43.79           C  
ATOM   4988  C   GLY L  29      98.503 -20.639  21.970  1.00 42.33           C  
ATOM   4989  O   GLY L  29      99.487 -21.342  22.144  1.00 43.13           O  
ATOM   4990  N   TYR L  30      97.893 -20.548  20.798  1.00 41.59           N  
ATOM   4991  CA  TYR L  30      98.362 -21.323  19.649  1.00 42.04           C  
ATOM   4992  C   TYR L  30      98.048 -20.621  18.336  1.00 42.92           C  
ATOM   4993  O   TYR L  30      97.092 -19.859  18.234  1.00 45.18           O  
ATOM   4994  CB  TYR L  30      97.672 -22.698  19.620  1.00 41.15           C  
ATOM   4995  CG  TYR L  30      97.510 -23.344  20.977  1.00 39.93           C  
ATOM   4996  CD1 TYR L  30      98.478 -24.217  21.476  1.00 38.41           C  
ATOM   4997  CD2 TYR L  30      96.417 -23.025  21.793  1.00 38.94           C  
ATOM   4998  CE1 TYR L  30      98.368 -24.750  22.750  1.00 38.41           C  
ATOM   4999  CE2 TYR L  30      96.296 -23.551  23.067  1.00 38.45           C  
ATOM   5000  CZ  TYR L  30      97.276 -24.413  23.543  1.00 40.00           C  
ATOM   5001  OH  TYR L  30      97.171 -24.940  24.814  1.00 40.83           O  
ATOM   5002  N   ASP L  31      98.832 -20.902  17.313  1.00 43.15           N  
ATOM   5003  CA  ASP L  31      98.584 -20.305  16.018  1.00 43.88           C  
ATOM   5004  C   ASP L  31      97.647 -21.239  15.254  1.00 43.11           C  
ATOM   5005  O   ASP L  31      97.885 -21.575  14.088  1.00 42.50           O  
ATOM   5006  CB  ASP L  31      99.908 -20.117  15.278  1.00 47.11           C  
ATOM   5007  CG  ASP L  31     100.859 -19.193  16.025  1.00 51.78           C  
ATOM   5008  OD1 ASP L  31     100.598 -17.967  16.083  1.00 52.73           O  
ATOM   5009  OD2 ASP L  31     101.866 -19.697  16.574  1.00 55.78           O  
ATOM   5010  N   LEU L  32      96.569 -21.646  15.923  1.00 41.96           N  
ATOM   5011  CA  LEU L  32      95.608 -22.565  15.327  1.00 41.34           C  
ATOM   5012  C   LEU L  32      94.195 -22.022  15.213  1.00 41.43           C  
ATOM   5013  O   LEU L  32      93.227 -22.690  15.593  1.00 42.66           O  
ATOM   5014  CB  LEU L  32      95.596 -23.875  16.112  1.00 39.48           C  
ATOM   5015  CG  LEU L  32      96.925 -24.631  16.019  1.00 39.39           C  
ATOM   5016  CD1 LEU L  32      96.970 -25.767  17.029  1.00 40.42           C  
ATOM   5017  CD2 LEU L  32      97.107 -25.152  14.594  1.00 38.15           C  
ATOM   5018  N   VAL L  33      94.085 -20.804  14.690  1.00 41.34           N  
ATOM   5019  CA  VAL L  33      92.790 -20.164  14.490  1.00 40.08           C  
ATOM   5020  C   VAL L  33      92.371 -20.327  13.035  1.00 40.83           C  
ATOM   5021  O   VAL L  33      93.214 -20.340  12.124  1.00 40.44           O  
ATOM   5022  CB  VAL L  33      92.829 -18.664  14.795  1.00 37.34           C  
ATOM   5023  CG1 VAL L  33      91.444 -18.079  14.609  1.00 35.05           C  
ATOM   5024  CG2 VAL L  33      93.315 -18.431  16.198  1.00 36.09           C  
ATOM   5025  N   SER L  34      91.065 -20.460  12.827  1.00 39.71           N  
ATOM   5026  CA  SER L  34      90.529 -20.610  11.488  1.00 38.94           C  
ATOM   5027  C   SER L  34      89.180 -19.923  11.373  1.00 38.42           C  
ATOM   5028  O   SER L  34      88.497 -19.725  12.377  1.00 38.24           O  
ATOM   5029  CB  SER L  34      90.401 -22.092  11.147  1.00 39.56           C  
ATOM   5030  OG  SER L  34      89.862 -22.810  12.234  1.00 40.02           O  
ATOM   5031  N   TRP L  35      88.809 -19.537  10.153  1.00 37.62           N  
ATOM   5032  CA  TRP L  35      87.524 -18.888   9.928  1.00 37.05           C  
ATOM   5033  C   TRP L  35      86.643 -19.633   8.929  1.00 37.65           C  
ATOM   5034  O   TRP L  35      87.121 -20.275   7.989  1.00 37.27           O  
ATOM   5035  CB  TRP L  35      87.711 -17.439   9.467  1.00 35.09           C  
ATOM   5036  CG  TRP L  35      88.329 -16.537  10.517  1.00 34.72           C  
ATOM   5037  CD1 TRP L  35      89.665 -16.351  10.757  1.00 34.33           C  
ATOM   5038  CD2 TRP L  35      87.633 -15.709  11.469  1.00 31.40           C  
ATOM   5039  NE1 TRP L  35      89.841 -15.459  11.793  1.00 33.10           N  
ATOM   5040  CE2 TRP L  35      88.613 -15.051  12.247  1.00 31.02           C  
ATOM   5041  CE3 TRP L  35      86.282 -15.460  11.738  1.00 28.80           C  
ATOM   5042  CZ2 TRP L  35      88.283 -14.156  13.277  1.00 29.45           C  
ATOM   5043  CZ3 TRP L  35      85.953 -14.564  12.766  1.00 29.86           C  
ATOM   5044  CH2 TRP L  35      86.950 -13.926  13.520  1.00 28.10           C  
ATOM   5045  N   TYR L  36      85.339 -19.535   9.140  1.00 37.73           N  
ATOM   5046  CA  TYR L  36      84.388 -20.206   8.273  1.00 36.67           C  
ATOM   5047  C   TYR L  36      83.395 -19.180   7.766  1.00 37.47           C  
ATOM   5048  O   TYR L  36      83.045 -18.228   8.471  1.00 37.20           O  
ATOM   5049  CB  TYR L  36      83.635 -21.289   9.059  1.00 35.22           C  
ATOM   5050  CG  TYR L  36      84.523 -22.154   9.926  1.00 35.43           C  
ATOM   5051  CD1 TYR L  36      85.176 -23.262   9.398  1.00 34.71           C  
ATOM   5052  CD2 TYR L  36      84.757 -21.827  11.267  1.00 35.93           C  
ATOM   5053  CE1 TYR L  36      86.045 -24.022  10.177  1.00 35.04           C  
ATOM   5054  CE2 TYR L  36      85.626 -22.581  12.057  1.00 34.23           C  
ATOM   5055  CZ  TYR L  36      86.268 -23.676  11.501  1.00 34.62           C  
ATOM   5056  OH  TYR L  36      87.147 -24.418  12.252  1.00 33.44           O  
ATOM   5057  N   GLN L  37      82.959 -19.375   6.530  1.00 38.32           N  
ATOM   5058  CA  GLN L  37      81.964 -18.516   5.910  1.00 38.37           C  
ATOM   5059  C   GLN L  37      80.773 -19.442   5.764  1.00 38.57           C  
ATOM   5060  O   GLN L  37      80.932 -20.605   5.384  1.00 37.55           O  
ATOM   5061  CB  GLN L  37      82.432 -18.057   4.534  1.00 39.18           C  
ATOM   5062  CG  GLN L  37      81.390 -17.280   3.751  1.00 42.20           C  
ATOM   5063  CD  GLN L  37      81.797 -17.042   2.302  1.00 43.63           C  
ATOM   5064  OE1 GLN L  37      81.991 -17.992   1.538  1.00 43.59           O  
ATOM   5065  NE2 GLN L  37      81.927 -15.772   1.917  1.00 42.68           N  
ATOM   5066  N   HIS L  38      79.583 -18.954   6.083  1.00 39.21           N  
ATOM   5067  CA  HIS L  38      78.406 -19.803   5.968  1.00 40.83           C  
ATOM   5068  C   HIS L  38      77.191 -19.086   5.423  1.00 42.27           C  
ATOM   5069  O   HIS L  38      76.617 -18.226   6.091  1.00 43.33           O  
ATOM   5070  CB  HIS L  38      78.033 -20.418   7.325  1.00 38.80           C  
ATOM   5071  CG  HIS L  38      76.890 -21.388   7.250  1.00 39.61           C  
ATOM   5072  ND1 HIS L  38      75.820 -21.350   8.120  1.00 39.40           N  
ATOM   5073  CD2 HIS L  38      76.661 -22.433   6.416  1.00 37.40           C  
ATOM   5074  CE1 HIS L  38      74.983 -22.332   7.826  1.00 38.00           C  
ATOM   5075  NE2 HIS L  38      75.470 -23.003   6.798  1.00 36.43           N  
ATOM   5076  N   HIS L  39      76.811 -19.425   4.198  1.00 43.20           N  
ATOM   5077  CA  HIS L  39      75.617 -18.845   3.614  1.00 43.94           C  
ATOM   5078  C   HIS L  39      74.547 -19.767   4.170  1.00 44.69           C  
ATOM   5079  O   HIS L  39      74.429 -20.918   3.744  1.00 43.30           O  
ATOM   5080  CB  HIS L  39      75.669 -18.937   2.094  1.00 46.02           C  
ATOM   5081  CG  HIS L  39      76.744 -18.099   1.473  1.00 48.10           C  
ATOM   5082  ND1 HIS L  39      76.835 -16.735   1.668  1.00 49.34           N  
ATOM   5083  CD2 HIS L  39      77.765 -18.427   0.645  1.00 47.73           C  
ATOM   5084  CE1 HIS L  39      77.864 -16.261   0.990  1.00 47.87           C  
ATOM   5085  NE2 HIS L  39      78.445 -17.267   0.360  1.00 48.84           N  
ATOM   5086  N   PRO L  40      73.768 -19.284   5.148  1.00 45.47           N  
ATOM   5087  CA  PRO L  40      72.709 -20.077   5.773  1.00 47.03           C  
ATOM   5088  C   PRO L  40      72.088 -21.077   4.832  1.00 48.75           C  
ATOM   5089  O   PRO L  40      71.750 -20.752   3.699  1.00 49.59           O  
ATOM   5090  CB  PRO L  40      71.725 -19.020   6.244  1.00 46.14           C  
ATOM   5091  CG  PRO L  40      72.639 -17.936   6.695  1.00 46.95           C  
ATOM   5092  CD  PRO L  40      73.671 -17.876   5.567  1.00 46.49           C  
ATOM   5093  N   GLY L  41      71.964 -22.311   5.299  1.00 51.34           N  
ATOM   5094  CA  GLY L  41      71.371 -23.342   4.471  1.00 51.73           C  
ATOM   5095  C   GLY L  41      72.340 -23.982   3.505  1.00 51.36           C  
ATOM   5096  O   GLY L  41      71.949 -24.839   2.718  1.00 52.16           O  
ATOM   5097  N   GLY L  42      73.600 -23.564   3.556  1.00 50.84           N  
ATOM   5098  CA  GLY L  42      74.602 -24.136   2.676  1.00 48.74           C  
ATOM   5099  C   GLY L  42      75.708 -24.749   3.506  1.00 47.80           C  
ATOM   5100  O   GLY L  42      75.653 -24.713   4.735  1.00 49.78           O  
ATOM   5101  N   ALA L  43      76.711 -25.317   2.852  1.00 45.05           N  
ATOM   5102  CA  ALA L  43      77.828 -25.908   3.573  1.00 42.75           C  
ATOM   5103  C   ALA L  43      78.824 -24.837   3.994  1.00 42.13           C  
ATOM   5104  O   ALA L  43      79.211 -23.986   3.197  1.00 40.71           O  
ATOM   5105  CB  ALA L  43      78.523 -26.928   2.708  1.00 40.93           C  
ATOM   5106  N   PRO L  44      79.247 -24.866   5.262  1.00 42.92           N  
ATOM   5107  CA  PRO L  44      80.215 -23.886   5.765  1.00 43.35           C  
ATOM   5108  C   PRO L  44      81.455 -24.012   4.903  1.00 43.53           C  
ATOM   5109  O   PRO L  44      81.712 -25.073   4.366  1.00 44.15           O  
ATOM   5110  CB  PRO L  44      80.481 -24.356   7.189  1.00 42.62           C  
ATOM   5111  CG  PRO L  44      79.196 -25.030   7.566  1.00 45.30           C  
ATOM   5112  CD  PRO L  44      78.830 -25.796   6.326  1.00 43.55           C  
ATOM   5113  N   LYS L  45      82.222 -22.944   4.756  1.00 44.67           N  
ATOM   5114  CA  LYS L  45      83.431 -23.020   3.948  1.00 44.96           C  
ATOM   5115  C   LYS L  45      84.595 -22.500   4.749  1.00 45.31           C  
ATOM   5116  O   LYS L  45      84.483 -21.450   5.389  1.00 46.32           O  
ATOM   5117  CB  LYS L  45      83.282 -22.189   2.676  1.00 46.88           C  
ATOM   5118  CG  LYS L  45      84.551 -22.122   1.848  1.00 50.54           C  
ATOM   5119  CD  LYS L  45      84.285 -21.561   0.462  1.00 53.65           C  
ATOM   5120  CE  LYS L  45      85.516 -21.681  -0.431  1.00 56.33           C  
ATOM   5121  NZ  LYS L  45      85.264 -21.192  -1.827  1.00 58.10           N  
ATOM   5122  N   LEU L  46      85.707 -23.232   4.723  1.00 44.19           N  
ATOM   5123  CA  LEU L  46      86.914 -22.822   5.449  1.00 44.44           C  
ATOM   5124  C   LEU L  46      87.692 -21.794   4.611  1.00 45.22           C  
ATOM   5125  O   LEU L  46      88.171 -22.101   3.515  1.00 46.55           O  
ATOM   5126  CB  LEU L  46      87.789 -24.044   5.732  1.00 43.34           C  
ATOM   5127  CG  LEU L  46      89.214 -23.855   6.252  1.00 42.48           C  
ATOM   5128  CD1 LEU L  46      89.217 -23.422   7.709  1.00 39.68           C  
ATOM   5129  CD2 LEU L  46      89.947 -25.166   6.090  1.00 42.57           C  
ATOM   5130  N   ILE L  47      87.819 -20.574   5.118  1.00 43.98           N  
ATOM   5131  CA  ILE L  47      88.518 -19.542   4.375  1.00 43.54           C  
ATOM   5132  C   ILE L  47      89.873 -19.171   4.973  1.00 43.85           C  
ATOM   5133  O   ILE L  47      90.716 -18.612   4.279  1.00 44.82           O  
ATOM   5134  CB  ILE L  47      87.638 -18.289   4.251  1.00 44.40           C  
ATOM   5135  CG1 ILE L  47      87.321 -17.733   5.637  1.00 44.67           C  
ATOM   5136  CG2 ILE L  47      86.344 -18.641   3.543  1.00 43.93           C  
ATOM   5137  CD1 ILE L  47      86.301 -16.636   5.636  1.00 42.81           C  
ATOM   5138  N   ILE L  48      90.083 -19.461   6.255  1.00 43.32           N  
ATOM   5139  CA  ILE L  48      91.373 -19.180   6.902  1.00 43.77           C  
ATOM   5140  C   ILE L  48      91.703 -20.238   7.951  1.00 43.95           C  
ATOM   5141  O   ILE L  48      90.816 -20.715   8.654  1.00 44.84           O  
ATOM   5142  CB  ILE L  48      91.414 -17.795   7.620  1.00 42.72           C  
ATOM   5143  CG1 ILE L  48      91.234 -16.662   6.613  1.00 42.66           C  
ATOM   5144  CG2 ILE L  48      92.769 -17.609   8.312  1.00 39.72           C  
ATOM   5145  CD1 ILE L  48      92.353 -16.559   5.604  1.00 43.48           C  
ATOM   5146  N   TYR L  49      92.974 -20.610   8.055  1.00 42.47           N  
ATOM   5147  CA  TYR L  49      93.377 -21.584   9.049  1.00 42.34           C  
ATOM   5148  C   TYR L  49      94.813 -21.314   9.450  1.00 44.21           C  
ATOM   5149  O   TYR L  49      95.589 -20.747   8.673  1.00 44.49           O  
ATOM   5150  CB  TYR L  49      93.197 -23.009   8.513  1.00 40.82           C  
ATOM   5151  CG  TYR L  49      94.017 -23.382   7.294  1.00 40.62           C  
ATOM   5152  CD1 TYR L  49      95.355 -23.771   7.412  1.00 40.12           C  
ATOM   5153  CD2 TYR L  49      93.448 -23.382   6.025  1.00 40.95           C  
ATOM   5154  CE1 TYR L  49      96.099 -24.151   6.303  1.00 38.12           C  
ATOM   5155  CE2 TYR L  49      94.184 -23.759   4.910  1.00 40.63           C  
ATOM   5156  CZ  TYR L  49      95.509 -24.140   5.059  1.00 40.30           C  
ATOM   5157  OH  TYR L  49      96.237 -24.497   3.949  1.00 41.52           O  
ATOM   5158  N   GLU L  50      95.176 -21.706  10.666  1.00 44.91           N  
ATOM   5159  CA  GLU L  50      96.534 -21.464  11.133  1.00 44.61           C  
ATOM   5160  C   GLU L  50      96.698 -19.956  11.152  1.00 43.78           C  
ATOM   5161  O   GLU L  50      97.636 -19.411  10.584  1.00 43.60           O  
ATOM   5162  CB  GLU L  50      97.548 -22.074  10.172  1.00 45.24           C  
ATOM   5163  CG  GLU L  50      97.375 -23.558   9.955  1.00 49.15           C  
ATOM   5164  CD  GLU L  50      98.611 -24.337  10.328  1.00 52.74           C  
ATOM   5165  OE1 GLU L  50      99.051 -25.177   9.510  1.00 53.27           O  
ATOM   5166  OE2 GLU L  50      99.140 -24.110  11.443  1.00 54.63           O  
ATOM   5167  N   VAL L  51      95.737 -19.300  11.789  1.00 43.30           N  
ATOM   5168  CA  VAL L  51      95.690 -17.851  11.936  1.00 42.65           C  
ATOM   5169  C   VAL L  51      95.731 -17.004  10.678  1.00 42.13           C  
ATOM   5170  O   VAL L  51      95.154 -15.920  10.651  1.00 42.20           O  
ATOM   5171  CB  VAL L  51      96.823 -17.315  12.824  1.00 42.28           C  
ATOM   5172  CG1 VAL L  51      96.545 -15.843  13.159  1.00 39.66           C  
ATOM   5173  CG2 VAL L  51      96.952 -18.144  14.069  1.00 40.09           C  
ATOM   5174  N   THR L  52      96.406 -17.466   9.636  1.00 41.24           N  
ATOM   5175  CA  THR L  52      96.511 -16.630   8.452  1.00 40.75           C  
ATOM   5176  C   THR L  52      96.538 -17.335   7.092  1.00 42.12           C  
ATOM   5177  O   THR L  52      96.682 -16.679   6.071  1.00 40.82           O  
ATOM   5178  CB  THR L  52      97.763 -15.783   8.556  1.00 37.34           C  
ATOM   5179  OG1 THR L  52      98.887 -16.597   8.220  1.00 39.31           O  
ATOM   5180  CG2 THR L  52      97.962 -15.297   9.983  1.00 35.09           C  
ATOM   5181  N   ASN L  53      96.412 -18.656   7.059  1.00 45.30           N  
ATOM   5182  CA  ASN L  53      96.428 -19.351   5.779  1.00 48.10           C  
ATOM   5183  C   ASN L  53      95.103 -19.228   5.069  1.00 49.77           C  
ATOM   5184  O   ASN L  53      94.054 -19.145   5.700  1.00 51.50           O  
ATOM   5185  CB  ASN L  53      96.764 -20.826   5.956  1.00 49.96           C  
ATOM   5186  CG  ASN L  53      98.228 -21.055   6.250  1.00 53.40           C  
ATOM   5187  OD1 ASN L  53      98.691 -22.194   6.254  1.00 56.58           O  
ATOM   5188  ND2 ASN L  53      98.971 -19.973   6.502  1.00 53.15           N  
ATOM   5189  N   ARG L  54      95.157 -19.226   3.747  1.00 50.89           N  
ATOM   5190  CA  ARG L  54      93.963 -19.107   2.930  1.00 52.21           C  
ATOM   5191  C   ARG L  54      94.015 -20.160   1.829  1.00 52.57           C  
ATOM   5192  O   ARG L  54      94.900 -20.134   0.978  1.00 52.10           O  
ATOM   5193  CB  ARG L  54      93.907 -17.704   2.319  1.00 52.96           C  
ATOM   5194  CG  ARG L  54      92.874 -17.507   1.205  1.00 54.80           C  
ATOM   5195  CD  ARG L  54      93.185 -16.251   0.391  1.00 54.96           C  
ATOM   5196  NE  ARG L  54      93.577 -15.163   1.278  1.00 55.21           N  
ATOM   5197  CZ  ARG L  54      94.775 -14.589   1.273  1.00 56.48           C  
ATOM   5198  NH1 ARG L  54      95.705 -14.994   0.412  1.00 55.62           N  
ATOM   5199  NH2 ARG L  54      95.052 -13.630   2.155  1.00 56.38           N  
ATOM   5200  N   PRO L  55      93.076 -21.112   1.831  1.00 53.50           N  
ATOM   5201  CA  PRO L  55      93.168 -22.097   0.751  1.00 55.82           C  
ATOM   5202  C   PRO L  55      93.073 -21.424  -0.626  1.00 58.28           C  
ATOM   5203  O   PRO L  55      92.597 -20.293  -0.747  1.00 57.91           O  
ATOM   5204  CB  PRO L  55      91.981 -23.031   1.026  1.00 54.43           C  
ATOM   5205  CG  PRO L  55      91.779 -22.917   2.506  1.00 53.65           C  
ATOM   5206  CD  PRO L  55      91.991 -21.444   2.772  1.00 52.62           C  
ATOM   5207  N   SER L  56      93.551 -22.116  -1.657  1.00 61.53           N  
ATOM   5208  CA  SER L  56      93.478 -21.601  -3.019  1.00 64.32           C  
ATOM   5209  C   SER L  56      92.003 -21.594  -3.334  1.00 65.19           C  
ATOM   5210  O   SER L  56      91.303 -22.557  -3.031  1.00 66.69           O  
ATOM   5211  CB  SER L  56      94.195 -22.534  -3.999  1.00 65.96           C  
ATOM   5212  OG  SER L  56      95.605 -22.393  -3.910  1.00 70.65           O  
ATOM   5213  N   GLY L  57      91.520 -20.525  -3.944  1.00 66.40           N  
ATOM   5214  CA  GLY L  57      90.101 -20.465  -4.243  1.00 66.84           C  
ATOM   5215  C   GLY L  57      89.470 -19.399  -3.374  1.00 67.18           C  
ATOM   5216  O   GLY L  57      88.663 -18.605  -3.857  1.00 68.80           O  
ATOM   5217  N   VAL L  58      89.826 -19.385  -2.090  1.00 66.09           N  
ATOM   5218  CA  VAL L  58      89.309 -18.370  -1.184  1.00 65.04           C  
ATOM   5219  C   VAL L  58      89.869 -17.035  -1.668  1.00 64.69           C  
ATOM   5220  O   VAL L  58      91.082 -16.839  -1.702  1.00 65.55           O  
ATOM   5221  CB  VAL L  58      89.761 -18.619   0.267  1.00 64.65           C  
ATOM   5222  CG1 VAL L  58      89.604 -17.344   1.094  1.00 63.94           C  
ATOM   5223  CG2 VAL L  58      88.930 -19.728   0.876  1.00 63.90           C  
ATOM   5224  N   SER L  59      88.978 -16.128  -2.052  1.00 63.64           N  
ATOM   5225  CA  SER L  59      89.376 -14.828  -2.562  1.00 62.63           C  
ATOM   5226  C   SER L  59      90.350 -14.080  -1.667  1.00 61.80           C  
ATOM   5227  O   SER L  59      90.070 -13.831  -0.496  1.00 63.24           O  
ATOM   5228  CB  SER L  59      88.147 -13.965  -2.801  1.00 63.10           C  
ATOM   5229  OG  SER L  59      88.538 -12.667  -3.203  1.00 66.80           O  
ATOM   5230  N   ASP L  60      91.488 -13.716  -2.247  1.00 59.78           N  
ATOM   5231  CA  ASP L  60      92.545 -12.988  -1.559  1.00 59.06           C  
ATOM   5232  C   ASP L  60      92.050 -11.775  -0.779  1.00 56.69           C  
ATOM   5233  O   ASP L  60      92.806 -11.180  -0.007  1.00 54.65           O  
ATOM   5234  CB  ASP L  60      93.592 -12.543  -2.578  1.00 63.36           C  
ATOM   5235  CG  ASP L  60      92.963 -11.949  -3.835  1.00 68.08           C  
ATOM   5236  OD1 ASP L  60      92.323 -10.873  -3.749  1.00 71.05           O  
ATOM   5237  OD2 ASP L  60      93.096 -12.566  -4.915  1.00 68.84           O  
ATOM   5238  N   ARG L  61      90.790 -11.403  -0.993  1.00 55.03           N  
ATOM   5239  CA  ARG L  61      90.208 -10.256  -0.294  1.00 54.33           C  
ATOM   5240  C   ARG L  61      90.088 -10.613   1.184  1.00 54.09           C  
ATOM   5241  O   ARG L  61      90.154  -9.746   2.071  1.00 53.56           O  
ATOM   5242  CB  ARG L  61      88.829  -9.908  -0.880  1.00 51.91           C  
ATOM   5243  CG  ARG L  61      88.877  -9.656  -2.380  1.00 50.70           C  
ATOM   5244  CD  ARG L  61      87.603  -9.070  -2.965  1.00 47.76           C  
ATOM   5245  NE  ARG L  61      86.483  -9.996  -2.924  1.00 47.67           N  
ATOM   5246  CZ  ARG L  61      85.666 -10.122  -1.888  1.00 49.23           C  
ATOM   5247  NH1 ARG L  61      85.841  -9.373  -0.804  1.00 50.01           N  
ATOM   5248  NH2 ARG L  61      84.678 -11.001  -1.933  1.00 50.10           N  
ATOM   5249  N   PHE L  62      89.926 -11.908   1.435  1.00 52.51           N  
ATOM   5250  CA  PHE L  62      89.814 -12.401   2.789  1.00 51.85           C  
ATOM   5251  C   PHE L  62      91.209 -12.646   3.300  1.00 52.55           C  
ATOM   5252  O   PHE L  62      92.048 -13.213   2.600  1.00 53.61           O  
ATOM   5253  CB  PHE L  62      89.013 -13.698   2.823  1.00 50.59           C  
ATOM   5254  CG  PHE L  62      87.613 -13.540   2.347  1.00 50.53           C  
ATOM   5255  CD1 PHE L  62      87.336 -13.427   0.988  1.00 51.47           C  
ATOM   5256  CD2 PHE L  62      86.570 -13.445   3.253  1.00 51.16           C  
ATOM   5257  CE1 PHE L  62      86.031 -13.217   0.536  1.00 52.00           C  
ATOM   5258  CE2 PHE L  62      85.259 -13.236   2.813  1.00 52.87           C  
ATOM   5259  CZ  PHE L  62      84.991 -13.121   1.450  1.00 51.96           C  
ATOM   5260  N   SER L  63      91.467 -12.207   4.522  1.00 52.09           N  
ATOM   5261  CA  SER L  63      92.771 -12.394   5.123  1.00 52.03           C  
ATOM   5262  C   SER L  63      92.554 -12.395   6.607  1.00 52.46           C  
ATOM   5263  O   SER L  63      91.691 -11.682   7.101  1.00 55.28           O  
ATOM   5264  CB  SER L  63      93.682 -11.250   4.742  1.00 50.86           C  
ATOM   5265  OG  SER L  63      93.014 -10.037   4.991  1.00 52.71           O  
ATOM   5266  N   GLY L  64      93.326 -13.200   7.323  1.00 52.12           N  
ATOM   5267  CA  GLY L  64      93.162 -13.252   8.758  1.00 52.09           C  
ATOM   5268  C   GLY L  64      94.448 -13.004   9.504  1.00 51.88           C  
ATOM   5269  O   GLY L  64      95.522 -13.327   9.012  1.00 53.09           O  
ATOM   5270  N   SER L  65      94.334 -12.424  10.693  1.00 51.14           N  
ATOM   5271  CA  SER L  65      95.488 -12.149  11.529  1.00 49.79           C  
ATOM   5272  C   SER L  65      95.077 -12.348  12.980  1.00 51.18           C  
ATOM   5273  O   SER L  65      93.902 -12.567  13.287  1.00 51.64           O  
ATOM   5274  CB  SER L  65      95.939 -10.712  11.367  1.00 47.92           C  
ATOM   5275  OG  SER L  65      95.229  -9.892  12.277  1.00 45.57           O  
ATOM   5276  N   LYS L  66      96.053 -12.240  13.870  1.00 51.24           N  
ATOM   5277  CA  LYS L  66      95.820 -12.396  15.294  1.00 51.59           C  
ATOM   5278  C   LYS L  66      96.601 -11.306  16.012  1.00 52.20           C  
ATOM   5279  O   LYS L  66      97.426 -10.632  15.407  1.00 53.43           O  
ATOM   5280  CB  LYS L  66      96.314 -13.766  15.748  1.00 51.96           C  
ATOM   5281  CG  LYS L  66      96.122 -14.036  17.218  1.00 52.54           C  
ATOM   5282  CD  LYS L  66      97.325 -14.747  17.789  1.00 52.44           C  
ATOM   5283  CE  LYS L  66      97.625 -16.005  17.020  1.00 52.14           C  
ATOM   5284  NZ  LYS L  66      98.690 -16.771  17.708  1.00 54.98           N  
ATOM   5285  N   SER L  67      96.338 -11.128  17.298  1.00 52.02           N  
ATOM   5286  CA  SER L  67      97.040 -10.126  18.086  1.00 51.84           C  
ATOM   5287  C   SER L  67      96.676 -10.378  19.530  1.00 51.89           C  
ATOM   5288  O   SER L  67      95.490 -10.466  19.856  1.00 52.67           O  
ATOM   5289  CB  SER L  67      96.598  -8.720  17.705  1.00 51.52           C  
ATOM   5290  OG  SER L  67      96.039  -8.064  18.835  1.00 53.46           O  
ATOM   5291  N   GLY L  68      97.687 -10.482  20.390  1.00 50.75           N  
ATOM   5292  CA  GLY L  68      97.433 -10.742  21.793  1.00 49.64           C  
ATOM   5293  C   GLY L  68      96.527 -11.948  21.839  1.00 49.85           C  
ATOM   5294  O   GLY L  68      96.836 -12.982  21.238  1.00 51.67           O  
ATOM   5295  N   ASN L  69      95.397 -11.816  22.520  1.00 47.68           N  
ATOM   5296  CA  ASN L  69      94.447 -12.910  22.602  1.00 45.08           C  
ATOM   5297  C   ASN L  69      93.221 -12.686  21.722  1.00 44.09           C  
ATOM   5298  O   ASN L  69      92.124 -13.123  22.061  1.00 44.59           O  
ATOM   5299  CB  ASN L  69      94.015 -13.112  24.050  1.00 44.19           C  
ATOM   5300  CG  ASN L  69      95.160 -13.494  24.936  1.00 41.35           C  
ATOM   5301  OD1 ASN L  69      96.143 -14.052  24.468  1.00 41.32           O  
ATOM   5302  ND2 ASN L  69      95.036 -13.220  26.226  1.00 41.10           N  
ATOM   5303  N   THR L  70      93.402 -12.018  20.590  1.00 42.67           N  
ATOM   5304  CA  THR L  70      92.278 -11.766  19.700  1.00 42.77           C  
ATOM   5305  C   THR L  70      92.611 -11.930  18.225  1.00 43.67           C  
ATOM   5306  O   THR L  70      93.627 -11.433  17.745  1.00 44.22           O  
ATOM   5307  CB  THR L  70      91.732 -10.364  19.916  1.00 41.66           C  
ATOM   5308  OG1 THR L  70      91.497 -10.167  21.314  1.00 42.74           O  
ATOM   5309  CG2 THR L  70      90.441 -10.173  19.150  1.00 39.45           C  
ATOM   5310  N   ALA L  71      91.749 -12.640  17.509  1.00 43.51           N  
ATOM   5311  CA  ALA L  71      91.955 -12.863  16.088  1.00 44.18           C  
ATOM   5312  C   ALA L  71      90.973 -11.998  15.306  1.00 45.02           C  
ATOM   5313  O   ALA L  71      89.941 -11.577  15.839  1.00 44.80           O  
ATOM   5314  CB  ALA L  71      91.752 -14.322  15.761  1.00 44.45           C  
ATOM   5315  N   SER L  72      91.285 -11.738  14.040  1.00 45.63           N  
ATOM   5316  CA  SER L  72      90.430 -10.887  13.222  1.00 45.44           C  
ATOM   5317  C   SER L  72      90.364 -11.287  11.765  1.00 45.96           C  
ATOM   5318  O   SER L  72      91.388 -11.501  11.121  1.00 46.40           O  
ATOM   5319  CB  SER L  72      90.917  -9.433  13.291  1.00 43.58           C  
ATOM   5320  OG  SER L  72      90.824  -8.909  14.605  1.00 43.35           O  
ATOM   5321  N   LEU L  73      89.151 -11.390  11.242  1.00 47.03           N  
ATOM   5322  CA  LEU L  73      88.982 -11.708   9.834  1.00 47.11           C  
ATOM   5323  C   LEU L  73      88.842 -10.328   9.201  1.00 48.57           C  
ATOM   5324  O   LEU L  73      88.246  -9.423   9.799  1.00 49.25           O  
ATOM   5325  CB  LEU L  73      87.709 -12.537   9.600  1.00 45.60           C  
ATOM   5326  CG  LEU L  73      87.460 -13.034   8.162  1.00 44.25           C  
ATOM   5327  CD1 LEU L  73      88.581 -13.956   7.739  1.00 44.91           C  
ATOM   5328  CD2 LEU L  73      86.143 -13.768   8.064  1.00 41.58           C  
ATOM   5329  N   THR L  74      89.416 -10.145   8.019  1.00 48.90           N  
ATOM   5330  CA  THR L  74      89.311  -8.858   7.350  1.00 49.64           C  
ATOM   5331  C   THR L  74      88.932  -8.980   5.886  1.00 51.95           C  
ATOM   5332  O   THR L  74      89.724  -9.423   5.039  1.00 52.89           O  
ATOM   5333  CB  THR L  74      90.602  -8.055   7.462  1.00 47.09           C  
ATOM   5334  OG1 THR L  74      90.754  -7.603   8.809  1.00 47.42           O  
ATOM   5335  CG2 THR L  74      90.551  -6.857   6.555  1.00 45.20           C  
ATOM   5336  N   ILE L  75      87.696  -8.593   5.599  1.00 52.29           N  
ATOM   5337  CA  ILE L  75      87.199  -8.632   4.245  1.00 52.31           C  
ATOM   5338  C   ILE L  75      87.353  -7.223   3.704  1.00 52.60           C  
ATOM   5339  O   ILE L  75      86.917  -6.256   4.328  1.00 52.27           O  
ATOM   5340  CB  ILE L  75      85.720  -9.033   4.196  1.00 51.99           C  
ATOM   5341  CG1 ILE L  75      85.516 -10.341   4.958  1.00 50.58           C  
ATOM   5342  CG2 ILE L  75      85.270  -9.176   2.739  1.00 52.10           C  
ATOM   5343  CD1 ILE L  75      84.078 -10.810   4.985  1.00 50.64           C  
ATOM   5344  N   SER L  76      87.995  -7.122   2.547  1.00 52.94           N  
ATOM   5345  CA  SER L  76      88.231  -5.851   1.888  1.00 52.41           C  
ATOM   5346  C   SER L  76      87.496  -5.855   0.547  1.00 52.67           C  
ATOM   5347  O   SER L  76      87.204  -6.923  -0.008  1.00 52.09           O  
ATOM   5348  CB  SER L  76      89.728  -5.670   1.669  1.00 51.56           C  
ATOM   5349  OG  SER L  76      90.225  -6.715   0.855  1.00 53.41           O  
ATOM   5350  N   GLY L  77      87.199  -4.661   0.034  1.00 53.41           N  
ATOM   5351  CA  GLY L  77      86.492  -4.546  -1.231  1.00 52.14           C  
ATOM   5352  C   GLY L  77      85.217  -5.357  -1.197  1.00 51.64           C  
ATOM   5353  O   GLY L  77      85.022  -6.248  -2.025  1.00 51.15           O  
ATOM   5354  N   LEU L  78      84.349  -5.050  -0.235  1.00 51.28           N  
ATOM   5355  CA  LEU L  78      83.091  -5.769  -0.077  1.00 52.87           C  
ATOM   5356  C   LEU L  78      82.327  -6.119  -1.355  1.00 53.65           C  
ATOM   5357  O   LEU L  78      82.481  -5.488  -2.402  1.00 55.04           O  
ATOM   5358  CB  LEU L  78      82.167  -5.004   0.867  1.00 53.81           C  
ATOM   5359  CG  LEU L  78      82.344  -5.314   2.353  1.00 55.38           C  
ATOM   5360  CD1 LEU L  78      81.328  -4.514   3.165  1.00 55.66           C  
ATOM   5361  CD2 LEU L  78      82.161  -6.818   2.585  1.00 54.61           C  
ATOM   5362  N   GLN L  79      81.504  -7.150  -1.251  1.00 54.24           N  
ATOM   5363  CA  GLN L  79      80.694  -7.610  -2.359  1.00 55.57           C  
ATOM   5364  C   GLN L  79      79.478  -8.278  -1.757  1.00 56.23           C  
ATOM   5365  O   GLN L  79      79.564  -8.882  -0.689  1.00 56.71           O  
ATOM   5366  CB  GLN L  79      81.461  -8.621  -3.207  1.00 56.93           C  
ATOM   5367  CG  GLN L  79      82.543  -8.028  -4.095  1.00 61.26           C  
ATOM   5368  CD  GLN L  79      83.261  -9.089  -4.927  1.00 63.80           C  
ATOM   5369  OE1 GLN L  79      83.952  -9.956  -4.383  1.00 65.02           O  
ATOM   5370  NE2 GLN L  79      83.094  -9.029  -6.251  1.00 63.94           N  
ATOM   5371  N   ALA L  80      78.343  -8.174  -2.437  1.00 56.64           N  
ATOM   5372  CA  ALA L  80      77.118  -8.784  -1.942  1.00 57.00           C  
ATOM   5373  C   ALA L  80      77.339 -10.261  -1.649  1.00 58.24           C  
ATOM   5374  O   ALA L  80      76.825 -10.776  -0.654  1.00 58.67           O  
ATOM   5375  CB  ALA L  80      75.998  -8.620  -2.954  1.00 54.30           C  
ATOM   5376  N   GLU L  81      78.104 -10.938  -2.509  1.00 58.67           N  
ATOM   5377  CA  GLU L  81      78.373 -12.372  -2.336  1.00 59.04           C  
ATOM   5378  C   GLU L  81      79.004 -12.665  -0.979  1.00 58.13           C  
ATOM   5379  O   GLU L  81      78.900 -13.776  -0.458  1.00 58.61           O  
ATOM   5380  CB  GLU L  81      79.289 -12.890  -3.450  1.00 60.12           C  
ATOM   5381  CG  GLU L  81      80.662 -12.249  -3.464  1.00 63.12           C  
ATOM   5382  CD  GLU L  81      81.155 -12.002  -4.873  1.00 65.89           C  
ATOM   5383  OE1 GLU L  81      81.510 -12.982  -5.572  1.00 66.18           O  
ATOM   5384  OE2 GLU L  81      81.170 -10.819  -5.286  1.00 66.74           O  
ATOM   5385  N   ASP L  82      79.651 -11.660  -0.406  1.00 55.57           N  
ATOM   5386  CA  ASP L  82      80.283 -11.823   0.882  1.00 53.58           C  
ATOM   5387  C   ASP L  82      79.254 -11.821   1.994  1.00 52.93           C  
ATOM   5388  O   ASP L  82      79.594 -11.948   3.163  1.00 53.41           O  
ATOM   5389  CB  ASP L  82      81.296 -10.707   1.096  1.00 53.13           C  
ATOM   5390  CG  ASP L  82      82.353 -10.680   0.015  1.00 53.19           C  
ATOM   5391  OD1 ASP L  82      82.324 -11.571  -0.872  1.00 51.03           O  
ATOM   5392  OD2 ASP L  82      83.209  -9.769   0.056  1.00 52.76           O  
ATOM   5393  N   GLU L  83      77.987 -11.677   1.638  1.00 52.99           N  
ATOM   5394  CA  GLU L  83      76.963 -11.662   2.665  1.00 54.29           C  
ATOM   5395  C   GLU L  83      76.781 -13.085   3.137  1.00 54.34           C  
ATOM   5396  O   GLU L  83      76.411 -13.963   2.357  1.00 56.40           O  
ATOM   5397  CB  GLU L  83      75.638 -11.116   2.130  1.00 55.14           C  
ATOM   5398  CG  GLU L  83      74.922 -10.202   3.125  1.00 58.27           C  
ATOM   5399  CD  GLU L  83      73.571  -9.718   2.620  1.00 59.95           C  
ATOM   5400  OE1 GLU L  83      72.991  -8.791   3.232  1.00 60.76           O  
ATOM   5401  OE2 GLU L  83      73.088 -10.276   1.613  1.00 60.56           O  
ATOM   5402  N   ALA L  84      77.063 -13.314   4.414  1.00 52.74           N  
ATOM   5403  CA  ALA L  84      76.932 -14.638   4.995  1.00 49.35           C  
ATOM   5404  C   ALA L  84      77.225 -14.539   6.473  1.00 48.54           C  
ATOM   5405  O   ALA L  84      77.233 -13.440   7.046  1.00 47.07           O  
ATOM   5406  CB  ALA L  84      77.907 -15.594   4.336  1.00 48.51           C  
ATOM   5407  N   ASP L  85      77.457 -15.693   7.088  1.00 47.08           N  
ATOM   5408  CA  ASP L  85      77.784 -15.746   8.500  1.00 46.05           C  
ATOM   5409  C   ASP L  85      79.242 -16.135   8.588  1.00 44.58           C  
ATOM   5410  O   ASP L  85      79.698 -16.982   7.827  1.00 44.00           O  
ATOM   5411  CB  ASP L  85      76.912 -16.780   9.192  1.00 48.46           C  
ATOM   5412  CG  ASP L  85      75.460 -16.346   9.280  1.00 50.65           C  
ATOM   5413  OD1 ASP L  85      74.565 -17.221   9.265  1.00 50.36           O  
ATOM   5414  OD2 ASP L  85      75.220 -15.123   9.375  1.00 52.38           O  
ATOM   5415  N   TYR L  86      79.980 -15.491   9.488  1.00 44.43           N  
ATOM   5416  CA  TYR L  86      81.406 -15.782   9.661  1.00 43.78           C  
ATOM   5417  C   TYR L  86      81.687 -16.229  11.088  1.00 43.04           C  
ATOM   5418  O   TYR L  86      81.298 -15.555  12.050  1.00 42.74           O  
ATOM   5419  CB  TYR L  86      82.275 -14.554   9.304  1.00 43.94           C  
ATOM   5420  CG  TYR L  86      82.127 -14.215   7.848  1.00 44.10           C  
ATOM   5421  CD1 TYR L  86      81.050 -13.413   7.400  1.00 44.25           C  
ATOM   5422  CD2 TYR L  86      83.011 -14.688   6.894  1.00 45.06           C  
ATOM   5423  CE1 TYR L  86      80.875 -13.139   6.037  1.00 43.08           C  
ATOM   5424  CE2 TYR L  86      82.815 -14.423   5.528  1.00 44.51           C  
ATOM   5425  CZ  TYR L  86      81.757 -13.669   5.113  1.00 44.26           C  
ATOM   5426  OH  TYR L  86      81.560 -13.432   3.776  1.00 42.66           O  
ATOM   5427  N   TYR L  87      82.369 -17.360  11.219  1.00 42.45           N  
ATOM   5428  CA  TYR L  87      82.701 -17.878  12.534  1.00 41.13           C  
ATOM   5429  C   TYR L  87      84.190 -18.081  12.583  1.00 41.60           C  
ATOM   5430  O   TYR L  87      84.859 -18.146  11.549  1.00 41.39           O  
ATOM   5431  CB  TYR L  87      82.041 -19.243  12.816  1.00 39.00           C  
ATOM   5432  CG  TYR L  87      80.535 -19.281  12.731  1.00 35.85           C  
ATOM   5433  CD1 TYR L  87      79.907 -19.330  11.498  1.00 35.62           C  
ATOM   5434  CD2 TYR L  87      79.741 -19.246  13.880  1.00 34.33           C  
ATOM   5435  CE1 TYR L  87      78.530 -19.344  11.390  1.00 35.50           C  
ATOM   5436  CE2 TYR L  87      78.355 -19.253  13.793  1.00 33.34           C  
ATOM   5437  CZ  TYR L  87      77.752 -19.301  12.531  1.00 35.08           C  
ATOM   5438  OH  TYR L  87      76.381 -19.277  12.367  1.00 32.44           O  
ATOM   5439  N   CYS L  88      84.690 -18.180  13.807  1.00 42.18           N  
ATOM   5440  CA  CYS L  88      86.094 -18.433  14.062  1.00 43.61           C  
ATOM   5441  C   CYS L  88      86.174 -19.614  15.022  1.00 43.53           C  
ATOM   5442  O   CYS L  88      85.158 -20.110  15.511  1.00 42.29           O  
ATOM   5443  CB  CYS L  88      86.744 -17.227  14.710  1.00 44.30           C  
ATOM   5444  SG  CYS L  88      85.992 -16.741  16.286  1.00 47.47           S  
ATOM   5445  N   SER L  89      87.387 -20.062  15.288  1.00 43.24           N  
ATOM   5446  CA  SER L  89      87.592 -21.159  16.206  1.00 43.31           C  
ATOM   5447  C   SER L  89      89.079 -21.345  16.321  1.00 44.61           C  
ATOM   5448  O   SER L  89      89.850 -20.769  15.544  1.00 44.80           O  
ATOM   5449  CB  SER L  89      86.944 -22.450  15.685  1.00 42.16           C  
ATOM   5450  OG  SER L  89      87.630 -22.991  14.571  1.00 38.05           O  
ATOM   5451  N   SER L  90      89.486 -22.142  17.299  1.00 45.62           N  
ATOM   5452  CA  SER L  90      90.898 -22.416  17.483  1.00 45.44           C  
ATOM   5453  C   SER L  90      91.115 -23.552  18.459  1.00 45.20           C  
ATOM   5454  O   SER L  90      90.180 -24.050  19.096  1.00 43.88           O  
ATOM   5455  CB  SER L  90      91.614 -21.185  18.016  1.00 45.17           C  
ATOM   5456  OG  SER L  90      91.362 -21.058  19.402  1.00 46.16           O  
ATOM   5457  N   TYR L  91      92.381 -23.962  18.532  1.00 43.76           N  
ATOM   5458  CA  TYR L  91      92.838 -24.983  19.447  1.00 42.78           C  
ATOM   5459  C   TYR L  91      92.701 -24.430  20.870  1.00 42.33           C  
ATOM   5460  O   TYR L  91      92.731 -23.216  21.067  1.00 41.01           O  
ATOM   5461  CB  TYR L  91      94.265 -25.286  19.097  1.00 42.73           C  
ATOM   5462  CG  TYR L  91      94.948 -26.480  19.698  1.00 42.36           C  
ATOM   5463  CD1 TYR L  91      94.969 -27.696  19.011  1.00 40.69           C  
ATOM   5464  CD2 TYR L  91      95.639 -26.390  20.904  1.00 40.97           C  
ATOM   5465  CE1 TYR L  91      95.672 -28.785  19.509  1.00 41.36           C  
ATOM   5466  CE2 TYR L  91      96.341 -27.463  21.409  1.00 42.00           C  
ATOM   5467  CZ  TYR L  91      96.362 -28.659  20.715  1.00 42.66           C  
ATOM   5468  OH  TYR L  91      97.080 -29.715  21.211  1.00 42.87           O  
ATOM   5469  N   ALA L  92      92.563 -25.312  21.855  1.00 42.96           N  
ATOM   5470  CA  ALA L  92      92.448 -24.889  23.252  1.00 43.43           C  
ATOM   5471  C   ALA L  92      93.407 -25.728  24.098  1.00 44.21           C  
ATOM   5472  O   ALA L  92      93.844 -26.794  23.657  1.00 45.49           O  
ATOM   5473  CB  ALA L  92      91.019 -25.060  23.744  1.00 40.92           C  
ATOM   5474  N   SER L  93      93.727 -25.250  25.302  1.00 44.35           N  
ATOM   5475  CA  SER L  93      94.652 -25.935  26.218  1.00 44.23           C  
ATOM   5476  C   SER L  93      93.938 -26.947  27.120  1.00 44.55           C  
ATOM   5477  O   SER L  93      94.573 -27.818  27.746  1.00 43.01           O  
ATOM   5478  CB  SER L  93      95.333 -24.917  27.112  1.00 43.52           C  
ATOM   5479  OG  SER L  93      94.427 -24.524  28.128  1.00 45.61           O  
ATOM   5480  N   GLY L  94      92.617 -26.801  27.197  1.00 44.59           N  
ATOM   5481  CA  GLY L  94      91.803 -27.692  28.006  1.00 44.23           C  
ATOM   5482  C   GLY L  94      91.411 -28.947  27.252  1.00 43.68           C  
ATOM   5483  O   GLY L  94      91.994 -29.268  26.213  1.00 43.15           O  
ATOM   5484  N   SER L  95      90.402 -29.649  27.754  1.00 43.47           N  
ATOM   5485  CA  SER L  95      89.982 -30.894  27.130  1.00 44.04           C  
ATOM   5486  C   SER L  95      89.286 -30.774  25.783  1.00 43.24           C  
ATOM   5487  O   SER L  95      89.272 -31.734  25.015  1.00 43.42           O  
ATOM   5488  CB  SER L  95      89.106 -31.692  28.099  1.00 45.05           C  
ATOM   5489  OG  SER L  95      88.050 -30.901  28.602  1.00 46.59           O  
ATOM   5490  N   THR L  95A     88.721 -29.610  25.484  1.00 42.17           N  
ATOM   5491  CA  THR L  95A     88.032 -29.422  24.212  1.00 41.44           C  
ATOM   5492  C   THR L  95A     88.997 -29.262  23.048  1.00 40.23           C  
ATOM   5493  O   THR L  95A     89.866 -28.400  23.059  1.00 39.68           O  
ATOM   5494  CB  THR L  95A     87.143 -28.224  24.270  1.00 41.77           C  
ATOM   5495  OG1 THR L  95A     86.325 -28.326  25.436  1.00 44.03           O  
ATOM   5496  CG2 THR L  95A     86.263 -28.179  23.055  1.00 43.69           C  
ATOM   5497  N   PRO L  95B     88.844 -30.094  22.014  1.00 39.56           N  
ATOM   5498  CA  PRO L  95B     89.702 -30.071  20.829  1.00 39.70           C  
ATOM   5499  C   PRO L  95B     89.702 -28.743  20.095  1.00 40.46           C  
ATOM   5500  O   PRO L  95B     90.728 -28.307  19.564  1.00 40.43           O  
ATOM   5501  CB  PRO L  95B     89.125 -31.193  19.965  1.00 39.60           C  
ATOM   5502  CG  PRO L  95B     88.476 -32.117  20.967  1.00 38.82           C  
ATOM   5503  CD  PRO L  95B     87.805 -31.124  21.877  1.00 39.97           C  
ATOM   5504  N   ARG L  96      88.536 -28.104  20.078  1.00 41.29           N  
ATOM   5505  CA  ARG L  96      88.365 -26.844  19.384  1.00 39.04           C  
ATOM   5506  C   ARG L  96      87.105 -26.105  19.808  1.00 38.27           C  
ATOM   5507  O   ARG L  96      86.009 -26.630  19.687  1.00 37.63           O  
ATOM   5508  CB  ARG L  96      88.333 -27.115  17.881  1.00 39.23           C  
ATOM   5509  CG  ARG L  96      87.708 -26.018  17.063  1.00 43.79           C  
ATOM   5510  CD  ARG L  96      88.406 -25.858  15.720  1.00 46.80           C  
ATOM   5511  NE  ARG L  96      89.825 -25.581  15.904  1.00 48.94           N  
ATOM   5512  CZ  ARG L  96      90.639 -25.183  14.942  1.00 49.11           C  
ATOM   5513  NH1 ARG L  96      90.170 -25.009  13.718  1.00 51.86           N  
ATOM   5514  NH2 ARG L  96      91.919 -24.968  15.206  1.00 49.21           N  
ATOM   5515  N   ILE L  97      87.282 -24.884  20.313  1.00 39.50           N  
ATOM   5516  CA  ILE L  97      86.181 -24.010  20.725  1.00 38.70           C  
ATOM   5517  C   ILE L  97      85.849 -23.061  19.579  1.00 38.43           C  
ATOM   5518  O   ILE L  97      86.740 -22.517  18.930  1.00 39.55           O  
ATOM   5519  CB  ILE L  97      86.564 -23.158  21.904  1.00 37.61           C  
ATOM   5520  CG1 ILE L  97      87.944 -22.569  21.642  1.00 38.67           C  
ATOM   5521  CG2 ILE L  97      86.507 -23.977  23.168  1.00 38.82           C  
ATOM   5522  CD1 ILE L  97      88.536 -21.875  22.826  1.00 42.10           C  
ATOM   5523  N   PHE L  98      84.558 -22.867  19.344  1.00 37.97           N  
ATOM   5524  CA  PHE L  98      84.098 -22.006  18.276  1.00 36.92           C  
ATOM   5525  C   PHE L  98      83.577 -20.673  18.782  1.00 37.84           C  
ATOM   5526  O   PHE L  98      83.142 -20.551  19.929  1.00 37.52           O  
ATOM   5527  CB  PHE L  98      83.011 -22.729  17.483  1.00 34.49           C  
ATOM   5528  CG  PHE L  98      83.534 -23.857  16.654  1.00 32.49           C  
ATOM   5529  CD1 PHE L  98      83.762 -23.687  15.290  1.00 30.21           C  
ATOM   5530  CD2 PHE L  98      83.867 -25.072  17.244  1.00 31.39           C  
ATOM   5531  CE1 PHE L  98      84.322 -24.705  14.525  1.00 27.67           C  
ATOM   5532  CE2 PHE L  98      84.427 -26.099  16.487  1.00 28.16           C  
ATOM   5533  CZ  PHE L  98      84.656 -25.913  15.127  1.00 26.24           C  
ATOM   5534  N   GLY L  99      83.633 -19.671  17.912  1.00 39.04           N  
ATOM   5535  CA  GLY L  99      83.146 -18.357  18.273  1.00 39.46           C  
ATOM   5536  C   GLY L  99      81.657 -18.336  18.022  1.00 40.05           C  
ATOM   5537  O   GLY L  99      81.141 -19.185  17.293  1.00 39.34           O  
ATOM   5538  N   GLY L 100      80.970 -17.372  18.619  1.00 40.61           N  
ATOM   5539  CA  GLY L 100      79.532 -17.271  18.454  1.00 42.66           C  
ATOM   5540  C   GLY L 100      79.038 -16.924  17.061  1.00 43.51           C  
ATOM   5541  O   GLY L 100      77.898 -17.207  16.736  1.00 43.15           O  
ATOM   5542  N   GLY L 101      79.871 -16.298  16.238  1.00 45.41           N  
ATOM   5543  CA  GLY L 101      79.430 -15.960  14.895  1.00 48.06           C  
ATOM   5544  C   GLY L 101      78.930 -14.535  14.655  1.00 49.95           C  
ATOM   5545  O   GLY L 101      78.279 -13.910  15.512  1.00 48.19           O  
ATOM   5546  N   THR L 102      79.231 -14.032  13.459  1.00 50.45           N  
ATOM   5547  CA  THR L 102      78.842 -12.695  13.052  1.00 51.54           C  
ATOM   5548  C   THR L 102      78.138 -12.716  11.704  1.00 55.12           C  
ATOM   5549  O   THR L 102      78.673 -13.254  10.729  1.00 55.56           O  
ATOM   5550  CB  THR L 102      80.064 -11.797  12.927  1.00 49.24           C  
ATOM   5551  OG1 THR L 102      80.667 -11.635  14.210  1.00 47.79           O  
ATOM   5552  CG2 THR L 102      79.677 -10.450  12.397  1.00 49.00           C  
ATOM   5553  N   ARG L 103      76.939 -12.138  11.651  1.00 57.82           N  
ATOM   5554  CA  ARG L 103      76.195 -12.069  10.401  1.00 61.02           C  
ATOM   5555  C   ARG L 103      76.633 -10.798   9.697  1.00 62.27           C  
ATOM   5556  O   ARG L 103      76.533  -9.704  10.257  1.00 62.28           O  
ATOM   5557  CB  ARG L 103      74.689 -12.013  10.649  1.00 63.04           C  
ATOM   5558  CG  ARG L 103      74.099 -13.288  11.235  1.00 68.66           C  
ATOM   5559  CD  ARG L 103      72.576 -13.211  11.329  1.00 72.25           C  
ATOM   5560  NE  ARG L 103      71.944 -13.121  10.014  1.00 76.45           N  
ATOM   5561  CZ  ARG L 103      70.673 -12.777   9.812  1.00 77.94           C  
ATOM   5562  NH1 ARG L 103      69.889 -12.485  10.846  1.00 78.88           N  
ATOM   5563  NH2 ARG L 103      70.184 -12.724   8.575  1.00 77.67           N  
ATOM   5564  N   LEU L 104      77.128 -10.941   8.471  1.00 63.80           N  
ATOM   5565  CA  LEU L 104      77.590  -9.788   7.705  1.00 64.38           C  
ATOM   5566  C   LEU L 104      76.591  -9.337   6.666  1.00 65.09           C  
ATOM   5567  O   LEU L 104      76.316 -10.063   5.704  1.00 64.36           O  
ATOM   5568  CB  LEU L 104      78.900 -10.102   6.990  1.00 64.06           C  
ATOM   5569  CG  LEU L 104      79.387  -8.956   6.105  1.00 62.86           C  
ATOM   5570  CD1 LEU L 104      79.744  -7.769   6.988  1.00 61.88           C  
ATOM   5571  CD2 LEU L 104      80.569  -9.406   5.272  1.00 62.00           C  
ATOM   5572  N   THR L 105      76.067  -8.127   6.853  1.00 66.13           N  
ATOM   5573  CA  THR L 105      75.104  -7.562   5.917  1.00 66.49           C  
ATOM   5574  C   THR L 105      75.791  -6.595   4.970  1.00 68.41           C  
ATOM   5575  O   THR L 105      76.364  -5.590   5.398  1.00 67.68           O  
ATOM   5576  CB  THR L 105      74.014  -6.784   6.629  1.00 64.69           C  
ATOM   5577  OG1 THR L 105      73.714  -7.420   7.875  1.00 64.16           O  
ATOM   5578  CG2 THR L 105      72.770  -6.735   5.763  1.00 62.96           C  
ATOM   5579  N   VAL L 106      75.745  -6.909   3.682  1.00 70.71           N  
ATOM   5580  CA  VAL L 106      76.344  -6.044   2.684  1.00 73.16           C  
ATOM   5581  C   VAL L 106      75.208  -5.294   2.011  1.00 74.08           C  
ATOM   5582  O   VAL L 106      74.689  -5.718   0.982  1.00 74.68           O  
ATOM   5583  CB  VAL L 106      77.130  -6.845   1.621  1.00 74.14           C  
ATOM   5584  CG1 VAL L 106      77.645  -5.903   0.530  1.00 73.46           C  
ATOM   5585  CG2 VAL L 106      78.297  -7.570   2.279  1.00 74.67           C  
ATOM   5586  N   LEU L 106A     74.805  -4.189   2.620  1.00 75.39           N  
ATOM   5587  CA  LEU L 106A     73.737  -3.373   2.078  1.00 76.57           C  
ATOM   5588  C   LEU L 106A     74.318  -2.345   1.125  1.00 78.56           C  
ATOM   5589  O   LEU L 106A     75.306  -1.679   1.436  1.00 78.16           O  
ATOM   5590  CB  LEU L 106A     72.973  -2.683   3.213  1.00 74.84           C  
ATOM   5591  CG  LEU L 106A     73.783  -2.323   4.464  1.00 73.82           C  
ATOM   5592  CD1 LEU L 106A     74.861  -1.316   4.128  1.00 73.18           C  
ATOM   5593  CD2 LEU L 106A     72.854  -1.769   5.524  1.00 73.52           C  
ATOM   5594  N   GLY L 107      73.717  -2.247  -0.054  1.00 81.16           N  
ATOM   5595  CA  GLY L 107      74.168  -1.286  -1.042  1.00 85.98           C  
ATOM   5596  C   GLY L 107      73.074  -0.254  -1.203  1.00 89.53           C  
ATOM   5597  O   GLY L 107      73.103   0.582  -2.108  1.00 89.26           O  
ATOM   5598  N   GLN L 108      72.104  -0.338  -0.297  1.00 93.40           N  
ATOM   5599  CA  GLN L 108      70.945   0.541  -0.263  1.00 97.20           C  
ATOM   5600  C   GLN L 108      69.921   0.187  -1.340  1.00 99.51           C  
ATOM   5601  O   GLN L 108      69.700   0.942  -2.293  1.00 99.42           O  
ATOM   5602  CB  GLN L 108      71.381   2.003  -0.383  1.00 98.15           C  
ATOM   5603  CG  GLN L 108      72.206   2.467   0.804  1.00 99.33           C  
ATOM   5604  CD  GLN L 108      71.560   2.096   2.129  1.00 99.84           C  
ATOM   5605  OE1 GLN L 108      70.421   2.471   2.408  1.00 99.33           O  
ATOM   5606  NE2 GLN L 108      72.288   1.352   2.951  1.00100.36           N  
ATOM   5607  N   PRO L 109      69.288  -0.989  -1.200  1.00101.75           N  
ATOM   5608  CA  PRO L 109      68.274  -1.483  -2.138  1.00103.46           C  
ATOM   5609  C   PRO L 109      66.853  -1.056  -1.740  1.00105.06           C  
ATOM   5610  O   PRO L 109      66.088  -0.552  -2.568  1.00104.95           O  
ATOM   5611  CB  PRO L 109      68.468  -2.990  -2.068  1.00103.52           C  
ATOM   5612  CG  PRO L 109      68.767  -3.193  -0.602  1.00103.02           C  
ATOM   5613  CD  PRO L 109      69.720  -2.061  -0.277  1.00101.70           C  
TER    5614      PRO L 109                                                      
