# Supplementary material for: SARS-CoV-2 Spike Protein Interaction Space
Source: Int J Mol Sci. 2023 Jul 27;24(15):12058. doi: 10.3390/ijms241512058 (PMC10418891; doi:10.3390/ijms241512058)
Supplement: Supplementary file 1 [file ijms-24-12058-s001.zip › Supplementary Material File S1/2Q20.pdb]

REMARK 950 NUMBERING  Kabat
REMARK 950 METHOD     X-ray crystal structure
REMARK 950 RESOLUTION 1.300
REMARK 950 R-FACTOR   0.120
REMARK 950 R-FREE     0.148
REMARK 950 CHAIN-TYPE LABEL ORIGINAL
REMARK 950 CHAIN L    L    A
REMARK 950 CHAIN L    L    B
REMARK 950 MOLECULE : A : VK1 O18/O8 GERMLINE LIGHT CHAIN VARIABLE DOMAIN
REMARK 950 SPECIES  : A : HOMO SAPIENS
SEQRES   1 L 109  SER THR ASP ILE GLN MET THR GLN SER PRO SER SER LEU          
SEQRES   2 L 109  SER ALA SER VAL GLY ASP ARG VAL THR ILE THR CYS GLN          
SEQRES   3 L 109  ALA SER GLN ASP ILE SER ASN TYR LEU ASN TRP TYR GLN          
SEQRES   4 L 109  GLN LYS PRO GLY LYS ALA PRO LYS LEU LEU ILE TYR ASP          
SEQRES   5 L 109  ALA SER ASN LEU GLU THR GLY VAL PRO SER ARG PHE SER          
SEQRES   6 L 109  GLY SER GLY SER GLY THR ASP PHE THR PHE THR ILE SER          
SEQRES   7 L 109  SER LEU GLN PRO GLU ASP ILE ALA THR TYR TYR CYS GLN          
SEQRES   8 L 109  GLN TYR ASP ASN LEU PRO TYR THR PHE GLY GLN GLY THR          
SEQRES   9 L 109  LYS LEU GLU ILE LYS                                          
SEQRES   1 L 109  SER THR ASP ILE GLN MET THR GLN SER PRO SER SER LEU          
SEQRES   2 L 109  SER ALA SER VAL GLY ASP ARG VAL THR ILE THR CYS GLN          
SEQRES   3 L 109  ALA SER GLN ASP ILE SER ASN TYR LEU ASN TRP TYR GLN          
SEQRES   4 L 109  GLN LYS PRO GLY LYS ALA PRO LYS LEU LEU ILE TYR ASP          
SEQRES   5 L 109  ALA SER ASN LEU GLU THR GLY VAL PRO SER ARG PHE SER          
SEQRES   6 L 109  GLY SER GLY SER GLY THR ASP PHE THR PHE THR ILE SER          
SEQRES   7 L 109  SER LEU GLN PRO GLU ASP ILE ALA THR TYR TYR CYS GLN          
SEQRES   8 L 109  GLN TYR ASP ASN LEU PRO TYR THR PHE GLY GLN GLY THR          
SEQRES   9 L 109  LYS LEU GLU ILE LYS                                          
ATOM      8  N   ASP L   1      33.359 -34.262  15.232  1.00 26.73           N  
ATOM      9  CA  ASP L   1      33.612 -33.668  13.907  1.00 22.83           C  
ATOM     10  C   ASP L   1      34.368 -32.371  14.129  1.00 20.84           C  
ATOM     11  O   ASP L   1      34.205 -31.696  15.175  1.00 23.46           O  
ATOM     12  CB  ASP L   1      32.320 -33.366  13.230  1.00 25.19           C  
ATOM     13  CG  ASP L   1      31.506 -34.594  12.963  1.00 27.74           C  
ATOM     14  OD1 ASP L   1      32.039 -35.675  13.097  1.00 30.62           O  
ATOM     15  OD2 ASP L   1      30.379 -34.411  12.645  1.00 31.91           O  
ATOM     16  N   ILE L   2      35.241 -32.046  13.175  1.00 18.06           N  
ATOM     17  CA  ILE L   2      36.018 -30.794  13.246  1.00 17.10           C  
ATOM     18  C   ILE L   2      35.092 -29.615  13.085  1.00 15.75           C  
ATOM     19  O   ILE L   2      34.260 -29.584  12.178  1.00 16.50           O  
ATOM     20  CB  ILE L   2      37.134 -30.799  12.181  1.00 16.47           C  
ATOM     21  CG1 ILE L   2      38.063 -32.000  12.422  1.00 17.54           C  
ATOM     22  CG2 ILE L   2      37.872 -29.484  12.146  1.00 16.55           C  
ATOM     23  CD1 ILE L   2      39.220 -32.136  11.402  1.00 20.12           C  
ATOM     25  N   GLN L   3      35.214 -28.654  13.985  0.50 15.45           N  
ATOM     27  CA  GLN L   3      34.378 -27.475  13.928  0.50 15.56           C  
ATOM     29  C   GLN L   3      35.147 -26.341  13.278  0.50 13.66           C  
ATOM     31  O   GLN L   3      36.242 -26.004  13.721  0.50 14.08           O  
ATOM     33  CB  GLN L   3      33.947 -27.097  15.341  0.50 16.73           C  
ATOM     35  CG  GLN L   3      33.163 -28.201  16.024  0.50 20.80           C  
ATOM     37  CD  GLN L   3      31.775 -28.378  15.420  0.50 26.74           C  
ATOM     39  OE1 GLN L   3      31.061 -27.403  15.139  0.50 31.61           O  
ATOM     41  NE2 GLN L   3      31.391 -29.616  15.208  0.50 30.27           N  
ATOM     42  N   MET L   4      34.548 -25.747  12.251  1.00 14.04           N  
ATOM     43  CA  MET L   4      35.103 -24.632  11.523  1.00 13.02           C  
ATOM     44  C   MET L   4      34.405 -23.368  11.957  1.00 13.61           C  
ATOM     45  O   MET L   4      33.180 -23.289  11.813  1.00 15.52           O  
ATOM     46  CB  MET L   4      34.941 -24.851  10.026  1.00 13.98           C  
ATOM     47  CG  MET L   4      35.586 -26.120   9.496  1.00 16.00           C  
ATOM     48  SD  MET L   4      37.323 -26.298   9.896  1.00 17.00           S  
ATOM     49  CE  MET L   4      38.052 -24.852   9.206  1.00 19.23           C  
ATOM     50  N   THR L   5      35.134 -22.413  12.516  1.00 12.18           N  
ATOM     51  CA  THR L   5      34.553 -21.185  12.998  1.00 11.67           C  
ATOM     52  C   THR L   5      34.885 -20.078  11.985  1.00 11.61           C  
ATOM     53  O   THR L   5      36.046 -19.649  11.898  1.00 12.57           O  
ATOM     54  CB  THR L   5      35.050 -20.812  14.413  1.00 13.24           C  
ATOM     55  OG1 THR L   5      34.737 -21.865  15.321  1.00 14.64           O  
ATOM     56  CG2 THR L   5      34.388 -19.541  14.875  1.00 13.99           C  
ATOM     57  N   GLN L   6      33.901 -19.688  11.204  1.00 11.49           N  
ATOM     58  CA  GLN L   6      34.043 -18.727  10.122  1.00 10.65           C  
ATOM     59  C   GLN L   6      33.522 -17.387  10.565  1.00 11.58           C  
ATOM     60  O   GLN L   6      32.430 -17.296  11.111  1.00 13.47           O  
ATOM     61  CB  GLN L   6      33.297 -19.230   8.887  1.00 11.59           C  
ATOM     62  CG  GLN L   6      33.487 -18.341   7.683  1.00 11.64           C  
ATOM     63  CD  GLN L   6      32.898 -18.866   6.414  1.00 11.39           C  
ATOM     64  OE1 GLN L   6      32.540 -20.046   6.318  1.00 12.89           O  
ATOM     65  NE2 GLN L   6      32.788 -18.001   5.441  1.00 11.83           N  
ATOM     66  N   SER L   7      34.272 -16.323  10.276  1.00 11.52           N  
ATOM     68  CA  SER L   7      33.928 -14.971  10.676  0.50 12.04           C  
ATOM     69  C   SER L   7      34.238 -14.015   9.536  1.00 11.16           C  
ATOM     70  O   SER L   7      35.234 -14.209   8.872  1.00 12.26           O  
ATOM     72  CB  SER L   7      34.817 -14.492  11.854  0.50 12.68           C  
ATOM     74  OG  SER L   7      34.769 -15.348  12.933  0.50 22.98           O  
ATOM     75  N   PRO L   8      33.456 -12.956   9.354  1.00 11.28           N  
ATOM     76  CA  PRO L   8      32.201 -12.647  10.033  1.00 11.38           C  
ATOM     77  C   PRO L   8      31.042 -13.394   9.405  1.00 11.30           C  
ATOM     78  O   PRO L   8      31.176 -14.112   8.441  1.00 13.50           O  
ATOM     79  CB  PRO L   8      32.108 -11.123   9.838  1.00 13.03           C  
ATOM     80  CG  PRO L   8      32.667 -10.918   8.480  1.00 13.48           C  
ATOM     81  CD  PRO L   8      33.766 -11.953   8.325  1.00 12.35           C  
ATOM     84  N   SER L   9      29.868 -13.273  10.036  0.50 11.91           N  
ATOM     87  CA  SER L   9      28.654 -13.870   9.471  0.50 12.85           C  
ATOM     90  C   SER L   9      28.152 -13.099   8.252  0.50 11.63           C  
ATOM     93  O   SER L   9      27.659 -13.688   7.298  0.50 12.20           O  
ATOM     96  CB  SER L   9      27.562 -13.933  10.556  0.50 14.03           C  
ATOM     99  OG  SER L   9      26.359 -14.532  10.040  0.50 20.19           O  
ATOM    100  N   SER L  10      28.254 -11.787   8.300  1.00 12.52           N  
ATOM    101  CA  SER L  10      27.896 -10.926   7.177  1.00 12.90           C  
ATOM    102  C   SER L  10      28.758  -9.724   7.230  1.00 12.71           C  
ATOM    103  O   SER L  10      29.260  -9.344   8.286  1.00 12.60           O  
ATOM    104  CB  SER L  10      26.457 -10.536   7.237  1.00 16.69           C  
ATOM    105  OG  SER L  10      26.150  -9.807   8.353  1.00 18.75           O  
ATOM    107  N   LEU L  11      28.928  -9.082   6.068  0.50 11.81           N  
ATOM    109  CA  LEU L  11      29.629  -7.806   6.003  0.50 12.98           C  
ATOM    111  C   LEU L  11      29.259  -7.094   4.724  0.50 14.07           C  
ATOM    113  O   LEU L  11      28.962  -7.722   3.692  0.50 13.19           O  
ATOM    115  CB  LEU L  11      31.142  -7.930   6.175  0.50 14.41           C  
ATOM    117  CG  LEU L  11      31.927  -8.477   4.991  0.50 13.94           C  
ATOM    119  CD1 LEU L  11      33.352  -8.440   5.337  0.50 14.82           C  
ATOM    121  CD2 LEU L  11      31.518  -9.901   4.603  0.50 14.47           C  
ATOM    122  N   SER L  12      29.296  -5.769   4.822  1.00 13.77           N  
ATOM    123  CA  SER L  12      29.037  -4.914   3.683  1.00 14.36           C  
ATOM    124  C   SER L  12      30.269  -4.108   3.435  1.00 14.00           C  
ATOM    125  O   SER L  12      30.912  -3.617   4.350  1.00 14.95           O  
ATOM    126  CB  SER L  12      27.879  -3.970   3.974  1.00 17.82           C  
ATOM    127  OG  SER L  12      26.683  -4.660   4.091  1.00 25.26           O  
ATOM    128  N   ALA L  13      30.587  -3.892   2.178  1.00 14.97           N  
ATOM    129  CA  ALA L  13      31.734  -3.106   1.758  1.00 15.60           C  
ATOM    130  C   ALA L  13      31.451  -2.478   0.417  1.00 16.54           C  
ATOM    131  O   ALA L  13      30.428  -2.752  -0.189  1.00 18.07           O  
ATOM    132  CB  ALA L  13      33.034  -3.911   1.728  1.00 18.91           C  
ATOM    133  N   SER L  14      32.345  -1.641  -0.050  1.00 18.13           N  
ATOM    134  CA  SER L  14      32.182  -0.936  -1.292  1.00 16.96           C  
ATOM    135  C   SER L  14      32.961  -1.534  -2.398  1.00 18.11           C  
ATOM    136  O   SER L  14      33.976  -2.168  -2.178  1.00 17.05           O  
ATOM    137  CB  SER L  14      32.614   0.535  -1.102  1.00 19.59           C  
ATOM    138  OG  SER L  14      31.805   1.155  -0.125  1.00 24.20           O  
ATOM    139  N   VAL L  15      32.534  -1.276  -3.637  1.00 17.79           N  
ATOM    140  CA  VAL L  15      33.305  -1.684  -4.781  1.00 18.27           C  
ATOM    141  C   VAL L  15      34.687  -1.087  -4.656  1.00 18.44           C  
ATOM    142  O   VAL L  15      34.835   0.097  -4.317  1.00 20.60           O  
ATOM    143  CB  VAL L  15      32.630  -1.266  -6.087  1.00 20.73           C  
ATOM    144  CG1 VAL L  15      33.595  -1.441  -7.285  1.00 21.63           C  
ATOM    145  CG2 VAL L  15      31.385  -2.083  -6.278  1.00 23.57           C  
ATOM    146  N   GLY L  16      35.675  -1.925  -4.878  1.00 17.17           N  
ATOM    147  CA  GLY L  16      37.064  -1.590  -4.760  1.00 18.01           C  
ATOM    148  C   GLY L  16      37.695  -1.799  -3.393  1.00 18.86           C  
ATOM    149  O   GLY L  16      38.925  -1.730  -3.263  1.00 20.65           O  
ATOM    150  N   ASP L  17      36.881  -2.144  -2.386  1.00 17.09           N  
ATOM    151  CA  ASP L  17      37.440  -2.372  -1.054  1.00 17.67           C  
ATOM    152  C   ASP L  17      38.018  -3.749  -0.911  1.00 15.58           C  
ATOM    153  O   ASP L  17      37.623  -4.700  -1.588  1.00 16.48           O  
ATOM    154  CB  ASP L  17      36.300  -2.308   0.017  1.00 19.52           C  
ATOM    155  CG  ASP L  17      35.935  -0.927   0.517  1.00 22.83           C  
ATOM    156  OD1 ASP L  17      36.772  -0.068   0.549  1.00 25.52           O  
ATOM    157  OD2 ASP L  17      34.769  -0.723   0.951  1.00 25.13           O  
ATOM    159  N   ARG L  18      38.907  -3.886   0.047  0.50 14.39           N  
ATOM    161  CA  ARG L  18      39.421  -5.181   0.464  0.50 13.70           C  
ATOM    163  C   ARG L  18      38.440  -5.872   1.402  0.50 13.97           C  
ATOM    165  O   ARG L  18      37.907  -5.246   2.321  0.50 15.22           O  
ATOM    167  CB  ARG L  18      40.738  -5.058   1.194  0.50 13.94           C  
ATOM    169  CG  ARG L  18      41.426  -6.378   1.421  0.50 15.81           C  
ATOM    171  CD  ARG L  18      42.585  -6.304   2.335  0.50 16.61           C  
ATOM    173  NE  ARG L  18      43.673  -5.548   1.758  0.50 17.33           N  
ATOM    175  CZ  ARG L  18      44.776  -5.266   2.436  0.50 20.20           C  
ATOM    177  NH1 ARG L  18      44.897  -5.655   3.708  0.50 21.54           N  
ATOM    179  NH2 ARG L  18      45.717  -4.516   1.898  0.50 21.17           N  
ATOM    180  N   VAL L  19      38.194  -7.145   1.148  1.00 13.78           N  
ATOM    181  CA  VAL L  19      37.329  -7.981   1.994  1.00 13.48           C  
ATOM    182  C   VAL L  19      38.180  -9.080   2.594  1.00 12.60           C  
ATOM    183  O   VAL L  19      38.895  -9.769   1.881  1.00 13.09           O  
ATOM    184  CB  VAL L  19      36.197  -8.609   1.163  1.00 14.61           C  
ATOM    185  CG1 VAL L  19      35.406  -9.615   1.929  1.00 16.51           C  
ATOM    186  CG2 VAL L  19      35.292  -7.505   0.657  1.00 18.51           C  
ATOM    187  N   THR L  20      38.079  -9.261   3.914  1.00 12.23           N  
ATOM    188  CA  THR L  20      38.862 -10.230   4.625  1.00 12.65           C  
ATOM    189  C   THR L  20      37.950 -11.144   5.479  1.00 12.99           C  
ATOM    190  O   THR L  20      37.218 -10.642   6.316  1.00 13.93           O  
ATOM    191  CB  THR L  20      39.863  -9.511   5.558  1.00 13.81           C  
ATOM    192  OG1 THR L  20      40.581  -8.521   4.834  1.00 14.47           O  
ATOM    193  CG2 THR L  20      40.847 -10.504   6.072  1.00 16.54           C  
ATOM    194  N   ILE L  21      37.999 -12.440   5.215  1.00 11.99           N  
ATOM    195  CA  ILE L  21      37.163 -13.469   5.880  1.00 12.07           C  
ATOM    196  C   ILE L  21      38.110 -14.467   6.506  1.00 11.87           C  
ATOM    197  O   ILE L  21      39.136 -14.815   5.926  1.00 13.15           O  
ATOM    198  CB  ILE L  21      36.203 -14.151   4.831  1.00 13.81           C  
ATOM    199  CG1 ILE L  21      35.245 -13.092   4.272  1.00 14.38           C  
ATOM    200  CG2 ILE L  21      35.484 -15.307   5.437  1.00 14.00           C  
ATOM    201  CD1 ILE L  21      34.424 -13.598   3.065  1.00 16.50           C  
ATOM    202  N   THR L  22      37.784 -14.910   7.721  1.00 12.12           N  
ATOM    203  CA  THR L  22      38.630 -15.870   8.411  1.00 12.59           C  
ATOM    204  C   THR L  22      37.906 -17.172   8.724  1.00 11.88           C  
ATOM    205  O   THR L  22      36.682 -17.227   8.846  1.00 12.11           O  
ATOM    206  CB  THR L  22      39.234 -15.271   9.665  1.00 13.33           C  
ATOM    207  OG1 THR L  22      38.212 -14.860  10.564  1.00 13.53           O  
ATOM    208  CG2 THR L  22      40.106 -14.088   9.371  1.00 14.71           C  
ATOM    210  N   CYS L  23      38.716 -18.204   8.980  0.50 12.08           N  
ATOM    212  CA  CYS L  23      38.223 -19.516   9.283  0.50 12.52           C  
ATOM    214  C   CYS L  23      39.198 -20.230  10.208  0.50 12.67           C  
ATOM    216  O   CYS L  23      40.344 -20.422   9.820  0.50 12.60           O  
ATOM    218  CB  CYS L  23      38.002 -20.267   7.960  0.50 13.88           C  
ATOM    220  SG  CYS L  23      37.253 -21.902   8.162  0.50 16.25           S  
ATOM    221  N   GLN L  24      38.725 -20.632  11.397  1.00 12.67           N  
ATOM    222  CA  GLN L  24      39.532 -21.377  12.397  1.00 13.92           C  
ATOM    223  C   GLN L  24      39.038 -22.781  12.490  1.00 13.82           C  
ATOM    224  O   GLN L  24      37.853 -23.017  12.601  1.00 15.71           O  
ATOM    225  CB  GLN L  24      39.372 -20.718  13.774  1.00 15.22           C  
ATOM    226  CG  GLN L  24      40.093 -21.490  14.849  1.00 17.87           C  
ATOM    227  CD  GLN L  24      40.044 -20.812  16.190  1.00 19.16           C  
ATOM    228  OE1 GLN L  24      40.458 -19.734  16.270  1.00 21.82           O  
ATOM    229  NE2 GLN L  24      39.606 -21.461  17.228  1.00 22.11           N  
ATOM    230  N   ALA L  25      39.957 -23.748  12.430  1.00 13.28           N  
ATOM    231  CA  ALA L  25      39.618 -25.128  12.643  1.00 14.09           C  
ATOM    232  C   ALA L  25      39.858 -25.503  14.101  1.00 14.33           C  
ATOM    233  O   ALA L  25      40.818 -25.056  14.679  1.00 15.69           O  
ATOM    234  CB  ALA L  25      40.500 -26.032  11.743  1.00 14.75           C  
ATOM    235  N   SER L  26      39.045 -26.415  14.612  1.00 14.85           N  
ATOM    236  CA  SER L  26      39.192 -26.846  16.008  1.00 15.57           C  
ATOM    237  C   SER L  26      40.355 -27.800  16.249  1.00 17.00           C  
ATOM    238  O   SER L  26      40.703 -28.069  17.425  1.00 19.04           O  
ATOM    239  CB  SER L  26      37.880 -27.448  16.478  1.00 16.02           C  
ATOM    240  OG  SER L  26      37.547 -28.595  15.704  1.00 16.65           O  
ATOM    241  N   GLN L  27      40.931 -28.326  15.181  1.00 16.00           N  
ATOM    242  CA  GLN L  27      42.165 -29.112  15.256  1.00 18.40           C  
ATOM    243  C   GLN L  27      42.929 -28.875  13.955  1.00 17.37           C  
ATOM    244  O   GLN L  27      42.417 -28.303  13.010  1.00 16.85           O  
ATOM    245  CB  GLN L  27      41.937 -30.554  15.488  1.00 21.01           C  
ATOM    246  CG  GLN L  27      41.261 -31.193  14.420  1.00 21.71           C  
ATOM    247  CD  GLN L  27      40.794 -32.614  14.775  1.00 25.20           C  
ATOM    248  OE1 GLN L  27      39.930 -32.800  15.661  1.00 27.16           O  
ATOM    249  NE2 GLN L  27      41.346 -33.611  14.093  1.00 29.69           N  
ATOM    251  N   ASP L  28      44.225 -29.184  13.970  0.50 17.80           N  
ATOM    253  CA  ASP L  28      45.150 -28.975  12.830  0.50 17.78           C  
ATOM    255  C   ASP L  28      44.693 -29.758  11.608  0.50 18.40           C  
ATOM    257  O   ASP L  28      44.637 -30.980  11.638  0.50 19.97           O  
ATOM    259  CB  ASP L  28      46.537 -29.490  13.289  0.50 19.22           C  
ATOM    261  CG  ASP L  28      47.664 -29.217  12.289  0.50 21.03           C  
ATOM    263  OD1 ASP L  28      47.415 -28.775  11.162  0.50 23.89           O  
ATOM    265  OD2 ASP L  28      48.840 -29.479  12.678  0.50 28.43           O  
ATOM    266  N   ILE L  29      44.389 -29.040  10.523  1.00 16.41           N  
ATOM    267  CA  ILE L  29      43.903 -29.628   9.261  1.00 15.36           C  
ATOM    268  C   ILE L  29      44.948 -29.442   8.162  1.00 16.16           C  
ATOM    269  O   ILE L  29      44.626 -29.569   6.973  1.00 15.66           O  
ATOM    270  CB  ILE L  29      42.560 -29.040   8.837  1.00 14.73           C  
ATOM    271  CG1 ILE L  29      42.657 -27.541   8.633  1.00 14.82           C  
ATOM    272  CG2 ILE L  29      41.457 -29.435   9.823  1.00 15.47           C  
ATOM    273  CD1 ILE L  29      41.473 -26.959   7.887  1.00 15.28           C  
ATOM    274  N   SER L  30      46.183 -29.185   8.551  1.00 16.73           N  
ATOM    276  CA  SER L  30      47.242 -28.970   7.577  0.50 16.52           C  
ATOM    277  C   SER L  30      46.823 -27.853   6.619  1.00 15.68           C  
ATOM    278  O   SER L  30      46.420 -26.779   7.033  1.00 17.31           O  
ATOM    280  CB  SER L  30      47.620 -30.256   6.819  0.50 17.94           C  
ATOM    282  OG  SER L  30      48.720 -30.001   5.957  0.50 22.65           O  
ATOM    284  N   ASN L  31      46.950 -28.020   5.314  0.50 15.25           N  
ATOM    286  CA  ASN L  31      46.416 -26.989   4.409  0.50 15.11           C  
ATOM    288  C   ASN L  31      45.202 -27.496   3.628  0.50 14.07           C  
ATOM    290  O   ASN L  31      44.925 -26.996   2.538  0.50 13.85           O  
ATOM    292  CB  ASN L  31      47.496 -26.441   3.474  0.50 16.99           C  
ATOM    294  CG  ASN L  31      47.944 -27.439   2.491  0.50 21.11           C  
ATOM    296  OD1 ASN L  31      47.804 -28.647   2.710  0.50 25.72           O  
ATOM    298  ND2 ASN L  31      48.482 -26.963   1.368  0.50 26.11           N  
ATOM    299  N   TYR L  32      44.436 -28.452   4.184  1.00 13.31           N  
ATOM    300  CA  TYR L  32      43.251 -28.995   3.548  1.00 13.20           C  
ATOM    301  C   TYR L  32      42.003 -28.154   3.806  1.00 12.36           C  
ATOM    302  O   TYR L  32      41.093 -28.563   4.529  1.00 13.03           O  
ATOM    303  CB  TYR L  32      43.017 -30.437   3.925  1.00 15.57           C  
ATOM    304  CG  TYR L  32      44.178 -31.332   3.575  1.00 17.33           C  
ATOM    305  CD1 TYR L  32      44.618 -31.457   2.267  1.00 20.49           C  
ATOM    306  CD2 TYR L  32      44.816 -32.049   4.547  1.00 20.70           C  
ATOM    307  CE1 TYR L  32      45.634 -32.334   1.914  1.00 24.93           C  
ATOM    308  CE2 TYR L  32      45.899 -32.935   4.216  1.00 23.59           C  
ATOM    309  CZ  TYR L  32      46.277 -33.036   2.912  1.00 24.24           C  
ATOM    310  OH  TYR L  32      47.318 -33.861   2.610  1.00 30.94           O  
ATOM    311  N   LEU L  33      41.977 -26.953   3.205  1.00 12.61           N  
ATOM    312  CA  LEU L  33      40.871 -26.023   3.343  1.00 11.65           C  
ATOM    313  C   LEU L  33      40.444 -25.548   1.951  1.00 11.91           C  
ATOM    314  O   LEU L  33      41.274 -25.085   1.168  1.00 12.68           O  
ATOM    315  CB  LEU L  33      41.223 -24.843   4.258  1.00 14.24           C  
ATOM    316  CG  LEU L  33      39.965 -24.040   4.663  1.00 14.97           C  
ATOM    317  CD1 LEU L  33      39.246 -24.696   5.740  1.00 15.59           C  
ATOM    318  CD2 LEU L  33      40.214 -22.620   5.074  1.00 20.05           C  
ATOM    319  N   ASN L  34      39.133 -25.640   1.700  1.00 11.16           N  
ATOM    320  CA  ASN L  34      38.479 -25.127   0.508  1.00 10.78           C  
ATOM    321  C   ASN L  34      37.730 -23.846   0.862  1.00 10.72           C  
ATOM    322  O   ASN L  34      37.194 -23.711   1.977  1.00 11.48           O  
ATOM    323  CB  ASN L  34      37.471 -26.142  -0.028  1.00 11.81           C  
ATOM    324  CG  ASN L  34      38.068 -27.347  -0.644  1.00 11.44           C  
ATOM    325  OD1 ASN L  34      39.118 -27.242  -1.253  1.00 11.78           O  
ATOM    326  ND2 ASN L  34      37.378 -28.484  -0.572  1.00 12.95           N  
ATOM    327  N   TRP L  35      37.625 -22.963  -0.124  1.00 10.21           N  
ATOM    328  CA  TRP L  35      36.731 -21.827  -0.079  1.00 10.30           C  
ATOM    329  C   TRP L  35      35.789 -21.872  -1.256  1.00 10.25           C  
ATOM    330  O   TRP L  35      36.237 -21.940  -2.415  1.00 11.02           O  
ATOM    331  CB  TRP L  35      37.504 -20.496  -0.088  1.00 10.84           C  
ATOM    332  CG  TRP L  35      38.337 -20.248   1.108  1.00 10.47           C  
ATOM    333  CD1 TRP L  35      39.656 -20.471   1.231  1.00 11.36           C  
ATOM    334  CD2 TRP L  35      37.883 -19.685   2.356  1.00 10.49           C  
ATOM    335  NE1 TRP L  35      40.081 -20.053   2.502  1.00 12.32           N  
ATOM    336  CE2 TRP L  35      38.986 -19.589   3.199  1.00 11.01           C  
ATOM    337  CE3 TRP L  35      36.655 -19.187   2.796  1.00 10.85           C  
ATOM    338  CZ2 TRP L  35      38.918 -19.044   4.457  1.00 11.71           C  
ATOM    339  CZ3 TRP L  35      36.561 -18.637   4.037  1.00 11.30           C  
ATOM    340  CH2 TRP L  35      37.701 -18.559   4.860  1.00 12.07           C  
ATOM    341  N   TYR L  36      34.490 -21.822  -0.973  1.00 10.42           N  
ATOM    342  CA  TYR L  36      33.423 -21.822  -1.970  1.00 10.06           C  
ATOM    343  C   TYR L  36      32.748 -20.468  -1.980  1.00 10.17           C  
ATOM    344  O   TYR L  36      32.610 -19.803  -0.965  1.00 11.21           O  
ATOM    345  CB  TYR L  36      32.348 -22.852  -1.648  1.00 11.13           C  
ATOM    346  CG  TYR L  36      32.788 -24.290  -1.612  1.00 11.24           C  
ATOM    347  CD1 TYR L  36      32.550 -25.126  -2.687  1.00 11.44           C  
ATOM    348  CD2 TYR L  36      33.360 -24.843  -0.485  1.00 11.91           C  
ATOM    349  CE1 TYR L  36      32.869 -26.469  -2.629  1.00 11.82           C  
ATOM    350  CE2 TYR L  36      33.692 -26.161  -0.434  1.00 12.01           C  
ATOM    351  CZ  TYR L  36      33.421 -26.983  -1.497  1.00 11.21           C  
ATOM    352  OH  TYR L  36      33.682 -28.366  -1.443  1.00 12.05           O  
ATOM    353  N   GLN L  37      32.232 -20.136  -3.164  1.00 10.24           N  
ATOM    354  CA  GLN L  37      31.385 -18.973  -3.386  1.00  9.84           C  
ATOM    355  C   GLN L  37      29.999 -19.464  -3.822  1.00 10.47           C  
ATOM    356  O   GLN L  37      29.899 -20.236  -4.766  1.00 11.33           O  
ATOM    357  CB  GLN L  37      31.986 -18.141  -4.517  1.00 10.95           C  
ATOM    358  CG  GLN L  37      31.177 -16.884  -4.920  1.00 11.67           C  
ATOM    359  CD  GLN L  37      31.739 -16.282  -6.168  1.00 12.54           C  
ATOM    360  OE1 GLN L  37      31.691 -16.930  -7.199  1.00 14.33           O  
ATOM    361  NE2 GLN L  37      32.265 -15.038  -6.115  1.00 13.15           N  
ATOM    362  N   GLN L  38      28.950 -18.969  -3.155  1.00 10.47           N  
ATOM    363  CA  GLN L  38      27.582 -19.330  -3.460  1.00 10.68           C  
ATOM    364  C   GLN L  38      26.832 -18.065  -3.811  1.00 11.17           C  
ATOM    365  O   GLN L  38      26.480 -17.288  -2.938  1.00 11.73           O  
ATOM    366  CB  GLN L  38      26.926 -20.068  -2.321  1.00 11.34           C  
ATOM    367  CG  GLN L  38      25.512 -20.556  -2.698  1.00 11.87           C  
ATOM    368  CD  GLN L  38      24.883 -21.426  -1.652  1.00 11.76           C  
ATOM    369  OE1 GLN L  38      25.171 -21.250  -0.454  1.00 12.66           O  
ATOM    370  NE2 GLN L  38      24.021 -22.362  -2.063  1.00 12.16           N  
ATOM    371  N   LYS L  39      26.634 -17.857  -5.097  1.00 12.52           N  
ATOM    372  CA  LYS L  39      25.869 -16.697  -5.551  1.00 15.00           C  
ATOM    373  C   LYS L  39      24.403 -16.916  -5.290  1.00 16.34           C  
ATOM    374  O   LYS L  39      23.925 -18.058  -5.144  1.00 15.85           O  
ATOM    375  CB  LYS L  39      26.149 -16.403  -7.022  1.00 16.89           C  
ATOM    376  CG  LYS L  39      27.587 -15.924  -7.233  1.00 18.87           C  
ATOM    377  CD  LYS L  39      27.900 -15.537  -8.663  1.00 22.65           C  
ATOM    378  CE  LYS L  39      29.288 -15.010  -8.760  1.00 26.59           C  
ATOM    379  NZ  LYS L  39      29.383 -14.211 -10.018  1.00 31.86           N  
ATOM    380  N   PRO L  40      23.626 -15.827  -5.158  1.00 18.91           N  
ATOM    381  CA  PRO L  40      22.252 -16.015  -4.713  1.00 21.00           C  
ATOM    382  C   PRO L  40      21.425 -16.933  -5.624  1.00 21.21           C  
ATOM    383  O   PRO L  40      21.434 -16.747  -6.828  1.00 24.38           O  
ATOM    384  CB  PRO L  40      21.724 -14.553  -4.696  1.00 23.26           C  
ATOM    385  CG  PRO L  40      22.949 -13.701  -4.438  1.00 22.85           C  
ATOM    386  CD  PRO L  40      24.060 -14.416  -5.178  1.00 20.45           C  
ATOM    387  N   GLY L  41      20.760 -17.923  -5.051  1.00 21.40           N  
ATOM    388  CA  GLY L  41      20.037 -18.913  -5.820  1.00 21.88           C  
ATOM    389  C   GLY L  41      20.777 -20.038  -6.484  1.00 22.30           C  
ATOM    390  O   GLY L  41      20.163 -20.903  -7.090  1.00 26.36           O  
ATOM    391  N   LYS L  42      22.101 -20.028  -6.378  1.00 18.56           N  
ATOM    392  CA  LYS L  42      22.962 -20.950  -7.077  1.00 16.46           C  
ATOM    393  C   LYS L  42      23.607 -21.883  -6.090  1.00 13.55           C  
ATOM    394  O   LYS L  42      23.517 -21.690  -4.888  1.00 13.85           O  
ATOM    395  CB  LYS L  42      24.016 -20.210  -7.870  1.00 16.96           C  
ATOM    396  CG  LYS L  42      23.402 -19.125  -8.810  1.00 21.66           C  
ATOM    397  CD  LYS L  42      22.536 -19.845  -9.868  1.00 26.21           C  
ATOM    398  CE  LYS L  42      22.126 -18.998 -11.094  1.00 31.91           C  
ATOM    399  NZ  LYS L  42      21.500 -19.903 -12.158  1.00 37.36           N  
ATOM    400  N   ALA L  43      24.282 -22.912  -6.580  1.00 14.15           N  
ATOM    401  CA  ALA L  43      25.030 -23.824  -5.751  1.00 13.68           C  
ATOM    402  C   ALA L  43      26.371 -23.216  -5.387  1.00 12.60           C  
ATOM    403  O   ALA L  43      26.902 -22.351  -6.103  1.00 13.77           O  
ATOM    404  CB  ALA L  43      25.296 -25.141  -6.481  1.00 15.59           C  
ATOM    405  N   PRO L  44      26.960 -23.689  -4.294  1.00 12.14           N  
ATOM    406  CA  PRO L  44      28.346 -23.284  -4.024  1.00 12.34           C  
ATOM    407  C   PRO L  44      29.282 -23.778  -5.125  1.00 12.37           C  
ATOM    408  O   PRO L  44      29.139 -24.904  -5.620  1.00 13.93           O  
ATOM    409  CB  PRO L  44      28.675 -23.944  -2.700  1.00 13.46           C  
ATOM    410  CG  PRO L  44      27.306 -24.328  -2.126  1.00 13.55           C  
ATOM    411  CD  PRO L  44      26.484 -24.702  -3.343  1.00 13.10           C  
ATOM    414  N   LYS L  45      30.273 -22.945  -5.439  0.50 12.11           N  
ATOM    417  CA  LYS L  45      31.321 -23.212  -6.434  0.50 12.55           C  
ATOM    420  C   LYS L  45      32.676 -23.091  -5.738  0.50 11.16           C  
ATOM    423  O   LYS L  45      32.948 -22.112  -5.094  0.50 11.39           O  
ATOM    426  CB  LYS L  45      31.243 -22.192  -7.568  0.50 14.53           C  
ATOM    429  CG  LYS L  45      32.325 -22.306  -8.585  0.50 17.37           C  
ATOM    432  CD  LYS L  45      31.952 -21.402  -9.752  0.50 21.61           C  
ATOM    435  CE  LYS L  45      32.458 -19.979  -9.668  0.50 16.90           C  
ATOM    438  NZ  LYS L  45      33.526 -20.019 -10.819  0.50 26.13           N  
ATOM    440  N   LEU L  46      33.569 -24.010  -6.063  0.50 11.39           N  
ATOM    442  CA  LEU L  46      34.860 -23.982  -5.399  0.50 10.95           C  
ATOM    444  C   LEU L  46      35.721 -22.924  -6.075  0.50 11.39           C  
ATOM    446  O   LEU L  46      35.847 -22.857  -7.299  0.50 11.13           O  
ATOM    448  CB  LEU L  46      35.523 -25.349  -5.442  0.50 11.75           C  
ATOM    450  CG  LEU L  46      36.831 -25.501  -4.645  0.50 12.47           C  
ATOM    452  CD1 LEU L  46      36.660 -25.296  -3.155  0.50 13.19           C  
ATOM    454  CD2 LEU L  46      37.396 -26.885  -4.885  0.50 14.06           C  
ATOM    455  N   LEU L  47      36.304 -22.042  -5.263  1.00 10.34           N  
ATOM    456  CA  LEU L  47      37.246 -21.054  -5.768  1.00 10.79           C  
ATOM    457  C   LEU L  47      38.694 -21.386  -5.423  1.00 10.52           C  
ATOM    458  O   LEU L  47      39.574 -21.200  -6.248  1.00 11.02           O  
ATOM    459  CB  LEU L  47      36.935 -19.680  -5.238  1.00 12.03           C  
ATOM    460  CG  LEU L  47      35.571 -19.045  -5.560  1.00 12.63           C  
ATOM    461  CD1 LEU L  47      35.542 -17.587  -5.128  1.00 15.77           C  
ATOM    462  CD2 LEU L  47      35.146 -19.150  -7.002  1.00 15.51           C  
ATOM    463  N   ILE L  48      38.928 -21.784  -4.179  1.00 10.96           N  
ATOM    464  CA  ILE L  48      40.285 -21.997  -3.652  1.00 11.43           C  
ATOM    465  C   ILE L  48      40.321 -23.344  -2.951  1.00 11.14           C  
ATOM    466  O   ILE L  48      39.374 -23.696  -2.236  1.00 11.77           O  
ATOM    467  CB  ILE L  48      40.730 -20.875  -2.724  1.00 11.84           C  
ATOM    468  CG1 ILE L  48      40.773 -19.565  -3.486  1.00 15.39           C  
ATOM    469  CG2 ILE L  48      42.046 -21.134  -2.071  1.00 12.85           C  
ATOM    470  CD1 ILE L  48      41.179 -18.330  -2.730  1.00 17.37           C  
ATOM    471  N   TYR L  49      41.377 -24.098  -3.198  1.00 11.08           N  
ATOM    472  CA  TYR L  49      41.610 -25.361  -2.548  1.00 11.33           C  
ATOM    473  C   TYR L  49      43.026 -25.427  -2.004  1.00 11.30           C  
ATOM    474  O   TYR L  49      43.874 -24.631  -2.367  1.00 11.92           O  
ATOM    475  CB  TYR L  49      41.333 -26.553  -3.510  1.00 12.39           C  
ATOM    476  CG  TYR L  49      42.295 -26.619  -4.702  1.00 11.74           C  
ATOM    477  CD1 TYR L  49      42.110 -25.796  -5.801  1.00 11.68           C  
ATOM    478  CD2 TYR L  49      43.374 -27.457  -4.670  1.00 12.45           C  
ATOM    479  CE1 TYR L  49      42.990 -25.827  -6.860  1.00 11.92           C  
ATOM    480  CE2 TYR L  49      44.275 -27.504  -5.743  1.00 13.24           C  
ATOM    481  CZ  TYR L  49      44.068 -26.707  -6.834  1.00 12.49           C  
ATOM    482  OH  TYR L  49      44.959 -26.799  -7.884  1.00 13.33           O  
ATOM    484  N   ASP L  50      43.267 -26.417  -1.141  0.50 11.87           N  
ATOM    486  CA  ASP L  50      44.575 -26.558  -0.495  0.50 12.95           C  
ATOM    488  C   ASP L  50      44.996 -25.253   0.149  0.50 12.56           C  
ATOM    490  O   ASP L  50      46.176 -24.941   0.187  0.50 12.45           O  
ATOM    492  CB  ASP L  50      45.655 -27.070  -1.465  0.50 14.39           C  
ATOM    494  CG  ASP L  50      45.530 -28.555  -1.807  0.50 16.36           C  
ATOM    496  OD1 ASP L  50      44.838 -29.329  -1.149  0.50 19.58           O  
ATOM    498  OD2 ASP L  50      46.227 -29.011  -2.729  0.50 20.49           O  
ATOM    499  N   ALA L  51      44.029 -24.522   0.695  1.00 12.03           N  
ATOM    500  CA  ALA L  51      44.194 -23.208   1.350  1.00 12.23           C  
ATOM    501  C   ALA L  51      44.499 -22.033   0.465  1.00 11.56           C  
ATOM    502  O   ALA L  51      44.039 -20.926   0.747  1.00 12.48           O  
ATOM    503  CB  ALA L  51      45.192 -23.292   2.520  1.00 13.36           C  
ATOM    505  N   SER L  52      45.281 -22.227  -0.619  0.50 11.65           N  
ATOM    507  CA  SER L  52      45.880 -21.121  -1.361  0.50 12.09           C  
ATOM    509  C   SER L  52      45.902 -21.313  -2.870  0.50 11.66           C  
ATOM    511  O   SER L  52      46.445 -20.462  -3.574  0.50 11.81           O  
ATOM    513  CB  SER L  52      47.325 -20.945  -0.885  0.50 13.16           C  
ATOM    515  OG  SER L  52      47.332 -20.562   0.465  0.50 14.99           O  
ATOM    516  N   ASN L  53      45.377 -22.423  -3.384  1.00 11.62           N  
ATOM    517  CA  ASN L  53      45.383 -22.685  -4.812  1.00 12.10           C  
ATOM    518  C   ASN L  53      44.088 -22.279  -5.497  1.00 11.41           C  
ATOM    519  O   ASN L  53      43.037 -22.628  -5.036  1.00 12.75           O  
ATOM    520  CB  ASN L  53      45.732 -24.162  -5.095  1.00 12.31           C  
ATOM    521  CG  ASN L  53      47.159 -24.507  -4.630  1.00 14.52           C  
ATOM    522  OD1 ASN L  53      47.332 -25.473  -3.942  1.00 20.89           O  
ATOM    523  ND2 ASN L  53      48.142 -23.820  -5.118  1.00 17.37           N  
ATOM    524  N   LEU L  54      44.191 -21.562  -6.607  1.00 12.06           N  
ATOM    525  CA  LEU L  54      42.996 -21.071  -7.314  1.00 11.34           C  
ATOM    526  C   LEU L  54      42.529 -22.037  -8.361  1.00 11.20           C  
ATOM    527  O   LEU L  54      43.338 -22.603  -9.115  1.00 11.83           O  
ATOM    528  CB  LEU L  54      43.257 -19.719  -7.969  1.00 13.24           C  
ATOM    529  CG  LEU L  54      43.037 -18.514  -7.072  1.00 15.36           C  
ATOM    530  CD1 LEU L  54      43.930 -18.480  -5.871  1.00 18.11           C  
ATOM    531  CD2 LEU L  54      43.163 -17.258  -7.868  1.00 16.30           C  
ATOM    532  N   GLU L  55      41.219 -22.188  -8.469  1.00 11.45           N  
ATOM    533  CA  GLU L  55      40.644 -22.970  -9.554  1.00 11.58           C  
ATOM    534  C   GLU L  55      40.571 -22.203 -10.873  1.00 11.32           C  
ATOM    535  O   GLU L  55      40.831 -21.001 -10.953  1.00 11.29           O  
ATOM    536  CB  GLU L  55      39.262 -23.502  -9.136  1.00 12.07           C  
ATOM    537  CG  GLU L  55      39.315 -24.927  -8.598  1.00 13.27           C  
ATOM    538  CD  GLU L  55      39.773 -25.959  -9.614  1.00 13.32           C  
ATOM    539  OE1 GLU L  55      39.740 -25.642 -10.817  1.00 13.99           O  
ATOM    540  OE2 GLU L  55      40.152 -27.069  -9.203  1.00 14.06           O  
ATOM    541  N   THR L  56      40.173 -22.938 -11.910  1.00 11.37           N  
ATOM    542  CA  THR L  56      40.124 -22.399 -13.234  1.00 11.82           C  
ATOM    543  C   THR L  56      39.149 -21.236 -13.339  1.00 11.91           C  
ATOM    544  O   THR L  56      38.012 -21.345 -12.902  1.00 13.26           O  
ATOM    545  CB  THR L  56      39.730 -23.480 -14.215  1.00 11.90           C  
ATOM    546  OG1 THR L  56      40.626 -24.611 -14.060  1.00 12.57           O  
ATOM    547  CG2 THR L  56      39.753 -23.030 -15.640  1.00 13.70           C  
ATOM    548  N   GLY L  57      39.599 -20.151 -13.937  1.00 12.12           N  
ATOM    549  CA  GLY L  57      38.758 -18.993 -14.144  1.00 13.73           C  
ATOM    550  C   GLY L  57      38.582 -18.084 -12.961  1.00 14.28           C  
ATOM    551  O   GLY L  57      37.932 -17.064 -13.053  1.00 16.79           O  
ATOM    552  N   VAL L  58      39.165 -18.428 -11.820  1.00 13.37           N  
ATOM    553  CA  VAL L  58      39.015 -17.609 -10.610  1.00 14.06           C  
ATOM    554  C   VAL L  58      39.936 -16.401 -10.784  1.00 14.93           C  
ATOM    555  O   VAL L  58      41.113 -16.549 -10.988  1.00 15.86           O  
ATOM    556  CB  VAL L  58      39.353 -18.399  -9.384  1.00 12.54           C  
ATOM    557  CG1 VAL L  58      39.295 -17.527  -8.115  1.00 13.41           C  
ATOM    558  CG2 VAL L  58      38.402 -19.604  -9.246  1.00 13.55           C  
ATOM    560  N   PRO L  59      39.347 -15.189 -10.644  0.50 16.70           N  
ATOM    562  CA  PRO L  59      40.033 -13.900 -10.694  0.50 17.86           C  
ATOM    564  C   PRO L  59      41.197 -13.739  -9.701  0.50 16.41           C  
ATOM    566  O   PRO L  59      41.143 -14.247  -8.554  0.50 15.86           O  
ATOM    568  CB  PRO L  59      38.889 -12.920 -10.443  0.50 17.76           C  
ATOM    570  CG  PRO L  59      37.736 -13.538 -11.144  0.50 17.20           C  
ATOM    572  CD  PRO L  59      37.889 -14.984 -10.649  0.50 16.99           C  
ATOM    573  N   SER L  60      42.254 -13.036 -10.124  1.00 17.12           N  
ATOM    574  CA  SER L  60      43.394 -12.829  -9.301  1.00 18.16           C  
ATOM    575  C   SER L  60      43.114 -12.056  -8.043  1.00 16.30           C  
ATOM    576  O   SER L  60      43.938 -12.097  -7.139  1.00 17.22           O  
ATOM    577  CB  SER L  60      44.505 -12.116 -10.089  1.00 20.47           C  
ATOM    578  OG  SER L  60      44.081 -10.843 -10.487  1.00 24.68           O  
ATOM    579  N   ARG L  61      41.990 -11.354  -7.985  1.00 15.22           N  
ATOM    580  CA  ARG L  61      41.625 -10.630  -6.782  1.00 15.03           C  
ATOM    581  C   ARG L  61      41.313 -11.544  -5.594  1.00 13.84           C  
ATOM    582  O   ARG L  61      41.304 -11.088  -4.468  1.00 14.35           O  
ATOM    583  CB  ARG L  61      40.465  -9.697  -6.976  1.00 15.40           C  
ATOM    584  CG  ARG L  61      39.184 -10.263  -7.381  1.00 17.77           C  
ATOM    585  CD  ARG L  61      38.107  -9.203  -7.599  1.00 20.07           C  
ATOM    586  NE  ARG L  61      36.847  -9.708  -8.119  1.00 18.98           N  
ATOM    587  CZ  ARG L  61      36.601 -10.096  -9.337  1.00 18.76           C  
ATOM    588  NH1 ARG L  61      37.550  -9.939 -10.263  1.00 20.91           N  
ATOM    589  NH2 ARG L  61      35.440 -10.571  -9.636  1.00 21.04           N  
ATOM    590  N   PHE L  62      41.072 -12.822  -5.846  1.00 13.60           N  
ATOM    591  CA  PHE L  62      40.816 -13.795  -4.772  1.00 13.04           C  
ATOM    592  C   PHE L  62      42.103 -14.462  -4.346  1.00 13.17           C  
ATOM    593  O   PHE L  62      42.879 -14.914  -5.169  1.00 15.83           O  
ATOM    594  CB  PHE L  62      39.826 -14.858  -5.250  1.00 13.62           C  
ATOM    595  CG  PHE L  62      38.468 -14.357  -5.552  1.00 13.47           C  
ATOM    596  CD1 PHE L  62      37.573 -14.178  -4.550  1.00 16.51           C  
ATOM    597  CD2 PHE L  62      38.056 -14.096  -6.848  1.00 16.80           C  
ATOM    598  CE1 PHE L  62      36.300 -13.706  -4.767  1.00 17.28           C  
ATOM    599  CE2 PHE L  62      36.796 -13.620  -7.101  1.00 17.36           C  
ATOM    600  CZ  PHE L  62      35.866 -13.425  -6.058  1.00 15.63           C  
ATOM    601  N   SER L  63      42.300 -14.593  -3.032  1.00 12.67           N  
ATOM    602  CA  SER L  63      43.433 -15.326  -2.510  1.00 13.21           C  
ATOM    603  C   SER L  63      43.060 -15.992  -1.190  1.00 12.09           C  
ATOM    604  O   SER L  63      42.097 -15.579  -0.540  1.00 12.90           O  
ATOM    605  CB  SER L  63      44.687 -14.457  -2.346  1.00 14.83           C  
ATOM    606  OG  SER L  63      44.465 -13.451  -1.369  1.00 16.67           O  
ATOM    607  N   GLY L  64      43.837 -16.987  -0.834  1.00 12.88           N  
ATOM    608  CA  GLY L  64      43.700 -17.650   0.422  1.00 12.35           C  
ATOM    609  C   GLY L  64      45.048 -17.909   1.049  1.00 12.87           C  
ATOM    610  O   GLY L  64      46.030 -18.139   0.342  1.00 14.24           O  
ATOM    611  N   SER L  65      45.072 -17.900   2.377  1.00 13.45           N  
ATOM    612  CA  SER L  65      46.289 -18.172   3.117  1.00 14.46           C  
ATOM    613  C   SER L  65      45.989 -18.916   4.390  1.00 14.03           C  
ATOM    614  O   SER L  65      44.840 -19.049   4.809  1.00 13.32           O  
ATOM    615  CB  SER L  65      47.031 -16.911   3.439  1.00 17.28           C  
ATOM    616  OG  SER L  65      46.320 -16.074   4.250  1.00 22.89           O  
ATOM    617  N   GLY L  66      47.046 -19.415   5.012  1.00 15.60           N  
ATOM    618  CA  GLY L  66      47.009 -20.095   6.295  1.00 15.77           C  
ATOM    619  C   GLY L  66      47.340 -21.544   6.191  1.00 16.53           C  
ATOM    620  O   GLY L  66      47.400 -22.141   5.120  1.00 18.85           O  
ATOM    622  N   SER L  67      47.521 -22.173   7.349  0.50 18.41           N  
ATOM    624  CA  SER L  67      47.819 -23.587   7.443  0.50 19.80           C  
ATOM    626  C   SER L  67      47.750 -23.972   8.903  0.50 18.90           C  
ATOM    628  O   SER L  67      48.265 -23.199   9.730  0.50 21.60           O  
ATOM    630  CB  SER L  67      49.251 -23.813   7.081  0.50 21.87           C  
ATOM    632  OG  SER L  67      50.001 -23.259   8.174  0.50 24.39           O  
ATOM    633  N   GLY L  68      47.217 -25.159   9.212  1.00 17.05           N  
ATOM    634  CA  GLY L  68      47.060 -25.626  10.569  1.00 17.10           C  
ATOM    635  C   GLY L  68      45.678 -25.393  11.043  1.00 16.05           C  
ATOM    636  O   GLY L  68      44.786 -26.166  10.790  1.00 15.84           O  
ATOM    637  N   THR L  69      45.476 -24.315  11.813  1.00 17.56           N  
ATOM    638  CA  THR L  69      44.148 -24.046  12.366  1.00 16.78           C  
ATOM    639  C   THR L  69      43.599 -22.668  11.967  1.00 17.24           C  
ATOM    640  O   THR L  69      42.457 -22.380  12.222  1.00 19.14           O  
ATOM    641  CB  THR L  69      44.149 -24.130  13.902  1.00 18.61           C  
ATOM    642  OG1 THR L  69      45.177 -23.265  14.361  1.00 21.73           O  
ATOM    643  CG2 THR L  69      44.407 -25.525  14.411  1.00 19.76           C  
ATOM    645  N   ASP L  70      44.397 -21.742  11.453  0.50 14.79           N  
ATOM    647  CA  ASP L  70      43.925 -20.394  11.110  0.50 15.27           C  
ATOM    649  C   ASP L  70      44.125 -20.149   9.617  0.50 14.97           C  
ATOM    651  O   ASP L  70      45.203 -20.490   9.062  0.50 17.46           O  
ATOM    653  CB  ASP L  70      44.581 -19.263  11.977  0.50 17.20           C  
ATOM    655  CG  ASP L  70      44.353 -19.427  13.487  0.50 18.25           C  
ATOM    657  OD1 ASP L  70      43.305 -19.009  14.048  0.50 19.58           O  
ATOM    659  OD2 ASP L  70      45.300 -19.922  14.116  0.50 27.25           O  
ATOM    660  N   PHE L  71      43.055 -19.659   8.991  1.00 13.44           N  
ATOM    661  CA  PHE L  71      42.985 -19.405   7.541  1.00 13.26           C  
ATOM    662  C   PHE L  71      42.297 -18.080   7.219  1.00 12.85           C  
ATOM    663  O   PHE L  71      41.437 -17.631   7.982  1.00 13.33           O  
ATOM    664  CB  PHE L  71      42.222 -20.552   6.871  1.00 12.79           C  
ATOM    665  CG  PHE L  71      42.863 -21.886   7.100  1.00 12.75           C  
ATOM    666  CD1 PHE L  71      43.795 -22.392   6.216  1.00 12.76           C  
ATOM    667  CD2 PHE L  71      42.599 -22.595   8.228  1.00 12.67           C  
ATOM    668  CE1 PHE L  71      44.412 -23.603   6.455  1.00 13.62           C  
ATOM    669  CE2 PHE L  71      43.220 -23.835   8.486  1.00 13.23           C  
ATOM    670  CZ  PHE L  71      44.144 -24.334   7.574  1.00 13.78           C  
ATOM    671  N   THR L  72      42.646 -17.483   6.088  1.00 12.52           N  
ATOM    672  CA  THR L  72      42.136 -16.229   5.634  1.00 12.47           C  
ATOM    673  C   THR L  72      41.795 -16.304   4.138  1.00 12.43           C  
ATOM    674  O   THR L  72      42.583 -16.812   3.366  1.00 15.93           O  
ATOM    675  CB  THR L  72      43.104 -15.094   5.900  1.00 13.61           C  
ATOM    676  OG1 THR L  72      43.456 -15.092   7.291  1.00 16.05           O  
ATOM    677  CG2 THR L  72      42.564 -13.738   5.537  1.00 15.67           C  
ATOM    678  N   PHE L  73      40.675 -15.749   3.754  1.00 11.74           N  
ATOM    679  CA  PHE L  73      40.257 -15.545   2.401  1.00 10.94           C  
ATOM    680  C   PHE L  73      40.144 -14.072   2.180  1.00 11.21           C  
ATOM    681  O   PHE L  73      39.506 -13.367   2.958  1.00 12.39           O  
ATOM    682  CB  PHE L  73      38.902 -16.218   2.193  1.00 12.17           C  
ATOM    683  CG  PHE L  73      38.243 -16.019   0.858  1.00 11.64           C  
ATOM    684  CD1 PHE L  73      38.539 -16.877  -0.184  1.00 13.15           C  
ATOM    685  CD2 PHE L  73      37.288 -15.054   0.653  1.00 14.13           C  
ATOM    686  CE1 PHE L  73      37.904 -16.755  -1.386  1.00 15.15           C  
ATOM    687  CE2 PHE L  73      36.666 -14.943  -0.542  1.00 15.05           C  
ATOM    688  CZ  PHE L  73      36.957 -15.810  -1.551  1.00 16.43           C  
ATOM    689  N   THR L  74      40.745 -13.572   1.090  1.00 11.77           N  
ATOM    690  CA  THR L  74      40.784 -12.148   0.800  1.00 12.40           C  
ATOM    691  C   THR L  74      40.301 -11.866  -0.601  1.00 12.55           C  
ATOM    692  O   THR L  74      40.719 -12.551  -1.549  1.00 14.21           O  
ATOM    693  CB  THR L  74      42.215 -11.591   0.996  1.00 13.77           C  
ATOM    694  OG1 THR L  74      42.665 -11.950   2.292  1.00 15.03           O  
ATOM    695  CG2 THR L  74      42.252 -10.077   0.834  1.00 16.86           C  
ATOM    696  N   ILE L  75      39.443 -10.852  -0.751  1.00 12.65           N  
ATOM    697  CA  ILE L  75      39.162 -10.258  -2.047  1.00 12.78           C  
ATOM    698  C   ILE L  75      39.880  -8.922  -2.057  1.00 13.29           C  
ATOM    699  O   ILE L  75      39.578  -8.041  -1.236  1.00 14.27           O  
ATOM    700  CB  ILE L  75      37.674 -10.076  -2.299  1.00 14.28           C  
ATOM    701  CG1 ILE L  75      36.889 -11.340  -1.989  1.00 14.60           C  
ATOM    702  CG2 ILE L  75      37.444  -9.607  -3.739  1.00 14.74           C  
ATOM    703  CD1 ILE L  75      35.388 -11.168  -2.153  1.00 15.77           C  
ATOM    704  N   SER L  76      40.847  -8.728  -2.948  1.00 13.76           N  
ATOM    705  CA  SER L  76      41.689  -7.538  -2.868  1.00 14.93           C  
ATOM    706  C   SER L  76      40.941  -6.272  -3.199  1.00 15.31           C  
ATOM    707  O   SER L  76      41.229  -5.209  -2.645  1.00 16.38           O  
ATOM    708  CB  SER L  76      42.883  -7.693  -3.784  1.00 17.33           C  
ATOM    709  OG  SER L  76      42.441  -7.806  -5.121  1.00 19.62           O  
ATOM    710  N   SER L  77      40.013  -6.355  -4.129  1.00 15.24           N  
ATOM    711  CA  SER L  77      39.265  -5.229  -4.657  1.00 16.16           C  
ATOM    712  C   SER L  77      37.886  -5.731  -5.055  1.00 15.50           C  
ATOM    713  O   SER L  77      37.713  -6.373  -6.075  1.00 17.15           O  
ATOM    714  CB  SER L  77      40.002  -4.635  -5.870  1.00 18.61           C  
ATOM    715  OG  SER L  77      39.234  -3.580  -6.441  1.00 22.97           O  
ATOM    716  N   LEU L  78      36.893  -5.493  -4.197  1.00 15.36           N  
ATOM    717  CA  LEU L  78      35.573  -6.085  -4.372  1.00 16.03           C  
ATOM    718  C   LEU L  78      34.926  -5.581  -5.649  1.00 16.09           C  
ATOM    719  O   LEU L  78      34.939  -4.377  -5.924  1.00 17.98           O  
ATOM    720  CB  LEU L  78      34.735  -5.656  -3.171  1.00 17.14           C  
ATOM    721  CG  LEU L  78      33.325  -6.155  -3.054  1.00 19.84           C  
ATOM    722  CD1 LEU L  78      33.346  -7.673  -2.974  1.00 22.16           C  
ATOM    723  CD2 LEU L  78      32.658  -5.600  -1.829  1.00 21.11           C  
ATOM    724  N   GLN L  79      34.321  -6.523  -6.398  1.00 16.31           N  
ATOM    725  CA  GLN L  79      33.556  -6.194  -7.601  1.00 16.73           C  
ATOM    726  C   GLN L  79      32.113  -6.562  -7.410  1.00 17.17           C  
ATOM    727  O   GLN L  79      31.763  -7.430  -6.621  1.00 16.82           O  
ATOM    728  CB  GLN L  79      34.129  -6.900  -8.835  1.00 18.24           C  
ATOM    729  CG  GLN L  79      35.610  -6.565  -9.021  1.00 19.74           C  
ATOM    730  CD  GLN L  79      35.881  -5.149  -9.227  1.00 24.66           C  
ATOM    731  OE1 GLN L  79      36.633  -4.466  -8.462  1.00 31.13           O  
ATOM    732  NE2 GLN L  79      35.271  -4.647 -10.191  1.00 25.40           N  
ATOM    733  N   PRO L  80      31.209  -5.930  -8.193  1.00 18.72           N  
ATOM    734  CA  PRO L  80      29.782  -6.227  -8.007  1.00 20.71           C  
ATOM    735  C   PRO L  80      29.402  -7.695  -8.140  1.00 19.57           C  
ATOM    736  O   PRO L  80      28.517  -8.190  -7.420  1.00 21.87           O  
ATOM    737  CB  PRO L  80      29.122  -5.406  -9.142  1.00 22.30           C  
ATOM    738  CG  PRO L  80      30.071  -4.385  -9.436  1.00 23.80           C  
ATOM    739  CD  PRO L  80      31.431  -4.842  -9.178  1.00 19.85           C  
ATOM    740  N   GLU L  81      30.076  -8.406  -9.021  1.00 19.02           N  
ATOM    741  CA  GLU L  81      29.758  -9.790  -9.256  1.00 19.09           C  
ATOM    742  C   GLU L  81      30.192 -10.689  -8.071  1.00 17.91           C  
ATOM    743  O   GLU L  81      29.889 -11.899  -8.089  1.00 20.03           O  
ATOM    744  CB  GLU L  81      30.405 -10.292 -10.554  1.00 20.23           C  
ATOM    745  CG  GLU L  81      31.860 -10.208 -10.651  1.00 21.33           C  
ATOM    746  CD  GLU L  81      32.404  -8.866 -11.251  1.00 23.52           C  
ATOM    747  OE1 GLU L  81      31.786  -7.753 -11.116  1.00 23.49           O  
ATOM    748  OE2 GLU L  81      33.502  -8.978 -11.826  1.00 29.00           O  
ATOM    749  N   ASP L  82      30.860 -10.112  -7.060  1.00 16.54           N  
ATOM    750  CA  ASP L  82      31.357 -10.916  -5.935  1.00 15.45           C  
ATOM    751  C   ASP L  82      30.330 -11.067  -4.827  1.00 15.79           C  
ATOM    752  O   ASP L  82      30.597 -11.742  -3.832  1.00 15.27           O  
ATOM    753  CB  ASP L  82      32.632 -10.281  -5.397  1.00 15.27           C  
ATOM    754  CG  ASP L  82      33.776 -10.226  -6.425  1.00 15.70           C  
ATOM    755  OD1 ASP L  82      33.770 -10.996  -7.413  1.00 17.02           O  
ATOM    756  OD2 ASP L  82      34.670  -9.374  -6.183  1.00 17.13           O  
ATOM    758  N   ILE L  83      29.173 -10.394  -4.925  0.50 16.18           N  
ATOM    760  CA  ILE L  83      28.035 -10.598  -3.999  0.50 16.36           C  
ATOM    762  C   ILE L  83      27.674 -12.039  -3.950  0.50 15.76           C  
ATOM    764  O   ILE L  83      27.380 -12.683  -4.950  0.50 15.35           O  
ATOM    766  CB  ILE L  83      26.730  -9.808  -4.384  0.50 17.56           C  
ATOM    768  CG1 ILE L  83      26.973  -8.316  -4.194  0.50 19.49           C  
ATOM    770  CG2 ILE L  83      25.487 -10.272  -3.574  0.50 17.37           C  
ATOM    772  CD1 ILE L  83      25.937  -7.500  -4.867  0.50 19.63           C  
ATOM    773  N   ALA L  84      27.764 -12.587  -2.759  1.00 13.98           N  
ATOM    774  CA  ALA L  84      27.619 -14.021  -2.580  1.00 12.55           C  
ATOM    775  C   ALA L  84      27.775 -14.343  -1.115  1.00 11.86           C  
ATOM    776  O   ALA L  84      28.166 -13.464  -0.327  1.00 12.77           O  
ATOM    777  CB  ALA L  84      28.683 -14.794  -3.376  1.00 13.38           C  
ATOM    778  N   THR L  85      27.515 -15.597  -0.751  1.00 12.10           N  
ATOM    779  CA  THR L  85      27.908 -16.141   0.521  1.00 11.48           C  
ATOM    780  C   THR L  85      29.074 -17.063   0.298  1.00 11.85           C  
ATOM    781  O   THR L  85      29.046 -17.899  -0.592  1.00 12.99           O  
ATOM    782  CB  THR L  85      26.737 -16.847   1.209  1.00 13.27           C  
ATOM    783  OG1 THR L  85      25.703 -15.870   1.430  1.00 13.68           O  
ATOM    784  CG2 THR L  85      27.135 -17.450   2.527  1.00 13.02           C  
ATOM    785  N   TYR L  86      30.111 -16.884   1.105  1.00 10.93           N  
ATOM    786  CA  TYR L  86      31.333 -17.664   1.015  1.00 10.85           C  
ATOM    787  C   TYR L  86      31.407 -18.650   2.145  1.00 10.63           C  
ATOM    788  O   TYR L  86      31.004 -18.315   3.260  1.00 11.48           O  
ATOM    789  CB  TYR L  86      32.552 -16.705   1.029  1.00 11.09           C  
ATOM    790  CG  TYR L  86      32.609 -15.821  -0.201  1.00 11.82           C  
ATOM    791  CD1 TYR L  86      33.346 -16.155  -1.305  1.00 11.78           C  
ATOM    792  CD2 TYR L  86      31.849 -14.649  -0.251  1.00 11.48           C  
ATOM    793  CE1 TYR L  86      33.334 -15.339  -2.408  1.00 11.91           C  
ATOM    794  CE2 TYR L  86      31.821 -13.831  -1.378  1.00 12.13           C  
ATOM    795  CZ  TYR L  86      32.546 -14.219  -2.483  1.00 12.09           C  
ATOM    796  OH  TYR L  86      32.553 -13.470  -3.633  1.00 13.73           O  
ATOM    797  N   TYR L  87      31.955 -19.837   1.890  1.00 10.22           N  
ATOM    798  CA  TYR L  87      32.106 -20.876   2.899  1.00 10.38           C  
ATOM    799  C   TYR L  87      33.501 -21.446   2.870  1.00 10.77           C  
ATOM    800  O   TYR L  87      34.007 -21.768   1.807  1.00 11.34           O  
ATOM    801  CB  TYR L  87      31.140 -22.060   2.636  1.00 11.70           C  
ATOM    802  CG  TYR L  87      29.679 -21.713   2.741  1.00 11.20           C  
ATOM    803  CD1 TYR L  87      29.057 -21.700   3.977  1.00 11.03           C  
ATOM    804  CD2 TYR L  87      28.926 -21.399   1.635  1.00 11.81           C  
ATOM    805  CE1 TYR L  87      27.736 -21.349   4.090  1.00 11.73           C  
ATOM    806  CE2 TYR L  87      27.617 -21.046   1.737  1.00 12.13           C  
ATOM    807  CZ  TYR L  87      27.010 -21.008   2.964  1.00 11.76           C  
ATOM    808  OH  TYR L  87      25.687 -20.650   3.096  1.00 13.55           O  
ATOM    809  N   CYS L  88      34.078 -21.667   4.040  1.00 10.12           N  
ATOM    810  CA  CYS L  88      35.236 -22.534   4.137  1.00 10.48           C  
ATOM    811  C   CYS L  88      34.778 -23.965   4.423  1.00 11.12           C  
ATOM    812  O   CYS L  88      33.691 -24.211   4.946  1.00 11.86           O  
ATOM    813  CB  CYS L  88      36.255 -22.049   5.175  1.00 11.57           C  
ATOM    814  SG  CYS L  88      35.598 -22.075   6.876  1.00 13.99           S  
ATOM    815  N   GLN L  89      35.639 -24.907   4.088  1.00 10.58           N  
ATOM    816  CA  GLN L  89      35.402 -26.313   4.337  1.00 11.04           C  
ATOM    817  C   GLN L  89      36.739 -27.007   4.567  1.00 11.77           C  
ATOM    818  O   GLN L  89      37.647 -26.886   3.733  1.00 12.34           O  
ATOM    819  CB  GLN L  89      34.714 -26.961   3.154  1.00 11.65           C  
ATOM    820  CG  GLN L  89      34.488 -28.471   3.314  1.00 12.77           C  
ATOM    821  CD  GLN L  89      34.162 -29.220   2.071  1.00 12.04           C  
ATOM    822  OE1 GLN L  89      34.716 -28.946   0.987  1.00 12.49           O  
ATOM    823  NE2 GLN L  89      33.286 -30.220   2.208  1.00 12.90           N  
ATOM    824  N   GLN L  90      36.863 -27.787   5.640  1.00 11.95           N  
ATOM    825  CA  GLN L  90      38.053 -28.603   5.826  1.00 11.81           C  
ATOM    826  C   GLN L  90      37.850 -29.964   5.191  1.00 12.65           C  
ATOM    827  O   GLN L  90      36.730 -30.516   5.227  1.00 12.62           O  
ATOM    828  CB  GLN L  90      38.407 -28.765   7.316  1.00 12.30           C  
ATOM    829  CG  GLN L  90      37.451 -29.590   8.191  1.00 13.22           C  
ATOM    830  CD  GLN L  90      37.596 -31.087   8.134  1.00 13.33           C  
ATOM    831  OE1 GLN L  90      38.658 -31.608   7.705  1.00 14.03           O  
ATOM    832  NE2 GLN L  90      36.564 -31.807   8.597  1.00 14.40           N  
ATOM    833  N   TYR L  91      38.909 -30.518   4.617  1.00 12.56           N  
ATOM    834  CA  TYR L  91      38.867 -31.856   4.034  1.00 13.05           C  
ATOM    835  C   TYR L  91      40.030 -32.704   4.449  1.00 14.43           C  
ATOM    836  O   TYR L  91      40.522 -33.559   3.726  1.00 15.54           O  
ATOM    837  CB  TYR L  91      38.611 -31.820   2.517  1.00 14.22           C  
ATOM    838  CG  TYR L  91      39.626 -31.089   1.710  1.00 12.76           C  
ATOM    839  CD1 TYR L  91      39.626 -29.714   1.637  1.00 12.97           C  
ATOM    840  CD2 TYR L  91      40.586 -31.780   0.981  1.00 13.90           C  
ATOM    841  CE1 TYR L  91      40.576 -29.039   0.905  1.00 12.70           C  
ATOM    842  CE2 TYR L  91      41.535 -31.103   0.251  1.00 14.46           C  
ATOM    843  CZ  TYR L  91      41.529 -29.718   0.209  1.00 13.25           C  
ATOM    844  OH  TYR L  91      42.447 -29.022  -0.535  1.00 15.43           O  
ATOM    845  N   ASP L  92      40.473 -32.463   5.685  1.00 14.97           N  
ATOM    846  CA  ASP L  92      41.475 -33.334   6.303  1.00 17.57           C  
ATOM    847  C   ASP L  92      40.859 -34.614   6.824  1.00 17.31           C  
ATOM    848  O   ASP L  92      41.469 -35.681   6.665  1.00 21.07           O  
ATOM    849  CB  ASP L  92      42.185 -32.606   7.451  1.00 17.15           C  
ATOM    850  CG  ASP L  92      43.400 -33.342   7.934  1.00 21.70           C  
ATOM    851  OD1 ASP L  92      44.110 -33.972   7.162  1.00 27.86           O  
ATOM    852  OD2 ASP L  92      43.595 -33.294   9.074  1.00 30.90           O  
ATOM    854  N   ASN L  93      39.697 -34.575   7.451  0.50 17.53           N  
ATOM    856  CA  ASN L  93      39.137 -35.803   8.045  0.50 18.07           C  
ATOM    858  C   ASN L  93      37.620 -35.747   7.935  0.50 16.98           C  
ATOM    860  O   ASN L  93      37.011 -34.725   8.187  0.50 16.65           O  
ATOM    862  CB  ASN L  93      39.645 -35.956   9.490  0.50 19.15           C  
ATOM    864  CG  ASN L  93      39.401 -37.317  10.101  0.50 23.46           C  
ATOM    866  OD1 ASN L  93      39.976 -38.307   9.654  0.50 31.14           O  
ATOM    868  ND2 ASN L  93      38.610 -37.363  11.158  0.50 28.36           N  
ATOM    869  N   LEU L  94      37.035 -36.851   7.525  1.00 17.66           N  
ATOM    870  CA  LEU L  94      35.615 -36.952   7.278  1.00 16.93           C  
ATOM    871  C   LEU L  94      34.859 -36.887   8.603  1.00 16.47           C  
ATOM    872  O   LEU L  94      35.321 -37.461   9.639  1.00 20.44           O  
ATOM    873  CB  LEU L  94      35.296 -38.299   6.580  1.00 18.34           C  
ATOM    874  CG  LEU L  94      35.785 -38.377   5.161  1.00 18.48           C  
ATOM    875  CD1 LEU L  94      35.908 -39.776   4.673  1.00 22.04           C  
ATOM    876  CD2 LEU L  94      34.881 -37.528   4.257  1.00 17.88           C  
ATOM    877  N   PRO L  95      33.679 -36.256   8.628  1.00 17.15           N  
ATOM    878  CA  PRO L  95      33.102 -35.541   7.518  1.00 16.20           C  
ATOM    879  C   PRO L  95      33.780 -34.240   7.229  1.00 14.68           C  
ATOM    880  O   PRO L  95      34.250 -33.583   8.158  1.00 14.94           O  
ATOM    881  CB  PRO L  95      31.654 -35.314   7.974  1.00 16.36           C  
ATOM    882  CG  PRO L  95      31.757 -35.230   9.483  1.00 19.36           C  
ATOM    883  CD  PRO L  95      32.801 -36.249   9.819  1.00 17.95           C  
ATOM    884  N   TYR L  96      33.779 -33.842   5.981  1.00 13.60           N  
ATOM    885  CA  TYR L  96      34.432 -32.614   5.541  1.00 13.21           C  
ATOM    886  C   TYR L  96      33.523 -31.417   5.805  1.00 12.90           C  
ATOM    887  O   TYR L  96      32.624 -31.076   5.030  1.00 13.09           O  
ATOM    888  CB  TYR L  96      34.780 -32.715   4.057  1.00 12.93           C  
ATOM    889  CG  TYR L  96      35.753 -33.816   3.706  1.00 14.09           C  
ATOM    890  CD1 TYR L  96      36.662 -34.331   4.634  1.00 14.53           C  
ATOM    891  CD2 TYR L  96      35.886 -34.248   2.381  1.00 14.72           C  
ATOM    892  CE1 TYR L  96      37.601 -35.275   4.266  1.00 15.34           C  
ATOM    893  CE2 TYR L  96      36.837 -35.192   2.022  1.00 17.54           C  
ATOM    894  CZ  TYR L  96      37.692 -35.706   2.978  1.00 17.03           C  
ATOM    895  OH  TYR L  96      38.678 -36.641   2.604  1.00 19.54           O  
ATOM    896  N   THR L  97      33.709 -30.817   6.968  1.00 12.73           N  
ATOM    897  CA  THR L  97      32.789 -29.886   7.550  1.00 12.63           C  
ATOM    898  C   THR L  97      32.990 -28.451   7.064  1.00 11.84           C  
ATOM    899  O   THR L  97      34.095 -28.035   6.703  1.00 11.96           O  
ATOM    900  CB  THR L  97      32.879 -29.972   9.085  1.00 13.16           C  
ATOM    901  OG1 THR L  97      34.252 -29.884   9.444  1.00 13.98           O  
ATOM    902  CG2 THR L  97      32.267 -31.246   9.615  1.00 15.58           C  
ATOM    903  N   PHE L  98      31.875 -27.724   7.062  1.00 12.21           N  
ATOM    904  CA  PHE L  98      31.807 -26.359   6.599  1.00 11.89           C  
ATOM    905  C   PHE L  98      31.780 -25.346   7.732  1.00 11.74           C  
ATOM    906  O   PHE L  98      31.179 -25.573   8.765  1.00 12.79           O  
ATOM    907  CB  PHE L  98      30.526 -26.145   5.809  1.00 12.45           C  
ATOM    908  CG  PHE L  98      30.505 -26.833   4.472  1.00 12.62           C  
ATOM    909  CD1 PHE L  98      30.954 -26.223   3.360  1.00 13.62           C  
ATOM    910  CD2 PHE L  98      30.049 -28.127   4.348  1.00 15.30           C  
ATOM    911  CE1 PHE L  98      30.947 -26.881   2.110  1.00 14.46           C  
ATOM    912  CE2 PHE L  98      30.062 -28.779   3.153  1.00 17.20           C  
ATOM    913  CZ  PHE L  98      30.469 -28.135   2.037  1.00 15.34           C  
ATOM    914  N   GLY L  99      32.346 -24.183   7.478  1.00 11.77           N  
ATOM    915  CA  GLY L  99      32.037 -23.018   8.251  1.00 12.03           C  
ATOM    916  C   GLY L  99      30.617 -22.565   8.010  1.00 11.36           C  
ATOM    917  O   GLY L  99      29.944 -22.998   7.082  1.00 12.81           O  
ATOM    919  N   GLN L 100      30.120 -21.639   8.835  0.50 11.95           N  
ATOM    921  CA  GLN L 100      28.724 -21.247   8.712  0.50 12.99           C  
ATOM    923  C   GLN L 100      28.427 -20.183   7.713  0.50 12.28           C  
ATOM    925  O   GLN L 100      27.263 -19.791   7.565  0.50 13.97           O  
ATOM    927  CB  GLN L 100      28.106 -20.855  10.052  0.50 15.61           C  
ATOM    929  CG  GLN L 100      27.408 -22.042  10.715  0.50 21.17           C  
ATOM    931  CD  GLN L 100      26.232 -22.711   9.826  0.50 23.48           C  
ATOM    933  OE1 GLN L 100      25.371 -22.054   9.082  0.50 23.38           O  
ATOM    935  NE2 GLN L 100      26.206 -24.050   9.924  0.50 20.45           N  
ATOM    936  N   GLY L 101      29.448 -19.698   7.008  1.00 11.32           N  
ATOM    937  CA  GLY L 101      29.231 -18.797   5.901  1.00 11.57           C  
ATOM    938  C   GLY L 101      29.466 -17.321   6.247  1.00 11.57           C  
ATOM    939  O   GLY L 101      29.282 -16.911   7.384  1.00 14.04           O  
ATOM    940  N   THR L 102      29.783 -16.562   5.225  1.00 11.37           N  
ATOM    941  CA  THR L 102      29.873 -15.125   5.279  1.00 11.28           C  
ATOM    942  C   THR L 102      29.107 -14.547   4.134  1.00 11.37           C  
ATOM    943  O   THR L 102      29.472 -14.764   2.976  1.00 11.89           O  
ATOM    944  CB  THR L 102      31.348 -14.642   5.185  1.00 12.13           C  
ATOM    945  OG1 THR L 102      32.168 -15.225   6.188  1.00 12.53           O  
ATOM    946  CG2 THR L 102      31.407 -13.138   5.245  1.00 13.01           C  
ATOM    947  N   LYS L 103      28.022 -13.810   4.442  1.00 11.65           N  
ATOM    948  CA  LYS L 103      27.237 -13.159   3.425  1.00 12.21           C  
ATOM    949  C   LYS L 103      27.749 -11.787   3.122  1.00 12.73           C  
ATOM    950  O   LYS L 103      27.823 -10.930   4.005  1.00 14.49           O  
ATOM    951  CB  LYS L 103      25.774 -13.093   3.889  1.00 14.56           C  
ATOM    952  CG  LYS L 103      24.888 -12.511   2.840  1.00 16.80           C  
ATOM    953  CD  LYS L 103      23.452 -12.531   3.279  1.00 20.89           C  
ATOM    954  CE  LYS L 103      22.545 -12.079   2.195  1.00 25.61           C  
ATOM    955  NZ  LYS L 103      21.090 -12.324   2.503  1.00 33.06           N  
ATOM    956  N   LEU L 104      28.187 -11.598   1.892  0.75 13.00           N  
ATOM    958  CA  LEU L 104      28.818 -10.362   1.510  0.75 14.45           C  
ATOM    961  C   LEU L 104      27.865  -9.510   0.651  0.50 15.90           C  
ATOM    963  O   LEU L 104      27.386 -10.001  -0.373  0.50 17.50           O  
ATOM    964  CB  LEU L 104      30.104 -10.726   0.682  0.75 14.91           C  
ATOM    966  CG  LEU L 104      30.892  -9.546   0.125  0.75 13.88           C  
ATOM    968  CD1 LEU L 104      31.377  -8.579   1.092  0.75 16.44           C  
ATOM    970  CD2 LEU L 104      32.047 -10.172  -0.652  0.75 16.44           C  
ATOM    972  N   GLU L 105      27.640  -8.259   1.071  1.00 16.07           N  
ATOM    973  CA  GLU L 105      26.786  -7.321   0.374  1.00 17.77           C  
ATOM    974  C   GLU L 105      27.569  -6.054   0.068  1.00 18.03           C  
ATOM    975  O   GLU L 105      28.570  -5.742   0.697  1.00 17.97           O  
ATOM    976  CB  GLU L 105      25.548  -7.015   1.177  1.00 19.70           C  
ATOM    977  CG  GLU L 105      24.642  -8.235   1.195  1.00 26.20           C  
ATOM    978  CD  GLU L 105      23.365  -8.064   1.931  0.50 25.95           C  
ATOM    979  OE1 GLU L 105      23.351  -8.333   3.133  0.50 27.20           O  
ATOM    980  OE2 GLU L 105      22.355  -7.740   1.277  0.50 30.34           O  
ATOM    981  N   ILE L 106      27.045  -5.278  -0.893  1.00 19.67           N  
ATOM    982  CA  ILE L 106      27.592  -3.968  -1.215  1.00 21.43           C  
ATOM    983  C   ILE L 106      26.939  -2.880  -0.351  1.00 24.57           C  
ATOM    984  O   ILE L 106      25.723  -2.850  -0.154  1.00 28.50           O  
ATOM    985  CB  ILE L 106      27.363  -3.576  -2.687  1.00 25.16           C  
ATOM    986  CG1 ILE L 106      28.100  -4.468  -3.617  1.00 29.18           C  
ATOM    987  CG2 ILE L 106      27.954  -2.205  -2.983  1.00 26.01           C  
ATOM    988  CD1 ILE L 106      29.593  -4.678  -3.383  1.00 34.65           C  
ATOM    989  N   LYS L 107      27.765  -2.005   0.204  1.00 25.06           N  
ATOM    990  CA  LYS L 107      27.307  -0.880   1.072  1.00 27.86           C  
ATOM    991  C   LYS L 107      26.296  -0.013   0.393  1.00 30.88           C  
ATOM    992  O   LYS L 107      26.479   0.331  -0.795  1.00 33.29           O  
ATOM    993  CB  LYS L 107      28.502  -0.048   1.487  1.00 26.55           C  
ATOM    994  CG  LYS L 107      28.215   1.278   2.287  1.00 28.09           C  
ATOM    995  CD  LYS L 107      29.508   2.126   2.429  1.00 29.56           C  
ATOM    996  CE  LYS L 107      29.342   3.433   3.243  1.00 30.62           C  
ATOM    997  NZ  LYS L 107      30.630   4.236   3.316  1.00 32.81           N  
ATOM    998  OXT LYS L 107      25.337   0.337   1.096  1.00 34.96           O  
TER     999      LYS L 107                                                      
ATOM   1020  N   ASP L   1      36.528 -31.173 -14.919  1.00 15.82           N  
ATOM   1021  CA  ASP L   1      35.770 -31.165 -13.684  1.00 16.11           C  
ATOM   1022  C   ASP L   1      34.512 -32.062 -13.841  1.00 15.11           C  
ATOM   1023  O   ASP L   1      33.928 -32.161 -14.920  1.00 16.49           O  
ATOM   1024  CB  ASP L   1      35.369 -29.781 -13.353  1.00 17.06           C  
ATOM   1025  CG  ASP L   1      36.535 -28.849 -13.020  1.00 14.88           C  
ATOM   1026  OD1 ASP L   1      37.714 -29.292 -12.845  1.00 17.61           O  
ATOM   1027  OD2 ASP L   1      36.263 -27.688 -12.876  1.00 17.84           O  
ATOM   1028  N   ILE L   2      34.136 -32.723 -12.758  1.00 14.80           N  
ATOM   1029  CA  ILE L   2      32.967 -33.590 -12.762  1.00 14.06           C  
ATOM   1030  C   ILE L   2      31.713 -32.759 -12.658  1.00 14.17           C  
ATOM   1031  O   ILE L   2      31.600 -31.924 -11.756  1.00 16.88           O  
ATOM   1032  CB  ILE L   2      33.060 -34.641 -11.668  1.00 14.04           C  
ATOM   1033  CG1 ILE L   2      34.355 -35.464 -11.807  1.00 14.97           C  
ATOM   1034  CG2 ILE L   2      31.806 -35.470 -11.641  1.00 15.26           C  
ATOM   1035  CD1 ILE L   2      34.756 -36.233 -10.588  1.00 17.41           C  
ATOM   1037  N   GLN L   3      30.792 -32.974 -13.577  0.50 15.03           N  
ATOM   1039  CA  GLN L   3      29.553 -32.232 -13.614  0.50 15.43           C  
ATOM   1041  C   GLN L   3      28.483 -33.108 -12.985  0.50 14.62           C  
ATOM   1043  O   GLN L   3      28.403 -34.287 -13.295  0.50 14.32           O  
ATOM   1045  CB  GLN L   3      29.229 -31.899 -15.081  0.50 17.15           C  
ATOM   1047  CG  GLN L   3      27.957 -31.080 -15.278  0.50 18.63           C  
ATOM   1049  CD  GLN L   3      27.638 -30.822 -16.746  0.50 22.25           C  
ATOM   1051  OE1 GLN L   3      28.555 -30.682 -17.556  0.50 31.63           O  
ATOM   1053  NE2 GLN L   3      26.330 -30.744 -17.103  0.50 26.25           N  
ATOM   1054  N   MET L   4      27.698 -32.523 -12.100  1.00 14.01           N  
ATOM   1055  CA  MET L   4      26.574 -33.219 -11.456  1.00 13.47           C  
ATOM   1056  C   MET L   4      25.297 -32.620 -11.994  1.00 13.46           C  
ATOM   1057  O   MET L   4      25.074 -31.415 -11.869  1.00 15.27           O  
ATOM   1058  CB  MET L   4      26.656 -33.010  -9.960  1.00 15.06           C  
ATOM   1059  CG  MET L   4      27.937 -33.500  -9.315  1.00 16.57           C  
ATOM   1060  SD  MET L   4      28.351 -35.233  -9.677  1.00 17.61           S  
ATOM   1061  CE  MET L   4      26.824 -36.094  -9.218  1.00 23.23           C  
ATOM   1062  N   THR L   5      24.482 -33.462 -12.645  1.00 13.95           N  
ATOM   1063  CA  THR L   5      23.226 -33.023 -13.261  1.00 13.82           C  
ATOM   1064  C   THR L   5      22.072 -33.431 -12.320  1.00 13.56           C  
ATOM   1065  O   THR L   5      21.730 -34.617 -12.248  1.00 14.06           O  
ATOM   1066  CB  THR L   5      23.060 -33.634 -14.626  1.00 15.23           C  
ATOM   1067  OG1 THR L   5      24.122 -33.168 -15.454  1.00 17.50           O  
ATOM   1068  CG2 THR L   5      21.734 -33.239 -15.227  1.00 17.14           C  
ATOM   1069  N   GLN L   6      21.524 -32.456 -11.624  1.00 12.72           N  
ATOM   1070  CA  GLN L   6      20.504 -32.694 -10.591  1.00 12.17           C  
ATOM   1071  C   GLN L   6      19.136 -32.279 -11.111  1.00 12.92           C  
ATOM   1072  O   GLN L   6      19.002 -31.213 -11.700  1.00 13.50           O  
ATOM   1073  CB  GLN L   6      20.899 -31.849  -9.344  1.00 12.62           C  
ATOM   1074  CG  GLN L   6      19.977 -32.099  -8.150  1.00 13.02           C  
ATOM   1075  CD  GLN L   6      20.402 -31.411  -6.890  1.00 11.54           C  
ATOM   1076  OE1 GLN L   6      21.541 -31.010  -6.754  1.00 13.65           O  
ATOM   1077  NE2 GLN L   6      19.453 -31.281  -5.982  1.00 12.54           N  
ATOM   1078  N   SER L   7      18.120 -33.094 -10.826  1.00 12.26           N  
ATOM   1079  CA  SER L   7      16.794 -32.797 -11.304  1.00 12.04           C  
ATOM   1080  C   SER L   7      15.830 -33.268 -10.222  1.00 11.92           C  
ATOM   1081  O   SER L   7      16.060 -34.289  -9.567  1.00 13.28           O  
ATOM   1082  CB  SER L   7      16.519 -33.546 -12.605  1.00 13.62           C  
ATOM   1083  OG  SER L   7      15.255 -33.201 -13.130  1.00 15.59           O  
ATOM   1084  N   PRO L   8      14.711 -32.553 -10.014  1.00 12.39           N  
ATOM   1085  CA  PRO L   8      14.310 -31.324 -10.682  1.00 13.09           C  
ATOM   1086  C   PRO L   8      14.960 -30.103 -10.044  1.00 13.37           C  
ATOM   1087  O   PRO L   8      15.669 -30.212  -9.057  1.00 14.55           O  
ATOM   1088  CB  PRO L   8      12.794 -31.350 -10.488  1.00 13.08           C  
ATOM   1089  CG  PRO L   8      12.627 -31.940  -9.162  1.00 14.20           C  
ATOM   1090  CD  PRO L   8      13.724 -32.959  -8.996  1.00 12.63           C  
ATOM   1091  N   SER L   9      14.719 -28.935 -10.620  1.00 13.41           N  
ATOM   1093  CA  SER L   9      15.200 -27.654 -10.073  0.50 14.33           C  
ATOM   1094  C   SER L   9      14.375 -27.181  -8.902  1.00 13.73           C  
ATOM   1095  O   SER L   9      14.864 -26.554  -7.972  1.00 14.25           O  
ATOM   1097  CB  SER L   9      15.206 -26.583 -11.160  0.50 15.98           C  
ATOM   1099  OG  SER L   9      15.693 -25.377 -10.607  0.50 22.01           O  
ATOM   1100  N   SER L  10      13.060 -27.426  -8.977  1.00 14.18           N  
ATOM   1101  CA  SER L  10      12.177 -27.104  -7.914  1.00 14.45           C  
ATOM   1102  C   SER L  10      11.040 -28.057  -7.905  1.00 12.80           C  
ATOM   1103  O   SER L  10      10.718 -28.662  -8.928  1.00 13.45           O  
ATOM   1104  CB  SER L  10      11.726 -25.706  -7.925  1.00 19.80           C  
ATOM   1105  OG  SER L  10      10.995 -25.486  -9.039  1.00 22.34           O  
ATOM   1106  N   LEU L  11      10.411 -28.236  -6.745  1.00 12.63           N  
ATOM   1107  CA  LEU L  11       9.234 -29.058  -6.620  1.00 13.59           C  
ATOM   1108  C   LEU L  11       8.411 -28.647  -5.443  1.00 12.91           C  
ATOM   1109  O   LEU L  11       8.939 -28.129  -4.457  1.00 14.38           O  
ATOM   1110  CB  LEU L  11       9.508 -30.515  -6.602  1.00 16.71           C  
ATOM   1111  CG  LEU L  11      10.079 -31.160  -5.416  1.00 17.74           C  
ATOM   1112  CD1 LEU L  11       9.066 -31.554  -4.296  1.00 16.87           C  
ATOM   1113  CD2 LEU L  11      10.745 -32.479  -5.834  1.00 21.43           C  
ATOM   1115  N   SER L  12       7.123 -28.921  -5.531  0.50 13.05           N  
ATOM   1117  CA  SER L  12       6.193 -28.717  -4.444  0.50 13.69           C  
ATOM   1119  C   SER L  12       5.424 -29.996  -4.188  0.50 12.79           C  
ATOM   1121  O   SER L  12       5.015 -30.646  -5.140  0.50 12.63           O  
ATOM   1123  CB  SER L  12       5.228 -27.582  -4.740  0.50 15.94           C  
ATOM   1125  OG  SER L  12       4.175 -27.978  -5.587  0.50 19.11           O  
ATOM   1126  N   ALA L  13       5.169 -30.319  -2.925  1.00 12.79           N  
ATOM   1127  CA  ALA L  13       4.431 -31.502  -2.571  1.00 13.43           C  
ATOM   1128  C   ALA L  13       3.761 -31.236  -1.232  1.00 13.55           C  
ATOM   1129  O   ALA L  13       3.994 -30.219  -0.582  1.00 15.40           O  
ATOM   1130  CB  ALA L  13       5.363 -32.726  -2.521  1.00 15.85           C  
ATOM   1131  N   SER L  14       2.976 -32.176  -0.784  1.00 14.25           N  
ATOM   1132  CA  SER L  14       2.238 -32.064   0.470  1.00 14.14           C  
ATOM   1133  C   SER L  14       2.926 -32.808   1.562  1.00 13.57           C  
ATOM   1134  O   SER L  14       3.732 -33.702   1.356  1.00 13.41           O  
ATOM   1135  CB  SER L  14       0.863 -32.663   0.266  1.00 18.04           C  
ATOM   1136  OG  SER L  14       0.099 -31.903  -0.640  1.00 22.01           O  
ATOM   1137  N   VAL L  15       2.543 -32.497   2.783  1.00 13.65           N  
ATOM   1138  CA  VAL L  15       3.045 -33.213   3.919  1.00 13.57           C  
ATOM   1139  C   VAL L  15       2.784 -34.707   3.780  1.00 14.02           C  
ATOM   1140  O   VAL L  15       1.671 -35.151   3.419  1.00 15.39           O  
ATOM   1141  CB  VAL L  15       2.462 -32.660   5.220  1.00 14.75           C  
ATOM   1142  CG1 VAL L  15       2.845 -33.556   6.387  1.00 16.74           C  
ATOM   1143  CG2 VAL L  15       2.987 -31.284   5.493  1.00 17.09           C  
ATOM   1144  N   GLY L  16       3.809 -35.489   4.024  1.00 12.41           N  
ATOM   1145  CA  GLY L  16       3.757 -36.960   3.895  1.00 13.39           C  
ATOM   1146  C   GLY L  16       4.175 -37.485   2.559  1.00 12.73           C  
ATOM   1147  O   GLY L  16       4.446 -38.664   2.441  1.00 13.18           O  
ATOM   1148  N   ASP L  17       4.236 -36.627   1.523  1.00 12.92           N  
ATOM   1149  CA  ASP L  17       4.496 -37.139   0.199  1.00 13.14           C  
ATOM   1150  C   ASP L  17       5.949 -37.582   0.068  1.00 12.47           C  
ATOM   1151  O   ASP L  17       6.875 -37.081   0.695  1.00 12.67           O  
ATOM   1152  CB  ASP L  17       4.221 -36.073  -0.808  1.00 13.07           C  
ATOM   1153  CG  ASP L  17       2.737 -35.843  -1.093  1.00 15.15           C  
ATOM   1154  OD1 ASP L  17       1.903 -36.634  -0.693  1.00 16.21           O  
ATOM   1155  OD2 ASP L  17       2.431 -34.817  -1.743  1.00 16.90           O  
ATOM   1156  N   ARG L  18       6.159 -38.493  -0.871  1.00 13.07           N  
ATOM   1157  CA  ARG L  18       7.481 -38.976  -1.244  1.00 12.44           C  
ATOM   1158  C   ARG L  18       8.152 -37.964  -2.178  1.00 11.97           C  
ATOM   1159  O   ARG L  18       7.589 -37.612  -3.221  1.00 13.56           O  
ATOM   1160  CB  ARG L  18       7.322 -40.317  -1.962  1.00 13.12           C  
ATOM   1161  CG  ARG L  18       8.617 -40.987  -2.368  1.00 14.65           C  
ATOM   1162  CD  ARG L  18       8.284 -42.391  -2.960  1.00 15.97           C  
ATOM   1163  NE  ARG L  18       9.515 -43.212  -3.112  0.50 12.90           N  
ATOM   1164  CZ  ARG L  18       9.528 -44.564  -3.082  0.50 15.45           C  
ATOM   1165  NH1 ARG L  18       8.422 -45.270  -3.035  0.50 15.92           N  
ATOM   1166  NH2 ARG L  18      10.654 -45.238  -3.191  0.50 17.34           N  
ATOM   1167  N   VAL L  19       9.358 -37.522  -1.846  1.00 12.14           N  
ATOM   1168  CA  VAL L  19      10.144 -36.599  -2.664  1.00 12.38           C  
ATOM   1169  C   VAL L  19      11.291 -37.374  -3.279  1.00 11.87           C  
ATOM   1170  O   VAL L  19      11.968 -38.102  -2.581  1.00 12.59           O  
ATOM   1171  CB  VAL L  19      10.687 -35.439  -1.813  1.00 12.82           C  
ATOM   1172  CG1 VAL L  19      11.686 -34.599  -2.575  1.00 15.11           C  
ATOM   1173  CG2 VAL L  19       9.501 -34.608  -1.315  1.00 15.64           C  
ATOM   1174  N   THR L  20      11.458 -37.270  -4.583  1.00 12.12           N  
ATOM   1175  CA  THR L  20      12.472 -37.984  -5.294  1.00 11.80           C  
ATOM   1176  C   THR L  20      13.331 -37.001  -6.112  1.00 12.50           C  
ATOM   1177  O   THR L  20      12.807 -36.246  -6.941  1.00 13.26           O  
ATOM   1178  CB  THR L  20      11.834 -38.972  -6.301  1.00 13.20           C  
ATOM   1179  OG1 THR L  20      10.929 -39.824  -5.593  1.00 14.25           O  
ATOM   1180  CG2 THR L  20      12.875 -39.834  -6.976  1.00 15.54           C  
ATOM   1181  N   ILE L  21      14.648 -36.991  -5.849  1.00 11.98           N  
ATOM   1182  CA  ILE L  21      15.611 -36.131  -6.541  1.00 12.22           C  
ATOM   1183  C   ILE L  21      16.669 -37.016  -7.150  1.00 11.86           C  
ATOM   1184  O   ILE L  21      17.132 -37.945  -6.513  1.00 12.97           O  
ATOM   1185  CB  ILE L  21      16.218 -35.106  -5.580  1.00 12.73           C  
ATOM   1186  CG1 ILE L  21      15.124 -34.206  -4.996  1.00 14.49           C  
ATOM   1187  CG2 ILE L  21      17.279 -34.291  -6.311  1.00 14.21           C  
ATOM   1188  CD1 ILE L  21      15.569 -33.288  -3.860  1.00 16.18           C  
ATOM   1189  N   THR L  22      17.080 -36.748  -8.399  1.00 12.68           N  
ATOM   1190  CA  THR L  22      18.136 -37.485  -9.041  1.00 12.85           C  
ATOM   1191  C   THR L  22      19.354 -36.639  -9.312  1.00 13.05           C  
ATOM   1192  O   THR L  22      19.270 -35.425  -9.461  1.00 13.33           O  
ATOM   1193  CB  THR L  22      17.642 -38.160 -10.324  1.00 13.68           C  
ATOM   1194  OG1 THR L  22      17.120 -37.184 -11.213  1.00 14.21           O  
ATOM   1195  CG2 THR L  22      16.538 -39.174 -10.031  1.00 14.45           C  
ATOM   1197  N   CYS L  23      20.470 -37.341  -9.470  0.50 13.72           N  
ATOM   1199  CA  CYS L  23      21.723 -36.724  -9.698  0.50 13.88           C  
ATOM   1201  C   CYS L  23      22.600 -37.640 -10.523  0.50 14.00           C  
ATOM   1203  O   CYS L  23      22.917 -38.743 -10.089  0.50 13.62           O  
ATOM   1205  CB  CYS L  23      22.369 -36.408  -8.358  0.50 14.97           C  
ATOM   1207  SG  CYS L  23      23.928 -35.519  -8.543  0.50 19.07           S  
ATOM   1209  N   GLN L  24      22.970 -37.158 -11.708  0.50 14.14           N  
ATOM   1211  CA  GLN L  24      23.853 -37.872 -12.630  0.50 14.21           C  
ATOM   1213  C   GLN L  24      25.242 -37.248 -12.615  0.50 14.37           C  
ATOM   1215  O   GLN L  24      25.380 -36.035 -12.696  0.50 15.21           O  
ATOM   1217  CB  GLN L  24      23.307 -37.797 -14.046  0.50 15.20           C  
ATOM   1219  CG  GLN L  24      21.869 -38.152 -14.195  0.50 17.82           C  
ATOM   1221  CD  GLN L  24      21.470 -39.471 -13.531  0.50 20.62           C  
ATOM   1223  OE1 GLN L  24      22.094 -40.528 -13.758  0.50 24.55           O  
ATOM   1225  NE2 GLN L  24      20.447 -39.408 -12.676  0.50 20.11           N  
ATOM   1226  N   ALA L  25      26.269 -38.067 -12.441  1.00 15.76           N  
ATOM   1227  CA  ALA L  25      27.662 -37.609 -12.540  1.00 15.01           C  
ATOM   1228  C   ALA L  25      28.145 -37.816 -13.969  1.00 16.18           C  
ATOM   1229  O   ALA L  25      27.846 -38.832 -14.606  1.00 17.85           O  
ATOM   1230  CB  ALA L  25      28.547 -38.392 -11.586  1.00 15.90           C  
ATOM   1231  N   SER L  26      28.966 -36.904 -14.461  1.00 15.90           N  
ATOM   1232  CA  SER L  26      29.494 -36.966 -15.817  1.00 16.32           C  
ATOM   1233  C   SER L  26      30.628 -37.961 -15.987  1.00 17.68           C  
ATOM   1234  O   SER L  26      31.007 -38.254 -17.131  1.00 20.78           O  
ATOM   1235  CB  SER L  26      29.995 -35.595 -16.258  1.00 16.47           C  
ATOM   1236  OG  SER L  26      31.046 -35.133 -15.407  1.00 17.52           O  
ATOM   1237  N   GLN L  27      31.132 -38.474 -14.864  0.75 18.80           N  
ATOM   1239  CA  GLN L  27      32.206 -39.469 -14.739  0.75 20.33           C  
ATOM   1242  C   GLN L  27      31.762 -40.488 -13.694  0.50 19.87           C  
ATOM   1244  O   GLN L  27      31.043 -40.071 -12.796  0.50 19.42           O  
ATOM   1245  CB  GLN L  27      33.559 -38.752 -14.336  0.75 20.69           C  
ATOM   1247  CG  GLN L  27      33.906 -37.721 -15.378  0.75 21.95           C  
ATOM   1249  CD  GLN L  27      35.164 -36.984 -15.107  0.75 21.63           C  
ATOM   1251  OE1 GLN L  27      36.060 -37.489 -14.427  0.75 25.05           O  
ATOM   1253  NE2 GLN L  27      35.252 -35.759 -15.600  0.75 25.98           N  
ATOM   1255  N   ASP L  28      32.296 -41.692 -13.685  1.00 19.86           N  
ATOM   1256  CA  ASP L  28      32.080 -42.637 -12.608  1.00 19.73           C  
ATOM   1257  C   ASP L  28      32.740 -42.140 -11.353  1.00 19.79           C  
ATOM   1258  O   ASP L  28      33.928 -41.904 -11.353  1.00 21.44           O  
ATOM   1259  CB  ASP L  28      32.591 -44.063 -12.979  1.00 21.62           C  
ATOM   1260  CG  ASP L  28      32.044 -45.075 -12.066  1.00 22.98           C  
ATOM   1261  OD1 ASP L  28      32.360 -45.063 -10.872  1.00 23.75           O  
ATOM   1262  OD2 ASP L  28      31.192 -45.919 -12.498  1.00 31.59           O  
ATOM   1263  N   ILE L  29      31.959 -41.969 -10.290  1.00 18.19           N  
ATOM   1264  CA  ILE L  29      32.415 -41.475  -9.004  1.00 17.73           C  
ATOM   1265  C   ILE L  29      32.240 -42.492  -7.903  1.00 16.62           C  
ATOM   1266  O   ILE L  29      32.312 -42.143  -6.738  1.00 17.24           O  
ATOM   1267  CB  ILE L  29      31.768 -40.149  -8.651  1.00 16.54           C  
ATOM   1268  CG1 ILE L  29      30.234 -40.262  -8.529  1.00 16.38           C  
ATOM   1269  CG2 ILE L  29      32.176 -39.029  -9.608  1.00 17.93           C  
ATOM   1270  CD1 ILE L  29      29.565 -39.046  -7.882  1.00 16.18           C  
ATOM   1272  N   SER L  30      32.085 -43.774  -8.271  0.50 18.14           N  
ATOM   1274  CA  SER L  30      31.675 -44.862  -7.371  0.50 18.41           C  
ATOM   1276  C   SER L  30      30.663 -44.372  -6.350  0.50 17.48           C  
ATOM   1278  O   SER L  30      29.572 -43.954  -6.759  0.50 18.88           O  
ATOM   1280  CB  SER L  30      32.838 -45.658  -6.756  0.50 19.03           C  
ATOM   1282  OG  SER L  30      33.652 -44.890  -5.899  0.50 21.64           O  
ATOM   1284  N   ASN L  31      30.963 -44.420  -5.059  0.50 17.62           N  
ATOM   1286  CA  ASN L  31      29.990 -43.996  -4.073  0.50 18.38           C  
ATOM   1288  C   ASN L  31      30.250 -42.632  -3.489  0.50 18.27           C  
ATOM   1290  O   ASN L  31      29.546 -42.273  -2.556  0.50 18.19           O  
ATOM   1292  CB  ASN L  31      29.831 -45.030  -2.940  0.50 19.72           C  
ATOM   1294  CG  ASN L  31      29.352 -46.368  -3.445  0.50 21.82           C  
ATOM   1296  OD1 ASN L  31      28.536 -46.455  -4.359  0.50 24.67           O  
ATOM   1298  ND2 ASN L  31      29.867 -47.411  -2.850  0.50 26.70           N  
ATOM   1299  N   TYR L  32      31.207 -41.862  -4.019  1.00 16.70           N  
ATOM   1300  CA  TYR L  32      31.671 -40.624  -3.381  1.00 17.28           C  
ATOM   1301  C   TYR L  32      30.739 -39.467  -3.715  1.00 16.22           C  
ATOM   1302  O   TYR L  32      31.111 -38.474  -4.351  1.00 14.95           O  
ATOM   1303  CB  TYR L  32      33.082 -40.315  -3.818  1.00 17.64           C  
ATOM   1304  CG  TYR L  32      34.103 -41.334  -3.404  1.00 20.44           C  
ATOM   1305  CD1 TYR L  32      34.412 -41.538  -2.077  1.00 26.54           C  
ATOM   1306  CD2 TYR L  32      34.720 -42.160  -4.321  1.00 22.00           C  
ATOM   1307  CE1 TYR L  32      35.361 -42.448  -1.683  1.00 28.74           C  
ATOM   1308  CE2 TYR L  32      35.698 -43.076  -3.919  1.00 26.44           C  
ATOM   1309  CZ  TYR L  32      35.968 -43.227  -2.599  1.00 27.14           C  
ATOM   1310  OH  TYR L  32      36.926 -44.142  -2.185  1.00 32.84           O  
ATOM   1311  N   LEU L  33      29.526 -39.585  -3.180  1.00 16.74           N  
ATOM   1312  CA  LEU L  33      28.439 -38.678  -3.478  1.00 15.36           C  
ATOM   1313  C   LEU L  33      27.728 -38.412  -2.191  1.00 14.82           C  
ATOM   1314  O   LEU L  33      27.298 -39.343  -1.498  1.00 17.80           O  
ATOM   1315  CB  LEU L  33      27.542 -39.314  -4.515  1.00 17.55           C  
ATOM   1316  CG  LEU L  33      26.471 -38.543  -5.152  1.00 21.08           C  
ATOM   1317  CD1 LEU L  33      25.216 -38.580  -4.240  1.00 21.29           C  
ATOM   1318  CD2 LEU L  33      26.873 -37.184  -5.771  1.00 20.06           C  
ATOM   1319  N   ASN L  34      27.553 -37.149  -1.835  1.00 13.04           N  
ATOM   1320  CA  ASN L  34      26.855 -36.737  -0.651  1.00 13.62           C  
ATOM   1321  C   ASN L  34      25.608 -35.945  -1.023  1.00 12.88           C  
ATOM   1322  O   ASN L  34      25.550 -35.316  -2.077  1.00 13.28           O  
ATOM   1323  CB  ASN L  34      27.766 -35.864   0.230  1.00 14.19           C  
ATOM   1324  CG  ASN L  34      28.977 -36.534   0.738  1.00 15.60           C  
ATOM   1325  OD1 ASN L  34      29.062 -37.707   0.860  1.00 21.27           O  
ATOM   1326  ND2 ASN L  34      29.978 -35.751   0.952  1.00 24.88           N  
ATOM   1327  N   TRP L  35      24.628 -35.957  -0.105  1.00 12.36           N  
ATOM   1328  CA  TRP L  35      23.435 -35.144  -0.212  1.00 12.15           C  
ATOM   1329  C   TRP L  35      23.336 -34.207   0.985  1.00 11.91           C  
ATOM   1330  O   TRP L  35      23.448 -34.651   2.126  1.00 12.60           O  
ATOM   1331  CB  TRP L  35      22.187 -36.007  -0.321  1.00 12.66           C  
ATOM   1332  CG  TRP L  35      22.084 -36.818  -1.552  1.00 12.16           C  
ATOM   1333  CD1 TRP L  35      22.457 -38.138  -1.697  1.00 13.46           C  
ATOM   1334  CD2 TRP L  35      21.562 -36.408  -2.795  1.00 11.85           C  
ATOM   1335  NE1 TRP L  35      22.201 -38.565  -2.968  1.00 13.58           N  
ATOM   1336  CE2 TRP L  35      21.643 -37.529  -3.667  1.00 12.47           C  
ATOM   1337  CE3 TRP L  35      20.961 -35.239  -3.278  1.00 12.70           C  
ATOM   1338  CZ2 TRP L  35      21.152 -37.487  -4.970  1.00 13.82           C  
ATOM   1339  CZ3 TRP L  35      20.446 -35.199  -4.578  1.00 13.22           C  
ATOM   1340  CH2 TRP L  35      20.555 -36.338  -5.386  1.00 13.32           C  
ATOM   1341  N   TYR L  36      23.150 -32.924   0.684  1.00 12.27           N  
ATOM   1342  CA  TYR L  36      23.066 -31.850   1.655  1.00 11.79           C  
ATOM   1343  C   TYR L  36      21.742 -31.169   1.602  1.00 11.82           C  
ATOM   1344  O   TYR L  36      21.095 -31.054   0.553  1.00 12.73           O  
ATOM   1345  CB  TYR L  36      24.143 -30.792   1.369  1.00 12.76           C  
ATOM   1346  CG  TYR L  36      25.560 -31.262   1.558  1.00 12.18           C  
ATOM   1347  CD1 TYR L  36      26.181 -31.121   2.776  1.00 12.41           C  
ATOM   1348  CD2 TYR L  36      26.273 -31.799   0.532  1.00 13.36           C  
ATOM   1349  CE1 TYR L  36      27.479 -31.576   2.989  1.00 13.71           C  
ATOM   1350  CE2 TYR L  36      27.526 -32.229   0.702  1.00 13.74           C  
ATOM   1351  CZ  TYR L  36      28.147 -32.142   1.951  1.00 13.41           C  
ATOM   1352  OH  TYR L  36      29.426 -32.620   2.115  1.00 17.12           O  
ATOM   1353  N   GLN L  37      21.314 -30.686   2.764  1.00 12.45           N  
ATOM   1354  CA  GLN L  37      20.152 -29.839   2.965  1.00 12.07           C  
ATOM   1355  C   GLN L  37      20.624 -28.437   3.338  1.00 12.84           C  
ATOM   1356  O   GLN L  37      21.456 -28.317   4.231  1.00 14.51           O  
ATOM   1357  CB  GLN L  37      19.344 -30.394   4.124  1.00 13.22           C  
ATOM   1358  CG  GLN L  37      18.053 -29.649   4.487  1.00 13.56           C  
ATOM   1359  CD  GLN L  37      17.470 -30.170   5.769  1.00 14.52           C  
ATOM   1360  OE1 GLN L  37      18.058 -29.951   6.838  1.00 16.91           O  
ATOM   1361  NE2 GLN L  37      16.354 -30.873   5.680  1.00 15.11           N  
ATOM   1362  N   GLN L  38      20.102 -27.420   2.681  1.00 11.89           N  
ATOM   1363  CA  GLN L  38      20.471 -26.031   2.986  1.00 11.74           C  
ATOM   1364  C   GLN L  38      19.229 -25.203   3.207  1.00 11.86           C  
ATOM   1365  O   GLN L  38      18.417 -25.023   2.313  1.00 13.02           O  
ATOM   1366  CB  GLN L  38      21.333 -25.423   1.879  1.00 11.40           C  
ATOM   1367  CG  GLN L  38      21.934 -24.079   2.306  1.00 12.99           C  
ATOM   1368  CD  GLN L  38      22.829 -23.464   1.269  1.00 12.61           C  
ATOM   1369  OE1 GLN L  38      22.524 -23.622   0.071  1.00 13.54           O  
ATOM   1370  NE2 GLN L  38      23.880 -22.761   1.700  1.00 13.11           N  
ATOM   1371  N   LYS L  39      19.106 -24.645   4.415  1.00 14.37           N  
ATOM   1372  CA  LYS L  39      18.031 -23.709   4.731  1.00 14.75           C  
ATOM   1373  C   LYS L  39      18.517 -22.277   4.595  1.00 17.85           C  
ATOM   1374  O   LYS L  39      19.711 -22.057   4.608  1.00 16.88           O  
ATOM   1375  CB  LYS L  39      17.526 -23.983   6.170  1.00 16.14           C  
ATOM   1376  CG  LYS L  39      16.812 -25.352   6.262  1.00 16.84           C  
ATOM   1377  CD  LYS L  39      16.218 -25.633   7.588  1.00 17.44           C  
ATOM   1378  CE  LYS L  39      15.582 -26.986   7.646  1.00 19.04           C  
ATOM   1379  NZ  LYS L  39      14.904 -27.184   8.948  1.00 21.74           N  
ATOM   1380  N   PRO L  40      17.598 -21.301   4.423  1.00 19.66           N  
ATOM   1381  CA  PRO L  40      18.041 -19.958   4.130  1.00 21.83           C  
ATOM   1382  C   PRO L  40      18.958 -19.404   5.151  1.00 21.38           C  
ATOM   1383  O   PRO L  40      18.687 -19.442   6.346  1.00 23.42           O  
ATOM   1384  CB  PRO L  40      16.728 -19.177   4.067  1.00 24.68           C  
ATOM   1385  CG  PRO L  40      15.740 -20.165   3.617  1.00 24.28           C  
ATOM   1386  CD  PRO L  40      16.138 -21.420   4.316  1.00 22.56           C  
ATOM   1387  N   GLY L  41      20.060 -18.813   4.676  1.00 22.51           N  
ATOM   1388  CA  GLY L  41      21.054 -18.255   5.538  1.00 23.53           C  
ATOM   1389  C   GLY L  41      21.917 -19.203   6.334  1.00 22.28           C  
ATOM   1390  O   GLY L  41      22.677 -18.798   7.225  1.00 26.22           O  
ATOM   1392  N   LYS L  42      21.829 -20.489   6.031  0.50 18.83           N  
ATOM   1394  CA  LYS L  42      22.584 -21.469   6.751  0.50 17.34           C  
ATOM   1396  C   LYS L  42      23.476 -22.256   5.776  0.50 15.02           C  
ATOM   1398  O   LYS L  42      23.236 -22.295   4.582  0.50 14.95           O  
ATOM   1400  CB  LYS L  42      21.615 -22.415   7.460  0.50 18.38           C  
ATOM   1402  CG  LYS L  42      20.453 -21.696   8.142  0.50 22.99           C  
ATOM   1404  CD  LYS L  42      20.918 -20.845   9.280  0.50 26.57           C  
ATOM   1406  CE  LYS L  42      19.761 -20.116   9.985  0.50 28.94           C  
ATOM   1408  NZ  LYS L  42      19.606 -18.714   9.420  0.50 32.83           N  
ATOM   1409  N   ALA L  43      24.523 -22.857   6.302  1.00 15.36           N  
ATOM   1410  CA  ALA L  43      25.427 -23.694   5.550  1.00 14.53           C  
ATOM   1411  C   ALA L  43      24.746 -25.008   5.147  1.00 13.70           C  
ATOM   1412  O   ALA L  43      23.831 -25.476   5.822  1.00 14.45           O  
ATOM   1413  CB  ALA L  43      26.637 -24.005   6.374  1.00 17.20           C  
ATOM   1414  N   PRO L  44      25.243 -25.630   4.107  1.00 13.20           N  
ATOM   1415  CA  PRO L  44      24.762 -26.991   3.789  1.00 13.71           C  
ATOM   1416  C   PRO L  44      25.009 -27.929   4.938  1.00 13.43           C  
ATOM   1417  O   PRO L  44      26.086 -27.928   5.533  1.00 15.72           O  
ATOM   1418  CB  PRO L  44      25.591 -27.373   2.545  1.00 15.55           C  
ATOM   1419  CG  PRO L  44      26.150 -26.109   2.027  1.00 18.06           C  
ATOM   1420  CD  PRO L  44      26.332 -25.191   3.201  1.00 15.06           C  
ATOM   1421  N   LYS L  45      24.007 -28.765   5.221  1.00 12.95           N  
ATOM   1422  CA  LYS L  45      24.029 -29.771   6.286  1.00 13.40           C  
ATOM   1423  C   LYS L  45      23.997 -31.161   5.628  1.00 12.82           C  
ATOM   1424  O   LYS L  45      23.159 -31.457   4.792  1.00 12.71           O  
ATOM   1425  CB  LYS L  45      22.831 -29.626   7.170  1.00 15.15           C  
ATOM   1426  CG  LYS L  45      22.664 -30.669   8.249  1.00 19.05           C  
ATOM   1427  CD  LYS L  45      21.370 -30.557   9.090  1.00 22.88           C  
ATOM   1428  CE  LYS L  45      21.140 -31.818   9.977  1.00 24.61           C  
ATOM   1429  NZ  LYS L  45      22.257 -31.923  10.946  1.00 32.76           N  
ATOM   1430  N   LEU L  46      24.935 -31.979   6.035  1.00 12.95           N  
ATOM   1431  CA  LEU L  46      25.093 -33.309   5.471  1.00 12.79           C  
ATOM   1432  C   LEU L  46      23.955 -34.206   5.936  1.00 13.23           C  
ATOM   1433  O   LEU L  46      23.768 -34.418   7.139  1.00 14.96           O  
ATOM   1434  CB  LEU L  46      26.427 -33.893   5.899  1.00 13.70           C  
ATOM   1435  CG  LEU L  46      26.779 -35.266   5.320  1.00 14.29           C  
ATOM   1436  CD1 LEU L  46      26.877 -35.267   3.837  1.00 15.22           C  
ATOM   1437  CD2 LEU L  46      28.135 -35.703   5.919  1.00 16.76           C  
ATOM   1438  N   LEU L  47      23.237 -34.827   5.001  1.00 13.33           N  
ATOM   1439  CA  LEU L  47      22.204 -35.808   5.318  1.00 13.24           C  
ATOM   1440  C   LEU L  47      22.575 -37.217   4.970  1.00 13.72           C  
ATOM   1441  O   LEU L  47      22.352 -38.135   5.792  1.00 14.27           O  
ATOM   1442  CB  LEU L  47      20.876 -35.455   4.629  1.00 14.79           C  
ATOM   1443  CG  LEU L  47      20.262 -34.103   5.007  1.00 14.76           C  
ATOM   1444  CD1 LEU L  47      18.832 -34.082   4.539  1.00 17.30           C  
ATOM   1445  CD2 LEU L  47      20.296 -33.792   6.474  1.00 17.05           C  
ATOM   1446  N   ILE L  48      23.109 -37.412   3.770  1.00 14.12           N  
ATOM   1447  CA  ILE L  48      23.473 -38.727   3.266  1.00 14.52           C  
ATOM   1448  C   ILE L  48      24.907 -38.643   2.783  1.00 14.24           C  
ATOM   1449  O   ILE L  48      25.239 -37.707   2.052  1.00 14.52           O  
ATOM   1450  CB  ILE L  48      22.590 -39.183   2.103  1.00 14.41           C  
ATOM   1451  CG1 ILE L  48      21.122 -39.193   2.496  1.00 15.74           C  
ATOM   1452  CG2 ILE L  48      23.047 -40.516   1.529  1.00 16.09           C  
ATOM   1453  CD1 ILE L  48      20.752 -40.257   3.471  1.00 16.92           C  
ATOM   1454  N   TYR L  49      25.767 -39.551   3.230  1.00 15.16           N  
ATOM   1455  CA  TYR L  49      27.132 -39.581   2.774  1.00 15.60           C  
ATOM   1456  C   TYR L  49      27.463 -40.884   2.115  1.00 14.94           C  
ATOM   1457  O   TYR L  49      26.879 -41.932   2.414  1.00 15.74           O  
ATOM   1458  CB  TYR L  49      28.106 -39.272   3.952  1.00 18.23           C  
ATOM   1459  CG  TYR L  49      28.170 -40.287   5.042  1.00 18.71           C  
ATOM   1460  CD1 TYR L  49      27.261 -40.278   6.094  1.00 20.25           C  
ATOM   1461  CD2 TYR L  49      29.160 -41.266   5.042  1.00 20.75           C  
ATOM   1462  CE1 TYR L  49      27.335 -41.220   7.109  1.00 22.38           C  
ATOM   1463  CE2 TYR L  49      29.216 -42.220   6.050  1.00 23.10           C  
ATOM   1464  CZ  TYR L  49      28.318 -42.159   7.087  1.00 23.83           C  
ATOM   1465  OH  TYR L  49      28.377 -43.091   8.116  1.00 27.48           O  
ATOM   1466  N   ASP L  50      28.427 -40.837   1.209  1.00 15.04           N  
ATOM   1467  CA  ASP L  50      28.844 -42.019   0.465  1.00 16.23           C  
ATOM   1468  C   ASP L  50      27.660 -42.740  -0.118  1.00 15.33           C  
ATOM   1469  O   ASP L  50      27.506 -43.964  -0.004  1.00 15.39           O  
ATOM   1470  CB  ASP L  50      29.745 -42.928   1.295  1.00 17.61           C  
ATOM   1471  CG  ASP L  50      31.049 -42.304   1.614  1.00 20.42           C  
ATOM   1472  OD1 ASP L  50      31.405 -41.268   1.022  1.00 24.89           O  
ATOM   1473  OD2 ASP L  50      31.745 -42.852   2.495  1.00 30.40           O  
ATOM   1474  N   ALA L  51      26.834 -41.957  -0.797  1.00 14.61           N  
ATOM   1475  CA  ALA L  51      25.658 -42.337  -1.589  1.00 15.50           C  
ATOM   1476  C   ALA L  51      24.442 -42.845  -0.798  1.00 14.51           C  
ATOM   1477  O   ALA L  51      23.321 -42.553  -1.186  1.00 14.90           O  
ATOM   1478  CB  ALA L  51      26.028 -43.347  -2.669  1.00 16.36           C  
ATOM   1479  N   SER L  52      24.652 -43.586   0.290  1.00 15.20           N  
ATOM   1480  CA  SER L  52      23.560 -44.281   0.968  1.00 16.21           C  
ATOM   1481  C   SER L  52      23.599 -44.308   2.459  1.00 16.66           C  
ATOM   1482  O   SER L  52      22.731 -44.916   3.070  1.00 18.12           O  
ATOM   1483  CB  SER L  52      23.484 -45.709   0.460  1.00 17.88           C  
ATOM   1484  OG  SER L  52      24.694 -46.409   0.722  1.00 21.54           O  
ATOM   1485  N   ASN L  53      24.590 -43.677   3.074  1.00 16.51           N  
ATOM   1486  CA  ASN L  53      24.693 -43.749   4.533  1.00 17.26           C  
ATOM   1487  C   ASN L  53      24.033 -42.571   5.190  1.00 16.12           C  
ATOM   1488  O   ASN L  53      24.255 -41.447   4.803  1.00 17.24           O  
ATOM   1489  CB  ASN L  53      26.168 -43.835   4.920  1.00 17.37           C  
ATOM   1490  CG  ASN L  53      26.847 -44.992   4.236  1.00 18.91           C  
ATOM   1491  OD1 ASN L  53      27.563 -44.821   3.202  1.00 26.54           O  
ATOM   1492  ND2 ASN L  53      26.613 -46.137   4.721  1.00 22.79           N  
ATOM   1493  N   LEU L  54      23.213 -42.820   6.199  1.00 17.64           N  
ATOM   1494  CA  LEU L  54      22.536 -41.806   6.904  1.00 18.03           C  
ATOM   1495  C   LEU L  54      23.425 -41.179   7.933  1.00 18.23           C  
ATOM   1496  O   LEU L  54      23.986 -41.858   8.801  1.00 20.30           O  
ATOM   1497  CB  LEU L  54      21.318 -42.457   7.544  1.00 19.07           C  
ATOM   1498  CG  LEU L  54      20.334 -41.536   8.246  1.00 18.51           C  
ATOM   1499  CD1 LEU L  54      19.689 -40.514   7.281  1.00 17.78           C  
ATOM   1500  CD2 LEU L  54      19.236 -42.419   8.882  1.00 20.81           C  
ATOM   1501  N   GLU L  55      23.545 -39.863   7.875  1.00 18.81           N  
ATOM   1502  CA  GLU L  55      24.370 -39.147   8.824  1.00 20.19           C  
ATOM   1503  C   GLU L  55      23.728 -39.173  10.212  1.00 22.02           C  
ATOM   1504  O   GLU L  55      22.524 -39.242  10.386  1.00 20.06           O  
ATOM   1505  CB  GLU L  55      24.569 -37.736   8.282  1.00 22.53           C  
ATOM   1506  CG  GLU L  55      25.318 -36.788   9.141  1.00 24.47           C  
ATOM   1507  CD  GLU L  55      26.761 -37.089   9.352  1.00 26.15           C  
ATOM   1508  OE1 GLU L  55      27.203 -38.201   9.141  1.00 33.63           O  
ATOM   1509  OE2 GLU L  55      27.523 -36.196   9.747  1.00 32.56           O  
ATOM   1510  N   THR L  56      24.593 -39.163  11.226  1.00 24.12           N  
ATOM   1511  CA  THR L  56      24.130 -39.261  12.579  1.00 25.48           C  
ATOM   1512  C   THR L  56      23.151 -38.206  12.937  1.00 24.06           C  
ATOM   1513  O   THR L  56      23.353 -37.062  12.615  1.00 25.62           O  
ATOM   1514  CB  THR L  56      25.352 -39.172  13.551  1.00 27.81           C  
ATOM   1515  OG1 THR L  56      26.317 -40.118  13.080  1.00 34.28           O  
ATOM   1516  CG2 THR L  56      24.883 -39.492  14.968  1.00 29.04           C  
ATOM   1517  N   GLY L  57      22.039 -38.596  13.537  1.00 23.20           N  
ATOM   1518  CA  GLY L  57      21.016 -37.633  13.951  1.00 22.68           C  
ATOM   1519  C   GLY L  57      19.960 -37.346  12.905  1.00 21.21           C  
ATOM   1520  O   GLY L  57      18.986 -36.664  13.175  1.00 25.37           O  
ATOM   1521  N   VAL L  58      20.156 -37.782  11.676  1.00 18.21           N  
ATOM   1522  CA  VAL L  58      19.228 -37.402  10.579  1.00 16.47           C  
ATOM   1523  C   VAL L  58      18.095 -38.441  10.583  1.00 17.21           C  
ATOM   1524  O   VAL L  58      18.349 -39.632  10.680  1.00 17.44           O  
ATOM   1525  CB  VAL L  58      20.006 -37.373   9.269  1.00 16.69           C  
ATOM   1526  CG1 VAL L  58      19.076 -37.099   8.072  1.00 17.57           C  
ATOM   1527  CG2 VAL L  58      21.130 -36.307   9.300  1.00 18.24           C  
ATOM   1528  N   PRO L  59      16.853 -37.992  10.413  1.00 15.99           N  
ATOM   1529  CA  PRO L  59      15.732 -38.932  10.363  1.00 16.13           C  
ATOM   1530  C   PRO L  59      15.834 -39.927   9.217  1.00 15.45           C  
ATOM   1531  O   PRO L  59      16.288 -39.596   8.126  1.00 14.97           O  
ATOM   1532  CB  PRO L  59      14.536 -37.986  10.209  1.00 17.56           C  
ATOM   1533  CG  PRO L  59      14.942 -36.698  10.718  1.00 18.84           C  
ATOM   1534  CD  PRO L  59      16.376 -36.604  10.378  1.00 17.30           C  
ATOM   1535  N   SER L  60      15.345 -41.140   9.466  1.00 14.79           N  
ATOM   1536  CA  SER L  60      15.430 -42.237   8.542  1.00 14.57           C  
ATOM   1537  C   SER L  60      14.559 -42.070   7.316  1.00 14.75           C  
ATOM   1538  O   SER L  60      14.750 -42.796   6.348  1.00 14.95           O  
ATOM   1539  CB  SER L  60      15.206 -43.580   9.224  1.00 16.47           C  
ATOM   1540  OG  SER L  60      13.939 -43.625   9.838  1.00 16.71           O  
ATOM   1541  N   ARG L  61      13.641 -41.102   7.298  1.00 12.88           N  
ATOM   1542  CA  ARG L  61      12.891 -40.820   6.075  1.00 12.15           C  
ATOM   1543  C   ARG L  61      13.799 -40.389   4.937  1.00 12.33           C  
ATOM   1544  O   ARG L  61      13.394 -40.375   3.791  1.00 12.53           O  
ATOM   1545  CB  ARG L  61      11.798 -39.787   6.296  1.00 12.35           C  
ATOM   1546  CG  ARG L  61      12.255 -38.400   6.678  1.00 12.71           C  
ATOM   1547  CD  ARG L  61      11.079 -37.461   6.748  1.00 13.58           C  
ATOM   1548  NE  ARG L  61      11.421 -36.153   7.274  1.00 13.53           N  
ATOM   1549  CZ  ARG L  61      11.534 -35.893   8.571  1.00 14.38           C  
ATOM   1550  NH1 ARG L  61      11.349 -36.856   9.466  1.00 16.15           N  
ATOM   1551  NH2 ARG L  61      11.867 -34.687   8.979  1.00 15.70           N  
ATOM   1552  N   PHE L  62      14.988 -39.888   5.247  1.00 12.65           N  
ATOM   1553  CA  PHE L  62      15.957 -39.519   4.232  1.00 12.40           C  
ATOM   1554  C   PHE L  62      16.803 -40.711   3.841  1.00 12.59           C  
ATOM   1555  O   PHE L  62      17.310 -41.425   4.703  1.00 13.64           O  
ATOM   1556  CB  PHE L  62      16.898 -38.418   4.792  1.00 13.21           C  
ATOM   1557  CG  PHE L  62      16.219 -37.121   5.088  1.00 12.50           C  
ATOM   1558  CD1 PHE L  62      15.880 -36.268   4.046  1.00 13.92           C  
ATOM   1559  CD2 PHE L  62      15.890 -36.740   6.382  1.00 14.42           C  
ATOM   1560  CE1 PHE L  62      15.300 -35.074   4.286  1.00 13.34           C  
ATOM   1561  CE2 PHE L  62      15.284 -35.536   6.616  1.00 14.51           C  
ATOM   1562  CZ  PHE L  62      14.989 -34.667   5.547  1.00 13.91           C  
ATOM   1563  N   SER L  63      16.942 -40.954   2.548  1.00 12.37           N  
ATOM   1564  CA  SER L  63      17.763 -42.032   2.056  1.00 12.48           C  
ATOM   1565  C   SER L  63      18.383 -41.664   0.725  1.00 12.66           C  
ATOM   1566  O   SER L  63      17.938 -40.751   0.017  1.00 12.67           O  
ATOM   1567  CB  SER L  63      16.969 -43.350   1.947  1.00 13.89           C  
ATOM   1568  OG  SER L  63      15.970 -43.250   0.977  1.00 15.48           O  
ATOM   1569  N   GLY L  64      19.410 -42.411   0.374  1.00 13.33           N  
ATOM   1570  CA  GLY L  64      20.023 -42.317  -0.929  1.00 13.29           C  
ATOM   1571  C   GLY L  64      20.388 -43.644  -1.485  1.00 14.11           C  
ATOM   1572  O   GLY L  64      20.627 -44.588  -0.739  1.00 15.09           O  
ATOM   1573  N   SER L  65      20.452 -43.732  -2.809  1.00 14.32           N  
ATOM   1574  CA  SER L  65      20.884 -44.938  -3.499  1.00 15.18           C  
ATOM   1575  C   SER L  65      21.644 -44.578  -4.736  1.00 15.69           C  
ATOM   1576  O   SER L  65      21.641 -43.457  -5.195  1.00 14.95           O  
ATOM   1577  CB  SER L  65      19.667 -45.772  -3.828  1.00 17.42           C  
ATOM   1578  OG  SER L  65      18.856 -45.156  -4.783  1.00 21.97           O  
ATOM   1579  N   GLY L  66      22.333 -45.573  -5.260  1.00 18.00           N  
ATOM   1580  CA  GLY L  66      23.076 -45.476  -6.481  1.00 18.86           C  
ATOM   1581  C   GLY L  66      24.550 -45.602  -6.301  1.00 19.06           C  
ATOM   1582  O   GLY L  66      25.083 -45.499  -5.199  1.00 20.31           O  
ATOM   1583  N   SER L  67      25.243 -45.913  -7.390  1.00 20.75           N  
ATOM   1584  CA  SER L  67      26.690 -46.046  -7.385  1.00 21.71           C  
ATOM   1586  C   SER L  67      27.228 -45.997  -8.785  0.50 21.94           C  
ATOM   1588  O   SER L  67      26.836 -46.817  -9.600  0.50 23.26           O  
ATOM   1589  CB  SER L  67      27.143 -47.391  -6.784  1.00 24.20           C  
ATOM   1590  OG  SER L  67      28.553 -47.487  -6.633  1.00 29.57           O  
ATOM   1592  N   GLY L  68      28.222 -45.156  -9.029  0.50 19.58           N  
ATOM   1594  CA  GLY L  68      28.782 -44.975 -10.347  0.50 19.40           C  
ATOM   1595  C   GLY L  68      28.475 -43.615 -10.920  1.00 18.10           C  
ATOM   1596  O   GLY L  68      29.157 -42.678 -10.604  1.00 18.56           O  
ATOM   1597  N   THR L  69      27.383 -43.507 -11.672  1.00 18.69           N  
ATOM   1598  CA  THR L  69      26.929 -42.278 -12.226  1.00 18.28           C  
ATOM   1599  C   THR L  69      25.521 -41.832 -11.871  1.00 18.00           C  
ATOM   1600  O   THR L  69      25.234 -40.660 -12.003  1.00 19.39           O  
ATOM   1601  CB  THR L  69      27.081 -42.246 -13.763  1.00 20.69           C  
ATOM   1602  OG1 THR L  69      26.237 -43.227 -14.339  1.00 23.36           O  
ATOM   1603  CG2 THR L  69      28.539 -42.525 -14.170  1.00 20.79           C  
ATOM   1605  N   ASP L  70      24.694 -42.734 -11.364  0.50 16.81           N  
ATOM   1607  CA  ASP L  70      23.242 -42.514 -11.292  0.50 16.85           C  
ATOM   1609  C   ASP L  70      22.682 -42.626  -9.889  0.50 15.88           C  
ATOM   1611  O   ASP L  70      22.516 -43.733  -9.383  0.50 16.18           O  
ATOM   1613  CB  ASP L  70      22.557 -43.535 -12.231  0.50 16.72           C  
ATOM   1615  CG  ASP L  70      21.067 -43.266 -12.432  0.50 21.31           C  
ATOM   1617  OD1 ASP L  70      20.426 -42.563 -11.622  0.50 24.45           O  
ATOM   1619  OD2 ASP L  70      20.502 -43.726 -13.431  0.50 24.69           O  
ATOM   1620  N   PHE L  71      22.362 -41.491  -9.253  1.00 14.22           N  
ATOM   1621  CA  PHE L  71      22.053 -41.463  -7.835  1.00 13.55           C  
ATOM   1622  C   PHE L  71      20.649 -40.900  -7.626  1.00 13.56           C  
ATOM   1623  O   PHE L  71      20.187 -40.039  -8.377  1.00 14.10           O  
ATOM   1624  CB  PHE L  71      23.091 -40.562  -7.118  1.00 13.48           C  
ATOM   1625  CG  PHE L  71      24.494 -41.047  -7.275  1.00 13.04           C  
ATOM   1626  CD1 PHE L  71      25.038 -41.923  -6.392  1.00 15.51           C  
ATOM   1627  CD2 PHE L  71      25.243 -40.646  -8.351  1.00 14.04           C  
ATOM   1628  CE1 PHE L  71      26.338 -42.410  -6.552  1.00 15.07           C  
ATOM   1629  CE2 PHE L  71      26.533 -41.126  -8.542  1.00 14.94           C  
ATOM   1630  CZ  PHE L  71      27.083 -41.999  -7.636  1.00 15.77           C  
ATOM   1631  N   THR L  72      19.989 -41.364  -6.559  1.00 13.32           N  
ATOM   1632  CA  THR L  72      18.661 -40.936  -6.196  1.00 13.38           C  
ATOM   1633  C   THR L  72      18.627 -40.637  -4.717  1.00 13.22           C  
ATOM   1634  O   THR L  72      19.085 -41.428  -3.903  1.00 15.86           O  
ATOM   1635  CB  THR L  72      17.616 -42.010  -6.561  1.00 14.49           C  
ATOM   1636  OG1 THR L  72      17.692 -42.269  -7.967  1.00 16.16           O  
ATOM   1637  CG2 THR L  72      16.213 -41.547  -6.199  1.00 15.86           C  
ATOM   1638  N   PHE L  73      18.031 -39.514  -4.370  1.00 12.63           N  
ATOM   1639  CA  PHE L  73      17.738 -39.110  -2.983  1.00 12.20           C  
ATOM   1640  C   PHE L  73      16.250 -39.116  -2.775  1.00 11.83           C  
ATOM   1641  O   PHE L  73      15.502 -38.638  -3.632  1.00 13.02           O  
ATOM   1642  CB  PHE L  73      18.310 -37.680  -2.796  1.00 12.80           C  
ATOM   1643  CG  PHE L  73      17.978 -37.015  -1.513  1.00 12.54           C  
ATOM   1644  CD1 PHE L  73      18.679 -37.246  -0.378  1.00 13.40           C  
ATOM   1645  CD2 PHE L  73      16.964 -36.083  -1.467  1.00 13.42           C  
ATOM   1646  CE1 PHE L  73      18.433 -36.581   0.784  1.00 14.49           C  
ATOM   1647  CE2 PHE L  73      16.694 -35.388  -0.311  1.00 14.66           C  
ATOM   1648  CZ  PHE L  73      17.391 -35.650   0.821  1.00 14.26           C  
ATOM   1649  N   THR L  74      15.807 -39.682  -1.646  1.00 11.67           N  
ATOM   1650  CA  THR L  74      14.388 -39.768  -1.332  1.00 11.88           C  
ATOM   1651  C   THR L  74      14.132 -39.197   0.056  1.00 11.69           C  
ATOM   1652  O   THR L  74      14.880 -39.475   0.990  1.00 12.75           O  
ATOM   1653  CB  THR L  74      13.962 -41.261  -1.381  1.00 13.38           C  
ATOM   1654  OG1 THR L  74      14.191 -41.748  -2.674  1.00 15.30           O  
ATOM   1655  CG2 THR L  74      12.491 -41.406  -1.027  1.00 15.36           C  
ATOM   1656  N   ILE L  75      13.033 -38.474   0.171  1.00 11.28           N  
ATOM   1657  CA  ILE L  75      12.395 -38.188   1.434  1.00 11.46           C  
ATOM   1658  C   ILE L  75      11.089 -38.973   1.422  1.00 11.45           C  
ATOM   1659  O   ILE L  75      10.209 -38.672   0.631  1.00 12.12           O  
ATOM   1660  CB  ILE L  75      12.097 -36.691   1.680  1.00 12.15           C  
ATOM   1661  CG1 ILE L  75      13.304 -35.823   1.312  1.00 12.65           C  
ATOM   1662  CG2 ILE L  75      11.687 -36.478   3.117  1.00 12.94           C  
ATOM   1663  CD1 ILE L  75      13.011 -34.332   1.374  1.00 13.97           C  
ATOM   1664  N   SER L  76      10.961 -39.987   2.259  1.00 11.55           N  
ATOM   1665  CA  SER L  76       9.799 -40.861   2.122  1.00 11.27           C  
ATOM   1666  C   SER L  76       8.500 -40.217   2.551  1.00 11.53           C  
ATOM   1667  O   SER L  76       7.446 -40.547   2.028  1.00 12.37           O  
ATOM   1668  CB  SER L  76      10.033 -42.193   2.787  1.00 12.97           C  
ATOM   1669  OG  SER L  76      10.280 -42.041   4.161  1.00 13.79           O  
ATOM   1670  N   SER L  77       8.540 -39.289   3.520  1.00 11.22           N  
ATOM   1671  CA  SER L  77       7.366 -38.555   3.943  1.00 11.18           C  
ATOM   1672  C   SER L  77       7.769 -37.125   4.251  1.00 11.08           C  
ATOM   1673  O   SER L  77       8.350 -36.822   5.275  1.00 13.11           O  
ATOM   1674  CB  SER L  77       6.677 -39.255   5.117  1.00 11.36           C  
ATOM   1675  OG  SER L  77       7.551 -39.461   6.224  1.00 13.28           O  
ATOM   1676  N   LEU L  78       7.449 -36.220   3.330  1.00 11.48           N  
ATOM   1677  CA  LEU L  78       7.875 -34.834   3.455  1.00 11.84           C  
ATOM   1678  C   LEU L  78       7.271 -34.205   4.693  1.00 11.83           C  
ATOM   1679  O   LEU L  78       6.047 -34.253   4.898  1.00 12.40           O  
ATOM   1680  CB  LEU L  78       7.428 -34.082   2.224  1.00 13.10           C  
ATOM   1681  CG  LEU L  78       7.805 -32.605   2.151  1.00 14.41           C  
ATOM   1682  CD1 LEU L  78       9.329 -32.387   2.180  1.00 16.44           C  
ATOM   1683  CD2 LEU L  78       7.219 -31.975   0.909  1.00 15.54           C  
ATOM   1684  N   GLN L  79       8.099 -33.506   5.498  1.00 12.19           N  
ATOM   1685  CA  GLN L  79       7.618 -32.816   6.674  1.00 12.26           C  
ATOM   1686  C   GLN L  79       7.885 -31.313   6.559  1.00 12.70           C  
ATOM   1687  O   GLN L  79       8.738 -30.886   5.798  1.00 13.48           O  
ATOM   1688  CB  GLN L  79       8.326 -33.358   7.921  1.00 12.90           C  
ATOM   1689  CG  GLN L  79       8.164 -34.885   8.094  1.00 11.91           C  
ATOM   1690  CD  GLN L  79       6.745 -35.352   8.181  1.00 11.46           C  
ATOM   1691  OE1 GLN L  79       5.926 -34.706   8.847  1.00 12.50           O  
ATOM   1692  NE2 GLN L  79       6.403 -36.459   7.500  1.00 11.92           N  
ATOM   1693  N   PRO L  80       7.137 -30.505   7.335  1.00 13.46           N  
ATOM   1694  CA  PRO L  80       7.346 -29.056   7.236  1.00 14.00           C  
ATOM   1695  C   PRO L  80       8.792 -28.630   7.453  1.00 15.05           C  
ATOM   1696  O   PRO L  80       9.298 -27.705   6.769  1.00 16.39           O  
ATOM   1697  CB  PRO L  80       6.436 -28.510   8.325  1.00 16.88           C  
ATOM   1698  CG  PRO L  80       5.364 -29.553   8.432  1.00 18.26           C  
ATOM   1699  CD  PRO L  80       6.003 -30.859   8.213  1.00 14.43           C  
ATOM   1700  N   GLU L  81       9.470 -29.255   8.370  1.00 14.27           N  
ATOM   1701  CA  GLU L  81      10.850 -28.902   8.696  1.00 14.60           C  
ATOM   1702  C   GLU L  81      11.826 -29.264   7.596  1.00 14.31           C  
ATOM   1703  O   GLU L  81      12.985 -28.912   7.686  1.00 16.12           O  
ATOM   1704  CB  GLU L  81      11.289 -29.526  10.019  1.00 14.88           C  
ATOM   1705  CG  GLU L  81      11.186 -31.038  10.080  1.00 16.26           C  
ATOM   1706  CD  GLU L  81       9.828 -31.601  10.649  1.00 17.48           C  
ATOM   1707  OE1 GLU L  81       8.736 -31.026  10.366  1.00 17.60           O  
ATOM   1708  OE2 GLU L  81       9.882 -32.607  11.420  1.00 19.95           O  
ATOM   1709  N   ASP L  82      11.381 -30.005   6.564  1.00 14.28           N  
ATOM   1710  CA  ASP L  82      12.232 -30.412   5.467  1.00 13.33           C  
ATOM   1711  C   ASP L  82      12.279 -29.412   4.303  1.00 13.82           C  
ATOM   1712  O   ASP L  82      12.999 -29.593   3.316  1.00 14.29           O  
ATOM   1713  CB  ASP L  82      11.734 -31.769   4.911  1.00 13.78           C  
ATOM   1714  CG  ASP L  82      11.713 -32.891   5.926  1.00 14.97           C  
ATOM   1715  OD1 ASP L  82      12.388 -32.787   6.973  1.00 15.28           O  
ATOM   1716  OD2 ASP L  82      10.962 -33.864   5.631  1.00 14.01           O  
ATOM   1718  N   ILE L  83      11.458 -28.360   4.363  0.50 14.77           N  
ATOM   1720  CA  ILE L  83      11.534 -27.282   3.392  0.50 15.12           C  
ATOM   1722  C   ILE L  83      12.943 -26.718   3.396  0.50 14.26           C  
ATOM   1724  O   ILE L  83      13.492 -26.345   4.448  0.50 13.69           O  
ATOM   1726  CB  ILE L  83      10.496 -26.134   3.617  0.50 16.72           C  
ATOM   1728  CG1 ILE L  83       9.063 -26.548   3.298  0.50 18.27           C  
ATOM   1730  CG2 ILE L  83      10.793 -24.942   2.756  0.50 16.91           C  
ATOM   1732  CD1 ILE L  83       8.096 -25.636   3.981  0.50 21.23           C  
ATOM   1733  N   ALA L  84      13.535 -26.669   2.212  1.00 13.14           N  
ATOM   1734  CA  ALA L  84      14.967 -26.339   2.093  1.00 13.04           C  
ATOM   1735  C   ALA L  84      15.328 -26.495   0.635  1.00 12.11           C  
ATOM   1736  O   ALA L  84      14.523 -26.955  -0.181  1.00 12.52           O  
ATOM   1737  CB  ALA L  84      15.821 -27.273   2.890  1.00 14.05           C  
ATOM   1738  N   THR L  85      16.570 -26.155   0.304  1.00 12.56           N  
ATOM   1739  CA  THR L  85      17.154 -26.546  -0.956  1.00 11.88           C  
ATOM   1740  C   THR L  85      18.111 -27.722  -0.718  1.00 12.35           C  
ATOM   1741  O   THR L  85      18.885 -27.717   0.239  1.00 15.02           O  
ATOM   1742  CB  THR L  85      17.903 -25.363  -1.604  1.00 13.28           C  
ATOM   1743  OG1 THR L  85      16.942 -24.341  -1.864  1.00 15.43           O  
ATOM   1744  CG2 THR L  85      18.577 -25.732  -2.927  1.00 13.29           C  
ATOM   1745  N   TYR L  86      18.046 -28.749  -1.566  1.00 11.62           N  
ATOM   1746  CA  TYR L  86      18.884 -29.923  -1.466  1.00 11.59           C  
ATOM   1747  C   TYR L  86      19.889 -29.958  -2.594  1.00 11.08           C  
ATOM   1748  O   TYR L  86      19.554 -29.580  -3.718  1.00 12.05           O  
ATOM   1749  CB  TYR L  86      17.977 -31.194  -1.497  1.00 12.39           C  
ATOM   1750  CG  TYR L  86      17.096 -31.277  -0.259  1.00 12.19           C  
ATOM   1751  CD1 TYR L  86      17.473 -32.020   0.817  1.00 13.27           C  
ATOM   1752  CD2 TYR L  86      15.931 -30.553  -0.182  1.00 12.09           C  
ATOM   1753  CE1 TYR L  86      16.683 -32.061   1.973  1.00 13.33           C  
ATOM   1754  CE2 TYR L  86      15.166 -30.586   0.979  1.00 12.92           C  
ATOM   1755  CZ  TYR L  86      15.560 -31.345   2.038  1.00 12.86           C  
ATOM   1756  OH  TYR L  86      14.838 -31.374   3.234  1.00 13.77           O  
ATOM   1757  N   TYR L  87      21.087 -30.465  -2.301  1.00 11.80           N  
ATOM   1758  CA  TYR L  87      22.148 -30.580  -3.284  1.00 11.63           C  
ATOM   1759  C   TYR L  87      22.783 -31.932  -3.202  1.00 12.06           C  
ATOM   1760  O   TYR L  87      23.047 -32.427  -2.109  1.00 13.28           O  
ATOM   1761  CB  TYR L  87      23.273 -29.553  -3.023  1.00 12.64           C  
ATOM   1762  CG  TYR L  87      22.901 -28.126  -3.144  1.00 12.23           C  
ATOM   1763  CD1 TYR L  87      22.865 -27.485  -4.346  1.00 12.89           C  
ATOM   1764  CD2 TYR L  87      22.542 -27.375  -2.013  1.00 12.62           C  
ATOM   1765  CE1 TYR L  87      22.500 -26.181  -4.451  1.00 12.92           C  
ATOM   1766  CE2 TYR L  87      22.208 -26.060  -2.128  1.00 12.94           C  
ATOM   1767  CZ  TYR L  87      22.147 -25.454  -3.339  1.00 12.83           C  
ATOM   1768  OH  TYR L  87      21.806 -24.106  -3.448  1.00 14.91           O  
ATOM   1769  N   CYS L  88      23.132 -32.494  -4.350  1.00 11.88           N  
ATOM   1770  CA  CYS L  88      24.132 -33.558  -4.382  1.00 12.27           C  
ATOM   1771  C   CYS L  88      25.505 -32.905  -4.560  1.00 11.85           C  
ATOM   1772  O   CYS L  88      25.636 -31.780  -5.072  1.00 12.43           O  
ATOM   1773  CB  CYS L  88      23.879 -34.590  -5.485  1.00 12.89           C  
ATOM   1774  SG  CYS L  88      23.943 -33.868  -7.146  1.00 15.40           S  
ATOM   1776  N   GLN L  89      26.526 -33.659  -4.225  0.50 11.90           N  
ATOM   1778  CA  GLN L  89      27.897 -33.140  -4.293  0.50 11.88           C  
ATOM   1780  C   GLN L  89      28.872 -34.301  -4.361  0.50 12.35           C  
ATOM   1782  O   GLN L  89      28.886 -35.148  -3.460  0.50 12.40           O  
ATOM   1784  CB  GLN L  89      28.200 -32.279  -3.064  0.50 13.02           C  
ATOM   1786  CG  GLN L  89      29.623 -31.729  -3.017  0.50 12.29           C  
ATOM   1788  CD  GLN L  89      30.469 -32.248  -1.907  0.50 14.01           C  
ATOM   1790  OE1 GLN L  89      30.215 -33.318  -1.399  0.50 19.26           O  
ATOM   1792  NE2 GLN L  89      31.483 -31.514  -1.557  0.50 17.26           N  
ATOM   1793  N   GLN L  90      29.753 -34.305  -5.364  1.00 12.76           N  
ATOM   1794  CA  GLN L  90      30.720 -35.347  -5.471  1.00 12.99           C  
ATOM   1795  C   GLN L  90      32.035 -34.972  -4.792  1.00 13.12           C  
ATOM   1796  O   GLN L  90      32.459 -33.816  -4.831  1.00 13.20           O  
ATOM   1797  CB  GLN L  90      31.003 -35.738  -6.929  1.00 13.57           C  
ATOM   1798  CG  GLN L  90      31.715 -34.723  -7.799  1.00 12.84           C  
ATOM   1799  CD  GLN L  90      33.230 -34.682  -7.635  1.00 12.64           C  
ATOM   1800  OE1 GLN L  90      33.851 -35.656  -7.193  1.00 13.59           O  
ATOM   1801  NE2 GLN L  90      33.833 -33.534  -8.016  1.00 13.33           N  
ATOM   1803  N   TYR L  91      32.680 -35.931  -4.168  0.50 14.05           N  
ATOM   1805  CA  TYR L  91      34.023 -35.680  -3.642  0.50 14.23           C  
ATOM   1807  C   TYR L  91      34.930 -36.876  -4.032  0.50 15.35           C  
ATOM   1809  O   TYR L  91      35.838 -37.291  -3.310  0.50 19.18           O  
ATOM   1811  CB  TYR L  91      33.973 -35.369  -2.112  0.50 14.65           C  
ATOM   1813  CG  TYR L  91      33.850 -36.631  -1.234  0.50 14.27           C  
ATOM   1815  CD1 TYR L  91      32.643 -37.323  -1.080  0.50 15.66           C  
ATOM   1817  CD2 TYR L  91      34.948 -37.082  -0.495  0.50 15.07           C  
ATOM   1819  CE1 TYR L  91      32.556 -38.457  -0.303  0.50 14.32           C  
ATOM   1821  CE2 TYR L  91      34.858 -38.209   0.288  0.50 17.62           C  
ATOM   1823  CZ  TYR L  91      33.668 -38.889   0.392  0.50 16.55           C  
ATOM   1825  OH  TYR L  91      33.594 -40.002   1.211  0.50 17.93           O  
ATOM   1826  N   ASP L  92      34.713 -37.409  -5.222  1.00 14.90           N  
ATOM   1827  CA  ASP L  92      35.706 -38.310  -5.873  1.00 16.04           C  
ATOM   1828  C   ASP L  92      37.002 -37.597  -6.194  1.00 16.36           C  
ATOM   1829  O   ASP L  92      38.068 -38.177  -6.075  1.00 17.74           O  
ATOM   1830  CB  ASP L  92      35.077 -38.918  -7.151  1.00 16.94           C  
ATOM   1831  CG  ASP L  92      35.959 -39.894  -7.880  1.00 20.68           C  
ATOM   1832  OD1 ASP L  92      36.149 -40.921  -7.325  1.00 28.66           O  
ATOM   1833  OD2 ASP L  92      36.469 -39.542  -8.957  1.00 28.08           O  
ATOM   1834  N   ASN L  93      36.920 -36.362  -6.655  1.00 14.72           N  
ATOM   1835  CA  ASN L  93      38.121 -35.650  -7.112  1.00 14.62           C  
ATOM   1836  C   ASN L  93      37.911 -34.156  -6.986  1.00 13.54           C  
ATOM   1837  O   ASN L  93      36.858 -33.643  -7.336  1.00 14.19           O  
ATOM   1838  CB  ASN L  93      38.477 -36.011  -8.585  1.00 16.36           C  
ATOM   1839  CG  ASN L  93      39.884 -35.685  -8.966  1.00 18.45           C  
ATOM   1840  OD1 ASN L  93      40.143 -35.026 -10.022  1.00 24.80           O  
ATOM   1841  ND2 ASN L  93      40.809 -36.101  -8.167  1.00 19.49           N  
ATOM   1842  N   LEU L  94      38.924 -33.464  -6.501  1.00 12.95           N  
ATOM   1843  CA  LEU L  94      38.894 -32.016  -6.497  1.00 12.42           C  
ATOM   1844  C   LEU L  94      38.847 -31.526  -7.940  1.00 13.48           C  
ATOM   1845  O   LEU L  94      39.512 -32.090  -8.784  1.00 14.45           O  
ATOM   1846  CB  LEU L  94      40.135 -31.439  -5.822  1.00 13.35           C  
ATOM   1847  CG  LEU L  94      40.199 -31.520  -4.298  1.00 13.72           C  
ATOM   1848  CD1 LEU L  94      41.612 -31.198  -3.864  1.00 15.64           C  
ATOM   1849  CD2 LEU L  94      39.205 -30.549  -3.640  1.00 14.27           C  
ATOM   1850  N   PRO L  95      38.137 -30.433  -8.235  1.00 12.66           N  
ATOM   1851  CA  PRO L  95      37.314 -29.671  -7.281  1.00 12.28           C  
ATOM   1852  C   PRO L  95      36.037 -30.425  -6.937  1.00 12.08           C  
ATOM   1853  O   PRO L  95      35.399 -30.988  -7.852  1.00 12.55           O  
ATOM   1854  CB  PRO L  95      37.015 -28.381  -8.054  1.00 13.75           C  
ATOM   1855  CG  PRO L  95      37.062 -28.787  -9.498  1.00 14.19           C  
ATOM   1856  CD  PRO L  95      38.163 -29.822  -9.576  1.00 13.24           C  
ATOM   1857  N   TYR L  96      35.619 -30.425  -5.673  1.00 12.19           N  
ATOM   1858  CA  TYR L  96      34.365 -31.024  -5.284  1.00 12.08           C  
ATOM   1859  C   TYR L  96      33.259 -30.204  -5.895  1.00 12.89           C  
ATOM   1860  O   TYR L  96      33.330 -28.960  -5.797  1.00 18.86           O  
ATOM   1861  CB  TYR L  96      34.292 -31.155  -3.794  1.00 12.31           C  
ATOM   1862  CG  TYR L  96      35.446 -31.902  -3.155  1.00 12.87           C  
ATOM   1863  CD1 TYR L  96      36.109 -32.909  -3.794  1.00 13.95           C  
ATOM   1864  CD2 TYR L  96      35.852 -31.604  -1.892  1.00 14.56           C  
ATOM   1865  CE1 TYR L  96      37.124 -33.630  -3.176  1.00 15.74           C  
ATOM   1866  CE2 TYR L  96      36.892 -32.318  -1.292  1.00 15.65           C  
ATOM   1867  CZ  TYR L  96      37.507 -33.324  -1.938  1.00 15.38           C  
ATOM   1868  OH  TYR L  96      38.539 -34.026  -1.313  1.00 19.14           O  
ATOM   1869  N   THR L  97      32.314 -30.760  -6.578  1.00 12.73           N  
ATOM   1870  CA  THR L  97      31.305 -30.071  -7.365  1.00 12.11           C  
ATOM   1871  C   THR L  97      29.900 -30.470  -6.884  1.00 12.05           C  
ATOM   1872  O   THR L  97      29.618 -31.623  -6.615  1.00 12.82           O  
ATOM   1873  CB  THR L  97      31.484 -30.285  -8.825  1.00 12.53           C  
ATOM   1874  OG1 THR L  97      31.655 -31.677  -9.053  1.00 13.60           O  
ATOM   1875  CG2 THR L  97      32.664 -29.529  -9.362  1.00 13.62           C  
ATOM   1876  N   PHE L  98      29.038 -29.474  -6.856  1.00 12.18           N  
ATOM   1877  CA  PHE L  98      27.645 -29.592  -6.464  1.00 12.27           C  
ATOM   1878  C   PHE L  98      26.744 -29.656  -7.696  1.00 12.56           C  
ATOM   1879  O   PHE L  98      27.022 -29.012  -8.719  1.00 12.96           O  
ATOM   1880  CB  PHE L  98      27.225 -28.364  -5.675  1.00 12.87           C  
ATOM   1881  CG  PHE L  98      27.711 -28.315  -4.258  1.00 12.32           C  
ATOM   1882  CD1 PHE L  98      26.924 -28.788  -3.230  1.00 13.96           C  
ATOM   1883  CD2 PHE L  98      28.930 -27.771  -3.909  1.00 13.33           C  
ATOM   1884  CE1 PHE L  98      27.319 -28.711  -1.899  1.00 15.98           C  
ATOM   1885  CE2 PHE L  98      29.304 -27.685  -2.586  1.00 15.11           C  
ATOM   1886  CZ  PHE L  98      28.493 -28.146  -1.585  1.00 15.20           C  
ATOM   1887  N   GLY L  99      25.631 -30.365  -7.568  1.00 11.69           N  
ATOM   1888  CA  GLY L  99      24.558 -30.174  -8.478  1.00 12.18           C  
ATOM   1889  C   GLY L  99      23.910 -28.839  -8.313  1.00 11.89           C  
ATOM   1890  O   GLY L  99      24.189 -28.089  -7.380  1.00 12.27           O  
ATOM   1891  N   GLN L 100      22.971 -28.499  -9.208  1.00 12.00           N  
ATOM   1892  CA  GLN L 100      22.430 -27.142  -9.231  1.00 12.84           C  
ATOM   1893  C   GLN L 100      21.401 -26.893  -8.138  1.00 12.81           C  
ATOM   1894  O   GLN L 100      21.064 -25.737  -7.900  1.00 15.20           O  
ATOM   1895  CB  GLN L 100      21.818 -26.881 -10.608  1.00 14.02           C  
ATOM   1896  CG  GLN L 100      22.961 -26.631 -11.669  0.50 12.62           C  
ATOM   1897  CD  GLN L 100      22.485 -26.819 -13.090  0.50 15.83           C  
ATOM   1898  OE1 GLN L 100      22.021 -27.943 -13.483  0.50 17.21           O  
ATOM   1899  NE2 GLN L 100      22.623 -25.742 -13.902  0.50 19.26           N  
ATOM   1900  N   GLY L 101      20.968 -27.928  -7.431  1.00 12.44           N  
ATOM   1901  CA  GLY L 101      20.032 -27.781  -6.325  1.00 12.51           C  
ATOM   1902  C   GLY L 101      18.591 -28.078  -6.715  1.00 12.72           C  
ATOM   1903  O   GLY L 101      18.179 -27.920  -7.858  1.00 14.85           O  
ATOM   1904  N   THR L 102      17.814 -28.449  -5.706  1.00 12.36           N  
ATOM   1905  CA  THR L 102      16.381 -28.612  -5.819  1.00 12.14           C  
ATOM   1906  C   THR L 102      15.744 -27.860  -4.675  1.00 12.23           C  
ATOM   1907  O   THR L 102      15.958 -28.217  -3.527  1.00 12.76           O  
ATOM   1908  CB  THR L 102      15.968 -30.090  -5.713  1.00 12.46           C  
ATOM   1909  OG1 THR L 102      16.654 -30.898  -6.669  1.00 12.80           O  
ATOM   1910  CG2 THR L 102      14.493 -30.255  -5.875  1.00 13.65           C  
ATOM   1911  N   LYS L 103      14.951 -26.847  -5.005  1.00 13.29           N  
ATOM   1912  CA  LYS L 103      14.241 -26.076  -3.968  1.00 14.95           C  
ATOM   1913  C   LYS L 103      12.884 -26.701  -3.711  1.00 13.71           C  
ATOM   1914  O   LYS L 103      12.106 -26.847  -4.643  1.00 14.64           O  
ATOM   1915  CB  LYS L 103      14.069 -24.643  -4.397  1.00 17.42           C  
ATOM   1916  CG  LYS L 103      13.503 -23.818  -3.292  1.00 21.54           C  
ATOM   1917  CD  LYS L 103      13.709 -22.331  -3.531  1.00 26.42           C  
ATOM   1918  CE  LYS L 103      12.909 -21.491  -2.488  0.50 25.54           C  
ATOM   1919  NZ  LYS L 103      13.213 -20.037  -2.492  0.50 30.26           N  
ATOM   1921  N   LEU L 104      12.608 -27.029  -2.486  0.50 14.74           N  
ATOM   1923  CA  LEU L 104      11.468 -27.794  -2.137  0.50 15.23           C  
ATOM   1925  C   LEU L 104      10.513 -26.900  -1.369  0.50 15.03           C  
ATOM   1927  O   LEU L 104      10.927 -26.214  -0.449  0.50 16.34           O  
ATOM   1929  CB  LEU L 104      11.955 -28.968  -1.291  0.50 17.38           C  
ATOM   1931  CG  LEU L 104      10.950 -29.987  -0.834  0.50 20.21           C  
ATOM   1933  CD1 LEU L 104      11.722 -31.178  -0.244  0.50 24.02           C  
ATOM   1935  CD2 LEU L 104      10.037 -29.454   0.186  0.50 24.98           C  
ATOM   1937  N   GLU L 105       9.239 -26.909  -1.741  0.50 15.01           N  
ATOM   1939  CA  GLU L 105       8.185 -26.151  -1.031  0.50 16.34           C  
ATOM   1941  C   GLU L 105       6.951 -27.007  -0.757  0.50 16.94           C  
ATOM   1943  O   GLU L 105       6.746 -28.025  -1.448  0.50 16.41           O  
ATOM   1945  CB  GLU L 105       7.758 -24.947  -1.839  0.50 18.40           C  
ATOM   1947  CG  GLU L 105       8.860 -23.904  -2.100  0.50 24.27           C  
ATOM   1949  CD  GLU L 105       9.107 -22.987  -0.945  0.50 31.03           C  
ATOM   1951  OE1 GLU L 105       8.226 -22.872  -0.081  0.50 35.25           O  
ATOM   1953  OE2 GLU L 105      10.211 -22.373  -0.920  0.50 34.96           O  
ATOM   1954  N   ILE L 106       6.128 -26.620   0.217  1.00 17.06           N  
ATOM   1955  CA  ILE L 106       4.902 -27.333   0.515  1.00 19.42           C  
ATOM   1956  C   ILE L 106       3.798 -26.771  -0.321  1.00 20.13           C  
ATOM   1957  O   ILE L 106       3.649 -25.567  -0.410  1.00 24.84           O  
ATOM   1958  CB  ILE L 106       4.440 -27.192   1.990  1.00 21.80           C  
ATOM   1959  CG1 ILE L 106       5.444 -27.655   2.972  1.00 26.80           C  
ATOM   1960  CG2 ILE L 106       3.152 -27.955   2.270  1.00 24.01           C  
ATOM   1961  CD1 ILE L 106       5.709 -29.171   3.008  1.00 29.02           C  
ATOM   1962  N   LYS L 107       3.055 -27.638  -0.990  1.00 20.80           N  
ATOM   1963  CA  LYS L 107       1.877 -27.276  -1.823  1.00 24.39           C  
ATOM   1964  C   LYS L 107       0.884 -26.413  -1.074  1.00 28.80           C  
ATOM   1965  O   LYS L 107       0.505 -26.743   0.062  1.00 30.32           O  
ATOM   1966  CB  LYS L 107       1.221 -28.568  -2.293  1.00 23.71           C  
ATOM   1967  CG  LYS L 107      -0.046 -28.406  -3.175  1.00 25.01           C  
ATOM   1968  CD  LYS L 107      -0.861 -29.714  -3.255  1.00 27.64           C  
ATOM   1969  CE  LYS L 107      -2.062 -29.606  -4.169  0.50 26.21           C  
ATOM   1970  NZ  LYS L 107      -2.802 -30.915  -4.279  0.50 27.05           N  
ATOM   1971  OXT LYS L 107       0.433 -25.450  -1.682  1.00 32.97           O  
TER    1972      LYS L 107                                                      
