# Supplementary material for: SARS-CoV-2 Spike Protein Interaction Space
Source: Int J Mol Sci. 2023 Jul 27;24(15):12058. doi: 10.3390/ijms241512058 (PMC10418891; doi:10.3390/ijms241512058)
Supplement: Supplementary file 1 [file ijms-24-12058-s001.zip › Supplementary Material File S1/3B5G.pdb]

REMARK 950 NUMBERING  Kabat
REMARK 950 METHOD     X-ray crystal structure
REMARK 950 RESOLUTION 1.900
REMARK 950 R-FACTOR   0.168
REMARK 950 R-FREE     0.210
REMARK 950 CHAIN-TYPE LABEL ORIGINAL
REMARK 950 CHAIN L    L    A
REMARK 950 CHAIN L    L    B
REMARK 950 MOLECULE : A : AMYLOID LAMBDA 6 LIGHT CHAIN VARIABLE REGION PIP
REMARK 950 SPECIES  : A : HOMO SAPIENS
SEQRES   1 L 111  ASN PHE MET LEU THR GLN SER HIS SER VAL SER GLU SER          
SEQRES   2 L 111  PRO GLY LYS THR VAL THR ILE SER CYS THR ARG SER SER          
SEQRES   3 L 111  GLY SER ILE ALA SER ASN TYR VAL GLN TRP TYR GLN GLN          
SEQRES   4 L 111  ARG PRO GLY SER SER PRO THR THR VAL ILE TYR GLU ASP          
SEQRES   5 L 111  ASN GLN ARG PRO SER GLY VAL PRO ASP ARG PHE SER GLY          
SEQRES   6 L 111  SER ILE ASP SER SER SER ASN SER ALA SER LEU THR ILE          
SEQRES   7 L 111  SER GLY LEU LYS THR GLU ASP GLU ALA ASP TYR TYR CYS          
SEQRES   8 L 111  GLN SER TYR ASP SER SER ASN HIS VAL VAL PHE GLY GLY          
SEQRES   9 L 111  GLY THR LYS LEU THR VAL LEU                                  
SEQRES   1 L 111  ASN PHE MET LEU THR GLN SER HIS SER VAL SER GLU SER          
SEQRES   2 L 111  PRO GLY LYS THR VAL THR ILE SER CYS THR ARG SER SER          
SEQRES   3 L 111  GLY SER ILE ALA SER ASN TYR VAL GLN TRP TYR GLN GLN          
SEQRES   4 L 111  ARG PRO GLY SER SER PRO THR THR VAL ILE TYR GLU ASP          
SEQRES   5 L 111  ASN GLN ARG PRO SER GLY VAL PRO ASP ARG PHE SER GLY          
SEQRES   6 L 111  SER ILE ASP SER SER SER ASN SER ALA SER LEU THR ILE          
SEQRES   7 L 111  SER GLY LEU LYS THR GLU ASP GLU ALA ASP TYR TYR CYS          
SEQRES   8 L 111  GLN SER TYR ASP SER SER ASN HIS VAL VAL PHE GLY GLY          
SEQRES   9 L 111  GLY THR LYS LEU THR VAL LEU                                  
ATOM      1  N   ASN L   1      31.868  40.710  65.483  0.75 32.84           N  
ATOM      3  CA  ASN L   1      32.606  40.231  66.676  0.50 32.24           C  
ATOM      4  C   ASN L   1      33.710  39.251  66.304  0.75 31.26           C  
ATOM      5  O   ASN L   1      34.693  39.144  67.048  0.75 32.09           O  
ATOM      7  CB  ASN L   1      31.653  39.648  67.722  0.50 32.78           C  
ATOM      9  CG  ASN L   1      30.595  40.641  68.152  0.50 33.24           C  
ATOM     11  OD1 ASN L   1      30.555  41.764  67.655  0.50 33.45           O  
ATOM     13  ND2 ASN L   1      29.724  40.230  69.071  0.50 33.39           N  
ATOM     14  N   PHE L   2      33.613  38.616  65.134  1.00 28.18           N  
ATOM     15  CA  PHE L   2      34.694  37.752  64.622  1.00 23.64           C  
ATOM     16  C   PHE L   2      34.509  37.458  63.155  1.00 22.43           C  
ATOM     17  O   PHE L   2      33.439  37.701  62.616  1.00 22.55           O  
ATOM     18  CB  PHE L   2      34.756  36.423  65.377  1.00 21.80           C  
ATOM     19  CG  PHE L   2      33.483  35.601  65.317  1.00 20.33           C  
ATOM     20  CD1 PHE L   2      32.491  35.749  66.292  1.00 19.82           C  
ATOM     21  CD2 PHE L   2      33.301  34.655  64.316  1.00 18.82           C  
ATOM     22  CE1 PHE L   2      31.315  34.975  66.245  1.00 19.11           C  
ATOM     23  CE2 PHE L   2      32.158  33.857  64.270  1.00 18.85           C  
ATOM     24  CZ  PHE L   2      31.160  34.015  65.229  1.00 18.84           C  
ATOM     25  N   MET L   3      35.545  36.923  62.510  1.00 21.75           N  
ATOM     26  CA  MET L   3      35.354  36.324  61.205  1.00 20.50           C  
ATOM     27  C   MET L   3      35.672  34.838  61.202  1.00 17.92           C  
ATOM     28  O   MET L   3      36.369  34.341  62.076  1.00 16.03           O  
ATOM     29  CB  MET L   3      36.161  37.030  60.104  1.00 23.50           C  
ATOM     30  CG  MET L   3      37.634  36.775  60.120  1.00 25.76           C  
ATOM     31  SD  MET L   3      38.418  37.860  58.868  0.80 28.32           S  
ATOM     32  CE  MET L   3      38.324  39.389  59.806  1.00 27.81           C  
ATOM     33  N   LEU L   4      35.144  34.149  60.195  1.00 14.60           N  
ATOM     34  CA  LEU L   4      35.390  32.730  59.987  1.00 13.85           C  
ATOM     35  C   LEU L   4      36.227  32.622  58.725  1.00 13.90           C  
ATOM     36  O   LEU L   4      35.804  33.067  57.658  1.00 14.18           O  
ATOM     37  CB  LEU L   4      34.058  31.997  59.796  1.00 12.67           C  
ATOM     38  CG  LEU L   4      33.178  32.032  61.059  1.00 12.77           C  
ATOM     39  CD1 LEU L   4      31.786  31.474  60.785  1.00 12.99           C  
ATOM     40  CD2 LEU L   4      33.858  31.224  62.158  1.00 13.32           C  
ATOM     41  N   THR L   5      37.435  32.085  58.849  1.00 13.31           N  
ATOM     42  CA  THR L   5      38.344  32.040  57.698  1.00 12.63           C  
ATOM     43  C   THR L   5      38.405  30.613  57.203  1.00 12.57           C  
ATOM     44  O   THR L   5      38.864  29.715  57.920  1.00 12.90           O  
ATOM     45  CB  THR L   5      39.759  32.514  58.088  1.00 13.52           C  
ATOM     46  OG1 THR L   5      39.667  33.874  58.534  1.00 15.21           O  
ATOM     47  CG2 THR L   5      40.714  32.425  56.868  1.00 13.76           C  
ATOM     48  N   GLN L   6      37.941  30.395  55.983  1.00 10.91           N  
ATOM     49  CA  GLN L   6      37.898  29.046  55.450  1.00 11.56           C  
ATOM     50  C   GLN L   6      39.175  28.699  54.694  1.00 11.69           C  
ATOM     51  O   GLN L   6      39.900  29.585  54.199  1.00 12.27           O  
ATOM     52  CB  GLN L   6      36.672  28.874  54.535  1.00 11.67           C  
ATOM     53  CG  GLN L   6      35.362  29.056  55.315  1.00 11.42           C  
ATOM     54  CD  GLN L   6      34.134  28.715  54.509  1.00 10.73           C  
ATOM     55  OE1 GLN L   6      33.123  29.416  54.596  1.00 12.64           O  
ATOM     56  NE2 GLN L   6      34.216  27.668  53.687  1.00 11.09           N  
ATOM     57  N   SER L   7      39.428  27.405  54.616  1.00 12.00           N  
ATOM     58  CA  SER L   7      40.566  26.890  53.891  1.00 14.72           C  
ATOM     59  C   SER L   7      40.392  27.065  52.384  1.00 16.65           C  
ATOM     60  O   SER L   7      39.279  27.318  51.871  1.00 14.77           O  
ATOM     61  CB  SER L   7      40.836  25.435  54.295  1.00 14.08           C  
ATOM     62  OG  SER L   7      39.727  24.602  54.035  1.00 15.55           O  
ATOM     63  N   HIS L   8      41.521  27.000  51.685  1.00 17.94           N  
ATOM     64  CA  HIS L   8      41.557  27.234  50.234  1.00 21.16           C  
ATOM     65  C   HIS L   8      40.735  26.276  49.369  1.00 19.81           C  
ATOM     66  O   HIS L   8      40.476  25.115  49.716  1.00 19.16           O  
ATOM     67  CB  HIS L   8      43.017  27.248  49.747  1.00 22.74           C  
ATOM     68  CG  HIS L   8      43.692  25.919  49.832  1.00 25.16           C  
ATOM     69  ND1 HIS L   8      44.957  25.696  49.320  0.80 27.12           N  
ATOM     70  CD2 HIS L   8      43.279  24.736  50.343  0.80 25.69           C  
ATOM     71  CE1 HIS L   8      45.294  24.434  49.529  0.80 27.14           C  
ATOM     72  NE2 HIS L   8      44.289  23.828  50.138  0.80 26.99           N  
ATOM     73  N   SER L   9      40.297  26.788  48.234  1.00 21.09           N  
ATOM     74  CA  SER L   9      39.571  25.984  47.293  1.00 23.04           C  
ATOM     75  C   SER L   9      40.405  24.748  46.956  1.00 25.38           C  
ATOM     76  O   SER L   9      41.637  24.813  46.927  1.00 27.19           O  
ATOM     77  CB  SER L   9      39.152  26.850  46.096  1.00 24.08           C  
ATOM     78  OG  SER L   9      38.258  27.866  46.592  1.00 25.81           O  
ATOM     79  N   VAL L  11      39.741  23.603  46.845  1.00 26.12           N  
ATOM     80  CA  VAL L  11      40.426  22.325  46.613  1.00 28.46           C  
ATOM     81  C   VAL L  11      39.816  21.523  45.456  1.00 29.21           C  
ATOM     82  O   VAL L  11      38.633  21.660  45.141  1.00 28.67           O  
ATOM     83  CB  VAL L  11      40.500  21.434  47.889  1.00 28.71           C  
ATOM     84  CG1 VAL L  11      39.198  21.470  48.698  1.00 28.45           C  
ATOM     85  CG2 VAL L  11      40.825  19.995  47.483  1.00 31.23           C  
ATOM     86  N   SER L  12      40.660  20.718  44.812  1.00 30.47           N  
ATOM     87  CA  SER L  12      40.251  19.795  43.761  1.00 31.34           C  
ATOM     88  C   SER L  12      40.584  18.379  44.207  1.00 31.69           C  
ATOM     89  O   SER L  12      41.634  18.148  44.786  1.00 32.66           O  
ATOM     90  CB  SER L  12      41.008  20.108  42.468  1.00 31.86           C  
ATOM     91  OG  SER L  12      40.574  21.336  41.910  1.00 32.85           O  
ATOM     92  N   GLU L  13      39.690  17.432  43.958  1.00 32.03           N  
ATOM     93  CA  GLU L  13      39.913  16.069  44.414  1.00 31.95           C  
ATOM     94  C   GLU L  13      39.213  15.092  43.487  1.00 30.60           C  
ATOM     95  O   GLU L  13      38.191  15.415  42.896  1.00 30.22           O  
ATOM     96  CB  GLU L  13      39.405  15.910  45.846  1.00 33.36           C  
ATOM     97  CG  GLU L  13      39.744  14.587  46.472  1.00 35.91           C  
ATOM     98  CD  GLU L  13      41.246  14.371  46.569  1.00 37.85           C  
ATOM     99  OE1 GLU L  13      41.838  14.906  47.530  1.00 38.46           O  
ATOM    100  OE2 GLU L  13      41.823  13.672  45.687  1.00 38.37           O  
ATOM    101  N   SER L  14      39.779  13.895  43.347  1.00 30.31           N  
ATOM    102  CA  SER L  14      39.190  12.886  42.471  1.00 29.05           C  
ATOM    103  C   SER L  14      37.984  12.247  43.133  1.00 28.71           C  
ATOM    104  O   SER L  14      37.919  12.165  44.364  1.00 28.77           O  
ATOM    105  CB  SER L  14      40.213  11.797  42.115  1.00 30.01           C  
ATOM    106  OG  SER L  14      41.436  12.359  41.672  1.00 29.96           O  
ATOM    107  N   PRO L  15      37.025  11.782  42.316  1.00 28.49           N  
ATOM    108  CA  PRO L  15      35.846  11.069  42.797  1.00 28.29           C  
ATOM    109  C   PRO L  15      36.245   9.876  43.667  1.00 27.78           C  
ATOM    110  O   PRO L  15      37.310   9.255  43.460  1.00 25.72           O  
ATOM    111  CB  PRO L  15      35.165  10.604  41.505  1.00 29.24           C  
ATOM    112  CG  PRO L  15      35.615  11.604  40.469  1.00 29.10           C  
ATOM    113  CD  PRO L  15      37.038  11.914  40.848  1.00 28.71           C  
ATOM    114  N   GLY L  16      35.425   9.603  44.678  1.00 27.58           N  
ATOM    115  CA  GLY L  16      35.695   8.541  45.625  1.00 26.70           C  
ATOM    116  C   GLY L  16      36.630   8.929  46.751  1.00 26.56           C  
ATOM    117  O   GLY L  16      36.740   8.217  47.751  1.00 27.70           O  
ATOM    118  N   LYS L  17      37.322  10.049  46.615  1.00 25.29           N  
ATOM    119  CA  LYS L  17      38.304  10.419  47.620  1.00 24.83           C  
ATOM    120  C   LYS L  17      37.626  11.137  48.800  1.00 23.29           C  
ATOM    121  O   LYS L  17      36.419  11.328  48.808  1.00 23.94           O  
ATOM    122  CB  LYS L  17      39.362  11.340  47.021  1.00 27.01           C  
ATOM    123  CG  LYS L  17      40.056  10.786  45.770  1.00 29.06           C  
ATOM    124  CD  LYS L  17      40.651   9.420  46.029  1.00 30.23           C  
ATOM    125  CE  LYS L  17      41.945   9.215  45.243  1.00 31.54           C  
ATOM    126  NZ  LYS L  17      43.113   9.596  46.088  1.00 31.72           N  
ATOM    127  N   THR L  18      38.435  11.523  49.770  1.00 23.56           N  
ATOM    128  CA  THR L  18      37.983  12.253  50.947  1.00 23.01           C  
ATOM    129  C   THR L  18      38.638  13.630  50.970  1.00 22.59           C  
ATOM    130  O   THR L  18      39.848  13.764  50.748  1.00 23.03           O  
ATOM    131  CB  THR L  18      38.304  11.498  52.255  1.00 22.29           C  
ATOM    132  OG1 THR L  18      37.564  10.281  52.266  1.00 23.19           O  
ATOM    133  CG2 THR L  18      37.859  12.304  53.473  1.00 22.26           C  
ATOM    134  N   VAL L  19      37.820  14.650  51.226  1.00 20.27           N  
ATOM    136  CA  VAL L  19      38.291  16.018  51.355  0.50 19.01           C  
ATOM    137  C   VAL L  19      37.856  16.601  52.702  1.00 18.12           C  
ATOM    138  O   VAL L  19      36.762  16.288  53.187  1.00 17.09           O  
ATOM    140  CB  VAL L  19      37.749  16.881  50.185  0.50 19.41           C  
ATOM    142  CG1 VAL L  19      37.213  18.219  50.672  0.50 19.77           C  
ATOM    144  CG2 VAL L  19      38.828  17.056  49.120  0.50 19.32           C  
ATOM    145  N   THR L  20      38.707  17.435  53.303  1.00 16.60           N  
ATOM    146  CA  THR L  20      38.358  18.144  54.534  1.00 16.96           C  
ATOM    147  C   THR L  20      38.552  19.632  54.347  1.00 16.44           C  
ATOM    148  O   THR L  20      39.593  20.072  53.886  1.00 16.17           O  
ATOM    149  CB  THR L  20      39.190  17.674  55.736  1.00 18.17           C  
ATOM    150  OG1 THR L  20      38.861  16.311  56.012  1.00 18.50           O  
ATOM    151  CG2 THR L  20      38.853  18.498  56.974  1.00 18.72           C  
ATOM    152  N   ILE L  21      37.525  20.400  54.694  1.00 14.93           N  
ATOM    153  CA  ILE L  21      37.552  21.855  54.583  1.00 15.72           C  
ATOM    154  C   ILE L  21      37.496  22.399  56.001  1.00 14.71           C  
ATOM    155  O   ILE L  21      36.753  21.878  56.821  1.00 13.32           O  
ATOM    156  CB  ILE L  21      36.315  22.345  53.791  1.00 15.56           C  
ATOM    157  CG1 ILE L  21      36.391  21.837  52.341  1.00 16.95           C  
ATOM    158  CG2 ILE L  21      36.181  23.874  53.827  1.00 17.16           C  
ATOM    159  CD1 ILE L  21      35.119  22.217  51.514  1.00 19.09           C  
ATOM    160  N   SER L  22      38.278  23.438  56.277  1.00 14.75           N  
ATOM    161  CA  SER L  22      38.397  23.968  57.630  1.00 14.16           C  
ATOM    162  C   SER L  22      37.905  25.409  57.703  1.00 14.02           C  
ATOM    163  O   SER L  22      37.770  26.082  56.681  1.00 13.26           O  
ATOM    164  CB  SER L  22      39.847  23.882  58.113  1.00 15.16           C  
ATOM    165  OG  SER L  22      40.625  24.939  57.581  1.00 14.62           O  
ATOM    166  N   CYS L  23      37.638  25.877  58.918  1.00 12.01           N  
ATOM    167  CA  CYS L  23      36.885  27.119  59.114  0.65 13.85           C  
ATOM    169  C   CYS L  23      37.379  27.600  60.476  1.00 12.81           C  
ATOM    170  O   CYS L  23      37.012  27.047  61.513  1.00 14.44           O  
ATOM    171  CB  CYS L  23      35.363  26.972  59.139  0.65 14.36           C  
ATOM    173  SG  CYS L  23      34.472  28.489  59.554  0.65 18.25           S  
ATOM    175  N   THR L  24      38.209  28.638  60.464  1.00 12.49           N  
ATOM    176  CA  THR L  24      38.858  29.126  61.696  1.00 12.08           C  
ATOM    177  C   THR L  24      38.226  30.414  62.187  1.00 11.90           C  
ATOM    178  O   THR L  24      38.109  31.418  61.454  1.00 12.23           O  
ATOM    179  CB  THR L  24      40.402  29.343  61.507  1.00 12.38           C  
ATOM    180  OG1 THR L  24      40.988  28.137  61.016  1.00 13.32           O  
ATOM    181  CG2 THR L  24      41.049  29.718  62.838  1.00 11.06           C  
ATOM    182  N   ARG L  25      37.803  30.383  63.431  1.00 12.11           N  
ATOM    183  CA  ARG L  25      37.183  31.529  64.053  1.00 12.79           C  
ATOM    184  C   ARG L  25      38.280  32.471  64.574  1.00 14.64           C  
ATOM    185  O   ARG L  25      39.223  32.025  65.238  1.00 15.46           O  
ATOM    186  CB  ARG L  25      36.293  31.091  65.200  1.00 12.54           C  
ATOM    187  CG  ARG L  25      35.583  32.251  65.865  1.00 11.94           C  
ATOM    188  CD  ARG L  25      34.468  31.764  66.793  1.00 13.26           C  
ATOM    189  NE  ARG L  25      34.047  32.839  67.691  1.00 13.84           N  
ATOM    190  CZ  ARG L  25      32.907  32.877  68.394  1.00 16.39           C  
ATOM    191  NH1 ARG L  25      31.986  31.917  68.318  1.00 15.87           N  
ATOM    192  NH2 ARG L  25      32.679  33.915  69.183  1.00 16.89           N  
ATOM    193  N   SER L  26      38.158  33.751  64.238  1.00 14.88           N  
ATOM    194  CA  SER L  26      39.264  34.702  64.447  1.00 18.72           C  
ATOM    195  C   SER L  26      39.399  35.167  65.894  1.00 22.09           C  
ATOM    196  O   SER L  26      40.512  35.413  66.355  1.00 24.77           O  
ATOM    197  CB  SER L  26      39.086  35.920  63.558  1.00 18.18           C  
ATOM    198  OG  SER L  26      37.977  36.648  63.997  1.00 17.22           O  
ATOM    199  N   SER L  27      38.281  35.323  66.595  1.00 23.24           N  
ATOM    200  CA  SER L  27      38.325  35.592  68.024  1.00 24.92           C  
ATOM    201  C   SER L  27      37.092  35.037  68.734  1.00 23.89           C  
ATOM    202  O   SER L  27      35.984  34.961  68.167  1.00 22.22           O  
ATOM    203  CB  SER L  27      38.548  37.087  68.331  1.00 27.29           C  
ATOM    204  OG  SER L  27      37.331  37.808  68.328  1.00 30.52           O  
ATOM    205  N   GLY L  27A     37.310  34.618  69.977  1.00 23.30           N  
ATOM    206  CA  GLY L  27A     36.291  33.902  70.718  1.00 22.75           C  
ATOM    207  C   GLY L  27A     36.369  32.434  70.349  1.00 22.00           C  
ATOM    208  O   GLY L  27A     36.935  32.064  69.309  1.00 21.44           O  
ATOM    209  N   SER L  27B     35.809  31.592  71.205  1.00 20.11           N  
ATOM    210  CA  SER L  27B     35.943  30.157  71.041  1.00 19.46           C  
ATOM    211  C   SER L  27B     35.021  29.634  69.936  1.00 18.46           C  
ATOM    212  O   SER L  27B     33.830  29.957  69.921  1.00 18.33           O  
ATOM    213  CB  SER L  27B     35.567  29.452  72.338  1.00 20.55           C  
ATOM    214  OG  SER L  27B     35.737  28.062  72.160  1.00 22.12           O  
ATOM    215  N   ILE L  28      35.571  28.824  69.031  1.00 17.39           N  
ATOM    216  CA  ILE L  28      34.762  28.148  68.001  1.00 16.43           C  
ATOM    217  C   ILE L  28      33.652  27.335  68.679  1.00 16.99           C  
ATOM    218  O   ILE L  28      32.571  27.150  68.119  1.00 17.43           O  
ATOM    219  CB  ILE L  28      35.614  27.202  67.107  1.00 15.40           C  
ATOM    220  CG1 ILE L  28      34.796  26.651  65.927  1.00 14.12           C  
ATOM    221  CG2 ILE L  28      36.210  26.050  67.923  1.00 15.43           C  
ATOM    222  CD1 ILE L  28      34.677  27.614  64.776  1.00 12.58           C  
ATOM    223  N   ALA L  29      33.922  26.874  69.895  1.00 18.10           N  
ATOM    224  CA  ALA L  29      32.972  26.045  70.643  1.00 19.21           C  
ATOM    225  C   ALA L  29      31.880  26.839  71.358  1.00 20.21           C  
ATOM    226  O   ALA L  29      30.961  26.250  71.943  1.00 21.54           O  
ATOM    227  CB  ALA L  29      33.716  25.140  71.641  1.00 20.15           C  
ATOM    228  N   SER L  30      31.935  28.159  71.283  1.00 19.00           N  
ATOM    230  CA  SER L  30      30.964  29.004  71.966  0.50 19.02           C  
ATOM    231  C   SER L  30      29.613  29.133  71.257  1.00 19.47           C  
ATOM    232  O   SER L  30      28.605  29.440  71.874  1.00 19.84           O  
ATOM    234  CB  SER L  30      31.568  30.380  72.234  0.50 19.65           C  
ATOM    236  OG  SER L  30      32.565  30.267  73.229  0.50 18.62           O  
ATOM    237  N   ASN L  31      29.592  28.894  69.952  1.00 16.88           N  
ATOM    238  CA  ASN L  31      28.355  28.982  69.200  1.00 16.22           C  
ATOM    239  C   ASN L  31      28.359  27.841  68.188  1.00 14.72           C  
ATOM    240  O   ASN L  31      29.425  27.419  67.739  1.00 13.48           O  
ATOM    241  CB  ASN L  31      28.253  30.313  68.475  1.00 18.82           C  
ATOM    242  CG  ASN L  31      28.244  31.506  69.429  1.00 21.41           C  
ATOM    243  OD1 ASN L  31      27.179  31.920  69.904  1.00 23.21           O  
ATOM    244  ND2 ASN L  31      29.418  32.081  69.682  1.00 21.00           N  
ATOM    245  N   TYR L  32      27.179  27.321  67.873  1.00 12.06           N  
ATOM    246  CA  TYR L  32      27.078  26.202  66.949  1.00 13.29           C  
ATOM    247  C   TYR L  32      27.587  26.589  65.565  1.00  9.96           C  
ATOM    248  O   TYR L  32      27.348  27.691  65.103  1.00 11.13           O  
ATOM    249  CB  TYR L  32      25.636  25.757  66.816  1.00 14.87           C  
ATOM    250  CG  TYR L  32      25.201  24.834  67.924  1.00 16.91           C  
ATOM    251  CD1 TYR L  32      25.963  23.713  68.257  1.00 17.51           C  
ATOM    252  CD2 TYR L  32      24.026  25.068  68.626  1.00 18.22           C  
ATOM    253  CE1 TYR L  32      25.571  22.858  69.258  1.00 18.94           C  
ATOM    254  CE2 TYR L  32      23.618  24.201  69.640  1.00 18.74           C  
ATOM    255  CZ  TYR L  32      24.396  23.108  69.950  1.00 19.74           C  
ATOM    256  OH  TYR L  32      23.998  22.226  70.948  1.00 20.74           O  
ATOM    257  N   VAL L  33      28.247  25.651  64.910  1.00  9.40           N  
ATOM    258  CA  VAL L  33      28.713  25.848  63.530  1.00  9.78           C  
ATOM    259  C   VAL L  33      27.832  25.064  62.565  1.00  7.43           C  
ATOM    260  O   VAL L  33      27.502  23.875  62.812  1.00  8.83           O  
ATOM    261  CB  VAL L  33      30.191  25.442  63.375  1.00  8.85           C  
ATOM    262  CG1 VAL L  33      30.603  25.528  61.918  1.00 10.96           C  
ATOM    263  CG2 VAL L  33      31.063  26.345  64.222  1.00 10.64           C  
ATOM    264  N   GLN L  34      27.431  25.732  61.493  1.00  5.70           N  
ATOM    265  CA  GLN L  34      26.663  25.110  60.411  1.00  8.50           C  
ATOM    266  C   GLN L  34      27.514  25.167  59.165  1.00  8.88           C  
ATOM    267  O   GLN L  34      28.371  26.040  59.029  1.00  9.76           O  
ATOM    268  CB  GLN L  34      25.370  25.907  60.117  1.00  8.70           C  
ATOM    269  CG  GLN L  34      24.256  25.814  61.183  1.00  9.81           C  
ATOM    270  CD  GLN L  34      24.737  26.178  62.574  1.00 11.96           C  
ATOM    271  OE1 GLN L  34      24.658  25.353  63.486  1.00 11.30           O  
ATOM    272  NE2 GLN L  34      25.250  27.430  62.748  1.00 10.62           N  
ATOM    273  N   TRP L  35      27.259  24.223  58.268  1.00  9.03           N  
ATOM    274  CA  TRP L  35      27.911  24.179  56.982  1.00 10.16           C  
ATOM    275  C   TRP L  35      26.819  24.075  55.938  1.00  9.43           C  
ATOM    276  O   TRP L  35      25.869  23.278  56.077  1.00  8.88           O  
ATOM    277  CB  TRP L  35      28.798  22.941  56.859  1.00  8.36           C  
ATOM    278  CG  TRP L  35      30.033  22.976  57.720  1.00  8.08           C  
ATOM    279  CD1 TRP L  35      30.176  22.485  59.020  1.00  7.15           C  
ATOM    280  CD2 TRP L  35      31.292  23.539  57.356  1.00  8.18           C  
ATOM    281  NE1 TRP L  35      31.478  22.712  59.443  1.00  8.37           N  
ATOM    282  CE2 TRP L  35      32.177  23.341  58.438  1.00  8.16           C  
ATOM    283  CE3 TRP L  35      31.774  24.160  56.197  1.00  8.59           C  
ATOM    284  CZ2 TRP L  35      33.511  23.765  58.398  1.00  7.73           C  
ATOM    285  CZ3 TRP L  35      33.108  24.571  56.160  1.00  8.29           C  
ATOM    286  CH2 TRP L  35      33.949  24.382  57.255  1.00  8.78           C  
ATOM    287  N   TYR L  36      26.968  24.884  54.898  1.00  9.00           N  
ATOM    288  CA  TYR L  36      26.036  24.911  53.778  1.00 10.28           C  
ATOM    289  C   TYR L  36      26.771  24.535  52.515  1.00 10.89           C  
ATOM    290  O   TYR L  36      27.941  24.888  52.325  1.00  8.66           O  
ATOM    291  CB  TYR L  36      25.477  26.327  53.566  1.00  9.39           C  
ATOM    292  CG  TYR L  36      24.769  26.819  54.771  1.00 10.82           C  
ATOM    293  CD1 TYR L  36      23.425  26.525  54.972  1.00 12.12           C  
ATOM    294  CD2 TYR L  36      25.454  27.522  55.753  1.00 12.03           C  
ATOM    295  CE1 TYR L  36      22.776  26.930  56.112  1.00 11.86           C  
ATOM    296  CE2 TYR L  36      24.812  27.943  56.915  1.00 10.94           C  
ATOM    297  CZ  TYR L  36      23.476  27.636  57.078  1.00 12.11           C  
ATOM    298  OH  TYR L  36      22.839  28.030  58.220  1.00 11.43           O  
ATOM    299  N   GLN L  37      26.034  23.862  51.641  1.00  9.09           N  
ATOM    300  CA  GLN L  37      26.494  23.512  50.321  1.00 10.88           C  
ATOM    301  C   GLN L  37      25.724  24.413  49.369  1.00 10.10           C  
ATOM    302  O   GLN L  37      24.505  24.575  49.506  1.00 12.45           O  
ATOM    303  CB  GLN L  37      26.103  22.053  50.036  1.00  9.76           C  
ATOM    304  CG  GLN L  37      26.528  21.563  48.649  1.00 12.36           C  
ATOM    305  CD  GLN L  37      25.973  20.176  48.358  1.00 14.60           C  
ATOM    306  OE1 GLN L  37      24.753  19.992  48.289  1.00 16.64           O  
ATOM    307  NE2 GLN L  37      26.855  19.196  48.233  1.00 14.59           N  
ATOM    308  N   GLN L  38      26.431  25.000  48.427  1.00 10.77           N  
ATOM    309  CA  GLN L  38      25.786  25.814  47.406  1.00 10.83           C  
ATOM    310  C   GLN L  38      26.331  25.364  46.048  1.00 11.65           C  
ATOM    311  O   GLN L  38      27.440  25.728  45.628  1.00 11.71           O  
ATOM    312  CB  GLN L  38      26.035  27.297  47.622  1.00 11.78           C  
ATOM    313  CG  GLN L  38      25.233  28.138  46.593  1.00 13.71           C  
ATOM    314  CD  GLN L  38      25.434  29.621  46.821  1.00 14.19           C  
ATOM    315  OE1 GLN L  38      26.540  30.055  47.205  1.00 14.56           O  
ATOM    316  NE2 GLN L  38      24.372  30.409  46.604  1.00 12.46           N  
ATOM    317  N   ARG L  39      25.560  24.517  45.386  1.00 13.18           N  
ATOM    318  CA  ARG L  39      25.927  24.057  44.041  1.00 16.71           C  
ATOM    319  C   ARG L  39      25.872  25.230  43.062  1.00 17.49           C  
ATOM    320  O   ARG L  39      25.174  26.206  43.299  1.00 15.92           O  
ATOM    321  CB  ARG L  39      25.021  22.904  43.591  1.00 17.81           C  
ATOM    322  CG  ARG L  39      25.114  21.660  44.487  1.00 19.68           C  
ATOM    323  CD  ARG L  39      24.334  20.503  43.869  1.00 22.09           C  
ATOM    324  NE  ARG L  39      24.532  19.275  44.635  1.00 24.37           N  
ATOM    325  CZ  ARG L  39      23.697  18.868  45.580  1.00 24.64           C  
ATOM    326  NH1 ARG L  39      23.923  17.730  46.231  1.00 25.98           N  
ATOM    327  NH2 ARG L  39      22.625  19.594  45.858  1.00 24.14           N  
ATOM    328  N   PRO L  40      26.625  25.134  41.966  1.00 21.09           N  
ATOM    329  CA  PRO L  40      26.695  26.229  41.005  1.00 22.68           C  
ATOM    330  C   PRO L  40      25.272  26.582  40.586  1.00 23.71           C  
ATOM    331  O   PRO L  40      24.455  25.684  40.303  1.00 24.78           O  
ATOM    332  CB  PRO L  40      27.466  25.638  39.805  1.00 23.85           C  
ATOM    333  CG  PRO L  40      27.973  24.300  40.218  1.00 23.60           C  
ATOM    334  CD  PRO L  40      27.411  23.951  41.579  1.00 22.20           C  
ATOM    335  N   GLY L  41      24.944  27.863  40.659  1.00 23.98           N  
ATOM    336  CA  GLY L  41      23.653  28.344  40.181  1.00 23.79           C  
ATOM    337  C   GLY L  41      22.494  28.079  41.118  1.00 23.54           C  
ATOM    338  O   GLY L  41      21.351  28.342  40.776  1.00 22.41           O  
ATOM    339  N   SER L  42      22.779  27.574  42.312  1.00 20.69           N  
ATOM    340  CA  SER L  42      21.709  27.179  43.197  1.00 20.23           C  
ATOM    341  C   SER L  42      21.830  27.887  44.539  1.00 19.42           C  
ATOM    342  O   SER L  42      22.691  28.737  44.723  1.00 18.39           O  
ATOM    343  CB  SER L  42      21.706  25.659  43.356  1.00 21.79           C  
ATOM    344  OG  SER L  42      20.514  25.229  43.997  1.00 26.06           O  
ATOM    345  N   SER L  43      20.944  27.558  45.465  1.00 19.48           N  
ATOM    346  CA  SER L  43      20.872  28.261  46.725  1.00 18.33           C  
ATOM    347  C   SER L  43      21.572  27.442  47.834  1.00 16.57           C  
ATOM    348  O   SER L  43      21.774  26.264  47.689  1.00 16.82           O  
ATOM    349  CB  SER L  43      19.409  28.544  47.064  1.00 20.09           C  
ATOM    350  OG  SER L  43      18.677  27.330  47.225  1.00 21.63           O  
ATOM    351  N   PRO L  44      21.954  28.076  48.939  1.00 16.66           N  
ATOM    352  CA  PRO L  44      22.667  27.281  49.965  1.00 15.74           C  
ATOM    353  C   PRO L  44      21.707  26.325  50.684  1.00 15.41           C  
ATOM    354  O   PRO L  44      20.559  26.688  50.992  1.00 15.51           O  
ATOM    355  CB  PRO L  44      23.168  28.331  50.959  1.00 15.33           C  
ATOM    356  CG  PRO L  44      22.802  29.689  50.378  1.00 15.80           C  
ATOM    357  CD  PRO L  44      21.739  29.470  49.351  1.00 16.89           C  
ATOM    358  N   THR L  45      22.177  25.126  50.983  1.00 15.05           N  
ATOM    359  CA  THR L  45      21.364  24.205  51.755  1.00 15.56           C  
ATOM    360  C   THR L  45      22.251  23.637  52.847  1.00 13.74           C  
ATOM    361  O   THR L  45      23.454  23.456  52.646  1.00 12.37           O  
ATOM    362  CB  THR L  45      20.801  23.048  50.899  1.00 18.48           C  
ATOM    363  OG1 THR L  45      21.876  22.197  50.502  1.00 21.42           O  
ATOM    364  CG2 THR L  45      20.110  23.594  49.612  1.00 20.04           C  
ATOM    365  N   THR L  46      21.650  23.320  53.989  1.00 12.44           N  
ATOM    366  CA  THR L  46      22.426  22.842  55.131  1.00 12.63           C  
ATOM    367  C   THR L  46      22.928  21.436  54.844  1.00 12.07           C  
ATOM    368  O   THR L  46      22.144  20.583  54.393  1.00 11.33           O  
ATOM    369  CB  THR L  46      21.547  22.797  56.412  1.00 12.83           C  
ATOM    370  OG1 THR L  46      21.035  24.109  56.685  1.00 13.71           O  
ATOM    371  CG2 THR L  46      22.368  22.283  57.638  1.00 10.60           C  
ATOM    372  N   VAL L  47      24.206  21.181  55.117  1.00 11.09           N  
ATOM    373  CA  VAL L  47      24.693  19.794  55.157  1.00 11.10           C  
ATOM    374  C   VAL L  47      25.059  19.359  56.580  1.00 10.93           C  
ATOM    375  O   VAL L  47      25.030  18.162  56.895  1.00 10.53           O  
ATOM    376  CB  VAL L  47      25.840  19.489  54.169  1.00 11.62           C  
ATOM    377  CG1 VAL L  47      25.316  19.529  52.711  1.00 13.87           C  
ATOM    378  CG2 VAL L  47      27.019  20.431  54.376  1.00 10.96           C  
ATOM    379  N   ILE L  48      25.408  20.346  57.413  1.00  9.62           N  
ATOM    380  CA  ILE L  48      25.718  20.148  58.832  1.00 10.50           C  
ATOM    381  C   ILE L  48      25.124  21.300  59.635  1.00 10.46           C  
ATOM    382  O   ILE L  48      25.205  22.468  59.231  1.00  8.54           O  
ATOM    383  CB  ILE L  48      27.242  20.075  59.091  1.00  9.12           C  
ATOM    384  CG1 ILE L  48      27.843  18.803  58.448  1.00  8.42           C  
ATOM    385  CG2 ILE L  48      27.534  20.100  60.627  1.00  7.26           C  
ATOM    386  CD1 ILE L  48      27.365  17.421  59.168  1.00  9.22           C  
ATOM    387  N   TYR L  49      24.492  20.985  60.759  1.00 10.98           N  
ATOM    388  CA  TYR L  49      24.099  22.039  61.685  1.00 12.03           C  
ATOM    389  C   TYR L  49      24.469  21.578  63.102  1.00 11.45           C  
ATOM    390  O   TYR L  49      24.762  20.405  63.311  1.00 11.17           O  
ATOM    391  CB  TYR L  49      22.609  22.372  61.547  1.00 12.26           C  
ATOM    392  CG  TYR L  49      21.729  21.224  61.957  1.00 13.69           C  
ATOM    393  CD1 TYR L  49      21.263  21.120  63.269  1.00 13.69           C  
ATOM    394  CD2 TYR L  49      21.400  20.220  61.049  1.00 14.32           C  
ATOM    395  CE1 TYR L  49      20.456  20.022  63.680  1.00 16.12           C  
ATOM    396  CE2 TYR L  49      20.602  19.134  61.434  1.00 16.24           C  
ATOM    397  CZ  TYR L  49      20.124  19.043  62.735  1.00 16.00           C  
ATOM    398  OH  TYR L  49      19.333  17.951  63.101  1.00 17.50           O  
ATOM    399  N   GLU L  50      24.485  22.493  64.059  1.00  9.66           N  
ATOM    400  CA  GLU L  50      24.910  22.137  65.417  1.00 10.51           C  
ATOM    401  C   GLU L  50      26.224  21.344  65.417  1.00 11.17           C  
ATOM    402  O   GLU L  50      26.342  20.304  66.082  1.00 11.34           O  
ATOM    403  CB  GLU L  50      23.780  21.372  66.129  1.00 11.50           C  
ATOM    404  CG  GLU L  50      22.597  22.281  66.370  1.00 12.91           C  
ATOM    405  CD  GLU L  50      21.351  21.547  66.892  1.00 15.40           C  
ATOM    406  OE1 GLU L  50      21.440  20.376  67.308  1.00 15.95           O  
ATOM    407  OE2 GLU L  50      20.272  22.157  66.860  1.00 16.98           O  
ATOM    408  N   ASP L  51      27.202  21.854  64.666  1.00  9.83           N  
ATOM    409  CA  ASP L  51      28.567  21.302  64.577  1.00 12.27           C  
ATOM    410  C   ASP L  51      28.718  19.978  63.808  1.00 10.54           C  
ATOM    411  O   ASP L  51      29.679  19.801  63.078  1.00 11.42           O  
ATOM    412  CB  ASP L  51      29.215  21.085  65.957  1.00 12.03           C  
ATOM    413  CG  ASP L  51      29.218  22.336  66.834  1.00 15.26           C  
ATOM    414  OD1 ASP L  51      29.311  23.483  66.338  1.00 13.66           O  
ATOM    415  OD2 ASP L  51      29.191  22.144  68.073  1.00 17.28           O  
ATOM    416  N   ASN L  52      27.809  19.034  64.019  1.00  9.46           N  
ATOM    417  CA  ASN L  52      27.989  17.693  63.486  1.00 10.65           C  
ATOM    418  C   ASN L  52      26.701  16.929  63.121  1.00  9.63           C  
ATOM    419  O   ASN L  52      26.769  15.752  62.798  1.00 10.56           O  
ATOM    420  CB  ASN L  52      28.882  16.834  64.422  1.00  9.48           C  
ATOM    421  CG  ASN L  52      28.245  16.622  65.808  1.00 11.65           C  
ATOM    422  OD1 ASN L  52      27.102  17.020  66.032  1.00  9.93           O  
ATOM    423  ND2 ASN L  52      28.989  16.010  66.722  1.00 12.32           N  
ATOM    424  N   GLN L  53      25.556  17.609  63.141  1.00  9.53           N  
ATOM    425  CA  GLN L  53      24.270  16.987  62.842  1.00 10.71           C  
ATOM    426  C   GLN L  53      23.983  17.110  61.358  1.00 11.58           C  
ATOM    427  O   GLN L  53      24.081  18.208  60.806  1.00 11.24           O  
ATOM    428  CB  GLN L  53      23.133  17.673  63.614  1.00  9.65           C  
ATOM    429  CG  GLN L  53      23.340  17.629  65.143  1.00 10.19           C  
ATOM    430  CD  GLN L  53      23.381  16.184  65.630  1.00  9.67           C  
ATOM    431  OE1 GLN L  53      22.361  15.489  65.580  1.00  9.56           O  
ATOM    432  NE2 GLN L  53      24.560  15.719  66.064  1.00  9.48           N  
ATOM    433  N   ARG L  54      23.628  15.999  60.728  1.00 10.84           N  
ATOM    434  CA  ARG L  54      23.172  16.000  59.316  1.00 12.80           C  
ATOM    435  C   ARG L  54      21.655  16.133  59.249  1.00 13.93           C  
ATOM    436  O   ARG L  54      20.936  15.422  59.956  1.00 14.97           O  
ATOM    437  CB  ARG L  54      23.574  14.695  58.614  1.00 12.83           C  
ATOM    438  CG  ARG L  54      25.051  14.600  58.267  1.00 12.68           C  
ATOM    439  CD  ARG L  54      25.425  13.248  57.636  1.00 13.95           C  
ATOM    440  NE  ARG L  54      25.239  12.146  58.575  1.00 14.43           N  
ATOM    441  CZ  ARG L  54      26.151  11.759  59.468  1.00 17.27           C  
ATOM    442  NH1 ARG L  54      27.351  12.377  59.563  1.00 17.31           N  
ATOM    443  NH2 ARG L  54      25.852  10.750  60.304  1.00 18.62           N  
ATOM    444  N   PRO L  55      21.153  17.038  58.396  1.00 15.25           N  
ATOM    445  CA  PRO L  55      19.703  17.059  58.166  1.00 16.09           C  
ATOM    446  C   PRO L  55      19.279  15.775  57.464  1.00 17.28           C  
ATOM    447  O   PRO L  55      20.114  15.086  56.868  1.00 16.75           O  
ATOM    448  CB  PRO L  55      19.505  18.250  57.206  1.00 16.84           C  
ATOM    449  CG  PRO L  55      20.776  19.065  57.304  1.00 15.28           C  
ATOM    450  CD  PRO L  55      21.871  18.052  57.601  1.00 14.34           C  
ATOM    451  N   SER L  56      17.995  15.443  57.525  1.00 19.94           N  
ATOM    453  CA  SER L  56      17.500  14.266  56.809  0.50 20.34           C  
ATOM    454  C   SER L  56      17.773  14.474  55.323  1.00 21.14           C  
ATOM    455  O   SER L  56      17.641  15.591  54.802  1.00 21.18           O  
ATOM    457  CB  SER L  56      16.006  14.054  57.069  0.50 20.89           C  
ATOM    459  OG  SER L  56      15.269  15.222  56.749  0.50 19.93           O  
ATOM    460  N   GLY L  57      18.202  13.416  54.656  1.00 20.94           N  
ATOM    461  CA  GLY L  57      18.462  13.481  53.232  1.00 21.40           C  
ATOM    462  C   GLY L  57      19.895  13.834  52.918  1.00 20.78           C  
ATOM    463  O   GLY L  57      20.304  13.826  51.748  1.00 22.43           O  
ATOM    464  N   VAL L  58      20.676  14.165  53.948  1.00 17.85           N  
ATOM    465  CA  VAL L  58      22.095  14.398  53.725  1.00 16.23           C  
ATOM    466  C   VAL L  58      22.821  13.118  54.105  1.00 16.28           C  
ATOM    467  O   VAL L  58      22.672  12.630  55.222  1.00 17.43           O  
ATOM    468  CB  VAL L  58      22.628  15.593  54.553  1.00 14.99           C  
ATOM    469  CG1 VAL L  58      24.171  15.686  54.466  1.00 15.10           C  
ATOM    470  CG2 VAL L  58      21.922  16.900  54.117  1.00 15.17           C  
ATOM    471  N   PRO L  59      23.614  12.577  53.190  1.00 17.25           N  
ATOM    472  CA  PRO L  59      24.171  11.251  53.446  1.00 18.76           C  
ATOM    473  C   PRO L  59      25.340  11.281  54.425  1.00 18.47           C  
ATOM    474  O   PRO L  59      25.978  12.328  54.614  1.00 15.43           O  
ATOM    475  CB  PRO L  59      24.669  10.808  52.074  1.00 19.46           C  
ATOM    476  CG  PRO L  59      24.931  12.076  51.328  1.00 20.18           C  
ATOM    477  CD  PRO L  59      24.019  13.130  51.888  1.00 18.68           C  
ATOM    478  N   ASP L  60      25.633  10.121  55.007  1.00 18.71           N  
ATOM    479  CA  ASP L  60      26.646  10.029  56.041  1.00 19.24           C  
ATOM    480  C   ASP L  60      28.069  10.205  55.524  1.00 18.61           C  
ATOM    481  O   ASP L  60      29.024  10.175  56.310  1.00 18.23           O  
ATOM    482  CB  ASP L  60      26.490   8.733  56.860  1.00 21.47           C  
ATOM    483  CG  ASP L  60      26.888   7.478  56.072  1.00 24.02           C  
ATOM    484  OD1 ASP L  60      27.143   7.585  54.849  1.00 23.77           O  
ATOM    485  OD2 ASP L  60      26.965   6.381  56.682  1.00 24.93           O  
ATOM    486  N   ARG L  61      28.217  10.427  54.221  1.00 16.23           N  
ATOM    487  CA  ARG L  61      29.501  10.842  53.677  1.00 16.99           C  
ATOM    488  C   ARG L  61      29.942  12.227  54.187  1.00 14.85           C  
ATOM    489  O   ARG L  61      31.119  12.563  54.111  1.00 14.61           O  
ATOM    490  CB  ARG L  61      29.447  10.902  52.150  1.00 17.69           C  
ATOM    491  CG  ARG L  61      29.108   9.589  51.482  1.00 20.36           C  
ATOM    492  CD  ARG L  61      29.253   9.714  49.955  1.00 19.91           C  
ATOM    493  NE  ARG L  61      28.278  10.614  49.324  1.00 19.89           N  
ATOM    494  CZ  ARG L  61      28.566  11.817  48.827  1.00 19.89           C  
ATOM    495  NH1 ARG L  61      29.810  12.288  48.882  1.00 18.67           N  
ATOM    496  NH2 ARG L  61      27.603  12.537  48.234  1.00 19.50           N  
ATOM    497  N   PHE L  62      28.989  13.021  54.677  1.00 14.25           N  
ATOM    498  CA  PHE L  62      29.274  14.359  55.195  1.00 14.33           C  
ATOM    499  C   PHE L  62      29.436  14.294  56.711  1.00 13.81           C  
ATOM    500  O   PHE L  62      28.580  13.736  57.405  1.00 14.96           O  
ATOM    501  CB  PHE L  62      28.126  15.317  54.840  1.00 15.10           C  
ATOM    502  CG  PHE L  62      28.083  15.687  53.391  1.00 16.00           C  
ATOM    503  CD1 PHE L  62      27.429  14.870  52.467  1.00 15.55           C  
ATOM    504  CD2 PHE L  62      28.673  16.872  52.948  1.00 15.47           C  
ATOM    505  CE1 PHE L  62      27.392  15.200  51.106  1.00 15.87           C  
ATOM    506  CE2 PHE L  62      28.637  17.216  51.596  1.00 16.17           C  
ATOM    507  CZ  PHE L  62      28.016  16.367  50.665  1.00 16.12           C  
ATOM    508  N   SER L  63      30.514  14.858  57.235  1.00 13.63           N  
ATOM    509  CA  SER L  63      30.607  14.937  58.673  1.00 14.99           C  
ATOM    510  C   SER L  63      31.246  16.233  59.141  1.00 13.51           C  
ATOM    511  O   SER L  63      32.140  16.788  58.493  1.00 13.00           O  
ATOM    512  CB  SER L  63      31.355  13.735  59.232  1.00 17.42           C  
ATOM    513  OG  SER L  63      32.611  13.673  58.643  1.00 18.95           O  
ATOM    514  N   GLY L  64      30.752  16.728  60.257  1.00 13.25           N  
ATOM    515  CA  GLY L  64      31.273  17.981  60.830  1.00 11.61           C  
ATOM    516  C   GLY L  64      32.062  17.668  62.097  1.00 11.92           C  
ATOM    517  O   GLY L  64      31.767  16.727  62.823  1.00 10.95           O  
ATOM    518  N   SER L  65      33.073  18.467  62.372  1.00 11.48           N  
ATOM    520  CA  SER L  65      33.851  18.308  63.588  0.50 13.90           C  
ATOM    521  C   SER L  65      34.277  19.677  64.083  1.00 13.45           C  
ATOM    522  O   SER L  65      34.204  20.663  63.342  1.00 11.89           O  
ATOM    524  CB  SER L  65      35.073  17.427  63.321  0.50 15.47           C  
ATOM    526  OG  SER L  65      35.754  17.132  64.526  0.50 16.68           O  
ATOM    527  N   ILE L  66      34.716  19.732  65.330  1.00 13.26           N  
ATOM    528  CA  ILE L  66      35.180  20.947  65.939  1.00 14.04           C  
ATOM    529  C   ILE L  66      36.547  20.605  66.513  1.00 15.95           C  
ATOM    530  O   ILE L  66      36.705  19.564  67.156  1.00 15.78           O  
ATOM    531  CB  ILE L  66      34.241  21.367  67.092  1.00 14.79           C  
ATOM    532  CG1 ILE L  66      32.806  21.613  66.583  1.00 15.00           C  
ATOM    533  CG2 ILE L  66      34.776  22.617  67.820  1.00 14.75           C  
ATOM    534  CD1 ILE L  66      32.644  22.837  65.660  1.00 15.14           C  
ATOM    535  N   ASP L  66A     37.534  21.453  66.261  1.00 16.32           N  
ATOM    536  CA  ASP L  66A     38.886  21.246  66.811  1.00 19.25           C  
ATOM    537  C   ASP L  66A     39.197  22.443  67.665  1.00 18.82           C  
ATOM    538  O   ASP L  66A     39.598  23.501  67.159  1.00 17.12           O  
ATOM    539  CB  ASP L  66A     39.939  21.105  65.710  1.00 21.69           C  
ATOM    540  CG  ASP L  66A     41.355  20.992  66.273  1.00 25.63           C  
ATOM    541  OD1 ASP L  66A     41.540  20.583  67.437  1.00 26.75           O  
ATOM    542  OD2 ASP L  66A     42.295  21.340  65.551  1.00 27.68           O  
ATOM    543  N   SER L  66B     38.964  22.293  68.961  1.00 17.49           N  
ATOM    545  CA  SER L  66B     39.182  23.402  69.879  0.50 18.72           C  
ATOM    546  C   SER L  66B     40.632  23.898  69.925  1.00 18.11           C  
ATOM    547  O   SER L  66B     40.877  25.103  70.112  1.00 18.46           O  
ATOM    549  CB  SER L  66B     38.684  23.057  71.284  0.50 19.15           C  
ATOM    551  OG  SER L  66B     37.336  23.447  71.425  0.50 20.64           O  
ATOM    552  N   SER L  67      41.603  23.012  69.719  1.00 19.02           N  
ATOM    553  CA  SER L  67      42.993  23.485  69.776  1.00 21.33           C  
ATOM    554  C   SER L  67      43.385  24.427  68.647  1.00 21.57           C  
ATOM    555  O   SER L  67      44.264  25.259  68.833  0.80 21.82           O  
ATOM    556  CB  SER L  67      44.032  22.366  69.946  1.00 22.98           C  
ATOM    557  OG  SER L  67      43.632  21.182  69.312  0.80 25.20           O  
ATOM    558  N   SER L  68      42.721  24.329  67.501  1.00 19.97           N  
ATOM    559  CA  SER L  68      43.020  25.231  66.383  1.00 18.53           C  
ATOM    560  C   SER L  68      41.916  26.267  66.205  1.00 18.05           C  
ATOM    561  O   SER L  68      41.923  27.064  65.254  1.00 16.83           O  
ATOM    562  CB  SER L  68      43.248  24.440  65.097  1.00 19.13           C  
ATOM    563  OG  SER L  68      42.125  23.634  64.775  1.00 19.40           O  
ATOM    564  N   ASN L  69      40.973  26.261  67.140  1.00 15.34           N  
ATOM    565  CA  ASN L  69      39.816  27.130  67.094  1.00 14.42           C  
ATOM    566  C   ASN L  69      39.128  27.052  65.724  1.00 12.33           C  
ATOM    567  O   ASN L  69      38.720  28.076  65.168  1.00 12.28           O  
ATOM    568  CB  ASN L  69      40.172  28.577  67.418  1.00 14.26           C  
ATOM    569  CG  ASN L  69      39.031  29.306  68.093  1.00 15.83           C  
ATOM    570  OD1 ASN L  69      38.362  28.740  68.949  1.00 16.12           O  
ATOM    571  ND2 ASN L  69      38.813  30.568  67.731  1.00 16.93           N  
ATOM    572  N   SER L  70      38.966  25.835  65.222  1.00 12.18           N  
ATOM    573  CA  SER L  70      38.374  25.633  63.903  1.00 12.90           C  
ATOM    574  C   SER L  70      37.276  24.581  63.912  1.00 11.86           C  
ATOM    575  O   SER L  70      37.200  23.729  64.809  1.00 12.69           O  
ATOM    576  CB  SER L  70      39.451  25.223  62.878  1.00 12.62           C  
ATOM    577  OG  SER L  70      40.052  24.011  63.283  1.00 16.23           O  
ATOM    578  N   ALA L  71      36.440  24.645  62.885  1.00 10.49           N  
ATOM    579  CA  ALA L  71      35.456  23.600  62.595  1.00 10.33           C  
ATOM    580  C   ALA L  71      35.871  22.990  61.262  1.00 10.54           C  
ATOM    581  O   ALA L  71      36.551  23.638  60.465  1.00 11.36           O  
ATOM    582  CB  ALA L  71      34.076  24.212  62.489  1.00  9.59           C  
ATOM    583  N   SER L  72      35.497  21.749  61.005  1.00 10.87           N  
ATOM    585  CA  SER L  72      35.859  21.119  59.740  0.50 12.29           C  
ATOM    586  C   SER L  72      34.679  20.351  59.172  1.00 11.65           C  
ATOM    587  O   SER L  72      33.836  19.831  59.910  1.00 11.35           O  
ATOM    589  CB  SER L  72      37.065  20.187  59.909  0.50 13.24           C  
ATOM    591  OG  SER L  72      36.750  19.141  60.806  0.50 14.95           O  
ATOM    592  N   LEU L  73      34.617  20.301  57.857  1.00 11.42           N  
ATOM    593  CA  LEU L  73      33.608  19.528  57.177  1.00 10.96           C  
ATOM    594  C   LEU L  73      34.403  18.533  56.363  1.00 10.62           C  
ATOM    595  O   LEU L  73      35.326  18.916  55.656  1.00 11.03           O  
ATOM    596  CB  LEU L  73      32.814  20.434  56.227  1.00  9.26           C  
ATOM    597  CG  LEU L  73      31.847  19.699  55.295  1.00  9.78           C  
ATOM    598  CD1 LEU L  73      30.648  19.131  56.099  1.00  9.12           C  
ATOM    599  CD2 LEU L  73      31.325  20.655  54.229  1.00  9.92           C  
ATOM    600  N   THR L  74      34.061  17.258  56.495  1.00 10.50           N  
ATOM    601  CA  THR L  74      34.750  16.202  55.767  1.00 12.62           C  
ATOM    602  C   THR L  74      33.726  15.507  54.895  1.00 12.39           C  
ATOM    603  O   THR L  74      32.624  15.202  55.339  1.00 14.10           O  
ATOM    604  CB  THR L  74      35.415  15.193  56.745  1.00 12.64           C  
ATOM    605  OG1 THR L  74      36.409  15.865  57.506  1.00 15.01           O  
ATOM    606  CG2 THR L  74      36.062  13.970  55.988  1.00 15.08           C  
ATOM    607  N   ILE L  75      34.090  15.270  53.642  1.00 13.11           N  
ATOM    608  CA  ILE L  75      33.243  14.586  52.698  1.00 15.72           C  
ATOM    609  C   ILE L  75      34.072  13.426  52.162  1.00 17.62           C  
ATOM    610  O   ILE L  75      35.163  13.620  51.605  1.00 18.56           O  
ATOM    611  CB  ILE L  75      32.825  15.477  51.489  1.00 16.66           C  
ATOM    612  CG1 ILE L  75      32.296  16.845  51.953  1.00 16.63           C  
ATOM    613  CG2 ILE L  75      31.772  14.739  50.623  1.00 18.83           C  
ATOM    614  CD1 ILE L  75      32.181  17.887  50.820  1.00 16.69           C  
ATOM    615  N   SER L  76      33.581  12.219  52.390  1.00 20.04           N  
ATOM    616  CA  SER L  76      34.270  11.039  51.914  1.00 21.46           C  
ATOM    617  C   SER L  76      33.480  10.538  50.719  1.00 21.56           C  
ATOM    618  O   SER L  76      32.337  10.966  50.496  1.00 21.44           O  
ATOM    619  CB  SER L  76      34.268   9.993  53.012  1.00 21.65           C  
ATOM    620  OG  SER L  76      32.944   9.527  53.169  1.00 22.79           O  
ATOM    621  N   GLY L  77      34.058   9.618  49.946  1.00 21.47           N  
ATOM    622  CA  GLY L  77      33.321   9.072  48.813  1.00 22.09           C  
ATOM    623  C   GLY L  77      32.851  10.154  47.860  1.00 22.19           C  
ATOM    624  O   GLY L  77      31.719  10.115  47.351  1.00 23.17           O  
ATOM    625  N   LEU L  78      33.727  11.119  47.611  1.00 23.92           N  
ATOM    627  CA  LEU L  78      33.388  12.283  46.786  0.50 23.63           C  
ATOM    628  C   LEU L  78      32.650  11.891  45.533  1.00 25.06           C  
ATOM    629  O   LEU L  78      33.097  11.007  44.781  1.00 26.17           O  
ATOM    631  CB  LEU L  78      34.641  13.046  46.368  0.50 23.37           C  
ATOM    633  CG  LEU L  78      35.264  14.016  47.353  0.50 22.50           C  
ATOM    635  CD1 LEU L  78      36.396  14.731  46.659  0.50 21.83           C  
ATOM    637  CD2 LEU L  78      34.213  14.994  47.829  0.50 22.10           C  
ATOM    638  N   LYS L  79      31.521  12.542  45.303  1.00 24.80           N  
ATOM    639  CA  LYS L  79      30.749  12.352  44.103  1.00 26.20           C  
ATOM    640  C   LYS L  79      30.786  13.672  43.355  1.00 28.12           C  
ATOM    641  O   LYS L  79      30.979  14.735  43.955  1.00 26.30           O  
ATOM    642  CB  LYS L  79      29.304  12.000  44.448  1.00 27.02           C  
ATOM    643  CG  LYS L  79      29.132  10.634  45.115  1.00 28.11           C  
ATOM    644  CD  LYS L  79      27.679  10.415  45.467  1.00 29.54           C  
ATOM    645  CE  LYS L  79      27.361   8.936  45.688  1.00 31.19           C  
ATOM    646  NZ  LYS L  79      28.429   8.208  46.464  1.00 32.75           N  
ATOM    647  N   THR L  80      30.585  13.622  42.047  1.00 28.27           N  
ATOM    648  CA  THR L  80      30.594  14.840  41.276  1.00 29.03           C  
ATOM    649  C   THR L  80      29.449  15.772  41.689  1.00 28.89           C  
ATOM    650  O   THR L  80      29.534  16.960  41.443  1.00 32.17           O  
ATOM    651  CB  THR L  80      30.515  14.540  39.777  1.00 30.02           C  
ATOM    652  OG1 THR L  80      29.270  13.888  39.511  1.00 30.47           O  
ATOM    653  CG2 THR L  80      31.669  13.636  39.361  1.00 30.30           C  
ATOM    654  N   GLU L  81      28.378  15.253  42.294  1.00 27.42           N  
ATOM    656  CA  GLU L  81      27.330  16.154  42.769  0.50 26.83           C  
ATOM    657  C   GLU L  81      27.725  16.886  44.067  1.00 25.81           C  
ATOM    658  O   GLU L  81      27.005  17.781  44.523  1.00 25.91           O  
ATOM    660  CB  GLU L  81      25.958  15.477  42.899  0.50 27.76           C  
ATOM    662  CG  GLU L  81      25.747  14.644  44.152  0.50 28.31           C  
ATOM    664  CD  GLU L  81      25.555  13.166  43.851  0.50 28.74           C  
ATOM    666  OE1 GLU L  81      25.228  12.413  44.785  0.50 29.53           O  
ATOM    668  OE2 GLU L  81      25.720  12.750  42.686  0.50 29.17           O  
ATOM    669  N   ASP L  82      28.877  16.544  44.640  1.00 22.93           N  
ATOM    670  CA  ASP L  82      29.376  17.291  45.799  1.00 21.67           C  
ATOM    671  C   ASP L  82      30.113  18.562  45.362  1.00 20.87           C  
ATOM    672  O   ASP L  82      30.541  19.355  46.203  1.00 18.50           O  
ATOM    673  CB  ASP L  82      30.335  16.442  46.620  1.00 21.47           C  
ATOM    674  CG  ASP L  82      29.691  15.182  47.154  1.00 21.73           C  
ATOM    675  OD1 ASP L  82      28.453  15.186  47.360  1.00 22.37           O  
ATOM    676  OD2 ASP L  82      30.442  14.207  47.391  1.00 23.26           O  
ATOM    677  N   GLU L  83      30.340  18.707  44.060  1.00 19.15           N  
ATOM    678  CA  GLU L  83      31.036  19.884  43.556  1.00 18.86           C  
ATOM    679  C   GLU L  83      30.186  21.109  43.851  1.00 17.49           C  
ATOM    680  O   GLU L  83      29.032  21.218  43.419  1.00 18.10           O  
ATOM    681  CB  GLU L  83      31.335  19.762  42.051  1.00 22.21           C  
ATOM    682  CG  GLU L  83      31.951  21.012  41.479  1.00 25.15           C  
ATOM    683  CD  GLU L  83      32.660  20.751  40.156  1.00 28.65           C  
ATOM    684  OE1 GLU L  83      33.653  19.973  40.119  1.00 28.58           O  
ATOM    685  OE2 GLU L  83      32.222  21.361  39.168  1.00 30.35           O  
ATOM    686  N   ALA L  84      30.741  22.025  44.642  1.00 16.77           N  
ATOM    687  CA  ALA L  84      29.924  23.096  45.212  1.00 15.37           C  
ATOM    688  C   ALA L  84      30.810  24.062  45.971  1.00 14.31           C  
ATOM    689  O   ALA L  84      31.973  23.761  46.223  1.00 14.69           O  
ATOM    690  CB  ALA L  84      28.857  22.503  46.126  1.00 14.34           C  
ATOM    691  N   ASP L  85      30.273  25.234  46.300  1.00 14.51           N  
ATOM    692  CA  ASP L  85      30.931  26.103  47.266  1.00 14.11           C  
ATOM    693  C   ASP L  85      30.370  25.716  48.626  1.00 12.31           C  
ATOM    694  O   ASP L  85      29.151  25.499  48.768  1.00 12.80           O  
ATOM    695  CB  ASP L  85      30.629  27.570  46.995  1.00 15.22           C  
ATOM    696  CG  ASP L  85      31.346  28.084  45.786  1.00 19.04           C  
ATOM    697  OD1 ASP L  85      32.561  27.841  45.668  1.00 20.61           O  
ATOM    698  OD2 ASP L  85      30.698  28.731  44.952  1.00 20.48           O  
ATOM    699  N   TYR L  86      31.250  25.628  49.617  1.00  9.24           N  
ATOM    700  CA  TYR L  86      30.808  25.288  50.967  1.00  9.32           C  
ATOM    701  C   TYR L  86      31.085  26.464  51.885  1.00  9.51           C  
ATOM    702  O   TYR L  86      32.157  27.084  51.811  1.00 10.20           O  
ATOM    703  CB  TYR L  86      31.539  24.037  51.474  1.00  9.22           C  
ATOM    704  CG  TYR L  86      31.058  22.830  50.734  1.00  9.09           C  
ATOM    705  CD1 TYR L  86      31.632  22.473  49.503  1.00  8.99           C  
ATOM    706  CD2 TYR L  86      29.970  22.081  51.218  1.00 10.17           C  
ATOM    707  CE1 TYR L  86      31.166  21.341  48.789  1.00 10.70           C  
ATOM    708  CE2 TYR L  86      29.498  20.957  50.520  1.00 10.75           C  
ATOM    709  CZ  TYR L  86      30.117  20.605  49.304  1.00 10.50           C  
ATOM    710  OH  TYR L  86      29.660  19.543  48.573  1.00 11.54           O  
ATOM    711  N   TYR L  87      30.111  26.777  52.730  1.00  8.46           N  
ATOM    712  CA  TYR L  87      30.245  27.900  53.664  1.00  9.48           C  
ATOM    713  C   TYR L  87      30.062  27.418  55.089  1.00  9.42           C  
ATOM    714  O   TYR L  87      29.145  26.655  55.378  1.00 10.29           O  
ATOM    715  CB  TYR L  87      29.167  28.952  53.368  1.00  9.93           C  
ATOM    716  CG  TYR L  87      29.363  29.607  52.024  1.00 10.20           C  
ATOM    717  CD1 TYR L  87      30.225  30.701  51.878  1.00  9.74           C  
ATOM    718  CD2 TYR L  87      28.702  29.130  50.895  1.00 10.94           C  
ATOM    719  CE1 TYR L  87      30.426  31.285  50.616  1.00 10.75           C  
ATOM    720  CE2 TYR L  87      28.895  29.716  49.639  1.00 12.65           C  
ATOM    721  CZ  TYR L  87      29.748  30.785  49.519  1.00 12.10           C  
ATOM    722  OH  TYR L  87      29.927  31.354  48.284  1.00 14.04           O  
ATOM    723  N   CYS L  88      30.963  27.834  55.963  1.00 10.18           N  
ATOM    724  CA  CYS L  88      30.713  27.632  57.388  0.70 11.72           C  
ATOM    726  C   CYS L  88      29.990  28.867  57.900  1.00 10.04           C  
ATOM    727  O   CYS L  88      30.032  29.953  57.303  1.00  9.69           O  
ATOM    728  CB  CYS L  88      31.988  27.392  58.182  0.70 12.81           C  
ATOM    730  SG  CYS L  88      33.118  28.764  58.046  0.70 12.64           S  
ATOM    732  N   GLN L  89      29.247  28.677  58.971  1.00  9.02           N  
ATOM    733  CA  GLN L  89      28.446  29.766  59.494  1.00  9.30           C  
ATOM    734  C   GLN L  89      28.265  29.584  61.002  1.00  9.05           C  
ATOM    735  O   GLN L  89      28.023  28.472  61.487  1.00  8.43           O  
ATOM    736  CB  GLN L  89      27.077  29.790  58.776  1.00  9.09           C  
ATOM    737  CG  GLN L  89      26.117  30.792  59.376  1.00  9.70           C  
ATOM    738  CD  GLN L  89      25.119  30.180  60.355  1.00 10.09           C  
ATOM    739  OE1 GLN L  89      24.461  29.172  60.041  1.00 11.73           O  
ATOM    740  NE2 GLN L  89      24.940  30.824  61.503  1.00  9.78           N  
ATOM    741  N   SER L  90      28.362  30.675  61.750  1.00  9.04           N  
ATOM    742  CA  SER L  90      28.086  30.604  63.169  1.00  9.21           C  
ATOM    743  C   SER L  90      27.417  31.912  63.621  1.00 11.42           C  
ATOM    744  O   SER L  90      26.891  32.654  62.812  1.00 10.02           O  
ATOM    745  CB  SER L  90      29.390  30.322  63.949  1.00 10.27           C  
ATOM    746  OG  SER L  90      29.094  29.896  65.259  1.00 11.33           O  
ATOM    747  N   TYR L  91      27.400  32.155  64.922  1.00 13.00           N  
ATOM    748  CA  TYR L  91      26.630  33.277  65.491  1.00 16.25           C  
ATOM    749  C   TYR L  91      27.524  34.000  66.452  1.00 17.57           C  
ATOM    750  O   TYR L  91      28.342  33.362  67.121  1.00 16.82           O  
ATOM    751  CB  TYR L  91      25.406  32.756  66.253  1.00 16.48           C  
ATOM    752  CG  TYR L  91      24.424  32.012  65.389  1.00 17.31           C  
ATOM    753  CD1 TYR L  91      23.489  32.702  64.635  1.00 17.86           C  
ATOM    754  CD2 TYR L  91      24.423  30.622  65.329  1.00 16.93           C  
ATOM    755  CE1 TYR L  91      22.572  32.034  63.843  1.00 18.45           C  
ATOM    756  CE2 TYR L  91      23.489  29.951  64.547  1.00 18.46           C  
ATOM    757  CZ  TYR L  91      22.583  30.676  63.805  1.00 18.07           C  
ATOM    758  OH  TYR L  91      21.675  30.053  63.003  1.00 19.11           O  
ATOM    759  N   ASP L  92      27.380  35.324  66.514  1.00 20.85           N  
ATOM    760  CA  ASP L  92      28.084  36.115  67.525  1.00 24.75           C  
ATOM    761  C   ASP L  92      27.257  36.245  68.806  1.00 27.32           C  
ATOM    762  O   ASP L  92      26.187  35.631  68.931  1.00 25.78           O  
ATOM    763  CB  ASP L  92      28.470  37.491  66.977  1.00 25.59           C  
ATOM    764  CG  ASP L  92      27.271  38.408  66.750  1.00 25.82           C  
ATOM    765  OD1 ASP L  92      27.242  39.042  65.666  1.00 27.58           O  
ATOM    766  OD2 ASP L  92      26.357  38.491  67.606  1.00 25.76           O  
ATOM    767  N   SER L  93      27.767  37.026  69.766  1.00 30.61           N  
ATOM    768  CA  SER L  93      27.111  37.167  71.075  1.00 33.58           C  
ATOM    769  C   SER L  93      25.669  37.677  70.994  1.00 34.05           C  
ATOM    770  O   SER L  93      24.831  37.268  71.799  1.00 35.78           O  
ATOM    771  CB  SER L  93      27.940  38.058  72.010  1.00 34.71           C  
ATOM    772  OG  SER L  93      28.549  39.125  71.284  1.00 37.10           O  
ATOM    773  N   SER L  94      25.382  38.548  70.020  1.00 33.11           N  
ATOM    774  CA  SER L  94      24.026  39.072  69.817  1.00 32.79           C  
ATOM    775  C   SER L  94      23.213  38.168  68.899  1.00 31.69           C  
ATOM    776  O   SER L  94      22.105  38.525  68.473  1.00 30.27           O  
ATOM    777  CB  SER L  94      24.068  40.486  69.231  1.00 34.17           C  
ATOM    778  OG  SER L  94      25.178  41.210  69.736  1.00 35.73           O  
ATOM    779  N   ASN L  95      23.779  37.004  68.574  1.00 29.37           N  
ATOM    780  CA  ASN L  95      23.088  36.053  67.731  1.00 28.42           C  
ATOM    781  C   ASN L  95      23.002  36.442  66.269  1.00 25.28           C  
ATOM    782  O   ASN L  95      22.217  35.870  65.517  1.00 25.03           O  
ATOM    783  CB  ASN L  95      21.688  35.822  68.251  1.00 31.85           C  
ATOM    784  CG  ASN L  95      21.584  34.565  69.023  1.00 34.23           C  
ATOM    785  OD1 ASN L  95      22.021  34.494  70.170  1.00 35.67           O  
ATOM    786  ND2 ASN L  95      21.026  33.538  68.395  1.00 35.80           N  
ATOM    787  N   HIS L  95A     23.800  37.413  65.869  1.00 22.52           N  
ATOM    788  CA  HIS L  95A     23.885  37.757  64.466  1.00 22.57           C  
ATOM    789  C   HIS L  95A     24.681  36.694  63.697  1.00 20.10           C  
ATOM    790  O   HIS L  95A     25.645  36.136  64.211  1.00 17.93           O  
ATOM    791  CB  HIS L  95A     24.458  39.152  64.303  1.00 25.36           C  
ATOM    792  CG  HIS L  95A     23.641  40.186  65.009  1.00 28.77           C  
ATOM    793  ND1 HIS L  95A     24.186  41.321  65.568  1.00 30.48           N  
ATOM    794  CD2 HIS L  95A     22.317  40.214  65.306  1.00 29.65           C  
ATOM    795  CE1 HIS L  95A     23.225  42.025  66.142  1.00 30.82           C  
ATOM    796  NE2 HIS L  95A     22.085  41.372  66.004  1.00 30.16           N  
ATOM    797  N   VAL L  96      24.223  36.399  62.488  1.00 17.46           N  
ATOM    798  CA  VAL L  96      24.845  35.379  61.653  1.00 15.44           C  
ATOM    799  C   VAL L  96      26.220  35.868  61.184  1.00 14.85           C  
ATOM    800  O   VAL L  96      26.357  37.014  60.730  1.00 15.20           O  
ATOM    801  CB  VAL L  96      23.956  35.112  60.417  1.00 14.68           C  
ATOM    802  CG1 VAL L  96      24.643  34.189  59.397  1.00 14.40           C  
ATOM    803  CG2 VAL L  96      22.617  34.558  60.846  1.00 16.00           C  
ATOM    804  N   VAL L  97      27.234  35.013  61.292  1.00 12.45           N  
ATOM    805  CA  VAL L  97      28.519  35.271  60.638  1.00 12.78           C  
ATOM    806  C   VAL L  97      28.770  34.133  59.639  1.00 12.54           C  
ATOM    807  O   VAL L  97      28.681  32.964  60.006  1.00 10.01           O  
ATOM    808  CB  VAL L  97      29.708  35.296  61.646  1.00 15.06           C  
ATOM    809  CG1 VAL L  97      31.040  35.481  60.894  1.00 16.58           C  
ATOM    810  CG2 VAL L  97      29.522  36.405  62.732  1.00 16.42           C  
ATOM    811  N   PHE L  98      29.096  34.486  58.402  1.00 11.36           N  
ATOM    812  CA  PHE L  98      29.421  33.509  57.347  1.00 13.54           C  
ATOM    813  C   PHE L  98      30.910  33.517  57.085  1.00 12.31           C  
ATOM    814  O   PHE L  98      31.539  34.598  57.077  1.00 10.82           O  
ATOM    815  CB  PHE L  98      28.704  33.887  56.057  1.00 13.83           C  
ATOM    816  CG  PHE L  98      27.431  33.154  55.863  1.00 14.55           C  
ATOM    817  CD1 PHE L  98      26.221  33.741  56.173  1.00 14.68           C  
ATOM    818  CD2 PHE L  98      27.446  31.845  55.420  1.00 15.61           C  
ATOM    819  CE1 PHE L  98      25.024  33.025  56.003  1.00 15.41           C  
ATOM    820  CE2 PHE L  98      26.262  31.135  55.275  1.00 16.21           C  
ATOM    821  CZ  PHE L  98      25.067  31.722  55.565  1.00 15.22           C  
ATOM    822  N   GLY L  99      31.472  32.327  56.888  1.00 11.25           N  
ATOM    823  CA  GLY L  99      32.822  32.208  56.331  1.00 10.98           C  
ATOM    824  C   GLY L  99      32.816  32.688  54.876  1.00 11.32           C  
ATOM    825  O   GLY L  99      31.755  32.961  54.268  1.00 10.68           O  
ATOM    826  N   GLY L 100      33.999  32.805  54.300  1.00  9.89           N  
ATOM    827  CA  GLY L 100      34.102  33.387  52.948  1.00 11.50           C  
ATOM    828  C   GLY L 100      33.909  32.363  51.832  1.00 11.16           C  
ATOM    829  O   GLY L 100      33.894  32.734  50.635  1.00 10.98           O  
ATOM    830  N   GLY L 101      33.783  31.081  52.208  1.00  9.67           N  
ATOM    831  CA  GLY L 101      33.444  30.031  51.261  1.00 11.90           C  
ATOM    832  C   GLY L 101      34.681  29.284  50.742  1.00 11.19           C  
ATOM    833  O   GLY L 101      35.799  29.828  50.714  1.00 12.08           O  
ATOM    834  N   THR L 102      34.493  28.017  50.418  1.00 10.66           N  
ATOM    835  CA  THR L 102      35.573  27.181  49.871  1.00 12.96           C  
ATOM    836  C   THR L 102      34.994  26.442  48.672  1.00 12.24           C  
ATOM    837  O   THR L 102      33.961  25.783  48.776  1.00 11.69           O  
ATOM    838  CB  THR L 102      36.002  26.113  50.898  1.00 12.97           C  
ATOM    839  OG1 THR L 102      36.599  26.750  52.013  1.00 12.94           O  
ATOM    840  CG2 THR L 102      37.032  25.140  50.300  1.00 12.62           C  
ATOM    841  N   LYS L 103      35.634  26.571  47.524  1.00 13.20           N  
ATOM    842  CA  LYS L 103      35.132  25.858  46.354  1.00 15.41           C  
ATOM    843  C   LYS L 103      35.745  24.460  46.322  1.00 14.87           C  
ATOM    844  O   LYS L 103      36.958  24.294  46.465  1.00 17.18           O  
ATOM    845  CB  LYS L 103      35.457  26.620  45.058  1.00 18.43           C  
ATOM    846  CG  LYS L 103      35.045  25.874  43.760  1.00 21.94           C  
ATOM    847  CD  LYS L 103      33.583  25.419  43.728  1.00 24.97           C  
ATOM    848  CE  LYS L 103      33.263  24.644  42.429  1.00 27.40           C  
ATOM    849  NZ  LYS L 103      31.796  24.504  42.229  1.00 28.81           N  
ATOM    850  N   LEU L 104      34.893  23.464  46.158  1.00 15.45           N  
ATOM    851  CA  LEU L 104      35.341  22.095  45.993  1.00 17.78           C  
ATOM    852  C   LEU L 104      35.073  21.704  44.532  1.00 18.90           C  
ATOM    853  O   LEU L 104      33.939  21.735  44.080  1.00 18.07           O  
ATOM    854  CB  LEU L 104      34.577  21.193  46.954  1.00 17.97           C  
ATOM    855  CG  LEU L 104      34.737  19.679  46.812  1.00 19.87           C  
ATOM    856  CD1 LEU L 104      36.220  19.287  46.721  1.00 20.65           C  
ATOM    857  CD2 LEU L 104      34.045  18.998  48.014  1.00 20.56           C  
ATOM    858  N   THR L 105      36.148  21.376  43.817  1.00 21.95           N  
ATOM    859  CA  THR L 105      36.076  20.866  42.457  1.00 24.54           C  
ATOM    860  C   THR L 105      36.331  19.357  42.457  1.00 25.36           C  
ATOM    861  O   THR L 105      37.339  18.891  42.998  1.00 26.26           O  
ATOM    862  CB  THR L 105      37.132  21.541  41.538  1.00 25.24           C  
ATOM    863  OG1 THR L 105      37.005  22.966  41.608  1.00 25.86           O  
ATOM    864  CG2 THR L 105      36.937  21.096  40.074  1.00 26.92           C  
ATOM    865  N   VAL L 106      35.416  18.597  41.873  1.00 27.68           N  
ATOM    866  CA  VAL L 106      35.633  17.151  41.704  1.00 30.85           C  
ATOM    867  C   VAL L 106      36.347  16.920  40.362  1.00 31.36           C  
ATOM    868  O   VAL L 106      35.761  17.109  39.297  1.00 32.31           O  
ATOM    869  CB  VAL L 106      34.316  16.325  41.838  1.00 30.66           C  
ATOM    870  CG1 VAL L 106      34.604  14.822  41.821  1.00 30.96           C  
ATOM    871  CG2 VAL L 106      33.560  16.728  43.131  1.00 29.98           C  
ATOM    872  N   LEU L 106A     37.628  16.561  40.436  1.00 32.96           N  
ATOM    873  CA  LEU L 106A     38.448  16.324  39.247  1.00 34.94           C  
ATOM    874  C   LEU L 106A     37.825  15.211  38.419  1.00 36.59           C  
ATOM    875  O   LEU L 106A     37.940  15.191  37.191  0.70 38.08           O  
ATOM    876  CB  LEU L 106A     39.868  15.914  39.642  1.00 35.47           C  
ATOM    877  CG  LEU L 106A     40.732  16.799  40.544  1.00 35.44           C  
ATOM    878  CD1 LEU L 106A     41.878  15.984  41.151  1.00 36.04           C  
ATOM    879  CD2 LEU L 106A     41.270  18.029  39.819  1.00 35.94           C  
ATOM    880  OXT LEU L 106A     37.183  14.298  38.949  0.80 37.47           O  
TER     881      LEU L 106A                                                     
ATOM    882  N   ASN L   1       9.886  21.666  58.164  0.80 30.65           N  
ATOM    883  CA  ASN L   1       9.613  23.054  58.662  0.80 29.00           C  
ATOM    884  C   ASN L   1       8.708  23.879  57.732  0.80 26.30           C  
ATOM    885  O   ASN L   1       7.466  23.851  57.859  0.60 25.86           O  
ATOM    886  CB  ASN L   1      10.926  23.795  58.983  0.80 31.52           C  
ATOM    887  CG  ASN L   1      12.126  23.276  58.177  0.80 33.28           C  
ATOM    888  OD1 ASN L   1      12.083  23.188  56.948  0.80 34.18           O  
ATOM    889  ND2 ASN L   1      13.210  22.945  58.879  0.80 34.07           N  
ATOM    890  N   PHE L   2       9.335  24.624  56.826  1.00 21.82           N  
ATOM    891  CA  PHE L   2       8.638  25.379  55.788  1.00 19.47           C  
ATOM    892  C   PHE L   2       9.633  25.716  54.687  1.00 18.76           C  
ATOM    893  O   PHE L   2      10.844  25.560  54.862  1.00 19.63           O  
ATOM    894  CB  PHE L   2       8.030  26.679  56.355  1.00 17.12           C  
ATOM    895  CG  PHE L   2       9.037  27.588  57.015  1.00 16.61           C  
ATOM    896  CD1 PHE L   2       9.309  27.467  58.374  1.00 16.27           C  
ATOM    897  CD2 PHE L   2       9.704  28.560  56.276  1.00 14.98           C  
ATOM    898  CE1 PHE L   2      10.222  28.307  59.001  1.00 16.21           C  
ATOM    899  CE2 PHE L   2      10.647  29.390  56.889  1.00 15.81           C  
ATOM    900  CZ  PHE L   2      10.894  29.253  58.275  1.00 14.69           C  
ATOM    901  N   MET L   3       9.125  26.191  53.558  1.00 17.01           N  
ATOM    903  CA  MET L   3       9.964  26.687  52.485  0.50 16.79           C  
ATOM    904  C   MET L   3       9.788  28.190  52.348  1.00 15.29           C  
ATOM    905  O   MET L   3       8.781  28.735  52.766  1.00 13.80           O  
ATOM    907  CB  MET L   3       9.593  26.016  51.170  0.50 18.36           C  
ATOM    909  CG  MET L   3       9.757  24.530  51.200  0.50 20.66           C  
ATOM    911  SD  MET L   3       9.142  23.826  49.690  0.50 23.41           S  
ATOM    913  CE  MET L   3      10.555  24.093  48.594  0.50 23.64           C  
ATOM    914  N   LEU L   4      10.786  28.841  51.787  1.00 13.60           N  
ATOM    915  CA  LEU L   4      10.717  30.249  51.475  1.00 13.37           C  
ATOM    916  C   LEU L   4      10.802  30.361  49.960  1.00 15.24           C  
ATOM    917  O   LEU L   4      11.799  29.957  49.347  1.00 15.24           O  
ATOM    918  CB  LEU L   4      11.848  31.007  52.162  1.00 14.22           C  
ATOM    919  CG  LEU L   4      11.718  31.061  53.693  1.00 14.43           C  
ATOM    920  CD1 LEU L   4      12.968  31.676  54.281  1.00 15.44           C  
ATOM    921  CD2 LEU L   4      10.474  31.856  54.147  1.00 14.30           C  
ATOM    922  N   THR L   5       9.747  30.878  49.346  1.00 14.78           N  
ATOM    923  CA  THR L   5       9.733  30.927  47.904  1.00 15.32           C  
ATOM    924  C   THR L   5       9.952  32.348  47.440  1.00 14.79           C  
ATOM    925  O   THR L   5       9.129  33.222  47.701  1.00 15.91           O  
ATOM    926  CB  THR L   5       8.410  30.365  47.337  1.00 16.47           C  
ATOM    927  OG1 THR L   5       8.280  29.009  47.762  1.00 17.21           O  
ATOM    928  CG2 THR L   5       8.438  30.413  45.824  1.00 16.59           C  
ATOM    929  N   GLN L   6      11.047  32.575  46.728  1.00 12.92           N  
ATOM    930  CA  GLN L   6      11.345  33.946  46.291  1.00 14.06           C  
ATOM    931  C   GLN L   6      10.742  34.332  44.945  1.00 14.11           C  
ATOM    932  O   GLN L   6      10.395  33.472  44.145  1.00 14.20           O  
ATOM    933  CB  GLN L   6      12.851  34.200  46.326  1.00 12.61           C  
ATOM    934  CG  GLN L   6      13.356  34.110  47.776  1.00 13.81           C  
ATOM    935  CD  GLN L   6      14.832  34.451  47.909  1.00 13.34           C  
ATOM    936  OE1 GLN L   6      15.557  33.815  48.674  1.00 14.19           O  
ATOM    937  NE2 GLN L   6      15.291  35.431  47.127  1.00 12.83           N  
ATOM    938  N   SER L   7      10.607  35.632  44.723  1.00 13.92           N  
ATOM    939  CA  SER L   7      10.088  36.160  43.467  1.00 15.05           C  
ATOM    940  C   SER L   7      11.116  35.957  42.344  1.00 16.34           C  
ATOM    941  O   SER L   7      12.289  35.654  42.599  1.00 15.36           O  
ATOM    942  CB  SER L   7       9.626  37.621  43.622  1.00 14.87           C  
ATOM    943  OG  SER L   7      10.645  38.434  44.161  1.00 15.82           O  
ATOM    944  N   HIS L   8      10.655  36.060  41.103  1.00 16.82           N  
ATOM    946  CA  HIS L   8      11.465  35.755  39.925  0.50 18.80           C  
ATOM    947  C   HIS L   8      12.666  36.693  39.787  1.00 18.97           C  
ATOM    948  O   HIS L   8      12.621  37.839  40.252  1.00 17.15           O  
ATOM    950  CB  HIS L   8      10.597  35.822  38.650  0.50 20.42           C  
ATOM    952  CG  HIS L   8      10.051  37.187  38.345  0.50 21.65           C  
ATOM    954  ND1 HIS L   8       8.758  37.392  37.910  0.50 23.03           N  
ATOM    956  CD2 HIS L   8      10.626  38.414  38.395  0.50 22.48           C  
ATOM    958  CE1 HIS L   8       8.560  38.683  37.705  0.50 23.08           C  
ATOM    960  NE2 HIS L   8       9.679  39.326  37.991  0.50 22.90           N  
ATOM    961  N   SER L   9      13.727  36.226  39.130  1.00 19.81           N  
ATOM    962  CA  SER L   9      14.853  37.100  38.891  1.00 21.64           C  
ATOM    963  C   SER L   9      14.395  38.300  38.076  1.00 21.69           C  
ATOM    964  O   SER L   9      13.408  38.218  37.321  1.00 19.70           O  
ATOM    965  CB  SER L   9      16.019  36.371  38.222  1.00 23.81           C  
ATOM    966  OG  SER L   9      15.605  35.647  37.100  1.00 27.22           O  
ATOM    967  N   VAL L  11      15.093  39.411  38.277  1.00 19.81           N  
ATOM    968  CA  VAL L  11      14.695  40.698  37.750  1.00 21.76           C  
ATOM    969  C   VAL L  11      15.903  41.436  37.149  1.00 20.07           C  
ATOM    970  O   VAL L  11      17.014  41.349  37.676  1.00 17.76           O  
ATOM    971  CB  VAL L  11      14.005  41.553  38.874  1.00 23.08           C  
ATOM    972  CG1 VAL L  11      14.777  41.474  40.165  1.00 23.36           C  
ATOM    973  CG2 VAL L  11      13.831  43.015  38.444  1.00 25.68           C  
ATOM    974  N   SER L  12      15.686  42.132  36.031  1.00 19.52           N  
ATOM    975  CA  SER L  12      16.675  43.078  35.496  1.00 19.99           C  
ATOM    976  C   SER L  12      16.101  44.472  35.548  1.00 19.57           C  
ATOM    977  O   SER L  12      14.974  44.691  35.122  1.00 19.74           O  
ATOM    978  CB  SER L  12      17.038  42.760  34.048  1.00 20.86           C  
ATOM    979  OG  SER L  12      17.469  41.418  33.934  1.00 24.42           O  
ATOM    980  N   GLU L  13      16.881  45.424  36.043  1.00 19.15           N  
ATOM    981  CA  GLU L  13      16.407  46.777  36.158  1.00 20.23           C  
ATOM    982  C   GLU L  13      17.529  47.763  35.883  1.00 20.45           C  
ATOM    983  O   GLU L  13      18.706  47.466  36.107  1.00 20.76           O  
ATOM    984  CB  GLU L  13      15.786  46.986  37.544  1.00 23.87           C  
ATOM    985  CG  GLU L  13      14.907  48.208  37.654  1.00 26.21           C  
ATOM    986  CD  GLU L  13      13.992  48.378  36.443  1.00 28.08           C  
ATOM    987  OE1 GLU L  13      12.984  47.641  36.345  1.00 30.09           O  
ATOM    988  OE2 GLU L  13      14.279  49.246  35.591  1.00 28.50           O  
ATOM    989  N   SER L  14      17.161  48.923  35.350  1.00 20.19           N  
ATOM    990  CA  SER L  14      18.103  49.999  35.084  1.00 21.32           C  
ATOM    991  C   SER L  14      18.560  50.686  36.365  1.00 20.62           C  
ATOM    992  O   SER L  14      17.807  50.749  37.345  1.00 21.20           O  
ATOM    993  CB  SER L  14      17.453  51.036  34.171  1.00 21.79           C  
ATOM    994  OG  SER L  14      17.321  50.509  32.868  1.00 24.05           O  
ATOM    995  N   PRO L  15      19.795  51.213  36.357  1.00 19.90           N  
ATOM    996  CA  PRO L  15      20.319  52.030  37.463  1.00 18.89           C  
ATOM    997  C   PRO L  15      19.381  53.181  37.835  1.00 18.11           C  
ATOM    998  O   PRO L  15      18.816  53.853  36.950  1.00 16.11           O  
ATOM    999  CB  PRO L  15      21.627  52.589  36.895  1.00 19.44           C  
ATOM   1000  CG  PRO L  15      22.048  51.560  35.852  1.00 19.94           C  
ATOM   1001  CD  PRO L  15      20.772  51.051  35.260  1.00 19.88           C  
ATOM   1002  N   GLY L  16      19.216  53.398  39.137  1.00 16.65           N  
ATOM   1003  CA  GLY L  16      18.473  54.542  39.651  1.00 17.62           C  
ATOM   1004  C   GLY L  16      17.019  54.198  39.893  1.00 18.42           C  
ATOM   1005  O   GLY L  16      16.298  54.945  40.543  1.00 18.90           O  
ATOM   1006  N   LYS L  17      16.585  53.064  39.363  1.00 18.54           N  
ATOM   1007  CA  LYS L  17      15.222  52.614  39.549  1.00 20.35           C  
ATOM   1008  C   LYS L  17      15.130  51.913  40.893  1.00 21.42           C  
ATOM   1009  O   LYS L  17      16.148  51.783  41.599  1.00 22.71           O  
ATOM   1010  CB  LYS L  17      14.826  51.663  38.430  1.00 21.66           C  
ATOM   1011  CG  LYS L  17      14.910  52.301  37.045  1.00 23.53           C  
ATOM   1012  CD  LYS L  17      13.649  53.040  36.730  1.00 25.91           C  
ATOM   1013  CE  LYS L  17      12.597  52.086  36.190  1.00 27.47           C  
ATOM   1014  NZ  LYS L  17      12.573  52.141  34.697  1.00 27.94           N  
ATOM   1015  N   THR L  18      13.920  51.470  41.240  1.00 21.02           N  
ATOM   1016  CA  THR L  18      13.657  50.761  42.517  1.00 19.71           C  
ATOM   1017  C   THR L  18      13.131  49.380  42.227  1.00 19.99           C  
ATOM   1018  O   THR L  18      12.245  49.207  41.367  1.00 21.38           O  
ATOM   1019  CB  THR L  18      12.621  51.527  43.397  1.00 20.13           C  
ATOM   1020  OG1 THR L  18      13.185  52.766  43.824  1.00 20.27           O  
ATOM   1021  CG2 THR L  18      12.200  50.718  44.638  1.00 20.50           C  
ATOM   1022  N   VAL L  19      13.681  48.401  42.939  1.00 17.85           N  
ATOM   1024  CA  VAL L  19      13.241  47.030  42.773  0.50 17.14           C  
ATOM   1025  C   VAL L  19      12.811  46.417  44.110  1.00 16.03           C  
ATOM   1026  O   VAL L  19      13.379  46.704  45.167  1.00 16.37           O  
ATOM   1028  CB  VAL L  19      14.319  46.176  42.073  0.50 16.89           C  
ATOM   1030  CG1 VAL L  19      15.579  46.085  42.929  0.50 15.33           C  
ATOM   1032  CG2 VAL L  19      13.764  44.807  41.717  0.50 17.00           C  
ATOM   1033  N   THR L  20      11.757  45.610  44.068  1.00 14.59           N  
ATOM   1034  CA  THR L  20      11.332  44.874  45.265  1.00 16.15           C  
ATOM   1035  C   THR L  20      11.348  43.355  44.985  1.00 17.09           C  
ATOM   1036  O   THR L  20      10.834  42.881  43.954  1.00 17.36           O  
ATOM   1037  CB  THR L  20       9.960  45.342  45.807  1.00 16.89           C  
ATOM   1038  OG1 THR L  20      10.017  46.747  46.080  1.00 17.25           O  
ATOM   1039  CG2 THR L  20       9.591  44.588  47.116  1.00 17.14           C  
ATOM   1040  N   ILE L  21      12.008  42.631  45.884  1.00 16.19           N  
ATOM   1042  CA  ILE L  21      12.120  41.174  45.828  0.50 16.37           C  
ATOM   1043  C   ILE L  21      11.256  40.659  46.960  1.00 16.15           C  
ATOM   1044  O   ILE L  21      11.319  41.186  48.069  1.00 15.55           O  
ATOM   1046  CB  ILE L  21      13.590  40.717  46.057  0.50 16.81           C  
ATOM   1048  CG1 ILE L  21      14.521  41.368  45.025  0.50 17.36           C  
ATOM   1050  CG2 ILE L  21      13.711  39.188  46.055  0.50 17.29           C  
ATOM   1052  CD1 ILE L  21      14.034  41.198  43.616  0.50 16.72           C  
ATOM   1053  N   SER L  22      10.436  39.656  46.699  1.00 16.03           N  
ATOM   1054  CA  SER L  22       9.628  39.111  47.786  1.00 16.70           C  
ATOM   1055  C   SER L  22      10.005  37.665  48.133  1.00 17.14           C  
ATOM   1056  O   SER L  22      10.696  36.972  47.379  1.00 15.63           O  
ATOM   1057  CB  SER L  22       8.147  39.198  47.459  1.00 18.69           C  
ATOM   1058  OG  SER L  22       7.796  38.080  46.674  1.00 21.23           O  
ATOM   1059  N   CYS L  23       9.532  37.255  49.302  1.00 15.79           N  
ATOM   1060  CA  CYS L  23       9.851  35.961  49.858  0.65 17.67           C  
ATOM   1062  C   CYS L  23       8.659  35.494  50.671  1.00 16.08           C  
ATOM   1063  O   CYS L  23       8.254  36.117  51.649  1.00 17.65           O  
ATOM   1064  CB  CYS L  23      11.104  36.031  50.723  0.65 17.99           C  
ATOM   1066  SG  CYS L  23      11.522  34.467  51.496  0.65 22.81           S  
ATOM   1068  N   THR L  24       8.053  34.406  50.201  1.00 15.00           N  
ATOM   1069  CA  THR L  24       6.796  33.909  50.782  1.00 13.36           C  
ATOM   1070  C   THR L  24       7.060  32.615  51.553  1.00 13.82           C  
ATOM   1071  O   THR L  24       7.712  31.672  51.045  1.00 12.29           O  
ATOM   1072  CB  THR L  24       5.729  33.670  49.698  1.00 14.32           C  
ATOM   1073  OG1 THR L  24       5.547  34.887  48.945  1.00 13.87           O  
ATOM   1074  CG2 THR L  24       4.366  33.226  50.325  1.00 13.97           C  
ATOM   1075  N   ARG L  25       6.569  32.583  52.787  1.00 13.10           N  
ATOM   1076  CA  ARG L  25       6.765  31.421  53.638  1.00 12.62           C  
ATOM   1077  C   ARG L  25       5.640  30.406  53.423  1.00 11.88           C  
ATOM   1078  O   ARG L  25       4.457  30.766  53.445  1.00 12.59           O  
ATOM   1079  CB  ARG L  25       6.904  31.872  55.102  1.00 11.57           C  
ATOM   1080  CG  ARG L  25       6.696  30.757  56.122  1.00 10.78           C  
ATOM   1081  CD  ARG L  25       7.212  31.179  57.498  1.00 11.64           C  
ATOM   1082  NE  ARG L  25       6.912  30.168  58.502  1.00 12.82           N  
ATOM   1083  CZ  ARG L  25       7.416  30.167  59.730  1.00 13.06           C  
ATOM   1084  NH1 ARG L  25       8.255  31.130  60.101  1.00 12.58           N  
ATOM   1085  NH2 ARG L  25       7.076  29.193  60.583  1.00 13.83           N  
ATOM   1086  N   SER L  26       5.999  29.137  53.200  1.00 11.03           N  
ATOM   1087  CA  SER L  26       5.013  28.124  52.775  1.00 11.29           C  
ATOM   1088  C   SER L  26       3.959  27.677  53.795  1.00 11.86           C  
ATOM   1089  O   SER L  26       2.917  27.169  53.404  1.00 12.95           O  
ATOM   1090  CB  SER L  26       5.717  26.859  52.241  1.00 10.48           C  
ATOM   1091  OG  SER L  26       6.421  26.226  53.287  1.00  9.67           O  
ATOM   1092  N   SER L  27       4.266  27.762  55.086  1.00 11.09           N  
ATOM   1093  CA  SER L  27       3.304  27.402  56.131  1.00 13.39           C  
ATOM   1094  C   SER L  27       3.805  28.003  57.435  1.00 13.48           C  
ATOM   1095  O   SER L  27       4.994  28.321  57.569  1.00 14.67           O  
ATOM   1096  CB  SER L  27       3.126  25.883  56.266  1.00 16.06           C  
ATOM   1097  OG  SER L  27       4.342  25.298  56.682  1.00 20.36           O  
ATOM   1098  N   GLY L  27A      2.915  28.161  58.405  1.00 13.44           N  
ATOM   1099  CA  GLY L  27A      3.268  28.934  59.591  1.00 12.95           C  
ATOM   1100  C   GLY L  27A      3.293  30.410  59.269  1.00 14.38           C  
ATOM   1101  O   GLY L  27A      3.118  30.806  58.107  1.00 15.58           O  
ATOM   1102  N   SER L  27B      3.524  31.233  60.292  1.00 14.95           N  
ATOM   1104  CA  SER L  27B      3.464  32.673  60.118  0.50 14.41           C  
ATOM   1105  C   SER L  27B      4.849  33.279  59.889  1.00 15.03           C  
ATOM   1106  O   SER L  27B      5.766  33.056  60.672  1.00 16.42           O  
ATOM   1108  CB  SER L  27B      2.822  33.332  61.327  0.50 14.27           C  
ATOM   1110  OG  SER L  27B      2.950  34.737  61.232  0.50 13.84           O  
ATOM   1111  N   ILE L  28       4.978  34.034  58.806  1.00 13.93           N  
ATOM   1112  CA  ILE L  28       6.221  34.761  58.483  1.00 16.23           C  
ATOM   1113  C   ILE L  28       6.638  35.588  59.694  1.00 17.53           C  
ATOM   1114  O   ILE L  28       7.822  35.709  59.987  1.00 17.14           O  
ATOM   1115  CB  ILE L  28       6.029  35.695  57.245  1.00 16.25           C  
ATOM   1116  CG1 ILE L  28       7.365  36.269  56.732  1.00 16.20           C  
ATOM   1117  CG2 ILE L  28       5.050  36.808  57.554  1.00 16.40           C  
ATOM   1118  CD1 ILE L  28       8.132  35.353  55.859  1.00 15.59           C  
ATOM   1119  N   ALA L  29       5.655  36.129  60.418  1.00 17.16           N  
ATOM   1120  CA  ALA L  29       5.963  37.032  61.500  1.00 18.80           C  
ATOM   1121  C   ALA L  29       6.438  36.306  62.755  1.00 18.88           C  
ATOM   1122  O   ALA L  29       6.840  36.950  63.709  1.00 21.25           O  
ATOM   1123  CB  ALA L  29       4.774  37.944  61.800  1.00 19.27           C  
ATOM   1124  N   SER L  30       6.419  34.977  62.753  1.00 17.76           N  
ATOM   1126  CA  SER L  30       6.822  34.197  63.926  0.50 17.37           C  
ATOM   1127  C   SER L  30       8.331  34.072  64.118  1.00 16.88           C  
ATOM   1128  O   SER L  30       8.796  33.744  65.216  1.00 14.52           O  
ATOM   1130  CB  SER L  30       6.196  32.798  63.908  0.50 17.79           C  
ATOM   1132  OG  SER L  30       4.825  32.878  64.219  0.50 18.04           O  
ATOM   1133  N   ASN L  31       9.098  34.302  63.049  1.00 14.52           N  
ATOM   1134  CA  ASN L  31      10.553  34.198  63.143  1.00 15.12           C  
ATOM   1135  C   ASN L  31      11.168  35.307  62.293  1.00 14.68           C  
ATOM   1136  O   ASN L  31      10.606  35.687  61.244  1.00 15.24           O  
ATOM   1137  CB  ASN L  31      11.052  32.823  62.631  1.00 16.27           C  
ATOM   1138  CG  ASN L  31      10.503  31.646  63.441  1.00 18.86           C  
ATOM   1139  OD1 ASN L  31      11.090  31.222  64.451  1.00 19.86           O  
ATOM   1140  ND2 ASN L  31       9.394  31.092  62.982  1.00 18.56           N  
ATOM   1141  N   TYR L  32      12.304  35.841  62.741  1.00 13.37           N  
ATOM   1142  CA  TYR L  32      12.938  36.945  62.028  1.00 13.26           C  
ATOM   1143  C   TYR L  32      13.377  36.568  60.628  1.00 11.68           C  
ATOM   1144  O   TYR L  32      13.843  35.457  60.389  1.00 11.96           O  
ATOM   1145  CB  TYR L  32      14.152  37.462  62.784  1.00 14.31           C  
ATOM   1146  CG  TYR L  32      13.776  38.389  63.911  1.00 14.75           C  
ATOM   1147  CD1 TYR L  32      12.955  39.506  63.673  1.00 16.76           C  
ATOM   1148  CD2 TYR L  32      14.205  38.147  65.196  1.00 16.76           C  
ATOM   1149  CE1 TYR L  32      12.599  40.384  64.704  1.00 17.46           C  
ATOM   1150  CE2 TYR L  32      13.861  39.021  66.246  1.00 17.63           C  
ATOM   1151  CZ  TYR L  32      13.063  40.124  65.986  1.00 17.92           C  
ATOM   1152  OH  TYR L  32      12.724  40.959  67.021  1.00 17.31           O  
ATOM   1153  N   VAL L  33      13.270  37.534  59.730  1.00 12.06           N  
ATOM   1154  CA  VAL L  33      13.704  37.345  58.383  1.00 11.78           C  
ATOM   1155  C   VAL L  33      14.968  38.138  58.091  1.00 12.33           C  
ATOM   1156  O   VAL L  33      15.063  39.335  58.438  1.00 12.92           O  
ATOM   1157  CB  VAL L  33      12.581  37.738  57.373  1.00 13.15           C  
ATOM   1158  CG1 VAL L  33      13.129  37.656  55.940  1.00 11.51           C  
ATOM   1159  CG2 VAL L  33      11.387  36.797  57.519  1.00 14.86           C  
ATOM   1160  N   GLN L  34      15.940  37.481  57.446  1.00 11.71           N  
ATOM   1161  CA  GLN L  34      17.212  38.095  57.093  1.00 12.51           C  
ATOM   1162  C   GLN L  34      17.293  38.078  55.579  1.00 11.97           C  
ATOM   1163  O   GLN L  34      16.721  37.197  54.946  1.00 12.43           O  
ATOM   1164  CB  GLN L  34      18.413  37.289  57.643  1.00 12.66           C  
ATOM   1165  CG  GLN L  34      18.640  37.431  59.151  1.00 14.07           C  
ATOM   1166  CD  GLN L  34      17.425  37.080  59.982  1.00 15.58           C  
ATOM   1167  OE1 GLN L  34      16.883  37.948  60.661  1.00 14.94           O  
ATOM   1168  NE2 GLN L  34      16.992  35.801  59.945  1.00 13.89           N  
ATOM   1169  N   TRP L  35      17.965  39.083  55.008  1.00 12.08           N  
ATOM   1170  CA  TRP L  35      18.284  39.087  53.588  1.00 12.56           C  
ATOM   1171  C   TRP L  35      19.794  39.180  53.400  1.00 13.03           C  
ATOM   1172  O   TRP L  35      20.471  39.981  54.046  1.00 12.30           O  
ATOM   1173  CB  TRP L  35      17.636  40.274  52.864  1.00 13.01           C  
ATOM   1174  CG  TRP L  35      16.145  40.215  52.813  1.00 14.47           C  
ATOM   1175  CD1 TRP L  35      15.242  40.696  53.766  1.00 13.82           C  
ATOM   1176  CD2 TRP L  35      15.365  39.627  51.784  1.00 13.94           C  
ATOM   1177  NE1 TRP L  35      13.954  40.448  53.339  1.00 13.54           N  
ATOM   1178  CE2 TRP L  35      14.002  39.795  52.135  1.00 14.02           C  
ATOM   1179  CE3 TRP L  35      15.685  39.013  50.557  1.00 14.78           C  
ATOM   1180  CZ2 TRP L  35      12.951  39.360  51.301  1.00 13.88           C  
ATOM   1181  CZ3 TRP L  35      14.642  38.574  49.733  1.00 13.47           C  
ATOM   1182  CH2 TRP L  35      13.290  38.758  50.117  1.00 13.67           C  
ATOM   1183  N   TYR L  36      20.310  38.379  52.474  1.00 12.48           N  
ATOM   1184  CA  TYR L  36      21.726  38.362  52.156  1.00 12.74           C  
ATOM   1185  C   TYR L  36      21.929  38.742  50.700  1.00 12.97           C  
ATOM   1186  O   TYR L  36      21.150  38.376  49.805  1.00 11.29           O  
ATOM   1187  CB  TYR L  36      22.313  36.959  52.342  1.00 13.27           C  
ATOM   1188  CG  TYR L  36      22.182  36.482  53.760  1.00 13.84           C  
ATOM   1189  CD1 TYR L  36      23.164  36.771  54.705  1.00 13.68           C  
ATOM   1190  CD2 TYR L  36      21.032  35.785  54.164  1.00 14.23           C  
ATOM   1191  CE1 TYR L  36      23.024  36.338  56.041  1.00 14.85           C  
ATOM   1192  CE2 TYR L  36      20.865  35.371  55.476  1.00 14.76           C  
ATOM   1193  CZ  TYR L  36      21.869  35.643  56.400  1.00 15.02           C  
ATOM   1194  OH  TYR L  36      21.690  35.212  57.685  1.00 16.44           O  
ATOM   1195  N   GLN L  37      22.963  39.535  50.495  1.00 12.23           N  
ATOM   1196  CA  GLN L  37      23.464  39.836  49.173  1.00 12.09           C  
ATOM   1197  C   GLN L  37      24.652  38.894  48.865  1.00 12.28           C  
ATOM   1198  O   GLN L  37      25.599  38.777  49.650  1.00 13.24           O  
ATOM   1199  CB  GLN L  37      23.959  41.274  49.133  1.00 11.93           C  
ATOM   1200  CG  GLN L  37      24.433  41.727  47.741  1.00 11.98           C  
ATOM   1201  CD  GLN L  37      25.054  43.118  47.796  1.00 12.94           C  
ATOM   1202  OE1 GLN L  37      26.172  43.298  48.326  1.00 13.46           O  
ATOM   1203  NE2 GLN L  37      24.324  44.111  47.284  1.00 11.95           N  
ATOM   1204  N   GLN L  38      24.612  38.251  47.708  1.00 12.04           N  
ATOM   1205  CA  GLN L  38      25.760  37.448  47.283  1.00 12.41           C  
ATOM   1206  C   GLN L  38      26.249  37.957  45.950  1.00 13.33           C  
ATOM   1207  O   GLN L  38      25.627  37.708  44.907  1.00 12.61           O  
ATOM   1208  CB  GLN L  38      25.402  35.975  47.189  1.00 10.78           C  
ATOM   1209  CG  GLN L  38      26.634  35.123  46.927  1.00 12.52           C  
ATOM   1210  CD  GLN L  38      26.361  33.650  47.005  1.00 12.73           C  
ATOM   1211  OE1 GLN L  38      25.311  33.186  46.568  1.00 13.79           O  
ATOM   1212  NE2 GLN L  38      27.318  32.890  47.543  1.00 12.29           N  
ATOM   1213  N   ARG L  39      27.326  38.724  45.967  1.00 14.76           N  
ATOM   1215  CA  ARG L  39      27.876  39.265  44.726  0.50 15.91           C  
ATOM   1216  C   ARG L  39      28.486  38.119  43.935  1.00 17.18           C  
ATOM   1217  O   ARG L  39      28.901  37.110  44.527  1.00 16.37           O  
ATOM   1219  CB  ARG L  39      28.960  40.313  45.007  0.50 15.86           C  
ATOM   1221  CG  ARG L  39      28.539  41.479  45.902  0.50 16.33           C  
ATOM   1223  CD  ARG L  39      27.331  42.239  45.392  0.50 16.35           C  
ATOM   1225  NE  ARG L  39      27.287  42.397  43.945  0.50 15.93           N  
ATOM   1227  CZ  ARG L  39      28.129  43.152  43.242  0.50 14.92           C  
ATOM   1229  NH1 ARG L  39      27.999  43.253  41.918  0.50 11.34           N  
ATOM   1231  NH2 ARG L  39      29.100  43.797  43.871  0.50 14.61           N  
ATOM   1232  N   PRO L  40      28.559  38.266  42.598  1.00 19.58           N  
ATOM   1233  CA  PRO L  40      29.173  37.196  41.814  1.00 21.40           C  
ATOM   1234  C   PRO L  40      30.524  36.798  42.382  1.00 21.58           C  
ATOM   1235  O   PRO L  40      31.361  37.657  42.670  1.00 23.34           O  
ATOM   1236  CB  PRO L  40      29.332  37.833  40.422  1.00 20.94           C  
ATOM   1237  CG  PRO L  40      28.188  38.799  40.354  1.00 21.32           C  
ATOM   1238  CD  PRO L  40      28.099  39.379  41.736  1.00 20.49           C  
ATOM   1239  N   GLY L  41      30.700  35.505  42.587  1.00 22.95           N  
ATOM   1240  CA  GLY L  41      31.956  34.947  43.073  1.00 23.65           C  
ATOM   1241  C   GLY L  41      32.309  35.266  44.515  1.00 23.76           C  
ATOM   1242  O   GLY L  41      33.463  35.119  44.914  1.00 24.70           O  
ATOM   1243  N   SER L  42      31.334  35.701  45.308  1.00 22.33           N  
ATOM   1245  CA  SER L  42      31.603  36.050  46.695  0.50 21.30           C  
ATOM   1246  C   SER L  42      30.673  35.316  47.651  1.00 20.57           C  
ATOM   1247  O   SER L  42      29.808  34.567  47.234  1.00 20.73           O  
ATOM   1249  CB  SER L  42      31.482  37.567  46.898  0.50 21.54           C  
ATOM   1251  OG  SER L  42      32.116  37.975  48.100  0.50 21.71           O  
ATOM   1252  N   SER L  43      30.867  35.534  48.943  1.00 19.96           N  
ATOM   1253  CA  SER L  43      30.052  34.906  49.980  1.00 19.01           C  
ATOM   1254  C   SER L  43      28.810  35.740  50.300  1.00 17.75           C  
ATOM   1255  O   SER L  43      28.754  36.903  49.952  1.00 18.48           O  
ATOM   1256  CB  SER L  43      30.892  34.769  51.243  1.00 20.09           C  
ATOM   1257  OG  SER L  43      31.640  35.956  51.440  1.00 21.31           O  
ATOM   1258  N   PRO L  44      27.816  35.151  50.982  1.00 17.02           N  
ATOM   1259  CA  PRO L  44      26.643  35.965  51.391  1.00 15.84           C  
ATOM   1260  C   PRO L  44      27.007  36.974  52.485  1.00 15.83           C  
ATOM   1261  O   PRO L  44      27.809  36.679  53.381  1.00 14.81           O  
ATOM   1262  CB  PRO L  44      25.645  34.925  51.926  1.00 16.51           C  
ATOM   1263  CG  PRO L  44      26.231  33.546  51.508  1.00 16.39           C  
ATOM   1264  CD  PRO L  44      27.703  33.749  51.425  1.00 16.90           C  
ATOM   1265  N   THR L  45      26.472  38.184  52.369  1.00 15.10           N  
ATOM   1266  CA  THR L  45      26.665  39.184  53.389  1.00 15.00           C  
ATOM   1267  C   THR L  45      25.278  39.741  53.704  1.00 13.78           C  
ATOM   1268  O   THR L  45      24.424  39.859  52.836  1.00 14.12           O  
ATOM   1269  CB  THR L  45      27.629  40.341  52.960  1.00 16.43           C  
ATOM   1270  OG1 THR L  45      26.982  41.176  51.998  1.00 19.42           O  
ATOM   1271  CG2 THR L  45      28.931  39.795  52.348  1.00 18.17           C  
ATOM   1272  N   THR L  46      25.056  40.050  54.962  1.00 13.11           N  
ATOM   1273  CA  THR L  46      23.748  40.471  55.437  1.00 13.49           C  
ATOM   1274  C   THR L  46      23.459  41.886  54.930  1.00 13.24           C  
ATOM   1275  O   THR L  46      24.284  42.785  55.121  1.00 13.13           O  
ATOM   1276  CB  THR L  46      23.739  40.539  56.957  1.00 14.36           C  
ATOM   1277  OG1 THR L  46      24.072  39.253  57.484  1.00 13.70           O  
ATOM   1278  CG2 THR L  46      22.335  40.957  57.483  1.00 14.25           C  
ATOM   1279  N   VAL L  47      22.317  42.092  54.287  1.00 12.68           N  
ATOM   1280  CA  VAL L  47      21.880  43.478  54.032  1.00 12.71           C  
ATOM   1281  C   VAL L  47      20.714  43.901  54.935  1.00 11.55           C  
ATOM   1282  O   VAL L  47      20.530  45.090  55.220  1.00 12.23           O  
ATOM   1283  CB  VAL L  47      21.545  43.740  52.550  1.00 12.78           C  
ATOM   1284  CG1 VAL L  47      22.829  43.711  51.698  1.00 13.57           C  
ATOM   1285  CG2 VAL L  47      20.482  42.781  52.053  1.00 13.15           C  
ATOM   1286  N   ILE L  48      19.932  42.915  55.367  1.00 11.05           N  
ATOM   1287  CA  ILE L  48      18.813  43.126  56.312  1.00 12.05           C  
ATOM   1288  C   ILE L  48      18.797  41.978  57.316  1.00 11.68           C  
ATOM   1289  O   ILE L  48      18.953  40.821  56.935  1.00 11.78           O  
ATOM   1290  CB  ILE L  48      17.391  43.194  55.619  1.00 12.72           C  
ATOM   1291  CG1 ILE L  48      17.256  44.404  54.679  1.00 11.96           C  
ATOM   1292  CG2 ILE L  48      16.308  43.307  56.701  1.00 12.60           C  
ATOM   1293  CD1 ILE L  48      17.148  45.732  55.496  1.00 11.41           C  
ATOM   1294  N   TYR L  49      18.632  42.298  58.598  1.00 11.49           N  
ATOM   1295  CA  TYR L  49      18.384  41.266  59.604  1.00 11.93           C  
ATOM   1296  C   TYR L  49      17.236  41.680  60.485  1.00 12.79           C  
ATOM   1297  O   TYR L  49      16.840  42.862  60.459  1.00 10.92           O  
ATOM   1298  CB  TYR L  49      19.636  40.974  60.434  1.00 11.97           C  
ATOM   1299  CG  TYR L  49      20.102  42.154  61.273  1.00 11.96           C  
ATOM   1300  CD1 TYR L  49      19.772  42.242  62.623  1.00 12.15           C  
ATOM   1301  CD2 TYR L  49      20.864  43.172  60.704  1.00 12.53           C  
ATOM   1302  CE1 TYR L  49      20.174  43.328  63.398  1.00 14.17           C  
ATOM   1303  CE2 TYR L  49      21.279  44.264  61.474  1.00 12.76           C  
ATOM   1304  CZ  TYR L  49      20.933  44.339  62.800  1.00 13.90           C  
ATOM   1305  OH  TYR L  49      21.343  45.436  63.552  1.00 14.45           O  
ATOM   1306  N   GLU L  50      16.664  40.724  61.235  1.00 11.39           N  
ATOM   1307  CA  GLU L  50      15.539  41.050  62.112  1.00 13.34           C  
ATOM   1308  C   GLU L  50      14.466  41.831  61.347  1.00 13.44           C  
ATOM   1309  O   GLU L  50      13.956  42.869  61.830  1.00 11.99           O  
ATOM   1310  CB  GLU L  50      16.019  41.841  63.350  1.00 13.21           C  
ATOM   1311  CG  GLU L  50      16.734  40.950  64.334  1.00 14.93           C  
ATOM   1312  CD  GLU L  50      17.319  41.690  65.519  1.00 17.78           C  
ATOM   1313  OE1 GLU L  50      17.059  42.896  65.714  1.00 19.05           O  
ATOM   1314  OE2 GLU L  50      18.049  41.043  66.266  1.00 19.55           O  
ATOM   1315  N   ASP L  51      14.156  41.328  60.149  1.00 12.39           N  
ATOM   1316  CA  ASP L  51      13.076  41.862  59.255  1.00 13.34           C  
ATOM   1317  C   ASP L  51      13.470  43.137  58.497  1.00 13.19           C  
ATOM   1318  O   ASP L  51      13.271  43.233  57.280  1.00 13.28           O  
ATOM   1319  CB  ASP L  51      11.760  42.091  60.011  1.00 13.31           C  
ATOM   1320  CG  ASP L  51      11.267  40.865  60.729  1.00 16.17           C  
ATOM   1321  OD1 ASP L  51      11.525  39.721  60.276  1.00 16.26           O  
ATOM   1322  OD2 ASP L  51      10.559  41.064  61.732  1.00 16.06           O  
ATOM   1323  N   ASN L  52      13.925  44.153  59.229  1.00 11.73           N  
ATOM   1324  CA  ASN L  52      14.113  45.474  58.628  1.00 10.63           C  
ATOM   1325  C   ASN L  52      15.387  46.234  59.052  1.00  9.96           C  
ATOM   1326  O   ASN L  52      15.622  47.361  58.580  1.00 10.68           O  
ATOM   1327  CB  ASN L  52      12.813  46.295  58.838  1.00  9.93           C  
ATOM   1328  CG  ASN L  52      12.491  46.548  60.296  1.00 12.73           C  
ATOM   1329  OD1 ASN L  52      13.255  46.187  61.217  1.00 11.59           O  
ATOM   1330  ND2 ASN L  52      11.325  47.165  60.535  1.00 13.18           N  
ATOM   1331  N   GLN L  53      16.196  45.632  59.927  1.00  9.07           N  
ATOM   1332  CA  GLN L  53      17.468  46.251  60.372  1.00  9.59           C  
ATOM   1333  C   GLN L  53      18.636  46.214  59.368  1.00 11.20           C  
ATOM   1334  O   GLN L  53      18.975  45.146  58.845  1.00 12.09           O  
ATOM   1335  CB  GLN L  53      17.914  45.598  61.686  1.00  8.02           C  
ATOM   1336  CG  GLN L  53      16.844  45.622  62.762  1.00  8.35           C  
ATOM   1337  CD  GLN L  53      16.486  47.065  63.112  1.00  9.50           C  
ATOM   1338  OE1 GLN L  53      17.305  47.787  63.667  1.00 10.30           O  
ATOM   1339  NE2 GLN L  53      15.273  47.487  62.764  1.00  8.34           N  
ATOM   1340  N   ARG L  54      19.249  47.356  59.070  1.00 10.29           N  
ATOM   1341  CA  ARG L  54      20.456  47.330  58.222  1.00 10.99           C  
ATOM   1342  C   ARG L  54      21.706  47.233  59.087  1.00 12.73           C  
ATOM   1343  O   ARG L  54      21.837  47.972  60.086  1.00 11.92           O  
ATOM   1344  CB  ARG L  54      20.564  48.605  57.360  1.00 12.39           C  
ATOM   1345  CG  ARG L  54      19.557  48.663  56.228  1.00 11.44           C  
ATOM   1346  CD  ARG L  54      19.609  50.015  55.533  1.00 13.21           C  
ATOM   1347  NE  ARG L  54      19.120  51.133  56.339  1.00 12.98           N  
ATOM   1348  CZ  ARG L  54      17.836  51.444  56.525  1.00 15.37           C  
ATOM   1349  NH1 ARG L  54      16.842  50.719  55.973  1.00 13.49           N  
ATOM   1350  NH2 ARG L  54      17.542  52.496  57.297  1.00 14.62           N  
ATOM   1351  N   PRO L  55      22.638  46.329  58.723  1.00 14.46           N  
ATOM   1352  CA  PRO L  55      23.945  46.330  59.395  1.00 15.55           C  
ATOM   1353  C   PRO L  55      24.670  47.645  59.127  1.00 15.78           C  
ATOM   1354  O   PRO L  55      24.376  48.317  58.156  1.00 13.36           O  
ATOM   1355  CB  PRO L  55      24.709  45.203  58.675  1.00 15.05           C  
ATOM   1356  CG  PRO L  55      23.630  44.282  58.185  1.00 15.50           C  
ATOM   1357  CD  PRO L  55      22.543  45.256  57.718  1.00 14.67           C  
ATOM   1358  N   SER L  56      25.617  48.007  59.977  1.00 17.61           N  
ATOM   1360  CA  SER L  56      26.459  49.171  59.725  0.50 18.51           C  
ATOM   1361  C   SER L  56      27.135  49.043  58.361  1.00 19.36           C  
ATOM   1362  O   SER L  56      27.634  47.971  58.002  1.00 20.42           O  
ATOM   1364  CB  SER L  56      27.522  49.302  60.817  0.50 19.40           C  
ATOM   1366  OG  SER L  56      26.939  49.236  62.104  0.50 18.36           O  
ATOM   1367  N   GLY L  57      27.146  50.123  57.597  1.00 19.44           N  
ATOM   1368  CA  GLY L  57      27.733  50.095  56.265  1.00 19.65           C  
ATOM   1369  C   GLY L  57      26.791  49.682  55.141  1.00 19.44           C  
ATOM   1370  O   GLY L  57      27.151  49.762  53.963  1.00 21.27           O  
ATOM   1371  N   VAL L  58      25.588  49.216  55.471  1.00 16.81           N  
ATOM   1372  CA  VAL L  58      24.615  48.974  54.418  1.00 14.55           C  
ATOM   1373  C   VAL L  58      23.819  50.244  54.221  1.00 14.91           C  
ATOM   1374  O   VAL L  58      23.233  50.760  55.166  1.00 14.34           O  
ATOM   1375  CB  VAL L  58      23.697  47.789  54.750  1.00 13.50           C  
ATOM   1376  CG1 VAL L  58      22.620  47.576  53.661  1.00 13.83           C  
ATOM   1377  CG2 VAL L  58      24.547  46.526  54.960  1.00 13.51           C  
ATOM   1378  N   PRO L  59      23.787  50.747  52.987  1.00 15.34           N  
ATOM   1379  CA  PRO L  59      23.114  52.017  52.732  1.00 16.58           C  
ATOM   1380  C   PRO L  59      21.604  51.970  52.890  1.00 15.23           C  
ATOM   1381  O   PRO L  59      20.985  50.919  52.723  1.00 14.02           O  
ATOM   1382  CB  PRO L  59      23.463  52.330  51.278  1.00 15.94           C  
ATOM   1383  CG  PRO L  59      23.838  51.054  50.677  1.00 17.31           C  
ATOM   1384  CD  PRO L  59      24.419  50.191  51.782  1.00 16.33           C  
ATOM   1385  N   ASP L  60      21.015  53.123  53.172  1.00 15.77           N  
ATOM   1386  CA  ASP L  60      19.593  53.166  53.445  1.00 16.04           C  
ATOM   1387  C   ASP L  60      18.747  52.962  52.194  1.00 16.01           C  
ATOM   1388  O   ASP L  60      17.529  53.039  52.260  1.00 17.22           O  
ATOM   1389  CB  ASP L  60      19.198  54.454  54.185  1.00 18.26           C  
ATOM   1390  CG  ASP L  60      19.461  55.733  53.370  1.00 18.69           C  
ATOM   1391  OD1 ASP L  60      20.040  55.681  52.267  1.00 19.18           O  
ATOM   1392  OD2 ASP L  60      19.082  56.811  53.863  1.00 20.27           O  
ATOM   1393  N   ARG L  61      19.394  52.692  51.059  1.00 16.24           N  
ATOM   1394  CA  ARG L  61      18.681  52.321  49.841  1.00 14.59           C  
ATOM   1395  C   ARG L  61      18.040  50.965  50.006  1.00 13.31           C  
ATOM   1396  O   ARG L  61      17.097  50.634  49.280  1.00 14.63           O  
ATOM   1397  CB  ARG L  61      19.648  52.236  48.647  1.00 14.82           C  
ATOM   1398  CG  ARG L  61      20.504  53.459  48.475  1.00 18.17           C  
ATOM   1399  CD  ARG L  61      21.303  53.412  47.170  1.00 17.35           C  
ATOM   1400  NE  ARG L  61      22.501  52.561  47.216  1.00 16.92           N  
ATOM   1401  CZ  ARG L  61      22.562  51.376  46.636  1.00 15.96           C  
ATOM   1402  NH1 ARG L  61      21.495  50.937  45.993  1.00 15.77           N  
ATOM   1403  NH2 ARG L  61      23.678  50.647  46.683  1.00 16.18           N  
ATOM   1404  N   PHE L  62      18.577  50.169  50.929  1.00 13.61           N  
ATOM   1405  CA  PHE L  62      18.057  48.829  51.204  1.00 12.57           C  
ATOM   1406  C   PHE L  62      17.062  48.893  52.355  1.00 12.35           C  
ATOM   1407  O   PHE L  62      17.390  49.396  53.422  1.00 14.28           O  
ATOM   1408  CB  PHE L  62      19.191  47.873  51.618  1.00 13.21           C  
ATOM   1409  CG  PHE L  62      20.143  47.517  50.509  1.00 14.42           C  
ATOM   1410  CD1 PHE L  62      21.220  48.348  50.190  1.00 14.94           C  
ATOM   1411  CD2 PHE L  62      19.979  46.340  49.794  1.00 14.17           C  
ATOM   1412  CE1 PHE L  62      22.092  48.017  49.146  1.00 15.59           C  
ATOM   1413  CE2 PHE L  62      20.870  46.014  48.755  1.00 14.45           C  
ATOM   1414  CZ  PHE L  62      21.902  46.827  48.442  1.00 15.63           C  
ATOM   1415  N   SER L  63      15.884  48.311  52.167  1.00 12.41           N  
ATOM   1416  CA  SER L  63      14.941  48.213  53.263  1.00 14.84           C  
ATOM   1417  C   SER L  63      14.163  46.914  53.218  1.00 14.74           C  
ATOM   1418  O   SER L  63      13.881  46.387  52.139  1.00 14.82           O  
ATOM   1419  CB  SER L  63      13.991  49.403  53.258  1.00 16.98           C  
ATOM   1420  OG  SER L  63      13.223  49.433  52.070  1.00 20.09           O  
ATOM   1421  N   GLY L  64      13.851  46.388  54.399  1.00 13.62           N  
ATOM   1422  CA  GLY L  64      13.059  45.173  54.526  1.00 12.79           C  
ATOM   1423  C   GLY L  64      11.686  45.461  55.097  1.00 13.76           C  
ATOM   1424  O   GLY L  64      11.492  46.427  55.834  1.00 11.51           O  
ATOM   1425  N   SER L  65      10.705  44.639  54.731  1.00 13.84           N  
ATOM   1426  CA  SER L  65       9.401  44.772  55.321  1.00 14.91           C  
ATOM   1427  C   SER L  65       8.809  43.376  55.414  1.00 14.93           C  
ATOM   1428  O   SER L  65       9.332  42.424  54.819  1.00 13.01           O  
ATOM   1429  CB  SER L  65       8.502  45.674  54.461  1.00 17.48           C  
ATOM   1430  OG  SER L  65       8.450  45.171  53.138  1.00 22.28           O  
ATOM   1431  N   ILE L  66       7.736  43.265  56.186  1.00 14.36           N  
ATOM   1432  CA  ILE L  66       7.016  42.035  56.325  1.00 15.26           C  
ATOM   1433  C   ILE L  66       5.543  42.322  56.011  1.00 17.45           C  
ATOM   1434  O   ILE L  66       4.999  43.346  56.437  1.00 16.33           O  
ATOM   1435  CB  ILE L  66       7.098  41.558  57.767  1.00 15.98           C  
ATOM   1436  CG1 ILE L  66       8.554  41.285  58.174  1.00 14.16           C  
ATOM   1437  CG2 ILE L  66       6.164  40.352  57.995  1.00 14.52           C  
ATOM   1438  CD1 ILE L  66       9.214  40.047  57.517  1.00 13.49           C  
ATOM   1439  N   ASP L  66A      4.910  41.426  55.258  1.00 17.92           N  
ATOM   1440  CA  ASP L  66A      3.491  41.532  54.972  1.00 18.18           C  
ATOM   1441  C   ASP L  66A      2.791  40.267  55.430  1.00 17.92           C  
ATOM   1442  O   ASP L  66A      2.790  39.239  54.723  1.00 14.93           O  
ATOM   1443  CB  ASP L  66A      3.245  41.718  53.484  1.00 20.40           C  
ATOM   1444  CG  ASP L  66A      1.772  41.929  53.173  1.00 23.60           C  
ATOM   1445  OD1 ASP L  66A      1.011  42.297  54.099  1.00 25.02           O  
ATOM   1446  OD2 ASP L  66A      1.382  41.711  52.015  1.00 24.79           O  
ATOM   1447  N   SER L  66B      2.192  40.354  56.612  1.00 18.28           N  
ATOM   1448  CA  SER L  66B      1.540  39.213  57.219  1.00 20.58           C  
ATOM   1449  C   SER L  66B      0.373  38.687  56.407  1.00 19.84           C  
ATOM   1450  O   SER L  66B      0.124  37.488  56.408  1.00 19.56           O  
ATOM   1451  CB  SER L  66B      1.085  39.553  58.633  1.00 21.98           C  
ATOM   1452  OG  SER L  66B      2.205  39.434  59.474  1.00 25.31           O  
ATOM   1453  N   SER L  67      -0.328  39.568  55.700  1.00 20.25           N  
ATOM   1454  CA  SER L  67      -1.519  39.123  54.986  1.00 20.78           C  
ATOM   1455  C   SER L  67      -1.162  38.222  53.792  1.00 20.09           C  
ATOM   1456  O   SER L  67      -1.943  37.335  53.425  1.00 19.77           O  
ATOM   1457  CB  SER L  67      -2.432  40.298  54.588  1.00 22.79           C  
ATOM   1458  OG  SER L  67      -1.762  41.173  53.704  1.00 25.68           O  
ATOM   1459  N   SER L  68       0.021  38.411  53.208  1.00 17.07           N  
ATOM   1460  CA  SER L  68       0.475  37.516  52.151  1.00 16.67           C  
ATOM   1461  C   SER L  68       1.532  36.530  52.658  1.00 14.12           C  
ATOM   1462  O   SER L  68       2.117  35.775  51.885  1.00 14.53           O  
ATOM   1463  CB  SER L  68       1.036  38.309  50.975  1.00 18.26           C  
ATOM   1464  OG  SER L  68       2.120  39.140  51.386  1.00 21.55           O  
ATOM   1465  N   ASN L  69       1.785  36.561  53.953  1.00 12.21           N  
ATOM   1466  CA  ASN L  69       2.809  35.722  54.573  1.00 12.59           C  
ATOM   1467  C   ASN L  69       4.171  35.858  53.908  1.00 12.32           C  
ATOM   1468  O   ASN L  69       4.876  34.859  53.670  1.00 10.96           O  
ATOM   1469  CB  ASN L  69       2.372  34.252  54.587  1.00 12.24           C  
ATOM   1470  CG  ASN L  69       2.890  33.508  55.800  1.00 12.00           C  
ATOM   1471  OD1 ASN L  69       2.877  34.034  56.895  1.00 12.65           O  
ATOM   1472  ND2 ASN L  69       3.311  32.266  55.610  1.00 12.68           N  
ATOM   1473  N   SER L  70       4.552  37.101  53.618  1.00 12.85           N  
ATOM   1474  CA  SER L  70       5.749  37.333  52.822  1.00 13.95           C  
ATOM   1475  C   SER L  70       6.638  38.374  53.466  1.00 13.18           C  
ATOM   1476  O   SER L  70       6.174  39.189  54.254  1.00 14.14           O  
ATOM   1477  CB  SER L  70       5.391  37.765  51.391  1.00 14.80           C  
ATOM   1478  OG  SER L  70       4.689  38.982  51.410  1.00 17.22           O  
ATOM   1479  N   ALA L  71       7.921  38.310  53.131  1.00 12.82           N  
ATOM   1480  CA  ALA L  71       8.860  39.388  53.415  1.00 13.32           C  
ATOM   1481  C   ALA L  71       9.284  40.061  52.101  1.00 14.21           C  
ATOM   1482  O   ALA L  71       9.250  39.436  51.029  1.00 13.17           O  
ATOM   1483  CB  ALA L  71      10.091  38.825  54.136  1.00 13.28           C  
ATOM   1484  N   SER L  72       9.700  41.326  52.172  1.00 13.82           N  
ATOM   1485  CA  SER L  72      10.176  41.987  50.953  1.00 15.45           C  
ATOM   1486  C   SER L  72      11.446  42.747  51.214  1.00 14.07           C  
ATOM   1487  O   SER L  72      11.614  43.287  52.299  1.00 14.34           O  
ATOM   1488  CB  SER L  72       9.114  42.929  50.378  1.00 17.03           C  
ATOM   1489  OG  SER L  72       8.088  42.141  49.785  1.00 22.33           O  
ATOM   1490  N   LEU L  73      12.329  42.766  50.220  1.00 13.26           N  
ATOM   1491  CA  LEU L  73      13.546  43.570  50.254  1.00 12.68           C  
ATOM   1492  C   LEU L  73      13.390  44.577  49.133  1.00 13.17           C  
ATOM   1493  O   LEU L  73      13.172  44.183  47.978  1.00 11.57           O  
ATOM   1494  CB  LEU L  73      14.784  42.707  49.972  1.00 13.27           C  
ATOM   1495  CG  LEU L  73      16.110  43.459  49.767  1.00 13.60           C  
ATOM   1496  CD1 LEU L  73      16.563  44.106  51.084  1.00 14.11           C  
ATOM   1497  CD2 LEU L  73      17.190  42.514  49.235  1.00 15.15           C  
ATOM   1498  N   THR L  74      13.500  45.861  49.466  1.00 12.79           N  
ATOM   1499  CA  THR L  74      13.403  46.915  48.446  1.00 14.06           C  
ATOM   1500  C   THR L  74      14.755  47.614  48.334  1.00 13.77           C  
ATOM   1501  O   THR L  74      15.411  47.915  49.340  1.00 14.85           O  
ATOM   1502  CB  THR L  74      12.254  47.915  48.753  1.00 14.46           C  
ATOM   1503  OG1 THR L  74      11.004  47.213  48.745  1.00 15.53           O  
ATOM   1504  CG2 THR L  74      12.189  49.005  47.705  1.00 16.86           C  
ATOM   1505  N   ILE L  75      15.200  47.831  47.104  1.00 14.03           N  
ATOM   1506  CA  ILE L  75      16.428  48.546  46.883  1.00 14.87           C  
ATOM   1507  C   ILE L  75      16.085  49.728  46.004  1.00 17.30           C  
ATOM   1508  O   ILE L  75      15.675  49.544  44.859  1.00 17.77           O  
ATOM   1509  CB  ILE L  75      17.463  47.702  46.134  1.00 15.23           C  
ATOM   1510  CG1 ILE L  75      17.707  46.374  46.853  1.00 16.11           C  
ATOM   1511  CG2 ILE L  75      18.771  48.515  45.955  1.00 14.49           C  
ATOM   1512  CD1 ILE L  75      18.591  45.399  46.006  1.00 16.83           C  
ATOM   1513  N   SER L  76      16.224  50.935  46.544  1.00 18.85           N  
ATOM   1515  CA  SER L  76      15.991  52.143  45.760  0.50 20.64           C  
ATOM   1516  C   SER L  76      17.313  52.642  45.161  1.00 21.13           C  
ATOM   1517  O   SER L  76      18.405  52.188  45.557  1.00 21.80           O  
ATOM   1519  CB  SER L  76      15.343  53.210  46.638  0.50 21.30           C  
ATOM   1521  OG  SER L  76      14.369  52.612  47.480  0.50 22.66           O  
ATOM   1522  N   GLY L  77      17.227  53.563  44.204  1.00 20.49           N  
ATOM   1523  CA  GLY L  77      18.432  54.104  43.608  1.00 21.20           C  
ATOM   1524  C   GLY L  77      19.397  53.002  43.219  1.00 21.53           C  
ATOM   1525  O   GLY L  77      20.599  53.074  43.516  1.00 22.73           O  
ATOM   1526  N   LEU L  78      18.865  51.982  42.557  1.00 21.33           N  
ATOM   1528  CA  LEU L  78      19.656  50.800  42.134  0.50 21.01           C  
ATOM   1529  C   LEU L  78      21.025  51.178  41.581  1.00 21.41           C  
ATOM   1530  O   LEU L  78      21.152  52.104  40.734  1.00 19.04           O  
ATOM   1532  CB  LEU L  78      18.917  49.995  41.066  0.50 20.35           C  
ATOM   1534  CG  LEU L  78      17.969  48.888  41.498  0.50 19.76           C  
ATOM   1536  CD1 LEU L  78      17.573  48.100  40.269  0.50 19.18           C  
ATOM   1538  CD2 LEU L  78      18.641  47.986  42.516  0.50 19.47           C  
ATOM   1539  N   LYS L  79      22.059  50.488  42.061  1.00 19.42           N  
ATOM   1540  CA  LYS L  79      23.409  50.803  41.590  1.00 21.26           C  
ATOM   1541  C   LYS L  79      23.980  49.578  40.926  1.00 19.00           C  
ATOM   1542  O   LYS L  79      23.553  48.462  41.238  1.00 17.12           O  
ATOM   1543  CB  LYS L  79      24.294  51.263  42.766  1.00 23.02           C  
ATOM   1544  CG  LYS L  79      24.051  52.708  43.185  1.00 25.85           C  
ATOM   1545  CD  LYS L  79      24.980  53.130  44.327  1.00 28.44           C  
ATOM   1546  CE  LYS L  79      25.024  54.629  44.499  1.00 30.74           C  
ATOM   1547  NZ  LYS L  79      25.722  55.000  45.793  1.00 32.86           N  
ATOM   1548  N   THR L  80      24.932  49.763  40.012  1.00 17.75           N  
ATOM   1549  CA  THR L  80      25.548  48.599  39.382  1.00 18.13           C  
ATOM   1550  C   THR L  80      26.122  47.623  40.422  1.00 17.94           C  
ATOM   1551  O   THR L  80      26.104  46.412  40.220  1.00 17.85           O  
ATOM   1552  CB  THR L  80      26.617  48.964  38.319  1.00 19.24           C  
ATOM   1553  OG1 THR L  80      27.736  49.605  38.953  1.00 21.76           O  
ATOM   1554  CG2 THR L  80      26.017  49.880  37.242  1.00 18.21           C  
ATOM   1555  N   GLU L  81      26.639  48.159  41.522  1.00 17.85           N  
ATOM   1557  CA  GLU L  81      27.193  47.374  42.618  0.50 18.72           C  
ATOM   1558  C   GLU L  81      26.137  46.482  43.287  1.00 18.26           C  
ATOM   1559  O   GLU L  81      26.466  45.548  44.019  1.00 17.68           O  
ATOM   1561  CB  GLU L  81      27.780  48.322  43.674  0.50 19.53           C  
ATOM   1563  CG  GLU L  81      29.001  49.115  43.214  0.50 20.02           C  
ATOM   1565  CD  GLU L  81      28.698  50.134  42.123  0.50 19.99           C  
ATOM   1567  OE1 GLU L  81      27.573  50.679  42.097  0.50 18.87           O  
ATOM   1569  OE2 GLU L  81      29.601  50.383  41.289  0.50 20.67           O  
ATOM   1570  N   ASP L  82      24.858  46.788  43.067  1.00 16.39           N  
ATOM   1571  CA  ASP L  82      23.796  45.988  43.695  1.00 17.11           C  
ATOM   1572  C   ASP L  82      23.517  44.698  42.928  1.00 16.22           C  
ATOM   1573  O   ASP L  82      22.735  43.866  43.393  1.00 16.14           O  
ATOM   1574  CB  ASP L  82      22.489  46.768  43.819  1.00 17.16           C  
ATOM   1575  CG  ASP L  82      22.647  48.057  44.597  1.00 17.85           C  
ATOM   1576  OD1 ASP L  82      23.510  48.136  45.501  1.00 18.61           O  
ATOM   1577  OD2 ASP L  82      21.879  48.995  44.318  1.00 18.63           O  
ATOM   1578  N   GLU L  83      24.144  44.539  41.761  1.00 15.56           N  
ATOM   1579  CA  GLU L  83      23.950  43.313  40.981  1.00 15.07           C  
ATOM   1580  C   GLU L  83      24.455  42.116  41.796  1.00 14.91           C  
ATOM   1581  O   GLU L  83      25.620  42.058  42.158  1.00 15.02           O  
ATOM   1582  CB  GLU L  83      24.626  43.403  39.607  1.00 15.17           C  
ATOM   1583  CG  GLU L  83      24.482  42.110  38.849  1.00 16.98           C  
ATOM   1584  CD  GLU L  83      24.809  42.239  37.382  1.00 19.06           C  
ATOM   1585  OE1 GLU L  83      24.283  43.145  36.681  1.00 16.84           O  
ATOM   1586  OE2 GLU L  83      25.614  41.395  36.938  1.00 22.77           O  
ATOM   1587  N   ALA L  84      23.563  41.176  42.086  1.00 14.26           N  
ATOM   1588  CA  ALA L  84      23.841  40.092  43.032  1.00 14.05           C  
ATOM   1589  C   ALA L  84      22.693  39.107  43.040  1.00 14.59           C  
ATOM   1590  O   ALA L  84      21.607  39.408  42.543  1.00 14.45           O  
ATOM   1591  CB  ALA L  84      24.012  40.636  44.404  1.00 13.55           C  
ATOM   1592  N   ASP L  85      22.932  37.941  43.637  1.00 12.91           N  
ATOM   1593  CA  ASP L  85      21.832  37.062  44.009  1.00 15.03           C  
ATOM   1594  C   ASP L  85      21.433  37.461  45.415  1.00 14.42           C  
ATOM   1595  O   ASP L  85      22.298  37.720  46.276  1.00 15.18           O  
ATOM   1596  CB  ASP L  85      22.266  35.604  44.012  1.00 15.23           C  
ATOM   1597  CG  ASP L  85      22.477  35.070  42.615  1.00 20.61           C  
ATOM   1598  OD1 ASP L  85      21.642  35.360  41.736  1.00 23.26           O  
ATOM   1599  OD2 ASP L  85      23.483  34.392  42.371  1.00 22.39           O  
ATOM   1600  N   TYR L  86      20.134  37.512  45.654  1.00 13.52           N  
ATOM   1601  CA  TYR L  86      19.638  37.910  46.983  1.00 12.79           C  
ATOM   1602  C   TYR L  86      18.879  36.728  47.583  1.00 13.05           C  
ATOM   1603  O   TYR L  86      18.073  36.128  46.899  1.00 14.22           O  
ATOM   1604  CB  TYR L  86      18.737  39.163  46.908  1.00 11.67           C  
ATOM   1605  CG  TYR L  86      19.532  40.397  46.632  1.00 11.83           C  
ATOM   1606  CD1 TYR L  86      19.823  40.780  45.325  1.00 11.61           C  
ATOM   1607  CD2 TYR L  86      20.074  41.146  47.685  1.00 11.12           C  
ATOM   1608  CE1 TYR L  86      20.615  41.907  45.062  1.00 10.69           C  
ATOM   1609  CE2 TYR L  86      20.835  42.258  47.443  1.00 11.16           C  
ATOM   1610  CZ  TYR L  86      21.109  42.638  46.134  1.00 10.93           C  
ATOM   1611  OH  TYR L  86      21.887  43.745  45.900  1.00 12.07           O  
ATOM   1612  N   TYR L  87      19.159  36.417  48.847  1.00 11.07           N  
ATOM   1613  CA  TYR L  87      18.519  35.312  49.553  1.00 12.97           C  
ATOM   1614  C   TYR L  87      17.812  35.795  50.796  1.00 13.10           C  
ATOM   1615  O   TYR L  87      18.406  36.496  51.614  1.00 14.75           O  
ATOM   1616  CB  TYR L  87      19.539  34.224  49.991  1.00 12.73           C  
ATOM   1617  CG  TYR L  87      20.232  33.588  48.816  1.00 13.00           C  
ATOM   1618  CD1 TYR L  87      19.643  32.528  48.133  1.00 13.02           C  
ATOM   1619  CD2 TYR L  87      21.440  34.091  48.348  1.00 13.57           C  
ATOM   1620  CE1 TYR L  87      20.245  31.978  47.052  1.00 13.31           C  
ATOM   1621  CE2 TYR L  87      22.047  33.546  47.236  1.00 13.19           C  
ATOM   1622  CZ  TYR L  87      21.438  32.486  46.602  1.00 12.61           C  
ATOM   1623  OH  TYR L  87      22.016  31.906  45.509  1.00 14.13           O  
ATOM   1624  N   CYS L  88      16.562  35.369  50.941  1.00 13.18           N  
ATOM   1625  CA  CYS L  88      15.882  35.533  52.232  0.70 12.75           C  
ATOM   1627  C   CYS L  88      16.155  34.298  53.074  1.00 12.01           C  
ATOM   1628  O   CYS L  88      16.496  33.184  52.575  1.00 12.66           O  
ATOM   1629  CB  CYS L  88      14.364  35.770  52.105  0.70 14.56           C  
ATOM   1631  SG  CYS L  88      13.564  34.360  51.313  0.70 16.17           S  
ATOM   1633  N   GLN L  89      16.024  34.484  54.371  1.00  9.93           N  
ATOM   1634  CA  GLN L  89      16.382  33.442  55.283  1.00  9.67           C  
ATOM   1635  C   GLN L  89      15.652  33.637  56.593  1.00 10.58           C  
ATOM   1636  O   GLN L  89      15.569  34.773  57.119  1.00 11.81           O  
ATOM   1637  CB  GLN L  89      17.902  33.470  55.524  1.00  9.27           C  
ATOM   1638  CG  GLN L  89      18.382  32.443  56.602  1.00 10.63           C  
ATOM   1639  CD  GLN L  89      18.537  33.073  57.990  1.00 12.14           C  
ATOM   1640  OE1 GLN L  89      19.188  34.098  58.129  1.00 14.39           O  
ATOM   1641  NE2 GLN L  89      17.974  32.431  59.030  1.00 10.76           N  
ATOM   1642  N   SER L  90      15.146  32.537  57.139  1.00  9.59           N  
ATOM   1643  CA  SER L  90      14.495  32.637  58.431  1.00 11.09           C  
ATOM   1644  C   SER L  90      14.780  31.356  59.210  1.00 12.25           C  
ATOM   1645  O   SER L  90      15.759  30.651  58.900  1.00 12.58           O  
ATOM   1646  CB  SER L  90      13.000  32.961  58.260  1.00  9.98           C  
ATOM   1647  OG  SER L  90      12.381  33.287  59.509  1.00 11.63           O  
ATOM   1648  N   TYR L  91      13.973  31.070  60.239  1.00 14.60           N  
ATOM   1649  CA  TYR L  91      14.237  29.952  61.148  1.00 15.99           C  
ATOM   1650  C   TYR L  91      12.933  29.257  61.466  1.00 16.98           C  
ATOM   1651  O   TYR L  91      11.882  29.894  61.463  1.00 16.15           O  
ATOM   1652  CB  TYR L  91      14.780  30.430  62.499  1.00 18.26           C  
ATOM   1653  CG  TYR L  91      16.056  31.228  62.449  1.00 19.04           C  
ATOM   1654  CD1 TYR L  91      17.313  30.588  62.468  1.00 19.84           C  
ATOM   1655  CD2 TYR L  91      16.015  32.626  62.412  1.00 19.52           C  
ATOM   1656  CE1 TYR L  91      18.506  31.331  62.434  1.00 20.23           C  
ATOM   1657  CE2 TYR L  91      17.206  33.376  62.369  1.00 20.53           C  
ATOM   1658  CZ  TYR L  91      18.437  32.714  62.372  1.00 21.26           C  
ATOM   1659  OH  TYR L  91      19.602  33.454  62.330  1.00 22.60           O  
ATOM   1660  N   ASP L  92      13.008  27.967  61.774  1.00 16.62           N  
ATOM   1661  CA  ASP L  92      11.834  27.261  62.228  1.00 19.59           C  
ATOM   1662  C   ASP L  92      11.837  27.243  63.737  1.00 20.38           C  
ATOM   1663  O   ASP L  92      12.690  27.869  64.357  1.00 19.39           O  
ATOM   1664  CB  ASP L  92      11.718  25.872  61.610  1.00 20.20           C  
ATOM   1665  CG  ASP L  92      12.850  24.920  62.014  1.00 21.05           C  
ATOM   1666  OD1 ASP L  92      13.279  24.880  63.196  1.00 20.85           O  
ATOM   1667  OD2 ASP L  92      13.300  24.184  61.109  1.00 21.79           O  
ATOM   1668  N   SER L  93      10.865  26.561  64.336  1.00 25.10           N  
ATOM   1669  CA  SER L  93      10.711  26.624  65.790  1.00 27.33           C  
ATOM   1670  C   SER L  93      11.816  25.852  66.524  1.00 27.50           C  
ATOM   1671  O   SER L  93      11.986  26.014  67.730  1.00 28.32           O  
ATOM   1672  CB  SER L  93       9.331  26.119  66.213  1.00 28.95           C  
ATOM   1673  OG  SER L  93       9.158  24.772  65.797  1.00 31.04           O  
ATOM   1674  N   SER L  94      12.569  25.031  65.793  1.00 27.01           N  
ATOM   1675  CA  SER L  94      13.776  24.407  66.346  1.00 26.80           C  
ATOM   1676  C   SER L  94      15.007  25.286  66.124  1.00 26.35           C  
ATOM   1677  O   SER L  94      16.130  24.881  66.440  1.00 25.72           O  
ATOM   1678  CB  SER L  94      14.040  23.056  65.691  1.00 27.55           C  
ATOM   1679  OG  SER L  94      12.979  22.160  65.919  1.00 28.38           O  
ATOM   1680  N   ASN L  95      14.799  26.478  65.569  1.00 24.87           N  
ATOM   1681  CA  ASN L  95      15.906  27.374  65.222  1.00 24.62           C  
ATOM   1682  C   ASN L  95      16.778  26.887  64.070  1.00 21.75           C  
ATOM   1683  O   ASN L  95      17.904  27.362  63.889  1.00 20.95           O  
ATOM   1684  CB  ASN L  95      16.784  27.666  66.429  1.00 28.46           C  
ATOM   1685  CG  ASN L  95      16.185  28.712  67.326  1.00 31.72           C  
ATOM   1686  OD1 ASN L  95      15.395  29.562  66.879  1.00 33.65           O  
ATOM   1687  ND2 ASN L  95      16.552  28.664  68.606  1.00 33.17           N  
ATOM   1688  N   HIS L  95A     16.262  25.944  63.302  1.00 18.35           N  
ATOM   1689  CA  HIS L  95A     16.959  25.503  62.113  1.00 17.88           C  
ATOM   1690  C   HIS L  95A     16.838  26.562  61.029  1.00 16.67           C  
ATOM   1691  O   HIS L  95A     15.759  27.106  60.807  1.00 15.19           O  
ATOM   1692  CB  HIS L  95A     16.383  24.192  61.612  1.00 20.10           C  
ATOM   1693  CG  HIS L  95A     16.521  23.081  62.594  1.00 23.00           C  
ATOM   1694  ND1 HIS L  95A     15.556  22.110  62.760  1.00 24.69           N  
ATOM   1695  CD2 HIS L  95A     17.482  22.827  63.513  1.00 23.74           C  
ATOM   1696  CE1 HIS L  95A     15.944  21.275  63.709  1.00 25.53           C  
ATOM   1697  NE2 HIS L  95A     17.101  21.697  64.192  1.00 25.39           N  
ATOM   1698  N   VAL L  96      17.932  26.802  60.318  1.00 14.30           N  
ATOM   1699  CA  VAL L  96      17.939  27.826  59.279  1.00 13.71           C  
ATOM   1700  C   VAL L  96      17.197  27.331  58.039  1.00 12.35           C  
ATOM   1701  O   VAL L  96      17.345  26.168  57.646  1.00 12.91           O  
ATOM   1702  CB  VAL L  96      19.386  28.220  58.928  1.00 14.10           C  
ATOM   1703  CG1 VAL L  96      19.415  29.268  57.810  1.00 14.25           C  
ATOM   1704  CG2 VAL L  96      20.113  28.703  60.180  1.00 14.97           C  
ATOM   1705  N   VAL L  97      16.362  28.198  57.463  1.00 12.06           N  
ATOM   1706  CA  VAL L  97      15.706  27.926  56.187  1.00 11.14           C  
ATOM   1707  C   VAL L  97      16.105  29.064  55.220  1.00 11.42           C  
ATOM   1708  O   VAL L  97      15.938  30.240  55.541  1.00 10.30           O  
ATOM   1709  CB  VAL L  97      14.167  27.895  56.328  1.00 11.12           C  
ATOM   1710  CG1 VAL L  97      13.498  27.808  54.931  1.00 11.83           C  
ATOM   1711  CG2 VAL L  97      13.681  26.765  57.319  1.00 10.06           C  
ATOM   1712  N   PHE L  98      16.667  28.709  54.067  1.00 10.70           N  
ATOM   1713  CA  PHE L  98      16.982  29.662  53.019  1.00 12.05           C  
ATOM   1714  C   PHE L  98      15.973  29.620  51.888  1.00 12.89           C  
ATOM   1715  O   PHE L  98      15.540  28.548  51.487  1.00 13.96           O  
ATOM   1716  CB  PHE L  98      18.357  29.381  52.396  1.00 12.73           C  
ATOM   1717  CG  PHE L  98      19.488  30.129  53.061  1.00 13.66           C  
ATOM   1718  CD1 PHE L  98      20.292  29.498  53.984  1.00 15.36           C  
ATOM   1719  CD2 PHE L  98      19.741  31.468  52.756  1.00 15.96           C  
ATOM   1720  CE1 PHE L  98      21.330  30.177  54.622  1.00 15.97           C  
ATOM   1721  CE2 PHE L  98      20.806  32.155  53.373  1.00 15.28           C  
ATOM   1722  CZ  PHE L  98      21.575  31.504  54.327  1.00 15.31           C  
ATOM   1723  N   GLY L  99      15.651  30.800  51.369  1.00 12.09           N  
ATOM   1724  CA  GLY L  99      14.962  30.954  50.101  1.00 12.89           C  
ATOM   1725  C   GLY L  99      15.825  30.458  48.933  1.00 13.97           C  
ATOM   1726  O   GLY L  99      17.037  30.220  49.078  1.00 12.64           O  
ATOM   1727  N   GLY L 100      15.188  30.285  47.774  1.00 12.95           N  
ATOM   1728  CA  GLY L 100      15.870  29.717  46.628  1.00 13.57           C  
ATOM   1729  C   GLY L 100      16.673  30.762  45.884  1.00 12.59           C  
ATOM   1730  O   GLY L 100      17.381  30.431  44.935  1.00 13.34           O  
ATOM   1731  N   GLY L 101      16.572  32.022  46.309  1.00 12.14           N  
ATOM   1732  CA  GLY L 101      17.365  33.110  45.709  1.00 12.59           C  
ATOM   1733  C   GLY L 101      16.721  33.832  44.542  1.00 13.24           C  
ATOM   1734  O   GLY L 101      15.879  33.263  43.824  1.00 11.16           O  
ATOM   1735  N   THR L 102      17.087  35.108  44.377  1.00 11.65           N  
ATOM   1736  CA  THR L 102      16.563  35.920  43.291  1.00 13.10           C  
ATOM   1737  C   THR L 102      17.738  36.674  42.731  1.00 13.64           C  
ATOM   1738  O   THR L 102      18.441  37.384  43.468  1.00 13.12           O  
ATOM   1739  CB  THR L 102      15.520  36.970  43.770  1.00 13.04           C  
ATOM   1740  OG1 THR L 102      14.352  36.333  44.318  1.00 12.47           O  
ATOM   1741  CG2 THR L 102      15.113  37.901  42.604  1.00 11.86           C  
ATOM   1742  N   LYS L 103      17.971  36.507  41.434  1.00 14.52           N  
ATOM   1743  CA  LYS L 103      19.037  37.243  40.775  1.00 15.27           C  
ATOM   1744  C   LYS L 103      18.572  38.636  40.339  1.00 15.24           C  
ATOM   1745  O   LYS L 103      17.579  38.790  39.606  1.00 14.89           O  
ATOM   1746  CB  LYS L 103      19.588  36.440  39.576  1.00 18.61           C  
ATOM   1747  CG  LYS L 103      20.605  37.217  38.691  1.00 21.72           C  
ATOM   1748  CD  LYS L 103      22.006  37.328  39.342  1.00 24.97           C  
ATOM   1749  CE  LYS L 103      22.944  38.280  38.551  1.00 27.09           C  
ATOM   1750  NZ  LYS L 103      24.257  37.623  38.208  1.00 28.51           N  
ATOM   1751  N   LEU L 104      19.309  39.642  40.792  1.00 14.21           N  
ATOM   1752  CA  LEU L 104      19.117  41.027  40.373  1.00 15.39           C  
ATOM   1753  C   LEU L 104      20.239  41.429  39.414  1.00 14.49           C  
ATOM   1754  O   LEU L 104      21.409  41.484  39.793  1.00 15.24           O  
ATOM   1755  CB  LEU L 104      19.093  41.955  41.578  1.00 16.55           C  
ATOM   1756  CG  LEU L 104      19.040  43.451  41.243  1.00 19.93           C  
ATOM   1757  CD1 LEU L 104      17.817  43.807  40.419  1.00 20.12           C  
ATOM   1758  CD2 LEU L 104      19.061  44.254  42.533  1.00 19.90           C  
ATOM   1759  N   THR L 105      19.864  41.656  38.161  1.00 13.78           N  
ATOM   1760  CA  THR L 105      20.765  42.119  37.133  1.00 15.68           C  
ATOM   1761  C   THR L 105      20.521  43.600  36.955  1.00 16.08           C  
ATOM   1762  O   THR L 105      19.380  44.032  36.744  1.00 16.07           O  
ATOM   1763  CB  THR L 105      20.494  41.394  35.789  1.00 15.99           C  
ATOM   1764  OG1 THR L 105      20.687  39.980  35.977  1.00 16.55           O  
ATOM   1765  CG2 THR L 105      21.446  41.882  34.705  1.00 16.66           C  
ATOM   1766  N   VAL L 106      21.587  44.386  37.051  1.00 16.37           N  
ATOM   1767  CA  VAL L 106      21.471  45.824  36.833  1.00 16.64           C  
ATOM   1768  C   VAL L 106      21.889  46.116  35.387  1.00 17.89           C  
ATOM   1769  O   VAL L 106      23.016  45.836  34.990  1.00 18.16           O  
ATOM   1770  CB  VAL L 106      22.321  46.615  37.840  1.00 16.54           C  
ATOM   1771  CG1 VAL L 106      22.276  48.129  37.524  1.00 16.46           C  
ATOM   1772  CG2 VAL L 106      21.864  46.322  39.277  1.00 17.18           C  
ATOM   1773  N   LEU L 106A     20.965  46.650  34.595  1.00 18.12           N  
ATOM   1774  CA  LEU L 106A     21.238  46.918  33.188  1.00 18.80           C  
ATOM   1775  C   LEU L 106A     22.290  48.020  32.968  0.80 19.94           C  
ATOM   1776  O   LEU L 106A     22.905  48.074  31.901  0.80 19.89           O  
ATOM   1777  CB  LEU L 106A     19.936  47.211  32.430  1.00 18.66           C  
ATOM   1778  CG  LEU L 106A     18.874  46.110  32.571  1.00 18.86           C  
ATOM   1779  CD1 LEU L 106A     17.516  46.567  32.051  1.00 19.01           C  
ATOM   1780  CD2 LEU L 106A     19.324  44.813  31.899  1.00 18.42           C  
ATOM   1781  OXT LEU L 106A     22.583  48.861  33.829  0.80 20.09           O  
TER    1782      LEU L 106A                                                     
