# Supplementary material for: SARS-CoV-2 Spike Protein Interaction Space
Source: Int J Mol Sci. 2023 Jul 27;24(15):12058. doi: 10.3390/ijms241512058 (PMC10418891; doi:10.3390/ijms241512058)
Supplement: Supplementary file 1 [file ijms-24-12058-s001.zip › Supplementary Material File S1/3BD3.pdb]

REMARK 950 NUMBERING  Kabat
REMARK 950 METHOD     X-ray crystal structure
REMARK 950 RESOLUTION 1.600
REMARK 950 R-FACTOR   0.229
REMARK 950 R-FREE     0.270
REMARK 950 CHAIN-TYPE LABEL ORIGINAL
REMARK 950 CHAIN L    L    A
REMARK 950 CHAIN L    L    B
REMARK 950 MOLECULE : A : CATALYTIC ANTIBODY
REMARK 950 SPECIES  : A : MUS MUSCULUS
SEQRES   1 L 112  LEU VAL MET SER GLN SER PRO SER SER LEU ALA VAL SER          
SEQRES   2 L 112  ALA GLY GLU LYS VAL THR MET SER CYS LYS SER SER GLN          
SEQRES   3 L 112  SER LEU PHE ASN SER ARG THR ARG LYS ASN TYR LEU ALA          
SEQRES   4 L 112  TRP TYR GLN GLN LYS PRO GLY GLN SER PRO LYS LEU LEU          
SEQRES   5 L 112  ILE TYR TRP ALA SER THR ARG GLU SER GLY VAL PRO ASP          
SEQRES   6 L 112  ARG PHE THR GLY SER GLY SER GLY THR ASP PHE THR LEU          
SEQRES   7 L 112  THR ILE SER SER VAL GLN ALA GLU ASP LEU ALA VAL TYR          
SEQRES   8 L 112  TYR CYS LYS GLN SER TYR TYR HIS MET TYR THR PHE GLY          
SEQRES   9 L 112  SER GLY THR LYS LEU GLU ILE LYS                              
SEQRES   1 L 112  LEU VAL MET SER GLN SER PRO SER SER LEU ALA VAL SER          
SEQRES   2 L 112  ALA GLY GLU LYS VAL THR MET SER CYS LYS SER SER GLN          
SEQRES   3 L 112  SER LEU PHE ASN SER ARG THR ARG LYS ASN TYR LEU ALA          
SEQRES   4 L 112  TRP TYR GLN GLN LYS PRO GLY GLN SER PRO LYS LEU LEU          
SEQRES   5 L 112  ILE TYR TRP ALA SER THR ARG GLU SER GLY VAL PRO ASP          
SEQRES   6 L 112  ARG PHE THR GLY SER GLY SER GLY THR ASP PHE THR LEU          
SEQRES   7 L 112  THR ILE SER SER VAL GLN ALA GLU ASP LEU ALA VAL TYR          
SEQRES   8 L 112  TYR CYS LYS GLN SER TYR TYR HIS MET TYR THR PHE GLY          
SEQRES   9 L 112  SER GLY THR LYS LEU GLU ILE LYS                              
ATOM      1  N   LEU L   2     -85.733  59.477 148.548  1.00 50.93           N  
ATOM      2  CA  LEU L   2     -84.301  59.183 148.252  1.00 50.31           C  
ATOM      3  C   LEU L   2     -83.383  60.141 149.005  1.00 49.59           C  
ATOM      4  O   LEU L   2     -83.518  61.360 148.898  1.00 49.60           O  
ATOM      5  CB  LEU L   2     -84.041  59.295 146.747  1.00 51.29           C  
ATOM      6  CG  LEU L   2     -82.622  58.977 146.269  1.00 52.67           C  
ATOM      7  CD1 LEU L   2     -82.257  57.553 146.660  1.00 54.52           C  
ATOM      8  CD2 LEU L   2     -82.535  59.152 144.761  1.00 53.52           C  
ATOM      9  N   VAL L   3     -82.447  59.581 149.765  1.00 48.07           N  
ATOM     10  CA  VAL L   3     -81.507  60.381 150.540  1.00 47.39           C  
ATOM     11  C   VAL L   3     -80.056  60.035 150.209  1.00 45.77           C  
ATOM     12  O   VAL L   3     -79.628  58.894 150.376  1.00 46.41           O  
ATOM     13  CB  VAL L   3     -81.724  60.179 152.058  1.00 48.26           C  
ATOM     14  CG1 VAL L   3     -80.769  61.061 152.845  1.00 48.39           C  
ATOM     15  CG2 VAL L   3     -83.166  60.495 152.426  1.00 48.36           C  
ATOM     16  N   MET L   4     -79.308  61.030 149.737  1.00 43.61           N  
ATOM     17  CA  MET L   4     -77.898  60.853 149.390  1.00 41.22           C  
ATOM     18  C   MET L   4     -77.050  61.392 150.538  1.00 40.32           C  
ATOM     19  O   MET L   4     -77.153  62.567 150.889  1.00 39.86           O  
ATOM     20  CB  MET L   4     -77.565  61.624 148.109  1.00 41.00           C  
ATOM     21  CG  MET L   4     -78.312  61.160 146.864  1.00 40.76           C  
ATOM     22  SD  MET L   4     -77.816  59.507 146.315  1.00 38.93           S  
ATOM     23  CE  MET L   4     -76.192  59.859 145.633  1.00 39.34           C  
ATOM     24  N   SER L   5     -76.212  60.542 151.123  1.00 37.10           N  
ATOM     25  CA  SER L   5     -75.379  60.972 152.241  1.00 36.10           C  
ATOM     26  C   SER L   5     -73.897  60.682 152.030  1.00 34.18           C  
ATOM     27  O   SER L   5     -73.512  59.553 151.714  1.00 35.07           O  
ATOM     28  CB  SER L   5     -75.838  60.293 153.529  1.00 36.47           C  
ATOM     29  OG  SER L   5     -75.637  58.895 153.458  1.00 40.95           O  
ATOM     30  N   GLN L   6     -73.069  61.704 152.219  1.00 28.65           N  
ATOM     31  CA  GLN L   6     -71.629  61.553 152.057  1.00 26.10           C  
ATOM     32  C   GLN L   6     -70.912  61.611 153.395  1.00 24.98           C  
ATOM     33  O   GLN L   6     -71.405  62.196 154.363  1.00 25.95           O  
ATOM     34  CB  GLN L   6     -71.059  62.647 151.144  1.00 25.39           C  
ATOM     35  CG  GLN L   6     -71.370  62.463 149.657  1.00 25.41           C  
ATOM     36  CD  GLN L   6     -70.672  63.496 148.780  1.00 23.24           C  
ATOM     37  OE1 GLN L   6     -71.317  64.336 148.154  1.00 24.36           O  
ATOM     38  NE2 GLN L   6     -69.346  63.430 148.730  1.00 26.19           N  
ATOM     39  N   SER L   7     -69.747  60.980 153.443  1.00 23.27           N  
ATOM     40  CA  SER L   7     -68.914  60.981 154.637  1.00 22.51           C  
ATOM     41  C   SER L   7     -67.518  60.537 154.230  1.00 21.83           C  
ATOM     42  O   SER L   7     -67.355  59.813 153.251  1.00 21.56           O  
ATOM     43  CB  SER L   7     -69.469  60.032 155.702  1.00 23.32           C  
ATOM     44  OG  SER L   7     -69.355  58.675 155.303  1.00 24.58           O  
ATOM     45  N   PRO L   8     -66.488  61.008 154.943  1.00 20.98           N  
ATOM     46  CA  PRO L   8     -66.586  61.927 156.079  1.00 20.65           C  
ATOM     47  C   PRO L   8     -66.800  63.339 155.551  1.00 20.92           C  
ATOM     48  O   PRO L   8     -66.591  63.602 154.366  1.00 22.21           O  
ATOM     49  CB  PRO L   8     -65.234  61.764 156.764  1.00 21.40           C  
ATOM     50  CG  PRO L   8     -64.315  61.553 155.589  1.00 20.95           C  
ATOM     51  CD  PRO L   8     -65.090  60.594 154.717  1.00 21.35           C  
ATOM     52  N   SER L   9     -67.222  64.255 156.415  1.00 20.90           N  
ATOM     53  CA  SER L   9     -67.445  65.622 155.973  1.00 21.93           C  
ATOM     54  C   SER L   9     -66.144  66.356 155.634  1.00 20.76           C  
ATOM     55  O   SER L   9     -66.090  67.153 154.691  1.00 22.66           O  
ATOM     56  CB  SER L   9     -68.221  66.394 157.047  1.00 24.34           C  
ATOM     57  OG  SER L   9     -68.336  67.761 156.697  1.00 32.79           O  
ATOM     58  N   SER L  10     -65.098  66.080 156.404  1.00 21.41           N  
ATOM     59  CA  SER L  10     -63.799  66.713 156.220  1.00 21.82           C  
ATOM     60  C   SER L  10     -62.653  65.721 156.397  1.00 23.70           C  
ATOM     61  O   SER L  10     -62.654  64.911 157.329  1.00 24.27           O  
ATOM     62  CB  SER L  10     -63.636  67.868 157.218  1.00 23.37           C  
ATOM     63  OG  SER L  10     -62.295  68.332 157.270  1.00 26.75           O  
ATOM     64  N   LEU L  11     -61.692  65.786 155.479  1.00 23.64           N  
ATOM     65  CA  LEU L  11     -60.514  64.928 155.500  1.00 25.60           C  
ATOM     66  C   LEU L  11     -59.270  65.800 155.476  1.00 25.96           C  
ATOM     67  O   LEU L  11     -59.118  66.646 154.597  1.00 25.16           O  
ATOM     68  CB  LEU L  11     -60.489  64.012 154.278  1.00 24.98           C  
ATOM     69  CG  LEU L  11     -61.107  62.630 154.426  1.00 27.13           C  
ATOM     70  CD1 LEU L  11     -61.199  61.956 153.065  1.00 25.70           C  
ATOM     71  CD2 LEU L  11     -60.254  61.811 155.382  1.00 24.55           C  
ATOM     72  N   ALA L  12     -58.390  65.592 156.446  1.00 28.50           N  
ATOM     73  CA  ALA L  12     -57.147  66.341 156.537  1.00 30.89           C  
ATOM     74  C   ALA L  12     -56.016  65.322 156.559  1.00 32.69           C  
ATOM     75  O   ALA L  12     -55.857  64.589 157.533  1.00 34.99           O  
ATOM     76  CB  ALA L  12     -57.132  67.177 157.808  1.00 31.67           C  
ATOM     77  N   VAL L  13     -55.238  65.262 155.484  1.00 34.26           N  
ATOM     78  CA  VAL L  13     -54.143  64.302 155.418  1.00 36.49           C  
ATOM     79  C   VAL L  13     -52.844  64.943 154.948  1.00 36.50           C  
ATOM     80  O   VAL L  13     -52.808  66.122 154.601  1.00 35.85           O  
ATOM     81  CB  VAL L  13     -54.490  63.130 154.468  1.00 37.76           C  
ATOM     82  CG1 VAL L  13     -55.733  62.409 154.968  1.00 39.63           C  
ATOM     83  CG2 VAL L  13     -54.706  63.646 153.052  1.00 39.06           C  
ATOM     84  N   SER L  14     -51.770  64.163 154.956  1.00 37.42           N  
ATOM     85  CA  SER L  14     -50.482  64.669 154.512  1.00 37.89           C  
ATOM     86  C   SER L  14     -50.295  64.322 153.041  1.00 36.59           C  
ATOM     87  O   SER L  14     -50.906  63.382 152.532  1.00 34.49           O  
ATOM     88  CB  SER L  14     -49.353  64.075 155.363  1.00 39.33           C  
ATOM     89  OG  SER L  14     -49.563  62.696 155.608  1.00 43.42           O  
ATOM     90  N   ALA L  15     -49.465  65.098 152.352  1.00 36.84           N  
ATOM     91  CA  ALA L  15     -49.215  64.870 150.936  1.00 36.19           C  
ATOM     92  C   ALA L  15     -48.749  63.439 150.679  1.00 35.54           C  
ATOM     93  O   ALA L  15     -47.990  62.874 151.466  1.00 36.37           O  
ATOM     94  CB  ALA L  15     -48.173  65.860 150.427  1.00 36.49           C  
ATOM     95  N   GLY L  16     -49.218  62.860 149.578  1.00 34.39           N  
ATOM     96  CA  GLY L  16     -48.833  61.506 149.226  1.00 33.76           C  
ATOM     97  C   GLY L  16     -49.703  60.409 149.814  1.00 32.14           C  
ATOM     98  O   GLY L  16     -49.622  59.260 149.382  1.00 33.44           O  
ATOM     99  N   GLU L  17     -50.531  60.747 150.795  1.00 31.93           N  
ATOM    100  CA  GLU L  17     -51.399  59.749 151.420  1.00 32.06           C  
ATOM    101  C   GLU L  17     -52.606  59.385 150.565  1.00 29.60           C  
ATOM    102  O   GLU L  17     -53.017  60.144 149.690  1.00 29.22           O  
ATOM    103  CB  GLU L  17     -51.902  60.245 152.780  1.00 35.84           C  
ATOM    104  CG  GLU L  17     -50.850  60.273 153.878  1.00 42.56           C  
ATOM    105  CD  GLU L  17     -51.460  60.405 155.263  1.00 46.31           C  
ATOM    106  OE1 GLU L  17     -52.139  61.421 155.528  1.00 47.94           O  
ATOM    107  OE2 GLU L  17     -51.263  59.487 156.089  1.00 50.11           O  
ATOM    108  N   LYS L  18     -53.168  58.209 150.821  1.00 27.30           N  
ATOM    109  CA  LYS L  18     -54.352  57.759 150.104  1.00 24.83           C  
ATOM    110  C   LYS L  18     -55.565  58.094 150.969  1.00 22.89           C  
ATOM    111  O   LYS L  18     -55.472  58.100 152.191  1.00 23.01           O  
ATOM    112  CB  LYS L  18     -54.307  56.240 149.874  1.00 25.73           C  
ATOM    113  CG  LYS L  18     -55.633  55.653 149.389  1.00 26.51           C  
ATOM    114  CD  LYS L  18     -55.583  54.137 149.214  1.00 27.59           C  
ATOM    115  CE  LYS L  18     -54.912  53.734 147.912  1.00 30.22           C  
ATOM    116  NZ  LYS L  18     -54.988  52.253 147.716  1.00 28.14           N  
ATOM    117  N   VAL L  19     -56.689  58.399 150.333  1.00 22.98           N  
ATOM    118  CA  VAL L  19     -57.919  58.667 151.063  1.00 21.19           C  
ATOM    119  C   VAL L  19     -59.079  58.009 150.349  1.00 21.16           C  
ATOM    120  O   VAL L  19     -59.040  57.789 149.138  1.00 20.29           O  
ATOM    121  CB  VAL L  19     -58.264  60.186 151.177  1.00 21.82           C  
ATOM    122  CG1 VAL L  19     -57.174  60.928 151.914  1.00 22.89           C  
ATOM    123  CG2 VAL L  19     -58.505  60.778 149.780  1.00 19.02           C  
ATOM    124  N   THR L  20     -60.111  57.683 151.111  1.00 18.77           N  
ATOM    125  CA  THR L  20     -61.312  57.118 150.530  1.00 19.32           C  
ATOM    126  C   THR L  20     -62.480  57.862 151.169  1.00 20.70           C  
ATOM    127  O   THR L  20     -62.406  58.266 152.330  1.00 20.37           O  
ATOM    128  CB  THR L  20     -61.450  55.595 150.800  1.00 20.33           C  
ATOM    129  OG1 THR L  20     -61.095  55.308 152.154  1.00 16.62           O  
ATOM    130  CG2 THR L  20     -60.556  54.795 149.843  1.00 19.14           C  
ATOM    131  N   MET L  21     -63.533  58.078 150.392  1.00 20.77           N  
ATOM    132  CA  MET L  21     -64.727  58.751 150.893  1.00 21.05           C  
ATOM    133  C   MET L  21     -65.946  58.006 150.379  1.00 21.41           C  
ATOM    134  O   MET L  21     -65.900  57.375 149.323  1.00 20.05           O  
ATOM    135  CB  MET L  21     -64.745  60.221 150.457  1.00 21.77           C  
ATOM    136  CG  MET L  21     -64.532  60.448 148.983  1.00 22.96           C  
ATOM    137  SD  MET L  21     -64.208  62.194 148.602  1.00 23.54           S  
ATOM    138  CE  MET L  21     -62.439  62.249 148.710  1.00 26.41           C  
ATOM    139  N   SER L  22     -67.039  58.091 151.129  1.00 21.02           N  
ATOM    140  CA  SER L  22     -68.263  57.381 150.792  1.00 21.51           C  
ATOM    141  C   SER L  22     -69.449  58.237 150.391  1.00 23.61           C  
ATOM    142  O   SER L  22     -69.565  59.396 150.779  1.00 21.23           O  
ATOM    143  CB  SER L  22     -68.700  56.523 151.979  1.00 22.11           C  
ATOM    144  OG  SER L  22     -67.640  55.745 152.464  1.00 23.21           O  
ATOM    145  N   CYS L  23     -70.338  57.608 149.637  1.00 25.62           N  
ATOM    146  CA  CYS L  23     -71.566  58.214 149.175  1.00 28.54           C  
ATOM    147  C   CYS L  23     -72.615  57.112 149.240  1.00 31.15           C  
ATOM    148  O   CYS L  23     -72.521  56.119 148.516  1.00 29.75           O  
ATOM    149  CB  CYS L  23     -71.395  58.706 147.743  1.00 26.12           C  
ATOM    150  SG  CYS L  23     -72.893  59.298 146.876  1.00 30.40           S  
ATOM    151  N   LYS L  24     -73.591  57.269 150.131  1.00 33.55           N  
ATOM    152  CA  LYS L  24     -74.657  56.282 150.270  1.00 35.88           C  
ATOM    153  C   LYS L  24     -75.980  56.835 149.774  1.00 37.49           C  
ATOM    154  O   LYS L  24     -76.216  58.044 149.808  1.00 36.63           O  
ATOM    155  CB  LYS L  24     -74.825  55.856 151.730  1.00 36.91           C  
ATOM    156  CG  LYS L  24     -73.755  54.924 152.247  1.00 39.23           C  
ATOM    157  CD  LYS L  24     -74.108  54.433 153.641  1.00 40.45           C  
ATOM    158  CE  LYS L  24     -73.053  53.480 154.169  1.00 41.64           C  
ATOM    159  NZ  LYS L  24     -73.336  53.060 155.563  1.00 38.99           N  
ATOM    160  N   SER L  25     -76.839  55.937 149.311  1.00 38.65           N  
ATOM    161  CA  SER L  25     -78.158  56.306 148.824  1.00 41.29           C  
ATOM    162  C   SER L  25     -79.172  55.456 149.575  1.00 41.81           C  
ATOM    163  O   SER L  25     -78.890  54.309 149.920  1.00 41.70           O  
ATOM    164  CB  SER L  25     -78.263  56.043 147.319  1.00 42.24           C  
ATOM    165  OG  SER L  25     -78.001  54.680 147.023  1.00 45.66           O  
ATOM    166  N   SER L  26     -80.344  56.026 149.841  1.00 43.82           N  
ATOM    167  CA  SER L  26     -81.395  55.311 150.555  1.00 44.36           C  
ATOM    168  C   SER L  26     -82.033  54.261 149.650  1.00 45.13           C  
ATOM    169  O   SER L  26     -82.651  53.310 150.128  1.00 45.02           O  
ATOM    170  CB  SER L  26     -82.462  56.297 151.048  1.00 44.25           C  
ATOM    171  OG  SER L  26     -83.018  57.033 149.970  1.00 42.96           O  
ATOM    172  N   GLN L  27     -81.875  54.442 148.341  1.00 45.69           N  
ATOM    173  CA  GLN L  27     -82.429  53.517 147.354  1.00 45.94           C  
ATOM    174  C   GLN L  27     -81.341  53.117 146.358  1.00 44.57           C  
ATOM    175  O   GLN L  27     -80.406  53.878 146.118  1.00 43.77           O  
ATOM    176  CB  GLN L  27     -83.585  54.179 146.597  1.00 47.70           C  
ATOM    177  CG  GLN L  27     -84.660  54.792 147.485  1.00 50.83           C  
ATOM    178  CD  GLN L  27     -85.486  53.756 148.223  1.00 52.22           C  
ATOM    179  OE1 GLN L  27     -86.302  54.096 149.080  1.00 55.04           O  
ATOM    180  NE2 GLN L  27     -85.287  52.487 147.887  1.00 53.32           N  
ATOM    181  N   SER L  27A    -81.468  51.925 145.780  1.00 43.89           N  
ATOM    182  CA  SER L  27A    -80.493  51.439 144.805  1.00 42.74           C  
ATOM    183  C   SER L  27A    -80.433  52.341 143.576  1.00 42.18           C  
ATOM    184  O   SER L  27A    -81.463  52.807 143.086  1.00 43.62           O  
ATOM    185  CB  SER L  27A    -80.846  50.014 144.370  1.00 42.87           C  
ATOM    186  OG  SER L  27A    -79.969  49.563 143.352  1.00 41.57           O  
ATOM    187  N   LEU L  27B    -79.224  52.584 143.077  1.00 40.75           N  
ATOM    188  CA  LEU L  27B    -79.036  53.427 141.901  1.00 40.00           C  
ATOM    189  C   LEU L  27B    -78.700  52.572 140.687  1.00 40.25           C  
ATOM    190  O   LEU L  27B    -78.321  53.085 139.633  1.00 38.28           O  
ATOM    191  CB  LEU L  27B    -77.909  54.436 142.143  1.00 40.70           C  
ATOM    192  CG  LEU L  27B    -78.091  55.402 143.318  1.00 39.72           C  
ATOM    193  CD1 LEU L  27B    -76.858  56.280 143.451  1.00 39.57           C  
ATOM    194  CD2 LEU L  27B    -79.329  56.254 143.099  1.00 40.65           C  
ATOM    195  N   PHE L  27C    -78.843  51.262 140.847  1.00 42.01           N  
ATOM    196  CA  PHE L  27C    -78.551  50.321 139.774  1.00 43.95           C  
ATOM    197  C   PHE L  27C    -79.758  50.116 138.865  1.00 45.61           C  
ATOM    198  O   PHE L  27C    -80.842  49.756 139.326  1.00 44.69           O  
ATOM    199  CB  PHE L  27C    -78.127  48.973 140.361  1.00 43.24           C  
ATOM    200  CG  PHE L  27C    -77.712  47.965 139.327  1.00 43.14           C  
ATOM    201  CD1 PHE L  27C    -76.528  48.129 138.616  1.00 42.48           C  
ATOM    202  CD2 PHE L  27C    -78.513  46.861 139.054  1.00 42.87           C  
ATOM    203  CE1 PHE L  27C    -76.144  47.204 137.646  1.00 42.98           C  
ATOM    204  CE2 PHE L  27C    -78.138  45.930 138.086  1.00 42.40           C  
ATOM    205  CZ  PHE L  27C    -76.953  46.103 137.382  1.00 42.08           C  
ATOM    206  N   ASN L  27D    -79.561  50.346 137.572  1.00 48.18           N  
ATOM    207  CA  ASN L  27D    -80.626  50.176 136.595  1.00 51.55           C  
ATOM    208  C   ASN L  27D    -80.509  48.807 135.932  1.00 52.86           C  
ATOM    209  O   ASN L  27D    -79.473  48.475 135.359  1.00 52.37           O  
ATOM    210  CB  ASN L  27D    -80.555  51.279 135.538  1.00 52.38           C  
ATOM    211  CG  ASN L  27D    -81.542  51.064 134.407  1.00 54.50           C  
ATOM    212  OD1 ASN L  27D    -82.721  50.791 134.638  1.00 55.56           O  
ATOM    213  ND2 ASN L  27D    -81.066  51.197 133.176  1.00 54.30           N  
ATOM    214  N   SER L  27E    -81.576  48.018 136.016  1.00 54.66           N  
ATOM    215  CA  SER L  27E    -81.589  46.681 135.433  1.00 56.92           C  
ATOM    216  C   SER L  27E    -81.672  46.708 133.910  1.00 57.77           C  
ATOM    217  O   SER L  27E    -81.494  45.681 133.254  1.00 58.10           O  
ATOM    218  CB  SER L  27E    -82.763  45.875 135.993  1.00 57.26           C  
ATOM    219  OG  SER L  27E    -82.636  45.697 137.393  1.00 57.39           O  
ATOM    220  N   ARG L  27F    -81.938  47.886 133.353  1.00 58.76           N  
ATOM    221  CA  ARG L  27F    -82.048  48.045 131.907  1.00 59.17           C  
ATOM    222  C   ARG L  27F    -80.676  48.163 131.248  1.00 58.10           C  
ATOM    223  O   ARG L  27F    -80.309  47.336 130.413  1.00 57.78           O  
ATOM    224  CB  ARG L  27F    -82.886  49.285 131.578  1.00 61.77           C  
ATOM    225  CG  ARG L  27F    -84.280  49.280 132.193  1.00 65.15           C  
ATOM    226  CD  ARG L  27F    -85.141  48.160 131.627  1.00 67.35           C  
ATOM    227  NE  ARG L  27F    -85.382  48.328 130.197  1.00 69.64           N  
ATOM    228  CZ  ARG L  27F    -86.112  47.498 129.457  1.00 70.77           C  
ATOM    229  NH1 ARG L  27F    -86.677  46.433 130.010  1.00 71.43           N  
ATOM    230  NH2 ARG L  27F    -86.279  47.734 128.162  1.00 71.09           N  
ATOM    231  N   THR L  28     -79.926  49.196 131.623  1.00 56.04           N  
ATOM    232  CA  THR L  28     -78.593  49.420 131.069  1.00 54.24           C  
ATOM    233  C   THR L  28     -77.537  48.719 131.913  1.00 52.13           C  
ATOM    234  O   THR L  28     -76.368  48.656 131.536  1.00 51.77           O  
ATOM    235  CB  THR L  28     -78.248  50.923 131.018  1.00 54.64           C  
ATOM    236  OG1 THR L  28     -78.224  51.453 132.349  1.00 53.50           O  
ATOM    237  CG2 THR L  28     -79.280  51.678 130.196  1.00 54.85           C  
ATOM    238  N   ARG L  29     -77.963  48.197 133.058  1.00 50.58           N  
ATOM    239  CA  ARG L  29     -77.078  47.495 133.975  1.00 50.37           C  
ATOM    240  C   ARG L  29     -75.860  48.316 134.381  1.00 48.79           C  
ATOM    241  O   ARG L  29     -74.719  47.870 134.266  1.00 48.25           O  
ATOM    242  CB  ARG L  29     -76.653  46.154 133.370  1.00 51.34           C  
ATOM    243  CG  ARG L  29     -77.822  45.193 133.231  1.00 54.25           C  
ATOM    244  CD  ARG L  29     -77.394  43.802 132.810  1.00 57.04           C  
ATOM    245  NE  ARG L  29     -78.518  42.869 132.849  1.00 59.00           N  
ATOM    246  CZ  ARG L  29     -79.185  42.547 133.953  1.00 60.86           C  
ATOM    247  NH1 ARG L  29     -78.843  43.082 135.119  1.00 60.36           N  
ATOM    248  NH2 ARG L  29     -80.199  41.693 133.893  1.00 61.55           N  
ATOM    249  N   LYS L  30     -76.126  49.524 134.861  1.00 47.66           N  
ATOM    250  CA  LYS L  30     -75.087  50.434 135.320  1.00 46.50           C  
ATOM    251  C   LYS L  30     -75.621  51.272 136.478  1.00 44.60           C  
ATOM    252  O   LYS L  30     -76.833  51.428 136.639  1.00 43.10           O  
ATOM    253  CB  LYS L  30     -74.626  51.354 134.184  1.00 47.67           C  
ATOM    254  CG  LYS L  30     -73.522  50.775 133.308  1.00 49.87           C  
ATOM    255  CD  LYS L  30     -72.964  51.833 132.362  1.00 50.14           C  
ATOM    256  CE  LYS L  30     -71.684  51.367 131.673  1.00 51.16           C  
ATOM    257  NZ  LYS L  30     -71.892  50.172 130.808  1.00 51.89           N  
ATOM    258  N   ASN L  31     -74.708  51.795 137.288  1.00 42.50           N  
ATOM    259  CA  ASN L  31     -75.071  52.624 138.430  1.00 40.89           C  
ATOM    260  C   ASN L  31     -74.920  54.090 138.050  1.00 39.77           C  
ATOM    261  O   ASN L  31     -73.823  54.553 137.739  1.00 39.66           O  
ATOM    262  CB  ASN L  31     -74.173  52.292 139.625  1.00 40.21           C  
ATOM    263  CG  ASN L  31     -74.562  50.993 140.301  1.00 38.97           C  
ATOM    264  OD1 ASN L  31     -75.512  50.948 141.082  1.00 39.26           O  
ATOM    265  ND2 ASN L  31     -73.835  49.925 139.997  1.00 40.09           N  
ATOM    266  N   TYR L  32     -76.031  54.815 138.070  1.00 39.68           N  
ATOM    267  CA  TYR L  32     -76.021  56.225 137.714  1.00 39.49           C  
ATOM    268  C   TYR L  32     -75.576  57.085 138.887  1.00 38.09           C  
ATOM    269  O   TYR L  32     -76.376  57.772 139.520  1.00 38.78           O  
ATOM    270  CB  TYR L  32     -77.408  56.643 137.228  1.00 41.87           C  
ATOM    271  CG  TYR L  32     -77.795  55.964 135.934  1.00 43.99           C  
ATOM    272  CD1 TYR L  32     -77.141  56.270 134.742  1.00 44.71           C  
ATOM    273  CD2 TYR L  32     -78.790  54.987 135.908  1.00 45.98           C  
ATOM    274  CE1 TYR L  32     -77.465  55.621 133.553  1.00 45.19           C  
ATOM    275  CE2 TYR L  32     -79.122  54.332 134.725  1.00 45.50           C  
ATOM    276  CZ  TYR L  32     -78.455  54.654 133.552  1.00 45.05           C  
ATOM    277  OH  TYR L  32     -78.779  54.010 132.381  1.00 45.33           O  
ATOM    278  N   LEU L  33     -74.280  57.024 139.165  1.00 36.35           N  
ATOM    279  CA  LEU L  33     -73.678  57.782 140.248  1.00 34.21           C  
ATOM    280  C   LEU L  33     -72.384  58.379 139.707  1.00 33.21           C  
ATOM    281  O   LEU L  33     -71.577  57.680 139.098  1.00 34.34           O  
ATOM    282  CB  LEU L  33     -73.396  56.852 141.436  1.00 32.66           C  
ATOM    283  CG  LEU L  33     -72.887  57.436 142.761  1.00 32.43           C  
ATOM    284  CD1 LEU L  33     -71.413  57.780 142.647  1.00 30.88           C  
ATOM    285  CD2 LEU L  33     -73.714  58.663 143.133  1.00 29.92           C  
ATOM    286  N   ALA L  34     -72.198  59.679 139.909  1.00 30.81           N  
ATOM    287  CA  ALA L  34     -70.998  60.351 139.436  1.00 28.41           C  
ATOM    288  C   ALA L  34     -70.303  61.089 140.574  1.00 27.82           C  
ATOM    289  O   ALA L  34     -70.894  61.315 141.635  1.00 29.30           O  
ATOM    290  CB  ALA L  34     -71.350  61.326 138.309  1.00 29.81           C  
ATOM    291  N   TRP L  35     -69.043  61.448 140.348  1.00 26.66           N  
ATOM    292  CA  TRP L  35     -68.245  62.170 141.336  1.00 27.00           C  
ATOM    293  C   TRP L  35     -67.671  63.436 140.714  1.00 27.32           C  
ATOM    294  O   TRP L  35     -67.134  63.404 139.605  1.00 26.86           O  
ATOM    295  CB  TRP L  35     -67.084  61.311 141.845  1.00 25.68           C  
ATOM    296  CG  TRP L  35     -67.491  60.157 142.710  1.00 23.65           C  
ATOM    297  CD1 TRP L  35     -67.788  58.885 142.300  1.00 24.07           C  
ATOM    298  CD2 TRP L  35     -67.638  60.164 144.135  1.00 23.41           C  
ATOM    299  NE1 TRP L  35     -68.108  58.102 143.380  1.00 22.88           N  
ATOM    300  CE2 TRP L  35     -68.025  58.862 144.520  1.00 21.50           C  
ATOM    301  CE3 TRP L  35     -67.484  61.146 145.125  1.00 22.05           C  
ATOM    302  CZ2 TRP L  35     -68.253  58.510 145.859  1.00 23.99           C  
ATOM    303  CZ3 TRP L  35     -67.713  60.795 146.459  1.00 21.31           C  
ATOM    304  CH2 TRP L  35     -68.094  59.490 146.810  1.00 21.90           C  
ATOM    305  N   TYR L  36     -67.772  64.546 141.436  1.00 29.02           N  
ATOM    306  CA  TYR L  36     -67.256  65.820 140.950  1.00 29.70           C  
ATOM    307  C   TYR L  36     -66.245  66.433 141.911  1.00 28.47           C  
ATOM    308  O   TYR L  36     -66.288  66.190 143.118  1.00 29.73           O  
ATOM    309  CB  TYR L  36     -68.398  66.825 140.745  1.00 33.34           C  
ATOM    310  CG  TYR L  36     -69.407  66.445 139.684  1.00 35.89           C  
ATOM    311  CD1 TYR L  36     -70.320  65.413 139.897  1.00 37.98           C  
ATOM    312  CD2 TYR L  36     -69.458  67.129 138.472  1.00 38.68           C  
ATOM    313  CE1 TYR L  36     -71.263  65.072 138.930  1.00 39.35           C  
ATOM    314  CE2 TYR L  36     -70.394  66.797 137.496  1.00 40.29           C  
ATOM    315  CZ  TYR L  36     -71.294  65.768 137.733  1.00 40.50           C  
ATOM    316  OH  TYR L  36     -72.223  65.437 136.771  1.00 43.67           O  
ATOM    317  N   GLN L  37     -65.335  67.225 141.357  1.00 25.30           N  
ATOM    318  CA  GLN L  37     -64.317  67.923 142.132  1.00 25.02           C  
ATOM    319  C   GLN L  37     -64.656  69.407 142.064  1.00 24.47           C  
ATOM    320  O   GLN L  37     -64.814  69.966 140.978  1.00 24.90           O  
ATOM    321  CB  GLN L  37     -62.931  67.686 141.540  1.00 24.77           C  
ATOM    322  CG  GLN L  37     -61.850  68.557 142.154  1.00 25.85           C  
ATOM    323  CD  GLN L  37     -60.464  68.225 141.630  1.00 29.09           C  
ATOM    324  OE1 GLN L  37     -59.767  67.375 142.183  1.00 32.98           O  
ATOM    325  NE2 GLN L  37     -60.063  68.889 140.549  1.00 27.62           N  
ATOM    326  N   GLN L  38     -64.766  70.045 143.224  1.00 24.59           N  
ATOM    327  CA  GLN L  38     -65.118  71.454 143.269  1.00 25.49           C  
ATOM    328  C   GLN L  38     -64.088  72.287 144.009  1.00 25.24           C  
ATOM    329  O   GLN L  38     -63.939  72.173 145.224  1.00 24.90           O  
ATOM    330  CB  GLN L  38     -66.489  71.623 143.936  1.00 23.96           C  
ATOM    331  CG  GLN L  38     -66.919  73.071 144.127  1.00 26.78           C  
ATOM    332  CD  GLN L  38     -67.202  73.774 142.814  1.00 27.51           C  
ATOM    333  OE1 GLN L  38     -68.270  73.609 142.227  1.00 25.97           O  
ATOM    334  NE2 GLN L  38     -66.237  74.556 142.341  1.00 29.93           N  
ATOM    335  N   LYS L  39     -63.370  73.123 143.270  1.00 27.22           N  
ATOM    336  CA  LYS L  39     -62.372  73.990 143.873  1.00 29.34           C  
ATOM    337  C   LYS L  39     -63.020  75.345 144.115  1.00 31.64           C  
ATOM    338  O   LYS L  39     -63.991  75.700 143.452  1.00 30.70           O  
ATOM    339  CB  LYS L  39     -61.154  74.124 142.960  1.00 30.54           C  
ATOM    340  CG  LYS L  39     -60.406  72.815 142.769  1.00 32.58           C  
ATOM    341  CD  LYS L  39     -59.104  73.020 142.032  1.00 32.45           C  
ATOM    342  CE  LYS L  39     -58.362  71.707 141.863  1.00 33.36           C  
ATOM    343  NZ  LYS L  39     -57.049  71.907 141.192  1.00 36.26           N  
ATOM    344  N   PRO L  40     -62.492  76.119 145.076  1.00 32.86           N  
ATOM    345  CA  PRO L  40     -63.026  77.441 145.413  1.00 34.26           C  
ATOM    346  C   PRO L  40     -63.318  78.355 144.220  1.00 35.32           C  
ATOM    347  O   PRO L  40     -62.409  78.763 143.499  1.00 35.10           O  
ATOM    348  CB  PRO L  40     -61.953  78.014 146.336  1.00 33.98           C  
ATOM    349  CG  PRO L  40     -61.444  76.798 147.036  1.00 33.89           C  
ATOM    350  CD  PRO L  40     -61.311  75.807 145.901  1.00 33.25           C  
ATOM    351  N   GLY L  41     -64.597  78.660 144.026  1.00 36.31           N  
ATOM    352  CA  GLY L  41     -65.011  79.543 142.951  1.00 38.20           C  
ATOM    353  C   GLY L  41     -64.895  79.029 141.528  1.00 38.92           C  
ATOM    354  O   GLY L  41     -65.415  79.659 140.608  1.00 40.72           O  
ATOM    355  N   GLN L  42     -64.224  77.899 141.333  1.00 39.61           N  
ATOM    356  CA  GLN L  42     -64.056  77.336 139.994  1.00 39.74           C  
ATOM    357  C   GLN L  42     -65.283  76.570 139.515  1.00 38.71           C  
ATOM    358  O   GLN L  42     -66.234  76.361 140.267  1.00 37.51           O  
ATOM    359  CB  GLN L  42     -62.839  76.407 139.955  1.00 41.97           C  
ATOM    360  CG  GLN L  42     -61.502  77.120 140.039  1.00 45.44           C  
ATOM    361  CD  GLN L  42     -60.327  76.171 139.893  1.00 46.72           C  
ATOM    362  OE1 GLN L  42     -60.267  75.380 138.951  1.00 47.97           O  
ATOM    363  NE2 GLN L  42     -59.381  76.250 140.822  1.00 48.11           N  
ATOM    364  N   SER L  43     -65.264  76.160 138.251  1.00 39.51           N  
ATOM    365  CA  SER L  43     -66.377  75.400 137.697  1.00 40.04           C  
ATOM    366  C   SER L  43     -66.191  73.934 138.083  1.00 40.32           C  
ATOM    367  O   SER L  43     -65.067  73.428 138.095  1.00 40.08           O  
ATOM    368  CB  SER L  43     -66.416  75.528 136.171  1.00 40.85           C  
ATOM    369  OG  SER L  43     -65.336  74.833 135.568  1.00 42.14           O  
ATOM    370  N   PRO L  44     -67.289  73.239 138.419  1.00 40.79           N  
ATOM    371  CA  PRO L  44     -67.236  71.825 138.804  1.00 41.20           C  
ATOM    372  C   PRO L  44     -66.499  70.999 137.755  1.00 40.58           C  
ATOM    373  O   PRO L  44     -66.605  71.270 136.557  1.00 39.21           O  
ATOM    374  CB  PRO L  44     -68.709  71.440 138.896  1.00 41.54           C  
ATOM    375  CG  PRO L  44     -69.355  72.704 139.340  1.00 42.39           C  
ATOM    376  CD  PRO L  44     -68.671  73.747 138.486  1.00 41.34           C  
ATOM    377  N   LYS L  45     -65.756  69.993 138.202  1.00 39.73           N  
ATOM    378  CA  LYS L  45     -65.015  69.137 137.283  1.00 39.66           C  
ATOM    379  C   LYS L  45     -65.459  67.685 137.417  1.00 38.75           C  
ATOM    380  O   LYS L  45     -65.343  67.088 138.485  1.00 37.74           O  
ATOM    381  CB  LYS L  45     -63.514  69.242 137.555  1.00 41.34           C  
ATOM    382  CG  LYS L  45     -62.659  68.340 136.685  1.00 43.81           C  
ATOM    383  CD  LYS L  45     -61.185  68.500 137.013  1.00 46.40           C  
ATOM    384  CE  LYS L  45     -60.319  67.679 136.069  1.00 47.91           C  
ATOM    385  NZ  LYS L  45     -60.653  66.231 136.131  1.00 49.15           N  
ATOM    386  N   LEU L  46     -65.977  67.126 136.329  1.00 36.92           N  
ATOM    387  CA  LEU L  46     -66.427  65.740 136.329  1.00 35.71           C  
ATOM    388  C   LEU L  46     -65.217  64.826 136.452  1.00 34.90           C  
ATOM    389  O   LEU L  46     -64.275  64.917 135.662  1.00 33.55           O  
ATOM    390  CB  LEU L  46     -67.186  65.420 135.038  1.00 36.35           C  
ATOM    391  CG  LEU L  46     -67.623  63.962 134.856  1.00 36.41           C  
ATOM    392  CD1 LEU L  46     -68.584  63.565 135.967  1.00 36.76           C  
ATOM    393  CD2 LEU L  46     -68.285  63.794 133.495  1.00 35.72           C  
ATOM    394  N   LEU L  47     -65.241  63.953 137.453  1.00 33.25           N  
ATOM    395  CA  LEU L  47     -64.142  63.023 137.682  1.00 34.04           C  
ATOM    396  C   LEU L  47     -64.513  61.615 137.245  1.00 33.91           C  
ATOM    397  O   LEU L  47     -63.774  60.964 136.505  1.00 34.49           O  
ATOM    398  CB  LEU L  47     -63.773  62.989 139.168  1.00 33.82           C  
ATOM    399  CG  LEU L  47     -63.254  64.267 139.825  1.00 35.03           C  
ATOM    400  CD1 LEU L  47     -63.047  64.010 141.309  1.00 34.06           C  
ATOM    401  CD2 LEU L  47     -61.954  64.699 139.172  1.00 34.18           C  
ATOM    402  N   ILE L  48     -65.667  61.152 137.708  1.00 35.20           N  
ATOM    403  CA  ILE L  48     -66.126  59.809 137.396  1.00 34.88           C  
ATOM    404  C   ILE L  48     -67.637  59.742 137.194  1.00 35.94           C  
ATOM    405  O   ILE L  48     -68.402  60.434 137.870  1.00 33.13           O  
ATOM    406  CB  ILE L  48     -65.711  58.835 138.535  1.00 36.82           C  
ATOM    407  CG1 ILE L  48     -64.181  58.772 138.622  1.00 37.44           C  
ATOM    408  CG2 ILE L  48     -66.299  57.451 138.298  1.00 35.74           C  
ATOM    409  CD1 ILE L  48     -63.658  57.956 139.774  1.00 39.94           C  
ATOM    410  N   TYR L  49     -68.056  58.919 136.237  1.00 36.46           N  
ATOM    411  CA  TYR L  49     -69.471  58.715 135.952  1.00 38.13           C  
ATOM    412  C   TYR L  49     -69.713  57.214 135.819  1.00 37.91           C  
ATOM    413  O   TYR L  49     -68.767  56.444 135.656  1.00 36.80           O  
ATOM    414  CB  TYR L  49     -69.893  59.471 134.682  1.00 40.84           C  
ATOM    415  CG  TYR L  49     -69.097  59.168 133.431  1.00 42.15           C  
ATOM    416  CD1 TYR L  49     -69.423  58.084 132.615  1.00 43.43           C  
ATOM    417  CD2 TYR L  49     -68.032  59.984 133.048  1.00 42.90           C  
ATOM    418  CE1 TYR L  49     -68.712  57.824 131.444  1.00 43.15           C  
ATOM    419  CE2 TYR L  49     -67.311  59.732 131.882  1.00 43.06           C  
ATOM    420  CZ  TYR L  49     -67.658  58.652 131.085  1.00 44.09           C  
ATOM    421  OH  TYR L  49     -66.954  58.405 129.929  1.00 44.08           O  
ATOM    422  N   TRP L  50     -70.970  56.798 135.905  1.00 38.40           N  
ATOM    423  CA  TRP L  50     -71.309  55.380 135.835  1.00 40.06           C  
ATOM    424  C   TRP L  50     -70.639  54.631 136.986  1.00 38.80           C  
ATOM    425  O   TRP L  50     -70.281  53.457 136.862  1.00 36.88           O  
ATOM    426  CB  TRP L  50     -70.875  54.770 134.497  1.00 43.28           C  
ATOM    427  CG  TRP L  50     -71.771  55.123 133.345  1.00 48.17           C  
ATOM    428  CD1 TRP L  50     -73.089  55.480 133.409  1.00 48.73           C  
ATOM    429  CD2 TRP L  50     -71.433  55.086 131.953  1.00 50.18           C  
ATOM    430  NE1 TRP L  50     -73.594  55.664 132.144  1.00 50.65           N  
ATOM    431  CE2 TRP L  50     -72.599  55.427 131.231  1.00 51.34           C  
ATOM    432  CE3 TRP L  50     -70.260  54.792 131.244  1.00 51.21           C  
ATOM    433  CZ2 TRP L  50     -72.625  55.486 129.831  1.00 52.40           C  
ATOM    434  CZ3 TRP L  50     -70.286  54.849 129.851  1.00 52.03           C  
ATOM    435  CH2 TRP L  50     -71.463  55.194 129.161  1.00 52.35           C  
ATOM    436  N   ALA L  51     -70.471  55.334 138.104  1.00 36.61           N  
ATOM    437  CA  ALA L  51     -69.865  54.794 139.320  1.00 34.94           C  
ATOM    438  C   ALA L  51     -68.367  54.494 139.249  1.00 34.79           C  
ATOM    439  O   ALA L  51     -67.641  54.731 140.215  1.00 30.07           O  
ATOM    440  CB  ALA L  51     -70.619  53.544 139.768  1.00 34.86           C  
ATOM    441  N   SER L  52     -67.897  53.979 138.116  1.00 34.39           N  
ATOM    442  CA  SER L  52     -66.482  53.642 137.999  1.00 36.74           C  
ATOM    443  C   SER L  52     -65.785  54.063 136.709  1.00 37.72           C  
ATOM    444  O   SER L  52     -64.601  53.773 136.526  1.00 37.89           O  
ATOM    445  CB  SER L  52     -66.301  52.136 138.189  1.00 36.47           C  
ATOM    446  OG  SER L  52     -67.087  51.418 137.254  1.00 35.49           O  
ATOM    447  N   THR L  53     -66.498  54.736 135.814  1.00 38.71           N  
ATOM    448  CA  THR L  53     -65.884  55.164 134.563  1.00 40.52           C  
ATOM    449  C   THR L  53     -65.185  56.506 134.739  1.00 41.28           C  
ATOM    450  O   THR L  53     -65.822  57.518 135.031  1.00 39.97           O  
ATOM    451  CB  THR L  53     -66.924  55.271 133.432  1.00 41.72           C  
ATOM    452  OG1 THR L  53     -67.581  54.008 133.268  1.00 41.15           O  
ATOM    453  CG2 THR L  53     -66.240  55.646 132.122  1.00 41.96           C  
ATOM    454  N   ARG L  54     -63.868  56.502 134.566  1.00 42.16           N  
ATOM    455  CA  ARG L  54     -63.068  57.711 134.718  1.00 44.49           C  
ATOM    456  C   ARG L  54     -63.159  58.610 133.486  1.00 45.19           C  
ATOM    457  O   ARG L  54     -62.967  58.158 132.358  1.00 44.22           O  
ATOM    458  CB  ARG L  54     -61.606  57.337 134.990  1.00 45.70           C  
ATOM    459  CG  ARG L  54     -60.726  58.512 135.371  1.00 47.58           C  
ATOM    460  CD  ARG L  54     -59.291  58.087 135.665  1.00 49.20           C  
ATOM    461  NE  ARG L  54     -59.202  57.101 136.739  1.00 50.34           N  
ATOM    462  CZ  ARG L  54     -59.166  55.786 136.549  1.00 51.51           C  
ATOM    463  NH1 ARG L  54     -59.204  55.288 135.320  1.00 52.95           N  
ATOM    464  NH2 ARG L  54     -59.104  54.967 137.592  1.00 51.68           N  
ATOM    465  N   GLU L  55     -63.461  59.885 133.715  1.00 46.27           N  
ATOM    466  CA  GLU L  55     -63.581  60.861 132.635  1.00 48.54           C  
ATOM    467  C   GLU L  55     -62.222  61.108 131.991  1.00 48.81           C  
ATOM    468  O   GLU L  55     -61.193  61.085 132.667  1.00 49.06           O  
ATOM    469  CB  GLU L  55     -64.143  62.178 133.181  1.00 50.07           C  
ATOM    470  CG  GLU L  55     -64.291  63.291 132.148  1.00 52.66           C  
ATOM    471  CD  GLU L  55     -65.306  62.964 131.068  1.00 54.38           C  
ATOM    472  OE1 GLU L  55     -65.085  61.993 130.315  1.00 56.27           O  
ATOM    473  OE2 GLU L  55     -66.327  63.678 130.972  1.00 55.20           O  
ATOM    474  N   SER L  56     -62.220  61.343 130.683  1.00 50.11           N  
ATOM    475  CA  SER L  56     -60.977  61.589 129.962  1.00 50.23           C  
ATOM    476  C   SER L  56     -60.248  62.791 130.549  1.00 49.88           C  
ATOM    477  O   SER L  56     -60.852  63.836 130.792  1.00 50.20           O  
ATOM    478  CB  SER L  56     -61.260  61.830 128.476  1.00 51.25           C  
ATOM    479  OG  SER L  56     -62.015  63.013 128.283  1.00 53.09           O  
ATOM    480  N   GLY L  57     -58.948  62.633 130.780  1.00 49.56           N  
ATOM    481  CA  GLY L  57     -58.154  63.714 131.336  1.00 49.32           C  
ATOM    482  C   GLY L  57     -57.886  63.546 132.820  1.00 49.14           C  
ATOM    483  O   GLY L  57     -57.040  64.236 133.389  1.00 49.29           O  
ATOM    484  N   VAL L  58     -58.608  62.624 133.448  1.00 48.23           N  
ATOM    485  CA  VAL L  58     -58.451  62.364 134.876  1.00 46.89           C  
ATOM    486  C   VAL L  58     -57.452  61.232 135.111  1.00 46.31           C  
ATOM    487  O   VAL L  58     -57.598  60.140 134.560  1.00 46.10           O  
ATOM    488  CB  VAL L  58     -59.801  61.982 135.516  1.00 46.93           C  
ATOM    489  CG1 VAL L  58     -59.641  61.839 137.022  1.00 46.14           C  
ATOM    490  CG2 VAL L  58     -60.849  63.036 135.187  1.00 45.51           C  
ATOM    491  N   PRO L  59     -56.424  61.480 135.939  1.00 45.76           N  
ATOM    492  CA  PRO L  59     -55.393  60.483 136.249  1.00 45.67           C  
ATOM    493  C   PRO L  59     -55.924  59.269 137.009  1.00 45.62           C  
ATOM    494  O   PRO L  59     -56.957  59.345 137.678  1.00 45.23           O  
ATOM    495  CB  PRO L  59     -54.376  61.283 137.058  1.00 45.81           C  
ATOM    496  CG  PRO L  59     -55.231  62.288 137.762  1.00 46.25           C  
ATOM    497  CD  PRO L  59     -56.177  62.734 136.674  1.00 45.36           C  
ATOM    498  N   ASP L  60     -55.210  58.151 136.907  1.00 44.77           N  
ATOM    499  CA  ASP L  60     -55.622  56.924 137.579  1.00 45.00           C  
ATOM    500  C   ASP L  60     -55.639  57.037 139.102  1.00 42.82           C  
ATOM    501  O   ASP L  60     -55.996  56.079 139.789  1.00 43.35           O  
ATOM    502  CB  ASP L  60     -54.725  55.751 137.163  1.00 47.71           C  
ATOM    503  CG  ASP L  60     -53.249  56.052 137.327  1.00 50.70           C  
ATOM    504  OD1 ASP L  60     -52.854  56.547 138.403  1.00 52.52           O  
ATOM    505  OD2 ASP L  60     -52.482  55.781 136.379  1.00 53.75           O  
ATOM    506  N   ARG L  61     -55.249  58.197 139.627  1.00 41.27           N  
ATOM    507  CA  ARG L  61     -55.245  58.403 141.075  1.00 39.12           C  
ATOM    508  C   ARG L  61     -56.679  58.437 141.587  1.00 36.76           C  
ATOM    509  O   ARG L  61     -56.942  58.104 142.742  1.00 33.77           O  
ATOM    510  CB  ARG L  61     -54.559  59.720 141.452  1.00 39.86           C  
ATOM    511  CG  ARG L  61     -53.115  59.853 141.009  1.00 43.60           C  
ATOM    512  CD  ARG L  61     -52.390  60.890 141.861  1.00 44.64           C  
ATOM    513  NE  ARG L  61     -53.166  62.118 142.053  1.00 46.16           N  
ATOM    514  CZ  ARG L  61     -53.347  63.054 141.126  1.00 48.35           C  
ATOM    515  NH1 ARG L  61     -52.808  62.916 139.920  1.00 48.57           N  
ATOM    516  NH2 ARG L  61     -54.063  64.133 141.406  1.00 45.53           N  
ATOM    517  N   PHE L  62     -57.598  58.856 140.720  1.00 34.12           N  
ATOM    518  CA  PHE L  62     -59.015  58.927 141.063  1.00 33.80           C  
ATOM    519  C   PHE L  62     -59.705  57.649 140.610  1.00 34.16           C  
ATOM    520  O   PHE L  62     -59.705  57.323 139.421  1.00 34.42           O  
ATOM    521  CB  PHE L  62     -59.670  60.130 140.381  1.00 31.65           C  
ATOM    522  CG  PHE L  62     -59.203  61.451 140.909  1.00 30.50           C  
ATOM    523  CD1 PHE L  62     -59.753  61.982 142.073  1.00 31.58           C  
ATOM    524  CD2 PHE L  62     -58.195  62.154 140.261  1.00 31.76           C  
ATOM    525  CE1 PHE L  62     -59.303  63.193 142.589  1.00 31.50           C  
ATOM    526  CE2 PHE L  62     -57.735  63.367 140.767  1.00 33.21           C  
ATOM    527  CZ  PHE L  62     -58.291  63.890 141.935  1.00 33.81           C  
ATOM    528  N   THR L  63     -60.287  56.925 141.559  1.00 33.14           N  
ATOM    529  CA  THR L  63     -60.978  55.677 141.250  1.00 33.47           C  
ATOM    530  C   THR L  63     -62.331  55.606 141.943  1.00 32.42           C  
ATOM    531  O   THR L  63     -62.428  55.809 143.153  1.00 29.68           O  
ATOM    532  CB  THR L  63     -60.159  54.451 141.701  1.00 34.02           C  
ATOM    533  OG1 THR L  63     -58.849  54.515 141.132  1.00 36.19           O  
ATOM    534  CG2 THR L  63     -60.840  53.164 141.254  1.00 37.45           C  
ATOM    535  N   GLY L  64     -63.368  55.311 141.171  1.00 31.65           N  
ATOM    536  CA  GLY L  64     -64.698  55.197 141.733  1.00 31.74           C  
ATOM    537  C   GLY L  64     -65.108  53.740 141.761  1.00 31.11           C  
ATOM    538  O   GLY L  64     -64.794  52.989 140.836  1.00 31.30           O  
ATOM    539  N   SER L  65     -65.795  53.332 142.824  1.00 29.86           N  
ATOM    540  CA  SER L  65     -66.243  51.951 142.954  1.00 30.24           C  
ATOM    541  C   SER L  65     -67.552  51.834 143.718  1.00 30.51           C  
ATOM    542  O   SER L  65     -68.089  52.827 144.211  1.00 28.98           O  
ATOM    543  CB  SER L  65     -65.171  51.106 143.648  1.00 30.96           C  
ATOM    544  OG  SER L  65     -64.809  51.651 144.901  1.00 33.20           O  
ATOM    545  N   GLY L  66     -68.059  50.608 143.805  1.00 30.50           N  
ATOM    546  CA  GLY L  66     -69.300  50.359 144.512  1.00 32.82           C  
ATOM    547  C   GLY L  66     -70.485  50.146 143.591  1.00 34.02           C  
ATOM    548  O   GLY L  66     -70.428  50.448 142.398  1.00 32.46           O  
ATOM    549  N   SER L  67     -71.568  49.621 144.154  1.00 35.78           N  
ATOM    550  CA  SER L  67     -72.781  49.373 143.391  1.00 37.03           C  
ATOM    551  C   SER L  67     -73.986  49.293 144.320  1.00 37.05           C  
ATOM    552  O   SER L  67     -73.855  48.967 145.502  1.00 38.58           O  
ATOM    553  CB  SER L  67     -72.651  48.070 142.597  1.00 37.21           C  
ATOM    554  OG  SER L  67     -73.794  47.857 141.776  1.00 37.74           O  
ATOM    555  N   GLY L  68     -75.160  49.601 143.782  1.00 36.68           N  
ATOM    556  CA  GLY L  68     -76.368  49.549 144.580  1.00 36.67           C  
ATOM    557  C   GLY L  68     -76.574  50.795 145.415  1.00 36.97           C  
ATOM    558  O   GLY L  68     -77.088  51.799 144.919  1.00 37.80           O  
ATOM    559  N   THR L  69     -76.159  50.744 146.677  1.00 37.14           N  
ATOM    560  CA  THR L  69     -76.337  51.883 147.570  1.00 36.74           C  
ATOM    561  C   THR L  69     -75.059  52.472 148.162  1.00 36.13           C  
ATOM    562  O   THR L  69     -75.041  53.644 148.528  1.00 36.31           O  
ATOM    563  CB  THR L  69     -77.273  51.520 148.735  1.00 37.08           C  
ATOM    564  OG1 THR L  69     -76.708  50.438 149.485  1.00 36.40           O  
ATOM    565  CG2 THR L  69     -78.638  51.105 148.209  1.00 37.45           C  
ATOM    566  N   ASP L  70     -73.998  51.673 148.260  1.00 34.68           N  
ATOM    567  CA  ASP L  70     -72.741  52.156 148.834  1.00 32.82           C  
ATOM    568  C   ASP L  70     -71.665  52.381 147.776  1.00 31.43           C  
ATOM    569  O   ASP L  70     -71.174  51.429 147.163  1.00 30.23           O  
ATOM    570  CB  ASP L  70     -72.225  51.167 149.884  1.00 34.85           C  
ATOM    571  CG  ASP L  70     -71.133  51.761 150.760  1.00 38.24           C  
ATOM    572  OD1 ASP L  70     -71.454  52.581 151.644  1.00 40.72           O  
ATOM    573  OD2 ASP L  70     -69.953  51.416 150.560  1.00 41.56           O  
ATOM    574  N   PHE L  71     -71.298  53.645 147.570  1.00 28.44           N  
ATOM    575  CA  PHE L  71     -70.280  54.006 146.585  1.00 26.78           C  
ATOM    576  C   PHE L  71     -69.046  54.621 147.238  1.00 26.08           C  
ATOM    577  O   PHE L  71     -69.129  55.243 148.297  1.00 26.62           O  
ATOM    578  CB  PHE L  71     -70.862  54.971 145.548  1.00 26.26           C  
ATOM    579  CG  PHE L  71     -72.036  54.411 144.802  1.00 29.07           C  
ATOM    580  CD1 PHE L  71     -73.321  54.512 145.325  1.00 28.63           C  
ATOM    581  CD2 PHE L  71     -71.853  53.748 143.594  1.00 28.95           C  
ATOM    582  CE1 PHE L  71     -74.410  53.959 144.655  1.00 31.04           C  
ATOM    583  CE2 PHE L  71     -72.930  53.191 142.915  1.00 29.51           C  
ATOM    584  CZ  PHE L  71     -74.212  53.295 143.444  1.00 29.31           C  
ATOM    585  N   THR L  72     -67.901  54.453 146.585  1.00 23.24           N  
ATOM    586  CA  THR L  72     -66.631  54.940 147.105  1.00 22.47           C  
ATOM    587  C   THR L  72     -65.771  55.679 146.089  1.00 23.75           C  
ATOM    588  O   THR L  72     -65.685  55.280 144.925  1.00 23.41           O  
ATOM    589  CB  THR L  72     -65.786  53.755 147.630  1.00 22.87           C  
ATOM    590  OG1 THR L  72     -66.545  53.020 148.594  1.00 22.53           O  
ATOM    591  CG2 THR L  72     -64.485  54.238 148.255  1.00 18.07           C  
ATOM    592  N   LEU L  73     -65.137  56.760 146.531  1.00 21.98           N  
ATOM    593  CA  LEU L  73     -64.220  57.497 145.681  1.00 21.66           C  
ATOM    594  C   LEU L  73     -62.864  57.366 146.363  1.00 22.73           C  
ATOM    595  O   LEU L  73     -62.709  57.674 147.548  1.00 20.79           O  
ATOM    596  CB  LEU L  73     -64.600  58.979 145.547  1.00 22.05           C  
ATOM    597  CG  LEU L  73     -63.593  59.818 144.747  1.00 21.32           C  
ATOM    598  CD1 LEU L  73     -63.537  59.356 143.280  1.00 22.20           C  
ATOM    599  CD2 LEU L  73     -63.995  61.286 144.813  1.00 23.33           C  
ATOM    600  N   THR L  74     -61.888  56.866 145.618  1.00 20.75           N  
ATOM    601  CA  THR L  74     -60.540  56.700 146.137  1.00 22.45           C  
ATOM    602  C   THR L  74     -59.595  57.673 145.448  1.00 22.79           C  
ATOM    603  O   THR L  74     -59.703  57.895 144.242  1.00 24.39           O  
ATOM    604  CB  THR L  74     -60.001  55.272 145.859  1.00 21.47           C  
ATOM    605  OG1 THR L  74     -60.869  54.299 146.448  1.00 21.78           O  
ATOM    606  CG2 THR L  74     -58.589  55.101 146.426  1.00 24.78           C  
ATOM    607  N   ILE L  75     -58.684  58.262 146.214  1.00 22.68           N  
ATOM    608  CA  ILE L  75     -57.670  59.153 145.659  1.00 24.67           C  
ATOM    609  C   ILE L  75     -56.345  58.582 146.159  1.00 27.24           C  
ATOM    610  O   ILE L  75     -56.020  58.682 147.346  1.00 26.05           O  
ATOM    611  CB  ILE L  75     -57.812  60.612 146.145  1.00 23.73           C  
ATOM    612  CG1 ILE L  75     -59.204  61.158 145.802  1.00 23.44           C  
ATOM    613  CG2 ILE L  75     -56.757  61.480 145.472  1.00 24.13           C  
ATOM    614  CD1 ILE L  75     -59.467  62.545 146.367  1.00 25.98           C  
ATOM    615  N   SER L  76     -55.603  57.970 145.235  1.00 27.52           N  
ATOM    616  CA  SER L  76     -54.316  57.310 145.491  1.00 32.40           C  
ATOM    617  C   SER L  76     -53.292  58.033 146.352  1.00 33.19           C  
ATOM    618  O   SER L  76     -52.999  57.610 147.472  1.00 36.55           O  
ATOM    619  CB  SER L  76     -53.644  56.951 144.160  1.00 32.94           C  
ATOM    620  OG  SER L  76     -54.456  56.089 143.391  1.00 40.45           O  
ATOM    621  N   SER L  77     -52.706  59.091 145.806  1.00 33.43           N  
ATOM    622  CA  SER L  77     -51.706  59.860 146.529  1.00 33.79           C  
ATOM    623  C   SER L  77     -52.052  61.335 146.398  1.00 33.38           C  
ATOM    624  O   SER L  77     -51.682  61.993 145.428  1.00 33.13           O  
ATOM    625  CB  SER L  77     -50.308  59.592 145.963  1.00 35.06           C  
ATOM    626  OG  SER L  77     -50.215  59.982 144.607  1.00 37.63           O  
ATOM    627  N   VAL L  78     -52.775  61.842 147.387  1.00 32.02           N  
ATOM    628  CA  VAL L  78     -53.209  63.230 147.406  1.00 32.28           C  
ATOM    629  C   VAL L  78     -52.090  64.241 147.175  1.00 32.03           C  
ATOM    630  O   VAL L  78     -50.993  64.112 147.717  1.00 30.78           O  
ATOM    631  CB  VAL L  78     -53.903  63.563 148.744  1.00 30.19           C  
ATOM    632  CG1 VAL L  78     -54.377  65.012 148.742  1.00 32.51           C  
ATOM    633  CG2 VAL L  78     -55.075  62.619 148.961  1.00 31.37           C  
ATOM    634  N   GLN L  79     -52.391  65.252 146.370  1.00 33.48           N  
ATOM    635  CA  GLN L  79     -51.439  66.308 146.065  1.00 36.38           C  
ATOM    636  C   GLN L  79     -52.130  67.660 146.223  1.00 36.33           C  
ATOM    637  O   GLN L  79     -53.356  67.729 146.323  1.00 34.66           O  
ATOM    638  CB  GLN L  79     -50.908  66.139 144.640  1.00 39.24           C  
ATOM    639  CG  GLN L  79     -50.187  64.816 144.420  1.00 45.12           C  
ATOM    640  CD  GLN L  79     -49.733  64.624 142.989  1.00 48.37           C  
ATOM    641  OE1 GLN L  79     -48.962  65.424 142.459  1.00 51.56           O  
ATOM    642  NE2 GLN L  79     -50.210  63.559 142.352  1.00 50.15           N  
ATOM    643  N   ALA L  80     -51.338  68.726 146.253  1.00 36.36           N  
ATOM    644  CA  ALA L  80     -51.859  70.079 146.416  1.00 38.03           C  
ATOM    645  C   ALA L  80     -53.006  70.407 145.464  1.00 38.51           C  
ATOM    646  O   ALA L  80     -53.956  71.093 145.842  1.00 39.01           O  
ATOM    647  CB  ALA L  80     -50.731  71.091 146.243  1.00 39.09           C  
ATOM    648  N   GLU L  81     -52.930  69.918 144.232  1.00 38.36           N  
ATOM    649  CA  GLU L  81     -53.980  70.196 143.260  1.00 39.55           C  
ATOM    650  C   GLU L  81     -55.289  69.460 143.545  1.00 38.10           C  
ATOM    651  O   GLU L  81     -56.310  69.743 142.919  1.00 37.06           O  
ATOM    652  CB  GLU L  81     -53.502  69.865 141.842  1.00 42.56           C  
ATOM    653  CG  GLU L  81     -52.856  68.499 141.694  1.00 46.91           C  
ATOM    654  CD  GLU L  81     -51.349  68.545 141.863  1.00 48.89           C  
ATOM    655  OE1 GLU L  81     -50.874  69.041 142.906  1.00 50.40           O  
ATOM    656  OE2 GLU L  81     -50.639  68.081 140.945  1.00 52.17           O  
ATOM    657  N   ASP L  82     -55.264  68.525 144.493  1.00 36.32           N  
ATOM    658  CA  ASP L  82     -56.462  67.765 144.840  1.00 34.49           C  
ATOM    659  C   ASP L  82     -57.315  68.467 145.900  1.00 32.73           C  
ATOM    660  O   ASP L  82     -58.449  68.061 146.163  1.00 31.19           O  
ATOM    661  CB  ASP L  82     -56.083  66.366 145.340  1.00 33.95           C  
ATOM    662  CG  ASP L  82     -55.335  65.553 144.296  1.00 34.90           C  
ATOM    663  OD1 ASP L  82     -55.747  65.580 143.119  1.00 35.92           O  
ATOM    664  OD2 ASP L  82     -54.343  64.882 144.655  1.00 34.48           O  
ATOM    665  N   LEU L  83     -56.763  69.514 146.507  1.00 31.56           N  
ATOM    666  CA  LEU L  83     -57.467  70.273 147.537  1.00 30.79           C  
ATOM    667  C   LEU L  83     -58.763  70.829 146.953  1.00 28.74           C  
ATOM    668  O   LEU L  83     -58.743  71.659 146.043  1.00 28.73           O  
ATOM    669  CB  LEU L  83     -56.581  71.414 148.051  1.00 33.04           C  
ATOM    670  CG  LEU L  83     -55.201  71.004 148.583  1.00 35.36           C  
ATOM    671  CD1 LEU L  83     -54.395  72.247 148.939  1.00 36.16           C  
ATOM    672  CD2 LEU L  83     -55.359  70.099 149.801  1.00 35.69           C  
ATOM    673  N   ALA L  84     -59.887  70.358 147.483  1.00 26.10           N  
ATOM    674  CA  ALA L  84     -61.203  70.767 147.010  1.00 25.21           C  
ATOM    675  C   ALA L  84     -62.294  70.020 147.767  1.00 24.41           C  
ATOM    676  O   ALA L  84     -62.016  69.286 148.714  1.00 24.03           O  
ATOM    677  CB  ALA L  84     -61.318  70.468 145.515  1.00 26.22           C  
ATOM    678  N   VAL L  85     -63.540  70.216 147.346  1.00 21.79           N  
ATOM    679  CA  VAL L  85     -64.662  69.522 147.956  1.00 21.46           C  
ATOM    680  C   VAL L  85     -65.187  68.561 146.893  1.00 22.88           C  
ATOM    681  O   VAL L  85     -65.383  68.947 145.740  1.00 22.62           O  
ATOM    682  CB  VAL L  85     -65.779  70.508 148.401  1.00 21.70           C  
ATOM    683  CG1 VAL L  85     -66.961  69.741 148.988  1.00 21.38           C  
ATOM    684  CG2 VAL L  85     -65.219  71.486 149.424  1.00 22.71           C  
ATOM    685  N   TYR L  86     -65.377  67.302 147.282  1.00 21.34           N  
ATOM    686  CA  TYR L  86     -65.860  66.263 146.379  1.00 22.23           C  
ATOM    687  C   TYR L  86     -67.314  65.896 146.622  1.00 22.78           C  
ATOM    688  O   TYR L  86     -67.709  65.569 147.741  1.00 22.56           O  
ATOM    689  CB  TYR L  86     -64.977  65.018 146.508  1.00 21.12           C  
ATOM    690  CG  TYR L  86     -63.564  65.284 146.077  1.00 19.66           C  
ATOM    691  CD1 TYR L  86     -62.655  65.908 146.925  1.00 21.85           C  
ATOM    692  CD2 TYR L  86     -63.158  64.998 144.774  1.00 23.43           C  
ATOM    693  CE1 TYR L  86     -61.377  66.249 146.487  1.00 22.56           C  
ATOM    694  CE2 TYR L  86     -61.889  65.336 144.327  1.00 22.46           C  
ATOM    695  CZ  TYR L  86     -61.007  65.960 145.179  1.00 22.49           C  
ATOM    696  OH  TYR L  86     -59.766  66.320 144.720  1.00 22.13           O  
ATOM    697  N   TYR L  87     -68.104  65.941 145.555  1.00 23.01           N  
ATOM    698  CA  TYR L  87     -69.518  65.632 145.632  1.00 22.94           C  
ATOM    699  C   TYR L  87     -69.888  64.458 144.752  1.00 23.96           C  
ATOM    700  O   TYR L  87     -69.277  64.240 143.706  1.00 24.73           O  
ATOM    701  CB  TYR L  87     -70.365  66.821 145.160  1.00 24.13           C  
ATOM    702  CG  TYR L  87     -70.212  68.103 145.944  1.00 23.85           C  
ATOM    703  CD1 TYR L  87     -69.192  69.009 145.650  1.00 25.50           C  
ATOM    704  CD2 TYR L  87     -71.102  68.420 146.964  1.00 24.19           C  
ATOM    705  CE1 TYR L  87     -69.067  70.210 146.359  1.00 25.98           C  
ATOM    706  CE2 TYR L  87     -70.986  69.613 147.677  1.00 22.68           C  
ATOM    707  CZ  TYR L  87     -69.972  70.497 147.370  1.00 23.50           C  
ATOM    708  OH  TYR L  87     -69.869  71.665 148.082  1.00 25.67           O  
ATOM    709  N   CYS L  88     -70.894  63.708 145.180  1.00 25.56           N  
ATOM    710  CA  CYS L  88     -71.398  62.614 144.374  1.00 27.82           C  
ATOM    711  C   CYS L  88     -72.774  63.052 143.900  1.00 30.45           C  
ATOM    712  O   CYS L  88     -73.493  63.761 144.614  1.00 28.74           O  
ATOM    713  CB  CYS L  88     -71.488  61.313 145.172  1.00 27.09           C  
ATOM    714  SG  CYS L  88     -72.566  61.295 146.639  1.00 26.92           S  
ATOM    715  N   LYS L  89     -73.119  62.646 142.683  1.00 34.76           N  
ATOM    716  CA  LYS L  89     -74.396  62.985 142.060  1.00 37.80           C  
ATOM    717  C   LYS L  89     -75.028  61.726 141.473  1.00 40.36           C  
ATOM    718  O   LYS L  89     -74.378  60.984 140.736  1.00 37.38           O  
ATOM    719  CB  LYS L  89     -74.170  64.007 140.939  1.00 39.80           C  
ATOM    720  CG  LYS L  89     -75.412  64.365 140.121  1.00 41.77           C  
ATOM    721  CD  LYS L  89     -75.040  65.204 138.901  1.00 44.06           C  
ATOM    722  CE  LYS L  89     -76.262  65.593 138.075  1.00 44.56           C  
ATOM    723  NZ  LYS L  89     -77.005  64.405 137.565  1.00 48.46           N  
ATOM    724  N   GLN L  90     -76.293  61.492 141.807  1.00 44.40           N  
ATOM    725  CA  GLN L  90     -77.018  60.333 141.298  1.00 49.91           C  
ATOM    726  C   GLN L  90     -77.993  60.769 140.210  1.00 52.84           C  
ATOM    727  O   GLN L  90     -78.639  61.811 140.329  1.00 52.56           O  
ATOM    728  CB  GLN L  90     -77.771  59.626 142.434  1.00 50.35           C  
ATOM    729  CG  GLN L  90     -78.870  60.440 143.122  1.00 53.25           C  
ATOM    730  CD  GLN L  90     -80.165  60.491 142.327  1.00 53.97           C  
ATOM    731  OE1 GLN L  90     -80.479  59.576 141.562  1.00 53.65           O  
ATOM    732  NE2 GLN L  90     -80.939  61.550 142.528  1.00 54.17           N  
ATOM    733  N   SER L  91     -78.092  59.973 139.149  1.00 56.31           N  
ATOM    734  CA  SER L  91     -78.983  60.290 138.037  1.00 60.31           C  
ATOM    735  C   SER L  91     -80.002  59.190 137.760  1.00 63.26           C  
ATOM    736  O   SER L  91     -80.237  58.835 136.606  1.00 63.56           O  
ATOM    737  CB  SER L  91     -78.168  60.555 136.768  1.00 60.03           C  
ATOM    738  OG  SER L  91     -77.367  61.715 136.905  1.00 60.48           O  
ATOM    739  N   TYR L  92     -80.609  58.654 138.815  1.00 67.13           N  
ATOM    740  CA  TYR L  92     -81.605  57.601 138.653  1.00 71.25           C  
ATOM    741  C   TYR L  92     -82.997  58.140 138.978  1.00 73.51           C  
ATOM    742  O   TYR L  92     -83.684  58.661 138.098  1.00 74.11           O  
ATOM    743  CB  TYR L  92     -81.272  56.408 139.554  1.00 72.24           C  
ATOM    744  CG  TYR L  92     -81.975  55.128 139.156  1.00 73.69           C  
ATOM    745  CD1 TYR L  92     -81.846  54.613 137.865  1.00 74.29           C  
ATOM    746  CD2 TYR L  92     -82.766  54.429 140.066  1.00 74.36           C  
ATOM    747  CE1 TYR L  92     -82.488  53.434 137.491  1.00 74.46           C  
ATOM    748  CE2 TYR L  92     -83.413  53.248 139.702  1.00 74.89           C  
ATOM    749  CZ  TYR L  92     -83.269  52.758 138.413  1.00 74.74           C  
ATOM    750  OH  TYR L  92     -83.906  51.594 138.047  1.00 75.30           O  
ATOM    751  N   TYR L  93     -83.414  58.018 140.236  1.00 75.90           N  
ATOM    752  CA  TYR L  93     -84.725  58.514 140.648  1.00 78.08           C  
ATOM    753  C   TYR L  93     -84.739  60.037 140.556  1.00 79.02           C  
ATOM    754  O   TYR L  93     -85.711  60.638 140.097  1.00 79.36           O  
ATOM    755  CB  TYR L  93     -85.044  58.084 142.085  1.00 79.04           C  
ATOM    756  CG  TYR L  93     -85.203  56.591 142.274  1.00 80.39           C  
ATOM    757  CD1 TYR L  93     -84.193  55.830 142.864  1.00 80.86           C  
ATOM    758  CD2 TYR L  93     -86.366  55.938 141.865  1.00 81.02           C  
ATOM    759  CE1 TYR L  93     -84.338  54.454 143.045  1.00 81.55           C  
ATOM    760  CE2 TYR L  93     -86.521  54.563 142.039  1.00 81.66           C  
ATOM    761  CZ  TYR L  93     -85.505  53.828 142.630  1.00 81.85           C  
ATOM    762  OH  TYR L  93     -85.655  52.470 142.803  1.00 81.84           O  
ATOM    763  N   HIS L  94     -83.645  60.647 141.002  1.00 80.00           N  
ATOM    764  CA  HIS L  94     -83.469  62.096 140.982  1.00 80.44           C  
ATOM    765  C   HIS L  94     -84.337  62.890 141.960  1.00 79.46           C  
ATOM    766  O   HIS L  94     -84.932  63.902 141.591  1.00 79.49           O  
ATOM    767  CB  HIS L  94     -83.668  62.634 139.559  1.00 82.09           C  
ATOM    768  CG  HIS L  94     -82.478  63.369 139.022  1.00 83.78           C  
ATOM    769  ND1 HIS L  94     -82.475  63.987 137.788  1.00 84.61           N  
ATOM    770  CD2 HIS L  94     -81.250  63.586 139.551  1.00 84.33           C  
ATOM    771  CE1 HIS L  94     -81.300  64.551 137.582  1.00 84.73           C  
ATOM    772  NE2 HIS L  94     -80.537  64.323 138.637  1.00 84.66           N  
ATOM    773  N   MET L  95     -84.405  62.426 143.206  1.00 78.43           N  
ATOM    774  CA  MET L  95     -85.162  63.119 144.247  1.00 77.18           C  
ATOM    775  C   MET L  95     -84.142  63.945 145.024  1.00 75.26           C  
ATOM    776  O   MET L  95     -84.363  65.116 145.336  1.00 75.42           O  
ATOM    777  CB  MET L  95     -85.852  62.120 145.182  1.00 78.52           C  
ATOM    778  CG  MET L  95     -87.021  61.375 144.546  1.00 80.05           C  
ATOM    779  SD  MET L  95     -87.951  60.360 145.721  1.00 81.26           S  
ATOM    780  CE  MET L  95     -87.273  58.734 145.386  1.00 81.57           C  
ATOM    781  N   TYR L  96     -83.019  63.304 145.330  1.00 72.31           N  
ATOM    782  CA  TYR L  96     -81.905  63.934 146.026  1.00 68.58           C  
ATOM    783  C   TYR L  96     -80.745  63.703 145.068  1.00 64.55           C  
ATOM    784  O   TYR L  96     -80.225  62.593 144.972  1.00 65.06           O  
ATOM    785  CB  TYR L  96     -81.636  63.237 147.358  1.00 70.87           C  
ATOM    786  CG  TYR L  96     -81.616  64.176 148.541  1.00 72.90           C  
ATOM    787  CD1 TYR L  96     -82.747  64.918 148.883  1.00 74.10           C  
ATOM    788  CD2 TYR L  96     -80.470  64.322 149.322  1.00 73.64           C  
ATOM    789  CE1 TYR L  96     -82.739  65.781 149.974  1.00 75.15           C  
ATOM    790  CE2 TYR L  96     -80.450  65.183 150.417  1.00 74.76           C  
ATOM    791  CZ  TYR L  96     -81.589  65.908 150.737  1.00 75.33           C  
ATOM    792  OH  TYR L  96     -81.582  66.758 151.820  1.00 75.58           O  
ATOM    793  N   THR L  97     -80.350  64.751 144.355  1.00 59.17           N  
ATOM    794  CA  THR L  97     -79.289  64.639 143.365  1.00 53.79           C  
ATOM    795  C   THR L  97     -77.856  64.582 143.890  1.00 49.45           C  
ATOM    796  O   THR L  97     -77.126  63.638 143.590  1.00 49.26           O  
ATOM    797  CB  THR L  97     -79.385  65.783 142.338  1.00 54.40           C  
ATOM    798  OG1 THR L  97     -80.744  65.920 141.905  1.00 54.86           O  
ATOM    799  CG2 THR L  97     -78.513  65.483 141.128  1.00 55.15           C  
ATOM    800  N   PHE L  98     -77.445  65.582 144.662  1.00 43.58           N  
ATOM    801  CA  PHE L  98     -76.081  65.609 145.173  1.00 38.79           C  
ATOM    802  C   PHE L  98     -75.923  65.273 146.647  1.00 35.98           C  
ATOM    803  O   PHE L  98     -76.834  65.473 147.453  1.00 35.41           O  
ATOM    804  CB  PHE L  98     -75.440  66.981 144.925  1.00 37.81           C  
ATOM    805  CG  PHE L  98     -75.277  67.327 143.475  1.00 38.31           C  
ATOM    806  CD1 PHE L  98     -76.369  67.723 142.712  1.00 39.05           C  
ATOM    807  CD2 PHE L  98     -74.028  67.255 142.869  1.00 38.15           C  
ATOM    808  CE1 PHE L  98     -76.218  68.041 141.365  1.00 40.52           C  
ATOM    809  CE2 PHE L  98     -73.867  67.572 141.523  1.00 38.42           C  
ATOM    810  CZ  PHE L  98     -74.963  67.965 140.772  1.00 38.63           C  
ATOM    811  N   GLY L  99     -74.748  64.751 146.986  1.00 32.73           N  
ATOM    812  CA  GLY L  99     -74.447  64.436 148.368  1.00 29.81           C  
ATOM    813  C   GLY L  99     -73.970  65.744 148.974  1.00 28.10           C  
ATOM    814  O   GLY L  99     -73.752  66.707 148.237  1.00 26.79           O  
ATOM    815  N   SER L 100     -73.788  65.781 150.294  1.00 26.90           N  
ATOM    816  CA  SER L 100     -73.364  67.002 150.988  1.00 27.26           C  
ATOM    817  C   SER L 100     -71.889  67.365 150.802  1.00 24.91           C  
ATOM    818  O   SER L 100     -71.455  68.452 151.190  1.00 24.25           O  
ATOM    819  CB  SER L 100     -73.685  66.892 152.485  1.00 27.24           C  
ATOM    820  OG  SER L 100     -72.903  65.888 153.098  1.00 34.20           O  
ATOM    821  N   GLY L 101     -71.121  66.450 150.216  1.00 23.12           N  
ATOM    822  CA  GLY L 101     -69.716  66.711 149.966  1.00 23.02           C  
ATOM    823  C   GLY L 101     -68.702  66.379 151.048  1.00 23.29           C  
ATOM    824  O   GLY L 101     -69.015  66.325 152.239  1.00 24.44           O  
ATOM    825  N   THR L 102     -67.471  66.146 150.600  1.00 21.09           N  
ATOM    826  CA  THR L 102     -66.344  65.845 151.480  1.00 19.97           C  
ATOM    827  C   THR L 102     -65.218  66.812 151.148  1.00 20.32           C  
ATOM    828  O   THR L 102     -64.721  66.806 150.025  1.00 22.25           O  
ATOM    829  CB  THR L 102     -65.797  64.424 151.249  1.00 18.22           C  
ATOM    830  OG1 THR L 102     -66.768  63.462 151.664  1.00 19.57           O  
ATOM    831  CG2 THR L 102     -64.492  64.221 152.028  1.00 19.66           C  
ATOM    832  N   LYS L 103     -64.820  67.637 152.113  1.00 18.72           N  
ATOM    833  CA  LYS L 103     -63.733  68.584 151.903  1.00 19.88           C  
ATOM    834  C   LYS L 103     -62.403  67.871 152.132  1.00 21.41           C  
ATOM    835  O   LYS L 103     -62.241  67.153 153.121  1.00 23.85           O  
ATOM    836  CB  LYS L 103     -63.851  69.784 152.861  1.00 19.74           C  
ATOM    837  CG  LYS L 103     -62.712  70.790 152.698  1.00 24.01           C  
ATOM    838  CD  LYS L 103     -62.790  71.959 153.683  1.00 25.76           C  
ATOM    839  CE  LYS L 103     -61.626  72.919 153.461  1.00 26.05           C  
ATOM    840  NZ  LYS L 103     -61.488  73.928 154.541  1.00 28.43           N  
ATOM    841  N   LEU L 104     -61.464  68.055 151.206  1.00 20.63           N  
ATOM    842  CA  LEU L 104     -60.137  67.446 151.303  1.00 22.67           C  
ATOM    843  C   LEU L 104     -59.073  68.531 151.458  1.00 25.23           C  
ATOM    844  O   LEU L 104     -59.019  69.475 150.666  1.00 24.76           O  
ATOM    845  CB  LEU L 104     -59.825  66.628 150.044  1.00 20.41           C  
ATOM    846  CG  LEU L 104     -58.454  65.943 150.015  1.00 22.44           C  
ATOM    847  CD1 LEU L 104     -58.347  64.969 151.178  1.00 22.60           C  
ATOM    848  CD2 LEU L 104     -58.260  65.224 148.695  1.00 23.50           C  
ATOM    849  N   GLU L 105     -58.228  68.395 152.472  1.00 26.70           N  
ATOM    850  CA  GLU L 105     -57.160  69.360 152.701  1.00 31.38           C  
ATOM    851  C   GLU L 105     -55.880  68.641 153.137  1.00 33.07           C  
ATOM    852  O   GLU L 105     -55.915  67.460 153.487  1.00 30.10           O  
ATOM    853  CB  GLU L 105     -57.583  70.372 153.765  1.00 34.30           C  
ATOM    854  CG  GLU L 105     -57.801  69.778 155.135  1.00 40.35           C  
ATOM    855  CD  GLU L 105     -58.352  70.785 156.120  1.00 42.84           C  
ATOM    856  OE1 GLU L 105     -59.463  71.297 155.881  1.00 42.58           O  
ATOM    857  OE2 GLU L 105     -57.666  71.072 157.123  1.00 46.11           O  
ATOM    858  N   ILE L 106     -54.757  69.358 153.109  1.00 35.96           N  
ATOM    859  CA  ILE L 106     -53.457  68.801 153.484  1.00 40.41           C  
ATOM    860  C   ILE L 106     -52.920  69.375 154.798  1.00 43.16           C  
ATOM    861  O   ILE L 106     -52.976  70.581 155.029  1.00 43.50           O  
ATOM    862  CB  ILE L 106     -52.401  69.051 152.370  1.00 40.88           C  
ATOM    863  CG1 ILE L 106     -52.802  68.311 151.090  1.00 41.90           C  
ATOM    864  CG2 ILE L 106     -51.030  68.593 152.841  1.00 41.18           C  
ATOM    865  CD1 ILE L 106     -51.848  68.515 149.921  1.00 42.20           C  
ATOM    866  N   LYS L 107     -52.394  68.496 155.650  1.00 46.25           N  
ATOM    867  CA  LYS L 107     -51.834  68.880 156.949  1.00 49.66           C  
ATOM    868  C   LYS L 107     -52.892  69.345 157.947  1.00 50.84           C  
ATOM    869  O   LYS L 107     -54.097  69.254 157.629  1.00 52.38           O  
ATOM    870  CB  LYS L 107     -50.768  69.967 156.766  1.00 50.42           C  
ATOM    871  CG  LYS L 107     -49.450  69.430 156.228  1.00 53.94           C  
ATOM    872  CD  LYS L 107     -48.779  68.495 157.231  1.00 55.11           C  
ATOM    873  CE  LYS L 107     -48.359  69.240 158.492  1.00 56.22           C  
ATOM    874  NZ  LYS L 107     -47.374  70.315 158.185  1.00 56.70           N  
ATOM    875  OXT LYS L 107     -52.497  69.786 159.047  1.00 52.71           O  
TER     876      LYS L 107                                                      
ATOM    877  N   LEU L   2     -52.553  87.163 147.151  1.00 38.66           N  
ATOM    878  CA  LEU L   2     -52.905  87.162 148.599  1.00 37.20           C  
ATOM    879  C   LEU L   2     -53.384  85.790 149.049  1.00 35.84           C  
ATOM    880  O   LEU L   2     -54.105  85.100 148.327  1.00 36.03           O  
ATOM    881  CB  LEU L   2     -53.991  88.203 148.886  1.00 38.52           C  
ATOM    882  CG  LEU L   2     -53.634  89.672 148.637  1.00 40.97           C  
ATOM    883  CD1 LEU L   2     -54.805  90.556 149.040  1.00 40.92           C  
ATOM    884  CD2 LEU L   2     -52.395  90.050 149.432  1.00 41.17           C  
ATOM    885  N   VAL L   3     -52.974  85.406 150.252  1.00 33.81           N  
ATOM    886  CA  VAL L   3     -53.337  84.122 150.828  1.00 33.36           C  
ATOM    887  C   VAL L   3     -54.495  84.264 151.811  1.00 32.66           C  
ATOM    888  O   VAL L   3     -54.409  85.023 152.779  1.00 31.75           O  
ATOM    889  CB  VAL L   3     -52.142  83.500 151.572  1.00 33.89           C  
ATOM    890  CG1 VAL L   3     -52.540  82.159 152.168  1.00 34.58           C  
ATOM    891  CG2 VAL L   3     -50.967  83.342 150.619  1.00 34.05           C  
ATOM    892  N   MET L   4     -55.572  83.527 151.554  1.00 30.51           N  
ATOM    893  CA  MET L   4     -56.754  83.553 152.413  1.00 30.21           C  
ATOM    894  C   MET L   4     -56.830  82.258 153.207  1.00 28.64           C  
ATOM    895  O   MET L   4     -56.774  81.171 152.628  1.00 30.42           O  
ATOM    896  CB  MET L   4     -58.030  83.697 151.574  1.00 28.49           C  
ATOM    897  CG  MET L   4     -58.063  84.911 150.663  1.00 30.13           C  
ATOM    898  SD  MET L   4     -57.769  86.461 151.537  1.00 29.47           S  
ATOM    899  CE  MET L   4     -59.333  86.717 152.310  1.00 31.45           C  
ATOM    900  N   SER L   5     -56.964  82.373 154.526  1.00 27.48           N  
ATOM    901  CA  SER L   5     -57.048  81.200 155.400  1.00 27.26           C  
ATOM    902  C   SER L   5     -58.346  81.151 156.202  1.00 27.04           C  
ATOM    903  O   SER L   5     -58.636  82.065 156.977  1.00 29.02           O  
ATOM    904  CB  SER L   5     -55.876  81.182 156.381  1.00 29.17           C  
ATOM    905  OG  SER L   5     -54.633  81.137 155.700  1.00 31.52           O  
ATOM    906  N   GLN L   6     -59.105  80.070 156.033  1.00 25.61           N  
ATOM    907  CA  GLN L   6     -60.375  79.890 156.734  1.00 24.79           C  
ATOM    908  C   GLN L   6     -60.344  78.790 157.783  1.00 26.33           C  
ATOM    909  O   GLN L   6     -59.604  77.811 157.656  1.00 25.53           O  
ATOM    910  CB  GLN L   6     -61.496  79.563 155.744  1.00 24.96           C  
ATOM    911  CG  GLN L   6     -62.016  80.738 154.952  1.00 25.40           C  
ATOM    912  CD  GLN L   6     -63.171  80.348 154.054  1.00 23.54           C  
ATOM    913  OE1 GLN L   6     -63.011  80.218 152.843  1.00 26.60           O  
ATOM    914  NE2 GLN L   6     -64.345  80.145 154.651  1.00 24.40           N  
ATOM    915  N   SER L   7     -61.172  78.959 158.808  1.00 23.67           N  
ATOM    916  CA  SER L   7     -61.305  77.989 159.890  1.00 25.74           C  
ATOM    917  C   SER L   7     -62.669  78.196 160.547  1.00 25.12           C  
ATOM    918  O   SER L   7     -63.172  79.312 160.602  1.00 25.59           O  
ATOM    919  CB  SER L   7     -60.199  78.186 160.933  1.00 28.62           C  
ATOM    920  OG  SER L   7     -60.255  79.487 161.494  1.00 32.31           O  
ATOM    921  N   PRO L   8     -63.299  77.116 161.023  1.00 24.95           N  
ATOM    922  CA  PRO L   8     -62.789  75.746 160.968  1.00 25.88           C  
ATOM    923  C   PRO L   8     -63.127  75.146 159.606  1.00 25.88           C  
ATOM    924  O   PRO L   8     -63.877  75.739 158.829  1.00 26.26           O  
ATOM    925  CB  PRO L   8     -63.549  75.064 162.094  1.00 26.38           C  
ATOM    926  CG  PRO L   8     -64.905  75.712 161.969  1.00 26.16           C  
ATOM    927  CD  PRO L   8     -64.556  77.171 161.796  1.00 24.76           C  
ATOM    928  N   SER L   9     -62.586  73.972 159.315  1.00 26.01           N  
ATOM    929  CA  SER L   9     -62.871  73.339 158.041  1.00 25.33           C  
ATOM    930  C   SER L   9     -64.283  72.779 158.003  1.00 24.08           C  
ATOM    931  O   SER L   9     -64.931  72.776 156.956  1.00 23.35           O  
ATOM    932  CB  SER L   9     -61.865  72.219 157.769  1.00 26.31           C  
ATOM    933  OG  SER L   9     -60.563  72.747 157.630  1.00 32.07           O  
ATOM    934  N   SER L  10     -64.770  72.321 159.150  1.00 24.42           N  
ATOM    935  CA  SER L  10     -66.097  71.731 159.215  1.00 26.34           C  
ATOM    936  C   SER L  10     -66.865  72.084 160.482  1.00 26.29           C  
ATOM    937  O   SER L  10     -66.305  72.105 161.577  1.00 28.17           O  
ATOM    938  CB  SER L  10     -65.977  70.206 159.098  1.00 28.40           C  
ATOM    939  OG  SER L  10     -67.228  69.568 159.276  1.00 34.04           O  
ATOM    940  N   LEU L  11     -68.152  72.369 160.311  1.00 25.57           N  
ATOM    941  CA  LEU L  11     -69.046  72.701 161.414  1.00 25.23           C  
ATOM    942  C   LEU L  11     -70.252  71.770 161.315  1.00 24.07           C  
ATOM    943  O   LEU L  11     -70.840  71.619 160.247  1.00 23.97           O  
ATOM    944  CB  LEU L  11     -69.511  74.160 161.312  1.00 25.99           C  
ATOM    945  CG  LEU L  11     -68.489  75.264 161.621  1.00 29.56           C  
ATOM    946  CD1 LEU L  11     -69.010  76.610 161.139  1.00 31.37           C  
ATOM    947  CD2 LEU L  11     -68.208  75.294 163.116  1.00 30.68           C  
ATOM    948  N   ALA L  12     -70.603  71.132 162.428  1.00 24.07           N  
ATOM    949  CA  ALA L  12     -71.744  70.226 162.477  1.00 24.93           C  
ATOM    950  C   ALA L  12     -72.581  70.607 163.694  1.00 26.86           C  
ATOM    951  O   ALA L  12     -72.162  70.402 164.834  1.00 27.00           O  
ATOM    952  CB  ALA L  12     -71.267  68.780 162.593  1.00 28.34           C  
ATOM    953  N   VAL L  13     -73.763  71.167 163.447  1.00 26.87           N  
ATOM    954  CA  VAL L  13     -74.640  71.605 164.530  1.00 27.08           C  
ATOM    955  C   VAL L  13     -76.091  71.197 164.318  1.00 27.08           C  
ATOM    956  O   VAL L  13     -76.461  70.701 163.257  1.00 27.42           O  
ATOM    957  CB  VAL L  13     -74.598  73.147 164.687  1.00 27.72           C  
ATOM    958  CG1 VAL L  13     -73.181  73.603 164.969  1.00 28.51           C  
ATOM    959  CG2 VAL L  13     -75.145  73.818 163.428  1.00 30.54           C  
ATOM    960  N   SER L  14     -76.915  71.421 165.338  1.00 25.80           N  
ATOM    961  CA  SER L  14     -78.329  71.091 165.255  1.00 27.11           C  
ATOM    962  C   SER L  14     -79.095  72.334 164.818  1.00 25.45           C  
ATOM    963  O   SER L  14     -78.617  73.459 164.982  1.00 24.55           O  
ATOM    964  CB  SER L  14     -78.842  70.604 166.611  1.00 31.22           C  
ATOM    965  OG  SER L  14     -78.216  69.382 166.971  1.00 36.14           O  
ATOM    966  N   ALA L  15     -80.276  72.125 164.249  1.00 25.32           N  
ATOM    967  CA  ALA L  15     -81.093  73.234 163.781  1.00 25.03           C  
ATOM    968  C   ALA L  15     -81.333  74.246 164.894  1.00 24.71           C  
ATOM    969  O   ALA L  15     -81.555  73.878 166.050  1.00 24.25           O  
ATOM    970  CB  ALA L  15     -82.422  72.713 163.252  1.00 27.19           C  
ATOM    971  N   GLY L  16     -81.273  75.526 164.543  1.00 22.82           N  
ATOM    972  CA  GLY L  16     -81.504  76.566 165.527  1.00 22.08           C  
ATOM    973  C   GLY L  16     -80.261  77.100 166.211  1.00 21.18           C  
ATOM    974  O   GLY L  16     -80.305  78.163 166.825  1.00 20.95           O  
ATOM    975  N   GLU L  17     -79.150  76.374 166.134  1.00 19.93           N  
ATOM    976  CA  GLU L  17     -77.921  76.849 166.758  1.00 19.80           C  
ATOM    977  C   GLU L  17     -77.303  77.996 165.975  1.00 20.01           C  
ATOM    978  O   GLU L  17     -77.766  78.344 164.886  1.00 20.24           O  
ATOM    979  CB  GLU L  17     -76.889  75.726 166.861  1.00 21.80           C  
ATOM    980  CG  GLU L  17     -77.138  74.725 167.955  1.00 28.00           C  
ATOM    981  CD  GLU L  17     -75.957  73.788 168.114  1.00 33.48           C  
ATOM    982  OE1 GLU L  17     -74.850  74.283 168.417  1.00 38.35           O  
ATOM    983  OE2 GLU L  17     -76.132  72.570 167.927  1.00 35.46           O  
ATOM    984  N   LYS L  18     -76.241  78.566 166.526  1.00 20.53           N  
ATOM    985  CA  LYS L  18     -75.551  79.673 165.881  1.00 21.44           C  
ATOM    986  C   LYS L  18     -74.108  79.273 165.638  1.00 23.25           C  
ATOM    987  O   LYS L  18     -73.487  78.620 166.482  1.00 23.23           O  
ATOM    988  CB  LYS L  18     -75.616  80.910 166.771  1.00 22.23           C  
ATOM    989  CG  LYS L  18     -74.694  82.047 166.388  1.00 20.66           C  
ATOM    990  CD  LYS L  18     -74.897  83.215 167.347  1.00 21.51           C  
ATOM    991  CE  LYS L  18     -73.834  84.295 167.206  1.00 23.25           C  
ATOM    992  NZ  LYS L  18     -74.087  85.416 168.167  1.00 24.69           N  
ATOM    993  N   VAL L  19     -73.582  79.643 164.477  1.00 20.76           N  
ATOM    994  CA  VAL L  19     -72.204  79.324 164.159  1.00 22.50           C  
ATOM    995  C   VAL L  19     -71.416  80.558 163.773  1.00 21.66           C  
ATOM    996  O   VAL L  19     -71.979  81.581 163.384  1.00 20.76           O  
ATOM    997  CB  VAL L  19     -72.097  78.292 163.002  1.00 20.57           C  
ATOM    998  CG1 VAL L  19     -72.789  76.995 163.399  1.00 23.61           C  
ATOM    999  CG2 VAL L  19     -72.702  78.863 161.730  1.00 21.41           C  
ATOM   1000  N   THR L  20     -70.098  80.451 163.895  1.00 22.46           N  
ATOM   1001  CA  THR L  20     -69.191  81.528 163.535  1.00 23.65           C  
ATOM   1002  C   THR L  20     -68.011  80.898 162.808  1.00 23.00           C  
ATOM   1003  O   THR L  20     -67.559  79.819 163.181  1.00 24.27           O  
ATOM   1004  CB  THR L  20     -68.639  82.255 164.774  1.00 25.16           C  
ATOM   1005  OG1 THR L  20     -69.717  82.798 165.550  1.00 30.25           O  
ATOM   1006  CG2 THR L  20     -67.707  83.376 164.347  1.00 25.74           C  
ATOM   1007  N   MET L  21     -67.530  81.561 161.764  1.00 23.14           N  
ATOM   1008  CA  MET L  21     -66.377  81.070 161.015  1.00 22.79           C  
ATOM   1009  C   MET L  21     -65.469  82.241 160.693  1.00 23.33           C  
ATOM   1010  O   MET L  21     -65.928  83.377 160.543  1.00 21.13           O  
ATOM   1011  CB  MET L  21     -66.816  80.366 159.735  1.00 24.41           C  
ATOM   1012  CG  MET L  21     -67.735  81.190 158.884  1.00 23.18           C  
ATOM   1013  SD  MET L  21     -68.452  80.190 157.588  1.00 23.90           S  
ATOM   1014  CE  MET L  21     -69.824  79.488 158.428  1.00 22.29           C  
ATOM   1015  N   SER L  22     -64.174  81.962 160.580  1.00 21.85           N  
ATOM   1016  CA  SER L  22     -63.216  83.019 160.320  1.00 23.95           C  
ATOM   1017  C   SER L  22     -62.476  82.918 159.005  1.00 22.58           C  
ATOM   1018  O   SER L  22     -62.344  81.847 158.420  1.00 22.59           O  
ATOM   1019  CB  SER L  22     -62.186  83.080 161.448  1.00 27.81           C  
ATOM   1020  OG  SER L  22     -61.416  81.896 161.479  1.00 34.70           O  
ATOM   1021  N   CYS L  23     -61.988  84.069 158.570  1.00 22.60           N  
ATOM   1022  CA  CYS L  23     -61.232  84.188 157.346  1.00 23.81           C  
ATOM   1023  C   CYS L  23     -60.139  85.213 157.609  1.00 24.73           C  
ATOM   1024  O   CYS L  23     -60.413  86.338 158.037  1.00 24.64           O  
ATOM   1025  CB  CYS L  23     -62.159  84.659 156.232  1.00 23.75           C  
ATOM   1026  SG  CYS L  23     -61.399  85.175 154.648  1.00 26.23           S  
ATOM   1027  N   LYS L  24     -58.898  84.808 157.373  1.00 24.48           N  
ATOM   1028  CA  LYS L  24     -57.754  85.676 157.590  1.00 25.89           C  
ATOM   1029  C   LYS L  24     -56.997  85.906 156.289  1.00 26.96           C  
ATOM   1030  O   LYS L  24     -56.873  84.998 155.470  1.00 29.91           O  
ATOM   1031  CB  LYS L  24     -56.817  85.051 158.629  1.00 28.39           C  
ATOM   1032  CG  LYS L  24     -55.511  85.807 158.819  1.00 32.81           C  
ATOM   1033  CD  LYS L  24     -54.610  85.126 159.833  1.00 37.35           C  
ATOM   1034  CE  LYS L  24     -53.222  85.748 159.816  1.00 39.42           C  
ATOM   1035  NZ  LYS L  24     -52.592  85.625 158.466  1.00 43.06           N  
ATOM   1036  N   SER L  25     -56.489  87.121 156.098  1.00 28.40           N  
ATOM   1037  CA  SER L  25     -55.741  87.444 154.884  1.00 28.94           C  
ATOM   1038  C   SER L  25     -54.281  87.735 155.211  1.00 29.69           C  
ATOM   1039  O   SER L  25     -53.975  88.286 156.267  1.00 29.85           O  
ATOM   1040  CB  SER L  25     -56.365  88.651 154.179  1.00 28.86           C  
ATOM   1041  OG  SER L  25     -56.367  89.797 155.016  1.00 31.21           O  
ATOM   1042  N   SER L  26     -53.385  87.364 154.300  1.00 29.61           N  
ATOM   1043  CA  SER L  26     -51.951  87.578 154.502  1.00 30.36           C  
ATOM   1044  C   SER L  26     -51.583  89.058 154.474  1.00 31.57           C  
ATOM   1045  O   SER L  26     -50.506  89.450 154.928  1.00 31.27           O  
ATOM   1046  CB  SER L  26     -51.148  86.824 153.436  1.00 29.96           C  
ATOM   1047  OG  SER L  26     -51.583  87.159 152.128  1.00 31.31           O  
ATOM   1048  N   GLN L  27     -52.481  89.876 153.938  1.00 30.18           N  
ATOM   1049  CA  GLN L  27     -52.258  91.314 153.853  1.00 31.98           C  
ATOM   1050  C   GLN L  27     -53.594  92.039 154.035  1.00 30.13           C  
ATOM   1051  O   GLN L  27     -54.649  91.465 153.781  1.00 28.41           O  
ATOM   1052  CB  GLN L  27     -51.638  91.661 152.496  1.00 36.23           C  
ATOM   1053  CG  GLN L  27     -51.375  93.140 152.283  1.00 41.83           C  
ATOM   1054  CD  GLN L  27     -50.808  93.448 150.904  1.00 44.51           C  
ATOM   1055  OE1 GLN L  27     -50.571  94.608 150.564  1.00 47.40           O  
ATOM   1056  NE2 GLN L  27     -50.587  92.409 150.106  1.00 45.84           N  
ATOM   1057  N   SER L  27A    -53.548  93.290 154.487  1.00 28.22           N  
ATOM   1058  CA  SER L  27A    -54.766  94.068 154.703  1.00 26.66           C  
ATOM   1059  C   SER L  27A    -55.597  94.227 153.434  1.00 27.56           C  
ATOM   1060  O   SER L  27A    -55.060  94.479 152.356  1.00 26.33           O  
ATOM   1061  CB  SER L  27A    -54.427  95.454 155.239  1.00 28.55           C  
ATOM   1062  OG  SER L  27A    -55.602  96.234 155.388  1.00 26.70           O  
ATOM   1063  N   LEU L  27B    -56.914  94.092 153.573  1.00 26.64           N  
ATOM   1064  CA  LEU L  27B    -57.816  94.229 152.432  1.00 26.45           C  
ATOM   1065  C   LEU L  27B    -58.529  95.576 152.488  1.00 27.94           C  
ATOM   1066  O   LEU L  27B    -59.441  95.841 151.708  1.00 26.04           O  
ATOM   1067  CB  LEU L  27B    -58.845  93.088 152.434  1.00 24.47           C  
ATOM   1068  CG  LEU L  27B    -58.302  91.659 152.548  1.00 21.61           C  
ATOM   1069  CD1 LEU L  27B    -59.456  90.655 152.621  1.00 21.11           C  
ATOM   1070  CD2 LEU L  27B    -57.415  91.346 151.352  1.00 20.05           C  
ATOM   1071  N   PHE L  27C    -58.099  96.430 153.414  1.00 29.37           N  
ATOM   1072  CA  PHE L  27C    -58.696  97.749 153.581  1.00 30.73           C  
ATOM   1073  C   PHE L  27C    -58.094  98.779 152.632  1.00 33.24           C  
ATOM   1074  O   PHE L  27C    -56.874  98.946 152.575  1.00 31.84           O  
ATOM   1075  CB  PHE L  27C    -58.510  98.231 155.021  1.00 32.30           C  
ATOM   1076  CG  PHE L  27C    -59.154  99.559 155.302  1.00 33.72           C  
ATOM   1077  CD1 PHE L  27C    -60.538  99.669 155.393  1.00 34.56           C  
ATOM   1078  CD2 PHE L  27C    -58.378 100.702 155.467  1.00 35.08           C  
ATOM   1079  CE1 PHE L  27C    -61.142 100.898 155.644  1.00 35.91           C  
ATOM   1080  CE2 PHE L  27C    -58.970 101.936 155.717  1.00 36.02           C  
ATOM   1081  CZ  PHE L  27C    -60.355 102.033 155.807  1.00 36.66           C  
ATOM   1082  N   ASN L  27D    -58.952  99.475 151.894  1.00 34.08           N  
ATOM   1083  CA  ASN L  27D    -58.487 100.496 150.963  1.00 38.88           C  
ATOM   1084  C   ASN L  27D    -58.658 101.867 151.611  1.00 40.92           C  
ATOM   1085  O   ASN L  27D    -59.776 102.297 151.892  1.00 40.98           O  
ATOM   1086  CB  ASN L  27D    -59.276 100.421 149.653  1.00 39.76           C  
ATOM   1087  CG  ASN L  27D    -58.682 101.296 148.569  1.00 40.82           C  
ATOM   1088  OD1 ASN L  27D    -58.577 102.510 148.727  1.00 39.98           O  
ATOM   1089  ND2 ASN L  27D    -58.284 100.681 147.461  1.00 42.93           N  
ATOM   1090  N   SER L  27E    -57.539 102.546 151.847  1.00 43.37           N  
ATOM   1091  CA  SER L  27E    -57.547 103.857 152.480  1.00 44.70           C  
ATOM   1092  C   SER L  27E    -58.234 104.944 151.662  1.00 45.91           C  
ATOM   1093  O   SER L  27E    -58.562 106.006 152.189  1.00 46.62           O  
ATOM   1094  CB  SER L  27E    -56.110 104.287 152.807  1.00 45.44           C  
ATOM   1095  OG  SER L  27E    -55.278 104.218 151.663  1.00 47.05           O  
ATOM   1096  N   ARG L  27F    -58.458 104.683 150.379  1.00 46.23           N  
ATOM   1097  CA  ARG L  27F    -59.106 105.667 149.519  1.00 46.78           C  
ATOM   1098  C   ARG L  27F    -60.626 105.502 149.513  1.00 45.89           C  
ATOM   1099  O   ARG L  27F    -61.365 106.473 149.678  1.00 46.07           O  
ATOM   1100  CB  ARG L  27F    -58.566 105.555 148.089  1.00 48.86           C  
ATOM   1101  CG  ARG L  27F    -59.041 106.662 147.157  1.00 52.13           C  
ATOM   1102  CD  ARG L  27F    -58.350 106.592 145.800  1.00 54.55           C  
ATOM   1103  NE  ARG L  27F    -58.773 105.441 145.006  1.00 56.73           N  
ATOM   1104  CZ  ARG L  27F    -59.984 105.302 144.473  1.00 57.67           C  
ATOM   1105  NH1 ARG L  27F    -60.901 106.246 144.645  1.00 57.20           N  
ATOM   1106  NH2 ARG L  27F    -60.278 104.220 143.765  1.00 57.66           N  
ATOM   1107  N   THR L  28     -61.087 104.270 149.330  1.00 43.95           N  
ATOM   1108  CA  THR L  28     -62.517 103.989 149.297  1.00 41.80           C  
ATOM   1109  C   THR L  28     -63.090 103.711 150.683  1.00 41.17           C  
ATOM   1110  O   THR L  28     -64.307 103.701 150.868  1.00 40.79           O  
ATOM   1111  CB  THR L  28     -62.818 102.789 148.378  1.00 41.67           C  
ATOM   1112  OG1 THR L  28     -62.061 101.653 148.811  1.00 38.20           O  
ATOM   1113  CG2 THR L  28     -62.449 103.119 146.940  1.00 40.64           C  
ATOM   1114  N   ARG L  29     -62.210 103.487 151.654  1.00 40.26           N  
ATOM   1115  CA  ARG L  29     -62.631 103.217 153.026  1.00 39.39           C  
ATOM   1116  C   ARG L  29     -63.409 101.901 153.116  1.00 37.05           C  
ATOM   1117  O   ARG L  29     -64.307 101.761 153.945  1.00 37.16           O  
ATOM   1118  CB  ARG L  29     -63.513 104.363 153.544  1.00 42.57           C  
ATOM   1119  CG  ARG L  29     -62.972 105.768 153.270  1.00 45.81           C  
ATOM   1120  CD  ARG L  29     -61.620 105.976 153.923  1.00 47.57           C  
ATOM   1121  NE  ARG L  29     -61.698 105.789 155.368  1.00 49.59           N  
ATOM   1122  CZ  ARG L  29     -60.648 105.567 156.152  1.00 49.83           C  
ATOM   1123  NH1 ARG L  29     -59.430 105.503 155.631  1.00 50.04           N  
ATOM   1124  NH2 ARG L  29     -60.819 105.403 157.456  1.00 50.68           N  
ATOM   1125  N   LYS L  30     -63.068 100.935 152.269  1.00 34.15           N  
ATOM   1126  CA  LYS L  30     -63.767  99.651 152.288  1.00 30.79           C  
ATOM   1127  C   LYS L  30     -62.826  98.457 152.383  1.00 27.19           C  
ATOM   1128  O   LYS L  30     -61.671  98.526 151.975  1.00 26.65           O  
ATOM   1129  CB  LYS L  30     -64.642  99.511 151.035  1.00 31.43           C  
ATOM   1130  CG  LYS L  30     -65.712 100.583 150.904  1.00 34.90           C  
ATOM   1131  CD  LYS L  30     -66.493 100.449 149.609  1.00 36.90           C  
ATOM   1132  CE  LYS L  30     -67.523 101.565 149.460  1.00 39.83           C  
ATOM   1133  NZ  LYS L  30     -68.518 101.592 150.575  1.00 40.94           N  
ATOM   1134  N   ASN L  31     -63.328  97.367 152.953  1.00 25.39           N  
ATOM   1135  CA  ASN L  31     -62.561  96.138 153.068  1.00 23.77           C  
ATOM   1136  C   ASN L  31     -63.102  95.242 151.966  1.00 22.22           C  
ATOM   1137  O   ASN L  31     -64.293  94.925 151.947  1.00 23.83           O  
ATOM   1138  CB  ASN L  31     -62.777  95.496 154.434  1.00 24.30           C  
ATOM   1139  CG  ASN L  31     -62.039  96.226 155.536  1.00 25.37           C  
ATOM   1140  OD1 ASN L  31     -60.821  96.103 155.669  1.00 28.25           O  
ATOM   1141  ND2 ASN L  31     -62.772  97.003 156.324  1.00 28.37           N  
ATOM   1142  N   TYR L  32     -62.230  94.851 151.044  1.00 21.93           N  
ATOM   1143  CA  TYR L  32     -62.640  94.025 149.916  1.00 20.34           C  
ATOM   1144  C   TYR L  32     -62.619  92.545 150.228  1.00 19.12           C  
ATOM   1145  O   TYR L  32     -61.763  91.801 149.752  1.00 20.00           O  
ATOM   1146  CB  TYR L  32     -61.766  94.361 148.709  1.00 22.94           C  
ATOM   1147  CG  TYR L  32     -62.044  95.763 148.210  1.00 24.78           C  
ATOM   1148  CD1 TYR L  32     -63.125  96.022 147.364  1.00 26.76           C  
ATOM   1149  CD2 TYR L  32     -61.279  96.841 148.647  1.00 27.15           C  
ATOM   1150  CE1 TYR L  32     -63.438  97.324 146.972  1.00 29.03           C  
ATOM   1151  CE2 TYR L  32     -61.580  98.145 148.261  1.00 28.76           C  
ATOM   1152  CZ  TYR L  32     -62.660  98.379 147.427  1.00 29.27           C  
ATOM   1153  OH  TYR L  32     -62.972  99.665 147.061  1.00 32.11           O  
ATOM   1154  N   LEU L  33     -63.595  92.140 151.031  1.00 17.09           N  
ATOM   1155  CA  LEU L  33     -63.753  90.761 151.454  1.00 18.93           C  
ATOM   1156  C   LEU L  33     -65.222  90.396 151.275  1.00 18.98           C  
ATOM   1157  O   LEU L  33     -66.122  91.136 151.695  1.00 18.56           O  
ATOM   1158  CB  LEU L  33     -63.327  90.614 152.923  1.00 20.18           C  
ATOM   1159  CG  LEU L  33     -63.139  89.221 153.539  1.00 20.61           C  
ATOM   1160  CD1 LEU L  33     -64.479  88.620 153.944  1.00 22.01           C  
ATOM   1161  CD2 LEU L  33     -62.410  88.323 152.540  1.00 22.41           C  
ATOM   1162  N   ALA L  34     -65.456  89.258 150.631  1.00 17.49           N  
ATOM   1163  CA  ALA L  34     -66.806  88.785 150.376  1.00 17.27           C  
ATOM   1164  C   ALA L  34     -66.977  87.358 150.870  1.00 16.75           C  
ATOM   1165  O   ALA L  34     -66.000  86.633 151.041  1.00 17.71           O  
ATOM   1166  CB  ALA L  34     -67.096  88.846 148.888  1.00 17.43           C  
ATOM   1167  N   TRP L  35     -68.231  86.978 151.104  1.00 17.24           N  
ATOM   1168  CA  TRP L  35     -68.583  85.633 151.548  1.00 17.49           C  
ATOM   1169  C   TRP L  35     -69.553  85.033 150.548  1.00 18.01           C  
ATOM   1170  O   TRP L  35     -70.501  85.692 150.128  1.00 17.33           O  
ATOM   1171  CB  TRP L  35     -69.252  85.655 152.924  1.00 17.41           C  
ATOM   1172  CG  TRP L  35     -68.336  86.022 154.043  1.00 15.24           C  
ATOM   1173  CD1 TRP L  35     -68.153  87.258 154.579  1.00 17.81           C  
ATOM   1174  CD2 TRP L  35     -67.473  85.133 154.770  1.00 16.66           C  
ATOM   1175  NE1 TRP L  35     -67.231  87.201 155.601  1.00 17.46           N  
ATOM   1176  CE2 TRP L  35     -66.799  85.909 155.740  1.00 16.71           C  
ATOM   1177  CE3 TRP L  35     -67.205  83.761 154.694  1.00 17.68           C  
ATOM   1178  CZ2 TRP L  35     -65.871  85.358 156.635  1.00 17.56           C  
ATOM   1179  CZ3 TRP L  35     -66.280  83.207 155.583  1.00 17.78           C  
ATOM   1180  CH2 TRP L  35     -65.625  84.009 156.541  1.00 15.95           C  
ATOM   1181  N   TYR L  36     -69.297  83.781 150.182  1.00 18.66           N  
ATOM   1182  CA  TYR L  36     -70.124  83.042 149.239  1.00 18.53           C  
ATOM   1183  C   TYR L  36     -70.641  81.766 149.893  1.00 18.08           C  
ATOM   1184  O   TYR L  36     -69.975  81.172 150.743  1.00 18.95           O  
ATOM   1185  CB  TYR L  36     -69.320  82.638 148.002  1.00 17.80           C  
ATOM   1186  CG  TYR L  36     -68.976  83.764 147.056  1.00 17.34           C  
ATOM   1187  CD1 TYR L  36     -67.971  84.677 147.357  1.00 17.97           C  
ATOM   1188  CD2 TYR L  36     -69.645  83.892 145.843  1.00 20.34           C  
ATOM   1189  CE1 TYR L  36     -67.634  85.696 146.459  1.00 16.85           C  
ATOM   1190  CE2 TYR L  36     -69.330  84.903 144.947  1.00 18.12           C  
ATOM   1191  CZ  TYR L  36     -68.322  85.801 145.257  1.00 19.90           C  
ATOM   1192  OH  TYR L  36     -68.010  86.802 144.367  1.00 19.90           O  
ATOM   1193  N   GLN L  37     -71.830  81.350 149.469  1.00 15.67           N  
ATOM   1194  CA  GLN L  37     -72.471  80.144 149.963  1.00 16.89           C  
ATOM   1195  C   GLN L  37     -72.641  79.209 148.783  1.00 19.03           C  
ATOM   1196  O   GLN L  37     -73.217  79.600 147.768  1.00 19.00           O  
ATOM   1197  CB  GLN L  37     -73.852  80.484 150.529  1.00 16.60           C  
ATOM   1198  CG  GLN L  37     -74.687  79.289 150.985  1.00 19.61           C  
ATOM   1199  CD  GLN L  37     -76.116  79.689 151.317  1.00 20.28           C  
ATOM   1200  OE1 GLN L  37     -76.581  79.522 152.448  1.00 22.68           O  
ATOM   1201  NE2 GLN L  37     -76.821  80.229 150.328  1.00 18.68           N  
ATOM   1202  N   GLN L  38     -72.128  77.987 148.894  1.00 18.60           N  
ATOM   1203  CA  GLN L  38     -72.312  77.038 147.809  1.00 20.09           C  
ATOM   1204  C   GLN L  38     -73.021  75.807 148.329  1.00 21.37           C  
ATOM   1205  O   GLN L  38     -72.441  75.002 149.069  1.00 21.61           O  
ATOM   1206  CB  GLN L  38     -70.994  76.634 147.168  1.00 19.82           C  
ATOM   1207  CG  GLN L  38     -71.213  75.618 146.061  1.00 22.84           C  
ATOM   1208  CD  GLN L  38     -70.029  75.484 145.141  1.00 24.03           C  
ATOM   1209  OE1 GLN L  38     -68.891  75.379 145.589  1.00 25.81           O  
ATOM   1210  NE2 GLN L  38     -70.291  75.478 143.841  1.00 28.70           N  
ATOM   1211  N   LYS L  39     -74.289  75.678 147.955  1.00 21.32           N  
ATOM   1212  CA  LYS L  39     -75.099  74.542 148.369  1.00 22.65           C  
ATOM   1213  C   LYS L  39     -74.802  73.380 147.418  1.00 24.41           C  
ATOM   1214  O   LYS L  39     -74.314  73.592 146.309  1.00 23.65           O  
ATOM   1215  CB  LYS L  39     -76.585  74.919 148.330  1.00 23.70           C  
ATOM   1216  CG  LYS L  39     -76.954  76.034 149.310  1.00 23.39           C  
ATOM   1217  CD  LYS L  39     -78.457  76.311 149.350  1.00 23.77           C  
ATOM   1218  CE  LYS L  39     -78.787  77.347 150.418  1.00 27.03           C  
ATOM   1219  NZ  LYS L  39     -80.247  77.609 150.564  1.00 26.98           N  
ATOM   1220  N   PRO L  40     -75.071  72.137 147.846  1.00 24.26           N  
ATOM   1221  CA  PRO L  40     -74.806  70.975 146.987  1.00 27.08           C  
ATOM   1222  C   PRO L  40     -75.420  71.026 145.580  1.00 27.26           C  
ATOM   1223  O   PRO L  40     -76.630  71.204 145.415  1.00 29.89           O  
ATOM   1224  CB  PRO L  40     -75.347  69.812 147.813  1.00 26.99           C  
ATOM   1225  CG  PRO L  40     -75.096  70.266 149.222  1.00 26.75           C  
ATOM   1226  CD  PRO L  40     -75.550  71.708 149.172  1.00 28.19           C  
ATOM   1227  N   GLY L  41     -74.565  70.864 144.575  1.00 27.63           N  
ATOM   1228  CA  GLY L  41     -75.015  70.867 143.192  1.00 29.36           C  
ATOM   1229  C   GLY L  41     -75.413  72.219 142.630  1.00 29.76           C  
ATOM   1230  O   GLY L  41     -75.988  72.296 141.545  1.00 30.26           O  
ATOM   1231  N   GLN L  42     -75.118  73.286 143.364  1.00 27.45           N  
ATOM   1232  CA  GLN L  42     -75.451  74.630 142.907  1.00 27.85           C  
ATOM   1233  C   GLN L  42     -74.194  75.470 142.726  1.00 26.72           C  
ATOM   1234  O   GLN L  42     -73.114  75.089 143.178  1.00 27.93           O  
ATOM   1235  CB  GLN L  42     -76.370  75.323 143.914  1.00 27.06           C  
ATOM   1236  CG  GLN L  42     -77.772  74.742 143.992  1.00 30.32           C  
ATOM   1237  CD  GLN L  42     -78.644  75.505 144.964  1.00 28.85           C  
ATOM   1238  OE1 GLN L  42     -78.520  76.722 145.092  1.00 29.83           O  
ATOM   1239  NE2 GLN L  42     -79.543  74.802 145.641  1.00 30.44           N  
ATOM   1240  N   SER L  43     -74.338  76.611 142.057  1.00 25.10           N  
ATOM   1241  CA  SER L  43     -73.211  77.513 141.857  1.00 24.34           C  
ATOM   1242  C   SER L  43     -73.121  78.390 143.104  1.00 22.51           C  
ATOM   1243  O   SER L  43     -74.109  78.548 143.829  1.00 22.61           O  
ATOM   1244  CB  SER L  43     -73.420  78.382 140.610  1.00 28.24           C  
ATOM   1245  OG  SER L  43     -74.596  79.169 140.721  1.00 31.49           O  
ATOM   1246  N   PRO L  44     -71.934  78.959 143.378  1.00 22.20           N  
ATOM   1247  CA  PRO L  44     -71.740  79.817 144.551  1.00 22.14           C  
ATOM   1248  C   PRO L  44     -72.622  81.052 144.532  1.00 20.78           C  
ATOM   1249  O   PRO L  44     -72.733  81.744 143.515  1.00 22.60           O  
ATOM   1250  CB  PRO L  44     -70.259  80.175 144.477  1.00 23.10           C  
ATOM   1251  CG  PRO L  44     -69.659  78.981 143.803  1.00 24.52           C  
ATOM   1252  CD  PRO L  44     -70.652  78.728 142.692  1.00 21.86           C  
ATOM   1253  N   LYS L  45     -73.246  81.328 145.668  1.00 21.51           N  
ATOM   1254  CA  LYS L  45     -74.112  82.481 145.781  1.00 23.22           C  
ATOM   1255  C   LYS L  45     -73.437  83.532 146.659  1.00 21.13           C  
ATOM   1256  O   LYS L  45     -73.065  83.260 147.795  1.00 21.12           O  
ATOM   1257  CB  LYS L  45     -75.453  82.054 146.380  1.00 27.15           C  
ATOM   1258  CG  LYS L  45     -76.519  83.125 146.354  1.00 34.28           C  
ATOM   1259  CD  LYS L  45     -76.472  83.972 147.604  1.00 35.66           C  
ATOM   1260  CE  LYS L  45     -77.751  83.813 148.419  1.00 38.69           C  
ATOM   1261  NZ  LYS L  45     -77.979  82.421 148.913  1.00 39.85           N  
ATOM   1262  N   LEU L  46     -73.265  84.731 146.115  1.00 20.49           N  
ATOM   1263  CA  LEU L  46     -72.649  85.813 146.867  1.00 17.46           C  
ATOM   1264  C   LEU L  46     -73.593  86.229 147.983  1.00 19.27           C  
ATOM   1265  O   LEU L  46     -74.750  86.571 147.733  1.00 17.92           O  
ATOM   1266  CB  LEU L  46     -72.372  87.003 145.941  1.00 17.73           C  
ATOM   1267  CG  LEU L  46     -71.837  88.266 146.618  1.00 16.13           C  
ATOM   1268  CD1 LEU L  46     -70.479  87.994 147.256  1.00 18.75           C  
ATOM   1269  CD2 LEU L  46     -71.730  89.369 145.578  1.00 18.60           C  
ATOM   1270  N   LEU L  47     -73.111  86.198 149.223  1.00 17.06           N  
ATOM   1271  CA  LEU L  47     -73.951  86.575 150.350  1.00 18.84           C  
ATOM   1272  C   LEU L  47     -73.689  87.985 150.837  1.00 16.93           C  
ATOM   1273  O   LEU L  47     -74.616  88.766 151.064  1.00 17.66           O  
ATOM   1274  CB  LEU L  47     -73.719  85.640 151.544  1.00 19.07           C  
ATOM   1275  CG  LEU L  47     -74.101  84.163 151.552  1.00 19.30           C  
ATOM   1276  CD1 LEU L  47     -73.580  83.544 152.845  1.00 21.66           C  
ATOM   1277  CD2 LEU L  47     -75.604  84.001 151.456  1.00 21.61           C  
ATOM   1278  N   ILE L  48     -72.406  88.298 150.981  1.00 16.95           N  
ATOM   1279  CA  ILE L  48     -71.964  89.572 151.545  1.00 16.54           C  
ATOM   1280  C   ILE L  48     -70.717  90.082 150.840  1.00 17.44           C  
ATOM   1281  O   ILE L  48     -69.879  89.290 150.433  1.00 17.28           O  
ATOM   1282  CB  ILE L  48     -71.621  89.350 153.036  1.00 18.06           C  
ATOM   1283  CG1 ILE L  48     -72.889  88.973 153.805  1.00 19.41           C  
ATOM   1284  CG2 ILE L  48     -70.935  90.566 153.626  1.00 20.58           C  
ATOM   1285  CD1 ILE L  48     -72.596  88.351 155.160  1.00 20.94           C  
ATOM   1286  N   TYR L  49     -70.601  91.400 150.690  1.00 17.68           N  
ATOM   1287  CA  TYR L  49     -69.419  91.993 150.079  1.00 16.42           C  
ATOM   1288  C   TYR L  49     -69.002  93.220 150.901  1.00 18.63           C  
ATOM   1289  O   TYR L  49     -69.761  93.687 151.752  1.00 19.17           O  
ATOM   1290  CB  TYR L  49     -69.678  92.371 148.615  1.00 18.39           C  
ATOM   1291  CG  TYR L  49     -70.846  93.304 148.421  1.00 17.34           C  
ATOM   1292  CD1 TYR L  49     -72.156  92.815 148.363  1.00 16.49           C  
ATOM   1293  CD2 TYR L  49     -70.646  94.682 148.320  1.00 18.79           C  
ATOM   1294  CE1 TYR L  49     -73.241  93.683 148.203  1.00 16.31           C  
ATOM   1295  CE2 TYR L  49     -71.717  95.547 148.166  1.00 18.75           C  
ATOM   1296  CZ  TYR L  49     -73.007  95.050 148.108  1.00 18.06           C  
ATOM   1297  OH  TYR L  49     -74.054  95.937 147.956  1.00 20.32           O  
ATOM   1298  N   TRP L  50     -67.806  93.739 150.639  1.00 18.27           N  
ATOM   1299  CA  TRP L  50     -67.272  94.880 151.393  1.00 17.50           C  
ATOM   1300  C   TRP L  50     -67.333  94.539 152.878  1.00 17.95           C  
ATOM   1301  O   TRP L  50     -67.660  95.379 153.723  1.00 18.05           O  
ATOM   1302  CB  TRP L  50     -68.056  96.167 151.106  1.00 17.66           C  
ATOM   1303  CG  TRP L  50     -67.889  96.651 149.698  1.00 19.89           C  
ATOM   1304  CD1 TRP L  50     -66.944  96.251 148.798  1.00 21.58           C  
ATOM   1305  CD2 TRP L  50     -68.685  97.636 149.034  1.00 19.34           C  
ATOM   1306  NE1 TRP L  50     -67.106  96.927 147.608  1.00 24.60           N  
ATOM   1307  CE2 TRP L  50     -68.169  97.783 147.728  1.00 20.75           C  
ATOM   1308  CE3 TRP L  50     -69.789  98.410 149.418  1.00 22.03           C  
ATOM   1309  CZ2 TRP L  50     -68.716  98.674 146.802  1.00 23.03           C  
ATOM   1310  CZ3 TRP L  50     -70.334  99.297 148.498  1.00 21.70           C  
ATOM   1311  CH2 TRP L  50     -69.797  99.419 147.204  1.00 23.78           C  
ATOM   1312  N   ALA L  51     -67.033  93.273 153.155  1.00 17.72           N  
ATOM   1313  CA  ALA L  51     -66.985  92.707 154.498  1.00 19.07           C  
ATOM   1314  C   ALA L  51     -68.289  92.535 155.255  1.00 17.02           C  
ATOM   1315  O   ALA L  51     -68.491  91.513 155.918  1.00 17.68           O  
ATOM   1316  CB  ALA L  51     -66.012  93.520 155.360  1.00 19.50           C  
ATOM   1317  N   SER L  52     -69.183  93.513 155.159  1.00 18.18           N  
ATOM   1318  CA  SER L  52     -70.422  93.463 155.931  1.00 17.66           C  
ATOM   1319  C   SER L  52     -71.738  93.786 155.236  1.00 17.71           C  
ATOM   1320  O   SER L  52     -72.787  93.746 155.873  1.00 18.96           O  
ATOM   1321  CB  SER L  52     -70.279  94.409 157.120  1.00 18.75           C  
ATOM   1322  OG  SER L  52     -70.106  95.734 156.639  1.00 21.53           O  
ATOM   1323  N   THR L  53     -71.699  94.121 153.953  1.00 18.91           N  
ATOM   1324  CA  THR L  53     -72.930  94.454 153.250  1.00 19.69           C  
ATOM   1325  C   THR L  53     -73.572  93.227 152.619  1.00 17.64           C  
ATOM   1326  O   THR L  53     -72.945  92.535 151.818  1.00 19.07           O  
ATOM   1327  CB  THR L  53     -72.678  95.487 152.137  1.00 19.02           C  
ATOM   1328  OG1 THR L  53     -72.149  96.690 152.706  1.00 22.23           O  
ATOM   1329  CG2 THR L  53     -73.975  95.807 151.406  1.00 20.09           C  
ATOM   1330  N   ARG L  54     -74.822  92.965 152.986  1.00 17.57           N  
ATOM   1331  CA  ARG L  54     -75.545  91.823 152.456  1.00 18.06           C  
ATOM   1332  C   ARG L  54     -76.136  92.099 151.086  1.00 18.70           C  
ATOM   1333  O   ARG L  54     -76.600  93.212 150.805  1.00 19.03           O  
ATOM   1334  CB  ARG L  54     -76.698  91.433 153.383  1.00 20.44           C  
ATOM   1335  CG  ARG L  54     -76.331  90.505 154.514  1.00 23.57           C  
ATOM   1336  CD  ARG L  54     -77.555  90.214 155.367  1.00 25.92           C  
ATOM   1337  NE  ARG L  54     -78.005  91.413 156.065  1.00 29.98           N  
ATOM   1338  CZ  ARG L  54     -79.231  91.920 155.985  1.00 28.72           C  
ATOM   1339  NH1 ARG L  54     -80.156  91.338 155.235  1.00 30.14           N  
ATOM   1340  NH2 ARG L  54     -79.530  93.026 156.652  1.00 32.40           N  
ATOM   1341  N   GLU L  55     -76.093  91.079 150.236  1.00 18.68           N  
ATOM   1342  CA  GLU L  55     -76.706  91.158 148.914  1.00 19.34           C  
ATOM   1343  C   GLU L  55     -78.206  91.223 149.178  1.00 20.94           C  
ATOM   1344  O   GLU L  55     -78.674  90.826 150.250  1.00 20.25           O  
ATOM   1345  CB  GLU L  55     -76.393  89.901 148.104  1.00 19.34           C  
ATOM   1346  CG  GLU L  55     -75.058  89.939 147.430  1.00 17.46           C  
ATOM   1347  CD  GLU L  55     -75.101  90.753 146.161  1.00 21.94           C  
ATOM   1348  OE1 GLU L  55     -75.706  90.281 145.182  1.00 21.62           O  
ATOM   1349  OE2 GLU L  55     -74.547  91.866 146.157  1.00 22.35           O  
ATOM   1350  N   SER L  56     -78.972  91.718 148.215  1.00 22.44           N  
ATOM   1351  CA  SER L  56     -80.417  91.800 148.410  1.00 23.10           C  
ATOM   1352  C   SER L  56     -81.011  90.400 148.582  1.00 22.66           C  
ATOM   1353  O   SER L  56     -80.566  89.442 147.948  1.00 22.18           O  
ATOM   1354  CB  SER L  56     -81.074  92.493 147.216  1.00 27.17           C  
ATOM   1355  OG  SER L  56     -80.850  91.750 146.035  1.00 35.08           O  
ATOM   1356  N   GLY L  57     -82.002  90.283 149.459  1.00 24.90           N  
ATOM   1357  CA  GLY L  57     -82.640  88.999 149.674  1.00 25.89           C  
ATOM   1358  C   GLY L  57     -81.994  88.092 150.702  1.00 24.39           C  
ATOM   1359  O   GLY L  57     -82.649  87.192 151.228  1.00 27.53           O  
ATOM   1360  N   VAL L  58     -80.716  88.314 150.992  1.00 22.38           N  
ATOM   1361  CA  VAL L  58     -80.015  87.482 151.975  1.00 19.73           C  
ATOM   1362  C   VAL L  58     -80.587  87.773 153.359  1.00 20.47           C  
ATOM   1363  O   VAL L  58     -80.671  88.929 153.770  1.00 20.53           O  
ATOM   1364  CB  VAL L  58     -78.490  87.752 151.947  1.00 18.49           C  
ATOM   1365  CG1 VAL L  58     -77.780  86.893 152.993  1.00 20.17           C  
ATOM   1366  CG2 VAL L  58     -77.938  87.440 150.559  1.00 18.45           C  
ATOM   1367  N   PRO L  59     -81.014  86.725 154.084  1.00 20.87           N  
ATOM   1368  CA  PRO L  59     -81.585  86.912 155.423  1.00 21.26           C  
ATOM   1369  C   PRO L  59     -80.598  87.533 156.398  1.00 19.89           C  
ATOM   1370  O   PRO L  59     -79.391  87.268 156.328  1.00 19.25           O  
ATOM   1371  CB  PRO L  59     -82.033  85.504 155.816  1.00 22.26           C  
ATOM   1372  CG  PRO L  59     -81.184  84.604 155.004  1.00 27.91           C  
ATOM   1373  CD  PRO L  59     -81.035  85.308 153.679  1.00 21.98           C  
ATOM   1374  N   ASP L  60     -81.104  88.366 157.305  1.00 17.87           N  
ATOM   1375  CA  ASP L  60     -80.229  89.031 158.252  1.00 17.72           C  
ATOM   1376  C   ASP L  60     -79.707  88.123 159.360  1.00 18.18           C  
ATOM   1377  O   ASP L  60     -79.097  88.591 160.316  1.00 18.08           O  
ATOM   1378  CB  ASP L  60     -80.871  90.329 158.802  1.00 19.46           C  
ATOM   1379  CG  ASP L  60     -82.125  90.099 159.637  1.00 19.74           C  
ATOM   1380  OD1 ASP L  60     -82.646  88.970 159.671  1.00 21.18           O  
ATOM   1381  OD2 ASP L  60     -82.580  91.091 160.258  1.00 22.51           O  
ATOM   1382  N   ARG L  61     -79.932  86.819 159.205  1.00 18.83           N  
ATOM   1383  CA  ARG L  61     -79.396  85.833 160.147  1.00 18.91           C  
ATOM   1384  C   ARG L  61     -77.905  85.716 159.808  1.00 20.34           C  
ATOM   1385  O   ARG L  61     -77.110  85.227 160.613  1.00 19.76           O  
ATOM   1386  CB  ARG L  61     -80.029  84.452 159.948  1.00 21.98           C  
ATOM   1387  CG  ARG L  61     -81.480  84.317 160.338  1.00 25.41           C  
ATOM   1388  CD  ARG L  61     -81.912  82.853 160.230  1.00 22.35           C  
ATOM   1389  NE  ARG L  61     -81.960  82.336 158.856  1.00 23.64           N  
ATOM   1390  CZ  ARG L  61     -81.097  81.466 158.331  1.00 22.58           C  
ATOM   1391  NH1 ARG L  61     -80.087  81.001 159.054  1.00 23.83           N  
ATOM   1392  NH2 ARG L  61     -81.264  81.024 157.092  1.00 22.00           N  
ATOM   1393  N   PHE L  62     -77.544  86.147 158.598  1.00 17.62           N  
ATOM   1394  CA  PHE L  62     -76.154  86.110 158.134  1.00 17.32           C  
ATOM   1395  C   PHE L  62     -75.507  87.464 158.409  1.00 17.76           C  
ATOM   1396  O   PHE L  62     -75.991  88.486 157.938  1.00 19.67           O  
ATOM   1397  CB  PHE L  62     -76.087  85.824 156.623  1.00 16.22           C  
ATOM   1398  CG  PHE L  62     -76.526  84.442 156.240  1.00 18.13           C  
ATOM   1399  CD1 PHE L  62     -75.613  83.393 156.198  1.00 18.04           C  
ATOM   1400  CD2 PHE L  62     -77.864  84.181 155.946  1.00 19.33           C  
ATOM   1401  CE1 PHE L  62     -76.022  82.107 155.868  1.00 20.03           C  
ATOM   1402  CE2 PHE L  62     -78.285  82.897 155.615  1.00 20.54           C  
ATOM   1403  CZ  PHE L  62     -77.364  81.855 155.576  1.00 20.15           C  
ATOM   1404  N   THR L  63     -74.419  87.473 159.173  1.00 17.53           N  
ATOM   1405  CA  THR L  63     -73.725  88.718 159.475  1.00 19.45           C  
ATOM   1406  C   THR L  63     -72.240  88.632 159.170  1.00 19.24           C  
ATOM   1407  O   THR L  63     -71.552  87.737 159.661  1.00 19.39           O  
ATOM   1408  CB  THR L  63     -73.845  89.103 160.959  1.00 19.80           C  
ATOM   1409  OG1 THR L  63     -75.220  89.103 161.351  1.00 22.86           O  
ATOM   1410  CG2 THR L  63     -73.251  90.484 161.193  1.00 20.60           C  
ATOM   1411  N   GLY L  64     -71.750  89.571 158.364  1.00 17.97           N  
ATOM   1412  CA  GLY L  64     -70.334  89.610 158.039  1.00 20.03           C  
ATOM   1413  C   GLY L  64     -69.696  90.725 158.851  1.00 19.42           C  
ATOM   1414  O   GLY L  64     -70.279  91.799 159.000  1.00 19.21           O  
ATOM   1415  N   SER L  65     -68.511  90.480 159.392  1.00 18.66           N  
ATOM   1416  CA  SER L  65     -67.842  91.497 160.195  1.00 19.56           C  
ATOM   1417  C   SER L  65     -66.327  91.398 160.073  1.00 20.39           C  
ATOM   1418  O   SER L  65     -65.809  90.493 159.422  1.00 21.06           O  
ATOM   1419  CB  SER L  65     -68.264  91.354 161.661  1.00 18.83           C  
ATOM   1420  OG  SER L  65     -67.749  90.160 162.222  1.00 25.60           O  
ATOM   1421  N   GLY L  66     -65.619  92.337 160.696  1.00 23.72           N  
ATOM   1422  CA  GLY L  66     -64.167  92.318 160.638  1.00 23.15           C  
ATOM   1423  C   GLY L  66     -63.583  93.405 159.756  1.00 25.93           C  
ATOM   1424  O   GLY L  66     -64.313  94.107 159.061  1.00 25.93           O  
ATOM   1425  N   SER L  67     -62.262  93.548 159.780  1.00 25.67           N  
ATOM   1426  CA  SER L  67     -61.597  94.564 158.972  1.00 27.49           C  
ATOM   1427  C   SER L  67     -60.105  94.278 158.886  1.00 26.98           C  
ATOM   1428  O   SER L  67     -59.560  93.556 159.719  1.00 28.66           O  
ATOM   1429  CB  SER L  67     -61.828  95.951 159.582  1.00 28.97           C  
ATOM   1430  OG  SER L  67     -61.292  96.972 158.764  1.00 34.61           O  
ATOM   1431  N   GLY L  68     -59.452  94.838 157.874  1.00 26.66           N  
ATOM   1432  CA  GLY L  68     -58.024  94.635 157.706  1.00 27.27           C  
ATOM   1433  C   GLY L  68     -57.611  93.254 157.229  1.00 27.07           C  
ATOM   1434  O   GLY L  68     -57.626  92.980 156.030  1.00 27.28           O  
ATOM   1435  N   THR L  69     -57.255  92.381 158.169  1.00 24.54           N  
ATOM   1436  CA  THR L  69     -56.801  91.030 157.849  1.00 25.85           C  
ATOM   1437  C   THR L  69     -57.610  89.926 158.529  1.00 24.85           C  
ATOM   1438  O   THR L  69     -57.391  88.746 158.263  1.00 26.04           O  
ATOM   1439  CB  THR L  69     -55.329  90.842 158.266  1.00 26.76           C  
ATOM   1440  OG1 THR L  69     -55.201  91.114 159.668  1.00 28.98           O  
ATOM   1441  CG2 THR L  69     -54.415  91.783 157.488  1.00 29.62           C  
ATOM   1442  N   ASP L  70     -58.537  90.304 159.405  1.00 24.85           N  
ATOM   1443  CA  ASP L  70     -59.353  89.327 160.122  1.00 24.64           C  
ATOM   1444  C   ASP L  70     -60.842  89.577 159.939  1.00 23.17           C  
ATOM   1445  O   ASP L  70     -61.352  90.651 160.274  1.00 22.19           O  
ATOM   1446  CB  ASP L  70     -58.995  89.340 161.611  1.00 29.59           C  
ATOM   1447  CG  ASP L  70     -57.642  88.711 161.884  1.00 33.72           C  
ATOM   1448  OD1 ASP L  70     -57.437  87.548 161.480  1.00 38.79           O  
ATOM   1449  OD2 ASP L  70     -56.783  89.370 162.503  1.00 39.37           O  
ATOM   1450  N   PHE L  71     -61.539  88.573 159.417  1.00 22.25           N  
ATOM   1451  CA  PHE L  71     -62.971  88.693 159.156  1.00 21.43           C  
ATOM   1452  C   PHE L  71     -63.757  87.486 159.659  1.00 19.68           C  
ATOM   1453  O   PHE L  71     -63.204  86.403 159.833  1.00 21.91           O  
ATOM   1454  CB  PHE L  71     -63.196  88.861 157.650  1.00 21.25           C  
ATOM   1455  CG  PHE L  71     -62.454  90.025 157.049  1.00 19.48           C  
ATOM   1456  CD1 PHE L  71     -61.132  89.890 156.621  1.00 19.82           C  
ATOM   1457  CD2 PHE L  71     -63.069  91.268 156.932  1.00 20.18           C  
ATOM   1458  CE1 PHE L  71     -60.437  90.975 156.087  1.00 19.75           C  
ATOM   1459  CE2 PHE L  71     -62.385  92.356 156.400  1.00 20.42           C  
ATOM   1460  CZ  PHE L  71     -61.063  92.212 155.976  1.00 20.45           C  
ATOM   1461  N   THR L  72     -65.051  87.675 159.905  1.00 20.13           N  
ATOM   1462  CA  THR L  72     -65.886  86.580 160.371  1.00 19.32           C  
ATOM   1463  C   THR L  72     -67.265  86.597 159.734  1.00 20.49           C  
ATOM   1464  O   THR L  72     -67.758  87.649 159.315  1.00 18.54           O  
ATOM   1465  CB  THR L  72     -66.082  86.619 161.910  1.00 23.58           C  
ATOM   1466  OG1 THR L  72     -66.866  87.763 162.265  1.00 27.75           O  
ATOM   1467  CG2 THR L  72     -64.744  86.703 162.616  1.00 19.59           C  
ATOM   1468  N   LEU L  73     -67.865  85.413 159.648  1.00 20.13           N  
ATOM   1469  CA  LEU L  73     -69.223  85.243 159.135  1.00 18.61           C  
ATOM   1470  C   LEU L  73     -69.955  84.549 160.267  1.00 19.56           C  
ATOM   1471  O   LEU L  73     -69.468  83.558 160.804  1.00 19.31           O  
ATOM   1472  CB  LEU L  73     -69.275  84.346 157.888  1.00 19.79           C  
ATOM   1473  CG  LEU L  73     -70.706  84.009 157.422  1.00 17.39           C  
ATOM   1474  CD1 LEU L  73     -71.443  85.289 157.054  1.00 18.81           C  
ATOM   1475  CD2 LEU L  73     -70.680  83.068 156.210  1.00 19.07           C  
ATOM   1476  N   THR L  74     -71.115  85.078 160.639  1.00 19.16           N  
ATOM   1477  CA  THR L  74     -71.905  84.498 161.710  1.00 21.63           C  
ATOM   1478  C   THR L  74     -73.278  84.147 161.156  1.00 19.94           C  
ATOM   1479  O   THR L  74     -73.823  84.882 160.333  1.00 19.32           O  
ATOM   1480  CB  THR L  74     -72.061  85.504 162.880  1.00 24.58           C  
ATOM   1481  OG1 THR L  74     -70.771  85.775 163.449  1.00 26.80           O  
ATOM   1482  CG2 THR L  74     -72.977  84.946 163.953  1.00 26.94           C  
ATOM   1483  N   ILE L  75     -73.818  83.008 161.571  1.00 19.57           N  
ATOM   1484  CA  ILE L  75     -75.140  82.602 161.124  1.00 17.59           C  
ATOM   1485  C   ILE L  75     -75.936  82.196 162.354  1.00 19.83           C  
ATOM   1486  O   ILE L  75     -75.595  81.229 163.039  1.00 19.87           O  
ATOM   1487  CB  ILE L  75     -75.088  81.404 160.153  1.00 19.28           C  
ATOM   1488  CG1 ILE L  75     -74.015  81.633 159.086  1.00 20.37           C  
ATOM   1489  CG2 ILE L  75     -76.441  81.237 159.470  1.00 18.96           C  
ATOM   1490  CD1 ILE L  75     -73.808  80.441 158.162  1.00 20.78           C  
ATOM   1491  N   SER L  76     -76.984  82.954 162.653  1.00 20.24           N  
ATOM   1492  CA  SER L  76     -77.820  82.648 163.801  1.00 19.28           C  
ATOM   1493  C   SER L  76     -78.987  81.791 163.338  1.00 19.74           C  
ATOM   1494  O   SER L  76     -79.334  81.794 162.155  1.00 18.50           O  
ATOM   1495  CB  SER L  76     -78.330  83.942 164.439  1.00 20.83           C  
ATOM   1496  OG  SER L  76     -79.056  84.706 163.494  1.00 21.50           O  
ATOM   1497  N   SER L  77     -79.575  81.047 164.274  1.00 18.30           N  
ATOM   1498  CA  SER L  77     -80.714  80.174 163.990  1.00 19.00           C  
ATOM   1499  C   SER L  77     -80.559  79.392 162.689  1.00 20.63           C  
ATOM   1500  O   SER L  77     -81.408  79.456 161.802  1.00 21.72           O  
ATOM   1501  CB  SER L  77     -82.000  81.004 163.961  1.00 19.90           C  
ATOM   1502  OG  SER L  77     -82.263  81.533 165.251  1.00 20.02           O  
ATOM   1503  N   VAL L  78     -79.464  78.644 162.597  1.00 20.82           N  
ATOM   1504  CA  VAL L  78     -79.165  77.858 161.406  1.00 20.96           C  
ATOM   1505  C   VAL L  78     -80.307  76.914 161.066  1.00 22.80           C  
ATOM   1506  O   VAL L  78     -80.868  76.249 161.940  1.00 24.63           O  
ATOM   1507  CB  VAL L  78     -77.854  77.041 161.594  1.00 22.05           C  
ATOM   1508  CG1 VAL L  78     -77.621  76.127 160.404  1.00 25.86           C  
ATOM   1509  CG2 VAL L  78     -76.676  77.986 161.757  1.00 21.51           C  
ATOM   1510  N   GLN L  79     -80.652  76.869 159.783  1.00 24.36           N  
ATOM   1511  CA  GLN L  79     -81.720  76.010 159.296  1.00 26.73           C  
ATOM   1512  C   GLN L  79     -81.151  74.953 158.362  1.00 27.48           C  
ATOM   1513  O   GLN L  79     -80.031  75.087 157.864  1.00 25.65           O  
ATOM   1514  CB  GLN L  79     -82.784  76.850 158.587  1.00 30.24           C  
ATOM   1515  CG  GLN L  79     -83.404  77.900 159.498  1.00 35.35           C  
ATOM   1516  CD  GLN L  79     -84.715  78.447 158.969  1.00 39.88           C  
ATOM   1517  OE1 GLN L  79     -84.776  78.991 157.865  1.00 41.67           O  
ATOM   1518  NE2 GLN L  79     -85.775  78.309 159.761  1.00 42.98           N  
ATOM   1519  N   ALA L  80     -81.924  73.898 158.135  1.00 28.42           N  
ATOM   1520  CA  ALA L  80     -81.484  72.803 157.283  1.00 29.47           C  
ATOM   1521  C   ALA L  80     -81.026  73.264 155.906  1.00 28.97           C  
ATOM   1522  O   ALA L  80     -80.080  72.706 155.337  1.00 29.77           O  
ATOM   1523  CB  ALA L  80     -82.602  71.773 157.142  1.00 30.02           C  
ATOM   1524  N   GLU L  81     -81.691  74.285 155.374  1.00 28.40           N  
ATOM   1525  CA  GLU L  81     -81.361  74.804 154.050  1.00 29.37           C  
ATOM   1526  C   GLU L  81     -80.017  75.521 153.989  1.00 27.70           C  
ATOM   1527  O   GLU L  81     -79.543  75.845 152.899  1.00 26.92           O  
ATOM   1528  CB  GLU L  81     -82.451  75.758 153.551  1.00 32.89           C  
ATOM   1529  CG  GLU L  81     -82.512  77.076 154.305  1.00 37.40           C  
ATOM   1530  CD  GLU L  81     -83.669  77.141 155.276  1.00 40.99           C  
ATOM   1531  OE1 GLU L  81     -83.997  76.096 155.882  1.00 42.71           O  
ATOM   1532  OE2 GLU L  81     -84.243  78.240 155.442  1.00 41.01           O  
ATOM   1533  N   ASP L  82     -79.405  75.774 155.144  1.00 23.96           N  
ATOM   1534  CA  ASP L  82     -78.110  76.453 155.171  1.00 21.64           C  
ATOM   1535  C   ASP L  82     -76.955  75.491 154.891  1.00 19.32           C  
ATOM   1536  O   ASP L  82     -75.798  75.909 154.831  1.00 21.08           O  
ATOM   1537  CB  ASP L  82     -77.868  77.148 156.521  1.00 18.87           C  
ATOM   1538  CG  ASP L  82     -78.899  78.224 156.824  1.00 19.42           C  
ATOM   1539  OD1 ASP L  82     -79.388  78.880 155.874  1.00 20.91           O  
ATOM   1540  OD2 ASP L  82     -79.200  78.438 158.019  1.00 24.36           O  
ATOM   1541  N   LEU L  83     -77.269  74.205 154.748  1.00 21.89           N  
ATOM   1542  CA  LEU L  83     -76.253  73.193 154.453  1.00 21.93           C  
ATOM   1543  C   LEU L  83     -75.475  73.673 153.230  1.00 20.83           C  
ATOM   1544  O   LEU L  83     -76.048  73.818 152.153  1.00 21.39           O  
ATOM   1545  CB  LEU L  83     -76.927  71.850 154.149  1.00 23.05           C  
ATOM   1546  CG  LEU L  83     -76.069  70.790 153.443  1.00 25.31           C  
ATOM   1547  CD1 LEU L  83     -74.916  70.359 154.342  1.00 27.16           C  
ATOM   1548  CD2 LEU L  83     -76.942  69.593 153.089  1.00 29.18           C  
ATOM   1549  N   ALA L  84     -74.176  73.909 153.394  1.00 19.81           N  
ATOM   1550  CA  ALA L  84     -73.358  74.410 152.299  1.00 17.44           C  
ATOM   1551  C   ALA L  84     -71.898  74.558 152.709  1.00 19.16           C  
ATOM   1552  O   ALA L  84     -71.527  74.298 153.859  1.00 19.90           O  
ATOM   1553  CB  ALA L  84     -73.897  75.782 151.866  1.00 18.53           C  
ATOM   1554  N   VAL L  85     -71.066  74.942 151.747  1.00 18.12           N  
ATOM   1555  CA  VAL L  85     -69.670  75.230 152.030  1.00 18.96           C  
ATOM   1556  C   VAL L  85     -69.609  76.749 151.856  1.00 19.44           C  
ATOM   1557  O   VAL L  85     -70.096  77.288 150.859  1.00 18.17           O  
ATOM   1558  CB  VAL L  85     -68.693  74.559 151.040  1.00 19.17           C  
ATOM   1559  CG1 VAL L  85     -67.264  75.003 151.346  1.00 18.96           C  
ATOM   1560  CG2 VAL L  85     -68.794  73.051 151.162  1.00 21.02           C  
ATOM   1561  N   TYR L  86     -69.030  77.436 152.833  1.00 16.58           N  
ATOM   1562  CA  TYR L  86     -68.934  78.893 152.796  1.00 17.04           C  
ATOM   1563  C   TYR L  86     -67.501  79.318 152.530  1.00 18.25           C  
ATOM   1564  O   TYR L  86     -66.581  78.893 153.230  1.00 17.87           O  
ATOM   1565  CB  TYR L  86     -69.437  79.482 154.122  1.00 15.97           C  
ATOM   1566  CG  TYR L  86     -70.907  79.228 154.357  1.00 16.17           C  
ATOM   1567  CD1 TYR L  86     -71.362  77.989 154.822  1.00 17.32           C  
ATOM   1568  CD2 TYR L  86     -71.855  80.197 154.039  1.00 16.20           C  
ATOM   1569  CE1 TYR L  86     -72.727  77.725 154.959  1.00 17.71           C  
ATOM   1570  CE2 TYR L  86     -73.216  79.942 154.165  1.00 17.57           C  
ATOM   1571  CZ  TYR L  86     -73.651  78.714 154.622  1.00 18.01           C  
ATOM   1572  OH  TYR L  86     -74.999  78.463 154.745  1.00 19.77           O  
ATOM   1573  N   TYR L  87     -67.314  80.152 151.512  1.00 16.38           N  
ATOM   1574  CA  TYR L  87     -65.983  80.614 151.134  1.00 19.30           C  
ATOM   1575  C   TYR L  87     -65.839  82.121 151.234  1.00 18.59           C  
ATOM   1576  O   TYR L  87     -66.793  82.855 150.969  1.00 18.69           O  
ATOM   1577  CB  TYR L  87     -65.670  80.248 149.671  1.00 20.10           C  
ATOM   1578  CG  TYR L  87     -65.742  78.782 149.305  1.00 20.83           C  
ATOM   1579  CD1 TYR L  87     -66.942  78.205 148.884  1.00 21.45           C  
ATOM   1580  CD2 TYR L  87     -64.603  77.978 149.345  1.00 21.65           C  
ATOM   1581  CE1 TYR L  87     -67.003  76.861 148.509  1.00 22.37           C  
ATOM   1582  CE2 TYR L  87     -64.660  76.634 148.974  1.00 21.11           C  
ATOM   1583  CZ  TYR L  87     -65.858  76.083 148.559  1.00 22.30           C  
ATOM   1584  OH  TYR L  87     -65.919  74.749 148.206  1.00 24.78           O  
ATOM   1585  N   CYS L  88     -64.662  82.588 151.634  1.00 18.22           N  
ATOM   1586  CA  CYS L  88     -64.438  84.021 151.634  1.00 18.70           C  
ATOM   1587  C   CYS L  88     -63.590  84.290 150.408  1.00 19.24           C  
ATOM   1588  O   CYS L  88     -62.906  83.394 149.909  1.00 20.37           O  
ATOM   1589  CB  CYS L  88     -63.727  84.519 152.890  1.00 19.57           C  
ATOM   1590  SG  CYS L  88     -62.104  83.803 153.307  1.00 22.86           S  
ATOM   1591  N   LYS L  89     -63.638  85.525 149.921  1.00 18.15           N  
ATOM   1592  CA  LYS L  89     -62.904  85.904 148.721  1.00 19.30           C  
ATOM   1593  C   LYS L  89     -62.436  87.351 148.824  1.00 19.00           C  
ATOM   1594  O   LYS L  89     -63.222  88.229 149.166  1.00 19.47           O  
ATOM   1595  CB  LYS L  89     -63.843  85.746 147.520  1.00 18.89           C  
ATOM   1596  CG  LYS L  89     -63.294  86.219 146.184  1.00 20.97           C  
ATOM   1597  CD  LYS L  89     -64.398  86.243 145.122  1.00 21.32           C  
ATOM   1598  CE  LYS L  89     -63.840  86.680 143.775  1.00 21.75           C  
ATOM   1599  NZ  LYS L  89     -64.871  86.670 142.694  1.00 21.39           N  
ATOM   1600  N   GLN L  90     -61.158  87.597 148.541  1.00 19.82           N  
ATOM   1601  CA  GLN L  90     -60.631  88.955 148.582  1.00 20.66           C  
ATOM   1602  C   GLN L  90     -60.622  89.508 147.174  1.00 20.88           C  
ATOM   1603  O   GLN L  90     -60.315  88.789 146.217  1.00 23.18           O  
ATOM   1604  CB  GLN L  90     -59.204  88.995 149.159  1.00 22.14           C  
ATOM   1605  CG  GLN L  90     -58.144  88.264 148.327  1.00 23.77           C  
ATOM   1606  CD  GLN L  90     -57.544  89.105 147.202  1.00 23.06           C  
ATOM   1607  OE1 GLN L  90     -56.885  88.571 146.305  1.00 25.52           O  
ATOM   1608  NE2 GLN L  90     -57.758  90.415 147.248  1.00 22.90           N  
ATOM   1609  N   SER L  91     -60.977  90.781 147.053  1.00 21.52           N  
ATOM   1610  CA  SER L  91     -60.995  91.452 145.758  1.00 22.33           C  
ATOM   1611  C   SER L  91     -60.247  92.782 145.847  1.00 25.16           C  
ATOM   1612  O   SER L  91     -60.499  93.704 145.069  1.00 26.48           O  
ATOM   1613  CB  SER L  91     -62.438  91.691 145.305  1.00 22.12           C  
ATOM   1614  OG  SER L  91     -63.127  92.522 146.219  1.00 22.54           O  
ATOM   1615  N   TYR L  92     -59.323  92.871 146.801  1.00 28.06           N  
ATOM   1616  CA  TYR L  92     -58.535  94.085 146.999  1.00 32.08           C  
ATOM   1617  C   TYR L  92     -57.492  94.235 145.894  1.00 35.18           C  
ATOM   1618  O   TYR L  92     -57.373  95.297 145.273  1.00 34.59           O  
ATOM   1619  CB  TYR L  92     -57.841  94.051 148.366  1.00 34.97           C  
ATOM   1620  CG  TYR L  92     -57.009  95.280 148.671  1.00 38.87           C  
ATOM   1621  CD1 TYR L  92     -57.605  96.534 148.815  1.00 41.91           C  
ATOM   1622  CD2 TYR L  92     -55.622  95.192 148.800  1.00 41.26           C  
ATOM   1623  CE1 TYR L  92     -56.838  97.671 149.079  1.00 44.04           C  
ATOM   1624  CE2 TYR L  92     -54.850  96.322 149.063  1.00 43.24           C  
ATOM   1625  CZ  TYR L  92     -55.464  97.556 149.198  1.00 44.05           C  
ATOM   1626  OH  TYR L  92     -54.701  98.678 149.434  1.00 45.70           O  
ATOM   1627  N   TYR L  93     -56.735  93.169 145.656  1.00 36.96           N  
ATOM   1628  CA  TYR L  93     -55.711  93.173 144.619  1.00 42.56           C  
ATOM   1629  C   TYR L  93     -56.173  92.305 143.460  1.00 43.78           C  
ATOM   1630  O   TYR L  93     -56.767  91.250 143.674  1.00 43.44           O  
ATOM   1631  CB  TYR L  93     -54.383  92.633 145.169  1.00 46.90           C  
ATOM   1632  CG  TYR L  93     -53.555  93.651 145.927  1.00 52.01           C  
ATOM   1633  CD1 TYR L  93     -53.227  94.880 145.350  1.00 54.04           C  
ATOM   1634  CD2 TYR L  93     -53.067  93.373 147.206  1.00 54.49           C  
ATOM   1635  CE1 TYR L  93     -52.434  95.806 146.024  1.00 56.72           C  
ATOM   1636  CE2 TYR L  93     -52.271  94.296 147.890  1.00 56.88           C  
ATOM   1637  CZ  TYR L  93     -51.959  95.510 147.291  1.00 57.05           C  
ATOM   1638  OH  TYR L  93     -51.171  96.425 147.951  1.00 58.92           O  
ATOM   1639  N   HIS L  94     -55.913  92.748 142.233  1.00 45.42           N  
ATOM   1640  CA  HIS L  94     -56.315  91.966 141.075  1.00 47.70           C  
ATOM   1641  C   HIS L  94     -55.798  90.548 141.222  1.00 46.70           C  
ATOM   1642  O   HIS L  94     -54.757  90.321 141.839  1.00 48.52           O  
ATOM   1643  CB  HIS L  94     -55.808  92.604 139.783  1.00 51.84           C  
ATOM   1644  CG  HIS L  94     -56.794  93.543 139.162  1.00 54.79           C  
ATOM   1645  ND1 HIS L  94     -58.040  93.132 138.745  1.00 55.76           N  
ATOM   1646  CD2 HIS L  94     -56.731  94.872 138.913  1.00 56.33           C  
ATOM   1647  CE1 HIS L  94     -58.705  94.168 138.265  1.00 57.57           C  
ATOM   1648  NE2 HIS L  94     -57.934  95.236 138.355  1.00 57.46           N  
ATOM   1649  N   MET L  95     -56.535  89.605 140.646  1.00 45.26           N  
ATOM   1650  CA  MET L  95     -56.232  88.182 140.742  1.00 43.26           C  
ATOM   1651  C   MET L  95     -56.817  87.821 142.100  1.00 39.69           C  
ATOM   1652  O   MET L  95     -56.096  87.561 143.066  1.00 39.70           O  
ATOM   1653  CB  MET L  95     -54.724  87.911 140.731  1.00 46.27           C  
ATOM   1654  CG  MET L  95     -54.345  86.436 140.652  1.00 50.03           C  
ATOM   1655  SD  MET L  95     -54.799  85.668 139.077  1.00 56.55           S  
ATOM   1656  CE  MET L  95     -53.359  86.056 138.062  1.00 55.03           C  
ATOM   1657  N   TYR L  96     -58.143  87.847 142.161  1.00 34.42           N  
ATOM   1658  CA  TYR L  96     -58.878  87.544 143.380  1.00 31.25           C  
ATOM   1659  C   TYR L  96     -58.566  86.123 143.849  1.00 29.98           C  
ATOM   1660  O   TYR L  96     -58.337  85.232 143.036  1.00 29.90           O  
ATOM   1661  CB  TYR L  96     -60.385  87.709 143.125  1.00 27.67           C  
ATOM   1662  CG  TYR L  96     -60.785  89.057 142.546  1.00 27.65           C  
ATOM   1663  CD1 TYR L  96     -59.975  90.183 142.715  1.00 26.23           C  
ATOM   1664  CD2 TYR L  96     -62.006  89.222 141.875  1.00 26.05           C  
ATOM   1665  CE1 TYR L  96     -60.364  91.436 142.239  1.00 26.58           C  
ATOM   1666  CE2 TYR L  96     -62.403  90.479 141.395  1.00 28.17           C  
ATOM   1667  CZ  TYR L  96     -61.574  91.581 141.586  1.00 27.90           C  
ATOM   1668  OH  TYR L  96     -61.964  92.833 141.149  1.00 27.15           O  
ATOM   1669  N   THR L  97     -58.548  85.919 145.165  1.00 28.31           N  
ATOM   1670  CA  THR L  97     -58.269  84.605 145.736  1.00 27.81           C  
ATOM   1671  C   THR L  97     -59.343  84.210 146.741  1.00 26.63           C  
ATOM   1672  O   THR L  97     -59.971  85.069 147.351  1.00 25.47           O  
ATOM   1673  CB  THR L  97     -56.904  84.572 146.453  1.00 27.90           C  
ATOM   1674  OG1 THR L  97     -56.787  85.714 147.309  1.00 28.51           O  
ATOM   1675  CG2 THR L  97     -55.767  84.575 145.442  1.00 30.49           C  
ATOM   1676  N   PHE L  98     -59.524  82.904 146.914  1.00 25.95           N  
ATOM   1677  CA  PHE L  98     -60.524  82.363 147.824  1.00 24.89           C  
ATOM   1678  C   PHE L  98     -59.932  81.569 148.975  1.00 24.15           C  
ATOM   1679  O   PHE L  98     -58.830  81.030 148.878  1.00 25.16           O  
ATOM   1680  CB  PHE L  98     -61.457  81.407 147.088  1.00 25.15           C  
ATOM   1681  CG  PHE L  98     -62.298  82.046 146.031  1.00 27.90           C  
ATOM   1682  CD1 PHE L  98     -61.753  82.399 144.800  1.00 29.48           C  
ATOM   1683  CD2 PHE L  98     -63.658  82.233 146.244  1.00 27.72           C  
ATOM   1684  CE1 PHE L  98     -62.557  82.923 143.793  1.00 30.57           C  
ATOM   1685  CE2 PHE L  98     -64.471  82.757 145.243  1.00 28.73           C  
ATOM   1686  CZ  PHE L  98     -63.920  83.100 144.017  1.00 28.52           C  
ATOM   1687  N   GLY L  99     -60.689  81.489 150.065  1.00 24.23           N  
ATOM   1688  CA  GLY L  99     -60.264  80.682 151.189  1.00 23.11           C  
ATOM   1689  C   GLY L  99     -60.671  79.272 150.791  1.00 21.22           C  
ATOM   1690  O   GLY L  99     -61.421  79.102 149.825  1.00 21.31           O  
ATOM   1691  N   SER L 100     -60.199  78.265 151.523  1.00 23.14           N  
ATOM   1692  CA  SER L 100     -60.509  76.865 151.211  1.00 23.05           C  
ATOM   1693  C   SER L 100     -61.926  76.430 151.604  1.00 22.38           C  
ATOM   1694  O   SER L 100     -62.356  75.324 151.271  1.00 23.01           O  
ATOM   1695  CB  SER L 100     -59.471  75.943 151.867  1.00 26.86           C  
ATOM   1696  OG  SER L 100     -59.403  76.141 153.263  1.00 29.45           O  
ATOM   1697  N   GLY L 101     -62.633  77.296 152.330  1.00 22.15           N  
ATOM   1698  CA  GLY L 101     -64.003  77.008 152.721  1.00 21.75           C  
ATOM   1699  C   GLY L 101     -64.279  76.338 154.054  1.00 22.99           C  
ATOM   1700  O   GLY L 101     -63.428  75.647 154.615  1.00 24.55           O  
ATOM   1701  N   THR L 102     -65.484  76.573 154.568  1.00 20.67           N  
ATOM   1702  CA  THR L 102     -65.939  75.973 155.821  1.00 18.68           C  
ATOM   1703  C   THR L 102     -67.249  75.265 155.511  1.00 20.48           C  
ATOM   1704  O   THR L 102     -68.210  75.884 155.060  1.00 20.07           O  
ATOM   1705  CB  THR L 102     -66.190  77.030 156.913  1.00 17.06           C  
ATOM   1706  OG1 THR L 102     -64.949  77.637 157.278  1.00 20.55           O  
ATOM   1707  CG2 THR L 102     -66.827  76.386 158.158  1.00 19.62           C  
ATOM   1708  N   LYS L 103     -67.275  73.961 155.744  1.00 19.66           N  
ATOM   1709  CA  LYS L 103     -68.459  73.166 155.489  1.00 21.24           C  
ATOM   1710  C   LYS L 103     -69.390  73.222 156.696  1.00 21.91           C  
ATOM   1711  O   LYS L 103     -68.950  73.056 157.834  1.00 23.11           O  
ATOM   1712  CB  LYS L 103     -68.051  71.722 155.203  1.00 23.80           C  
ATOM   1713  CG  LYS L 103     -69.184  70.817 154.802  1.00 28.29           C  
ATOM   1714  CD  LYS L 103     -68.655  69.470 154.345  1.00 31.99           C  
ATOM   1715  CE  LYS L 103     -69.756  68.627 153.745  1.00 33.49           C  
ATOM   1716  NZ  LYS L 103     -70.853  68.382 154.703  1.00 34.12           N  
ATOM   1717  N   LEU L 104     -70.671  73.480 156.440  1.00 19.86           N  
ATOM   1718  CA  LEU L 104     -71.680  73.541 157.495  1.00 19.72           C  
ATOM   1719  C   LEU L 104     -72.720  72.461 157.257  1.00 21.15           C  
ATOM   1720  O   LEU L 104     -73.289  72.363 156.171  1.00 20.61           O  
ATOM   1721  CB  LEU L 104     -72.381  74.907 157.509  1.00 20.25           C  
ATOM   1722  CG  LEU L 104     -73.517  75.041 158.535  1.00 21.07           C  
ATOM   1723  CD1 LEU L 104     -72.942  74.930 159.945  1.00 21.04           C  
ATOM   1724  CD2 LEU L 104     -74.224  76.392 158.371  1.00 21.51           C  
ATOM   1725  N   GLU L 105     -72.972  71.645 158.272  1.00 22.83           N  
ATOM   1726  CA  GLU L 105     -73.968  70.594 158.142  1.00 25.05           C  
ATOM   1727  C   GLU L 105     -74.891  70.643 159.354  1.00 26.30           C  
ATOM   1728  O   GLU L 105     -74.482  71.065 160.436  1.00 24.97           O  
ATOM   1729  CB  GLU L 105     -73.291  69.222 158.031  1.00 27.43           C  
ATOM   1730  CG  GLU L 105     -72.550  68.791 159.278  1.00 30.30           C  
ATOM   1731  CD  GLU L 105     -71.677  67.565 159.053  1.00 32.67           C  
ATOM   1732  OE1 GLU L 105     -70.667  67.682 158.332  1.00 33.92           O  
ATOM   1733  OE2 GLU L 105     -72.005  66.488 159.591  1.00 35.62           O  
ATOM   1734  N   ILE L 106     -76.137  70.227 159.155  1.00 29.91           N  
ATOM   1735  CA  ILE L 106     -77.136  70.224 160.219  1.00 36.32           C  
ATOM   1736  C   ILE L 106     -77.675  68.814 160.427  1.00 39.70           C  
ATOM   1737  O   ILE L 106     -78.332  68.259 159.548  1.00 40.53           O  
ATOM   1738  CB  ILE L 106     -78.335  71.144 159.883  1.00 37.03           C  
ATOM   1739  CG1 ILE L 106     -77.851  72.555 159.538  1.00 38.35           C  
ATOM   1740  CG2 ILE L 106     -79.284  71.204 161.069  1.00 39.89           C  
ATOM   1741  CD1 ILE L 106     -77.332  72.709 158.118  1.00 39.92           C  
ATOM   1742  N   LYS L 107     -77.400  68.240 161.593  1.00 43.74           N  
ATOM   1743  CA  LYS L 107     -77.863  66.893 161.904  1.00 47.88           C  
ATOM   1744  C   LYS L 107     -79.085  66.924 162.816  1.00 48.91           C  
ATOM   1745  O   LYS L 107     -80.136  66.383 162.408  1.00 50.46           O  
ATOM   1746  CB  LYS L 107     -76.738  66.090 162.565  1.00 50.47           C  
ATOM   1747  CG  LYS L 107     -76.124  66.769 163.782  1.00 53.07           C  
ATOM   1748  CD  LYS L 107     -75.038  65.914 164.429  1.00 55.15           C  
ATOM   1749  CE  LYS L 107     -73.854  65.688 163.498  1.00 57.06           C  
ATOM   1750  NZ  LYS L 107     -72.771  64.909 164.166  1.00 56.67           N  
ATOM   1751  OXT LYS L 107     -78.975  67.488 163.926  1.00 49.43           O  
TER    1752      LYS L 107                                                      
