# Supplementary material for: SARS-CoV-2 Spike Protein Interaction Space
Source: Int J Mol Sci. 2023 Jul 27;24(15):12058. doi: 10.3390/ijms241512058 (PMC10418891; doi:10.3390/ijms241512058)
Supplement: Supplementary file 1 [file ijms-24-12058-s001.zip › Supplementary Material File S1/3BDX.pdb]

REMARK 950 NUMBERING  Kabat
REMARK 950 METHOD     X-ray crystal structure
REMARK 950 RESOLUTION 2.300
REMARK 950 R-FACTOR   0.205
REMARK 950 R-FREE     0.246
REMARK 950 CHAIN-TYPE LABEL ORIGINAL
REMARK 950 CHAIN L    L    A
REMARK 950 CHAIN L    L    B
REMARK 950 MOLECULE : A : AMYLOID LAMBDA 6 LIGHT CHAIN VARIABLE REGION PIP (FRAGMENT)
REMARK 950 SPECIES  : A : HOMO SAPIENS
SEQRES   1 L 111  ASN PHE MET LEU THR GLN SER HIS SER VAL SER GLU SER          
SEQRES   2 L 111  PRO GLY LYS THR VAL THR ILE SER CYS THR ARG SER SER          
SEQRES   3 L 111  GLY SER ILE ALA SER ASN TYR VAL GLN TRP TYR GLN GLN          
SEQRES   4 L 111  ARG PRO GLY SER SER PRO THR THR VAL ILE TYR GLU ASP          
SEQRES   5 L 111  ASN GLN ARG PRO SER GLY VAL PRO ASP ARG PHE SER GLY          
SEQRES   6 L 111  SER ILE ASP SER SER SER ASN SER ALA SER LEU THR ILE          
SEQRES   7 L 111  SER GLY LEU LYS THR GLU ASP GLU ALA ASP TYR TYR CYS          
SEQRES   8 L 111  GLN SER TYR ASP SER SER ASN HIS VAL VAL PHE GLY GLY          
SEQRES   9 L 111  GLY THR LYS LEU THR VAL LEU                                  
SEQRES   1 L 111  ASN PHE MET LEU THR GLN SER HIS SER VAL SER GLU SER          
SEQRES   2 L 111  PRO GLY LYS THR VAL THR ILE SER CYS THR ARG SER SER          
SEQRES   3 L 111  GLY SER ILE ALA SER ASN TYR VAL GLN TRP TYR GLN GLN          
SEQRES   4 L 111  ARG PRO GLY SER SER PRO THR THR VAL ILE TYR GLU ASP          
SEQRES   5 L 111  ASN GLN ARG PRO SER GLY VAL PRO ASP ARG PHE SER GLY          
SEQRES   6 L 111  SER ILE ASP SER SER SER ASN SER ALA SER LEU THR ILE          
SEQRES   7 L 111  SER GLY LEU LYS THR GLU ASP GLU ALA ASP TYR TYR CYS          
SEQRES   8 L 111  GLN SER TYR ASP SER SER ASN HIS VAL VAL PHE GLY GLY          
SEQRES   9 L 111  GLY THR LYS LEU THR VAL LEU                                  
ATOM      1  N   ASN L   1      20.071  24.055  57.424  1.00 35.89           N  
ATOM      2  CA  ASN L   1      21.261  23.810  58.299  1.00 36.33           C  
ATOM      3  C   ASN L   1      22.157  22.658  57.845  1.00 34.39           C  
ATOM      4  O   ASN L   1      22.197  21.601  58.478  1.00 35.13           O  
ATOM      5  CB  ASN L   1      20.817  23.552  59.743  1.00 37.60           C  
ATOM      6  CG  ASN L   1      20.293  24.811  60.432  1.00 39.38           C  
ATOM      7  OD1 ASN L   1      20.256  24.883  61.667  1.00 39.47           O  
ATOM      8  ND2 ASN L   1      19.875  25.806  59.634  1.00 39.66           N  
ATOM      9  N   PHE L   2      22.870  22.866  56.745  1.00 31.36           N  
ATOM     10  CA  PHE L   2      23.788  21.862  56.220  1.00 28.06           C  
ATOM     11  C   PHE L   2      25.181  22.456  56.294  1.00 26.73           C  
ATOM     12  O   PHE L   2      25.370  23.522  56.870  1.00 25.76           O  
ATOM     13  CB  PHE L   2      23.465  21.542  54.753  1.00 26.93           C  
ATOM     14  CG  PHE L   2      23.423  22.754  53.853  1.00 24.48           C  
ATOM     15  CD1 PHE L   2      22.243  23.464  53.673  1.00 23.30           C  
ATOM     16  CD2 PHE L   2      24.570  23.185  53.185  1.00 24.10           C  
ATOM     17  CE1 PHE L   2      22.204  24.575  52.845  1.00 22.60           C  
ATOM     18  CE2 PHE L   2      24.537  24.299  52.358  1.00 22.80           C  
ATOM     19  CZ  PHE L   2      23.353  24.993  52.187  1.00 22.84           C  
ATOM     20  N   MET L   3      26.164  21.768  55.730  1.00 25.14           N  
ATOM     21  CA  MET L   3      27.503  22.332  55.716  1.00 25.00           C  
ATOM     22  C   MET L   3      28.128  22.174  54.340  1.00 23.37           C  
ATOM     23  O   MET L   3      27.765  21.283  53.571  1.00 23.06           O  
ATOM     24  CB  MET L   3      28.397  21.708  56.802  1.00 26.38           C  
ATOM     25  CG  MET L   3      28.779  20.239  56.648  1.00 28.57           C  
ATOM     26  SD  MET L   3      29.644  19.655  58.184  1.00 31.62           S  
ATOM     27  CE  MET L   3      31.307  20.380  57.971  1.00 28.80           C  
ATOM     28  N   LEU L   4      29.034  23.079  54.012  1.00 21.29           N  
ATOM     29  CA  LEU L   4      29.719  23.019  52.742  1.00 19.91           C  
ATOM     30  C   LEU L   4      31.175  22.709  53.067  1.00 20.04           C  
ATOM     31  O   LEU L   4      31.846  23.487  53.743  1.00 20.41           O  
ATOM     32  CB  LEU L   4      29.581  24.357  52.002  1.00 19.27           C  
ATOM     33  CG  LEU L   4      28.177  24.681  51.456  1.00 20.41           C  
ATOM     34  CD1 LEU L   4      28.160  26.061  50.803  1.00 18.22           C  
ATOM     35  CD2 LEU L   4      27.761  23.621  50.445  1.00 19.84           C  
ATOM     36  N   THR L   5      31.652  21.548  52.627  1.00 18.76           N  
ATOM     37  CA  THR L   5      33.036  21.164  52.886  1.00 17.65           C  
ATOM     38  C   THR L   5      33.829  21.139  51.580  1.00 17.20           C  
ATOM     39  O   THR L   5      33.429  20.521  50.590  1.00 15.81           O  
ATOM     40  CB  THR L   5      33.110  19.808  53.612  1.00 17.71           C  
ATOM     41  OG1 THR L   5      32.388  19.899  54.847  1.00 16.93           O  
ATOM     42  CG2 THR L   5      34.551  19.445  53.919  1.00 14.54           C  
ATOM     43  N   GLN L   6      34.965  21.826  51.603  1.00 17.04           N  
ATOM     44  CA  GLN L   6      35.804  21.975  50.430  1.00 18.14           C  
ATOM     45  C   GLN L   6      37.081  21.156  50.445  1.00 19.79           C  
ATOM     46  O   GLN L   6      37.451  20.560  51.463  1.00 19.28           O  
ATOM     47  CB  GLN L   6      36.164  23.455  50.259  1.00 17.68           C  
ATOM     48  CG  GLN L   6      35.062  24.425  50.696  1.00 15.88           C  
ATOM     49  CD  GLN L   6      35.388  25.885  50.387  1.00 16.77           C  
ATOM     50  OE1 GLN L   6      34.687  26.799  50.835  1.00 16.54           O  
ATOM     51  NE2 GLN L   6      36.448  26.107  49.610  1.00 12.79           N  
ATOM     52  N   SER L   7      37.750  21.154  49.293  1.00 20.67           N  
ATOM     53  CA  SER L   7      39.013  20.448  49.099  1.00 22.21           C  
ATOM     54  C   SER L   7      40.022  20.940  50.127  1.00 23.60           C  
ATOM     55  O   SER L   7      39.936  22.080  50.597  1.00 23.09           O  
ATOM     56  CB  SER L   7      39.576  20.734  47.704  1.00 22.28           C  
ATOM     57  OG  SER L   7      38.595  20.573  46.696  1.00 24.28           O  
ATOM     58  N   HIS L   8      40.982  20.083  50.470  1.00 24.87           N  
ATOM     59  CA  HIS L   8      42.011  20.459  51.423  1.00 25.73           C  
ATOM     60  C   HIS L   8      43.021  21.322  50.687  1.00 26.31           C  
ATOM     61  O   HIS L   8      43.059  21.323  49.455  1.00 26.82           O  
ATOM     62  CB  HIS L   8      42.687  19.212  52.031  1.00 27.65           C  
ATOM     63  CG  HIS L   8      42.970  18.122  51.042  1.00 28.40           C  
ATOM     64  ND1 HIS L   8      42.445  16.852  51.166  1.00 29.18           N  
ATOM     65  CD2 HIS L   8      43.693  18.120  49.896  1.00 28.81           C  
ATOM     66  CE1 HIS L   8      42.828  16.117  50.137  1.00 30.11           C  
ATOM     67  NE2 HIS L   8      43.586  16.863  49.350  1.00 29.80           N  
ATOM     68  N   SER L   9      43.822  22.065  51.444  1.00 27.59           N  
ATOM     69  CA  SER L   9      44.836  22.953  50.884  1.00 28.83           C  
ATOM     70  C   SER L   9      45.480  22.373  49.629  1.00 29.14           C  
ATOM     71  O   SER L   9      45.757  21.176  49.561  1.00 28.27           O  
ATOM     72  CB  SER L   9      45.915  23.226  51.930  1.00 29.19           C  
ATOM     73  OG  SER L   9      45.342  23.785  53.099  1.00 31.51           O  
ATOM     74  N   VAL L  11      45.713  23.230  48.640  1.00 29.49           N  
ATOM     75  CA  VAL L  11      46.316  22.797  47.390  1.00 30.59           C  
ATOM     76  C   VAL L  11      47.511  23.673  47.013  1.00 32.02           C  
ATOM     77  O   VAL L  11      47.540  24.878  47.306  1.00 30.33           O  
ATOM     78  CB  VAL L  11      45.314  22.856  46.219  1.00 29.28           C  
ATOM     79  CG1 VAL L  11      45.858  22.055  45.051  1.00 31.69           C  
ATOM     80  CG2 VAL L  11      43.952  22.327  46.643  1.00 30.17           C  
ATOM     81  N   SER L  12      48.490  23.041  46.362  1.00 33.06           N  
ATOM     82  CA  SER L  12      49.696  23.700  45.888  1.00 34.51           C  
ATOM     83  C   SER L  12      49.873  23.254  44.454  1.00 36.23           C  
ATOM     84  O   SER L  12      49.636  22.091  44.123  1.00 36.46           O  
ATOM     85  CB  SER L  12      50.917  23.266  46.684  1.00 34.83           C  
ATOM     86  OG  SER L  12      50.862  23.751  48.009  1.00 37.57           O  
ATOM     87  N   GLU L  13      50.293  24.176  43.602  1.00 36.97           N  
ATOM     88  CA  GLU L  13      50.492  23.858  42.201  1.00 37.62           C  
ATOM     89  C   GLU L  13      51.417  24.913  41.587  1.00 37.33           C  
ATOM     90  O   GLU L  13      51.726  25.925  42.229  1.00 37.62           O  
ATOM     91  CB  GLU L  13      49.142  23.850  41.491  1.00 39.22           C  
ATOM     92  CG  GLU L  13      49.141  23.109  40.162  1.00 42.61           C  
ATOM     93  CD  GLU L  13      49.370  21.611  40.324  1.00 44.37           C  
ATOM     94  OE1 GLU L  13      48.751  21.010  41.245  1.00 44.10           O  
ATOM     95  OE2 GLU L  13      50.155  21.040  39.521  1.00 44.86           O  
ATOM     96  N   SER L  14      51.854  24.681  40.353  1.00 36.06           N  
ATOM     97  CA  SER L  14      52.754  25.609  39.680  1.00 34.70           C  
ATOM     98  C   SER L  14      52.018  26.540  38.727  1.00 34.28           C  
ATOM     99  O   SER L  14      50.941  26.209  38.214  1.00 34.30           O  
ATOM    100  CB  SER L  14      53.808  24.831  38.885  1.00 35.87           C  
ATOM    101  OG  SER L  14      54.459  23.855  39.687  1.00 37.80           O  
ATOM    102  N   PRO L  15      52.590  27.728  38.472  1.00 33.44           N  
ATOM    103  CA  PRO L  15      51.961  28.688  37.562  1.00 31.89           C  
ATOM    104  C   PRO L  15      51.713  28.052  36.196  1.00 31.23           C  
ATOM    105  O   PRO L  15      52.456  27.159  35.776  1.00 30.85           O  
ATOM    106  CB  PRO L  15      52.987  29.813  37.498  1.00 32.23           C  
ATOM    107  CG  PRO L  15      53.547  29.813  38.896  1.00 33.02           C  
ATOM    108  CD  PRO L  15      53.760  28.326  39.142  1.00 32.82           C  
ATOM    109  N   GLY L  16      50.676  28.515  35.503  1.00 30.11           N  
ATOM    110  CA  GLY L  16      50.360  27.968  34.197  1.00 27.84           C  
ATOM    111  C   GLY L  16      49.665  26.620  34.282  1.00 27.25           C  
ATOM    112  O   GLY L  16      49.140  26.122  33.284  1.00 26.87           O  
ATOM    113  N   LYS L  17      49.663  26.023  35.469  1.00 26.44           N  
ATOM    114  CA  LYS L  17      49.023  24.731  35.681  1.00 27.55           C  
ATOM    115  C   LYS L  17      47.502  24.910  35.861  1.00 27.42           C  
ATOM    116  O   LYS L  17      46.985  26.028  35.802  1.00 28.26           O  
ATOM    117  CB  LYS L  17      49.622  24.077  36.926  1.00 29.71           C  
ATOM    118  CG  LYS L  17      49.692  22.551  36.906  1.00 32.43           C  
ATOM    119  CD  LYS L  17      50.784  22.044  35.971  1.00 32.96           C  
ATOM    120  CE  LYS L  17      51.300  20.674  36.428  1.00 34.43           C  
ATOM    121  NZ  LYS L  17      52.052  20.757  37.727  1.00 35.04           N  
ATOM    122  N   THR L  18      46.788  23.813  36.092  1.00 26.96           N  
ATOM    123  CA  THR L  18      45.338  23.869  36.267  1.00 25.34           C  
ATOM    124  C   THR L  18      44.932  23.244  37.582  1.00 25.36           C  
ATOM    125  O   THR L  18      45.416  22.173  37.923  1.00 27.22           O  
ATOM    126  CB  THR L  18      44.605  23.082  35.163  1.00 25.27           C  
ATOM    127  OG1 THR L  18      44.849  23.691  33.890  1.00 25.70           O  
ATOM    128  CG2 THR L  18      43.106  23.049  35.434  1.00 25.03           C  
ATOM    129  N   VAL L  19      44.047  23.895  38.327  1.00 24.62           N  
ATOM    130  CA  VAL L  19      43.599  23.313  39.584  1.00 23.90           C  
ATOM    131  C   VAL L  19      42.079  23.359  39.687  1.00 23.28           C  
ATOM    132  O   VAL L  19      41.412  24.124  38.987  1.00 23.35           O  
ATOM    133  CB  VAL L  19      44.204  24.031  40.826  1.00 24.59           C  
ATOM    134  CG1 VAL L  19      45.615  24.503  40.518  1.00 25.51           C  
ATOM    135  CG2 VAL L  19      43.316  25.184  41.260  1.00 24.00           C  
ATOM    136  N   THR L  20      41.545  22.530  40.572  1.00 21.94           N  
ATOM    137  CA  THR L  20      40.115  22.461  40.793  1.00 20.99           C  
ATOM    138  C   THR L  20      39.882  22.298  42.283  1.00 20.58           C  
ATOM    139  O   THR L  20      40.452  21.415  42.920  1.00 21.85           O  
ATOM    140  CB  THR L  20      39.494  21.271  40.024  1.00 21.01           C  
ATOM    141  OG1 THR L  20      39.749  21.434  38.621  1.00 21.47           O  
ATOM    142  CG2 THR L  20      37.989  21.202  40.251  1.00 20.42           C  
ATOM    143  N   ILE L  21      39.068  23.190  42.837  1.00 19.78           N  
ATOM    144  CA  ILE L  21      38.727  23.161  44.250  1.00 17.29           C  
ATOM    145  C   ILE L  21      37.275  22.709  44.294  1.00 16.94           C  
ATOM    146  O   ILE L  21      36.440  23.224  43.555  1.00 15.25           O  
ATOM    147  CB  ILE L  21      38.882  24.573  44.897  1.00 17.34           C  
ATOM    148  CG1 ILE L  21      40.353  24.990  44.886  1.00 15.37           C  
ATOM    149  CG2 ILE L  21      38.362  24.564  46.332  1.00 16.45           C  
ATOM    150  CD1 ILE L  21      40.604  26.371  45.450  1.00 15.41           C  
ATOM    151  N   SER L  22      36.981  21.727  45.138  1.00 17.00           N  
ATOM    152  CA  SER L  22      35.623  21.215  45.241  1.00 18.51           C  
ATOM    153  C   SER L  22      34.909  21.645  46.509  1.00 18.52           C  
ATOM    154  O   SER L  22      35.523  22.093  47.472  1.00 17.80           O  
ATOM    155  CB  SER L  22      35.622  19.693  45.129  1.00 20.16           C  
ATOM    156  OG  SER L  22      36.070  19.308  43.842  1.00 23.80           O  
ATOM    157  N   CYS L  23      33.592  21.504  46.487  1.00 19.70           N  
ATOM    158  CA  CYS L  23      32.748  21.903  47.601  1.00 19.55           C  
ATOM    159  C   CYS L  23      31.501  21.038  47.569  1.00 20.12           C  
ATOM    160  O   CYS L  23      30.663  21.166  46.669  1.00 21.09           O  
ATOM    161  CB  CYS L  23      32.403  23.375  47.422  1.00 18.24           C  
ATOM    162  SG  CYS L  23      31.032  24.105  48.361  1.00 20.64           S  
ATOM    163  N   THR L  24      31.390  20.149  48.548  1.00 17.93           N  
ATOM    164  CA  THR L  24      30.257  19.252  48.623  1.00 17.06           C  
ATOM    165  C   THR L  24      29.280  19.630  49.733  1.00 18.92           C  
ATOM    166  O   THR L  24      29.677  20.074  50.812  1.00 18.72           O  
ATOM    167  CB  THR L  24      30.743  17.813  48.814  1.00 13.96           C  
ATOM    168  OG1 THR L  24      31.482  17.420  47.656  1.00 15.15           O  
ATOM    169  CG2 THR L  24      29.582  16.865  49.024  1.00 12.09           C  
ATOM    170  N   ARG L  25      27.994  19.462  49.449  1.00 19.00           N  
ATOM    171  CA  ARG L  25      26.955  19.785  50.412  1.00 20.11           C  
ATOM    172  C   ARG L  25      26.655  18.531  51.235  1.00 21.05           C  
ATOM    173  O   ARG L  25      26.388  17.467  50.682  1.00 21.15           O  
ATOM    174  CB  ARG L  25      25.710  20.291  49.671  1.00 19.23           C  
ATOM    175  CG  ARG L  25      24.515  20.586  50.561  1.00 20.75           C  
ATOM    176  CD  ARG L  25      23.508  21.531  49.886  1.00 20.13           C  
ATOM    177  NE  ARG L  25      22.225  21.530  50.588  1.00 21.37           N  
ATOM    178  CZ  ARG L  25      21.259  22.430  50.416  1.00 20.59           C  
ATOM    179  NH1 ARG L  25      21.410  23.431  49.560  1.00 20.86           N  
ATOM    180  NH2 ARG L  25      20.128  22.319  51.097  1.00 18.92           N  
ATOM    181  N   SER L  26      26.722  18.658  52.558  1.00 21.63           N  
ATOM    182  CA  SER L  26      26.480  17.531  53.450  1.00 22.23           C  
ATOM    183  C   SER L  26      25.088  16.907  53.269  1.00 22.59           C  
ATOM    184  O   SER L  26      24.959  15.690  53.192  1.00 22.37           O  
ATOM    185  CB  SER L  26      26.661  17.961  54.902  1.00 21.48           C  
ATOM    186  OG  SER L  26      25.454  18.482  55.421  1.00 23.79           O  
ATOM    187  N   SER L  27      24.049  17.734  53.215  1.00 22.45           N  
ATOM    188  CA  SER L  27      22.693  17.220  53.023  1.00 23.56           C  
ATOM    189  C   SER L  27      21.860  18.213  52.210  1.00 23.74           C  
ATOM    190  O   SER L  27      22.206  19.398  52.121  1.00 23.18           O  
ATOM    191  CB  SER L  27      22.017  16.933  54.371  1.00 21.08           C  
ATOM    192  OG  SER L  27      21.816  18.121  55.102  1.00 26.16           O  
ATOM    193  N   GLY L  27A     20.766  17.724  51.628  1.00 22.72           N  
ATOM    194  CA  GLY L  27A     19.930  18.573  50.797  1.00 24.27           C  
ATOM    195  C   GLY L  27A     20.552  18.582  49.413  1.00 24.54           C  
ATOM    196  O   GLY L  27A     21.723  18.225  49.262  1.00 25.44           O  
ATOM    197  N   SER L  27B     19.801  18.977  48.394  1.00 24.76           N  
ATOM    198  CA  SER L  27B     20.364  18.987  47.045  1.00 25.12           C  
ATOM    199  C   SER L  27B     21.132  20.265  46.702  1.00 24.31           C  
ATOM    200  O   SER L  27B     20.595  21.373  46.813  1.00 24.71           O  
ATOM    201  CB  SER L  27B     19.266  18.776  46.007  1.00 24.63           C  
ATOM    202  OG  SER L  27B     19.823  18.881  44.711  1.00 27.41           O  
ATOM    203  N   ILE L  28      22.380  20.097  46.264  1.00 22.59           N  
ATOM    204  CA  ILE L  28      23.250  21.218  45.889  1.00 21.19           C  
ATOM    205  C   ILE L  28      22.614  22.186  44.878  1.00 21.16           C  
ATOM    206  O   ILE L  28      22.932  23.374  44.875  1.00 21.16           O  
ATOM    207  CB  ILE L  28      24.575  20.694  45.288  1.00 20.09           C  
ATOM    208  CG1 ILE L  28      25.601  21.824  45.161  1.00 19.49           C  
ATOM    209  CG2 ILE L  28      24.314  20.066  43.927  1.00 18.68           C  
ATOM    210  CD1 ILE L  28      26.251  22.218  46.451  1.00 18.15           C  
ATOM    211  N   ALA L  29      21.721  21.682  44.025  1.00 21.09           N  
ATOM    212  CA  ALA L  29      21.072  22.510  43.002  1.00 22.04           C  
ATOM    213  C   ALA L  29      19.761  23.147  43.460  1.00 22.19           C  
ATOM    214  O   ALA L  29      18.967  23.613  42.645  1.00 21.62           O  
ATOM    215  CB  ALA L  29      20.829  21.686  41.742  1.00 21.55           C  
ATOM    216  N   SER L  30      19.539  23.161  44.769  1.00 23.92           N  
ATOM    217  CA  SER L  30      18.334  23.751  45.345  1.00 24.07           C  
ATOM    218  C   SER L  30      18.565  25.253  45.457  1.00 23.33           C  
ATOM    219  O   SER L  30      17.625  26.042  45.475  1.00 23.11           O  
ATOM    220  CB  SER L  30      18.083  23.170  46.737  1.00 26.02           C  
ATOM    221  OG  SER L  30      18.188  21.752  46.728  1.00 29.13           O  
ATOM    222  N   ASN L  31      19.836  25.631  45.544  1.00 22.53           N  
ATOM    223  CA  ASN L  31      20.222  27.026  45.645  1.00 21.74           C  
ATOM    224  C   ASN L  31      21.533  27.296  44.940  1.00 20.94           C  
ATOM    225  O   ASN L  31      22.417  26.439  44.891  1.00 21.00           O  
ATOM    226  CB  ASN L  31      20.350  27.443  47.099  1.00 24.06           C  
ATOM    227  CG  ASN L  31      19.011  27.587  47.769  1.00 25.72           C  
ATOM    228  OD1 ASN L  31      18.442  26.608  48.256  1.00 25.36           O  
ATOM    229  ND2 ASN L  31      18.486  28.813  47.784  1.00 26.93           N  
ATOM    230  N   TYR L  32      21.655  28.504  44.403  1.00 19.03           N  
ATOM    231  CA  TYR L  32      22.858  28.900  43.692  1.00 17.48           C  
ATOM    232  C   TYR L  32      24.105  28.783  44.560  1.00 16.38           C  
ATOM    233  O   TYR L  32      24.045  28.893  45.786  1.00 14.82           O  
ATOM    234  CB  TYR L  32      22.707  30.333  43.170  1.00 16.67           C  
ATOM    235  CG  TYR L  32      21.782  30.448  41.976  1.00 16.13           C  
ATOM    236  CD1 TYR L  32      21.946  29.617  40.868  1.00 16.06           C  
ATOM    237  CD2 TYR L  32      20.766  31.410  41.937  1.00 17.06           C  
ATOM    238  CE1 TYR L  32      21.127  29.738  39.750  1.00 16.80           C  
ATOM    239  CE2 TYR L  32      19.940  31.542  40.821  1.00 15.34           C  
ATOM    240  CZ  TYR L  32      20.129  30.700  39.732  1.00 17.59           C  
ATOM    241  OH  TYR L  32      19.324  30.811  38.620  1.00 19.67           O  
ATOM    242  N   VAL L  33      25.236  28.539  43.913  1.00 14.86           N  
ATOM    243  CA  VAL L  33      26.495  28.422  44.622  1.00 14.07           C  
ATOM    244  C   VAL L  33      27.413  29.554  44.157  1.00 14.24           C  
ATOM    245  O   VAL L  33      27.563  29.803  42.964  1.00 14.38           O  
ATOM    246  CB  VAL L  33      27.160  27.053  44.353  1.00 14.49           C  
ATOM    247  CG1 VAL L  33      28.481  26.953  45.104  1.00 14.38           C  
ATOM    248  CG2 VAL L  33      26.223  25.935  44.773  1.00 12.06           C  
ATOM    249  N   GLN L  34      28.005  30.254  45.112  1.00 13.61           N  
ATOM    250  CA  GLN L  34      28.901  31.352  44.800  1.00 13.75           C  
ATOM    251  C   GLN L  34      30.316  30.996  45.257  1.00 14.52           C  
ATOM    252  O   GLN L  34      30.496  30.159  46.155  1.00 12.03           O  
ATOM    253  CB  GLN L  34      28.432  32.628  45.512  1.00 12.73           C  
ATOM    254  CG  GLN L  34      27.177  33.297  44.928  1.00 14.63           C  
ATOM    255  CD  GLN L  34      25.943  32.394  44.933  1.00 14.24           C  
ATOM    256  OE1 GLN L  34      25.403  32.052  43.883  1.00 15.26           O  
ATOM    257  NE2 GLN L  34      25.495  32.014  46.118  1.00 15.01           N  
ATOM    258  N   TRP L  35      31.310  31.610  44.614  1.00 14.47           N  
ATOM    259  CA  TRP L  35      32.712  31.412  44.973  1.00 15.11           C  
ATOM    260  C   TRP L  35      33.356  32.773  45.213  1.00 16.91           C  
ATOM    261  O   TRP L  35      33.101  33.732  44.478  1.00 18.97           O  
ATOM    262  CB  TRP L  35      33.496  30.686  43.871  1.00 13.79           C  
ATOM    263  CG  TRP L  35      33.173  29.238  43.729  1.00 14.12           C  
ATOM    264  CD1 TRP L  35      32.225  28.686  42.915  1.00 14.31           C  
ATOM    265  CD2 TRP L  35      33.797  28.145  44.421  1.00 13.35           C  
ATOM    266  NE1 TRP L  35      32.219  27.315  43.056  1.00 13.89           N  
ATOM    267  CE2 TRP L  35      33.173  26.956  43.971  1.00 14.30           C  
ATOM    268  CE3 TRP L  35      34.822  28.053  45.376  1.00 14.61           C  
ATOM    269  CZ2 TRP L  35      33.542  25.687  44.445  1.00 14.48           C  
ATOM    270  CZ3 TRP L  35      35.190  26.789  45.851  1.00 12.20           C  
ATOM    271  CH2 TRP L  35      34.550  25.626  45.382  1.00 14.60           C  
ATOM    272  N   TYR L  36      34.191  32.851  46.244  1.00 16.81           N  
ATOM    273  CA  TYR L  36      34.884  34.087  46.583  1.00 16.11           C  
ATOM    274  C   TYR L  36      36.367  33.827  46.718  1.00 16.01           C  
ATOM    275  O   TYR L  36      36.788  32.794  47.225  1.00 16.59           O  
ATOM    276  CB  TYR L  36      34.392  34.651  47.919  1.00 13.36           C  
ATOM    277  CG  TYR L  36      32.916  34.879  47.970  1.00 12.48           C  
ATOM    278  CD1 TYR L  36      32.370  36.095  47.576  1.00 11.29           C  
ATOM    279  CD2 TYR L  36      32.057  33.860  48.362  1.00 11.47           C  
ATOM    280  CE1 TYR L  36      31.013  36.292  47.565  1.00 10.41           C  
ATOM    281  CE2 TYR L  36      30.693  34.043  48.356  1.00 13.06           C  
ATOM    282  CZ  TYR L  36      30.176  35.264  47.954  1.00 12.62           C  
ATOM    283  OH  TYR L  36      28.820  35.448  47.926  1.00 12.51           O  
ATOM    284  N   GLN L  37      37.152  34.787  46.264  1.00 17.47           N  
ATOM    285  CA  GLN L  37      38.587  34.705  46.378  1.00 17.20           C  
ATOM    286  C   GLN L  37      38.930  35.674  47.491  1.00 17.74           C  
ATOM    287  O   GLN L  37      38.450  36.810  47.484  1.00 15.59           O  
ATOM    288  CB  GLN L  37      39.252  35.183  45.098  1.00 18.57           C  
ATOM    289  CG  GLN L  37      40.759  35.191  45.165  1.00 17.25           C  
ATOM    290  CD  GLN L  37      41.356  35.873  43.970  1.00 18.29           C  
ATOM    291  OE1 GLN L  37      41.229  37.085  43.815  1.00 16.83           O  
ATOM    292  NE2 GLN L  37      41.996  35.099  43.100  1.00 18.42           N  
ATOM    293  N   GLN L  38      39.740  35.222  48.444  1.00 15.92           N  
ATOM    294  CA  GLN L  38      40.157  36.072  49.548  1.00 17.74           C  
ATOM    295  C   GLN L  38      41.673  36.041  49.672  1.00 17.24           C  
ATOM    296  O   GLN L  38      42.242  35.115  50.241  1.00 18.32           O  
ATOM    297  CB  GLN L  38      39.506  35.632  50.871  1.00 17.43           C  
ATOM    298  CG  GLN L  38      39.895  36.511  52.060  1.00 19.34           C  
ATOM    299  CD  GLN L  38      39.043  36.275  53.306  1.00 18.79           C  
ATOM    300  OE1 GLN L  38      38.814  35.141  53.708  1.00 19.84           O  
ATOM    301  NE2 GLN L  38      38.587  37.358  53.926  1.00 20.09           N  
ATOM    302  N   ARG L  39      42.322  37.048  49.099  1.00 18.41           N  
ATOM    303  CA  ARG L  39      43.774  37.161  49.157  1.00 20.70           C  
ATOM    304  C   ARG L  39      44.168  37.592  50.568  1.00 21.77           C  
ATOM    305  O   ARG L  39      43.348  38.135  51.309  1.00 21.82           O  
ATOM    306  CB  ARG L  39      44.263  38.199  48.152  1.00 20.77           C  
ATOM    307  CG  ARG L  39      44.010  37.817  46.719  1.00 23.35           C  
ATOM    308  CD  ARG L  39      44.348  38.954  45.786  1.00 25.88           C  
ATOM    309  NE  ARG L  39      44.144  38.561  44.400  1.00 30.63           N  
ATOM    310  CZ  ARG L  39      44.151  39.398  43.368  1.00 32.43           C  
ATOM    311  NH1 ARG L  39      43.961  38.934  42.131  1.00 32.18           N  
ATOM    312  NH2 ARG L  39      44.340  40.699  43.573  1.00 34.25           N  
ATOM    313  N   PRO L  40      45.432  37.354  50.954  1.00 23.22           N  
ATOM    314  CA  PRO L  40      45.961  37.708  52.281  1.00 23.32           C  
ATOM    315  C   PRO L  40      45.542  39.111  52.721  1.00 22.14           C  
ATOM    316  O   PRO L  40      45.628  40.057  51.940  1.00 20.48           O  
ATOM    317  CB  PRO L  40      47.476  37.594  52.088  1.00 25.36           C  
ATOM    318  CG  PRO L  40      47.597  36.464  51.075  1.00 25.08           C  
ATOM    319  CD  PRO L  40      46.492  36.800  50.086  1.00 23.84           C  
ATOM    320  N   GLY L  41      45.080  39.233  53.965  1.00 20.99           N  
ATOM    321  CA  GLY L  41      44.663  40.527  54.481  1.00 21.41           C  
ATOM    322  C   GLY L  41      43.754  41.326  53.555  1.00 21.97           C  
ATOM    323  O   GLY L  41      43.876  42.550  53.453  1.00 22.36           O  
ATOM    324  N   SER L  42      42.839  40.642  52.875  1.00 22.55           N  
ATOM    325  CA  SER L  42      41.920  41.313  51.969  1.00 21.77           C  
ATOM    326  C   SER L  42      40.506  40.808  52.195  1.00 21.82           C  
ATOM    327  O   SER L  42      40.296  39.825  52.913  1.00 22.70           O  
ATOM    328  CB  SER L  42      42.337  41.068  50.524  1.00 24.22           C  
ATOM    329  OG  SER L  42      41.811  42.079  49.683  1.00 28.20           O  
ATOM    330  N   SER L  43      39.530  41.474  51.587  1.00 20.43           N  
ATOM    331  CA  SER L  43      38.139  41.077  51.760  1.00 20.03           C  
ATOM    332  C   SER L  43      37.671  40.163  50.642  1.00 20.00           C  
ATOM    333  O   SER L  43      38.199  40.199  49.530  1.00 19.46           O  
ATOM    334  CB  SER L  43      37.246  42.310  51.815  1.00 18.70           C  
ATOM    335  OG  SER L  43      37.253  42.980  50.572  1.00 20.87           O  
ATOM    336  N   PRO L  44      36.659  39.330  50.922  1.00 20.01           N  
ATOM    337  CA  PRO L  44      36.127  38.402  49.917  1.00 18.84           C  
ATOM    338  C   PRO L  44      35.558  39.090  48.674  1.00 18.06           C  
ATOM    339  O   PRO L  44      34.752  40.020  48.784  1.00 17.05           O  
ATOM    340  CB  PRO L  44      35.043  37.639  50.685  1.00 18.56           C  
ATOM    341  CG  PRO L  44      35.505  37.700  52.099  1.00 19.83           C  
ATOM    342  CD  PRO L  44      35.992  39.130  52.219  1.00 20.47           C  
ATOM    343  N   THR L  45      35.993  38.638  47.498  1.00 17.90           N  
ATOM    344  CA  THR L  45      35.481  39.167  46.237  1.00 18.75           C  
ATOM    345  C   THR L  45      34.985  37.987  45.385  1.00 18.58           C  
ATOM    346  O   THR L  45      35.564  36.894  45.405  1.00 17.20           O  
ATOM    347  CB  THR L  45      36.552  39.958  45.450  1.00 18.78           C  
ATOM    348  OG1 THR L  45      37.464  39.048  44.837  1.00 22.50           O  
ATOM    349  CG2 THR L  45      37.332  40.878  46.381  1.00 20.01           C  
ATOM    350  N   THR L  46      33.910  38.216  44.641  1.00 18.19           N  
ATOM    351  CA  THR L  46      33.306  37.181  43.809  1.00 19.25           C  
ATOM    352  C   THR L  46      34.056  36.819  42.522  1.00 18.94           C  
ATOM    353  O   THR L  46      34.464  37.697  41.763  1.00 19.87           O  
ATOM    354  CB  THR L  46      31.869  37.587  43.413  1.00 19.03           C  
ATOM    355  OG1 THR L  46      31.066  37.726  44.594  1.00 19.21           O  
ATOM    356  CG2 THR L  46      31.251  36.541  42.494  1.00 17.69           C  
ATOM    357  N   VAL L  47      34.232  35.521  42.285  1.00 17.89           N  
ATOM    358  CA  VAL L  47      34.880  35.042  41.062  1.00 17.55           C  
ATOM    359  C   VAL L  47      33.828  34.292  40.249  1.00 17.58           C  
ATOM    360  O   VAL L  47      33.935  34.176  39.027  1.00 17.39           O  
ATOM    361  CB  VAL L  47      36.079  34.092  41.345  1.00 17.35           C  
ATOM    362  CG1 VAL L  47      37.288  34.901  41.798  1.00 14.61           C  
ATOM    363  CG2 VAL L  47      35.701  33.061  42.389  1.00 15.29           C  
ATOM    364  N   ILE L  48      32.812  33.788  40.948  1.00 17.00           N  
ATOM    365  CA  ILE L  48      31.698  33.068  40.335  1.00 15.37           C  
ATOM    366  C   ILE L  48      30.440  33.201  41.187  1.00 15.40           C  
ATOM    367  O   ILE L  48      30.495  33.088  42.411  1.00 15.48           O  
ATOM    368  CB  ILE L  48      31.972  31.553  40.168  1.00 15.91           C  
ATOM    369  CG1 ILE L  48      32.941  31.296  39.011  1.00 17.28           C  
ATOM    370  CG2 ILE L  48      30.664  30.828  39.891  1.00 11.52           C  
ATOM    371  CD1 ILE L  48      34.396  31.306  39.401  1.00 20.61           C  
ATOM    372  N   TYR L  49      29.311  33.451  40.528  1.00 15.11           N  
ATOM    373  CA  TYR L  49      28.025  33.570  41.205  1.00 13.98           C  
ATOM    374  C   TYR L  49      27.001  32.821  40.368  1.00 13.40           C  
ATOM    375  O   TYR L  49      27.250  32.525  39.206  1.00 13.15           O  
ATOM    376  CB  TYR L  49      27.628  35.044  41.371  1.00 14.28           C  
ATOM    377  CG  TYR L  49      27.335  35.794  40.085  1.00 14.15           C  
ATOM    378  CD1 TYR L  49      26.046  35.830  39.552  1.00 15.20           C  
ATOM    379  CD2 TYR L  49      28.340  36.485  39.417  1.00 14.23           C  
ATOM    380  CE1 TYR L  49      25.764  36.541  38.384  1.00 15.53           C  
ATOM    381  CE2 TYR L  49      28.074  37.198  38.251  1.00 16.45           C  
ATOM    382  CZ  TYR L  49      26.783  37.225  37.738  1.00 16.68           C  
ATOM    383  OH  TYR L  49      26.512  37.946  36.592  1.00 15.77           O  
ATOM    384  N   GLU L  50      25.855  32.504  40.954  1.00 14.83           N  
ATOM    385  CA  GLU L  50      24.825  31.762  40.235  1.00 16.36           C  
ATOM    386  C   GLU L  50      25.440  30.560  39.496  1.00 16.82           C  
ATOM    387  O   GLU L  50      25.334  30.428  38.276  1.00 17.63           O  
ATOM    388  CB  GLU L  50      24.089  32.697  39.269  1.00 17.52           C  
ATOM    389  CG  GLU L  50      23.022  33.555  39.953  1.00 19.76           C  
ATOM    390  CD  GLU L  50      22.532  34.713  39.087  1.00 20.63           C  
ATOM    391  OE1 GLU L  50      22.511  34.578  37.846  1.00 21.23           O  
ATOM    392  OE2 GLU L  50      22.152  35.758  39.656  1.00 22.27           O  
ATOM    393  N   ASP L  51      26.095  29.701  40.277  1.00 17.59           N  
ATOM    394  CA  ASP L  51      26.763  28.480  39.820  1.00 16.31           C  
ATOM    395  C   ASP L  51      27.920  28.632  38.845  1.00 15.96           C  
ATOM    396  O   ASP L  51      28.989  28.061  39.057  1.00 14.46           O  
ATOM    397  CB  ASP L  51      25.752  27.499  39.214  1.00 18.56           C  
ATOM    398  CG  ASP L  51      24.652  27.109  40.188  1.00 20.67           C  
ATOM    399  OD1 ASP L  51      24.902  27.105  41.416  1.00 21.53           O  
ATOM    400  OD2 ASP L  51      23.537  26.793  39.721  1.00 19.33           O  
ATOM    401  N   ASN L  52      27.728  29.401  37.781  1.00 16.37           N  
ATOM    402  CA  ASN L  52      28.785  29.522  36.782  1.00 17.50           C  
ATOM    403  C   ASN L  52      29.000  30.878  36.129  1.00 17.67           C  
ATOM    404  O   ASN L  52      29.730  30.968  35.143  1.00 18.58           O  
ATOM    405  CB  ASN L  52      28.549  28.486  35.682  1.00 16.36           C  
ATOM    406  CG  ASN L  52      27.123  28.521  35.138  1.00 17.29           C  
ATOM    407  OD1 ASN L  52      26.410  29.517  35.284  1.00 13.85           O  
ATOM    408  ND2 ASN L  52      26.710  27.432  34.492  1.00 16.67           N  
ATOM    409  N   GLN L  53      28.389  31.926  36.671  1.00 18.27           N  
ATOM    410  CA  GLN L  53      28.516  33.269  36.093  1.00 18.98           C  
ATOM    411  C   GLN L  53      29.720  34.046  36.606  1.00 18.68           C  
ATOM    412  O   GLN L  53      29.899  34.196  37.812  1.00 20.78           O  
ATOM    413  CB  GLN L  53      27.247  34.091  36.376  1.00 17.61           C  
ATOM    414  CG  GLN L  53      25.955  33.424  35.927  1.00 16.92           C  
ATOM    415  CD  GLN L  53      25.898  33.212  34.418  1.00 16.56           C  
ATOM    416  OE1 GLN L  53      25.827  34.171  33.649  1.00 17.53           O  
ATOM    417  NE2 GLN L  53      25.931  31.951  33.991  1.00 13.00           N  
ATOM    418  N   ARG L  54      30.547  34.536  35.690  1.00 18.61           N  
ATOM    419  CA  ARG L  54      31.709  35.335  36.069  1.00 18.76           C  
ATOM    420  C   ARG L  54      31.305  36.789  36.023  1.00 18.14           C  
ATOM    421  O   ARG L  54      30.716  37.233  35.044  1.00 19.07           O  
ATOM    422  CB  ARG L  54      32.879  35.149  35.094  1.00 16.86           C  
ATOM    423  CG  ARG L  54      33.615  33.841  35.221  1.00 18.06           C  
ATOM    424  CD  ARG L  54      34.784  33.769  34.256  1.00 18.82           C  
ATOM    425  NE  ARG L  54      34.354  33.684  32.863  1.00 20.97           N  
ATOM    426  CZ  ARG L  54      33.780  32.612  32.317  1.00 24.16           C  
ATOM    427  NH1 ARG L  54      33.563  31.520  33.047  1.00 22.10           N  
ATOM    428  NH2 ARG L  54      33.424  32.632  31.033  1.00 23.02           N  
ATOM    429  N   PRO L  55      31.571  37.542  37.097  1.00 19.36           N  
ATOM    430  CA  PRO L  55      31.201  38.962  37.057  1.00 20.39           C  
ATOM    431  C   PRO L  55      32.175  39.657  36.102  1.00 21.06           C  
ATOM    432  O   PRO L  55      33.282  39.159  35.883  1.00 21.80           O  
ATOM    433  CB  PRO L  55      31.385  39.412  38.514  1.00 19.12           C  
ATOM    434  CG  PRO L  55      32.427  38.455  39.051  1.00 17.23           C  
ATOM    435  CD  PRO L  55      31.992  37.142  38.454  1.00 17.41           C  
ATOM    436  N   SER L  56      31.775  40.785  35.521  1.00 23.05           N  
ATOM    437  CA  SER L  56      32.667  41.497  34.604  1.00 25.41           C  
ATOM    438  C   SER L  56      33.951  41.819  35.365  1.00 25.63           C  
ATOM    439  O   SER L  56      33.905  42.322  36.491  1.00 26.55           O  
ATOM    440  CB  SER L  56      32.009  42.785  34.102  1.00 26.41           C  
ATOM    441  OG  SER L  56      31.685  43.647  35.182  1.00 29.41           O  
ATOM    442  N   GLY L  57      35.094  41.517  34.761  1.00 25.39           N  
ATOM    443  CA  GLY L  57      36.356  41.766  35.432  1.00 24.87           C  
ATOM    444  C   GLY L  57      37.079  40.470  35.766  1.00 24.35           C  
ATOM    445  O   GLY L  57      38.305  40.411  35.719  1.00 25.39           O  
ATOM    446  N   VAL L  58      36.333  39.427  36.115  1.00 23.49           N  
ATOM    447  CA  VAL L  58      36.961  38.146  36.427  1.00 22.70           C  
ATOM    448  C   VAL L  58      37.293  37.438  35.116  1.00 22.56           C  
ATOM    449  O   VAL L  58      36.397  37.116  34.326  1.00 23.45           O  
ATOM    450  CB  VAL L  58      36.034  37.231  37.278  1.00 21.51           C  
ATOM    451  CG1 VAL L  58      36.698  35.880  37.501  1.00 18.98           C  
ATOM    452  CG2 VAL L  58      35.741  37.886  38.621  1.00 20.64           C  
ATOM    453  N   PRO L  59      38.588  37.189  34.867  1.00 21.98           N  
ATOM    454  CA  PRO L  59      39.009  36.517  33.637  1.00 21.97           C  
ATOM    455  C   PRO L  59      38.385  35.140  33.473  1.00 22.61           C  
ATOM    456  O   PRO L  59      37.985  34.504  34.457  1.00 22.22           O  
ATOM    457  CB  PRO L  59      40.534  36.476  33.766  1.00 21.22           C  
ATOM    458  CG  PRO L  59      40.764  36.497  35.237  1.00 21.94           C  
ATOM    459  CD  PRO L  59      39.751  37.492  35.721  1.00 21.72           C  
ATOM    460  N   ASP L  60      38.304  34.682  32.226  1.00 21.78           N  
ATOM    461  CA  ASP L  60      37.706  33.387  31.936  1.00 21.48           C  
ATOM    462  C   ASP L  60      38.587  32.203  32.331  1.00 21.33           C  
ATOM    463  O   ASP L  60      38.357  31.084  31.888  1.00 19.18           O  
ATOM    464  CB  ASP L  60      37.335  33.301  30.452  1.00 24.81           C  
ATOM    465  CG  ASP L  60      38.550  33.212  29.541  1.00 24.27           C  
ATOM    466  OD1 ASP L  60      39.667  33.553  29.979  1.00 28.04           O  
ATOM    467  OD2 ASP L  60      38.383  32.804  28.380  1.00 24.20           O  
ATOM    468  N   ARG L  61      39.594  32.457  33.165  1.00 21.46           N  
ATOM    469  CA  ARG L  61      40.476  31.400  33.656  1.00 20.54           C  
ATOM    470  C   ARG L  61      39.740  30.693  34.802  1.00 20.11           C  
ATOM    471  O   ARG L  61      40.067  29.556  35.163  1.00 19.32           O  
ATOM    472  CB  ARG L  61      41.801  31.986  34.168  1.00 21.16           C  
ATOM    473  CG  ARG L  61      42.590  32.751  33.111  1.00 23.67           C  
ATOM    474  CD  ARG L  61      43.946  33.235  33.623  1.00 22.80           C  
ATOM    475  NE  ARG L  61      43.809  34.166  34.738  1.00 22.73           N  
ATOM    476  CZ  ARG L  61      43.987  33.841  36.013  1.00 22.96           C  
ATOM    477  NH1 ARG L  61      44.321  32.599  36.348  1.00 23.69           N  
ATOM    478  NH2 ARG L  61      43.826  34.759  36.958  1.00 23.07           N  
ATOM    479  N   PHE L  62      38.761  31.389  35.382  1.00 20.04           N  
ATOM    480  CA  PHE L  62      37.937  30.840  36.463  1.00 19.20           C  
ATOM    481  C   PHE L  62      36.643  30.308  35.853  1.00 18.21           C  
ATOM    482  O   PHE L  62      35.991  30.994  35.058  1.00 19.32           O  
ATOM    483  CB  PHE L  62      37.569  31.911  37.499  1.00 19.06           C  
ATOM    484  CG  PHE L  62      38.742  32.487  38.235  1.00 19.67           C  
ATOM    485  CD1 PHE L  62      39.566  33.429  37.630  1.00 19.69           C  
ATOM    486  CD2 PHE L  62      39.020  32.091  39.539  1.00 20.10           C  
ATOM    487  CE1 PHE L  62      40.654  33.973  38.314  1.00 21.08           C  
ATOM    488  CE2 PHE L  62      40.107  32.627  40.236  1.00 20.10           C  
ATOM    489  CZ  PHE L  62      40.925  33.568  39.622  1.00 19.09           C  
ATOM    490  N   SER L  63      36.268  29.093  36.230  1.00 17.33           N  
ATOM    491  CA  SER L  63      35.052  28.482  35.713  1.00 18.20           C  
ATOM    492  C   SER L  63      34.294  27.712  36.784  1.00 18.07           C  
ATOM    493  O   SER L  63      34.869  26.919  37.535  1.00 17.79           O  
ATOM    494  CB  SER L  63      35.383  27.548  34.544  1.00 17.16           C  
ATOM    495  OG  SER L  63      36.374  26.605  34.909  1.00 21.22           O  
ATOM    496  N   GLY L  64      32.993  27.950  36.853  1.00 18.03           N  
ATOM    497  CA  GLY L  64      32.192  27.259  37.839  1.00 17.44           C  
ATOM    498  C   GLY L  64      31.339  26.175  37.219  1.00 17.15           C  
ATOM    499  O   GLY L  64      30.889  26.292  36.079  1.00 16.05           O  
ATOM    500  N   SER L  65      31.123  25.111  37.978  1.00 17.46           N  
ATOM    501  CA  SER L  65      30.300  24.008  37.525  1.00 20.12           C  
ATOM    502  C   SER L  65      29.661  23.347  38.729  1.00 21.87           C  
ATOM    503  O   SER L  65      30.126  23.500  39.862  1.00 20.96           O  
ATOM    504  CB  SER L  65      31.136  22.980  36.761  1.00 21.51           C  
ATOM    505  OG  SER L  65      32.164  22.452  37.582  1.00 26.22           O  
ATOM    506  N   ILE L  66      28.585  22.611  38.466  1.00 22.37           N  
ATOM    507  CA  ILE L  66      27.841  21.903  39.495  1.00 21.13           C  
ATOM    508  C   ILE L  66      27.664  20.454  39.055  1.00 21.20           C  
ATOM    509  O   ILE L  66      27.475  20.167  37.875  1.00 20.84           O  
ATOM    510  CB  ILE L  66      26.443  22.536  39.702  1.00 20.76           C  
ATOM    511  CG1 ILE L  66      26.584  23.943  40.296  1.00 22.30           C  
ATOM    512  CG2 ILE L  66      25.592  21.652  40.593  1.00 21.16           C  
ATOM    513  CD1 ILE L  66      27.151  23.977  41.706  1.00 21.51           C  
ATOM    514  N   ASP L  66A     27.741  19.539  40.009  1.00 21.80           N  
ATOM    515  CA  ASP L  66A     27.560  18.131  39.708  1.00 21.58           C  
ATOM    516  C   ASP L  66A     26.576  17.576  40.726  1.00 21.21           C  
ATOM    517  O   ASP L  66A     26.917  17.360  41.894  1.00 17.33           O  
ATOM    518  CB  ASP L  66A     28.900  17.397  39.764  1.00 22.46           C  
ATOM    519  CG  ASP L  66A     28.742  15.899  39.642  1.00 24.04           C  
ATOM    520  OD1 ASP L  66A     27.676  15.440  39.175  1.00 23.38           O  
ATOM    521  OD2 ASP L  66A     29.692  15.182  40.011  1.00 25.62           O  
ATOM    522  N   SER L  66B     25.343  17.370  40.269  1.00 22.46           N  
ATOM    523  CA  SER L  66B     24.278  16.883  41.132  1.00 25.56           C  
ATOM    524  C   SER L  66B     24.446  15.450  41.609  1.00 26.76           C  
ATOM    525  O   SER L  66B     24.016  15.114  42.717  1.00 26.82           O  
ATOM    526  CB  SER L  66B     22.924  17.034  40.442  1.00 24.48           C  
ATOM    527  OG  SER L  66B     22.570  18.402  40.353  1.00 25.32           O  
ATOM    528  N   SER L  67      25.071  14.605  40.794  1.00 26.67           N  
ATOM    529  CA  SER L  67      25.248  13.227  41.214  1.00 27.04           C  
ATOM    530  C   SER L  67      26.161  13.181  42.439  1.00 26.18           C  
ATOM    531  O   SER L  67      25.988  12.329  43.307  1.00 27.17           O  
ATOM    532  CB  SER L  67      25.816  12.369  40.077  1.00 27.46           C  
ATOM    533  OG  SER L  67      27.202  12.597  39.884  1.00 31.75           O  
ATOM    534  N   SER L  68      27.119  14.103  42.522  1.00 24.15           N  
ATOM    535  CA  SER L  68      28.035  14.141  43.665  1.00 22.21           C  
ATOM    536  C   SER L  68      27.559  15.135  44.713  1.00 20.14           C  
ATOM    537  O   SER L  68      28.072  15.169  45.832  1.00 18.70           O  
ATOM    538  CB  SER L  68      29.447  14.530  43.213  1.00 22.61           C  
ATOM    539  OG  SER L  68      29.998  13.553  42.349  1.00 23.75           O  
ATOM    540  N   ASN L  69      26.579  15.946  44.332  1.00 20.19           N  
ATOM    541  CA  ASN L  69      26.025  16.967  45.206  1.00 19.35           C  
ATOM    542  C   ASN L  69      27.105  17.997  45.549  1.00 18.95           C  
ATOM    543  O   ASN L  69      27.107  18.591  46.622  1.00 17.46           O  
ATOM    544  CB  ASN L  69      25.481  16.324  46.480  1.00 19.69           C  
ATOM    545  CG  ASN L  69      24.356  17.123  47.081  1.00 22.30           C  
ATOM    546  OD1 ASN L  69      23.427  17.527  46.370  1.00 23.82           O  
ATOM    547  ND2 ASN L  69      24.421  17.362  48.391  1.00 22.05           N  
ATOM    548  N   SER L  70      28.022  18.203  44.615  1.00 18.92           N  
ATOM    549  CA  SER L  70      29.117  19.133  44.817  1.00 17.91           C  
ATOM    550  C   SER L  70      29.097  20.291  43.839  1.00 18.28           C  
ATOM    551  O   SER L  70      28.259  20.355  42.935  1.00 16.19           O  
ATOM    552  CB  SER L  70      30.452  18.403  44.665  1.00 18.87           C  
ATOM    553  OG  SER L  70      30.594  17.890  43.348  1.00 20.60           O  
ATOM    554  N   ALA L  71      30.051  21.197  44.040  1.00 16.91           N  
ATOM    555  CA  ALA L  71      30.237  22.369  43.194  1.00 16.82           C  
ATOM    556  C   ALA L  71      31.746  22.458  42.986  1.00 15.36           C  
ATOM    557  O   ALA L  71      32.512  22.017  43.839  1.00 14.32           O  
ATOM    558  CB  ALA L  71      29.708  23.633  43.894  1.00 15.85           C  
ATOM    559  N   SER L  72      32.176  23.015  41.859  1.00 15.13           N  
ATOM    560  CA  SER L  72      33.602  23.115  41.594  1.00 17.05           C  
ATOM    561  C   SER L  72      34.059  24.426  40.970  1.00 16.76           C  
ATOM    562  O   SER L  72      33.358  25.039  40.163  1.00 15.43           O  
ATOM    563  CB  SER L  72      34.060  21.967  40.682  1.00 19.50           C  
ATOM    564  OG  SER L  72      33.868  20.703  41.291  1.00 23.86           O  
ATOM    565  N   LEU L  73      35.254  24.843  41.367  1.00 15.95           N  
ATOM    566  CA  LEU L  73      35.860  26.042  40.832  1.00 16.19           C  
ATOM    567  C   LEU L  73      37.143  25.603  40.144  1.00 17.33           C  
ATOM    568  O   LEU L  73      37.991  24.931  40.749  1.00 16.65           O  
ATOM    569  CB  LEU L  73      36.184  27.055  41.939  1.00 15.13           C  
ATOM    570  CG  LEU L  73      37.069  28.229  41.487  1.00 13.81           C  
ATOM    571  CD1 LEU L  73      36.402  28.978  40.357  1.00 12.71           C  
ATOM    572  CD2 LEU L  73      37.332  29.165  42.657  1.00 13.85           C  
ATOM    573  N   THR L  74      37.265  25.956  38.869  1.00 17.16           N  
ATOM    574  CA  THR L  74      38.454  25.617  38.115  1.00 18.34           C  
ATOM    575  C   THR L  74      39.230  26.876  37.750  1.00 18.81           C  
ATOM    576  O   THR L  74      38.673  27.840  37.236  1.00 17.86           O  
ATOM    577  CB  THR L  74      38.100  24.820  36.843  1.00 19.36           C  
ATOM    578  OG1 THR L  74      37.670  23.504  37.219  1.00 19.91           O  
ATOM    579  CG2 THR L  74      39.309  24.708  35.922  1.00 18.98           C  
ATOM    580  N   ILE L  75      40.521  26.865  38.061  1.00 20.87           N  
ATOM    581  CA  ILE L  75      41.396  27.988  37.763  1.00 23.08           C  
ATOM    582  C   ILE L  75      42.467  27.501  36.803  1.00 25.50           C  
ATOM    583  O   ILE L  75      43.403  26.796  37.196  1.00 25.98           O  
ATOM    584  CB  ILE L  75      42.093  28.527  39.018  1.00 21.83           C  
ATOM    585  CG1 ILE L  75      41.063  28.799  40.115  1.00 20.71           C  
ATOM    586  CG2 ILE L  75      42.853  29.799  38.669  1.00 21.15           C  
ATOM    587  CD1 ILE L  75      41.670  29.235  41.435  1.00 19.09           C  
ATOM    588  N   SER L  76      42.306  27.857  35.535  1.00 27.61           N  
ATOM    589  CA  SER L  76      43.251  27.475  34.504  1.00 29.14           C  
ATOM    590  C   SER L  76      44.212  28.645  34.317  1.00 29.69           C  
ATOM    591  O   SER L  76      43.819  29.806  34.491  1.00 30.91           O  
ATOM    592  CB  SER L  76      42.504  27.205  33.202  1.00 29.00           C  
ATOM    593  OG  SER L  76      41.892  28.396  32.743  1.00 30.02           O  
ATOM    594  N   GLY L  77      45.465  28.337  33.977  1.00 29.31           N  
ATOM    595  CA  GLY L  77      46.464  29.371  33.773  1.00 27.86           C  
ATOM    596  C   GLY L  77      46.969  29.981  35.065  1.00 27.71           C  
ATOM    597  O   GLY L  77      47.377  31.140  35.085  1.00 27.11           O  
ATOM    598  N   LEU L  78      46.954  29.198  36.143  1.00 28.08           N  
ATOM    599  CA  LEU L  78      47.396  29.675  37.456  1.00 28.55           C  
ATOM    600  C   LEU L  78      48.472  30.737  37.397  1.00 28.50           C  
ATOM    601  O   LEU L  78      49.480  30.583  36.699  1.00 29.50           O  
ATOM    602  CB  LEU L  78      47.922  28.525  38.326  1.00 28.34           C  
ATOM    603  CG  LEU L  78      46.995  27.855  39.343  1.00 28.90           C  
ATOM    604  CD1 LEU L  78      47.806  26.838  40.127  1.00 27.79           C  
ATOM    605  CD2 LEU L  78      46.389  28.883  40.288  1.00 26.12           C  
ATOM    606  N   LYS L  79      48.242  31.815  38.135  1.00 27.76           N  
ATOM    607  CA  LYS L  79      49.186  32.915  38.231  1.00 27.79           C  
ATOM    608  C   LYS L  79      49.480  33.028  39.723  1.00 28.45           C  
ATOM    609  O   LYS L  79      48.770  32.431  40.540  1.00 29.99           O  
ATOM    610  CB  LYS L  79      48.559  34.211  37.707  1.00 27.80           C  
ATOM    611  CG  LYS L  79      48.113  34.132  36.259  1.00 29.18           C  
ATOM    612  CD  LYS L  79      47.802  35.523  35.671  1.00 30.92           C  
ATOM    613  CE  LYS L  79      47.560  35.438  34.159  1.00 31.07           C  
ATOM    614  NZ  LYS L  79      47.400  36.778  33.522  1.00 32.37           N  
ATOM    615  N   THR L  80      50.511  33.777  40.095  1.00 28.22           N  
ATOM    616  CA  THR L  80      50.836  33.908  41.508  1.00 28.93           C  
ATOM    617  C   THR L  80      49.823  34.782  42.257  1.00 27.73           C  
ATOM    618  O   THR L  80      49.600  34.589  43.454  1.00 26.67           O  
ATOM    619  CB  THR L  80      52.264  34.484  41.702  1.00 30.55           C  
ATOM    620  OG1 THR L  80      52.354  35.783  41.098  1.00 31.73           O  
ATOM    621  CG2 THR L  80      53.295  33.558  41.059  1.00 30.50           C  
ATOM    622  N   GLU L  81      49.206  35.727  41.548  1.00 26.85           N  
ATOM    623  CA  GLU L  81      48.215  36.628  42.139  1.00 28.02           C  
ATOM    624  C   GLU L  81      46.941  35.857  42.498  1.00 27.30           C  
ATOM    625  O   GLU L  81      46.038  36.375  43.174  1.00 26.45           O  
ATOM    626  CB  GLU L  81      47.884  37.749  41.148  1.00 29.52           C  
ATOM    627  CG  GLU L  81      47.492  37.233  39.769  1.00 34.42           C  
ATOM    628  CD  GLU L  81      48.075  38.069  38.636  1.00 36.84           C  
ATOM    629  OE1 GLU L  81      47.443  39.069  38.223  1.00 37.54           O  
ATOM    630  OE2 GLU L  81      49.183  37.726  38.163  1.00 37.84           O  
ATOM    631  N   ASP L  82      46.875  34.615  42.028  1.00 26.47           N  
ATOM    632  CA  ASP L  82      45.732  33.757  42.284  1.00 26.18           C  
ATOM    633  C   ASP L  82      45.827  33.144  43.679  1.00 25.97           C  
ATOM    634  O   ASP L  82      44.890  32.490  44.146  1.00 25.42           O  
ATOM    635  CB  ASP L  82      45.656  32.644  41.232  1.00 26.62           C  
ATOM    636  CG  ASP L  82      45.364  33.171  39.827  1.00 27.94           C  
ATOM    637  OD1 ASP L  82      44.471  34.036  39.670  1.00 27.72           O  
ATOM    638  OD2 ASP L  82      46.018  32.706  38.868  1.00 29.34           O  
ATOM    639  N   GLU L  83      46.955  33.358  44.351  1.00 25.43           N  
ATOM    640  CA  GLU L  83      47.134  32.800  45.687  1.00 24.40           C  
ATOM    641  C   GLU L  83      46.132  33.425  46.644  1.00 23.71           C  
ATOM    642  O   GLU L  83      46.114  34.645  46.846  1.00 24.38           O  
ATOM    643  CB  GLU L  83      48.557  33.035  46.184  1.00 25.30           C  
ATOM    644  CG  GLU L  83      48.846  32.334  47.490  1.00 27.63           C  
ATOM    645  CD  GLU L  83      50.296  31.921  47.608  1.00 29.38           C  
ATOM    646  OE1 GLU L  83      50.781  31.177  46.722  1.00 29.06           O  
ATOM    647  OE2 GLU L  83      50.952  32.338  48.587  1.00 32.11           O  
ATOM    648  N   ALA L  84      45.293  32.586  47.237  1.00 20.79           N  
ATOM    649  CA  ALA L  84      44.271  33.088  48.133  1.00 19.89           C  
ATOM    650  C   ALA L  84      43.514  31.933  48.738  1.00 19.05           C  
ATOM    651  O   ALA L  84      43.794  30.775  48.447  1.00 18.31           O  
ATOM    652  CB  ALA L  84      43.295  33.980  47.351  1.00 15.00           C  
ATOM    653  N   ASP L  85      42.564  32.268  49.601  1.00 19.50           N  
ATOM    654  CA  ASP L  85      41.695  31.272  50.201  1.00 18.43           C  
ATOM    655  C   ASP L  85      40.445  31.345  49.328  1.00 17.51           C  
ATOM    656  O   ASP L  85      40.005  32.435  48.960  1.00 16.94           O  
ATOM    657  CB  ASP L  85      41.317  31.638  51.640  1.00 19.17           C  
ATOM    658  CG  ASP L  85      42.454  31.430  52.620  1.00 20.53           C  
ATOM    659  OD1 ASP L  85      43.161  30.413  52.503  1.00 21.65           O  
ATOM    660  OD2 ASP L  85      42.635  32.275  53.520  1.00 22.81           O  
ATOM    661  N   TYR L  86      39.888  30.194  48.977  1.00 17.36           N  
ATOM    662  CA  TYR L  86      38.680  30.182  48.174  1.00 15.57           C  
ATOM    663  C   TYR L  86      37.554  29.581  48.989  1.00 14.73           C  
ATOM    664  O   TYR L  86      37.729  28.549  49.640  1.00 14.14           O  
ATOM    665  CB  TYR L  86      38.903  29.413  46.868  1.00 16.02           C  
ATOM    666  CG  TYR L  86      39.802  30.170  45.925  1.00 15.50           C  
ATOM    667  CD1 TYR L  86      41.189  30.111  46.055  1.00 16.03           C  
ATOM    668  CD2 TYR L  86      39.265  31.027  44.963  1.00 16.68           C  
ATOM    669  CE1 TYR L  86      42.021  30.893  45.254  1.00 17.87           C  
ATOM    670  CE2 TYR L  86      40.083  31.814  44.157  1.00 16.62           C  
ATOM    671  CZ  TYR L  86      41.461  31.741  44.307  1.00 18.47           C  
ATOM    672  OH  TYR L  86      42.281  32.498  43.496  1.00 21.30           O  
ATOM    673  N   TYR L  87      36.409  30.259  48.958  1.00 13.69           N  
ATOM    674  CA  TYR L  87      35.224  29.848  49.697  1.00 12.66           C  
ATOM    675  C   TYR L  87      34.024  29.708  48.796  1.00 13.65           C  
ATOM    676  O   TYR L  87      33.742  30.597  47.987  1.00 13.81           O  
ATOM    677  CB  TYR L  87      34.849  30.895  50.752  1.00 12.14           C  
ATOM    678  CG  TYR L  87      35.878  31.124  51.821  1.00 12.70           C  
ATOM    679  CD1 TYR L  87      35.931  30.308  52.948  1.00 13.60           C  
ATOM    680  CD2 TYR L  87      36.819  32.140  51.694  1.00 12.06           C  
ATOM    681  CE1 TYR L  87      36.901  30.493  53.924  1.00 13.36           C  
ATOM    682  CE2 TYR L  87      37.791  32.338  52.664  1.00 14.68           C  
ATOM    683  CZ  TYR L  87      37.828  31.509  53.777  1.00 15.31           C  
ATOM    684  OH  TYR L  87      38.797  31.699  54.737  1.00 18.84           O  
ATOM    685  N   CYS L  88      33.311  28.597  48.939  1.00 13.93           N  
ATOM    686  CA  CYS L  88      32.080  28.401  48.186  1.00 14.50           C  
ATOM    687  C   CYS L  88      31.002  28.826  49.170  1.00 15.52           C  
ATOM    688  O   CYS L  88      31.219  28.847  50.383  1.00 15.17           O  
ATOM    689  CB  CYS L  88      31.870  26.944  47.791  1.00 14.84           C  
ATOM    690  SG  CYS L  88      31.908  25.753  49.163  1.00 14.23           S  
ATOM    691  N   GLN L  89      29.840  29.170  48.649  1.00 16.10           N  
ATOM    692  CA  GLN L  89      28.761  29.619  49.496  1.00 15.54           C  
ATOM    693  C   GLN L  89      27.451  29.353  48.795  1.00 15.47           C  
ATOM    694  O   GLN L  89      27.381  29.328  47.566  1.00 15.69           O  
ATOM    695  CB  GLN L  89      28.938  31.115  49.790  1.00 14.60           C  
ATOM    696  CG  GLN L  89      27.750  31.772  50.456  1.00 15.47           C  
ATOM    697  CD  GLN L  89      26.877  32.519  49.465  1.00 14.91           C  
ATOM    698  OE1 GLN L  89      25.654  32.462  49.537  1.00 16.43           O  
ATOM    699  NE2 GLN L  89      27.504  33.237  48.546  1.00 12.91           N  
ATOM    700  N   SER L  90      26.413  29.130  49.583  1.00 15.86           N  
ATOM    701  CA  SER L  90      25.100  28.872  49.030  1.00 14.90           C  
ATOM    702  C   SER L  90      24.050  29.313  50.035  1.00 14.96           C  
ATOM    703  O   SER L  90      24.358  29.982  51.019  1.00 13.97           O  
ATOM    704  CB  SER L  90      24.951  27.390  48.705  1.00 12.83           C  
ATOM    705  OG  SER L  90      23.786  27.163  47.939  1.00 15.48           O  
ATOM    706  N   TYR L  91      22.808  28.931  49.793  1.00 16.72           N  
ATOM    707  CA  TYR L  91      21.735  29.327  50.682  1.00 18.34           C  
ATOM    708  C   TYR L  91      20.947  28.130  51.168  1.00 20.67           C  
ATOM    709  O   TYR L  91      20.928  27.075  50.523  1.00 20.23           O  
ATOM    710  CB  TYR L  91      20.794  30.278  49.955  1.00 18.13           C  
ATOM    711  CG  TYR L  91      21.464  31.502  49.400  1.00 16.75           C  
ATOM    712  CD1 TYR L  91      21.574  32.660  50.160  1.00 17.31           C  
ATOM    713  CD2 TYR L  91      21.978  31.508  48.103  1.00 16.55           C  
ATOM    714  CE1 TYR L  91      22.178  33.800  49.644  1.00 18.38           C  
ATOM    715  CE2 TYR L  91      22.579  32.635  47.578  1.00 16.43           C  
ATOM    716  CZ  TYR L  91      22.677  33.779  48.350  1.00 18.02           C  
ATOM    717  OH  TYR L  91      23.265  34.906  47.829  1.00 19.68           O  
ATOM    718  N   ASP L  92      20.287  28.300  52.310  1.00 22.90           N  
ATOM    719  CA  ASP L  92      19.475  27.232  52.860  1.00 25.89           C  
ATOM    720  C   ASP L  92      18.006  27.524  52.612  1.00 27.42           C  
ATOM    721  O   ASP L  92      17.651  28.450  51.879  1.00 26.73           O  
ATOM    722  CB  ASP L  92      19.744  27.051  54.363  1.00 26.99           C  
ATOM    723  CG  ASP L  92      19.197  28.192  55.214  1.00 28.00           C  
ATOM    724  OD1 ASP L  92      18.817  29.256  54.662  1.00 27.14           O  
ATOM    725  OD2 ASP L  92      19.164  28.016  56.455  1.00 29.96           O  
ATOM    726  N   SER L  93      17.159  26.709  53.224  1.00 30.45           N  
ATOM    727  CA  SER L  93      15.716  26.825  53.096  1.00 31.12           C  
ATOM    728  C   SER L  93      15.244  28.265  53.298  1.00 30.74           C  
ATOM    729  O   SER L  93      14.566  28.833  52.443  1.00 31.01           O  
ATOM    730  CB  SER L  93      15.055  25.916  54.136  1.00 33.01           C  
ATOM    731  OG  SER L  93      15.879  24.783  54.411  1.00 34.29           O  
ATOM    732  N   SER L  94      15.622  28.859  54.426  1.00 30.32           N  
ATOM    733  CA  SER L  94      15.194  30.218  54.749  1.00 29.12           C  
ATOM    734  C   SER L  94      15.914  31.319  53.978  1.00 28.77           C  
ATOM    735  O   SER L  94      15.661  32.497  54.216  1.00 28.88           O  
ATOM    736  CB  SER L  94      15.371  30.473  56.245  1.00 29.22           C  
ATOM    737  OG  SER L  94      14.939  29.362  57.001  1.00 28.55           O  
ATOM    738  N   ASN L  95      16.807  30.941  53.066  1.00 27.33           N  
ATOM    739  CA  ASN L  95      17.561  31.913  52.270  1.00 26.79           C  
ATOM    740  C   ASN L  95      18.730  32.533  53.044  1.00 25.29           C  
ATOM    741  O   ASN L  95      19.250  33.590  52.690  1.00 25.02           O  
ATOM    742  CB  ASN L  95      16.627  33.007  51.745  1.00 26.07           C  
ATOM    743  CG  ASN L  95      16.000  32.642  50.417  1.00 28.40           C  
ATOM    744  OD1 ASN L  95      14.847  32.981  50.141  1.00 30.71           O  
ATOM    745  ND2 ASN L  95      16.767  31.961  49.570  1.00 29.27           N  
ATOM    746  N   HIS L  95A     19.156  31.859  54.101  1.00 24.27           N  
ATOM    747  CA  HIS L  95A     20.263  32.358  54.884  1.00 22.35           C  
ATOM    748  C   HIS L  95A     21.572  31.794  54.344  1.00 20.85           C  
ATOM    749  O   HIS L  95A     21.650  30.637  53.907  1.00 18.52           O  
ATOM    750  CB  HIS L  95A     20.027  32.009  56.346  1.00 25.17           C  
ATOM    751  CG  HIS L  95A     18.794  32.652  56.901  1.00 26.96           C  
ATOM    752  ND1 HIS L  95A     17.936  32.007  57.766  1.00 28.17           N  
ATOM    753  CD2 HIS L  95A     18.260  33.879  56.684  1.00 27.97           C  
ATOM    754  CE1 HIS L  95A     16.926  32.807  58.055  1.00 28.84           C  
ATOM    755  NE2 HIS L  95A     17.097  33.949  57.412  1.00 28.71           N  
ATOM    756  N   VAL L  96      22.590  32.641  54.349  1.00 18.12           N  
ATOM    757  CA  VAL L  96      23.895  32.285  53.825  1.00 18.00           C  
ATOM    758  C   VAL L  96      24.624  31.178  54.573  1.00 18.56           C  
ATOM    759  O   VAL L  96      24.544  31.075  55.796  1.00 18.69           O  
ATOM    760  CB  VAL L  96      24.812  33.526  53.772  1.00 15.48           C  
ATOM    761  CG1 VAL L  96      26.114  33.182  53.071  1.00 14.21           C  
ATOM    762  CG2 VAL L  96      24.095  34.660  53.070  1.00 12.85           C  
ATOM    763  N   VAL L  97      25.334  30.354  53.809  1.00 18.12           N  
ATOM    764  CA  VAL L  97      26.125  29.259  54.354  1.00 18.36           C  
ATOM    765  C   VAL L  97      27.480  29.299  53.652  1.00 18.58           C  
ATOM    766  O   VAL L  97      27.548  29.369  52.429  1.00 19.79           O  
ATOM    767  CB  VAL L  97      25.459  27.893  54.087  1.00 18.64           C  
ATOM    768  CG1 VAL L  97      26.338  26.767  54.617  1.00 17.80           C  
ATOM    769  CG2 VAL L  97      24.096  27.851  54.737  1.00 16.72           C  
ATOM    770  N   PHE L  98      28.558  29.266  54.423  1.00 19.11           N  
ATOM    771  CA  PHE L  98      29.898  29.299  53.846  1.00 18.04           C  
ATOM    772  C   PHE L  98      30.629  27.977  54.025  1.00 18.13           C  
ATOM    773  O   PHE L  98      30.442  27.283  55.025  1.00 18.81           O  
ATOM    774  CB  PHE L  98      30.735  30.402  54.501  1.00 19.27           C  
ATOM    775  CG  PHE L  98      30.951  31.608  53.633  1.00 19.00           C  
ATOM    776  CD1 PHE L  98      30.189  32.755  53.809  1.00 18.44           C  
ATOM    777  CD2 PHE L  98      31.933  31.601  52.648  1.00 19.22           C  
ATOM    778  CE1 PHE L  98      30.406  33.878  53.017  1.00 18.59           C  
ATOM    779  CE2 PHE L  98      32.153  32.717  51.858  1.00 19.12           C  
ATOM    780  CZ  PHE L  98      31.389  33.859  52.043  1.00 16.38           C  
ATOM    781  N   GLY L  99      31.462  27.628  53.051  1.00 17.21           N  
ATOM    782  CA  GLY L  99      32.235  26.410  53.165  1.00 15.79           C  
ATOM    783  C   GLY L  99      33.419  26.744  54.054  1.00 16.54           C  
ATOM    784  O   GLY L  99      33.666  27.920  54.339  1.00 15.22           O  
ATOM    785  N   GLY L 100      34.160  25.730  54.488  1.00 15.23           N  
ATOM    786  CA  GLY L 100      35.306  25.978  55.344  1.00 15.35           C  
ATOM    787  C   GLY L 100      36.465  26.688  54.668  1.00 16.57           C  
ATOM    788  O   GLY L 100      37.357  27.195  55.346  1.00 18.21           O  
ATOM    789  N   GLY L 101      36.466  26.722  53.336  1.00 16.91           N  
ATOM    790  CA  GLY L 101      37.544  27.374  52.611  1.00 14.45           C  
ATOM    791  C   GLY L 101      38.624  26.429  52.114  1.00 13.41           C  
ATOM    792  O   GLY L 101      38.796  25.337  52.644  1.00 13.56           O  
ATOM    793  N   THR L 102      39.349  26.849  51.082  1.00 13.45           N  
ATOM    794  CA  THR L 102      40.424  26.043  50.515  1.00 15.42           C  
ATOM    795  C   THR L 102      41.641  26.925  50.258  1.00 17.73           C  
ATOM    796  O   THR L 102      41.586  27.867  49.455  1.00 15.87           O  
ATOM    797  CB  THR L 102      40.001  25.376  49.189  1.00 14.51           C  
ATOM    798  OG1 THR L 102      38.935  24.456  49.436  1.00 13.89           O  
ATOM    799  CG2 THR L 102      41.167  24.627  48.574  1.00 15.38           C  
ATOM    800  N   LYS L 103      42.738  26.615  50.947  1.00 19.14           N  
ATOM    801  CA  LYS L 103      43.964  27.389  50.807  1.00 21.02           C  
ATOM    802  C   LYS L 103      44.715  27.009  49.541  1.00 21.98           C  
ATOM    803  O   LYS L 103      45.106  25.856  49.365  1.00 22.33           O  
ATOM    804  CB  LYS L 103      44.860  27.178  52.029  1.00 21.63           C  
ATOM    805  CG  LYS L 103      46.138  28.007  52.020  1.00 25.72           C  
ATOM    806  CD  LYS L 103      45.851  29.486  51.777  1.00 27.62           C  
ATOM    807  CE  LYS L 103      47.123  30.327  51.865  1.00 29.49           C  
ATOM    808  NZ  LYS L 103      46.835  31.789  51.723  1.00 29.21           N  
ATOM    809  N   LEU L 104      44.899  27.981  48.651  1.00 23.44           N  
ATOM    810  CA  LEU L 104      45.616  27.752  47.401  1.00 25.05           C  
ATOM    811  C   LEU L 104      46.910  28.558  47.375  1.00 26.40           C  
ATOM    812  O   LEU L 104      46.883  29.793  47.405  1.00 26.75           O  
ATOM    813  CB  LEU L 104      44.755  28.145  46.191  1.00 23.93           C  
ATOM    814  CG  LEU L 104      45.475  28.066  44.831  1.00 24.96           C  
ATOM    815  CD1 LEU L 104      45.983  26.645  44.603  1.00 24.06           C  
ATOM    816  CD2 LEU L 104      44.543  28.480  43.705  1.00 22.78           C  
ATOM    817  N   THR L 105      48.042  27.858  47.337  1.00 27.97           N  
ATOM    818  CA  THR L 105      49.342  28.516  47.284  1.00 27.83           C  
ATOM    819  C   THR L 105      49.947  28.235  45.908  1.00 28.16           C  
ATOM    820  O   THR L 105      49.995  27.087  45.459  1.00 28.05           O  
ATOM    821  CB  THR L 105      50.309  27.982  48.367  1.00 28.24           C  
ATOM    822  OG1 THR L 105      50.842  26.718  47.954  1.00 30.46           O  
ATOM    823  CG2 THR L 105      49.582  27.793  49.690  1.00 29.10           C  
ATOM    824  N   VAL L 106      50.388  29.284  45.227  1.00 28.33           N  
ATOM    825  CA  VAL L 106      50.988  29.113  43.914  1.00 29.61           C  
ATOM    826  C   VAL L 106      52.501  29.037  44.094  1.00 29.79           C  
ATOM    827  O   VAL L 106      53.148  30.034  44.414  1.00 29.99           O  
ATOM    828  CB  VAL L 106      50.632  30.289  42.982  1.00 29.27           C  
ATOM    829  CG1 VAL L 106      51.114  30.001  41.572  1.00 29.31           C  
ATOM    830  CG2 VAL L 106      49.139  30.518  42.995  1.00 28.18           C  
ATOM    831  N   LEU L 106A     53.051  27.841  43.908  1.00 30.58           N  
ATOM    832  CA  LEU L 106A     54.485  27.615  44.055  1.00 30.80           C  
ATOM    833  C   LEU L 106A     55.296  28.663  43.292  1.00 31.10           C  
ATOM    834  O   LEU L 106A     56.206  29.262  43.902  1.00 32.27           O  
ATOM    835  CB  LEU L 106A     54.844  26.211  43.566  1.00 29.84           C  
ATOM    836  CG  LEU L 106A     54.093  25.052  44.231  1.00 30.04           C  
ATOM    837  CD1 LEU L 106A     54.514  23.750  43.578  1.00 29.30           C  
ATOM    838  CD2 LEU L 106A     54.382  25.010  45.720  1.00 29.98           C  
ATOM    839  OXT LEU L 106A     55.018  28.879  42.098  1.00 31.33           O  
TER     840      LEU L 106A                                                     
ATOM    841  N   ASN L   1      28.003  47.281  41.241  1.00 36.20           N  
ATOM    842  CA  ASN L   1      26.915  48.201  41.698  1.00 35.82           C  
ATOM    843  C   ASN L   1      27.490  49.133  42.767  1.00 35.04           C  
ATOM    844  O   ASN L   1      28.463  49.846  42.520  1.00 35.84           O  
ATOM    845  CB  ASN L   1      25.748  47.391  42.286  1.00 36.16           C  
ATOM    846  CG  ASN L   1      24.394  48.030  42.011  1.00 37.02           C  
ATOM    847  OD1 ASN L   1      23.900  48.009  40.879  1.00 37.19           O  
ATOM    848  ND2 ASN L   1      23.791  48.611  43.046  1.00 37.91           N  
ATOM    849  N   PHE L   2      26.894  49.110  43.958  1.00 33.30           N  
ATOM    850  CA  PHE L   2      27.344  49.941  45.072  1.00 29.82           C  
ATOM    851  C   PHE L   2      28.369  49.189  45.922  1.00 28.43           C  
ATOM    852  O   PHE L   2      28.372  47.958  45.962  1.00 29.90           O  
ATOM    853  CB  PHE L   2      26.162  50.295  45.972  1.00 28.40           C  
ATOM    854  CG  PHE L   2      25.627  49.122  46.738  1.00 26.97           C  
ATOM    855  CD1 PHE L   2      24.673  48.285  46.177  1.00 25.25           C  
ATOM    856  CD2 PHE L   2      26.126  48.819  48.010  1.00 26.69           C  
ATOM    857  CE1 PHE L   2      24.222  47.155  46.869  1.00 25.80           C  
ATOM    858  CE2 PHE L   2      25.684  47.693  48.711  1.00 25.30           C  
ATOM    859  CZ  PHE L   2      24.730  46.860  48.138  1.00 25.91           C  
ATOM    860  N   MET L   3      29.221  49.929  46.619  1.00 26.52           N  
ATOM    861  CA  MET L   3      30.211  49.317  47.485  1.00 25.94           C  
ATOM    862  C   MET L   3      29.889  49.681  48.932  1.00 23.91           C  
ATOM    863  O   MET L   3      29.211  50.681  49.209  1.00 23.06           O  
ATOM    864  CB  MET L   3      31.621  49.796  47.124  1.00 29.50           C  
ATOM    865  CG  MET L   3      31.842  51.287  47.287  1.00 32.94           C  
ATOM    866  SD  MET L   3      33.413  51.809  46.527  1.00 37.48           S  
ATOM    867  CE  MET L   3      34.504  51.757  47.972  1.00 36.80           C  
ATOM    868  N   LEU L   4      30.366  48.854  49.851  1.00 20.89           N  
ATOM    869  CA  LEU L   4      30.128  49.081  51.267  1.00 18.27           C  
ATOM    870  C   LEU L   4      31.438  49.496  51.916  1.00 17.37           C  
ATOM    871  O   LEU L   4      32.457  48.825  51.761  1.00 17.11           O  
ATOM    872  CB  LEU L   4      29.566  47.806  51.907  1.00 15.38           C  
ATOM    873  CG  LEU L   4      28.179  47.416  51.380  1.00 15.02           C  
ATOM    874  CD1 LEU L   4      27.875  45.968  51.717  1.00 16.16           C  
ATOM    875  CD2 LEU L   4      27.128  48.338  51.957  1.00 13.69           C  
ATOM    876  N   THR L   5      31.402  50.614  52.631  1.00 17.16           N  
ATOM    877  CA  THR L   5      32.587  51.146  53.288  1.00 19.34           C  
ATOM    878  C   THR L   5      32.543  50.921  54.793  1.00 19.07           C  
ATOM    879  O   THR L   5      31.651  51.422  55.477  1.00 20.13           O  
ATOM    880  CB  THR L   5      32.707  52.646  53.035  1.00 20.12           C  
ATOM    881  OG1 THR L   5      32.346  52.928  51.675  1.00 24.63           O  
ATOM    882  CG2 THR L   5      34.132  53.112  53.292  1.00 21.44           C  
ATOM    883  N   GLN L   6      33.508  50.183  55.320  1.00 17.72           N  
ATOM    884  CA  GLN L   6      33.513  49.917  56.749  1.00 18.43           C  
ATOM    885  C   GLN L   6      34.499  50.767  57.517  1.00 18.79           C  
ATOM    886  O   GLN L   6      35.391  51.385  56.944  1.00 18.78           O  
ATOM    887  CB  GLN L   6      33.807  48.443  57.026  1.00 15.51           C  
ATOM    888  CG  GLN L   6      32.853  47.496  56.335  1.00 17.56           C  
ATOM    889  CD  GLN L   6      33.096  46.048  56.696  1.00 16.35           C  
ATOM    890  OE1 GLN L   6      32.862  45.163  55.888  1.00 18.36           O  
ATOM    891  NE2 GLN L   6      33.555  45.800  57.918  1.00 16.53           N  
ATOM    892  N   SER L   7      34.321  50.768  58.832  1.00 22.76           N  
ATOM    893  CA  SER L   7      35.165  51.515  59.748  1.00 25.27           C  
ATOM    894  C   SER L   7      36.618  51.074  59.709  1.00 27.42           C  
ATOM    895  O   SER L   7      36.937  49.915  59.406  1.00 27.10           O  
ATOM    896  CB  SER L   7      34.639  51.370  61.176  1.00 24.79           C  
ATOM    897  OG  SER L   7      33.509  52.193  61.395  1.00 27.95           O  
ATOM    898  N   HIS L   8      37.495  52.023  60.007  1.00 30.30           N  
ATOM    899  CA  HIS L   8      38.932  51.775  60.070  1.00 33.44           C  
ATOM    900  C   HIS L   8      39.102  50.793  61.233  1.00 33.90           C  
ATOM    901  O   HIS L   8      38.295  50.817  62.169  1.00 35.15           O  
ATOM    902  CB  HIS L   8      39.654  53.092  60.392  1.00 35.56           C  
ATOM    903  CG  HIS L   8      41.136  52.952  60.572  1.00 37.65           C  
ATOM    904  ND1 HIS L   8      42.035  53.179  59.552  1.00 38.72           N  
ATOM    905  CD2 HIS L   8      41.874  52.618  61.658  1.00 38.14           C  
ATOM    906  CE1 HIS L   8      43.265  52.995  60.002  1.00 39.08           C  
ATOM    907  NE2 HIS L   8      43.195  52.654  61.277  1.00 39.74           N  
ATOM    908  N   SER L   9      40.117  49.930  61.183  1.00 33.15           N  
ATOM    909  CA  SER L   9      40.350  48.981  62.274  1.00 31.94           C  
ATOM    910  C   SER L   9      40.006  49.649  63.615  1.00 31.96           C  
ATOM    911  O   SER L   9      40.191  50.856  63.781  1.00 32.42           O  
ATOM    912  CB  SER L   9      41.819  48.544  62.289  1.00 31.92           C  
ATOM    913  OG  SER L   9      42.674  49.641  62.572  1.00 29.21           O  
ATOM    914  N   VAL L  11      39.510  48.868  64.569  1.00 31.13           N  
ATOM    915  CA  VAL L  11      39.138  49.407  65.866  1.00 30.17           C  
ATOM    916  C   VAL L  11      39.723  48.557  66.980  1.00 30.39           C  
ATOM    917  O   VAL L  11      39.817  47.334  66.861  1.00 29.91           O  
ATOM    918  CB  VAL L  11      37.602  49.429  66.059  1.00 30.11           C  
ATOM    919  CG1 VAL L  11      37.242  50.314  67.244  1.00 29.75           C  
ATOM    920  CG2 VAL L  11      36.920  49.910  64.801  1.00 30.47           C  
ATOM    921  N   SER L  12      40.100  49.220  68.067  1.00 30.70           N  
ATOM    922  CA  SER L  12      40.669  48.548  69.225  1.00 30.00           C  
ATOM    923  C   SER L  12      39.989  49.091  70.480  1.00 29.29           C  
ATOM    924  O   SER L  12      39.772  50.300  70.619  1.00 29.30           O  
ATOM    925  CB  SER L  12      42.174  48.795  69.279  1.00 30.69           C  
ATOM    926  OG  SER L  12      42.454  50.186  69.235  1.00 33.69           O  
ATOM    927  N   GLU L  13      39.654  48.188  71.392  1.00 28.30           N  
ATOM    928  CA  GLU L  13      38.975  48.557  72.624  1.00 25.99           C  
ATOM    929  C   GLU L  13      39.347  47.533  73.701  1.00 25.69           C  
ATOM    930  O   GLU L  13      39.873  46.462  73.389  1.00 24.06           O  
ATOM    931  CB  GLU L  13      37.465  48.561  72.359  1.00 25.82           C  
ATOM    932  CG  GLU L  13      36.599  49.055  73.492  1.00 26.65           C  
ATOM    933  CD  GLU L  13      37.118  50.341  74.080  1.00 27.72           C  
ATOM    934  OE1 GLU L  13      37.701  50.284  75.183  1.00 27.33           O  
ATOM    935  OE2 GLU L  13      36.960  51.404  73.435  1.00 28.73           O  
ATOM    936  N   SER L  14      39.082  47.865  74.961  1.00 25.25           N  
ATOM    937  CA  SER L  14      39.392  46.972  76.076  1.00 26.41           C  
ATOM    938  C   SER L  14      38.247  46.013  76.389  1.00 26.86           C  
ATOM    939  O   SER L  14      37.106  46.227  75.968  1.00 27.54           O  
ATOM    940  CB  SER L  14      39.713  47.781  77.340  1.00 25.98           C  
ATOM    941  OG  SER L  14      40.992  48.385  77.253  1.00 27.17           O  
ATOM    942  N   PRO L  15      38.541  44.938  77.136  1.00 26.62           N  
ATOM    943  CA  PRO L  15      37.525  43.950  77.506  1.00 26.90           C  
ATOM    944  C   PRO L  15      36.410  44.602  78.312  1.00 26.41           C  
ATOM    945  O   PRO L  15      36.662  45.506  79.111  1.00 27.51           O  
ATOM    946  CB  PRO L  15      38.311  42.945  78.342  1.00 26.84           C  
ATOM    947  CG  PRO L  15      39.682  43.021  77.756  1.00 26.37           C  
ATOM    948  CD  PRO L  15      39.876  44.503  77.585  1.00 27.06           C  
ATOM    949  N   GLY L  16      35.182  44.145  78.099  1.00 26.01           N  
ATOM    950  CA  GLY L  16      34.056  44.692  78.830  1.00 25.82           C  
ATOM    951  C   GLY L  16      33.521  46.019  78.322  1.00 26.68           C  
ATOM    952  O   GLY L  16      32.434  46.431  78.721  1.00 28.17           O  
ATOM    953  N   LYS L  17      34.260  46.704  77.457  1.00 26.25           N  
ATOM    954  CA  LYS L  17      33.770  47.972  76.944  1.00 26.23           C  
ATOM    955  C   LYS L  17      32.854  47.740  75.737  1.00 25.90           C  
ATOM    956  O   LYS L  17      32.562  46.593  75.374  1.00 25.76           O  
ATOM    957  CB  LYS L  17      34.941  48.892  76.592  1.00 27.35           C  
ATOM    958  CG  LYS L  17      35.892  49.116  77.772  1.00 30.28           C  
ATOM    959  CD  LYS L  17      36.537  50.503  77.770  1.00 31.85           C  
ATOM    960  CE  LYS L  17      37.495  50.672  78.967  1.00 34.60           C  
ATOM    961  NZ  LYS L  17      38.103  52.057  79.065  1.00 34.31           N  
ATOM    962  N   THR L  18      32.399  48.822  75.116  1.00 24.60           N  
ATOM    963  CA  THR L  18      31.489  48.711  73.984  1.00 23.42           C  
ATOM    964  C   THR L  18      31.999  49.300  72.677  1.00 23.11           C  
ATOM    965  O   THR L  18      32.360  50.478  72.616  1.00 24.51           O  
ATOM    966  CB  THR L  18      30.163  49.374  74.333  1.00 23.28           C  
ATOM    967  OG1 THR L  18      29.639  48.759  75.516  1.00 24.04           O  
ATOM    968  CG2 THR L  18      29.169  49.240  73.188  1.00 22.61           C  
ATOM    969  N   VAL L  19      32.020  48.478  71.632  1.00 21.47           N  
ATOM    970  CA  VAL L  19      32.471  48.923  70.313  1.00 20.60           C  
ATOM    971  C   VAL L  19      31.339  48.910  69.300  1.00 18.53           C  
ATOM    972  O   VAL L  19      30.432  48.084  69.373  1.00 16.51           O  
ATOM    973  CB  VAL L  19      33.614  48.032  69.738  1.00 20.00           C  
ATOM    974  CG1 VAL L  19      34.901  48.300  70.470  1.00 23.05           C  
ATOM    975  CG2 VAL L  19      33.245  46.550  69.852  1.00 21.37           C  
ATOM    976  N   THR L  20      31.403  49.835  68.351  1.00 19.37           N  
ATOM    977  CA  THR L  20      30.404  49.914  67.292  1.00 20.57           C  
ATOM    978  C   THR L  20      31.108  50.073  65.947  1.00 20.27           C  
ATOM    979  O   THR L  20      31.842  51.034  65.731  1.00 22.17           O  
ATOM    980  CB  THR L  20      29.421  51.091  67.512  1.00 20.23           C  
ATOM    981  OG1 THR L  20      28.662  50.864  68.708  1.00 19.67           O  
ATOM    982  CG2 THR L  20      28.454  51.198  66.337  1.00 20.60           C  
ATOM    983  N   ILE L  21      30.890  49.109  65.058  1.00 19.23           N  
ATOM    984  CA  ILE L  21      31.488  49.111  63.727  1.00 18.07           C  
ATOM    985  C   ILE L  21      30.467  49.629  62.711  1.00 18.12           C  
ATOM    986  O   ILE L  21      29.301  49.229  62.733  1.00 17.54           O  
ATOM    987  CB  ILE L  21      31.930  47.684  63.338  1.00 18.82           C  
ATOM    988  CG1 ILE L  21      32.915  47.162  64.390  1.00 18.83           C  
ATOM    989  CG2 ILE L  21      32.546  47.684  61.939  1.00 17.34           C  
ATOM    990  CD1 ILE L  21      33.279  45.706  64.259  1.00 20.23           C  
ATOM    991  N   SER L  22      30.904  50.516  61.822  1.00 17.31           N  
ATOM    992  CA  SER L  22      30.001  51.085  60.826  1.00 18.15           C  
ATOM    993  C   SER L  22      30.219  50.547  59.418  1.00 16.95           C  
ATOM    994  O   SER L  22      31.342  50.254  59.020  1.00 14.82           O  
ATOM    995  CB  SER L  22      30.131  52.609  60.816  1.00 19.26           C  
ATOM    996  OG  SER L  22      29.960  53.134  62.122  1.00 23.87           O  
ATOM    997  N   CYS L  23      29.119  50.433  58.680  1.00 17.27           N  
ATOM    998  CA  CYS L  23      29.101  49.941  57.299  1.00 18.07           C  
ATOM    999  C   CYS L  23      28.249  50.906  56.482  1.00 18.73           C  
ATOM   1000  O   CYS L  23      27.021  50.874  56.563  1.00 19.53           O  
ATOM   1001  CB  CYS L  23      28.471  48.553  57.252  1.00 16.74           C  
ATOM   1002  SG  CYS L  23      28.168  47.807  55.613  1.00 19.71           S  
ATOM   1003  N   THR L  24      28.899  51.749  55.689  1.00 18.24           N  
ATOM   1004  CA  THR L  24      28.194  52.739  54.888  1.00 19.00           C  
ATOM   1005  C   THR L  24      28.059  52.352  53.416  1.00 19.39           C  
ATOM   1006  O   THR L  24      28.993  51.836  52.808  1.00 19.05           O  
ATOM   1007  CB  THR L  24      28.896  54.122  55.021  1.00 19.67           C  
ATOM   1008  OG1 THR L  24      28.777  54.579  56.375  1.00 20.21           O  
ATOM   1009  CG2 THR L  24      28.272  55.153  54.092  1.00 19.30           C  
ATOM   1010  N   ARG L  25      26.875  52.605  52.863  1.00 20.26           N  
ATOM   1011  CA  ARG L  25      26.573  52.302  51.473  1.00 21.74           C  
ATOM   1012  C   ARG L  25      26.833  53.544  50.613  1.00 23.75           C  
ATOM   1013  O   ARG L  25      26.259  54.614  50.848  1.00 24.43           O  
ATOM   1014  CB  ARG L  25      25.116  51.835  51.360  1.00 19.93           C  
ATOM   1015  CG  ARG L  25      24.637  51.518  49.954  1.00 21.06           C  
ATOM   1016  CD  ARG L  25      23.515  50.486  49.970  1.00 20.12           C  
ATOM   1017  NE  ARG L  25      22.796  50.423  48.699  1.00 22.37           N  
ATOM   1018  CZ  ARG L  25      21.987  49.426  48.341  1.00 23.85           C  
ATOM   1019  NH1 ARG L  25      21.792  48.390  49.158  1.00 22.94           N  
ATOM   1020  NH2 ARG L  25      21.362  49.463  47.169  1.00 22.80           N  
ATOM   1021  N   SER L  26      27.707  53.386  49.617  1.00 25.87           N  
ATOM   1022  CA  SER L  26      28.101  54.468  48.711  1.00 26.24           C  
ATOM   1023  C   SER L  26      26.954  55.207  48.033  1.00 26.15           C  
ATOM   1024  O   SER L  26      26.916  56.436  48.049  1.00 27.49           O  
ATOM   1025  CB  SER L  26      29.067  53.933  47.647  1.00 26.71           C  
ATOM   1026  OG  SER L  26      28.570  52.745  47.049  1.00 27.82           O  
ATOM   1027  N   SER L  27      26.043  54.464  47.414  1.00 25.28           N  
ATOM   1028  CA  SER L  27      24.885  55.062  46.758  1.00 25.20           C  
ATOM   1029  C   SER L  27      23.714  54.117  46.972  1.00 24.91           C  
ATOM   1030  O   SER L  27      23.907  52.909  47.037  1.00 25.46           O  
ATOM   1031  CB  SER L  27      25.139  55.266  45.256  1.00 25.44           C  
ATOM   1032  OG  SER L  27      25.122  54.043  44.535  1.00 25.87           O  
ATOM   1033  N   GLY L  27A     22.507  54.665  47.084  1.00 24.97           N  
ATOM   1034  CA  GLY L  27A     21.332  53.840  47.317  1.00 25.37           C  
ATOM   1035  C   GLY L  27A     21.072  53.740  48.812  1.00 26.10           C  
ATOM   1036  O   GLY L  27A     21.941  54.082  49.614  1.00 27.10           O  
ATOM   1037  N   SER L  27B     19.888  53.283  49.206  1.00 25.74           N  
ATOM   1038  CA  SER L  27B     19.580  53.165  50.633  1.00 25.98           C  
ATOM   1039  C   SER L  27B     20.131  51.873  51.233  1.00 25.05           C  
ATOM   1040  O   SER L  27B     19.869  50.774  50.730  1.00 24.29           O  
ATOM   1041  CB  SER L  27B     18.068  53.217  50.880  1.00 26.92           C  
ATOM   1042  OG  SER L  27B     17.781  52.991  52.251  1.00 24.69           O  
ATOM   1043  N   ILE L  28      20.887  52.022  52.313  1.00 22.94           N  
ATOM   1044  CA  ILE L  28      21.482  50.890  53.005  1.00 22.71           C  
ATOM   1045  C   ILE L  28      20.365  49.921  53.421  1.00 23.13           C  
ATOM   1046  O   ILE L  28      20.605  48.741  53.674  1.00 23.33           O  
ATOM   1047  CB  ILE L  28      22.266  51.394  54.244  1.00 22.05           C  
ATOM   1048  CG1 ILE L  28      23.459  50.476  54.545  1.00 22.67           C  
ATOM   1049  CG2 ILE L  28      21.326  51.545  55.417  1.00 23.04           C  
ATOM   1050  CD1 ILE L  28      23.102  49.102  55.006  1.00 21.00           C  
ATOM   1051  N   ALA L  29      19.135  50.424  53.461  1.00 23.18           N  
ATOM   1052  CA  ALA L  29      17.987  49.615  53.849  1.00 22.36           C  
ATOM   1053  C   ALA L  29      17.229  48.979  52.667  1.00 22.25           C  
ATOM   1054  O   ALA L  29      16.266  48.237  52.873  1.00 19.51           O  
ATOM   1055  CB  ALA L  29      17.037  50.456  54.691  1.00 22.00           C  
ATOM   1056  N   SER L  30      17.652  49.269  51.437  1.00 22.24           N  
ATOM   1057  CA  SER L  30      16.998  48.692  50.261  1.00 21.94           C  
ATOM   1058  C   SER L  30      17.175  47.182  50.254  1.00 21.43           C  
ATOM   1059  O   SER L  30      16.384  46.457  49.657  1.00 23.16           O  
ATOM   1060  CB  SER L  30      17.580  49.265  48.967  1.00 23.08           C  
ATOM   1061  OG  SER L  30      17.102  50.574  48.721  1.00 26.64           O  
ATOM   1062  N   ASN L  31      18.220  46.715  50.924  1.00 20.82           N  
ATOM   1063  CA  ASN L  31      18.509  45.293  50.994  1.00 19.62           C  
ATOM   1064  C   ASN L  31      19.066  44.883  52.370  1.00 18.65           C  
ATOM   1065  O   ASN L  31      19.792  45.641  53.018  1.00 18.82           O  
ATOM   1066  CB  ASN L  31      19.504  44.916  49.882  1.00 19.88           C  
ATOM   1067  CG  ASN L  31      19.052  45.393  48.503  1.00 20.39           C  
ATOM   1068  OD1 ASN L  31      19.338  46.528  48.094  1.00 18.05           O  
ATOM   1069  ND2 ASN L  31      18.325  44.533  47.788  1.00 15.26           N  
ATOM   1070  N   TYR L  32      18.718  43.683  52.819  1.00 17.71           N  
ATOM   1071  CA  TYR L  32      19.199  43.193  54.108  1.00 18.52           C  
ATOM   1072  C   TYR L  32      20.707  43.329  54.285  1.00 16.18           C  
ATOM   1073  O   TYR L  32      21.467  43.257  53.330  1.00 15.69           O  
ATOM   1074  CB  TYR L  32      18.836  41.721  54.294  1.00 18.84           C  
ATOM   1075  CG  TYR L  32      17.366  41.471  54.477  1.00 21.34           C  
ATOM   1076  CD1 TYR L  32      16.635  42.178  55.430  1.00 20.34           C  
ATOM   1077  CD2 TYR L  32      16.709  40.495  53.726  1.00 22.57           C  
ATOM   1078  CE1 TYR L  32      15.289  41.915  55.630  1.00 21.33           C  
ATOM   1079  CE2 TYR L  32      15.364  40.225  53.921  1.00 22.44           C  
ATOM   1080  CZ  TYR L  32      14.666  40.936  54.872  1.00 21.56           C  
ATOM   1081  OH  TYR L  32      13.343  40.647  55.081  1.00 26.61           O  
ATOM   1082  N   VAL L  33      21.134  43.526  55.522  1.00 14.68           N  
ATOM   1083  CA  VAL L  33      22.554  43.624  55.801  1.00 14.71           C  
ATOM   1084  C   VAL L  33      22.914  42.491  56.743  1.00 14.88           C  
ATOM   1085  O   VAL L  33      22.171  42.185  57.678  1.00 15.17           O  
ATOM   1086  CB  VAL L  33      22.931  44.966  56.448  1.00 14.89           C  
ATOM   1087  CG1 VAL L  33      24.425  45.014  56.698  1.00 13.12           C  
ATOM   1088  CG2 VAL L  33      22.525  46.101  55.543  1.00 14.83           C  
ATOM   1089  N   GLN L  34      24.043  41.851  56.465  1.00 15.19           N  
ATOM   1090  CA  GLN L  34      24.535  40.745  57.274  1.00 12.80           C  
ATOM   1091  C   GLN L  34      25.936  41.066  57.767  1.00 13.24           C  
ATOM   1092  O   GLN L  34      26.683  41.807  57.120  1.00 12.97           O  
ATOM   1093  CB  GLN L  34      24.575  39.447  56.459  1.00 13.17           C  
ATOM   1094  CG  GLN L  34      23.225  38.765  56.259  1.00 15.23           C  
ATOM   1095  CD  GLN L  34      22.282  39.531  55.335  1.00 16.19           C  
ATOM   1096  OE1 GLN L  34      21.108  39.715  55.651  1.00 15.97           O  
ATOM   1097  NE2 GLN L  34      22.791  39.965  54.183  1.00 18.08           N  
ATOM   1098  N   TRP L  35      26.281  40.511  58.925  1.00 12.45           N  
ATOM   1099  CA  TRP L  35      27.598  40.705  59.504  1.00 12.29           C  
ATOM   1100  C   TRP L  35      28.266  39.355  59.726  1.00 12.38           C  
ATOM   1101  O   TRP L  35      27.656  38.414  60.226  1.00 11.06           O  
ATOM   1102  CB  TRP L  35      27.507  41.467  60.829  1.00 11.85           C  
ATOM   1103  CG  TRP L  35      27.096  42.895  60.667  1.00 10.31           C  
ATOM   1104  CD1 TRP L  35      25.823  43.389  60.657  1.00 10.25           C  
ATOM   1105  CD2 TRP L  35      27.964  44.019  60.499  1.00 10.55           C  
ATOM   1106  NE1 TRP L  35      25.842  44.754  60.500  1.00 10.21           N  
ATOM   1107  CE2 TRP L  35      27.143  45.169  60.400  1.00 11.27           C  
ATOM   1108  CE3 TRP L  35      29.354  44.171  60.424  1.00  9.01           C  
ATOM   1109  CZ2 TRP L  35      27.671  46.453  60.230  1.00 10.88           C  
ATOM   1110  CZ3 TRP L  35      29.879  45.445  60.254  1.00  8.50           C  
ATOM   1111  CH2 TRP L  35      29.037  46.571  60.160  1.00  9.80           C  
ATOM   1112  N   TYR L  36      29.531  39.260  59.346  1.00 13.67           N  
ATOM   1113  CA  TYR L  36      30.254  38.018  59.506  1.00 13.25           C  
ATOM   1114  C   TYR L  36      31.474  38.227  60.358  1.00 14.18           C  
ATOM   1115  O   TYR L  36      32.144  39.251  60.260  1.00 13.14           O  
ATOM   1116  CB  TYR L  36      30.700  37.483  58.146  1.00 13.04           C  
ATOM   1117  CG  TYR L  36      29.572  37.209  57.198  1.00 12.65           C  
ATOM   1118  CD1 TYR L  36      28.814  36.054  57.307  1.00 14.82           C  
ATOM   1119  CD2 TYR L  36      29.242  38.125  56.199  1.00 16.43           C  
ATOM   1120  CE1 TYR L  36      27.747  35.813  56.445  1.00 16.48           C  
ATOM   1121  CE2 TYR L  36      28.180  37.897  55.332  1.00 15.12           C  
ATOM   1122  CZ  TYR L  36      27.436  36.741  55.464  1.00 15.43           C  
ATOM   1123  OH  TYR L  36      26.364  36.523  54.638  1.00 17.05           O  
ATOM   1124  N   GLN L  37      31.749  37.244  61.203  1.00 15.03           N  
ATOM   1125  CA  GLN L  37      32.932  37.268  62.040  1.00 15.72           C  
ATOM   1126  C   GLN L  37      33.898  36.296  61.391  1.00 16.43           C  
ATOM   1127  O   GLN L  37      33.520  35.179  61.035  1.00 15.97           O  
ATOM   1128  CB  GLN L  37      32.627  36.771  63.448  1.00 16.67           C  
ATOM   1129  CG  GLN L  37      33.846  36.739  64.354  1.00 14.93           C  
ATOM   1130  CD  GLN L  37      33.532  36.213  65.740  1.00 17.31           C  
ATOM   1131  OE1 GLN L  37      33.391  35.005  65.942  1.00 18.02           O  
ATOM   1132  NE2 GLN L  37      33.406  37.120  66.702  1.00 17.15           N  
ATOM   1133  N   GLN L  38      35.137  36.726  61.212  1.00 17.73           N  
ATOM   1134  CA  GLN L  38      36.136  35.848  60.640  1.00 19.85           C  
ATOM   1135  C   GLN L  38      37.362  35.872  61.535  1.00 21.02           C  
ATOM   1136  O   GLN L  38      38.191  36.782  61.466  1.00 19.77           O  
ATOM   1137  CB  GLN L  38      36.507  36.264  59.213  1.00 18.67           C  
ATOM   1138  CG  GLN L  38      37.568  35.351  58.588  1.00 18.51           C  
ATOM   1139  CD  GLN L  38      37.795  35.620  57.112  1.00 18.14           C  
ATOM   1140  OE1 GLN L  38      37.926  36.772  56.688  1.00 17.13           O  
ATOM   1141  NE2 GLN L  38      37.854  34.553  56.320  1.00 16.32           N  
ATOM   1142  N   ARG L  39      37.439  34.874  62.404  1.00 23.19           N  
ATOM   1143  CA  ARG L  39      38.556  34.737  63.315  1.00 25.96           C  
ATOM   1144  C   ARG L  39      39.752  34.310  62.484  1.00 26.51           C  
ATOM   1145  O   ARG L  39      39.591  33.796  61.378  1.00 26.43           O  
ATOM   1146  CB  ARG L  39      38.254  33.673  64.367  1.00 26.67           C  
ATOM   1147  CG  ARG L  39      37.194  34.074  65.386  1.00 29.44           C  
ATOM   1148  CD  ARG L  39      37.763  34.006  66.804  1.00 31.72           C  
ATOM   1149  NE  ARG L  39      36.719  34.089  67.820  1.00 33.61           N  
ATOM   1150  CZ  ARG L  39      35.687  33.249  67.898  1.00 34.19           C  
ATOM   1151  NH1 ARG L  39      34.778  33.390  68.855  1.00 34.23           N  
ATOM   1152  NH2 ARG L  39      35.565  32.267  67.015  1.00 34.25           N  
ATOM   1153  N   PRO L  40      40.968  34.514  63.008  1.00 27.13           N  
ATOM   1154  CA  PRO L  40      42.193  34.138  62.287  1.00 27.35           C  
ATOM   1155  C   PRO L  40      42.118  32.699  61.776  1.00 26.83           C  
ATOM   1156  O   PRO L  40      41.656  31.805  62.485  1.00 27.84           O  
ATOM   1157  CB  PRO L  40      43.283  34.305  63.346  1.00 28.39           C  
ATOM   1158  CG  PRO L  40      42.719  35.378  64.266  1.00 28.04           C  
ATOM   1159  CD  PRO L  40      41.270  34.976  64.377  1.00 26.56           C  
ATOM   1160  N   GLY L  41      42.559  32.477  60.546  1.00 25.86           N  
ATOM   1161  CA  GLY L  41      42.542  31.131  59.989  1.00 25.40           C  
ATOM   1162  C   GLY L  41      41.196  30.434  59.880  1.00 24.54           C  
ATOM   1163  O   GLY L  41      41.143  29.231  59.614  1.00 25.20           O  
ATOM   1164  N   SER L  42      40.104  31.170  60.077  1.00 23.80           N  
ATOM   1165  CA  SER L  42      38.771  30.576  59.989  1.00 21.17           C  
ATOM   1166  C   SER L  42      37.995  31.137  58.808  1.00 20.14           C  
ATOM   1167  O   SER L  42      38.433  32.079  58.149  1.00 18.40           O  
ATOM   1168  CB  SER L  42      37.970  30.851  61.262  1.00 22.48           C  
ATOM   1169  OG  SER L  42      38.683  30.467  62.426  1.00 27.06           O  
ATOM   1170  N   SER L  43      36.836  30.543  58.554  1.00 17.29           N  
ATOM   1171  CA  SER L  43      35.963  30.986  57.484  1.00 17.08           C  
ATOM   1172  C   SER L  43      34.963  31.966  58.094  1.00 16.40           C  
ATOM   1173  O   SER L  43      34.784  32.005  59.310  1.00 16.39           O  
ATOM   1174  CB  SER L  43      35.228  29.790  56.871  1.00 16.34           C  
ATOM   1175  OG  SER L  43      34.597  29.013  57.872  1.00 17.47           O  
ATOM   1176  N   PRO L  44      34.306  32.778  57.259  1.00 15.72           N  
ATOM   1177  CA  PRO L  44      33.337  33.739  57.789  1.00 15.43           C  
ATOM   1178  C   PRO L  44      32.129  33.051  58.417  1.00 15.37           C  
ATOM   1179  O   PRO L  44      31.596  32.089  57.860  1.00 16.98           O  
ATOM   1180  CB  PRO L  44      32.939  34.554  56.555  1.00 14.09           C  
ATOM   1181  CG  PRO L  44      34.103  34.404  55.639  1.00 16.09           C  
ATOM   1182  CD  PRO L  44      34.484  32.958  55.810  1.00 15.07           C  
ATOM   1183  N   THR L  45      31.712  33.526  59.584  1.00 15.47           N  
ATOM   1184  CA  THR L  45      30.536  32.968  60.234  1.00 15.39           C  
ATOM   1185  C   THR L  45      29.610  34.129  60.568  1.00 15.80           C  
ATOM   1186  O   THR L  45      30.062  35.220  60.935  1.00 16.30           O  
ATOM   1187  CB  THR L  45      30.877  32.172  61.523  1.00 15.12           C  
ATOM   1188  OG1 THR L  45      31.277  33.063  62.567  1.00 16.11           O  
ATOM   1189  CG2 THR L  45      32.002  31.187  61.251  1.00 15.19           C  
ATOM   1190  N   THR L  46      28.314  33.893  60.416  1.00 15.31           N  
ATOM   1191  CA  THR L  46      27.303  34.902  60.678  1.00 15.47           C  
ATOM   1192  C   THR L  46      27.075  35.212  62.161  1.00 16.56           C  
ATOM   1193  O   THR L  46      26.968  34.307  62.987  1.00 18.05           O  
ATOM   1194  CB  THR L  46      25.939  34.478  60.078  1.00 16.20           C  
ATOM   1195  OG1 THR L  46      26.096  34.161  58.687  1.00 18.07           O  
ATOM   1196  CG2 THR L  46      24.913  35.600  60.230  1.00 13.56           C  
ATOM   1197  N   VAL L  47      27.021  36.501  62.492  1.00 16.46           N  
ATOM   1198  CA  VAL L  47      26.722  36.927  63.848  1.00 15.66           C  
ATOM   1199  C   VAL L  47      25.436  37.735  63.747  1.00 14.55           C  
ATOM   1200  O   VAL L  47      24.676  37.830  64.706  1.00 14.09           O  
ATOM   1201  CB  VAL L  47      27.839  37.804  64.483  1.00 17.16           C  
ATOM   1202  CG1 VAL L  47      29.038  36.945  64.822  1.00 15.59           C  
ATOM   1203  CG2 VAL L  47      28.211  38.944  63.557  1.00 14.53           C  
ATOM   1204  N   ILE L  48      25.198  38.305  62.568  1.00 13.22           N  
ATOM   1205  CA  ILE L  48      23.990  39.084  62.307  1.00 13.75           C  
ATOM   1206  C   ILE L  48      23.512  38.867  60.879  1.00 14.37           C  
ATOM   1207  O   ILE L  48      24.318  38.801  59.962  1.00 15.99           O  
ATOM   1208  CB  ILE L  48      24.215  40.607  62.487  1.00 12.88           C  
ATOM   1209  CG1 ILE L  48      24.507  40.944  63.950  1.00 13.81           C  
ATOM   1210  CG2 ILE L  48      22.974  41.364  62.040  1.00 11.30           C  
ATOM   1211  CD1 ILE L  48      23.371  40.621  64.883  1.00 12.89           C  
ATOM   1212  N   TYR L  49      22.203  38.744  60.697  1.00 14.80           N  
ATOM   1213  CA  TYR L  49      21.627  38.585  59.366  1.00 15.77           C  
ATOM   1214  C   TYR L  49      20.268  39.278  59.336  1.00 14.98           C  
ATOM   1215  O   TYR L  49      19.590  39.383  60.358  1.00 15.37           O  
ATOM   1216  CB  TYR L  49      21.502  37.100  58.987  1.00 14.55           C  
ATOM   1217  CG  TYR L  49      20.422  36.328  59.708  1.00 15.96           C  
ATOM   1218  CD1 TYR L  49      19.122  36.277  59.211  1.00 15.01           C  
ATOM   1219  CD2 TYR L  49      20.708  35.626  60.881  1.00 15.69           C  
ATOM   1220  CE1 TYR L  49      18.131  35.540  59.869  1.00 18.27           C  
ATOM   1221  CE2 TYR L  49      19.732  34.888  61.542  1.00 14.91           C  
ATOM   1222  CZ  TYR L  49      18.448  34.848  61.034  1.00 17.53           C  
ATOM   1223  OH  TYR L  49      17.484  34.125  61.692  1.00 17.43           O  
ATOM   1224  N   GLU L  50      19.881  39.759  58.163  1.00 15.15           N  
ATOM   1225  CA  GLU L  50      18.616  40.468  58.001  1.00 15.51           C  
ATOM   1226  C   GLU L  50      18.591  41.698  58.909  1.00 14.81           C  
ATOM   1227  O   GLU L  50      17.623  41.960  59.616  1.00 14.93           O  
ATOM   1228  CB  GLU L  50      17.431  39.529  58.280  1.00 14.64           C  
ATOM   1229  CG  GLU L  50      17.080  38.666  57.064  1.00 17.39           C  
ATOM   1230  CD  GLU L  50      15.917  37.699  57.291  1.00 19.95           C  
ATOM   1231  OE1 GLU L  50      14.973  38.057  58.028  1.00 19.48           O  
ATOM   1232  OE2 GLU L  50      15.943  36.582  56.714  1.00 19.76           O  
ATOM   1233  N   ASP L  51      19.698  42.433  58.878  1.00 14.11           N  
ATOM   1234  CA  ASP L  51      19.888  43.664  59.643  1.00 14.21           C  
ATOM   1235  C   ASP L  51      20.103  43.546  61.155  1.00 13.58           C  
ATOM   1236  O   ASP L  51      20.992  44.204  61.702  1.00 14.08           O  
ATOM   1237  CB  ASP L  51      18.739  44.648  59.389  1.00 14.25           C  
ATOM   1238  CG  ASP L  51      18.494  44.906  57.913  1.00 15.19           C  
ATOM   1239  OD1 ASP L  51      19.464  45.049  57.140  1.00 14.96           O  
ATOM   1240  OD2 ASP L  51      17.311  44.981  57.528  1.00 19.77           O  
ATOM   1241  N   ASN L  52      19.311  42.719  61.831  1.00 12.52           N  
ATOM   1242  CA  ASN L  52      19.441  42.589  63.278  1.00 12.79           C  
ATOM   1243  C   ASN L  52      19.128  41.209  63.874  1.00 13.39           C  
ATOM   1244  O   ASN L  52      18.985  41.076  65.089  1.00 11.79           O  
ATOM   1245  CB  ASN L  52      18.541  43.628  63.951  1.00 14.92           C  
ATOM   1246  CG  ASN L  52      17.091  43.547  63.464  1.00 18.18           C  
ATOM   1247  OD1 ASN L  52      16.669  42.529  62.904  1.00 18.84           O  
ATOM   1248  ND2 ASN L  52      16.323  44.615  63.687  1.00 19.71           N  
ATOM   1249  N   GLN L  53      19.006  40.182  63.044  1.00 13.68           N  
ATOM   1250  CA  GLN L  53      18.704  38.857  63.576  1.00 12.98           C  
ATOM   1251  C   GLN L  53      19.978  38.097  63.917  1.00 14.41           C  
ATOM   1252  O   GLN L  53      20.956  38.146  63.166  1.00 14.98           O  
ATOM   1253  CB  GLN L  53      17.874  38.056  62.578  1.00 11.05           C  
ATOM   1254  CG  GLN L  53      16.586  38.749  62.179  1.00 11.61           C  
ATOM   1255  CD  GLN L  53      15.683  39.047  63.364  1.00  8.98           C  
ATOM   1256  OE1 GLN L  53      15.094  38.142  63.953  1.00 10.86           O  
ATOM   1257  NE2 GLN L  53      15.574  40.324  63.719  1.00 10.52           N  
ATOM   1258  N   ARG L  54      19.967  37.417  65.063  1.00 14.18           N  
ATOM   1259  CA  ARG L  54      21.115  36.633  65.503  1.00 15.17           C  
ATOM   1260  C   ARG L  54      20.870  35.159  65.298  1.00 15.23           C  
ATOM   1261  O   ARG L  54      19.810  34.651  65.645  1.00 13.73           O  
ATOM   1262  CB  ARG L  54      21.404  36.826  66.993  1.00 16.40           C  
ATOM   1263  CG  ARG L  54      22.129  38.099  67.387  1.00 18.15           C  
ATOM   1264  CD  ARG L  54      22.531  38.023  68.854  1.00 19.18           C  
ATOM   1265  NE  ARG L  54      21.366  37.849  69.713  1.00 21.37           N  
ATOM   1266  CZ  ARG L  54      20.480  38.811  69.960  1.00 23.98           C  
ATOM   1267  NH1 ARG L  54      20.639  40.020  69.416  1.00 22.48           N  
ATOM   1268  NH2 ARG L  54      19.423  38.563  70.727  1.00 22.00           N  
ATOM   1269  N   PRO L  55      21.855  34.451  64.722  1.00 16.75           N  
ATOM   1270  CA  PRO L  55      21.726  33.011  64.497  1.00 16.48           C  
ATOM   1271  C   PRO L  55      21.744  32.422  65.900  1.00 18.87           C  
ATOM   1272  O   PRO L  55      22.354  32.998  66.802  1.00 18.82           O  
ATOM   1273  CB  PRO L  55      23.003  32.657  63.737  1.00 14.67           C  
ATOM   1274  CG  PRO L  55      23.396  33.936  63.084  1.00 14.89           C  
ATOM   1275  CD  PRO L  55      23.112  34.959  64.149  1.00 14.53           C  
ATOM   1276  N   SER L  56      21.076  31.294  66.104  1.00 21.44           N  
ATOM   1277  CA  SER L  56      21.069  30.687  67.432  1.00 21.79           C  
ATOM   1278  C   SER L  56      22.515  30.348  67.724  1.00 21.10           C  
ATOM   1279  O   SER L  56      23.259  29.947  66.825  1.00 21.53           O  
ATOM   1280  CB  SER L  56      20.239  29.411  67.441  1.00 21.31           C  
ATOM   1281  OG  SER L  56      20.841  28.451  66.597  1.00 23.21           O  
ATOM   1282  N   GLY L  57      22.916  30.506  68.977  1.00 20.43           N  
ATOM   1283  CA  GLY L  57      24.287  30.215  69.323  1.00 20.65           C  
ATOM   1284  C   GLY L  57      25.073  31.489  69.522  1.00 20.90           C  
ATOM   1285  O   GLY L  57      25.911  31.562  70.416  1.00 23.52           O  
ATOM   1286  N   VAL L  58      24.815  32.499  68.699  1.00 19.86           N  
ATOM   1287  CA  VAL L  58      25.525  33.770  68.831  1.00 19.00           C  
ATOM   1288  C   VAL L  58      24.945  34.580  69.993  1.00 19.50           C  
ATOM   1289  O   VAL L  58      23.741  34.798  70.061  1.00 20.20           O  
ATOM   1290  CB  VAL L  58      25.424  34.589  67.532  1.00 19.78           C  
ATOM   1291  CG1 VAL L  58      26.171  35.911  67.681  1.00 16.89           C  
ATOM   1292  CG2 VAL L  58      25.976  33.776  66.369  1.00 15.88           C  
ATOM   1293  N   PRO L  59      25.807  35.028  70.923  1.00 20.07           N  
ATOM   1294  CA  PRO L  59      25.515  35.817  72.128  1.00 19.52           C  
ATOM   1295  C   PRO L  59      24.714  37.087  71.872  1.00 20.14           C  
ATOM   1296  O   PRO L  59      24.871  37.737  70.828  1.00 18.90           O  
ATOM   1297  CB  PRO L  59      26.902  36.151  72.667  1.00 19.80           C  
ATOM   1298  CG  PRO L  59      27.713  35.000  72.236  1.00 20.93           C  
ATOM   1299  CD  PRO L  59      27.254  34.783  70.818  1.00 21.35           C  
ATOM   1300  N   ASP L  60      23.877  37.467  72.831  1.00 19.38           N  
ATOM   1301  CA  ASP L  60      23.097  38.677  72.640  1.00 20.42           C  
ATOM   1302  C   ASP L  60      23.973  39.899  72.856  1.00 20.08           C  
ATOM   1303  O   ASP L  60      23.484  41.029  72.929  1.00 21.80           O  
ATOM   1304  CB  ASP L  60      21.881  38.703  73.568  1.00 22.24           C  
ATOM   1305  CG  ASP L  60      22.255  38.829  75.025  1.00 26.07           C  
ATOM   1306  OD1 ASP L  60      22.831  37.870  75.596  1.00 28.17           O  
ATOM   1307  OD2 ASP L  60      21.969  39.900  75.603  1.00 28.03           O  
ATOM   1308  N   ARG L  61      25.278  39.672  72.950  1.00 18.52           N  
ATOM   1309  CA  ARG L  61      26.220  40.767  73.130  1.00 18.22           C  
ATOM   1310  C   ARG L  61      26.374  41.460  71.781  1.00 17.58           C  
ATOM   1311  O   ARG L  61      26.762  42.624  71.707  1.00 18.47           O  
ATOM   1312  CB  ARG L  61      27.580  40.241  73.604  1.00 18.09           C  
ATOM   1313  CG  ARG L  61      27.539  39.602  74.964  1.00 19.71           C  
ATOM   1314  CD  ARG L  61      28.928  39.293  75.500  1.00 20.69           C  
ATOM   1315  NE  ARG L  61      29.633  38.257  74.745  1.00 20.37           N  
ATOM   1316  CZ  ARG L  61      30.447  38.486  73.718  1.00 19.58           C  
ATOM   1317  NH1 ARG L  61      30.668  39.723  73.302  1.00 18.63           N  
ATOM   1318  NH2 ARG L  61      31.067  37.471  73.131  1.00 20.53           N  
ATOM   1319  N   PHE L  62      26.090  40.715  70.717  1.00 16.45           N  
ATOM   1320  CA  PHE L  62      26.167  41.238  69.368  1.00 15.18           C  
ATOM   1321  C   PHE L  62      24.767  41.710  68.997  1.00 16.09           C  
ATOM   1322  O   PHE L  62      23.779  41.023  69.276  1.00 15.67           O  
ATOM   1323  CB  PHE L  62      26.586  40.156  68.363  1.00 16.27           C  
ATOM   1324  CG  PHE L  62      27.972  39.611  68.566  1.00 16.57           C  
ATOM   1325  CD1 PHE L  62      28.232  38.672  69.558  1.00 16.70           C  
ATOM   1326  CD2 PHE L  62      29.016  40.026  67.751  1.00 14.92           C  
ATOM   1327  CE1 PHE L  62      29.512  38.154  69.734  1.00 16.81           C  
ATOM   1328  CE2 PHE L  62      30.301  39.514  67.921  1.00 16.17           C  
ATOM   1329  CZ  PHE L  62      30.550  38.579  68.912  1.00 15.99           C  
ATOM   1330  N   SER L  63      24.683  42.883  68.379  1.00 15.63           N  
ATOM   1331  CA  SER L  63      23.405  43.424  67.940  1.00 16.21           C  
ATOM   1332  C   SER L  63      23.619  44.374  66.764  1.00 15.48           C  
ATOM   1333  O   SER L  63      24.524  45.221  66.768  1.00 15.83           O  
ATOM   1334  CB  SER L  63      22.705  44.162  69.082  1.00 15.85           C  
ATOM   1335  OG  SER L  63      23.311  45.413  69.323  1.00 20.41           O  
ATOM   1336  N   GLY L  64      22.791  44.223  65.745  1.00 14.42           N  
ATOM   1337  CA  GLY L  64      22.918  45.078  64.591  1.00 14.17           C  
ATOM   1338  C   GLY L  64      21.757  46.034  64.497  1.00 14.12           C  
ATOM   1339  O   GLY L  64      20.718  45.834  65.118  1.00 14.57           O  
ATOM   1340  N   SER L  65      21.942  47.088  63.720  1.00 14.63           N  
ATOM   1341  CA  SER L  65      20.898  48.070  63.515  1.00 16.40           C  
ATOM   1342  C   SER L  65      21.195  48.824  62.234  1.00 16.43           C  
ATOM   1343  O   SER L  65      22.260  48.662  61.643  1.00 16.81           O  
ATOM   1344  CB  SER L  65      20.830  49.034  64.696  1.00 17.22           C  
ATOM   1345  OG  SER L  65      22.091  49.622  64.928  1.00 19.76           O  
ATOM   1346  N   ILE L  66      20.240  49.634  61.802  1.00 16.54           N  
ATOM   1347  CA  ILE L  66      20.390  50.424  60.595  1.00 17.68           C  
ATOM   1348  C   ILE L  66      20.220  51.879  60.993  1.00 19.32           C  
ATOM   1349  O   ILE L  66      19.155  52.281  61.474  1.00 21.12           O  
ATOM   1350  CB  ILE L  66      19.321  50.042  59.569  1.00 16.31           C  
ATOM   1351  CG1 ILE L  66      19.557  48.606  59.116  1.00 17.97           C  
ATOM   1352  CG2 ILE L  66      19.354  50.991  58.390  1.00 16.49           C  
ATOM   1353  CD1 ILE L  66      18.430  48.046  58.300  1.00 22.90           C  
ATOM   1354  N   ASP L  66A     21.274  52.664  60.817  1.00 19.99           N  
ATOM   1355  CA  ASP L  66A     21.227  54.073  61.174  1.00 20.42           C  
ATOM   1356  C   ASP L  66A     20.808  54.921  59.968  1.00 20.68           C  
ATOM   1357  O   ASP L  66A     21.627  55.237  59.101  1.00 18.02           O  
ATOM   1358  CB  ASP L  66A     22.597  54.520  61.695  1.00 22.26           C  
ATOM   1359  CG  ASP L  66A     22.599  55.963  62.177  1.00 25.03           C  
ATOM   1360  OD1 ASP L  66A     23.681  56.468  62.542  1.00 25.14           O  
ATOM   1361  OD2 ASP L  66A     21.517  56.592  62.189  1.00 27.08           O  
ATOM   1362  N   SER L  66B     19.529  55.290  59.924  1.00 21.32           N  
ATOM   1363  CA  SER L  66B     19.000  56.095  58.826  1.00 23.71           C  
ATOM   1364  C   SER L  66B     19.582  57.505  58.783  1.00 23.74           C  
ATOM   1365  O   SER L  66B     19.501  58.180  57.764  1.00 23.32           O  
ATOM   1366  CB  SER L  66B     17.482  56.171  58.921  1.00 24.84           C  
ATOM   1367  OG  SER L  66B     17.086  56.656  60.195  1.00 28.62           O  
ATOM   1368  N   SER L  67      20.183  57.945  59.883  1.00 25.03           N  
ATOM   1369  CA  SER L  67      20.769  59.279  59.932  1.00 26.86           C  
ATOM   1370  C   SER L  67      22.136  59.345  59.234  1.00 28.16           C  
ATOM   1371  O   SER L  67      22.646  60.439  58.963  1.00 28.85           O  
ATOM   1372  CB  SER L  67      20.908  59.737  61.387  1.00 26.91           C  
ATOM   1373  OG  SER L  67      19.655  59.686  62.057  1.00 26.62           O  
ATOM   1374  N   SER L  68      22.725  58.183  58.947  1.00 28.35           N  
ATOM   1375  CA  SER L  68      24.027  58.129  58.281  1.00 27.99           C  
ATOM   1376  C   SER L  68      24.074  57.158  57.098  1.00 27.69           C  
ATOM   1377  O   SER L  68      25.104  57.039  56.422  1.00 28.54           O  
ATOM   1378  CB  SER L  68      25.136  57.785  59.291  1.00 28.74           C  
ATOM   1379  OG  SER L  68      24.855  56.610  60.043  1.00 28.87           O  
ATOM   1380  N   ASN L  69      22.960  56.475  56.846  1.00 24.90           N  
ATOM   1381  CA  ASN L  69      22.858  55.525  55.741  1.00 23.31           C  
ATOM   1382  C   ASN L  69      23.888  54.415  55.849  1.00 22.78           C  
ATOM   1383  O   ASN L  69      24.603  54.113  54.896  1.00 23.04           O  
ATOM   1384  CB  ASN L  69      23.032  56.247  54.407  1.00 22.73           C  
ATOM   1385  CG  ASN L  69      22.621  55.393  53.233  1.00 21.35           C  
ATOM   1386  OD1 ASN L  69      21.501  54.894  53.182  1.00 20.88           O  
ATOM   1387  ND2 ASN L  69      23.524  55.220  52.280  1.00 23.76           N  
ATOM   1388  N   SER L  70      23.948  53.793  57.014  1.00 22.22           N  
ATOM   1389  CA  SER L  70      24.906  52.726  57.252  1.00 19.43           C  
ATOM   1390  C   SER L  70      24.371  51.717  58.265  1.00 18.21           C  
ATOM   1391  O   SER L  70      23.549  52.049  59.115  1.00 15.61           O  
ATOM   1392  CB  SER L  70      26.198  53.332  57.784  1.00 18.77           C  
ATOM   1393  OG  SER L  70      25.929  54.075  58.960  1.00 19.03           O  
ATOM   1394  N   ALA L  71      24.841  50.480  58.164  1.00 16.53           N  
ATOM   1395  CA  ALA L  71      24.427  49.447  59.101  1.00 15.45           C  
ATOM   1396  C   ALA L  71      25.378  49.557  60.285  1.00 14.37           C  
ATOM   1397  O   ALA L  71      26.447  50.156  60.166  1.00 11.89           O  
ATOM   1398  CB  ALA L  71      24.533  48.063  58.452  1.00 14.64           C  
ATOM   1399  N   SER L  72      24.993  48.987  61.421  1.00 13.70           N  
ATOM   1400  CA  SER L  72      25.834  49.042  62.604  1.00 15.04           C  
ATOM   1401  C   SER L  72      25.959  47.717  63.339  1.00 15.04           C  
ATOM   1402  O   SER L  72      24.976  47.016  63.563  1.00 15.72           O  
ATOM   1403  CB  SER L  72      25.310  50.091  63.590  1.00 17.06           C  
ATOM   1404  OG  SER L  72      25.641  51.407  63.176  1.00 22.10           O  
ATOM   1405  N   LEU L  73      27.183  47.374  63.708  1.00 14.88           N  
ATOM   1406  CA  LEU L  73      27.419  46.163  64.471  1.00 15.10           C  
ATOM   1407  C   LEU L  73      28.004  46.618  65.802  1.00 15.05           C  
ATOM   1408  O   LEU L  73      29.095  47.191  65.851  1.00 12.88           O  
ATOM   1409  CB  LEU L  73      28.408  45.229  63.764  1.00 15.94           C  
ATOM   1410  CG  LEU L  73      28.749  43.983  64.593  1.00 17.00           C  
ATOM   1411  CD1 LEU L  73      27.501  43.099  64.742  1.00 15.26           C  
ATOM   1412  CD2 LEU L  73      29.882  43.211  63.923  1.00 16.72           C  
ATOM   1413  N   THR L  74      27.256  46.377  66.872  1.00 15.16           N  
ATOM   1414  CA  THR L  74      27.680  46.753  68.212  1.00 15.88           C  
ATOM   1415  C   THR L  74      27.949  45.492  69.020  1.00 16.76           C  
ATOM   1416  O   THR L  74      27.208  44.514  68.928  1.00 16.81           O  
ATOM   1417  CB  THR L  74      26.593  47.595  68.930  1.00 16.58           C  
ATOM   1418  OG1 THR L  74      26.408  48.835  68.237  1.00 13.84           O  
ATOM   1419  CG2 THR L  74      26.995  47.878  70.375  1.00 16.30           C  
ATOM   1420  N   ILE L  75      29.032  45.513  69.787  1.00 18.06           N  
ATOM   1421  CA  ILE L  75      29.398  44.389  70.635  1.00 18.87           C  
ATOM   1422  C   ILE L  75      29.616  44.960  72.030  1.00 20.39           C  
ATOM   1423  O   ILE L  75      30.566  45.709  72.246  1.00 20.19           O  
ATOM   1424  CB  ILE L  75      30.717  43.716  70.187  1.00 18.75           C  
ATOM   1425  CG1 ILE L  75      30.592  43.156  68.768  1.00 20.08           C  
ATOM   1426  CG2 ILE L  75      31.077  42.613  71.162  1.00 18.13           C  
ATOM   1427  CD1 ILE L  75      31.877  42.492  68.250  1.00 17.43           C  
ATOM   1428  N   SER L  76      28.730  44.623  72.963  1.00 20.85           N  
ATOM   1429  CA  SER L  76      28.852  45.106  74.331  1.00 22.53           C  
ATOM   1430  C   SER L  76      29.557  44.068  75.208  1.00 22.58           C  
ATOM   1431  O   SER L  76      29.459  42.862  74.971  1.00 21.52           O  
ATOM   1432  CB  SER L  76      27.471  45.421  74.912  1.00 23.33           C  
ATOM   1433  OG  SER L  76      26.731  44.238  75.154  1.00 25.51           O  
ATOM   1434  N   GLY L  77      30.266  44.547  76.226  1.00 23.25           N  
ATOM   1435  CA  GLY L  77      30.985  43.652  77.109  1.00 22.36           C  
ATOM   1436  C   GLY L  77      31.990  42.832  76.325  1.00 23.09           C  
ATOM   1437  O   GLY L  77      32.052  41.610  76.479  1.00 22.24           O  
ATOM   1438  N   LEU L  78      32.769  43.507  75.481  1.00 22.69           N  
ATOM   1439  CA  LEU L  78      33.789  42.862  74.647  1.00 22.98           C  
ATOM   1440  C   LEU L  78      34.550  41.731  75.335  1.00 24.36           C  
ATOM   1441  O   LEU L  78      34.884  41.831  76.516  1.00 23.44           O  
ATOM   1442  CB  LEU L  78      34.805  43.900  74.159  1.00 23.77           C  
ATOM   1443  CG  LEU L  78      34.750  44.358  72.701  1.00 24.13           C  
ATOM   1444  CD1 LEU L  78      35.808  45.425  72.481  1.00 24.48           C  
ATOM   1445  CD2 LEU L  78      34.979  43.180  71.766  1.00 22.62           C  
ATOM   1446  N   LYS L  79      34.821  40.665  74.578  1.00 24.82           N  
ATOM   1447  CA  LYS L  79      35.568  39.501  75.071  1.00 26.26           C  
ATOM   1448  C   LYS L  79      36.831  39.322  74.232  1.00 26.50           C  
ATOM   1449  O   LYS L  79      36.858  39.706  73.054  1.00 27.48           O  
ATOM   1450  CB  LYS L  79      34.746  38.217  74.945  1.00 26.36           C  
ATOM   1451  CG  LYS L  79      33.418  38.229  75.657  1.00 28.37           C  
ATOM   1452  CD  LYS L  79      33.586  38.401  77.146  1.00 30.23           C  
ATOM   1453  CE  LYS L  79      32.284  38.065  77.855  1.00 32.36           C  
ATOM   1454  NZ  LYS L  79      31.872  36.665  77.526  1.00 34.82           N  
ATOM   1455  N   THR L  80      37.867  38.731  74.819  1.00 24.67           N  
ATOM   1456  CA  THR L  80      39.096  38.513  74.069  1.00 24.32           C  
ATOM   1457  C   THR L  80      38.768  37.694  72.827  1.00 23.50           C  
ATOM   1458  O   THR L  80      39.255  37.997  71.736  1.00 23.12           O  
ATOM   1459  CB  THR L  80      40.185  37.783  74.922  1.00 25.01           C  
ATOM   1460  OG1 THR L  80      39.683  36.524  75.394  1.00 26.27           O  
ATOM   1461  CG2 THR L  80      40.580  38.641  76.121  1.00 23.05           C  
ATOM   1462  N   GLU L  81      37.915  36.679  72.974  1.00 23.79           N  
ATOM   1463  CA  GLU L  81      37.562  35.845  71.824  1.00 25.13           C  
ATOM   1464  C   GLU L  81      36.704  36.553  70.782  1.00 24.60           C  
ATOM   1465  O   GLU L  81      36.273  35.934  69.805  1.00 25.41           O  
ATOM   1466  CB  GLU L  81      36.881  34.524  72.252  1.00 26.62           C  
ATOM   1467  CG  GLU L  81      35.578  34.618  73.056  1.00 29.50           C  
ATOM   1468  CD  GLU L  81      35.811  34.726  74.566  1.00 31.59           C  
ATOM   1469  OE1 GLU L  81      34.844  34.514  75.340  1.00 32.37           O  
ATOM   1470  OE2 GLU L  81      36.955  35.027  74.977  1.00 31.42           O  
ATOM   1471  N   ASP L  82      36.452  37.844  70.976  1.00 23.34           N  
ATOM   1472  CA  ASP L  82      35.670  38.591  69.996  1.00 21.82           C  
ATOM   1473  C   ASP L  82      36.609  39.203  68.957  1.00 21.10           C  
ATOM   1474  O   ASP L  82      36.165  39.756  67.952  1.00 20.30           O  
ATOM   1475  CB  ASP L  82      34.845  39.696  70.668  1.00 21.81           C  
ATOM   1476  CG  ASP L  82      33.710  39.147  71.509  1.00 22.26           C  
ATOM   1477  OD1 ASP L  82      33.202  38.056  71.179  1.00 21.81           O  
ATOM   1478  OD2 ASP L  82      33.311  39.812  72.492  1.00 23.92           O  
ATOM   1479  N   GLU L  83      37.914  39.083  69.198  1.00 20.92           N  
ATOM   1480  CA  GLU L  83      38.917  39.625  68.285  1.00 18.48           C  
ATOM   1481  C   GLU L  83      38.917  38.873  66.966  1.00 17.21           C  
ATOM   1482  O   GLU L  83      39.118  37.660  66.931  1.00 19.34           O  
ATOM   1483  CB  GLU L  83      40.313  39.566  68.919  1.00 18.26           C  
ATOM   1484  CG  GLU L  83      41.415  40.077  68.019  1.00 18.93           C  
ATOM   1485  CD  GLU L  83      42.669  40.469  68.779  1.00 20.88           C  
ATOM   1486  OE1 GLU L  83      42.572  41.279  69.726  1.00 20.05           O  
ATOM   1487  OE2 GLU L  83      43.762  39.979  68.423  1.00 24.74           O  
ATOM   1488  N   ALA L  84      38.688  39.609  65.886  1.00 15.40           N  
ATOM   1489  CA  ALA L  84      38.652  39.051  64.543  1.00 15.63           C  
ATOM   1490  C   ALA L  84      38.268  40.145  63.562  1.00 16.11           C  
ATOM   1491  O   ALA L  84      38.082  41.299  63.942  1.00 15.77           O  
ATOM   1492  CB  ALA L  84      37.629  37.923  64.468  1.00 15.08           C  
ATOM   1493  N   ASP L  85      38.159  39.773  62.293  1.00 15.57           N  
ATOM   1494  CA  ASP L  85      37.751  40.711  61.266  1.00 16.27           C  
ATOM   1495  C   ASP L  85      36.238  40.620  61.150  1.00 16.26           C  
ATOM   1496  O   ASP L  85      35.662  39.536  61.256  1.00 16.24           O  
ATOM   1497  CB  ASP L  85      38.361  40.359  59.905  1.00 18.23           C  
ATOM   1498  CG  ASP L  85      39.813  40.755  59.788  1.00 18.61           C  
ATOM   1499  OD1 ASP L  85      40.304  41.489  60.665  1.00 20.79           O  
ATOM   1500  OD2 ASP L  85      40.460  40.339  58.802  1.00 20.85           O  
ATOM   1501  N   TYR L  86      35.592  41.757  60.937  1.00 15.77           N  
ATOM   1502  CA  TYR L  86      34.149  41.765  60.777  1.00 16.15           C  
ATOM   1503  C   TYR L  86      33.825  42.351  59.416  1.00 14.97           C  
ATOM   1504  O   TYR L  86      34.424  43.342  58.999  1.00 16.77           O  
ATOM   1505  CB  TYR L  86      33.478  42.556  61.908  1.00 13.36           C  
ATOM   1506  CG  TYR L  86      33.569  41.848  63.242  1.00 11.76           C  
ATOM   1507  CD1 TYR L  86      34.695  41.984  64.048  1.00 13.00           C  
ATOM   1508  CD2 TYR L  86      32.558  40.982  63.664  1.00 11.54           C  
ATOM   1509  CE1 TYR L  86      34.818  41.271  65.237  1.00 11.56           C  
ATOM   1510  CE2 TYR L  86      32.668  40.266  64.850  1.00 11.08           C  
ATOM   1511  CZ  TYR L  86      33.805  40.412  65.631  1.00 12.95           C  
ATOM   1512  OH  TYR L  86      33.950  39.683  66.789  1.00 11.99           O  
ATOM   1513  N   TYR L  87      32.894  41.714  58.719  1.00 14.58           N  
ATOM   1514  CA  TYR L  87      32.492  42.140  57.385  1.00 14.61           C  
ATOM   1515  C   TYR L  87      31.000  42.336  57.297  1.00 14.60           C  
ATOM   1516  O   TYR L  87      30.234  41.576  57.885  1.00 14.89           O  
ATOM   1517  CB  TYR L  87      32.854  41.077  56.342  1.00 13.30           C  
ATOM   1518  CG  TYR L  87      34.322  40.861  56.106  1.00 14.37           C  
ATOM   1519  CD1 TYR L  87      35.042  41.694  55.249  1.00 14.96           C  
ATOM   1520  CD2 TYR L  87      35.003  39.842  56.763  1.00 14.65           C  
ATOM   1521  CE1 TYR L  87      36.407  41.518  55.058  1.00 15.84           C  
ATOM   1522  CE2 TYR L  87      36.369  39.658  56.584  1.00 16.67           C  
ATOM   1523  CZ  TYR L  87      37.063  40.503  55.735  1.00 16.95           C  
ATOM   1524  OH  TYR L  87      38.416  40.354  55.601  1.00 17.43           O  
ATOM   1525  N   CYS L  88      30.582  43.356  56.562  1.00 14.98           N  
ATOM   1526  CA  CYS L  88      29.156  43.559  56.347  1.00 15.56           C  
ATOM   1527  C   CYS L  88      28.943  43.159  54.901  1.00 13.29           C  
ATOM   1528  O   CYS L  88      29.860  43.250  54.092  1.00 13.62           O  
ATOM   1529  CB  CYS L  88      28.729  45.015  56.574  1.00 15.23           C  
ATOM   1530  SG  CYS L  88      29.536  46.307  55.576  1.00 18.55           S  
ATOM   1531  N   GLN L  89      27.745  42.686  54.590  1.00 12.64           N  
ATOM   1532  CA  GLN L  89      27.419  42.259  53.246  1.00 12.86           C  
ATOM   1533  C   GLN L  89      25.952  42.509  52.959  1.00 13.71           C  
ATOM   1534  O   GLN L  89      25.104  42.396  53.843  1.00 13.70           O  
ATOM   1535  CB  GLN L  89      27.744  40.770  53.072  1.00 10.07           C  
ATOM   1536  CG  GLN L  89      27.224  40.147  51.786  1.00 10.27           C  
ATOM   1537  CD  GLN L  89      25.804  39.612  51.924  1.00 10.21           C  
ATOM   1538  OE1 GLN L  89      25.500  38.883  52.858  1.00  9.24           O  
ATOM   1539  NE2 GLN L  89      24.941  39.962  50.983  1.00 10.11           N  
ATOM   1540  N   SER L  90      25.663  42.860  51.713  1.00 15.26           N  
ATOM   1541  CA  SER L  90      24.305  43.111  51.302  1.00 15.58           C  
ATOM   1542  C   SER L  90      24.144  42.648  49.860  1.00 16.68           C  
ATOM   1543  O   SER L  90      25.008  41.960  49.329  1.00 16.96           O  
ATOM   1544  CB  SER L  90      23.996  44.595  51.440  1.00 15.12           C  
ATOM   1545  OG  SER L  90      22.607  44.812  51.405  1.00 14.23           O  
ATOM   1546  N   TYR L  91      23.037  43.020  49.232  1.00 18.03           N  
ATOM   1547  CA  TYR L  91      22.770  42.623  47.860  1.00 18.75           C  
ATOM   1548  C   TYR L  91      22.447  43.842  47.027  1.00 20.60           C  
ATOM   1549  O   TYR L  91      22.319  44.941  47.554  1.00 21.23           O  
ATOM   1550  CB  TYR L  91      21.582  41.670  47.810  1.00 17.73           C  
ATOM   1551  CG  TYR L  91      21.748  40.441  48.666  1.00 19.55           C  
ATOM   1552  CD1 TYR L  91      22.426  39.321  48.194  1.00 19.63           C  
ATOM   1553  CD2 TYR L  91      21.227  40.397  49.953  1.00 19.45           C  
ATOM   1554  CE1 TYR L  91      22.577  38.188  48.985  1.00 18.88           C  
ATOM   1555  CE2 TYR L  91      21.373  39.275  50.750  1.00 19.45           C  
ATOM   1556  CZ  TYR L  91      22.047  38.174  50.264  1.00 19.59           C  
ATOM   1557  OH  TYR L  91      22.185  37.066  51.061  1.00 18.23           O  
ATOM   1558  N   ASP L  92      22.314  43.633  45.719  1.00 23.19           N  
ATOM   1559  CA  ASP L  92      21.974  44.710  44.798  1.00 24.88           C  
ATOM   1560  C   ASP L  92      20.597  44.420  44.199  1.00 26.58           C  
ATOM   1561  O   ASP L  92      19.913  43.479  44.617  1.00 26.67           O  
ATOM   1562  CB  ASP L  92      23.033  44.826  43.690  1.00 25.35           C  
ATOM   1563  CG  ASP L  92      22.916  43.734  42.623  1.00 26.51           C  
ATOM   1564  OD1 ASP L  92      22.121  42.779  42.793  1.00 25.03           O  
ATOM   1565  OD2 ASP L  92      23.636  43.835  41.600  1.00 27.73           O  
ATOM   1566  N   SER L  93      20.198  45.224  43.221  1.00 28.58           N  
ATOM   1567  CA  SER L  93      18.905  45.064  42.552  1.00 29.92           C  
ATOM   1568  C   SER L  93      18.685  43.623  42.063  1.00 30.52           C  
ATOM   1569  O   SER L  93      17.640  43.016  42.319  1.00 29.15           O  
ATOM   1570  CB  SER L  93      18.826  46.020  41.356  1.00 30.96           C  
ATOM   1571  OG  SER L  93      19.391  47.283  41.674  1.00 33.34           O  
ATOM   1572  N   SER L  94      19.676  43.081  41.355  1.00 30.93           N  
ATOM   1573  CA  SER L  94      19.588  41.720  40.827  1.00 31.35           C  
ATOM   1574  C   SER L  94      20.044  40.662  41.839  1.00 32.12           C  
ATOM   1575  O   SER L  94      20.405  39.542  41.459  1.00 31.84           O  
ATOM   1576  CB  SER L  94      20.423  41.610  39.549  1.00 31.26           C  
ATOM   1577  OG  SER L  94      20.056  42.627  38.623  1.00 33.24           O  
ATOM   1578  N   ASN L  95      20.007  41.022  43.123  1.00 32.09           N  
ATOM   1579  CA  ASN L  95      20.413  40.136  44.216  1.00 31.44           C  
ATOM   1580  C   ASN L  95      21.842  39.587  44.150  1.00 29.74           C  
ATOM   1581  O   ASN L  95      22.102  38.447  44.526  1.00 30.23           O  
ATOM   1582  CB  ASN L  95      19.406  38.990  44.368  1.00 32.63           C  
ATOM   1583  CG  ASN L  95      18.155  39.413  45.136  1.00 35.05           C  
ATOM   1584  OD1 ASN L  95      17.101  38.781  45.027  1.00 36.27           O  
ATOM   1585  ND2 ASN L  95      18.272  40.486  45.927  1.00 35.79           N  
ATOM   1586  N   HIS L  95A     22.765  40.422  43.687  1.00 28.77           N  
ATOM   1587  CA  HIS L  95A     24.177  40.070  43.598  1.00 27.36           C  
ATOM   1588  C   HIS L  95A     24.827  40.465  44.932  1.00 26.05           C  
ATOM   1589  O   HIS L  95A     24.520  41.525  45.489  1.00 25.44           O  
ATOM   1590  CB  HIS L  95A     24.836  40.847  42.454  1.00 28.78           C  
ATOM   1591  CG  HIS L  95A     24.405  40.406  41.089  1.00 30.63           C  
ATOM   1592  ND1 HIS L  95A     24.383  41.259  40.004  1.00 31.00           N  
ATOM   1593  CD2 HIS L  95A     24.029  39.191  40.620  1.00 31.38           C  
ATOM   1594  CE1 HIS L  95A     24.015  40.588  38.927  1.00 31.59           C  
ATOM   1595  NE2 HIS L  95A     23.795  39.331  39.273  1.00 31.09           N  
ATOM   1596  N   VAL L  96      25.732  39.624  45.429  1.00 23.73           N  
ATOM   1597  CA  VAL L  96      26.409  39.865  46.708  1.00 21.91           C  
ATOM   1598  C   VAL L  96      27.466  40.967  46.697  1.00 20.37           C  
ATOM   1599  O   VAL L  96      28.289  41.044  45.789  1.00 21.37           O  
ATOM   1600  CB  VAL L  96      27.077  38.563  47.234  1.00 20.65           C  
ATOM   1601  CG1 VAL L  96      27.805  38.837  48.538  1.00 17.54           C  
ATOM   1602  CG2 VAL L  96      26.025  37.483  47.426  1.00 18.25           C  
ATOM   1603  N   VAL L  97      27.438  41.809  47.725  1.00 19.32           N  
ATOM   1604  CA  VAL L  97      28.392  42.904  47.867  1.00 17.86           C  
ATOM   1605  C   VAL L  97      29.022  42.858  49.253  1.00 17.84           C  
ATOM   1606  O   VAL L  97      28.328  43.008  50.254  1.00 17.54           O  
ATOM   1607  CB  VAL L  97      27.710  44.288  47.701  1.00 18.41           C  
ATOM   1608  CG1 VAL L  97      28.680  45.402  48.093  1.00 19.62           C  
ATOM   1609  CG2 VAL L  97      27.257  44.483  46.267  1.00 18.58           C  
ATOM   1610  N   PHE L  98      30.334  42.651  49.316  1.00 17.08           N  
ATOM   1611  CA  PHE L  98      31.026  42.617  50.601  1.00 15.86           C  
ATOM   1612  C   PHE L  98      31.669  43.953  50.935  1.00 16.21           C  
ATOM   1613  O   PHE L  98      32.124  44.668  50.048  1.00 14.66           O  
ATOM   1614  CB  PHE L  98      32.120  41.546  50.616  1.00 15.54           C  
ATOM   1615  CG  PHE L  98      31.709  40.277  51.286  1.00 15.12           C  
ATOM   1616  CD1 PHE L  98      31.163  39.232  50.558  1.00 16.17           C  
ATOM   1617  CD2 PHE L  98      31.842  40.136  52.661  1.00 16.04           C  
ATOM   1618  CE1 PHE L  98      30.753  38.064  51.191  1.00 16.82           C  
ATOM   1619  CE2 PHE L  98      31.437  38.979  53.303  1.00 14.41           C  
ATOM   1620  CZ  PHE L  98      30.892  37.942  52.568  1.00 17.14           C  
ATOM   1621  N   GLY L  99      31.692  44.288  52.221  1.00 15.76           N  
ATOM   1622  CA  GLY L  99      32.330  45.519  52.644  1.00 15.46           C  
ATOM   1623  C   GLY L  99      33.804  45.191  52.720  1.00 15.40           C  
ATOM   1624  O   GLY L  99      34.176  44.046  52.510  1.00 15.37           O  
ATOM   1625  N   GLY L 100      34.648  46.167  53.025  1.00 15.70           N  
ATOM   1626  CA  GLY L 100      36.073  45.886  53.107  1.00 15.61           C  
ATOM   1627  C   GLY L 100      36.537  45.196  54.380  1.00 15.79           C  
ATOM   1628  O   GLY L 100      37.681  44.750  54.470  1.00 16.03           O  
ATOM   1629  N   GLY L 101      35.662  45.112  55.376  1.00 16.86           N  
ATOM   1630  CA  GLY L 101      36.030  44.461  56.618  1.00 17.21           C  
ATOM   1631  C   GLY L 101      36.732  45.387  57.595  1.00 19.08           C  
ATOM   1632  O   GLY L 101      37.452  46.311  57.199  1.00 18.71           O  
ATOM   1633  N   THR L 102      36.538  45.118  58.882  1.00 18.04           N  
ATOM   1634  CA  THR L 102      37.124  45.933  59.935  1.00 18.47           C  
ATOM   1635  C   THR L 102      37.824  45.057  60.944  1.00 17.69           C  
ATOM   1636  O   THR L 102      37.238  44.117  61.470  1.00 17.71           O  
ATOM   1637  CB  THR L 102      36.033  46.754  60.673  1.00 18.31           C  
ATOM   1638  OG1 THR L 102      35.486  47.739  59.786  1.00 18.65           O  
ATOM   1639  CG2 THR L 102      36.613  47.443  61.897  1.00 19.62           C  
ATOM   1640  N   LYS L 103      39.080  45.374  61.223  1.00 19.15           N  
ATOM   1641  CA  LYS L 103      39.848  44.608  62.189  1.00 20.91           C  
ATOM   1642  C   LYS L 103      39.543  45.080  63.610  1.00 20.78           C  
ATOM   1643  O   LYS L 103      39.779  46.236  63.964  1.00 21.12           O  
ATOM   1644  CB  LYS L 103      41.344  44.743  61.894  1.00 22.84           C  
ATOM   1645  CG  LYS L 103      42.239  44.259  63.019  1.00 27.80           C  
ATOM   1646  CD  LYS L 103      42.004  42.788  63.333  1.00 29.66           C  
ATOM   1647  CE  LYS L 103      42.893  42.328  64.484  1.00 31.59           C  
ATOM   1648  NZ  LYS L 103      42.757  40.863  64.737  1.00 32.83           N  
ATOM   1649  N   LEU L 104      38.992  44.182  64.414  1.00 21.06           N  
ATOM   1650  CA  LEU L 104      38.673  44.497  65.796  1.00 20.62           C  
ATOM   1651  C   LEU L 104      39.809  43.953  66.646  1.00 20.98           C  
ATOM   1652  O   LEU L 104      40.198  42.786  66.514  1.00 21.53           O  
ATOM   1653  CB  LEU L 104      37.345  43.851  66.216  1.00 18.77           C  
ATOM   1654  CG  LEU L 104      36.963  43.959  67.701  1.00 19.53           C  
ATOM   1655  CD1 LEU L 104      36.940  45.418  68.158  1.00 17.63           C  
ATOM   1656  CD2 LEU L 104      35.607  43.315  67.909  1.00 17.16           C  
ATOM   1657  N   THR L 105      40.346  44.806  67.506  1.00 21.09           N  
ATOM   1658  CA  THR L 105      41.443  44.414  68.370  1.00 22.62           C  
ATOM   1659  C   THR L 105      41.069  44.595  69.837  1.00 22.79           C  
ATOM   1660  O   THR L 105      40.815  45.714  70.290  1.00 22.59           O  
ATOM   1661  CB  THR L 105      42.709  45.256  68.076  1.00 24.29           C  
ATOM   1662  OG1 THR L 105      42.993  45.226  66.672  1.00 24.87           O  
ATOM   1663  CG2 THR L 105      43.912  44.696  68.837  1.00 24.87           C  
ATOM   1664  N   VAL L 106      41.014  43.490  70.571  1.00 23.29           N  
ATOM   1665  CA  VAL L 106      40.699  43.552  71.994  1.00 24.35           C  
ATOM   1666  C   VAL L 106      42.044  43.636  72.714  1.00 24.97           C  
ATOM   1667  O   VAL L 106      42.869  42.724  72.623  1.00 25.77           O  
ATOM   1668  CB  VAL L 106      39.923  42.300  72.457  1.00 24.05           C  
ATOM   1669  CG1 VAL L 106      39.416  42.499  73.874  1.00 25.25           C  
ATOM   1670  CG2 VAL L 106      38.760  42.032  71.518  1.00 23.63           C  
ATOM   1671  N   LEU L 106A     42.264  44.746  73.409  1.00 25.62           N  
ATOM   1672  CA  LEU L 106A     43.516  45.000  74.124  1.00 27.39           C  
ATOM   1673  C   LEU L 106A     43.732  44.171  75.389  1.00 28.33           C  
ATOM   1674  O   LEU L 106A     44.905  43.809  75.644  1.00 28.26           O  
ATOM   1675  CB  LEU L 106A     43.607  46.488  74.467  1.00 27.99           C  
ATOM   1676  CG  LEU L 106A     43.544  47.397  73.237  1.00 29.18           C  
ATOM   1677  CD1 LEU L 106A     43.401  48.857  73.661  1.00 29.00           C  
ATOM   1678  CD2 LEU L 106A     44.799  47.174  72.389  1.00 28.73           C  
ATOM   1679  OXT LEU L 106A     42.745  43.911  76.124  1.00 29.06           O  
TER    1680      LEU L 106A                                                     
