# Supplementary material for: SARS-CoV-2 Spike Protein Interaction Space
Source: Int J Mol Sci. 2023 Jul 27;24(15):12058. doi: 10.3390/ijms241512058 (PMC10418891; doi:10.3390/ijms241512058)
Supplement: Supplementary file 1 [file ijms-24-12058-s001.zip › Supplementary Material File S1/3BJL.pdb]

REMARK 950 NUMBERING  Kabat
REMARK 950 METHOD     X-ray crystal structure
REMARK 950 RESOLUTION 2.300
REMARK 950 R-FACTOR   0.165
REMARK 950 R-FREE     0.000
REMARK 950 CHAIN-TYPE LABEL ORIGINAL
REMARK 950 CHAIN L    L    A
REMARK 950 CHAIN L    L    B
REMARK 950 MOLECULE : A : LOC - LAMBDA 1 TYPE LIGHT-CHAIN DIMER
REMARK 950 SPECIES  : A : HOMO SAPIENS
SEQRES   1 L 216  PCA SER VAL LEU THR GLN PRO PRO SER ALA SER GLY THR          
SEQRES   2 L 216  PRO GLY GLN ARG VAL THR ILE SER CYS SER GLY SER SER          
SEQRES   3 L 216  SER ASN ILE GLY GLU ASN SER VAL THR TRP TYR GLN HIS          
SEQRES   4 L 216  LEU SER GLY THR ALA PRO LYS LEU LEU ILE TYR GLU ASP          
SEQRES   5 L 216  ASN SER ARG ALA SER GLY VAL SER ASP ARG PHE SER ALA          
SEQRES   6 L 216  SER LYS SER GLY THR SER ALA SER LEU ALA ILE SER GLY          
SEQRES   7 L 216  LEU GLN PRO GLU ASP GLU THR ASP TYR TYR CYS ALA ALA          
SEQRES   8 L 216  TRP ASP ASP SER LEU ASP VAL ALA VAL PHE GLY THR GLY          
SEQRES   9 L 216  THR LYS VAL THR VAL LEU GLY GLN PRO LYS ALA ASN PRO          
SEQRES  10 L 216  THR VAL THR LEU PHE PRO PRO SER SER GLU GLU LEU GLN          
SEQRES  11 L 216  ALA ASN LYS ALA THR LEU VAL CYS LEU ILE SER ASP PHE          
SEQRES  12 L 216  TYR PRO GLY ALA VAL THR VAL ALA TRP LYS ALA ASP GLY          
SEQRES  13 L 216  SER PRO VAL LYS ALA GLY VAL GLU THR THR LYS PRO SER          
SEQRES  14 L 216  LYS GLN SER ASN ASN LYS TYR ALA ALA SER SER TYR LEU          
SEQRES  15 L 216  SER LEU THR PRO GLU GLN TRP LYS SER HIS ARG SER TYR          
SEQRES  16 L 216  SER CYS GLN VAL THR HIS GLU GLY SER THR VAL GLU LYS          
SEQRES  17 L 216  THR VAL ALA PRO THR GLU CYS SER                              
SEQRES   1 L 216  PCA SER VAL LEU THR GLN PRO PRO SER ALA SER GLY THR          
SEQRES   2 L 216  PRO GLY GLN ARG VAL THR ILE SER CYS SER GLY SER SER          
SEQRES   3 L 216  SER ASN ILE GLY GLU ASN SER VAL THR TRP TYR GLN HIS          
SEQRES   4 L 216  LEU SER GLY THR ALA PRO LYS LEU LEU ILE TYR GLU ASP          
SEQRES   5 L 216  ASN SER ARG ALA SER GLY VAL SER ASP ARG PHE SER ALA          
SEQRES   6 L 216  SER LYS SER GLY THR SER ALA SER LEU ALA ILE SER GLY          
SEQRES   7 L 216  LEU GLN PRO GLU ASP GLU THR ASP TYR TYR CYS ALA ALA          
SEQRES   8 L 216  TRP ASP ASP SER LEU ASP VAL ALA VAL PHE GLY THR GLY          
SEQRES   9 L 216  THR LYS VAL THR VAL LEU GLY GLN PRO LYS ALA ASN PRO          
SEQRES  10 L 216  THR VAL THR LEU PHE PRO PRO SER SER GLU GLU LEU GLN          
SEQRES  11 L 216  ALA ASN LYS ALA THR LEU VAL CYS LEU ILE SER ASP PHE          
SEQRES  12 L 216  TYR PRO GLY ALA VAL THR VAL ALA TRP LYS ALA ASP GLY          
SEQRES  13 L 216  SER PRO VAL LYS ALA GLY VAL GLU THR THR LYS PRO SER          
SEQRES  14 L 216  LYS GLN SER ASN ASN LYS TYR ALA ALA SER SER TYR LEU          
SEQRES  15 L 216  SER LEU THR PRO GLU GLN TRP LYS SER HIS ARG SER TYR          
SEQRES  16 L 216  SER CYS GLN VAL THR HIS GLU GLY SER THR VAL GLU LYS          
SEQRES  17 L 216  THR VAL ALA PRO THR GLU CYS SER                              
ATOM      8  N   SER L   2     100.894  36.705  30.352  1.00 44.35           N  
ATOM      9  CA  SER L   2     100.662  38.155  30.153  1.00 42.55           C  
ATOM     10  C   SER L   2     100.863  38.540  28.682  1.00 40.69           C  
ATOM     11  O   SER L   2     101.919  38.504  28.078  1.00 40.87           O  
ATOM     12  CB  SER L   2     101.188  39.061  31.199  1.00 43.84           C  
ATOM     13  OG  SER L   2     100.198  39.476  32.175  1.00 44.22           O  
ATOM     14  N   VAL L   3      99.753  38.928  28.110  1.00 38.00           N  
ATOM     15  CA  VAL L   3      99.259  39.365  26.853  1.00 34.79           C  
ATOM     16  C   VAL L   3      99.105  40.906  26.739  1.00 32.41           C  
ATOM     17  O   VAL L   3      99.391  41.685  27.660  1.00 31.85           O  
ATOM     18  CB  VAL L   3      97.879  38.637  26.642  1.00 34.54           C  
ATOM     19  CG1 VAL L   3      97.918  37.137  26.880  1.00 34.82           C  
ATOM     20  CG2 VAL L   3      96.776  39.201  27.526  1.00 34.34           C  
ATOM     21  N   LEU L   4      98.689  41.325  25.560  1.00 29.65           N  
ATOM     22  CA  LEU L   4      98.410  42.660  25.062  1.00 26.75           C  
ATOM     23  C   LEU L   4      96.869  42.776  25.136  1.00 25.40           C  
ATOM     24  O   LEU L   4      96.243  41.887  24.546  1.00 24.96           O  
ATOM     25  CB  LEU L   4      98.843  42.756  23.606  1.00 25.70           C  
ATOM     26  CG  LEU L   4     100.313  42.579  23.282  1.00 24.88           C  
ATOM     27  CD1 LEU L   4     100.554  42.436  21.783  1.00 24.71           C  
ATOM     28  CD2 LEU L   4     101.005  43.834  23.748  1.00 24.75           C  
ATOM     29  N   THR L   5      96.374  43.799  25.770  1.00 23.79           N  
ATOM     30  CA  THR L   5      94.958  43.986  26.001  1.00 22.39           C  
ATOM     31  C   THR L   5      94.185  44.588  24.872  1.00 22.52           C  
ATOM     32  O   THR L   5      94.561  45.625  24.314  1.00 23.01           O  
ATOM     33  CB  THR L   5      94.733  44.810  27.330  1.00 21.68           C  
ATOM     34  OG1 THR L   5      96.010  44.785  28.039  1.00 21.09           O  
ATOM     35  CG2 THR L   5      93.580  44.318  28.221  1.00 22.38           C  
ATOM     36  N   GLN L   6      93.062  43.968  24.545  1.00 22.32           N  
ATOM     37  CA  GLN L   6      92.177  44.478  23.501  1.00 22.22           C  
ATOM     38  C   GLN L   6      90.719  44.302  23.945  1.00 23.01           C  
ATOM     39  O   GLN L   6      90.345  43.289  24.561  1.00 24.06           O  
ATOM     40  CB  GLN L   6      92.326  43.728  22.222  1.00 21.39           C  
ATOM     41  CG  GLN L   6      93.565  43.871  21.423  1.00 22.09           C  
ATOM     42  CD  GLN L   6      93.394  42.866  20.273  1.00 21.85           C  
ATOM     43  OE1 GLN L   6      93.976  41.797  20.395  1.00 23.33           O  
ATOM     44  NE2 GLN L   6      92.541  43.291  19.383  1.00 20.67           N  
ATOM     45  N   PRO L   7      89.894  45.245  23.559  1.00 22.91           N  
ATOM     46  CA  PRO L   7      88.469  45.121  23.884  1.00 23.26           C  
ATOM     47  C   PRO L   7      87.895  43.855  23.238  1.00 23.39           C  
ATOM     48  O   PRO L   7      88.364  43.452  22.166  1.00 23.62           O  
ATOM     49  CB  PRO L   7      87.899  46.398  23.233  1.00 23.43           C  
ATOM     50  CG  PRO L   7      88.893  46.760  22.144  1.00 23.02           C  
ATOM     51  CD  PRO L   7      90.238  46.444  22.791  1.00 22.78           C  
ATOM     52  N   PRO L   8      86.874  43.261  23.831  1.00 23.74           N  
ATOM     53  CA  PRO L   8      86.170  42.087  23.339  1.00 23.95           C  
ATOM     54  C   PRO L   8      85.542  42.398  21.994  1.00 24.78           C  
ATOM     55  O   PRO L   8      85.582  41.606  21.074  1.00 24.75           O  
ATOM     56  CB  PRO L   8      85.000  41.901  24.321  1.00 23.15           C  
ATOM     57  CG  PRO L   8      85.584  42.411  25.597  1.00 22.95           C  
ATOM     58  CD  PRO L   8      86.278  43.670  25.124  1.00 23.77           C  
ATOM     59  N   SER L   9      84.912  43.570  22.008  1.00 26.51           N  
ATOM     60  CA  SER L   9      84.203  44.011  20.797  1.00 28.16           C  
ATOM     61  C   SER L   9      84.364  45.489  20.505  1.00 29.27           C  
ATOM     62  O   SER L   9      84.523  46.387  21.361  1.00 30.56           O  
ATOM     63  CB  SER L   9      82.721  43.625  20.864  1.00 28.29           C  
ATOM     64  OG  SER L   9      81.903  44.702  21.247  1.00 28.68           O  
ATOM     65  N   ALA L  11      84.279  45.736  19.216  1.00 29.12           N  
ATOM     66  CA  ALA L  11      84.327  47.112  18.675  1.00 29.07           C  
ATOM     67  C   ALA L  11      83.280  47.036  17.563  1.00 29.10           C  
ATOM     68  O   ALA L  11      83.051  45.906  17.092  1.00 29.30           O  
ATOM     69  CB  ALA L  11      85.702  47.471  18.221  1.00 28.81           C  
ATOM     70  N   SER L  12      82.662  48.128  17.186  1.00 29.33           N  
ATOM     71  CA  SER L  12      81.665  47.998  16.103  1.00 29.12           C  
ATOM     72  C   SER L  12      80.914  49.301  15.932  1.00 29.23           C  
ATOM     73  O   SER L  12      80.956  50.160  16.825  1.00 29.18           O  
ATOM     74  CB  SER L  12      80.638  46.975  16.637  1.00 29.52           C  
ATOM     75  OG  SER L  12      80.021  47.616  17.775  1.00 29.76           O  
ATOM     76  N   GLY L  13      80.196  49.309  14.827  1.00 29.36           N  
ATOM     77  CA  GLY L  13      79.333  50.446  14.500  1.00 30.09           C  
ATOM     78  C   GLY L  13      78.522  50.098  13.265  1.00 30.57           C  
ATOM     79  O   GLY L  13      78.748  49.033  12.683  1.00 30.56           O  
ATOM     80  N   THR L  14      77.670  51.017  12.905  1.00 31.52           N  
ATOM     81  CA  THR L  14      76.802  50.895  11.698  1.00 32.53           C  
ATOM     82  C   THR L  14      77.597  50.863  10.416  1.00 32.72           C  
ATOM     83  O   THR L  14      78.762  51.257  10.281  1.00 31.99           O  
ATOM     84  CB  THR L  14      75.786  52.102  11.827  1.00 33.09           C  
ATOM     85  OG1 THR L  14      76.654  53.288  11.863  1.00 34.09           O  
ATOM     86  CG2 THR L  14      75.021  52.006  13.151  1.00 33.73           C  
ATOM     87  N   PRO L  15      76.981  50.334   9.368  1.00 33.53           N  
ATOM     88  CA  PRO L  15      77.632  50.195   8.055  1.00 34.39           C  
ATOM     89  C   PRO L  15      78.300  51.474   7.604  1.00 35.42           C  
ATOM     90  O   PRO L  15      77.860  52.613   7.891  1.00 35.95           O  
ATOM     91  CB  PRO L  15      76.558  49.685   7.121  1.00 33.90           C  
ATOM     92  CG  PRO L  15      75.281  50.013   7.858  1.00 33.49           C  
ATOM     93  CD  PRO L  15      75.615  49.792   9.331  1.00 33.44           C  
ATOM     94  N   GLY L  16      79.367  51.258   6.851  1.00 36.04           N  
ATOM     95  CA  GLY L  16      80.146  52.402   6.349  1.00 37.32           C  
ATOM     96  C   GLY L  16      80.961  53.064   7.452  1.00 37.85           C  
ATOM     97  O   GLY L  16      82.115  53.490   7.223  1.00 38.36           O  
ATOM     98  N   GLN L  17      80.408  53.157   8.638  1.00 38.25           N  
ATOM     99  CA  GLN L  17      81.085  53.781   9.804  1.00 38.70           C  
ATOM    100  C   GLN L  17      82.545  53.354   9.981  1.00 38.81           C  
ATOM    101  O   GLN L  17      83.034  52.296   9.561  1.00 38.79           O  
ATOM    102  CB  GLN L  17      80.243  53.620  11.028  1.00 39.21           C  
ATOM    103  CG  GLN L  17      80.760  54.094  12.371  1.00 39.57           C  
ATOM    104  CD  GLN L  17      79.519  54.086  13.271  1.00 39.71           C  
ATOM    105  OE1 GLN L  17      79.572  53.695  14.412  1.00 40.64           O  
ATOM    106  NE2 GLN L  17      78.444  54.499  12.601  1.00 39.91           N  
ATOM    107  N   ARG L  18      83.267  54.259  10.629  1.00 38.69           N  
ATOM    108  CA  ARG L  18      84.702  54.155  10.890  1.00 38.82           C  
ATOM    109  C   ARG L  18      84.928  53.693  12.320  1.00 37.85           C  
ATOM    110  O   ARG L  18      84.604  54.428  13.262  1.00 37.80           O  
ATOM    111  CB  ARG L  18      85.359  55.508  10.607  1.00 42.16           C  
ATOM    112  CG  ARG L  18      86.752  55.530  10.006  1.00 44.63           C  
ATOM    113  CD  ARG L  18      87.826  55.540  11.062  1.00 46.18           C  
ATOM    114  NE  ARG L  18      88.547  56.798  11.124  1.00 47.08           N  
ATOM    115  CZ  ARG L  18      88.719  57.488  12.243  1.00 48.22           C  
ATOM    116  NH1 ARG L  18      88.246  57.111  13.426  1.00 48.64           N  
ATOM    117  NH2 ARG L  18      89.397  58.652  12.218  1.00 50.02           N  
ATOM    118  N   VAL L  19      85.463  52.480  12.413  1.00 36.52           N  
ATOM    119  CA  VAL L  19      85.750  51.819  13.713  1.00 34.77           C  
ATOM    120  C   VAL L  19      87.239  51.585  13.848  1.00 33.56           C  
ATOM    121  O   VAL L  19      87.994  51.593  12.846  1.00 34.27           O  
ATOM    122  CB  VAL L  19      84.849  50.587  13.871  1.00 34.65           C  
ATOM    123  CG1 VAL L  19      83.522  50.738  13.102  1.00 34.02           C  
ATOM    124  CG2 VAL L  19      85.556  49.304  13.526  1.00 34.23           C  
ATOM    125  N   THR L  20      87.688  51.433  15.084  1.00 31.80           N  
ATOM    126  CA  THR L  20      89.126  51.255  15.364  1.00 29.74           C  
ATOM    127  C   THR L  20      89.320  50.444  16.627  1.00 28.44           C  
ATOM    128  O   THR L  20      88.788  50.880  17.655  1.00 28.84           O  
ATOM    129  CB  THR L  20      89.735  52.704  15.608  1.00 30.04           C  
ATOM    130  OG1 THR L  20      89.638  52.853  17.055  1.00 29.30           O  
ATOM    131  CG2 THR L  20      88.944  53.799  14.882  1.00 29.47           C  
ATOM    132  N   ILE L  21      89.985  49.335  16.525  1.00 26.96           N  
ATOM    133  CA  ILE L  21      90.343  48.354  17.520  1.00 24.53           C  
ATOM    134  C   ILE L  21      91.735  48.779  18.061  1.00 24.31           C  
ATOM    135  O   ILE L  21      92.610  48.697  17.190  1.00 22.80           O  
ATOM    136  CB  ILE L  21      90.681  46.929  16.916  1.00 22.12           C  
ATOM    137  CG1 ILE L  21      89.533  46.408  16.054  1.00 20.34           C  
ATOM    138  CG2 ILE L  21      91.171  46.006  18.055  1.00 21.00           C  
ATOM    139  CD1 ILE L  21      89.132  47.318  14.895  1.00 18.13           C  
ATOM    140  N   SER L  22      91.761  49.121  19.323  1.00 24.86           N  
ATOM    141  CA  SER L  22      93.038  49.569  19.931  1.00 26.22           C  
ATOM    142  C   SER L  22      93.679  48.370  20.616  1.00 26.76           C  
ATOM    143  O   SER L  22      92.943  47.365  20.738  1.00 27.26           O  
ATOM    144  CB  SER L  22      92.761  50.689  20.913  1.00 27.25           C  
ATOM    145  OG  SER L  22      91.845  50.213  21.893  1.00 28.46           O  
ATOM    146  N   CYS L  23      94.919  48.497  21.015  1.00 26.91           N  
ATOM    147  CA  CYS L  23      95.597  47.332  21.664  1.00 27.50           C  
ATOM    148  C   CYS L  23      96.693  47.814  22.579  1.00 28.43           C  
ATOM    149  O   CYS L  23      97.657  48.395  22.068  1.00 28.59           O  
ATOM    150  CB  CYS L  23      96.168  46.516  20.503  1.00 27.02           C  
ATOM    151  SG  CYS L  23      97.525  45.471  20.971  1.00 26.67           S  
ATOM    152  N   SER L  24      96.634  47.611  23.877  1.00 29.67           N  
ATOM    153  CA  SER L  24      97.648  48.126  24.781  1.00 31.17           C  
ATOM    154  C   SER L  24      98.597  47.126  25.385  1.00 32.19           C  
ATOM    155  O   SER L  24      98.302  46.065  25.946  1.00 32.47           O  
ATOM    156  CB  SER L  24      96.981  48.935  25.911  1.00 32.70           C  
ATOM    157  OG  SER L  24      95.838  49.574  25.336  1.00 35.11           O  
ATOM    158  N   GLY L  25      99.840  47.598  25.317  1.00 33.01           N  
ATOM    159  CA  GLY L  25     100.946  46.799  25.822  1.00 34.21           C  
ATOM    160  C   GLY L  25     101.713  47.657  26.804  1.00 35.21           C  
ATOM    161  O   GLY L  25     101.101  48.507  27.436  1.00 35.51           O  
ATOM    162  N   SER L  26     102.975  47.344  26.798  1.00 36.39           N  
ATOM    163  CA  SER L  26     104.032  47.880  27.619  1.00 37.21           C  
ATOM    164  C   SER L  26     105.191  48.545  26.831  1.00 37.74           C  
ATOM    165  O   SER L  26     105.245  48.818  25.621  1.00 37.75           O  
ATOM    166  CB  SER L  26     104.673  46.742  28.458  1.00 37.08           C  
ATOM    167  OG  SER L  26     103.778  46.040  29.277  1.00 36.79           O  
ATOM    168  N   SER L  27     106.150  48.816  27.711  1.00 37.89           N  
ATOM    169  CA  SER L  27     107.444  49.425  27.529  1.00 37.45           C  
ATOM    170  C   SER L  27     108.302  48.404  26.771  1.00 36.38           C  
ATOM    171  O   SER L  27     108.899  48.842  25.783  1.00 36.59           O  
ATOM    172  CB  SER L  27     108.117  49.948  28.785  1.00 39.01           C  
ATOM    173  OG  SER L  27     107.536  49.648  30.072  1.00 39.97           O  
ATOM    174  N   SER L  27A    108.258  47.157  27.204  1.00 35.36           N  
ATOM    175  CA  SER L  27A    109.044  46.077  26.596  1.00 34.18           C  
ATOM    176  C   SER L  27A    108.509  45.485  25.311  1.00 33.86           C  
ATOM    177  O   SER L  27A    109.326  44.786  24.664  1.00 33.40           O  
ATOM    178  CB  SER L  27A    109.392  44.988  27.588  1.00 33.47           C  
ATOM    179  OG  SER L  27A    110.536  45.205  28.381  1.00 32.81           O  
ATOM    180  N   ASN L  27B    107.271  45.699  24.898  1.00 33.99           N  
ATOM    181  CA  ASN L  27B    106.734  45.139  23.666  1.00 34.45           C  
ATOM    182  C   ASN L  27B    106.203  46.184  22.692  1.00 35.37           C  
ATOM    183  O   ASN L  27B    106.946  46.558  21.778  1.00 35.75           O  
ATOM    184  CB  ASN L  27B    105.710  44.014  23.865  1.00 33.76           C  
ATOM    185  CG  ASN L  27B    104.750  44.204  25.000  1.00 32.68           C  
ATOM    186  OD1 ASN L  27B    104.245  45.296  25.287  1.00 32.28           O  
ATOM    187  ND2 ASN L  27B    104.503  43.106  25.701  1.00 32.65           N  
ATOM    188  N   ILE L  28     104.938  46.549  22.836  1.00 36.22           N  
ATOM    189  CA  ILE L  28     104.289  47.521  21.948  1.00 36.97           C  
ATOM    190  C   ILE L  28     105.206  48.730  21.754  1.00 37.22           C  
ATOM    191  O   ILE L  28     105.562  48.950  20.570  1.00 37.71           O  
ATOM    192  CB  ILE L  28     102.829  47.932  22.320  1.00 37.27           C  
ATOM    193  CG1 ILE L  28     101.862  46.723  22.371  1.00 37.96           C  
ATOM    194  CG2 ILE L  28     102.232  49.009  21.375  1.00 37.60           C  
ATOM    195  CD1 ILE L  28     101.287  46.202  21.029  1.00 37.89           C  
ATOM    196  N   GLY L  29     105.568  49.439  22.817  1.00 36.98           N  
ATOM    197  CA  GLY L  29     106.447  50.599  22.667  1.00 36.86           C  
ATOM    198  C   GLY L  29     107.940  50.360  22.563  1.00 36.94           C  
ATOM    199  O   GLY L  29     108.677  51.058  23.304  1.00 37.03           O  
ATOM    200  N   GLU L  30     108.459  49.473  21.743  1.00 36.71           N  
ATOM    201  CA  GLU L  30     109.848  49.125  21.518  1.00 36.59           C  
ATOM    202  C   GLU L  30     109.985  48.192  20.305  1.00 35.84           C  
ATOM    203  O   GLU L  30     111.063  48.100  19.715  1.00 35.44           O  
ATOM    204  CB  GLU L  30     110.634  48.435  22.626  1.00 38.60           C  
ATOM    205  CG  GLU L  30     111.670  49.164  23.439  1.00 41.86           C  
ATOM    206  CD  GLU L  30     112.645  48.457  24.320  1.00 44.74           C  
ATOM    207  OE1 GLU L  30     112.455  47.979  25.449  1.00 45.23           O  
ATOM    208  OE2 GLU L  30     113.810  48.409  23.788  1.00 46.21           O  
ATOM    209  N   ASN L  31     108.902  47.515  19.976  1.00 35.33           N  
ATOM    210  CA  ASN L  31     108.828  46.576  18.855  1.00 34.49           C  
ATOM    211  C   ASN L  31     107.651  46.986  17.959  1.00 33.33           C  
ATOM    212  O   ASN L  31     106.859  47.860  18.227  1.00 32.73           O  
ATOM    213  CB  ASN L  31     108.825  45.102  19.193  1.00 36.13           C  
ATOM    214  CG  ASN L  31     110.078  44.374  19.623  1.00 36.71           C  
ATOM    215  OD1 ASN L  31     111.015  44.134  18.824  1.00 37.23           O  
ATOM    216  ND2 ASN L  31     110.173  43.932  20.893  1.00 35.98           N  
ATOM    217  N   SER L  32     107.610  46.268  16.874  1.00 33.52           N  
ATOM    218  CA  SER L  32     106.620  46.489  15.809  1.00 34.22           C  
ATOM    219  C   SER L  32     105.418  45.556  15.941  1.00 33.60           C  
ATOM    220  O   SER L  32     105.477  44.306  15.899  1.00 33.82           O  
ATOM    221  CB  SER L  32     107.228  46.521  14.415  1.00 34.92           C  
ATOM    222  OG  SER L  32     107.295  45.274  13.727  1.00 35.86           O  
ATOM    223  N   VAL L  33     104.305  46.261  16.120  1.00 32.64           N  
ATOM    224  CA  VAL L  33     102.976  45.648  16.239  1.00 31.09           C  
ATOM    225  C   VAL L  33     102.624  45.146  14.825  1.00 30.74           C  
ATOM    226  O   VAL L  33     102.836  45.862  13.835  1.00 31.09           O  
ATOM    227  CB  VAL L  33     101.973  46.691  16.765  1.00 30.16           C  
ATOM    228  CG1 VAL L  33     100.670  45.982  17.140  1.00 29.57           C  
ATOM    229  CG2 VAL L  33     102.562  47.601  17.806  1.00 27.79           C  
ATOM    230  N   THR L  34     102.163  43.958  14.747  1.00 29.94           N  
ATOM    231  CA  THR L  34     101.733  43.174  13.575  1.00 29.07           C  
ATOM    232  C   THR L  34     100.248  42.988  13.839  1.00 28.27           C  
ATOM    233  O   THR L  34      99.897  42.901  15.038  1.00 28.88           O  
ATOM    234  CB  THR L  34     102.645  41.905  13.494  1.00 30.19           C  
ATOM    235  OG1 THR L  34     102.034  40.770  12.857  1.00 31.36           O  
ATOM    236  CG2 THR L  34     103.129  41.360  14.874  1.00 32.06           C  
ATOM    237  N   TRP L  35      99.356  42.993  12.878  1.00 27.18           N  
ATOM    238  CA  TRP L  35      97.915  42.826  13.117  1.00 25.22           C  
ATOM    239  C   TRP L  35      97.346  41.709  12.265  1.00 25.19           C  
ATOM    240  O   TRP L  35      97.662  41.705  11.083  1.00 25.37           O  
ATOM    241  CB  TRP L  35      97.224  44.144  12.801  1.00 22.07           C  
ATOM    242  CG  TRP L  35      97.368  45.235  13.783  1.00 19.35           C  
ATOM    243  CD1 TRP L  35      98.316  46.221  13.793  1.00 19.37           C  
ATOM    244  CD2 TRP L  35      96.513  45.510  14.909  1.00 18.10           C  
ATOM    245  NE1 TRP L  35      98.120  47.090  14.827  1.00 18.97           N  
ATOM    246  CE2 TRP L  35      96.999  46.665  15.531  1.00 17.90           C  
ATOM    247  CE3 TRP L  35      95.372  44.905  15.420  1.00 17.46           C  
ATOM    248  CZ2 TRP L  35      96.394  47.187  16.652  1.00 16.89           C  
ATOM    249  CZ3 TRP L  35      94.743  45.429  16.509  1.00 15.67           C  
ATOM    250  CH2 TRP L  35      95.271  46.544  17.113  1.00 16.50           C  
ATOM    251  N   TYR L  36      96.504  40.870  12.753  1.00 25.77           N  
ATOM    252  CA  TYR L  36      95.885  39.809  12.013  1.00 27.46           C  
ATOM    253  C   TYR L  36      94.360  39.881  12.105  1.00 29.29           C  
ATOM    254  O   TYR L  36      93.722  40.508  12.943  1.00 29.39           O  
ATOM    255  CB  TYR L  36      96.315  38.429  12.512  1.00 28.03           C  
ATOM    256  CG  TYR L  36      97.789  38.201  12.520  1.00 29.26           C  
ATOM    257  CD1 TYR L  36      98.611  38.842  13.443  1.00 30.48           C  
ATOM    258  CD2 TYR L  36      98.384  37.352  11.598  1.00 29.86           C  
ATOM    259  CE1 TYR L  36      99.989  38.662  13.478  1.00 30.74           C  
ATOM    260  CE2 TYR L  36      99.770  37.152  11.590  1.00 30.98           C  
ATOM    261  CZ  TYR L  36     100.546  37.807  12.541  1.00 31.35           C  
ATOM    262  OH  TYR L  36     101.901  37.627  12.541  1.00 32.89           O  
ATOM    263  N   GLN L  37      93.825  39.135  11.187  1.00 31.52           N  
ATOM    264  CA  GLN L  37      92.410  38.867  10.924  1.00 34.28           C  
ATOM    265  C   GLN L  37      92.356  37.344  11.179  1.00 36.13           C  
ATOM    266  O   GLN L  37      93.188  36.627  10.600  1.00 36.19           O  
ATOM    267  CB  GLN L  37      91.995  39.190   9.493  1.00 34.76           C  
ATOM    268  CG  GLN L  37      90.748  40.010   9.288  1.00 35.63           C  
ATOM    269  CD  GLN L  37      90.553  40.616   7.923  1.00 36.38           C  
ATOM    270  OE1 GLN L  37      90.957  40.176   6.844  1.00 36.82           O  
ATOM    271  NE2 GLN L  37      89.834  41.755   7.887  1.00 37.00           N  
ATOM    272  N   HIS L  38      91.536  36.932  12.089  1.00 38.39           N  
ATOM    273  CA  HIS L  38      91.352  35.515  12.407  1.00 40.81           C  
ATOM    274  C   HIS L  38      89.839  35.283  12.237  1.00 42.30           C  
ATOM    275  O   HIS L  38      89.097  36.218  11.966  1.00 42.54           O  
ATOM    276  CB  HIS L  38      91.835  34.968  13.738  1.00 42.02           C  
ATOM    277  CG  HIS L  38      91.758  33.467  13.854  1.00 43.21           C  
ATOM    278  ND1 HIS L  38      91.324  32.808  14.987  1.00 44.00           N  
ATOM    279  CD2 HIS L  38      92.074  32.512  12.938  1.00 43.31           C  
ATOM    280  CE1 HIS L  38      91.396  31.490  14.754  1.00 44.34           C  
ATOM    281  NE2 HIS L  38      91.836  31.296  13.522  1.00 44.43           N  
ATOM    282  N   LEU L  39      89.456  34.066  12.316  1.00 44.36           N  
ATOM    283  CA  LEU L  39      88.161  33.471  12.226  1.00 46.16           C  
ATOM    284  C   LEU L  39      88.423  31.936  12.135  1.00 47.42           C  
ATOM    285  O   LEU L  39      89.289  31.436  11.424  1.00 46.92           O  
ATOM    286  CB  LEU L  39      87.228  33.993  11.172  1.00 47.64           C  
ATOM    287  CG  LEU L  39      85.795  34.402  11.552  1.00 48.81           C  
ATOM    288  CD1 LEU L  39      84.768  34.016  10.479  1.00 48.63           C  
ATOM    289  CD2 LEU L  39      85.386  33.860  12.910  1.00 48.34           C  
ATOM    290  N   SER L  40      87.603  31.366  12.989  1.00 49.27           N  
ATOM    291  CA  SER L  40      87.439  29.949  13.282  1.00 51.10           C  
ATOM    292  C   SER L  40      87.307  29.137  11.987  1.00 52.39           C  
ATOM    293  O   SER L  40      86.264  29.050  11.292  1.00 53.06           O  
ATOM    294  CB  SER L  40      86.267  29.755  14.249  1.00 50.75           C  
ATOM    295  OG  SER L  40      85.044  29.755  13.530  1.00 51.18           O  
ATOM    296  N   GLY L  41      88.443  28.526  11.685  1.00 53.03           N  
ATOM    297  CA  GLY L  41      88.610  27.718  10.470  1.00 53.97           C  
ATOM    298  C   GLY L  41      89.896  28.300   9.830  1.00 54.80           C  
ATOM    299  O   GLY L  41      89.850  29.210   9.004  1.00 54.82           O  
ATOM    300  N   THR L  42      90.967  27.775  10.370  1.00 55.35           N  
ATOM    301  CA  THR L  42      92.364  28.033  10.008  1.00 55.70           C  
ATOM    302  C   THR L  42      92.570  29.244   9.119  1.00 55.56           C  
ATOM    303  O   THR L  42      92.439  29.132   7.849  1.00 56.12           O  
ATOM    304  CB  THR L  42      92.938  26.683   9.334  1.00 56.23           C  
ATOM    305  OG1 THR L  42      91.899  26.158   8.419  1.00 55.43           O  
ATOM    306  CG2 THR L  42      93.417  25.648  10.365  1.00 55.79           C  
ATOM    307  N   ALA L  43      92.914  30.425   9.698  1.00 54.50           N  
ATOM    308  CA  ALA L  43      93.085  31.567   8.772  1.00 52.46           C  
ATOM    309  C   ALA L  43      93.740  32.809   9.278  1.00 50.78           C  
ATOM    310  O   ALA L  43      93.460  33.869   8.655  1.00 51.31           O  
ATOM    311  CB  ALA L  43      91.674  31.978   8.268  1.00 53.18           C  
ATOM    312  N   PRO L  44      94.537  32.736  10.316  1.00 48.96           N  
ATOM    313  CA  PRO L  44      95.225  33.959  10.787  1.00 47.49           C  
ATOM    314  C   PRO L  44      95.795  34.646   9.549  1.00 46.09           C  
ATOM    315  O   PRO L  44      96.961  34.342   9.230  1.00 46.62           O  
ATOM    316  CB  PRO L  44      96.349  33.403  11.646  1.00 47.59           C  
ATOM    317  CG  PRO L  44      95.874  32.070  12.113  1.00 48.28           C  
ATOM    318  CD  PRO L  44      94.922  31.533  11.044  1.00 48.56           C  
ATOM    319  N   LYS L  45      95.072  35.454   8.834  1.00 44.22           N  
ATOM    320  CA  LYS L  45      95.591  36.127   7.631  1.00 42.74           C  
ATOM    321  C   LYS L  45      96.340  37.382   8.049  1.00 41.34           C  
ATOM    322  O   LYS L  45      95.640  38.312   8.529  1.00 41.40           O  
ATOM    323  CB  LYS L  45      94.438  36.554   6.715  1.00 43.83           C  
ATOM    324  CG  LYS L  45      94.666  37.816   5.846  1.00 43.74           C  
ATOM    325  CD  LYS L  45      93.370  38.390   5.307  1.00 44.11           C  
ATOM    326  CE  LYS L  45      93.445  39.431   4.215  1.00 44.11           C  
ATOM    327  NZ  LYS L  45      92.134  40.146   4.036  1.00 43.81           N  
ATOM    328  N   LEU L  46      97.639  37.484   7.845  1.00 39.64           N  
ATOM    329  CA  LEU L  46      98.294  38.749   8.257  1.00 38.61           C  
ATOM    330  C   LEU L  46      97.749  39.953   7.492  1.00 37.86           C  
ATOM    331  O   LEU L  46      97.640  39.964   6.252  1.00 38.44           O  
ATOM    332  CB  LEU L  46      99.825  38.629   8.188  1.00 38.03           C  
ATOM    333  CG  LEU L  46     100.454  39.907   7.600  1.00 37.69           C  
ATOM    334  CD1 LEU L  46     100.190  41.067   8.535  1.00 37.70           C  
ATOM    335  CD2 LEU L  46     101.899  39.643   7.314  1.00 36.87           C  
ATOM    336  N   LEU L  47      97.459  41.004   8.232  1.00 36.94           N  
ATOM    337  CA  LEU L  47      96.917  42.239   7.696  1.00 36.08           C  
ATOM    338  C   LEU L  47      97.974  43.337   7.712  1.00 35.35           C  
ATOM    339  O   LEU L  47      98.256  43.842   6.633  1.00 35.50           O  
ATOM    340  CB  LEU L  47      95.663  42.688   8.429  1.00 36.14           C  
ATOM    341  CG  LEU L  47      94.294  42.105   8.224  1.00 36.05           C  
ATOM    342  CD1 LEU L  47      93.230  43.080   8.766  1.00 35.87           C  
ATOM    343  CD2 LEU L  47      94.038  41.849   6.750  1.00 35.59           C  
ATOM    344  N   ILE L  48      98.470  43.677   8.881  1.00 35.09           N  
ATOM    345  CA  ILE L  48      99.416  44.732   9.070  1.00 34.90           C  
ATOM    346  C   ILE L  48     100.716  44.450   9.824  1.00 35.65           C  
ATOM    347  O   ILE L  48     100.710  44.430  11.050  1.00 35.30           O  
ATOM    348  CB  ILE L  48      98.781  45.931   9.884  1.00 34.19           C  
ATOM    349  CG1 ILE L  48      97.703  46.656   9.123  1.00 34.31           C  
ATOM    350  CG2 ILE L  48      99.964  46.828  10.363  1.00 33.72           C  
ATOM    351  CD1 ILE L  48      97.632  46.575   7.589  1.00 34.34           C  
ATOM    352  N   TYR L  49     101.772  44.414   9.064  1.00 36.63           N  
ATOM    353  CA  TYR L  49     103.160  44.206   9.470  1.00 37.50           C  
ATOM    354  C   TYR L  49     103.780  45.562   9.752  1.00 37.98           C  
ATOM    355  O   TYR L  49     103.235  46.651   9.480  1.00 38.01           O  
ATOM    356  CB  TYR L  49     103.850  43.315   8.438  1.00 38.52           C  
ATOM    357  CG  TYR L  49     104.308  43.855   7.109  1.00 39.62           C  
ATOM    358  CD1 TYR L  49     105.513  44.582   7.044  1.00 40.13           C  
ATOM    359  CD2 TYR L  49     103.652  43.677   5.889  1.00 39.96           C  
ATOM    360  CE1 TYR L  49     106.031  45.125   5.881  1.00 39.85           C  
ATOM    361  CE2 TYR L  49     104.162  44.229   4.700  1.00 40.16           C  
ATOM    362  CZ  TYR L  49     105.341  44.955   4.692  1.00 39.77           C  
ATOM    363  OH  TYR L  49     105.833  45.519   3.546  1.00 40.19           O  
ATOM    364  N   GLU L  50     104.930  45.552  10.369  1.00 39.41           N  
ATOM    365  CA  GLU L  50     105.721  46.715  10.742  1.00 40.82           C  
ATOM    366  C   GLU L  50     104.884  47.896  11.172  1.00 41.00           C  
ATOM    367  O   GLU L  50     105.174  49.015  10.743  1.00 41.01           O  
ATOM    368  CB  GLU L  50     106.600  47.238   9.584  1.00 42.80           C  
ATOM    369  CG  GLU L  50     107.570  46.230   9.006  1.00 45.91           C  
ATOM    370  CD  GLU L  50     108.789  46.718   8.293  1.00 48.19           C  
ATOM    371  OE1 GLU L  50     108.791  47.507   7.347  1.00 49.43           O  
ATOM    372  OE2 GLU L  50     109.838  46.180   8.755  1.00 49.22           O  
ATOM    373  N   ASP L  51     103.909  47.654  11.985  1.00 41.78           N  
ATOM    374  CA  ASP L  51     103.006  48.624  12.572  1.00 42.74           C  
ATOM    375  C   ASP L  51     102.006  49.218  11.570  1.00 43.14           C  
ATOM    376  O   ASP L  51     100.806  48.943  11.492  1.00 43.19           O  
ATOM    377  CB  ASP L  51     103.815  49.765  13.241  1.00 44.75           C  
ATOM    378  CG  ASP L  51     104.979  49.356  14.108  1.00 45.52           C  
ATOM    379  OD1 ASP L  51     104.800  49.101  15.317  1.00 46.41           O  
ATOM    380  OD2 ASP L  51     106.121  49.290  13.599  1.00 45.61           O  
ATOM    381  N   ASN L  52     102.553  50.166  10.858  1.00 43.37           N  
ATOM    382  CA  ASN L  52     102.112  51.071   9.861  1.00 42.92           C  
ATOM    383  C   ASN L  52     101.872  50.466   8.471  1.00 42.28           C  
ATOM    384  O   ASN L  52     101.145  51.184   7.775  1.00 41.63           O  
ATOM    385  CB  ASN L  52     103.157  52.198   9.626  1.00 44.33           C  
ATOM    386  CG  ASN L  52     103.795  52.963  10.736  1.00 45.28           C  
ATOM    387  OD1 ASN L  52     103.173  53.855  11.356  1.00 45.91           O  
ATOM    388  ND2 ASN L  52     105.103  52.752  11.040  1.00 46.00           N  
ATOM    389  N   SER L  53     102.459  49.339   8.141  1.00 42.07           N  
ATOM    390  CA  SER L  53     102.369  48.782   6.780  1.00 42.23           C  
ATOM    391  C   SER L  53     101.365  47.697   6.510  1.00 42.55           C  
ATOM    392  O   SER L  53     101.303  46.709   7.247  1.00 42.15           O  
ATOM    393  CB  SER L  53     103.798  48.371   6.365  1.00 42.44           C  
ATOM    394  OG  SER L  53     104.510  49.378   5.645  1.00 42.45           O  
ATOM    395  N   ARG L  54     100.624  47.787   5.409  1.00 43.62           N  
ATOM    396  CA  ARG L  54      99.584  46.855   4.961  1.00 45.03           C  
ATOM    397  C   ARG L  54     100.018  45.635   4.152  1.00 45.11           C  
ATOM    398  O   ARG L  54     100.803  45.729   3.181  1.00 45.15           O  
ATOM    399  CB  ARG L  54      98.500  47.602   4.145  1.00 47.18           C  
ATOM    400  CG  ARG L  54      97.925  48.898   4.663  1.00 49.49           C  
ATOM    401  CD  ARG L  54      96.692  49.376   3.972  1.00 50.29           C  
ATOM    402  NE  ARG L  54      96.705  49.156   2.532  1.00 51.72           N  
ATOM    403  CZ  ARG L  54      97.483  49.860   1.696  1.00 52.74           C  
ATOM    404  NH1 ARG L  54      98.283  50.837   2.128  1.00 53.19           N  
ATOM    405  NH2 ARG L  54      97.496  49.567   0.391  1.00 53.33           N  
ATOM    406  N   ALA L  55      99.470  44.463   4.477  1.00 45.24           N  
ATOM    407  CA  ALA L  55      99.828  43.216   3.758  1.00 46.27           C  
ATOM    408  C   ALA L  55      99.333  43.363   2.329  1.00 47.09           C  
ATOM    409  O   ALA L  55      99.188  44.511   1.898  1.00 47.38           O  
ATOM    410  CB  ALA L  55      99.365  41.942   4.423  1.00 45.47           C  
ATOM    411  N   SER L  56      99.105  42.261   1.654  1.00 48.21           N  
ATOM    412  CA  SER L  56      98.611  42.273   0.255  1.00 49.42           C  
ATOM    413  C   SER L  56      97.151  41.827   0.241  1.00 50.46           C  
ATOM    414  O   SER L  56      96.729  41.024   1.113  1.00 51.22           O  
ATOM    415  CB  SER L  56      99.431  41.395  -0.661  1.00 49.36           C  
ATOM    416  OG  SER L  56     100.662  41.939  -1.068  1.00 49.53           O  
ATOM    417  N   GLY L  57      96.381  42.310  -0.728  1.00 50.96           N  
ATOM    418  CA  GLY L  57      94.929  41.921  -0.779  1.00 51.13           C  
ATOM    419  C   GLY L  57      94.226  42.606   0.411  1.00 51.08           C  
ATOM    420  O   GLY L  57      93.099  42.284   0.810  1.00 51.11           O  
ATOM    421  N   VAL L  58      94.974  43.568   0.943  1.00 51.09           N  
ATOM    422  CA  VAL L  58      94.657  44.400   2.062  1.00 50.47           C  
ATOM    423  C   VAL L  58      94.146  45.788   1.609  1.00 50.07           C  
ATOM    424  O   VAL L  58      94.925  46.662   1.251  1.00 50.16           O  
ATOM    425  CB  VAL L  58      95.752  44.648   3.118  1.00 50.22           C  
ATOM    426  CG1 VAL L  58      95.404  45.884   3.966  1.00 49.70           C  
ATOM    427  CG2 VAL L  58      95.919  43.439   4.023  1.00 50.68           C  
ATOM    428  N   SER L  59      92.855  45.796   1.765  1.00 49.63           N  
ATOM    429  CA  SER L  59      91.983  46.932   1.524  1.00 49.28           C  
ATOM    430  C   SER L  59      92.633  48.190   2.132  1.00 48.43           C  
ATOM    431  O   SER L  59      93.181  48.234   3.233  1.00 47.85           O  
ATOM    432  CB  SER L  59      90.610  46.651   2.131  1.00 50.33           C  
ATOM    433  OG  SER L  59      89.519  46.887   1.258  1.00 51.77           O  
ATOM    434  N   ASP L  60      92.531  49.211   1.308  1.00 48.07           N  
ATOM    435  CA  ASP L  60      93.002  50.567   1.558  1.00 47.32           C  
ATOM    436  C   ASP L  60      92.242  51.033   2.836  1.00 46.11           C  
ATOM    437  O   ASP L  60      92.572  52.071   3.413  1.00 45.83           O  
ATOM    438  CB  ASP L  60      92.734  51.528   0.404  1.00 49.10           C  
ATOM    439  CG  ASP L  60      92.208  51.046  -0.923  1.00 49.77           C  
ATOM    440  OD1 ASP L  60      90.965  50.801  -1.008  1.00 49.90           O  
ATOM    441  OD2 ASP L  60      92.977  50.941  -1.910  1.00 49.47           O  
ATOM    442  N   ARG L  61      91.235  50.222   3.148  1.00 44.56           N  
ATOM    443  CA  ARG L  61      90.343  50.474   4.287  1.00 42.54           C  
ATOM    444  C   ARG L  61      91.017  50.398   5.639  1.00 40.38           C  
ATOM    445  O   ARG L  61      90.640  51.145   6.559  1.00 39.63           O  
ATOM    446  CB  ARG L  61      89.083  49.620   4.200  1.00 44.09           C  
ATOM    447  CG  ARG L  61      88.115  50.047   3.079  1.00 45.16           C  
ATOM    448  CD  ARG L  61      86.812  49.297   3.250  1.00 46.50           C  
ATOM    449  NE  ARG L  61      87.055  48.135   4.094  1.00 47.96           N  
ATOM    450  CZ  ARG L  61      86.517  46.938   4.086  1.00 48.26           C  
ATOM    451  NH1 ARG L  61      85.588  46.599   3.193  1.00 49.73           N  
ATOM    452  NH2 ARG L  61      86.841  45.972   4.950  1.00 48.32           N  
ATOM    453  N   PHE L  62      92.033  49.562   5.733  1.00 38.56           N  
ATOM    454  CA  PHE L  62      92.804  49.389   6.960  1.00 36.77           C  
ATOM    455  C   PHE L  62      94.150  50.140   6.959  1.00 36.72           C  
ATOM    456  O   PHE L  62      94.955  50.299   6.022  1.00 36.24           O  
ATOM    457  CB  PHE L  62      93.067  47.925   7.261  1.00 34.35           C  
ATOM    458  CG  PHE L  62      92.007  46.944   6.952  1.00 32.66           C  
ATOM    459  CD1 PHE L  62      91.547  46.782   5.645  1.00 31.98           C  
ATOM    460  CD2 PHE L  62      91.461  46.172   7.980  1.00 31.75           C  
ATOM    461  CE1 PHE L  62      90.547  45.854   5.376  1.00 31.35           C  
ATOM    462  CE2 PHE L  62      90.471  45.243   7.719  1.00 31.53           C  
ATOM    463  CZ  PHE L  62      90.010  45.081   6.426  1.00 30.81           C  
ATOM    464  N   SER L  63      94.419  50.560   8.186  1.00 36.62           N  
ATOM    465  CA  SER L  63      95.665  51.294   8.499  1.00 37.17           C  
ATOM    466  C   SER L  63      95.855  51.216  10.013  1.00 37.68           C  
ATOM    467  O   SER L  63      94.857  51.077  10.755  1.00 37.57           O  
ATOM    468  CB  SER L  63      95.565  52.713   7.974  1.00 36.50           C  
ATOM    469  OG  SER L  63      94.484  53.368   8.596  1.00 34.79           O  
ATOM    470  N   ALA L  64      97.109  51.280  10.416  1.00 38.10           N  
ATOM    471  CA  ALA L  64      97.412  51.175  11.851  1.00 38.71           C  
ATOM    472  C   ALA L  64      98.154  52.399  12.334  1.00 39.53           C  
ATOM    473  O   ALA L  64      98.516  53.332  11.614  1.00 39.94           O  
ATOM    474  CB  ALA L  64      98.068  49.822  12.065  1.00 37.76           C  
ATOM    475  N   SER L  65      98.378  52.440  13.625  1.00 40.30           N  
ATOM    476  CA  SER L  65      99.065  53.447  14.398  1.00 41.06           C  
ATOM    477  C   SER L  65      99.772  52.818  15.624  1.00 41.63           C  
ATOM    478  O   SER L  65      99.748  51.603  15.914  1.00 41.35           O  
ATOM    479  CB  SER L  65      98.085  54.508  14.893  1.00 41.65           C  
ATOM    480  OG  SER L  65      98.400  54.807  16.272  1.00 43.32           O  
ATOM    481  N   LYS L  66     100.417  53.734  16.361  1.00 41.68           N  
ATOM    482  CA  LYS L  66     101.156  53.374  17.555  1.00 41.65           C  
ATOM    483  C   LYS L  66     101.639  54.613  18.313  1.00 42.37           C  
ATOM    484  O   LYS L  66     102.511  55.332  17.819  1.00 42.45           O  
ATOM    485  CB  LYS L  66     102.394  52.526  17.239  1.00 39.63           C  
ATOM    486  CG  LYS L  66     103.042  51.847  18.427  1.00 37.71           C  
ATOM    487  CD  LYS L  66     104.141  50.879  18.073  1.00 36.64           C  
ATOM    488  CE  LYS L  66     105.475  51.575  17.989  1.00 36.83           C  
ATOM    489  NZ  LYS L  66     106.595  50.601  17.983  1.00 37.52           N  
ATOM    490  N   SER L  67     101.053  54.788  19.484  1.00 42.94           N  
ATOM    491  CA  SER L  67     101.418  55.830  20.425  1.00 43.67           C  
ATOM    492  C   SER L  67     102.471  55.208  21.373  1.00 43.60           C  
ATOM    493  O   SER L  67     103.457  54.606  20.893  1.00 44.17           O  
ATOM    494  CB  SER L  67     100.329  56.436  21.287  1.00 45.60           C  
ATOM    495  OG  SER L  67     100.926  57.341  22.239  1.00 46.89           O  
ATOM    496  N   GLY L  68     102.221  55.359  22.669  1.00 43.12           N  
ATOM    497  CA  GLY L  68     103.195  54.852  23.655  1.00 42.22           C  
ATOM    498  C   GLY L  68     103.490  53.353  23.501  1.00 41.16           C  
ATOM    499  O   GLY L  68     104.299  52.821  22.761  1.00 40.41           O  
ATOM    500  N   THR L  69     102.773  52.689  24.344  1.00 40.66           N  
ATOM    501  CA  THR L  69     102.530  51.351  24.739  1.00 39.92           C  
ATOM    502  C   THR L  69     101.129  50.935  24.225  1.00 38.98           C  
ATOM    503  O   THR L  69     100.487  50.059  24.824  1.00 38.99           O  
ATOM    504  CB  THR L  69     102.474  51.326  26.346  1.00 40.39           C  
ATOM    505  OG1 THR L  69     101.246  52.047  26.722  1.00 40.54           O  
ATOM    506  CG2 THR L  69     103.741  51.893  26.969  1.00 39.99           C  
ATOM    507  N   SER L  70     100.767  51.631  23.157  1.00 37.47           N  
ATOM    508  CA  SER L  70      99.460  51.437  22.526  1.00 36.11           C  
ATOM    509  C   SER L  70      99.521  51.509  21.019  1.00 34.72           C  
ATOM    510  O   SER L  70     100.374  52.129  20.394  1.00 35.30           O  
ATOM    511  CB  SER L  70      98.486  52.451  23.124  1.00 36.70           C  
ATOM    512  OG  SER L  70      97.138  52.116  22.852  1.00 37.47           O  
ATOM    513  N   ALA L  71      98.589  50.856  20.368  1.00 33.01           N  
ATOM    514  CA  ALA L  71      98.460  50.796  18.908  1.00 30.81           C  
ATOM    515  C   ALA L  71      96.969  50.661  18.640  1.00 29.32           C  
ATOM    516  O   ALA L  71      96.198  50.269  19.536  1.00 29.10           O  
ATOM    517  CB  ALA L  71      99.300  49.659  18.356  1.00 32.16           C  
ATOM    518  N   SER L  72      96.585  51.004  17.429  1.00 28.15           N  
ATOM    519  CA  SER L  72      95.178  50.972  17.030  1.00 27.05           C  
ATOM    520  C   SER L  72      95.064  50.673  15.541  1.00 26.05           C  
ATOM    521  O   SER L  72      95.868  51.226  14.820  1.00 25.88           O  
ATOM    522  CB  SER L  72      94.580  52.369  17.266  1.00 27.69           C  
ATOM    523  OG  SER L  72      95.256  53.241  16.341  1.00 28.46           O  
ATOM    524  N   LEU L  73      94.111  49.854  15.192  1.00 25.28           N  
ATOM    525  CA  LEU L  73      93.810  49.481  13.835  1.00 25.01           C  
ATOM    526  C   LEU L  73      92.471  50.156  13.550  1.00 26.51           C  
ATOM    527  O   LEU L  73      91.592  49.880  14.390  1.00 27.39           O  
ATOM    528  CB  LEU L  73      93.681  47.961  13.695  1.00 22.12           C  
ATOM    529  CG  LEU L  73      93.126  47.495  12.350  1.00 18.99           C  
ATOM    530  CD1 LEU L  73      94.151  47.582  11.268  1.00 17.68           C  
ATOM    531  CD2 LEU L  73      92.676  46.063  12.503  1.00 19.22           C  
ATOM    532  N   ALA L  74      92.362  50.950  12.513  1.00 27.65           N  
ATOM    533  CA  ALA L  74      91.024  51.564  12.267  1.00 28.50           C  
ATOM    534  C   ALA L  74      90.552  51.014  10.927  1.00 29.30           C  
ATOM    535  O   ALA L  74      91.351  51.010   9.976  1.00 29.56           O  
ATOM    536  CB  ALA L  74      91.093  53.044  12.397  1.00 27.99           C  
ATOM    537  N   ILE L  75      89.363  50.458  10.884  1.00 29.69           N  
ATOM    538  CA  ILE L  75      88.859  49.930   9.577  1.00 30.89           C  
ATOM    539  C   ILE L  75      88.097  51.147   9.081  1.00 31.34           C  
ATOM    540  O   ILE L  75      87.084  51.430   9.739  1.00 32.21           O  
ATOM    541  CB  ILE L  75      87.909  48.733   9.837  1.00 32.08           C  
ATOM    542  CG1 ILE L  75      88.727  47.416   9.759  1.00 32.26           C  
ATOM    543  CG2 ILE L  75      86.644  48.698   8.938  1.00 32.43           C  
ATOM    544  CD1 ILE L  75      88.471  46.608  11.092  1.00 33.12           C  
ATOM    545  N   SER L  76      88.492  51.848   8.070  1.00 31.76           N  
ATOM    546  CA  SER L  76      87.745  53.079   7.753  1.00 31.86           C  
ATOM    547  C   SER L  76      86.641  52.917   6.774  1.00 31.53           C  
ATOM    548  O   SER L  76      86.889  53.520   5.696  1.00 31.88           O  
ATOM    549  CB  SER L  76      88.766  54.133   7.281  1.00 34.63           C  
ATOM    550  OG  SER L  76      90.151  53.782   7.534  1.00 36.01           O  
ATOM    551  N   GLY L  77      85.536  52.257   7.015  1.00 31.38           N  
ATOM    552  CA  GLY L  77      84.452  52.165   6.033  1.00 31.41           C  
ATOM    553  C   GLY L  77      83.638  50.895   6.070  1.00 31.67           C  
ATOM    554  O   GLY L  77      83.126  50.350   5.065  1.00 31.59           O  
ATOM    555  N   LEU L  78      83.510  50.469   7.294  1.00 31.84           N  
ATOM    556  CA  LEU L  78      82.873  49.260   7.741  1.00 32.41           C  
ATOM    557  C   LEU L  78      81.940  48.703   6.680  1.00 33.49           C  
ATOM    558  O   LEU L  78      81.024  49.393   6.251  1.00 33.68           O  
ATOM    559  CB  LEU L  78      82.352  49.448   9.165  1.00 31.33           C  
ATOM    560  CG  LEU L  78      82.429  48.206  10.056  1.00 30.51           C  
ATOM    561  CD1 LEU L  78      83.861  47.782  10.319  1.00 30.62           C  
ATOM    562  CD2 LEU L  78      81.691  48.496  11.338  1.00 29.60           C  
ATOM    563  N   GLN L  79      82.249  47.471   6.293  1.00 34.86           N  
ATOM    564  CA  GLN L  79      81.630  46.547   5.356  1.00 35.39           C  
ATOM    565  C   GLN L  79      81.388  45.272   6.184  1.00 35.33           C  
ATOM    566  O   GLN L  79      82.162  45.143   7.140  1.00 35.55           O  
ATOM    567  CB  GLN L  79      82.425  46.133   4.119  1.00 36.77           C  
ATOM    568  CG  GLN L  79      82.195  46.858   2.827  1.00 39.56           C  
ATOM    569  CD  GLN L  79      81.242  46.376   1.766  1.00 41.11           C  
ATOM    570  OE1 GLN L  79      80.003  46.619   1.750  1.00 40.95           O  
ATOM    571  NE2 GLN L  79      81.803  45.711   0.726  1.00 40.95           N  
ATOM    572  N   PRO L  80      80.430  44.474   5.794  1.00 35.91           N  
ATOM    573  CA  PRO L  80      80.111  43.196   6.487  1.00 36.20           C  
ATOM    574  C   PRO L  80      81.300  42.251   6.530  1.00 36.21           C  
ATOM    575  O   PRO L  80      81.514  41.554   7.522  1.00 36.26           O  
ATOM    576  CB  PRO L  80      78.905  42.625   5.718  1.00 35.77           C  
ATOM    577  CG  PRO L  80      79.086  43.183   4.335  1.00 35.26           C  
ATOM    578  CD  PRO L  80      79.507  44.639   4.652  1.00 35.61           C  
ATOM    579  N   GLU L  81      82.082  42.229   5.477  1.00 36.65           N  
ATOM    580  CA  GLU L  81      83.286  41.437   5.295  1.00 36.92           C  
ATOM    581  C   GLU L  81      84.317  41.700   6.394  1.00 36.08           C  
ATOM    582  O   GLU L  81      85.439  41.150   6.301  1.00 36.20           O  
ATOM    583  CB  GLU L  81      84.022  41.875   4.006  1.00 39.00           C  
ATOM    584  CG  GLU L  81      83.471  41.620   2.644  1.00 42.32           C  
ATOM    585  CD  GLU L  81      82.558  42.597   1.957  1.00 44.54           C  
ATOM    586  OE1 GLU L  81      81.324  42.628   2.059  1.00 44.54           O  
ATOM    587  OE2 GLU L  81      83.225  43.367   1.192  1.00 45.60           O  
ATOM    588  N   ASP L  82      83.994  42.569   7.342  1.00 34.48           N  
ATOM    589  CA  ASP L  82      84.942  42.929   8.394  1.00 32.96           C  
ATOM    590  C   ASP L  82      84.692  42.207   9.706  1.00 32.67           C  
ATOM    591  O   ASP L  82      85.632  42.064  10.498  1.00 33.11           O  
ATOM    592  CB  ASP L  82      84.959  44.428   8.604  1.00 31.64           C  
ATOM    593  CG  ASP L  82      85.138  45.205   7.324  1.00 31.08           C  
ATOM    594  OD1 ASP L  82      85.788  44.667   6.421  1.00 30.27           O  
ATOM    595  OD2 ASP L  82      84.613  46.324   7.235  1.00 31.32           O  
ATOM    596  N   GLU L  83      83.462  41.823   9.912  1.00 32.27           N  
ATOM    597  CA  GLU L  83      83.070  41.144  11.152  1.00 31.60           C  
ATOM    598  C   GLU L  83      83.841  39.838  11.186  1.00 30.82           C  
ATOM    599  O   GLU L  83      83.367  38.878  10.594  1.00 31.04           O  
ATOM    600  CB  GLU L  83      81.595  40.817  11.258  1.00 32.12           C  
ATOM    601  CG  GLU L  83      80.656  41.933  10.791  1.00 33.41           C  
ATOM    602  CD  GLU L  83      79.271  41.463  10.454  1.00 35.16           C  
ATOM    603  OE1 GLU L  83      78.727  41.016  11.500  1.00 35.33           O  
ATOM    604  OE2 GLU L  83      78.807  41.494   9.311  1.00 35.87           O  
ATOM    605  N   THR L  84      84.922  39.923  11.885  1.00 30.00           N  
ATOM    606  CA  THR L  84      85.870  38.788  12.063  1.00 29.34           C  
ATOM    607  C   THR L  84      86.550  39.130  13.375  1.00 28.34           C  
ATOM    608  O   THR L  84      86.189  40.185  13.930  1.00 28.19           O  
ATOM    609  CB  THR L  84      86.785  38.893  10.767  1.00 30.83           C  
ATOM    610  OG1 THR L  84      87.175  37.557  10.314  1.00 31.58           O  
ATOM    611  CG2 THR L  84      88.034  39.789  10.893  1.00 30.98           C  
ATOM    612  N   ASP L  85      87.485  38.376  13.851  1.00 27.80           N  
ATOM    613  CA  ASP L  85      88.303  38.625  15.055  1.00 26.77           C  
ATOM    614  C   ASP L  85      89.585  39.310  14.530  1.00 25.41           C  
ATOM    615  O   ASP L  85      89.968  38.895  13.403  1.00 25.42           O  
ATOM    616  CB  ASP L  85      88.694  37.335  15.759  1.00 29.23           C  
ATOM    617  CG  ASP L  85      87.451  36.531  16.074  1.00 31.77           C  
ATOM    618  OD1 ASP L  85      86.504  37.171  16.590  1.00 32.77           O  
ATOM    619  OD2 ASP L  85      87.414  35.319  15.784  1.00 34.20           O  
ATOM    620  N   TYR L  86      90.123  40.224  15.288  1.00 23.32           N  
ATOM    621  CA  TYR L  86      91.332  40.998  14.894  1.00 20.98           C  
ATOM    622  C   TYR L  86      92.331  40.791  15.993  1.00 19.22           C  
ATOM    623  O   TYR L  86      91.819  40.875  17.103  1.00 18.73           O  
ATOM    624  CB  TYR L  86      90.919  42.497  14.795  1.00 21.53           C  
ATOM    625  CG  TYR L  86      90.148  42.716  13.497  1.00 22.22           C  
ATOM    626  CD1 TYR L  86      88.777  42.491  13.403  1.00 21.76           C  
ATOM    627  CD2 TYR L  86      90.854  43.103  12.345  1.00 21.94           C  
ATOM    628  CE1 TYR L  86      88.139  42.657  12.168  1.00 21.87           C  
ATOM    629  CE2 TYR L  86      90.226  43.283  11.124  1.00 21.02           C  
ATOM    630  CZ  TYR L  86      88.875  43.041  11.044  1.00 21.44           C  
ATOM    631  OH  TYR L  86      88.269  43.193   9.832  1.00 21.36           O  
ATOM    632  N   TYR L  87      93.575  40.533  15.723  1.00 18.45           N  
ATOM    633  CA  TYR L  87      94.566  40.281  16.787  1.00 17.58           C  
ATOM    634  C   TYR L  87      95.762  41.165  16.564  1.00 16.70           C  
ATOM    635  O   TYR L  87      95.975  41.271  15.379  1.00 16.83           O  
ATOM    636  CB  TYR L  87      95.132  38.794  16.719  1.00 18.01           C  
ATOM    637  CG  TYR L  87      94.088  37.832  17.279  1.00 16.46           C  
ATOM    638  CD1 TYR L  87      93.044  37.404  16.463  1.00 16.38           C  
ATOM    639  CD2 TYR L  87      94.099  37.503  18.623  1.00 14.82           C  
ATOM    640  CE1 TYR L  87      92.016  36.598  16.991  1.00 15.93           C  
ATOM    641  CE2 TYR L  87      93.086  36.719  19.136  1.00 14.96           C  
ATOM    642  CZ  TYR L  87      92.074  36.259  18.339  1.00 15.09           C  
ATOM    643  OH  TYR L  87      91.138  35.460  18.894  1.00 16.06           O  
ATOM    644  N   CYS L  88      96.423  41.658  17.524  1.00 16.99           N  
ATOM    645  CA  CYS L  88      97.625  42.496  17.408  1.00 17.58           C  
ATOM    646  C   CYS L  88      98.720  41.676  18.074  1.00 17.42           C  
ATOM    647  O   CYS L  88      98.357  40.863  18.949  1.00 17.77           O  
ATOM    648  CB  CYS L  88      97.387  43.810  18.123  1.00 20.06           C  
ATOM    649  SG  CYS L  88      97.415  43.846  19.953  1.00 24.41           S  
ATOM    650  N   ALA L  89      99.953  41.821  17.767  1.00 17.39           N  
ATOM    651  CA  ALA L  89     101.048  41.074  18.421  1.00 17.11           C  
ATOM    652  C   ALA L  89     102.330  41.881  18.369  1.00 17.41           C  
ATOM    653  O   ALA L  89     102.611  42.648  17.437  1.00 16.71           O  
ATOM    654  CB  ALA L  89     101.126  39.737  17.683  1.00 16.52           C  
ATOM    655  N   ALA L  90     103.223  41.767  19.319  1.00 18.27           N  
ATOM    656  CA  ALA L  90     104.498  42.464  19.332  1.00 19.10           C  
ATOM    657  C   ALA L  90     105.527  41.528  19.940  1.00 20.23           C  
ATOM    658  O   ALA L  90     105.138  40.640  20.690  1.00 21.69           O  
ATOM    659  CB  ALA L  90     104.473  43.696  20.249  1.00 19.20           C  
ATOM    660  N   TRP L  91     106.783  41.754  19.669  1.00 21.03           N  
ATOM    661  CA  TRP L  91     107.834  40.940  20.301  1.00 21.56           C  
ATOM    662  C   TRP L  91     108.065  41.552  21.690  1.00 22.84           C  
ATOM    663  O   TRP L  91     107.915  42.767  21.915  1.00 22.83           O  
ATOM    664  CB  TRP L  91     109.041  40.877  19.425  1.00 19.83           C  
ATOM    665  CG  TRP L  91     110.041  39.854  19.847  1.00 19.35           C  
ATOM    666  CD1 TRP L  91     111.143  40.053  20.648  1.00 19.19           C  
ATOM    667  CD2 TRP L  91     110.033  38.470  19.488  1.00 18.19           C  
ATOM    668  NE1 TRP L  91     111.814  38.875  20.801  1.00 18.93           N  
ATOM    669  CE2 TRP L  91     111.169  37.897  20.088  1.00 18.58           C  
ATOM    670  CE3 TRP L  91     109.168  37.685  18.771  1.00 18.68           C  
ATOM    671  CZ2 TRP L  91     111.479  36.551  19.970  1.00 19.22           C  
ATOM    672  CZ3 TRP L  91     109.455  36.332  18.637  1.00 20.86           C  
ATOM    673  CH2 TRP L  91     110.604  35.767  19.212  1.00 20.10           C  
ATOM    674  N   ASP L  92     108.372  40.681  22.624  1.00 24.49           N  
ATOM    675  CA  ASP L  92     108.646  41.168  24.019  1.00 25.89           C  
ATOM    676  C   ASP L  92     110.106  40.800  24.267  1.00 27.24           C  
ATOM    677  O   ASP L  92     110.458  39.620  24.317  1.00 26.77           O  
ATOM    678  CB  ASP L  92     107.603  40.648  24.960  1.00 25.42           C  
ATOM    679  CG  ASP L  92     107.645  41.262  26.343  1.00 24.84           C  
ATOM    680  OD1 ASP L  92     108.773  41.291  26.845  1.00 24.80           O  
ATOM    681  OD2 ASP L  92     106.620  41.681  26.913  1.00 24.62           O  
ATOM    682  N   ASP L  93     110.908  41.871  24.313  1.00 29.31           N  
ATOM    683  CA  ASP L  93     112.343  41.617  24.512  1.00 31.94           C  
ATOM    684  C   ASP L  93     112.675  41.334  25.982  1.00 32.47           C  
ATOM    685  O   ASP L  93     113.812  40.870  26.278  1.00 32.58           O  
ATOM    686  CB  ASP L  93     113.303  42.408  23.698  1.00 34.70           C  
ATOM    687  CG  ASP L  93     113.064  43.789  23.207  1.00 35.50           C  
ATOM    688  OD1 ASP L  93     112.973  44.696  24.079  1.00 37.16           O  
ATOM    689  OD2 ASP L  93     112.984  43.987  21.984  1.00 36.08           O  
ATOM    690  N   SER L  94     111.699  41.511  26.844  1.00 33.07           N  
ATOM    691  CA  SER L  94     111.814  41.222  28.284  1.00 33.00           C  
ATOM    692  C   SER L  94     111.694  39.695  28.462  1.00 33.58           C  
ATOM    693  O   SER L  94     112.585  39.050  29.058  1.00 34.54           O  
ATOM    694  CB  SER L  94     110.787  41.924  29.133  1.00 31.97           C  
ATOM    695  OG  SER L  94     110.616  41.186  30.334  1.00 32.11           O  
ATOM    696  N   LEU L  95     110.596  39.158  27.941  1.00 33.22           N  
ATOM    697  CA  LEU L  95     110.356  37.704  27.995  1.00 32.41           C  
ATOM    698  C   LEU L  95     111.161  37.165  26.793  1.00 32.10           C  
ATOM    699  O   LEU L  95     111.707  36.067  26.812  1.00 32.24           O  
ATOM    700  CB  LEU L  95     108.883  37.385  27.820  1.00 32.16           C  
ATOM    701  CG  LEU L  95     107.872  37.973  28.773  1.00 31.87           C  
ATOM    702  CD1 LEU L  95     106.609  37.135  28.805  1.00 32.17           C  
ATOM    703  CD2 LEU L  95     108.500  38.027  30.161  1.00 32.39           C  
ATOM    704  N   ASP L  95A    111.152  38.057  25.788  1.00 31.62           N  
ATOM    705  CA  ASP L  95A    111.828  37.680  24.549  1.00 30.56           C  
ATOM    706  C   ASP L  95A    111.029  36.582  23.834  1.00 29.44           C  
ATOM    707  O   ASP L  95A    111.693  35.648  23.352  1.00 29.83           O  
ATOM    708  CB  ASP L  95A    113.188  37.070  24.940  1.00 33.76           C  
ATOM    709  CG  ASP L  95A    113.981  36.954  23.648  1.00 37.32           C  
ATOM    710  OD1 ASP L  95A    113.924  37.930  22.866  1.00 39.88           O  
ATOM    711  OD2 ASP L  95A    114.586  35.892  23.418  1.00 39.63           O  
ATOM    712  N   VAL L  95B    109.731  36.630  23.838  1.00 27.35           N  
ATOM    713  CA  VAL L  95B    108.767  35.724  23.213  1.00 24.84           C  
ATOM    714  C   VAL L  95B    107.745  36.690  22.551  1.00 24.49           C  
ATOM    715  O   VAL L  95B    107.751  37.900  22.894  1.00 24.05           O  
ATOM    716  CB  VAL L  95B    108.065  34.762  24.167  1.00 22.83           C  
ATOM    717  CG1 VAL L  95B    108.960  33.951  25.068  1.00 21.64           C  
ATOM    718  CG2 VAL L  95B    106.994  35.457  25.014  1.00 21.65           C  
ATOM    719  N   ALA L  96     106.940  36.152  21.655  1.00 23.96           N  
ATOM    720  CA  ALA L  96     105.908  36.945  20.942  1.00 22.81           C  
ATOM    721  C   ALA L  96     104.702  36.994  21.875  1.00 22.23           C  
ATOM    722  O   ALA L  96     104.239  35.923  22.236  1.00 22.77           O  
ATOM    723  CB  ALA L  96     105.482  36.417  19.593  1.00 21.58           C  
ATOM    724  N   VAL L  97     104.293  38.185  22.170  1.00 21.97           N  
ATOM    725  CA  VAL L  97     103.156  38.502  23.017  1.00 21.75           C  
ATOM    726  C   VAL L  97     101.904  38.870  22.249  1.00 21.01           C  
ATOM    727  O   VAL L  97     101.959  39.762  21.408  1.00 21.66           O  
ATOM    728  CB  VAL L  97     103.667  39.594  23.981  1.00 22.69           C  
ATOM    729  CG1 VAL L  97     102.470  40.173  24.731  1.00 24.05           C  
ATOM    730  CG2 VAL L  97     104.691  38.957  24.912  1.00 22.52           C  
ATOM    731  N   PHE L  98     100.780  38.258  22.511  1.00 20.44           N  
ATOM    732  CA  PHE L  98      99.535  38.431  21.798  1.00 20.58           C  
ATOM    733  C   PHE L  98      98.438  39.238  22.438  1.00 20.05           C  
ATOM    734  O   PHE L  98      98.412  39.351  23.651  1.00 20.53           O  
ATOM    735  CB  PHE L  98      98.897  37.034  21.443  1.00 22.05           C  
ATOM    736  CG  PHE L  98      99.796  36.428  20.403  1.00 24.20           C  
ATOM    737  CD1 PHE L  98      99.768  36.945  19.106  1.00 25.66           C  
ATOM    738  CD2 PHE L  98     100.694  35.421  20.749  1.00 24.62           C  
ATOM    739  CE1 PHE L  98     100.653  36.414  18.130  1.00 26.59           C  
ATOM    740  CE2 PHE L  98     101.546  34.902  19.788  1.00 24.76           C  
ATOM    741  CZ  PHE L  98     101.551  35.386  18.495  1.00 25.17           C  
ATOM    742  N   GLY L  99      97.594  39.714  21.572  1.00 19.70           N  
ATOM    743  CA  GLY L  99      96.409  40.526  21.929  1.00 20.21           C  
ATOM    744  C   GLY L  99      95.329  39.492  22.231  1.00 20.24           C  
ATOM    745  O   GLY L  99      95.490  38.362  21.755  1.00 20.16           O  
ATOM    746  N   THR L 100      94.339  39.877  22.996  1.00 20.61           N  
ATOM    747  CA  THR L 100      93.282  38.936  23.399  1.00 20.61           C  
ATOM    748  C   THR L 100      92.152  38.833  22.413  1.00 21.38           C  
ATOM    749  O   THR L 100      91.241  37.987  22.640  1.00 22.35           O  
ATOM    750  CB  THR L 100      92.813  39.291  24.848  1.00 19.57           C  
ATOM    751  OG1 THR L 100      92.216  40.612  24.691  1.00 20.63           O  
ATOM    752  CG2 THR L 100      93.984  39.323  25.824  1.00 19.19           C  
ATOM    753  N   GLY L 101      92.239  39.629  21.357  1.00 21.12           N  
ATOM    754  CA  GLY L 101      91.301  39.675  20.264  1.00 20.29           C  
ATOM    755  C   GLY L 101      90.112  40.568  20.485  1.00 20.87           C  
ATOM    756  O   GLY L 101      89.577  40.784  21.585  1.00 21.31           O  
ATOM    757  N   THR L 102      89.632  41.104  19.386  1.00 21.04           N  
ATOM    758  CA  THR L 102      88.473  41.992  19.291  1.00 20.31           C  
ATOM    759  C   THR L 102      87.560  41.462  18.180  1.00 20.04           C  
ATOM    760  O   THR L 102      88.080  41.012  17.149  1.00 20.62           O  
ATOM    761  CB  THR L 102      88.883  43.490  18.955  1.00 18.64           C  
ATOM    762  OG1 THR L 102      89.814  43.858  20.002  1.00 18.76           O  
ATOM    763  CG2 THR L 102      87.688  44.445  18.826  1.00 17.22           C  
ATOM    764  N   LYS L 103      86.288  41.581  18.366  1.00 19.58           N  
ATOM    765  CA  LYS L 103      85.334  41.115  17.314  1.00 19.67           C  
ATOM    766  C   LYS L 103      84.684  42.363  16.783  1.00 19.55           C  
ATOM    767  O   LYS L 103      84.175  43.076  17.686  1.00 20.29           O  
ATOM    768  CB  LYS L 103      84.388  40.228  18.074  1.00 21.10           C  
ATOM    769  CG  LYS L 103      82.983  39.887  17.804  1.00 22.13           C  
ATOM    770  CD  LYS L 103      82.815  38.908  16.667  1.00 23.91           C  
ATOM    771  CE  LYS L 103      81.418  38.841  16.075  1.00 25.60           C  
ATOM    772  NZ  LYS L 103      81.364  39.307  14.668  1.00 26.58           N  
ATOM    773  N   VAL L 104      84.686  42.661  15.514  1.00 19.58           N  
ATOM    774  CA  VAL L 104      83.957  43.833  14.975  1.00 20.44           C  
ATOM    775  C   VAL L 104      82.606  43.349  14.408  1.00 22.12           C  
ATOM    776  O   VAL L 104      82.448  42.414  13.591  1.00 22.79           O  
ATOM    777  CB  VAL L 104      84.787  44.722  14.062  1.00 18.43           C  
ATOM    778  CG1 VAL L 104      86.274  44.489  14.260  1.00 17.76           C  
ATOM    779  CG2 VAL L 104      84.387  44.706  12.616  1.00 17.40           C  
ATOM    780  N   THR L 105      81.532  43.959  14.877  1.00 22.90           N  
ATOM    781  CA  THR L 105      80.194  43.573  14.466  1.00 24.29           C  
ATOM    782  C   THR L 105      79.596  44.695  13.625  1.00 25.07           C  
ATOM    783  O   THR L 105      79.712  45.806  14.180  1.00 25.71           O  
ATOM    784  CB  THR L 105      79.259  43.350  15.737  1.00 24.46           C  
ATOM    785  OG1 THR L 105      80.023  42.579  16.716  1.00 26.50           O  
ATOM    786  CG2 THR L 105      77.923  42.714  15.404  1.00 24.73           C  
ATOM    787  N   VAL L 106      78.989  44.414  12.492  1.00 25.45           N  
ATOM    788  CA  VAL L 106      78.345  45.491  11.726  1.00 25.68           C  
ATOM    789  C   VAL L 106      76.974  45.655  12.373  1.00 27.03           C  
ATOM    790  O   VAL L 106      75.950  45.144  11.971  1.00 28.05           O  
ATOM    791  CB  VAL L 106      78.349  45.296  10.249  1.00 24.42           C  
ATOM    792  CG1 VAL L 106      77.143  45.892   9.540  1.00 25.34           C  
ATOM    793  CG2 VAL L 106      79.602  45.892   9.627  1.00 24.23           C  
ATOM    794  N   LEU L 106A     77.039  46.352  13.455  1.00 28.45           N  
ATOM    795  CA  LEU L 106A     76.004  46.747  14.384  1.00 30.35           C  
ATOM    796  C   LEU L 106A     74.640  46.840  13.738  1.00 31.36           C  
ATOM    797  O   LEU L 106A     74.232  47.941  13.299  1.00 32.56           O  
ATOM    798  CB  LEU L 106A     76.491  48.093  14.989  1.00 30.76           C  
ATOM    799  CG  LEU L 106A     75.846  48.546  16.279  1.00 30.82           C  
ATOM    800  CD1 LEU L 106A     76.383  47.886  17.520  1.00 30.42           C  
ATOM    801  CD2 LEU L 106A     76.079  50.056  16.299  1.00 32.25           C  
ATOM    802  N   GLY L 107      73.923  45.734  13.678  1.00 31.63           N  
ATOM    803  CA  GLY L 107      72.575  45.759  13.075  1.00 31.36           C  
ATOM    804  C   GLY L 107      71.530  45.950  14.162  1.00 31.46           C  
ATOM    805  O   GLY L 107      70.379  45.502  13.882  1.00 32.22           O  
ATOM    806  N   GLN L 108      71.878  46.591  15.290  1.00 30.79           N  
ATOM    807  CA  GLN L 108      70.800  46.717  16.347  1.00 29.90           C  
ATOM    808  C   GLN L 108      71.279  47.406  17.589  1.00 28.60           C  
ATOM    809  O   GLN L 108      72.478  47.445  17.911  1.00 29.63           O  
ATOM    810  CB  GLN L 108      70.309  45.273  16.569  1.00 30.70           C  
ATOM    811  CG  GLN L 108      69.843  44.883  17.918  1.00 32.88           C  
ATOM    812  CD  GLN L 108      69.847  43.417  18.268  1.00 34.29           C  
ATOM    813  OE1 GLN L 108      69.621  42.544  17.433  1.00 34.60           O  
ATOM    814  NE2 GLN L 108      70.110  43.152  19.568  1.00 34.53           N  
ATOM    815  N   PRO L 109      70.394  47.988  18.389  1.00 27.05           N  
ATOM    816  CA  PRO L 109      70.766  48.661  19.624  1.00 26.20           C  
ATOM    817  C   PRO L 109      71.818  47.889  20.406  1.00 25.63           C  
ATOM    818  O   PRO L 109      71.537  46.727  20.703  1.00 25.87           O  
ATOM    819  CB  PRO L 109      69.479  48.570  20.463  1.00 26.08           C  
ATOM    820  CG  PRO L 109      68.385  48.557  19.444  1.00 26.60           C  
ATOM    821  CD  PRO L 109      68.947  48.035  18.144  1.00 26.74           C  
TER     822      PRO L 109                                                      
ATOM   1607  N   SER L   2     102.997  32.671   5.612  1.00 47.61           N  
ATOM   1608  CA  SER L   2     104.037  31.731   5.174  1.00 46.32           C  
ATOM   1609  C   SER L   2     105.483  32.190   5.453  1.00 44.31           C  
ATOM   1610  O   SER L   2     105.877  33.151   4.727  1.00 45.09           O  
ATOM   1611  CB  SER L   2     103.911  31.401   3.672  1.00 47.56           C  
ATOM   1612  OG  SER L   2     102.692  30.702   3.373  1.00 48.92           O  
ATOM   1613  N   VAL L   3     106.273  31.606   6.339  1.00 41.35           N  
ATOM   1614  CA  VAL L   3     107.637  32.028   6.634  1.00 39.00           C  
ATOM   1615  C   VAL L   3     108.536  31.010   7.343  1.00 37.36           C  
ATOM   1616  O   VAL L   3     109.665  30.834   6.843  1.00 37.37           O  
ATOM   1617  CB  VAL L   3     107.769  33.388   7.371  1.00 38.60           C  
ATOM   1618  CG1 VAL L   3     109.139  34.014   7.146  1.00 38.11           C  
ATOM   1619  CG2 VAL L   3     106.703  34.390   7.036  1.00 39.16           C  
ATOM   1620  N   LEU L   4     108.204  30.438   8.461  1.00 35.40           N  
ATOM   1621  CA  LEU L   4     109.002  29.391   9.177  1.00 33.41           C  
ATOM   1622  C   LEU L   4     108.252  28.075   8.909  1.00 32.42           C  
ATOM   1623  O   LEU L   4     107.205  27.769   9.477  1.00 32.96           O  
ATOM   1624  CB  LEU L   4     109.093  29.872  10.600  1.00 31.97           C  
ATOM   1625  CG  LEU L   4     110.340  29.699  11.424  1.00 29.67           C  
ATOM   1626  CD1 LEU L   4     111.544  30.220  10.668  1.00 29.83           C  
ATOM   1627  CD2 LEU L   4     110.177  30.501  12.704  1.00 29.01           C  
ATOM   1628  N   THR L   5     108.684  27.268   8.013  1.00 31.58           N  
ATOM   1629  CA  THR L   5     108.094  26.081   7.492  1.00 31.29           C  
ATOM   1630  C   THR L   5     107.784  24.913   8.369  1.00 32.14           C  
ATOM   1631  O   THR L   5     108.644  24.088   8.756  1.00 33.02           O  
ATOM   1632  CB  THR L   5     108.900  25.616   6.191  1.00 29.86           C  
ATOM   1633  OG1 THR L   5     109.022  26.832   5.393  1.00 30.34           O  
ATOM   1634  CG2 THR L   5     108.213  24.467   5.494  1.00 29.43           C  
ATOM   1635  N   GLN L   6     106.497  24.730   8.571  1.00 32.36           N  
ATOM   1636  CA  GLN L   6     105.875  23.688   9.379  1.00 32.73           C  
ATOM   1637  C   GLN L   6     104.991  22.781   8.510  1.00 33.73           C  
ATOM   1638  O   GLN L   6     104.396  23.325   7.552  1.00 34.01           O  
ATOM   1639  CB  GLN L   6     104.957  24.356  10.452  1.00 30.84           C  
ATOM   1640  CG  GLN L   6     105.620  25.074  11.581  1.00 28.48           C  
ATOM   1641  CD  GLN L   6     104.635  25.523  12.620  1.00 28.30           C  
ATOM   1642  OE1 GLN L   6     104.342  26.689  12.897  1.00 28.12           O  
ATOM   1643  NE2 GLN L   6     104.085  24.535  13.286  1.00 28.12           N  
ATOM   1644  N   PRO L   7     104.889  21.512   8.887  1.00 34.47           N  
ATOM   1645  CA  PRO L   7     104.000  20.524   8.222  1.00 34.59           C  
ATOM   1646  C   PRO L   7     102.606  21.108   8.495  1.00 35.00           C  
ATOM   1647  O   PRO L   7     102.402  21.528   9.646  1.00 35.64           O  
ATOM   1648  CB  PRO L   7     104.165  19.257   9.022  1.00 34.58           C  
ATOM   1649  CG  PRO L   7     105.461  19.395   9.780  1.00 34.85           C  
ATOM   1650  CD  PRO L   7     105.556  20.892  10.055  1.00 34.98           C  
ATOM   1651  N   PRO L   8     101.745  21.130   7.521  1.00 35.17           N  
ATOM   1652  CA  PRO L   8     100.414  21.707   7.629  1.00 34.95           C  
ATOM   1653  C   PRO L   8      99.395  20.994   8.484  1.00 34.38           C  
ATOM   1654  O   PRO L   8      98.364  21.629   8.725  1.00 33.58           O  
ATOM   1655  CB  PRO L   8      99.851  21.720   6.205  1.00 35.36           C  
ATOM   1656  CG  PRO L   8     100.675  20.689   5.483  1.00 35.97           C  
ATOM   1657  CD  PRO L   8     102.041  20.596   6.174  1.00 35.43           C  
ATOM   1658  N   SER L   9      99.697  19.772   8.812  1.00 34.86           N  
ATOM   1659  CA  SER L   9      98.864  18.909   9.626  1.00 35.86           C  
ATOM   1660  C   SER L   9      99.642  17.706  10.160  1.00 36.40           C  
ATOM   1661  O   SER L   9     100.631  17.326   9.535  1.00 36.85           O  
ATOM   1662  CB  SER L   9      97.730  18.269   8.806  1.00 36.40           C  
ATOM   1663  OG  SER L   9      96.936  17.497   9.741  1.00 38.29           O  
ATOM   1664  N   ALA L  11      99.129  17.136  11.220  1.00 36.77           N  
ATOM   1665  CA  ALA L  11      99.652  15.916  11.855  1.00 37.15           C  
ATOM   1666  C   ALA L  11      98.414  15.224  12.468  1.00 37.80           C  
ATOM   1667  O   ALA L  11      97.481  15.889  12.934  1.00 38.45           O  
ATOM   1668  CB  ALA L  11     100.708  16.100  12.889  1.00 36.07           C  
ATOM   1669  N   SER L  12      98.428  13.926  12.414  1.00 38.14           N  
ATOM   1670  CA  SER L  12      97.324  13.093  12.923  1.00 38.01           C  
ATOM   1671  C   SER L  12      97.863  12.078  13.931  1.00 38.25           C  
ATOM   1672  O   SER L  12      99.043  11.654  13.884  1.00 38.29           O  
ATOM   1673  CB  SER L  12      96.731  12.399  11.721  1.00 38.59           C  
ATOM   1674  OG  SER L  12      95.413  11.987  11.911  1.00 40.99           O  
ATOM   1675  N   GLY L  13      96.948  11.717  14.830  1.00 38.11           N  
ATOM   1676  CA  GLY L  13      97.206  10.752  15.900  1.00 37.54           C  
ATOM   1677  C   GLY L  13      95.912  10.128  16.431  1.00 37.13           C  
ATOM   1678  O   GLY L  13      94.873  10.154  15.779  1.00 36.67           O  
ATOM   1679  N   THR L  14      96.068   9.587  17.609  1.00 36.71           N  
ATOM   1680  CA  THR L  14      95.098   8.883  18.437  1.00 36.61           C  
ATOM   1681  C   THR L  14      95.509   9.071  19.895  1.00 36.73           C  
ATOM   1682  O   THR L  14      96.728   9.177  20.176  1.00 37.59           O  
ATOM   1683  CB  THR L  14      95.164   7.321  18.110  1.00 36.08           C  
ATOM   1684  OG1 THR L  14      95.129   7.260  16.655  1.00 36.05           O  
ATOM   1685  CG2 THR L  14      94.085   6.477  18.774  1.00 35.53           C  
ATOM   1686  N   PRO L  15      94.564   9.092  20.802  1.00 36.42           N  
ATOM   1687  CA  PRO L  15      94.961   9.283  22.220  1.00 36.14           C  
ATOM   1688  C   PRO L  15      96.108   8.311  22.448  1.00 36.14           C  
ATOM   1689  O   PRO L  15      96.032   7.186  21.927  1.00 35.93           O  
ATOM   1690  CB  PRO L  15      93.692   9.071  22.979  1.00 36.15           C  
ATOM   1691  CG  PRO L  15      92.569   9.403  21.999  1.00 36.52           C  
ATOM   1692  CD  PRO L  15      93.105   8.972  20.629  1.00 36.50           C  
ATOM   1693  N   GLY L  16      97.178   8.753  23.081  1.00 35.99           N  
ATOM   1694  CA  GLY L  16      98.339   7.999  23.430  1.00 35.84           C  
ATOM   1695  C   GLY L  16      99.487   7.772  22.500  1.00 36.13           C  
ATOM   1696  O   GLY L  16     100.542   7.216  22.934  1.00 35.07           O  
ATOM   1697  N   GLN L  17      99.336   8.157  21.237  1.00 36.91           N  
ATOM   1698  CA  GLN L  17     100.458   7.949  20.296  1.00 38.73           C  
ATOM   1699  C   GLN L  17     101.636   8.828  20.737  1.00 39.52           C  
ATOM   1700  O   GLN L  17     102.012   8.955  21.926  1.00 40.39           O  
ATOM   1701  CB  GLN L  17     100.111   8.166  18.849  1.00 40.38           C  
ATOM   1702  CG  GLN L  17      99.714   6.945  18.044  1.00 42.91           C  
ATOM   1703  CD  GLN L  17      99.388   7.307  16.607  1.00 44.71           C  
ATOM   1704  OE1 GLN L  17      98.246   7.263  16.154  1.00 46.10           O  
ATOM   1705  NE2 GLN L  17     100.420   7.694  15.846  1.00 45.54           N  
ATOM   1706  N   ARG L  18     102.252   9.404  19.728  1.00 39.28           N  
ATOM   1707  CA  ARG L  18     103.404  10.310  19.866  1.00 38.59           C  
ATOM   1708  C   ARG L  18     103.430  11.044  18.511  1.00 37.17           C  
ATOM   1709  O   ARG L  18     103.292  10.342  17.491  1.00 37.24           O  
ATOM   1710  CB  ARG L  18     104.725   9.673  20.171  1.00 40.29           C  
ATOM   1711  CG  ARG L  18     105.861  10.656  20.467  1.00 42.73           C  
ATOM   1712  CD  ARG L  18     107.158   9.937  20.371  1.00 45.72           C  
ATOM   1713  NE  ARG L  18     107.659   9.217  21.479  1.00 47.89           N  
ATOM   1714  CZ  ARG L  18     107.503   8.109  22.171  1.00 48.35           C  
ATOM   1715  NH1 ARG L  18     106.585   7.168  21.933  1.00 48.46           N  
ATOM   1716  NH2 ARG L  18     108.345   7.876  23.209  1.00 47.98           N  
ATOM   1717  N   VAL L  19     103.491  12.351  18.631  1.00 35.20           N  
ATOM   1718  CA  VAL L  19     103.491  13.219  17.453  1.00 33.47           C  
ATOM   1719  C   VAL L  19     104.618  14.227  17.617  1.00 32.17           C  
ATOM   1720  O   VAL L  19     105.003  14.570  18.729  1.00 31.62           O  
ATOM   1721  CB  VAL L  19     102.102  13.814  17.223  1.00 34.17           C  
ATOM   1722  CG1 VAL L  19     101.998  15.315  17.479  1.00 33.96           C  
ATOM   1723  CG2 VAL L  19     101.610  13.435  15.832  1.00 34.90           C  
ATOM   1724  N   THR L  20     105.103  14.657  16.486  1.00 31.19           N  
ATOM   1725  CA  THR L  20     106.214  15.584  16.429  1.00 31.04           C  
ATOM   1726  C   THR L  20     106.015  16.629  15.364  1.00 30.80           C  
ATOM   1727  O   THR L  20     106.135  16.246  14.187  1.00 31.52           O  
ATOM   1728  CB  THR L  20     107.538  14.782  16.078  1.00 31.67           C  
ATOM   1729  OG1 THR L  20     107.555  13.825  17.176  1.00 32.53           O  
ATOM   1730  CG2 THR L  20     108.783  15.655  15.939  1.00 32.15           C  
ATOM   1731  N   ILE L  21     105.785  17.858  15.842  1.00 29.90           N  
ATOM   1732  CA  ILE L  21     105.602  18.952  14.878  1.00 28.37           C  
ATOM   1733  C   ILE L  21     106.975  19.478  14.471  1.00 28.12           C  
ATOM   1734  O   ILE L  21     107.833  19.775  15.340  1.00 27.96           O  
ATOM   1735  CB  ILE L  21     104.578  19.999  15.374  1.00 26.59           C  
ATOM   1736  CG1 ILE L  21     103.260  19.378  15.838  1.00 25.98           C  
ATOM   1737  CG2 ILE L  21     104.355  20.972  14.167  1.00 27.55           C  
ATOM   1738  CD1 ILE L  21     103.078  19.229  17.368  1.00 25.35           C  
ATOM   1739  N   SER L  22     107.217  19.555  13.159  1.00 28.02           N  
ATOM   1740  CA  SER L  22     108.518  20.037  12.718  1.00 27.42           C  
ATOM   1741  C   SER L  22     108.586  21.538  12.486  1.00 26.60           C  
ATOM   1742  O   SER L  22     107.534  22.171  12.372  1.00 26.39           O  
ATOM   1743  CB  SER L  22     109.087  19.288  11.543  1.00 28.68           C  
ATOM   1744  OG  SER L  22     110.512  19.516  11.753  1.00 32.77           O  
ATOM   1745  N   CYS L  23     109.812  22.052  12.457  1.00 25.60           N  
ATOM   1746  CA  CYS L  23     109.921  23.521  12.263  1.00 25.34           C  
ATOM   1747  C   CYS L  23     111.246  23.903  11.641  1.00 25.10           C  
ATOM   1748  O   CYS L  23     112.306  23.984  12.265  1.00 24.57           O  
ATOM   1749  CB  CYS L  23     109.607  24.173  13.607  1.00 25.00           C  
ATOM   1750  SG  CYS L  23     109.797  25.985  13.504  1.00 25.39           S  
ATOM   1751  N   SER L  24     111.197  24.185  10.359  1.00 25.21           N  
ATOM   1752  CA  SER L  24     112.346  24.485   9.496  1.00 25.55           C  
ATOM   1753  C   SER L  24     112.655  25.907   9.124  1.00 25.85           C  
ATOM   1754  O   SER L  24     111.921  26.663   8.436  1.00 25.07           O  
ATOM   1755  CB  SER L  24     112.067  23.627   8.238  1.00 26.10           C  
ATOM   1756  OG  SER L  24     113.132  23.558   7.341  1.00 27.31           O  
ATOM   1757  N   GLY L  25     113.869  26.325   9.535  1.00 26.59           N  
ATOM   1758  CA  GLY L  25     114.284  27.710   9.204  1.00 27.75           C  
ATOM   1759  C   GLY L  25     115.495  27.849   8.274  1.00 28.18           C  
ATOM   1760  O   GLY L  25     115.805  27.069   7.354  1.00 28.43           O  
ATOM   1761  N   SER L  26     116.160  28.960   8.590  1.00 28.20           N  
ATOM   1762  CA  SER L  26     117.430  29.429   8.043  1.00 27.75           C  
ATOM   1763  C   SER L  26     118.386  29.809   9.164  1.00 27.23           C  
ATOM   1764  O   SER L  26     118.116  29.973  10.381  1.00 27.54           O  
ATOM   1765  CB  SER L  26     117.211  30.430   6.954  1.00 28.21           C  
ATOM   1766  OG  SER L  26     118.060  29.949   5.884  1.00 30.90           O  
ATOM   1767  N   SER L  27     119.649  29.910   8.873  1.00 26.88           N  
ATOM   1768  CA  SER L  27     120.700  30.218   9.851  1.00 26.16           C  
ATOM   1769  C   SER L  27     120.463  31.437  10.705  1.00 25.04           C  
ATOM   1770  O   SER L  27     120.896  31.365  11.867  1.00 25.40           O  
ATOM   1771  CB  SER L  27     122.086  30.286   9.193  1.00 26.75           C  
ATOM   1772  OG  SER L  27     121.978  30.245   7.755  1.00 28.20           O  
ATOM   1773  N   SER L  27A    119.888  32.482  10.230  1.00 24.25           N  
ATOM   1774  CA  SER L  27A    119.650  33.763  10.837  1.00 23.88           C  
ATOM   1775  C   SER L  27A    118.511  33.857  11.815  1.00 24.65           C  
ATOM   1776  O   SER L  27A    118.433  34.858  12.559  1.00 24.49           O  
ATOM   1777  CB  SER L  27A    119.519  34.820   9.764  1.00 24.32           C  
ATOM   1778  OG  SER L  27A    118.538  34.544   8.805  1.00 23.16           O  
ATOM   1779  N   ASN L  27B    117.667  32.853  11.805  1.00 25.55           N  
ATOM   1780  CA  ASN L  27B    116.514  32.683  12.692  1.00 26.06           C  
ATOM   1781  C   ASN L  27B    116.764  31.390  13.495  1.00 27.39           C  
ATOM   1782  O   ASN L  27B    117.519  31.417  14.486  1.00 27.64           O  
ATOM   1783  CB  ASN L  27B    115.156  32.740  12.057  1.00 25.66           C  
ATOM   1784  CG  ASN L  27B    114.960  32.084  10.719  1.00 26.10           C  
ATOM   1785  OD1 ASN L  27B    115.216  30.871  10.573  1.00 26.59           O  
ATOM   1786  ND2 ASN L  27B    114.521  32.820   9.681  1.00 25.21           N  
ATOM   1787  N   ILE L  28     116.164  30.272  13.072  1.00 28.37           N  
ATOM   1788  CA  ILE L  28     116.325  29.002  13.798  1.00 28.26           C  
ATOM   1789  C   ILE L  28     117.784  28.750  14.104  1.00 28.39           C  
ATOM   1790  O   ILE L  28     118.103  28.703  15.310  1.00 28.68           O  
ATOM   1791  CB  ILE L  28     115.568  27.827  13.147  1.00 28.77           C  
ATOM   1792  CG1 ILE L  28     114.053  28.181  13.081  1.00 28.38           C  
ATOM   1793  CG2 ILE L  28     115.793  26.493  13.936  1.00 28.74           C  
ATOM   1794  CD1 ILE L  28     113.151  26.916  12.945  1.00 27.98           C  
ATOM   1795  N   GLY L  29     118.634  28.657  13.094  1.00 28.23           N  
ATOM   1796  CA  GLY L  29     120.063  28.473  13.332  1.00 27.75           C  
ATOM   1797  C   GLY L  29     120.645  29.301  14.448  1.00 27.80           C  
ATOM   1798  O   GLY L  29     121.325  28.817  15.376  1.00 27.75           O  
ATOM   1799  N   GLU L  30     120.464  30.609  14.432  1.00 28.57           N  
ATOM   1800  CA  GLU L  30     120.998  31.565  15.395  1.00 28.94           C  
ATOM   1801  C   GLU L  30     120.170  31.989  16.578  1.00 28.38           C  
ATOM   1802  O   GLU L  30     120.906  32.233  17.589  1.00 29.47           O  
ATOM   1803  CB  GLU L  30     121.492  32.877  14.793  1.00 31.05           C  
ATOM   1804  CG  GLU L  30     122.969  33.025  14.328  1.00 33.93           C  
ATOM   1805  CD  GLU L  30     123.259  34.509  14.130  1.00 36.11           C  
ATOM   1806  OE1 GLU L  30     122.989  35.144  15.203  1.00 37.75           O  
ATOM   1807  OE2 GLU L  30     123.612  35.058  13.099  1.00 37.04           O  
ATOM   1808  N   ASN L  31     118.869  32.143  16.609  1.00 26.97           N  
ATOM   1809  CA  ASN L  31     118.217  32.564  17.896  1.00 25.78           C  
ATOM   1810  C   ASN L  31     117.468  31.379  18.457  1.00 24.90           C  
ATOM   1811  O   ASN L  31     117.582  30.298  17.855  1.00 24.57           O  
ATOM   1812  CB  ASN L  31     117.472  33.859  17.659  1.00 25.98           C  
ATOM   1813  CG  ASN L  31     118.256  34.735  16.692  1.00 25.76           C  
ATOM   1814  OD1 ASN L  31     119.344  35.174  17.041  1.00 25.93           O  
ATOM   1815  ND2 ASN L  31     117.742  34.941  15.504  1.00 26.31           N  
ATOM   1816  N   SER L  32     116.760  31.512  19.572  1.00 24.39           N  
ATOM   1817  CA  SER L  32     116.032  30.335  20.107  1.00 23.34           C  
ATOM   1818  C   SER L  32     114.625  30.258  19.530  1.00 22.67           C  
ATOM   1819  O   SER L  32     114.055  31.248  19.051  1.00 22.79           O  
ATOM   1820  CB  SER L  32     116.063  30.209  21.598  1.00 23.53           C  
ATOM   1821  OG  SER L  32     115.838  31.433  22.218  1.00 23.77           O  
ATOM   1822  N   VAL L  33     114.107  29.040  19.540  1.00 21.66           N  
ATOM   1823  CA  VAL L  33     112.764  28.781  18.997  1.00 21.08           C  
ATOM   1824  C   VAL L  33     111.818  28.697  20.192  1.00 21.06           C  
ATOM   1825  O   VAL L  33     112.151  28.080  21.195  1.00 21.92           O  
ATOM   1826  CB  VAL L  33     112.736  27.473  18.189  1.00 19.51           C  
ATOM   1827  CG1 VAL L  33     111.401  27.298  17.507  1.00 18.80           C  
ATOM   1828  CG2 VAL L  33     113.893  27.403  17.252  1.00 18.69           C  
ATOM   1829  N   THR L  34     110.689  29.229  20.042  1.00 20.88           N  
ATOM   1830  CA  THR L  34     109.527  29.431  20.904  1.00 19.89           C  
ATOM   1831  C   THR L  34     108.326  28.715  20.352  1.00 18.77           C  
ATOM   1832  O   THR L  34     108.112  28.780  19.106  1.00 18.48           O  
ATOM   1833  CB  THR L  34     109.409  31.018  20.650  1.00 20.81           C  
ATOM   1834  OG1 THR L  34     109.391  31.630  21.926  1.00 23.84           O  
ATOM   1835  CG2 THR L  34     108.273  31.403  19.720  1.00 22.42           C  
ATOM   1836  N   TRP L  35     107.507  28.014  21.101  1.00 17.91           N  
ATOM   1837  CA  TRP L  35     106.357  27.350  20.397  1.00 17.28           C  
ATOM   1838  C   TRP L  35     105.074  27.790  21.052  1.00 17.89           C  
ATOM   1839  O   TRP L  35     105.122  27.874  22.293  1.00 18.19           O  
ATOM   1840  CB  TRP L  35     106.500  25.856  20.459  1.00 15.19           C  
ATOM   1841  CG  TRP L  35     107.476  25.142  19.621  1.00 12.98           C  
ATOM   1842  CD1 TRP L  35     108.782  24.870  19.910  1.00 12.62           C  
ATOM   1843  CD2 TRP L  35     107.237  24.601  18.301  1.00 11.80           C  
ATOM   1844  NE1 TRP L  35     109.352  24.177  18.865  1.00 12.34           N  
ATOM   1845  CE2 TRP L  35     108.420  24.003  17.877  1.00 11.35           C  
ATOM   1846  CE3 TRP L  35     106.124  24.561  17.479  1.00 11.74           C  
ATOM   1847  CZ2 TRP L  35     108.516  23.344  16.664  1.00 11.73           C  
ATOM   1848  CZ3 TRP L  35     106.196  23.934  16.256  1.00 11.17           C  
ATOM   1849  CH2 TRP L  35     107.386  23.352  15.860  1.00 11.38           C  
ATOM   1850  N   TYR L  36     104.034  27.986  20.284  1.00 19.00           N  
ATOM   1851  CA  TYR L  36     102.731  28.409  20.816  1.00 20.60           C  
ATOM   1852  C   TYR L  36     101.621  27.431  20.450  1.00 21.61           C  
ATOM   1853  O   TYR L  36     101.642  26.858  19.363  1.00 21.39           O  
ATOM   1854  CB  TYR L  36     102.290  29.811  20.242  1.00 20.29           C  
ATOM   1855  CG  TYR L  36     103.384  30.845  20.440  1.00 21.24           C  
ATOM   1856  CD1 TYR L  36     104.509  30.801  19.616  1.00 21.45           C  
ATOM   1857  CD2 TYR L  36     103.348  31.830  21.424  1.00 21.34           C  
ATOM   1858  CE1 TYR L  36     105.552  31.680  19.729  1.00 21.00           C  
ATOM   1859  CE2 TYR L  36     104.378  32.744  21.563  1.00 21.40           C  
ATOM   1860  CZ  TYR L  36     105.452  32.635  20.702  1.00 22.10           C  
ATOM   1861  OH  TYR L  36     106.522  33.467  20.819  1.00 26.25           O  
ATOM   1862  N   GLN L  37     100.669  27.322  21.338  1.00 23.37           N  
ATOM   1863  CA  GLN L  37      99.491  26.478  21.078  1.00 26.84           C  
ATOM   1864  C   GLN L  37      98.312  27.346  20.705  1.00 29.27           C  
ATOM   1865  O   GLN L  37      98.007  28.353  21.400  1.00 29.56           O  
ATOM   1866  CB  GLN L  37      99.224  25.643  22.309  1.00 27.59           C  
ATOM   1867  CG  GLN L  37      97.946  24.836  22.300  1.00 28.61           C  
ATOM   1868  CD  GLN L  37      97.959  23.891  23.498  1.00 30.13           C  
ATOM   1869  OE1 GLN L  37      98.014  24.283  24.662  1.00 30.10           O  
ATOM   1870  NE2 GLN L  37      97.943  22.592  23.159  1.00 31.16           N  
ATOM   1871  N   HIS L  38      97.563  27.037  19.654  1.00 31.93           N  
ATOM   1872  CA  HIS L  38      96.406  27.976  19.439  1.00 35.07           C  
ATOM   1873  C   HIS L  38      95.061  27.315  19.424  1.00 37.27           C  
ATOM   1874  O   HIS L  38      94.851  26.285  18.746  1.00 37.63           O  
ATOM   1875  CB  HIS L  38      96.709  28.830  18.196  1.00 35.24           C  
ATOM   1876  CG  HIS L  38      95.638  29.859  18.009  1.00 35.78           C  
ATOM   1877  ND1 HIS L  38      94.910  30.019  16.856  1.00 35.62           N  
ATOM   1878  CD2 HIS L  38      95.187  30.761  18.915  1.00 36.44           C  
ATOM   1879  CE1 HIS L  38      94.046  31.002  17.075  1.00 36.64           C  
ATOM   1880  NE2 HIS L  38      94.185  31.483  18.302  1.00 36.97           N  
ATOM   1881  N   LEU L  39      94.066  27.836  20.139  1.00 39.81           N  
ATOM   1882  CA  LEU L  39      92.694  27.245  20.138  1.00 41.94           C  
ATOM   1883  C   LEU L  39      91.719  28.116  19.394  1.00 42.88           C  
ATOM   1884  O   LEU L  39      91.215  29.060  20.033  1.00 43.38           O  
ATOM   1885  CB  LEU L  39      92.293  27.086  21.625  1.00 43.37           C  
ATOM   1886  CG  LEU L  39      93.440  26.230  22.243  1.00 45.20           C  
ATOM   1887  CD1 LEU L  39      94.289  27.121  23.122  1.00 45.93           C  
ATOM   1888  CD2 LEU L  39      92.780  25.016  22.857  1.00 45.80           C  
ATOM   1889  N   SER L  40      91.509  27.812  18.131  1.00 43.84           N  
ATOM   1890  CA  SER L  40      90.604  28.657  17.302  1.00 44.67           C  
ATOM   1891  C   SER L  40      89.717  29.518  18.209  1.00 44.14           C  
ATOM   1892  O   SER L  40      88.818  29.006  18.905  1.00 44.25           O  
ATOM   1893  CB  SER L  40      89.841  27.808  16.296  1.00 46.33           C  
ATOM   1894  OG  SER L  40      88.531  28.371  16.081  1.00 48.30           O  
ATOM   1895  N   GLY L  41      90.002  30.814  18.197  1.00 43.39           N  
ATOM   1896  CA  GLY L  41      89.295  31.802  18.989  1.00 42.29           C  
ATOM   1897  C   GLY L  41      89.776  31.932  20.418  1.00 41.62           C  
ATOM   1898  O   GLY L  41      88.938  31.909  21.350  1.00 41.60           O  
ATOM   1899  N   THR L  42      91.100  32.106  20.634  1.00 40.79           N  
ATOM   1900  CA  THR L  42      91.590  32.261  21.998  1.00 39.11           C  
ATOM   1901  C   THR L  42      92.685  33.306  22.147  1.00 37.79           C  
ATOM   1902  O   THR L  42      92.522  34.245  22.947  1.00 38.15           O  
ATOM   1903  CB  THR L  42      92.107  30.980  22.759  1.00 39.95           C  
ATOM   1904  OG1 THR L  42      92.779  30.055  21.846  1.00 40.72           O  
ATOM   1905  CG2 THR L  42      91.045  30.316  23.631  1.00 40.82           C  
ATOM   1906  N   ALA L  43      93.756  33.063  21.442  1.00 36.19           N  
ATOM   1907  CA  ALA L  43      94.985  33.891  21.517  1.00 34.51           C  
ATOM   1908  C   ALA L  43      96.030  32.809  21.900  1.00 33.22           C  
ATOM   1909  O   ALA L  43      95.746  32.118  22.907  1.00 33.47           O  
ATOM   1910  CB  ALA L  43      95.003  34.887  22.671  1.00 33.70           C  
ATOM   1911  N   PRO L  44      97.089  32.752  21.119  1.00 31.35           N  
ATOM   1912  CA  PRO L  44      98.112  31.735  21.371  1.00 29.63           C  
ATOM   1913  C   PRO L  44      98.676  31.793  22.769  1.00 27.91           C  
ATOM   1914  O   PRO L  44      98.989  32.906  23.209  1.00 28.00           O  
ATOM   1915  CB  PRO L  44      99.141  32.028  20.267  1.00 29.67           C  
ATOM   1916  CG  PRO L  44      98.378  32.656  19.154  1.00 29.58           C  
ATOM   1917  CD  PRO L  44      97.375  33.534  19.917  1.00 30.66           C  
ATOM   1918  N   LYS L  45      98.824  30.651  23.423  1.00 26.52           N  
ATOM   1919  CA  LYS L  45      99.486  30.565  24.732  1.00 25.13           C  
ATOM   1920  C   LYS L  45     100.899  29.978  24.473  1.00 22.76           C  
ATOM   1921  O   LYS L  45     101.087  29.113  23.640  1.00 21.80           O  
ATOM   1922  CB  LYS L  45      98.772  29.844  25.823  1.00 28.27           C  
ATOM   1923  CG  LYS L  45      99.184  30.242  27.281  1.00 30.84           C  
ATOM   1924  CD  LYS L  45      99.840  29.139  28.097  1.00 32.39           C  
ATOM   1925  CE  LYS L  45      99.156  27.812  28.341  1.00 32.98           C  
ATOM   1926  NZ  LYS L  45      99.395  26.725  27.332  1.00 32.07           N  
ATOM   1927  N   LEU L  46     101.871  30.507  25.147  1.00 21.23           N  
ATOM   1928  CA  LEU L  46     103.292  30.097  25.003  1.00 20.74           C  
ATOM   1929  C   LEU L  46     103.297  28.651  25.507  1.00 20.76           C  
ATOM   1930  O   LEU L  46     102.627  28.485  26.531  1.00 20.84           O  
ATOM   1931  CB  LEU L  46     104.168  31.089  25.733  1.00 18.62           C  
ATOM   1932  CG  LEU L  46     105.622  31.338  25.803  1.00 16.09           C  
ATOM   1933  CD1 LEU L  46     106.302  31.048  27.138  1.00 14.86           C  
ATOM   1934  CD2 LEU L  46     106.289  30.469  24.744  1.00 16.33           C  
ATOM   1935  N   LEU L  47     103.998  27.777  24.847  1.00 20.91           N  
ATOM   1936  CA  LEU L  47     104.117  26.355  25.216  1.00 20.89           C  
ATOM   1937  C   LEU L  47     105.577  26.075  25.577  1.00 21.08           C  
ATOM   1938  O   LEU L  47     105.804  25.564  26.703  1.00 21.23           O  
ATOM   1939  CB  LEU L  47     103.516  25.477  24.171  1.00 21.55           C  
ATOM   1940  CG  LEU L  47     103.196  24.024  24.367  1.00 22.25           C  
ATOM   1941  CD1 LEU L  47     101.929  23.809  25.217  1.00 22.18           C  
ATOM   1942  CD2 LEU L  47     102.925  23.423  22.983  1.00 21.88           C  
ATOM   1943  N   ILE L  48     106.535  26.416  24.723  1.00 20.96           N  
ATOM   1944  CA  ILE L  48     107.951  26.191  25.095  1.00 20.65           C  
ATOM   1945  C   ILE L  48     108.781  27.424  24.793  1.00 20.27           C  
ATOM   1946  O   ILE L  48     108.399  28.077  23.810  1.00 20.93           O  
ATOM   1947  CB  ILE L  48     108.587  25.012  24.291  1.00 21.18           C  
ATOM   1948  CG1 ILE L  48     108.469  23.660  25.025  1.00 20.04           C  
ATOM   1949  CG2 ILE L  48     110.041  25.426  23.906  1.00 21.59           C  
ATOM   1950  CD1 ILE L  48     107.314  22.805  24.409  1.00 20.13           C  
ATOM   1951  N   TYR L  49     109.821  27.699  25.494  1.00 20.59           N  
ATOM   1952  CA  TYR L  49     110.669  28.878  25.185  1.00 22.16           C  
ATOM   1953  C   TYR L  49     112.113  28.382  25.253  1.00 23.86           C  
ATOM   1954  O   TYR L  49     112.289  27.230  25.722  1.00 24.41           O  
ATOM   1955  CB  TYR L  49     110.376  30.110  26.057  1.00 22.17           C  
ATOM   1956  CG  TYR L  49     110.633  29.922  27.542  1.00 21.65           C  
ATOM   1957  CD1 TYR L  49     111.897  30.161  28.120  1.00 21.99           C  
ATOM   1958  CD2 TYR L  49     109.590  29.464  28.359  1.00 20.77           C  
ATOM   1959  CE1 TYR L  49     112.136  29.913  29.476  1.00 21.52           C  
ATOM   1960  CE2 TYR L  49     109.815  29.215  29.699  1.00 21.19           C  
ATOM   1961  CZ  TYR L  49     111.084  29.430  30.255  1.00 21.48           C  
ATOM   1962  OH  TYR L  49     111.261  29.200  31.593  1.00 21.39           O  
ATOM   1963  N   GLU L  50     113.079  29.162  24.799  1.00 24.89           N  
ATOM   1964  CA  GLU L  50     114.497  28.847  24.807  1.00 25.47           C  
ATOM   1965  C   GLU L  50     114.785  27.489  24.197  1.00 25.51           C  
ATOM   1966  O   GLU L  50     115.656  26.725  24.630  1.00 25.95           O  
ATOM   1967  CB  GLU L  50     115.151  28.834  26.189  1.00 26.84           C  
ATOM   1968  CG  GLU L  50     115.792  30.121  26.653  1.00 30.98           C  
ATOM   1969  CD  GLU L  50     116.526  31.004  25.685  1.00 33.20           C  
ATOM   1970  OE1 GLU L  50     117.348  30.656  24.832  1.00 34.42           O  
ATOM   1971  OE2 GLU L  50     116.288  32.262  25.807  1.00 34.82           O  
ATOM   1972  N   ASP L  51     114.049  27.206  23.181  1.00 25.85           N  
ATOM   1973  CA  ASP L  51     114.044  26.010  22.391  1.00 26.05           C  
ATOM   1974  C   ASP L  51     113.472  24.825  23.178  1.00 26.77           C  
ATOM   1975  O   ASP L  51     112.677  24.081  22.563  1.00 27.20           O  
ATOM   1976  CB  ASP L  51     115.391  25.596  21.835  1.00 25.98           C  
ATOM   1977  CG  ASP L  51     116.365  26.689  21.514  1.00 25.61           C  
ATOM   1978  OD1 ASP L  51     116.231  27.336  20.483  1.00 24.60           O  
ATOM   1979  OD2 ASP L  51     117.304  26.898  22.292  1.00 27.11           O  
ATOM   1980  N   ASN L  52     113.902  24.696  24.413  1.00 27.27           N  
ATOM   1981  CA  ASN L  52     113.544  23.520  25.222  1.00 27.60           C  
ATOM   1982  C   ASN L  52     112.745  23.651  26.467  1.00 27.18           C  
ATOM   1983  O   ASN L  52     112.299  22.597  26.986  1.00 26.93           O  
ATOM   1984  CB  ASN L  52     114.916  22.779  25.475  1.00 29.48           C  
ATOM   1985  CG  ASN L  52     115.844  23.569  26.370  1.00 31.87           C  
ATOM   1986  OD1 ASN L  52     117.095  23.547  26.246  1.00 32.98           O  
ATOM   1987  ND2 ASN L  52     115.312  24.329  27.361  1.00 33.13           N  
ATOM   1988  N   SER L  53     112.503  24.822  26.986  1.00 27.71           N  
ATOM   1989  CA  SER L  53     111.768  25.054  28.242  1.00 28.05           C  
ATOM   1990  C   SER L  53     110.294  25.330  28.126  1.00 28.24           C  
ATOM   1991  O   SER L  53     109.780  25.978  27.183  1.00 28.44           O  
ATOM   1992  CB  SER L  53     112.574  26.153  28.950  1.00 29.15           C  
ATOM   1993  OG  SER L  53     113.951  25.651  28.951  1.00 30.88           O  
ATOM   1994  N   ARG L  54     109.548  24.826  29.119  1.00 28.17           N  
ATOM   1995  CA  ARG L  54     108.107  24.949  29.216  1.00 27.98           C  
ATOM   1996  C   ARG L  54     107.599  26.132  30.016  1.00 27.93           C  
ATOM   1997  O   ARG L  54     107.941  26.261  31.183  1.00 27.66           O  
ATOM   1998  CB  ARG L  54     107.445  23.722  29.885  1.00 27.26           C  
ATOM   1999  CG  ARG L  54     107.912  22.420  29.328  1.00 27.62           C  
ATOM   2000  CD  ARG L  54     107.265  21.271  30.037  1.00 28.81           C  
ATOM   2001  NE  ARG L  54     107.795  20.078  29.367  1.00 30.44           N  
ATOM   2002  CZ  ARG L  54     109.023  19.591  29.503  1.00 31.04           C  
ATOM   2003  NH1 ARG L  54     109.826  20.133  30.426  1.00 31.99           N  
ATOM   2004  NH2 ARG L  54     109.453  18.559  28.769  1.00 30.90           N  
ATOM   2005  N   ALA L  55     106.707  26.879  29.389  1.00 28.74           N  
ATOM   2006  CA  ALA L  55     106.056  28.046  30.040  1.00 28.92           C  
ATOM   2007  C   ALA L  55     105.413  27.438  31.290  1.00 29.79           C  
ATOM   2008  O   ALA L  55     105.340  26.177  31.327  1.00 30.17           O  
ATOM   2009  CB  ALA L  55     104.978  28.593  29.135  1.00 28.40           C  
ATOM   2010  N   SER L  56     104.956  28.270  32.209  1.00 29.85           N  
ATOM   2011  CA  SER L  56     104.347  27.671  33.406  1.00 30.23           C  
ATOM   2012  C   SER L  56     102.988  27.081  32.997  1.00 30.89           C  
ATOM   2013  O   SER L  56     102.248  27.587  32.152  1.00 30.66           O  
ATOM   2014  CB  SER L  56     104.197  28.614  34.549  1.00 29.84           C  
ATOM   2015  OG  SER L  56     102.889  29.145  34.513  1.00 31.44           O  
ATOM   2016  N   GLY L  57     102.743  25.952  33.644  1.00 31.76           N  
ATOM   2017  CA  GLY L  57     101.533  25.149  33.496  1.00 32.12           C  
ATOM   2018  C   GLY L  57     101.453  24.314  32.236  1.00 32.43           C  
ATOM   2019  O   GLY L  57     100.313  24.022  31.802  1.00 32.94           O  
ATOM   2020  N   VAL L  58     102.602  23.932  31.687  1.00 32.09           N  
ATOM   2021  CA  VAL L  58     102.707  23.105  30.467  1.00 31.10           C  
ATOM   2022  C   VAL L  58     103.151  21.695  30.849  1.00 31.90           C  
ATOM   2023  O   VAL L  58     104.130  21.512  31.585  1.00 32.02           O  
ATOM   2024  CB  VAL L  58     103.604  23.875  29.508  1.00 29.26           C  
ATOM   2025  CG1 VAL L  58     103.873  23.190  28.208  1.00 28.36           C  
ATOM   2026  CG2 VAL L  58     103.013  25.278  29.309  1.00 28.83           C  
ATOM   2027  N   SER L  59     102.377  20.720  30.411  1.00 32.33           N  
ATOM   2028  CA  SER L  59     102.522  19.304  30.651  1.00 32.87           C  
ATOM   2029  C   SER L  59     103.895  18.822  30.193  1.00 32.96           C  
ATOM   2030  O   SER L  59     104.475  19.563  29.414  1.00 33.06           O  
ATOM   2031  CB  SER L  59     101.536  18.487  29.812  1.00 34.60           C  
ATOM   2032  OG  SER L  59     100.632  19.460  29.290  1.00 37.41           O  
ATOM   2033  N   ASP L  60     104.196  17.645  30.681  1.00 32.91           N  
ATOM   2034  CA  ASP L  60     105.474  16.982  30.426  1.00 32.78           C  
ATOM   2035  C   ASP L  60     105.335  16.185  29.129  1.00 31.41           C  
ATOM   2036  O   ASP L  60     106.335  15.574  28.749  1.00 31.24           O  
ATOM   2037  CB  ASP L  60     105.950  16.129  31.606  1.00 36.68           C  
ATOM   2038  CG  ASP L  60     106.288  16.976  32.833  1.00 39.88           C  
ATOM   2039  OD1 ASP L  60     105.516  17.935  33.151  1.00 40.60           O  
ATOM   2040  OD2 ASP L  60     107.345  16.646  33.468  1.00 40.55           O  
ATOM   2041  N   ARG L  61     104.104  16.251  28.624  1.00 29.56           N  
ATOM   2042  CA  ARG L  61     103.774  15.592  27.369  1.00 27.71           C  
ATOM   2043  C   ARG L  61     104.472  16.322  26.198  1.00 26.45           C  
ATOM   2044  O   ARG L  61     104.636  15.698  25.152  1.00 26.41           O  
ATOM   2045  CB  ARG L  61     102.307  15.571  26.977  1.00 27.24           C  
ATOM   2046  CG  ARG L  61     101.345  15.097  28.059  1.00 27.08           C  
ATOM   2047  CD  ARG L  61     100.238  14.322  27.441  1.00 26.98           C  
ATOM   2048  NE  ARG L  61      99.434  15.081  26.464  1.00 26.50           N  
ATOM   2049  CZ  ARG L  61      98.771  16.095  27.030  1.00 27.82           C  
ATOM   2050  NH1 ARG L  61      99.006  16.245  28.350  1.00 29.08           N  
ATOM   2051  NH2 ARG L  61      97.965  16.913  26.406  1.00 28.62           N  
ATOM   2052  N   PHE L  62     104.794  17.559  26.448  1.00 24.93           N  
ATOM   2053  CA  PHE L  62     105.404  18.459  25.497  1.00 23.98           C  
ATOM   2054  C   PHE L  62     106.881  18.689  25.771  1.00 24.49           C  
ATOM   2055  O   PHE L  62     107.244  19.036  26.892  1.00 24.31           O  
ATOM   2056  CB  PHE L  62     104.697  19.813  25.487  1.00 22.38           C  
ATOM   2057  CG  PHE L  62     103.255  19.675  25.051  1.00 21.34           C  
ATOM   2058  CD1 PHE L  62     102.947  19.702  23.690  1.00 20.27           C  
ATOM   2059  CD2 PHE L  62     102.271  19.515  26.026  1.00 20.01           C  
ATOM   2060  CE1 PHE L  62     101.624  19.564  23.280  1.00 20.21           C  
ATOM   2061  CE2 PHE L  62     100.954  19.373  25.634  1.00 20.33           C  
ATOM   2062  CZ  PHE L  62     100.634  19.422  24.259  1.00 20.75           C  
ATOM   2063  N   SER L  63     107.636  18.525  24.702  1.00 24.76           N  
ATOM   2064  CA  SER L  63     109.107  18.724  24.757  1.00 25.23           C  
ATOM   2065  C   SER L  63     109.519  19.279  23.402  1.00 24.97           C  
ATOM   2066  O   SER L  63     108.770  19.100  22.431  1.00 25.05           O  
ATOM   2067  CB  SER L  63     109.784  17.410  25.115  1.00 25.06           C  
ATOM   2068  OG  SER L  63     108.940  16.384  24.641  1.00 25.26           O  
ATOM   2069  N   ALA L  64     110.639  19.973  23.372  1.00 24.78           N  
ATOM   2070  CA  ALA L  64     111.068  20.546  22.079  1.00 24.63           C  
ATOM   2071  C   ALA L  64     112.554  20.331  21.934  1.00 25.47           C  
ATOM   2072  O   ALA L  64     113.292  19.860  22.809  1.00 25.07           O  
ATOM   2073  CB  ALA L  64     110.567  21.965  21.976  1.00 23.59           C  
ATOM   2074  N   SER L  65     112.982  20.649  20.731  1.00 27.36           N  
ATOM   2075  CA  SER L  65     114.410  20.540  20.352  1.00 29.27           C  
ATOM   2076  C   SER L  65     114.680  21.339  19.067  1.00 29.51           C  
ATOM   2077  O   SER L  65     113.808  21.426  18.203  1.00 29.26           O  
ATOM   2078  CB  SER L  65     114.883  19.111  20.200  1.00 30.18           C  
ATOM   2079  OG  SER L  65     113.812  18.206  19.934  1.00 32.58           O  
ATOM   2080  N   LYS L  66     115.863  21.917  19.079  1.00 30.38           N  
ATOM   2081  CA  LYS L  66     116.401  22.693  17.943  1.00 31.87           C  
ATOM   2082  C   LYS L  66     117.551  21.795  17.454  1.00 33.05           C  
ATOM   2083  O   LYS L  66     118.546  21.616  18.119  1.00 33.67           O  
ATOM   2084  CB  LYS L  66     116.849  24.070  18.261  1.00 31.00           C  
ATOM   2085  CG  LYS L  66     117.468  24.812  17.077  1.00 29.10           C  
ATOM   2086  CD  LYS L  66     118.552  25.739  17.578  1.00 26.79           C  
ATOM   2087  CE  LYS L  66     118.032  27.008  18.174  1.00 25.29           C  
ATOM   2088  NZ  LYS L  66     119.127  28.028  18.059  1.00 24.59           N  
ATOM   2089  N   SER L  67     117.225  21.115  16.398  1.00 34.69           N  
ATOM   2090  CA  SER L  67     118.006  20.080  15.720  1.00 35.76           C  
ATOM   2091  C   SER L  67     119.206  20.700  15.051  1.00 35.56           C  
ATOM   2092  O   SER L  67     120.322  20.179  15.301  1.00 35.98           O  
ATOM   2093  CB  SER L  67     117.115  19.216  14.814  1.00 37.56           C  
ATOM   2094  OG  SER L  67     115.955  18.757  15.605  1.00 39.07           O  
ATOM   2095  N   GLY L  68     118.992  21.770  14.308  1.00 34.99           N  
ATOM   2096  CA  GLY L  68     120.166  22.426  13.690  1.00 34.42           C  
ATOM   2097  C   GLY L  68     119.734  23.756  13.101  1.00 34.40           C  
ATOM   2098  O   GLY L  68     120.311  24.817  13.431  1.00 34.54           O  
ATOM   2099  N   THR L  69     118.709  23.637  12.271  1.00 33.62           N  
ATOM   2100  CA  THR L  69     118.132  24.805  11.540  1.00 32.39           C  
ATOM   2101  C   THR L  69     116.622  24.640  11.547  1.00 30.90           C  
ATOM   2102  O   THR L  69     115.767  25.325  11.019  1.00 29.98           O  
ATOM   2103  CB  THR L  69     118.669  24.726  10.038  1.00 33.35           C  
ATOM   2104  OG1 THR L  69     118.975  26.114   9.702  1.00 34.12           O  
ATOM   2105  CG2 THR L  69     117.748  23.987   9.047  1.00 32.60           C  
ATOM   2106  N   SER L  70     116.357  23.500  12.163  1.00 30.40           N  
ATOM   2107  CA  SER L  70     114.962  23.061  12.295  1.00 30.27           C  
ATOM   2108  C   SER L  70     114.788  22.731  13.769  1.00 29.61           C  
ATOM   2109  O   SER L  70     115.772  22.505  14.466  1.00 30.07           O  
ATOM   2110  CB  SER L  70     114.682  21.933  11.343  1.00 30.84           C  
ATOM   2111  OG  SER L  70     115.427  20.797  11.685  1.00 32.96           O  
ATOM   2112  N   ALA L  71     113.553  22.809  14.182  1.00 28.84           N  
ATOM   2113  CA  ALA L  71     113.168  22.509  15.566  1.00 27.83           C  
ATOM   2114  C   ALA L  71     111.982  21.551  15.464  1.00 27.19           C  
ATOM   2115  O   ALA L  71     111.314  21.484  14.407  1.00 27.10           O  
ATOM   2116  CB  ALA L  71     112.957  23.802  16.307  1.00 28.06           C  
ATOM   2117  N   SER L  72     111.789  20.816  16.529  1.00 26.83           N  
ATOM   2118  CA  SER L  72     110.751  19.815  16.663  1.00 26.46           C  
ATOM   2119  C   SER L  72     110.090  19.937  18.047  1.00 26.19           C  
ATOM   2120  O   SER L  72     110.849  19.997  19.008  1.00 25.88           O  
ATOM   2121  CB  SER L  72     111.257  18.373  16.630  1.00 26.67           C  
ATOM   2122  OG  SER L  72     112.515  18.196  16.053  1.00 27.99           O  
ATOM   2123  N   LEU L  73     108.786  19.940  17.983  1.00 26.25           N  
ATOM   2124  CA  LEU L  73     107.913  19.943  19.144  1.00 26.82           C  
ATOM   2125  C   LEU L  73     107.250  18.533  19.013  1.00 28.17           C  
ATOM   2126  O   LEU L  73     106.806  18.155  17.937  1.00 27.61           O  
ATOM   2127  CB  LEU L  73     106.857  21.014  19.231  1.00 25.16           C  
ATOM   2128  CG  LEU L  73     105.647  20.772  20.130  1.00 23.53           C  
ATOM   2129  CD1 LEU L  73     105.696  21.545  21.429  1.00 22.36           C  
ATOM   2130  CD2 LEU L  73     104.397  21.173  19.384  1.00 22.98           C  
ATOM   2131  N   ALA L  74     107.295  17.895  20.154  1.00 29.59           N  
ATOM   2132  CA  ALA L  74     106.774  16.559  20.298  1.00 30.99           C  
ATOM   2133  C   ALA L  74     105.851  16.369  21.496  1.00 31.65           C  
ATOM   2134  O   ALA L  74     106.248  16.560  22.642  1.00 31.81           O  
ATOM   2135  CB  ALA L  74     107.953  15.572  20.443  1.00 31.85           C  
ATOM   2136  N   ILE L  75     104.691  15.900  21.137  1.00 32.63           N  
ATOM   2137  CA  ILE L  75     103.582  15.504  21.970  1.00 33.46           C  
ATOM   2138  C   ILE L  75     103.713  13.966  22.141  1.00 34.30           C  
ATOM   2139  O   ILE L  75     103.596  13.122  21.261  1.00 34.70           O  
ATOM   2140  CB  ILE L  75     102.162  15.852  21.400  1.00 32.94           C  
ATOM   2141  CG1 ILE L  75     102.081  17.353  21.076  1.00 33.46           C  
ATOM   2142  CG2 ILE L  75     101.051  15.352  22.374  1.00 32.64           C  
ATOM   2143  CD1 ILE L  75     101.350  17.778  19.784  1.00 32.90           C  
ATOM   2144  N   SER L  76     104.020  13.648  23.358  1.00 35.25           N  
ATOM   2145  CA  SER L  76     104.166  12.259  23.826  1.00 36.02           C  
ATOM   2146  C   SER L  76     102.799  11.981  24.472  1.00 36.30           C  
ATOM   2147  O   SER L  76     102.177  12.896  25.075  1.00 36.33           O  
ATOM   2148  CB  SER L  76     105.326  12.276  24.805  1.00 37.22           C  
ATOM   2149  OG  SER L  76     106.058  13.523  24.624  1.00 39.20           O  
ATOM   2150  N   GLY L  77     102.329  10.771  24.258  1.00 36.06           N  
ATOM   2151  CA  GLY L  77     101.058  10.343  24.814  1.00 35.29           C  
ATOM   2152  C   GLY L  77      99.927  11.281  24.460  1.00 34.97           C  
ATOM   2153  O   GLY L  77      99.195  11.728  25.362  1.00 34.65           O  
ATOM   2154  N   LEU L  78      99.755  11.496  23.183  1.00 34.83           N  
ATOM   2155  CA  LEU L  78      98.701  12.373  22.640  1.00 35.27           C  
ATOM   2156  C   LEU L  78      97.294  12.231  23.170  1.00 35.63           C  
ATOM   2157  O   LEU L  78      96.612  11.203  23.177  1.00 35.36           O  
ATOM   2158  CB  LEU L  78      98.879  12.170  21.138  1.00 35.62           C  
ATOM   2159  CG  LEU L  78      98.018  12.981  20.210  1.00 36.16           C  
ATOM   2160  CD1 LEU L  78      98.162  12.409  18.795  1.00 36.80           C  
ATOM   2161  CD2 LEU L  78      96.570  12.831  20.648  1.00 36.63           C  
ATOM   2162  N   GLN L  79      96.752  13.374  23.618  1.00 36.30           N  
ATOM   2163  CA  GLN L  79      95.456  13.661  24.174  1.00 36.21           C  
ATOM   2164  C   GLN L  79      94.539  14.557  23.312  1.00 35.55           C  
ATOM   2165  O   GLN L  79      94.944  15.421  22.530  1.00 35.41           O  
ATOM   2166  CB  GLN L  79      95.441  14.362  25.541  1.00 38.12           C  
ATOM   2167  CG  GLN L  79      95.151  13.375  26.662  1.00 42.17           C  
ATOM   2168  CD  GLN L  79      96.455  12.812  27.200  1.00 43.90           C  
ATOM   2169  OE1 GLN L  79      97.267  12.286  26.422  1.00 45.87           O  
ATOM   2170  NE2 GLN L  79      96.649  12.972  28.509  1.00 45.00           N  
ATOM   2171  N   PRO L  80      93.256  14.382  23.617  1.00 34.85           N  
ATOM   2172  CA  PRO L  80      92.166  15.050  22.950  1.00 34.27           C  
ATOM   2173  C   PRO L  80      91.972  16.518  23.178  1.00 33.44           C  
ATOM   2174  O   PRO L  80      90.944  17.028  22.701  1.00 33.77           O  
ATOM   2175  CB  PRO L  80      90.905  14.268  23.421  1.00 34.67           C  
ATOM   2176  CG  PRO L  80      91.453  12.888  23.776  1.00 34.73           C  
ATOM   2177  CD  PRO L  80      92.720  13.359  24.563  1.00 35.02           C  
ATOM   2178  N   GLU L  81      92.835  17.171  23.871  1.00 32.68           N  
ATOM   2179  CA  GLU L  81      92.809  18.585  24.236  1.00 31.49           C  
ATOM   2180  C   GLU L  81      94.082  19.180  23.638  1.00 31.28           C  
ATOM   2181  O   GLU L  81      94.441  20.336  23.842  1.00 31.05           O  
ATOM   2182  CB  GLU L  81      92.818  18.745  25.737  1.00 32.10           C  
ATOM   2183  CG  GLU L  81      93.919  18.344  26.656  1.00 34.12           C  
ATOM   2184  CD  GLU L  81      93.947  17.118  27.492  1.00 35.43           C  
ATOM   2185  OE1 GLU L  81      92.887  16.433  27.465  1.00 36.21           O  
ATOM   2186  OE2 GLU L  81      94.913  16.742  28.169  1.00 35.89           O  
ATOM   2187  N   ASP L  82      94.722  18.280  22.884  1.00 30.38           N  
ATOM   2188  CA  ASP L  82      95.978  18.584  22.205  1.00 29.74           C  
ATOM   2189  C   ASP L  82      95.695  18.997  20.765  1.00 29.59           C  
ATOM   2190  O   ASP L  82      96.579  19.426  20.000  1.00 29.61           O  
ATOM   2191  CB  ASP L  82      96.932  17.418  22.353  1.00 30.29           C  
ATOM   2192  CG  ASP L  82      97.598  17.377  23.708  1.00 31.62           C  
ATOM   2193  OD1 ASP L  82      97.619  18.456  24.365  1.00 32.86           O  
ATOM   2194  OD2 ASP L  82      98.116  16.336  24.143  1.00 32.17           O  
ATOM   2195  N   GLU L  83      94.429  18.846  20.432  1.00 29.06           N  
ATOM   2196  CA  GLU L  83      93.834  19.172  19.141  1.00 28.20           C  
ATOM   2197  C   GLU L  83      93.618  20.663  18.913  1.00 27.66           C  
ATOM   2198  O   GLU L  83      92.543  21.241  19.121  1.00 27.59           O  
ATOM   2199  CB  GLU L  83      92.484  18.450  19.007  1.00 27.50           C  
ATOM   2200  CG  GLU L  83      92.088  18.000  17.622  1.00 29.36           C  
ATOM   2201  CD  GLU L  83      90.692  17.587  17.297  1.00 29.45           C  
ATOM   2202  OE1 GLU L  83      89.694  18.236  17.550  1.00 29.14           O  
ATOM   2203  OE2 GLU L  83      90.653  16.469  16.697  1.00 30.18           O  
ATOM   2204  N   THR L  84      94.637  21.345  18.443  1.00 27.24           N  
ATOM   2205  CA  THR L  84      94.637  22.782  18.143  1.00 26.77           C  
ATOM   2206  C   THR L  84      95.722  23.035  17.111  1.00 25.69           C  
ATOM   2207  O   THR L  84      96.131  22.033  16.509  1.00 26.28           O  
ATOM   2208  CB  THR L  84      94.868  23.613  19.452  1.00 27.99           C  
ATOM   2209  OG1 THR L  84      96.070  23.057  20.073  1.00 29.98           O  
ATOM   2210  CG2 THR L  84      93.755  23.631  20.488  1.00 29.19           C  
ATOM   2211  N   ASP L  85      96.186  24.229  16.931  1.00 24.95           N  
ATOM   2212  CA  ASP L  85      97.224  24.622  15.974  1.00 24.25           C  
ATOM   2213  C   ASP L  85      98.484  24.846  16.819  1.00 23.06           C  
ATOM   2214  O   ASP L  85      98.253  25.249  17.953  1.00 22.98           O  
ATOM   2215  CB  ASP L  85      96.925  25.951  15.278  1.00 26.95           C  
ATOM   2216  CG  ASP L  85      95.615  25.933  14.505  1.00 29.47           C  
ATOM   2217  OD1 ASP L  85      95.482  24.996  13.673  1.00 30.69           O  
ATOM   2218  OD2 ASP L  85      94.739  26.819  14.729  1.00 29.63           O  
ATOM   2219  N   TYR L  86      99.606  24.696  16.211  1.00 22.33           N  
ATOM   2220  CA  TYR L  86     100.901  24.895  16.887  1.00 21.91           C  
ATOM   2221  C   TYR L  86     101.810  25.760  16.036  1.00 22.02           C  
ATOM   2222  O   TYR L  86     101.933  25.529  14.845  1.00 21.71           O  
ATOM   2223  CB  TYR L  86     101.578  23.537  17.164  1.00 20.32           C  
ATOM   2224  CG  TYR L  86     100.773  22.741  18.182  1.00 18.65           C  
ATOM   2225  CD1 TYR L  86      99.671  21.964  17.846  1.00 17.97           C  
ATOM   2226  CD2 TYR L  86     101.157  22.776  19.502  1.00 17.40           C  
ATOM   2227  CE1 TYR L  86      98.945  21.240  18.784  1.00 16.41           C  
ATOM   2228  CE2 TYR L  86     100.450  22.069  20.438  1.00 17.40           C  
ATOM   2229  CZ  TYR L  86      99.354  21.309  20.089  1.00 16.94           C  
ATOM   2230  OH  TYR L  86      98.723  20.697  21.148  1.00 18.68           O  
ATOM   2231  N   TYR L  87     102.484  26.691  16.684  1.00 23.02           N  
ATOM   2232  CA  TYR L  87     103.395  27.613  15.982  1.00 23.74           C  
ATOM   2233  C   TYR L  87     104.785  27.714  16.580  1.00 22.92           C  
ATOM   2234  O   TYR L  87     104.988  27.671  17.798  1.00 22.70           O  
ATOM   2235  CB  TYR L  87     102.743  29.048  15.929  1.00 25.30           C  
ATOM   2236  CG  TYR L  87     101.406  29.037  15.230  1.00 27.39           C  
ATOM   2237  CD1 TYR L  87     101.405  29.179  13.841  1.00 28.75           C  
ATOM   2238  CD2 TYR L  87     100.170  28.853  15.846  1.00 28.08           C  
ATOM   2239  CE1 TYR L  87     100.231  29.147  13.097  1.00 29.16           C  
ATOM   2240  CE2 TYR L  87      98.990  28.803  15.114  1.00 28.50           C  
ATOM   2241  CZ  TYR L  87      99.009  28.952  13.738  1.00 28.84           C  
ATOM   2242  OH  TYR L  87      97.904  28.949  12.904  1.00 28.57           O  
ATOM   2243  N   CYS L  88     105.747  27.868  15.687  1.00 22.85           N  
ATOM   2244  CA  CYS L  88     107.134  28.106  16.119  1.00 23.09           C  
ATOM   2245  C   CYS L  88     107.343  29.606  15.816  1.00 22.78           C  
ATOM   2246  O   CYS L  88     106.537  30.166  15.074  1.00 23.10           O  
ATOM   2247  CB  CYS L  88     108.214  27.321  15.464  1.00 23.97           C  
ATOM   2248  SG  CYS L  88     108.045  26.861  13.757  1.00 26.76           S  
ATOM   2249  N   ALA L  89     108.385  30.142  16.355  1.00 22.18           N  
ATOM   2250  CA  ALA L  89     108.737  31.569  16.156  1.00 21.35           C  
ATOM   2251  C   ALA L  89     110.218  31.577  16.463  1.00 21.89           C  
ATOM   2252  O   ALA L  89     110.715  30.594  17.055  1.00 22.71           O  
ATOM   2253  CB  ALA L  89     107.890  32.374  17.084  1.00 20.41           C  
ATOM   2254  N   ALA L  90     110.932  32.559  16.056  1.00 22.21           N  
ATOM   2255  CA  ALA L  90     112.346  32.812  16.209  1.00 22.17           C  
ATOM   2256  C   ALA L  90     112.656  34.236  15.765  1.00 22.68           C  
ATOM   2257  O   ALA L  90     112.012  34.761  14.837  1.00 23.26           O  
ATOM   2258  CB  ALA L  90     113.125  31.828  15.286  1.00 22.26           C  
ATOM   2259  N   TRP L  91     113.640  34.874  16.357  1.00 22.98           N  
ATOM   2260  CA  TRP L  91     114.025  36.202  15.853  1.00 23.49           C  
ATOM   2261  C   TRP L  91     114.859  35.980  14.575  1.00 23.59           C  
ATOM   2262  O   TRP L  91     115.598  34.992  14.443  1.00 23.03           O  
ATOM   2263  CB  TRP L  91     114.850  36.972  16.858  1.00 24.04           C  
ATOM   2264  CG  TRP L  91     115.064  38.404  16.484  1.00 24.37           C  
ATOM   2265  CD1 TRP L  91     116.195  38.962  15.936  1.00 24.78           C  
ATOM   2266  CD2 TRP L  91     114.114  39.463  16.648  1.00 24.06           C  
ATOM   2267  NE1 TRP L  91     116.009  40.315  15.761  1.00 24.95           N  
ATOM   2268  CE2 TRP L  91     114.734  40.638  16.187  1.00 24.85           C  
ATOM   2269  CE3 TRP L  91     112.836  39.534  17.153  1.00 24.59           C  
ATOM   2270  CZ2 TRP L  91     114.098  41.877  16.216  1.00 25.08           C  
ATOM   2271  CZ3 TRP L  91     112.212  40.768  17.206  1.00 24.71           C  
ATOM   2272  CH2 TRP L  91     112.818  41.918  16.743  1.00 24.60           C  
ATOM   2273  N   ASP L  92     114.756  36.946  13.665  1.00 24.41           N  
ATOM   2274  CA  ASP L  92     115.602  36.790  12.455  1.00 25.94           C  
ATOM   2275  C   ASP L  92     116.734  37.837  12.518  1.00 26.83           C  
ATOM   2276  O   ASP L  92     116.435  39.035  12.560  1.00 26.69           O  
ATOM   2277  CB  ASP L  92     114.887  36.763  11.132  1.00 24.80           C  
ATOM   2278  CG  ASP L  92     115.957  36.507  10.071  1.00 25.75           C  
ATOM   2279  OD1 ASP L  92     116.786  37.404   9.843  1.00 27.19           O  
ATOM   2280  OD2 ASP L  92     115.979  35.388   9.566  1.00 25.96           O  
ATOM   2281  N   ASP L  93     117.955  37.311  12.505  1.00 27.94           N  
ATOM   2282  CA  ASP L  93     119.096  38.225  12.586  1.00 29.78           C  
ATOM   2283  C   ASP L  93     119.048  39.258  11.475  1.00 30.28           C  
ATOM   2284  O   ASP L  93     118.949  40.459  11.828  1.00 30.70           O  
ATOM   2285  CB  ASP L  93     120.435  37.565  12.843  1.00 31.93           C  
ATOM   2286  CG  ASP L  93     120.715  37.568  14.351  1.00 34.95           C  
ATOM   2287  OD1 ASP L  93     120.110  38.348  15.143  1.00 34.67           O  
ATOM   2288  OD2 ASP L  93     121.586  36.720  14.690  1.00 36.33           O  
ATOM   2289  N   SER L  94     119.067  38.881  10.218  1.00 30.39           N  
ATOM   2290  CA  SER L  94     119.053  39.880   9.140  1.00 30.53           C  
ATOM   2291  C   SER L  94     117.758  40.613   8.978  1.00 30.79           C  
ATOM   2292  O   SER L  94     117.686  41.860   9.001  1.00 31.88           O  
ATOM   2293  CB  SER L  94     119.520  39.245   7.840  1.00 30.54           C  
ATOM   2294  OG  SER L  94     118.999  37.927   7.788  1.00 32.08           O  
ATOM   2295  N   LEU L  95     116.670  39.903   8.751  1.00 30.60           N  
ATOM   2296  CA  LEU L  95     115.383  40.597   8.516  1.00 29.15           C  
ATOM   2297  C   LEU L  95     115.190  41.626   9.619  1.00 28.78           C  
ATOM   2298  O   LEU L  95     114.529  42.639   9.424  1.00 28.29           O  
ATOM   2299  CB  LEU L  95     114.325  39.536   8.435  1.00 28.14           C  
ATOM   2300  CG  LEU L  95     114.333  38.418   7.444  1.00 26.96           C  
ATOM   2301  CD1 LEU L  95     113.300  38.680   6.386  1.00 27.09           C  
ATOM   2302  CD2 LEU L  95     115.687  38.246   6.789  1.00 28.24           C  
ATOM   2303  N   ASP L  95A    115.737  41.293  10.771  1.00 29.01           N  
ATOM   2304  CA  ASP L  95A    115.577  42.142  11.955  1.00 29.77           C  
ATOM   2305  C   ASP L  95A    114.119  42.183  12.492  1.00 29.85           C  
ATOM   2306  O   ASP L  95A    113.558  43.208  12.921  1.00 29.10           O  
ATOM   2307  CB  ASP L  95A    116.126  43.558  11.716  1.00 30.25           C  
ATOM   2308  CG  ASP L  95A    116.481  44.034  13.135  1.00 31.61           C  
ATOM   2309  OD1 ASP L  95A    116.839  43.066  13.862  1.00 32.40           O  
ATOM   2310  OD2 ASP L  95A    116.382  45.191  13.493  1.00 32.46           O  
ATOM   2311  N   VAL L  95B    113.519  40.994  12.501  1.00 29.82           N  
ATOM   2312  CA  VAL L  95B    112.181  40.683  12.931  1.00 29.32           C  
ATOM   2313  C   VAL L  95B    112.005  39.197  13.296  1.00 29.18           C  
ATOM   2314  O   VAL L  95B    112.753  38.334  12.876  1.00 28.88           O  
ATOM   2315  CB  VAL L  95B    111.158  41.031  11.819  1.00 29.67           C  
ATOM   2316  CG1 VAL L  95B    111.126  42.513  11.535  1.00 30.32           C  
ATOM   2317  CG2 VAL L  95B    111.415  40.171  10.575  1.00 28.96           C  
ATOM   2318  N   ALA L  96     110.951  39.022  14.064  1.00 29.37           N  
ATOM   2319  CA  ALA L  96     110.441  37.769  14.572  1.00 30.09           C  
ATOM   2320  C   ALA L  96     109.768  37.049  13.387  1.00 30.76           C  
ATOM   2321  O   ALA L  96     108.888  37.662  12.728  1.00 31.39           O  
ATOM   2322  CB  ALA L  96     109.379  38.022  15.640  1.00 29.12           C  
ATOM   2323  N   VAL L  97     110.190  35.828  13.129  1.00 30.49           N  
ATOM   2324  CA  VAL L  97     109.582  35.041  12.017  1.00 29.77           C  
ATOM   2325  C   VAL L  97     108.619  34.049  12.662  1.00 30.16           C  
ATOM   2326  O   VAL L  97     108.900  33.435  13.716  1.00 30.42           O  
ATOM   2327  CB  VAL L  97     110.721  34.525  11.139  1.00 28.42           C  
ATOM   2328  CG1 VAL L  97     110.320  34.220   9.718  1.00 27.57           C  
ATOM   2329  CG2 VAL L  97     111.854  35.533  11.135  1.00 27.89           C  
ATOM   2330  N   PHE L  98     107.446  33.900  12.063  1.00 29.93           N  
ATOM   2331  CA  PHE L  98     106.404  32.997  12.576  1.00 29.09           C  
ATOM   2332  C   PHE L  98     106.233  31.809  11.667  1.00 28.13           C  
ATOM   2333  O   PHE L  98     106.329  31.930  10.455  1.00 27.55           O  
ATOM   2334  CB  PHE L  98     105.142  33.833  12.818  1.00 30.85           C  
ATOM   2335  CG  PHE L  98     105.076  34.437  14.194  1.00 32.94           C  
ATOM   2336  CD1 PHE L  98     105.615  35.694  14.455  1.00 33.81           C  
ATOM   2337  CD2 PHE L  98     104.465  33.730  15.247  1.00 33.94           C  
ATOM   2338  CE1 PHE L  98     105.523  36.247  15.743  1.00 34.56           C  
ATOM   2339  CE2 PHE L  98     104.367  34.250  16.542  1.00 34.25           C  
ATOM   2340  CZ  PHE L  98     104.918  35.531  16.782  1.00 34.56           C  
ATOM   2341  N   GLY L  99     106.014  30.663  12.226  1.00 28.07           N  
ATOM   2342  CA  GLY L  99     105.774  29.394  11.525  1.00 28.80           C  
ATOM   2343  C   GLY L  99     104.427  29.439  10.796  1.00 29.54           C  
ATOM   2344  O   GLY L  99     103.475  30.225  11.050  1.00 30.08           O  
ATOM   2345  N   THR L 100     104.321  28.566   9.795  1.00 29.82           N  
ATOM   2346  CA  THR L 100     103.111  28.526   8.949  1.00 30.03           C  
ATOM   2347  C   THR L 100     101.983  27.837   9.669  1.00 30.34           C  
ATOM   2348  O   THR L 100     100.808  28.071   9.322  1.00 30.92           O  
ATOM   2349  CB  THR L 100     103.428  28.028   7.505  1.00 30.46           C  
ATOM   2350  OG1 THR L 100     103.813  26.615   7.548  1.00 31.25           O  
ATOM   2351  CG2 THR L 100     104.497  28.868   6.774  1.00 30.21           C  
ATOM   2352  N   GLY L 101     102.290  27.028  10.678  1.00 30.20           N  
ATOM   2353  CA  GLY L 101     101.239  26.356  11.464  1.00 29.56           C  
ATOM   2354  C   GLY L 101     101.024  24.906  11.085  1.00 29.21           C  
ATOM   2355  O   GLY L 101     101.166  24.544   9.903  1.00 29.37           O  
ATOM   2356  N   THR L 102     100.697  24.137  12.089  1.00 28.67           N  
ATOM   2357  CA  THR L 102     100.423  22.705  12.080  1.00 28.39           C  
ATOM   2358  C   THR L 102      99.225  22.403  12.938  1.00 28.27           C  
ATOM   2359  O   THR L 102      99.269  22.881  14.078  1.00 28.59           O  
ATOM   2360  CB  THR L 102     101.629  21.935  12.784  1.00 28.00           C  
ATOM   2361  OG1 THR L 102     102.761  22.703  12.294  1.00 28.20           O  
ATOM   2362  CG2 THR L 102     101.629  20.431  12.533  1.00 27.85           C  
ATOM   2363  N   LYS L 103      98.277  21.652  12.466  1.00 29.10           N  
ATOM   2364  CA  LYS L 103      97.111  21.399  13.362  1.00 29.67           C  
ATOM   2365  C   LYS L 103      97.021  19.913  13.595  1.00 29.00           C  
ATOM   2366  O   LYS L 103      97.059  19.198  12.595  1.00 29.03           O  
ATOM   2367  CB  LYS L 103      95.811  21.978  12.900  1.00 32.38           C  
ATOM   2368  CG  LYS L 103      94.822  21.167  12.118  1.00 35.26           C  
ATOM   2369  CD  LYS L 103      94.906  21.346  10.600  1.00 37.61           C  
ATOM   2370  CE  LYS L 103      94.451  20.033   9.905  1.00 39.29           C  
ATOM   2371  NZ  LYS L 103      95.147  19.932   8.567  1.00 39.45           N  
ATOM   2372  N   VAL L 104      96.938  19.576  14.867  1.00 28.86           N  
ATOM   2373  CA  VAL L 104      96.825  18.190  15.285  1.00 28.72           C  
ATOM   2374  C   VAL L 104      95.342  17.778  15.259  1.00 29.75           C  
ATOM   2375  O   VAL L 104      94.370  18.553  15.335  1.00 29.62           O  
ATOM   2376  CB  VAL L 104      97.428  17.911  16.670  1.00 27.66           C  
ATOM   2377  CG1 VAL L 104      97.599  16.416  16.888  1.00 26.85           C  
ATOM   2378  CG2 VAL L 104      98.742  18.622  16.897  1.00 28.01           C  
ATOM   2379  N   THR L 105      95.237  16.461  15.158  1.00 30.32           N  
ATOM   2380  CA  THR L 105      93.918  15.860  15.172  1.00 31.11           C  
ATOM   2381  C   THR L 105      94.001  14.665  16.113  1.00 32.06           C  
ATOM   2382  O   THR L 105      94.989  13.896  15.997  1.00 32.56           O  
ATOM   2383  CB  THR L 105      93.411  15.445  13.759  1.00 31.37           C  
ATOM   2384  OG1 THR L 105      93.383  16.626  12.905  1.00 32.69           O  
ATOM   2385  CG2 THR L 105      92.019  14.811  13.828  1.00 32.42           C  
ATOM   2386  N   VAL L 106      93.023  14.601  17.013  1.00 31.96           N  
ATOM   2387  CA  VAL L 106      93.034  13.393  17.886  1.00 32.17           C  
ATOM   2388  C   VAL L 106      91.965  12.517  17.211  1.00 33.13           C  
ATOM   2389  O   VAL L 106      90.777  12.869  17.148  1.00 33.06           O  
ATOM   2390  CB  VAL L 106      92.930  13.685  19.350  1.00 31.34           C  
ATOM   2391  CG1 VAL L 106      92.621  12.527  20.278  1.00 30.34           C  
ATOM   2392  CG2 VAL L 106      94.205  14.388  19.823  1.00 31.20           C  
ATOM   2393  N   LEU L 106A     92.536  11.452  16.621  1.00 33.92           N  
ATOM   2394  CA  LEU L 106A     91.711  10.446  15.907  1.00 33.73           C  
ATOM   2395  C   LEU L 106A     90.950   9.718  17.039  1.00 33.75           C  
ATOM   2396  O   LEU L 106A     91.589   9.187  17.954  1.00 33.51           O  
ATOM   2397  CB  LEU L 106A     92.527   9.577  14.966  1.00 33.49           C  
ATOM   2398  CG  LEU L 106A     93.010  10.164  13.639  1.00 32.83           C  
ATOM   2399  CD1 LEU L 106A     93.432   9.111  12.630  1.00 32.26           C  
ATOM   2400  CD2 LEU L 106A     91.891  11.040  13.075  1.00 31.73           C  
ATOM   2401  N   GLY L 107      89.653   9.851  16.923  1.00 33.80           N  
ATOM   2402  CA  GLY L 107      88.623   9.350  17.751  1.00 34.36           C  
ATOM   2403  C   GLY L 107      88.698   9.586  19.234  1.00 34.88           C  
ATOM   2404  O   GLY L 107      89.308   8.844  20.040  1.00 34.74           O  
ATOM   2405  N   GLN L 108      88.061  10.687  19.638  1.00 35.24           N  
ATOM   2406  CA  GLN L 108      88.015  10.970  21.086  1.00 35.54           C  
ATOM   2407  C   GLN L 108      86.876   9.994  21.533  1.00 35.02           C  
ATOM   2408  O   GLN L 108      85.995   9.581  20.753  1.00 35.21           O  
ATOM   2409  CB  GLN L 108      87.623  12.332  21.553  1.00 38.10           C  
ATOM   2410  CG  GLN L 108      88.506  13.518  21.562  1.00 40.51           C  
ATOM   2411  CD  GLN L 108      88.799  14.118  20.200  1.00 41.90           C  
ATOM   2412  OE1 GLN L 108      89.662  13.530  19.508  1.00 42.86           O  
ATOM   2413  NE2 GLN L 108      88.133  15.225  19.860  1.00 41.37           N  
ATOM   2414  N   PRO L 109      86.956   9.696  22.800  1.00 34.43           N  
ATOM   2415  CA  PRO L 109      85.948   8.825  23.389  1.00 34.40           C  
ATOM   2416  C   PRO L 109      84.650   9.599  23.585  1.00 34.47           C  
ATOM   2417  O   PRO L 109      84.626  10.833  23.734  1.00 34.91           O  
ATOM   2418  CB  PRO L 109      86.566   8.416  24.714  1.00 34.56           C  
ATOM   2419  CG  PRO L 109      87.812   9.200  24.931  1.00 34.23           C  
ATOM   2420  CD  PRO L 109      87.972  10.144  23.758  1.00 34.54           C  
TER    2421      PRO L 109                                                      
