# Supplementary material for: SARS-CoV-2 Spike Protein Interaction Space
Source: Int J Mol Sci. 2023 Jul 27;24(15):12058. doi: 10.3390/ijms241512058 (PMC10418891; doi:10.3390/ijms241512058)
Supplement: Supplementary file 1 [file ijms-24-12058-s001.zip › Supplementary Material File S1/3CDC.pdb]

REMARK 950 NUMBERING  Kabat
REMARK 950 METHOD     X-ray crystal structure
REMARK 950 RESOLUTION 1.530
REMARK 950 R-FACTOR   0.191
REMARK 950 R-FREE     0.231
REMARK 950 CHAIN-TYPE LABEL ORIGINAL
REMARK 950 CHAIN L    L    A
REMARK 950 CHAIN L    L    B
REMARK 950 MOLECULE : A : LIGHT CHAIN AMYLOIDOGENIC
REMARK 950 SPECIES  : A : HOMO SAPIENS
SEQRES   1 L 109  SER THR ASP ILE GLN MET THR GLN SER PRO SER SER LEU          
SEQRES   2 L 109  SER ALA SER VAL GLY ASP ARG VAL THR ILE THR CYS GLN          
SEQRES   3 L 109  ALA SER GLN ASP ILE SER ASN TYR LEU ILE TRP TYR GLN          
SEQRES   4 L 109  GLN LYS PRO GLY LYS ALA PRO LYS LEU LEU ILE TYR ASP          
SEQRES   5 L 109  ALA SER ASN LEU GLU THR GLY VAL PRO SER ARG PHE SER          
SEQRES   6 L 109  GLY SER GLY SER GLY THR ASP PHE THR PHE THR ILE SER          
SEQRES   7 L 109  SER LEU GLN PRO GLU ASP ILE ALA THR TYR HIS CYS GLN          
SEQRES   8 L 109  GLN TYR ASP ASN LEU PRO TYR THR PHE GLY GLN GLY THR          
SEQRES   9 L 109  LYS LEU GLU ILE LYS                                          
SEQRES   1 L 109  SER THR ASP ILE GLN MET THR GLN SER PRO SER SER LEU          
SEQRES   2 L 109  SER ALA SER VAL GLY ASP ARG VAL THR ILE THR CYS GLN          
SEQRES   3 L 109  ALA SER GLN ASP ILE SER ASN TYR LEU ILE TRP TYR GLN          
SEQRES   4 L 109  GLN LYS PRO GLY LYS ALA PRO LYS LEU LEU ILE TYR ASP          
SEQRES   5 L 109  ALA SER ASN LEU GLU THR GLY VAL PRO SER ARG PHE SER          
SEQRES   6 L 109  GLY SER GLY SER GLY THR ASP PHE THR PHE THR ILE SER          
SEQRES   7 L 109  SER LEU GLN PRO GLU ASP ILE ALA THR TYR HIS CYS GLN          
SEQRES   8 L 109  GLN TYR ASP ASN LEU PRO TYR THR PHE GLY GLN GLY THR          
SEQRES   9 L 109  LYS LEU GLU ILE LYS                                          
ATOM     14  N   ASP L   1     -32.094  34.354  16.148  1.00 23.78           N  
ATOM     15  CA  ASP L   1     -32.192  33.574  14.888  1.00 22.08           C  
ATOM     16  C   ASP L   1     -33.110  32.363  15.037  1.00 22.15           C  
ATOM     17  O   ASP L   1     -33.153  31.760  16.117  1.00 22.30           O  
ATOM     18  CB  ASP L   1     -30.818  33.163  14.418  1.00 23.02           C  
ATOM     19  CG  ASP L   1     -29.946  34.378  14.085  1.00 22.34           C  
ATOM     20  OD1 ASP L   1     -30.443  35.528  14.069  1.00 25.97           O  
ATOM     21  OD2 ASP L   1     -28.770  34.136  13.787  1.00 30.02           O  
ATOM     22  N   ILE L   2     -33.847  32.011  13.967  1.00 19.58           N  
ATOM     23  CA  ILE L   2     -34.700  30.820  14.044  1.00 19.90           C  
ATOM     24  C   ILE L   2     -33.821  29.605  13.891  1.00 19.14           C  
ATOM     25  O   ILE L   2     -33.025  29.540  12.939  1.00 19.82           O  
ATOM     26  CB  ILE L   2     -35.761  30.843  12.917  1.00 20.01           C  
ATOM     27  CG1 ILE L   2     -36.612  32.123  13.080  1.00 21.25           C  
ATOM     28  CG2 ILE L   2     -36.558  29.514  12.888  1.00 19.59           C  
ATOM     29  CD1 ILE L   2     -37.567  32.400  11.922  1.00 21.57           C  
ATOM     30  N   GLN L   3     -33.929  28.655  14.833  1.00 19.24           N  
ATOM     31  CA  GLN L   3     -33.116  27.450  14.829  1.00 20.03           C  
ATOM     32  C   GLN L   3     -33.892  26.313  14.205  1.00 19.53           C  
ATOM     33  O   GLN L   3     -35.049  26.053  14.594  1.00 19.56           O  
ATOM     34  CB  GLN L   3     -32.791  27.028  16.282  1.00 21.55           C  
ATOM     35  CG  GLN L   3     -32.035  28.128  17.044  1.00 27.60           C  
ATOM     36  CD  GLN L   3     -30.674  28.434  16.428  1.00 34.73           C  
ATOM     37  OE1 GLN L   3     -29.925  27.518  16.033  1.00 39.19           O  
ATOM     38  NE2 GLN L   3     -30.343  29.716  16.339  1.00 36.95           N  
ATOM     39  N   MET L   4     -33.277  25.663  13.202  1.00 18.56           N  
ATOM     40  CA  MET L   4     -33.933  24.564  12.517  1.00 18.48           C  
ATOM     41  C   MET L   4     -33.262  23.275  12.982  1.00 18.31           C  
ATOM     42  O   MET L   4     -32.024  23.156  12.868  1.00 20.48           O  
ATOM     43  CB  MET L   4     -33.689  24.706  11.000  1.00 19.60           C  
ATOM     44  CG  MET L   4     -34.174  26.027  10.506  1.00 20.25           C  
ATOM     45  SD  MET L   4     -35.956  26.299  10.704  1.00 22.65           S  
ATOM     46  CE  MET L   4     -36.655  24.905   9.814  1.00 24.77           C  
ATOM     47  N   THR L   5     -34.044  22.306  13.449  1.00 17.24           N  
ATOM     48  CA  THR L   5     -33.461  21.062  13.935  1.00 16.94           C  
ATOM     49  C   THR L   5     -33.866  19.977  12.977  1.00 17.90           C  
ATOM     50  O   THR L   5     -35.054  19.574  12.949  1.00 18.75           O  
ATOM     51  CB  THR L   5     -33.963  20.720  15.378  1.00 17.94           C  
ATOM     52  OG1 THR L   5     -33.605  21.838  16.223  1.00 18.25           O  
ATOM     53  CG2 THR L   5     -33.272  19.431  15.891  1.00 18.79           C  
ATOM     54  N   GLN L   6     -32.879  19.514  12.216  1.00 17.37           N  
ATOM     55  CA  GLN L   6     -33.175  18.550  11.152  1.00 17.72           C  
ATOM     56  C   GLN L   6     -32.672  17.167  11.556  1.00 18.42           C  
ATOM     57  O   GLN L   6     -31.566  17.075  12.171  1.00 20.51           O  
ATOM     58  CB  GLN L   6     -32.396  18.948   9.882  1.00 16.85           C  
ATOM     59  CG  GLN L   6     -32.688  17.989   8.725  1.00 17.57           C  
ATOM     60  CD  GLN L   6     -32.010  18.478   7.427  1.00 17.31           C  
ATOM     61  OE1 GLN L   6     -31.583  19.639   7.366  1.00 19.68           O  
ATOM     62  NE2 GLN L   6     -31.949  17.604   6.384  1.00 18.25           N  
ATOM     63  N   SER L   7     -33.443  16.106  11.258  1.00 17.72           N  
ATOM     64  CA  SER L   7     -33.050  14.732  11.639  1.00 18.99           C  
ATOM     65  C   SER L   7     -33.433  13.779  10.491  1.00 18.02           C  
ATOM     66  O   SER L   7     -34.479  13.973   9.853  1.00 18.13           O  
ATOM     67  CB  SER L   7     -33.849  14.299  12.877  1.00 21.19           C  
ATOM     68  OG  SER L   7     -33.446  13.007  13.331  1.00 24.78           O  
ATOM     69  N   PRO L   8     -32.650  12.716  10.281  1.00 19.03           N  
ATOM     70  CA  PRO L   8     -31.382  12.393  10.979  1.00 19.18           C  
ATOM     71  C   PRO L   8     -30.196  13.131  10.346  1.00 19.73           C  
ATOM     72  O   PRO L   8     -30.368  13.860   9.349  1.00 21.12           O  
ATOM     73  CB  PRO L   8     -31.254  10.878  10.778  1.00 20.31           C  
ATOM     74  CG  PRO L   8     -31.906  10.608   9.408  1.00 20.02           C  
ATOM     75  CD  PRO L   8     -33.027  11.680   9.293  1.00 19.31           C  
ATOM     77  N   SER L   9     -29.014  12.945  10.936  0.50 18.62           N  
ATOM     79  CA  SER L   9     -27.773  13.529  10.429  0.50 18.96           C  
ATOM     81  C   SER L   9     -27.352  12.821   9.155  0.50 19.27           C  
ATOM     83  O   SER L   9     -26.905  13.449   8.199  0.50 19.20           O  
ATOM     85  CB  SER L   9     -26.627  13.389  11.466  0.50 19.00           C  
ATOM     87  OG  SER L   9     -25.489  14.053  10.918  0.50 22.52           O  
ATOM     88  N   SER L  10     -27.464  11.499   9.185  1.00 18.71           N  
ATOM     89  CA  SER L  10     -27.102  10.642   8.050  1.00 19.11           C  
ATOM     90  C   SER L  10     -27.942   9.392   8.119  1.00 19.29           C  
ATOM     91  O   SER L  10     -28.412   9.001   9.190  1.00 18.35           O  
ATOM     92  CB  SER L  10     -25.635  10.290   8.107  1.00 22.22           C  
ATOM     93  OG  SER L  10     -25.371   9.486   9.249  1.00 24.60           O  
ATOM     94  N   LEU L  11     -28.189   8.802   6.950  1.00 18.78           N  
ATOM     95  CA  LEU L  11     -28.865   7.516   6.996  1.00 19.32           C  
ATOM     96  C   LEU L  11     -28.444   6.723   5.791  1.00 19.87           C  
ATOM     97  O   LEU L  11     -28.082   7.330   4.750  1.00 21.04           O  
ATOM     98  CB  LEU L  11     -30.375   7.627   7.011  1.00 22.04           C  
ATOM     99  CG  LEU L  11     -31.089   8.261   5.807  1.00 22.28           C  
ATOM    100  CD1 LEU L  11     -31.401   7.236   4.732  1.00 24.82           C  
ATOM    101  CD2 LEU L  11     -32.432   8.899   6.150  1.00 22.35           C  
ATOM    103  N   SER L  12     -28.533   5.392   5.932  0.50 20.21           N  
ATOM    105  CA  SER L  12     -28.205   4.411   4.883  0.50 20.76           C  
ATOM    107  C   SER L  12     -29.487   3.656   4.490  0.50 19.71           C  
ATOM    109  O   SER L  12     -30.195   3.134   5.365  0.50 19.14           O  
ATOM    111  CB  SER L  12     -27.174   3.420   5.455  0.50 22.49           C  
ATOM    113  OG  SER L  12     -26.649   2.542   4.470  0.50 26.90           O  
ATOM    114  N   ALA L  13     -29.817   3.609   3.195  1.00 18.31           N  
ATOM    115  CA  ALA L  13     -31.031   2.916   2.788  1.00 19.84           C  
ATOM    116  C   ALA L  13     -30.771   2.248   1.435  1.00 20.80           C  
ATOM    117  O   ALA L  13     -29.701   2.412   0.870  1.00 21.89           O  
ATOM    118  CB  ALA L  13     -32.218   3.887   2.719  1.00 21.37           C  
ATOM    119  N   SER L  14     -31.757   1.509   0.934  1.00 21.22           N  
ATOM    120  CA  SER L  14     -31.603   0.751  -0.300  1.00 21.17           C  
ATOM    121  C   SER L  14     -32.439   1.355  -1.418  1.00 21.65           C  
ATOM    122  O   SER L  14     -33.434   2.026  -1.167  1.00 21.26           O  
ATOM    123  CB  SER L  14     -32.044  -0.693  -0.033  1.00 23.57           C  
ATOM    124  OG  SER L  14     -31.133  -1.303   0.870  1.00 26.22           O  
ATOM    125  N   VAL L  15     -32.030   1.098  -2.668  1.00 20.77           N  
ATOM    126  CA  VAL L  15     -32.881   1.504  -3.781  1.00 21.80           C  
ATOM    127  C   VAL L  15     -34.282   0.966  -3.576  1.00 21.81           C  
ATOM    128  O   VAL L  15     -34.464  -0.219  -3.220  1.00 23.30           O  
ATOM    129  CB  VAL L  15     -32.294   1.056  -5.152  1.00 21.82           C  
ATOM    130  CG1 VAL L  15     -33.265   1.333  -6.307  1.00 25.63           C  
ATOM    131  CG2 VAL L  15     -30.981   1.806  -5.356  1.00 24.77           C  
ATOM    132  N   GLY L  16     -35.265   1.830  -3.787  1.00 21.69           N  
ATOM    133  CA  GLY L  16     -36.662   1.449  -3.647  1.00 22.35           C  
ATOM    134  C   GLY L  16     -37.261   1.766  -2.277  1.00 22.67           C  
ATOM    135  O   GLY L  16     -38.497   1.715  -2.109  1.00 24.62           O  
ATOM    136  N   ASP L  17     -36.403   2.113  -1.317  1.00 22.44           N  
ATOM    137  CA  ASP L  17     -36.848   2.280   0.072  1.00 23.12           C  
ATOM    138  C   ASP L  17     -37.528   3.645   0.213  1.00 21.86           C  
ATOM    139  O   ASP L  17     -37.159   4.614  -0.462  1.00 22.26           O  
ATOM    140  CB  ASP L  17     -35.621   2.321   1.017  1.00 24.17           C  
ATOM    141  CG  ASP L  17     -35.152   0.929   1.505  1.00 26.53           C  
ATOM    142  OD1 ASP L  17     -35.840  -0.086   1.293  1.00 25.57           O  
ATOM    143  OD2 ASP L  17     -34.120   0.891   2.239  1.00 30.31           O  
ATOM    144  N   ARG L  18     -38.433   3.747   1.187  1.00 21.14           N  
ATOM    145  CA  ARG L  18     -38.965   5.047   1.595  1.00 20.92           C  
ATOM    146  C   ARG L  18     -37.959   5.750   2.522  1.00 19.56           C  
ATOM    147  O   ARG L  18     -37.445   5.097   3.456  1.00 21.22           O  
ATOM    148  CB  ARG L  18     -40.267   4.803   2.371  1.00 20.55           C  
ATOM    149  CG  ARG L  18     -41.054   6.081   2.733  1.00 21.41           C  
ATOM    150  CD  ARG L  18     -42.376   5.702   3.381  1.00 24.96           C  
ATOM    151  NE  ARG L  18     -43.304   6.824   3.656  1.00 30.86           N  
ATOM    152  CZ  ARG L  18     -44.160   7.349   2.755  1.00 32.52           C  
ATOM    153  NH1 ARG L  18     -44.211   6.878   1.504  1.00 32.47           N  
ATOM    154  NH2 ARG L  18     -44.971   8.352   3.099  1.00 33.82           N  
ATOM    155  N   VAL L  19     -37.723   7.068   2.285  1.00 18.04           N  
ATOM    156  CA  VAL L  19     -36.782   7.855   3.108  1.00 19.09           C  
ATOM    157  C   VAL L  19     -37.552   9.019   3.730  1.00 18.36           C  
ATOM    158  O   VAL L  19     -38.254   9.726   2.981  1.00 19.01           O  
ATOM    159  CB  VAL L  19     -35.627   8.432   2.270  1.00 19.53           C  
ATOM    160  CG1 VAL L  19     -34.785   9.451   3.077  1.00 21.34           C  
ATOM    161  CG2 VAL L  19     -34.822   7.286   1.749  1.00 22.04           C  
ATOM    162  N   THR L  20     -37.416   9.181   5.059  1.00 18.38           N  
ATOM    163  CA  THR L  20     -38.200  10.213   5.719  1.00 18.13           C  
ATOM    164  C   THR L  20     -37.268  11.095   6.573  1.00 19.00           C  
ATOM    165  O   THR L  20     -36.502  10.549   7.378  1.00 20.26           O  
ATOM    166  CB  THR L  20     -39.286   9.595   6.658  1.00 20.47           C  
ATOM    167  OG1 THR L  20     -39.961   8.526   5.971  1.00 20.10           O  
ATOM    168  CG2 THR L  20     -40.262  10.693   7.119  1.00 21.92           C  
ATOM    169  N   ILE L  21     -37.314  12.400   6.308  1.00 17.88           N  
ATOM    170  CA  ILE L  21     -36.438  13.383   6.983  1.00 18.75           C  
ATOM    171  C   ILE L  21     -37.357  14.399   7.628  1.00 18.49           C  
ATOM    172  O   ILE L  21     -38.385  14.775   7.026  1.00 18.19           O  
ATOM    173  CB  ILE L  21     -35.496  14.077   5.920  1.00 20.37           C  
ATOM    174  CG1 ILE L  21     -34.575  12.986   5.333  1.00 21.20           C  
ATOM    175  CG2 ILE L  21     -34.684  15.202   6.520  1.00 21.25           C  
ATOM    176  CD1 ILE L  21     -33.768  13.447   4.101  1.00 22.01           C  
ATOM    177  N   THR L  22     -37.017  14.813   8.867  1.00 17.80           N  
ATOM    178  CA  THR L  22     -37.864  15.830   9.496  1.00 17.59           C  
ATOM    179  C   THR L  22     -37.081  17.112   9.801  1.00 18.39           C  
ATOM    180  O   THR L  22     -35.810  17.072   9.934  1.00 19.13           O  
ATOM    181  CB  THR L  22     -38.522  15.305  10.802  1.00 20.09           C  
ATOM    182  OG1 THR L  22     -37.467  14.872  11.671  1.00 20.60           O  
ATOM    183  CG2 THR L  22     -39.437  14.104  10.513  1.00 21.28           C  
ATOM    185  N   CYS L  23     -37.815  18.230   9.890  0.50 17.68           N  
ATOM    187  CA  CYS L  23     -37.229  19.497  10.371  0.50 19.23           C  
ATOM    189  C   CYS L  23     -38.224  20.077  11.355  0.50 18.76           C  
ATOM    191  O   CYS L  23     -39.456  19.921  11.192  0.50 19.10           O  
ATOM    193  CB  CYS L  23     -36.885  20.485   9.223  0.50 21.21           C  
ATOM    195  SG  CYS L  23     -35.149  20.199   8.607  0.50 24.66           S  
ATOM    196  N   GLN L  24     -37.669  20.678  12.400  1.00 18.52           N  
ATOM    197  CA  GLN L  24     -38.481  21.428  13.380  1.00 19.23           C  
ATOM    198  C   GLN L  24     -37.939  22.867  13.412  1.00 19.58           C  
ATOM    199  O   GLN L  24     -36.712  23.047  13.549  1.00 20.55           O  
ATOM    200  CB  GLN L  24     -38.270  20.879  14.836  1.00 20.22           C  
ATOM    201  CG  GLN L  24     -39.178  21.511  15.856  1.00 23.30           C  
ATOM    202  CD  GLN L  24     -39.017  20.785  17.110  1.00 27.72           C  
ATOM    203  OE1 GLN L  24     -39.379  19.612  17.201  1.00 26.91           O  
ATOM    204  NE2 GLN L  24     -38.421  21.435  18.069  1.00 27.02           N  
ATOM    205  N   ALA L  25     -38.825  23.859  13.345  1.00 18.82           N  
ATOM    206  CA  ALA L  25     -38.424  25.245  13.541  1.00 19.38           C  
ATOM    207  C   ALA L  25     -38.665  25.659  14.984  1.00 20.42           C  
ATOM    208  O   ALA L  25     -39.639  25.211  15.600  1.00 20.50           O  
ATOM    209  CB  ALA L  25     -39.256  26.148  12.685  1.00 19.83           C  
ATOM    210  N   SER L  26     -37.810  26.547  15.456  1.00 18.98           N  
ATOM    211  CA  SER L  26     -37.901  26.987  16.875  1.00 20.90           C  
ATOM    212  C   SER L  26     -39.052  27.956  17.078  1.00 21.67           C  
ATOM    213  O   SER L  26     -39.394  28.286  18.254  1.00 21.02           O  
ATOM    214  CB  SER L  26     -36.582  27.639  17.313  1.00 20.04           C  
ATOM    215  OG  SER L  26     -36.312  28.803  16.537  1.00 21.37           O  
ATOM    216  N   GLN L  27     -39.641  28.479  16.025  1.00 20.10           N  
ATOM    217  CA  GLN L  27     -40.856  29.277  16.136  1.00 21.81           C  
ATOM    218  C   GLN L  27     -41.717  29.051  14.898  1.00 20.81           C  
ATOM    219  O   GLN L  27     -41.248  28.453  13.909  1.00 20.93           O  
ATOM    220  CB  GLN L  27     -40.518  30.751  16.336  1.00 23.92           C  
ATOM    221  CG  GLN L  27     -39.889  31.379  15.123  1.00 25.00           C  
ATOM    222  CD  GLN L  27     -39.369  32.787  15.408  1.00 26.42           C  
ATOM    223  OE1 GLN L  27     -38.490  32.972  16.258  1.00 27.09           O  
ATOM    224  NE2 GLN L  27     -39.862  33.768  14.648  1.00 28.21           N  
ATOM    225  N   ASP L  28     -42.965  29.483  14.963  1.00 21.24           N  
ATOM    226  CA  ASP L  28     -43.903  29.209  13.894  1.00 22.17           C  
ATOM    227  C   ASP L  28     -43.448  29.960  12.630  1.00 21.29           C  
ATOM    228  O   ASP L  28     -43.427  31.220  12.638  1.00 23.45           O  
ATOM    229  CB  ASP L  28     -45.333  29.630  14.309  1.00 22.87           C  
ATOM    230  CG  ASP L  28     -46.394  29.083  13.332  1.00 27.42           C  
ATOM    231  OD1 ASP L  28     -46.283  29.346  12.128  1.00 24.82           O  
ATOM    232  OD2 ASP L  28     -47.314  28.344  13.760  1.00 33.26           O  
ATOM    233  N   ILE L  29     -43.100  29.215  11.546  1.00 19.84           N  
ATOM    234  CA  ILE L  29     -42.688  29.822  10.266  1.00 19.55           C  
ATOM    235  C   ILE L  29     -43.778  29.616   9.201  1.00 19.05           C  
ATOM    236  O   ILE L  29     -43.477  29.712   7.995  1.00 18.86           O  
ATOM    237  CB  ILE L  29     -41.329  29.248   9.770  1.00 19.27           C  
ATOM    238  CG1 ILE L  29     -41.390  27.737   9.619  1.00 20.15           C  
ATOM    239  CG2 ILE L  29     -40.182  29.697  10.719  1.00 20.50           C  
ATOM    240  CD1 ILE L  29     -40.169  27.139   8.934  1.00 18.90           C  
ATOM    242  N   SER L  30     -45.021  29.355   9.610  0.50 19.40           N  
ATOM    244  CA  SER L  30     -46.098  29.139   8.630  0.50 20.37           C  
ATOM    246  C   SER L  30     -45.730  28.023   7.652  0.50 20.81           C  
ATOM    248  O   SER L  30     -45.440  26.904   8.083  0.50 20.69           O  
ATOM    250  CB  SER L  30     -46.378  30.432   7.868  0.50 21.22           C  
ATOM    252  OG  SER L  30     -47.481  30.253   7.011  0.50 23.68           O  
ATOM    253  N   ASN L  31     -45.790  28.330   6.348  1.00 19.98           N  
ATOM    254  CA  ASN L  31     -45.401  27.345   5.306  1.00 20.29           C  
ATOM    255  C   ASN L  31     -44.031  27.684   4.673  1.00 19.36           C  
ATOM    256  O   ASN L  31     -43.660  27.112   3.647  1.00 18.84           O  
ATOM    257  CB  ASN L  31     -46.472  27.265   4.204  1.00 21.38           C  
ATOM    258  CG  ASN L  31     -47.815  26.774   4.726  1.00 26.30           C  
ATOM    259  OD1 ASN L  31     -47.890  25.917   5.618  1.00 32.37           O  
ATOM    260  ND2 ASN L  31     -48.894  27.285   4.121  1.00 33.59           N  
ATOM    261  N   TYR L  32     -43.305  28.620   5.292  1.00 18.10           N  
ATOM    262  CA  TYR L  32     -42.101  29.137   4.640  1.00 18.07           C  
ATOM    263  C   TYR L  32     -40.897  28.226   4.878  1.00 17.03           C  
ATOM    264  O   TYR L  32     -39.895  28.632   5.491  1.00 17.27           O  
ATOM    265  CB  TYR L  32     -41.812  30.576   5.078  1.00 19.12           C  
ATOM    266  CG  TYR L  32     -42.928  31.524   4.767  1.00 21.37           C  
ATOM    267  CD1 TYR L  32     -43.401  31.684   3.464  1.00 23.57           C  
ATOM    268  CD2 TYR L  32     -43.516  32.276   5.788  1.00 23.33           C  
ATOM    269  CE1 TYR L  32     -44.423  32.582   3.174  1.00 26.82           C  
ATOM    270  CE2 TYR L  32     -44.522  33.193   5.512  1.00 26.39           C  
ATOM    271  CZ  TYR L  32     -44.976  33.335   4.207  1.00 26.59           C  
ATOM    272  OH  TYR L  32     -46.001  34.244   3.947  1.00 29.22           O  
ATOM    273  N   LEU L  33     -40.966  27.000   4.327  1.00 17.11           N  
ATOM    274  CA  LEU L  33     -39.846  26.062   4.424  1.00 17.73           C  
ATOM    275  C   LEU L  33     -39.530  25.540   2.994  1.00 17.41           C  
ATOM    276  O   LEU L  33     -40.466  25.181   2.274  1.00 17.90           O  
ATOM    277  CB  LEU L  33     -40.202  24.872   5.337  1.00 18.42           C  
ATOM    278  CG  LEU L  33     -38.971  24.011   5.657  1.00 21.71           C  
ATOM    279  CD1 LEU L  33     -38.060  24.625   6.727  1.00 21.49           C  
ATOM    280  CD2 LEU L  33     -39.317  22.554   6.004  1.00 27.74           C  
ATOM    281  N   ILE L  34     -38.223  25.497   2.693  1.00 16.15           N  
ATOM    282  CA  ILE L  34     -37.709  24.925   1.461  1.00 16.42           C  
ATOM    283  C   ILE L  34     -36.924  23.675   1.798  1.00 15.69           C  
ATOM    284  O   ILE L  34     -36.259  23.605   2.861  1.00 17.20           O  
ATOM    285  CB  ILE L  34     -36.743  25.916   0.809  1.00 17.08           C  
ATOM    286  CG1 ILE L  34     -37.539  27.078   0.171  1.00 19.36           C  
ATOM    287  CG2 ILE L  34     -35.886  25.214  -0.252  1.00 19.62           C  
ATOM    288  CD1 ILE L  34     -36.704  28.342  -0.121  1.00 20.40           C  
ATOM    289  N   TRP L  35     -36.998  22.693   0.889  1.00 15.64           N  
ATOM    290  CA  TRP L  35     -36.080  21.551   0.949  1.00 16.12           C  
ATOM    291  C   TRP L  35     -35.175  21.590  -0.278  1.00 16.82           C  
ATOM    292  O   TRP L  35     -35.667  21.687  -1.417  1.00 16.62           O  
ATOM    293  CB  TRP L  35     -36.832  20.215   0.924  1.00 16.59           C  
ATOM    294  CG  TRP L  35     -37.606  19.997   2.192  1.00 16.84           C  
ATOM    295  CD1 TRP L  35     -38.945  20.268   2.385  1.00 18.54           C  
ATOM    296  CD2 TRP L  35     -37.110  19.470   3.452  1.00 14.65           C  
ATOM    297  NE1 TRP L  35     -39.325  19.920   3.695  1.00 16.75           N  
ATOM    298  CE2 TRP L  35     -38.220  19.449   4.375  1.00 15.74           C  
ATOM    299  CE3 TRP L  35     -35.863  18.964   3.854  1.00 16.89           C  
ATOM    300  CZ2 TRP L  35     -38.087  18.961   5.699  1.00 16.40           C  
ATOM    301  CZ3 TRP L  35     -35.723  18.491   5.166  1.00 17.37           C  
ATOM    302  CH2 TRP L  35     -36.848  18.477   6.060  1.00 17.28           C  
ATOM    303  N   TYR L  36     -33.868  21.561  -0.007  1.00 15.95           N  
ATOM    304  CA  TYR L  36     -32.867  21.506  -1.073  1.00 16.23           C  
ATOM    305  C   TYR L  36     -32.169  20.158  -1.145  1.00 16.85           C  
ATOM    306  O   TYR L  36     -31.986  19.488  -0.110  1.00 17.87           O  
ATOM    307  CB  TYR L  36     -31.719  22.492  -0.784  1.00 17.47           C  
ATOM    308  CG  TYR L  36     -32.086  23.941  -0.857  1.00 16.53           C  
ATOM    309  CD1 TYR L  36     -32.222  24.621  -2.065  1.00 18.71           C  
ATOM    310  CD2 TYR L  36     -32.311  24.659   0.311  1.00 18.30           C  
ATOM    311  CE1 TYR L  36     -32.611  25.957  -2.101  1.00 19.01           C  
ATOM    312  CE2 TYR L  36     -32.629  25.969   0.287  1.00 19.60           C  
ATOM    313  CZ  TYR L  36     -32.797  26.654  -0.900  1.00 20.27           C  
ATOM    314  OH  TYR L  36     -33.144  27.984  -0.887  1.00 22.41           O  
ATOM    315  N   GLN L  37     -31.689  19.844  -2.365  1.00 15.80           N  
ATOM    316  CA  GLN L  37     -30.863  18.680  -2.568  1.00 16.51           C  
ATOM    317  C   GLN L  37     -29.472  19.188  -2.961  1.00 17.48           C  
ATOM    318  O   GLN L  37     -29.369  20.052  -3.851  1.00 19.35           O  
ATOM    319  CB  GLN L  37     -31.400  17.878  -3.772  1.00 17.48           C  
ATOM    320  CG  GLN L  37     -30.599  16.672  -4.078  1.00 18.30           C  
ATOM    321  CD  GLN L  37     -31.138  16.048  -5.362  1.00 19.71           C  
ATOM    322  OE1 GLN L  37     -31.052  16.689  -6.434  1.00 22.63           O  
ATOM    323  NE2 GLN L  37     -31.747  14.827  -5.258  1.00 20.76           N  
ATOM    324  N   GLN L  38     -28.416  18.676  -2.303  1.00 18.25           N  
ATOM    325  CA  GLN L  38     -27.073  19.141  -2.631  1.00 19.22           C  
ATOM    326  C   GLN L  38     -26.159  17.967  -2.932  1.00 20.72           C  
ATOM    327  O   GLN L  38     -25.958  17.115  -2.086  1.00 19.67           O  
ATOM    328  CB  GLN L  38     -26.504  19.929  -1.439  1.00 20.85           C  
ATOM    329  CG  GLN L  38     -25.114  20.472  -1.707  1.00 20.87           C  
ATOM    330  CD  GLN L  38     -24.652  21.399  -0.593  1.00 24.29           C  
ATOM    331  OE1 GLN L  38     -25.056  21.236   0.569  1.00 27.34           O  
ATOM    332  NE2 GLN L  38     -23.744  22.312  -0.912  1.00 25.40           N  
ATOM    333  N   LYS L  39     -25.573  17.972  -4.136  1.00 22.50           N  
ATOM    334  CA  LYS L  39     -24.452  17.047  -4.444  1.00 24.79           C  
ATOM    335  C   LYS L  39     -23.064  17.778  -4.375  1.00 25.93           C  
ATOM    336  O   LYS L  39     -23.005  18.997  -4.637  1.00 26.40           O  
ATOM    337  CB  LYS L  39     -24.746  16.441  -5.823  1.00 24.40           C  
ATOM    338  CG  LYS L  39     -26.182  15.876  -5.935  1.00 24.44           C  
ATOM    339  CD  LYS L  39     -26.482  15.201  -7.283  1.00 25.41           C  
ATOM    340  CE  LYS L  39     -27.803  14.441  -7.173  1.00 27.97           C  
ATOM    341  NZ  LYS L  39     -28.155  13.789  -8.450  1.00 27.23           N  
ATOM    342  N   PRO L  40     -21.936  17.052  -4.068  1.00 29.36           N  
ATOM    343  CA  PRO L  40     -20.518  17.593  -4.016  1.00 28.48           C  
ATOM    344  C   PRO L  40     -20.472  18.448  -5.267  1.00 29.92           C  
ATOM    345  O   PRO L  40     -20.441  17.916  -6.369  1.00 30.41           O  
ATOM    346  CB  PRO L  40     -19.677  16.334  -4.089  1.00 30.58           C  
ATOM    347  CG  PRO L  40     -20.561  15.291  -3.339  1.00 30.75           C  
ATOM    348  CD  PRO L  40     -21.998  15.626  -3.700  1.00 28.61           C  
ATOM    349  N   GLY L  41     -20.408  19.774  -5.142  1.00 30.35           N  
ATOM    350  CA  GLY L  41     -19.395  20.592  -5.762  1.00 28.96           C  
ATOM    351  C   GLY L  41     -20.418  21.207  -6.759  1.00 30.60           C  
ATOM    352  O   GLY L  41     -20.079  21.792  -7.826  1.00 31.96           O  
ATOM    353  N   LYS L  42     -21.718  21.078  -6.402  1.00 29.11           N  
ATOM    354  CA  LYS L  42     -22.825  21.533  -7.266  1.00 28.89           C  
ATOM    355  C   LYS L  42     -23.689  22.569  -6.551  1.00 27.21           C  
ATOM    356  O   LYS L  42     -23.736  22.578  -5.318  1.00 23.57           O  
ATOM    357  CB  LYS L  42     -23.735  20.352  -7.630  1.00 30.20           C  
ATOM    358  CG  LYS L  42     -23.029  19.154  -8.320  1.00 32.22           C  
ATOM    359  CD  LYS L  42     -22.151  19.604  -9.480  1.00 34.99           C  
ATOM    360  CE  LYS L  42     -21.310  18.428  -9.981  1.00 37.01           C  
ATOM    361  NZ  LYS L  42     -21.204  18.476 -11.468  1.00 38.44           N  
ATOM    362  N   ALA L  43     -24.398  23.414  -7.318  1.00 26.94           N  
ATOM    363  CA  ALA L  43     -25.348  24.341  -6.674  1.00 26.54           C  
ATOM    364  C   ALA L  43     -26.426  23.504  -5.960  1.00 27.00           C  
ATOM    365  O   ALA L  43     -26.995  22.587  -6.601  1.00 27.47           O  
ATOM    366  CB  ALA L  43     -25.988  25.313  -7.746  1.00 27.62           C  
ATOM    367  N   PRO L  44     -26.707  23.797  -4.650  1.00 26.07           N  
ATOM    368  CA  PRO L  44     -27.915  23.179  -3.999  1.00 25.58           C  
ATOM    369  C   PRO L  44     -29.092  23.515  -4.839  1.00 24.15           C  
ATOM    370  O   PRO L  44     -29.154  24.641  -5.378  1.00 24.34           O  
ATOM    371  CB  PRO L  44     -28.017  23.908  -2.654  1.00 26.22           C  
ATOM    372  CG  PRO L  44     -26.511  24.381  -2.409  1.00 25.04           C  
ATOM    373  CD  PRO L  44     -25.999  24.730  -3.742  1.00 27.66           C  
ATOM    374  N   LYS L  45     -30.040  22.574  -4.938  1.00 21.31           N  
ATOM    375  CA  LYS L  45     -31.096  22.674  -5.896  1.00 21.78           C  
ATOM    376  C   LYS L  45     -32.406  22.619  -5.128  1.00 19.31           C  
ATOM    377  O   LYS L  45     -32.633  21.680  -4.348  1.00 17.80           O  
ATOM    378  CB  LYS L  45     -31.078  21.465  -6.825  1.00 21.98           C  
ATOM    379  CG  LYS L  45     -32.195  21.472  -7.864  1.00 27.14           C  
ATOM    380  CD  LYS L  45     -32.242  20.163  -8.678  1.00 27.18           C  
ATOM    381  CE  LYS L  45     -33.616  20.057  -9.328  1.00 30.65           C  
ATOM    382  NZ  LYS L  45     -34.541  21.014  -8.593  1.00 31.33           N  
ATOM    383  N   LEU L  46     -33.222  23.638  -5.330  1.00 17.98           N  
ATOM    384  CA  LEU L  46     -34.493  23.684  -4.630  1.00 16.86           C  
ATOM    385  C   LEU L  46     -35.445  22.612  -5.156  1.00 17.45           C  
ATOM    386  O   LEU L  46     -35.734  22.584  -6.392  1.00 18.85           O  
ATOM    387  CB  LEU L  46     -35.111  25.048  -4.815  1.00 18.13           C  
ATOM    388  CG  LEU L  46     -36.376  25.333  -3.983  1.00 18.66           C  
ATOM    389  CD1 LEU L  46     -36.426  26.783  -3.596  1.00 17.43           C  
ATOM    390  CD2 LEU L  46     -37.612  24.909  -4.776  1.00 19.84           C  
ATOM    392  N   LEU L  47     -35.948  21.749  -4.248  0.50 16.34           N  
ATOM    394  CA  LEU L  47     -36.930  20.718  -4.656  0.50 17.65           C  
ATOM    396  C   LEU L  47     -38.339  21.170  -4.286  0.50 16.88           C  
ATOM    398  O   LEU L  47     -39.272  21.139  -5.118  0.50 17.38           O  
ATOM    400  CB  LEU L  47     -36.674  19.390  -3.934  0.50 18.27           C  
ATOM    402  CG  LEU L  47     -35.357  18.629  -4.074  0.50 20.25           C  
ATOM    404  CD1 LEU L  47     -34.192  19.523  -3.950  0.50 21.81           C  
ATOM    406  CD2 LEU L  47     -35.272  17.540  -3.005  0.50 19.56           C  
ATOM    407  N   ILE L  48     -38.488  21.547  -3.007  1.00 15.93           N  
ATOM    408  CA  ILE L  48     -39.824  21.859  -2.456  1.00 16.81           C  
ATOM    409  C   ILE L  48     -39.795  23.231  -1.831  1.00 17.41           C  
ATOM    410  O   ILE L  48     -38.779  23.612  -1.226  1.00 17.57           O  
ATOM    411  CB  ILE L  48     -40.158  20.794  -1.358  1.00 18.65           C  
ATOM    412  CG1 ILE L  48     -40.259  19.434  -2.062  1.00 22.38           C  
ATOM    413  CG2 ILE L  48     -41.451  21.151  -0.622  1.00 19.11           C  
ATOM    414  CD1 ILE L  48     -40.254  18.223  -1.198  1.00 27.84           C  
ATOM    415  N   TYR L  49     -40.857  24.005  -2.078  1.00 16.99           N  
ATOM    416  CA  TYR L  49     -41.016  25.293  -1.448  1.00 15.65           C  
ATOM    417  C   TYR L  49     -42.442  25.425  -0.864  1.00 16.75           C  
ATOM    418  O   TYR L  49     -43.314  24.618  -1.192  1.00 18.37           O  
ATOM    419  CB  TYR L  49     -40.732  26.428  -2.405  1.00 18.19           C  
ATOM    420  CG  TYR L  49     -41.775  26.494  -3.536  1.00 17.86           C  
ATOM    421  CD1 TYR L  49     -41.667  25.638  -4.644  1.00 17.15           C  
ATOM    422  CD2 TYR L  49     -42.826  27.395  -3.468  1.00 17.52           C  
ATOM    423  CE1 TYR L  49     -42.608  25.696  -5.696  1.00 16.86           C  
ATOM    424  CE2 TYR L  49     -43.794  27.411  -4.472  1.00 18.59           C  
ATOM    425  CZ  TYR L  49     -43.645  26.586  -5.589  1.00 19.27           C  
ATOM    426  OH  TYR L  49     -44.635  26.721  -6.529  1.00 18.88           O  
ATOM    427  N   ASP L  50     -42.637  26.432  -0.013  1.00 17.41           N  
ATOM    428  CA  ASP L  50     -43.912  26.621   0.660  1.00 18.05           C  
ATOM    429  C   ASP L  50     -44.311  25.286   1.330  1.00 17.59           C  
ATOM    430  O   ASP L  50     -45.523  24.912   1.354  1.00 18.84           O  
ATOM    431  CB  ASP L  50     -45.019  27.082  -0.331  1.00 17.95           C  
ATOM    432  CG  ASP L  50     -46.113  27.892   0.351  1.00 23.32           C  
ATOM    433  OD1 ASP L  50     -47.302  27.538   0.154  1.00 29.50           O  
ATOM    434  OD2 ASP L  50     -45.757  28.905   1.037  1.00 24.74           O  
ATOM    435  N   ALA L  51     -43.272  24.596   1.854  1.00 17.73           N  
ATOM    436  CA  ALA L  51     -43.437  23.318   2.583  1.00 18.07           C  
ATOM    437  C   ALA L  51     -43.886  22.129   1.762  1.00 18.06           C  
ATOM    438  O   ALA L  51     -43.430  21.033   2.074  1.00 17.86           O  
ATOM    439  CB  ALA L  51     -44.362  23.495   3.812  1.00 18.65           C  
ATOM    440  N   SER L  52     -44.724  22.350   0.713  1.00 17.56           N  
ATOM    441  CA  SER L  52     -45.311  21.189   0.051  1.00 17.30           C  
ATOM    442  C   SER L  52     -45.390  21.319  -1.472  1.00 17.81           C  
ATOM    443  O   SER L  52     -45.930  20.427  -2.128  1.00 18.99           O  
ATOM    444  CB  SER L  52     -46.749  20.970   0.518  1.00 19.82           C  
ATOM    445  OG  SER L  52     -47.532  22.129   0.265  1.00 22.36           O  
ATOM    446  N   ASN L  53     -44.827  22.402  -1.991  1.00 17.13           N  
ATOM    447  CA  ASN L  53     -44.953  22.633  -3.452  1.00 17.79           C  
ATOM    448  C   ASN L  53     -43.720  22.138  -4.183  1.00 17.42           C  
ATOM    449  O   ASN L  53     -42.599  22.446  -3.774  1.00 18.66           O  
ATOM    450  CB  ASN L  53     -45.123  24.118  -3.720  1.00 19.12           C  
ATOM    451  CG  ASN L  53     -46.514  24.665  -3.335  1.00 20.50           C  
ATOM    452  OD1 ASN L  53     -46.739  25.903  -3.362  1.00 27.40           O  
ATOM    453  ND2 ASN L  53     -47.451  23.790  -3.113  1.00 22.70           N  
ATOM    454  N   LEU L  54     -43.908  21.438  -5.299  1.00 17.84           N  
ATOM    455  CA  LEU L  54     -42.754  20.946  -6.047  1.00 17.95           C  
ATOM    456  C   LEU L  54     -42.331  21.903  -7.171  1.00 17.47           C  
ATOM    457  O   LEU L  54     -43.193  22.446  -7.871  1.00 18.10           O  
ATOM    458  CB  LEU L  54     -43.061  19.622  -6.742  1.00 18.81           C  
ATOM    459  CG  LEU L  54     -42.867  18.390  -5.856  1.00 21.46           C  
ATOM    460  CD1 LEU L  54     -43.781  18.430  -4.653  1.00 23.53           C  
ATOM    461  CD2 LEU L  54     -43.085  17.091  -6.637  1.00 22.71           C  
ATOM    462  N   GLU L  55     -41.012  21.988  -7.397  1.00 16.58           N  
ATOM    463  CA  GLU L  55     -40.515  22.749  -8.553  1.00 17.67           C  
ATOM    464  C   GLU L  55     -40.483  21.922  -9.822  1.00 16.75           C  
ATOM    465  O   GLU L  55     -40.714  20.700  -9.824  1.00 17.32           O  
ATOM    466  CB  GLU L  55     -39.132  23.329  -8.254  1.00 17.96           C  
ATOM    467  CG  GLU L  55     -39.280  24.760  -7.748  1.00 19.22           C  
ATOM    468  CD  GLU L  55     -39.745  25.744  -8.855  1.00 20.89           C  
ATOM    469  OE1 GLU L  55     -39.939  25.342 -10.053  1.00 20.78           O  
ATOM    470  OE2 GLU L  55     -39.943  26.944  -8.487  1.00 23.87           O  
ATOM    471  N   THR L  56     -40.188  22.611 -10.921  1.00 16.40           N  
ATOM    472  CA  THR L  56     -40.215  21.990 -12.217  1.00 16.97           C  
ATOM    473  C   THR L  56     -39.214  20.826 -12.305  1.00 17.78           C  
ATOM    474  O   THR L  56     -38.041  20.965 -11.906  1.00 19.64           O  
ATOM    475  CB  THR L  56     -39.950  23.078 -13.297  1.00 17.39           C  
ATOM    476  OG1 THR L  56     -40.833  24.187 -13.068  1.00 17.26           O  
ATOM    477  CG2 THR L  56     -40.136  22.468 -14.712  1.00 18.08           C  
ATOM    478  N   GLY L  57     -39.694  19.705 -12.828  1.00 18.67           N  
ATOM    479  CA  GLY L  57     -38.867  18.563 -13.066  1.00 18.83           C  
ATOM    480  C   GLY L  57     -38.608  17.739 -11.812  1.00 19.18           C  
ATOM    481  O   GLY L  57     -37.924  16.717 -11.888  1.00 22.13           O  
ATOM    482  N   VAL L  58     -39.074  18.196 -10.657  1.00 18.07           N  
ATOM    483  CA  VAL L  58     -38.878  17.364  -9.450  1.00 19.80           C  
ATOM    484  C   VAL L  58     -39.815  16.150  -9.536  1.00 20.87           C  
ATOM    485  O   VAL L  58     -41.027  16.315  -9.704  1.00 21.59           O  
ATOM    486  CB  VAL L  58     -39.165  18.199  -8.203  1.00 19.15           C  
ATOM    487  CG1 VAL L  58     -39.119  17.301  -6.902  1.00 20.38           C  
ATOM    488  CG2 VAL L  58     -38.145  19.319  -8.142  1.00 17.85           C  
ATOM    489  N   PRO L  59     -39.250  14.930  -9.445  1.00 23.10           N  
ATOM    490  CA  PRO L  59     -40.058  13.736  -9.613  1.00 22.75           C  
ATOM    491  C   PRO L  59     -41.115  13.591  -8.523  1.00 21.52           C  
ATOM    492  O   PRO L  59     -40.917  14.087  -7.377  1.00 21.38           O  
ATOM    493  CB  PRO L  59     -39.024  12.596  -9.541  1.00 23.74           C  
ATOM    494  CG  PRO L  59     -37.716  13.191  -9.899  1.00 26.35           C  
ATOM    495  CD  PRO L  59     -37.814  14.626  -9.372  1.00 23.50           C  
ATOM    496  N   SER L  60     -42.182  12.865  -8.858  1.00 22.50           N  
ATOM    497  CA  SER L  60     -43.319  12.734  -7.976  1.00 22.48           C  
ATOM    498  C   SER L  60     -42.949  11.914  -6.719  1.00 21.19           C  
ATOM    499  O   SER L  60     -43.747  11.897  -5.761  1.00 21.75           O  
ATOM    500  CB  SER L  60     -44.496  12.031  -8.665  1.00 23.74           C  
ATOM    501  OG  SER L  60     -44.111  10.728  -9.047  1.00 28.66           O  
ATOM    502  N   ARG L  61     -41.798  11.219  -6.731  1.00 19.54           N  
ATOM    503  CA  ARG L  61     -41.444  10.446  -5.512  1.00 20.11           C  
ATOM    504  C   ARG L  61     -41.080  11.396  -4.367  1.00 18.95           C  
ATOM    505  O   ARG L  61     -40.992  10.937  -3.205  1.00 19.56           O  
ATOM    506  CB  ARG L  61     -40.288   9.476  -5.722  1.00 19.57           C  
ATOM    507  CG  ARG L  61     -39.000  10.070  -6.228  1.00 22.09           C  
ATOM    508  CD  ARG L  61     -37.856   8.979  -6.327  1.00 23.27           C  
ATOM    509  NE  ARG L  61     -36.629   9.529  -6.905  1.00 24.71           N  
ATOM    510  CZ  ARG L  61     -36.486   9.878  -8.181  1.00 25.14           C  
ATOM    511  NH1 ARG L  61     -37.498   9.694  -9.060  1.00 25.39           N  
ATOM    512  NH2 ARG L  61     -35.333  10.378  -8.595  1.00 25.47           N  
ATOM    513  N   PHE L  62     -40.876  12.683  -4.658  1.00 17.69           N  
ATOM    514  CA  PHE L  62     -40.511  13.628  -3.558  1.00 17.87           C  
ATOM    515  C   PHE L  62     -41.756  14.341  -3.061  1.00 18.48           C  
ATOM    516  O   PHE L  62     -42.594  14.749  -3.868  1.00 19.58           O  
ATOM    517  CB  PHE L  62     -39.526  14.695  -4.066  1.00 18.91           C  
ATOM    518  CG  PHE L  62     -38.152  14.158  -4.417  1.00 19.50           C  
ATOM    519  CD1 PHE L  62     -37.200  13.943  -3.428  1.00 21.54           C  
ATOM    520  CD2 PHE L  62     -37.815  13.863  -5.740  1.00 22.52           C  
ATOM    521  CE1 PHE L  62     -35.928  13.446  -3.723  1.00 23.53           C  
ATOM    522  CE2 PHE L  62     -36.526  13.370  -6.058  1.00 23.42           C  
ATOM    523  CZ  PHE L  62     -35.581  13.180  -5.042  1.00 21.01           C  
ATOM    524  N   SER L  63     -41.893  14.512  -1.730  1.00 17.95           N  
ATOM    525  CA  SER L  63     -43.017  15.280  -1.249  1.00 18.60           C  
ATOM    526  C   SER L  63     -42.626  15.980   0.058  1.00 18.75           C  
ATOM    527  O   SER L  63     -41.667  15.535   0.729  1.00 20.25           O  
ATOM    528  CB  SER L  63     -44.238  14.399  -0.998  1.00 22.41           C  
ATOM    529  OG  SER L  63     -43.985  13.448  -0.007  1.00 23.51           O  
ATOM    530  N   GLY L  64     -43.318  17.067   0.389  1.00 18.95           N  
ATOM    531  CA  GLY L  64     -43.087  17.716   1.696  1.00 19.09           C  
ATOM    532  C   GLY L  64     -44.419  17.971   2.335  1.00 19.05           C  
ATOM    533  O   GLY L  64     -45.451  18.180   1.647  1.00 19.77           O  
ATOM    534  N   SER L  65     -44.396  17.968   3.675  1.00 18.19           N  
ATOM    535  CA  SER L  65     -45.616  18.311   4.372  1.00 20.85           C  
ATOM    536  C   SER L  65     -45.251  19.041   5.661  1.00 21.07           C  
ATOM    537  O   SER L  65     -44.079  19.161   6.052  1.00 19.91           O  
ATOM    538  CB  SER L  65     -46.463  17.080   4.698  1.00 22.88           C  
ATOM    539  OG  SER L  65     -45.777  16.254   5.610  1.00 26.00           O  
ATOM    540  N   GLY L  66     -46.284  19.564   6.295  1.00 22.50           N  
ATOM    541  CA  GLY L  66     -46.113  20.246   7.563  1.00 22.72           C  
ATOM    542  C   GLY L  66     -46.392  21.732   7.458  1.00 24.10           C  
ATOM    543  O   GLY L  66     -46.437  22.340   6.380  1.00 24.75           O  
ATOM    545  N   SER L  67     -46.564  22.362   8.615  0.50 24.17           N  
ATOM    547  CA  SER L  67     -46.898  23.785   8.665  0.50 23.75           C  
ATOM    549  C   SER L  67     -46.733  24.257  10.097  0.50 22.66           C  
ATOM    551  O   SER L  67     -47.178  23.552  11.022  0.50 22.34           O  
ATOM    553  CB  SER L  67     -48.364  23.987   8.310  0.50 25.17           C  
ATOM    555  OG  SER L  67     -49.161  23.405   9.330  0.50 27.53           O  
ATOM    556  N   GLY L  68     -46.131  25.432  10.287  1.00 22.01           N  
ATOM    557  CA  GLY L  68     -45.947  25.980  11.649  1.00 21.24           C  
ATOM    558  C   GLY L  68     -44.538  25.660  12.095  1.00 20.14           C  
ATOM    559  O   GLY L  68     -43.598  26.382  11.769  1.00 20.16           O  
ATOM    560  N   THR L  69     -44.383  24.562  12.843  1.00 20.05           N  
ATOM    561  CA  THR L  69     -43.085  24.252  13.401  1.00 20.67           C  
ATOM    562  C   THR L  69     -42.568  22.873  13.013  1.00 20.49           C  
ATOM    563  O   THR L  69     -41.360  22.645  13.193  1.00 22.29           O  
ATOM    564  CB  THR L  69     -43.077  24.302  14.952  1.00 21.58           C  
ATOM    565  OG1 THR L  69     -44.070  23.396  15.429  1.00 24.69           O  
ATOM    566  CG2 THR L  69     -43.384  25.709  15.456  1.00 23.39           C  
ATOM    567  N   ASP L  70     -43.405  21.974  12.451  1.00 19.74           N  
ATOM    568  CA  ASP L  70     -42.953  20.610  12.189  1.00 20.60           C  
ATOM    569  C   ASP L  70     -43.137  20.233  10.724  1.00 19.92           C  
ATOM    570  O   ASP L  70     -44.261  20.306  10.236  1.00 20.76           O  
ATOM    571  CB  ASP L  70     -43.731  19.645  13.072  1.00 21.57           C  
ATOM    572  CG  ASP L  70     -43.404  19.859  14.535  1.00 24.62           C  
ATOM    573  OD1 ASP L  70     -42.436  19.216  15.022  1.00 25.27           O  
ATOM    574  OD2 ASP L  70     -44.076  20.740  15.144  1.00 29.63           O  
ATOM    575  N   PHE L  71     -42.042  19.814  10.082  1.00 17.35           N  
ATOM    576  CA  PHE L  71     -42.085  19.539   8.648  1.00 17.64           C  
ATOM    577  C   PHE L  71     -41.471  18.179   8.331  1.00 17.60           C  
ATOM    578  O   PHE L  71     -40.574  17.710   9.040  1.00 18.43           O  
ATOM    579  CB  PHE L  71     -41.298  20.639   7.911  1.00 17.21           C  
ATOM    580  CG  PHE L  71     -41.844  22.015   8.192  1.00 17.67           C  
ATOM    581  CD1 PHE L  71     -42.805  22.561   7.363  1.00 16.47           C  
ATOM    582  CD2 PHE L  71     -41.433  22.752   9.304  1.00 17.51           C  
ATOM    583  CE1 PHE L  71     -43.361  23.811   7.615  1.00 17.01           C  
ATOM    584  CE2 PHE L  71     -42.003  23.991   9.542  1.00 17.74           C  
ATOM    585  CZ  PHE L  71     -42.957  24.516   8.689  1.00 18.78           C  
ATOM    586  N   THR L  72     -41.925  17.575   7.218  1.00 17.76           N  
ATOM    587  CA  THR L  72     -41.410  16.258   6.818  1.00 17.55           C  
ATOM    588  C   THR L  72     -41.140  16.292   5.307  1.00 17.62           C  
ATOM    589  O   THR L  72     -41.973  16.808   4.573  1.00 19.17           O  
ATOM    590  CB  THR L  72     -42.452  15.160   7.108  1.00 21.47           C  
ATOM    591  OG1 THR L  72     -42.832  15.262   8.497  1.00 22.63           O  
ATOM    592  CG2 THR L  72     -41.898  13.773   6.870  1.00 20.76           C  
ATOM    593  N   PHE L  73     -40.013  15.709   4.932  1.00 16.59           N  
ATOM    594  CA  PHE L  73     -39.640  15.529   3.523  1.00 17.22           C  
ATOM    595  C   PHE L  73     -39.548  14.023   3.299  1.00 17.01           C  
ATOM    596  O   PHE L  73     -38.924  13.296   4.111  1.00 18.36           O  
ATOM    597  CB  PHE L  73     -38.273  16.162   3.307  1.00 17.22           C  
ATOM    598  CG  PHE L  73     -37.657  15.898   1.964  1.00 18.57           C  
ATOM    599  CD1 PHE L  73     -38.058  16.647   0.876  1.00 18.73           C  
ATOM    600  CD2 PHE L  73     -36.660  14.935   1.816  1.00 20.30           C  
ATOM    601  CE1 PHE L  73     -37.486  16.420  -0.368  1.00 19.86           C  
ATOM    602  CE2 PHE L  73     -36.080  14.701   0.579  1.00 20.86           C  
ATOM    603  CZ  PHE L  73     -36.484  15.443  -0.493  1.00 19.93           C  
ATOM    604  N   THR L  74     -40.184  13.526   2.232  1.00 17.40           N  
ATOM    605  CA  THR L  74     -40.213  12.100   2.020  1.00 18.21           C  
ATOM    606  C   THR L  74     -39.821  11.779   0.570  1.00 18.58           C  
ATOM    607  O   THR L  74     -40.254  12.496  -0.358  1.00 19.08           O  
ATOM    608  CB  THR L  74     -41.637  11.572   2.271  1.00 20.60           C  
ATOM    609  OG1 THR L  74     -42.076  11.969   3.580  1.00 20.23           O  
ATOM    610  CG2 THR L  74     -41.674  10.038   2.223  1.00 23.04           C  
ATOM    611  N   ILE L  75     -39.003  10.728   0.432  1.00 17.64           N  
ATOM    612  CA  ILE L  75     -38.771  10.149  -0.914  1.00 18.14           C  
ATOM    613  C   ILE L  75     -39.473   8.792  -0.880  1.00 18.80           C  
ATOM    614  O   ILE L  75     -39.140   7.944  -0.048  1.00 19.62           O  
ATOM    615  CB  ILE L  75     -37.283   9.907  -1.195  1.00 19.17           C  
ATOM    616  CG1 ILE L  75     -36.479  11.193  -0.923  1.00 18.51           C  
ATOM    617  CG2 ILE L  75     -37.096   9.441  -2.691  1.00 20.82           C  
ATOM    618  CD1 ILE L  75     -34.936  11.051  -1.136  1.00 20.05           C  
ATOM    619  N   SER L  76     -40.475   8.581  -1.741  1.00 19.45           N  
ATOM    620  CA  SER L  76     -41.295   7.385  -1.598  1.00 20.11           C  
ATOM    621  C   SER L  76     -40.569   6.108  -1.999  1.00 20.52           C  
ATOM    622  O   SER L  76     -40.853   5.022  -1.450  1.00 22.97           O  
ATOM    623  CB  SER L  76     -42.567   7.548  -2.403  1.00 21.45           C  
ATOM    624  OG  SER L  76     -42.304   7.714  -3.767  1.00 23.88           O  
ATOM    625  N   SER L  77     -39.635   6.233  -2.939  1.00 20.58           N  
ATOM    626  CA  SER L  77     -38.903   5.078  -3.485  1.00 21.33           C  
ATOM    627  C   SER L  77     -37.520   5.559  -3.936  1.00 20.87           C  
ATOM    628  O   SER L  77     -37.380   6.130  -5.037  1.00 21.55           O  
ATOM    629  CB  SER L  77     -39.662   4.506  -4.698  1.00 23.57           C  
ATOM    630  OG  SER L  77     -38.923   3.431  -5.276  1.00 26.97           O  
ATOM    631  N   LEU L  78     -36.503   5.403  -3.073  1.00 20.44           N  
ATOM    632  CA  LEU L  78     -35.183   5.958  -3.361  1.00 21.25           C  
ATOM    633  C   LEU L  78     -34.628   5.465  -4.694  1.00 21.19           C  
ATOM    634  O   LEU L  78     -34.657   4.252  -4.949  1.00 22.04           O  
ATOM    635  CB  LEU L  78     -34.249   5.465  -2.263  1.00 22.52           C  
ATOM    636  CG  LEU L  78     -32.885   6.088  -2.111  1.00 23.58           C  
ATOM    637  CD1 LEU L  78     -32.969   7.581  -1.805  1.00 24.56           C  
ATOM    638  CD2 LEU L  78     -32.134   5.368  -0.943  1.00 23.21           C  
ATOM    640  N   GLN L  79     -34.124   6.391  -5.524  0.50 21.16           N  
ATOM    642  CA  GLN L  79     -33.384   6.011  -6.737  0.50 21.75           C  
ATOM    644  C   GLN L  79     -31.912   6.443  -6.620  0.50 21.72           C  
ATOM    646  O   GLN L  79     -31.584   7.354  -5.845  0.50 20.50           O  
ATOM    648  CB  GLN L  79     -34.051   6.611  -7.991  0.50 21.88           C  
ATOM    650  CG  GLN L  79     -35.481   6.116  -8.190  0.50 22.83           C  
ATOM    652  CD  GLN L  79     -36.120   6.484  -9.537  0.50 23.84           C  
ATOM    654  OE1 GLN L  79     -35.441   6.868 -10.506  0.50 28.30           O  
ATOM    656  NE2 GLN L  79     -37.440   6.328  -9.603  0.50 24.01           N  
ATOM    657  N   PRO L  80     -31.005   5.805  -7.389  1.00 21.67           N  
ATOM    658  CA  PRO L  80     -29.567   6.109  -7.236  1.00 22.27           C  
ATOM    659  C   PRO L  80     -29.195   7.572  -7.338  1.00 21.63           C  
ATOM    660  O   PRO L  80     -28.291   8.038  -6.591  1.00 23.55           O  
ATOM    661  CB  PRO L  80     -28.900   5.328  -8.390  1.00 23.49           C  
ATOM    662  CG  PRO L  80     -29.871   4.206  -8.669  1.00 23.77           C  
ATOM    663  CD  PRO L  80     -31.251   4.741  -8.392  1.00 22.07           C  
ATOM    664  N   GLU L  81     -29.890   8.319  -8.202  1.00 20.47           N  
ATOM    665  CA  GLU L  81     -29.545   9.721  -8.418  1.00 21.34           C  
ATOM    666  C   GLU L  81     -29.941  10.575  -7.210  1.00 21.36           C  
ATOM    667  O   GLU L  81     -29.698  11.797  -7.203  1.00 22.76           O  
ATOM    668  CB  GLU L  81     -30.239  10.272  -9.669  1.00 21.96           C  
ATOM    669  CG  GLU L  81     -31.756  10.131  -9.662  1.00 24.57           C  
ATOM    670  CD  GLU L  81     -32.248   8.861 -10.376  1.00 27.56           C  
ATOM    671  OE1 GLU L  81     -31.565   7.805 -10.295  1.00 25.25           O  
ATOM    672  OE2 GLU L  81     -33.346   8.935 -10.991  1.00 31.24           O  
ATOM    673  N   ASP L  82     -30.620   9.949  -6.236  1.00 20.13           N  
ATOM    674  CA  ASP L  82     -31.102  10.705  -5.036  1.00 20.17           C  
ATOM    675  C   ASP L  82     -30.050  10.819  -3.928  1.00 19.67           C  
ATOM    676  O   ASP L  82     -30.232  11.516  -2.893  1.00 20.01           O  
ATOM    677  CB  ASP L  82     -32.341   9.991  -4.466  1.00 20.15           C  
ATOM    678  CG  ASP L  82     -33.555   9.996  -5.440  1.00 19.40           C  
ATOM    679  OD1 ASP L  82     -33.585  10.816  -6.428  1.00 20.59           O  
ATOM    680  OD2 ASP L  82     -34.485   9.199  -5.179  1.00 20.92           O  
ATOM    681  N   ILE L  83     -28.951  10.097  -4.119  1.00 19.83           N  
ATOM    682  CA  ILE L  83     -27.839  10.148  -3.146  1.00 20.36           C  
ATOM    683  C   ILE L  83     -27.299  11.574  -3.164  1.00 20.31           C  
ATOM    684  O   ILE L  83     -26.889  12.094  -4.216  1.00 22.10           O  
ATOM    685  CB  ILE L  83     -26.770   9.090  -3.506  1.00 21.61           C  
ATOM    686  CG1 ILE L  83     -27.391   7.686  -3.373  1.00 24.62           C  
ATOM    687  CG2 ILE L  83     -25.463   9.309  -2.696  1.00 23.96           C  
ATOM    688  CD1 ILE L  83     -28.334   7.466  -2.116  1.00 28.14           C  
ATOM    689  N   ALA L  84     -27.318  12.204  -1.992  1.00 19.96           N  
ATOM    690  CA  ALA L  84     -27.054  13.624  -1.836  1.00 18.82           C  
ATOM    691  C   ALA L  84     -27.198  13.962  -0.366  1.00 18.69           C  
ATOM    692  O   ALA L  84     -27.584  13.104   0.402  1.00 19.45           O  
ATOM    693  CB  ALA L  84     -28.094  14.473  -2.651  1.00 20.31           C  
ATOM    694  N   THR L  85     -26.874  15.206  -0.030  1.00 18.01           N  
ATOM    695  CA  THR L  85     -27.267  15.746   1.308  1.00 17.49           C  
ATOM    696  C   THR L  85     -28.484  16.648   1.087  1.00 18.54           C  
ATOM    697  O   THR L  85     -28.489  17.442   0.100  1.00 19.37           O  
ATOM    698  CB  THR L  85     -26.095  16.542   1.904  1.00 19.56           C  
ATOM    699  OG1 THR L  85     -25.010  15.630   2.122  1.00 21.40           O  
ATOM    700  CG2 THR L  85     -26.458  17.223   3.234  1.00 20.25           C  
ATOM    701  N   TYR L  86     -29.490  16.529   1.975  1.00 17.41           N  
ATOM    702  CA  TYR L  86     -30.716  17.324   1.854  1.00 17.39           C  
ATOM    703  C   TYR L  86     -30.691  18.319   3.034  1.00 16.48           C  
ATOM    704  O   TYR L  86     -30.318  17.935   4.148  1.00 17.31           O  
ATOM    705  CB  TYR L  86     -31.967  16.394   1.948  1.00 17.48           C  
ATOM    706  CG  TYR L  86     -32.028  15.502   0.727  1.00 17.73           C  
ATOM    707  CD1 TYR L  86     -32.767  15.891  -0.356  1.00 18.64           C  
ATOM    708  CD2 TYR L  86     -31.251  14.376   0.629  1.00 17.58           C  
ATOM    709  CE1 TYR L  86     -32.788  15.145  -1.531  1.00 18.20           C  
ATOM    710  CE2 TYR L  86     -31.208  13.633  -0.563  1.00 17.54           C  
ATOM    711  CZ  TYR L  86     -32.008  14.015  -1.635  1.00 18.79           C  
ATOM    712  OH  TYR L  86     -32.063  13.275  -2.835  1.00 20.18           O  
ATOM    713  N   HIS L  87     -31.107  19.552   2.766  1.00 16.95           N  
ATOM    714  CA  HIS L  87     -31.227  20.589   3.783  1.00 15.92           C  
ATOM    715  C   HIS L  87     -32.601  21.208   3.802  1.00 17.35           C  
ATOM    716  O   HIS L  87     -33.149  21.468   2.726  1.00 18.04           O  
ATOM    717  CB  HIS L  87     -30.239  21.749   3.557  1.00 18.05           C  
ATOM    718  CG  HIS L  87     -28.816  21.341   3.704  1.00 19.41           C  
ATOM    719  ND1 HIS L  87     -28.133  21.334   4.908  1.00 22.69           N  
ATOM    720  CD2 HIS L  87     -27.919  20.974   2.756  1.00 21.90           C  
ATOM    721  CE1 HIS L  87     -26.873  20.967   4.685  1.00 21.85           C  
ATOM    722  NE2 HIS L  87     -26.735  20.719   3.396  1.00 23.88           N  
ATOM    723  N   CYS L  88     -33.129  21.514   5.000  1.00 17.47           N  
ATOM    724  CA  CYS L  88     -34.277  22.400   5.064  1.00 17.51           C  
ATOM    725  C   CYS L  88     -33.772  23.848   5.252  1.00 17.19           C  
ATOM    726  O   CYS L  88     -32.726  24.065   5.894  1.00 18.10           O  
ATOM    727  CB  CYS L  88     -35.269  22.038   6.200  1.00 20.02           C  
ATOM    728  SG  CYS L  88     -34.429  21.902   7.775  1.00 21.96           S  
ATOM    729  N   GLN L  89     -34.574  24.823   4.799  1.00 16.17           N  
ATOM    730  CA  GLN L  89     -34.251  26.222   5.053  1.00 17.04           C  
ATOM    731  C   GLN L  89     -35.533  26.988   5.350  1.00 17.32           C  
ATOM    732  O   GLN L  89     -36.485  26.857   4.588  1.00 17.12           O  
ATOM    733  CB  GLN L  89     -33.591  26.838   3.791  1.00 17.66           C  
ATOM    734  CG  GLN L  89     -33.189  28.354   3.971  1.00 19.50           C  
ATOM    735  CD  GLN L  89     -32.763  29.058   2.620  1.00 21.88           C  
ATOM    736  OE1 GLN L  89     -33.305  28.772   1.617  1.00 24.41           O  
ATOM    737  NE2 GLN L  89     -31.740  29.951   2.658  1.00 30.68           N  
ATOM    738  N   GLN L  90     -35.574  27.749   6.464  1.00 16.55           N  
ATOM    739  CA  GLN L  90     -36.753  28.598   6.627  1.00 17.62           C  
ATOM    740  C   GLN L  90     -36.524  29.914   5.899  1.00 18.18           C  
ATOM    741  O   GLN L  90     -35.399  30.410   5.890  1.00 18.36           O  
ATOM    742  CB  GLN L  90     -37.059  28.888   8.155  1.00 17.41           C  
ATOM    743  CG  GLN L  90     -35.952  29.684   8.868  1.00 18.19           C  
ATOM    744  CD  GLN L  90     -36.053  31.195   8.754  1.00 18.09           C  
ATOM    745  OE1 GLN L  90     -37.090  31.753   8.317  1.00 19.15           O  
ATOM    746  NE2 GLN L  90     -34.959  31.870   9.127  1.00 18.77           N  
ATOM    747  N   TYR L  91     -37.575  30.462   5.283  1.00 17.52           N  
ATOM    748  CA  TYR L  91     -37.465  31.789   4.692  1.00 17.35           C  
ATOM    749  C   TYR L  91     -38.586  32.723   5.209  1.00 19.18           C  
ATOM    750  O   TYR L  91     -39.033  33.670   4.506  1.00 21.20           O  
ATOM    751  CB  TYR L  91     -37.434  31.724   3.146  1.00 19.46           C  
ATOM    752  CG  TYR L  91     -38.610  31.043   2.501  1.00 18.73           C  
ATOM    753  CD1 TYR L  91     -38.749  29.654   2.512  1.00 17.67           C  
ATOM    754  CD2 TYR L  91     -39.530  31.793   1.770  1.00 18.11           C  
ATOM    755  CE1 TYR L  91     -39.828  29.022   1.857  1.00 19.70           C  
ATOM    756  CE2 TYR L  91     -40.594  31.194   1.120  1.00 17.58           C  
ATOM    757  CZ  TYR L  91     -40.737  29.803   1.124  1.00 18.68           C  
ATOM    758  OH  TYR L  91     -41.772  29.138   0.492  1.00 21.01           O  
ATOM    759  N   ASP L  92     -39.032  32.456   6.455  1.00 18.29           N  
ATOM    760  CA  ASP L  92     -39.966  33.366   7.111  1.00 20.65           C  
ATOM    761  C   ASP L  92     -39.292  34.714   7.448  1.00 20.84           C  
ATOM    762  O   ASP L  92     -39.912  35.777   7.263  1.00 23.07           O  
ATOM    763  CB  ASP L  92     -40.461  32.706   8.404  1.00 21.28           C  
ATOM    764  CG  ASP L  92     -41.515  33.543   9.136  1.00 26.11           C  
ATOM    765  OD1 ASP L  92     -42.605  33.747   8.572  1.00 30.71           O  
ATOM    766  OD2 ASP L  92     -41.252  33.952  10.284  1.00 32.22           O  
ATOM    768  N   ASN L  93     -38.046  34.674   7.922  0.50 20.92           N  
ATOM    770  CA  ASN L  93     -37.374  35.902   8.373  0.50 21.65           C  
ATOM    772  C   ASN L  93     -35.853  35.834   8.268  0.50 20.99           C  
ATOM    774  O   ASN L  93     -35.265  34.816   8.624  0.50 20.90           O  
ATOM    776  CB  ASN L  93     -37.772  36.229   9.818  0.50 23.72           C  
ATOM    778  CG  ASN L  93     -38.765  37.376   9.896  0.50 27.11           C  
ATOM    780  OD1 ASN L  93     -38.383  38.535  10.049  0.50 28.57           O  
ATOM    782  ND2 ASN L  93     -40.033  37.064   9.764  0.50 29.17           N  
ATOM    783  N   LEU L  94     -35.225  36.905   7.770  1.00 20.08           N  
ATOM    784  CA  LEU L  94     -33.767  36.981   7.744  1.00 19.56           C  
ATOM    785  C   LEU L  94     -33.243  37.059   9.175  1.00 19.92           C  
ATOM    786  O   LEU L  94     -33.870  37.711  10.031  1.00 22.40           O  
ATOM    787  CB  LEU L  94     -33.304  38.240   7.025  1.00 20.48           C  
ATOM    788  CG  LEU L  94     -33.518  38.205   5.519  1.00 20.81           C  
ATOM    789  CD1 LEU L  94     -33.340  39.618   4.939  1.00 21.68           C  
ATOM    790  CD2 LEU L  94     -32.574  37.248   4.837  1.00 20.48           C  
ATOM    791  N   PRO L  95     -32.067  36.442   9.427  1.00 19.37           N  
ATOM    792  CA  PRO L  95     -31.282  35.652   8.462  1.00 18.87           C  
ATOM    793  C   PRO L  95     -31.954  34.313   8.170  1.00 18.43           C  
ATOM    794  O   PRO L  95     -32.464  33.637   9.081  1.00 18.86           O  
ATOM    795  CB  PRO L  95     -29.968  35.420   9.185  1.00 20.38           C  
ATOM    796  CG  PRO L  95     -30.367  35.384  10.692  1.00 20.60           C  
ATOM    797  CD  PRO L  95     -31.419  36.511  10.770  1.00 20.64           C  
ATOM    798  N   TYR L  96     -31.922  33.927   6.889  1.00 18.00           N  
ATOM    799  CA  TYR L  96     -32.394  32.610   6.590  1.00 18.61           C  
ATOM    800  C   TYR L  96     -31.465  31.591   7.214  1.00 18.11           C  
ATOM    801  O   TYR L  96     -30.226  31.774   7.229  1.00 19.40           O  
ATOM    802  CB  TYR L  96     -32.396  32.440   5.087  1.00 18.66           C  
ATOM    803  CG  TYR L  96     -33.373  33.347   4.374  1.00 19.89           C  
ATOM    804  CD1 TYR L  96     -34.458  33.954   5.039  1.00 20.30           C  
ATOM    805  CD2 TYR L  96     -33.223  33.566   2.994  1.00 20.98           C  
ATOM    806  CE1 TYR L  96     -35.396  34.770   4.319  1.00 22.57           C  
ATOM    807  CE2 TYR L  96     -34.140  34.343   2.306  1.00 21.11           C  
ATOM    808  CZ  TYR L  96     -35.179  34.972   2.954  1.00 22.50           C  
ATOM    809  OH  TYR L  96     -36.074  35.728   2.207  1.00 26.43           O  
ATOM    810  N   THR L  97     -32.068  30.530   7.778  1.00 17.01           N  
ATOM    811  CA  THR L  97     -31.328  29.544   8.516  1.00 16.07           C  
ATOM    812  C   THR L  97     -31.684  28.145   8.018  1.00 16.35           C  
ATOM    813  O   THR L  97     -32.836  27.911   7.561  1.00 17.04           O  
ATOM    814  CB  THR L  97     -31.591  29.641  10.055  1.00 17.58           C  
ATOM    815  OG1 THR L  97     -32.998  29.721  10.225  1.00 18.23           O  
ATOM    816  CG2 THR L  97     -30.910  30.951  10.601  1.00 17.77           C  
ATOM    817  N   PHE L  98     -30.687  27.251   8.150  1.00 17.59           N  
ATOM    818  CA  PHE L  98     -30.777  25.903   7.615  1.00 17.58           C  
ATOM    819  C   PHE L  98     -30.721  24.837   8.699  1.00 17.83           C  
ATOM    820  O   PHE L  98     -30.135  25.070   9.750  1.00 18.49           O  
ATOM    821  CB  PHE L  98     -29.552  25.618   6.725  1.00 18.72           C  
ATOM    822  CG  PHE L  98     -29.593  26.327   5.403  1.00 20.32           C  
ATOM    823  CD1 PHE L  98     -29.898  25.611   4.241  1.00 21.93           C  
ATOM    824  CD2 PHE L  98     -29.363  27.686   5.332  1.00 22.61           C  
ATOM    825  CE1 PHE L  98     -29.904  26.245   2.995  1.00 22.53           C  
ATOM    826  CE2 PHE L  98     -29.399  28.355   4.093  1.00 25.47           C  
ATOM    827  CZ  PHE L  98     -29.686  27.611   2.955  1.00 23.67           C  
ATOM    828  N   GLY L  99     -31.316  23.679   8.423  1.00 18.40           N  
ATOM    829  CA  GLY L  99     -31.037  22.497   9.212  1.00 19.46           C  
ATOM    830  C   GLY L  99     -29.614  22.022   8.959  1.00 20.61           C  
ATOM    831  O   GLY L  99     -28.950  22.459   7.957  1.00 21.65           O  
ATOM    833  N   GLN L 100     -29.095  21.133   9.812  0.50 18.66           N  
ATOM    835  CA  GLN L 100     -27.684  20.784   9.634  0.50 18.83           C  
ATOM    837  C   GLN L 100     -27.418  19.907   8.421  0.50 19.17           C  
ATOM    839  O   GLN L 100     -26.241  19.760   8.023  0.50 18.71           O  
ATOM    841  CB  GLN L 100     -27.052  20.170  10.893  0.50 19.96           C  
ATOM    843  CG  GLN L 100     -25.548  20.044  10.799  0.50 25.43           C  
ATOM    845  CD  GLN L 100     -24.819  19.976  12.147  0.50 29.51           C  
ATOM    847  OE1 GLN L 100     -25.258  20.561  13.153  0.50 33.39           O  
ATOM    849  NE2 GLN L 100     -23.684  19.276  12.161  0.50 29.65           N  
ATOM    850  N   GLY L 101     -28.489  19.343   7.835  1.00 18.93           N  
ATOM    851  CA  GLY L 101     -28.319  18.462   6.674  1.00 19.40           C  
ATOM    852  C   GLY L 101     -28.486  16.981   7.007  1.00 18.92           C  
ATOM    853  O   GLY L 101     -28.199  16.553   8.162  1.00 19.31           O  
ATOM    854  N   THR L 102     -28.975  16.207   6.005  1.00 17.84           N  
ATOM    855  CA  THR L 102     -29.076  14.768   6.166  1.00 18.39           C  
ATOM    856  C   THR L 102     -28.339  14.171   4.980  1.00 18.48           C  
ATOM    857  O   THR L 102     -28.751  14.411   3.841  1.00 18.41           O  
ATOM    858  CB  THR L 102     -30.524  14.280   6.069  1.00 19.39           C  
ATOM    859  OG1 THR L 102     -31.325  14.912   7.085  1.00 18.77           O  
ATOM    860  CG2 THR L 102     -30.576  12.764   6.198  1.00 20.26           C  
ATOM    861  N   LYS L 103     -27.258  13.443   5.266  1.00 18.21           N  
ATOM    862  CA  LYS L 103     -26.482  12.840   4.176  1.00 18.88           C  
ATOM    863  C   LYS L 103     -27.098  11.458   3.901  1.00 19.45           C  
ATOM    864  O   LYS L 103     -27.121  10.600   4.803  1.00 20.51           O  
ATOM    865  CB  LYS L 103     -25.024  12.651   4.603  1.00 19.83           C  
ATOM    866  CG  LYS L 103     -24.175  12.065   3.463  1.00 23.17           C  
ATOM    867  CD  LYS L 103     -22.703  12.108   3.893  1.00 28.94           C  
ATOM    868  CE  LYS L 103     -21.778  11.758   2.717  1.00 33.08           C  
ATOM    869  NZ  LYS L 103     -20.350  11.823   3.172  1.00 36.42           N  
ATOM    871  N   LEU L 104     -27.576  11.262   2.661  0.50 20.32           N  
ATOM    873  CA  LEU L 104     -28.096   9.972   2.262  0.50 21.43           C  
ATOM    875  C   LEU L 104     -26.999   9.134   1.642  0.50 21.43           C  
ATOM    877  O   LEU L 104     -26.232   9.610   0.794  0.50 21.71           O  
ATOM    879  CB  LEU L 104     -29.166  10.116   1.185  0.50 21.62           C  
ATOM    881  CG  LEU L 104     -30.434  10.897   1.446  0.50 21.62           C  
ATOM    883  CD1 LEU L 104     -31.557  10.562   0.381  0.50 19.03           C  
ATOM    885  CD2 LEU L 104     -30.938  10.587   2.828  0.50 19.42           C  
ATOM    886  N   GLU L 105     -26.961   7.869   2.029  1.00 21.46           N  
ATOM    887  CA  GLU L 105     -26.058   6.875   1.353  1.00 23.26           C  
ATOM    888  C   GLU L 105     -26.933   5.659   0.979  1.00 24.59           C  
ATOM    889  O   GLU L 105     -27.780   5.281   1.764  1.00 23.79           O  
ATOM    890  CB  GLU L 105     -24.888   6.535   2.246  1.00 24.88           C  
ATOM    891  CG  GLU L 105     -23.867   7.667   2.280  1.00 31.58           C  
ATOM    892  CD  GLU L 105     -22.789   7.444   3.349  1.00 38.93           C  
ATOM    893  OE1 GLU L 105     -22.539   6.264   3.722  1.00 43.31           O  
ATOM    894  OE2 GLU L 105     -22.217   8.452   3.817  1.00 41.48           O  
ATOM    895  N   ILE L 106     -26.659   4.918  -0.104  1.00 27.38           N  
ATOM    896  CA  ILE L 106     -26.558   3.402  -0.110  1.00 30.64           C  
ATOM    897  C   ILE L 106     -25.833   2.715   1.055  1.00 33.09           C  
ATOM    898  O   ILE L 106     -24.627   2.731   1.091  1.00 34.93           O  
ATOM    899  CB  ILE L 106     -26.199   2.932  -1.540  1.00 30.82           C  
ATOM    900  CG1 ILE L 106     -26.937   3.840  -2.529  1.00 30.99           C  
ATOM    901  CG2 ILE L 106     -26.604   1.443  -1.785  1.00 30.46           C  
ATOM    902  CD1 ILE L 106     -28.488   3.666  -2.556  1.00 32.33           C  
ATOM    903  N   LYS L 107     -26.518   1.967   1.937  1.00 35.86           N  
ATOM    904  CA  LYS L 107     -26.547   0.496   1.992  1.00 37.26           C  
ATOM    905  C   LYS L 107     -25.607  -0.316   1.088  1.00 38.70           C  
ATOM    906  O   LYS L 107     -25.976  -0.865   0.054  1.00 39.29           O  
ATOM    907  CB  LYS L 107     -27.904  -0.168   2.266  1.00 36.86           C  
ATOM    908  CG  LYS L 107     -27.721  -1.333   3.263  1.00 37.89           C  
ATOM    909  CD  LYS L 107     -28.861  -2.320   3.228  1.00 39.04           C  
ATOM    910  CE  LYS L 107     -28.635  -3.462   4.218  1.00 40.23           C  
ATOM    911  NZ  LYS L 107     -29.828  -4.362   4.254  1.00 40.71           N  
ATOM    912  OXT LYS L 107     -24.429  -0.440   1.469  1.00 40.83           O  
TER     913      LYS L 107                                                      
ATOM    934  N   ASP L   1     -36.267  30.768 -14.166  1.00 22.36           N  
ATOM    935  CA  ASP L   1     -35.507  30.757 -12.916  1.00 21.46           C  
ATOM    936  C   ASP L   1     -34.245  31.583 -13.079  1.00 21.31           C  
ATOM    937  O   ASP L   1     -33.653  31.593 -14.170  1.00 22.03           O  
ATOM    938  CB  ASP L   1     -35.124  29.346 -12.522  1.00 23.15           C  
ATOM    939  CG  ASP L   1     -36.338  28.474 -12.192  1.00 23.22           C  
ATOM    940  OD1 ASP L   1     -37.475  29.017 -11.985  1.00 24.77           O  
ATOM    941  OD2 ASP L   1     -36.117  27.241 -12.085  1.00 26.31           O  
ATOM    942  N   ILE L   2     -33.846  32.262 -11.999  1.00 20.52           N  
ATOM    943  CA  ILE L   2     -32.652  33.087 -12.066  1.00 19.37           C  
ATOM    944  C   ILE L   2     -31.461  32.160 -11.930  1.00 20.27           C  
ATOM    945  O   ILE L   2     -31.386  31.367 -10.975  1.00 20.78           O  
ATOM    946  CB  ILE L   2     -32.662  34.173 -10.928  1.00 19.78           C  
ATOM    947  CG1 ILE L   2     -33.897  35.055 -11.120  1.00 21.03           C  
ATOM    948  CG2 ILE L   2     -31.312  34.978 -10.891  1.00 20.48           C  
ATOM    949  CD1 ILE L   2     -34.331  35.985 -10.004  1.00 22.16           C  
ATOM    951  N   GLN L   3     -30.489  32.292 -12.829  0.50 20.05           N  
ATOM    953  CA  GLN L   3     -29.312  31.445 -12.805  0.50 20.41           C  
ATOM    955  C   GLN L   3     -28.126  32.293 -12.264  0.50 20.20           C  
ATOM    957  O   GLN L   3     -27.863  33.398 -12.759  0.50 20.43           O  
ATOM    959  CB  GLN L   3     -29.003  30.878 -14.223  0.50 21.71           C  
ATOM    961  CG  GLN L   3     -30.226  30.410 -15.082  0.50 24.30           C  
ATOM    963  CD  GLN L   3     -31.035  29.182 -14.570  0.50 28.36           C  
ATOM    965  OE1 GLN L   3     -30.496  28.304 -13.875  0.50 30.79           O  
ATOM    967  NE2 GLN L   3     -32.330  29.102 -14.968  0.50 24.90           N  
ATOM    968  N   MET L   4     -27.433  31.770 -11.240  1.00 19.56           N  
ATOM    969  CA  MET L   4     -26.337  32.473 -10.567  1.00 19.66           C  
ATOM    970  C   MET L   4     -25.020  31.855 -11.054  1.00 18.91           C  
ATOM    971  O   MET L   4     -24.789  30.661 -10.829  1.00 20.71           O  
ATOM    972  CB  MET L   4     -26.440  32.267  -9.047  1.00 19.46           C  
ATOM    973  CG  MET L   4     -27.759  32.776  -8.534  1.00 21.52           C  
ATOM    974  SD  MET L   4     -28.058  34.544  -8.769  1.00 23.22           S  
ATOM    975  CE  MET L   4     -26.488  35.371  -8.286  1.00 27.04           C  
ATOM    976  N   THR L   5     -24.158  32.654 -11.688  1.00 18.57           N  
ATOM    977  CA  THR L   5     -22.875  32.166 -12.194  1.00 17.74           C  
ATOM    978  C   THR L   5     -21.780  32.649 -11.232  1.00 18.12           C  
ATOM    979  O   THR L   5     -21.448  33.849 -11.201  1.00 18.48           O  
ATOM    980  CB  THR L   5     -22.641  32.742 -13.578  1.00 18.94           C  
ATOM    981  OG1 THR L   5     -23.691  32.255 -14.455  1.00 19.37           O  
ATOM    982  CG2 THR L   5     -21.260  32.282 -14.040  1.00 20.73           C  
ATOM    983  N   GLN L   6     -21.247  31.687 -10.473  1.00 17.29           N  
ATOM    984  CA  GLN L   6     -20.278  32.030  -9.434  1.00 18.14           C  
ATOM    985  C   GLN L   6     -18.892  31.574  -9.864  1.00 17.82           C  
ATOM    986  O   GLN L   6     -18.741  30.475 -10.458  1.00 18.96           O  
ATOM    987  CB  GLN L   6     -20.674  31.286  -8.179  1.00 17.91           C  
ATOM    988  CG  GLN L   6     -19.680  31.558  -7.015  1.00 18.16           C  
ATOM    989  CD  GLN L   6     -20.158  30.902  -5.722  1.00 18.23           C  
ATOM    990  OE1 GLN L   6     -21.302  30.406  -5.630  1.00 20.10           O  
ATOM    991  NE2 GLN L   6     -19.262  30.857  -4.713  1.00 19.07           N  
ATOM    993  N   SER L   7     -17.880  32.384  -9.572  0.50 17.83           N  
ATOM    995  CA  SER L   7     -16.541  31.975  -9.965  0.50 18.25           C  
ATOM    997  C   SER L   7     -15.557  32.561  -8.986  0.50 17.85           C  
ATOM    999  O   SER L   7     -15.794  33.664  -8.479  0.50 18.00           O  
ATOM   1001  CB  SER L   7     -16.234  32.480 -11.373  0.50 20.19           C  
ATOM   1003  OG  SER L   7     -17.175  31.965 -12.284  0.50 23.96           O  
ATOM   1004  N   PRO L   8     -14.459  31.846  -8.740  1.00 18.56           N  
ATOM   1005  CA  PRO L   8     -14.058  30.554  -9.383  1.00 18.77           C  
ATOM   1006  C   PRO L   8     -14.773  29.371  -8.752  1.00 20.02           C  
ATOM   1007  O   PRO L   8     -15.522  29.551  -7.780  1.00 20.69           O  
ATOM   1008  CB  PRO L   8     -12.528  30.472  -9.136  1.00 20.70           C  
ATOM   1009  CG  PRO L   8     -12.337  31.237  -7.907  1.00 19.43           C  
ATOM   1010  CD  PRO L   8     -13.461  32.301  -7.762  1.00 18.84           C  
ATOM   1011  N   SER L   9     -14.555  28.162  -9.266  1.00 18.80           N  
ATOM   1012  CA  SER L   9     -15.182  27.008  -8.581  1.00 20.21           C  
ATOM   1013  C   SER L   9     -14.324  26.515  -7.432  1.00 19.96           C  
ATOM   1014  O   SER L   9     -14.824  25.911  -6.483  1.00 20.25           O  
ATOM   1015  CB  SER L   9     -15.454  25.853  -9.530  1.00 23.47           C  
ATOM   1016  OG  SER L   9     -14.292  25.657 -10.257  1.00 25.94           O  
ATOM   1017  N   SER L  10     -13.011  26.716  -7.560  1.00 19.01           N  
ATOM   1018  CA  SER L  10     -12.103  26.404  -6.451  1.00 20.07           C  
ATOM   1019  C   SER L  10     -10.890  27.304  -6.495  1.00 19.08           C  
ATOM   1020  O   SER L  10     -10.546  27.829  -7.590  1.00 19.10           O  
ATOM   1021  CB  SER L  10     -11.664  24.945  -6.479  1.00 21.16           C  
ATOM   1022  OG  SER L  10     -11.022  24.620  -7.688  1.00 25.77           O  
ATOM   1023  N   LEU L  11     -10.265  27.521  -5.330  1.00 18.43           N  
ATOM   1024  CA  LEU L  11      -9.036  28.257  -5.396  1.00 18.87           C  
ATOM   1025  C   LEU L  11      -8.188  27.889  -4.202  1.00 19.20           C  
ATOM   1026  O   LEU L  11      -8.731  27.421  -3.170  1.00 19.33           O  
ATOM   1027  CB  LEU L  11      -9.280  29.751  -5.435  1.00 21.20           C  
ATOM   1028  CG  LEU L  11      -9.890  30.395  -4.176  1.00 21.97           C  
ATOM   1029  CD1 LEU L  11      -8.831  30.758  -3.068  1.00 21.77           C  
ATOM   1030  CD2 LEU L  11     -10.644  31.680  -4.522  1.00 22.10           C  
ATOM   1032  N   SER L  12      -6.886  28.102  -4.339  0.50 18.57           N  
ATOM   1034  CA  SER L  12      -5.984  27.937  -3.207  0.50 18.86           C  
ATOM   1036  C   SER L  12      -5.379  29.288  -2.888  0.50 18.68           C  
ATOM   1038  O   SER L  12      -5.196  30.132  -3.780  0.50 18.01           O  
ATOM   1040  CB  SER L  12      -4.883  26.913  -3.531  0.50 20.52           C  
ATOM   1042  OG  SER L  12      -5.447  25.663  -3.904  0.50 20.63           O  
ATOM   1043  N   ALA L  13      -5.024  29.479  -1.618  1.00 17.88           N  
ATOM   1044  CA  ALA L  13      -4.346  30.722  -1.252  1.00 18.89           C  
ATOM   1045  C   ALA L  13      -3.658  30.511   0.070  1.00 19.36           C  
ATOM   1046  O   ALA L  13      -3.782  29.428   0.670  1.00 21.06           O  
ATOM   1047  CB  ALA L  13      -5.306  31.914  -1.190  1.00 19.82           C  
ATOM   1048  N   SER L  14      -2.918  31.515   0.483  1.00 19.68           N  
ATOM   1049  CA  SER L  14      -2.200  31.394   1.736  1.00 20.45           C  
ATOM   1050  C   SER L  14      -2.881  32.141   2.878  1.00 19.17           C  
ATOM   1051  O   SER L  14      -3.713  33.017   2.653  1.00 18.94           O  
ATOM   1052  CB  SER L  14      -0.790  31.935   1.562  1.00 22.29           C  
ATOM   1053  OG  SER L  14      -0.034  31.118   0.681  1.00 25.83           O  
ATOM   1054  N   VAL L  15      -2.520  31.806   4.131  1.00 19.03           N  
ATOM   1055  CA  VAL L  15      -3.076  32.550   5.249  1.00 19.28           C  
ATOM   1056  C   VAL L  15      -2.746  34.030   5.062  1.00 20.19           C  
ATOM   1057  O   VAL L  15      -1.601  34.392   4.682  1.00 21.39           O  
ATOM   1058  CB  VAL L  15      -2.479  32.032   6.590  1.00 20.35           C  
ATOM   1059  CG1 VAL L  15      -2.871  32.953   7.762  1.00 21.95           C  
ATOM   1060  CG2 VAL L  15      -2.964  30.606   6.793  1.00 21.08           C  
ATOM   1061  N   GLY L  16      -3.745  34.864   5.318  1.00 18.65           N  
ATOM   1062  CA  GLY L  16      -3.591  36.303   5.158  1.00 18.54           C  
ATOM   1063  C   GLY L  16      -4.076  36.809   3.812  1.00 18.09           C  
ATOM   1064  O   GLY L  16      -4.358  38.005   3.677  1.00 18.44           O  
ATOM   1065  N   ASP L  17      -4.169  35.907   2.824  1.00 17.95           N  
ATOM   1066  CA  ASP L  17      -4.408  36.405   1.475  1.00 18.24           C  
ATOM   1067  C   ASP L  17      -5.803  37.008   1.333  1.00 17.13           C  
ATOM   1068  O   ASP L  17      -6.737  36.584   1.985  1.00 18.46           O  
ATOM   1069  CB  ASP L  17      -4.256  35.280   0.454  1.00 18.55           C  
ATOM   1070  CG  ASP L  17      -2.782  35.047   0.041  1.00 22.81           C  
ATOM   1071  OD1 ASP L  17      -1.905  35.899   0.329  1.00 23.61           O  
ATOM   1072  OD2 ASP L  17      -2.518  34.006  -0.578  1.00 23.05           O  
ATOM   1074  N   ARG L  18      -5.942  37.953   0.396  0.50 18.15           N  
ATOM   1076  CA  ARG L  18      -7.265  38.453   0.024  0.50 18.42           C  
ATOM   1078  C   ARG L  18      -7.897  37.414  -0.877  0.50 18.11           C  
ATOM   1080  O   ARG L  18      -7.238  36.930  -1.810  0.50 17.72           O  
ATOM   1082  CB  ARG L  18      -7.115  39.770  -0.758  0.50 17.98           C  
ATOM   1084  CG  ARG L  18      -8.386  40.380  -1.352  0.50 18.35           C  
ATOM   1086  CD  ARG L  18      -8.073  41.859  -1.740  0.50 20.07           C  
ATOM   1088  NE  ARG L  18      -7.488  42.486  -0.569  0.50 24.06           N  
ATOM   1090  CZ  ARG L  18      -8.168  43.171   0.353  0.50 23.27           C  
ATOM   1092  NH1 ARG L  18      -9.447  43.434   0.181  0.50 21.12           N  
ATOM   1094  NH2 ARG L  18      -7.544  43.615   1.427  0.50 15.45           N  
ATOM   1095  N   VAL L  19      -9.169  37.081  -0.605  1.00 17.07           N  
ATOM   1096  CA  VAL L  19      -9.906  36.115  -1.461  1.00 17.44           C  
ATOM   1097  C   VAL L  19     -11.066  36.863  -2.081  1.00 17.44           C  
ATOM   1098  O   VAL L  19     -11.794  37.579  -1.391  1.00 17.89           O  
ATOM   1099  CB  VAL L  19     -10.467  34.959  -0.635  1.00 19.02           C  
ATOM   1100  CG1 VAL L  19     -11.428  34.052  -1.441  1.00 20.28           C  
ATOM   1101  CG2 VAL L  19      -9.288  34.147  -0.100  1.00 20.47           C  
ATOM   1102  N   THR L  20     -11.218  36.703  -3.403  1.00 17.24           N  
ATOM   1103  CA  THR L  20     -12.253  37.415  -4.133  1.00 16.49           C  
ATOM   1104  C   THR L  20     -13.077  36.406  -4.926  1.00 17.84           C  
ATOM   1105  O   THR L  20     -12.500  35.657  -5.717  1.00 18.24           O  
ATOM   1106  CB  THR L  20     -11.602  38.400  -5.138  1.00 18.81           C  
ATOM   1107  OG1 THR L  20     -10.663  39.256  -4.433  1.00 19.52           O  
ATOM   1108  CG2 THR L  20     -12.672  39.252  -5.831  1.00 21.51           C  
ATOM   1109  N   ILE L  21     -14.384  36.457  -4.707  1.00 17.85           N  
ATOM   1110  CA  ILE L  21     -15.328  35.551  -5.372  1.00 18.09           C  
ATOM   1111  C   ILE L  21     -16.401  36.394  -6.026  1.00 17.20           C  
ATOM   1112  O   ILE L  21     -16.813  37.389  -5.438  1.00 17.90           O  
ATOM   1113  CB  ILE L  21     -15.990  34.576  -4.313  1.00 18.23           C  
ATOM   1114  CG1 ILE L  21     -14.900  33.654  -3.788  1.00 20.71           C  
ATOM   1115  CG2 ILE L  21     -17.085  33.715  -4.926  1.00 21.17           C  
ATOM   1116  CD1 ILE L  21     -15.329  32.862  -2.518  1.00 21.80           C  
ATOM   1117  N   THR L  22     -16.843  36.053  -7.254  1.00 17.11           N  
ATOM   1118  CA  THR L  22     -17.894  36.883  -7.858  1.00 17.74           C  
ATOM   1119  C   THR L  22     -19.134  36.028  -8.153  1.00 17.72           C  
ATOM   1120  O   THR L  22     -19.016  34.788  -8.305  1.00 18.26           O  
ATOM   1121  CB  THR L  22     -17.378  37.492  -9.182  1.00 19.48           C  
ATOM   1122  OG1 THR L  22     -16.864  36.438  -9.995  1.00 19.35           O  
ATOM   1123  CG2 THR L  22     -16.267  38.492  -8.887  1.00 20.10           C  
ATOM   1124  N   CYS L  23     -20.293  36.681  -8.213  1.00 18.56           N  
ATOM   1125  CA  CYS L  23     -21.507  35.973  -8.658  1.00 20.76           C  
ATOM   1126  C   CYS L  23     -22.211  36.897  -9.609  1.00 21.05           C  
ATOM   1127  O   CYS L  23     -22.327  38.083  -9.297  1.00 22.22           O  
ATOM   1128  CB  CYS L  23     -22.432  35.676  -7.462  1.00 22.96           C  
ATOM   1129  SG  CYS L  23     -22.069  33.942  -6.819  1.00 31.98           S  
ATOM   1130  N   GLN L  24     -22.644  36.368 -10.760  1.00 19.09           N  
ATOM   1131  CA  GLN L  24     -23.458  37.152 -11.689  1.00 20.01           C  
ATOM   1132  C   GLN L  24     -24.856  36.533 -11.789  1.00 20.36           C  
ATOM   1133  O   GLN L  24     -24.986  35.343 -12.053  1.00 20.82           O  
ATOM   1134  CB  GLN L  24     -22.857  37.130 -13.100  1.00 21.75           C  
ATOM   1135  CG  GLN L  24     -23.605  38.129 -13.972  1.00 24.25           C  
ATOM   1136  CD  GLN L  24     -23.008  38.287 -15.326  1.00 29.45           C  
ATOM   1137  OE1 GLN L  24     -22.899  37.319 -16.107  1.00 29.55           O  
ATOM   1138  NE2 GLN L  24     -22.588  39.512 -15.623  1.00 31.96           N  
ATOM   1139  N   ALA L  25     -25.870  37.356 -11.570  1.00 19.47           N  
ATOM   1140  CA  ALA L  25     -27.246  36.900 -11.713  1.00 20.49           C  
ATOM   1141  C   ALA L  25     -27.676  37.064 -13.171  1.00 21.15           C  
ATOM   1142  O   ALA L  25     -27.281  38.063 -13.831  1.00 21.60           O  
ATOM   1143  CB  ALA L  25     -28.190  37.723 -10.824  1.00 21.12           C  
ATOM   1144  N   SER L  26     -28.531  36.149 -13.651  1.00 20.49           N  
ATOM   1145  CA  SER L  26     -28.958  36.230 -15.056  1.00 20.84           C  
ATOM   1146  C   SER L  26     -29.970  37.328 -15.330  1.00 23.58           C  
ATOM   1147  O   SER L  26     -30.239  37.665 -16.517  1.00 23.32           O  
ATOM   1148  CB  SER L  26     -29.492  34.882 -15.504  1.00 22.07           C  
ATOM   1149  OG  SER L  26     -30.601  34.504 -14.709  1.00 21.89           O  
ATOM   1150  N   GLN L  27     -30.575  37.844 -14.271  1.00 24.07           N  
ATOM   1151  CA  GLN L  27     -31.521  38.956 -14.323  1.00 27.14           C  
ATOM   1152  C   GLN L  27     -31.288  39.869 -13.101  1.00 26.92           C  
ATOM   1153  O   GLN L  27     -30.639  39.439 -12.146  1.00 26.12           O  
ATOM   1154  CB  GLN L  27     -32.949  38.392 -14.319  1.00 28.84           C  
ATOM   1155  CG  GLN L  27     -33.194  37.339 -15.409  1.00 31.83           C  
ATOM   1156  CD  GLN L  27     -34.568  36.714 -15.303  1.00 32.47           C  
ATOM   1157  OE1 GLN L  27     -35.203  36.768 -14.255  1.00 34.88           O  
ATOM   1158  NE2 GLN L  27     -35.041  36.113 -16.418  1.00 33.73           N  
ATOM   1159  N   ASP L  28     -31.774  41.113 -13.132  1.00 26.28           N  
ATOM   1160  CA  ASP L  28     -31.529  42.083 -12.040  1.00 26.09           C  
ATOM   1161  C   ASP L  28     -32.231  41.644 -10.771  1.00 25.14           C  
ATOM   1162  O   ASP L  28     -33.470  41.533 -10.761  1.00 26.52           O  
ATOM   1163  CB  ASP L  28     -32.078  43.476 -12.384  1.00 27.62           C  
ATOM   1164  CG  ASP L  28     -31.494  44.577 -11.490  1.00 30.64           C  
ATOM   1165  OD1 ASP L  28     -31.818  44.625 -10.272  1.00 30.43           O  
ATOM   1166  OD2 ASP L  28     -30.679  45.393 -11.998  1.00 36.23           O  
ATOM   1167  N   ILE L  29     -31.451  41.423  -9.703  1.00 21.94           N  
ATOM   1168  CA  ILE L  29     -32.056  41.001  -8.435  1.00 22.70           C  
ATOM   1169  C   ILE L  29     -31.905  42.066  -7.339  1.00 23.56           C  
ATOM   1170  O   ILE L  29     -31.896  41.735  -6.141  1.00 23.18           O  
ATOM   1171  CB  ILE L  29     -31.396  39.667  -7.962  1.00 20.77           C  
ATOM   1172  CG1 ILE L  29     -29.877  39.775  -7.925  1.00 20.80           C  
ATOM   1173  CG2 ILE L  29     -31.727  38.496  -8.873  1.00 21.83           C  
ATOM   1174  CD1 ILE L  29     -29.193  38.632  -7.073  1.00 20.99           C  
ATOM   1176  N   SER L  30     -31.809  43.334  -7.729  0.50 23.83           N  
ATOM   1178  CA  SER L  30     -31.628  44.400  -6.757  0.50 24.24           C  
ATOM   1180  C   SER L  30     -30.456  44.022  -5.831  0.50 24.03           C  
ATOM   1182  O   SER L  30     -29.385  43.604  -6.306  0.50 24.52           O  
ATOM   1184  CB  SER L  30     -32.926  44.607  -5.955  0.50 24.12           C  
ATOM   1186  OG  SER L  30     -32.851  45.815  -5.249  0.50 26.26           O  
ATOM   1187  N   ASN L  31     -30.672  44.153  -4.520  1.00 23.19           N  
ATOM   1188  CA  ASN L  31     -29.636  43.831  -3.549  1.00 22.90           C  
ATOM   1189  C   ASN L  31     -29.955  42.484  -2.866  1.00 21.81           C  
ATOM   1190  O   ASN L  31     -29.415  42.206  -1.818  1.00 20.61           O  
ATOM   1191  CB  ASN L  31     -29.492  44.954  -2.503  1.00 24.70           C  
ATOM   1192  CG  ASN L  31     -29.072  46.291  -3.147  1.00 29.96           C  
ATOM   1193  OD1 ASN L  31     -28.005  46.384  -3.747  1.00 34.07           O  
ATOM   1194  ND2 ASN L  31     -29.933  47.309  -3.043  1.00 37.40           N  
ATOM   1195  N   TYR L  32     -30.841  41.671  -3.463  1.00 19.22           N  
ATOM   1196  CA  TYR L  32     -31.326  40.473  -2.768  1.00 18.66           C  
ATOM   1197  C   TYR L  32     -30.375  39.318  -2.998  1.00 18.96           C  
ATOM   1198  O   TYR L  32     -30.741  38.301  -3.615  1.00 18.37           O  
ATOM   1199  CB  TYR L  32     -32.759  40.124  -3.157  1.00 19.30           C  
ATOM   1200  CG  TYR L  32     -33.751  41.231  -2.848  1.00 19.64           C  
ATOM   1201  CD1 TYR L  32     -33.974  41.644  -1.544  1.00 22.32           C  
ATOM   1202  CD2 TYR L  32     -34.463  41.858  -3.869  1.00 21.23           C  
ATOM   1203  CE1 TYR L  32     -34.892  42.660  -1.257  1.00 23.20           C  
ATOM   1204  CE2 TYR L  32     -35.364  42.865  -3.601  1.00 24.51           C  
ATOM   1205  CZ  TYR L  32     -35.591  43.252  -2.302  1.00 25.18           C  
ATOM   1206  OH  TYR L  32     -36.506  44.252  -2.032  1.00 28.09           O  
ATOM   1207  N   LEU L  33     -29.168  39.455  -2.439  1.00 19.00           N  
ATOM   1208  CA  LEU L  33     -28.171  38.367  -2.535  1.00 18.76           C  
ATOM   1209  C   LEU L  33     -27.621  38.080  -1.118  1.00 18.41           C  
ATOM   1210  O   LEU L  33     -27.325  39.006  -0.360  1.00 18.49           O  
ATOM   1211  CB  LEU L  33     -26.972  38.740  -3.469  1.00 19.90           C  
ATOM   1212  CG  LEU L  33     -26.062  37.532  -3.838  1.00 21.15           C  
ATOM   1213  CD1 LEU L  33     -26.748  36.558  -4.803  1.00 24.16           C  
ATOM   1214  CD2 LEU L  33     -24.770  37.913  -4.572  1.00 22.49           C  
ATOM   1215  N   ILE L  34     -27.489  36.793  -0.808  1.00 17.43           N  
ATOM   1216  CA  ILE L  34     -26.852  36.312   0.446  1.00 17.51           C  
ATOM   1217  C   ILE L  34     -25.567  35.571   0.086  1.00 17.97           C  
ATOM   1218  O   ILE L  34     -25.504  34.903  -0.975  1.00 17.65           O  
ATOM   1219  CB  ILE L  34     -27.785  35.331   1.140  1.00 18.68           C  
ATOM   1220  CG1 ILE L  34     -28.932  36.104   1.785  1.00 20.32           C  
ATOM   1221  CG2 ILE L  34     -27.056  34.477   2.185  1.00 20.52           C  
ATOM   1222  CD1 ILE L  34     -30.149  35.223   2.139  1.00 23.67           C  
ATOM   1223  N   TRP L  35     -24.560  35.704   0.963  1.00 17.32           N  
ATOM   1224  CA  TRP L  35     -23.393  34.851   0.862  1.00 17.14           C  
ATOM   1225  C   TRP L  35     -23.380  33.954   2.099  1.00 17.51           C  
ATOM   1226  O   TRP L  35     -23.513  34.465   3.207  1.00 17.57           O  
ATOM   1227  CB  TRP L  35     -22.109  35.655   0.843  1.00 17.73           C  
ATOM   1228  CG  TRP L  35     -21.972  36.454  -0.454  1.00 17.75           C  
ATOM   1229  CD1 TRP L  35     -22.327  37.792  -0.689  1.00 18.53           C  
ATOM   1230  CD2 TRP L  35     -21.452  35.963  -1.707  1.00 17.01           C  
ATOM   1231  NE1 TRP L  35     -22.002  38.163  -2.036  1.00 18.43           N  
ATOM   1232  CE2 TRP L  35     -21.490  37.046  -2.665  1.00 18.50           C  
ATOM   1233  CE3 TRP L  35     -20.877  34.743  -2.094  1.00 18.25           C  
ATOM   1234  CZ2 TRP L  35     -20.996  36.912  -3.972  1.00 18.19           C  
ATOM   1235  CZ3 TRP L  35     -20.386  34.627  -3.418  1.00 18.15           C  
ATOM   1236  CH2 TRP L  35     -20.496  35.695  -4.342  1.00 18.03           C  
ATOM   1237  N   TYR L  36     -23.194  32.643   1.855  1.00 17.26           N  
ATOM   1238  CA  TYR L  36     -23.105  31.625   2.901  1.00 17.76           C  
ATOM   1239  C   TYR L  36     -21.709  31.000   2.957  1.00 17.53           C  
ATOM   1240  O   TYR L  36     -21.042  30.869   1.935  1.00 18.75           O  
ATOM   1241  CB  TYR L  36     -24.047  30.428   2.597  1.00 19.19           C  
ATOM   1242  CG  TYR L  36     -25.479  30.772   2.649  1.00 19.91           C  
ATOM   1243  CD1 TYR L  36     -26.143  30.884   3.877  1.00 18.89           C  
ATOM   1244  CD2 TYR L  36     -26.230  30.899   1.465  1.00 19.35           C  
ATOM   1245  CE1 TYR L  36     -27.499  31.208   3.949  1.00 19.67           C  
ATOM   1246  CE2 TYR L  36     -27.561  31.201   1.503  1.00 19.99           C  
ATOM   1247  CZ  TYR L  36     -28.212  31.327   2.747  1.00 20.25           C  
ATOM   1248  OH  TYR L  36     -29.545  31.616   2.771  1.00 21.16           O  
ATOM   1249  N   GLN L  37     -21.332  30.578   4.173  1.00 16.92           N  
ATOM   1250  CA  GLN L  37     -20.161  29.758   4.400  1.00 17.40           C  
ATOM   1251  C   GLN L  37     -20.651  28.349   4.715  1.00 18.68           C  
ATOM   1252  O   GLN L  37     -21.567  28.193   5.527  1.00 19.82           O  
ATOM   1253  CB  GLN L  37     -19.423  30.245   5.654  1.00 18.12           C  
ATOM   1254  CG  GLN L  37     -18.183  29.505   5.928  1.00 20.11           C  
ATOM   1255  CD  GLN L  37     -17.584  30.028   7.253  1.00 20.14           C  
ATOM   1256  OE1 GLN L  37     -18.204  29.841   8.336  1.00 21.37           O  
ATOM   1257  NE2 GLN L  37     -16.427  30.729   7.171  1.00 19.69           N  
ATOM   1258  N   GLN L  38     -20.086  27.323   4.069  1.00 19.64           N  
ATOM   1259  CA  GLN L  38     -20.477  25.953   4.365  1.00 20.80           C  
ATOM   1260  C   GLN L  38     -19.289  25.065   4.638  1.00 21.35           C  
ATOM   1261  O   GLN L  38     -18.473  24.832   3.750  1.00 20.93           O  
ATOM   1262  CB  GLN L  38     -21.263  25.332   3.212  1.00 21.20           C  
ATOM   1263  CG  GLN L  38     -21.908  24.018   3.606  1.00 21.72           C  
ATOM   1264  CD  GLN L  38     -22.694  23.439   2.481  1.00 23.15           C  
ATOM   1265  OE1 GLN L  38     -22.518  23.846   1.324  1.00 27.12           O  
ATOM   1266  NE2 GLN L  38     -23.567  22.488   2.795  1.00 24.78           N  
ATOM   1267  N   LYS L  39     -19.228  24.551   5.872  1.00 22.81           N  
ATOM   1268  CA  LYS L  39     -18.235  23.519   6.191  1.00 24.52           C  
ATOM   1269  C   LYS L  39     -18.928  22.134   6.109  1.00 26.93           C  
ATOM   1270  O   LYS L  39     -20.126  22.028   6.327  1.00 27.38           O  
ATOM   1271  CB  LYS L  39     -17.682  23.790   7.610  1.00 24.84           C  
ATOM   1272  CG  LYS L  39     -17.053  25.198   7.705  1.00 25.57           C  
ATOM   1273  CD  LYS L  39     -16.327  25.457   9.017  1.00 25.01           C  
ATOM   1274  CE  LYS L  39     -15.584  26.790   8.976  1.00 25.27           C  
ATOM   1275  NZ  LYS L  39     -15.081  27.122  10.365  1.00 25.68           N  
ATOM   1276  N   PRO L  40     -18.155  21.058   5.873  1.00 30.22           N  
ATOM   1277  CA  PRO L  40     -18.679  19.672   5.774  1.00 30.42           C  
ATOM   1278  C   PRO L  40     -19.561  19.235   6.975  1.00 31.64           C  
ATOM   1279  O   PRO L  40     -19.169  19.409   8.150  1.00 31.10           O  
ATOM   1280  CB  PRO L  40     -17.401  18.841   5.629  1.00 31.65           C  
ATOM   1281  CG  PRO L  40     -16.441  19.817   4.909  1.00 30.74           C  
ATOM   1282  CD  PRO L  40     -16.719  21.136   5.558  1.00 30.19           C  
ATOM   1283  N   GLY L  41     -20.763  18.741   6.665  1.00 30.94           N  
ATOM   1284  CA  GLY L  41     -21.727  18.274   7.655  1.00 30.52           C  
ATOM   1285  C   GLY L  41     -22.390  19.308   8.545  1.00 31.54           C  
ATOM   1286  O   GLY L  41     -23.040  18.941   9.542  1.00 33.08           O  
ATOM   1287  N   LYS L  42     -22.255  20.603   8.197  1.00 30.18           N  
ATOM   1288  CA  LYS L  42     -22.781  21.687   9.057  1.00 29.42           C  
ATOM   1289  C   LYS L  42     -23.845  22.473   8.300  1.00 28.37           C  
ATOM   1290  O   LYS L  42     -23.849  22.444   7.085  1.00 24.69           O  
ATOM   1291  CB  LYS L  42     -21.645  22.616   9.474  1.00 29.94           C  
ATOM   1292  CG  LYS L  42     -20.455  21.873  10.156  1.00 32.35           C  
ATOM   1293  CD  LYS L  42     -20.721  21.602  11.638  1.00 37.69           C  
ATOM   1294  CE  LYS L  42     -19.793  20.503  12.177  1.00 39.79           C  
ATOM   1295  NZ  LYS L  42     -20.506  19.174  12.296  1.00 41.68           N  
ATOM   1296  N   ALA L  43     -24.738  23.172   9.015  1.00 28.25           N  
ATOM   1297  CA  ALA L  43     -25.706  24.027   8.326  1.00 27.73           C  
ATOM   1298  C   ALA L  43     -24.912  25.139   7.524  1.00 28.13           C  
ATOM   1299  O   ALA L  43     -23.955  25.691   8.066  1.00 29.11           O  
ATOM   1300  CB  ALA L  43     -26.657  24.651   9.359  1.00 28.59           C  
ATOM   1301  N   PRO L  44     -25.279  25.444   6.232  1.00 27.74           N  
ATOM   1302  CA  PRO L  44     -24.728  26.694   5.563  1.00 25.65           C  
ATOM   1303  C   PRO L  44     -25.043  27.826   6.507  1.00 24.62           C  
ATOM   1304  O   PRO L  44     -26.142  27.815   7.088  1.00 24.72           O  
ATOM   1305  CB  PRO L  44     -25.583  26.843   4.298  1.00 26.90           C  
ATOM   1306  CG  PRO L  44     -26.044  25.355   4.019  1.00 27.00           C  
ATOM   1307  CD  PRO L  44     -26.235  24.729   5.360  1.00 28.57           C  
ATOM   1308  N   LYS L  45     -24.079  28.745   6.711  1.00 21.42           N  
ATOM   1309  CA  LYS L  45     -24.207  29.814   7.666  1.00 21.66           C  
ATOM   1310  C   LYS L  45     -24.219  31.121   6.940  1.00 20.00           C  
ATOM   1311  O   LYS L  45     -23.277  31.387   6.190  1.00 18.93           O  
ATOM   1312  CB  LYS L  45     -22.985  29.810   8.581  1.00 23.12           C  
ATOM   1313  CG  LYS L  45     -22.892  31.037   9.516  1.00 26.34           C  
ATOM   1314  CD  LYS L  45     -21.629  30.978  10.411  1.00 28.06           C  
ATOM   1315  CE  LYS L  45     -21.402  32.276  11.259  1.00 31.10           C  
ATOM   1316  NZ  LYS L  45     -22.635  32.619  12.057  1.00 37.98           N  
ATOM   1317  N   LEU L  46     -25.275  31.889   7.152  1.00 19.31           N  
ATOM   1318  CA  LEU L  46     -25.419  33.197   6.508  1.00 18.74           C  
ATOM   1319  C   LEU L  46     -24.342  34.147   7.007  1.00 19.14           C  
ATOM   1320  O   LEU L  46     -24.231  34.353   8.252  1.00 20.47           O  
ATOM   1321  CB  LEU L  46     -26.814  33.746   6.728  1.00 19.04           C  
ATOM   1322  CG  LEU L  46     -27.149  35.003   5.895  1.00 19.92           C  
ATOM   1323  CD1 LEU L  46     -28.620  35.055   5.552  1.00 20.60           C  
ATOM   1324  CD2 LEU L  46     -26.718  36.276   6.644  1.00 19.00           C  
ATOM   1325  N   LEU L  47     -23.554  34.705   6.054  1.00 18.35           N  
ATOM   1326  CA  LEU L  47     -22.561  35.744   6.432  1.00 17.98           C  
ATOM   1327  C   LEU L  47     -23.009  37.159   6.055  1.00 19.01           C  
ATOM   1328  O   LEU L  47     -22.830  38.120   6.819  1.00 19.81           O  
ATOM   1329  CB  LEU L  47     -21.208  35.517   5.760  1.00 18.95           C  
ATOM   1330  CG  LEU L  47     -20.499  34.191   6.130  1.00 19.60           C  
ATOM   1331  CD1 LEU L  47     -19.082  34.074   5.547  1.00 22.46           C  
ATOM   1332  CD2 LEU L  47     -20.482  33.865   7.626  1.00 21.78           C  
ATOM   1333  N   ILE L  48     -23.547  37.262   4.837  1.00 18.33           N  
ATOM   1334  CA  ILE L  48     -23.920  38.583   4.313  1.00 19.67           C  
ATOM   1335  C   ILE L  48     -25.312  38.464   3.737  1.00 18.93           C  
ATOM   1336  O   ILE L  48     -25.625  37.439   3.080  1.00 18.39           O  
ATOM   1337  CB  ILE L  48     -22.973  38.980   3.123  1.00 21.29           C  
ATOM   1338  CG1 ILE L  48     -21.511  39.076   3.604  1.00 25.12           C  
ATOM   1339  CG2 ILE L  48     -23.412  40.254   2.376  1.00 22.12           C  
ATOM   1340  CD1 ILE L  48     -20.536  38.921   2.552  1.00 33.28           C  
ATOM   1341  N   TYR L  49     -26.121  39.515   3.962  1.00 18.72           N  
ATOM   1342  CA  TYR L  49     -27.439  39.583   3.349  1.00 18.69           C  
ATOM   1343  C   TYR L  49     -27.633  40.974   2.733  1.00 19.07           C  
ATOM   1344  O   TYR L  49     -26.848  41.900   2.978  1.00 19.37           O  
ATOM   1345  CB  TYR L  49     -28.548  39.323   4.367  1.00 19.73           C  
ATOM   1346  CG  TYR L  49     -28.591  40.341   5.494  1.00 22.11           C  
ATOM   1347  CD1 TYR L  49     -27.635  40.317   6.526  1.00 22.38           C  
ATOM   1348  CD2 TYR L  49     -29.588  41.326   5.529  1.00 21.90           C  
ATOM   1349  CE1 TYR L  49     -27.654  41.258   7.572  1.00 23.68           C  
ATOM   1350  CE2 TYR L  49     -29.614  42.284   6.573  1.00 23.79           C  
ATOM   1351  CZ  TYR L  49     -28.648  42.241   7.588  1.00 22.73           C  
ATOM   1352  OH  TYR L  49     -28.683  43.165   8.648  1.00 25.44           O  
ATOM   1353  N   ASP L  50     -28.661  41.099   1.896  1.00 19.49           N  
ATOM   1354  CA  ASP L  50     -28.920  42.386   1.205  1.00 20.61           C  
ATOM   1355  C   ASP L  50     -27.626  42.815   0.480  1.00 20.82           C  
ATOM   1356  O   ASP L  50     -27.332  44.017   0.390  1.00 21.24           O  
ATOM   1357  CB  ASP L  50     -29.341  43.482   2.176  1.00 21.98           C  
ATOM   1358  CG  ASP L  50     -30.201  44.531   1.509  1.00 28.98           C  
ATOM   1359  OD1 ASP L  50     -29.878  45.714   1.685  1.00 34.23           O  
ATOM   1360  OD2 ASP L  50     -31.206  44.157   0.823  1.00 31.95           O  
ATOM   1361  N   ALA L  51     -26.892  41.809  -0.014  1.00 18.74           N  
ATOM   1362  CA  ALA L  51     -25.690  41.995  -0.838  1.00 19.88           C  
ATOM   1363  C   ALA L  51     -24.460  42.503  -0.088  1.00 18.99           C  
ATOM   1364  O   ALA L  51     -23.325  42.163  -0.455  1.00 19.58           O  
ATOM   1365  CB  ALA L  51     -25.955  42.886  -2.046  1.00 20.11           C  
ATOM   1366  N   SER L  52     -24.664  43.300   0.972  1.00 19.74           N  
ATOM   1367  CA  SER L  52     -23.511  44.000   1.589  1.00 21.44           C  
ATOM   1368  C   SER L  52     -23.582  44.106   3.103  1.00 21.81           C  
ATOM   1369  O   SER L  52     -22.667  44.670   3.720  1.00 22.48           O  
ATOM   1370  CB  SER L  52     -23.369  45.433   1.041  1.00 23.35           C  
ATOM   1371  OG  SER L  52     -24.536  46.187   1.345  1.00 26.32           O  
ATOM   1372  N   ASN L  53     -24.681  43.619   3.679  1.00 21.28           N  
ATOM   1373  CA  ASN L  53     -24.828  43.743   5.140  1.00 22.02           C  
ATOM   1374  C   ASN L  53     -24.265  42.514   5.853  1.00 22.95           C  
ATOM   1375  O   ASN L  53     -24.602  41.390   5.501  1.00 22.29           O  
ATOM   1376  CB  ASN L  53     -26.318  43.832   5.485  1.00 21.87           C  
ATOM   1377  CG  ASN L  53     -26.932  45.162   5.090  1.00 27.09           C  
ATOM   1378  OD1 ASN L  53     -26.220  46.103   4.737  1.00 30.92           O  
ATOM   1379  ND2 ASN L  53     -28.255  45.258   5.197  1.00 30.98           N  
ATOM   1380  N   LEU L  54     -23.446  42.748   6.881  1.00 22.66           N  
ATOM   1381  CA  LEU L  54     -22.824  41.690   7.626  1.00 23.22           C  
ATOM   1382  C   LEU L  54     -23.748  41.241   8.760  1.00 23.76           C  
ATOM   1383  O   LEU L  54     -24.247  42.116   9.520  1.00 23.64           O  
ATOM   1384  CB  LEU L  54     -21.563  42.292   8.231  1.00 24.55           C  
ATOM   1385  CG  LEU L  54     -20.466  41.466   8.864  1.00 26.47           C  
ATOM   1386  CD1 LEU L  54     -19.954  40.369   7.916  1.00 25.80           C  
ATOM   1387  CD2 LEU L  54     -19.328  42.361   9.401  1.00 23.98           C  
ATOM   1388  N   GLU L  55     -23.947  39.924   8.925  1.00 24.74           N  
ATOM   1389  CA  GLU L  55     -24.756  39.406  10.060  1.00 24.86           C  
ATOM   1390  C   GLU L  55     -23.989  39.557  11.375  1.00 25.76           C  
ATOM   1391  O   GLU L  55     -22.742  39.649  11.400  1.00 22.97           O  
ATOM   1392  CB  GLU L  55     -25.212  37.904   9.947  1.00 25.92           C  
ATOM   1393  CG  GLU L  55     -26.752  37.701   9.745  1.00 27.63           C  
ATOM   1394  CD  GLU L  55     -27.631  38.271  10.806  1.00 30.71           C  
ATOM   1395  OE1 GLU L  55     -27.263  38.166  12.001  1.00 32.03           O  
ATOM   1396  OE2 GLU L  55     -28.736  38.782  10.472  1.00 30.70           O  
ATOM   1397  N   THR L  56     -24.749  39.478  12.468  1.00 27.50           N  
ATOM   1398  CA  THR L  56     -24.188  39.521  13.814  1.00 27.92           C  
ATOM   1399  C   THR L  56     -23.099  38.528  14.068  1.00 27.42           C  
ATOM   1400  O   THR L  56     -23.227  37.313  13.801  1.00 28.52           O  
ATOM   1401  CB  THR L  56     -25.289  39.225  14.901  1.00 28.99           C  
ATOM   1402  OG1 THR L  56     -26.399  40.059  14.610  1.00 32.81           O  
ATOM   1403  CG2 THR L  56     -24.774  39.482  16.346  1.00 32.62           C  
ATOM   1404  N   GLY L  57     -22.003  39.069  14.580  1.00 26.94           N  
ATOM   1405  CA  GLY L  57     -20.890  38.286  15.019  1.00 26.00           C  
ATOM   1406  C   GLY L  57     -20.018  37.717  13.935  1.00 25.69           C  
ATOM   1407  O   GLY L  57     -19.056  37.018  14.220  1.00 27.70           O  
ATOM   1408  N   VAL L  58     -20.344  38.027  12.673  1.00 21.34           N  
ATOM   1409  CA  VAL L  58     -19.494  37.616  11.560  1.00 21.17           C  
ATOM   1410  C   VAL L  58     -18.300  38.603  11.490  1.00 20.41           C  
ATOM   1411  O   VAL L  58     -18.518  39.852  11.578  1.00 21.00           O  
ATOM   1412  CB  VAL L  58     -20.285  37.637  10.267  1.00 21.12           C  
ATOM   1413  CG1 VAL L  58     -19.365  37.271   9.052  1.00 21.74           C  
ATOM   1414  CG2 VAL L  58     -21.460  36.625  10.368  1.00 21.41           C  
ATOM   1415  N   PRO L  59     -17.074  38.050  11.386  1.00 20.13           N  
ATOM   1416  CA  PRO L  59     -15.881  38.910  11.338  1.00 19.62           C  
ATOM   1417  C   PRO L  59     -15.951  39.900  10.183  1.00 19.41           C  
ATOM   1418  O   PRO L  59     -16.438  39.556   9.090  1.00 19.49           O  
ATOM   1419  CB  PRO L  59     -14.761  37.923  11.068  1.00 20.49           C  
ATOM   1420  CG  PRO L  59     -15.219  36.610  11.703  1.00 20.41           C  
ATOM   1421  CD  PRO L  59     -16.716  36.606  11.437  1.00 20.50           C  
ATOM   1422  N   SER L  60     -15.365  41.094  10.387  1.00 19.00           N  
ATOM   1423  CA  SER L  60     -15.537  42.155   9.388  1.00 18.20           C  
ATOM   1424  C   SER L  60     -14.646  41.926   8.171  1.00 18.30           C  
ATOM   1425  O   SER L  60     -14.781  42.630   7.124  1.00 18.97           O  
ATOM   1426  CB  SER L  60     -15.237  43.518  10.016  1.00 20.30           C  
ATOM   1427  OG  SER L  60     -13.977  43.533  10.670  1.00 19.74           O  
ATOM   1428  N   ARG L  61     -13.772  40.921   8.244  1.00 17.52           N  
ATOM   1429  CA  ARG L  61     -12.997  40.611   7.016  1.00 17.89           C  
ATOM   1430  C   ARG L  61     -13.886  40.066   5.902  1.00 17.27           C  
ATOM   1431  O   ARG L  61     -13.449  40.038   4.737  1.00 16.77           O  
ATOM   1432  CB  ARG L  61     -11.882  39.605   7.248  1.00 18.52           C  
ATOM   1433  CG  ARG L  61     -12.339  38.228   7.791  1.00 18.60           C  
ATOM   1434  CD  ARG L  61     -11.099  37.336   7.973  1.00 20.50           C  
ATOM   1435  NE  ARG L  61     -11.436  36.043   8.578  1.00 19.41           N  
ATOM   1436  CZ  ARG L  61     -11.624  35.893   9.897  1.00 20.12           C  
ATOM   1437  NH1 ARG L  61     -11.504  36.958  10.746  1.00 21.25           N  
ATOM   1438  NH2 ARG L  61     -11.931  34.678  10.375  1.00 19.84           N  
ATOM   1439  N   PHE L  62     -15.092  39.635   6.253  1.00 17.28           N  
ATOM   1440  CA  PHE L  62     -16.052  39.184   5.214  1.00 17.50           C  
ATOM   1441  C   PHE L  62     -16.864  40.372   4.704  1.00 18.39           C  
ATOM   1442  O   PHE L  62     -17.400  41.127   5.499  1.00 19.03           O  
ATOM   1443  CB  PHE L  62     -17.009  38.159   5.805  1.00 17.81           C  
ATOM   1444  CG  PHE L  62     -16.330  36.891   6.186  1.00 18.21           C  
ATOM   1445  CD1 PHE L  62     -15.940  35.981   5.222  1.00 18.81           C  
ATOM   1446  CD2 PHE L  62     -16.047  36.596   7.524  1.00 20.45           C  
ATOM   1447  CE1 PHE L  62     -15.306  34.779   5.560  1.00 19.21           C  
ATOM   1448  CE2 PHE L  62     -15.403  35.400   7.833  1.00 19.39           C  
ATOM   1449  CZ  PHE L  62     -15.010  34.500   6.873  1.00 19.43           C  
ATOM   1450  N   SER L  63     -16.944  40.574   3.384  1.00 17.84           N  
ATOM   1451  CA  SER L  63     -17.730  41.702   2.931  1.00 18.20           C  
ATOM   1452  C   SER L  63     -18.342  41.345   1.561  1.00 18.17           C  
ATOM   1453  O   SER L  63     -17.850  40.449   0.870  1.00 18.45           O  
ATOM   1454  CB  SER L  63     -16.892  42.979   2.813  1.00 20.48           C  
ATOM   1455  OG  SER L  63     -15.880  42.863   1.838  1.00 19.77           O  
ATOM   1456  N   GLY L  64     -19.409  42.062   1.219  1.00 18.75           N  
ATOM   1457  CA  GLY L  64     -20.042  41.902  -0.087  1.00 18.65           C  
ATOM   1458  C   GLY L  64     -20.310  43.260  -0.707  1.00 18.86           C  
ATOM   1459  O   GLY L  64     -20.484  44.276  -0.016  1.00 19.74           O  
ATOM   1460  N   SER L  65     -20.308  43.254  -2.034  1.00 18.02           N  
ATOM   1461  CA  SER L  65     -20.676  44.477  -2.736  1.00 19.86           C  
ATOM   1462  C   SER L  65     -21.393  44.109  -4.034  1.00 20.59           C  
ATOM   1463  O   SER L  65     -21.449  42.927  -4.439  1.00 19.74           O  
ATOM   1464  CB  SER L  65     -19.433  45.318  -3.052  1.00 22.69           C  
ATOM   1465  OG  SER L  65     -18.569  44.620  -3.916  1.00 24.63           O  
ATOM   1466  N   GLY L  66     -21.951  45.125  -4.685  1.00 22.50           N  
ATOM   1467  CA  GLY L  66     -22.645  44.940  -5.958  1.00 22.57           C  
ATOM   1468  C   GLY L  66     -24.133  45.169  -5.790  1.00 23.75           C  
ATOM   1469  O   GLY L  66     -24.701  45.122  -4.670  1.00 23.56           O  
ATOM   1470  N   SER L  67     -24.800  45.406  -6.920  1.00 24.02           N  
ATOM   1471  CA  SER L  67     -26.230  45.599  -6.896  1.00 25.97           C  
ATOM   1472  C   SER L  67     -26.649  45.408  -8.332  1.00 25.41           C  
ATOM   1473  O   SER L  67     -25.973  45.927  -9.229  1.00 27.15           O  
ATOM   1474  CB  SER L  67     -26.544  47.049  -6.443  1.00 27.76           C  
ATOM   1475  OG  SER L  67     -27.936  47.300  -6.272  1.00 32.69           O  
ATOM   1476  N   GLY L  68     -27.752  44.699  -8.541  1.00 24.52           N  
ATOM   1477  CA  GLY L  68     -28.278  44.437  -9.874  1.00 24.25           C  
ATOM   1478  C   GLY L  68     -27.973  43.039 -10.343  1.00 23.02           C  
ATOM   1479  O   GLY L  68     -28.709  42.100 -10.026  1.00 22.77           O  
ATOM   1480  N   THR L  69     -26.872  42.889 -11.093  1.00 22.67           N  
ATOM   1481  CA  THR L  69     -26.511  41.569 -11.596  1.00 22.07           C  
ATOM   1482  C   THR L  69     -25.107  41.125 -11.158  1.00 22.27           C  
ATOM   1483  O   THR L  69     -24.869  39.923 -11.116  1.00 23.15           O  
ATOM   1484  CB  THR L  69     -26.527  41.489 -13.114  1.00 23.24           C  
ATOM   1485  OG1 THR L  69     -25.710  42.550 -13.616  1.00 25.33           O  
ATOM   1486  CG2 THR L  69     -27.971  41.661 -13.619  1.00 24.12           C  
ATOM   1487  N   ASP L  70     -24.211  42.070 -10.843  1.00 21.46           N  
ATOM   1488  CA  ASP L  70     -22.781  41.723 -10.652  1.00 21.12           C  
ATOM   1489  C   ASP L  70     -22.335  41.936  -9.201  1.00 21.15           C  
ATOM   1490  O   ASP L  70     -22.271  43.090  -8.708  1.00 21.78           O  
ATOM   1491  CB  ASP L  70     -21.928  42.594 -11.559  1.00 22.87           C  
ATOM   1492  CG  ASP L  70     -22.057  42.201 -13.020  1.00 25.96           C  
ATOM   1493  OD1 ASP L  70     -23.049  41.541 -13.395  1.00 30.38           O  
ATOM   1494  OD2 ASP L  70     -21.154  42.562 -13.797  1.00 33.36           O  
ATOM   1495  N   PHE L  71     -22.027  40.829  -8.534  1.00 18.86           N  
ATOM   1496  CA  PHE L  71     -21.763  40.878  -7.085  1.00 18.13           C  
ATOM   1497  C   PHE L  71     -20.361  40.333  -6.765  1.00 18.72           C  
ATOM   1498  O   PHE L  71     -19.844  39.463  -7.496  1.00 19.06           O  
ATOM   1499  CB  PHE L  71     -22.824  40.048  -6.330  1.00 17.95           C  
ATOM   1500  CG  PHE L  71     -24.214  40.566  -6.567  1.00 19.41           C  
ATOM   1501  CD1 PHE L  71     -24.757  41.535  -5.723  1.00 19.67           C  
ATOM   1502  CD2 PHE L  71     -24.960  40.116  -7.649  1.00 19.51           C  
ATOM   1503  CE1 PHE L  71     -26.041  42.014  -5.923  1.00 19.16           C  
ATOM   1504  CE2 PHE L  71     -26.229  40.611  -7.891  1.00 19.40           C  
ATOM   1505  CZ  PHE L  71     -26.764  41.580  -7.057  1.00 20.43           C  
ATOM   1506  N   THR L  72     -19.773  40.824  -5.673  1.00 18.09           N  
ATOM   1507  CA  THR L  72     -18.436  40.372  -5.274  1.00 17.83           C  
ATOM   1508  C   THR L  72     -18.412  40.123  -3.760  1.00 19.45           C  
ATOM   1509  O   THR L  72     -18.918  40.942  -3.003  1.00 21.45           O  
ATOM   1510  CB  THR L  72     -17.394  41.469  -5.554  1.00 20.06           C  
ATOM   1511  OG1 THR L  72     -17.443  41.825  -6.943  1.00 19.87           O  
ATOM   1512  CG2 THR L  72     -15.959  41.009  -5.211  1.00 21.90           C  
ATOM   1513  N   PHE L  73     -17.784  39.009  -3.385  1.00 17.45           N  
ATOM   1514  CA  PHE L  73     -17.603  38.646  -1.984  1.00 17.54           C  
ATOM   1515  C   PHE L  73     -16.096  38.645  -1.739  1.00 17.12           C  
ATOM   1516  O   PHE L  73     -15.320  38.093  -2.577  1.00 18.71           O  
ATOM   1517  CB  PHE L  73     -18.152  37.232  -1.780  1.00 18.10           C  
ATOM   1518  CG  PHE L  73     -17.879  36.605  -0.408  1.00 17.47           C  
ATOM   1519  CD1 PHE L  73     -18.597  37.017   0.718  1.00 18.41           C  
ATOM   1520  CD2 PHE L  73     -16.963  35.572  -0.291  1.00 20.06           C  
ATOM   1521  CE1 PHE L  73     -18.324  36.397   1.968  1.00 19.26           C  
ATOM   1522  CE2 PHE L  73     -16.708  34.976   0.946  1.00 20.78           C  
ATOM   1523  CZ  PHE L  73     -17.425  35.378   2.049  1.00 18.90           C  
ATOM   1524  N   THR L  74     -15.668  39.220  -0.599  1.00 16.88           N  
ATOM   1525  CA  THR L  74     -14.261  39.289  -0.325  1.00 17.27           C  
ATOM   1526  C   THR L  74     -14.012  38.753   1.083  1.00 16.80           C  
ATOM   1527  O   THR L  74     -14.804  39.045   1.995  1.00 17.63           O  
ATOM   1528  CB  THR L  74     -13.780  40.741  -0.380  1.00 19.91           C  
ATOM   1529  OG1 THR L  74     -14.034  41.230  -1.709  1.00 20.15           O  
ATOM   1530  CG2 THR L  74     -12.276  40.813  -0.067  1.00 22.54           C  
ATOM   1531  N   ILE L  75     -12.919  38.005   1.232  1.00 17.44           N  
ATOM   1532  CA  ILE L  75     -12.364  37.742   2.608  1.00 17.39           C  
ATOM   1533  C   ILE L  75     -11.051  38.541   2.606  1.00 17.77           C  
ATOM   1534  O   ILE L  75     -10.139  38.190   1.804  1.00 17.98           O  
ATOM   1535  CB  ILE L  75     -12.052  36.254   2.842  1.00 17.66           C  
ATOM   1536  CG1 ILE L  75     -13.256  35.392   2.416  1.00 19.43           C  
ATOM   1537  CG2 ILE L  75     -11.744  36.022   4.339  1.00 18.88           C  
ATOM   1538  CD1 ILE L  75     -13.011  33.875   2.622  1.00 20.17           C  
ATOM   1539  N   SER L  76     -10.936  39.626   3.397  1.00 16.90           N  
ATOM   1540  CA  SER L  76      -9.766  40.449   3.183  1.00 15.48           C  
ATOM   1541  C   SER L  76      -8.480  39.852   3.708  1.00 16.74           C  
ATOM   1542  O   SER L  76      -7.400  40.299   3.312  1.00 17.38           O  
ATOM   1543  CB  SER L  76     -10.033  41.837   3.752  1.00 17.40           C  
ATOM   1544  OG  SER L  76     -10.298  41.760   5.141  1.00 18.70           O  
ATOM   1545  N   SER L  77      -8.565  38.885   4.645  1.00 16.76           N  
ATOM   1546  CA  SER L  77      -7.361  38.132   5.012  1.00 17.62           C  
ATOM   1547  C   SER L  77      -7.787  36.716   5.392  1.00 18.19           C  
ATOM   1548  O   SER L  77      -8.477  36.525   6.385  1.00 19.02           O  
ATOM   1549  CB  SER L  77      -6.590  38.797   6.189  1.00 18.33           C  
ATOM   1550  OG  SER L  77      -7.452  39.013   7.315  1.00 17.70           O  
ATOM   1551  N   LEU L  78      -7.415  35.730   4.568  1.00 18.18           N  
ATOM   1552  CA  LEU L  78      -7.875  34.368   4.776  1.00 18.37           C  
ATOM   1553  C   LEU L  78      -7.281  33.765   6.041  1.00 18.92           C  
ATOM   1554  O   LEU L  78      -6.051  33.728   6.165  1.00 18.67           O  
ATOM   1555  CB  LEU L  78      -7.357  33.526   3.593  1.00 18.90           C  
ATOM   1556  CG  LEU L  78      -7.848  32.068   3.565  1.00 19.34           C  
ATOM   1557  CD1 LEU L  78      -9.375  32.013   3.556  1.00 21.31           C  
ATOM   1558  CD2 LEU L  78      -7.231  31.371   2.343  1.00 20.51           C  
ATOM   1559  N   GLN L  79      -8.140  33.196   6.904  1.00 18.48           N  
ATOM   1560  CA  GLN L  79      -7.606  32.511   8.064  1.00 18.85           C  
ATOM   1561  C   GLN L  79      -7.915  31.019   7.977  1.00 19.29           C  
ATOM   1562  O   GLN L  79      -8.821  30.586   7.247  1.00 18.80           O  
ATOM   1563  CB  GLN L  79      -8.270  33.075   9.332  1.00 19.63           C  
ATOM   1564  CG  GLN L  79      -8.160  34.626   9.458  1.00 19.92           C  
ATOM   1565  CD  GLN L  79      -6.753  35.175   9.355  1.00 19.34           C  
ATOM   1566  OE1 GLN L  79      -6.508  36.241   8.684  1.00 20.87           O  
ATOM   1567  NE2 GLN L  79      -5.832  34.532  10.043  1.00 16.41           N  
ATOM   1568  N   PRO L  80      -7.170  30.207   8.741  1.00 20.10           N  
ATOM   1569  CA  PRO L  80      -7.466  28.762   8.690  1.00 19.58           C  
ATOM   1570  C   PRO L  80      -8.916  28.413   8.919  1.00 19.39           C  
ATOM   1571  O   PRO L  80      -9.450  27.460   8.269  1.00 20.83           O  
ATOM   1572  CB  PRO L  80      -6.562  28.167   9.798  1.00 20.87           C  
ATOM   1573  CG  PRO L  80      -5.351  29.091   9.762  1.00 22.60           C  
ATOM   1574  CD  PRO L  80      -5.996  30.500   9.588  1.00 20.77           C  
ATOM   1575  N   GLU L  81      -9.565  29.125   9.842  1.00 19.74           N  
ATOM   1576  CA  GLU L  81     -10.942  28.805  10.189  1.00 20.21           C  
ATOM   1577  C   GLU L  81     -11.928  29.140   9.060  1.00 20.71           C  
ATOM   1578  O   GLU L  81     -13.134  28.794   9.161  1.00 21.66           O  
ATOM   1579  CB  GLU L  81     -11.409  29.462  11.498  1.00 21.02           C  
ATOM   1580  CG  GLU L  81     -11.158  30.973  11.607  1.00 21.33           C  
ATOM   1581  CD  GLU L  81      -9.783  31.361  12.205  1.00 25.21           C  
ATOM   1582  OE1 GLU L  81      -8.736  30.718  11.876  1.00 24.15           O  
ATOM   1583  OE2 GLU L  81      -9.775  32.342  13.030  1.00 26.70           O  
ATOM   1584  N   ASP L  82     -11.416  29.840   8.033  1.00 18.87           N  
ATOM   1585  CA  ASP L  82     -12.297  30.267   6.919  1.00 19.20           C  
ATOM   1586  C   ASP L  82     -12.333  29.258   5.793  1.00 19.24           C  
ATOM   1587  O   ASP L  82     -13.062  29.440   4.799  1.00 19.85           O  
ATOM   1588  CB  ASP L  82     -11.788  31.583   6.321  1.00 19.29           C  
ATOM   1589  CG  ASP L  82     -11.728  32.723   7.369  1.00 19.58           C  
ATOM   1590  OD1 ASP L  82     -12.423  32.655   8.422  1.00 20.45           O  
ATOM   1591  OD2 ASP L  82     -10.965  33.697   7.093  1.00 20.38           O  
ATOM   1592  N   ILE L  83     -11.539  28.200   5.927  1.00 19.39           N  
ATOM   1593  CA  ILE L  83     -11.521  27.192   4.893  1.00 19.48           C  
ATOM   1594  C   ILE L  83     -12.879  26.485   4.882  1.00 19.74           C  
ATOM   1595  O   ILE L  83     -13.339  25.959   5.895  1.00 20.99           O  
ATOM   1596  CB  ILE L  83     -10.335  26.185   5.093  1.00 20.41           C  
ATOM   1597  CG1 ILE L  83      -8.997  26.918   4.879  1.00 20.69           C  
ATOM   1598  CG2 ILE L  83     -10.538  24.938   4.195  1.00 21.79           C  
ATOM   1599  CD1 ILE L  83      -8.862  27.632   3.474  1.00 21.80           C  
ATOM   1600  N   ALA L  84     -13.538  26.507   3.715  1.00 19.42           N  
ATOM   1601  CA  ALA L  84     -14.936  26.103   3.606  1.00 18.39           C  
ATOM   1602  C   ALA L  84     -15.302  26.267   2.111  1.00 18.01           C  
ATOM   1603  O   ALA L  84     -14.458  26.727   1.320  1.00 18.29           O  
ATOM   1604  CB  ALA L  84     -15.832  27.048   4.413  1.00 19.43           C  
ATOM   1605  N   THR L  85     -16.530  25.868   1.731  1.00 17.31           N  
ATOM   1606  CA  THR L  85     -17.113  26.269   0.431  1.00 18.35           C  
ATOM   1607  C   THR L  85     -18.071  27.432   0.645  1.00 18.80           C  
ATOM   1608  O   THR L  85     -18.813  27.452   1.653  1.00 18.99           O  
ATOM   1609  CB  THR L  85     -17.878  25.091  -0.154  1.00 20.02           C  
ATOM   1610  OG1 THR L  85     -16.922  24.044  -0.406  1.00 21.77           O  
ATOM   1611  CG2 THR L  85     -18.574  25.482  -1.437  1.00 20.68           C  
ATOM   1612  N   TYR L  86     -18.009  28.436  -0.246  1.00 16.89           N  
ATOM   1613  CA  TYR L  86     -18.862  29.613  -0.095  1.00 17.43           C  
ATOM   1614  C   TYR L  86     -19.852  29.593  -1.259  1.00 16.52           C  
ATOM   1615  O   TYR L  86     -19.468  29.280  -2.368  1.00 17.21           O  
ATOM   1616  CB  TYR L  86     -18.023  30.921  -0.157  1.00 17.38           C  
ATOM   1617  CG  TYR L  86     -17.153  30.992   1.088  1.00 18.05           C  
ATOM   1618  CD1 TYR L  86     -17.571  31.743   2.149  1.00 18.81           C  
ATOM   1619  CD2 TYR L  86     -15.945  30.275   1.214  1.00 18.71           C  
ATOM   1620  CE1 TYR L  86     -16.826  31.812   3.317  1.00 16.89           C  
ATOM   1621  CE2 TYR L  86     -15.180  30.330   2.450  1.00 18.76           C  
ATOM   1622  CZ  TYR L  86     -15.666  31.102   3.484  1.00 18.74           C  
ATOM   1623  OH  TYR L  86     -14.967  31.200   4.704  1.00 19.26           O  
ATOM   1624  N   HIS L  87     -21.088  29.950  -0.957  1.00 16.71           N  
ATOM   1625  CA  HIS L  87     -22.125  30.034  -2.002  1.00 16.82           C  
ATOM   1626  C   HIS L  87     -22.865  31.370  -1.991  1.00 17.82           C  
ATOM   1627  O   HIS L  87     -23.085  31.920  -0.911  1.00 18.38           O  
ATOM   1628  CB  HIS L  87     -23.231  28.979  -1.751  1.00 18.63           C  
ATOM   1629  CG  HIS L  87     -22.762  27.579  -1.903  1.00 20.00           C  
ATOM   1630  ND1 HIS L  87     -22.780  26.906  -3.113  1.00 22.02           N  
ATOM   1631  CD2 HIS L  87     -22.338  26.679  -0.973  1.00 21.30           C  
ATOM   1632  CE1 HIS L  87     -22.360  25.661  -2.917  1.00 23.37           C  
ATOM   1633  NE2 HIS L  87     -22.057  25.509  -1.642  1.00 23.46           N  
ATOM   1634  N   CYS L  88     -23.229  31.902  -3.160  1.00 17.75           N  
ATOM   1635  CA  CYS L  88     -24.207  33.003  -3.203  1.00 18.31           C  
ATOM   1636  C   CYS L  88     -25.621  32.407  -3.389  1.00 17.25           C  
ATOM   1637  O   CYS L  88     -25.782  31.300  -3.986  1.00 18.60           O  
ATOM   1638  CB  CYS L  88     -23.947  33.975  -4.372  1.00 20.61           C  
ATOM   1639  SG  CYS L  88     -23.782  33.138  -5.961  1.00 22.85           S  
ATOM   1640  N   GLN L  89     -26.627  33.166  -2.926  1.00 16.95           N  
ATOM   1641  CA  GLN L  89     -28.029  32.770  -3.135  1.00 17.31           C  
ATOM   1642  C   GLN L  89     -28.845  34.013  -3.399  1.00 17.31           C  
ATOM   1643  O   GLN L  89     -28.742  34.975  -2.645  1.00 17.98           O  
ATOM   1644  CB  GLN L  89     -28.598  32.091  -1.861  1.00 18.47           C  
ATOM   1645  CG  GLN L  89     -30.078  31.579  -2.018  1.00 19.22           C  
ATOM   1646  CD  GLN L  89     -30.706  31.278  -0.627  1.00 21.25           C  
ATOM   1647  OE1 GLN L  89     -30.409  31.951   0.332  1.00 23.68           O  
ATOM   1648  NE2 GLN L  89     -31.502  30.205  -0.537  1.00 24.85           N  
ATOM   1649  N   GLN L  90     -29.638  34.004  -4.486  1.00 17.92           N  
ATOM   1650  CA  GLN L  90     -30.527  35.147  -4.667  1.00 17.46           C  
ATOM   1651  C   GLN L  90     -31.860  34.865  -3.970  1.00 18.59           C  
ATOM   1652  O   GLN L  90     -32.358  33.744  -3.987  1.00 19.10           O  
ATOM   1653  CB  GLN L  90     -30.801  35.459  -6.171  1.00 18.19           C  
ATOM   1654  CG  GLN L  90     -31.507  34.376  -6.965  1.00 18.27           C  
ATOM   1655  CD  GLN L  90     -33.034  34.396  -6.848  1.00 18.34           C  
ATOM   1656  OE1 GLN L  90     -33.663  35.419  -6.439  1.00 20.10           O  
ATOM   1657  NE2 GLN L  90     -33.642  33.248  -7.176  1.00 19.12           N  
ATOM   1658  N   TYR L  91     -32.456  35.922  -3.406  1.00 16.89           N  
ATOM   1659  CA  TYR L  91     -33.776  35.777  -2.844  1.00 18.10           C  
ATOM   1660  C   TYR L  91     -34.723  36.882  -3.315  1.00 18.46           C  
ATOM   1661  O   TYR L  91     -35.668  37.273  -2.617  1.00 19.99           O  
ATOM   1662  CB  TYR L  91     -33.729  35.673  -1.308  1.00 19.06           C  
ATOM   1663  CG  TYR L  91     -33.086  36.859  -0.611  1.00 18.34           C  
ATOM   1664  CD1 TYR L  91     -31.693  37.049  -0.645  1.00 20.29           C  
ATOM   1665  CD2 TYR L  91     -33.866  37.777   0.111  1.00 18.77           C  
ATOM   1666  CE1 TYR L  91     -31.088  38.133   0.029  1.00 20.93           C  
ATOM   1667  CE2 TYR L  91     -33.276  38.852   0.794  1.00 19.08           C  
ATOM   1668  CZ  TYR L  91     -31.876  39.030   0.737  1.00 21.02           C  
ATOM   1669  OH  TYR L  91     -31.267  40.091   1.371  1.00 21.44           O  
ATOM   1670  N   ASP L  92     -34.487  37.344  -4.545  1.00 18.27           N  
ATOM   1671  CA  ASP L  92     -35.444  38.187  -5.232  1.00 18.75           C  
ATOM   1672  C   ASP L  92     -36.745  37.462  -5.569  1.00 19.44           C  
ATOM   1673  O   ASP L  92     -37.827  38.070  -5.483  1.00 20.69           O  
ATOM   1674  CB  ASP L  92     -34.816  38.761  -6.495  1.00 19.54           C  
ATOM   1675  CG  ASP L  92     -35.737  39.744  -7.209  1.00 22.24           C  
ATOM   1676  OD1 ASP L  92     -36.074  40.790  -6.628  1.00 26.67           O  
ATOM   1677  OD2 ASP L  92     -36.139  39.487  -8.364  1.00 25.25           O  
ATOM   1678  N   ASN L  93     -36.645  36.182  -5.957  1.00 17.91           N  
ATOM   1679  CA  ASN L  93     -37.866  35.500  -6.394  1.00 19.09           C  
ATOM   1680  C   ASN L  93     -37.699  33.990  -6.293  1.00 18.25           C  
ATOM   1681  O   ASN L  93     -36.653  33.445  -6.655  1.00 19.86           O  
ATOM   1682  CB  ASN L  93     -38.150  35.859  -7.864  1.00 18.62           C  
ATOM   1683  CG  ASN L  93     -39.616  35.569  -8.285  1.00 21.27           C  
ATOM   1684  OD1 ASN L  93     -40.545  36.078  -7.650  1.00 23.09           O  
ATOM   1685  ND2 ASN L  93     -39.811  34.739  -9.364  1.00 21.06           N  
ATOM   1686  N   LEU L  94     -38.707  33.327  -5.728  1.00 16.85           N  
ATOM   1687  CA  LEU L  94     -38.671  31.882  -5.688  1.00 17.74           C  
ATOM   1688  C   LEU L  94     -38.716  31.360  -7.144  1.00 17.12           C  
ATOM   1689  O   LEU L  94     -39.436  31.926  -8.017  1.00 17.85           O  
ATOM   1690  CB  LEU L  94     -39.873  31.329  -4.967  1.00 17.49           C  
ATOM   1691  CG  LEU L  94     -39.901  31.524  -3.431  1.00 18.70           C  
ATOM   1692  CD1 LEU L  94     -41.270  31.161  -2.981  1.00 19.46           C  
ATOM   1693  CD2 LEU L  94     -38.913  30.552  -2.799  1.00 18.48           C  
ATOM   1694  N   PRO L  95     -38.033  30.257  -7.386  1.00 17.51           N  
ATOM   1695  CA  PRO L  95     -37.196  29.477  -6.458  1.00 17.61           C  
ATOM   1696  C   PRO L  95     -35.904  30.197  -6.144  1.00 16.97           C  
ATOM   1697  O   PRO L  95     -35.267  30.778  -7.060  1.00 18.07           O  
ATOM   1698  CB  PRO L  95     -36.847  28.235  -7.249  1.00 17.28           C  
ATOM   1699  CG  PRO L  95     -36.941  28.661  -8.710  1.00 18.31           C  
ATOM   1700  CD  PRO L  95     -38.083  29.636  -8.739  1.00 17.68           C  
ATOM   1701  N   TYR L  96     -35.513  30.198  -4.872  1.00 17.16           N  
ATOM   1702  CA  TYR L  96     -34.235  30.772  -4.529  1.00 17.83           C  
ATOM   1703  C   TYR L  96     -33.159  29.891  -5.166  1.00 18.42           C  
ATOM   1704  O   TYR L  96     -33.254  28.651  -5.146  1.00 20.66           O  
ATOM   1705  CB  TYR L  96     -34.092  30.819  -3.022  1.00 18.78           C  
ATOM   1706  CG  TYR L  96     -35.109  31.707  -2.381  1.00 18.58           C  
ATOM   1707  CD1 TYR L  96     -35.785  32.695  -3.101  1.00 19.08           C  
ATOM   1708  CD2 TYR L  96     -35.375  31.590  -1.008  1.00 20.25           C  
ATOM   1709  CE1 TYR L  96     -36.730  33.528  -2.501  1.00 20.08           C  
ATOM   1710  CE2 TYR L  96     -36.300  32.404  -0.407  1.00 21.24           C  
ATOM   1711  CZ  TYR L  96     -36.974  33.370  -1.129  1.00 21.29           C  
ATOM   1712  OH  TYR L  96     -37.888  34.208  -0.513  1.00 24.89           O  
ATOM   1713  N   THR L  97     -32.173  30.510  -5.803  1.00 17.43           N  
ATOM   1714  CA  THR L  97     -31.167  29.729  -6.515  1.00 16.65           C  
ATOM   1715  C   THR L  97     -29.771  30.110  -6.088  1.00 16.85           C  
ATOM   1716  O   THR L  97     -29.550  31.251  -5.646  1.00 15.96           O  
ATOM   1717  CB  THR L  97     -31.313  29.972  -8.011  1.00 18.37           C  
ATOM   1718  OG1 THR L  97     -31.458  31.389  -8.245  1.00 18.33           O  
ATOM   1719  CG2 THR L  97     -32.535  29.213  -8.549  1.00 19.11           C  
ATOM   1720  N   PHE L  98     -28.851  29.132  -6.196  1.00 16.89           N  
ATOM   1721  CA  PHE L  98     -27.489  29.305  -5.680  1.00 17.51           C  
ATOM   1722  C   PHE L  98     -26.453  29.258  -6.775  1.00 17.93           C  
ATOM   1723  O   PHE L  98     -26.691  28.613  -7.826  1.00 18.00           O  
ATOM   1724  CB  PHE L  98     -27.122  28.093  -4.826  1.00 18.00           C  
ATOM   1725  CG  PHE L  98     -27.708  28.121  -3.457  1.00 19.58           C  
ATOM   1726  CD1 PHE L  98     -26.880  28.441  -2.419  1.00 21.99           C  
ATOM   1727  CD2 PHE L  98     -29.010  27.746  -3.212  1.00 21.98           C  
ATOM   1728  CE1 PHE L  98     -27.313  28.435  -1.123  1.00 21.03           C  
ATOM   1729  CE2 PHE L  98     -29.457  27.727  -1.852  1.00 24.10           C  
ATOM   1730  CZ  PHE L  98     -28.587  28.110  -0.854  1.00 22.36           C  
ATOM   1731  N   GLY L  99     -25.336  29.918  -6.515  1.00 17.92           N  
ATOM   1732  CA  GLY L  99     -24.167  29.690  -7.360  1.00 19.27           C  
ATOM   1733  C   GLY L  99     -23.577  28.298  -7.084  1.00 19.89           C  
ATOM   1734  O   GLY L  99     -23.978  27.589  -6.118  1.00 19.80           O  
ATOM   1735  N   GLN L 100     -22.639  27.879  -7.941  1.00 19.04           N  
ATOM   1736  CA  GLN L 100     -22.153  26.518  -7.853  1.00 21.43           C  
ATOM   1737  C   GLN L 100     -21.198  26.284  -6.699  1.00 19.91           C  
ATOM   1738  O   GLN L 100     -20.820  25.140  -6.413  1.00 21.47           O  
ATOM   1739  CB  GLN L 100     -21.481  26.119  -9.170  1.00 21.93           C  
ATOM   1740  CG  GLN L 100     -22.576  25.874 -10.238  1.00 27.58           C  
ATOM   1741  CD  GLN L 100     -22.112  25.884 -11.699  1.00 29.00           C  
ATOM   1742  OE1 GLN L 100     -22.033  24.819 -12.340  1.00 38.33           O  
ATOM   1743  NE2 GLN L 100     -21.866  27.086 -12.254  1.00 32.53           N  
ATOM   1744  N   GLY L 101     -20.822  27.363  -6.032  1.00 19.64           N  
ATOM   1745  CA  GLY L 101     -19.929  27.225  -4.866  1.00 19.65           C  
ATOM   1746  C   GLY L 101     -18.467  27.473  -5.219  1.00 19.58           C  
ATOM   1747  O   GLY L 101     -18.055  27.194  -6.373  1.00 20.34           O  
ATOM   1748  N   THR L 102     -17.702  28.029  -4.257  1.00 18.07           N  
ATOM   1749  CA  THR L 102     -16.274  28.147  -4.438  1.00 18.23           C  
ATOM   1750  C   THR L 102     -15.626  27.423  -3.248  1.00 18.18           C  
ATOM   1751  O   THR L 102     -15.859  27.856  -2.120  1.00 18.44           O  
ATOM   1752  CB  THR L 102     -15.847  29.635  -4.353  1.00 17.88           C  
ATOM   1753  OG1 THR L 102     -16.487  30.393  -5.427  1.00 18.76           O  
ATOM   1754  CG2 THR L 102     -14.326  29.748  -4.510  1.00 20.28           C  
ATOM   1755  N   LYS L 103     -14.844  26.372  -3.501  1.00 19.13           N  
ATOM   1756  CA  LYS L 103     -14.195  25.644  -2.395  1.00 19.17           C  
ATOM   1757  C   LYS L 103     -12.800  26.266  -2.203  1.00 19.21           C  
ATOM   1758  O   LYS L 103     -12.019  26.365  -3.184  1.00 19.35           O  
ATOM   1759  CB  LYS L 103     -14.045  24.171  -2.766  1.00 21.21           C  
ATOM   1760  CG  LYS L 103     -13.459  23.312  -1.609  1.00 25.46           C  
ATOM   1761  CD  LYS L 103     -13.471  21.834  -2.004  1.00 28.62           C  
ATOM   1762  CE  LYS L 103     -12.697  21.009  -0.953  1.00 33.56           C  
ATOM   1763  NZ  LYS L 103     -13.155  19.584  -0.980  1.00 36.58           N  
ATOM   1764  N   LEU L 104     -12.485  26.693  -0.963  1.00 19.05           N  
ATOM   1765  CA  LEU L 104     -11.180  27.256  -0.701  1.00 21.04           C  
ATOM   1766  C   LEU L 104     -10.272  26.218  -0.090  1.00 20.86           C  
ATOM   1767  O   LEU L 104     -10.737  25.395   0.707  1.00 20.99           O  
ATOM   1768  CB  LEU L 104     -11.271  28.352   0.375  1.00 21.27           C  
ATOM   1769  CG  LEU L 104     -12.288  29.438   0.094  1.00 20.78           C  
ATOM   1770  CD1 LEU L 104     -12.035  30.599   1.130  1.00 21.40           C  
ATOM   1771  CD2 LEU L 104     -12.215  29.997  -1.338  1.00 22.86           C  
ATOM   1773  N   GLU L 105      -8.994  26.244  -0.442  0.62 20.68           N  
ATOM   1775  CA  GLU L 105      -8.030  25.460   0.312  0.62 22.09           C  
ATOM   1777  C   GLU L 105      -6.789  26.294   0.574  0.62 22.05           C  
ATOM   1779  O   GLU L 105      -6.538  27.320  -0.089  0.62 21.36           O  
ATOM   1781  CB  GLU L 105      -7.661  24.185  -0.426  0.62 23.47           C  
ATOM   1783  CG  GLU L 105      -6.608  24.392  -1.478  0.62 28.23           C  
ATOM   1785  CD  GLU L 105      -5.718  23.178  -1.720  0.62 34.15           C  
ATOM   1787  OE1 GLU L 105      -6.236  22.032  -1.678  0.62 35.63           O  
ATOM   1789  OE2 GLU L 105      -4.499  23.385  -1.965  0.62 35.40           O  
ATOM   1790  N   ILE L 106      -6.027  25.871   1.582  1.00 21.75           N  
ATOM   1791  CA  ILE L 106      -4.763  26.519   1.878  1.00 23.88           C  
ATOM   1792  C   ILE L 106      -3.703  25.919   0.963  1.00 26.27           C  
ATOM   1793  O   ILE L 106      -3.561  24.689   0.846  1.00 26.72           O  
ATOM   1794  CB  ILE L 106      -4.337  26.349   3.365  1.00 24.13           C  
ATOM   1795  CG1 ILE L 106      -5.314  27.053   4.310  1.00 25.88           C  
ATOM   1796  CG2 ILE L 106      -2.881  26.880   3.561  1.00 26.60           C  
ATOM   1797  CD1 ILE L 106      -5.244  28.605   4.312  1.00 28.31           C  
ATOM   1798  N   LYS L 107      -2.956  26.810   0.316  1.00 27.67           N  
ATOM   1799  CA  LYS L 107      -1.847  26.427  -0.536  1.00 30.88           C  
ATOM   1800  C   LYS L 107      -0.858  25.512   0.197  1.00 31.90           C  
ATOM   1801  O   LYS L 107      -0.432  25.852   1.303  1.00 32.50           O  
ATOM   1802  CB  LYS L 107      -1.122  27.686  -0.970  1.00 30.72           C  
ATOM   1803  CG  LYS L 107       0.069  27.445  -1.861  1.00 34.52           C  
ATOM   1804  CD  LYS L 107       0.819  28.745  -2.050  1.00 39.20           C  
ATOM   1805  CE  LYS L 107       2.048  28.529  -2.922  1.00 42.22           C  
ATOM   1806  NZ  LYS L 107       1.694  27.842  -4.217  1.00 45.53           N  
ATOM   1807  OXT LYS L 107      -0.474  24.456  -0.337  1.00 34.53           O  
TER    1808      LYS L 107                                                      
