# Supplementary material for: SARS-CoV-2 Spike Protein Interaction Space
Source: Int J Mol Sci. 2023 Jul 27;24(15):12058. doi: 10.3390/ijms241512058 (PMC10418891; doi:10.3390/ijms241512058)
Supplement: Supplementary file 1 [file ijms-24-12058-s001.zip › Supplementary Material File S1/3MCG.pdb]

REMARK 950 NUMBERING  Kabat
REMARK 950 METHOD     X-ray crystal structure
REMARK 950 RESOLUTION 2.000
REMARK 950 R-FACTOR   0.208
REMARK 950 R-FREE     0.000
REMARK 950 CHAIN-TYPE LABEL ORIGINAL
REMARK 950 CHAIN L    L    1
REMARK 950 CHAIN L    L    2
REMARK 950 MOLECULE : 1 : IMMUNOGLOBULIN LAMBDA DIMER MCG (LIGHT CHAIN)
REMARK 950 SPECIES  : 1 : HOMO SAPIENS
SEQRES L 1  216  PCA SER ALA LEU THR GLN PRO PRO SER ALA SER GLY SER          
SEQRES   2 L 216  LEU GLY GLN SER VAL THR ILE SER CYS THR GLY THR SER          
SEQRES   3 L 216  SER ASP VAL GLY GLY TYR ASN TYR VAL SER TRP TYR GLN          
SEQRES   4 L 216  GLN HIS ALA GLY LYS ALA PRO LYS VAL ILE ILE TYR GLU          
SEQRES   5 L 216  VAL ASN LYS ARG PRO SER GLY VAL PRO ASP ARG PHE SER          
SEQRES   6 L 216  GLY SER LYS SER GLY ASN THR ALA SER LEU THR VAL SER          
SEQRES   7 L 216  GLY LEU GLN ALA GLU ASP GLU ALA ASP TYR TYR CYS SER          
SEQRES   8 L 216  SER TYR GLU GLY SER ASP ASN PHE VAL PHE GLY THR GLY          
SEQRES   9 L 216  THR LYS VAL THR VAL LEU GLY GLN PRO LYS ALA ASN PRO          
SEQRES  10 L 216  THR VAL THR LEU PHE PRO PRO SER SER GLU GLU LEU GLN          
SEQRES  11 L 216  ALA ASN LYS ALA THR LEU VAL CYS LEU ILE SER ASP PHE          
SEQRES  12 L 216  TYR PRO GLY ALA VAL THR VAL ALA TRP LYS ALA ASP GLY          
SEQRES  13 L 216  SER PRO VAL LYS ALA GLY VAL GLU THR THR LYS PRO SER          
SEQRES  14 L 216  LYS GLN SER ASN ASN LYS TYR ALA ALA SER SER TYR LEU          
SEQRES  15 L 216  SER LEU THR PRO GLU GLN TRP LYS SER HIS ARG SER TYR          
SEQRES  16 L 216  SER CYS GLN VAL THR HIS GLU GLY SER THR VAL GLU LYS          
SEQRES  17 L 216  THR VAL ALA PRO THR GLU CYS SER                              
SEQRES L 2  216  PCA SER ALA LEU THR GLN PRO PRO SER ALA SER GLY SER          
SEQRES L 1  216  PCA SER ALA LEU THR GLN PRO PRO SER ALA SER GLY SER          
SEQRES   2 L 216  LEU GLY GLN SER VAL THR ILE SER CYS THR GLY THR SER          
SEQRES   3 L 216  SER ASP VAL GLY GLY TYR ASN TYR VAL SER TRP TYR GLN          
SEQRES   4 L 216  GLN HIS ALA GLY LYS ALA PRO LYS VAL ILE ILE TYR GLU          
SEQRES   5 L 216  VAL ASN LYS ARG PRO SER GLY VAL PRO ASP ARG PHE SER          
SEQRES   6 L 216  GLY SER LYS SER GLY ASN THR ALA SER LEU THR VAL SER          
SEQRES   7 L 216  GLY LEU GLN ALA GLU ASP GLU ALA ASP TYR TYR CYS SER          
SEQRES   8 L 216  SER TYR GLU GLY SER ASP ASN PHE VAL PHE GLY THR GLY          
SEQRES   9 L 216  THR LYS VAL THR VAL LEU GLY GLN PRO LYS ALA ASN PRO          
SEQRES  10 L 216  THR VAL THR LEU PHE PRO PRO SER SER GLU GLU LEU GLN          
SEQRES  11 L 216  ALA ASN LYS ALA THR LEU VAL CYS LEU ILE SER ASP PHE          
SEQRES  12 L 216  TYR PRO GLY ALA VAL THR VAL ALA TRP LYS ALA ASP GLY          
SEQRES  13 L 216  SER PRO VAL LYS ALA GLY VAL GLU THR THR LYS PRO SER          
SEQRES  14 L 216  LYS GLN SER ASN ASN LYS TYR ALA ALA SER SER TYR LEU          
SEQRES  15 L 216  SER LEU THR PRO GLU GLN TRP LYS SER HIS ARG SER TYR          
SEQRES  16 L 216  SER CYS GLN VAL THR HIS GLU GLY SER THR VAL GLU LYS          
SEQRES  17 L 216  THR VAL ALA PRO THR GLU CYS SER                              
SEQRES L 2  216  PCA SER ALA LEU THR GLN PRO PRO SER ALA SER GLY SER          
ATOM      9  N   SER L   2     -21.959 -22.494  -1.668  1.00 10.93           N  
ATOM     10  CA  SER L   2     -20.601 -22.902  -1.992  1.00 10.91           C  
ATOM     11  C   SER L   2     -19.815 -23.260  -0.743  1.00 10.76           C  
ATOM     12  O   SER L   2     -20.496 -23.509   0.262  1.00 11.10           O  
ATOM     13  CB  SER L   2     -19.730 -22.270  -3.021  1.00 11.37           C  
ATOM     14  OG  SER L   2     -18.617 -23.269  -3.224  1.00 11.36           O  
ATOM     15  N   ALA L   3     -18.501 -23.415  -0.866  1.00 10.63           N  
ATOM     16  CA  ALA L   3     -17.728 -23.907   0.324  1.00 10.35           C  
ATOM     17  C   ALA L   3     -16.364 -23.215   0.319  1.00 10.11           C  
ATOM     18  O   ALA L   3     -15.812 -23.038   1.448  1.00 10.13           O  
ATOM     19  CB  ALA L   3     -17.622 -25.409   0.469  1.00  9.97           C  
ATOM     20  N   LEU L   4     -15.976 -22.871  -0.910  1.00  9.57           N  
ATOM     21  CA  LEU L   4     -14.610 -22.231  -1.013  1.00  9.16           C  
ATOM     22  C   LEU L   4     -13.777 -22.922   0.062  1.00  9.22           C  
ATOM     23  O   LEU L   4     -13.601 -22.675   1.272  1.00  8.86           O  
ATOM     24  CB  LEU L   4     -14.915 -20.761  -1.186  1.00  8.36           C  
ATOM     25  CG  LEU L   4     -15.019 -20.327  -2.660  1.00  8.11           C  
ATOM     26  CD1 LEU L   4     -13.641 -20.256  -3.298  1.00  7.54           C  
ATOM     27  CD2 LEU L   4     -15.836 -21.377  -3.413  1.00  7.75           C  
ATOM     28  N   THR L   5     -13.121 -23.984  -0.477  1.00  9.42           N  
ATOM     29  CA  THR L   5     -12.388 -25.018   0.230  1.00  9.18           C  
ATOM     30  C   THR L   5     -11.088 -24.579   0.881  1.00  9.12           C  
ATOM     31  O   THR L   5     -10.051 -24.493   0.180  1.00  8.77           O  
ATOM     32  CB  THR L   5     -11.957 -26.089  -0.875  1.00  9.39           C  
ATOM     33  OG1 THR L   5     -13.187 -26.761  -1.254  1.00 10.10           O  
ATOM     34  CG2 THR L   5     -10.835 -26.898  -0.257  1.00  9.73           C  
ATOM     35  N   GLN L   6     -11.191 -24.387   2.184  1.00  8.89           N  
ATOM     36  CA  GLN L   6     -10.094 -23.832   2.981  1.00  8.93           C  
ATOM     37  C   GLN L   6      -9.763 -24.695   4.206  1.00  8.76           C  
ATOM     38  O   GLN L   6     -10.643 -24.968   5.043  1.00  8.61           O  
ATOM     39  CB  GLN L   6     -10.422 -22.394   3.511  1.00  9.07           C  
ATOM     40  CG  GLN L   6     -10.448 -21.316   2.511  1.00  9.08           C  
ATOM     41  CD  GLN L   6     -10.182 -19.904   2.832  1.00  9.13           C  
ATOM     42  OE1 GLN L   6     -10.980 -18.992   2.561  1.00  9.27           O  
ATOM     43  NE2 GLN L   6      -9.024 -19.533   3.375  1.00  9.32           N  
ATOM     44  N   PRO L   7      -8.480 -25.070   4.261  1.00  8.68           N  
ATOM     45  CA  PRO L   7      -7.984 -25.798   5.460  1.00  8.66           C  
ATOM     46  C   PRO L   7      -8.329 -24.938   6.675  1.00  8.58           C  
ATOM     47  O   PRO L   7      -8.619 -23.735   6.508  1.00  8.64           O  
ATOM     48  CB  PRO L   7      -6.505 -25.886   5.167  1.00  8.74           C  
ATOM     49  CG  PRO L   7      -6.192 -24.557   4.484  1.00  8.63           C  
ATOM     50  CD  PRO L   7      -7.374 -24.360   3.559  1.00  8.61           C  
ATOM     51  N   PRO L   8      -8.198 -25.495   7.854  1.00  8.49           N  
ATOM     52  CA  PRO L   8      -8.638 -24.887   9.104  1.00  8.40           C  
ATOM     53  C   PRO L   8      -7.783 -23.863   9.814  1.00  8.14           C  
ATOM     54  O   PRO L   8      -8.274 -22.710  10.069  1.00  8.08           O  
ATOM     55  CB  PRO L   8      -8.871 -26.166   9.976  1.00  8.53           C  
ATOM     56  CG  PRO L   8      -7.653 -27.020   9.584  1.00  8.55           C  
ATOM     57  CD  PRO L   8      -7.458 -26.775   8.097  1.00  8.56           C  
ATOM     58  N   SER L   9      -6.610 -24.258  10.264  1.00  7.66           N  
ATOM     59  CA  SER L   9      -5.627 -23.279  10.784  1.00  7.41           C  
ATOM     60  C   SER L   9      -4.284 -23.639  10.163  1.00  7.39           C  
ATOM     61  O   SER L   9      -4.050 -24.826   9.963  1.00  7.38           O  
ATOM     62  CB  SER L   9      -5.666 -23.184  12.273  1.00  7.27           C  
ATOM     63  OG  SER L   9      -4.307 -23.388  12.678  1.00  6.41           O  
ATOM     64  N   ALA L  11      -3.551 -22.598   9.743  1.00  7.40           N  
ATOM     65  CA  ALA L  11      -2.200 -22.861   9.107  1.00  7.17           C  
ATOM     66  C   ALA L  11      -1.254 -22.484  10.266  1.00  7.03           C  
ATOM     67  O   ALA L  11      -1.573 -21.403  10.831  1.00  7.07           O  
ATOM     68  CB  ALA L  11      -1.923 -22.106   7.865  1.00  7.04           C  
ATOM     69  N   SER L  12      -0.282 -23.273  10.551  1.00  6.79           N  
ATOM     70  CA  SER L  12       0.448 -23.020  11.823  1.00  7.16           C  
ATOM     71  C   SER L  12       1.922 -23.071  11.590  1.00  7.56           C  
ATOM     72  O   SER L  12       2.516 -24.160  11.826  1.00  7.90           O  
ATOM     73  CB  SER L  12      -0.070 -23.957  12.882  1.00  6.73           C  
ATOM     74  OG  SER L  12       0.585 -23.911  14.117  1.00  6.27           O  
ATOM     75  N   GLY L  13       2.497 -21.954  11.181  1.00  7.75           N  
ATOM     76  CA  GLY L  13       3.942 -21.871  10.980  1.00  8.27           C  
ATOM     77  C   GLY L  13       4.801 -21.763  12.252  1.00  8.47           C  
ATOM     78  O   GLY L  13       4.612 -22.291  13.374  1.00  8.43           O  
ATOM     79  N   SER L  14       5.874 -21.011  11.970  1.00  8.41           N  
ATOM     80  CA  SER L  14       6.973 -20.760  12.962  1.00  8.46           C  
ATOM     81  C   SER L  14       7.566 -19.423  12.476  1.00  8.24           C  
ATOM     82  O   SER L  14       8.475 -19.269  11.666  1.00  8.16           O  
ATOM     83  CB  SER L  14       7.827 -22.011  13.003  1.00  8.65           C  
ATOM     84  OG  SER L  14       8.153 -22.446  14.346  1.00  9.19           O  
ATOM     85  N   LEU L  15       6.925 -18.374  12.985  1.00  8.13           N  
ATOM     86  CA  LEU L  15       7.145 -16.980  12.715  1.00  8.01           C  
ATOM     87  C   LEU L  15       7.607 -16.884  11.217  1.00  8.04           C  
ATOM     88  O   LEU L  15       6.952 -17.272  10.312  1.00  7.86           O  
ATOM     89  CB  LEU L  15       8.082 -16.229  13.548  1.00  7.46           C  
ATOM     90  CG  LEU L  15       8.397 -15.780  14.878  1.00  7.29           C  
ATOM     91  CD1 LEU L  15       7.387 -14.806  15.492  1.00  7.11           C  
ATOM     92  CD2 LEU L  15       8.499 -17.014  15.824  1.00  7.52           C  
ATOM     93  N   GLY L  16       8.761 -16.281  11.150  1.00  8.33           N  
ATOM     94  CA  GLY L  16       9.508 -15.932   9.943  1.00  8.64           C  
ATOM     95  C   GLY L  16       9.311 -16.998   8.874  1.00  8.72           C  
ATOM     96  O   GLY L  16      10.165 -17.812   8.509  1.00  9.02           O  
ATOM     97  N   GLN L  17       8.094 -16.939   8.359  1.00  8.78           N  
ATOM     98  CA  GLN L  17       7.521 -17.934   7.440  1.00  8.45           C  
ATOM     99  C   GLN L  17       6.592 -17.305   6.389  1.00  8.18           C  
ATOM    100  O   GLN L  17       6.246 -16.133   6.306  1.00  7.80           O  
ATOM    101  CB  GLN L  17       6.818 -18.977   8.345  1.00  8.69           C  
ATOM    102  CG  GLN L  17       7.792 -19.586   9.387  1.00  8.13           C  
ATOM    103  CD  GLN L  17       8.189 -20.977   8.957  1.00  8.68           C  
ATOM    104  OE1 GLN L  17       7.422 -21.624   8.190  1.00  8.53           O  
ATOM    105  NE2 GLN L  17       9.341 -21.432   9.431  1.00  8.35           N  
ATOM    106  N   SER L  18       6.280 -18.170   5.446  1.00  7.89           N  
ATOM    107  CA  SER L  18       5.477 -18.020   4.276  1.00  7.57           C  
ATOM    108  C   SER L  18       4.551 -19.272   4.240  1.00  7.51           C  
ATOM    109  O   SER L  18       5.022 -20.403   4.348  1.00  7.61           O  
ATOM    110  CB  SER L  18       6.197 -17.939   2.939  1.00  7.43           C  
ATOM    111  OG  SER L  18       7.217 -18.823   2.676  1.00  6.07           O  
ATOM    112  N   VAL L  19       3.297 -18.973   4.088  1.00  7.39           N  
ATOM    113  CA  VAL L  19       2.263 -19.975   3.931  1.00  7.12           C  
ATOM    114  C   VAL L  19       1.463 -19.512   2.677  1.00  6.93           C  
ATOM    115  O   VAL L  19       1.461 -18.379   2.247  1.00  6.86           O  
ATOM    116  CB  VAL L  19       1.324 -20.196   5.103  1.00  7.40           C  
ATOM    117  CG1 VAL L  19       1.821 -19.663   6.443  1.00  7.45           C  
ATOM    118  CG2 VAL L  19      -0.065 -19.641   4.759  1.00  7.30           C  
ATOM    119  N   THR L  20       0.824 -20.499   2.166  1.00  6.79           N  
ATOM    120  CA  THR L  20      -0.102 -20.494   1.064  1.00  6.60           C  
ATOM    121  C   THR L  20      -1.433 -20.996   1.688  1.00  6.64           C  
ATOM    122  O   THR L  20      -1.443 -22.111   2.293  1.00  6.37           O  
ATOM    123  CB  THR L  20       0.288 -21.689   0.082  1.00  6.38           C  
ATOM    124  OG1 THR L  20       0.999 -22.506   1.107  1.00  6.76           O  
ATOM    125  CG2 THR L  20       1.065 -21.464  -1.162  1.00  5.95           C  
ATOM    126  N   ILE L  21      -2.402 -20.134   1.502  1.00  6.41           N  
ATOM    127  CA  ILE L  21      -3.810 -20.558   1.842  1.00  6.25           C  
ATOM    128  C   ILE L  21      -4.423 -20.722   0.445  1.00  6.28           C  
ATOM    129  O   ILE L  21      -4.106 -19.866  -0.437  1.00  6.14           O  
ATOM    130  CB  ILE L  21      -4.415 -19.484   2.782  1.00  5.65           C  
ATOM    131  CG1 ILE L  21      -3.382 -19.128   3.872  1.00  5.53           C  
ATOM    132  CG2 ILE L  21      -5.766 -19.875   3.432  1.00  5.76           C  
ATOM    133  CD1 ILE L  21      -3.820 -18.113   4.950  1.00  5.17           C  
ATOM    134  N   SER L  22      -5.149 -21.805   0.223  1.00  6.37           N  
ATOM    135  CA  SER L  22      -5.777 -22.012  -1.096  1.00  6.47           C  
ATOM    136  C   SER L  22      -7.300 -21.849  -0.876  1.00  6.95           C  
ATOM    137  O   SER L  22      -7.786 -21.710   0.246  1.00  6.64           O  
ATOM    138  CB  SER L  22      -5.449 -23.210  -1.889  1.00  5.65           C  
ATOM    139  OG  SER L  22      -6.213 -24.354  -1.654  1.00  4.84           O  
ATOM    140  N   CYS L  23      -7.953 -21.866  -2.009  1.00  7.40           N  
ATOM    141  CA  CYS L  23      -9.375 -21.667  -2.167  1.00  8.43           C  
ATOM    142  C   CYS L  23      -9.776 -22.215  -3.555  1.00  8.97           C  
ATOM    143  O   CYS L  23      -9.622 -21.641  -4.655  1.00  8.46           O  
ATOM    144  CB  CYS L  23      -9.748 -20.192  -2.003  1.00  8.77           C  
ATOM    145  SG  CYS L  23     -11.486 -19.854  -1.520  1.00  9.53           S  
ATOM    146  N   THR L  24     -10.345 -23.413  -3.397  1.00  9.84           N  
ATOM    147  CA  THR L  24     -10.920 -24.179  -4.541  1.00 10.69           C  
ATOM    148  C   THR L  24     -12.404 -23.787  -4.506  1.00 11.26           C  
ATOM    149  O   THR L  24     -12.867 -23.478  -3.360  1.00 11.30           O  
ATOM    150  CB  THR L  24     -10.701 -25.726  -4.403  1.00 10.96           C  
ATOM    151  OG1 THR L  24     -11.566 -26.164  -3.287  1.00 10.60           O  
ATOM    152  CG2 THR L  24      -9.286 -26.303  -4.165  1.00 10.63           C  
ATOM    153  N   GLY L  25     -13.043 -23.690  -5.649  1.00 11.80           N  
ATOM    154  CA  GLY L  25     -14.511 -23.451  -5.664  1.00 12.40           C  
ATOM    155  C   GLY L  25     -15.184 -24.492  -6.600  1.00 12.79           C  
ATOM    156  O   GLY L  25     -15.585 -25.617  -6.290  1.00 12.80           O  
ATOM    157  N   THR L  26     -15.375 -24.026  -7.816  1.00 13.11           N  
ATOM    158  CA  THR L  26     -15.888 -24.685  -8.984  1.00 13.27           C  
ATOM    159  C   THR L  26     -14.740 -24.433  -9.998  1.00 13.58           C  
ATOM    160  O   THR L  26     -13.630 -24.278  -9.476  1.00 13.65           O  
ATOM    161  CB  THR L  26     -17.250 -24.219  -9.589  1.00 13.00           C  
ATOM    162  OG1 THR L  26     -16.967 -22.939 -10.249  1.00 12.40           O  
ATOM    163  CG2 THR L  26     -18.393 -24.218  -8.570  1.00 12.54           C  
ATOM    164  N   SER L  27     -15.066 -24.438 -11.234  1.00 13.90           N  
ATOM    165  CA  SER L  27     -14.031 -24.282 -12.299  1.00 14.37           C  
ATOM    166  C   SER L  27     -14.416 -22.920 -12.943  1.00 14.42           C  
ATOM    167  O   SER L  27     -13.635 -22.263 -13.650  1.00 14.67           O  
ATOM    168  CB  SER L  27     -14.138 -25.360 -13.355  1.00 14.87           C  
ATOM    169  OG  SER L  27     -13.362 -25.330 -14.530  1.00 15.19           O  
ATOM    170  N   SER L  27A    -15.710 -22.684 -12.634  1.00 14.20           N  
ATOM    171  CA  SER L  27A    -16.312 -21.514 -13.347  1.00 14.05           C  
ATOM    172  C   SER L  27A    -15.525 -20.326 -12.754  1.00 13.85           C  
ATOM    173  O   SER L  27A    -14.741 -19.677 -13.410  1.00 13.75           O  
ATOM    174  CB  SER L  27A    -17.801 -21.379 -13.179  1.00 14.20           C  
ATOM    175  OG  SER L  27A    -18.319 -20.381 -14.075  1.00 13.64           O  
ATOM    176  N   ASP L  27B    -15.906 -20.204 -11.463  1.00 13.62           N  
ATOM    177  CA  ASP L  27B    -15.394 -19.052 -10.647  1.00 12.97           C  
ATOM    178  C   ASP L  27B    -14.142 -19.674 -10.045  1.00 12.61           C  
ATOM    179  O   ASP L  27B    -14.131 -20.941  -9.999  1.00 12.48           O  
ATOM    180  CB  ASP L  27B    -16.482 -18.596  -9.680  1.00 12.97           C  
ATOM    181  CG  ASP L  27B    -16.992 -19.799  -8.884  1.00 13.02           C  
ATOM    182  OD1 ASP L  27B    -17.408 -20.820  -9.471  1.00 13.28           O  
ATOM    183  OD2 ASP L  27B    -16.944 -19.712  -7.643  1.00 12.80           O  
ATOM    184  N   VAL L  27C    -13.345 -18.870  -9.464  1.00 12.16           N  
ATOM    185  CA  VAL L  27C    -11.937 -19.304  -9.128  1.00 11.73           C  
ATOM    186  C   VAL L  27C    -11.306 -19.906 -10.348  1.00 11.45           C  
ATOM    187  O   VAL L  27C    -10.162 -19.401 -10.671  1.00 11.55           O  
ATOM    188  CB  VAL L  27C    -11.916 -19.757  -7.693  1.00 11.55           C  
ATOM    189  CG1 VAL L  27C    -10.932 -20.779  -7.194  1.00 11.37           C  
ATOM    190  CG2 VAL L  27C    -11.692 -18.414  -6.866  1.00 11.34           C  
ATOM    191  N   GLY L  28     -11.884 -20.750 -11.134  1.00 11.10           N  
ATOM    192  CA  GLY L  28     -11.291 -21.358 -12.321  1.00 10.63           C  
ATOM    193  C   GLY L  28     -11.064 -20.259 -13.375  1.00 10.43           C  
ATOM    194  O   GLY L  28     -10.034 -19.583 -13.350  1.00 10.31           O  
ATOM    195  N   GLY L  29     -12.040 -20.161 -14.275  1.00 10.21           N  
ATOM    196  CA  GLY L  29     -11.987 -19.129 -15.334  1.00  9.84           C  
ATOM    197  C   GLY L  29     -11.928 -17.800 -14.595  1.00  9.64           C  
ATOM    198  O   GLY L  29     -10.864 -17.169 -14.479  1.00  9.62           O  
ATOM    199  N   TYR L  30     -13.057 -17.442 -14.020  1.00  9.62           N  
ATOM    200  CA  TYR L  30     -13.253 -16.197 -13.252  1.00  9.39           C  
ATOM    201  C   TYR L  30     -11.980 -15.642 -12.568  1.00  9.10           C  
ATOM    202  O   TYR L  30     -11.259 -16.387 -11.931  1.00  8.79           O  
ATOM    203  CB  TYR L  30     -14.353 -16.315 -12.225  1.00  9.61           C  
ATOM    204  CG  TYR L  30     -15.672 -15.645 -12.545  1.00 10.14           C  
ATOM    205  CD1 TYR L  30     -16.748 -16.430 -12.989  1.00 10.30           C  
ATOM    206  CD2 TYR L  30     -15.897 -14.275 -12.342  1.00  9.75           C  
ATOM    207  CE1 TYR L  30     -18.002 -15.862 -13.229  1.00 10.60           C  
ATOM    208  CE2 TYR L  30     -17.117 -13.710 -12.588  1.00  9.99           C  
ATOM    209  CZ  TYR L  30     -18.175 -14.486 -13.019  1.00 10.38           C  
ATOM    210  OH  TYR L  30     -19.401 -13.931 -13.258  1.00 10.59           O  
ATOM    211  N   ASN L  31     -11.810 -14.307 -12.699  1.00  8.68           N  
ATOM    212  CA  ASN L  31     -10.659 -13.628 -12.224  1.00  8.21           C  
ATOM    213  C   ASN L  31     -10.970 -12.759 -11.037  1.00  8.14           C  
ATOM    214  O   ASN L  31     -10.281 -11.703 -11.163  1.00  8.30           O  
ATOM    215  CB  ASN L  31     -10.021 -12.629 -13.227  1.00  7.90           C  
ATOM    216  CG  ASN L  31      -9.196 -13.443 -14.184  1.00  8.23           C  
ATOM    217  OD1 ASN L  31      -8.929 -14.588 -13.721  1.00  8.22           O  
ATOM    218  ND2 ASN L  31      -8.923 -12.882 -15.335  1.00  8.12           N  
ATOM    219  N   TYR L  32     -11.786 -13.156 -10.127  1.00  7.93           N  
ATOM    220  CA  TYR L  32     -12.014 -12.158  -8.996  1.00  7.73           C  
ATOM    221  C   TYR L  32     -11.856 -12.882  -7.700  1.00  7.64           C  
ATOM    222  O   TYR L  32     -12.968 -13.369  -7.315  1.00  8.05           O  
ATOM    223  CB  TYR L  32     -13.388 -11.604  -9.246  1.00  7.17           C  
ATOM    224  CG  TYR L  32     -13.721 -10.256  -9.776  1.00  6.89           C  
ATOM    225  CD1 TYR L  32     -13.253  -9.708 -10.966  1.00  6.72           C  
ATOM    226  CD2 TYR L  32     -14.624  -9.462  -9.043  1.00  6.76           C  
ATOM    227  CE1 TYR L  32     -13.655  -8.450 -11.413  1.00  6.42           C  
ATOM    228  CE2 TYR L  32     -15.016  -8.199  -9.466  1.00  6.48           C  
ATOM    229  CZ  TYR L  32     -14.535  -7.714 -10.659  1.00  6.29           C  
ATOM    230  OH  TYR L  32     -14.995  -6.476 -11.031  1.00  6.57           O  
ATOM    231  N   VAL L  33     -10.667 -12.971  -7.113  1.00  7.60           N  
ATOM    232  CA  VAL L  33     -10.711 -13.678  -5.750  1.00  7.44           C  
ATOM    233  C   VAL L  33     -10.351 -12.649  -4.712  1.00  7.41           C  
ATOM    234  O   VAL L  33      -9.648 -11.700  -5.155  1.00  7.53           O  
ATOM    235  CB  VAL L  33      -9.919 -14.951  -5.710  1.00  7.60           C  
ATOM    236  CG1 VAL L  33     -10.001 -15.779  -7.010  1.00  7.64           C  
ATOM    237  CG2 VAL L  33      -8.507 -14.703  -5.205  1.00  7.05           C  
ATOM    238  N   SER L  34     -10.788 -12.809  -3.475  1.00  7.32           N  
ATOM    239  CA  SER L  34     -10.522 -11.762  -2.453  1.00  7.29           C  
ATOM    240  C   SER L  34     -10.128 -12.448  -1.152  1.00  7.08           C  
ATOM    241  O   SER L  34     -10.776 -13.440  -0.843  1.00  7.24           O  
ATOM    242  CB  SER L  34     -11.649 -10.789  -2.197  1.00  7.22           C  
ATOM    243  OG  SER L  34     -12.217 -10.189  -3.349  1.00  7.23           O  
ATOM    244  N   TRP L  35      -9.184 -11.874  -0.459  1.00  7.09           N  
ATOM    245  CA  TRP L  35      -8.651 -12.539   0.764  1.00  7.15           C  
ATOM    246  C   TRP L  35      -8.516 -11.505   1.873  1.00  7.01           C  
ATOM    247  O   TRP L  35      -7.662 -10.601   1.745  1.00  6.87           O  
ATOM    248  CB  TRP L  35      -7.328 -13.178   0.439  1.00  7.82           C  
ATOM    249  CG  TRP L  35      -7.222 -14.145  -0.690  1.00  8.04           C  
ATOM    250  CD1 TRP L  35      -7.113 -13.898  -2.016  1.00  7.85           C  
ATOM    251  CD2 TRP L  35      -7.148 -15.585  -0.551  1.00  8.24           C  
ATOM    252  NE1 TRP L  35      -7.027 -15.081  -2.713  1.00  8.34           N  
ATOM    253  CE2 TRP L  35      -7.038 -16.128  -1.840  1.00  8.10           C  
ATOM    254  CE3 TRP L  35      -7.206 -16.439   0.566  1.00  8.43           C  
ATOM    255  CZ2 TRP L  35      -6.982 -17.486  -2.060  1.00  8.24           C  
ATOM    256  CZ3 TRP L  35      -7.123 -17.792   0.339  1.00  8.30           C  
ATOM    257  CH2 TRP L  35      -7.009 -18.314  -0.960  1.00  8.28           C  
ATOM    258  N   TYR L  36      -9.319 -11.732   2.918  1.00  6.81           N  
ATOM    259  CA  TYR L  36      -9.420 -10.767   4.014  1.00  6.34           C  
ATOM    260  C   TYR L  36      -8.978 -11.309   5.388  1.00  6.33           C  
ATOM    261  O   TYR L  36      -9.029 -12.502   5.686  1.00  6.49           O  
ATOM    262  CB  TYR L  36     -10.845 -10.279   4.256  1.00  5.06           C  
ATOM    263  CG  TYR L  36     -11.936 -10.496   3.282  1.00  4.34           C  
ATOM    264  CD1 TYR L  36     -12.080  -9.695   2.144  1.00  3.93           C  
ATOM    265  CD2 TYR L  36     -12.897 -11.508   3.496  1.00  4.07           C  
ATOM    266  CE1 TYR L  36     -13.124  -9.897   1.231  1.00  3.44           C  
ATOM    267  CE2 TYR L  36     -13.940 -11.722   2.585  1.00  3.62           C  
ATOM    268  CZ  TYR L  36     -14.040 -10.911   1.463  1.00  3.33           C  
ATOM    269  OH  TYR L  36     -15.075 -11.135   0.615  1.00  3.29           O  
ATOM    270  N   GLN L  37      -8.765 -10.318   6.252  1.00  6.58           N  
ATOM    271  CA  GLN L  37      -8.130 -10.590   7.555  1.00  6.60           C  
ATOM    272  C   GLN L  37      -8.793  -9.993   8.756  1.00  6.65           C  
ATOM    273  O   GLN L  37      -8.795  -8.785   9.044  1.00  6.81           O  
ATOM    274  CB  GLN L  37      -6.683 -10.132   7.386  1.00  6.71           C  
ATOM    275  CG  GLN L  37      -5.720 -10.251   8.502  1.00  6.70           C  
ATOM    276  CD  GLN L  37      -4.803  -9.011   8.502  1.00  6.73           C  
ATOM    277  OE1 GLN L  37      -5.296  -7.916   8.668  1.00  6.49           O  
ATOM    278  NE2 GLN L  37      -3.520  -9.258   8.315  1.00  6.73           N  
ATOM    279  N   GLN L  38      -9.238 -10.949   9.567  1.00  6.68           N  
ATOM    280  CA  GLN L  38      -9.960 -10.643  10.855  1.00  6.71           C  
ATOM    281  C   GLN L  38      -8.998 -10.936  12.032  1.00  6.97           C  
ATOM    282  O   GLN L  38      -9.027 -11.984  12.676  1.00  7.09           O  
ATOM    283  CB  GLN L  38     -11.268 -11.292  10.885  1.00  5.67           C  
ATOM    284  CG  GLN L  38     -12.016 -12.418  10.356  1.00  3.43           C  
ATOM    285  CD  GLN L  38     -13.437 -12.366  10.921  1.00  2.64           C  
ATOM    286  OE1 GLN L  38     -13.828 -11.357  11.469  1.00  2.23           O  
ATOM    287  NE2 GLN L  38     -14.163 -13.400  10.814  1.00  2.14           N  
ATOM    288  N   HIS L  39      -8.195  -9.853  12.290  1.00  7.22           N  
ATOM    289  CA  HIS L  39      -7.046 -10.030  13.235  1.00  7.24           C  
ATOM    290  C   HIS L  39      -7.622 -10.256  14.635  1.00  7.54           C  
ATOM    291  O   HIS L  39      -7.534  -9.417  15.555  1.00  7.64           O  
ATOM    292  CB  HIS L  39      -5.951  -8.975  13.179  1.00  6.40           C  
ATOM    293  CG  HIS L  39      -4.560  -9.519  13.232  1.00  5.73           C  
ATOM    294  ND1 HIS L  39      -4.051 -10.507  12.448  1.00  5.33           N  
ATOM    295  CD2 HIS L  39      -3.510  -9.120  13.998  1.00  5.81           C  
ATOM    296  CE1 HIS L  39      -2.770 -10.682  12.757  1.00  5.35           C  
ATOM    297  NE2 HIS L  39      -2.406  -9.857  13.685  1.00  4.97           N  
ATOM    298  N   ALA L  40      -8.221 -11.457  14.711  1.00  7.72           N  
ATOM    299  CA  ALA L  40      -8.958 -11.881  15.909  1.00  7.92           C  
ATOM    300  C   ALA L  40     -10.378 -11.369  15.720  1.00  8.15           C  
ATOM    301  O   ALA L  40     -10.906 -10.636  16.559  1.00  7.91           O  
ATOM    302  CB  ALA L  40      -8.292 -11.288  17.132  1.00  8.32           C  
ATOM    303  N   GLY L  41     -10.942 -11.719  14.591  1.00  8.43           N  
ATOM    304  CA  GLY L  41     -12.288 -11.336  14.174  1.00  9.15           C  
ATOM    305  C   GLY L  41     -12.496  -9.866  13.861  1.00  9.57           C  
ATOM    306  O   GLY L  41     -11.617  -9.019  13.545  1.00  9.88           O  
ATOM    307  N   LYS L  42     -13.768  -9.477  13.927  1.00  9.75           N  
ATOM    308  CA  LYS L  42     -14.377  -8.188  13.764  1.00  9.82           C  
ATOM    309  C   LYS L  42     -14.480  -7.665  12.333  1.00  9.88           C  
ATOM    310  O   LYS L  42     -15.471  -7.851  11.601  1.00  9.88           O  
ATOM    311  CB  LYS L  42     -13.860  -7.054  14.673  1.00  9.46           C  
ATOM    312  CG  LYS L  42     -12.450  -6.559  14.504  1.00  8.96           C  
ATOM    313  CD  LYS L  42     -11.677  -6.567  15.803  1.00  9.28           C  
ATOM    314  CE  LYS L  42     -12.342  -5.812  16.948  1.00  9.29           C  
ATOM    315  NZ  LYS L  42     -11.360  -5.583  18.081  1.00  9.01           N  
ATOM    316  N   ALA L  43     -13.457  -6.895  12.019  1.00  9.99           N  
ATOM    317  CA  ALA L  43     -13.301  -6.230  10.700  1.00  9.84           C  
ATOM    318  C   ALA L  43     -12.115  -6.996  10.047  1.00  9.63           C  
ATOM    319  O   ALA L  43     -10.908  -6.861  10.406  1.00  9.68           O  
ATOM    320  CB  ALA L  43     -13.154  -4.756  10.810  1.00  9.37           C  
ATOM    321  N   PRO L  44     -12.639  -7.933   9.234  1.00  9.42           N  
ATOM    322  CA  PRO L  44     -11.681  -8.683   8.350  1.00  9.20           C  
ATOM    323  C   PRO L  44     -11.495  -7.706   7.180  1.00  8.78           C  
ATOM    324  O   PRO L  44     -12.487  -7.428   6.494  1.00  9.06           O  
ATOM    325  CB  PRO L  44     -12.316  -9.989   8.108  1.00  9.18           C  
ATOM    326  CG  PRO L  44     -13.689  -9.979   8.672  1.00  9.34           C  
ATOM    327  CD  PRO L  44     -13.788  -8.834   9.639  1.00  9.32           C  
ATOM    328  N   LYS L  45     -10.313  -7.196   7.046  1.00  8.18           N  
ATOM    329  CA  LYS L  45     -10.033  -6.184   5.981  1.00  7.67           C  
ATOM    330  C   LYS L  45      -9.784  -6.874   4.677  1.00  7.49           C  
ATOM    331  O   LYS L  45      -9.461  -8.086   4.777  1.00  7.54           O  
ATOM    332  CB  LYS L  45      -8.782  -5.451   6.438  1.00  7.64           C  
ATOM    333  CG  LYS L  45      -7.630  -5.403   5.426  1.00  7.41           C  
ATOM    334  CD  LYS L  45      -6.315  -5.404   6.239  1.00  7.42           C  
ATOM    335  CE  LYS L  45      -6.478  -4.503   7.478  1.00  7.22           C  
ATOM    336  NZ  LYS L  45      -5.163  -3.792   7.652  1.00  7.06           N  
ATOM    337  N   VAL L  46      -9.888  -6.234   3.561  1.00  7.06           N  
ATOM    338  CA  VAL L  46      -9.505  -6.813   2.244  1.00  7.03           C  
ATOM    339  C   VAL L  46      -7.974  -6.586   2.238  1.00  6.98           C  
ATOM    340  O   VAL L  46      -7.490  -5.455   2.484  1.00  6.70           O  
ATOM    341  CB  VAL L  46     -10.392  -6.242   1.173  1.00  7.08           C  
ATOM    342  CG1 VAL L  46      -9.960  -6.366  -0.280  1.00  7.20           C  
ATOM    343  CG2 VAL L  46     -11.808  -6.849   1.240  1.00  7.47           C  
ATOM    344  N   ILE L  47      -7.275  -7.735   2.065  1.00  6.77           N  
ATOM    345  CA  ILE L  47      -5.800  -7.702   2.150  1.00  6.51           C  
ATOM    346  C   ILE L  47      -5.360  -8.028   0.723  1.00  6.38           C  
ATOM    347  O   ILE L  47      -4.313  -7.579   0.346  1.00  6.37           O  
ATOM    348  CB  ILE L  47      -5.083  -8.569   3.191  1.00  6.43           C  
ATOM    349  CG1 ILE L  47      -5.210 -10.102   2.910  1.00  6.54           C  
ATOM    350  CG2 ILE L  47      -5.475  -8.320   4.689  1.00  6.41           C  
ATOM    351  CD1 ILE L  47      -5.012 -10.901   4.282  1.00  6.21           C  
ATOM    352  N   ILE L  48      -6.252  -8.770   0.083  1.00  6.52           N  
ATOM    353  CA  ILE L  48      -6.046  -9.136  -1.334  1.00  6.60           C  
ATOM    354  C   ILE L  48      -7.333  -9.043  -2.134  1.00  6.80           C  
ATOM    355  O   ILE L  48      -8.368  -9.536  -1.595  1.00  7.28           O  
ATOM    356  CB  ILE L  48      -5.663 -10.676  -1.413  1.00  5.99           C  
ATOM    357  CG1 ILE L  48      -4.838 -10.993  -0.178  1.00  6.05           C  
ATOM    358  CG2 ILE L  48      -5.091 -11.030  -2.792  1.00  5.74           C  
ATOM    359  CD1 ILE L  48      -3.362 -10.627  -0.089  1.00  6.03           C  
ATOM    360  N   TYR L  49      -7.268  -8.527  -3.305  1.00  7.11           N  
ATOM    361  CA  TYR L  49      -8.497  -8.455  -4.163  1.00  6.95           C  
ATOM    362  C   TYR L  49      -7.940  -8.798  -5.529  1.00  7.17           C  
ATOM    363  O   TYR L  49      -6.689  -8.894  -5.654  1.00  7.09           O  
ATOM    364  CB  TYR L  49      -9.168  -7.115  -4.011  1.00  7.40           C  
ATOM    365  CG  TYR L  49      -8.583  -5.996  -4.836  1.00  7.51           C  
ATOM    366  CD1 TYR L  49      -8.961  -5.834  -6.181  1.00  7.50           C  
ATOM    367  CD2 TYR L  49      -7.607  -5.146  -4.303  1.00  7.71           C  
ATOM    368  CE1 TYR L  49      -8.376  -4.835  -6.962  1.00  7.59           C  
ATOM    369  CE2 TYR L  49      -7.024  -4.151  -5.102  1.00  7.71           C  
ATOM    370  CZ  TYR L  49      -7.428  -3.976  -6.420  1.00  7.38           C  
ATOM    371  OH  TYR L  49      -6.872  -2.974  -7.138  1.00  7.11           O  
ATOM    372  N   GLU L  50      -8.770  -8.924  -6.512  1.00  7.22           N  
ATOM    373  CA  GLU L  50      -8.464  -9.376  -7.846  1.00  7.41           C  
ATOM    374  C   GLU L  50      -7.691 -10.690  -7.931  1.00  7.55           C  
ATOM    375  O   GLU L  50      -8.326 -11.670  -8.425  1.00  7.76           O  
ATOM    376  CB  GLU L  50      -7.828  -8.429  -8.840  1.00  6.65           C  
ATOM    377  CG  GLU L  50      -8.789  -7.983  -9.967  1.00  6.08           C  
ATOM    378  CD  GLU L  50      -9.443  -6.651  -9.645  1.00  5.73           C  
ATOM    379  OE1 GLU L  50      -8.676  -5.727  -9.583  1.00  5.69           O  
ATOM    380  OE2 GLU L  50     -10.654  -6.611  -9.448  1.00  5.40           O  
ATOM    381  N   VAL L  51      -6.510 -10.725  -7.430  1.00  7.92           N  
ATOM    382  CA  VAL L  51      -5.602 -11.901  -7.698  1.00  8.45           C  
ATOM    383  C   VAL L  51      -4.485 -11.799  -6.679  1.00  8.73           C  
ATOM    384  O   VAL L  51      -4.258 -12.620  -5.798  1.00  8.65           O  
ATOM    385  CB  VAL L  51      -5.255 -11.713  -9.187  1.00  8.79           C  
ATOM    386  CG1 VAL L  51      -4.166 -12.586  -9.788  1.00  8.96           C  
ATOM    387  CG2 VAL L  51      -6.484 -11.805 -10.141  1.00  8.76           C  
ATOM    388  N   ASN L  52      -3.781 -10.681  -6.778  1.00  9.18           N  
ATOM    389  CA  ASN L  52      -2.660 -10.207  -5.992  1.00  9.63           C  
ATOM    390  C   ASN L  52      -2.666  -8.650  -5.762  1.00  9.72           C  
ATOM    391  O   ASN L  52      -1.689  -8.061  -5.233  1.00  9.50           O  
ATOM    392  CB  ASN L  52      -1.291 -10.615  -6.522  1.00 10.12           C  
ATOM    393  CG  ASN L  52      -1.217 -11.406  -7.789  1.00 10.65           C  
ATOM    394  OD1 ASN L  52      -2.172 -11.411  -8.599  1.00 10.95           O  
ATOM    395  ND2 ASN L  52      -0.087 -12.122  -7.985  1.00 10.47           N  
ATOM    396  N   LYS L  53      -3.759  -8.053  -6.149  1.00  9.75           N  
ATOM    397  CA  LYS L  53      -4.032  -6.647  -5.922  1.00 10.04           C  
ATOM    398  C   LYS L  53      -4.236  -6.363  -4.439  1.00 10.45           C  
ATOM    399  O   LYS L  53      -4.841  -7.179  -3.704  1.00 10.15           O  
ATOM    400  CB  LYS L  53      -5.244  -6.199  -6.708  1.00  9.69           C  
ATOM    401  CG  LYS L  53      -4.983  -5.925  -8.169  1.00  9.72           C  
ATOM    402  CD  LYS L  53      -6.250  -5.949  -8.998  1.00  9.64           C  
ATOM    403  CE  LYS L  53      -6.188  -4.979 -10.161  1.00  9.68           C  
ATOM    404  NZ  LYS L  53      -5.981  -3.579  -9.677  1.00  9.18           N  
ATOM    405  N   ARG L  54      -3.816  -5.168  -4.026  1.00 10.87           N  
ATOM    406  CA  ARG L  54      -3.835  -4.746  -2.642  1.00 11.67           C  
ATOM    407  C   ARG L  54      -4.245  -3.283  -2.392  1.00 12.17           C  
ATOM    408  O   ARG L  54      -3.501  -2.405  -2.840  1.00 12.07           O  
ATOM    409  CB  ARG L  54      -2.397  -4.765  -2.024  1.00 11.67           C  
ATOM    410  CG  ARG L  54      -1.615  -6.046  -1.879  1.00 11.12           C  
ATOM    411  CD  ARG L  54      -0.310  -5.827  -1.171  1.00 10.39           C  
ATOM    412  NE  ARG L  54       0.657  -5.058  -1.967  1.00  9.44           N  
ATOM    413  CZ  ARG L  54       0.993  -5.458  -3.195  1.00  8.76           C  
ATOM    414  NH1 ARG L  54       1.893  -4.849  -3.929  1.00  8.13           N  
ATOM    415  NH2 ARG L  54       0.303  -6.520  -3.636  1.00  8.57           N  
ATOM    416  N   PRO L  55      -5.347  -3.121  -1.654  1.00 12.72           N  
ATOM    417  CA  PRO L  55      -5.646  -1.785  -1.120  1.00 13.05           C  
ATOM    418  C   PRO L  55      -4.348  -1.220  -0.523  1.00 13.32           C  
ATOM    419  O   PRO L  55      -3.310  -1.868  -0.291  1.00 13.31           O  
ATOM    420  CB  PRO L  55      -6.569  -2.078   0.098  1.00 13.16           C  
ATOM    421  CG  PRO L  55      -5.959  -3.374   0.639  1.00 12.94           C  
ATOM    422  CD  PRO L  55      -5.855  -4.176  -0.701  1.00 12.94           C  
ATOM    423  N   SER L  56      -4.476   0.016  -0.122  1.00 13.60           N  
ATOM    424  CA  SER L  56      -3.506   0.921   0.451  1.00 13.69           C  
ATOM    425  C   SER L  56      -3.090   0.869   1.891  1.00 13.74           C  
ATOM    426  O   SER L  56      -1.894   1.133   2.179  1.00 13.90           O  
ATOM    427  CB  SER L  56      -4.147   2.357   0.187  1.00 13.59           C  
ATOM    428  OG  SER L  56      -5.061   2.182  -0.923  1.00 13.17           O  
ATOM    429  N   GLY L  57      -3.983   0.599   2.822  1.00 13.76           N  
ATOM    430  CA  GLY L  57      -3.759   0.607   4.283  1.00 13.44           C  
ATOM    431  C   GLY L  57      -3.876  -0.867   4.741  1.00 13.43           C  
ATOM    432  O   GLY L  57      -4.759  -1.405   5.411  1.00 13.30           O  
ATOM    433  N   VAL L  58      -2.864  -1.546   4.256  1.00 13.17           N  
ATOM    434  CA  VAL L  58      -2.623  -3.004   4.283  1.00 12.73           C  
ATOM    435  C   VAL L  58      -1.131  -3.005   3.930  1.00 12.57           C  
ATOM    436  O   VAL L  58      -0.775  -2.019   3.199  1.00 12.95           O  
ATOM    437  CB  VAL L  58      -3.492  -3.609   3.137  1.00 12.67           C  
ATOM    438  CG1 VAL L  58      -3.007  -3.183   1.742  1.00 11.90           C  
ATOM    439  CG2 VAL L  58      -3.632  -5.119   3.219  1.00 12.19           C  
ATOM    440  N   PRO L  59      -0.389  -4.007   4.318  1.00 12.16           N  
ATOM    441  CA  PRO L  59       1.068  -3.973   4.136  1.00 11.73           C  
ATOM    442  C   PRO L  59       1.575  -4.762   2.954  1.00 11.34           C  
ATOM    443  O   PRO L  59       0.803  -5.187   2.107  1.00 11.28           O  
ATOM    444  CB  PRO L  59       1.590  -4.600   5.431  1.00 11.85           C  
ATOM    445  CG  PRO L  59       0.451  -5.451   5.944  1.00 11.93           C  
ATOM    446  CD  PRO L  59      -0.831  -5.061   5.229  1.00 12.01           C  
ATOM    447  N   ASP L  60       2.883  -4.909   2.933  1.00 10.82           N  
ATOM    448  CA  ASP L  60       3.617  -5.705   1.945  1.00 10.43           C  
ATOM    449  C   ASP L  60       3.755  -7.104   2.582  1.00 10.13           C  
ATOM    450  O   ASP L  60       3.084  -7.338   3.614  1.00 10.07           O  
ATOM    451  CB  ASP L  60       5.004  -5.088   1.673  1.00 10.59           C  
ATOM    452  CG  ASP L  60       5.718  -5.105   3.029  1.00 10.97           C  
ATOM    453  OD1 ASP L  60       6.904  -5.317   3.221  1.00 11.01           O  
ATOM    454  OD2 ASP L  60       4.880  -4.931   3.968  1.00 11.58           O  
ATOM    455  N   ARG L  61       4.488  -7.984   1.911  1.00  9.70           N  
ATOM    456  CA  ARG L  61       4.774  -9.295   2.535  1.00  9.22           C  
ATOM    457  C   ARG L  61       3.592 -10.204   2.160  1.00  8.76           C  
ATOM    458  O   ARG L  61       3.605 -11.405   2.445  1.00  8.57           O  
ATOM    459  CB  ARG L  61       4.634  -9.092   4.091  1.00  9.55           C  
ATOM    460  CG  ARG L  61       5.708  -8.557   4.943  1.00 10.48           C  
ATOM    461  CD  ARG L  61       5.523  -7.360   5.860  1.00 11.06           C  
ATOM    462  NE  ARG L  61       6.342  -7.391   7.067  1.00 11.74           N  
ATOM    463  CZ  ARG L  61       7.612  -7.636   7.378  1.00 11.88           C  
ATOM    464  NH1 ARG L  61       8.087  -7.687   8.651  1.00 11.69           N  
ATOM    465  NH2 ARG L  61       8.584  -7.842   6.465  1.00 11.98           N  
ATOM    466  N   PHE L  62       2.658  -9.536   1.451  1.00  8.02           N  
ATOM    467  CA  PHE L  62       1.254 -10.111   1.431  1.00  7.19           C  
ATOM    468  C   PHE L  62       0.960 -10.505   0.022  1.00  6.95           C  
ATOM    469  O   PHE L  62       0.982  -9.516  -0.728  1.00  7.03           O  
ATOM    470  CB  PHE L  62       0.283  -9.016   1.884  1.00  6.02           C  
ATOM    471  CG  PHE L  62      -0.529  -9.347   3.091  1.00  5.84           C  
ATOM    472  CD1 PHE L  62      -0.877 -10.675   3.358  1.00  5.61           C  
ATOM    473  CD2 PHE L  62      -0.985  -8.358   3.963  1.00  5.46           C  
ATOM    474  CE1 PHE L  62      -1.645 -11.014   4.473  1.00  5.12           C  
ATOM    475  CE2 PHE L  62      -1.764  -8.676   5.080  1.00  5.06           C  
ATOM    476  CZ  PHE L  62      -2.081 -10.015   5.321  1.00  5.03           C  
ATOM    477  N   SER L  63       0.632 -11.765  -0.246  1.00  6.83           N  
ATOM    478  CA  SER L  63       0.647 -12.136  -1.712  1.00  6.39           C  
ATOM    479  C   SER L  63      -0.539 -13.010  -2.007  1.00  6.18           C  
ATOM    480  O   SER L  63      -1.115 -13.505  -1.028  1.00  6.45           O  
ATOM    481  CB  SER L  63       1.961 -12.871  -2.046  1.00  6.28           C  
ATOM    482  OG  SER L  63       3.046 -12.521  -1.193  1.00  4.93           O  
ATOM    483  N   GLY L  64      -0.852 -13.177  -3.277  1.00  5.85           N  
ATOM    484  CA  GLY L  64      -1.944 -14.019  -3.729  1.00  5.51           C  
ATOM    485  C   GLY L  64      -1.995 -14.242  -5.226  1.00  5.31           C  
ATOM    486  O   GLY L  64      -1.770 -13.332  -6.033  1.00  5.08           O  
ATOM    487  N   SER L  65      -2.341 -15.433  -5.647  1.00  5.20           N  
ATOM    488  CA  SER L  65      -2.435 -15.899  -7.008  1.00  4.99           C  
ATOM    489  C   SER L  65      -3.756 -16.644  -7.249  1.00  4.82           C  
ATOM    490  O   SER L  65      -4.460 -17.170  -6.401  1.00  4.75           O  
ATOM    491  CB  SER L  65      -1.253 -16.750  -7.429  1.00  5.29           C  
ATOM    492  OG  SER L  65      -0.784 -17.667  -6.450  1.00  5.62           O  
ATOM    493  N   LYS L  66      -4.043 -16.647  -8.509  1.00  4.56           N  
ATOM    494  CA  LYS L  66      -5.218 -17.276  -9.170  1.00  4.34           C  
ATOM    495  C   LYS L  66      -4.515 -18.345 -10.038  1.00  4.09           C  
ATOM    496  O   LYS L  66      -4.100 -18.111 -11.156  1.00  3.88           O  
ATOM    497  CB  LYS L  66      -5.898 -16.240  -9.964  1.00  4.74           C  
ATOM    498  CG  LYS L  66      -6.811 -16.301 -11.109  1.00  4.78           C  
ATOM    499  CD  LYS L  66      -6.363 -17.321 -12.140  1.00  5.46           C  
ATOM    500  CE  LYS L  66      -7.627 -18.079 -12.565  1.00  5.89           C  
ATOM    501  NZ  LYS L  66      -8.731 -17.087 -12.501  1.00  7.45           N  
ATOM    502  N   SER L  67      -4.343 -19.452  -9.390  1.00  4.00           N  
ATOM    503  CA  SER L  67      -3.644 -20.660  -9.882  1.00  3.80           C  
ATOM    504  C   SER L  67      -4.765 -21.376 -10.635  1.00  3.74           C  
ATOM    505  O   SER L  67      -5.540 -22.047  -9.968  1.00  3.89           O  
ATOM    506  CB  SER L  67      -3.149 -21.490  -8.691  1.00  3.56           C  
ATOM    507  OG  SER L  67      -2.433 -22.672  -9.018  1.00  3.12           O  
ATOM    508  N   GLY L  68      -4.886 -21.172 -11.904  1.00  3.60           N  
ATOM    509  CA  GLY L  68      -5.853 -21.723 -12.762  1.00  3.60           C  
ATOM    510  C   GLY L  68      -6.912 -22.572 -12.180  1.00  3.83           C  
ATOM    511  O   GLY L  68      -7.329 -23.416 -12.982  1.00  4.01           O  
ATOM    512  N   ASN L  69      -7.349 -22.467 -10.969  1.00  4.15           N  
ATOM    513  CA  ASN L  69      -8.501 -23.260 -10.433  1.00  4.44           C  
ATOM    514  C   ASN L  69      -8.508 -23.139  -8.917  1.00  4.59           C  
ATOM    515  O   ASN L  69      -9.558 -23.418  -8.318  1.00  4.72           O  
ATOM    516  CB  ASN L  69      -8.587 -24.579 -11.082  1.00  4.62           C  
ATOM    517  CG  ASN L  69      -9.671 -25.476 -11.556  1.00  5.58           C  
ATOM    518  OD1 ASN L  69     -10.770 -25.307 -12.176  1.00  4.98           O  
ATOM    519  ND2 ASN L  69      -9.374 -26.837 -11.321  1.00  4.69           N  
ATOM    520  N   THR L  70      -7.431 -22.787  -8.258  1.00  4.73           N  
ATOM    521  CA  THR L  70      -7.269 -22.532  -6.860  1.00  5.17           C  
ATOM    522  C   THR L  70      -6.762 -21.024  -6.763  1.00  5.09           C  
ATOM    523  O   THR L  70      -5.956 -20.600  -7.534  1.00  4.95           O  
ATOM    524  CB  THR L  70      -6.320 -23.251  -5.840  1.00  5.40           C  
ATOM    525  OG1 THR L  70      -6.656 -22.731  -4.460  1.00  5.59           O  
ATOM    526  CG2 THR L  70      -4.806 -22.901  -5.964  1.00  5.77           C  
ATOM    527  N   ALA L  71      -7.332 -20.430  -5.757  1.00  5.53           N  
ATOM    528  CA  ALA L  71      -7.003 -19.027  -5.413  1.00  5.49           C  
ATOM    529  C   ALA L  71      -6.112 -19.282  -4.185  1.00  5.52           C  
ATOM    530  O   ALA L  71      -6.554 -20.114  -3.380  1.00  5.61           O  
ATOM    531  CB  ALA L  71      -8.226 -18.228  -5.010  1.00  5.82           C  
ATOM    532  N   SER L  72      -4.977 -18.625  -4.175  1.00  5.41           N  
ATOM    533  CA  SER L  72      -4.022 -18.864  -3.072  1.00  5.26           C  
ATOM    534  C   SER L  72      -3.499 -17.491  -2.672  1.00  5.34           C  
ATOM    535  O   SER L  72      -3.401 -16.640  -3.519  1.00  5.26           O  
ATOM    536  CB  SER L  72      -2.944 -19.831  -3.485  1.00  4.62           C  
ATOM    537  OG  SER L  72      -3.494 -21.151  -3.527  1.00  4.80           O  
ATOM    538  N   LEU L  73      -3.269 -17.353  -1.411  1.00  5.55           N  
ATOM    539  CA  LEU L  73      -2.622 -16.197  -0.790  1.00  5.87           C  
ATOM    540  C   LEU L  73      -1.308 -16.824  -0.219  1.00  6.20           C  
ATOM    541  O   LEU L  73      -1.364 -17.953   0.327  1.00  5.98           O  
ATOM    542  CB  LEU L  73      -3.523 -15.631   0.269  1.00  5.44           C  
ATOM    543  CG  LEU L  73      -3.257 -14.550   1.261  1.00  4.77           C  
ATOM    544  CD1 LEU L  73      -3.692 -15.047   2.660  1.00  4.47           C  
ATOM    545  CD2 LEU L  73      -1.830 -14.095   1.255  1.00  4.61           C  
ATOM    546  N   THR L  74      -0.225 -16.071  -0.461  1.00  6.55           N  
ATOM    547  CA  THR L  74       1.041 -16.448   0.152  1.00  6.94           C  
ATOM    548  C   THR L  74       1.518 -15.270   1.062  1.00  7.08           C  
ATOM    549  O   THR L  74       1.897 -14.236   0.488  1.00  7.14           O  
ATOM    550  CB  THR L  74       2.331 -16.773  -0.664  1.00  7.09           C  
ATOM    551  OG1 THR L  74       2.095 -17.877  -1.561  1.00  7.11           O  
ATOM    552  CG2 THR L  74       3.502 -17.005   0.370  1.00  6.65           C  
ATOM    553  N   VAL L  75       1.499 -15.595   2.349  1.00  7.14           N  
ATOM    554  CA  VAL L  75       2.011 -14.598   3.317  1.00  7.13           C  
ATOM    555  C   VAL L  75       3.504 -14.998   3.458  1.00  7.50           C  
ATOM    556  O   VAL L  75       3.762 -16.201   3.524  1.00  7.69           O  
ATOM    557  CB  VAL L  75       1.329 -14.468   4.656  1.00  6.33           C  
ATOM    558  CG1 VAL L  75       2.298 -13.797   5.655  1.00  5.71           C  
ATOM    559  CG2 VAL L  75       0.009 -13.746   4.611  1.00  5.39           C  
ATOM    560  N   SER L  76       4.323 -13.957   3.446  1.00  7.80           N  
ATOM    561  CA  SER L  76       5.779 -14.205   3.437  1.00  7.88           C  
ATOM    562  C   SER L  76       6.434 -13.136   4.330  1.00  7.92           C  
ATOM    563  O   SER L  76       6.917 -12.087   3.906  1.00  7.79           O  
ATOM    564  CB  SER L  76       6.414 -14.321   2.061  1.00  8.01           C  
ATOM    565  OG  SER L  76       7.849 -14.323   2.068  1.00  7.33           O  
ATOM    566  N   GLY L  77       6.416 -13.549   5.575  1.00  7.85           N  
ATOM    567  CA  GLY L  77       7.022 -12.791   6.695  1.00  8.15           C  
ATOM    568  C   GLY L  77       6.360 -13.586   7.877  1.00  8.29           C  
ATOM    569  O   GLY L  77       6.709 -14.663   8.289  1.00  8.23           O  
ATOM    570  N   LEU L  78       5.356 -12.862   8.359  1.00  8.45           N  
ATOM    571  CA  LEU L  78       4.464 -13.352   9.399  1.00  8.42           C  
ATOM    572  C   LEU L  78       5.160 -13.247  10.757  1.00  8.41           C  
ATOM    573  O   LEU L  78       5.700 -14.290  11.093  1.00  8.45           O  
ATOM    574  CB  LEU L  78       4.033 -14.812   9.105  1.00  8.17           C  
ATOM    575  CG  LEU L  78       2.637 -15.102   9.679  1.00  7.99           C  
ATOM    576  CD1 LEU L  78       2.420 -16.572   9.964  1.00  7.96           C  
ATOM    577  CD2 LEU L  78       2.478 -14.246  10.948  1.00  7.92           C  
ATOM    578  N   GLN L  79       5.114 -12.057  11.313  1.00  8.49           N  
ATOM    579  CA  GLN L  79       5.718 -12.043  12.719  1.00  8.77           C  
ATOM    580  C   GLN L  79       4.544 -11.699  13.583  1.00  8.84           C  
ATOM    581  O   GLN L  79       4.108 -12.440  14.479  1.00  8.78           O  
ATOM    582  CB  GLN L  79       6.952 -11.220  12.637  1.00  9.38           C  
ATOM    583  CG  GLN L  79       7.018 -10.396  11.372  1.00 10.37           C  
ATOM    584  CD  GLN L  79       6.657  -8.939  11.415  1.00 10.63           C  
ATOM    585  OE1 GLN L  79       5.775  -8.441  12.113  1.00 10.42           O  
ATOM    586  NE2 GLN L  79       7.437  -8.197  10.579  1.00 10.72           N  
ATOM    587  N   ALA L  80       3.966 -10.583  13.229  1.00  9.10           N  
ATOM    588  CA  ALA L  80       2.818  -9.976  13.981  1.00  9.37           C  
ATOM    589  C   ALA L  80       2.025  -9.179  12.926  1.00  9.36           C  
ATOM    590  O   ALA L  80       1.894  -7.962  12.781  1.00  9.35           O  
ATOM    591  CB  ALA L  80       3.264  -9.270  15.225  1.00  9.79           C  
ATOM    592  N   GLU L  81       1.465 -10.058  12.096  1.00  9.26           N  
ATOM    593  CA  GLU L  81       0.700  -9.766  10.901  1.00  9.07           C  
ATOM    594  C   GLU L  81      -0.248 -10.935  10.692  1.00  8.95           C  
ATOM    595  O   GLU L  81      -1.411 -10.572  10.899  1.00  9.21           O  
ATOM    596  CB  GLU L  81       1.551  -9.631   9.659  1.00  9.06           C  
ATOM    597  CG  GLU L  81       2.904  -8.890   9.802  1.00  8.87           C  
ATOM    598  CD  GLU L  81       3.848  -9.322   8.664  1.00  8.79           C  
ATOM    599  OE1 GLU L  81       3.590  -8.910   7.532  1.00  8.28           O  
ATOM    600  OE2 GLU L  81       4.712 -10.103   9.161  1.00  8.29           O  
ATOM    601  N   ASP L  82       0.223 -12.161  10.447  1.00  8.75           N  
ATOM    602  CA  ASP L  82      -0.811 -13.180  10.061  1.00  8.63           C  
ATOM    603  C   ASP L  82      -1.774 -13.446  11.203  1.00  8.58           C  
ATOM    604  O   ASP L  82      -2.980 -13.607  10.844  1.00  8.59           O  
ATOM    605  CB  ASP L  82      -0.353 -14.287   9.175  1.00  8.21           C  
ATOM    606  CG  ASP L  82      -0.456 -14.143   7.664  1.00  8.20           C  
ATOM    607  OD1 ASP L  82      -1.455 -13.875   6.967  1.00  7.52           O  
ATOM    608  OD2 ASP L  82       0.636 -14.353   7.071  1.00  7.77           O  
ATOM    609  N   GLU L  83      -1.413 -13.420  12.431  1.00  8.48           N  
ATOM    610  CA  GLU L  83      -2.311 -13.654  13.565  1.00  8.57           C  
ATOM    611  C   GLU L  83      -3.730 -13.179  13.345  1.00  8.67           C  
ATOM    612  O   GLU L  83      -4.300 -12.320  14.133  1.00  9.05           O  
ATOM    613  CB  GLU L  83      -1.658 -12.930  14.791  1.00  8.41           C  
ATOM    614  CG  GLU L  83      -0.191 -12.503  14.648  1.00  8.17           C  
ATOM    615  CD  GLU L  83       0.862 -13.391  14.104  1.00  8.00           C  
ATOM    616  OE1 GLU L  83       1.824 -13.114  13.376  1.00  7.86           O  
ATOM    617  OE2 GLU L  83       0.767 -14.581  14.458  1.00  7.88           O  
ATOM    618  N   ALA L  84      -4.442 -13.682  12.343  1.00  8.40           N  
ATOM    619  CA  ALA L  84      -5.773 -13.306  11.927  1.00  8.06           C  
ATOM    620  C   ALA L  84      -6.682 -14.453  11.491  1.00  7.99           C  
ATOM    621  O   ALA L  84      -6.128 -15.558  11.305  1.00  7.98           O  
ATOM    622  CB  ALA L  84      -5.673 -12.406  10.663  1.00  7.92           C  
ATOM    623  N   ASP L  85      -7.978 -14.159  11.332  1.00  7.58           N  
ATOM    624  CA  ASP L  85      -8.864 -15.241  10.774  1.00  7.52           C  
ATOM    625  C   ASP L  85      -8.613 -14.875   9.281  1.00  7.43           C  
ATOM    626  O   ASP L  85      -8.442 -13.664   9.141  1.00  7.30           O  
ATOM    627  CB  ASP L  85     -10.285 -15.372  11.144  1.00  7.12           C  
ATOM    628  CG  ASP L  85     -11.259 -16.426  10.646  1.00  6.97           C  
ATOM    629  OD1 ASP L  85     -11.825 -17.271  11.421  1.00  6.02           O  
ATOM    630  OD2 ASP L  85     -11.623 -16.448   9.413  1.00  6.37           O  
ATOM    631  N   TYR L  86      -8.590 -15.880   8.470  1.00  7.54           N  
ATOM    632  CA  TYR L  86      -8.388 -15.554   7.018  1.00  7.85           C  
ATOM    633  C   TYR L  86      -9.527 -16.079   6.159  1.00  7.86           C  
ATOM    634  O   TYR L  86      -9.944 -17.237   6.200  1.00  7.51           O  
ATOM    635  CB  TYR L  86      -6.949 -15.930   6.637  1.00  8.30           C  
ATOM    636  CG  TYR L  86      -5.939 -14.919   7.155  1.00  8.62           C  
ATOM    637  CD1 TYR L  86      -5.783 -13.704   6.464  1.00  8.89           C  
ATOM    638  CD2 TYR L  86      -5.179 -15.131   8.287  1.00  8.86           C  
ATOM    639  CE1 TYR L  86      -4.881 -12.734   6.898  1.00  9.17           C  
ATOM    640  CE2 TYR L  86      -4.254 -14.179   8.721  1.00  9.20           C  
ATOM    641  CZ  TYR L  86      -4.110 -12.978   8.041  1.00  9.30           C  
ATOM    642  OH  TYR L  86      -3.209 -12.051   8.479  1.00  9.15           O  
ATOM    643  N   TYR L  87     -10.019 -15.122   5.314  1.00  7.84           N  
ATOM    644  CA  TYR L  87     -11.200 -15.443   4.470  1.00  8.09           C  
ATOM    645  C   TYR L  87     -11.031 -15.192   2.988  1.00  8.16           C  
ATOM    646  O   TYR L  87     -10.766 -14.093   2.438  1.00  7.97           O  
ATOM    647  CB  TYR L  87     -12.409 -14.793   5.134  1.00  8.43           C  
ATOM    648  CG  TYR L  87     -13.399 -15.674   5.857  1.00  8.55           C  
ATOM    649  CD1 TYR L  87     -14.189 -16.618   5.187  1.00  8.39           C  
ATOM    650  CD2 TYR L  87     -13.614 -15.495   7.229  1.00  8.69           C  
ATOM    651  CE1 TYR L  87     -15.131 -17.385   5.867  1.00  8.47           C  
ATOM    652  CE2 TYR L  87     -14.565 -16.242   7.926  1.00  8.74           C  
ATOM    653  CZ  TYR L  87     -15.324 -17.195   7.236  1.00  8.72           C  
ATOM    654  OH  TYR L  87     -16.233 -17.907   7.961  1.00  8.40           O  
ATOM    655  N   CYS L  88     -11.245 -16.294   2.249  1.00  8.28           N  
ATOM    656  CA  CYS L  88     -11.123 -16.437   0.833  1.00  8.33           C  
ATOM    657  C   CYS L  88     -12.525 -16.265   0.230  1.00  8.32           C  
ATOM    658  O   CYS L  88     -13.303 -17.098   0.679  1.00  8.35           O  
ATOM    659  CB  CYS L  88     -10.857 -17.893   0.291  1.00  9.05           C  
ATOM    660  SG  CYS L  88     -10.995 -17.885  -1.561  1.00  9.56           S  
ATOM    661  N   SER L  89     -12.678 -15.457  -0.740  1.00  8.26           N  
ATOM    662  CA  SER L  89     -13.922 -15.147  -1.359  1.00  8.39           C  
ATOM    663  C   SER L  89     -13.775 -15.066  -2.874  1.00  8.69           C  
ATOM    664  O   SER L  89     -13.013 -14.296  -3.457  1.00  8.56           O  
ATOM    665  CB  SER L  89     -14.280 -13.666  -1.000  1.00  8.53           C  
ATOM    666  OG  SER L  89     -13.200 -12.992  -1.717  1.00  8.18           O  
ATOM    667  N   SER L  90     -14.638 -15.765  -3.512  1.00  9.16           N  
ATOM    668  CA  SER L  90     -14.837 -15.942  -4.939  1.00  9.48           C  
ATOM    669  C   SER L  90     -15.904 -15.055  -5.525  1.00  9.70           C  
ATOM    670  O   SER L  90     -17.048 -15.349  -5.074  1.00  9.73           O  
ATOM    671  CB  SER L  90     -15.495 -17.405  -4.951  1.00  9.43           C  
ATOM    672  OG  SER L  90     -16.356 -17.414  -3.813  1.00  8.81           O  
ATOM    673  N   TYR L  91     -15.610 -14.154  -6.418  1.00  9.80           N  
ATOM    674  CA  TYR L  91     -16.721 -13.346  -7.018  1.00 10.32           C  
ATOM    675  C   TYR L  91     -17.460 -14.217  -8.039  1.00 10.44           C  
ATOM    676  O   TYR L  91     -16.878 -15.183  -8.566  1.00 10.38           O  
ATOM    677  CB  TYR L  91     -16.123 -12.045  -7.679  1.00 10.69           C  
ATOM    678  CG  TYR L  91     -16.928 -11.413  -8.798  1.00 10.36           C  
ATOM    679  CD1 TYR L  91     -16.919 -11.903 -10.103  1.00 10.17           C  
ATOM    680  CD2 TYR L  91     -17.742 -10.310  -8.521  1.00 10.36           C  
ATOM    681  CE1 TYR L  91     -17.723 -11.351 -11.086  1.00  9.85           C  
ATOM    682  CE2 TYR L  91     -18.526  -9.714  -9.511  1.00 10.18           C  
ATOM    683  CZ  TYR L  91     -18.525 -10.261 -10.793  1.00 10.07           C  
ATOM    684  OH  TYR L  91     -19.326  -9.667 -11.719  1.00  9.90           O  
ATOM    685  N   GLU L  92     -18.756 -13.921  -8.188  1.00 10.67           N  
ATOM    686  CA  GLU L  92     -19.465 -14.475  -9.408  1.00 10.88           C  
ATOM    687  C   GLU L  92     -20.834 -13.872  -9.560  1.00 10.67           C  
ATOM    688  O   GLU L  92     -21.334 -13.219  -8.613  1.00 10.84           O  
ATOM    689  CB  GLU L  92     -19.226 -15.917  -9.589  1.00 11.36           C  
ATOM    690  CG  GLU L  92     -20.137 -16.943  -9.005  1.00 12.33           C  
ATOM    691  CD  GLU L  92     -21.540 -17.024  -9.562  1.00 12.44           C  
ATOM    692  OE1 GLU L  92     -22.463 -17.360  -8.818  1.00 12.61           O  
ATOM    693  OE2 GLU L  92     -21.574 -16.753 -10.796  1.00 12.69           O  
ATOM    694  N   GLY L  93     -21.472 -13.967 -10.734  1.00 10.53           N  
ATOM    695  CA  GLY L  93     -22.687 -13.286 -11.096  1.00 10.20           C  
ATOM    696  C   GLY L  93     -24.031 -13.894 -10.871  1.00 10.15           C  
ATOM    697  O   GLY L  93     -24.966 -13.719 -11.704  1.00  9.80           O  
ATOM    698  N   SER L  94     -24.218 -14.478  -9.676  1.00 10.05           N  
ATOM    699  CA  SER L  94     -25.405 -15.360  -9.442  1.00 10.09           C  
ATOM    700  C   SER L  94     -26.237 -14.817  -8.282  1.00  9.97           C  
ATOM    701  O   SER L  94     -26.737 -15.661  -7.485  1.00 10.01           O  
ATOM    702  CB  SER L  94     -25.017 -16.816  -9.169  1.00  9.83           C  
ATOM    703  OG  SER L  94     -25.919 -17.803  -9.486  1.00  9.15           O  
ATOM    704  N   ASP L  95     -26.398 -13.500  -8.327  1.00  9.84           N  
ATOM    705  CA  ASP L  95     -27.109 -12.881  -7.161  1.00  9.80           C  
ATOM    706  C   ASP L  95     -26.279 -13.453  -5.999  1.00  9.81           C  
ATOM    707  O   ASP L  95     -26.889 -13.835  -5.008  1.00  9.86           O  
ATOM    708  CB  ASP L  95     -28.594 -13.228  -7.119  1.00  9.32           C  
ATOM    709  CG  ASP L  95     -29.536 -12.162  -7.675  1.00  9.02           C  
ATOM    710  OD1 ASP L  95     -29.994 -11.218  -6.991  1.00  8.09           O  
ATOM    711  OD2 ASP L  95     -29.858 -12.264  -8.874  1.00  8.67           O  
ATOM    712  N   ASN L  95A    -24.978 -13.652  -6.274  1.00  9.95           N  
ATOM    713  CA  ASN L  95A    -24.090 -14.058  -5.153  1.00  9.94           C  
ATOM    714  C   ASN L  95A    -22.638 -13.822  -5.409  1.00 10.06           C  
ATOM    715  O   ASN L  95A    -22.248 -13.033  -6.288  1.00 10.30           O  
ATOM    716  CB  ASN L  95A    -24.652 -15.104  -4.276  1.00  9.69           C  
ATOM    717  CG  ASN L  95A    -23.855 -15.855  -3.257  1.00  9.57           C  
ATOM    718  OD1 ASN L  95A    -22.876 -15.365  -2.633  1.00  9.22           O  
ATOM    719  ND2 ASN L  95A    -24.317 -17.114  -3.076  1.00  8.81           N  
ATOM    720  N   PHE L  96     -21.821 -14.277  -4.510  1.00 10.13           N  
ATOM    721  CA  PHE L  96     -20.361 -14.002  -4.398  1.00 10.15           C  
ATOM    722  C   PHE L  96     -20.016 -14.791  -3.076  1.00  9.97           C  
ATOM    723  O   PHE L  96     -20.565 -14.658  -1.956  1.00  9.69           O  
ATOM    724  CB  PHE L  96     -20.017 -12.584  -4.497  1.00 10.96           C  
ATOM    725  CG  PHE L  96     -18.704 -11.926  -4.570  1.00 11.79           C  
ATOM    726  CD1 PHE L  96     -18.588 -10.663  -5.181  1.00 12.28           C  
ATOM    727  CD2 PHE L  96     -17.553 -12.486  -4.011  1.00 12.36           C  
ATOM    728  CE1 PHE L  96     -17.373  -9.984  -5.238  1.00 12.52           C  
ATOM    729  CE2 PHE L  96     -16.301 -11.842  -4.063  1.00 12.63           C  
ATOM    730  CZ  PHE L  96     -16.229 -10.591  -4.686  1.00 12.58           C  
ATOM    731  N   VAL L  97     -19.048 -15.659  -3.338  1.00  9.53           N  
ATOM    732  CA  VAL L  97     -18.665 -16.717  -2.424  1.00  9.23           C  
ATOM    733  C   VAL L  97     -17.588 -16.287  -1.463  1.00  8.98           C  
ATOM    734  O   VAL L  97     -16.705 -15.500  -1.739  1.00  9.15           O  
ATOM    735  CB  VAL L  97     -18.394 -18.012  -3.235  1.00  9.26           C  
ATOM    736  CG1 VAL L  97     -18.741 -19.269  -2.456  1.00  9.09           C  
ATOM    737  CG2 VAL L  97     -19.083 -18.020  -4.597  1.00  9.19           C  
ATOM    738  N   PHE L  98     -17.762 -16.787  -0.257  1.00  8.70           N  
ATOM    739  CA  PHE L  98     -16.779 -16.751   0.846  1.00  8.28           C  
ATOM    740  C   PHE L  98     -16.534 -18.303   1.059  1.00  7.97           C  
ATOM    741  O   PHE L  98     -17.346 -19.115   0.654  1.00  7.85           O  
ATOM    742  CB  PHE L  98     -17.183 -16.047   2.047  1.00  8.66           C  
ATOM    743  CG  PHE L  98     -17.281 -14.617   2.359  1.00  8.77           C  
ATOM    744  CD1 PHE L  98     -17.364 -14.224   3.721  1.00  8.78           C  
ATOM    745  CD2 PHE L  98     -17.299 -13.628   1.375  1.00  8.86           C  
ATOM    746  CE1 PHE L  98     -17.463 -12.885   4.078  1.00  8.66           C  
ATOM    747  CE2 PHE L  98     -17.419 -12.277   1.715  1.00  8.74           C  
ATOM    748  CZ  PHE L  98     -17.497 -11.921   3.064  1.00  8.86           C  
ATOM    749  N   GLY L  99     -15.417 -18.624   1.621  1.00  7.70           N  
ATOM    750  CA  GLY L  99     -14.915 -19.939   1.868  1.00  7.25           C  
ATOM    751  C   GLY L  99     -14.746 -20.184   3.361  1.00  6.87           C  
ATOM    752  O   GLY L  99     -15.303 -19.392   4.103  1.00  6.86           O  
ATOM    753  N   THR L 100     -13.972 -21.201   3.652  1.00  7.02           N  
ATOM    754  CA  THR L 100     -14.013 -21.636   5.135  1.00  6.94           C  
ATOM    755  C   THR L 100     -12.800 -21.064   5.723  1.00  6.81           C  
ATOM    756  O   THR L 100     -12.021 -20.432   4.945  1.00  6.50           O  
ATOM    757  CB  THR L 100     -15.019 -22.771   5.325  1.00  7.16           C  
ATOM    758  OG1 THR L 100     -15.135 -23.138   6.763  1.00  7.02           O  
ATOM    759  CG2 THR L 100     -15.010 -23.969   4.369  1.00  6.87           C  
ATOM    760  N   GLY L 101     -12.677 -21.046   7.064  1.00  6.68           N  
ATOM    761  CA  GLY L 101     -11.729 -20.260   7.790  1.00  6.66           C  
ATOM    762  C   GLY L 101     -10.354 -20.692   8.174  1.00  6.70           C  
ATOM    763  O   GLY L 101     -10.092 -21.309   9.224  1.00  6.52           O  
ATOM    764  N   THR L 102      -9.410 -20.258   7.314  1.00  6.78           N  
ATOM    765  CA  THR L 102      -7.993 -20.541   7.547  1.00  7.11           C  
ATOM    766  C   THR L 102      -7.539 -19.405   8.483  1.00  7.26           C  
ATOM    767  O   THR L 102      -7.311 -18.307   8.041  1.00  7.47           O  
ATOM    768  CB  THR L 102      -7.080 -20.676   6.308  1.00  6.95           C  
ATOM    769  OG1 THR L 102      -7.787 -21.387   5.258  1.00  7.01           O  
ATOM    770  CG2 THR L 102      -5.804 -21.472   6.662  1.00  6.74           C  
ATOM    771  N   LYS L 103      -7.447 -19.760   9.738  1.00  7.59           N  
ATOM    772  CA  LYS L 103      -6.976 -18.873  10.807  1.00  7.59           C  
ATOM    773  C   LYS L 103      -5.470 -19.191  11.076  1.00  7.70           C  
ATOM    774  O   LYS L 103      -4.926 -20.292  10.979  1.00  7.56           O  
ATOM    775  CB  LYS L 103      -7.801 -18.853  12.041  1.00  7.48           C  
ATOM    776  CG  LYS L 103      -8.322 -20.129  12.641  1.00  7.59           C  
ATOM    777  CD  LYS L 103      -9.102 -21.037  11.721  1.00  7.55           C  
ATOM    778  CE  LYS L 103     -10.503 -20.554  11.442  1.00  7.27           C  
ATOM    779  NZ  LYS L 103     -10.422 -19.164  10.935  1.00  7.11           N  
ATOM    780  N   VAL L 104      -4.822 -18.070  11.339  1.00  7.71           N  
ATOM    781  CA  VAL L 104      -3.403 -17.903  11.479  1.00  8.04           C  
ATOM    782  C   VAL L 104      -3.127 -17.285  12.852  1.00  8.34           C  
ATOM    783  O   VAL L 104      -3.890 -16.579  13.511  1.00  8.48           O  
ATOM    784  CB  VAL L 104      -2.809 -17.097  10.295  1.00  7.81           C  
ATOM    785  CG1 VAL L 104      -1.346 -16.756  10.478  1.00  7.65           C  
ATOM    786  CG2 VAL L 104      -2.943 -17.758   8.928  1.00  7.92           C  
ATOM    787  N   THR L 105      -1.915 -17.599  13.305  1.00  8.69           N  
ATOM    788  CA  THR L 105      -1.251 -17.357  14.540  1.00  8.56           C  
ATOM    789  C   THR L 105       0.162 -18.016  14.443  1.00  8.69           C  
ATOM    790  O   THR L 105       0.494 -18.810  13.574  1.00  8.84           O  
ATOM    791  CB  THR L 105      -1.813 -18.277  15.754  1.00  8.15           C  
ATOM    792  OG1 THR L 105      -3.225 -18.351  15.523  1.00  8.55           O  
ATOM    793  CG2 THR L 105      -1.494 -17.905  17.176  1.00  7.77           C  
ATOM    794  N   VAL L 106       0.818 -17.850  15.501  1.00  8.94           N  
ATOM    795  CA  VAL L 106       2.107 -18.363  15.935  1.00  9.24           C  
ATOM    796  C   VAL L 106       2.541 -17.119  16.755  1.00  9.53           C  
ATOM    797  O   VAL L 106       2.692 -16.016  16.187  1.00  9.49           O  
ATOM    798  CB  VAL L 106       3.042 -18.804  14.852  1.00  9.72           C  
ATOM    799  CG1 VAL L 106       3.703 -17.600  14.135  1.00  9.80           C  
ATOM    800  CG2 VAL L 106       4.134 -19.784  15.302  1.00  9.34           C  
ATOM    801  N   LEU L 106A      2.507 -17.355  18.033  1.00  9.67           N  
ATOM    802  CA  LEU L 106A      2.879 -16.260  19.001  1.00  9.85           C  
ATOM    803  C   LEU L 106A      2.889 -16.979  20.353  1.00  9.83           C  
ATOM    804  O   LEU L 106A      3.518 -16.508  21.304  1.00  9.96           O  
ATOM    805  CB  LEU L 106A      2.086 -15.029  18.732  1.00  9.87           C  
ATOM    806  CG  LEU L 106A      0.683 -14.829  19.245  1.00 10.09           C  
ATOM    807  CD1 LEU L 106A      0.676 -14.161  20.621  1.00 10.21           C  
ATOM    808  CD2 LEU L 106A     -0.090 -14.000  18.223  1.00 10.12           C  
ATOM    809  N   GLY L 107       2.309 -18.187  20.306  1.00  9.73           N  
ATOM    810  CA  GLY L 107       2.154 -19.011  21.485  1.00  9.82           C  
ATOM    811  C   GLY L 107       3.487 -19.518  22.011  1.00  9.88           C  
ATOM    812  O   GLY L 107       4.570 -19.156  21.551  1.00  9.87           O  
ATOM    813  N   GLN L 108       3.317 -20.351  23.050  1.00  9.98           N  
ATOM    814  CA  GLN L 108       4.420 -21.170  23.622  1.00  9.85           C  
ATOM    815  C   GLN L 108       4.406 -22.549  22.912  1.00  9.62           C  
ATOM    816  O   GLN L 108       5.080 -22.833  21.869  1.00  9.07           O  
ATOM    817  CB  GLN L 108       4.115 -21.365  25.102  1.00 10.55           C  
ATOM    818  CG  GLN L 108       5.051 -22.354  25.777  1.00 11.73           C  
ATOM    819  CD  GLN L 108       4.424 -22.884  27.070  1.00 12.31           C  
ATOM    820  OE1 GLN L 108       3.652 -22.183  27.733  1.00 12.22           O  
ATOM    821  NE2 GLN L 108       4.797 -24.139  27.350  1.00 12.33           N  
ATOM    822  N   PRO L 109       3.539 -23.399  23.459  1.00  9.41           N  
ATOM    823  CA  PRO L 109       3.240 -24.721  22.932  1.00  9.41           C  
ATOM    824  C   PRO L 109       2.315 -24.835  21.734  1.00  9.34           C  
ATOM    825  O   PRO L 109       1.361 -24.134  21.417  1.00  9.43           O  
ATOM    826  CB  PRO L 109       2.560 -25.413  24.137  1.00  9.49           C  
ATOM    827  CG  PRO L 109       2.121 -24.318  25.057  1.00  9.50           C  
ATOM    828  CD  PRO L 109       2.426 -23.004  24.377  1.00  9.47           C  
TER     829      PRO L 109                                                      
ATOM   1616  N   SER L   2     -10.282   3.585   7.291  1.00 13.73           N  
ATOM   1617  CA  SER L   2     -11.596   3.961   6.641  1.00 13.22           C  
ATOM   1618  C   SER L   2     -12.671   3.239   7.447  1.00 12.84           C  
ATOM   1619  O   SER L   2     -12.763   1.985   7.225  1.00 13.04           O  
ATOM   1620  CB  SER L   2     -11.653   3.545   5.202  1.00 13.41           C  
ATOM   1621  OG  SER L   2     -10.386   3.574   4.523  1.00 14.01           O  
ATOM   1622  N   ALA L   3     -13.340   3.926   8.342  1.00 12.17           N  
ATOM   1623  CA  ALA L   3     -14.313   3.232   9.197  1.00 11.44           C  
ATOM   1624  C   ALA L   3     -15.688   3.557   8.627  1.00 11.05           C  
ATOM   1625  O   ALA L   3     -15.815   4.561   7.956  1.00 11.01           O  
ATOM   1626  CB  ALA L   3     -14.270   3.618  10.654  1.00 11.69           C  
ATOM   1627  N   LEU L   4     -16.603   2.675   8.953  1.00 10.71           N  
ATOM   1628  CA  LEU L   4     -18.014   2.851   8.557  1.00 10.15           C  
ATOM   1629  C   LEU L   4     -18.916   2.897   9.816  1.00  9.74           C  
ATOM   1630  O   LEU L   4     -19.171   1.874  10.479  1.00  9.62           O  
ATOM   1631  CB  LEU L   4     -18.430   1.793   7.537  1.00  9.73           C  
ATOM   1632  CG  LEU L   4     -19.234   2.428   6.406  1.00  9.49           C  
ATOM   1633  CD1 LEU L   4     -18.425   3.664   5.968  1.00  9.61           C  
ATOM   1634  CD2 LEU L   4     -19.443   1.427   5.317  1.00  9.71           C  
ATOM   1635  N   THR L   5     -19.379   4.170   9.980  1.00  8.83           N  
ATOM   1636  CA  THR L   5     -20.242   4.391  11.200  1.00  8.16           C  
ATOM   1637  C   THR L   5     -21.515   3.563  11.053  1.00  7.86           C  
ATOM   1638  O   THR L   5     -22.251   3.393  10.050  1.00  7.36           O  
ATOM   1639  CB  THR L   5     -20.257   5.948  11.410  1.00  7.77           C  
ATOM   1640  OG1 THR L   5     -18.851   6.388  11.207  1.00  6.96           O  
ATOM   1641  CG2 THR L   5     -20.763   6.503  12.733  1.00  7.47           C  
ATOM   1642  N   GLN L   6     -21.800   2.871  12.142  1.00  7.53           N  
ATOM   1643  CA  GLN L   6     -22.968   2.003  12.377  1.00  7.33           C  
ATOM   1644  C   GLN L   6     -22.865   1.613  13.871  1.00  6.95           C  
ATOM   1645  O   GLN L   6     -21.749   1.509  14.383  1.00  6.97           O  
ATOM   1646  CB  GLN L   6     -23.122   0.852  11.415  1.00  7.89           C  
ATOM   1647  CG  GLN L   6     -23.328  -0.514  12.109  1.00  7.61           C  
ATOM   1648  CD  GLN L   6     -23.455  -1.610  11.066  1.00  7.81           C  
ATOM   1649  OE1 GLN L   6     -24.596  -1.850  10.629  1.00  7.76           O  
ATOM   1650  NE2 GLN L   6     -22.340  -2.245  10.714  1.00  7.59           N  
ATOM   1651  N   PRO L   7     -24.025   1.425  14.436  1.00  6.51           N  
ATOM   1652  CA  PRO L   7     -24.098   1.305  15.933  1.00  6.08           C  
ATOM   1653  C   PRO L   7     -23.454  -0.034  16.149  1.00  5.70           C  
ATOM   1654  O   PRO L   7     -23.268  -0.720  15.151  1.00  5.46           O  
ATOM   1655  CB  PRO L   7     -25.517   1.645  16.212  1.00  6.09           C  
ATOM   1656  CG  PRO L   7     -26.038   2.377  14.997  1.00  6.04           C  
ATOM   1657  CD  PRO L   7     -25.374   1.572  13.862  1.00  6.29           C  
ATOM   1658  N   PRO L   8     -23.126  -0.309  17.383  1.00  5.63           N  
ATOM   1659  CA  PRO L   8     -22.385  -1.530  17.764  1.00  5.51           C  
ATOM   1660  C   PRO L   8     -23.445  -2.536  18.219  1.00  5.45           C  
ATOM   1661  O   PRO L   8     -23.188  -3.722  18.402  1.00  5.31           O  
ATOM   1662  CB  PRO L   8     -21.659  -1.003  19.036  1.00  5.34           C  
ATOM   1663  CG  PRO L   8     -22.767  -0.210  19.715  1.00  5.29           C  
ATOM   1664  CD  PRO L   8     -23.667   0.343  18.616  1.00  5.35           C  
ATOM   1665  N   SER L   9     -24.638  -1.886  18.445  1.00  5.38           N  
ATOM   1666  CA  SER L   9     -25.746  -2.725  18.877  1.00  5.38           C  
ATOM   1667  C   SER L   9     -27.164  -2.265  18.676  1.00  5.24           C  
ATOM   1668  O   SER L   9     -27.711  -1.246  19.027  1.00  5.00           O  
ATOM   1669  CB  SER L   9     -25.439  -3.414  20.179  1.00  5.92           C  
ATOM   1670  OG  SER L   9     -24.989  -2.785  21.321  1.00  6.30           O  
ATOM   1671  N   ALA L  11     -27.833  -3.243  18.013  1.00  5.26           N  
ATOM   1672  CA  ALA L  11     -29.231  -3.301  17.712  1.00  5.48           C  
ATOM   1673  C   ALA L  11     -29.980  -4.271  18.670  1.00  5.63           C  
ATOM   1674  O   ALA L  11     -29.617  -5.262  19.284  1.00  5.41           O  
ATOM   1675  CB  ALA L  11     -29.534  -3.645  16.265  1.00  5.73           C  
ATOM   1676  N   SER L  12     -31.254  -3.850  18.750  1.00  5.75           N  
ATOM   1677  CA  SER L  12     -32.384  -4.296  19.525  1.00  5.61           C  
ATOM   1678  C   SER L  12     -33.691  -4.203  18.677  1.00  5.69           C  
ATOM   1679  O   SER L  12     -33.776  -3.622  17.579  1.00  5.23           O  
ATOM   1680  CB  SER L  12     -32.411  -3.414  20.810  1.00  5.34           C  
ATOM   1681  OG  SER L  12     -31.319  -3.627  21.701  1.00  3.90           O  
ATOM   1682  N   GLY L  13     -34.766  -4.803  19.123  1.00  5.71           N  
ATOM   1683  CA  GLY L  13     -36.053  -4.962  18.581  1.00  6.08           C  
ATOM   1684  C   GLY L  13     -36.876  -6.168  19.034  1.00  6.24           C  
ATOM   1685  O   GLY L  13     -36.559  -6.846  20.061  1.00  6.27           O  
ATOM   1686  N   SER L  14     -37.926  -6.448  18.238  1.00  6.01           N  
ATOM   1687  CA  SER L  14     -38.835  -7.576  18.524  1.00  5.90           C  
ATOM   1688  C   SER L  14     -38.778  -8.559  17.355  1.00  5.68           C  
ATOM   1689  O   SER L  14     -37.713  -8.695  16.819  1.00  5.55           O  
ATOM   1690  CB  SER L  14     -40.261  -7.032  18.527  1.00  6.22           C  
ATOM   1691  OG  SER L  14     -40.668  -6.890  17.130  1.00  6.22           O  
ATOM   1692  N   LEU L  15     -39.930  -9.124  17.041  1.00  5.63           N  
ATOM   1693  CA  LEU L  15     -40.071  -9.928  15.792  1.00  5.71           C  
ATOM   1694  C   LEU L  15     -41.492  -9.740  15.211  1.00  5.66           C  
ATOM   1695  O   LEU L  15     -41.968 -10.272  14.191  1.00  5.43           O  
ATOM   1696  CB  LEU L  15     -39.450 -11.270  15.947  1.00  6.33           C  
ATOM   1697  CG  LEU L  15     -40.084 -12.314  16.837  1.00  6.60           C  
ATOM   1698  CD1 LEU L  15     -41.397 -12.740  16.174  1.00  7.04           C  
ATOM   1699  CD2 LEU L  15     -39.147 -13.514  16.934  1.00  6.90           C  
ATOM   1700  N   GLY L  16     -42.185  -8.796  15.846  1.00  5.43           N  
ATOM   1701  CA  GLY L  16     -43.475  -8.256  15.585  1.00  5.24           C  
ATOM   1702  C   GLY L  16     -43.429  -6.998  14.698  1.00  5.23           C  
ATOM   1703  O   GLY L  16     -44.321  -6.844  13.834  1.00  5.06           O  
ATOM   1704  N   GLN L  17     -42.407  -6.150  14.960  1.00  5.27           N  
ATOM   1705  CA  GLN L  17     -42.168  -5.014  14.057  1.00  5.23           C  
ATOM   1706  C   GLN L  17     -40.952  -5.087  13.113  1.00  5.03           C  
ATOM   1707  O   GLN L  17     -40.853  -6.044  12.321  1.00  5.06           O  
ATOM   1708  CB  GLN L  17     -42.294  -3.609  14.617  1.00  5.04           C  
ATOM   1709  CG  GLN L  17     -42.172  -2.631  13.358  1.00  4.95           C  
ATOM   1710  CD  GLN L  17     -42.235  -1.251  13.998  1.00  4.95           C  
ATOM   1711  OE1 GLN L  17     -41.372  -0.932  14.821  1.00  5.03           O  
ATOM   1712  NE2 GLN L  17     -43.345  -0.611  13.659  1.00  4.96           N  
ATOM   1713  N   SER L  18     -40.130  -4.057  13.107  1.00  4.85           N  
ATOM   1714  CA  SER L  18     -39.024  -3.921  12.117  1.00  4.65           C  
ATOM   1715  C   SER L  18     -37.728  -3.360  12.582  1.00  4.27           C  
ATOM   1716  O   SER L  18     -37.828  -2.412  13.401  1.00  4.55           O  
ATOM   1717  CB  SER L  18     -39.720  -2.998  11.047  1.00  4.67           C  
ATOM   1718  OG  SER L  18     -40.940  -3.794  10.752  1.00  4.96           O  
ATOM   1719  N   VAL L  19     -36.562  -3.835  12.155  1.00  3.81           N  
ATOM   1720  CA  VAL L  19     -35.274  -3.224  12.590  1.00  3.34           C  
ATOM   1721  C   VAL L  19     -34.438  -2.607  11.501  1.00  3.04           C  
ATOM   1722  O   VAL L  19     -34.485  -3.084  10.336  1.00  3.48           O  
ATOM   1723  CB  VAL L  19     -34.621  -4.176  13.574  1.00  3.33           C  
ATOM   1724  CG1 VAL L  19     -33.163  -3.878  13.856  1.00  3.52           C  
ATOM   1725  CG2 VAL L  19     -35.489  -4.153  14.855  1.00  3.30           C  
ATOM   1726  N   THR L  20     -33.740  -1.506  11.783  1.00  2.45           N  
ATOM   1727  CA  THR L  20     -32.938  -0.777  10.835  1.00  2.11           C  
ATOM   1728  C   THR L  20     -31.516  -0.498  11.366  1.00  2.13           C  
ATOM   1729  O   THR L  20     -31.410   0.306  12.297  1.00  2.01           O  
ATOM   1730  CB  THR L  20     -33.340   0.694  10.356  1.00  2.00           C  
ATOM   1731  OG1 THR L  20     -33.829   1.419  11.496  1.00  2.00           O  
ATOM   1732  CG2 THR L  20     -34.224   0.769   9.147  1.00  2.00           C  
ATOM   1733  N   ILE L  21     -30.575  -1.051  10.663  1.00  2.26           N  
ATOM   1734  CA  ILE L  21     -29.151  -0.811  10.923  1.00  2.32           C  
ATOM   1735  C   ILE L  21     -28.731   0.292   9.929  1.00  2.58           C  
ATOM   1736  O   ILE L  21     -29.060   0.248   8.757  1.00  2.60           O  
ATOM   1737  CB  ILE L  21     -28.325  -2.119  10.820  1.00  2.00           C  
ATOM   1738  CG1 ILE L  21     -28.865  -2.901   9.585  1.00  2.00           C  
ATOM   1739  CG2 ILE L  21     -28.310  -3.016  12.067  1.00  2.00           C  
ATOM   1740  CD1 ILE L  21     -28.773  -4.444   9.772  1.00  2.00           C  
ATOM   1741  N   SER L  22     -27.997   1.269  10.470  1.00  2.91           N  
ATOM   1742  CA  SER L  22     -27.558   2.476   9.826  1.00  3.16           C  
ATOM   1743  C   SER L  22     -26.073   2.574   9.547  1.00  3.49           C  
ATOM   1744  O   SER L  22     -25.259   2.896  10.441  1.00  3.71           O  
ATOM   1745  CB  SER L  22     -27.863   3.670  10.771  1.00  2.78           C  
ATOM   1746  OG  SER L  22     -29.103   3.733  11.366  1.00  2.74           O  
ATOM   1747  N   CYS L  23     -25.703   2.410   8.320  1.00  4.17           N  
ATOM   1748  CA  CYS L  23     -24.306   2.467   7.821  1.00  4.76           C  
ATOM   1749  C   CYS L  23     -23.980   3.813   7.203  1.00  5.22           C  
ATOM   1750  O   CYS L  23     -24.220   3.957   5.985  1.00  5.41           O  
ATOM   1751  CB  CYS L  23     -24.114   1.334   6.814  1.00  4.79           C  
ATOM   1752  SG  CYS L  23     -22.864   1.446   5.504  1.00  3.42           S  
ATOM   1753  N   THR L  24     -23.370   4.722   7.953  1.00  5.75           N  
ATOM   1754  CA  THR L  24     -23.025   6.055   7.547  1.00  6.02           C  
ATOM   1755  C   THR L  24     -21.562   6.428   7.316  1.00  6.44           C  
ATOM   1756  O   THR L  24     -20.692   6.105   8.163  1.00  6.69           O  
ATOM   1757  CB  THR L  24     -23.569   7.126   8.619  1.00  5.60           C  
ATOM   1758  OG1 THR L  24     -23.626   8.285   7.743  1.00  5.67           O  
ATOM   1759  CG2 THR L  24     -22.657   7.456   9.797  1.00  5.08           C  
ATOM   1760  N   GLY L  25     -21.341   7.152   6.202  1.00  6.71           N  
ATOM   1761  CA  GLY L  25     -19.968   7.605   5.858  1.00  7.22           C  
ATOM   1762  C   GLY L  25     -19.807   8.850   4.979  1.00  7.61           C  
ATOM   1763  O   GLY L  25     -20.763   9.654   4.695  1.00  7.62           O  
ATOM   1764  N   THR L  26     -18.544   9.116   4.550  1.00  7.49           N  
ATOM   1765  CA  THR L  26     -18.225  10.165   3.601  1.00  7.54           C  
ATOM   1766  C   THR L  26     -18.866   9.994   2.204  1.00  7.38           C  
ATOM   1767  O   THR L  26     -19.086   8.889   1.702  1.00  7.31           O  
ATOM   1768  CB  THR L  26     -16.699  10.478   3.397  1.00  8.10           C  
ATOM   1769  OG1 THR L  26     -15.894   9.270   3.561  1.00  8.32           O  
ATOM   1770  CG2 THR L  26     -16.253  11.699   4.220  1.00  8.51           C  
ATOM   1771  N   SER L  27     -19.120  11.147   1.588  1.00  7.32           N  
ATOM   1772  CA  SER L  27     -19.851  11.266   0.321  1.00  7.36           C  
ATOM   1773  C   SER L  27     -19.063  10.454  -0.732  1.00  7.63           C  
ATOM   1774  O   SER L  27     -19.557   9.917  -1.758  1.00  7.49           O  
ATOM   1775  CB  SER L  27     -20.235  12.651  -0.114  1.00  7.10           C  
ATOM   1776  OG  SER L  27     -20.966  13.491   0.745  1.00  6.46           O  
ATOM   1777  N   SER L  27A    -17.786  10.341  -0.370  1.00  7.73           N  
ATOM   1778  CA  SER L  27A    -16.780   9.514  -1.087  1.00  7.71           C  
ATOM   1779  C   SER L  27A    -17.278   8.066  -1.206  1.00  7.47           C  
ATOM   1780  O   SER L  27A    -17.597   7.604  -2.310  1.00  7.28           O  
ATOM   1781  CB  SER L  27A    -15.452   9.622  -0.306  1.00  7.91           C  
ATOM   1782  OG  SER L  27A    -14.377   9.896  -1.216  1.00  8.06           O  
ATOM   1783  N   ASP L  27B    -17.413   7.404  -0.070  1.00  7.36           N  
ATOM   1784  CA  ASP L  27B    -18.073   6.114   0.045  1.00  7.33           C  
ATOM   1785  C   ASP L  27B    -19.565   5.935  -0.226  1.00  7.13           C  
ATOM   1786  O   ASP L  27B    -20.047   5.095  -1.045  1.00  6.88           O  
ATOM   1787  CB  ASP L  27B    -17.753   5.566   1.493  1.00  7.72           C  
ATOM   1788  CG  ASP L  27B    -18.054   4.057   1.394  1.00  8.07           C  
ATOM   1789  OD1 ASP L  27B    -19.002   3.544   2.017  1.00  8.01           O  
ATOM   1790  OD2 ASP L  27B    -17.291   3.449   0.580  1.00  8.38           O  
ATOM   1791  N   VAL L  27C    -20.391   6.679   0.492  1.00  7.18           N  
ATOM   1792  CA  VAL L  27C    -21.856   6.595   0.495  1.00  6.78           C  
ATOM   1793  C   VAL L  27C    -22.590   7.893   0.202  1.00  6.79           C  
ATOM   1794  O   VAL L  27C    -23.713   8.067   0.726  1.00  6.36           O  
ATOM   1795  CB  VAL L  27C    -22.262   6.113   1.919  1.00  6.72           C  
ATOM   1796  CG1 VAL L  27C    -21.338   6.713   2.978  1.00  6.42           C  
ATOM   1797  CG2 VAL L  27C    -23.732   6.346   2.234  1.00  6.20           C  
ATOM   1798  N   GLY L  28     -21.903   8.751  -0.469  1.00  7.11           N  
ATOM   1799  CA  GLY L  28     -22.484  10.142  -0.687  1.00  7.75           C  
ATOM   1800  C   GLY L  28     -22.765  10.109  -2.185  1.00  8.00           C  
ATOM   1801  O   GLY L  28     -23.929   9.948  -2.548  1.00  8.34           O  
ATOM   1802  N   GLY L  29     -21.663  10.140  -2.905  1.00  8.21           N  
ATOM   1803  CA  GLY L  29     -21.700  10.132  -4.372  1.00  8.53           C  
ATOM   1804  C   GLY L  29     -21.385   8.753  -4.935  1.00  8.72           C  
ATOM   1805  O   GLY L  29     -21.485   8.603  -6.181  1.00  8.76           O  
ATOM   1806  N   TYR L  30     -20.941   7.868  -4.026  1.00  8.91           N  
ATOM   1807  CA  TYR L  30     -20.825   6.438  -4.500  1.00  9.18           C  
ATOM   1808  C   TYR L  30     -21.983   5.657  -3.828  1.00  9.01           C  
ATOM   1809  O   TYR L  30     -22.675   6.105  -2.929  1.00  9.10           O  
ATOM   1810  CB  TYR L  30     -19.530   5.799  -4.526  1.00  9.49           C  
ATOM   1811  CG  TYR L  30     -18.715   5.414  -5.722  1.00 10.01           C  
ATOM   1812  CD1 TYR L  30     -19.030   4.351  -6.568  1.00 10.08           C  
ATOM   1813  CD2 TYR L  30     -17.482   6.067  -5.946  1.00 10.18           C  
ATOM   1814  CE1 TYR L  30     -18.183   3.956  -7.598  1.00 10.43           C  
ATOM   1815  CE2 TYR L  30     -16.625   5.690  -6.974  1.00 10.31           C  
ATOM   1816  CZ  TYR L  30     -16.978   4.631  -7.803  1.00 10.54           C  
ATOM   1817  OH  TYR L  30     -16.106   4.309  -8.815  1.00 10.41           O  
ATOM   1818  N   ASN L  31     -22.222   4.514  -4.428  1.00  8.91           N  
ATOM   1819  CA  ASN L  31     -23.250   3.509  -4.158  1.00  8.52           C  
ATOM   1820  C   ASN L  31     -22.464   2.265  -3.702  1.00  8.43           C  
ATOM   1821  O   ASN L  31     -21.427   2.509  -3.034  1.00  8.75           O  
ATOM   1822  CB  ASN L  31     -23.914   3.119  -5.510  1.00  8.08           C  
ATOM   1823  CG  ASN L  31     -25.361   2.715  -5.463  1.00  7.75           C  
ATOM   1824  OD1 ASN L  31     -26.061   2.857  -4.447  1.00  7.15           O  
ATOM   1825  ND2 ASN L  31     -25.864   2.264  -6.610  1.00  7.33           N  
ATOM   1826  N   TYR L  32     -22.934   1.077  -4.026  1.00  8.07           N  
ATOM   1827  CA  TYR L  32     -22.061  -0.103  -3.845  1.00  7.58           C  
ATOM   1828  C   TYR L  32     -21.747  -0.294  -2.343  1.00  7.25           C  
ATOM   1829  O   TYR L  32     -20.616  -0.422  -1.850  1.00  7.27           O  
ATOM   1830  CB  TYR L  32     -20.741  -0.074  -4.588  1.00  7.84           C  
ATOM   1831  CG  TYR L  32     -20.680   0.233  -6.040  1.00  8.01           C  
ATOM   1832  CD1 TYR L  32     -20.213   1.485  -6.492  1.00  8.04           C  
ATOM   1833  CD2 TYR L  32     -21.092  -0.692  -7.001  1.00  8.08           C  
ATOM   1834  CE1 TYR L  32     -20.180   1.790  -7.858  1.00  8.12           C  
ATOM   1835  CE2 TYR L  32     -21.059  -0.405  -8.371  1.00  7.87           C  
ATOM   1836  CZ  TYR L  32     -20.608   0.832  -8.782  1.00  7.91           C  
ATOM   1837  OH  TYR L  32     -20.564   1.102 -10.118  1.00  8.19           O  
ATOM   1838  N   VAL L  33     -22.764  -0.404  -1.642  1.00  6.93           N  
ATOM   1839  CA  VAL L  33     -22.928  -0.660  -0.217  1.00  6.59           C  
ATOM   1840  C   VAL L  33     -23.532  -2.079  -0.283  1.00  6.39           C  
ATOM   1841  O   VAL L  33     -24.579  -2.247  -0.930  1.00  6.24           O  
ATOM   1842  CB  VAL L  33     -23.793   0.496   0.280  1.00  6.42           C  
ATOM   1843  CG1 VAL L  33     -23.908   0.554   1.783  1.00  6.37           C  
ATOM   1844  CG2 VAL L  33     -23.271   1.818  -0.312  1.00  6.37           C  
ATOM   1845  N   SER L  34     -22.777  -3.025   0.209  1.00  6.21           N  
ATOM   1846  CA  SER L  34     -23.213  -4.406   0.319  1.00  5.93           C  
ATOM   1847  C   SER L  34     -23.145  -4.616   1.872  1.00  5.95           C  
ATOM   1848  O   SER L  34     -22.425  -3.877   2.567  1.00  6.03           O  
ATOM   1849  CB  SER L  34     -22.290  -5.429  -0.256  1.00  6.02           C  
ATOM   1850  OG  SER L  34     -21.341  -5.588   0.853  1.00  5.98           O  
ATOM   1851  N   TRP L  35     -23.929  -5.549   2.294  1.00  5.74           N  
ATOM   1852  CA  TRP L  35     -24.090  -5.894   3.694  1.00  5.65           C  
ATOM   1853  C   TRP L  35     -23.889  -7.438   3.703  1.00  5.70           C  
ATOM   1854  O   TRP L  35     -24.231  -8.052   2.708  1.00  5.60           O  
ATOM   1855  CB  TRP L  35     -25.438  -5.566   4.319  1.00  5.39           C  
ATOM   1856  CG  TRP L  35     -25.783  -4.150   4.419  1.00  5.42           C  
ATOM   1857  CD1 TRP L  35     -25.952  -3.281   3.343  1.00  5.81           C  
ATOM   1858  CD2 TRP L  35     -25.949  -3.344   5.592  1.00  5.50           C  
ATOM   1859  NE1 TRP L  35     -26.204  -1.994   3.779  1.00  5.32           N  
ATOM   1860  CE2 TRP L  35     -26.223  -2.007   5.160  1.00  5.37           C  
ATOM   1861  CE3 TRP L  35     -25.874  -3.627   6.936  1.00  5.22           C  
ATOM   1862  CZ2 TRP L  35     -26.443  -0.976   6.046  1.00  4.93           C  
ATOM   1863  CZ3 TRP L  35     -26.086  -2.551   7.815  1.00  5.58           C  
ATOM   1864  CH2 TRP L  35     -26.371  -1.263   7.371  1.00  4.91           C  
ATOM   1865  N   TYR L  36     -23.362  -7.860   4.829  1.00  5.77           N  
ATOM   1866  CA  TYR L  36     -23.174  -9.331   5.010  1.00  5.54           C  
ATOM   1867  C   TYR L  36     -23.780  -9.808   6.320  1.00  5.63           C  
ATOM   1868  O   TYR L  36     -23.755  -9.120   7.397  1.00  5.56           O  
ATOM   1869  CB  TYR L  36     -21.660  -9.495   4.944  1.00  5.44           C  
ATOM   1870  CG  TYR L  36     -20.988  -8.674   3.866  1.00  5.17           C  
ATOM   1871  CD1 TYR L  36     -21.021  -7.309   3.747  1.00  4.74           C  
ATOM   1872  CD2 TYR L  36     -20.202  -9.401   2.930  1.00  5.53           C  
ATOM   1873  CE1 TYR L  36     -20.366  -6.654   2.736  1.00  4.92           C  
ATOM   1874  CE2 TYR L  36     -19.489  -8.748   1.914  1.00  5.26           C  
ATOM   1875  CZ  TYR L  36     -19.582  -7.381   1.827  1.00  5.03           C  
ATOM   1876  OH  TYR L  36     -18.882  -6.790   0.810  1.00  5.62           O  
ATOM   1877  N   GLN L  37     -24.378 -10.973   6.224  1.00  5.55           N  
ATOM   1878  CA  GLN L  37     -24.991 -11.618   7.419  1.00  5.83           C  
ATOM   1879  C   GLN L  37     -23.855 -12.516   7.926  1.00  5.86           C  
ATOM   1880  O   GLN L  37     -23.574 -13.474   7.167  1.00  5.85           O  
ATOM   1881  CB  GLN L  37     -26.284 -12.299   7.116  1.00  6.02           C  
ATOM   1882  CG  GLN L  37     -27.028 -13.016   8.183  1.00  6.76           C  
ATOM   1883  CD  GLN L  37     -27.745 -12.287   9.266  1.00  6.71           C  
ATOM   1884  OE1 GLN L  37     -27.396 -12.291  10.456  1.00  6.72           O  
ATOM   1885  NE2 GLN L  37     -28.843 -11.610   8.910  1.00  7.26           N  
ATOM   1886  N   GLN L  38     -23.224 -12.055   9.038  1.00  5.94           N  
ATOM   1887  CA  GLN L  38     -22.275 -13.044   9.668  1.00  5.83           C  
ATOM   1888  C   GLN L  38     -22.816 -13.333  11.081  1.00  5.89           C  
ATOM   1889  O   GLN L  38     -23.358 -12.478  11.763  1.00  5.41           O  
ATOM   1890  CB  GLN L  38     -20.825 -12.767   9.606  1.00  5.98           C  
ATOM   1891  CG  GLN L  38     -19.839 -11.838  10.041  1.00  6.06           C  
ATOM   1892  CD  GLN L  38     -19.423 -10.500   9.535  1.00  6.07           C  
ATOM   1893  OE1 GLN L  38     -19.890  -9.807   8.617  1.00  6.20           O  
ATOM   1894  NE2 GLN L  38     -18.353  -9.912  10.127  1.00  5.68           N  
ATOM   1895  N   HIS L  39     -22.675 -14.618  11.440  1.00  6.08           N  
ATOM   1896  CA  HIS L  39     -22.952 -15.121  12.814  1.00  6.29           C  
ATOM   1897  C   HIS L  39     -21.710 -15.893  13.354  1.00  6.15           C  
ATOM   1898  O   HIS L  39     -21.582 -17.099  13.023  1.00  6.21           O  
ATOM   1899  CB  HIS L  39     -24.120 -16.076  12.966  1.00  6.65           C  
ATOM   1900  CG  HIS L  39     -25.173 -16.267  11.953  1.00  7.48           C  
ATOM   1901  ND1 HIS L  39     -25.647 -15.345  11.044  1.00  7.50           N  
ATOM   1902  CD2 HIS L  39     -25.944 -17.409  11.754  1.00  7.44           C  
ATOM   1903  CE1 HIS L  39     -26.589 -15.903  10.295  1.00  7.61           C  
ATOM   1904  NE2 HIS L  39     -26.813 -17.124  10.721  1.00  7.69           N  
ATOM   1905  N   ALA L  40     -20.898 -15.327  14.201  1.00  5.89           N  
ATOM   1906  CA  ALA L  40     -19.602 -15.857  14.546  1.00  5.79           C  
ATOM   1907  C   ALA L  40     -19.269 -17.305  14.210  1.00  5.80           C  
ATOM   1908  O   ALA L  40     -19.019 -18.128  15.140  1.00  6.14           O  
ATOM   1909  CB  ALA L  40     -19.183 -15.550  15.986  1.00  5.26           C  
ATOM   1910  N   GLY L  41     -19.159 -17.669  12.937  1.00  5.62           N  
ATOM   1911  CA  GLY L  41     -18.680 -18.925  12.455  1.00  4.99           C  
ATOM   1912  C   GLY L  41     -19.462 -19.529  11.327  1.00  4.96           C  
ATOM   1913  O   GLY L  41     -20.170 -20.517  11.584  1.00  4.88           O  
ATOM   1914  N   LYS L  42     -19.371 -18.976  10.139  1.00  4.83           N  
ATOM   1915  CA  LYS L  42     -19.936 -19.581   8.925  1.00  4.75           C  
ATOM   1916  C   LYS L  42     -19.511 -18.913   7.645  1.00  4.76           C  
ATOM   1917  O   LYS L  42     -19.671 -19.550   6.575  1.00  4.83           O  
ATOM   1918  CB  LYS L  42     -21.428 -19.838   8.994  1.00  4.91           C  
ATOM   1919  CG  LYS L  42     -22.123 -20.027   7.640  1.00  5.13           C  
ATOM   1920  CD  LYS L  42     -23.532 -20.596   7.711  1.00  5.13           C  
ATOM   1921  CE  LYS L  42     -23.474 -22.026   8.276  1.00  5.58           C  
ATOM   1922  NZ  LYS L  42     -22.409 -22.763   7.518  1.00  5.29           N  
ATOM   1923  N   ALA L  43     -18.954 -17.727   7.645  1.00  4.73           N  
ATOM   1924  CA  ALA L  43     -18.522 -16.967   6.477  1.00  4.69           C  
ATOM   1925  C   ALA L  43     -19.596 -16.032   5.911  1.00  4.60           C  
ATOM   1926  O   ALA L  43     -20.635 -16.469   5.365  1.00  4.66           O  
ATOM   1927  CB  ALA L  43     -17.924 -17.862   5.402  1.00  5.33           C  
ATOM   1928  N   PRO L  44     -19.302 -14.743   5.990  1.00  4.43           N  
ATOM   1929  CA  PRO L  44     -20.326 -13.701   5.703  1.00  4.63           C  
ATOM   1930  C   PRO L  44     -21.062 -13.760   4.386  1.00  4.58           C  
ATOM   1931  O   PRO L  44     -20.585 -14.145   3.309  1.00  4.60           O  
ATOM   1932  CB  PRO L  44     -19.631 -12.440   6.152  1.00  4.51           C  
ATOM   1933  CG  PRO L  44     -18.741 -12.885   7.285  1.00  4.39           C  
ATOM   1934  CD  PRO L  44     -18.181 -14.188   6.785  1.00  4.50           C  
ATOM   1935  N   LYS L  45     -22.369 -13.404   4.472  1.00  4.65           N  
ATOM   1936  CA  LYS L  45     -23.305 -13.446   3.344  1.00  4.43           C  
ATOM   1937  C   LYS L  45     -23.790 -12.115   2.812  1.00  4.45           C  
ATOM   1938  O   LYS L  45     -24.508 -11.374   3.537  1.00  4.78           O  
ATOM   1939  CB  LYS L  45     -24.575 -14.224   3.777  1.00  4.48           C  
ATOM   1940  CG  LYS L  45     -25.390 -14.838   2.596  1.00  3.91           C  
ATOM   1941  CD  LYS L  45     -26.345 -15.875   3.209  1.00  3.47           C  
ATOM   1942  CE  LYS L  45     -27.224 -15.123   4.241  1.00  3.04           C  
ATOM   1943  NZ  LYS L  45     -27.023 -15.826   5.529  1.00  3.23           N  
ATOM   1944  N   VAL L  46     -23.474 -11.843   1.568  1.00  4.19           N  
ATOM   1945  CA  VAL L  46     -23.926 -10.618   0.857  1.00  3.85           C  
ATOM   1946  C   VAL L  46     -25.421 -10.581   1.064  1.00  4.21           C  
ATOM   1947  O   VAL L  46     -25.992 -11.623   0.633  1.00  4.12           O  
ATOM   1948  CB  VAL L  46     -23.619 -10.885  -0.635  1.00  3.46           C  
ATOM   1949  CG1 VAL L  46     -22.680  -9.964  -1.340  1.00  2.85           C  
ATOM   1950  CG2 VAL L  46     -23.172 -12.355  -0.781  1.00  3.34           C  
ATOM   1951  N   ILE L  47     -26.025  -9.571   1.598  1.00  4.44           N  
ATOM   1952  CA  ILE L  47     -27.494  -9.596   1.825  1.00  4.73           C  
ATOM   1953  C   ILE L  47     -28.246  -8.327   1.566  1.00  4.88           C  
ATOM   1954  O   ILE L  47     -29.385  -8.111   1.997  1.00  4.82           O  
ATOM   1955  CB  ILE L  47     -27.631 -10.219   3.260  1.00  4.85           C  
ATOM   1956  CG1 ILE L  47     -26.303  -9.707   3.928  1.00  4.66           C  
ATOM   1957  CG2 ILE L  47     -27.791 -11.719   3.255  1.00  4.25           C  
ATOM   1958  CD1 ILE L  47     -26.461  -9.676   5.454  1.00  5.98           C  
ATOM   1959  N   ILE L  48     -27.660  -7.434   0.817  1.00  4.98           N  
ATOM   1960  CA  ILE L  48     -28.086  -6.240   0.169  1.00  5.08           C  
ATOM   1961  C   ILE L  48     -26.759  -5.672  -0.452  1.00  5.15           C  
ATOM   1962  O   ILE L  48     -25.725  -5.483   0.156  1.00  5.21           O  
ATOM   1963  CB  ILE L  48     -29.069  -5.242   0.698  1.00  4.94           C  
ATOM   1964  CG1 ILE L  48     -28.479  -4.000   1.409  1.00  4.99           C  
ATOM   1965  CG2 ILE L  48     -30.133  -5.828   1.728  1.00  4.98           C  
ATOM   1966  CD1 ILE L  48     -29.384  -3.684   2.689  1.00  4.56           C  
ATOM   1967  N   TYR L  49     -26.873  -5.577  -1.739  1.00  5.49           N  
ATOM   1968  CA  TYR L  49     -25.758  -5.218  -2.633  1.00  5.85           C  
ATOM   1969  C   TYR L  49     -26.173  -3.988  -3.432  1.00  6.42           C  
ATOM   1970  O   TYR L  49     -27.368  -3.789  -3.784  1.00  6.93           O  
ATOM   1971  CB  TYR L  49     -25.309  -6.379  -3.416  1.00  5.22           C  
ATOM   1972  CG  TYR L  49     -26.129  -7.062  -4.456  1.00  5.01           C  
ATOM   1973  CD1 TYR L  49     -26.448  -8.424  -4.376  1.00  4.65           C  
ATOM   1974  CD2 TYR L  49     -26.556  -6.360  -5.594  1.00  4.96           C  
ATOM   1975  CE1 TYR L  49     -27.206  -9.056  -5.358  1.00  4.43           C  
ATOM   1976  CE2 TYR L  49     -27.328  -6.980  -6.582  1.00  4.93           C  
ATOM   1977  CZ  TYR L  49     -27.626  -8.338  -6.452  1.00  4.62           C  
ATOM   1978  OH  TYR L  49     -28.376  -8.884  -7.451  1.00  5.67           O  
ATOM   1979  N   GLU L  50     -25.197  -3.152  -3.662  1.00  6.70           N  
ATOM   1980  CA  GLU L  50     -25.285  -1.846  -4.266  1.00  7.10           C  
ATOM   1981  C   GLU L  50     -25.902  -0.871  -3.267  1.00  7.25           C  
ATOM   1982  O   GLU L  50     -25.178   0.002  -2.719  1.00  7.37           O  
ATOM   1983  CB  GLU L  50     -25.958  -1.700  -5.623  1.00  7.23           C  
ATOM   1984  CG  GLU L  50     -25.262  -0.611  -6.465  1.00  7.54           C  
ATOM   1985  CD  GLU L  50     -25.572  -0.476  -7.897  1.00  7.83           C  
ATOM   1986  OE1 GLU L  50     -26.387   0.287  -8.426  1.00  8.32           O  
ATOM   1987  OE2 GLU L  50     -24.901  -1.215  -8.634  1.00  7.97           O  
ATOM   1988  N   VAL L  51     -27.204  -1.066  -3.022  1.00  7.44           N  
ATOM   1989  CA  VAL L  51     -27.949  -0.187  -2.099  1.00  7.34           C  
ATOM   1990  C   VAL L  51     -29.191  -0.838  -1.515  1.00  7.39           C  
ATOM   1991  O   VAL L  51     -29.571  -0.428  -0.402  1.00  6.96           O  
ATOM   1992  CB  VAL L  51     -28.406   1.112  -2.833  1.00  7.62           C  
ATOM   1993  CG1 VAL L  51     -29.885   1.059  -3.194  1.00  7.45           C  
ATOM   1994  CG2 VAL L  51     -28.034   2.375  -2.097  1.00  7.39           C  
ATOM   1995  N   ASN L  52     -29.815  -1.722  -2.273  1.00  7.42           N  
ATOM   1996  CA  ASN L  52     -31.027  -2.424  -1.913  1.00  7.66           C  
ATOM   1997  C   ASN L  52     -31.305  -3.559  -2.935  1.00  7.59           C  
ATOM   1998  O   ASN L  52     -32.508  -3.880  -3.088  1.00  7.68           O  
ATOM   1999  CB  ASN L  52     -32.341  -1.591  -1.902  1.00  8.43           C  
ATOM   2000  CG  ASN L  52     -32.590  -0.882  -3.226  1.00  9.07           C  
ATOM   2001  OD1 ASN L  52     -31.848  -1.119  -4.229  1.00  9.77           O  
ATOM   2002  ND2 ASN L  52     -33.535   0.043  -3.331  1.00  8.72           N  
ATOM   2003  N   LYS L  53     -30.256  -4.002  -3.581  1.00  7.42           N  
ATOM   2004  CA  LYS L  53     -30.446  -5.111  -4.586  1.00  7.08           C  
ATOM   2005  C   LYS L  53     -30.074  -6.414  -3.891  1.00  6.86           C  
ATOM   2006  O   LYS L  53     -28.971  -6.464  -3.277  1.00  6.60           O  
ATOM   2007  CB  LYS L  53     -29.569  -4.755  -5.777  1.00  7.10           C  
ATOM   2008  CG  LYS L  53     -29.573  -3.236  -6.056  1.00  6.85           C  
ATOM   2009  CD  LYS L  53     -28.955  -2.988  -7.427  1.00  7.16           C  
ATOM   2010  CE  LYS L  53     -29.825  -2.004  -8.237  1.00  6.84           C  
ATOM   2011  NZ  LYS L  53     -31.222  -2.158  -7.744  1.00  6.81           N  
ATOM   2012  N   ARG L  54     -30.931  -7.445  -3.996  1.00  6.68           N  
ATOM   2013  CA  ARG L  54     -30.703  -8.620  -3.120  1.00  6.45           C  
ATOM   2014  C   ARG L  54     -31.016  -9.989  -3.625  1.00  6.56           C  
ATOM   2015  O   ARG L  54     -32.133 -10.318  -4.058  1.00  6.70           O  
ATOM   2016  CB  ARG L  54     -31.430  -8.357  -1.786  1.00  5.31           C  
ATOM   2017  CG  ARG L  54     -32.903  -8.118  -2.028  1.00  4.29           C  
ATOM   2018  CD  ARG L  54     -33.388  -6.971  -1.181  1.00  3.50           C  
ATOM   2019  NE  ARG L  54     -34.853  -7.117  -1.134  1.00  2.88           N  
ATOM   2020  CZ  ARG L  54     -35.481  -6.985  -2.312  1.00  2.38           C  
ATOM   2021  NH1 ARG L  54     -36.765  -7.229  -2.386  1.00  2.72           N  
ATOM   2022  NH2 ARG L  54     -34.778  -6.521  -3.314  1.00  2.25           N  
ATOM   2023  N   PRO L  55     -29.993 -10.853  -3.523  1.00  6.56           N  
ATOM   2024  CA  PRO L  55     -30.050 -12.256  -3.914  1.00  6.51           C  
ATOM   2025  C   PRO L  55     -30.730 -13.145  -2.881  1.00  6.59           C  
ATOM   2026  O   PRO L  55     -30.832 -12.826  -1.659  1.00  6.80           O  
ATOM   2027  CB  PRO L  55     -28.571 -12.622  -3.942  1.00  6.57           C  
ATOM   2028  CG  PRO L  55     -28.053 -11.860  -2.720  1.00  6.39           C  
ATOM   2029  CD  PRO L  55     -28.654 -10.507  -2.957  1.00  6.50           C  
ATOM   2030  N   SER L  56     -31.169 -14.286  -3.419  1.00  6.61           N  
ATOM   2031  CA  SER L  56     -31.939 -15.265  -2.591  1.00  6.42           C  
ATOM   2032  C   SER L  56     -31.264 -15.306  -1.225  1.00  6.70           C  
ATOM   2033  O   SER L  56     -30.122 -15.704  -1.109  1.00  6.72           O  
ATOM   2034  CB  SER L  56     -32.107 -16.591  -3.267  1.00  5.60           C  
ATOM   2035  OG  SER L  56     -32.746 -16.356  -4.528  1.00  3.24           O  
ATOM   2036  N   GLY L  57     -32.031 -14.831  -0.269  1.00  7.10           N  
ATOM   2037  CA  GLY L  57     -31.560 -14.664   1.130  1.00  7.70           C  
ATOM   2038  C   GLY L  57     -32.397 -13.456   1.672  1.00  8.05           C  
ATOM   2039  O   GLY L  57     -32.820 -13.458   2.852  1.00  8.15           O  
ATOM   2040  N   VAL L  58     -32.546 -12.507   0.714  1.00  8.09           N  
ATOM   2041  CA  VAL L  58     -33.487 -11.376   1.118  1.00  8.14           C  
ATOM   2042  C   VAL L  58     -34.849 -12.000   0.814  1.00  7.97           C  
ATOM   2043  O   VAL L  58     -34.983 -12.444  -0.325  1.00  7.95           O  
ATOM   2044  CB  VAL L  58     -33.187 -10.079   0.391  1.00  8.62           C  
ATOM   2045  CG1 VAL L  58     -33.822  -8.870   1.093  1.00  8.26           C  
ATOM   2046  CG2 VAL L  58     -31.663  -9.848   0.204  1.00  8.74           C  
ATOM   2047  N   PRO L  59     -35.665 -12.082   1.837  1.00  7.97           N  
ATOM   2048  CA  PRO L  59     -37.042 -12.582   1.675  1.00  7.96           C  
ATOM   2049  C   PRO L  59     -37.728 -11.514   0.801  1.00  7.92           C  
ATOM   2050  O   PRO L  59     -38.364 -11.815  -0.184  1.00  8.26           O  
ATOM   2051  CB  PRO L  59     -37.711 -12.446   3.049  1.00  7.90           C  
ATOM   2052  CG  PRO L  59     -36.980 -11.257   3.669  1.00  7.99           C  
ATOM   2053  CD  PRO L  59     -35.527 -11.382   3.125  1.00  8.05           C  
ATOM   2054  N   ASP L  60     -37.487 -10.296   1.312  1.00  7.68           N  
ATOM   2055  CA  ASP L  60     -38.088  -9.115   0.669  1.00  7.47           C  
ATOM   2056  C   ASP L  60     -37.737  -7.865   1.446  1.00  7.34           C  
ATOM   2057  O   ASP L  60     -36.685  -7.272   1.162  1.00  7.20           O  
ATOM   2058  CB  ASP L  60     -39.540  -9.409   0.460  1.00  7.52           C  
ATOM   2059  CG  ASP L  60     -40.478  -8.414  -0.143  1.00  7.88           C  
ATOM   2060  OD1 ASP L  60     -41.452  -8.106   0.623  1.00  7.47           O  
ATOM   2061  OD2 ASP L  60     -40.302  -8.003  -1.342  1.00  7.41           O  
ATOM   2062  N   ARG L  61     -38.585  -7.550   2.410  1.00  7.40           N  
ATOM   2063  CA  ARG L  61     -38.443  -6.211   3.095  1.00  7.37           C  
ATOM   2064  C   ARG L  61     -37.232  -6.276   4.017  1.00  7.53           C  
ATOM   2065  O   ARG L  61     -37.258  -5.988   5.214  1.00  6.94           O  
ATOM   2066  CB  ARG L  61     -39.740  -5.768   3.731  1.00  7.36           C  
ATOM   2067  CG  ARG L  61     -40.828  -6.743   4.169  1.00  7.13           C  
ATOM   2068  CD  ARG L  61     -40.507  -7.561   5.330  1.00  6.89           C  
ATOM   2069  NE  ARG L  61     -41.370  -8.438   6.030  1.00  6.28           N  
ATOM   2070  CZ  ARG L  61     -42.276  -8.274   6.984  1.00  6.28           C  
ATOM   2071  NH1 ARG L  61     -42.571  -7.056   7.509  1.00  5.58           N  
ATOM   2072  NH2 ARG L  61     -42.999  -9.296   7.503  1.00  5.45           N  
ATOM   2073  N   PHE L  62     -36.108  -6.640   3.365  1.00  7.59           N  
ATOM   2074  CA  PHE L  62     -34.806  -6.826   4.076  1.00  7.70           C  
ATOM   2075  C   PHE L  62     -33.813  -5.936   3.309  1.00  7.57           C  
ATOM   2076  O   PHE L  62     -32.713  -6.357   2.968  1.00  7.52           O  
ATOM   2077  CB  PHE L  62     -34.370  -8.277   3.960  1.00  8.19           C  
ATOM   2078  CG  PHE L  62     -33.262  -8.686   4.875  1.00  8.83           C  
ATOM   2079  CD1 PHE L  62     -33.488  -8.690   6.264  1.00  9.02           C  
ATOM   2080  CD2 PHE L  62     -32.024  -9.058   4.389  1.00  9.10           C  
ATOM   2081  CE1 PHE L  62     -32.501  -9.071   7.141  1.00  8.99           C  
ATOM   2082  CE2 PHE L  62     -30.998  -9.467   5.261  1.00  9.26           C  
ATOM   2083  CZ  PHE L  62     -31.247  -9.463   6.640  1.00  9.35           C  
ATOM   2084  N   SER L  63     -34.315  -4.718   3.129  1.00  7.51           N  
ATOM   2085  CA  SER L  63     -33.639  -3.770   2.210  1.00  7.23           C  
ATOM   2086  C   SER L  63     -32.616  -2.943   2.976  1.00  7.17           C  
ATOM   2087  O   SER L  63     -32.229  -3.255   4.087  1.00  6.69           O  
ATOM   2088  CB  SER L  63     -34.635  -2.986   1.374  1.00  6.87           C  
ATOM   2089  OG  SER L  63     -35.657  -2.412   2.131  1.00  5.82           O  
ATOM   2090  N   GLY L  64     -32.108  -1.993   2.257  1.00  7.17           N  
ATOM   2091  CA  GLY L  64     -31.110  -0.993   2.684  1.00  7.35           C  
ATOM   2092  C   GLY L  64     -31.356   0.135   1.651  1.00  7.38           C  
ATOM   2093  O   GLY L  64     -31.902  -0.190   0.577  1.00  7.44           O  
ATOM   2094  N   SER L  65     -31.134   1.337   2.036  1.00  7.30           N  
ATOM   2095  CA  SER L  65     -31.244   2.508   1.145  1.00  7.43           C  
ATOM   2096  C   SER L  65     -30.277   3.489   1.821  1.00  7.28           C  
ATOM   2097  O   SER L  65     -29.927   3.196   2.978  1.00  6.99           O  
ATOM   2098  CB  SER L  65     -32.627   2.983   0.833  1.00  8.05           C  
ATOM   2099  OG  SER L  65     -32.644   3.600  -0.496  1.00  8.66           O  
ATOM   2100  N   LYS L  66     -29.874   4.492   1.115  1.00  7.28           N  
ATOM   2101  CA  LYS L  66     -28.848   5.428   1.634  1.00  7.13           C  
ATOM   2102  C   LYS L  66     -29.311   6.875   1.415  1.00  7.11           C  
ATOM   2103  O   LYS L  66     -29.234   7.478   0.318  1.00  6.82           O  
ATOM   2104  CB  LYS L  66     -27.507   5.080   0.998  1.00  7.40           C  
ATOM   2105  CG  LYS L  66     -26.880   5.876  -0.042  1.00  7.54           C  
ATOM   2106  CD  LYS L  66     -26.945   5.776  -1.528  1.00  7.28           C  
ATOM   2107  CE  LYS L  66     -26.292   7.020  -2.121  1.00  7.19           C  
ATOM   2108  NZ  LYS L  66     -26.012   6.981  -3.551  1.00  7.62           N  
ATOM   2109  N   SER L  67     -29.802   7.408   2.555  1.00  6.69           N  
ATOM   2110  CA  SER L  67     -30.219   8.835   2.569  1.00  6.31           C  
ATOM   2111  C   SER L  67     -28.926   9.595   2.771  1.00  6.16           C  
ATOM   2112  O   SER L  67     -28.230   9.222   3.750  1.00  6.11           O  
ATOM   2113  CB  SER L  67     -31.238   8.978   3.691  1.00  6.33           C  
ATOM   2114  OG  SER L  67     -32.513   8.603   3.206  1.00  5.64           O  
ATOM   2115  N   GLY L  68     -28.562  10.501   1.911  1.00  5.84           N  
ATOM   2116  CA  GLY L  68     -27.366  11.294   2.018  1.00  5.75           C  
ATOM   2117  C   GLY L  68     -26.051  10.523   2.054  1.00  5.83           C  
ATOM   2118  O   GLY L  68     -25.192  10.641   1.153  1.00  5.43           O  
ATOM   2119  N   ASN L  69     -25.881   9.807   3.133  1.00  6.01           N  
ATOM   2120  CA  ASN L  69     -24.639   8.966   3.288  1.00  6.53           C  
ATOM   2121  C   ASN L  69     -24.817   8.071   4.500  1.00  6.42           C  
ATOM   2122  O   ASN L  69     -23.971   7.287   4.950  1.00  6.59           O  
ATOM   2123  CB  ASN L  69     -23.471   9.912   3.113  1.00  7.21           C  
ATOM   2124  CG  ASN L  69     -23.003  11.124   3.789  1.00  7.07           C  
ATOM   2125  OD1 ASN L  69     -22.816  11.215   5.034  1.00  7.08           O  
ATOM   2126  ND2 ASN L  69     -22.642  12.217   3.038  1.00  6.93           N  
ATOM   2127  N   THR L  70     -26.009   8.133   5.010  1.00  6.52           N  
ATOM   2128  CA  THR L  70     -26.590   7.420   6.163  1.00  6.51           C  
ATOM   2129  C   THR L  70     -27.352   6.314   5.421  1.00  6.30           C  
ATOM   2130  O   THR L  70     -28.441   6.588   4.866  1.00  6.53           O  
ATOM   2131  CB  THR L  70     -27.581   8.394   6.906  1.00  7.14           C  
ATOM   2132  OG1 THR L  70     -28.357   9.057   5.794  1.00  7.49           O  
ATOM   2133  CG2 THR L  70     -27.052   9.504   7.806  1.00  6.80           C  
ATOM   2134  N   ALA L  71     -26.707   5.185   5.351  1.00  6.15           N  
ATOM   2135  CA  ALA L  71     -27.267   4.076   4.496  1.00  5.91           C  
ATOM   2136  C   ALA L  71     -27.779   3.019   5.424  1.00  5.65           C  
ATOM   2137  O   ALA L  71     -26.970   2.233   5.928  1.00  5.51           O  
ATOM   2138  CB  ALA L  71     -26.162   3.655   3.522  1.00  6.27           C  
ATOM   2139  N   SER L  72     -29.093   2.980   5.614  1.00  5.65           N  
ATOM   2140  CA  SER L  72     -29.717   1.996   6.520  1.00  5.43           C  
ATOM   2141  C   SER L  72     -30.355   0.818   5.796  1.00  5.33           C  
ATOM   2142  O   SER L  72     -30.995   0.948   4.746  1.00  5.39           O  
ATOM   2143  CB  SER L  72     -30.746   2.694   7.412  1.00  5.39           C  
ATOM   2144  OG  SER L  72     -30.302   3.992   7.764  1.00  5.67           O  
ATOM   2145  N   LEU L  73     -30.116  -0.369   6.374  1.00  5.14           N  
ATOM   2146  CA  LEU L  73     -30.771  -1.586   5.943  1.00  5.28           C  
ATOM   2147  C   LEU L  73     -31.814  -1.922   7.046  1.00  5.21           C  
ATOM   2148  O   LEU L  73     -31.552  -1.912   8.246  1.00  5.07           O  
ATOM   2149  CB  LEU L  73     -29.922  -2.782   5.573  1.00  5.83           C  
ATOM   2150  CG  LEU L  73     -30.582  -4.147   5.939  1.00  5.95           C  
ATOM   2151  CD1 LEU L  73     -30.411  -5.204   4.882  1.00  6.17           C  
ATOM   2152  CD2 LEU L  73     -29.884  -4.622   7.220  1.00  5.96           C  
ATOM   2153  N   THR L  74     -32.985  -2.214   6.528  1.00  5.23           N  
ATOM   2154  CA  THR L  74     -34.145  -2.573   7.340  1.00  4.86           C  
ATOM   2155  C   THR L  74     -34.541  -4.006   6.986  1.00  4.74           C  
ATOM   2156  O   THR L  74     -34.506  -4.462   5.835  1.00  4.76           O  
ATOM   2157  CB  THR L  74     -35.298  -1.500   7.244  1.00  4.87           C  
ATOM   2158  OG1 THR L  74     -36.104  -1.719   8.447  1.00  4.87           O  
ATOM   2159  CG2 THR L  74     -36.113  -1.472   5.968  1.00  4.53           C  
ATOM   2160  N   VAL L  75     -34.758  -4.693   8.064  1.00  4.42           N  
ATOM   2161  CA  VAL L  75     -35.440  -6.059   7.968  1.00  4.40           C  
ATOM   2162  C   VAL L  75     -36.763  -5.563   8.568  1.00  4.47           C  
ATOM   2163  O   VAL L  75     -36.854  -4.961   9.636  1.00  4.29           O  
ATOM   2164  CB  VAL L  75     -34.491  -6.932   8.678  1.00  4.34           C  
ATOM   2165  CG1 VAL L  75     -33.944  -6.146   9.905  1.00  4.43           C  
ATOM   2166  CG2 VAL L  75     -34.990  -8.278   9.120  1.00  4.58           C  
ATOM   2167  N   SER L  76     -37.764  -5.689   7.785  1.00  4.72           N  
ATOM   2168  CA  SER L  76     -39.172  -5.285   7.999  1.00  4.46           C  
ATOM   2169  C   SER L  76     -39.768  -6.601   8.488  1.00  4.61           C  
ATOM   2170  O   SER L  76     -39.501  -7.582   7.729  1.00  4.51           O  
ATOM   2171  CB  SER L  76     -39.752  -4.799   6.697  1.00  4.25           C  
ATOM   2172  OG  SER L  76     -40.937  -5.322   6.259  1.00  3.56           O  
ATOM   2173  N   GLY L  77     -40.312  -6.541   9.693  1.00  4.64           N  
ATOM   2174  CA  GLY L  77     -40.890  -7.916  10.122  1.00  4.77           C  
ATOM   2175  C   GLY L  77     -39.902  -8.440  11.153  1.00  4.84           C  
ATOM   2176  O   GLY L  77     -40.256  -8.464  12.329  1.00  4.88           O  
ATOM   2177  N   LEU L  78     -38.769  -8.894  10.644  1.00  4.95           N  
ATOM   2178  CA  LEU L  78     -37.715  -9.456  11.530  1.00  5.41           C  
ATOM   2179  C   LEU L  78     -38.049 -10.920  11.719  1.00  6.07           C  
ATOM   2180  O   LEU L  78     -39.259 -11.277  11.861  1.00  6.61           O  
ATOM   2181  CB  LEU L  78     -37.653  -8.545  12.727  1.00  4.28           C  
ATOM   2182  CG  LEU L  78     -36.867  -7.269  12.773  1.00  3.45           C  
ATOM   2183  CD1 LEU L  78     -37.453  -6.255  13.746  1.00  2.88           C  
ATOM   2184  CD2 LEU L  78     -35.423  -7.586  13.209  1.00  2.98           C  
ATOM   2185  N   GLN L  79     -37.070 -11.794  11.721  1.00  6.58           N  
ATOM   2186  CA  GLN L  79     -37.298 -13.271  11.765  1.00  6.75           C  
ATOM   2187  C   GLN L  79     -36.430 -13.802  12.891  1.00  7.27           C  
ATOM   2188  O   GLN L  79     -35.303 -13.231  13.095  1.00  7.33           O  
ATOM   2189  CB  GLN L  79     -37.017 -13.837  10.399  1.00  6.50           C  
ATOM   2190  CG  GLN L  79     -35.585 -13.627   9.881  1.00  6.46           C  
ATOM   2191  CD  GLN L  79     -35.105 -12.192   9.846  1.00  6.16           C  
ATOM   2192  OE1 GLN L  79     -34.712 -11.640  10.881  1.00  6.09           O  
ATOM   2193  NE2 GLN L  79     -35.107 -11.556   8.680  1.00  5.64           N  
ATOM   2194  N   ALA L  80     -36.947 -14.808  13.589  1.00  7.62           N  
ATOM   2195  CA  ALA L  80     -36.197 -15.313  14.784  1.00  8.15           C  
ATOM   2196  C   ALA L  80     -34.854 -15.837  14.329  1.00  8.41           C  
ATOM   2197  O   ALA L  80     -34.721 -17.071  14.388  1.00  8.65           O  
ATOM   2198  CB  ALA L  80     -37.000 -16.407  15.444  1.00  8.06           C  
ATOM   2199  N   GLU L  81     -33.974 -14.948  13.893  1.00  8.74           N  
ATOM   2200  CA  GLU L  81     -32.675 -15.505  13.339  1.00  8.90           C  
ATOM   2201  C   GLU L  81     -31.827 -15.625  14.610  1.00  8.91           C  
ATOM   2202  O   GLU L  81     -32.319 -15.388  15.708  1.00  8.89           O  
ATOM   2203  CB  GLU L  81     -31.971 -14.599  12.365  1.00  8.96           C  
ATOM   2204  CG  GLU L  81     -31.107 -14.990  11.245  1.00  9.51           C  
ATOM   2205  CD  GLU L  81     -29.933 -15.868  11.116  1.00  9.76           C  
ATOM   2206  OE1 GLU L  81     -29.601 -16.796  11.875  1.00  9.76           O  
ATOM   2207  OE2 GLU L  81     -29.200 -15.660  10.062  1.00  9.56           O  
ATOM   2208  N   ASP L  82     -30.596 -15.936  14.364  1.00  9.00           N  
ATOM   2209  CA  ASP L  82     -29.491 -15.859  15.369  1.00  8.76           C  
ATOM   2210  C   ASP L  82     -29.156 -14.362  15.360  1.00  8.64           C  
ATOM   2211  O   ASP L  82     -29.455 -13.722  14.312  1.00  8.21           O  
ATOM   2212  CB  ASP L  82     -28.432 -16.790  14.801  1.00  9.04           C  
ATOM   2213  CG  ASP L  82     -27.143 -16.921  15.524  1.00  9.55           C  
ATOM   2214  OD1 ASP L  82     -26.236 -16.056  15.484  1.00  9.90           O  
ATOM   2215  OD2 ASP L  82     -27.016 -17.985  16.209  1.00 10.10           O  
ATOM   2216  N   GLU L  83     -28.609 -13.867  16.444  1.00  8.73           N  
ATOM   2217  CA  GLU L  83     -28.250 -12.419  16.514  1.00  9.01           C  
ATOM   2218  C   GLU L  83     -26.752 -12.218  16.702  1.00  8.98           C  
ATOM   2219  O   GLU L  83     -26.228 -12.717  17.710  1.00  9.01           O  
ATOM   2220  CB  GLU L  83     -28.862 -11.654  17.680  1.00  9.18           C  
ATOM   2221  CG  GLU L  83     -28.483 -11.844  19.116  1.00  8.96           C  
ATOM   2222  CD  GLU L  83     -28.514 -13.194  19.777  1.00  9.22           C  
ATOM   2223  OE1 GLU L  83     -27.876 -13.342  20.824  1.00  8.54           O  
ATOM   2224  OE2 GLU L  83     -29.212 -14.076  19.202  1.00  8.86           O  
ATOM   2225  N   ALA L  84     -26.124 -11.529  15.807  1.00  8.83           N  
ATOM   2226  CA  ALA L  84     -24.702 -11.204  15.810  1.00  8.64           C  
ATOM   2227  C   ALA L  84     -24.528 -10.156  14.711  1.00  8.55           C  
ATOM   2228  O   ALA L  84     -25.503  -9.490  14.308  1.00  8.88           O  
ATOM   2229  CB  ALA L  84     -23.762 -12.363  15.584  1.00  8.62           C  
ATOM   2230  N   ASP L  85     -23.397 -10.093  14.115  1.00  8.44           N  
ATOM   2231  CA  ASP L  85     -22.889  -9.132  13.178  1.00  7.97           C  
ATOM   2232  C   ASP L  85     -23.391  -8.834  11.809  1.00  7.84           C  
ATOM   2233  O   ASP L  85     -23.335  -9.726  10.918  1.00  7.71           O  
ATOM   2234  CB  ASP L  85     -21.392  -9.760  13.097  1.00  7.78           C  
ATOM   2235  CG  ASP L  85     -20.905  -9.748  14.541  1.00  7.88           C  
ATOM   2236  OD1 ASP L  85     -21.231 -10.527  15.425  1.00  7.74           O  
ATOM   2237  OD2 ASP L  85     -20.141  -8.770  14.845  1.00  8.50           O  
ATOM   2238  N   TYR L  86     -23.859  -7.563  11.612  1.00  7.65           N  
ATOM   2239  CA  TYR L  86     -24.116  -7.111  10.189  1.00  7.69           C  
ATOM   2240  C   TYR L  86     -23.131  -5.966   9.840  1.00  7.55           C  
ATOM   2241  O   TYR L  86     -22.737  -5.074  10.651  1.00  7.64           O  
ATOM   2242  CB  TYR L  86     -25.520  -6.817   9.796  1.00  7.90           C  
ATOM   2243  CG  TYR L  86     -26.644  -7.753  10.159  1.00  8.29           C  
ATOM   2244  CD1 TYR L  86     -27.009  -7.903  11.518  1.00  8.41           C  
ATOM   2245  CD2 TYR L  86     -27.393  -8.450   9.205  1.00  8.23           C  
ATOM   2246  CE1 TYR L  86     -28.064  -8.731  11.903  1.00  8.45           C  
ATOM   2247  CE2 TYR L  86     -28.444  -9.263   9.567  1.00  8.34           C  
ATOM   2248  CZ  TYR L  86     -28.765  -9.425  10.919  1.00  8.58           C  
ATOM   2249  OH  TYR L  86     -29.784 -10.289  11.270  1.00  8.66           O  
ATOM   2250  N   TYR L  87     -22.703  -5.993   8.572  1.00  7.27           N  
ATOM   2251  CA  TYR L  87     -21.663  -5.099   8.062  1.00  6.94           C  
ATOM   2252  C   TYR L  87     -21.811  -4.574   6.658  1.00  7.02           C  
ATOM   2253  O   TYR L  87     -22.068  -5.430   5.762  1.00  7.05           O  
ATOM   2254  CB  TYR L  87     -20.326  -5.914   8.051  1.00  6.55           C  
ATOM   2255  CG  TYR L  87     -19.894  -6.384   9.415  1.00  6.06           C  
ATOM   2256  CD1 TYR L  87     -20.690  -7.112  10.290  1.00  5.73           C  
ATOM   2257  CD2 TYR L  87     -18.581  -6.121   9.792  1.00  6.04           C  
ATOM   2258  CE1 TYR L  87     -20.233  -7.486  11.535  1.00  5.85           C  
ATOM   2259  CE2 TYR L  87     -18.074  -6.545  11.022  1.00  6.10           C  
ATOM   2260  CZ  TYR L  87     -18.909  -7.233  11.890  1.00  5.92           C  
ATOM   2261  OH  TYR L  87     -18.338  -7.609  13.083  1.00  6.28           O  
ATOM   2262  N   CYS L  88     -21.496  -3.289   6.441  1.00  6.80           N  
ATOM   2263  CA  CYS L  88     -21.636  -2.619   5.160  1.00  6.60           C  
ATOM   2264  C   CYS L  88     -20.273  -2.171   4.602  1.00  6.73           C  
ATOM   2265  O   CYS L  88     -19.429  -1.584   5.296  1.00  7.04           O  
ATOM   2266  CB  CYS L  88     -22.504  -1.319   5.214  1.00  5.49           C  
ATOM   2267  SG  CYS L  88     -21.879  -0.132   6.439  1.00  5.06           S  
ATOM   2268  N   SER L  89     -20.102  -2.440   3.338  1.00  6.77           N  
ATOM   2269  CA  SER L  89     -18.896  -2.109   2.595  1.00  7.11           C  
ATOM   2270  C   SER L  89     -19.375  -1.231   1.430  1.00  7.64           C  
ATOM   2271  O   SER L  89     -20.392  -1.646   0.812  1.00  7.76           O  
ATOM   2272  CB  SER L  89     -18.205  -3.280   1.941  1.00  7.03           C  
ATOM   2273  OG  SER L  89     -19.074  -3.926   0.946  1.00  6.16           O  
ATOM   2274  N   SER L  90     -18.676  -0.133   1.209  1.00  7.97           N  
ATOM   2275  CA  SER L  90     -18.902   0.612  -0.032  1.00  8.22           C  
ATOM   2276  C   SER L  90     -17.554   0.808  -0.763  1.00  8.55           C  
ATOM   2277  O   SER L  90     -16.489   0.826  -0.099  1.00  8.56           O  
ATOM   2278  CB  SER L  90     -19.537   1.955   0.163  1.00  8.03           C  
ATOM   2279  OG  SER L  90     -18.660   2.775  -0.689  1.00  7.92           O  
ATOM   2280  N   TYR L  91     -17.682   1.066  -2.065  1.00  8.79           N  
ATOM   2281  CA  TYR L  91     -16.505   1.252  -2.915  1.00  9.28           C  
ATOM   2282  C   TYR L  91     -15.572   2.394  -2.563  1.00  9.55           C  
ATOM   2283  O   TYR L  91     -14.332   2.261  -2.852  1.00  9.72           O  
ATOM   2284  CB  TYR L  91     -17.048   1.516  -4.382  1.00  8.99           C  
ATOM   2285  CG  TYR L  91     -16.060   1.102  -5.436  1.00  9.05           C  
ATOM   2286  CD1 TYR L  91     -15.136   0.093  -5.125  1.00  9.12           C  
ATOM   2287  CD2 TYR L  91     -16.025   1.636  -6.723  1.00  9.00           C  
ATOM   2288  CE1 TYR L  91     -14.189  -0.359  -6.051  1.00  9.46           C  
ATOM   2289  CE2 TYR L  91     -15.108   1.232  -7.676  1.00  9.38           C  
ATOM   2290  CZ  TYR L  91     -14.179   0.222  -7.339  1.00  9.78           C  
ATOM   2291  OH  TYR L  91     -13.247  -0.218  -8.255  1.00  9.28           O  
ATOM   2292  N   GLU L  92     -16.039   3.428  -1.894  1.00  9.81           N  
ATOM   2293  CA  GLU L  92     -15.179   4.581  -1.552  1.00 10.23           C  
ATOM   2294  C   GLU L  92     -14.209   4.771  -2.705  1.00 10.29           C  
ATOM   2295  O   GLU L  92     -13.110   5.354  -2.644  1.00 10.22           O  
ATOM   2296  CB  GLU L  92     -14.486   4.270  -0.236  1.00 11.53           C  
ATOM   2297  CG  GLU L  92     -13.412   5.034   0.420  1.00 12.87           C  
ATOM   2298  CD  GLU L  92     -13.103   5.333   1.833  1.00 13.69           C  
ATOM   2299  OE1 GLU L  92     -13.443   4.806   2.905  1.00 14.06           O  
ATOM   2300  OE2 GLU L  92     -12.323   6.384   1.920  1.00 14.20           O  
ATOM   2301  N   GLY L  93     -14.557   4.252  -3.869  1.00 10.29           N  
ATOM   2302  CA  GLY L  93     -13.930   4.261  -5.121  1.00 10.64           C  
ATOM   2303  C   GLY L  93     -12.696   3.599  -5.629  1.00 10.69           C  
ATOM   2304  O   GLY L  93     -12.661   2.527  -6.280  1.00 10.73           O  
ATOM   2305  N   SER L  94     -11.576   4.310  -5.488  1.00 10.85           N  
ATOM   2306  CA  SER L  94     -10.231   3.869  -5.959  1.00 10.60           C  
ATOM   2307  C   SER L  94     -10.130   2.521  -5.234  1.00 10.51           C  
ATOM   2308  O   SER L  94      -9.894   2.577  -4.007  1.00 10.56           O  
ATOM   2309  CB  SER L  94      -9.148   4.839  -5.602  1.00 11.04           C  
ATOM   2310  OG  SER L  94      -9.429   6.233  -5.927  1.00 10.97           O  
ATOM   2311  N   ASP L  95     -10.453   1.466  -5.899  1.00 10.26           N  
ATOM   2312  CA  ASP L  95     -10.322   0.128  -5.359  1.00 10.49           C  
ATOM   2313  C   ASP L  95     -10.059   0.016  -3.894  1.00 10.64           C  
ATOM   2314  O   ASP L  95      -9.245  -0.946  -3.687  1.00 10.70           O  
ATOM   2315  CB  ASP L  95      -8.978  -0.398  -6.032  1.00 10.53           C  
ATOM   2316  CG  ASP L  95      -7.907   0.676  -5.691  1.00 11.10           C  
ATOM   2317  OD1 ASP L  95      -7.859   1.778  -6.342  1.00 11.07           O  
ATOM   2318  OD2 ASP L  95      -7.115   0.387  -4.751  1.00 10.70           O  
ATOM   2319  N   ASN L  95A    -10.579   0.791  -2.966  1.00 10.78           N  
ATOM   2320  CA  ASN L  95A    -10.169   0.618  -1.531  1.00 10.59           C  
ATOM   2321  C   ASN L  95A    -11.384   0.486  -0.621  1.00 10.33           C  
ATOM   2322  O   ASN L  95A    -11.573   1.349   0.294  1.00 10.50           O  
ATOM   2323  CB  ASN L  95A     -9.208   1.748  -1.157  1.00 11.26           C  
ATOM   2324  CG  ASN L  95A     -8.488   1.681   0.156  1.00 12.01           C  
ATOM   2325  OD1 ASN L  95A     -8.442   0.681   0.924  1.00 12.29           O  
ATOM   2326  ND2 ASN L  95A     -7.786   2.779   0.547  1.00 12.00           N  
ATOM   2327  N   PHE L  96     -12.131  -0.600  -0.778  1.00  9.85           N  
ATOM   2328  CA  PHE L  96     -13.424  -0.776  -0.106  1.00  9.41           C  
ATOM   2329  C   PHE L  96     -13.456  -0.622   1.416  1.00  9.08           C  
ATOM   2330  O   PHE L  96     -12.513  -1.080   2.035  1.00  9.18           O  
ATOM   2331  CB  PHE L  96     -14.081  -2.111  -0.400  1.00  9.08           C  
ATOM   2332  CG  PHE L  96     -14.820  -2.290  -1.686  1.00  8.55           C  
ATOM   2333  CD1 PHE L  96     -16.216  -2.206  -1.705  1.00  8.37           C  
ATOM   2334  CD2 PHE L  96     -14.128  -2.606  -2.851  1.00  8.39           C  
ATOM   2335  CE1 PHE L  96     -16.921  -2.405  -2.870  1.00  8.46           C  
ATOM   2336  CE2 PHE L  96     -14.815  -2.826  -4.046  1.00  8.58           C  
ATOM   2337  CZ  PHE L  96     -16.221  -2.717  -4.049  1.00  8.53           C  
ATOM   2338  N   VAL L  97     -14.572  -0.075   1.907  1.00  8.87           N  
ATOM   2339  CA  VAL L  97     -14.657   0.084   3.381  1.00  8.71           C  
ATOM   2340  C   VAL L  97     -16.002  -0.238   4.009  1.00  8.88           C  
ATOM   2341  O   VAL L  97     -17.093  -0.096   3.451  1.00  8.63           O  
ATOM   2342  CB  VAL L  97     -13.967   1.359   3.828  1.00  8.55           C  
ATOM   2343  CG1 VAL L  97     -14.690   2.652   3.536  1.00  8.09           C  
ATOM   2344  CG2 VAL L  97     -13.625   1.124   5.294  1.00  8.23           C  
ATOM   2345  N   PHE L  98     -15.867  -0.692   5.280  1.00  9.03           N  
ATOM   2346  CA  PHE L  98     -17.037  -1.268   5.980  1.00  9.16           C  
ATOM   2347  C   PHE L  98     -17.176  -0.984   7.445  1.00  9.14           C  
ATOM   2348  O   PHE L  98     -16.302  -1.009   8.328  1.00  9.13           O  
ATOM   2349  CB  PHE L  98     -17.067  -2.726   5.580  1.00  9.62           C  
ATOM   2350  CG  PHE L  98     -15.921  -3.590   5.984  1.00 10.41           C  
ATOM   2351  CD1 PHE L  98     -15.774  -3.939   7.339  1.00 10.74           C  
ATOM   2352  CD2 PHE L  98     -15.035  -4.103   5.046  1.00 10.41           C  
ATOM   2353  CE1 PHE L  98     -14.730  -4.772   7.758  1.00 11.10           C  
ATOM   2354  CE2 PHE L  98     -13.997  -4.950   5.440  1.00 10.91           C  
ATOM   2355  CZ  PHE L  98     -13.828  -5.260   6.812  1.00 10.99           C  
ATOM   2356  N   GLY L  99     -18.461  -0.729   7.728  1.00  8.95           N  
ATOM   2357  CA  GLY L  99     -18.996  -0.410   9.084  1.00  8.90           C  
ATOM   2358  C   GLY L  99     -19.207  -1.801   9.736  1.00  8.68           C  
ATOM   2359  O   GLY L  99     -19.548  -2.785   9.072  1.00  8.91           O  
ATOM   2360  N   THR L 100     -18.976  -1.817  10.999  1.00  8.37           N  
ATOM   2361  CA  THR L 100     -18.936  -3.012  11.840  1.00  7.77           C  
ATOM   2362  C   THR L 100     -20.096  -2.978  12.801  1.00  7.64           C  
ATOM   2363  O   THR L 100     -20.733  -1.901  12.938  1.00  7.75           O  
ATOM   2364  CB  THR L 100     -17.525  -2.884  12.584  1.00  7.45           C  
ATOM   2365  OG1 THR L 100     -17.523  -3.755  13.707  1.00  7.00           O  
ATOM   2366  CG2 THR L 100     -17.224  -1.441  13.053  1.00  7.57           C  
ATOM   2367  N   GLY L 101     -20.449  -4.106  13.396  1.00  7.46           N  
ATOM   2368  CA  GLY L 101     -21.369  -4.191  14.485  1.00  6.94           C  
ATOM   2369  C   GLY L 101     -22.708  -4.866  14.343  1.00  6.58           C  
ATOM   2370  O   GLY L 101     -23.070  -5.937  13.839  1.00  6.70           O  
ATOM   2371  N   THR L 102     -23.586  -4.143  15.025  1.00  6.42           N  
ATOM   2372  CA  THR L 102     -25.016  -4.352  15.243  1.00  5.99           C  
ATOM   2373  C   THR L 102     -24.991  -5.549  16.200  1.00  5.82           C  
ATOM   2374  O   THR L 102     -24.622  -5.378  17.384  1.00  5.67           O  
ATOM   2375  CB  THR L 102     -25.966  -4.342  14.043  1.00  6.06           C  
ATOM   2376  OG1 THR L 102     -25.897  -2.950  13.493  1.00  6.12           O  
ATOM   2377  CG2 THR L 102     -27.434  -4.704  14.299  1.00  5.71           C  
ATOM   2378  N   LYS L 103     -25.384  -6.638  15.650  1.00  5.61           N  
ATOM   2379  CA  LYS L 103     -25.531  -7.930  16.380  1.00  5.63           C  
ATOM   2380  C   LYS L 103     -27.059  -7.824  16.593  1.00  5.61           C  
ATOM   2381  O   LYS L 103     -27.616  -7.278  15.589  1.00  5.44           O  
ATOM   2382  CB  LYS L 103     -24.707  -8.381  17.470  1.00  5.65           C  
ATOM   2383  CG  LYS L 103     -24.947  -8.486  18.923  1.00  5.51           C  
ATOM   2384  CD  LYS L 103     -24.189  -9.562  19.671  1.00  5.89           C  
ATOM   2385  CE  LYS L 103     -24.547 -10.975  19.349  1.00  6.36           C  
ATOM   2386  NZ  LYS L 103     -25.787 -11.543  19.970  1.00  7.31           N  
ATOM   2387  N   VAL L 104     -27.613  -8.265  17.685  1.00  5.70           N  
ATOM   2388  CA  VAL L 104     -28.993  -8.082  17.967  1.00  5.85           C  
ATOM   2389  C   VAL L 104     -29.537  -8.501  19.357  1.00  6.00           C  
ATOM   2390  O   VAL L 104     -29.199  -9.423  20.041  1.00  5.92           O  
ATOM   2391  CB  VAL L 104     -30.074  -8.671  17.009  1.00  5.75           C  
ATOM   2392  CG1 VAL L 104     -31.075  -9.564  17.727  1.00  4.86           C  
ATOM   2393  CG2 VAL L 104     -30.848  -7.469  16.422  1.00  5.66           C  
ATOM   2394  N   THR L 105     -30.602  -7.734  19.578  1.00  6.09           N  
ATOM   2395  CA  THR L 105     -31.483  -7.855  20.759  1.00  6.39           C  
ATOM   2396  C   THR L 105     -32.925  -7.910  20.289  1.00  6.30           C  
ATOM   2397  O   THR L 105     -33.634  -6.924  20.198  1.00  6.37           O  
ATOM   2398  CB  THR L 105     -31.064  -6.794  21.810  1.00  6.73           C  
ATOM   2399  OG1 THR L 105     -29.583  -7.197  21.896  1.00  7.31           O  
ATOM   2400  CG2 THR L 105     -31.736  -6.803  23.173  1.00  6.27           C  
ATOM   2401  N   VAL L 106     -33.334  -9.120  19.995  1.00  6.15           N  
ATOM   2402  CA  VAL L 106     -34.611  -9.452  19.400  1.00  6.18           C  
ATOM   2403  C   VAL L 106     -35.416 -10.292  20.354  1.00  5.98           C  
ATOM   2404  O   VAL L 106     -34.972 -11.437  20.613  1.00  5.86           O  
ATOM   2405  CB  VAL L 106     -34.294 -10.264  18.127  1.00  7.07           C  
ATOM   2406  CG1 VAL L 106     -33.740 -11.649  18.549  1.00  7.85           C  
ATOM   2407  CG2 VAL L 106     -35.471 -10.399  17.186  1.00  7.60           C  
ATOM   2408  N   LEU L 106A    -36.522  -9.705  20.787  1.00  5.82           N  
ATOM   2409  CA  LEU L 106A    -37.424 -10.564  21.686  1.00  5.59           C  
ATOM   2410  C   LEU L 106A    -37.747 -11.699  20.761  1.00  5.61           C  
ATOM   2411  O   LEU L 106A    -36.920 -11.793  19.766  1.00  5.99           O  
ATOM   2412  CB  LEU L 106A    -38.521  -9.527  21.974  1.00  5.41           C  
ATOM   2413  CG  LEU L 106A    -38.893  -9.451  23.435  1.00  5.78           C  
ATOM   2414  CD1 LEU L 106A    -40.325  -9.763  23.763  1.00  5.68           C  
ATOM   2415  CD2 LEU L 106A    -38.004 -10.541  24.154  1.00  6.11           C  
ATOM   2416  N   GLY L 107     -38.775 -12.489  20.947  1.00  5.26           N  
ATOM   2417  CA  GLY L 107     -39.196 -13.395  19.816  1.00  4.89           C  
ATOM   2418  C   GLY L 107     -38.071 -14.426  19.522  1.00  4.73           C  
ATOM   2419  O   GLY L 107     -37.388 -14.617  18.508  1.00  4.33           O  
ATOM   2420  N   GLN L 108     -37.965 -15.197  20.557  1.00  4.39           N  
ATOM   2421  CA  GLN L 108     -37.084 -16.318  20.838  1.00  4.37           C  
ATOM   2422  C   GLN L 108     -37.335 -16.454  22.374  1.00  4.44           C  
ATOM   2423  O   GLN L 108     -37.223 -15.443  23.103  1.00  4.31           O  
ATOM   2424  CB  GLN L 108     -35.671 -16.100  20.364  1.00  3.75           C  
ATOM   2425  CG  GLN L 108     -35.480 -16.355  18.874  1.00  3.00           C  
ATOM   2426  CD  GLN L 108     -34.761 -17.583  18.447  1.00  2.46           C  
ATOM   2427  OE1 GLN L 108     -33.609 -17.826  18.785  1.00  2.23           O  
ATOM   2428  NE2 GLN L 108     -35.335 -18.431  17.586  1.00  2.18           N  
ATOM   2429  N   PRO L 109     -37.818 -17.667  22.714  1.00  4.38           N  
ATOM   2430  CA  PRO L 109     -38.072 -18.014  24.085  1.00  4.41           C  
ATOM   2431  C   PRO L 109     -36.920 -18.441  24.961  1.00  4.46           C  
ATOM   2432  O   PRO L 109     -36.367 -19.550  24.734  1.00  4.59           O  
ATOM   2433  CB  PRO L 109     -38.960 -19.320  23.969  1.00  4.19           C  
ATOM   2434  CG  PRO L 109     -39.745 -19.018  22.731  1.00  4.10           C  
ATOM   2435  CD  PRO L 109     -38.733 -18.442  21.776  1.00  4.19           C  
TER    2436      PRO L 109                                                      
