# Supplementary material for: SARS-CoV-2 Spike Protein Interaction Space
Source: Int J Mol Sci. 2023 Jul 27;24(15):12058. doi: 10.3390/ijms241512058 (PMC10418891; doi:10.3390/ijms241512058)
Supplement: Supplementary file 1 [file ijms-24-12058-s001.zip › Supplementary Material File S1/3T0W.pdb]

REMARK 950 NUMBERING  Kabat
REMARK 950 METHOD     X-ray crystal structure
REMARK 950 RESOLUTION 1.500
REMARK 950 R-FACTOR   0.150
REMARK 950 R-FREE     0.183
REMARK 950 CHAIN-TYPE LABEL ORIGINAL
REMARK 950 CHAIN L    L    A
REMARK 950 CHAIN L    L    B
REMARK 950 MOLECULE : A : IMMUNOGLOBULIN VARIABLE LAMBDA DOMAIN
REMARK 950 SPECIES  : A : HOMO SAPIENS
SEQRES   1 L 123  PCA PRO VAL LEU THR GLN SER PRO SER VAL SER GLY THR          
SEQRES   2 L 123  PRO GLY GLN LYS VAL THR ILE PHE CYS SER GLY SER SER          
SEQRES   3 L 123  SER ASN VAL GLU ASP ASN SER VAL TYR TRP TYR GLN GLN          
SEQRES   4 L 123  PHE PRO GLY THR THR PRO LYS VAL LEU ILE TYR ASN ASP          
SEQRES   5 L 123  ASP ARG ARG SER SER GLY VAL PRO ASP ARG PHE SER GLY          
SEQRES   6 L 123  SER LYS SER GLY THR SER ALA SER LEU ALA ILE SER GLY          
SEQRES   7 L 123  LEU ARG SER GLU ASP GLU ALA ASP TYR TYR CYS LEU SER          
SEQRES   8 L 123  TRP ASP ASP SER LEU ASN GLY TRP VAL PHE GLY GLY GLY          
SEQRES   9 L 123  THR LYS VAL THR VAL LEU ASP ALA ALA SER GLY ALA ASP          
SEQRES  10 L 123  HIS HIS HIS HIS HIS HIS                                      
SEQRES   1 L 123  PCA PRO VAL LEU THR GLN SER PRO SER VAL SER GLY THR          
SEQRES   2 L 123  PRO GLY GLN LYS VAL THR ILE PHE CYS SER GLY SER SER          
SEQRES   3 L 123  SER ASN VAL GLU ASP ASN SER VAL TYR TRP TYR GLN GLN          
SEQRES   4 L 123  PHE PRO GLY THR THR PRO LYS VAL LEU ILE TYR ASN ASP          
SEQRES   5 L 123  ASP ARG ARG SER SER GLY VAL PRO ASP ARG PHE SER GLY          
SEQRES   6 L 123  SER LYS SER GLY THR SER ALA SER LEU ALA ILE SER GLY          
SEQRES   7 L 123  LEU ARG SER GLU ASP GLU ALA ASP TYR TYR CYS LEU SER          
SEQRES   8 L 123  TRP ASP ASP SER LEU ASN GLY TRP VAL PHE GLY GLY GLY          
SEQRES   9 L 123  THR LYS VAL THR VAL LEU ASP ALA ALA SER GLY ALA ASP          
SEQRES  10 L 123  HIS HIS HIS HIS HIS HIS                                      
ATOM      9  N   PRO L   2      -8.343   6.731 -24.719  1.00 12.33           N  
ATOM     10  CA  PRO L   2      -9.634   6.856 -24.042  1.00  9.92           C  
ATOM     11  C   PRO L   2     -10.531   7.848 -24.765  1.00 10.64           C  
ATOM     12  O   PRO L   2     -10.069   8.893 -25.223  1.00 13.49           O  
ATOM     13  CB  PRO L   2      -9.246   7.393 -22.657  1.00 12.07           C  
ATOM     14  CG  PRO L   2      -7.816   6.997 -22.484  1.00 15.33           C  
ATOM     15  CD  PRO L   2      -7.222   7.127 -23.852  1.00 13.36           C  
ATOM     16  N   VAL L   3     -11.810   7.511 -24.863  1.00  8.25           N  
ATOM     17  CA  VAL L   3     -12.773   8.346 -25.563  1.00  8.45           C  
ATOM     18  C   VAL L   3     -13.223   9.534 -24.712  1.00  7.72           C  
ATOM     19  O   VAL L   3     -13.430  10.637 -25.235  1.00  9.68           O  
ATOM     20  CB  VAL L   3     -13.975   7.505 -26.029  1.00 10.01           C  
ATOM     21  CG1 VAL L   3     -15.098   8.398 -26.551  1.00 10.64           C  
ATOM     22  CG2 VAL L   3     -13.519   6.532 -27.094  1.00 11.10           C  
ATOM     23  N   LEU L   4     -13.353   9.317 -23.403  1.00  7.35           N  
ATOM     24  CA  LEU L   4     -13.681  10.406 -22.492  1.00  7.33           C  
ATOM     25  C   LEU L   4     -12.392  11.072 -22.058  1.00  7.39           C  
ATOM     26  O   LEU L   4     -11.335  10.428 -22.014  1.00  8.89           O  
ATOM     27  CB  LEU L   4     -14.467   9.904 -21.272  1.00  7.76           C  
ATOM     28  CG  LEU L   4     -15.739   9.113 -21.597  1.00  6.38           C  
ATOM     29  CD1 LEU L   4     -16.431   8.678 -20.315  1.00  7.23           C  
ATOM     30  CD2 LEU L   4     -16.687   9.945 -22.456  1.00  7.49           C  
ATOM     31  N   THR L   5     -12.467  12.366 -21.761  1.00  7.22           N  
ATOM     32  CA  THR L   5     -11.269  13.129 -21.452  1.00  6.75           C  
ATOM     33  C   THR L   5     -11.165  13.456 -19.979  1.00  6.26           C  
ATOM     34  O   THR L   5     -12.021  14.152 -19.430  1.00  8.76           O  
ATOM     35  CB  THR L   5     -11.209  14.432 -22.263  1.00 11.20           C  
ATOM     36  OG1 THR L   5     -11.246  14.111 -23.660  1.00 14.38           O  
ATOM     37  CG2 THR L   5      -9.932  15.207 -21.935  1.00 14.19           C  
ATOM     38  N   GLN L   6     -10.110  12.932 -19.354  1.00  6.87           N  
ATOM     39  CA  GLN L   6      -9.776  13.233 -17.970  1.00  7.49           C  
ATOM     40  C   GLN L   6      -8.340  13.736 -17.889  1.00  8.60           C  
ATOM     41  O   GLN L   6      -7.446  13.169 -18.516  1.00 10.06           O  
ATOM     42  CB  GLN L   6      -9.891  11.976 -17.100  1.00  7.61           C  
ATOM     43  CG  GLN L   6     -11.310  11.446 -16.896  1.00  7.14           C  
ATOM     44  CD  GLN L   6     -11.335  10.257 -15.950  1.00  6.45           C  
ATOM     45  OE1 GLN L   6     -11.210   9.099 -16.370  1.00  7.64           O  
ATOM     46  NE2 GLN L   6     -11.480  10.537 -14.668  1.00  7.63           N  
ATOM     47  N   SER L   7      -8.116  14.796 -17.120  1.00  9.22           N  
ATOM     48  CA  SER L   7      -6.755  15.246 -16.856  0.56  9.75           C  
ATOM     50  C   SER L   7      -6.009  14.135 -16.152  1.00 10.21           C  
ATOM     51  O   SER L   7      -6.530  13.525 -15.224  1.00 10.75           O  
ATOM     52  CB  SER L   7      -6.759  16.489 -15.977  0.56 11.54           C  
ATOM     54  OG  SER L   7      -7.386  17.551 -16.654  0.56 12.62           O  
ATOM     56  N   PRO L   8      -4.774  13.859 -16.590  1.00  9.51           N  
ATOM     57  CA  PRO L   8      -4.076  12.705 -16.002  1.00 10.42           C  
ATOM     58  C   PRO L   8      -3.718  12.861 -14.526  1.00 10.16           C  
ATOM     59  O   PRO L   8      -3.604  11.863 -13.813  1.00 10.48           O  
ATOM     60  CB  PRO L   8      -2.803  12.585 -16.853  1.00 13.40           C  
ATOM     61  CG  PRO L   8      -2.618  13.924 -17.464  1.00 16.52           C  
ATOM     62  CD  PRO L   8      -4.004  14.484 -17.676  1.00 12.92           C  
ATOM     63  N   SER L   9      -3.541  14.093 -14.067  1.00 10.32           N  
ATOM     64  CA  SER L   9      -3.028  14.303 -12.723  1.00 13.04           C  
ATOM     65  C   SER L   9      -3.576  15.577 -12.115  1.00 13.05           C  
ATOM     66  O   SER L   9      -3.534  16.635 -12.740  1.00 15.28           O  
ATOM     67  CB  SER L   9      -1.499  14.348 -12.749  1.00 16.69           C  
ATOM     68  OG  SER L   9      -0.989  14.803 -11.512  1.00 22.41           O  
ATOM     69  N   VAL L  11      -4.088  15.461 -10.894  1.00 10.98           N  
ATOM     70  CA  VAL L  11      -4.569  16.603 -10.125  1.00 12.22           C  
ATOM     71  C   VAL L  11      -4.047  16.493  -8.694  1.00 10.41           C  
ATOM     72  O   VAL L  11      -3.996  15.402  -8.138  1.00 11.56           O  
ATOM     73  CB  VAL L  11      -6.114  16.670 -10.142  1.00 14.93           C  
ATOM     74  CG1 VAL L  11      -6.629  17.737  -9.196  1.00 18.35           C  
ATOM     75  CG2 VAL L  11      -6.613  16.916 -11.563  1.00 15.41           C  
ATOM     76  N   SER L  12      -3.634  17.615  -8.115  1.00 11.67           N  
ATOM     77  CA  SER L  12      -3.124  17.624  -6.751  1.00 11.72           C  
ATOM     78  C   SER L  12      -3.933  18.536  -5.844  1.00 11.70           C  
ATOM     79  O   SER L  12      -4.570  19.488  -6.299  1.00 12.09           O  
ATOM     80  CB  SER L  12      -1.653  18.054  -6.712  1.00 12.99           C  
ATOM     81  OG  SER L  12      -0.832  17.171  -7.464  1.00 15.02           O  
ATOM     82  N   GLY L  13      -3.890  18.235  -4.554  1.00 13.83           N  
ATOM     83  CA  GLY L  13      -4.469  19.100  -3.544  1.00 12.51           C  
ATOM     84  C   GLY L  13      -3.833  18.804  -2.205  1.00 12.87           C  
ATOM     85  O   GLY L  13      -3.092  17.834  -2.067  1.00 14.16           O  
ATOM     86  N   THR L  14      -4.120  19.643  -1.219  1.00 13.27           N  
ATOM     87  CA  THR L  14      -3.632  19.431   0.133  1.00 13.41           C  
ATOM     88  C   THR L  14      -4.813  19.043   1.011  1.00 11.92           C  
ATOM     89  O   THR L  14      -5.965  19.266   0.637  1.00 12.63           O  
ATOM     90  CB  THR L  14      -2.931  20.692   0.675  1.00 16.36           C  
ATOM     91  OG1 THR L  14      -3.836  21.801   0.628  1.00 17.37           O  
ATOM     92  CG2 THR L  14      -1.695  21.014  -0.169  1.00 16.39           C  
ATOM     93  N   PRO L  15      -4.542  18.436   2.173  1.00 13.27           N  
ATOM     94  CA  PRO L  15      -5.660  17.963   2.993  1.00 12.35           C  
ATOM     95  C   PRO L  15      -6.663  19.059   3.325  1.00 13.20           C  
ATOM     96  O   PRO L  15      -6.278  20.166   3.708  1.00 15.21           O  
ATOM     97  CB  PRO L  15      -4.967  17.447   4.253  1.00 13.93           C  
ATOM     98  CG  PRO L  15      -3.621  17.009   3.756  1.00 14.95           C  
ATOM     99  CD  PRO L  15      -3.241  18.033   2.733  1.00 14.73           C  
ATOM    100  N   GLY L  16      -7.943  18.739   3.157  1.00 12.59           N  
ATOM    101  CA  GLY L  16      -9.026  19.643   3.490  1.00 12.90           C  
ATOM    102  C   GLY L  16      -9.519  20.437   2.298  1.00 12.14           C  
ATOM    103  O   GLY L  16     -10.595  21.034   2.343  1.00 13.59           O  
ATOM    104  N   GLN L  17      -8.742  20.455   1.221  1.00 11.10           N  
ATOM    105  CA  GLN L  17      -9.159  21.202   0.039  1.00 10.51           C  
ATOM    106  C   GLN L  17     -10.375  20.580  -0.624  1.00 11.43           C  
ATOM    107  O   GLN L  17     -10.550  19.357  -0.626  1.00 12.92           O  
ATOM    108  CB  GLN L  17      -8.036  21.299  -0.992  1.00 12.04           C  
ATOM    109  CG  GLN L  17      -6.942  22.278  -0.624  1.00 15.52           C  
ATOM    110  CD  GLN L  17      -6.132  22.696  -1.829  1.00 16.17           C  
ATOM    111  OE1 GLN L  17      -5.509  21.865  -2.485  1.00 16.11           O  
ATOM    112  NE2 GLN L  17      -6.151  23.993  -2.143  1.00 16.71           N  
ATOM    113  N   LYS L  18     -11.217  21.439  -1.182  1.00  9.45           N  
ATOM    114  CA  LYS L  18     -12.354  20.983  -1.968  0.53  9.30           C  
ATOM    116  C   LYS L  18     -11.955  20.967  -3.432  1.00  8.87           C  
ATOM    117  O   LYS L  18     -11.785  22.014  -4.061  1.00  9.50           O  
ATOM    118  CB  LYS L  18     -13.581  21.860  -1.721  0.53 10.90           C  
ATOM    120  CG  LYS L  18     -14.121  21.724  -0.300  0.53 13.55           C  
ATOM    122  CD  LYS L  18     -15.439  22.449  -0.104  0.53 17.71           C  
ATOM    124  CE  LYS L  18     -15.900  22.330   1.343  0.53 20.25           C  
ATOM    126  NZ  LYS L  18     -17.163  23.071   1.608  0.53 22.33           N  
ATOM    128  N   VAL L  19     -11.774  19.759  -3.958  1.00  8.47           N  
ATOM    129  CA  VAL L  19     -11.297  19.559  -5.317  1.00  8.42           C  
ATOM    130  C   VAL L  19     -12.311  18.751  -6.104  1.00  8.68           C  
ATOM    131  O   VAL L  19     -12.843  17.769  -5.610  1.00  9.39           O  
ATOM    132  CB  VAL L  19      -9.942  18.817  -5.309  1.00 10.61           C  
ATOM    133  CG1 VAL L  19      -9.461  18.540  -6.734  1.00 13.93           C  
ATOM    134  CG2 VAL L  19      -8.906  19.616  -4.524  1.00 10.92           C  
ATOM    135  N   THR L  20     -12.588  19.183  -7.326  1.00  6.81           N  
ATOM    136  CA  THR L  20     -13.526  18.490  -8.192  1.00  7.10           C  
ATOM    137  C   THR L  20     -12.781  18.096  -9.441  1.00  6.62           C  
ATOM    138  O   THR L  20     -12.066  18.917 -10.022  1.00  8.47           O  
ATOM    139  CB  THR L  20     -14.700  19.401  -8.541  1.00  9.59           C  
ATOM    140  OG1 THR L  20     -15.364  19.765  -7.325  1.00 11.79           O  
ATOM    141  CG2 THR L  20     -15.682  18.711  -9.476  1.00  8.30           C  
ATOM    142  N   ILE L  21     -12.929  16.840  -9.846  1.00  6.94           N  
ATOM    143  CA  ILE L  21     -12.308  16.403 -11.085  1.00  7.81           C  
ATOM    144  C   ILE L  21     -13.354  16.181 -12.162  1.00  6.62           C  
ATOM    145  O   ILE L  21     -14.509  15.852 -11.876  1.00  8.52           O  
ATOM    146  CB  ILE L  21     -11.422  15.162 -10.899  1.00 10.21           C  
ATOM    147  CG1 ILE L  21     -12.246  13.971 -10.410  1.00  9.69           C  
ATOM    148  CG2 ILE L  21     -10.277  15.456  -9.933  1.00 13.32           C  
ATOM    149  CD1 ILE L  21     -11.422  12.700 -10.248  1.00 12.61           C  
ATOM    150  N   PHE L  22     -12.939  16.379 -13.404  1.00  5.89           N  
ATOM    151  CA  PHE L  22     -13.862  16.445 -14.519  1.00  5.83           C  
ATOM    152  C   PHE L  22     -13.697  15.309 -15.527  1.00  7.39           C  
ATOM    153  O   PHE L  22     -12.607  14.762 -15.713  1.00  8.50           O  
ATOM    154  CB  PHE L  22     -13.763  17.814 -15.205  1.00  5.87           C  
ATOM    155  CG  PHE L  22     -14.289  18.942 -14.360  1.00  6.16           C  
ATOM    156  CD1 PHE L  22     -15.548  19.471 -14.588  1.00  8.47           C  
ATOM    157  CD2 PHE L  22     -13.532  19.452 -13.312  1.00  6.94           C  
ATOM    158  CE1 PHE L  22     -16.036  20.500 -13.792  1.00  9.46           C  
ATOM    159  CE2 PHE L  22     -14.018  20.475 -12.517  1.00  8.61           C  
ATOM    160  CZ  PHE L  22     -15.273  20.997 -12.756  1.00  9.42           C  
ATOM    161  N   CYS L  23     -14.809  14.975 -16.168  1.00  6.22           N  
ATOM    162  CA  CYS L  23     -14.866  13.933 -17.174  1.00  6.94           C  
ATOM    163  C   CYS L  23     -15.581  14.516 -18.378  1.00  6.59           C  
ATOM    164  O   CYS L  23     -16.800  14.672 -18.360  1.00  9.32           O  
ATOM    165  CB  CYS L  23     -15.644  12.741 -16.615  1.00  9.19           C  
ATOM    166  SG  CYS L  23     -15.929  11.413 -17.777  1.00  9.47           S  
ATOM    167  N   SER L  24     -14.822  14.850 -19.419  1.00  7.36           N  
ATOM    168  CA  SER L  24     -15.377  15.559 -20.564  1.00  7.44           C  
ATOM    169  C   SER L  24     -15.731  14.600 -21.675  1.00  7.61           C  
ATOM    170  O   SER L  24     -14.861  13.922 -22.222  1.00  9.60           O  
ATOM    171  CB  SER L  24     -14.401  16.618 -21.085  1.00  9.62           C  
ATOM    172  OG  SER L  24     -14.097  17.556 -20.067  1.00 11.89           O  
ATOM    173  N   GLY L  25     -17.016  14.545 -22.002  1.00  7.17           N  
ATOM    174  CA  GLY L  25     -17.474  13.693 -23.078  1.00  8.42           C  
ATOM    175  C   GLY L  25     -18.161  14.482 -24.175  1.00  8.51           C  
ATOM    176  O   GLY L  25     -17.857  15.655 -24.420  1.00 10.19           O  
ATOM    177  N   SER L  26     -19.105  13.826 -24.837  1.00  7.97           N  
ATOM    178  CA  SER L  26     -19.818  14.432 -25.951  1.00  8.63           C  
ATOM    179  C   SER L  26     -21.283  14.026 -25.930  1.00  8.78           C  
ATOM    180  O   SER L  26     -21.743  13.339 -25.014  1.00  9.30           O  
ATOM    181  CB  SER L  26     -19.190  14.008 -27.273  1.00 10.91           C  
ATOM    182  OG  SER L  26     -19.369  12.621 -27.479  1.00 16.41           O  
ATOM    183  N   SER L  27     -22.006  14.449 -26.956  1.00 10.56           N  
ATOM    184  CA  SER L  27     -23.441  14.222 -27.032  1.00 11.35           C  
ATOM    185  C   SER L  27     -23.846  12.744 -26.997  1.00 10.31           C  
ATOM    186  O   SER L  27     -24.907  12.405 -26.473  1.00 12.50           O  
ATOM    187  CB  SER L  27     -23.998  14.874 -28.296  1.00 15.72           C  
ATOM    188  OG  SER L  27     -23.481  14.224 -29.442  1.00 20.73           O  
ATOM    189  N   SER L  27A    -23.005  11.865 -27.542  1.00  9.62           N  
ATOM    190  CA  SER L  27A    -23.362  10.454 -27.680  0.54  8.40           C  
ATOM    192  C   SER L  27A    -23.055   9.630 -26.431  1.00  8.53           C  
ATOM    193  O   SER L  27A    -23.530   8.505 -26.292  1.00  9.85           O  
ATOM    194  CB  SER L  27A    -22.647   9.834 -28.886  0.54  9.94           C  
ATOM    196  OG  SER L  27A    -21.246   9.799 -28.687  0.54 11.75           O  
ATOM    198  N   ASN L  27B    -22.245  10.175 -25.529  1.00  6.88           N  
ATOM    199  CA  ASN L  27B    -21.897   9.427 -24.328  1.00  7.62           C  
ATOM    200  C   ASN L  27B    -22.398  10.079 -23.038  1.00  7.83           C  
ATOM    201  O   ASN L  27B    -23.542   9.845 -22.628  1.00  8.94           O  
ATOM    202  CB  ASN L  27B    -20.403   9.012 -24.276  1.00  8.88           C  
ATOM    203  CG  ASN L  27B    -19.434  10.133 -24.664  1.00  6.32           C  
ATOM    204  OD1 ASN L  27B    -19.384  11.189 -24.019  1.00  7.57           O  
ATOM    205  ND2 ASN L  27B    -18.622   9.883 -25.699  1.00  8.33           N  
ATOM    206  N   VAL L  28     -21.564  10.906 -22.414  1.00  6.23           N  
ATOM    207  CA  VAL L  28     -21.922  11.539 -21.146  1.00  6.67           C  
ATOM    208  C   VAL L  28     -23.276  12.266 -21.184  1.00  9.05           C  
ATOM    209  O   VAL L  28     -24.065  12.189 -20.236  1.00  9.68           O  
ATOM    210  CB  VAL L  28     -20.810  12.516 -20.706  1.00  7.41           C  
ATOM    211  CG1 VAL L  28     -21.265  13.377 -19.536  1.00  9.19           C  
ATOM    212  CG2 VAL L  28     -19.549  11.736 -20.352  1.00  8.24           C  
ATOM    213  N   GLU L  29     -23.562  12.973 -22.270  1.00  8.75           N  
ATOM    214  CA  GLU L  29     -24.773  13.779 -22.289  1.00 10.36           C  
ATOM    215  C   GLU L  29     -26.034  12.919 -22.346  1.00 11.76           C  
ATOM    216  O   GLU L  29     -27.105  13.351 -21.917  1.00 15.07           O  
ATOM    217  CB  GLU L  29     -24.748  14.745 -23.470  1.00 12.01           C  
ATOM    218  CG  GLU L  29     -25.835  15.802 -23.414  1.00 14.20           C  
ATOM    219  CD  GLU L  29     -25.694  16.836 -24.504  1.00 16.55           C  
ATOM    220  OE1 GLU L  29     -25.473  16.456 -25.669  1.00 22.28           O  
ATOM    221  OE2 GLU L  29     -25.795  18.034 -24.197  1.00 20.03           O  
ATOM    222  N   ASP L  30     -25.913  11.715 -22.893  1.00 10.44           N  
ATOM    223  CA  ASP L  30     -27.098  10.911 -23.181  1.00  9.65           C  
ATOM    224  C   ASP L  30     -27.236   9.660 -22.323  1.00 10.23           C  
ATOM    225  O   ASP L  30     -28.231   8.950 -22.436  1.00 13.39           O  
ATOM    226  CB  ASP L  30     -27.109  10.499 -24.655  1.00 13.63           C  
ATOM    227  CG  ASP L  30     -28.503  10.228 -25.168  1.00 19.42           C  
ATOM    228  OD1 ASP L  30     -29.427  10.987 -24.794  1.00 19.54           O  
ATOM    229  OD2 ASP L  30     -28.678   9.252 -25.934  1.00 22.76           O  
ATOM    230  N   ASN L  31     -26.245   9.388 -21.481  1.00  9.50           N  
ATOM    231  CA  ASN L  31     -26.154   8.101 -20.796  1.00  9.62           C  
ATOM    232  C   ASN L  31     -25.709   8.212 -19.346  1.00  9.61           C  
ATOM    233  O   ASN L  31     -25.133   9.219 -18.945  1.00 12.04           O  
ATOM    234  CB  ASN L  31     -25.202   7.172 -21.552  1.00 10.27           C  
ATOM    235  CG  ASN L  31     -25.752   6.767 -22.890  1.00 11.99           C  
ATOM    236  OD1 ASN L  31     -26.714   6.010 -22.960  1.00 15.89           O  
ATOM    237  ND2 ASN L  31     -25.179   7.297 -23.959  1.00 14.07           N  
ATOM    238  N   SER L  32     -25.983   7.166 -18.567  1.00  8.87           N  
ATOM    239  CA  SER L  32     -25.544   7.105 -17.180  1.00  8.60           C  
ATOM    240  C   SER L  32     -24.031   7.092 -17.089  1.00  7.91           C  
ATOM    241  O   SER L  32     -23.368   6.324 -17.780  1.00  8.78           O  
ATOM    242  CB  SER L  32     -26.079   5.840 -16.507  1.00 11.86           C  
ATOM    243  OG  SER L  32     -27.492   5.857 -16.455  1.00 15.68           O  
ATOM    244  N   VAL L  33     -23.491   7.935 -16.219  1.00  8.01           N  
ATOM    245  CA  VAL L  33     -22.056   7.946 -15.955  1.00  6.42           C  
ATOM    246  C   VAL L  33     -21.748   7.214 -14.653  1.00  6.92           C  
ATOM    247  O   VAL L  33     -22.497   7.301 -13.680  1.00  8.04           O  
ATOM    248  CB  VAL L  33     -21.500   9.391 -15.934  1.00  7.49           C  
ATOM    249  CG1 VAL L  33     -20.039   9.417 -15.480  1.00  8.15           C  
ATOM    250  CG2 VAL L  33     -21.652  10.008 -17.317  1.00  8.89           C  
ATOM    251  N   TYR L  34     -20.643   6.480 -14.648  1.00  5.79           N  
ATOM    252  CA  TYR L  34     -20.180   5.780 -13.456  1.00  5.89           C  
ATOM    253  C   TYR L  34     -18.768   6.245 -13.171  1.00  5.71           C  
ATOM    254  O   TYR L  34     -18.012   6.586 -14.099  1.00  6.60           O  
ATOM    255  CB  TYR L  34     -20.159   4.258 -13.670  1.00  6.99           C  
ATOM    256  CG  TYR L  34     -21.460   3.681 -14.187  1.00  6.75           C  
ATOM    257  CD1 TYR L  34     -22.339   3.013 -13.338  1.00  9.13           C  
ATOM    258  CD2 TYR L  34     -21.811   3.807 -15.529  1.00  6.96           C  
ATOM    259  CE1 TYR L  34     -23.534   2.485 -13.812  1.00  9.23           C  
ATOM    260  CE2 TYR L  34     -23.013   3.282 -16.014  1.00  9.80           C  
ATOM    261  CZ  TYR L  34     -23.865   2.626 -15.148  1.00 10.21           C  
ATOM    262  OH  TYR L  34     -25.046   2.091 -15.624  1.00 13.22           O  
ATOM    263  N   TRP L  35     -18.406   6.255 -11.893  1.00  6.97           N  
ATOM    264  CA  TRP L  35     -17.038   6.566 -11.495  1.00  5.88           C  
ATOM    265  C   TRP L  35     -16.512   5.439 -10.640  1.00  5.25           C  
ATOM    266  O   TRP L  35     -17.232   4.920  -9.782  1.00  6.26           O  
ATOM    267  CB  TRP L  35     -16.991   7.839 -10.644  1.00  6.88           C  
ATOM    268  CG  TRP L  35     -17.303   9.115 -11.370  1.00  5.99           C  
ATOM    269  CD1 TRP L  35     -18.539   9.628 -11.628  1.00  6.25           C  
ATOM    270  CD2 TRP L  35     -16.357  10.061 -11.888  1.00  5.76           C  
ATOM    271  NE1 TRP L  35     -18.424  10.823 -12.295  1.00  7.36           N  
ATOM    272  CE2 TRP L  35     -17.095  11.115 -12.461  1.00  6.92           C  
ATOM    273  CE3 TRP L  35     -14.960  10.117 -11.918  1.00  7.38           C  
ATOM    274  CZ2 TRP L  35     -16.483  12.220 -13.057  1.00  7.02           C  
ATOM    275  CZ3 TRP L  35     -14.351  11.208 -12.513  1.00  7.21           C  
ATOM    276  CH2 TRP L  35     -15.111  12.249 -13.075  1.00  7.00           C  
ATOM    277  N   TYR L  36     -15.248   5.080 -10.840  1.00  5.43           N  
ATOM    278  CA  TYR L  36     -14.608   4.171  -9.909  1.00  6.10           C  
ATOM    279  C   TYR L  36     -13.246   4.655  -9.443  1.00  6.52           C  
ATOM    280  O   TYR L  36     -12.583   5.439 -10.125  1.00  7.25           O  
ATOM    281  CB  TYR L  36     -14.541   2.746 -10.448  1.00  6.76           C  
ATOM    282  CG  TYR L  36     -13.674   2.489 -11.661  1.00  6.23           C  
ATOM    283  CD1 TYR L  36     -14.228   2.423 -12.940  1.00  7.04           C  
ATOM    284  CD2 TYR L  36     -12.317   2.213 -11.518  1.00  7.89           C  
ATOM    285  CE1 TYR L  36     -13.456   2.117 -14.039  1.00  8.54           C  
ATOM    286  CE2 TYR L  36     -11.527   1.906 -12.618  1.00  8.20           C  
ATOM    287  CZ  TYR L  36     -12.104   1.859 -13.875  1.00  6.61           C  
ATOM    288  OH  TYR L  36     -11.328   1.550 -14.973  1.00  9.68           O  
ATOM    289  N   GLN L  37     -12.857   4.167  -8.270  1.00  7.70           N  
ATOM    290  CA  GLN L  37     -11.591   4.485  -7.633  1.00  6.57           C  
ATOM    291  C   GLN L  37     -10.684   3.264  -7.705  1.00  6.17           C  
ATOM    292  O   GLN L  37     -11.122   2.145  -7.449  1.00  8.56           O  
ATOM    293  CB  GLN L  37     -11.857   4.847  -6.169  1.00  7.32           C  
ATOM    294  CG  GLN L  37     -10.622   5.158  -5.324  1.00  7.76           C  
ATOM    295  CD  GLN L  37     -10.969   5.291  -3.857  1.00  7.66           C  
ATOM    296  OE1 GLN L  37     -11.513   4.364  -3.250  1.00 11.77           O  
ATOM    297  NE2 GLN L  37     -10.685   6.460  -3.281  1.00  9.76           N  
ATOM    298  N   GLN L  38      -9.419   3.470  -8.049  1.00  7.65           N  
ATOM    299  CA  GLN L  38      -8.489   2.358  -8.127  1.00  7.44           C  
ATOM    300  C   GLN L  38      -7.169   2.726  -7.453  1.00  9.16           C  
ATOM    301  O   GLN L  38      -6.445   3.608  -7.921  1.00 10.49           O  
ATOM    302  CB  GLN L  38      -8.251   1.932  -9.587  1.00 10.40           C  
ATOM    303  CG  GLN L  38      -7.337   0.708  -9.727  1.00 12.95           C  
ATOM    304  CD  GLN L  38      -7.106   0.296 -11.168  1.00 18.86           C  
ATOM    305  OE1 GLN L  38      -6.540  -0.764 -11.441  1.00 24.69           O  
ATOM    306  NE2 GLN L  38      -7.546   1.128 -12.098  1.00 19.09           N  
ATOM    307  N   PHE L  39      -6.865   2.061  -6.346  1.00  8.89           N  
ATOM    308  CA  PHE L  39      -5.548   2.209  -5.741  1.00  9.07           C  
ATOM    309  C   PHE L  39      -4.599   1.308  -6.520  1.00 11.66           C  
ATOM    310  O   PHE L  39      -5.013   0.279  -7.050  1.00 12.48           O  
ATOM    311  CB  PHE L  39      -5.562   1.831  -4.259  1.00 10.52           C  
ATOM    312  CG  PHE L  39      -6.435   2.713  -3.413  1.00 11.29           C  
ATOM    313  CD1 PHE L  39      -6.004   3.976  -3.028  1.00 13.09           C  
ATOM    314  CD2 PHE L  39      -7.671   2.275  -2.972  1.00 14.51           C  
ATOM    315  CE1 PHE L  39      -6.802   4.791  -2.256  1.00 13.49           C  
ATOM    316  CE2 PHE L  39      -8.472   3.088  -2.186  1.00 14.95           C  
ATOM    317  CZ  PHE L  39      -8.035   4.349  -1.832  1.00 14.15           C  
ATOM    318  N   PRO L  40      -3.321   1.693  -6.604  1.00 14.44           N  
ATOM    319  CA  PRO L  40      -2.379   0.902  -7.405  1.00 15.36           C  
ATOM    320  C   PRO L  40      -2.421  -0.586  -7.055  1.00 15.97           C  
ATOM    321  O   PRO L  40      -2.341  -0.939  -5.884  1.00 16.03           O  
ATOM    322  CB  PRO L  40      -1.026   1.505  -7.029  1.00 16.71           C  
ATOM    323  CG  PRO L  40      -1.347   2.931  -6.719  1.00 17.17           C  
ATOM    324  CD  PRO L  40      -2.701   2.911  -6.053  1.00 16.09           C  
ATOM    325  N   GLY L  41      -2.576  -1.438  -8.065  1.00 16.04           N  
ATOM    326  CA  GLY L  41      -2.526  -2.879  -7.871  1.00 19.69           C  
ATOM    327  C   GLY L  41      -3.727  -3.468  -7.149  1.00 19.58           C  
ATOM    328  O   GLY L  41      -3.716  -4.639  -6.764  1.00 22.52           O  
ATOM    329  N   THR L  42      -4.772  -2.664  -6.983  1.00 17.51           N  
ATOM    330  CA  THR L  42      -5.926  -3.052  -6.188  1.00 17.63           C  
ATOM    331  C   THR L  42      -7.186  -3.135  -7.057  1.00 15.31           C  
ATOM    332  O   THR L  42      -7.295  -2.467  -8.084  1.00 16.93           O  
ATOM    333  CB  THR L  42      -6.144  -2.032  -5.033  1.00 18.78           C  
ATOM    334  OG1 THR L  42      -4.911  -1.850  -4.316  1.00 21.83           O  
ATOM    335  CG2 THR L  42      -7.221  -2.516  -4.076  1.00 22.92           C  
ATOM    336  N   THR L  43      -8.134  -3.966  -6.643  1.00 12.86           N  
ATOM    337  CA  THR L  43      -9.416  -4.067  -7.329  1.00 13.30           C  
ATOM    338  C   THR L  43     -10.160  -2.735  -7.225  1.00 11.51           C  
ATOM    339  O   THR L  43     -10.233  -2.148  -6.144  1.00 13.05           O  
ATOM    340  CB  THR L  43     -10.257  -5.184  -6.696  1.00 15.02           C  
ATOM    341  OG1 THR L  43      -9.540  -6.421  -6.795  1.00 19.89           O  
ATOM    342  CG2 THR L  43     -11.599  -5.326  -7.376  1.00 13.05           C  
ATOM    343  N   PRO L  44     -10.708  -2.245  -8.348  1.00 11.34           N  
ATOM    344  CA  PRO L  44     -11.458  -0.983  -8.294  1.00 11.92           C  
ATOM    345  C   PRO L  44     -12.698  -1.062  -7.406  1.00 10.28           C  
ATOM    346  O   PRO L  44     -13.293  -2.132  -7.217  1.00 10.76           O  
ATOM    347  CB  PRO L  44     -11.877  -0.755  -9.753  1.00 12.84           C  
ATOM    348  CG  PRO L  44     -10.932  -1.581 -10.573  1.00 14.91           C  
ATOM    349  CD  PRO L  44     -10.567  -2.758  -9.722  1.00 12.53           C  
ATOM    350  N   LYS L  45     -13.064   0.092  -6.858  1.00  9.26           N  
ATOM    351  CA  LYS L  45     -14.320   0.275  -6.144  1.00  9.21           C  
ATOM    352  C   LYS L  45     -15.195   1.287  -6.888  1.00  6.72           C  
ATOM    353  O   LYS L  45     -14.786   2.420  -7.112  1.00  8.33           O  
ATOM    354  CB  LYS L  45     -14.070   0.741  -4.704  1.00 13.02           C  
ATOM    355  CG  LYS L  45     -15.357   1.006  -3.923  1.00 16.56           C  
ATOM    356  CD  LYS L  45     -15.121   1.056  -2.429  1.00 23.27           C  
ATOM    357  CE  LYS L  45     -14.444   2.338  -2.000  1.00 26.97           C  
ATOM    358  NZ  LYS L  45     -14.305   2.378  -0.511  1.00 28.89           N  
ATOM    359  N   VAL L  46     -16.397   0.878  -7.275  1.00  6.46           N  
ATOM    360  CA  VAL L  46     -17.324   1.814  -7.904  1.00  7.62           C  
ATOM    361  C   VAL L  46     -17.789   2.820  -6.855  1.00  7.88           C  
ATOM    362  O   VAL L  46     -18.285   2.440  -5.792  1.00 10.67           O  
ATOM    363  CB  VAL L  46     -18.536   1.093  -8.526  1.00  8.27           C  
ATOM    364  CG1 VAL L  46     -19.530   2.108  -9.081  1.00  9.36           C  
ATOM    365  CG2 VAL L  46     -18.074   0.127  -9.617  1.00 10.72           C  
ATOM    366  N   LEU L  47     -17.621   4.107  -7.149  1.00  6.46           N  
ATOM    367  CA  LEU L  47     -18.008   5.160  -6.201  1.00  5.87           C  
ATOM    368  C   LEU L  47     -19.388   5.718  -6.502  1.00  5.89           C  
ATOM    369  O   LEU L  47     -20.165   5.997  -5.596  1.00  7.79           O  
ATOM    370  CB  LEU L  47     -17.018   6.322  -6.230  1.00  8.23           C  
ATOM    371  CG  LEU L  47     -15.561   5.993  -5.955  1.00  8.26           C  
ATOM    372  CD1 LEU L  47     -14.769   7.277  -5.994  1.00 13.56           C  
ATOM    373  CD2 LEU L  47     -15.423   5.305  -4.609  1.00 10.48           C  
ATOM    374  N   ILE L  48     -19.654   5.902  -7.790  1.00  6.05           N  
ATOM    375  CA  ILE L  48     -20.851   6.578  -8.274  1.00  6.41           C  
ATOM    376  C   ILE L  48     -21.458   5.756  -9.399  1.00  7.17           C  
ATOM    377  O   ILE L  48     -20.744   5.298 -10.289  1.00  7.62           O  
ATOM    378  CB  ILE L  48     -20.526   7.980  -8.852  1.00  7.30           C  
ATOM    379  CG1 ILE L  48     -19.884   8.893  -7.801  1.00  8.89           C  
ATOM    380  CG2 ILE L  48     -21.786   8.619  -9.427  1.00  8.55           C  
ATOM    381  CD1 ILE L  48     -20.776   9.262  -6.606  1.00 10.16           C  
ATOM    382  N   TYR L  49     -22.770   5.562  -9.361  1.00  7.71           N  
ATOM    383  CA  TYR L  49     -23.466   4.925 -10.471  1.00  7.63           C  
ATOM    384  C   TYR L  49     -24.645   5.817 -10.870  1.00  7.73           C  
ATOM    385  O   TYR L  49     -25.061   6.697 -10.106  1.00  8.57           O  
ATOM    386  CB  TYR L  49     -23.905   3.493 -10.111  1.00  9.96           C  
ATOM    387  CG  TYR L  49     -24.887   3.422  -8.957  1.00  9.57           C  
ATOM    388  CD1 TYR L  49     -24.445   3.457  -7.634  1.00  9.46           C  
ATOM    389  CD2 TYR L  49     -26.257   3.329  -9.191  1.00 11.28           C  
ATOM    390  CE1 TYR L  49     -25.340   3.404  -6.582  1.00 11.54           C  
ATOM    391  CE2 TYR L  49     -27.158   3.275  -8.145  1.00 12.62           C  
ATOM    392  CZ  TYR L  49     -26.696   3.312  -6.841  1.00 12.45           C  
ATOM    393  OH  TYR L  49     -27.591   3.253  -5.790  1.00 16.52           O  
ATOM    394  N   ASN L  50     -25.162   5.623 -12.075  1.00  8.43           N  
ATOM    395  CA  ASN L  50     -26.306   6.412 -12.528  1.00  9.42           C  
ATOM    396  C   ASN L  50     -26.120   7.920 -12.327  1.00  7.93           C  
ATOM    397  O   ASN L  50     -27.003   8.603 -11.804  1.00 10.02           O  
ATOM    398  CB  ASN L  50     -27.591   5.927 -11.841  1.00 10.75           C  
ATOM    399  CG  ASN L  50     -27.986   4.529 -12.272  1.00 13.04           C  
ATOM    400  OD1 ASN L  50     -27.270   3.881 -13.036  1.00 15.58           O  
ATOM    401  ND2 ASN L  50     -29.123   4.052 -11.775  1.00 16.85           N  
ATOM    402  N   ASP L  51     -24.958   8.421 -12.746  1.00  9.05           N  
ATOM    403  CA  ASP L  51     -24.629   9.854 -12.732  1.00  9.71           C  
ATOM    404  C   ASP L  51     -24.278  10.411 -11.358  1.00  9.12           C  
ATOM    405  O   ASP L  51     -23.252  11.076 -11.194  1.00 10.34           O  
ATOM    406  CB  ASP L  51     -25.770  10.707 -13.301  1.00 11.06           C  
ATOM    407  CG  ASP L  51     -26.132  10.348 -14.727  1.00 13.84           C  
ATOM    408  OD1 ASP L  51     -25.232  10.075 -15.543  1.00 13.07           O  
ATOM    409  OD2 ASP L  51     -27.336  10.371 -15.037  1.00 18.82           O  
ATOM    410  N   ASP L  52     -25.148  10.179 -10.379  1.00  9.60           N  
ATOM    411  CA  ASP L  52     -25.047  10.905  -9.118  1.00  9.99           C  
ATOM    412  C   ASP L  52     -25.403  10.105  -7.873  1.00 10.67           C  
ATOM    413  O   ASP L  52     -25.552  10.675  -6.793  1.00 12.57           O  
ATOM    414  CB  ASP L  52     -25.886  12.193  -9.175  1.00 10.89           C  
ATOM    415  CG  ASP L  52     -27.377  11.935  -9.370  1.00 15.31           C  
ATOM    416  OD1 ASP L  52     -27.817  10.769  -9.327  1.00 14.90           O  
ATOM    417  OD2 ASP L  52     -28.129  12.925  -9.535  1.00 19.25           O  
ATOM    418  N   ARG L  53     -25.510   8.788  -8.005  1.00  9.32           N  
ATOM    419  CA  ARG L  53     -25.822   7.940  -6.862  0.52  9.38           C  
ATOM    421  C   ARG L  53     -24.553   7.365  -6.247  1.00  9.90           C  
ATOM    422  O   ARG L  53     -23.730   6.775  -6.945  1.00 10.46           O  
ATOM    423  CB  ARG L  53     -26.769   6.815  -7.278  0.52 11.26           C  
ATOM    425  CG  ARG L  53     -28.034   7.329  -7.943  0.52 14.52           C  
ATOM    427  CD  ARG L  53     -29.028   6.227  -8.201  0.52 18.60           C  
ATOM    429  NE  ARG L  53     -29.470   5.581  -6.968  0.52 22.14           N  
ATOM    431  CZ  ARG L  53     -30.433   4.667  -6.918  0.52 23.48           C  
ATOM    433  NH1 ARG L  53     -31.057   4.306  -8.031  0.52 23.42           N  
ATOM    435  NH2 ARG L  53     -30.773   4.120  -5.760  0.52 25.23           N  
ATOM    437  N   ARG L  54     -24.398   7.544  -4.940  1.00  9.65           N  
ATOM    438  CA  ARG L  54     -23.210   7.069  -4.255  1.00  8.87           C  
ATOM    439  C   ARG L  54     -23.386   5.615  -3.827  1.00  9.82           C  
ATOM    440  O   ARG L  54     -24.350   5.260  -3.130  1.00 12.30           O  
ATOM    441  CB  ARG L  54     -22.903   7.955  -3.044  1.00 11.54           C  
ATOM    442  CG  ARG L  54     -21.598   7.616  -2.349  1.00 11.18           C  
ATOM    443  CD  ARG L  54     -21.482   8.318  -1.000  1.00 17.29           C  
ATOM    444  NE  ARG L  54     -21.549   9.757  -1.170  1.00 21.03           N  
ATOM    445  CZ  ARG L  54     -22.383  10.567  -0.527  1.00 20.65           C  
ATOM    446  NH1 ARG L  54     -23.243  10.101   0.375  1.00 23.36           N  
ATOM    447  NH2 ARG L  54     -22.351  11.860  -0.793  1.00 21.84           N  
ATOM    448  N   SER L  55     -22.458   4.769  -4.256  1.00  9.42           N  
ATOM    449  CA  SER L  55     -22.439   3.379  -3.808  1.00  9.39           C  
ATOM    450  C   SER L  55     -22.280   3.256  -2.295  1.00  9.29           C  
ATOM    451  O   SER L  55     -21.663   4.101  -1.647  1.00 10.84           O  
ATOM    452  CB  SER L  55     -21.273   2.633  -4.453  1.00 10.45           C  
ATOM    453  OG  SER L  55     -21.388   2.605  -5.856  1.00 12.19           O  
ATOM    454  N   SER L  56     -22.817   2.176  -1.745  1.00 11.69           N  
ATOM    455  CA  SER L  56     -22.513   1.785  -0.377  1.00 11.82           C  
ATOM    456  C   SER L  56     -21.004   1.606  -0.251  1.00 12.93           C  
ATOM    457  O   SER L  56     -20.339   1.204  -1.213  1.00 14.84           O  
ATOM    458  CB  SER L  56     -23.227   0.469  -0.067  1.00 16.70           C  
ATOM    459  OG  SER L  56     -23.006   0.053   1.263  1.00 21.85           O  
ATOM    460  N   GLY L  57     -20.456   1.913   0.922  1.00 10.85           N  
ATOM    461  CA  GLY L  57     -19.044   1.702   1.175  1.00 11.15           C  
ATOM    462  C   GLY L  57     -18.149   2.818   0.677  1.00 10.08           C  
ATOM    463  O   GLY L  57     -16.954   2.607   0.478  1.00 13.13           O  
ATOM    464  N   VAL L  58     -18.721   4.007   0.491  1.00  9.51           N  
ATOM    465  CA  VAL L  58     -17.996   5.160  -0.038  1.00  9.67           C  
ATOM    466  C   VAL L  58     -18.129   6.313   0.954  1.00  9.26           C  
ATOM    467  O   VAL L  58     -19.224   6.562   1.449  1.00  9.83           O  
ATOM    468  CB  VAL L  58     -18.597   5.599  -1.385  1.00  8.84           C  
ATOM    469  CG1 VAL L  58     -17.909   6.867  -1.913  1.00 10.29           C  
ATOM    470  CG2 VAL L  58     -18.518   4.460  -2.417  1.00 10.34           C  
ATOM    471  N   PRO L  59     -17.022   7.019   1.258  1.00 11.33           N  
ATOM    472  CA  PRO L  59     -17.092   8.157   2.187  1.00 12.14           C  
ATOM    473  C   PRO L  59     -18.040   9.253   1.695  1.00 11.41           C  
ATOM    474  O   PRO L  59     -18.171   9.468   0.481  1.00 10.09           O  
ATOM    475  CB  PRO L  59     -15.648   8.679   2.209  1.00 14.55           C  
ATOM    476  CG  PRO L  59     -14.814   7.529   1.766  1.00 14.88           C  
ATOM    477  CD  PRO L  59     -15.648   6.777   0.785  1.00 13.12           C  
ATOM    478  N   ASP L  60     -18.698   9.949   2.621  1.00 11.90           N  
ATOM    479  CA  ASP L  60     -19.690  10.935   2.203  1.00 13.45           C  
ATOM    480  C   ASP L  60     -19.098  12.196   1.559  1.00 11.41           C  
ATOM    481  O   ASP L  60     -19.843  13.009   1.005  1.00 12.92           O  
ATOM    482  CB  ASP L  60     -20.740  11.237   3.296  1.00 19.03           C  
ATOM    483  CG  ASP L  60     -20.215  12.100   4.425  1.00 21.73           C  
ATOM    484  OD1 ASP L  60     -19.135  12.701   4.302  1.00 21.85           O  
ATOM    485  OD2 ASP L  60     -20.928  12.203   5.446  1.00 27.19           O  
ATOM    486  N   ARG L  61     -17.770  12.337   1.582  1.00  9.32           N  
ATOM    488  CA  ARG L  61     -17.098  13.475   0.947  0.50 10.17           C  
ATOM    489  C   ARG L  61     -17.110  13.395  -0.577  1.00  8.40           C  
ATOM    490  O   ARG L  61     -16.775  14.363  -1.257  1.00  9.33           O  
ATOM    492  CB  ARG L  61     -15.646  13.584   1.423  0.50 12.06           C  
ATOM    494  CG  ARG L  61     -15.500  13.863   2.898  0.50 13.67           C  
ATOM    496  CD  ARG L  61     -14.079  13.619   3.391  0.50 15.09           C  
ATOM    498  NE  ARG L  61     -13.622  12.241   3.222  0.50 16.94           N  
ATOM    500  CZ  ARG L  61     -12.789  11.852   2.263  0.50 16.74           C  
ATOM    502  NH1 ARG L  61     -12.335  12.741   1.393  0.50 16.27           N  
ATOM    504  NH2 ARG L  61     -12.412  10.582   2.175  0.50 16.86           N  
ATOM    505  N   PHE L  62     -17.481  12.236  -1.119  1.00  9.02           N  
ATOM    506  CA  PHE L  62     -17.545  12.050  -2.569  1.00  8.56           C  
ATOM    507  C   PHE L  62     -18.960  12.272  -3.085  1.00  8.01           C  
ATOM    508  O   PHE L  62     -19.918  11.748  -2.521  1.00  9.87           O  
ATOM    509  CB  PHE L  62     -17.128  10.629  -2.952  1.00  9.24           C  
ATOM    510  CG  PHE L  62     -15.664  10.363  -2.814  1.00  8.61           C  
ATOM    511  CD1 PHE L  62     -14.787  10.658  -3.857  1.00  9.08           C  
ATOM    512  CD2 PHE L  62     -15.154   9.816  -1.653  1.00 11.94           C  
ATOM    513  CE1 PHE L  62     -13.432  10.414  -3.736  1.00 10.36           C  
ATOM    514  CE2 PHE L  62     -13.799   9.568  -1.528  1.00 12.59           C  
ATOM    515  CZ  PHE L  62     -12.937   9.866  -2.566  1.00 11.25           C  
ATOM    516  N   SER L  63     -19.101  13.034  -4.164  1.00  7.13           N  
ATOM    517  CA  SER L  63     -20.398  13.146  -4.829  1.00  8.59           C  
ATOM    518  C   SER L  63     -20.194  13.284  -6.329  1.00  8.01           C  
ATOM    519  O   SER L  63     -19.178  13.807  -6.780  1.00 10.63           O  
ATOM    520  CB  SER L  63     -21.208  14.324  -4.285  1.00 10.56           C  
ATOM    521  OG  SER L  63     -20.560  15.550  -4.546  1.00 13.40           O  
ATOM    522  N   GLY L  64     -21.149  12.791  -7.106  1.00  7.68           N  
ATOM    523  CA  GLY L  64     -21.059  12.888  -8.545  1.00  7.38           C  
ATOM    524  C   GLY L  64     -22.170  13.743  -9.111  1.00  8.32           C  
ATOM    525  O   GLY L  64     -23.271  13.813  -8.550  1.00 11.06           O  
ATOM    526  N   SER L  65     -21.889  14.380 -10.237  1.00  8.45           N  
ATOM    527  CA  SER L  65     -22.907  15.149 -10.934  0.57  9.32           C  
ATOM    529  C   SER L  65     -22.583  15.254 -12.416  1.00  8.85           C  
ATOM    530  O   SER L  65     -21.539  14.774 -12.874  1.00  8.24           O  
ATOM    531  CB  SER L  65     -23.013  16.543 -10.334  0.57 10.01           C  
ATOM    533  OG  SER L  65     -21.827  17.263 -10.589  0.57 11.94           O  
ATOM    535  N   LYS L  66     -23.503  15.852 -13.167  1.00 12.33           N  
ATOM    536  CA  LYS L  66     -23.302  16.099 -14.588  1.00 13.01           C  
ATOM    537  C   LYS L  66     -23.746  17.510 -14.985  1.00 15.08           C  
ATOM    538  O   LYS L  66     -24.619  18.106 -14.352  1.00 15.08           O  
ATOM    539  CB  LYS L  66     -24.055  15.075 -15.434  1.00 16.20           C  
ATOM    540  CG  LYS L  66     -23.658  13.638 -15.180  1.00 14.29           C  
ATOM    541  CD  LYS L  66     -23.827  12.793 -16.439  1.00 17.76           C  
ATOM    542  CE  LYS L  66     -25.244  12.861 -16.990  1.00 18.13           C  
ATOM    543  NZ  LYS L  66     -25.545  11.694 -17.877  1.00 14.48           N  
ATOM    544  N   SER L  67     -23.122  18.032 -16.034  1.00 13.33           N  
ATOM    545  CA  SER L  67     -23.479  19.317 -16.625  1.00 12.85           C  
ATOM    546  C   SER L  67     -23.321  19.158 -18.137  1.00 14.81           C  
ATOM    547  O   SER L  67     -22.218  19.289 -18.668  1.00 16.60           O  
ATOM    548  CB  SER L  67     -22.552  20.419 -16.096  1.00 13.59           C  
ATOM    549  OG  SER L  67     -22.948  21.708 -16.554  1.00 16.00           O  
ATOM    550  N   GLY L  68     -24.423  18.855 -18.823  1.00 13.89           N  
ATOM    551  CA  GLY L  68     -24.400  18.644 -20.266  1.00 11.64           C  
ATOM    552  C   GLY L  68     -23.510  17.483 -20.706  1.00  9.49           C  
ATOM    553  O   GLY L  68     -23.771  16.315 -20.379  1.00 11.70           O  
ATOM    554  N   THR L  69     -22.445  17.803 -21.441  1.00  7.57           N  
ATOM    555  CA  THR L  69     -21.532  16.787 -21.952  1.00  8.21           C  
ATOM    556  C   THR L  69     -20.419  16.434 -20.963  1.00  8.31           C  
ATOM    557  O   THR L  69     -19.537  15.623 -21.276  1.00  7.86           O  
ATOM    558  CB  THR L  69     -20.882  17.235 -23.275  1.00  7.77           C  
ATOM    559  OG1 THR L  69     -20.187  18.476 -23.081  1.00  8.11           O  
ATOM    560  CG2 THR L  69     -21.943  17.437 -24.354  1.00  9.54           C  
ATOM    561  N   SER L  70     -20.472  17.034 -19.776  1.00  8.16           N  
ATOM    562  CA  SER L  70     -19.440  16.862 -18.757  1.00  8.11           C  
ATOM    563  C   SER L  70     -19.986  16.210 -17.492  1.00  7.59           C  
ATOM    564  O   SER L  70     -21.135  16.453 -17.096  1.00  9.87           O  
ATOM    565  CB  SER L  70     -18.827  18.222 -18.406  1.00 11.05           C  
ATOM    566  OG  SER L  70     -17.934  18.104 -17.311  1.00 12.29           O  
ATOM    567  N   ALA L  71     -19.165  15.371 -16.867  1.00  6.51           N  
ATOM    568  CA  ALA L  71     -19.485  14.797 -15.567  1.00  6.75           C  
ATOM    569  C   ALA L  71     -18.389  15.199 -14.594  1.00  6.52           C  
ATOM    570  O   ALA L  71     -17.254  15.441 -15.002  1.00  7.42           O  
ATOM    571  CB  ALA L  71     -19.585  13.278 -15.660  1.00  7.41           C  
ATOM    572  N   SER L  72     -18.719  15.285 -13.310  1.00  6.59           N  
ATOM    573  CA  SER L  72     -17.715  15.642 -12.315  1.00  7.41           C  
ATOM    574  C   SER L  72     -17.831  14.809 -11.041  1.00  7.50           C  
ATOM    575  O   SER L  72     -18.909  14.354 -10.668  1.00  8.71           O  
ATOM    576  CB  SER L  72     -17.747  17.140 -11.989  1.00 10.25           C  
ATOM    577  OG  SER L  72     -18.997  17.533 -11.467  1.00 14.17           O  
ATOM    578  N   LEU L  73     -16.694  14.611 -10.390  1.00  7.49           N  
ATOM    579  CA  LEU L  73     -16.629  13.945  -9.100  1.00  6.73           C  
ATOM    580  C   LEU L  73     -16.044  14.950  -8.120  1.00  6.43           C  
ATOM    581  O   LEU L  73     -14.893  15.382  -8.264  1.00  7.47           O  
ATOM    582  CB  LEU L  73     -15.748  12.695  -9.188  1.00  6.19           C  
ATOM    583  CG  LEU L  73     -15.613  11.877  -7.907  1.00  7.10           C  
ATOM    584  CD1 LEU L  73     -16.922  11.150  -7.602  1.00  9.44           C  
ATOM    585  CD2 LEU L  73     -14.457  10.892  -8.032  1.00  8.87           C  
ATOM    586  N   ALA L  74     -16.852  15.345  -7.141  1.00  6.79           N  
ATOM    587  CA  ALA L  74     -16.433  16.343  -6.172  1.00  6.80           C  
ATOM    588  C   ALA L  74     -15.961  15.677  -4.890  1.00  7.28           C  
ATOM    589  O   ALA L  74     -16.670  14.843  -4.326  1.00  9.24           O  
ATOM    590  CB  ALA L  74     -17.581  17.297  -5.863  1.00  7.97           C  
ATOM    591  N   ILE L  75     -14.779  16.069  -4.423  1.00  8.12           N  
ATOM    592  CA  ILE L  75     -14.273  15.611  -3.133  1.00  9.15           C  
ATOM    593  C   ILE L  75     -14.288  16.790  -2.182  1.00  9.61           C  
ATOM    594  O   ILE L  75     -13.505  17.734  -2.323  1.00 11.15           O  
ATOM    595  CB  ILE L  75     -12.847  15.057  -3.237  1.00 10.35           C  
ATOM    596  CG1 ILE L  75     -12.771  14.024  -4.362  1.00 12.37           C  
ATOM    597  CG2 ILE L  75     -12.412  14.459  -1.907  1.00 12.67           C  
ATOM    598  CD1 ILE L  75     -11.383  13.481  -4.622  1.00 13.70           C  
ATOM    599  N   SER L  76     -15.201  16.744  -1.222  1.00 11.27           N  
ATOM    601  CA  SER L  76     -15.388  17.855  -0.301  0.53 12.58           C  
ATOM    602  C   SER L  76     -14.511  17.677   0.925  1.00 13.52           C  
ATOM    603  O   SER L  76     -14.981  17.244   1.975  1.00 17.14           O  
ATOM    605  CB  SER L  76     -16.853  17.964   0.117  0.53 13.84           C  
ATOM    607  OG  SER L  76     -17.066  19.135   0.885  0.53 16.00           O  
ATOM    608  N   GLY L  77     -13.234  17.996   0.780  1.00 12.96           N  
ATOM    609  CA  GLY L  77     -12.294  17.849   1.875  1.00 10.52           C  
ATOM    610  C   GLY L  77     -11.369  16.678   1.627  1.00 10.01           C  
ATOM    611  O   GLY L  77     -11.574  15.582   2.147  1.00 11.74           O  
ATOM    612  N   LEU L  78     -10.341  16.919   0.826  1.00 10.25           N  
ATOM    613  CA  LEU L  78      -9.388  15.887   0.447  1.00 11.25           C  
ATOM    614  C   LEU L  78      -8.718  15.295   1.683  1.00 10.44           C  
ATOM    615  O   LEU L  78      -8.358  16.019   2.611  1.00 13.18           O  
ATOM    616  CB  LEU L  78      -8.337  16.521  -0.464  1.00 16.34           C  
ATOM    617  CG  LEU L  78      -7.523  15.711  -1.456  1.00 19.35           C  
ATOM    618  CD1 LEU L  78      -8.405  14.852  -2.325  1.00 16.76           C  
ATOM    619  CD2 LEU L  78      -6.734  16.696  -2.308  1.00 17.44           C  
ATOM    620  N   ARG L  79      -8.569  13.975   1.700  1.00  9.45           N  
ATOM    621  CA  ARG L  79      -7.796  13.296   2.730  1.00 10.28           C  
ATOM    622  C   ARG L  79      -6.686  12.478   2.081  1.00  9.51           C  
ATOM    623  O   ARG L  79      -6.763  12.123   0.907  1.00 10.02           O  
ATOM    624  CB  ARG L  79      -8.692  12.388   3.571  1.00 11.13           C  
ATOM    625  CG  ARG L  79      -9.848  13.117   4.216  1.00 11.52           C  
ATOM    626  CD  ARG L  79     -10.501  12.299   5.314  1.00 12.10           C  
ATOM    627  NE  ARG L  79     -11.628  13.031   5.884  1.00 14.89           N  
ATOM    628  CZ  ARG L  79     -12.316  12.640   6.951  1.00 16.92           C  
ATOM    629  NH1 ARG L  79     -11.992  11.520   7.581  1.00 15.93           N  
ATOM    630  NH2 ARG L  79     -13.322  13.379   7.395  1.00 21.51           N  
ATOM    631  N   SER L  80      -5.657  12.169   2.857  1.00 12.79           N  
ATOM    632  CA  SER L  80      -4.511  11.428   2.342  1.00 13.62           C  
ATOM    633  C   SER L  80      -4.907  10.118   1.669  1.00 12.90           C  
ATOM    634  O   SER L  80      -4.320   9.740   0.655  1.00 14.28           O  
ATOM    635  CB  SER L  80      -3.514  11.148   3.464  1.00 17.25           C  
ATOM    636  OG  SER L  80      -4.106  10.329   4.462  1.00 22.33           O  
ATOM    637  N   GLU L  81      -5.896   9.424   2.229  1.00 13.56           N  
ATOM    638  CA  GLU L  81      -6.325   8.143   1.667  1.00 12.88           C  
ATOM    639  C   GLU L  81      -7.077   8.274   0.344  1.00 13.19           C  
ATOM    640  O   GLU L  81      -7.478   7.272  -0.240  1.00 14.57           O  
ATOM    641  CB  GLU L  81      -7.166   7.359   2.670  1.00 13.96           C  
ATOM    642  CG  GLU L  81      -8.456   8.040   3.041  1.00 16.95           C  
ATOM    643  CD  GLU L  81      -8.378   8.735   4.387  1.00 22.19           C  
ATOM    644  OE1 GLU L  81      -7.340   9.370   4.699  1.00 22.21           O  
ATOM    645  OE2 GLU L  81      -9.366   8.637   5.136  1.00 23.67           O  
ATOM    646  N   ASP L  82      -7.270   9.506  -0.120  1.00 10.88           N  
ATOM    647  CA  ASP L  82      -7.929   9.739  -1.403  1.00  9.68           C  
ATOM    648  C   ASP L  82      -6.934   9.715  -2.565  1.00 10.02           C  
ATOM    649  O   ASP L  82      -7.317   9.853  -3.732  1.00 10.57           O  
ATOM    650  CB  ASP L  82      -8.679  11.072  -1.403  1.00 11.10           C  
ATOM    651  CG  ASP L  82      -9.821  11.099  -0.423  1.00 11.87           C  
ATOM    652  OD1 ASP L  82     -10.367  10.018  -0.096  1.00 13.65           O  
ATOM    653  OD2 ASP L  82     -10.161  12.211   0.029  1.00 11.71           O  
ATOM    654  N   GLU L  83      -5.654   9.564  -2.247  1.00 10.07           N  
ATOM    655  CA  GLU L  83      -4.644   9.438  -3.286  1.00 10.11           C  
ATOM    656  C   GLU L  83      -4.851   8.119  -4.028  1.00 10.60           C  
ATOM    657  O   GLU L  83      -4.608   7.040  -3.483  1.00 13.43           O  
ATOM    658  CB  GLU L  83      -3.243   9.515  -2.679  1.00 12.46           C  
ATOM    659  CG  GLU L  83      -2.149   9.490  -3.714  1.00 14.46           C  
ATOM    660  CD  GLU L  83      -0.837  10.036  -3.189  1.00 19.23           C  
ATOM    661  OE1 GLU L  83      -0.822  11.172  -2.654  1.00 18.04           O  
ATOM    662  OE2 GLU L  83       0.180   9.328  -3.316  1.00 26.37           O  
ATOM    663  N   ALA L  84      -5.310   8.219  -5.271  1.00  8.93           N  
ATOM    664  CA  ALA L  84      -5.754   7.065  -6.046  1.00  8.13           C  
ATOM    665  C   ALA L  84      -6.030   7.533  -7.459  1.00  7.86           C  
ATOM    666  O   ALA L  84      -5.926   8.729  -7.747  1.00  9.06           O  
ATOM    667  CB  ALA L  84      -7.031   6.480  -5.440  1.00  9.24           C  
ATOM    668  N   ASP L  85      -6.364   6.592  -8.340  1.00  7.26           N  
ATOM    669  CA  ASP L  85      -6.735   6.903  -9.721  1.00  6.95           C  
ATOM    670  C   ASP L  85      -8.259   6.818  -9.834  1.00  8.39           C  
ATOM    671  O   ASP L  85      -8.852   5.843  -9.389  1.00 11.27           O  
ATOM    672  CB  ASP L  85      -6.072   5.902 -10.671  1.00 10.01           C  
ATOM    673  CG  ASP L  85      -5.894   6.434 -12.084  1.00 12.71           C  
ATOM    674  OD1 ASP L  85      -6.480   7.476 -12.439  1.00 13.66           O  
ATOM    675  OD2 ASP L  85      -5.153   5.783 -12.853  1.00 15.38           O  
ATOM    676  N   TYR L  86      -8.885   7.844 -10.410  1.00  6.70           N  
ATOM    677  CA  TYR L  86     -10.337   7.906 -10.546  1.00  5.94           C  
ATOM    678  C   TYR L  86     -10.732   7.881 -12.015  1.00  6.10           C  
ATOM    679  O   TYR L  86     -10.281   8.718 -12.796  1.00  7.16           O  
ATOM    680  CB  TYR L  86     -10.866   9.177  -9.874  1.00  6.64           C  
ATOM    681  CG  TYR L  86     -10.595   9.189  -8.390  1.00  6.03           C  
ATOM    682  CD1 TYR L  86      -9.368   9.614  -7.890  1.00  5.79           C  
ATOM    683  CD2 TYR L  86     -11.547   8.732  -7.485  1.00  7.61           C  
ATOM    684  CE1 TYR L  86      -9.106   9.602  -6.535  1.00  8.12           C  
ATOM    685  CE2 TYR L  86     -11.300   8.721  -6.127  1.00  7.55           C  
ATOM    686  CZ  TYR L  86     -10.076   9.154  -5.656  1.00  6.47           C  
ATOM    687  OH  TYR L  86      -9.806   9.136  -4.309  1.00  8.84           O  
ATOM    688  N   TYR L  87     -11.570   6.918 -12.381  1.00  6.99           N  
ATOM    689  CA  TYR L  87     -12.013   6.754 -13.762  1.00  6.43           C  
ATOM    690  C   TYR L  87     -13.496   7.048 -13.907  1.00  5.39           C  
ATOM    691  O   TYR L  87     -14.292   6.709 -13.034  1.00  7.03           O  
ATOM    692  CB  TYR L  87     -11.783   5.314 -14.228  1.00  7.67           C  
ATOM    693  CG  TYR L  87     -10.332   4.957 -14.446  1.00  6.54           C  
ATOM    694  CD1 TYR L  87      -9.517   4.575 -13.385  1.00  7.84           C  
ATOM    695  CD2 TYR L  87      -9.773   5.009 -15.721  1.00  8.47           C  
ATOM    696  CE1 TYR L  87      -8.183   4.250 -13.591  1.00  9.11           C  
ATOM    697  CE2 TYR L  87      -8.442   4.690 -15.932  1.00 10.54           C  
ATOM    698  CZ  TYR L  87      -7.651   4.309 -14.867  1.00 10.24           C  
ATOM    699  OH  TYR L  87      -6.324   3.979 -15.086  1.00 14.53           O  
ATOM    700  N   CYS L  88     -13.868   7.656 -15.025  1.00  6.29           N  
ATOM    701  CA  CYS L  88     -15.276   7.762 -15.400  1.00  5.98           C  
ATOM    702  C   CYS L  88     -15.550   6.883 -16.620  1.00  4.87           C  
ATOM    703  O   CYS L  88     -14.642   6.574 -17.400  1.00  6.45           O  
ATOM    704  CB  CYS L  88     -15.635   9.213 -15.719  1.00  7.21           C  
ATOM    705  SG  CYS L  88     -14.706   9.925 -17.118  1.00  8.43           S  
ATOM    706  N   LEU L  89     -16.799   6.462 -16.777  1.00  5.53           N  
ATOM    707  CA  LEU L  89     -17.190   5.677 -17.947  1.00  5.06           C  
ATOM    708  C   LEU L  89     -18.675   5.860 -18.208  1.00  5.31           C  
ATOM    709  O   LEU L  89     -19.424   6.257 -17.314  1.00  6.78           O  
ATOM    710  CB  LEU L  89     -16.874   4.185 -17.753  1.00  7.90           C  
ATOM    711  CG  LEU L  89     -17.698   3.468 -16.686  1.00  8.34           C  
ATOM    712  CD1 LEU L  89     -18.680   2.483 -17.309  1.00  8.78           C  
ATOM    713  CD2 LEU L  89     -16.783   2.723 -15.728  1.00 13.10           C  
ATOM    714  N   SER L  90     -19.085   5.602 -19.446  1.00  5.79           N  
ATOM    715  CA  SER L  90     -20.496   5.561 -19.796  1.00  6.78           C  
ATOM    716  C   SER L  90     -20.667   4.747 -21.067  1.00  6.70           C  
ATOM    717  O   SER L  90     -19.697   4.380 -21.725  1.00  7.35           O  
ATOM    718  CB  SER L  90     -21.065   6.968 -20.013  1.00  8.16           C  
ATOM    719  OG  SER L  90     -20.734   7.456 -21.296  1.00  8.54           O  
ATOM    720  N   TRP L  91     -21.911   4.471 -21.414  1.00  6.91           N  
ATOM    721  CA  TRP L  91     -22.211   3.957 -22.739  1.00  6.37           C  
ATOM    722  C   TRP L  91     -22.037   5.087 -23.749  1.00  6.73           C  
ATOM    723  O   TRP L  91     -22.201   6.267 -23.414  1.00  7.21           O  
ATOM    724  CB  TRP L  91     -23.643   3.443 -22.775  1.00  7.99           C  
ATOM    725  CG  TRP L  91     -24.033   2.780 -24.056  1.00  9.97           C  
ATOM    726  CD1 TRP L  91     -24.812   3.301 -25.058  1.00 11.86           C  
ATOM    727  CD2 TRP L  91     -23.679   1.460 -24.466  1.00  9.80           C  
ATOM    728  NE1 TRP L  91     -24.966   2.373 -26.061  1.00 12.48           N  
ATOM    729  CE2 TRP L  91     -24.278   1.235 -25.723  1.00 11.25           C  
ATOM    730  CE3 TRP L  91     -22.914   0.441 -23.887  1.00 11.71           C  
ATOM    731  CZ2 TRP L  91     -24.132   0.033 -26.414  1.00 12.43           C  
ATOM    732  CZ3 TRP L  91     -22.774  -0.748 -24.571  1.00 13.45           C  
ATOM    733  CH2 TRP L  91     -23.376  -0.942 -25.826  1.00 13.65           C  
ATOM    734  N   ASP L  92     -21.701   4.716 -24.982  1.00  7.46           N  
ATOM    735  CA  ASP L  92     -21.650   5.651 -26.093  1.00  7.54           C  
ATOM    736  C   ASP L  92     -22.597   5.153 -27.185  1.00  8.09           C  
ATOM    737  O   ASP L  92     -22.395   4.066 -27.715  1.00  8.98           O  
ATOM    738  CB  ASP L  92     -20.215   5.755 -26.623  1.00  8.59           C  
ATOM    739  CG  ASP L  92     -20.054   6.833 -27.672  1.00  8.40           C  
ATOM    740  OD1 ASP L  92     -20.750   6.782 -28.702  1.00  9.39           O  
ATOM    741  OD2 ASP L  92     -19.210   7.728 -27.487  1.00 12.81           O  
ATOM    742  N   ASP L  93     -23.613   5.955 -27.525  1.00  9.51           N  
ATOM    743  CA  ASP L  93     -24.650   5.639 -28.520  0.52 10.26           C  
ATOM    745  C   ASP L  93     -24.138   5.513 -29.948  1.00 11.38           C  
ATOM    746  O   ASP L  93     -24.775   4.898 -30.799  1.00 15.19           O  
ATOM    747  CB  ASP L  93     -25.703   6.755 -28.559  0.52 13.11           C  
ATOM    749  CG  ASP L  93     -26.359   7.008 -27.221  0.52 14.33           C  
ATOM    751  OD1 ASP L  93     -26.301   6.142 -26.329  0.52 15.84           O  
ATOM    753  OD2 ASP L  93     -26.956   8.088 -27.072  0.52 17.35           O  
ATOM    755  N   SER L  94     -23.024   6.181 -30.227  1.00  9.20           N  
ATOM    756  CA  SER L  94     -22.470   6.231 -31.578  0.59  8.71           C  
ATOM    758  C   SER L  94     -21.498   5.073 -31.794  1.00  9.24           C  
ATOM    759  O   SER L  94     -21.551   4.369 -32.814  1.00 10.46           O  
ATOM    760  CB  SER L  94     -21.768   7.574 -31.802  0.59 10.41           C  
ATOM    762  OG  SER L  94     -21.472   7.780 -33.169  0.59  9.02           O  
ATOM    764  N   LEU L  95     -20.616   4.876 -30.820  1.00  9.79           N  
ATOM    765  CA  LEU L  95     -19.679   3.755 -30.850  1.00 11.15           C  
ATOM    766  C   LEU L  95     -20.392   2.450 -30.524  1.00 13.84           C  
ATOM    767  O   LEU L  95     -19.887   1.358 -30.826  1.00 14.03           O  
ATOM    768  CB  LEU L  95     -18.536   3.991 -29.858  1.00 11.36           C  
ATOM    769  CG  LEU L  95     -17.503   5.006 -30.354  1.00 11.74           C  
ATOM    770  CD1 LEU L  95     -16.639   5.517 -29.205  1.00 13.53           C  
ATOM    771  CD2 LEU L  95     -16.630   4.405 -31.461  1.00 11.79           C  
ATOM    772  N   ASN L  95A    -21.562   2.573 -29.903  1.00 11.77           N  
ATOM    773  CA  ASN L  95A    -22.331   1.394 -29.518  0.53 11.33           C  
ATOM    775  C   ASN L  95A    -21.528   0.482 -28.593  1.00 11.66           C  
ATOM    776  O   ASN L  95A    -21.471  -0.733 -28.806  1.00 13.68           O  
ATOM    777  CB  ASN L  95A    -22.772   0.616 -30.761  0.53 11.98           C  
ATOM    779  CG  ASN L  95A    -23.862  -0.384 -30.464  0.53 14.32           C  
ATOM    781  OD1 ASN L  95A    -24.693  -0.170 -29.582  0.53 15.86           O  
ATOM    783  ND2 ASN L  95A    -23.867  -1.488 -31.200  0.53 15.56           N  
ATOM    785  N   GLY L  95B    -20.905   1.073 -27.585  1.00 10.13           N  
ATOM    786  CA  GLY L  95B    -20.103   0.334 -26.638  1.00 10.39           C  
ATOM    787  C   GLY L  95B    -19.712   1.237 -25.493  1.00  9.29           C  
ATOM    788  O   GLY L  95B    -20.048   2.434 -25.476  1.00  8.78           O  
ATOM    789  N   TRP L  96     -19.001   0.655 -24.534  1.00  9.54           N  
ATOM    790  CA  TRP L  96     -18.530   1.385 -23.368  1.00  7.99           C  
ATOM    791  C   TRP L  96     -17.371   2.287 -23.734  1.00  9.25           C  
ATOM    792  O   TRP L  96     -16.511   1.920 -24.539  1.00 11.95           O  
ATOM    793  CB  TRP L  96     -18.124   0.419 -22.243  1.00  9.71           C  
ATOM    794  CG  TRP L  96     -19.250  -0.480 -21.890  1.00 10.97           C  
ATOM    795  CD1 TRP L  96     -19.379  -1.806 -22.215  1.00 13.23           C  
ATOM    796  CD2 TRP L  96     -20.454  -0.117 -21.205  1.00  9.92           C  
ATOM    797  NE1 TRP L  96     -20.577  -2.291 -21.752  1.00 13.54           N  
ATOM    798  CE2 TRP L  96     -21.255  -1.279 -21.125  1.00 11.89           C  
ATOM    799  CE3 TRP L  96     -20.926   1.072 -20.630  1.00  9.16           C  
ATOM    800  CZ2 TRP L  96     -22.505  -1.286 -20.511  1.00 11.71           C  
ATOM    801  CZ3 TRP L  96     -22.174   1.063 -20.010  1.00 10.00           C  
ATOM    802  CH2 TRP L  96     -22.952  -0.111 -19.967  1.00 10.03           C  
ATOM    803  N   VAL L  97     -17.364   3.476 -23.143  1.00  8.25           N  
ATOM    804  CA  VAL L  97     -16.241   4.391 -23.272  1.00  8.13           C  
ATOM    805  C   VAL L  97     -15.765   4.807 -21.888  1.00  5.94           C  
ATOM    806  O   VAL L  97     -16.548   4.814 -20.920  1.00  6.66           O  
ATOM    807  CB  VAL L  97     -16.570   5.629 -24.135  1.00  6.99           C  
ATOM    808  CG1 VAL L  97     -16.831   5.210 -25.589  1.00  8.93           C  
ATOM    809  CG2 VAL L  97     -17.750   6.429 -23.577  1.00  8.09           C  
ATOM    810  N   PHE L  98     -14.486   5.156 -21.804  1.00  7.27           N  
ATOM    811  CA  PHE L  98     -13.829   5.392 -20.530  1.00  6.59           C  
ATOM    812  C   PHE L  98     -12.957   6.617 -20.638  1.00  6.91           C  
ATOM    813  O   PHE L  98     -12.484   6.955 -21.725  1.00  8.00           O  
ATOM    814  CB  PHE L  98     -12.920   4.209 -20.176  1.00  8.06           C  
ATOM    815  CG  PHE L  98     -13.628   2.888 -20.113  1.00  8.02           C  
ATOM    816  CD1 PHE L  98     -14.036   2.362 -18.892  1.00  9.68           C  
ATOM    817  CD2 PHE L  98     -13.890   2.170 -21.270  1.00 10.25           C  
ATOM    818  CE1 PHE L  98     -14.690   1.143 -18.831  1.00 11.30           C  
ATOM    819  CE2 PHE L  98     -14.544   0.943 -21.214  1.00 11.35           C  
ATOM    820  CZ  PHE L  98     -14.943   0.433 -20.001  1.00 12.14           C  
ATOM    821  N   GLY L  99     -12.744   7.273 -19.505  1.00  6.78           N  
ATOM    822  CA  GLY L  99     -11.656   8.225 -19.384  1.00  6.75           C  
ATOM    823  C   GLY L  99     -10.343   7.492 -19.141  1.00  8.12           C  
ATOM    824  O   GLY L  99     -10.316   6.293 -18.848  1.00  8.47           O  
ATOM    825  N   GLY L 100      -9.240   8.222 -19.242  1.00  7.56           N  
ATOM    826  CA  GLY L 100      -7.927   7.644 -19.014  1.00  8.78           C  
ATOM    827  C   GLY L 100      -7.525   7.617 -17.551  1.00  8.24           C  
ATOM    828  O   GLY L 100      -6.434   7.146 -17.214  1.00  9.89           O  
ATOM    829  N   GLY L 101      -8.401   8.127 -16.684  1.00  7.44           N  
ATOM    830  CA  GLY L 101      -8.141   8.188 -15.253  1.00  8.13           C  
ATOM    831  C   GLY L 101      -7.439   9.460 -14.811  1.00  8.58           C  
ATOM    832  O   GLY L 101      -6.516   9.949 -15.481  1.00  9.87           O  
ATOM    833  N   THR L 102      -7.880  10.004 -13.680  1.00  7.98           N  
ATOM    834  CA  THR L 102      -7.181  11.113 -13.041  1.00  7.38           C  
ATOM    835  C   THR L 102      -6.549  10.622 -11.752  1.00  7.57           C  
ATOM    836  O   THR L 102      -7.246  10.169 -10.845  1.00  8.52           O  
ATOM    837  CB  THR L 102      -8.145  12.259 -12.708  1.00  7.82           C  
ATOM    838  OG1 THR L 102      -8.693  12.787 -13.928  1.00  8.42           O  
ATOM    839  CG2 THR L 102      -7.406  13.374 -11.957  1.00  8.97           C  
ATOM    840  N   LYS L 103      -5.225  10.702 -11.681  1.00  8.69           N  
ATOM    841  CA  LYS L 103      -4.504  10.363 -10.467  1.00  9.07           C  
ATOM    842  C   LYS L 103      -4.506  11.576  -9.571  1.00  8.82           C  
ATOM    843  O   LYS L 103      -3.988  12.631  -9.935  1.00 11.62           O  
ATOM    844  CB  LYS L 103      -3.070   9.923 -10.783  1.00 11.57           C  
ATOM    845  CG  LYS L 103      -3.028   8.576 -11.487  1.00 15.80           C  
ATOM    846  CD  LYS L 103      -1.619   8.082 -11.774  1.00 19.52           C  
ATOM    847  CE  LYS L 103      -1.670   6.748 -12.511  1.00 23.87           C  
ATOM    848  NZ  LYS L 103      -0.312   6.216 -12.833  1.00 26.98           N  
ATOM    849  N   VAL L 104      -5.113  11.424  -8.407  1.00  9.62           N  
ATOM    850  CA  VAL L 104      -5.128  12.478  -7.410  1.00 10.21           C  
ATOM    851  C   VAL L 104      -3.962  12.280  -6.453  1.00 10.21           C  
ATOM    852  O   VAL L 104      -3.798  11.208  -5.866  1.00 11.17           O  
ATOM    853  CB  VAL L 104      -6.466  12.504  -6.637  1.00 12.20           C  
ATOM    854  CG1 VAL L 104      -6.407  13.506  -5.482  1.00 13.08           C  
ATOM    855  CG2 VAL L 104      -7.614  12.835  -7.586  1.00 13.60           C  
ATOM    856  N   THR L 105      -3.135  13.315  -6.327  1.00 12.35           N  
ATOM    857  CA  THR L 105      -2.026  13.316  -5.389  1.00 12.21           C  
ATOM    858  C   THR L 105      -2.392  14.254  -4.250  1.00 11.97           C  
ATOM    859  O   THR L 105      -2.865  15.377  -4.486  1.00 12.38           O  
ATOM    860  CB  THR L 105      -0.719  13.801  -6.065  1.00 14.90           C  
ATOM    861  OG1 THR L 105      -0.310  12.853  -7.057  1.00 17.08           O  
ATOM    862  CG2 THR L 105       0.399  13.961  -5.040  1.00 16.60           C  
ATOM    863  N   VAL L 106      -2.209  13.785  -3.021  1.00 12.33           N  
ATOM    864  CA  VAL L 106      -2.462  14.618  -1.854  1.00 13.93           C  
ATOM    865  C   VAL L 106      -1.132  15.073  -1.248  1.00 16.84           C  
ATOM    866  O   VAL L 106      -0.386  14.272  -0.685  1.00 19.08           O  
ATOM    867  CB  VAL L 106      -3.344  13.883  -0.815  1.00 13.94           C  
ATOM    868  CG1 VAL L 106      -3.677  14.800   0.360  1.00 14.30           C  
ATOM    869  CG2 VAL L 106      -4.617  13.381  -1.481  1.00 14.82           C  
ATOM    870  N   LEU L 106A     -0.845  16.367  -1.382  1.00 19.61           N  
ATOM    871  CA  LEU L 106A      0.427  16.947  -0.952  1.00 23.44           C  
ATOM    872  C   LEU L 106A      0.350  17.574   0.434  1.00 26.94           C  
ATOM    873  O   LEU L 106A     -0.727  17.897   0.922  1.00 27.94           O  
ATOM    874  CB  LEU L 106A      0.867  18.021  -1.948  1.00 26.18           C  
ATOM    875  CG  LEU L 106A      1.017  17.588  -3.405  1.00 29.36           C  
ATOM    876  CD1 LEU L 106A      1.073  18.802  -4.324  1.00 30.27           C  
ATOM    877  CD2 LEU L 106A      2.255  16.726  -3.566  1.00 30.74           C  
ATOM    878  N   ASP L 107       1.504  17.766   1.062  1.00 30.23           N  
ATOM    879  CA  ASP L 107       1.542  18.422   2.362  1.00 32.47           C  
ATOM    880  C   ASP L 107       1.208  19.904   2.225  1.00 34.05           C  
ATOM    881  O   ASP L 107       1.583  20.548   1.242  1.00 35.29           O  
ATOM    882  CB  ASP L 107       2.914  18.251   3.013  1.00 33.27           C  
TER     883      ASP L 107                                                      
ATOM    892  N   PRO L   2     -13.590 -11.918 -26.659  1.00 24.97           N  
ATOM    893  CA  PRO L   2     -14.098 -11.817 -25.288  1.00 20.94           C  
ATOM    894  C   PRO L   2     -13.443 -12.831 -24.354  1.00 19.30           C  
ATOM    895  O   PRO L   2     -13.223 -13.989 -24.714  1.00 21.47           O  
ATOM    896  CB  PRO L   2     -15.590 -12.130 -25.445  1.00 20.42           C  
ATOM    897  CG  PRO L   2     -15.899 -11.750 -26.856  1.00 22.63           C  
ATOM    898  CD  PRO L   2     -14.675 -12.107 -27.638  1.00 24.24           C  
ATOM    899  N   VAL L   3     -13.148 -12.382 -23.145  1.00 16.37           N  
ATOM    900  CA  VAL L   3     -12.500 -13.216 -22.151  1.00 13.85           C  
ATOM    901  C   VAL L   3     -13.522 -14.104 -21.433  1.00 12.55           C  
ATOM    902  O   VAL L   3     -13.187 -15.196 -20.971  1.00 13.62           O  
ATOM    903  CB  VAL L   3     -11.701 -12.341 -21.165  1.00 14.48           C  
ATOM    904  CG1 VAL L   3     -11.222 -13.140 -19.971  1.00 14.93           C  
ATOM    905  CG2 VAL L   3     -10.533 -11.692 -21.881  1.00 13.86           C  
ATOM    906  N   LEU L   4     -14.765 -13.638 -21.345  1.00  9.02           N  
ATOM    907  CA  LEU L   4     -15.828 -14.438 -20.745  1.00  8.27           C  
ATOM    908  C   LEU L   4     -16.609 -15.143 -21.857  1.00  9.08           C  
ATOM    909  O   LEU L   4     -16.773 -14.591 -22.954  1.00 10.32           O  
ATOM    910  CB  LEU L   4     -16.749 -13.561 -19.896  1.00  8.01           C  
ATOM    911  CG  LEU L   4     -16.039 -12.725 -18.824  1.00  8.05           C  
ATOM    912  CD1 LEU L   4     -17.027 -11.872 -18.014  1.00  8.39           C  
ATOM    913  CD2 LEU L   4     -15.213 -13.621 -17.904  1.00  9.28           C  
ATOM    914  N   THR L   5     -17.080 -16.359 -21.575  1.00  7.56           N  
ATOM    915  CA  THR L   5     -17.694 -17.209 -22.594  1.00  7.75           C  
ATOM    916  C   THR L   5     -19.211 -17.270 -22.435  1.00  5.72           C  
ATOM    917  O   THR L   5     -19.719 -17.682 -21.384  1.00  7.13           O  
ATOM    918  CB  THR L   5     -17.109 -18.641 -22.541  1.00 10.49           C  
ATOM    919  OG1 THR L   5     -15.709 -18.600 -22.846  1.00 12.93           O  
ATOM    920  CG2 THR L   5     -17.806 -19.568 -23.538  1.00 12.85           C  
ATOM    921  N   GLN L   6     -19.910 -16.846 -23.487  1.00  7.15           N  
ATOM    922  CA  GLN L   6     -21.368 -16.878 -23.555  1.00  7.05           C  
ATOM    923  C   GLN L   6     -21.795 -17.573 -24.844  1.00  7.82           C  
ATOM    924  O   GLN L   6     -21.102 -17.473 -25.859  1.00  9.90           O  
ATOM    925  CB  GLN L   6     -21.930 -15.452 -23.564  1.00  7.73           C  
ATOM    926  CG  GLN L   6     -21.627 -14.628 -22.317  1.00  6.96           C  
ATOM    927  CD  GLN L   6     -22.389 -13.313 -22.310  1.00  8.58           C  
ATOM    928  OE1 GLN L   6     -21.817 -12.244 -22.521  1.00  8.18           O  
ATOM    929  NE2 GLN L   6     -23.694 -13.391 -22.088  1.00 13.39           N  
ATOM    930  N   SER L   7     -22.937 -18.257 -24.827  1.00  6.76           N  
ATOM    931  CA  SER L   7     -23.507 -18.734 -26.091  1.00  6.20           C  
ATOM    932  C   SER L   7     -23.777 -17.547 -27.020  1.00  7.61           C  
ATOM    933  O   SER L   7     -24.335 -16.544 -26.595  1.00  8.62           O  
ATOM    934  CB  SER L   7     -24.819 -19.476 -25.857  1.00  7.98           C  
ATOM    935  OG  SER L   7     -25.330 -19.936 -27.097  1.00  7.31           O  
ATOM    936  N   PRO L   8     -23.401 -17.660 -28.301  1.00  7.88           N  
ATOM    937  CA  PRO L   8     -23.675 -16.524 -29.186  1.00  7.08           C  
ATOM    938  C   PRO L   8     -25.171 -16.240 -29.284  1.00  8.24           C  
ATOM    939  O   PRO L   8     -25.576 -15.082 -29.403  1.00  9.48           O  
ATOM    940  CB  PRO L   8     -23.128 -16.992 -30.540  1.00  9.09           C  
ATOM    941  CG  PRO L   8     -22.072 -17.999 -30.187  1.00 11.53           C  
ATOM    942  CD  PRO L   8     -22.594 -18.704 -28.956  1.00  8.81           C  
ATOM    943  N   SER L   9     -25.984 -17.292 -29.242  1.00  8.32           N  
ATOM    944  CA  SER L   9     -27.413 -17.126 -29.421  1.00  9.95           C  
ATOM    945  C   SER L   9     -28.198 -18.215 -28.726  1.00  9.69           C  
ATOM    946  O   SER L   9     -27.664 -19.271 -28.355  1.00 11.70           O  
ATOM    947  CB  SER L   9     -27.762 -17.119 -30.910  1.00 15.28           C  
ATOM    948  OG  SER L   9     -27.557 -18.394 -31.476  1.00 17.59           O  
ATOM    949  N   VAL L  11     -29.484 -17.943 -28.568  1.00 12.83           N  
ATOM    950  CA  VAL L  11     -30.437 -18.943 -28.138  1.00 15.08           C  
ATOM    951  C   VAL L  11     -31.814 -18.429 -28.540  1.00 15.99           C  
ATOM    952  O   VAL L  11     -32.006 -17.221 -28.704  1.00 16.36           O  
ATOM    953  CB  VAL L  11     -30.333 -19.191 -26.615  1.00 14.69           C  
ATOM    954  CG1 VAL L  11     -30.828 -17.988 -25.845  1.00 16.49           C  
ATOM    955  CG2 VAL L  11     -31.102 -20.439 -26.210  1.00 18.82           C  
ATOM    956  N   SER L  12     -32.752 -19.343 -28.756  1.00 17.05           N  
ATOM    957  CA  SER L  12     -34.127 -18.958 -29.039  1.00 15.52           C  
ATOM    958  C   SER L  12     -35.054 -19.569 -27.996  1.00 17.14           C  
ATOM    959  O   SER L  12     -34.684 -20.486 -27.269  1.00 17.79           O  
ATOM    960  CB  SER L  12     -34.557 -19.408 -30.443  1.00 17.84           C  
ATOM    961  OG  SER L  12     -33.767 -18.801 -31.459  1.00 20.94           O  
ATOM    962  N   GLY L  13     -36.264 -19.042 -27.918  1.00 16.42           N  
ATOM    963  CA  GLY L  13     -37.267 -19.615 -27.048  1.00 16.23           C  
ATOM    964  C   GLY L  13     -38.621 -19.066 -27.414  1.00 15.76           C  
ATOM    965  O   GLY L  13     -38.724 -18.085 -28.152  1.00 17.49           O  
ATOM    966  N   THR L  14     -39.662 -19.709 -26.908  1.00 16.80           N  
ATOM    967  CA  THR L  14     -41.020 -19.270 -27.172  1.00 17.84           C  
ATOM    968  C   THR L  14     -41.562 -18.598 -25.916  1.00 18.73           C  
ATOM    969  O   THR L  14     -41.002 -18.758 -24.827  1.00 17.66           O  
ATOM    970  CB  THR L  14     -41.922 -20.448 -27.604  1.00 17.61           C  
ATOM    971  OG1 THR L  14     -41.848 -21.490 -26.624  1.00 18.71           O  
ATOM    972  CG2 THR L  14     -41.473 -21.003 -28.964  1.00 19.19           C  
ATOM    973  N   PRO L  15     -42.638 -17.818 -26.061  1.00 19.61           N  
ATOM    974  CA  PRO L  15     -43.145 -17.093 -24.894  1.00 19.37           C  
ATOM    975  C   PRO L  15     -43.444 -18.029 -23.727  1.00 19.36           C  
ATOM    976  O   PRO L  15     -44.034 -19.104 -23.911  1.00 19.30           O  
ATOM    977  CB  PRO L  15     -44.427 -16.448 -25.420  1.00 20.75           C  
ATOM    978  CG  PRO L  15     -44.169 -16.272 -26.881  1.00 22.69           C  
ATOM    979  CD  PRO L  15     -43.375 -17.477 -27.290  1.00 21.04           C  
ATOM    980  N   GLY L  16     -43.015 -17.622 -22.536  1.00 19.25           N  
ATOM    981  CA  GLY L  16     -43.253 -18.385 -21.327  1.00 19.45           C  
ATOM    982  C   GLY L  16     -42.170 -19.392 -20.988  1.00 21.11           C  
ATOM    983  O   GLY L  16     -42.189 -19.981 -19.910  1.00 23.78           O  
ATOM    984  N   GLN L  17     -41.226 -19.602 -21.899  1.00 19.99           N  
ATOM    985  CA  GLN L  17     -40.160 -20.570 -21.648  1.00 20.86           C  
ATOM    986  C   GLN L  17     -39.080 -19.999 -20.747  1.00 19.55           C  
ATOM    987  O   GLN L  17     -38.765 -18.811 -20.814  1.00 21.83           O  
ATOM    988  CB  GLN L  17     -39.533 -21.051 -22.958  1.00 21.83           C  
ATOM    989  CG  GLN L  17     -40.427 -21.988 -23.743  1.00 22.55           C  
ATOM    990  CD  GLN L  17     -39.704 -22.683 -24.885  1.00 24.33           C  
ATOM    991  OE1 GLN L  17     -38.775 -22.133 -25.485  1.00 23.88           O  
ATOM    992  NE2 GLN L  17     -40.129 -23.903 -25.189  1.00 26.46           N  
ATOM    993  N   LYS L  18     -38.509 -20.853 -19.906  1.00 18.04           N  
ATOM    994  CA  LYS L  18     -37.358 -20.460 -19.109  1.00 17.11           C  
ATOM    995  C   LYS L  18     -36.086 -20.589 -19.924  1.00 16.33           C  
ATOM    996  O   LYS L  18     -35.833 -21.619 -20.552  1.00 19.71           O  
ATOM    997  CB  LYS L  18     -37.242 -21.303 -17.837  1.00 19.84           C  
ATOM    998  CG  LYS L  18     -36.031 -20.939 -16.988  1.00 22.21           C  
ATOM    999  CD  LYS L  18     -35.921 -21.812 -15.754  1.00 23.92           C  
ATOM   1000  CE  LYS L  18     -34.725 -21.412 -14.912  1.00 25.85           C  
ATOM   1001  NZ  LYS L  18     -34.515 -22.358 -13.774  1.00 28.70           N  
ATOM   1002  N   VAL L  19     -35.287 -19.530 -19.904  1.00 13.82           N  
ATOM   1004  CA  VAL L  19     -34.007 -19.493 -20.603  0.50 13.36           C  
ATOM   1005  C   VAL L  19     -32.911 -19.074 -19.635  1.00 12.97           C  
ATOM   1006  O   VAL L  19     -33.094 -18.129 -18.870  1.00 15.67           O  
ATOM   1008  CB  VAL L  19     -34.048 -18.486 -21.783  0.50 14.32           C  
ATOM   1010  CG1 VAL L  19     -32.643 -18.189 -22.304  0.50 15.39           C  
ATOM   1012  CG2 VAL L  19     -34.950 -19.001 -22.901  0.50 16.07           C  
ATOM   1013  N   THR L  20     -31.774 -19.758 -19.677  1.00 12.18           N  
ATOM   1014  CA  THR L  20     -30.642 -19.361 -18.862  1.00 12.63           C  
ATOM   1015  C   THR L  20     -29.464 -18.972 -19.747  1.00 12.92           C  
ATOM   1016  O   THR L  20     -29.075 -19.706 -20.665  1.00 13.89           O  
ATOM   1017  CB  THR L  20     -30.214 -20.461 -17.865  1.00 12.97           C  
ATOM   1018  OG1 THR L  20     -31.319 -20.790 -17.011  1.00 16.78           O  
ATOM   1019  CG2 THR L  20     -29.049 -19.976 -17.013  1.00 13.93           C  
ATOM   1020  N   ILE L  21     -28.931 -17.789 -19.468  1.00  9.68           N  
ATOM   1022  CA  ILE L  21     -27.767 -17.250 -20.164  0.51  8.96           C  
ATOM   1023  C   ILE L  21     -26.544 -17.480 -19.296  1.00  7.54           C  
ATOM   1024  O   ILE L  21     -26.527 -17.074 -18.150  1.00  8.47           O  
ATOM   1026  CB  ILE L  21     -27.894 -15.725 -20.369  0.51  8.86           C  
ATOM   1028  CG1 ILE L  21     -29.308 -15.344 -20.815  0.51 10.42           C  
ATOM   1030  CG2 ILE L  21     -26.840 -15.220 -21.351  0.51  9.00           C  
ATOM   1032  CD1 ILE L  21     -29.695 -15.890 -22.162  0.51 11.28           C  
ATOM   1033  N   PHE L  22     -25.527 -18.125 -19.845  1.00 10.49           N  
ATOM   1034  CA  PHE L  22     -24.328 -18.419 -19.076  1.00  9.22           C  
ATOM   1035  C   PHE L  22     -23.174 -17.477 -19.379  1.00  8.50           C  
ATOM   1036  O   PHE L  22     -23.125 -16.832 -20.425  1.00 11.30           O  
ATOM   1037  CB  PHE L  22     -23.918 -19.882 -19.269  1.00 11.13           C  
ATOM   1038  CG  PHE L  22     -24.856 -20.833 -18.613  1.00 12.60           C  
ATOM   1039  CD1 PHE L  22     -24.727 -21.127 -17.262  1.00 14.56           C  
ATOM   1040  CD2 PHE L  22     -25.918 -21.373 -19.318  1.00 14.82           C  
ATOM   1041  CE1 PHE L  22     -25.616 -21.983 -16.641  1.00 19.11           C  
ATOM   1042  CE2 PHE L  22     -26.806 -22.230 -18.705  1.00 16.90           C  
ATOM   1043  CZ  PHE L  22     -26.658 -22.536 -17.365  1.00 19.13           C  
ATOM   1044  N   CYS L  23     -22.240 -17.414 -18.442  1.00  8.43           N  
ATOM   1045  CA  CYS L  23     -21.113 -16.514 -18.540  1.00  9.82           C  
ATOM   1046  C   CYS L  23     -19.949 -17.155 -17.809  1.00  6.52           C  
ATOM   1047  O   CYS L  23     -19.787 -16.976 -16.602  1.00  9.52           O  
ATOM   1048  CB  CYS L  23     -21.475 -15.188 -17.881  1.00 11.31           C  
ATOM   1049  SG  CYS L  23     -20.092 -14.045 -17.751  1.00 12.02           S  
ATOM   1050  N   SER L  24     -19.159 -17.946 -18.522  1.00  7.89           N  
ATOM   1051  CA  SER L  24     -18.084 -18.659 -17.849  1.00  7.64           C  
ATOM   1052  C   SER L  24     -16.743 -17.932 -17.951  1.00  8.29           C  
ATOM   1053  O   SER L  24     -16.390 -17.359 -18.996  1.00  9.84           O  
ATOM   1054  CB  SER L  24     -17.997 -20.115 -18.328  1.00 13.97           C  
ATOM   1055  OG  SER L  24     -17.669 -20.178 -19.696  1.00 14.87           O  
ATOM   1056  N   GLY L  25     -16.017 -17.936 -16.841  1.00  8.62           N  
ATOM   1057  CA  GLY L  25     -14.755 -17.234 -16.751  1.00  8.44           C  
ATOM   1058  C   GLY L  25     -13.735 -18.042 -15.994  1.00  8.92           C  
ATOM   1059  O   GLY L  25     -13.719 -19.285 -16.068  1.00 11.24           O  
ATOM   1060  N   SER L  26     -12.902 -17.329 -15.244  1.00  8.86           N  
ATOM   1061  CA  SER L  26     -11.767 -17.914 -14.560  1.00  9.18           C  
ATOM   1062  C   SER L  26     -11.754 -17.536 -13.094  1.00  9.58           C  
ATOM   1063  O   SER L  26     -12.598 -16.762 -12.613  1.00 10.60           O  
ATOM   1064  CB  SER L  26     -10.473 -17.393 -15.182  1.00 11.01           C  
ATOM   1065  OG  SER L  26     -10.246 -16.059 -14.752  1.00 13.55           O  
ATOM   1066  N   SER L  27     -10.754 -18.054 -12.390  1.00 11.81           N  
ATOM   1067  CA  SER L  27     -10.587 -17.765 -10.976  1.00 12.93           C  
ATOM   1068  C   SER L  27     -10.203 -16.316 -10.714  1.00 14.65           C  
ATOM   1069  O   SER L  27     -10.274 -15.861  -9.579  1.00 18.23           O  
ATOM   1070  CB  SER L  27      -9.519 -18.675 -10.369  1.00 14.91           C  
ATOM   1071  OG  SER L  27      -8.255 -18.416 -10.953  1.00 17.46           O  
ATOM   1072  N   SER L  27A     -9.785 -15.594 -11.751  1.00 13.65           N  
ATOM   1073  CA  SER L  27A     -9.349 -14.213 -11.564  1.00 15.65           C  
ATOM   1074  C   SER L  27A    -10.365 -13.176 -12.032  1.00 13.61           C  
ATOM   1075  O   SER L  27A    -10.152 -11.977 -11.855  1.00 15.21           O  
ATOM   1076  CB  SER L  27A     -8.006 -13.979 -12.247  1.00 20.57           C  
ATOM   1077  OG  SER L  27A     -8.141 -14.033 -13.650  1.00 22.19           O  
ATOM   1078  N   ASN L  27B    -11.464 -13.622 -12.628  1.00 10.45           N  
ATOM   1079  CA  ASN L  27B    -12.537 -12.690 -12.958  1.00  8.62           C  
ATOM   1080  C   ASN L  27B    -13.847 -13.060 -12.261  1.00 10.27           C  
ATOM   1081  O   ASN L  27B    -14.075 -12.643 -11.128  1.00 11.65           O  
ATOM   1082  CB  ASN L  27B    -12.685 -12.413 -14.476  1.00 10.21           C  
ATOM   1083  CG  ASN L  27B    -12.673 -13.684 -15.342  1.00  9.87           C  
ATOM   1084  OD1 ASN L  27B    -13.482 -14.587 -15.155  1.00  9.53           O  
ATOM   1085  ND2 ASN L  27B    -11.783 -13.715 -16.339  1.00 10.09           N  
ATOM   1086  N   VAL L  28     -14.685 -13.850 -12.917  1.00  8.67           N  
ATOM   1087  CA  VAL L  28     -15.984 -14.204 -12.366  1.00  8.88           C  
ATOM   1088  C   VAL L  28     -15.915 -14.761 -10.950  1.00  9.74           C  
ATOM   1089  O   VAL L  28     -16.747 -14.433 -10.120  1.00  9.96           O  
ATOM   1090  CB  VAL L  28     -16.694 -15.223 -13.280  1.00  9.51           C  
ATOM   1091  CG1 VAL L  28     -17.910 -15.835 -12.574  1.00 10.81           C  
ATOM   1092  CG2 VAL L  28     -17.083 -14.551 -14.598  1.00 11.71           C  
ATOM   1093  N   GLU L  29     -14.935 -15.606 -10.661  1.00 10.30           N  
ATOM   1094  CA  GLU L  29     -14.975 -16.300  -9.380  1.00 11.45           C  
ATOM   1095  C   GLU L  29     -14.914 -15.341  -8.191  1.00 11.95           C  
ATOM   1096  O   GLU L  29     -15.598 -15.546  -7.184  1.00 13.99           O  
ATOM   1097  CB  GLU L  29     -13.869 -17.348  -9.264  1.00 12.35           C  
ATOM   1098  CG  GLU L  29     -13.985 -18.169  -7.990  1.00 14.37           C  
ATOM   1099  CD  GLU L  29     -13.289 -19.510  -8.083  1.00 20.92           C  
ATOM   1100  OE1 GLU L  29     -12.273 -19.609  -8.799  1.00 19.67           O  
ATOM   1101  OE2 GLU L  29     -13.774 -20.473  -7.445  1.00 28.09           O  
ATOM   1102  N   ASP L  30     -14.108 -14.290  -8.307  1.00 12.72           N  
ATOM   1103  CA  ASP L  30     -13.815 -13.452  -7.146  1.00 14.27           C  
ATOM   1104  C   ASP L  30     -14.096 -11.964  -7.343  1.00 11.99           C  
ATOM   1105  O   ASP L  30     -13.729 -11.138  -6.498  1.00 14.79           O  
ATOM   1106  CB  ASP L  30     -12.369 -13.666  -6.692  1.00 16.54           C  
ATOM   1107  CG  ASP L  30     -11.356 -13.144  -7.691  1.00 19.67           C  
ATOM   1108  OD1 ASP L  30     -11.640 -13.173  -8.905  1.00 20.23           O  
ATOM   1109  OD2 ASP L  30     -10.269 -12.695  -7.259  1.00 25.70           O  
ATOM   1110  N   ASN L  31     -14.758 -11.627  -8.447  1.00 10.07           N  
ATOM   1111  CA  ASN L  31     -15.133 -10.248  -8.718  1.00  9.75           C  
ATOM   1112  C   ASN L  31     -16.612 -10.116  -9.013  1.00  9.06           C  
ATOM   1113  O   ASN L  31     -17.241 -11.055  -9.517  1.00 10.52           O  
ATOM   1114  CB  ASN L  31     -14.329  -9.691  -9.891  1.00 10.36           C  
ATOM   1115  CG  ASN L  31     -12.876  -9.478  -9.541  1.00 12.07           C  
ATOM   1116  OD1 ASN L  31     -12.509  -8.443  -8.992  1.00 13.08           O  
ATOM   1117  ND2 ASN L  31     -12.041 -10.470  -9.838  1.00 12.61           N  
ATOM   1118  N   SER L  32     -17.159  -8.940  -8.719  1.00 10.33           N  
ATOM   1119  CA  SER L  32     -18.563  -8.663  -8.990  1.00 10.32           C  
ATOM   1120  C   SER L  32     -18.877  -8.805 -10.462  1.00 10.31           C  
ATOM   1121  O   SER L  32     -18.204  -8.224 -11.314  1.00 11.13           O  
ATOM   1122  CB  SER L  32     -18.926  -7.257  -8.542  1.00 12.68           C  
ATOM   1123  OG  SER L  32     -18.836  -7.163  -7.138  1.00 17.49           O  
ATOM   1124  N   VAL L  33     -19.925  -9.568 -10.748  1.00 10.32           N  
ATOM   1125  CA  VAL L  33     -20.393  -9.747 -12.104  1.00  9.26           C  
ATOM   1126  C   VAL L  33     -21.611  -8.861 -12.346  1.00  8.98           C  
ATOM   1127  O   VAL L  33     -22.512  -8.766 -11.497  1.00 10.22           O  
ATOM   1128  CB  VAL L  33     -20.745 -11.223 -12.390  1.00  9.26           C  
ATOM   1129  CG1 VAL L  33     -21.301 -11.360 -13.807  1.00 10.93           C  
ATOM   1130  CG2 VAL L  33     -19.512 -12.101 -12.223  1.00 10.31           C  
ATOM   1131  N   TYR L  34     -21.622  -8.200 -13.497  1.00  6.74           N  
ATOM   1132  CA  TYR L  34     -22.742  -7.351 -13.894  1.00  5.96           C  
ATOM   1133  C   TYR L  34     -23.340  -7.890 -15.178  1.00  7.60           C  
ATOM   1134  O   TYR L  34     -22.625  -8.423 -16.025  1.00  7.78           O  
ATOM   1135  CB  TYR L  34     -22.277  -5.907 -14.124  1.00  6.61           C  
ATOM   1136  CG  TYR L  34     -21.526  -5.302 -12.962  1.00  8.19           C  
ATOM   1137  CD1 TYR L  34     -22.155  -4.433 -12.081  1.00  8.86           C  
ATOM   1138  CD2 TYR L  34     -20.180  -5.594 -12.752  1.00  9.08           C  
ATOM   1139  CE1 TYR L  34     -21.466  -3.882 -11.016  1.00  9.66           C  
ATOM   1140  CE2 TYR L  34     -19.485  -5.043 -11.695  1.00 10.63           C  
ATOM   1141  CZ  TYR L  34     -20.134  -4.189 -10.828  1.00 10.16           C  
ATOM   1142  OH  TYR L  34     -19.439  -3.633  -9.770  1.00 13.37           O  
ATOM   1143  N   TRP L  35     -24.652  -7.740 -15.325  1.00  8.22           N  
ATOM   1144  CA  TRP L  35     -25.328  -8.140 -16.551  1.00  7.48           C  
ATOM   1145  C   TRP L  35     -26.075  -6.962 -17.122  1.00  7.17           C  
ATOM   1146  O   TRP L  35     -26.759  -6.249 -16.383  1.00  8.12           O  
ATOM   1147  CB  TRP L  35     -26.353  -9.230 -16.257  1.00  7.88           C  
ATOM   1148  CG  TRP L  35     -25.777 -10.552 -15.906  1.00  6.41           C  
ATOM   1149  CD1 TRP L  35     -25.423 -10.997 -14.663  1.00  6.80           C  
ATOM   1150  CD2 TRP L  35     -25.506 -11.624 -16.811  1.00  6.98           C  
ATOM   1151  NE1 TRP L  35     -24.950 -12.281 -14.742  1.00  7.08           N  
ATOM   1152  CE2 TRP L  35     -25.002 -12.697 -16.049  1.00  7.42           C  
ATOM   1153  CE3 TRP L  35     -25.659 -11.784 -18.187  1.00  7.61           C  
ATOM   1154  CZ2 TRP L  35     -24.622 -13.908 -16.624  1.00  8.42           C  
ATOM   1155  CZ3 TRP L  35     -25.302 -12.985 -18.757  1.00  8.85           C  
ATOM   1156  CH2 TRP L  35     -24.786 -14.038 -17.978  1.00  9.40           C  
ATOM   1157  N   TYR L  36     -25.962  -6.759 -18.428  1.00  7.39           N  
ATOM   1158  CA  TYR L  36     -26.771  -5.750 -19.091  1.00  7.59           C  
ATOM   1159  C   TYR L  36     -27.453  -6.270 -20.344  1.00  7.30           C  
ATOM   1160  O   TYR L  36     -27.025  -7.255 -20.946  1.00  7.82           O  
ATOM   1161  CB  TYR L  36     -25.970  -4.476 -19.373  1.00 10.06           C  
ATOM   1162  CG  TYR L  36     -24.833  -4.595 -20.366  1.00 11.12           C  
ATOM   1163  CD1 TYR L  36     -23.549  -4.907 -19.946  1.00 12.70           C  
ATOM   1164  CD2 TYR L  36     -25.040  -4.354 -21.719  1.00 12.24           C  
ATOM   1165  CE1 TYR L  36     -22.499  -4.990 -20.854  1.00 14.14           C  
ATOM   1166  CE2 TYR L  36     -24.005  -4.434 -22.623  1.00 14.25           C  
ATOM   1167  CZ  TYR L  36     -22.738  -4.750 -22.190  1.00 14.58           C  
ATOM   1168  OH  TYR L  36     -21.712  -4.822 -23.101  1.00 18.01           O  
ATOM   1169  N   GLN L  37     -28.523  -5.577 -20.718  1.00  8.50           N  
ATOM   1170  CA  GLN L  37     -29.414  -5.963 -21.791  1.00 11.09           C  
ATOM   1171  C   GLN L  37     -29.338  -4.871 -22.841  1.00 11.93           C  
ATOM   1172  O   GLN L  37     -29.502  -3.693 -22.517  1.00 14.84           O  
ATOM   1173  CB  GLN L  37     -30.830  -6.035 -21.209  1.00 12.11           C  
ATOM   1174  CG  GLN L  37     -31.943  -6.412 -22.151  1.00 15.13           C  
ATOM   1175  CD  GLN L  37     -33.287  -6.188 -21.499  1.00 16.72           C  
ATOM   1176  OE1 GLN L  37     -33.546  -5.116 -20.941  1.00 17.74           O  
ATOM   1177  NE2 GLN L  37     -34.138  -7.202 -21.532  1.00 16.25           N  
ATOM   1178  N   GLN L  38     -29.062  -5.251 -24.083  1.00 13.14           N  
ATOM   1179  CA  GLN L  38     -28.937  -4.289 -25.166  1.00 17.26           C  
ATOM   1180  C   GLN L  38     -29.920  -4.579 -26.299  1.00 18.69           C  
ATOM   1181  O   GLN L  38     -29.928  -5.672 -26.870  1.00 17.60           O  
ATOM   1182  CB  GLN L  38     -27.509  -4.283 -25.713  1.00 18.71           C  
ATOM   1183  CG  GLN L  38     -27.316  -3.316 -26.867  1.00 23.51           C  
ATOM   1184  CD  GLN L  38     -25.945  -3.412 -27.500  1.00 24.94           C  
ATOM   1185  OE1 GLN L  38     -25.626  -2.666 -28.423  1.00 28.85           O  
ATOM   1186  NE2 GLN L  38     -25.125  -4.323 -27.005  1.00 27.59           N  
ATOM   1187  N   PHE L  39     -30.754  -3.589 -26.608  1.00 23.66           N  
ATOM   1188  CA  PHE L  39     -31.618  -3.624 -27.779  1.00 27.21           C  
ATOM   1189  C   PHE L  39     -30.948  -2.827 -28.890  1.00 27.66           C  
ATOM   1190  O   PHE L  39     -30.215  -1.876 -28.617  1.00 27.46           O  
ATOM   1191  CB  PHE L  39     -32.986  -3.007 -27.461  1.00 28.64           C  
ATOM   1192  CG  PHE L  39     -33.738  -3.717 -26.367  1.00 30.73           C  
ATOM   1193  CD1 PHE L  39     -34.573  -4.786 -26.660  1.00 31.76           C  
ATOM   1194  CD2 PHE L  39     -33.616  -3.314 -25.047  1.00 32.32           C  
ATOM   1195  CE1 PHE L  39     -35.269  -5.440 -25.653  1.00 30.84           C  
ATOM   1196  CE2 PHE L  39     -34.311  -3.964 -24.038  1.00 31.76           C  
ATOM   1197  CZ  PHE L  39     -35.141  -5.027 -24.343  1.00 30.68           C  
ATOM   1198  N   PRO L  40     -31.193  -3.212 -30.151  1.00 30.80           N  
ATOM   1199  CA  PRO L  40     -30.606  -2.502 -31.292  1.00 32.27           C  
ATOM   1200  C   PRO L  40     -30.943  -1.015 -31.250  1.00 32.69           C  
ATOM   1201  O   PRO L  40     -32.118  -0.658 -31.161  1.00 33.29           O  
ATOM   1202  CB  PRO L  40     -31.282  -3.163 -32.498  1.00 31.75           C  
ATOM   1203  CG  PRO L  40     -31.662  -4.531 -32.017  1.00 32.86           C  
ATOM   1204  CD  PRO L  40     -32.021  -4.358 -30.568  1.00 32.34           C  
ATOM   1205  N   GLY L  41     -29.919  -0.167 -31.296  1.00 33.78           N  
ATOM   1206  CA  GLY L  41     -30.102   1.274 -31.359  1.00 34.07           C  
ATOM   1207  C   GLY L  41     -30.700   1.890 -30.108  1.00 35.06           C  
ATOM   1208  O   GLY L  41     -31.234   3.002 -30.150  1.00 34.44           O  
ATOM   1209  N   THR L  42     -30.603   1.170 -28.994  1.00 33.10           N  
ATOM   1210  CA  THR L  42     -31.199   1.610 -27.737  1.00 33.26           C  
ATOM   1211  C   THR L  42     -30.178   1.668 -26.607  1.00 30.05           C  
ATOM   1212  O   THR L  42     -29.209   0.909 -26.585  1.00 29.70           O  
ATOM   1213  CB  THR L  42     -32.338   0.669 -27.299  1.00 37.09           C  
ATOM   1214  OG1 THR L  42     -33.304   0.560 -28.350  1.00 40.91           O  
ATOM   1215  CG2 THR L  42     -33.017   1.191 -26.041  1.00 38.02           C  
ATOM   1216  N   THR L  43     -30.412   2.578 -25.668  1.00 27.81           N  
ATOM   1217  CA  THR L  43     -29.640   2.656 -24.439  1.00 25.19           C  
ATOM   1218  C   THR L  43     -29.692   1.311 -23.701  1.00 22.35           C  
ATOM   1219  O   THR L  43     -30.769   0.795 -23.447  1.00 23.42           O  
ATOM   1220  CB  THR L  43     -30.241   3.728 -23.514  1.00 28.68           C  
ATOM   1221  OG1 THR L  43     -30.507   4.928 -24.261  1.00 31.43           O  
ATOM   1222  CG2 THR L  43     -29.300   4.030 -22.361  1.00 29.40           C  
ATOM   1223  N   PRO L  44     -28.531   0.740 -23.347  1.00 21.02           N  
ATOM   1224  CA  PRO L  44     -28.553  -0.538 -22.618  1.00 19.59           C  
ATOM   1225  C   PRO L  44     -29.059  -0.355 -21.200  1.00 16.68           C  
ATOM   1226  O   PRO L  44     -29.022   0.759 -20.674  1.00 19.31           O  
ATOM   1227  CB  PRO L  44     -27.075  -0.943 -22.564  1.00 24.07           C  
ATOM   1228  CG  PRO L  44     -26.404  -0.122 -23.607  1.00 25.70           C  
ATOM   1229  CD  PRO L  44     -27.160   1.175 -23.646  1.00 25.56           C  
ATOM   1230  N   LYS L  45     -29.518  -1.436 -20.583  1.00 13.84           N  
ATOM   1231  CA  LYS L  45     -29.959  -1.392 -19.195  1.00 14.43           C  
ATOM   1232  C   LYS L  45     -29.191  -2.418 -18.376  1.00 11.94           C  
ATOM   1233  O   LYS L  45     -29.081  -3.585 -18.766  1.00 11.63           O  
ATOM   1234  CB  LYS L  45     -31.459  -1.675 -19.091  1.00 18.87           C  
ATOM   1235  CG  LYS L  45     -32.340  -0.680 -19.839  1.00 25.66           C  
ATOM   1236  CD  LYS L  45     -32.094   0.747 -19.385  1.00 31.30           C  
ATOM   1237  CE  LYS L  45     -32.969   1.726 -20.161  1.00 34.39           C  
ATOM   1238  NZ  LYS L  45     -32.752   1.623 -21.636  1.00 36.78           N  
ATOM   1239  N   VAL L  46     -28.637  -1.982 -17.251  1.00 11.28           N  
ATOM   1240  CA  VAL L  46     -27.978  -2.905 -16.342  1.00 10.50           C  
ATOM   1241  C   VAL L  46     -29.052  -3.616 -15.525  1.00 11.40           C  
ATOM   1242  O   VAL L  46     -29.812  -2.978 -14.804  1.00 13.99           O  
ATOM   1243  CB  VAL L  46     -26.998  -2.175 -15.407  1.00 12.08           C  
ATOM   1244  CG1 VAL L  46     -26.448  -3.142 -14.363  1.00 13.12           C  
ATOM   1245  CG2 VAL L  46     -25.870  -1.527 -16.217  1.00 16.38           C  
ATOM   1246  N   LEU L  47     -29.126  -4.939 -15.665  1.00  8.44           N  
ATOM   1247  CA  LEU L  47     -30.162  -5.723 -15.003  1.00  7.94           C  
ATOM   1248  C   LEU L  47     -29.724  -6.255 -13.650  1.00  8.26           C  
ATOM   1249  O   LEU L  47     -30.529  -6.330 -12.715  1.00  9.73           O  
ATOM   1250  CB  LEU L  47     -30.571  -6.914 -15.873  1.00  9.81           C  
ATOM   1251  CG  LEU L  47     -31.137  -6.590 -17.256  1.00 11.73           C  
ATOM   1252  CD1 LEU L  47     -31.662  -7.869 -17.915  1.00 14.95           C  
ATOM   1253  CD2 LEU L  47     -32.235  -5.527 -17.163  1.00 15.88           C  
ATOM   1254  N   ILE L  48     -28.455  -6.654 -13.562  1.00  9.19           N  
ATOM   1255  CA  ILE L  48     -27.919  -7.282 -12.362  1.00  8.12           C  
ATOM   1256  C   ILE L  48     -26.589  -6.636 -12.028  1.00  8.93           C  
ATOM   1257  O   ILE L  48     -25.757  -6.431 -12.916  1.00  9.76           O  
ATOM   1258  CB  ILE L  48     -27.655  -8.795 -12.597  1.00  9.06           C  
ATOM   1259  CG1 ILE L  48     -28.944  -9.544 -12.956  1.00  9.73           C  
ATOM   1260  CG2 ILE L  48     -26.940  -9.429 -11.398  1.00  9.61           C  
ATOM   1261  CD1 ILE L  48     -29.984  -9.603 -11.846  1.00 12.38           C  
ATOM   1262  N   TYR L  49     -26.383  -6.326 -10.752  1.00  9.04           N  
ATOM   1263  CA  TYR L  49     -25.088  -5.849 -10.276  1.00 10.10           C  
ATOM   1264  C   TYR L  49     -24.649  -6.730  -9.105  1.00  9.91           C  
ATOM   1265  O   TYR L  49     -25.466  -7.402  -8.490  1.00 10.44           O  
ATOM   1266  CB  TYR L  49     -25.146  -4.358  -9.884  1.00 12.51           C  
ATOM   1267  CG  TYR L  49     -26.087  -4.055  -8.748  1.00 13.13           C  
ATOM   1268  CD1 TYR L  49     -27.454  -3.927  -8.970  1.00 12.92           C  
ATOM   1269  CD2 TYR L  49     -25.614  -3.907  -7.450  1.00 13.94           C  
ATOM   1270  CE1 TYR L  49     -28.321  -3.655  -7.932  1.00 13.86           C  
ATOM   1271  CE2 TYR L  49     -26.479  -3.629  -6.402  1.00 15.23           C  
ATOM   1272  CZ  TYR L  49     -27.831  -3.512  -6.652  1.00 14.00           C  
ATOM   1273  OH  TYR L  49     -28.711  -3.239  -5.622  1.00 17.18           O  
ATOM   1274  N   ASN L  50     -23.356  -6.744  -8.808  1.00 11.83           N  
ATOM   1275  CA  ASN L  50     -22.859  -7.516  -7.666  1.00 12.74           C  
ATOM   1276  C   ASN L  50     -23.332  -8.969  -7.661  1.00 12.32           C  
ATOM   1277  O   ASN L  50     -23.789  -9.482  -6.633  1.00 13.65           O  
ATOM   1278  CB  ASN L  50     -23.238  -6.835  -6.347  1.00 15.15           C  
ATOM   1279  CG  ASN L  50     -22.573  -5.490  -6.184  1.00 18.05           C  
ATOM   1280  OD1 ASN L  50     -21.931  -4.987  -7.102  1.00 19.82           O  
ATOM   1281  ND2 ASN L  50     -22.722  -4.897  -5.009  1.00 20.72           N  
ATOM   1282  N   ASP L  51     -23.221  -9.616  -8.819  1.00 11.48           N  
ATOM   1283  CA  ASP L  51     -23.512 -11.043  -8.993  1.00 11.25           C  
ATOM   1284  C   ASP L  51     -24.997 -11.385  -9.043  1.00 10.37           C  
ATOM   1285  O   ASP L  51     -25.435 -12.104  -9.948  1.00 12.16           O  
ATOM   1286  CB  ASP L  51     -22.848 -11.921  -7.922  1.00 11.45           C  
ATOM   1287  CG  ASP L  51     -21.369 -11.646  -7.758  1.00 13.64           C  
ATOM   1288  OD1 ASP L  51     -20.680 -11.430  -8.766  1.00 12.33           O  
ATOM   1289  OD2 ASP L  51     -20.893 -11.679  -6.600  1.00 17.96           O  
ATOM   1290  N   ASP L  52     -25.767 -10.906  -8.068  1.00 10.94           N  
ATOM   1291  CA  ASP L  52     -27.129 -11.420  -7.895  1.00 11.98           C  
ATOM   1292  C   ASP L  52     -28.160 -10.383  -7.460  1.00 11.48           C  
ATOM   1293  O   ASP L  52     -29.275 -10.739  -7.062  1.00 12.87           O  
ATOM   1294  CB  ASP L  52     -27.145 -12.616  -6.929  1.00 13.84           C  
ATOM   1295  CG  ASP L  52     -26.711 -12.252  -5.515  1.00 16.84           C  
ATOM   1296  OD1 ASP L  52     -26.485 -11.055  -5.248  1.00 16.68           O  
ATOM   1297  OD2 ASP L  52     -26.619 -13.173  -4.659  1.00 19.76           O  
ATOM   1298  N   ARG L  53     -27.796  -9.107  -7.539  1.00 10.67           N  
ATOM   1299  CA  ARG L  53     -28.702  -8.048  -7.123  1.00 11.99           C  
ATOM   1300  C   ARG L  53     -29.406  -7.448  -8.329  1.00 12.03           C  
ATOM   1301  O   ARG L  53     -28.768  -7.029  -9.291  1.00 11.61           O  
ATOM   1302  CB  ARG L  53     -27.952  -6.987  -6.314  1.00 13.30           C  
ATOM   1303  CG  ARG L  53     -27.276  -7.582  -5.087  1.00 16.68           C  
ATOM   1304  CD  ARG L  53     -26.574  -6.547  -4.238  1.00 23.19           C  
ATOM   1305  NE  ARG L  53     -27.476  -5.485  -3.803  1.00 27.88           N  
ATOM   1306  CZ  ARG L  53     -27.112  -4.486  -3.006  1.00 30.82           C  
ATOM   1307  NH1 ARG L  53     -25.866  -4.422  -2.554  1.00 33.42           N  
ATOM   1308  NH2 ARG L  53     -27.988  -3.553  -2.664  1.00 31.47           N  
ATOM   1309  N   ARG L  54     -30.731  -7.455  -8.285  1.00 12.50           N  
ATOM   1310  CA  ARG L  54     -31.532  -6.932  -9.376  1.00 12.12           C  
ATOM   1311  C   ARG L  54     -31.620  -5.412  -9.292  1.00 12.24           C  
ATOM   1312  O   ARG L  54     -31.970  -4.861  -8.248  1.00 14.53           O  
ATOM   1313  CB  ARG L  54     -32.936  -7.539  -9.312  1.00 17.36           C  
ATOM   1314  CG  ARG L  54     -33.798  -7.246 -10.515  1.00 23.40           C  
ATOM   1315  CD  ARG L  54     -35.145  -7.950 -10.434  1.00 29.77           C  
ATOM   1316  NE  ARG L  54     -34.999  -9.384 -10.232  1.00 32.75           N  
ATOM   1317  CZ  ARG L  54     -35.356 -10.020  -9.122  1.00 34.27           C  
ATOM   1318  NH1 ARG L  54     -35.893  -9.346  -8.113  1.00 36.33           N  
ATOM   1319  NH2 ARG L  54     -35.182 -11.330  -9.024  1.00 32.75           N  
ATOM   1320  N   SER L  55     -31.319  -4.734 -10.391  1.00 11.41           N  
ATOM   1321  CA  SER L  55     -31.488  -3.288 -10.442  1.00 12.29           C  
ATOM   1322  C   SER L  55     -32.954  -2.936 -10.247  1.00 13.01           C  
ATOM   1323  O   SER L  55     -33.841  -3.712 -10.610  1.00 14.22           O  
ATOM   1324  CB  SER L  55     -31.000  -2.737 -11.779  1.00 11.36           C  
ATOM   1325  OG  SER L  55     -29.621  -2.986 -11.937  1.00 13.62           O  
ATOM   1326  N   SER L  56     -33.212  -1.767  -9.677  1.00 14.42           N  
ATOM   1327  CA  SER L  56     -34.586  -1.351  -9.430  0.51 15.76           C  
ATOM   1329  C   SER L  56     -35.394  -1.370 -10.721  1.00 15.56           C  
ATOM   1330  O   SER L  56     -34.930  -0.916 -11.762  1.00 15.81           O  
ATOM   1331  CB  SER L  56     -34.627   0.042  -8.800  0.51 18.36           C  
ATOM   1333  OG  SER L  56     -34.043   0.035  -7.509  0.51 19.46           O  
ATOM   1335  N   GLY L  57     -36.604  -1.913 -10.648  1.00 16.70           N  
ATOM   1336  CA  GLY L  57     -37.484  -1.940 -11.797  1.00 18.23           C  
ATOM   1337  C   GLY L  57     -37.350  -3.159 -12.686  1.00 17.88           C  
ATOM   1338  O   GLY L  57     -38.242  -3.433 -13.477  1.00 21.14           O  
ATOM   1339  N   VAL L  58     -36.241  -3.886 -12.576  1.00 16.92           N  
ATOM   1340  CA  VAL L  58     -36.042  -5.071 -13.407  1.00 16.26           C  
ATOM   1341  C   VAL L  58     -37.116  -6.109 -13.060  1.00 18.29           C  
ATOM   1342  O   VAL L  58     -37.355  -6.379 -11.882  1.00 18.72           O  
ATOM   1343  CB  VAL L  58     -34.612  -5.645 -13.233  1.00 15.49           C  
ATOM   1344  CG1 VAL L  58     -34.447  -6.953 -13.995  1.00 15.89           C  
ATOM   1345  CG2 VAL L  58     -33.580  -4.637 -13.700  1.00 14.88           C  
ATOM   1346  N   PRO L  59     -37.790  -6.670 -14.087  1.00 18.48           N  
ATOM   1347  CA  PRO L  59     -38.884  -7.617 -13.853  1.00 19.79           C  
ATOM   1348  C   PRO L  59     -38.460  -8.798 -12.991  1.00 21.39           C  
ATOM   1349  O   PRO L  59     -37.291  -9.205 -13.021  1.00 19.58           O  
ATOM   1350  CB  PRO L  59     -39.248  -8.082 -15.264  1.00 20.35           C  
ATOM   1351  CG  PRO L  59     -38.945  -6.901 -16.115  1.00 21.02           C  
ATOM   1352  CD  PRO L  59     -37.667  -6.334 -15.519  1.00 20.17           C  
ATOM   1353  N   ASP L  60     -39.418  -9.324 -12.231  1.00 22.55           N  
ATOM   1354  CA  ASP L  60     -39.196 -10.446 -11.325  1.00 22.86           C  
ATOM   1355  C   ASP L  60     -38.605 -11.648 -12.045  1.00 20.02           C  
ATOM   1356  O   ASP L  60     -37.927 -12.470 -11.432  1.00 21.30           O  
ATOM   1357  CB  ASP L  60     -40.514 -10.906 -10.685  1.00 25.52           C  
ATOM   1358  CG  ASP L  60     -41.151  -9.856  -9.789  1.00 27.05           C  
ATOM   1359  OD1 ASP L  60     -40.485  -8.856  -9.440  1.00 28.44           O  
ATOM   1360  OD2 ASP L  60     -42.333 -10.055  -9.420  1.00 27.41           O  
ATOM   1361  N   ARG L  61     -38.886 -11.771 -13.340  1.00 18.68           N  
ATOM   1362  CA  ARG L  61     -38.465 -12.961 -14.077  1.00 16.50           C  
ATOM   1363  C   ARG L  61     -36.954 -13.077 -14.296  1.00 15.41           C  
ATOM   1364  O   ARG L  61     -36.469 -14.123 -14.720  1.00 13.91           O  
ATOM   1365  CB  ARG L  61     -39.222 -13.090 -15.404  1.00 18.58           C  
ATOM   1366  CG  ARG L  61     -38.944 -11.997 -16.416  1.00 17.89           C  
ATOM   1367  CD  ARG L  61     -39.824 -12.195 -17.655  1.00 18.41           C  
ATOM   1368  NE  ARG L  61     -39.644 -11.122 -18.617  1.00 19.85           N  
ATOM   1369  CZ  ARG L  61     -40.242  -9.939 -18.540  1.00 19.28           C  
ATOM   1370  NH1 ARG L  61     -41.078  -9.676 -17.539  1.00 20.04           N  
ATOM   1371  NH2 ARG L  61     -40.005  -9.020 -19.470  1.00 21.69           N  
ATOM   1372  N   PHE L  62     -36.214 -12.013 -14.002  1.00 15.73           N  
ATOM   1373  CA  PHE L  62     -34.759 -12.027 -14.169  1.00 12.61           C  
ATOM   1374  C   PHE L  62     -34.064 -12.322 -12.845  1.00 13.52           C  
ATOM   1375  O   PHE L  62     -34.377 -11.714 -11.824  1.00 15.65           O  
ATOM   1376  CB  PHE L  62     -34.263 -10.673 -14.699  1.00 13.52           C  
ATOM   1377  CG  PHE L  62     -34.702 -10.371 -16.104  1.00 13.34           C  
ATOM   1378  CD1 PHE L  62     -33.960 -10.815 -17.187  1.00 13.56           C  
ATOM   1379  CD2 PHE L  62     -35.861  -9.643 -16.343  1.00 18.09           C  
ATOM   1380  CE1 PHE L  62     -34.367 -10.544 -18.481  1.00 14.70           C  
ATOM   1381  CE2 PHE L  62     -36.270  -9.366 -17.635  1.00 17.87           C  
ATOM   1382  CZ  PHE L  62     -35.521  -9.823 -18.707  1.00 16.89           C  
ATOM   1383  N   SER L  63     -33.110 -13.242 -12.855  1.00 12.50           N  
ATOM   1384  CA  SER L  63     -32.309 -13.480 -11.664  1.00 13.95           C  
ATOM   1385  C   SER L  63     -30.875 -13.849 -12.015  1.00 11.43           C  
ATOM   1386  O   SER L  63     -30.612 -14.580 -12.970  1.00 15.19           O  
ATOM   1387  CB  SER L  63     -32.931 -14.549 -10.776  1.00 18.78           C  
ATOM   1388  OG  SER L  63     -33.077 -15.762 -11.477  1.00 21.08           O  
ATOM   1389  N   GLY L  64     -29.941 -13.323 -11.245  1.00 10.16           N  
ATOM   1390  CA  GLY L  64     -28.543 -13.604 -11.496  1.00 10.44           C  
ATOM   1391  C   GLY L  64     -27.952 -14.426 -10.377  1.00 11.06           C  
ATOM   1392  O   GLY L  64     -28.357 -14.303  -9.218  1.00 11.91           O  
ATOM   1393  N   SER L  65     -26.984 -15.265 -10.717  1.00  9.77           N  
ATOM   1394  CA  SER L  65     -26.263 -16.018  -9.703  1.00  9.82           C  
ATOM   1395  C   SER L  65     -24.888 -16.396 -10.231  1.00  8.32           C  
ATOM   1396  O   SER L  65     -24.599 -16.207 -11.406  1.00  8.60           O  
ATOM   1397  CB  SER L  65     -27.041 -17.270  -9.306  1.00 13.80           C  
ATOM   1398  OG  SER L  65     -27.098 -18.186 -10.380  1.00 16.94           O  
ATOM   1399  N   LYS L  66     -24.040 -16.937  -9.364  1.00  9.45           N  
ATOM   1400  CA  LYS L  66     -22.775 -17.497  -9.818  1.00  9.76           C  
ATOM   1401  C   LYS L  66     -22.281 -18.545  -8.836  1.00  9.56           C  
ATOM   1402  O   LYS L  66     -22.657 -18.547  -7.664  1.00 11.92           O  
ATOM   1403  CB  LYS L  66     -21.711 -16.415 -10.030  1.00 11.22           C  
ATOM   1404  CG  LYS L  66     -21.077 -15.867  -8.767  1.00 12.29           C  
ATOM   1405  CD  LYS L  66     -20.049 -14.801  -9.129  1.00 12.56           C  
ATOM   1406  CE  LYS L  66     -19.301 -14.332  -7.912  1.00 11.93           C  
ATOM   1407  NZ  LYS L  66     -18.464 -13.136  -8.216  1.00 10.95           N  
ATOM   1408  N   SER L  67     -21.441 -19.442  -9.333  1.00  9.56           N  
ATOM   1409  CA  SER L  67     -20.815 -20.458  -8.512  1.00 11.28           C  
ATOM   1410  C   SER L  67     -19.501 -20.815  -9.190  1.00 10.42           C  
ATOM   1411  O   SER L  67     -19.444 -20.924 -10.412  1.00 10.30           O  
ATOM   1412  CB  SER L  67     -21.720 -21.694  -8.427  1.00 15.98           C  
ATOM   1413  OG  SER L  67     -21.086 -22.763  -7.751  1.00 22.17           O  
ATOM   1414  N   GLY L  68     -18.440 -21.001  -8.415  1.00 11.98           N  
ATOM   1415  CA  GLY L  68     -17.158 -21.301  -9.021  1.00 11.26           C  
ATOM   1416  C   GLY L  68     -16.771 -20.190  -9.979  1.00 10.61           C  
ATOM   1417  O   GLY L  68     -16.833 -19.010  -9.620  1.00 11.88           O  
ATOM   1418  N   THR L  69     -16.386 -20.554 -11.203  1.00  9.70           N  
ATOM   1419  CA  THR L  69     -15.931 -19.565 -12.180  1.00 10.36           C  
ATOM   1420  C   THR L  69     -16.989 -19.219 -13.226  1.00 10.33           C  
ATOM   1421  O   THR L  69     -16.674 -18.621 -14.257  1.00 11.30           O  
ATOM   1422  CB  THR L  69     -14.664 -20.038 -12.937  1.00 10.41           C  
ATOM   1423  OG1 THR L  69     -14.997 -21.139 -13.789  1.00  9.60           O  
ATOM   1424  CG2 THR L  69     -13.551 -20.440 -11.979  1.00 10.63           C  
ATOM   1425  N   SER L  70     -18.240 -19.582 -12.970  1.00  9.41           N  
ATOM   1426  CA  SER L  70     -19.295 -19.347 -13.957  1.00  9.37           C  
ATOM   1427  C   SER L  70     -20.505 -18.628 -13.360  1.00  8.94           C  
ATOM   1428  O   SER L  70     -20.941 -18.929 -12.241  1.00  9.78           O  
ATOM   1429  CB  SER L  70     -19.716 -20.668 -14.608  1.00 11.27           C  
ATOM   1430  OG  SER L  70     -20.754 -20.474 -15.564  1.00 13.45           O  
ATOM   1431  N   ALA L  71     -21.040 -17.680 -14.123  1.00  8.44           N  
ATOM   1432  CA  ALA L  71     -22.209 -16.912 -13.714  1.00  8.26           C  
ATOM   1433  C   ALA L  71     -23.363 -17.186 -14.675  1.00  7.09           C  
ATOM   1434  O   ALA L  71     -23.159 -17.645 -15.803  1.00  8.82           O  
ATOM   1435  CB  ALA L  71     -21.881 -15.410 -13.689  1.00  8.82           C  
ATOM   1436  N   SER L  72     -24.576 -16.892 -14.235  1.00  7.86           N  
ATOM   1437  CA  SER L  72     -25.731 -17.083 -15.101  1.00  8.16           C  
ATOM   1438  C   SER L  72     -26.830 -16.071 -14.827  1.00  7.41           C  
ATOM   1439  O   SER L  72     -26.958 -15.537 -13.717  1.00  8.63           O  
ATOM   1440  CB  SER L  72     -26.282 -18.505 -14.992  1.00 11.00           C  
ATOM   1441  OG  SER L  72     -26.721 -18.794 -13.677  1.00 12.90           O  
ATOM   1442  N   LEU L  73     -27.601 -15.809 -15.873  1.00  7.77           N  
ATOM   1443  CA  LEU L  73     -28.780 -14.967 -15.791  1.00  7.98           C  
ATOM   1444  C   LEU L  73     -29.961 -15.806 -16.240  1.00  8.13           C  
ATOM   1445  O   LEU L  73     -30.021 -16.238 -17.392  1.00  9.16           O  
ATOM   1446  CB  LEU L  73     -28.628 -13.762 -16.712  1.00  9.48           C  
ATOM   1447  CG  LEU L  73     -29.819 -12.804 -16.779  1.00 10.02           C  
ATOM   1448  CD1 LEU L  73     -30.011 -12.086 -15.454  1.00 12.24           C  
ATOM   1449  CD2 LEU L  73     -29.648 -11.807 -17.914  1.00 12.01           C  
ATOM   1450  N   ALA L  74     -30.899 -16.042 -15.331  1.00  9.88           N  
ATOM   1451  CA  ALA L  74     -32.074 -16.825 -15.674  1.00 11.18           C  
ATOM   1452  C   ALA L  74     -33.246 -15.904 -15.988  1.00 10.64           C  
ATOM   1453  O   ALA L  74     -33.520 -14.961 -15.244  1.00 12.85           O  
ATOM   1454  CB  ALA L  74     -32.426 -17.766 -14.544  1.00 13.89           C  
ATOM   1455  N   ILE L  75     -33.921 -16.172 -17.099  1.00 11.05           N  
ATOM   1456  CA  ILE L  75     -35.148 -15.469 -17.453  1.00 12.06           C  
ATOM   1457  C   ILE L  75     -36.281 -16.476 -17.349  1.00 13.22           C  
ATOM   1458  O   ILE L  75     -36.380 -17.390 -18.165  1.00 13.94           O  
ATOM   1459  CB  ILE L  75     -35.090 -14.923 -18.885  1.00 13.86           C  
ATOM   1460  CG1 ILE L  75     -33.800 -14.127 -19.093  1.00 15.33           C  
ATOM   1461  CG2 ILE L  75     -36.328 -14.076 -19.187  1.00 14.66           C  
ATOM   1462  CD1 ILE L  75     -33.591 -13.666 -20.524  1.00 17.40           C  
ATOM   1463  N   SER L  76     -37.123 -16.332 -16.334  1.00 14.91           N  
ATOM   1465  CA  SER L  76     -38.209 -17.283 -16.132  0.50 18.56           C  
ATOM   1466  C   SER L  76     -39.479 -16.845 -16.844  1.00 22.58           C  
ATOM   1467  O   SER L  76     -40.316 -16.147 -16.281  1.00 30.37           O  
ATOM   1469  CB  SER L  76     -38.475 -17.503 -14.645  0.50 19.47           C  
ATOM   1471  OG  SER L  76     -37.400 -18.210 -14.052  0.50 20.51           O  
ATOM   1472  N   GLY L  77     -39.615 -17.265 -18.091  1.00 24.86           N  
ATOM   1473  CA  GLY L  77     -40.797 -16.954 -18.861  1.00 24.04           C  
ATOM   1474  C   GLY L  77     -40.551 -15.821 -19.825  1.00 21.45           C  
ATOM   1475  O   GLY L  77     -40.876 -14.668 -19.536  1.00 21.44           O  
ATOM   1476  N   LEU L  78     -39.975 -16.154 -20.975  1.00 19.56           N  
ATOM   1477  CA  LEU L  78     -39.699 -15.162 -21.999  1.00 17.80           C  
ATOM   1478  C   LEU L  78     -40.934 -14.359 -22.368  1.00 16.55           C  
ATOM   1479  O   LEU L  78     -42.024 -14.906 -22.531  1.00 20.28           O  
ATOM   1480  CB  LEU L  78     -39.179 -15.827 -23.271  1.00 18.74           C  
ATOM   1481  CG  LEU L  78     -37.757 -16.371 -23.293  1.00 18.99           C  
ATOM   1482  CD1 LEU L  78     -37.507 -17.067 -24.627  1.00 18.32           C  
ATOM   1483  CD2 LEU L  78     -36.779 -15.234 -23.063  1.00 18.72           C  
ATOM   1484  N   ARG L  79     -40.740 -13.054 -22.505  1.00 15.36           N  
ATOM   1485  CA  ARG L  79     -41.686 -12.192 -23.192  1.00 15.71           C  
ATOM   1486  C   ARG L  79     -41.032 -11.602 -24.428  1.00 16.91           C  
ATOM   1487  O   ARG L  79     -39.812 -11.595 -24.545  1.00 16.98           O  
ATOM   1488  CB  ARG L  79     -42.141 -11.076 -22.270  1.00 16.24           C  
ATOM   1489  CG  ARG L  79     -42.797 -11.610 -21.044  1.00 17.48           C  
ATOM   1490  CD  ARG L  79     -43.352 -10.521 -20.176  1.00 17.75           C  
ATOM   1491  NE  ARG L  79     -43.937 -11.126 -18.989  1.00 19.31           N  
ATOM   1492  CZ  ARG L  79     -44.557 -10.448 -18.035  1.00 19.85           C  
ATOM   1493  NH1 ARG L  79     -44.684  -9.129 -18.131  1.00 22.36           N  
ATOM   1494  NH2 ARG L  79     -45.056 -11.095 -16.992  1.00 22.05           N  
ATOM   1495  N   SER L  80     -41.845 -11.101 -25.351  1.00 17.01           N  
ATOM   1496  CA  SER L  80     -41.342 -10.489 -26.580  0.55 18.96           C  
ATOM   1498  C   SER L  80     -40.335  -9.388 -26.289  1.00 20.60           C  
ATOM   1499  O   SER L  80     -39.350  -9.218 -27.014  1.00 21.41           O  
ATOM   1500  CB  SER L  80     -42.493  -9.902 -27.399  0.55 18.75           C  
ATOM   1502  OG  SER L  80     -42.916  -8.656 -26.867  0.55 18.22           O  
ATOM   1504  N   GLU L  81     -40.593  -8.626 -25.227  1.00 20.18           N  
ATOM   1505  CA  GLU L  81     -39.723  -7.507 -24.888  1.00 23.14           C  
ATOM   1506  C   GLU L  81     -38.338  -7.972 -24.436  1.00 20.97           C  
ATOM   1507  O   GLU L  81     -37.421  -7.165 -24.317  1.00 22.52           O  
ATOM   1508  CB  GLU L  81     -40.360  -6.603 -23.829  1.00 25.80           C  
ATOM   1509  CG  GLU L  81     -40.489  -7.230 -22.454  1.00 28.05           C  
ATOM   1510  CD  GLU L  81     -40.866  -6.212 -21.396  1.00 34.36           C  
ATOM   1511  OE1 GLU L  81     -40.574  -5.012 -21.592  1.00 36.60           O  
ATOM   1512  OE2 GLU L  81     -41.459  -6.608 -20.373  1.00 36.99           O  
ATOM   1513  N   ASP L  82     -38.193  -9.273 -24.190  1.00 17.82           N  
ATOM   1514  CA  ASP L  82     -36.924  -9.827 -23.728  1.00 15.88           C  
ATOM   1515  C   ASP L  82     -35.991 -10.175 -24.878  1.00 14.59           C  
ATOM   1516  O   ASP L  82     -34.860 -10.604 -24.648  1.00 15.78           O  
ATOM   1517  CB  ASP L  82     -37.137 -11.090 -22.886  1.00 14.51           C  
ATOM   1518  CG  ASP L  82     -37.938 -10.835 -21.631  1.00 14.77           C  
ATOM   1519  OD1 ASP L  82     -37.937  -9.687 -21.138  1.00 17.38           O  
ATOM   1520  OD2 ASP L  82     -38.570 -11.793 -21.137  1.00 15.80           O  
ATOM   1521  N   GLU L  83     -36.457 -10.010 -26.113  1.00 16.00           N  
ATOM   1522  CA  GLU L  83     -35.587 -10.215 -27.267  1.00 15.26           C  
ATOM   1523  C   GLU L  83     -34.526  -9.118 -27.287  1.00 14.48           C  
ATOM   1524  O   GLU L  83     -34.825  -7.948 -27.535  1.00 17.50           O  
ATOM   1525  CB  GLU L  83     -36.386 -10.228 -28.576  1.00 16.03           C  
ATOM   1526  CG  GLU L  83     -35.502 -10.354 -29.825  1.00 19.41           C  
ATOM   1527  CD  GLU L  83     -36.272 -10.791 -31.062  1.00 22.14           C  
ATOM   1528  OE1 GLU L  83     -36.989 -11.813 -30.998  1.00 20.60           O  
ATOM   1529  OE2 GLU L  83     -36.163 -10.109 -32.104  1.00 27.66           O  
ATOM   1530  N   ALA L  84     -33.288  -9.511 -27.021  1.00 12.92           N  
ATOM   1531  CA  ALA L  84     -32.213  -8.569 -26.774  1.00 11.45           C  
ATOM   1532  C   ALA L  84     -30.889  -9.322 -26.702  1.00 10.78           C  
ATOM   1533  O   ALA L  84     -30.868 -10.557 -26.738  1.00 11.27           O  
ATOM   1534  CB  ALA L  84     -32.468  -7.827 -25.472  1.00 12.76           C  
ATOM   1535  N   ASP L  85     -29.789  -8.579 -26.608  1.00 10.48           N  
ATOM   1536  CA  ASP L  85     -28.457  -9.170 -26.447  1.00  9.20           C  
ATOM   1537  C   ASP L  85     -28.050  -8.986 -24.988  1.00  9.28           C  
ATOM   1538  O   ASP L  85     -28.025  -7.860 -24.488  1.00 12.90           O  
ATOM   1539  CB  ASP L  85     -27.463  -8.462 -27.375  1.00 11.18           C  
ATOM   1540  CG  ASP L  85     -26.219  -9.293 -27.669  1.00 13.72           C  
ATOM   1541  OD1 ASP L  85     -25.983 -10.307 -26.982  1.00 14.56           O  
ATOM   1542  OD2 ASP L  85     -25.467  -8.919 -28.599  1.00 14.34           O  
ATOM   1543  N   TYR L  86     -27.752 -10.087 -24.303  1.00  7.98           N  
ATOM   1544  CA  TYR L  86     -27.397 -10.068 -22.881  1.00  6.48           C  
ATOM   1545  C   TYR L  86     -25.904 -10.293 -22.682  1.00  7.49           C  
ATOM   1546  O   TYR L  86     -25.360 -11.315 -23.107  1.00  8.57           O  
ATOM   1547  CB  TYR L  86     -28.199 -11.139 -22.120  1.00  7.82           C  
ATOM   1548  CG  TYR L  86     -29.676 -10.871 -22.154  1.00  8.01           C  
ATOM   1549  CD1 TYR L  86     -30.447 -11.261 -23.244  1.00  9.29           C  
ATOM   1550  CD2 TYR L  86     -30.302 -10.203 -21.110  1.00  7.91           C  
ATOM   1551  CE1 TYR L  86     -31.802 -11.002 -23.291  1.00  9.53           C  
ATOM   1552  CE2 TYR L  86     -31.662  -9.945 -21.145  1.00  9.74           C  
ATOM   1553  CZ  TYR L  86     -32.407 -10.346 -22.239  1.00  9.36           C  
ATOM   1554  OH  TYR L  86     -33.758 -10.074 -22.285  1.00 13.29           O  
ATOM   1555  N   TYR L  87     -25.255  -9.338 -22.026  1.00  7.33           N  
ATOM   1556  CA  TYR L  87     -23.819  -9.391 -21.786  1.00  7.07           C  
ATOM   1557  C   TYR L  87     -23.500  -9.473 -20.309  1.00  6.82           C  
ATOM   1558  O   TYR L  87     -24.184  -8.863 -19.485  1.00  7.81           O  
ATOM   1559  CB  TYR L  87     -23.161  -8.105 -22.280  1.00  8.27           C  
ATOM   1560  CG  TYR L  87     -23.076  -7.960 -23.769  1.00  9.78           C  
ATOM   1561  CD1 TYR L  87     -24.146  -7.470 -24.502  1.00 11.79           C  
ATOM   1562  CD2 TYR L  87     -21.905  -8.291 -24.447  1.00 11.36           C  
ATOM   1563  CE1 TYR L  87     -24.056  -7.333 -25.874  1.00 12.65           C  
ATOM   1564  CE2 TYR L  87     -21.808  -8.145 -25.807  1.00 12.51           C  
ATOM   1565  CZ  TYR L  87     -22.887  -7.669 -26.515  1.00 13.63           C  
ATOM   1566  OH  TYR L  87     -22.792  -7.526 -27.877  1.00 18.14           O  
ATOM   1567  N   CYS L  88     -22.427 -10.186 -19.979  1.00  7.01           N  
ATOM   1568  CA  CYS L  88     -21.875 -10.140 -18.638  1.00  7.80           C  
ATOM   1569  C   CYS L  88     -20.516  -9.452 -18.677  1.00  6.75           C  
ATOM   1570  O   CYS L  88     -19.868  -9.392 -19.722  1.00  8.22           O  
ATOM   1571  CB  CYS L  88     -21.707 -11.552 -18.077  1.00  9.11           C  
ATOM   1572  SG  CYS L  88     -20.565 -12.581 -19.085  1.00  9.75           S  
ATOM   1573  N   LEU L  89     -20.087  -8.934 -17.530  1.00  6.70           N  
ATOM   1574  CA  LEU L  89     -18.763  -8.335 -17.408  1.00  8.29           C  
ATOM   1575  C   LEU L  89     -18.304  -8.394 -15.956  1.00  7.55           C  
ATOM   1576  O   LEU L  89     -19.123  -8.513 -15.031  1.00  7.88           O  
ATOM   1577  CB  LEU L  89     -18.762  -6.884 -17.914  1.00 10.34           C  
ATOM   1578  CG  LEU L  89     -19.479  -5.863 -17.024  1.00 12.22           C  
ATOM   1579  CD1 LEU L  89     -18.482  -5.039 -16.210  1.00 12.93           C  
ATOM   1580  CD2 LEU L  89     -20.380  -4.939 -17.852  1.00 15.07           C  
ATOM   1581  N   SER L  90     -16.993  -8.328 -15.757  1.00  8.27           N  
ATOM   1582  CA  SER L  90     -16.434  -8.212 -14.415  1.00  8.04           C  
ATOM   1583  C   SER L  90     -15.021  -7.650 -14.492  1.00  7.30           C  
ATOM   1584  O   SER L  90     -14.433  -7.563 -15.568  1.00  8.80           O  
ATOM   1585  CB  SER L  90     -16.403  -9.568 -13.707  1.00  9.37           C  
ATOM   1586  OG  SER L  90     -15.250 -10.306 -14.073  1.00 11.55           O  
ATOM   1587  N   TRP L  91     -14.479  -7.258 -13.346  1.00  7.21           N  
ATOM   1588  CA  TRP L  91     -13.053  -6.981 -13.255  1.00  8.41           C  
ATOM   1589  C   TRP L  91     -12.272  -8.286 -13.361  1.00  9.08           C  
ATOM   1590  O   TRP L  91     -12.766  -9.355 -12.984  1.00 11.02           O  
ATOM   1591  CB  TRP L  91     -12.727  -6.296 -11.927  1.00  9.83           C  
ATOM   1592  CG  TRP L  91     -11.305  -5.847 -11.785  1.00  9.56           C  
ATOM   1593  CD1 TRP L  91     -10.341  -6.387 -10.973  1.00  9.39           C  
ATOM   1594  CD2 TRP L  91     -10.692  -4.743 -12.454  1.00 10.58           C  
ATOM   1595  NE1 TRP L  91      -9.164  -5.688 -11.110  1.00 10.87           N  
ATOM   1596  CE2 TRP L  91      -9.355  -4.673 -12.010  1.00 10.65           C  
ATOM   1597  CE3 TRP L  91     -11.139  -3.812 -13.394  1.00 10.37           C  
ATOM   1598  CZ2 TRP L  91      -8.463  -3.708 -12.479  1.00 12.00           C  
ATOM   1599  CZ3 TRP L  91     -10.252  -2.847 -13.846  1.00 12.83           C  
ATOM   1600  CH2 TRP L  91      -8.934  -2.804 -13.391  1.00 12.97           C  
ATOM   1601  N   ASP L  92     -11.054  -8.198 -13.883  1.00  9.57           N  
ATOM   1602  CA  ASP L  92     -10.148  -9.345 -13.929  1.00 10.48           C  
ATOM   1603  C   ASP L  92      -8.857  -8.936 -13.215  1.00 11.17           C  
ATOM   1604  O   ASP L  92      -8.174  -8.004 -13.647  1.00 12.50           O  
ATOM   1605  CB  ASP L  92      -9.879  -9.760 -15.382  1.00 12.25           C  
ATOM   1606  CG  ASP L  92      -9.069 -11.048 -15.492  1.00 14.20           C  
ATOM   1607  OD1 ASP L  92      -7.994 -11.145 -14.864  1.00 16.95           O  
ATOM   1608  OD2 ASP L  92      -9.504 -11.971 -16.215  1.00 15.13           O  
ATOM   1609  N   ASP L  93      -8.552  -9.610 -12.106  1.00 12.63           N  
ATOM   1610  CA  ASP L  93      -7.405  -9.190 -11.310  0.59 15.07           C  
ATOM   1612  C   ASP L  93      -6.079  -9.765 -11.804  1.00 18.16           C  
ATOM   1613  O   ASP L  93      -5.029  -9.480 -11.232  1.00 23.13           O  
ATOM   1614  CB  ASP L  93      -7.630  -9.408  -9.800  0.59 17.36           C  
ATOM   1616  CG  ASP L  93      -8.055 -10.827  -9.455  0.59 18.83           C  
ATOM   1618  OD1 ASP L  93      -7.398 -11.787  -9.900  0.59 19.71           O  
ATOM   1620  OD2 ASP L  93      -9.048 -10.980  -8.719  0.59 18.76           O  
ATOM   1622  N   SER L  94      -6.125 -10.533 -12.888  1.00 20.82           N  
ATOM   1623  CA  SER L  94      -4.903 -11.024 -13.515  1.00 23.06           C  
ATOM   1624  C   SER L  94      -4.488 -10.067 -14.626  1.00 23.34           C  
ATOM   1625  O   SER L  94      -3.313  -9.727 -14.769  1.00 27.33           O  
ATOM   1626  CB  SER L  94      -5.123 -12.431 -14.078  1.00 26.84           C  
ATOM   1627  OG  SER L  94      -3.963 -12.903 -14.731  1.00 30.47           O  
ATOM   1628  N   LEU L  95      -5.475  -9.626 -15.401  1.00 21.69           N  
ATOM   1629  CA  LEU L  95      -5.254  -8.679 -16.486  1.00 22.22           C  
ATOM   1630  C   LEU L  95      -5.240  -7.243 -15.978  1.00 22.88           C  
ATOM   1631  O   LEU L  95      -4.761  -6.340 -16.666  1.00 25.76           O  
ATOM   1632  CB  LEU L  95      -6.341  -8.842 -17.552  1.00 25.46           C  
ATOM   1633  CG  LEU L  95      -6.463 -10.263 -18.119  1.00 29.00           C  
ATOM   1634  CD1 LEU L  95      -7.584 -10.354 -19.147  1.00 30.84           C  
ATOM   1635  CD2 LEU L  95      -5.129 -10.738 -18.713  1.00 31.49           C  
ATOM   1636  N   ASN L  95A     -5.753  -7.041 -14.766  1.00 20.55           N  
ATOM   1637  CA  ASN L  95A     -5.925  -5.704 -14.207  1.00 19.73           C  
ATOM   1638  C   ASN L  95A     -6.740  -4.807 -15.140  1.00 16.94           C  
ATOM   1639  O   ASN L  95A     -6.347  -3.685 -15.472  1.00 18.46           O  
ATOM   1640  CB  ASN L  95A     -4.576  -5.081 -13.839  1.00 22.91           C  
ATOM   1641  CG  ASN L  95A     -3.852  -5.865 -12.752  1.00 27.72           C  
ATOM   1642  OD1 ASN L  95A     -2.665  -6.187 -12.876  1.00 32.18           O  
ATOM   1643  ND2 ASN L  95A     -4.568  -6.181 -11.681  1.00 29.28           N  
ATOM   1644  N   GLY L  95B     -7.886  -5.327 -15.563  1.00 14.53           N  
ATOM   1645  CA  GLY L  95B     -8.774  -4.600 -16.446  1.00 12.63           C  
ATOM   1646  C   GLY L  95B    -10.127  -5.274 -16.522  1.00 11.33           C  
ATOM   1647  O   GLY L  95B    -10.305  -6.371 -15.994  1.00 11.03           O  
ATOM   1648  N   TRP L  96     -11.071  -4.615 -17.184  1.00 11.35           N  
ATOM   1649  CA  TRP L  96     -12.425  -5.130 -17.346  1.00 10.04           C  
ATOM   1650  C   TRP L  96     -12.438  -6.211 -18.400  1.00  8.90           C  
ATOM   1651  O   TRP L  96     -11.744  -6.108 -19.404  1.00 11.29           O  
ATOM   1652  CB  TRP L  96     -13.395  -4.004 -17.733  1.00 10.75           C  
ATOM   1653  CG  TRP L  96     -13.379  -2.915 -16.731  1.00 10.25           C  
ATOM   1654  CD1 TRP L  96     -12.767  -1.697 -16.846  1.00 11.64           C  
ATOM   1655  CD2 TRP L  96     -13.958  -2.954 -15.422  1.00  8.25           C  
ATOM   1656  NE1 TRP L  96     -12.951  -0.969 -15.695  1.00 10.92           N  
ATOM   1657  CE2 TRP L  96     -13.675  -1.722 -14.804  1.00  9.17           C  
ATOM   1658  CE3 TRP L  96     -14.700  -3.911 -14.718  1.00  7.80           C  
ATOM   1659  CZ2 TRP L  96     -14.104  -1.421 -13.513  1.00  9.97           C  
ATOM   1660  CZ3 TRP L  96     -15.123  -3.614 -13.437  1.00  9.89           C  
ATOM   1661  CH2 TRP L  96     -14.818  -2.378 -12.843  1.00  9.14           C  
ATOM   1662  N   VAL L  97     -13.226  -7.253 -18.155  1.00  9.14           N  
ATOM   1663  CA  VAL L  97     -13.453  -8.295 -19.150  1.00  8.33           C  
ATOM   1664  C   VAL L  97     -14.941  -8.491 -19.399  1.00  8.08           C  
ATOM   1665  O   VAL L  97     -15.775  -8.183 -18.540  1.00  8.59           O  
ATOM   1666  CB  VAL L  97     -12.778  -9.644 -18.783  1.00  9.66           C  
ATOM   1667  CG1 VAL L  97     -11.261  -9.497 -18.792  1.00 10.84           C  
ATOM   1668  CG2 VAL L  97     -13.286 -10.180 -17.432  1.00 12.13           C  
ATOM   1669  N   PHE L  98     -15.257  -9.018 -20.579  1.00  9.18           N  
ATOM   1670  CA  PHE L  98     -16.626  -9.067 -21.063  1.00  9.15           C  
ATOM   1671  C   PHE L  98     -16.921 -10.390 -21.740  1.00  9.56           C  
ATOM   1672  O   PHE L  98     -16.032 -11.029 -22.298  1.00  9.86           O  
ATOM   1673  CB  PHE L  98     -16.864  -7.939 -22.075  1.00 11.14           C  
ATOM   1674  CG  PHE L  98     -16.569  -6.573 -21.532  1.00 12.17           C  
ATOM   1675  CD1 PHE L  98     -17.580  -5.796 -20.987  1.00 13.27           C  
ATOM   1676  CD2 PHE L  98     -15.278  -6.071 -21.547  1.00 13.85           C  
ATOM   1677  CE1 PHE L  98     -17.307  -4.537 -20.472  1.00 14.96           C  
ATOM   1678  CE2 PHE L  98     -15.004  -4.811 -21.031  1.00 15.28           C  
ATOM   1679  CZ  PHE L  98     -16.020  -4.050 -20.492  1.00 14.65           C  
ATOM   1680  N   GLY L  99     -18.183 -10.794 -21.693  1.00  9.69           N  
ATOM   1681  CA  GLY L  99     -18.665 -11.844 -22.562  1.00  9.01           C  
ATOM   1682  C   GLY L  99     -18.942 -11.290 -23.948  1.00  8.97           C  
ATOM   1683  O   GLY L  99     -18.994 -10.070 -24.151  1.00 10.83           O  
ATOM   1684  N   GLY L 100     -19.114 -12.187 -24.914  1.00  9.49           N  
ATOM   1685  CA  GLY L 100     -19.425 -11.789 -26.275  1.00  9.81           C  
ATOM   1686  C   GLY L 100     -20.888 -11.453 -26.514  1.00  8.46           C  
ATOM   1687  O   GLY L 100     -21.254 -11.000 -27.598  1.00 10.91           O  
ATOM   1688  N   GLY L 101     -21.726 -11.668 -25.506  1.00  7.73           N  
ATOM   1689  CA  GLY L 101     -23.152 -11.416 -25.637  1.00  8.86           C  
ATOM   1690  C   GLY L 101     -23.918 -12.640 -26.114  1.00  7.54           C  
ATOM   1691  O   GLY L 101     -23.457 -13.374 -26.991  1.00  9.32           O  
ATOM   1692  N   THR L 102     -25.090 -12.868 -25.529  1.00  8.22           N  
ATOM   1693  CA  THR L 102     -26.005 -13.885 -26.023  1.00  7.05           C  
ATOM   1694  C   THR L 102     -27.239 -13.200 -26.579  1.00  7.97           C  
ATOM   1695  O   THR L 102     -27.966 -12.537 -25.840  1.00  8.69           O  
ATOM   1696  CB  THR L 102     -26.434 -14.864 -24.916  1.00  7.13           C  
ATOM   1697  OG1 THR L 102     -25.278 -15.545 -24.411  1.00  8.77           O  
ATOM   1698  CG2 THR L 102     -27.427 -15.887 -25.457  1.00  8.71           C  
ATOM   1699  N   LYS L 103     -27.465 -13.355 -27.880  1.00  8.12           N  
ATOM   1700  CA  LYS L 103     -28.662 -12.810 -28.516  1.00  8.15           C  
ATOM   1701  C   LYS L 103     -29.830 -13.766 -28.311  1.00  9.44           C  
ATOM   1702  O   LYS L 103     -29.806 -14.905 -28.778  1.00  9.70           O  
ATOM   1703  CB  LYS L 103     -28.429 -12.525 -30.004  1.00 10.31           C  
ATOM   1704  CG  LYS L 103     -27.434 -11.400 -30.243  1.00 14.90           C  
ATOM   1705  CD  LYS L 103     -27.340 -11.020 -31.711  1.00 21.26           C  
ATOM   1706  CE  LYS L 103     -26.482  -9.777 -31.890  1.00 25.92           C  
ATOM   1707  NZ  LYS L 103     -26.457  -9.291 -33.298  1.00 29.38           N  
ATOM   1708  N   VAL L 104     -30.837 -13.305 -27.580  1.00 10.02           N  
ATOM   1709  CA  VAL L 104     -32.036 -14.101 -27.362  1.00 10.78           C  
ATOM   1710  C   VAL L 104     -33.104 -13.717 -28.372  1.00 12.60           C  
ATOM   1711  O   VAL L 104     -33.510 -12.556 -28.450  1.00 13.24           O  
ATOM   1712  CB  VAL L 104     -32.600 -13.887 -25.942  1.00 11.78           C  
ATOM   1713  CG1 VAL L 104     -33.914 -14.633 -25.787  1.00 13.97           C  
ATOM   1714  CG2 VAL L 104     -31.587 -14.337 -24.892  1.00 12.28           C  
ATOM   1715  N   THR L 105     -33.544 -14.699 -29.153  1.00 12.26           N  
ATOM   1716  CA  THR L 105     -34.657 -14.517 -30.069  1.00 12.08           C  
ATOM   1717  C   THR L 105     -35.900 -15.148 -29.461  1.00 14.08           C  
ATOM   1718  O   THR L 105     -35.872 -16.300 -29.023  1.00 14.69           O  
ATOM   1719  CB  THR L 105     -34.374 -15.154 -31.441  1.00 13.51           C  
ATOM   1720  OG1 THR L 105     -33.249 -14.499 -32.052  1.00 16.33           O  
ATOM   1721  CG2 THR L 105     -35.579 -15.003 -32.363  1.00 16.32           C  
ATOM   1722  N   VAL L 106     -36.983 -14.379 -29.410  1.00 15.56           N  
ATOM   1723  CA  VAL L 106     -38.251 -14.890 -28.923  1.00 16.12           C  
ATOM   1724  C   VAL L 106     -39.156 -15.152 -30.120  1.00 18.48           C  
ATOM   1725  O   VAL L 106     -39.545 -14.226 -30.831  1.00 20.97           O  
ATOM   1726  CB  VAL L 106     -38.916 -13.901 -27.948  1.00 17.77           C  
ATOM   1727  CG1 VAL L 106     -40.224 -14.475 -27.429  1.00 18.68           C  
ATOM   1728  CG2 VAL L 106     -37.959 -13.586 -26.801  1.00 17.24           C  
ATOM   1729  N   LEU L 106A    -39.458 -16.424 -30.353  1.00 19.74           N  
ATOM   1730  CA  LEU L 106A    -40.251 -16.830 -31.506  1.00 22.76           C  
ATOM   1731  C   LEU L 106A    -41.728 -16.860 -31.155  1.00 27.41           C  
ATOM   1732  O   LEU L 106A    -42.093 -16.844 -29.983  1.00 28.54           O  
ATOM   1733  CB  LEU L 106A    -39.814 -18.217 -31.978  1.00 25.54           C  
ATOM   1734  CG  LEU L 106A    -38.320 -18.413 -32.226  1.00 28.83           C  
ATOM   1735  CD1 LEU L 106A    -37.991 -19.896 -32.311  1.00 31.15           C  
ATOM   1736  CD2 LEU L 106A    -37.878 -17.680 -33.483  1.00 29.28           C  
ATOM   1737  N   ASP L 107     -42.575 -16.912 -32.177  1.00 29.62           N  
ATOM   1738  CA  ASP L 107     -44.017 -16.986 -31.968  1.00 31.08           C  
ATOM   1739  C   ASP L 107     -44.414 -18.282 -31.262  1.00 31.26           C  
ATOM   1740  O   ASP L 107     -43.819 -19.336 -31.493  1.00 32.28           O  
ATOM   1741  CB  ASP L 107     -44.755 -16.865 -33.304  1.00 31.15           C  
TER    1742      ASP L 107                                                      
