# Supplementary material for: SARS-CoV-2 Spike Protein Interaction Space
Source: Int J Mol Sci. 2023 Jul 27;24(15):12058. doi: 10.3390/ijms241512058 (PMC10418891; doi:10.3390/ijms241512058)
Supplement: Supplementary file 1 [file ijms-24-12058-s001.zip › Supplementary Material File S1/3UPA.pdb]

REMARK 950 NUMBERING  Kabat
REMARK 950 METHOD     X-ray crystal structure
REMARK 950 RESOLUTION 1.800
REMARK 950 R-FACTOR   0.231
REMARK 950 R-FREE     0.283
REMARK 950 CHAIN-TYPE LABEL ORIGINAL
REMARK 950 CHAIN L    L    A
REMARK 950 CHAIN L    L    B
REMARK 950 MOLECULE : A : KAPPA LIGHT CHAIN VARIABLE DOMAIN
REMARK 950 SPECIES  : A : HOMO SAPIENS
SEQRES   1 L 107  ASP ILE GLN MET THR GLN SER PRO SER SER LEU SER ALA          
SEQRES   2 L 107  SER VAL GLY ASP ARG VAL THR ILE THR CYS ARG ALA SER          
SEQRES   3 L 107  GLN SER ILE SER SER TYR LEU ASN TRP TYR GLN GLN LYS          
SEQRES   4 L 107  PRO GLY LYS ALA PRO LYS LEU LEU ILE TYR ASP ALA ASP          
SEQRES   5 L 107  ASP LEU GLN SER GLY VAL PRO SER ARG PHE SER GLY SER          
SEQRES   6 L 107  GLY SER GLY THR ASP PHE THR LEU THR ILE SER SER LEU          
SEQRES   7 L 107  GLN PRO GLU ASP PHE ALA THR TYR TYR CYS GLN GLN SER          
SEQRES   8 L 107  TYR SER THR PRO ASN THR PHE GLY GLN GLY THR LYS VAL          
SEQRES   9 L 107  GLU ILE LYS                                                  
SEQRES   1 L 107  ASP ILE GLN MET THR GLN SER PRO SER SER LEU SER ALA          
SEQRES   2 L 107  SER VAL GLY ASP ARG VAL THR ILE THR CYS ARG ALA SER          
SEQRES   3 L 107  GLN SER ILE SER SER TYR LEU ASN TRP TYR GLN GLN LYS          
SEQRES   4 L 107  PRO GLY LYS ALA PRO LYS LEU LEU ILE TYR ASP ALA ASP          
SEQRES   5 L 107  ASP LEU GLN SER GLY VAL PRO SER ARG PHE SER GLY SER          
SEQRES   6 L 107  GLY SER GLY THR ASP PHE THR LEU THR ILE SER SER LEU          
SEQRES   7 L 107  GLN PRO GLU ASP PHE ALA THR TYR TYR CYS GLN GLN SER          
SEQRES   8 L 107  TYR SER THR PRO ASN THR PHE GLY GLN GLY THR LYS VAL          
SEQRES   9 L 107  GLU ILE LYS                                                  
ATOM      1  N   ASP L   1      33.567 -10.561   2.406  1.00 32.48           N  
ATOM      2  CA  ASP L   1      32.281 -11.275   2.658  1.00 28.64           C  
ATOM      3  C   ASP L   1      32.487 -12.522   3.519  1.00 28.96           C  
ATOM      4  O   ASP L   1      33.500 -13.214   3.378  1.00 36.53           O  
ATOM      5  CB  ASP L   1      31.628 -11.675   1.334  1.00 33.27           C  
ATOM      6  N   ILE L   2      31.532 -12.797   4.414  1.00 22.55           N  
ATOM      7  CA  ILE L   2      31.524 -14.012   5.236  1.00 21.50           C  
ATOM      8  C   ILE L   2      30.215 -14.781   5.023  1.00 18.72           C  
ATOM      9  O   ILE L   2      29.126 -14.202   5.118  1.00 22.17           O  
ATOM     10  CB  ILE L   2      31.739 -13.671   6.727  1.00 20.63           C  
ATOM     11  CG1 ILE L   2      33.124 -13.031   6.891  1.00 23.34           C  
ATOM     12  CG2 ILE L   2      31.545 -14.917   7.619  1.00 22.37           C  
ATOM     13  CD1 ILE L   2      33.616 -12.926   8.306  1.00 22.91           C  
ATOM     14  N   GLN L   3      30.321 -16.077   4.707  1.00 22.29           N  
ATOM     15  CA  GLN L   3      29.154 -16.952   4.516  1.00 19.36           C  
ATOM     16  C   GLN L   3      28.830 -17.771   5.775  1.00 18.98           C  
ATOM     17  O   GLN L   3      29.712 -18.395   6.396  1.00 17.13           O  
ATOM     18  CB  GLN L   3      29.358 -17.891   3.316  1.00 23.58           C  
ATOM     19  N   MET L   4      27.551 -17.766   6.143  1.00 18.40           N  
ATOM     20  CA  MET L   4      27.077 -18.424   7.356  1.00 16.22           C  
ATOM     21  C   MET L   4      26.209 -19.621   6.935  1.00 19.64           C  
ATOM     22  O   MET L   4      25.244 -19.455   6.194  1.00 22.49           O  
ATOM     23  CB  MET L   4      26.265 -17.438   8.219  1.00 16.71           C  
ATOM     24  CG  MET L   4      27.043 -16.139   8.648  1.00 16.89           C  
ATOM     25  SD  MET L   4      28.565 -16.444   9.597  1.00 17.43           S  
ATOM     26  CE  MET L   4      27.935 -17.439  10.955  1.00 19.45           C  
ATOM     27  N   THR L   5      26.569 -20.817   7.392  1.00 19.11           N  
ATOM     28  CA  THR L   5      25.852 -22.043   7.066  1.00 20.83           C  
ATOM     29  C   THR L   5      25.153 -22.582   8.305  1.00 21.95           C  
ATOM     30  O   THR L   5      25.824 -22.968   9.273  1.00 25.13           O  
ATOM     31  CB  THR L   5      26.815 -23.130   6.550  1.00 21.19           C  
ATOM     32  OG1 THR L   5      27.551 -22.621   5.424  1.00 27.35           O  
ATOM     33  CG2 THR L   5      26.057 -24.403   6.148  1.00 23.74           C  
ATOM     34  N   GLN L   6      23.817 -22.616   8.263  1.00 17.57           N  
ATOM     35  CA  GLN L   6      22.999 -23.134   9.360  1.00 18.29           C  
ATOM     36  C   GLN L   6      22.524 -24.540   9.119  1.00 19.26           C  
ATOM     37  O   GLN L   6      22.199 -24.895   7.990  1.00 23.63           O  
ATOM     38  CB  GLN L   6      21.759 -22.272   9.583  1.00 19.01           C  
ATOM     39  CG  GLN L   6      21.917 -21.352  10.701  1.00 21.22           C  
ATOM     40  CD  GLN L   6      20.714 -20.518  10.930  1.00 17.26           C  
ATOM     41  OE1 GLN L   6      20.632 -19.401  10.421  1.00 16.57           O  
ATOM     42  NE2 GLN L   6      19.746 -21.058  11.669  1.00 20.13           N  
ATOM     43  N   SER L   7      22.471 -25.315  10.194  1.00 21.82           N  
ATOM     44  CA  SER L   7      21.981 -26.700  10.151  1.00 22.80           C  
ATOM     45  C   SER L   7      21.245 -27.051  11.446  1.00 25.33           C  
ATOM     46  O   SER L   7      21.575 -26.533  12.507  1.00 24.11           O  
ATOM     47  CB  SER L   7      23.145 -27.673   9.931  1.00 30.53           C  
ATOM     48  OG  SER L   7      23.992 -27.755  11.075  1.00 32.97           O  
ATOM     49  N   PRO L   8      20.197 -27.896  11.368  1.00 26.69           N  
ATOM     50  CA  PRO L   8      19.509 -28.331  10.166  1.00 24.93           C  
ATOM     51  C   PRO L   8      18.639 -27.203   9.588  1.00 23.45           C  
ATOM     52  O   PRO L   8      18.550 -26.119  10.167  1.00 22.62           O  
ATOM     53  CB  PRO L   8      18.647 -29.492  10.667  1.00 26.18           C  
ATOM     54  CG  PRO L   8      18.329 -29.120  12.075  1.00 27.90           C  
ATOM     55  CD  PRO L   8      19.583 -28.457  12.589  1.00 28.29           C  
ATOM     56  N   SER L   9      18.043 -27.459   8.436  1.00 24.52           N  
ATOM     57  CA  SER L   9      17.171 -26.492   7.778  1.00 23.25           C  
ATOM     58  C   SER L   9      15.818 -26.378   8.486  1.00 23.61           C  
ATOM     59  O   SER L   9      15.219 -25.303   8.545  1.00 21.31           O  
ATOM     60  CB  SER L   9      16.957 -26.919   6.325  1.00 27.58           C  
ATOM     61  N   SER L  10      15.326 -27.502   8.998  1.00 22.35           N  
ATOM     62  CA  SER L  10      14.112 -27.517   9.818  1.00 22.43           C  
ATOM     63  C   SER L  10      14.203 -28.672  10.787  1.00 22.50           C  
ATOM     64  O   SER L  10      14.897 -29.662  10.506  1.00 21.24           O  
ATOM     65  CB  SER L  10      12.860 -27.702   8.949  1.00 32.58           C  
ATOM     66  N   LEU L  11      13.497 -28.561  11.911  1.00 22.35           N  
ATOM     67  CA  LEU L  11      13.411 -29.659  12.871  1.00 22.57           C  
ATOM     68  C   LEU L  11      12.052 -29.729  13.538  1.00 20.19           C  
ATOM     69  O   LEU L  11      11.301 -28.746  13.552  1.00 21.05           O  
ATOM     70  CB  LEU L  11      14.521 -29.584  13.914  1.00 25.29           C  
ATOM     71  CG  LEU L  11      14.610 -28.389  14.849  1.00 26.50           C  
ATOM     72  CD1 LEU L  11      13.833 -28.634  16.140  1.00 28.49           C  
ATOM     73  CD2 LEU L  11      16.079 -28.080  15.178  1.00 27.61           C  
ATOM     74  N   SER L  12      11.751 -30.916  14.068  1.00 17.97           N  
ATOM     75  CA  SER L  12      10.458 -31.234  14.660  1.00 19.15           C  
ATOM     76  C   SER L  12      10.674 -31.452  16.128  1.00 18.78           C  
ATOM     77  O   SER L  12      11.545 -32.228  16.499  1.00 19.54           O  
ATOM     78  CB  SER L  12       9.896 -32.543  14.078  1.00 23.06           C  
ATOM     79  OG  SER L  12       9.586 -32.421  12.711  1.00 31.39           O  
ATOM     80  N   ALA L  13       9.892 -30.779  16.961  1.00 18.07           N  
ATOM     81  CA  ALA L  13       9.959 -30.985  18.412  1.00 19.83           C  
ATOM     82  C   ALA L  13       8.602 -30.703  19.047  1.00 21.84           C  
ATOM     83  O   ALA L  13       7.760 -30.000  18.475  1.00 21.45           O  
ATOM     84  CB  ALA L  13      11.035 -30.062  19.047  1.00 19.83           C  
ATOM     85  N   SER L  14       8.410 -31.258  20.235  1.00 22.48           N  
ATOM     86  CA  SER L  14       7.194 -31.032  21.014  1.00 24.31           C  
ATOM     87  C   SER L  14       7.531 -30.046  22.110  1.00 21.88           C  
ATOM     88  O   SER L  14       8.706 -29.842  22.410  1.00 21.58           O  
ATOM     89  CB  SER L  14       6.714 -32.333  21.623  1.00 24.60           C  
ATOM     90  OG  SER L  14       6.368 -33.279  20.620  1.00 27.47           O  
ATOM     91  N   VAL L  15       6.507 -29.425  22.690  1.00 22.37           N  
ATOM     92  CA  VAL L  15       6.699 -28.596  23.880  1.00 20.82           C  
ATOM     93  C   VAL L  15       7.416 -29.412  24.957  1.00 21.88           C  
ATOM     94  O   VAL L  15       7.108 -30.597  25.176  1.00 20.74           O  
ATOM     95  CB  VAL L  15       5.361 -28.077  24.431  1.00 21.01           C  
ATOM     96  CG1 VAL L  15       5.538 -27.498  25.850  1.00 21.56           C  
ATOM     97  CG2 VAL L  15       4.772 -27.057  23.492  1.00 21.49           C  
ATOM     98  N   GLY L  16       8.387 -28.782  25.613  1.00 21.63           N  
ATOM     99  CA  GLY L  16       9.203 -29.437  26.630  1.00 24.71           C  
ATOM    100  C   GLY L  16      10.521 -30.011  26.146  1.00 26.94           C  
ATOM    101  O   GLY L  16      11.387 -30.337  26.963  1.00 30.99           O  
ATOM    102  N   ASP L  17      10.684 -30.142  24.829  1.00 25.42           N  
ATOM    103  CA  ASP L  17      11.875 -30.774  24.255  1.00 24.44           C  
ATOM    104  C   ASP L  17      13.039 -29.793  24.218  1.00 23.65           C  
ATOM    105  O   ASP L  17      12.829 -28.590  24.212  1.00 20.52           O  
ATOM    106  CB  ASP L  17      11.611 -31.239  22.820  1.00 24.70           C  
ATOM    107  CG  ASP L  17      10.706 -32.462  22.748  1.00 27.00           C  
ATOM    108  OD1 ASP L  17      10.304 -32.993  23.800  1.00 26.43           O  
ATOM    109  OD2 ASP L  17      10.390 -32.875  21.617  1.00 27.27           O  
ATOM    110  N   ARG L  18      14.252 -30.331  24.160  1.00 22.81           N  
ATOM    111  CA  ARG L  18      15.466 -29.535  24.031  1.00 24.94           C  
ATOM    112  C   ARG L  18      15.889 -29.588  22.568  1.00 24.14           C  
ATOM    113  O   ARG L  18      15.850 -30.663  21.935  1.00 23.58           O  
ATOM    114  CB  ARG L  18      16.581 -30.103  24.916  1.00 28.29           C  
ATOM    115  N   VAL L  19      16.284 -28.446  22.023  1.00 22.86           N  
ATOM    116  CA  VAL L  19      16.739 -28.390  20.631  1.00 21.48           C  
ATOM    117  C   VAL L  19      18.054 -27.653  20.484  1.00 22.61           C  
ATOM    118  O   VAL L  19      18.347 -26.717  21.241  1.00 21.37           O  
ATOM    119  CB  VAL L  19      15.648 -27.842  19.693  1.00 20.66           C  
ATOM    120  CG1 VAL L  19      14.513 -28.856  19.593  1.00 21.04           C  
ATOM    121  CG2 VAL L  19      15.121 -26.528  20.166  1.00 21.26           C  
ATOM    122  N   THR L  20      18.851 -28.123  19.524  1.00 23.41           N  
ATOM    123  CA  THR L  20      20.148 -27.539  19.214  1.00 25.55           C  
ATOM    124  C   THR L  20      20.217 -27.159  17.728  1.00 23.49           C  
ATOM    125  O   THR L  20      19.788 -27.910  16.861  1.00 23.80           O  
ATOM    126  CB  THR L  20      21.280 -28.523  19.587  1.00 29.20           C  
ATOM    127  OG1 THR L  20      21.471 -28.505  21.007  1.00 35.66           O  
ATOM    128  CG2 THR L  20      22.584 -28.136  18.907  1.00 31.63           C  
ATOM    129  N   ILE L  21      20.758 -25.979  17.451  1.00 19.65           N  
ATOM    130  CA  ILE L  21      20.892 -25.474  16.097  1.00 19.87           C  
ATOM    131  C   ILE L  21      22.334 -25.044  15.933  1.00 21.42           C  
ATOM    132  O   ILE L  21      22.938 -24.476  16.850  1.00 21.57           O  
ATOM    133  CB  ILE L  21      19.936 -24.264  15.843  1.00 17.89           C  
ATOM    134  CG1 ILE L  21      18.476 -24.722  15.909  1.00 18.48           C  
ATOM    135  CG2 ILE L  21      20.235 -23.609  14.475  1.00 17.35           C  
ATOM    136  CD1 ILE L  21      17.495 -23.593  16.165  1.00 17.66           C  
ATOM    137  N   THR L  22      22.896 -25.327  14.771  1.00 20.45           N  
ATOM    138  CA  THR L  22      24.294 -25.059  14.545  1.00 20.94           C  
ATOM    139  C   THR L  22      24.467 -24.022  13.460  1.00 19.03           C  
ATOM    140  O   THR L  22      23.601 -23.857  12.588  1.00 23.11           O  
ATOM    141  CB  THR L  22      25.058 -26.377  14.237  1.00 24.30           C  
ATOM    142  OG1 THR L  22      25.036 -27.197  15.408  1.00 26.66           O  
ATOM    143  CG2 THR L  22      26.515 -26.112  13.835  1.00 26.47           C  
ATOM    144  N   CYS L  23      25.554 -23.263  13.583  1.00 21.14           N  
ATOM    146  CA  CYS L  23      25.930 -22.272  12.575  0.50 21.80           C  
ATOM    147  C   CYS L  23      27.432 -22.289  12.409  1.00 22.72           C  
ATOM    148  O   CYS L  23      28.183 -22.221  13.382  1.00 21.80           O  
ATOM    150  CB  CYS L  23      25.455 -20.850  12.919  0.50 24.85           C  
ATOM    152  SG  CYS L  23      23.983 -20.367  11.998  0.50 28.63           S  
ATOM    153  N   ARG L  24      27.865 -22.407  11.155  1.00 21.42           N  
ATOM    154  CA  ARG L  24      29.289 -22.397  10.817  1.00 21.69           C  
ATOM    155  C   ARG L  24      29.582 -21.140  10.007  1.00 20.04           C  
ATOM    156  O   ARG L  24      28.862 -20.832   9.053  1.00 17.74           O  
ATOM    157  CB  ARG L  24      29.673 -23.663  10.017  1.00 28.13           C  
ATOM    158  N   ALA L  25      30.610 -20.392  10.406  1.00 18.72           N  
ATOM    159  CA  ALA L  25      31.070 -19.262   9.633  1.00 18.13           C  
ATOM    160  C   ALA L  25      32.195 -19.705   8.710  1.00 18.97           C  
ATOM    161  O   ALA L  25      32.952 -20.621   9.038  1.00 20.43           O  
ATOM    162  CB  ALA L  25      31.534 -18.124  10.557  1.00 17.79           C  
ATOM    163  N   SER L  26      32.317 -19.048   7.565  1.00 18.17           N  
ATOM    164  CA  SER L  26      33.302 -19.463   6.556  1.00 19.56           C  
ATOM    165  C   SER L  26      34.741 -19.078   6.901  1.00 20.58           C  
ATOM    166  O   SER L  26      35.684 -19.611   6.312  1.00 20.92           O  
ATOM    167  CB  SER L  26      32.930 -18.880   5.201  1.00 17.53           C  
ATOM    168  OG  SER L  26      32.867 -17.480   5.255  1.00 18.07           O  
ATOM    169  N   GLN L  27      34.896 -18.114   7.808  1.00 20.50           N  
ATOM    170  CA  GLN L  27      36.197 -17.767   8.381  1.00 22.12           C  
ATOM    171  C   GLN L  27      35.950 -17.312   9.820  1.00 20.51           C  
ATOM    172  O   GLN L  27      34.793 -17.159  10.225  1.00 16.73           O  
ATOM    173  CB  GLN L  27      36.912 -16.693   7.537  1.00 22.93           C  
ATOM    174  CG  GLN L  27      36.293 -15.295   7.577  1.00 22.86           C  
ATOM    175  CD  GLN L  27      37.008 -14.311   6.656  1.00 26.09           C  
ATOM    176  OE1 GLN L  27      37.874 -13.548   7.097  1.00 27.99           O  
ATOM    177  NE2 GLN L  27      36.651 -14.331   5.368  1.00 27.02           N  
ATOM    178  N   SER L  28      36.997 -17.102  10.610  1.00 19.57           N  
ATOM    179  CA  SER L  28      36.753 -16.766  12.031  1.00 20.03           C  
ATOM    180  C   SER L  28      36.039 -15.440  12.210  1.00 18.53           C  
ATOM    181  O   SER L  28      36.305 -14.490  11.498  1.00 19.48           O  
ATOM    182  CB  SER L  28      38.031 -16.739  12.854  1.00 20.50           C  
ATOM    183  N   ILE L  29      35.131 -15.402  13.178  1.00 17.76           N  
ATOM    184  CA  ILE L  29      34.402 -14.201  13.552  1.00 17.01           C  
ATOM    185  C   ILE L  29      34.436 -14.024  15.071  1.00 18.10           C  
ATOM    186  O   ILE L  29      33.559 -13.393  15.642  1.00 16.41           O  
ATOM    187  CB  ILE L  29      32.928 -14.257  13.031  1.00 16.04           C  
ATOM    188  CG1 ILE L  29      32.149 -15.423  13.658  1.00 15.00           C  
ATOM    189  CG2 ILE L  29      32.932 -14.430  11.540  1.00 13.80           C  
ATOM    190  CD1 ILE L  29      30.662 -15.427  13.335  1.00 15.32           C  
ATOM    191  N   SER L  30      35.483 -14.574  15.704  1.00 20.56           N  
ATOM    192  CA  SER L  30      35.591 -14.688  17.174  1.00 20.87           C  
ATOM    193  C   SER L  30      34.222 -14.910  17.811  1.00 20.70           C  
ATOM    194  O   SER L  30      33.634 -15.979  17.636  1.00 22.91           O  
ATOM    195  CB  SER L  30      36.369 -13.509  17.810  1.00 21.70           C  
ATOM    196  OG  SER L  30      35.716 -12.244  17.698  1.00 20.72           O  
ATOM    197  N   SER L  31      33.708 -13.927  18.534  1.00 19.33           N  
ATOM    198  CA  SER L  31      32.433 -14.087  19.216  1.00 19.75           C  
ATOM    199  C   SER L  31      31.390 -13.122  18.678  1.00 20.66           C  
ATOM    200  O   SER L  31      30.365 -12.880  19.310  1.00 19.65           O  
ATOM    201  CB  SER L  31      32.628 -13.909  20.723  1.00 23.20           C  
ATOM    202  OG  SER L  31      33.447 -14.961  21.213  1.00 24.40           O  
ATOM    203  N   TYR L  32      31.616 -12.613  17.475  1.00 17.57           N  
ATOM    204  CA  TYR L  32      30.675 -11.666  16.888  1.00 15.47           C  
ATOM    205  C   TYR L  32      29.613 -12.423  16.117  1.00 15.56           C  
ATOM    206  O   TYR L  32      29.524 -12.376  14.892  1.00 16.37           O  
ATOM    207  CB  TYR L  32      31.424 -10.648  16.044  1.00 16.96           C  
ATOM    208  CG  TYR L  32      32.201  -9.704  16.916  1.00 17.69           C  
ATOM    209  CD1 TYR L  32      31.693  -8.453  17.244  1.00 19.65           C  
ATOM    210  CD2 TYR L  32      33.428 -10.080  17.461  1.00 20.47           C  
ATOM    211  CE1 TYR L  32      32.392  -7.585  18.082  1.00 18.85           C  
ATOM    212  CE2 TYR L  32      34.143  -9.218  18.289  1.00 20.11           C  
ATOM    213  CZ  TYR L  32      33.619  -7.966  18.592  1.00 20.25           C  
ATOM    214  OH  TYR L  32      34.344  -7.105  19.413  1.00 19.68           O  
ATOM    215  N   LEU L  33      28.779 -13.114  16.880  1.00 15.85           N  
ATOM    216  CA  LEU L  33      27.757 -13.994  16.329  1.00 15.50           C  
ATOM    217  C   LEU L  33      26.484 -13.730  17.121  1.00 15.24           C  
ATOM    218  O   LEU L  33      26.501 -13.732  18.344  1.00 16.71           O  
ATOM    219  CB  LEU L  33      28.200 -15.449  16.443  1.00 16.26           C  
ATOM    220  CG  LEU L  33      27.375 -16.512  15.720  1.00 15.55           C  
ATOM    221  CD1 LEU L  33      26.092 -16.794  16.483  1.00 16.30           C  
ATOM    222  CD2 LEU L  33      27.113 -16.093  14.235  1.00 14.17           C  
ATOM    223  N   ASN L  34      25.398 -13.445  16.406  1.00 15.44           N  
ATOM    224  CA  ASN L  34      24.123 -13.124  17.010  1.00 14.36           C  
ATOM    225  C   ASN L  34      23.084 -14.131  16.647  1.00 13.15           C  
ATOM    226  O   ASN L  34      23.109 -14.643  15.535  1.00 15.54           O  
ATOM    227  CB  ASN L  34      23.675 -11.758  16.507  1.00 14.41           C  
ATOM    228  CG  ASN L  34      24.747 -10.714  16.705  1.00 21.44           C  
ATOM    229  OD1 ASN L  34      25.001 -10.301  17.830  1.00 21.11           O  
ATOM    230  ND2 ASN L  34      25.393 -10.291  15.612  1.00 18.95           N  
ATOM    231  N   TRP L  35      22.175 -14.417  17.583  1.00 12.50           N  
ATOM    232  CA  TRP L  35      21.007 -15.241  17.303  1.00 11.16           C  
ATOM    233  C   TRP L  35      19.727 -14.421  17.332  1.00 11.03           C  
ATOM    234  O   TRP L  35      19.443 -13.710  18.291  1.00 13.77           O  
ATOM    235  CB  TRP L  35      20.919 -16.458  18.238  1.00 12.69           C  
ATOM    236  CG  TRP L  35      22.026 -17.484  18.045  1.00 11.94           C  
ATOM    237  CD1 TRP L  35      23.203 -17.631  18.791  1.00 12.74           C  
ATOM    238  CD2 TRP L  35      22.074 -18.575  17.045  1.00 12.19           C  
ATOM    239  NE1 TRP L  35      23.956 -18.685  18.324  1.00 13.13           N  
ATOM    240  CE2 TRP L  35      23.339 -19.285  17.273  1.00 13.64           C  
ATOM    241  CE3 TRP L  35      21.236 -19.002  16.029  1.00 12.12           C  
ATOM    242  CZ2 TRP L  35      23.710 -20.372  16.509  1.00 12.94           C  
ATOM    243  CZ3 TRP L  35      21.620 -20.106  15.263  1.00 13.06           C  
ATOM    244  CH2 TRP L  35      22.834 -20.763  15.497  1.00 14.36           C  
ATOM    245  N   TYR L  36      18.969 -14.539  16.245  1.00 10.54           N  
ATOM    246  CA  TYR L  36      17.687 -13.894  16.044  1.00 10.56           C  
ATOM    247  C   TYR L  36      16.587 -14.949  15.951  1.00 10.83           C  
ATOM    248  O   TYR L  36      16.806 -16.083  15.455  1.00 11.72           O  
ATOM    249  CB  TYR L  36      17.706 -13.131  14.726  1.00 10.89           C  
ATOM    250  CG  TYR L  36      18.425 -11.824  14.777  1.00 13.32           C  
ATOM    251  CD1 TYR L  36      19.808 -11.732  14.494  1.00 14.46           C  
ATOM    252  CD2 TYR L  36      17.737 -10.663  15.102  1.00 13.45           C  
ATOM    253  CE1 TYR L  36      20.456 -10.520  14.563  1.00 15.92           C  
ATOM    254  CE2 TYR L  36      18.371  -9.463  15.155  1.00 14.41           C  
ATOM    255  CZ  TYR L  36      19.724  -9.382  14.887  1.00 17.08           C  
ATOM    256  OH  TYR L  36      20.322  -8.144  14.971  1.00 16.95           O  
ATOM    257  N   GLN L  37      15.402 -14.559  16.424  1.00 10.48           N  
ATOM    258  CA  GLN L  37      14.171 -15.364  16.331  1.00 10.51           C  
ATOM    259  C   GLN L  37      13.212 -14.607  15.410  1.00 10.87           C  
ATOM    260  O   GLN L  37      13.039 -13.381  15.565  1.00 13.46           O  
ATOM    261  CB  GLN L  37      13.554 -15.525  17.723  1.00 11.39           C  
ATOM    262  CG  GLN L  37      12.251 -16.341  17.763  1.00 14.09           C  
ATOM    263  CD  GLN L  37      11.554 -16.211  19.104  1.00 15.75           C  
ATOM    264  OE1 GLN L  37      11.102 -15.121  19.478  1.00 17.31           O  
ATOM    265  NE2 GLN L  37      11.497 -17.311  19.855  1.00 15.20           N  
ATOM    266  N   GLN L  38      12.603 -15.296  14.448  1.00 11.66           N  
ATOM    267  CA  GLN L  38      11.597 -14.642  13.597  1.00 13.54           C  
ATOM    268  C   GLN L  38      10.315 -15.452  13.503  1.00 15.76           C  
ATOM    269  O   GLN L  38      10.340 -16.610  13.064  1.00 15.70           O  
ATOM    270  CB  GLN L  38      12.157 -14.413  12.190  1.00 13.48           C  
ATOM    271  CG  GLN L  38      11.280 -13.546  11.309  1.00 15.84           C  
ATOM    272  CD  GLN L  38      11.922 -13.276   9.958  1.00 16.47           C  
ATOM    273  OE1 GLN L  38      12.558 -14.154   9.390  1.00 13.76           O  
ATOM    274  NE2 GLN L  38      11.736 -12.073   9.434  1.00 16.43           N  
ATOM    275  N   LYS L  39       9.216 -14.820  13.909  1.00 17.15           N  
ATOM    276  CA  LYS L  39       7.869 -15.334  13.732  1.00 21.10           C  
ATOM    277  C   LYS L  39       7.363 -14.929  12.341  1.00 25.12           C  
ATOM    278  O   LYS L  39       7.704 -13.849  11.846  1.00 22.92           O  
ATOM    279  CB  LYS L  39       6.925 -14.764  14.797  1.00 23.89           C  
ATOM    280  CG  LYS L  39       7.353 -14.968  16.253  1.00 27.13           C  
ATOM    281  CD  LYS L  39       7.158 -16.397  16.715  1.00 28.20           C  
ATOM    282  CE  LYS L  39       7.786 -16.629  18.081  1.00 24.82           C  
ATOM    283  NZ  LYS L  39       6.893 -16.202  19.214  1.00 25.12           N  
ATOM    284  N   PRO L  40       6.522 -15.770  11.715  1.00 24.49           N  
ATOM    285  CA  PRO L  40       6.043 -15.439  10.358  1.00 25.88           C  
ATOM    286  C   PRO L  40       5.272 -14.111  10.299  1.00 28.56           C  
ATOM    287  O   PRO L  40       4.408 -13.843  11.148  1.00 26.64           O  
ATOM    288  CB  PRO L  40       5.132 -16.621   9.986  1.00 27.97           C  
ATOM    289  CG  PRO L  40       5.163 -17.571  11.131  1.00 31.50           C  
ATOM    290  CD  PRO L  40       5.818 -16.924  12.301  1.00 29.00           C  
ATOM    291  N   GLY L  41       5.618 -13.273   9.323  1.00 30.40           N  
ATOM    292  CA  GLY L  41       5.020 -11.946   9.186  1.00 30.01           C  
ATOM    293  C   GLY L  41       5.681 -10.850  10.000  1.00 26.61           C  
ATOM    294  O   GLY L  41       5.424  -9.667   9.757  1.00 25.04           O  
ATOM    295  N   LYS L  42       6.536 -11.236  10.951  1.00 23.77           N  
ATOM    296  CA  LYS L  42       7.151 -10.300  11.892  1.00 20.69           C  
ATOM    297  C   LYS L  42       8.651 -10.123  11.627  1.00 18.27           C  
ATOM    298  O   LYS L  42       9.269 -10.883  10.870  1.00 16.72           O  
ATOM    299  CB  LYS L  42       6.912 -10.767  13.348  1.00 20.51           C  
ATOM    300  N   ALA L  43       9.228  -9.109  12.255  1.00 17.72           N  
ATOM    301  CA  ALA L  43      10.644  -8.831  12.114  1.00 18.05           C  
ATOM    302  C   ALA L  43      11.439  -9.758  13.019  1.00 17.45           C  
ATOM    303  O   ALA L  43      10.929 -10.181  14.062  1.00 17.49           O  
ATOM    304  CB  ALA L  43      10.942  -7.373  12.481  1.00 19.42           C  
ATOM    305  N   PRO L  44      12.710 -10.010  12.671  1.00 17.55           N  
ATOM    306  CA  PRO L  44      13.626 -10.736  13.539  1.00 16.48           C  
ATOM    307  C   PRO L  44      13.889  -9.965  14.843  1.00 14.76           C  
ATOM    308  O   PRO L  44      14.021  -8.744  14.818  1.00 15.54           O  
ATOM    309  CB  PRO L  44      14.911 -10.822  12.713  1.00 17.56           C  
ATOM    310  CG  PRO L  44      14.524 -10.452  11.333  1.00 18.36           C  
ATOM    311  CD  PRO L  44      13.392  -9.532  11.453  1.00 16.32           C  
ATOM    312  N   LYS L  45      13.899 -10.689  15.953  1.00 13.82           N  
ATOM    313  CA  LYS L  45      14.196 -10.150  17.277  1.00 13.81           C  
ATOM    314  C   LYS L  45      15.494 -10.797  17.771  1.00 13.19           C  
ATOM    315  O   LYS L  45      15.663 -12.020  17.696  1.00 12.56           O  
ATOM    316  CB  LYS L  45      13.043 -10.457  18.234  1.00 14.62           C  
ATOM    317  N   LEU L  46      16.408  -9.981  18.273  1.00 13.92           N  
ATOM    318  CA  LEU L  46      17.681 -10.452  18.811  1.00 15.00           C  
ATOM    319  C   LEU L  46      17.512 -11.198  20.137  1.00 17.07           C  
ATOM    320  O   LEU L  46      16.894 -10.661  21.066  1.00 16.43           O  
ATOM    321  CB  LEU L  46      18.579  -9.235  19.042  1.00 14.85           C  
ATOM    322  CG  LEU L  46      20.005  -9.457  19.520  1.00 15.98           C  
ATOM    323  CD1 LEU L  46      20.818 -10.207  18.475  1.00 15.61           C  
ATOM    324  CD2 LEU L  46      20.607  -8.080  19.788  1.00 18.52           C  
ATOM    325  N   LEU L  47      18.071 -12.403  20.234  1.00 14.88           N  
ATOM    326  CA  LEU L  47      18.054 -13.183  21.488  1.00 18.97           C  
ATOM    327  C   LEU L  47      19.432 -13.244  22.172  1.00 18.32           C  
ATOM    328  O   LEU L  47      19.545 -13.060  23.386  1.00 19.87           O  
ATOM    329  CB  LEU L  47      17.493 -14.590  21.246  1.00 23.55           C  
ATOM    330  CG  LEU L  47      16.002 -14.672  20.861  1.00 25.78           C  
ATOM    331  CD1 LEU L  47      15.507 -16.081  21.063  1.00 28.88           C  
ATOM    332  CD2 LEU L  47      15.115 -13.706  21.659  1.00 24.27           C  
ATOM    333  N   ILE L  48      20.473 -13.488  21.390  1.00 19.47           N  
ATOM    334  CA  ILE L  48      21.827 -13.623  21.917  1.00 20.96           C  
ATOM    335  C   ILE L  48      22.779 -12.821  21.045  1.00 19.89           C  
ATOM    336  O   ILE L  48      22.636 -12.806  19.828  1.00 16.10           O  
ATOM    337  CB  ILE L  48      22.226 -15.122  21.926  1.00 20.20           C  
ATOM    338  CG1 ILE L  48      21.415 -15.874  22.983  1.00 23.21           C  
ATOM    339  CG2 ILE L  48      23.741 -15.328  22.122  1.00 23.19           C  
ATOM    340  CD1 ILE L  48      21.562 -17.381  22.925  1.00 24.82           C  
ATOM    341  N   TYR L  49      23.736 -12.136  21.659  1.00 20.63           N  
ATOM    342  CA  TYR L  49      24.816 -11.515  20.905  1.00 21.17           C  
ATOM    343  C   TYR L  49      26.169 -11.860  21.547  1.00 22.06           C  
ATOM    344  O   TYR L  49      26.213 -12.536  22.566  1.00 22.04           O  
ATOM    345  CB  TYR L  49      24.561 -10.022  20.771  1.00 17.72           C  
ATOM    346  N   ASP L  50      27.272 -11.455  20.927  1.00 22.49           N  
ATOM    347  CA  ASP L  50      28.600 -11.853  21.420  1.00 21.74           C  
ATOM    348  C   ASP L  50      28.736 -13.392  21.601  1.00 22.86           C  
ATOM    349  O   ASP L  50      29.458 -13.852  22.487  1.00 24.14           O  
ATOM    350  CB  ASP L  50      28.928 -11.136  22.734  1.00 22.92           C  
ATOM    351  N   ALA L  51      28.027 -14.164  20.771  1.00 20.45           N  
ATOM    352  CA  ALA L  51      28.075 -15.638  20.753  1.00 21.29           C  
ATOM    353  C   ALA L  51      27.296 -16.278  21.886  1.00 19.84           C  
ATOM    354  O   ALA L  51      26.524 -17.196  21.660  1.00 20.53           O  
ATOM    355  CB  ALA L  51      29.518 -16.151  20.744  1.00 23.22           C  
ATOM    356  N   ASP L  52      27.485 -15.792  23.104  1.00 22.72           N  
ATOM    357  CA  ASP L  52      26.849 -16.405  24.260  1.00 25.22           C  
ATOM    358  C   ASP L  52      26.322 -15.397  25.292  1.00 26.12           C  
ATOM    359  O   ASP L  52      26.028 -15.793  26.425  1.00 27.94           O  
ATOM    360  CB  ASP L  52      27.843 -17.353  24.935  1.00 29.21           C  
ATOM    361  CG  ASP L  52      29.109 -16.648  25.387  1.00 31.49           C  
ATOM    362  OD1 ASP L  52      29.993 -17.333  25.932  1.00 38.60           O  
ATOM    363  OD2 ASP L  52      29.230 -15.417  25.185  1.00 28.78           O  
ATOM    364  N   ASP L  53      26.215 -14.116  24.912  1.00 26.61           N  
ATOM    365  CA  ASP L  53      25.705 -13.077  25.816  1.00 27.66           C  
ATOM    366  C   ASP L  53      24.193 -13.008  25.606  1.00 26.21           C  
ATOM    367  O   ASP L  53      23.707 -12.393  24.635  1.00 25.80           O  
ATOM    368  CB  ASP L  53      26.378 -11.703  25.573  1.00 27.91           C  
ATOM    369  CG  ASP L  53      26.139 -10.705  26.718  1.00 28.68           C  
ATOM    370  OD1 ASP L  53      25.222 -10.927  27.544  1.00 28.66           O  
ATOM    371  OD2 ASP L  53      26.884  -9.689  26.804  1.00 30.57           O  
ATOM    372  N   LEU L  54      23.465 -13.675  26.499  1.00 27.41           N  
ATOM    373  CA  LEU L  54      22.009 -13.639  26.486  1.00 25.94           C  
ATOM    374  C   LEU L  54      21.565 -12.219  26.803  1.00 25.52           C  
ATOM    375  O   LEU L  54      21.957 -11.630  27.830  1.00 22.74           O  
ATOM    376  CB  LEU L  54      21.417 -14.627  27.497  1.00 27.18           C  
ATOM    377  CG  LEU L  54      19.886 -14.780  27.490  1.00 28.62           C  
ATOM    378  CD1 LEU L  54      19.419 -15.513  26.265  1.00 22.82           C  
ATOM    379  CD2 LEU L  54      19.415 -15.503  28.725  1.00 25.04           C  
ATOM    380  N   GLN L  55      20.778 -11.648  25.900  1.00 23.09           N  
ATOM    381  CA  GLN L  55      20.313 -10.273  26.060  1.00 22.23           C  
ATOM    382  C   GLN L  55      19.428 -10.176  27.289  1.00 21.67           C  
ATOM    383  O   GLN L  55      18.652 -11.089  27.562  1.00 21.43           O  
ATOM    384  CB  GLN L  55      19.532  -9.839  24.809  1.00 22.43           C  
ATOM    385  N   SER L  56      19.539  -9.074  28.041  1.00 25.74           N  
ATOM    386  CA  SER L  56      18.707  -8.889  29.232  1.00 28.35           C  
ATOM    387  C   SER L  56      17.235  -9.044  28.836  1.00 28.12           C  
ATOM    388  O   SER L  56      16.812  -8.591  27.760  1.00 26.11           O  
ATOM    389  CB  SER L  56      18.956  -7.527  29.881  1.00 33.06           C  
ATOM    390  OG  SER L  56      18.554  -6.482  29.013  1.00 33.28           O  
ATOM    391  N   GLY L  57      16.480  -9.743  29.671  1.00 25.60           N  
ATOM    392  CA  GLY L  57      15.070  -9.997  29.405  1.00 25.73           C  
ATOM    393  C   GLY L  57      14.739 -11.110  28.421  1.00 24.73           C  
ATOM    394  O   GLY L  57      13.562 -11.368  28.175  1.00 28.83           O  
ATOM    395  N   VAL L  58      15.750 -11.791  27.877  1.00 24.93           N  
ATOM    396  CA  VAL L  58      15.514 -13.013  27.104  1.00 22.19           C  
ATOM    397  C   VAL L  58      15.637 -14.252  28.025  1.00 25.76           C  
ATOM    398  O   VAL L  58      16.602 -14.378  28.786  1.00 22.80           O  
ATOM    399  CB  VAL L  58      16.441 -13.114  25.891  1.00 21.81           C  
ATOM    400  CG1 VAL L  58      16.172 -14.385  25.112  1.00 21.87           C  
ATOM    401  CG2 VAL L  58      16.235 -11.906  24.983  1.00 18.56           C  
ATOM    402  N   PRO L  59      14.644 -15.149  27.979  1.00 23.69           N  
ATOM    403  CA  PRO L  59      14.653 -16.301  28.895  1.00 25.88           C  
ATOM    404  C   PRO L  59      15.905 -17.193  28.850  1.00 24.14           C  
ATOM    405  O   PRO L  59      16.572 -17.316  27.813  1.00 23.55           O  
ATOM    406  CB  PRO L  59      13.391 -17.079  28.490  1.00 26.95           C  
ATOM    407  CG  PRO L  59      12.483 -16.025  27.912  1.00 26.30           C  
ATOM    408  CD  PRO L  59      13.382 -15.061  27.218  1.00 25.64           C  
ATOM    409  N   SER L  60      16.195 -17.819  29.994  1.00 25.25           N  
ATOM    410  CA  SER L  60      17.432 -18.563  30.199  1.00 24.99           C  
ATOM    411  C   SER L  60      17.449 -19.920  29.509  1.00 25.35           C  
ATOM    412  O   SER L  60      18.506 -20.548  29.399  1.00 26.92           O  
ATOM    413  CB  SER L  60      17.686 -18.775  31.698  1.00 27.43           C  
ATOM    414  OG  SER L  60      16.772 -19.702  32.250  1.00 29.08           O  
ATOM    415  N   ARG L  61      16.285 -20.378  29.059  1.00 23.01           N  
ATOM    416  CA  ARG L  61      16.220 -21.563  28.212  1.00 23.60           C  
ATOM    417  C   ARG L  61      16.949 -21.393  26.874  1.00 20.49           C  
ATOM    418  O   ARG L  61      17.252 -22.376  26.206  1.00 20.39           O  
ATOM    419  CB  ARG L  61      14.762 -21.994  27.978  1.00 22.64           C  
ATOM    420  CG  ARG L  61      13.903 -21.022  27.185  1.00 21.65           C  
ATOM    421  CD  ARG L  61      12.473 -21.542  27.132  1.00 22.13           C  
ATOM    422  NE  ARG L  61      11.582 -20.663  26.385  1.00 21.10           N  
ATOM    423  CZ  ARG L  61      10.922 -19.604  26.872  1.00 20.48           C  
ATOM    424  NH1 ARG L  61      11.007 -19.236  28.153  1.00 21.24           N  
ATOM    425  NH2 ARG L  61      10.162 -18.894  26.050  1.00 18.05           N  
ATOM    426  N   PHE L  62      17.211 -20.152  26.473  1.00 21.34           N  
ATOM    427  CA  PHE L  62      18.018 -19.877  25.288  1.00 21.33           C  
ATOM    428  C   PHE L  62      19.474 -19.697  25.697  1.00 23.56           C  
ATOM    429  O   PHE L  62      19.768 -18.915  26.603  1.00 24.37           O  
ATOM    430  CB  PHE L  62      17.528 -18.597  24.611  1.00 18.58           C  
ATOM    431  CG  PHE L  62      16.155 -18.724  24.014  1.00 17.63           C  
ATOM    432  CD1 PHE L  62      15.965 -19.445  22.839  1.00 17.77           C  
ATOM    433  CD2 PHE L  62      15.061 -18.129  24.632  1.00 19.84           C  
ATOM    434  CE1 PHE L  62      14.689 -19.569  22.288  1.00 16.00           C  
ATOM    435  CE2 PHE L  62      13.793 -18.245  24.096  1.00 17.98           C  
ATOM    436  CZ  PHE L  62      13.605 -18.961  22.932  1.00 16.55           C  
ATOM    437  N   SER L  63      20.373 -20.437  25.060  1.00 22.02           N  
ATOM    438  CA  SER L  63      21.807 -20.254  25.310  1.00 25.24           C  
ATOM    439  C   SER L  63      22.620 -20.431  24.033  1.00 21.35           C  
ATOM    440  O   SER L  63      22.327 -21.286  23.198  1.00 22.44           O  
ATOM    441  CB  SER L  63      22.304 -21.205  26.411  1.00 28.17           C  
ATOM    442  OG  SER L  63      22.458 -22.526  25.929  1.00 32.21           O  
ATOM    443  N   GLY L  64      23.654 -19.612  23.892  1.00 21.76           N  
ATOM    444  CA  GLY L  64      24.559 -19.704  22.755  1.00 24.07           C  
ATOM    445  C   GLY L  64      25.917 -20.194  23.216  1.00 25.28           C  
ATOM    446  O   GLY L  64      26.321 -19.950  24.361  1.00 26.49           O  
ATOM    447  N   SER L  65      26.610 -20.899  22.332  1.00 23.23           N  
ATOM    448  CA  SER L  65      27.979 -21.306  22.584  1.00 24.96           C  
ATOM    449  C   SER L  65      28.785 -21.234  21.297  1.00 23.08           C  
ATOM    450  O   SER L  65      28.233 -21.213  20.196  1.00 22.32           O  
ATOM    451  CB  SER L  65      28.031 -22.720  23.185  1.00 28.70           C  
ATOM    452  OG  SER L  65      26.979 -23.522  22.698  1.00 32.66           O  
ATOM    453  N   GLY L  66      30.100 -21.199  21.449  1.00 24.50           N  
ATOM    454  CA  GLY L  66      30.992 -21.155  20.315  1.00 25.50           C  
ATOM    455  C   GLY L  66      31.777 -19.870  20.216  1.00 23.83           C  
ATOM    456  O   GLY L  66      31.374 -18.806  20.709  1.00 27.14           O  
ATOM    457  N   SER L  67      32.910 -19.994  19.549  1.00 24.54           N  
ATOM    458  CA  SER L  67      33.859 -18.925  19.354  1.00 25.95           C  
ATOM    459  C   SER L  67      34.595 -19.329  18.083  1.00 27.40           C  
ATOM    460  O   SER L  67      34.854 -20.511  17.879  1.00 33.26           O  
ATOM    461  CB  SER L  67      34.828 -18.845  20.547  1.00 28.82           C  
ATOM    462  N   GLY L  68      34.912 -18.369  17.221  1.00 24.13           N  
ATOM    463  CA  GLY L  68      35.691 -18.650  16.028  1.00 23.06           C  
ATOM    464  C   GLY L  68      34.817 -18.901  14.818  1.00 21.43           C  
ATOM    465  O   GLY L  68      34.368 -17.950  14.184  1.00 18.57           O  
ATOM    466  N   THR L  69      34.592 -20.176  14.491  1.00 22.24           N  
ATOM    467  CA  THR L  69      33.803 -20.561  13.304  1.00 21.62           C  
ATOM    468  C   THR L  69      32.599 -21.457  13.565  1.00 24.11           C  
ATOM    469  O   THR L  69      31.767 -21.615  12.674  1.00 22.95           O  
ATOM    470  CB  THR L  69      34.660 -21.251  12.217  1.00 24.66           C  
ATOM    471  OG1 THR L  69      35.132 -22.516  12.701  1.00 27.12           O  
ATOM    472  CG2 THR L  69      35.852 -20.370  11.798  1.00 23.47           C  
ATOM    473  N   ASP L  70      32.491 -22.036  14.758  1.00 22.96           N  
ATOM    474  CA  ASP L  70      31.437 -23.021  15.062  1.00 23.57           C  
ATOM    475  C   ASP L  70      30.612 -22.581  16.241  1.00 22.21           C  
ATOM    476  O   ASP L  70      31.156 -22.395  17.339  1.00 22.89           O  
ATOM    477  CB  ASP L  70      32.060 -24.387  15.390  1.00 27.52           C  
ATOM    478  CG  ASP L  70      32.198 -25.276  14.176  1.00 29.15           C  
ATOM    479  OD1 ASP L  70      32.463 -24.749  13.080  1.00 29.78           O  
ATOM    480  OD2 ASP L  70      32.035 -26.513  14.324  1.00 33.47           O  
ATOM    481  N   PHE L  71      29.296 -22.452  16.028  1.00 18.03           N  
ATOM    482  CA  PHE L  71      28.407 -21.893  17.041  1.00 18.06           C  
ATOM    483  C   PHE L  71      27.167 -22.745  17.170  1.00 17.78           C  
ATOM    484  O   PHE L  71      26.758 -23.398  16.222  1.00 19.72           O  
ATOM    485  CB  PHE L  71      28.009 -20.465  16.677  1.00 16.97           C  
ATOM    486  CG  PHE L  71      29.175 -19.550  16.506  1.00 17.01           C  
ATOM    487  CD1 PHE L  71      29.873 -19.524  15.295  1.00 16.67           C  
ATOM    488  CD2 PHE L  71      29.579 -18.715  17.541  1.00 17.49           C  
ATOM    489  CE1 PHE L  71      30.926 -18.683  15.118  1.00 17.51           C  
ATOM    490  CE2 PHE L  71      30.653 -17.847  17.369  1.00 16.37           C  
ATOM    491  CZ  PHE L  71      31.326 -17.825  16.155  1.00 17.18           C  
ATOM    492  N   THR L  72      26.594 -22.756  18.363  1.00 17.94           N  
ATOM    493  CA  THR L  72      25.378 -23.496  18.614  1.00 18.73           C  
ATOM    494  C   THR L  72      24.398 -22.610  19.378  1.00 18.47           C  
ATOM    495  O   THR L  72      24.795 -21.827  20.226  1.00 19.87           O  
ATOM    496  CB  THR L  72      25.679 -24.807  19.402  1.00 23.94           C  
ATOM    497  OG1 THR L  72      26.640 -25.603  18.683  1.00 26.33           O  
ATOM    498  CG2 THR L  72      24.432 -25.629  19.589  1.00 24.23           C  
ATOM    499  N   LEU L  73      23.118 -22.736  19.062  1.00 15.65           N  
ATOM    500  CA  LEU L  73      22.052 -22.191  19.887  1.00 16.58           C  
ATOM    501  C   LEU L  73      21.301 -23.375  20.468  1.00 17.04           C  
ATOM    502  O   LEU L  73      20.782 -24.191  19.720  1.00 19.06           O  
ATOM    503  CB  LEU L  73      21.076 -21.376  19.043  1.00 15.12           C  
ATOM    504  CG  LEU L  73      19.745 -21.014  19.697  1.00 16.47           C  
ATOM    505  CD1 LEU L  73      19.961 -19.950  20.781  1.00 19.66           C  
ATOM    506  CD2 LEU L  73      18.779 -20.549  18.623  1.00 14.23           C  
ATOM    507  N   THR L  74      21.234 -23.460  21.788  1.00 18.32           N  
ATOM    508  CA  THR L  74      20.413 -24.477  22.449  1.00 20.65           C  
ATOM    509  C   THR L  74      19.177 -23.877  23.119  1.00 19.97           C  
ATOM    510  O   THR L  74      19.255 -22.854  23.814  1.00 19.90           O  
ATOM    511  CB  THR L  74      21.206 -25.254  23.499  1.00 22.05           C  
ATOM    512  OG1 THR L  74      22.311 -25.913  22.868  1.00 23.51           O  
ATOM    513  CG2 THR L  74      20.317 -26.288  24.176  1.00 25.19           C  
ATOM    514  N   ILE L  75      18.037 -24.528  22.903  1.00 18.34           N  
ATOM    515  CA  ILE L  75      16.815 -24.213  23.609  1.00 18.01           C  
ATOM    516  C   ILE L  75      16.587 -25.408  24.510  1.00 20.70           C  
ATOM    517  O   ILE L  75      16.306 -26.505  24.039  1.00 19.77           O  
ATOM    518  CB  ILE L  75      15.613 -24.005  22.683  1.00 17.87           C  
ATOM    519  CG1 ILE L  75      15.972 -23.068  21.537  1.00 16.46           C  
ATOM    520  CG2 ILE L  75      14.450 -23.416  23.467  1.00 16.79           C  
ATOM    521  CD1 ILE L  75      14.778 -22.699  20.663  1.00 17.80           C  
ATOM    522  N   SER L  76      16.768 -25.202  25.807  1.00 21.19           N  
ATOM    523  CA  SER L  76      16.897 -26.332  26.709  1.00 23.70           C  
ATOM    524  C   SER L  76      15.556 -26.984  27.042  1.00 25.20           C  
ATOM    525  O   SER L  76      15.528 -28.161  27.410  1.00 32.09           O  
ATOM    526  CB  SER L  76      17.650 -25.925  27.971  1.00 24.44           C  
ATOM    527  OG  SER L  76      16.956 -24.913  28.651  1.00 25.38           O  
ATOM    528  N   SER L  77      14.465 -26.235  26.903  1.00 24.21           N  
ATOM    529  CA  SER L  77      13.125 -26.727  27.217  1.00 25.82           C  
ATOM    530  C   SER L  77      12.091 -25.877  26.485  1.00 25.61           C  
ATOM    531  O   SER L  77      11.751 -24.780  26.939  1.00 25.48           O  
ATOM    532  CB  SER L  77      12.894 -26.677  28.737  1.00 27.81           C  
ATOM    533  OG  SER L  77      11.597 -27.141  29.087  1.00 27.56           O  
ATOM    534  N   LEU L  78      11.625 -26.362  25.332  1.00 23.14           N  
ATOM    535  CA  LEU L  78      10.803 -25.548  24.412  1.00 20.80           C  
ATOM    536  C   LEU L  78       9.446 -25.188  24.995  1.00 22.70           C  
ATOM    537  O   LEU L  78       8.748 -26.055  25.551  1.00 23.51           O  
ATOM    538  CB  LEU L  78      10.571 -26.295  23.085  1.00 20.08           C  
ATOM    539  CG  LEU L  78      11.728 -26.311  22.097  1.00 21.15           C  
ATOM    540  CD1 LEU L  78      11.533 -27.438  21.098  1.00 20.00           C  
ATOM    541  CD2 LEU L  78      11.832 -24.948  21.383  1.00 17.76           C  
ATOM    542  N   GLN L  79       9.089 -23.911  24.893  1.00 21.69           N  
ATOM    543  CA  GLN L  79       7.729 -23.456  25.176  1.00 21.04           C  
ATOM    544  C   GLN L  79       7.061 -23.186  23.839  1.00 21.48           C  
ATOM    545  O   GLN L  79       7.747 -22.980  22.828  1.00 19.55           O  
ATOM    546  CB  GLN L  79       7.743 -22.212  26.091  1.00 18.73           C  
ATOM    547  N   PRO L  80       5.716 -23.225  23.791  1.00 21.99           N  
ATOM    548  CA  PRO L  80       5.047 -23.068  22.506  1.00 20.94           C  
ATOM    549  C   PRO L  80       5.328 -21.754  21.794  1.00 19.83           C  
ATOM    550  O   PRO L  80       5.215 -21.701  20.571  1.00 23.37           O  
ATOM    551  CB  PRO L  80       3.566 -23.155  22.878  1.00 23.49           C  
ATOM    552  CG  PRO L  80       3.523 -22.716  24.259  1.00 24.04           C  
ATOM    553  CD  PRO L  80       4.733 -23.342  24.879  1.00 24.93           C  
ATOM    554  N   GLU L  81       5.686 -20.715  22.545  1.00 18.21           N  
ATOM    555  CA  GLU L  81       6.043 -19.428  21.959  1.00 18.96           C  
ATOM    556  C   GLU L  81       7.368 -19.492  21.206  1.00 16.29           C  
ATOM    557  O   GLU L  81       7.737 -18.535  20.524  1.00 15.65           O  
ATOM    558  CB  GLU L  81       6.109 -18.324  23.027  1.00 20.27           C  
ATOM    559  CG  GLU L  81       7.095 -18.567  24.179  1.00 22.76           C  
ATOM    560  CD  GLU L  81       6.457 -19.161  25.403  1.00 27.33           C  
ATOM    561  OE1 GLU L  81       5.559 -20.032  25.255  1.00 33.23           O  
ATOM    562  OE2 GLU L  81       6.852 -18.760  26.521  1.00 33.44           O  
ATOM    563  N   ASP L  82       8.097 -20.600  21.341  1.00 18.36           N  
ATOM    564  CA  ASP L  82       9.459 -20.699  20.780  1.00 16.11           C  
ATOM    565  C   ASP L  82       9.460 -21.249  19.370  1.00 15.56           C  
ATOM    566  O   ASP L  82      10.511 -21.297  18.730  1.00 14.46           O  
ATOM    567  CB  ASP L  82      10.338 -21.594  21.673  1.00 16.58           C  
ATOM    568  CG  ASP L  82      10.477 -21.053  23.092  1.00 17.10           C  
ATOM    569  OD1 ASP L  82      10.243 -19.841  23.307  1.00 16.33           O  
ATOM    570  OD2 ASP L  82      10.833 -21.831  23.997  1.00 16.57           O  
ATOM    571  N   PHE L  83       8.317 -21.737  18.893  1.00 15.91           N  
ATOM    572  CA  PHE L  83       8.277 -22.277  17.548  1.00 17.23           C  
ATOM    573  C   PHE L  83       8.334 -21.068  16.616  1.00 18.37           C  
ATOM    574  O   PHE L  83       7.549 -20.143  16.767  1.00 21.55           O  
ATOM    575  CB  PHE L  83       7.059 -23.184  17.367  1.00 19.66           C  
ATOM    576  CG  PHE L  83       7.196 -24.497  18.116  1.00 23.07           C  
ATOM    577  CD1 PHE L  83       8.030 -25.495  17.642  1.00 23.36           C  
ATOM    578  CD2 PHE L  83       6.542 -24.704  19.324  1.00 26.24           C  
ATOM    579  CE1 PHE L  83       8.169 -26.704  18.324  1.00 25.19           C  
ATOM    580  CE2 PHE L  83       6.689 -25.905  20.016  1.00 30.73           C  
ATOM    581  CZ  PHE L  83       7.514 -26.906  19.506  1.00 28.69           C  
ATOM    582  N   ALA L  84       9.330 -21.073  15.729  1.00 15.97           N  
ATOM    583  CA  ALA L  84       9.805 -19.905  14.975  1.00 13.60           C  
ATOM    584  C   ALA L  84      10.952 -20.343  14.065  1.00 12.84           C  
ATOM    585  O   ALA L  84      11.412 -21.476  14.144  1.00 12.16           O  
ATOM    586  CB  ALA L  84      10.333 -18.794  15.943  1.00 12.78           C  
ATOM    587  N   THR L  85      11.447 -19.414  13.249  1.00 14.30           N  
ATOM    588  CA  THR L  85      12.673 -19.611  12.498  1.00 13.58           C  
ATOM    589  C   THR L  85      13.782 -18.862  13.217  1.00 14.39           C  
ATOM    590  O   THR L  85      13.610 -17.719  13.633  1.00 15.28           O  
ATOM    591  CB  THR L  85      12.523 -19.151  11.037  1.00 14.43           C  
ATOM    592  OG1 THR L  85      11.509 -19.944  10.395  1.00 16.50           O  
ATOM    593  CG2 THR L  85      13.818 -19.317  10.278  1.00 14.24           C  
ATOM    594  N   TYR L  86      14.919 -19.517  13.374  1.00 12.29           N  
ATOM    595  CA  TYR L  86      16.035 -18.937  14.079  1.00 11.30           C  
ATOM    596  C   TYR L  86      17.132 -18.716  13.055  1.00 10.97           C  
ATOM    597  O   TYR L  86      17.333 -19.562  12.172  1.00 12.33           O  
ATOM    598  CB  TYR L  86      16.493 -19.835  15.219  1.00 13.47           C  
ATOM    599  CG  TYR L  86      15.452 -19.912  16.316  1.00 12.18           C  
ATOM    600  CD1 TYR L  86      14.342 -20.748  16.184  1.00 12.48           C  
ATOM    601  CD2 TYR L  86      15.572 -19.156  17.470  1.00 12.73           C  
ATOM    602  CE1 TYR L  86      13.369 -20.825  17.203  1.00 13.55           C  
ATOM    603  CE2 TYR L  86      14.591 -19.196  18.488  1.00 12.94           C  
ATOM    604  CZ  TYR L  86      13.498 -20.021  18.344  1.00 14.08           C  
ATOM    605  OH  TYR L  86      12.521 -20.063  19.322  1.00 14.86           O  
ATOM    606  N   TYR L  87      17.774 -17.555  13.148  1.00 11.15           N  
ATOM    607  CA  TYR L  87      18.885 -17.192  12.271  1.00 10.48           C  
ATOM    608  C   TYR L  87      20.094 -16.886  13.124  1.00 11.41           C  
ATOM    609  O   TYR L  87      19.976 -16.319  14.218  1.00 12.71           O  
ATOM    610  CB  TYR L  87      18.539 -15.951  11.445  1.00 10.18           C  
ATOM    611  CG  TYR L  87      17.441 -16.121  10.439  1.00 10.67           C  
ATOM    612  CD1 TYR L  87      17.689 -16.696   9.195  1.00 10.79           C  
ATOM    613  CD2 TYR L  87      16.133 -15.729  10.726  1.00 11.40           C  
ATOM    614  CE1 TYR L  87      16.690 -16.843   8.260  1.00 11.65           C  
ATOM    615  CE2 TYR L  87      15.136 -15.875   9.804  1.00 11.10           C  
ATOM    616  CZ  TYR L  87      15.407 -16.454   8.567  1.00 12.01           C  
ATOM    617  OH  TYR L  87      14.391 -16.618   7.641  1.00 11.57           O  
ATOM    618  N   CYS L  88      21.266 -17.288  12.654  1.00 12.62           N  
ATOM    620  CA  CYS L  88      22.494 -16.707  13.175  0.50 13.06           C  
ATOM    621  C   CYS L  88      22.883 -15.605  12.230  1.00 12.24           C  
ATOM    622  O   CYS L  88      22.492 -15.628  11.058  1.00 12.89           O  
ATOM    624  CB  CYS L  88      23.610 -17.719  13.255  0.50 14.91           C  
ATOM    626  SG  CYS L  88      24.084 -18.369  11.661  0.50 18.58           S  
ATOM    627  N   GLN L  89      23.646 -14.645  12.745  1.00 11.17           N  
ATOM    628  CA  GLN L  89      24.092 -13.497  11.971  1.00 11.01           C  
ATOM    629  C   GLN L  89      25.489 -13.090  12.480  1.00 10.66           C  
ATOM    630  O   GLN L  89      25.663 -12.777  13.664  1.00 13.36           O  
ATOM    631  CB  GLN L  89      23.102 -12.352  12.126  1.00 11.26           C  
ATOM    632  CG  GLN L  89      23.461 -11.067  11.332  1.00 13.27           C  
ATOM    633  CD  GLN L  89      23.313  -9.794  12.107  1.00 15.66           C  
ATOM    634  OE1 GLN L  89      23.588  -9.734  13.316  1.00 15.05           O  
ATOM    635  NE2 GLN L  89      22.893  -8.731  11.412  1.00 15.11           N  
ATOM    636  N   GLN L  90      26.464 -13.051  11.602  1.00 12.31           N  
ATOM    637  CA  GLN L  90      27.775 -12.518  11.997  1.00 13.44           C  
ATOM    638  C   GLN L  90      27.791 -10.984  11.982  1.00 14.91           C  
ATOM    639  O   GLN L  90      27.241 -10.376  11.074  1.00 15.85           O  
ATOM    640  CB  GLN L  90      28.913 -13.125  11.182  1.00 15.54           C  
ATOM    641  CG  GLN L  90      28.987 -12.761   9.687  1.00 15.21           C  
ATOM    642  CD  GLN L  90      29.659 -11.432   9.463  1.00 15.60           C  
ATOM    643  OE1 GLN L  90      30.340 -10.903  10.354  1.00 13.63           O  
ATOM    644  NE2 GLN L  90      29.489 -10.878   8.258  1.00 15.46           N  
ATOM    645  N   SER L  91      28.422 -10.382  12.999  1.00 15.24           N  
ATOM    646  CA  SER L  91      28.546  -8.928  13.090  1.00 16.25           C  
ATOM    647  C   SER L  91      30.031  -8.546  13.147  1.00 17.45           C  
ATOM    648  O   SER L  91      30.394  -7.461  13.646  1.00 18.01           O  
ATOM    649  CB  SER L  91      27.765  -8.382  14.295  1.00 16.65           C  
ATOM    650  OG  SER L  91      28.172  -9.006  15.498  1.00 16.02           O  
ATOM    651  N   TYR L  92      30.890  -9.432  12.634  1.00 13.96           N  
ATOM    652  CA  TYR L  92      32.321  -9.161  12.554  1.00 15.45           C  
ATOM    653  C   TYR L  92      32.643  -8.191  11.445  1.00 15.37           C  
ATOM    654  O   TYR L  92      33.400  -7.247  11.657  1.00 15.93           O  
ATOM    655  CB  TYR L  92      33.134 -10.453  12.360  1.00 16.01           C  
ATOM    656  CG  TYR L  92      34.552 -10.278  11.834  1.00 16.77           C  
ATOM    657  CD1 TYR L  92      35.512  -9.590  12.562  1.00 17.49           C  
ATOM    658  CD2 TYR L  92      34.938 -10.837  10.614  1.00 16.87           C  
ATOM    659  CE1 TYR L  92      36.821  -9.437  12.086  1.00 19.67           C  
ATOM    660  CE2 TYR L  92      36.255 -10.701  10.142  1.00 18.30           C  
ATOM    661  CZ  TYR L  92      37.182 -10.002  10.874  1.00 19.48           C  
ATOM    662  OH  TYR L  92      38.465  -9.848  10.400  1.00 21.26           O  
ATOM    663  N   SER L  93      32.090  -8.449  10.264  1.00 15.39           N  
ATOM    664  CA  SER L  93      32.401  -7.708   9.045  1.00 17.28           C  
ATOM    665  C   SER L  93      31.136  -7.198   8.373  1.00 20.13           C  
ATOM    666  O   SER L  93      30.081  -7.820   8.464  1.00 18.32           O  
ATOM    667  CB  SER L  93      33.108  -8.618   8.041  1.00 20.03           C  
ATOM    668  N   THR L  94      31.271  -6.064   7.691  1.00 21.12           N  
ATOM    669  CA  THR L  94      30.229  -5.529   6.825  1.00 19.98           C  
ATOM    670  C   THR L  94      30.404  -6.075   5.402  1.00 19.54           C  
ATOM    671  O   THR L  94      31.502  -6.023   4.854  1.00 21.23           O  
ATOM    672  CB  THR L  94      30.253  -4.007   6.836  1.00 21.95           C  
ATOM    673  OG1 THR L  94      29.954  -3.581   8.170  1.00 23.48           O  
ATOM    674  CG2 THR L  94      29.210  -3.440   5.846  1.00 20.86           C  
ATOM    675  N   PRO L  95      29.328  -6.604   4.798  1.00 16.95           N  
ATOM    676  CA  PRO L  95      27.958  -6.659   5.315  1.00 18.06           C  
ATOM    677  C   PRO L  95      27.776  -7.736   6.376  1.00 18.43           C  
ATOM    678  O   PRO L  95      28.302  -8.841   6.238  1.00 16.46           O  
ATOM    679  CB  PRO L  95      27.140  -7.011   4.073  1.00 18.47           C  
ATOM    680  CG  PRO L  95      28.092  -7.865   3.255  1.00 19.90           C  
ATOM    681  CD  PRO L  95      29.442  -7.244   3.473  1.00 17.94           C  
ATOM    682  N   ASN L  96      27.054  -7.408   7.440  1.00 18.31           N  
ATOM    683  CA  ASN L  96      26.626  -8.434   8.361  1.00 18.14           C  
ATOM    684  C   ASN L  96      25.800  -9.405   7.536  1.00 17.12           C  
ATOM    685  O   ASN L  96      25.038  -8.983   6.626  1.00 15.16           O  
ATOM    686  CB  ASN L  96      25.794  -7.845   9.494  1.00 17.65           C  
ATOM    687  CG  ASN L  96      26.598  -6.937  10.443  1.00 19.96           C  
ATOM    688  OD1 ASN L  96      27.830  -6.796  10.350  1.00 20.98           O  
ATOM    689  ND2 ASN L  96      25.880  -6.318  11.370  1.00 17.09           N  
ATOM    690  N   THR L  97      25.994 -10.701   7.773  1.00 14.87           N  
ATOM    691  CA  THR L  97      25.309 -11.714   6.989  1.00 13.07           C  
ATOM    692  C   THR L  97      24.634 -12.719   7.890  1.00 12.93           C  
ATOM    693  O   THR L  97      25.169 -13.094   8.950  1.00 13.26           O  
ATOM    694  CB  THR L  97      26.279 -12.515   6.062  1.00 13.69           C  
ATOM    695  OG1 THR L  97      27.515 -12.728   6.742  1.00 15.20           O  
ATOM    696  CG2 THR L  97      26.540 -11.758   4.772  1.00 15.62           C  
ATOM    697  N   PHE L  98      23.485 -13.182   7.413  1.00 11.83           N  
ATOM    698  CA  PHE L  98      22.648 -14.152   8.087  1.00 11.75           C  
ATOM    699  C   PHE L  98      22.860 -15.567   7.513  1.00 12.04           C  
ATOM    700  O   PHE L  98      23.074 -15.729   6.305  1.00 12.21           O  
ATOM    701  CB  PHE L  98      21.168 -13.770   7.896  1.00 11.34           C  
ATOM    702  CG  PHE L  98      20.680 -12.660   8.816  1.00 12.40           C  
ATOM    703  CD1 PHE L  98      20.823 -11.320   8.468  1.00 12.37           C  
ATOM    704  CD2 PHE L  98      20.060 -12.963  10.009  1.00 13.15           C  
ATOM    705  CE1 PHE L  98      20.360 -10.309   9.328  1.00 13.22           C  
ATOM    706  CE2 PHE L  98      19.582 -11.967  10.866  1.00 13.55           C  
ATOM    707  CZ  PHE L  98      19.753 -10.627  10.522  1.00 13.16           C  
ATOM    708  N   GLY L  99      22.757 -16.581   8.371  1.00 11.70           N  
ATOM    709  CA  GLY L  99      22.517 -17.970   7.937  1.00 12.66           C  
ATOM    710  C   GLY L  99      21.158 -18.141   7.247  1.00 13.45           C  
ATOM    711  O   GLY L  99      20.336 -17.222   7.273  1.00 13.43           O  
ATOM    712  N   GLN L 100      20.927 -19.314   6.640  1.00 13.95           N  
ATOM    713  CA  GLN L 100      19.687 -19.592   5.883  1.00 14.92           C  
ATOM    714  C   GLN L 100      18.465 -19.834   6.739  1.00 13.36           C  
ATOM    715  O   GLN L 100      17.337 -19.819   6.231  1.00 14.10           O  
ATOM    716  CB  GLN L 100      19.864 -20.799   4.950  1.00 18.13           C  
ATOM    717  N   GLY L 101      18.692 -20.043   8.031  1.00 12.44           N  
ATOM    718  CA  GLY L 101      17.633 -20.179   9.017  1.00 13.56           C  
ATOM    719  C   GLY L 101      17.306 -21.626   9.273  1.00 15.34           C  
ATOM    720  O   GLY L 101      17.515 -22.479   8.405  1.00 16.68           O  
ATOM    721  N   THR L 102      16.846 -21.901  10.488  1.00 16.33           N  
ATOM    722  CA  THR L 102      16.354 -23.208  10.910  1.00 16.12           C  
ATOM    723  C   THR L 102      14.940 -23.005  11.450  1.00 15.85           C  
ATOM    724  O   THR L 102      14.760 -22.252  12.404  1.00 15.71           O  
ATOM    725  CB  THR L 102      17.233 -23.783  12.050  1.00 16.82           C  
ATOM    726  OG1 THR L 102      18.602 -23.871  11.619  1.00 17.39           O  
ATOM    727  CG2 THR L 102      16.742 -25.172  12.496  1.00 18.57           C  
ATOM    728  N   LYS L 103      13.952 -23.665  10.842  1.00 15.68           N  
ATOM    729  CA  LYS L 103      12.565 -23.573  11.272  1.00 18.13           C  
ATOM    730  C   LYS L 103      12.333 -24.648  12.309  1.00 16.19           C  
ATOM    731  O   LYS L 103      12.519 -25.842  12.042  1.00 16.59           O  
ATOM    732  CB  LYS L 103      11.581 -23.756  10.107  1.00 19.94           C  
ATOM    733  N   VAL L 104      11.950 -24.223  13.504  1.00 16.60           N  
ATOM    734  CA  VAL L 104      11.604 -25.161  14.552  1.00 17.37           C  
ATOM    735  C   VAL L 104      10.081 -25.295  14.546  1.00 16.62           C  
ATOM    736  O   VAL L 104       9.373 -24.345  14.859  1.00 13.63           O  
ATOM    737  CB  VAL L 104      12.135 -24.696  15.910  1.00 19.21           C  
ATOM    738  CG1 VAL L 104      11.643 -25.622  17.006  1.00 19.35           C  
ATOM    739  CG2 VAL L 104      13.676 -24.658  15.871  1.00 17.28           C  
ATOM    740  N   GLU L 105       9.609 -26.481  14.167  1.00 16.87           N  
ATOM    741  CA  GLU L 105       8.204 -26.738  13.872  1.00 20.18           C  
ATOM    742  C   GLU L 105       7.575 -27.725  14.876  1.00 22.80           C  
ATOM    743  O   GLU L 105       8.241 -28.629  15.379  1.00 26.39           O  
ATOM    744  CB  GLU L 105       8.089 -27.277  12.433  1.00 20.11           C  
ATOM    745  N   ILE L 106       6.293 -27.521  15.177  1.00 20.97           N  
ATOM    746  CA  ILE L 106       5.587 -28.283  16.213  1.00 20.90           C  
ATOM    747  C   ILE L 106       5.286 -29.717  15.764  1.00 25.03           C  
ATOM    748  O   ILE L 106       4.883 -29.928  14.613  1.00 25.24           O  
ATOM    749  CB  ILE L 106       4.250 -27.578  16.571  1.00 23.87           C  
ATOM    750  N   LYS L 107       5.479 -30.682  16.668  1.00 29.99           N  
ATOM    751  CA  LYS L 107       5.235 -32.107  16.387  1.00 30.40           C  
ATOM    752  C   LYS L 107       3.966 -32.630  17.064  1.00 38.15           C  
ATOM    753  O   LYS L 107       3.458 -32.047  18.022  1.00 39.27           O  
ATOM    754  CB  LYS L 107       6.436 -32.952  16.830  1.00 33.50           C  
TER     755      LYS L 107                                                      
ATOM    756  N   ASP L   1      16.076  -0.375  23.481  1.00 32.25           N  
ATOM    757  CA  ASP L   1      15.384   0.839  23.978  1.00 29.41           C  
ATOM    758  C   ASP L   1      15.045   1.796  22.826  1.00 24.63           C  
ATOM    759  O   ASP L   1      14.229   2.696  23.008  1.00 29.73           O  
ATOM    760  CB  ASP L   1      16.217   1.569  25.045  1.00 30.37           C  
ATOM    761  N   ILE L   2      15.662   1.624  21.656  1.00 20.52           N  
ATOM    762  CA  ILE L   2      15.229   2.400  20.495  1.00 17.46           C  
ATOM    763  C   ILE L   2      14.233   1.592  19.687  1.00 16.94           C  
ATOM    764  O   ILE L   2      14.514   0.447  19.288  1.00 18.00           O  
ATOM    765  CB  ILE L   2      16.398   2.891  19.625  1.00 17.57           C  
ATOM    766  CG1 ILE L   2      17.387   3.660  20.493  1.00 18.47           C  
ATOM    767  CG2 ILE L   2      15.868   3.733  18.452  1.00 15.05           C  
ATOM    768  CD1 ILE L   2      18.449   4.418  19.770  1.00 17.87           C  
ATOM    769  N   GLN L   3      13.061   2.192  19.463  1.00 15.10           N  
ATOM    770  CA  GLN L   3      12.004   1.567  18.674  1.00 14.96           C  
ATOM    771  C   GLN L   3      12.000   2.138  17.263  1.00 13.45           C  
ATOM    772  O   GLN L   3      12.065   3.363  17.095  1.00 12.70           O  
ATOM    773  CB  GLN L   3      10.639   1.854  19.306  1.00 15.19           C  
ATOM    774  N   MET L   4      11.886   1.255  16.276  1.00 13.49           N  
ATOM    775  CA  MET L   4      11.817   1.644  14.870  1.00 14.36           C  
ATOM    776  C   MET L   4      10.403   1.448  14.350  1.00 17.90           C  
ATOM    777  O   MET L   4       9.795   0.377  14.544  1.00 15.26           O  
ATOM    778  CB  MET L   4      12.776   0.813  14.039  1.00 13.49           C  
ATOM    779  CG  MET L   4      14.212   0.845  14.527  1.00 13.88           C  
ATOM    780  SD  MET L   4      14.895   2.508  14.612  1.00 15.00           S  
ATOM    781  CE  MET L   4      14.770   3.062  12.935  1.00 15.48           C  
ATOM    782  N   THR L   5       9.871   2.499  13.733  1.00 15.30           N  
ATOM    783  CA  THR L   5       8.519   2.488  13.183  1.00 16.98           C  
ATOM    784  C   THR L   5       8.630   2.657  11.659  1.00 17.66           C  
ATOM    785  O   THR L   5       9.085   3.690  11.185  1.00 18.42           O  
ATOM    786  CB  THR L   5       7.671   3.634  13.770  1.00 18.11           C  
ATOM    787  OG1 THR L   5       7.573   3.487  15.207  1.00 20.19           O  
ATOM    788  CG2 THR L   5       6.266   3.622  13.171  1.00 22.09           C  
ATOM    789  N   GLN L   6       8.217   1.618  10.942  1.00 16.27           N  
ATOM    790  CA  GLN L   6       8.223   1.535   9.500  1.00 17.27           C  
ATOM    791  C   GLN L   6       6.825   1.707   8.887  1.00 18.29           C  
ATOM    792  O   GLN L   6       5.843   1.138   9.406  1.00 16.05           O  
ATOM    793  CB  GLN L   6       8.786   0.156   9.139  1.00 20.84           C  
ATOM    794  CG  GLN L   6       9.535   0.165   7.903  1.00 20.41           C  
ATOM    795  CD  GLN L   6      10.366  -1.074   7.680  1.00 16.97           C  
ATOM    796  OE1 GLN L   6      10.901  -1.736   8.623  1.00 15.61           O  
ATOM    797  NE2 GLN L   6      10.468  -1.414   6.419  1.00 16.34           N  
ATOM    798  N   SER L   7       6.719   2.506   7.817  1.00 17.95           N  
ATOM    799  CA  SER L   7       5.461   2.597   7.051  1.00 19.80           C  
ATOM    800  C   SER L   7       5.670   2.568   5.531  1.00 19.84           C  
ATOM    801  O   SER L   7       6.639   3.138   5.019  1.00 20.04           O  
ATOM    802  CB  SER L   7       4.577   3.798   7.475  1.00 28.01           C  
ATOM    803  OG  SER L   7       5.312   4.829   8.093  1.00 34.37           O  
ATOM    804  N   PRO L   8       4.754   1.905   4.804  1.00 17.93           N  
ATOM    805  CA  PRO L   8       3.537   1.196   5.230  1.00 18.09           C  
ATOM    806  C   PRO L   8       3.843  -0.227   5.675  1.00 17.82           C  
ATOM    807  O   PRO L   8       4.949  -0.698   5.438  1.00 18.09           O  
ATOM    808  CB  PRO L   8       2.700   1.170   3.954  1.00 19.89           C  
ATOM    809  CG  PRO L   8       3.684   1.126   2.868  1.00 18.75           C  
ATOM    810  CD  PRO L   8       4.901   1.884   3.335  1.00 18.61           C  
ATOM    811  N   SER L   9       2.877  -0.907   6.276  1.00 18.59           N  
ATOM    812  CA  SER L   9       3.056  -2.323   6.654  1.00 18.35           C  
ATOM    813  C   SER L   9       3.138  -3.191   5.385  1.00 19.66           C  
ATOM    814  O   SER L   9       3.906  -4.150   5.300  1.00 19.06           O  
ATOM    815  CB  SER L   9       1.890  -2.792   7.553  1.00 21.06           C  
ATOM    816  N   SER L  10       2.329  -2.851   4.399  1.00 20.30           N  
ATOM    817  CA  SER L  10       2.339  -3.550   3.132  1.00 22.53           C  
ATOM    818  C   SER L  10       2.199  -2.551   2.008  1.00 22.65           C  
ATOM    819  O   SER L  10       1.671  -1.459   2.200  1.00 21.99           O  
ATOM    820  CB  SER L  10       1.198  -4.568   3.075  1.00 26.81           C  
ATOM    821  N   LEU L  11       2.685  -2.932   0.832  1.00 24.78           N  
ATOM    822  CA  LEU L  11       2.546  -2.124  -0.365  1.00 23.34           C  
ATOM    823  C   LEU L  11       2.297  -3.064  -1.548  1.00 23.82           C  
ATOM    824  O   LEU L  11       3.120  -3.933  -1.841  1.00 25.12           O  
ATOM    825  CB  LEU L  11       3.801  -1.267  -0.573  1.00 24.47           C  
ATOM    826  N   SER L  12       1.126  -2.940  -2.169  1.00 24.05           N  
ATOM    827  CA  SER L  12       0.817  -3.661  -3.405  1.00 26.31           C  
ATOM    828  C   SER L  12       1.479  -2.895  -4.545  1.00 26.68           C  
ATOM    829  O   SER L  12       1.283  -1.681  -4.642  1.00 23.34           O  
ATOM    830  CB  SER L  12      -0.698  -3.725  -3.630  1.00 30.82           C  
ATOM    831  N   ALA L  13       2.246  -3.597  -5.397  1.00 26.36           N  
ATOM    832  CA  ALA L  13       2.965  -2.955  -6.514  1.00 25.49           C  
ATOM    833  C   ALA L  13       2.964  -3.772  -7.809  1.00 27.61           C  
ATOM    834  O   ALA L  13       2.824  -4.999  -7.768  1.00 23.60           O  
ATOM    835  CB  ALA L  13       4.415  -2.687  -6.100  1.00 23.78           C  
ATOM    836  N   SER L  14       3.124  -3.066  -8.939  1.00 27.98           N  
ATOM    837  CA  SER L  14       3.427  -3.659 -10.265  1.00 28.61           C  
ATOM    838  C   SER L  14       4.860  -3.316 -10.665  1.00 30.06           C  
ATOM    839  O   SER L  14       5.398  -2.283 -10.259  1.00 32.23           O  
ATOM    840  CB  SER L  14       2.510  -3.090 -11.365  1.00 31.74           C  
ATOM    841  OG  SER L  14       1.142  -3.358 -11.135  1.00 32.69           O  
ATOM    842  N   VAL L  15       5.472  -4.182 -11.476  1.00 31.28           N  
ATOM    843  CA  VAL L  15       6.818  -3.945 -12.011  1.00 30.09           C  
ATOM    844  C   VAL L  15       6.815  -2.590 -12.719  1.00 32.27           C  
ATOM    845  O   VAL L  15       5.882  -2.297 -13.473  1.00 31.38           O  
ATOM    846  CB  VAL L  15       7.229  -5.076 -12.990  1.00 33.96           C  
ATOM    847  CG1 VAL L  15       8.627  -4.824 -13.572  1.00 34.57           C  
ATOM    848  CG2 VAL L  15       7.175  -6.444 -12.279  1.00 30.96           C  
ATOM    849  N   GLY L  16       7.820  -1.756 -12.441  1.00 28.04           N  
ATOM    850  CA  GLY L  16       7.858  -0.371 -12.927  1.00 28.80           C  
ATOM    851  C   GLY L  16       7.412   0.683 -11.915  1.00 31.78           C  
ATOM    852  O   GLY L  16       7.770   1.861 -12.046  1.00 34.83           O  
ATOM    853  N   ASP L  17       6.632   0.297 -10.899  1.00 28.23           N  
ATOM    854  CA  ASP L  17       6.238   1.258  -9.866  1.00 30.43           C  
ATOM    855  C   ASP L  17       7.468   1.830  -9.155  1.00 30.58           C  
ATOM    856  O   ASP L  17       8.421   1.110  -8.846  1.00 28.03           O  
ATOM    857  CB  ASP L  17       5.338   0.617  -8.796  1.00 29.93           C  
ATOM    858  CG  ASP L  17       3.905   0.386  -9.264  1.00 31.71           C  
ATOM    859  OD1 ASP L  17       3.525   0.777 -10.392  1.00 36.21           O  
ATOM    860  OD2 ASP L  17       3.145  -0.201  -8.464  1.00 33.35           O  
ATOM    861  N   ARG L  18       7.451   3.129  -8.892  1.00 34.32           N  
ATOM    862  CA  ARG L  18       8.381   3.676  -7.909  1.00 35.81           C  
ATOM    863  C   ARG L  18       7.886   3.241  -6.517  1.00 30.69           C  
ATOM    864  O   ARG L  18       6.677   3.304  -6.231  1.00 31.16           O  
ATOM    865  CB  ARG L  18       8.477   5.197  -8.055  1.00 41.55           C  
ATOM    866  CG  ARG L  18       9.194   5.930  -6.930  1.00 40.41           C  
ATOM    867  CD  ARG L  18       9.451   7.385  -7.333  1.00 43.96           C  
ATOM    868  NE  ARG L  18      10.868   7.631  -7.597  1.00 51.16           N  
ATOM    869  CZ  ARG L  18      11.675   8.383  -6.847  1.00 50.93           C  
ATOM    870  NH1 ARG L  18      11.226   9.014  -5.761  1.00 56.29           N  
ATOM    871  NH2 ARG L  18      12.952   8.511  -7.188  1.00 52.95           N  
ATOM    872  N   VAL L  19       8.801   2.760  -5.674  1.00 26.43           N  
ATOM    873  CA  VAL L  19       8.462   2.351  -4.304  1.00 27.25           C  
ATOM    874  C   VAL L  19       9.230   3.204  -3.316  1.00 23.53           C  
ATOM    875  O   VAL L  19      10.450   3.354  -3.442  1.00 21.68           O  
ATOM    876  CB  VAL L  19       8.788   0.849  -4.029  1.00 26.73           C  
ATOM    877  N   THR L  20       8.516   3.760  -2.333  1.00 22.78           N  
ATOM    878  CA  THR L  20       9.122   4.589  -1.291  1.00 23.37           C  
ATOM    879  C   THR L  20       8.659   4.131   0.093  1.00 24.66           C  
ATOM    880  O   THR L  20       7.461   4.111   0.388  1.00 28.27           O  
ATOM    881  CB  THR L  20       8.789   6.071  -1.490  1.00 26.97           C  
ATOM    882  OG1 THR L  20       9.045   6.416  -2.847  1.00 24.52           O  
ATOM    883  CG2 THR L  20       9.630   6.955  -0.567  1.00 28.90           C  
ATOM    884  N   ILE L  21       9.630   3.738   0.917  1.00 19.29           N  
ATOM    885  CA  ILE L  21       9.402   3.166   2.234  1.00 20.60           C  
ATOM    886  C   ILE L  21      10.051   4.086   3.262  1.00 19.34           C  
ATOM    887  O   ILE L  21      11.145   4.610   3.024  1.00 20.38           O  
ATOM    888  CB  ILE L  21      10.061   1.763   2.358  1.00 20.85           C  
ATOM    889  N   THR L  22       9.391   4.277   4.403  1.00 18.61           N  
ATOM    890  CA  THR L  22       9.958   5.099   5.472  1.00 17.41           C  
ATOM    891  C   THR L  22      10.155   4.350   6.784  1.00 16.20           C  
ATOM    892  O   THR L  22       9.534   3.301   7.036  1.00 19.01           O  
ATOM    893  CB  THR L  22       9.126   6.381   5.754  1.00 18.64           C  
ATOM    894  OG1 THR L  22       7.810   6.026   6.202  1.00 19.11           O  
ATOM    895  CG2 THR L  22       9.046   7.253   4.499  1.00 20.18           C  
ATOM    896  N   CYS L  23      11.004   4.951   7.607  1.00 15.62           N  
ATOM    898  CA  CYS L  23      11.408   4.408   8.889  0.50 15.43           C  
ATOM    899  C   CYS L  23      11.716   5.566   9.880  1.00 16.70           C  
ATOM    900  O   CYS L  23      12.502   6.460   9.558  1.00 18.57           O  
ATOM    902  CB  CYS L  23      12.630   3.530   8.608  0.50 14.24           C  
ATOM    904  SG  CYS L  23      13.435   2.789   9.992  0.50 13.00           S  
ATOM    905  N   ARG L  24      11.118   5.536  11.070  1.00 14.67           N  
ATOM    906  CA  ARG L  24      11.325   6.559  12.084  1.00 15.31           C  
ATOM    907  C   ARG L  24      11.908   5.869  13.300  1.00 15.67           C  
ATOM    908  O   ARG L  24      11.362   4.866  13.741  1.00 14.49           O  
ATOM    909  CB  ARG L  24       9.996   7.235  12.454  1.00 14.96           C  
ATOM    910  N   ALA L  25      13.052   6.365  13.775  1.00 17.29           N  
ATOM    911  CA  ALA L  25      13.649   5.948  15.042  1.00 15.19           C  
ATOM    912  C   ALA L  25      12.991   6.736  16.179  1.00 16.96           C  
ATOM    913  O   ALA L  25      12.593   7.899  15.994  1.00 19.66           O  
ATOM    914  CB  ALA L  25      15.162   6.188  15.030  1.00 14.34           C  
ATOM    915  N   SER L  26      12.863   6.118  17.345  1.00 17.19           N  
ATOM    916  CA  SER L  26      12.195   6.747  18.502  1.00 18.63           C  
ATOM    917  C   SER L  26      13.050   7.839  19.136  1.00 22.11           C  
ATOM    918  O   SER L  26      12.560   8.641  19.942  1.00 23.07           O  
ATOM    919  CB  SER L  26      11.806   5.688  19.548  1.00 18.33           C  
ATOM    920  OG  SER L  26      12.952   5.033  20.056  1.00 16.60           O  
ATOM    921  N   GLN L  27      14.330   7.846  18.784  1.00 21.99           N  
ATOM    922  CA  GLN L  27      15.241   8.942  19.106  1.00 22.61           C  
ATOM    923  C   GLN L  27      16.328   9.032  18.026  1.00 20.86           C  
ATOM    924  O   GLN L  27      16.376   8.205  17.120  1.00 16.49           O  
ATOM    925  CB  GLN L  27      15.851   8.736  20.492  1.00 27.01           C  
ATOM    926  CG  GLN L  27      16.579   7.428  20.682  1.00 28.42           C  
ATOM    927  CD  GLN L  27      17.019   7.226  22.121  1.00 34.84           C  
ATOM    928  OE1 GLN L  27      18.159   7.520  22.479  1.00 37.80           O  
ATOM    929  NE2 GLN L  27      16.106   6.757  22.962  1.00 34.73           N  
ATOM    930  N   SER L  28      17.199  10.030  18.115  1.00 20.48           N  
ATOM    931  CA  SER L  28      18.223  10.220  17.088  1.00 20.14           C  
ATOM    932  C   SER L  28      19.224   9.052  17.067  1.00 19.90           C  
ATOM    933  O   SER L  28      19.719   8.622  18.122  1.00 21.35           O  
ATOM    934  CB  SER L  28      18.932  11.580  17.267  1.00 25.76           C  
ATOM    935  N   ILE L  29      19.479   8.528  15.867  1.00 17.67           N  
ATOM    936  CA  ILE L  29      20.435   7.421  15.643  1.00 18.07           C  
ATOM    937  C   ILE L  29      21.499   7.799  14.599  1.00 18.25           C  
ATOM    938  O   ILE L  29      22.160   6.917  14.020  1.00 18.11           O  
ATOM    939  CB  ILE L  29      19.736   6.095  15.224  1.00 15.70           C  
ATOM    940  CG1 ILE L  29      18.933   6.250  13.918  1.00 15.48           C  
ATOM    941  CG2 ILE L  29      18.838   5.580  16.355  1.00 16.30           C  
ATOM    942  CD1 ILE L  29      18.553   4.944  13.271  1.00 13.94           C  
ATOM    943  N   SER L  30      21.716   9.104  14.423  1.00 21.62           N  
ATOM    944  CA  SER L  30      22.671   9.599  13.425  1.00 21.43           C  
ATOM    945  C   SER L  30      22.448   8.870  12.095  1.00 19.13           C  
ATOM    946  O   SER L  30      21.326   8.850  11.578  1.00 16.39           O  
ATOM    947  CB  SER L  30      24.116   9.442  13.927  1.00 27.26           C  
ATOM    948  OG  SER L  30      25.062   9.718  12.890  1.00 29.03           O  
ATOM    949  N   SER L  31      23.497   8.243  11.565  1.00 17.42           N  
ATOM    950  CA  SER L  31      23.447   7.576  10.262  1.00 17.95           C  
ATOM    951  C   SER L  31      23.392   6.050  10.399  1.00 16.19           C  
ATOM    952  O   SER L  31      23.463   5.347   9.403  1.00 15.72           O  
ATOM    953  CB  SER L  31      24.689   7.957   9.448  1.00 19.43           C  
ATOM    954  OG  SER L  31      25.860   7.554  10.159  1.00 23.72           O  
ATOM    955  N   TYR L  32      23.272   5.562  11.635  1.00 16.78           N  
ATOM    956  CA  TYR L  32      23.393   4.135  11.960  1.00 16.94           C  
ATOM    957  C   TYR L  32      22.092   3.374  11.723  1.00 15.12           C  
ATOM    958  O   TYR L  32      21.467   2.876  12.675  1.00 15.26           O  
ATOM    959  CB  TYR L  32      23.821   3.978  13.422  1.00 18.09           C  
ATOM    960  CG  TYR L  32      25.223   4.474  13.689  1.00 21.69           C  
ATOM    961  CD1 TYR L  32      26.289   3.578  13.772  1.00 22.46           C  
ATOM    962  CD2 TYR L  32      25.490   5.835  13.850  1.00 23.09           C  
ATOM    963  CE1 TYR L  32      27.592   4.018  14.009  1.00 25.75           C  
ATOM    964  CE2 TYR L  32      26.802   6.292  14.079  1.00 25.92           C  
ATOM    965  CZ  TYR L  32      27.844   5.374  14.160  1.00 26.09           C  
ATOM    966  OH  TYR L  32      29.134   5.806  14.401  1.00 29.98           O  
ATOM    967  N   LEU L  33      21.698   3.298  10.453  1.00 15.11           N  
ATOM    968  CA  LEU L  33      20.436   2.702  10.033  1.00 12.56           C  
ATOM    969  C   LEU L  33      20.727   1.875   8.783  1.00 12.61           C  
ATOM    970  O   LEU L  33      21.335   2.376   7.808  1.00 12.49           O  
ATOM    971  CB  LEU L  33      19.404   3.815   9.739  1.00 12.33           C  
ATOM    972  CG  LEU L  33      17.951   3.450   9.450  1.00 12.72           C  
ATOM    973  CD1 LEU L  33      17.767   3.002   7.997  1.00 12.80           C  
ATOM    974  CD2 LEU L  33      17.488   2.358  10.410  1.00 12.08           C  
ATOM    975  N   ASN L  34      20.308   0.606   8.837  1.00 10.45           N  
ATOM    976  CA  ASN L  34      20.569  -0.373   7.808  1.00 11.91           C  
ATOM    977  C   ASN L  34      19.250  -0.802   7.172  1.00 10.92           C  
ATOM    978  O   ASN L  34      18.237  -0.829   7.845  1.00 11.79           O  
ATOM    979  CB  ASN L  34      21.264  -1.563   8.450  1.00 12.96           C  
ATOM    980  CG  ASN L  34      22.505  -1.134   9.204  1.00 16.84           C  
ATOM    981  OD1 ASN L  34      23.407  -0.542   8.610  1.00 16.94           O  
ATOM    982  ND2 ASN L  34      22.535  -1.362  10.526  1.00 18.08           N  
ATOM    983  N   TRP L  35      19.265  -1.081   5.878  1.00 10.16           N  
ATOM    984  CA  TRP L  35      18.091  -1.615   5.188  1.00 10.21           C  
ATOM    985  C   TRP L  35      18.382  -2.995   4.701  1.00 10.00           C  
ATOM    986  O   TRP L  35      19.380  -3.211   3.984  1.00 11.14           O  
ATOM    987  CB  TRP L  35      17.751  -0.734   3.989  1.00 10.84           C  
ATOM    988  CG  TRP L  35      17.225   0.619   4.351  1.00 10.82           C  
ATOM    989  CD1 TRP L  35      17.925   1.834   4.431  1.00 10.53           C  
ATOM    990  CD2 TRP L  35      15.849   0.943   4.713  1.00 11.38           C  
ATOM    991  NE1 TRP L  35      17.063   2.865   4.787  1.00 12.47           N  
ATOM    992  CE2 TRP L  35      15.814   2.381   4.991  1.00 11.84           C  
ATOM    993  CE3 TRP L  35      14.662   0.197   4.833  1.00 11.56           C  
ATOM    994  CZ2 TRP L  35      14.624   3.031   5.351  1.00 12.76           C  
ATOM    995  CZ3 TRP L  35      13.493   0.863   5.206  1.00 13.02           C  
ATOM    996  CH2 TRP L  35      13.478   2.239   5.459  1.00 12.42           C  
ATOM    997  N   TYR L  36      17.523  -3.932   5.074  1.00 10.19           N  
ATOM    998  CA  TYR L  36      17.611  -5.320   4.671  1.00 11.03           C  
ATOM    999  C   TYR L  36      16.421  -5.684   3.766  1.00 11.31           C  
ATOM   1000  O   TYR L  36      15.333  -5.130   3.899  1.00 10.33           O  
ATOM   1001  CB  TYR L  36      17.550  -6.224   5.889  1.00 11.95           C  
ATOM   1002  CG  TYR L  36      18.819  -6.339   6.705  1.00 12.89           C  
ATOM   1003  CD1 TYR L  36      19.069  -5.504   7.790  1.00 14.75           C  
ATOM   1004  CD2 TYR L  36      19.744  -7.323   6.415  1.00 12.77           C  
ATOM   1005  CE1 TYR L  36      20.235  -5.633   8.533  1.00 14.23           C  
ATOM   1006  CE2 TYR L  36      20.904  -7.473   7.157  1.00 14.91           C  
ATOM   1007  CZ  TYR L  36      21.149  -6.633   8.212  1.00 15.01           C  
ATOM   1008  OH  TYR L  36      22.308  -6.841   8.932  1.00 16.25           O  
ATOM   1009  N   GLN L  37      16.642  -6.675   2.911  1.00 10.39           N  
ATOM   1010  CA  GLN L  37      15.629  -7.233   2.049  1.00 10.86           C  
ATOM   1011  C   GLN L  37      15.484  -8.707   2.353  1.00 12.00           C  
ATOM   1012  O   GLN L  37      16.468  -9.433   2.352  1.00 11.91           O  
ATOM   1013  CB  GLN L  37      16.035  -7.034   0.593  1.00 11.20           C  
ATOM   1014  CG  GLN L  37      15.167  -7.740  -0.450  1.00 12.64           C  
ATOM   1015  CD  GLN L  37      15.844  -7.880  -1.796  1.00 13.45           C  
ATOM   1016  OE1 GLN L  37      16.804  -8.659  -1.955  1.00 14.13           O  
ATOM   1017  NE2 GLN L  37      15.347  -7.146  -2.792  1.00 16.44           N  
ATOM   1018  N   GLN L  38      14.263  -9.163   2.578  1.00 11.96           N  
ATOM   1019  CA  GLN L  38      14.020 -10.568   2.823  1.00 13.64           C  
ATOM   1020  C   GLN L  38      12.952 -11.135   1.893  1.00 15.10           C  
ATOM   1021  O   GLN L  38      11.814 -10.694   1.903  1.00 15.86           O  
ATOM   1022  CB  GLN L  38      13.554 -10.777   4.268  1.00 13.35           C  
ATOM   1023  CG  GLN L  38      13.484 -12.242   4.651  1.00 14.82           C  
ATOM   1024  CD  GLN L  38      13.121 -12.475   6.092  1.00 15.51           C  
ATOM   1025  OE1 GLN L  38      12.427 -11.664   6.717  1.00 17.45           O  
ATOM   1026  NE2 GLN L  38      13.569 -13.607   6.632  1.00 14.02           N  
ATOM   1027  N   LYS L  39      13.321 -12.154   1.139  1.00 18.73           N  
ATOM   1028  CA  LYS L  39      12.345 -12.893   0.357  1.00 21.45           C  
ATOM   1029  C   LYS L  39      11.833 -14.104   1.136  1.00 24.57           C  
ATOM   1030  O   LYS L  39      12.557 -14.644   1.989  1.00 23.39           O  
ATOM   1031  CB  LYS L  39      12.976 -13.289  -0.956  1.00 24.36           C  
ATOM   1032  CG  LYS L  39      13.467 -12.078  -1.716  1.00 23.92           C  
ATOM   1033  CD  LYS L  39      13.609 -12.359  -3.177  1.00 29.94           C  
ATOM   1034  CE  LYS L  39      14.154 -11.139  -3.877  1.00 30.99           C  
ATOM   1035  NZ  LYS L  39      14.800 -11.500  -5.159  1.00 33.13           N  
ATOM   1036  N   PRO L  40      10.568 -14.530   0.869  1.00 30.27           N  
ATOM   1037  CA  PRO L  40       9.984 -15.586   1.687  1.00 30.82           C  
ATOM   1038  C   PRO L  40      10.824 -16.858   1.674  1.00 33.03           C  
ATOM   1039  O   PRO L  40      11.267 -17.302   0.609  1.00 32.01           O  
ATOM   1040  CB  PRO L  40       8.613 -15.824   1.034  1.00 34.87           C  
ATOM   1041  CG  PRO L  40       8.278 -14.519   0.387  1.00 34.66           C  
ATOM   1042  CD  PRO L  40       9.599 -14.008  -0.120  1.00 32.09           C  
ATOM   1043  N   GLY L  41      11.060 -17.413   2.859  1.00 32.58           N  
ATOM   1044  CA  GLY L  41      11.846 -18.633   3.001  1.00 30.94           C  
ATOM   1045  C   GLY L  41      13.343 -18.389   2.950  1.00 28.55           C  
ATOM   1046  O   GLY L  41      14.124 -19.340   3.028  1.00 28.85           O  
ATOM   1047  N   LYS L  42      13.757 -17.125   2.802  1.00 22.16           N  
ATOM   1048  CA  LYS L  42      15.179 -16.788   2.747  1.00 21.20           C  
ATOM   1049  C   LYS L  42      15.568 -15.839   3.886  1.00 19.09           C  
ATOM   1050  O   LYS L  42      14.706 -15.218   4.523  1.00 18.44           O  
ATOM   1051  CB  LYS L  42      15.545 -16.170   1.398  1.00 17.88           C  
ATOM   1052  N   ALA L  43      16.871 -15.764   4.144  1.00 19.09           N  
ATOM   1053  CA  ALA L  43      17.402 -14.912   5.212  1.00 18.59           C  
ATOM   1054  C   ALA L  43      17.397 -13.487   4.704  1.00 15.71           C  
ATOM   1055  O   ALA L  43      17.524 -13.288   3.490  1.00 16.65           O  
ATOM   1056  CB  ALA L  43      18.801 -15.302   5.558  1.00 17.29           C  
ATOM   1057  N   PRO L  44      17.296 -12.502   5.611  1.00 14.67           N  
ATOM   1058  CA  PRO L  44      17.508 -11.108   5.220  1.00 13.31           C  
ATOM   1059  C   PRO L  44      18.877 -10.873   4.609  1.00 14.35           C  
ATOM   1060  O   PRO L  44      19.871 -11.479   5.033  1.00 15.55           O  
ATOM   1061  CB  PRO L  44      17.377 -10.345   6.549  1.00 13.05           C  
ATOM   1062  CG  PRO L  44      16.560 -11.271   7.420  1.00 14.33           C  
ATOM   1063  CD  PRO L  44      17.041 -12.614   7.060  1.00 15.37           C  
ATOM   1064  N   LYS L  45      18.921  -9.996   3.616  1.00 14.06           N  
ATOM   1065  CA  LYS L  45      20.181  -9.641   2.975  1.00 12.84           C  
ATOM   1066  C   LYS L  45      20.369  -8.144   3.126  1.00 12.37           C  
ATOM   1067  O   LYS L  45      19.437  -7.382   2.879  1.00 13.48           O  
ATOM   1068  CB  LYS L  45      20.156 -10.040   1.485  1.00 13.34           C  
ATOM   1069  N   LEU L  46      21.578  -7.723   3.517  1.00 12.18           N  
ATOM   1070  CA  LEU L  46      21.849  -6.295   3.732  1.00 12.77           C  
ATOM   1071  C   LEU L  46      21.922  -5.566   2.391  1.00 14.06           C  
ATOM   1072  O   LEU L  46      22.724  -5.927   1.530  1.00 14.30           O  
ATOM   1073  CB  LEU L  46      23.175  -6.084   4.494  1.00 13.80           C  
ATOM   1074  CG  LEU L  46      23.483  -4.615   4.860  1.00 14.33           C  
ATOM   1075  CD1 LEU L  46      22.448  -4.077   5.795  1.00 12.97           C  
ATOM   1076  CD2 LEU L  46      24.894  -4.492   5.476  1.00 15.25           C  
ATOM   1077  N   LEU L  47      21.101  -4.539   2.209  1.00 15.16           N  
ATOM   1078  CA  LEU L  47      21.156  -3.742   0.977  1.00 15.49           C  
ATOM   1079  C   LEU L  47      21.885  -2.418   1.162  1.00 14.69           C  
ATOM   1080  O   LEU L  47      22.685  -2.030   0.324  1.00 13.44           O  
ATOM   1081  CB  LEU L  47      19.746  -3.482   0.456  1.00 16.82           C  
ATOM   1082  CG  LEU L  47      18.978  -4.705  -0.043  1.00 18.75           C  
ATOM   1083  CD1 LEU L  47      17.812  -4.239  -0.871  1.00 18.61           C  
ATOM   1084  CD2 LEU L  47      19.847  -5.703  -0.855  1.00 19.82           C  
ATOM   1085  N   ILE L  48      21.577  -1.725   2.253  1.00 15.13           N  
ATOM   1086  CA  ILE L  48      22.118  -0.395   2.529  1.00 16.15           C  
ATOM   1087  C   ILE L  48      22.624  -0.319   3.969  1.00 16.05           C  
ATOM   1088  O   ILE L  48      21.921  -0.724   4.889  1.00 11.84           O  
ATOM   1089  CB  ILE L  48      21.052   0.703   2.340  1.00 18.94           C  
ATOM   1090  CG1 ILE L  48      20.362   0.544   0.977  1.00 19.96           C  
ATOM   1091  CG2 ILE L  48      21.691   2.043   2.500  1.00 16.77           C  
ATOM   1092  CD1 ILE L  48      19.536   1.756   0.558  1.00 20.40           C  
ATOM   1093  N   TYR L  49      23.847   0.189   4.134  1.00 16.26           N  
ATOM   1094  CA  TYR L  49      24.515   0.306   5.430  1.00 16.85           C  
ATOM   1095  C   TYR L  49      24.700   1.799   5.708  1.00 19.63           C  
ATOM   1096  O   TYR L  49      24.872   2.577   4.772  1.00 18.72           O  
ATOM   1097  CB  TYR L  49      25.885  -0.398   5.385  1.00 17.28           C  
ATOM   1098  N   ASP L  50      24.657   2.196   6.978  1.00 17.63           N  
ATOM   1099  CA  ASP L  50      24.948   3.585   7.366  1.00 19.67           C  
ATOM   1100  C   ASP L  50      24.039   4.577   6.597  1.00 17.22           C  
ATOM   1101  O   ASP L  50      24.492   5.618   6.105  1.00 16.95           O  
ATOM   1102  CB  ASP L  50      26.436   3.912   7.157  1.00 24.56           C  
ATOM   1103  CG  ASP L  50      26.884   5.177   7.903  1.00 26.92           C  
ATOM   1104  OD1 ASP L  50      26.695   5.255   9.132  1.00 31.78           O  
ATOM   1105  OD2 ASP L  50      27.458   6.085   7.251  1.00 33.33           O  
ATOM   1106  N   ALA L  51      22.767   4.194   6.487  1.00 14.78           N  
ATOM   1107  CA  ALA L  51      21.676   4.992   5.906  1.00 14.75           C  
ATOM   1108  C   ALA L  51      21.665   5.129   4.381  1.00 16.31           C  
ATOM   1109  O   ALA L  51      20.577   5.191   3.798  1.00 15.71           O  
ATOM   1110  CB  ALA L  51      21.569   6.370   6.584  1.00 16.73           C  
ATOM   1111  N   ASP L  52      22.831   5.149   3.734  1.00 17.22           N  
ATOM   1112  CA  ASP L  52      22.888   5.423   2.299  1.00 18.73           C  
ATOM   1113  C   ASP L  52      23.956   4.673   1.490  1.00 18.31           C  
ATOM   1114  O   ASP L  52      24.016   4.845   0.276  1.00 21.52           O  
ATOM   1115  CB  ASP L  52      22.994   6.945   2.083  1.00 21.84           C  
ATOM   1116  CG  ASP L  52      24.181   7.562   2.829  1.00 26.75           C  
ATOM   1117  OD1 ASP L  52      24.059   8.702   3.302  1.00 33.22           O  
ATOM   1118  OD2 ASP L  52      25.228   6.896   2.951  1.00 27.83           O  
ATOM   1119  N   ASP L  53      24.785   3.837   2.129  1.00 17.82           N  
ATOM   1120  CA  ASP L  53      25.851   3.124   1.412  1.00 19.22           C  
ATOM   1121  C   ASP L  53      25.334   1.801   0.859  1.00 18.77           C  
ATOM   1122  O   ASP L  53      25.063   0.875   1.623  1.00 18.22           O  
ATOM   1123  CB  ASP L  53      27.054   2.862   2.328  1.00 21.64           C  
ATOM   1124  N   LEU L  54      25.173   1.725  -0.462  1.00 21.38           N  
ATOM   1125  CA  LEU L  54      24.710   0.490  -1.122  1.00 20.55           C  
ATOM   1126  C   LEU L  54      25.786  -0.573  -1.035  1.00 20.17           C  
ATOM   1127  O   LEU L  54      26.950  -0.298  -1.333  1.00 19.99           O  
ATOM   1128  CB  LEU L  54      24.426   0.728  -2.606  1.00 20.69           C  
ATOM   1129  CG  LEU L  54      23.298   1.677  -2.971  1.00 26.38           C  
ATOM   1130  CD1 LEU L  54      23.147   1.758  -4.494  1.00 27.74           C  
ATOM   1131  CD2 LEU L  54      22.008   1.240  -2.298  1.00 27.12           C  
ATOM   1132  N   GLN L  55      25.392  -1.801  -0.693  1.00 18.37           N  
ATOM   1133  CA  GLN L  55      26.362  -2.905  -0.637  1.00 19.91           C  
ATOM   1134  C   GLN L  55      26.689  -3.421  -2.040  1.00 18.31           C  
ATOM   1135  O   GLN L  55      25.957  -3.137  -2.985  1.00 17.18           O  
ATOM   1136  CB  GLN L  55      25.833  -4.029   0.251  1.00 20.12           C  
ATOM   1137  CG  GLN L  55      25.660  -3.609   1.678  1.00 23.78           C  
ATOM   1138  CD  GLN L  55      26.939  -3.060   2.265  1.00 25.39           C  
ATOM   1139  OE1 GLN L  55      27.896  -3.804   2.525  1.00 26.59           O  
ATOM   1140  NE2 GLN L  55      26.975  -1.747   2.466  1.00 25.35           N  
ATOM   1141  N   SER L  56      27.786  -4.172  -2.161  1.00 19.95           N  
ATOM   1142  CA  SER L  56      28.226  -4.728  -3.439  1.00 20.35           C  
ATOM   1143  C   SER L  56      27.110  -5.463  -4.135  1.00 21.19           C  
ATOM   1144  O   SER L  56      26.386  -6.240  -3.501  1.00 21.82           O  
ATOM   1145  CB  SER L  56      29.353  -5.742  -3.232  1.00 21.98           C  
ATOM   1146  OG  SER L  56      30.510  -5.123  -2.736  1.00 24.22           O  
ATOM   1147  N   GLY L  57      26.976  -5.237  -5.440  1.00 20.27           N  
ATOM   1148  CA  GLY L  57      25.949  -5.931  -6.241  1.00 20.68           C  
ATOM   1149  C   GLY L  57      24.529  -5.389  -6.155  1.00 22.29           C  
ATOM   1150  O   GLY L  57      23.655  -5.795  -6.956  1.00 24.42           O  
ATOM   1151  N   VAL L  58      24.278  -4.493  -5.193  1.00 20.12           N  
ATOM   1152  CA  VAL L  58      22.955  -3.892  -5.018  1.00 20.00           C  
ATOM   1153  C   VAL L  58      22.801  -2.864  -6.115  1.00 20.39           C  
ATOM   1154  O   VAL L  58      23.580  -1.912  -6.178  1.00 19.96           O  
ATOM   1155  CB  VAL L  58      22.761  -3.192  -3.653  1.00 19.19           C  
ATOM   1156  CG1 VAL L  58      21.348  -2.563  -3.557  1.00 18.44           C  
ATOM   1157  CG2 VAL L  58      22.972  -4.178  -2.504  1.00 19.36           C  
ATOM   1158  N   PRO L  59      21.814  -3.060  -6.994  1.00 20.67           N  
ATOM   1159  CA  PRO L  59      21.700  -2.190  -8.156  1.00 22.87           C  
ATOM   1160  C   PRO L  59      21.294  -0.755  -7.814  1.00 22.87           C  
ATOM   1161  O   PRO L  59      20.662  -0.504  -6.770  1.00 23.94           O  
ATOM   1162  CB  PRO L  59      20.631  -2.882  -9.014  1.00 27.85           C  
ATOM   1163  CG  PRO L  59      19.833  -3.678  -8.071  1.00 24.68           C  
ATOM   1164  CD  PRO L  59      20.752  -4.083  -6.948  1.00 23.78           C  
ATOM   1165  N   SER L  60      21.623   0.162  -8.724  1.00 23.82           N  
ATOM   1166  CA  SER L  60      21.455   1.600  -8.527  1.00 25.13           C  
ATOM   1167  C   SER L  60      20.014   2.068  -8.406  1.00 24.40           C  
ATOM   1168  O   SER L  60      19.761   3.220  -8.017  1.00 27.64           O  
ATOM   1169  CB  SER L  60      22.125   2.375  -9.688  1.00 24.15           C  
ATOM   1170  N   ARG L  61      19.062   1.206  -8.752  1.00 22.12           N  
ATOM   1171  CA  ARG L  61      17.669   1.540  -8.519  1.00 21.58           C  
ATOM   1172  C   ARG L  61      17.333   1.668  -7.017  1.00 21.90           C  
ATOM   1173  O   ARG L  61      16.349   2.306  -6.677  1.00 22.31           O  
ATOM   1174  CB  ARG L  61      16.740   0.560  -9.238  1.00 21.20           C  
ATOM   1175  CG  ARG L  61      16.685  -0.836  -8.653  1.00 21.18           C  
ATOM   1176  CD  ARG L  61      15.646  -1.610  -9.416  1.00 22.63           C  
ATOM   1177  NE  ARG L  61      15.684  -3.020  -9.090  1.00 21.88           N  
ATOM   1178  CZ  ARG L  61      16.518  -3.904  -9.621  1.00 22.07           C  
ATOM   1179  NH1 ARG L  61      17.429  -3.537 -10.538  1.00 20.32           N  
ATOM   1180  NH2 ARG L  61      16.415  -5.177  -9.248  1.00 22.04           N  
ATOM   1181  N   PHE L  62      18.164   1.101  -6.139  1.00 19.71           N  
ATOM   1182  CA  PHE L  62      18.012   1.245  -4.691  1.00 20.27           C  
ATOM   1183  C   PHE L  62      18.770   2.467  -4.176  1.00 20.07           C  
ATOM   1184  O   PHE L  62      19.895   2.705  -4.589  1.00 19.36           O  
ATOM   1185  CB  PHE L  62      18.499  -0.015  -3.971  1.00 18.22           C  
ATOM   1186  CG  PHE L  62      17.615  -1.199  -4.174  1.00 18.19           C  
ATOM   1187  CD1 PHE L  62      16.593  -1.475  -3.288  1.00 16.01           C  
ATOM   1188  CD2 PHE L  62      17.800  -2.043  -5.256  1.00 17.28           C  
ATOM   1189  CE1 PHE L  62      15.771  -2.583  -3.474  1.00 17.07           C  
ATOM   1190  CE2 PHE L  62      16.979  -3.143  -5.441  1.00 18.08           C  
ATOM   1191  CZ  PHE L  62      15.954  -3.407  -4.541  1.00 16.04           C  
ATOM   1192  N   SER L  63      18.109   3.250  -3.313  1.00 22.44           N  
ATOM   1193  CA  SER L  63      18.666   4.472  -2.707  1.00 20.36           C  
ATOM   1194  C   SER L  63      18.179   4.582  -1.270  1.00 20.27           C  
ATOM   1195  O   SER L  63      17.035   4.272  -0.992  1.00 24.20           O  
ATOM   1196  CB  SER L  63      18.182   5.733  -3.454  1.00 20.76           C  
ATOM   1197  N   GLY L  64      19.051   5.038  -0.380  1.00 20.05           N  
ATOM   1198  CA  GLY L  64      18.683   5.340   1.010  1.00 18.77           C  
ATOM   1199  C   GLY L  64      19.050   6.769   1.367  1.00 21.56           C  
ATOM   1200  O   GLY L  64      20.054   7.306   0.878  1.00 20.04           O  
ATOM   1201  N   SER L  65      18.241   7.406   2.207  1.00 21.40           N  
ATOM   1202  CA  SER L  65      18.552   8.752   2.679  1.00 22.52           C  
ATOM   1203  C   SER L  65      18.088   8.956   4.115  1.00 22.02           C  
ATOM   1204  O   SER L  65      17.316   8.145   4.665  1.00 15.75           O  
ATOM   1205  CB  SER L  65      17.927   9.806   1.763  1.00 29.18           C  
ATOM   1206  OG  SER L  65      16.538   9.586   1.603  1.00 28.50           O  
ATOM   1207  N   GLY L  66      18.599  10.026   4.717  1.00 21.90           N  
ATOM   1208  CA  GLY L  66      18.209  10.421   6.063  1.00 22.86           C  
ATOM   1209  C   GLY L  66      19.314  10.282   7.087  1.00 21.55           C  
ATOM   1210  O   GLY L  66      20.283   9.529   6.888  1.00 20.05           O  
ATOM   1211  N   SER L  67      19.162  11.051   8.165  1.00 19.69           N  
ATOM   1212  CA  SER L  67      19.993  10.975   9.363  1.00 21.27           C  
ATOM   1213  C   SER L  67      19.148  11.523  10.497  1.00 20.64           C  
ATOM   1214  O   SER L  67      18.293  12.388  10.278  1.00 23.13           O  
ATOM   1215  CB  SER L  67      21.293  11.792   9.241  1.00 25.54           C  
ATOM   1216  OG  SER L  67      21.085  13.189   9.445  1.00 31.93           O  
ATOM   1217  N   GLY L  68      19.376  11.011  11.694  1.00 19.30           N  
ATOM   1218  CA  GLY L  68      18.702  11.481  12.878  1.00 20.86           C  
ATOM   1219  C   GLY L  68      17.546  10.563  13.200  1.00 20.31           C  
ATOM   1220  O   GLY L  68      17.757   9.470  13.727  1.00 21.38           O  
ATOM   1221  N   THR L  69      16.322  11.002  12.910  1.00 19.76           N  
ATOM   1222  CA  THR L  69      15.147  10.176  13.223  1.00 17.41           C  
ATOM   1223  C   THR L  69      14.442   9.592  12.008  1.00 19.24           C  
ATOM   1224  O   THR L  69      13.886   8.492  12.094  1.00 18.73           O  
ATOM   1225  CB  THR L  69      14.105  10.925  14.081  1.00 17.16           C  
ATOM   1226  OG1 THR L  69      13.599  12.071  13.378  1.00 15.70           O  
ATOM   1227  CG2 THR L  69      14.709  11.371  15.401  1.00 19.71           C  
ATOM   1228  N   ASP L  70      14.434  10.312  10.882  1.00 17.51           N  
ATOM   1229  CA  ASP L  70      13.593   9.897   9.760  1.00 17.61           C  
ATOM   1230  C   ASP L  70      14.392   9.452   8.560  1.00 17.48           C  
ATOM   1231  O   ASP L  70      15.264  10.186   8.080  1.00 18.61           O  
ATOM   1232  CB  ASP L  70      12.618  10.997   9.395  1.00 20.96           C  
ATOM   1233  CG  ASP L  70      11.574  11.175  10.458  1.00 23.45           C  
ATOM   1234  OD1 ASP L  70      11.919  11.767  11.489  1.00 19.12           O  
ATOM   1235  OD2 ASP L  70      10.444  10.656  10.296  1.00 32.93           O  
ATOM   1236  N   PHE L  71      14.099   8.233   8.105  1.00 16.68           N  
ATOM   1237  CA  PHE L  71      14.854   7.576   7.019  1.00 14.77           C  
ATOM   1238  C   PHE L  71      13.917   7.087   5.907  1.00 15.54           C  
ATOM   1239  O   PHE L  71      12.732   6.835   6.153  1.00 16.43           O  
ATOM   1240  CB  PHE L  71      15.678   6.415   7.591  1.00 13.31           C  
ATOM   1241  CG  PHE L  71      16.651   6.838   8.654  1.00 13.47           C  
ATOM   1242  CD1 PHE L  71      16.213   7.056   9.964  1.00 13.66           C  
ATOM   1243  CD2 PHE L  71      17.999   7.025   8.361  1.00 14.73           C  
ATOM   1244  CE1 PHE L  71      17.087   7.472  10.947  1.00 14.67           C  
ATOM   1245  CE2 PHE L  71      18.879   7.433   9.351  1.00 13.74           C  
ATOM   1246  CZ  PHE L  71      18.433   7.662  10.635  1.00 13.59           C  
ATOM   1247  N   THR L  72      14.435   7.008   4.680  1.00 15.56           N  
ATOM   1248  CA  THR L  72      13.651   6.585   3.518  1.00 15.98           C  
ATOM   1249  C   THR L  72      14.417   5.610   2.622  1.00 16.67           C  
ATOM   1250  O   THR L  72      15.584   5.824   2.314  1.00 18.60           O  
ATOM   1251  CB  THR L  72      13.189   7.813   2.652  1.00 20.75           C  
ATOM   1252  OG1 THR L  72      12.450   8.727   3.462  1.00 19.64           O  
ATOM   1253  CG2 THR L  72      12.319   7.372   1.472  1.00 19.38           C  
ATOM   1254  N   LEU L  73      13.758   4.528   2.224  1.00 16.50           N  
ATOM   1255  CA  LEU L  73      14.269   3.659   1.157  1.00 16.61           C  
ATOM   1256  C   LEU L  73      13.448   3.896  -0.107  1.00 17.34           C  
ATOM   1257  O   LEU L  73      12.215   3.844  -0.071  1.00 18.71           O  
ATOM   1258  CB  LEU L  73      14.187   2.185   1.539  1.00 16.28           C  
ATOM   1259  CG  LEU L  73      14.728   1.201   0.477  1.00 18.52           C  
ATOM   1260  CD1 LEU L  73      16.204   1.437   0.223  1.00 21.04           C  
ATOM   1261  CD2 LEU L  73      14.511  -0.235   0.888  1.00 18.28           C  
ATOM   1262  N   THR L  74      14.130   4.135  -1.224  1.00 17.95           N  
ATOM   1263  CA  THR L  74      13.462   4.292  -2.518  1.00 21.32           C  
ATOM   1264  C   THR L  74      13.968   3.287  -3.531  1.00 21.33           C  
ATOM   1265  O   THR L  74      15.165   3.111  -3.681  1.00 23.29           O  
ATOM   1266  CB  THR L  74      13.680   5.688  -3.111  1.00 23.38           C  
ATOM   1267  OG1 THR L  74      13.211   6.665  -2.186  1.00 21.74           O  
ATOM   1268  CG2 THR L  74      12.904   5.842  -4.449  1.00 23.50           C  
ATOM   1269  N   ILE L  75      13.033   2.616  -4.199  1.00 21.34           N  
ATOM   1270  CA  ILE L  75      13.319   1.848  -5.390  1.00 18.77           C  
ATOM   1271  C   ILE L  75      12.760   2.626  -6.612  1.00 20.24           C  
ATOM   1272  O   ILE L  75      11.555   2.835  -6.692  1.00 21.62           O  
ATOM   1273  CB  ILE L  75      12.682   0.448  -5.320  1.00 20.09           C  
ATOM   1274  CG1 ILE L  75      12.977  -0.217  -3.965  1.00 18.31           C  
ATOM   1275  CG2 ILE L  75      13.199  -0.414  -6.472  1.00 20.55           C  
ATOM   1276  CD1 ILE L  75      12.126  -1.464  -3.682  1.00 20.39           C  
ATOM   1277  N   SER L  76      13.644   3.028  -7.535  1.00 21.33           N  
ATOM   1278  CA  SER L  76      13.314   3.775  -8.789  1.00 23.16           C  
ATOM   1279  C   SER L  76      12.207   3.169  -9.665  1.00 26.90           C  
ATOM   1280  O   SER L  76      11.194   3.823  -9.935  1.00 31.13           O  
ATOM   1281  CB  SER L  76      14.569   3.914  -9.668  1.00 22.08           C  
ATOM   1282  N   SER L  77      12.438   1.950 -10.158  1.00 27.50           N  
ATOM   1283  CA  SER L  77      11.431   1.193 -10.906  1.00 28.04           C  
ATOM   1284  C   SER L  77      11.475  -0.253 -10.439  1.00 27.35           C  
ATOM   1285  O   SER L  77      12.421  -0.980 -10.731  1.00 28.80           O  
ATOM   1286  CB  SER L  77      11.680   1.266 -12.428  1.00 29.19           C  
ATOM   1287  N   LEU L  78      10.464  -0.657  -9.679  1.00 24.94           N  
ATOM   1288  CA  LEU L  78      10.409  -2.017  -9.146  1.00 25.45           C  
ATOM   1289  C   LEU L  78      10.589  -3.088 -10.240  1.00 26.19           C  
ATOM   1290  O   LEU L  78       9.911  -3.047 -11.275  1.00 24.93           O  
ATOM   1291  CB  LEU L  78       9.080  -2.230  -8.427  1.00 26.24           C  
ATOM   1292  CG  LEU L  78       8.972  -3.389  -7.438  1.00 26.05           C  
ATOM   1293  CD1 LEU L  78       9.799  -3.132  -6.153  1.00 26.74           C  
ATOM   1294  CD2 LEU L  78       7.505  -3.579  -7.095  1.00 29.06           C  
ATOM   1295  N   GLN L  79      11.507  -4.029 -10.011  1.00 24.93           N  
ATOM   1296  CA  GLN L  79      11.740  -5.143 -10.925  1.00 24.16           C  
ATOM   1297  C   GLN L  79      11.177  -6.441 -10.313  1.00 25.99           C  
ATOM   1298  O   GLN L  79      10.928  -6.504  -9.100  1.00 23.18           O  
ATOM   1299  CB  GLN L  79      13.243  -5.275 -11.214  1.00 24.31           C  
ATOM   1300  N   PRO L  80      10.945  -7.477 -11.140  1.00 26.26           N  
ATOM   1301  CA  PRO L  80      10.310  -8.691 -10.598  1.00 27.16           C  
ATOM   1302  C   PRO L  80      11.016  -9.272  -9.373  1.00 26.47           C  
ATOM   1303  O   PRO L  80      10.367  -9.790  -8.466  1.00 29.15           O  
ATOM   1304  CB  PRO L  80      10.376  -9.669 -11.770  1.00 29.12           C  
ATOM   1305  CG  PRO L  80      10.398  -8.798 -12.978  1.00 30.20           C  
ATOM   1306  CD  PRO L  80      11.160  -7.571 -12.595  1.00 28.67           C  
ATOM   1307  N   GLU L  81      12.340  -9.155  -9.342  1.00 24.89           N  
ATOM   1308  CA  GLU L  81      13.141  -9.690  -8.242  1.00 24.30           C  
ATOM   1309  C   GLU L  81      13.046  -8.860  -6.956  1.00 22.94           C  
ATOM   1310  O   GLU L  81      13.494  -9.310  -5.908  1.00 25.46           O  
ATOM   1311  CB  GLU L  81      14.612  -9.841  -8.668  1.00 25.23           C  
ATOM   1312  CG  GLU L  81      15.316  -8.532  -9.019  1.00 26.15           C  
ATOM   1313  CD  GLU L  81      15.220  -8.154 -10.500  1.00 34.94           C  
ATOM   1314  OE1 GLU L  81      14.268  -8.595 -11.210  1.00 27.59           O  
ATOM   1315  OE2 GLU L  81      16.111  -7.398 -10.949  1.00 36.65           O  
ATOM   1316  N   ASP L  82      12.457  -7.668  -7.026  1.00 24.00           N  
ATOM   1317  CA  ASP L  82      12.373  -6.768  -5.871  1.00 20.55           C  
ATOM   1318  C   ASP L  82      11.203  -7.061  -4.924  1.00 21.39           C  
ATOM   1319  O   ASP L  82      11.173  -6.533  -3.804  1.00 19.17           O  
ATOM   1320  CB  ASP L  82      12.273  -5.321  -6.336  1.00 18.47           C  
ATOM   1321  CG  ASP L  82      13.481  -4.869  -7.132  1.00 20.60           C  
ATOM   1322  OD1 ASP L  82      14.571  -5.492  -7.005  1.00 19.08           O  
ATOM   1323  OD2 ASP L  82      13.344  -3.855  -7.864  1.00 21.75           O  
ATOM   1324  N   PHE L  83      10.244  -7.884  -5.350  1.00 20.99           N  
ATOM   1325  CA  PHE L  83       9.154  -8.280  -4.464  1.00 21.74           C  
ATOM   1326  C   PHE L  83       9.709  -9.041  -3.268  1.00 23.69           C  
ATOM   1327  O   PHE L  83      10.383 -10.071  -3.420  1.00 26.70           O  
ATOM   1328  CB  PHE L  83       8.084  -9.078  -5.226  1.00 23.23           C  
ATOM   1329  CG  PHE L  83       7.279  -8.230  -6.164  1.00 22.56           C  
ATOM   1330  CD1 PHE L  83       6.353  -7.322  -5.667  1.00 23.74           C  
ATOM   1331  CD2 PHE L  83       7.458  -8.310  -7.542  1.00 24.39           C  
ATOM   1332  CE1 PHE L  83       5.594  -6.530  -6.524  1.00 24.99           C  
ATOM   1333  CE2 PHE L  83       6.719  -7.506  -8.407  1.00 26.65           C  
ATOM   1334  CZ  PHE L  83       5.787  -6.616  -7.895  1.00 24.63           C  
ATOM   1335  N   ALA L  84       9.441  -8.499  -2.080  1.00 24.84           N  
ATOM   1336  CA  ALA L  84      10.161  -8.861  -0.868  1.00 19.30           C  
ATOM   1337  C   ALA L  84       9.621  -8.044   0.294  1.00 18.47           C  
ATOM   1338  O   ALA L  84       8.880  -7.094   0.087  1.00 16.36           O  
ATOM   1339  CB  ALA L  84      11.659  -8.556  -1.043  1.00 19.84           C  
ATOM   1340  N   THR L  85      10.030  -8.400   1.507  1.00 17.58           N  
ATOM   1341  CA  THR L  85       9.807  -7.547   2.674  1.00 15.82           C  
ATOM   1342  C   THR L  85      11.110  -6.797   2.969  1.00 14.66           C  
ATOM   1343  O   THR L  85      12.190  -7.393   2.987  1.00 17.34           O  
ATOM   1344  CB  THR L  85       9.333  -8.368   3.868  1.00 15.67           C  
ATOM   1345  OG1 THR L  85       8.125  -9.048   3.514  1.00 18.16           O  
ATOM   1346  CG2 THR L  85       9.080  -7.497   5.074  1.00 15.45           C  
ATOM   1347  N   TYR L  86      11.000  -5.482   3.148  1.00 13.50           N  
ATOM   1348  CA  TYR L  86      12.130  -4.636   3.479  1.00 12.48           C  
ATOM   1349  C   TYR L  86      12.038  -4.198   4.936  1.00 11.70           C  
ATOM   1350  O   TYR L  86      10.958  -3.730   5.408  1.00 11.31           O  
ATOM   1351  CB  TYR L  86      12.143  -3.425   2.559  1.00 14.02           C  
ATOM   1352  CG  TYR L  86      12.365  -3.849   1.130  1.00 13.35           C  
ATOM   1353  CD1 TYR L  86      11.297  -4.314   0.344  1.00 14.91           C  
ATOM   1354  CD2 TYR L  86      13.626  -3.861   0.591  1.00 14.54           C  
ATOM   1355  CE1 TYR L  86      11.506  -4.757  -0.970  1.00 14.53           C  
ATOM   1356  CE2 TYR L  86      13.850  -4.308  -0.703  1.00 13.88           C  
ATOM   1357  CZ  TYR L  86      12.775  -4.733  -1.479  1.00 14.51           C  
ATOM   1358  OH  TYR L  86      13.048  -5.159  -2.757  1.00 14.48           O  
ATOM   1359  N   TYR L  87      13.146  -4.357   5.650  1.00 11.05           N  
ATOM   1360  CA  TYR L  87      13.228  -3.924   7.062  1.00 10.16           C  
ATOM   1361  C   TYR L  87      14.292  -2.873   7.240  1.00 10.70           C  
ATOM   1362  O   TYR L  87      15.377  -2.994   6.666  1.00 13.72           O  
ATOM   1363  CB  TYR L  87      13.614  -5.073   7.979  1.00 12.42           C  
ATOM   1364  CG  TYR L  87      12.658  -6.218   7.999  1.00 12.23           C  
ATOM   1365  CD1 TYR L  87      11.520  -6.156   8.772  1.00 13.81           C  
ATOM   1366  CD2 TYR L  87      12.919  -7.390   7.266  1.00 13.86           C  
ATOM   1367  CE1 TYR L  87      10.625  -7.220   8.826  1.00 13.89           C  
ATOM   1368  CE2 TYR L  87      12.013  -8.460   7.297  1.00 13.45           C  
ATOM   1369  CZ  TYR L  87      10.882  -8.365   8.087  1.00 15.09           C  
ATOM   1370  OH  TYR L  87       9.987  -9.400   8.137  1.00 17.27           O  
ATOM   1371  N   CYS L  88      14.008  -1.870   8.076  1.00 10.97           N  
ATOM   1373  CA  CYS L  88      15.079  -1.041   8.586  0.50 10.68           C  
ATOM   1374  C   CYS L  88      15.526  -1.607   9.934  1.00 10.80           C  
ATOM   1375  O   CYS L  88      14.768  -2.322  10.616  1.00 10.21           O  
ATOM   1377  CB  CYS L  88      14.671   0.421   8.691  0.50 11.86           C  
ATOM   1379  SG  CYS L  88      13.293   0.774   9.753  0.50 13.09           S  
ATOM   1380  N   GLN L  89      16.775  -1.345  10.272  1.00 10.62           N  
ATOM   1381  CA  GLN L  89      17.351  -1.812  11.516  1.00 10.87           C  
ATOM   1382  C   GLN L  89      18.315  -0.736  12.010  1.00 12.33           C  
ATOM   1383  O   GLN L  89      19.224  -0.313  11.273  1.00 12.41           O  
ATOM   1384  CB  GLN L  89      18.109  -3.120  11.292  1.00 12.87           C  
ATOM   1385  CG  GLN L  89      18.703  -3.712  12.548  1.00 13.40           C  
ATOM   1386  CD  GLN L  89      20.109  -4.269  12.356  1.00 14.82           C  
ATOM   1387  OE1 GLN L  89      20.893  -3.750  11.571  1.00 15.90           O  
ATOM   1388  NE2 GLN L  89      20.441  -5.300  13.128  1.00 16.47           N  
ATOM   1389  N   GLN L  90      18.144  -0.308  13.262  1.00 11.84           N  
ATOM   1390  CA  GLN L  90      19.107   0.619  13.868  1.00 13.05           C  
ATOM   1391  C   GLN L  90      20.262  -0.141  14.516  1.00 14.65           C  
ATOM   1392  O   GLN L  90      20.068  -1.211  15.142  1.00 14.41           O  
ATOM   1393  CB  GLN L  90      18.432   1.588  14.847  1.00 12.80           C  
ATOM   1394  CG  GLN L  90      17.875   0.941  16.110  1.00 13.83           C  
ATOM   1395  CD  GLN L  90      18.879   0.770  17.225  1.00 15.27           C  
ATOM   1396  OE1 GLN L  90      19.943   1.418  17.252  1.00 18.79           O  
ATOM   1397  NE2 GLN L  90      18.545  -0.118  18.175  1.00 14.91           N  
ATOM   1398  N   SER L  91      21.464   0.403  14.339  1.00 15.89           N  
ATOM   1399  CA  SER L  91      22.689  -0.177  14.893  1.00 17.37           C  
ATOM   1400  C   SER L  91      23.419   0.850  15.784  1.00 18.23           C  
ATOM   1401  O   SER L  91      24.621   0.720  16.038  1.00 17.68           O  
ATOM   1402  CB  SER L  91      23.575  -0.679  13.756  1.00 19.34           C  
ATOM   1403  OG  SER L  91      24.058   0.383  12.952  1.00 23.73           O  
ATOM   1404  N   TYR L  92      22.649   1.823  16.286  1.00 15.90           N  
ATOM   1405  CA  TYR L  92      23.135   2.915  17.124  1.00 16.88           C  
ATOM   1406  C   TYR L  92      23.204   2.581  18.617  1.00 17.47           C  
ATOM   1407  O   TYR L  92      24.074   3.099  19.341  1.00 18.72           O  
ATOM   1408  CB  TYR L  92      22.281   4.171  16.937  1.00 17.87           C  
ATOM   1409  CG  TYR L  92      22.895   5.402  17.561  1.00 19.96           C  
ATOM   1410  CD1 TYR L  92      24.025   5.984  17.001  1.00 22.04           C  
ATOM   1411  CD2 TYR L  92      22.355   5.981  18.708  1.00 24.00           C  
ATOM   1412  CE1 TYR L  92      24.613   7.102  17.561  1.00 24.51           C  
ATOM   1413  CE2 TYR L  92      22.945   7.101  19.290  1.00 22.65           C  
ATOM   1414  CZ  TYR L  92      24.069   7.656  18.699  1.00 26.09           C  
ATOM   1415  OH  TYR L  92      24.671   8.776  19.234  1.00 36.51           O  
ATOM   1416  N   SER L  93      22.278   1.746  19.069  1.00 17.72           N  
ATOM   1417  CA  SER L  93      22.173   1.344  20.457  1.00 21.54           C  
ATOM   1418  C   SER L  93      22.047  -0.173  20.510  1.00 21.28           C  
ATOM   1419  O   SER L  93      21.548  -0.784  19.581  1.00 20.70           O  
ATOM   1420  CB  SER L  93      20.933   1.966  21.095  1.00 24.22           C  
ATOM   1421  OG  SER L  93      20.784   1.536  22.436  1.00 33.75           O  
ATOM   1422  N   THR L  94      22.495  -0.773  21.602  1.00 21.33           N  
ATOM   1423  CA  THR L  94      22.300  -2.199  21.814  1.00 23.18           C  
ATOM   1424  C   THR L  94      21.118  -2.380  22.784  1.00 23.63           C  
ATOM   1425  O   THR L  94      21.010  -1.648  23.772  1.00 25.82           O  
ATOM   1426  CB  THR L  94      23.580  -2.865  22.353  1.00 26.68           C  
ATOM   1427  OG1 THR L  94      24.172  -2.033  23.347  1.00 30.19           O  
ATOM   1428  CG2 THR L  94      24.583  -3.097  21.220  1.00 29.66           C  
ATOM   1429  N   PRO L  95      20.204  -3.316  22.489  1.00 22.20           N  
ATOM   1430  CA  PRO L  95      20.180  -4.204  21.336  1.00 21.65           C  
ATOM   1431  C   PRO L  95      19.783  -3.507  20.046  1.00 18.95           C  
ATOM   1432  O   PRO L  95      18.899  -2.626  20.038  1.00 18.85           O  
ATOM   1433  CB  PRO L  95      19.106  -5.226  21.699  1.00 23.64           C  
ATOM   1434  CG  PRO L  95      18.179  -4.491  22.581  1.00 25.90           C  
ATOM   1435  CD  PRO L  95      18.978  -3.446  23.298  1.00 24.66           C  
ATOM   1436  N   ASN L  96      20.422  -3.912  18.947  1.00 17.61           N  
ATOM   1437  CA  ASN L  96      19.992  -3.470  17.643  1.00 16.22           C  
ATOM   1438  C   ASN L  96      18.537  -3.901  17.468  1.00 15.37           C  
ATOM   1439  O   ASN L  96      18.142  -4.969  17.954  1.00 16.46           O  
ATOM   1440  CB  ASN L  96      20.893  -4.061  16.556  1.00 15.88           C  
ATOM   1441  CG  ASN L  96      22.337  -3.515  16.609  1.00 19.77           C  
ATOM   1442  OD1 ASN L  96      22.700  -2.702  17.467  1.00 19.35           O  
ATOM   1443  ND2 ASN L  96      23.153  -3.963  15.676  1.00 20.32           N  
ATOM   1444  N   THR L  97      17.742  -3.060  16.817  1.00 14.89           N  
ATOM   1445  CA  THR L  97      16.319  -3.313  16.647  1.00 14.47           C  
ATOM   1446  C   THR L  97      15.848  -3.100  15.211  1.00 14.10           C  
ATOM   1447  O   THR L  97      16.303  -2.195  14.532  1.00 12.03           O  
ATOM   1448  CB  THR L  97      15.468  -2.488  17.626  1.00 15.37           C  
ATOM   1449  OG1 THR L  97      15.795  -1.100  17.528  1.00 13.40           O  
ATOM   1450  CG2 THR L  97      15.715  -2.991  19.071  1.00 15.38           C  
ATOM   1451  N   PHE L  98      14.933  -3.963  14.780  1.00 14.38           N  
ATOM   1452  CA  PHE L  98      14.331  -3.890  13.448  1.00 13.52           C  
ATOM   1453  C   PHE L  98      12.989  -3.193  13.511  1.00 11.56           C  
ATOM   1454  O   PHE L  98      12.265  -3.311  14.509  1.00 11.86           O  
ATOM   1455  CB  PHE L  98      14.069  -5.291  12.897  1.00 14.15           C  
ATOM   1456  CG  PHE L  98      15.265  -5.954  12.284  1.00 14.91           C  
ATOM   1457  CD1 PHE L  98      15.512  -5.841  10.935  1.00 14.99           C  
ATOM   1458  CD2 PHE L  98      16.108  -6.742  13.050  1.00 17.76           C  
ATOM   1459  CE1 PHE L  98      16.623  -6.480  10.346  1.00 16.32           C  
ATOM   1460  CE2 PHE L  98      17.212  -7.381  12.476  1.00 17.51           C  
ATOM   1461  CZ  PHE L  98      17.453  -7.258  11.124  1.00 15.91           C  
ATOM   1462  N   GLY L  99      12.667  -2.486  12.437  1.00 11.47           N  
ATOM   1463  CA  GLY L  99      11.297  -2.061  12.155  1.00 11.85           C  
ATOM   1464  C   GLY L  99      10.419  -3.244  11.798  1.00 12.11           C  
ATOM   1465  O   GLY L  99      10.914  -4.350  11.526  1.00 12.01           O  
ATOM   1466  N   GLN L 100       9.106  -3.023  11.752  1.00 14.15           N  
ATOM   1467  CA  GLN L 100       8.145  -4.151  11.605  1.00 15.42           C  
ATOM   1468  C   GLN L 100       8.036  -4.646  10.153  1.00 13.94           C  
ATOM   1469  O   GLN L 100       7.351  -5.642   9.868  1.00 13.48           O  
ATOM   1470  CB  GLN L 100       6.751  -3.745  12.096  1.00 18.91           C  
ATOM   1471  N   GLY L 101       8.710  -3.950   9.253  1.00 12.43           N  
ATOM   1472  CA  GLY L 101       8.784  -4.328   7.853  1.00 12.96           C  
ATOM   1473  C   GLY L 101       7.760  -3.662   6.951  1.00 14.89           C  
ATOM   1474  O   GLY L 101       6.735  -3.175   7.411  1.00 14.40           O  
ATOM   1475  N   THR L 102       8.075  -3.662   5.654  1.00 15.06           N  
ATOM   1476  CA  THR L 102       7.142  -3.360   4.590  1.00 14.84           C  
ATOM   1477  C   THR L 102       7.155  -4.491   3.576  1.00 15.51           C  
ATOM   1478  O   THR L 102       8.190  -4.752   2.933  1.00 13.53           O  
ATOM   1479  CB  THR L 102       7.501  -2.061   3.832  1.00 15.97           C  
ATOM   1480  OG1 THR L 102       7.593  -0.959   4.741  1.00 15.78           O  
ATOM   1481  CG2 THR L 102       6.441  -1.770   2.761  1.00 16.45           C  
ATOM   1482  N   LYS L 103       6.018  -5.156   3.422  1.00 17.56           N  
ATOM   1483  CA  LYS L 103       5.887  -6.219   2.437  1.00 19.36           C  
ATOM   1484  C   LYS L 103       5.502  -5.613   1.098  1.00 19.48           C  
ATOM   1485  O   LYS L 103       4.390  -5.109   0.943  1.00 22.34           O  
ATOM   1486  CB  LYS L 103       4.854  -7.258   2.883  1.00 22.48           C  
ATOM   1487  CG  LYS L 103       4.785  -8.503   1.990  1.00 26.15           C  
ATOM   1488  CD  LYS L 103       3.743  -9.498   2.499  1.00 31.11           C  
ATOM   1489  CE  LYS L 103       3.776 -10.818   1.721  1.00 38.58           C  
ATOM   1490  NZ  LYS L 103       4.871 -11.737   2.175  1.00 38.98           N  
ATOM   1491  N   VAL L 104       6.438  -5.640   0.146  1.00 21.88           N  
ATOM   1492  CA  VAL L 104       6.164  -5.211  -1.233  1.00 21.38           C  
ATOM   1493  C   VAL L 104       5.770  -6.497  -1.984  1.00 25.22           C  
ATOM   1494  O   VAL L 104       6.577  -7.422  -2.128  1.00 20.30           O  
ATOM   1495  CB  VAL L 104       7.369  -4.481  -1.880  1.00 20.72           C  
ATOM   1496  CG1 VAL L 104       6.991  -3.923  -3.234  1.00 22.32           C  
ATOM   1497  CG2 VAL L 104       7.861  -3.349  -0.972  1.00 19.00           C  
ATOM   1498  N   GLU L 105       4.504  -6.567  -2.396  1.00 26.01           N  
ATOM   1499  CA  GLU L 105       3.934  -7.803  -2.945  1.00 28.27           C  
ATOM   1500  C   GLU L 105       3.189  -7.556  -4.257  1.00 27.54           C  
ATOM   1501  O   GLU L 105       2.722  -6.442  -4.528  1.00 25.42           O  
ATOM   1502  CB  GLU L 105       3.020  -8.472  -1.908  1.00 32.03           C  
ATOM   1503  CG  GLU L 105       1.915  -7.586  -1.333  1.00 36.05           C  
ATOM   1504  CD  GLU L 105       1.454  -8.058   0.040  1.00 41.09           C  
ATOM   1505  OE1 GLU L 105       1.462  -7.247   0.990  1.00 50.27           O  
ATOM   1506  OE2 GLU L 105       1.111  -9.248   0.174  1.00 42.17           O  
ATOM   1507  N   ILE L 106       3.100  -8.597  -5.079  1.00 25.89           N  
ATOM   1508  CA  ILE L 106       2.411  -8.493  -6.370  1.00 29.39           C  
ATOM   1509  C   ILE L 106       0.931  -8.208  -6.148  1.00 32.10           C  
ATOM   1510  O   ILE L 106       0.339  -8.667  -5.161  1.00 32.40           O  
ATOM   1511  CB  ILE L 106       2.533  -9.799  -7.203  1.00 27.52           C  
ATOM   1512  N   LYS L 107       0.357  -7.413  -7.046  1.00 21.13           N  
ATOM   1513  CA  LYS L 107      -1.091  -7.115  -7.071  1.00 22.33           C  
ATOM   1514  C   LYS L 107      -1.359  -5.923  -7.994  1.00 22.51           C  
ATOM   1515  O   LYS L 107      -0.942  -4.784  -7.692  1.00 26.22           O  
ATOM   1516  CB  LYS L 107      -1.629  -6.809  -5.670  1.00 33.38           C  
TER    1517      LYS L 107                                                      
