# Supplementary material for: SARS-CoV-2 Spike Protein Interaction Space
Source: Int J Mol Sci. 2023 Jul 27;24(15):12058. doi: 10.3390/ijms241512058 (PMC10418891; doi:10.3390/ijms241512058)
Supplement: Supplementary file 1 [file ijms-24-12058-s001.zip › Supplementary Material File S1/4BJL.pdb]

REMARK 950 NUMBERING  Kabat
REMARK 950 METHOD     X-ray crystal structure
REMARK 950 RESOLUTION 2.400
REMARK 950 R-FACTOR   0.155
REMARK 950 R-FREE     0.000
REMARK 950 CHAIN-TYPE LABEL ORIGINAL
REMARK 950 CHAIN L    L    A
REMARK 950 CHAIN L    L    B
REMARK 950 MOLECULE : A : LOC - LAMBDA 1 TYPE LIGHT-CHAIN DIMER
REMARK 950 SPECIES  : A : HOMO SAPIENS
SEQRES   1 L 216  PCA SER VAL LEU THR GLN PRO PRO SER ALA SER GLY THR          
SEQRES   2 L 216  PRO GLY GLN ARG VAL THR ILE SER CYS SER GLY SER SER          
SEQRES   3 L 216  SER ASN ILE GLY GLU ASN SER VAL THR TRP TYR GLN HIS          
SEQRES   4 L 216  LEU SER GLY THR ALA PRO LYS LEU LEU ILE TYR GLU ASP          
SEQRES   5 L 216  ASN SER ARG ALA SER GLY VAL SER ASP ARG PHE SER ALA          
SEQRES   6 L 216  SER LYS SER GLY THR SER ALA SER LEU ALA ILE SER GLY          
SEQRES   7 L 216  LEU GLN PRO GLU ASP GLU THR ASP TYR TYR CYS ALA ALA          
SEQRES   8 L 216  TRP ASP ASP SER LEU ASP VAL ALA VAL PHE GLY THR GLY          
SEQRES   9 L 216  THR LYS VAL THR VAL LEU GLY GLN PRO LYS ALA ASN PRO          
SEQRES  10 L 216  THR VAL THR LEU PHE PRO PRO SER SER GLU GLU LEU GLN          
SEQRES  11 L 216  ALA ASN LYS ALA THR LEU VAL CYS LEU ILE SER ASP PHE          
SEQRES  12 L 216  TYR PRO GLY ALA VAL THR VAL ALA TRP LYS ALA ASP GLY          
SEQRES  13 L 216  SER PRO VAL LYS ALA GLY VAL GLU THR THR LYS PRO SER          
SEQRES  14 L 216  LYS GLN SER ASN ASN LYS TYR ALA ALA SER SER TYR LEU          
SEQRES  15 L 216  SER LEU THR PRO GLU GLN TRP LYS SER HIS ARG SER TYR          
SEQRES  16 L 216  SER CYS GLN VAL THR HIS GLU GLY SER THR VAL GLU LYS          
SEQRES  17 L 216  THR VAL ALA PRO THR GLU CYS SER                              
SEQRES   1 L 216  PCA SER VAL LEU THR GLN PRO PRO SER ALA SER GLY THR          
SEQRES   2 L 216  PRO GLY GLN ARG VAL THR ILE SER CYS SER GLY SER SER          
SEQRES   3 L 216  SER ASN ILE GLY GLU ASN SER VAL THR TRP TYR GLN HIS          
SEQRES   4 L 216  LEU SER GLY THR ALA PRO LYS LEU LEU ILE TYR GLU ASP          
SEQRES   5 L 216  ASN SER ARG ALA SER GLY VAL SER ASP ARG PHE SER ALA          
SEQRES   6 L 216  SER LYS SER GLY THR SER ALA SER LEU ALA ILE SER GLY          
SEQRES   7 L 216  LEU GLN PRO GLU ASP GLU THR ASP TYR TYR CYS ALA ALA          
SEQRES   8 L 216  TRP ASP ASP SER LEU ASP VAL ALA VAL PHE GLY THR GLY          
SEQRES   9 L 216  THR LYS VAL THR VAL LEU GLY GLN PRO LYS ALA ASN PRO          
SEQRES  10 L 216  THR VAL THR LEU PHE PRO PRO SER SER GLU GLU LEU GLN          
SEQRES  11 L 216  ALA ASN LYS ALA THR LEU VAL CYS LEU ILE SER ASP PHE          
SEQRES  12 L 216  TYR PRO GLY ALA VAL THR VAL ALA TRP LYS ALA ASP GLY          
SEQRES  13 L 216  SER PRO VAL LYS ALA GLY VAL GLU THR THR LYS PRO SER          
SEQRES  14 L 216  LYS GLN SER ASN ASN LYS TYR ALA ALA SER SER TYR LEU          
SEQRES  15 L 216  SER LEU THR PRO GLU GLN TRP LYS SER HIS ARG SER TYR          
SEQRES  16 L 216  SER CYS GLN VAL THR HIS GLU GLY SER THR VAL GLU LYS          
SEQRES  17 L 216  THR VAL ALA PRO THR GLU CYS SER                              
ATOM      8  N   SER L   2     -29.697  20.750  20.102  1.00 38.66           N  
ATOM      9  CA  SER L   2     -29.253  21.945  20.860  1.00 36.69           C  
ATOM     10  C   SER L   2     -28.110  21.620  21.825  1.00 35.02           C  
ATOM     11  O   SER L   2     -27.803  20.470  22.159  1.00 34.89           O  
ATOM     12  CB  SER L   2     -30.475  22.471  21.636  1.00 36.28           C  
ATOM     13  OG  SER L   2     -30.643  23.855  21.501  1.00 35.55           O  
ATOM     14  N   VAL L   3     -27.511  22.686  22.314  1.00 32.87           N  
ATOM     15  CA  VAL L   3     -26.388  22.677  23.267  1.00 30.61           C  
ATOM     16  C   VAL L   3     -25.695  24.025  23.042  1.00 29.21           C  
ATOM     17  O   VAL L   3     -25.598  24.461  21.877  1.00 28.88           O  
ATOM     18  CB  VAL L   3     -25.566  21.407  23.073  1.00 30.06           C  
ATOM     19  CG1 VAL L   3     -24.316  21.586  22.233  1.00 29.95           C  
ATOM     20  CG2 VAL L   3     -25.249  20.724  24.386  1.00 30.04           C  
ATOM     21  N   LEU L   4     -25.336  24.667  24.139  1.00 27.67           N  
ATOM     22  CA  LEU L   4     -24.686  25.972  24.064  1.00 25.55           C  
ATOM     23  C   LEU L   4     -23.255  25.779  23.615  1.00 24.93           C  
ATOM     24  O   LEU L   4     -22.574  24.942  24.221  1.00 25.01           O  
ATOM     25  CB  LEU L   4     -24.813  26.665  25.422  1.00 23.97           C  
ATOM     26  CG  LEU L   4     -26.048  27.587  25.358  1.00 23.20           C  
ATOM     27  CD1 LEU L   4     -27.053  26.853  24.480  1.00 22.46           C  
ATOM     28  CD2 LEU L   4     -26.572  27.771  26.757  1.00 23.41           C  
ATOM     29  N   THR L   5     -22.916  26.534  22.599  1.00 24.25           N  
ATOM     30  CA  THR L   5     -21.540  26.506  22.043  1.00 23.80           C  
ATOM     31  C   THR L   5     -20.706  27.336  23.020  1.00 22.80           C  
ATOM     32  O   THR L   5     -21.058  28.452  23.430  1.00 22.68           O  
ATOM     33  CB  THR L   5     -21.429  26.864  20.534  1.00 25.48           C  
ATOM     34  OG1 THR L   5     -22.244  25.883  19.753  1.00 26.60           O  
ATOM     35  CG2 THR L   5     -19.994  26.941  19.948  1.00 25.55           C  
ATOM     36  N   GLN L   6     -19.630  26.689  23.429  1.00 22.01           N  
ATOM     37  CA  GLN L   6     -18.696  27.210  24.428  1.00 21.08           C  
ATOM     38  C   GLN L   6     -17.252  26.849  24.097  1.00 21.28           C  
ATOM     39  O   GLN L   6     -16.982  25.634  24.073  1.00 21.86           O  
ATOM     40  CB  GLN L   6     -19.053  26.484  25.746  1.00 18.51           C  
ATOM     41  CG  GLN L   6     -19.042  27.537  26.846  1.00 17.70           C  
ATOM     42  CD  GLN L   6     -19.593  26.815  28.070  1.00 16.89           C  
ATOM     43  OE1 GLN L   6     -20.488  26.033  27.819  1.00 16.45           O  
ATOM     44  NE2 GLN L   6     -19.026  27.151  29.194  1.00 16.56           N  
ATOM     45  N   PRO L   7     -16.427  27.873  23.891  1.00 20.99           N  
ATOM     46  CA  PRO L   7     -15.025  27.657  23.543  1.00 20.50           C  
ATOM     47  C   PRO L   7     -14.488  26.550  24.451  1.00 20.54           C  
ATOM     48  O   PRO L   7     -14.976  26.431  25.586  1.00 20.29           O  
ATOM     49  CB  PRO L   7     -14.371  28.997  23.694  1.00 20.42           C  
ATOM     50  CG  PRO L   7     -15.420  30.027  23.870  1.00 20.27           C  
ATOM     51  CD  PRO L   7     -16.751  29.310  23.943  1.00 20.72           C  
ATOM     52  N   PRO L   8     -13.557  25.781  23.889  1.00 20.40           N  
ATOM     53  CA  PRO L   8     -12.918  24.669  24.560  1.00 20.64           C  
ATOM     54  C   PRO L   8     -12.017  25.054  25.723  1.00 21.01           C  
ATOM     55  O   PRO L   8     -11.835  24.409  26.777  1.00 20.90           O  
ATOM     56  CB  PRO L   8     -12.115  23.987  23.443  1.00 20.63           C  
ATOM     57  CG  PRO L   8     -11.930  24.983  22.337  1.00 20.37           C  
ATOM     58  CD  PRO L   8     -13.093  25.935  22.487  1.00 20.57           C  
ATOM     59  N   SER L   9     -11.356  26.161  25.481  1.00 21.76           N  
ATOM     60  CA  SER L   9     -10.396  26.768  26.406  1.00 22.48           C  
ATOM     61  C   SER L   9     -10.565  28.292  26.356  1.00 23.37           C  
ATOM     62  O   SER L   9     -11.028  28.954  25.405  1.00 23.40           O  
ATOM     63  CB  SER L   9      -8.976  26.266  26.107  1.00 20.69           C  
ATOM     64  OG  SER L   9      -8.243  26.200  27.320  1.00 18.69           O  
ATOM     65  N   ALA L  11     -10.203  28.856  27.483  1.00 24.15           N  
ATOM     66  CA  ALA L  11     -10.180  30.292  27.815  1.00 24.54           C  
ATOM     67  C   ALA L  11      -8.989  30.333  28.779  1.00 24.68           C  
ATOM     68  O   ALA L  11      -8.928  29.364  29.564  1.00 24.91           O  
ATOM     69  CB  ALA L  11     -11.503  30.760  28.364  1.00 24.52           C  
ATOM     70  N   SER L  12      -8.067  31.256  28.619  1.00 25.27           N  
ATOM     71  CA  SER L  12      -6.870  31.270  29.491  1.00 25.32           C  
ATOM     72  C   SER L  12      -6.368  32.719  29.593  1.00 25.56           C  
ATOM     73  O   SER L  12      -6.889  33.586  28.901  1.00 25.65           O  
ATOM     74  CB  SER L  12      -5.744  30.368  29.000  1.00 24.85           C  
ATOM     75  OG  SER L  12      -5.093  30.935  27.861  1.00 24.52           O  
ATOM     76  N   GLY L  13      -5.377  32.813  30.450  1.00 25.93           N  
ATOM     77  CA  GLY L  13      -4.616  33.975  30.823  1.00 26.06           C  
ATOM     78  C   GLY L  13      -3.681  33.753  32.026  1.00 25.92           C  
ATOM     79  O   GLY L  13      -3.838  32.811  32.791  1.00 25.51           O  
ATOM     80  N   THR L  14      -2.772  34.679  32.155  1.00 26.25           N  
ATOM     81  CA  THR L  14      -1.708  34.865  33.145  1.00 26.82           C  
ATOM     82  C   THR L  14      -2.359  35.347  34.438  1.00 26.61           C  
ATOM     83  O   THR L  14      -3.332  36.115  34.331  1.00 27.00           O  
ATOM     84  CB  THR L  14      -0.661  35.950  32.624  1.00 27.49           C  
ATOM     85  OG1 THR L  14      -1.447  37.202  32.390  1.00 27.72           O  
ATOM     86  CG2 THR L  14       0.112  35.543  31.368  1.00 26.62           C  
ATOM     87  N   PRO L  15      -1.861  34.945  35.576  1.00 26.46           N  
ATOM     88  CA  PRO L  15      -2.467  35.333  36.853  1.00 26.64           C  
ATOM     89  C   PRO L  15      -2.623  36.832  36.979  1.00 27.36           C  
ATOM     90  O   PRO L  15      -1.738  37.643  36.699  1.00 26.74           O  
ATOM     91  CB  PRO L  15      -1.606  34.657  37.892  1.00 26.56           C  
ATOM     92  CG  PRO L  15      -0.898  33.546  37.170  1.00 26.44           C  
ATOM     93  CD  PRO L  15      -0.719  34.031  35.737  1.00 26.60           C  
ATOM     94  N   GLY L  16      -3.814  37.247  37.416  1.00 28.56           N  
ATOM     95  CA  GLY L  16      -4.213  38.653  37.619  1.00 29.19           C  
ATOM     96  C   GLY L  16      -5.118  39.081  36.449  1.00 30.08           C  
ATOM     97  O   GLY L  16      -5.961  39.991  36.510  1.00 30.20           O  
ATOM     98  N   GLN L  17      -4.868  38.361  35.377  1.00 30.61           N  
ATOM     99  CA  GLN L  17      -5.549  38.475  34.090  1.00 31.35           C  
ATOM    100  C   GLN L  17      -7.055  38.216  34.295  1.00 30.97           C  
ATOM    101  O   GLN L  17      -7.507  37.492  35.189  1.00 31.02           O  
ATOM    102  CB  GLN L  17      -4.929  37.552  33.046  1.00 33.21           C  
ATOM    103  CG  GLN L  17      -4.205  38.137  31.858  1.00 35.33           C  
ATOM    104  CD  GLN L  17      -5.143  38.439  30.691  1.00 36.86           C  
ATOM    105  OE1 GLN L  17      -5.724  37.491  30.136  1.00 37.81           O  
ATOM    106  NE2 GLN L  17      -5.327  39.719  30.325  1.00 37.13           N  
ATOM    107  N   ARG L  18      -7.792  38.832  33.415  1.00 30.36           N  
ATOM    108  CA  ARG L  18      -9.243  38.819  33.310  1.00 29.97           C  
ATOM    109  C   ARG L  18      -9.597  37.954  32.101  1.00 29.79           C  
ATOM    110  O   ARG L  18      -9.180  38.297  30.975  1.00 30.40           O  
ATOM    111  CB  ARG L  18      -9.699  40.258  33.041  1.00 29.65           C  
ATOM    112  CG  ARG L  18     -11.155  40.562  33.199  1.00 29.61           C  
ATOM    113  CD  ARG L  18     -11.546  41.698  32.294  1.00 30.29           C  
ATOM    114  NE  ARG L  18     -12.509  42.544  33.005  1.00 30.79           N  
ATOM    115  CZ  ARG L  18     -13.733  42.845  32.549  1.00 30.70           C  
ATOM    116  NH1 ARG L  18     -14.098  42.404  31.332  1.00 30.47           N  
ATOM    117  NH2 ARG L  18     -14.565  43.562  33.307  1.00 30.36           N  
ATOM    118  N   VAL L  19     -10.324  36.882  32.336  1.00 29.25           N  
ATOM    119  CA  VAL L  19     -10.710  35.987  31.214  1.00 28.29           C  
ATOM    120  C   VAL L  19     -12.214  36.073  30.985  1.00 28.19           C  
ATOM    121  O   VAL L  19     -12.983  36.507  31.868  1.00 28.58           O  
ATOM    122  CB  VAL L  19     -10.205  34.581  31.591  1.00 27.45           C  
ATOM    123  CG1 VAL L  19     -11.325  33.635  31.990  1.00 26.91           C  
ATOM    124  CG2 VAL L  19      -9.308  33.995  30.521  1.00 27.85           C  
ATOM    125  N   THR L  20     -12.656  35.651  29.804  1.00 27.57           N  
ATOM    126  CA  THR L  20     -14.034  35.584  29.397  1.00 26.38           C  
ATOM    127  C   THR L  20     -14.378  34.274  28.680  1.00 25.99           C  
ATOM    128  O   THR L  20     -13.753  33.808  27.735  1.00 26.00           O  
ATOM    129  CB  THR L  20     -14.575  36.767  28.513  1.00 26.18           C  
ATOM    130  OG1 THR L  20     -14.119  38.018  29.103  1.00 26.33           O  
ATOM    131  CG2 THR L  20     -16.117  36.738  28.430  1.00 26.13           C  
ATOM    132  N   ILE L  21     -15.455  33.701  29.194  1.00 25.88           N  
ATOM    133  CA  ILE L  21     -16.052  32.493  28.644  1.00 25.60           C  
ATOM    134  C   ILE L  21     -17.353  32.979  27.972  1.00 26.37           C  
ATOM    135  O   ILE L  21     -18.196  33.639  28.563  1.00 26.20           O  
ATOM    136  CB  ILE L  21     -16.253  31.307  29.619  1.00 23.52           C  
ATOM    137  CG1 ILE L  21     -15.119  31.273  30.661  1.00 22.56           C  
ATOM    138  CG2 ILE L  21     -16.319  29.928  28.908  1.00 23.23           C  
ATOM    139  CD1 ILE L  21     -15.529  31.903  31.997  1.00 22.77           C  
ATOM    140  N   SER L  22     -17.417  32.676  26.712  1.00 27.77           N  
ATOM    141  CA  SER L  22     -18.517  32.929  25.786  1.00 29.13           C  
ATOM    142  C   SER L  22     -19.248  31.580  25.633  1.00 30.39           C  
ATOM    143  O   SER L  22     -18.655  30.480  25.688  1.00 30.32           O  
ATOM    144  CB  SER L  22     -18.072  33.555  24.498  1.00 29.25           C  
ATOM    145  OG  SER L  22     -17.117  32.826  23.758  1.00 29.78           O  
ATOM    146  N   CYS L  23     -20.542  31.712  25.462  1.00 31.57           N  
ATOM    147  CA  CYS L  23     -21.503  30.574  25.340  1.00 32.45           C  
ATOM    148  C   CYS L  23     -22.539  30.951  24.294  1.00 33.45           C  
ATOM    149  O   CYS L  23     -23.576  31.574  24.595  1.00 33.33           O  
ATOM    150  CB  CYS L  23     -22.027  30.421  26.760  1.00 32.29           C  
ATOM    151  SG  CYS L  23     -23.521  29.550  27.108  1.00 31.58           S  
ATOM    152  N   SER L  24     -22.284  30.574  23.044  1.00 34.50           N  
ATOM    153  CA  SER L  24     -23.203  30.943  21.971  1.00 35.95           C  
ATOM    154  C   SER L  24     -24.347  29.997  21.730  1.00 37.27           C  
ATOM    155  O   SER L  24     -24.334  29.128  20.855  1.00 37.31           O  
ATOM    156  CB  SER L  24     -22.453  31.290  20.696  1.00 35.89           C  
ATOM    157  OG  SER L  24     -21.512  32.323  21.015  1.00 35.79           O  
ATOM    158  N   GLY L  25     -25.380  30.259  22.511  1.00 38.88           N  
ATOM    159  CA  GLY L  25     -26.679  29.550  22.463  1.00 40.52           C  
ATOM    160  C   GLY L  25     -27.464  30.164  21.277  1.00 41.53           C  
ATOM    161  O   GLY L  25     -26.836  30.985  20.549  1.00 42.14           O  
ATOM    162  N   SER L  26     -28.731  29.806  21.127  1.00 41.75           N  
ATOM    163  CA  SER L  26     -29.536  30.332  19.987  1.00 41.87           C  
ATOM    164  C   SER L  26     -30.584  31.341  20.371  1.00 41.51           C  
ATOM    165  O   SER L  26     -30.906  31.579  21.558  1.00 41.48           O  
ATOM    166  CB  SER L  26     -30.030  29.121  19.197  1.00 42.84           C  
ATOM    167  OG  SER L  26     -28.927  28.196  19.049  1.00 43.95           O  
ATOM    168  N   SER L  27     -31.127  32.035  19.370  1.00 41.34           N  
ATOM    169  CA  SER L  27     -32.152  33.081  19.613  1.00 41.31           C  
ATOM    170  C   SER L  27     -33.434  32.429  20.132  1.00 41.34           C  
ATOM    171  O   SER L  27     -34.533  32.717  19.654  1.00 41.24           O  
ATOM    172  CB  SER L  27     -32.433  33.901  18.378  1.00 41.40           C  
ATOM    173  OG  SER L  27     -31.233  34.326  17.756  1.00 41.23           O  
ATOM    174  N   SER L  27A    -33.212  31.551  21.073  1.00 41.64           N  
ATOM    175  CA  SER L  27A    -34.200  30.731  21.765  1.00 42.08           C  
ATOM    176  C   SER L  27A    -33.794  30.532  23.233  1.00 42.13           C  
ATOM    177  O   SER L  27A    -34.676  30.652  24.113  1.00 42.82           O  
ATOM    178  CB  SER L  27A    -34.473  29.394  21.088  1.00 42.25           C  
ATOM    179  OG  SER L  27A    -33.330  28.595  20.867  1.00 42.00           O  
ATOM    180  N   ASN L  27B    -32.527  30.273  23.489  1.00 41.40           N  
ATOM    181  CA  ASN L  27B    -32.045  30.079  24.877  1.00 40.51           C  
ATOM    182  C   ASN L  27B    -31.467  31.364  25.439  1.00 40.03           C  
ATOM    183  O   ASN L  27B    -32.064  32.031  26.303  1.00 39.53           O  
ATOM    184  CB  ASN L  27B    -31.172  28.819  24.878  1.00 39.41           C  
ATOM    185  CG  ASN L  27B    -30.598  28.637  23.464  1.00 38.66           C  
ATOM    186  OD1 ASN L  27B    -29.855  29.546  23.055  1.00 37.55           O  
ATOM    187  ND2 ASN L  27B    -30.935  27.551  22.783  1.00 37.70           N  
ATOM    188  N   ILE L  28     -30.285  31.735  25.012  1.00 40.36           N  
ATOM    189  CA  ILE L  28     -29.631  32.961  25.482  1.00 40.88           C  
ATOM    190  C   ILE L  28     -30.501  34.137  24.973  1.00 41.55           C  
ATOM    191  O   ILE L  28     -30.601  35.183  25.623  1.00 41.55           O  
ATOM    192  CB  ILE L  28     -28.193  33.168  24.884  1.00 40.47           C  
ATOM    193  CG1 ILE L  28     -27.576  31.827  24.435  1.00 39.92           C  
ATOM    194  CG2 ILE L  28     -27.259  33.972  25.817  1.00 40.38           C  
ATOM    195  CD1 ILE L  28     -26.041  31.783  24.648  1.00 40.19           C  
ATOM    196  N   GLY L  29     -31.012  33.862  23.767  1.00 41.83           N  
ATOM    197  CA  GLY L  29     -31.823  34.856  23.068  1.00 42.47           C  
ATOM    198  C   GLY L  29     -33.197  34.975  23.702  1.00 42.97           C  
ATOM    199  O   GLY L  29     -34.178  34.733  22.968  1.00 43.44           O  
ATOM    200  N   GLU L  30     -33.277  35.311  24.981  1.00 43.03           N  
ATOM    201  CA  GLU L  30     -34.554  35.451  25.673  1.00 43.14           C  
ATOM    202  C   GLU L  30     -34.518  35.005  27.131  1.00 42.89           C  
ATOM    203  O   GLU L  30     -34.886  35.817  28.015  1.00 43.83           O  
ATOM    204  CB  GLU L  30     -35.711  34.645  25.061  1.00 44.16           C  
ATOM    205  CG  GLU L  30     -37.123  35.220  25.152  1.00 45.15           C  
ATOM    206  CD  GLU L  30     -37.244  36.695  24.857  1.00 45.73           C  
ATOM    207  OE1 GLU L  30     -37.351  37.030  23.660  1.00 45.33           O  
ATOM    208  OE2 GLU L  30     -37.240  37.518  25.766  1.00 46.96           O  
ATOM    209  N   ASN L  31     -34.135  33.780  27.372  1.00 41.76           N  
ATOM    210  CA  ASN L  31     -34.081  33.120  28.661  1.00 40.26           C  
ATOM    211  C   ASN L  31     -32.878  33.382  29.562  1.00 38.72           C  
ATOM    212  O   ASN L  31     -31.776  33.754  29.170  1.00 38.33           O  
ATOM    213  CB  ASN L  31     -34.294  31.604  28.397  1.00 41.36           C  
ATOM    214  CG  ASN L  31     -35.647  31.348  27.749  1.00 42.12           C  
ATOM    215  OD1 ASN L  31     -36.694  31.683  28.332  1.00 43.07           O  
ATOM    216  ND2 ASN L  31     -35.624  30.751  26.562  1.00 41.85           N  
ATOM    217  N   SER L  32     -33.166  33.110  30.843  1.00 37.03           N  
ATOM    218  CA  SER L  32     -32.267  33.227  31.994  1.00 35.07           C  
ATOM    219  C   SER L  32     -31.017  32.381  31.774  1.00 33.75           C  
ATOM    220  O   SER L  32     -31.213  31.236  31.328  1.00 34.01           O  
ATOM    221  CB  SER L  32     -32.966  32.796  33.279  1.00 34.14           C  
ATOM    222  OG  SER L  32     -33.540  33.925  33.914  1.00 33.49           O  
ATOM    223  N   VAL L  33     -29.839  32.911  32.054  1.00 31.90           N  
ATOM    224  CA  VAL L  33     -28.601  32.107  31.844  1.00 29.76           C  
ATOM    225  C   VAL L  33     -27.939  31.928  33.208  1.00 28.44           C  
ATOM    226  O   VAL L  33     -27.761  32.866  33.990  1.00 28.36           O  
ATOM    227  CB  VAL L  33     -27.779  32.624  30.668  1.00 29.48           C  
ATOM    228  CG1 VAL L  33     -26.512  31.838  30.346  1.00 28.33           C  
ATOM    229  CG2 VAL L  33     -28.608  32.760  29.379  1.00 28.71           C  
ATOM    230  N   THR L  34     -27.636  30.657  33.463  1.00 26.92           N  
ATOM    231  CA  THR L  34     -27.038  30.070  34.653  1.00 24.49           C  
ATOM    232  C   THR L  34     -25.607  29.601  34.454  1.00 22.98           C  
ATOM    233  O   THR L  34     -25.265  28.905  33.491  1.00 22.56           O  
ATOM    234  CB  THR L  34     -27.925  28.873  35.199  1.00 24.66           C  
ATOM    235  OG1 THR L  34     -29.123  28.746  34.375  1.00 24.13           O  
ATOM    236  CG2 THR L  34     -28.365  29.082  36.668  1.00 25.28           C  
ATOM    237  N   TRP L  35     -24.723  29.973  35.385  1.00 21.72           N  
ATOM    238  CA  TRP L  35     -23.323  29.556  35.253  1.00 20.11           C  
ATOM    239  C   TRP L  35     -22.841  28.743  36.465  1.00 19.77           C  
ATOM    240  O   TRP L  35     -22.907  29.143  37.616  1.00 18.86           O  
ATOM    241  CB  TRP L  35     -22.400  30.669  34.914  1.00 18.33           C  
ATOM    242  CG  TRP L  35     -22.395  31.357  33.613  1.00 17.58           C  
ATOM    243  CD1 TRP L  35     -23.220  32.379  33.201  1.00 17.59           C  
ATOM    244  CD2 TRP L  35     -21.468  31.192  32.533  1.00 17.17           C  
ATOM    245  NE1 TRP L  35     -22.911  32.811  31.945  1.00 16.33           N  
ATOM    246  CE2 TRP L  35     -21.803  32.126  31.533  1.00 16.79           C  
ATOM    247  CE3 TRP L  35     -20.399  30.335  32.318  1.00 17.55           C  
ATOM    248  CZ2 TRP L  35     -21.109  32.201  30.331  1.00 17.03           C  
ATOM    249  CZ3 TRP L  35     -19.708  30.432  31.121  1.00 17.48           C  
ATOM    250  CH2 TRP L  35     -20.057  31.337  30.133  1.00 16.58           C  
ATOM    251  N   TYR L  36     -22.323  27.576  36.064  1.00 19.83           N  
ATOM    252  CA  TYR L  36     -21.713  26.563  36.901  1.00 19.74           C  
ATOM    253  C   TYR L  36     -20.207  26.400  36.608  1.00 19.42           C  
ATOM    254  O   TYR L  36     -19.809  26.351  35.443  1.00 18.93           O  
ATOM    255  CB  TYR L  36     -22.368  25.162  36.677  1.00 18.95           C  
ATOM    256  CG  TYR L  36     -23.852  25.244  36.888  1.00 18.47           C  
ATOM    257  CD1 TYR L  36     -24.425  25.176  38.149  1.00 18.22           C  
ATOM    258  CD2 TYR L  36     -24.661  25.436  35.759  1.00 19.21           C  
ATOM    259  CE1 TYR L  36     -25.807  25.282  38.307  1.00 19.01           C  
ATOM    260  CE2 TYR L  36     -26.045  25.551  35.891  1.00 19.80           C  
ATOM    261  CZ  TYR L  36     -26.604  25.474  37.176  1.00 20.35           C  
ATOM    262  OH  TYR L  36     -27.979  25.615  37.247  1.00 21.63           O  
ATOM    263  N   GLN L  37     -19.451  26.323  37.677  1.00 19.39           N  
ATOM    264  CA  GLN L  37     -17.990  26.070  37.555  1.00 20.10           C  
ATOM    265  C   GLN L  37     -17.920  24.579  37.925  1.00 20.86           C  
ATOM    266  O   GLN L  37     -18.758  24.263  38.777  1.00 21.44           O  
ATOM    267  CB  GLN L  37     -17.081  26.873  38.428  1.00 18.65           C  
ATOM    268  CG  GLN L  37     -16.034  26.116  39.195  1.00 17.88           C  
ATOM    269  CD  GLN L  37     -15.403  26.960  40.258  1.00 18.42           C  
ATOM    270  OE1 GLN L  37     -14.380  27.627  40.082  1.00 19.74           O  
ATOM    271  NE2 GLN L  37     -16.020  26.984  41.430  1.00 17.86           N  
ATOM    272  N   HIS L  38     -17.067  23.764  37.369  1.00 21.82           N  
ATOM    273  CA  HIS L  38     -17.075  22.345  37.754  1.00 22.63           C  
ATOM    274  C   HIS L  38     -15.696  21.739  37.926  1.00 23.72           C  
ATOM    275  O   HIS L  38     -14.953  21.695  36.934  1.00 23.71           O  
ATOM    276  CB  HIS L  38     -17.808  21.430  36.714  1.00 20.91           C  
ATOM    277  CG  HIS L  38     -17.554  19.973  36.982  1.00 20.10           C  
ATOM    278  ND1 HIS L  38     -17.737  19.365  38.203  1.00 19.72           N  
ATOM    279  CD2 HIS L  38     -17.095  18.994  36.161  1.00 20.05           C  
ATOM    280  CE1 HIS L  38     -17.389  18.104  38.175  1.00 19.11           C  
ATOM    281  NE2 HIS L  38     -16.990  17.865  36.948  1.00 20.65           N  
ATOM    282  N   LEU L  39     -15.451  21.213  39.124  1.00 25.20           N  
ATOM    283  CA  LEU L  39     -14.183  20.515  39.400  1.00 26.68           C  
ATOM    284  C   LEU L  39     -14.364  18.993  39.508  1.00 27.32           C  
ATOM    285  O   LEU L  39     -15.140  18.496  40.372  1.00 27.64           O  
ATOM    286  CB  LEU L  39     -13.573  21.078  40.698  1.00 27.24           C  
ATOM    287  CG  LEU L  39     -12.042  21.116  40.711  1.00 27.77           C  
ATOM    288  CD1 LEU L  39     -11.604  22.581  40.583  1.00 29.07           C  
ATOM    289  CD2 LEU L  39     -11.491  20.493  41.985  1.00 27.18           C  
ATOM    290  N   SER L  40     -13.629  18.269  38.671  1.00 27.62           N  
ATOM    291  CA  SER L  40     -13.721  16.791  38.811  1.00 28.22           C  
ATOM    292  C   SER L  40     -13.471  16.485  40.312  1.00 27.58           C  
ATOM    293  O   SER L  40     -12.588  17.080  40.958  1.00 26.81           O  
ATOM    294  CB  SER L  40     -12.666  16.063  38.008  1.00 30.52           C  
ATOM    295  OG  SER L  40     -12.193  14.899  38.729  1.00 32.42           O  
ATOM    296  N   GLY L  41     -14.267  15.526  40.751  1.00 27.28           N  
ATOM    297  CA  GLY L  41     -14.204  15.050  42.142  1.00 27.28           C  
ATOM    298  C   GLY L  41     -15.105  15.865  43.064  1.00 27.57           C  
ATOM    299  O   GLY L  41     -15.229  15.542  44.270  1.00 27.46           O  
ATOM    300  N   THR L  42     -15.707  16.893  42.456  1.00 27.17           N  
ATOM    301  CA  THR L  42     -16.610  17.821  43.130  1.00 26.59           C  
ATOM    302  C   THR L  42     -17.818  18.109  42.251  1.00 26.82           C  
ATOM    303  O   THR L  42     -17.727  18.177  41.018  1.00 27.00           O  
ATOM    304  CB  THR L  42     -15.853  19.123  43.561  1.00 26.72           C  
ATOM    305  OG1 THR L  42     -15.129  18.661  44.744  1.00 27.69           O  
ATOM    306  CG2 THR L  42     -16.656  20.390  43.871  1.00 26.96           C  
ATOM    307  N   ALA L  43     -18.930  18.225  42.960  1.00 26.70           N  
ATOM    308  CA  ALA L  43     -20.272  18.510  42.421  1.00 26.14           C  
ATOM    309  C   ALA L  43     -20.185  19.927  41.873  1.00 26.08           C  
ATOM    310  O   ALA L  43     -19.466  20.784  42.465  1.00 26.51           O  
ATOM    311  CB  ALA L  43     -21.293  18.453  43.567  1.00 25.22           C  
ATOM    312  N   PRO L  44     -20.889  20.151  40.791  1.00 25.64           N  
ATOM    313  CA  PRO L  44     -20.853  21.507  40.179  1.00 25.39           C  
ATOM    314  C   PRO L  44     -21.245  22.565  41.185  1.00 25.41           C  
ATOM    315  O   PRO L  44     -21.896  22.323  42.223  1.00 25.44           O  
ATOM    316  CB  PRO L  44     -21.715  21.389  38.954  1.00 25.23           C  
ATOM    317  CG  PRO L  44     -22.463  20.080  39.074  1.00 25.34           C  
ATOM    318  CD  PRO L  44     -21.740  19.212  40.085  1.00 25.21           C  
ATOM    319  N   LYS L  45     -20.832  23.787  40.914  1.00 25.84           N  
ATOM    320  CA  LYS L  45     -21.165  24.938  41.762  1.00 26.62           C  
ATOM    321  C   LYS L  45     -21.990  25.931  40.934  1.00 26.87           C  
ATOM    322  O   LYS L  45     -21.725  26.101  39.730  1.00 26.88           O  
ATOM    323  CB  LYS L  45     -19.972  25.676  42.330  1.00 26.91           C  
ATOM    324  CG  LYS L  45     -19.132  24.908  43.342  1.00 27.42           C  
ATOM    325  CD  LYS L  45     -19.390  25.393  44.754  1.00 28.26           C  
ATOM    326  CE  LYS L  45     -19.200  24.261  45.760  1.00 29.20           C  
ATOM    327  NZ  LYS L  45     -20.154  24.405  46.896  1.00 29.44           N  
ATOM    328  N   LEU L  46     -22.972  26.525  41.601  1.00 27.24           N  
ATOM    329  CA  LEU L  46     -23.764  27.553  40.911  1.00 27.59           C  
ATOM    330  C   LEU L  46     -22.992  28.898  41.011  1.00 28.03           C  
ATOM    331  O   LEU L  46     -22.822  29.466  42.103  1.00 27.89           O  
ATOM    332  CB  LEU L  46     -25.169  27.603  41.472  1.00 26.77           C  
ATOM    333  CG  LEU L  46     -25.904  28.869  40.990  1.00 26.93           C  
ATOM    334  CD1 LEU L  46     -26.193  28.788  39.498  1.00 26.55           C  
ATOM    335  CD2 LEU L  46     -27.166  29.056  41.812  1.00 27.15           C  
ATOM    336  N   LEU L  47     -22.549  29.361  39.865  1.00 28.37           N  
ATOM    337  CA  LEU L  47     -21.782  30.599  39.745  1.00 29.92           C  
ATOM    338  C   LEU L  47     -22.674  31.851  39.728  1.00 30.87           C  
ATOM    339  O   LEU L  47     -22.956  32.470  40.778  1.00 31.23           O  
ATOM    340  CB  LEU L  47     -20.882  30.438  38.514  1.00 29.38           C  
ATOM    341  CG  LEU L  47     -19.509  29.817  38.618  1.00 28.96           C  
ATOM    342  CD1 LEU L  47     -18.718  30.144  37.342  1.00 28.55           C  
ATOM    343  CD2 LEU L  47     -18.753  30.313  39.860  1.00 27.61           C  
ATOM    344  N   ILE L  48     -23.051  32.239  38.523  1.00 31.32           N  
ATOM    345  CA  ILE L  48     -23.914  33.405  38.252  1.00 31.94           C  
ATOM    346  C   ILE L  48     -25.283  32.740  38.155  1.00 32.67           C  
ATOM    347  O   ILE L  48     -25.411  31.766  37.417  1.00 32.64           O  
ATOM    348  CB  ILE L  48     -23.431  34.257  37.057  1.00 31.58           C  
ATOM    349  CG1 ILE L  48     -22.189  35.081  37.514  1.00 30.67           C  
ATOM    350  CG2 ILE L  48     -24.500  35.202  36.441  1.00 31.58           C  
ATOM    351  CD1 ILE L  48     -21.182  34.294  38.383  1.00 29.40           C  
ATOM    352  N   TYR L  49     -26.161  33.266  38.962  1.00 33.69           N  
ATOM    353  CA  TYR L  49     -27.510  32.688  39.128  1.00 34.71           C  
ATOM    354  C   TYR L  49     -28.533  33.010  38.095  1.00 35.36           C  
ATOM    355  O   TYR L  49     -29.246  32.062  37.660  1.00 35.47           O  
ATOM    356  CB  TYR L  49     -27.841  32.786  40.610  1.00 35.20           C  
ATOM    357  CG  TYR L  49     -28.833  33.653  41.262  1.00 35.53           C  
ATOM    358  CD1 TYR L  49     -29.085  34.976  40.883  1.00 36.54           C  
ATOM    359  CD2 TYR L  49     -29.561  33.167  42.353  1.00 35.79           C  
ATOM    360  CE1 TYR L  49     -30.028  35.775  41.517  1.00 36.95           C  
ATOM    361  CE2 TYR L  49     -30.514  33.950  42.999  1.00 37.22           C  
ATOM    362  CZ  TYR L  49     -30.755  35.262  42.589  1.00 37.50           C  
ATOM    363  OH  TYR L  49     -31.708  35.997  43.267  1.00 37.66           O  
ATOM    364  N   GLU L  50     -28.722  34.231  37.628  1.00 35.91           N  
ATOM    365  CA  GLU L  50     -29.732  34.509  36.618  1.00 36.27           C  
ATOM    366  C   GLU L  50     -29.172  35.531  35.644  1.00 36.21           C  
ATOM    367  O   GLU L  50     -29.527  36.704  35.722  1.00 36.20           O  
ATOM    368  CB  GLU L  50     -31.056  35.051  37.121  1.00 38.61           C  
ATOM    369  CG  GLU L  50     -32.197  34.054  37.356  1.00 41.09           C  
ATOM    370  CD  GLU L  50     -33.575  34.388  36.859  1.00 42.00           C  
ATOM    371  OE1 GLU L  50     -33.822  35.097  35.886  1.00 42.44           O  
ATOM    372  OE2 GLU L  50     -34.491  33.826  37.529  1.00 42.21           O  
ATOM    373  N   ASP L  51     -28.313  35.005  34.791  1.00 36.05           N  
ATOM    374  CA  ASP L  51     -27.668  35.804  33.743  1.00 35.46           C  
ATOM    375  C   ASP L  51     -26.429  36.556  34.257  1.00 35.75           C  
ATOM    376  O   ASP L  51     -25.288  36.211  33.867  1.00 36.07           O  
ATOM    377  CB  ASP L  51     -28.706  36.713  33.133  1.00 34.18           C  
ATOM    378  CG  ASP L  51     -29.533  36.188  31.993  1.00 32.80           C  
ATOM    379  OD1 ASP L  51     -29.120  35.406  31.148  1.00 31.65           O  
ATOM    380  OD2 ASP L  51     -30.685  36.697  31.970  1.00 32.38           O  
ATOM    381  N   ASN L  52     -26.684  37.557  35.069  1.00 35.63           N  
ATOM    382  CA  ASN L  52     -25.652  38.432  35.656  1.00 35.78           C  
ATOM    383  C   ASN L  52     -25.676  38.404  37.184  1.00 35.90           C  
ATOM    384  O   ASN L  52     -24.694  38.617  37.922  1.00 35.33           O  
ATOM    385  CB  ASN L  52     -25.719  39.801  35.002  1.00 35.85           C  
ATOM    386  CG  ASN L  52     -27.004  40.587  35.010  1.00 36.24           C  
ATOM    387  OD1 ASN L  52     -27.531  41.018  33.947  1.00 36.19           O  
ATOM    388  ND2 ASN L  52     -27.547  40.860  36.202  1.00 36.01           N  
ATOM    389  N   SER L  53     -26.859  38.116  37.694  1.00 36.61           N  
ATOM    390  CA  SER L  53     -27.087  38.032  39.148  1.00 37.32           C  
ATOM    391  C   SER L  53     -26.405  36.790  39.689  1.00 37.83           C  
ATOM    392  O   SER L  53     -26.748  35.640  39.412  1.00 37.94           O  
ATOM    393  CB  SER L  53     -28.547  38.201  39.469  1.00 37.39           C  
ATOM    394  OG  SER L  53     -28.885  39.587  39.241  1.00 37.38           O  
ATOM    395  N   ARG L  54     -25.364  37.091  40.422  1.00 38.33           N  
ATOM    396  CA  ARG L  54     -24.442  36.179  41.086  1.00 39.05           C  
ATOM    397  C   ARG L  54     -25.055  35.465  42.272  1.00 39.26           C  
ATOM    398  O   ARG L  54     -26.009  35.964  42.894  1.00 39.66           O  
ATOM    399  CB  ARG L  54     -23.215  37.022  41.484  1.00 39.55           C  
ATOM    400  CG  ARG L  54     -22.528  36.701  42.785  1.00 39.82           C  
ATOM    401  CD  ARG L  54     -21.656  37.828  43.238  1.00 40.49           C  
ATOM    402  NE  ARG L  54     -20.961  38.453  42.105  1.00 41.07           N  
ATOM    403  CZ  ARG L  54     -20.484  39.706  42.238  1.00 40.99           C  
ATOM    404  NH1 ARG L  54     -20.696  40.278  43.424  1.00 41.40           N  
ATOM    405  NH2 ARG L  54     -19.848  40.357  41.281  1.00 40.46           N  
ATOM    406  N   ALA L  55     -24.509  34.296  42.572  1.00 39.46           N  
ATOM    407  CA  ALA L  55     -24.942  33.458  43.707  1.00 39.63           C  
ATOM    408  C   ALA L  55     -24.137  33.872  44.948  1.00 39.56           C  
ATOM    409  O   ALA L  55     -23.348  34.827  44.875  1.00 39.56           O  
ATOM    410  CB  ALA L  55     -24.801  31.978  43.419  1.00 39.26           C  
ATOM    411  N   SER L  56     -24.371  33.174  46.047  1.00 39.46           N  
ATOM    412  CA  SER L  56     -23.659  33.455  47.313  1.00 39.07           C  
ATOM    413  C   SER L  56     -22.499  32.449  47.362  1.00 39.08           C  
ATOM    414  O   SER L  56     -22.606  31.303  46.880  1.00 39.44           O  
ATOM    415  CB  SER L  56     -24.522  33.369  48.542  1.00 39.09           C  
ATOM    416  OG  SER L  56     -24.895  32.026  48.821  1.00 38.60           O  
ATOM    417  N   GLY L  57     -21.444  32.930  47.974  1.00 38.76           N  
ATOM    418  CA  GLY L  57     -20.178  32.157  48.081  1.00 37.83           C  
ATOM    419  C   GLY L  57     -19.343  32.820  46.941  1.00 37.30           C  
ATOM    420  O   GLY L  57     -18.262  33.361  47.182  1.00 37.70           O  
ATOM    421  N   VAL L  58     -19.985  32.792  45.779  1.00 36.22           N  
ATOM    422  CA  VAL L  58     -19.456  33.362  44.516  1.00 34.33           C  
ATOM    423  C   VAL L  58     -18.911  34.773  44.808  1.00 33.19           C  
ATOM    424  O   VAL L  58     -19.472  35.591  45.545  1.00 33.31           O  
ATOM    425  CB  VAL L  58     -20.462  33.248  43.358  1.00 33.42           C  
ATOM    426  CG1 VAL L  58     -19.843  33.291  41.974  1.00 32.42           C  
ATOM    427  CG2 VAL L  58     -21.354  32.007  43.420  1.00 33.26           C  
ATOM    428  N   SER L  59     -17.779  35.034  44.214  1.00 31.86           N  
ATOM    429  CA  SER L  59     -16.913  36.182  44.231  1.00 29.89           C  
ATOM    430  C   SER L  59     -17.099  37.167  43.098  1.00 28.73           C  
ATOM    431  O   SER L  59     -17.540  36.883  41.980  1.00 28.20           O  
ATOM    432  CB  SER L  59     -15.474  35.632  44.265  1.00 30.17           C  
ATOM    433  OG  SER L  59     -15.471  34.480  45.117  1.00 29.55           O  
ATOM    434  N   ASP L  60     -16.741  38.385  43.438  1.00 28.13           N  
ATOM    435  CA  ASP L  60     -16.803  39.612  42.663  1.00 27.72           C  
ATOM    436  C   ASP L  60     -15.973  39.529  41.383  1.00 27.70           C  
ATOM    437  O   ASP L  60     -16.189  40.296  40.428  1.00 27.71           O  
ATOM    438  CB  ASP L  60     -16.251  40.781  43.502  1.00 27.98           C  
ATOM    439  CG  ASP L  60     -16.385  40.489  44.991  1.00 27.98           C  
ATOM    440  OD1 ASP L  60     -17.512  40.691  45.498  1.00 27.63           O  
ATOM    441  OD2 ASP L  60     -15.322  40.073  45.516  1.00 27.28           O  
ATOM    442  N   ARG L  61     -14.986  38.650  41.490  1.00 27.28           N  
ATOM    443  CA  ARG L  61     -14.099  38.408  40.340  1.00 26.47           C  
ATOM    444  C   ARG L  61     -14.998  37.908  39.209  1.00 26.23           C  
ATOM    445  O   ARG L  61     -14.911  38.476  38.119  1.00 26.01           O  
ATOM    446  CB  ARG L  61     -13.101  37.330  40.736  1.00 26.56           C  
ATOM    447  CG  ARG L  61     -12.976  37.290  42.259  1.00 26.87           C  
ATOM    448  CD  ARG L  61     -11.679  36.660  42.587  1.00 28.67           C  
ATOM    449  NE  ARG L  61     -11.694  35.206  42.509  1.00 29.59           N  
ATOM    450  CZ  ARG L  61     -10.878  34.488  41.723  1.00 29.65           C  
ATOM    451  NH1 ARG L  61     -10.064  35.151  40.892  1.00 29.84           N  
ATOM    452  NH2 ARG L  61     -10.899  33.158  41.760  1.00 29.10           N  
ATOM    453  N   PHE L  62     -15.833  36.923  39.540  1.00 26.06           N  
ATOM    454  CA  PHE L  62     -16.762  36.296  38.600  1.00 25.97           C  
ATOM    455  C   PHE L  62     -17.941  37.248  38.366  1.00 26.26           C  
ATOM    456  O   PHE L  62     -18.768  37.448  39.238  1.00 26.33           O  
ATOM    457  CB  PHE L  62     -17.323  34.903  38.896  1.00 24.47           C  
ATOM    458  CG  PHE L  62     -16.259  34.033  39.484  1.00 24.06           C  
ATOM    459  CD1 PHE L  62     -16.041  34.071  40.862  1.00 24.29           C  
ATOM    460  CD2 PHE L  62     -15.434  33.285  38.668  1.00 23.81           C  
ATOM    461  CE1 PHE L  62     -15.047  33.313  41.472  1.00 23.90           C  
ATOM    462  CE2 PHE L  62     -14.437  32.503  39.261  1.00 24.13           C  
ATOM    463  CZ  PHE L  62     -14.258  32.508  40.663  1.00 23.93           C  
ATOM    464  N   SER L  63     -17.890  37.686  37.153  1.00 27.01           N  
ATOM    465  CA  SER L  63     -18.826  38.632  36.551  1.00 28.47           C  
ATOM    466  C   SER L  63     -19.537  37.935  35.382  1.00 28.77           C  
ATOM    467  O   SER L  63     -19.001  36.934  34.855  1.00 28.82           O  
ATOM    468  CB  SER L  63     -18.029  39.863  36.084  1.00 29.40           C  
ATOM    469  OG  SER L  63     -16.811  40.028  36.825  1.00 29.33           O  
ATOM    470  N   ALA L  64     -20.690  38.475  35.014  1.00 28.85           N  
ATOM    471  CA  ALA L  64     -21.465  37.894  33.918  1.00 29.13           C  
ATOM    472  C   ALA L  64     -22.403  38.902  33.264  1.00 29.56           C  
ATOM    473  O   ALA L  64     -23.158  39.639  33.909  1.00 29.43           O  
ATOM    474  CB  ALA L  64     -22.205  36.651  34.403  1.00 28.97           C  
ATOM    475  N   SER L  65     -22.345  38.887  31.945  1.00 29.89           N  
ATOM    476  CA  SER L  65     -23.139  39.711  31.073  1.00 30.68           C  
ATOM    477  C   SER L  65     -23.942  38.852  30.099  1.00 32.01           C  
ATOM    478  O   SER L  65     -23.234  38.339  29.191  1.00 32.69           O  
ATOM    479  CB  SER L  65     -22.248  40.595  30.160  1.00 28.97           C  
ATOM    480  OG  SER L  65     -23.054  41.120  29.106  1.00 26.63           O  
ATOM    481  N   LYS L  66     -25.253  38.737  30.233  1.00 32.80           N  
ATOM    482  CA  LYS L  66     -25.980  37.990  29.162  1.00 33.49           C  
ATOM    483  C   LYS L  66     -26.078  39.042  28.038  1.00 34.06           C  
ATOM    484  O   LYS L  66     -25.887  40.259  28.394  1.00 34.75           O  
ATOM    485  CB  LYS L  66     -27.344  37.429  29.476  1.00 33.66           C  
ATOM    486  CG  LYS L  66     -27.717  36.343  28.424  1.00 34.08           C  
ATOM    487  CD  LYS L  66     -29.074  36.565  27.784  1.00 33.64           C  
ATOM    488  CE  LYS L  66     -30.171  35.794  28.479  1.00 33.52           C  
ATOM    489  NZ  LYS L  66     -31.313  35.573  27.543  1.00 33.84           N  
ATOM    490  N   SER L  67     -26.316  38.670  26.805  1.00 34.14           N  
ATOM    491  CA  SER L  67     -26.362  39.740  25.755  1.00 34.85           C  
ATOM    492  C   SER L  67     -27.394  39.465  24.673  1.00 34.96           C  
ATOM    493  O   SER L  67     -28.622  39.407  24.926  1.00 35.14           O  
ATOM    494  CB  SER L  67     -24.945  39.908  25.189  1.00 35.40           C  
ATOM    495  OG  SER L  67     -24.598  41.298  25.187  1.00 35.90           O  
ATOM    496  N   GLY L  68     -26.884  39.356  23.443  1.00 34.62           N  
ATOM    497  CA  GLY L  68     -27.821  39.019  22.309  1.00 33.83           C  
ATOM    498  C   GLY L  68     -27.961  37.523  22.694  1.00 33.76           C  
ATOM    499  O   GLY L  68     -28.047  37.182  23.875  1.00 33.53           O  
ATOM    500  N   THR L  69     -27.863  36.718  21.700  1.00 33.92           N  
ATOM    501  CA  THR L  69     -27.910  35.245  21.835  1.00 33.31           C  
ATOM    502  C   THR L  69     -26.608  34.795  22.479  1.00 32.97           C  
ATOM    503  O   THR L  69     -26.076  33.759  22.024  1.00 33.10           O  
ATOM    504  CB  THR L  69     -27.958  34.767  20.314  1.00 33.67           C  
ATOM    505  OG1 THR L  69     -29.200  35.355  19.807  1.00 33.68           O  
ATOM    506  CG2 THR L  69     -27.807  33.281  20.082  1.00 33.88           C  
ATOM    507  N   SER L  70     -26.094  35.542  23.457  1.00 32.15           N  
ATOM    508  CA  SER L  70     -24.779  35.117  24.011  1.00 31.68           C  
ATOM    509  C   SER L  70     -24.528  35.601  25.402  1.00 31.27           C  
ATOM    510  O   SER L  70     -24.980  36.734  25.706  1.00 31.97           O  
ATOM    511  CB  SER L  70     -23.750  35.745  23.047  1.00 32.53           C  
ATOM    512  OG  SER L  70     -24.271  35.612  21.707  1.00 34.08           O  
ATOM    513  N   ALA L  71     -23.821  34.846  26.231  1.00 30.12           N  
ATOM    514  CA  ALA L  71     -23.554  35.363  27.605  1.00 29.24           C  
ATOM    515  C   ALA L  71     -22.046  35.453  27.791  1.00 28.67           C  
ATOM    516  O   ALA L  71     -21.304  35.078  26.859  1.00 28.86           O  
ATOM    517  CB  ALA L  71     -24.227  34.556  28.682  1.00 28.91           C  
ATOM    518  N   SER L  72     -21.634  35.912  28.969  1.00 27.84           N  
ATOM    519  CA  SER L  72     -20.182  36.015  29.217  1.00 27.18           C  
ATOM    520  C   SER L  72     -19.721  36.020  30.663  1.00 26.70           C  
ATOM    521  O   SER L  72     -19.855  37.014  31.388  1.00 26.52           O  
ATOM    522  CB  SER L  72     -19.645  37.234  28.465  1.00 27.03           C  
ATOM    523  OG  SER L  72     -19.533  36.967  27.081  1.00 27.08           O  
ATOM    524  N   LEU L  73     -19.137  34.900  31.092  1.00 26.12           N  
ATOM    525  CA  LEU L  73     -18.568  34.792  32.456  1.00 25.46           C  
ATOM    526  C   LEU L  73     -17.174  35.427  32.289  1.00 25.77           C  
ATOM    527  O   LEU L  73     -16.508  35.112  31.291  1.00 25.97           O  
ATOM    528  CB  LEU L  73     -18.523  33.344  32.884  1.00 22.86           C  
ATOM    529  CG  LEU L  73     -18.622  32.977  34.339  1.00 21.22           C  
ATOM    530  CD1 LEU L  73     -17.442  32.115  34.784  1.00 20.71           C  
ATOM    531  CD2 LEU L  73     -18.685  34.210  35.196  1.00 20.99           C  
ATOM    532  N   ALA L  74     -16.794  36.293  33.177  1.00 26.19           N  
ATOM    533  CA  ALA L  74     -15.452  36.957  33.092  1.00 26.22           C  
ATOM    534  C   ALA L  74     -14.769  36.601  34.393  1.00 26.68           C  
ATOM    535  O   ALA L  74     -15.372  37.036  35.401  1.00 26.98           O  
ATOM    536  CB  ALA L  74     -15.737  38.437  32.891  1.00 25.39           C  
ATOM    537  N   ILE L  75     -13.695  35.831  34.478  1.00 27.31           N  
ATOM    538  CA  ILE L  75     -13.166  35.529  35.827  1.00 28.37           C  
ATOM    539  C   ILE L  75     -12.144  36.600  36.186  1.00 28.98           C  
ATOM    540  O   ILE L  75     -10.974  36.305  36.451  1.00 29.65           O  
ATOM    541  CB  ILE L  75     -12.615  34.100  36.087  1.00 28.87           C  
ATOM    542  CG1 ILE L  75     -13.705  33.004  36.000  1.00 28.57           C  
ATOM    543  CG2 ILE L  75     -11.898  33.993  37.483  1.00 28.34           C  
ATOM    544  CD1 ILE L  75     -14.545  33.041  34.706  1.00 28.30           C  
ATOM    545  N   SER L  76     -12.646  37.795  36.232  1.00 29.80           N  
ATOM    546  CA  SER L  76     -12.013  39.075  36.513  1.00 29.88           C  
ATOM    547  C   SER L  76     -11.118  39.194  37.749  1.00 29.16           C  
ATOM    548  O   SER L  76     -11.508  39.957  38.665  1.00 29.38           O  
ATOM    549  CB  SER L  76     -13.083  40.201  36.597  1.00 30.59           C  
ATOM    550  OG  SER L  76     -13.743  40.397  35.348  1.00 31.05           O  
ATOM    551  N   GLY L  77      -9.965  38.571  37.750  1.00 28.38           N  
ATOM    552  CA  GLY L  77      -8.961  38.621  38.790  1.00 27.90           C  
ATOM    553  C   GLY L  77      -8.126  37.358  38.852  1.00 27.76           C  
ATOM    554  O   GLY L  77      -7.577  37.074  39.939  1.00 27.95           O  
ATOM    555  N   LEU L  78      -8.044  36.657  37.733  1.00 27.21           N  
ATOM    556  CA  LEU L  78      -7.358  35.371  37.606  1.00 26.88           C  
ATOM    557  C   LEU L  78      -6.397  35.063  38.754  1.00 26.82           C  
ATOM    558  O   LEU L  78      -5.302  35.568  38.912  1.00 26.55           O  
ATOM    559  CB  LEU L  78      -6.824  35.068  36.214  1.00 24.58           C  
ATOM    560  CG  LEU L  78      -7.468  34.059  35.283  1.00 22.18           C  
ATOM    561  CD1 LEU L  78      -6.773  34.110  33.926  1.00 21.30           C  
ATOM    562  CD2 LEU L  78      -7.361  32.636  35.811  1.00 21.29           C  
ATOM    563  N   GLN L  79      -6.897  34.172  39.554  1.00 27.87           N  
ATOM    564  CA  GLN L  79      -6.223  33.561  40.747  1.00 29.21           C  
ATOM    565  C   GLN L  79      -6.197  32.109  40.233  1.00 30.07           C  
ATOM    566  O   GLN L  79      -7.032  31.873  39.324  1.00 30.61           O  
ATOM    567  CB  GLN L  79      -6.972  33.817  41.989  1.00 29.87           C  
ATOM    568  CG  GLN L  79      -6.409  33.593  43.358  1.00 30.89           C  
ATOM    569  CD  GLN L  79      -7.510  33.248  44.369  1.00 31.15           C  
ATOM    570  OE1 GLN L  79      -8.696  33.360  44.064  1.00 30.39           O  
ATOM    571  NE2 GLN L  79      -7.085  32.802  45.555  1.00 31.17           N  
ATOM    572  N   PRO L  80      -5.317  31.271  40.691  1.00 30.78           N  
ATOM    573  CA  PRO L  80      -5.121  29.912  40.233  1.00 31.17           C  
ATOM    574  C   PRO L  80      -6.111  28.805  40.483  1.00 31.32           C  
ATOM    575  O   PRO L  80      -5.915  27.667  39.969  1.00 31.51           O  
ATOM    576  CB  PRO L  80      -3.808  29.453  40.964  1.00 31.35           C  
ATOM    577  CG  PRO L  80      -3.154  30.717  41.429  1.00 31.32           C  
ATOM    578  CD  PRO L  80      -4.326  31.662  41.730  1.00 31.23           C  
ATOM    579  N   GLU L  81      -7.083  29.056  41.308  1.00 31.52           N  
ATOM    580  CA  GLU L  81      -8.093  28.062  41.717  1.00 31.73           C  
ATOM    581  C   GLU L  81      -9.215  28.042  40.690  1.00 31.10           C  
ATOM    582  O   GLU L  81     -10.158  27.242  40.705  1.00 31.35           O  
ATOM    583  CB  GLU L  81      -8.722  28.500  43.050  1.00 34.22           C  
ATOM    584  CG  GLU L  81      -8.066  29.625  43.860  1.00 36.17           C  
ATOM    585  CD  GLU L  81      -7.135  29.247  44.980  1.00 37.22           C  
ATOM    586  OE1 GLU L  81      -6.402  28.255  44.968  1.00 37.78           O  
ATOM    587  OE2 GLU L  81      -7.162  30.062  45.945  1.00 37.46           O  
ATOM    588  N   ASP L  82      -9.068  29.023  39.815  1.00 30.18           N  
ATOM    589  CA  ASP L  82     -10.001  29.307  38.729  1.00 28.78           C  
ATOM    590  C   ASP L  82      -9.919  28.343  37.557  1.00 27.89           C  
ATOM    591  O   ASP L  82     -10.823  28.483  36.709  1.00 27.51           O  
ATOM    592  CB  ASP L  82      -9.880  30.782  38.324  1.00 28.31           C  
ATOM    593  CG  ASP L  82     -10.151  31.729  39.490  1.00 27.52           C  
ATOM    594  OD1 ASP L  82     -10.695  31.365  40.542  1.00 26.70           O  
ATOM    595  OD2 ASP L  82      -9.767  32.902  39.282  1.00 27.52           O  
ATOM    596  N   GLU L  83      -8.912  27.482  37.520  1.00 26.97           N  
ATOM    597  CA  GLU L  83      -8.789  26.505  36.395  1.00 25.82           C  
ATOM    598  C   GLU L  83      -9.672  25.343  36.898  1.00 25.12           C  
ATOM    599  O   GLU L  83      -9.327  24.618  37.823  1.00 25.33           O  
ATOM    600  CB  GLU L  83      -7.427  26.001  36.060  1.00 25.04           C  
ATOM    601  CG  GLU L  83      -6.246  26.923  36.311  1.00 25.17           C  
ATOM    602  CD  GLU L  83      -4.960  26.236  36.682  1.00 25.23           C  
ATOM    603  OE1 GLU L  83      -4.418  25.870  35.621  1.00 24.91           O  
ATOM    604  OE2 GLU L  83      -4.550  26.079  37.824  1.00 25.21           O  
ATOM    605  N   THR L  84     -10.799  25.353  36.297  1.00 24.21           N  
ATOM    606  CA  THR L  84     -12.015  24.593  36.456  1.00 23.33           C  
ATOM    607  C   THR L  84     -12.668  24.484  35.090  1.00 23.50           C  
ATOM    608  O   THR L  84     -12.067  24.690  34.035  1.00 23.24           O  
ATOM    609  CB  THR L  84     -12.835  25.519  37.483  1.00 22.19           C  
ATOM    610  OG1 THR L  84     -12.378  25.075  38.801  1.00 22.09           O  
ATOM    611  CG2 THR L  84     -14.318  25.626  37.352  1.00 21.01           C  
ATOM    612  N   ASP L  85     -13.906  24.150  35.073  1.00 24.29           N  
ATOM    613  CA  ASP L  85     -14.812  23.978  33.949  1.00 25.12           C  
ATOM    614  C   ASP L  85     -15.932  25.002  34.216  1.00 25.45           C  
ATOM    615  O   ASP L  85     -16.193  25.254  35.400  1.00 25.63           O  
ATOM    616  CB  ASP L  85     -15.346  22.539  33.942  1.00 26.41           C  
ATOM    617  CG  ASP L  85     -14.167  21.591  33.760  1.00 27.83           C  
ATOM    618  OD1 ASP L  85     -13.021  22.032  33.987  1.00 28.86           O  
ATOM    619  OD2 ASP L  85     -14.442  20.442  33.390  1.00 28.49           O  
ATOM    620  N   TYR L  86     -16.461  25.556  33.164  1.00 25.51           N  
ATOM    621  CA  TYR L  86     -17.546  26.513  33.315  1.00 25.62           C  
ATOM    622  C   TYR L  86     -18.492  26.184  32.158  1.00 26.61           C  
ATOM    623  O   TYR L  86     -18.128  26.306  31.010  1.00 26.61           O  
ATOM    624  CB  TYR L  86     -17.180  27.976  33.368  1.00 24.36           C  
ATOM    625  CG  TYR L  86     -16.177  28.277  34.465  1.00 23.39           C  
ATOM    626  CD1 TYR L  86     -14.846  27.878  34.277  1.00 22.96           C  
ATOM    627  CD2 TYR L  86     -16.511  28.920  35.647  1.00 22.46           C  
ATOM    628  CE1 TYR L  86     -13.887  28.139  35.244  1.00 22.46           C  
ATOM    629  CE2 TYR L  86     -15.552  29.173  36.621  1.00 21.72           C  
ATOM    630  CZ  TYR L  86     -14.235  28.793  36.421  1.00 21.87           C  
ATOM    631  OH  TYR L  86     -13.276  29.038  37.371  1.00 21.09           O  
ATOM    632  N   TYR L  87     -19.601  25.698  32.642  1.00 27.96           N  
ATOM    633  CA  TYR L  87     -20.779  25.308  31.895  1.00 29.21           C  
ATOM    634  C   TYR L  87     -21.811  26.448  32.126  1.00 30.87           C  
ATOM    635  O   TYR L  87     -21.843  27.086  33.202  1.00 31.48           O  
ATOM    636  CB  TYR L  87     -21.399  23.979  32.364  1.00 27.85           C  
ATOM    637  CG  TYR L  87     -20.406  22.840  32.215  1.00 27.02           C  
ATOM    638  CD1 TYR L  87     -19.406  22.660  33.167  1.00 26.45           C  
ATOM    639  CD2 TYR L  87     -20.434  22.005  31.108  1.00 26.68           C  
ATOM    640  CE1 TYR L  87     -18.485  21.632  33.033  1.00 26.51           C  
ATOM    641  CE2 TYR L  87     -19.508  20.982  30.947  1.00 26.14           C  
ATOM    642  CZ  TYR L  87     -18.542  20.803  31.920  1.00 26.18           C  
ATOM    643  OH  TYR L  87     -17.647  19.800  31.764  1.00 26.65           O  
ATOM    644  N   CYS L  88     -22.561  26.634  31.070  1.00 31.77           N  
ATOM    645  CA  CYS L  88     -23.650  27.580  30.915  1.00 32.36           C  
ATOM    646  C   CYS L  88     -24.852  26.724  30.440  1.00 33.22           C  
ATOM    647  O   CYS L  88     -24.715  25.926  29.500  1.00 33.41           O  
ATOM    648  CB  CYS L  88     -23.242  28.655  29.930  1.00 31.85           C  
ATOM    649  SG  CYS L  88     -22.920  27.986  28.272  1.00 32.49           S  
ATOM    650  N   ALA L  89     -25.925  26.890  31.156  1.00 33.81           N  
ATOM    651  CA  ALA L  89     -27.228  26.280  30.994  1.00 34.57           C  
ATOM    652  C   ALA L  89     -28.188  27.439  30.720  1.00 35.80           C  
ATOM    653  O   ALA L  89     -27.953  28.550  31.244  1.00 35.51           O  
ATOM    654  CB  ALA L  89     -27.620  25.607  32.298  1.00 34.16           C  
ATOM    655  N   ALA L  90     -29.188  27.187  29.923  1.00 37.24           N  
ATOM    656  CA  ALA L  90     -30.178  28.255  29.616  1.00 39.22           C  
ATOM    657  C   ALA L  90     -31.422  27.441  29.272  1.00 40.82           C  
ATOM    658  O   ALA L  90     -31.227  26.237  29.416  1.00 40.61           O  
ATOM    659  CB  ALA L  90     -29.766  29.143  28.475  1.00 38.86           C  
ATOM    660  N   TRP L  91     -32.476  28.074  28.852  1.00 43.11           N  
ATOM    661  CA  TRP L  91     -33.684  27.360  28.499  1.00 45.77           C  
ATOM    662  C   TRP L  91     -34.085  27.384  27.041  1.00 47.18           C  
ATOM    663  O   TRP L  91     -34.378  28.400  26.398  1.00 47.21           O  
ATOM    664  CB  TRP L  91     -34.859  27.788  29.391  1.00 47.86           C  
ATOM    665  CG  TRP L  91     -35.905  26.704  29.269  1.00 49.74           C  
ATOM    666  CD1 TRP L  91     -36.880  26.547  28.328  1.00 50.23           C  
ATOM    667  CD2 TRP L  91     -35.983  25.570  30.150  1.00 50.14           C  
ATOM    668  NE1 TRP L  91     -37.590  25.396  28.592  1.00 50.86           N  
ATOM    669  CE2 TRP L  91     -37.061  24.784  29.700  1.00 50.28           C  
ATOM    670  CE3 TRP L  91     -35.249  25.179  31.262  1.00 50.31           C  
ATOM    671  CZ2 TRP L  91     -37.427  23.628  30.356  1.00 50.27           C  
ATOM    672  CZ3 TRP L  91     -35.608  24.019  31.912  1.00 50.45           C  
ATOM    673  CH2 TRP L  91     -36.685  23.259  31.459  1.00 50.57           C  
ATOM    674  N   ASP L  92     -34.190  26.159  26.515  1.00 48.99           N  
ATOM    675  CA  ASP L  92     -34.560  26.027  25.091  1.00 50.87           C  
ATOM    676  C   ASP L  92     -36.090  26.073  24.951  1.00 51.80           C  
ATOM    677  O   ASP L  92     -36.845  26.701  25.677  1.00 51.64           O  
ATOM    678  CB  ASP L  92     -33.930  24.799  24.441  1.00 51.72           C  
ATOM    679  CG  ASP L  92     -33.407  24.979  23.024  1.00 52.13           C  
ATOM    680  OD1 ASP L  92     -33.676  25.984  22.348  1.00 52.69           O  
ATOM    681  OD2 ASP L  92     -32.678  24.067  22.555  1.00 52.01           O  
ATOM    682  N   ASP L  93     -36.420  25.329  23.924  1.00 52.98           N  
ATOM    683  CA  ASP L  93     -37.676  25.024  23.319  1.00 53.94           C  
ATOM    684  C   ASP L  93     -37.646  23.793  22.416  1.00 54.32           C  
ATOM    685  O   ASP L  93     -38.642  23.552  21.709  1.00 54.23           O  
ATOM    686  CB  ASP L  93     -38.154  26.272  22.520  1.00 54.84           C  
ATOM    687  CG  ASP L  93     -39.279  26.841  23.402  1.00 56.25           C  
ATOM    688  OD1 ASP L  93     -39.696  26.134  24.349  1.00 56.57           O  
ATOM    689  OD2 ASP L  93     -39.628  27.970  23.041  1.00 57.31           O  
ATOM    690  N   SER L  94     -36.529  23.080  22.426  1.00 54.82           N  
ATOM    691  CA  SER L  94     -36.426  21.871  21.589  1.00 55.45           C  
ATOM    692  C   SER L  94     -37.099  20.763  22.414  1.00 55.60           C  
ATOM    693  O   SER L  94     -36.850  19.566  22.291  1.00 56.33           O  
ATOM    694  CB  SER L  94     -35.124  21.501  20.979  1.00 56.08           C  
ATOM    695  OG  SER L  94     -33.962  22.146  21.423  1.00 56.54           O  
ATOM    696  N   LEU L  95     -37.985  21.242  23.249  1.00 55.29           N  
ATOM    697  CA  LEU L  95     -38.860  20.483  24.124  1.00 54.92           C  
ATOM    698  C   LEU L  95     -39.592  21.539  24.985  1.00 54.67           C  
ATOM    699  O   LEU L  95     -40.667  22.068  24.710  1.00 55.01           O  
ATOM    700  CB  LEU L  95     -38.143  19.439  24.974  1.00 54.66           C  
ATOM    701  CG  LEU L  95     -38.839  18.093  25.206  1.00 54.17           C  
ATOM    702  CD1 LEU L  95     -37.796  17.018  25.518  1.00 53.68           C  
ATOM    703  CD2 LEU L  95     -39.848  18.192  26.339  1.00 53.61           C  
ATOM    704  N   ASP L  95A    -38.817  21.832  25.985  1.00 53.88           N  
ATOM    705  CA  ASP L  95A    -39.248  22.792  27.069  1.00 52.87           C  
ATOM    706  C   ASP L  95A    -38.077  22.376  27.995  1.00 51.21           C  
ATOM    707  O   ASP L  95A    -38.235  21.869  29.085  1.00 50.82           O  
ATOM    708  CB  ASP L  95A    -40.637  22.385  27.444  1.00 55.36           C  
ATOM    709  CG  ASP L  95A    -41.376  22.936  28.615  1.00 56.87           C  
ATOM    710  OD1 ASP L  95A    -40.799  23.782  29.336  1.00 57.87           O  
ATOM    711  OD2 ASP L  95A    -42.542  22.560  28.906  1.00 57.63           O  
ATOM    712  N   VAL L  95B    -36.954  22.520  27.269  1.00 49.44           N  
ATOM    713  CA  VAL L  95B    -35.655  22.151  27.795  1.00 47.25           C  
ATOM    714  C   VAL L  95B    -34.582  23.234  27.745  1.00 45.32           C  
ATOM    715  O   VAL L  95B    -34.504  24.117  26.915  1.00 45.07           O  
ATOM    716  CB  VAL L  95B    -35.134  20.851  27.111  1.00 47.50           C  
ATOM    717  CG1 VAL L  95B    -35.528  19.624  27.914  1.00 47.09           C  
ATOM    718  CG2 VAL L  95B    -35.603  20.776  25.665  1.00 47.75           C  
ATOM    719  N   ALA L  96     -33.743  23.013  28.739  1.00 43.25           N  
ATOM    720  CA  ALA L  96     -32.548  23.729  29.112  1.00 40.85           C  
ATOM    721  C   ALA L  96     -31.336  23.049  28.458  1.00 38.60           C  
ATOM    722  O   ALA L  96     -31.063  21.883  28.791  1.00 39.05           O  
ATOM    723  CB  ALA L  96     -32.383  23.696  30.644  1.00 41.31           C  
ATOM    724  N   VAL L  97     -30.693  23.737  27.550  1.00 35.93           N  
ATOM    725  CA  VAL L  97     -29.510  23.200  26.866  1.00 33.11           C  
ATOM    726  C   VAL L  97     -28.270  23.720  27.576  1.00 31.36           C  
ATOM    727  O   VAL L  97     -28.294  24.853  28.108  1.00 31.74           O  
ATOM    728  CB  VAL L  97     -29.567  23.477  25.363  1.00 32.73           C  
ATOM    729  CG1 VAL L  97     -28.897  22.347  24.593  1.00 32.90           C  
ATOM    730  CG2 VAL L  97     -30.971  23.701  24.870  1.00 32.39           C  
ATOM    731  N   PHE L  98     -27.223  22.888  27.602  1.00 29.14           N  
ATOM    732  CA  PHE L  98     -26.019  23.359  28.295  1.00 26.71           C  
ATOM    733  C   PHE L  98     -24.904  23.533  27.274  1.00 25.12           C  
ATOM    734  O   PHE L  98     -25.043  23.134  26.137  1.00 25.32           O  
ATOM    735  CB  PHE L  98     -25.524  22.530  29.431  1.00 27.35           C  
ATOM    736  CG  PHE L  98     -26.616  21.770  30.106  1.00 28.25           C  
ATOM    737  CD1 PHE L  98     -27.400  20.905  29.312  1.00 27.72           C  
ATOM    738  CD2 PHE L  98     -26.807  21.915  31.488  1.00 28.43           C  
ATOM    739  CE1 PHE L  98     -28.425  20.190  29.906  1.00 27.65           C  
ATOM    740  CE2 PHE L  98     -27.830  21.167  32.095  1.00 28.71           C  
ATOM    741  CZ  PHE L  98     -28.638  20.330  31.281  1.00 28.25           C  
ATOM    742  N   GLY L  99     -23.882  24.138  27.831  1.00 23.46           N  
ATOM    743  CA  GLY L  99     -22.706  24.419  27.017  1.00 22.11           C  
ATOM    744  C   GLY L  99     -21.784  23.204  27.055  1.00 20.67           C  
ATOM    745  O   GLY L  99     -21.787  22.383  27.988  1.00 20.26           O  
ATOM    746  N   THR L 100     -21.011  23.196  25.995  1.00 19.45           N  
ATOM    747  CA  THR L 100     -20.020  22.135  25.848  1.00 19.18           C  
ATOM    748  C   THR L 100     -18.901  22.312  26.870  1.00 18.76           C  
ATOM    749  O   THR L 100     -17.991  21.452  26.964  1.00 19.17           O  
ATOM    750  CB  THR L 100     -19.528  22.081  24.362  1.00 19.72           C  
ATOM    751  OG1 THR L 100     -20.636  22.576  23.540  1.00 20.21           O  
ATOM    752  CG2 THR L 100     -19.139  20.644  24.007  1.00 20.94           C  
ATOM    753  N   GLY L 101     -18.950  23.391  27.642  1.00 17.51           N  
ATOM    754  CA  GLY L 101     -17.949  23.638  28.686  1.00 16.62           C  
ATOM    755  C   GLY L 101     -16.695  24.239  28.126  1.00 16.10           C  
ATOM    756  O   GLY L 101     -16.502  24.176  26.906  1.00 17.05           O  
ATOM    757  N   THR L 102     -15.879  24.841  28.956  1.00 15.47           N  
ATOM    758  CA  THR L 102     -14.626  25.523  28.532  1.00 13.79           C  
ATOM    759  C   THR L 102     -13.703  25.457  29.747  1.00 13.44           C  
ATOM    760  O   THR L 102     -14.172  25.654  30.878  1.00 13.16           O  
ATOM    761  CB  THR L 102     -14.895  26.974  28.035  1.00 12.57           C  
ATOM    762  OG1 THR L 102     -14.297  27.884  28.976  1.00 11.79           O  
ATOM    763  CG2 THR L 102     -16.369  27.346  27.872  1.00 12.24           C  
ATOM    764  N   LYS L 103     -12.467  25.070  29.510  1.00 13.16           N  
ATOM    765  CA  LYS L 103     -11.508  24.911  30.583  1.00 12.59           C  
ATOM    766  C   LYS L 103     -10.610  26.137  30.681  1.00 12.86           C  
ATOM    767  O   LYS L 103     -10.024  26.573  29.679  1.00 13.01           O  
ATOM    768  CB  LYS L 103     -10.555  23.718  30.458  1.00 11.55           C  
ATOM    769  CG  LYS L 103     -10.312  23.170  31.868  1.00 11.32           C  
ATOM    770  CD  LYS L 103      -8.928  22.689  32.169  1.00 10.70           C  
ATOM    771  CE  LYS L 103      -8.567  22.999  33.620  1.00 10.67           C  
ATOM    772  NZ  LYS L 103      -8.776  21.767  34.456  1.00 11.12           N  
ATOM    773  N   VAL L 104     -10.555  26.615  31.925  1.00 12.81           N  
ATOM    774  CA  VAL L 104      -9.709  27.779  32.104  1.00 12.95           C  
ATOM    775  C   VAL L 104      -8.421  27.178  32.700  1.00 12.93           C  
ATOM    776  O   VAL L 104      -8.493  26.370  33.603  1.00 13.48           O  
ATOM    777  CB  VAL L 104     -10.194  29.012  32.827  1.00 12.39           C  
ATOM    778  CG1 VAL L 104     -11.684  29.139  32.976  1.00 12.02           C  
ATOM    779  CG2 VAL L 104      -9.415  29.221  34.124  1.00 13.21           C  
ATOM    780  N   THR L 105      -7.413  27.656  32.065  1.00 13.07           N  
ATOM    781  CA  THR L 105      -6.017  27.374  32.375  1.00 13.67           C  
ATOM    782  C   THR L 105      -5.378  28.702  32.770  1.00 13.58           C  
ATOM    783  O   THR L 105      -5.559  29.716  32.082  1.00 13.21           O  
ATOM    784  CB  THR L 105      -5.325  26.666  31.148  1.00 13.33           C  
ATOM    785  OG1 THR L 105      -6.430  26.386  30.228  1.00 14.58           O  
ATOM    786  CG2 THR L 105      -4.686  25.345  31.512  1.00 13.61           C  
ATOM    787  N   VAL L 106      -4.715  28.696  33.902  1.00 14.55           N  
ATOM    788  CA  VAL L 106      -3.994  29.937  34.333  1.00 15.89           C  
ATOM    789  C   VAL L 106      -2.637  29.815  33.595  1.00 15.42           C  
ATOM    790  O   VAL L 106      -1.905  28.919  34.024  1.00 15.41           O  
ATOM    791  CB  VAL L 106      -3.797  30.052  35.857  1.00 16.95           C  
ATOM    792  CG1 VAL L 106      -2.518  30.775  36.265  1.00 16.18           C  
ATOM    793  CG2 VAL L 106      -4.999  30.695  36.529  1.00 17.39           C  
ATOM    794  N   LEU L 106A     -2.444  30.569  32.539  1.00 15.58           N  
ATOM    795  CA  LEU L 106A     -1.151  30.472  31.815  1.00 15.59           C  
ATOM    796  C   LEU L 106A     -0.062  30.466  32.914  1.00 15.78           C  
ATOM    797  O   LEU L 106A     -0.012  31.316  33.805  1.00 16.35           O  
ATOM    798  CB  LEU L 106A     -1.049  31.491  30.742  1.00 14.49           C  
ATOM    799  CG  LEU L 106A     -1.531  31.255  29.336  1.00 14.32           C  
ATOM    800  CD1 LEU L 106A     -2.936  31.804  29.124  1.00 14.26           C  
ATOM    801  CD2 LEU L 106A     -0.557  32.008  28.408  1.00 13.93           C  
ATOM    802  N   GLY L 107       0.704  29.406  32.838  1.00 16.01           N  
ATOM    803  CA  GLY L 107       1.793  29.024  33.720  1.00 16.45           C  
ATOM    804  C   GLY L 107       3.034  28.838  32.839  1.00 16.90           C  
ATOM    805  O   GLY L 107       4.119  28.568  33.330  1.00 17.04           O  
ATOM    806  N   GLN L 108       2.789  29.066  31.562  1.00 17.25           N  
ATOM    807  CA  GLN L 108       3.857  28.999  30.507  1.00 17.05           C  
ATOM    808  C   GLN L 108       3.336  29.920  29.414  1.00 16.84           C  
ATOM    809  O   GLN L 108       2.111  30.098  29.297  1.00 16.51           O  
ATOM    810  CB  GLN L 108       4.007  27.534  30.150  1.00 17.82           C  
ATOM    811  CG  GLN L 108       4.941  27.088  29.075  1.00 18.44           C  
ATOM    812  CD  GLN L 108       4.396  25.830  28.387  1.00 19.06           C  
ATOM    813  OE1 GLN L 108       3.802  25.026  29.090  1.00 18.04           O  
ATOM    814  NE2 GLN L 108       4.635  25.757  27.078  1.00 19.39           N  
ATOM    815  N   PRO L 109       4.193  30.564  28.666  1.00 16.82           N  
ATOM    816  CA  PRO L 109       3.796  31.450  27.563  1.00 17.00           C  
ATOM    817  C   PRO L 109       2.791  30.701  26.711  1.00 17.45           C  
ATOM    818  O   PRO L 109       3.054  29.504  26.423  1.00 18.69           O  
ATOM    819  CB  PRO L 109       5.071  31.631  26.729  1.00 16.68           C  
ATOM    820  CG  PRO L 109       5.908  30.455  27.168  1.00 16.60           C  
ATOM    821  CD  PRO L 109       5.655  30.439  28.691  1.00 16.76           C  
TER     822      PRO L 109                                                      
ATOM   1607  N   SER L   2     -23.042  21.646  50.989  1.00 41.03           N  
ATOM   1608  CA  SER L   2     -24.458  21.250  50.958  1.00 39.07           C  
ATOM   1609  C   SER L   2     -24.774  19.871  50.389  1.00 37.21           C  
ATOM   1610  O   SER L   2     -25.674  19.174  50.878  1.00 37.09           O  
ATOM   1611  CB  SER L   2     -25.085  22.225  49.905  1.00 39.43           C  
ATOM   1612  OG  SER L   2     -24.329  21.939  48.700  1.00 39.65           O  
ATOM   1613  N   VAL L   3     -24.110  19.555  49.324  1.00 35.51           N  
ATOM   1614  CA  VAL L   3     -24.086  18.444  48.424  1.00 33.99           C  
ATOM   1615  C   VAL L   3     -24.800  17.134  48.739  1.00 32.51           C  
ATOM   1616  O   VAL L   3     -25.275  16.799  49.814  1.00 32.27           O  
ATOM   1617  CB  VAL L   3     -22.644  18.195  47.874  1.00 33.84           C  
ATOM   1618  CG1 VAL L   3     -22.390  18.914  46.552  1.00 33.61           C  
ATOM   1619  CG2 VAL L   3     -21.581  18.576  48.878  1.00 34.06           C  
ATOM   1620  N   LEU L   4     -24.901  16.362  47.666  1.00 31.26           N  
ATOM   1621  CA  LEU L   4     -25.448  15.028  47.499  1.00 29.63           C  
ATOM   1622  C   LEU L   4     -24.195  14.143  47.187  1.00 28.45           C  
ATOM   1623  O   LEU L   4     -23.306  14.446  46.398  1.00 28.29           O  
ATOM   1624  CB  LEU L   4     -26.514  14.892  46.437  1.00 29.13           C  
ATOM   1625  CG  LEU L   4     -27.924  15.406  46.570  1.00 28.64           C  
ATOM   1626  CD1 LEU L   4     -28.224  16.614  45.689  1.00 27.59           C  
ATOM   1627  CD2 LEU L   4     -28.897  14.290  46.168  1.00 27.91           C  
ATOM   1628  N   THR L   5     -24.212  13.072  47.898  1.00 27.39           N  
ATOM   1629  CA  THR L   5     -23.227  11.988  48.000  1.00 25.71           C  
ATOM   1630  C   THR L   5     -23.453  10.875  47.008  1.00 23.99           C  
ATOM   1631  O   THR L   5     -24.576  10.375  46.845  1.00 23.95           O  
ATOM   1632  CB  THR L   5     -23.239  11.544  49.521  1.00 26.14           C  
ATOM   1633  OG1 THR L   5     -24.531  10.890  49.774  1.00 26.92           O  
ATOM   1634  CG2 THR L   5     -23.131  12.766  50.484  1.00 26.36           C  
ATOM   1635  N   GLN L   6     -22.402  10.525  46.311  1.00 22.53           N  
ATOM   1636  CA  GLN L   6     -22.324   9.508  45.272  1.00 21.15           C  
ATOM   1637  C   GLN L   6     -20.945   8.828  45.363  1.00 20.62           C  
ATOM   1638  O   GLN L   6     -19.925   9.424  45.787  1.00 20.78           O  
ATOM   1639  CB  GLN L   6     -22.526  10.045  43.856  1.00 20.58           C  
ATOM   1640  CG  GLN L   6     -23.868  10.658  43.534  1.00 19.77           C  
ATOM   1641  CD  GLN L   6     -23.939  11.279  42.161  1.00 18.71           C  
ATOM   1642  OE1 GLN L   6     -24.149  12.469  41.982  1.00 18.51           O  
ATOM   1643  NE2 GLN L   6     -23.758  10.415  41.168  1.00 18.61           N  
ATOM   1644  N   PRO L   7     -20.979   7.566  44.964  1.00 19.74           N  
ATOM   1645  CA  PRO L   7     -19.739   6.741  44.955  1.00 18.50           C  
ATOM   1646  C   PRO L   7     -18.893   7.381  43.853  1.00 17.36           C  
ATOM   1647  O   PRO L   7     -19.508   7.872  42.861  1.00 17.94           O  
ATOM   1648  CB  PRO L   7     -20.224   5.364  44.611  1.00 19.15           C  
ATOM   1649  CG  PRO L   7     -21.729   5.380  44.450  1.00 19.47           C  
ATOM   1650  CD  PRO L   7     -22.152   6.840  44.440  1.00 19.68           C  
ATOM   1651  N   PRO L   8     -17.585   7.388  44.023  1.00 15.54           N  
ATOM   1652  CA  PRO L   8     -16.641   7.997  43.081  1.00 13.93           C  
ATOM   1653  C   PRO L   8     -16.650   7.399  41.693  1.00 12.87           C  
ATOM   1654  O   PRO L   8     -16.509   8.057  40.630  1.00 12.36           O  
ATOM   1655  CB  PRO L   8     -15.312   7.934  43.784  1.00 14.03           C  
ATOM   1656  CG  PRO L   8     -15.575   7.534  45.203  1.00 14.46           C  
ATOM   1657  CD  PRO L   8     -16.917   6.834  45.221  1.00 15.04           C  
ATOM   1658  N   SER L   9     -16.850   6.122  41.654  1.00 12.29           N  
ATOM   1659  CA  SER L   9     -16.935   5.205  40.540  1.00 12.07           C  
ATOM   1660  C   SER L   9     -17.962   4.135  40.940  1.00 12.68           C  
ATOM   1661  O   SER L   9     -18.539   4.148  42.035  1.00 13.47           O  
ATOM   1662  CB  SER L   9     -15.622   4.399  40.467  1.00 11.33           C  
ATOM   1663  OG  SER L   9     -15.480   3.944  41.832  1.00 10.57           O  
ATOM   1664  N   ALA L  11     -18.101   3.202  40.053  1.00 13.11           N  
ATOM   1665  CA  ALA L  11     -19.004   2.025  40.117  1.00 13.05           C  
ATOM   1666  C   ALA L  11     -18.763   1.400  38.720  1.00 13.15           C  
ATOM   1667  O   ALA L  11     -19.082   2.114  37.747  1.00 13.11           O  
ATOM   1668  CB  ALA L  11     -20.457   2.334  40.280  1.00 12.55           C  
ATOM   1669  N   SER L  12     -18.171   0.229  38.757  1.00 12.85           N  
ATOM   1670  CA  SER L  12     -17.835  -0.460  37.491  1.00 12.63           C  
ATOM   1671  C   SER L  12     -18.656  -1.752  37.396  1.00 12.58           C  
ATOM   1672  O   SER L  12     -19.444  -2.079  38.261  1.00 11.35           O  
ATOM   1673  CB  SER L  12     -16.339  -0.778  37.477  1.00 12.14           C  
ATOM   1674  OG  SER L  12     -15.989  -1.129  38.829  1.00 12.33           O  
ATOM   1675  N   GLY L  13     -18.398  -2.402  36.291  1.00 13.36           N  
ATOM   1676  CA  GLY L  13     -18.963  -3.670  35.891  1.00 14.34           C  
ATOM   1677  C   GLY L  13     -18.664  -3.914  34.407  1.00 15.06           C  
ATOM   1678  O   GLY L  13     -18.304  -3.027  33.618  1.00 15.67           O  
ATOM   1679  N   THR L  14     -18.927  -5.119  34.054  1.00 15.77           N  
ATOM   1680  CA  THR L  14     -18.842  -5.798  32.780  1.00 16.76           C  
ATOM   1681  C   THR L  14     -20.024  -5.563  31.865  1.00 17.44           C  
ATOM   1682  O   THR L  14     -21.138  -5.197  32.303  1.00 17.59           O  
ATOM   1683  CB  THR L  14     -18.816  -7.369  33.170  1.00 17.49           C  
ATOM   1684  OG1 THR L  14     -17.398  -7.698  33.095  1.00 17.98           O  
ATOM   1685  CG2 THR L  14     -19.802  -8.229  32.417  1.00 16.23           C  
ATOM   1686  N   PRO L  15     -19.805  -5.829  30.590  1.00 18.04           N  
ATOM   1687  CA  PRO L  15     -20.824  -5.695  29.539  1.00 18.51           C  
ATOM   1688  C   PRO L  15     -21.993  -6.642  29.755  1.00 19.36           C  
ATOM   1689  O   PRO L  15     -21.778  -7.863  29.768  1.00 19.87           O  
ATOM   1690  CB  PRO L  15     -20.049  -6.003  28.256  1.00 18.35           C  
ATOM   1691  CG  PRO L  15     -18.636  -5.543  28.619  1.00 18.02           C  
ATOM   1692  CD  PRO L  15     -18.502  -6.240  29.996  1.00 18.32           C  
ATOM   1693  N   GLY L  16     -23.192  -6.111  29.962  1.00 19.95           N  
ATOM   1694  CA  GLY L  16     -24.409  -6.871  30.181  1.00 20.58           C  
ATOM   1695  C   GLY L  16     -24.841  -6.884  31.644  1.00 21.33           C  
ATOM   1696  O   GLY L  16     -26.001  -7.155  32.018  1.00 21.03           O  
ATOM   1697  N   GLN L  17     -23.872  -6.619  32.476  1.00 22.26           N  
ATOM   1698  CA  GLN L  17     -24.051  -6.554  33.956  1.00 23.40           C  
ATOM   1699  C   GLN L  17     -24.984  -5.381  34.218  1.00 23.98           C  
ATOM   1700  O   GLN L  17     -25.199  -4.564  33.285  1.00 23.66           O  
ATOM   1701  CB  GLN L  17     -22.666  -6.414  34.543  1.00 24.26           C  
ATOM   1702  CG  GLN L  17     -22.529  -6.309  36.039  1.00 26.13           C  
ATOM   1703  CD  GLN L  17     -21.224  -6.956  36.475  1.00 27.21           C  
ATOM   1704  OE1 GLN L  17     -20.253  -6.344  36.903  1.00 28.38           O  
ATOM   1705  NE2 GLN L  17     -21.210  -8.283  36.315  1.00 28.45           N  
ATOM   1706  N   ARG L  18     -25.531  -5.306  35.408  1.00 25.23           N  
ATOM   1707  CA  ARG L  18     -26.435  -4.194  35.803  1.00 26.66           C  
ATOM   1708  C   ARG L  18     -25.885  -3.539  37.082  1.00 26.71           C  
ATOM   1709  O   ARG L  18     -25.578  -4.180  38.105  1.00 26.50           O  
ATOM   1710  CB  ARG L  18     -27.895  -4.513  35.830  1.00 28.94           C  
ATOM   1711  CG  ARG L  18     -28.315  -5.977  35.847  1.00 32.09           C  
ATOM   1712  CD  ARG L  18     -29.793  -6.218  35.806  1.00 33.45           C  
ATOM   1713  NE  ARG L  18     -30.405  -6.603  37.067  1.00 34.60           N  
ATOM   1714  CZ  ARG L  18     -31.703  -6.810  37.295  1.00 34.96           C  
ATOM   1715  NH1 ARG L  18     -32.551  -6.771  36.258  1.00 35.76           N  
ATOM   1716  NH2 ARG L  18     -32.185  -7.091  38.509  1.00 34.84           N  
ATOM   1717  N   VAL L  19     -25.729  -2.223  36.933  1.00 26.68           N  
ATOM   1718  CA  VAL L  19     -25.163  -1.298  37.916  1.00 26.02           C  
ATOM   1719  C   VAL L  19     -26.030  -0.095  38.270  1.00 25.92           C  
ATOM   1720  O   VAL L  19     -26.750   0.563  37.522  1.00 26.34           O  
ATOM   1721  CB  VAL L  19     -23.755  -0.866  37.429  1.00 25.04           C  
ATOM   1722  CG1 VAL L  19     -23.287  -1.748  36.271  1.00 25.01           C  
ATOM   1723  CG2 VAL L  19     -23.705   0.586  37.046  1.00 24.35           C  
ATOM   1724  N   THR L  20     -25.915   0.248  39.523  1.00 25.66           N  
ATOM   1725  CA  THR L  20     -26.593   1.285  40.228  1.00 25.99           C  
ATOM   1726  C   THR L  20     -25.617   2.297  40.839  1.00 25.79           C  
ATOM   1727  O   THR L  20     -24.646   1.948  41.533  1.00 25.54           O  
ATOM   1728  CB  THR L  20     -27.470   0.641  41.401  1.00 27.89           C  
ATOM   1729  OG1 THR L  20     -26.676   0.709  42.650  1.00 28.32           O  
ATOM   1730  CG2 THR L  20     -27.865  -0.823  41.122  1.00 28.18           C  
ATOM   1731  N   ILE L  21     -25.967   3.545  40.559  1.00 25.21           N  
ATOM   1732  CA  ILE L  21     -25.261   4.735  41.081  1.00 24.27           C  
ATOM   1733  C   ILE L  21     -26.072   5.119  42.324  1.00 23.98           C  
ATOM   1734  O   ILE L  21     -27.300   4.953  42.274  1.00 24.09           O  
ATOM   1735  CB  ILE L  21     -25.167   5.808  39.955  1.00 23.00           C  
ATOM   1736  CG1 ILE L  21     -24.455   5.175  38.743  1.00 22.23           C  
ATOM   1737  CG2 ILE L  21     -24.517   7.132  40.382  1.00 23.01           C  
ATOM   1738  CD1 ILE L  21     -23.585   3.938  39.099  1.00 21.91           C  
ATOM   1739  N   SER L  22     -25.454   5.483  43.400  1.00 24.27           N  
ATOM   1740  CA  SER L  22     -26.079   5.887  44.653  1.00 24.45           C  
ATOM   1741  C   SER L  22     -25.962   7.411  44.810  1.00 24.20           C  
ATOM   1742  O   SER L  22     -24.905   8.025  44.674  1.00 24.01           O  
ATOM   1743  CB  SER L  22     -25.454   5.233  45.880  1.00 25.71           C  
ATOM   1744  OG  SER L  22     -26.196   4.067  46.233  1.00 26.69           O  
ATOM   1745  N   CYS L  23     -27.116   7.976  45.092  1.00 24.13           N  
ATOM   1746  CA  CYS L  23     -27.230   9.405  45.288  1.00 23.82           C  
ATOM   1747  C   CYS L  23     -28.086   9.731  46.504  1.00 23.75           C  
ATOM   1748  O   CYS L  23     -29.204  10.234  46.348  1.00 23.78           O  
ATOM   1749  CB  CYS L  23     -27.782  10.146  44.058  1.00 23.61           C  
ATOM   1750  SG  CYS L  23     -27.602  11.924  44.352  1.00 23.03           S  
ATOM   1751  N   SER L  24     -27.518   9.478  47.657  1.00 24.03           N  
ATOM   1752  CA  SER L  24     -28.235   9.736  48.911  1.00 24.49           C  
ATOM   1753  C   SER L  24     -28.063  11.166  49.413  1.00 24.81           C  
ATOM   1754  O   SER L  24     -27.038  11.874  49.314  1.00 24.65           O  
ATOM   1755  CB  SER L  24     -27.879   8.642  49.890  1.00 24.44           C  
ATOM   1756  OG  SER L  24     -27.092   9.132  50.949  1.00 25.57           O  
ATOM   1757  N   GLY L  25     -29.174  11.643  50.009  1.00 24.82           N  
ATOM   1758  CA  GLY L  25     -29.253  12.996  50.549  1.00 24.63           C  
ATOM   1759  C   GLY L  25     -30.080  13.059  51.811  1.00 24.53           C  
ATOM   1760  O   GLY L  25     -30.238  12.037  52.481  1.00 24.38           O  
ATOM   1761  N   SER L  26     -30.571  14.262  52.074  1.00 24.90           N  
ATOM   1762  CA  SER L  26     -31.359  14.614  53.261  1.00 24.71           C  
ATOM   1763  C   SER L  26     -32.773  15.049  52.929  1.00 24.49           C  
ATOM   1764  O   SER L  26     -33.135  15.118  51.746  1.00 24.55           O  
ATOM   1765  CB  SER L  26     -30.645  15.604  54.165  1.00 25.62           C  
ATOM   1766  OG  SER L  26     -29.897  16.645  53.588  1.00 25.07           O  
ATOM   1767  N   SER L  27     -33.533  15.326  53.969  1.00 24.58           N  
ATOM   1768  CA  SER L  27     -34.943  15.739  53.912  1.00 25.24           C  
ATOM   1769  C   SER L  27     -35.255  16.909  52.991  1.00 25.64           C  
ATOM   1770  O   SER L  27     -36.212  16.912  52.178  1.00 25.69           O  
ATOM   1771  CB  SER L  27     -35.399  16.042  55.355  1.00 25.47           C  
ATOM   1772  OG  SER L  27     -34.587  15.196  56.183  1.00 26.61           O  
ATOM   1773  N   SER L  27A    -34.440  17.936  53.130  1.00 25.35           N  
ATOM   1774  CA  SER L  27A    -34.471  19.197  52.391  1.00 24.50           C  
ATOM   1775  C   SER L  27A    -34.339  18.991  50.897  1.00 24.10           C  
ATOM   1776  O   SER L  27A    -35.034  19.619  50.073  1.00 23.69           O  
ATOM   1777  CB  SER L  27A    -33.262  19.966  53.005  1.00 24.83           C  
ATOM   1778  OG  SER L  27A    -32.941  19.238  54.214  1.00 24.40           O  
ATOM   1779  N   ASN L  27B    -33.422  18.116  50.503  1.00 24.18           N  
ATOM   1780  CA  ASN L  27B    -33.137  17.750  49.103  1.00 23.87           C  
ATOM   1781  C   ASN L  27B    -33.936  16.498  48.730  1.00 23.58           C  
ATOM   1782  O   ASN L  27B    -35.165  16.483  48.928  1.00 23.66           O  
ATOM   1783  CB  ASN L  27B    -31.676  17.685  48.741  1.00 24.07           C  
ATOM   1784  CG  ASN L  27B    -30.701  17.077  49.706  1.00 24.48           C  
ATOM   1785  OD1 ASN L  27B    -30.842  15.888  50.062  1.00 24.03           O  
ATOM   1786  ND2 ASN L  27B    -29.691  17.847  50.155  1.00 24.24           N  
ATOM   1787  N   ILE L  28     -33.272  15.502  48.186  1.00 23.13           N  
ATOM   1788  CA  ILE L  28     -33.988  14.274  47.797  1.00 22.74           C  
ATOM   1789  C   ILE L  28     -35.261  14.057  48.612  1.00 23.35           C  
ATOM   1790  O   ILE L  28     -36.371  13.848  48.048  1.00 23.09           O  
ATOM   1791  CB  ILE L  28     -33.009  13.067  47.836  1.00 20.62           C  
ATOM   1792  CG1 ILE L  28     -31.863  13.349  46.840  1.00 20.23           C  
ATOM   1793  CG2 ILE L  28     -33.717  11.730  47.492  1.00 20.92           C  
ATOM   1794  CD1 ILE L  28     -30.863  12.150  46.783  1.00 19.12           C  
ATOM   1795  N   GLY L  29     -35.141  14.105  49.928  1.00 23.85           N  
ATOM   1796  CA  GLY L  29     -36.204  13.895  50.882  1.00 24.88           C  
ATOM   1797  C   GLY L  29     -37.427  14.772  50.862  1.00 25.68           C  
ATOM   1798  O   GLY L  29     -38.170  14.855  51.863  1.00 25.06           O  
ATOM   1799  N   GLU L  30     -37.700  15.456  49.769  1.00 27.01           N  
ATOM   1800  CA  GLU L  30     -38.858  16.364  49.624  1.00 27.99           C  
ATOM   1801  C   GLU L  30     -39.074  16.791  48.184  1.00 28.33           C  
ATOM   1802  O   GLU L  30     -40.255  17.066  47.802  1.00 28.80           O  
ATOM   1803  CB  GLU L  30     -38.850  17.548  50.576  1.00 28.89           C  
ATOM   1804  CG  GLU L  30     -40.179  17.815  51.314  1.00 29.72           C  
ATOM   1805  CD  GLU L  30     -41.160  18.588  50.466  1.00 30.63           C  
ATOM   1806  OE1 GLU L  30     -40.830  19.808  50.507  1.00 31.49           O  
ATOM   1807  OE2 GLU L  30     -42.105  18.170  49.806  1.00 30.10           O  
ATOM   1808  N   ASN L  31     -38.032  16.789  47.348  1.00 28.12           N  
ATOM   1809  CA  ASN L  31     -38.273  17.088  45.915  1.00 28.18           C  
ATOM   1810  C   ASN L  31     -37.587  16.035  45.059  1.00 27.65           C  
ATOM   1811  O   ASN L  31     -36.732  15.201  45.394  1.00 27.93           O  
ATOM   1812  CB  ASN L  31     -38.166  18.566  45.596  1.00 30.07           C  
ATOM   1813  CG  ASN L  31     -37.267  19.202  46.666  1.00 31.54           C  
ATOM   1814  OD1 ASN L  31     -37.624  20.217  47.268  1.00 32.16           O  
ATOM   1815  ND2 ASN L  31     -36.137  18.512  46.872  1.00 31.94           N  
ATOM   1816  N   SER L  32     -38.098  15.946  43.857  1.00 26.81           N  
ATOM   1817  CA  SER L  32     -37.755  15.055  42.774  1.00 25.88           C  
ATOM   1818  C   SER L  32     -36.268  15.060  42.506  1.00 24.92           C  
ATOM   1819  O   SER L  32     -35.659  16.139  42.690  1.00 25.63           O  
ATOM   1820  CB  SER L  32     -38.520  15.536  41.523  1.00 27.16           C  
ATOM   1821  OG  SER L  32     -39.027  16.852  41.757  1.00 28.91           O  
ATOM   1822  N   VAL L  33     -35.724  13.915  42.100  1.00 22.72           N  
ATOM   1823  CA  VAL L  33     -34.263  13.928  41.808  1.00 20.51           C  
ATOM   1824  C   VAL L  33     -34.175  13.877  40.280  1.00 19.15           C  
ATOM   1825  O   VAL L  33     -35.155  13.384  39.714  1.00 19.30           O  
ATOM   1826  CB  VAL L  33     -33.558  12.718  42.443  1.00 20.33           C  
ATOM   1827  CG1 VAL L  33     -33.073  11.743  41.363  1.00 19.33           C  
ATOM   1828  CG2 VAL L  33     -32.478  13.105  43.430  1.00 19.69           C  
ATOM   1829  N   THR L  34     -33.106  14.334  39.722  1.00 17.71           N  
ATOM   1830  CA  THR L  34     -32.756  14.339  38.317  1.00 16.20           C  
ATOM   1831  C   THR L  34     -31.345  13.737  38.166  1.00 15.69           C  
ATOM   1832  O   THR L  34     -30.541  13.818  39.131  1.00 15.27           O  
ATOM   1833  CB  THR L  34     -32.635  15.776  37.668  1.00 15.57           C  
ATOM   1834  OG1 THR L  34     -33.710  16.524  38.226  1.00 15.45           O  
ATOM   1835  CG2 THR L  34     -32.567  15.680  36.148  1.00 15.80           C  
ATOM   1836  N   TRP L  35     -31.102  13.229  36.960  1.00 14.95           N  
ATOM   1837  CA  TRP L  35     -29.766  12.630  36.760  1.00 14.47           C  
ATOM   1838  C   TRP L  35     -29.245  13.119  35.422  1.00 14.38           C  
ATOM   1839  O   TRP L  35     -30.034  13.221  34.502  1.00 14.30           O  
ATOM   1840  CB  TRP L  35     -29.741  11.123  36.833  1.00 14.16           C  
ATOM   1841  CG  TRP L  35     -29.942  10.456  38.143  1.00 14.46           C  
ATOM   1842  CD1 TRP L  35     -31.125  10.201  38.815  1.00 14.04           C  
ATOM   1843  CD2 TRP L  35     -28.912   9.887  38.978  1.00 14.46           C  
ATOM   1844  NE1 TRP L  35     -30.902   9.519  39.984  1.00 13.73           N  
ATOM   1845  CE2 TRP L  35     -29.550   9.324  40.113  1.00 13.90           C  
ATOM   1846  CE3 TRP L  35     -27.536   9.790  38.834  1.00 14.51           C  
ATOM   1847  CZ2 TRP L  35     -28.837   8.679  41.102  1.00 13.73           C  
ATOM   1848  CZ3 TRP L  35     -26.829   9.124  39.806  1.00 14.33           C  
ATOM   1849  CH2 TRP L  35     -27.476   8.595  40.914  1.00 14.02           C  
ATOM   1850  N   TYR L  36     -27.944  13.337  35.406  1.00 14.50           N  
ATOM   1851  CA  TYR L  36     -27.316  13.718  34.159  1.00 15.03           C  
ATOM   1852  C   TYR L  36     -26.171  12.761  33.878  1.00 15.45           C  
ATOM   1853  O   TYR L  36     -25.588  12.203  34.775  1.00 15.63           O  
ATOM   1854  CB  TYR L  36     -26.653  15.103  34.256  1.00 14.98           C  
ATOM   1855  CG  TYR L  36     -27.690  16.147  34.561  1.00 14.01           C  
ATOM   1856  CD1 TYR L  36     -28.456  16.670  33.515  1.00 13.77           C  
ATOM   1857  CD2 TYR L  36     -27.889  16.557  35.873  1.00 13.70           C  
ATOM   1858  CE1 TYR L  36     -29.424  17.628  33.810  1.00 13.80           C  
ATOM   1859  CE2 TYR L  36     -28.834  17.539  36.158  1.00 13.84           C  
ATOM   1860  CZ  TYR L  36     -29.605  18.050  35.127  1.00 13.62           C  
ATOM   1861  OH  TYR L  36     -30.511  19.033  35.426  1.00 14.31           O  
ATOM   1862  N   GLN L  37     -25.884  12.742  32.626  1.00 16.86           N  
ATOM   1863  CA  GLN L  37     -24.746  11.982  32.063  1.00 17.92           C  
ATOM   1864  C   GLN L  37     -23.779  13.146  31.767  1.00 18.77           C  
ATOM   1865  O   GLN L  37     -24.286  14.263  31.610  1.00 18.51           O  
ATOM   1866  CB  GLN L  37     -25.055  11.249  30.784  1.00 17.67           C  
ATOM   1867  CG  GLN L  37     -24.006  10.231  30.426  1.00 18.08           C  
ATOM   1868  CD  GLN L  37     -24.540   9.087  29.584  1.00 18.62           C  
ATOM   1869  OE1 GLN L  37     -24.453   7.922  29.997  1.00 18.97           O  
ATOM   1870  NE2 GLN L  37     -25.047   9.406  28.399  1.00 17.95           N  
ATOM   1871  N   HIS L  38     -22.508  12.839  31.779  1.00 20.12           N  
ATOM   1872  CA  HIS L  38     -21.519  13.904  31.480  1.00 20.99           C  
ATOM   1873  C   HIS L  38     -20.255  13.286  30.920  1.00 20.90           C  
ATOM   1874  O   HIS L  38     -19.317  12.977  31.659  1.00 21.04           O  
ATOM   1875  CB  HIS L  38     -21.188  14.850  32.643  1.00 22.03           C  
ATOM   1876  CG  HIS L  38     -20.134  15.843  32.242  1.00 23.18           C  
ATOM   1877  ND1 HIS L  38     -18.907  15.955  32.848  1.00 23.89           N  
ATOM   1878  CD2 HIS L  38     -20.189  16.792  31.265  1.00 23.50           C  
ATOM   1879  CE1 HIS L  38     -18.260  16.958  32.249  1.00 24.63           C  
ATOM   1880  NE2 HIS L  38     -19.019  17.488  31.298  1.00 23.54           N  
ATOM   1881  N   LEU L  39     -20.311  13.078  29.598  1.00 21.15           N  
ATOM   1882  CA  LEU L  39     -19.101  12.505  28.943  1.00 20.83           C  
ATOM   1883  C   LEU L  39     -18.013  13.608  29.065  1.00 20.96           C  
ATOM   1884  O   LEU L  39     -17.914  14.536  28.256  1.00 19.91           O  
ATOM   1885  CB  LEU L  39     -19.387  12.055  27.528  1.00 19.60           C  
ATOM   1886  CG  LEU L  39     -18.065  11.555  26.890  1.00 18.68           C  
ATOM   1887  CD1 LEU L  39     -17.647  10.300  27.628  1.00 17.85           C  
ATOM   1888  CD2 LEU L  39     -18.262  11.389  25.388  1.00 18.53           C  
ATOM   1889  N   SER L  40     -17.332  13.416  30.176  1.00 21.56           N  
ATOM   1890  CA  SER L  40     -16.257  14.298  30.629  1.00 22.52           C  
ATOM   1891  C   SER L  40     -15.600  14.962  29.433  1.00 22.80           C  
ATOM   1892  O   SER L  40     -14.640  14.428  28.845  1.00 23.21           O  
ATOM   1893  CB  SER L  40     -15.288  13.458  31.470  1.00 23.35           C  
ATOM   1894  OG  SER L  40     -14.483  14.313  32.277  1.00 24.33           O  
ATOM   1895  N   GLY L  41     -16.109  16.119  29.047  1.00 22.98           N  
ATOM   1896  CA  GLY L  41     -15.566  16.850  27.905  1.00 22.96           C  
ATOM   1897  C   GLY L  41     -16.647  17.282  26.948  1.00 23.18           C  
ATOM   1898  O   GLY L  41     -16.355  17.839  25.873  1.00 23.79           O  
ATOM   1899  N   THR L  42     -17.895  17.017  27.292  1.00 23.22           N  
ATOM   1900  CA  THR L  42     -19.052  17.415  26.471  1.00 22.46           C  
ATOM   1901  C   THR L  42     -20.084  18.109  27.379  1.00 22.43           C  
ATOM   1902  O   THR L  42     -19.909  18.259  28.599  1.00 22.29           O  
ATOM   1903  CB  THR L  42     -19.776  16.203  25.749  1.00 20.98           C  
ATOM   1904  OG1 THR L  42     -19.866  15.186  26.795  1.00 19.57           O  
ATOM   1905  CG2 THR L  42     -19.081  15.735  24.473  1.00 20.79           C  
ATOM   1906  N   ALA L  43     -21.154  18.470  26.672  1.00 22.01           N  
ATOM   1907  CA  ALA L  43     -22.298  19.085  27.376  1.00 21.11           C  
ATOM   1908  C   ALA L  43     -22.897  17.921  28.169  1.00 21.25           C  
ATOM   1909  O   ALA L  43     -22.914  16.764  27.706  1.00 21.10           O  
ATOM   1910  CB  ALA L  43     -23.318  19.543  26.338  1.00 20.04           C  
ATOM   1911  N   PRO L  44     -23.398  18.248  29.333  1.00 21.34           N  
ATOM   1912  CA  PRO L  44     -24.064  17.237  30.178  1.00 21.39           C  
ATOM   1913  C   PRO L  44     -25.341  16.723  29.531  1.00 21.21           C  
ATOM   1914  O   PRO L  44     -26.039  17.394  28.750  1.00 21.33           O  
ATOM   1915  CB  PRO L  44     -24.295  17.981  31.496  1.00 21.45           C  
ATOM   1916  CG  PRO L  44     -23.521  19.249  31.438  1.00 21.32           C  
ATOM   1917  CD  PRO L  44     -23.408  19.581  29.947  1.00 21.38           C  
ATOM   1918  N   LYS L  45     -25.733  15.490  29.835  1.00 21.38           N  
ATOM   1919  CA  LYS L  45     -26.992  14.955  29.269  1.00 21.46           C  
ATOM   1920  C   LYS L  45     -28.004  14.694  30.388  1.00 21.77           C  
ATOM   1921  O   LYS L  45     -27.800  14.003  31.398  1.00 21.58           O  
ATOM   1922  CB  LYS L  45     -26.759  13.820  28.329  1.00 20.79           C  
ATOM   1923  CG  LYS L  45     -28.046  13.206  27.742  1.00 21.21           C  
ATOM   1924  CD  LYS L  45     -27.665  12.014  26.880  1.00 22.07           C  
ATOM   1925  CE  LYS L  45     -28.739  11.324  26.108  1.00 23.46           C  
ATOM   1926  NZ  LYS L  45     -29.633  10.444  26.941  1.00 24.45           N  
ATOM   1927  N   LEU L  46     -29.136  15.416  30.237  1.00 21.85           N  
ATOM   1928  CA  LEU L  46     -30.216  15.251  31.232  1.00 21.78           C  
ATOM   1929  C   LEU L  46     -30.649  13.795  30.918  1.00 22.08           C  
ATOM   1930  O   LEU L  46     -30.750  13.500  29.708  1.00 22.25           O  
ATOM   1931  CB  LEU L  46     -31.221  16.366  31.149  1.00 21.69           C  
ATOM   1932  CG  LEU L  46     -32.384  16.305  32.154  1.00 21.99           C  
ATOM   1933  CD1 LEU L  46     -32.136  17.094  33.424  1.00 21.50           C  
ATOM   1934  CD2 LEU L  46     -33.650  16.795  31.452  1.00 22.29           C  
ATOM   1935  N   LEU L  47     -30.765  12.993  31.960  1.00 21.53           N  
ATOM   1936  CA  LEU L  47     -31.074  11.591  31.884  1.00 21.27           C  
ATOM   1937  C   LEU L  47     -32.447  11.191  32.387  1.00 21.94           C  
ATOM   1938  O   LEU L  47     -33.202  10.580  31.596  1.00 22.25           O  
ATOM   1939  CB  LEU L  47     -29.904  10.865  32.591  1.00 19.89           C  
ATOM   1940  CG  LEU L  47     -29.334   9.668  31.857  1.00 18.63           C  
ATOM   1941  CD1 LEU L  47     -28.859  10.140  30.507  1.00 18.37           C  
ATOM   1942  CD2 LEU L  47     -28.184   9.030  32.624  1.00 17.93           C  
ATOM   1943  N   ILE L  48     -32.769  11.471  33.627  1.00 22.16           N  
ATOM   1944  CA  ILE L  48     -33.998  11.195  34.366  1.00 21.33           C  
ATOM   1945  C   ILE L  48     -34.474  12.475  35.076  1.00 22.20           C  
ATOM   1946  O   ILE L  48     -33.690  13.406  35.320  1.00 21.63           O  
ATOM   1947  CB  ILE L  48     -33.702  10.071  35.421  1.00 19.16           C  
ATOM   1948  CG1 ILE L  48     -34.118   8.679  34.951  1.00 17.85           C  
ATOM   1949  CG2 ILE L  48     -34.346  10.400  36.789  1.00 19.37           C  
ATOM   1950  CD1 ILE L  48     -34.260   8.584  33.417  1.00 17.41           C  
ATOM   1951  N   TYR L  49     -35.752  12.505  35.396  1.00 23.75           N  
ATOM   1952  CA  TYR L  49     -36.413  13.597  36.133  1.00 25.64           C  
ATOM   1953  C   TYR L  49     -37.590  13.017  36.914  1.00 26.45           C  
ATOM   1954  O   TYR L  49     -38.101  11.907  36.659  1.00 25.50           O  
ATOM   1955  CB  TYR L  49     -36.768  14.811  35.263  1.00 28.00           C  
ATOM   1956  CG  TYR L  49     -37.809  14.526  34.189  1.00 29.86           C  
ATOM   1957  CD1 TYR L  49     -39.169  14.415  34.564  1.00 30.09           C  
ATOM   1958  CD2 TYR L  49     -37.472  14.291  32.849  1.00 29.86           C  
ATOM   1959  CE1 TYR L  49     -40.162  14.112  33.642  1.00 30.63           C  
ATOM   1960  CE2 TYR L  49     -38.457  13.969  31.911  1.00 30.46           C  
ATOM   1961  CZ  TYR L  49     -39.795  13.898  32.304  1.00 31.12           C  
ATOM   1962  OH  TYR L  49     -40.803  13.619  31.426  1.00 31.52           O  
ATOM   1963  N   GLU L  50     -38.036  13.773  37.904  1.00 28.53           N  
ATOM   1964  CA  GLU L  50     -39.191  13.220  38.683  1.00 31.82           C  
ATOM   1965  C   GLU L  50     -38.807  11.766  38.994  1.00 31.44           C  
ATOM   1966  O   GLU L  50     -39.469  10.762  38.830  1.00 31.42           O  
ATOM   1967  CB  GLU L  50     -40.539  13.310  38.038  1.00 38.18           C  
ATOM   1968  CG  GLU L  50     -41.771  12.442  38.338  1.00 44.32           C  
ATOM   1969  CD  GLU L  50     -43.176  12.927  38.052  1.00 47.67           C  
ATOM   1970  OE1 GLU L  50     -43.478  13.250  36.847  1.00 49.53           O  
ATOM   1971  OE2 GLU L  50     -44.072  13.008  38.929  1.00 49.01           O  
ATOM   1972  N   ASP L  51     -37.620  11.735  39.516  1.00 31.43           N  
ATOM   1973  CA  ASP L  51     -36.821  10.665  40.010  1.00 31.67           C  
ATOM   1974  C   ASP L  51     -36.789   9.394  39.165  1.00 31.49           C  
ATOM   1975  O   ASP L  51     -35.830   8.604  39.328  1.00 31.92           O  
ATOM   1976  CB  ASP L  51     -37.274  10.284  41.425  1.00 31.88           C  
ATOM   1977  CG  ASP L  51     -38.409  11.082  41.991  1.00 31.84           C  
ATOM   1978  OD1 ASP L  51     -38.084  12.113  42.605  1.00 32.46           O  
ATOM   1979  OD2 ASP L  51     -39.556  10.664  41.870  1.00 32.51           O  
ATOM   1980  N   ASN L  52     -37.818   9.209  38.380  1.00 30.94           N  
ATOM   1981  CA  ASN L  52     -37.883   7.970  37.580  1.00 30.55           C  
ATOM   1982  C   ASN L  52     -38.326   8.309  36.178  1.00 30.36           C  
ATOM   1983  O   ASN L  52     -38.196   7.399  35.342  1.00 30.58           O  
ATOM   1984  CB  ASN L  52     -38.921   7.050  38.294  1.00 31.00           C  
ATOM   1985  CG  ASN L  52     -40.115   7.977  38.632  1.00 30.97           C  
ATOM   1986  OD1 ASN L  52     -40.531   8.695  37.710  1.00 30.71           O  
ATOM   1987  ND2 ASN L  52     -40.574   8.026  39.872  1.00 30.61           N  
ATOM   1988  N   SER L  53     -38.839   9.517  35.990  1.00 30.16           N  
ATOM   1989  CA  SER L  53     -39.327   9.869  34.608  1.00 29.97           C  
ATOM   1990  C   SER L  53     -38.110  10.137  33.742  1.00 29.42           C  
ATOM   1991  O   SER L  53     -37.260  10.952  34.138  1.00 29.79           O  
ATOM   1992  CB  SER L  53     -40.413  10.909  34.626  1.00 29.88           C  
ATOM   1993  OG  SER L  53     -41.722  10.276  34.709  1.00 30.77           O  
ATOM   1994  N   ARG L  54     -38.010   9.441  32.632  1.00 28.82           N  
ATOM   1995  CA  ARG L  54     -36.914   9.472  31.692  1.00 28.26           C  
ATOM   1996  C   ARG L  54     -36.717  10.751  30.911  1.00 28.34           C  
ATOM   1997  O   ARG L  54     -36.797  11.839  31.481  1.00 28.33           O  
ATOM   1998  CB  ARG L  54     -36.939   8.296  30.703  1.00 27.30           C  
ATOM   1999  CG  ARG L  54     -35.540   7.713  30.528  1.00 27.35           C  
ATOM   2000  CD  ARG L  54     -35.574   6.355  29.903  1.00 27.70           C  
ATOM   2001  NE  ARG L  54     -36.405   5.425  30.643  1.00 26.58           N  
ATOM   2002  CZ  ARG L  54     -37.281   4.551  30.162  1.00 25.88           C  
ATOM   2003  NH1 ARG L  54     -37.516   4.404  28.853  1.00 25.17           N  
ATOM   2004  NH2 ARG L  54     -37.939   3.821  31.082  1.00 25.60           N  
ATOM   2005  N   ALA L  55     -36.391  10.606  29.636  1.00 28.68           N  
ATOM   2006  CA  ALA L  55     -36.134  11.748  28.755  1.00 29.29           C  
ATOM   2007  C   ALA L  55     -36.024  11.329  27.291  1.00 29.78           C  
ATOM   2008  O   ALA L  55     -36.262  10.190  26.899  1.00 29.80           O  
ATOM   2009  CB  ALA L  55     -34.899  12.513  29.181  1.00 28.98           C  
ATOM   2010  N   SER L  56     -35.662  12.321  26.495  1.00 30.40           N  
ATOM   2011  CA  SER L  56     -35.532  12.207  25.036  1.00 30.78           C  
ATOM   2012  C   SER L  56     -34.281  11.489  24.545  1.00 30.82           C  
ATOM   2013  O   SER L  56     -33.131  11.941  24.579  1.00 30.93           O  
ATOM   2014  CB  SER L  56     -35.703  13.560  24.339  1.00 30.41           C  
ATOM   2015  OG  SER L  56     -35.690  13.469  22.928  1.00 29.88           O  
ATOM   2016  N   GLY L  57     -34.566  10.309  24.010  1.00 31.06           N  
ATOM   2017  CA  GLY L  57     -33.624   9.379  23.406  1.00 30.59           C  
ATOM   2018  C   GLY L  57     -32.746   8.659  24.418  1.00 30.06           C  
ATOM   2019  O   GLY L  57     -31.624   8.274  24.029  1.00 30.16           O  
ATOM   2020  N   VAL L  58     -33.250   8.540  25.637  1.00 29.41           N  
ATOM   2021  CA  VAL L  58     -32.522   7.830  26.706  1.00 28.47           C  
ATOM   2022  C   VAL L  58     -33.025   6.383  26.692  1.00 28.50           C  
ATOM   2023  O   VAL L  58     -34.212   6.041  26.537  1.00 28.21           O  
ATOM   2024  CB  VAL L  58     -32.672   8.582  28.014  1.00 27.34           C  
ATOM   2025  CG1 VAL L  58     -31.839   7.959  29.117  1.00 27.46           C  
ATOM   2026  CG2 VAL L  58     -32.287  10.036  27.801  1.00 27.14           C  
ATOM   2027  N   SER L  59     -32.054   5.507  26.807  1.00 28.30           N  
ATOM   2028  CA  SER L  59     -32.348   4.057  26.798  1.00 28.43           C  
ATOM   2029  C   SER L  59     -33.228   3.670  27.962  1.00 28.29           C  
ATOM   2030  O   SER L  59     -33.207   4.228  29.066  1.00 28.01           O  
ATOM   2031  CB  SER L  59     -30.982   3.385  26.813  1.00 29.27           C  
ATOM   2032  OG  SER L  59     -30.070   4.437  26.369  1.00 30.29           O  
ATOM   2033  N   ASP L  60     -34.031   2.672  27.662  1.00 28.63           N  
ATOM   2034  CA  ASP L  60     -34.998   2.053  28.613  1.00 29.05           C  
ATOM   2035  C   ASP L  60     -34.070   1.334  29.628  1.00 28.55           C  
ATOM   2036  O   ASP L  60     -34.509   0.702  30.579  1.00 28.59           O  
ATOM   2037  CB  ASP L  60     -35.999   1.123  27.934  1.00 30.61           C  
ATOM   2038  CG  ASP L  60     -35.649   0.796  26.480  1.00 31.28           C  
ATOM   2039  OD1 ASP L  60     -36.040   1.494  25.517  1.00 31.83           O  
ATOM   2040  OD2 ASP L  60     -34.924  -0.216  26.315  1.00 31.50           O  
ATOM   2041  N   ARG L  61     -32.818   1.574  29.225  1.00 27.58           N  
ATOM   2042  CA  ARG L  61     -31.624   1.066  29.856  1.00 26.29           C  
ATOM   2043  C   ARG L  61     -31.429   1.732  31.201  1.00 25.79           C  
ATOM   2044  O   ARG L  61     -31.163   1.021  32.179  1.00 25.68           O  
ATOM   2045  CB  ARG L  61     -30.379   1.213  28.961  1.00 24.95           C  
ATOM   2046  CG  ARG L  61     -30.427   0.285  27.758  1.00 24.08           C  
ATOM   2047  CD  ARG L  61     -29.190  -0.299  27.265  1.00 22.82           C  
ATOM   2048  NE  ARG L  61     -28.023  -0.161  28.100  1.00 22.02           N  
ATOM   2049  CZ  ARG L  61     -27.189   0.887  28.150  1.00 20.42           C  
ATOM   2050  NH1 ARG L  61     -27.363   1.983  27.429  1.00 18.71           N  
ATOM   2051  NH2 ARG L  61     -26.130   0.791  28.959  1.00 19.53           N  
ATOM   2052  N   PHE L  62     -31.617   3.045  31.156  1.00 25.52           N  
ATOM   2053  CA  PHE L  62     -31.431   3.838  32.387  1.00 25.38           C  
ATOM   2054  C   PHE L  62     -32.767   4.033  33.092  1.00 26.04           C  
ATOM   2055  O   PHE L  62     -33.670   4.670  32.537  1.00 26.44           O  
ATOM   2056  CB  PHE L  62     -30.733   5.172  32.149  1.00 23.52           C  
ATOM   2057  CG  PHE L  62     -29.434   5.142  31.416  1.00 21.65           C  
ATOM   2058  CD1 PHE L  62     -28.237   4.957  32.102  1.00 20.96           C  
ATOM   2059  CD2 PHE L  62     -29.432   5.252  30.021  1.00 20.87           C  
ATOM   2060  CE1 PHE L  62     -27.039   4.915  31.363  1.00 20.89           C  
ATOM   2061  CE2 PHE L  62     -28.259   5.198  29.296  1.00 20.47           C  
ATOM   2062  CZ  PHE L  62     -27.051   5.035  29.966  1.00 20.23           C  
ATOM   2063  N   SER L  63     -32.820   3.543  34.296  1.00 26.43           N  
ATOM   2064  CA  SER L  63     -34.029   3.673  35.157  1.00 26.98           C  
ATOM   2065  C   SER L  63     -33.514   4.230  36.479  1.00 27.13           C  
ATOM   2066  O   SER L  63     -32.293   3.963  36.628  1.00 27.78           O  
ATOM   2067  CB  SER L  63     -34.457   2.204  35.342  1.00 27.50           C  
ATOM   2068  OG  SER L  63     -33.238   1.547  35.668  1.00 27.89           O  
ATOM   2069  N   ALA L  64     -34.278   4.862  37.321  1.00 27.08           N  
ATOM   2070  CA  ALA L  64     -33.902   5.429  38.620  1.00 26.93           C  
ATOM   2071  C   ALA L  64     -35.004   5.317  39.683  1.00 27.08           C  
ATOM   2072  O   ALA L  64     -36.201   5.060  39.404  1.00 26.79           O  
ATOM   2073  CB  ALA L  64     -33.518   6.913  38.451  1.00 26.99           C  
ATOM   2074  N   SER L  65     -34.574   5.579  40.918  1.00 27.04           N  
ATOM   2075  CA  SER L  65     -35.430   5.512  42.112  1.00 27.04           C  
ATOM   2076  C   SER L  65     -35.253   6.743  43.003  1.00 26.57           C  
ATOM   2077  O   SER L  65     -34.465   7.637  42.681  1.00 26.69           O  
ATOM   2078  CB  SER L  65     -35.103   4.260  42.946  1.00 28.92           C  
ATOM   2079  OG  SER L  65     -34.324   4.502  44.133  1.00 29.08           O  
ATOM   2080  N   LYS L  66     -35.966   6.709  44.094  1.00 26.18           N  
ATOM   2081  CA  LYS L  66     -36.089   7.616  45.230  1.00 26.02           C  
ATOM   2082  C   LYS L  66     -36.929   6.875  46.311  1.00 26.04           C  
ATOM   2083  O   LYS L  66     -37.870   6.115  46.000  1.00 25.98           O  
ATOM   2084  CB  LYS L  66     -36.678   8.983  44.966  1.00 24.96           C  
ATOM   2085  CG  LYS L  66     -36.471  10.129  45.962  1.00 24.89           C  
ATOM   2086  CD  LYS L  66     -37.331   9.997  47.196  1.00 25.25           C  
ATOM   2087  CE  LYS L  66     -37.954  11.167  47.873  1.00 24.04           C  
ATOM   2088  NZ  LYS L  66     -38.168  12.262  46.881  1.00 24.94           N  
ATOM   2089  N   SER L  67     -36.551   7.062  47.559  1.00 25.85           N  
ATOM   2090  CA  SER L  67     -37.165   6.507  48.764  1.00 25.61           C  
ATOM   2091  C   SER L  67     -36.481   7.269  49.913  1.00 25.51           C  
ATOM   2092  O   SER L  67     -35.306   7.044  50.200  1.00 25.26           O  
ATOM   2093  CB  SER L  67     -37.064   5.030  49.021  1.00 25.59           C  
ATOM   2094  OG  SER L  67     -37.865   4.302  48.104  1.00 26.34           O  
ATOM   2095  N   GLY L  68     -37.312   8.160  50.423  1.00 25.91           N  
ATOM   2096  CA  GLY L  68     -36.899   9.067  51.520  1.00 25.56           C  
ATOM   2097  C   GLY L  68     -35.758   9.969  51.001  1.00 24.98           C  
ATOM   2098  O   GLY L  68     -36.016  10.892  50.231  1.00 25.06           O  
ATOM   2099  N   THR L  69     -34.566   9.650  51.407  1.00 24.68           N  
ATOM   2100  CA  THR L  69     -33.277  10.241  51.170  1.00 24.55           C  
ATOM   2101  C   THR L  69     -32.429   9.718  50.004  1.00 24.18           C  
ATOM   2102  O   THR L  69     -31.519  10.466  49.530  1.00 24.25           O  
ATOM   2103  CB  THR L  69     -32.397  10.184  52.518  1.00 25.06           C  
ATOM   2104  OG1 THR L  69     -32.405   8.800  53.033  1.00 25.57           O  
ATOM   2105  CG2 THR L  69     -32.822  11.154  53.618  1.00 25.00           C  
ATOM   2106  N   SER L  70     -32.661   8.515  49.507  1.00 23.31           N  
ATOM   2107  CA  SER L  70     -31.862   7.921  48.443  1.00 22.66           C  
ATOM   2108  C   SER L  70     -32.502   7.790  47.073  1.00 21.61           C  
ATOM   2109  O   SER L  70     -33.662   7.398  46.917  1.00 21.53           O  
ATOM   2110  CB  SER L  70     -31.438   6.523  48.942  1.00 23.96           C  
ATOM   2111  OG  SER L  70     -32.432   5.594  48.465  1.00 25.51           O  
ATOM   2112  N   ALA L  71     -31.743   8.120  46.057  1.00 20.47           N  
ATOM   2113  CA  ALA L  71     -32.041   8.089  44.632  1.00 19.76           C  
ATOM   2114  C   ALA L  71     -30.985   7.117  44.086  1.00 19.34           C  
ATOM   2115  O   ALA L  71     -29.994   6.995  44.821  1.00 19.45           O  
ATOM   2116  CB  ALA L  71     -31.820   9.401  43.909  1.00 20.09           C  
ATOM   2117  N   SER L  72     -31.207   6.560  42.942  1.00 19.04           N  
ATOM   2118  CA  SER L  72     -30.248   5.564  42.420  1.00 18.53           C  
ATOM   2119  C   SER L  72     -30.450   5.283  40.950  1.00 18.32           C  
ATOM   2120  O   SER L  72     -31.592   4.855  40.568  1.00 18.91           O  
ATOM   2121  CB  SER L  72     -30.473   4.222  43.163  1.00 19.09           C  
ATOM   2122  OG  SER L  72     -31.726   3.631  42.787  1.00 19.20           O  
ATOM   2123  N   LEU L  73     -29.373   5.490  40.194  1.00 17.53           N  
ATOM   2124  CA  LEU L  73     -29.467   5.185  38.751  1.00 16.82           C  
ATOM   2125  C   LEU L  73     -29.188   3.685  38.596  1.00 17.39           C  
ATOM   2126  O   LEU L  73     -28.485   2.950  39.344  1.00 17.88           O  
ATOM   2127  CB  LEU L  73     -28.681   6.090  37.871  1.00 15.63           C  
ATOM   2128  CG  LEU L  73     -29.304   6.473  36.537  1.00 15.41           C  
ATOM   2129  CD1 LEU L  73     -30.659   7.116  36.652  1.00 14.68           C  
ATOM   2130  CD2 LEU L  73     -28.333   7.469  35.865  1.00 16.64           C  
ATOM   2131  N   ALA L  74     -29.886   3.200  37.576  1.00 17.04           N  
ATOM   2132  CA  ALA L  74     -29.784   1.783  37.257  1.00 16.82           C  
ATOM   2133  C   ALA L  74     -29.740   1.792  35.735  1.00 16.62           C  
ATOM   2134  O   ALA L  74     -30.716   2.193  35.159  1.00 16.72           O  
ATOM   2135  CB  ALA L  74     -30.927   0.966  37.782  1.00 17.74           C  
ATOM   2136  N   ILE L  75     -28.567   1.449  35.335  1.00 17.18           N  
ATOM   2137  CA  ILE L  75     -28.219   1.323  33.909  1.00 17.40           C  
ATOM   2138  C   ILE L  75     -28.278  -0.192  33.715  1.00 18.28           C  
ATOM   2139  O   ILE L  75     -27.432  -0.926  34.250  1.00 18.19           O  
ATOM   2140  CB  ILE L  75     -26.790   1.919  33.761  1.00 16.58           C  
ATOM   2141  CG1 ILE L  75     -26.180   1.196  32.537  1.00 16.37           C  
ATOM   2142  CG2 ILE L  75     -26.001   1.763  35.060  1.00 16.95           C  
ATOM   2143  CD1 ILE L  75     -27.274   1.298  31.399  1.00 17.57           C  
ATOM   2144  N   SER L  76     -29.371  -0.605  33.102  1.00 19.14           N  
ATOM   2145  CA  SER L  76     -29.520  -2.080  32.882  1.00 20.32           C  
ATOM   2146  C   SER L  76     -28.536  -2.390  31.765  1.00 20.87           C  
ATOM   2147  O   SER L  76     -28.359  -1.541  30.849  1.00 21.13           O  
ATOM   2148  CB  SER L  76     -30.960  -2.428  32.548  1.00 20.70           C  
ATOM   2149  OG  SER L  76     -31.831  -1.592  33.318  1.00 22.30           O  
ATOM   2150  N   GLY L  77     -27.906  -3.527  31.829  1.00 21.33           N  
ATOM   2151  CA  GLY L  77     -26.934  -4.002  30.824  1.00 21.70           C  
ATOM   2152  C   GLY L  77     -26.005  -2.907  30.285  1.00 21.56           C  
ATOM   2153  O   GLY L  77     -26.381  -2.169  29.349  1.00 21.13           O  
ATOM   2154  N   LEU L  78     -24.817  -2.880  30.909  1.00 21.34           N  
ATOM   2155  CA  LEU L  78     -23.793  -1.906  30.523  1.00 20.99           C  
ATOM   2156  C   LEU L  78     -23.491  -2.195  29.019  1.00 21.60           C  
ATOM   2157  O   LEU L  78     -23.631  -3.300  28.474  1.00 21.09           O  
ATOM   2158  CB  LEU L  78     -22.556  -1.901  31.351  1.00 19.29           C  
ATOM   2159  CG  LEU L  78     -22.338  -1.698  32.803  1.00 18.10           C  
ATOM   2160  CD1 LEU L  78     -20.834  -1.718  33.123  1.00 17.76           C  
ATOM   2161  CD2 LEU L  78     -22.906  -0.366  33.260  1.00 17.14           C  
ATOM   2162  N   GLN L  79     -23.063  -1.074  28.458  1.00 22.07           N  
ATOM   2163  CA  GLN L  79     -22.676  -0.941  27.059  1.00 22.15           C  
ATOM   2164  C   GLN L  79     -21.372  -0.162  27.092  1.00 22.29           C  
ATOM   2165  O   GLN L  79     -21.187   0.710  27.933  1.00 21.92           O  
ATOM   2166  CB  GLN L  79     -23.736  -0.154  26.301  1.00 23.47           C  
ATOM   2167  CG  GLN L  79     -25.002  -0.991  26.162  1.00 25.34           C  
ATOM   2168  CD  GLN L  79     -24.731  -1.937  25.002  1.00 27.35           C  
ATOM   2169  OE1 GLN L  79     -24.784  -3.155  25.077  1.00 29.05           O  
ATOM   2170  NE2 GLN L  79     -24.377  -1.271  23.910  1.00 27.76           N  
ATOM   2171  N   PRO L  80     -20.514  -0.530  26.184  1.00 23.20           N  
ATOM   2172  CA  PRO L  80     -19.218   0.177  26.105  1.00 23.52           C  
ATOM   2173  C   PRO L  80     -19.490   1.637  26.422  1.00 23.77           C  
ATOM   2174  O   PRO L  80     -18.926   2.162  27.403  1.00 23.74           O  
ATOM   2175  CB  PRO L  80     -18.734  -0.123  24.705  1.00 23.67           C  
ATOM   2176  CG  PRO L  80     -19.300  -1.522  24.426  1.00 23.70           C  
ATOM   2177  CD  PRO L  80     -20.644  -1.569  25.146  1.00 23.57           C  
ATOM   2178  N   GLU L  81     -20.365   2.247  25.649  1.00 23.93           N  
ATOM   2179  CA  GLU L  81     -20.717   3.638  25.785  1.00 24.95           C  
ATOM   2180  C   GLU L  81     -21.138   4.284  27.082  1.00 24.77           C  
ATOM   2181  O   GLU L  81     -21.032   5.557  27.095  1.00 25.58           O  
ATOM   2182  CB  GLU L  81     -21.864   4.042  24.808  1.00 26.34           C  
ATOM   2183  CG  GLU L  81     -21.717   3.355  23.447  1.00 28.24           C  
ATOM   2184  CD  GLU L  81     -22.605   2.124  23.373  1.00 29.45           C  
ATOM   2185  OE1 GLU L  81     -23.676   2.106  23.993  1.00 29.33           O  
ATOM   2186  OE2 GLU L  81     -22.043   1.279  22.633  1.00 29.27           O  
ATOM   2187  N   ASP L  82     -21.602   3.613  28.088  1.00 24.20           N  
ATOM   2188  CA  ASP L  82     -22.055   4.124  29.375  1.00 22.98           C  
ATOM   2189  C   ASP L  82     -20.986   4.716  30.284  1.00 22.12           C  
ATOM   2190  O   ASP L  82     -21.401   5.393  31.278  1.00 22.21           O  
ATOM   2191  CB  ASP L  82     -22.839   3.032  30.132  1.00 23.43           C  
ATOM   2192  CG  ASP L  82     -23.874   2.338  29.272  1.00 23.43           C  
ATOM   2193  OD1 ASP L  82     -24.656   2.988  28.554  1.00 23.60           O  
ATOM   2194  OD2 ASP L  82     -23.890   1.091  29.380  1.00 23.45           O  
ATOM   2195  N   GLU L  83     -19.709   4.486  30.020  1.00 20.83           N  
ATOM   2196  CA  GLU L  83     -18.638   5.051  30.874  1.00 19.47           C  
ATOM   2197  C   GLU L  83     -18.575   6.572  30.696  1.00 18.67           C  
ATOM   2198  O   GLU L  83     -18.043   7.078  29.688  1.00 19.22           O  
ATOM   2199  CB  GLU L  83     -17.250   4.523  30.570  1.00 18.82           C  
ATOM   2200  CG  GLU L  83     -17.088   3.046  30.269  1.00 19.94           C  
ATOM   2201  CD  GLU L  83     -15.858   2.656  29.520  1.00 19.84           C  
ATOM   2202  OE1 GLU L  83     -15.571   2.912  28.379  1.00 19.77           O  
ATOM   2203  OE2 GLU L  83     -15.102   2.010  30.250  1.00 20.76           O  
ATOM   2204  N   THR L  84     -19.135   7.285  31.647  1.00 17.09           N  
ATOM   2205  CA  THR L  84     -19.166   8.745  31.687  1.00 15.35           C  
ATOM   2206  C   THR L  84     -19.398   9.068  33.160  1.00 14.87           C  
ATOM   2207  O   THR L  84     -19.434   8.136  33.972  1.00 15.14           O  
ATOM   2208  CB  THR L  84     -20.330   9.355  30.842  1.00 14.63           C  
ATOM   2209  OG1 THR L  84     -21.509   9.024  31.651  1.00 14.14           O  
ATOM   2210  CG2 THR L  84     -20.465   8.906  29.385  1.00 14.03           C  
ATOM   2211  N   ASP L  85     -19.514  10.329  33.464  1.00 14.81           N  
ATOM   2212  CA  ASP L  85     -19.772  10.689  34.902  1.00 14.39           C  
ATOM   2213  C   ASP L  85     -21.300  10.673  34.978  1.00 14.77           C  
ATOM   2214  O   ASP L  85     -21.925  10.667  33.894  1.00 15.30           O  
ATOM   2215  CB  ASP L  85     -19.059  11.935  35.287  1.00 13.41           C  
ATOM   2216  CG  ASP L  85     -17.548  11.847  35.374  1.00 12.71           C  
ATOM   2217  OD1 ASP L  85     -16.958  11.312  36.305  1.00 12.10           O  
ATOM   2218  OD2 ASP L  85     -16.853  12.362  34.480  1.00 12.81           O  
ATOM   2219  N   TYR L  86     -21.843  10.558  36.149  1.00 14.63           N  
ATOM   2220  CA  TYR L  86     -23.278  10.561  36.425  1.00 14.45           C  
ATOM   2221  C   TYR L  86     -23.458  11.473  37.623  1.00 14.82           C  
ATOM   2222  O   TYR L  86     -22.887  11.106  38.673  1.00 15.26           O  
ATOM   2223  CB  TYR L  86     -23.816   9.132  36.745  1.00 15.12           C  
ATOM   2224  CG  TYR L  86     -23.810   8.238  35.512  1.00 15.26           C  
ATOM   2225  CD1 TYR L  86     -24.854   8.353  34.583  1.00 15.54           C  
ATOM   2226  CD2 TYR L  86     -22.770   7.373  35.215  1.00 14.38           C  
ATOM   2227  CE1 TYR L  86     -24.831   7.605  33.405  1.00 14.85           C  
ATOM   2228  CE2 TYR L  86     -22.751   6.606  34.063  1.00 13.63           C  
ATOM   2229  CZ  TYR L  86     -23.787   6.728  33.165  1.00 13.81           C  
ATOM   2230  OH  TYR L  86     -23.779   5.996  32.020  1.00 13.65           O  
ATOM   2231  N   TYR L  87     -24.088  12.618  37.491  1.00 15.67           N  
ATOM   2232  CA  TYR L  87     -24.340  13.513  38.673  1.00 16.10           C  
ATOM   2233  C   TYR L  87     -25.828  13.440  39.023  1.00 16.34           C  
ATOM   2234  O   TYR L  87     -26.670  13.101  38.150  1.00 16.48           O  
ATOM   2235  CB  TYR L  87     -23.928  15.002  38.430  1.00 14.54           C  
ATOM   2236  CG  TYR L  87     -22.443  15.058  38.113  1.00 13.33           C  
ATOM   2237  CD1 TYR L  87     -22.015  14.756  36.815  1.00 12.53           C  
ATOM   2238  CD2 TYR L  87     -21.507  15.295  39.116  1.00 12.73           C  
ATOM   2239  CE1 TYR L  87     -20.652  14.761  36.524  1.00 13.02           C  
ATOM   2240  CE2 TYR L  87     -20.132  15.294  38.854  1.00 12.22           C  
ATOM   2241  CZ  TYR L  87     -19.733  15.030  37.558  1.00 12.98           C  
ATOM   2242  OH  TYR L  87     -18.397  14.969  37.278  1.00 14.29           O  
ATOM   2243  N   CYS L  88     -26.175  13.715  40.253  1.00 16.84           N  
ATOM   2244  CA  CYS L  88     -27.658  13.713  40.531  1.00 17.99           C  
ATOM   2245  C   CYS L  88     -27.951  15.158  40.957  1.00 18.26           C  
ATOM   2246  O   CYS L  88     -26.956  15.855  41.265  1.00 18.99           O  
ATOM   2247  CB  CYS L  88     -28.029  12.726  41.594  1.00 18.82           C  
ATOM   2248  SG  CYS L  88     -26.725  12.772  42.870  1.00 20.68           S  
ATOM   2249  N   ALA L  89     -29.196  15.524  40.964  1.00 17.79           N  
ATOM   2250  CA  ALA L  89     -29.611  16.878  41.363  1.00 17.82           C  
ATOM   2251  C   ALA L  89     -30.909  16.648  42.088  1.00 18.66           C  
ATOM   2252  O   ALA L  89     -31.552  15.641  41.740  1.00 19.34           O  
ATOM   2253  CB  ALA L  89     -29.806  17.657  40.061  1.00 17.82           C  
ATOM   2254  N   ALA L  90     -31.310  17.419  43.024  1.00 19.78           N  
ATOM   2255  CA  ALA L  90     -32.532  17.397  43.815  1.00 20.33           C  
ATOM   2256  C   ALA L  90     -32.536  18.818  44.432  1.00 21.50           C  
ATOM   2257  O   ALA L  90     -31.507  19.207  45.017  1.00 21.89           O  
ATOM   2258  CB  ALA L  90     -32.577  16.387  44.928  1.00 19.96           C  
ATOM   2259  N   TRP L  91     -33.627  19.491  44.231  1.00 22.30           N  
ATOM   2260  CA  TRP L  91     -33.764  20.862  44.777  1.00 23.40           C  
ATOM   2261  C   TRP L  91     -33.603  20.735  46.297  1.00 24.80           C  
ATOM   2262  O   TRP L  91     -34.133  19.732  46.835  1.00 24.73           O  
ATOM   2263  CB  TRP L  91     -35.135  21.444  44.417  1.00 22.03           C  
ATOM   2264  CG  TRP L  91     -35.455  22.793  44.945  1.00 19.80           C  
ATOM   2265  CD1 TRP L  91     -36.175  23.084  46.073  1.00 18.89           C  
ATOM   2266  CD2 TRP L  91     -35.046  24.040  44.389  1.00 18.71           C  
ATOM   2267  NE1 TRP L  91     -36.241  24.437  46.241  1.00 18.57           N  
ATOM   2268  CE2 TRP L  91     -35.550  25.046  45.229  1.00 18.66           C  
ATOM   2269  CE3 TRP L  91     -34.314  24.390  43.268  1.00 19.25           C  
ATOM   2270  CZ2 TRP L  91     -35.359  26.399  44.973  1.00 18.25           C  
ATOM   2271  CZ3 TRP L  91     -34.111  25.746  43.010  1.00 19.59           C  
ATOM   2272  CH2 TRP L  91     -34.633  26.742  43.853  1.00 18.70           C  
ATOM   2273  N   ASP L  92     -32.905  21.717  46.862  1.00 25.89           N  
ATOM   2274  CA  ASP L  92     -32.756  21.728  48.317  1.00 27.44           C  
ATOM   2275  C   ASP L  92     -33.710  22.824  48.833  1.00 28.69           C  
ATOM   2276  O   ASP L  92     -33.432  24.001  48.530  1.00 29.04           O  
ATOM   2277  CB  ASP L  92     -31.347  21.949  48.822  1.00 28.35           C  
ATOM   2278  CG  ASP L  92     -31.352  21.643  50.335  1.00 29.19           C  
ATOM   2279  OD1 ASP L  92     -31.165  20.464  50.725  1.00 30.29           O  
ATOM   2280  OD2 ASP L  92     -31.592  22.589  51.086  1.00 28.16           O  
ATOM   2281  N   ASP L  93     -34.727  22.400  49.545  1.00 29.93           N  
ATOM   2282  CA  ASP L  93     -35.773  23.250  50.114  1.00 30.97           C  
ATOM   2283  C   ASP L  93     -35.376  23.823  51.471  1.00 31.51           C  
ATOM   2284  O   ASP L  93     -36.299  23.969  52.294  1.00 32.29           O  
ATOM   2285  CB  ASP L  93     -37.157  22.579  50.253  1.00 31.74           C  
ATOM   2286  CG  ASP L  93     -38.091  22.724  49.074  1.00 32.44           C  
ATOM   2287  OD1 ASP L  93     -37.798  23.580  48.195  1.00 33.15           O  
ATOM   2288  OD2 ASP L  93     -39.128  22.039  48.955  1.00 32.07           O  
ATOM   2289  N   SER L  94     -34.126  24.118  51.642  1.00 31.95           N  
ATOM   2290  CA  SER L  94     -33.533  24.695  52.855  1.00 31.96           C  
ATOM   2291  C   SER L  94     -32.345  25.605  52.512  1.00 31.78           C  
ATOM   2292  O   SER L  94     -31.778  26.269  53.397  1.00 31.76           O  
ATOM   2293  CB  SER L  94     -33.123  23.586  53.825  1.00 32.60           C  
ATOM   2294  OG  SER L  94     -34.317  22.976  54.312  1.00 33.92           O  
ATOM   2295  N   LEU L  95     -31.981  25.572  51.263  1.00 31.77           N  
ATOM   2296  CA  LEU L  95     -30.931  26.279  50.531  1.00 31.73           C  
ATOM   2297  C   LEU L  95     -31.695  26.890  49.350  1.00 31.67           C  
ATOM   2298  O   LEU L  95     -31.343  27.790  48.628  1.00 32.20           O  
ATOM   2299  CB  LEU L  95     -29.849  25.303  50.097  1.00 31.35           C  
ATOM   2300  CG  LEU L  95     -28.860  24.965  51.227  1.00 31.17           C  
ATOM   2301  CD1 LEU L  95     -28.256  23.591  51.000  1.00 30.94           C  
ATOM   2302  CD2 LEU L  95     -27.847  26.097  51.250  1.00 30.08           C  
ATOM   2303  N   ASP L  95A    -32.852  26.224  49.248  1.00 31.58           N  
ATOM   2304  CA  ASP L  95A    -33.752  26.772  48.203  1.00 31.18           C  
ATOM   2305  C   ASP L  95A    -32.896  26.980  46.978  1.00 29.71           C  
ATOM   2306  O   ASP L  95A    -32.900  28.000  46.294  1.00 29.28           O  
ATOM   2307  CB  ASP L  95A    -34.295  28.027  48.929  1.00 35.05           C  
ATOM   2308  CG  ASP L  95A    -35.111  28.853  47.954  1.00 38.57           C  
ATOM   2309  OD1 ASP L  95A    -34.993  28.354  46.781  1.00 41.11           O  
ATOM   2310  OD2 ASP L  95A    -35.787  29.858  48.235  1.00 39.35           O  
ATOM   2311  N   VAL L  95B    -32.087  25.978  46.699  1.00 28.61           N  
ATOM   2312  CA  VAL L  95B    -31.255  25.939  45.501  1.00 27.98           C  
ATOM   2313  C   VAL L  95B    -31.221  24.430  45.168  1.00 27.87           C  
ATOM   2314  O   VAL L  95B    -31.509  23.651  46.090  1.00 27.91           O  
ATOM   2315  CB  VAL L  95B    -29.874  26.535  45.499  1.00 27.87           C  
ATOM   2316  CG1 VAL L  95B    -29.835  28.060  45.592  1.00 28.73           C  
ATOM   2317  CG2 VAL L  95B    -28.971  25.940  46.570  1.00 27.92           C  
ATOM   2318  N   ALA L  96     -30.905  24.206  43.908  1.00 27.59           N  
ATOM   2319  CA  ALA L  96     -30.785  22.810  43.398  1.00 26.74           C  
ATOM   2320  C   ALA L  96     -29.445  22.293  43.917  1.00 26.42           C  
ATOM   2321  O   ALA L  96     -28.506  23.133  43.926  1.00 27.02           O  
ATOM   2322  CB  ALA L  96     -30.891  22.804  41.889  1.00 25.79           C  
ATOM   2323  N   VAL L  97     -29.359  21.048  44.374  1.00 25.54           N  
ATOM   2324  CA  VAL L  97     -28.080  20.498  44.890  1.00 24.13           C  
ATOM   2325  C   VAL L  97     -27.581  19.434  43.902  1.00 23.67           C  
ATOM   2326  O   VAL L  97     -28.413  18.821  43.207  1.00 23.64           O  
ATOM   2327  CB  VAL L  97     -28.211  19.988  46.318  1.00 23.10           C  
ATOM   2328  CG1 VAL L  97     -26.894  19.938  47.071  1.00 22.70           C  
ATOM   2329  CG2 VAL L  97     -29.240  20.772  47.101  1.00 23.64           C  
ATOM   2330  N   PHE L  98     -26.264  19.243  43.907  1.00 22.83           N  
ATOM   2331  CA  PHE L  98     -25.612  18.278  43.027  1.00 21.85           C  
ATOM   2332  C   PHE L  98     -24.739  17.295  43.819  1.00 21.29           C  
ATOM   2333  O   PHE L  98     -24.094  17.690  44.790  1.00 20.54           O  
ATOM   2334  CB  PHE L  98     -24.709  18.928  41.976  1.00 22.23           C  
ATOM   2335  CG  PHE L  98     -25.316  19.459  40.733  1.00 22.11           C  
ATOM   2336  CD1 PHE L  98     -25.931  20.717  40.737  1.00 21.79           C  
ATOM   2337  CD2 PHE L  98     -25.223  18.717  39.542  1.00 22.67           C  
ATOM   2338  CE1 PHE L  98     -26.482  21.221  39.574  1.00 21.94           C  
ATOM   2339  CE2 PHE L  98     -25.803  19.204  38.360  1.00 22.92           C  
ATOM   2340  CZ  PHE L  98     -26.449  20.456  38.398  1.00 22.60           C  
ATOM   2341  N   GLY L  99     -24.729  16.105  43.243  1.00 21.25           N  
ATOM   2342  CA  GLY L  99     -23.901  14.973  43.810  1.00 20.87           C  
ATOM   2343  C   GLY L  99     -22.465  15.314  43.351  1.00 20.24           C  
ATOM   2344  O   GLY L  99     -22.315  16.299  42.600  1.00 20.19           O  
ATOM   2345  N   THR L 100     -21.511  14.555  43.755  1.00 19.81           N  
ATOM   2346  CA  THR L 100     -20.100  14.751  43.419  1.00 20.25           C  
ATOM   2347  C   THR L 100     -19.598  14.003  42.195  1.00 20.81           C  
ATOM   2348  O   THR L 100     -18.409  14.093  41.789  1.00 20.54           O  
ATOM   2349  CB  THR L 100     -19.273  14.392  44.715  1.00 20.12           C  
ATOM   2350  OG1 THR L 100     -19.947  13.148  45.155  1.00 21.07           O  
ATOM   2351  CG2 THR L 100     -19.339  15.484  45.773  1.00 19.64           C  
ATOM   2352  N   GLY L 101     -20.518  13.269  41.575  1.00 21.18           N  
ATOM   2353  CA  GLY L 101     -20.302  12.474  40.370  1.00 21.02           C  
ATOM   2354  C   GLY L 101     -19.976  11.028  40.595  1.00 21.01           C  
ATOM   2355  O   GLY L 101     -19.553  10.616  41.714  1.00 22.42           O  
ATOM   2356  N   THR L 102     -20.146  10.216  39.563  1.00 20.00           N  
ATOM   2357  CA  THR L 102     -19.836   8.781  39.671  1.00 18.45           C  
ATOM   2358  C   THR L 102     -19.376   8.244  38.330  1.00 18.64           C  
ATOM   2359  O   THR L 102     -20.222   8.164  37.426  1.00 18.35           O  
ATOM   2360  CB  THR L 102     -21.101   8.012  40.157  1.00 16.79           C  
ATOM   2361  OG1 THR L 102     -21.272   8.395  41.526  1.00 16.61           O  
ATOM   2362  CG2 THR L 102     -20.979   6.493  40.016  1.00 17.67           C  
ATOM   2363  N   LYS L 103     -18.090   7.900  38.245  1.00 18.77           N  
ATOM   2364  CA  LYS L 103     -17.596   7.363  36.966  1.00 19.41           C  
ATOM   2365  C   LYS L 103     -17.807   5.827  36.927  1.00 19.04           C  
ATOM   2366  O   LYS L 103     -17.171   5.073  37.666  1.00 18.55           O  
ATOM   2367  CB  LYS L 103     -16.146   7.639  36.672  1.00 21.18           C  
ATOM   2368  CG  LYS L 103     -15.636   8.986  36.209  1.00 22.26           C  
ATOM   2369  CD  LYS L 103     -14.272   9.304  36.854  1.00 23.34           C  
ATOM   2370  CE  LYS L 103     -13.781  10.693  36.452  1.00 23.69           C  
ATOM   2371  NZ  LYS L 103     -14.025  11.665  37.534  1.00 24.21           N  
ATOM   2372  N   VAL L 104     -18.689   5.475  36.016  1.00 18.79           N  
ATOM   2373  CA  VAL L 104     -19.015   4.065  35.730  1.00 18.80           C  
ATOM   2374  C   VAL L 104     -17.907   3.697  34.730  1.00 19.38           C  
ATOM   2375  O   VAL L 104     -17.447   4.640  34.047  1.00 20.25           O  
ATOM   2376  CB  VAL L 104     -20.437   3.917  35.174  1.00 17.18           C  
ATOM   2377  CG1 VAL L 104     -20.667   2.708  34.280  1.00 16.15           C  
ATOM   2378  CG2 VAL L 104     -21.468   3.889  36.287  1.00 16.91           C  
ATOM   2379  N   THR L 105     -17.536   2.461  34.653  1.00 19.78           N  
ATOM   2380  CA  THR L 105     -16.494   2.037  33.675  1.00 19.96           C  
ATOM   2381  C   THR L 105     -16.861   0.645  33.210  1.00 20.04           C  
ATOM   2382  O   THR L 105     -16.875  -0.257  34.060  1.00 20.16           O  
ATOM   2383  CB  THR L 105     -15.087   2.213  34.343  1.00 20.32           C  
ATOM   2384  OG1 THR L 105     -14.092   1.366  33.719  1.00 20.48           O  
ATOM   2385  CG2 THR L 105     -15.054   1.930  35.858  1.00 20.99           C  
ATOM   2386  N   VAL L 106     -17.200   0.456  31.947  1.00 20.30           N  
ATOM   2387  CA  VAL L 106     -17.514  -0.879  31.418  1.00 20.71           C  
ATOM   2388  C   VAL L 106     -16.192  -1.654  31.234  1.00 20.87           C  
ATOM   2389  O   VAL L 106     -15.468  -1.500  30.238  1.00 20.64           O  
ATOM   2390  CB  VAL L 106     -18.293  -0.843  30.106  1.00 21.16           C  
ATOM   2391  CG1 VAL L 106     -18.825  -2.226  29.712  1.00 21.16           C  
ATOM   2392  CG2 VAL L 106     -19.446   0.134  30.174  1.00 22.06           C  
ATOM   2393  N   LEU L 106A    -15.963  -2.487  32.218  1.00 21.08           N  
ATOM   2394  CA  LEU L 106A    -14.818  -3.332  32.389  1.00 21.62           C  
ATOM   2395  C   LEU L 106A    -14.636  -4.543  31.499  1.00 21.65           C  
ATOM   2396  O   LEU L 106A    -13.475  -4.739  31.026  1.00 22.40           O  
ATOM   2397  CB  LEU L 106A    -14.751  -3.733  33.882  1.00 22.75           C  
ATOM   2398  CG  LEU L 106A    -14.174  -2.877  34.968  1.00 24.26           C  
ATOM   2399  CD1 LEU L 106A    -14.304  -3.589  36.338  1.00 24.57           C  
ATOM   2400  CD2 LEU L 106A    -12.696  -2.527  34.762  1.00 23.49           C  
ATOM   2401  N   GLY L 107     -15.566  -5.437  31.256  1.00 21.33           N  
ATOM   2402  CA  GLY L 107     -15.270  -6.646  30.460  1.00 21.00           C  
ATOM   2403  C   GLY L 107     -15.318  -6.580  28.968  1.00 20.33           C  
ATOM   2404  O   GLY L 107     -16.025  -7.437  28.333  1.00 20.45           O  
ATOM   2405  N   GLN L 108     -14.579  -5.650  28.381  1.00 19.05           N  
ATOM   2406  CA  GLN L 108     -14.640  -5.507  26.911  1.00 18.29           C  
ATOM   2407  C   GLN L 108     -13.630  -6.402  26.233  1.00 17.86           C  
ATOM   2408  O   GLN L 108     -12.631  -6.823  26.836  1.00 17.74           O  
ATOM   2409  CB  GLN L 108     -14.629  -4.039  26.448  1.00 18.68           C  
ATOM   2410  CG  GLN L 108     -15.444  -3.087  27.252  1.00 19.10           C  
ATOM   2411  CD  GLN L 108     -15.644  -1.634  27.016  1.00 19.28           C  
ATOM   2412  OE1 GLN L 108     -16.007  -0.858  27.931  1.00 18.93           O  
ATOM   2413  NE2 GLN L 108     -15.489  -1.153  25.782  1.00 19.17           N  
ATOM   2414  N   PRO L 109     -13.910  -6.650  24.964  1.00 18.00           N  
ATOM   2415  CA  PRO L 109     -13.133  -7.465  24.035  1.00 17.98           C  
ATOM   2416  C   PRO L 109     -11.866  -6.826  23.467  1.00 17.94           C  
ATOM   2417  O   PRO L 109     -11.782  -5.683  22.983  1.00 17.69           O  
ATOM   2418  CB  PRO L 109     -14.090  -7.826  22.902  1.00 17.91           C  
ATOM   2419  CG  PRO L 109     -15.436  -7.293  23.281  1.00 17.84           C  
ATOM   2420  CD  PRO L 109     -15.119  -6.148  24.259  1.00 18.41           C  
TER    2421      PRO L 109                                                      
