# Supplementary material for: SARS-CoV-2 Spike Protein Interaction Space
Source: Int J Mol Sci. 2023 Jul 27;24(15):12058. doi: 10.3390/ijms241512058 (PMC10418891; doi:10.3390/ijms241512058)
Supplement: Supplementary file 1 [file ijms-24-12058-s001.zip › Supplementary Material File S1/4K3G.pdb]

REMARK 950 NUMBERING  Kabat
REMARK 950 METHOD     X-ray crystal structure
REMARK 950 RESOLUTION 1.930
REMARK 950 R-FACTOR   0.195
REMARK 950 R-FREE     0.231
REMARK 950 CHAIN-TYPE LABEL ORIGINAL
REMARK 950 CHAIN L    L    A
REMARK 950 CHAIN L    L    B
REMARK 950 MOLECULE : A : IMMUNOGLOBULIN LAMBDA VARIABLE DOMAIN L5(L89S)
REMARK 950 SPECIES  : A : HOMO SAPIENS
SEQRES   1 L 118  GLN ALA VAL VAL THR GLN GLU PRO SER VAL THR VAL SER          
SEQRES   2 L 118  PRO GLY GLY THR VAL ILE LEU THR CYS GLY SER SER THR          
SEQRES   3 L 118  GLY ALA VAL THR SER GLY HIS TYR ALA ASN TRP PHE GLN          
SEQRES   4 L 118  GLN LYS PRO GLY GLN ALA PRO ARG ALA LEU ILE PHE GLU          
SEQRES   5 L 118  THR ASP LYS LYS TYR SER TRP THR PRO GLY ARG PHE SER          
SEQRES   6 L 118  GLY SER LEU LEU GLY ALA LYS ALA ALA LEU THR ILE SER          
SEQRES   7 L 118  ASP ALA GLN PRO GLU ASP GLU ALA GLU TYR TYR CYS SER          
SEQRES   8 L 118  LEU SER ASP VAL ASP GLY TYR LEU PHE GLY GLY GLY THR          
SEQRES   9 L 118  GLN LEU THR VAL LEU SER THR GLY HIS HIS HIS HIS HIS          
SEQRES  10 L 118  HIS                                                          
SEQRES   1 L 118  GLN ALA VAL VAL THR GLN GLU PRO SER VAL THR VAL SER          
SEQRES   2 L 118  PRO GLY GLY THR VAL ILE LEU THR CYS GLY SER SER THR          
SEQRES   3 L 118  GLY ALA VAL THR SER GLY HIS TYR ALA ASN TRP PHE GLN          
SEQRES   4 L 118  GLN LYS PRO GLY GLN ALA PRO ARG ALA LEU ILE PHE GLU          
SEQRES   5 L 118  THR ASP LYS LYS TYR SER TRP THR PRO GLY ARG PHE SER          
SEQRES   6 L 118  GLY SER LEU LEU GLY ALA LYS ALA ALA LEU THR ILE SER          
SEQRES   7 L 118  ASP ALA GLN PRO GLU ASP GLU ALA GLU TYR TYR CYS SER          
SEQRES   8 L 118  LEU SER ASP VAL ASP GLY TYR LEU PHE GLY GLY GLY THR          
SEQRES   9 L 118  GLN LEU THR VAL LEU SER THR GLY HIS HIS HIS HIS HIS          
SEQRES  10 L 118  HIS                                                          
ATOM      1  N   ALA L   2      17.337  -4.295 -19.437  1.00 65.11           N  
ATOM      2  CA  ALA L   2      16.437  -5.440 -19.353  1.00 51.23           C  
ATOM      3  C   ALA L   2      15.561  -5.336 -18.115  1.00 48.20           C  
ATOM      4  O   ALA L   2      15.938  -4.706 -17.127  1.00 51.39           O  
ATOM      5  CB  ALA L   2      17.223  -6.737 -19.335  1.00 58.75           C  
ATOM      6  N   VAL L   3      14.391  -5.959 -18.165  1.00 36.66           N  
ATOM      7  CA  VAL L   3      13.449  -5.852 -17.064  1.00 36.40           C  
ATOM      8  C   VAL L   3      12.917  -7.219 -16.659  1.00 37.11           C  
ATOM      9  O   VAL L   3      12.684  -8.091 -17.504  1.00 33.73           O  
ATOM     10  CB  VAL L   3      12.280  -4.893 -17.411  1.00 48.05           C  
ATOM     11  CG1 VAL L   3      11.110  -5.080 -16.452  1.00 47.43           C  
ATOM     12  CG2 VAL L   3      12.762  -3.445 -17.395  1.00 49.00           C  
ATOM     13  N   VAL L   4      12.735  -7.396 -15.356  1.00 28.75           N  
ATOM     14  CA  VAL L   4      12.208  -8.628 -14.820  1.00 28.18           C  
ATOM     15  C   VAL L   4      10.717  -8.459 -14.576  1.00 26.58           C  
ATOM     16  O   VAL L   4      10.286  -7.501 -13.925  1.00 30.78           O  
ATOM     17  CB  VAL L   4      12.933  -9.015 -13.513  1.00 26.55           C  
ATOM     18  CG1 VAL L   4      12.346 -10.292 -12.947  1.00 26.85           C  
ATOM     19  CG2 VAL L   4      14.420  -9.181 -13.785  1.00 28.98           C  
ATOM     20  N   THR L   5       9.933  -9.392 -15.107  1.00 26.08           N  
ATOM     21  CA  THR L   5       8.484  -9.264 -15.051  1.00 36.71           C  
ATOM     22  C   THR L   5       7.830 -10.387 -14.258  1.00 28.55           C  
ATOM     23  O   THR L   5       8.151 -11.564 -14.439  1.00 28.11           O  
ATOM     24  CB  THR L   5       7.876  -9.231 -16.465  1.00 38.09           C  
ATOM     25  OG1 THR L   5       8.177 -10.459 -17.138  1.00 49.73           O  
ATOM     26  CG2 THR L   5       8.449  -8.076 -17.253  1.00 35.59           C  
ATOM     27  N   GLN L   6       6.915 -10.004 -13.374  1.00 25.45           N  
ATOM     28  CA  GLN L   6       6.141 -10.946 -12.581  1.00 25.05           C  
ATOM     29  C   GLN L   6       4.665 -10.579 -12.699  1.00 25.24           C  
ATOM     30  O   GLN L   6       4.348  -9.407 -12.906  1.00 31.22           O  
ATOM     31  CB  GLN L   6       6.535 -10.833 -11.110  1.00 25.27           C  
ATOM     32  CG  GLN L   6       7.949 -11.255 -10.774  1.00 25.73           C  
ATOM     33  CD  GLN L   6       8.195 -11.166  -9.271  1.00 24.38           C  
ATOM     34  OE1 GLN L   6       8.856 -10.251  -8.795  1.00 25.53           O  
ATOM     35  NE2 GLN L   6       7.630 -12.113  -8.519  1.00 22.34           N  
ATOM     36  N   GLU L   7       3.774 -11.562 -12.560  1.00 28.11           N  
ATOM     37  CA  GLU L   7       2.332 -11.293 -12.526  1.00 27.89           C  
ATOM     38  C   GLU L   7       2.052 -10.292 -11.418  1.00 25.88           C  
ATOM     39  O   GLU L   7       2.586 -10.420 -10.316  1.00 30.77           O  
ATOM     40  CB  GLU L   7       1.532 -12.572 -12.245  1.00 27.26           C  
ATOM     41  CG  GLU L   7       1.634 -13.651 -13.304  1.00 31.66           C  
ATOM     42  CD  GLU L   7       2.801 -14.608 -13.076  1.00 35.80           C  
ATOM     43  OE1 GLU L   7       3.570 -14.410 -12.110  1.00 25.61           O  
ATOM     44  OE2 GLU L   7       2.950 -15.562 -13.873  1.00 28.61           O  
ATOM     45  N   PRO L   8       1.217  -9.279 -11.689  1.00 33.20           N  
ATOM     46  CA  PRO L   8       0.927  -8.366 -10.580  1.00 34.03           C  
ATOM     47  C   PRO L   8       0.256  -9.071  -9.406  1.00 28.08           C  
ATOM     48  O   PRO L   8       0.561  -8.789  -8.256  1.00 26.64           O  
ATOM     49  CB  PRO L   8      -0.013  -7.335 -11.216  1.00 36.26           C  
ATOM     50  CG  PRO L   8       0.380  -7.322 -12.630  1.00 33.71           C  
ATOM     51  CD  PRO L   8       0.766  -8.735 -12.981  1.00 33.27           C  
ATOM     52  N   SER L   9      -0.642 -10.003  -9.679  1.00 28.75           N  
ATOM     53  CA  SER L   9      -1.340 -10.656  -8.578  1.00 25.75           C  
ATOM     54  C   SER L   9      -1.973 -11.961  -9.014  1.00 33.56           C  
ATOM     55  O   SER L   9      -2.418 -12.105 -10.161  1.00 37.08           O  
ATOM     56  CB  SER L   9      -2.415  -9.730  -7.995  1.00 35.80           C  
ATOM     57  OG  SER L   9      -3.336  -9.342  -9.001  1.00 38.80           O  
ATOM     58  N   VAL L  11      -2.001 -12.913  -8.090  1.00 30.52           N  
ATOM     59  CA  VAL L  11      -2.605 -14.211  -8.333  1.00 28.46           C  
ATOM     60  C   VAL L  11      -3.316 -14.656  -7.067  1.00 28.01           C  
ATOM     61  O   VAL L  11      -3.069 -14.122  -5.985  1.00 28.27           O  
ATOM     62  CB  VAL L  11      -1.547 -15.273  -8.729  1.00 31.06           C  
ATOM     63  CG1 VAL L  11      -0.871 -14.895 -10.057  1.00 28.95           C  
ATOM     64  CG2 VAL L  11      -0.522 -15.418  -7.629  1.00 27.27           C  
ATOM     65  N   THR L  12      -4.189 -15.645  -7.200  1.00 24.55           N  
ATOM     66  CA  THR L  12      -4.996 -16.090  -6.086  1.00 25.28           C  
ATOM     67  C   THR L  12      -4.941 -17.585  -6.024  1.00 27.38           C  
ATOM     68  O   THR L  12      -4.862 -18.249  -7.048  1.00 28.34           O  
ATOM     69  CB  THR L  12      -6.466 -15.668  -6.292  1.00 34.44           C  
ATOM     70  OG1 THR L  12      -6.527 -14.249  -6.470  1.00 41.37           O  
ATOM     71  CG2 THR L  12      -7.320 -16.070  -5.103  1.00 35.58           C  
ATOM     72  N   VAL L  13      -4.971 -18.124  -4.816  1.00 24.06           N  
ATOM     73  CA  VAL L  13      -5.007 -19.559  -4.638  1.00 26.95           C  
ATOM     74  C   VAL L  13      -5.982 -19.859  -3.501  1.00 28.49           C  
ATOM     75  O   VAL L  13      -6.185 -19.024  -2.610  1.00 31.01           O  
ATOM     76  CB  VAL L  13      -3.607 -20.130  -4.329  1.00 24.25           C  
ATOM     77  CG1 VAL L  13      -3.099 -19.632  -2.955  1.00 26.24           C  
ATOM     78  CG2 VAL L  13      -3.629 -21.646  -4.367  1.00 20.68           C  
ATOM     79  N   SER L  14      -6.612 -21.024  -3.554  1.00 26.93           N  
ATOM     81  CA  SER L  14      -7.477 -21.482  -2.472  0.77 34.53           C  
ATOM     82  C   SER L  14      -6.648 -22.254  -1.456  1.00 29.60           C  
ATOM     83  O   SER L  14      -5.572 -22.764  -1.783  1.00 28.67           O  
ATOM     85  CB  SER L  14      -8.578 -22.390  -3.022  0.77 33.01           C  
ATOM     87  OG  SER L  14      -8.016 -23.508  -3.687  0.77 33.69           O  
ATOM     88  N   PRO L  15      -7.144 -22.356  -0.218  1.00 33.83           N  
ATOM     89  CA  PRO L  15      -6.404 -23.134   0.782  1.00 31.97           C  
ATOM     90  C   PRO L  15      -6.233 -24.567   0.324  1.00 29.51           C  
ATOM     91  O   PRO L  15      -7.204 -25.188  -0.100  1.00 38.14           O  
ATOM     92  CB  PRO L  15      -7.322 -23.080   2.011  1.00 31.07           C  
ATOM     93  CG  PRO L  15      -8.040 -21.794   1.866  1.00 40.51           C  
ATOM     94  CD  PRO L  15      -8.292 -21.647   0.372  1.00 38.11           C  
ATOM     95  N   GLY L  16      -5.016 -25.089   0.408  1.00 28.81           N  
ATOM     96  CA  GLY L  16      -4.732 -26.430  -0.063  1.00 25.23           C  
ATOM     97  C   GLY L  16      -4.529 -26.487  -1.578  1.00 25.58           C  
ATOM     98  O   GLY L  16      -4.191 -27.538  -2.123  1.00 30.53           O  
ATOM     99  N   GLY L  17      -4.738 -25.361  -2.254  1.00 28.96           N  
ATOM    100  CA  GLY L  17      -4.598 -25.287  -3.707  1.00 26.88           C  
ATOM    101  C   GLY L  17      -3.154 -25.176  -4.184  1.00 36.11           C  
ATOM    102  O   GLY L  17      -2.224 -25.050  -3.377  1.00 28.70           O  
ATOM    103  N   THR L  18      -2.961 -25.250  -5.498  1.00 25.69           N  
ATOM    104  CA  THR L  18      -1.631 -25.086  -6.093  1.00 23.86           C  
ATOM    105  C   THR L  18      -1.620 -23.877  -7.015  1.00 24.75           C  
ATOM    106  O   THR L  18      -2.539 -23.673  -7.806  1.00 23.42           O  
ATOM    107  CB  THR L  18      -1.187 -26.327  -6.864  1.00 31.46           C  
ATOM    108  OG1 THR L  18      -1.034 -27.416  -5.951  1.00 34.43           O  
ATOM    109  CG2 THR L  18       0.156 -26.070  -7.552  1.00 30.47           C  
ATOM    110  N   VAL L  19      -0.587 -23.057  -6.903  1.00 25.82           N  
ATOM    111  CA  VAL L  19      -0.501 -21.858  -7.726  1.00 23.04           C  
ATOM    112  C   VAL L  19       0.932 -21.769  -8.254  1.00 23.03           C  
ATOM    113  O   VAL L  19       1.863 -22.277  -7.624  1.00 22.12           O  
ATOM    114  CB  VAL L  19      -0.887 -20.599  -6.919  1.00 23.65           C  
ATOM    115  CG1 VAL L  19       0.072 -20.401  -5.732  1.00 20.28           C  
ATOM    116  CG2 VAL L  19      -0.942 -19.351  -7.811  1.00 27.14           C  
ATOM    117  N   ILE L  20       1.090 -21.147  -9.417  1.00 25.40           N  
ATOM    118  CA  ILE L  20       2.404 -20.958 -10.005  1.00 26.05           C  
ATOM    119  C   ILE L  20       2.647 -19.486 -10.265  1.00 21.91           C  
ATOM    120  O   ILE L  20       1.810 -18.803 -10.856  1.00 23.35           O  
ATOM    121  CB  ILE L  20       2.549 -21.729 -11.327  1.00 25.10           C  
ATOM    122  CG1 ILE L  20       2.496 -23.226 -11.057  1.00 24.59           C  
ATOM    123  CG2 ILE L  20       3.872 -21.346 -12.031  1.00 24.38           C  
ATOM    124  CD1 ILE L  20       2.491 -24.063 -12.326  1.00 37.54           C  
ATOM    125  N   LEU L  21       3.799 -19.001  -9.814  1.00 21.93           N  
ATOM    126  CA  LEU L  21       4.200 -17.631 -10.063  1.00 21.40           C  
ATOM    127  C   LEU L  21       5.403 -17.689 -10.988  1.00 21.82           C  
ATOM    128  O   LEU L  21       6.228 -18.602 -10.887  1.00 23.25           O  
ATOM    129  CB  LEU L  21       4.622 -16.935  -8.767  1.00 23.73           C  
ATOM    130  CG  LEU L  21       3.543 -16.542  -7.767  1.00 24.17           C  
ATOM    131  CD1 LEU L  21       2.913 -17.779  -7.217  1.00 23.49           C  
ATOM    132  CD2 LEU L  21       4.149 -15.696  -6.638  1.00 23.59           C  
ATOM    133  N   THR L  22       5.515 -16.713 -11.878  1.00 22.99           N  
ATOM    134  CA  THR L  22       6.606 -16.739 -12.838  1.00 21.86           C  
ATOM    135  C   THR L  22       7.398 -15.445 -12.850  1.00 21.75           C  
ATOM    136  O   THR L  22       6.960 -14.415 -12.352  1.00 23.10           O  
ATOM    137  CB  THR L  22       6.131 -17.102 -14.278  1.00 24.34           C  
ATOM    138  OG1 THR L  22       5.303 -16.055 -14.792  1.00 26.51           O  
ATOM    139  CG2 THR L  22       5.373 -18.423 -14.280  1.00 23.88           C  
ATOM    140  N   CYS L  23       8.567 -15.529 -13.467  1.00 21.45           N  
ATOM    142  CA  CYS L  23       9.578 -14.494 -13.403  0.56 20.64           C  
ATOM    143  C   CYS L  23      10.305 -14.546 -14.748  1.00 22.85           C  
ATOM    144  O   CYS L  23      11.055 -15.490 -14.997  1.00 24.60           O  
ATOM    146  CB  CYS L  23      10.533 -14.837 -12.248  0.56 19.64           C  
ATOM    148  SG  CYS L  23      12.027 -13.812 -12.028  0.56 27.13           S  
ATOM    149  N   GLY L  24      10.068 -13.566 -15.607  1.00 26.87           N  
ATOM    150  CA  GLY L  24      10.639 -13.568 -16.941  1.00 25.88           C  
ATOM    151  C   GLY L  24      11.574 -12.404 -17.175  1.00 27.06           C  
ATOM    152  O   GLY L  24      11.523 -11.406 -16.465  1.00 28.29           O  
ATOM    153  N   SER L  25      12.440 -12.556 -18.175  1.00 29.75           N  
ATOM    154  CA  SER L  25      13.388 -11.524 -18.580  1.00 29.81           C  
ATOM    155  C   SER L  25      12.879 -10.876 -19.863  1.00 31.15           C  
ATOM    156  O   SER L  25      12.412 -11.574 -20.762  1.00 32.03           O  
ATOM    157  CB  SER L  25      14.756 -12.165 -18.851  1.00 30.63           C  
ATOM    158  OG  SER L  25      15.667 -11.222 -19.389  1.00 42.00           O  
ATOM    159  N   SER L  26      12.957  -9.554 -19.953  1.00 33.08           N  
ATOM    160  CA  SER L  26      12.455  -8.855 -21.139  1.00 38.60           C  
ATOM    161  C   SER L  26      13.343  -9.033 -22.372  1.00 51.45           C  
ATOM    162  O   SER L  26      13.007  -8.542 -23.449  1.00 61.98           O  
ATOM    163  CB  SER L  26      12.319  -7.365 -20.859  1.00 39.43           C  
ATOM    164  OG  SER L  26      13.602  -6.771 -20.794  1.00 42.32           O  
ATOM    165  N   THR L  27      14.467  -9.730 -22.226  1.00 46.46           N  
ATOM    166  CA  THR L  27      15.440  -9.820 -23.317  1.00 55.83           C  
ATOM    167  C   THR L  27      15.737 -11.234 -23.822  1.00 60.38           C  
ATOM    168  O   THR L  27      16.470 -11.399 -24.796  1.00 60.75           O  
ATOM    169  CB  THR L  27      16.778  -9.152 -22.936  1.00 54.87           C  
ATOM    170  OG1 THR L  27      17.414  -9.897 -21.889  1.00 55.34           O  
ATOM    171  CG2 THR L  27      16.544  -7.720 -22.474  1.00 57.71           C  
ATOM    172  N   GLY L  27A     15.180 -12.249 -23.168  1.00 51.58           N  
ATOM    173  CA  GLY L  27A     15.419 -13.621 -23.584  1.00 43.29           C  
ATOM    174  C   GLY L  27A     14.871 -14.640 -22.606  1.00 39.81           C  
ATOM    175  O   GLY L  27A     14.257 -14.275 -21.610  1.00 42.20           O  
ATOM    176  N   ALA L  27B     15.090 -15.920 -22.893  1.00 30.99           N  
ATOM    177  CA  ALA L  27B     14.639 -16.987 -22.008  1.00 31.92           C  
ATOM    178  C   ALA L  27B     15.504 -17.001 -20.758  1.00 38.34           C  
ATOM    179  O   ALA L  27B     16.716 -16.778 -20.833  1.00 33.82           O  
ATOM    180  CB  ALA L  27B     14.722 -18.328 -22.710  1.00 29.61           C  
ATOM    181  N   VAL L  27C     14.888 -17.255 -19.608  1.00 27.33           N  
ATOM    182  CA  VAL L  27C     15.652 -17.480 -18.393  1.00 25.73           C  
ATOM    183  C   VAL L  27C     16.233 -18.883 -18.408  1.00 34.86           C  
ATOM    184  O   VAL L  27C     15.539 -19.844 -18.732  1.00 31.79           O  
ATOM    185  CB  VAL L  27C     14.773 -17.357 -17.140  1.00 25.55           C  
ATOM    186  CG1 VAL L  27C     15.622 -17.561 -15.886  1.00 28.31           C  
ATOM    187  CG2 VAL L  27C     14.084 -15.999 -17.127  1.00 27.80           C  
ATOM    188  N   THR L  28      17.505 -18.995 -18.047  1.00 30.25           N  
ATOM    189  CA  THR L  28      18.174 -20.284 -17.938  1.00 35.87           C  
ATOM    190  C   THR L  28      18.801 -20.386 -16.559  1.00 37.61           C  
ATOM    191  O   THR L  28      18.758 -19.428 -15.782  1.00 35.58           O  
ATOM    192  CB  THR L  28      19.301 -20.414 -18.972  1.00 43.90           C  
ATOM    193  OG1 THR L  28      20.402 -19.585 -18.582  1.00 47.48           O  
ATOM    194  CG2 THR L  28      18.813 -19.981 -20.341  1.00 40.89           C  
ATOM    195  N   SER L  29      19.393 -21.539 -16.264  1.00 38.65           N  
ATOM    196  CA  SER L  29      20.034 -21.774 -14.974  1.00 42.66           C  
ATOM    197  C   SER L  29      21.129 -20.739 -14.704  1.00 39.22           C  
ATOM    198  O   SER L  29      21.414 -20.410 -13.547  1.00 35.76           O  
ATOM    199  CB  SER L  29      20.618 -23.186 -14.919  1.00 43.00           C  
ATOM    200  OG  SER L  29      21.506 -23.409 -16.003  1.00 52.89           O  
ATOM    201  N   GLY L  30      21.733 -20.228 -15.776  1.00 33.48           N  
ATOM    202  CA  GLY L  30      22.768 -19.212 -15.666  1.00 33.95           C  
ATOM    203  C   GLY L  30      22.274 -17.855 -15.192  1.00 35.23           C  
ATOM    204  O   GLY L  30      23.076 -16.926 -15.033  1.00 30.72           O  
ATOM    205  N   HIS L  31      20.965 -17.736 -14.965  1.00 28.64           N  
ATOM    206  CA  HIS L  31      20.357 -16.512 -14.417  1.00 29.83           C  
ATOM    207  C   HIS L  31      20.122 -16.523 -12.895  1.00 28.13           C  
ATOM    208  O   HIS L  31      19.654 -15.533 -12.310  1.00 34.43           O  
ATOM    209  CB  HIS L  31      19.034 -16.218 -15.114  1.00 35.60           C  
ATOM    210  CG  HIS L  31      19.178 -15.726 -16.521  1.00 42.64           C  
ATOM    211  ND1 HIS L  31      19.347 -14.391 -16.829  1.00 52.91           N  
ATOM    212  CD2 HIS L  31      19.137 -16.382 -17.705  1.00 41.38           C  
ATOM    213  CE1 HIS L  31      19.420 -14.251 -18.142  1.00 49.06           C  
ATOM    214  NE2 HIS L  31      19.298 -15.444 -18.697  1.00 47.69           N  
ATOM    215  N   TYR L  32      20.381 -17.660 -12.269  1.00 26.76           N  
ATOM    216  CA  TYR L  32      20.353 -17.780 -10.814  1.00 31.78           C  
ATOM    217  C   TYR L  32      19.086 -17.232 -10.143  1.00 31.55           C  
ATOM    218  O   TYR L  32      19.184 -16.587  -9.105  1.00 30.00           O  
ATOM    219  CB  TYR L  32      21.595 -17.104 -10.216  1.00 28.00           C  
ATOM    220  CG  TYR L  32      22.894 -17.716 -10.695  1.00 30.46           C  
ATOM    221  CD1 TYR L  32      23.576 -18.642  -9.924  1.00 38.63           C  
ATOM    222  CD2 TYR L  32      23.416 -17.390 -11.939  1.00 32.96           C  
ATOM    223  CE1 TYR L  32      24.759 -19.215 -10.371  1.00 35.41           C  
ATOM    224  CE2 TYR L  32      24.601 -17.953 -12.392  1.00 34.61           C  
ATOM    225  CZ  TYR L  32      25.264 -18.866 -11.606  1.00 40.57           C  
ATOM    226  OH  TYR L  32      26.441 -19.427 -12.066  1.00 41.42           O  
ATOM    227  N   ALA L  33      17.909 -17.508 -10.703  1.00 22.93           N  
ATOM    228  CA  ALA L  33      16.659 -16.988 -10.128  1.00 17.34           C  
ATOM    229  C   ALA L  33      16.574 -17.158  -8.593  1.00 20.16           C  
ATOM    230  O   ALA L  33      16.839 -18.252  -8.070  1.00 21.26           O  
ATOM    231  CB  ALA L  33      15.453 -17.636 -10.808  1.00 22.22           C  
ATOM    232  N   ASN L  34      16.239 -16.075  -7.884  1.00 17.98           N  
ATOM    233  CA  ASN L  34      15.961 -16.123  -6.435  1.00 18.77           C  
ATOM    234  C   ASN L  34      14.515 -15.739  -6.175  1.00 21.38           C  
ATOM    235  O   ASN L  34      13.965 -14.917  -6.901  1.00 20.83           O  
ATOM    236  CB  ASN L  34      16.826 -15.131  -5.638  1.00 21.62           C  
ATOM    237  CG  ASN L  34      18.299 -15.294  -5.893  1.00 34.83           C  
ATOM    238  OD1 ASN L  34      18.891 -16.289  -5.503  1.00 27.99           O  
ATOM    239  ND2 ASN L  34      18.907 -14.300  -6.543  1.00 33.68           N  
ATOM    240  N   TRP L  35      13.911 -16.292  -5.128  1.00 18.39           N  
ATOM    241  CA  TRP L  35      12.552 -15.884  -4.745  1.00 17.72           C  
ATOM    242  C   TRP L  35      12.528 -15.464  -3.295  1.00 19.35           C  
ATOM    243  O   TRP L  35      13.201 -16.072  -2.458  1.00 19.75           O  
ATOM    244  CB  TRP L  35      11.542 -17.021  -4.949  1.00 15.25           C  
ATOM    245  CG  TRP L  35      11.332 -17.364  -6.390  1.00 17.24           C  
ATOM    246  CD1 TRP L  35      12.058 -18.249  -7.145  1.00 21.38           C  
ATOM    247  CD2 TRP L  35      10.331 -16.820  -7.250  1.00 20.35           C  
ATOM    248  NE1 TRP L  35      11.569 -18.271  -8.439  1.00 22.59           N  
ATOM    249  CE2 TRP L  35      10.507 -17.405  -8.523  1.00 20.00           C  
ATOM    250  CE3 TRP L  35       9.304 -15.882  -7.067  1.00 19.93           C  
ATOM    251  CZ2 TRP L  35       9.683 -17.094  -9.608  1.00 20.46           C  
ATOM    252  CZ3 TRP L  35       8.486 -15.570  -8.146  1.00 22.23           C  
ATOM    253  CH2 TRP L  35       8.680 -16.174  -9.402  1.00 21.08           C  
ATOM    254  N   PHE L  36      11.739 -14.428  -3.007  1.00 17.84           N  
ATOM    255  CA  PHE L  36      11.613 -13.891  -1.657  1.00 18.72           C  
ATOM    256  C   PHE L  36      10.141 -13.760  -1.292  1.00 22.73           C  
ATOM    257  O   PHE L  36       9.308 -13.541  -2.160  1.00 24.89           O  
ATOM    258  CB  PHE L  36      12.260 -12.510  -1.588  1.00 19.28           C  
ATOM    259  CG  PHE L  36      13.697 -12.484  -2.042  1.00 25.20           C  
ATOM    260  CD1 PHE L  36      14.726 -12.567  -1.113  1.00 18.47           C  
ATOM    261  CD2 PHE L  36      14.019 -12.352  -3.403  1.00 18.31           C  
ATOM    262  CE1 PHE L  36      16.064 -12.539  -1.527  1.00 19.31           C  
ATOM    263  CE2 PHE L  36      15.350 -12.316  -3.827  1.00 17.73           C  
ATOM    264  CZ  PHE L  36      16.370 -12.409  -2.896  1.00 20.78           C  
ATOM    265  N   GLN L  37       9.834 -13.889  -0.006  1.00 18.49           N  
ATOM    266  CA  GLN L  37       8.469 -13.761   0.483  1.00 21.80           C  
ATOM    267  C   GLN L  37       8.392 -12.556   1.418  1.00 24.76           C  
ATOM    268  O   GLN L  37       9.215 -12.414   2.317  1.00 25.24           O  
ATOM    269  CB  GLN L  37       8.104 -15.032   1.245  1.00 21.77           C  
ATOM    270  CG  GLN L  37       6.745 -15.039   1.896  1.00 34.94           C  
ATOM    271  CD  GLN L  37       6.574 -16.267   2.769  1.00 41.90           C  
ATOM    272  OE1 GLN L  37       7.385 -16.526   3.657  1.00 41.80           O  
ATOM    273  NE2 GLN L  37       5.546 -17.049   2.496  1.00 28.86           N  
ATOM    274  N   GLN L  38       7.409 -11.688   1.222  1.00 24.91           N  
ATOM    275  CA  GLN L  38       7.276 -10.549   2.121  1.00 32.53           C  
ATOM    276  C   GLN L  38       5.844 -10.184   2.497  1.00 41.16           C  
ATOM    277  O   GLN L  38       4.971 -10.047   1.639  1.00 34.59           O  
ATOM    278  CB  GLN L  38       7.958  -9.318   1.541  1.00 36.07           C  
ATOM    279  CG  GLN L  38       7.651  -8.066   2.355  1.00 47.37           C  
ATOM    280  CD  GLN L  38       8.585  -6.931   2.055  1.00 41.29           C  
ATOM    281  OE1 GLN L  38       9.083  -6.801   0.940  1.00 50.53           O  
ATOM    282  NE2 GLN L  38       8.846  -6.101   3.060  1.00 58.42           N  
ATOM    283  N   LYS L  39       5.631  -9.996   3.791  1.00 45.53           N  
ATOM    284  CA  LYS L  39       4.346  -9.545   4.308  0.64 44.93           C  
ATOM    286  C   LYS L  39       4.448  -8.091   4.765  1.00 58.73           C  
ATOM    287  O   LYS L  39       5.468  -7.685   5.326  1.00 58.36           O  
ATOM    288  CB  LYS L  39       3.905 -10.454   5.449  0.64 35.91           C  
ATOM    290  CG  LYS L  39       3.765 -11.902   5.006  0.64 41.15           C  
ATOM    292  CD  LYS L  39       4.408 -12.872   5.980  0.64 37.26           C  
ATOM    294  CE  LYS L  39       4.397 -14.279   5.413  0.64 33.36           C  
ATOM    296  NZ  LYS L  39       4.731 -15.333   6.421  0.64 36.85           N  
ATOM    298  N   PRO L  40       3.393  -7.295   4.516  1.00 56.77           N  
ATOM    299  CA  PRO L  40       3.446  -5.871   4.869  1.00 53.06           C  
ATOM    300  C   PRO L  40       3.993  -5.644   6.278  1.00 54.46           C  
ATOM    301  O   PRO L  40       3.654  -6.380   7.211  1.00 44.62           O  
ATOM    302  CB  PRO L  40       1.981  -5.436   4.766  1.00 63.25           C  
ATOM    303  CG  PRO L  40       1.423  -6.326   3.693  1.00 58.18           C  
ATOM    304  CD  PRO L  40       2.106  -7.664   3.896  1.00 53.94           C  
ATOM    305  N   GLY L  41       4.863  -4.646   6.411  1.00 57.16           N  
ATOM    306  CA  GLY L  41       5.473  -4.330   7.689  1.00 59.41           C  
ATOM    307  C   GLY L  41       6.405  -5.400   8.233  1.00 66.01           C  
ATOM    308  O   GLY L  41       6.800  -5.339   9.398  1.00 63.15           O  
ATOM    309  N   GLN L  42       6.747  -6.383   7.400  1.00 58.83           N  
ATOM    310  CA  GLN L  42       7.719  -7.416   7.772  1.00 51.65           C  
ATOM    311  C   GLN L  42       8.903  -7.421   6.819  1.00 48.45           C  
ATOM    312  O   GLN L  42       8.787  -7.017   5.661  1.00 50.63           O  
ATOM    313  CB  GLN L  42       7.093  -8.808   7.757  1.00 39.51           C  
ATOM    314  CG  GLN L  42       6.017  -9.036   8.771  1.00 41.51           C  
ATOM    315  CD  GLN L  42       5.904 -10.506   9.137  1.00 55.89           C  
ATOM    316  OE1 GLN L  42       6.904 -11.224   9.178  1.00 62.91           O  
ATOM    317  NE2 GLN L  42       4.683 -10.963   9.397  1.00 60.90           N  
ATOM    318  N   ALA L  43      10.047  -7.886   7.308  1.00 43.95           N  
ATOM    319  CA  ALA L  43      11.195  -8.066   6.446  1.00 34.37           C  
ATOM    320  C   ALA L  43      10.871  -9.169   5.432  1.00 25.99           C  
ATOM    321  O   ALA L  43      10.227 -10.160   5.773  1.00 28.77           O  
ATOM    322  CB  ALA L  43      12.413  -8.443   7.273  1.00 29.22           C  
ATOM    323  N   PRO L  44      11.321  -9.008   4.188  1.00 29.07           N  
ATOM    324  CA  PRO L  44      11.188 -10.159   3.291  1.00 26.56           C  
ATOM    325  C   PRO L  44      12.135 -11.264   3.755  1.00 24.82           C  
ATOM    326  O   PRO L  44      13.128 -10.953   4.422  1.00 21.88           O  
ATOM    327  CB  PRO L  44      11.653  -9.598   1.956  1.00 23.86           C  
ATOM    328  CG  PRO L  44      12.641  -8.550   2.331  1.00 32.84           C  
ATOM    329  CD  PRO L  44      12.076  -7.906   3.572  1.00 30.90           C  
ATOM    330  N   ARG L  45      11.805 -12.522   3.455  1.00 24.34           N  
ATOM    331  CA  ARG L  45      12.667 -13.670   3.731  0.56 23.45           C  
ATOM    333  C   ARG L  45      13.041 -14.311   2.402  1.00 23.16           C  
ATOM    334  O   ARG L  45      12.187 -14.416   1.521  1.00 20.23           O  
ATOM    335  CB  ARG L  45      11.914 -14.723   4.559  0.56 23.83           C  
ATOM    337  CG  ARG L  45      11.998 -14.558   6.064  0.56 26.40           C  
ATOM    339  CD  ARG L  45      11.218 -13.361   6.577  0.56 23.64           C  
ATOM    341  NE  ARG L  45      10.963 -13.491   8.009  0.56 25.01           N  
ATOM    343  CZ  ARG L  45      10.443 -12.535   8.770  0.56 27.66           C  
ATOM    345  NH1 ARG L  45      10.119 -11.366   8.244  0.56 31.33           N  
ATOM    347  NH2 ARG L  45      10.252 -12.751  10.061  0.56 27.14           N  
ATOM    349  N   ALA L  46      14.290 -14.760   2.261  1.00 17.46           N  
ATOM    350  CA  ALA L  46      14.687 -15.521   1.064  1.00 16.93           C  
ATOM    351  C   ALA L  46      14.090 -16.923   1.153  1.00 21.45           C  
ATOM    352  O   ALA L  46      14.079 -17.502   2.244  1.00 18.20           O  
ATOM    353  CB  ALA L  46      16.220 -15.610   0.956  1.00 17.95           C  
ATOM    354  N   LEU L  47      13.598 -17.457   0.024  1.00 19.68           N  
ATOM    355  CA  LEU L  47      13.050 -18.826  -0.046  1.00 17.70           C  
ATOM    356  C   LEU L  47      13.812 -19.748  -1.010  1.00 19.27           C  
ATOM    357  O   LEU L  47      13.991 -20.923  -0.733  1.00 21.16           O  
ATOM    358  CB  LEU L  47      11.575 -18.834  -0.488  1.00 18.12           C  
ATOM    359  CG  LEU L  47      10.555 -18.099   0.389  1.00 29.92           C  
ATOM    360  CD1 LEU L  47       9.140 -18.285  -0.167  1.00 32.33           C  
ATOM    361  CD2 LEU L  47      10.634 -18.608   1.803  1.00 28.62           C  
ATOM    362  N   ILE L  48      14.214 -19.226  -2.162  1.00 18.16           N  
ATOM    363  CA  ILE L  48      14.808 -20.071  -3.211  1.00 19.67           C  
ATOM    364  C   ILE L  48      16.013 -19.351  -3.763  1.00 22.88           C  
ATOM    365  O   ILE L  48      15.975 -18.138  -3.921  1.00 19.35           O  
ATOM    366  CB  ILE L  48      13.816 -20.306  -4.377  1.00 18.93           C  
ATOM    367  CG1 ILE L  48      12.554 -21.039  -3.889  1.00 20.70           C  
ATOM    368  CG2 ILE L  48      14.526 -21.007  -5.588  1.00 21.38           C  
ATOM    369  CD1 ILE L  48      12.799 -22.499  -3.500  1.00 25.84           C  
ATOM    370  N   PHE L  49      17.099 -20.076  -4.027  1.00 20.33           N  
ATOM    371  CA  PHE L  49      18.209 -19.480  -4.773  1.00 20.51           C  
ATOM    372  C   PHE L  49      18.682 -20.441  -5.877  1.00 21.46           C  
ATOM    373  O   PHE L  49      18.298 -21.595  -5.887  1.00 20.21           O  
ATOM    374  CB  PHE L  49      19.361 -19.110  -3.830  1.00 26.28           C  
ATOM    375  CG  PHE L  49      20.024 -20.299  -3.182  1.00 29.19           C  
ATOM    376  CD1 PHE L  49      19.410 -20.969  -2.127  1.00 21.06           C  
ATOM    377  CD2 PHE L  49      21.269 -20.734  -3.614  1.00 26.18           C  
ATOM    378  CE1 PHE L  49      20.023 -22.066  -1.527  1.00 23.03           C  
ATOM    379  CE2 PHE L  49      21.886 -21.819  -3.021  1.00 26.42           C  
ATOM    380  CZ  PHE L  49      21.261 -22.487  -1.981  1.00 27.41           C  
ATOM    381  N   GLU L  50      19.511 -19.959  -6.797  1.00 23.78           N  
ATOM    382  CA  GLU L  50      19.972 -20.783  -7.915  1.00 24.26           C  
ATOM    383  C   GLU L  50      18.819 -21.541  -8.558  1.00 27.46           C  
ATOM    384  O   GLU L  50      18.917 -22.745  -8.798  1.00 24.35           O  
ATOM    385  CB  GLU L  50      21.057 -21.773  -7.452  1.00 28.78           C  
ATOM    386  CG  GLU L  50      22.405 -21.118  -7.220  1.00 35.71           C  
ATOM    387  CD  GLU L  50      23.412 -22.058  -6.576  1.00 40.75           C  
ATOM    388  OE1 GLU L  50      23.360 -23.279  -6.841  1.00 39.66           O  
ATOM    389  OE2 GLU L  50      24.251 -21.568  -5.797  1.00 41.30           O  
ATOM    390  N   THR L  51      17.717 -20.830  -8.785  1.00 24.65           N  
ATOM    391  CA  THR L  51      16.543 -21.349  -9.482  1.00 21.61           C  
ATOM    392  C   THR L  51      15.707 -22.349  -8.700  1.00 22.78           C  
ATOM    393  O   THR L  51      14.487 -22.205  -8.617  1.00 23.34           O  
ATOM    394  CB  THR L  51      16.912 -21.956 -10.871  1.00 28.89           C  
ATOM    395  OG1 THR L  51      17.707 -21.015 -11.594  1.00 30.24           O  
ATOM    396  CG2 THR L  51      15.655 -22.255 -11.676  1.00 25.12           C  
ATOM    397  N   ASP L  52      16.345 -23.363  -8.127  1.00 19.16           N  
ATOM    398  CA  ASP L  52      15.576 -24.436  -7.506  1.00 23.10           C  
ATOM    399  C   ASP L  52      16.086 -24.905  -6.129  1.00 23.55           C  
ATOM    400  O   ASP L  52      15.570 -25.875  -5.584  1.00 25.62           O  
ATOM    401  CB  ASP L  52      15.443 -25.629  -8.482  1.00 23.86           C  
ATOM    402  CG  ASP L  52      16.784 -26.327  -8.753  1.00 34.01           C  
ATOM    403  OD1 ASP L  52      17.794 -25.958  -8.128  1.00 26.59           O  
ATOM    404  OD2 ASP L  52      16.825 -27.260  -9.579  1.00 39.60           O  
ATOM    405  N   LYS L  53      17.088 -24.225  -5.572  1.00 22.58           N  
ATOM    406  CA  LYS L  53      17.658 -24.611  -4.275  1.00 26.24           C  
ATOM    407  C   LYS L  53      16.923 -23.939  -3.111  1.00 27.31           C  
ATOM    408  O   LYS L  53      16.608 -22.751  -3.194  1.00 21.05           O  
ATOM    409  CB  LYS L  53      19.142 -24.230  -4.211  1.00 24.28           C  
ATOM    410  CG  LYS L  53      20.011 -24.911  -5.278  1.00 27.40           C  
ATOM    411  CD  LYS L  53      19.781 -26.426  -5.282  1.00 30.23           C  
ATOM    412  CE  LYS L  53      20.666 -27.146  -6.308  1.00 44.32           C  
ATOM    413  NZ  LYS L  53      20.317 -26.769  -7.714  1.00 38.72           N  
ATOM    414  N   LYS L  54      16.684 -24.682  -2.025  1.00 20.17           N  
ATOM    415  CA  LYS L  54      15.948 -24.151  -0.876  1.00 22.83           C  
ATOM    416  C   LYS L  54      16.878 -23.900   0.302  1.00 26.45           C  
ATOM    417  O   LYS L  54      17.977 -24.456   0.364  1.00 24.62           O  
ATOM    418  CB  LYS L  54      14.847 -25.128  -0.426  1.00 25.29           C  
ATOM    419  CG  LYS L  54      13.925 -25.595  -1.542  1.00 28.44           C  
ATOM    420  CD  LYS L  54      12.828 -26.529  -1.045  1.00 32.94           C  
ATOM    421  CE  LYS L  54      12.139 -27.206  -2.238  1.00 42.86           C  
ATOM    422  NZ  LYS L  54      10.948 -28.033  -1.856  1.00 40.03           N  
ATOM    423  N   TYR L  55      16.428 -23.072   1.244  1.00 22.55           N  
ATOM    424  CA  TYR L  55      17.117 -22.932   2.524  1.00 21.07           C  
ATOM    425  C   TYR L  55      16.535 -23.932   3.522  1.00 23.05           C  
ATOM    426  O   TYR L  55      15.495 -24.540   3.265  1.00 22.90           O  
ATOM    427  CB  TYR L  55      16.984 -21.494   3.046  1.00 21.40           C  
ATOM    428  CG  TYR L  55      17.584 -20.480   2.099  1.00 22.46           C  
ATOM    429  CD1 TYR L  55      18.949 -20.213   2.122  1.00 23.17           C  
ATOM    430  CD2 TYR L  55      16.792 -19.804   1.171  1.00 19.39           C  
ATOM    431  CE1 TYR L  55      19.514 -19.305   1.259  1.00 20.78           C  
ATOM    432  CE2 TYR L  55      17.356 -18.884   0.292  1.00 18.98           C  
ATOM    433  CZ  TYR L  55      18.720 -18.641   0.349  1.00 24.57           C  
ATOM    434  OH  TYR L  55      19.310 -17.737  -0.513  1.00 23.34           O  
ATOM    435  N   SER L  56      17.198 -24.098   4.661  1.00 24.51           N  
ATOM    436  CA  SER L  56      16.703 -25.001   5.692  1.00 23.21           C  
ATOM    437  C   SER L  56      15.381 -24.501   6.269  1.00 24.06           C  
ATOM    438  O   SER L  56      14.657 -25.269   6.902  1.00 22.11           O  
ATOM    439  CB  SER L  56      17.721 -25.130   6.816  1.00 22.61           C  
ATOM    440  OG  SER L  56      17.796 -23.903   7.509  1.00 25.53           O  
ATOM    441  N   TRP L  57      15.064 -23.216   6.082  1.00 19.70           N  
ATOM    442  CA  TRP L  57      13.774 -22.697   6.571  1.00 17.04           C  
ATOM    443  C   TRP L  57      12.683 -22.624   5.493  1.00 20.82           C  
ATOM    444  O   TRP L  57      11.574 -22.167   5.769  1.00 24.37           O  
ATOM    445  CB  TRP L  57      13.932 -21.307   7.224  1.00 21.77           C  
ATOM    446  CG  TRP L  57      14.503 -20.297   6.274  1.00 18.72           C  
ATOM    447  CD1 TRP L  57      13.813 -19.548   5.351  1.00 22.08           C  
ATOM    448  CD2 TRP L  57      15.883 -19.920   6.148  1.00 19.59           C  
ATOM    449  NE1 TRP L  57      14.686 -18.742   4.653  1.00 21.69           N  
ATOM    450  CE2 TRP L  57      15.958 -18.947   5.125  1.00 20.88           C  
ATOM    451  CE3 TRP L  57      17.066 -20.321   6.792  1.00 17.60           C  
ATOM    452  CZ2 TRP L  57      17.166 -18.369   4.732  1.00 22.87           C  
ATOM    453  CZ3 TRP L  57      18.263 -19.739   6.408  1.00 21.05           C  
ATOM    454  CH2 TRP L  57      18.304 -18.771   5.390  1.00 20.05           C  
ATOM    455  N   THR L  58      12.980 -23.082   4.280  1.00 19.54           N  
ATOM    456  CA  THR L  58      11.998 -23.019   3.187  1.00 18.29           C  
ATOM    457  C   THR L  58      11.015 -24.182   3.268  1.00 20.98           C  
ATOM    458  O   THR L  58      11.426 -25.335   3.193  1.00 21.95           O  
ATOM    459  CB  THR L  58      12.680 -23.125   1.808  1.00 27.64           C  
ATOM    460  OG1 THR L  58      13.736 -22.163   1.696  1.00 21.93           O  
ATOM    461  CG2 THR L  58      11.648 -22.920   0.675  1.00 24.53           C  
ATOM    462  N   PRO L  59       9.712 -23.893   3.398  1.00 24.02           N  
ATOM    463  CA  PRO L  59       8.760 -25.014   3.465  1.00 28.98           C  
ATOM    464  C   PRO L  59       8.779 -25.869   2.199  1.00 26.12           C  
ATOM    465  O   PRO L  59       8.891 -25.336   1.089  1.00 28.19           O  
ATOM    466  CB  PRO L  59       7.405 -24.320   3.615  1.00 25.35           C  
ATOM    467  CG  PRO L  59       7.717 -22.993   4.224  1.00 29.50           C  
ATOM    468  CD  PRO L  59       9.068 -22.594   3.661  1.00 24.24           C  
ATOM    469  N   GLY L  60       8.672 -27.184   2.373  1.00 28.65           N  
ATOM    470  CA  GLY L  60       8.651 -28.114   1.259  1.00 27.15           C  
ATOM    471  C   GLY L  60       7.587 -27.787   0.226  1.00 25.51           C  
ATOM    472  O   GLY L  60       7.736 -28.154  -0.932  1.00 29.24           O  
ATOM    473  N   ARG L  61       6.534 -27.085   0.643  1.00 26.26           N  
ATOM    474  CA  ARG L  61       5.462 -26.630  -0.260  1.00 34.82           C  
ATOM    475  C   ARG L  61       5.952 -25.755  -1.421  1.00 33.70           C  
ATOM    476  O   ARG L  61       5.264 -25.625  -2.437  1.00 28.82           O  
ATOM    477  CB  ARG L  61       4.424 -25.789   0.508  1.00 29.86           C  
ATOM    478  CG  ARG L  61       3.760 -26.474   1.650  1.00 41.17           C  
ATOM    479  CD  ARG L  61       2.550 -25.686   2.105  1.00 37.09           C  
ATOM    480  NE  ARG L  61       2.864 -24.362   2.639  1.00 32.78           N  
ATOM    481  CZ  ARG L  61       3.463 -24.150   3.807  1.00 44.89           C  
ATOM    482  NH1 ARG L  61       3.861 -25.179   4.554  1.00 38.27           N  
ATOM    483  NH2 ARG L  61       3.684 -22.908   4.224  1.00 42.12           N  
ATOM    484  N   PHE L  62       7.098 -25.103  -1.241  1.00 24.64           N  
ATOM    485  CA  PHE L  62       7.618 -24.177  -2.248  1.00 22.50           C  
ATOM    486  C   PHE L  62       8.659 -24.884  -3.106  1.00 26.20           C  
ATOM    487  O   PHE L  62       9.554 -25.526  -2.576  1.00 27.10           O  
ATOM    488  CB  PHE L  62       8.270 -22.959  -1.575  1.00 23.17           C  
ATOM    489  CG  PHE L  62       7.304 -22.088  -0.814  1.00 28.69           C  
ATOM    490  CD1 PHE L  62       6.742 -20.961  -1.402  1.00 30.44           C  
ATOM    491  CD2 PHE L  62       6.950 -22.400   0.486  1.00 36.76           C  
ATOM    492  CE1 PHE L  62       5.852 -20.164  -0.700  1.00 28.80           C  
ATOM    493  CE2 PHE L  62       6.065 -21.608   1.188  1.00 32.13           C  
ATOM    494  CZ  PHE L  62       5.524 -20.491   0.605  1.00 24.54           C  
ATOM    495  N   SER L  63       8.550 -24.775  -4.429  1.00 22.60           N  
ATOM    496  CA  SER L  63       9.623 -25.260  -5.297  1.00 22.22           C  
ATOM    497  C   SER L  63       9.868 -24.338  -6.486  1.00 24.96           C  
ATOM    498  O   SER L  63       8.938 -23.743  -7.052  1.00 22.50           O  
ATOM    499  CB  SER L  63       9.360 -26.694  -5.787  1.00 31.39           C  
ATOM    500  OG  SER L  63       8.113 -26.780  -6.438  1.00 42.60           O  
ATOM    501  N   GLY L  64      11.133 -24.216  -6.857  1.00 20.47           N  
ATOM    502  CA  GLY L  64      11.507 -23.384  -7.983  1.00 20.46           C  
ATOM    503  C   GLY L  64      11.847 -24.265  -9.170  1.00 23.59           C  
ATOM    504  O   GLY L  64      12.360 -25.373  -9.002  1.00 25.52           O  
ATOM    505  N   SER L  65      11.551 -23.778 -10.367  1.00 22.67           N  
ATOM    506  CA  SER L  65      11.908 -24.495 -11.588  1.00 32.82           C  
ATOM    507  C   SER L  65      12.027 -23.489 -12.713  1.00 34.40           C  
ATOM    508  O   SER L  65      11.782 -22.299 -12.518  1.00 29.17           O  
ATOM    509  CB  SER L  65      10.819 -25.504 -11.946  1.00 27.67           C  
ATOM    510  OG  SER L  65       9.610 -24.811 -12.223  1.00 29.03           O  
ATOM    511  N   LEU L  66      12.432 -23.967 -13.882  1.00 26.97           N  
ATOM    512  CA  LEU L  66      12.290 -23.199 -15.109  1.00 30.34           C  
ATOM    513  C   LEU L  66      11.045 -23.717 -15.805  1.00 36.71           C  
ATOM    514  O   LEU L  66      10.816 -24.924 -15.874  1.00 31.34           O  
ATOM    515  CB  LEU L  66      13.507 -23.366 -16.019  1.00 32.16           C  
ATOM    516  CG  LEU L  66      14.830 -22.771 -15.526  1.00 36.12           C  
ATOM    517  CD1 LEU L  66      15.961 -23.133 -16.494  1.00 36.17           C  
ATOM    518  CD2 LEU L  66      14.723 -21.255 -15.324  1.00 29.18           C  
ATOM    519  N   LEU L  67      10.237 -22.799 -16.305  1.00 29.89           N  
ATOM    520  CA  LEU L  67       8.977 -23.156 -16.931  1.00 32.75           C  
ATOM    521  C   LEU L  67       8.836 -22.294 -18.163  1.00 35.18           C  
ATOM    522  O   LEU L  67       8.677 -21.076 -18.065  1.00 33.65           O  
ATOM    523  CB  LEU L  67       7.824 -22.873 -15.981  1.00 34.57           C  
ATOM    524  CG  LEU L  67       6.447 -23.368 -16.403  1.00 40.65           C  
ATOM    525  CD1 LEU L  67       6.442 -24.892 -16.476  1.00 42.90           C  
ATOM    526  CD2 LEU L  67       5.401 -22.867 -15.418  1.00 41.49           C  
ATOM    527  N   GLY L  68       8.889 -22.926 -19.327  1.00 37.39           N  
ATOM    528  CA  GLY L  68       8.949 -22.176 -20.565  1.00 35.95           C  
ATOM    529  C   GLY L  68      10.236 -21.373 -20.574  1.00 35.78           C  
ATOM    530  O   GLY L  68      11.312 -21.893 -20.257  1.00 37.77           O  
ATOM    531  N   ALA L  69      10.125 -20.096 -20.910  1.00 32.60           N  
ATOM    532  CA  ALA L  69      11.288 -19.228 -20.973  1.00 31.31           C  
ATOM    533  C   ALA L  69      11.451 -18.464 -19.659  1.00 23.31           C  
ATOM    534  O   ALA L  69      12.200 -17.500 -19.596  1.00 32.31           O  
ATOM    535  CB  ALA L  69      11.144 -18.257 -22.129  1.00 38.22           C  
ATOM    536  N   LYS L  70      10.763 -18.908 -18.611  1.00 26.66           N  
ATOM    537  CA  LYS L  70      10.743 -18.154 -17.360  1.00 27.30           C  
ATOM    538  C   LYS L  70      11.146 -18.987 -16.146  1.00 27.36           C  
ATOM    539  O   LYS L  70      11.099 -20.215 -16.177  1.00 26.51           O  
ATOM    540  CB  LYS L  70       9.339 -17.594 -17.108  1.00 31.75           C  
ATOM    541  CG  LYS L  70       8.733 -16.788 -18.257  1.00 27.90           C  
ATOM    542  CD  LYS L  70       7.463 -16.078 -17.762  1.00 30.69           C  
ATOM    543  CE  LYS L  70       6.822 -15.222 -18.841  1.00 39.09           C  
ATOM    544  NZ  LYS L  70       5.864 -14.233 -18.266  1.00 42.62           N  
ATOM    545  N   ALA L  71      11.522 -18.311 -15.064  1.00 19.65           N  
ATOM    546  CA  ALA L  71      11.692 -18.985 -13.787  1.00 19.10           C  
ATOM    547  C   ALA L  71      10.316 -19.046 -13.141  1.00 19.32           C  
ATOM    548  O   ALA L  71       9.497 -18.169 -13.387  1.00 22.41           O  
ATOM    549  CB  ALA L  71      12.654 -18.212 -12.908  1.00 19.18           C  
ATOM    550  N   ALA L  72      10.075 -20.067 -12.323  1.00 18.41           N  
ATOM    551  CA  ALA L  72       8.756 -20.304 -11.728  1.00 23.30           C  
ATOM    552  C   ALA L  72       8.870 -20.734 -10.276  1.00 21.31           C  
ATOM    553  O   ALA L  72       9.767 -21.478  -9.910  1.00 20.80           O  
ATOM    554  CB  ALA L  72       7.980 -21.371 -12.520  1.00 20.39           C  
ATOM    555  N   LEU L  73       7.941 -20.260  -9.457  1.00 19.55           N  
ATOM    556  CA  LEU L  73       7.821 -20.695  -8.079  1.00 18.63           C  
ATOM    557  C   LEU L  73       6.470 -21.387  -7.987  1.00 21.16           C  
ATOM    558  O   LEU L  73       5.449 -20.789  -8.309  1.00 23.84           O  
ATOM    559  CB  LEU L  73       7.858 -19.480  -7.136  1.00 17.49           C  
ATOM    560  CG  LEU L  73       7.639 -19.802  -5.650  1.00 17.63           C  
ATOM    561  CD1 LEU L  73       8.805 -20.622  -5.125  1.00 20.54           C  
ATOM    562  CD2 LEU L  73       7.480 -18.528  -4.841  1.00 22.19           C  
ATOM    563  N   THR L  74       6.471 -22.657  -7.607  1.00 17.44           N  
ATOM    564  CA  THR L  74       5.233 -23.387  -7.423  1.00 21.50           C  
ATOM    565  C   THR L  74       4.968 -23.552  -5.935  1.00 22.80           C  
ATOM    566  O   THR L  74       5.811 -24.048  -5.192  1.00 24.27           O  
ATOM    567  CB  THR L  74       5.265 -24.773  -8.106  1.00 25.94           C  
ATOM    568  OG1 THR L  74       5.455 -24.608  -9.521  1.00 26.22           O  
ATOM    569  CG2 THR L  74       3.949 -25.529  -7.842  1.00 28.16           C  
ATOM    570  N   ILE L  75       3.795 -23.110  -5.508  1.00 20.29           N  
ATOM    571  CA  ILE L  75       3.364 -23.272  -4.121  1.00 20.89           C  
ATOM    572  C   ILE L  75       2.238 -24.287  -4.085  1.00 28.62           C  
ATOM    573  O   ILE L  75       1.146 -24.027  -4.610  1.00 28.79           O  
ATOM    574  CB  ILE L  75       2.835 -21.939  -3.559  1.00 24.22           C  
ATOM    575  CG1 ILE L  75       3.902 -20.846  -3.705  1.00 27.23           C  
ATOM    576  CG2 ILE L  75       2.417 -22.092  -2.070  1.00 28.08           C  
ATOM    577  CD1 ILE L  75       3.387 -19.427  -3.380  1.00 22.37           C  
ATOM    578  N   SER L  76       2.498 -25.436  -3.472  1.00 26.68           N  
ATOM    580  CA  SER L  76       1.506 -26.499  -3.365  0.58 31.51           C  
ATOM    581  C   SER L  76       0.856 -26.488  -1.982  1.00 36.24           C  
ATOM    582  O   SER L  76       1.400 -25.914  -1.028  1.00 29.51           O  
ATOM    584  CB  SER L  76       2.148 -27.864  -3.629  0.58 27.95           C  
ATOM    586  OG  SER L  76       2.873 -27.870  -4.846  0.58 25.16           O  
ATOM    587  N   ASP L  77      -0.302 -27.130  -1.877  1.00 32.90           N  
ATOM    588  CA  ASP L  77      -1.030 -27.200  -0.615  1.00 34.02           C  
ATOM    589  C   ASP L  77      -0.979 -25.874   0.136  1.00 31.18           C  
ATOM    590  O   ASP L  77      -0.573 -25.829   1.293  1.00 30.15           O  
ATOM    591  CB  ASP L  77      -0.454 -28.308   0.257  1.00 32.89           C  
ATOM    592  CG  ASP L  77      -1.279 -28.543   1.510  1.00 49.61           C  
ATOM    593  OD1 ASP L  77      -2.475 -28.168   1.513  1.00 38.66           O  
ATOM    594  OD2 ASP L  77      -0.728 -29.096   2.488  1.00 46.38           O  
ATOM    595  N   ALA L  78      -1.404 -24.806  -0.531  1.00 29.36           N  
ATOM    596  CA  ALA L  78      -1.275 -23.448  -0.012  1.00 24.09           C  
ATOM    597  C   ALA L  78      -1.926 -23.207   1.364  1.00 36.62           C  
ATOM    598  O   ALA L  78      -3.046 -23.648   1.637  1.00 32.47           O  
ATOM    599  CB  ALA L  78      -1.806 -22.443  -1.024  1.00 27.33           C  
ATOM    600  N   GLN L  79      -1.219 -22.469   2.212  1.00 31.00           N  
ATOM    601  CA  GLN L  79      -1.698 -22.158   3.555  1.00 30.77           C  
ATOM    602  C   GLN L  79      -2.019 -20.690   3.662  1.00 36.29           C  
ATOM    603  O   GLN L  79      -1.447 -19.861   2.950  1.00 31.63           O  
ATOM    604  CB  GLN L  79      -0.637 -22.505   4.597  1.00 31.94           C  
ATOM    605  CG  GLN L  79      -0.185 -23.935   4.547  1.00 27.77           C  
ATOM    606  CD  GLN L  79      -1.286 -24.896   4.959  1.00 47.29           C  
ATOM    607  OE1 GLN L  79      -1.819 -24.806   6.066  1.00 43.80           O  
ATOM    608  NE2 GLN L  79      -1.638 -25.815   4.067  1.00 40.15           N  
ATOM    609  N   PRO L  80      -2.932 -20.355   4.571  1.00 38.70           N  
ATOM    610  CA  PRO L  80      -3.269 -18.959   4.834  1.00 30.89           C  
ATOM    611  C   PRO L  80      -2.030 -18.095   5.032  1.00 28.16           C  
ATOM    612  O   PRO L  80      -2.033 -16.945   4.606  1.00 33.41           O  
ATOM    613  CB  PRO L  80      -4.059 -19.044   6.139  1.00 36.97           C  
ATOM    614  CG  PRO L  80      -4.717 -20.375   6.061  1.00 40.14           C  
ATOM    615  CD  PRO L  80      -3.743 -21.285   5.373  1.00 34.40           C  
ATOM    616  N   GLU L  81      -0.994 -18.634   5.667  1.00 33.46           N  
ATOM    617  CA  GLU L  81       0.209 -17.848   5.938  1.00 38.08           C  
ATOM    618  C   GLU L  81       1.068 -17.607   4.693  1.00 39.86           C  
ATOM    619  O   GLU L  81       2.042 -16.853   4.748  1.00 35.63           O  
ATOM    620  CB  GLU L  81       1.057 -18.480   7.049  1.00 36.07           C  
ATOM    621  CG  GLU L  81       1.421 -19.934   6.834  1.00 39.17           C  
ATOM    622  CD  GLU L  81       0.461 -20.887   7.529  1.00 54.64           C  
ATOM    623  OE1 GLU L  81      -0.769 -20.645   7.492  1.00 47.98           O  
ATOM    624  OE2 GLU L  81       0.940 -21.880   8.120  1.00 55.63           O  
ATOM    625  N   ASP L  82       0.706 -18.237   3.578  1.00 32.27           N  
ATOM    626  CA  ASP L  82       1.427 -18.028   2.320  1.00 30.01           C  
ATOM    627  C   ASP L  82       0.985 -16.736   1.651  1.00 32.86           C  
ATOM    628  O   ASP L  82       1.630 -16.263   0.702  1.00 29.84           O  
ATOM    629  CB  ASP L  82       1.234 -19.219   1.378  1.00 29.15           C  
ATOM    630  CG  ASP L  82       1.803 -20.515   1.946  1.00 31.70           C  
ATOM    631  OD1 ASP L  82       2.759 -20.458   2.752  1.00 31.62           O  
ATOM    632  OD2 ASP L  82       1.309 -21.600   1.573  1.00 32.99           O  
ATOM    633  N   GLU L  83      -0.113 -16.151   2.141  1.00 26.30           N  
ATOM    634  CA  GLU L  83      -0.533 -14.854   1.624  1.00 26.59           C  
ATOM    635  C   GLU L  83       0.588 -13.846   1.865  1.00 38.48           C  
ATOM    636  O   GLU L  83       1.071 -13.705   2.992  1.00 38.09           O  
ATOM    637  CB  GLU L  83      -1.845 -14.377   2.258  1.00 28.30           C  
ATOM    638  CG  GLU L  83      -2.309 -13.047   1.705  1.00 28.98           C  
ATOM    639  CD  GLU L  83      -3.810 -12.823   1.853  1.00 50.66           C  
ATOM    640  OE1 GLU L  83      -4.594 -13.770   1.607  1.00 40.16           O  
ATOM    641  OE2 GLU L  83      -4.206 -11.690   2.199  1.00 47.88           O  
ATOM    642  N   ALA L  84       1.006 -13.153   0.810  1.00 30.58           N  
ATOM    643  CA  ALA L  84       2.223 -12.348   0.880  1.00 28.07           C  
ATOM    644  C   ALA L  84       2.580 -11.800  -0.491  1.00 32.46           C  
ATOM    645  O   ALA L  84       1.999 -12.202  -1.504  1.00 25.00           O  
ATOM    646  CB  ALA L  84       3.376 -13.199   1.423  1.00 25.79           C  
ATOM    647  N   GLU L  85       3.525 -10.865  -0.521  1.00 24.94           N  
ATOM    648  CA  GLU L  85       4.092 -10.422  -1.784  1.00 24.70           C  
ATOM    649  C   GLU L  85       5.313 -11.314  -2.068  1.00 26.97           C  
ATOM    650  O   GLU L  85       6.140 -11.533  -1.176  1.00 26.76           O  
ATOM    651  CB  GLU L  85       4.514  -8.954  -1.699  1.00 26.78           C  
ATOM    652  CG  GLU L  85       4.945  -8.355  -3.027  1.00 33.35           C  
ATOM    653  CD  GLU L  85       3.766  -7.952  -3.884  1.00 35.81           C  
ATOM    654  OE1 GLU L  85       2.629  -7.967  -3.361  1.00 40.82           O  
ATOM    655  OE2 GLU L  85       3.972  -7.616  -5.068  1.00 37.31           O  
ATOM    656  N   TYR L  86       5.406 -11.845  -3.292  1.00 25.17           N  
ATOM    657  CA  TYR L  86       6.554 -12.665  -3.698  1.00 21.27           C  
ATOM    658  C   TYR L  86       7.407 -11.932  -4.727  1.00 23.31           C  
ATOM    659  O   TYR L  86       6.902 -11.541  -5.776  1.00 24.61           O  
ATOM    660  CB  TYR L  86       6.084 -14.025  -4.243  1.00 20.95           C  
ATOM    661  CG  TYR L  86       5.518 -14.873  -3.143  1.00 18.17           C  
ATOM    662  CD1 TYR L  86       6.321 -15.776  -2.457  1.00 22.57           C  
ATOM    663  CD2 TYR L  86       4.203 -14.707  -2.720  1.00 23.81           C  
ATOM    664  CE1 TYR L  86       5.818 -16.521  -1.416  1.00 25.56           C  
ATOM    665  CE2 TYR L  86       3.692 -15.444  -1.672  1.00 22.11           C  
ATOM    666  CZ  TYR L  86       4.494 -16.350  -1.024  1.00 22.35           C  
ATOM    667  OH  TYR L  86       3.983 -17.093   0.023  1.00 24.27           O  
ATOM    668  N   TYR L  87       8.695 -11.757  -4.427  1.00 20.29           N  
ATOM    669  CA  TYR L  87       9.621 -11.126  -5.366  1.00 22.43           C  
ATOM    670  C   TYR L  87      10.616 -12.124  -5.937  1.00 20.00           C  
ATOM    671  O   TYR L  87      11.070 -13.008  -5.243  1.00 20.25           O  
ATOM    672  CB  TYR L  87      10.414 -10.014  -4.674  1.00 23.11           C  
ATOM    673  CG  TYR L  87       9.577  -8.824  -4.294  1.00 27.19           C  
ATOM    674  CD1 TYR L  87       9.400  -7.769  -5.176  1.00 30.07           C  
ATOM    675  CD2 TYR L  87       8.964  -8.755  -3.054  1.00 33.90           C  
ATOM    676  CE1 TYR L  87       8.625  -6.675  -4.834  1.00 38.27           C  
ATOM    677  CE2 TYR L  87       8.185  -7.665  -2.701  1.00 35.11           C  
ATOM    678  CZ  TYR L  87       8.021  -6.628  -3.599  1.00 33.99           C  
ATOM    679  OH  TYR L  87       7.249  -5.541  -3.249  1.00 43.28           O  
ATOM    680  N   CYS L  88      10.943 -11.981  -7.213  1.00 22.35           N  
ATOM    681  CA  CYS L  88      12.015 -12.781  -7.785  0.78 21.73           C  
ATOM    683  C   CYS L  88      13.136 -11.836  -8.170  1.00 23.16           C  
ATOM    684  O   CYS L  88      12.922 -10.648  -8.346  1.00 21.29           O  
ATOM    685  CB  CYS L  88      11.548 -13.556  -9.019  0.78 23.66           C  
ATOM    687  SG  CYS L  88      11.239 -12.501 -10.450  0.78 24.42           S  
ATOM    689  N   SER L  89      14.348 -12.363  -8.258  1.00 22.28           N  
ATOM    690  CA  SER L  89      15.447 -11.572  -8.780  1.00 23.07           C  
ATOM    691  C   SER L  89      16.151 -12.468  -9.787  1.00 24.18           C  
ATOM    692  O   SER L  89      16.155 -13.690  -9.642  1.00 18.97           O  
ATOM    693  CB  SER L  89      16.398 -11.103  -7.672  1.00 21.30           C  
ATOM    694  OG  SER L  89      17.093 -12.185  -7.054  1.00 22.15           O  
ATOM    695  N   LEU L  90      16.691 -11.869 -10.835  1.00 17.92           N  
ATOM    696  CA  LEU L  90      17.468 -12.611 -11.812  1.00 20.60           C  
ATOM    697  C   LEU L  90      18.867 -12.025 -11.808  1.00 23.59           C  
ATOM    698  O   LEU L  90      19.025 -10.809 -11.680  1.00 20.57           O  
ATOM    699  CB  LEU L  90      16.833 -12.485 -13.193  1.00 21.48           C  
ATOM    700  CG  LEU L  90      15.451 -13.133 -13.373  1.00 21.83           C  
ATOM    701  CD1 LEU L  90      15.055 -13.081 -14.861  1.00 23.02           C  
ATOM    702  CD2 LEU L  90      15.477 -14.564 -12.898  1.00 19.22           C  
ATOM    703  N   SER L  91      19.881 -12.874 -11.931  1.00 19.01           N  
ATOM    704  CA  SER L  91      21.257 -12.427 -11.695  1.00 24.19           C  
ATOM    705  C   SER L  91      22.283 -13.087 -12.628  1.00 27.62           C  
ATOM    706  O   SER L  91      22.340 -14.308 -12.736  1.00 23.08           O  
ATOM    707  CB  SER L  91      21.633 -12.707 -10.239  1.00 25.54           C  
ATOM    708  OG  SER L  91      22.946 -12.260  -9.947  1.00 26.20           O  
ATOM    709  N   ASP L  92      23.083 -12.274 -13.307  1.00 21.84           N  
ATOM    710  CA  ASP L  92      24.213 -12.783 -14.084  1.00 22.96           C  
ATOM    711  C   ASP L  92      25.316 -11.734 -14.142  1.00 22.66           C  
ATOM    712  O   ASP L  92      25.277 -10.736 -13.403  1.00 20.32           O  
ATOM    713  CB  ASP L  92      23.791 -13.280 -15.484  1.00 20.09           C  
ATOM    714  CG  ASP L  92      23.210 -12.178 -16.375  1.00 29.52           C  
ATOM    715  OD1 ASP L  92      23.546 -10.991 -16.201  1.00 24.36           O  
ATOM    716  OD2 ASP L  92      22.417 -12.514 -17.279  1.00 33.39           O  
ATOM    717  N   VAL L  93      26.310 -11.956 -14.997  1.00 22.32           N  
ATOM    718  CA  VAL L  93      27.428 -11.021 -15.068  1.00 20.13           C  
ATOM    719  C   VAL L  93      26.977  -9.580 -15.411  1.00 22.24           C  
ATOM    720  O   VAL L  93      27.657  -8.608 -15.080  1.00 24.17           O  
ATOM    721  CB  VAL L  93      28.520 -11.503 -16.061  1.00 23.18           C  
ATOM    722  CG1 VAL L  93      28.020 -11.407 -17.513  1.00 21.11           C  
ATOM    723  CG2 VAL L  93      29.773 -10.667 -15.874  1.00 25.06           C  
ATOM    724  N   ASP L  94      25.819  -9.442 -16.050  1.00 21.68           N  
ATOM    725  CA  ASP L  94      25.342  -8.121 -16.485  1.00 23.66           C  
ATOM    726  C   ASP L  94      24.477  -7.417 -15.448  1.00 31.30           C  
ATOM    727  O   ASP L  94      24.120  -6.244 -15.606  1.00 26.07           O  
ATOM    728  CB  ASP L  94      24.602  -8.225 -17.821  1.00 25.38           C  
ATOM    729  CG  ASP L  94      25.526  -8.646 -18.950  1.00 29.42           C  
ATOM    730  OD1 ASP L  94      26.652  -8.104 -19.002  1.00 26.90           O  
ATOM    731  OD2 ASP L  94      25.152  -9.529 -19.749  1.00 31.84           O  
ATOM    732  N   GLY L  95      24.149  -8.119 -14.374  1.00 20.67           N  
ATOM    733  CA  GLY L  95      23.531  -7.433 -13.250  1.00 21.77           C  
ATOM    734  C   GLY L  95      22.558  -8.278 -12.481  1.00 22.44           C  
ATOM    735  O   GLY L  95      22.231  -9.395 -12.890  1.00 21.95           O  
ATOM    736  N   TYR L  96      22.093  -7.719 -11.368  1.00 21.95           N  
ATOM    737  CA  TYR L  96      21.180  -8.375 -10.448  1.00 22.25           C  
ATOM    738  C   TYR L  96      19.911  -7.539 -10.413  1.00 26.00           C  
ATOM    739  O   TYR L  96      19.935  -6.411  -9.917  1.00 21.45           O  
ATOM    740  CB  TYR L  96      21.816  -8.398  -9.049  1.00 18.68           C  
ATOM    741  CG  TYR L  96      21.006  -9.090  -7.980  1.00 23.42           C  
ATOM    742  CD1 TYR L  96      21.273 -10.408  -7.630  1.00 23.29           C  
ATOM    743  CD2 TYR L  96      19.988  -8.423  -7.300  1.00 25.51           C  
ATOM    744  CE1 TYR L  96      20.545 -11.051  -6.656  1.00 26.51           C  
ATOM    745  CE2 TYR L  96      19.243  -9.073  -6.305  1.00 26.01           C  
ATOM    746  CZ  TYR L  96      19.533 -10.383  -5.994  1.00 25.36           C  
ATOM    747  OH  TYR L  96      18.817 -11.047  -5.024  1.00 32.35           O  
ATOM    748  N   LEU L  97      18.803  -8.080 -10.913  1.00 19.01           N  
ATOM    749  CA  LEU L  97      17.573  -7.270 -11.011  1.00 21.99           C  
ATOM    750  C   LEU L  97      16.366  -7.904 -10.327  1.00 26.57           C  
ATOM    751  O   LEU L  97      16.148  -9.104 -10.454  1.00 20.49           O  
ATOM    752  CB  LEU L  97      17.239  -7.007 -12.472  1.00 23.07           C  
ATOM    753  CG  LEU L  97      18.280  -6.176 -13.239  1.00 31.49           C  
ATOM    754  CD1 LEU L  97      17.831  -5.965 -14.676  1.00 45.97           C  
ATOM    755  CD2 LEU L  97      18.490  -4.851 -12.536  1.00 38.86           C  
ATOM    756  N   PHE L  98      15.572  -7.091  -9.634  1.00 23.18           N  
ATOM    757  CA  PHE L  98      14.351  -7.581  -8.996  1.00 27.81           C  
ATOM    758  C   PHE L  98      13.169  -7.413  -9.939  1.00 29.95           C  
ATOM    759  O   PHE L  98      13.123  -6.464 -10.738  1.00 27.13           O  
ATOM    760  CB  PHE L  98      14.065  -6.830  -7.692  1.00 26.73           C  
ATOM    761  CG  PHE L  98      14.910  -7.272  -6.520  1.00 23.19           C  
ATOM    762  CD1 PHE L  98      15.936  -6.469  -6.045  1.00 22.27           C  
ATOM    763  CD2 PHE L  98      14.651  -8.471  -5.877  1.00 25.71           C  
ATOM    764  CE1 PHE L  98      16.699  -6.863  -4.970  1.00 27.55           C  
ATOM    765  CE2 PHE L  98      15.410  -8.874  -4.797  1.00 28.63           C  
ATOM    766  CZ  PHE L  98      16.443  -8.073  -4.346  1.00 30.05           C  
ATOM    767  N   GLY L  99      12.229  -8.347  -9.870  1.00 23.45           N  
ATOM    768  CA  GLY L  99      10.946  -8.183 -10.532  1.00 24.54           C  
ATOM    769  C   GLY L  99      10.066  -7.270  -9.687  1.00 24.94           C  
ATOM    770  O   GLY L  99      10.415  -6.945  -8.543  1.00 26.34           O  
ATOM    771  N   GLY L 100       8.928  -6.859 -10.237  1.00 29.81           N  
ATOM    772  CA  GLY L 100       8.040  -5.933  -9.555  1.00 24.55           C  
ATOM    773  C   GLY L 100       7.179  -6.554  -8.468  1.00 33.34           C  
ATOM    774  O   GLY L 100       6.443  -5.847  -7.769  1.00 31.05           O  
ATOM    775  N   GLY L 101       7.249  -7.873  -8.316  1.00 25.52           N  
ATOM    776  CA  GLY L 101       6.552  -8.513  -7.216  1.00 23.26           C  
ATOM    777  C   GLY L 101       5.143  -8.966  -7.552  1.00 29.45           C  
ATOM    778  O   GLY L 101       4.420  -8.302  -8.295  1.00 31.00           O  
ATOM    779  N   THR L 102       4.768 -10.113  -6.996  1.00 25.75           N  
ATOM    780  CA  THR L 102       3.454 -10.704  -7.183  1.00 28.86           C  
ATOM    781  C   THR L 102       2.707 -10.798  -5.864  1.00 25.95           C  
ATOM    782  O   THR L 102       3.172 -11.441  -4.925  1.00 26.57           O  
ATOM    783  CB  THR L 102       3.570 -12.136  -7.757  1.00 26.83           C  
ATOM    784  OG1 THR L 102       4.128 -12.075  -9.075  1.00 22.24           O  
ATOM    785  CG2 THR L 102       2.192 -12.803  -7.829  1.00 27.26           C  
ATOM    786  N   GLN L 103       1.538 -10.171  -5.790  1.00 29.34           N  
ATOM    788  CA  GLN L 103       0.706 -10.302  -4.603  0.59 28.69           C  
ATOM    789  C   GLN L 103      -0.079 -11.602  -4.669  1.00 28.66           C  
ATOM    790  O   GLN L 103      -0.906 -11.799  -5.563  1.00 31.75           O  
ATOM    792  CB  GLN L 103      -0.265  -9.125  -4.457  0.59 30.78           C  
ATOM    794  CG  GLN L 103      -1.143  -9.232  -3.207  0.59 31.37           C  
ATOM    796  CD  GLN L 103      -0.349  -9.121  -1.919  0.59 32.07           C  
ATOM    798  OE1 GLN L 103       0.496  -8.233  -1.777  0.59 33.23           O  
ATOM    800  NE2 GLN L 103      -0.608 -10.031  -0.973  0.59 27.22           N  
ATOM    801  N   LEU L 104       0.201 -12.499  -3.733  1.00 25.64           N  
ATOM    802  CA  LEU L 104      -0.553 -13.742  -3.644  1.00 27.21           C  
ATOM    803  C   LEU L 104      -1.637 -13.568  -2.591  1.00 31.10           C  
ATOM    804  O   LEU L 104      -1.342 -13.229  -1.442  1.00 27.85           O  
ATOM    805  CB  LEU L 104       0.338 -14.925  -3.245  1.00 21.24           C  
ATOM    806  CG  LEU L 104      -0.415 -16.245  -3.016  1.00 29.37           C  
ATOM    807  CD1 LEU L 104      -1.035 -16.757  -4.327  1.00 28.96           C  
ATOM    808  CD2 LEU L 104       0.466 -17.322  -2.381  1.00 31.93           C  
ATOM    809  N   THR L 105      -2.880 -13.804  -2.995  1.00 28.23           N  
ATOM    810  CA  THR L 105      -4.002 -13.873  -2.063  1.00 31.62           C  
ATOM    811  C   THR L 105      -4.404 -15.325  -1.848  1.00 31.89           C  
ATOM    812  O   THR L 105      -4.594 -16.066  -2.815  1.00 31.16           O  
ATOM    813  CB  THR L 105      -5.220 -13.118  -2.606  1.00 37.38           C  
ATOM    814  OG1 THR L 105      -4.904 -11.726  -2.725  1.00 35.51           O  
ATOM    815  CG2 THR L 105      -6.433 -13.304  -1.679  1.00 41.77           C  
ATOM    816  N   VAL L 106      -4.516 -15.739  -0.589  1.00 27.44           N  
ATOM    817  CA  VAL L 106      -5.050 -17.063  -0.273  1.00 28.51           C  
ATOM    818  C   VAL L 106      -6.490 -16.909   0.219  1.00 44.86           C  
ATOM    819  O   VAL L 106      -6.749 -16.200   1.195  1.00 40.18           O  
ATOM    820  CB  VAL L 106      -4.194 -17.806   0.778  1.00 30.94           C  
ATOM    821  CG1 VAL L 106      -4.754 -19.203   1.049  1.00 30.42           C  
ATOM    822  CG2 VAL L 106      -2.762 -17.912   0.305  1.00 30.08           C  
ATOM    823  N   LEU L 106A     -7.424 -17.559  -0.471  1.00 37.29           N  
ATOM    824  CA  LEU L 106A     -8.842 -17.436  -0.148  1.00 48.66           C  
ATOM    825  C   LEU L 106A     -9.139 -18.019   1.229  1.00 41.27           C  
ATOM    826  O   LEU L 106A     -8.485 -18.960   1.669  1.00 48.54           O  
ATOM    827  CB  LEU L 106A     -9.700 -18.110  -1.223  1.00 42.68           C  
ATOM    828  CG  LEU L 106A     -9.475 -17.562  -2.639  1.00 42.12           C  
ATOM    829  CD1 LEU L 106A    -10.085 -18.460  -3.709  1.00 43.50           C  
ATOM    830  CD2 LEU L 106A     -9.973 -16.128  -2.775  1.00 46.15           C  
ATOM    831  N   SER L 107     -10.122 -17.448   1.915  1.00 56.51           N  
ATOM    832  CA  SER L 107     -10.477 -17.913   3.251  1.00 61.26           C  
ATOM    833  C   SER L 107     -11.657 -18.877   3.216  1.00 62.65           C  
ATOM    834  O   SER L 107     -11.537 -20.027   3.637  1.00 69.40           O  
ATOM    835  CB  SER L 107     -10.786 -16.724   4.155  1.00 67.45           C  
ATOM    836  OG  SER L 107     -11.562 -15.762   3.464  1.00 72.94           O  
TER     837      SER L 107                                                      
ATOM    838  N   GLN L   1      13.070  -6.281  14.440  1.00 51.00           N  
ATOM    839  CA  GLN L   1      13.786  -6.516  13.190  1.00 40.43           C  
ATOM    840  C   GLN L   1      15.237  -6.045  13.292  1.00 34.98           C  
ATOM    841  O   GLN L   1      15.494  -4.937  13.746  1.00 35.23           O  
ATOM    842  CB  GLN L   1      13.083  -5.780  12.054  1.00 45.79           C  
ATOM    843  CG  GLN L   1      13.685  -6.046  10.678  1.00 55.41           C  
ATOM    844  CD  GLN L   1      13.221  -5.043   9.633  1.00 61.88           C  
ATOM    845  OE1 GLN L   1      12.257  -4.305   9.845  1.00 71.67           O  
ATOM    846  NE2 GLN L   1      13.916  -5.004   8.503  1.00 55.01           N  
ATOM    847  N   ALA L   2      16.185  -6.875  12.864  1.00 28.87           N  
ATOM    848  CA  ALA L   2      17.599  -6.511  12.958  1.00 30.52           C  
ATOM    849  C   ALA L   2      17.957  -5.395  11.988  1.00 29.29           C  
ATOM    850  O   ALA L   2      17.242  -5.156  11.019  1.00 22.80           O  
ATOM    851  CB  ALA L   2      18.493  -7.712  12.717  1.00 34.65           C  
ATOM    852  N   VAL L   3      19.078  -4.730  12.261  1.00 21.89           N  
ATOM    853  CA  VAL L   3      19.597  -3.673  11.410  1.00 24.28           C  
ATOM    854  C   VAL L   3      21.003  -4.068  11.010  1.00 24.45           C  
ATOM    855  O   VAL L   3      21.800  -4.484  11.848  1.00 26.25           O  
ATOM    856  CB  VAL L   3      19.650  -2.307  12.146  1.00 26.87           C  
ATOM    857  CG1 VAL L   3      20.265  -1.243  11.239  1.00 26.41           C  
ATOM    858  CG2 VAL L   3      18.265  -1.887  12.581  1.00 24.55           C  
ATOM    859  N   VAL L   4      21.302  -3.942   9.726  1.00 18.58           N  
ATOM    860  CA  VAL L   4      22.616  -4.300   9.205  1.00 25.43           C  
ATOM    861  C   VAL L   4      23.478  -3.057   9.092  1.00 28.70           C  
ATOM    862  O   VAL L   4      23.017  -2.028   8.600  1.00 25.51           O  
ATOM    863  CB  VAL L   4      22.491  -4.996   7.821  1.00 22.91           C  
ATOM    864  CG1 VAL L   4      23.871  -5.296   7.241  1.00 21.48           C  
ATOM    865  CG2 VAL L   4      21.689  -6.277   7.962  1.00 19.06           C  
ATOM    866  N   THR L   5      24.725  -3.145   9.551  1.00 24.16           N  
ATOM    867  CA  THR L   5      25.608  -1.976   9.587  1.00 30.60           C  
ATOM    868  C   THR L   5      26.869  -2.109   8.719  1.00 25.01           C  
ATOM    869  O   THR L   5      27.653  -3.048   8.860  1.00 28.17           O  
ATOM    870  CB  THR L   5      26.022  -1.627  11.037  1.00 31.85           C  
ATOM    871  OG1 THR L   5      26.531  -2.804  11.685  1.00 36.16           O  
ATOM    872  CG2 THR L   5      24.826  -1.130  11.828  1.00 35.33           C  
ATOM    873  N   GLN L   6      27.056  -1.143   7.830  1.00 23.75           N  
ATOM    874  CA  GLN L   6      28.218  -1.090   6.960  1.00 29.81           C  
ATOM    875  C   GLN L   6      28.870   0.283   7.136  1.00 30.24           C  
ATOM    876  O   GLN L   6      28.161   1.260   7.353  1.00 29.37           O  
ATOM    877  CB  GLN L   6      27.770  -1.209   5.508  1.00 26.71           C  
ATOM    878  CG  GLN L   6      27.307  -2.607   5.064  1.00 25.21           C  
ATOM    879  CD  GLN L   6      27.002  -2.635   3.582  1.00 24.24           C  
ATOM    880  OE1 GLN L   6      25.848  -2.495   3.170  1.00 22.74           O  
ATOM    881  NE2 GLN L   6      28.045  -2.779   2.768  1.00 22.72           N  
ATOM    882  N   GLU L   7      30.197   0.355   7.026  1.00 27.56           N  
ATOM    883  CA  GLU L   7      30.897   1.648   6.966  1.00 33.75           C  
ATOM    884  C   GLU L   7      30.334   2.522   5.848  1.00 34.42           C  
ATOM    885  O   GLU L   7      30.216   2.075   4.706  1.00 30.05           O  
ATOM    886  CB  GLU L   7      32.397   1.463   6.709  1.00 34.47           C  
ATOM    887  CG  GLU L   7      33.141   0.608   7.711  1.00 35.86           C  
ATOM    888  CD  GLU L   7      33.173  -0.857   7.315  1.00 43.47           C  
ATOM    889  OE1 GLU L   7      32.313  -1.281   6.512  1.00 35.78           O  
ATOM    890  OE2 GLU L   7      34.061  -1.585   7.810  1.00 40.79           O  
ATOM    891  N   PRO L   8      30.000   3.786   6.157  1.00 36.86           N  
ATOM    892  CA  PRO L   8      29.437   4.577   5.056  1.00 35.11           C  
ATOM    893  C   PRO L   8      30.438   4.811   3.926  1.00 33.91           C  
ATOM    894  O   PRO L   8      30.051   4.902   2.752  1.00 30.93           O  
ATOM    895  CB  PRO L   8      29.025   5.896   5.731  1.00 38.20           C  
ATOM    896  CG  PRO L   8      29.712   5.893   7.075  1.00 38.53           C  
ATOM    897  CD  PRO L   8      29.879   4.465   7.460  1.00 32.98           C  
ATOM    898  N   SER L   9      31.715   4.871   4.277  1.00 31.78           N  
ATOM    899  CA  SER L   9      32.739   5.263   3.321  1.00 44.12           C  
ATOM    900  C   SER L   9      34.084   4.638   3.638  1.00 42.97           C  
ATOM    901  O   SER L   9      34.474   4.524   4.800  1.00 45.79           O  
ATOM    902  CB  SER L   9      32.886   6.789   3.300  1.00 43.28           C  
ATOM    903  OG  SER L   9      34.030   7.172   2.553  1.00 52.06           O  
ATOM    904  N   VAL L  11      34.794   4.235   2.595  1.00 40.75           N  
ATOM    905  CA  VAL L  11      36.144   3.724   2.753  1.00 36.15           C  
ATOM    906  C   VAL L  11      37.018   4.143   1.565  1.00 48.45           C  
ATOM    907  O   VAL L  11      36.514   4.428   0.473  1.00 41.55           O  
ATOM    908  CB  VAL L  11      36.167   2.189   2.928  1.00 35.96           C  
ATOM    909  CG1 VAL L  11      37.588   1.694   2.974  1.00 47.38           C  
ATOM    910  CG2 VAL L  11      35.455   1.785   4.203  1.00 40.03           C  
ATOM    911  N   THR L  12      38.327   4.195   1.791  1.00 45.79           N  
ATOM    912  CA  THR L  12      39.272   4.619   0.771  1.00 45.50           C  
ATOM    913  C   THR L  12      40.391   3.592   0.625  1.00 39.97           C  
ATOM    914  O   THR L  12      40.764   2.931   1.591  1.00 47.96           O  
ATOM    915  CB  THR L  12      39.872   6.008   1.112  1.00 53.13           C  
ATOM    916  OG1 THR L  12      38.848   7.008   1.016  1.00 54.18           O  
ATOM    917  CG2 THR L  12      41.000   6.362   0.152  1.00 50.66           C  
ATOM    918  N   VAL L  13      40.913   3.450  -0.589  1.00 36.97           N  
ATOM    919  CA  VAL L  13      42.016   2.531  -0.845  1.00 41.11           C  
ATOM    920  C   VAL L  13      42.925   3.116  -1.927  1.00 44.80           C  
ATOM    921  O   VAL L  13      42.497   3.944  -2.734  1.00 44.59           O  
ATOM    922  CB  VAL L  13      41.499   1.139  -1.283  1.00 38.52           C  
ATOM    923  CG1 VAL L  13      40.882   1.213  -2.673  1.00 40.49           C  
ATOM    924  CG2 VAL L  13      42.605   0.101  -1.240  1.00 34.59           C  
ATOM    925  N   SER L  14      44.184   2.697  -1.935  1.00 55.72           N  
ATOM    926  CA  SER L  14      45.093   3.089  -3.004  1.00 59.03           C  
ATOM    927  C   SER L  14      45.072   2.020  -4.082  1.00 44.63           C  
ATOM    928  O   SER L  14      45.066   0.826  -3.769  1.00 45.37           O  
ATOM    929  CB  SER L  14      46.518   3.253  -2.472  1.00 56.44           C  
ATOM    930  OG  SER L  14      46.571   4.233  -1.451  1.00 68.19           O  
ATOM    931  N   PRO L  15      45.055   2.439  -5.357  1.00 59.30           N  
ATOM    932  CA  PRO L  15      45.179   1.444  -6.425  1.00 52.06           C  
ATOM    933  C   PRO L  15      46.346   0.540  -6.080  1.00 52.85           C  
ATOM    934  O   PRO L  15      47.441   1.043  -5.825  1.00 55.43           O  
ATOM    935  CB  PRO L  15      45.483   2.289  -7.669  1.00 54.52           C  
ATOM    936  CG  PRO L  15      45.832   3.664  -7.150  1.00 59.74           C  
ATOM    937  CD  PRO L  15      45.076   3.815  -5.876  1.00 59.63           C  
ATOM    938  N   GLY L  16      46.106  -0.766  -6.025  1.00 46.42           N  
ATOM    939  CA  GLY L  16      47.122  -1.707  -5.599  1.00 37.93           C  
ATOM    940  C   GLY L  16      46.898  -2.151  -4.167  1.00 42.01           C  
ATOM    941  O   GLY L  16      47.352  -3.222  -3.758  1.00 44.76           O  
ATOM    942  N   GLY L  17      46.189  -1.326  -3.401  1.00 43.10           N  
ATOM    943  CA  GLY L  17      45.977  -1.592  -1.987  1.00 40.10           C  
ATOM    944  C   GLY L  17      45.030  -2.745  -1.687  1.00 49.71           C  
ATOM    945  O   GLY L  17      44.468  -3.364  -2.591  1.00 45.08           O  
ATOM    946  N   THR L  18      44.880  -3.041  -0.400  1.00 42.13           N  
ATOM    947  CA  THR L  18      43.905  -4.004   0.089  1.00 44.20           C  
ATOM    948  C   THR L  18      43.015  -3.304   1.100  1.00 53.04           C  
ATOM    949  O   THR L  18      43.511  -2.659   2.026  1.00 47.31           O  
ATOM    950  CB  THR L  18      44.581  -5.192   0.789  1.00 43.81           C  
ATOM    951  OG1 THR L  18      45.256  -6.005  -0.176  1.00 45.47           O  
ATOM    952  CG2 THR L  18      43.556  -6.044   1.518  1.00 42.03           C  
ATOM    953  N   VAL L  19      41.703  -3.419   0.927  1.00 41.83           N  
ATOM    954  CA  VAL L  19      40.770  -2.816   1.870  1.00 35.92           C  
ATOM    955  C   VAL L  19      39.751  -3.844   2.357  1.00 39.36           C  
ATOM    956  O   VAL L  19      39.402  -4.781   1.633  1.00 32.32           O  
ATOM    957  CB  VAL L  19      40.052  -1.607   1.247  1.00 43.97           C  
ATOM    958  CG1 VAL L  19      39.337  -2.016  -0.039  1.00 44.68           C  
ATOM    959  CG2 VAL L  19      39.082  -1.008   2.234  1.00 42.28           C  
ATOM    960  N   ILE L  20      39.294  -3.686   3.593  1.00 34.49           N  
ATOM    961  CA  ILE L  20      38.317  -4.610   4.155  1.00 30.35           C  
ATOM    962  C   ILE L  20      37.026  -3.882   4.465  1.00 37.68           C  
ATOM    963  O   ILE L  20      37.031  -2.863   5.144  1.00 38.34           O  
ATOM    964  CB  ILE L  20      38.857  -5.304   5.407  1.00 34.16           C  
ATOM    965  CG1 ILE L  20      40.087  -6.136   5.045  1.00 38.14           C  
ATOM    966  CG2 ILE L  20      37.806  -6.194   6.013  1.00 34.63           C  
ATOM    967  CD1 ILE L  20      40.741  -6.801   6.226  1.00 41.66           C  
ATOM    968  N   LEU L  21      35.921  -4.390   3.932  1.00 33.05           N  
ATOM    969  CA  LEU L  21      34.611  -3.816   4.196  1.00 26.23           C  
ATOM    970  C   LEU L  21      33.903  -4.775   5.117  1.00 26.44           C  
ATOM    971  O   LEU L  21      34.041  -5.983   4.973  1.00 29.15           O  
ATOM    972  CB  LEU L  21      33.802  -3.665   2.900  1.00 35.34           C  
ATOM    973  CG  LEU L  21      34.406  -2.886   1.728  1.00 33.06           C  
ATOM    974  CD1 LEU L  21      33.355  -2.667   0.644  1.00 31.44           C  
ATOM    975  CD2 LEU L  21      34.963  -1.558   2.196  1.00 45.98           C  
ATOM    976  N   THR L  22      33.145  -4.254   6.071  1.00 29.01           N  
ATOM    977  CA  THR L  22      32.515  -5.141   7.042  1.00 26.57           C  
ATOM    978  C   THR L  22      31.022  -4.941   7.074  1.00 27.40           C  
ATOM    979  O   THR L  22      30.512  -3.893   6.691  1.00 26.33           O  
ATOM    980  CB  THR L  22      33.063  -4.965   8.483  1.00 31.66           C  
ATOM    981  OG1 THR L  22      32.679  -3.677   8.994  1.00 31.52           O  
ATOM    982  CG2 THR L  22      34.585  -5.120   8.504  1.00 35.35           C  
ATOM    983  N   CYS L  23      30.336  -5.957   7.573  1.00 24.78           N  
ATOM    985  CA  CYS L  23      28.886  -5.992   7.558  0.66 27.77           C  
ATOM    986  C   CYS L  23      28.395  -6.636   8.856  1.00 26.84           C  
ATOM    987  O   CYS L  23      28.554  -7.846   9.058  1.00 25.11           O  
ATOM    989  CB  CYS L  23      28.438  -6.788   6.325  0.66 25.71           C  
ATOM    991  SG  CYS L  23      26.659  -7.032   6.097  0.66 30.23           S  
ATOM    992  N   GLY L  24      27.821  -5.835   9.745  1.00 28.52           N  
ATOM    993  CA  GLY L  24      27.426  -6.349  11.043  1.00 25.58           C  
ATOM    994  C   GLY L  24      25.930  -6.449  11.226  1.00 25.73           C  
ATOM    995  O   GLY L  24      25.173  -5.770  10.536  1.00 23.06           O  
ATOM    996  N   SER L  25      25.504  -7.313  12.148  1.00 21.89           N  
ATOM    997  CA  SER L  25      24.092  -7.411  12.528  1.00 22.92           C  
ATOM    998  C   SER L  25      23.869  -6.829  13.929  1.00 21.59           C  
ATOM    999  O   SER L  25      24.643  -7.108  14.845  1.00 24.36           O  
ATOM   1000  CB  SER L  25      23.645  -8.871  12.570  1.00 21.12           C  
ATOM   1001  OG  SER L  25      22.357  -8.964  13.159  1.00 29.84           O  
ATOM   1002  N   SER L  26      22.806  -6.052  14.105  1.00 21.55           N  
ATOM   1003  CA  SER L  26      22.528  -5.469  15.422  1.00 23.05           C  
ATOM   1004  C   SER L  26      22.163  -6.521  16.482  1.00 32.21           C  
ATOM   1005  O   SER L  26      22.194  -6.231  17.676  1.00 28.61           O  
ATOM   1006  CB  SER L  26      21.388  -4.454  15.334  1.00 19.41           C  
ATOM   1007  OG  SER L  26      20.160  -5.089  15.009  1.00 24.10           O  
ATOM   1008  N   THR L  27      21.790  -7.729  16.060  1.00 31.07           N  
ATOM   1009  CA  THR L  27      21.320  -8.727  17.029  1.00 31.87           C  
ATOM   1010  C   THR L  27      22.348  -9.782  17.426  1.00 36.97           C  
ATOM   1011  O   THR L  27      22.040 -10.695  18.192  1.00 36.29           O  
ATOM   1012  CB  THR L  27      20.025  -9.407  16.572  1.00 34.84           C  
ATOM   1013  OG1 THR L  27      20.234 -10.045  15.306  1.00 33.40           O  
ATOM   1014  CG2 THR L  27      18.911  -8.384  16.443  1.00 36.38           C  
ATOM   1015  N   GLY L  27A     23.567  -9.661  16.922  1.00 29.52           N  
ATOM   1016  CA  GLY L  27A     24.627 -10.557  17.356  1.00 35.20           C  
ATOM   1017  C   GLY L  27A     25.652 -10.886  16.287  1.00 32.54           C  
ATOM   1018  O   GLY L  27A     25.607 -10.351  15.176  1.00 30.78           O  
ATOM   1019  N   ALA L  27B     26.572 -11.789  16.616  1.00 27.88           N  
ATOM   1020  CA  ALA L  27B     27.628 -12.159  15.689  1.00 31.87           C  
ATOM   1021  C   ALA L  27B     27.018 -12.830  14.467  1.00 26.46           C  
ATOM   1022  O   ALA L  27B     26.010 -13.518  14.569  1.00 28.02           O  
ATOM   1023  CB  ALA L  27B     28.642 -13.084  16.362  1.00 34.21           C  
ATOM   1024  N   VAL L  27C     27.625 -12.605  13.310  1.00 28.77           N  
ATOM   1025  CA  VAL L  27C     27.221 -13.282  12.088  1.00 32.46           C  
ATOM   1026  C   VAL L  27C     27.963 -14.609  12.046  1.00 33.84           C  
ATOM   1027  O   VAL L  27C     29.187 -14.637  11.943  1.00 33.61           O  
ATOM   1028  CB  VAL L  27C     27.582 -12.456  10.834  1.00 29.25           C  
ATOM   1029  CG1 VAL L  27C     27.162 -13.195   9.550  1.00 29.35           C  
ATOM   1030  CG2 VAL L  27C     26.930 -11.081  10.905  1.00 26.07           C  
ATOM   1031  N   THR L  28      27.218 -15.702  12.142  1.00 30.64           N  
ATOM   1032  CA  THR L  28      27.828 -17.029  12.195  1.00 40.31           C  
ATOM   1033  C   THR L  28      27.354 -17.879  11.022  1.00 44.52           C  
ATOM   1034  O   THR L  28      26.491 -17.455  10.248  1.00 36.79           O  
ATOM   1035  CB  THR L  28      27.502 -17.736  13.528  1.00 39.29           C  
ATOM   1036  OG1 THR L  28      26.082 -17.756  13.732  1.00 36.07           O  
ATOM   1037  CG2 THR L  28      28.155 -16.996  14.691  1.00 48.36           C  
ATOM   1038  N   SER L  29      27.919 -19.073  10.870  1.00 42.01           N  
ATOM   1039  CA  SER L  29      27.488 -19.940   9.778  1.00 40.55           C  
ATOM   1040  C   SER L  29      25.986 -20.227   9.886  1.00 41.99           C  
ATOM   1041  O   SER L  29      25.465 -20.446  10.980  1.00 44.36           O  
ATOM   1042  CB  SER L  29      28.314 -21.234   9.721  1.00 56.19           C  
ATOM   1043  OG  SER L  29      28.450 -21.828  10.998  1.00 52.43           O  
ATOM   1044  N   GLY L  30      25.297 -20.203   8.749  1.00 37.06           N  
ATOM   1045  CA  GLY L  30      23.850 -20.331   8.723  1.00 35.32           C  
ATOM   1046  C   GLY L  30      23.195 -18.964   8.629  1.00 34.39           C  
ATOM   1047  O   GLY L  30      22.016 -18.836   8.295  1.00 37.49           O  
ATOM   1048  N   HIS L  31      23.969 -17.933   8.944  1.00 29.68           N  
ATOM   1049  CA  HIS L  31      23.528 -16.571   8.725  1.00 24.15           C  
ATOM   1050  C   HIS L  31      24.333 -16.027   7.551  1.00 33.51           C  
ATOM   1051  O   HIS L  31      25.497 -15.660   7.709  1.00 28.87           O  
ATOM   1052  CB  HIS L  31      23.741 -15.735   9.985  1.00 38.14           C  
ATOM   1053  CG  HIS L  31      22.940 -14.472  10.015  1.00 37.23           C  
ATOM   1054  ND1 HIS L  31      23.010 -13.573  11.059  1.00 40.31           N  
ATOM   1055  CD2 HIS L  31      22.049 -13.957   9.132  1.00 30.96           C  
ATOM   1056  CE1 HIS L  31      22.202 -12.555  10.814  1.00 36.32           C  
ATOM   1057  NE2 HIS L  31      21.603 -12.764   9.654  1.00 31.66           N  
ATOM   1058  N   TYR L  32      23.709 -16.009   6.371  1.00 24.21           N  
ATOM   1059  CA  TYR L  32      24.423 -15.820   5.108  1.00 27.33           C  
ATOM   1060  C   TYR L  32      24.617 -14.357   4.721  1.00 25.06           C  
ATOM   1061  O   TYR L  32      23.669 -13.573   4.735  1.00 24.39           O  
ATOM   1062  CB  TYR L  32      23.698 -16.548   3.970  1.00 25.59           C  
ATOM   1063  CG  TYR L  32      23.559 -18.024   4.236  1.00 35.69           C  
ATOM   1064  CD1 TYR L  32      24.692 -18.828   4.382  1.00 30.91           C  
ATOM   1065  CD2 TYR L  32      22.306 -18.613   4.382  1.00 32.57           C  
ATOM   1066  CE1 TYR L  32      24.583 -20.180   4.647  1.00 38.65           C  
ATOM   1067  CE2 TYR L  32      22.185 -19.976   4.652  1.00 38.90           C  
ATOM   1068  CZ  TYR L  32      23.332 -20.751   4.780  1.00 50.69           C  
ATOM   1069  OH  TYR L  32      23.243 -22.102   5.049  1.00 55.89           O  
ATOM   1070  N   ALA L  33      25.847 -14.004   4.365  1.00 19.31           N  
ATOM   1071  CA  ALA L  33      26.135 -12.679   3.825  1.00 24.34           C  
ATOM   1072  C   ALA L  33      26.273 -12.722   2.305  1.00 21.45           C  
ATOM   1073  O   ALA L  33      26.911 -13.614   1.759  1.00 23.51           O  
ATOM   1074  CB  ALA L  33      27.406 -12.101   4.458  1.00 24.29           C  
ATOM   1075  N   ASN L  34      25.656 -11.759   1.629  1.00 18.70           N  
ATOM   1076  CA  ASN L  34      25.836 -11.568   0.195  1.00 18.76           C  
ATOM   1077  C   ASN L  34      26.385 -10.184  -0.040  1.00 23.61           C  
ATOM   1078  O   ASN L  34      26.019  -9.252   0.672  1.00 21.67           O  
ATOM   1079  CB  ASN L  34      24.497 -11.683  -0.520  1.00 21.92           C  
ATOM   1080  CG  ASN L  34      23.755 -12.934  -0.128  1.00 31.63           C  
ATOM   1081  OD1 ASN L  34      24.052 -13.997  -0.634  1.00 30.25           O  
ATOM   1082  ND2 ASN L  34      22.824 -12.818   0.817  1.00 33.65           N  
ATOM   1083  N   TRP L  35      27.240 -10.052  -1.049  1.00 20.25           N  
ATOM   1084  CA  TRP L  35      27.848  -8.770  -1.388  1.00 21.91           C  
ATOM   1085  C   TRP L  35      27.535  -8.407  -2.833  1.00 23.95           C  
ATOM   1086  O   TRP L  35      27.528  -9.272  -3.722  1.00 19.89           O  
ATOM   1087  CB  TRP L  35      29.369  -8.815  -1.186  1.00 18.18           C  
ATOM   1088  CG  TRP L  35      29.763  -8.912   0.254  1.00 19.60           C  
ATOM   1089  CD1 TRP L  35      29.945 -10.061   0.988  1.00 22.05           C  
ATOM   1090  CD2 TRP L  35      29.999  -7.821   1.152  1.00 18.79           C  
ATOM   1091  NE1 TRP L  35      30.273  -9.744   2.292  1.00 20.31           N  
ATOM   1092  CE2 TRP L  35      30.320  -8.378   2.414  1.00 23.74           C  
ATOM   1093  CE3 TRP L  35      29.976  -6.425   1.013  1.00 22.60           C  
ATOM   1094  CZ2 TRP L  35      30.628  -7.584   3.528  1.00 23.71           C  
ATOM   1095  CZ3 TRP L  35      30.279  -5.641   2.123  1.00 23.95           C  
ATOM   1096  CH2 TRP L  35      30.605  -6.225   3.361  1.00 24.35           C  
ATOM   1097  N   PHE L  36      27.297  -7.122  -3.065  1.00 18.34           N  
ATOM   1098  CA  PHE L  36      26.916  -6.644  -4.386  1.00 17.62           C  
ATOM   1099  C   PHE L  36      27.749  -5.415  -4.684  1.00 27.71           C  
ATOM   1100  O   PHE L  36      28.001  -4.609  -3.797  1.00 25.11           O  
ATOM   1101  CB  PHE L  36      25.448  -6.216  -4.394  1.00 18.17           C  
ATOM   1102  CG  PHE L  36      24.490  -7.311  -4.035  1.00 22.82           C  
ATOM   1103  CD1 PHE L  36      23.816  -8.012  -5.032  1.00 22.41           C  
ATOM   1104  CD2 PHE L  36      24.259  -7.635  -2.705  1.00 20.67           C  
ATOM   1105  CE1 PHE L  36      22.932  -9.031  -4.707  1.00 22.43           C  
ATOM   1106  CE2 PHE L  36      23.381  -8.642  -2.370  1.00 23.71           C  
ATOM   1107  CZ  PHE L  36      22.710  -9.339  -3.372  1.00 25.23           C  
ATOM   1108  N   GLN L  37      28.144  -5.251  -5.939  1.00 19.14           N  
ATOM   1109  CA  GLN L  37      28.816  -4.027  -6.348  1.00 30.03           C  
ATOM   1110  C   GLN L  37      27.876  -3.178  -7.194  1.00 30.35           C  
ATOM   1111  O   GLN L  37      27.178  -3.702  -8.068  1.00 26.77           O  
ATOM   1112  CB  GLN L  37      30.069  -4.372  -7.139  1.00 24.93           C  
ATOM   1113  CG  GLN L  37      30.832  -3.166  -7.647  1.00 34.40           C  
ATOM   1114  CD  GLN L  37      31.820  -3.567  -8.705  1.00 35.40           C  
ATOM   1115  OE1 GLN L  37      31.444  -3.812  -9.852  1.00 32.68           O  
ATOM   1116  NE2 GLN L  37      33.085  -3.694  -8.320  1.00 31.44           N  
ATOM   1117  N   GLN L  38      27.858  -1.869  -6.946  1.00 24.36           N  
ATOM   1118  CA  GLN L  38      26.943  -0.981  -7.653  1.00 28.36           C  
ATOM   1119  C   GLN L  38      27.635   0.312  -8.097  1.00 44.90           C  
ATOM   1120  O   GLN L  38      28.113   1.084  -7.267  1.00 31.76           O  
ATOM   1121  CB  GLN L  38      25.750  -0.646  -6.759  1.00 33.68           C  
ATOM   1122  CG  GLN L  38      24.934   0.555  -7.215  1.00 46.23           C  
ATOM   1123  CD  GLN L  38      23.584   0.169  -7.776  1.00 39.14           C  
ATOM   1124  OE1 GLN L  38      22.754  -0.413  -7.081  1.00 48.15           O  
ATOM   1125  NE2 GLN L  38      23.358   0.488  -9.040  1.00 44.27           N  
ATOM   1126  N   LYS L  39      27.697   0.531  -9.408  1.00 44.93           N  
ATOM   1127  CA  LYS L  39      28.185   1.796  -9.954  1.00 47.23           C  
ATOM   1128  C   LYS L  39      27.012   2.699 -10.346  1.00 45.94           C  
ATOM   1129  O   LYS L  39      25.908   2.217 -10.616  1.00 41.72           O  
ATOM   1130  CB  LYS L  39      29.086   1.545 -11.152  1.00 42.75           C  
ATOM   1131  CG  LYS L  39      30.278   0.672 -10.847  1.00 43.04           C  
ATOM   1132  CD  LYS L  39      31.116   0.473 -12.095  1.00 48.89           C  
ATOM   1133  CE  LYS L  39      32.494  -0.060 -11.771  1.00 52.89           C  
ATOM   1134  NZ  LYS L  39      32.443  -1.480 -11.352  1.00 58.79           N  
ATOM   1135  N   PRO L  40      27.237   4.022 -10.365  1.00 51.56           N  
ATOM   1136  CA  PRO L  40      26.110   4.894 -10.707  1.00 48.58           C  
ATOM   1137  C   PRO L  40      25.672   4.679 -12.161  1.00 41.34           C  
ATOM   1138  O   PRO L  40      26.505   4.471 -13.050  1.00 39.02           O  
ATOM   1139  CB  PRO L  40      26.668   6.305 -10.472  1.00 54.95           C  
ATOM   1140  CG  PRO L  40      28.151   6.155 -10.596  1.00 54.07           C  
ATOM   1141  CD  PRO L  40      28.484   4.771 -10.119  1.00 44.12           C  
ATOM   1142  N   GLY L  41      24.362   4.680 -12.380  1.00 43.10           N  
ATOM   1143  CA  GLY L  41      23.812   4.449 -13.702  1.00 50.95           C  
ATOM   1144  C   GLY L  41      23.860   3.007 -14.184  1.00 56.34           C  
ATOM   1145  O   GLY L  41      23.362   2.706 -15.266  1.00 49.46           O  
ATOM   1146  N   GLN L  42      24.456   2.113 -13.397  1.00 49.28           N  
ATOM   1147  CA  GLN L  42      24.538   0.700 -13.781  1.00 45.09           C  
ATOM   1148  C   GLN L  42      23.738  -0.202 -12.851  1.00 42.56           C  
ATOM   1149  O   GLN L  42      23.466   0.154 -11.703  1.00 38.02           O  
ATOM   1150  CB  GLN L  42      25.988   0.227 -13.792  1.00 37.44           C  
ATOM   1151  CG  GLN L  42      26.869   0.937 -14.786  1.00 52.24           C  
ATOM   1152  CD  GLN L  42      28.203   0.247 -14.945  1.00 56.20           C  
ATOM   1153  OE1 GLN L  42      28.286  -0.982 -14.911  1.00 60.16           O  
ATOM   1154  NE2 GLN L  42      29.260   1.033 -15.113  1.00 64.93           N  
ATOM   1155  N   ALA L  43      23.359  -1.376 -13.343  1.00 35.22           N  
ATOM   1156  CA  ALA L  43      22.711  -2.353 -12.479  1.00 32.46           C  
ATOM   1157  C   ALA L  43      23.759  -2.863 -11.489  1.00 22.21           C  
ATOM   1158  O   ALA L  43      24.941  -2.939 -11.819  1.00 27.86           O  
ATOM   1159  CB  ALA L  43      22.122  -3.501 -13.293  1.00 24.56           C  
ATOM   1160  N   PRO L  44      23.334  -3.203 -10.266  1.00 26.15           N  
ATOM   1161  CA  PRO L  44      24.321  -3.808  -9.369  1.00 19.95           C  
ATOM   1162  C   PRO L  44      24.650  -5.206  -9.858  1.00 24.72           C  
ATOM   1163  O   PRO L  44      23.862  -5.805 -10.603  1.00 22.01           O  
ATOM   1164  CB  PRO L  44      23.587  -3.885  -8.023  1.00 22.97           C  
ATOM   1165  CG  PRO L  44      22.145  -3.910  -8.362  1.00 22.20           C  
ATOM   1166  CD  PRO L  44      21.973  -3.194  -9.698  1.00 24.15           C  
ATOM   1167  N   ARG L  45      25.814  -5.701  -9.462  1.00 19.91           N  
ATOM   1168  CA  ARG L  45      26.244  -7.054  -9.783  1.00 23.04           C  
ATOM   1169  C   ARG L  45      26.431  -7.811  -8.476  1.00 21.99           C  
ATOM   1170  O   ARG L  45      26.970  -7.257  -7.527  1.00 21.91           O  
ATOM   1171  CB  ARG L  45      27.577  -7.010 -10.518  1.00 23.46           C  
ATOM   1172  CG  ARG L  45      27.468  -7.091 -12.030  1.00 32.45           C  
ATOM   1173  CD  ARG L  45      26.852  -5.843 -12.636  1.00 37.26           C  
ATOM   1174  NE  ARG L  45      27.096  -5.779 -14.079  1.00 33.65           N  
ATOM   1175  CZ  ARG L  45      26.789  -4.742 -14.853  1.00 34.32           C  
ATOM   1176  NH1 ARG L  45      26.204  -3.667 -14.334  1.00 33.26           N  
ATOM   1177  NH2 ARG L  45      27.059  -4.790 -16.154  1.00 33.71           N  
ATOM   1178  N   ALA L  46      25.978  -9.061  -8.420  1.00 19.72           N  
ATOM   1179  CA  ALA L  46      26.225  -9.903  -7.253  1.00 21.41           C  
ATOM   1180  C   ALA L  46      27.681 -10.382  -7.310  1.00 23.55           C  
ATOM   1181  O   ALA L  46      28.164 -10.759  -8.383  1.00 21.90           O  
ATOM   1182  CB  ALA L  46      25.253 -11.093  -7.236  1.00 17.04           C  
ATOM   1183  N   LEU L  47      28.377 -10.342  -6.172  1.00 19.78           N  
ATOM   1184  CA  LEU L  47      29.771 -10.800  -6.090  1.00 19.04           C  
ATOM   1185  C   LEU L  47      29.997 -12.034  -5.205  1.00 23.22           C  
ATOM   1186  O   LEU L  47      30.766 -12.921  -5.560  1.00 21.62           O  
ATOM   1187  CB  LEU L  47      30.669  -9.677  -5.555  1.00 22.82           C  
ATOM   1188  CG  LEU L  47      30.759  -8.402  -6.396  1.00 28.21           C  
ATOM   1189  CD1 LEU L  47      31.587  -7.372  -5.643  1.00 38.69           C  
ATOM   1190  CD2 LEU L  47      31.354  -8.691  -7.758  1.00 33.85           C  
ATOM   1191  N   ILE L  48      29.364 -12.055  -4.035  1.00 21.55           N  
ATOM   1192  CA  ILE L  48      29.560 -13.113  -3.040  1.00 21.35           C  
ATOM   1193  C   ILE L  48      28.198 -13.584  -2.552  1.00 22.83           C  
ATOM   1194  O   ILE L  48      27.268 -12.779  -2.435  1.00 19.91           O  
ATOM   1195  CB  ILE L  48      30.367 -12.582  -1.807  1.00 21.26           C  
ATOM   1196  CG1 ILE L  48      31.776 -12.151  -2.217  1.00 23.30           C  
ATOM   1197  CG2 ILE L  48      30.413 -13.616  -0.685  1.00 22.57           C  
ATOM   1198  CD1 ILE L  48      32.592 -13.248  -2.855  1.00 26.61           C  
ATOM   1199  N   PHE L  49      28.060 -14.887  -2.303  1.00 20.29           N  
ATOM   1200  CA  PHE L  49      26.846 -15.419  -1.674  1.00 18.99           C  
ATOM   1201  C   PHE L  49      27.256 -16.429  -0.597  1.00 21.91           C  
ATOM   1202  O   PHE L  49      28.384 -16.917  -0.620  1.00 20.90           O  
ATOM   1203  CB  PHE L  49      25.888 -16.036  -2.703  1.00 22.03           C  
ATOM   1204  CG  PHE L  49      26.416 -17.281  -3.369  1.00 23.97           C  
ATOM   1205  CD1 PHE L  49      27.382 -17.199  -4.365  1.00 26.52           C  
ATOM   1206  CD2 PHE L  49      25.939 -18.531  -3.000  1.00 28.72           C  
ATOM   1207  CE1 PHE L  49      27.871 -18.344  -4.981  1.00 29.57           C  
ATOM   1208  CE2 PHE L  49      26.423 -19.679  -3.608  1.00 28.01           C  
ATOM   1209  CZ  PHE L  49      27.391 -19.583  -4.598  1.00 26.98           C  
ATOM   1210  N   GLU L  50      26.365 -16.715   0.350  1.00 22.63           N  
ATOM   1211  CA  GLU L  50      26.686 -17.647   1.441  1.00 23.56           C  
ATOM   1212  C   GLU L  50      28.012 -17.280   2.106  1.00 25.86           C  
ATOM   1213  O   GLU L  50      28.834 -18.152   2.402  1.00 25.66           O  
ATOM   1214  CB  GLU L  50      26.750 -19.080   0.921  1.00 24.57           C  
ATOM   1215  CG  GLU L  50      25.404 -19.771   0.852  1.00 39.81           C  
ATOM   1216  CD  GLU L  50      25.478 -21.086   0.096  1.00 46.69           C  
ATOM   1217  OE1 GLU L  50      26.447 -21.846   0.311  1.00 43.54           O  
ATOM   1218  OE2 GLU L  50      24.581 -21.341  -0.733  1.00 37.04           O  
ATOM   1219  N   THR L  51      28.216 -15.977   2.294  1.00 21.16           N  
ATOM   1220  CA  THR L  51      29.340 -15.428   3.050  1.00 21.66           C  
ATOM   1221  C   THR L  51      30.691 -15.492   2.346  1.00 20.85           C  
ATOM   1222  O   THR L  51      31.407 -14.484   2.291  1.00 20.60           O  
ATOM   1223  CB  THR L  51      29.460 -16.082   4.442  1.00 30.40           C  
ATOM   1224  OG1 THR L  51      28.207 -15.968   5.116  1.00 27.09           O  
ATOM   1225  CG2 THR L  51      30.538 -15.389   5.259  1.00 25.04           C  
ATOM   1226  N   ASP L  52      31.042 -16.648   1.786  1.00 22.21           N  
ATOM   1227  CA  ASP L  52      32.354 -16.758   1.148  1.00 26.76           C  
ATOM   1228  C   ASP L  52      32.404 -17.365  -0.268  1.00 28.41           C  
ATOM   1229  O   ASP L  52      33.485 -17.585  -0.793  1.00 30.63           O  
ATOM   1230  CB  ASP L  52      33.323 -17.507   2.072  1.00 29.90           C  
ATOM   1231  CG  ASP L  52      32.906 -18.951   2.315  1.00 34.41           C  
ATOM   1232  OD1 ASP L  52      31.952 -19.437   1.664  1.00 34.04           O  
ATOM   1233  OD2 ASP L  52      33.545 -19.610   3.164  1.00 49.65           O  
ATOM   1234  N   LYS L  53      31.253 -17.628  -0.881  1.00 24.32           N  
ATOM   1235  CA  LYS L  53      31.232 -18.241  -2.209  1.00 24.46           C  
ATOM   1236  C   LYS L  53      31.166 -17.206  -3.332  1.00 29.79           C  
ATOM   1237  O   LYS L  53      30.470 -16.202  -3.205  1.00 23.60           O  
ATOM   1238  CB  LYS L  53      30.067 -19.224  -2.302  1.00 24.48           C  
ATOM   1239  CG  LYS L  53      30.145 -20.298  -1.235  1.00 30.60           C  
ATOM   1240  CD  LYS L  53      29.025 -21.301  -1.365  1.00 41.79           C  
ATOM   1241  CE  LYS L  53      29.247 -22.486  -0.434  1.00 46.53           C  
ATOM   1242  NZ  LYS L  53      28.233 -23.548  -0.677  1.00 59.35           N  
ATOM   1243  N   LYS L  54      31.893 -17.450  -4.425  1.00 26.05           N  
ATOM   1244  CA  LYS L  54      31.961 -16.504  -5.543  1.00 29.63           C  
ATOM   1245  C   LYS L  54      31.139 -16.994  -6.721  1.00 27.52           C  
ATOM   1246  O   LYS L  54      30.894 -18.189  -6.868  1.00 26.80           O  
ATOM   1247  CB  LYS L  54      33.409 -16.312  -6.027  1.00 23.42           C  
ATOM   1248  CG  LYS L  54      34.376 -15.882  -4.950  1.00 35.14           C  
ATOM   1249  CD  LYS L  54      35.800 -15.753  -5.487  1.00 37.63           C  
ATOM   1250  CE  LYS L  54      36.771 -15.635  -4.317  1.00 48.91           C  
ATOM   1251  NZ  LYS L  54      38.137 -15.205  -4.719  1.00 50.23           N  
ATOM   1252  N   TYR L  55      30.708 -16.064  -7.560  1.00 22.58           N  
ATOM   1253  CA  TYR L  55      30.156 -16.436  -8.855  1.00 23.24           C  
ATOM   1254  C   TYR L  55      31.281 -16.586  -9.859  1.00 26.98           C  
ATOM   1255  O   TYR L  55      32.391 -16.121  -9.615  1.00 24.71           O  
ATOM   1256  CB  TYR L  55      29.149 -15.391  -9.322  1.00 21.05           C  
ATOM   1257  CG  TYR L  55      27.985 -15.281  -8.374  1.00 22.61           C  
ATOM   1258  CD1 TYR L  55      26.911 -16.152  -8.471  1.00 27.00           C  
ATOM   1259  CD2 TYR L  55      27.972 -14.338  -7.357  1.00 22.48           C  
ATOM   1260  CE1 TYR L  55      25.843 -16.068  -7.608  1.00 26.51           C  
ATOM   1261  CE2 TYR L  55      26.897 -14.256  -6.469  1.00 21.37           C  
ATOM   1262  CZ  TYR L  55      25.838 -15.116  -6.612  1.00 25.67           C  
ATOM   1263  OH  TYR L  55      24.766 -15.055  -5.754  1.00 29.64           O  
ATOM   1264  N   SER L  56      30.987 -17.211 -10.995  1.00 25.47           N  
ATOM   1265  CA  SER L  56      31.990 -17.429 -12.030  1.00 27.14           C  
ATOM   1266  C   SER L  56      32.531 -16.125 -12.596  1.00 23.58           C  
ATOM   1267  O   SER L  56      33.588 -16.114 -13.244  1.00 26.63           O  
ATOM   1268  CB  SER L  56      31.398 -18.268 -13.164  1.00 27.45           C  
ATOM   1269  OG  SER L  56      30.342 -17.557 -13.790  1.00 29.57           O  
ATOM   1270  N   TRP L  57      31.796 -15.031 -12.390  1.00 18.24           N  
ATOM   1271  CA  TRP L  57      32.228 -13.719 -12.881  1.00 21.52           C  
ATOM   1272  C   TRP L  57      32.875 -12.846 -11.784  1.00 17.34           C  
ATOM   1273  O   TRP L  57      33.255 -11.699 -12.035  1.00 23.46           O  
ATOM   1274  CB  TRP L  57      31.049 -12.966 -13.540  1.00 19.81           C  
ATOM   1275  CG  TRP L  57      29.885 -12.766 -12.587  1.00 21.01           C  
ATOM   1276  CD1 TRP L  57      29.758 -11.791 -11.647  1.00 20.18           C  
ATOM   1277  CD2 TRP L  57      28.699 -13.567 -12.498  1.00 23.58           C  
ATOM   1278  NE1 TRP L  57      28.560 -11.935 -10.965  1.00 20.45           N  
ATOM   1279  CE2 TRP L  57      27.895 -13.019 -11.471  1.00 21.71           C  
ATOM   1280  CE3 TRP L  57      28.239 -14.691 -13.184  1.00 20.42           C  
ATOM   1281  CZ2 TRP L  57      26.662 -13.568 -11.112  1.00 21.83           C  
ATOM   1282  CZ3 TRP L  57      27.012 -15.236 -12.825  1.00 25.72           C  
ATOM   1283  CH2 TRP L  57      26.235 -14.669 -11.807  1.00 20.66           C  
ATOM   1284  N   THR L  58      33.031 -13.396 -10.582  1.00 21.77           N  
ATOM   1285  CA  THR L  58      33.659 -12.638  -9.495  1.00 26.33           C  
ATOM   1286  C   THR L  58      35.184 -12.669  -9.606  1.00 26.30           C  
ATOM   1287  O   THR L  58      35.782 -13.737  -9.521  1.00 24.47           O  
ATOM   1288  CB  THR L  58      33.285 -13.212  -8.113  1.00 32.26           C  
ATOM   1289  OG1 THR L  58      31.859 -13.245  -7.966  1.00 26.09           O  
ATOM   1290  CG2 THR L  58      33.920 -12.368  -6.983  1.00 25.46           C  
ATOM   1291  N   PRO L  59      35.824 -11.496  -9.768  1.00 26.34           N  
ATOM   1292  CA  PRO L  59      37.294 -11.512  -9.784  1.00 30.57           C  
ATOM   1293  C   PRO L  59      37.867 -12.095  -8.493  1.00 33.26           C  
ATOM   1294  O   PRO L  59      37.323 -11.874  -7.407  1.00 30.47           O  
ATOM   1295  CB  PRO L  59      37.666 -10.029  -9.915  1.00 31.68           C  
ATOM   1296  CG  PRO L  59      36.446  -9.375 -10.547  1.00 27.26           C  
ATOM   1297  CD  PRO L  59      35.279 -10.137  -9.944  1.00 28.62           C  
ATOM   1298  N   GLY L  60      38.963 -12.840  -8.612  1.00 40.57           N  
ATOM   1299  CA  GLY L  60      39.603 -13.446  -7.456  1.00 28.98           C  
ATOM   1300  C   GLY L  60      40.091 -12.434  -6.427  1.00 27.16           C  
ATOM   1301  O   GLY L  60      40.324 -12.787  -5.280  1.00 35.99           O  
ATOM   1302  N   ARG L  61      40.236 -11.182  -6.843  1.00 26.74           N  
ATOM   1303  CA  ARG L  61      40.602 -10.079  -5.952  1.00 36.04           C  
ATOM   1304  C   ARG L  61      39.598  -9.876  -4.817  1.00 35.69           C  
ATOM   1305  O   ARG L  61      39.929  -9.302  -3.776  1.00 36.95           O  
ATOM   1306  CB  ARG L  61      40.691  -8.781  -6.752  1.00 33.97           C  
ATOM   1307  CG  ARG L  61      42.016  -8.578  -7.427  1.00 52.12           C  
ATOM   1308  CD  ARG L  61      41.856  -7.747  -8.671  1.00 54.92           C  
ATOM   1309  NE  ARG L  61      40.850  -6.702  -8.519  1.00 43.84           N  
ATOM   1310  CZ  ARG L  61      39.915  -6.454  -9.428  1.00 39.83           C  
ATOM   1311  NH1 ARG L  61      39.860  -7.185 -10.534  1.00 48.65           N  
ATOM   1312  NH2 ARG L  61      39.041  -5.482  -9.235  1.00 48.18           N  
ATOM   1313  N   PHE L  62      38.369 -10.331  -5.042  1.00 30.76           N  
ATOM   1314  CA  PHE L  62      37.283 -10.199  -4.069  1.00 32.26           C  
ATOM   1315  C   PHE L  62      37.153 -11.475  -3.253  1.00 35.88           C  
ATOM   1316  O   PHE L  62      37.065 -12.572  -3.815  1.00 32.59           O  
ATOM   1317  CB  PHE L  62      35.959  -9.888  -4.789  1.00 25.93           C  
ATOM   1318  CG  PHE L  62      35.933  -8.539  -5.437  1.00 31.50           C  
ATOM   1319  CD1 PHE L  62      35.409  -7.447  -4.767  1.00 31.83           C  
ATOM   1320  CD2 PHE L  62      36.451  -8.353  -6.703  1.00 34.39           C  
ATOM   1321  CE1 PHE L  62      35.400  -6.201  -5.351  1.00 28.33           C  
ATOM   1322  CE2 PHE L  62      36.445  -7.112  -7.292  1.00 38.27           C  
ATOM   1323  CZ  PHE L  62      35.921  -6.033  -6.621  1.00 38.37           C  
ATOM   1324  N   SER L  63      37.137 -11.335  -1.927  1.00 30.18           N  
ATOM   1325  CA  SER L  63      37.043 -12.488  -1.048  1.00 29.93           C  
ATOM   1326  C   SER L  63      36.114 -12.216   0.144  1.00 27.39           C  
ATOM   1327  O   SER L  63      36.241 -11.197   0.821  1.00 30.86           O  
ATOM   1328  CB  SER L  63      38.441 -12.857  -0.543  1.00 35.69           C  
ATOM   1329  OG  SER L  63      38.423 -14.116   0.097  1.00 47.08           O  
ATOM   1330  N   GLY L  64      35.191 -13.130   0.408  1.00 27.66           N  
ATOM   1331  CA  GLY L  64      34.303 -12.986   1.552  1.00 26.45           C  
ATOM   1332  C   GLY L  64      34.718 -13.851   2.737  1.00 33.05           C  
ATOM   1333  O   GLY L  64      35.278 -14.935   2.558  1.00 29.98           O  
ATOM   1334  N   SER L  65      34.440 -13.387   3.954  1.00 29.21           N  
ATOM   1335  CA  SER L  65      34.753 -14.180   5.141  1.00 32.86           C  
ATOM   1336  C   SER L  65      33.975 -13.685   6.347  1.00 37.64           C  
ATOM   1337  O   SER L  65      33.271 -12.678   6.268  1.00 31.32           O  
ATOM   1338  CB  SER L  65      36.250 -14.112   5.452  1.00 33.44           C  
ATOM   1339  OG  SER L  65      36.622 -12.797   5.817  1.00 34.65           O  
ATOM   1340  N   LEU L  66      34.094 -14.410   7.457  1.00 38.42           N  
ATOM   1341  CA  LEU L  66      33.675 -13.901   8.757  1.00 33.43           C  
ATOM   1342  C   LEU L  66      34.884 -13.277   9.455  1.00 41.70           C  
ATOM   1343  O   LEU L  66      35.951 -13.890   9.538  1.00 44.44           O  
ATOM   1344  CB  LEU L  66      33.071 -15.017   9.607  1.00 35.77           C  
ATOM   1345  CG  LEU L  66      31.747 -15.554   9.060  1.00 35.58           C  
ATOM   1346  CD1 LEU L  66      31.138 -16.603   9.983  1.00 38.73           C  
ATOM   1347  CD2 LEU L  66      30.782 -14.393   8.862  1.00 31.43           C  
ATOM   1348  N   LEU L  67      34.720 -12.046   9.925  1.00 40.16           N  
ATOM   1349  CA  LEU L  67      35.778 -11.334  10.633  1.00 41.20           C  
ATOM   1350  C   LEU L  67      35.276 -10.845  11.987  1.00 44.89           C  
ATOM   1351  O   LEU L  67      34.536  -9.862  12.067  1.00 33.86           O  
ATOM   1352  CB  LEU L  67      36.262 -10.140   9.824  1.00 34.87           C  
ATOM   1353  CG  LEU L  67      37.318  -9.316  10.567  1.00 53.28           C  
ATOM   1354  CD1 LEU L  67      38.531 -10.182  10.845  1.00 49.21           C  
ATOM   1355  CD2 LEU L  67      37.715  -8.066   9.798  1.00 49.07           C  
ATOM   1356  N   GLY L  68      35.695 -11.526  13.047  1.00 44.19           N  
ATOM   1357  CA  GLY L  68      35.140 -11.277  14.362  1.00 40.69           C  
ATOM   1358  C   GLY L  68      33.669 -11.630  14.327  1.00 37.25           C  
ATOM   1359  O   GLY L  68      33.290 -12.727  13.907  1.00 41.11           O  
ATOM   1360  N   ALA L  69      32.832 -10.683  14.733  1.00 31.35           N  
ATOM   1361  CA  ALA L  69      31.399 -10.908  14.799  1.00 31.26           C  
ATOM   1362  C   ALA L  69      30.707 -10.440  13.520  1.00 30.31           C  
ATOM   1363  O   ALA L  69      29.479 -10.439  13.438  1.00 26.84           O  
ATOM   1364  CB  ALA L  69      30.815 -10.176  16.004  1.00 32.35           C  
ATOM   1365  N   LYS L  70      31.495 -10.033  12.529  1.00 26.24           N  
ATOM   1366  CA  LYS L  70      30.925  -9.478  11.303  1.00 31.59           C  
ATOM   1367  C   LYS L  70      31.276 -10.298  10.068  1.00 29.79           C  
ATOM   1368  O   LYS L  70      32.213 -11.108  10.079  1.00 26.25           O  
ATOM   1369  CB  LYS L  70      31.413  -8.040  11.091  1.00 28.42           C  
ATOM   1370  CG  LYS L  70      31.154  -7.105  12.276  1.00 30.15           C  
ATOM   1371  CD  LYS L  70      31.329  -5.656  11.861  1.00 32.22           C  
ATOM   1372  CE  LYS L  70      31.094  -4.722  13.027  1.00 43.68           C  
ATOM   1373  NZ  LYS L  70      31.277  -3.303  12.626  1.00 46.67           N  
ATOM   1374  N   ALA L  71      30.530 -10.064   8.993  1.00 25.86           N  
ATOM   1375  CA  ALA L  71      30.931 -10.552   7.680  1.00 27.70           C  
ATOM   1376  C   ALA L  71      31.864  -9.515   7.089  1.00 25.96           C  
ATOM   1377  O   ALA L  71      31.756  -8.318   7.399  1.00 25.83           O  
ATOM   1378  CB  ALA L  71      29.718 -10.756   6.786  1.00 27.11           C  
ATOM   1379  N   ALA L  72      32.788  -9.967   6.244  1.00 24.50           N  
ATOM   1380  CA  ALA L  72      33.783  -9.087   5.644  1.00 24.51           C  
ATOM   1381  C   ALA L  72      33.946  -9.365   4.153  1.00 25.76           C  
ATOM   1382  O   ALA L  72      33.901 -10.519   3.719  1.00 28.99           O  
ATOM   1383  CB  ALA L  72      35.127  -9.247   6.347  1.00 22.61           C  
ATOM   1384  N   LEU L  73      34.143  -8.298   3.387  1.00 26.38           N  
ATOM   1385  CA  LEU L  73      34.549  -8.398   1.993  1.00 29.47           C  
ATOM   1386  C   LEU L  73      35.947  -7.806   1.880  1.00 28.97           C  
ATOM   1387  O   LEU L  73      36.124  -6.606   2.081  1.00 28.09           O  
ATOM   1388  CB  LEU L  73      33.611  -7.579   1.106  1.00 23.64           C  
ATOM   1389  CG  LEU L  73      33.957  -7.498  -0.396  1.00 26.86           C  
ATOM   1390  CD1 LEU L  73      33.879  -8.864  -1.035  1.00 23.03           C  
ATOM   1391  CD2 LEU L  73      33.036  -6.522  -1.134  1.00 28.82           C  
ATOM   1392  N   THR L  74      36.934  -8.634   1.554  1.00 25.75           N  
ATOM   1393  CA  THR L  74      38.281  -8.134   1.315  1.00 30.38           C  
ATOM   1394  C   THR L  74      38.544  -7.928  -0.166  1.00 33.71           C  
ATOM   1395  O   THR L  74      38.362  -8.841  -0.965  1.00 31.18           O  
ATOM   1396  CB  THR L  74      39.354  -9.077   1.874  1.00 35.51           C  
ATOM   1397  OG1 THR L  74      39.125  -9.267   3.272  1.00 35.84           O  
ATOM   1398  CG2 THR L  74      40.758  -8.475   1.660  1.00 33.24           C  
ATOM   1399  N   ILE L  75      38.948  -6.714  -0.524  1.00 28.43           N  
ATOM   1400  CA  ILE L  75      39.306  -6.404  -1.893  1.00 33.69           C  
ATOM   1401  C   ILE L  75      40.803  -6.167  -1.930  1.00 39.44           C  
ATOM   1402  O   ILE L  75      41.291  -5.162  -1.410  1.00 39.51           O  
ATOM   1403  CB  ILE L  75      38.613  -5.132  -2.393  1.00 33.77           C  
ATOM   1404  CG1 ILE L  75      37.099  -5.231  -2.205  1.00 36.54           C  
ATOM   1405  CG2 ILE L  75      38.969  -4.865  -3.863  1.00 38.01           C  
ATOM   1406  CD1 ILE L  75      36.382  -3.968  -2.554  1.00 30.57           C  
ATOM   1407  N   SER L  76      41.532  -7.101  -2.522  1.00 38.50           N  
ATOM   1408  CA  SER L  76      42.964  -6.932  -2.689  1.00 43.91           C  
ATOM   1409  C   SER L  76      43.283  -6.395  -4.083  1.00 51.76           C  
ATOM   1410  O   SER L  76      42.478  -6.511  -5.013  1.00 42.54           O  
ATOM   1411  CB  SER L  76      43.688  -8.247  -2.434  1.00 42.96           C  
ATOM   1412  OG  SER L  76      43.235  -9.250  -3.319  1.00 60.53           O  
ATOM   1413  N   ASP L  77      44.451  -5.778  -4.216  1.00 49.56           N  
ATOM   1414  CA  ASP L  77      44.912  -5.310  -5.511  1.00 40.09           C  
ATOM   1415  C   ASP L  77      43.918  -4.341  -6.138  1.00 48.17           C  
ATOM   1416  O   ASP L  77      43.699  -4.353  -7.353  1.00 40.81           O  
ATOM   1417  CB  ASP L  77      45.128  -6.504  -6.435  1.00 47.01           C  
ATOM   1418  CG  ASP L  77      46.004  -6.169  -7.614  1.00 62.39           C  
ATOM   1419  OD1 ASP L  77      46.723  -5.145  -7.543  1.00 50.72           O  
ATOM   1420  OD2 ASP L  77      45.977  -6.930  -8.605  1.00 61.31           O  
ATOM   1421  N   ALA L  78      43.321  -3.496  -5.305  1.00 38.59           N  
ATOM   1422  CA  ALA L  78      42.278  -2.588  -5.762  1.00 37.41           C  
ATOM   1423  C   ALA L  78      42.572  -2.012  -7.143  1.00 51.46           C  
ATOM   1424  O   ALA L  78      43.717  -1.693  -7.463  1.00 47.74           O  
ATOM   1425  CB  ALA L  78      42.064  -1.465  -4.755  1.00 47.10           C  
ATOM   1426  N   GLN L  79      41.524  -1.883  -7.953  1.00 42.78           N  
ATOM   1427  CA  GLN L  79      41.638  -1.300  -9.281  1.00 45.02           C  
ATOM   1428  C   GLN L  79      40.712  -0.111  -9.384  1.00 45.22           C  
ATOM   1429  O   GLN L  79      39.723  -0.026  -8.657  1.00 42.22           O  
ATOM   1430  CB  GLN L  79      41.268  -2.328 -10.354  1.00 44.06           C  
ATOM   1431  CG  GLN L  79      42.157  -3.540 -10.351  1.00 39.14           C  
ATOM   1432  CD  GLN L  79      43.549  -3.242 -10.890  1.00 51.16           C  
ATOM   1433  OE1 GLN L  79      43.711  -2.473 -11.843  1.00 53.08           O  
ATOM   1434  NE2 GLN L  79      44.560  -3.851 -10.282  1.00 48.24           N  
ATOM   1435  N   PRO L  80      41.027   0.815 -10.296  1.00 48.23           N  
ATOM   1436  CA  PRO L  80      40.171   1.982 -10.515  1.00 40.99           C  
ATOM   1437  C   PRO L  80      38.720   1.576 -10.758  1.00 38.74           C  
ATOM   1438  O   PRO L  80      37.802   2.294 -10.356  1.00 39.90           O  
ATOM   1439  CB  PRO L  80      40.764   2.611 -11.781  1.00 42.79           C  
ATOM   1440  CG  PRO L  80      42.187   2.188 -11.771  1.00 48.22           C  
ATOM   1441  CD  PRO L  80      42.214   0.819 -11.170  1.00 41.08           C  
ATOM   1442  N   GLU L  81      38.524   0.442 -11.426  1.00 36.39           N  
ATOM   1443  CA  GLU L  81      37.186  -0.040 -11.763  1.00 47.11           C  
ATOM   1444  C   GLU L  81      36.441  -0.543 -10.527  1.00 46.42           C  
ATOM   1445  O   GLU L  81      35.235  -0.775 -10.582  1.00 39.84           O  
ATOM   1446  CB  GLU L  81      37.267  -1.154 -12.815  1.00 39.46           C  
ATOM   1447  CG  GLU L  81      38.236  -2.259 -12.432  1.00 50.14           C  
ATOM   1448  CD  GLU L  81      38.380  -3.326 -13.497  1.00 58.11           C  
ATOM   1449  OE1 GLU L  81      37.793  -3.164 -14.585  1.00 70.94           O  
ATOM   1450  OE2 GLU L  81      39.081  -4.330 -13.245  1.00 58.61           O  
ATOM   1451  N   ASP L  82      37.164  -0.707  -9.419  1.00 38.45           N  
ATOM   1452  CA  ASP L  82      36.563  -1.153  -8.162  1.00 32.44           C  
ATOM   1453  C   ASP L  82      35.876  -0.023  -7.405  1.00 43.37           C  
ATOM   1454  O   ASP L  82      35.174  -0.268  -6.425  1.00 37.40           O  
ATOM   1455  CB  ASP L  82      37.609  -1.814  -7.268  1.00 38.97           C  
ATOM   1456  CG  ASP L  82      38.120  -3.113  -7.843  1.00 37.66           C  
ATOM   1457  OD1 ASP L  82      37.433  -3.678  -8.729  1.00 42.20           O  
ATOM   1458  OD2 ASP L  82      39.201  -3.574  -7.417  1.00 41.58           O  
ATOM   1459  N   GLU L  83      36.076   1.216  -7.847  1.00 36.56           N  
ATOM   1460  CA  GLU L  83      35.397   2.326  -7.200  1.00 34.46           C  
ATOM   1461  C   GLU L  83      33.899   2.192  -7.438  1.00 43.43           C  
ATOM   1462  O   GLU L  83      33.431   2.250  -8.576  1.00 42.12           O  
ATOM   1463  CB  GLU L  83      35.916   3.682  -7.690  1.00 34.21           C  
ATOM   1464  CG  GLU L  83      35.212   4.850  -7.019  1.00 41.43           C  
ATOM   1465  CD  GLU L  83      36.007   6.154  -7.076  1.00 53.36           C  
ATOM   1466  OE1 GLU L  83      37.259   6.110  -7.047  1.00 44.98           O  
ATOM   1467  OE2 GLU L  83      35.370   7.227  -7.137  1.00 51.86           O  
ATOM   1468  N   ALA L  84      33.152   2.001  -6.356  1.00 33.69           N  
ATOM   1469  CA  ALA L  84      31.738   1.673  -6.446  1.00 35.33           C  
ATOM   1470  C   ALA L  84      31.135   1.686  -5.057  1.00 33.84           C  
ATOM   1471  O   ALA L  84      31.852   1.823  -4.063  1.00 34.40           O  
ATOM   1472  CB  ALA L  84      31.557   0.285  -7.073  1.00 27.67           C  
ATOM   1473  N   GLU L  85      29.814   1.555  -5.001  1.00 26.55           N  
ATOM   1474  CA  GLU L  85      29.117   1.319  -3.752  1.00 29.87           C  
ATOM   1475  C   GLU L  85      29.046  -0.193  -3.560  1.00 32.68           C  
ATOM   1476  O   GLU L  85      28.744  -0.920  -4.508  1.00 30.40           O  
ATOM   1477  CB  GLU L  85      27.713   1.923  -3.812  1.00 30.26           C  
ATOM   1478  CG  GLU L  85      26.973   1.927  -2.495  1.00 43.81           C  
ATOM   1479  CD  GLU L  85      27.414   3.045  -1.575  1.00 44.92           C  
ATOM   1480  OE1 GLU L  85      28.130   3.955  -2.045  1.00 57.54           O  
ATOM   1481  OE2 GLU L  85      27.044   3.016  -0.382  1.00 45.41           O  
ATOM   1482  N   TYR L  86      29.356  -0.662  -2.350  1.00 29.73           N  
ATOM   1483  CA  TYR L  86      29.285  -2.088  -2.029  1.00 27.35           C  
ATOM   1484  C   TYR L  86      28.204  -2.336  -0.982  1.00 30.28           C  
ATOM   1485  O   TYR L  86      28.257  -1.792   0.123  1.00 24.49           O  
ATOM   1486  CB  TYR L  86      30.643  -2.630  -1.560  1.00 23.73           C  
ATOM   1487  CG  TYR L  86      31.645  -2.676  -2.695  1.00 32.69           C  
ATOM   1488  CD1 TYR L  86      31.869  -3.852  -3.403  1.00 29.56           C  
ATOM   1489  CD2 TYR L  86      32.321  -1.525  -3.102  1.00 32.27           C  
ATOM   1490  CE1 TYR L  86      32.767  -3.894  -4.475  1.00 30.80           C  
ATOM   1491  CE2 TYR L  86      33.225  -1.561  -4.170  1.00 26.32           C  
ATOM   1492  CZ  TYR L  86      33.447  -2.747  -4.847  1.00 32.72           C  
ATOM   1493  OH  TYR L  86      34.335  -2.783  -5.911  1.00 28.26           O  
ATOM   1494  N   TYR L  87      27.207  -3.136  -1.349  1.00 22.50           N  
ATOM   1495  CA  TYR L  87      26.126  -3.456  -0.432  1.00 20.31           C  
ATOM   1496  C   TYR L  87      26.223  -4.885   0.077  1.00 23.10           C  
ATOM   1497  O   TYR L  87      26.538  -5.798  -0.672  1.00 22.52           O  
ATOM   1498  CB  TYR L  87      24.772  -3.299  -1.118  1.00 24.07           C  
ATOM   1499  CG  TYR L  87      24.420  -1.879  -1.444  1.00 28.59           C  
ATOM   1500  CD1 TYR L  87      23.833  -1.057  -0.497  1.00 28.78           C  
ATOM   1501  CD2 TYR L  87      24.674  -1.360  -2.708  1.00 33.78           C  
ATOM   1502  CE1 TYR L  87      23.509   0.259  -0.802  1.00 34.31           C  
ATOM   1503  CE2 TYR L  87      24.352  -0.059  -3.020  1.00 32.16           C  
ATOM   1504  CZ  TYR L  87      23.777   0.746  -2.070  1.00 35.63           C  
ATOM   1505  OH  TYR L  87      23.466   2.043  -2.400  1.00 41.19           O  
ATOM   1506  N   CYS L  88      25.913  -5.080   1.347  1.00 21.03           N  
ATOM   1508  CA  CYS L  88      25.867  -6.413   1.926  0.50 21.58           C  
ATOM   1509  C   CYS L  88      24.430  -6.692   2.323  1.00 26.61           C  
ATOM   1510  O   CYS L  88      23.699  -5.769   2.701  1.00 24.91           O  
ATOM   1512  CB  CYS L  88      26.794  -6.492   3.144  0.50 24.65           C  
ATOM   1514  SG  CYS L  88      26.526  -7.904   4.261  0.50 27.17           S  
ATOM   1515  N   SER L  89      24.021  -7.951   2.228  1.00 18.61           N  
ATOM   1516  CA  SER L  89      22.759  -8.369   2.804  1.00 18.84           C  
ATOM   1517  C   SER L  89      23.074  -9.521   3.740  1.00 22.33           C  
ATOM   1518  O   SER L  89      24.002 -10.295   3.489  1.00 19.84           O  
ATOM   1519  CB  SER L  89      21.738  -8.789   1.739  1.00 21.80           C  
ATOM   1520  OG  SER L  89      22.227  -9.845   0.911  1.00 22.15           O  
ATOM   1521  N   LEU L  90      22.320  -9.610   4.832  1.00 20.84           N  
ATOM   1522  CA  LEU L  90      22.439 -10.722   5.760  1.00 16.71           C  
ATOM   1523  C   LEU L  90      21.100 -11.435   5.746  1.00 23.57           C  
ATOM   1524  O   LEU L  90      20.044 -10.791   5.822  1.00 21.83           O  
ATOM   1525  CB  LEU L  90      22.792 -10.237   7.163  1.00 17.58           C  
ATOM   1526  CG  LEU L  90      24.166  -9.571   7.322  1.00 23.71           C  
ATOM   1527  CD1 LEU L  90      24.339  -9.081   8.753  1.00 23.95           C  
ATOM   1528  CD2 LEU L  90      25.288 -10.519   6.959  1.00 22.24           C  
ATOM   1529  N   SER L  91      21.140 -12.760   5.617  1.00 19.68           N  
ATOM   1530  CA  SER L  91      19.935 -13.541   5.340  1.00 20.69           C  
ATOM   1531  C   SER L  91      19.798 -14.745   6.286  1.00 19.39           C  
ATOM   1532  O   SER L  91      20.705 -15.560   6.389  1.00 19.27           O  
ATOM   1533  CB  SER L  91      19.992 -14.053   3.892  1.00 20.47           C  
ATOM   1534  OG  SER L  91      18.870 -14.872   3.577  1.00 27.45           O  
ATOM   1535  N   ASP L  92      18.661 -14.847   6.965  1.00 18.84           N  
ATOM   1536  CA  ASP L  92      18.302 -16.073   7.694  1.00 23.46           C  
ATOM   1537  C   ASP L  92      16.788 -16.177   7.798  1.00 18.75           C  
ATOM   1538  O   ASP L  92      16.069 -15.462   7.104  1.00 19.07           O  
ATOM   1539  CB  ASP L  92      18.987 -16.177   9.067  1.00 20.65           C  
ATOM   1540  CG  ASP L  92      18.549 -15.079  10.056  1.00 24.62           C  
ATOM   1541  OD1 ASP L  92      17.482 -14.461   9.879  1.00 24.67           O  
ATOM   1542  OD2 ASP L  92      19.286 -14.856  11.031  1.00 30.27           O  
ATOM   1543  N   VAL L  93      16.293 -17.068   8.648  1.00 19.63           N  
ATOM   1544  CA  VAL L  93      14.846 -17.307   8.712  1.00 20.80           C  
ATOM   1545  C   VAL L  93      14.061 -16.044   9.087  1.00 25.53           C  
ATOM   1546  O   VAL L  93      12.875 -15.925   8.776  1.00 24.69           O  
ATOM   1547  CB  VAL L  93      14.493 -18.469   9.702  1.00 23.15           C  
ATOM   1548  CG1 VAL L  93      14.918 -18.111  11.122  1.00 23.38           C  
ATOM   1549  CG2 VAL L  93      13.000 -18.801   9.636  1.00 25.44           C  
ATOM   1550  N   ASP L  94      14.729 -15.090   9.731  1.00 23.28           N  
ATOM   1551  CA  ASP L  94      14.064 -13.879  10.198  1.00 21.04           C  
ATOM   1552  C   ASP L  94      14.075 -12.723   9.206  1.00 26.65           C  
ATOM   1553  O   ASP L  94      13.466 -11.683   9.453  1.00 28.64           O  
ATOM   1554  CB  ASP L  94      14.660 -13.429  11.528  1.00 26.51           C  
ATOM   1555  CG  ASP L  94      14.351 -14.393  12.638  1.00 28.65           C  
ATOM   1556  OD1 ASP L  94      13.180 -14.839  12.708  1.00 25.90           O  
ATOM   1557  OD2 ASP L  94      15.277 -14.724  13.404  1.00 31.22           O  
ATOM   1558  N   GLY L  95      14.761 -12.885   8.087  1.00 22.84           N  
ATOM   1559  CA  GLY L  95      14.759 -11.823   7.102  1.00 23.51           C  
ATOM   1560  C   GLY L  95      15.993 -11.768   6.250  1.00 22.27           C  
ATOM   1561  O   GLY L  95      17.057 -12.280   6.615  1.00 23.05           O  
ATOM   1562  N   TYR L  96      15.813 -11.157   5.089  1.00 19.51           N  
ATOM   1563  CA  TYR L  96      16.865 -10.898   4.140  1.00 19.74           C  
ATOM   1564  C   TYR L  96      17.016  -9.388   4.210  1.00 23.50           C  
ATOM   1565  O   TYR L  96      16.159  -8.660   3.713  1.00 21.72           O  
ATOM   1566  CB  TYR L  96      16.402 -11.327   2.737  1.00 20.88           C  
ATOM   1567  CG  TYR L  96      17.457 -11.162   1.674  1.00 24.92           C  
ATOM   1568  CD1 TYR L  96      18.271 -12.222   1.313  1.00 20.20           C  
ATOM   1569  CD2 TYR L  96      17.656  -9.941   1.049  1.00 24.73           C  
ATOM   1570  CE1 TYR L  96      19.253 -12.073   0.358  1.00 21.48           C  
ATOM   1571  CE2 TYR L  96      18.639  -9.779   0.099  1.00 23.34           C  
ATOM   1572  CZ  TYR L  96      19.435 -10.844  -0.241  1.00 25.20           C  
ATOM   1573  OH  TYR L  96      20.414 -10.693  -1.195  1.00 28.58           O  
ATOM   1574  N   LEU L  97      18.095  -8.926   4.826  1.00 21.75           N  
ATOM   1575  CA  LEU L  97      18.243  -7.519   5.207  1.00 24.66           C  
ATOM   1576  C   LEU L  97      19.477  -6.853   4.583  1.00 22.83           C  
ATOM   1577  O   LEU L  97      20.581  -7.390   4.633  1.00 21.75           O  
ATOM   1578  CB  LEU L  97      18.321  -7.411   6.735  1.00 22.47           C  
ATOM   1579  CG  LEU L  97      17.227  -8.113   7.549  1.00 26.11           C  
ATOM   1580  CD1 LEU L  97      17.439  -7.941   9.051  1.00 28.11           C  
ATOM   1581  CD2 LEU L  97      15.870  -7.592   7.151  1.00 29.56           C  
ATOM   1582  N   PHE L  98      19.284  -5.663   4.022  1.00 22.60           N  
ATOM   1583  CA  PHE L  98      20.376  -4.925   3.405  1.00 21.71           C  
ATOM   1584  C   PHE L  98      21.028  -3.930   4.366  1.00 26.77           C  
ATOM   1585  O   PHE L  98      20.351  -3.281   5.174  1.00 20.77           O  
ATOM   1586  CB  PHE L  98      19.889  -4.176   2.158  1.00 26.23           C  
ATOM   1587  CG  PHE L  98      19.869  -5.015   0.915  1.00 24.85           C  
ATOM   1588  CD1 PHE L  98      18.676  -5.505   0.415  1.00 24.77           C  
ATOM   1589  CD2 PHE L  98      21.053  -5.331   0.258  1.00 25.47           C  
ATOM   1590  CE1 PHE L  98      18.654  -6.288  -0.727  1.00 28.28           C  
ATOM   1591  CE2 PHE L  98      21.037  -6.108  -0.892  1.00 32.49           C  
ATOM   1592  CZ  PHE L  98      19.835  -6.586  -1.379  1.00 32.08           C  
ATOM   1593  N   GLY L  99      22.348  -3.815   4.264  1.00 21.38           N  
ATOM   1594  CA  GLY L  99      23.070  -2.723   4.890  1.00 25.07           C  
ATOM   1595  C   GLY L  99      22.911  -1.449   4.062  1.00 23.59           C  
ATOM   1596  O   GLY L  99      22.343  -1.480   2.959  1.00 20.16           O  
ATOM   1597  N   GLY L 100      23.426  -0.336   4.580  1.00 27.77           N  
ATOM   1598  CA  GLY L 100      23.287   0.961   3.928  1.00 25.26           C  
ATOM   1599  C   GLY L 100      24.281   1.187   2.800  1.00 33.14           C  
ATOM   1600  O   GLY L 100      24.204   2.187   2.082  1.00 30.86           O  
ATOM   1601  N   GLY L 101      25.218   0.259   2.638  1.00 28.32           N  
ATOM   1602  CA  GLY L 101      26.197   0.342   1.569  1.00 28.01           C  
ATOM   1603  C   GLY L 101      27.455   1.089   1.966  1.00 33.59           C  
ATOM   1604  O   GLY L 101      27.409   1.984   2.800  1.00 33.58           O  
ATOM   1605  N   THR L 102      28.579   0.710   1.366  1.00 26.69           N  
ATOM   1606  CA  THR L 102      29.858   1.377   1.585  1.00 32.31           C  
ATOM   1607  C   THR L 102      30.332   1.971   0.262  1.00 35.60           C  
ATOM   1608  O   THR L 102      30.484   1.247  -0.725  1.00 30.97           O  
ATOM   1609  CB  THR L 102      30.949   0.386   2.085  1.00 28.50           C  
ATOM   1610  OG1 THR L 102      30.596  -0.138   3.376  1.00 28.59           O  
ATOM   1611  CG2 THR L 102      32.320   1.072   2.175  1.00 28.08           C  
ATOM   1612  N   GLN L 103      30.546   3.284   0.230  1.00 34.52           N  
ATOM   1613  CA  GLN L 103      31.192   3.896  -0.928  1.00 30.66           C  
ATOM   1614  C   GLN L 103      32.695   3.670  -0.864  1.00 36.48           C  
ATOM   1615  O   GLN L 103      33.367   4.154   0.057  1.00 42.39           O  
ATOM   1616  CB  GLN L 103      30.888   5.394  -1.020  1.00 40.67           C  
ATOM   1617  CG  GLN L 103      31.591   6.100  -2.195  1.00 39.66           C  
ATOM   1618  CD  GLN L 103      31.051   5.684  -3.564  1.00 39.69           C  
ATOM   1619  OE1 GLN L 103      29.845   5.758  -3.817  1.00 43.12           O  
ATOM   1620  NE2 GLN L 103      31.946   5.251  -4.455  1.00 42.93           N  
ATOM   1621  N   LEU L 104      33.222   2.907  -1.819  1.00 31.72           N  
ATOM   1622  CA  LEU L 104      34.665   2.712  -1.914  1.00 30.47           C  
ATOM   1623  C   LEU L 104      35.212   3.743  -2.882  1.00 40.22           C  
ATOM   1624  O   LEU L 104      34.679   3.928  -3.986  1.00 34.64           O  
ATOM   1625  CB  LEU L 104      35.028   1.300  -2.394  1.00 31.61           C  
ATOM   1626  CG  LEU L 104      36.520   0.970  -2.591  1.00 33.83           C  
ATOM   1627  CD1 LEU L 104      37.258   0.904  -1.262  1.00 32.45           C  
ATOM   1628  CD2 LEU L 104      36.741  -0.339  -3.352  1.00 32.95           C  
ATOM   1629  N   THR L 105      36.258   4.435  -2.446  1.00 40.82           N  
ATOM   1630  CA  THR L 105      36.962   5.388  -3.295  1.00 40.18           C  
ATOM   1631  C   THR L 105      38.346   4.848  -3.564  1.00 40.27           C  
ATOM   1632  O   THR L 105      39.061   4.476  -2.636  1.00 43.61           O  
ATOM   1633  CB  THR L 105      37.100   6.759  -2.628  1.00 39.70           C  
ATOM   1634  OG1 THR L 105      35.824   7.408  -2.593  1.00 45.40           O  
ATOM   1635  CG2 THR L 105      38.077   7.625  -3.405  1.00 49.43           C  
ATOM   1636  N   VAL L 106      38.716   4.785  -4.838  1.00 44.90           N  
ATOM   1637  CA  VAL L 106      40.067   4.400  -5.210  1.00 49.93           C  
ATOM   1638  C   VAL L 106      40.835   5.664  -5.607  1.00 50.47           C  
ATOM   1639  O   VAL L 106      40.373   6.453  -6.439  1.00 54.15           O  
ATOM   1640  CB  VAL L 106      40.076   3.367  -6.362  1.00 44.28           C  
ATOM   1641  CG1 VAL L 106      41.479   2.847  -6.594  1.00 46.45           C  
ATOM   1642  CG2 VAL L 106      39.136   2.207  -6.047  1.00 46.72           C  
ATOM   1643  N   LEU L 106A     41.993   5.864  -4.989  1.00 53.93           N  
ATOM   1644  CA  LEU L 106A     42.804   7.050  -5.253  1.00 65.43           C  
ATOM   1645  C   LEU L 106A     44.038   6.742  -6.097  1.00 60.01           C  
ATOM   1646  O   LEU L 106A     44.379   7.493  -7.012  1.00 70.85           O  
ATOM   1647  CB  LEU L 106A     43.213   7.714  -3.938  1.00 64.64           C  
ATOM   1648  CG  LEU L 106A     42.136   8.610  -3.321  1.00 69.20           C  
ATOM   1649  CD1 LEU L 106A     42.489   8.987  -1.890  1.00 72.63           C  
ATOM   1650  CD2 LEU L 106A     41.924   9.858  -4.178  1.00 64.67           C  
TER    1651      LEU L 106A                                                     
