# Supplementary material for: SARS-CoV-2 Spike Protein Interaction Space
Source: Int J Mol Sci. 2023 Jul 27;24(15):12058. doi: 10.3390/ijms241512058 (PMC10418891; doi:10.3390/ijms241512058)
Supplement: Supplementary file 1 [file ijms-24-12058-s001.zip › Supplementary Material File S1/4K07.pdb]

REMARK 950 NUMBERING  Kabat
REMARK 950 METHOD     X-ray crystal structure
REMARK 950 RESOLUTION 2.830
REMARK 950 R-FACTOR   0.203
REMARK 950 R-FREE     0.236
REMARK 950 CHAIN-TYPE LABEL ORIGINAL
REMARK 950 CHAIN L    L    C
REMARK 950 CHAIN L    L    D
REMARK 950 MOLECULE : C : AMYLOIDOGENIC IMMUNOGLOBULIN LIGHT CHAIN PROTEIN AL-103
REMARK 950 SPECIES  : C : HOMO SAPIENS
SEQRES   1 L 129  MET ARG ALA LYS LEU LEU GLY ILE VAL LEU THR THR PRO          
SEQRES   2 L 129  ILE ALA ILE SER SER PHE ALA SER THR ASP ILE GLN MET          
SEQRES   3 L 129  THR GLN SER PRO SER SER LEU SER ALA SER VAL GLY ASP          
SEQRES   4 L 129  ARG VAL THR ILE THR CYS GLN ALA SER GLN ASP ILE SER          
SEQRES   5 L 129  ASN TYR LEU ILE TRP TYR GLN GLN LYS PRO GLY LYS ALA          
SEQRES   6 L 129  PRO LYS LEU LEU ILE TYR ASP ALA SER ASN LEU GLU THR          
SEQRES   7 L 129  GLY VAL PRO SER ARG PHE SER GLY SER GLY SER GLY THR          
SEQRES   8 L 129  ASP PHE THR PHE THR ILE SER SER LEU GLN PRO GLU ASP          
SEQRES   9 L 129  ILE ALA THR TYR TYR CYS GLN GLN TYR HIS ASN LEU PRO          
SEQRES  10 L 129  TYR THR PHE GLY PRO GLY THR LYS LEU GLU ILE LYS              
SEQRES   1 L 129  MET ARG ALA LYS LEU LEU GLY ILE VAL LEU THR THR PRO          
SEQRES   2 L 129  ILE ALA ILE SER SER PHE ALA SER THR ASP ILE GLN MET          
SEQRES   3 L 129  THR GLN SER PRO SER SER LEU SER ALA SER VAL GLY ASP          
SEQRES   4 L 129  ARG VAL THR ILE THR CYS GLN ALA SER GLN ASP ILE SER          
SEQRES   5 L 129  ASN TYR LEU ILE TRP TYR GLN GLN LYS PRO GLY LYS ALA          
SEQRES   6 L 129  PRO LYS LEU LEU ILE TYR ASP ALA SER ASN LEU GLU THR          
SEQRES   7 L 129  GLY VAL PRO SER ARG PHE SER GLY SER GLY SER GLY THR          
SEQRES   8 L 129  ASP PHE THR PHE THR ILE SER SER LEU GLN PRO GLU ASP          
SEQRES   9 L 129  ILE ALA THR TYR TYR CYS GLN GLN TYR HIS ASN LEU PRO          
SEQRES  10 L 129  TYR THR PHE GLY PRO GLY THR LYS LEU GLU ILE LYS              
ATOM   3343  N   ASP L   1       6.338 -83.979 -17.463  1.00143.54           N  
ATOM   3344  CA  ASP L   1       4.996 -83.490 -17.756  1.00134.76           C  
ATOM   3345  C   ASP L   1       4.914 -81.971 -17.635  1.00123.93           C  
ATOM   3346  O   ASP L   1       4.553 -81.456 -16.575  1.00122.56           O  
ATOM   3347  CB  ASP L   1       3.988 -84.151 -16.816  1.00140.88           C  
ATOM   3348  CG  ASP L   1       2.588 -83.600 -16.985  1.00145.43           C  
ATOM   3349  OD1 ASP L   1       2.107 -83.549 -18.137  1.00146.16           O  
ATOM   3350  OD2 ASP L   1       1.979 -83.203 -15.967  1.00147.31           O  
ATOM   3351  H   ASP L   1       6.403 -84.388 -16.710  1.00172.24           H  
ATOM   3352  HA  ASP L   1       4.763 -83.732 -18.666  1.00161.72           H  
ATOM   3353  HB2 ASP L   1       3.960 -85.103 -17.000  1.00169.05           H  
ATOM   3354  HB3 ASP L   1       4.262 -83.997 -15.899  1.00169.05           H  
ATOM   3355  N   ILE L   2       5.261 -81.237 -18.693  1.00 86.74           N  
ATOM   3356  CA  ILE L   2       5.167 -79.779 -18.646  1.00 77.45           C  
ATOM   3357  C   ILE L   2       3.704 -79.361 -18.577  1.00 80.27           C  
ATOM   3358  O   ILE L   2       2.875 -79.815 -19.377  1.00 69.33           O  
ATOM   3359  CB  ILE L   2       5.847 -79.153 -19.875  1.00 73.59           C  
ATOM   3360  CG1 ILE L   2       7.341 -79.486 -19.891  1.00 72.92           C  
ATOM   3361  CG2 ILE L   2       5.637 -77.635 -19.881  1.00 74.64           C  
ATOM   3362  CD1 ILE L   2       8.087 -78.927 -21.094  1.00 72.19           C  
ATOM   3363  H   ILE L   2       5.549 -81.553 -19.439  1.00104.08           H  
ATOM   3364  HA  ILE L   2       5.615 -79.454 -17.849  1.00 92.94           H  
ATOM   3365  HB  ILE L   2       5.441 -79.524 -20.674  1.00 88.31           H  
ATOM   3366 HG12 ILE L   2       7.751 -79.120 -19.092  1.00 87.51           H  
ATOM   3367 HG13 ILE L   2       7.445 -80.451 -19.901  1.00 87.51           H  
ATOM   3368 HG21 ILE L   2       6.073 -77.259 -20.662  1.00 89.57           H  
ATOM   3369 HG22 ILE L   2       4.686 -77.448 -19.911  1.00 89.57           H  
ATOM   3370 HG23 ILE L   2       6.023 -77.260 -19.074  1.00 89.57           H  
ATOM   3371 HD11 ILE L   2       9.021 -79.179 -21.031  1.00 86.62           H  
ATOM   3372 HD12 ILE L   2       7.698 -79.292 -21.904  1.00 86.62           H  
ATOM   3373 HD13 ILE L   2       8.004 -77.960 -21.094  1.00 86.62           H  
ATOM   3374  N   GLN L   3       3.381 -78.494 -17.620  1.00 68.47           N  
ATOM   3375  CA  GLN L   3       2.028 -77.985 -17.441  1.00 74.80           C  
ATOM   3376  C   GLN L   3       1.946 -76.603 -18.067  1.00 66.61           C  
ATOM   3377  O   GLN L   3       2.735 -75.716 -17.724  1.00 63.52           O  
ATOM   3378  CB  GLN L   3       1.641 -77.914 -15.964  1.00 85.92           C  
ATOM   3379  CG  GLN L   3       1.679 -79.243 -15.257  1.00 89.91           C  
ATOM   3380  CD  GLN L   3       0.561 -80.152 -15.712  1.00103.83           C  
ATOM   3381  OE1 GLN L   3      -0.243 -79.786 -16.572  1.00 99.76           O  
ATOM   3382  NE2 GLN L   3       0.499 -81.346 -15.136  1.00115.12           N  
ATOM   3383  H   GLN L   3       3.943 -78.180 -17.050  1.00 82.17           H  
ATOM   3384  HA  GLN L   3       1.400 -78.567 -17.896  1.00 89.76           H  
ATOM   3385  HB2 GLN L   3       2.257 -77.319 -15.509  1.00103.10           H  
ATOM   3386  HB3 GLN L   3       0.738 -77.568 -15.895  1.00103.10           H  
ATOM   3387  HG2 GLN L   3       2.523 -79.682 -15.448  1.00107.89           H  
ATOM   3388  HG3 GLN L   3       1.584 -79.099 -14.303  1.00107.89           H  
ATOM   3389 HE21 GLN L   3       1.077 -81.565 -14.539  1.00138.14           H  
ATOM   3390 HE22 GLN L   3      -0.119 -81.900 -15.360  1.00138.14           H  
ATOM   3391  N   MET L   4       0.981 -76.412 -18.957  1.00 67.20           N  
ATOM   3392  CA  MET L   4       0.769 -75.128 -19.609  1.00 61.48           C  
ATOM   3393  C   MET L   4      -0.432 -74.419 -19.002  1.00 58.38           C  
ATOM   3394  O   MET L   4      -1.555 -74.927 -19.069  1.00 66.67           O  
ATOM   3395  CB  MET L   4       0.541 -75.316 -21.112  1.00 61.56           C  
ATOM   3396  CG  MET L   4       1.668 -76.012 -21.856  1.00 63.64           C  
ATOM   3397  SD  MET L   4       3.267 -75.216 -21.621  1.00 88.03           S  
ATOM   3398  CE  MET L   4       2.922 -73.561 -22.219  1.00 55.71           C  
ATOM   3399  H   MET L   4       0.427 -77.021 -19.204  1.00 80.64           H  
ATOM   3400  HA  MET L   4       1.558 -74.576 -19.490  1.00 73.78           H  
ATOM   3401  HB2 MET L   4      -0.262 -75.846 -21.237  1.00 73.87           H  
ATOM   3402  HB3 MET L   4       0.420 -74.443 -21.517  1.00 73.87           H  
ATOM   3403  HG2 MET L   4       1.739 -76.926 -21.537  1.00 76.37           H  
ATOM   3404  HG3 MET L   4       1.468 -76.008 -22.805  1.00 76.37           H  
ATOM   3405  HE1 MET L   4       3.726 -73.024 -22.142  1.00 66.85           H  
ATOM   3406  HE2 MET L   4       2.645 -73.613 -23.147  1.00 66.85           H  
ATOM   3407  HE3 MET L   4       2.212 -73.174 -21.683  1.00 66.85           H  
ATOM   3408  N   THR L   5      -0.195 -73.256 -18.416  1.00 60.39           N  
ATOM   3409  CA  THR L   5      -1.251 -72.474 -17.800  1.00 67.29           C  
ATOM   3410  C   THR L   5      -1.511 -71.343 -18.779  1.00 62.45           C  
ATOM   3411  O   THR L   5      -0.628 -70.962 -19.551  1.00 53.71           O  
ATOM   3412  CB  THR L   5      -0.883 -71.929 -16.416  1.00 74.23           C  
ATOM   3413  OG1 THR L   5       0.146 -70.946 -16.540  1.00 84.55           O  
ATOM   3414  CG2 THR L   5      -0.417 -73.042 -15.487  1.00 83.86           C  
ATOM   3415  H   THR L   5       0.583 -72.893 -18.362  1.00 72.47           H  
ATOM   3416  HA  THR L   5      -2.054 -73.012 -17.721  1.00 80.74           H  
ATOM   3417  HB  THR L   5      -1.667 -71.517 -16.021  1.00 89.08           H  
ATOM   3418  HG1 THR L   5       0.837 -71.291 -16.894  1.00101.46           H  
ATOM   3419 HG21 THR L   5      -0.190 -72.675 -14.618  1.00100.63           H  
ATOM   3420 HG22 THR L   5      -1.122 -73.699 -15.377  1.00100.63           H  
ATOM   3421 HG23 THR L   5       0.365 -73.478 -15.859  1.00100.63           H  
ATOM   3422  N   GLN L   6      -2.725 -70.817 -18.772  1.00 70.42           N  
ATOM   3423  CA  GLN L   6      -3.050 -69.811 -19.769  1.00 67.06           C  
ATOM   3424  C   GLN L   6      -4.037 -68.845 -19.141  1.00 59.83           C  
ATOM   3425  O   GLN L   6      -4.998 -69.268 -18.496  1.00 63.70           O  
ATOM   3426  CB  GLN L   6      -3.588 -70.505 -21.027  1.00 75.24           C  
ATOM   3427  CG  GLN L   6      -3.872 -69.632 -22.223  1.00 76.07           C  
ATOM   3428  CD  GLN L   6      -4.244 -70.466 -23.444  1.00 75.81           C  
ATOM   3429  OE1 GLN L   6      -4.038 -71.681 -23.465  1.00 61.76           O  
ATOM   3430  NE2 GLN L   6      -4.773 -69.816 -24.472  1.00 84.97           N  
ATOM   3431  H   GLN L   6      -3.357 -71.015 -18.224  1.00 84.50           H  
ATOM   3432  HA  GLN L   6      -2.248 -69.320 -20.008  1.00 80.47           H  
ATOM   3433  HB2 GLN L   6      -2.939 -71.169 -21.306  1.00 90.28           H  
ATOM   3434  HB3 GLN L   6      -4.419 -70.948 -20.794  1.00 90.28           H  
ATOM   3435  HG2 GLN L   6      -4.614 -69.042 -22.021  1.00 91.29           H  
ATOM   3436  HG3 GLN L   6      -3.080 -69.115 -22.438  1.00 91.29           H  
ATOM   3437 HE21 GLN L   6      -4.891 -68.965 -24.429  1.00101.96           H  
ATOM   3438 HE22 GLN L   6      -4.998 -70.245 -25.183  1.00101.96           H  
ATOM   3439  N   SER L   7      -3.795 -67.553 -19.339  1.00 63.28           N  
ATOM   3440  CA  SER L   7      -4.608 -66.512 -18.751  1.00 70.44           C  
ATOM   3441  C   SER L   7      -4.825 -65.425 -19.795  1.00 61.11           C  
ATOM   3442  O   SER L   7      -3.919 -65.144 -20.586  1.00 62.69           O  
ATOM   3443  CB  SER L   7      -3.929 -65.918 -17.512  1.00 76.54           C  
ATOM   3444  OG  SER L   7      -4.476 -64.656 -17.187  1.00 82.67           O  
ATOM   3445  H   SER L   7      -3.149 -67.255 -19.823  1.00 75.94           H  
ATOM   3446  HA  SER L   7      -5.470 -66.874 -18.492  1.00 84.53           H  
ATOM   3447  HB2 SER L   7      -4.059 -66.520 -16.763  1.00 91.84           H  
ATOM   3448  HB3 SER L   7      -2.982 -65.814 -17.692  1.00 91.84           H  
ATOM   3449  HG  SER L   7      -4.089 -64.341 -16.499  1.00 99.20           H  
ATOM   3450  N   PRO L   8      -6.005 -64.821 -19.849  1.00 59.89           N  
ATOM   3451  CA  PRO L   8      -7.138 -65.278 -19.041  1.00 58.61           C  
ATOM   3452  C   PRO L   8      -7.840 -66.489 -19.647  1.00 62.94           C  
ATOM   3453  O   PRO L   8      -7.522 -66.952 -20.745  1.00 67.24           O  
ATOM   3454  CB  PRO L   8      -8.033 -64.027 -19.004  1.00 66.63           C  
ATOM   3455  CG  PRO L   8      -7.845 -63.419 -20.349  1.00 64.41           C  
ATOM   3456  CD  PRO L   8      -6.389 -63.696 -20.723  1.00 59.22           C  
ATOM   3457  HA  PRO L   8      -6.847 -65.492 -18.140  1.00 70.33           H  
ATOM   3458  HB2 PRO L   8      -8.958 -64.285 -18.866  1.00 79.95           H  
ATOM   3459  HB3 PRO L   8      -7.732 -63.425 -18.305  1.00 79.95           H  
ATOM   3460  HG2 PRO L   8      -8.447 -63.838 -20.983  1.00 77.29           H  
ATOM   3461  HG3 PRO L   8      -8.010 -62.464 -20.300  1.00 77.29           H  
ATOM   3462  HD2 PRO L   8      -6.325 -63.957 -21.655  1.00 71.07           H  
ATOM   3463  HD3 PRO L   8      -5.839 -62.920 -20.534  1.00 71.07           H  
ATOM   3464  N   SER L   9      -8.820 -66.997 -18.895  0.58 57.70           N  
ATOM   3466  CA  SER L   9      -9.606 -68.130 -19.371  0.58 59.14           C  
ATOM   3468  C   SER L   9     -10.580 -67.704 -20.466  0.58 72.86           C  
ATOM   3470  O   SER L   9     -10.786 -68.429 -21.442  0.58 79.09           O  
ATOM   3472  CB  SER L   9     -10.362 -68.773 -18.207  0.58 61.75           C  
ATOM   3474  OG  SER L   9     -11.391 -67.917 -17.746  0.58 69.03           O  
ATOM   3476  H   SER L   9      -9.046 -66.707 -18.118  0.58 69.24           H  
ATOM   3478  HA  SER L   9      -9.007 -68.796 -19.745  0.58 70.97           H  
ATOM   3480  HB2 SER L   9     -10.755 -69.608 -18.508  0.58 74.10           H  
ATOM   3482  HB3 SER L   9      -9.741 -68.941 -17.481  0.58 74.10           H  
ATOM   3484  HG  SER L   9     -11.806 -68.282 -17.100  0.58 82.83           H  
ATOM   3486  N   SER L  10     -11.209 -66.543 -20.310  1.00 81.03           N  
ATOM   3487  CA  SER L  10     -12.103 -66.015 -21.329  1.00 86.16           C  
ATOM   3488  C   SER L  10     -12.035 -64.500 -21.254  1.00 70.16           C  
ATOM   3489  O   SER L  10     -11.680 -63.936 -20.218  1.00 59.86           O  
ATOM   3490  CB  SER L  10     -13.540 -66.521 -21.135  1.00119.00           C  
ATOM   3491  OG  SER L  10     -14.106 -66.111 -19.904  1.00126.03           O  
ATOM   3492  HA  SER L  10     -11.795 -66.293 -22.205  1.00103.39           H  
ATOM   3493  HB2 SER L  10     -14.089 -66.178 -21.857  1.00142.80           H  
ATOM   3494  HB3 SER L  10     -13.533 -67.491 -21.165  1.00142.80           H  
ATOM   3495  HG  SER L  10     -14.898 -66.410 -19.834  1.00151.24           H  
ATOM   3496  N   LEU L  11     -12.362 -63.835 -22.360  1.00 62.17           N  
ATOM   3497  CA  LEU L  11     -12.455 -62.386 -22.297  1.00 71.10           C  
ATOM   3498  C   LEU L  11     -13.276 -61.857 -23.464  1.00 70.87           C  
ATOM   3499  O   LEU L  11     -13.282 -62.431 -24.559  1.00 59.85           O  
ATOM   3500  CB  LEU L  11     -11.056 -61.760 -22.260  1.00 74.92           C  
ATOM   3501  CG  LEU L  11     -10.471 -60.985 -23.443  1.00 71.64           C  
ATOM   3502  CD1 LEU L  11      -9.751 -59.783 -22.889  1.00 70.52           C  
ATOM   3503  CD2 LEU L  11      -9.522 -61.841 -24.258  1.00 65.36           C  
ATOM   3504  H   LEU L  11     -12.529 -64.185 -23.128  1.00 74.61           H  
ATOM   3505  HA  LEU L  11     -12.911 -62.138 -21.478  1.00 85.32           H  
ATOM   3506  HB2 LEU L  11     -11.042 -61.147 -21.508  1.00 89.90           H  
ATOM   3507  HB3 LEU L  11     -10.431 -62.479 -22.079  1.00 89.90           H  
ATOM   3508  HG  LEU L  11     -11.188 -60.679 -24.020  1.00 85.97           H  
ATOM   3509 HD11 LEU L  11      -9.371 -59.277 -23.625  1.00 84.63           H  
ATOM   3510 HD12 LEU L  11     -10.383 -59.234 -22.401  1.00 84.63           H  
ATOM   3511 HD13 LEU L  11      -9.045 -60.084 -22.296  1.00 84.63           H  
ATOM   3512 HD21 LEU L  11      -9.175 -61.314 -24.995  1.00 78.43           H  
ATOM   3513 HD22 LEU L  11      -8.794 -62.135 -23.689  1.00 78.43           H  
ATOM   3514 HD23 LEU L  11     -10.005 -62.610 -24.600  1.00 78.43           H  
ATOM   3515  N   SER L  12     -13.945 -60.732 -23.210  1.00 85.44           N  
ATOM   3516  CA  SER L  12     -14.735 -60.028 -24.207  1.00 79.05           C  
ATOM   3517  C   SER L  12     -14.135 -58.643 -24.383  1.00 68.05           C  
ATOM   3518  O   SER L  12     -13.718 -58.013 -23.408  1.00 72.73           O  
ATOM   3519  CB  SER L  12     -16.211 -59.927 -23.816  1.00 80.91           C  
ATOM   3520  OG  SER L  12     -16.553 -60.902 -22.843  1.00 95.55           O  
ATOM   3521  H   SER L  12     -13.953 -60.349 -22.440  1.00102.53           H  
ATOM   3522  HA  SER L  12     -14.676 -60.496 -25.054  1.00 94.86           H  
ATOM   3523  HB2 SER L  12     -16.379 -59.045 -23.449  1.00 97.09           H  
ATOM   3524  HB3 SER L  12     -16.756 -60.066 -24.606  1.00 97.09           H  
ATOM   3525  HG  SER L  12     -16.083 -60.793 -22.143  1.00114.67           H  
ATOM   3526  N   ALA L  13     -14.122 -58.163 -25.621  1.00 59.66           N  
ATOM   3527  CA  ALA L  13     -13.589 -56.847 -25.954  1.00 63.31           C  
ATOM   3528  C   ALA L  13     -14.336 -56.333 -27.173  1.00 64.89           C  
ATOM   3529  O   ALA L  13     -15.170 -57.033 -27.753  1.00 73.60           O  
ATOM   3530  CB  ALA L  13     -12.076 -56.893 -26.200  1.00 58.59           C  
ATOM   3531  H   ALA L  13     -14.424 -58.591 -26.303  1.00 71.59           H  
ATOM   3532  HA  ALA L  13     -13.757 -56.239 -25.217  1.00 75.97           H  
ATOM   3533  HB1 ALA L  13     -11.765 -56.000 -26.417  1.00 70.30           H  
ATOM   3534  HB2 ALA L  13     -11.635 -57.211 -25.397  1.00 70.30           H  
ATOM   3535  HB3 ALA L  13     -11.895 -57.495 -26.938  1.00 70.30           H  
ATOM   3536  N   SER L  14     -14.038 -55.101 -27.563  1.00 60.88           N  
ATOM   3537  CA  SER L  14     -14.728 -54.477 -28.678  1.00 61.87           C  
ATOM   3538  C   SER L  14     -13.865 -54.563 -29.927  1.00 64.63           C  
ATOM   3539  O   SER L  14     -12.640 -54.694 -29.863  1.00 63.13           O  
ATOM   3540  CB  SER L  14     -15.036 -53.009 -28.369  1.00 65.27           C  
ATOM   3541  OG  SER L  14     -15.875 -52.888 -27.235  1.00 72.01           O  
ATOM   3542  H   SER L  14     -13.439 -54.605 -27.196  1.00 73.06           H  
ATOM   3543  HA  SER L  14     -15.564 -54.941 -28.846  1.00 74.25           H  
ATOM   3544  HB2 SER L  14     -14.203 -52.543 -28.196  1.00 78.33           H  
ATOM   3545  HB3 SER L  14     -15.482 -52.614 -29.134  1.00 78.33           H  
ATOM   3546  HG  SER L  14     -16.035 -52.068 -27.078  1.00 86.41           H  
ATOM   3547  N   VAL L  15     -14.537 -54.487 -31.078  1.00 63.19           N  
ATOM   3548  CA  VAL L  15     -13.850 -54.427 -32.359  1.00 66.12           C  
ATOM   3549  C   VAL L  15     -12.886 -53.251 -32.385  1.00 76.06           C  
ATOM   3550  O   VAL L  15     -13.234 -52.131 -31.991  1.00 78.65           O  
ATOM   3551  CB  VAL L  15     -14.888 -54.324 -33.487  1.00 67.75           C  
ATOM   3552  CG1 VAL L  15     -14.225 -53.978 -34.822  1.00 64.59           C  
ATOM   3553  CG2 VAL L  15     -15.652 -55.627 -33.607  1.00 59.57           C  
ATOM   3554  H   VAL L  15     -15.395 -54.469 -31.138  1.00 75.82           H  
ATOM   3555  HA  VAL L  15     -13.340 -55.242 -32.488  1.00 79.35           H  
ATOM   3556  HB  VAL L  15     -15.521 -53.621 -33.273  1.00 81.29           H  
ATOM   3557 HG11 VAL L  15     -14.908 -53.921 -35.508  1.00 77.51           H  
ATOM   3558 HG12 VAL L  15     -13.770 -53.125 -34.736  1.00 77.51           H  
ATOM   3559 HG13 VAL L  15     -13.586 -54.672 -35.046  1.00 77.51           H  
ATOM   3560 HG21 VAL L  15     -16.303 -55.546 -34.322  1.00 71.49           H  
ATOM   3561 HG22 VAL L  15     -15.028 -56.342 -33.806  1.00 71.49           H  
ATOM   3562 HG23 VAL L  15     -16.104 -55.806 -32.767  1.00 71.49           H  
ATOM   3563  N   GLY L  16     -11.656 -53.508 -32.832  1.00 70.31           N  
ATOM   3564  CA  GLY L  16     -10.632 -52.489 -32.871  1.00 59.87           C  
ATOM   3565  C   GLY L  16      -9.782 -52.351 -31.628  1.00 66.51           C  
ATOM   3566  O   GLY L  16      -8.816 -51.575 -31.648  1.00 69.77           O  
ATOM   3567  H   GLY L  16     -11.396 -54.275 -33.120  1.00 84.37           H  
ATOM   3568  HA2 GLY L  16     -10.037 -52.676 -33.614  1.00 71.84           H  
ATOM   3569  HA3 GLY L  16     -11.053 -51.632 -33.036  1.00 71.84           H  
ATOM   3570  N   ASP L  17     -10.096 -53.063 -30.551  1.00 74.38           N  
ATOM   3571  CA  ASP L  17      -9.280 -52.919 -29.360  1.00 78.24           C  
ATOM   3572  C   ASP L  17      -8.024 -53.784 -29.470  1.00 79.08           C  
ATOM   3573  O   ASP L  17      -7.992 -54.782 -30.198  1.00 72.33           O  
ATOM   3574  CB  ASP L  17     -10.102 -53.344 -28.144  1.00 79.63           C  
ATOM   3575  CG  ASP L  17     -10.999 -52.233 -27.626  1.00 97.30           C  
ATOM   3576  OD1 ASP L  17     -10.994 -51.129 -28.211  1.00102.02           O  
ATOM   3577  OD2 ASP L  17     -11.717 -52.464 -26.629  1.00102.49           O  
ATOM   3578  H   ASP L  17     -10.752 -53.615 -30.486  1.00 89.25           H  
ATOM   3579  HA  ASP L  17      -9.015 -51.993 -29.252  1.00 93.89           H  
ATOM   3580  HB2 ASP L  17     -10.665 -54.095 -28.389  1.00 95.56           H  
ATOM   3581  HB3 ASP L  17      -9.499 -53.600 -27.429  1.00 95.56           H  
ATOM   3582  N   ARG L  18      -6.983 -53.407 -28.721  1.00 72.47           N  
ATOM   3583  CA  ARG L  18      -5.815 -54.268 -28.593  1.00 59.69           C  
ATOM   3584  C   ARG L  18      -6.101 -55.329 -27.531  1.00 73.09           C  
ATOM   3585  O   ARG L  18      -6.523 -54.999 -26.417  1.00 76.55           O  
ATOM   3586  CB  ARG L  18      -4.609 -53.389 -28.255  1.00 66.52           C  
ATOM   3587  CG  ARG L  18      -3.242 -54.031 -28.321  1.00 72.93           C  
ATOM   3588  CD  ARG L  18      -2.205 -53.082 -27.726  1.00 72.50           C  
ATOM   3589  NE  ARG L  18      -0.868 -53.664 -27.667  1.00 88.86           N  
ATOM   3590  CZ  ARG L  18      -0.033 -53.751 -28.699  1.00 97.31           C  
ATOM   3591  NH1 ARG L  18      -0.383 -53.286 -29.895  1.00 91.86           N  
ATOM   3592  NH2 ARG L  18       1.140 -54.349 -28.546  1.00100.36           N  
ATOM   3593  H   ARG L  18      -6.933 -52.668 -28.285  1.00 86.97           H  
ATOM   3594  HA  ARG L  18      -5.645 -54.714 -29.438  1.00 71.63           H  
ATOM   3595  HB2 ARG L  18      -4.601 -52.640 -28.871  1.00 79.83           H  
ATOM   3596  HB3 ARG L  18      -4.724 -53.057 -27.351  1.00 79.83           H  
ATOM   3597  HG2 ARG L  18      -3.242 -54.853 -27.806  1.00 87.52           H  
ATOM   3598  HG3 ARG L  18      -3.008 -54.206 -29.246  1.00 87.52           H  
ATOM   3599  HD2 ARG L  18      -2.159 -52.282 -28.274  1.00 87.00           H  
ATOM   3600  HD3 ARG L  18      -2.472 -52.850 -26.823  1.00 87.00           H  
ATOM   3601  HE  ARG L  18      -0.601 -53.973 -26.910  1.00106.64           H  
ATOM   3602 HH11 ARG L  18      -1.150 -52.914 -30.004  1.00110.23           H  
ATOM   3603 HH12 ARG L  18       0.164 -53.347 -30.556  1.00110.23           H  
ATOM   3604 HH21 ARG L  18       1.373 -54.648 -27.774  1.00120.43           H  
ATOM   3605 HH22 ARG L  18       1.688 -54.396 -29.208  1.00120.43           H  
ATOM   3606  N   VAL L  19      -5.832 -56.596 -27.858  1.00 67.35           N  
ATOM   3607  CA  VAL L  19      -5.998 -57.726 -26.941  1.00 71.14           C  
ATOM   3608  C   VAL L  19      -4.679 -58.443 -26.668  1.00 71.33           C  
ATOM   3609  O   VAL L  19      -3.936 -58.752 -27.606  1.00 73.19           O  
ATOM   3610  CB  VAL L  19      -7.055 -58.709 -27.469  1.00 71.93           C  
ATOM   3611  CG1 VAL L  19      -7.108 -59.963 -26.599  1.00 79.35           C  
ATOM   3612  CG2 VAL L  19      -8.407 -58.019 -27.480  1.00 70.28           C  
ATOM   3613  H   VAL L  19      -5.541 -56.832 -28.632  1.00 80.82           H  
ATOM   3614  HA  VAL L  19      -6.321 -57.384 -26.092  1.00 85.36           H  
ATOM   3615  HB  VAL L  19      -6.832 -58.970 -28.376  1.00 86.32           H  
ATOM   3616 HG11 VAL L  19      -7.781 -60.564 -26.954  1.00 95.22           H  
ATOM   3617 HG12 VAL L  19      -6.238 -60.393 -26.613  1.00 95.22           H  
ATOM   3618 HG13 VAL L  19      -7.336 -59.708 -25.691  1.00 95.22           H  
ATOM   3619 HG21 VAL L  19      -9.075 -58.639 -27.813  1.00 84.33           H  
ATOM   3620 HG22 VAL L  19      -8.630 -57.746 -26.576  1.00 84.33           H  
ATOM   3621 HG23 VAL L  19      -8.360 -57.241 -28.058  1.00 84.33           H  
ATOM   3622  N   THR L  20      -4.385 -58.691 -25.389  1.00 69.05           N  
ATOM   3623  CA  THR L  20      -3.151 -59.351 -24.966  1.00 66.72           C  
ATOM   3624  C   THR L  20      -3.507 -60.525 -24.057  1.00 64.34           C  
ATOM   3625  O   THR L  20      -4.131 -60.332 -23.009  1.00 72.68           O  
ATOM   3626  CB  THR L  20      -2.201 -58.392 -24.241  1.00 72.71           C  
ATOM   3627  OG1 THR L  20      -2.062 -57.182 -24.995  1.00 87.29           O  
ATOM   3628  CG2 THR L  20      -0.832 -59.040 -24.071  1.00 70.95           C  
ATOM   3629  H   THR L  20      -4.900 -58.479 -24.733  1.00 82.86           H  
ATOM   3630  HA  THR L  20      -2.692 -59.700 -25.746  1.00 80.07           H  
ATOM   3631  HB  THR L  20      -2.556 -58.188 -23.362  1.00 87.25           H  
ATOM   3632  HG1 THR L  20      -1.535 -56.648 -24.594  1.00104.75           H  
ATOM   3633 HG21 THR L  20      -0.233 -58.431 -23.612  1.00 85.14           H  
ATOM   3634 HG22 THR L  20      -0.913 -59.855 -23.552  1.00 85.14           H  
ATOM   3635 HG23 THR L  20      -0.458 -59.255 -24.940  1.00 85.14           H  
ATOM   3636  N   ILE L  21      -3.107 -61.732 -24.459  1.00 50.40           N  
ATOM   3637  CA  ILE L  21      -3.387 -62.986 -23.754  1.00 62.04           C  
ATOM   3638  C   ILE L  21      -2.034 -63.618 -23.448  1.00 65.59           C  
ATOM   3639  O   ILE L  21      -1.106 -63.531 -24.261  1.00 68.57           O  
ATOM   3640  CB  ILE L  21      -4.331 -63.964 -24.494  1.00 58.24           C  
ATOM   3641  CG1 ILE L  21      -3.719 -64.528 -25.775  1.00 69.99           C  
ATOM   3642  CG2 ILE L  21      -5.671 -63.284 -24.757  1.00 65.06           C  
ATOM   3643  CD1 ILE L  21      -4.549 -65.669 -26.371  1.00 64.42           C  
ATOM   3644  H   ILE L  21      -2.647 -61.855 -25.175  1.00 60.48           H  
ATOM   3645  HA  ILE L  21      -3.805 -62.771 -22.905  1.00 74.45           H  
ATOM   3646  HB  ILE L  21      -4.498 -64.712 -23.899  1.00 69.89           H  
ATOM   3647 HG12 ILE L  21      -3.661 -63.821 -26.437  1.00 83.98           H  
ATOM   3648 HG13 ILE L  21      -2.833 -64.872 -25.578  1.00 83.98           H  
ATOM   3649 HG21 ILE L  21      -6.254 -63.906 -25.221  1.00 78.07           H  
ATOM   3650 HG22 ILE L  21      -6.067 -63.028 -23.910  1.00 78.07           H  
ATOM   3651 HG23 ILE L  21      -5.523 -62.497 -25.305  1.00 78.07           H  
ATOM   3652 HD11 ILE L  21      -4.114 -65.986 -27.178  1.00 77.31           H  
ATOM   3653 HD12 ILE L  21      -4.608 -66.388 -25.722  1.00 77.31           H  
ATOM   3654 HD13 ILE L  21      -5.436 -65.337 -26.581  1.00 77.31           H  
ATOM   3655  N   THR L  22      -1.912 -64.229 -22.270  1.00 66.64           N  
ATOM   3656  CA  THR L  22      -0.662 -64.828 -21.823  1.00 63.31           C  
ATOM   3657  C   THR L  22      -0.753 -66.335 -21.621  1.00 65.44           C  
ATOM   3658  O   THR L  22      -1.830 -66.935 -21.526  1.00 57.32           O  
ATOM   3659  CB  THR L  22      -0.191 -64.213 -20.495  1.00 73.32           C  
ATOM   3660  OG1 THR L  22      -1.169 -64.439 -19.472  1.00 89.02           O  
ATOM   3661  CG2 THR L  22       0.060 -62.725 -20.647  1.00 76.82           C  
ATOM   3662  H   THR L  22      -2.554 -64.309 -21.704  1.00 79.96           H  
ATOM   3663  HA  THR L  22       0.022 -64.658 -22.489  1.00 75.97           H  
ATOM   3664  HB  THR L  22       0.643 -64.632 -20.232  1.00 87.99           H  
ATOM   3665  HG1 THR L  22      -1.909 -64.083 -19.693  1.00106.82           H  
ATOM   3666 HG21 THR L  22       0.357 -62.351 -19.803  1.00 92.19           H  
ATOM   3667 HG22 THR L  22       0.745 -62.572 -21.318  1.00 92.19           H  
ATOM   3668 HG23 THR L  22      -0.755 -62.277 -20.922  1.00 92.19           H  
ATOM   3669  N   CYS L  23       0.441 -66.922 -21.578  1.00 70.91           N  
ATOM   3670  CA  CYS L  23       0.658 -68.354 -21.430  1.00 64.93           C  
ATOM   3671  C   CYS L  23       1.948 -68.563 -20.662  1.00 66.34           C  
ATOM   3672  O   CYS L  23       3.016 -68.115 -21.094  1.00 65.68           O  
ATOM   3673  CB  CYS L  23       0.760 -69.023 -22.799  1.00 66.87           C  
ATOM   3674  SG  CYS L  23       0.919 -70.807 -22.749  1.00 90.28           S  
ATOM   3675  H   CYS L  23       1.178 -66.483 -21.636  1.00 85.09           H  
ATOM   3676  HA  CYS L  23      -0.074 -68.753 -20.935  1.00 77.91           H  
ATOM   3677  HB2 CYS L  23      -0.040 -68.813 -23.306  1.00 80.24           H  
ATOM   3678  HB3 CYS L  23       1.539 -68.671 -23.258  1.00 80.24           H  
ATOM   3679  N   GLN L  24       1.828 -69.239 -19.524  1.00 73.58           N  
ATOM   3680  CA  GLN L  24       2.945 -69.574 -18.655  1.00 80.84           C  
ATOM   3681  C   GLN L  24       3.185 -71.079 -18.725  1.00 73.09           C  
ATOM   3682  O   GLN L  24       2.238 -71.867 -18.636  1.00 79.00           O  
ATOM   3683  CB  GLN L  24       2.660 -69.093 -17.229  1.00 91.46           C  
ATOM   3684  CG  GLN L  24       3.695 -69.452 -16.187  1.00110.44           C  
ATOM   3685  CD  GLN L  24       3.371 -68.837 -14.836  1.00125.90           C  
ATOM   3686  OE1 GLN L  24       3.233 -67.620 -14.711  1.00130.10           O  
ATOM   3687  NE2 GLN L  24       3.258 -69.678 -13.812  1.00131.01           N  
ATOM   3688  H   GLN L  24       1.074 -69.525 -19.224  1.00 88.29           H  
ATOM   3689  HA  GLN L  24       3.743 -69.124 -18.973  1.00 97.01           H  
ATOM   3690  HB2 GLN L  24       2.587 -68.126 -17.242  1.00109.75           H  
ATOM   3691  HB3 GLN L  24       1.816 -69.475 -16.941  1.00109.75           H  
ATOM   3692  HG2 GLN L  24       3.723 -70.416 -16.083  1.00132.53           H  
ATOM   3693  HG3 GLN L  24       4.562 -69.121 -16.471  1.00132.53           H  
ATOM   3694 HE21 GLN L  24       3.367 -70.522 -13.935  1.00157.21           H  
ATOM   3695 HE22 GLN L  24       3.075 -69.378 -13.027  1.00157.21           H  
ATOM   3696  N   ALA L  25       4.446 -71.465 -18.914  1.00 61.77           N  
ATOM   3697  CA  ALA L  25       4.884 -72.857 -18.894  1.00 63.26           C  
ATOM   3698  C   ALA L  25       5.382 -73.253 -17.510  1.00 68.00           C  
ATOM   3699  O   ALA L  25       5.901 -72.423 -16.758  1.00 73.67           O  
ATOM   3700  CB  ALA L  25       5.999 -73.080 -19.916  1.00 64.87           C  
ATOM   3701  H   ALA L  25       5.090 -70.914 -19.062  1.00 74.13           H  
ATOM   3702  HA  ALA L  25       4.139 -73.432 -19.127  1.00 75.91           H  
ATOM   3703  HB1 ALA L  25       6.274 -74.009 -19.885  1.00 77.84           H  
ATOM   3704  HB2 ALA L  25       5.665 -72.862 -20.800  1.00 77.84           H  
ATOM   3705  HB3 ALA L  25       6.749 -72.505 -19.694  1.00 77.84           H  
ATOM   3706  N   SER L  26       5.193 -74.533 -17.158  1.00 70.91           N  
ATOM   3707  CA  SER L  26       5.638 -74.976 -15.843  1.00 77.28           C  
ATOM   3708  C   SER L  26       7.144 -75.176 -15.750  1.00 77.56           C  
ATOM   3709  O   SER L  26       7.664 -75.296 -14.637  1.00 82.27           O  
ATOM   3710  CB  SER L  26       4.949 -76.295 -15.487  1.00 82.02           C  
ATOM   3711  OG  SER L  26       5.296 -77.312 -16.411  1.00 95.63           O  
ATOM   3712  H   SER L  26       4.823 -75.138 -17.645  1.00 85.09           H  
ATOM   3713  HA  SER L  26       5.381 -74.313 -15.182  1.00 92.73           H  
ATOM   3714  HB2 SER L  26       5.227 -76.567 -14.599  1.00 98.43           H  
ATOM   3715  HB3 SER L  26       3.988 -76.164 -15.508  1.00 98.43           H  
ATOM   3716  HG  SER L  26       6.137 -77.437 -16.404  1.00114.76           H  
ATOM   3717  N   GLN L  27       7.855 -75.225 -16.873  1.00 78.48           N  
ATOM   3718  CA  GLN L  27       9.312 -75.210 -16.861  1.00 89.19           C  
ATOM   3719  C   GLN L  27       9.780 -74.543 -18.147  1.00 92.42           C  
ATOM   3720  O   GLN L  27       9.014 -74.378 -19.099  1.00 91.62           O  
ATOM   3721  CB  GLN L  27       9.953 -76.593 -16.663  1.00 95.15           C  
ATOM   3722  CG  GLN L  27       9.747 -77.614 -17.745  1.00103.91           C  
ATOM   3723  CD  GLN L  27      10.205 -78.994 -17.306  1.00112.70           C  
ATOM   3724  OE1 GLN L  27       9.638 -79.587 -16.390  1.00115.03           O  
ATOM   3725  NE2 GLN L  27      11.283 -79.481 -17.915  1.00114.74           N  
ATOM   3726  H   GLN L  27       7.513 -75.266 -17.661  1.00 94.18           H  
ATOM   3727  HA  GLN L  27       9.604 -74.652 -16.124  1.00107.03           H  
ATOM   3728  HB2 GLN L  27      10.910 -76.469 -16.569  1.00114.18           H  
ATOM   3729  HB3 GLN L  27       9.600 -76.973 -15.843  1.00114.18           H  
ATOM   3730  HG2 GLN L  27       8.803 -77.663 -17.962  1.00124.70           H  
ATOM   3731  HG3 GLN L  27      10.259 -77.358 -18.527  1.00124.70           H  
ATOM   3732 HE21 GLN L  27      11.680 -79.019 -18.522  1.00137.69           H  
ATOM   3733 HE22 GLN L  27      11.582 -80.259 -17.702  1.00137.69           H  
ATOM   3734  N   ASP L  28      11.038 -74.122 -18.144  1.00 92.58           N  
ATOM   3735  CA  ASP L  28      11.616 -73.413 -19.280  1.00 86.35           C  
ATOM   3736  C   ASP L  28      11.592 -74.240 -20.564  1.00 79.13           C  
ATOM   3737  O   ASP L  28      12.193 -75.316 -20.636  1.00 84.48           O  
ATOM   3738  CB  ASP L  28      13.052 -73.017 -18.933  1.00 89.18           C  
ATOM   3739  CG  ASP L  28      13.707 -72.151 -19.998  1.00 95.87           C  
ATOM   3740  OD1 ASP L  28      13.128 -71.977 -21.091  1.00 94.34           O  
ATOM   3741  OD2 ASP L  28      14.817 -71.642 -19.739  1.00104.24           O  
ATOM   3742  H   ASP L  28      11.584 -74.235 -17.490  1.00111.09           H  
ATOM   3743  HA  ASP L  28      11.110 -72.600 -19.437  1.00103.62           H  
ATOM   3744  HB2 ASP L  28      13.049 -72.516 -18.102  1.00107.02           H  
ATOM   3745  HB3 ASP L  28      13.585 -73.821 -18.833  1.00107.02           H  
ATOM   3746  N   ILE L  29      10.880 -73.725 -21.569  1.00 68.66           N  
ATOM   3747  CA  ILE L  29      10.716 -74.351 -22.881  1.00 64.04           C  
ATOM   3748  C   ILE L  29      11.400 -73.522 -23.972  1.00 62.80           C  
ATOM   3749  O   ILE L  29      11.098 -73.688 -25.155  1.00 55.41           O  
ATOM   3750  CB  ILE L  29       9.233 -74.576 -23.225  1.00 64.93           C  
ATOM   3751  CG1 ILE L  29       8.454 -73.256 -23.157  1.00 67.50           C  
ATOM   3752  CG2 ILE L  29       8.625 -75.610 -22.295  1.00 72.73           C  
ATOM   3753  CD1 ILE L  29       7.084 -73.315 -23.811  1.00 60.69           C  
ATOM   3754  H   ILE L  29      10.463 -72.975 -21.507  1.00 82.39           H  
ATOM   3755  HA  ILE L  29      11.146 -75.220 -22.863  1.00 76.84           H  
ATOM   3756  HB  ILE L  29       9.179 -74.914 -24.133  1.00 77.92           H  
ATOM   3757 HG12 ILE L  29       8.328 -73.016 -22.226  1.00 81.00           H  
ATOM   3758 HG13 ILE L  29       8.968 -72.567 -23.607  1.00 81.00           H  
ATOM   3759 HG21 ILE L  29       7.692 -75.735 -22.530  1.00 87.28           H  
ATOM   3760 HG22 ILE L  29       9.107 -76.446 -22.394  1.00 87.28           H  
ATOM   3761 HG23 ILE L  29       8.696 -75.293 -21.381  1.00 87.28           H  
ATOM   3762 HD11 ILE L  29       6.657 -72.448 -23.727  1.00 72.83           H  
ATOM   3763 HD12 ILE L  29       7.192 -73.542 -24.748  1.00 72.83           H  
ATOM   3764 HD13 ILE L  29       6.551 -73.991 -23.365  1.00 72.83           H  
ATOM   3765  N   SER L  30      12.329 -72.644 -23.595  1.00 71.44           N  
ATOM   3766  CA  SER L  30      13.028 -71.766 -24.545  1.00 77.28           C  
ATOM   3767  C   SER L  30      11.949 -70.998 -25.305  1.00 74.90           C  
ATOM   3768  O   SER L  30      11.052 -70.432 -24.661  1.00 73.65           O  
ATOM   3769  CB  SER L  30      13.974 -72.595 -25.404  1.00 74.53           C  
ATOM   3770  OG  SER L  30      14.734 -71.769 -26.270  1.00 82.54           O  
ATOM   3771  H   SER L  30      12.578 -72.534 -22.779  1.00 85.73           H  
ATOM   3772  HA  SER L  30      13.560 -71.123 -24.049  1.00 92.74           H  
ATOM   3773  HB2 SER L  30      14.578 -73.085 -24.825  1.00 89.44           H  
ATOM   3774  HB3 SER L  30      13.452 -73.215 -25.938  1.00 89.44           H  
ATOM   3775  HG  SER L  30      15.256 -72.246 -26.742  1.00 99.05           H  
ATOM   3776  N   ASN L  31      11.991 -70.939 -26.639  1.00 64.74           N  
ATOM   3777  CA  ASN L  31      10.925 -70.334 -27.428  1.00 53.90           C  
ATOM   3778  C   ASN L  31      10.146 -71.367 -28.236  1.00 65.77           C  
ATOM   3779  O   ASN L  31       9.565 -71.036 -29.269  1.00 66.17           O  
ATOM   3780  CB  ASN L  31      11.506 -69.282 -28.366  1.00 55.20           C  
ATOM   3781  CG  ASN L  31      12.367 -69.893 -29.455  1.00 59.32           C  
ATOM   3782  OD1 ASN L  31      12.882 -70.999 -29.302  1.00 66.23           O  
ATOM   3783  ND2 ASN L  31      12.518 -69.181 -30.567  1.00 64.73           N  
ATOM   3784  H   ASN L  31      12.638 -71.249 -27.113  1.00 77.69           H  
ATOM   3785  HA  ASN L  31      10.303 -69.891 -26.830  1.00 64.68           H  
ATOM   3786  HB2 ASN L  31      10.780 -68.800 -28.791  1.00 66.23           H  
ATOM   3787  HB3 ASN L  31      12.058 -68.670 -27.854  1.00 66.23           H  
ATOM   3788 HD21 ASN L  31      12.136 -68.414 -30.642  1.00 77.68           H  
ATOM   3789 HD22 ASN L  31      12.997 -69.488 -31.212  1.00 77.68           H  
ATOM   3790  N   TYR L  32      10.098 -72.613 -27.768  1.00 78.47           N  
ATOM   3791  CA  TYR L  32       9.352 -73.669 -28.456  1.00 74.25           C  
ATOM   3792  C   TYR L  32       7.887 -73.640 -28.024  1.00 72.57           C  
ATOM   3793  O   TYR L  32       7.381 -74.532 -27.341  1.00 72.07           O  
ATOM   3794  CB  TYR L  32       9.999 -75.023 -28.209  1.00 81.91           C  
ATOM   3795  CG  TYR L  32      11.431 -75.088 -28.677  1.00 92.18           C  
ATOM   3796  CD1 TYR L  32      11.754 -74.874 -30.010  1.00101.70           C  
ATOM   3797  CD2 TYR L  32      12.460 -75.310 -27.787  1.00 95.11           C  
ATOM   3798  CE1 TYR L  32      13.060 -74.951 -30.449  1.00105.43           C  
ATOM   3799  CE2 TYR L  32      13.772 -75.368 -28.209  1.00 97.87           C  
ATOM   3800  CZ  TYR L  32      14.067 -75.190 -29.542  1.00101.85           C  
ATOM   3801  OH  TYR L  32      15.375 -75.221 -29.963  1.00105.34           O  
ATOM   3802  H   TYR L  32      10.492 -72.875 -27.049  1.00 94.16           H  
ATOM   3803  HA  TYR L  32       9.381 -73.498 -29.410  1.00 89.10           H  
ATOM   3804  HB2 TYR L  32       9.986 -75.209 -27.257  1.00 98.29           H  
ATOM   3805  HB3 TYR L  32       9.498 -75.703 -28.686  1.00 98.29           H  
ATOM   3806  HD1 TYR L  32      11.073 -74.728 -30.627  1.00122.04           H  
ATOM   3807  HD2 TYR L  32      12.264 -75.445 -26.888  1.00114.13           H  
ATOM   3808  HE1 TYR L  32      13.262 -74.811 -31.346  1.00126.51           H  
ATOM   3809  HE2 TYR L  32      14.454 -75.529 -27.597  1.00117.44           H  
ATOM   3810  HH  TYR L  32      15.889 -75.376 -29.305  1.00126.41           H  
ATOM   3811  N   LEU L  33       7.205 -72.583 -28.456  1.00 63.02           N  
ATOM   3812  CA  LEU L  33       5.797 -72.376 -28.150  1.00 56.66           C  
ATOM   3813  C   LEU L  33       5.039 -72.059 -29.425  1.00 48.21           C  
ATOM   3814  O   LEU L  33       5.445 -71.187 -30.200  1.00 58.58           O  
ATOM   3815  CB  LEU L  33       5.572 -71.252 -27.145  1.00 61.31           C  
ATOM   3816  CG  LEU L  33       4.132 -71.299 -26.626  1.00 58.45           C  
ATOM   3817  CD1 LEU L  33       3.980 -72.362 -25.546  1.00 68.28           C  
ATOM   3818  CD2 LEU L  33       3.685 -69.948 -26.130  1.00 66.51           C  
ATOM   3819  H   LEU L  33       7.546 -71.959 -28.939  1.00 75.63           H  
ATOM   3820  HA  LEU L  33       5.431 -73.192 -27.776  1.00 67.99           H  
ATOM   3821  HB2 LEU L  33       6.175 -71.362 -26.394  1.00 73.57           H  
ATOM   3822  HB3 LEU L  33       5.717 -70.396 -27.577  1.00 73.57           H  
ATOM   3823  HG  LEU L  33       3.549 -71.546 -27.360  1.00 70.13           H  
ATOM   3824 HD11 LEU L  33       3.060 -72.369 -25.237  1.00 81.94           H  
ATOM   3825 HD12 LEU L  33       4.209 -73.227 -25.920  1.00 81.94           H  
ATOM   3826 HD13 LEU L  33       4.575 -72.152 -24.809  1.00 81.94           H  
ATOM   3827 HD21 LEU L  33       2.772 -70.016 -25.810  1.00 79.81           H  
ATOM   3828 HD22 LEU L  33       4.269 -69.668 -25.408  1.00 79.81           H  
ATOM   3829 HD23 LEU L  33       3.733 -69.313 -26.861  1.00 79.81           H  
ATOM   3830  N   ILE L  34       3.950 -72.767 -29.624  1.00 57.18           N  
ATOM   3831  CA  ILE L  34       3.009 -72.528 -30.708  1.00 64.72           C  
ATOM   3832  C   ILE L  34       1.778 -71.840 -30.133  1.00 60.69           C  
ATOM   3833  O   ILE L  34       1.429 -72.018 -28.962  1.00 58.77           O  
ATOM   3834  CB  ILE L  34       2.643 -73.850 -31.416  1.00 59.08           C  
ATOM   3835  CG1 ILE L  34       3.812 -74.319 -32.277  1.00 56.96           C  
ATOM   3836  CG2 ILE L  34       1.442 -73.676 -32.305  1.00 50.43           C  
ATOM   3837  CD1 ILE L  34       4.030 -75.798 -32.227  1.00 63.69           C  
ATOM   3838  H   ILE L  34       3.719 -73.424 -29.120  1.00 68.62           H  
ATOM   3839  HA  ILE L  34       3.413 -71.935 -31.360  1.00 77.67           H  
ATOM   3840  HB  ILE L  34       2.449 -74.526 -30.748  1.00 70.90           H  
ATOM   3841 HG12 ILE L  34       3.640 -74.074 -33.200  1.00 68.36           H  
ATOM   3842 HG13 ILE L  34       4.623 -73.887 -31.967  1.00 68.36           H  
ATOM   3843 HG21 ILE L  34       1.241 -74.523 -32.733  1.00 60.52           H  
ATOM   3844 HG22 ILE L  34       0.689 -73.390 -31.765  1.00 60.52           H  
ATOM   3845 HG23 ILE L  34       1.642 -73.005 -32.976  1.00 60.52           H  
ATOM   3846 HD11 ILE L  34       4.784 -76.025 -32.794  1.00 76.43           H  
ATOM   3847 HD12 ILE L  34       4.214 -76.059 -31.311  1.00 76.43           H  
ATOM   3848 HD13 ILE L  34       3.230 -76.246 -32.545  1.00 76.43           H  
ATOM   3849  N   TRP L  35       1.125 -71.034 -30.965  1.00 40.63           N  
ATOM   3850  CA  TRP L  35      -0.204 -70.506 -30.687  1.00 37.21           C  
ATOM   3851  C   TRP L  35      -1.173 -70.915 -31.780  1.00 38.67           C  
ATOM   3852  O   TRP L  35      -0.925 -70.674 -32.967  1.00 40.37           O  
ATOM   3853  CB  TRP L  35      -0.197 -68.975 -30.570  1.00 42.38           C  
ATOM   3854  CG  TRP L  35       0.529 -68.425 -29.399  1.00 42.87           C  
ATOM   3855  CD1 TRP L  35       1.808 -67.964 -29.351  1.00 39.19           C  
ATOM   3856  CD2 TRP L  35      -0.043 -68.162 -28.115  1.00 36.74           C  
ATOM   3857  NE1 TRP L  35       2.088 -67.490 -28.089  1.00 49.80           N  
ATOM   3858  CE2 TRP L  35       0.964 -67.599 -27.314  1.00 35.62           C  
ATOM   3859  CE3 TRP L  35      -1.308 -68.373 -27.560  1.00 38.67           C  
ATOM   3860  CZ2 TRP L  35       0.746 -67.242 -25.987  1.00 36.37           C  
ATOM   3861  CZ3 TRP L  35      -1.523 -68.025 -26.242  1.00 40.14           C  
ATOM   3862  CH2 TRP L  35      -0.502 -67.461 -25.471  1.00 44.09           C  
ATOM   3863  H   TRP L  35       1.444 -70.771 -31.719  1.00 48.75           H  
ATOM   3864  HA  TRP L  35      -0.523 -70.872 -29.848  1.00 44.66           H  
ATOM   3865  HB2 TRP L  35       0.217 -68.608 -31.367  1.00 50.85           H  
ATOM   3866  HB3 TRP L  35      -1.115 -68.667 -30.513  1.00 50.85           H  
ATOM   3867  HD1 TRP L  35       2.415 -68.003 -30.054  1.00 47.03           H  
ATOM   3868  HE1 TRP L  35       2.843 -67.169 -27.832  1.00 59.76           H  
ATOM   3869  HE3 TRP L  35      -1.990 -68.753 -28.067  1.00 46.40           H  
ATOM   3870  HZ2 TRP L  35       1.423 -66.866 -25.472  1.00 43.65           H  
ATOM   3871  HZ3 TRP L  35      -2.359 -68.168 -25.861  1.00 48.16           H  
ATOM   3872  HH2 TRP L  35      -0.672 -67.237 -24.585  1.00 52.91           H  
ATOM   3873  N   TYR L  36      -2.267 -71.545 -31.368  1.00 41.66           N  
ATOM   3874  CA  TYR L  36      -3.319 -71.973 -32.271  1.00 57.18           C  
ATOM   3875  C   TYR L  36      -4.582 -71.164 -32.038  1.00 52.36           C  
ATOM   3876  O   TYR L  36      -4.849 -70.704 -30.926  1.00 53.21           O  
ATOM   3877  CB  TYR L  36      -3.690 -73.449 -32.098  1.00 52.26           C  
ATOM   3878  CG  TYR L  36      -2.602 -74.444 -32.369  1.00 42.27           C  
ATOM   3879  CD1 TYR L  36      -2.554 -75.104 -33.585  1.00 59.03           C  
ATOM   3880  CD2 TYR L  36      -1.707 -74.823 -31.381  1.00 52.56           C  
ATOM   3881  CE1 TYR L  36      -1.583 -76.031 -33.854  1.00 70.09           C  
ATOM   3882  CE2 TYR L  36      -0.743 -75.783 -31.634  1.00 64.37           C  
ATOM   3883  CZ  TYR L  36      -0.685 -76.379 -32.878  1.00 64.65           C  
ATOM   3884  OH  TYR L  36       0.251 -77.344 -33.154  1.00 62.02           O  
ATOM   3885  H   TYR L  36      -2.423 -71.741 -30.545  1.00 49.99           H  
ATOM   3886  HA  TYR L  36      -3.032 -71.835 -33.187  1.00 68.62           H  
ATOM   3887  HB2 TYR L  36      -3.981 -73.583 -31.183  1.00 62.71           H  
ATOM   3888  HB3 TYR L  36      -4.422 -73.651 -32.701  1.00 62.71           H  
ATOM   3889  HD1 TYR L  36      -3.152 -74.864 -34.256  1.00 70.83           H  
ATOM   3890  HD2 TYR L  36      -1.740 -74.413 -30.547  1.00 63.07           H  
ATOM   3891  HE1 TYR L  36      -1.555 -76.451 -34.683  1.00 84.11           H  
ATOM   3892  HE2 TYR L  36      -0.129 -76.015 -30.975  1.00 77.24           H  
ATOM   3893  HH  TYR L  36       0.747 -77.471 -32.475  1.00 74.43           H  
ATOM   3894  N   GLN L  37      -5.358 -71.015 -33.106  1.00 56.82           N  
ATOM   3895  CA  GLN L  37      -6.694 -70.449 -33.053  1.00 56.18           C  
ATOM   3896  C   GLN L  37      -7.636 -71.561 -33.479  1.00 59.37           C  
ATOM   3897  O   GLN L  37      -7.427 -72.172 -34.532  1.00 69.42           O  
ATOM   3898  CB  GLN L  37      -6.801 -69.246 -33.994  1.00 53.99           C  
ATOM   3899  CG  GLN L  37      -8.164 -68.590 -34.077  1.00 61.77           C  
ATOM   3900  CD  GLN L  37      -8.225 -67.561 -35.194  1.00 73.69           C  
ATOM   3901  OE1 GLN L  37      -8.103 -67.902 -36.370  1.00 74.66           O  
ATOM   3902  NE2 GLN L  37      -8.405 -66.295 -34.831  1.00 72.61           N  
ATOM   3903  H   GLN L  37      -5.120 -71.245 -33.900  1.00 68.18           H  
ATOM   3904  HA  GLN L  37      -6.909 -70.172 -32.148  1.00 67.42           H  
ATOM   3905  HB2 GLN L  37      -6.172 -68.570 -33.698  1.00 64.79           H  
ATOM   3906  HB3 GLN L  37      -6.565 -69.537 -34.889  1.00 64.79           H  
ATOM   3907  HG2 GLN L  37      -8.835 -69.268 -34.252  1.00 74.12           H  
ATOM   3908  HG3 GLN L  37      -8.353 -68.140 -33.239  1.00 74.12           H  
ATOM   3909 HE21 GLN L  37      -8.480 -66.093 -33.998  1.00 87.13           H  
ATOM   3910 HE22 GLN L  37      -8.446 -65.678 -35.428  1.00 87.13           H  
ATOM   3911  N   GLN L  38      -8.659 -71.835 -32.672  1.00 52.36           N  
ATOM   3912  CA  GLN L  38      -9.628 -72.880 -32.997  1.00 54.68           C  
ATOM   3913  C   GLN L  38     -11.047 -72.322 -33.058  1.00 58.17           C  
ATOM   3914  O   GLN L  38     -11.670 -72.090 -32.017  1.00 59.56           O  
ATOM   3915  CB  GLN L  38      -9.555 -74.036 -32.001  1.00 54.52           C  
ATOM   3916  CG  GLN L  38     -10.475 -75.177 -32.413  1.00 57.51           C  
ATOM   3917  CD  GLN L  38     -10.337 -76.413 -31.557  1.00 60.77           C  
ATOM   3918  OE1 GLN L  38     -10.022 -76.337 -30.370  1.00 67.41           O  
ATOM   3919  NE2 GLN L  38     -10.566 -77.569 -32.163  1.00 62.50           N  
ATOM   3920  H   GLN L  38      -8.815 -71.429 -31.930  1.00 62.83           H  
ATOM   3921  HA  GLN L  38      -9.416 -73.235 -33.875  1.00 65.62           H  
ATOM   3922  HB2 GLN L  38      -8.647 -74.373 -31.967  1.00 65.43           H  
ATOM   3923  HB3 GLN L  38      -9.831 -73.722 -31.126  1.00 65.43           H  
ATOM   3924  HG2 GLN L  38     -11.395 -74.875 -32.350  1.00 69.01           H  
ATOM   3925  HG3 GLN L  38     -10.273 -75.427 -33.328  1.00 69.01           H  
ATOM   3926 HE21 GLN L  38     -10.779 -77.583 -32.996  1.00 75.00           H  
ATOM   3927 HE22 GLN L  38     -10.502 -78.306 -31.724  1.00 75.00           H  
ATOM   3928  N   LYS L  39     -11.562 -72.090 -34.260  1.00 60.01           N  
ATOM   3929  CA  LYS L  39     -12.937 -71.644 -34.362  1.00 66.30           C  
ATOM   3930  C   LYS L  39     -13.884 -72.816 -34.101  1.00 77.34           C  
ATOM   3931  O   LYS L  39     -13.512 -73.979 -34.269  1.00 72.50           O  
ATOM   3932  CB  LYS L  39     -13.238 -71.014 -35.719  1.00 65.92           C  
ATOM   3933  CG  LYS L  39     -12.540 -69.690 -35.965  1.00 70.02           C  
ATOM   3934  CD  LYS L  39     -12.967 -69.089 -37.296  1.00 81.68           C  
ATOM   3935  CE  LYS L  39     -12.346 -67.721 -37.521  1.00 89.46           C  
ATOM   3936  NZ  LYS L  39     -11.259 -67.739 -38.533  1.00 91.32           N  
ATOM   3937  H   LYS L  39     -11.148 -72.181 -35.008  1.00 72.01           H  
ATOM   3938  HA  LYS L  39     -13.100 -70.973 -33.680  1.00 79.56           H  
ATOM   3939  HB2 LYS L  39     -12.958 -71.628 -36.415  1.00 79.10           H  
ATOM   3940  HB3 LYS L  39     -14.193 -70.859 -35.784  1.00 79.10           H  
ATOM   3941  HG2 LYS L  39     -12.773 -69.067 -35.259  1.00 84.02           H  
ATOM   3942  HG3 LYS L  39     -11.580 -69.832 -35.987  1.00 84.02           H  
ATOM   3943  HD2 LYS L  39     -12.683 -69.673 -38.016  1.00 98.02           H  
ATOM   3944  HD3 LYS L  39     -13.932 -68.989 -37.306  1.00 98.02           H  
ATOM   3945  HE2 LYS L  39     -13.032 -67.109 -37.829  1.00107.35           H  
ATOM   3946  HE3 LYS L  39     -11.970 -67.403 -36.685  1.00107.35           H  
ATOM   3947  HZ1 LYS L  39     -10.924 -66.921 -38.634  1.00109.58           H  
ATOM   3948  HZ2 LYS L  39     -10.609 -68.288 -38.272  1.00109.58           H  
ATOM   3949  HZ3 LYS L  39     -11.577 -68.020 -39.316  1.00109.58           H  
ATOM   3950  N   PRO L  40     -15.107 -72.528 -33.661  1.00 97.01           N  
ATOM   3951  CA  PRO L  40     -16.018 -73.594 -33.217  1.00 93.36           C  
ATOM   3952  C   PRO L  40     -16.304 -74.628 -34.301  1.00 95.63           C  
ATOM   3953  O   PRO L  40     -16.615 -74.287 -35.444  1.00 95.94           O  
ATOM   3954  CB  PRO L  40     -17.284 -72.825 -32.827  1.00 98.46           C  
ATOM   3955  CG  PRO L  40     -16.790 -71.486 -32.422  1.00100.67           C  
ATOM   3956  CD  PRO L  40     -15.635 -71.189 -33.331  1.00 99.61           C  
ATOM   3957  HA  PRO L  40     -15.659 -74.039 -32.434  1.00112.04           H  
ATOM   3958  HB2 PRO L  40     -17.877 -72.757 -33.591  1.00118.15           H  
ATOM   3959  HB3 PRO L  40     -17.724 -73.269 -32.085  1.00118.15           H  
ATOM   3960  HG2 PRO L  40     -17.494 -70.829 -32.540  1.00120.80           H  
ATOM   3961  HG3 PRO L  40     -16.499 -71.512 -31.497  1.00120.80           H  
ATOM   3962  HD2 PRO L  40     -15.943 -70.740 -34.133  1.00119.53           H  
ATOM   3963  HD3 PRO L  40     -14.964 -70.666 -32.865  1.00119.53           H  
ATOM   3964  N   GLY L  41     -16.162 -75.905 -33.934  1.00 92.26           N  
ATOM   3965  CA  GLY L  41     -16.304 -77.036 -34.837  1.00 94.70           C  
ATOM   3966  C   GLY L  41     -15.137 -77.368 -35.745  1.00 95.22           C  
ATOM   3967  O   GLY L  41     -15.218 -78.366 -36.474  1.00 94.09           O  
ATOM   3968  H   GLY L  41     -15.975 -76.144 -33.129  1.00110.71           H  
ATOM   3969  HA2 GLY L  41     -16.491 -77.827 -34.307  1.00113.64           H  
ATOM   3970  HA3 GLY L  41     -17.074 -76.877 -35.405  1.00113.64           H  
ATOM   3971  N   LYS L  42     -14.064 -76.588 -35.735  1.00 91.43           N  
ATOM   3972  CA  LYS L  42     -12.941 -76.752 -36.653  1.00 74.89           C  
ATOM   3973  C   LYS L  42     -11.698 -77.215 -35.914  1.00 75.03           C  
ATOM   3974  O   LYS L  42     -11.632 -77.237 -34.681  1.00 80.27           O  
ATOM   3975  CB  LYS L  42     -12.632 -75.483 -37.454  1.00 74.27           C  
ATOM   3976  CG  LYS L  42     -13.790 -74.905 -38.226  1.00 89.01           C  
ATOM   3977  CD  LYS L  42     -13.656 -75.423 -39.666  1.00 96.25           C  
ATOM   3978  CE  LYS L  42     -14.512 -74.694 -40.670  1.00 99.01           C  
ATOM   3979  NZ  LYS L  42     -15.125 -75.674 -41.609  1.00 99.06           N  
ATOM   3980  H   LYS L  42     -13.960 -75.933 -35.187  1.00109.71           H  
ATOM   3981  HA  LYS L  42     -13.171 -77.445 -37.291  1.00 89.87           H  
ATOM   3982  HB2 LYS L  42     -12.322 -74.800 -36.838  1.00 89.12           H  
ATOM   3983  HB3 LYS L  42     -11.929 -75.686 -38.091  1.00 89.12           H  
ATOM   3984  HG2 LYS L  42     -14.630 -75.214 -37.852  1.00106.82           H  
ATOM   3985  HG3 LYS L  42     -13.741 -73.936 -38.230  1.00106.82           H  
ATOM   3986  HD2 LYS L  42     -12.732 -75.332 -39.944  1.00115.51           H  
ATOM   3987  HD3 LYS L  42     -13.912 -76.359 -39.684  1.00115.51           H  
ATOM   3988  HE2 LYS L  42     -15.222 -74.220 -40.210  1.00118.81           H  
ATOM   3989  HE3 LYS L  42     -13.964 -74.078 -41.180  1.00118.81           H  
ATOM   3990  HZ1 LYS L  42     -15.632 -75.248 -42.204  1.00118.87           H  
ATOM   3991  HZ2 LYS L  42     -14.488 -76.122 -42.039  1.00118.87           H  
ATOM   3992  HZ3 LYS L  42     -15.631 -76.251 -41.158  1.00118.87           H  
ATOM   3993  N   ALA L  43     -10.699 -77.556 -36.708  1.00 64.37           N  
ATOM   3994  CA  ALA L  43      -9.409 -77.940 -36.185  1.00 57.99           C  
ATOM   3995  C   ALA L  43      -8.615 -76.705 -35.791  1.00 63.64           C  
ATOM   3996  O   ALA L  43      -8.852 -75.604 -36.299  1.00 64.19           O  
ATOM   3997  CB  ALA L  43      -8.638 -78.747 -37.222  1.00 63.89           C  
ATOM   3998  H   ALA L  43     -10.746 -77.572 -37.566  1.00 77.24           H  
ATOM   3999  HA  ALA L  43      -9.531 -78.491 -35.396  1.00 69.59           H  
ATOM   4000  HB1 ALA L  43      -7.777 -78.995 -36.852  1.00 76.67           H  
ATOM   4001  HB2 ALA L  43      -9.146 -79.543 -37.443  1.00 76.67           H  
ATOM   4002  HB3 ALA L  43      -8.514 -78.203 -38.016  1.00 76.67           H  
ATOM   4003  N   PRO L  44      -7.641 -76.868 -34.902  1.00 65.83           N  
ATOM   4004  CA  PRO L  44      -6.725 -75.763 -34.617  1.00 62.58           C  
ATOM   4005  C   PRO L  44      -5.936 -75.359 -35.849  1.00 62.42           C  
ATOM   4006  O   PRO L  44      -5.548 -76.193 -36.670  1.00 60.61           O  
ATOM   4007  CB  PRO L  44      -5.816 -76.332 -33.519  1.00 60.68           C  
ATOM   4008  CG  PRO L  44      -6.558 -77.536 -32.995  1.00 54.41           C  
ATOM   4009  CD  PRO L  44      -7.237 -78.088 -34.190  1.00 52.34           C  
ATOM   4010  HA  PRO L  44      -7.210 -74.996 -34.274  1.00 75.10           H  
ATOM   4011  HB2 PRO L  44      -4.964 -76.593 -33.902  1.00 72.82           H  
ATOM   4012  HB3 PRO L  44      -5.693 -75.672 -32.820  1.00 72.82           H  
ATOM   4013  HG2 PRO L  44      -5.930 -78.176 -32.626  1.00 65.29           H  
ATOM   4014  HG3 PRO L  44      -7.205 -77.259 -32.327  1.00 65.29           H  
ATOM   4015  HD2 PRO L  44      -6.617 -78.607 -34.726  1.00 62.80           H  
ATOM   4016  HD3 PRO L  44      -8.014 -78.608 -33.933  1.00 62.80           H  
ATOM   4017  N   LYS L  45      -5.695 -74.057 -35.953  1.00 59.02           N  
ATOM   4018  CA  LYS L  45      -4.928 -73.464 -37.036  1.00 56.44           C  
ATOM   4019  C   LYS L  45      -3.758 -72.731 -36.418  1.00 60.25           C  
ATOM   4020  O   LYS L  45      -3.930 -71.970 -35.459  1.00 61.02           O  
ATOM   4021  CB  LYS L  45      -5.740 -72.463 -37.859  1.00 51.54           C  
ATOM   4022  CG  LYS L  45      -4.879 -71.770 -38.914  1.00 69.26           C  
ATOM   4023  CD  LYS L  45      -5.660 -70.939 -39.912  1.00 73.63           C  
ATOM   4024  CE  LYS L  45      -4.698 -70.285 -40.903  1.00 77.87           C  
ATOM   4025  NZ  LYS L  45      -5.215 -69.019 -41.492  1.00 78.07           N  
ATOM   4026  H   LYS L  45      -5.978 -73.477 -35.385  1.00 70.83           H  
ATOM   4027  HA  LYS L  45      -4.592 -74.159 -37.624  1.00 67.73           H  
ATOM   4028  HB2 LYS L  45      -6.459 -72.930 -38.313  1.00 61.85           H  
ATOM   4029  HB3 LYS L  45      -6.102 -71.783 -37.268  1.00 61.85           H  
ATOM   4030  HG2 LYS L  45      -4.253 -71.180 -38.466  1.00 83.11           H  
ATOM   4031  HG3 LYS L  45      -4.392 -72.446 -39.411  1.00 83.11           H  
ATOM   4032  HD2 LYS L  45      -6.270 -71.511 -40.404  1.00 88.35           H  
ATOM   4033  HD3 LYS L  45      -6.147 -70.242 -39.445  1.00 88.35           H  
ATOM   4034  HE2 LYS L  45      -3.868 -70.081 -40.444  1.00 93.44           H  
ATOM   4035  HE3 LYS L  45      -4.529 -70.904 -41.630  1.00 93.44           H  
ATOM   4036  HZ1 LYS L  45      -4.618 -68.682 -42.059  1.00 93.68           H  
ATOM   4037  HZ2 LYS L  45      -5.974 -69.176 -41.930  1.00 93.68           H  
ATOM   4038  HZ3 LYS L  45      -5.371 -68.425 -40.848  1.00 93.68           H  
ATOM   4039  N   LEU L  46      -2.574 -72.973 -36.961  1.00 44.19           N  
ATOM   4040  CA  LEU L  46      -1.369 -72.422 -36.380  1.00 49.54           C  
ATOM   4041  C   LEU L  46      -1.267 -70.954 -36.764  1.00 60.75           C  
ATOM   4042  O   LEU L  46      -1.366 -70.606 -37.946  1.00 66.06           O  
ATOM   4043  CB  LEU L  46      -0.161 -73.195 -36.888  1.00 49.60           C  
ATOM   4044  CG  LEU L  46       1.178 -72.851 -36.256  1.00 59.46           C  
ATOM   4045  CD1 LEU L  46       1.616 -74.046 -35.456  1.00 74.19           C  
ATOM   4046  CD2 LEU L  46       2.182 -72.532 -37.319  1.00 64.97           C  
ATOM   4047  H   LEU L  46      -2.445 -73.452 -37.663  1.00 53.03           H  
ATOM   4048  HA  LEU L  46      -1.405 -72.493 -35.413  1.00 59.45           H  
ATOM   4049  HB2 LEU L  46      -0.317 -74.139 -36.732  1.00 59.52           H  
ATOM   4050  HB3 LEU L  46      -0.078 -73.036 -37.841  1.00 59.52           H  
ATOM   4051  HG  LEU L  46       1.084 -72.087 -35.665  1.00 71.35           H  
ATOM   4052 HD11 LEU L  46       2.471 -73.852 -35.041  1.00 89.02           H  
ATOM   4053 HD12 LEU L  46       0.951 -74.231 -34.774  1.00 89.02           H  
ATOM   4054 HD13 LEU L  46       1.702 -74.809 -36.050  1.00 89.02           H  
ATOM   4055 HD21 LEU L  46       3.028 -72.315 -36.898  1.00 77.97           H  
ATOM   4056 HD22 LEU L  46       2.287 -73.305 -37.895  1.00 77.97           H  
ATOM   4057 HD23 LEU L  46       1.865 -71.775 -37.835  1.00 77.97           H  
ATOM   4058  N   LEU L  47      -1.061 -70.092 -35.771  1.00 46.34           N  
ATOM   4059  CA  LEU L  47      -0.828 -68.682 -36.037  1.00 50.91           C  
ATOM   4060  C   LEU L  47       0.628 -68.302 -35.848  1.00 45.97           C  
ATOM   4061  O   LEU L  47       1.217 -67.618 -36.690  1.00 58.90           O  
ATOM   4062  CB  LEU L  47      -1.679 -67.847 -35.066  1.00 44.19           C  
ATOM   4063  CG  LEU L  47      -3.202 -67.962 -35.069  1.00 51.12           C  
ATOM   4064  CD1 LEU L  47      -3.796 -66.897 -34.175  1.00 54.15           C  
ATOM   4065  CD2 LEU L  47      -3.738 -67.797 -36.468  1.00 47.68           C  
ATOM   4066  H   LEU L  47      -1.052 -70.301 -34.936  1.00 55.61           H  
ATOM   4067  HA  LEU L  47      -1.091 -68.471 -36.947  1.00 61.10           H  
ATOM   4068  HB2 LEU L  47      -1.391 -68.068 -34.167  1.00 53.03           H  
ATOM   4069  HB3 LEU L  47      -1.476 -66.913 -35.235  1.00 53.03           H  
ATOM   4070  HG  LEU L  47      -3.465 -68.834 -34.735  1.00 61.34           H  
ATOM   4071 HD11 LEU L  47      -4.763 -66.980 -34.185  1.00 64.99           H  
ATOM   4072 HD12 LEU L  47      -3.463 -67.021 -33.272  1.00 64.99           H  
ATOM   4073 HD13 LEU L  47      -3.536 -66.024 -34.507  1.00 64.99           H  
ATOM   4074 HD21 LEU L  47      -4.705 -67.874 -36.446  1.00 57.21           H  
ATOM   4075 HD22 LEU L  47      -3.483 -66.924 -36.803  1.00 57.21           H  
ATOM   4076 HD23 LEU L  47      -3.364 -68.491 -37.034  1.00 57.21           H  
ATOM   4077  N   ILE L  48       1.211 -68.741 -34.741  1.00 60.40           N  
ATOM   4078  CA  ILE L  48       2.554 -68.361 -34.342  1.00 57.14           C  
ATOM   4079  C   ILE L  48       3.313 -69.604 -33.904  1.00 58.33           C  
ATOM   4080  O   ILE L  48       2.758 -70.461 -33.206  1.00 61.76           O  
ATOM   4081  CB  ILE L  48       2.522 -67.291 -33.234  1.00 56.18           C  
ATOM   4082  CG1 ILE L  48       1.841 -66.043 -33.791  1.00 64.99           C  
ATOM   4083  CG2 ILE L  48       3.935 -66.993 -32.727  1.00 54.86           C  
ATOM   4084  CD1 ILE L  48       1.719 -64.922 -32.823  1.00 76.25           C  
ATOM   4085  H   ILE L  48       0.832 -69.279 -34.186  1.00 72.49           H  
ATOM   4086  HA  ILE L  48       3.015 -67.984 -35.108  1.00 68.56           H  
ATOM   4087  HB  ILE L  48       1.993 -67.628 -32.494  1.00 67.41           H  
ATOM   4088 HG12 ILE L  48       2.354 -65.722 -34.550  1.00 77.98           H  
ATOM   4089 HG13 ILE L  48       0.946 -66.281 -34.080  1.00 77.98           H  
ATOM   4090 HG21 ILE L  48       3.885 -66.318 -32.032  1.00 65.83           H  
ATOM   4091 HG22 ILE L  48       4.320 -67.809 -32.369  1.00 65.83           H  
ATOM   4092 HG23 ILE L  48       4.474 -66.669 -33.466  1.00 65.83           H  
ATOM   4093 HD11 ILE L  48       1.278 -64.175 -33.258  1.00 91.51           H  
ATOM   4094 HD12 ILE L  48       1.196 -65.218 -32.062  1.00 91.51           H  
ATOM   4095 HD13 ILE L  48       2.607 -64.658 -32.533  1.00 91.51           H  
ATOM   4096  N   TYR L  49       4.564 -69.718 -34.332  1.00 56.34           N  
ATOM   4097  CA  TYR L  49       5.442 -70.793 -33.895  1.00 58.90           C  
ATOM   4098  C   TYR L  49       6.751 -70.149 -33.461  1.00 55.80           C  
ATOM   4099  O   TYR L  49       7.010 -68.977 -33.740  1.00 56.86           O  
ATOM   4100  CB  TYR L  49       5.627 -71.873 -34.974  1.00 57.66           C  
ATOM   4101  CG  TYR L  49       6.324 -71.414 -36.230  1.00 65.92           C  
ATOM   4102  CD1 TYR L  49       7.655 -71.725 -36.471  1.00 64.57           C  
ATOM   4103  CD2 TYR L  49       5.640 -70.677 -37.186  1.00 64.76           C  
ATOM   4104  CE1 TYR L  49       8.284 -71.318 -37.634  1.00 67.58           C  
ATOM   4105  CE2 TYR L  49       6.260 -70.257 -38.340  1.00 70.00           C  
ATOM   4106  CZ  TYR L  49       7.579 -70.581 -38.565  1.00 75.91           C  
ATOM   4107  OH  TYR L  49       8.193 -70.147 -39.716  1.00 78.68           O  
ATOM   4108  H   TYR L  49       4.933 -69.175 -34.887  1.00 67.60           H  
ATOM   4109  HA  TYR L  49       5.050 -71.219 -33.117  1.00 70.68           H  
ATOM   4110  HB2 TYR L  49       6.151 -72.598 -34.598  1.00 69.19           H  
ATOM   4111  HB3 TYR L  49       4.752 -72.205 -35.231  1.00 69.19           H  
ATOM   4112  HD1 TYR L  49       8.128 -72.226 -35.846  1.00 77.49           H  
ATOM   4113  HD2 TYR L  49       4.748 -70.459 -37.042  1.00 77.71           H  
ATOM   4114  HE1 TYR L  49       9.177 -71.527 -37.782  1.00 81.10           H  
ATOM   4115  HE2 TYR L  49       5.787 -69.761 -38.969  1.00 84.00           H  
ATOM   4116  HH  TYR L  49       7.642 -69.709 -40.193  1.00 94.42           H  
ATOM   4117  N   ASP L  50       7.576 -70.924 -32.763  1.00 57.56           N  
ATOM   4118  CA  ASP L  50       8.835 -70.428 -32.209  1.00 61.28           C  
ATOM   4119  C   ASP L  50       8.611 -69.155 -31.387  1.00 76.56           C  
ATOM   4120  O   ASP L  50       9.412 -68.218 -31.419  1.00 77.83           O  
ATOM   4121  CB  ASP L  50       9.879 -70.196 -33.309  1.00 81.01           C  
ATOM   4122  CG  ASP L  50      10.469 -71.493 -33.853  1.00104.13           C  
ATOM   4123  OD1 ASP L  50      10.318 -72.556 -33.211  1.00102.66           O  
ATOM   4124  OD2 ASP L  50      11.103 -71.445 -34.929  1.00115.51           O  
ATOM   4125  H   ASP L  50       7.427 -71.754 -32.593  1.00 69.07           H  
ATOM   4126  HA  ASP L  50       9.191 -71.102 -31.609  1.00 73.54           H  
ATOM   4127  HB2 ASP L  50       9.461 -69.725 -34.046  1.00 97.21           H  
ATOM   4128  HB3 ASP L  50      10.606 -69.666 -32.947  1.00 97.21           H  
ATOM   4129  N   ALA L  51       7.468 -69.102 -30.693  1.00 74.68           N  
ATOM   4130  CA  ALA L  51       7.063 -67.976 -29.847  1.00 59.35           C  
ATOM   4131  C   ALA L  51       6.672 -66.693 -30.580  1.00 64.86           C  
ATOM   4132  O   ALA L  51       5.775 -65.975 -30.121  1.00 63.51           O  
ATOM   4133  CB  ALA L  51       8.165 -67.649 -28.834  1.00 60.22           C  
ATOM   4134  H   ALA L  51       6.888 -69.736 -30.699  1.00 89.62           H  
ATOM   4135  HA  ALA L  51       6.285 -68.255 -29.338  1.00 71.21           H  
ATOM   4136  HB1 ALA L  51       7.878 -66.903 -28.284  1.00 72.27           H  
ATOM   4137  HB2 ALA L  51       8.323 -68.428 -28.277  1.00 72.27           H  
ATOM   4138  HB3 ALA L  51       8.975 -67.415 -29.313  1.00 72.27           H  
ATOM   4139  N   SER L  52       7.339 -66.383 -31.699  1.00 62.76           N  
ATOM   4140  CA  SER L  52       7.265 -65.051 -32.300  1.00 64.45           C  
ATOM   4141  C   SER L  52       7.228 -65.057 -33.820  1.00 64.85           C  
ATOM   4142  O   SER L  52       7.183 -63.980 -34.422  1.00 62.90           O  
ATOM   4143  CB  SER L  52       8.456 -64.184 -31.853  1.00 64.44           C  
ATOM   4144  OG  SER L  52       9.118 -64.730 -30.726  1.00 73.15           O  
ATOM   4145  H   SER L  52       7.842 -66.932 -32.129  1.00 75.31           H  
ATOM   4146  HA  SER L  52       6.455 -64.618 -31.989  1.00 77.34           H  
ATOM   4147  HB2 SER L  52       9.088 -64.120 -32.585  1.00 77.32           H  
ATOM   4148  HB3 SER L  52       8.129 -63.300 -31.624  1.00 77.32           H  
ATOM   4149  HG  SER L  52       9.769 -64.232 -30.501  1.00 87.78           H  
ATOM   4150  N   ASN L  53       7.227 -66.215 -34.457  1.00 62.33           N  
ATOM   4151  CA  ASN L  53       7.237 -66.294 -35.907  1.00 67.64           C  
ATOM   4152  C   ASN L  53       5.810 -66.426 -36.400  1.00 72.26           C  
ATOM   4153  O   ASN L  53       5.058 -67.275 -35.916  1.00 78.27           O  
ATOM   4154  CB  ASN L  53       8.067 -67.486 -36.383  1.00 68.94           C  
ATOM   4155  CG  ASN L  53       9.380 -67.073 -37.004  1.00 90.54           C  
ATOM   4156  OD1 ASN L  53      10.328 -66.713 -36.305  1.00101.91           O  
ATOM   4157  ND2 ASN L  53       9.451 -67.137 -38.330  1.00 96.06           N  
ATOM   4158  H   ASN L  53       7.221 -66.982 -34.067  1.00 74.80           H  
ATOM   4159  HA  ASN L  53       7.619 -65.482 -36.275  1.00 81.17           H  
ATOM   4160  HB2 ASN L  53       8.261 -68.059 -35.625  1.00 82.72           H  
ATOM   4161  HB3 ASN L  53       7.562 -67.977 -37.049  1.00 82.72           H  
ATOM   4162 HD21 ASN L  53       8.771 -67.403 -38.784  1.00115.27           H  
ATOM   4163 HD22 ASN L  53      10.177 -66.912 -38.733  1.00115.27           H  
ATOM   4164  N   LEU L  54       5.464 -65.628 -37.402  1.00 67.19           N  
ATOM   4165  CA  LEU L  54       4.112 -65.607 -37.926  1.00 62.62           C  
ATOM   4166  C   LEU L  54       4.060 -66.652 -39.017  1.00 70.46           C  
ATOM   4167  O   LEU L  54       5.014 -66.800 -39.785  1.00 76.03           O  
ATOM   4168  CB  LEU L  54       3.764 -64.251 -38.535  1.00 62.71           C  
ATOM   4169  CG  LEU L  54       2.307 -63.818 -38.398  1.00 61.32           C  
ATOM   4170  CD1 LEU L  54       1.913 -63.656 -36.933  1.00 63.70           C  
ATOM   4171  CD2 LEU L  54       1.996 -62.600 -39.242  1.00 71.91           C  
ATOM   4172  H   LEU L  54       6.001 -65.084 -37.798  1.00 80.63           H  
ATOM   4173  HA  LEU L  54       3.471 -65.828 -37.232  1.00 75.14           H  
ATOM   4174  HB2 LEU L  54       4.310 -63.573 -38.105  1.00 75.25           H  
ATOM   4175  HB3 LEU L  54       3.971 -64.278 -39.482  1.00 75.25           H  
ATOM   4176  HG  LEU L  54       1.759 -64.538 -38.748  1.00 73.58           H  
ATOM   4177 HD11 LEU L  54       0.984 -63.381 -36.885  1.00 76.44           H  
ATOM   4178 HD12 LEU L  54       2.031 -64.505 -36.479  1.00 76.44           H  
ATOM   4179 HD13 LEU L  54       2.479 -62.981 -36.527  1.00 76.44           H  
ATOM   4180 HD21 LEU L  54       1.062 -62.364 -39.122  1.00 86.29           H  
ATOM   4181 HD22 LEU L  54       2.562 -61.866 -38.957  1.00 86.29           H  
ATOM   4182 HD23 LEU L  54       2.168 -62.809 -40.173  1.00 86.29           H  
ATOM   4183  N   GLU L  55       2.957 -67.389 -39.083  1.00 83.12           N  
ATOM   4184  CA  GLU L  55       2.866 -68.290 -40.210  1.00 97.24           C  
ATOM   4185  C   GLU L  55       2.420 -67.573 -41.483  1.00 94.65           C  
ATOM   4186  O   GLU L  55       1.969 -66.426 -41.470  1.00 97.95           O  
ATOM   4187  CB  GLU L  55       1.860 -69.381 -39.826  1.00106.49           C  
ATOM   4188  CG  GLU L  55       1.336 -70.289 -40.907  1.00113.87           C  
ATOM   4189  CD  GLU L  55       2.348 -71.303 -41.351  1.00122.07           C  
ATOM   4190  OE1 GLU L  55       3.547 -71.103 -41.059  1.00122.52           O  
ATOM   4191  OE2 GLU L  55       1.941 -72.291 -42.005  1.00128.61           O  
ATOM   4192  H   GLU L  55       2.297 -67.388 -38.531  1.00 99.74           H  
ATOM   4193  HA  GLU L  55       3.729 -68.703 -40.370  1.00116.69           H  
ATOM   4194  HB2 GLU L  55       2.279 -69.950 -39.162  1.00127.78           H  
ATOM   4195  HB3 GLU L  55       1.089 -68.947 -39.428  1.00127.78           H  
ATOM   4196  HG2 GLU L  55       0.560 -70.765 -40.572  1.00136.64           H  
ATOM   4197  HG3 GLU L  55       1.090 -69.754 -41.678  1.00136.64           H  
ATOM   4198  N   THR L  56       2.553 -68.297 -42.594  0.91 85.12           N  
ATOM   4199  CA  THR L  56       2.219 -67.779 -43.913  1.00 86.38           C  
ATOM   4200  C   THR L  56       0.718 -67.524 -44.022  0.77 83.46           C  
ATOM   4201  O   THR L  56      -0.090 -68.358 -43.602  1.00 78.64           O  
ATOM   4202  CB  THR L  56       2.722 -68.713 -45.005  1.00 98.84           C  
ATOM   4203  OG1 THR L  56       4.133 -68.908 -44.831  1.00102.97           O  
ATOM   4204  CG2 THR L  56       2.467 -68.100 -46.373  1.00100.93           C  
ATOM   4205  H   THR L  56       2.841 -69.107 -42.606  0.91102.14           H  
ATOM   4206  HA  THR L  56       2.667 -66.927 -44.030  1.00103.65           H  
ATOM   4207  HB  THR L  56       2.261 -69.565 -44.950  1.00118.61           H  
ATOM   4208  HG1 THR L  56       4.431 -69.428 -45.434  1.00123.56           H  
ATOM   4209 HG21 THR L  56       2.788 -68.695 -47.068  1.00121.11           H  
ATOM   4210 HG22 THR L  56       1.517 -67.952 -46.498  1.00121.11           H  
ATOM   4211 HG23 THR L  56       2.931 -67.251 -46.447  1.00121.11           H  
ATOM   4212  N   GLY L  57       0.341 -66.373 -44.560  1.00 78.74           N  
ATOM   4213  CA  GLY L  57      -1.055 -66.038 -44.781  1.00 75.77           C  
ATOM   4214  C   GLY L  57      -1.796 -65.563 -43.557  1.00 72.55           C  
ATOM   4215  O   GLY L  57      -2.973 -65.198 -43.668  1.00 84.75           O  
ATOM   4216  H   GLY L  57       0.887 -65.758 -44.811  1.00 94.49           H  
ATOM   4217  HA2 GLY L  57      -1.108 -65.339 -45.452  1.00 90.92           H  
ATOM   4218  HA3 GLY L  57      -1.515 -66.819 -45.125  1.00 90.92           H  
ATOM   4219  N   VAL L  58      -1.150 -65.570 -42.402  1.00 68.58           N  
ATOM   4220  CA  VAL L  58      -1.768 -65.130 -41.150  1.00 68.89           C  
ATOM   4221  C   VAL L  58      -1.773 -63.601 -41.136  1.00 82.03           C  
ATOM   4222  O   VAL L  58      -0.721 -62.993 -41.378  1.00 84.61           O  
ATOM   4223  CB  VAL L  58      -1.036 -65.713 -39.947  1.00 73.82           C  
ATOM   4224  CG1 VAL L  58      -1.623 -65.191 -38.648  1.00 83.30           C  
ATOM   4225  CG2 VAL L  58      -1.124 -67.234 -39.999  1.00 72.65           C  
ATOM   4226  H   VAL L  58      -0.335 -65.829 -42.311  1.00 82.29           H  
ATOM   4227  HA  VAL L  58      -2.688 -65.436 -41.123  1.00 82.66           H  
ATOM   4228  HB  VAL L  58      -0.100 -65.459 -39.985  1.00 88.59           H  
ATOM   4229 HG11 VAL L  58      -1.137 -65.579 -37.904  1.00 99.96           H  
ATOM   4230 HG12 VAL L  58      -1.539 -64.224 -38.630  1.00 99.96           H  
ATOM   4231 HG13 VAL L  58      -2.558 -65.443 -38.600  1.00 99.96           H  
ATOM   4232 HG21 VAL L  58      -0.658 -67.604 -39.233  1.00 87.18           H  
ATOM   4233 HG22 VAL L  58      -2.058 -67.497 -39.977  1.00 87.18           H  
ATOM   4234 HG23 VAL L  58      -0.712 -67.547 -40.820  1.00 87.18           H  
ATOM   4235  N   PRO L  59      -2.912 -62.946 -40.916  1.00 88.11           N  
ATOM   4236  CA  PRO L  59      -2.900 -61.476 -40.856  1.00 88.47           C  
ATOM   4237  C   PRO L  59      -1.913 -60.920 -39.832  1.00 81.56           C  
ATOM   4238  O   PRO L  59      -1.696 -61.486 -38.758  1.00 65.92           O  
ATOM   4239  CB  PRO L  59      -4.350 -61.124 -40.498  1.00 87.76           C  
ATOM   4240  CG  PRO L  59      -4.868 -62.319 -39.830  1.00 84.86           C  
ATOM   4241  CD  PRO L  59      -4.200 -63.498 -40.465  1.00 86.37           C  
ATOM   4242  HA  PRO L  59      -2.692 -61.109 -41.729  1.00106.17           H  
ATOM   4243  HB2 PRO L  59      -4.364 -60.362 -39.899  1.00105.31           H  
ATOM   4244  HB3 PRO L  59      -4.851 -60.937 -41.307  1.00105.31           H  
ATOM   4245  HG2 PRO L  59      -4.654 -62.277 -38.885  1.00101.83           H  
ATOM   4246  HG3 PRO L  59      -5.829 -62.366 -39.957  1.00101.83           H  
ATOM   4247  HD2 PRO L  59      -4.058 -64.200 -39.811  1.00103.65           H  
ATOM   4248  HD3 PRO L  59      -4.717 -63.815 -41.222  1.00103.65           H  
ATOM   4249  N   SER L  60      -1.310 -59.789 -40.208  1.00 99.91           N  
ATOM   4250  CA  SER L  60      -0.311 -59.080 -39.410  1.00105.29           C  
ATOM   4251  C   SER L  60      -0.819 -58.550 -38.071  1.00 97.30           C  
ATOM   4252  O   SER L  60       0.004 -58.238 -37.204  1.00 93.61           O  
ATOM   4253  CB  SER L  60       0.254 -57.913 -40.224  1.00119.44           C  
ATOM   4254  OG  SER L  60      -0.757 -56.965 -40.528  1.00125.35           O  
ATOM   4255  H   SER L  60      -1.474 -59.398 -40.957  1.00119.89           H  
ATOM   4256  HA  SER L  60       0.421 -59.688 -39.224  1.00126.35           H  
ATOM   4257  HB2 SER L  60       0.950 -57.477 -39.708  1.00143.33           H  
ATOM   4258  HB3 SER L  60       0.623 -58.256 -41.053  1.00143.33           H  
ATOM   4259  HG  SER L  60      -0.429 -56.324 -40.979  1.00150.42           H  
ATOM   4260  N   ARG L  61      -2.134 -58.444 -37.860  1.00 88.24           N  
ATOM   4261  CA  ARG L  61      -2.604 -57.967 -36.561  1.00 83.47           C  
ATOM   4262  C   ARG L  61      -2.271 -58.937 -35.435  1.00 77.19           C  
ATOM   4263  O   ARG L  61      -2.352 -58.549 -34.264  1.00 76.75           O  
ATOM   4264  CB  ARG L  61      -4.112 -57.702 -36.536  1.00 82.91           C  
ATOM   4265  CG  ARG L  61      -5.011 -58.887 -36.794  1.00 91.70           C  
ATOM   4266  CD  ARG L  61      -6.464 -58.435 -36.779  1.00 94.69           C  
ATOM   4267  NE  ARG L  61      -7.393 -59.502 -37.131  1.00 93.94           N  
ATOM   4268  CZ  ARG L  61      -7.578 -59.967 -38.359  1.00 97.50           C  
ATOM   4269  NH1 ARG L  61      -6.907 -59.446 -39.378  1.00107.97           N  
ATOM   4270  NH2 ARG L  61      -8.418 -60.970 -38.563  1.00 97.52           N  
ATOM   4271  H   ARG L  61      -2.750 -58.633 -38.429  1.00105.89           H  
ATOM   4272  HA  ARG L  61      -2.159 -57.129 -36.363  1.00100.16           H  
ATOM   4273  HB2 ARG L  61      -4.344 -57.351 -35.662  1.00 99.49           H  
ATOM   4274  HB3 ARG L  61      -4.314 -57.036 -37.212  1.00 99.49           H  
ATOM   4275  HG2 ARG L  61      -4.812 -59.264 -37.665  1.00110.04           H  
ATOM   4276  HG3 ARG L  61      -4.885 -59.550 -36.097  1.00110.04           H  
ATOM   4277  HD2 ARG L  61      -6.688 -58.124 -35.888  1.00113.63           H  
ATOM   4278  HD3 ARG L  61      -6.577 -57.716 -37.420  1.00113.63           H  
ATOM   4279  HE  ARG L  61      -7.855 -59.856 -36.497  1.00112.72           H  
ATOM   4280 HH11 ARG L  61      -6.351 -58.804 -39.243  1.00129.56           H  
ATOM   4281 HH12 ARG L  61      -7.030 -59.749 -40.173  1.00129.56           H  
ATOM   4282 HH21 ARG L  61      -8.857 -61.304 -37.904  1.00117.03           H  
ATOM   4283 HH22 ARG L  61      -8.550 -61.265 -39.360  1.00117.03           H  
ATOM   4284  N   PHE L  62      -1.911 -60.177 -35.756  1.00 61.17           N  
ATOM   4285  CA  PHE L  62      -1.533 -61.157 -34.749  1.00 55.90           C  
ATOM   4286  C   PHE L  62      -0.029 -61.093 -34.522  1.00 58.26           C  
ATOM   4287  O   PHE L  62       0.752 -60.975 -35.470  1.00 63.35           O  
ATOM   4288  CB  PHE L  62      -1.897 -62.590 -35.145  1.00 62.64           C  
ATOM   4289  CG  PHE L  62      -3.370 -62.843 -35.278  1.00 65.56           C  
ATOM   4290  CD1 PHE L  62      -4.151 -63.080 -34.173  1.00 68.93           C  
ATOM   4291  CD2 PHE L  62      -3.938 -63.001 -36.523  1.00 70.23           C  
ATOM   4292  CE1 PHE L  62      -5.499 -63.347 -34.298  1.00 68.64           C  
ATOM   4293  CE2 PHE L  62      -5.286 -63.284 -36.656  1.00 70.28           C  
ATOM   4294  CZ  PHE L  62      -6.062 -63.460 -35.542  1.00 67.23           C  
ATOM   4295  H   PHE L  62      -1.877 -60.476 -36.562  1.00 73.40           H  
ATOM   4296  HA  PHE L  62      -1.978 -60.947 -33.914  1.00 67.08           H  
ATOM   4297  HB2 PHE L  62      -1.486 -62.790 -36.000  1.00 75.16           H  
ATOM   4298  HB3 PHE L  62      -1.555 -63.195 -34.469  1.00 75.16           H  
ATOM   4299  HD1 PHE L  62      -3.780 -62.993 -33.324  1.00 82.72           H  
ATOM   4300  HD2 PHE L  62      -3.420 -62.872 -37.284  1.00 84.28           H  
ATOM   4301  HE1 PHE L  62      -6.020 -63.474 -33.539  1.00 82.37           H  
ATOM   4302  HE2 PHE L  62      -5.664 -63.355 -37.503  1.00 84.34           H  
ATOM   4303  HZ  PHE L  62      -6.968 -63.651 -35.630  1.00 80.67           H  
ATOM   4304  N   SER L  63       0.368 -61.158 -33.254  1.00 56.32           N  
ATOM   4305  CA  SER L  63       1.777 -61.225 -32.903  1.00 55.80           C  
ATOM   4306  C   SER L  63       1.937 -62.074 -31.652  1.00 53.72           C  
ATOM   4307  O   SER L  63       0.992 -62.290 -30.887  1.00 52.01           O  
ATOM   4308  CB  SER L  63       2.370 -59.833 -32.662  1.00 58.65           C  
ATOM   4309  OG  SER L  63       1.764 -59.227 -31.536  1.00 60.57           O  
ATOM   4310  H   SER L  63      -0.163 -61.164 -32.578  1.00 67.58           H  
ATOM   4311  HA  SER L  63       2.270 -61.647 -33.625  1.00 66.96           H  
ATOM   4312  HB2 SER L  63       3.323 -59.918 -32.502  1.00 70.38           H  
ATOM   4313  HB3 SER L  63       2.210 -59.281 -33.443  1.00 70.38           H  
ATOM   4314  HG  SER L  63       2.097 -58.455 -31.407  1.00 72.69           H  
ATOM   4315  N   GLY L  64       3.156 -62.553 -31.463  1.00 54.57           N  
ATOM   4316  CA  GLY L  64       3.505 -63.307 -30.276  1.00 55.45           C  
ATOM   4317  C   GLY L  64       4.852 -62.870 -29.750  1.00 60.77           C  
ATOM   4318  O   GLY L  64       5.721 -62.416 -30.498  1.00 60.30           O  
ATOM   4319  H   GLY L  64       3.806 -62.452 -32.016  1.00 65.48           H  
ATOM   4320  HA2 GLY L  64       2.838 -63.164 -29.587  1.00 66.54           H  
ATOM   4321  HA3 GLY L  64       3.542 -64.253 -30.485  1.00 66.54           H  
ATOM   4322  N   SER L  65       4.999 -62.976 -28.435  1.00 69.79           N  
ATOM   4323  CA  SER L  65       6.242 -62.624 -27.779  1.00 70.74           C  
ATOM   4324  C   SER L  65       6.480 -63.562 -26.604  1.00 64.56           C  
ATOM   4325  O   SER L  65       5.601 -64.323 -26.197  1.00 78.35           O  
ATOM   4326  CB  SER L  65       6.195 -61.160 -27.328  1.00 86.30           C  
ATOM   4327  OG  SER L  65       7.481 -60.667 -27.034  1.00103.96           O  
ATOM   4328  H   SER L  65       4.386 -63.252 -27.899  1.00 83.75           H  
ATOM   4329  HA  SER L  65       6.976 -62.727 -28.405  1.00 84.89           H  
ATOM   4330  HB2 SER L  65       5.809 -60.625 -28.039  1.00103.56           H  
ATOM   4331  HB3 SER L  65       5.645 -61.095 -26.532  1.00103.56           H  
ATOM   4332  HG  SER L  65       7.432 -59.855 -26.787  1.00124.75           H  
ATOM   4333  N   GLY L  66       7.690 -63.497 -26.072  1.00 62.85           N  
ATOM   4334  CA  GLY L  66       8.097 -64.238 -24.896  1.00 63.92           C  
ATOM   4335  C   GLY L  66       9.139 -65.299 -25.213  1.00 65.40           C  
ATOM   4336  O   GLY L  66       9.408 -65.643 -26.364  1.00 64.91           O  
ATOM   4337  H   GLY L  66       8.319 -63.007 -26.393  1.00 75.42           H  
ATOM   4338  HA2 GLY L  66       8.470 -63.626 -24.242  1.00 76.70           H  
ATOM   4339  HA3 GLY L  66       7.324 -64.673 -24.505  1.00 76.70           H  
ATOM   4340  N   SER L  67       9.701 -65.843 -24.138  1.00 67.64           N  
ATOM   4341  CA  SER L  67      10.710 -66.886 -24.219  1.00 69.75           C  
ATOM   4342  C   SER L  67      10.982 -67.394 -22.812  1.00 72.13           C  
ATOM   4343  O   SER L  67      10.933 -66.618 -21.858  1.00 74.18           O  
ATOM   4344  CB  SER L  67      11.998 -66.353 -24.862  1.00 82.94           C  
ATOM   4345  OG  SER L  67      12.986 -67.362 -24.951  1.00102.13           O  
ATOM   4346  H   SER L  67       9.507 -65.617 -23.332  1.00 81.17           H  
ATOM   4347  HA  SER L  67      10.377 -67.622 -24.756  1.00 83.70           H  
ATOM   4348  HB2 SER L  67      11.795 -66.033 -25.754  1.00 99.53           H  
ATOM   4349  HB3 SER L  67      12.341 -65.625 -24.320  1.00 99.53           H  
ATOM   4350  HG  SER L  67      13.691 -67.047 -25.309  1.00122.56           H  
ATOM   4351  N   GLY L  68      11.195 -68.698 -22.676  1.00 55.12           N  
ATOM   4352  CA  GLY L  68      11.438 -69.285 -21.371  1.00 58.89           C  
ATOM   4353  C   GLY L  68      10.209 -69.915 -20.751  1.00 65.94           C  
ATOM   4354  O   GLY L  68       9.851 -71.049 -21.089  1.00 65.93           O  
ATOM   4355  H   GLY L  68      11.204 -69.263 -23.325  1.00 66.15           H  
ATOM   4356  HA2 GLY L  68      12.122 -69.968 -21.450  1.00 70.67           H  
ATOM   4357  HA3 GLY L  68      11.763 -68.598 -20.768  1.00 70.67           H  
ATOM   4358  N   THR L  69       9.559 -69.188 -19.834  1.00 69.57           N  
ATOM   4359  CA  THR L  69       8.390 -69.689 -19.129  1.00 64.13           C  
ATOM   4360  C   THR L  69       7.162 -68.812 -19.293  1.00 67.66           C  
ATOM   4361  O   THR L  69       6.060 -69.282 -19.000  1.00 66.66           O  
ATOM   4362  CB  THR L  69       8.677 -69.807 -17.621  1.00 66.99           C  
ATOM   4363  OG1 THR L  69       9.145 -68.551 -17.119  1.00 81.67           O  
ATOM   4364  CG2 THR L  69       9.721 -70.877 -17.342  1.00 80.96           C  
ATOM   4365  H   THR L  69       9.785 -68.391 -19.605  1.00 83.48           H  
ATOM   4366  HA  THR L  69       8.174 -70.573 -19.465  1.00 76.95           H  
ATOM   4367  HB  THR L  69       7.860 -70.052 -17.159  1.00 80.38           H  
ATOM   4368  HG1 THR L  69       8.557 -67.951 -17.243  1.00 98.00           H  
ATOM   4369 HG21 THR L  69       9.887 -70.936 -16.388  1.00 97.15           H  
ATOM   4370 HG22 THR L  69       9.407 -71.738 -17.662  1.00 97.15           H  
ATOM   4371 HG23 THR L  69      10.550 -70.656 -17.794  1.00 97.15           H  
ATOM   4372  N   ASP L  70       7.316 -67.571 -19.754  1.00 80.60           N  
ATOM   4373  CA  ASP L  70       6.219 -66.622 -19.908  1.00 59.88           C  
ATOM   4374  C   ASP L  70       6.103 -66.198 -21.363  1.00 49.89           C  
ATOM   4375  O   ASP L  70       7.095 -65.797 -21.979  1.00 64.75           O  
ATOM   4376  CB  ASP L  70       6.421 -65.413 -19.001  1.00 56.29           C  
ATOM   4377  CG  ASP L  70       6.513 -65.801 -17.539  1.00 76.25           C  
ATOM   4378  OD1 ASP L  70       5.453 -65.938 -16.891  1.00 79.16           O  
ATOM   4379  OD2 ASP L  70       7.637 -66.030 -17.050  1.00 89.76           O  
ATOM   4380  H   ASP L  70       8.076 -67.246 -19.992  1.00 96.72           H  
ATOM   4381  HA  ASP L  70       5.388 -67.054 -19.654  1.00 71.86           H  
ATOM   4382  HB2 ASP L  70       7.246 -64.966 -19.247  1.00 67.55           H  
ATOM   4383  HB3 ASP L  70       5.670 -64.808 -19.106  1.00 67.55           H  
ATOM   4384  N   PHE L  71       4.888 -66.251 -21.893  1.00 55.41           N  
ATOM   4385  CA  PHE L  71       4.634 -65.941 -23.291  1.00 60.92           C  
ATOM   4386  C   PHE L  71       3.369 -65.103 -23.403  1.00 60.53           C  
ATOM   4387  O   PHE L  71       2.469 -65.194 -22.563  1.00 54.36           O  
ATOM   4388  CB  PHE L  71       4.519 -67.225 -24.110  1.00 46.69           C  
ATOM   4389  CG  PHE L  71       5.746 -68.083 -24.049  1.00 54.36           C  
ATOM   4390  CD1 PHE L  71       6.750 -67.941 -24.991  1.00 59.85           C  
ATOM   4391  CD2 PHE L  71       5.910 -69.013 -23.033  1.00 63.79           C  
ATOM   4392  CE1 PHE L  71       7.885 -68.726 -24.937  1.00 62.31           C  
ATOM   4393  CE2 PHE L  71       7.044 -69.797 -22.970  1.00 67.01           C  
ATOM   4394  CZ  PHE L  71       8.035 -69.653 -23.923  1.00 65.56           C  
ATOM   4395  H   PHE L  71       4.181 -66.468 -21.454  1.00 66.49           H  
ATOM   4396  HA  PHE L  71       5.375 -65.422 -23.643  1.00 73.11           H  
ATOM   4397  HB2 PHE L  71       3.774 -67.747 -23.772  1.00 56.03           H  
ATOM   4398  HB3 PHE L  71       4.364 -66.992 -25.038  1.00 56.03           H  
ATOM   4399  HD1 PHE L  71       6.653 -67.319 -25.676  1.00 71.82           H  
ATOM   4400  HD2 PHE L  71       5.245 -69.114 -22.391  1.00 76.55           H  
ATOM   4401  HE1 PHE L  71       8.551 -68.625 -25.578  1.00 74.78           H  
ATOM   4402  HE2 PHE L  71       7.141 -70.422 -22.288  1.00 80.42           H  
ATOM   4403  HZ  PHE L  71       8.799 -70.181 -23.883  1.00 78.68           H  
ATOM   4404  N   THR L  72       3.305 -64.294 -24.460  1.00 49.54           N  
ATOM   4405  CA  THR L  72       2.181 -63.403 -24.699  1.00 57.86           C  
ATOM   4406  C   THR L  72       1.801 -63.500 -26.165  1.00 50.20           C  
ATOM   4407  O   THR L  72       2.664 -63.563 -27.044  1.00 46.13           O  
ATOM   4408  CB  THR L  72       2.489 -61.935 -24.337  1.00 69.41           C  
ATOM   4409  OG1 THR L  72       3.328 -61.346 -25.339  1.00 74.69           O  
ATOM   4410  CG2 THR L  72       3.166 -61.836 -22.976  1.00 71.94           C  
ATOM   4411  H   THR L  72       3.916 -64.245 -25.063  1.00 59.45           H  
ATOM   4412  HA  THR L  72       1.424 -63.694 -24.168  1.00 69.43           H  
ATOM   4413  HB  THR L  72       1.656 -61.440 -24.293  1.00 83.30           H  
ATOM   4414  HG1 THR L  72       3.497 -60.538 -25.139  1.00 89.63           H  
ATOM   4415 HG21 THR L  72       3.352 -60.907 -22.765  1.00 86.33           H  
ATOM   4416 HG22 THR L  72       2.588 -62.205 -22.290  1.00 86.33           H  
ATOM   4417 HG23 THR L  72       4.001 -62.331 -22.984  1.00 86.33           H  
ATOM   4418  N   PHE L  73       0.498 -63.545 -26.404  1.00 55.27           N  
ATOM   4419  CA  PHE L  73      -0.097 -63.459 -27.729  1.00 57.99           C  
ATOM   4420  C   PHE L  73      -0.950 -62.202 -27.795  1.00 42.16           C  
ATOM   4421  O   PHE L  73      -1.735 -61.936 -26.879  1.00 48.03           O  
ATOM   4422  CB  PHE L  73      -0.905 -64.714 -28.030  1.00 41.35           C  
ATOM   4423  CG  PHE L  73      -1.639 -64.662 -29.316  1.00 38.18           C  
ATOM   4424  CD1 PHE L  73      -1.013 -65.048 -30.482  1.00 36.42           C  
ATOM   4425  CD2 PHE L  73      -2.964 -64.283 -29.359  1.00 44.69           C  
ATOM   4426  CE1 PHE L  73      -1.681 -65.022 -31.674  1.00 47.22           C  
ATOM   4427  CE2 PHE L  73      -3.641 -64.260 -30.555  1.00 41.85           C  
ATOM   4428  CZ  PHE L  73      -2.996 -64.634 -31.709  1.00 39.43           C  
ATOM   4429  H   PHE L  73      -0.090 -63.629 -25.782  1.00 66.33           H  
ATOM   4430  HA  PHE L  73       0.607 -63.384 -28.392  1.00 69.59           H  
ATOM   4431  HB2 PHE L  73      -0.301 -65.473 -28.064  1.00 49.62           H  
ATOM   4432  HB3 PHE L  73      -1.556 -64.844 -27.323  1.00 49.62           H  
ATOM   4433  HD1 PHE L  73      -0.122 -65.311 -30.460  1.00 43.71           H  
ATOM   4434  HD2 PHE L  73      -3.399 -64.030 -28.577  1.00 53.63           H  
ATOM   4435  HE1 PHE L  73      -1.248 -65.275 -32.457  1.00 56.66           H  
ATOM   4436  HE2 PHE L  73      -4.531 -63.994 -30.583  1.00 50.22           H  
ATOM   4437  HZ  PHE L  73      -3.451 -64.616 -32.520  1.00 47.31           H  
ATOM   4438  N   THR L  74      -0.773 -61.421 -28.858  1.00 43.77           N  
ATOM   4439  CA  THR L  74      -1.447 -60.137 -28.995  1.00 61.19           C  
ATOM   4440  C   THR L  74      -2.178 -60.035 -30.323  1.00 66.10           C  
ATOM   4441  O   THR L  74      -1.647 -60.418 -31.370  1.00 59.50           O  
ATOM   4442  CB  THR L  74      -0.449 -58.978 -28.885  1.00 50.47           C  
ATOM   4443  OG1 THR L  74       0.305 -59.102 -27.674  1.00 54.02           O  
ATOM   4444  CG2 THR L  74      -1.177 -57.643 -28.891  1.00 68.46           C  
ATOM   4445  H   THR L  74      -0.260 -61.616 -29.520  1.00 52.53           H  
ATOM   4446  HA  THR L  74      -2.099 -60.043 -28.283  1.00 73.43           H  
ATOM   4447  HB  THR L  74       0.155 -59.000 -29.644  1.00 60.57           H  
ATOM   4448  HG1 THR L  74       0.859 -58.461 -27.610  1.00 64.83           H  
ATOM   4449 HG21 THR L  74      -0.537 -56.917 -28.821  1.00 82.16           H  
ATOM   4450 HG22 THR L  74      -1.679 -57.543 -29.714  1.00 82.16           H  
ATOM   4451 HG23 THR L  74      -1.789 -57.597 -28.140  1.00 82.16           H  
ATOM   4452  N   ILE L  75      -3.413 -59.545 -30.253  1.00 69.45           N  
ATOM   4453  CA  ILE L  75      -4.169 -59.057 -31.402  1.00 69.29           C  
ATOM   4454  C   ILE L  75      -4.198 -57.536 -31.336  1.00 61.34           C  
ATOM   4455  O   ILE L  75      -4.741 -56.961 -30.386  1.00 57.38           O  
ATOM   4456  CB  ILE L  75      -5.590 -59.639 -31.423  1.00 64.69           C  
ATOM   4457  CG1 ILE L  75      -5.511 -61.164 -31.310  1.00 62.88           C  
ATOM   4458  CG2 ILE L  75      -6.300 -59.238 -32.705  1.00 67.04           C  
ATOM   4459  CD1 ILE L  75      -6.842 -61.865 -31.237  1.00 67.51           C  
ATOM   4460  H   ILE L  75      -3.852 -59.483 -29.516  1.00 83.33           H  
ATOM   4461  HA  ILE L  75      -3.719 -59.319 -32.220  1.00 83.15           H  
ATOM   4462  HB  ILE L  75      -6.086 -59.291 -30.665  1.00 77.63           H  
ATOM   4463 HG12 ILE L  75      -5.041 -61.507 -32.086  1.00 75.46           H  
ATOM   4464 HG13 ILE L  75      -5.017 -61.389 -30.505  1.00 75.46           H  
ATOM   4465 HG21 ILE L  75      -7.194 -59.614 -32.701  1.00 80.44           H  
ATOM   4466 HG22 ILE L  75      -6.348 -58.270 -32.750  1.00 80.44           H  
ATOM   4467 HG23 ILE L  75      -5.800 -59.581 -33.463  1.00 80.44           H  
ATOM   4468 HD11 ILE L  75      -6.692 -62.821 -31.168  1.00 81.01           H  
ATOM   4469 HD12 ILE L  75      -7.323 -61.547 -30.457  1.00 81.01           H  
ATOM   4470 HD13 ILE L  75      -7.347 -61.666 -32.041  1.00 81.01           H  
ATOM   4471  N   SER L  76      -3.609 -56.888 -32.346  1.00 58.66           N  
ATOM   4472  CA  SER L  76      -3.413 -55.440 -32.304  1.00 78.65           C  
ATOM   4473  C   SER L  76      -4.738 -54.693 -32.407  1.00 76.34           C  
ATOM   4474  O   SER L  76      -4.899 -53.633 -31.792  1.00 74.38           O  
ATOM   4475  CB  SER L  76      -2.461 -54.996 -33.418  1.00 79.60           C  
ATOM   4476  OG  SER L  76      -2.992 -55.282 -34.698  1.00 88.35           O  
ATOM   4477  H   SER L  76      -3.315 -57.263 -33.061  1.00 70.40           H  
ATOM   4478  HA  SER L  76      -3.007 -55.204 -31.455  1.00 94.39           H  
ATOM   4479  HB2 SER L  76      -2.317 -54.040 -33.344  1.00 95.51           H  
ATOM   4480  HB3 SER L  76      -1.619 -55.465 -33.315  1.00 95.51           H  
ATOM   4481  HG  SER L  76      -2.449 -55.028 -35.301  1.00106.02           H  
ATOM   4482  N   SER L  77      -5.687 -55.231 -33.175  1.00 75.40           N  
ATOM   4483  CA  SER L  77      -6.961 -54.567 -33.450  1.00 77.93           C  
ATOM   4484  C   SER L  77      -8.002 -55.665 -33.625  1.00 69.28           C  
ATOM   4485  O   SER L  77      -8.075 -56.274 -34.697  1.00 77.48           O  
ATOM   4486  CB  SER L  77      -6.864 -53.696 -34.695  1.00 79.38           C  
ATOM   4487  OG  SER L  77      -8.115 -53.117 -35.010  1.00 79.27           O  
ATOM   4488  H   SER L  77      -5.613 -55.998 -33.556  1.00 90.48           H  
ATOM   4489  HA  SER L  77      -7.213 -54.011 -32.697  1.00 93.52           H  
ATOM   4490  HB2 SER L  77      -6.221 -52.988 -34.535  1.00 95.26           H  
ATOM   4491  HB3 SER L  77      -6.574 -54.245 -35.440  1.00 95.26           H  
ATOM   4492  HG  SER L  77      -8.690 -53.727 -35.154  1.00 95.13           H  
ATOM   4493  N   LEU L  78      -8.798 -55.916 -32.583  1.00 56.60           N  
ATOM   4494  CA  LEU L  78      -9.676 -57.077 -32.620  1.00 62.76           C  
ATOM   4495  C   LEU L  78     -10.694 -56.926 -33.741  1.00 69.64           C  
ATOM   4496  O   LEU L  78     -11.316 -55.872 -33.899  1.00 75.56           O  
ATOM   4497  CB  LEU L  78     -10.387 -57.227 -31.274  1.00 62.02           C  
ATOM   4498  CG  LEU L  78     -11.329 -58.419 -31.089  1.00 69.93           C  
ATOM   4499  CD1 LEU L  78     -10.582 -59.731 -31.243  1.00 69.32           C  
ATOM   4500  CD2 LEU L  78     -12.022 -58.353 -29.729  1.00 65.39           C  
ATOM   4501  H   LEU L  78      -8.846 -55.443 -31.867  1.00 67.92           H  
ATOM   4502  HA  LEU L  78      -9.151 -57.877 -32.783  1.00 75.31           H  
ATOM   4503  HB2 LEU L  78      -9.709 -57.294 -30.584  1.00 74.43           H  
ATOM   4504  HB3 LEU L  78     -10.913 -56.426 -31.124  1.00 74.43           H  
ATOM   4505  HG  LEU L  78     -12.015 -58.386 -31.774  1.00 83.92           H  
ATOM   4506 HD11 LEU L  78     -11.204 -60.465 -31.121  1.00 83.18           H  
ATOM   4507 HD12 LEU L  78     -10.194 -59.770 -32.132  1.00 83.18           H  
ATOM   4508 HD13 LEU L  78      -9.881 -59.776 -30.574  1.00 83.18           H  
ATOM   4509 HD21 LEU L  78     -12.611 -59.118 -29.638  1.00 78.47           H  
ATOM   4510 HD22 LEU L  78     -11.349 -58.369 -29.031  1.00 78.47           H  
ATOM   4511 HD23 LEU L  78     -12.535 -57.532 -29.676  1.00 78.47           H  
ATOM   4512  N   GLN L  79     -10.870 -57.996 -34.507  1.00 63.70           N  
ATOM   4513  CA  GLN L  79     -11.859 -58.104 -35.566  1.00 61.79           C  
ATOM   4514  C   GLN L  79     -12.886 -59.198 -35.309  1.00 70.08           C  
ATOM   4515  O   GLN L  79     -12.641 -60.128 -34.531  1.00 64.62           O  
ATOM   4516  CB  GLN L  79     -11.167 -58.360 -36.910  1.00 56.08           C  
ATOM   4517  CG  GLN L  79     -10.145 -57.306 -37.270  1.00 66.64           C  
ATOM   4518  CD  GLN L  79     -10.781 -55.934 -37.400  1.00 77.50           C  
ATOM   4519  OE1 GLN L  79     -10.412 -54.990 -36.699  1.00 81.65           O  
ATOM   4520  NE2 GLN L  79     -11.761 -55.824 -38.290  1.00 72.49           N  
ATOM   4521  H   GLN L  79     -10.400 -58.711 -34.424  1.00 76.44           H  
ATOM   4522  HA  GLN L  79     -12.336 -57.261 -35.633  1.00 74.15           H  
ATOM   4523  HB2 GLN L  79     -10.712 -59.216 -36.871  1.00 67.29           H  
ATOM   4524  HB3 GLN L  79     -11.838 -58.375 -37.611  1.00 67.29           H  
ATOM   4525  HG2 GLN L  79      -9.471 -57.264 -36.574  1.00 79.97           H  
ATOM   4526  HG3 GLN L  79      -9.737 -57.534 -38.120  1.00 79.97           H  
ATOM   4527 HE21 GLN L  79     -12.001 -56.508 -38.752  1.00 86.98           H  
ATOM   4528 HE22 GLN L  79     -12.156 -55.068 -38.404  1.00 86.98           H  
ATOM   4529  N   PRO L  80     -14.062 -59.104 -35.938  1.00 75.18           N  
ATOM   4530  CA  PRO L  80     -15.098 -60.124 -35.713  1.00 71.50           C  
ATOM   4531  C   PRO L  80     -14.633 -61.528 -36.027  1.00 57.84           C  
ATOM   4532  O   PRO L  80     -15.056 -62.473 -35.352  1.00 66.02           O  
ATOM   4533  CB  PRO L  80     -16.234 -59.686 -36.645  1.00 74.42           C  
ATOM   4534  CG  PRO L  80     -16.022 -58.238 -36.860  1.00 74.81           C  
ATOM   4535  CD  PRO L  80     -14.553 -57.981 -36.756  1.00 72.92           C  
ATOM   4536  HA  PRO L  80     -15.408 -60.089 -34.794  1.00 85.80           H  
ATOM   4537  HB2 PRO L  80     -16.174 -60.170 -37.484  1.00 89.31           H  
ATOM   4538  HB3 PRO L  80     -17.089 -59.848 -36.216  1.00 89.31           H  
ATOM   4539  HG2 PRO L  80     -16.344 -57.994 -37.741  1.00 89.78           H  
ATOM   4540  HG3 PRO L  80     -16.499 -57.740 -36.178  1.00 89.78           H  
ATOM   4541  HD2 PRO L  80     -14.144 -57.999 -37.635  1.00 87.50           H  
ATOM   4542  HD3 PRO L  80     -14.389 -57.137 -36.305  1.00 87.50           H  
ATOM   4543  N   GLU L  81     -13.772 -61.697 -37.034  1.00 67.22           N  
ATOM   4544  CA  GLU L  81     -13.335 -63.032 -37.420  1.00 83.38           C  
ATOM   4545  C   GLU L  81     -12.387 -63.652 -36.411  1.00 80.99           C  
ATOM   4546  O   GLU L  81     -12.015 -64.817 -36.573  1.00 75.68           O  
ATOM   4547  CB  GLU L  81     -12.635 -62.992 -38.781  1.00 89.98           C  
ATOM   4548  CG  GLU L  81     -13.453 -62.411 -39.937  1.00107.15           C  
ATOM   4549  CD  GLU L  81     -13.701 -60.915 -39.814  1.00115.60           C  
ATOM   4550  OE1 GLU L  81     -12.851 -60.214 -39.223  1.00118.35           O  
ATOM   4551  OE2 GLU L  81     -14.740 -60.437 -40.317  1.00118.40           O  
ATOM   4552  H   GLU L  81     -13.433 -61.060 -37.502  1.00 80.66           H  
ATOM   4553  HA  GLU L  81     -14.111 -63.608 -37.497  1.00100.06           H  
ATOM   4554  HB2 GLU L  81     -11.832 -62.454 -38.696  1.00107.97           H  
ATOM   4555  HB3 GLU L  81     -12.392 -63.898 -39.026  1.00107.97           H  
ATOM   4556  HG2 GLU L  81     -12.976 -62.566 -40.767  1.00128.58           H  
ATOM   4557  HG3 GLU L  81     -14.315 -62.854 -39.964  1.00128.58           H  
ATOM   4558  N   ASP L  82     -11.986 -62.908 -35.388  1.00 79.02           N  
ATOM   4559  CA  ASP L  82     -11.041 -63.413 -34.408  1.00 79.34           C  
ATOM   4560  C   ASP L  82     -11.725 -64.127 -33.252  1.00 74.56           C  
ATOM   4561  O   ASP L  82     -11.032 -64.690 -32.397  1.00 65.34           O  
ATOM   4562  CB  ASP L  82     -10.171 -62.259 -33.904  1.00 80.65           C  
ATOM   4563  CG  ASP L  82      -9.354 -61.625 -35.023  1.00 87.84           C  
ATOM   4564  OD1 ASP L  82      -9.146 -62.291 -36.063  1.00 86.35           O  
ATOM   4565  OD2 ASP L  82      -8.928 -60.460 -34.872  1.00 90.41           O  
ATOM   4566  H   ASP L  82     -12.250 -62.104 -35.239  1.00 94.82           H  
ATOM   4567  HA  ASP L  82     -10.457 -64.053 -34.843  1.00 95.21           H  
ATOM   4568  HB2 ASP L  82     -10.741 -61.574 -33.522  1.00 96.78           H  
ATOM   4569  HB3 ASP L  82      -9.556 -62.595 -33.234  1.00 96.78           H  
ATOM   4570  N   ILE L  83     -13.059 -64.105 -33.201  1.00 75.83           N  
ATOM   4571  CA  ILE L  83     -13.817 -64.899 -32.239  1.00 80.25           C  
ATOM   4572  C   ILE L  83     -13.374 -66.348 -32.388  1.00 72.48           C  
ATOM   4573  O   ILE L  83     -13.536 -66.954 -33.452  1.00 65.30           O  
ATOM   4574  CB  ILE L  83     -15.334 -64.743 -32.457  1.00 86.60           C  
ATOM   4575  CG1 ILE L  83     -15.779 -63.331 -32.070  1.00 85.69           C  
ATOM   4576  CG2 ILE L  83     -16.118 -65.780 -31.655  1.00 83.64           C  
ATOM   4577  CD1 ILE L  83     -17.159 -62.964 -32.583  1.00 91.90           C  
ATOM   4578  H   ILE L  83     -13.552 -63.631 -33.722  1.00 91.00           H  
ATOM   4579  HA  ILE L  83     -13.605 -64.604 -31.339  1.00 96.30           H  
ATOM   4580  HB  ILE L  83     -15.524 -64.876 -33.399  1.00103.92           H  
ATOM   4581 HG12 ILE L  83     -15.794 -63.263 -31.103  1.00102.82           H  
ATOM   4582 HG13 ILE L  83     -15.147 -62.693 -32.436  1.00102.82           H  
ATOM   4583 HG21 ILE L  83     -17.066 -65.652 -31.816  1.00100.37           H  
ATOM   4584 HG22 ILE L  83     -15.850 -66.667 -31.941  1.00100.37           H  
ATOM   4585 HG23 ILE L  83     -15.924 -65.662 -30.712  1.00100.37           H  
ATOM   4586 HD11 ILE L  83     -17.370 -62.061 -32.300  1.00110.28           H  
ATOM   4587 HD12 ILE L  83     -17.159 -63.016 -33.552  1.00110.28           H  
ATOM   4588 HD13 ILE L  83     -17.807 -63.586 -32.218  1.00110.28           H  
ATOM   4589  N   ALA L  84     -12.843 -66.917 -31.315  1.00 70.89           N  
ATOM   4590  CA  ALA L  84     -12.215 -68.229 -31.360  1.00 61.46           C  
ATOM   4591  C   ALA L  84     -11.724 -68.535 -29.955  1.00 59.63           C  
ATOM   4592  O   ALA L  84     -11.755 -67.681 -29.061  1.00 59.62           O  
ATOM   4593  CB  ALA L  84     -11.055 -68.304 -32.357  1.00 53.46           C  
ATOM   4594  H   ALA L  84     -12.833 -66.556 -30.534  1.00 85.07           H  
ATOM   4595  HA  ALA L  84     -12.875 -68.895 -31.607  1.00 73.75           H  
ATOM   4596  HB1 ALA L  84     -10.681 -69.199 -32.339  1.00 64.15           H  
ATOM   4597  HB2 ALA L  84     -11.389 -68.102 -33.245  1.00 64.15           H  
ATOM   4598  HB3 ALA L  84     -10.378 -67.658 -32.102  1.00 64.15           H  
ATOM   4599  N   THR L  85     -11.252 -69.759 -29.778  1.00 53.64           N  
ATOM   4600  CA  THR L  85     -10.473 -70.128 -28.611  1.00 55.40           C  
ATOM   4601  C   THR L  85      -9.023 -70.237 -29.034  1.00 57.34           C  
ATOM   4602  O   THR L  85      -8.719 -70.848 -30.062  1.00 69.95           O  
ATOM   4603  CB  THR L  85     -10.941 -71.452 -28.013  1.00 51.74           C  
ATOM   4604  OG1 THR L  85     -12.307 -71.331 -27.596  1.00 53.37           O  
ATOM   4605  CG2 THR L  85     -10.084 -71.829 -26.813  1.00 54.40           C  
ATOM   4606  H   THR L  85     -11.373 -70.406 -30.332  1.00 64.36           H  
ATOM   4607  HA  THR L  85     -10.549 -69.436 -27.935  1.00 66.47           H  
ATOM   4608  HB  THR L  85     -10.866 -72.153 -28.678  1.00 62.08           H  
ATOM   4609  HG1 THR L  85     -12.574 -72.066 -27.261  1.00 64.05           H  
ATOM   4610 HG21 THR L  85     -10.389 -72.671 -26.439  1.00 65.28           H  
ATOM   4611 HG22 THR L  85      -9.157 -71.921 -27.084  1.00 65.28           H  
ATOM   4612 HG23 THR L  85     -10.146 -71.141 -26.132  1.00 65.28           H  
ATOM   4613  N   TYR L  86      -8.140 -69.609 -28.267  1.00 49.82           N  
ATOM   4614  CA  TYR L  86      -6.726 -69.617 -28.581  1.00 46.81           C  
ATOM   4615  C   TYR L  86      -6.041 -70.558 -27.605  1.00 57.78           C  
ATOM   4616  O   TYR L  86      -6.391 -70.605 -26.422  1.00 57.28           O  
ATOM   4617  CB  TYR L  86      -6.155 -68.200 -28.498  1.00 56.72           C  
ATOM   4618  CG  TYR L  86      -6.762 -67.325 -29.561  1.00 51.76           C  
ATOM   4619  CD1 TYR L  86      -6.135 -67.141 -30.782  1.00 46.92           C  
ATOM   4620  CD2 TYR L  86      -8.003 -66.735 -29.365  1.00 52.28           C  
ATOM   4621  CE1 TYR L  86      -6.706 -66.352 -31.760  1.00 45.87           C  
ATOM   4622  CE2 TYR L  86      -8.587 -65.959 -30.340  1.00 44.31           C  
ATOM   4623  CZ  TYR L  86      -7.935 -65.768 -31.534  1.00 43.72           C  
ATOM   4624  OH  TYR L  86      -8.523 -65.008 -32.515  1.00 52.84           O  
ATOM   4625  H   TYR L  86      -8.340 -69.169 -27.555  1.00 59.78           H  
ATOM   4626  HA  TYR L  86      -6.593 -69.953 -29.481  1.00 56.17           H  
ATOM   4627  HB2 TYR L  86      -6.363 -67.818 -27.630  1.00 68.06           H  
ATOM   4628  HB3 TYR L  86      -5.195 -68.230 -28.634  1.00 68.06           H  
ATOM   4629  HD1 TYR L  86      -5.305 -67.531 -30.935  1.00 56.31           H  
ATOM   4630  HD2 TYR L  86      -8.445 -66.861 -28.557  1.00 62.73           H  
ATOM   4631  HE1 TYR L  86      -6.274 -66.230 -32.574  1.00 55.05           H  
ATOM   4632  HE2 TYR L  86      -9.415 -65.563 -30.190  1.00 53.17           H  
ATOM   4633  HH  TYR L  86      -9.272 -64.711 -32.244  1.00 63.41           H  
ATOM   4634  N   TYR L  87      -5.044 -71.274 -28.101  1.00 66.00           N  
ATOM   4635  CA  TYR L  87      -4.275 -72.217 -27.310  1.00 65.59           C  
ATOM   4636  C   TYR L  87      -2.798 -72.000 -27.547  1.00 55.34           C  
ATOM   4637  O   TYR L  87      -2.369 -71.782 -28.684  1.00 57.23           O  
ATOM   4638  CB  TYR L  87      -4.580 -73.670 -27.687  1.00 58.88           C  
ATOM   4639  CG  TYR L  87      -5.975 -74.172 -27.429  1.00 52.26           C  
ATOM   4640  CD1 TYR L  87      -6.339 -74.646 -26.178  1.00 54.64           C  
ATOM   4641  CD2 TYR L  87      -6.918 -74.213 -28.446  1.00 52.50           C  
ATOM   4642  CE1 TYR L  87      -7.608 -75.135 -25.941  1.00 67.82           C  
ATOM   4643  CE2 TYR L  87      -8.192 -74.696 -28.219  1.00 56.93           C  
ATOM   4644  CZ  TYR L  87      -8.532 -75.156 -26.964  1.00 63.80           C  
ATOM   4645  OH  TYR L  87      -9.799 -75.636 -26.725  1.00 64.02           O  
ATOM   4646  H   TYR L  87      -4.787 -71.228 -28.921  1.00 79.21           H  
ATOM   4647  HA  TYR L  87      -4.465 -72.089 -26.367  1.00 78.71           H  
ATOM   4648  HB2 TYR L  87      -4.411 -73.776 -28.637  1.00 70.66           H  
ATOM   4649  HB3 TYR L  87      -3.975 -74.243 -27.191  1.00 70.66           H  
ATOM   4650  HD1 TYR L  87      -5.717 -74.635 -25.487  1.00 65.56           H  
ATOM   4651  HD2 TYR L  87      -6.690 -73.906 -29.294  1.00 63.00           H  
ATOM   4652  HE1 TYR L  87      -7.840 -75.442 -25.095  1.00 81.38           H  
ATOM   4653  HE2 TYR L  87      -8.816 -74.712 -28.908  1.00 68.32           H  
ATOM   4654  HH  TYR L  87      -9.868 -75.881 -25.914  1.00 76.83           H  
ATOM   4655  N   CYS L  88      -2.032 -72.041 -26.474  1.00 41.07           N  
ATOM   4656  CA  CYS L  88      -0.603 -72.229 -26.602  1.00 52.85           C  
ATOM   4657  C   CYS L  88      -0.291 -73.722 -26.516  1.00 49.90           C  
ATOM   4658  O   CYS L  88      -1.065 -74.510 -25.970  1.00 47.90           O  
ATOM   4659  CB  CYS L  88       0.135 -71.451 -25.516  1.00 39.83           C  
ATOM   4660  SG  CYS L  88      -0.232 -72.047 -23.863  1.00 75.26           S  
ATOM   4661  H   CYS L  88      -2.313 -71.963 -25.665  1.00 49.29           H  
ATOM   4662  HA  CYS L  88      -0.310 -71.902 -27.467  1.00 63.42           H  
ATOM   4663  HB2 CYS L  88       1.091 -71.536 -25.661  1.00 47.79           H  
ATOM   4664  HB3 CYS L  88      -0.126 -70.518 -25.564  1.00 47.79           H  
ATOM   4665  N   GLN L  89       0.855 -74.108 -27.067  1.00 54.21           N  
ATOM   4666  CA  GLN L  89       1.309 -75.490 -26.991  1.00 38.29           C  
ATOM   4667  C   GLN L  89       2.823 -75.444 -26.983  1.00 40.01           C  
ATOM   4668  O   GLN L  89       3.429 -74.873 -27.892  1.00 40.02           O  
ATOM   4669  CB  GLN L  89       0.824 -76.350 -28.167  1.00 44.01           C  
ATOM   4670  CG  GLN L  89       1.359 -77.799 -28.115  1.00 57.41           C  
ATOM   4671  CD  GLN L  89       1.224 -78.554 -29.424  1.00 55.19           C  
ATOM   4672  OE1 GLN L  89       0.687 -79.658 -29.465  1.00 59.99           O  
ATOM   4673  NE2 GLN L  89       1.734 -77.972 -30.495  1.00 66.14           N  
ATOM   4674  H   GLN L  89       1.390 -73.585 -27.492  1.00 65.05           H  
ATOM   4675  HA  GLN L  89       1.003 -75.892 -26.163  1.00 45.94           H  
ATOM   4676  HB2 GLN L  89      -0.145 -76.388 -28.151  1.00 52.81           H  
ATOM   4677  HB3 GLN L  89       1.126 -75.948 -28.996  1.00 52.81           H  
ATOM   4678  HG2 GLN L  89       2.300 -77.776 -27.883  1.00 68.89           H  
ATOM   4679  HG3 GLN L  89       0.866 -78.290 -27.439  1.00 68.89           H  
ATOM   4680 HE21 GLN L  89       2.117 -77.205 -30.427  1.00 79.36           H  
ATOM   4681 HE22 GLN L  89       1.682 -78.360 -31.261  1.00 79.36           H  
ATOM   4682  N   GLN L  90       3.428 -76.130 -26.028  1.00 37.24           N  
ATOM   4683  CA  GLN L  90       4.869 -76.272 -26.020  1.00 37.59           C  
ATOM   4684  C   GLN L  90       5.259 -77.516 -26.803  1.00 49.78           C  
ATOM   4685  O   GLN L  90       4.536 -78.517 -26.818  1.00 39.64           O  
ATOM   4686  CB  GLN L  90       5.399 -76.318 -24.582  1.00 40.25           C  
ATOM   4687  CG  GLN L  90       5.039 -77.547 -23.749  1.00 41.21           C  
ATOM   4688  CD  GLN L  90       5.933 -78.750 -24.020  1.00 59.60           C  
ATOM   4689  OE1 GLN L  90       7.035 -78.620 -24.555  1.00 58.56           O  
ATOM   4690  NE2 GLN L  90       5.469 -79.927 -23.623  1.00 62.16           N  
ATOM   4691  H   GLN L  90       3.028 -76.521 -25.375  1.00 44.69           H  
ATOM   4692  HA  GLN L  90       5.265 -75.504 -26.461  1.00 45.11           H  
ATOM   4693  HB2 GLN L  90       6.367 -76.270 -24.616  1.00 48.30           H  
ATOM   4694  HB3 GLN L  90       5.057 -75.543 -24.110  1.00 48.30           H  
ATOM   4695  HG2 GLN L  90       5.120 -77.323 -22.809  1.00 49.46           H  
ATOM   4696  HG3 GLN L  90       4.126 -77.805 -23.949  1.00 49.46           H  
ATOM   4697 HE21 GLN L  90       4.702 -79.978 -23.236  1.00 74.59           H  
ATOM   4698 HE22 GLN L  90       5.934 -80.639 -23.752  1.00 74.59           H  
ATOM   4699  N   TYR L  91       6.381 -77.413 -27.501  1.00 55.64           N  
ATOM   4700  CA  TYR L  91       6.966 -78.508 -28.259  1.00 56.00           C  
ATOM   4701  C   TYR L  91       8.448 -78.592 -27.940  1.00 56.42           C  
ATOM   4702  O   TYR L  91       9.272 -78.916 -28.796  1.00 60.01           O  
ATOM   4703  CB  TYR L  91       6.707 -78.375 -29.762  1.00 57.05           C  
ATOM   4704  CG  TYR L  91       7.251 -77.131 -30.409  1.00 61.16           C  
ATOM   4705  CD1 TYR L  91       8.383 -77.181 -31.208  1.00 59.12           C  
ATOM   4706  CD2 TYR L  91       6.624 -75.901 -30.230  1.00 62.66           C  
ATOM   4707  CE1 TYR L  91       8.874 -76.041 -31.817  1.00 70.31           C  
ATOM   4708  CE2 TYR L  91       7.111 -74.758 -30.832  1.00 54.00           C  
ATOM   4709  CZ  TYR L  91       8.233 -74.832 -31.620  1.00 65.62           C  
ATOM   4710  OH  TYR L  91       8.727 -73.694 -32.205  1.00 76.76           O  
ATOM   4711  H   TYR L  91       6.840 -76.687 -27.552  1.00 66.77           H  
ATOM   4712  HA  TYR L  91       6.557 -79.337 -27.966  1.00 67.20           H  
ATOM   4713  HB2 TYR L  91       7.110 -79.135 -30.210  1.00 68.46           H  
ATOM   4714  HB3 TYR L  91       5.749 -78.384 -29.910  1.00 68.46           H  
ATOM   4715  HD1 TYR L  91       8.813 -77.994 -31.344  1.00 70.95           H  
ATOM   4716  HD2 TYR L  91       5.863 -75.850 -29.700  1.00 75.19           H  
ATOM   4717  HE1 TYR L  91       9.637 -76.085 -32.347  1.00 84.38           H  
ATOM   4718  HE2 TYR L  91       6.685 -73.942 -30.700  1.00 64.80           H  
ATOM   4719  HH  TYR L  91       9.424 -73.877 -32.656  1.00 92.11           H  
ATOM   4720  N   HIS L  92       8.781 -78.271 -26.691  1.00 71.89           N  
ATOM   4721  CA  HIS L  92      10.124 -78.475 -26.175  1.00 76.24           C  
ATOM   4722  C   HIS L  92      10.388 -79.925 -25.827  1.00 78.77           C  
ATOM   4723  O   HIS L  92      11.437 -80.464 -26.195  1.00 92.26           O  
ATOM   4724  CB  HIS L  92      10.293 -77.636 -24.911  1.00 81.99           C  
ATOM   4725  CG  HIS L  92      11.695 -77.572 -24.394  1.00 84.39           C  
ATOM   4726  ND1 HIS L  92      12.749 -77.051 -25.108  1.00 80.66           N  
ATOM   4727  CD2 HIS L  92      12.214 -78.000 -23.219  1.00 74.87           C  
ATOM   4728  CE1 HIS L  92      13.855 -77.144 -24.391  1.00 78.21           C  
ATOM   4729  NE2 HIS L  92      13.556 -77.717 -23.240  1.00 82.13           N  
ATOM   4730  H   HIS L  92       8.237 -77.930 -26.119  1.00 86.27           H  
ATOM   4731  HA  HIS L  92      10.776 -78.187 -26.832  1.00 91.49           H  
ATOM   4732  HB2 HIS L  92      10.008 -76.728 -25.100  1.00 98.39           H  
ATOM   4733  HB3 HIS L  92       9.738 -78.014 -24.211  1.00 98.39           H  
ATOM   4734  HD1 HIS L  92      12.695 -76.709 -25.896  1.00 96.80           H  
ATOM   4735  HD2 HIS L  92      11.746 -78.402 -22.523  1.00 89.84           H  
ATOM   4736  HE1 HIS L  92      14.700 -76.858 -24.654  1.00 93.85           H  
ATOM   4737  HE2 HIS L  92      14.113 -77.887 -22.607  1.00 98.56           H  
ATOM   4738  N   ASN L  93       9.428 -80.592 -25.195  1.00 83.84           N  
ATOM   4739  CA  ASN L  93       9.648 -81.956 -24.747  1.00 82.64           C  
ATOM   4740  C   ASN L  93       8.374 -82.772 -24.805  1.00 81.68           C  
ATOM   4741  O   ASN L  93       7.323 -82.291 -24.372  1.00 80.70           O  
ATOM   4742  CB  ASN L  93      10.129 -81.971 -23.286  1.00 89.32           C  
ATOM   4743  CG  ASN L  93      11.557 -81.487 -23.113  1.00105.63           C  
ATOM   4744  OD1 ASN L  93      12.368 -81.535 -24.040  1.00116.62           O  
ATOM   4745  ND2 ASN L  93      11.885 -81.052 -21.896  1.00105.90           N  
ATOM   4746  H   ASN L  93       8.648 -80.278 -25.015  1.00100.61           H  
ATOM   4747  HA  ASN L  93      10.319 -82.381 -25.303  1.00 99.17           H  
ATOM   4748  HB2 ASN L  93       9.554 -81.392 -22.761  1.00107.18           H  
ATOM   4749  HB3 ASN L  93      10.079 -82.879 -22.949  1.00107.18           H  
ATOM   4750 HD21 ASN L  93      11.300 -81.057 -21.265  1.00127.08           H  
ATOM   4751 HD22 ASN L  93      12.682 -80.767 -21.741  1.00127.08           H  
ATOM   4752  N   LEU L  94       8.461 -83.988 -25.342  1.00 70.22           N  
ATOM   4753  CA  LEU L  94       7.271 -84.810 -25.439  1.00 62.70           C  
ATOM   4754  C   LEU L  94       6.926 -85.228 -24.009  1.00 71.03           C  
ATOM   4755  O   LEU L  94       7.828 -85.384 -23.181  1.00 68.51           O  
ATOM   4756  CB  LEU L  94       7.440 -86.022 -26.349  1.00 64.82           C  
ATOM   4757  CG  LEU L  94       7.533 -85.707 -27.845  1.00 65.70           C  
ATOM   4758  CD1 LEU L  94       8.166 -86.862 -28.614  1.00 61.53           C  
ATOM   4759  CD2 LEU L  94       6.132 -85.374 -28.389  1.00 68.75           C  
ATOM   4760  H   LEU L  94       9.179 -84.348 -25.648  1.00 84.27           H  
ATOM   4761  HA  LEU L  94       6.540 -84.274 -25.783  1.00 75.23           H  
ATOM   4762  HB2 LEU L  94       8.254 -86.485 -26.097  1.00 77.79           H  
ATOM   4763  HB3 LEU L  94       6.679 -86.611 -26.221  1.00 77.79           H  
ATOM   4764  HG  LEU L  94       8.094 -84.925 -27.967  1.00 78.84           H  
ATOM   4765 HD11 LEU L  94       8.209 -86.629 -29.554  1.00 73.83           H  
ATOM   4766 HD12 LEU L  94       9.059 -87.018 -28.270  1.00 73.83           H  
ATOM   4767 HD13 LEU L  94       7.622 -87.656 -28.494  1.00 73.83           H  
ATOM   4768 HD21 LEU L  94       6.200 -85.176 -29.336  1.00 82.50           H  
ATOM   4769 HD22 LEU L  94       5.550 -86.138 -28.251  1.00 82.50           H  
ATOM   4770 HD23 LEU L  94       5.784 -84.603 -27.913  1.00 82.50           H  
ATOM   4771  N   PRO L  95       5.647 -85.362 -23.660  1.00 81.55           N  
ATOM   4772  CA  PRO L  95       4.555 -85.038 -24.585  1.00 68.59           C  
ATOM   4773  C   PRO L  95       4.370 -83.543 -24.804  1.00 67.89           C  
ATOM   4774  O   PRO L  95       4.626 -82.721 -23.918  1.00 69.44           O  
ATOM   4775  CB  PRO L  95       3.335 -85.645 -23.882  1.00 75.83           C  
ATOM   4776  CG  PRO L  95       3.682 -85.548 -22.411  1.00 78.10           C  
ATOM   4777  CD  PRO L  95       5.156 -85.845 -22.357  1.00 83.25           C  
ATOM   4778  HA  PRO L  95       4.690 -85.478 -25.439  1.00 82.31           H  
ATOM   4779  HB2 PRO L  95       2.542 -85.124 -24.086  1.00 91.00           H  
ATOM   4780  HB3 PRO L  95       3.223 -86.570 -24.152  1.00 91.00           H  
ATOM   4781  HG2 PRO L  95       3.498 -84.653 -22.087  1.00 93.72           H  
ATOM   4782  HG3 PRO L  95       3.179 -86.208 -21.910  1.00 93.72           H  
ATOM   4783  HD2 PRO L  95       5.574 -85.352 -21.634  1.00 99.89           H  
ATOM   4784  HD3 PRO L  95       5.307 -86.799 -22.272  1.00 99.89           H  
ATOM   4785  N   TYR L  96       3.915 -83.202 -26.013  1.00 64.00           N  
ATOM   4786  CA  TYR L  96       3.700 -81.814 -26.418  1.00 44.82           C  
ATOM   4787  C   TYR L  96       2.363 -81.281 -25.930  1.00 55.14           C  
ATOM   4788  O   TYR L  96       1.309 -81.508 -26.527  1.00 61.69           O  
ATOM   4789  CB  TYR L  96       3.816 -81.619 -27.919  1.00 43.59           C  
ATOM   4790  CG  TYR L  96       5.164 -81.908 -28.518  1.00 53.44           C  
ATOM   4791  CD1 TYR L  96       6.325 -81.846 -27.741  1.00 57.77           C  
ATOM   4792  CD2 TYR L  96       5.310 -82.047 -29.890  1.00 53.00           C  
ATOM   4793  CE1 TYR L  96       7.580 -82.061 -28.301  1.00 65.06           C  
ATOM   4794  CE2 TYR L  96       6.562 -82.241 -30.461  1.00 64.42           C  
ATOM   4795  CZ  TYR L  96       7.688 -82.243 -29.664  1.00 71.63           C  
ATOM   4796  OH  TYR L  96       8.943 -82.426 -30.219  1.00 79.11           O  
ATOM   4797  H   TYR L  96       3.721 -83.771 -26.627  1.00 76.79           H  
ATOM   4798  HA  TYR L  96       4.390 -81.271 -26.007  1.00 53.78           H  
ATOM   4799  HB2 TYR L  96       3.176 -82.205 -28.352  1.00 52.31           H  
ATOM   4800  HB3 TYR L  96       3.600 -80.697 -28.124  1.00 52.31           H  
ATOM   4801  HD1 TYR L  96       6.251 -81.733 -26.821  1.00 69.33           H  
ATOM   4802  HD2 TYR L  96       4.554 -82.056 -30.433  1.00 63.59           H  
ATOM   4803  HE1 TYR L  96       8.341 -82.049 -27.767  1.00 78.07           H  
ATOM   4804  HE2 TYR L  96       6.640 -82.370 -31.378  1.00 77.30           H  
ATOM   4805  HH  TYR L  96       8.878 -82.527 -31.060  1.00 94.93           H  
ATOM   4806  N   THR L  97       2.412 -80.654 -24.769  1.00 66.45           N  
ATOM   4807  CA  THR L  97       1.235 -80.325 -23.994  1.00 63.75           C  
ATOM   4808  C   THR L  97       0.617 -78.976 -24.385  1.00 67.87           C  
ATOM   4809  O   THR L  97       1.309 -78.043 -24.803  1.00 64.23           O  
ATOM   4810  CB  THR L  97       1.607 -80.295 -22.511  1.00 56.81           C  
ATOM   4811  OG1 THR L  97       2.772 -79.493 -22.325  1.00 57.14           O  
ATOM   4812  CG2 THR L  97       1.878 -81.699 -21.969  1.00 79.36           C  
ATOM   4813  H   THR L  97       3.145 -80.400 -24.397  1.00 79.74           H  
ATOM   4814  HA  THR L  97       0.565 -81.014 -24.125  1.00 76.50           H  
ATOM   4815  HB  THR L  97       0.873 -79.912 -22.006  1.00 68.17           H  
ATOM   4816  HG1 THR L  97       2.984 -79.473 -21.502  1.00 68.56           H  
ATOM   4817 HG21 THR L  97       2.111 -81.651 -21.028  1.00 95.23           H  
ATOM   4818 HG22 THR L  97       1.087 -82.251 -22.070  1.00 95.23           H  
ATOM   4819 HG23 THR L  97       2.612 -82.106 -22.455  1.00 95.23           H  
ATOM   4820  N   PHE L  98      -0.698 -78.881 -24.200  1.00 67.90           N  
ATOM   4821  CA  PHE L  98      -1.528 -77.709 -24.472  1.00 49.72           C  
ATOM   4822  C   PHE L  98      -1.866 -76.948 -23.203  1.00 57.88           C  
ATOM   4823  O   PHE L  98      -2.018 -77.519 -22.118  1.00 60.36           O  
ATOM   4824  CB  PHE L  98      -2.837 -78.039 -25.216  1.00 66.51           C  
ATOM   4825  CG  PHE L  98      -2.707 -78.261 -26.696  1.00 65.00           C  
ATOM   4826  CD1 PHE L  98      -2.892 -77.131 -27.471  1.00 71.54           C  
ATOM   4827  CD2 PHE L  98      -2.314 -79.431 -27.319  1.00 68.84           C  
ATOM   4828  CE1 PHE L  98      -2.821 -77.153 -28.824  1.00 72.31           C  
ATOM   4829  CE2 PHE L  98      -2.213 -79.455 -28.730  1.00 66.16           C  
ATOM   4830  CZ  PHE L  98      -2.465 -78.294 -29.466  1.00 70.42           C  
ATOM   4831  H   PHE L  98      -1.164 -79.536 -23.895  1.00 81.48           H  
ATOM   4832  HA  PHE L  98      -1.021 -77.107 -25.040  1.00 59.66           H  
ATOM   4833  HB2 PHE L  98      -3.212 -78.847 -24.832  1.00 79.82           H  
ATOM   4834  HB3 PHE L  98      -3.456 -77.303 -25.086  1.00 79.82           H  
ATOM   4835  HD1 PHE L  98      -3.152 -76.342 -27.052  1.00 85.85           H  
ATOM   4836  HD2 PHE L  98      -2.162 -80.202 -26.823  1.00 82.61           H  
ATOM   4837  HE1 PHE L  98      -2.975 -76.375 -29.310  1.00 86.77           H  
ATOM   4838  HE2 PHE L  98      -1.976 -80.241 -29.167  1.00 79.39           H  
ATOM   4839  HZ  PHE L  98      -2.396 -78.305 -30.393  1.00 84.50           H  
ATOM   4840  N   GLY L  99      -1.989 -75.634 -23.374  1.00 57.96           N  
ATOM   4841  CA  GLY L  99      -2.684 -74.791 -22.444  1.00 52.06           C  
ATOM   4842  C   GLY L  99      -4.169 -75.065 -22.450  1.00 54.74           C  
ATOM   4843  O   GLY L  99      -4.701 -75.760 -23.319  1.00 64.57           O  
ATOM   4844  H   GLY L  99      -1.663 -75.207 -24.046  1.00 69.55           H  
ATOM   4845  HA2 GLY L  99      -2.344 -74.943 -21.549  1.00 62.48           H  
ATOM   4846  HA3 GLY L  99      -2.540 -73.860 -22.677  1.00 62.48           H  
ATOM   4847  N   PRO L 100      -4.871 -74.518 -21.461  1.00 60.85           N  
ATOM   4848  CA  PRO L 100      -6.304 -74.798 -21.305  1.00 57.85           C  
ATOM   4849  C   PRO L 100      -7.227 -73.907 -22.122  1.00 51.57           C  
ATOM   4850  O   PRO L 100      -8.449 -74.035 -22.004  1.00 50.02           O  
ATOM   4851  CB  PRO L 100      -6.459 -74.535 -19.808  1.00 52.98           C  
ATOM   4852  CG  PRO L 100      -5.620 -73.286 -19.684  1.00 69.13           C  
ATOM   4853  CD  PRO L 100      -4.352 -73.839 -20.256  1.00 66.47           C  
ATOM   4854  HA  PRO L 100      -6.495 -75.730 -21.495  1.00 69.43           H  
ATOM   4855  HB2 PRO L 100      -7.388 -74.367 -19.585  1.00 63.58           H  
ATOM   4856  HB3 PRO L 100      -6.090 -75.269 -19.292  1.00 63.58           H  
ATOM   4857  HG2 PRO L 100      -5.982 -72.569 -20.227  1.00 82.95           H  
ATOM   4858  HG3 PRO L 100      -5.517 -73.028 -18.754  1.00 82.95           H  
ATOM   4859  HD2 PRO L 100      -3.742 -73.125 -20.497  1.00 79.76           H  
ATOM   4860  HD3 PRO L 100      -3.947 -74.476 -19.647  1.00 79.76           H  
ATOM   4861  N   GLY L 101      -6.680 -72.991 -22.892  1.00 47.84           N  
ATOM   4862  CA  GLY L 101      -7.458 -72.222 -23.835  1.00 57.71           C  
ATOM   4863  C   GLY L 101      -7.815 -70.846 -23.310  1.00 59.46           C  
ATOM   4864  O   GLY L 101      -7.936 -70.616 -22.100  1.00 62.95           O  
ATOM   4865  H   GLY L 101      -5.844 -72.791 -22.886  1.00 57.41           H  
ATOM   4866  HA2 GLY L 101      -6.955 -72.116 -24.657  1.00 69.25           H  
ATOM   4867  HA3 GLY L 101      -8.280 -72.696 -24.037  1.00 69.25           H  
ATOM   4868  N   THR L 102      -8.036 -69.926 -24.242  1.00 76.15           N  
ATOM   4869  CA  THR L 102      -8.566 -68.601 -23.956  1.00 74.21           C  
ATOM   4870  C   THR L 102      -9.698 -68.355 -24.935  1.00 70.90           C  
ATOM   4871  O   THR L 102      -9.461 -68.275 -26.144  1.00 65.15           O  
ATOM   4872  CB  THR L 102      -7.488 -67.521 -24.077  1.00 71.38           C  
ATOM   4873  OG1 THR L 102      -6.432 -67.793 -23.146  1.00 71.13           O  
ATOM   4874  CG2 THR L 102      -8.067 -66.140 -23.779  1.00 63.96           C  
ATOM   4875  H   THR L 102      -7.880 -70.053 -25.078  1.00 91.38           H  
ATOM   4876  HA  THR L 102      -8.925 -68.581 -23.055  1.00 89.05           H  
ATOM   4877  HB  THR L 102      -7.132 -67.518 -24.980  1.00 85.65           H  
ATOM   4878  HG1 THR L 102      -5.830 -67.197 -23.208  1.00 85.35           H  
ATOM   4879 HG21 THR L 102      -7.374 -65.466 -23.859  1.00 76.75           H  
ATOM   4880 HG22 THR L 102      -8.779 -65.936 -24.405  1.00 76.75           H  
ATOM   4881 HG23 THR L 102      -8.425 -66.118 -22.877  1.00 76.75           H  
ATOM   4882  N   LYS L 103     -10.915 -68.226 -24.419  1.00 79.80           N  
ATOM   4883  CA  LYS L 103     -12.075 -67.940 -25.248  1.00 79.17           C  
ATOM   4884  C   LYS L 103     -12.249 -66.436 -25.407  1.00 64.03           C  
ATOM   4885  O   LYS L 103     -12.482 -65.724 -24.427  1.00 60.95           O  
ATOM   4886  CB  LYS L 103     -13.329 -68.542 -24.614  1.00 82.23           C  
ATOM   4887  CG  LYS L 103     -14.600 -68.372 -25.432  1.00 89.13           C  
ATOM   4888  CD  LYS L 103     -15.780 -69.069 -24.765  1.00101.75           C  
ATOM   4889  CE  LYS L 103     -17.029 -69.014 -25.630  1.00 99.97           C  
ATOM   4890  NZ  LYS L 103     -17.638 -67.649 -25.580  1.00101.95           N  
ATOM   4891  H   LYS L 103     -11.095 -68.300 -23.581  1.00 95.76           H  
ATOM   4892  HA  LYS L 103     -11.953 -68.333 -26.126  1.00 95.01           H  
ATOM   4893  HB2 LYS L 103     -13.186 -69.493 -24.488  1.00 98.67           H  
ATOM   4894  HB3 LYS L 103     -13.475 -68.118 -23.754  1.00 98.67           H  
ATOM   4895  HG2 LYS L 103     -14.807 -67.428 -25.511  1.00106.95           H  
ATOM   4896  HG3 LYS L 103     -14.471 -68.763 -26.311  1.00106.95           H  
ATOM   4897  HD2 LYS L 103     -15.557 -70.000 -24.613  1.00122.10           H  
ATOM   4898  HD3 LYS L 103     -15.975 -68.629 -23.923  1.00122.10           H  
ATOM   4899  HE2 LYS L 103     -16.795 -69.214 -26.550  1.00119.97           H  
ATOM   4900  HE3 LYS L 103     -17.680 -69.653 -25.299  1.00119.97           H  
ATOM   4901  HZ1 LYS L 103     -18.368 -67.623 -26.088  1.00122.34           H  
ATOM   4902  HZ2 LYS L 103     -17.860 -67.445 -24.743  1.00122.34           H  
ATOM   4903  HZ3 LYS L 103     -17.056 -67.046 -25.879  1.00122.34           H  
ATOM   4904  N   LEU L 104     -12.111 -65.959 -26.640  1.00 54.74           N  
ATOM   4905  CA  LEU L 104     -12.173 -64.538 -26.945  1.00 52.34           C  
ATOM   4906  C   LEU L 104     -13.532 -64.246 -27.574  1.00 51.81           C  
ATOM   4907  O   LEU L 104     -13.891 -64.865 -28.582  1.00 51.05           O  
ATOM   4908  CB  LEU L 104     -11.036 -64.160 -27.894  1.00 66.15           C  
ATOM   4909  CG  LEU L 104     -10.583 -62.703 -27.964  1.00 75.73           C  
ATOM   4910  CD1 LEU L 104      -9.357 -62.623 -28.855  1.00 73.04           C  
ATOM   4911  CD2 LEU L 104     -11.681 -61.786 -28.477  1.00 71.57           C  
ATOM   4912  H   LEU L 104     -11.978 -66.452 -27.331  1.00 65.69           H  
ATOM   4913  HA  LEU L 104     -12.086 -64.021 -26.130  1.00 62.81           H  
ATOM   4914  HB2 LEU L 104     -10.258 -64.682 -27.644  1.00 79.38           H  
ATOM   4915  HB3 LEU L 104     -11.306 -64.412 -28.792  1.00 79.38           H  
ATOM   4916  HG  LEU L 104     -10.331 -62.406 -27.076  1.00 90.88           H  
ATOM   4917 HD11 LEU L 104      -9.063 -61.700 -28.904  1.00 87.65           H  
ATOM   4918 HD12 LEU L 104      -8.655 -63.175 -28.475  1.00 87.65           H  
ATOM   4919 HD13 LEU L 104      -9.589 -62.945 -29.740  1.00 87.65           H  
ATOM   4920 HD21 LEU L 104     -11.345 -60.876 -28.503  1.00 85.89           H  
ATOM   4921 HD22 LEU L 104     -11.938 -62.069 -29.368  1.00 85.89           H  
ATOM   4922 HD23 LEU L 104     -12.443 -61.841 -27.879  1.00 85.89           H  
ATOM   4923  N   GLU L 105     -14.284 -63.308 -26.996  1.00 75.81           N  
ATOM   4924  CA  GLU L 105     -15.568 -62.919 -27.560  1.00 71.66           C  
ATOM   4925  C   GLU L 105     -15.591 -61.413 -27.783  1.00 66.11           C  
ATOM   4926  O   GLU L 105     -14.770 -60.675 -27.240  1.00 77.47           O  
ATOM   4927  CB  GLU L 105     -16.711 -63.356 -26.623  1.00 80.61           C  
ATOM   4928  CG  GLU L 105     -18.126 -63.079 -27.115  1.00 95.37           C  
ATOM   4929  CD  GLU L 105     -18.506 -63.887 -28.337  1.00108.33           C  
ATOM   4930  OE1 GLU L 105     -18.194 -65.099 -28.375  1.00111.61           O  
ATOM   4931  OE2 GLU L 105     -19.121 -63.313 -29.259  1.00110.07           O  
ATOM   4932  H   GLU L 105     -14.070 -62.885 -26.278  1.00 90.97           H  
ATOM   4933  HA  GLU L 105     -15.690 -63.358 -28.417  1.00 86.00           H  
ATOM   4934  HB2 GLU L 105     -16.638 -64.312 -26.478  1.00 96.73           H  
ATOM   4935  HB3 GLU L 105     -16.605 -62.893 -25.777  1.00 96.73           H  
ATOM   4936  HG2 GLU L 105     -18.752 -63.297 -26.407  1.00114.45           H  
ATOM   4937  HG3 GLU L 105     -18.200 -62.139 -27.344  1.00114.45           H  
ATOM   4938  N   ILE L 106     -16.490 -60.972 -28.657  1.00 72.16           N  
ATOM   4939  CA  ILE L 106     -16.767 -59.553 -28.885  1.00 82.23           C  
ATOM   4940  C   ILE L 106     -17.898 -59.062 -27.982  1.00 83.04           C  
ATOM   4941  O   ILE L 106     -18.540 -59.860 -27.293  1.00 95.87           O  
ATOM   4942  CB  ILE L 106     -17.012 -59.309 -30.384  1.00 80.69           C  
ATOM   4943  CG1 ILE L 106     -15.698 -59.664 -31.080  1.00 76.51           C  
ATOM   4944  CG2 ILE L 106     -17.319 -57.850 -30.703  1.00 72.29           C  
ATOM   4945  CD1 ILE L 106     -15.613 -59.334 -32.510  1.00 83.07           C  
ATOM   4946  H   ILE L 106     -16.969 -61.492 -29.147  1.00 86.59           H  
ATOM   4947  HA  ILE L 106     -15.974 -59.050 -28.643  1.00 98.67           H  
ATOM   4948  HB  ILE L 106     -17.726 -59.882 -30.705  1.00 96.83           H  
ATOM   4949 HG12 ILE L 106     -14.979 -59.192 -30.632  1.00 91.81           H  
ATOM   4950 HG13 ILE L 106     -15.557 -60.620 -30.996  1.00 91.81           H  
ATOM   4951 HG21 ILE L 106     -17.463 -57.759 -31.658  1.00 86.75           H  
ATOM   4952 HG22 ILE L 106     -18.117 -57.583 -30.221  1.00 86.75           H  
ATOM   4953 HG23 ILE L 106     -16.567 -57.302 -30.428  1.00 86.75           H  
ATOM   4954 HD11 ILE L 106     -14.743 -59.601 -32.844  1.00 99.69           H  
ATOM   4955 HD12 ILE L 106     -16.311 -59.811 -32.986  1.00 99.69           H  
ATOM   4956 HD13 ILE L 106     -15.731 -58.378 -32.621  1.00 99.69           H  
ATOM   4957  N   LYS L 107     -18.133 -57.753 -27.957  1.00 93.40           N  
ATOM   4958  CA  LYS L 107     -19.199 -57.159 -27.149  1.00101.76           C  
ATOM   4959  C   LYS L 107     -18.966 -57.399 -25.665  1.00104.35           C  
ATOM   4960  O   LYS L 107     -18.248 -56.643 -25.014  1.00106.91           O  
ATOM   4961  CB  LYS L 107     -20.568 -57.722 -27.576  1.00 98.80           C  
ATOM   4962  CG  LYS L 107     -21.746 -57.289 -26.711  1.00111.50           C  
ATOM   4963  CD  LYS L 107     -23.020 -58.063 -27.051  1.00119.71           C  
ATOM   4964  CE  LYS L 107     -22.955 -59.514 -26.578  1.00120.66           C  
ATOM   4965  NZ  LYS L 107     -24.182 -60.281 -26.938  1.00124.21           N  
ATOM   4966  H   LYS L 107     -17.681 -57.176 -28.408  1.00112.08           H  
ATOM   4967  HA  LYS L 107     -19.210 -56.201 -27.298  1.00122.12           H  
ATOM   4968  HB2 LYS L 107     -20.750 -57.432 -28.483  1.00118.56           H  
ATOM   4969  HB3 LYS L 107     -20.525 -58.691 -27.547  1.00118.56           H  
ATOM   4970  HG2 LYS L 107     -21.534 -57.452 -25.779  1.00133.80           H  
ATOM   4971  HG3 LYS L 107     -21.918 -56.346 -26.855  1.00133.80           H  
ATOM   4972  HD2 LYS L 107     -23.776 -57.637 -26.617  1.00143.65           H  
ATOM   4973  HD3 LYS L 107     -23.144 -58.064 -28.013  1.00143.65           H  
ATOM   4974  HE2 LYS L 107     -22.195 -59.950 -26.994  1.00144.79           H  
ATOM   4975  HE3 LYS L 107     -22.862 -59.529 -25.613  1.00144.79           H  
ATOM   4976  HZ1 LYS L 107     -24.112 -61.120 -26.649  1.00149.06           H  
ATOM   4977  HZ2 LYS L 107     -24.897 -59.905 -26.563  1.00149.06           H  
ATOM   4978  HZ3 LYS L 107     -24.289 -60.288 -27.821  1.00149.06           H  
TER    4979      LYS L 107                                                      
ATOM   4994  N   ASP L   1       5.157 -76.331 -46.705  1.00175.04           N  
ATOM   4995  CA  ASP L   1       3.801 -76.494 -46.189  1.00168.97           C  
ATOM   4996  C   ASP L   1       3.253 -77.905 -46.387  1.00156.13           C  
ATOM   4997  O   ASP L   1       2.559 -78.177 -47.372  1.00163.74           O  
ATOM   4998  CB  ASP L   1       2.873 -75.475 -46.852  1.00178.44           C  
ATOM   4999  CG  ASP L   1       1.450 -75.560 -46.339  1.00180.70           C  
ATOM   5000  OD1 ASP L   1       1.268 -75.792 -45.125  1.00178.41           O  
ATOM   5001  OD2 ASP L   1       0.514 -75.395 -47.148  1.00184.28           O  
ATOM   5002  H   ASP L   1       5.199 -75.860 -47.424  1.00210.04           H  
ATOM   5003  HA  ASP L   1       3.807 -76.311 -45.237  1.00202.76           H  
ATOM   5004  HB2 ASP L   1       3.205 -74.581 -46.673  1.00214.13           H  
ATOM   5005  HB3 ASP L   1       2.857 -75.637 -47.809  1.00214.13           H  
ATOM   5006  N   ILE L   2       3.573 -78.810 -45.461  1.00104.62           N  
ATOM   5007  CA  ILE L   2       3.071 -80.180 -45.521  1.00 88.77           C  
ATOM   5008  C   ILE L   2       1.566 -80.180 -45.280  1.00 79.28           C  
ATOM   5009  O   ILE L   2       1.082 -79.558 -44.329  1.00 83.22           O  
ATOM   5010  CB  ILE L   2       3.781 -81.045 -44.466  1.00 82.29           C  
ATOM   5011  CG1 ILE L   2       5.289 -81.076 -44.725  1.00 83.79           C  
ATOM   5012  CG2 ILE L   2       3.186 -82.457 -44.432  1.00 76.48           C  
ATOM   5013  CD1 ILE L   2       6.076 -81.885 -43.712  1.00 82.33           C  
ATOM   5014  H   ILE L   2       4.081 -78.653 -44.785  1.00125.55           H  
ATOM   5015  HA  ILE L   2       3.245 -80.554 -46.399  1.00106.52           H  
ATOM   5016  HB  ILE L   2       3.635 -80.638 -43.598  1.00 98.75           H  
ATOM   5017 HG12 ILE L   2       5.447 -81.463 -45.600  1.00100.55           H  
ATOM   5018 HG13 ILE L   2       5.627 -80.167 -44.704  1.00100.55           H  
ATOM   5019 HG21 ILE L   2       3.652 -82.979 -43.760  1.00 91.78           H  
ATOM   5020 HG22 ILE L   2       2.244 -82.397 -44.210  1.00 91.78           H  
ATOM   5021 HG23 ILE L   2       3.296 -82.867 -45.304  1.00 91.78           H  
ATOM   5022 HD11 ILE L   2       7.017 -81.854 -43.946  1.00 98.79           H  
ATOM   5023 HD12 ILE L   2       5.942 -81.504 -42.831  1.00 98.79           H  
ATOM   5024 HD13 ILE L   2       5.761 -82.802 -43.728  1.00 98.79           H  
ATOM   5025  N   GLN L   3       0.812 -80.847 -46.151  1.00100.62           N  
ATOM   5026  CA  GLN L   3      -0.640 -80.938 -46.012  1.00105.46           C  
ATOM   5027  C   GLN L   3      -1.034 -82.282 -45.401  1.00 93.72           C  
ATOM   5028  O   GLN L   3      -0.645 -83.336 -45.915  1.00 82.34           O  
ATOM   5029  CB  GLN L   3      -1.334 -80.735 -47.359  1.00115.07           C  
ATOM   5030  CG  GLN L   3      -1.056 -79.379 -48.007  1.00125.30           C  
ATOM   5031  CD  GLN L   3      -1.736 -78.227 -47.274  1.00131.61           C  
ATOM   5032  OE1 GLN L   3      -2.458 -78.436 -46.298  1.00131.49           O  
ATOM   5033  NE2 GLN L   3      -1.513 -77.007 -47.749  1.00133.23           N  
ATOM   5034  H   GLN L   3       1.121 -81.261 -46.838  1.00120.74           H  
ATOM   5035  HA  GLN L   3      -0.942 -80.238 -45.412  1.00126.56           H  
ATOM   5036  HB2 GLN L   3      -1.032 -81.423 -47.973  1.00138.08           H  
ATOM   5037  HB3 GLN L   3      -2.293 -80.809 -47.230  1.00138.08           H  
ATOM   5038  HG2 GLN L   3      -0.100 -79.216 -48.001  1.00150.36           H  
ATOM   5039  HG3 GLN L   3      -1.385 -79.391 -48.919  1.00150.36           H  
ATOM   5040 HE21 GLN L   3      -1.007 -76.899 -48.436  1.00159.87           H  
ATOM   5041 HE22 GLN L   3      -1.874 -76.325 -47.370  1.00159.87           H  
ATOM   5042  N   MET L   4      -1.815 -82.244 -44.317  1.00 81.94           N  
ATOM   5043  CA  MET L   4      -2.303 -83.450 -43.648  1.00 69.23           C  
ATOM   5044  C   MET L   4      -3.768 -83.713 -43.980  1.00 69.59           C  
ATOM   5045  O   MET L   4      -4.638 -82.895 -43.661  1.00 72.48           O  
ATOM   5046  CB  MET L   4      -2.169 -83.329 -42.127  1.00 64.45           C  
ATOM   5047  CG  MET L   4      -0.778 -83.094 -41.588  1.00 67.33           C  
ATOM   5048  SD  MET L   4       0.417 -84.326 -42.135  1.00104.66           S  
ATOM   5049  CE  MET L   4      -0.352 -85.830 -41.526  1.00 86.98           C  
ATOM   5050  H   MET L   4      -2.081 -81.516 -43.945  1.00 98.32           H  
ATOM   5051  HA  MET L   4      -1.772 -84.208 -43.937  1.00 83.08           H  
ATOM   5052  HB2 MET L   4      -2.721 -82.588 -41.832  1.00 77.35           H  
ATOM   5053  HB3 MET L   4      -2.496 -84.151 -41.728  1.00 77.35           H  
ATOM   5054  HG2 MET L   4      -0.468 -82.225 -41.888  1.00 80.80           H  
ATOM   5055  HG3 MET L   4      -0.808 -83.117 -40.619  1.00 80.80           H  
ATOM   5056  HE1 MET L   4       0.206 -86.587 -41.762  1.00104.37           H  
ATOM   5057  HE2 MET L   4      -0.441 -85.771 -40.562  1.00104.37           H  
ATOM   5058  HE3 MET L   4      -1.227 -85.925 -41.934  1.00104.37           H  
ATOM   5059  N   THR L   5      -4.038 -84.848 -44.614  1.00 77.31           N  
ATOM   5060  CA  THR L   5      -5.387 -85.240 -44.997  1.00 78.89           C  
ATOM   5061  C   THR L   5      -5.805 -86.328 -44.017  1.00 77.37           C  
ATOM   5062  O   THR L   5      -4.982 -87.159 -43.618  1.00 77.23           O  
ATOM   5063  CB  THR L   5      -5.482 -85.735 -46.443  1.00 90.29           C  
ATOM   5064  OG1 THR L   5      -4.672 -86.902 -46.619  1.00 96.14           O  
ATOM   5065  CG2 THR L   5      -5.029 -84.654 -47.412  1.00 92.41           C  
ATOM   5066  H   THR L   5      -3.438 -85.422 -44.839  1.00 92.77           H  
ATOM   5067  HA  THR L   5      -5.986 -84.484 -44.891  1.00 94.67           H  
ATOM   5068  HB  THR L   5      -6.405 -85.954 -46.645  1.00108.35           H  
ATOM   5069  HG1 THR L   5      -3.860 -86.722 -46.443  1.00115.36           H  
ATOM   5070 HG21 THR L   5      -5.094 -84.979 -48.324  1.00110.90           H  
ATOM   5071 HG22 THR L   5      -5.590 -83.868 -47.317  1.00110.90           H  
ATOM   5072 HG23 THR L   5      -4.109 -84.409 -47.229  1.00110.90           H  
ATOM   5073  N   GLN L   6      -7.069 -86.321 -43.616  1.00 84.99           N  
ATOM   5074  CA  GLN L   6      -7.524 -87.256 -42.598  1.00 83.20           C  
ATOM   5075  C   GLN L   6      -8.887 -87.806 -42.985  1.00 77.39           C  
ATOM   5076  O   GLN L   6      -9.768 -87.056 -43.411  1.00 73.72           O  
ATOM   5077  CB  GLN L   6      -7.547 -86.556 -41.233  1.00 84.34           C  
ATOM   5078  CG  GLN L   6      -7.890 -87.417 -40.040  1.00 88.47           C  
ATOM   5079  CD  GLN L   6      -7.722 -86.655 -38.738  1.00 79.74           C  
ATOM   5080  OE1 GLN L   6      -7.110 -85.587 -38.709  1.00 63.93           O  
ATOM   5081  NE2 GLN L   6      -8.251 -87.204 -37.652  1.00 87.78           N  
ATOM   5082  H   GLN L   6      -7.677 -85.791 -43.913  1.00101.99           H  
ATOM   5083  HA  GLN L   6      -6.902 -87.999 -42.546  1.00 99.84           H  
ATOM   5084  HB2 GLN L   6      -6.669 -86.178 -41.072  1.00101.21           H  
ATOM   5085  HB3 GLN L   6      -8.202 -85.842 -41.270  1.00101.21           H  
ATOM   5086  HG2 GLN L   6      -8.814 -87.704 -40.108  1.00106.17           H  
ATOM   5087  HG3 GLN L   6      -7.300 -88.187 -40.020  1.00106.17           H  
ATOM   5088 HE21 GLN L   6      -8.663 -87.957 -37.709  1.00105.34           H  
ATOM   5089 HE22 GLN L   6      -8.181 -86.808 -36.892  1.00105.34           H  
ATOM   5090  N   SER L   7      -9.052 -89.121 -42.833  0.66 79.88           N  
ATOM   5092  CA  SER L   7     -10.269 -89.812 -43.235  0.66 78.86           C  
ATOM   5094  C   SER L   7     -10.581 -90.902 -42.217  0.66 73.19           C  
ATOM   5096  O   SER L   7      -9.659 -91.596 -41.767  0.66 76.36           O  
ATOM   5098  CB  SER L   7     -10.116 -90.439 -44.626  0.66 82.10           C  
ATOM   5100  OG  SER L   7     -11.339 -90.996 -45.075  0.66 79.90           O  
ATOM   5102  H   SER L   7      -8.459 -89.642 -42.493  0.66 95.85           H  
ATOM   5104  HA  SER L   7     -11.009 -89.185 -43.256  0.66 94.63           H  
ATOM   5106  HB2 SER L   7      -9.835 -89.753 -45.251  0.66 98.52           H  
ATOM   5108  HB3 SER L   7      -9.448 -91.141 -44.583  0.66 98.52           H  
ATOM   5110  HG  SER L   7     -11.236 -91.339 -45.846  0.66 95.88           H  
ATOM   5112  N   PRO L   8     -11.845 -91.095 -41.836  1.00 57.65           N  
ATOM   5113  CA  PRO L   8     -12.944 -90.285 -42.373  1.00 58.75           C  
ATOM   5114  C   PRO L   8     -13.115 -88.974 -41.607  1.00 57.67           C  
ATOM   5115  O   PRO L   8     -12.479 -88.732 -40.580  1.00 56.00           O  
ATOM   5116  CB  PRO L   8     -14.136 -91.221 -42.185  1.00 59.90           C  
ATOM   5117  CG  PRO L   8     -13.827 -91.918 -40.900  1.00 58.60           C  
ATOM   5118  CD  PRO L   8     -12.327 -92.091 -40.865  1.00 57.46           C  
ATOM   5119  HA  PRO L   8     -12.811 -90.104 -43.317  1.00 70.50           H  
ATOM   5120  HB2 PRO L   8     -14.955 -90.705 -42.113  1.00 71.88           H  
ATOM   5121  HB3 PRO L   8     -14.183 -91.851 -42.921  1.00 71.88           H  
ATOM   5122  HG2 PRO L   8     -14.124 -91.371 -40.156  1.00 70.32           H  
ATOM   5123  HG3 PRO L   8     -14.270 -92.781 -40.886  1.00 70.32           H  
ATOM   5124  HD2 PRO L   8     -11.984 -91.893 -39.980  1.00 68.95           H  
ATOM   5125  HD3 PRO L   8     -12.083 -92.986 -41.149  1.00 68.95           H  
ATOM   5126  N   SER L   9     -14.013 -88.125 -42.123  1.00 59.06           N  
ATOM   5127  CA  SER L   9     -14.310 -86.862 -41.444  1.00 74.58           C  
ATOM   5128  C   SER L   9     -15.138 -87.051 -40.180  1.00 78.42           C  
ATOM   5129  O   SER L   9     -14.915 -86.357 -39.180  1.00 77.30           O  
ATOM   5130  CB  SER L   9     -15.049 -85.927 -42.400  1.00 79.34           C  
ATOM   5131  OG  SER L   9     -14.419 -85.876 -43.666  1.00 97.21           O  
ATOM   5132  H   SER L   9     -14.454 -88.254 -42.850  1.00 70.87           H  
ATOM   5133  HA  SER L   9     -13.476 -86.436 -41.193  1.00 89.50           H  
ATOM   5134  HB2 SER L   9     -15.957 -86.248 -42.514  1.00 95.21           H  
ATOM   5135  HB3 SER L   9     -15.061 -85.034 -42.020  1.00 95.21           H  
ATOM   5136  HG  SER L   9     -14.844 -85.352 -44.182  1.00116.65           H  
ATOM   5137  N   SER L  10     -16.105 -87.961 -40.203  1.00 77.08           N  
ATOM   5138  CA  SER L  10     -16.886 -88.267 -39.014  1.00 72.77           C  
ATOM   5139  C   SER L  10     -17.316 -89.719 -39.104  1.00 72.40           C  
ATOM   5140  O   SER L  10     -17.373 -90.306 -40.188  1.00 68.16           O  
ATOM   5141  CB  SER L  10     -18.098 -87.337 -38.840  1.00 70.66           C  
ATOM   5142  OG  SER L  10     -19.021 -87.460 -39.901  1.00 76.48           O  
ATOM   5143  H   SER L  10     -16.329 -88.415 -40.898  1.00 92.50           H  
ATOM   5144  HA  SER L  10     -16.320 -88.170 -38.232  1.00 87.33           H  
ATOM   5145  HB2 SER L  10     -18.546 -87.563 -38.010  1.00 84.79           H  
ATOM   5146  HB3 SER L  10     -17.784 -86.420 -38.804  1.00 84.79           H  
ATOM   5147  HG  SER L  10     -19.678 -86.935 -39.777  1.00 91.77           H  
ATOM   5148  N   LEU L  11     -17.608 -90.304 -37.950  1.00 74.68           N  
ATOM   5149  CA  LEU L  11     -18.158 -91.647 -37.951  1.00 75.21           C  
ATOM   5150  C   LEU L  11     -18.860 -91.931 -36.635  1.00 69.60           C  
ATOM   5151  O   LEU L  11     -18.492 -91.398 -35.585  1.00 78.02           O  
ATOM   5152  CB  LEU L  11     -17.057 -92.675 -38.227  1.00 72.60           C  
ATOM   5153  CG  LEU L  11     -16.081 -92.964 -37.089  1.00 75.89           C  
ATOM   5154  CD1 LEU L  11     -16.541 -94.105 -36.204  1.00 81.97           C  
ATOM   5155  CD2 LEU L  11     -14.719 -93.263 -37.688  1.00 87.99           C  
ATOM   5156  H   LEU L  11     -17.499 -89.953 -37.172  1.00 89.61           H  
ATOM   5157  HA  LEU L  11     -18.816 -91.717 -38.661  1.00 90.25           H  
ATOM   5158  HB2 LEU L  11     -17.481 -93.515 -38.461  1.00 87.12           H  
ATOM   5159  HB3 LEU L  11     -16.533 -92.360 -38.980  1.00 87.12           H  
ATOM   5160  HG  LEU L  11     -15.998 -92.171 -36.536  1.00 91.07           H  
ATOM   5161 HD11 LEU L  11     -15.886 -94.244 -35.503  1.00 98.36           H  
ATOM   5162 HD12 LEU L  11     -17.399 -93.877 -35.815  1.00 98.36           H  
ATOM   5163 HD13 LEU L  11     -16.624 -94.908 -36.743  1.00 98.36           H  
ATOM   5164 HD21 LEU L  11     -14.093 -93.448 -36.971  1.00105.59           H  
ATOM   5165 HD22 LEU L  11     -14.793 -94.035 -38.271  1.00105.59           H  
ATOM   5166 HD23 LEU L  11     -14.422 -92.492 -38.196  1.00105.59           H  
ATOM   5167  N   SER L  12     -19.870 -92.791 -36.719  1.00 66.17           N  
ATOM   5168  CA  SER L  12     -20.633 -93.249 -35.571  1.00 67.19           C  
ATOM   5169  C   SER L  12     -20.438 -94.748 -35.469  1.00 72.07           C  
ATOM   5170  O   SER L  12     -20.420 -95.453 -36.482  1.00 71.88           O  
ATOM   5171  CB  SER L  12     -22.126 -92.953 -35.684  1.00 70.91           C  
ATOM   5172  OG  SER L  12     -22.394 -91.561 -35.641  1.00 84.26           O  
ATOM   5173  H   SER L  12     -20.140 -93.133 -37.460  1.00 79.40           H  
ATOM   5174  HA  SER L  12     -20.292 -92.834 -34.763  1.00 80.63           H  
ATOM   5175  HB2 SER L  12     -22.452 -93.308 -36.526  1.00 85.10           H  
ATOM   5176  HB3 SER L  12     -22.587 -93.383 -34.946  1.00 85.10           H  
ATOM   5177  HG  SER L  12     -23.231 -91.424 -35.706  1.00101.11           H  
ATOM   5178  N   ALA L  13     -20.339 -95.238 -34.245  1.00 70.29           N  
ATOM   5179  CA  ALA L  13     -20.163 -96.657 -34.020  1.00 71.54           C  
ATOM   5180  C   ALA L  13     -20.793 -97.001 -32.685  1.00 74.20           C  
ATOM   5181  O   ALA L  13     -21.229 -96.124 -31.935  1.00 73.64           O  
ATOM   5182  CB  ALA L  13     -18.681 -97.037 -34.044  1.00 69.34           C  
ATOM   5183  H   ALA L  13     -20.370 -94.767 -33.526  1.00 84.35           H  
ATOM   5184  HA  ALA L  13     -20.621 -97.156 -34.715  1.00 85.85           H  
ATOM   5185  HB1 ALA L  13     -18.597 -97.991 -33.891  1.00 83.20           H  
ATOM   5186  HB2 ALA L  13     -18.310 -96.807 -34.910  1.00 83.20           H  
ATOM   5187  HB3 ALA L  13     -18.218 -96.548 -33.346  1.00 83.20           H  
ATOM   5188  N   SER L  14     -20.819 -98.291 -32.392  1.00 76.93           N  
ATOM   5189  CA  SER L  14     -21.437 -98.803 -31.184  1.00 80.30           C  
ATOM   5190  C   SER L  14     -20.368 -99.115 -30.150  1.00 79.48           C  
ATOM   5191  O   SER L  14     -19.195 -99.315 -30.477  1.00 78.99           O  
ATOM   5192  CB  SER L  14     -22.266-100.039 -31.514  1.00 86.95           C  
ATOM   5193  OG  SER L  14     -23.287 -99.685 -32.433  1.00 86.22           O  
ATOM   5194  H   SER L  14     -20.477 -98.903 -32.889  1.00 92.32           H  
ATOM   5195  HA  SER L  14     -22.029 -98.129 -30.816  1.00 96.36           H  
ATOM   5196  HB2 SER L  14     -21.694-100.712 -31.915  1.00104.34           H  
ATOM   5197  HB3 SER L  14     -22.670-100.381 -30.701  1.00104.34           H  
ATOM   5198  HG  SER L  14     -23.756-100.368 -32.624  1.00103.46           H  
ATOM   5199  N   VAL L  15     -20.790 -99.135 -28.885  1.00 81.71           N  
ATOM   5200  CA  VAL L  15     -19.900 -99.547 -27.807  1.00 83.26           C  
ATOM   5201  C   VAL L  15     -19.353-100.937 -28.094  1.00 84.39           C  
ATOM   5202  O   VAL L  15     -20.100-101.857 -28.451  1.00 88.22           O  
ATOM   5203  CB  VAL L  15     -20.658 -99.521 -26.469  1.00 88.33           C  
ATOM   5204  CG1 VAL L  15     -19.862-100.221 -25.369  1.00 90.71           C  
ATOM   5205  CG2 VAL L  15     -20.973 -98.093 -26.059  1.00 86.32           C  
ATOM   5206  H   VAL L  15     -21.581 -98.915 -28.629  1.00 98.05           H  
ATOM   5207  HA  VAL L  15     -19.155 -98.929 -27.749  1.00 99.91           H  
ATOM   5208  HB  VAL L  15     -21.499 -99.993 -26.575  1.00106.00           H  
ATOM   5209 HG11 VAL L  15     -20.368-100.185 -24.542  1.00108.85           H  
ATOM   5210 HG12 VAL L  15     -19.712-101.144 -25.626  1.00108.85           H  
ATOM   5211 HG13 VAL L  15     -19.012 -99.766 -25.257  1.00108.85           H  
ATOM   5212 HG21 VAL L  15     -21.450 -98.105 -25.214  1.00103.58           H  
ATOM   5213 HG22 VAL L  15     -20.141 -97.602 -25.962  1.00103.58           H  
ATOM   5214 HG23 VAL L  15     -21.523 -97.682 -26.744  1.00103.58           H  
ATOM   5215  N   GLY L  16     -18.034-101.095 -27.941  1.00 82.46           N  
ATOM   5216  CA  GLY L  16     -17.383-102.352 -28.221  1.00 84.65           C  
ATOM   5217  C   GLY L  16     -16.884-102.569 -29.636  1.00 82.77           C  
ATOM   5218  O   GLY L  16     -16.212-103.582 -29.877  1.00 84.56           O  
ATOM   5219  H   GLY L  16     -17.500-100.476 -27.673  1.00 98.95           H  
ATOM   5220  HA2 GLY L  16     -16.621-102.442 -27.627  1.00101.58           H  
ATOM   5221  HA3 GLY L  16     -18.001-103.070 -28.017  1.00101.58           H  
ATOM   5222  N   ASP L  17     -17.162-101.668 -30.578  1.00 79.65           N  
ATOM   5223  CA  ASP L  17     -16.682-101.909 -31.930  1.00 81.83           C  
ATOM   5224  C   ASP L  17     -15.222-101.508 -32.091  1.00 75.01           C  
ATOM   5225  O   ASP L  17     -14.688-100.677 -31.351  1.00 72.65           O  
ATOM   5226  CB  ASP L  17     -17.500-101.087 -32.931  1.00 92.95           C  
ATOM   5227  CG  ASP L  17     -18.793-101.759 -33.344  1.00112.18           C  
ATOM   5228  OD1 ASP L  17     -18.863-103.008 -33.365  1.00120.50           O  
ATOM   5229  OD2 ASP L  17     -19.753-101.020 -33.654  1.00109.09           O  
ATOM   5230  H   ASP L  17     -17.607-100.941 -30.465  1.00 95.58           H  
ATOM   5231  HA  ASP L  17     -16.774-102.850 -32.148  1.00 98.20           H  
ATOM   5232  HB2 ASP L  17     -17.723-100.233 -32.528  1.00111.54           H  
ATOM   5233  HB3 ASP L  17     -16.968-100.946 -33.730  1.00111.54           H  
ATOM   5234  N   ARG L  18     -14.574-102.115 -33.088  1.00 83.04           N  
ATOM   5235  CA  ARG L  18     -13.250-101.679 -33.500  1.00 81.10           C  
ATOM   5236  C   ARG L  18     -13.420-100.484 -34.432  1.00 77.24           C  
ATOM   5237  O   ARG L  18     -14.215-100.542 -35.375  1.00 83.82           O  
ATOM   5238  CB  ARG L  18     -12.546-102.860 -34.169  1.00 82.94           C  
ATOM   5239  CG  ARG L  18     -11.071-102.721 -34.461  1.00 91.34           C  
ATOM   5240  CD  ARG L  18     -10.630-103.892 -35.335  1.00 84.41           C  
ATOM   5241  NE  ARG L  18      -9.224-103.832 -35.715  1.00 86.87           N  
ATOM   5242  CZ  ARG L  18      -8.210-104.057 -34.887  1.00 85.06           C  
ATOM   5243  NH1 ARG L  18      -8.436-104.371 -33.615  1.00 77.68           N  
ATOM   5244  NH2 ARG L  18      -6.963-103.925 -35.322  1.00 81.35           N  
ATOM   5245  H   ARG L  18     -14.883-102.780 -33.537  1.00 99.65           H  
ATOM   5246  HA  ARG L  18     -12.736-101.404 -32.725  1.00 97.32           H  
ATOM   5247  HB2 ARG L  18     -12.649-103.635 -33.594  1.00 99.53           H  
ATOM   5248  HB3 ARG L  18     -12.988-103.032 -35.015  1.00 99.53           H  
ATOM   5249  HG2 ARG L  18     -10.908-101.894 -34.942  1.00109.60           H  
ATOM   5250  HG3 ARG L  18     -10.568-102.742 -33.632  1.00109.60           H  
ATOM   5251  HD2 ARG L  18     -10.772-104.719 -34.847  1.00101.29           H  
ATOM   5252  HD3 ARG L  18     -11.159-103.894 -36.148  1.00101.29           H  
ATOM   5253  HE  ARG L  18      -9.038-103.638 -36.532  1.00104.24           H  
ATOM   5254 HH11 ARG L  18      -9.243-104.440 -33.326  1.00 93.21           H  
ATOM   5255 HH12 ARG L  18      -7.775-104.515 -33.083  1.00 93.21           H  
ATOM   5256 HH21 ARG L  18      -6.815-103.726 -36.146  1.00 97.63           H  
ATOM   5257 HH22 ARG L  18      -6.304-104.082 -34.793  1.00 97.63           H  
ATOM   5258  N   VAL L  19     -12.675 -99.409 -34.183  1.00 65.93           N  
ATOM   5259  CA  VAL L  19     -12.688 -98.217 -35.030  1.00 63.27           C  
ATOM   5260  C   VAL L  19     -11.310 -97.963 -35.628  1.00 61.69           C  
ATOM   5261  O   VAL L  19     -10.315 -97.949 -34.897  1.00 61.14           O  
ATOM   5262  CB  VAL L  19     -13.172 -96.986 -34.242  1.00 63.19           C  
ATOM   5263  CG1 VAL L  19     -13.029 -95.717 -35.076  1.00 59.17           C  
ATOM   5264  CG2 VAL L  19     -14.622 -97.179 -33.838  1.00 73.19           C  
ATOM   5265  H   VAL L  19     -12.140 -99.345 -33.513  1.00 79.12           H  
ATOM   5266  HA  VAL L  19     -13.307 -98.361 -35.763  1.00 75.93           H  
ATOM   5267  HB  VAL L  19     -12.640 -96.887 -33.437  1.00 75.83           H  
ATOM   5268 HG11 VAL L  19     -13.341 -94.960 -34.555  1.00 71.00           H  
ATOM   5269 HG12 VAL L  19     -12.095 -95.596 -35.309  1.00 71.00           H  
ATOM   5270 HG13 VAL L  19     -13.562 -95.807 -35.881  1.00 71.00           H  
ATOM   5271 HG21 VAL L  19     -14.918 -96.399 -33.343  1.00 87.83           H  
ATOM   5272 HG22 VAL L  19     -15.160 -97.287 -34.638  1.00 87.83           H  
ATOM   5273 HG23 VAL L  19     -14.692 -97.971 -33.282  1.00 87.83           H  
ATOM   5274  N   THR L  20     -11.250 -97.746 -36.943  1.00 74.03           N  
ATOM   5275  CA  THR L  20      -9.985 -97.506 -37.635  1.00 79.06           C  
ATOM   5276  C   THR L  20     -10.109 -96.230 -38.460  1.00 73.41           C  
ATOM   5277  O   THR L  20     -10.971 -96.136 -39.342  1.00 79.49           O  
ATOM   5278  CB  THR L  20      -9.577 -98.680 -38.528  1.00 94.51           C  
ATOM   5279  OG1 THR L  20      -9.685 -99.908 -37.797  1.00108.81           O  
ATOM   5280  CG2 THR L  20      -8.134 -98.498 -38.995  1.00 92.34           C  
ATOM   5281  H   THR L  20     -11.937 -97.732 -37.461  1.00 88.83           H  
ATOM   5282  HA  THR L  20      -9.285 -97.372 -36.977  1.00 94.87           H  
ATOM   5283  HB  THR L  20     -10.153 -98.713 -39.308  1.00113.41           H  
ATOM   5284  HG1 THR L  20      -9.458-100.562 -38.291  1.00130.57           H  
ATOM   5285 HG21 THR L  20      -7.873 -99.241 -39.561  1.00110.81           H  
ATOM   5286 HG22 THR L  20      -8.051 -97.673 -39.498  1.00110.81           H  
ATOM   5287 HG23 THR L  20      -7.541 -98.462 -38.229  1.00110.81           H  
ATOM   5288  N   ILE L  21      -9.255 -95.253 -38.163  1.00 57.93           N  
ATOM   5289  CA  ILE L  21      -9.231 -93.936 -38.802  1.00 67.00           C  
ATOM   5290  C   ILE L  21      -7.832 -93.756 -39.382  1.00 62.13           C  
ATOM   5291  O   ILE L  21      -6.846 -94.198 -38.781  1.00 56.93           O  
ATOM   5292  CB  ILE L  21      -9.646 -92.765 -37.878  1.00 57.93           C  
ATOM   5293  CG1 ILE L  21      -8.667 -92.536 -36.735  1.00 63.85           C  
ATOM   5294  CG2 ILE L  21     -11.061 -93.001 -37.353  1.00 62.40           C  
ATOM   5295  CD1 ILE L  21      -8.948 -91.249 -35.974  1.00 60.95           C  
ATOM   5296  H   ILE L  21      -8.646 -95.336 -37.561  1.00 69.51           H  
ATOM   5297  HA  ILE L  21      -9.853 -93.948 -39.546  1.00 80.40           H  
ATOM   5298  HB  ILE L  21      -9.663 -91.958 -38.416  1.00 69.51           H  
ATOM   5299 HG12 ILE L  21      -8.732 -93.275 -36.110  1.00 76.62           H  
ATOM   5300 HG13 ILE L  21      -7.768 -92.483 -37.094  1.00 76.62           H  
ATOM   5301 HG21 ILE L  21     -11.310 -92.262 -36.776  1.00 74.88           H  
ATOM   5302 HG22 ILE L  21     -11.671 -93.054 -38.105  1.00 74.88           H  
ATOM   5303 HG23 ILE L  21     -11.077 -93.832 -36.853  1.00 74.88           H  
ATOM   5304 HD11 ILE L  21      -8.297 -91.156 -35.261  1.00 73.14           H  
ATOM   5305 HD12 ILE L  21      -8.879 -90.500 -36.585  1.00 73.14           H  
ATOM   5306 HD13 ILE L  21      -9.843 -91.292 -35.601  1.00 73.14           H  
ATOM   5307  N   THR L  22      -7.747 -93.145 -40.561  1.00 57.69           N  
ATOM   5308  CA  THR L  22      -6.473 -92.950 -41.237  1.00 70.78           C  
ATOM   5309  C   THR L  22      -6.127 -91.475 -41.408  1.00 71.35           C  
ATOM   5310  O   THR L  22      -6.973 -90.580 -41.312  1.00 71.34           O  
ATOM   5311  CB  THR L  22      -6.488 -93.589 -42.631  1.00 75.98           C  
ATOM   5312  OG1 THR L  22      -7.516 -92.979 -43.422  1.00 81.41           O  
ATOM   5313  CG2 THR L  22      -6.723 -95.085 -42.543  1.00 80.14           C  
ATOM   5314  H   THR L  22      -8.421 -92.831 -40.992  1.00 69.23           H  
ATOM   5315  HA  THR L  22      -5.768 -93.369 -40.718  1.00 84.93           H  
ATOM   5316  HB  THR L  22      -5.629 -93.443 -43.057  1.00 91.17           H  
ATOM   5317  HG1 THR L  22      -8.273 -93.093 -43.053  1.00 97.70           H  
ATOM   5318 HG21 THR L  22      -6.729 -95.472 -43.432  1.00 96.16           H  
ATOM   5319 HG22 THR L  22      -6.017 -95.500 -42.023  1.00 96.16           H  
ATOM   5320 HG23 THR L  22      -7.575 -95.262 -42.115  1.00 96.16           H  
ATOM   5321  N   CYS L  23      -4.839 -91.256 -41.660  1.00 68.65           N  
ATOM   5322  CA  CYS L  23      -4.252 -89.934 -41.833  1.00 61.62           C  
ATOM   5323  C   CYS L  23      -3.098 -90.051 -42.810  1.00 62.03           C  
ATOM   5324  O   CYS L  23      -2.142 -90.790 -42.557  1.00 65.25           O  
ATOM   5325  CB  CYS L  23      -3.748 -89.385 -40.503  1.00 66.21           C  
ATOM   5326  SG  CYS L  23      -3.114 -87.715 -40.617  1.00104.05           S  
ATOM   5327  H   CYS L  23      -4.262 -91.889 -41.738  1.00 82.38           H  
ATOM   5328  HA  CYS L  23      -4.913 -89.324 -42.197  1.00 73.95           H  
ATOM   5329  HB2 CYS L  23      -4.480 -89.383 -39.867  1.00 79.45           H  
ATOM   5330  HB3 CYS L  23      -3.032 -89.954 -40.180  1.00 79.45           H  
ATOM   5331  N   GLN L  24      -3.193 -89.311 -43.912  1.00 63.39           N  
ATOM   5332  CA  GLN L  24      -2.166 -89.274 -44.943  1.00 74.63           C  
ATOM   5333  C   GLN L  24      -1.462 -87.922 -44.941  1.00 77.49           C  
ATOM   5334  O   GLN L  24      -2.120 -86.875 -44.920  1.00 69.39           O  
ATOM   5335  CB  GLN L  24      -2.786 -89.565 -46.313  1.00 84.41           C  
ATOM   5336  CG  GLN L  24      -1.830 -89.460 -47.487  1.00 94.73           C  
ATOM   5337  CD  GLN L  24      -2.479 -89.864 -48.800  1.00105.79           C  
ATOM   5338  OE1 GLN L  24      -2.983 -90.977 -48.938  1.00113.30           O  
ATOM   5339  NE2 GLN L  24      -2.473 -88.953 -49.770  1.00106.92           N  
ATOM   5340  H   GLN L  24      -3.867 -88.806 -44.087  1.00 76.07           H  
ATOM   5341  HA  GLN L  24      -1.505 -89.959 -44.759  1.00 89.55           H  
ATOM   5342  HB2 GLN L  24      -3.141 -90.468 -46.305  1.00101.29           H  
ATOM   5343  HB3 GLN L  24      -3.507 -88.934 -46.465  1.00101.29           H  
ATOM   5344  HG2 GLN L  24      -1.529 -88.541 -47.570  1.00113.68           H  
ATOM   5345  HG3 GLN L  24      -1.072 -90.045 -47.333  1.00113.68           H  
ATOM   5346 HE21 GLN L  24      -2.114 -88.184 -49.636  1.00128.30           H  
ATOM   5347 HE22 GLN L  24      -2.829 -89.135 -50.532  1.00128.30           H  
ATOM   5348  N   ALA L  25      -0.128 -87.952 -44.954  1.00 68.06           N  
ATOM   5349  CA  ALA L  25       0.694 -86.757 -45.085  1.00 69.01           C  
ATOM   5350  C   ALA L  25       1.060 -86.535 -46.547  1.00 76.91           C  
ATOM   5351  O   ALA L  25       1.202 -87.487 -47.320  1.00 78.42           O  
ATOM   5352  CB  ALA L  25       1.961 -86.875 -44.239  1.00 69.45           C  
ATOM   5353  H   ALA L  25       0.332 -88.676 -44.887  1.00 81.67           H  
ATOM   5354  HA  ALA L  25       0.192 -85.987 -44.776  1.00 82.81           H  
ATOM   5355  HB1 ALA L  25       2.488 -86.067 -44.346  1.00 83.34           H  
ATOM   5356  HB2 ALA L  25       1.711 -86.987 -43.309  1.00 83.34           H  
ATOM   5357  HB3 ALA L  25       2.470 -87.644 -44.540  1.00 83.34           H  
ATOM   5358  N   SER L  26       1.198 -85.261 -46.929  1.00 73.16           N  
ATOM   5359  CA  SER L  26       1.535 -84.920 -48.308  1.00 65.68           C  
ATOM   5360  C   SER L  26       3.000 -85.144 -48.660  1.00 68.56           C  
ATOM   5361  O   SER L  26       3.346 -85.071 -49.842  1.00 71.56           O  
ATOM   5362  CB  SER L  26       1.177 -83.456 -48.578  1.00 71.20           C  
ATOM   5363  OG  SER L  26       1.924 -82.596 -47.740  1.00 74.72           O  
ATOM   5364  H   SER L  26       1.101 -84.582 -46.410  1.00 87.79           H  
ATOM   5365  HA  SER L  26       1.001 -85.470 -48.903  1.00 78.82           H  
ATOM   5366  HB2 SER L  26       1.378 -83.247 -49.504  1.00 85.43           H  
ATOM   5367  HB3 SER L  26       0.232 -83.324 -48.405  1.00 85.43           H  
ATOM   5368  HG  SER L  26       2.755 -82.703 -47.881  1.00 89.66           H  
ATOM   5369  N   GLN L  27       3.874 -85.358 -47.679  1.00 79.10           N  
ATOM   5370  CA  GLN L  27       5.247 -85.766 -47.950  1.00 78.65           C  
ATOM   5371  C   GLN L  27       5.725 -86.631 -46.794  1.00 78.25           C  
ATOM   5372  O   GLN L  27       5.107 -86.674 -45.729  1.00 81.91           O  
ATOM   5373  CB  GLN L  27       6.237 -84.607 -48.144  1.00 82.03           C  
ATOM   5374  CG  GLN L  27       6.471 -83.750 -46.921  1.00 88.72           C  
ATOM   5375  CD  GLN L  27       7.256 -82.489 -47.225  1.00102.44           C  
ATOM   5376  OE1 GLN L  27       6.795 -81.610 -47.950  1.00106.21           O  
ATOM   5377  NE2 GLN L  27       8.470 -82.411 -46.685  1.00103.69           N  
ATOM   5378  H   GLN L  27       3.694 -85.272 -46.842  1.00 94.92           H  
ATOM   5379  HA  GLN L  27       5.261 -86.307 -48.755  1.00 94.38           H  
ATOM   5380  HB2 GLN L  27       7.094 -84.976 -48.410  1.00 98.43           H  
ATOM   5381  HB3 GLN L  27       5.900 -84.029 -48.846  1.00 98.43           H  
ATOM   5382  HG2 GLN L  27       5.613 -83.487 -46.551  1.00106.46           H  
ATOM   5383  HG3 GLN L  27       6.970 -84.263 -46.267  1.00106.46           H  
ATOM   5384 HE21 GLN L  27       8.766 -83.055 -46.197  1.00124.42           H  
ATOM   5385 HE22 GLN L  27       8.960 -81.718 -46.825  1.00124.42           H  
ATOM   5386  N   ASP L  28       6.801 -87.370 -47.040  1.00 85.89           N  
ATOM   5387  CA  ASP L  28       7.338 -88.279 -46.036  1.00 83.05           C  
ATOM   5388  C   ASP L  28       7.748 -87.528 -44.771  1.00 79.74           C  
ATOM   5389  O   ASP L  28       8.639 -86.675 -44.797  1.00 91.56           O  
ATOM   5390  CB  ASP L  28       8.539 -89.020 -46.629  1.00 90.09           C  
ATOM   5391  CG  ASP L  28       9.092 -90.096 -45.709  1.00101.94           C  
ATOM   5392  OD1 ASP L  28       8.665 -90.175 -44.540  1.00105.55           O  
ATOM   5393  OD2 ASP L  28       9.965 -90.870 -46.157  1.00105.92           O  
ATOM   5394  H   ASP L  28       7.238 -87.363 -47.780  1.00103.07           H  
ATOM   5395  HA  ASP L  28       6.662 -88.932 -45.798  1.00 99.66           H  
ATOM   5396  HB2 ASP L  28       8.267 -89.447 -47.457  1.00108.11           H  
ATOM   5397  HB3 ASP L  28       9.248 -88.382 -46.803  1.00108.11           H  
ATOM   5398  N   ILE L  29       7.093 -87.866 -43.664  1.00 73.30           N  
ATOM   5399  CA  ILE L  29       7.322 -87.265 -42.352  1.00 76.07           C  
ATOM   5400  C   ILE L  29       7.916 -88.290 -41.385  1.00 77.77           C  
ATOM   5401  O   ILE L  29       7.869 -88.093 -40.170  1.00 72.03           O  
ATOM   5402  CB  ILE L  29       6.039 -86.647 -41.767  1.00 80.30           C  
ATOM   5403  CG1 ILE L  29       4.920 -87.689 -41.678  1.00 76.32           C  
ATOM   5404  CG2 ILE L  29       5.599 -85.449 -42.595  1.00 76.66           C  
ATOM   5405  CD1 ILE L  29       3.751 -87.256 -40.797  1.00 61.14           C  
ATOM   5406  H   ILE L  29       6.481 -88.470 -43.649  1.00 87.96           H  
ATOM   5407  HA  ILE L  29       7.970 -86.550 -42.451  1.00 91.28           H  
ATOM   5408  HB  ILE L  29       6.236 -86.338 -40.869  1.00 96.36           H  
ATOM   5409 HG12 ILE L  29       4.575 -87.856 -42.569  1.00 91.59           H  
ATOM   5410 HG13 ILE L  29       5.284 -88.509 -41.307  1.00 91.59           H  
ATOM   5411 HG21 ILE L  29       4.791 -85.078 -42.207  1.00 91.99           H  
ATOM   5412 HG22 ILE L  29       6.305 -84.784 -42.587  1.00 91.99           H  
ATOM   5413 HG23 ILE L  29       5.427 -85.740 -43.504  1.00 91.99           H  
ATOM   5414 HD11 ILE L  29       3.085 -87.962 -40.788  1.00 73.36           H  
ATOM   5415 HD12 ILE L  29       4.077 -87.096 -39.897  1.00 73.36           H  
ATOM   5416 HD13 ILE L  29       3.368 -86.443 -41.160  1.00 73.36           H  
ATOM   5417  N   SER L  30       8.496 -89.368 -41.911  1.00 80.94           N  
ATOM   5418  CA  SER L  30       9.070 -90.448 -41.096  1.00 71.46           C  
ATOM   5419  C   SER L  30       7.958 -90.939 -40.170  1.00 73.61           C  
ATOM   5420  O   SER L  30       6.835 -91.165 -40.649  1.00 77.01           O  
ATOM   5421  CB  SER L  30      10.331 -89.938 -40.409  1.00 78.49           C  
ATOM   5422  OG  SER L  30      10.976 -90.970 -39.682  1.00 80.12           O  
ATOM   5423  H   SER L  30       8.572 -89.503 -42.757  1.00 97.12           H  
ATOM   5424  HA  SER L  30       9.322 -91.183 -41.676  1.00 85.75           H  
ATOM   5425  HB2 SER L  30      10.941 -89.600 -41.083  1.00 94.19           H  
ATOM   5426  HB3 SER L  30      10.089 -89.226 -39.796  1.00 94.19           H  
ATOM   5427  HG  SER L  30      11.676 -90.667 -39.307  1.00 96.15           H  
ATOM   5428  N   ASN L  31       8.200 -91.110 -38.869  1.00 73.97           N  
ATOM   5429  CA  ASN L  31       7.142 -91.460 -37.928  1.00 73.17           C  
ATOM   5430  C   ASN L  31       6.821 -90.321 -36.967  1.00 68.04           C  
ATOM   5431  O   ASN L  31       6.351 -90.558 -35.853  1.00 62.98           O  
ATOM   5432  CB  ASN L  31       7.530 -92.705 -37.132  1.00 74.62           C  
ATOM   5433  CG  ASN L  31       8.684 -92.448 -36.182  1.00 83.88           C  
ATOM   5434  OD1 ASN L  31       9.474 -91.524 -36.382  1.00 97.37           O  
ATOM   5435  ND2 ASN L  31       8.752 -93.225 -35.112  1.00 84.88           N  
ATOM   5436  H   ASN L  31       8.975 -91.028 -38.507  1.00 88.76           H  
ATOM   5437  HA  ASN L  31       6.336 -91.664 -38.426  1.00 87.81           H  
ATOM   5438  HB2 ASN L  31       6.767 -92.996 -36.608  1.00 89.54           H  
ATOM   5439  HB3 ASN L  31       7.797 -93.405 -37.749  1.00 89.54           H  
ATOM   5440 HD21 ASN L  31       8.160 -93.836 -34.986  1.00101.86           H  
ATOM   5441 HD22 ASN L  31       9.388 -93.118 -34.543  1.00101.86           H  
ATOM   5442  N   TYR L  32       7.052 -89.082 -37.387  1.00 71.90           N  
ATOM   5443  CA  TYR L  32       6.746 -87.921 -36.550  1.00 65.92           C  
ATOM   5444  C   TYR L  32       5.288 -87.506 -36.709  1.00 61.36           C  
ATOM   5445  O   TYR L  32       4.951 -86.487 -37.307  1.00 67.81           O  
ATOM   5446  CB  TYR L  32       7.710 -86.775 -36.808  1.00 71.51           C  
ATOM   5447  CG  TYR L  32       9.124 -87.173 -36.530  1.00 77.50           C  
ATOM   5448  CD1 TYR L  32       9.482 -87.609 -35.260  1.00 83.63           C  
ATOM   5449  CD2 TYR L  32      10.097 -87.117 -37.503  1.00 74.32           C  
ATOM   5450  CE1 TYR L  32      10.768 -87.953 -34.962  1.00 88.23           C  
ATOM   5451  CE2 TYR L  32      11.381 -87.478 -37.222  1.00 80.31           C  
ATOM   5452  CZ  TYR L  32      11.722 -87.894 -35.942  1.00 88.56           C  
ATOM   5453  OH  TYR L  32      13.000 -88.290 -35.628  1.00 92.64           O  
ATOM   5454  H   TYR L  32       7.386 -88.883 -38.154  1.00 86.28           H  
ATOM   5455  HA  TYR L  32       6.864 -88.183 -35.624  1.00 79.10           H  
ATOM   5456  HB2 TYR L  32       7.646 -86.507 -37.738  1.00 85.81           H  
ATOM   5457  HB3 TYR L  32       7.484 -86.031 -36.229  1.00 85.81           H  
ATOM   5458  HD1 TYR L  32       8.837 -87.640 -34.591  1.00100.35           H  
ATOM   5459  HD2 TYR L  32       9.875 -86.831 -38.360  1.00 89.18           H  
ATOM   5460  HE1 TYR L  32      10.989 -88.249 -34.109  1.00105.88           H  
ATOM   5461  HE2 TYR L  32      12.031 -87.440 -37.886  1.00 96.37           H  
ATOM   5462  HH  TYR L  32      13.504 -88.212 -36.308  1.00111.17           H  
ATOM   5463  N   LEU L  33       4.419 -88.356 -36.168  1.00 60.26           N  
ATOM   5464  CA  LEU L  33       2.986 -88.133 -36.197  1.00 65.60           C  
ATOM   5465  C   LEU L  33       2.477 -88.307 -34.777  1.00 69.42           C  
ATOM   5466  O   LEU L  33       2.746 -89.326 -34.132  1.00 81.93           O  
ATOM   5467  CB  LEU L  33       2.257 -89.114 -37.113  1.00 72.83           C  
ATOM   5468  CG  LEU L  33       0.820 -88.660 -37.376  1.00 66.44           C  
ATOM   5469  CD1 LEU L  33       0.808 -87.584 -38.451  1.00 66.05           C  
ATOM   5470  CD2 LEU L  33      -0.075 -89.819 -37.737  1.00 81.22           C  
ATOM   5471  H   LEU L  33       4.646 -89.084 -35.771  1.00 72.31           H  
ATOM   5472  HA  LEU L  33       2.797 -87.228 -36.491  1.00 78.72           H  
ATOM   5473  HB2 LEU L  33       2.721 -89.166 -37.963  1.00 87.40           H  
ATOM   5474  HB3 LEU L  33       2.228 -89.987 -36.691  1.00 87.40           H  
ATOM   5475  HG  LEU L  33       0.469 -88.263 -36.563  1.00 79.73           H  
ATOM   5476 HD11 LEU L  33      -0.108 -87.305 -38.608  1.00 79.25           H  
ATOM   5477 HD12 LEU L  33       1.337 -86.829 -38.148  1.00 79.25           H  
ATOM   5478 HD13 LEU L  33       1.188 -87.948 -39.266  1.00 79.25           H  
ATOM   5479 HD21 LEU L  33      -0.973 -89.488 -37.895  1.00 97.46           H  
ATOM   5480 HD22 LEU L  33       0.267 -90.244 -38.540  1.00 97.46           H  
ATOM   5481 HD23 LEU L  33      -0.081 -90.454 -37.004  1.00 97.46           H  
ATOM   5482  N   ILE L  34       1.728 -87.319 -34.317  1.00 54.00           N  
ATOM   5483  CA  ILE L  34       1.031 -87.336 -33.041  1.00 53.60           C  
ATOM   5484  C   ILE L  34      -0.444 -87.563 -33.317  1.00 51.96           C  
ATOM   5485  O   ILE L  34      -0.956 -87.193 -34.376  1.00 51.21           O  
ATOM   5486  CB  ILE L  34       1.265 -86.030 -32.254  1.00 59.53           C  
ATOM   5487  CG1 ILE L  34       2.675 -86.021 -31.660  1.00 58.79           C  
ATOM   5488  CG2 ILE L  34       0.267 -85.889 -31.135  1.00 54.38           C  
ATOM   5489  CD1 ILE L  34       3.398 -84.718 -31.850  1.00 58.86           C  
ATOM   5490  H   ILE L  34       1.602 -86.588 -34.752  1.00 64.80           H  
ATOM   5491  HA  ILE L  34       1.359 -88.076 -32.506  1.00 64.32           H  
ATOM   5492  HB  ILE L  34       1.172 -85.276 -32.857  1.00 71.43           H  
ATOM   5493 HG12 ILE L  34       2.614 -86.191 -30.707  1.00 70.54           H  
ATOM   5494 HG13 ILE L  34       3.199 -86.716 -32.086  1.00 70.54           H  
ATOM   5495 HG21 ILE L  34       0.440 -85.060 -30.660  1.00 65.26           H  
ATOM   5496 HG22 ILE L  34      -0.627 -85.875 -31.510  1.00 65.26           H  
ATOM   5497 HG23 ILE L  34       0.361 -86.642 -30.531  1.00 65.26           H  
ATOM   5498 HD11 ILE L  34       4.279 -84.785 -31.450  1.00 70.63           H  
ATOM   5499 HD12 ILE L  34       3.477 -84.537 -32.799  1.00 70.63           H  
ATOM   5500 HD13 ILE L  34       2.892 -84.011 -31.419  1.00 70.63           H  
ATOM   5501  N   TRP L  35      -1.126 -88.186 -32.361  1.00 65.25           N  
ATOM   5502  CA  TRP L  35      -2.580 -88.249 -32.344  1.00 61.44           C  
ATOM   5503  C   TRP L  35      -3.128 -87.648 -31.060  1.00 61.79           C  
ATOM   5504  O   TRP L  35      -2.746 -88.060 -29.959  1.00 67.48           O  
ATOM   5505  CB  TRP L  35      -3.073 -89.694 -32.462  1.00 64.16           C  
ATOM   5506  CG  TRP L  35      -2.784 -90.364 -33.763  1.00 63.08           C  
ATOM   5507  CD1 TRP L  35      -1.745 -91.199 -34.049  1.00 64.54           C  
ATOM   5508  CD2 TRP L  35      -3.594 -90.313 -34.940  1.00 62.25           C  
ATOM   5509  NE1 TRP L  35      -1.842 -91.649 -35.345  1.00 66.63           N  
ATOM   5510  CE2 TRP L  35      -2.970 -91.119 -35.914  1.00 58.29           C  
ATOM   5511  CE3 TRP L  35      -4.783 -89.651 -35.270  1.00 59.00           C  
ATOM   5512  CZ2 TRP L  35      -3.496 -91.286 -37.193  1.00 58.31           C  
ATOM   5513  CZ3 TRP L  35      -5.301 -89.814 -36.538  1.00 58.93           C  
ATOM   5514  CH2 TRP L  35      -4.658 -90.625 -37.487  1.00 63.53           C  
ATOM   5515  H   TRP L  35      -0.757 -88.589 -31.697  1.00 78.30           H  
ATOM   5516  HA  TRP L  35      -2.933 -87.744 -33.093  1.00 73.73           H  
ATOM   5517  HB2 TRP L  35      -2.653 -90.220 -31.763  1.00 76.99           H  
ATOM   5518  HB3 TRP L  35      -4.035 -89.701 -32.338  1.00 76.99           H  
ATOM   5519  HD1 TRP L  35      -1.063 -91.422 -33.457  1.00 77.45           H  
ATOM   5520  HE1 TRP L  35      -1.286 -92.178 -35.734  1.00 79.95           H  
ATOM   5521  HE3 TRP L  35      -5.215 -89.114 -34.646  1.00 70.81           H  
ATOM   5522  HZ2 TRP L  35      -3.069 -91.819 -37.825  1.00 69.97           H  
ATOM   5523  HZ3 TRP L  35      -6.090 -89.378 -36.769  1.00 70.72           H  
ATOM   5524  HH2 TRP L  35      -5.028 -90.713 -38.336  1.00 76.24           H  
ATOM   5525  N   TYR L  36      -4.025 -86.679 -31.213  1.00 51.54           N  
ATOM   5526  CA  TYR L  36      -4.686 -86.020 -30.098  1.00 55.73           C  
ATOM   5527  C   TYR L  36      -6.156 -86.386 -30.062  1.00 52.69           C  
ATOM   5528  O   TYR L  36      -6.770 -86.678 -31.090  1.00 51.94           O  
ATOM   5529  CB  TYR L  36      -4.615 -84.488 -30.142  1.00 53.10           C  
ATOM   5530  CG  TYR L  36      -3.254 -83.895 -30.081  1.00 53.85           C  
ATOM   5531  CD1 TYR L  36      -2.771 -83.397 -28.882  1.00 61.43           C  
ATOM   5532  CD2 TYR L  36      -2.488 -83.728 -31.223  1.00 53.40           C  
ATOM   5533  CE1 TYR L  36      -1.528 -82.840 -28.796  1.00 63.26           C  
ATOM   5534  CE2 TYR L  36      -1.242 -83.138 -31.153  1.00 56.70           C  
ATOM   5535  CZ  TYR L  36      -0.764 -82.699 -29.929  1.00 63.91           C  
ATOM   5536  OH  TYR L  36       0.464 -82.088 -29.801  1.00 63.91           O  
ATOM   5537  H   TYR L  36      -4.274 -86.378 -31.979  1.00 61.85           H  
ATOM   5538  HA  TYR L  36      -4.280 -86.317 -29.269  1.00 66.88           H  
ATOM   5539  HB2 TYR L  36      -5.024 -84.187 -30.968  1.00 63.72           H  
ATOM   5540  HB3 TYR L  36      -5.116 -84.138 -29.389  1.00 63.72           H  
ATOM   5541  HD1 TYR L  36      -3.278 -83.501 -28.109  1.00 73.71           H  
ATOM   5542  HD2 TYR L  36      -2.808 -84.035 -32.041  1.00 64.08           H  
ATOM   5543  HE1 TYR L  36      -1.214 -82.524 -27.979  1.00 75.91           H  
ATOM   5544  HE2 TYR L  36      -0.723 -83.048 -31.919  1.00 68.04           H  
ATOM   5545  HH  TYR L  36       0.851 -82.053 -30.557  1.00 76.69           H  
ATOM   5546  N   GLN L  37      -6.698 -86.360 -28.850  1.00 57.47           N  
ATOM   5547  CA  GLN L  37      -8.120 -86.490 -28.592  1.00 55.19           C  
ATOM   5548  C   GLN L  37      -8.586 -85.184 -27.975  1.00 56.44           C  
ATOM   5549  O   GLN L  37      -7.980 -84.713 -27.008  1.00 60.19           O  
ATOM   5550  CB  GLN L  37      -8.371 -87.640 -27.622  1.00 57.20           C  
ATOM   5551  CG  GLN L  37      -9.805 -87.851 -27.228  1.00 58.64           C  
ATOM   5552  CD  GLN L  37      -9.914 -88.847 -26.102  1.00 63.66           C  
ATOM   5553  OE1 GLN L  37      -9.431 -88.593 -24.998  1.00 62.49           O  
ATOM   5554  NE2 GLN L  37     -10.522 -89.998 -26.374  1.00 66.35           N  
ATOM   5555  H   GLN L  37      -6.236 -86.263 -28.131  1.00 68.97           H  
ATOM   5556  HA  GLN L  37      -8.603 -86.650 -29.418  1.00 66.23           H  
ATOM   5557  HB2 GLN L  37      -8.059 -88.461 -28.032  1.00 68.64           H  
ATOM   5558  HB3 GLN L  37      -7.868 -87.472 -26.810  1.00 68.64           H  
ATOM   5559  HG2 GLN L  37     -10.183 -87.009 -26.929  1.00 70.37           H  
ATOM   5560  HG3 GLN L  37     -10.300 -88.193 -27.988  1.00 70.37           H  
ATOM   5561 HE21 GLN L  37     -10.831 -90.145 -27.163  1.00 79.62           H  
ATOM   5562 HE22 GLN L  37     -10.606 -90.596 -25.761  1.00 79.62           H  
ATOM   5563  N   GLN L  38      -9.640 -84.592 -28.533  1.00 56.75           N  
ATOM   5564  CA  GLN L  38     -10.192 -83.342 -28.010  1.00 67.14           C  
ATOM   5565  C   GLN L  38     -11.660 -83.511 -27.637  1.00 76.45           C  
ATOM   5566  O   GLN L  38     -12.525 -83.502 -28.518  1.00 86.58           O  
ATOM   5567  CB  GLN L  38     -10.057 -82.200 -29.014  1.00 67.28           C  
ATOM   5568  CG  GLN L  38     -10.528 -80.863 -28.427  1.00 60.05           C  
ATOM   5569  CD  GLN L  38     -10.281 -79.674 -29.332  1.00 63.87           C  
ATOM   5570  OE1 GLN L  38     -10.287 -79.806 -30.556  1.00 67.62           O  
ATOM   5571  NE2 GLN L  38     -10.100 -78.496 -28.736  1.00 62.11           N  
ATOM   5572  H   GLN L  38     -10.058 -84.897 -29.221  1.00 68.10           H  
ATOM   5573  HA  GLN L  38      -9.706 -83.095 -27.207  1.00 80.57           H  
ATOM   5574  HB2 GLN L  38      -9.125 -82.107 -29.268  1.00 80.73           H  
ATOM   5575  HB3 GLN L  38     -10.598 -82.395 -29.795  1.00 80.73           H  
ATOM   5576  HG2 GLN L  38     -11.482 -80.915 -28.260  1.00 72.06           H  
ATOM   5577  HG3 GLN L  38     -10.057 -80.705 -27.594  1.00 72.06           H  
ATOM   5578 HE21 GLN L  38     -10.128 -78.440 -27.878  1.00 74.53           H  
ATOM   5579 HE22 GLN L  38      -9.956 -77.792 -29.208  1.00 74.53           H  
ATOM   5580  N   LYS L  39     -11.952 -83.673 -26.355  1.00 84.77           N  
ATOM   5581  CA  LYS L  39     -13.349 -83.741 -25.970  1.00 94.52           C  
ATOM   5582  C   LYS L  39     -13.975 -82.351 -26.009  1.00 95.93           C  
ATOM   5583  O   LYS L  39     -13.277 -81.340 -25.898  1.00 97.37           O  
ATOM   5584  CB  LYS L  39     -13.542 -84.358 -24.591  1.00102.18           C  
ATOM   5585  CG  LYS L  39     -13.210 -85.824 -24.508  1.00100.67           C  
ATOM   5586  CD  LYS L  39     -13.535 -86.347 -23.123  1.00112.33           C  
ATOM   5587  CE  LYS L  39     -13.298 -87.834 -23.028  1.00116.45           C  
ATOM   5588  NZ  LYS L  39     -12.093 -88.167 -22.234  1.00117.69           N  
ATOM   5589  H   LYS L  39     -11.385 -83.744 -25.713  1.00101.72           H  
ATOM   5590  HA  LYS L  39     -13.822 -84.296 -26.610  1.00113.43           H  
ATOM   5591  HB2 LYS L  39     -12.971 -83.891 -23.960  1.00122.62           H  
ATOM   5592  HB3 LYS L  39     -14.471 -84.251 -24.331  1.00122.62           H  
ATOM   5593  HG2 LYS L  39     -13.740 -86.315 -25.156  1.00120.81           H  
ATOM   5594  HG3 LYS L  39     -12.263 -85.954 -24.674  1.00120.81           H  
ATOM   5595  HD2 LYS L  39     -12.966 -85.906 -22.473  1.00134.80           H  
ATOM   5596  HD3 LYS L  39     -14.469 -86.174 -22.926  1.00134.80           H  
ATOM   5597  HE2 LYS L  39     -14.064 -88.250 -22.602  1.00139.74           H  
ATOM   5598  HE3 LYS L  39     -13.178 -88.193 -23.921  1.00139.74           H  
ATOM   5599  HZ1 LYS L  39     -11.986 -89.050 -22.200  1.00141.22           H  
ATOM   5600  HZ2 LYS L  39     -11.372 -87.803 -22.608  1.00141.22           H  
ATOM   5601  HZ3 LYS L  39     -12.179 -87.855 -21.405  1.00141.22           H  
ATOM   5602  N   PRO L  40     -15.293 -82.278 -26.175  1.00111.05           N  
ATOM   5603  CA  PRO L  40     -15.949 -80.983 -26.402  1.00109.61           C  
ATOM   5604  C   PRO L  40     -15.692 -80.000 -25.270  1.00102.79           C  
ATOM   5605  O   PRO L  40     -15.849 -80.323 -24.091  1.00107.78           O  
ATOM   5606  CB  PRO L  40     -17.431 -81.355 -26.496  1.00112.89           C  
ATOM   5607  CG  PRO L  40     -17.426 -82.749 -26.998  1.00111.54           C  
ATOM   5608  CD  PRO L  40     -16.228 -83.400 -26.370  1.00112.36           C  
ATOM   5609  HA  PRO L  40     -15.657 -80.596 -27.242  1.00131.53           H  
ATOM   5610  HB2 PRO L  40     -17.839 -81.305 -25.618  1.00135.47           H  
ATOM   5611  HB3 PRO L  40     -17.879 -80.764 -27.122  1.00135.47           H  
ATOM   5612  HG2 PRO L  40     -18.241 -83.196 -26.723  1.00133.85           H  
ATOM   5613  HG3 PRO L  40     -17.346 -82.747 -27.964  1.00133.85           H  
ATOM   5614  HD2 PRO L  40     -16.466 -83.795 -25.517  1.00134.83           H  
ATOM   5615  HD3 PRO L  40     -15.846 -84.058 -26.973  1.00134.83           H  
ATOM   5616  N   GLY L  41     -15.280 -78.793 -25.647  1.00 89.47           N  
ATOM   5617  CA  GLY L  41     -14.888 -77.745 -24.726  1.00 95.87           C  
ATOM   5618  C   GLY L  41     -13.500 -77.820 -24.128  1.00 87.80           C  
ATOM   5619  O   GLY L  41     -13.119 -76.906 -23.393  1.00 86.06           O  
ATOM   5620  H   GLY L  41     -15.220 -78.554 -26.471  1.00107.37           H  
ATOM   5621  HA2 GLY L  41     -14.959 -76.894 -25.185  1.00115.05           H  
ATOM   5622  HA3 GLY L  41     -15.519 -77.734 -23.990  1.00115.05           H  
ATOM   5623  N   LYS L  42     -12.731 -78.856 -24.410  1.00 89.37           N  
ATOM   5624  CA  LYS L  42     -11.436 -79.045 -23.793  1.00 81.81           C  
ATOM   5625  C   LYS L  42     -10.334 -78.869 -24.818  1.00 74.84           C  
ATOM   5626  O   LYS L  42     -10.565 -78.809 -26.024  1.00 76.09           O  
ATOM   5627  CB  LYS L  42     -11.272 -80.416 -23.120  1.00 87.71           C  
ATOM   5628  CG  LYS L  42     -12.280 -80.815 -22.106  1.00104.54           C  
ATOM   5629  CD  LYS L  42     -12.186 -79.850 -20.905  1.00111.51           C  
ATOM   5630  CE  LYS L  42     -12.902 -80.360 -19.643  1.00117.92           C  
ATOM   5631  NZ  LYS L  42     -12.544 -79.482 -18.449  1.00122.32           N  
ATOM   5632  H   LYS L  42     -12.943 -79.475 -24.968  1.00107.24           H  
ATOM   5633  HA  LYS L  42     -11.316 -78.366 -23.111  1.00 98.17           H  
ATOM   5634  HB2 LYS L  42     -11.286 -81.093 -23.815  1.00105.26           H  
ATOM   5635  HB3 LYS L  42     -10.407 -80.431 -22.681  1.00105.26           H  
ATOM   5636  HG2 LYS L  42     -13.170 -80.755 -22.486  1.00125.45           H  
ATOM   5637  HG3 LYS L  42     -12.096 -81.716 -21.797  1.00125.45           H  
ATOM   5638  HD2 LYS L  42     -11.251 -79.717 -20.683  1.00133.81           H  
ATOM   5639  HD3 LYS L  42     -12.589 -79.002 -21.153  1.00133.81           H  
ATOM   5640  HE2 LYS L  42     -13.862 -80.323 -19.777  1.00141.50           H  
ATOM   5641  HE3 LYS L  42     -12.620 -81.269 -19.454  1.00141.50           H  
ATOM   5642  HZ1 LYS L  42     -12.958 -79.778 -17.719  1.00146.78           H  
ATOM   5643  HZ2 LYS L  42     -11.665 -79.502 -18.311  1.00146.78           H  
ATOM   5644  HZ3 LYS L  42     -12.794 -78.642 -18.604  1.00146.78           H  
ATOM   5645  N   ALA L  43      -9.119 -78.826 -24.301  1.00 69.96           N  
ATOM   5646  CA  ALA L  43      -7.951 -78.766 -25.145  1.00 75.17           C  
ATOM   5647  C   ALA L  43      -7.650 -80.167 -25.662  1.00 66.49           C  
ATOM   5648  O   ALA L  43      -8.064 -81.163 -25.062  1.00 71.16           O  
ATOM   5649  CB  ALA L  43      -6.761 -78.219 -24.372  1.00 79.96           C  
ATOM   5650  H   ALA L  43      -8.946 -78.830 -23.458  1.00 83.95           H  
ATOM   5651  HA  ALA L  43      -8.124 -78.185 -25.902  1.00 90.20           H  
ATOM   5652  HB1 ALA L  43      -5.990 -78.189 -24.960  1.00 95.95           H  
ATOM   5653  HB2 ALA L  43      -6.972 -77.327 -24.057  1.00 95.95           H  
ATOM   5654  HB3 ALA L  43      -6.580 -78.803 -23.618  1.00 95.95           H  
ATOM   5655  N   PRO L  44      -6.930 -80.277 -26.774  1.00 60.67           N  
ATOM   5656  CA  PRO L  44      -6.455 -81.594 -27.204  1.00 58.59           C  
ATOM   5657  C   PRO L  44      -5.518 -82.200 -26.175  1.00 59.39           C  
ATOM   5658  O   PRO L  44      -4.732 -81.501 -25.531  1.00 61.04           O  
ATOM   5659  CB  PRO L  44      -5.732 -81.293 -28.524  1.00 57.19           C  
ATOM   5660  CG  PRO L  44      -6.220 -79.929 -28.928  1.00 58.35           C  
ATOM   5661  CD  PRO L  44      -6.398 -79.212 -27.638  1.00 63.14           C  
ATOM   5662  HA  PRO L  44      -7.200 -82.193 -27.366  1.00 70.31           H  
ATOM   5663  HB2 PRO L  44      -4.773 -81.287 -28.378  1.00 68.63           H  
ATOM   5664  HB3 PRO L  44      -5.975 -81.956 -29.189  1.00 68.63           H  
ATOM   5665  HG2 PRO L  44      -5.552 -79.490 -29.478  1.00 70.02           H  
ATOM   5666  HG3 PRO L  44      -7.063 -80.006 -29.400  1.00 70.02           H  
ATOM   5667  HD2 PRO L  44      -5.546 -78.893 -27.303  1.00 75.76           H  
ATOM   5668  HD3 PRO L  44      -7.042 -78.493 -27.732  1.00 75.76           H  
ATOM   5669  N   LYS L  45      -5.615 -83.519 -26.028  1.00 70.51           N  
ATOM   5670  CA  LYS L  45      -4.782 -84.287 -25.117  1.00 77.03           C  
ATOM   5671  C   LYS L  45      -4.054 -85.332 -25.940  1.00 73.02           C  
ATOM   5672  O   LYS L  45      -4.659 -85.988 -26.794  1.00 78.07           O  
ATOM   5673  CB  LYS L  45      -5.616 -84.972 -24.026  1.00 91.14           C  
ATOM   5674  CG  LYS L  45      -4.807 -85.884 -23.090  1.00106.59           C  
ATOM   5675  CD  LYS L  45      -5.672 -86.970 -22.454  1.00113.05           C  
ATOM   5676  CE  LYS L  45      -4.827 -87.967 -21.663  1.00116.87           C  
ATOM   5677  NZ  LYS L  45      -5.631 -89.079 -21.069  1.00114.54           N  
ATOM   5678  H   LYS L  45      -6.177 -84.004 -26.463  1.00 84.61           H  
ATOM   5679  HA  LYS L  45      -4.129 -83.707 -24.696  1.00 92.43           H  
ATOM   5680  HB2 LYS L  45      -6.036 -84.289 -23.481  1.00109.37           H  
ATOM   5681  HB3 LYS L  45      -6.297 -85.516 -24.451  1.00109.37           H  
ATOM   5682  HG2 LYS L  45      -4.104 -86.318 -23.598  1.00127.91           H  
ATOM   5683  HG3 LYS L  45      -4.423 -85.349 -22.378  1.00127.91           H  
ATOM   5684  HD2 LYS L  45      -6.306 -86.558 -21.845  1.00135.66           H  
ATOM   5685  HD3 LYS L  45      -6.142 -87.454 -23.151  1.00135.66           H  
ATOM   5686  HE2 LYS L  45      -4.168 -88.360 -22.256  1.00140.24           H  
ATOM   5687  HE3 LYS L  45      -4.384 -87.499 -20.939  1.00140.24           H  
ATOM   5688  HZ1 LYS L  45      -5.099 -89.632 -20.619  1.00137.45           H  
ATOM   5689  HZ2 LYS L  45      -6.241 -88.748 -20.511  1.00137.45           H  
ATOM   5690  HZ3 LYS L  45      -6.045 -89.533 -21.712  1.00137.45           H  
ATOM   5691  N   LEU L  46      -2.757 -85.463 -25.700  1.00 70.87           N  
ATOM   5692  CA  LEU L  46      -1.937 -86.348 -26.509  1.00 70.99           C  
ATOM   5693  C   LEU L  46      -2.208 -87.800 -26.146  1.00 62.59           C  
ATOM   5694  O   LEU L  46      -2.153 -88.173 -24.970  1.00 60.04           O  
ATOM   5695  CB  LEU L  46      -0.468 -86.026 -26.275  1.00 80.55           C  
ATOM   5696  CG  LEU L  46       0.534 -86.759 -27.158  1.00 83.47           C  
ATOM   5697  CD1 LEU L  46       1.078 -85.763 -28.131  1.00 79.82           C  
ATOM   5698  CD2 LEU L  46       1.645 -87.358 -26.339  1.00 89.48           C  
ATOM   5699  H   LEU L  46      -2.329 -85.052 -25.077  1.00 85.04           H  
ATOM   5700  HA  LEU L  46      -2.140 -86.217 -27.449  1.00 85.19           H  
ATOM   5701  HB2 LEU L  46      -0.338 -85.075 -26.420  1.00 96.67           H  
ATOM   5702  HB3 LEU L  46      -0.252 -86.242 -25.354  1.00 96.67           H  
ATOM   5703  HG  LEU L  46       0.087 -87.466 -27.648  1.00100.16           H  
ATOM   5704 HD11 LEU L  46       1.721 -86.205 -28.708  1.00 95.78           H  
ATOM   5705 HD12 LEU L  46       0.347 -85.408 -28.660  1.00 95.78           H  
ATOM   5706 HD13 LEU L  46       1.511 -85.047 -27.640  1.00 95.78           H  
ATOM   5707 HD21 LEU L  46       2.262 -87.816 -26.931  1.00107.38           H  
ATOM   5708 HD22 LEU L  46       2.105 -86.648 -25.865  1.00107.38           H  
ATOM   5709 HD23 LEU L  46       1.265 -87.987 -25.705  1.00107.38           H  
ATOM   5710  N   LEU L  47      -2.487 -88.624 -27.155  1.00 57.69           N  
ATOM   5711  CA  LEU L  47      -2.639 -90.057 -26.947  1.00 62.07           C  
ATOM   5712  C   LEU L  47      -1.456 -90.858 -27.458  1.00 64.24           C  
ATOM   5713  O   LEU L  47      -0.939 -91.729 -26.750  1.00 62.07           O  
ATOM   5714  CB  LEU L  47      -3.892 -90.556 -27.683  1.00 59.71           C  
ATOM   5715  CG  LEU L  47      -5.282 -90.037 -27.346  1.00 59.14           C  
ATOM   5716  CD1 LEU L  47      -6.306 -90.870 -28.093  1.00 56.35           C  
ATOM   5717  CD2 LEU L  47      -5.520 -90.138 -25.858  1.00 59.67           C  
ATOM   5718  H   LEU L  47      -2.593 -88.374 -27.971  1.00 69.23           H  
ATOM   5719  HA  LEU L  47      -2.747 -90.237 -26.000  1.00 74.49           H  
ATOM   5720  HB2 LEU L  47      -3.759 -90.372 -28.626  1.00 71.65           H  
ATOM   5721  HB3 LEU L  47      -3.929 -91.517 -27.561  1.00 71.65           H  
ATOM   5722  HG  LEU L  47      -5.367 -89.110 -27.619  1.00 70.97           H  
ATOM   5723 HD11 LEU L  47      -7.194 -90.542 -27.880  1.00 67.62           H  
ATOM   5724 HD12 LEU L  47      -6.143 -90.790 -29.045  1.00 67.62           H  
ATOM   5725 HD13 LEU L  47      -6.220 -91.796 -27.818  1.00 67.62           H  
ATOM   5726 HD21 LEU L  47      -6.408 -89.804 -25.657  1.00 71.60           H  
ATOM   5727 HD22 LEU L  47      -5.446 -91.067 -25.589  1.00 71.60           H  
ATOM   5728 HD23 LEU L  47      -4.854 -89.606 -25.395  1.00 71.60           H  
ATOM   5729  N   ILE L  48      -1.004 -90.556 -28.671  1.00 66.73           N  
ATOM   5730  CA  ILE L  48       0.022 -91.331 -29.352  1.00 66.87           C  
ATOM   5731  C   ILE L  48       1.058 -90.386 -29.937  1.00 65.85           C  
ATOM   5732  O   ILE L  48       0.706 -89.344 -30.499  1.00 69.98           O  
ATOM   5733  CB  ILE L  48      -0.583 -92.246 -30.439  1.00 77.28           C  
ATOM   5734  CG1 ILE L  48      -1.516 -93.266 -29.782  1.00 70.79           C  
ATOM   5735  CG2 ILE L  48       0.523 -92.951 -31.234  1.00 79.48           C  
ATOM   5736  CD1 ILE L  48      -2.190 -94.211 -30.740  1.00 75.74           C  
ATOM   5737  H   ILE L  48      -1.287 -89.887 -29.131  1.00 80.07           H  
ATOM   5738  HA  ILE L  48       0.469 -91.897 -28.703  1.00 80.25           H  
ATOM   5739  HB  ILE L  48      -1.102 -91.699 -31.050  1.00 92.73           H  
ATOM   5740 HG12 ILE L  48      -1.000 -93.800 -29.157  1.00 84.95           H  
ATOM   5741 HG13 ILE L  48      -2.211 -92.787 -29.304  1.00 84.95           H  
ATOM   5742 HG21 ILE L  48       0.116 -93.517 -31.908  1.00 95.38           H  
ATOM   5743 HG22 ILE L  48       1.083 -92.281 -31.658  1.00 95.38           H  
ATOM   5744 HG23 ILE L  48       1.054 -93.489 -30.626  1.00 95.38           H  
ATOM   5745 HD11 ILE L  48      -2.757 -94.817 -30.239  1.00 90.89           H  
ATOM   5746 HD12 ILE L  48      -2.724 -93.697 -31.366  1.00 90.89           H  
ATOM   5747 HD13 ILE L  48      -1.511 -94.712 -31.219  1.00 90.89           H  
ATOM   5748  N   TYR L  49       2.332 -90.740 -29.793  1.00 59.69           N  
ATOM   5749  CA  TYR L  49       3.422 -89.985 -30.392  1.00 61.30           C  
ATOM   5750  C   TYR L  49       4.319 -90.969 -31.133  1.00 68.45           C  
ATOM   5751  O   TYR L  49       4.206 -92.187 -30.974  1.00 77.67           O  
ATOM   5752  CB  TYR L  49       4.201 -89.166 -29.347  1.00 60.16           C  
ATOM   5753  CG  TYR L  49       4.946 -89.974 -28.310  1.00 63.78           C  
ATOM   5754  CD1 TYR L  49       6.288 -90.277 -28.472  1.00 67.41           C  
ATOM   5755  CD2 TYR L  49       4.311 -90.417 -27.159  1.00 64.12           C  
ATOM   5756  CE1 TYR L  49       6.976 -90.994 -27.519  1.00 71.59           C  
ATOM   5757  CE2 TYR L  49       4.989 -91.146 -26.204  1.00 69.99           C  
ATOM   5758  CZ  TYR L  49       6.322 -91.430 -26.386  1.00 73.76           C  
ATOM   5759  OH  TYR L  49       6.996 -92.170 -25.441  1.00 81.33           O  
ATOM   5760  H   TYR L  49       2.592 -91.425 -29.343  1.00 71.63           H  
ATOM   5761  HA  TYR L  49       3.055 -89.366 -31.043  1.00 73.56           H  
ATOM   5762  HB2 TYR L  49       4.852 -88.617 -29.812  1.00 72.19           H  
ATOM   5763  HB3 TYR L  49       3.574 -88.595 -28.876  1.00 72.19           H  
ATOM   5764  HD1 TYR L  49       6.735 -89.981 -29.233  1.00 80.89           H  
ATOM   5765  HD2 TYR L  49       3.410 -90.224 -27.031  1.00 76.94           H  
ATOM   5766  HE1 TYR L  49       7.875 -91.196 -27.645  1.00 85.90           H  
ATOM   5767  HE2 TYR L  49       4.548 -91.441 -25.441  1.00 83.98           H  
ATOM   5768  HH  TYR L  49       6.474 -92.370 -24.801  1.00 97.60           H  
ATOM   5769  N   ASP L  50       5.203 -90.430 -31.971  1.00 77.90           N  
ATOM   5770  CA  ASP L  50       6.090 -91.239 -32.811  1.00 90.71           C  
ATOM   5771  C   ASP L  50       5.308 -92.275 -33.620  1.00 89.47           C  
ATOM   5772  O   ASP L  50       5.750 -93.410 -33.810  1.00 91.84           O  
ATOM   5773  CB  ASP L  50       7.185 -91.910 -31.974  1.00101.01           C  
ATOM   5774  CG  ASP L  50       8.260 -90.937 -31.525  1.00110.53           C  
ATOM   5775  OD1 ASP L  50       8.340 -89.822 -32.084  1.00113.57           O  
ATOM   5776  OD2 ASP L  50       9.036 -91.291 -30.613  1.00116.12           O  
ATOM   5777  H   ASP L  50       5.312 -89.583 -32.073  1.00 93.49           H  
ATOM   5778  HA  ASP L  50       6.530 -90.651 -33.444  1.00108.86           H  
ATOM   5779  HB2 ASP L  50       6.783 -92.300 -31.182  1.00121.22           H  
ATOM   5780  HB3 ASP L  50       7.609 -92.602 -32.506  1.00121.22           H  
ATOM   5781  N   ALA L  51       4.109 -91.883 -34.060  1.00 72.81           N  
ATOM   5782  CA  ALA L  51       3.194 -92.716 -34.843  1.00 72.29           C  
ATOM   5783  C   ALA L  51       2.529 -93.859 -34.079  1.00 69.81           C  
ATOM   5784  O   ALA L  51       1.368 -94.177 -34.356  1.00 69.50           O  
ATOM   5785  CB  ALA L  51       3.909 -93.285 -36.075  1.00 72.62           C  
ATOM   5786  H   ALA L  51       3.790 -91.098 -33.908  1.00 87.37           H  
ATOM   5787  HA  ALA L  51       2.481 -92.146 -35.170  1.00 86.74           H  
ATOM   5788  HB1 ALA L  51       3.285 -93.833 -36.577  1.00 87.15           H  
ATOM   5789  HB2 ALA L  51       4.222 -92.551 -36.625  1.00 87.15           H  
ATOM   5790  HB3 ALA L  51       4.661 -93.824 -35.782  1.00 87.15           H  
ATOM   5791  N   SER L  52       3.227 -94.486 -33.129  1.00 71.92           N  
ATOM   5792  CA  SER L  52       2.767 -95.758 -32.583  1.00 74.58           C  
ATOM   5793  C   SER L  52       2.981 -95.903 -31.085  1.00 74.21           C  
ATOM   5794  O   SER L  52       2.633 -96.953 -30.534  1.00 76.43           O  
ATOM   5795  CB  SER L  52       3.470 -96.921 -33.294  1.00 80.75           C  
ATOM   5796  OG  SER L  52       4.849 -96.928 -32.975  1.00 83.53           O  
ATOM   5797  H   SER L  52       3.962 -94.197 -32.789  1.00 86.30           H  
ATOM   5798  HA  SER L  52       1.815 -95.840 -32.753  1.00 89.49           H  
ATOM   5799  HB2 SER L  52       3.072 -97.757 -33.005  1.00 96.90           H  
ATOM   5800  HB3 SER L  52       3.366 -96.817 -34.253  1.00 96.90           H  
ATOM   5801  HG  SER L  52       5.236 -97.574 -33.371  1.00100.24           H  
ATOM   5802  N   ASN L  53       3.535 -94.900 -30.415  1.00 72.01           N  
ATOM   5803  CA  ASN L  53       3.795 -94.943 -28.984  1.00 73.04           C  
ATOM   5804  C   ASN L  53       2.681 -94.275 -28.210  1.00 69.34           C  
ATOM   5805  O   ASN L  53       2.292 -93.151 -28.526  1.00 73.49           O  
ATOM   5806  CB  ASN L  53       5.123 -94.281 -28.629  1.00 73.91           C  
ATOM   5807  CG  ASN L  53       6.284 -95.008 -29.209  1.00 84.66           C  
ATOM   5808  OD1 ASN L  53       7.159 -94.428 -29.852  1.00 85.12           O  
ATOM   5809  ND2 ASN L  53       6.309 -96.305 -28.970  1.00 91.18           N  
ATOM   5810  H   ASN L  53       3.777 -94.160 -30.782  1.00 86.41           H  
ATOM   5811  HA  ASN L  53       3.840 -95.870 -28.702  1.00 87.65           H  
ATOM   5812  HB2 ASN L  53       5.130 -93.375 -28.975  1.00 88.69           H  
ATOM   5813  HB3 ASN L  53       5.225 -94.270 -27.664  1.00 88.69           H  
ATOM   5814 HD21 ASN L  53       5.682 -96.669 -28.508  1.00109.41           H  
ATOM   5815 HD22 ASN L  53       6.953 -96.786 -29.276  1.00109.41           H  
ATOM   5816  N   LEU L  54       2.212 -94.946 -27.170  1.00 78.75           N  
ATOM   5817  CA  LEU L  54       1.122 -94.441 -26.363  1.00 75.45           C  
ATOM   5818  C   LEU L  54       1.780 -93.628 -25.262  1.00 79.73           C  
ATOM   5819  O   LEU L  54       2.823 -94.024 -24.733  1.00 86.25           O  
ATOM   5820  CB  LEU L  54       0.293 -95.577 -25.760  1.00 75.53           C  
ATOM   5821  CG  LEU L  54      -0.844 -96.190 -26.575  1.00 78.91           C  
ATOM   5822  CD1 LEU L  54      -0.329 -96.828 -27.861  1.00 83.15           C  
ATOM   5823  CD2 LEU L  54      -1.587 -97.197 -25.712  1.00 82.28           C  
ATOM   5824  H   LEU L  54       2.515 -95.708 -26.910  1.00 94.50           H  
ATOM   5825  HA  LEU L  54       0.547 -93.865 -26.891  1.00 90.54           H  
ATOM   5826  HB2 LEU L  54       0.901 -96.301 -25.546  1.00 90.63           H  
ATOM   5827  HB3 LEU L  54      -0.102 -95.247 -24.938  1.00 90.63           H  
ATOM   5828  HG  LEU L  54      -1.468 -95.489 -26.820  1.00 94.69           H  
ATOM   5829 HD11 LEU L  54      -1.079 -97.205 -28.348  1.00 99.78           H  
ATOM   5830 HD12 LEU L  54       0.107 -96.149 -28.398  1.00 99.78           H  
ATOM   5831 HD13 LEU L  54       0.303 -97.528 -27.634  1.00 99.78           H  
ATOM   5832 HD21 LEU L  54      -2.309 -97.585 -26.231  1.00 98.73           H  
ATOM   5833 HD22 LEU L  54      -0.969 -97.890 -25.433  1.00 98.73           H  
ATOM   5834 HD23 LEU L  54      -1.946 -96.741 -24.935  1.00 98.73           H  
ATOM   5835  N   GLU L  55       1.185 -92.492 -24.913  1.00 80.88           N  
ATOM   5836  CA  GLU L  55       1.743 -91.807 -23.765  1.00 92.74           C  
ATOM   5837  C   GLU L  55       1.252 -92.478 -22.486  1.00 89.71           C  
ATOM   5838  O   GLU L  55       0.374 -93.343 -22.503  1.00 91.13           O  
ATOM   5839  CB  GLU L  55       1.342 -90.327 -23.831  1.00 95.10           C  
ATOM   5840  CG  GLU L  55       1.703 -89.437 -22.646  1.00100.49           C  
ATOM   5841  CD  GLU L  55       3.197 -89.291 -22.442  1.00113.15           C  
ATOM   5842  OE1 GLU L  55       3.666 -89.442 -21.295  1.00122.60           O  
ATOM   5843  OE2 GLU L  55       3.904 -89.012 -23.435  1.00110.94           O  
ATOM   5844  H   GLU L  55       0.508 -92.123 -25.295  1.00 97.06           H  
ATOM   5845  HA  GLU L  55       2.711 -91.866 -23.791  1.00111.29           H  
ATOM   5846  HB2 GLU L  55       1.762 -89.939 -24.614  1.00114.12           H  
ATOM   5847  HB3 GLU L  55       0.378 -90.283 -23.934  1.00114.12           H  
ATOM   5848  HG2 GLU L  55       1.334 -88.552 -22.793  1.00120.59           H  
ATOM   5849  HG3 GLU L  55       1.328 -89.822 -21.838  1.00120.59           H  
ATOM   5850  N   THR L  56       1.827 -92.066 -21.362  1.00 87.30           N  
ATOM   5851  CA  THR L  56       1.492 -92.683 -20.089  1.00 93.17           C  
ATOM   5852  C   THR L  56       0.023 -92.447 -19.751  0.71 86.89           C  
ATOM   5853  O   THR L  56      -0.532 -91.380 -20.028  0.98 84.21           O  
ATOM   5854  CB  THR L  56       2.406 -92.157 -18.985  1.00109.06           C  
ATOM   5855  OG1 THR L  56       3.773 -92.364 -19.366  1.00117.29           O  
ATOM   5856  CG2 THR L  56       2.131 -92.885 -17.678  1.00107.55           C  
ATOM   5857  H   THR L  56       2.410 -91.436 -21.312  1.00104.76           H  
ATOM   5858  HA  THR L  56       1.630 -93.640 -20.158  1.00111.80           H  
ATOM   5859  HB  THR L  56       2.245 -91.210 -18.852  1.00130.87           H  
ATOM   5860  HG1 THR L  56       4.291 -92.074 -18.758  1.00140.75           H  
ATOM   5861 HG21 THR L  56       2.715 -92.547 -16.981  1.00129.06           H  
ATOM   5862 HG22 THR L  56       1.209 -92.749 -17.410  1.00129.06           H  
ATOM   5863 HG23 THR L  56       2.290 -93.836 -17.789  1.00129.06           H  
ATOM   5864  N   GLY L  57      -0.605 -93.455 -19.156  1.00 81.57           N  
ATOM   5865  CA  GLY L  57      -1.983 -93.378 -18.720  1.00 66.52           C  
ATOM   5866  C   GLY L  57      -3.020 -93.574 -19.800  1.00 64.14           C  
ATOM   5867  O   GLY L  57      -4.218 -93.553 -19.490  1.00 67.37           O  
ATOM   5868  H   GLY L  57      -0.237 -94.215 -18.992  1.00 97.88           H  
ATOM   5869  HA2 GLY L  57      -2.133 -94.052 -18.038  1.00 79.82           H  
ATOM   5870  HA3 GLY L  57      -2.135 -92.508 -18.318  1.00 79.82           H  
ATOM   5871  N   VAL L  58      -2.611 -93.740 -21.050  1.00 85.77           N  
ATOM   5872  CA  VAL L  58      -3.560 -93.927 -22.151  1.00 84.39           C  
ATOM   5873  C   VAL L  58      -4.065 -95.368 -22.110  1.00 83.97           C  
ATOM   5874  O   VAL L  58      -3.243 -96.297 -22.083  1.00 90.92           O  
ATOM   5875  CB  VAL L  58      -2.907 -93.606 -23.492  1.00 92.93           C  
ATOM   5876  CG1 VAL L  58      -3.876 -93.879 -24.638  1.00 95.47           C  
ATOM   5877  CG2 VAL L  58      -2.452 -92.151 -23.522  1.00 87.73           C  
ATOM   5878  H   VAL L  58      -1.786 -93.749 -21.293  1.00102.93           H  
ATOM   5879  HA  VAL L  58      -4.317 -93.333 -22.029  1.00101.27           H  
ATOM   5880  HB  VAL L  58      -2.128 -94.171 -23.612  1.00111.52           H  
ATOM   5881 HG11 VAL L  58      -3.438 -93.668 -25.477  1.00114.56           H  
ATOM   5882 HG12 VAL L  58      -4.128 -94.815 -24.622  1.00114.56           H  
ATOM   5883 HG13 VAL L  58      -4.662 -93.322 -24.525  1.00114.56           H  
ATOM   5884 HG21 VAL L  58      -2.040 -91.967 -24.381  1.00105.27           H  
ATOM   5885 HG22 VAL L  58      -3.223 -91.577 -23.394  1.00105.27           H  
ATOM   5886 HG23 VAL L  58      -1.810 -92.007 -22.809  1.00105.27           H  
ATOM   5887  N   PRO L  59      -5.375 -95.607 -22.084  1.00 62.87           N  
ATOM   5888  CA  PRO L  59      -5.856 -96.996 -22.110  1.00 68.85           C  
ATOM   5889  C   PRO L  59      -5.310 -97.768 -23.305  1.00 67.74           C  
ATOM   5890  O   PRO L  59      -5.140 -97.234 -24.402  1.00 71.46           O  
ATOM   5891  CB  PRO L  59      -7.380 -96.852 -22.166  1.00 67.06           C  
ATOM   5892  CG  PRO L  59      -7.622 -95.495 -22.674  1.00 65.34           C  
ATOM   5893  CD  PRO L  59      -6.480 -94.644 -22.205  1.00 61.09           C  
ATOM   5894  HA  PRO L  59      -5.607 -97.453 -21.292  1.00 82.62           H  
ATOM   5895  HB2 PRO L  59      -7.749 -97.515 -22.770  1.00 80.47           H  
ATOM   5896  HB3 PRO L  59      -7.750 -96.956 -21.275  1.00 80.47           H  
ATOM   5897  HG2 PRO L  59      -7.652 -95.515 -23.643  1.00 78.41           H  
ATOM   5898  HG3 PRO L  59      -8.460 -95.163 -22.316  1.00 78.41           H  
ATOM   5899  HD2 PRO L  59      -6.269 -93.966 -22.866  1.00 73.31           H  
ATOM   5900  HD3 PRO L  59      -6.683 -94.251 -21.342  1.00 73.31           H  
ATOM   5901  N   SER L  60      -5.044 -99.050 -23.064  1.00 70.56           N  
ATOM   5902  CA  SER L  60      -4.485 -99.955 -24.062  1.00 72.95           C  
ATOM   5903  C   SER L  60      -5.373-100.160 -25.284  1.00 69.10           C  
ATOM   5904  O   SER L  60      -4.874-100.621 -26.316  1.00 71.68           O  
ATOM   5905  CB  SER L  60      -4.206-101.308 -23.409  1.00 78.67           C  
ATOM   5906  OG  SER L  60      -5.412-101.899 -22.956  1.00 90.57           O  
ATOM   5907  H   SER L  60      -5.183 -99.429 -22.304  1.00 84.67           H  
ATOM   5908  HA  SER L  60      -3.639 -99.595 -24.370  1.00 87.54           H  
ATOM   5909  HB2 SER L  60      -3.791-101.895 -24.060  1.00 94.40           H  
ATOM   5910  HB3 SER L  60      -3.612-101.178 -22.653  1.00 94.40           H  
ATOM   5911  HG  SER L  60      -5.249-102.651 -22.593  1.00108.68           H  
ATOM   5912  N   ARG L  61      -6.660 -99.816 -25.216  1.00 71.28           N  
ATOM   5913  CA  ARG L  61      -7.512 -99.972 -26.392  1.00 73.71           C  
ATOM   5914  C   ARG L  61      -7.114 -99.052 -27.543  1.00 77.95           C  
ATOM   5915  O   ARG L  61      -7.543 -99.291 -28.677  1.00 78.29           O  
ATOM   5916  CB  ARG L  61      -8.981 -99.722 -26.049  1.00 78.51           C  
ATOM   5917  CG  ARG L  61      -9.297 -98.328 -25.532  1.00 89.08           C  
ATOM   5918  CD  ARG L  61     -10.775 -98.208 -25.181  1.00 90.63           C  
ATOM   5919  NE  ARG L  61     -11.108 -96.925 -24.569  1.00 89.34           N  
ATOM   5920  CZ  ARG L  61     -10.815 -96.583 -23.318  1.00 93.10           C  
ATOM   5921  NH1 ARG L  61     -10.224 -97.449 -22.506  1.00103.09           N  
ATOM   5922  NH2 ARG L  61     -11.126 -95.374 -22.876  1.00 93.74           N  
ATOM   5923  H   ARG L  61      -7.054 -99.499 -24.520  1.00 85.53           H  
ATOM   5924  HA  ARG L  61      -7.436-100.886 -26.708  1.00 88.46           H  
ATOM   5925  HB2 ARG L  61      -9.512 -99.864 -26.849  1.00 94.22           H  
ATOM   5926  HB3 ARG L  61      -9.249-100.355 -25.365  1.00 94.22           H  
ATOM   5927  HG2 ARG L  61      -8.777 -98.155 -24.731  1.00106.90           H  
ATOM   5928  HG3 ARG L  61      -9.090 -97.674 -26.218  1.00106.90           H  
ATOM   5929  HD2 ARG L  61     -11.301 -98.299 -25.991  1.00108.75           H  
ATOM   5930  HD3 ARG L  61     -11.009 -98.909 -24.553  1.00108.75           H  
ATOM   5931  HE  ARG L  61     -11.524 -96.348 -25.052  1.00107.21           H  
ATOM   5932 HH11 ARG L  61     -10.011 -98.231 -22.793  1.00123.71           H  
ATOM   5933 HH12 ARG L  61     -10.044 -97.224 -21.696  1.00123.71           H  
ATOM   5934 HH21 ARG L  61     -11.521 -94.814 -23.396  1.00112.49           H  
ATOM   5935 HH22 ARG L  61     -10.957 -95.158 -22.061  1.00112.49           H  
ATOM   5936  N   PHE L  62      -6.310 -98.021 -27.289  1.00 76.60           N  
ATOM   5937  CA  PHE L  62      -5.839 -97.125 -28.339  1.00 72.13           C  
ATOM   5938  C   PHE L  62      -4.512 -97.607 -28.901  1.00 74.92           C  
ATOM   5939  O   PHE L  62      -3.630 -98.044 -28.158  1.00 84.91           O  
ATOM   5940  CB  PHE L  62      -5.640 -95.682 -27.862  1.00 73.32           C  
ATOM   5941  CG  PHE L  62      -6.893 -94.993 -27.443  1.00 73.62           C  
ATOM   5942  CD1 PHE L  62      -7.731 -94.435 -28.384  1.00 74.79           C  
ATOM   5943  CD2 PHE L  62      -7.173 -94.794 -26.107  1.00 75.46           C  
ATOM   5944  CE1 PHE L  62      -8.880 -93.774 -28.008  1.00 78.80           C  
ATOM   5945  CE2 PHE L  62      -8.317 -94.123 -25.721  1.00 75.84           C  
ATOM   5946  CZ  PHE L  62      -9.170 -93.611 -26.673  1.00 77.26           C  
ATOM   5947  H   PHE L  62      -6.020 -97.818 -26.505  1.00 91.92           H  
ATOM   5948  HA  PHE L  62      -6.487 -97.116 -29.061  1.00 86.55           H  
ATOM   5949  HB2 PHE L  62      -5.038 -95.687 -27.102  1.00 87.98           H  
ATOM   5950  HB3 PHE L  62      -5.249 -95.168 -28.586  1.00 87.98           H  
ATOM   5951  HD1 PHE L  62      -7.546 -94.552 -29.288  1.00 89.75           H  
ATOM   5952  HD2 PHE L  62      -6.607 -95.147 -25.460  1.00 90.55           H  
ATOM   5953  HE1 PHE L  62      -9.449 -93.423 -28.654  1.00 94.56           H  
ATOM   5954  HE2 PHE L  62      -8.512 -94.017 -24.818  1.00 91.01           H  
ATOM   5955  HZ  PHE L  62      -9.939 -93.157 -26.415  1.00 92.71           H  
ATOM   5956  N   SER L  63      -4.388 -97.549 -30.224  1.00 68.13           N  
ATOM   5957  CA  SER L  63      -3.121 -97.855 -30.868  1.00 70.81           C  
ATOM   5958  C   SER L  63      -2.999 -96.977 -32.103  1.00 70.18           C  
ATOM   5959  O   SER L  63      -3.989 -96.468 -32.634  1.00 69.03           O  
ATOM   5960  CB  SER L  63      -3.011 -99.342 -31.247  1.00 76.05           C  
ATOM   5961  OG  SER L  63      -3.972 -99.701 -32.226  1.00 78.12           O  
ATOM   5962  H   SER L  63      -5.020 -97.336 -30.767  1.00 81.75           H  
ATOM   5963  HA  SER L  63      -2.393 -97.638 -30.265  1.00 84.98           H  
ATOM   5964  HB2 SER L  63      -2.124 -99.510 -31.601  1.00 91.27           H  
ATOM   5965  HB3 SER L  63      -3.157 -99.879 -30.453  1.00 91.27           H  
ATOM   5966  HG  SER L  63      -3.895-100.524 -32.421  1.00 93.75           H  
ATOM   5967  N   GLY L  64      -1.763 -96.816 -32.551  1.00 71.42           N  
ATOM   5968  CA  GLY L  64      -1.476 -96.083 -33.769  1.00 71.39           C  
ATOM   5969  C   GLY L  64      -0.429 -96.802 -34.585  1.00 76.11           C  
ATOM   5970  O   GLY L  64       0.449 -97.478 -34.048  1.00 78.58           O  
ATOM   5971  H   GLY L  64      -1.063 -97.127 -32.159  1.00 85.71           H  
ATOM   5972  HA2 GLY L  64      -2.284 -95.999 -34.301  1.00 85.66           H  
ATOM   5973  HA3 GLY L  64      -1.150 -95.196 -33.552  1.00 85.66           H  
ATOM   5974  N   SER L  65      -0.523 -96.640 -35.899  1.00 78.02           N  
ATOM   5975  CA  SER L  65       0.438 -97.252 -36.796  1.00 83.17           C  
ATOM   5976  C   SER L  65       0.728 -96.373 -37.998  1.00 82.94           C  
ATOM   5977  O   SER L  65       0.078 -95.354 -38.247  1.00 79.23           O  
ATOM   5978  CB  SER L  65      -0.027 -98.595 -37.313  1.00104.31           C  
ATOM   5979  OG  SER L  65       0.823 -98.955 -38.391  1.00117.99           O  
ATOM   5980  H   SER L  65      -1.135 -96.182 -36.293  1.00 93.62           H  
ATOM   5981  HA  SER L  65       1.271 -97.388 -36.318  1.00 99.80           H  
ATOM   5982  HB2 SER L  65       0.042 -99.257 -36.607  1.00125.17           H  
ATOM   5983  HB3 SER L  65      -0.942 -98.524 -37.628  1.00125.17           H  
ATOM   5984  HG  SER L  65       0.589 -99.709 -38.706  1.00141.59           H  
ATOM   5985  N   GLY L  66       1.753 -96.792 -38.721  1.00 87.47           N  
ATOM   5986  CA  GLY L  66       2.179 -96.182 -39.959  1.00 88.67           C  
ATOM   5987  C   GLY L  66       3.538 -95.524 -39.826  1.00 87.38           C  
ATOM   5988  O   GLY L  66       4.097 -95.370 -38.740  1.00 85.12           O  
ATOM   5989  H   GLY L  66       2.240 -97.465 -38.497  1.00104.97           H  
ATOM   5990  HA2 GLY L  66       2.228 -96.857 -40.654  1.00106.41           H  
ATOM   5991  HA3 GLY L  66       1.534 -95.508 -40.228  1.00106.41           H  
ATOM   5992  N   SER L  67       4.056 -95.137 -40.984  1.00107.73           N  
ATOM   5993  CA  SER L  67       5.334 -94.459 -41.093  1.00108.78           C  
ATOM   5994  C   SER L  67       5.474 -94.000 -42.531  1.00109.13           C  
ATOM   5995  O   SER L  67       5.072 -94.712 -43.454  1.00112.90           O  
ATOM   5996  CB  SER L  67       6.495 -95.383 -40.704  1.00117.20           C  
ATOM   5997  OG  SER L  67       7.743 -94.732 -40.867  1.00118.15           O  
ATOM   5998  H   SER L  67       3.671 -95.262 -41.742  1.00129.27           H  
ATOM   5999  HA  SER L  67       5.345 -93.681 -40.514  1.00130.53           H  
ATOM   6000  HB2 SER L  67       6.394 -95.641 -39.775  1.00140.65           H  
ATOM   6001  HB3 SER L  67       6.475 -96.170 -41.271  1.00140.65           H  
ATOM   6002  HG  SER L  67       8.375 -95.257 -40.648  1.00141.78           H  
ATOM   6003  N   GLY L  68       6.027 -92.808 -42.708  1.00 83.48           N  
ATOM   6004  CA  GLY L  68       6.188 -92.227 -44.023  1.00 88.22           C  
ATOM   6005  C   GLY L  68       5.095 -91.238 -44.363  1.00 82.81           C  
ATOM   6006  O   GLY L  68       5.143 -90.083 -43.931  1.00 87.23           O  
ATOM   6007  H   GLY L  68       6.319 -92.311 -42.069  1.00100.18           H  
ATOM   6008  HA2 GLY L  68       7.042 -91.769 -44.071  1.00105.86           H  
ATOM   6009  HA3 GLY L  68       6.181 -92.932 -44.690  1.00105.86           H  
ATOM   6010  N   THR L  69       4.103 -91.684 -45.139  1.00 96.96           N  
ATOM   6011  CA  THR L  69       3.011 -90.833 -45.588  1.00 96.19           C  
ATOM   6012  C   THR L  69       1.629 -91.340 -45.206  1.00 96.04           C  
ATOM   6013  O   THR L  69       0.674 -90.564 -45.286  1.00 97.52           O  
ATOM   6014  CB  THR L  69       3.052 -90.665 -47.115  1.00 98.46           C  
ATOM   6015  OG1 THR L  69       3.058 -91.950 -47.747  1.00102.69           O  
ATOM   6016  CG2 THR L  69       4.288 -89.890 -47.531  1.00102.10           C  
ATOM   6017  H   THR L  69       4.045 -92.494 -45.423  1.00116.35           H  
ATOM   6018  HA  THR L  69       3.122 -89.955 -45.191  1.00115.43           H  
ATOM   6019  HB  THR L  69       2.270 -90.169 -47.405  1.00118.16           H  
ATOM   6020  HG1 THR L  69       2.358 -92.382 -47.534  1.00123.23           H  
ATOM   6021 HG21 THR L  69       4.307 -89.788 -48.495  1.00122.52           H  
ATOM   6022 HG22 THR L  69       4.281 -89.011 -47.121  1.00122.52           H  
ATOM   6023 HG23 THR L  69       5.087 -90.363 -47.248  1.00122.52           H  
ATOM   6024  N   ASP L  70       1.493 -92.600 -44.794  1.00 86.44           N  
ATOM   6025  CA  ASP L  70       0.204 -93.196 -44.462  1.00 68.22           C  
ATOM   6026  C   ASP L  70       0.209 -93.637 -43.007  1.00 62.26           C  
ATOM   6027  O   ASP L  70       1.142 -94.307 -42.558  1.00 72.77           O  
ATOM   6028  CB  ASP L  70      -0.095 -94.375 -45.379  1.00 84.54           C  
ATOM   6029  CG  ASP L  70      -0.106 -93.980 -46.839  1.00102.87           C  
ATOM   6030  OD1 ASP L  70      -1.158 -93.507 -47.318  1.00110.04           O  
ATOM   6031  OD2 ASP L  70       0.942 -94.126 -47.505  1.00109.62           O  
ATOM   6032  H   ASP L  70       2.153 -93.143 -44.696  1.00103.72           H  
ATOM   6033  HA  ASP L  70      -0.495 -92.534 -44.578  1.00 81.86           H  
ATOM   6034  HB2 ASP L  70       0.587 -95.054 -45.256  1.00101.44           H  
ATOM   6035  HB3 ASP L  70      -0.968 -94.736 -45.158  1.00101.44           H  
ATOM   6036  N   PHE L  71      -0.838 -93.260 -42.282  1.00 56.96           N  
ATOM   6037  CA  PHE L  71      -0.955 -93.535 -40.860  1.00 54.83           C  
ATOM   6038  C   PHE L  71      -2.374 -93.974 -40.520  1.00 61.76           C  
ATOM   6039  O   PHE L  71      -3.333 -93.649 -41.225  1.00 54.82           O  
ATOM   6040  CB  PHE L  71      -0.544 -92.303 -40.050  1.00 60.54           C  
ATOM   6041  CG  PHE L  71       0.867 -91.862 -40.315  1.00 67.28           C  
ATOM   6042  CD1 PHE L  71       1.907 -92.339 -39.535  1.00 68.56           C  
ATOM   6043  CD2 PHE L  71       1.159 -91.003 -41.360  1.00 73.13           C  
ATOM   6044  CE1 PHE L  71       3.205 -91.948 -39.773  1.00 71.60           C  
ATOM   6045  CE2 PHE L  71       2.460 -90.611 -41.608  1.00 74.90           C  
ATOM   6046  CZ  PHE L  71       3.485 -91.084 -40.814  1.00 79.06           C  
ATOM   6047  H   PHE L  71      -1.511 -92.832 -42.603  1.00 68.35           H  
ATOM   6048  HA  PHE L  71      -0.354 -94.260 -40.628  1.00 65.80           H  
ATOM   6049  HB2 PHE L  71      -1.134 -91.567 -40.277  1.00 72.65           H  
ATOM   6050  HB3 PHE L  71      -0.620 -92.508 -39.105  1.00 72.65           H  
ATOM   6051  HD1 PHE L  71       1.724 -92.919 -38.831  1.00 82.27           H  
ATOM   6052  HD2 PHE L  71       0.471 -90.681 -41.897  1.00 87.75           H  
ATOM   6053  HE1 PHE L  71       3.894 -92.270 -39.237  1.00 85.92           H  
ATOM   6054  HE2 PHE L  71       2.645 -90.027 -42.308  1.00 89.89           H  
ATOM   6055  HZ  PHE L  71       4.361 -90.820 -40.978  1.00 94.87           H  
ATOM   6056  N   THR L  72      -2.486 -94.756 -39.450  1.00 53.34           N  
ATOM   6057  CA  THR L  72      -3.760 -95.290 -38.995  1.00 59.19           C  
ATOM   6058  C   THR L  72      -3.834 -95.134 -37.485  1.00 53.60           C  
ATOM   6059  O   THR L  72      -2.840 -95.332 -36.782  1.00 53.80           O  
ATOM   6060  CB  THR L  72      -3.958 -96.779 -39.367  1.00 55.24           C  
ATOM   6061  OG1 THR L  72      -3.111 -97.600 -38.557  1.00 58.47           O  
ATOM   6062  CG2 THR L  72      -3.653 -97.038 -40.836  1.00 57.57           C  
ATOM   6063  H   THR L  72      -1.821 -94.995 -38.960  1.00 64.00           H  
ATOM   6064  HA  THR L  72      -4.483 -94.778 -39.391  1.00 71.03           H  
ATOM   6065  HB  THR L  72      -4.883 -97.024 -39.205  1.00 66.28           H  
ATOM   6066  HG1 THR L  72      -3.218 -98.418 -38.760  1.00 70.16           H  
ATOM   6067 HG21 THR L  72      -3.786 -97.977 -41.042  1.00 69.09           H  
ATOM   6068 HG22 THR L  72      -4.242 -96.507 -41.396  1.00 69.09           H  
ATOM   6069 HG23 THR L  72      -2.734 -96.799 -41.031  1.00 69.09           H  
ATOM   6070  N   PHE L  73      -5.001 -94.725 -37.005  1.00 49.94           N  
ATOM   6071  CA  PHE L  73      -5.321 -94.703 -35.583  1.00 53.31           C  
ATOM   6072  C   PHE L  73      -6.473 -95.663 -35.351  1.00 49.45           C  
ATOM   6073  O   PHE L  73      -7.481 -95.604 -36.062  1.00 55.68           O  
ATOM   6074  CB  PHE L  73      -5.642 -93.280 -35.123  1.00 56.40           C  
ATOM   6075  CG  PHE L  73      -6.104 -93.180 -33.713  1.00 52.53           C  
ATOM   6076  CD1 PHE L  73      -5.194 -93.064 -32.683  1.00 54.47           C  
ATOM   6077  CD2 PHE L  73      -7.459 -93.116 -33.421  1.00 47.56           C  
ATOM   6078  CE1 PHE L  73      -5.624 -92.956 -31.375  1.00 64.73           C  
ATOM   6079  CE2 PHE L  73      -7.894 -92.999 -32.117  1.00 51.09           C  
ATOM   6080  CZ  PHE L  73      -6.977 -92.915 -31.094  1.00 46.55           C  
ATOM   6081  H   PHE L  73      -5.646 -94.446 -37.500  1.00 59.93           H  
ATOM   6082  HA  PHE L  73      -4.556 -95.019 -35.078  1.00 63.98           H  
ATOM   6083  HB2 PHE L  73      -4.843 -92.737 -35.211  1.00 67.68           H  
ATOM   6084  HB3 PHE L  73      -6.344 -92.921 -35.689  1.00 67.68           H  
ATOM   6085  HD1 PHE L  73      -4.283 -93.097 -32.867  1.00 65.36           H  
ATOM   6086  HD2 PHE L  73      -8.081 -93.179 -34.110  1.00 57.08           H  
ATOM   6087  HE1 PHE L  73      -5.004 -92.894 -30.685  1.00 77.68           H  
ATOM   6088  HE2 PHE L  73      -8.804 -92.975 -31.930  1.00 61.30           H  
ATOM   6089  HZ  PHE L  73      -7.267 -92.835 -30.214  1.00 55.87           H  
ATOM   6090  N   THR L  74      -6.323 -96.537 -34.355  1.00 63.70           N  
ATOM   6091  CA  THR L  74      -7.297 -97.585 -34.087  1.00 72.14           C  
ATOM   6092  C   THR L  74      -7.735 -97.575 -32.633  1.00 69.48           C  
ATOM   6093  O   THR L  74      -6.906 -97.435 -31.729  1.00 76.15           O  
ATOM   6094  CB  THR L  74      -6.693 -98.957 -34.429  1.00 77.30           C  
ATOM   6095  OG1 THR L  74      -6.184 -98.935 -35.768  1.00 84.07           O  
ATOM   6096  CG2 THR L  74      -7.724-100.069 -34.295  1.00 84.55           C  
ATOM   6097  H   THR L  74      -5.654 -96.540 -33.815  1.00 76.45           H  
ATOM   6098  HA  THR L  74      -8.080 -97.448 -34.643  1.00 86.56           H  
ATOM   6099  HB  THR L  74      -5.965 -99.145 -33.816  1.00 92.76           H  
ATOM   6100  HG1 THR L  74      -5.849 -99.691 -35.964  1.00100.88           H  
ATOM   6101 HG21 THR L  74      -7.321-100.923 -34.515  1.00101.46           H  
ATOM   6102 HG22 THR L  74      -8.058-100.103 -33.384  1.00101.46           H  
ATOM   6103 HG23 THR L  74      -8.467 -99.907 -34.897  1.00101.46           H  
ATOM   6104  N   ILE L  75      -9.044 -97.680 -32.420  1.00 65.22           N  
ATOM   6105  CA  ILE L  75      -9.627 -98.021 -31.124  1.00 71.50           C  
ATOM   6106  C   ILE L  75     -10.144 -99.451 -31.186  1.00 71.96           C  
ATOM   6107  O   ILE L  75     -11.040 -99.758 -31.981  1.00 70.41           O  
ATOM   6108  CB  ILE L  75     -10.757 -97.059 -30.731  1.00 71.31           C  
ATOM   6109  CG1 ILE L  75     -10.286 -95.612 -30.868  1.00 67.44           C  
ATOM   6110  CG2 ILE L  75     -11.209 -97.363 -29.306  1.00 69.26           C  
ATOM   6111  CD1 ILE L  75     -11.350 -94.583 -30.581  1.00 74.76           C  
ATOM   6112  H   ILE L  75      -9.634 -97.553 -33.032  1.00 78.26           H  
ATOM   6113  HA  ILE L  75      -8.939 -97.976 -30.442  1.00 85.80           H  
ATOM   6114  HB  ILE L  75     -11.506 -97.199 -31.331  1.00 85.57           H  
ATOM   6115 HG12 ILE L  75      -9.556 -95.463 -30.246  1.00 80.93           H  
ATOM   6116 HG13 ILE L  75      -9.976 -95.471 -31.776  1.00 80.93           H  
ATOM   6117 HG21 ILE L  75     -11.923 -96.752 -29.065  1.00 83.11           H  
ATOM   6118 HG22 ILE L  75     -11.528 -98.278 -29.265  1.00 83.11           H  
ATOM   6119 HG23 ILE L  75     -10.457 -97.247 -28.705  1.00 83.11           H  
ATOM   6120 HD11 ILE L  75     -10.969 -93.697 -30.690  1.00 89.71           H  
ATOM   6121 HD12 ILE L  75     -12.084 -94.707 -31.203  1.00 89.71           H  
ATOM   6122 HD13 ILE L  75     -11.663 -94.699 -29.671  1.00 89.71           H  
ATOM   6123  N   SER L  76      -9.576-100.329 -30.367  1.00 76.70           N  
ATOM   6124  CA  SER L  76      -9.898-101.746 -30.486  1.00 71.82           C  
ATOM   6125  C   SER L  76     -11.329-102.024 -30.046  1.00 79.32           C  
ATOM   6126  O   SER L  76     -11.995-102.905 -30.607  1.00 87.33           O  
ATOM   6127  CB  SER L  76      -8.908-102.570 -29.681  1.00 68.81           C  
ATOM   6128  OG  SER L  76      -8.963-102.273 -28.299  1.00 79.80           O  
ATOM   6129  H   SER L  76      -9.012-100.137 -29.747  1.00 92.04           H  
ATOM   6130  HA  SER L  76      -9.817-102.009 -31.416  1.00 86.18           H  
ATOM   6131  HB2 SER L  76      -9.110-103.510 -29.806  1.00 82.57           H  
ATOM   6132  HB3 SER L  76      -8.012-102.382 -30.004  1.00 82.57           H  
ATOM   6133  HG  SER L  76      -8.399-102.748 -27.876  1.00 95.76           H  
ATOM   6134  N   SER L  77     -11.812-101.292 -29.041  1.00 68.39           N  
ATOM   6135  CA  SER L  77     -13.132-101.544 -28.474  1.00 76.51           C  
ATOM   6136  C   SER L  77     -13.643-100.184 -28.005  1.00 73.22           C  
ATOM   6137  O   SER L  77     -13.243 -99.704 -26.941  1.00 81.27           O  
ATOM   6138  CB  SER L  77     -13.058-102.553 -27.337  1.00 85.31           C  
ATOM   6139  OG  SER L  77     -14.326-102.747 -26.752  1.00 92.22           O  
ATOM   6140  H   SER L  77     -11.390-100.641 -28.670  1.00 82.06           H  
ATOM   6141  HA  SER L  77     -13.728-101.885 -29.159  1.00 91.82           H  
ATOM   6142  HB2 SER L  77     -12.738-103.400 -27.686  1.00102.37           H  
ATOM   6143  HB3 SER L  77     -12.446-102.222 -26.661  1.00102.37           H  
ATOM   6144  HG  SER L  77     -14.271-103.312 -26.119  1.00110.66           H  
ATOM   6145  N   LEU L  78     -14.506 -99.567 -28.815  1.00 63.33           N  
ATOM   6146  CA  LEU L  78     -14.909 -98.188 -28.576  1.00 61.20           C  
ATOM   6147  C   LEU L  78     -15.665 -98.082 -27.255  1.00 65.83           C  
ATOM   6148  O   LEU L  78     -16.530 -98.907 -26.951  1.00 81.12           O  
ATOM   6149  CB  LEU L  78     -15.757 -97.687 -29.748  1.00 61.88           C  
ATOM   6150  CG  LEU L  78     -16.228 -96.235 -29.689  1.00 68.91           C  
ATOM   6151  CD1 LEU L  78     -15.017 -95.322 -29.650  1.00 59.83           C  
ATOM   6152  CD2 LEU L  78     -17.101 -95.917 -30.895  1.00 69.44           C  
ATOM   6153  H   LEU L  78     -14.869 -99.927 -29.507  1.00 76.00           H  
ATOM   6154  HA  LEU L  78     -14.118 -97.630 -28.516  1.00 73.44           H  
ATOM   6155  HB2 LEU L  78     -15.238 -97.787 -30.561  1.00 74.25           H  
ATOM   6156  HB3 LEU L  78     -16.551 -98.243 -29.805  1.00 74.25           H  
ATOM   6157  HG  LEU L  78     -16.749 -96.094 -28.883  1.00 82.69           H  
ATOM   6158 HD11 LEU L  78     -15.318 -94.400 -29.612  1.00 71.79           H  
ATOM   6159 HD12 LEU L  78     -14.490 -95.530 -28.862  1.00 71.79           H  
ATOM   6160 HD13 LEU L  78     -14.487 -95.465 -30.450  1.00 71.79           H  
ATOM   6161 HD21 LEU L  78     -17.389 -94.992 -30.841  1.00 83.33           H  
ATOM   6162 HD22 LEU L  78     -16.583 -96.055 -31.704  1.00 83.33           H  
ATOM   6163 HD23 LEU L  78     -17.872 -96.505 -30.890  1.00 83.33           H  
ATOM   6164  N   GLN L  79     -15.331 -97.060 -26.467  1.00 56.30           N  
ATOM   6165  CA  GLN L  79     -15.997 -96.748 -25.211  1.00 63.36           C  
ATOM   6166  C   GLN L  79     -16.708 -95.398 -25.191  1.00 73.87           C  
ATOM   6167  O   GLN L  79     -16.383 -94.499 -25.977  1.00 70.50           O  
ATOM   6168  CB  GLN L  79     -14.958 -96.756 -24.082  1.00 64.96           C  
ATOM   6169  CG  GLN L  79     -14.190 -98.049 -23.970  1.00 61.36           C  
ATOM   6170  CD  GLN L  79     -15.112 -99.200 -23.684  1.00 69.37           C  
ATOM   6171  OE1 GLN L  79     -15.180-100.166 -24.443  1.00 72.51           O  
ATOM   6172  NE2 GLN L  79     -15.887 -99.068 -22.625  1.00 66.99           N  
ATOM   6173  H   GLN L  79     -14.693 -96.513 -26.652  1.00 67.56           H  
ATOM   6174  HA  GLN L  79     -16.653 -97.436 -25.021  1.00 76.03           H  
ATOM   6175  HB2 GLN L  79     -14.319 -96.044 -24.240  1.00 77.95           H  
ATOM   6176  HB3 GLN L  79     -15.413 -96.608 -23.238  1.00 77.95           H  
ATOM   6177  HG2 GLN L  79     -13.732 -98.224 -24.808  1.00 73.64           H  
ATOM   6178  HG3 GLN L  79     -13.550 -97.981 -23.244  1.00 73.64           H  
ATOM   6179 HE21 GLN L  79     -15.844 -98.354 -22.147  1.00 80.39           H  
ATOM   6180 HE22 GLN L  79     -16.435 -99.695 -22.413  1.00 80.39           H  
ATOM   6181  N   PRO L  80     -17.700 -95.226 -24.302  1.00 85.95           N  
ATOM   6182  CA  PRO L  80     -18.422 -93.941 -24.268  1.00 83.31           C  
ATOM   6183  C   PRO L  80     -17.497 -92.764 -24.033  1.00 83.59           C  
ATOM   6184  O   PRO L  80     -17.725 -91.678 -24.582  1.00 82.98           O  
ATOM   6185  CB  PRO L  80     -19.417 -94.124 -23.115  1.00 83.24           C  
ATOM   6186  CG  PRO L  80     -19.592 -95.582 -22.978  1.00 88.02           C  
ATOM   6187  CD  PRO L  80     -18.311 -96.230 -23.412  1.00 88.15           C  
ATOM   6188  HA  PRO L  80     -18.910 -93.807 -25.095  1.00 99.98           H  
ATOM   6189  HB2 PRO L  80     -19.047 -93.746 -22.302  1.00 99.88           H  
ATOM   6190  HB3 PRO L  80     -20.259 -93.698 -23.340  1.00 99.88           H  
ATOM   6191  HG2 PRO L  80     -19.780 -95.796 -22.051  1.00105.62           H  
ATOM   6192  HG3 PRO L  80     -20.324 -95.871 -23.546  1.00105.62           H  
ATOM   6193  HD2 PRO L  80     -17.740 -96.394 -22.646  1.00105.79           H  
ATOM   6194  HD3 PRO L  80     -18.495 -97.047 -23.901  1.00105.79           H  
ATOM   6195  N   GLU L  81     -16.449 -92.950 -23.227  1.00 92.31           N  
ATOM   6196  CA  GLU L  81     -15.551 -91.842 -22.937  1.00 99.03           C  
ATOM   6197  C   GLU L  81     -14.679 -91.486 -24.128  1.00 96.93           C  
ATOM   6198  O   GLU L  81     -13.913 -90.521 -24.046  1.00101.41           O  
ATOM   6199  CB  GLU L  81     -14.693 -92.153 -21.704  1.00107.53           C  
ATOM   6200  CG  GLU L  81     -13.832 -93.403 -21.795  1.00120.91           C  
ATOM   6201  CD  GLU L  81     -14.556 -94.645 -21.292  1.00130.07           C  
ATOM   6202  OE1 GLU L  81     -15.799 -94.702 -21.407  1.00132.16           O  
ATOM   6203  OE2 GLU L  81     -13.884 -95.559 -20.768  1.00132.26           O  
ATOM   6204  H   GLU L  81     -16.243 -93.692 -22.845  1.00110.77           H  
ATOM   6205  HA  GLU L  81     -16.087 -91.061 -22.727  1.00118.84           H  
ATOM   6206  HB2 GLU L  81     -14.099 -91.403 -21.548  1.00129.03           H  
ATOM   6207  HB3 GLU L  81     -15.283 -92.262 -20.942  1.00129.03           H  
ATOM   6208  HG2 GLU L  81     -13.587 -93.553 -22.722  1.00145.10           H  
ATOM   6209  HG3 GLU L  81     -13.036 -93.280 -21.256  1.00145.10           H  
ATOM   6210  N   ASP L  82     -14.756 -92.255 -25.213  1.00 87.56           N  
ATOM   6211  CA  ASP L  82     -13.938 -92.016 -26.391  1.00 84.71           C  
ATOM   6212  C   ASP L  82     -14.607 -91.060 -27.367  1.00 78.37           C  
ATOM   6213  O   ASP L  82     -13.991 -90.703 -28.377  1.00 75.91           O  
ATOM   6214  CB  ASP L  82     -13.618 -93.337 -27.103  1.00 88.22           C  
ATOM   6215  CG  ASP L  82     -12.822 -94.294 -26.234  1.00 93.90           C  
ATOM   6216  OD1 ASP L  82     -12.179 -93.836 -25.265  1.00102.42           O  
ATOM   6217  OD2 ASP L  82     -12.836 -95.507 -26.525  1.00 95.07           O  
ATOM   6218  H   ASP L  82     -15.284 -92.930 -25.289  1.00105.07           H  
ATOM   6219  HA  ASP L  82     -13.099 -91.618 -26.112  1.00101.66           H  
ATOM   6220  HB2 ASP L  82     -14.449 -93.774 -27.347  1.00105.87           H  
ATOM   6221  HB3 ASP L  82     -13.096 -93.148 -27.898  1.00105.87           H  
ATOM   6222  N   ILE L  83     -15.855 -90.663 -27.105  1.00 75.62           N  
ATOM   6223  CA  ILE L  83     -16.521 -89.624 -27.882  1.00 75.92           C  
ATOM   6224  C   ILE L  83     -15.623 -88.400 -27.875  1.00 79.01           C  
ATOM   6225  O   ILE L  83     -15.334 -87.833 -26.815  1.00 90.12           O  
ATOM   6226  CB  ILE L  83     -17.915 -89.280 -27.324  1.00 81.13           C  
ATOM   6227  CG1 ILE L  83     -18.884 -90.439 -27.550  1.00 90.92           C  
ATOM   6228  CG2 ILE L  83     -18.460 -88.007 -27.974  1.00 74.59           C  
ATOM   6229  CD1 ILE L  83     -20.155 -90.332 -26.722  1.00 95.51           C  
ATOM   6230  H   ILE L  83     -16.341 -90.987 -26.473  1.00 90.75           H  
ATOM   6231  HA  ILE L  83     -16.624 -89.923 -28.799  1.00 91.10           H  
ATOM   6232  HB  ILE L  83     -17.835 -89.128 -26.370  1.00 97.36           H  
ATOM   6233 HG12 ILE L  83     -19.139 -90.457 -28.486  1.00109.10           H  
ATOM   6234 HG13 ILE L  83     -18.443 -91.269 -27.312  1.00109.10           H  
ATOM   6235 HG21 ILE L  83     -19.336 -87.815 -27.605  1.00 89.51           H  
ATOM   6236 HG22 ILE L  83     -17.854 -87.273 -27.787  1.00 89.51           H  
ATOM   6237 HG23 ILE L  83     -18.527 -88.145 -28.932  1.00 89.51           H  
ATOM   6238 HD11 ILE L  83     -20.722 -91.096 -26.914  1.00114.61           H  
ATOM   6239 HD12 ILE L  83     -19.919 -90.324 -25.781  1.00114.61           H  
ATOM   6240 HD13 ILE L  83     -20.616 -89.511 -26.955  1.00114.61           H  
ATOM   6241  N   ALA L  84     -15.204 -87.969 -29.055  1.00 71.07           N  
ATOM   6242  CA  ALA L  84     -14.204 -86.920 -29.170  1.00 69.19           C  
ATOM   6243  C   ALA L  84     -13.969 -86.691 -30.652  1.00 66.65           C  
ATOM   6244  O   ALA L  84     -14.485 -87.416 -31.508  1.00 55.60           O  
ATOM   6245  CB  ALA L  84     -12.891 -87.273 -28.470  1.00 72.25           C  
ATOM   6246  H   ALA L  84     -15.485 -88.270 -29.810  1.00 85.29           H  
ATOM   6247  HA  ALA L  84     -14.549 -86.101 -28.782  1.00 83.03           H  
ATOM   6248  HB1 ALA L  84     -12.267 -86.538 -28.582  1.00 86.70           H  
ATOM   6249  HB2 ALA L  84     -13.065 -87.419 -27.527  1.00 86.70           H  
ATOM   6250  HB3 ALA L  84     -12.527 -88.079 -28.869  1.00 86.70           H  
ATOM   6251  N   THR L  85     -13.190 -85.660 -30.938  1.00 60.75           N  
ATOM   6252  CA  THR L  85     -12.604 -85.469 -32.251  1.00 63.05           C  
ATOM   6253  C   THR L  85     -11.137 -85.832 -32.134  1.00 61.27           C  
ATOM   6254  O   THR L  85     -10.458 -85.392 -31.200  1.00 72.00           O  
ATOM   6255  CB  THR L  85     -12.743 -84.023 -32.738  1.00 63.08           C  
ATOM   6256  OG1 THR L  85     -14.127 -83.658 -32.806  1.00 62.35           O  
ATOM   6257  CG2 THR L  85     -12.088 -83.847 -34.117  1.00 49.67           C  
ATOM   6258  H   THR L  85     -12.983 -85.043 -30.375  1.00 72.90           H  
ATOM   6259  HA  THR L  85     -13.026 -86.061 -32.892  1.00 75.66           H  
ATOM   6260  HB  THR L  85     -12.291 -83.434 -32.114  1.00 75.70           H  
ATOM   6261  HG1 THR L  85     -14.203 -82.855 -33.076  1.00 74.82           H  
ATOM   6262 HG21 THR L  85     -12.183 -82.929 -34.414  1.00 59.60           H  
ATOM   6263 HG22 THR L  85     -11.145 -84.066 -34.066  1.00 59.60           H  
ATOM   6264 HG23 THR L  85     -12.513 -84.433 -34.763  1.00 59.60           H  
ATOM   6265  N   TYR L  86     -10.656 -86.650 -33.057  1.00 61.02           N  
ATOM   6266  CA  TYR L  86      -9.272 -87.077 -33.029  1.00 60.78           C  
ATOM   6267  C   TYR L  86      -8.559 -86.319 -34.133  1.00 62.26           C  
ATOM   6268  O   TYR L  86      -9.127 -86.092 -35.205  1.00 66.76           O  
ATOM   6269  CB  TYR L  86      -9.175 -88.598 -33.190  1.00 58.17           C  
ATOM   6270  CG  TYR L  86      -9.795 -89.282 -31.995  1.00 50.50           C  
ATOM   6271  CD1 TYR L  86      -9.017 -89.680 -30.917  1.00 59.30           C  
ATOM   6272  CD2 TYR L  86     -11.171 -89.459 -31.912  1.00 46.25           C  
ATOM   6273  CE1 TYR L  86      -9.586 -90.289 -29.813  1.00 69.84           C  
ATOM   6274  CE2 TYR L  86     -11.749 -90.051 -30.809  1.00 59.71           C  
ATOM   6275  CZ  TYR L  86     -10.952 -90.468 -29.763  1.00 69.73           C  
ATOM   6276  OH  TYR L  86     -11.525 -91.045 -28.653  1.00 73.22           O  
ATOM   6277  H   TYR L  86     -11.113 -86.971 -33.711  1.00 73.23           H  
ATOM   6278  HA  TYR L  86      -8.874 -86.831 -32.179  1.00 72.93           H  
ATOM   6279  HB2 TYR L  86      -9.656 -88.871 -33.987  1.00 69.81           H  
ATOM   6280  HB3 TYR L  86      -8.243 -88.860 -33.248  1.00 69.81           H  
ATOM   6281  HD1 TYR L  86      -8.095 -89.565 -30.951  1.00 71.16           H  
ATOM   6282  HD2 TYR L  86     -11.710 -89.183 -32.618  1.00 55.50           H  
ATOM   6283  HE1 TYR L  86      -9.053 -90.559 -29.101  1.00 83.81           H  
ATOM   6284  HE2 TYR L  86     -12.670 -90.174 -30.773  1.00 71.65           H  
ATOM   6285  HH  TYR L  86     -12.367 -91.094 -28.754  1.00 87.87           H  
ATOM   6286  N   TYR L  87      -7.314 -85.942 -33.873  1.00 63.58           N  
ATOM   6287  CA  TYR L  87      -6.516 -85.208 -34.837  1.00 64.50           C  
ATOM   6288  C   TYR L  87      -5.153 -85.859 -34.925  1.00 61.92           C  
ATOM   6289  O   TYR L  87      -4.563 -86.202 -33.897  1.00 70.16           O  
ATOM   6290  CB  TYR L  87      -6.315 -83.751 -34.394  1.00 64.16           C  
ATOM   6291  CG  TYR L  87      -7.561 -82.899 -34.291  1.00 68.63           C  
ATOM   6292  CD1 TYR L  87      -8.109 -82.267 -35.400  1.00 79.51           C  
ATOM   6293  CD2 TYR L  87      -8.163 -82.689 -33.056  1.00 69.90           C  
ATOM   6294  CE1 TYR L  87      -9.242 -81.469 -35.280  1.00 77.79           C  
ATOM   6295  CE2 TYR L  87      -9.289 -81.900 -32.929  1.00 64.08           C  
ATOM   6296  CZ  TYR L  87      -9.823 -81.291 -34.039  1.00 68.48           C  
ATOM   6297  OH  TYR L  87     -10.947 -80.512 -33.904  1.00 74.78           O  
ATOM   6298  H   TYR L  87      -6.906 -86.102 -33.133  1.00 76.29           H  
ATOM   6299  HA  TYR L  87      -6.938 -85.225 -35.710  1.00 77.40           H  
ATOM   6300  HB2 TYR L  87      -5.896 -83.755 -33.519  1.00 76.99           H  
ATOM   6301  HB3 TYR L  87      -5.723 -83.319 -35.031  1.00 76.99           H  
ATOM   6302  HD1 TYR L  87      -7.718 -82.386 -36.236  1.00 95.41           H  
ATOM   6303  HD2 TYR L  87      -7.806 -83.097 -32.301  1.00 83.88           H  
ATOM   6304  HE1 TYR L  87      -9.607 -81.059 -36.030  1.00 93.35           H  
ATOM   6305  HE2 TYR L  87      -9.683 -81.779 -32.095  1.00 76.90           H  
ATOM   6306  HH  TYR L  87     -11.192 -80.493 -33.091  1.00 89.74           H  
ATOM   6307  N   CYS L  88      -4.640 -86.004 -36.138  1.00 63.18           N  
ATOM   6308  CA  CYS L  88      -3.221 -86.264 -36.283  1.00 66.83           C  
ATOM   6309  C   CYS L  88      -2.481 -84.944 -36.440  1.00 68.50           C  
ATOM   6310  O   CYS L  88      -3.047 -83.929 -36.850  1.00 75.68           O  
ATOM   6311  CB  CYS L  88      -2.945 -87.180 -37.476  1.00 60.57           C  
ATOM   6312  SG  CYS L  88      -3.383 -86.461 -39.051  1.00 88.00           S  
ATOM   6313  H   CYS L  88      -5.080 -85.957 -36.875  1.00 75.82           H  
ATOM   6314  HA  CYS L  88      -2.893 -86.703 -35.482  1.00 80.20           H  
ATOM   6315  HB2 CYS L  88      -1.998 -87.388 -37.498  1.00 72.69           H  
ATOM   6316  HB3 CYS L  88      -3.458 -87.996 -37.369  1.00 72.69           H  
ATOM   6317  N   GLN L  89      -1.197 -84.971 -36.111  1.00 65.76           N  
ATOM   6318  CA  GLN L  89      -0.344 -83.804 -36.266  1.00 62.55           C  
ATOM   6319  C   GLN L  89       1.055 -84.315 -36.547  1.00 64.18           C  
ATOM   6320  O   GLN L  89       1.563 -85.166 -35.814  1.00 64.65           O  
ATOM   6321  CB  GLN L  89      -0.359 -82.899 -35.028  1.00 57.83           C  
ATOM   6322  CG  GLN L  89       0.586 -81.698 -35.152  1.00 55.00           C  
ATOM   6323  CD  GLN L  89       0.883 -80.996 -33.839  1.00 68.35           C  
ATOM   6324  OE1 GLN L  89       0.921 -79.767 -33.787  1.00 80.66           O  
ATOM   6325  NE2 GLN L  89       1.101 -81.769 -32.775  1.00 72.71           N  
ATOM   6326  H   GLN L  89      -0.792 -85.660 -35.792  1.00 78.92           H  
ATOM   6327  HA  GLN L  89      -0.642 -83.285 -37.030  1.00 75.06           H  
ATOM   6328  HB2 GLN L  89      -1.258 -82.560 -34.896  1.00 69.40           H  
ATOM   6329  HB3 GLN L  89      -0.084 -83.418 -34.255  1.00 69.40           H  
ATOM   6330  HG2 GLN L  89       1.429 -82.003 -35.520  1.00 66.00           H  
ATOM   6331  HG3 GLN L  89       0.184 -81.048 -35.749  1.00 66.00           H  
ATOM   6332 HE21 GLN L  89       1.070 -82.625 -32.852  1.00 87.26           H  
ATOM   6333 HE22 GLN L  89       1.273 -81.411 -32.012  1.00 87.26           H  
ATOM   6334  N   GLN L  90       1.677 -83.778 -37.583  1.00 60.90           N  
ATOM   6335  CA  GLN L  90       3.067 -84.075 -37.857  1.00 58.89           C  
ATOM   6336  C   GLN L  90       3.952 -83.071 -37.133  1.00 61.48           C  
ATOM   6337  O   GLN L  90       3.591 -81.901 -36.972  1.00 54.00           O  
ATOM   6338  CB  GLN L  90       3.349 -84.078 -39.361  1.00 54.16           C  
ATOM   6339  CG  GLN L  90       3.266 -82.743 -40.073  1.00 64.09           C  
ATOM   6340  CD  GLN L  90       4.525 -81.897 -39.923  1.00 73.16           C  
ATOM   6341  OE1 GLN L  90       5.598 -82.404 -39.592  1.00 79.36           O  
ATOM   6342  NE2 GLN L  90       4.409 -80.614 -40.223  1.00 68.44           N  
ATOM   6343  H   GLN L  90       1.313 -83.237 -38.144  1.00 73.08           H  
ATOM   6344  HA  GLN L  90       3.274 -84.958 -37.514  1.00 70.67           H  
ATOM   6345  HB2 GLN L  90       4.246 -84.421 -39.500  1.00 64.99           H  
ATOM   6346  HB3 GLN L  90       2.710 -84.670 -39.788  1.00 64.99           H  
ATOM   6347  HG2 GLN L  90       3.123 -82.900 -41.019  1.00 76.91           H  
ATOM   6348  HG3 GLN L  90       2.523 -82.238 -39.707  1.00 76.91           H  
ATOM   6349 HE21 GLN L  90       3.652 -80.300 -40.485  1.00 82.12           H  
ATOM   6350 HE22 GLN L  90       5.090 -80.093 -40.156  1.00 82.12           H  
ATOM   6351  N   TYR L  91       5.106 -83.557 -36.673  1.00 54.56           N  
ATOM   6352  CA  TYR L  91       6.126 -82.753 -36.008  1.00 64.56           C  
ATOM   6353  C   TYR L  91       7.487 -83.044 -36.628  1.00 65.51           C  
ATOM   6354  O   TYR L  91       8.528 -83.039 -35.963  1.00 67.55           O  
ATOM   6355  CB  TYR L  91       6.098 -82.935 -34.483  1.00 67.82           C  
ATOM   6356  CG  TYR L  91       6.305 -84.328 -33.928  1.00 68.60           C  
ATOM   6357  CD1 TYR L  91       7.263 -84.577 -32.951  1.00 62.73           C  
ATOM   6358  CD2 TYR L  91       5.483 -85.381 -34.318  1.00 77.91           C  
ATOM   6359  CE1 TYR L  91       7.423 -85.846 -32.408  1.00 81.33           C  
ATOM   6360  CE2 TYR L  91       5.639 -86.648 -33.784  1.00 76.93           C  
ATOM   6361  CZ  TYR L  91       6.606 -86.876 -32.834  1.00 80.59           C  
ATOM   6362  OH  TYR L  91       6.754 -88.148 -32.330  1.00 78.59           O  
ATOM   6363  H   TYR L  91       5.326 -84.385 -36.740  1.00 65.47           H  
ATOM   6364  HA  TYR L  91       5.931 -81.819 -36.183  1.00 77.47           H  
ATOM   6365  HB2 TYR L  91       6.793 -82.374 -34.103  1.00 81.38           H  
ATOM   6366  HB3 TYR L  91       5.236 -82.628 -34.162  1.00 81.38           H  
ATOM   6367  HD1 TYR L  91       7.812 -83.884 -32.663  1.00 75.28           H  
ATOM   6368  HD2 TYR L  91       4.826 -85.233 -34.960  1.00 93.49           H  
ATOM   6369  HE1 TYR L  91       8.081 -86.003 -31.769  1.00 97.59           H  
ATOM   6370  HE2 TYR L  91       5.094 -87.345 -34.070  1.00 92.31           H  
ATOM   6371  HH  TYR L  91       7.386 -88.165 -31.762  1.00 94.30           H  
ATOM   6372  N   HIS L  92       7.431 -83.314 -37.934  1.00 61.69           N  
ATOM   6373  CA  HIS L  92       8.569 -83.423 -38.836  1.00 69.73           C  
ATOM   6374  C   HIS L  92       9.100 -82.061 -39.249  1.00 79.00           C  
ATOM   6375  O   HIS L  92      10.319 -81.862 -39.322  1.00 77.64           O  
ATOM   6376  CB  HIS L  92       8.175 -84.185 -40.097  1.00 64.00           C  
ATOM   6377  CG  HIS L  92       9.334 -84.524 -40.980  1.00 75.31           C  
ATOM   6378  ND1 HIS L  92      10.246 -85.514 -40.699  1.00 82.28           N  
ATOM   6379  CD2 HIS L  92       9.747 -83.947 -42.135  1.00 84.03           C  
ATOM   6380  CE1 HIS L  92      11.158 -85.551 -41.657  1.00 86.62           C  
ATOM   6381  NE2 HIS L  92      10.878 -84.610 -42.540  1.00 83.51           N  
ATOM   6382  H   HIS L  92       6.686 -83.447 -38.342  1.00 74.03           H  
ATOM   6383  HA  HIS L  92       9.283 -83.909 -38.395  1.00 83.68           H  
ATOM   6384  HB2 HIS L  92       7.745 -85.015 -39.840  1.00 76.80           H  
ATOM   6385  HB3 HIS L  92       7.559 -83.641 -40.612  1.00 76.80           H  
ATOM   6386  HD1 HIS L  92      10.221 -86.035 -40.016  1.00 98.74           H  
ATOM   6387  HD2 HIS L  92       9.333 -83.242 -42.578  1.00100.84           H  
ATOM   6388  HE1 HIS L  92      11.876 -86.140 -41.700  1.00103.94           H  
ATOM   6389  HE2 HIS L  92      11.330 -84.441 -43.252  1.00100.22           H  
ATOM   6390  N   ASN L  93       8.206 -81.113 -39.524  1.00 89.32           N  
ATOM   6391  CA  ASN L  93       8.643 -79.830 -40.041  1.00 93.66           C  
ATOM   6392  C   ASN L  93       7.822 -78.651 -39.579  1.00 84.78           C  
ATOM   6393  O   ASN L  93       6.592 -78.689 -39.655  1.00 86.80           O  
ATOM   6394  CB  ASN L  93       8.364 -79.859 -41.557  1.00127.70           C  
ATOM   6395  CG  ASN L  93       9.574 -79.970 -42.426  1.00135.89           C  
ATOM   6396  OD1 ASN L  93      10.659 -80.365 -42.004  1.00140.59           O  
ATOM   6397  ND2 ASN L  93       9.368 -79.646 -43.708  1.00137.79           N  
ATOM   6398  H   ASN L  93       7.356 -81.189 -39.420  1.00107.19           H  
ATOM   6399  HA  ASN L  93       9.586 -79.678 -39.873  1.00112.39           H  
ATOM   6400  HB2 ASN L  93       7.794 -80.620 -41.751  1.00153.24           H  
ATOM   6401  HB3 ASN L  93       7.904 -79.040 -41.801  1.00153.24           H  
ATOM   6402 HD21 ASN L  93       8.587 -79.399 -43.968  1.00165.35           H  
ATOM   6403 HD22 ASN L  93      10.017 -79.686 -44.271  1.00165.35           H  
ATOM   6404  N   LEU L  94       8.487 -77.609 -39.100  1.00 74.18           N  
ATOM   6405  CA  LEU L  94       7.714 -76.460 -38.682  1.00 75.29           C  
ATOM   6406  C   LEU L  94       7.260 -75.777 -39.973  1.00 76.33           C  
ATOM   6407  O   LEU L  94       8.047 -75.682 -40.920  1.00 76.54           O  
ATOM   6408  CB  LEU L  94       8.496 -75.523 -37.765  1.00 75.41           C  
ATOM   6409  CG  LEU L  94       8.688 -76.188 -36.396  1.00 76.16           C  
ATOM   6410  CD1 LEU L  94       9.832 -75.598 -35.580  1.00 71.06           C  
ATOM   6411  CD2 LEU L  94       7.359 -76.101 -35.600  1.00 72.17           C  
ATOM   6412  H   LEU L  94       9.340 -77.545 -39.010  1.00 89.01           H  
ATOM   6413  HA  LEU L  94       6.925 -76.762 -38.205  1.00 90.35           H  
ATOM   6414  HB2 LEU L  94       9.368 -75.343 -38.148  1.00 90.49           H  
ATOM   6415  HB3 LEU L  94       8.000 -74.698 -37.641  1.00 90.49           H  
ATOM   6416  HG  LEU L  94       8.884 -77.128 -36.536  1.00 91.39           H  
ATOM   6417 HD11 LEU L  94       9.891 -76.068 -34.734  1.00 85.27           H  
ATOM   6418 HD12 LEU L  94      10.659 -75.703 -36.076  1.00 85.27           H  
ATOM   6419 HD13 LEU L  94       9.656 -74.657 -35.425  1.00 85.27           H  
ATOM   6420 HD21 LEU L  94       7.482 -76.522 -34.735  1.00 86.60           H  
ATOM   6421 HD22 LEU L  94       7.122 -75.167 -35.483  1.00 86.60           H  
ATOM   6422 HD23 LEU L  94       6.663 -76.560 -36.096  1.00 86.60           H  
ATOM   6423  N   PRO L  95       6.053 -75.240 -40.049  1.00 83.87           N  
ATOM   6424  CA  PRO L  95       5.080 -75.375 -38.968  1.00 80.93           C  
ATOM   6425  C   PRO L  95       4.500 -76.785 -38.877  1.00 81.32           C  
ATOM   6426  O   PRO L  95       4.261 -77.458 -39.884  1.00 74.66           O  
ATOM   6427  CB  PRO L  95       4.006 -74.358 -39.355  1.00 79.71           C  
ATOM   6428  CG  PRO L  95       4.084 -74.327 -40.855  1.00 82.03           C  
ATOM   6429  CD  PRO L  95       5.540 -74.448 -41.175  1.00 82.57           C  
ATOM   6430  HA  PRO L  95       5.474 -75.126 -38.117  1.00 97.12           H  
ATOM   6431  HB2 PRO L  95       3.135 -74.665 -39.058  1.00 95.66           H  
ATOM   6432  HB3 PRO L  95       4.219 -73.490 -38.978  1.00 95.66           H  
ATOM   6433  HG2 PRO L  95       3.589 -75.076 -41.223  1.00 98.44           H  
ATOM   6434  HG3 PRO L  95       3.729 -73.486 -41.184  1.00 98.44           H  
ATOM   6435  HD2 PRO L  95       5.666 -74.924 -42.011  1.00 99.08           H  
ATOM   6436  HD3 PRO L  95       5.958 -73.573 -41.194  1.00 99.08           H  
ATOM   6437  N   TYR L  96       4.141 -77.154 -37.650  1.00 72.47           N  
ATOM   6438  CA  TYR L  96       3.605 -78.465 -37.272  1.00 60.06           C  
ATOM   6439  C   TYR L  96       2.133 -78.578 -37.605  1.00 66.81           C  
ATOM   6440  O   TYR L  96       1.271 -78.114 -36.849  1.00 62.85           O  
ATOM   6441  CB  TYR L  96       3.797 -78.823 -35.805  1.00 57.28           C  
ATOM   6442  CG  TYR L  96       5.204 -78.964 -35.333  1.00 69.99           C  
ATOM   6443  CD1 TYR L  96       6.227 -79.261 -36.229  1.00 77.48           C  
ATOM   6444  CD2 TYR L  96       5.484 -79.021 -33.973  1.00 71.91           C  
ATOM   6445  CE1 TYR L  96       7.517 -79.445 -35.793  1.00 79.19           C  
ATOM   6446  CE2 TYR L  96       6.771 -79.226 -33.525  1.00 78.34           C  
ATOM   6447  CZ  TYR L  96       7.778 -79.442 -34.443  1.00 78.24           C  
ATOM   6448  OH  TYR L  96       9.065 -79.659 -34.002  1.00 80.80           O  
ATOM   6449  H   TYR L  96       4.204 -76.625 -36.975  1.00 86.96           H  
ATOM   6450  HA  TYR L  96       4.068 -79.140 -37.793  1.00 72.08           H  
ATOM   6451  HB2 TYR L  96       3.382 -78.131 -35.267  1.00 68.73           H  
ATOM   6452  HB3 TYR L  96       3.353 -79.669 -35.638  1.00 68.73           H  
ATOM   6453  HD1 TYR L  96       6.051 -79.249 -37.142  1.00 92.98           H  
ATOM   6454  HD2 TYR L  96       4.804 -78.863 -33.358  1.00 86.29           H  
ATOM   6455  HE1 TYR L  96       8.200 -79.605 -36.403  1.00 95.03           H  
ATOM   6456  HE2 TYR L  96       6.957 -79.221 -32.614  1.00 94.01           H  
ATOM   6457  HH  TYR L  96       9.090 -79.631 -33.153  1.00 96.96           H  
ATOM   6458  N   THR L  97       1.842 -79.191 -38.747  1.00 83.26           N  
ATOM   6459  CA  THR L  97       0.535 -79.083 -39.337  1.00 82.53           C  
ATOM   6460  C   THR L  97      -0.410 -80.061 -38.673  1.00 80.12           C  
ATOM   6461  O   THR L  97      -0.017 -81.130 -38.204  1.00 64.93           O  
ATOM   6462  CB  THR L  97       0.608 -79.515 -40.799  1.00 78.16           C  
ATOM   6463  OG1 THR L  97       1.978 -79.662 -41.211  1.00 82.01           O  
ATOM   6464  CG2 THR L  97      -0.115 -78.584 -41.702  1.00 89.86           C  
ATOM   6465  H   THR L  97       2.393 -79.676 -39.195  1.00 99.91           H  
ATOM   6466  HA  THR L  97       0.189 -78.179 -39.269  1.00 99.04           H  
ATOM   6467  HB  THR L  97       0.176 -80.380 -40.878  1.00 93.79           H  
ATOM   6468  HG1 THR L  97       2.389 -78.923 -41.125  1.00 98.41           H  
ATOM   6469 HG21 THR L  97      -0.046 -78.892 -42.620  1.00107.83           H  
ATOM   6470 HG22 THR L  97      -1.052 -78.542 -41.454  1.00107.83           H  
ATOM   6471 HG23 THR L  97       0.268 -77.696 -41.638  1.00107.83           H  
ATOM   6472  N   PHE L  98      -1.671 -79.668 -38.633  1.00 82.95           N  
ATOM   6473  CA  PHE L  98      -2.711 -80.445 -37.995  1.00 70.63           C  
ATOM   6474  C   PHE L  98      -3.503 -81.141 -39.086  1.00 75.81           C  
ATOM   6475  O   PHE L  98      -3.653 -80.612 -40.190  1.00 85.81           O  
ATOM   6476  CB  PHE L  98      -3.582 -79.508 -37.152  1.00 69.36           C  
ATOM   6477  CG  PHE L  98      -3.536 -79.796 -35.675  1.00 66.51           C  
ATOM   6478  CD1 PHE L  98      -4.437 -80.673 -35.098  1.00 70.47           C  
ATOM   6479  CD2 PHE L  98      -2.563 -79.221 -34.873  1.00 66.51           C  
ATOM   6480  CE1 PHE L  98      -4.392 -80.942 -33.742  1.00 65.97           C  
ATOM   6481  CE2 PHE L  98      -2.507 -79.493 -33.518  1.00 69.87           C  
ATOM   6482  CZ  PHE L  98      -3.424 -80.358 -32.952  1.00 63.06           C  
ATOM   6483  H   PHE L  98      -1.955 -78.933 -38.978  1.00 99.55           H  
ATOM   6484  HA  PHE L  98      -2.316 -81.115 -37.415  1.00 84.75           H  
ATOM   6485  HB2 PHE L  98      -3.279 -78.596 -37.286  1.00 83.23           H  
ATOM   6486  HB3 PHE L  98      -4.503 -79.594 -37.442  1.00 83.23           H  
ATOM   6487  HD1 PHE L  98      -5.095 -81.069 -35.623  1.00 84.57           H  
ATOM   6488  HD2 PHE L  98      -1.945 -78.636 -35.249  1.00 79.81           H  
ATOM   6489  HE1 PHE L  98      -5.008 -81.528 -33.365  1.00 79.16           H  
ATOM   6490  HE2 PHE L  98      -1.855 -79.094 -32.989  1.00 83.84           H  
ATOM   6491  HZ  PHE L  98      -3.391 -80.542 -32.041  1.00 75.68           H  
ATOM   6492  N   GLY L  99      -3.999 -82.336 -38.791  1.00 70.13           N  
ATOM   6493  CA  GLY L  99      -5.081 -82.881 -39.566  1.00 67.36           C  
ATOM   6494  C   GLY L  99      -6.392 -82.152 -39.353  1.00 67.35           C  
ATOM   6495  O   GLY L  99      -6.544 -81.354 -38.425  1.00 67.99           O  
ATOM   6496  H   GLY L  99      -3.725 -82.840 -38.151  1.00 84.16           H  
ATOM   6497  HA2 GLY L  99      -4.856 -82.833 -40.508  1.00 80.83           H  
ATOM   6498  HA3 GLY L  99      -5.208 -83.812 -39.329  1.00 80.83           H  
ATOM   6499  N   PRO L 100      -7.370 -82.412 -40.218  1.00 71.62           N  
ATOM   6500  CA  PRO L 100      -8.659 -81.711 -40.131  1.00 74.56           C  
ATOM   6501  C   PRO L 100      -9.669 -82.353 -39.192  1.00 68.75           C  
ATOM   6502  O   PRO L 100     -10.787 -81.840 -39.070  1.00 85.45           O  
ATOM   6503  CB  PRO L 100      -9.111 -81.794 -41.593  1.00 65.57           C  
ATOM   6504  CG  PRO L 100      -8.603 -83.150 -41.964  1.00 60.19           C  
ATOM   6505  CD  PRO L 100      -7.184 -82.913 -41.595  1.00 68.75           C  
ATOM   6506  HA  PRO L 100      -8.526 -80.782 -39.884  1.00 89.47           H  
ATOM   6507  HB2 PRO L 100     -10.078 -81.748 -41.651  1.00 78.68           H  
ATOM   6508  HB3 PRO L 100      -8.687 -81.098 -42.119  1.00 78.68           H  
ATOM   6509  HG2 PRO L 100      -9.013 -83.839 -41.418  1.00 72.22           H  
ATOM   6510  HG3 PRO L 100      -8.711 -83.315 -42.914  1.00 72.22           H  
ATOM   6511  HD2 PRO L 100      -6.680 -83.742 -41.599  1.00 82.50           H  
ATOM   6512  HD3 PRO L 100      -6.785 -82.235 -42.162  1.00 82.50           H  
ATOM   6513  N   GLY L 101      -9.313 -83.457 -38.559  1.00 63.62           N  
ATOM   6514  CA  GLY L 101     -10.118 -84.040 -37.509  1.00 63.24           C  
ATOM   6515  C   GLY L 101     -10.982 -85.194 -37.985  1.00 54.16           C  
ATOM   6516  O   GLY L 101     -11.368 -85.283 -39.155  1.00 60.14           O  
ATOM   6517  H   GLY L 101      -8.592 -83.895 -38.726  1.00 76.34           H  
ATOM   6518  HA2 GLY L 101      -9.536 -84.365 -36.804  1.00 75.88           H  
ATOM   6519  HA3 GLY L 101     -10.698 -83.359 -37.135  1.00 75.88           H  
ATOM   6520  N   THR L 102     -11.317 -86.079 -37.048  1.00 69.30           N  
ATOM   6521  CA  THR L 102     -12.304 -87.134 -37.243  1.00 69.71           C  
ATOM   6522  C   THR L 102     -13.211 -87.046 -36.033  1.00 67.80           C  
ATOM   6523  O   THR L 102     -12.762 -87.304 -34.912  1.00 65.99           O  
ATOM   6524  CB  THR L 102     -11.687 -88.532 -37.355  1.00 70.90           C  
ATOM   6525  OG1 THR L 102     -10.797 -88.593 -38.478  1.00 73.30           O  
ATOM   6526  CG2 THR L 102     -12.786 -89.578 -37.552  1.00 72.72           C  
ATOM   6527  H   THR L 102     -10.970 -86.085 -36.261  1.00 83.17           H  
ATOM   6528  HA  THR L 102     -12.825 -86.956 -38.041  1.00 83.66           H  
ATOM   6529  HB  THR L 102     -11.202 -88.741 -36.542  1.00 85.08           H  
ATOM   6530  HG1 THR L 102     -11.221 -88.422 -39.195  1.00 87.96           H  
ATOM   6531 HG21 THR L 102     -12.393 -90.462 -37.623  1.00 87.26           H  
ATOM   6532 HG22 THR L 102     -13.396 -89.564 -36.798  1.00 87.26           H  
ATOM   6533 HG23 THR L 102     -13.283 -89.388 -38.363  1.00 87.26           H  
ATOM   6534  N   LYS L 103     -14.477 -86.703 -36.248  1.00 77.38           N  
ATOM   6535  CA  LYS L 103     -15.436 -86.632 -35.154  1.00 74.46           C  
ATOM   6536  C   LYS L 103     -16.080 -87.998 -34.963  1.00 85.29           C  
ATOM   6537  O   LYS L 103     -16.774 -88.501 -35.853  1.00 84.24           O  
ATOM   6538  CB  LYS L 103     -16.482 -85.565 -35.459  1.00 80.16           C  
ATOM   6539  CG  LYS L 103     -17.499 -85.327 -34.363  1.00 86.10           C  
ATOM   6540  CD  LYS L 103     -18.433 -84.191 -34.746  1.00 92.70           C  
ATOM   6541  CE  LYS L 103     -19.384 -83.842 -33.619  1.00 98.09           C  
ATOM   6542  NZ  LYS L 103     -20.502 -84.830 -33.567  1.00100.60           N  
ATOM   6543  H   LYS L 103     -14.806 -86.507 -37.018  1.00 92.86           H  
ATOM   6544  HA  LYS L 103     -14.977 -86.389 -34.334  1.00 89.36           H  
ATOM   6545  HB2 LYS L 103     -16.027 -84.725 -35.622  1.00 96.20           H  
ATOM   6546  HB3 LYS L 103     -16.969 -85.830 -36.256  1.00 96.20           H  
ATOM   6547  HG2 LYS L 103     -18.029 -86.129 -34.232  1.00103.32           H  
ATOM   6548  HG3 LYS L 103     -17.041 -85.085 -33.543  1.00103.32           H  
ATOM   6549  HD2 LYS L 103     -17.908 -83.403 -34.955  1.00111.24           H  
ATOM   6550  HD3 LYS L 103     -18.960 -84.457 -35.516  1.00111.24           H  
ATOM   6551  HE2 LYS L 103     -18.910 -83.868 -32.774  1.00117.71           H  
ATOM   6552  HE3 LYS L 103     -19.758 -82.960 -33.772  1.00117.71           H  
ATOM   6553  HZ1 LYS L 103     -21.060 -84.623 -32.905  1.00120.72           H  
ATOM   6554  HZ2 LYS L 103     -20.951 -84.822 -34.336  1.00120.72           H  
ATOM   6555  HZ3 LYS L 103     -20.179 -85.647 -33.429  1.00120.72           H  
ATOM   6556  N   LEU L 104     -15.824 -88.603 -33.811  1.00 79.67           N  
ATOM   6557  CA  LEU L 104     -16.293 -89.944 -33.506  1.00 69.95           C  
ATOM   6558  C   LEU L 104     -17.470 -89.850 -32.539  1.00 73.05           C  
ATOM   6559  O   LEU L 104     -17.338 -89.254 -31.462  1.00 79.95           O  
ATOM   6560  CB  LEU L 104     -15.118 -90.761 -32.967  1.00 78.67           C  
ATOM   6561  CG  LEU L 104     -15.262 -92.189 -32.462  1.00 96.54           C  
ATOM   6562  CD1 LEU L 104     -13.871 -92.727 -32.174  1.00 94.24           C  
ATOM   6563  CD2 LEU L 104     -16.084 -92.255 -31.196  1.00 99.33           C  
ATOM   6564  H   LEU L 104     -15.368 -88.247 -33.174  1.00 95.60           H  
ATOM   6565  HA  LEU L 104     -16.605 -90.365 -34.322  1.00 83.94           H  
ATOM   6566  HB2 LEU L 104     -14.456 -90.798 -33.675  1.00 94.41           H  
ATOM   6567  HB3 LEU L 104     -14.743 -90.257 -32.228  1.00 94.41           H  
ATOM   6568  HG  LEU L 104     -15.681 -92.742 -33.140  1.00115.84           H  
ATOM   6569 HD11 LEU L 104     -13.946 -93.638 -31.851  1.00113.09           H  
ATOM   6570 HD12 LEU L 104     -13.350 -92.708 -32.993  1.00113.09           H  
ATOM   6571 HD13 LEU L 104     -13.450 -92.170 -31.501  1.00113.09           H  
ATOM   6572 HD21 LEU L 104     -16.150 -93.180 -30.911  1.00119.19           H  
ATOM   6573 HD22 LEU L 104     -15.648 -91.727 -30.509  1.00119.19           H  
ATOM   6574 HD23 LEU L 104     -16.969 -91.900 -31.376  1.00119.19           H  
ATOM   6575  N   GLU L 105     -18.611 -90.445 -32.912  1.00 79.98           N  
ATOM   6576  CA  GLU L 105     -19.787 -90.473 -32.051  1.00 86.53           C  
ATOM   6577  C   GLU L 105     -20.263 -91.917 -31.832  1.00 86.19           C  
ATOM   6578  O   GLU L 105     -19.895 -92.845 -32.562  1.00 92.29           O  
ATOM   6579  CB  GLU L 105     -20.890 -89.587 -32.673  1.00119.71           C  
ATOM   6580  CG  GLU L 105     -22.230 -89.512 -31.941  1.00133.71           C  
ATOM   6581  CD  GLU L 105     -22.210 -88.672 -30.674  1.00133.48           C  
ATOM   6582  OE1 GLU L 105     -21.249 -87.893 -30.477  1.00133.47           O  
ATOM   6583  OE2 GLU L 105     -23.167 -88.784 -29.879  1.00131.38           O  
ATOM   6584  H   GLU L 105     -18.723 -90.842 -33.666  1.00 95.98           H  
ATOM   6585  HA  GLU L 105     -19.555 -90.100 -31.187  1.00103.83           H  
ATOM   6586  HB2 GLU L 105     -20.549 -88.681 -32.733  1.00143.65           H  
ATOM   6587  HB3 GLU L 105     -21.073 -89.918 -33.566  1.00143.65           H  
ATOM   6588  HG2 GLU L 105     -22.889 -89.125 -32.540  1.00160.46           H  
ATOM   6589  HG3 GLU L 105     -22.500 -90.410 -31.695  1.00160.46           H  
ATOM   6590  N   ILE L 106     -21.031 -92.080 -30.737  1.00 83.92           N  
ATOM   6591  CA  ILE L 106     -21.739 -93.295 -30.311  1.00 96.81           C  
ATOM   6592  C   ILE L 106     -23.162 -93.355 -30.851  1.00 98.49           C  
ATOM   6593  O   ILE L 106     -23.790 -92.321 -31.067  1.00 95.30           O  
ATOM   6594  CB  ILE L 106     -21.712 -93.521 -28.800  1.00 95.16           C  
ATOM   6595  CG1 ILE L 106     -20.247 -93.579 -28.382  1.00 98.99           C  
ATOM   6596  CG2 ILE L 106     -22.468 -94.828 -28.495  1.00 89.02           C  
ATOM   6597  CD1 ILE L 106     -19.936 -94.557 -27.312  1.00101.37           C  
ATOM   6598  H   ILE L 106     -21.162 -91.436 -30.182  1.00100.70           H  
ATOM   6599  HA  ILE L 106     -21.271 -94.048 -30.703  1.00116.17           H  
ATOM   6600  HB  ILE L 106     -22.149 -92.780 -28.352  1.00114.19           H  
ATOM   6601 HG12 ILE L 106     -19.714 -93.815 -29.157  1.00118.79           H  
ATOM   6602 HG13 ILE L 106     -19.983 -92.702 -28.062  1.00118.79           H  
ATOM   6603 HG21 ILE L 106     -22.457 -94.983 -27.537  1.00106.82           H  
ATOM   6604 HG22 ILE L 106     -23.383 -94.743 -28.806  1.00106.82           H  
ATOM   6605 HG23 ILE L 106     -22.029 -95.561 -28.953  1.00106.82           H  
ATOM   6606 HD11 ILE L 106     -18.986 -94.520 -27.117  1.00121.65           H  
ATOM   6607 HD12 ILE L 106     -20.446 -94.330 -26.519  1.00121.65           H  
ATOM   6608 HD13 ILE L 106     -20.176 -95.446 -27.617  1.00121.65           H  
ATOM   6609  N   LYS L 107     -23.570 -94.547 -31.289  1.00101.66           N  
ATOM   6610  CA  LYS L 107     -24.915 -94.818 -31.827  1.00101.66           C  
ATOM   6611  C   LYS L 107     -24.951 -94.660 -33.334  1.00106.79           C  
ATOM   6612  O   LYS L 107     -24.835 -95.650 -34.045  1.00113.16           O  
ATOM   6613  CB  LYS L 107     -25.989 -93.914 -31.162  1.00102.93           C  
ATOM   6614  CG  LYS L 107     -27.398 -94.004 -31.736  1.00108.17           C  
ATOM   6615  CD  LYS L 107     -28.306 -92.901 -31.171  1.00110.68           C  
ATOM   6616  CE  LYS L 107     -27.892 -91.512 -31.699  1.00106.17           C  
ATOM   6617  NZ  LYS L 107     -28.725 -90.408 -31.150  1.00110.51           N  
ATOM   6618  H   LYS L 107     -23.067 -95.244 -31.286  1.00122.00           H  
ATOM   6619  HA  LYS L 107     -25.145 -95.739 -31.625  1.00121.99           H  
ATOM   6620  HB2 LYS L 107     -26.045 -94.150 -30.223  1.00123.52           H  
ATOM   6621  HB3 LYS L 107     -25.702 -92.991 -31.244  1.00123.52           H  
ATOM   6622  HG2 LYS L 107     -27.358 -93.901 -32.700  1.00129.81           H  
ATOM   6623  HG3 LYS L 107     -27.784 -94.863 -31.505  1.00129.81           H  
ATOM   6624  HD2 LYS L 107     -29.222 -93.069 -31.441  1.00132.81           H  
ATOM   6625  HD3 LYS L 107     -28.236 -92.892 -30.204  1.00132.81           H  
ATOM   6626  HE2 LYS L 107     -26.970 -91.343 -31.451  1.00127.41           H  
ATOM   6627  HE3 LYS L 107     -27.982 -91.503 -32.665  1.00127.41           H  
ATOM   6628  HZ1 LYS L 107     -28.452 -89.628 -31.480  1.00132.62           H  
ATOM   6629  HZ2 LYS L 107     -29.578 -90.533 -31.370  1.00132.62           H  
ATOM   6630  HZ3 LYS L 107     -28.655 -90.387 -30.263  1.00132.62           H  
TER    6631      LYS L 107                                                      
