# Supplementary material for: SARS-CoV-2 Spike Protein Interaction Space
Source: Int J Mol Sci. 2023 Jul 27;24(15):12058. doi: 10.3390/ijms241512058 (PMC10418891; doi:10.3390/ijms241512058)
Supplement: Supplementary file 1 [file ijms-24-12058-s001.zip › Supplementary Material File S1/4LVE.pdb]

REMARK 950 NUMBERING  Kabat
REMARK 950 METHOD     X-ray crystal structure
REMARK 950 RESOLUTION 2.300
REMARK 950 R-FACTOR   0.190
REMARK 950 R-FREE     0.267
REMARK 950 CHAIN-TYPE LABEL ORIGINAL
REMARK 950 CHAIN L    L    A
REMARK 950 CHAIN L    L    B
REMARK 950 MOLECULE : A : LEN
REMARK 950 SPECIES  : A : HOMO SAPIENS
SEQRES   1 L 114  ASP ILE VAL MET THR GLN SER PRO ASP SER LEU ALA VAL          
SEQRES   2 L 114  SER LEU GLY GLU ARG ALA THR ILE ASN CYS LYS SER SER          
SEQRES   3 L 114  GLN SER VAL LEU TYR SER SER ASN SER THR ASN TYR LEU          
SEQRES   4 L 114  ALA TRP TYR GLN GLN LYS PRO GLY GLN PRO PRO LYS LEU          
SEQRES   5 L 114  LEU ILE TYR TRP ALA SER THR ARG GLU SER GLY VAL PRO          
SEQRES   6 L 114  ASP ARG PHE SER GLY SER GLY SER GLY THR ASP PHE THR          
SEQRES   7 L 114  LEU THR ILE SER SER LEU GLN ALA GLU ASP VAL ALA VAL          
SEQRES   8 L 114  TYR TYR CYS GLN GLN TYR TYR SER THR PRO TYR SER PHE          
SEQRES   9 L 114  GLY GLN GLY THR LYS LEU GLU ILE LYS ARG                      
SEQRES   1 L 114  ASP ILE VAL MET THR GLN SER PRO ASP SER LEU ALA VAL          
SEQRES   2 L 114  SER LEU GLY GLU ARG ALA THR ILE ASN CYS LYS SER SER          
SEQRES   3 L 114  GLN SER VAL LEU TYR SER SER ASN SER THR ASN TYR LEU          
SEQRES   4 L 114  ALA TRP TYR GLN GLN LYS PRO GLY GLN PRO PRO LYS LEU          
SEQRES   5 L 114  LEU ILE TYR TRP ALA SER THR ARG GLU SER GLY VAL PRO          
SEQRES   6 L 114  ASP ARG PHE SER GLY SER GLY SER GLY THR ASP PHE THR          
SEQRES   7 L 114  LEU THR ILE SER SER LEU GLN ALA GLU ASP VAL ALA VAL          
SEQRES   8 L 114  TYR TYR CYS GLN GLN TYR TYR SER THR PRO TYR SER PHE          
SEQRES   9 L 114  GLY GLN GLY THR LYS LEU GLU ILE LYS ARG                      
ATOM      1  N   ASP L   1      22.744  -8.690  27.027  1.00 36.83           N  
ATOM      2  CA  ASP L   1      21.520  -7.907  26.693  1.00 35.60           C  
ATOM      3  C   ASP L   1      21.162  -8.121  25.225  1.00 33.71           C  
ATOM      4  O   ASP L   1      22.042  -8.302  24.389  1.00 33.49           O  
ATOM      5  CB  ASP L   1      21.762  -6.412  26.929  1.00 38.92           C  
ATOM      6  CG  ASP L   1      22.281  -6.115  28.320  1.00 42.14           C  
ATOM      7  OD1 ASP L   1      21.622  -6.512  29.297  1.00 45.47           O  
ATOM      8  OD2 ASP L   1      23.347  -5.478  28.438  1.00 45.63           O  
ATOM      9  N   ILE L   2      19.870  -8.101  24.913  1.00 31.36           N  
ATOM     10  CA  ILE L   2      19.420  -8.271  23.537  1.00 28.18           C  
ATOM     11  C   ILE L   2      19.443  -6.922  22.815  1.00 26.55           C  
ATOM     12  O   ILE L   2      19.021  -5.908  23.367  1.00 25.89           O  
ATOM     13  CB  ILE L   2      17.996  -8.859  23.490  1.00 28.67           C  
ATOM     14  CG1 ILE L   2      18.010 -10.264  24.100  1.00 29.46           C  
ATOM     15  CG2 ILE L   2      17.490  -8.895  22.059  1.00 26.60           C  
ATOM     16  CD1 ILE L   2      16.670 -10.956  24.121  1.00 30.80           C  
ATOM     17  N   VAL L   3      19.937  -6.922  21.579  1.00 24.40           N  
ATOM     18  CA  VAL L   3      20.041  -5.704  20.781  1.00 20.99           C  
ATOM     19  C   VAL L   3      19.027  -5.681  19.640  1.00 19.74           C  
ATOM     20  O   VAL L   3      18.973  -6.607  18.835  1.00 19.85           O  
ATOM     21  CB  VAL L   3      21.459  -5.572  20.195  1.00 21.66           C  
ATOM     22  CG1 VAL L   3      21.587  -4.271  19.420  1.00 20.73           C  
ATOM     23  CG2 VAL L   3      22.491  -5.637  21.327  1.00 21.62           C  
ATOM     24  N   MET L   4      18.241  -4.610  19.556  1.00 18.44           N  
ATOM     25  CA  MET L   4      17.211  -4.494  18.515  1.00 16.69           C  
ATOM     26  C   MET L   4      17.599  -3.488  17.440  1.00 15.51           C  
ATOM     27  O   MET L   4      17.907  -2.333  17.746  1.00 14.36           O  
ATOM     28  CB  MET L   4      15.879  -4.055  19.142  1.00 15.17           C  
ATOM     29  CG  MET L   4      15.497  -4.832  20.390  1.00 13.95           C  
ATOM     30  SD  MET L   4      15.158  -6.580  20.079  1.00 20.56           S  
ATOM     31  CE  MET L   4      13.577  -6.486  19.164  1.00 18.73           C  
ATOM     32  N   THR L   5      17.569  -3.917  16.181  1.00 15.40           N  
ATOM     33  CA  THR L   5      17.914  -3.022  15.084  1.00 17.66           C  
ATOM     34  C   THR L   5      16.797  -3.001  14.052  1.00 16.78           C  
ATOM     35  O   THR L   5      16.257  -4.038  13.688  1.00 17.57           O  
ATOM     36  CB  THR L   5      19.234  -3.446  14.396  1.00 19.47           C  
ATOM     37  OG1 THR L   5      20.275  -3.556  15.377  1.00 18.30           O  
ATOM     38  CG2 THR L   5      19.650  -2.403  13.369  1.00 20.71           C  
ATOM     39  N   GLN L   6      16.453  -1.813  13.575  1.00 17.25           N  
ATOM     40  CA  GLN L   6      15.377  -1.694  12.605  1.00 18.38           C  
ATOM     41  C   GLN L   6      15.904  -1.235  11.255  1.00 19.69           C  
ATOM     42  O   GLN L   6      16.979  -0.640  11.155  1.00 20.43           O  
ATOM     43  CB  GLN L   6      14.328  -0.704  13.116  1.00 17.90           C  
ATOM     44  CG  GLN L   6      13.904  -0.953  14.558  1.00 17.42           C  
ATOM     45  CD  GLN L   6      12.842   0.025  15.043  1.00 16.98           C  
ATOM     46  OE1 GLN L   6      12.504   0.055  16.229  1.00 17.50           O  
ATOM     47  NE2 GLN L   6      12.308   0.823  14.125  1.00 15.27           N  
ATOM     48  N   SER L   7      15.136  -1.519  10.216  1.00 19.40           N  
ATOM     49  CA  SER L   7      15.510  -1.142   8.868  1.00 20.05           C  
ATOM     50  C   SER L   7      14.255  -0.785   8.081  1.00 21.67           C  
ATOM     51  O   SER L   7      13.310  -1.573   8.024  1.00 20.09           O  
ATOM     52  CB  SER L   7      16.228  -2.305   8.185  1.00 19.28           C  
ATOM     53  OG  SER L   7      16.598  -1.953   6.866  1.00 21.30           O  
ATOM     54  N   PRO L   8      14.227   0.411   7.466  1.00 22.65           N  
ATOM     55  CA  PRO L   8      15.261   1.451   7.450  1.00 22.07           C  
ATOM     56  C   PRO L   8      15.089   2.360   8.669  1.00 23.13           C  
ATOM     57  O   PRO L   8      14.363   2.015   9.606  1.00 25.31           O  
ATOM     58  CB  PRO L   8      14.946   2.184   6.164  1.00 24.08           C  
ATOM     59  CG  PRO L   8      13.431   2.265   6.273  1.00 23.69           C  
ATOM     60  CD  PRO L   8      13.108   0.804   6.585  1.00 22.90           C  
ATOM     61  N   ASP L   9      15.747   3.517   8.664  1.00 21.47           N  
ATOM     62  CA  ASP L   9      15.595   4.449   9.780  1.00 23.56           C  
ATOM     63  C   ASP L   9      14.418   5.386   9.489  1.00 23.33           C  
ATOM     64  O   ASP L   9      13.814   5.949  10.400  1.00 23.85           O  
ATOM     65  CB  ASP L   9      16.883   5.255  10.020  1.00 22.29           C  
ATOM     66  CG  ASP L   9      18.075   4.365  10.371  1.00 22.34           C  
ATOM     67  OD1 ASP L   9      18.636   3.721   9.464  1.00 24.86           O  
ATOM     68  OD2 ASP L   9      18.443   4.292  11.560  1.00 22.84           O  
ATOM     69  N   SER L  10      14.094   5.534   8.209  1.00 22.75           N  
ATOM     70  CA  SER L  10      12.978   6.365   7.784  1.00 24.23           C  
ATOM     71  C   SER L  10      12.530   5.929   6.392  1.00 24.33           C  
ATOM     72  O   SER L  10      13.334   5.435   5.598  1.00 24.27           O  
ATOM     73  CB  SER L  10      13.388   7.837   7.747  1.00 27.45           C  
ATOM     74  OG  SER L  10      14.382   8.058   6.765  1.00 30.67           O  
ATOM     75  N   LEU L  11      11.245   6.106   6.105  1.00 22.08           N  
ATOM     76  CA  LEU L  11      10.693   5.746   4.812  1.00 22.47           C  
ATOM     77  C   LEU L  11       9.380   6.480   4.530  1.00 22.88           C  
ATOM     78  O   LEU L  11       8.764   7.045   5.436  1.00 20.62           O  
ATOM     79  CB  LEU L  11      10.479   4.228   4.719  1.00 22.84           C  
ATOM     80  CG  LEU L  11       9.669   3.424   5.752  1.00 24.78           C  
ATOM     81  CD1 LEU L  11       9.029   4.326   6.801  1.00 25.71           C  
ATOM     82  CD2 LEU L  11       8.616   2.609   5.013  1.00 25.35           C  
ATOM     83  N   ALA L  12       8.965   6.471   3.266  1.00 21.20           N  
ATOM     84  CA  ALA L  12       7.725   7.127   2.863  1.00 22.77           C  
ATOM     85  C   ALA L  12       7.009   6.362   1.757  1.00 22.72           C  
ATOM     86  O   ALA L  12       7.645   5.790   0.871  1.00 22.71           O  
ATOM     87  CB  ALA L  12       8.010   8.553   2.396  1.00 22.35           C  
ATOM     88  N   VAL L  13       5.681   6.349   1.831  1.00 23.35           N  
ATOM     89  CA  VAL L  13       4.843   5.697   0.831  1.00 24.18           C  
ATOM     90  C   VAL L  13       3.656   6.625   0.560  1.00 23.99           C  
ATOM     91  O   VAL L  13       3.440   7.588   1.296  1.00 22.74           O  
ATOM     92  CB  VAL L  13       4.326   4.322   1.324  1.00 24.28           C  
ATOM     93  CG1 VAL L  13       5.502   3.462   1.771  1.00 24.14           C  
ATOM     94  CG2 VAL L  13       3.327   4.500   2.451  1.00 23.37           C  
ATOM     95  N   SER L  14       2.902   6.351  -0.500  1.00 25.93           N  
ATOM     96  CA  SER L  14       1.744   7.176  -0.848  1.00 27.51           C  
ATOM     97  C   SER L  14       0.560   6.839   0.040  1.00 26.86           C  
ATOM     98  O   SER L  14       0.490   5.744   0.592  1.00 26.85           O  
ATOM     99  CB  SER L  14       1.344   6.948  -2.311  1.00 27.66           C  
ATOM    100  OG  SER L  14       2.381   7.324  -3.201  1.00 29.09           O  
ATOM    101  N   LEU L  15      -0.365   7.780   0.194  1.00 29.13           N  
ATOM    102  CA  LEU L  15      -1.552   7.522   1.005  1.00 28.88           C  
ATOM    103  C   LEU L  15      -2.320   6.379   0.361  1.00 28.16           C  
ATOM    104  O   LEU L  15      -2.520   6.375  -0.855  1.00 30.55           O  
ATOM    105  CB  LEU L  15      -2.445   8.764   1.076  1.00 28.14           C  
ATOM    106  CG  LEU L  15      -1.921   9.932   1.911  1.00 30.06           C  
ATOM    107  CD1 LEU L  15      -2.880  11.107   1.820  1.00 30.99           C  
ATOM    108  CD2 LEU L  15      -1.772   9.489   3.359  1.00 31.18           C  
ATOM    109  N   GLY L  16      -2.734   5.405   1.169  1.00 27.42           N  
ATOM    110  CA  GLY L  16      -3.481   4.271   0.643  1.00 27.69           C  
ATOM    111  C   GLY L  16      -2.614   3.096   0.221  1.00 28.24           C  
ATOM    112  O   GLY L  16      -3.124   2.020  -0.102  1.00 29.46           O  
ATOM    113  N   GLU L  17      -1.301   3.299   0.210  1.00 27.36           N  
ATOM    114  CA  GLU L  17      -0.368   2.243  -0.165  1.00 26.50           C  
ATOM    115  C   GLU L  17       0.160   1.555   1.085  1.00 25.73           C  
ATOM    116  O   GLU L  17      -0.022   2.051   2.196  1.00 25.06           O  
ATOM    117  CB  GLU L  17       0.787   2.826  -0.976  1.00 26.79           C  
ATOM    118  CG  GLU L  17       0.320   3.497  -2.249  1.00 32.83           C  
ATOM    119  CD  GLU L  17      -0.537   2.577  -3.102  1.00 36.62           C  
ATOM    120  OE1 GLU L  17      -0.035   1.511  -3.523  1.00 36.28           O  
ATOM    121  OE2 GLU L  17      -1.719   2.918  -3.343  1.00 39.65           O  
ATOM    122  N   ARG L  18       0.813   0.413   0.909  1.00 23.98           N  
ATOM    123  CA  ARG L  18       1.337  -0.319   2.051  1.00 25.24           C  
ATOM    124  C   ARG L  18       2.763   0.083   2.389  1.00 24.50           C  
ATOM    125  O   ARG L  18       3.497   0.594   1.545  1.00 25.93           O  
ATOM    126  CB  ARG L  18       1.277  -1.827   1.794  1.00 23.66           C  
ATOM    127  CG  ARG L  18       2.143  -2.304   0.649  1.00 25.86           C  
ATOM    128  CD  ARG L  18       1.976  -3.801   0.433  1.00 27.85           C  
ATOM    129  NE  ARG L  18       2.837  -4.296  -0.636  1.00 32.86           N  
ATOM    130  CZ  ARG L  18       4.165  -4.361  -0.563  1.00 35.25           C  
ATOM    131  NH1 ARG L  18       4.797  -3.964   0.533  1.00 34.76           N  
ATOM    132  NH2 ARG L  18       4.864  -4.823  -1.592  1.00 34.96           N  
ATOM    133  N   ALA L  19       3.142  -0.149   3.641  1.00 23.56           N  
ATOM    134  CA  ALA L  19       4.481   0.169   4.119  1.00 22.21           C  
ATOM    135  C   ALA L  19       4.900  -0.918   5.106  1.00 21.66           C  
ATOM    136  O   ALA L  19       4.060  -1.460   5.836  1.00 20.89           O  
ATOM    137  CB  ALA L  19       4.484   1.534   4.795  1.00 18.93           C  
ATOM    138  N   THR L  20       6.192  -1.246   5.116  1.00 21.36           N  
ATOM    139  CA  THR L  20       6.710  -2.275   6.015  1.00 19.25           C  
ATOM    140  C   THR L  20       8.011  -1.859   6.689  1.00 20.34           C  
ATOM    141  O   THR L  20       8.931  -1.345   6.041  1.00 22.38           O  
ATOM    142  CB  THR L  20       6.947  -3.620   5.279  1.00 18.89           C  
ATOM    143  OG1 THR L  20       7.844  -3.421   4.183  1.00 19.52           O  
ATOM    144  CG2 THR L  20       5.635  -4.198   4.761  1.00 21.08           C  
ATOM    145  N   ILE L  21       8.072  -2.086   7.999  1.00 19.43           N  
ATOM    146  CA  ILE L  21       9.238  -1.761   8.805  1.00 20.25           C  
ATOM    147  C   ILE L  21       9.736  -3.077   9.395  1.00 23.11           C  
ATOM    148  O   ILE L  21       8.951  -3.861   9.935  1.00 23.20           O  
ATOM    149  CB  ILE L  21       8.863  -0.787   9.934  1.00 18.15           C  
ATOM    150  CG1 ILE L  21       8.228   0.470   9.337  1.00 17.44           C  
ATOM    151  CG2 ILE L  21      10.106  -0.393  10.722  1.00 18.38           C  
ATOM    152  CD1 ILE L  21       7.654   1.414  10.370  1.00 14.03           C  
ATOM    153  N   ASN L  22      11.039  -3.320   9.283  1.00 24.08           N  
ATOM    154  CA  ASN L  22      11.638  -4.557   9.769  1.00 23.21           C  
ATOM    155  C   ASN L  22      12.436  -4.361  11.055  1.00 23.20           C  
ATOM    156  O   ASN L  22      12.982  -3.283  11.296  1.00 22.94           O  
ATOM    157  CB  ASN L  22      12.522  -5.147   8.668  1.00 25.51           C  
ATOM    158  CG  ASN L  22      13.054  -6.509   9.018  1.00 26.33           C  
ATOM    159  OD1 ASN L  22      14.225  -6.660   9.380  1.00 29.70           O  
ATOM    160  ND2 ASN L  22      12.192  -7.517   8.930  1.00 21.78           N  
ATOM    161  N   CYS L  23      12.508  -5.415  11.870  1.00 21.18           N  
ATOM    162  CA  CYS L  23      13.201  -5.361  13.161  1.00 20.28           C  
ATOM    163  C   CYS L  23      13.943  -6.658  13.472  1.00 20.54           C  
ATOM    164  O   CYS L  23      13.352  -7.737  13.463  1.00 20.17           O  
ATOM    165  CB  CYS L  23      12.171  -5.058  14.269  1.00 19.29           C  
ATOM    166  SG  CYS L  23      12.715  -5.293  15.993  1.00 18.66           S  
ATOM    167  N   LYS L  24      15.241  -6.544  13.753  1.00 21.30           N  
ATOM    168  CA  LYS L  24      16.073  -7.705  14.067  1.00 21.71           C  
ATOM    169  C   LYS L  24      16.504  -7.708  15.531  1.00 21.64           C  
ATOM    170  O   LYS L  24      16.791  -6.655  16.091  1.00 19.92           O  
ATOM    171  CB  LYS L  24      17.343  -7.697  13.220  1.00 24.07           C  
ATOM    172  CG  LYS L  24      17.165  -7.762  11.709  1.00 27.01           C  
ATOM    173  CD  LYS L  24      16.642  -9.096  11.241  1.00 30.05           C  
ATOM    174  CE  LYS L  24      17.129  -9.376   9.825  1.00 29.06           C  
ATOM    175  NZ  LYS L  24      16.853  -8.249   8.907  1.00 33.12           N  
ATOM    176  N   SER L  25      16.566  -8.893  16.137  1.00 21.88           N  
ATOM    177  CA  SER L  25      17.010  -9.036  17.524  1.00 23.58           C  
ATOM    178  C   SER L  25      18.286  -9.886  17.494  1.00 24.24           C  
ATOM    179  O   SER L  25      18.344 -10.905  16.808  1.00 24.59           O  
ATOM    180  CB  SER L  25      15.933  -9.720  18.377  1.00 23.01           C  
ATOM    181  OG  SER L  25      15.669 -11.035  17.918  1.00 27.90           O  
ATOM    182  N   SER L  26      19.312  -9.470  18.228  1.00 24.94           N  
ATOM    183  CA  SER L  26      20.575 -10.213  18.227  1.00 27.08           C  
ATOM    184  C   SER L  26      20.437 -11.610  18.821  1.00 27.52           C  
ATOM    185  O   SER L  26      21.332 -12.439  18.696  1.00 27.64           O  
ATOM    186  CB  SER L  26      21.656  -9.430  18.972  1.00 24.16           C  
ATOM    187  OG  SER L  26      21.266  -9.174  20.303  1.00 29.77           O  
ATOM    188  N   GLN L  27      19.309 -11.870  19.466  1.00 28.72           N  
ATOM    189  CA  GLN L  27      19.057 -13.180  20.053  1.00 30.79           C  
ATOM    190  C   GLN L  27      17.558 -13.445  20.011  1.00 30.25           C  
ATOM    191  O   GLN L  27      16.752 -12.530  20.192  1.00 30.79           O  
ATOM    192  CB  GLN L  27      19.552 -13.223  21.498  1.00 34.13           C  
ATOM    193  CG  GLN L  27      21.034 -12.929  21.650  1.00 39.65           C  
ATOM    194  CD  GLN L  27      21.490 -12.949  23.096  1.00 43.32           C  
ATOM    195  OE1 GLN L  27      22.662 -12.705  23.392  1.00 46.04           O  
ATOM    196  NE2 GLN L  27      20.567 -13.242  24.008  1.00 44.97           N  
ATOM    197  N   SER L  27A     17.188 -14.697  19.771  1.00 28.70           N  
ATOM    198  CA  SER L  27A     15.784 -15.077  19.693  1.00 27.48           C  
ATOM    199  C   SER L  27A     14.963 -14.641  20.902  1.00 25.86           C  
ATOM    200  O   SER L  27A     15.413 -14.741  22.046  1.00 26.22           O  
ATOM    201  CB  SER L  27A     15.661 -16.593  19.529  1.00 26.91           C  
ATOM    202  OG  SER L  27A     14.298 -16.991  19.534  1.00 25.84           O  
ATOM    203  N   VAL L  27B     13.756 -14.152  20.644  1.00 24.38           N  
ATOM    204  CA  VAL L  27B     12.867 -13.742  21.722  1.00 23.53           C  
ATOM    205  C   VAL L  27B     11.678 -14.699  21.750  1.00 25.24           C  
ATOM    206  O   VAL L  27B     10.686 -14.468  22.446  1.00 24.76           O  
ATOM    207  CB  VAL L  27B     12.385 -12.274  21.546  1.00 23.79           C  
ATOM    208  CG1 VAL L  27B     13.597 -11.347  21.514  1.00 22.03           C  
ATOM    209  CG2 VAL L  27B     11.558 -12.117  20.271  1.00 23.09           C  
ATOM    210  N   LEU L  27C     11.789 -15.773  20.969  1.00 26.02           N  
ATOM    211  CA  LEU L  27C     10.754 -16.803  20.911  1.00 27.81           C  
ATOM    212  C   LEU L  27C     10.840 -17.608  22.193  1.00 28.42           C  
ATOM    213  O   LEU L  27C     11.896 -18.155  22.515  1.00 29.00           O  
ATOM    214  CB  LEU L  27C     10.981 -17.743  19.722  1.00 27.64           C  
ATOM    215  CG  LEU L  27C     10.087 -18.988  19.637  1.00 28.16           C  
ATOM    216  CD1 LEU L  27C      8.605 -18.582  19.590  1.00 26.92           C  
ATOM    217  CD2 LEU L  27C     10.464 -19.796  18.395  1.00 26.44           C  
ATOM    218  N   TYR L  27D      9.735 -17.676  22.926  1.00 29.06           N  
ATOM    219  CA  TYR L  27D      9.710 -18.422  24.175  1.00 31.42           C  
ATOM    220  C   TYR L  27D      9.211 -19.850  23.944  1.00 32.53           C  
ATOM    221  O   TYR L  27D      8.018 -20.080  23.722  1.00 31.00           O  
ATOM    222  CB  TYR L  27D      8.830 -17.693  25.190  1.00 32.29           C  
ATOM    223  CG  TYR L  27D      8.824 -18.322  26.560  1.00 36.21           C  
ATOM    224  CD1 TYR L  27D     10.021 -18.625  27.216  1.00 38.07           C  
ATOM    225  CD2 TYR L  27D      7.624 -18.586  27.220  1.00 38.57           C  
ATOM    226  CE1 TYR L  27D     10.024 -19.178  28.499  1.00 39.62           C  
ATOM    227  CE2 TYR L  27D      7.615 -19.137  28.501  1.00 41.20           C  
ATOM    228  CZ  TYR L  27D      8.817 -19.431  29.135  1.00 40.83           C  
ATOM    229  OH  TYR L  27D      8.809 -19.984  30.398  1.00 41.48           O  
ATOM    230  N   SER L  27E     10.141 -20.801  24.001  1.00 34.49           N  
ATOM    231  CA  SER L  27E      9.840 -22.214  23.779  1.00 36.44           C  
ATOM    232  C   SER L  27E      8.702 -22.787  24.627  1.00 37.16           C  
ATOM    233  O   SER L  27E      7.828 -23.476  24.109  1.00 37.84           O  
ATOM    234  CB  SER L  27E     11.102 -23.051  23.997  1.00 34.84           C  
ATOM    235  OG  SER L  27E     11.602 -22.881  25.311  1.00 38.01           O  
ATOM    236  N   SER L  27F      8.708 -22.500  25.923  1.00 38.68           N  
ATOM    237  CA  SER L  27F      7.679 -23.016  26.821  1.00 39.98           C  
ATOM    238  C   SER L  27F      6.246 -22.756  26.361  1.00 40.53           C  
ATOM    239  O   SER L  27F      5.372 -23.609  26.534  1.00 42.69           O  
ATOM    240  CB  SER L  27F      7.882 -22.441  28.222  1.00 41.19           C  
ATOM    241  OG  SER L  27F      9.178 -22.757  28.702  1.00 40.56           O  
ATOM    242  N   ASN L  28       6.006 -21.587  25.774  1.00 39.35           N  
ATOM    243  CA  ASN L  28       4.671 -21.240  25.298  1.00 36.82           C  
ATOM    244  C   ASN L  28       4.684 -20.995  23.793  1.00 34.71           C  
ATOM    245  O   ASN L  28       3.647 -20.740  23.180  1.00 33.09           O  
ATOM    246  CB  ASN L  28       4.167 -19.983  26.002  1.00 39.16           C  
ATOM    247  CG  ASN L  28       2.698 -19.723  25.737  1.00 42.30           C  
ATOM    248  OD1 ASN L  28       2.167 -18.671  26.096  1.00 44.69           O  
ATOM    249  ND2 ASN L  28       2.024 -20.694  25.119  1.00 43.31           N  
ATOM    250  N   SER L  29       5.870 -21.066  23.204  1.00 33.98           N  
ATOM    251  CA  SER L  29       6.032 -20.852  21.776  1.00 32.20           C  
ATOM    252  C   SER L  29       5.463 -19.512  21.324  1.00 31.35           C  
ATOM    253  O   SER L  29       4.815 -19.426  20.280  1.00 32.27           O  
ATOM    254  CB  SER L  29       5.366 -21.979  20.991  1.00 33.27           C  
ATOM    255  OG  SER L  29       5.519 -21.769  19.601  1.00 36.84           O  
ATOM    256  N   THR L  30       5.697 -18.468  22.113  1.00 28.84           N  
ATOM    257  CA  THR L  30       5.220 -17.137  21.752  1.00 27.95           C  
ATOM    258  C   THR L  30       6.399 -16.156  21.762  1.00 25.17           C  
ATOM    259  O   THR L  30       7.373 -16.346  22.491  1.00 24.87           O  
ATOM    260  CB  THR L  30       4.112 -16.643  22.717  1.00 28.42           C  
ATOM    261  OG1 THR L  30       4.666 -16.396  24.013  1.00 33.73           O  
ATOM    262  CG2 THR L  30       3.024 -17.695  22.840  1.00 28.70           C  
ATOM    263  N   ASN L  31       6.308 -15.125  20.931  1.00 22.95           N  
ATOM    264  CA  ASN L  31       7.357 -14.122  20.823  1.00 21.21           C  
ATOM    265  C   ASN L  31       7.096 -12.914  21.706  1.00 21.62           C  
ATOM    266  O   ASN L  31       6.028 -12.298  21.636  1.00 21.36           O  
ATOM    267  CB  ASN L  31       7.487 -13.654  19.374  1.00 20.70           C  
ATOM    268  CG  ASN L  31       7.998 -14.734  18.462  1.00 18.75           C  
ATOM    269  OD1 ASN L  31       9.120 -15.195  18.609  1.00 20.36           O  
ATOM    270  ND2 ASN L  31       7.174 -15.147  17.511  1.00 19.43           N  
ATOM    271  N   TYR L  32       8.077 -12.574  22.532  1.00 19.89           N  
ATOM    272  CA  TYR L  32       7.961 -11.422  23.416  1.00 21.36           C  
ATOM    273  C   TYR L  32       8.451 -10.190  22.668  1.00 21.98           C  
ATOM    274  O   TYR L  32       9.477  -9.597  22.995  1.00 21.72           O  
ATOM    275  CB  TYR L  32       8.765 -11.675  24.690  1.00 22.30           C  
ATOM    276  CG  TYR L  32       8.098 -12.713  25.563  1.00 22.98           C  
ATOM    277  CD1 TYR L  32       7.784 -13.976  25.060  1.00 21.39           C  
ATOM    278  CD2 TYR L  32       7.694 -12.403  26.859  1.00 22.46           C  
ATOM    279  CE1 TYR L  32       7.079 -14.896  25.815  1.00 21.78           C  
ATOM    280  CE2 TYR L  32       6.986 -13.323  27.626  1.00 23.00           C  
ATOM    281  CZ  TYR L  32       6.677 -14.566  27.093  1.00 24.28           C  
ATOM    282  OH  TYR L  32       5.933 -15.462  27.826  1.00 26.24           O  
ATOM    283  N   LEU L  33       7.680  -9.822  21.653  1.00 21.13           N  
ATOM    284  CA  LEU L  33       7.993  -8.704  20.782  1.00 20.53           C  
ATOM    285  C   LEU L  33       6.818  -7.730  20.751  1.00 20.28           C  
ATOM    286  O   LEU L  33       5.649  -8.137  20.775  1.00 21.03           O  
ATOM    287  CB  LEU L  33       8.281  -9.255  19.377  1.00 20.96           C  
ATOM    288  CG  LEU L  33       8.828  -8.361  18.262  1.00 22.65           C  
ATOM    289  CD1 LEU L  33       7.794  -7.334  17.836  1.00 20.08           C  
ATOM    290  CD2 LEU L  33      10.115  -7.701  18.752  1.00 20.65           C  
ATOM    291  N   ALA L  34       7.124  -6.442  20.698  1.00 18.53           N  
ATOM    292  CA  ALA L  34       6.077  -5.434  20.665  1.00 17.62           C  
ATOM    293  C   ALA L  34       6.419  -4.287  19.728  1.00 19.42           C  
ATOM    294  O   ALA L  34       7.589  -4.051  19.403  1.00 18.93           O  
ATOM    295  CB  ALA L  34       5.825  -4.899  22.067  1.00 18.25           C  
ATOM    296  N   TRP L  35       5.382  -3.587  19.285  1.00 18.24           N  
ATOM    297  CA  TRP L  35       5.545  -2.438  18.409  1.00 20.70           C  
ATOM    298  C   TRP L  35       4.865  -1.231  19.026  1.00 21.97           C  
ATOM    299  O   TRP L  35       3.754  -1.348  19.560  1.00 21.71           O  
ATOM    300  CB  TRP L  35       4.928  -2.689  17.034  1.00 19.73           C  
ATOM    301  CG  TRP L  35       5.671  -3.653  16.196  1.00 21.16           C  
ATOM    302  CD1 TRP L  35       5.453  -4.994  16.090  1.00 20.89           C  
ATOM    303  CD2 TRP L  35       6.777  -3.353  15.339  1.00 19.81           C  
ATOM    304  NE1 TRP L  35       6.352  -5.548  15.213  1.00 20.19           N  
ATOM    305  CE2 TRP L  35       7.177  -4.563  14.739  1.00 20.44           C  
ATOM    306  CE3 TRP L  35       7.467  -2.176  15.019  1.00 18.80           C  
ATOM    307  CZ2 TRP L  35       8.240  -4.632  13.833  1.00 21.01           C  
ATOM    308  CZ3 TRP L  35       8.520  -2.244  14.123  1.00 19.79           C  
ATOM    309  CH2 TRP L  35       8.898  -3.466  13.538  1.00 21.02           C  
ATOM    310  N   TYR L  36       5.530  -0.079  18.952  1.00 20.85           N  
ATOM    311  CA  TYR L  36       4.985   1.162  19.492  1.00 20.14           C  
ATOM    312  C   TYR L  36       4.933   2.254  18.445  1.00 20.86           C  
ATOM    313  O   TYR L  36       5.750   2.307  17.527  1.00 20.66           O  
ATOM    314  CB  TYR L  36       5.815   1.688  20.668  1.00 20.92           C  
ATOM    315  CG  TYR L  36       5.829   0.810  21.899  1.00 21.42           C  
ATOM    316  CD1 TYR L  36       6.436  -0.445  21.881  1.00 20.69           C  
ATOM    317  CD2 TYR L  36       5.269   1.253  23.091  1.00 20.47           C  
ATOM    318  CE1 TYR L  36       6.490  -1.236  23.024  1.00 22.37           C  
ATOM    319  CE2 TYR L  36       5.317   0.470  24.243  1.00 22.82           C  
ATOM    320  CZ  TYR L  36       5.930  -0.771  24.202  1.00 21.36           C  
ATOM    321  OH  TYR L  36       5.988  -1.540  25.336  1.00 22.42           O  
ATOM    322  N   GLN L  37       3.963   3.139  18.607  1.00 21.69           N  
ATOM    323  CA  GLN L  37       3.796   4.259  17.708  1.00 21.64           C  
ATOM    324  C   GLN L  37       4.036   5.510  18.536  1.00 22.50           C  
ATOM    325  O   GLN L  37       3.449   5.669  19.609  1.00 21.98           O  
ATOM    326  CB  GLN L  37       2.377   4.278  17.152  1.00 20.87           C  
ATOM    327  CG  GLN L  37       2.105   5.415  16.201  1.00 22.13           C  
ATOM    328  CD  GLN L  37       0.632   5.539  15.883  1.00 24.44           C  
ATOM    329  OE1 GLN L  37      -0.173   5.834  16.759  1.00 22.10           O  
ATOM    330  NE2 GLN L  37       0.269   5.302  14.623  1.00 25.68           N  
ATOM    331  N   GLN L  38       4.917   6.382  18.059  1.00 23.58           N  
ATOM    332  CA  GLN L  38       5.188   7.622  18.772  1.00 25.13           C  
ATOM    333  C   GLN L  38       4.990   8.836  17.885  1.00 25.78           C  
ATOM    334  O   GLN L  38       5.637   8.975  16.848  1.00 26.73           O  
ATOM    335  CB  GLN L  38       6.606   7.647  19.351  1.00 25.17           C  
ATOM    336  CG  GLN L  38       6.960   9.002  19.964  1.00 26.41           C  
ATOM    337  CD  GLN L  38       8.275   8.993  20.712  1.00 27.29           C  
ATOM    338  OE1 GLN L  38       9.284   8.513  20.204  1.00 31.64           O  
ATOM    339  NE2 GLN L  38       8.276   9.544  21.921  1.00 24.59           N  
ATOM    340  N   LYS L  39       4.074   9.703  18.304  1.00 26.24           N  
ATOM    341  CA  LYS L  39       3.774  10.935  17.590  1.00 25.77           C  
ATOM    342  C   LYS L  39       4.436  12.055  18.389  1.00 25.50           C  
ATOM    343  O   LYS L  39       4.732  11.889  19.570  1.00 25.14           O  
ATOM    344  CB  LYS L  39       2.265  11.141  17.518  1.00 25.33           C  
ATOM    345  N   PRO L  40       4.695  13.206  17.758  1.00 25.97           N  
ATOM    346  CA  PRO L  40       5.329  14.316  18.472  1.00 25.11           C  
ATOM    347  C   PRO L  40       4.522  14.808  19.674  1.00 25.39           C  
ATOM    348  O   PRO L  40       3.302  14.907  19.611  1.00 25.99           O  
ATOM    349  CB  PRO L  40       5.468  15.372  17.376  1.00 27.06           C  
ATOM    350  CG  PRO L  40       4.262  15.073  16.487  1.00 26.98           C  
ATOM    351  CD  PRO L  40       4.453  13.582  16.355  1.00 28.33           C  
ATOM    352  N   GLY L  41       5.209  15.106  20.773  1.00 25.14           N  
ATOM    353  CA  GLY L  41       4.524  15.592  21.957  1.00 26.49           C  
ATOM    354  C   GLY L  41       3.840  14.521  22.789  1.00 28.26           C  
ATOM    355  O   GLY L  41       3.092  14.829  23.716  1.00 27.76           O  
ATOM    356  N   GLN L  42       4.090  13.258  22.463  1.00 27.93           N  
ATOM    357  CA  GLN L  42       3.489  12.156  23.200  1.00 27.56           C  
ATOM    358  C   GLN L  42       4.522  11.052  23.396  1.00 28.14           C  
ATOM    359  O   GLN L  42       5.542  11.013  22.708  1.00 27.63           O  
ATOM    360  CB  GLN L  42       2.300  11.584  22.430  1.00 28.43           C  
ATOM    361  CG  GLN L  42       1.226  12.586  22.056  1.00 32.10           C  
ATOM    362  CD  GLN L  42       0.120  11.960  21.212  1.00 35.81           C  
ATOM    363  OE1 GLN L  42      -0.789  12.649  20.746  1.00 39.04           O  
ATOM    364  NE2 GLN L  42       0.194  10.647  21.013  1.00 36.18           N  
ATOM    365  N   PRO L  43       4.294  10.163  24.372  1.00 26.19           N  
ATOM    366  CA  PRO L  43       5.239   9.068  24.605  1.00 25.23           C  
ATOM    367  C   PRO L  43       4.887   7.955  23.621  1.00 24.14           C  
ATOM    368  O   PRO L  43       3.802   7.965  23.030  1.00 22.91           O  
ATOM    369  CB  PRO L  43       4.913   8.656  26.031  1.00 23.73           C  
ATOM    370  CG  PRO L  43       3.405   8.728  25.992  1.00 24.43           C  
ATOM    371  CD  PRO L  43       3.220  10.127  25.383  1.00 25.69           C  
ATOM    372  N   PRO L  44       5.806   7.006  23.396  1.00 23.85           N  
ATOM    373  CA  PRO L  44       5.472   5.924  22.471  1.00 23.15           C  
ATOM    374  C   PRO L  44       4.231   5.211  23.033  1.00 22.34           C  
ATOM    375  O   PRO L  44       4.060   5.130  24.251  1.00 21.24           O  
ATOM    376  CB  PRO L  44       6.736   5.059  22.505  1.00 23.92           C  
ATOM    377  CG  PRO L  44       7.298   5.342  23.889  1.00 24.61           C  
ATOM    378  CD  PRO L  44       7.181   6.840  23.891  1.00 24.05           C  
ATOM    379  N   LYS L  45       3.369   4.715  22.149  1.00 23.31           N  
ATOM    380  CA  LYS L  45       2.136   4.037  22.553  1.00 23.41           C  
ATOM    381  C   LYS L  45       2.086   2.605  22.042  1.00 22.36           C  
ATOM    382  O   LYS L  45       2.312   2.360  20.860  1.00 22.47           O  
ATOM    383  CB  LYS L  45       0.928   4.789  21.996  1.00 27.99           C  
ATOM    384  CG  LYS L  45       0.695   6.192  22.553  1.00 31.30           C  
ATOM    385  CD  LYS L  45       0.067   6.145  23.930  1.00 34.49           C  
ATOM    386  CE  LYS L  45      -0.462   7.515  24.326  1.00 37.57           C  
ATOM    387  NZ  LYS L  45      -1.266   7.472  25.579  1.00 35.51           N  
ATOM    388  N   LEU L  46       1.764   1.663  22.924  1.00 21.39           N  
ATOM    389  CA  LEU L  46       1.691   0.258  22.542  1.00 20.47           C  
ATOM    390  C   LEU L  46       0.761   0.067  21.351  1.00 22.94           C  
ATOM    391  O   LEU L  46      -0.400   0.483  21.382  1.00 23.59           O  
ATOM    392  CB  LEU L  46       1.202  -0.598  23.715  1.00 18.83           C  
ATOM    393  CG  LEU L  46       1.163  -2.104  23.422  1.00 19.29           C  
ATOM    394  CD1 LEU L  46       2.567  -2.578  23.053  1.00 18.49           C  
ATOM    395  CD2 LEU L  46       0.646  -2.872  24.635  1.00 17.07           C  
ATOM    396  N   LEU L  47       1.272  -0.576  20.307  1.00 22.10           N  
ATOM    397  CA  LEU L  47       0.493  -0.811  19.100  1.00 24.83           C  
ATOM    398  C   LEU L  47       0.205  -2.302  18.907  1.00 25.51           C  
ATOM    399  O   LEU L  47      -0.926  -2.702  18.604  1.00 27.25           O  
ATOM    400  CB  LEU L  47       1.253  -0.258  17.889  1.00 25.86           C  
ATOM    401  CG  LEU L  47       0.569  -0.241  16.523  1.00 26.89           C  
ATOM    402  CD1 LEU L  47      -0.699   0.590  16.592  1.00 28.78           C  
ATOM    403  CD2 LEU L  47       1.524   0.344  15.491  1.00 27.40           C  
ATOM    404  N   ILE L  48       1.234  -3.119  19.100  1.00 24.10           N  
ATOM    405  CA  ILE L  48       1.113  -4.557  18.933  1.00 23.16           C  
ATOM    406  C   ILE L  48       2.018  -5.303  19.911  1.00 23.19           C  
ATOM    407  O   ILE L  48       3.117  -4.842  20.223  1.00 23.02           O  
ATOM    408  CB  ILE L  48       1.484  -4.962  17.483  1.00 22.21           C  
ATOM    409  CG1 ILE L  48       0.478  -4.349  16.506  1.00 24.23           C  
ATOM    410  CG2 ILE L  48       1.523  -6.469  17.352  1.00 22.75           C  
ATOM    411  CD1 ILE L  48       0.670  -4.753  15.057  1.00 26.53           C  
ATOM    412  N   TYR L  49       1.545  -6.441  20.413  1.00 23.18           N  
ATOM    413  CA  TYR L  49       2.336  -7.257  21.335  1.00 22.38           C  
ATOM    414  C   TYR L  49       2.234  -8.731  20.960  1.00 21.81           C  
ATOM    415  O   TYR L  49       1.367  -9.118  20.172  1.00 21.22           O  
ATOM    416  CB  TYR L  49       1.917  -7.037  22.797  1.00 23.06           C  
ATOM    417  CG  TYR L  49       0.448  -7.216  23.110  1.00 23.17           C  
ATOM    418  CD1 TYR L  49      -0.491  -6.259  22.728  1.00 24.78           C  
ATOM    419  CD2 TYR L  49      -0.002  -8.333  23.811  1.00 23.98           C  
ATOM    420  CE1 TYR L  49      -1.851  -6.408  23.043  1.00 24.26           C  
ATOM    421  CE2 TYR L  49      -1.352  -8.495  24.131  1.00 25.26           C  
ATOM    422  CZ  TYR L  49      -2.270  -7.528  23.745  1.00 25.70           C  
ATOM    423  OH  TYR L  49      -3.601  -7.680  24.068  1.00 25.47           O  
ATOM    424  N   TRP L  50       3.116  -9.549  21.526  1.00 20.84           N  
ATOM    425  CA  TRP L  50       3.165 -10.972  21.198  1.00 21.27           C  
ATOM    426  C   TRP L  50       3.459 -11.075  19.691  1.00 21.34           C  
ATOM    427  O   TRP L  50       3.153 -12.078  19.046  1.00 23.65           O  
ATOM    428  CB  TRP L  50       1.839 -11.660  21.544  1.00 22.90           C  
ATOM    429  CG  TRP L  50       1.528 -11.716  23.029  1.00 23.04           C  
ATOM    430  CD1 TRP L  50       0.304 -11.561  23.606  1.00 23.42           C  
ATOM    431  CD2 TRP L  50       2.451 -11.950  24.109  1.00 21.12           C  
ATOM    432  NE1 TRP L  50       0.402 -11.675  24.972  1.00 24.47           N  
ATOM    433  CE2 TRP L  50       1.707 -11.915  25.308  1.00 22.07           C  
ATOM    434  CE3 TRP L  50       3.832 -12.183  24.179  1.00 21.42           C  
ATOM    435  CZ2 TRP L  50       2.295 -12.104  26.563  1.00 21.77           C  
ATOM    436  CZ3 TRP L  50       4.417 -12.373  25.427  1.00 21.69           C  
ATOM    437  CH2 TRP L  50       3.649 -12.332  26.602  1.00 22.13           C  
ATOM    438  N   ALA L  51       4.043 -10.008  19.145  1.00 20.55           N  
ATOM    439  CA  ALA L  51       4.421  -9.928  17.730  1.00 19.81           C  
ATOM    440  C   ALA L  51       3.291  -9.724  16.730  1.00 20.31           C  
ATOM    441  O   ALA L  51       3.492  -9.111  15.681  1.00 19.29           O  
ATOM    442  CB  ALA L  51       5.227 -11.164  17.329  1.00 18.94           C  
ATOM    443  N   SER L  52       2.103 -10.229  17.039  1.00 20.62           N  
ATOM    444  CA  SER L  52       1.006 -10.096  16.098  1.00 20.46           C  
ATOM    445  C   SER L  52      -0.345  -9.722  16.703  1.00 22.66           C  
ATOM    446  O   SER L  52      -1.318  -9.547  15.972  1.00 23.09           O  
ATOM    447  CB  SER L  52       0.871 -11.394  15.318  1.00 18.91           C  
ATOM    448  OG  SER L  52       0.693 -12.469  16.222  1.00 18.23           O  
ATOM    449  N   THR L  53      -0.418  -9.604  18.025  1.00 22.80           N  
ATOM    450  CA  THR L  53      -1.680  -9.237  18.663  1.00 21.95           C  
ATOM    451  C   THR L  53      -1.856  -7.726  18.642  1.00 24.35           C  
ATOM    452  O   THR L  53      -1.011  -6.969  19.125  1.00 25.69           O  
ATOM    453  CB  THR L  53      -1.741  -9.716  20.115  1.00 21.22           C  
ATOM    454  OG1 THR L  53      -1.498 -11.127  20.155  1.00 20.27           O  
ATOM    455  CG2 THR L  53      -3.120  -9.422  20.714  1.00 21.04           C  
ATOM    456  N   ARG L  54      -2.970  -7.288  18.081  1.00 24.99           N  
ATOM    457  CA  ARG L  54      -3.251  -5.873  17.978  1.00 25.28           C  
ATOM    458  C   ARG L  54      -3.849  -5.397  19.298  1.00 25.62           C  
ATOM    459  O   ARG L  54      -4.675  -6.084  19.904  1.00 26.73           O  
ATOM    460  CB  ARG L  54      -4.196  -5.670  16.794  1.00 26.33           C  
ATOM    461  CG  ARG L  54      -4.359  -4.266  16.268  1.00 28.37           C  
ATOM    462  CD  ARG L  54      -4.739  -4.332  14.780  1.00 27.45           C  
ATOM    463  NE  ARG L  54      -5.695  -5.407  14.510  1.00 25.78           N  
ATOM    464  CZ  ARG L  54      -5.451  -6.456  13.725  1.00 27.79           C  
ATOM    465  NH1 ARG L  54      -4.281  -6.586  13.118  1.00 26.97           N  
ATOM    466  NH2 ARG L  54      -6.375  -7.392  13.557  1.00 27.60           N  
ATOM    467  N   GLU L  55      -3.386  -4.242  19.765  1.00 25.01           N  
ATOM    468  CA  GLU L  55      -3.875  -3.668  21.011  1.00 23.86           C  
ATOM    469  C   GLU L  55      -5.278  -3.128  20.761  1.00 23.64           C  
ATOM    470  O   GLU L  55      -5.662  -2.903  19.615  1.00 21.46           O  
ATOM    471  CB  GLU L  55      -2.942  -2.543  21.463  1.00 26.32           C  
ATOM    472  CG  GLU L  55      -3.315  -1.868  22.770  1.00 29.08           C  
ATOM    473  CD  GLU L  55      -3.487  -2.853  23.909  1.00 30.57           C  
ATOM    474  OE1 GLU L  55      -2.618  -2.891  24.805  1.00 30.57           O  
ATOM    475  OE2 GLU L  55      -4.489  -3.597  23.898  1.00 33.15           O  
ATOM    476  N   SER L  56      -6.044  -2.934  21.828  1.00 23.10           N  
ATOM    477  CA  SER L  56      -7.404  -2.428  21.695  1.00 27.28           C  
ATOM    478  C   SER L  56      -7.431  -1.049  21.053  1.00 28.41           C  
ATOM    479  O   SER L  56      -6.569  -0.206  21.322  1.00 28.44           O  
ATOM    480  CB  SER L  56      -8.081  -2.359  23.065  1.00 29.29           C  
ATOM    481  OG  SER L  56      -8.123  -3.637  23.675  1.00 33.64           O  
ATOM    482  N   GLY L  57      -8.430  -0.824  20.207  1.00 28.68           N  
ATOM    483  CA  GLY L  57      -8.567   0.462  19.544  1.00 29.89           C  
ATOM    484  C   GLY L  57      -7.702   0.611  18.309  1.00 30.34           C  
ATOM    485  O   GLY L  57      -7.922   1.505  17.492  1.00 30.50           O  
ATOM    486  N   VAL L  58      -6.716  -0.267  18.167  1.00 29.17           N  
ATOM    487  CA  VAL L  58      -5.826  -0.215  17.017  1.00 29.25           C  
ATOM    488  C   VAL L  58      -6.515  -0.762  15.765  1.00 29.24           C  
ATOM    489  O   VAL L  58      -6.979  -1.900  15.748  1.00 30.38           O  
ATOM    490  CB  VAL L  58      -4.534  -1.009  17.296  1.00 29.08           C  
ATOM    491  CG1 VAL L  58      -3.635  -0.996  16.072  1.00 29.99           C  
ATOM    492  CG2 VAL L  58      -3.810  -0.407  18.485  1.00 26.37           C  
ATOM    493  N   PRO L  59      -6.587   0.051  14.697  1.00 29.78           N  
ATOM    494  CA  PRO L  59      -7.218  -0.334  13.433  1.00 29.34           C  
ATOM    495  C   PRO L  59      -6.517  -1.517  12.780  1.00 30.08           C  
ATOM    496  O   PRO L  59      -5.304  -1.693  12.931  1.00 32.22           O  
ATOM    497  CB  PRO L  59      -7.113   0.946  12.607  1.00 26.85           C  
ATOM    498  CG  PRO L  59      -5.820   1.524  13.102  1.00 30.13           C  
ATOM    499  CD  PRO L  59      -6.069   1.424  14.590  1.00 30.46           C  
ATOM    500  N   ASP L  60      -7.282  -2.322  12.052  1.00 29.00           N  
ATOM    501  CA  ASP L  60      -6.733  -3.498  11.392  1.00 31.00           C  
ATOM    502  C   ASP L  60      -5.716  -3.221  10.284  1.00 29.15           C  
ATOM    503  O   ASP L  60      -5.135  -4.155   9.739  1.00 28.70           O  
ATOM    504  CB  ASP L  60      -7.869  -4.392  10.863  1.00 34.23           C  
ATOM    505  CG  ASP L  60      -8.829  -3.658   9.936  1.00 36.92           C  
ATOM    506  OD1 ASP L  60      -9.832  -4.274   9.511  1.00 40.14           O  
ATOM    507  OD2 ASP L  60      -8.589  -2.474   9.631  1.00 38.33           O  
ATOM    508  N   ARG L  61      -5.498  -1.951   9.949  1.00 28.44           N  
ATOM    509  CA  ARG L  61      -4.518  -1.609   8.917  1.00 28.20           C  
ATOM    510  C   ARG L  61      -3.142  -2.059   9.412  1.00 27.40           C  
ATOM    511  O   ARG L  61      -2.241  -2.345   8.623  1.00 25.66           O  
ATOM    512  CB  ARG L  61      -4.456  -0.092   8.672  1.00 29.27           C  
ATOM    513  CG  ARG L  61      -5.727   0.576   8.207  1.00 33.44           C  
ATOM    514  CD  ARG L  61      -5.414   1.977   7.685  1.00 35.14           C  
ATOM    515  NE  ARG L  61      -4.790   2.862   8.675  1.00 36.94           N  
ATOM    516  CZ  ARG L  61      -5.426   3.408   9.709  1.00 37.72           C  
ATOM    517  NH1 ARG L  61      -6.714   3.166   9.903  1.00 39.77           N  
ATOM    518  NH2 ARG L  61      -4.781   4.215  10.540  1.00 37.91           N  
ATOM    519  N   PHE L  62      -2.998  -2.088  10.734  1.00 26.87           N  
ATOM    520  CA  PHE L  62      -1.759  -2.481  11.400  1.00 26.82           C  
ATOM    521  C   PHE L  62      -1.736  -3.973  11.711  1.00 26.49           C  
ATOM    522  O   PHE L  62      -2.717  -4.522  12.208  1.00 26.93           O  
ATOM    523  CB  PHE L  62      -1.618  -1.706  12.714  1.00 26.23           C  
ATOM    524  CG  PHE L  62      -1.422  -0.231  12.535  1.00 27.19           C  
ATOM    525  CD1 PHE L  62      -0.158   0.287  12.251  1.00 26.21           C  
ATOM    526  CD2 PHE L  62      -2.507   0.640  12.607  1.00 27.57           C  
ATOM    527  CE1 PHE L  62       0.022   1.649  12.041  1.00 27.44           C  
ATOM    528  CE2 PHE L  62      -2.340   2.006  12.397  1.00 27.45           C  
ATOM    529  CZ  PHE L  62      -1.069   2.513  12.111  1.00 28.69           C  
ATOM    530  N   SER L  63      -0.619  -4.626  11.416  1.00 25.89           N  
ATOM    531  CA  SER L  63      -0.473  -6.050  11.713  1.00 25.07           C  
ATOM    532  C   SER L  63       1.002  -6.418  11.760  1.00 22.97           C  
ATOM    533  O   SER L  63       1.795  -5.944  10.955  1.00 21.67           O  
ATOM    534  CB  SER L  63      -1.185  -6.913  10.668  1.00 24.19           C  
ATOM    535  OG  SER L  63      -0.581  -6.793   9.399  1.00 25.96           O  
ATOM    536  N   GLY L  64       1.367  -7.260  12.720  1.00 23.09           N  
ATOM    537  CA  GLY L  64       2.752  -7.663  12.843  1.00 22.20           C  
ATOM    538  C   GLY L  64       2.950  -9.112  12.467  1.00 22.05           C  
ATOM    539  O   GLY L  64       2.013  -9.914  12.531  1.00 21.32           O  
ATOM    540  N   SER L  65       4.172  -9.439  12.068  1.00 20.31           N  
ATOM    541  CA  SER L  65       4.527 -10.794  11.675  1.00 21.76           C  
ATOM    542  C   SER L  65       6.004 -11.030  11.962  1.00 21.63           C  
ATOM    543  O   SER L  65       6.739 -10.099  12.294  1.00 20.67           O  
ATOM    544  CB  SER L  65       4.256 -11.023  10.179  1.00 22.06           C  
ATOM    545  OG  SER L  65       5.064 -10.188   9.365  1.00 23.37           O  
ATOM    546  N   GLY L  66       6.424 -12.283  11.825  1.00 22.69           N  
ATOM    547  CA  GLY L  66       7.805 -12.643  12.079  1.00 21.76           C  
ATOM    548  C   GLY L  66       7.861 -13.603  13.252  1.00 23.14           C  
ATOM    549  O   GLY L  66       6.858 -13.807  13.940  1.00 23.15           O  
ATOM    550  N   SER L  67       9.031 -14.187  13.480  1.00 20.25           N  
ATOM    551  CA  SER L  67       9.230 -15.125  14.572  1.00 20.84           C  
ATOM    552  C   SER L  67      10.724 -15.223  14.886  1.00 20.99           C  
ATOM    553  O   SER L  67      11.560 -15.074  14.002  1.00 20.69           O  
ATOM    554  CB  SER L  67       8.695 -16.506  14.178  1.00 20.21           C  
ATOM    555  OG  SER L  67       8.820 -17.427  15.250  1.00 24.47           O  
ATOM    556  N   GLY L  68      11.059 -15.466  16.146  1.00 21.20           N  
ATOM    557  CA  GLY L  68      12.461 -15.587  16.513  1.00 22.05           C  
ATOM    558  C   GLY L  68      13.267 -14.298  16.560  1.00 21.66           C  
ATOM    559  O   GLY L  68      13.269 -13.592  17.572  1.00 20.91           O  
ATOM    560  N   THR L  69      13.950 -13.973  15.469  1.00 21.50           N  
ATOM    561  CA  THR L  69      14.774 -12.774  15.448  1.00 23.95           C  
ATOM    562  C   THR L  69      14.475 -11.829  14.301  1.00 25.67           C  
ATOM    563  O   THR L  69      15.209 -10.860  14.083  1.00 26.68           O  
ATOM    564  CB  THR L  69      16.253 -13.136  15.355  1.00 22.98           C  
ATOM    565  OG1 THR L  69      16.496 -13.797  14.109  1.00 21.53           O  
ATOM    566  CG2 THR L  69      16.641 -14.064  16.489  1.00 24.41           C  
ATOM    567  N   ASP L  70      13.409 -12.104  13.564  1.00 25.54           N  
ATOM    568  CA  ASP L  70      13.061 -11.263  12.430  1.00 25.51           C  
ATOM    569  C   ASP L  70      11.564 -10.962  12.440  1.00 25.19           C  
ATOM    570  O   ASP L  70      10.743 -11.873  12.323  1.00 24.63           O  
ATOM    571  CB  ASP L  70      13.471 -11.984  11.148  1.00 26.04           C  
ATOM    572  CG  ASP L  70      13.339 -11.119   9.926  1.00 26.93           C  
ATOM    573  OD1 ASP L  70      12.199 -10.818   9.530  1.00 29.25           O  
ATOM    574  OD2 ASP L  70      14.385 -10.731   9.371  1.00 29.08           O  
ATOM    575  N   PHE L  71      11.215  -9.689  12.609  1.00 23.45           N  
ATOM    576  CA  PHE L  71       9.813  -9.277  12.645  1.00 21.64           C  
ATOM    577  C   PHE L  71       9.519  -8.135  11.686  1.00 21.69           C  
ATOM    578  O   PHE L  71      10.410  -7.377  11.313  1.00 21.11           O  
ATOM    579  CB  PHE L  71       9.399  -8.851  14.058  1.00 18.92           C  
ATOM    580  CG  PHE L  71       9.603  -9.914  15.095  1.00 19.60           C  
ATOM    581  CD1 PHE L  71      10.868 -10.154  15.629  1.00 20.93           C  
ATOM    582  CD2 PHE L  71       8.540 -10.705  15.516  1.00 18.29           C  
ATOM    583  CE1 PHE L  71      11.070 -11.165  16.567  1.00 18.07           C  
ATOM    584  CE2 PHE L  71       8.733 -11.718  16.453  1.00 17.01           C  
ATOM    585  CZ  PHE L  71      10.007 -11.945  16.977  1.00 17.74           C  
ATOM    586  N   THR L  72       8.253  -8.011  11.300  1.00 21.21           N  
ATOM    587  CA  THR L  72       7.846  -6.961  10.384  1.00 20.94           C  
ATOM    588  C   THR L  72       6.509  -6.323  10.749  1.00 21.12           C  
ATOM    589  O   THR L  72       5.530  -7.014  11.033  1.00 21.45           O  
ATOM    590  CB  THR L  72       7.745  -7.504   8.940  1.00 22.17           C  
ATOM    591  OG1 THR L  72       9.052  -7.870   8.473  1.00 20.87           O  
ATOM    592  CG2 THR L  72       7.139  -6.452   8.009  1.00 20.98           C  
ATOM    593  N   LEU L  73       6.483  -4.996  10.763  1.00 20.84           N  
ATOM    594  CA  LEU L  73       5.258  -4.262  11.032  1.00 20.68           C  
ATOM    595  C   LEU L  73       4.747  -3.872   9.650  1.00 22.25           C  
ATOM    596  O   LEU L  73       5.514  -3.383   8.818  1.00 21.11           O  
ATOM    597  CB  LEU L  73       5.520  -2.994  11.848  1.00 18.28           C  
ATOM    598  CG  LEU L  73       4.237  -2.173  12.066  1.00 16.59           C  
ATOM    599  CD1 LEU L  73       3.282  -2.977  12.951  1.00 18.80           C  
ATOM    600  CD2 LEU L  73       4.545  -0.832  12.709  1.00 14.49           C  
ATOM    601  N   THR L  74       3.461  -4.093   9.403  1.00 22.44           N  
ATOM    602  CA  THR L  74       2.881  -3.771   8.109  1.00 25.32           C  
ATOM    603  C   THR L  74       1.666  -2.859   8.220  1.00 25.68           C  
ATOM    604  O   THR L  74       0.855  -2.986   9.135  1.00 27.10           O  
ATOM    605  CB  THR L  74       2.453  -5.051   7.352  1.00 25.12           C  
ATOM    606  OG1 THR L  74       3.606  -5.853   7.061  1.00 27.17           O  
ATOM    607  CG2 THR L  74       1.757  -4.693   6.053  1.00 24.10           C  
ATOM    608  N   ILE L  75       1.557  -1.939   7.272  1.00 25.56           N  
ATOM    609  CA  ILE L  75       0.449  -1.009   7.215  1.00 25.49           C  
ATOM    610  C   ILE L  75      -0.106  -1.152   5.805  1.00 27.29           C  
ATOM    611  O   ILE L  75       0.522  -0.724   4.835  1.00 28.04           O  
ATOM    612  CB  ILE L  75       0.934   0.425   7.476  1.00 24.89           C  
ATOM    613  CG1 ILE L  75       1.581   0.490   8.860  1.00 25.18           C  
ATOM    614  CG2 ILE L  75      -0.229   1.400   7.402  1.00 26.01           C  
ATOM    615  CD1 ILE L  75       2.144   1.836   9.219  1.00 25.49           C  
ATOM    616  N   SER L  76      -1.275  -1.781   5.697  1.00 28.00           N  
ATOM    617  CA  SER L  76      -1.917  -2.024   4.405  1.00 28.05           C  
ATOM    618  C   SER L  76      -2.360  -0.790   3.610  1.00 29.22           C  
ATOM    619  O   SER L  76      -2.215  -0.753   2.387  1.00 30.20           O  
ATOM    620  CB  SER L  76      -3.104  -2.980   4.595  1.00 28.62           C  
ATOM    621  OG  SER L  76      -3.990  -2.523   5.605  1.00 29.66           O  
ATOM    622  N   SER L  77      -2.896   0.216   4.290  1.00 28.80           N  
ATOM    623  CA  SER L  77      -3.349   1.429   3.615  1.00 29.52           C  
ATOM    624  C   SER L  77      -2.926   2.636   4.423  1.00 29.38           C  
ATOM    625  O   SER L  77      -3.588   2.996   5.394  1.00 30.97           O  
ATOM    626  CB  SER L  77      -4.872   1.426   3.479  1.00 29.73           C  
ATOM    627  OG  SER L  77      -5.307   0.309   2.730  1.00 33.83           O  
ATOM    628  N   LEU L  78      -1.828   3.266   4.023  1.00 28.23           N  
ATOM    629  CA  LEU L  78      -1.326   4.425   4.749  1.00 28.98           C  
ATOM    630  C   LEU L  78      -2.320   5.576   4.840  1.00 30.21           C  
ATOM    631  O   LEU L  78      -2.888   5.999   3.834  1.00 31.72           O  
ATOM    632  CB  LEU L  78      -0.045   4.951   4.108  1.00 27.34           C  
ATOM    633  CG  LEU L  78       0.493   6.162   4.872  1.00 26.54           C  
ATOM    634  CD1 LEU L  78       1.001   5.687   6.233  1.00 26.46           C  
ATOM    635  CD2 LEU L  78       1.608   6.838   4.094  1.00 29.46           C  
ATOM    636  N   GLN L  79      -2.529   6.078   6.053  1.00 30.39           N  
ATOM    637  CA  GLN L  79      -3.423   7.206   6.264  1.00 30.98           C  
ATOM    638  C   GLN L  79      -2.612   8.283   6.951  1.00 31.89           C  
ATOM    639  O   GLN L  79      -1.626   7.981   7.623  1.00 30.65           O  
ATOM    640  CB  GLN L  79      -4.630   6.820   7.124  1.00 32.74           C  
ATOM    641  CG  GLN L  79      -5.584   5.836   6.450  1.00 37.26           C  
ATOM    642  CD  GLN L  79      -6.885   5.647   7.224  1.00 41.26           C  
ATOM    643  OE1 GLN L  79      -7.707   4.796   6.879  1.00 42.36           O  
ATOM    644  NE2 GLN L  79      -7.082   6.451   8.266  1.00 42.36           N  
ATOM    645  N   ALA L  80      -3.031   9.534   6.769  1.00 32.26           N  
ATOM    646  CA  ALA L  80      -2.350  10.692   7.335  1.00 32.02           C  
ATOM    647  C   ALA L  80      -1.989  10.575   8.813  1.00 32.01           C  
ATOM    648  O   ALA L  80      -0.925  11.032   9.229  1.00 32.81           O  
ATOM    649  CB  ALA L  80      -3.189  11.945   7.101  1.00 32.82           C  
ATOM    650  N   GLU L  81      -2.866   9.971   9.608  1.00 32.54           N  
ATOM    651  CA  GLU L  81      -2.595   9.829  11.035  1.00 34.36           C  
ATOM    652  C   GLU L  81      -1.579   8.732  11.361  1.00 33.24           C  
ATOM    653  O   GLU L  81      -1.227   8.538  12.526  1.00 32.69           O  
ATOM    654  CB  GLU L  81      -3.886   9.562  11.824  1.00 35.97           C  
ATOM    655  CG  GLU L  81      -4.649   8.316  11.400  1.00 41.47           C  
ATOM    656  CD  GLU L  81      -5.702   8.599  10.346  1.00 44.04           C  
ATOM    657  OE1 GLU L  81      -5.379   9.238   9.320  1.00 46.17           O  
ATOM    658  OE2 GLU L  81      -6.859   8.170  10.545  1.00 47.19           O  
ATOM    659  N   ASP L  82      -1.112   8.011  10.345  1.00 31.41           N  
ATOM    660  CA  ASP L  82      -0.132   6.961  10.579  1.00 29.84           C  
ATOM    661  C   ASP L  82       1.287   7.530  10.530  1.00 28.87           C  
ATOM    662  O   ASP L  82       2.262   6.808  10.741  1.00 28.43           O  
ATOM    663  CB  ASP L  82      -0.272   5.838   9.545  1.00 30.89           C  
ATOM    664  CG  ASP L  82      -1.657   5.207   9.542  1.00 31.30           C  
ATOM    665  OD1 ASP L  82      -2.204   4.955  10.637  1.00 32.53           O  
ATOM    666  OD2 ASP L  82      -2.189   4.940   8.443  1.00 32.20           O  
ATOM    667  N   VAL L  83       1.399   8.824  10.245  1.00 26.54           N  
ATOM    668  CA  VAL L  83       2.701   9.478  10.172  1.00 25.56           C  
ATOM    669  C   VAL L  83       3.280   9.620  11.571  1.00 26.39           C  
ATOM    670  O   VAL L  83       2.809  10.428  12.372  1.00 28.69           O  
ATOM    671  CB  VAL L  83       2.585  10.870   9.527  1.00 24.62           C  
ATOM    672  CG1 VAL L  83       3.900  11.606   9.621  1.00 26.61           C  
ATOM    673  CG2 VAL L  83       2.194  10.725   8.084  1.00 26.00           C  
ATOM    674  N   ALA L  84       4.306   8.831  11.861  1.00 25.52           N  
ATOM    675  CA  ALA L  84       4.936   8.849  13.173  1.00 24.28           C  
ATOM    676  C   ALA L  84       6.239   8.054  13.157  1.00 23.56           C  
ATOM    677  O   ALA L  84       6.721   7.644  12.095  1.00 21.55           O  
ATOM    678  CB  ALA L  84       3.985   8.251  14.203  1.00 22.88           C  
ATOM    679  N   VAL L  85       6.804   7.839  14.340  1.00 21.76           N  
ATOM    680  CA  VAL L  85       8.032   7.063  14.457  1.00 23.31           C  
ATOM    681  C   VAL L  85       7.632   5.743  15.105  1.00 23.90           C  
ATOM    682  O   VAL L  85       6.919   5.736  16.109  1.00 25.28           O  
ATOM    683  CB  VAL L  85       9.082   7.770  15.355  1.00 21.55           C  
ATOM    684  CG1 VAL L  85      10.360   6.955  15.387  1.00 20.67           C  
ATOM    685  CG2 VAL L  85       9.355   9.190  14.843  1.00 17.17           C  
ATOM    686  N   TYR L  86       8.067   4.628  14.529  1.00 21.89           N  
ATOM    687  CA  TYR L  86       7.721   3.329  15.092  1.00 21.64           C  
ATOM    688  C   TYR L  86       8.920   2.623  15.696  1.00 20.42           C  
ATOM    689  O   TYR L  86      10.030   2.684  15.159  1.00 17.77           O  
ATOM    690  CB  TYR L  86       7.070   2.436  14.030  1.00 21.11           C  
ATOM    691  CG  TYR L  86       5.758   2.994  13.521  1.00 22.57           C  
ATOM    692  CD1 TYR L  86       5.731   4.100  12.670  1.00 20.94           C  
ATOM    693  CD2 TYR L  86       4.542   2.464  13.951  1.00 20.53           C  
ATOM    694  CE1 TYR L  86       4.527   4.662  12.267  1.00 22.88           C  
ATOM    695  CE2 TYR L  86       3.335   3.022  13.555  1.00 23.18           C  
ATOM    696  CZ  TYR L  86       3.337   4.120  12.716  1.00 22.31           C  
ATOM    697  OH  TYR L  86       2.147   4.683  12.333  1.00 25.05           O  
ATOM    698  N   TYR L  87       8.689   1.964  16.828  1.00 18.66           N  
ATOM    699  CA  TYR L  87       9.745   1.235  17.510  1.00 17.04           C  
ATOM    700  C   TYR L  87       9.306  -0.181  17.838  1.00 16.70           C  
ATOM    701  O   TYR L  87       8.128  -0.421  18.139  1.00 15.02           O  
ATOM    702  CB  TYR L  87      10.123   1.904  18.836  1.00 15.93           C  
ATOM    703  CG  TYR L  87      10.611   3.326  18.748  1.00 17.08           C  
ATOM    704  CD1 TYR L  87       9.718   4.387  18.625  1.00 15.85           C  
ATOM    705  CD2 TYR L  87      11.979   3.613  18.790  1.00 16.87           C  
ATOM    706  CE1 TYR L  87      10.171   5.700  18.550  1.00 18.37           C  
ATOM    707  CE2 TYR L  87      12.442   4.919  18.715  1.00 13.50           C  
ATOM    708  CZ  TYR L  87      11.537   5.957  18.597  1.00 17.48           C  
ATOM    709  OH  TYR L  87      11.995   7.248  18.530  1.00 22.18           O  
ATOM    710  N   CYS L  88      10.251  -1.117  17.773  1.00 15.30           N  
ATOM    711  CA  CYS L  88       9.963  -2.488  18.159  1.00 15.56           C  
ATOM    712  C   CYS L  88      10.613  -2.638  19.536  1.00 15.64           C  
ATOM    713  O   CYS L  88      11.511  -1.877  19.886  1.00 19.64           O  
ATOM    714  CB  CYS L  88      10.548  -3.510  17.171  1.00 15.33           C  
ATOM    715  SG  CYS L  88      12.357  -3.504  16.917  1.00 18.18           S  
ATOM    716  N   GLN L  89      10.146  -3.591  20.329  1.00 16.81           N  
ATOM    717  CA  GLN L  89      10.700  -3.812  21.662  1.00 15.96           C  
ATOM    718  C   GLN L  89      10.689  -5.293  21.995  1.00 16.10           C  
ATOM    719  O   GLN L  89       9.765  -6.013  21.612  1.00 15.02           O  
ATOM    720  CB  GLN L  89       9.878  -3.084  22.737  1.00 16.74           C  
ATOM    721  CG  GLN L  89      10.228  -3.537  24.170  1.00 16.18           C  
ATOM    722  CD  GLN L  89       9.192  -3.144  25.229  1.00 17.83           C  
ATOM    723  OE1 GLN L  89       7.989  -3.280  25.022  1.00 14.33           O  
ATOM    724  NE2 GLN L  89       9.668  -2.696  26.385  1.00 16.60           N  
ATOM    725  N   GLN L  90      11.724  -5.754  22.691  1.00 14.89           N  
ATOM    726  CA  GLN L  90      11.756  -7.143  23.114  1.00 17.76           C  
ATOM    727  C   GLN L  90      11.598  -7.070  24.632  1.00 18.35           C  
ATOM    728  O   GLN L  90      12.169  -6.193  25.291  1.00 18.52           O  
ATOM    729  CB  GLN L  90      13.072  -7.829  22.708  1.00 18.04           C  
ATOM    730  CG  GLN L  90      14.320  -7.377  23.464  1.00 21.42           C  
ATOM    731  CD  GLN L  90      14.449  -7.998  24.848  1.00 20.58           C  
ATOM    732  OE1 GLN L  90      15.318  -7.613  25.630  1.00 24.87           O  
ATOM    733  NE2 GLN L  90      13.600  -8.972  25.149  1.00 23.53           N  
ATOM    734  N   TYR L  91      10.782  -7.959  25.178  1.00 19.46           N  
ATOM    735  CA  TYR L  91      10.551  -7.992  26.613  1.00 20.98           C  
ATOM    736  C   TYR L  91      10.584  -9.448  27.056  1.00 20.67           C  
ATOM    737  O   TYR L  91       9.837  -9.895  27.920  1.00 20.17           O  
ATOM    738  CB  TYR L  91       9.228  -7.274  26.958  1.00 20.11           C  
ATOM    739  CG  TYR L  91       7.987  -7.785  26.253  1.00 20.63           C  
ATOM    740  CD1 TYR L  91       7.270  -8.863  26.757  1.00 23.11           C  
ATOM    741  CD2 TYR L  91       7.528  -7.182  25.081  1.00 21.74           C  
ATOM    742  CE1 TYR L  91       6.122  -9.331  26.117  1.00 23.86           C  
ATOM    743  CE2 TYR L  91       6.380  -7.643  24.429  1.00 21.01           C  
ATOM    744  CZ  TYR L  91       5.683  -8.718  24.955  1.00 23.33           C  
ATOM    745  OH  TYR L  91       4.545  -9.192  24.330  1.00 25.57           O  
ATOM    746  N   TYR L  92      11.503 -10.169  26.424  1.00 21.82           N  
ATOM    747  CA  TYR L  92      11.750 -11.573  26.685  1.00 23.80           C  
ATOM    748  C   TYR L  92      12.673 -11.641  27.899  1.00 23.37           C  
ATOM    749  O   TYR L  92      12.450 -12.422  28.825  1.00 24.63           O  
ATOM    750  CB  TYR L  92      12.437 -12.199  25.467  1.00 24.96           C  
ATOM    751  CG  TYR L  92      12.844 -13.649  25.620  1.00 26.56           C  
ATOM    752  CD1 TYR L  92      11.890 -14.665  25.678  1.00 26.74           C  
ATOM    753  CD2 TYR L  92      14.196 -14.007  25.689  1.00 27.67           C  
ATOM    754  CE1 TYR L  92      12.273 -16.015  25.801  1.00 29.17           C  
ATOM    755  CE2 TYR L  92      14.590 -15.344  25.811  1.00 26.03           C  
ATOM    756  CZ  TYR L  92      13.625 -16.344  25.866  1.00 29.34           C  
ATOM    757  OH  TYR L  92      14.011 -17.664  25.996  1.00 29.16           O  
ATOM    758  N   SER L  93      13.709 -10.811  27.897  1.00 23.08           N  
ATOM    759  CA  SER L  93      14.657 -10.798  29.005  1.00 23.95           C  
ATOM    760  C   SER L  93      15.121  -9.389  29.322  1.00 22.44           C  
ATOM    761  O   SER L  93      15.405  -8.594  28.424  1.00 22.36           O  
ATOM    762  CB  SER L  93      15.865 -11.678  28.678  1.00 24.05           C  
ATOM    763  OG  SER L  93      16.512 -11.226  27.503  1.00 25.44           O  
ATOM    764  N   THR L  94      15.181  -9.076  30.608  1.00 23.02           N  
ATOM    765  CA  THR L  94      15.608  -7.757  31.035  1.00 24.16           C  
ATOM    766  C   THR L  94      17.101  -7.644  30.763  1.00 24.91           C  
ATOM    767  O   THR L  94      17.827  -8.631  30.836  1.00 24.04           O  
ATOM    768  CB  THR L  94      15.346  -7.549  32.533  1.00 24.07           C  
ATOM    769  OG1 THR L  94      16.102  -8.509  33.280  1.00 28.11           O  
ATOM    770  CG2 THR L  94      13.851  -7.721  32.847  1.00 22.71           C  
ATOM    771  N   PRO L  95      17.577  -6.440  30.420  1.00 26.11           N  
ATOM    772  CA  PRO L  95      16.812  -5.199  30.273  1.00 25.68           C  
ATOM    773  C   PRO L  95      15.954  -5.248  29.017  1.00 25.20           C  
ATOM    774  O   PRO L  95      16.434  -5.653  27.962  1.00 26.20           O  
ATOM    775  CB  PRO L  95      17.911  -4.140  30.140  1.00 28.10           C  
ATOM    776  CG  PRO L  95      19.143  -4.821  30.765  1.00 29.07           C  
ATOM    777  CD  PRO L  95      18.997  -6.175  30.149  1.00 27.15           C  
ATOM    778  N   TYR L  96      14.690  -4.857  29.114  1.00 25.05           N  
ATOM    779  CA  TYR L  96      13.873  -4.852  27.915  1.00 25.91           C  
ATOM    780  C   TYR L  96      14.490  -3.752  27.066  1.00 25.67           C  
ATOM    781  O   TYR L  96      15.035  -2.782  27.605  1.00 28.04           O  
ATOM    782  CB  TYR L  96      12.406  -4.537  28.230  1.00 25.01           C  
ATOM    783  CG  TYR L  96      11.754  -5.527  29.162  1.00 22.33           C  
ATOM    784  CD1 TYR L  96      12.133  -6.869  29.161  1.00 24.15           C  
ATOM    785  CD2 TYR L  96      10.718  -5.138  30.007  1.00 24.45           C  
ATOM    786  CE1 TYR L  96      11.496  -7.801  29.979  1.00 22.58           C  
ATOM    787  CE2 TYR L  96      10.073  -6.062  30.828  1.00 22.43           C  
ATOM    788  CZ  TYR L  96      10.466  -7.387  30.808  1.00 23.30           C  
ATOM    789  OH  TYR L  96       9.826  -8.304  31.615  1.00 25.69           O  
ATOM    790  N   SER L  97      14.423  -3.898  25.749  1.00 25.49           N  
ATOM    791  CA  SER L  97      15.031  -2.908  24.870  1.00 24.21           C  
ATOM    792  C   SER L  97      14.264  -2.559  23.596  1.00 23.49           C  
ATOM    793  O   SER L  97      13.495  -3.363  23.068  1.00 22.92           O  
ATOM    794  CB  SER L  97      16.448  -3.362  24.506  1.00 21.75           C  
ATOM    795  OG  SER L  97      16.434  -4.671  23.961  1.00 22.70           O  
ATOM    796  N   PHE L  98      14.504  -1.341  23.121  1.00 22.03           N  
ATOM    797  CA  PHE L  98      13.891  -0.793  21.918  1.00 21.59           C  
ATOM    798  C   PHE L  98      14.841  -0.761  20.721  1.00 20.83           C  
ATOM    799  O   PHE L  98      16.061  -0.833  20.882  1.00 21.80           O  
ATOM    800  CB  PHE L  98      13.439   0.649  22.182  1.00 22.10           C  
ATOM    801  CG  PHE L  98      12.057   0.777  22.749  1.00 24.07           C  
ATOM    802  CD1 PHE L  98      11.687   0.100  23.902  1.00 25.38           C  
ATOM    803  CD2 PHE L  98      11.135   1.634  22.150  1.00 26.09           C  
ATOM    804  CE1 PHE L  98      10.416   0.278  24.458  1.00 22.77           C  
ATOM    805  CE2 PHE L  98       9.866   1.817  22.698  1.00 26.64           C  
ATOM    806  CZ  PHE L  98       9.510   1.133  23.857  1.00 25.22           C  
ATOM    807  N   GLY L  99      14.263  -0.638  19.526  1.00 19.06           N  
ATOM    808  CA  GLY L  99      15.048  -0.517  18.306  1.00 19.20           C  
ATOM    809  C   GLY L  99      15.394   0.964  18.210  1.00 19.26           C  
ATOM    810  O   GLY L  99      14.984   1.719  19.087  1.00 16.79           O  
ATOM    811  N   GLN L 100      16.113   1.407  17.180  1.00 19.94           N  
ATOM    812  CA  GLN L 100      16.473   2.829  17.116  1.00 20.77           C  
ATOM    813  C   GLN L 100      15.356   3.739  16.617  1.00 20.40           C  
ATOM    814  O   GLN L 100      15.485   4.961  16.667  1.00 21.86           O  
ATOM    815  CB  GLN L 100      17.714   3.068  16.245  1.00 20.34           C  
ATOM    816  CG  GLN L 100      17.446   2.996  14.748  1.00 20.16           C  
ATOM    817  CD  GLN L 100      17.371   1.581  14.235  1.00 19.78           C  
ATOM    818  OE1 GLN L 100      17.035   0.659  14.972  1.00 19.81           O  
ATOM    819  NE2 GLN L 100      17.664   1.402  12.952  1.00 19.23           N  
ATOM    820  N   GLY L 101      14.271   3.154  16.123  1.00 21.37           N  
ATOM    821  CA  GLY L 101      13.162   3.960  15.639  1.00 19.87           C  
ATOM    822  C   GLY L 101      13.129   4.156  14.133  1.00 21.52           C  
ATOM    823  O   GLY L 101      14.167   4.356  13.496  1.00 22.10           O  
ATOM    824  N   THR L 102      11.926   4.108  13.567  1.00 21.10           N  
ATOM    825  CA  THR L 102      11.729   4.278  12.132  1.00 20.90           C  
ATOM    826  C   THR L 102      10.670   5.346  11.855  1.00 21.01           C  
ATOM    827  O   THR L 102       9.528   5.240  12.321  1.00 19.36           O  
ATOM    828  CB  THR L 102      11.282   2.951  11.485  1.00 23.30           C  
ATOM    829  OG1 THR L 102      12.291   1.952  11.693  1.00 20.93           O  
ATOM    830  CG2 THR L 102      11.039   3.132   9.993  1.00 22.47           C  
ATOM    831  N   LYS L 103      11.054   6.370  11.094  1.00 21.19           N  
ATOM    832  CA  LYS L 103      10.154   7.469  10.748  1.00 23.32           C  
ATOM    833  C   LYS L 103       9.327   7.164   9.511  1.00 22.76           C  
ATOM    834  O   LYS L 103       9.875   6.960   8.431  1.00 22.34           O  
ATOM    835  CB  LYS L 103      10.945   8.751  10.489  1.00 26.04           C  
ATOM    836  CG  LYS L 103      11.756   9.241  11.668  1.00 32.88           C  
ATOM    837  CD  LYS L 103      12.525  10.518  11.326  1.00 37.10           C  
ATOM    838  CE  LYS L 103      13.533  10.287  10.202  1.00 40.39           C  
ATOM    839  NZ  LYS L 103      14.311  11.518   9.873  1.00 43.92           N  
ATOM    840  N   LEU L 104       8.009   7.141   9.671  1.00 21.44           N  
ATOM    841  CA  LEU L 104       7.115   6.880   8.555  1.00 22.79           C  
ATOM    842  C   LEU L 104       6.499   8.192   8.072  1.00 25.14           C  
ATOM    843  O   LEU L 104       5.811   8.887   8.829  1.00 23.50           O  
ATOM    844  CB  LEU L 104       6.016   5.909   8.975  1.00 22.87           C  
ATOM    845  CG  LEU L 104       5.002   5.566   7.882  1.00 24.61           C  
ATOM    846  CD1 LEU L 104       5.723   5.037   6.640  1.00 24.25           C  
ATOM    847  CD2 LEU L 104       4.020   4.545   8.426  1.00 21.38           C  
ATOM    848  N   GLU L 105       6.760   8.528   6.812  1.00 27.71           N  
ATOM    849  CA  GLU L 105       6.258   9.760   6.212  1.00 30.53           C  
ATOM    850  C   GLU L 105       5.375   9.513   4.996  1.00 31.18           C  
ATOM    851  O   GLU L 105       5.396   8.433   4.401  1.00 31.94           O  
ATOM    852  CB  GLU L 105       7.431  10.656   5.798  1.00 33.56           C  
ATOM    853  CG  GLU L 105       8.205  11.272   6.953  1.00 38.26           C  
ATOM    854  CD  GLU L 105       7.445  12.400   7.635  1.00 42.59           C  
ATOM    855  OE1 GLU L 105       6.300  12.177   8.087  1.00 44.14           O  
ATOM    856  OE2 GLU L 105       7.999  13.517   7.720  1.00 44.21           O  
ATOM    857  N   ILE L 106       4.603  10.531   4.628  1.00 31.64           N  
ATOM    858  CA  ILE L 106       3.729  10.445   3.470  1.00 32.13           C  
ATOM    859  C   ILE L 106       4.453  10.896   2.211  1.00 34.07           C  
ATOM    860  O   ILE L 106       5.029  11.982   2.170  1.00 32.91           O  
ATOM    861  CB  ILE L 106       2.477  11.328   3.635  1.00 31.41           C  
ATOM    862  CG1 ILE L 106       1.621  10.804   4.783  1.00 32.04           C  
ATOM    863  CG2 ILE L 106       1.678  11.350   2.336  1.00 29.46           C  
ATOM    864  CD1 ILE L 106       0.397  11.632   5.054  1.00 30.80           C  
ATOM    865  N   LYS L 107       4.428  10.047   1.190  1.00 36.71           N  
ATOM    866  CA  LYS L 107       5.034  10.363  -0.096  1.00 39.60           C  
ATOM    867  C   LYS L 107       4.094  11.314  -0.840  1.00 42.25           C  
ATOM    868  O   LYS L 107       3.008  10.911  -1.270  1.00 43.57           O  
ATOM    869  CB  LYS L 107       5.229   9.077  -0.904  1.00 39.41           C  
ATOM    870  CG  LYS L 107       5.422   9.279  -2.401  1.00 40.94           C  
ATOM    871  CD  LYS L 107       6.635  10.128  -2.725  1.00 42.75           C  
ATOM    872  CE  LYS L 107       6.755  10.321  -4.227  1.00 43.04           C  
ATOM    873  NZ  LYS L 107       7.915  11.179  -4.574  1.00 44.49           N  
ATOM    874  N   ARG L 108       4.502  12.572  -0.983  1.00 43.63           N  
ATOM    875  CA  ARG L 108       3.678  13.565  -1.669  1.00 45.57           C  
ATOM    876  C   ARG L 108       4.020  13.651  -3.153  1.00 47.04           C  
ATOM    877  O   ARG L 108       3.100  13.462  -3.977  1.00 48.30           O  
ATOM    878  CB  ARG L 108       3.848  14.930  -1.015  1.00 45.73           C  
ATOM    879  OXT ARG L 108       5.200  13.913  -3.475  1.00 48.84           O  
TER     880      ARG L 108                                                      
ATOM    881  N   ASP L   1      25.175   5.274  26.447  1.00 42.17           N  
ATOM    882  CA  ASP L   1      23.716   5.586  26.445  1.00 41.49           C  
ATOM    883  C   ASP L   1      23.202   5.879  27.854  1.00 41.31           C  
ATOM    884  O   ASP L   1      23.983   6.140  28.771  1.00 41.31           O  
ATOM    885  CB  ASP L   1      22.925   4.418  25.855  1.00 40.21           C  
ATOM    886  CG  ASP L   1      23.311   4.113  24.422  1.00 41.45           C  
ATOM    887  OD1 ASP L   1      23.391   5.065  23.612  1.00 39.67           O  
ATOM    888  OD2 ASP L   1      23.511   2.918  24.103  1.00 40.22           O  
ATOM    889  N   ILE L   2      21.884   5.833  28.026  1.00 39.28           N  
ATOM    890  CA  ILE L   2      21.298   6.098  29.329  1.00 36.18           C  
ATOM    891  C   ILE L   2      20.932   4.814  30.067  1.00 34.22           C  
ATOM    892  O   ILE L   2      20.098   4.034  29.605  1.00 33.32           O  
ATOM    893  CB  ILE L   2      20.044   6.983  29.205  1.00 36.26           C  
ATOM    894  CG1 ILE L   2      20.414   8.295  28.504  1.00 36.10           C  
ATOM    895  CG2 ILE L   2      19.467   7.261  30.590  1.00 34.37           C  
ATOM    896  CD1 ILE L   2      19.254   9.271  28.345  1.00 36.06           C  
ATOM    897  N   VAL L   3      21.573   4.608  31.216  1.00 31.49           N  
ATOM    898  CA  VAL L   3      21.339   3.437  32.053  1.00 28.67           C  
ATOM    899  C   VAL L   3      20.326   3.770  33.153  1.00 26.94           C  
ATOM    900  O   VAL L   3      20.440   4.791  33.826  1.00 28.55           O  
ATOM    901  CB  VAL L   3      22.660   2.956  32.710  1.00 29.47           C  
ATOM    902  CG1 VAL L   3      22.392   1.770  33.624  1.00 28.89           C  
ATOM    903  CG2 VAL L   3      23.668   2.569  31.631  1.00 25.07           C  
ATOM    904  N   MET L   4      19.334   2.907  33.333  1.00 23.27           N  
ATOM    905  CA  MET L   4      18.315   3.135  34.353  1.00 20.93           C  
ATOM    906  C   MET L   4      18.447   2.089  35.449  1.00 19.26           C  
ATOM    907  O   MET L   4      18.516   0.896  35.159  1.00 18.35           O  
ATOM    908  CB  MET L   4      16.916   3.031  33.735  1.00 20.07           C  
ATOM    909  CG  MET L   4      16.720   3.878  32.491  1.00 19.37           C  
ATOM    910  SD  MET L   4      16.816   5.656  32.794  1.00 25.11           S  
ATOM    911  CE  MET L   4      15.304   5.965  33.710  1.00 24.75           C  
ATOM    912  N   THR L   5      18.480   2.529  36.704  1.00 17.51           N  
ATOM    913  CA  THR L   5      18.577   1.601  37.830  1.00 17.89           C  
ATOM    914  C   THR L   5      17.420   1.801  38.813  1.00 17.29           C  
ATOM    915  O   THR L   5      17.100   2.932  39.196  1.00 16.40           O  
ATOM    916  CB  THR L   5      19.912   1.773  38.590  1.00 19.76           C  
ATOM    917  OG1 THR L   5      21.005   1.506  37.702  1.00 22.97           O  
ATOM    918  CG2 THR L   5      19.988   0.812  39.751  1.00 21.29           C  
ATOM    919  N   GLN L   6      16.794   0.702  39.226  1.00 16.96           N  
ATOM    920  CA  GLN L   6      15.677   0.790  40.163  1.00 17.40           C  
ATOM    921  C   GLN L   6      16.096   0.281  41.538  1.00 18.72           C  
ATOM    922  O   GLN L   6      17.168  -0.291  41.701  1.00 19.68           O  
ATOM    923  CB  GLN L   6      14.490  -0.021  39.644  1.00 15.35           C  
ATOM    924  CG  GLN L   6      14.166   0.268  38.192  1.00 16.40           C  
ATOM    925  CD  GLN L   6      12.896  -0.412  37.708  1.00 16.24           C  
ATOM    926  OE1 GLN L   6      12.665  -0.531  36.500  1.00 16.38           O  
ATOM    927  NE2 GLN L   6      12.057  -0.845  38.645  1.00 18.80           N  
ATOM    928  N   SER L   7      15.248   0.506  42.530  1.00 20.26           N  
ATOM    929  CA  SER L   7      15.528   0.069  43.890  1.00 21.86           C  
ATOM    930  C   SER L   7      14.261   0.163  44.724  1.00 22.64           C  
ATOM    931  O   SER L   7      13.604   1.209  44.744  1.00 24.81           O  
ATOM    932  CB  SER L   7      16.613   0.945  44.515  1.00 19.67           C  
ATOM    933  OG  SER L   7      16.894   0.525  45.833  1.00 21.13           O  
ATOM    934  N   PRO L   8      13.904  -0.923  45.434  1.00 22.88           N  
ATOM    935  CA  PRO L   8      14.588  -2.220  45.517  1.00 23.36           C  
ATOM    936  C   PRO L   8      14.264  -3.087  44.301  1.00 24.23           C  
ATOM    937  O   PRO L   8      13.622  -2.621  43.356  1.00 27.07           O  
ATOM    938  CB  PRO L   8      14.004  -2.810  46.788  1.00 21.77           C  
ATOM    939  CG  PRO L   8      12.543  -2.415  46.609  1.00 23.28           C  
ATOM    940  CD  PRO L   8      12.718  -0.928  46.314  1.00 23.30           C  
ATOM    941  N   ASP L   9      14.702  -4.344  44.320  1.00 23.25           N  
ATOM    942  CA  ASP L   9      14.408  -5.251  43.215  1.00 23.62           C  
ATOM    943  C   ASP L   9      13.036  -5.858  43.455  1.00 22.46           C  
ATOM    944  O   ASP L   9      12.384  -6.354  42.534  1.00 21.70           O  
ATOM    945  CB  ASP L   9      15.469  -6.345  43.113  1.00 24.61           C  
ATOM    946  CG  ASP L   9      16.774  -5.842  42.508  1.00 29.22           C  
ATOM    947  OD1 ASP L   9      16.796  -5.529  41.296  1.00 30.21           O  
ATOM    948  OD2 ASP L   9      17.781  -5.749  43.240  1.00 32.08           O  
ATOM    949  N   SER L  10      12.606  -5.797  44.710  1.00 22.29           N  
ATOM    950  CA  SER L  10      11.310  -6.311  45.131  1.00 22.27           C  
ATOM    951  C   SER L  10      10.992  -5.801  46.538  1.00 22.12           C  
ATOM    952  O   SER L  10      11.893  -5.394  47.281  1.00 18.54           O  
ATOM    953  CB  SER L  10      11.317  -7.837  45.123  1.00 25.19           C  
ATOM    954  OG  SER L  10      12.311  -8.337  45.994  1.00 27.60           O  
ATOM    955  N   LEU L  11       9.708  -5.817  46.889  1.00 19.48           N  
ATOM    956  CA  LEU L  11       9.261  -5.368  48.196  1.00 21.59           C  
ATOM    957  C   LEU L  11       7.822  -5.823  48.423  1.00 22.66           C  
ATOM    958  O   LEU L  11       7.130  -6.211  47.478  1.00 21.87           O  
ATOM    959  CB  LEU L  11       9.322  -3.839  48.292  1.00 21.37           C  
ATOM    960  CG  LEU L  11       8.302  -3.015  47.491  1.00 24.90           C  
ATOM    961  CD1 LEU L  11       8.471  -1.542  47.813  1.00 24.05           C  
ATOM    962  CD2 LEU L  11       8.476  -3.250  46.000  1.00 24.59           C  
ATOM    963  N   ALA L  12       7.380  -5.766  49.676  1.00 22.25           N  
ATOM    964  CA  ALA L  12       6.021  -6.153  50.032  1.00 23.17           C  
ATOM    965  C   ALA L  12       5.457  -5.254  51.121  1.00 24.00           C  
ATOM    966  O   ALA L  12       6.183  -4.816  52.019  1.00 24.31           O  
ATOM    967  CB  ALA L  12       5.990  -7.596  50.499  1.00 24.73           C  
ATOM    968  N   VAL L  13       4.164  -4.967  51.022  1.00 22.78           N  
ATOM    969  CA  VAL L  13       3.477  -4.148  52.010  1.00 25.15           C  
ATOM    970  C   VAL L  13       2.097  -4.775  52.240  1.00 27.86           C  
ATOM    971  O   VAL L  13       1.604  -5.528  51.398  1.00 27.74           O  
ATOM    972  CB  VAL L  13       3.315  -2.671  51.534  1.00 25.12           C  
ATOM    973  CG1 VAL L  13       4.675  -2.082  51.189  1.00 22.42           C  
ATOM    974  CG2 VAL L  13       2.374  -2.589  50.341  1.00 22.90           C  
ATOM    975  N   SER L  14       1.484  -4.489  53.384  1.00 29.19           N  
ATOM    976  CA  SER L  14       0.169  -5.044  53.692  1.00 31.14           C  
ATOM    977  C   SER L  14      -0.869  -4.387  52.779  1.00 32.64           C  
ATOM    978  O   SER L  14      -0.637  -3.285  52.278  1.00 33.20           O  
ATOM    979  CB  SER L  14      -0.191  -4.763  55.159  1.00 31.49           C  
ATOM    980  OG  SER L  14       0.787  -5.280  56.051  1.00 30.13           O  
ATOM    981  N   LEU L  15      -2.001  -5.051  52.543  1.00 32.66           N  
ATOM    982  CA  LEU L  15      -3.029  -4.438  51.704  1.00 32.89           C  
ATOM    983  C   LEU L  15      -3.464  -3.152  52.380  1.00 31.26           C  
ATOM    984  O   LEU L  15      -3.510  -3.085  53.604  1.00 31.89           O  
ATOM    985  CB  LEU L  15      -4.262  -5.331  51.550  1.00 32.98           C  
ATOM    986  CG  LEU L  15      -4.185  -6.640  50.772  1.00 34.94           C  
ATOM    987  CD1 LEU L  15      -3.302  -7.612  51.499  1.00 37.72           C  
ATOM    988  CD2 LEU L  15      -5.583  -7.223  50.628  1.00 37.18           C  
ATOM    989  N   GLY L  16      -3.770  -2.133  51.584  1.00 31.94           N  
ATOM    990  CA  GLY L  16      -4.225  -0.868  52.133  1.00 32.27           C  
ATOM    991  C   GLY L  16      -3.141   0.154  52.415  1.00 32.49           C  
ATOM    992  O   GLY L  16      -3.424   1.346  52.502  1.00 34.04           O  
ATOM    993  N   GLU L  17      -1.902  -0.306  52.550  1.00 32.99           N  
ATOM    994  CA  GLU L  17      -0.786   0.583  52.841  1.00 33.66           C  
ATOM    995  C   GLU L  17      -0.040   1.069  51.596  1.00 33.11           C  
ATOM    996  O   GLU L  17      -0.159   0.485  50.511  1.00 30.83           O  
ATOM    997  CB  GLU L  17       0.197  -0.114  53.787  1.00 35.44           C  
ATOM    998  CG  GLU L  17      -0.432  -0.622  55.086  1.00 37.99           C  
ATOM    999  CD  GLU L  17      -1.155   0.465  55.866  1.00 38.86           C  
ATOM   1000  OE1 GLU L  17      -0.524   1.491  56.193  1.00 40.43           O  
ATOM   1001  OE2 GLU L  17      -2.357   0.291  56.158  1.00 40.75           O  
ATOM   1002  N   ARG L  18       0.735   2.139  51.774  1.00 31.65           N  
ATOM   1003  CA  ARG L  18       1.522   2.742  50.696  1.00 31.03           C  
ATOM   1004  C   ARG L  18       2.779   1.955  50.326  1.00 29.22           C  
ATOM   1005  O   ARG L  18       3.286   1.168  51.119  1.00 29.66           O  
ATOM   1006  CB  ARG L  18       1.925   4.175  51.081  1.00 33.42           C  
ATOM   1007  CG  ARG L  18       2.581   4.313  52.462  1.00 34.77           C  
ATOM   1008  CD  ARG L  18       2.948   5.768  52.769  1.00 36.03           C  
ATOM   1009  NE  ARG L  18       4.214   6.174  52.163  1.00 38.62           N  
ATOM   1010  CZ  ARG L  18       5.410   5.996  52.726  1.00 35.73           C  
ATOM   1011  NH1 ARG L  18       5.519   5.425  53.918  1.00 32.77           N  
ATOM   1012  NH2 ARG L  18       6.506   6.362  52.078  1.00 35.23           N  
ATOM   1013  N   ALA L  19       3.271   2.176  49.109  1.00 25.86           N  
ATOM   1014  CA  ALA L  19       4.489   1.532  48.619  1.00 24.21           C  
ATOM   1015  C   ALA L  19       5.187   2.501  47.658  1.00 22.98           C  
ATOM   1016  O   ALA L  19       4.518   3.221  46.915  1.00 20.73           O  
ATOM   1017  CB  ALA L  19       4.154   0.223  47.904  1.00 23.96           C  
ATOM   1018  N   THR L  20       6.520   2.536  47.690  1.00 21.43           N  
ATOM   1019  CA  THR L  20       7.292   3.427  46.818  1.00 20.72           C  
ATOM   1020  C   THR L  20       8.450   2.698  46.136  1.00 21.69           C  
ATOM   1021  O   THR L  20       9.189   1.948  46.780  1.00 23.64           O  
ATOM   1022  CB  THR L  20       7.894   4.645  47.600  1.00 19.75           C  
ATOM   1023  OG1 THR L  20       8.757   4.176  48.640  1.00 21.66           O  
ATOM   1024  CG2 THR L  20       6.801   5.498  48.217  1.00 18.70           C  
ATOM   1025  N   ILE L  21       8.605   2.930  44.834  1.00 20.49           N  
ATOM   1026  CA  ILE L  21       9.667   2.313  44.052  1.00 20.10           C  
ATOM   1027  C   ILE L  21      10.535   3.414  43.457  1.00 20.87           C  
ATOM   1028  O   ILE L  21      10.028   4.349  42.841  1.00 20.20           O  
ATOM   1029  CB  ILE L  21       9.086   1.440  42.926  1.00 20.21           C  
ATOM   1030  CG1 ILE L  21       8.267   0.303  43.540  1.00 20.71           C  
ATOM   1031  CG2 ILE L  21      10.211   0.885  42.065  1.00 15.54           C  
ATOM   1032  CD1 ILE L  21       7.570  -0.591  42.520  1.00 20.06           C  
ATOM   1033  N   ASN L  22      11.844   3.295  43.639  1.00 19.90           N  
ATOM   1034  CA  ASN L  22      12.762   4.317  43.162  1.00 18.76           C  
ATOM   1035  C   ASN L  22      13.460   3.934  41.862  1.00 19.85           C  
ATOM   1036  O   ASN L  22      13.704   2.756  41.597  1.00 18.46           O  
ATOM   1037  CB  ASN L  22      13.805   4.605  44.248  1.00 20.28           C  
ATOM   1038  CG  ASN L  22      14.568   5.895  44.004  1.00 22.01           C  
ATOM   1039  OD1 ASN L  22      15.794   5.898  43.920  1.00 22.64           O  
ATOM   1040  ND2 ASN L  22      13.840   7.002  43.895  1.00 20.14           N  
ATOM   1041  N   CYS L  23      13.775   4.946  41.057  1.00 19.67           N  
ATOM   1042  CA  CYS L  23      14.453   4.758  39.782  1.00 20.40           C  
ATOM   1043  C   CYS L  23      15.420   5.907  39.511  1.00 20.25           C  
ATOM   1044  O   CYS L  23      15.069   7.070  39.655  1.00 19.49           O  
ATOM   1045  CB  CYS L  23      13.416   4.649  38.654  1.00 23.14           C  
ATOM   1046  SG  CYS L  23      14.097   4.758  36.972  1.00 24.72           S  
ATOM   1047  N   LYS L  24      16.648   5.576  39.129  1.00 21.07           N  
ATOM   1048  CA  LYS L  24      17.649   6.594  38.834  1.00 21.25           C  
ATOM   1049  C   LYS L  24      18.187   6.434  37.418  1.00 21.19           C  
ATOM   1050  O   LYS L  24      18.410   5.314  36.953  1.00 22.68           O  
ATOM   1051  CB  LYS L  24      18.809   6.509  39.835  1.00 22.70           C  
ATOM   1052  CG  LYS L  24      18.439   6.881  41.268  1.00 23.90           C  
ATOM   1053  CD  LYS L  24      19.604   6.679  42.238  1.00 28.39           C  
ATOM   1054  CE  LYS L  24      20.825   7.510  41.869  1.00 31.53           C  
ATOM   1055  NZ  LYS L  24      21.952   7.315  42.831  1.00 35.11           N  
ATOM   1056  N   SER L  25      18.374   7.553  36.728  1.00 17.66           N  
ATOM   1057  CA  SER L  25      18.913   7.527  35.377  1.00 20.96           C  
ATOM   1058  C   SER L  25      20.378   7.961  35.441  1.00 21.82           C  
ATOM   1059  O   SER L  25      20.716   8.912  36.139  1.00 23.51           O  
ATOM   1060  CB  SER L  25      18.119   8.469  34.475  1.00 20.61           C  
ATOM   1061  OG  SER L  25      18.154   9.791  34.973  1.00 24.00           O  
ATOM   1062  N   SER L  26      21.246   7.260  34.724  1.00 24.03           N  
ATOM   1063  CA  SER L  26      22.671   7.586  34.732  1.00 26.04           C  
ATOM   1064  C   SER L  26      22.907   8.968  34.144  1.00 27.43           C  
ATOM   1065  O   SER L  26      23.973   9.561  34.313  1.00 27.70           O  
ATOM   1066  CB  SER L  26      23.460   6.547  33.926  1.00 25.75           C  
ATOM   1067  OG  SER L  26      23.095   6.576  32.557  1.00 25.78           O  
ATOM   1068  N   GLN L  27      21.893   9.478  33.459  1.00 28.94           N  
ATOM   1069  CA  GLN L  27      21.956  10.783  32.817  1.00 30.46           C  
ATOM   1070  C   GLN L  27      20.597  11.478  32.928  1.00 30.33           C  
ATOM   1071  O   GLN L  27      19.577  10.821  33.132  1.00 29.67           O  
ATOM   1072  CB  GLN L  27      22.341  10.593  31.353  1.00 32.90           C  
ATOM   1073  CG  GLN L  27      22.205  11.830  30.498  1.00 37.05           C  
ATOM   1074  CD  GLN L  27      22.496  11.545  29.041  1.00 40.65           C  
ATOM   1075  OE1 GLN L  27      22.247  12.382  28.175  1.00 44.23           O  
ATOM   1076  NE2 GLN L  27      23.032  10.359  28.762  1.00 41.01           N  
ATOM   1077  N   SER L  27A     20.585  12.800  32.792  1.00 29.21           N  
ATOM   1078  CA  SER L  27A     19.346  13.563  32.896  1.00 30.15           C  
ATOM   1079  C   SER L  27A     18.428  13.335  31.708  1.00 29.40           C  
ATOM   1080  O   SER L  27A     18.876  13.321  30.563  1.00 33.54           O  
ATOM   1081  CB  SER L  27A     19.645  15.057  33.015  1.00 31.01           C  
ATOM   1082  OG  SER L  27A     18.439  15.793  33.178  1.00 31.79           O  
ATOM   1083  N   VAL L  27B     17.140  13.159  31.986  1.00 27.66           N  
ATOM   1084  CA  VAL L  27B     16.148  12.939  30.932  1.00 25.97           C  
ATOM   1085  C   VAL L  27B     15.204  14.133  30.813  1.00 26.62           C  
ATOM   1086  O   VAL L  27B     14.105  14.026  30.254  1.00 27.75           O  
ATOM   1087  CB  VAL L  27B     15.305  11.671  31.205  1.00 24.08           C  
ATOM   1088  CG1 VAL L  27B     16.199  10.439  31.203  1.00 21.33           C  
ATOM   1089  CG2 VAL L  27B     14.580  11.801  32.535  1.00 21.14           C  
ATOM   1090  N   LEU L  27C     15.638  15.268  31.347  1.00 26.78           N  
ATOM   1091  CA  LEU L  27C     14.838  16.489  31.326  1.00 29.17           C  
ATOM   1092  C   LEU L  27C     15.037  17.297  30.052  1.00 28.94           C  
ATOM   1093  O   LEU L  27C     16.148  17.719  29.739  1.00 31.37           O  
ATOM   1094  CB  LEU L  27C     15.174  17.352  32.550  1.00 27.79           C  
ATOM   1095  CG  LEU L  27C     14.546  18.746  32.701  1.00 27.98           C  
ATOM   1096  CD1 LEU L  27C     13.028  18.666  32.674  1.00 25.19           C  
ATOM   1097  CD2 LEU L  27C     15.022  19.360  34.018  1.00 26.66           C  
ATOM   1098  N   TYR L  27D     13.950  17.498  29.316  1.00 29.62           N  
ATOM   1099  CA  TYR L  27D     13.987  18.277  28.087  1.00 29.91           C  
ATOM   1100  C   TYR L  27D     13.604  19.715  28.449  1.00 29.92           C  
ATOM   1101  O   TYR L  27D     12.434  20.025  28.698  1.00 28.25           O  
ATOM   1102  CB  TYR L  27D     13.014  17.683  27.062  1.00 30.70           C  
ATOM   1103  CG  TYR L  27D     13.050  18.360  25.714  1.00 34.18           C  
ATOM   1104  CD1 TYR L  27D     14.266  18.662  25.096  1.00 35.74           C  
ATOM   1105  CD2 TYR L  27D     11.873  18.665  25.033  1.00 34.19           C  
ATOM   1106  CE1 TYR L  27D     14.308  19.253  23.832  1.00 36.04           C  
ATOM   1107  CE2 TYR L  27D     11.903  19.252  23.770  1.00 35.91           C  
ATOM   1108  CZ  TYR L  27D     13.123  19.543  23.176  1.00 37.16           C  
ATOM   1109  OH  TYR L  27D     13.157  20.131  21.930  1.00 40.31           O  
ATOM   1110  N   SER L  27E     14.610  20.583  28.485  1.00 29.81           N  
ATOM   1111  CA  SER L  27E     14.431  21.982  28.855  1.00 30.56           C  
ATOM   1112  C   SER L  27E     13.521  22.824  27.966  1.00 30.59           C  
ATOM   1113  O   SER L  27E     12.926  23.794  28.439  1.00 32.54           O  
ATOM   1114  CB  SER L  27E     15.797  22.664  28.964  1.00 29.74           C  
ATOM   1115  OG  SER L  27E     16.489  22.600  27.733  1.00 33.80           O  
ATOM   1116  N   SER L  27F     13.415  22.474  26.690  1.00 29.73           N  
ATOM   1117  CA  SER L  27F     12.563  23.230  25.780  1.00 30.28           C  
ATOM   1118  C   SER L  27F     11.156  23.423  26.337  1.00 30.94           C  
ATOM   1119  O   SER L  27F     10.602  24.516  26.266  1.00 31.78           O  
ATOM   1120  CB  SER L  27F     12.471  22.533  24.431  1.00 31.07           C  
ATOM   1121  OG  SER L  27F     11.572  23.225  23.586  1.00 36.92           O  
ATOM   1122  N   ASN L  28      10.572  22.358  26.878  1.00 29.94           N  
ATOM   1123  CA  ASN L  28       9.235  22.453  27.448  1.00 28.80           C  
ATOM   1124  C   ASN L  28       9.276  21.983  28.895  1.00 28.07           C  
ATOM   1125  O   ASN L  28       8.251  21.630  29.481  1.00 28.58           O  
ATOM   1126  CB  ASN L  28       8.230  21.631  26.620  1.00 29.59           C  
ATOM   1127  CG  ASN L  28       8.446  20.128  26.734  1.00 30.79           C  
ATOM   1128  OD1 ASN L  28       9.568  19.632  26.631  1.00 29.16           O  
ATOM   1129  ND2 ASN L  28       7.353  19.392  26.915  1.00 31.06           N  
ATOM   1130  N   SER L  29      10.481  22.001  29.462  1.00 26.48           N  
ATOM   1131  CA  SER L  29      10.717  21.600  30.847  1.00 25.94           C  
ATOM   1132  C   SER L  29      10.035  20.282  31.208  1.00 25.20           C  
ATOM   1133  O   SER L  29       9.326  20.192  32.211  1.00 24.77           O  
ATOM   1134  CB  SER L  29      10.235  22.700  31.794  1.00 26.45           C  
ATOM   1135  OG  SER L  29      10.874  23.933  31.515  1.00 29.36           O  
ATOM   1136  N   THR L  30      10.264  19.249  30.408  1.00 24.26           N  
ATOM   1137  CA  THR L  30       9.623  17.971  30.679  1.00 25.07           C  
ATOM   1138  C   THR L  30      10.550  16.772  30.788  1.00 24.12           C  
ATOM   1139  O   THR L  30      11.509  16.639  30.037  1.00 24.36           O  
ATOM   1140  CB  THR L  30       8.565  17.669  29.610  1.00 24.97           C  
ATOM   1141  OG1 THR L  30       7.581  18.707  29.622  1.00 25.98           O  
ATOM   1142  CG2 THR L  30       7.896  16.340  29.880  1.00 23.49           C  
ATOM   1143  N   ASN L  31      10.244  15.900  31.740  1.00 24.30           N  
ATOM   1144  CA  ASN L  31      11.008  14.683  31.948  1.00 24.17           C  
ATOM   1145  C   ASN L  31      10.382  13.564  31.124  1.00 23.63           C  
ATOM   1146  O   ASN L  31       9.217  13.221  31.316  1.00 23.60           O  
ATOM   1147  CB  ASN L  31      11.001  14.290  33.427  1.00 25.67           C  
ATOM   1148  CG  ASN L  31      11.746  15.272  34.291  1.00 27.84           C  
ATOM   1149  OD1 ASN L  31      12.948  15.481  34.114  1.00 31.22           O  
ATOM   1150  ND2 ASN L  31      11.041  15.887  35.233  1.00 28.45           N  
ATOM   1151  N   TYR L  32      11.157  13.011  30.201  1.00 23.84           N  
ATOM   1152  CA  TYR L  32      10.697  11.918  29.350  1.00 24.18           C  
ATOM   1153  C   TYR L  32      10.951  10.597  30.074  1.00 23.69           C  
ATOM   1154  O   TYR L  32      11.816   9.809  29.695  1.00 24.95           O  
ATOM   1155  CB  TYR L  32      11.436  11.965  28.009  1.00 23.01           C  
ATOM   1156  CG  TYR L  32      10.940  13.060  27.085  1.00 22.80           C  
ATOM   1157  CD1 TYR L  32      10.714  14.355  27.556  1.00 21.78           C  
ATOM   1158  CD2 TYR L  32      10.692  12.797  25.737  1.00 22.97           C  
ATOM   1159  CE1 TYR L  32      10.247  15.358  26.705  1.00 21.60           C  
ATOM   1160  CE2 TYR L  32      10.226  13.790  24.881  1.00 21.98           C  
ATOM   1161  CZ  TYR L  32      10.003  15.065  25.372  1.00 22.01           C  
ATOM   1162  OH  TYR L  32       9.507  16.038  24.537  1.00 23.74           O  
ATOM   1163  N   LEU L  33      10.177  10.379  31.129  1.00 22.67           N  
ATOM   1164  CA  LEU L  33      10.298   9.197  31.966  1.00 21.52           C  
ATOM   1165  C   LEU L  33       8.924   8.554  32.093  1.00 22.19           C  
ATOM   1166  O   LEU L  33       7.912   9.243  32.269  1.00 19.91           O  
ATOM   1167  CB  LEU L  33      10.818   9.624  33.345  1.00 22.85           C  
ATOM   1168  CG  LEU L  33      11.203   8.628  34.441  1.00 23.80           C  
ATOM   1169  CD1 LEU L  33       9.985   7.842  34.908  1.00 22.95           C  
ATOM   1170  CD2 LEU L  33      12.292   7.712  33.915  1.00 20.99           C  
ATOM   1171  N   ALA L  34       8.887   7.232  32.006  1.00 21.62           N  
ATOM   1172  CA  ALA L  34       7.625   6.524  32.114  1.00 21.53           C  
ATOM   1173  C   ALA L  34       7.714   5.334  33.064  1.00 22.49           C  
ATOM   1174  O   ALA L  34       8.805   4.849  33.371  1.00 21.99           O  
ATOM   1175  CB  ALA L  34       7.185   6.059  30.738  1.00 20.20           C  
ATOM   1176  N   TRP L  35       6.559   4.884  33.545  1.00 20.89           N  
ATOM   1177  CA  TRP L  35       6.494   3.720  34.421  1.00 21.16           C  
ATOM   1178  C   TRP L  35       5.537   2.706  33.802  1.00 23.36           C  
ATOM   1179  O   TRP L  35       4.446   3.070  33.345  1.00 22.92           O  
ATOM   1180  CB  TRP L  35       5.999   4.080  35.829  1.00 19.22           C  
ATOM   1181  CG  TRP L  35       6.973   4.851  36.667  1.00 23.35           C  
ATOM   1182  CD1 TRP L  35       7.131   6.205  36.711  1.00 24.20           C  
ATOM   1183  CD2 TRP L  35       7.947   4.306  37.569  1.00 23.36           C  
ATOM   1184  NE1 TRP L  35       8.139   6.539  37.585  1.00 23.79           N  
ATOM   1185  CE2 TRP L  35       8.658   5.393  38.124  1.00 23.59           C  
ATOM   1186  CE3 TRP L  35       8.288   3.005  37.960  1.00 24.91           C  
ATOM   1187  CZ2 TRP L  35       9.693   5.221  39.052  1.00 24.41           C  
ATOM   1188  CZ3 TRP L  35       9.321   2.831  38.885  1.00 24.61           C  
ATOM   1189  CH2 TRP L  35      10.009   3.937  39.419  1.00 24.75           C  
ATOM   1190  N   TYR L  36       5.957   1.443  33.777  1.00 23.67           N  
ATOM   1191  CA  TYR L  36       5.143   0.363  33.228  1.00 24.70           C  
ATOM   1192  C   TYR L  36       4.786  -0.674  34.277  1.00 26.62           C  
ATOM   1193  O   TYR L  36       5.596  -1.005  35.150  1.00 27.80           O  
ATOM   1194  CB  TYR L  36       5.857  -0.362  32.080  1.00 24.46           C  
ATOM   1195  CG  TYR L  36       6.032   0.448  30.817  1.00 24.98           C  
ATOM   1196  CD1 TYR L  36       7.003   1.450  30.728  1.00 22.51           C  
ATOM   1197  CD2 TYR L  36       5.215   0.219  29.709  1.00 21.41           C  
ATOM   1198  CE1 TYR L  36       7.155   2.199  29.567  1.00 22.17           C  
ATOM   1199  CE2 TYR L  36       5.357   0.965  28.541  1.00 22.64           C  
ATOM   1200  CZ  TYR L  36       6.326   1.951  28.477  1.00 23.67           C  
ATOM   1201  OH  TYR L  36       6.458   2.694  27.332  1.00 24.72           O  
ATOM   1202  N   GLN L  37       3.566  -1.189  34.172  1.00 26.10           N  
ATOM   1203  CA  GLN L  37       3.074  -2.215  35.075  1.00 26.59           C  
ATOM   1204  C   GLN L  37       3.043  -3.533  34.290  1.00 28.62           C  
ATOM   1205  O   GLN L  37       2.538  -3.580  33.165  1.00 27.47           O  
ATOM   1206  CB  GLN L  37       1.662  -1.862  35.538  1.00 25.59           C  
ATOM   1207  CG  GLN L  37       1.090  -2.803  36.575  1.00 26.25           C  
ATOM   1208  CD  GLN L  37      -0.383  -2.553  36.818  1.00 26.86           C  
ATOM   1209  OE1 GLN L  37      -1.197  -2.705  35.914  1.00 29.12           O  
ATOM   1210  NE2 GLN L  37      -0.733  -2.166  38.039  1.00 24.05           N  
ATOM   1211  N   GLN L  38       3.594  -4.598  34.865  1.00 30.63           N  
ATOM   1212  CA  GLN L  38       3.591  -5.883  34.177  1.00 34.40           C  
ATOM   1213  C   GLN L  38       3.124  -7.047  35.039  1.00 36.16           C  
ATOM   1214  O   GLN L  38       3.825  -7.489  35.948  1.00 37.18           O  
ATOM   1215  CB  GLN L  38       4.977  -6.197  33.600  1.00 34.95           C  
ATOM   1216  CG  GLN L  38       5.040  -7.561  32.927  1.00 37.52           C  
ATOM   1217  CD  GLN L  38       6.352  -7.821  32.218  1.00 40.31           C  
ATOM   1218  OE1 GLN L  38       7.426  -7.733  32.813  1.00 42.80           O  
ATOM   1219  NE2 GLN L  38       6.270  -8.159  30.938  1.00 42.20           N  
ATOM   1220  N   LYS L  39       1.923  -7.531  34.747  1.00 39.46           N  
ATOM   1221  CA  LYS L  39       1.354  -8.664  35.460  1.00 41.50           C  
ATOM   1222  C   LYS L  39       1.808  -9.866  34.658  1.00 43.91           C  
ATOM   1223  O   LYS L  39       1.773  -9.838  33.430  1.00 45.28           O  
ATOM   1224  CB  LYS L  39      -0.173  -8.579  35.462  1.00 41.55           C  
ATOM   1225  CG  LYS L  39      -0.702  -7.312  36.109  1.00 42.71           C  
ATOM   1226  CD  LYS L  39      -2.216  -7.212  36.047  1.00 42.91           C  
ATOM   1227  CE  LYS L  39      -2.687  -5.897  36.658  1.00 44.40           C  
ATOM   1228  NZ  LYS L  39      -4.165  -5.723  36.583  1.00 43.36           N  
ATOM   1229  N   PRO L  40       2.246 -10.939  35.332  1.00 45.94           N  
ATOM   1230  CA  PRO L  40       2.705 -12.140  34.629  1.00 45.73           C  
ATOM   1231  C   PRO L  40       1.691 -12.634  33.596  1.00 45.41           C  
ATOM   1232  O   PRO L  40       0.487 -12.659  33.860  1.00 45.43           O  
ATOM   1233  CB  PRO L  40       2.925 -13.125  35.772  1.00 46.12           C  
ATOM   1234  CG  PRO L  40       3.405 -12.199  36.878  1.00 47.33           C  
ATOM   1235  CD  PRO L  40       2.318 -11.149  36.788  1.00 46.75           C  
ATOM   1236  N   GLY L  41       2.183 -13.015  32.421  1.00 44.28           N  
ATOM   1237  CA  GLY L  41       1.302 -13.491  31.367  1.00 42.87           C  
ATOM   1238  C   GLY L  41       0.900 -12.369  30.427  1.00 42.65           C  
ATOM   1239  O   GLY L  41       0.174 -12.581  29.454  1.00 41.65           O  
ATOM   1240  N   GLN L  42       1.376 -11.164  30.722  1.00 40.75           N  
ATOM   1241  CA  GLN L  42       1.066  -9.999  29.910  1.00 38.77           C  
ATOM   1242  C   GLN L  42       2.328  -9.167  29.682  1.00 37.04           C  
ATOM   1243  O   GLN L  42       3.305  -9.267  30.437  1.00 34.64           O  
ATOM   1244  CB  GLN L  42       0.018  -9.136  30.611  1.00 40.64           C  
ATOM   1245  CG  GLN L  42      -1.246  -9.868  31.026  1.00 43.64           C  
ATOM   1246  CD  GLN L  42      -2.191  -8.980  31.824  1.00 46.64           C  
ATOM   1247  OE1 GLN L  42      -3.258  -9.418  32.263  1.00 46.77           O  
ATOM   1248  NE2 GLN L  42      -1.799  -7.722  32.015  1.00 47.51           N  
ATOM   1249  N   PRO L  43       2.337  -8.352  28.614  1.00 34.99           N  
ATOM   1250  CA  PRO L  43       3.478  -7.496  28.290  1.00 31.95           C  
ATOM   1251  C   PRO L  43       3.435  -6.279  29.211  1.00 29.94           C  
ATOM   1252  O   PRO L  43       2.435  -6.043  29.889  1.00 29.70           O  
ATOM   1253  CB  PRO L  43       3.186  -7.104  26.856  1.00 31.82           C  
ATOM   1254  CG  PRO L  43       1.694  -6.887  26.931  1.00 32.94           C  
ATOM   1255  CD  PRO L  43       1.299  -8.209  27.577  1.00 34.74           C  
ATOM   1256  N   PRO L  44       4.512  -5.488  29.243  1.00 27.90           N  
ATOM   1257  CA  PRO L  44       4.492  -4.310  30.110  1.00 27.00           C  
ATOM   1258  C   PRO L  44       3.383  -3.378  29.614  1.00 25.52           C  
ATOM   1259  O   PRO L  44       3.143  -3.283  28.410  1.00 24.90           O  
ATOM   1260  CB  PRO L  44       5.883  -3.716  29.896  1.00 27.70           C  
ATOM   1261  CG  PRO L  44       6.714  -4.939  29.530  1.00 29.02           C  
ATOM   1262  CD  PRO L  44       5.791  -5.564  28.522  1.00 26.52           C  
ATOM   1263  N   LYS L  45       2.705  -2.710  30.539  1.00 24.05           N  
ATOM   1264  CA  LYS L  45       1.630  -1.786  30.195  1.00 24.87           C  
ATOM   1265  C   LYS L  45       1.975  -0.397  30.715  1.00 22.74           C  
ATOM   1266  O   LYS L  45       2.387  -0.256  31.864  1.00 20.50           O  
ATOM   1267  CB  LYS L  45       0.310  -2.241  30.822  1.00 26.48           C  
ATOM   1268  CG  LYS L  45      -0.263  -3.522  30.245  1.00 31.28           C  
ATOM   1269  CD  LYS L  45      -0.724  -3.323  28.818  1.00 35.33           C  
ATOM   1270  CE  LYS L  45      -1.461  -4.549  28.298  1.00 39.57           C  
ATOM   1271  NZ  LYS L  45      -2.032  -4.312  26.943  1.00 40.46           N  
ATOM   1272  N   LEU L  46       1.794   0.619  29.871  1.00 23.05           N  
ATOM   1273  CA  LEU L  46       2.093   2.003  30.243  1.00 22.73           C  
ATOM   1274  C   LEU L  46       1.237   2.429  31.432  1.00 23.68           C  
ATOM   1275  O   LEU L  46       0.021   2.242  31.442  1.00 24.35           O  
ATOM   1276  CB  LEU L  46       1.837   2.950  29.064  1.00 20.98           C  
ATOM   1277  CG  LEU L  46       2.225   4.415  29.285  1.00 20.26           C  
ATOM   1278  CD1 LEU L  46       3.742   4.525  29.498  1.00 20.00           C  
ATOM   1279  CD2 LEU L  46       1.796   5.241  28.077  1.00 19.00           C  
ATOM   1280  N   LEU L  47       1.882   3.018  32.427  1.00 24.63           N  
ATOM   1281  CA  LEU L  47       1.189   3.448  33.631  1.00 25.14           C  
ATOM   1282  C   LEU L  47       1.301   4.965  33.812  1.00 25.13           C  
ATOM   1283  O   LEU L  47       0.306   5.656  34.056  1.00 25.44           O  
ATOM   1284  CB  LEU L  47       1.804   2.733  34.837  1.00 26.40           C  
ATOM   1285  CG  LEU L  47       1.044   2.763  36.157  1.00 28.99           C  
ATOM   1286  CD1 LEU L  47      -0.187   1.877  36.028  1.00 26.77           C  
ATOM   1287  CD2 LEU L  47       1.942   2.256  37.279  1.00 29.29           C  
ATOM   1288  N   ILE L  48       2.520   5.479  33.690  1.00 23.13           N  
ATOM   1289  CA  ILE L  48       2.759   6.900  33.858  1.00 21.02           C  
ATOM   1290  C   ILE L  48       3.850   7.399  32.926  1.00 20.73           C  
ATOM   1291  O   ILE L  48       4.804   6.677  32.636  1.00 19.53           O  
ATOM   1292  CB  ILE L  48       3.141   7.207  35.330  1.00 21.94           C  
ATOM   1293  CG1 ILE L  48       1.936   6.922  36.232  1.00 22.93           C  
ATOM   1294  CG2 ILE L  48       3.607   8.657  35.478  1.00 20.84           C  
ATOM   1295  CD1 ILE L  48       2.186   7.118  37.709  1.00 23.87           C  
ATOM   1296  N   TYR L  49       3.691   8.629  32.441  1.00 20.63           N  
ATOM   1297  CA  TYR L  49       4.679   9.243  31.561  1.00 21.56           C  
ATOM   1298  C   TYR L  49       4.870  10.724  31.877  1.00 21.11           C  
ATOM   1299  O   TYR L  49       4.104  11.305  32.652  1.00 21.87           O  
ATOM   1300  CB  TYR L  49       4.324   9.038  30.083  1.00 24.07           C  
ATOM   1301  CG  TYR L  49       2.924   9.438  29.671  1.00 26.11           C  
ATOM   1302  CD1 TYR L  49       1.820   8.643  29.986  1.00 24.71           C  
ATOM   1303  CD2 TYR L  49       2.707  10.610  28.942  1.00 28.18           C  
ATOM   1304  CE1 TYR L  49       0.529   9.009  29.577  1.00 26.81           C  
ATOM   1305  CE2 TYR L  49       1.428  10.983  28.532  1.00 28.46           C  
ATOM   1306  CZ  TYR L  49       0.346  10.182  28.851  1.00 27.31           C  
ATOM   1307  OH  TYR L  49      -0.910  10.562  28.435  1.00 29.53           O  
ATOM   1308  N   TRP L  50       5.903  11.327  31.288  1.00 18.57           N  
ATOM   1309  CA  TRP L  50       6.231  12.726  31.548  1.00 17.37           C  
ATOM   1310  C   TRP L  50       6.544  12.792  33.047  1.00 16.42           C  
ATOM   1311  O   TRP L  50       6.516  13.857  33.659  1.00 14.62           O  
ATOM   1312  CB  TRP L  50       5.050  13.653  31.204  1.00 19.84           C  
ATOM   1313  CG  TRP L  50       4.672  13.738  29.729  1.00 22.74           C  
ATOM   1314  CD1 TRP L  50       3.418  13.981  29.226  1.00 23.15           C  
ATOM   1315  CD2 TRP L  50       5.540  13.625  28.586  1.00 22.26           C  
ATOM   1316  NE1 TRP L  50       3.451  14.021  27.852  1.00 23.90           N  
ATOM   1317  CE2 TRP L  50       4.739  13.806  27.432  1.00 25.58           C  
ATOM   1318  CE3 TRP L  50       6.914  13.388  28.423  1.00 26.47           C  
ATOM   1319  CZ2 TRP L  50       5.267  13.755  26.131  1.00 22.17           C  
ATOM   1320  CZ3 TRP L  50       7.440  13.338  27.126  1.00 25.57           C  
ATOM   1321  CH2 TRP L  50       6.615  13.521  26.000  1.00 24.74           C  
ATOM   1322  N   ALA L  51       6.821  11.620  33.617  1.00 15.39           N  
ATOM   1323  CA  ALA L  51       7.173  11.430  35.030  1.00 16.89           C  
ATOM   1324  C   ALA L  51       6.053  11.488  36.066  1.00 17.52           C  
ATOM   1325  O   ALA L  51       6.120  10.794  37.081  1.00 16.91           O  
ATOM   1326  CB  ALA L  51       8.296  12.400  35.436  1.00 16.48           C  
ATOM   1327  N   SER L  52       5.026  12.295  35.819  1.00 20.33           N  
ATOM   1328  CA  SER L  52       3.933  12.429  36.779  1.00 19.51           C  
ATOM   1329  C   SER L  52       2.512  12.409  36.194  1.00 21.48           C  
ATOM   1330  O   SER L  52       1.534  12.587  36.923  1.00 19.83           O  
ATOM   1331  CB  SER L  52       4.139  13.708  37.592  1.00 18.72           C  
ATOM   1332  OG  SER L  52       4.275  14.834  36.734  1.00 22.13           O  
ATOM   1333  N   THR L  53       2.395  12.194  34.888  1.00 21.99           N  
ATOM   1334  CA  THR L  53       1.085  12.144  34.249  1.00 21.84           C  
ATOM   1335  C   THR L  53       0.589  10.711  34.117  1.00 22.64           C  
ATOM   1336  O   THR L  53       1.210   9.897  33.431  1.00 22.67           O  
ATOM   1337  CB  THR L  53       1.114  12.754  32.838  1.00 19.57           C  
ATOM   1338  OG1 THR L  53       1.419  14.150  32.923  1.00 18.15           O  
ATOM   1339  CG2 THR L  53      -0.247  12.575  32.157  1.00 23.47           C  
ATOM   1340  N   ARG L  54      -0.530  10.396  34.759  1.00 23.71           N  
ATOM   1341  CA  ARG L  54      -1.061   9.045  34.652  1.00 26.72           C  
ATOM   1342  C   ARG L  54      -1.675   8.829  33.286  1.00 26.71           C  
ATOM   1343  O   ARG L  54      -2.202   9.762  32.678  1.00 27.58           O  
ATOM   1344  CB  ARG L  54      -2.134   8.752  35.710  1.00 29.33           C  
ATOM   1345  CG  ARG L  54      -1.631   8.562  37.131  1.00 31.84           C  
ATOM   1346  CD  ARG L  54      -2.725   7.922  37.985  1.00 35.99           C  
ATOM   1347  NE  ARG L  54      -3.955   8.714  38.016  1.00 38.60           N  
ATOM   1348  CZ  ARG L  54      -4.073   9.900  38.609  1.00 41.45           C  
ATOM   1349  NH1 ARG L  54      -5.233  10.543  38.580  1.00 42.73           N  
ATOM   1350  NH2 ARG L  54      -3.039  10.436  39.249  1.00 43.84           N  
ATOM   1351  N   GLU L  55      -1.596   7.592  32.809  1.00 26.10           N  
ATOM   1352  CA  GLU L  55      -2.174   7.228  31.528  1.00 27.09           C  
ATOM   1353  C   GLU L  55      -3.662   7.044  31.789  1.00 28.21           C  
ATOM   1354  O   GLU L  55      -4.061   6.669  32.890  1.00 26.16           O  
ATOM   1355  CB  GLU L  55      -1.554   5.923  31.021  1.00 27.49           C  
ATOM   1356  CG  GLU L  55      -2.182   5.357  29.750  1.00 28.79           C  
ATOM   1357  CD  GLU L  55      -2.124   6.311  28.572  1.00 29.73           C  
ATOM   1358  OE1 GLU L  55      -1.449   5.984  27.578  1.00 31.24           O  
ATOM   1359  OE2 GLU L  55      -2.751   7.385  28.637  1.00 31.32           O  
ATOM   1360  N   SER L  56      -4.481   7.324  30.784  1.00 30.41           N  
ATOM   1361  CA  SER L  56      -5.925   7.189  30.927  1.00 32.36           C  
ATOM   1362  C   SER L  56      -6.276   5.806  31.460  1.00 32.40           C  
ATOM   1363  O   SER L  56      -5.674   4.809  31.061  1.00 34.06           O  
ATOM   1364  CB  SER L  56      -6.605   7.410  29.575  1.00 33.86           C  
ATOM   1365  OG  SER L  56      -6.297   8.694  29.053  1.00 37.54           O  
ATOM   1366  N   GLY L  57      -7.240   5.749  32.372  1.00 32.49           N  
ATOM   1367  CA  GLY L  57      -7.653   4.468  32.921  1.00 33.07           C  
ATOM   1368  C   GLY L  57      -6.968   4.054  34.211  1.00 34.24           C  
ATOM   1369  O   GLY L  57      -7.523   3.260  34.972  1.00 36.33           O  
ATOM   1370  N   VAL L  58      -5.771   4.583  34.460  1.00 32.40           N  
ATOM   1371  CA  VAL L  58      -5.015   4.255  35.667  1.00 30.71           C  
ATOM   1372  C   VAL L  58      -5.612   4.906  36.921  1.00 30.33           C  
ATOM   1373  O   VAL L  58      -5.735   6.129  36.999  1.00 28.76           O  
ATOM   1374  CB  VAL L  58      -3.539   4.713  35.538  1.00 30.61           C  
ATOM   1375  CG1 VAL L  58      -2.775   4.384  36.813  1.00 28.19           C  
ATOM   1376  CG2 VAL L  58      -2.892   4.051  34.341  1.00 29.41           C  
ATOM   1377  N   PRO L  59      -5.971   4.090  37.927  1.00 30.26           N  
ATOM   1378  CA  PRO L  59      -6.551   4.595  39.175  1.00 31.64           C  
ATOM   1379  C   PRO L  59      -5.714   5.696  39.818  1.00 32.68           C  
ATOM   1380  O   PRO L  59      -4.482   5.629  39.836  1.00 33.13           O  
ATOM   1381  CB  PRO L  59      -6.648   3.330  40.033  1.00 31.32           C  
ATOM   1382  CG  PRO L  59      -5.556   2.442  39.457  1.00 32.14           C  
ATOM   1383  CD  PRO L  59      -5.851   2.626  37.995  1.00 30.63           C  
ATOM   1384  N   ASP L  60      -6.388   6.704  40.361  1.00 32.68           N  
ATOM   1385  CA  ASP L  60      -5.697   7.833  40.965  1.00 33.99           C  
ATOM   1386  C   ASP L  60      -4.810   7.499  42.163  1.00 33.22           C  
ATOM   1387  O   ASP L  60      -4.207   8.399  42.751  1.00 34.06           O  
ATOM   1388  CB  ASP L  60      -6.709   8.916  41.349  1.00 37.52           C  
ATOM   1389  CG  ASP L  60      -7.579   8.516  42.519  1.00 41.58           C  
ATOM   1390  OD1 ASP L  60      -8.041   7.355  42.550  1.00 43.79           O  
ATOM   1391  OD2 ASP L  60      -7.814   9.374  43.400  1.00 43.66           O  
ATOM   1392  N   ARG L  61      -4.715   6.226  42.534  1.00 30.20           N  
ATOM   1393  CA  ARG L  61      -3.857   5.878  43.656  1.00 28.90           C  
ATOM   1394  C   ARG L  61      -2.389   5.758  43.213  1.00 28.37           C  
ATOM   1395  O   ARG L  61      -1.484   5.720  44.046  1.00 25.12           O  
ATOM   1396  CB  ARG L  61      -4.335   4.592  44.347  1.00 29.87           C  
ATOM   1397  CG  ARG L  61      -4.332   3.321  43.519  1.00 30.80           C  
ATOM   1398  CD  ARG L  61      -4.759   2.158  44.410  1.00 34.42           C  
ATOM   1399  NE  ARG L  61      -4.726   0.866  43.733  1.00 35.82           N  
ATOM   1400  CZ  ARG L  61      -5.557   0.507  42.760  1.00 38.15           C  
ATOM   1401  NH1 ARG L  61      -6.497   1.345  42.345  1.00 39.20           N  
ATOM   1402  NH2 ARG L  61      -5.445  -0.689  42.200  1.00 38.46           N  
ATOM   1403  N   PHE L  62      -2.157   5.699  41.904  1.00 26.65           N  
ATOM   1404  CA  PHE L  62      -0.791   5.646  41.380  1.00 26.24           C  
ATOM   1405  C   PHE L  62      -0.375   7.078  41.053  1.00 26.86           C  
ATOM   1406  O   PHE L  62      -1.162   7.829  40.468  1.00 26.78           O  
ATOM   1407  CB  PHE L  62      -0.692   4.838  40.079  1.00 25.14           C  
ATOM   1408  CG  PHE L  62      -0.892   3.358  40.241  1.00 27.26           C  
ATOM   1409  CD1 PHE L  62      -2.168   2.818  40.384  1.00 27.48           C  
ATOM   1410  CD2 PHE L  62       0.205   2.498  40.222  1.00 26.43           C  
ATOM   1411  CE1 PHE L  62      -2.351   1.436  40.500  1.00 29.48           C  
ATOM   1412  CE2 PHE L  62       0.039   1.124  40.337  1.00 28.86           C  
ATOM   1413  CZ  PHE L  62      -1.243   0.587  40.476  1.00 31.07           C  
ATOM   1414  N   SER L  63       0.848   7.454  41.419  1.00 23.92           N  
ATOM   1415  CA  SER L  63       1.352   8.791  41.119  1.00 25.09           C  
ATOM   1416  C   SER L  63       2.878   8.768  40.996  1.00 26.18           C  
ATOM   1417  O   SER L  63       3.558   7.994  41.672  1.00 25.54           O  
ATOM   1418  CB  SER L  63       0.930   9.791  42.200  1.00 24.08           C  
ATOM   1419  OG  SER L  63       1.527   9.489  43.447  1.00 29.31           O  
ATOM   1420  N   GLY L  64       3.413   9.618  40.125  1.00 25.82           N  
ATOM   1421  CA  GLY L  64       4.849   9.663  39.929  1.00 24.58           C  
ATOM   1422  C   GLY L  64       5.426  11.010  40.309  1.00 24.87           C  
ATOM   1423  O   GLY L  64       4.729  12.022  40.282  1.00 25.27           O  
ATOM   1424  N   SER L  65       6.702  11.017  40.671  1.00 23.25           N  
ATOM   1425  CA  SER L  65       7.381  12.241  41.054  1.00 24.36           C  
ATOM   1426  C   SER L  65       8.869  12.151  40.728  1.00 25.09           C  
ATOM   1427  O   SER L  65       9.377  11.089  40.356  1.00 24.49           O  
ATOM   1428  CB  SER L  65       7.190  12.505  42.551  1.00 25.38           C  
ATOM   1429  OG  SER L  65       7.688  11.430  43.325  1.00 28.68           O  
ATOM   1430  N   GLY L  66       9.562  13.276  40.874  1.00 25.67           N  
ATOM   1431  CA  GLY L  66      10.983  13.315  40.590  1.00 24.80           C  
ATOM   1432  C   GLY L  66      11.293  14.163  39.370  1.00 25.81           C  
ATOM   1433  O   GLY L  66      10.396  14.598  38.652  1.00 25.06           O  
ATOM   1434  N   SER L  67      12.575  14.400  39.138  1.00 26.27           N  
ATOM   1435  CA  SER L  67      13.010  15.197  38.005  1.00 27.77           C  
ATOM   1436  C   SER L  67      14.508  15.002  37.829  1.00 27.99           C  
ATOM   1437  O   SER L  67      15.204  14.575  38.752  1.00 27.55           O  
ATOM   1438  CB  SER L  67      12.704  16.680  38.250  1.00 30.99           C  
ATOM   1439  OG  SER L  67      13.033  17.479  37.120  1.00 32.20           O  
ATOM   1440  N   GLY L  68      15.001  15.317  36.640  1.00 28.19           N  
ATOM   1441  CA  GLY L  68      16.419  15.166  36.383  1.00 27.43           C  
ATOM   1442  C   GLY L  68      16.876  13.723  36.278  1.00 26.32           C  
ATOM   1443  O   GLY L  68      16.778  13.110  35.212  1.00 27.45           O  
ATOM   1444  N   THR L  69      17.352  13.170  37.388  1.00 24.13           N  
ATOM   1445  CA  THR L  69      17.875  11.809  37.404  1.00 24.61           C  
ATOM   1446  C   THR L  69      17.306  10.871  38.468  1.00 24.68           C  
ATOM   1447  O   THR L  69      17.701   9.704  38.534  1.00 24.67           O  
ATOM   1448  CB  THR L  69      19.407  11.840  37.588  1.00 25.81           C  
ATOM   1449  OG1 THR L  69      19.725  12.437  38.852  1.00 22.30           O  
ATOM   1450  CG2 THR L  69      20.051  12.669  36.495  1.00 24.71           C  
ATOM   1451  N   ASP L  70      16.399  11.369  39.305  1.00 23.53           N  
ATOM   1452  CA  ASP L  70      15.811  10.544  40.362  1.00 23.69           C  
ATOM   1453  C   ASP L  70      14.280  10.596  40.334  1.00 24.50           C  
ATOM   1454  O   ASP L  70      13.682  11.667  40.455  1.00 23.95           O  
ATOM   1455  CB  ASP L  70      16.331  11.001  41.730  1.00 24.16           C  
ATOM   1456  CG  ASP L  70      15.766  10.180  42.877  1.00 23.80           C  
ATOM   1457  OD1 ASP L  70      15.969   8.953  42.901  1.00 27.11           O  
ATOM   1458  OD2 ASP L  70      15.113  10.759  43.762  1.00 29.03           O  
ATOM   1459  N   PHE L  71      13.653   9.432  40.177  1.00 21.90           N  
ATOM   1460  CA  PHE L  71      12.199   9.359  40.113  1.00 21.12           C  
ATOM   1461  C   PHE L  71      11.618   8.303  41.037  1.00 21.13           C  
ATOM   1462  O   PHE L  71      12.297   7.343  41.410  1.00 19.24           O  
ATOM   1463  CB  PHE L  71      11.744   9.090  38.676  1.00 20.44           C  
ATOM   1464  CG  PHE L  71      12.280  10.075  37.680  1.00 19.59           C  
ATOM   1465  CD1 PHE L  71      13.555   9.916  37.140  1.00 19.90           C  
ATOM   1466  CD2 PHE L  71      11.533  11.193  37.321  1.00 17.89           C  
ATOM   1467  CE1 PHE L  71      14.081  10.861  36.251  1.00 19.92           C  
ATOM   1468  CE2 PHE L  71      12.041  12.140  36.442  1.00 16.30           C  
ATOM   1469  CZ  PHE L  71      13.324  11.976  35.903  1.00 18.80           C  
ATOM   1470  N   THR L  72      10.348   8.479  41.391  1.00 20.44           N  
ATOM   1471  CA  THR L  72       9.676   7.554  42.290  1.00 21.83           C  
ATOM   1472  C   THR L  72       8.241   7.262  41.869  1.00 22.64           C  
ATOM   1473  O   THR L  72       7.522   8.153  41.426  1.00 24.83           O  
ATOM   1474  CB  THR L  72       9.619   8.125  43.731  1.00 21.75           C  
ATOM   1475  OG1 THR L  72      10.940   8.459  44.171  1.00 22.49           O  
ATOM   1476  CG2 THR L  72       9.001   7.111  44.689  1.00 19.77           C  
ATOM   1477  N   LEU L  73       7.836   6.004  42.009  1.00 22.64           N  
ATOM   1478  CA  LEU L  73       6.471   5.597  41.706  1.00 22.18           C  
ATOM   1479  C   LEU L  73       5.835   5.398  43.082  1.00 23.42           C  
ATOM   1480  O   LEU L  73       6.430   4.763  43.949  1.00 23.53           O  
ATOM   1481  CB  LEU L  73       6.449   4.274  40.937  1.00 20.60           C  
ATOM   1482  CG  LEU L  73       5.038   3.797  40.578  1.00 17.31           C  
ATOM   1483  CD1 LEU L  73       4.425   4.737  39.550  1.00 17.58           C  
ATOM   1484  CD2 LEU L  73       5.096   2.396  40.031  1.00 19.29           C  
ATOM   1485  N   THR L  74       4.645   5.946  43.298  1.00 24.67           N  
ATOM   1486  CA  THR L  74       3.995   5.805  44.595  1.00 25.43           C  
ATOM   1487  C   THR L  74       2.589   5.227  44.544  1.00 28.07           C  
ATOM   1488  O   THR L  74       1.724   5.718  43.819  1.00 28.83           O  
ATOM   1489  CB  THR L  74       3.917   7.166  45.337  1.00 25.12           C  
ATOM   1490  OG1 THR L  74       5.236   7.621  45.658  1.00 22.81           O  
ATOM   1491  CG2 THR L  74       3.104   7.032  46.618  1.00 24.46           C  
ATOM   1492  N   ILE L  75       2.370   4.177  45.326  1.00 28.88           N  
ATOM   1493  CA  ILE L  75       1.059   3.555  45.430  1.00 28.86           C  
ATOM   1494  C   ILE L  75       0.550   3.876  46.831  1.00 28.84           C  
ATOM   1495  O   ILE L  75       1.101   3.394  47.822  1.00 29.12           O  
ATOM   1496  CB  ILE L  75       1.143   2.031  45.233  1.00 31.64           C  
ATOM   1497  CG1 ILE L  75       1.621   1.736  43.811  1.00 31.62           C  
ATOM   1498  CG2 ILE L  75      -0.225   1.383  45.483  1.00 32.20           C  
ATOM   1499  CD1 ILE L  75       1.695   0.268  43.477  1.00 36.03           C  
ATOM   1500  N   SER L  76      -0.493   4.703  46.903  1.00 29.07           N  
ATOM   1501  CA  SER L  76      -1.085   5.134  48.172  1.00 27.99           C  
ATOM   1502  C   SER L  76      -1.782   4.034  48.972  1.00 28.74           C  
ATOM   1503  O   SER L  76      -1.779   4.064  50.197  1.00 30.86           O  
ATOM   1504  CB  SER L  76      -2.075   6.271  47.924  1.00 26.81           C  
ATOM   1505  OG  SER L  76      -3.157   5.826  47.126  1.00 25.21           O  
ATOM   1506  N   SER L  77      -2.394   3.077  48.284  1.00 29.29           N  
ATOM   1507  CA  SER L  77      -3.076   1.968  48.953  1.00 30.06           C  
ATOM   1508  C   SER L  77      -2.963   0.729  48.085  1.00 28.45           C  
ATOM   1509  O   SER L  77      -3.682   0.593  47.101  1.00 29.65           O  
ATOM   1510  CB  SER L  77      -4.559   2.286  49.180  1.00 29.14           C  
ATOM   1511  OG  SER L  77      -4.726   3.410  50.021  1.00 33.84           O  
ATOM   1512  N   LEU L  78      -2.063  -0.176  48.446  1.00 28.86           N  
ATOM   1513  CA  LEU L  78      -1.876  -1.397  47.667  1.00 29.45           C  
ATOM   1514  C   LEU L  78      -3.164  -2.212  47.575  1.00 29.32           C  
ATOM   1515  O   LEU L  78      -3.813  -2.464  48.590  1.00 28.60           O  
ATOM   1516  CB  LEU L  78      -0.788  -2.271  48.293  1.00 28.88           C  
ATOM   1517  CG  LEU L  78      -0.500  -3.549  47.503  1.00 30.48           C  
ATOM   1518  CD1 LEU L  78       0.103  -3.168  46.151  1.00 32.17           C  
ATOM   1519  CD2 LEU L  78       0.456  -4.443  48.269  1.00 32.04           C  
ATOM   1520  N   GLN L  79      -3.528  -2.619  46.361  1.00 28.55           N  
ATOM   1521  CA  GLN L  79      -4.725  -3.434  46.142  1.00 28.67           C  
ATOM   1522  C   GLN L  79      -4.286  -4.744  45.499  1.00 30.31           C  
ATOM   1523  O   GLN L  79      -3.199  -4.824  44.919  1.00 29.21           O  
ATOM   1524  CB  GLN L  79      -5.714  -2.707  45.234  1.00 25.49           C  
ATOM   1525  N   ALA L  80      -5.128  -5.768  45.602  1.00 30.91           N  
ATOM   1526  CA  ALA L  80      -4.811  -7.075  45.043  1.00 31.97           C  
ATOM   1527  C   ALA L  80      -4.339  -7.019  43.592  1.00 32.68           C  
ATOM   1528  O   ALA L  80      -3.349  -7.661  43.234  1.00 31.90           O  
ATOM   1529  CB  ALA L  80      -6.019  -7.997  45.160  1.00 31.68           C  
ATOM   1530  N   GLU L  81      -5.038  -6.256  42.759  1.00 33.08           N  
ATOM   1531  CA  GLU L  81      -4.669  -6.156  41.353  1.00 34.81           C  
ATOM   1532  C   GLU L  81      -3.359  -5.420  41.091  1.00 34.56           C  
ATOM   1533  O   GLU L  81      -2.842  -5.477  39.979  1.00 35.86           O  
ATOM   1534  CB  GLU L  81      -5.772  -5.470  40.539  1.00 36.68           C  
ATOM   1535  CG  GLU L  81      -6.077  -4.043  40.961  1.00 40.77           C  
ATOM   1536  CD  GLU L  81      -7.202  -3.957  41.970  1.00 44.87           C  
ATOM   1537  OE1 GLU L  81      -7.130  -4.636  43.022  1.00 45.93           O  
ATOM   1538  OE2 GLU L  81      -8.164  -3.202  41.703  1.00 45.88           O  
ATOM   1539  N   ASP L  82      -2.824  -4.721  42.089  1.00 32.58           N  
ATOM   1540  CA  ASP L  82      -1.576  -3.998  41.885  1.00 32.08           C  
ATOM   1541  C   ASP L  82      -0.350  -4.909  41.940  1.00 30.75           C  
ATOM   1542  O   ASP L  82       0.756  -4.488  41.595  1.00 29.74           O  
ATOM   1543  CB  ASP L  82      -1.411  -2.869  42.907  1.00 33.53           C  
ATOM   1544  CG  ASP L  82      -2.551  -1.878  42.867  1.00 35.35           C  
ATOM   1545  OD1 ASP L  82      -2.979  -1.512  41.755  1.00 38.70           O  
ATOM   1546  OD2 ASP L  82      -3.004  -1.448  43.947  1.00 37.51           O  
ATOM   1547  N   VAL L  83      -0.541  -6.151  42.373  1.00 28.37           N  
ATOM   1548  CA  VAL L  83       0.574  -7.087  42.442  1.00 26.88           C  
ATOM   1549  C   VAL L  83       1.097  -7.276  41.029  1.00 26.56           C  
ATOM   1550  O   VAL L  83       0.389  -7.784  40.164  1.00 26.51           O  
ATOM   1551  CB  VAL L  83       0.143  -8.452  43.008  1.00 26.14           C  
ATOM   1552  CG1 VAL L  83       1.333  -9.412  43.023  1.00 26.66           C  
ATOM   1553  CG2 VAL L  83      -0.401  -8.273  44.409  1.00 27.22           C  
ATOM   1554  N   ALA L  84       2.340  -6.862  40.805  1.00 25.23           N  
ATOM   1555  CA  ALA L  84       2.965  -6.957  39.492  1.00 23.77           C  
ATOM   1556  C   ALA L  84       4.407  -6.479  39.589  1.00 23.55           C  
ATOM   1557  O   ALA L  84       4.871  -6.122  40.669  1.00 23.41           O  
ATOM   1558  CB  ALA L  84       2.205  -6.087  38.500  1.00 24.58           C  
ATOM   1559  N   VAL L  85       5.106  -6.473  38.458  1.00 23.07           N  
ATOM   1560  CA  VAL L  85       6.495  -6.009  38.401  1.00 21.76           C  
ATOM   1561  C   VAL L  85       6.482  -4.649  37.703  1.00 22.38           C  
ATOM   1562  O   VAL L  85       5.957  -4.524  36.600  1.00 21.46           O  
ATOM   1563  CB  VAL L  85       7.397  -6.987  37.583  1.00 23.22           C  
ATOM   1564  CG1 VAL L  85       8.806  -6.414  37.438  1.00 21.96           C  
ATOM   1565  CG2 VAL L  85       7.457  -8.356  38.263  1.00 18.44           C  
ATOM   1566  N   TYR L  86       7.046  -3.627  38.338  1.00 21.61           N  
ATOM   1567  CA  TYR L  86       7.062  -2.309  37.720  1.00 21.45           C  
ATOM   1568  C   TYR L  86       8.419  -1.937  37.126  1.00 20.86           C  
ATOM   1569  O   TYR L  86       9.468  -2.306  37.656  1.00 18.84           O  
ATOM   1570  CB  TYR L  86       6.606  -1.246  38.722  1.00 21.52           C  
ATOM   1571  CG  TYR L  86       5.184  -1.457  39.194  1.00 22.19           C  
ATOM   1572  CD1 TYR L  86       4.869  -2.488  40.080  1.00 22.91           C  
ATOM   1573  CD2 TYR L  86       4.141  -0.676  38.694  1.00 21.45           C  
ATOM   1574  CE1 TYR L  86       3.547  -2.743  40.455  1.00 24.93           C  
ATOM   1575  CE2 TYR L  86       2.811  -0.922  39.061  1.00 23.97           C  
ATOM   1576  CZ  TYR L  86       2.527  -1.958  39.940  1.00 23.71           C  
ATOM   1577  OH  TYR L  86       1.228  -2.215  40.297  1.00 26.21           O  
ATOM   1578  N   TYR L  87       8.381  -1.217  36.007  1.00 19.72           N  
ATOM   1579  CA  TYR L  87       9.590  -0.792  35.320  1.00 17.69           C  
ATOM   1580  C   TYR L  87       9.573   0.695  34.977  1.00 19.29           C  
ATOM   1581  O   TYR L  87       8.551   1.222  34.533  1.00 16.10           O  
ATOM   1582  CB  TYR L  87       9.765  -1.547  33.998  1.00 16.89           C  
ATOM   1583  CG  TYR L  87       9.908  -3.047  34.088  1.00 16.61           C  
ATOM   1584  CD1 TYR L  87       8.788  -3.878  34.151  1.00 14.66           C  
ATOM   1585  CD2 TYR L  87      11.170  -3.639  34.087  1.00 13.84           C  
ATOM   1586  CE1 TYR L  87       8.920  -5.262  34.203  1.00 14.65           C  
ATOM   1587  CE2 TYR L  87      11.315  -5.022  34.141  1.00 16.78           C  
ATOM   1588  CZ  TYR L  87      10.191  -5.828  34.193  1.00 16.94           C  
ATOM   1589  OH  TYR L  87      10.343  -7.196  34.191  1.00 18.07           O  
ATOM   1590  N   CYS L  88      10.700   1.376  35.176  1.00 19.20           N  
ATOM   1591  CA  CYS L  88      10.770   2.777  34.789  1.00 20.05           C  
ATOM   1592  C   CYS L  88      11.476   2.765  33.442  1.00 21.46           C  
ATOM   1593  O   CYS L  88      12.200   1.823  33.131  1.00 22.94           O  
ATOM   1594  CB  CYS L  88      11.572   3.619  35.776  1.00 20.08           C  
ATOM   1595  SG  CYS L  88      13.322   3.162  35.975  1.00 20.81           S  
ATOM   1596  N   GLN L  89      11.253   3.797  32.638  1.00 22.63           N  
ATOM   1597  CA  GLN L  89      11.869   3.883  31.321  1.00 23.44           C  
ATOM   1598  C   GLN L  89      12.100   5.325  30.886  1.00 22.38           C  
ATOM   1599  O   GLN L  89      11.289   6.207  31.175  1.00 21.67           O  
ATOM   1600  CB  GLN L  89      10.976   3.217  30.272  1.00 25.55           C  
ATOM   1601  CG  GLN L  89      11.481   3.420  28.847  1.00 28.65           C  
ATOM   1602  CD  GLN L  89      10.362   3.427  27.820  1.00 29.98           C  
ATOM   1603  OE1 GLN L  89       9.397   4.177  27.954  1.00 29.92           O  
ATOM   1604  NE2 GLN L  89      10.496   2.612  26.780  1.00 30.36           N  
ATOM   1605  N   GLN L  90      13.211   5.564  30.195  1.00 20.34           N  
ATOM   1606  CA  GLN L  90      13.472   6.898  29.688  1.00 20.19           C  
ATOM   1607  C   GLN L  90      13.362   6.841  28.167  1.00 19.24           C  
ATOM   1608  O   GLN L  90      13.786   5.877  27.532  1.00 18.60           O  
ATOM   1609  CB  GLN L  90      14.858   7.417  30.125  1.00 20.65           C  
ATOM   1610  CG  GLN L  90      16.095   6.829  29.445  1.00 19.75           C  
ATOM   1611  CD  GLN L  90      16.238   7.230  27.981  1.00 19.09           C  
ATOM   1612  OE1 GLN L  90      15.987   8.376  27.605  1.00 18.84           O  
ATOM   1613  NE2 GLN L  90      16.675   6.292  27.157  1.00 20.31           N  
ATOM   1614  N   TYR L  91      12.756   7.865  27.587  1.00 20.11           N  
ATOM   1615  CA  TYR L  91      12.607   7.923  26.146  1.00 21.79           C  
ATOM   1616  C   TYR L  91      12.986   9.325  25.696  1.00 22.95           C  
ATOM   1617  O   TYR L  91      12.300   9.968  24.904  1.00 23.37           O  
ATOM   1618  CB  TYR L  91      11.176   7.520  25.744  1.00 20.59           C  
ATOM   1619  CG  TYR L  91      10.076   8.287  26.438  1.00 22.77           C  
ATOM   1620  CD1 TYR L  91       9.578   9.471  25.899  1.00 23.44           C  
ATOM   1621  CD2 TYR L  91       9.550   7.841  27.650  1.00 22.19           C  
ATOM   1622  CE1 TYR L  91       8.586  10.193  26.545  1.00 23.68           C  
ATOM   1623  CE2 TYR L  91       8.554   8.559  28.310  1.00 24.38           C  
ATOM   1624  CZ  TYR L  91       8.078   9.734  27.751  1.00 25.23           C  
ATOM   1625  OH  TYR L  91       7.107  10.465  28.398  1.00 27.69           O  
ATOM   1626  N   TYR L  92      14.112   9.773  26.239  1.00 23.36           N  
ATOM   1627  CA  TYR L  92      14.692  11.075  25.956  1.00 24.46           C  
ATOM   1628  C   TYR L  92      15.643  10.931  24.769  1.00 24.44           C  
ATOM   1629  O   TYR L  92      15.677  11.777  23.879  1.00 26.26           O  
ATOM   1630  CB  TYR L  92      15.471  11.552  27.184  1.00 27.05           C  
ATOM   1631  CG  TYR L  92      16.153  12.890  27.028  1.00 28.91           C  
ATOM   1632  CD1 TYR L  92      15.409  14.061  26.889  1.00 29.09           C  
ATOM   1633  CD2 TYR L  92      17.548  12.986  27.021  1.00 30.11           C  
ATOM   1634  CE1 TYR L  92      16.038  15.301  26.746  1.00 31.54           C  
ATOM   1635  CE2 TYR L  92      18.189  14.219  26.879  1.00 29.79           C  
ATOM   1636  CZ  TYR L  92      17.427  15.372  26.740  1.00 31.26           C  
ATOM   1637  OH  TYR L  92      18.048  16.591  26.582  1.00 31.54           O  
ATOM   1638  N   SER L  93      16.427   9.858  24.768  1.00 22.99           N  
ATOM   1639  CA  SER L  93      17.370   9.616  23.688  1.00 22.71           C  
ATOM   1640  C   SER L  93      17.407   8.135  23.365  1.00 21.44           C  
ATOM   1641  O   SER L  93      17.392   7.300  24.264  1.00 21.10           O  
ATOM   1642  CB  SER L  93      18.768  10.078  24.087  1.00 24.06           C  
ATOM   1643  OG  SER L  93      19.280   9.274  25.133  1.00 29.38           O  
ATOM   1644  N   THR L  94      17.453   7.810  22.080  1.00 21.02           N  
ATOM   1645  CA  THR L  94      17.496   6.414  21.670  1.00 22.55           C  
ATOM   1646  C   THR L  94      18.893   5.858  21.961  1.00 23.59           C  
ATOM   1647  O   THR L  94      19.878   6.592  21.953  1.00 23.98           O  
ATOM   1648  CB  THR L  94      17.189   6.265  20.155  1.00 22.20           C  
ATOM   1649  OG1 THR L  94      18.233   6.877  19.387  1.00 20.11           O  
ATOM   1650  CG2 THR L  94      15.864   6.952  19.805  1.00 21.35           C  
ATOM   1651  N   PRO L  95      18.989   4.561  22.271  1.00 24.39           N  
ATOM   1652  CA  PRO L  95      17.889   3.600  22.372  1.00 24.17           C  
ATOM   1653  C   PRO L  95      17.114   3.810  23.672  1.00 24.31           C  
ATOM   1654  O   PRO L  95      17.713   4.006  24.730  1.00 23.39           O  
ATOM   1655  CB  PRO L  95      18.622   2.268  22.359  1.00 25.71           C  
ATOM   1656  CG  PRO L  95      19.860   2.607  23.175  1.00 27.05           C  
ATOM   1657  CD  PRO L  95      20.282   3.877  22.465  1.00 25.10           C  
ATOM   1658  N   TYR L  96      15.788   3.790  23.607  1.00 22.97           N  
ATOM   1659  CA  TYR L  96      15.028   3.962  24.828  1.00 24.02           C  
ATOM   1660  C   TYR L  96      15.366   2.781  25.736  1.00 23.87           C  
ATOM   1661  O   TYR L  96      15.418   1.639  25.275  1.00 23.93           O  
ATOM   1662  CB  TYR L  96      13.527   4.015  24.534  1.00 23.61           C  
ATOM   1663  CG  TYR L  96      13.118   5.168  23.647  1.00 22.80           C  
ATOM   1664  CD1 TYR L  96      13.879   6.337  23.589  1.00 23.18           C  
ATOM   1665  CD2 TYR L  96      11.929   5.120  22.915  1.00 23.74           C  
ATOM   1666  CE1 TYR L  96      13.466   7.427  22.823  1.00 23.13           C  
ATOM   1667  CE2 TYR L  96      11.507   6.204  22.150  1.00 21.06           C  
ATOM   1668  CZ  TYR L  96      12.275   7.350  22.106  1.00 22.12           C  
ATOM   1669  OH  TYR L  96      11.855   8.417  21.345  1.00 22.21           O  
ATOM   1670  N   SER L  97      15.608   3.057  27.018  1.00 22.43           N  
ATOM   1671  CA  SER L  97      15.974   2.007  27.962  1.00 21.64           C  
ATOM   1672  C   SER L  97      15.132   1.872  29.234  1.00 22.61           C  
ATOM   1673  O   SER L  97      14.566   2.846  29.734  1.00 22.77           O  
ATOM   1674  CB  SER L  97      17.455   2.159  28.338  1.00 22.04           C  
ATOM   1675  OG  SER L  97      17.779   3.503  28.650  1.00 18.48           O  
ATOM   1676  N   PHE L  98      15.074   0.639  29.741  1.00 22.48           N  
ATOM   1677  CA  PHE L  98      14.337   0.282  30.948  1.00 21.21           C  
ATOM   1678  C   PHE L  98      15.252  -0.015  32.126  1.00 21.00           C  
ATOM   1679  O   PHE L  98      16.444  -0.287  31.953  1.00 21.14           O  
ATOM   1680  CB  PHE L  98      13.502  -0.978  30.724  1.00 23.73           C  
ATOM   1681  CG  PHE L  98      12.313  -0.785  29.844  1.00 26.51           C  
ATOM   1682  CD1 PHE L  98      12.460  -0.403  28.516  1.00 28.18           C  
ATOM   1683  CD2 PHE L  98      11.033  -1.021  30.340  1.00 27.52           C  
ATOM   1684  CE1 PHE L  98      11.347  -0.263  27.696  1.00 29.51           C  
ATOM   1685  CE2 PHE L  98       9.917  -0.885  29.527  1.00 27.09           C  
ATOM   1686  CZ  PHE L  98      10.072  -0.505  28.206  1.00 27.76           C  
ATOM   1687  N   GLY L  99      14.667   0.026  33.321  1.00 19.75           N  
ATOM   1688  CA  GLY L  99      15.394  -0.295  34.535  1.00 19.14           C  
ATOM   1689  C   GLY L  99      15.296  -1.806  34.639  1.00 18.66           C  
ATOM   1690  O   GLY L  99      14.705  -2.421  33.755  1.00 18.14           O  
ATOM   1691  N   GLN L 100      15.843  -2.410  35.694  1.00 18.93           N  
ATOM   1692  CA  GLN L 100      15.799  -3.871  35.828  1.00 19.45           C  
ATOM   1693  C   GLN L 100      14.438  -4.397  36.300  1.00 20.44           C  
ATOM   1694  O   GLN L 100      14.176  -5.599  36.238  1.00 20.40           O  
ATOM   1695  CB  GLN L 100      16.884  -4.372  36.798  1.00 17.52           C  
ATOM   1696  CG  GLN L 100      16.569  -4.147  38.278  1.00 17.55           C  
ATOM   1697  CD  GLN L 100      16.942  -2.770  38.786  1.00 21.05           C  
ATOM   1698  OE1 GLN L 100      16.910  -1.786  38.050  1.00 21.86           O  
ATOM   1699  NE2 GLN L 100      17.273  -2.691  40.070  1.00 18.98           N  
ATOM   1700  N   GLY L 101      13.584  -3.502  36.791  1.00 22.76           N  
ATOM   1701  CA  GLY L 101      12.271  -3.915  37.264  1.00 23.05           C  
ATOM   1702  C   GLY L 101      12.208  -4.125  38.769  1.00 23.21           C  
ATOM   1703  O   GLY L 101      13.216  -4.451  39.396  1.00 23.52           O  
ATOM   1704  N   THR L 102      11.024  -3.930  39.348  1.00 22.55           N  
ATOM   1705  CA  THR L 102      10.818  -4.098  40.782  1.00 21.46           C  
ATOM   1706  C   THR L 102       9.520  -4.856  41.023  1.00 23.14           C  
ATOM   1707  O   THR L 102       8.445  -4.438  40.585  1.00 22.78           O  
ATOM   1708  CB  THR L 102      10.756  -2.741  41.505  1.00 20.74           C  
ATOM   1709  OG1 THR L 102      11.985  -2.034  41.289  1.00 23.84           O  
ATOM   1710  CG2 THR L 102      10.566  -2.943  43.005  1.00 19.24           C  
ATOM   1711  N   LYS L 103       9.633  -5.976  41.724  1.00 22.97           N  
ATOM   1712  CA  LYS L 103       8.486  -6.827  42.011  1.00 26.10           C  
ATOM   1713  C   LYS L 103       7.719  -6.358  43.252  1.00 26.44           C  
ATOM   1714  O   LYS L 103       8.280  -6.271  44.344  1.00 26.04           O  
ATOM   1715  CB  LYS L 103       8.980  -8.264  42.194  1.00 27.66           C  
ATOM   1716  CG  LYS L 103       7.904  -9.315  42.360  1.00 31.50           C  
ATOM   1717  CD  LYS L 103       8.564 -10.683  42.546  1.00 37.76           C  
ATOM   1718  CE  LYS L 103       7.554 -11.806  42.683  1.00 38.82           C  
ATOM   1719  NZ  LYS L 103       8.240 -13.111  42.931  1.00 43.60           N  
ATOM   1720  N   LEU L 104       6.433  -6.061  43.077  1.00 25.94           N  
ATOM   1721  CA  LEU L 104       5.601  -5.598  44.182  1.00 27.90           C  
ATOM   1722  C   LEU L 104       4.658  -6.706  44.638  1.00 29.79           C  
ATOM   1723  O   LEU L 104       3.943  -7.298  43.832  1.00 29.16           O  
ATOM   1724  CB  LEU L 104       4.803  -4.361  43.761  1.00 25.11           C  
ATOM   1725  CG  LEU L 104       3.922  -3.703  44.826  1.00 26.01           C  
ATOM   1726  CD1 LEU L 104       4.772  -3.289  46.023  1.00 21.63           C  
ATOM   1727  CD2 LEU L 104       3.216  -2.489  44.230  1.00 24.30           C  
ATOM   1728  N   GLU L 105       4.661  -6.979  45.939  1.00 32.75           N  
ATOM   1729  CA  GLU L 105       3.825  -8.034  46.497  1.00 34.83           C  
ATOM   1730  C   GLU L 105       3.104  -7.638  47.782  1.00 34.29           C  
ATOM   1731  O   GLU L 105       3.328  -6.566  48.342  1.00 32.37           O  
ATOM   1732  CB  GLU L 105       4.677  -9.269  46.769  1.00 37.51           C  
ATOM   1733  CG  GLU L 105       5.448  -9.759  45.565  1.00 44.00           C  
ATOM   1734  CD  GLU L 105       6.349 -10.922  45.907  1.00 48.76           C  
ATOM   1735  OE1 GLU L 105       7.214 -10.756  46.795  1.00 51.60           O  
ATOM   1736  OE2 GLU L 105       6.197 -11.999  45.293  1.00 52.17           O  
ATOM   1737  N   ILE L 106       2.248  -8.539  48.247  1.00 35.41           N  
ATOM   1738  CA  ILE L 106       1.470  -8.327  49.452  1.00 37.08           C  
ATOM   1739  C   ILE L 106       2.100  -8.955  50.691  1.00 38.81           C  
ATOM   1740  O   ILE L 106       2.582 -10.086  50.658  1.00 38.94           O  
ATOM   1741  CB  ILE L 106       0.057  -8.905  49.288  1.00 37.53           C  
ATOM   1742  CG1 ILE L 106      -0.693  -8.142  48.196  1.00 37.70           C  
ATOM   1743  CG2 ILE L 106      -0.678  -8.848  50.608  1.00 36.81           C  
ATOM   1744  CD1 ILE L 106      -2.086  -8.672  47.923  1.00 36.34           C  
ATOM   1745  N   LYS L 107       2.083  -8.205  51.785  1.00 40.76           N  
ATOM   1746  CA  LYS L 107       2.617  -8.664  53.063  1.00 41.97           C  
ATOM   1747  C   LYS L 107       1.592  -9.604  53.699  1.00 41.33           C  
ATOM   1748  O   LYS L 107       0.737  -9.102  54.455  1.00 42.07           O  
ATOM   1749  CB  LYS L 107       2.877  -7.466  53.986  1.00 42.54           C  
ATOM   1750  CG  LYS L 107       3.386  -7.808  55.386  1.00 43.99           C  
ATOM   1751  CD  LYS L 107       4.748  -8.494  55.354  1.00 45.35           C  
ATOM   1752  CE  LYS L 107       5.294  -8.688  56.759  1.00 45.19           C  
ATOM   1753  NZ  LYS L 107       4.364  -9.490  57.598  1.00 47.76           N  
TER    1754      LYS L 107                                                      
