# Supplementary material for: SARS-CoV-2 Spike Protein Interaction Space
Source: Int J Mol Sci. 2023 Jul 27;24(15):12058. doi: 10.3390/ijms241512058 (PMC10418891; doi:10.3390/ijms241512058)
Supplement: Supplementary file 1 [file ijms-24-12058-s001.zip › Supplementary Material File S1/4N1C.pdb]

HEADER                                                        Nona
REMARK   6
REMARK   6  PDB written by MVD (www.molegro.com)
ATOM      1  N   ASP L   1      82.667 -14.117 -10.370  1.00 30.87
ATOM      2  CA  ASP L   1      81.983 -14.104 -11.691  1.00 26.10
ATOM      3  C   ASP L   1      81.621 -12.685 -12.146  1.00 23.58
ATOM      4  O   ASP L   1      81.781 -12.357 -13.314  1.00 27.12
ATOM      5  CB  ASP L   1      80.757 -14.994 -11.667  1.00 25.87
ATOM      6  CG  ASP L   1      79.942 -14.874 -12.920  1.00 23.56
ATOM      7  OD1 ASP L   1      78.966 -14.134 -12.855  1.00 20.15
ATOM      8  OD2 ASP L   1      80.273 -15.498 -13.949  1.00 35.90
ATOM      9  H   ASP L   1      82.963 -15.011  -9.952  1.00  0.00
ATOM     10  H   ASP L   1      82.688 -14.500 -12.422  1.00  0.00
ATOM     11  H   ASP L   1      80.130 -14.697 -10.826  1.00  0.00
ATOM     12  H   ASP L   1      81.092 -16.028 -11.588  1.00  0.00
ATOM     13  N   ILE L   2      81.164 -11.831 -11.235  1.00 20.70
ATOM     14  CA  ILE L   2      81.071 -10.405 -11.580  1.00 20.60
ATOM     15  C   ILE L   2      82.496  -9.845 -11.701  1.00 21.18
ATOM     16  O   ILE L   2      83.341 -10.083 -10.819  1.00 22.57
ATOM     17  CB  ILE L   2      80.255  -9.602 -10.537  1.00 20.86
ATOM     18  CG1 ILE L   2      78.815 -10.144 -10.403  1.00 23.00
ATOM     19  CG2 ILE L   2      80.236  -8.121 -10.945  1.00 20.06
ATOM     20  CD1 ILE L   2      77.985  -9.369  -9.412  1.00 25.65
ATOM     21  H   ILE L   2      80.880 -12.163 -10.302  1.00  0.00
ATOM     22  H   ILE L   2      80.541 -10.306 -12.527  1.00  0.00
ATOM     23  H   ILE L   2      80.732  -9.710  -9.563  1.00  0.00
ATOM     24  H   ILE L   2      78.860 -11.178 -10.062  1.00  0.00
ATOM     25  H   ILE L   2      78.328 -10.037 -11.372  1.00  0.00
ATOM     26  H   ILE L   2      79.655  -7.590 -10.191  1.00  0.00
ATOM     27  H   ILE L   2      81.272  -7.784 -10.970  1.00  0.00
ATOM     28  H   ILE L   2      79.769  -8.067 -11.928  1.00  0.00
ATOM     29  H   ILE L   2      76.997  -9.829  -9.395  1.00  0.00
ATOM     30  H   ILE L   2      78.486  -9.447  -8.447  1.00  0.00
ATOM     31  H   ILE L   2      77.946  -8.339  -9.766  1.00  0.00
ATOM     32  N   GLN L   3      82.765  -9.121 -12.793  1.00 21.50
ATOM     33  CA  GLN L   3      84.042  -8.476 -13.036  1.00 20.12
ATOM     34  C   GLN L   3      84.003  -7.032 -12.548  1.00 19.91
ATOM     35  O   GLN L   3      83.092  -6.283 -12.885  1.00 21.89
ATOM     36  CB  GLN L   3      84.404  -8.480 -14.541  1.00 22.28
ATOM     37  H   GLN L   3      82.024  -9.015 -13.501  1.00  0.00
ATOM     38  H   GLN L   3      84.799  -9.039 -12.490  1.00  0.00
ATOM     39  H   GLN L   3      85.368  -7.982 -14.638  1.00  0.00
ATOM     40  H   GLN L   3      84.453  -9.523 -14.854  1.00  0.00
ATOM     41  N   MET L   4      85.021  -6.646 -11.783  1.00 17.96
ATOM     42  CA  MET L   4      85.138  -5.295 -11.260  1.00 19.74
ATOM     43  C   MET L   4      86.337  -4.659 -11.917  1.00 21.24
ATOM     44  O   MET L   4      87.403  -5.279 -11.934  1.00 23.18
ATOM     45  CB  MET L   4      85.343  -5.315  -9.737  1.00 21.19
ATOM     46  CG  MET L   4      84.204  -5.977  -8.936  1.00 22.87
ATOM     47  SD  MET L   4      82.586  -5.270  -9.293  1.00 21.43
ATOM     48  CE  MET L   4      82.773  -3.555  -8.782  1.00 22.39
ATOM     49  H   MET L   4      85.755  -7.331 -11.553  1.00  0.00
ATOM     50  H   MET L   4      84.227  -4.735 -11.470  1.00  0.00
ATOM     51  H   MET L   4      85.392  -4.275  -9.414  1.00  0.00
ATOM     52  H   MET L   4      86.244  -5.898  -9.548  1.00  0.00
ATOM     53  H   MET L   4      84.456  -5.690  -7.915  1.00  0.00
ATOM     54  H   MET L   4      84.278  -7.051  -9.109  1.00  0.00
ATOM     55  H   MET L   4      81.820  -3.060  -8.972  1.00  0.00
ATOM     56  H   MET L   4      83.021  -3.564  -7.721  1.00  0.00
ATOM     57  H   MET L   4      83.577  -3.129  -9.382  1.00  0.00
ATOM     58  N   THR L   5      86.160  -3.458 -12.486  1.00 17.69
ATOM     59  CA  THR L   5      87.234  -2.784 -13.219  1.00 19.27
ATOM     60  C   THR L   5      87.557  -1.488 -12.496  1.00 19.34
ATOM     61  O   THR L   5      86.753  -0.559 -12.505  1.00 21.43
ATOM     62  CB  THR L   5      86.861  -2.454 -14.683  1.00 22.53
ATOM     63  OG1 THR L   5      86.455  -3.656 -15.358  1.00 26.85
ATOM     64  CG2 THR L   5      88.054  -1.901 -15.384  1.00 25.42
ATOM     65  H   THR L   5      85.243  -2.996 -12.405  1.00  0.00
ATOM     66  H   THR L   5      88.086  -3.463 -13.252  1.00  0.00
ATOM     67  H   THR L   5      86.048  -1.728 -14.690  1.00  0.00
ATOM     68  H   THR L   5      85.631  -4.019 -14.857  1.00  0.00
ATOM     69  H   THR L   5      87.749  -1.683 -16.408  1.00  0.00
ATOM     70  H   THR L   5      88.349  -0.999 -14.848  1.00  0.00
ATOM     71  H   THR L   5      88.829  -2.666 -15.346  1.00  0.00
ATOM     72  N   GLN L   6      88.741  -1.428 -11.897  1.00 17.55
ATOM     73  CA  GLN L   6      89.161  -0.332 -11.075  1.00 15.50
ATOM     74  C   GLN L   6      90.203   0.528 -11.747  1.00 16.82
ATOM     75  O   GLN L   6      91.098   0.003 -12.409  1.00 17.09
ATOM     76  CB  GLN L   6      89.741  -0.894  -9.765  1.00 17.08
ATOM     77  CG  GLN L   6      90.014   0.146  -8.757  1.00 16.97
ATOM     78  CD  GLN L   6      90.407  -0.427  -7.397  1.00 18.72
ATOM     79  OE1 GLN L   6      90.110  -1.581  -7.051  1.00 16.71
ATOM     80  NE2 GLN L   6      91.095   0.390  -6.638  1.00 13.24
ATOM     81  H   GLN L   6      89.394  -2.213 -12.031  1.00  0.00
ATOM     82  H   GLN L   6      88.291   0.297 -10.887  1.00  0.00
ATOM     83  H   GLN L   6      90.681  -1.405  -9.973  1.00  0.00
ATOM     84  H   GLN L   6      88.986  -1.545  -9.324  1.00  0.00
ATOM     85  H   GLN L   6      89.082   0.696  -8.627  1.00  0.00
ATOM     86  H   GLN L   6      90.828   0.766  -9.134  1.00  0.00
ATOM     87  H   GLN L   6      91.403   0.088  -5.703  1.00  0.00
ATOM     88  H   GLN L   6      91.328   1.335  -6.977  1.00  0.00
ATOM     89  N   SER L   7      90.053   1.850 -11.598  1.00 17.34
ATOM     90  CA  SER L   7      90.933   2.833 -12.234  1.00 16.58
ATOM     91  C   SER L   7      91.160   4.017 -11.307  1.00 16.42
ATOM     92  O   SER L   7      90.255   4.373 -10.568  1.00 18.42
ATOM     93  CB  SER L   7      90.289   3.373 -13.557  1.00 19.79
ATOM     94  H   SER L   7      89.282   2.192 -11.008  1.00  0.00
ATOM     95  H   SER L   7      91.879   2.337 -12.453  1.00  0.00
ATOM     96  H   SER L   7      90.987   4.095 -13.980  1.00  0.00
ATOM     97  H   SER L   7      90.145   2.516 -14.215  1.00  0.00
ATOM     98  N   PRO L   8      92.353   4.666 -11.361  1.00 17.71
ATOM     99  CA  PRO L   8      93.592   4.248 -12.035  1.00 16.19
ATOM    100  C   PRO L   8      94.237   3.101 -11.273  1.00 18.72
ATOM    101  O   PRO L   8      93.763   2.758 -10.183  1.00 18.15
ATOM    102  CB  PRO L   8      94.487   5.489 -11.923  1.00 20.83
ATOM    103  CG  PRO L   8      94.029   6.216 -10.787  1.00 21.63
ATOM    104  CD  PRO L   8      92.530   5.943 -10.654  1.00 20.47
ATOM    105  H   PRO L   8      93.428   3.912 -13.059  1.00  0.00
ATOM    106  H   PRO L   8      94.485   6.118 -12.813  1.00  0.00
ATOM    107  H   PRO L   8      95.525   5.204 -11.748  1.00  0.00
ATOM    108  H   PRO L   8      94.210   7.275 -10.971  1.00  0.00
ATOM    109  H   PRO L   8      94.602   5.942  -9.901  1.00  0.00
ATOM    110  H   PRO L   8      92.210   5.864  -9.615  1.00  0.00
ATOM    111  H   PRO L   8      91.896   6.734 -11.054  1.00  0.00
ATOM    112  N   SER L   9      95.302   2.549 -11.846  1.00 17.82
ATOM    113  CA  SER L   9      96.064   1.439 -11.267  1.00 17.35
ATOM    114  C   SER L   9      97.044   1.949 -10.225  1.00 19.25
ATOM    115  O   SER L   9      97.369   1.261  -9.252  1.00 16.23
ATOM    116  CB  SER L   9      96.833   0.720 -12.362  1.00 25.92
ATOM    117  OG  SER L   9      95.931  -0.087 -13.082  1.00 35.38
ATOM    118  H   SER L   9      95.611   2.925 -12.754  1.00  0.00
ATOM    119  H   SER L   9      95.364   0.752 -10.791  1.00  0.00
ATOM    120  H   SER L   9      97.652   0.110 -11.980  1.00  0.00
ATOM    121  H   SER L   9      97.243   1.446 -13.064  1.00  0.00
ATOM    122  H   SER L   9      96.473  -0.563 -13.817  1.00  0.00
ATOM    123  N   SER L  10      97.586   3.124 -10.486  1.00 16.75
ATOM    124  CA  SER L  10      98.546   3.743  -9.571  1.00 17.30
ATOM    125  C   SER L  10      98.453   5.246  -9.741  1.00 19.11
ATOM    126  O   SER L  10      98.097   5.733 -10.850  1.00 18.08
ATOM    127  CB  SER L  10      99.974   3.334  -9.951  1.00 27.03
ATOM    128  H   SER L  10      97.327   3.616 -11.353  1.00  0.00
ATOM    129  H   SER L  10      98.324   3.430  -8.551  1.00  0.00
ATOM    130  H   SER L  10     100.644   3.820  -9.242  1.00  0.00
ATOM    131  H   SER L  10     100.025   2.248  -9.877  1.00  0.00
ATOM    132  N   LEU L  11      98.824   5.960  -8.690  1.00 17.67
ATOM    133  CA  LEU L  11      98.888   7.399  -8.722  1.00 17.31
ATOM    134  C   LEU L  11      99.801   7.886  -7.638  1.00 19.08
ATOM    135  O   LEU L  11      99.976   7.225  -6.620  1.00 17.69
ATOM    136  CB  LEU L  11      97.496   8.015  -8.573  1.00 18.06
ATOM    137  CG  LEU L  11      96.717   7.918  -7.262  1.00 18.06
ATOM    138  CD1 LEU L  11      97.039   9.035  -6.302  1.00 18.90
ATOM    139  CD2 LEU L  11      95.208   7.862  -7.527  1.00 20.85
ATOM    140  H   LEU L  11      99.076   5.470  -7.820  1.00  0.00
ATOM    141  H   LEU L  11      99.284   7.710  -9.689  1.00  0.00
ATOM    142  H   LEU L  11      96.885   7.455  -9.281  1.00  0.00
ATOM    143  H   LEU L  11      97.670   9.084  -8.693  1.00  0.00
ATOM    144  H   LEU L  11      97.032   6.990  -6.786  1.00  0.00
ATOM    145  H   LEU L  11      96.435   8.872  -5.409  1.00  0.00
ATOM    146  H   LEU L  11      98.106   8.973  -6.087  1.00  0.00
ATOM    147  H   LEU L  11      96.780   9.969  -6.801  1.00  0.00
ATOM    148  H   LEU L  11      94.716   7.794  -6.557  1.00  0.00
ATOM    149  H   LEU L  11      94.942   8.779  -8.052  1.00  0.00
ATOM    150  H   LEU L  11      95.024   6.978  -8.137  1.00  0.00
ATOM    151  N   SER L  12     100.356   9.072  -7.856  1.00 16.66
ATOM    152  CA  SER L  12     101.200   9.714  -6.868  1.00 18.56
ATOM    153  C   SER L  12     100.585  11.051  -6.530  1.00 19.84
ATOM    154  O   SER L  12     100.022  11.697  -7.402  1.00 19.97
ATOM    155  CB  SER L  12     102.645   9.824  -7.343  1.00 22.57
ATOM    156  OG  SER L  12     102.856  10.886  -8.240  1.00 27.78
ATOM    157  H   SER L  12     100.182   9.549  -8.752  1.00  0.00
ATOM    158  H   SER L  12     101.250   9.109  -5.963  1.00  0.00
ATOM    159  H   SER L  12     102.965   8.909  -7.841  1.00  0.00
ATOM    160  H   SER L  12     103.254  10.079  -6.476  1.00  0.00
ATOM    161  H   SER L  12     103.854  10.871  -8.496  1.00  0.00
ATOM    162  N   ALA L  13     100.689  11.467  -5.279  1.00 15.33
ATOM    163  CA  ALA L  13      99.983  12.674  -4.831  1.00 16.44
ATOM    164  C   ALA L  13     100.620  13.247  -3.592  1.00 19.74
ATOM    165  O   ALA L  13     101.449  12.587  -2.983  1.00 20.75
ATOM    166  CB  ALA L  13      98.486  12.342  -4.572  1.00 17.66
ATOM    167  H   ALA L  13     101.271  10.939  -4.613  1.00  0.00
ATOM    168  H   ALA L  13     100.051  13.427  -5.617  1.00  0.00
ATOM    169  H   ALA L  13      98.007  13.264  -4.243  1.00  0.00
ATOM    170  H   ALA L  13      98.071  11.984  -5.514  1.00  0.00
ATOM    171  H   ALA L  13      98.459  11.574  -3.799  1.00  0.00
ATOM    172  N   SER L  14     100.270  14.500  -3.285  1.00 18.86
ATOM    173  CA  SER L  14     100.831  15.216  -2.134  1.00 20.14
ATOM    174  C   SER L  14      99.804  15.329  -1.032  1.00 18.90
ATOM    175  O   SER L  14      98.591  15.276  -1.282  1.00 19.23
ATOM    176  CB  SER L  14     101.258  16.626  -2.542  1.00 22.52
ATOM    177  OG  SER L  14     102.213  16.590  -3.578  1.00 25.15
ATOM    178  H   SER L  14      99.580  14.981  -3.879  1.00  0.00
ATOM    179  H   SER L  14     101.695  14.654  -1.779  1.00  0.00
ATOM    180  H   SER L  14     101.679  17.184  -1.706  1.00  0.00
ATOM    181  H   SER L  14     100.393  17.139  -2.963  1.00  0.00
ATOM    182  H   SER L  14     102.453  17.567  -3.800  1.00  0.00
ATOM    183  N   VAL L  15     100.300  15.475   0.186  1.00 18.30
ATOM    184  CA  VAL L  15      99.417  15.765   1.306  1.00 18.14
ATOM    185  C   VAL L  15      98.577  17.009   0.931  1.00 19.24
ATOM    186  O   VAL L  15      99.083  18.005   0.357  1.00 22.00
ATOM    187  CB  VAL L  15     100.217  15.974   2.608  1.00 20.07
ATOM    188  CG1 VAL L  15      99.330  16.539   3.672  1.00 23.03
ATOM    189  CG2 VAL L  15     100.844  14.653   3.037  1.00 21.30
ATOM    190  H   VAL L  15     101.314  15.383   0.342  1.00  0.00
ATOM    191  H   VAL L  15      98.753  14.922   1.497  1.00  0.00
ATOM    192  H   VAL L  15     101.020  16.691   2.438  1.00  0.00
ATOM    193  H   VAL L  15      99.943  16.666   4.564  1.00  0.00
ATOM    194  H   VAL L  15      98.954  17.492   3.300  1.00  0.00
ATOM    195  H   VAL L  15      98.526  15.820   3.831  1.00  0.00
ATOM    196  H   VAL L  15     101.397  14.846   3.956  1.00  0.00
ATOM    197  H   VAL L  15     100.027  13.949   3.196  1.00  0.00
ATOM    198  H   VAL L  15     101.502  14.335   2.228  1.00  0.00
ATOM    199  N   GLY L  16      97.283  16.915   1.207  1.00 20.23
ATOM    200  CA  GLY L  16      96.292  17.926   0.853  1.00 20.89
ATOM    201  C   GLY L  16      95.653  17.798  -0.501  1.00 21.49
ATOM    202  O   GLY L  16      94.790  18.599  -0.854  1.00 24.69
ATOM    203  H   GLY L  16      96.956  16.074   1.703  1.00  0.00
ATOM    204  H   GLY L  16      96.846  18.864   0.836  1.00  0.00
ATOM    205  H   GLY L  16      95.498  17.841   1.595  1.00  0.00
ATOM    206  N   ASP L  17      96.086  16.831  -1.296  1.00 18.88
ATOM    207  CA  ASP L  17      95.488  16.610  -2.613  1.00 18.53
ATOM    208  C   ASP L  17      94.124  15.934  -2.483  1.00 19.27
ATOM    209  O   ASP L  17      93.779  15.371  -1.429  1.00 17.52
ATOM    210  CB  ASP L  17      96.392  15.723  -3.475  1.00 18.88
ATOM    211  CG  ASP L  17      97.622  16.483  -4.096  1.00 21.25
ATOM    212  OD1 ASP L  17      97.817  17.726  -3.941  1.00 20.28
ATOM    213  OD2 ASP L  17      98.373  15.792  -4.828  1.00 24.76
ATOM    214  H   ASP L  17      96.857  16.224  -0.982  1.00  0.00
ATOM    215  H   ASP L  17      95.369  17.585  -3.086  1.00  0.00
ATOM    216  H   ASP L  17      95.775  15.373  -4.303  1.00  0.00
ATOM    217  H   ASP L  17      96.767  14.923  -2.836  1.00  0.00
ATOM    218  N   ARG L  18      93.368  15.939  -3.585  1.00 16.89
ATOM    219  CA  ARG L  18      92.211  15.071  -3.741  1.00 18.07
ATOM    220  C   ARG L  18      92.533  13.885  -4.645  1.00 21.93
ATOM    221  O   ARG L  18      93.121  14.056  -5.739  1.00 21.13
ATOM    222  CB  ARG L  18      91.005  15.837  -4.280  1.00 20.72
ATOM    223  CG  ARG L  18      89.775  14.947  -4.556  1.00 19.12
ATOM    224  CD  ARG L  18      88.597  15.718  -5.105  1.00 21.01
ATOM    225  NE  ARG L  18      88.197  16.823  -4.253  1.00 24.87
ATOM    226  CZ  ARG L  18      87.540  17.906  -4.666  1.00 24.14
ATOM    227  NH1 ARG L  18      87.228  18.082  -5.953  1.00 23.91
ATOM    228  NH2 ARG L  18      87.224  18.841  -3.789  1.00 27.59
ATOM    229  H   ARG L  18      93.614  16.581  -4.352  1.00  0.00
ATOM    230  H   ARG L  18      91.955  14.692  -2.751  1.00  0.00
ATOM    231  H   ARG L  18      91.308  16.277  -5.230  1.00  0.00
ATOM    232  H   ARG L  18      90.722  16.571  -3.526  1.00  0.00
ATOM    233  H   ARG L  18      89.462  14.487  -3.619  1.00  0.00
ATOM    234  H   ARG L  18      90.057  14.219  -5.316  1.00  0.00
ATOM    235  H   ARG L  18      87.741  15.051  -5.206  1.00  0.00
ATOM    236  H   ARG L  18      88.904  16.162  -6.052  1.00  0.00
ATOM    237  H   ARG L  18      88.439  16.766  -3.254  1.00  0.00
ATOM    238  H   ARG L  18      86.720  18.928  -6.249  1.00  0.00
ATOM    239  H   ARG L  18      87.496  17.372  -6.650  1.00  0.00
ATOM    240  H   ARG L  18      86.716  19.683  -4.095  1.00  0.00
ATOM    241  H   ARG L  18      87.485  18.728  -2.799  1.00  0.00
ATOM    242  N   VAL L  19      92.136  12.690  -4.208  1.00 15.94
ATOM    243  CA  VAL L  19      92.360  11.451  -4.978  1.00 17.70
ATOM    244  C   VAL L  19      90.989  10.897  -5.389  1.00 18.00
ATOM    245  O   VAL L  19      90.106  10.798  -4.551  1.00 20.13
ATOM    246  CB  VAL L  19      93.074  10.359  -4.082  1.00 18.36
ATOM    247  H   VAL L  19      91.655  12.629  -3.299  1.00  0.00
ATOM    248  H   VAL L  19      92.986  11.674  -5.842  1.00  0.00
ATOM    249  H   VAL L  19      94.045  10.765  -3.798  1.00  0.00
ATOM    250  N   THR L  20      90.822  10.507  -6.649  1.00 17.66
ATOM    251  CA  THR L  20      89.549   9.967  -7.149  1.00 16.54
ATOM    252  C   THR L  20      89.819   8.623  -7.812  1.00 19.30
ATOM    253  O   THR L  20      90.615   8.530  -8.760  1.00 19.17
ATOM    254  CB  THR L  20      88.878  10.926  -8.170  1.00 18.44
ATOM    255  OG1 THR L  20      88.773  12.232  -7.601  1.00 19.85
ATOM    256  CG2 THR L  20      87.490  10.429  -8.578  1.00 20.63
ATOM    257  H   THR L  20      91.616  10.586  -7.301  1.00  0.00
ATOM    258  H   THR L  20      88.866   9.853  -6.307  1.00  0.00
ATOM    259  H   THR L  20      89.500  10.958  -9.064  1.00  0.00
ATOM    260  H   THR L  20      89.726  12.525  -7.342  1.00  0.00
ATOM    261  H   THR L  20      87.090  11.151  -9.290  1.00  0.00
ATOM    262  H   THR L  20      87.623   9.446  -9.029  1.00  0.00
ATOM    263  H   THR L  20      86.889  10.380  -7.670  1.00  0.00
ATOM    264  N   ILE L  21      89.122   7.602  -7.328  1.00 15.00
ATOM    265  CA  ILE L  21      89.237   6.218  -7.824  1.00 15.66
ATOM    266  C   ILE L  21      87.872   5.756  -8.316  1.00 15.73
ATOM    267  O   ILE L  21      86.850   6.025  -7.676  1.00 16.76
ATOM    268  CB  ILE L  21      89.706   5.292  -6.692  1.00 14.45
ATOM    269  CG1 ILE L  21      91.102   5.725  -6.242  1.00 17.76
ATOM    270  CG2 ILE L  21      89.714   3.780  -7.149  1.00 13.76
ATOM    271  CD1 ILE L  21      91.635   5.006  -4.992  1.00 22.15
ATOM    272  H   ILE L  21      88.461   7.788  -6.560  1.00  0.00
ATOM    273  H   ILE L  21      89.962   6.183  -8.637  1.00  0.00
ATOM    274  H   ILE L  21      89.009   5.373  -5.858  1.00  0.00
ATOM    275  H   ILE L  21      91.032   6.783  -5.990  1.00  0.00
ATOM    276  H   ILE L  21      91.783   5.489  -7.060  1.00  0.00
ATOM    277  H   ILE L  21      90.055   3.191  -6.297  1.00  0.00
ATOM    278  H   ILE L  21      88.692   3.527  -7.433  1.00  0.00
ATOM    279  H   ILE L  21      90.399   3.706  -7.994  1.00  0.00
ATOM    280  H   ILE L  21      92.627   5.410  -4.790  1.00  0.00
ATOM    281  H   ILE L  21      90.938   5.218  -4.181  1.00  0.00
ATOM    282  H   ILE L  21      91.671   3.942  -5.227  1.00  0.00
ATOM    283  N   THR L  22      87.858   5.065  -9.451  1.00 17.56
ATOM    284  CA  THR L  22      86.628   4.591 -10.074  1.00 17.87
ATOM    285  C   THR L  22      86.587   3.064 -10.050  1.00 18.26
ATOM    286  O   THR L  22      87.596   2.423 -10.279  1.00 19.85
ATOM    287  CB  THR L  22      86.568   5.097 -11.547  1.00 21.64
ATOM    288  OG1 THR L  22      86.599   6.541 -11.568  1.00 27.35
ATOM    289  CG2 THR L  22      85.333   4.597 -12.283  1.00 23.65
ATOM    290  H   THR L  22      88.755   4.855  -9.911  1.00  0.00
ATOM    291  H   THR L  22      85.771   4.976  -9.521  1.00  0.00
ATOM    292  H   THR L  22      87.439   4.695 -12.065  1.00  0.00
ATOM    293  H   THR L  22      87.447   6.831 -11.061  1.00  0.00
ATOM    294  H   THR L  22      85.380   5.000 -13.295  1.00  0.00
ATOM    295  H   THR L  22      85.378   3.508 -12.278  1.00  0.00
ATOM    296  H   THR L  22      84.465   4.969 -11.739  1.00  0.00
ATOM    297  N   CYS L  23      85.404   2.496  -9.781  1.00 17.94
ATOM    298  CA  CYS L  23      85.176   1.071  -9.877  1.00 18.28
ATOM    299  C   CYS L  23      83.912   0.821 -10.735  1.00 18.05
ATOM    300  O   CYS L  23      82.853   1.365 -10.429  1.00 19.94
ATOM    301  CB  CYS L  23      85.035   0.540  -8.449  1.00 19.26
ATOM    302  SG  CYS L  23      84.897  -1.219  -8.270  1.00 21.15
ATOM    303  H   CYS L  23      84.622   3.101  -9.493  1.00  0.00
ATOM    304  H   CYS L  23      85.999   0.549 -10.365  1.00  0.00
ATOM    305  H   CYS L  23      84.051   0.933  -8.192  1.00  0.00
ATOM    306  H   CYS L  23      85.882   0.956  -7.903  1.00  0.00
ATOM    307  N   ARG L  24      84.036   0.014 -11.801  1.00 18.15
ATOM    308  CA  ARG L  24      82.881  -0.304 -12.641  1.00 19.44
ATOM    309  C   ARG L  24      82.601  -1.805 -12.459  1.00 19.36
ATOM    310  O   ARG L  24      83.528  -2.576 -12.287  1.00 20.08
ATOM    311  CB  ARG L  24      83.155  -0.029 -14.107  1.00 20.54
ATOM    312  CG  ARG L  24      83.469   1.441 -14.515  1.00 23.10
ATOM    313  CD  ARG L  24      82.469   2.459 -14.000  1.00 22.73
ATOM    314  NE  ARG L  24      81.102   2.202 -14.473  1.00 27.07
ATOM    315  CZ  ARG L  24      80.595   2.593 -15.653  1.00 28.59
ATOM    316  NH1 ARG L  24      81.308   3.291 -16.531  1.00 29.81
ATOM    317  NH2 ARG L  24      79.340   2.287 -15.950  1.00 29.58
ATOM    318  H   ARG L  24      84.957  -0.387 -12.030  1.00  0.00
ATOM    319  H   ARG L  24      82.035   0.316 -12.346  1.00  0.00
ATOM    320  H   ARG L  24      82.222  -0.280 -14.611  1.00  0.00
ATOM    321  H   ARG L  24      84.036  -0.621 -14.357  1.00  0.00
ATOM    322  H   ARG L  24      83.458   1.503 -15.603  1.00  0.00
ATOM    323  H   ARG L  24      84.425   1.702 -14.061  1.00  0.00
ATOM    324  H   ARG L  24      82.759   3.452 -14.343  1.00  0.00
ATOM    325  H   ARG L  24      82.441   2.379 -12.913  1.00  0.00
ATOM    326  H   ARG L  24      80.478   1.676 -13.844  1.00  0.00
ATOM    327  H   ARG L  24      80.887   3.574 -17.427  1.00  0.00
ATOM    328  H   ARG L  24      82.282   3.548 -16.315  1.00  0.00
ATOM    329  H   ARG L  24      78.938   2.581 -16.852  1.00  0.00
ATOM    330  H   ARG L  24      78.767   1.756 -15.279  1.00  0.00
ATOM    331  N   ALA L  25      81.338  -2.195 -12.519  1.00 21.33
ATOM    332  CA  ALA L  25      80.948  -3.580 -12.380  1.00 20.05
ATOM    333  C   ALA L  25      80.352  -4.045 -13.683  1.00 23.65
ATOM    334  O   ALA L  25      79.700  -3.253 -14.387  1.00 25.90
ATOM    335  CB  ALA L  25      79.958  -3.747 -11.224  1.00 20.06
ATOM    336  H   ALA L  25      80.606  -1.486 -12.670  1.00  0.00
ATOM    337  H   ALA L  25      81.821  -4.190 -12.147  1.00  0.00
ATOM    338  H   ALA L  25      79.705  -4.806 -11.172  1.00  0.00
ATOM    339  H   ALA L  25      80.463  -3.406 -10.320  1.00  0.00
ATOM    340  H   ALA L  25      79.088  -3.133 -11.458  1.00  0.00
ATOM    341  N   SER L  26      80.560  -5.326 -14.008  1.00 19.32
ATOM    342  CA  SER L  26      80.067  -5.909 -15.275  1.00 21.57
ATOM    343  C   SER L  26      78.550  -6.128 -15.299  1.00 24.56
ATOM    344  O   SER L  26      77.963  -6.344 -16.357  1.00 25.81
ATOM    345  CB  SER L  26      80.782  -7.233 -15.557  1.00 22.06
ATOM    346  OG  SER L  26      80.600  -8.158 -14.476  1.00 23.62
ATOM    347  H   SER L  26      81.081  -5.927 -13.354  1.00  0.00
ATOM    348  H   SER L  26      80.292  -5.181 -16.054  1.00  0.00
ATOM    349  H   SER L  26      81.851  -7.084 -15.709  1.00  0.00
ATOM    350  H   SER L  26      80.323  -7.696 -16.431  1.00  0.00
ATOM    351  H   SER L  26      81.103  -9.020 -14.730  1.00  0.00
ATOM    352  N   GLN L  27      77.921  -6.081 -14.133  1.00 24.27
ATOM    353  CA  GLN L  27      76.455  -6.040 -14.047  1.00 26.04
ATOM    354  C   GLN L  27      76.062  -5.199 -12.848  1.00 22.95
ATOM    355  O   GLN L  27      76.901  -4.881 -12.005  1.00 25.10
ATOM    356  CB  GLN L  27      75.854  -7.438 -13.918  1.00 28.09
ATOM    357  CG  GLN L  27      76.081  -8.092 -12.567  1.00 30.46
ATOM    358  CD  GLN L  27      75.621  -9.537 -12.516  1.00 30.25
ATOM    359  OE1 GLN L  27      76.348 -10.440 -12.938  1.00 31.70
ATOM    360  NE2 GLN L  27      74.411  -9.769 -11.983  1.00 30.51
ATOM    361  H   GLN L  27      78.475  -6.073 -13.265  1.00  0.00
ATOM    362  H   GLN L  27      76.066  -5.602 -14.967  1.00  0.00
ATOM    363  H   GLN L  27      76.335  -8.069 -14.665  1.00  0.00
ATOM    364  H   GLN L  27      74.776  -7.337 -14.044  1.00  0.00
ATOM    365  H   GLN L  27      75.503  -7.536 -11.829  1.00  0.00
ATOM    366  H   GLN L  27      77.153  -8.080 -12.371  1.00  0.00
ATOM    367  H   GLN L  27      74.050 -10.732 -11.924  1.00  0.00
ATOM    368  H   GLN L  27      73.843  -8.984 -11.633  1.00  0.00
ATOM    369  N   ASP L  28      74.779  -4.870 -12.767  1.00 24.80
ATOM    370  CA  ASP L  28      74.274  -4.042 -11.678  1.00 25.11
ATOM    371  C   ASP L  28      74.419  -4.727 -10.314  1.00 24.07
ATOM    372  O   ASP L  28      73.902  -5.821 -10.126  1.00 25.07
ATOM    373  CB  ASP L  28      72.802  -3.713 -11.959  1.00 32.43
ATOM    374  CG  ASP L  28      72.305  -2.556 -11.139  1.00 35.34
ATOM    375  OD1 ASP L  28      72.321  -2.657  -9.891  1.00 26.00
ATOM    376  OD2 ASP L  28      71.931  -1.528 -11.754  1.00 43.06
ATOM    377  H   ASP L  28      74.126  -5.207 -13.489  1.00  0.00
ATOM    378  H   ASP L  28      74.866  -3.128 -11.632  1.00  0.00
ATOM    379  H   ASP L  28      72.194  -4.584 -11.715  1.00  0.00
ATOM    380  H   ASP L  28      72.716  -3.424 -13.007  1.00  0.00
ATOM    381  N   ILE L  29      75.117  -4.081  -9.375  1.00 21.16
ATOM    382  CA  ILE L  29      75.378  -4.630  -8.051  1.00 20.55
ATOM    383  C   ILE L  29      74.694  -3.812  -6.945  1.00 19.45
ATOM    384  O   ILE L  29      75.072  -3.882  -5.779  1.00 19.58
ATOM    385  CB  ILE L  29      76.896  -4.803  -7.764  1.00 20.08
ATOM    386  CG1 ILE L  29      77.640  -3.475  -7.923  1.00 19.68
ATOM    387  CG2 ILE L  29      77.472  -5.891  -8.679  1.00 20.52
ATOM    388  CD1 ILE L  29      79.008  -3.435  -7.265  1.00 17.48
ATOM    389  H   ILE L  29      75.489  -3.147  -9.599  1.00  0.00
ATOM    390  H   ILE L  29      74.938  -5.627  -8.046  1.00  0.00
ATOM    391  H   ILE L  29      77.030  -5.118  -6.729  1.00  0.00
ATOM    392  H   ILE L  29      77.034  -2.705  -7.446  1.00  0.00
ATOM    393  H   ILE L  29      77.802  -3.327  -8.991  1.00  0.00
ATOM    394  H   ILE L  29      78.533  -5.977  -8.443  1.00  0.00
ATOM    395  H   ILE L  29      76.932  -6.812  -8.458  1.00  0.00
ATOM    396  H   ILE L  29      77.310  -5.563  -9.706  1.00  0.00
ATOM    397  H   ILE L  29      79.423  -2.445  -7.452  1.00  0.00
ATOM    398  H   ILE L  29      78.855  -3.616  -6.201  1.00  0.00
ATOM    399  H   ILE L  29      79.607  -4.220  -7.727  1.00  0.00
ATOM    400  N   ALA L  30      73.660  -3.067  -7.326  1.00 20.84
ATOM    401  CA  ALA L  30      72.897  -2.201  -6.435  1.00 20.53
ATOM    402  C   ALA L  30      73.844  -1.263  -5.662  1.00 22.32
ATOM    403  O   ALA L  30      74.561  -0.479  -6.297  1.00 22.51
ATOM    404  CB  ALA L  30      71.965  -3.058  -5.516  1.00 20.09
ATOM    405  H   ALA L  30      73.380  -3.104  -8.316  1.00  0.00
ATOM    406  H   ALA L  30      72.239  -1.554  -7.015  1.00  0.00
ATOM    407  H   ALA L  30      71.422  -2.363  -4.875  1.00  0.00
ATOM    408  H   ALA L  30      71.294  -3.613  -6.172  1.00  0.00
ATOM    409  H   ALA L  30      72.609  -3.722  -4.939  1.00  0.00
ATOM    410  N   SER L  31      73.900  -1.382  -4.342  1.00 20.83
ATOM    411  CA  SER L  31      74.813  -0.609  -3.513  1.00 19.87
ATOM    412  C   SER L  31      75.863  -1.468  -2.819  1.00 18.34
ATOM    413  O   SER L  31      76.517  -0.989  -1.888  1.00 17.73
ATOM    414  CB  SER L  31      74.019   0.110  -2.425  1.00 22.57
ATOM    415  OG  SER L  31      73.210  -0.796  -1.698  1.00 25.66
ATOM    416  H   SER L  31      73.268  -2.053  -3.882  1.00  0.00
ATOM    417  H   SER L  31      75.324   0.086  -4.180  1.00  0.00
ATOM    418  H   SER L  31      73.378   0.888  -2.839  1.00  0.00
ATOM    419  H   SER L  31      74.722   0.522  -1.701  1.00  0.00
ATOM    420  H   SER L  31      72.707  -0.247  -0.987  1.00  0.00
ATOM    421  N   ASP L  32      76.029  -2.714  -3.239  1.00 17.08
ATOM    422  CA  ASP L  32      76.829  -3.687  -2.467  1.00 18.44
ATOM    423  C   ASP L  32      78.302  -3.643  -2.868  1.00 15.04
ATOM    424  O   ASP L  32      78.837  -4.601  -3.413  1.00 15.36
ATOM    425  CB  ASP L  32      76.298  -5.100  -2.663  1.00 20.55
ATOM    426  CG  ASP L  32      74.990  -5.364  -1.922  1.00 22.03
ATOM    427  OD1 ASP L  32      74.479  -4.494  -1.172  1.00 20.09
ATOM    428  OD2 ASP L  32      74.471  -6.477  -2.115  1.00 21.04
ATOM    429  H   ASP L  32      75.591  -3.010  -4.123  1.00  0.00
ATOM    430  H   ASP L  32      76.744  -3.410  -1.416  1.00  0.00
ATOM    431  H   ASP L  32      77.045  -5.788  -2.266  1.00  0.00
ATOM    432  H   ASP L  32      76.108  -5.235  -3.728  1.00  0.00
ATOM    433  N   LEU L  33      78.956  -2.532  -2.565  1.00 14.91
ATOM    434  CA  LEU L  33      80.376  -2.365  -2.817  1.00 13.56
ATOM    435  C   LEU L  33      81.122  -2.013  -1.513  1.00 14.41
ATOM    436  O   LEU L  33      80.736  -1.090  -0.797  1.00 15.74
ATOM    437  CB  LEU L  33      80.622  -1.270  -3.851  1.00 15.10
ATOM    438  CG  LEU L  33      82.013  -1.237  -4.486  1.00 14.82
ATOM    439  CD1 LEU L  33      82.283  -2.477  -5.345  1.00 18.36
ATOM    440  CD2 LEU L  33      82.218   0.051  -5.350  1.00 16.54
ATOM    441  H   LEU L  33      78.436  -1.755  -2.133  1.00  0.00
ATOM    442  H   LEU L  33      80.755  -3.310  -3.205  1.00  0.00
ATOM    443  H   LEU L  33      80.508  -0.324  -3.322  1.00  0.00
ATOM    444  H   LEU L  33      79.920  -1.457  -4.664  1.00  0.00
ATOM    445  H   LEU L  33      82.725  -1.228  -3.661  1.00  0.00
ATOM    446  H   LEU L  33      83.288  -2.369  -5.754  1.00  0.00
ATOM    447  H   LEU L  33      82.204  -3.343  -4.688  1.00  0.00
ATOM    448  H   LEU L  33      81.526  -2.493  -6.129  1.00  0.00
ATOM    449  H   LEU L  33      83.225  -0.000  -5.765  1.00  0.00
ATOM    450  H   LEU L  33      81.457   0.036  -6.130  1.00  0.00
ATOM    451  H   LEU L  33      82.097   0.905  -4.683  1.00  0.00
ATOM    452  N   ASN L  34      82.177  -2.771  -1.251  1.00 14.67
ATOM    453  CA  ASN L  34      83.158  -2.460  -0.228  1.00 13.14
ATOM    454  C   ASN L  34      84.355  -1.699  -0.817  1.00 12.57
ATOM    455  O   ASN L  34      84.793  -2.033  -1.901  1.00 13.66
ATOM    456  CB  ASN L  34      83.686  -3.743   0.343  1.00 15.19
ATOM    457  CG  ASN L  34      82.656  -4.519   1.154  1.00 13.95
ATOM    458  OD1 ASN L  34      81.784  -3.942   1.823  1.00 16.22
ATOM    459  ND2 ASN L  34      82.787  -5.853   1.140  1.00 15.12
ATOM    460  H   ASN L  34      82.308  -3.629  -1.805  1.00  0.00
ATOM    461  H   ASN L  34      82.671  -1.846   0.529  1.00  0.00
ATOM    462  H   ASN L  34      84.500  -3.477   1.018  1.00  0.00
ATOM    463  H   ASN L  34      83.999  -4.368  -0.493  1.00  0.00
ATOM    464  H   ASN L  34      82.125  -6.441   1.667  1.00  0.00
ATOM    465  H   ASN L  34      83.549  -6.290   0.603  1.00  0.00
ATOM    466  N   TRP L  35      84.914  -0.782  -0.056  1.00 13.38
ATOM    467  CA  TRP L  35      86.248  -0.195  -0.306  1.00 12.61
ATOM    468  C   TRP L  35      87.170  -0.577   0.812  1.00 13.33
ATOM    469  O   TRP L  35      86.857  -0.326   1.989  1.00 14.32
ATOM    470  CB  TRP L  35      86.192   1.333  -0.371  1.00 14.19
ATOM    471  CG  TRP L  35      85.500   1.810  -1.597  1.00 13.12
ATOM    472  CD1 TRP L  35      84.195   2.259  -1.717  1.00 13.83
ATOM    473  CD2 TRP L  35      86.080   1.915  -2.922  1.00 14.04
ATOM    474  NE1 TRP L  35      83.920   2.629  -3.017  1.00 13.91
ATOM    475  CE2 TRP L  35      85.025   2.430  -3.795  1.00 15.53
ATOM    476  CE3 TRP L  35      87.332   1.638  -3.465  1.00 14.89
ATOM    477  CZ2 TRP L  35      85.237   2.655  -5.133  1.00 15.40
ATOM    478  CZ3 TRP L  35      87.527   1.897  -4.832  1.00 16.88
ATOM    479  CH2 TRP L  35      86.502   2.370  -5.641  1.00 16.02
ATOM    480  H   TRP L  35      84.389  -0.452   0.766  1.00  0.00
ATOM    481  H   TRP L  35      86.603  -0.575  -1.264  1.00  0.00
ATOM    482  H   TRP L  35      87.205   1.735  -0.373  1.00  0.00
ATOM    483  H   TRP L  35      85.615   1.690   0.482  1.00  0.00
ATOM    484  H   TRP L  35      83.481   2.313  -0.895  1.00  0.00
ATOM    485  H   TRP L  35      83.018   2.999  -3.350  1.00  0.00
ATOM    486  H   TRP L  35      88.135   1.233  -2.849  1.00  0.00
ATOM    487  H   TRP L  35      84.445   3.042  -5.774  1.00  0.00
ATOM    488  H   TRP L  35      88.510   1.722  -5.270  1.00  0.00
ATOM    489  H   TRP L  35      86.693   2.522  -6.703  1.00  0.00
ATOM    490  N   TYR L  36      88.289  -1.205   0.443  1.00 13.14
ATOM    491  CA  TYR L  36      89.340  -1.662   1.380  1.00 14.36
ATOM    492  C   TYR L  36      90.597  -0.819   1.215  1.00 13.32
ATOM    493  O   TYR L  36      90.921  -0.405   0.110  1.00 12.52
ATOM    494  CB  TYR L  36      89.696  -3.134   1.116  1.00 13.71
ATOM    495  CG  TYR L  36      88.697  -4.086   1.680  1.00 13.48
ATOM    496  CD1 TYR L  36      88.757  -4.440   3.044  1.00 15.14
ATOM    497  CD2 TYR L  36      87.673  -4.610   0.903  1.00 14.46
ATOM    498  CE1 TYR L  36      87.829  -5.293   3.592  1.00 15.99
ATOM    499  CE2 TYR L  36      86.748  -5.485   1.443  1.00 17.66
ATOM    500  CZ  TYR L  36      86.832  -5.820   2.776  1.00 17.76
ATOM    501  OH  TYR L  36      85.888  -6.675   3.330  1.00 24.93
ATOM    502  H   TYR L  36      88.431  -1.384  -0.561  1.00  0.00
ATOM    503  H   TYR L  36      88.954  -1.556   2.394  1.00  0.00
ATOM    504  H   TYR L  36      90.660  -3.354   1.575  1.00  0.00
ATOM    505  H   TYR L  36      89.693  -3.287   0.037  1.00  0.00
ATOM    506  H   TYR L  36      89.549  -4.032   3.671  1.00  0.00
ATOM    507  H   TYR L  36      87.597  -4.328  -0.147  1.00  0.00
ATOM    508  H   TYR L  36      87.873  -5.553   4.650  1.00  0.00
ATOM    509  H   TYR L  36      85.960  -5.906   0.819  1.00  0.00
ATOM    510  H   TYR L  36      86.118  -6.771   4.329  1.00  0.00
ATOM    511  N   GLN L  37      91.333  -0.646   2.308  1.00 13.53
ATOM    512  CA  GLN L  37      92.641   0.020   2.323  1.00 12.33
ATOM    513  C   GLN L  37      93.661  -0.994   2.840  1.00 15.41
ATOM    514  O   GLN L  37      93.461  -1.554   3.921  1.00 14.88
ATOM    515  CB  GLN L  37      92.569   1.228   3.243  1.00 14.48
ATOM    516  CG  GLN L  37      93.843   2.029   3.432  1.00 15.45
ATOM    517  CD  GLN L  37      93.723   2.982   4.606  1.00 19.02
ATOM    518  OE1 GLN L  37      93.625   2.541   5.774  1.00 16.61
ATOM    519  NE2 GLN L  37      93.694   4.293   4.318  1.00 17.61
ATOM    520  H   GLN L  37      90.962  -1.002   3.201  1.00  0.00
ATOM    521  H   GLN L  37      92.930   0.363   1.330  1.00  0.00
ATOM    522  H   GLN L  37      92.315   0.838   4.229  1.00  0.00
ATOM    523  H   GLN L  37      91.857   1.911   2.781  1.00  0.00
ATOM    524  H   GLN L  37      94.025   2.611   2.529  1.00  0.00
ATOM    525  H   GLN L  37      94.663   1.338   3.627  1.00  0.00
ATOM    526  H   GLN L  37      93.614   4.985   5.076  1.00  0.00
ATOM    527  H   GLN L  37      93.752   4.607   3.339  1.00  0.00
ATOM    528  N   GLN L  38      94.755  -1.184   2.104  1.00 14.76
ATOM    529  CA  GLN L  38      95.797  -2.131   2.516  1.00 13.45
ATOM    530  C   GLN L  38      97.161  -1.456   2.622  1.00 14.98
ATOM    531  O   GLN L  38      97.681  -0.910   1.654  1.00 14.49
ATOM    532  CB  GLN L  38      95.817  -3.308   1.526  1.00 13.77
ATOM    533  CG  GLN L  38      96.724  -4.426   2.015  1.00 14.02
ATOM    534  CD  GLN L  38      96.743  -5.633   1.107  1.00 13.60
ATOM    535  OE1 GLN L  38      96.630  -5.508  -0.110  1.00 16.27
ATOM    536  NE2 GLN L  38      96.920  -6.824   1.703  1.00 15.22
ATOM    537  H   GLN L  38      94.872  -0.655   1.228  1.00  0.00
ATOM    538  H   GLN L  38      95.567  -2.507   3.513  1.00  0.00
ATOM    539  H   GLN L  38      96.188  -2.957   0.563  1.00  0.00
ATOM    540  H   GLN L  38      94.806  -3.706   1.440  1.00  0.00
ATOM    541  H   GLN L  38      96.352  -4.754   2.985  1.00  0.00
ATOM    542  H   GLN L  38      97.740  -4.032   2.046  1.00  0.00
ATOM    543  H   GLN L  38      96.942  -7.685   1.138  1.00  0.00
ATOM    544  H   GLN L  38      97.033  -6.876   2.725  1.00  0.00
ATOM    545  N   LYS L  39      97.755  -1.509   3.814  1.00 18.01
ATOM    546  CA  LYS L  39      99.131  -1.045   4.006  1.00 19.62
ATOM    547  C   LYS L  39     100.120  -2.202   3.854  1.00 22.03
ATOM    548  O   LYS L  39      99.732  -3.361   4.022  1.00 20.20
ATOM    549  CB  LYS L  39      99.231  -0.362   5.361  1.00 20.60
ATOM    550  CG  LYS L  39      98.424   0.928   5.328  1.00 25.30
ATOM    551  CD  LYS L  39      98.178   1.601   6.651  1.00 32.42
ATOM    552  CE  LYS L  39      97.418   2.902   6.351  1.00 31.39
ATOM    553  NZ  LYS L  39      97.286   3.767   7.528  1.00 29.44
ATOM    554  H   LYS L  39      97.234  -1.885   4.619  1.00  0.00
ATOM    555  H   LYS L  39      99.395  -0.319   3.237  1.00  0.00
ATOM    556  H   LYS L  39     100.274  -0.137   5.582  1.00  0.00
ATOM    557  H   LYS L  39      98.838  -1.022   6.135  1.00  0.00
ATOM    558  H   LYS L  39      97.441   0.670   4.934  1.00  0.00
ATOM    559  H   LYS L  39      99.012   1.636   4.744  1.00  0.00
ATOM    560  H   LYS L  39      99.127   1.811   7.145  1.00  0.00
ATOM    561  H   LYS L  39      97.614   0.950   7.318  1.00  0.00
ATOM    562  H   LYS L  39      96.414   2.670   5.995  1.00  0.00
ATOM    563  H   LYS L  39      98.003   3.469   5.627  1.00  0.00
ATOM    564  H   LYS L  39      96.768   4.605   7.229  1.00  0.00
ATOM    565  H   LYS L  39      96.769   3.231   8.239  1.00  0.00
ATOM    566  H   LYS L  39      98.240   3.998   7.841  1.00  0.00
ATOM    567  N   PRO L  40     101.387  -1.904   3.519  1.00 28.04
ATOM    568  CA  PRO L  40     102.389  -2.977   3.321  1.00 30.41
ATOM    569  C   PRO L  40     102.526  -3.950   4.476  1.00 32.69
ATOM    570  O   PRO L  40     102.662  -3.539   5.634  1.00 30.51
ATOM    571  CB  PRO L  40     103.694  -2.201   3.123  1.00 38.73
ATOM    572  CG  PRO L  40     103.256  -0.892   2.534  1.00 40.69
ATOM    573  CD  PRO L  40     101.948  -0.574   3.212  1.00 35.08
ATOM    574  H   PRO L  40     102.100  -3.618   2.488  1.00  0.00
ATOM    575  H   PRO L  40     104.406  -2.722   2.484  1.00  0.00
ATOM    576  H   PRO L  40     104.233  -2.056   4.059  1.00  0.00
ATOM    577  H   PRO L  40     103.143  -0.958   1.452  1.00  0.00
ATOM    578  H   PRO L  40     103.997  -0.109   2.695  1.00  0.00
ATOM    579  H   PRO L  40     102.079   0.026   4.112  1.00  0.00
ATOM    580  H   PRO L  40     101.279   0.030   2.599  1.00  0.00
ATOM    581  N   GLY L  41     102.459  -5.244   4.163  1.00 27.81
ATOM    582  CA  GLY L  41     102.573  -6.296   5.164  1.00 30.32
ATOM    583  C   GLY L  41     101.378  -6.509   6.069  1.00 27.59
ATOM    584  O   GLY L  41     101.430  -7.348   6.957  1.00 30.80
ATOM    585  H   GLY L  41     102.322  -5.510   3.177  1.00  0.00
ATOM    586  H   GLY L  41     103.383  -5.964   5.813  1.00  0.00
ATOM    587  H   GLY L  41     102.736  -7.220   4.609  1.00  0.00
ATOM    588  N   LYS L  42     100.283  -5.772   5.830  1.00 25.08
ATOM    589  CA  LYS L  42      99.070  -5.866   6.624  1.00 22.71
ATOM    590  C   LYS L  42      97.897  -6.310   5.751  1.00 18.71
ATOM    591  O   LYS L  42      97.926  -6.139   4.510  1.00 20.23
ATOM    592  CB  LYS L  42      98.728  -4.500   7.242  1.00 23.71
ATOM    593  H   LYS L  42     100.303  -5.106   5.044  1.00  0.00
ATOM    594  H   LYS L  42      99.241  -6.597   7.414  1.00  0.00
ATOM    595  H   LYS L  42      97.815  -4.632   7.822  1.00  0.00
ATOM    596  H   LYS L  42      99.571  -4.215   7.872  1.00  0.00
ATOM    597  N   ALA L  43      96.873  -6.861   6.400  1.00 18.94
ATOM    598  CA  ALA L  43      95.629  -7.267   5.752  1.00 17.83
ATOM    599  C   ALA L  43      94.821  -6.056   5.279  1.00 18.55
ATOM    600  O   ALA L  43      94.929  -4.983   5.873  1.00 17.58
ATOM    601  CB  ALA L  43      94.733  -8.099   6.715  1.00 18.96
ATOM    602  H   ALA L  43      96.963  -7.009   7.415  1.00  0.00
ATOM    603  H   ALA L  43      95.915  -7.876   4.894  1.00  0.00
ATOM    604  H   ALA L  43      93.831  -8.362   6.163  1.00  0.00
ATOM    605  H   ALA L  43      95.306  -8.981   7.000  1.00  0.00
ATOM    606  H   ALA L  43      94.512  -7.464   7.573  1.00  0.00
ATOM    607  N   PRO L  44      93.973  -6.252   4.254  1.00 16.72
ATOM    608  CA  PRO L  44      93.063  -5.150   3.870  1.00 16.19
ATOM    609  C   PRO L  44      92.169  -4.797   5.034  1.00 18.65
ATOM    610  O   PRO L  44      91.766  -5.691   5.802  1.00 16.51
ATOM    611  CB  PRO L  44      92.263  -5.741   2.683  1.00 17.32
ATOM    612  CG  PRO L  44      93.099  -6.855   2.166  1.00 16.90
ATOM    613  CD  PRO L  44      93.807  -7.420   3.357  1.00 16.16
ATOM    614  H   PRO L  44      93.574  -4.227   3.597  1.00  0.00
ATOM    615  H   PRO L  44      92.043  -5.010   1.905  1.00  0.00
ATOM    616  H   PRO L  44      91.292  -6.119   3.002  1.00  0.00
ATOM    617  H   PRO L  44      93.806  -6.499   1.417  1.00  0.00
ATOM    618  H   PRO L  44      92.490  -7.608   1.666  1.00  0.00
ATOM    619  H   PRO L  44      93.245  -8.224   3.832  1.00  0.00
ATOM    620  H   PRO L  44      94.759  -7.886   3.101  1.00  0.00
ATOM    621  N   LYS L  45      91.937  -3.496   5.201  1.00 14.23
ATOM    622  CA  LYS L  45      91.079  -2.934   6.231  1.00 14.07
ATOM    623  C   LYS L  45      89.893  -2.295   5.570  1.00 12.76
ATOM    624  O   LYS L  45      90.045  -1.431   4.699  1.00 16.39
ATOM    625  CB  LYS L  45      91.870  -1.885   7.057  1.00 18.17
ATOM    626  H   LYS L  45      92.399  -2.841   4.554  1.00  0.00
ATOM    627  H   LYS L  45      90.739  -3.718   6.907  1.00  0.00
ATOM    628  H   LYS L  45      91.188  -1.494   7.812  1.00  0.00
ATOM    629  H   LYS L  45      92.717  -2.405   7.505  1.00  0.00
ATOM    630  N   LEU L  46      88.695  -2.722   5.978  1.00 14.53
ATOM    631  CA  LEU L  46      87.472  -2.161   5.400  1.00 15.22
ATOM    632  C   LEU L  46      87.337  -0.678   5.819  1.00 15.35
ATOM    633  O   LEU L  46      87.434  -0.335   7.006  1.00 16.26
ATOM    634  CB  LEU L  46      86.236  -2.964   5.870  1.00 15.80
ATOM    635  CG  LEU L  46      84.929  -2.453   5.221  1.00 21.56
ATOM    636  CD1 LEU L  46      84.910  -2.863   3.803  1.00 20.29
ATOM    637  CD2 LEU L  46      83.707  -2.942   5.927  1.00 28.30
ATOM    638  H   LEU L  46      88.631  -3.450   6.704  1.00  0.00
ATOM    639  H   LEU L  46      87.529  -2.224   4.313  1.00  0.00
ATOM    640  H   LEU L  46      86.146  -2.850   6.950  1.00  0.00
ATOM    641  H   LEU L  46      86.376  -4.005   5.578  1.00  0.00
ATOM    642  H   LEU L  46      84.912  -1.366   5.300  1.00  0.00
ATOM    643  H   LEU L  46      83.980  -2.489   3.376  1.00  0.00
ATOM    644  H   LEU L  46      85.783  -2.414   3.330  1.00  0.00
ATOM    645  H   LEU L  46      84.955  -3.952   3.785  1.00  0.00
ATOM    646  H   LEU L  46      82.847  -2.531   5.398  1.00  0.00
ATOM    647  H   LEU L  46      83.727  -4.031   5.882  1.00  0.00
ATOM    648  H   LEU L  46      83.764  -2.577   6.953  1.00  0.00
ATOM    649  N   LEU L  47      87.148   0.198   4.827  1.00 13.16
ATOM    650  CA  LEU L  47      86.811   1.597   5.066  1.00 14.36
ATOM    651  C   LEU L  47      85.314   1.885   4.900  1.00 14.66
ATOM    652  O   LEU L  47      84.742   2.621   5.713  1.00 16.52
ATOM    653  CB  LEU L  47      87.585   2.528   4.146  1.00 19.26
ATOM    654  CG  LEU L  47      89.107   2.464   4.294  1.00 19.18
ATOM    655  CD1 LEU L  47      89.711   3.698   3.661  1.00 21.53
ATOM    656  CD2 LEU L  47      89.551   2.349   5.769  1.00 21.65
ATOM    657  H   LEU L  47      87.244  -0.128   3.855  1.00  0.00
ATOM    658  H   LEU L  47      87.090   1.785   6.103  1.00  0.00
ATOM    659  H   LEU L  47      87.285   3.543   4.408  1.00  0.00
ATOM    660  H   LEU L  47      87.350   2.229   3.125  1.00  0.00
ATOM    661  H   LEU L  47      89.460   1.565   3.789  1.00  0.00
ATOM    662  H   LEU L  47      90.792   3.622   3.783  1.00  0.00
ATOM    663  H   LEU L  47      89.420   3.692   2.611  1.00  0.00
ATOM    664  H   LEU L  47      89.303   4.560   4.190  1.00  0.00
ATOM    665  H   LEU L  47      90.640   2.310   5.772  1.00  0.00
ATOM    666  H   LEU L  47      89.176   3.233   6.285  1.00  0.00
ATOM    667  H   LEU L  47      89.112   1.433   6.164  1.00  0.00
ATOM    668  N   ILE L  48      84.721   1.357   3.829  1.00 12.71
ATOM    669  CA  ILE L  48      83.344   1.667   3.407  1.00 14.12
ATOM    670  C   ILE L  48      82.636   0.401   2.962  1.00 13.67
ATOM    671  O   ILE L  48      83.257  -0.432   2.302  1.00 14.56
ATOM    672  CB  ILE L  48      83.343   2.698   2.270  1.00 14.14
ATOM    673  CG1 ILE L  48      83.844   4.050   2.788  1.00 15.02
ATOM    674  CG2 ILE L  48      81.962   2.866   1.617  1.00 14.60
ATOM    675  CD1 ILE L  48      84.136   5.059   1.667  1.00 17.21
ATOM    676  H   ILE L  48      85.260   0.689   3.260  1.00  0.00
ATOM    677  H   ILE L  48      82.812   2.092   4.258  1.00  0.00
ATOM    678  H   ILE L  48      84.016   2.321   1.500  1.00  0.00
ATOM    679  H   ILE L  48      84.777   3.871   3.322  1.00  0.00
ATOM    680  H   ILE L  48      83.061   4.472   3.419  1.00  0.00
ATOM    681  H   ILE L  48      82.070   3.613   0.830  1.00  0.00
ATOM    682  H   ILE L  48      81.679   1.893   1.216  1.00  0.00
ATOM    683  H   ILE L  48      81.278   3.197   2.399  1.00  0.00
ATOM    684  H   ILE L  48      84.482   5.975   2.145  1.00  0.00
ATOM    685  H   ILE L  48      84.905   4.617   1.033  1.00  0.00
ATOM    686  H   ILE L  48      83.203   5.212   1.125  1.00  0.00
ATOM    687  N   TYR L  49      81.369   0.244   3.350  1.00 14.70
ATOM    688  CA  TYR L  49      80.478  -0.797   2.847  1.00 14.84
ATOM    689  C   TYR L  49      79.174  -0.128   2.318  1.00 14.90
ATOM    690  O   TYR L  49      78.938   1.065   2.543  1.00 15.61
ATOM    691  CB  TYR L  49      80.177  -1.886   3.921  1.00 15.83
ATOM    692  CG  TYR L  49      79.457  -1.331   5.136  1.00 16.46
ATOM    693  CD1 TYR L  49      78.079  -1.330   5.206  1.00 19.64
ATOM    694  CD2 TYR L  49      80.175  -0.803   6.196  1.00 17.35
ATOM    695  CE1 TYR L  49      77.391  -0.799   6.349  1.00 20.00
ATOM    696  CE2 TYR L  49      79.526  -0.293   7.324  1.00 22.57
ATOM    697  CZ  TYR L  49      78.140  -0.267   7.382  1.00 25.01
ATOM    698  OH  TYR L  49      77.517   0.291   8.492  1.00 28.47
ATOM    699  H   TYR L  49      80.995   0.900   4.050  1.00  0.00
ATOM    700  H   TYR L  49      80.973  -1.320   2.029  1.00  0.00
ATOM    701  H   TYR L  49      81.118  -2.319   4.260  1.00  0.00
ATOM    702  H   TYR L  49      79.511  -2.622   3.471  1.00  0.00
ATOM    703  H   TYR L  49      77.501  -1.740   4.378  1.00  0.00
ATOM    704  H   TYR L  49      81.264  -0.785   6.150  1.00  0.00
ATOM    705  H   TYR L  49      76.302  -0.815   6.401  1.00  0.00
ATOM    706  H   TYR L  49      80.111   0.086   8.162  1.00  0.00
ATOM    707  H   TYR L  49      76.502   0.205   8.342  1.00  0.00
ATOM    708  N   SER L  50      78.343  -0.888   1.621  1.00 15.74
ATOM    709  CA  SER L  50      77.125  -0.348   0.999  1.00 16.88
ATOM    710  C   SER L  50      77.420   0.878   0.140  1.00 18.97
ATOM    711  O   SER L  50      76.587   1.790   0.001  1.00 19.48
ATOM    712  CB  SER L  50      76.038  -0.060   2.039  1.00 20.25
ATOM    713  OG  SER L  50      75.607  -1.246   2.693  1.00 22.15
ATOM    714  H   SER L  50      78.557  -1.890   1.511  1.00  0.00
ATOM    715  H   SER L  50      76.739  -1.120   0.333  1.00  0.00
ATOM    716  H   SER L  50      75.167   0.414   1.586  1.00  0.00
ATOM    717  H   SER L  50      76.474   0.560   2.823  1.00  0.00
ATOM    718  H   SER L  50      74.882  -0.970   3.371  1.00  0.00
ATOM    719  N   ASP L  51      78.630   0.874  -0.419  1.00 16.19
ATOM    720  CA  ASP L  51      79.155   1.917  -1.344  1.00 18.44
ATOM    721  C   ASP L  51      79.465   3.263  -0.714  1.00 17.26
ATOM    722  O   ASP L  51      80.365   3.962  -1.182  1.00 19.60
ATOM    723  CB  ASP L  51      78.382   2.018  -2.676  1.00 20.60
ATOM    724  CG  ASP L  51      77.138   2.913  -2.634  1.00 26.80
ATOM    725  OD1 ASP L  51      77.172   4.019  -2.064  1.00 24.84
ATOM    726  OD2 ASP L  51      76.119   2.532  -3.272  1.00 24.98
ATOM    727  H   ASP L  51      79.253   0.085  -0.193  1.00  0.00
ATOM    728  H   ASP L  51      80.141   1.534  -1.607  1.00  0.00
ATOM    729  H   ASP L  51      78.040   1.014  -2.925  1.00  0.00
ATOM    730  H   ASP L  51      79.061   2.465  -3.402  1.00  0.00
ATOM    731  N   SER L  52      78.770   3.617   0.354  1.00 17.17
ATOM    732  CA  SER L  52      78.938   4.946   0.971  1.00 19.04
ATOM    733  C   SER L  52      78.934   4.993   2.495  1.00 20.99
ATOM    734  O   SER L  52      79.160   6.069   3.055  1.00 20.74
ATOM    735  CB  SER L  52      77.835   5.883   0.452  1.00 23.25
ATOM    736  OG  SER L  52      76.572   5.355   0.790  1.00 23.27
ATOM    737  H   SER L  52      78.098   2.952   0.763  1.00  0.00
ATOM    738  H   SER L  52      79.940   5.259   0.678  1.00  0.00
ATOM    739  H   SER L  52      77.881   6.042  -0.625  1.00  0.00
ATOM    740  H   SER L  52      77.908   6.842   0.964  1.00  0.00
ATOM    741  H   SER L  52      75.865   6.009   0.426  1.00  0.00
ATOM    742  N   TYR L  53      78.687   3.866   3.160  1.00 18.25
ATOM    743  CA  TYR L  53      78.613   3.817   4.636  1.00 20.77
ATOM    744  C   TYR L  53      80.030   3.667   5.178  1.00 21.39
ATOM    745  O   TYR L  53      80.799   2.821   4.696  1.00 20.97
ATOM    746  CB  TYR L  53      77.771   2.629   5.125  1.00 20.16
ATOM    747  CG  TYR L  53      76.274   2.754   4.961  1.00 21.79
ATOM    748  CD1 TYR L  53      75.421   2.493   6.035  1.00 26.42
ATOM    749  CD2 TYR L  53      75.700   3.151   3.752  1.00 24.08
ATOM    750  CE1 TYR L  53      74.050   2.607   5.903  1.00 27.95
ATOM    751  CE2 TYR L  53      74.312   3.249   3.616  1.00 25.35
ATOM    752  CZ  TYR L  53      73.508   2.995   4.695  1.00 27.32
ATOM    753  OH  TYR L  53      72.136   3.122   4.574  1.00 31.01
ATOM    754  H   TYR L  53      78.542   2.997   2.627  1.00  0.00
ATOM    755  H   TYR L  53      78.142   4.734   4.990  1.00  0.00
ATOM    756  H   TYR L  53      77.951   2.534   6.196  1.00  0.00
ATOM    757  H   TYR L  53      78.060   1.779   4.508  1.00  0.00
ATOM    758  H   TYR L  53      75.844   2.194   6.994  1.00  0.00
ATOM    759  H   TYR L  53      76.342   3.388   2.903  1.00  0.00
ATOM    760  H   TYR L  53      73.399   2.391   6.750  1.00  0.00
ATOM    761  H   TYR L  53      73.873   3.526   2.658  1.00  0.00
ATOM    762  H   TYR L  53      71.729   2.883   5.490  1.00  0.00
ATOM    763  N   LEU L  54      80.396   4.523   6.121  1.00 19.52
ATOM    764  CA  LEU L  54      81.760   4.596   6.650  1.00 18.52
ATOM    765  C   LEU L  54      81.857   3.773   7.939  1.00 19.15
ATOM    766  O   LEU L  54      80.980   3.854   8.817  1.00 21.69
ATOM    767  CB  LEU L  54      82.133   6.028   7.003  1.00 20.36
ATOM    768  CG  LEU L  54      82.520   6.970   5.869  1.00 30.35
ATOM    769  CD1 LEU L  54      82.574   8.432   6.340  1.00 31.55
ATOM    770  CD2 LEU L  54      83.849   6.531   5.367  1.00 28.09
ATOM    771  H   LEU L  54      79.688   5.168   6.500  1.00  0.00
ATOM    772  H   LEU L  54      82.432   4.214   5.882  1.00  0.00
ATOM    773  H   LEU L  54      83.023   5.947   7.627  1.00  0.00
ATOM    774  H   LEU L  54      81.234   6.459   7.444  1.00  0.00
ATOM    775  H   LEU L  54      81.771   6.928   5.078  1.00  0.00
ATOM    776  H   LEU L  54      82.855   9.035   5.477  1.00  0.00
ATOM    777  H   LEU L  54      81.579   8.686   6.705  1.00  0.00
ATOM    778  H   LEU L  54      83.321   8.484   7.132  1.00  0.00
ATOM    779  H   LEU L  54      84.123   7.207   4.556  1.00  0.00
ATOM    780  H   LEU L  54      84.544   6.599   6.204  1.00  0.00
ATOM    781  H   LEU L  54      83.735   5.505   5.018  1.00  0.00
ATOM    782  N   GLN L  55      82.936   3.020   8.056  1.00 17.26
ATOM    783  CA  GLN L  55      83.312   2.381   9.298  1.00 18.79
ATOM    784  C   GLN L  55      83.641   3.427  10.346  1.00 19.37
ATOM    785  O   GLN L  55      84.090   4.518  10.038  1.00 20.26
ATOM    786  CB  GLN L  55      84.499   1.458   9.073  1.00 22.11
ATOM    787  CG  GLN L  55      84.159   0.251   8.284  1.00 23.13
ATOM    788  CD  GLN L  55      83.385  -0.765   9.099  1.00 28.15
ATOM    789  OE1 GLN L  55      82.161  -0.753   9.099  1.00 27.72
ATOM    790  NE2 GLN L  55      84.101  -1.635   9.835  1.00 25.01
ATOM    791  H   GLN L  55      83.534   2.882   7.229  1.00  0.00
ATOM    792  H   GLN L  55      82.473   1.785   9.657  1.00  0.00
ATOM    793  H   GLN L  55      84.872   1.125  10.042  1.00  0.00
ATOM    794  H   GLN L  55      85.240   2.009   8.494  1.00  0.00
ATOM    795  H   GLN L  55      85.098  -0.207   7.974  1.00  0.00
ATOM    796  H   GLN L  55      83.553   0.562   7.433  1.00  0.00
ATOM    797  H   GLN L  55      83.620  -2.345  10.406  1.00  0.00
ATOM    798  H   GLN L  55      85.130  -1.591   9.827  1.00  0.00
ATOM    799  N   SER L  56      83.348   3.102  11.600  1.00 21.82
ATOM    800  CA  SER L  56      83.706   3.998  12.691  1.00 26.15
ATOM    801  C   SER L  56      85.220   4.185  12.674  1.00 27.56
ATOM    802  O   SER L  56      85.976   3.234  12.414  1.00 26.01
ATOM    803  CB  SER L  56      83.226   3.453  14.052  1.00 32.68
ATOM    804  OG  SER L  56      83.923   2.284  14.387  1.00 36.60
ATOM    805  H   SER L  56      82.866   2.214  11.801  1.00  0.00
ATOM    806  H   SER L  56      83.211   4.959  12.552  1.00  0.00
ATOM    807  H   SER L  56      82.157   3.240  14.072  1.00  0.00
ATOM    808  H   SER L  56      83.487   4.173  14.828  1.00  0.00
ATOM    809  H   SER L  56      83.562   1.969  15.299  1.00  0.00
ATOM    810  N   GLY L  57      85.641   5.423  12.906  1.00 25.56
ATOM    811  CA  GLY L  57      87.057   5.795  12.885  1.00 23.58
ATOM    812  C   GLY L  57      87.591   6.239  11.538  1.00 21.15
ATOM    813  O   GLY L  57      88.677   6.792  11.471  1.00 22.29
ATOM    814  H   GLY L  57      84.942   6.152  13.109  1.00  0.00
ATOM    815  H   GLY L  57      87.595   4.884  13.148  1.00  0.00
ATOM    816  H   GLY L  57      87.171   6.623  13.585  1.00  0.00
ATOM    817  N   VAL L  58      86.866   5.978  10.448  1.00 18.57
ATOM    818  CA  VAL L  58      87.290   6.434   9.118  1.00 15.92
ATOM    819  C   VAL L  58      86.799   7.857   8.956  1.00 18.55
ATOM    820  O   VAL L  58      85.611   8.123   9.204  1.00 19.16
ATOM    821  CB  VAL L  58      86.700   5.553   7.996  1.00 16.06
ATOM    822  CG1 VAL L  58      87.110   6.085   6.598  1.00 17.15
ATOM    823  CG2 VAL L  58      87.132   4.107   8.160  1.00 18.19
ATOM    824  H   VAL L  58      85.990   5.445  10.542  1.00  0.00
ATOM    825  H   VAL L  58      88.375   6.370   9.040  1.00  0.00
ATOM    826  H   VAL L  58      85.614   5.598   8.074  1.00  0.00
ATOM    827  H   VAL L  58      86.662   5.420   5.860  1.00  0.00
ATOM    828  H   VAL L  58      86.722   7.100   6.517  1.00  0.00
ATOM    829  H   VAL L  58      88.199   6.063   6.555  1.00  0.00
ATOM    830  H   VAL L  58      86.683   3.545   7.341  1.00  0.00
ATOM    831  H   VAL L  58      88.221   4.092   8.113  1.00  0.00
ATOM    832  H   VAL L  58      86.764   3.773   9.130  1.00  0.00
ATOM    833  N   PRO L  59      87.685   8.789   8.588  1.00 17.75
ATOM    834  CA  PRO L  59      87.260  10.216   8.479  1.00 18.62
ATOM    835  C   PRO L  59      86.364  10.487   7.273  1.00 19.75
ATOM    836  O   PRO L  59      86.488   9.803   6.232  1.00 17.39
ATOM    837  CB  PRO L  59      88.590  10.971   8.355  1.00 21.77
ATOM    838  CG  PRO L  59      89.534   9.936   7.815  1.00 18.46
ATOM    839  CD  PRO L  59      89.130   8.648   8.368  1.00 19.04
ATOM    840  H   PRO L  59      86.656  10.522   9.333  1.00  0.00
ATOM    841  H   PRO L  59      88.934  11.397   9.297  1.00  0.00
ATOM    842  H   PRO L  59      88.519  11.835   7.694  1.00  0.00
ATOM    843  H   PRO L  59      90.568  10.157   8.078  1.00  0.00
ATOM    844  H   PRO L  59      89.477   9.897   6.727  1.00  0.00
ATOM    845  H   PRO L  59      89.371   7.820   7.701  1.00  0.00
ATOM    846  H   PRO L  59      89.666   8.414   9.288  1.00  0.00
ATOM    847  N   SER L  60      85.510  11.512   7.393  1.00 21.37
ATOM    848  CA  SER L  60      84.586  11.874   6.316  1.00 21.15
ATOM    849  C   SER L  60      85.303  12.397   5.076  1.00 22.63
ATOM    850  O   SER L  60      84.685  12.504   4.013  1.00 23.91
ATOM    851  CB  SER L  60      83.510  12.858   6.809  1.00 23.63
ATOM    852  OG  SER L  60      82.532  12.146   7.554  1.00 26.14
ATOM    853  H   SER L  60      85.503  12.060   8.265  1.00  0.00
ATOM    854  H   SER L  60      84.084  10.955   6.013  1.00  0.00
ATOM    855  H   SER L  60      83.024  13.398   5.996  1.00  0.00
ATOM    856  H   SER L  60      83.961  13.574   7.496  1.00  0.00
ATOM    857  H   SER L  60      81.832  12.834   7.866  1.00  0.00
ATOM    858  N   ARG L  61      86.605  12.650   5.185  1.00 19.48
ATOM    859  CA  ARG L  61      87.442  12.883   3.968  1.00 21.25
ATOM    860  C   ARG L  61      87.299  11.772   2.913  1.00 18.58
ATOM    861  O   ARG L  61      87.509  12.019   1.723  1.00 18.13
ATOM    862  CB  ARG L  61      88.909  12.978   4.348  1.00 20.21
ATOM    863  CG  ARG L  61      89.275  14.104   5.288  1.00 30.10
ATOM    864  CD  ARG L  61      90.806  14.225   5.431  1.00 26.08
ATOM    865  NE  ARG L  61      91.409  13.040   6.057  1.00 26.15
ATOM    866  CZ  ARG L  61      92.060  12.073   5.420  1.00 24.50
ATOM    867  NH1 ARG L  61      92.211  12.110   4.105  1.00 28.43
ATOM    868  NH2 ARG L  61      92.572  11.067   6.116  1.00 26.43
ATOM    869  H   ARG L  61      87.041  12.686   6.118  1.00  0.00
ATOM    870  H   ARG L  61      87.083  13.816   3.535  1.00  0.00
ATOM    871  H   ARG L  61      89.458  13.158   3.424  1.00  0.00
ATOM    872  H   ARG L  61      89.151  12.054   4.872  1.00  0.00
ATOM    873  H   ARG L  61      88.848  13.878   6.265  1.00  0.00
ATOM    874  H   ARG L  61      88.870  15.036   4.893  1.00  0.00
ATOM    875  H   ARG L  61      91.056  15.091   6.044  1.00  0.00
ATOM    876  H   ARG L  61      91.232  14.285   4.429  1.00  0.00
ATOM    877  H   ARG L  61      91.319  12.951   7.079  1.00  0.00
ATOM    878  H   ARG L  61      92.718  11.354   3.623  1.00  0.00
ATOM    879  H   ARG L  61      91.822  12.895   3.564  1.00  0.00
ATOM    880  H   ARG L  61      93.079  10.312   5.633  1.00  0.00
ATOM    881  H   ARG L  61      92.463  11.041   7.140  1.00  0.00
ATOM    882  N   PHE L  62      87.029  10.539   3.347  1.00 17.56
ATOM    883  CA  PHE L  62      86.737   9.430   2.452  1.00 17.94
ATOM    884  C   PHE L  62      85.252   9.472   2.119  1.00 20.55
ATOM    885  O   PHE L  62      84.408   9.410   3.019  1.00 21.49
ATOM    886  CB  PHE L  62      87.055   8.078   3.107  1.00 16.93
ATOM    887  CG  PHE L  62      88.524   7.821   3.272  1.00 17.01
ATOM    888  CD1 PHE L  62      89.257   7.197   2.256  1.00 15.83
ATOM    889  CD2 PHE L  62      89.192   8.226   4.412  1.00 20.88
ATOM    890  CE1 PHE L  62      90.613   6.971   2.406  1.00 16.78
ATOM    891  CE2 PHE L  62      90.554   7.998   4.547  1.00 20.30
ATOM    892  CZ  PHE L  62      91.263   7.359   3.525  1.00 18.31
ATOM    893  H   PHE L  62      87.027  10.365   4.362  1.00  0.00
ATOM    894  H   PHE L  62      87.353   9.528   1.558  1.00  0.00
ATOM    895  H   PHE L  62      86.654   7.286   2.475  1.00  0.00
ATOM    896  H   PHE L  62      86.629   8.093   4.110  1.00  0.00
ATOM    897  H   PHE L  62      88.755   6.887   1.339  1.00  0.00
ATOM    898  H   PHE L  62      88.645   8.728   5.210  1.00  0.00
ATOM    899  H   PHE L  62      91.166   6.472   1.610  1.00  0.00
ATOM    900  H   PHE L  62      91.072   8.318   5.451  1.00  0.00
ATOM    901  H   PHE L  62      92.332   7.175   3.630  1.00  0.00
ATOM    902  N   SER L  63      84.939   9.584   0.829  1.00 16.25
ATOM    903  CA  SER L  63      83.543   9.609   0.366  1.00 17.41
ATOM    904  C   SER L  63      83.358   8.562  -0.734  1.00 16.07
ATOM    905  O   SER L  63      83.991   8.640  -1.815  1.00 20.07
ATOM    906  CB  SER L  63      83.158  10.996  -0.164  1.00 19.34
ATOM    907  OG  SER L  63      81.814  10.983  -0.553  1.00 24.08
ATOM    908  H   SER L  63      85.697   9.655   0.135  1.00  0.00
ATOM    909  H   SER L  63      82.893   9.381   1.211  1.00  0.00
ATOM    910  H   SER L  63      83.773  11.326  -1.001  1.00  0.00
ATOM    911  H   SER L  63      83.231  11.724   0.644  1.00  0.00
ATOM    912  H   SER L  63      81.592  11.926  -0.902  1.00  0.00
ATOM    913  N   GLY L  64      82.477   7.597  -0.450  1.00 16.20
ATOM    914  CA  GLY L  64      82.030   6.618  -1.432  1.00 17.95
ATOM    915  C   GLY L  64      80.737   7.059  -2.079  1.00 19.32
ATOM    916  O   GLY L  64      79.815   7.564  -1.396  1.00 20.14
ATOM    917  H   GLY L  64      82.097   7.543   0.506  1.00  0.00
ATOM    918  H   GLY L  64      81.855   5.682  -0.901  1.00  0.00
ATOM    919  H   GLY L  64      82.808   6.496  -2.185  1.00  0.00
ATOM    920  N   SER L  65      80.638   6.875  -3.391  1.00 19.03
ATOM    921  CA  SER L  65      79.444   7.276  -4.126  1.00 20.14
ATOM    922  C   SER L  65      79.206   6.371  -5.325  1.00 22.52
ATOM    923  O   SER L  65      80.026   5.509  -5.634  1.00 19.06
ATOM    924  CB  SER L  65      79.567   8.733  -4.555  1.00 23.17
ATOM    925  OG  SER L  65      80.643   8.922  -5.460  1.00 22.96
ATOM    926  H   SER L  65      81.421   6.440  -3.900  1.00  0.00
ATOM    927  H   SER L  65      78.581   7.176  -3.468  1.00  0.00
ATOM    928  H   SER L  65      79.722   9.389  -3.698  1.00  0.00
ATOM    929  H   SER L  65      78.668   9.003  -5.109  1.00  0.00
ATOM    930  H   SER L  65      80.661   9.923  -5.702  1.00  0.00
ATOM    931  N   GLY L  66      78.077   6.590  -6.007  1.00 22.44
ATOM    932  CA  GLY L  66      77.713   5.815  -7.169  1.00 26.15
ATOM    933  C   GLY L  66      76.656   4.773  -6.834  1.00 23.78
ATOM    934  O   GLY L  66      76.121   4.736  -5.724  1.00 27.93
ATOM    935  H   GLY L  66      77.444   7.339  -5.692  1.00  0.00
ATOM    936  H   GLY L  66      78.617   5.297  -7.489  1.00  0.00
ATOM    937  H   GLY L  66      77.351   6.497  -7.938  1.00  0.00
ATOM    938  N   SER L  67      76.346   3.937  -7.815  1.00 23.05
ATOM    939  CA  SER L  67      75.351   2.882  -7.659  1.00 25.17
ATOM    940  C   SER L  67      75.287   2.126  -8.978  1.00 26.00
ATOM    941  O   SER L  67      75.735   2.641 -10.007  1.00 23.69
ATOM    942  CB  SER L  67      73.961   3.444  -7.338  1.00 30.94
ATOM    943  OG  SER L  67      73.462   4.189  -8.422  1.00 30.88
ATOM    944  H   SER L  67      76.826   4.036  -8.721  1.00  0.00
ATOM    945  H   SER L  67      75.640   2.238  -6.829  1.00  0.00
ATOM    946  H   SER L  67      73.963   4.078  -6.452  1.00  0.00
ATOM    947  H   SER L  67      73.269   2.611  -7.216  1.00  0.00
ATOM    948  H   SER L  67      72.533   4.537  -8.146  1.00  0.00
ATOM    949  N   GLY L  68      74.751   0.905  -8.930  1.00 23.63
ATOM    950  CA  GLY L  68      74.502   0.124 -10.128  1.00 23.33
ATOM    951  C   GLY L  68      75.771  -0.489 -10.665  1.00 20.73
ATOM    952  O   GLY L  68      76.237  -1.524 -10.157  1.00 20.49
ATOM    953  H   GLY L  68      74.506   0.504  -8.014  1.00  0.00
ATOM    954  H   GLY L  68      74.109   0.811 -10.877  1.00  0.00
ATOM    955  H   GLY L  68      73.784  -0.659  -9.885  1.00  0.00
ATOM    956  N   THR L  69      76.345   0.166 -11.674  1.00 22.78
ATOM    957  CA  THR L  69      77.573  -0.314 -12.293  1.00 21.66
ATOM    958  C   THR L  69      78.755   0.652 -12.133  1.00 22.49
ATOM    959  O   THR L  69      79.858   0.351 -12.617  1.00 20.39
ATOM    960  CB  THR L  69      77.347  -0.568 -13.796  1.00 22.04
ATOM    961  OG1 THR L  69      77.162   0.669 -14.493  1.00 23.20
ATOM    962  CG2 THR L  69      76.101  -1.467 -14.017  1.00 21.89
ATOM    963  H   THR L  69      75.910   1.032 -12.024  1.00  0.00
ATOM    964  H   THR L  69      77.829  -1.238 -11.774  1.00  0.00
ATOM    965  H   THR L  69      78.230  -1.074 -14.186  1.00  0.00
ATOM    966  H   THR L  69      78.004   1.238 -14.325  1.00  0.00
ATOM    967  H   THR L  69      75.997  -1.608 -15.093  1.00  0.00
ATOM    968  H   THR L  69      76.292  -2.408 -13.501  1.00  0.00
ATOM    969  H   THR L  69      75.247  -0.938 -13.593  1.00  0.00
ATOM    970  N   ASP L  70      78.526   1.805 -11.498  1.00 21.39
ATOM    971  CA  ASP L  70      79.493   2.917 -11.548  1.00 20.12
ATOM    972  C   ASP L  70      79.682   3.514 -10.167  1.00 20.50
ATOM    973  O   ASP L  70      78.740   4.095  -9.617  1.00 22.27
ATOM    974  CB  ASP L  70      78.918   3.985 -12.494  1.00 21.30
ATOM    975  CG  ASP L  70      79.909   5.029 -12.916  1.00 24.00
ATOM    976  OD1 ASP L  70      80.942   5.226 -12.252  1.00 22.70
ATOM    977  OD2 ASP L  70      79.632   5.699 -13.963  1.00 25.52
ATOM    978  H   ASP L  70      77.654   1.920 -10.961  1.00  0.00
ATOM    979  H   ASP L  70      80.461   2.560 -11.901  1.00  0.00
ATOM    980  H   ASP L  70      78.109   4.500 -11.976  1.00  0.00
ATOM    981  H   ASP L  70      78.609   3.474 -13.406  1.00  0.00
ATOM    982  N   PHE L  71      80.884   3.360  -9.600  1.00 19.00
ATOM    983  CA  PHE L  71      81.179   3.793  -8.223  1.00 17.01
ATOM    984  C   PHE L  71      82.467   4.582  -8.173  1.00 18.76
ATOM    985  O   PHE L  71      83.334   4.397  -9.020  1.00 19.42
ATOM    986  CB  PHE L  71      81.304   2.580  -7.307  1.00 18.26
ATOM    987  CG  PHE L  71      80.104   1.715  -7.306  1.00 17.74
ATOM    988  CD1 PHE L  71      79.123   1.881  -6.334  1.00 20.07
ATOM    989  CD2 PHE L  71      79.917   0.769  -8.310  1.00 18.45
ATOM    990  CE1 PHE L  71      77.978   1.068  -6.330  1.00 19.11
ATOM    991  CE2 PHE L  71      78.767  -0.033  -8.314  1.00 18.99
ATOM    992  CZ  PHE L  71      77.812   0.131  -7.319  1.00 18.92
ATOM    993  H   PHE L  71      81.636   2.920 -10.150  1.00  0.00
ATOM    994  H   PHE L  71      80.359   4.427  -7.887  1.00  0.00
ATOM    995  H   PHE L  71      81.458   2.926  -6.285  1.00  0.00
ATOM    996  H   PHE L  71      82.121   1.967  -7.686  1.00  0.00
ATOM    997  H   PHE L  71      79.244   2.648  -5.569  1.00  0.00
ATOM    998  H   PHE L  71      80.665   0.652  -9.094  1.00  0.00
ATOM    999  H   PHE L  71      77.227   1.180  -5.548  1.00  0.00
ATOM   1000  H   PHE L  71      78.623  -0.781  -9.094  1.00  0.00
ATOM   1001  H   PHE L  71      76.918  -0.493  -7.324  1.00  0.00
ATOM   1002  N   THR L  72      82.555   5.456  -7.180  1.00 16.09
ATOM   1003  CA  THR L  72      83.680   6.329  -6.989  1.00 17.74
ATOM   1004  C   THR L  72      84.050   6.421  -5.509  1.00 16.46
ATOM   1005  O   THR L  72      83.189   6.474  -4.636  1.00 17.45
ATOM   1006  CB  THR L  72      83.366   7.747  -7.535  1.00 18.41
ATOM   1007  OG1 THR L  72      83.034   7.662  -8.927  1.00 21.75
ATOM   1008  CG2 THR L  72      84.554   8.675  -7.312  1.00 23.16
ATOM   1009  H   THR L  72      81.775   5.512  -6.510  1.00  0.00
ATOM   1010  H   THR L  72      84.524   5.913  -7.538  1.00  0.00
ATOM   1011  H   THR L  72      82.513   8.161  -6.998  1.00  0.00
ATOM   1012  H   THR L  72      82.229   7.024  -9.006  1.00  0.00
ATOM   1013  H   THR L  72      84.277   9.650  -7.713  1.00  0.00
ATOM   1014  H   THR L  72      84.730   8.714  -6.237  1.00  0.00
ATOM   1015  H   THR L  72      85.400   8.243  -7.846  1.00  0.00
ATOM   1016  N   LEU L  73      85.350   6.381  -5.240  1.00 16.14
ATOM   1017  CA  LEU L  73      85.909   6.703  -3.939  1.00 14.72
ATOM   1018  C   LEU L  73      86.704   7.991  -4.134  1.00 17.00
ATOM   1019  O   LEU L  73      87.638   8.035  -4.925  1.00 15.74
ATOM   1020  CB  LEU L  73      86.845   5.609  -3.420  1.00 14.34
ATOM   1021  CG  LEU L  73      87.507   5.921  -2.075  1.00 14.57
ATOM   1022  CD1 LEU L  73      86.499   6.018  -0.964  1.00 16.76
ATOM   1023  CD2 LEU L  73      88.541   4.894  -1.741  1.00 14.69
ATOM   1024  H   LEU L  73      85.996   6.107  -5.994  1.00  0.00
ATOM   1025  H   LEU L  73      85.108   6.802  -3.206  1.00  0.00
ATOM   1026  H   LEU L  73      87.646   5.503  -4.152  1.00  0.00
ATOM   1027  H   LEU L  73      86.239   4.714  -3.277  1.00  0.00
ATOM   1028  H   LEU L  73      87.991   6.893  -2.174  1.00  0.00
ATOM   1029  H   LEU L  73      87.051   6.240  -0.051  1.00  0.00
ATOM   1030  H   LEU L  73      85.811   6.821  -1.227  1.00  0.00
ATOM   1031  H   LEU L  73      85.994   5.054  -0.907  1.00  0.00
ATOM   1032  H   LEU L  73      88.970   5.174  -0.779  1.00  0.00
ATOM   1033  H   LEU L  73      88.031   3.932  -1.692  1.00  0.00
ATOM   1034  H   LEU L  73      89.284   4.919  -2.538  1.00  0.00
ATOM   1035  N   THR L  74      86.304   9.034  -3.428  1.00 15.86
ATOM   1036  CA  THR L  74      87.019  10.293  -3.453  1.00 17.21
ATOM   1037  C   THR L  74      87.653  10.512  -2.091  1.00 21.00
ATOM   1038  O   THR L  74      86.949  10.535  -1.090  1.00 22.19
ATOM   1039  CB  THR L  74      86.045  11.436  -3.724  1.00 20.48
ATOM   1040  OG1 THR L  74      85.392  11.186  -4.993  1.00 20.60
ATOM   1041  CG2 THR L  74      86.819  12.765  -3.745  1.00 22.80
ATOM   1042  H   THR L  74      85.460   8.949  -2.844  1.00  0.00
ATOM   1043  H   THR L  74      87.778  10.268  -4.235  1.00  0.00
ATOM   1044  H   THR L  74      85.287  11.499  -2.943  1.00  0.00
ATOM   1045  H   THR L  74      84.898  10.287  -4.905  1.00  0.00
ATOM   1046  H   THR L  74      86.093  13.554  -3.940  1.00  0.00
ATOM   1047  H   THR L  74      87.286  12.877  -2.766  1.00  0.00
ATOM   1048  H   THR L  74      87.560  12.690  -4.541  1.00  0.00
ATOM   1049  N   ILE L  75      88.973  10.693  -2.067  1.00 17.05
ATOM   1050  CA  ILE L  75      89.676  11.010  -0.832  1.00 16.19
ATOM   1051  C   ILE L  75      90.100  12.466  -0.877  1.00 19.84
ATOM   1052  O   ILE L  75      90.942  12.876  -1.712  1.00 19.98
ATOM   1053  CB  ILE L  75      90.890  10.147  -0.626  1.00 16.40
ATOM   1054  CG1 ILE L  75      90.586   8.654  -0.830  1.00 16.13
ATOM   1055  CG2 ILE L  75      91.450  10.428   0.754  1.00 17.57
ATOM   1056  CD1 ILE L  75      91.893   7.759  -0.861  1.00 16.19
ATOM   1057  H   ILE L  75      89.508  10.607  -2.943  1.00  0.00
ATOM   1058  H   ILE L  75      88.998  10.821   0.000  1.00  0.00
ATOM   1059  H   ILE L  75      91.637  10.396  -1.379  1.00  0.00
ATOM   1060  H   ILE L  75      90.099   8.566  -1.801  1.00  0.00
ATOM   1061  H   ILE L  75      89.950   8.328  -0.007  1.00  0.00
ATOM   1062  H   ILE L  75      92.326   9.792   0.878  1.00  0.00
ATOM   1063  H   ILE L  75      91.710  11.486   0.783  1.00  0.00
ATOM   1064  H   ILE L  75      90.667  10.183   1.472  1.00  0.00
ATOM   1065  H   ILE L  75      91.570   6.728  -1.009  1.00  0.00
ATOM   1066  H   ILE L  75      92.504   8.115  -1.691  1.00  0.00
ATOM   1067  H   ILE L  75      92.394   7.893   0.098  1.00  0.00
ATOM   1068  N   SER L  76      89.500  13.276  -0.022  1.00 17.81
ATOM   1069  CA  SER L  76      89.815  14.678   0.009  1.00 21.53
ATOM   1070  C   SER L  76      90.890  14.929   1.043  1.00 21.19
ATOM   1071  O   SER L  76      91.085  14.136   1.977  1.00 22.05
ATOM   1072  CB  SER L  76      88.566  15.522   0.261  1.00 25.00
ATOM   1073  OG  SER L  76      87.800  15.553  -0.946  1.00 27.29
ATOM   1074  H   SER L  76      88.798  12.898   0.630  1.00  0.00
ATOM   1075  H   SER L  76      90.199  14.981  -0.965  1.00  0.00
ATOM   1076  H   SER L  76      88.798  16.537   0.582  1.00  0.00
ATOM   1077  H   SER L  76      87.950  15.056   1.030  1.00  0.00
ATOM   1078  H   SER L  76      86.964  16.125  -0.758  1.00  0.00
ATOM   1079  N   SER L  77      91.624  16.012   0.818  1.00 22.08
ATOM   1080  CA  SER L  77      92.663  16.444   1.695  1.00 20.79
ATOM   1081  C   SER L  77      93.535  15.295   2.153  1.00 22.36
ATOM   1082  O   SER L  77      93.660  15.037   3.356  1.00 22.68
ATOM   1083  CB  SER L  77      92.058  17.163   2.906  1.00 30.36
ATOM   1084  OG  SER L  77      93.070  17.870   3.586  1.00 33.80
ATOM   1085  H   SER L  77      91.435  16.566  -0.029  1.00  0.00
ATOM   1086  H   SER L  77      93.299  17.133   1.139  1.00  0.00
ATOM   1087  H   SER L  77      91.564  16.484   3.601  1.00  0.00
ATOM   1088  H   SER L  77      91.344  17.911   2.561  1.00  0.00
ATOM   1089  H   SER L  77      92.624  18.337   4.389  1.00  0.00
ATOM   1090  N   LEU L  78      94.194  14.659   1.197  1.00 16.42
ATOM   1091  CA  LEU L  78      95.013  13.483   1.474  1.00 16.47
ATOM   1092  C   LEU L  78      95.984  13.700   2.618  1.00 17.24
ATOM   1093  O   LEU L  78      96.677  14.713   2.699  1.00 19.43
ATOM   1094  CB  LEU L  78      95.790  13.098   0.196  1.00 17.20
ATOM   1095  CG  LEU L  78      96.270  11.679   0.004  1.00 18.59
ATOM   1096  CD1 LEU L  78      95.108  10.725  -0.062  1.00 21.72
ATOM   1097  CD2 LEU L  78      97.086  11.689  -1.316  1.00 19.49
ATOM   1098  H   LEU L  78      94.127  15.004   0.229  1.00  0.00
ATOM   1099  H   LEU L  78      94.343  12.678   1.776  1.00  0.00
ATOM   1100  H   LEU L  78      96.703  13.694   0.219  1.00  0.00
ATOM   1101  H   LEU L  78      95.071  13.235  -0.612  1.00  0.00
ATOM   1102  H   LEU L  78      96.884  11.340   0.839  1.00  0.00
ATOM   1103  H   LEU L  78      95.523   9.727  -0.200  1.00  0.00
ATOM   1104  H   LEU L  78      94.570  10.813   0.882  1.00  0.00
ATOM   1105  H   LEU L  78      94.493  11.029  -0.909  1.00  0.00
ATOM   1106  H   LEU L  78      97.444  10.672  -1.477  1.00  0.00
ATOM   1107  H   LEU L  78      96.408  12.010  -2.107  1.00  0.00
ATOM   1108  H   LEU L  78      97.908  12.391  -1.177  1.00  0.00
ATOM   1109  N   GLN L  79      96.018  12.728   3.527  1.00 17.66
ATOM   1110  CA  GLN L  79      96.919  12.758   4.685  1.00 18.57
ATOM   1111  C   GLN L  79      97.970  11.646   4.616  1.00 18.14
ATOM   1112  O   GLN L  79      97.814  10.672   3.894  1.00 20.15
ATOM   1113  CB  GLN L  79      96.079  12.593   5.941  1.00 21.91
ATOM   1114  CG  GLN L  79      95.078  13.709   6.166  1.00 22.60
ATOM   1115  CD  GLN L  79      95.715  15.034   6.374  1.00 26.55
ATOM   1116  OE1 GLN L  79      95.547  15.971   5.580  1.00 28.64
ATOM   1117  NE2 GLN L  79      96.475  15.130   7.429  1.00 30.66
ATOM   1118  H   GLN L  79      95.386  11.922   3.413  1.00  0.00
ATOM   1119  H   GLN L  79      97.453  13.708   4.694  1.00  0.00
ATOM   1120  H   GLN L  79      96.761  12.595   6.791  1.00  0.00
ATOM   1121  H   GLN L  79      95.510  11.670   5.830  1.00  0.00
ATOM   1122  H   GLN L  79      94.498  13.478   7.059  1.00  0.00
ATOM   1123  H   GLN L  79      94.468  13.791   5.266  1.00  0.00
ATOM   1124  H   GLN L  79      96.952  16.018   7.641  1.00  0.00
ATOM   1125  H   GLN L  79      96.599  14.318   8.050  1.00  0.00
ATOM   1126  N   PRO L  80      99.056  11.765   5.402  1.00 20.39
ATOM   1127  CA  PRO L  80     100.143  10.773   5.346  1.00 20.31
ATOM   1128  C   PRO L  80      99.695   9.338   5.566  1.00 18.24
ATOM   1129  O   PRO L  80     100.160   8.407   4.870  1.00 19.91
ATOM   1130  CB  PRO L  80     101.082  11.227   6.452  1.00 24.26
ATOM   1131  CG  PRO L  80     100.877  12.655   6.531  1.00 24.13
ATOM   1132  CD  PRO L  80      99.433  12.921   6.237  1.00 22.67
ATOM   1133  H   PRO L  80     100.595  10.743   4.355  1.00  0.00
ATOM   1134  H   PRO L  80     102.128  10.973   6.280  1.00  0.00
ATOM   1135  H   PRO L  80     100.845  10.760   7.408  1.00  0.00
ATOM   1136  H   PRO L  80     101.512  13.147   5.794  1.00  0.00
ATOM   1137  H   PRO L  80     101.167  13.027   7.514  1.00  0.00
ATOM   1138  H   PRO L  80      98.823  13.001   7.137  1.00  0.00
ATOM   1139  H   PRO L  80      99.257  13.877   5.745  1.00  0.00
ATOM   1140  N   GLU L  81      98.718   9.178   6.449  1.00 18.22
ATOM   1141  CA  GLU L  81      98.176   7.857   6.746  1.00 19.66
ATOM   1142  C   GLU L  81      97.376   7.241   5.608  1.00 19.16
ATOM   1143  O   GLU L  81      97.046   6.055   5.656  1.00 18.49
ATOM   1144  CB  GLU L  81      97.335   7.905   8.030  1.00 21.14
ATOM   1145  CG  GLU L  81      96.110   8.847   7.999  1.00 20.95
ATOM   1146  CD  GLU L  81      96.388  10.259   8.523  1.00 23.96
ATOM   1147  OE1 GLU L  81      97.562  10.739   8.557  1.00 23.03
ATOM   1148  OE2 GLU L  81      95.397  10.889   8.938  1.00 25.01
ATOM   1149  H   GLU L  81      98.335  10.002   6.934  1.00  0.00
ATOM   1150  H   GLU L  81      99.037   7.204   6.888  1.00  0.00
ATOM   1151  H   GLU L  81      97.995   8.285   8.810  1.00  0.00
ATOM   1152  H   GLU L  81      96.950   6.897   8.183  1.00  0.00
ATOM   1153  H   GLU L  81      95.345   8.411   8.641  1.00  0.00
ATOM   1154  H   GLU L  81      95.813   8.952   6.956  1.00  0.00
ATOM   1155  N   ASP L  82      97.042   8.043   4.593  1.00 16.36
ATOM   1156  CA  ASP L  82      96.221   7.574   3.489  1.00 18.52
ATOM   1157  C   ASP L  82      96.995   6.850   2.403  1.00 18.94
ATOM   1158  O   ASP L  82      96.390   6.203   1.523  1.00 17.76
ATOM   1159  CB  ASP L  82      95.505   8.757   2.853  1.00 17.70
ATOM   1160  CG  ASP L  82      94.586   9.466   3.789  1.00 19.56
ATOM   1161  OD1 ASP L  82      94.222   8.899   4.842  1.00 19.17
ATOM   1162  OD2 ASP L  82      94.227  10.622   3.465  1.00 21.69
ATOM   1163  H   ASP L  82      97.375   9.018   4.593  1.00  0.00
ATOM   1164  H   ASP L  82      95.524   6.856   3.920  1.00  0.00
ATOM   1165  H   ASP L  82      94.906   8.389   2.020  1.00  0.00
ATOM   1166  H   ASP L  82      96.265   9.479   2.554  1.00  0.00
ATOM   1167  N   PHE L  83      98.319   6.978   2.387  1.00 17.28
ATOM   1168  CA  PHE L  83      99.090   6.304   1.343  1.00 19.53
ATOM   1169  C   PHE L  83      99.066   4.794   1.595  1.00 18.73
ATOM   1170  O   PHE L  83      99.450   4.325   2.669  1.00 20.62
ATOM   1171  CB  PHE L  83     100.507   6.865   1.263  1.00 21.13
ATOM   1172  CG  PHE L  83     100.552   8.311   0.860  1.00 19.10
ATOM   1173  CD1 PHE L  83     100.379   8.698  -0.466  1.00 19.07
ATOM   1174  CD2 PHE L  83     100.772   9.296   1.815  1.00 21.96
ATOM   1175  CE1 PHE L  83     100.441  10.040  -0.809  1.00 23.50
ATOM   1176  CE2 PHE L  83     100.820  10.645   1.460  1.00 25.14
ATOM   1177  CZ  PHE L  83     100.662  11.004   0.151  1.00 23.31
ATOM   1178  H   PHE L  83      98.796   7.546   3.102  1.00  0.00
ATOM   1179  H   PHE L  83      98.636   6.490   0.370  1.00  0.00
ATOM   1180  H   PHE L  83     101.057   6.297   0.513  1.00  0.00
ATOM   1181  H   PHE L  83     100.944   6.800   2.260  1.00  0.00
ATOM   1182  H   PHE L  83     100.195   7.947  -1.234  1.00  0.00
ATOM   1183  H   PHE L  83     100.909   9.011   2.858  1.00  0.00
ATOM   1184  H   PHE L  83     100.313  10.336  -1.850  1.00  0.00
ATOM   1185  H   PHE L  83     100.982  11.407   2.222  1.00  0.00
ATOM   1186  H   PHE L  83     100.711  12.055  -0.135  1.00  0.00
ATOM   1187  N   ALA L  84      98.585   4.048   0.600  1.00 15.85
ATOM   1188  CA  ALA L  84      98.199   2.664   0.706  1.00 13.70
ATOM   1189  C   ALA L  84      97.686   2.179  -0.654  1.00 14.29
ATOM   1190  O   ALA L  84      97.606   2.947  -1.607  1.00 16.23
ATOM   1191  CB  ALA L  84      97.051   2.514   1.708  1.00 16.00
ATOM   1192  H   ALA L  84      98.481   4.498  -0.320  1.00  0.00
ATOM   1193  H   ALA L  84      99.064   2.086   1.031  1.00  0.00
ATOM   1194  H   ALA L  84      96.800   1.454   1.749  1.00  0.00
ATOM   1195  H   ALA L  84      97.415   2.882   2.667  1.00  0.00
ATOM   1196  H   ALA L  84      96.221   3.113   1.333  1.00  0.00
ATOM   1197  N   THR L  85      97.306   0.918  -0.705  1.00 13.08
ATOM   1198  CA  THR L  85      96.609   0.360  -1.863  1.00 13.87
ATOM   1199  C   THR L  85      95.138   0.225  -1.521  1.00 14.53
ATOM   1200  O   THR L  85      94.788  -0.239  -0.436  1.00 14.67
ATOM   1201  CB  THR L  85      97.252  -0.969  -2.340  1.00 16.35
ATOM   1202  OG1 THR L  85      98.640  -0.724  -2.690  1.00 16.30
ATOM   1203  CG2 THR L  85      96.512  -1.489  -3.523  1.00 15.80
ATOM   1204  H   THR L  85      97.507   0.305   0.098  1.00  0.00
ATOM   1205  H   THR L  85      96.704   1.035  -2.713  1.00  0.00
ATOM   1206  H   THR L  85      97.203  -1.710  -1.542  1.00  0.00
ATOM   1207  H   THR L  85      99.106  -0.368  -1.843  1.00  0.00
ATOM   1208  H   THR L  85      96.998  -2.418  -3.820  1.00  0.00
ATOM   1209  H   THR L  85      95.482  -1.653  -3.207  1.00  0.00
ATOM   1210  H   THR L  85      96.581  -0.729  -4.301  1.00  0.00
ATOM   1211  N   TYR L  86      94.271   0.700  -2.419  1.00 14.31
ATOM   1212  CA  TYR L  86      92.836   0.671  -2.224  1.00 14.12
ATOM   1213  C   TYR L  86      92.235  -0.347  -3.180  1.00 12.85
ATOM   1214  O   TYR L  86      92.654  -0.428  -4.325  1.00 15.48
ATOM   1215  CB  TYR L  86      92.224   2.044  -2.476  1.00 14.87
ATOM   1216  CG  TYR L  86      92.674   3.005  -1.408  1.00 12.48
ATOM   1217  CD1 TYR L  86      91.915   3.194  -0.263  1.00 12.47
ATOM   1218  CD2 TYR L  86      93.898   3.663  -1.498  1.00 13.77
ATOM   1219  CE1 TYR L  86      92.355   4.030   0.749  1.00 13.96
ATOM   1220  CE2 TYR L  86      94.358   4.525  -0.488  1.00 13.98
ATOM   1221  CZ  TYR L  86      93.559   4.705   0.638  1.00 15.01
ATOM   1222  OH  TYR L  86      93.980   5.511   1.682  1.00 16.48
ATOM   1223  H   TYR L  86      94.640   1.106  -3.291  1.00  0.00
ATOM   1224  H   TYR L  86      92.621   0.392  -1.193  1.00  0.00
ATOM   1225  H   TYR L  86      91.136   1.972  -2.462  1.00  0.00
ATOM   1226  H   TYR L  86      92.556   2.415  -3.446  1.00  0.00
ATOM   1227  H   TYR L  86      90.960   2.678  -0.158  1.00  0.00
ATOM   1228  H   TYR L  86      94.519   3.504  -2.380  1.00  0.00
ATOM   1229  H   TYR L  86      91.746   4.158   1.644  1.00  0.00
ATOM   1230  H   TYR L  86      95.315   5.039  -0.583  1.00  0.00
ATOM   1231  H   TYR L  86      93.258   5.457   2.414  1.00  0.00
ATOM   1232  N   TYR L  87      91.226  -1.062  -2.709  1.00 14.02
ATOM   1233  CA  TYR L  87      90.512  -2.048  -3.516  1.00 11.45
ATOM   1234  C   TYR L  87      89.021  -1.925  -3.339  1.00 13.81
ATOM   1235  O   TYR L  87      88.559  -1.808  -2.211  1.00 13.42
ATOM   1236  CB  TYR L  87      90.853  -3.491  -3.108  1.00 12.78
ATOM   1237  CG  TYR L  87      92.287  -3.902  -3.260  1.00 12.19
ATOM   1238  CD1 TYR L  87      92.825  -4.241  -4.495  1.00 15.95
ATOM   1239  CD2 TYR L  87      93.113  -3.966  -2.153  1.00 14.91
ATOM   1240  CE1 TYR L  87      94.121  -4.621  -4.614  1.00 15.55
ATOM   1241  CE2 TYR L  87      94.431  -4.337  -2.268  1.00 15.66
ATOM   1242  CZ  TYR L  87      94.945  -4.653  -3.489  1.00 16.41
ATOM   1243  OH  TYR L  87      96.274  -5.051  -3.571  1.00 19.86
ATOM   1244  H   TYR L  87      90.932  -0.917  -1.733  1.00  0.00
ATOM   1245  H   TYR L  87      90.818  -1.849  -4.543  1.00  0.00
ATOM   1246  H   TYR L  87      90.277  -4.155  -3.753  1.00  0.00
ATOM   1247  H   TYR L  87      90.649  -3.560  -2.039  1.00  0.00
ATOM   1248  H   TYR L  87      92.195  -4.201  -5.383  1.00  0.00
ATOM   1249  H   TYR L  87      92.711  -3.718  -1.171  1.00  0.00
ATOM   1250  H   TYR L  87      94.519  -4.902  -5.589  1.00  0.00
ATOM   1251  H   TYR L  87      95.065  -4.378  -1.382  1.00  0.00
ATOM   1252  H   TYR L  87      96.458  -5.284  -4.557  1.00  0.00
ATOM   1253  N   CYS L  88      88.267  -1.983  -4.430  1.00 13.43
ATOM   1254  CA  CYS L  88      86.822  -2.160  -4.347  1.00 13.49
ATOM   1255  C   CYS L  88      86.505  -3.653  -4.404  1.00 13.01
ATOM   1256  O   CYS L  88      87.255  -4.438  -4.991  1.00 15.40
ATOM   1257  CB  CYS L  88      86.087  -1.395  -5.449  1.00 15.44
ATOM   1258  SG  CYS L  88      86.539  -1.817  -7.158  1.00 17.98
ATOM   1259  H   CYS L  88      88.712  -1.901  -5.355  1.00  0.00
ATOM   1260  H   CYS L  88      86.470  -1.747  -3.402  1.00  0.00
ATOM   1261  H   CYS L  88      86.499  -0.400  -5.284  1.00  0.00
ATOM   1262  H   CYS L  88      85.028  -1.521  -5.224  1.00  0.00
ATOM   1263  N   GLN L  89      85.405  -4.055  -3.778  1.00 13.38
ATOM   1264  CA  GLN L  89      84.983  -5.450  -3.788  1.00 14.09
ATOM   1265  C   GLN L  89      83.464  -5.496  -3.755  1.00 14.07
ATOM   1266  O   GLN L  89      82.848  -4.924  -2.850  1.00 15.32
ATOM   1267  CB  GLN L  89      85.533  -6.235  -2.572  1.00 16.11
ATOM   1268  CG  GLN L  89      85.121  -7.762  -2.572  1.00 15.28
ATOM   1269  CD  GLN L  89      85.295  -8.424  -1.217  1.00 12.69
ATOM   1270  OE1 GLN L  89      84.850  -7.871  -0.222  1.00 15.24
ATOM   1271  NE2 GLN L  89      85.888  -9.629  -1.178  1.00 13.72
ATOM   1272  H   GLN L  89      84.835  -3.362  -3.272  1.00  0.00
ATOM   1273  H   GLN L  89      85.377  -5.916  -4.691  1.00  0.00
ATOM   1274  H   GLN L  89      85.099  -5.778  -1.683  1.00  0.00
ATOM   1275  H   GLN L  89      86.621  -6.171  -2.605  1.00  0.00
ATOM   1276  H   GLN L  89      85.739  -8.305  -3.287  1.00  0.00
ATOM   1277  H   GLN L  89      84.057  -7.817  -2.800  1.00  0.00
ATOM   1278  H   GLN L  89      86.023 -10.108  -0.276  1.00  0.00
ATOM   1279  H   GLN L  89      86.208 -10.074  -2.050  1.00  0.00
ATOM   1280  N   GLN L  90      82.862  -6.177  -4.723  1.00 15.72
ATOM   1281  CA  GLN L  90      81.414  -6.371  -4.711  1.00 14.38
ATOM   1282  C   GLN L  90      81.068  -7.550  -3.813  1.00 13.99
ATOM   1283  O   GLN L  90      81.780  -8.527  -3.754  1.00 16.79
ATOM   1284  CB  GLN L  90      80.839  -6.560  -6.131  1.00 16.95
ATOM   1285  CG  GLN L  90      81.215  -7.858  -6.851  1.00 17.36
ATOM   1286  CD  GLN L  90      80.343  -9.047  -6.489  1.00 16.08
ATOM   1287  OE1 GLN L  90      79.221  -8.889  -5.993  1.00 16.69
ATOM   1288  NE2 GLN L  90      80.861 -10.257  -6.728  1.00 17.77
ATOM   1289  H   GLN L  90      83.422  -6.573  -5.491  1.00  0.00
ATOM   1290  H   GLN L  90      80.952  -5.468  -4.312  1.00  0.00
ATOM   1291  H   GLN L  90      81.242  -5.750  -6.738  1.00  0.00
ATOM   1292  H   GLN L  90      79.755  -6.588  -6.017  1.00  0.00
ATOM   1293  H   GLN L  90      82.236  -8.109  -6.563  1.00  0.00
ATOM   1294  H   GLN L  90      81.081  -7.683  -7.919  1.00  0.00
ATOM   1295  H   GLN L  90      80.318 -11.103  -6.504  1.00  0.00
ATOM   1296  H   GLN L  90      81.803 -10.343  -7.136  1.00  0.00
ATOM   1297  N   TYR L  91      79.974  -7.418  -3.104  1.00 15.48
ATOM   1298  CA  TYR L  91      79.389  -8.536  -2.334  1.00 15.43
ATOM   1299  C   TYR L  91      77.882  -8.662  -2.602  1.00 16.33
ATOM   1300  O   TYR L  91      77.106  -9.186  -1.774  1.00 15.89
ATOM   1301  CB  TYR L  91      79.696  -8.370  -0.835  1.00 16.04
ATOM   1302  CG  TYR L  91      79.104  -7.132  -0.212  1.00 16.06
ATOM   1303  CD1 TYR L  91      77.915  -7.180   0.498  1.00 16.79
ATOM   1304  CD2 TYR L  91      79.710  -5.880  -0.365  1.00 17.34
ATOM   1305  CE1 TYR L  91      77.349  -6.022   1.061  1.00 18.53
ATOM   1306  CE2 TYR L  91      79.157  -4.744   0.188  1.00 15.50
ATOM   1307  CZ  TYR L  91      77.976  -4.806   0.893  1.00 19.54
ATOM   1308  OH  TYR L  91      77.428  -3.645   1.436  1.00 18.06
ATOM   1309  H   TYR L  91      79.504  -6.502  -3.082  1.00  0.00
ATOM   1310  H   TYR L  91      79.849  -9.467  -2.666  1.00  0.00
ATOM   1311  H   TYR L  91      80.778  -8.300  -0.719  1.00  0.00
ATOM   1312  H   TYR L  91      79.242  -9.216  -0.320  1.00  0.00
ATOM   1313  H   TYR L  91      77.407  -8.136   0.623  1.00  0.00
ATOM   1314  H   TYR L  91      80.637  -5.801  -0.932  1.00  0.00
ATOM   1315  H   TYR L  91      76.420  -6.086   1.627  1.00  0.00
ATOM   1316  H   TYR L  91      79.661  -3.785   0.065  1.00  0.00
ATOM   1317  H   TYR L  91      76.561  -3.919   1.919  1.00  0.00
ATOM   1318  N   TYR L  92      77.470  -8.215  -3.776  1.00 17.74
ATOM   1319  CA  TYR L  92      76.099  -8.414  -4.275  1.00 18.35
ATOM   1320  C   TYR L  92      75.770  -9.876  -4.548  1.00 19.47
ATOM   1321  O   TYR L  92      74.669 -10.349  -4.246  1.00 19.50
ATOM   1322  CB  TYR L  92      75.967  -7.656  -5.571  1.00 19.11
ATOM   1323  CG  TYR L  92      74.596  -7.614  -6.165  1.00 19.43
ATOM   1324  CD1 TYR L  92      73.551  -6.937  -5.529  1.00 19.19
ATOM   1325  CD2 TYR L  92      74.333  -8.229  -7.375  1.00 23.44
ATOM   1326  CE1 TYR L  92      72.279  -6.884  -6.093  1.00 22.27
ATOM   1327  CE2 TYR L  92      73.084  -8.143  -7.947  1.00 23.19
ATOM   1328  CZ  TYR L  92      72.057  -7.501  -7.284  1.00 24.19
ATOM   1329  OH  TYR L  92      70.804  -7.437  -7.867  1.00 26.78
ATOM   1330  H   TYR L  92      78.139  -7.704  -4.369  1.00  0.00
ATOM   1331  H   TYR L  92      75.411  -8.061  -3.507  1.00  0.00
ATOM   1332  H   TYR L  92      76.601  -8.164  -6.298  1.00  0.00
ATOM   1333  H   TYR L  92      76.231  -6.622  -5.350  1.00  0.00
ATOM   1334  H   TYR L  92      73.735  -6.442  -4.575  1.00  0.00
ATOM   1335  H   TYR L  92      75.121  -8.787  -7.880  1.00  0.00
ATOM   1336  H   TYR L  92      71.472  -6.355  -5.586  1.00  0.00
ATOM   1337  H   TYR L  92      72.905  -8.584  -8.928  1.00  0.00
ATOM   1338  H   TYR L  92      70.207  -6.882  -7.237  1.00  0.00
ATOM   1339  N   MET L  93      76.726 -10.566  -5.148  1.00 17.32
ATOM   1340  CA  MET L  93      76.607 -11.970  -5.422  1.00 17.73
ATOM   1341  C   MET L  93      77.764 -12.747  -4.795  1.00 17.81
ATOM   1342  O   MET L  93      78.770 -12.185  -4.373  1.00 17.33
ATOM   1343  CB  MET L  93      76.483 -12.205  -6.931  1.00 20.96
ATOM   1344  CG  MET L  93      75.041 -11.867  -7.421  1.00 27.79
ATOM   1345  SD  MET L  93      74.895 -11.942  -9.177  1.00 30.23
ATOM   1346  CE  MET L  93      75.121 -13.700  -9.453  1.00 29.68
ATOM   1347  H   MET L  93      77.588 -10.077  -5.429  1.00  0.00
ATOM   1348  H   MET L  93      75.695 -12.350  -4.961  1.00  0.00
ATOM   1349  H   MET L  93      76.686 -13.257  -7.130  1.00  0.00
ATOM   1350  H   MET L  93      77.204 -11.572  -7.448  1.00  0.00
ATOM   1351  H   MET L  93      74.914 -10.826  -7.125  1.00  0.00
ATOM   1352  H   MET L  93      74.352 -12.533  -6.901  1.00  0.00
ATOM   1353  H   MET L  93      75.049 -13.866 -10.528  1.00  0.00
ATOM   1354  H   MET L  93      76.108 -13.959  -9.069  1.00  0.00
ATOM   1355  H   MET L  93      74.327 -14.213  -8.910  1.00  0.00
ATOM   1356  N   ILE L  94      77.576 -14.047  -4.730  1.00 16.80
ATOM   1357  CA  ILE L  94      78.550 -14.972  -4.219  1.00 16.83
ATOM   1358  C   ILE L  94      79.108 -15.724  -5.434  1.00 18.44
ATOM   1359  O   ILE L  94      78.357 -16.368  -6.174  1.00 18.77
ATOM   1360  CB  ILE L  94      77.891 -15.956  -3.188  1.00 16.55
ATOM   1361  CG1 ILE L  94      77.244 -15.171  -2.041  1.00 20.92
ATOM   1362  CG2 ILE L  94      78.936 -16.993  -2.662  1.00 19.44
ATOM   1363  CD1 ILE L  94      76.367 -16.061  -1.078  1.00 19.92
ATOM   1364  H   ILE L  94      76.678 -14.424  -5.065  1.00  0.00
ATOM   1365  H   ILE L  94      79.348 -14.457  -3.685  1.00  0.00
ATOM   1366  H   ILE L  94      77.105 -16.517  -3.693  1.00  0.00
ATOM   1367  H   ILE L  94      76.579 -14.444  -2.507  1.00  0.00
ATOM   1368  H   ILE L  94      78.049 -14.720  -1.461  1.00  0.00
ATOM   1369  H   ILE L  94      78.415 -17.640  -1.956  1.00  0.00
ATOM   1370  H   ILE L  94      79.299 -17.547  -3.528  1.00  0.00
ATOM   1371  H   ILE L  94      79.733 -16.426  -2.181  1.00  0.00
ATOM   1372  H   ILE L  94      75.964 -15.399  -0.311  1.00  0.00
ATOM   1373  H   ILE L  94      75.578 -16.505  -1.685  1.00  0.00
ATOM   1374  H   ILE L  94      77.027 -16.818  -0.654  1.00  0.00
ATOM   1375  N   PRO L  95      80.436 -15.696  -5.634  1.00 16.99
ATOM   1376  CA  PRO L  95      81.423 -15.167  -4.698  1.00 17.27
ATOM   1377  C   PRO L  95      81.617 -13.650  -4.821  1.00 17.58
ATOM   1378  O   PRO L  95      81.354 -13.050  -5.887  1.00 17.24
ATOM   1379  CB  PRO L  95      82.709 -15.857  -5.142  1.00 17.27
ATOM   1380  CG  PRO L  95      82.524 -15.993  -6.655  1.00 20.53
ATOM   1381  CD  PRO L  95      81.080 -16.446  -6.735  1.00 18.60
ATOM   1382  H   PRO L  95      81.124 -15.344  -3.665  1.00  0.00
ATOM   1383  H   PRO L  95      82.863 -16.816  -4.648  1.00  0.00
ATOM   1384  H   PRO L  95      83.604 -15.295  -4.873  1.00  0.00
ATOM   1385  H   PRO L  95      83.226 -16.678  -7.130  1.00  0.00
ATOM   1386  H   PRO L  95      82.720 -15.073  -7.206  1.00  0.00
ATOM   1387  H   PRO L  95      80.621 -16.227  -7.699  1.00  0.00
ATOM   1388  H   PRO L  95      80.953 -17.525  -6.643  1.00  0.00
ATOM   1389  N   SER L  96      82.136 -13.056  -3.754  1.00 16.11
ATOM   1390  CA  SER L  96      82.580 -11.662  -3.790  1.00 16.44
ATOM   1391  C   SER L  96      83.734 -11.584  -4.766  1.00 14.60
ATOM   1392  O   SER L  96      84.485 -12.548  -4.925  1.00 17.08
ATOM   1393  CB  SER L  96      83.100 -11.234  -2.420  1.00 17.26
ATOM   1394  OG  SER L  96      82.149 -11.429  -1.402  1.00 21.78
ATOM   1395  H   SER L  96      82.229 -13.590  -2.878  1.00  0.00
ATOM   1396  H   SER L  96      81.749 -11.017  -4.078  1.00  0.00
ATOM   1397  H   SER L  96      83.387 -10.183  -2.411  1.00  0.00
ATOM   1398  H   SER L  96      83.928 -11.892  -2.157  1.00  0.00
ATOM   1399  H   SER L  96      82.582 -11.116  -0.521  1.00  0.00
ATOM   1400  N   THR L  97      83.922 -10.432  -5.378  1.00 15.32
ATOM   1401  CA  THR L  97      85.011 -10.237  -6.320  1.00 16.00
ATOM   1402  C   THR L  97      85.645  -8.838  -6.174  1.00 16.22
ATOM   1403  O   THR L  97      84.952  -7.841  -5.870  1.00 16.37
ATOM   1404  CB  THR L  97      84.602 -10.508  -7.772  1.00 19.87
ATOM   1405  OG1 THR L  97      83.497  -9.670  -8.150  1.00 17.52
ATOM   1406  CG2 THR L  97      84.197 -12.009  -7.939  1.00 19.44
ATOM   1407  H   THR L  97      83.281  -9.650  -5.184  1.00  0.00
ATOM   1408  H   THR L  97      85.766 -10.980  -6.065  1.00  0.00
ATOM   1409  H   THR L  97      85.452 -10.284  -8.417  1.00  0.00
ATOM   1410  H   THR L  97      83.803  -8.694  -8.026  1.00  0.00
ATOM   1411  H   THR L  97      83.916 -12.149  -8.983  1.00  0.00
ATOM   1412  H   THR L  97      85.068 -12.606  -7.670  1.00  0.00
ATOM   1413  H   THR L  97      83.359 -12.190  -7.266  1.00  0.00
ATOM   1414  N   PHE L  98      86.962  -8.808  -6.414  1.00 16.02
ATOM   1415  CA  PHE L  98      87.797  -7.619  -6.216  1.00 16.65
ATOM   1416  C   PHE L  98      88.104  -6.902  -7.533  1.00 17.04
ATOM   1417  O   PHE L  98      88.348  -7.544  -8.587  1.00 17.23
ATOM   1418  CB  PHE L  98      89.147  -7.999  -5.597  1.00 16.64
ATOM   1419  CG  PHE L  98      89.178  -8.004  -4.097  1.00 14.06
ATOM   1420  CD1 PHE L  98      89.149  -6.814  -3.383  1.00 15.79
ATOM   1421  CD2 PHE L  98      89.321  -9.169  -3.414  1.00 15.86
ATOM   1422  CE1 PHE L  98      89.218  -6.811  -1.976  1.00 16.15
ATOM   1423  CE2 PHE L  98      89.380  -9.168  -2.005  1.00 15.45
ATOM   1424  CZ  PHE L  98      89.339  -7.990  -1.309  1.00 15.95
ATOM   1425  H   PHE L  98      87.414  -9.668  -6.757  1.00  0.00
ATOM   1426  H   PHE L  98      87.228  -6.962  -5.558  1.00  0.00
ATOM   1427  H   PHE L  98      89.881  -7.262  -5.924  1.00  0.00
ATOM   1428  H   PHE L  98      89.356  -9.024  -5.903  1.00  0.00
ATOM   1429  H   PHE L  98      89.072  -5.868  -3.919  1.00  0.00
ATOM   1430  H   PHE L  98      89.391 -10.111  -3.958  1.00  0.00
ATOM   1431  H   PHE L  98      89.175  -5.871  -1.426  1.00  0.00
ATOM   1432  H   PHE L  98      89.459 -10.112  -1.466  1.00  0.00
ATOM   1433  H   PHE L  98      89.403  -7.997  -0.221  1.00  0.00
ATOM   1434  N   GLY L  99      88.132  -5.576  -7.458  1.00 16.54
ATOM   1435  CA  GLY L  99      88.837  -4.748  -8.428  1.00 17.11
ATOM   1436  C   GLY L  99      90.355  -4.947  -8.326  1.00 15.77
ATOM   1437  O   GLY L  99      90.861  -5.496  -7.323  1.00 15.14
ATOM   1438  H   GLY L  99      87.635  -5.114  -6.683  1.00  0.00
ATOM   1439  H   GLY L  99      88.605  -3.712  -8.179  1.00  0.00
ATOM   1440  H   GLY L  99      88.479  -5.002  -9.426  1.00  0.00
ATOM   1441  N   GLN L 100      91.112  -4.523  -9.352  1.00 15.67
ATOM   1442  CA  GLN L 100      92.559  -4.824  -9.375  1.00 16.79
ATOM   1443  C   GLN L 100      93.442  -3.954  -8.480  1.00 15.46
ATOM   1444  O   GLN L 100      94.649  -4.219  -8.357  1.00 15.90
ATOM   1445  CB  GLN L 100      93.120  -4.797 -10.799  1.00 23.10
ATOM   1446  H   GLN L 100      90.684  -3.989 -10.122  1.00  0.00
ATOM   1447  H   GLN L 100      92.603  -5.829  -8.956  1.00  0.00
ATOM   1448  H   GLN L 100      94.183  -5.027 -10.727  1.00  0.00
ATOM   1449  H   GLN L 100      92.579  -5.553 -11.369  1.00  0.00
ATOM   1450  N   GLY L 101      92.865  -2.908  -7.897  1.00 14.45
ATOM   1451  CA  GLY L 101      93.555  -2.076  -6.950  1.00 13.68
ATOM   1452  C   GLY L 101      94.061  -0.784  -7.525  1.00 14.95
ATOM   1453  O   GLY L 101      94.255  -0.665  -8.765  1.00 14.92
ATOM   1454  H   GLY L 101      91.887  -2.686  -8.133  1.00  0.00
ATOM   1455  H   GLY L 101      94.426  -2.653  -6.639  1.00  0.00
ATOM   1456  H   GLY L 101      92.855  -1.858  -6.143  1.00  0.00
ATOM   1457  N   THR L 102      94.263   0.175  -6.624  1.00 13.83
ATOM   1458  CA  THR L 102      94.928   1.455  -6.920  1.00 13.47
ATOM   1459  C   THR L 102      95.993   1.769  -5.872  1.00 14.70
ATOM   1460  O   THR L 102      95.661   1.919  -4.678  1.00 14.58
ATOM   1461  CB  THR L 102      93.899   2.643  -6.910  1.00 12.89
ATOM   1462  OG1 THR L 102      92.804   2.375  -7.783  1.00 14.69
ATOM   1463  CG2 THR L 102      94.612   3.955  -7.254  1.00 14.29
ATOM   1464  H   THR L 102      93.934   0.012  -5.662  1.00  0.00
ATOM   1465  H   THR L 102      95.379   1.353  -7.907  1.00  0.00
ATOM   1466  H   THR L 102      93.481   2.747  -5.909  1.00  0.00
ATOM   1467  H   THR L 102      92.389   1.483  -7.480  1.00  0.00
ATOM   1468  H   THR L 102      93.858   4.742  -7.234  1.00  0.00
ATOM   1469  H   THR L 102      95.379   4.109  -6.495  1.00  0.00
ATOM   1470  H   THR L 102      95.043   3.832  -8.248  1.00  0.00
ATOM   1471  N   LYS L 103      97.255   1.862  -6.293  1.00 13.56
ATOM   1472  CA  LYS L 103      98.347   2.135  -5.384  1.00 14.97
ATOM   1473  C   LYS L 103      98.435   3.645  -5.273  1.00 17.14
ATOM   1474  O   LYS L 103      98.618   4.333  -6.294  1.00 18.78
ATOM   1475  CB  LYS L 103      99.655   1.569  -5.919  1.00 18.75
ATOM   1476  H   LYS L 103      97.458   1.736  -7.295  1.00  0.00
ATOM   1477  H   LYS L 103      98.173   1.669  -4.414  1.00  0.00
ATOM   1478  H   LYS L 103     100.428   1.809  -5.189  1.00  0.00
ATOM   1479  H   LYS L 103      99.517   0.493  -6.024  1.00  0.00
ATOM   1480  N   VAL L 104      98.284   4.173  -4.064  1.00 13.59
ATOM   1481  CA  VAL L 104      98.342   5.623  -3.840  1.00 14.37
ATOM   1482  C   VAL L 104      99.638   5.916  -3.116  1.00 19.37
ATOM   1483  O   VAL L 104      99.807   5.539  -1.960  1.00 16.13
ATOM   1484  CB  VAL L 104      97.106   6.152  -3.038  1.00 15.16
ATOM   1485  CG1 VAL L 104      97.250   7.637  -2.629  1.00 17.77
ATOM   1486  CG2 VAL L 104      95.815   5.936  -3.779  1.00 16.89
ATOM   1487  H   VAL L 104      98.122   3.548  -3.261  1.00  0.00
ATOM   1488  H   VAL L 104      98.311   6.144  -4.797  1.00  0.00
ATOM   1489  H   VAL L 104      97.076   5.561  -2.123  1.00  0.00
ATOM   1490  H   VAL L 104      96.347   7.906  -2.081  1.00  0.00
ATOM   1491  H   VAL L 104      98.140   7.711  -2.004  1.00  0.00
ATOM   1492  H   VAL L 104      97.352   8.212  -3.549  1.00  0.00
ATOM   1493  H   VAL L 104      95.017   6.331  -3.151  1.00  0.00
ATOM   1494  H   VAL L 104      95.894   6.477  -4.722  1.00  0.00
ATOM   1495  H   VAL L 104      95.713   4.862  -3.936  1.00  0.00
ATOM   1496  N   GLU L 105     100.579   6.547  -3.832  1.00 18.05
ATOM   1497  CA  GLU L 105     101.945   6.730  -3.352  1.00 20.12
ATOM   1498  C   GLU L 105     102.315   8.204  -3.247  1.00 23.34
ATOM   1499  O   GLU L 105     101.686   9.066  -3.883  1.00 20.25
ATOM   1500  CB  GLU L 105     102.919   6.041  -4.318  1.00 24.81
ATOM   1501  H   GLU L 105     100.328   6.918  -4.759  1.00  0.00
ATOM   1502  H   GLU L 105     102.011   6.290  -2.357  1.00  0.00
ATOM   1503  H   GLU L 105     103.923   6.200  -3.925  1.00  0.00
ATOM   1504  H   GLU L 105     102.654   4.984  -4.337  1.00  0.00
ATOM   1505  N   ILE L 106     103.372   8.486  -2.486  1.00 23.76
ATOM   1506  CA  ILE L 106     103.777   9.867  -2.239  1.00 25.46
ATOM   1507  C   ILE L 106     104.454  10.421  -3.487  1.00 28.19
ATOM   1508  O   ILE L 106     105.209   9.707  -4.148  1.00 30.16
ATOM   1509  CB  ILE L 106     104.731   9.973  -1.002  1.00 30.94
ATOM   1510  H   ILE L 106     103.912   7.717  -2.065  1.00  0.00
ATOM   1511  H   ILE L 106     102.888  10.456  -2.012  1.00  0.00
ATOM   1512  H   ILE L 106     104.192   9.563  -0.148  1.00  0.00
ATOM   1513  N   LYS L 107     104.158  11.681  -3.814  1.00 23.53
ATOM   1514  CA  LYS L 107     104.759  12.366  -4.987  1.00 25.41
ATOM   1515  C   LYS L 107     106.273  12.176  -5.073  1.00 32.41
ATOM   1516  O   LYS L 107     106.985  12.459  -4.108  1.00 43.10
ATOM   1517  CB  LYS L 107     104.419  13.861  -4.927  1.00 23.68
ATOM   1518  H   LYS L 107     103.486  12.199  -3.230  1.00  0.00
ATOM   1519  H   LYS L 107     104.336  11.914  -5.884  1.00  0.00
ATOM   1520  H   LYS L 107     104.875  14.327  -5.800  1.00  0.00
ATOM   1521  H   LYS L 107     103.332  13.942  -4.946  1.00  0.00
TER    1522      LYS L 107
ATOM   1523  N   ASP L   1      81.240  -5.717  14.710  1.00 24.16
ATOM   1524  CA  ASP L   1      81.741  -6.447  13.478  1.00 19.62
ATOM   1525  C   ASP L   1      82.256  -7.816  13.861  1.00 18.57
ATOM   1526  O   ASP L   1      82.753  -8.018  14.995  1.00 20.58
ATOM   1527  CB  ASP L   1      82.914  -5.693  12.799  1.00 22.86
ATOM   1528  CG  ASP L   1      82.534  -4.328  12.217  1.00 26.75
ATOM   1529  OD1 ASP L   1      81.354  -3.953  12.161  1.00 26.81
ATOM   1530  OD2 ASP L   1      83.481  -3.620  11.824  1.00 29.61
ATOM   1531  H   ASP L   1      80.854  -4.766  14.624  1.00  0.00
ATOM   1532  H   ASP L   1      80.899  -6.515  12.789  1.00  0.00
ATOM   1533  H   ASP L   1      83.266  -6.308  11.971  1.00  0.00
ATOM   1534  H   ASP L   1      83.663  -5.505  13.569  1.00  0.00
ATOM   1535  N   ILE L   2      82.209  -8.768  12.933  1.00 16.16
ATOM   1536  CA  ILE L   2      82.764 -10.100  13.190  1.00 17.26
ATOM   1537  C   ILE L   2      84.301 -10.030  13.145  1.00 17.40
ATOM   1538  O   ILE L   2      84.881  -9.408  12.219  1.00 17.56
ATOM   1539  CB  ILE L   2      82.173 -11.164  12.238  1.00 16.54
ATOM   1540  CG1 ILE L   2      80.649 -11.170  12.417  1.00 17.64
ATOM   1541  CG2 ILE L   2      82.856 -12.551  12.500  1.00 17.27
ATOM   1542  CD1 ILE L   2      79.892 -12.227  11.661  1.00 20.30
ATOM   1543  H   ILE L   2      81.776  -8.566  12.020  1.00  0.00
ATOM   1544  H   ILE L   2      82.475 -10.424  14.190  1.00  0.00
ATOM   1545  H   ILE L   2      82.376 -10.932  11.193  1.00  0.00
ATOM   1546  H   ILE L   2      80.281 -10.212  12.049  1.00  0.00
ATOM   1547  H   ILE L   2      80.469 -11.385  13.470  1.00  0.00
ATOM   1548  H   ILE L   2      82.407 -13.263  11.808  1.00  0.00
ATOM   1549  H   ILE L   2      83.922 -12.422  12.314  1.00  0.00
ATOM   1550  H   ILE L   2      82.655 -12.814  13.539  1.00  0.00
ATOM   1551  H   ILE L   2      78.836 -12.092  11.896  1.00  0.00
ATOM   1552  H   ILE L   2      80.095 -12.068  10.602  1.00  0.00
ATOM   1553  H   ILE L   2      80.264 -13.192  12.004  1.00  0.00
ATOM   1554  N   GLN L   3      84.950 -10.573  14.186  1.00 19.07
ATOM   1555  CA  GLN L   3      86.406 -10.605  14.270  1.00 17.57
ATOM   1556  C   GLN L   3      86.913 -11.968  13.787  1.00 17.92
ATOM   1557  O   GLN L   3      86.485 -13.033  14.287  1.00 19.66
ATOM   1558  CB  GLN L   3      86.901 -10.355  15.703  1.00 22.29
ATOM   1559  H   GLN L   3      84.400 -10.983  14.954  1.00  0.00
ATOM   1560  H   GLN L   3      86.796  -9.808  13.637  1.00  0.00
ATOM   1561  H   GLN L   3      87.990 -10.396  15.676  1.00  0.00
ATOM   1562  H   GLN L   3      86.540  -9.370  15.998  1.00  0.00
ATOM   1563  N   MET L   4      87.849 -11.919  12.852  1.00 16.50
ATOM   1564  CA  MET L   4      88.478 -13.126  12.330  1.00 15.98
ATOM   1565  C   MET L   4      89.897 -13.266  12.853  1.00 16.09
ATOM   1566  O   MET L   4      90.676 -12.319  12.793  1.00 19.79
ATOM   1567  CB  MET L   4      88.522 -13.082  10.799  1.00 16.81
ATOM   1568  CG  MET L   4      87.133 -12.899  10.134  1.00 18.95
ATOM   1569  SD  MET L   4      85.940 -14.187  10.584  1.00 21.68
ATOM   1570  CE  MET L   4      86.769 -15.647  10.021  1.00 22.94
ATOM   1571  H   MET L   4      88.141 -11.003  12.483  1.00  0.00
ATOM   1572  H   MET L   4      87.885 -13.979  12.661  1.00  0.00
ATOM   1573  H   MET L   4      88.915 -14.043  10.468  1.00  0.00
ATOM   1574  H   MET L   4      89.141 -12.230  10.517  1.00  0.00
ATOM   1575  H   MET L   4      87.375 -13.051   9.082  1.00  0.00
ATOM   1576  H   MET L   4      86.808 -11.884  10.363  1.00  0.00
ATOM   1577  H   MET L   4      86.119 -16.491  10.251  1.00  0.00
ATOM   1578  H   MET L   4      86.921 -15.533   8.948  1.00  0.00
ATOM   1579  H   MET L   4      87.714 -15.705  10.560  1.00  0.00
ATOM   1580  N   THR L   5      90.214 -14.432  13.398  1.00 14.64
ATOM   1581  CA  THR L   5      91.554 -14.700  13.939  1.00 16.25
ATOM   1582  C   THR L   5      92.249 -15.780  13.126  1.00 15.67
ATOM   1583  O   THR L   5      91.860 -16.959  13.176  1.00 14.92
ATOM   1584  CB  THR L   5      91.511 -15.144  15.414  1.00 17.90
ATOM   1585  OG1 THR L   5      90.785 -14.182  16.179  1.00 19.51
ATOM   1586  CG2 THR L   5      92.940 -15.292  15.961  1.00 21.34
ATOM   1587  H   THR L   5      89.500 -15.173  13.444  1.00  0.00
ATOM   1588  H   THR L   5      92.108 -13.763  13.877  1.00  0.00
ATOM   1589  H   THR L   5      91.010 -16.109  15.487  1.00  0.00
ATOM   1590  H   THR L   5      89.841 -14.124  15.771  1.00  0.00
ATOM   1591  H   THR L   5      92.852 -15.606  17.001  1.00  0.00
ATOM   1592  H   THR L   5      93.438 -16.046  15.351  1.00  0.00
ATOM   1593  H   THR L   5      93.418 -14.317  15.871  1.00  0.00
ATOM   1594  N   GLN L   6      93.268 -15.369  12.369  1.00 12.81
ATOM   1595  CA  GLN L   6      93.964 -16.223  11.439  1.00 12.55
ATOM   1596  C   GLN L   6      95.345 -16.598  11.958  1.00 15.07
ATOM   1597  O   GLN L   6      96.084 -15.707  12.449  1.00 17.06
ATOM   1598  CB  GLN L   6      94.089 -15.519  10.076  1.00 14.06
ATOM   1599  CG  GLN L   6      94.696 -16.428   9.029  1.00 12.44
ATOM   1600  CD  GLN L   6      94.728 -15.801   7.657  1.00 13.74
ATOM   1601  OE1 GLN L   6      94.046 -14.804   7.394  1.00 15.21
ATOM   1602  NE2 GLN L   6      95.446 -16.437   6.759  1.00 12.64
ATOM   1603  H   GLN L   6      93.574 -14.389  12.454  1.00  0.00
ATOM   1604  H   GLN L   6      93.387 -17.140  11.324  1.00  0.00
ATOM   1605  H   GLN L   6      94.731 -14.645  10.185  1.00  0.00
ATOM   1606  H   GLN L   6      93.089 -15.246   9.738  1.00  0.00
ATOM   1607  H   GLN L   6      94.084 -17.328   8.970  1.00  0.00
ATOM   1608  H   GLN L   6      95.725 -16.635   9.323  1.00  0.00
ATOM   1609  H   GLN L   6      95.515 -16.069   5.800  1.00  0.00
ATOM   1610  H   GLN L   6      95.940 -17.304   7.014  1.00  0.00
ATOM   1611  N   SER L   7      95.683 -17.881  11.853  1.00 14.57
ATOM   1612  CA  SER L   7      97.047 -18.343  12.189  1.00 16.51
ATOM   1613  C   SER L   7      97.551 -19.380  11.254  1.00 16.69
ATOM   1614  O   SER L   7      96.771 -20.090  10.674  1.00 17.19
ATOM   1615  CB  SER L   7      97.162 -18.872  13.613  1.00 26.83
ATOM   1616  OG  SER L   7      95.964 -19.334  14.123  1.00 22.68
ATOM   1617  H   SER L   7      94.982 -18.564  11.532  1.00  0.00
ATOM   1618  H   SER L   7      97.665 -17.450  12.094  1.00  0.00
ATOM   1619  H   SER L   7      97.534 -18.111  14.299  1.00  0.00
ATOM   1620  H   SER L   7      97.788 -19.764  13.577  1.00  0.00
ATOM   1621  H   SER L   7      96.152 -19.665  15.080  1.00  0.00
ATOM   1622  N   PRO L   8      98.882 -19.506  11.152  1.00 15.64
ATOM   1623  CA  PRO L   8      99.872 -18.654  11.808  1.00 15.35
ATOM   1624  C   PRO L   8     100.039 -17.336  11.055  1.00 17.00
ATOM   1625  O   PRO L   8      99.388 -17.147  10.043  1.00 18.07
ATOM   1626  CB  PRO L   8     101.123 -19.515  11.718  1.00 17.18
ATOM   1627  CG  PRO L   8     100.984 -20.238  10.454  1.00 19.87
ATOM   1628  CD  PRO L   8      99.514 -20.484  10.258  1.00 18.74
ATOM   1629  H   PRO L   8      99.613 -18.363  12.826  1.00  0.00
ATOM   1630  H   PRO L   8     101.245 -20.193  12.563  1.00  0.00
ATOM   1631  H   PRO L   8     102.032 -18.913  11.714  1.00  0.00
ATOM   1632  H   PRO L   8     101.532 -21.179  10.504  1.00  0.00
ATOM   1633  H   PRO L   8     101.416 -19.668   9.631  1.00  0.00
ATOM   1634  H   PRO L   8      99.201 -20.344   9.223  1.00  0.00
ATOM   1635  H   PRO L   8      99.212 -21.508  10.478  1.00  0.00
ATOM   1636  N   SER L   9     100.953 -16.479  11.496  1.00 15.63
ATOM   1637  CA  SER L   9     101.293 -15.246  10.774  1.00 17.03
ATOM   1638  C   SER L   9     102.150 -15.497   9.556  1.00 15.48
ATOM   1639  O   SER L   9     102.009 -14.778   8.572  1.00 17.10
ATOM   1640  CB  SER L   9     101.997 -14.247  11.702  1.00 21.43
ATOM   1641  OG  SER L   9     101.077 -13.803  12.656  1.00 35.10
ATOM   1642  H   SER L   9     101.442 -16.687  12.378  1.00  0.00
ATOM   1643  H   SER L   9     100.349 -14.825  10.430  1.00  0.00
ATOM   1644  H   SER L   9     102.428 -13.392  11.182  1.00  0.00
ATOM   1645  H   SER L   9     102.790 -14.753  12.253  1.00  0.00
ATOM   1646  H   SER L   9     101.572 -13.136  13.265  1.00  0.00
ATOM   1647  N   SER L  10     103.055 -16.474   9.644  1.00 16.05
ATOM   1648  CA  SER L  10     103.961 -16.843   8.568  1.00 16.13
ATOM   1649  C   SER L  10     104.441 -18.243   8.768  1.00 16.60
ATOM   1650  O   SER L  10     104.423 -18.752   9.887  1.00 15.78
ATOM   1651  CB  SER L  10     105.152 -15.893   8.501  1.00 17.79
ATOM   1652  OG  SER L  10     106.011 -16.126   9.614  1.00 22.82
ATOM   1653  H   SER L  10     103.115 -16.999  10.528  1.00  0.00
ATOM   1654  H   SER L  10     103.417 -16.774   7.626  1.00  0.00
ATOM   1655  H   SER L  10     104.846 -14.847   8.495  1.00  0.00
ATOM   1656  H   SER L  10     105.734 -16.107   7.605  1.00  0.00
ATOM   1657  H   SER L  10     106.798 -15.467   9.530  1.00  0.00
ATOM   1658  N   LEU L  11     104.816 -18.882   7.665  1.00 17.42
ATOM   1659  CA  LEU L  11     105.407 -20.201   7.739  1.00 16.67
ATOM   1660  C   LEU L  11     106.299 -20.441   6.539  1.00 18.41
ATOM   1661  O   LEU L  11     106.121 -19.822   5.481  1.00 18.03
ATOM   1662  CB  LEU L  11     104.314 -21.274   7.861  1.00 18.22
ATOM   1663  CG  LEU L  11     103.403 -21.483   6.642  1.00 17.33
ATOM   1664  CD1 LEU L  11     104.001 -22.494   5.653  1.00 20.28
ATOM   1665  CD2 LEU L  11     102.013 -21.923   7.077  1.00 17.98
ATOM   1666  H   LEU L  11     104.685 -18.434   6.747  1.00  0.00
ATOM   1667  H   LEU L  11     106.028 -20.265   8.633  1.00  0.00
ATOM   1668  H   LEU L  11     103.660 -20.943   8.668  1.00  0.00
ATOM   1669  H   LEU L  11     104.839 -22.218   8.005  1.00  0.00
ATOM   1670  H   LEU L  11     103.322 -20.525   6.128  1.00  0.00
ATOM   1671  H   LEU L  11     103.298 -22.583   4.825  1.00  0.00
ATOM   1672  H   LEU L  11     104.961 -22.093   5.328  1.00  0.00
ATOM   1673  H   LEU L  11     104.116 -23.435   6.190  1.00  0.00
ATOM   1674  H   LEU L  11     101.422 -22.053   6.171  1.00  0.00
ATOM   1675  H   LEU L  11     102.131 -22.860   7.621  1.00  0.00
ATOM   1676  H   LEU L  11     101.613 -21.133   7.712  1.00  0.00
ATOM   1677  N   SER L  12     107.298 -21.300   6.730  1.00 17.12
ATOM   1678  CA  SER L  12     108.191 -21.688   5.651  1.00 18.49
ATOM   1679  C   SER L  12     108.181 -23.195   5.606  1.00 21.78
ATOM   1680  O   SER L  12     108.224 -23.850   6.648  1.00 18.28
ATOM   1681  CB  SER L  12     109.618 -21.176   5.907  1.00 26.37
ATOM   1682  H   SER L  12     107.442 -21.701   7.668  1.00  0.00
ATOM   1683  H   SER L  12     107.861 -21.258   4.705  1.00  0.00
ATOM   1684  H   SER L  12     110.229 -21.501   5.065  1.00  0.00
ATOM   1685  H   SER L  12     109.560 -20.089   5.970  1.00  0.00
ATOM   1686  N   ALA L  13     108.106 -23.748   4.409  1.00 19.37
ATOM   1687  CA  ALA L  13     108.056 -25.197   4.265  1.00 21.24
ATOM   1688  C   ALA L  13     108.703 -25.601   2.955  1.00 24.15
ATOM   1689  O   ALA L  13     109.088 -24.755   2.166  1.00 21.91
ATOM   1690  CB  ALA L  13     106.603 -25.693   4.361  1.00 24.58
ATOM   1691  H   ALA L  13     108.083 -23.150   3.571  1.00  0.00
ATOM   1692  H   ALA L  13     108.614 -25.665   5.076  1.00  0.00
ATOM   1693  H   ALA L  13     106.628 -26.777   4.247  1.00  0.00
ATOM   1694  H   ALA L  13     106.229 -25.397   5.341  1.00  0.00
ATOM   1695  H   ALA L  13     106.049 -25.213   3.554  1.00  0.00
ATOM   1696  N   SER L  14     108.850 -26.903   2.751  1.00 26.72
ATOM   1697  CA  SER L  14     109.496 -27.424   1.543  1.00 29.51
ATOM   1698  C   SER L  14     108.489 -27.899   0.510  1.00 25.24
ATOM   1699  O   SER L  14     107.368 -28.264   0.854  1.00 24.12
ATOM   1700  CB  SER L  14     110.384 -28.599   1.901  1.00 27.44
ATOM   1701  OG  SER L  14     111.428 -28.241   2.796  1.00 32.62
ATOM   1702  H   SER L  14     108.501 -27.565   3.459  1.00  0.00
ATOM   1703  H   SER L  14     110.075 -26.605   1.118  1.00  0.00
ATOM   1704  H   SER L  14     110.842 -29.022   1.007  1.00  0.00
ATOM   1705  H   SER L  14     109.776 -29.323   2.443  1.00  0.00
ATOM   1706  H   SER L  14     111.973 -29.095   2.980  1.00  0.00
ATOM   1707  N   VAL L  15     108.943 -28.005  -0.741  1.00 27.07
ATOM   1708  CA  VAL L  15     108.085 -28.486  -1.816  1.00 21.00
ATOM   1709  C   VAL L  15     107.620 -29.906  -1.505  1.00 21.33
ATOM   1710  O   VAL L  15     108.408 -30.762  -1.053  1.00 27.52
ATOM   1711  CB  VAL L  15     108.781 -28.421  -3.231  1.00 25.39
ATOM   1712  CG1 VAL L  15     108.024 -29.283  -4.219  1.00 27.53
ATOM   1713  CG2 VAL L  15     108.828 -26.975  -3.719  1.00 23.94
ATOM   1714  H   VAL L  15     109.917 -27.742  -0.950  1.00  0.00
ATOM   1715  H   VAL L  15     107.223 -27.821  -1.869  1.00  0.00
ATOM   1716  H   VAL L  15     109.800 -28.798  -3.146  1.00  0.00
ATOM   1717  H   VAL L  15     108.543 -29.203  -5.174  1.00  0.00
ATOM   1718  H   VAL L  15     108.042 -30.302  -3.832  1.00  0.00
ATOM   1719  H   VAL L  15     107.010 -28.888  -4.275  1.00  0.00
ATOM   1720  H   VAL L  15     109.315 -26.983  -4.694  1.00  0.00
ATOM   1721  H   VAL L  15     107.797 -26.627  -3.784  1.00  0.00
ATOM   1722  H   VAL L  15     109.401 -26.409  -2.985  1.00  0.00
ATOM   1723  N   GLY L  16     106.336 -30.137  -1.699  1.00 22.49
ATOM   1724  CA  GLY L  16     105.696 -31.409  -1.458  1.00 25.63
ATOM   1725  C   GLY L  16     105.086 -31.543  -0.079  1.00 25.04
ATOM   1726  O   GLY L  16     104.350 -32.490   0.174  1.00 29.83
ATOM   1727  H   GLY L  16     105.753 -29.361  -2.044  1.00  0.00
ATOM   1728  H   GLY L  16     106.493 -32.149  -1.530  1.00  0.00
ATOM   1729  H   GLY L  16     104.914 -31.522  -2.209  1.00  0.00
ATOM   1730  N   ASP L  17     105.364 -30.592   0.810  1.00 22.70
ATOM   1731  CA  ASP L  17     104.822 -30.642   2.183  1.00 26.34
ATOM   1732  C   ASP L  17     103.356 -30.257   2.276  1.00 24.15
ATOM   1733  O   ASP L  17     102.828 -29.557   1.407  1.00 26.59
ATOM   1734  CB  ASP L  17     105.566 -29.690   3.105  1.00 30.63
ATOM   1735  CG  ASP L  17     106.932 -30.154   3.448  1.00 32.10
ATOM   1736  OD1 ASP L  17     107.316 -31.324   3.169  1.00 32.17
ATOM   1737  OD2 ASP L  17     107.632 -29.312   4.046  1.00 41.92
ATOM   1738  H   ASP L  17     105.969 -29.805   0.535  1.00  0.00
ATOM   1739  H   ASP L  17     104.946 -31.683   2.481  1.00  0.00
ATOM   1740  H   ASP L  17     105.006 -29.598   4.036  1.00  0.00
ATOM   1741  H   ASP L  17     105.682 -28.744   2.577  1.00  0.00
ATOM   1742  N   ARG L  18     102.700 -30.744   3.325  1.00 24.48
ATOM   1743  CA  ARG L  18     101.368 -30.295   3.663  1.00 24.76
ATOM   1744  C   ARG L  18     101.512 -29.085   4.575  1.00 28.35
ATOM   1745  O   ARG L  18     102.319 -29.103   5.523  1.00 25.87
ATOM   1746  CB  ARG L  18     100.560 -31.365   4.400  1.00 27.26
ATOM   1747  CG  ARG L  18      99.193 -30.908   4.902  1.00 27.16
ATOM   1748  CD  ARG L  18      98.489 -31.969   5.742  1.00 30.86
ATOM   1749  NE  ARG L  18      98.477 -33.259   5.059  1.00 30.57
ATOM   1750  CZ  ARG L  18      98.507 -34.443   5.660  1.00 24.45
ATOM   1751  NH1 ARG L  18      98.585 -34.536   6.981  1.00 22.06
ATOM   1752  NH2 ARG L  18      98.509 -35.544   4.919  1.00 25.79
ATOM   1753  H   ARG L  18     103.152 -31.459   3.912  1.00  0.00
ATOM   1754  H   ARG L  18     100.837 -30.061   2.740  1.00  0.00
ATOM   1755  H   ARG L  18     101.139 -31.650   5.278  1.00  0.00
ATOM   1756  H   ARG L  18     100.379 -32.170   3.687  1.00  0.00
ATOM   1757  H   ARG L  18      98.569 -30.701   4.033  1.00  0.00
ATOM   1758  H   ARG L  18      99.344 -30.030   5.530  1.00  0.00
ATOM   1759  H   ARG L  18      97.459 -31.674   5.945  1.00  0.00
ATOM   1760  H   ARG L  18      99.048 -32.106   6.668  1.00  0.00
ATOM   1761  H   ARG L  18      98.443 -33.250   4.030  1.00  0.00
ATOM   1762  H   ARG L  18      98.607 -35.462   7.432  1.00  0.00
ATOM   1763  H   ARG L  18      98.623 -33.682   7.556  1.00  0.00
ATOM   1764  H   ARG L  18      98.532 -36.469   5.371  1.00  0.00
ATOM   1765  H   ARG L  18      98.487 -35.473   3.892  1.00  0.00
ATOM   1766  N   VAL L  19     100.718 -28.066   4.270  1.00 23.54
ATOM   1767  CA  VAL L  19     100.667 -26.813   5.041  1.00 27.13
ATOM   1768  C   VAL L  19      99.213 -26.539   5.469  1.00 21.76
ATOM   1769  O   VAL L  19      98.280 -26.793   4.723  1.00 18.05
ATOM   1770  CB  VAL L  19     101.280 -25.659   4.165  1.00 33.65
ATOM   1771  CG1 VAL L  19     100.564 -24.363   4.356  1.00 30.68
ATOM   1772  CG2 VAL L  19     102.786 -25.535   4.491  1.00 42.12
ATOM   1773  H   VAL L  19     100.104 -28.157   3.448  1.00  0.00
ATOM   1774  H   VAL L  19     101.258 -26.882   5.954  1.00  0.00
ATOM   1775  H   VAL L  19     101.157 -25.912   3.112  1.00  0.00
ATOM   1776  H   VAL L  19     101.055 -23.630   3.715  1.00  0.00
ATOM   1777  H   VAL L  19      99.526 -24.526   4.065  1.00  0.00
ATOM   1778  H   VAL L  19     100.652 -24.102   5.411  1.00  0.00
ATOM   1779  H   VAL L  19     103.181 -24.730   3.871  1.00  0.00
ATOM   1780  H   VAL L  19     102.864 -25.304   5.553  1.00  0.00
ATOM   1781  H   VAL L  19     103.244 -26.494   4.251  1.00  0.00
ATOM   1782  N   THR L  20      99.004 -26.012   6.690  1.00 18.73
ATOM   1783  CA  THR L  20      97.668 -25.864   7.255  1.00 19.58
ATOM   1784  C   THR L  20      97.569 -24.459   7.838  1.00 17.67
ATOM   1785  O   THR L  20      98.441 -24.052   8.622  1.00 19.69
ATOM   1786  CB  THR L  20      97.419 -26.911   8.412  1.00 22.61
ATOM   1787  OG1 THR L  20      97.609 -28.242   7.899  1.00 28.18
ATOM   1788  CG2 THR L  20      96.049 -26.803   8.979  1.00 20.71
ATOM   1789  H   THR L  20      99.815 -25.703   7.244  1.00  0.00
ATOM   1790  H   THR L  20      96.925 -26.033   6.476  1.00  0.00
ATOM   1791  H   THR L  20      98.131 -26.697   9.209  1.00  0.00
ATOM   1792  H   THR L  20      98.564 -28.283   7.515  1.00  0.00
ATOM   1793  H   THR L  20      95.968 -27.556   9.763  1.00  0.00
ATOM   1794  H   THR L  20      95.947 -25.793   9.376  1.00  0.00
ATOM   1795  H   THR L  20      95.351 -26.991   8.163  1.00  0.00
ATOM   1796  N   ILE L  21      96.508 -23.740   7.484  1.00 15.99
ATOM   1797  CA  ILE L  21      96.249 -22.389   7.958  1.00 15.29
ATOM   1798  C   ILE L  21      94.866 -22.413   8.609  1.00 16.54
ATOM   1799  O   ILE L  21      93.930 -23.069   8.101  1.00 18.30
ATOM   1800  CB  ILE L  21      96.276 -21.417   6.785  1.00 17.49
ATOM   1801  CG1 ILE L  21      97.695 -21.347   6.199  1.00 18.05
ATOM   1802  CG2 ILE L  21      95.739 -20.032   7.181  1.00 18.57
ATOM   1803  CD1 ILE L  21      97.776 -20.607   4.879  1.00 20.43
ATOM   1804  H   ILE L  21      95.829 -24.165   6.836  1.00  0.00
ATOM   1805  H   ILE L  21      97.005 -22.062   8.672  1.00  0.00
ATOM   1806  H   ILE L  21      95.607 -21.788   6.008  1.00  0.00
ATOM   1807  H   ILE L  21      98.035 -22.367   6.021  1.00  0.00
ATOM   1808  H   ILE L  21      98.312 -20.794   6.907  1.00  0.00
ATOM   1809  H   ILE L  21      95.793 -19.403   6.292  1.00  0.00
ATOM   1810  H   ILE L  21      94.711 -20.173   7.516  1.00  0.00
ATOM   1811  H   ILE L  21      96.379 -19.659   7.981  1.00  0.00
ATOM   1812  H   ILE L  21      98.820 -20.624   4.568  1.00  0.00
ATOM   1813  H   ILE L  21      97.135 -21.138   4.176  1.00  0.00
ATOM   1814  H   ILE L  21      97.424 -19.592   5.061  1.00  0.00
ATOM   1815  N   THR L  22      94.733 -21.734   9.739  1.00 15.30
ATOM   1816  CA  THR L  22      93.485 -21.747  10.501  1.00 16.49
ATOM   1817  C   THR L  22      92.835 -20.371  10.491  1.00 15.52
ATOM   1818  O   THR L  22      93.532 -19.362  10.554  1.00 16.20
ATOM   1819  CB  THR L  22      93.791 -22.144  11.967  1.00 15.43
ATOM   1820  OG1 THR L  22      94.384 -23.448  11.971  1.00 19.18
ATOM   1821  CG2 THR L  22      92.530 -22.140  12.792  1.00 17.50
ATOM   1822  H   THR L  22      95.529 -21.183  10.090  1.00  0.00
ATOM   1823  H   THR L  22      92.804 -22.464  10.044  1.00  0.00
ATOM   1824  H   THR L  22      94.479 -21.422  12.406  1.00  0.00
ATOM   1825  H   THR L  22      95.237 -23.393  11.396  1.00  0.00
ATOM   1826  H   THR L  22      92.811 -22.426  13.806  1.00  0.00
ATOM   1827  H   THR L  22      92.127 -21.128  12.753  1.00  0.00
ATOM   1828  H   THR L  22      91.852 -22.864  12.341  1.00  0.00
ATOM   1829  N   CYS L  23      91.508 -20.324  10.375  1.00 13.79
ATOM   1830  CA  CYS L  23      90.755 -19.118  10.738  1.00 15.38
ATOM   1831  C   CYS L  23      89.653 -19.409  11.734  1.00 15.42
ATOM   1832  O   CYS L  23      88.918 -20.390  11.610  1.00 15.41
ATOM   1833  CB  CYS L  23      90.201 -18.377   9.511  1.00 14.93
ATOM   1834  SG  CYS L  23      91.408 -17.215   8.848  1.00 15.42
ATOM   1835  H   CYS L  23      91.002 -21.149  10.024  1.00  0.00
ATOM   1836  H   CYS L  23      91.472 -18.455  11.221  1.00  0.00
ATOM   1837  H   CYS L  23      89.381 -17.798   9.935  1.00  0.00
ATOM   1838  H   CYS L  23      89.835 -19.125   8.808  1.00  0.00
ATOM   1839  N   ARG L  24      89.577 -18.561  12.750  1.00 15.38
ATOM   1840  CA  ARG L  24      88.508 -18.624  13.738  1.00 17.83
ATOM   1841  C   ARG L  24      87.655 -17.355  13.589  1.00 18.53
ATOM   1842  O   ARG L  24      88.176 -16.250  13.436  1.00 18.75
ATOM   1843  CB  ARG L  24      89.032 -18.705  15.173  1.00 20.13
ATOM   1844  CG  ARG L  24      89.966 -19.879  15.485  1.00 23.32
ATOM   1845  CD  ARG L  24      89.340 -21.214  15.189  1.00 23.00
ATOM   1846  NE  ARG L  24      88.087 -21.426  15.903  1.00 25.48
ATOM   1847  CZ  ARG L  24      87.957 -21.963  17.119  1.00 27.39
ATOM   1848  NH1 ARG L  24      89.016 -22.343  17.835  1.00 29.08
ATOM   1849  NH2 ARG L  24      86.751 -22.117  17.631  1.00 28.92
ATOM   1850  H   ARG L  24      90.299 -17.832  12.844  1.00  0.00
ATOM   1851  H   ARG L  24      87.930 -19.530  13.557  1.00  0.00
ATOM   1852  H   ARG L  24      88.156 -18.834  15.809  1.00  0.00
ATOM   1853  H   ARG L  24      89.614 -17.798  15.337  1.00  0.00
ATOM   1854  H   ARG L  24      90.215 -19.854  16.546  1.00  0.00
ATOM   1855  H   ARG L  24      90.843 -19.787  14.845  1.00  0.00
ATOM   1856  H   ARG L  24      90.029 -22.004  15.487  1.00  0.00
ATOM   1857  H   ARG L  24      89.098 -21.238  14.127  1.00  0.00
ATOM   1858  H   ARG L  24      87.222 -21.135  15.426  1.00  0.00
ATOM   1859  H   ARG L  24      88.885 -22.754  18.770  1.00  0.00
ATOM   1860  H   ARG L  24      89.965 -22.225  17.453  1.00  0.00
ATOM   1861  H   ARG L  24      86.638 -22.530  18.568  1.00  0.00
ATOM   1862  H   ARG L  24      85.922 -21.824  17.094  1.00  0.00
ATOM   1863  N   ALA L  25      86.349 -17.534  13.687  1.00 18.27
ATOM   1864  CA  ALA L  25      85.392 -16.433  13.699  1.00 18.23
ATOM   1865  C   ALA L  25      84.850 -16.197  15.131  1.00 17.16
ATOM   1866  O   ALA L  25      84.605 -17.150  15.877  1.00 19.73
ATOM   1867  CB  ALA L  25      84.235 -16.725  12.746  1.00 16.59
ATOM   1868  H   ALA L  25      85.990 -18.497  13.758  1.00  0.00
ATOM   1869  H   ALA L  25      85.905 -15.531  13.367  1.00  0.00
ATOM   1870  H   ALA L  25      83.557 -15.873  12.797  1.00  0.00
ATOM   1871  H   ALA L  25      84.664 -16.842  11.751  1.00  0.00
ATOM   1872  H   ALA L  25      83.760 -17.642  13.093  1.00  0.00
ATOM   1873  N   SER L  26      84.610 -14.932  15.480  1.00 16.88
ATOM   1874  CA  SER L  26      83.998 -14.578  16.761  1.00 17.89
ATOM   1875  C   SER L  26      82.569 -15.065  16.992  1.00 20.85
ATOM   1876  O   SER L  26      82.114 -15.058  18.111  1.00 22.13
ATOM   1877  CB  SER L  26      84.041 -13.061  16.987  1.00 17.67
ATOM   1878  OG  SER L  26      83.433 -12.345  15.908  1.00 21.08
ATOM   1879  H   SER L  26      84.864 -14.179  14.825  1.00  0.00
ATOM   1880  H   SER L  26      84.612 -15.115  17.485  1.00  0.00
ATOM   1881  H   SER L  26      85.066 -12.706  17.095  1.00  0.00
ATOM   1882  H   SER L  26      83.438 -12.831  17.865  1.00  0.00
ATOM   1883  H   SER L  26      83.502 -11.343  16.135  1.00  0.00
ATOM   1884  N   GLN L  27      81.845 -15.420  15.933  1.00 20.23
ATOM   1885  CA  GLN L  27      80.527 -16.015  16.047  1.00 22.48
ATOM   1886  C   GLN L  27      80.315 -16.928  14.857  1.00 21.12
ATOM   1887  O   GLN L  27      81.087 -16.882  13.895  1.00 19.96
ATOM   1888  CB  GLN L  27      79.431 -14.942  16.093  1.00 22.36
ATOM   1889  CG  GLN L  27      79.227 -14.175  14.796  1.00 22.34
ATOM   1890  CD  GLN L  27      78.284 -12.992  14.986  1.00 26.79
ATOM   1891  OE1 GLN L  27      78.697 -11.932  15.456  1.00 25.75
ATOM   1892  NE2 GLN L  27      76.998 -13.198  14.694  1.00 26.38
ATOM   1893  H   GLN L  27      82.237 -15.266  14.993  1.00  0.00
ATOM   1894  H   GLN L  27      80.466 -16.580  16.977  1.00  0.00
ATOM   1895  H   GLN L  27      79.727 -14.212  16.847  1.00  0.00
ATOM   1896  H   GLN L  27      78.493 -15.459  16.295  1.00  0.00
ATOM   1897  H   GLN L  27      78.787 -14.852  14.064  1.00  0.00
ATOM   1898  H   GLN L  27      80.194 -13.797  14.463  1.00  0.00
ATOM   1899  H   GLN L  27      76.316 -12.434  14.804  1.00  0.00
ATOM   1900  H   GLN L  27      76.687 -14.121  14.359  1.00  0.00
ATOM   1901  N   ASP L  28      79.244 -17.701  14.919  1.00 22.17
ATOM   1902  CA  ASP L  28      78.864 -18.628  13.847  1.00 23.71
ATOM   1903  C   ASP L  28      78.683 -17.883  12.521  1.00 21.68
ATOM   1904  O   ASP L  28      77.886 -16.967  12.470  1.00 23.81
ATOM   1905  CB  ASP L  28      77.569 -19.298  14.309  1.00 25.25
ATOM   1906  CG  ASP L  28      76.951 -20.245  13.298  1.00 27.36
ATOM   1907  OD1 ASP L  28      77.611 -20.682  12.340  1.00 23.65
ATOM   1908  OD2 ASP L  28      75.755 -20.587  13.522  1.00 27.64
ATOM   1909  H   ASP L  28      78.649 -17.650  15.758  1.00  0.00
ATOM   1910  H   ASP L  28      79.638 -19.374  13.664  1.00  0.00
ATOM   1911  H   ASP L  28      76.841 -18.507  14.489  1.00  0.00
ATOM   1912  H   ASP L  28      77.816 -19.897  15.186  1.00  0.00
ATOM   1913  N   ILE L  29      79.416 -18.280  11.470  1.00 17.39
ATOM   1914  CA  ILE L  29      79.300 -17.651  10.146  1.00 16.92
ATOM   1915  C   ILE L  29      78.884 -18.669   9.082  1.00 17.94
ATOM   1916  O   ILE L  29      79.102 -18.471   7.884  1.00 17.79
ATOM   1917  CB  ILE L  29      80.599 -16.866   9.726  1.00 15.52
ATOM   1918  CG1 ILE L  29      81.814 -17.763   9.639  1.00 15.72
ATOM   1919  CG2 ILE L  29      80.894 -15.745  10.730  1.00 17.50
ATOM   1920  CD1 ILE L  29      82.998 -17.141   8.877  1.00 13.94
ATOM   1921  H   ILE L  29      80.084 -19.054  11.595  1.00  0.00
ATOM   1922  H   ILE L  29      78.508 -16.906  10.223  1.00  0.00
ATOM   1923  H   ILE L  29      80.403 -16.453   8.736  1.00  0.00
ATOM   1924  H   ILE L  29      81.505 -18.651   9.087  1.00  0.00
ATOM   1925  H   ILE L  29      82.139 -17.966  10.659  1.00  0.00
ATOM   1926  H   ILE L  29      81.798 -15.241  10.388  1.00  0.00
ATOM   1927  H   ILE L  29      80.032 -15.078  10.725  1.00  0.00
ATOM   1928  H   ILE L  29      81.036 -16.217  11.702  1.00  0.00
ATOM   1929  H   ILE L  29      83.803 -17.876   8.883  1.00  0.00
ATOM   1930  H   ILE L  29      82.650 -16.929   7.866  1.00  0.00
ATOM   1931  H   ILE L  29      83.276 -16.231   9.409  1.00  0.00
ATOM   1932  N   ALA L  30      78.258 -19.748   9.537  1.00 17.83
ATOM   1933  CA  ALA L  30      77.908 -20.880   8.675  1.00 19.02
ATOM   1934  C   ALA L  30      79.136 -21.328   7.906  1.00 19.06
ATOM   1935  O   ALA L  30      80.122 -21.681   8.553  1.00 17.62
ATOM   1936  CB  ALA L  30      76.709 -20.542   7.749  1.00 17.77
ATOM   1937  H   ALA L  30      78.009 -19.791  10.535  1.00  0.00
ATOM   1938  H   ALA L  30      77.577 -21.714   9.294  1.00  0.00
ATOM   1939  H   ALA L  30      76.513 -21.428   7.145  1.00  0.00
ATOM   1940  H   ALA L  30      75.866 -20.298   8.395  1.00  0.00
ATOM   1941  H   ALA L  30      77.009 -19.692   7.136  1.00  0.00
ATOM   1942  N   SER L  31      79.102 -21.292   6.570  1.00 19.88
ATOM   1943  CA  SER L  31      80.320 -21.544   5.764  1.00 17.84
ATOM   1944  C   SER L  31      80.683 -20.356   4.880  1.00 15.42
ATOM   1945  O   SER L  31      81.353 -20.522   3.843  1.00 14.61
ATOM   1946  CB  SER L  31      80.202 -22.835   4.948  1.00 22.38
ATOM   1947  OG  SER L  31      79.829 -23.908   5.800  1.00 28.40
ATOM   1948  H   SER L  31      78.213 -21.085   6.092  1.00  0.00
ATOM   1949  H   SER L  31      81.140 -21.676   6.470  1.00  0.00
ATOM   1950  H   SER L  31      81.129 -23.091   4.435  1.00  0.00
ATOM   1951  H   SER L  31      79.397 -22.726   4.221  1.00  0.00
ATOM   1952  H   SER L  31      79.762 -24.751   5.211  1.00  0.00
ATOM   1953  N   ASP L  32      80.268 -19.152   5.288  1.00 16.05
ATOM   1954  CA  ASP L  32      80.412 -17.944   4.467  1.00 14.96
ATOM   1955  C   ASP L  32      81.816 -17.319   4.637  1.00 14.46
ATOM   1956  O   ASP L  32      81.976 -16.199   5.153  1.00 15.98
ATOM   1957  CB  ASP L  32      79.319 -16.913   4.854  1.00 15.90
ATOM   1958  CG  ASP L  32      77.943 -17.257   4.315  1.00 20.44
ATOM   1959  OD1 ASP L  32      77.742 -18.287   3.588  1.00 21.05
ATOM   1960  OD2 ASP L  32      77.046 -16.446   4.624  1.00 20.90
ATOM   1961  H   ASP L  32      79.829 -19.069   6.216  1.00  0.00
ATOM   1962  H   ASP L  32      80.292 -18.224   3.420  1.00  0.00
ATOM   1963  H   ASP L  32      79.599 -15.944   4.442  1.00  0.00
ATOM   1964  H   ASP L  32      79.236 -16.917   5.941  1.00  0.00
ATOM   1965  N   LEU L  33      82.824 -18.059   4.190  1.00 15.90
ATOM   1966  CA  LEU L  33      84.221 -17.675   4.294  1.00 14.50
ATOM   1967  C   LEU L  33      84.889 -17.752   2.926  1.00 12.97
ATOM   1968  O   LEU L  33      84.733 -18.752   2.195  1.00 14.77
ATOM   1969  CB  LEU L  33      84.963 -18.609   5.291  1.00 15.10
ATOM   1970  CG  LEU L  33      86.350 -18.111   5.735  1.00 15.21
ATOM   1971  CD1 LEU L  33      86.261 -16.896   6.692  1.00 17.55
ATOM   1972  CD2 LEU L  33      87.144 -19.219   6.384  1.00 17.09
ATOM   1973  H   LEU L  33      82.602 -18.960   3.742  1.00  0.00
ATOM   1974  H   LEU L  33      84.273 -16.650   4.661  1.00  0.00
ATOM   1975  H   LEU L  33      85.117 -19.563   4.787  1.00  0.00
ATOM   1976  H   LEU L  33      84.351 -18.659   6.192  1.00  0.00
ATOM   1977  H   LEU L  33      86.865 -17.786   4.831  1.00  0.00
ATOM   1978  H   LEU L  33      87.283 -16.617   6.949  1.00  0.00
ATOM   1979  H   LEU L  33      85.748 -16.101   6.151  1.00  0.00
ATOM   1980  H   LEU L  33      85.697 -17.220   7.567  1.00  0.00
ATOM   1981  H   LEU L  33      88.107 -18.796   6.670  1.00  0.00
ATOM   1982  H   LEU L  33      86.575 -19.553   7.251  1.00  0.00
ATOM   1983  H   LEU L  33      87.254 -20.010   5.642  1.00  0.00
ATOM   1984  N   ASN L  34      85.603 -16.683   2.573  1.00 13.99
ATOM   1985  CA  ASN L  34      86.503 -16.660   1.417  1.00 13.67
ATOM   1986  C   ASN L  34      87.949 -16.923   1.800  1.00 12.92
ATOM   1987  O   ASN L  34      88.407 -16.390   2.804  1.00 15.27
ATOM   1988  CB  ASN L  34      86.464 -15.261   0.760  1.00 14.55
ATOM   1989  CG  ASN L  34      85.128 -14.926   0.102  1.00 16.00
ATOM   1990  OD1 ASN L  34      84.461 -15.786  -0.459  1.00 15.12
ATOM   1991  ND2 ASN L  34      84.755 -13.640   0.146  1.00 16.19
ATOM   1992  H   ASN L  34      85.518 -15.829   3.142  1.00  0.00
ATOM   1993  H   ASN L  34      86.161 -17.444   0.742  1.00  0.00
ATOM   1994  H   ASN L  34      87.225 -15.236  -0.020  1.00  0.00
ATOM   1995  H   ASN L  34      86.619 -14.527   1.550  1.00  0.00
ATOM   1996  H   ASN L  34      83.864 -13.347  -0.280  1.00  0.00
ATOM   1997  H   ASN L  34      85.359 -12.944   0.606  1.00  0.00
ATOM   1998  N   TRP L  35      88.660 -17.731   1.002  1.00 12.60
ATOM   1999  CA  TRP L  35      90.083 -17.865   1.116  1.00 13.05
ATOM   2000  C   TRP L  35      90.714 -17.250  -0.093  1.00 12.78
ATOM   2001  O   TRP L  35      90.419 -17.652  -1.233  1.00 14.66
ATOM   2002  CB  TRP L  35      90.493 -19.332   1.198  1.00 14.70
ATOM   2003  CG  TRP L  35      90.152 -20.019   2.481  1.00 15.64
ATOM   2004  CD1 TRP L  35      89.118 -20.890   2.750  1.00 18.12
ATOM   2005  CD2 TRP L  35      90.853 -19.837   3.740  1.00 15.27
ATOM   2006  NE1 TRP L  35      89.171 -21.314   4.063  1.00 15.87
ATOM   2007  CE2 TRP L  35      90.190 -20.693   4.709  1.00 17.91
ATOM   2008  CE3 TRP L  35      91.962 -19.094   4.133  1.00 15.13
ATOM   2009  CZ2 TRP L  35      90.643 -20.793   6.022  1.00 18.80
ATOM   2010  CZ3 TRP L  35      92.401 -19.199   5.471  1.00 15.61
ATOM   2011  CH2 TRP L  35      91.762 -20.055   6.370  1.00 16.64
ATOM   2012  H   TRP L  35      88.166 -18.276   0.280  1.00  0.00
ATOM   2013  H   TRP L  35      90.413 -17.366   2.027  1.00  0.00
ATOM   2014  H   TRP L  35      91.578 -19.376   1.099  1.00  0.00
ATOM   2015  H   TRP L  35      89.934 -19.856   0.423  1.00  0.00
ATOM   2016  H   TRP L  35      88.364 -21.201   2.027  1.00  0.00
ATOM   2017  H   TRP L  35      88.532 -22.000   4.489  1.00  0.00
ATOM   2018  H   TRP L  35      92.479 -18.447   3.425  1.00  0.00
ATOM   2019  H   TRP L  35      90.136 -21.428   6.748  1.00  0.00
ATOM   2020  H   TRP L  35      93.250 -18.604   5.806  1.00  0.00
ATOM   2021  H   TRP L  35      92.158 -20.146   7.382  1.00  0.00
ATOM   2022  N   TYR L  36      91.602 -16.286   0.166  1.00 14.19
ATOM   2023  CA  TYR L  36      92.342 -15.516  -0.843  1.00 14.65
ATOM   2024  C   TYR L  36      93.837 -15.822  -0.818  1.00 15.31
ATOM   2025  O   TYR L  36      94.395 -16.124   0.234  1.00 16.14
ATOM   2026  CB  TYR L  36      92.180 -14.026  -0.540  1.00 16.06
ATOM   2027  CG  TYR L  36      90.832 -13.491  -0.953  1.00 15.33
ATOM   2028  CD1 TYR L  36      90.535 -13.289  -2.277  1.00 15.62
ATOM   2029  CD2 TYR L  36      89.854 -13.206  -0.007  1.00 16.62
ATOM   2030  CE1 TYR L  36      89.296 -12.813  -2.674  1.00 15.90
ATOM   2031  CE2 TYR L  36      88.632 -12.742  -0.378  1.00 17.14
ATOM   2032  CZ  TYR L  36      88.350 -12.522  -1.702  1.00 18.92
ATOM   2033  OH  TYR L  36      87.118 -12.043  -2.104  1.00 24.18
ATOM   2034  H   TYR L  36      91.783 -16.064   1.155  1.00  0.00
ATOM   2035  H   TYR L  36      91.941 -15.787  -1.820  1.00  0.00
ATOM   2036  H   TYR L  36      92.942 -13.477  -1.093  1.00  0.00
ATOM   2037  H   TYR L  36      92.265 -13.893   0.539  1.00  0.00
ATOM   2038  H   TYR L  36      91.290 -13.508  -3.032  1.00  0.00
ATOM   2039  H   TYR L  36      90.071 -13.357   1.050  1.00  0.00
ATOM   2040  H   TYR L  36      89.069 -12.670  -3.730  1.00  0.00
ATOM   2041  H   TYR L  36      87.873 -12.544   0.379  1.00  0.00
ATOM   2042  H   TYR L  36      87.137 -11.988  -3.132  1.00  0.00
ATOM   2043  N   GLN L  37      94.459 -15.699  -1.986  1.00 15.17
ATOM   2044  CA  GLN L  37      95.864 -15.803  -2.184  1.00 15.94
ATOM   2045  C   GLN L  37      96.312 -14.501  -2.825  1.00 15.67
ATOM   2046  O   GLN L  37      95.850 -14.150  -3.919  1.00 15.92
ATOM   2047  CB  GLN L  37      96.152 -16.944  -3.134  1.00 18.21
ATOM   2048  CG  GLN L  37      97.583 -17.140  -3.493  1.00 18.71
ATOM   2049  CD  GLN L  37      97.768 -18.126  -4.651  1.00 22.23
ATOM   2050  OE1 GLN L  37      97.345 -17.856  -5.773  1.00 19.79
ATOM   2051  NE2 GLN L  37      98.412 -19.262  -4.386  1.00 22.49
ATOM   2052  H   GLN L  37      93.877 -15.513  -2.815  1.00  0.00
ATOM   2053  H   GLN L  37      96.383 -15.985  -1.243  1.00  0.00
ATOM   2054  H   GLN L  37      95.628 -16.727  -4.065  1.00  0.00
ATOM   2055  H   GLN L  37      95.848 -17.856  -2.621  1.00  0.00
ATOM   2056  H   GLN L  37      98.073 -17.559  -2.614  1.00  0.00
ATOM   2057  H   GLN L  37      97.993 -16.171  -3.778  1.00  0.00
ATOM   2058  H   GLN L  37      98.561 -19.956  -5.132  1.00  0.00
ATOM   2059  H   GLN L  37      98.761 -19.446  -3.435  1.00  0.00
ATOM   2060  N   GLN L  38      97.239 -13.813  -2.180  1.00 13.37
ATOM   2061  CA  GLN L  38      97.711 -12.529  -2.665  1.00 14.59
ATOM   2062  C   GLN L  38      99.198 -12.567  -2.955  1.00 14.11
ATOM   2063  O   GLN L  38     100.045 -12.755  -2.056  1.00 15.96
ATOM   2064  CB  GLN L  38      97.409 -11.425  -1.647  1.00 13.95
ATOM   2065  CG  GLN L  38      97.830 -10.017  -2.162  1.00 16.56
ATOM   2066  CD  GLN L  38      97.359  -8.912  -1.280  1.00 15.37
ATOM   2067  OE1 GLN L  38      97.457  -9.014  -0.076  1.00 16.90
ATOM   2068  NE2 GLN L  38      96.907  -7.810  -1.874  1.00 15.47
ATOM   2069  H   GLN L  38      97.636 -14.198  -1.311  1.00  0.00
ATOM   2070  H   GLN L  38      97.183 -12.312  -3.594  1.00  0.00
ATOM   2071  H   GLN L  38      97.986 -11.643  -0.748  1.00  0.00
ATOM   2072  H   GLN L  38      96.336 -11.423  -1.458  1.00  0.00
ATOM   2073  H   GLN L  38      97.412  -9.850  -3.155  1.00  0.00
ATOM   2074  H   GLN L  38      98.919  -9.970  -2.146  1.00  0.00
ATOM   2075  H   GLN L  38      96.571  -7.020  -1.306  1.00  0.00
ATOM   2076  H   GLN L  38      96.893  -7.748  -2.902  1.00  0.00
ATOM   2077  N   LYS L  39      99.539 -12.366  -4.218  1.00 17.65
ATOM   2078  CA  LYS L  39     100.942 -12.248  -4.598  1.00 21.04
ATOM   2079  C   LYS L  39     101.380 -10.796  -4.556  1.00 24.93
ATOM   2080  O   LYS L  39     100.555  -9.880  -4.711  1.00 23.66
ATOM   2081  CB  LYS L  39     101.162 -12.865  -5.987  1.00 24.78
ATOM   2082  CG  LYS L  39     100.778 -14.335  -6.038  1.00 29.13
ATOM   2083  CD  LYS L  39     101.837 -15.177  -6.703  1.00 33.15
ATOM   2084  CE  LYS L  39     101.600 -16.655  -6.505  1.00 34.27
ATOM   2085  NZ  LYS L  39     100.590 -17.231  -7.424  1.00 43.09
ATOM   2086  H   LYS L  39      98.807 -12.292  -4.939  1.00  0.00
ATOM   2087  H   LYS L  39     101.556 -12.797  -3.884  1.00  0.00
ATOM   2088  H   LYS L  39     102.220 -12.785  -6.235  1.00  0.00
ATOM   2089  H   LYS L  39     100.526 -12.334  -6.695  1.00  0.00
ATOM   2090  H   LYS L  39      99.857 -14.432  -6.613  1.00  0.00
ATOM   2091  H   LYS L  39     100.663 -14.691  -5.014  1.00  0.00
ATOM   2092  H   LYS L  39     102.799 -14.925  -6.256  1.00  0.00
ATOM   2093  H   LYS L  39     101.813 -14.969  -7.773  1.00  0.00
ATOM   2094  H   LYS L  39     101.236 -16.806  -5.489  1.00  0.00
ATOM   2095  H   LYS L  39     102.539 -17.165  -6.719  1.00  0.00
ATOM   2096  H   LYS L  39     100.514 -18.233  -7.198  1.00  0.00
ATOM   2097  H   LYS L  39      99.706 -16.731  -7.251  1.00  0.00
ATOM   2098  H   LYS L  39     100.934 -17.080  -8.383  1.00  0.00
ATOM   2099  N   PRO L  40     102.688 -10.568  -4.355  1.00 29.51
ATOM   2100  CA  PRO L  40     103.205  -9.202  -4.231  1.00 38.33
ATOM   2101  C   PRO L  40     102.772  -8.279  -5.353  1.00 27.78
ATOM   2102  O   PRO L  40     102.936  -8.604  -6.531  1.00 33.81
ATOM   2103  CB  PRO L  40     104.730  -9.403  -4.266  1.00 38.91
ATOM   2104  CG  PRO L  40     104.931 -10.754  -3.766  1.00 36.47
ATOM   2105  CD  PRO L  40     103.779 -11.561  -4.266  1.00 34.38
ATOM   2106  H   PRO L  40     102.829  -8.719  -3.329  1.00  0.00
ATOM   2107  H   PRO L  40     105.291  -8.668  -3.689  1.00  0.00
ATOM   2108  H   PRO L  40     105.129  -9.319  -5.277  1.00  0.00
ATOM   2109  H   PRO L  40     104.962 -10.749  -2.676  1.00  0.00
ATOM   2110  H   PRO L  40     105.888 -11.156  -4.097  1.00  0.00
ATOM   2111  H   PRO L  40     103.984 -12.039  -5.224  1.00  0.00
ATOM   2112  H   PRO L  40     103.532 -12.402  -3.618  1.00  0.00
ATOM   2113  N   GLY L  41     102.196  -7.133  -4.985  1.00 33.90
ATOM   2114  CA  GLY L  41     101.775  -6.110  -5.929  1.00 33.28
ATOM   2115  C   GLY L  41     100.438  -6.341  -6.621  1.00 32.59
ATOM   2116  O   GLY L  41     100.040  -5.533  -7.438  1.00 33.62
ATOM   2117  H   GLY L  41     102.042  -6.964  -3.981  1.00  0.00
ATOM   2118  H   GLY L  41     102.531  -6.141  -6.714  1.00  0.00
ATOM   2119  H   GLY L  41     101.709  -5.183  -5.360  1.00  0.00
ATOM   2120  N   LYS L  42      99.762  -7.450  -6.309  1.00 24.75
ATOM   2121  CA  LYS L  42      98.528  -7.850  -6.981  1.00 20.62
ATOM   2122  C   LYS L  42      97.379  -7.841  -5.985  1.00 21.18
ATOM   2123  O   LYS L  42      97.623  -7.951  -4.789  1.00 18.43
ATOM   2124  CB  LYS L  42      98.685  -9.275  -7.504  1.00 26.96
ATOM   2125  H   LYS L  42     100.129  -8.052  -5.558  1.00  0.00
ATOM   2126  H   LYS L  42      98.325  -7.158  -7.798  1.00  0.00
ATOM   2127  H   LYS L  42      97.749  -9.538  -7.997  1.00  0.00
ATOM   2128  H   LYS L  42      99.523  -9.268  -8.201  1.00  0.00
ATOM   2129  N   ALA L  43      96.150  -7.738  -6.485  1.00 17.03
ATOM   2130  CA  ALA L  43      94.945  -7.867  -5.662  1.00 19.10
ATOM   2131  C   ALA L  43      94.833  -9.315  -5.139  1.00 17.20
ATOM   2132  O   ALA L  43      95.318 -10.243  -5.763  1.00 17.10
ATOM   2133  CB  ALA L  43      93.703  -7.535  -6.470  1.00 20.20
ATOM   2134  H   ALA L  43      96.041  -7.560  -7.494  1.00  0.00
ATOM   2135  H   ALA L  43      95.020  -7.169  -4.828  1.00  0.00
ATOM   2136  H   ALA L  43      92.849  -7.650  -5.803  1.00  0.00
ATOM   2137  H   ALA L  43      93.813  -6.507  -6.815  1.00  0.00
ATOM   2138  H   ALA L  43      93.666  -8.239  -7.301  1.00  0.00
ATOM   2139  N   PRO L  44      94.160  -9.487  -4.007  1.00 15.74
ATOM   2140  CA  PRO L  44      93.863 -10.865  -3.525  1.00 16.51
ATOM   2141  C   PRO L  44      93.047 -11.607  -4.581  1.00 18.34
ATOM   2142  O   PRO L  44      92.137 -11.013  -5.147  1.00 17.84
ATOM   2143  CB  PRO L  44      93.021 -10.632  -2.278  1.00 18.29
ATOM   2144  CG  PRO L  44      93.312  -9.199  -1.864  1.00 17.68
ATOM   2145  CD  PRO L  44      93.603  -8.455  -3.119  1.00 17.96
ATOM   2146  H   PRO L  44      94.755 -11.460  -3.328  1.00  0.00
ATOM   2147  H   PRO L  44      93.269 -11.338  -1.486  1.00  0.00
ATOM   2148  H   PRO L  44      91.960 -10.785  -2.474  1.00  0.00
ATOM   2149  H   PRO L  44      94.149  -9.138  -1.168  1.00  0.00
ATOM   2150  H   PRO L  44      92.457  -8.757  -1.352  1.00  0.00
ATOM   2151  H   PRO L  44      92.715  -7.985  -3.542  1.00  0.00
ATOM   2152  H   PRO L  44      94.286  -7.619  -2.970  1.00  0.00
ATOM   2153  N   LYS L  45      93.420 -12.862  -4.843  1.00 15.23
ATOM   2154  CA  LYS L  45      92.793 -13.732  -5.824  1.00 18.01
ATOM   2155  C   LYS L  45      92.058 -14.805  -5.040  1.00 16.23
ATOM   2156  O   LYS L  45      92.647 -15.447  -4.175  1.00 15.13
ATOM   2157  CB  LYS L  45      93.831 -14.410  -6.690  1.00 18.88
ATOM   2158  H   LYS L  45      94.214 -13.243  -4.308  1.00  0.00
ATOM   2159  H   LYS L  45      92.132 -13.152  -6.469  1.00  0.00
ATOM   2160  H   LYS L  45      93.293 -15.042  -7.397  1.00  0.00
ATOM   2161  H   LYS L  45      94.389 -13.622  -7.195  1.00  0.00
ATOM   2162  N   LEU L  46      90.790 -15.001  -5.384  1.00 14.78
ATOM   2163  CA  LEU L  46      89.941 -15.969  -4.681  1.00 15.51
ATOM   2164  C   LEU L  46      90.292 -17.387  -5.037  1.00 16.13
ATOM   2165  O   LEU L  46      90.408 -17.723  -6.199  1.00 18.54
ATOM   2166  CB  LEU L  46      88.469 -15.728  -5.000  1.00 16.70
ATOM   2167  CG  LEU L  46      87.488 -16.483  -4.087  1.00 18.03
ATOM   2168  CD1 LEU L  46      87.578 -16.056  -2.677  1.00 18.31
ATOM   2169  CD2 LEU L  46      86.042 -16.301  -4.543  1.00 18.45
ATOM   2170  H   LEU L  46      90.393 -14.459  -6.165  1.00  0.00
ATOM   2171  H   LEU L  46      90.117 -15.825  -3.615  1.00  0.00
ATOM   2172  H   LEU L  46      88.305 -16.091  -6.015  1.00  0.00
ATOM   2173  H   LEU L  46      88.284 -14.662  -4.867  1.00  0.00
ATOM   2174  H   LEU L  46      87.777 -17.531  -4.161  1.00  0.00
ATOM   2175  H   LEU L  46      86.850 -16.645  -2.119  1.00  0.00
ATOM   2176  H   LEU L  46      88.598 -16.255  -2.348  1.00  0.00
ATOM   2177  H   LEU L  46      87.344 -14.992  -2.651  1.00  0.00
ATOM   2178  H   LEU L  46      85.416 -16.863  -3.849  1.00  0.00
ATOM   2179  H   LEU L  46      85.829 -15.233  -4.507  1.00  0.00
ATOM   2180  H   LEU L  46      85.976 -16.694  -5.558  1.00  0.00
ATOM   2181  N   LEU L  47      90.526 -18.207  -4.016  1.00 17.27
ATOM   2182  CA  LEU L  47      90.798 -19.646  -4.213  1.00 16.15
ATOM   2183  C   LEU L  47      89.549 -20.499  -3.962  1.00 15.79
ATOM   2184  O   LEU L  47      89.173 -21.329  -4.790  1.00 17.46
ATOM   2185  CB  LEU L  47      91.928 -20.083  -3.278  1.00 17.76
ATOM   2186  CG  LEU L  47      93.289 -19.433  -3.504  1.00 21.61
ATOM   2187  CD1 LEU L  47      94.348 -20.181  -2.714  1.00 34.50
ATOM   2188  CD2 LEU L  47      93.646 -19.403  -5.005  1.00 24.16
ATOM   2189  H   LEU L  47      90.517 -17.827  -3.059  1.00  0.00
ATOM   2190  H   LEU L  47      91.096 -19.797  -5.251  1.00  0.00
ATOM   2191  H   LEU L  47      92.071 -21.150  -3.451  1.00  0.00
ATOM   2192  H   LEU L  47      91.620 -19.790  -2.275  1.00  0.00
ATOM   2193  H   LEU L  47      93.247 -18.401  -3.155  1.00  0.00
ATOM   2194  H   LEU L  47      95.299 -19.684  -2.905  1.00  0.00
ATOM   2195  H   LEU L  47      94.063 -20.121  -1.663  1.00  0.00
ATOM   2196  H   LEU L  47      94.349 -21.209  -3.076  1.00  0.00
ATOM   2197  H   LEU L  47      94.624 -18.929  -5.091  1.00  0.00
ATOM   2198  H   LEU L  47      93.666 -20.437  -5.349  1.00  0.00
ATOM   2199  H   LEU L  47      92.870 -18.825  -5.506  1.00  0.00
ATOM   2200  N   ILE L  48      88.919 -20.238  -2.812  1.00 15.42
ATOM   2201  CA  ILE L  48      87.830 -21.057  -2.263  1.00 17.08
ATOM   2202  C   ILE L  48      86.800 -20.139  -1.598  1.00 15.99
ATOM   2203  O   ILE L  48      87.157 -19.173  -0.945  1.00 16.94
ATOM   2204  CB  ILE L  48      88.368 -22.055  -1.227  1.00 18.42
ATOM   2205  CG1 ILE L  48      89.350 -23.024  -1.885  1.00 20.84
ATOM   2206  CG2 ILE L  48      87.231 -22.874  -0.595  1.00 18.04
ATOM   2207  CD1 ILE L  48      89.995 -24.000  -0.900  1.00 21.94
ATOM   2208  H   ILE L  48      89.216 -19.410  -2.277  1.00  0.00
ATOM   2209  H   ILE L  48      87.367 -21.617  -3.075  1.00  0.00
ATOM   2210  H   ILE L  48      88.869 -21.477  -0.451  1.00  0.00
ATOM   2211  H   ILE L  48      90.149 -22.430  -2.329  1.00  0.00
ATOM   2212  H   ILE L  48      88.792 -23.613  -2.613  1.00  0.00
ATOM   2213  H   ILE L  48      87.689 -23.554   0.123  1.00  0.00
ATOM   2214  H   ILE L  48      86.559 -22.165  -0.111  1.00  0.00
ATOM   2215  H   ILE L  48      86.738 -23.412  -1.405  1.00  0.00
ATOM   2216  H   ILE L  48      90.669 -24.635  -1.475  1.00  0.00
ATOM   2217  H   ILE L  48      90.532 -23.402  -0.164  1.00  0.00
ATOM   2218  H   ILE L  48      89.188 -24.574  -0.445  1.00  0.00
ATOM   2219  N   TYR L  49      85.519 -20.455  -1.787  1.00 16.86
ATOM   2220  CA  TYR L  49      84.450 -19.759  -1.072  1.00 18.27
ATOM   2221  C   TYR L  49      83.378 -20.755  -0.600  1.00 17.89
ATOM   2222  O   TYR L  49      83.421 -21.926  -0.910  1.00 16.13
ATOM   2223  CB  TYR L  49      83.852 -18.643  -1.939  1.00 19.90
ATOM   2224  CG  TYR L  49      83.036 -19.171  -3.088  1.00 20.34
ATOM   2225  CD1 TYR L  49      81.659 -19.330  -2.961  1.00 22.32
ATOM   2226  CD2 TYR L  49      83.635 -19.520  -4.282  1.00 22.29
ATOM   2227  CE1 TYR L  49      80.900 -19.822  -3.998  1.00 24.00
ATOM   2228  CE2 TYR L  49      82.884 -20.042  -5.329  1.00 26.23
ATOM   2229  CZ  TYR L  49      81.515 -20.159  -5.183  1.00 26.81
ATOM   2230  OH  TYR L  49      80.753 -20.675  -6.177  1.00 26.86
ATOM   2231  H   TYR L  49      85.277 -21.205  -2.450  1.00  0.00
ATOM   2232  H   TYR L  49      84.873 -19.288  -0.185  1.00  0.00
ATOM   2233  H   TYR L  49      84.667 -18.049  -2.354  1.00  0.00
ATOM   2234  H   TYR L  49      83.179 -18.058  -1.312  1.00  0.00
ATOM   2235  H   TYR L  49      81.173 -19.060  -2.023  1.00  0.00
ATOM   2236  H   TYR L  49      84.710 -19.385  -4.405  1.00  0.00
ATOM   2237  H   TYR L  49      79.823 -19.944  -3.883  1.00  0.00
ATOM   2238  H   TYR L  49      83.369 -20.355  -6.254  1.00  0.00
ATOM   2239  H   TYR L  49      79.786 -20.718  -5.824  1.00  0.00
ATOM   2240  N   SER L  50      82.454 -20.291   0.225  1.00 18.45
ATOM   2241  CA  SER L  50      81.400 -21.147   0.748  1.00 19.00
ATOM   2242  C   SER L  50      81.924 -22.486   1.313  1.00 21.10
ATOM   2243  O   SER L  50      82.978 -22.519   1.898  1.00 18.54
ATOM   2244  CB  SER L  50      80.330 -21.362  -0.337  1.00 19.55
ATOM   2245  OG  SER L  50      79.190 -21.990   0.219  1.00 20.46
ATOM   2246  H   SER L  50      82.481 -19.300   0.504  1.00  0.00
ATOM   2247  H   SER L  50      80.951 -20.637   1.600  1.00  0.00
ATOM   2248  H   SER L  50      80.693 -21.963  -1.171  1.00  0.00
ATOM   2249  H   SER L  50      79.989 -20.390  -0.694  1.00  0.00
ATOM   2250  H   SER L  50      78.509 -22.110  -0.545  1.00  0.00
ATOM   2251  N   ASP L  51      81.177 -23.563   1.119  1.00 24.26
ATOM   2252  CA  ASP L  51      81.487 -24.867   1.725  1.00 25.27
ATOM   2253  C   ASP L  51      82.552 -25.565   0.885  1.00 25.92
ATOM   2254  O   ASP L  51      82.271 -26.538   0.177  1.00 24.65
ATOM   2255  CB  ASP L  51      80.213 -25.692   1.824  1.00 31.28
ATOM   2256  CG  ASP L  51      80.413 -26.998   2.540  1.00 35.11
ATOM   2257  OD1 ASP L  51      81.451 -27.186   3.224  1.00 29.49
ATOM   2258  OD2 ASP L  51      79.516 -27.848   2.387  1.00 38.28
ATOM   2259  H   ASP L  51      80.344 -23.484   0.518  1.00  0.00
ATOM   2260  H   ASP L  51      81.880 -24.740   2.733  1.00  0.00
ATOM   2261  H   ASP L  51      79.873 -25.916   0.813  1.00  0.00
ATOM   2262  H   ASP L  51      79.488 -25.116   2.400  1.00  0.00
ATOM   2263  N   SER L  52      83.770 -25.016   0.947  1.00 22.81
ATOM   2264  CA  SER L  52      84.899 -25.525   0.188  1.00 22.73
ATOM   2265  C   SER L  52      84.667 -25.631  -1.318  1.00 23.41
ATOM   2266  O   SER L  52      85.013 -26.644  -1.937  1.00 28.12
ATOM   2267  CB  SER L  52      85.332 -26.877   0.750  1.00 27.74
ATOM   2268  OG  SER L  52      86.568 -27.260   0.141  1.00 32.02
ATOM   2269  H   SER L  52      83.913 -24.199   1.558  1.00  0.00
ATOM   2270  H   SER L  52      85.690 -24.784   0.305  1.00  0.00
ATOM   2271  H   SER L  52      84.586 -27.654   0.583  1.00  0.00
ATOM   2272  H   SER L  52      85.516 -26.786   1.820  1.00  0.00
ATOM   2273  H   SER L  52      86.831 -28.172   0.541  1.00  0.00
ATOM   2274  N   TYR L  53      84.080 -24.596  -1.924  1.00 21.06
ATOM   2275  CA  TYR L  53      83.913 -24.542  -3.377  1.00 21.67
ATOM   2276  C   TYR L  53      85.161 -23.903  -4.006  1.00 22.20
ATOM   2277  O   TYR L  53      85.484 -22.754  -3.739  1.00 23.95
ATOM   2278  CB  TYR L  53      82.679 -23.719  -3.756  1.00 23.04
ATOM   2279  CG  TYR L  53      81.324 -24.239  -3.270  1.00 30.11
ATOM   2280  CD1 TYR L  53      81.183 -25.529  -2.761  1.00 32.24
ATOM   2281  CD2 TYR L  53      80.173 -23.452  -3.380  1.00 31.26
ATOM   2282  CE1 TYR L  53      79.946 -26.017  -2.352  1.00 36.44
ATOM   2283  CE2 TYR L  53      78.905 -23.935  -2.966  1.00 34.74
ATOM   2284  CZ  TYR L  53      78.812 -25.224  -2.456  1.00 35.82
ATOM   2285  OH  TYR L  53      77.605 -25.759  -2.043  1.00 35.07
ATOM   2286  H   TYR L  53      83.734 -23.812  -1.352  1.00  0.00
ATOM   2287  H   TYR L  53      83.780 -25.558  -3.749  1.00  0.00
ATOM   2288  H   TYR L  53      82.632 -23.735  -4.845  1.00  0.00
ATOM   2289  H   TYR L  53      82.812 -22.746  -3.283  1.00  0.00
ATOM   2290  H   TYR L  53      82.061 -26.170  -2.682  1.00  0.00
ATOM   2291  H   TYR L  53      80.252 -22.446  -3.793  1.00  0.00
ATOM   2292  H   TYR L  53      79.867 -27.026  -1.948  1.00  0.00
ATOM   2293  H   TYR L  53      78.019 -23.306  -3.047  1.00  0.00
ATOM   2294  H   TYR L  53      77.797 -26.716  -1.713  1.00  0.00
ATOM   2295  N   LEU L  54      85.875 -24.644  -4.841  1.00 21.36
ATOM   2296  CA  LEU L  54      87.101 -24.117  -5.479  1.00 20.70
ATOM   2297  C   LEU L  54      86.736 -23.291  -6.681  1.00 26.15
ATOM   2298  O   LEU L  54      85.861 -23.677  -7.460  1.00 28.97
ATOM   2299  CB  LEU L  54      88.016 -25.237  -5.949  1.00 21.18
ATOM   2300  CG  LEU L  54      89.035 -25.811  -4.983  1.00 25.69
ATOM   2301  CD1 LEU L  54      88.389 -26.198  -3.627  1.00 24.98
ATOM   2302  CD2 LEU L  54      89.710 -26.968  -5.690  1.00 28.35
ATOM   2303  H   LEU L  54      85.570 -25.606  -5.050  1.00  0.00
ATOM   2304  H   LEU L  54      87.620 -23.517  -4.731  1.00  0.00
ATOM   2305  H   LEU L  54      88.608 -24.799  -6.753  1.00  0.00
ATOM   2306  H   LEU L  54      87.348 -26.068  -6.175  1.00  0.00
ATOM   2307  H   LEU L  54      89.786 -25.068  -4.715  1.00  0.00
ATOM   2308  H   LEU L  54      89.184 -26.598  -2.998  1.00  0.00
ATOM   2309  H   LEU L  54      87.960 -25.288  -3.207  1.00  0.00
ATOM   2310  H   LEU L  54      87.625 -26.946  -3.840  1.00  0.00
ATOM   2311  H   LEU L  54      90.443 -27.381  -4.997  1.00  0.00
ATOM   2312  H   LEU L  54      88.931 -27.690  -5.935  1.00  0.00
ATOM   2313  H   LEU L  54      90.182 -26.563  -6.585  1.00  0.00
ATOM   2314  N   GLN L  55      87.408 -22.147  -6.836  1.00 21.74
ATOM   2315  CA  GLN L  55      87.321 -21.354  -8.054  1.00 23.15
ATOM   2316  C   GLN L  55      87.933 -22.081  -9.228  1.00 23.38
ATOM   2317  O   GLN L  55      88.843 -22.898  -9.060  1.00 22.63
ATOM   2318  CB  GLN L  55      88.066 -20.020  -7.902  1.00 23.86
ATOM   2319  CG  GLN L  55      87.381 -19.012  -7.036  1.00 26.12
ATOM   2320  CD  GLN L  55      86.182 -18.406  -7.703  1.00 28.21
ATOM   2321  OE1 GLN L  55      85.085 -18.946  -7.610  1.00 33.08
ATOM   2322  NE2 GLN L  55      86.368 -17.271  -8.358  1.00 23.86
ATOM   2323  H   GLN L  55      88.008 -21.815  -6.068  1.00  0.00
ATOM   2324  H   GLN L  55      86.260 -21.178  -8.231  1.00  0.00
ATOM   2325  H   GLN L  55      88.161 -19.573  -8.892  1.00  0.00
ATOM   2326  H   GLN L  55      89.011 -20.242  -7.406  1.00  0.00
ATOM   2327  H   GLN L  55      88.091 -18.212  -6.827  1.00  0.00
ATOM   2328  H   GLN L  55      87.047 -19.517  -6.130  1.00  0.00
ATOM   2329  H   GLN L  55      85.576 -16.815  -8.833  1.00  0.00
ATOM   2330  H   GLN L  55      87.305 -16.844  -8.393  1.00  0.00
ATOM   2331  N   SER L  56      87.456 -21.744 -10.438  1.00 28.67
ATOM   2332  CA  SER L  56      87.987 -22.316 -11.676  1.00 29.82
ATOM   2333  C   SER L  56      89.479 -22.044 -11.811  1.00 29.00
ATOM   2334  O   SER L  56      89.939 -20.941 -11.548  1.00 33.96
ATOM   2335  CB  SER L  56      87.220 -21.755 -12.903  1.00 34.07
ATOM   2336  H   SER L  56      86.689 -21.059 -10.496  1.00  0.00
ATOM   2337  H   SER L  56      87.844 -23.396 -11.637  1.00  0.00
ATOM   2338  H   SER L  56      87.657 -22.214 -13.789  1.00  0.00
ATOM   2339  H   SER L  56      86.173 -22.031 -12.778  1.00  0.00
ATOM   2340  N   GLY L  57      90.241 -23.078 -12.168  1.00 27.70
ATOM   2341  CA  GLY L  57      91.685 -22.951 -12.342  1.00 28.76
ATOM   2342  C   GLY L  57      92.491 -23.231 -11.084  1.00 29.27
ATOM   2343  O   GLY L  57      93.707 -23.402 -11.163  1.00 30.28
ATOM   2344  H   GLY L  57      89.798 -23.994 -12.326  1.00  0.00
ATOM   2345  H   GLY L  57      91.856 -21.907 -12.607  1.00  0.00
ATOM   2346  H   GLY L  57      91.979 -23.661 -13.115  1.00  0.00
ATOM   2347  N   VAL L  58      91.838 -23.281  -9.915  1.00 25.48
ATOM   2348  CA  VAL L  58      92.539 -23.558  -8.673  1.00 20.97
ATOM   2349  C   VAL L  58      92.784 -25.059  -8.516  1.00 21.41
ATOM   2350  O   VAL L  58      91.856 -25.852  -8.593  1.00 24.59
ATOM   2351  CB  VAL L  58      91.729 -23.046  -7.471  1.00 23.29
ATOM   2352  CG1 VAL L  58      92.445 -23.353  -6.131  1.00 26.07
ATOM   2353  CG2 VAL L  58      91.468 -21.551  -7.653  1.00 22.96
ATOM   2354  H   VAL L  58      90.821 -23.120  -9.897  1.00  0.00
ATOM   2355  H   VAL L  58      93.498 -23.041  -8.707  1.00  0.00
ATOM   2356  H   VAL L  58      90.773 -23.568  -7.428  1.00  0.00
ATOM   2357  H   VAL L  58      91.812 -22.962  -5.335  1.00  0.00
ATOM   2358  H   VAL L  58      92.553 -24.436  -6.068  1.00  0.00
ATOM   2359  H   VAL L  58      93.412 -22.851  -6.164  1.00  0.00
ATOM   2360  H   VAL L  58      90.894 -21.220  -6.788  1.00  0.00
ATOM   2361  H   VAL L  58      92.441 -21.062  -7.705  1.00  0.00
ATOM   2362  H   VAL L  58      90.906 -21.436  -8.580  1.00  0.00
ATOM   2363  N   PRO L  59      94.037 -25.461  -8.284  1.00 25.99
ATOM   2364  CA  PRO L  59      94.293 -26.904  -8.103  1.00 29.25
ATOM   2365  C   PRO L  59      93.614 -27.534  -6.883  1.00 31.06
ATOM   2366  O   PRO L  59      93.512 -26.865  -5.839  1.00 26.08
ATOM   2367  CB  PRO L  59      95.814 -26.988  -7.948  1.00 30.17
ATOM   2368  CG  PRO L  59      96.348 -25.666  -8.239  1.00 28.95
ATOM   2369  CD  PRO L  59      95.260 -24.650  -8.201  1.00 27.23
ATOM   2370  H   PRO L  59      93.883 -27.460  -8.946  1.00  0.00
ATOM   2371  H   PRO L  59      96.263 -27.735  -8.602  1.00  0.00
ATOM   2372  H   PRO L  59      96.081 -27.255  -6.925  1.00  0.00
ATOM   2373  H   PRO L  59      96.780 -25.687  -9.239  1.00  0.00
ATOM   2374  H   PRO L  59      97.113 -25.421  -7.502  1.00  0.00
ATOM   2375  H   PRO L  59      95.288 -24.039  -7.299  1.00  0.00
ATOM   2376  H   PRO L  59      95.332 -23.915  -9.003  1.00  0.00
ATOM   2377  N   SER L  60      93.195 -28.804  -7.029  1.00 29.27
ATOM   2378  CA  SER L  60      92.598 -29.637  -5.966  1.00 28.32
ATOM   2379  C   SER L  60      93.469 -29.799  -4.724  1.00 28.77
ATOM   2380  O   SER L  60      92.996 -30.278  -3.684  1.00 28.34
ATOM   2381  CB  SER L  60      92.286 -31.047  -6.522  1.00 40.17
ATOM   2382  H   SER L  60      93.299 -29.231  -7.960  1.00  0.00
ATOM   2383  H   SER L  60      91.696 -29.109  -5.657  1.00  0.00
ATOM   2384  H   SER L  60      91.849 -31.622  -5.705  1.00  0.00
ATOM   2385  H   SER L  60      91.585 -30.917  -7.346  1.00  0.00
ATOM   2386  N   ARG L  61      94.725 -29.387  -4.831  1.00 24.68
ATOM   2387  CA  ARG L  61      95.654 -29.374  -3.700  1.00 26.55
ATOM   2388  C   ARG L  61      95.195 -28.421  -2.607  1.00 21.98
ATOM   2389  O   ARG L  61      95.563 -28.596  -1.459  1.00 23.69
ATOM   2390  CB  ARG L  61      97.036 -28.929  -4.151  1.00 26.48
ATOM   2391  CG  ARG L  61      97.663 -29.825  -5.168  1.00 31.61
ATOM   2392  CD  ARG L  61      99.078 -29.429  -5.425  1.00 33.65
ATOM   2393  NE  ARG L  61      99.244 -28.099  -6.021  1.00 28.53
ATOM   2394  CZ  ARG L  61      99.600 -26.995  -5.361  1.00 26.03
ATOM   2395  NH1 ARG L  61      99.773 -27.013  -4.051  1.00 29.31
ATOM   2396  NH2 ARG L  61      99.783 -25.868  -6.034  1.00 28.75
ATOM   2397  H   ARG L  61      95.061 -29.062  -5.749  1.00  0.00
ATOM   2398  H   ARG L  61      95.685 -30.391  -3.308  1.00  0.00
ATOM   2399  H   ARG L  61      97.689 -28.925  -3.279  1.00  0.00
ATOM   2400  H   ARG L  61      96.922 -27.955  -4.626  1.00  0.00
ATOM   2401  H   ARG L  61      97.102 -29.747  -6.099  1.00  0.00
ATOM   2402  H   ARG L  61      97.649 -30.848  -4.791  1.00  0.00
ATOM   2403  H   ARG L  61      99.499 -30.147  -6.129  1.00  0.00
ATOM   2404  H   ARG L  61      99.578 -29.393  -4.457  1.00  0.00
ATOM   2405  H   ARG L  61      99.072 -28.010  -7.033  1.00  0.00
ATOM   2406  H   ARG L  61     100.048 -26.153  -3.556  1.00  0.00
ATOM   2407  H   ARG L  61      99.633 -27.887  -3.525  1.00  0.00
ATOM   2408  H   ARG L  61     100.058 -25.009  -5.536  1.00  0.00
ATOM   2409  H   ARG L  61      99.650 -25.851  -7.055  1.00  0.00
ATOM   2410  N   PHE L  62      94.481 -27.360  -2.996  1.00 21.56
ATOM   2411  CA  PHE L  62      93.830 -26.466  -2.036  1.00 19.93
ATOM   2412  C   PHE L  62      92.477 -27.053  -1.625  1.00 23.26
ATOM   2413  O   PHE L  62      91.647 -27.403  -2.469  1.00 22.28
ATOM   2414  CB  PHE L  62      93.649 -25.067  -2.640  1.00 21.22
ATOM   2415  CG  PHE L  62      94.944 -24.340  -2.915  1.00 20.19
ATOM   2416  CD1 PHE L  62      95.554 -23.603  -1.911  1.00 18.13
ATOM   2417  CD2 PHE L  62      95.557 -24.388  -4.176  1.00 24.60
ATOM   2418  CE1 PHE L  62      96.745 -22.950  -2.113  1.00 19.40
ATOM   2419  CE2 PHE L  62      96.781 -23.713  -4.405  1.00 26.06
ATOM   2420  CZ  PHE L  62      97.370 -22.977  -3.361  1.00 21.13
ATOM   2421  H   PHE L  62      94.386 -27.165  -4.003  1.00  0.00
ATOM   2422  H   PHE L  62      94.461 -26.373  -1.152  1.00  0.00
ATOM   2423  H   PHE L  62      93.087 -24.465  -1.926  1.00  0.00
ATOM   2424  H   PHE L  62      93.154 -25.194  -3.603  1.00  0.00
ATOM   2425  H   PHE L  62      95.075 -23.540  -0.934  1.00  0.00
ATOM   2426  H   PHE L  62      95.088 -24.948  -4.985  1.00  0.00
ATOM   2427  H   PHE L  62      97.207 -22.405  -1.290  1.00  0.00
ATOM   2428  H   PHE L  62      97.262 -23.763  -5.382  1.00  0.00
ATOM   2429  H   PHE L  62      98.302 -22.435  -3.524  1.00  0.00
ATOM   2430  N   SER L  63      92.249 -27.191  -0.327  1.00 22.04
ATOM   2431  CA  SER L  63      90.933 -27.554   0.164  1.00 23.06
ATOM   2432  C   SER L  63      90.625 -26.803   1.445  1.00 23.61
ATOM   2433  O   SER L  63      91.512 -26.557   2.276  1.00 26.31
ATOM   2434  CB  SER L  63      90.802 -29.061   0.417  1.00 26.36
ATOM   2435  OG  SER L  63      91.691 -29.478   1.407  1.00 33.21
ATOM   2436  H   SER L  63      93.017 -27.038   0.343  1.00  0.00
ATOM   2437  H   SER L  63      90.218 -27.280  -0.612  1.00  0.00
ATOM   2438  H   SER L  63      90.978 -29.657  -0.479  1.00  0.00
ATOM   2439  H   SER L  63      89.811 -29.258   0.826  1.00  0.00
ATOM   2440  H   SER L  63      91.553 -30.492   1.528  1.00  0.00
ATOM   2441  N   GLY L  64      89.353 -26.495   1.604  1.00 21.86
ATOM   2442  CA  GLY L  64      88.873 -25.807   2.773  1.00 21.19
ATOM   2443  C   GLY L  64      88.027 -26.743   3.580  1.00 24.15
ATOM   2444  O   GLY L  64      87.348 -27.635   3.036  1.00 25.36
ATOM   2445  H   GLY L  64      88.681 -26.755   0.868  1.00  0.00
ATOM   2446  H   GLY L  64      88.270 -24.961   2.443  1.00  0.00
ATOM   2447  H   GLY L  64      89.719 -25.438   3.353  1.00  0.00
ATOM   2448  N   SER L  65      88.089 -26.589   4.893  1.00 22.31
ATOM   2449  CA  SER L  65      87.212 -27.333   5.753  1.00 22.54
ATOM   2450  C   SER L  65      86.701 -26.465   6.860  1.00 23.58
ATOM   2451  O   SER L  65      87.204 -25.367   7.110  1.00 23.18
ATOM   2452  CB  SER L  65      87.902 -28.574   6.326  1.00 25.00
ATOM   2453  OG  SER L  65      89.097 -28.244   6.972  1.00 32.29
ATOM   2454  H   SER L  65      88.770 -25.932   5.300  1.00  0.00
ATOM   2455  H   SER L  65      86.369 -27.670   5.150  1.00  0.00
ATOM   2456  H   SER L  65      88.124 -29.316   5.559  1.00  0.00
ATOM   2457  H   SER L  65      87.266 -28.986   7.109  1.00  0.00
ATOM   2458  H   SER L  65      89.500 -29.123   7.328  1.00  0.00
ATOM   2459  N   GLY L  66      85.664 -26.957   7.506  1.00 25.78
ATOM   2460  CA  GLY L  66      85.125 -26.310   8.673  1.00 26.91
ATOM   2461  C   GLY L  66      83.797 -25.641   8.473  1.00 26.65
ATOM   2462  O   GLY L  66      83.256 -25.562   7.365  1.00 32.50
ATOM   2463  H   GLY L  66      85.228 -27.827   7.167  1.00  0.00
ATOM   2464  H   GLY L  66      85.839 -25.522   8.914  1.00  0.00
ATOM   2465  H   GLY L  66      85.013 -27.081   9.435  1.00  0.00
ATOM   2466  N   SER L  67      83.248 -25.186   9.588  1.00 30.25
ATOM   2467  CA  SER L  67      82.000 -24.466   9.598  1.00 24.72
ATOM   2468  C   SER L  67      81.880 -23.801  10.947  1.00 26.64
ATOM   2469  O   SER L  67      82.679 -24.092  11.848  1.00 24.86
ATOM   2470  CB  SER L  67      80.814 -25.391   9.338  1.00 33.23
ATOM   2471  OG  SER L  67      80.578 -26.253  10.437  1.00 37.36
ATOM   2472  H   SER L  67      83.731 -25.353  10.482  1.00  0.00
ATOM   2473  H   SER L  67      81.989 -23.725   8.799  1.00  0.00
ATOM   2474  H   SER L  67      80.969 -26.003   8.450  1.00  0.00
ATOM   2475  H   SER L  67      79.916 -24.779   9.249  1.00  0.00
ATOM   2476  H   SER L  67      79.770 -26.842  10.190  1.00  0.00
ATOM   2477  N   GLY L  68      80.922 -22.881  11.080  1.00 22.51
ATOM   2478  CA  GLY L  68      80.630 -22.284  12.355  1.00 21.17
ATOM   2479  C   GLY L  68      81.643 -21.245  12.722  1.00 19.37
ATOM   2480  O   GLY L  68      81.643 -20.139  12.161  1.00 19.80
ATOM   2481  H   GLY L  68      80.381 -22.593  10.252  1.00  0.00
ATOM   2482  H   GLY L  68      80.675 -23.084  13.095  1.00  0.00
ATOM   2483  H   GLY L  68      79.637 -21.838  12.306  1.00  0.00
ATOM   2484  N   THR L  69      82.542 -21.595  13.633  1.00 19.87
ATOM   2485  CA  THR L  69      83.574 -20.667  14.046  1.00 19.65
ATOM   2486  C   THR L  69      84.987 -21.146  13.733  1.00 19.25
ATOM   2487  O   THR L  69      85.924 -20.455  14.104  1.00 20.96
ATOM   2488  CB  THR L  69      83.515 -20.388  15.563  1.00 21.81
ATOM   2489  OG1 THR L  69      83.768 -21.582  16.278  1.00 21.28
ATOM   2490  CG2 THR L  69      82.137 -19.867  15.964  1.00 22.91
ATOM   2491  H   THR L  69      82.505 -22.536  14.050  1.00  0.00
ATOM   2492  H   THR L  69      83.369 -19.764  13.472  1.00  0.00
ATOM   2493  H   THR L  69      84.268 -19.637  15.799  1.00  0.00
ATOM   2494  H   THR L  69      84.700 -21.913  15.991  1.00  0.00
ATOM   2495  H   THR L  69      82.163 -19.692  17.039  1.00  0.00
ATOM   2496  H   THR L  69      81.970 -18.945  15.407  1.00  0.00
ATOM   2497  H   THR L  69      81.415 -20.638  15.697  1.00  0.00
ATOM   2498  N   ASP L  70      85.145 -22.323  13.128  1.00 17.18
ATOM   2499  CA  ASP L  70      86.465 -22.962  13.009  1.00 17.03
ATOM   2500  C   ASP L  70      86.687 -23.482  11.586  1.00 17.18
ATOM   2501  O   ASP L  70      85.988 -24.408  11.157  1.00 18.65
ATOM   2502  CB  ASP L  70      86.507 -24.108  13.997  1.00 18.81
ATOM   2503  CG  ASP L  70      87.892 -24.676  14.227  1.00 24.89
ATOM   2504  OD1 ASP L  70      88.823 -24.430  13.442  1.00 26.04
ATOM   2505  OD2 ASP L  70      88.049 -25.390  15.258  1.00 25.54
ATOM   2506  H   ASP L  70      84.321 -22.798  12.733  1.00  0.00
ATOM   2507  H   ASP L  70      87.254 -22.241  13.222  1.00  0.00
ATOM   2508  H   ASP L  70      85.894 -24.910  13.586  1.00  0.00
ATOM   2509  H   ASP L  70      86.153 -23.722  14.953  1.00  0.00
ATOM   2510  N   PHE L  71      87.669 -22.898  10.891  1.00 16.11
ATOM   2511  CA  PHE L  71      87.913 -23.138   9.483  1.00 15.61
ATOM   2512  C   PHE L  71      89.372 -23.416   9.256  1.00 17.66
ATOM   2513  O   PHE L  71      90.216 -22.882   9.962  1.00 17.30
ATOM   2514  CB  PHE L  71      87.520 -21.917   8.658  1.00 15.13
ATOM   2515  CG  PHE L  71      86.073 -21.589   8.775  1.00 16.43
ATOM   2516  CD1 PHE L  71      85.170 -22.120   7.879  1.00 19.48
ATOM   2517  CD2 PHE L  71      85.616 -20.812   9.810  1.00 18.76
ATOM   2518  CE1 PHE L  71      83.825 -21.848   7.998  1.00 21.55
ATOM   2519  CE2 PHE L  71      84.241 -20.513   9.949  1.00 20.22
ATOM   2520  CZ  PHE L  71      83.358 -21.034   9.028  1.00 21.58
ATOM   2521  H   PHE L  71      88.288 -22.239  11.385  1.00  0.00
ATOM   2522  H   PHE L  71      87.315 -23.996   9.176  1.00  0.00
ATOM   2523  H   PHE L  71      87.735 -22.115   7.608  1.00  0.00
ATOM   2524  H   PHE L  71      88.072 -21.060   9.044  1.00  0.00
ATOM   2525  H   PHE L  71      85.523 -22.760   7.070  1.00  0.00
ATOM   2526  H   PHE L  71      86.326 -20.418  10.538  1.00  0.00
ATOM   2527  H   PHE L  71      83.121 -22.272   7.282  1.00  0.00
ATOM   2528  H   PHE L  71      83.887 -19.884  10.766  1.00  0.00
ATOM   2529  H   PHE L  71      82.294 -20.809   9.105  1.00  0.00
ATOM   2530  N   THR L  72      89.644 -24.248   8.257  1.00 17.11
ATOM   2531  CA  THR L  72      91.006 -24.630   7.919  1.00 17.25
ATOM   2532  C   THR L  72      91.168 -24.547   6.394  1.00 19.70
ATOM   2533  O   THR L  72      90.284 -24.980   5.644  1.00 20.22
ATOM   2534  CB  THR L  72      91.335 -26.050   8.404  1.00 21.32
ATOM   2535  OG1 THR L  72      91.113 -26.140   9.830  1.00 20.52
ATOM   2536  CG2 THR L  72      92.796 -26.399   8.115  1.00 21.54
ATOM   2537  H   THR L  72      88.866 -24.635   7.704  1.00  0.00
ATOM   2538  H   THR L  72      91.697 -23.950   8.417  1.00  0.00
ATOM   2539  H   THR L  72      90.688 -26.748   7.873  1.00  0.00
ATOM   2540  H   THR L  72      90.125 -25.901   9.997  1.00  0.00
ATOM   2541  H   THR L  72      92.960 -27.412   8.482  1.00  0.00
ATOM   2542  H   THR L  72      92.932 -26.332   7.036  1.00  0.00
ATOM   2543  H   THR L  72      93.409 -25.671   8.647  1.00  0.00
ATOM   2544  N   LEU L  73      92.304 -23.997   5.955  1.00 17.84
ATOM   2545  CA  LEU L  73      92.779 -24.096   4.581  1.00 16.98
ATOM   2546  C   LEU L  73      93.986 -25.059   4.594  1.00 15.14
ATOM   2547  O   LEU L  73      94.990 -24.828   5.306  1.00 16.05
ATOM   2548  CB  LEU L  73      93.167 -22.720   4.010  1.00 15.82
ATOM   2549  CG  LEU L  73      93.769 -22.767   2.614  1.00 17.59
ATOM   2550  CD1 LEU L  73      92.686 -23.138   1.604  1.00 18.98
ATOM   2551  CD2 LEU L  73      94.425 -21.448   2.191  1.00 17.96
ATOM   2552  H   LEU L  73      92.879 -23.471   6.629  1.00  0.00
ATOM   2553  H   LEU L  73      91.988 -24.474   3.933  1.00  0.00
ATOM   2554  H   LEU L  73      93.921 -22.290   4.669  1.00  0.00
ATOM   2555  H   LEU L  73      92.250 -22.135   3.934  1.00  0.00
ATOM   2556  H   LEU L  73      94.556 -23.521   2.637  1.00  0.00
ATOM   2557  H   LEU L  73      93.160 -23.160   0.623  1.00  0.00
ATOM   2558  H   LEU L  73      92.304 -24.118   1.892  1.00  0.00
ATOM   2559  H   LEU L  73      91.916 -22.369   1.665  1.00  0.00
ATOM   2560  H   LEU L  73      94.818 -21.596   1.185  1.00  0.00
ATOM   2561  H   LEU L  73      93.648 -20.684   2.214  1.00  0.00
ATOM   2562  H   LEU L  73      95.218 -21.242   2.910  1.00  0.00
ATOM   2563  N   THR L  74      93.910 -26.136   3.823  1.00 17.71
ATOM   2564  CA  THR L  74      95.043 -27.063   3.738  1.00 19.55
ATOM   2565  C   THR L  74      95.598 -27.046   2.303  1.00 21.86
ATOM   2566  O   THR L  74      94.844 -27.162   1.349  1.00 20.47
ATOM   2567  CB  THR L  74      94.608 -28.486   4.124  1.00 24.95
ATOM   2568  OG1 THR L  74      94.004 -28.480   5.428  1.00 21.95
ATOM   2569  CG2 THR L  74      95.798 -29.459   4.157  1.00 24.68
ATOM   2570  H   THR L  74      93.053 -26.321   3.283  1.00  0.00
ATOM   2571  H   THR L  74      95.820 -26.747   4.435  1.00  0.00
ATOM   2572  H   THR L  74      93.897 -28.818   3.367  1.00  0.00
ATOM   2573  H   THR L  74      93.210 -27.825   5.389  1.00  0.00
ATOM   2574  H   THR L  74      95.403 -30.436   4.437  1.00  0.00
ATOM   2575  H   THR L  74      96.230 -29.468   3.156  1.00  0.00
ATOM   2576  H   THR L  74      96.501 -29.078   4.898  1.00  0.00
ATOM   2577  N   ILE L  75      96.901 -26.844   2.175  1.00 21.42
ATOM   2578  CA  ILE L  75      97.593 -26.993   0.895  1.00 22.00
ATOM   2579  C   ILE L  75      98.352 -28.301   0.959  1.00 21.49
ATOM   2580  O   ILE L  75      99.275 -28.436   1.766  1.00 21.22
ATOM   2581  CB  ILE L  75      98.593 -25.860   0.646  1.00 24.04
ATOM   2582  CG1 ILE L  75      97.921 -24.518   0.929  1.00 24.29
ATOM   2583  CG2 ILE L  75      99.117 -25.930  -0.791  1.00 29.29
ATOM   2584  CD1 ILE L  75      98.860 -23.295   0.880  1.00 27.18
ATOM   2585  H   ILE L  75      97.446 -26.573   3.006  1.00  0.00
ATOM   2586  H   ILE L  75      96.863 -26.969   0.086  1.00  0.00
ATOM   2587  H   ILE L  75      99.446 -25.966   1.317  1.00  0.00
ATOM   2588  H   ILE L  75      97.534 -24.577   1.946  1.00  0.00
ATOM   2589  H   ILE L  75      97.166 -24.375   0.156  1.00  0.00
ATOM   2590  H   ILE L  75      99.820 -25.107  -0.914  1.00  0.00
ATOM   2591  H   ILE L  75      99.603 -26.899  -0.906  1.00  0.00
ATOM   2592  H   ILE L  75      98.255 -25.828  -1.450  1.00  0.00
ATOM   2593  H   ILE L  75      98.252 -22.417   1.098  1.00  0.00
ATOM   2594  H   ILE L  75      99.629 -23.453   1.636  1.00  0.00
ATOM   2595  H   ILE L  75      99.281 -23.256  -0.125  1.00  0.00
ATOM   2596  N   SER L  76      97.938 -29.270   0.163  1.00 21.70
ATOM   2597  CA  SER L  76      98.641 -30.528   0.079  1.00 27.36
ATOM   2598  C   SER L  76      99.711 -30.285  -0.997  1.00 31.57
ATOM   2599  O   SER L  76      99.539 -29.425  -1.882  1.00 42.02
ATOM   2600  CB  SER L  76      97.658 -31.652  -0.249  1.00 27.18
ATOM   2601  OG  SER L  76      97.382 -31.683  -1.629  1.00 33.53
ATOM   2602  H   SER L  76      97.095 -29.125  -0.411  1.00  0.00
ATOM   2603  H   SER L  76      99.112 -30.848   1.009  1.00  0.00
ATOM   2604  H   SER L  76      96.718 -31.552   0.293  1.00  0.00
ATOM   2605  H   SER L  76      98.132 -32.607  -0.023  1.00  0.00
ATOM   2606  H   SER L  76      96.719 -32.455  -1.786  1.00  0.00
ATOM   2607  N   SER L  77     100.810 -31.004  -0.896  1.00 35.93
ATOM   2608  CA  SER L  77     101.995 -30.816  -1.723  1.00 36.01
ATOM   2609  C   SER L  77     102.227 -29.372  -2.138  1.00 30.80
ATOM   2610  O   SER L  77     101.925 -28.973  -3.266  1.00 36.11
ATOM   2611  CB  SER L  77     101.997 -31.750  -2.932  1.00 36.12
ATOM   2612  OG  SER L  77     100.758 -31.684  -3.591  1.00 43.65
ATOM   2613  H   SER L  77     100.833 -31.749  -0.185  1.00  0.00
ATOM   2614  H   SER L  77     102.839 -31.084  -1.087  1.00  0.00
ATOM   2615  H   SER L  77     102.202 -32.786  -2.663  1.00  0.00
ATOM   2616  H   SER L  77     102.737 -31.399  -3.651  1.00  0.00
ATOM   2617  H   SER L  77     100.809 -32.327  -4.394  1.00  0.00
ATOM   2618  N   LEU L  78     102.771 -28.612  -1.201  1.00 25.81
ATOM   2619  CA  LEU L  78     103.209 -27.257  -1.427  1.00 23.73
ATOM   2620  C   LEU L  78     104.100 -27.144  -2.650  1.00 26.47
ATOM   2621  O   LEU L  78     105.050 -27.915  -2.809  1.00 25.81
ATOM   2622  CB  LEU L  78     103.989 -26.767  -0.217  1.00 23.03
ATOM   2623  CG  LEU L  78     104.229 -25.288  -0.076  1.00 24.40
ATOM   2624  CD1 LEU L  78     102.915 -24.435  -0.119  1.00 22.71
ATOM   2625  CD2 LEU L  78     104.899 -25.127   1.265  1.00 22.80
ATOM   2626  H   LEU L  78     102.888 -29.010  -0.258  1.00  0.00
ATOM   2627  H   LEU L  78     102.319 -26.650  -1.591  1.00  0.00
ATOM   2628  H   LEU L  78     104.980 -27.212  -0.304  1.00  0.00
ATOM   2629  H   LEU L  78     103.378 -27.034   0.646  1.00  0.00
ATOM   2630  H   LEU L  78     104.830 -24.928  -0.911  1.00  0.00
ATOM   2631  H   LEU L  78     103.209 -23.391  -0.009  1.00  0.00
ATOM   2632  H   LEU L  78     102.444 -24.624  -1.084  1.00  0.00
ATOM   2633  H   LEU L  78     102.291 -24.770   0.709  1.00  0.00
ATOM   2634  H   LEU L  78     105.088 -24.062   1.401  1.00  0.00
ATOM   2635  H   LEU L  78     104.209 -25.515   2.015  1.00  0.00
ATOM   2636  H   LEU L  78     105.824 -25.702   1.230  1.00  0.00
ATOM   2637  N   GLN L  79     103.795 -26.173  -3.503  1.00 22.78
ATOM   2638  CA  GLN L  79     104.612 -25.957  -4.701  1.00 25.06
ATOM   2639  C   GLN L  79     105.150 -24.548  -4.728  1.00 23.26
ATOM   2640  O   GLN L  79     104.585 -23.661  -4.097  1.00 21.76
ATOM   2641  CB  GLN L  79     103.794 -26.226  -5.956  1.00 25.03
ATOM   2642  CG  GLN L  79     103.246 -27.659  -6.036  1.00 30.22
ATOM   2643  CD  GLN L  79     104.321 -28.722  -6.066  1.00 29.81
ATOM   2644  OE1 GLN L  79     104.204 -29.760  -5.417  1.00 32.85
ATOM   2645  NE2 GLN L  79     105.380 -28.474  -6.826  1.00 36.87
ATOM   2646  H   GLN L  79     102.981 -25.569  -3.322  1.00  0.00
ATOM   2647  H   GLN L  79     105.452 -26.651  -4.672  1.00  0.00
ATOM   2648  H   GLN L  79     104.458 -26.082  -6.808  1.00  0.00
ATOM   2649  H   GLN L  79     102.944 -25.543  -5.945  1.00  0.00
ATOM   2650  H   GLN L  79     102.673 -27.750  -6.959  1.00  0.00
ATOM   2651  H   GLN L  79     102.658 -27.833  -5.135  1.00  0.00
ATOM   2652  H   GLN L  79     106.144 -29.162  -6.885  1.00  0.00
ATOM   2653  H   GLN L  79     105.438 -27.593  -7.357  1.00  0.00
ATOM   2654  N   PRO L  80     106.216 -24.308  -5.513  1.00 25.12
ATOM   2655  CA  PRO L  80     106.855 -23.000  -5.531  1.00 25.60
ATOM   2656  C   PRO L  80     105.926 -21.835  -5.893  1.00 25.04
ATOM   2657  O   PRO L  80     106.073 -20.746  -5.332  1.00 26.72
ATOM   2658  CB  PRO L  80     107.958 -23.168  -6.578  1.00 32.07
ATOM   2659  CG  PRO L  80     108.337 -24.617  -6.451  1.00 31.96
ATOM   2660  CD  PRO L  80     107.034 -25.326  -6.208  1.00 29.68
ATOM   2661  H   PRO L  80     107.210 -22.728  -4.537  1.00  0.00
ATOM   2662  H   PRO L  80     108.804 -22.498  -6.425  1.00  0.00
ATOM   2663  H   PRO L  80     107.622 -22.921  -7.585  1.00  0.00
ATOM   2664  H   PRO L  80     109.050 -24.784  -5.644  1.00  0.00
ATOM   2665  H   PRO L  80     108.844 -24.987  -7.342  1.00  0.00
ATOM   2666  H   PRO L  80     106.564 -25.667  -7.130  1.00  0.00
ATOM   2667  H   PRO L  80     107.145 -26.242  -5.628  1.00  0.00
ATOM   2668  N   GLU L  81     104.946 -22.074  -6.771  1.00 25.40
ATOM   2669  CA  GLU L  81     103.982 -21.064  -7.157  1.00 25.21
ATOM   2670  C   GLU L  81     103.005 -20.671  -6.021  1.00 21.03
ATOM   2671  O   GLU L  81     102.250 -19.710  -6.136  1.00 21.99
ATOM   2672  CB  GLU L  81     103.188 -21.531  -8.392  1.00 25.23
ATOM   2673  CG  GLU L  81     102.376 -22.826  -8.173  1.00 26.98
ATOM   2674  CD  GLU L  81     103.046 -24.082  -8.717  1.00 29.29
ATOM   2675  OE1 GLU L  81     104.307 -24.214  -8.647  1.00 29.82
ATOM   2676  OE2 GLU L  81     102.299 -24.939  -9.263  1.00 34.05
ATOM   2677  H   GLU L  81     104.874 -23.013  -7.189  1.00  0.00
ATOM   2678  H   GLU L  81     104.558 -20.169  -7.395  1.00  0.00
ATOM   2679  H   GLU L  81     103.914 -21.737  -9.179  1.00  0.00
ATOM   2680  H   GLU L  81     102.477 -20.741  -8.633  1.00  0.00
ATOM   2681  H   GLU L  81     101.427 -22.715  -8.697  1.00  0.00
ATOM   2682  H   GLU L  81     102.278 -22.966  -7.097  1.00  0.00
ATOM   2683  N   ASP L  82     103.021 -21.421  -4.927  1.00 23.26
ATOM   2684  CA  ASP L  82     102.159 -21.142  -3.797  1.00 20.33
ATOM   2685  C   ASP L  82     102.672 -20.014  -2.908  1.00 21.86
ATOM   2686  O   ASP L  82     101.935 -19.583  -2.015  1.00 20.16
ATOM   2687  CB  ASP L  82     101.914 -22.405  -2.979  1.00 20.66
ATOM   2688  CG  ASP L  82     101.249 -23.509  -3.793  1.00 23.52
ATOM   2689  OD1 ASP L  82     100.665 -23.207  -4.866  1.00 23.60
ATOM   2690  OD2 ASP L  82     101.316 -24.687  -3.358  1.00 26.60
ATOM   2691  H   ASP L  82     103.664 -22.224  -4.880  1.00  0.00
ATOM   2692  H   ASP L  82     101.213 -20.797  -4.213  1.00  0.00
ATOM   2693  H   ASP L  82     101.248 -22.148  -2.155  1.00  0.00
ATOM   2694  H   ASP L  82     102.880 -22.776  -2.636  1.00  0.00
ATOM   2695  N   PHE L  83     103.890 -19.515  -3.136  1.00 21.64
ATOM   2696  CA  PHE L  83     104.370 -18.337  -2.382  1.00 26.28
ATOM   2697  C   PHE L  83     103.430 -17.148  -2.530  1.00 25.36
ATOM   2698  O   PHE L  83     103.127 -16.693  -3.647  1.00 22.46
ATOM   2699  CB  PHE L  83     105.792 -17.935  -2.778  1.00 26.80
ATOM   2700  H   PHE L  83     104.499 -19.954  -3.842  1.00  0.00
ATOM   2701  H   PHE L  83     104.385 -18.636  -1.334  1.00  0.00
ATOM   2702  H   PHE L  83     106.057 -17.066  -2.176  1.00  0.00
ATOM   2703  H   PHE L  83     106.436 -18.788  -2.564  1.00  0.00
ATOM   2704  N   ALA L  84     102.928 -16.677  -1.385  1.00 18.02
ATOM   2705  CA  ALA L  84     101.907 -15.666  -1.323  1.00 16.81
ATOM   2706  C   ALA L  84     101.582 -15.420   0.139  1.00 16.02
ATOM   2707  O   ALA L  84     102.068 -16.157   1.052  1.00 17.43
ATOM   2708  CB  ALA L  84     100.612 -16.115  -2.022  1.00 15.81
ATOM   2709  H   ALA L  84     103.291 -17.058  -0.500  1.00  0.00
ATOM   2710  H   ALA L  84     102.278 -14.772  -1.823  1.00  0.00
ATOM   2711  H   ALA L  84      99.899 -15.296  -1.928  1.00  0.00
ATOM   2712  H   ALA L  84     100.865 -16.315  -3.063  1.00  0.00
ATOM   2713  H   ALA L  84     100.268 -17.013  -1.509  1.00  0.00
ATOM   2714  N   THR L  85     100.795 -14.368   0.358  1.00 13.72
ATOM   2715  CA  THR L  85     100.051 -14.186   1.586  1.00 14.37
ATOM   2716  C   THR L  85      98.620 -14.651   1.403  1.00 15.95
ATOM   2717  O   THR L  85      97.923 -14.265   0.446  1.00 17.24
ATOM   2718  CB  THR L  85     100.103 -12.732   2.067  1.00 15.92
ATOM   2719  OG1 THR L  85     101.481 -12.331   2.170  1.00 18.23
ATOM   2720  CG2 THR L  85      99.446 -12.608   3.434  1.00 14.88
ATOM   2721  H   THR L  85     100.712 -13.653  -0.379  1.00  0.00
ATOM   2722  H   THR L  85     100.518 -14.795   2.359  1.00  0.00
ATOM   2723  H   THR L  85      99.572 -12.096   1.359  1.00  0.00
ATOM   2724  H   THR L  85     101.894 -12.427   1.231  1.00  0.00
ATOM   2725  H   THR L  85      99.511 -11.560   3.725  1.00  0.00
ATOM   2726  H   THR L  85      98.412 -12.934   3.321  1.00  0.00
ATOM   2727  H   THR L  85     100.002 -13.253   4.114  1.00  0.00
ATOM   2728  N   TYR L  86      98.171 -15.497   2.313  1.00 11.89
ATOM   2729  CA  TYR L  86      96.826 -16.046   2.266  1.00 13.97
ATOM   2730  C   TYR L  86      95.976 -15.356   3.332  1.00 14.17
ATOM   2731  O   TYR L  86      96.481 -15.041   4.404  1.00 14.63
ATOM   2732  CB  TYR L  86      96.863 -17.567   2.499  1.00 13.15
ATOM   2733  CG  TYR L  86      97.582 -18.309   1.410  1.00 12.98
ATOM   2734  CD1 TYR L  86      96.879 -18.835   0.342  1.00 13.98
ATOM   2735  CD2 TYR L  86      98.968 -18.451   1.403  1.00 13.38
ATOM   2736  CE1 TYR L  86      97.510 -19.461  -0.703  1.00 14.96
ATOM   2737  CE2 TYR L  86      99.608 -19.104   0.347  1.00 15.84
ATOM   2738  CZ  TYR L  86      98.865 -19.573  -0.710  1.00 13.92
ATOM   2739  OH  TYR L  86      99.453 -20.216  -1.779  1.00 17.02
ATOM   2740  H   TYR L  86      98.796 -15.777   3.082  1.00  0.00
ATOM   2741  H   TYR L  86      96.388 -15.869   1.284  1.00  0.00
ATOM   2742  H   TYR L  86      95.840 -17.942   2.537  1.00  0.00
ATOM   2743  H   TYR L  86      97.417 -17.748   3.420  1.00  0.00
ATOM   2744  H   TYR L  86      95.792 -18.750   0.330  1.00  0.00
ATOM   2745  H   TYR L  86      99.557 -18.050   2.228  1.00  0.00
ATOM   2746  H   TYR L  86      96.925 -19.869  -1.528  1.00  0.00
ATOM   2747  H   TYR L  86     100.689 -19.241   0.361  1.00  0.00
ATOM   2748  H   TYR L  86      98.693 -20.507  -2.410  1.00  0.00
ATOM   2749  N   TYR L  87      94.704 -15.095   3.007  1.00 12.03
ATOM   2750  CA  TYR L  87      93.771 -14.439   3.911  1.00 13.20
ATOM   2751  C   TYR L  87      92.451 -15.151   3.907  1.00 14.54
ATOM   2752  O   TYR L  87      91.982 -15.612   2.827  1.00 17.40
ATOM   2753  CB  TYR L  87      93.440 -13.019   3.473  1.00 13.39
ATOM   2754  CG  TYR L  87      94.610 -12.071   3.476  1.00 13.35
ATOM   2755  CD1 TYR L  87      95.054 -11.479   4.658  1.00 13.16
ATOM   2756  CD2 TYR L  87      95.285 -11.766   2.299  1.00 14.66
ATOM   2757  CE1 TYR L  87      96.110 -10.599   4.664  1.00 15.07
ATOM   2758  CE2 TYR L  87      96.360 -10.904   2.284  1.00 18.01
ATOM   2759  CZ  TYR L  87      96.783 -10.315   3.466  1.00 14.38
ATOM   2760  OH  TYR L  87      97.857  -9.433   3.454  1.00 17.73
ATOM   2761  H   TYR L  87      94.370 -15.372   2.073  1.00  0.00
ATOM   2762  H   TYR L  87      94.259 -14.447   4.886  1.00  0.00
ATOM   2763  H   TYR L  87      92.709 -12.623   4.178  1.00  0.00
ATOM   2764  H   TYR L  87      93.093 -13.078   2.441  1.00  0.00
ATOM   2765  H   TYR L  87      94.554 -11.719   5.596  1.00  0.00
ATOM   2766  H   TYR L  87      94.955 -12.220   1.365  1.00  0.00
ATOM   2767  H   TYR L  87      96.423 -10.125   5.594  1.00  0.00
ATOM   2768  H   TYR L  87      96.875 -10.686   1.348  1.00  0.00
ATOM   2769  H   TYR L  87      97.989  -9.106   4.422  1.00  0.00
ATOM   2770  N   CYS L  88      91.820 -15.206   5.073  1.00 12.12
ATOM   2771  CA  CYS L  88      90.405 -15.526   5.140  1.00 13.28
ATOM   2772  C   CYS L  88      89.598 -14.240   5.276  1.00 13.82
ATOM   2773  O   CYS L  88      90.062 -13.248   5.852  1.00 14.53
ATOM   2774  CB  CYS L  88      90.102 -16.466   6.290  1.00 13.75
ATOM   2775  SG  CYS L  88      90.405 -15.742   7.887  1.00 16.77
ATOM   2776  H   CYS L  88      92.341 -15.019   5.942  1.00  0.00
ATOM   2777  H   CYS L  88      90.123 -16.036   4.219  1.00  0.00
ATOM   2778  H   CYS L  88      90.860 -17.236   6.145  1.00  0.00
ATOM   2779  H   CYS L  88      89.085 -16.829   6.139  1.00  0.00
ATOM   2780  N   GLN L  89      88.400 -14.247   4.704  1.00 13.73
ATOM   2781  CA  GLN L  89      87.458 -13.140   4.849  1.00 13.39
ATOM   2782  C   GLN L  89      86.040 -13.682   4.996  1.00 14.18
ATOM   2783  O   GLN L  89      85.597 -14.491   4.172  1.00 15.61
ATOM   2784  CB  GLN L  89      87.489 -12.243   3.633  1.00 12.62
ATOM   2785  CG  GLN L  89      86.603 -10.991   3.722  1.00 12.84
ATOM   2786  CD  GLN L  89      86.186 -10.471   2.344  1.00 14.76
ATOM   2787  OE1 GLN L  89      86.048 -11.236   1.378  1.00 15.55
ATOM   2788  NE2 GLN L  89      86.023  -9.142   2.242  1.00 14.95
ATOM   2789  H   GLN L  89      88.125 -15.062   4.138  1.00  0.00
ATOM   2790  H   GLN L  89      87.747 -12.571   5.733  1.00  0.00
ATOM   2791  H   GLN L  89      87.103 -12.842   2.808  1.00  0.00
ATOM   2792  H   GLN L  89      88.519 -11.906   3.519  1.00  0.00
ATOM   2793  H   GLN L  89      87.173 -10.206   4.220  1.00  0.00
ATOM   2794  H   GLN L  89      85.697 -11.257   4.267  1.00  0.00
ATOM   2795  H   GLN L  89      85.743  -8.725   1.343  1.00  0.00
ATOM   2796  H   GLN L  89      86.178  -8.540   3.063  1.00  0.00
ATOM   2797  N   GLN L  90      85.349 -13.275   6.064  1.00 13.27
ATOM   2798  CA  GLN L  90      83.956 -13.666   6.236  1.00 14.02
ATOM   2799  C   GLN L  90      83.055 -12.718   5.461  1.00 13.40
ATOM   2800  O   GLN L  90      83.301 -11.498   5.423  1.00 14.77
ATOM   2801  CB  GLN L  90      83.543 -13.759   7.728  1.00 13.29
ATOM   2802  CG  GLN L  90      83.442 -12.417   8.403  1.00 14.06
ATOM   2803  CD  GLN L  90      82.113 -11.673   8.184  1.00 14.62
ATOM   2804  OE1 GLN L  90      81.061 -12.271   7.864  1.00 16.67
ATOM   2805  NE2 GLN L  90      82.143 -10.328   8.409  1.00 14.92
ATOM   2806  H   GLN L  90      85.804 -12.680   6.771  1.00  0.00
ATOM   2807  H   GLN L  90      83.839 -14.672   5.832  1.00  0.00
ATOM   2808  H   GLN L  90      84.292 -14.342   8.265  1.00  0.00
ATOM   2809  H   GLN L  90      82.546 -14.198   7.766  1.00  0.00
ATOM   2810  H   GLN L  90      84.223 -11.801   7.957  1.00  0.00
ATOM   2811  H   GLN L  90      83.548 -12.596   9.473  1.00  0.00
ATOM   2812  H   GLN L  90      81.290  -9.765   8.282  1.00  0.00
ATOM   2813  H   GLN L  90      83.019  -9.875   8.706  1.00  0.00
ATOM   2814  N   TYR L  91      82.017 -13.266   4.839  1.00 13.07
ATOM   2815  CA  TYR L  91      80.971 -12.451   4.186  1.00 14.43
ATOM   2816  C   TYR L  91      79.565 -12.818   4.663  1.00 18.00
ATOM   2817  O   TYR L  91      78.558 -12.569   3.980  1.00 16.21
ATOM   2818  CB  TYR L  91      81.105 -12.565   2.664  1.00 15.02
ATOM   2819  CG  TYR L  91      81.017 -13.987   2.137  1.00 14.63
ATOM   2820  CD1 TYR L  91      79.822 -14.516   1.677  1.00 16.33
ATOM   2821  CD2 TYR L  91      82.143 -14.787   2.089  1.00 14.61
ATOM   2822  CE1 TYR L  91      79.743 -15.825   1.196  1.00 15.29
ATOM   2823  CE2 TYR L  91      82.075 -16.087   1.613  1.00 15.98
ATOM   2824  CZ  TYR L  91      80.883 -16.608   1.177  1.00 15.50
ATOM   2825  OH  TYR L  91      80.848 -17.919   0.703  1.00 16.69
ATOM   2826  H   TYR L  91      81.938 -14.293   4.811  1.00  0.00
ATOM   2827  H   TYR L  91      81.120 -11.410   4.474  1.00  0.00
ATOM   2828  H   TYR L  91      82.088 -12.181   2.391  1.00  0.00
ATOM   2829  H   TYR L  91      80.273 -12.014   2.225  1.00  0.00
ATOM   2830  H   TYR L  91      78.924 -13.898   1.691  1.00  0.00
ATOM   2831  H   TYR L  91      83.099 -14.390   2.431  1.00  0.00
ATOM   2832  H   TYR L  91      78.794 -16.225   0.840  1.00  0.00
ATOM   2833  H   TYR L  91      82.976 -16.700   1.585  1.00  0.00
ATOM   2834  H   TYR L  91      79.878 -18.109   0.415  1.00  0.00
ATOM   2835  N   TYR L  92      79.512 -13.423   5.852  1.00 14.83
ATOM   2836  CA  TYR L  92      78.263 -13.855   6.469  1.00 14.37
ATOM   2837  C   TYR L  92      77.449 -12.619   6.854  1.00 16.05
ATOM   2838  O   TYR L  92      76.258 -12.509   6.543  1.00 18.28
ATOM   2839  CB  TYR L  92      78.579 -14.704   7.692  1.00 14.80
ATOM   2840  CG  TYR L  92      77.372 -15.158   8.476  1.00 15.48
ATOM   2841  CD1 TYR L  92      76.479 -16.078   7.933  1.00 16.26
ATOM   2842  CD2 TYR L  92      77.125 -14.680   9.744  1.00 16.37
ATOM   2843  CE1 TYR L  92      75.383 -16.523   8.657  1.00 18.46
ATOM   2844  CE2 TYR L  92      76.060 -15.117  10.460  1.00 18.00
ATOM   2845  CZ  TYR L  92      75.176 -16.026   9.915  1.00 19.82
ATOM   2846  OH  TYR L  92      74.069 -16.461  10.638  1.00 19.79
ATOM   2847  H   TYR L  92      80.394 -13.592   6.357  1.00  0.00
ATOM   2848  H   TYR L  92      77.678 -14.456   5.773  1.00  0.00
ATOM   2849  H   TYR L  92      79.181 -14.092   8.364  1.00  0.00
ATOM   2850  H   TYR L  92      79.072 -15.607   7.332  1.00  0.00
ATOM   2851  H   TYR L  92      76.644 -16.454   6.923  1.00  0.00
ATOM   2852  H   TYR L  92      77.796 -13.939  10.178  1.00  0.00
ATOM   2853  H   TYR L  92      74.698 -17.256   8.231  1.00  0.00
ATOM   2854  H   TYR L  92      75.901 -14.748  11.473  1.00  0.00
ATOM   2855  H   TYR L  92      73.566 -17.134  10.043  1.00  0.00
ATOM   2856  N   MET L  93      78.114 -11.668   7.499  1.00 16.71
ATOM   2857  CA  MET L  93      77.436 -10.438   7.890  1.00 19.84
ATOM   2858  C   MET L  93      78.079  -9.225   7.277  1.00 19.69
ATOM   2859  O   MET L  93      79.222  -9.251   6.820  1.00 18.64
ATOM   2860  CB  MET L  93      77.309 -10.352   9.422  1.00 23.91
ATOM   2861  CG  MET L  93      76.013 -11.045   9.877  1.00 27.91
ATOM   2862  SD  MET L  93      75.866 -11.324  11.631  1.00 36.14
ATOM   2863  CE  MET L  93      75.049  -9.795  12.044  1.00 39.75
ATOM   2864  H   MET L  93      79.111 -11.799   7.724  1.00  0.00
ATOM   2865  H   MET L  93      76.422 -10.462   7.491  1.00  0.00
ATOM   2866  H   MET L  93      77.283  -9.305   9.724  1.00  0.00
ATOM   2867  H   MET L  93      78.163 -10.848   9.883  1.00  0.00
ATOM   2868  H   MET L  93      76.142 -12.031   9.431  1.00  0.00
ATOM   2869  H   MET L  93      75.199 -10.447   9.468  1.00  0.00
ATOM   2870  H   MET L  93      74.880  -9.805  13.121  1.00  0.00
ATOM   2871  H   MET L  93      75.717  -8.986  11.746  1.00  0.00
ATOM   2872  H   MET L  93      74.113  -9.773  11.487  1.00  0.00
ATOM   2873  N   ILE L  94      77.308  -8.157   7.252  1.00 20.23
ATOM   2874  CA  ILE L  94      77.765  -6.893   6.711  1.00 21.79
ATOM   2875  C   ILE L  94      78.259  -6.090   7.924  1.00 25.93
ATOM   2876  O   ILE L  94      77.527  -5.970   8.919  1.00 23.34
ATOM   2877  CB  ILE L  94      76.594  -6.168   5.985  1.00 25.74
ATOM   2878  CG1 ILE L  94      76.106  -6.995   4.782  1.00 25.71
ATOM   2879  CG2 ILE L  94      77.021  -4.779   5.576  1.00 24.33
ATOM   2880  CD1 ILE L  94      74.704  -6.624   4.245  1.00 31.42
ATOM   2881  H   ILE L  94      76.351  -8.223   7.628  1.00  0.00
ATOM   2882  H   ILE L  94      78.557  -7.016   5.972  1.00  0.00
ATOM   2883  H   ILE L  94      75.753  -6.071   6.672  1.00  0.00
ATOM   2884  H   ILE L  94      76.044  -8.028   5.124  1.00  0.00
ATOM   2885  H   ILE L  94      76.812  -6.811   3.972  1.00  0.00
ATOM   2886  H   ILE L  94      76.169  -4.318   5.075  1.00  0.00
ATOM   2887  H   ILE L  94      77.291  -4.247   6.488  1.00  0.00
ATOM   2888  H   ILE L  94      77.873  -4.892   4.906  1.00  0.00
ATOM   2889  H   ILE L  94      74.499  -7.287   3.404  1.00  0.00
ATOM   2890  H   ILE L  94      73.999  -6.776   5.062  1.00  0.00
ATOM   2891  H   ILE L  94      74.747  -5.580   3.936  1.00  0.00
ATOM   2892  N   PRO L  95      79.495  -5.570   7.867  1.00 19.72
ATOM   2893  CA  PRO L  95      80.453  -5.640   6.750  1.00 18.48
ATOM   2894  C   PRO L  95      81.354  -6.876   6.744  1.00 17.63
ATOM   2895  O   PRO L  95      81.613  -7.467   7.783  1.00 16.78
ATOM   2896  CB  PRO L  95      81.345  -4.447   7.010  1.00 21.78
ATOM   2897  CG  PRO L  95      81.343  -4.325   8.507  1.00 21.74
ATOM   2898  CD  PRO L  95      80.014  -4.746   8.969  1.00 20.30
ATOM   2899  H   PRO L  95      79.913  -5.669   5.804  1.00  0.00
ATOM   2900  H   PRO L  95      80.992  -3.541   6.517  1.00  0.00
ATOM   2901  H   PRO L  95      82.349  -4.582   6.608  1.00  0.00
ATOM   2902  H   PRO L  95      81.558  -3.306   8.828  1.00  0.00
ATOM   2903  H   PRO L  95      82.108  -4.964   8.947  1.00  0.00
ATOM   2904  H   PRO L  95      80.060  -5.296   9.909  1.00  0.00
ATOM   2905  H   PRO L  95      79.367  -3.897   9.188  1.00  0.00
ATOM   2906  N   SER L  96      81.829  -7.240   5.572  1.00 15.45
ATOM   2907  CA  SER L  96      82.822  -8.323   5.433  1.00 15.11
ATOM   2908  C   SER L  96      84.107  -7.945   6.128  1.00 18.08
ATOM   2909  O   SER L  96      84.511  -6.794   6.081  1.00 17.56
ATOM   2910  CB  SER L  96      83.127  -8.592   3.962  1.00 18.69
ATOM   2911  OG  SER L  96      81.930  -8.990   3.299  1.00 20.84
ATOM   2912  H   SER L  96      81.498  -6.754   4.726  1.00  0.00
ATOM   2913  H   SER L  96      82.402  -9.220   5.887  1.00  0.00
ATOM   2914  H   SER L  96      83.888  -9.361   3.829  1.00  0.00
ATOM   2915  H   SER L  96      83.461  -7.670   3.486  1.00  0.00
ATOM   2916  H   SER L  96      82.175  -9.162   2.313  1.00  0.00
ATOM   2917  N   THR L  97      84.748  -8.906   6.779  1.00 15.57
ATOM   2918  CA  THR L  97      85.973  -8.615   7.516  1.00 14.70
ATOM   2919  C   THR L  97      87.056  -9.659   7.261  1.00 14.29
ATOM   2920  O   THR L  97      86.760 -10.805   7.007  1.00 14.13
ATOM   2921  CB  THR L  97      85.708  -8.497   9.020  1.00 17.81
ATOM   2922  OG1 THR L  97      85.030  -9.654   9.470  1.00 16.11
ATOM   2923  CG2 THR L  97      84.827  -7.232   9.356  1.00 19.98
ATOM   2924  H   THR L  97      84.378  -9.867   6.764  1.00  0.00
ATOM   2925  H   THR L  97      86.334  -7.655   7.147  1.00  0.00
ATOM   2926  H   THR L  97      86.670  -8.393   9.522  1.00  0.00
ATOM   2927  H   THR L  97      85.626 -10.462   9.238  1.00  0.00
ATOM   2928  H   THR L  97      84.685  -7.220  10.437  1.00  0.00
ATOM   2929  H   THR L  97      85.379  -6.358   9.010  1.00  0.00
ATOM   2930  H   THR L  97      83.883  -7.351   8.825  1.00  0.00
ATOM   2931  N   PHE L  98      88.308  -9.214   7.350  1.00 16.00
ATOM   2932  CA  PHE L  98      89.485 -10.056   7.056  1.00 13.46
ATOM   2933  C   PHE L  98      90.181 -10.591   8.307  1.00 12.35
ATOM   2934  O   PHE L  98      90.277  -9.928   9.370  1.00 15.44
ATOM   2935  CB  PHE L  98      90.530  -9.241   6.255  1.00 12.39
ATOM   2936  CG  PHE L  98      90.364  -9.337   4.747  1.00 13.30
ATOM   2937  CD1 PHE L  98      90.984 -10.334   4.046  1.00 15.87
ATOM   2938  CD2 PHE L  98      89.570  -8.455   4.074  1.00 14.77
ATOM   2939  CE1 PHE L  98      90.817 -10.461   2.704  1.00 16.13
ATOM   2940  CE2 PHE L  98      89.381  -8.568   2.708  1.00 15.39
ATOM   2941  CZ  PHE L  98      90.020  -9.577   2.030  1.00 15.67
ATOM   2942  H   PHE L  98      88.463  -8.237   7.637  1.00  0.00
ATOM   2943  H   PHE L  98      89.106 -10.905   6.487  1.00  0.00
ATOM   2944  H   PHE L  98      91.519  -9.630   6.497  1.00  0.00
ATOM   2945  H   PHE L  98      90.391  -8.192   6.516  1.00  0.00
ATOM   2946  H   PHE L  98      91.624 -11.040   4.574  1.00  0.00
ATOM   2947  H   PHE L  98      89.078  -7.650   4.620  1.00  0.00
ATOM   2948  H   PHE L  98      91.317 -11.266   2.165  1.00  0.00
ATOM   2949  H   PHE L  98      88.735  -7.867   2.178  1.00  0.00
ATOM   2950  H   PHE L  98      89.892  -9.674   0.952  1.00  0.00
ATOM   2951  N   GLY L  99      90.723 -11.789   8.169  1.00 12.43
ATOM   2952  CA  GLY L  99      91.815 -12.227   9.028  1.00 13.89
ATOM   2953  C   GLY L  99      93.119 -11.537   8.688  1.00 15.15
ATOM   2954  O   GLY L  99      93.239 -10.851   7.648  1.00 16.11
ATOM   2955  H   GLY L  99      90.367 -12.424   7.441  1.00  0.00
ATOM   2956  H   GLY L  99      91.941 -13.295   8.852  1.00  0.00
ATOM   2957  H   GLY L  99      91.541 -12.011  10.061  1.00  0.00
ATOM   2958  N   GLN L 100      94.112 -11.727   9.549  1.00 14.78
ATOM   2959  CA  GLN L 100      95.335 -10.943   9.486  1.00 16.99
ATOM   2960  C   GLN L 100      96.337 -11.424   8.473  1.00 13.72
ATOM   2961  O   GLN L 100      97.290 -10.694   8.173  1.00 14.61
ATOM   2962  CB  GLN L 100      96.029 -10.911  10.843  1.00 21.51
ATOM   2963  CG  GLN L 100      95.156 -10.383  11.955  1.00 25.60
ATOM   2964  CD  GLN L 100      94.439 -11.477  12.778  1.00 35.57
ATOM   2965  OE1 GLN L 100      93.892 -12.466  12.247  1.00 20.32
ATOM   2966  NE2 GLN L 100      94.458 -11.298  14.105  1.00 45.49
ATOM   2967  H   GLN L 100      94.014 -12.447  10.279  1.00  0.00
ATOM   2968  H   GLN L 100      95.003  -9.951   9.179  1.00  0.00
ATOM   2969  H   GLN L 100      96.892 -10.250  10.762  1.00  0.00
ATOM   2970  H   GLN L 100      96.289 -11.937  11.101  1.00  0.00
ATOM   2971  H   GLN L 100      94.381  -9.787  11.473  1.00  0.00
ATOM   2972  H   GLN L 100      95.802  -9.821  12.629  1.00  0.00
ATOM   2973  H   GLN L 100      94.002 -11.984  14.724  1.00  0.00
ATOM   2974  H   GLN L 100      94.929 -10.475  14.507  1.00  0.00
ATOM   2975  N   GLY L 101      96.116 -12.604   7.914  1.00 12.97
ATOM   2976  CA  GLY L 101      96.976 -13.126   6.854  1.00 13.63
ATOM   2977  C   GLY L 101      98.008 -14.119   7.345  1.00 14.74
ATOM   2978  O   GLY L 101      98.422 -14.092   8.527  1.00 16.70
ATOM   2979  H   GLY L 101      95.317 -13.169   8.235  1.00  0.00
ATOM   2980  H   GLY L 101      97.515 -12.267   6.454  1.00  0.00
ATOM   2981  H   GLY L 101      96.332 -13.616   6.124  1.00  0.00
ATOM   2982  N   THR L 102      98.449 -14.965   6.413  1.00 14.00
ATOM   2983  CA  THR L 102      99.545 -15.932   6.641  1.00 14.63
ATOM   2984  C   THR L 102     100.509 -15.843   5.463  1.00 15.67
ATOM   2985  O   THR L 102     100.117 -16.151   4.323  1.00 15.58
ATOM   2986  CB  THR L 102      99.039 -17.361   6.701  1.00 13.82
ATOM   2987  OG1 THR L 102      98.069 -17.473   7.732  1.00 15.00
ATOM   2988  CG2 THR L 102     100.231 -18.297   6.985  1.00 14.43
ATOM   2989  H   THR L 102      98.003 -14.944   5.485  1.00  0.00
ATOM   2990  H   THR L 102     100.019 -15.686   7.591  1.00  0.00
ATOM   2991  H   THR L 102      98.578 -17.640   5.753  1.00  0.00
ATOM   2992  H   THR L 102      97.300 -16.831   7.493  1.00  0.00
ATOM   2993  H   THR L 102      99.837 -19.313   7.022  1.00  0.00
ATOM   2994  H   THR L 102     100.940 -18.167   6.167  1.00  0.00
ATOM   2995  H   THR L 102     100.655 -17.992   7.942  1.00  0.00
ATOM   2996  N   LYS L 103     101.747 -15.413   5.720  1.00 14.03
ATOM   2997  CA  LYS L 103     102.759 -15.338   4.678  1.00 15.94
ATOM   2998  C   LYS L 103     103.379 -16.714   4.527  1.00 18.03
ATOM   2999  O   LYS L 103     103.926 -17.241   5.484  1.00 18.70
ATOM   3000  CB  LYS L 103     103.842 -14.283   4.981  1.00 19.87
ATOM   3001  H   LYS L 103     101.991 -15.128   6.679  1.00  0.00
ATOM   3002  H   LYS L 103     102.284 -15.024   3.748  1.00  0.00
ATOM   3003  H   LYS L 103     104.547 -14.303   4.150  1.00  0.00
ATOM   3004  H   LYS L 103     103.336 -13.321   5.060  1.00  0.00
ATOM   3005  N   VAL L 104     103.351 -17.259   3.317  1.00 15.05
ATOM   3006  CA  VAL L 104     103.847 -18.619   3.055  1.00 17.33
ATOM   3007  C   VAL L 104     105.079 -18.533   2.182  1.00 21.11
ATOM   3008  O   VAL L 104     105.037 -17.941   1.106  1.00 18.24
ATOM   3009  CB  VAL L 104     102.745 -19.492   2.386  1.00 15.24
ATOM   3010  CG1 VAL L 104     103.326 -20.815   1.866  1.00 18.81
ATOM   3011  CG2 VAL L 104     101.571 -19.740   3.329  1.00 15.91
ATOM   3012  H   VAL L 104     102.968 -16.710   2.534  1.00  0.00
ATOM   3013  H   VAL L 104     104.109 -19.098   3.998  1.00  0.00
ATOM   3014  H   VAL L 104     102.363 -18.934   1.531  1.00  0.00
ATOM   3015  H   VAL L 104     102.503 -21.369   1.414  1.00  0.00
ATOM   3016  H   VAL L 104     104.093 -20.561   1.134  1.00  0.00
ATOM   3017  H   VAL L 104     103.744 -21.339   2.725  1.00  0.00
ATOM   3018  H   VAL L 104     100.851 -20.353   2.787  1.00  0.00
ATOM   3019  H   VAL L 104     101.968 -20.257   4.203  1.00  0.00
ATOM   3020  H   VAL L 104     101.159 -18.765   3.588  1.00  0.00
ATOM   3021  N   GLU L 105     106.205 -19.051   2.676  1.00 19.76
ATOM   3022  CA  GLU L 105     107.426 -19.147   1.877  1.00 25.58
ATOM   3023  C   GLU L 105     107.778 -20.628   1.614  1.00 25.90
ATOM   3024  O   GLU L 105     107.530 -21.513   2.463  1.00 23.26
ATOM   3025  CB  GLU L 105     108.584 -18.440   2.566  1.00 28.62
ATOM   3026  H   GLU L 105     106.214 -19.393   3.648  1.00  0.00
ATOM   3027  H   GLU L 105     107.249 -18.653   0.922  1.00  0.00
ATOM   3028  H   GLU L 105     109.455 -18.551   1.920  1.00  0.00
ATOM   3029  H   GLU L 105     108.296 -17.395   2.682  1.00  0.00
ATOM   3030  N   ILE L 106     108.318 -20.904   0.423  1.00 29.56
ATOM   3031  CA  ILE L 106     108.548 -22.291  -0.007  1.00 32.61
ATOM   3032  C   ILE L 106     110.037 -22.544  -0.233  1.00 43.00
ATOM   3033  O   ILE L 106     110.723 -21.719  -0.838  1.00 42.43
ATOM   3034  CB  ILE L 106     107.747 -22.638  -1.289  1.00 31.53
ATOM   3035  H   ILE L 106     108.578 -20.130  -0.205  1.00  0.00
ATOM   3036  H   ILE L 106     108.194 -22.941   0.793  1.00  0.00
ATOM   3037  H   ILE L 106     106.697 -22.440  -1.072  1.00  0.00
TER    3038      ILE L 106
END
