# Supplementary material for: SARS-CoV-2 Spike Protein Interaction Space
Source: Int J Mol Sci. 2023 Jul 27;24(15):12058. doi: 10.3390/ijms241512058 (PMC10418891; doi:10.3390/ijms241512058)
Supplement: Supplementary file 1 [file ijms-24-12058-s001.zip › Supplementary Material File S1/4X4Z.pdb]

REMARK 950 NUMBERING  Kabat
REMARK 950 METHOD     X-ray crystal structure
REMARK 950 RESOLUTION 1.800
REMARK 950 R-FACTOR   0.179
REMARK 950 R-FREE     0.213
REMARK 950 CHAIN-TYPE LABEL ORIGINAL
REMARK 950 CHAIN L    L    A
REMARK 950 CHAIN L    L    B
REMARK 950 MOLECULE : A : HERCEPTIN VL DOMAIN WITH F53D MUTATION
REMARK 950 SPECIES  : A : HOMO SAPIENS
SEQRES   1 L 107  ASP ILE GLN MET THR GLN SER PRO SER SER LEU SER ALA          
SEQRES   2 L 107  SER VAL GLY ASP ARG VAL THR ILE THR CYS ARG ALA SER          
SEQRES   3 L 107  GLN ASP VAL ASN THR ALA VAL ALA TRP TYR GLN GLN LYS          
SEQRES   4 L 107  PRO GLY LYS ALA PRO LYS LEU LEU ILE TYR SER ALA SER          
SEQRES   5 L 107  ASP LEU TYR SER GLY VAL PRO SER ARG PHE SER GLY SER          
SEQRES   6 L 107  ARG SER GLY THR ASP PHE THR LEU THR ILE SER SER LEU          
SEQRES   7 L 107  GLN PRO GLU ASP PHE ALA THR TYR TYR CYS GLN GLN HIS          
SEQRES   8 L 107  TYR THR THR PRO PRO THR PHE GLY GLN GLY THR LYS VAL          
SEQRES   9 L 107  GLU ILE LYS                                                  
SEQRES   1 L 107  ASP ILE GLN MET THR GLN SER PRO SER SER LEU SER ALA          
SEQRES   2 L 107  SER VAL GLY ASP ARG VAL THR ILE THR CYS ARG ALA SER          
SEQRES   3 L 107  GLN ASP VAL ASN THR ALA VAL ALA TRP TYR GLN GLN LYS          
SEQRES   4 L 107  PRO GLY LYS ALA PRO LYS LEU LEU ILE TYR SER ALA SER          
SEQRES   5 L 107  ASP LEU TYR SER GLY VAL PRO SER ARG PHE SER GLY SER          
SEQRES   6 L 107  ARG SER GLY THR ASP PHE THR LEU THR ILE SER SER LEU          
SEQRES   7 L 107  GLN PRO GLU ASP PHE ALA THR TYR TYR CYS GLN GLN HIS          
SEQRES   8 L 107  TYR THR THR PRO PRO THR PHE GLY GLN GLY THR LYS VAL          
SEQRES   9 L 107  GLU ILE LYS                                                  
ATOM      1  N   ILE L   2      19.859 -40.729 -20.538  1.00 33.91           N  
ATOM      2  CA  ILE L   2      20.303 -41.644 -19.422  1.00 29.81           C  
ATOM      3  C   ILE L   2      19.169 -41.899 -18.443  1.00 31.23           C  
ATOM      4  O   ILE L   2      18.584 -40.964 -17.902  1.00 36.69           O  
ATOM      5  CB  ILE L   2      21.573 -41.097 -18.685  1.00 29.41           C  
ATOM      6  CG1 ILE L   2      22.749 -41.017 -19.678  1.00 32.59           C  
ATOM      7  CG2 ILE L   2      21.949 -41.974 -17.495  1.00 27.36           C  
ATOM      8  CD1 ILE L   2      24.074 -40.451 -19.144  1.00 34.61           C  
ATOM      9  N   GLN L   3      18.911 -43.158 -18.125  1.00 26.49           N  
ATOM     10  CA  GLN L   3      17.776 -43.511 -17.252  1.00 25.98           C  
ATOM     11  C   GLN L   3      18.368 -43.843 -15.904  1.00 24.23           C  
ATOM     12  O   GLN L   3      19.529 -44.302 -15.808  1.00 24.29           O  
ATOM     13  CB  GLN L   3      17.027 -44.735 -17.817  1.00 27.14           C  
ATOM     14  N   MET L   4      17.609 -43.555 -14.859  1.00 23.40           N  
ATOM     15  CA  MET L   4      17.938 -43.986 -13.496  1.00 22.21           C  
ATOM     16  C   MET L   4      16.864 -44.994 -13.107  1.00 22.77           C  
ATOM     17  O   MET L   4      15.684 -44.622 -13.081  1.00 22.69           O  
ATOM     18  CB  MET L   4      17.883 -42.750 -12.617  1.00 22.75           C  
ATOM     19  CG  MET L   4      19.016 -41.756 -13.011  1.00 23.89           C  
ATOM     20  SD  MET L   4      20.689 -42.426 -12.736  1.00 27.07           S  
ATOM     21  CE  MET L   4      20.845 -42.070 -10.990  1.00 25.68           C  
ATOM     22  N   THR L   5      17.227 -46.253 -12.859  1.00 20.81           N  
ATOM     23  CA  THR L   5      16.277 -47.282 -12.397  1.00 20.44           C  
ATOM     24  C   THR L   5      16.294 -47.418 -10.882  1.00 18.81           C  
ATOM     25  O   THR L   5      17.271 -47.935 -10.312  1.00 18.13           O  
ATOM     26  CB  THR L   5      16.627 -48.637 -13.066  1.00 21.48           C  
ATOM     27  OG1 THR L   5      16.492 -48.428 -14.456  1.00 22.49           O  
ATOM     28  CG2 THR L   5      15.709 -49.741 -12.633  1.00 23.59           C  
ATOM     29  N   GLN L   6      15.277 -46.847 -10.244  1.00 17.15           N  
ATOM     30  CA  GLN L   6      15.192 -46.707  -8.791  1.00 16.43           C  
ATOM     31  C   GLN L   6      14.388 -47.802  -8.202  1.00 16.74           C  
ATOM     32  O   GLN L   6      13.285 -48.119  -8.728  1.00 16.47           O  
ATOM     33  CB  GLN L   6      14.542 -45.403  -8.445  1.00 16.44           C  
ATOM     34  CG  GLN L   6      14.667 -45.103  -6.985  1.00 16.76           C  
ATOM     35  CD  GLN L   6      14.421 -43.683  -6.590  1.00 17.96           C  
ATOM     36  OE1 GLN L   6      14.478 -42.732  -7.429  1.00 18.42           O  
ATOM     37  NE2 GLN L   6      14.109 -43.517  -5.299  1.00 18.52           N  
ATOM     38  N   SER L   7      14.841 -48.418  -7.113  1.00 17.44           N  
ATOM     39  CA  SER L   7      14.044 -49.509  -6.534  1.00 20.27           C  
ATOM     40  C   SER L   7      14.332 -49.547  -5.043  1.00 19.22           C  
ATOM     41  O   SER L   7      15.467 -49.311  -4.663  1.00 18.92           O  
ATOM     42  CB  SER L   7      14.453 -50.841  -7.174  1.00 22.47           C  
ATOM     43  OG  SER L   7      13.500 -51.794  -6.792  1.00 25.01           O  
ATOM     44  N   PRO L   8      13.380 -49.895  -4.197  1.00 19.77           N  
ATOM     45  CA  PRO L   8      11.985 -50.274  -4.569  1.00 19.25           C  
ATOM     46  C   PRO L   8      11.201 -49.061  -4.937  1.00 19.33           C  
ATOM     47  O   PRO L   8      11.649 -47.934  -4.722  1.00 19.43           O  
ATOM     48  CB  PRO L   8      11.428 -50.917  -3.301  1.00 21.34           C  
ATOM     49  CG  PRO L   8      12.386 -50.615  -2.220  1.00 23.04           C  
ATOM     50  CD  PRO L   8      13.709 -50.209  -2.782  1.00 20.27           C  
ATOM     51  N   SER L   9      10.071 -49.286  -5.556  1.00 19.40           N  
ATOM     52  CA  SER L   9       9.087 -48.190  -5.823  1.00 21.84           C  
ATOM     53  C   SER L   9       8.430 -47.766  -4.519  1.00 20.73           C  
ATOM     54  O   SER L   9       8.226 -46.589  -4.278  1.00 20.32           O  
ATOM     55  CB  SER L   9       8.046 -48.695  -6.802  1.00 24.60           C  
ATOM     56  OG  SER L   9       7.040 -47.690  -6.981  1.00 29.38           O  
ATOM     57  N   SER L  10       8.079 -48.724  -3.649  1.00 22.53           N  
ATOM     58  CA  SER L  10       7.539 -48.382  -2.301  1.00 22.43           C  
ATOM     59  C   SER L  10       7.980 -49.474  -1.309  1.00 21.85           C  
ATOM     60  O   SER L  10       8.300 -50.599  -1.728  1.00 20.94           O  
ATOM     61  CB  SER L  10       6.008 -48.219  -2.296  1.00 27.05           C  
ATOM     62  OG  SER L  10       5.414 -49.430  -2.588  1.00 32.11           O  
ATOM     63  N   LEU L  11       8.056 -49.110  -0.055  1.00 21.01           N  
ATOM     64  CA  LEU L  11       8.471 -50.091   0.940  1.00 22.32           C  
ATOM     65  C   LEU L  11       7.886 -49.678   2.270  1.00 23.91           C  
ATOM     66  O   LEU L  11       7.695 -48.492   2.539  1.00 24.18           O  
ATOM     67  CB  LEU L  11       9.981 -50.187   0.985  1.00 21.96           C  
ATOM     68  CG  LEU L  11      10.815 -49.004   1.506  1.00 20.97           C  
ATOM     69  CD1 LEU L  11      10.830 -48.948   3.032  1.00 22.92           C  
ATOM     70  CD2 LEU L  11      12.221 -48.965   0.938  1.00 24.21           C  
ATOM     71  N   SER L  12       7.678 -50.669   3.127  1.00 24.31           N  
ATOM     72  CA  SER L  12       7.250 -50.426   4.472  1.00 24.83           C  
ATOM     73  C   SER L  12       8.306 -50.901   5.453  1.00 23.80           C  
ATOM     74  O   SER L  12       8.999 -51.931   5.202  1.00 22.52           O  
ATOM     75  CB  SER L  12       5.880 -51.123   4.708  1.00 30.27           C  
ATOM     76  OG  SER L  12       6.143 -52.476   4.630  1.00 35.33           O  
ATOM     77  N   ALA L  13       8.519 -50.112   6.497  1.00 22.06           N  
ATOM     78  CA  ALA L  13       9.642 -50.295   7.434  1.00 23.38           C  
ATOM     79  C   ALA L  13       9.316 -49.695   8.773  1.00 23.97           C  
ATOM     80  O   ALA L  13       8.350 -48.903   8.919  1.00 26.36           O  
ATOM     81  CB  ALA L  13      10.934 -49.643   6.898  1.00 22.86           C  
ATOM     82  N   SER L  14      10.135 -50.027   9.755  1.00 23.21           N  
ATOM     83  CA  SER L  14       9.855 -49.584  11.146  1.00 24.24           C  
ATOM     84  C   SER L  14      10.884 -48.616  11.621  1.00 24.61           C  
ATOM     85  O   SER L  14      12.022 -48.642  11.157  1.00 21.65           O  
ATOM     86  CB  SER L  14       9.938 -50.764  12.059  1.00 25.64           C  
ATOM     87  OG  SER L  14       8.948 -51.718  11.675  1.00 27.45           O  
ATOM     88  N   VAL L  15      10.519 -47.823  12.634  1.00 24.33           N  
ATOM     89  CA  VAL L  15      11.474 -46.962  13.275  1.00 24.06           C  
ATOM     90  C   VAL L  15      12.634 -47.797  13.797  1.00 24.19           C  
ATOM     91  O   VAL L  15      12.464 -48.895  14.352  1.00 24.89           O  
ATOM     92  CB  VAL L  15      10.789 -46.155  14.411  1.00 25.44           C  
ATOM     93  CG1 VAL L  15      11.816 -45.471  15.291  1.00 27.17           C  
ATOM     94  CG2 VAL L  15       9.799 -45.164  13.807  1.00 26.29           C  
ATOM     95  N   GLY L  16      13.835 -47.307  13.575  1.00 22.23           N  
ATOM     96  CA  GLY L  16      15.057 -48.021  13.975  1.00 23.63           C  
ATOM     97  C   GLY L  16      15.686 -48.955  12.949  1.00 21.48           C  
ATOM     98  O   GLY L  16      16.792 -49.415  13.161  1.00 23.70           O  
ATOM     99  N   ASP L  17      14.976 -49.221  11.866  1.00 22.02           N  
ATOM    100  CA  ASP L  17      15.415 -50.124  10.787  1.00 21.31           C  
ATOM    101  C   ASP L  17      16.553 -49.494  10.004  1.00 21.45           C  
ATOM    102  O   ASP L  17      16.645 -48.230   9.893  1.00 20.88           O  
ATOM    103  CB  ASP L  17      14.301 -50.376   9.765  1.00 21.03           C  
ATOM    104  CG  ASP L  17      13.289 -51.393  10.170  1.00 24.03           C  
ATOM    105  OD1 ASP L  17      13.326 -52.008  11.253  1.00 23.23           O  
ATOM    106  OD2 ASP L  17      12.445 -51.614   9.279  1.00 26.05           O  
ATOM    107  N   ARG L  18      17.399 -50.362   9.437  1.00 20.67           N  
ATOM    108  CA  ARG L  18      18.421 -49.965   8.488  1.00 21.15           C  
ATOM    109  C   ARG L  18      17.917 -50.377   7.129  1.00 21.50           C  
ATOM    110  O   ARG L  18      17.551 -51.541   6.927  1.00 20.97           O  
ATOM    111  CB  ARG L  18      19.754 -50.625   8.825  1.00 22.71           C  
ATOM    112  CG  ARG L  18      20.841 -50.307   7.804  1.00 23.92           C  
ATOM    113  CD  ARG L  18      22.097 -51.087   8.170  1.00 27.42           C  
ATOM    114  NE  ARG L  18      23.190 -50.775   7.254  1.00 32.51           N  
ATOM    115  CZ  ARG L  18      24.072 -49.798   7.485  1.00 35.40           C  
ATOM    116  NH1 ARG L  18      23.996 -49.066   8.591  1.00 36.57           N  
ATOM    117  NH2 ARG L  18      25.021 -49.573   6.620  1.00 37.11           N  
ATOM    118  N   VAL L  19      17.810 -49.424   6.203  1.00 20.19           N  
ATOM    119  CA  VAL L  19      17.191 -49.681   4.932  1.00 22.03           C  
ATOM    120  C   VAL L  19      17.979 -48.971   3.825  1.00 20.63           C  
ATOM    121  O   VAL L  19      18.520 -47.899   4.034  1.00 19.86           O  
ATOM    122  CB  VAL L  19      15.693 -49.216   4.896  1.00 26.10           C  
ATOM    123  CG1 VAL L  19      15.558 -47.721   4.818  1.00 24.36           C  
ATOM    124  CG2 VAL L  19      15.028 -49.759   3.678  1.00 30.86           C  
ATOM    125  N   THR L  20      18.031 -49.587   2.659  1.00 19.98           N  
ATOM    126  CA  THR L  20      18.807 -49.058   1.516  1.00 18.63           C  
ATOM    127  C   THR L  20      17.873 -48.962   0.300  1.00 19.94           C  
ATOM    128  O   THR L  20      17.114 -49.896  -0.032  1.00 20.04           O  
ATOM    129  CB  THR L  20      19.947 -50.014   1.221  1.00 21.82           C  
ATOM    130  OG1 THR L  20      20.907 -49.842   2.246  1.00 21.37           O  
ATOM    131  CG2 THR L  20      20.568 -49.721  -0.077  1.00 23.29           C  
ATOM    132  N   ILE L  21      17.986 -47.837  -0.386  1.00 17.20           N  
ATOM    133  CA  ILE L  21      17.290 -47.592  -1.681  1.00 18.39           C  
ATOM    134  C   ILE L  21      18.302 -47.504  -2.739  1.00 16.60           C  
ATOM    135  O   ILE L  21      19.439 -46.973  -2.498  1.00 15.27           O  
ATOM    136  CB  ILE L  21      16.520 -46.247  -1.591  1.00 20.76           C  
ATOM    137  CG1 ILE L  21      15.495 -46.364  -0.452  1.00 24.54           C  
ATOM    138  CG2 ILE L  21      15.919 -45.856  -2.970  1.00 24.20           C  
ATOM    139  CD1 ILE L  21      14.837 -45.007  -0.121  1.00 29.24           C  
ATOM    140  N   THR L  22      17.977 -48.025  -3.920  1.00 16.17           N  
ATOM    141  CA  THR L  22      19.028 -48.230  -4.948  1.00 16.95           C  
ATOM    142  C   THR L  22      18.606 -47.493  -6.238  1.00 17.82           C  
ATOM    143  O   THR L  22      17.430 -47.467  -6.569  1.00 19.05           O  
ATOM    144  CB  THR L  22      19.156 -49.719  -5.283  1.00 19.58           C  
ATOM    145  OG1 THR L  22      19.587 -50.398  -4.064  1.00 20.34           O  
ATOM    146  CG2 THR L  22      20.126 -49.918  -6.388  1.00 21.16           C  
ATOM    148  N   CYS L  23      19.568 -46.865  -6.897  0.50 16.67           N  
ATOM    150  CA  CYS L  23      19.377 -46.357  -8.265  0.50 17.05           C  
ATOM    152  C   CYS L  23      20.477 -46.899  -9.150  0.50 17.83           C  
ATOM    154  O   CYS L  23      21.656 -46.886  -8.749  0.50 17.97           O  
ATOM    156  CB  CYS L  23      19.381 -44.832  -8.273  0.50 18.29           C  
ATOM    158  SG  CYS L  23      17.723 -44.141  -7.903  0.50 18.21           S  
ATOM    159  N   ARG L  24      20.117 -47.440 -10.311  1.00 17.97           N  
ATOM    160  CA  ARG L  24      21.066 -47.849 -11.296  1.00 19.78           C  
ATOM    161  C   ARG L  24      21.017 -46.937 -12.533  1.00 19.56           C  
ATOM    162  O   ARG L  24      19.970 -46.813 -13.155  1.00 18.75           O  
ATOM    163  CB  ARG L  24      20.833 -49.298 -11.772  1.00 22.66           C  
ATOM    164  CG  ARG L  24      21.964 -49.861 -12.649  1.00 26.36           C  
ATOM    165  CD  ARG L  24      21.757 -51.346 -13.001  1.00 28.56           C  
ATOM    166  NE  ARG L  24      20.532 -51.389 -13.772  1.00 32.33           N  
ATOM    167  CZ  ARG L  24      19.473 -52.167 -13.543  1.00 35.64           C  
ATOM    168  NH1 ARG L  24      19.495 -53.166 -12.648  1.00 35.19           N  
ATOM    169  NH2 ARG L  24      18.414 -52.004 -14.317  1.00 38.28           N  
ATOM    170  N   ALA L  25      22.123 -46.296 -12.850  1.00 18.30           N  
ATOM    171  CA  ALA L  25      22.243 -45.496 -14.069  1.00 20.37           C  
ATOM    172  C   ALA L  25      22.378 -46.412 -15.310  1.00 22.64           C  
ATOM    173  O   ALA L  25      23.130 -47.407 -15.271  1.00 23.89           O  
ATOM    174  CB  ALA L  25      23.399 -44.520 -13.956  1.00 21.45           C  
ATOM    175  N   SER L  26      21.737 -46.057 -16.431  1.00 23.60           N  
ATOM    176  CA  SER L  26      21.807 -46.877 -17.645  1.00 26.53           C  
ATOM    177  C   SER L  26      23.171 -46.756 -18.296  1.00 29.70           C  
ATOM    178  O   SER L  26      23.536 -47.578 -19.098  1.00 30.38           O  
ATOM    179  CB  SER L  26      20.703 -46.533 -18.639  1.00 27.71           C  
ATOM    180  OG  SER L  26      20.704 -45.141 -18.975  1.00 29.10           O  
ATOM    181  N   GLN L  27      23.947 -45.743 -17.926  1.00 30.00           N  
ATOM    182  CA  GLN L  27      25.346 -45.698 -18.288  1.00 31.28           C  
ATOM    183  C   GLN L  27      26.131 -44.811 -17.350  1.00 27.74           C  
ATOM    184  O   GLN L  27      25.606 -44.266 -16.388  1.00 27.09           O  
ATOM    185  CB  GLN L  27      25.484 -45.202 -19.717  1.00 37.00           C  
ATOM    186  CG  GLN L  27      24.908 -43.843 -19.912  1.00 38.25           C  
ATOM    187  CD  GLN L  27      24.629 -43.624 -21.363  1.00 47.74           C  
ATOM    188  OE1 GLN L  27      25.293 -42.817 -22.011  1.00 49.00           O  
ATOM    189  NE2 GLN L  27      23.678 -44.393 -21.902  1.00 51.02           N  
ATOM    190  N   ASP L  28      27.426 -44.730 -17.570  1.00 28.45           N  
ATOM    191  CA  ASP L  28      28.304 -44.020 -16.655  1.00 28.87           C  
ATOM    192  C   ASP L  28      27.819 -42.562 -16.503  1.00 27.03           C  
ATOM    193  O   ASP L  28      27.578 -41.872 -17.500  1.00 29.75           O  
ATOM    194  CB  ASP L  28      29.719 -44.026 -17.188  1.00 31.69           C  
ATOM    195  CG  ASP L  28      30.761 -43.797 -16.124  1.00 33.78           C  
ATOM    196  OD1 ASP L  28      30.571 -43.109 -15.085  1.00 34.62           O  
ATOM    197  OD2 ASP L  28      31.868 -44.253 -16.400  1.00 38.77           O  
ATOM    198  N   VAL L  29      27.639 -42.164 -15.272  1.00 24.31           N  
ATOM    199  CA  VAL L  29      27.245 -40.751 -14.902  1.00 23.27           C  
ATOM    200  C   VAL L  29      28.233 -40.190 -13.931  1.00 22.40           C  
ATOM    201  O   VAL L  29      27.924 -39.269 -13.184  1.00 22.82           O  
ATOM    202  CB  VAL L  29      25.859 -40.634 -14.303  1.00 22.72           C  
ATOM    203  CG1 VAL L  29      24.808 -40.851 -15.373  1.00 23.68           C  
ATOM    204  CG2 VAL L  29      25.677 -41.521 -13.058  1.00 20.76           C  
ATOM    205  N   ASN L  30      29.442 -40.727 -13.940  1.00 26.07           N  
ATOM    206  CA  ASN L  30      30.393 -40.467 -12.890  1.00 30.62           C  
ATOM    207  C   ASN L  30      29.817 -40.405 -11.519  1.00 30.39           C  
ATOM    208  O   ASN L  30      29.236 -41.361 -11.031  1.00 27.42           O  
ATOM    209  CB  ASN L  30      31.132 -39.132 -13.126  1.00 35.33           C  
ATOM    210  CG  ASN L  30      30.457 -37.919 -12.487  1.00 40.58           C  
ATOM    211  OD1 ASN L  30      30.868 -37.348 -11.409  1.00 29.27           O  
ATOM    212  ND2 ASN L  30      29.495 -37.389 -13.252  1.00 51.88           N  
ATOM    213  N   THR L  31      30.009 -39.238 -10.893  1.00 25.50           N  
ATOM    214  CA  THR L  31      29.522 -39.057  -9.572  1.00 27.14           C  
ATOM    215  C   THR L  31      28.485 -37.896  -9.529  1.00 24.10           C  
ATOM    216  O   THR L  31      28.272 -37.289  -8.491  1.00 25.29           O  
ATOM    217  CB  THR L  31      30.729 -38.852  -8.601  1.00 33.60           C  
ATOM    218  OG1 THR L  31      30.278 -39.134  -7.274  1.00 40.76           O  
ATOM    219  CG2 THR L  31      31.245 -37.523  -8.597  1.00 34.56           C  
ATOM    220  N   ALA L  32      27.813 -37.657 -10.657  1.00 21.60           N  
ATOM    221  CA  ALA L  32      26.872 -36.568 -10.804  1.00 20.79           C  
ATOM    222  C   ALA L  32      25.453 -37.058 -10.432  1.00 18.75           C  
ATOM    223  O   ALA L  32      24.571 -37.128 -11.288  1.00 17.84           O  
ATOM    224  CB  ALA L  32      26.902 -36.072 -12.231  1.00 21.70           C  
ATOM    225  N   VAL L  33      25.264 -37.453  -9.169  1.00 17.22           N  
ATOM    226  CA  VAL L  33      24.028 -38.020  -8.648  1.00 16.96           C  
ATOM    227  C   VAL L  33      23.717 -37.309  -7.332  1.00 17.62           C  
ATOM    228  O   VAL L  33      24.586 -37.117  -6.510  1.00 19.20           O  
ATOM    229  CB  VAL L  33      24.168 -39.537  -8.476  1.00 17.62           C  
ATOM    230  CG1 VAL L  33      22.930 -40.115  -7.763  1.00 17.91           C  
ATOM    231  CG2 VAL L  33      24.262 -40.146  -9.864  1.00 18.22           C  
ATOM    232  N   ALA L  34      22.474 -36.895  -7.174  1.00 17.27           N  
ATOM    233  CA  ALA L  34      21.957 -36.290  -5.943  1.00 17.38           C  
ATOM    234  C   ALA L  34      20.734 -37.087  -5.479  1.00 16.84           C  
ATOM    235  O   ALA L  34      20.102 -37.813  -6.278  1.00 16.24           O  
ATOM    236  CB  ALA L  34      21.548 -34.871  -6.221  1.00 19.77           C  
ATOM    237  N   TRP L  35      20.439 -37.037  -4.185  1.00 14.99           N  
ATOM    238  CA  TRP L  35      19.233 -37.661  -3.656  1.00 15.85           C  
ATOM    239  C   TRP L  35      18.454 -36.575  -2.986  1.00 15.74           C  
ATOM    240  O   TRP L  35      19.018 -35.678  -2.329  1.00 17.00           O  
ATOM    241  CB  TRP L  35      19.648 -38.728  -2.609  1.00 16.53           C  
ATOM    242  CG  TRP L  35      20.300 -39.946  -3.164  1.00 15.72           C  
ATOM    243  CD1 TRP L  35      21.615 -40.169  -3.353  1.00 17.48           C  
ATOM    244  CD2 TRP L  35      19.637 -41.140  -3.591  1.00 16.30           C  
ATOM    245  NE1 TRP L  35      21.831 -41.416  -3.896  1.00 15.86           N  
ATOM    246  CE2 TRP L  35      20.643 -42.049  -4.019  1.00 17.19           C  
ATOM    247  CE3 TRP L  35      18.277 -41.557  -3.627  1.00 15.99           C  
ATOM    248  CZ2 TRP L  35      20.344 -43.356  -4.472  1.00 16.29           C  
ATOM    249  CZ3 TRP L  35      17.993 -42.859  -4.086  1.00 16.52           C  
ATOM    250  CH2 TRP L  35      18.999 -43.724  -4.492  1.00 15.61           C  
ATOM    251  N   TYR L  36      17.140 -36.693  -3.089  1.00 15.97           N  
ATOM    252  CA  TYR L  36      16.194 -35.766  -2.539  1.00 17.44           C  
ATOM    253  C   TYR L  36      15.123 -36.485  -1.749  1.00 18.03           C  
ATOM    254  O   TYR L  36      14.829 -37.633  -1.983  1.00 17.84           O  
ATOM    255  CB  TYR L  36      15.420 -34.975  -3.631  1.00 18.73           C  
ATOM    256  CG  TYR L  36      16.332 -34.200  -4.592  1.00 18.93           C  
ATOM    257  CD1 TYR L  36      16.901 -34.851  -5.713  1.00 19.31           C  
ATOM    258  CD2 TYR L  36      16.579 -32.857  -4.417  1.00 20.91           C  
ATOM    259  CE1 TYR L  36      17.752 -34.152  -6.585  1.00 20.23           C  
ATOM    260  CE2 TYR L  36      17.410 -32.176  -5.257  1.00 21.39           C  
ATOM    261  CZ  TYR L  36      18.010 -32.857  -6.365  1.00 20.75           C  
ATOM    262  OH  TYR L  36      18.858 -32.182  -7.290  1.00 20.54           O  
ATOM    263  N   GLN L  37      14.554 -35.752  -0.809  1.00 19.54           N  
ATOM    264  CA  GLN L  37      13.411 -36.199  -0.027  1.00 21.53           C  
ATOM    265  C   GLN L  37      12.274 -35.268  -0.289  1.00 21.78           C  
ATOM    266  O   GLN L  37      12.441 -34.043  -0.218  1.00 24.11           O  
ATOM    267  CB  GLN L  37      13.813 -36.120   1.449  1.00 24.37           C  
ATOM    268  CG  GLN L  37      12.771 -36.565   2.427  1.00 26.71           C  
ATOM    269  CD  GLN L  37      13.165 -36.160   3.852  1.00 29.86           C  
ATOM    270  OE1 GLN L  37      12.949 -35.027   4.232  1.00 28.39           O  
ATOM    271  NE2 GLN L  37      13.675 -37.094   4.645  1.00 26.94           N  
ATOM    272  N   GLN L  38      11.105 -35.834  -0.525  1.00 22.32           N  
ATOM    273  CA  GLN L  38       9.885 -35.061  -0.736  1.00 24.59           C  
ATOM    274  C   GLN L  38       8.765 -35.553   0.132  1.00 27.08           C  
ATOM    275  O   GLN L  38       8.441 -36.741   0.220  1.00 25.72           O  
ATOM    276  CB  GLN L  38       9.465 -35.022  -2.235  1.00 23.95           C  
ATOM    277  CG  GLN L  38       8.267 -34.140  -2.530  1.00 24.84           C  
ATOM    278  CD  GLN L  38       7.912 -34.043  -4.016  1.00 27.80           C  
ATOM    279  OE1 GLN L  38       8.118 -34.980  -4.804  1.00 30.25           O  
ATOM    280  NE2 GLN L  38       7.393 -32.935  -4.390  1.00 28.81           N  
ATOM    281  N   LYS L  39       8.152 -34.594   0.784  1.00 33.21           N  
ATOM    282  CA  LYS L  39       6.885 -34.809   1.518  1.00 35.19           C  
ATOM    283  C   LYS L  39       5.631 -34.292   0.732  1.00 36.72           C  
ATOM    284  O   LYS L  39       5.692 -33.344  -0.088  1.00 36.10           O  
ATOM    285  CB  LYS L  39       7.047 -34.244   2.943  1.00 36.43           C  
ATOM    286  CG  LYS L  39       8.235 -34.992   3.606  1.00 36.97           C  
ATOM    287  CD  LYS L  39       8.683 -34.510   4.975  1.00 38.50           C  
ATOM    288  CE  LYS L  39       9.619 -35.545   5.607  1.00 38.12           C  
ATOM    289  NZ  LYS L  39       9.993 -35.174   6.993  1.00 40.35           N  
ATOM    290  N   PRO L  40       4.491 -34.929   0.966  1.00 37.82           N  
ATOM    291  CA  PRO L  40       3.289 -34.438   0.266  1.00 40.97           C  
ATOM    292  C   PRO L  40       3.082 -32.910   0.441  1.00 44.25           C  
ATOM    293  O   PRO L  40       3.249 -32.385   1.548  1.00 43.60           O  
ATOM    294  CB  PRO L  40       2.150 -35.262   0.904  1.00 42.36           C  
ATOM    295  CG  PRO L  40       2.769 -36.305   1.749  1.00 42.62           C  
ATOM    296  CD  PRO L  40       4.206 -35.979   1.974  1.00 40.16           C  
ATOM    297  N   GLY L  41       2.748 -32.191  -0.636  1.00 44.07           N  
ATOM    298  CA  GLY L  41       2.553 -30.752  -0.560  1.00 44.90           C  
ATOM    299  C   GLY L  41       3.803 -29.888  -0.585  1.00 45.67           C  
ATOM    300  O   GLY L  41       3.675 -28.688  -0.716  1.00 49.65           O  
ATOM    301  N   LYS L  42       5.001 -30.478  -0.458  1.00 41.03           N  
ATOM    302  CA  LYS L  42       6.293 -29.714  -0.386  1.00 42.18           C  
ATOM    303  C   LYS L  42       7.155 -29.971  -1.600  1.00 37.91           C  
ATOM    304  O   LYS L  42       7.030 -31.009  -2.253  1.00 37.60           O  
ATOM    305  CB  LYS L  42       7.113 -30.108   0.859  1.00 39.79           C  
ATOM    306  N   ALA L  43       8.082 -29.064  -1.898  1.00 38.40           N  
ATOM    307  CA  ALA L  43       9.040 -29.352  -2.913  1.00 37.26           C  
ATOM    308  C   ALA L  43      10.076 -30.339  -2.340  1.00 31.26           C  
ATOM    309  O   ALA L  43      10.237 -30.446  -1.099  1.00 30.59           O  
ATOM    310  CB  ALA L  43       9.713 -28.098  -3.385  1.00 39.07           C  
ATOM    311  N   PRO L  44      10.759 -31.074  -3.218  1.00 31.06           N  
ATOM    312  CA  PRO L  44      11.834 -31.980  -2.678  1.00 29.15           C  
ATOM    313  C   PRO L  44      12.950 -31.170  -1.982  1.00 28.94           C  
ATOM    314  O   PRO L  44      13.133 -30.014  -2.316  1.00 32.78           O  
ATOM    315  CB  PRO L  44      12.348 -32.738  -3.925  1.00 29.00           C  
ATOM    316  CG  PRO L  44      11.300 -32.466  -5.007  1.00 30.46           C  
ATOM    317  CD  PRO L  44      10.632 -31.162  -4.681  1.00 31.70           C  
ATOM    318  N   LYS L  45      13.661 -31.749  -1.003  1.00 24.27           N  
ATOM    319  CA  LYS L  45      14.822 -31.112  -0.340  1.00 23.29           C  
ATOM    320  C   LYS L  45      16.047 -31.940  -0.686  1.00 21.44           C  
ATOM    321  O   LYS L  45      15.971 -33.169  -0.665  1.00 21.09           O  
ATOM    322  CB  LYS L  45      14.701 -31.214   1.187  1.00 24.46           C  
ATOM    323  N   LEU L  46      17.163 -31.294  -0.913  1.00 21.33           N  
ATOM    324  CA  LEU L  46      18.391 -31.977  -1.194  1.00 21.03           C  
ATOM    325  C   LEU L  46      18.957 -32.648   0.077  1.00 23.30           C  
ATOM    326  O   LEU L  46      19.164 -32.004   1.104  1.00 24.28           O  
ATOM    327  CB  LEU L  46      19.385 -30.979  -1.767  1.00 24.26           C  
ATOM    328  CG  LEU L  46      20.775 -31.522  -2.088  1.00 24.13           C  
ATOM    329  CD1 LEU L  46      20.685 -32.483  -3.255  1.00 24.93           C  
ATOM    330  CD2 LEU L  46      21.764 -30.352  -2.292  1.00 25.89           C  
ATOM    331  N   LEU L  47      19.258 -33.905  -0.022  1.00 21.71           N  
ATOM    332  CA  LEU L  47      19.875 -34.653   1.066  1.00 24.29           C  
ATOM    333  C   LEU L  47      21.386 -34.923   0.830  1.00 21.16           C  
ATOM    334  O   LEU L  47      22.193 -34.737   1.729  1.00 20.98           O  
ATOM    335  CB  LEU L  47      19.186 -35.995   1.201  1.00 26.07           C  
ATOM    336  CG  LEU L  47      17.743 -36.218   1.588  1.00 31.63           C  
ATOM    337  CD1 LEU L  47      17.522 -37.736   1.554  1.00 34.87           C  
ATOM    338  CD2 LEU L  47      17.507 -35.697   2.969  1.00 33.25           C  
ATOM    339  N   ILE L  48      21.684 -35.454  -0.356  1.00 20.33           N  
ATOM    340  CA  ILE L  48      22.996 -35.937  -0.759  1.00 20.68           C  
ATOM    341  C   ILE L  48      23.356 -35.406  -2.116  1.00 20.62           C  
ATOM    342  O   ILE L  48      22.512 -35.436  -3.020  1.00 18.69           O  
ATOM    343  CB  ILE L  48      23.044 -37.486  -0.775  1.00 22.38           C  
ATOM    344  CG1 ILE L  48      22.736 -37.948   0.669  1.00 24.86           C  
ATOM    345  CG2 ILE L  48      24.415 -37.984  -1.237  1.00 22.42           C  
ATOM    346  CD1 ILE L  48      22.887 -39.418   0.848  1.00 28.48           C  
ATOM    347  N   TYR L  49      24.603 -34.928  -2.262  1.00 19.62           N  
ATOM    348  CA  TYR L  49      25.054 -34.522  -3.566  1.00 20.90           C  
ATOM    349  C   TYR L  49      26.391 -35.227  -3.856  1.00 21.14           C  
ATOM    350  O   TYR L  49      27.072 -35.713  -2.933  1.00 20.82           O  
ATOM    351  CB  TYR L  49      25.122 -32.970  -3.632  1.00 22.38           C  
ATOM    352  CG  TYR L  49      26.093 -32.372  -2.678  1.00 24.12           C  
ATOM    353  CD1 TYR L  49      27.412 -32.103  -3.086  1.00 27.05           C  
ATOM    354  CD2 TYR L  49      25.731 -32.079  -1.341  1.00 25.82           C  
ATOM    355  CE1 TYR L  49      28.324 -31.578  -2.236  1.00 28.57           C  
ATOM    356  CE2 TYR L  49      26.660 -31.559  -0.464  1.00 27.96           C  
ATOM    357  CZ  TYR L  49      27.960 -31.325  -0.904  1.00 32.16           C  
ATOM    358  OH  TYR L  49      28.903 -30.836  -0.031  1.00 34.68           O  
ATOM    359  N   SER L  50      26.815 -35.226  -5.116  1.00 21.14           N  
ATOM    360  CA  SER L  50      28.063 -35.884  -5.515  1.00 21.90           C  
ATOM    361  C   SER L  50      28.106 -37.300  -4.976  1.00 21.09           C  
ATOM    362  O   SER L  50      29.138 -37.750  -4.466  1.00 20.41           O  
ATOM    363  CB  SER L  50      29.339 -35.089  -5.110  1.00 26.59           C  
ATOM    364  OG  SER L  50      29.198 -33.795  -5.615  1.00 32.63           O  
ATOM    365  N   ALA L  51      26.982 -37.990  -5.090  1.00 18.48           N  
ATOM    366  CA  ALA L  51      26.776 -39.357  -4.686  1.00 18.44           C  
ATOM    367  C   ALA L  51      26.875 -39.638  -3.182  1.00 19.41           C  
ATOM    368  O   ALA L  51      26.151 -40.506  -2.703  1.00 19.54           O  
ATOM    369  CB  ALA L  51      27.624 -40.308  -5.474  1.00 20.14           C  
ATOM    370  N   SER L  52      27.722 -38.924  -2.430  1.00 20.99           N  
ATOM    371  CA  SER L  52      27.987 -39.350  -1.074  1.00 23.13           C  
ATOM    372  C   SER L  52      28.196 -38.220  -0.066  1.00 24.10           C  
ATOM    373  O   SER L  52      28.441 -38.468   1.113  1.00 23.76           O  
ATOM    374  CB  SER L  52      29.225 -40.271  -1.104  1.00 24.40           C  
ATOM    375  OG  SER L  52      30.358 -39.564  -1.526  1.00 25.78           O  
ATOM    376  N   ASP L  53      28.056 -36.977  -0.502  1.00 23.01           N  
ATOM    377  CA  ASP L  53      28.256 -35.835   0.402  1.00 25.23           C  
ATOM    378  C   ASP L  53      26.955 -35.387   0.970  1.00 24.40           C  
ATOM    379  O   ASP L  53      26.020 -35.150   0.235  1.00 25.47           O  
ATOM    380  CB  ASP L  53      28.907 -34.665  -0.343  1.00 27.14           C  
ATOM    381  CG  ASP L  53      30.316 -34.977  -0.761  1.00 30.86           C  
ATOM    382  OD1 ASP L  53      30.975 -35.738  -0.076  1.00 34.23           O  
ATOM    383  OD2 ASP L  53      30.791 -34.442  -1.727  1.00 36.41           O  
ATOM    384  N   LEU L  54      26.857 -35.315   2.286  1.00 23.75           N  
ATOM    385  CA  LEU L  54      25.672 -34.810   2.931  1.00 26.14           C  
ATOM    386  C   LEU L  54      25.528 -33.273   2.816  1.00 26.50           C  
ATOM    387  O   LEU L  54      26.453 -32.528   3.106  1.00 25.17           O  
ATOM    388  CB  LEU L  54      25.647 -35.204   4.410  1.00 27.99           C  
ATOM    389  CG  LEU L  54      25.023 -36.580   4.711  1.00 30.91           C  
ATOM    390  CD1 LEU L  54      25.684 -37.630   3.893  1.00 33.04           C  
ATOM    391  CD2 LEU L  54      25.129 -36.898   6.199  1.00 29.98           C  
ATOM    392  N   TYR L  55      24.316 -32.825   2.495  1.00 25.47           N  
ATOM    393  CA  TYR L  55      23.959 -31.408   2.616  1.00 26.64           C  
ATOM    394  C   TYR L  55      23.970 -30.982   4.078  1.00 27.69           C  
ATOM    395  O   TYR L  55      23.759 -31.794   4.971  1.00 26.00           O  
ATOM    396  CB  TYR L  55      22.592 -31.103   1.959  1.00 28.17           C  
ATOM    397  N   SER L  56      24.220 -29.698   4.330  1.00 29.30           N  
ATOM    398  CA  SER L  56      24.255 -29.148   5.656  1.00 31.55           C  
ATOM    399  C   SER L  56      22.913 -29.406   6.355  1.00 31.94           C  
ATOM    400  O   SER L  56      21.864 -29.313   5.757  1.00 35.94           O  
ATOM    401  CB  SER L  56      24.641 -27.609   5.610  1.00 34.37           C  
ATOM    402  N   GLY L  57      22.962 -29.842   7.585  1.00 31.52           N  
ATOM    403  CA  GLY L  57      21.781 -30.095   8.358  1.00 33.24           C  
ATOM    404  C   GLY L  57      21.221 -31.498   8.249  1.00 32.20           C  
ATOM    405  O   GLY L  57      20.440 -31.899   9.072  1.00 36.54           O  
ATOM    406  N   VAL L  58      21.645 -32.250   7.261  1.00 28.26           N  
ATOM    407  CA  VAL L  58      21.104 -33.572   7.064  1.00 28.15           C  
ATOM    408  C   VAL L  58      21.727 -34.479   8.118  1.00 27.23           C  
ATOM    409  O   VAL L  58      22.949 -34.497   8.272  1.00 27.21           O  
ATOM    410  CB  VAL L  58      21.425 -34.088   5.651  1.00 26.33           C  
ATOM    411  CG1 VAL L  58      21.024 -35.549   5.492  1.00 24.89           C  
ATOM    412  CG2 VAL L  58      20.715 -33.231   4.608  1.00 26.24           C  
ATOM    413  N   PRO L  59      20.931 -35.312   8.796  1.00 27.40           N  
ATOM    414  CA  PRO L  59      21.610 -36.063   9.887  1.00 28.67           C  
ATOM    415  C   PRO L  59      22.493 -37.190   9.413  1.00 28.22           C  
ATOM    416  O   PRO L  59      22.273 -37.714   8.300  1.00 26.98           O  
ATOM    417  CB  PRO L  59      20.465 -36.659  10.709  1.00 29.99           C  
ATOM    418  CG  PRO L  59      19.228 -36.367   9.949  1.00 29.96           C  
ATOM    419  CD  PRO L  59      19.468 -35.311   8.912  1.00 28.73           C  
ATOM    420  N   SER L  60      23.406 -37.594  10.293  1.00 27.95           N  
ATOM    421  CA  SER L  60      24.496 -38.515   9.989  1.00 29.66           C  
ATOM    422  C   SER L  60      23.952 -39.909   9.662  1.00 28.89           C  
ATOM    423  O   SER L  60      24.655 -40.734   9.068  1.00 27.01           O  
ATOM    424  CB  SER L  60      25.441 -38.641  11.227  1.00 31.46           C  
ATOM    425  N   ARG L  61      22.696 -40.197  10.037  1.00 25.77           N  
ATOM    426  CA  ARG L  61      22.180 -41.526   9.699  1.00 24.76           C  
ATOM    427  C   ARG L  61      21.963 -41.740   8.206  1.00 22.77           C  
ATOM    428  O   ARG L  61      21.741 -42.879   7.759  1.00 21.49           O  
ATOM    429  CB  ARG L  61      20.906 -41.789  10.447  1.00 25.03           C  
ATOM    430  CG  ARG L  61      19.729 -40.917  10.068  1.00 23.89           C  
ATOM    431  CD  ARG L  61      18.595 -41.160  11.069  1.00 26.34           C  
ATOM    432  NE  ARG L  61      17.475 -40.313  10.698  1.00 26.62           N  
ATOM    433  CZ  ARG L  61      17.223 -39.126  11.241  1.00 27.66           C  
ATOM    434  NH1 ARG L  61      17.964 -38.690  12.265  1.00 28.44           N  
ATOM    435  NH2 ARG L  61      16.187 -38.399  10.800  1.00 28.42           N  
ATOM    436  N   PHE L  62      21.966 -40.667   7.426  1.00 21.55           N  
ATOM    437  CA  PHE L  62      21.913 -40.793   6.002  1.00 20.91           C  
ATOM    438  C   PHE L  62      23.288 -41.050   5.420  1.00 21.28           C  
ATOM    439  O   PHE L  62      24.269 -40.418   5.868  1.00 23.52           O  
ATOM    440  CB  PHE L  62      21.329 -39.550   5.325  1.00 20.56           C  
ATOM    441  CG  PHE L  62      19.855 -39.411   5.535  1.00 22.47           C  
ATOM    442  CD1 PHE L  62      18.984 -39.920   4.629  1.00 21.71           C  
ATOM    443  CD2 PHE L  62      19.350 -38.773   6.657  1.00 24.80           C  
ATOM    444  CE1 PHE L  62      17.609 -39.822   4.805  1.00 21.58           C  
ATOM    445  CE2 PHE L  62      17.976 -38.678   6.867  1.00 25.87           C  
ATOM    446  CZ  PHE L  62      17.099 -39.198   5.928  1.00 24.11           C  
ATOM    447  N   SER L  63      23.383 -41.908   4.407  1.00 19.85           N  
ATOM    448  CA  SER L  63      24.654 -42.013   3.702  1.00 22.18           C  
ATOM    449  C   SER L  63      24.413 -42.401   2.262  1.00 21.39           C  
ATOM    450  O   SER L  63      23.378 -43.014   1.947  1.00 19.93           O  
ATOM    451  CB  SER L  63      25.621 -43.024   4.367  1.00 25.65           C  
ATOM    452  OG  SER L  63      25.022 -44.277   4.375  1.00 31.52           O  
ATOM    453  N   GLY L  64      25.320 -42.006   1.380  1.00 18.50           N  
ATOM    454  CA  GLY L  64      25.205 -42.358  -0.010  1.00 18.38           C  
ATOM    455  C   GLY L  64      26.449 -43.033  -0.445  1.00 21.64           C  
ATOM    456  O   GLY L  64      27.511 -42.685  -0.011  1.00 20.76           O  
ATOM    457  N   SER L  65      26.328 -43.871  -1.442  1.00 20.36           N  
ATOM    458  CA  SER L  65      27.496 -44.545  -1.954  1.00 23.36           C  
ATOM    459  C   SER L  65      27.272 -44.853  -3.440  1.00 22.67           C  
ATOM    460  O   SER L  65      26.139 -44.870  -3.966  1.00 20.04           O  
ATOM    461  CB  SER L  65      27.759 -45.761  -1.043  1.00 25.42           C  
ATOM    462  OG  SER L  65      28.632 -46.590  -1.672  1.00 31.70           O  
ATOM    463  N   ARG L  66      28.377 -44.976  -4.142  1.00 22.98           N  
ATOM    464  CA  ARG L  66      28.409 -45.320  -5.582  1.00 23.68           C  
ATOM    465  C   ARG L  66      29.297 -46.535  -5.779  1.00 25.43           C  
ATOM    466  O   ARG L  66      30.416 -46.555  -5.241  1.00 22.18           O  
ATOM    467  CB  ARG L  66      29.050 -44.179  -6.345  1.00 25.33           C  
ATOM    468  CG  ARG L  66      29.331 -44.490  -7.802  1.00 29.48           C  
ATOM    469  CD  ARG L  66      30.413 -43.635  -8.470  1.00 32.85           C  
ATOM    470  NE  ARG L  66      30.640 -44.126  -9.838  1.00 32.12           N  
ATOM    471  CZ  ARG L  66      31.444 -43.554 -10.723  1.00 37.43           C  
ATOM    472  NH1 ARG L  66      32.127 -42.438 -10.416  1.00 36.09           N  
ATOM    473  NH2 ARG L  66      31.594 -44.080 -11.917  1.00 37.01           N  
ATOM    474  N   SER L  67      28.905 -47.454  -6.639  1.00 25.13           N  
ATOM    475  CA  SER L  67      29.861 -48.459  -7.095  1.00 26.74           C  
ATOM    476  C   SER L  67      29.579 -48.677  -8.590  1.00 25.91           C  
ATOM    477  O   SER L  67      28.507 -49.206  -8.978  1.00 23.12           O  
ATOM    478  CB  SER L  67      29.743 -49.702  -6.163  1.00 29.73           C  
ATOM    479  OG  SER L  67      30.313 -50.791  -6.792  1.00 32.81           O  
ATOM    480  N   GLY L  68      30.446 -48.086  -9.428  1.00 23.54           N  
ATOM    481  CA  GLY L  68      30.202 -48.023 -10.900  1.00 23.63           C  
ATOM    482  C   GLY L  68      28.941 -47.228 -11.195  1.00 23.98           C  
ATOM    483  O   GLY L  68      28.903 -46.010 -10.891  1.00 23.53           O  
ATOM    484  N   THR L  69      27.938 -47.880 -11.798  1.00 22.35           N  
ATOM    485  CA  THR L  69      26.689 -47.247 -12.185  1.00 21.85           C  
ATOM    486  C   THR L  69      25.602 -47.478 -11.132  1.00 21.80           C  
ATOM    487  O   THR L  69      24.422 -47.114 -11.355  1.00 21.75           O  
ATOM    488  CB  THR L  69      26.150 -47.779 -13.517  1.00 25.09           C  
ATOM    489  OG1 THR L  69      25.992 -49.212 -13.433  1.00 27.55           O  
ATOM    490  CG2 THR L  69      27.015 -47.493 -14.667  1.00 29.10           C  
ATOM    491  N   ASP L  70      25.935 -48.108 -10.012  1.00 19.53           N  
ATOM    492  CA  ASP L  70      24.926 -48.373  -8.940  1.00 21.28           C  
ATOM    493  C   ASP L  70      25.105 -47.378  -7.763  1.00 21.05           C  
ATOM    494  O   ASP L  70      26.219 -47.251  -7.158  1.00 22.99           O  
ATOM    495  CB  ASP L  70      25.049 -49.809  -8.405  1.00 23.19           C  
ATOM    496  CG  ASP L  70      24.984 -50.859  -9.520  1.00 26.10           C  
ATOM    497  OD1 ASP L  70      24.156 -50.746 -10.442  1.00 27.05           O  
ATOM    498  OD2 ASP L  70      25.824 -51.781  -9.496  1.00 27.57           O  
ATOM    499  N   PHE L  71      24.027 -46.716  -7.462  1.00 16.55           N  
ATOM    500  CA  PHE L  71      24.025 -45.680  -6.400  1.00 16.54           C  
ATOM    501  C   PHE L  71      23.047 -46.133  -5.293  1.00 16.58           C  
ATOM    502  O   PHE L  71      21.912 -46.597  -5.584  1.00 17.31           O  
ATOM    503  CB  PHE L  71      23.664 -44.318  -6.987  1.00 16.45           C  
ATOM    504  CG  PHE L  71      24.630 -43.817  -7.996  1.00 16.78           C  
ATOM    505  CD1 PHE L  71      24.582 -44.296  -9.310  1.00 16.84           C  
ATOM    506  CD2 PHE L  71      25.634 -42.948  -7.661  1.00 16.86           C  
ATOM    507  CE1 PHE L  71      25.485 -43.910 -10.237  1.00 17.97           C  
ATOM    508  CE2 PHE L  71      26.581 -42.547  -8.605  1.00 18.13           C  
ATOM    509  CZ  PHE L  71      26.501 -43.024  -9.916  1.00 19.57           C  
ATOM    510  N   THR L  72      23.419 -45.924  -4.043  1.00 16.93           N  
ATOM    511  CA  THR L  72      22.571 -46.255  -2.945  1.00 16.37           C  
ATOM    512  C   THR L  72      22.495 -45.120  -1.945  1.00 16.50           C  
ATOM    513  O   THR L  72      23.472 -44.355  -1.774  1.00 16.17           O  
ATOM    514  CB  THR L  72      23.059 -47.524  -2.200  1.00 19.25           C  
ATOM    515  OG1 THR L  72      24.403 -47.352  -1.767  1.00 20.42           O  
ATOM    516  CG2 THR L  72      22.950 -48.801  -3.092  1.00 20.70           C  
ATOM    517  N   LEU L  73      21.315 -45.020  -1.356  1.00 16.14           N  
ATOM    518  CA  LEU L  73      21.059 -44.196  -0.210  1.00 16.08           C  
ATOM    519  C   LEU L  73      20.647 -45.159   0.941  1.00 17.87           C  
ATOM    520  O   LEU L  73      19.668 -45.963   0.768  1.00 17.37           O  
ATOM    521  CB  LEU L  73      19.893 -43.297  -0.490  1.00 17.36           C  
ATOM    522  CG  LEU L  73      19.414 -42.439   0.648  1.00 20.45           C  
ATOM    523  CD1 LEU L  73      20.435 -41.411   0.907  1.00 22.68           C  
ATOM    524  CD2 LEU L  73      18.153 -41.663   0.272  1.00 24.55           C  
ATOM    525  N   THR L  74      21.344 -45.011   2.074  1.00 16.64           N  
ATOM    526  CA  THR L  74      21.105 -45.876   3.243  1.00 17.40           C  
ATOM    527  C   THR L  74      20.692 -44.961   4.373  1.00 19.98           C  
ATOM    528  O   THR L  74      21.247 -43.867   4.528  1.00 20.97           O  
ATOM    529  CB  THR L  74      22.362 -46.697   3.532  1.00 18.64           C  
ATOM    530  OG1 THR L  74      22.565 -47.567   2.400  1.00 19.11           O  
ATOM    531  CG2 THR L  74      22.180 -47.570   4.813  1.00 22.02           C  
ATOM    532  N   ILE L  75      19.709 -45.392   5.155  1.00 18.68           N  
ATOM    533  CA  ILE L  75      19.365 -44.750   6.405  1.00 20.50           C  
ATOM    534  C   ILE L  75      19.621 -45.764   7.485  1.00 22.18           C  
ATOM    535  O   ILE L  75      19.023 -46.826   7.456  1.00 22.74           O  
ATOM    536  CB  ILE L  75      17.890 -44.301   6.388  1.00 22.94           C  
ATOM    537  CG1 ILE L  75      17.628 -43.360   5.197  1.00 27.28           C  
ATOM    538  CG2 ILE L  75      17.538 -43.535   7.695  1.00 25.85           C  
ATOM    539  CD1 ILE L  75      16.145 -43.249   4.871  1.00 27.74           C  
ATOM    540  N   SER L  76      20.495 -45.450   8.428  1.00 23.36           N  
ATOM    541  CA  SER L  76      21.039 -46.470   9.325  1.00 26.40           C  
ATOM    542  C   SER L  76      20.101 -46.779  10.510  1.00 29.95           C  
ATOM    543  O   SER L  76      20.180 -47.877  11.128  1.00 34.59           O  
ATOM    544  CB  SER L  76      22.383 -46.015   9.845  1.00 30.10           C  
ATOM    545  OG  SER L  76      22.171 -44.843  10.629  1.00 32.96           O  
ATOM    546  N   SER L  77      19.245 -45.815  10.857  1.00 26.66           N  
ATOM    547  CA  SER L  77      18.271 -46.044  11.905  1.00 28.11           C  
ATOM    548  C   SER L  77      17.040 -45.111  11.588  1.00 25.94           C  
ATOM    549  O   SER L  77      17.071 -43.911  11.894  1.00 26.47           O  
ATOM    550  CB  SER L  77      18.872 -45.616  13.224  1.00 29.17           C  
ATOM    551  OG  SER L  77      17.942 -45.892  14.239  1.00 33.96           O  
ATOM    552  N   LEU L  78      16.060 -45.647  10.901  1.00 23.33           N  
ATOM    553  CA  LEU L  78      14.942 -44.890  10.413  1.00 24.84           C  
ATOM    554  C   LEU L  78      14.222 -44.197  11.551  1.00 24.62           C  
ATOM    555  O   LEU L  78      13.957 -44.809  12.589  1.00 24.24           O  
ATOM    556  CB  LEU L  78      14.040 -45.832   9.646  1.00 24.58           C  
ATOM    557  CG  LEU L  78      13.037 -45.327   8.684  1.00 30.75           C  
ATOM    558  CD1 LEU L  78      13.678 -44.605   7.511  1.00 29.78           C  
ATOM    559  CD2 LEU L  78      12.299 -46.561   8.131  1.00 31.23           C  
ATOM    560  N   GLN L  79      13.960 -42.913  11.361  1.00 23.67           N  
ATOM    561  CA  GLN L  79      13.246 -42.105  12.346  1.00 26.24           C  
ATOM    562  C   GLN L  79      11.907 -41.606  11.792  1.00 24.76           C  
ATOM    563  O   GLN L  79      11.674 -41.595  10.549  1.00 25.05           O  
ATOM    564  CB  GLN L  79      14.074 -40.890  12.790  1.00 28.55           C  
ATOM    565  CG  GLN L  79      15.436 -41.238  13.363  1.00 29.41           C  
ATOM    566  CD  GLN L  79      15.268 -42.013  14.642  1.00 33.12           C  
ATOM    567  OE1 GLN L  79      14.640 -41.524  15.561  1.00 33.97           O  
ATOM    568  NE2 GLN L  79      15.816 -43.225  14.706  1.00 34.20           N  
ATOM    569  N   PRO L  80      11.019 -41.155  12.689  1.00 27.83           N  
ATOM    570  CA  PRO L  80       9.690 -40.732  12.211  1.00 28.33           C  
ATOM    571  C   PRO L  80       9.753 -39.664  11.124  1.00 28.00           C  
ATOM    572  O   PRO L  80       8.998 -39.719  10.166  1.00 28.89           O  
ATOM    573  CB  PRO L  80       9.019 -40.210  13.500  1.00 30.80           C  
ATOM    574  CG  PRO L  80       9.524 -41.200  14.517  1.00 31.46           C  
ATOM    575  CD  PRO L  80      10.995 -41.385  14.150  1.00 30.19           C  
ATOM    576  N   GLU L  81      10.675 -38.720  11.228  1.00 28.84           N  
ATOM    577  CA  GLU L  81      10.796 -37.695  10.184  1.00 29.38           C  
ATOM    578  C   GLU L  81      11.208 -38.197   8.810  1.00 27.38           C  
ATOM    579  O   GLU L  81      11.151 -37.455   7.831  1.00 27.69           O  
ATOM    580  CB  GLU L  81      11.782 -36.636  10.618  1.00 32.82           C  
ATOM    581  CG  GLU L  81      13.076 -37.140  11.228  1.00 34.27           C  
ATOM    582  CD  GLU L  81      13.075 -37.328  12.774  1.00 39.87           C  
ATOM    583  OE1 GLU L  81      14.095 -36.895  13.350  1.00 54.42           O  
ATOM    584  OE2 GLU L  81      12.148 -37.897  13.471  1.00 38.85           O  
ATOM    585  N   ASP L  82      11.691 -39.423   8.727  1.00 25.57           N  
ATOM    586  CA  ASP L  82      12.299 -39.927   7.502  1.00 24.02           C  
ATOM    587  C   ASP L  82      11.250 -40.621   6.601  1.00 24.66           C  
ATOM    588  O   ASP L  82      11.519 -40.934   5.395  1.00 26.85           O  
ATOM    589  CB  ASP L  82      13.357 -40.963   7.815  1.00 22.64           C  
ATOM    590  CG  ASP L  82      14.504 -40.441   8.670  1.00 24.62           C  
ATOM    591  OD1 ASP L  82      14.821 -39.223   8.657  1.00 26.78           O  
ATOM    592  OD2 ASP L  82      15.170 -41.284   9.342  1.00 25.06           O  
ATOM    593  N   PHE L  83      10.063 -40.883   7.129  1.00 25.65           N  
ATOM    594  CA  PHE L  83       9.001 -41.382   6.253  1.00 25.55           C  
ATOM    595  C   PHE L  83       8.597 -40.304   5.200  1.00 27.06           C  
ATOM    596  O   PHE L  83       8.161 -39.196   5.499  1.00 30.47           O  
ATOM    597  CB  PHE L  83       7.872 -41.985   7.033  1.00 28.36           C  
ATOM    598  CG  PHE L  83       8.287 -43.153   7.904  1.00 29.51           C  
ATOM    599  CD1 PHE L  83       8.395 -44.423   7.388  1.00 30.09           C  
ATOM    600  CD2 PHE L  83       8.558 -42.984   9.240  1.00 32.15           C  
ATOM    601  CE1 PHE L  83       8.754 -45.492   8.161  1.00 33.66           C  
ATOM    602  CE2 PHE L  83       8.898 -44.046  10.019  1.00 33.46           C  
ATOM    603  CZ  PHE L  83       8.981 -45.292   9.492  1.00 33.90           C  
ATOM    604  N   ALA L  84       8.830 -40.621   3.939  1.00 23.44           N  
ATOM    605  CA  ALA L  84       8.703 -39.673   2.868  1.00 23.83           C  
ATOM    606  C   ALA L  84       8.959 -40.389   1.528  1.00 22.17           C  
ATOM    607  O   ALA L  84       9.069 -41.608   1.480  1.00 22.58           O  
ATOM    608  CB  ALA L  84       9.714 -38.582   3.057  1.00 23.80           C  
ATOM    609  N   THR L  85       8.965 -39.632   0.423  1.00 20.51           N  
ATOM    610  CA  THR L  85       9.370 -40.173  -0.873  1.00 20.60           C  
ATOM    611  C   THR L  85      10.782 -39.676  -1.203  1.00 20.13           C  
ATOM    612  O   THR L  85      11.129 -38.519  -0.946  1.00 24.66           O  
ATOM    613  CB  THR L  85       8.377 -39.785  -1.954  1.00 23.50           C  
ATOM    614  OG1 THR L  85       7.132 -40.369  -1.559  1.00 26.99           O  
ATOM    615  CG2 THR L  85       8.777 -40.316  -3.262  1.00 24.51           C  
ATOM    616  N   TYR L  86      11.598 -40.588  -1.698  1.00 18.14           N  
ATOM    617  CA  TYR L  86      12.999 -40.292  -2.024  1.00 16.80           C  
ATOM    618  C   TYR L  86      13.180 -40.428  -3.494  1.00 17.79           C  
ATOM    619  O   TYR L  86      12.621 -41.364  -4.106  1.00 16.92           O  
ATOM    620  CB  TYR L  86      13.954 -41.248  -1.307  1.00 17.01           C  
ATOM    621  CG  TYR L  86      13.878 -40.987   0.168  1.00 17.77           C  
ATOM    622  CD1 TYR L  86      12.887 -41.608   0.962  1.00 19.41           C  
ATOM    623  CD2 TYR L  86      14.726 -40.083   0.765  1.00 18.35           C  
ATOM    624  CE1 TYR L  86      12.792 -41.336   2.333  1.00 19.04           C  
ATOM    625  CE2 TYR L  86      14.650 -39.837   2.115  1.00 19.39           C  
ATOM    626  CZ  TYR L  86      13.663 -40.458   2.885  1.00 21.03           C  
ATOM    627  OH  TYR L  86      13.642 -40.110   4.240  1.00 22.48           O  
ATOM    628  N   TYR L  87      13.954 -39.507  -4.081  1.00 15.98           N  
ATOM    629  CA  TYR L  87      14.341 -39.588  -5.486  1.00 15.71           C  
ATOM    630  C   TYR L  87      15.821 -39.487  -5.706  1.00 16.49           C  
ATOM    631  O   TYR L  87      16.469 -38.610  -5.084  1.00 15.32           O  
ATOM    632  CB  TYR L  87      13.744 -38.349  -6.282  1.00 16.49           C  
ATOM    633  CG  TYR L  87      12.276 -38.387  -6.314  1.00 17.44           C  
ATOM    634  CD1 TYR L  87      11.621 -39.147  -7.244  1.00 19.19           C  
ATOM    635  CD2 TYR L  87      11.517 -37.673  -5.399  1.00 19.20           C  
ATOM    636  CE1 TYR L  87      10.230 -39.240  -7.254  1.00 19.67           C  
ATOM    637  CE2 TYR L  87      10.128 -37.737  -5.397  1.00 20.54           C  
ATOM    638  CZ  TYR L  87       9.507 -38.518  -6.343  1.00 21.36           C  
ATOM    639  OH  TYR L  87       8.170 -38.570  -6.384  1.00 25.96           O  
ATOM    641  N   CYS L  88      16.382 -40.298  -6.608  0.50 15.59           N  
ATOM    643  CA  CYS L  88      17.719 -40.015  -7.050  0.50 15.92           C  
ATOM    645  C   CYS L  88      17.597 -39.184  -8.342  0.50 16.06           C  
ATOM    647  O   CYS L  88      16.566 -39.201  -9.006  0.50 16.29           O  
ATOM    649  CB  CYS L  88      18.505 -41.260  -7.383  0.50 15.87           C  
ATOM    651  SG  CYS L  88      17.621 -42.239  -8.598  0.50 18.02           S  
ATOM    652  N   GLN L  89      18.646 -38.465  -8.660  1.00 16.28           N  
ATOM    653  CA  GLN L  89      18.698 -37.689  -9.923  1.00 15.94           C  
ATOM    654  C   GLN L  89      20.098 -37.771 -10.453  1.00 18.21           C  
ATOM    655  O   GLN L  89      21.038 -37.502  -9.715  1.00 18.59           O  
ATOM    656  CB  GLN L  89      18.243 -36.235  -9.686  1.00 16.86           C  
ATOM    657  CG  GLN L  89      18.251 -35.313 -10.878  1.00 17.67           C  
ATOM    658  CD  GLN L  89      18.112 -33.862 -10.450  1.00 19.85           C  
ATOM    659  OE1 GLN L  89      18.888 -33.415  -9.661  1.00 22.91           O  
ATOM    660  NE2 GLN L  89      17.140 -33.164 -10.948  1.00 19.04           N  
ATOM    661  N   GLN L  90      20.247 -38.037 -11.753  1.00 17.71           N  
ATOM    662  CA  GLN L  90      21.515 -37.837 -12.397  1.00 17.83           C  
ATOM    663  C   GLN L  90      21.504 -36.495 -13.096  1.00 18.17           C  
ATOM    664  O   GLN L  90      20.531 -36.144 -13.746  1.00 15.83           O  
ATOM    665  CB  GLN L  90      21.857 -38.961 -13.384  1.00 18.50           C  
ATOM    666  CG  GLN L  90      21.081 -39.052 -14.645  1.00 18.29           C  
ATOM    667  CD  GLN L  90      21.477 -38.049 -15.699  1.00 21.47           C  
ATOM    668  OE1 GLN L  90      22.587 -37.553 -15.745  1.00 20.77           O  
ATOM    669  NE2 GLN L  90      20.542 -37.813 -16.634  1.00 23.69           N  
ATOM    670  N   HIS L  91      22.612 -35.777 -12.956  1.00 18.14           N  
ATOM    671  CA  HIS L  91      22.735 -34.458 -13.611  1.00 19.84           C  
ATOM    672  C   HIS L  91      24.024 -34.452 -14.396  1.00 19.93           C  
ATOM    673  O   HIS L  91      24.664 -33.423 -14.557  1.00 21.23           O  
ATOM    674  CB  HIS L  91      22.598 -33.319 -12.544  1.00 20.80           C  
ATOM    675  CG  HIS L  91      23.563 -33.436 -11.391  1.00 22.54           C  
ATOM    676  ND1 HIS L  91      24.855 -32.929 -11.437  1.00 26.22           N  
ATOM    677  CD2 HIS L  91      23.437 -34.031 -10.173  1.00 23.33           C  
ATOM    678  CE1 HIS L  91      25.488 -33.221 -10.307  1.00 26.17           C  
ATOM    679  NE2 HIS L  91      24.644 -33.861  -9.516  1.00 23.65           N  
ATOM    680  N   TYR L  92      24.386 -35.624 -14.936  1.00 20.18           N  
ATOM    681  CA  TYR L  92      25.508 -35.739 -15.837  1.00 21.30           C  
ATOM    682  C   TYR L  92      25.101 -35.167 -17.185  1.00 23.69           C  
ATOM    683  O   TYR L  92      25.866 -34.454 -17.822  1.00 21.71           O  
ATOM    684  CB  TYR L  92      25.856 -37.206 -16.028  1.00 21.18           C  
ATOM    685  CG  TYR L  92      27.094 -37.516 -16.863  1.00 21.11           C  
ATOM    686  CD1 TYR L  92      28.320 -37.068 -16.503  1.00 23.03           C  
ATOM    687  CD2 TYR L  92      26.989 -38.325 -17.998  1.00 22.29           C  
ATOM    688  CE1 TYR L  92      29.503 -37.420 -17.237  1.00 23.73           C  
ATOM    689  CE2 TYR L  92      28.085 -38.688 -18.755  1.00 23.80           C  
ATOM    690  CZ  TYR L  92      29.368 -38.208 -18.399  1.00 25.20           C  
ATOM    691  OH  TYR L  92      30.434 -38.590 -19.187  1.00 26.64           O  
ATOM    692  N   THR L  93      23.901 -35.496 -17.674  1.00 22.92           N  
ATOM    693  CA  THR L  93      23.464 -34.811 -18.899  1.00 28.31           C  
ATOM    694  C   THR L  93      22.425 -33.806 -18.483  1.00 28.19           C  
ATOM    695  O   THR L  93      21.994 -33.803 -17.347  1.00 27.24           O  
ATOM    696  CB  THR L  93      22.925 -35.772 -19.947  1.00 32.35           C  
ATOM    697  OG1 THR L  93      21.908 -36.547 -19.315  1.00 33.58           O  
ATOM    698  CG2 THR L  93      24.076 -36.677 -20.453  1.00 37.54           C  
ATOM    699  N   THR L  94      22.065 -32.922 -19.379  1.00 29.32           N  
ATOM    700  CA  THR L  94      21.056 -31.901 -19.062  1.00 32.05           C  
ATOM    701  C   THR L  94      19.990 -32.002 -20.113  1.00 28.89           C  
ATOM    702  O   THR L  94      20.281 -32.225 -21.262  1.00 31.18           O  
ATOM    703  CB  THR L  94      21.548 -30.460 -19.080  1.00 38.28           C  
ATOM    704  OG1 THR L  94      22.399 -30.308 -20.207  1.00 41.43           O  
ATOM    705  CG2 THR L  94      22.259 -30.147 -17.834  1.00 40.70           C  
ATOM    706  N   PRO L  95      18.713 -31.918 -19.716  1.00 25.19           N  
ATOM    707  CA  PRO L  95      18.297 -31.690 -18.370  1.00 21.90           C  
ATOM    708  C   PRO L  95      18.537 -32.981 -17.542  1.00 19.93           C  
ATOM    709  O   PRO L  95      18.465 -34.134 -18.067  1.00 19.30           O  
ATOM    710  CB  PRO L  95      16.772 -31.423 -18.529  1.00 22.28           C  
ATOM    711  CG  PRO L  95      16.387 -32.264 -19.721  1.00 24.03           C  
ATOM    712  CD  PRO L  95      17.591 -32.194 -20.640  1.00 24.42           C  
ATOM    713  N   PRO L  96      18.728 -32.804 -16.265  1.00 18.54           N  
ATOM    714  CA  PRO L  96      18.900 -33.958 -15.350  1.00 18.06           C  
ATOM    715  C   PRO L  96      17.663 -34.886 -15.348  1.00 18.36           C  
ATOM    716  O   PRO L  96      16.551 -34.434 -15.665  1.00 18.60           O  
ATOM    717  CB  PRO L  96      19.080 -33.279 -13.986  1.00 18.72           C  
ATOM    718  CG  PRO L  96      19.655 -31.979 -14.316  1.00 20.15           C  
ATOM    719  CD  PRO L  96      18.980 -31.513 -15.602  1.00 20.04           C  
ATOM    720  N   THR L  97      17.836 -36.128 -14.959  1.00 17.02           N  
ATOM    721  CA  THR L  97      16.772 -37.111 -14.953  1.00 20.08           C  
ATOM    722  C   THR L  97      16.605 -37.702 -13.572  1.00 17.68           C  
ATOM    723  O   THR L  97      17.596 -38.161 -13.002  1.00 16.84           O  
ATOM    724  CB  THR L  97      17.120 -38.227 -15.988  1.00 22.11           C  
ATOM    725  OG1 THR L  97      17.100 -37.533 -17.273  1.00 25.67           O  
ATOM    726  CG2 THR L  97      16.092 -39.219 -16.028  1.00 25.38           C  
ATOM    727  N   PHE L  98      15.364 -37.806 -13.102  1.00 15.70           N  
ATOM    728  CA  PHE L  98      15.075 -38.436 -11.823  1.00 15.84           C  
ATOM    729  C   PHE L  98      14.861 -39.906 -11.992  1.00 16.23           C  
ATOM    730  O   PHE L  98      14.348 -40.339 -13.056  1.00 16.74           O  
ATOM    731  CB  PHE L  98      13.799 -37.835 -11.182  1.00 17.47           C  
ATOM    732  CG  PHE L  98      13.973 -36.363 -10.702  1.00 17.92           C  
ATOM    733  CD1 PHE L  98      13.509 -35.295 -11.464  1.00 18.44           C  
ATOM    734  CD2 PHE L  98      14.476 -36.089  -9.445  1.00 18.41           C  
ATOM    735  CE1 PHE L  98      13.598 -33.993 -11.008  1.00 18.66           C  
ATOM    736  CE2 PHE L  98      14.599 -34.795  -9.001  1.00 19.79           C  
ATOM    737  CZ  PHE L  98      14.148 -33.727  -9.787  1.00 19.89           C  
ATOM    738  N   GLY L  99      15.086 -40.650 -10.899  1.00 16.17           N  
ATOM    739  CA  GLY L  99      14.486 -41.942 -10.699  1.00 16.30           C  
ATOM    740  C   GLY L  99      12.990 -41.825 -10.499  1.00 18.94           C  
ATOM    741  O   GLY L  99      12.453 -40.747 -10.245  1.00 18.47           O  
ATOM    742  N   GLN L 100      12.308 -42.955 -10.616  1.00 18.01           N  
ATOM    743  CA  GLN L 100      10.868 -42.989 -10.396  1.00 21.77           C  
ATOM    744  C   GLN L 100      10.422 -42.880  -8.950  1.00 21.35           C  
ATOM    745  O   GLN L 100       9.214 -42.944  -8.692  1.00 22.37           O  
ATOM    746  CB  GLN L 100      10.241 -44.252 -11.012  1.00 25.14           C  
ATOM    747  CG  GLN L 100      10.257 -44.175 -12.549  1.00 28.53           C  
ATOM    748  CD  GLN L 100      10.162 -45.559 -13.172  1.00 34.61           C  
ATOM    749  OE1 GLN L 100      11.028 -46.420 -12.972  1.00 32.74           O  
ATOM    750  NE2 GLN L 100       9.074 -45.803 -13.861  1.00 38.89           N  
ATOM    751  N   GLY L 101      11.339 -42.855  -8.016  1.00 18.98           N  
ATOM    752  CA  GLY L 101      11.053 -42.568  -6.641  1.00 18.41           C  
ATOM    753  C   GLY L 101      10.881 -43.817  -5.764  1.00 18.25           C  
ATOM    754  O   GLY L 101      10.659 -44.890  -6.266  1.00 18.85           O  
ATOM    755  N   THR L 102      10.950 -43.590  -4.472  1.00 18.19           N  
ATOM    756  CA  THR L 102      10.692 -44.634  -3.426  1.00 17.52           C  
ATOM    757  C   THR L 102       9.882 -44.048  -2.320  1.00 18.73           C  
ATOM    758  O   THR L 102      10.361 -43.160  -1.646  1.00 21.06           O  
ATOM    759  CB  THR L 102      11.995 -45.164  -2.829  1.00 16.92           C  
ATOM    760  OG1 THR L 102      12.828 -45.645  -3.886  1.00 16.69           O  
ATOM    761  CG2 THR L 102      11.585 -46.344  -1.808  1.00 17.07           C  
ATOM    762  N   LYS L 103       8.646 -44.502  -2.139  1.00 20.92           N  
ATOM    763  CA  LYS L 103       7.818 -44.128  -1.012  1.00 21.03           C  
ATOM    764  C   LYS L 103       8.186 -44.983   0.185  1.00 25.17           C  
ATOM    765  O   LYS L 103       8.041 -46.205   0.110  1.00 23.94           O  
ATOM    766  CB  LYS L 103       6.374 -44.375  -1.319  1.00 26.28           C  
ATOM    767  N   VAL L 104       8.606 -44.323   1.265  1.00 23.03           N  
ATOM    768  CA  VAL L 104       9.020 -45.012   2.509  1.00 24.70           C  
ATOM    769  C   VAL L 104       7.922 -44.767   3.490  1.00 26.69           C  
ATOM    770  O   VAL L 104       7.734 -43.595   3.928  1.00 29.64           O  
ATOM    771  CB  VAL L 104      10.379 -44.511   3.044  1.00 23.44           C  
ATOM    772  CG1 VAL L 104      10.679 -45.171   4.412  1.00 26.97           C  
ATOM    773  CG2 VAL L 104      11.419 -44.851   2.054  1.00 22.88           C  
ATOM    774  N   GLU L 105       7.184 -45.829   3.793  1.00 25.08           N  
ATOM    775  CA  GLU L 105       5.965 -45.751   4.685  1.00 28.87           C  
ATOM    776  C   GLU L 105       6.275 -46.542   5.968  1.00 29.87           C  
ATOM    777  O   GLU L 105       7.028 -47.550   5.921  1.00 25.78           O  
ATOM    778  CB  GLU L 105       4.769 -46.448   4.037  1.00 29.22           C  
ATOM    779  N   ILE L 106       5.670 -46.132   7.091  1.00 31.12           N  
ATOM    780  CA  ILE L 106       5.764 -46.911   8.334  1.00 34.22           C  
ATOM    781  C   ILE L 106       4.923 -48.224   8.247  1.00 37.36           C  
ATOM    782  O   ILE L 106       3.798 -48.209   7.748  1.00 38.44           O  
ATOM    783  CB  ILE L 106       5.367 -46.073   9.580  1.00 35.91           C  
ATOM    784  CG1 ILE L 106       5.747 -46.833  10.850  1.00 38.79           C  
ATOM    785  CG2 ILE L 106       3.879 -45.703   9.517  1.00 39.40           C  
ATOM    786  CD1 ILE L 106       5.851 -45.971  12.092  1.00 42.73           C  
ATOM    787  N   LYS L 107       5.444 -49.333   8.776  1.00 37.58           N  
ATOM    788  CA  LYS L 107       4.782 -50.668   8.638  1.00 37.83           C  
ATOM    789  C   LYS L 107       3.434 -50.638   9.327  1.00 43.19           C  
ATOM    790  O   LYS L 107       3.421 -50.529  10.533  1.00 52.39           O  
ATOM    791  CB  LYS L 107       5.641 -51.836   9.220  1.00 37.97           C  
TER     792      LYS L 107                                                      
ATOM    793  N   ILE L   2       2.575 -45.438 -14.902  1.00 37.59           N  
ATOM    794  CA  ILE L   2       2.341 -44.013 -15.403  1.00 38.47           C  
ATOM    795  C   ILE L   2       3.564 -43.204 -15.741  1.00 36.58           C  
ATOM    796  O   ILE L   2       4.361 -42.879 -14.875  1.00 41.02           O  
ATOM    797  CB  ILE L   2       1.514 -43.100 -14.471  1.00 42.01           C  
ATOM    798  CG1 ILE L   2       0.207 -43.809 -14.088  1.00 45.90           C  
ATOM    799  CG2 ILE L   2       1.323 -41.734 -15.155  1.00 44.12           C  
ATOM    800  CD1 ILE L   2      -1.032 -42.959 -14.066  1.00 46.56           C  
ATOM    801  N   GLN L   3       3.624 -42.759 -16.989  1.00 32.64           N  
ATOM    802  CA  GLN L   3       4.823 -42.084 -17.535  1.00 28.71           C  
ATOM    803  C   GLN L   3       4.312 -40.723 -17.917  1.00 25.88           C  
ATOM    804  O   GLN L   3       3.152 -40.593 -18.317  1.00 22.04           O  
ATOM    805  CB  GLN L   3       5.289 -42.777 -18.810  1.00 31.04           C  
ATOM    806  N   MET L   4       5.123 -39.715 -17.653  1.00 23.93           N  
ATOM    807  CA  MET L   4       4.917 -38.389 -18.146  1.00 23.86           C  
ATOM    808  C   MET L   4       6.007 -38.120 -19.195  1.00 23.50           C  
ATOM    809  O   MET L   4       7.225 -38.233 -18.888  1.00 25.30           O  
ATOM    810  CB  MET L   4       5.036 -37.361 -17.002  1.00 25.82           C  
ATOM    811  CG  MET L   4       4.072 -37.699 -15.841  1.00 25.53           C  
ATOM    812  SD  MET L   4       2.401 -37.279 -16.371  1.00 30.38           S  
ATOM    813  CE  MET L   4       2.456 -35.541 -16.446  1.00 31.59           C  
ATOM    814  N   THR L   5       5.592 -37.815 -20.412  1.00 21.68           N  
ATOM    815  CA  THR L   5       6.502 -37.628 -21.512  1.00 21.90           C  
ATOM    816  C   THR L   5       6.568 -36.129 -21.716  1.00 20.36           C  
ATOM    817  O   THR L   5       5.639 -35.491 -22.225  1.00 18.93           O  
ATOM    818  CB  THR L   5       6.061 -38.318 -22.806  1.00 23.26           C  
ATOM    819  OG1 THR L   5       5.921 -39.696 -22.547  1.00 24.56           O  
ATOM    820  CG2 THR L   5       7.118 -38.175 -23.902  1.00 26.68           C  
ATOM    821  N   GLN L   6       7.707 -35.582 -21.402  1.00 17.59           N  
ATOM    822  CA  GLN L   6       7.886 -34.166 -21.473  1.00 18.55           C  
ATOM    823  C   GLN L   6       8.639 -33.712 -22.734  1.00 19.56           C  
ATOM    824  O   GLN L   6       9.634 -34.346 -23.162  1.00 18.76           O  
ATOM    825  CB  GLN L   6       8.623 -33.706 -20.213  1.00 20.46           C  
ATOM    826  CG  GLN L   6       8.819 -32.246 -20.112  1.00 20.54           C  
ATOM    827  CD  GLN L   6       9.310 -31.824 -18.726  1.00 21.41           C  
ATOM    828  OE1 GLN L   6       9.275 -32.563 -17.728  1.00 20.47           O  
ATOM    829  NE2 GLN L   6       9.697 -30.614 -18.650  1.00 18.68           N  
ATOM    830  N   SER L   7       8.209 -32.594 -23.304  1.00 19.75           N  
ATOM    831  CA  SER L   7       8.764 -32.099 -24.571  1.00 19.91           C  
ATOM    832  C   SER L   7       8.770 -30.553 -24.615  1.00 20.04           C  
ATOM    833  O   SER L   7       7.870 -29.928 -24.079  1.00 18.61           O  
ATOM    834  CB  SER L   7       7.976 -32.684 -25.766  1.00 23.16           C  
ATOM    835  OG  SER L   7       8.294 -31.925 -26.946  1.00 29.23           O  
ATOM    836  N   PRO L   8       9.814 -29.925 -25.181  1.00 18.67           N  
ATOM    837  CA  PRO L   8      11.058 -30.565 -25.710  1.00 18.72           C  
ATOM    838  C   PRO L   8      12.051 -30.855 -24.591  1.00 18.24           C  
ATOM    839  O   PRO L   8      11.808 -30.407 -23.466  1.00 19.85           O  
ATOM    840  CB  PRO L   8      11.630 -29.448 -26.635  1.00 19.09           C  
ATOM    841  CG  PRO L   8      11.221 -28.176 -25.937  1.00 18.38           C  
ATOM    842  CD  PRO L   8       9.862 -28.446 -25.323  1.00 18.64           C  
ATOM    843  N   SER L   9      13.191 -31.478 -24.873  1.00 19.24           N  
ATOM    844  CA  SER L   9      14.267 -31.637 -23.829  1.00 18.97           C  
ATOM    845  C   SER L   9      14.987 -30.382 -23.442  1.00 17.89           C  
ATOM    846  O   SER L   9      15.409 -30.247 -22.317  1.00 16.67           O  
ATOM    847  CB  SER L   9      15.378 -32.617 -24.286  1.00 23.96           C  
ATOM    848  OG  SER L   9      14.744 -33.790 -24.467  1.00 29.97           O  
ATOM    849  N   SER L  10      15.152 -29.469 -24.412  1.00 17.00           N  
ATOM    850  CA  SER L  10      15.709 -28.205 -24.131  1.00 16.94           C  
ATOM    851  C   SER L  10      15.201 -27.230 -25.185  1.00 17.19           C  
ATOM    852  O   SER L  10      14.780 -27.666 -26.294  1.00 16.28           O  
ATOM    853  CB  SER L  10      17.271 -28.212 -24.161  1.00 21.72           C  
ATOM    854  OG  SER L  10      17.720 -28.364 -25.469  1.00 29.45           O  
ATOM    855  N   LEU L  11      15.255 -25.966 -24.842  1.00 16.16           N  
ATOM    856  CA  LEU L  11      14.810 -24.889 -25.799  1.00 18.58           C  
ATOM    857  C   LEU L  11      15.593 -23.664 -25.464  1.00 20.01           C  
ATOM    858  O   LEU L  11      16.003 -23.440 -24.283  1.00 18.82           O  
ATOM    859  CB  LEU L  11      13.290 -24.652 -25.701  1.00 19.08           C  
ATOM    860  CG  LEU L  11      12.666 -24.083 -24.431  1.00 17.82           C  
ATOM    861  CD1 LEU L  11      12.769 -22.536 -24.440  1.00 19.82           C  
ATOM    862  CD2 LEU L  11      11.221 -24.541 -24.293  1.00 20.79           C  
ATOM    863  N   SER L  12      15.790 -22.833 -26.485  1.00 19.74           N  
ATOM    864  CA  SER L  12      16.390 -21.567 -26.219  1.00 21.46           C  
ATOM    865  C   SER L  12      15.466 -20.469 -26.670  1.00 20.61           C  
ATOM    866  O   SER L  12      14.666 -20.614 -27.601  1.00 19.53           O  
ATOM    867  CB  SER L  12      17.766 -21.473 -26.835  1.00 25.03           C  
ATOM    868  OG  SER L  12      17.652 -21.402 -28.218  1.00 30.24           O  
ATOM    869  N   ALA L  13      15.546 -19.378 -25.947  1.00 22.32           N  
ATOM    870  CA  ALA L  13      14.642 -18.254 -26.169  1.00 24.62           C  
ATOM    871  C   ALA L  13      15.290 -16.969 -25.590  1.00 24.64           C  
ATOM    872  O   ALA L  13      16.278 -17.019 -24.909  1.00 26.03           O  
ATOM    873  CB  ALA L  13      13.303 -18.539 -25.518  1.00 25.99           C  
ATOM    874  N   SER L  14      14.772 -15.831 -25.998  1.00 25.53           N  
ATOM    875  CA  SER L  14      15.268 -14.518 -25.512  1.00 28.20           C  
ATOM    876  C   SER L  14      14.340 -14.016 -24.429  1.00 26.82           C  
ATOM    877  O   SER L  14      13.174 -14.387 -24.370  1.00 23.54           O  
ATOM    878  CB  SER L  14      15.247 -13.476 -26.650  1.00 32.70           C  
ATOM    879  OG  SER L  14      16.031 -13.956 -27.709  1.00 37.69           O  
ATOM    880  N   VAL L  15      14.849 -13.134 -23.596  1.00 24.85           N  
ATOM    881  CA  VAL L  15      14.023 -12.429 -22.630  1.00 26.21           C  
ATOM    882  C   VAL L  15      12.869 -11.776 -23.350  1.00 26.07           C  
ATOM    883  O   VAL L  15      13.054 -11.111 -24.393  1.00 27.21           O  
ATOM    884  CB  VAL L  15      14.881 -11.392 -21.850  1.00 26.92           C  
ATOM    885  CG1 VAL L  15      14.039 -10.398 -21.030  1.00 29.57           C  
ATOM    886  CG2 VAL L  15      15.802 -12.127 -20.928  1.00 27.67           C  
ATOM    887  N   GLY L  16      11.663 -11.935 -22.826  1.00 24.29           N  
ATOM    888  CA  GLY L  16      10.510 -11.335 -23.414  1.00 26.43           C  
ATOM    889  C   GLY L  16       9.781 -12.343 -24.313  1.00 27.51           C  
ATOM    890  O   GLY L  16       8.625 -12.127 -24.700  1.00 29.31           O  
ATOM    891  N   ASP L  17      10.379 -13.487 -24.617  1.00 26.01           N  
ATOM    892  CA  ASP L  17       9.598 -14.481 -25.430  1.00 26.86           C  
ATOM    893  C   ASP L  17       8.531 -15.241 -24.620  1.00 24.89           C  
ATOM    894  O   ASP L  17       8.643 -15.418 -23.415  1.00 23.03           O  
ATOM    895  CB  ASP L  17      10.528 -15.516 -26.096  1.00 27.24           C  
ATOM    896  CG  ASP L  17      11.479 -14.902 -27.151  1.00 32.89           C  
ATOM    897  OD1 ASP L  17      11.391 -13.686 -27.517  1.00 34.00           O  
ATOM    898  OD2 ASP L  17      12.371 -15.663 -27.560  1.00 34.98           O  
ATOM    899  N   ARG L  18       7.511 -15.724 -25.299  1.00 23.73           N  
ATOM    900  CA  ARG L  18       6.551 -16.693 -24.704  1.00 24.96           C  
ATOM    901  C   ARG L  18       7.100 -18.071 -24.962  1.00 24.27           C  
ATOM    902  O   ARG L  18       7.447 -18.383 -26.118  1.00 27.25           O  
ATOM    903  CB  ARG L  18       5.154 -16.582 -25.381  1.00 25.27           C  
ATOM    904  N   VAL L  19       7.180 -18.898 -23.908  1.00 21.63           N  
ATOM    905  CA  VAL L  19       7.727 -20.245 -23.999  1.00 24.60           C  
ATOM    906  C   VAL L  19       6.629 -21.225 -23.504  1.00 22.28           C  
ATOM    907  O   VAL L  19       5.903 -20.855 -22.579  1.00 18.62           O  
ATOM    908  CB  VAL L  19       8.998 -20.256 -23.133  1.00 27.48           C  
ATOM    909  CG1 VAL L  19       9.264 -21.509 -22.389  1.00 31.39           C  
ATOM    910  CG2 VAL L  19      10.161 -19.805 -24.059  1.00 33.47           C  
ATOM    911  N   THR L  20       6.437 -22.355 -24.195  1.00 21.24           N  
ATOM    912  CA  THR L  20       5.538 -23.384 -23.720  1.00 21.29           C  
ATOM    913  C   THR L  20       6.256 -24.722 -23.632  1.00 21.18           C  
ATOM    914  O   THR L  20       7.067 -25.087 -24.465  1.00 21.22           O  
ATOM    915  CB  THR L  20       4.289 -23.535 -24.578  1.00 26.22           C  
ATOM    916  OG1 THR L  20       4.708 -23.829 -25.905  1.00 32.56           O  
ATOM    917  CG2 THR L  20       3.553 -22.291 -24.620  1.00 27.31           C  
ATOM    918  N   ILE L  21       5.948 -25.459 -22.575  1.00 19.64           N  
ATOM    919  CA  ILE L  21       6.566 -26.766 -22.320  1.00 19.68           C  
ATOM    920  C   ILE L  21       5.375 -27.721 -22.098  1.00 19.32           C  
ATOM    921  O   ILE L  21       4.381 -27.331 -21.413  1.00 19.32           O  
ATOM    922  CB  ILE L  21       7.421 -26.693 -21.051  1.00 20.29           C  
ATOM    923  CG1 ILE L  21       8.583 -25.733 -21.233  1.00 23.15           C  
ATOM    924  CG2 ILE L  21       7.929 -28.066 -20.663  1.00 21.67           C  
ATOM    925  CD1 ILE L  21       9.354 -25.425 -19.948  1.00 23.44           C  
ATOM    926  N   THR L  22       5.451 -28.907 -22.700  1.00 18.78           N  
ATOM    927  CA  THR L  22       4.328 -29.882 -22.715  1.00 21.45           C  
ATOM    928  C   THR L  22       4.748 -31.165 -21.983  1.00 21.47           C  
ATOM    929  O   THR L  22       5.925 -31.542 -21.984  1.00 18.41           O  
ATOM    930  CB  THR L  22       3.938 -30.241 -24.135  1.00 26.01           C  
ATOM    931  OG1 THR L  22       3.617 -29.024 -24.795  1.00 30.14           O  
ATOM    932  CG2 THR L  22       2.674 -31.115 -24.185  1.00 27.61           C  
ATOM    933  N   CYS L  23       3.751 -31.782 -21.356  1.00 21.72           N  
ATOM    934  CA  CYS L  23       3.892 -33.063 -20.656  1.00 19.71           C  
ATOM    935  C   CYS L  23       2.666 -33.831 -20.999  1.00 21.28           C  
ATOM    936  O   CYS L  23       1.567 -33.371 -20.646  1.00 22.59           O  
ATOM    937  CB  CYS L  23       3.979 -32.842 -19.145  1.00 25.61           C  
ATOM    938  SG  CYS L  23       5.791 -32.849 -18.658  1.00 34.40           S  
ATOM    939  N   ARG L  24       2.851 -34.999 -21.610  1.00 21.33           N  
ATOM    940  CA  ARG L  24       1.744 -35.889 -21.933  1.00 20.85           C  
ATOM    941  C   ARG L  24       1.733 -37.098 -20.983  1.00 21.48           C  
ATOM    942  O   ARG L  24       2.721 -37.815 -20.864  1.00 20.61           O  
ATOM    943  CB  ARG L  24       1.824 -36.346 -23.383  1.00 24.01           C  
ATOM    944  N   ALA L  25       0.610 -37.294 -20.296  1.00 21.20           N  
ATOM    945  CA  ALA L  25       0.485 -38.443 -19.335  1.00 21.77           C  
ATOM    946  C   ALA L  25       0.106 -39.689 -20.132  1.00 22.21           C  
ATOM    947  O   ALA L  25      -0.625 -39.582 -21.066  1.00 23.70           O  
ATOM    948  CB  ALA L  25      -0.575 -38.137 -18.305  1.00 24.04           C  
ATOM    949  N   SER L  26       0.560 -40.854 -19.724  1.00 23.14           N  
ATOM    950  CA  SER L  26       0.320 -42.068 -20.475  1.00 25.36           C  
ATOM    951  C   SER L  26      -1.123 -42.590 -20.287  1.00 27.20           C  
ATOM    952  O   SER L  26      -1.577 -43.444 -21.060  1.00 29.49           O  
ATOM    953  CB  SER L  26       1.332 -43.118 -20.076  1.00 25.72           C  
ATOM    954  OG  SER L  26       1.248 -43.401 -18.683  1.00 25.30           O  
ATOM    955  N   GLN L  27      -1.832 -42.083 -19.275  1.00 26.54           N  
ATOM    956  CA  GLN L  27      -3.284 -42.274 -19.116  1.00 28.66           C  
ATOM    957  C   GLN L  27      -3.844 -41.095 -18.326  1.00 27.81           C  
ATOM    958  O   GLN L  27      -3.077 -40.231 -17.852  1.00 24.91           O  
ATOM    959  CB  GLN L  27      -3.601 -43.574 -18.425  1.00 31.81           C  
ATOM    960  CG  GLN L  27      -3.083 -43.646 -17.000  1.00 33.88           C  
ATOM    961  CD  GLN L  27      -3.390 -45.000 -16.393  1.00 37.83           C  
ATOM    962  OE1 GLN L  27      -4.410 -45.193 -15.716  1.00 39.03           O  
ATOM    963  NE2 GLN L  27      -2.558 -45.951 -16.700  1.00 37.37           N  
ATOM    964  N   ASP L  28      -5.140 -41.042 -18.245  1.00 25.62           N  
ATOM    965  CA  ASP L  28      -5.836 -39.959 -17.533  1.00 27.95           C  
ATOM    966  C   ASP L  28      -5.377 -39.905 -16.091  1.00 27.13           C  
ATOM    967  O   ASP L  28      -5.514 -40.888 -15.354  1.00 25.69           O  
ATOM    968  CB  ASP L  28      -7.310 -40.249 -17.601  1.00 31.74           C  
ATOM    969  CG  ASP L  28      -8.220 -39.077 -17.169  1.00 35.54           C  
ATOM    970  OD1 ASP L  28      -9.463 -39.332 -17.301  1.00 46.41           O  
ATOM    971  OD2 ASP L  28      -7.818 -38.027 -16.647  1.00 33.31           O  
ATOM    972  N   VAL L  29      -4.909 -38.729 -15.667  1.00 25.01           N  
ATOM    973  CA  VAL L  29      -4.498 -38.520 -14.310  1.00 24.96           C  
ATOM    974  C   VAL L  29      -5.323 -37.362 -13.667  1.00 25.52           C  
ATOM    975  O   VAL L  29      -4.892 -36.714 -12.697  1.00 25.01           O  
ATOM    976  CB  VAL L  29      -2.984 -38.254 -14.205  1.00 23.57           C  
ATOM    977  CG1 VAL L  29      -2.103 -39.430 -14.682  1.00 24.14           C  
ATOM    978  CG2 VAL L  29      -2.593 -37.030 -15.019  1.00 23.46           C  
ATOM    979  N   ASN L  30      -6.487 -37.092 -14.233  1.00 28.32           N  
ATOM    980  CA  ASN L  30      -7.280 -35.901 -13.893  1.00 30.49           C  
ATOM    981  C   ASN L  30      -6.386 -34.672 -13.876  1.00 29.06           C  
ATOM    982  O   ASN L  30      -5.655 -34.473 -14.820  1.00 29.03           O  
ATOM    983  CB  ASN L  30      -7.990 -36.102 -12.566  1.00 32.85           C  
ATOM    984  CG  ASN L  30      -9.083 -35.024 -12.307  1.00 35.84           C  
ATOM    985  OD1 ASN L  30      -9.900 -34.668 -13.177  1.00 38.03           O  
ATOM    986  ND2 ASN L  30      -9.107 -34.537 -11.085  1.00 36.03           N  
ATOM    987  N   THR L  31      -6.355 -33.935 -12.770  1.00 29.58           N  
ATOM    988  CA  THR L  31      -5.569 -32.719 -12.651  1.00 29.34           C  
ATOM    989  C   THR L  31      -4.370 -32.872 -11.727  1.00 28.46           C  
ATOM    990  O   THR L  31      -3.839 -31.850 -11.230  1.00 26.81           O  
ATOM    991  CB  THR L  31      -6.466 -31.537 -12.151  1.00 30.09           C  
ATOM    992  OG1 THR L  31      -7.022 -31.809 -10.851  1.00 29.21           O  
ATOM    993  CG2 THR L  31      -7.564 -31.348 -13.134  1.00 31.10           C  
ATOM    994  N   ALA L  32      -3.959 -34.123 -11.467  1.00 25.77           N  
ATOM    995  CA  ALA L  32      -2.945 -34.405 -10.457  1.00 24.83           C  
ATOM    996  C   ALA L  32      -1.524 -34.250 -11.002  1.00 24.02           C  
ATOM    997  O   ALA L  32      -0.683 -35.198 -11.044  1.00 22.55           O  
ATOM    998  CB  ALA L  32      -3.175 -35.799  -9.846  1.00 25.48           C  
ATOM    999  N   VAL L  33      -1.238 -33.035 -11.504  1.00 23.94           N  
ATOM   1000  CA  VAL L  33       0.055 -32.740 -12.055  1.00 21.95           C  
ATOM   1001  C   VAL L  33       0.610 -31.425 -11.454  1.00 22.47           C  
ATOM   1002  O   VAL L  33      -0.115 -30.437 -11.264  1.00 23.48           O  
ATOM   1003  CB  VAL L  33      -0.026 -32.631 -13.584  1.00 23.96           C  
ATOM   1004  CG1 VAL L  33       1.188 -31.928 -14.218  1.00 23.23           C  
ATOM   1005  CG2 VAL L  33      -0.183 -34.038 -14.202  1.00 24.64           C  
ATOM   1006  N   ALA L  34       1.892 -31.414 -11.135  1.00 19.97           N  
ATOM   1007  CA  ALA L  34       2.509 -30.206 -10.611  1.00 21.30           C  
ATOM   1008  C   ALA L  34       3.693 -29.877 -11.463  1.00 19.48           C  
ATOM   1009  O   ALA L  34       4.191 -30.750 -12.209  1.00 20.95           O  
ATOM   1010  CB  ALA L  34       2.903 -30.352  -9.167  1.00 23.15           C  
ATOM   1011  N   TRP L  35       4.096 -28.608 -11.460  1.00 18.72           N  
ATOM   1012  CA  TRP L  35       5.301 -28.176 -12.214  1.00 18.24           C  
ATOM   1013  C   TRP L  35       6.295 -27.558 -11.249  1.00 17.38           C  
ATOM   1014  O   TRP L  35       5.919 -26.859 -10.279  1.00 18.18           O  
ATOM   1015  CB  TRP L  35       4.961 -27.153 -13.314  1.00 19.27           C  
ATOM   1016  CG  TRP L  35       4.098 -27.635 -14.439  1.00 18.07           C  
ATOM   1017  CD1 TRP L  35       2.725 -27.582 -14.542  1.00 18.87           C  
ATOM   1018  CD2 TRP L  35       4.572 -28.151 -15.668  1.00 16.48           C  
ATOM   1019  NE1 TRP L  35       2.351 -28.124 -15.758  1.00 18.15           N  
ATOM   1020  CE2 TRP L  35       3.485 -28.469 -16.441  1.00 16.98           C  
ATOM   1021  CE3 TRP L  35       5.841 -28.445 -16.175  1.00 15.85           C  
ATOM   1022  CZ2 TRP L  35       3.633 -28.993 -17.733  1.00 16.60           C  
ATOM   1023  CZ3 TRP L  35       5.960 -28.902 -17.462  1.00 15.57           C  
ATOM   1024  CH2 TRP L  35       4.858 -29.207 -18.201  1.00 16.33           C  
ATOM   1025  N   TYR L  36       7.552 -27.846 -11.506  1.00 15.98           N  
ATOM   1026  CA  TYR L  36       8.677 -27.385 -10.744  1.00 17.81           C  
ATOM   1027  C   TYR L  36       9.752 -26.726 -11.575  1.00 16.35           C  
ATOM   1028  O   TYR L  36       9.911 -27.027 -12.788  1.00 15.72           O  
ATOM   1029  CB  TYR L  36       9.419 -28.517  -9.959  1.00 18.30           C  
ATOM   1030  CG  TYR L  36       8.504 -29.316  -9.047  1.00 17.82           C  
ATOM   1031  CD1 TYR L  36       7.720 -30.358  -9.572  1.00 17.68           C  
ATOM   1032  CD2 TYR L  36       8.471 -29.095  -7.682  1.00 20.13           C  
ATOM   1033  CE1 TYR L  36       6.871 -31.029  -8.760  1.00 19.67           C  
ATOM   1034  CE2 TYR L  36       7.637 -29.851  -6.850  1.00 19.72           C  
ATOM   1035  CZ  TYR L  36       6.858 -30.811  -7.428  1.00 20.04           C  
ATOM   1036  OH  TYR L  36       6.037 -31.569  -6.613  1.00 24.86           O  
ATOM   1037  N   GLN L  37      10.475 -25.827 -10.918  1.00 16.29           N  
ATOM   1038  CA  GLN L  37      11.625 -25.152 -11.510  1.00 18.52           C  
ATOM   1039  C   GLN L  37      12.857 -25.548 -10.741  1.00 18.58           C  
ATOM   1040  O   GLN L  37      12.866 -25.476  -9.502  1.00 21.93           O  
ATOM   1041  CB  GLN L  37      11.475 -23.600 -11.386  1.00 18.88           C  
ATOM   1042  CG  GLN L  37      12.628 -22.792 -11.924  1.00 19.67           C  
ATOM   1043  CD  GLN L  37      12.507 -21.328 -11.564  1.00 22.91           C  
ATOM   1044  OE1 GLN L  37      12.732 -20.976 -10.406  1.00 24.28           O  
ATOM   1045  NE2 GLN L  37      12.053 -20.472 -12.500  1.00 23.34           N  
ATOM   1046  N   GLN L  38      13.895 -25.959 -11.430  1.00 16.59           N  
ATOM   1047  CA  GLN L  38      15.183 -26.218 -10.795  1.00 17.57           C  
ATOM   1048  C   GLN L  38      16.334 -25.479 -11.432  1.00 19.56           C  
ATOM   1049  O   GLN L  38      16.638 -25.673 -12.590  1.00 18.47           O  
ATOM   1050  CB  GLN L  38      15.553 -27.722 -10.806  1.00 18.47           C  
ATOM   1051  CG  GLN L  38      16.678 -28.066  -9.870  1.00 19.46           C  
ATOM   1052  CD  GLN L  38      16.886 -29.583  -9.750  1.00 20.17           C  
ATOM   1053  OE1 GLN L  38      16.498 -30.364 -10.649  1.00 20.01           O  
ATOM   1054  NE2 GLN L  38      17.514 -29.987  -8.665  1.00 22.17           N  
ATOM   1055  N   LYS L  39      17.029 -24.740 -10.606  1.00 20.29           N  
ATOM   1056  CA  LYS L  39      18.319 -24.152 -10.981  1.00 24.49           C  
ATOM   1057  C   LYS L  39      19.465 -25.035 -10.587  1.00 24.24           C  
ATOM   1058  O   LYS L  39      19.404 -25.688  -9.555  1.00 23.22           O  
ATOM   1059  CB  LYS L  39      18.448 -22.765 -10.305  1.00 26.04           C  
ATOM   1060  CG  LYS L  39      17.431 -21.872 -10.984  1.00 26.78           C  
ATOM   1061  CD  LYS L  39      17.467 -20.423 -10.608  1.00 33.70           C  
ATOM   1062  CE  LYS L  39      16.350 -19.727 -11.415  1.00 34.34           C  
ATOM   1063  NZ  LYS L  39      16.145 -18.387 -10.891  1.00 37.49           N  
ATOM   1064  N   PRO L  40      20.553 -24.948 -11.328  1.00 28.74           N  
ATOM   1065  CA  PRO L  40      21.771 -25.711 -10.972  1.00 31.32           C  
ATOM   1066  C   PRO L  40      22.215 -25.465  -9.556  1.00 32.78           C  
ATOM   1067  O   PRO L  40      22.271 -24.316  -9.084  1.00 33.67           O  
ATOM   1068  CB  PRO L  40      22.819 -25.231 -11.978  1.00 31.85           C  
ATOM   1069  CG  PRO L  40      22.165 -24.287 -12.890  1.00 34.29           C  
ATOM   1070  CD  PRO L  40      20.765 -23.975 -12.414  1.00 30.59           C  
ATOM   1071  N   GLY L  41      22.462 -26.534  -8.832  1.00 31.69           N  
ATOM   1072  CA  GLY L  41      22.797 -26.461  -7.448  1.00 32.93           C  
ATOM   1073  C   GLY L  41      21.721 -26.357  -6.407  1.00 34.73           C  
ATOM   1074  O   GLY L  41      22.047 -26.404  -5.219  1.00 37.29           O  
ATOM   1075  N   LYS L  42      20.464 -26.187  -6.802  1.00 29.61           N  
ATOM   1076  CA  LYS L  42      19.366 -25.997  -5.884  1.00 30.76           C  
ATOM   1077  C   LYS L  42      18.382 -27.132  -6.070  1.00 30.80           C  
ATOM   1078  O   LYS L  42      18.369 -27.778  -7.094  1.00 28.36           O  
ATOM   1079  CB  LYS L  42      18.640 -24.674  -6.210  1.00 30.42           C  
ATOM   1080  N   ALA L  43      17.579 -27.383  -5.055  1.00 30.82           N  
ATOM   1081  CA  ALA L  43      16.511 -28.300  -5.129  1.00 31.05           C  
ATOM   1082  C   ALA L  43      15.369 -27.644  -5.985  1.00 28.94           C  
ATOM   1083  O   ALA L  43      15.337 -26.415  -6.086  1.00 27.74           O  
ATOM   1084  CB  ALA L  43      16.020 -28.570  -3.751  1.00 33.75           C  
ATOM   1085  N   PRO L  44      14.461 -28.452  -6.564  1.00 29.04           N  
ATOM   1086  CA  PRO L  44      13.334 -27.927  -7.347  1.00 26.03           C  
ATOM   1087  C   PRO L  44      12.448 -27.109  -6.454  1.00 27.98           C  
ATOM   1088  O   PRO L  44      12.364 -27.426  -5.278  1.00 30.22           O  
ATOM   1089  CB  PRO L  44      12.593 -29.166  -7.816  1.00 26.01           C  
ATOM   1090  CG  PRO L  44      13.564 -30.293  -7.610  1.00 26.84           C  
ATOM   1091  CD  PRO L  44      14.364 -29.903  -6.433  1.00 28.96           C  
ATOM   1092  N   LYS L  45      11.795 -26.088  -7.012  1.00 23.35           N  
ATOM   1093  CA  LYS L  45      10.837 -25.200  -6.304  1.00 23.81           C  
ATOM   1094  C   LYS L  45       9.500 -25.448  -6.982  1.00 23.07           C  
ATOM   1095  O   LYS L  45       9.436 -25.491  -8.219  1.00 23.22           O  
ATOM   1096  CB  LYS L  45      11.198 -23.729  -6.521  1.00 24.83           C  
ATOM   1097  N   LEU L  46       8.429 -25.570  -6.197  1.00 23.05           N  
ATOM   1098  CA  LEU L  46       7.094 -25.796  -6.722  1.00 23.00           C  
ATOM   1099  C   LEU L  46       6.507 -24.532  -7.366  1.00 23.13           C  
ATOM   1100  O   LEU L  46       6.482 -23.461  -6.744  1.00 24.79           O  
ATOM   1101  CB  LEU L  46       6.149 -26.226  -5.593  1.00 26.04           C  
ATOM   1102  CG  LEU L  46       4.692 -26.531  -5.997  1.00 26.54           C  
ATOM   1103  CD1 LEU L  46       4.634 -27.692  -6.972  1.00 23.99           C  
ATOM   1104  CD2 LEU L  46       3.889 -26.880  -4.718  1.00 31.95           C  
ATOM   1105  N   LEU L  47       6.045 -24.636  -8.591  1.00 22.47           N  
ATOM   1106  CA  LEU L  47       5.431 -23.474  -9.296  1.00 23.47           C  
ATOM   1107  C   LEU L  47       3.916 -23.548  -9.374  1.00 24.32           C  
ATOM   1108  O   LEU L  47       3.178 -22.548  -9.177  1.00 23.39           O  
ATOM   1109  CB  LEU L  47       5.924 -23.387 -10.759  1.00 23.52           C  
ATOM   1110  CG  LEU L  47       7.427 -23.236 -11.000  1.00 26.88           C  
ATOM   1111  CD1 LEU L  47       7.758 -23.383 -12.484  1.00 24.94           C  
ATOM   1112  CD2 LEU L  47       7.901 -21.892 -10.527  1.00 27.55           C  
ATOM   1113  N   ILE L  48       3.440 -24.739  -9.710  1.00 23.57           N  
ATOM   1114  CA  ILE L  48       2.064 -24.952 -10.068  1.00 24.14           C  
ATOM   1115  C   ILE L  48       1.628 -26.289  -9.490  1.00 24.70           C  
ATOM   1116  O   ILE L  48       2.366 -27.249  -9.601  1.00 23.71           O  
ATOM   1117  CB  ILE L  48       1.882 -24.915 -11.589  1.00 25.52           C  
ATOM   1118  CG1 ILE L  48       2.111 -23.470 -12.100  1.00 29.72           C  
ATOM   1119  CG2 ILE L  48       0.478 -25.405 -11.990  1.00 28.49           C  
ATOM   1120  CD1 ILE L  48       1.892 -23.299 -13.549  1.00 27.76           C  
ATOM   1121  N   TYR L  49       0.430 -26.340  -8.897  1.00 26.00           N  
ATOM   1122  CA  TYR L  49      -0.152 -27.619  -8.446  1.00 27.94           C  
ATOM   1123  C   TYR L  49      -1.581 -27.751  -9.016  1.00 27.64           C  
ATOM   1124  O   TYR L  49      -2.196 -26.767  -9.476  1.00 27.05           O  
ATOM   1125  CB  TYR L  49      -0.136 -27.741  -6.887  1.00 29.75           C  
ATOM   1126  CG  TYR L  49      -0.891 -26.658  -6.198  1.00 33.63           C  
ATOM   1127  CD1 TYR L  49      -2.195 -26.838  -5.796  1.00 35.61           C  
ATOM   1128  CD2 TYR L  49      -0.306 -25.426  -5.965  1.00 37.08           C  
ATOM   1129  CE1 TYR L  49      -2.896 -25.836  -5.150  1.00 39.72           C  
ATOM   1130  CE2 TYR L  49      -0.988 -24.430  -5.338  1.00 40.02           C  
ATOM   1131  CZ  TYR L  49      -2.284 -24.650  -4.934  1.00 41.35           C  
ATOM   1132  OH  TYR L  49      -2.925 -23.620  -4.355  1.00 47.95           O  
ATOM   1133  N   SER L  50      -2.075 -28.987  -9.015  1.00 27.95           N  
ATOM   1134  CA  SER L  50      -3.383 -29.323  -9.556  1.00 28.38           C  
ATOM   1135  C   SER L  50      -3.504 -28.766 -10.987  1.00 26.00           C  
ATOM   1136  O   SER L  50      -4.532 -28.239 -11.336  1.00 24.17           O  
ATOM   1137  CB  SER L  50      -4.493 -28.729  -8.704  1.00 33.10           C  
ATOM   1138  OG  SER L  50      -4.513 -29.389  -7.465  1.00 38.92           O  
ATOM   1139  N   ALA L  51      -2.445 -28.865 -11.770  1.00 22.62           N  
ATOM   1140  CA  ALA L  51      -2.384 -28.491 -13.224  1.00 23.33           C  
ATOM   1141  C   ALA L  51      -2.349 -27.022 -13.495  1.00 22.55           C  
ATOM   1142  O   ALA L  51      -1.633 -26.582 -14.396  1.00 23.88           O  
ATOM   1143  CB  ALA L  51      -3.523 -29.112 -14.019  1.00 25.12           C  
ATOM   1144  N   SER L  52      -3.101 -26.232 -12.734  1.00 24.50           N  
ATOM   1145  CA  SER L  52      -3.221 -24.823 -13.088  1.00 25.32           C  
ATOM   1146  C   SER L  52      -3.212 -23.818 -11.903  1.00 28.48           C  
ATOM   1147  O   SER L  52      -3.403 -22.644 -12.119  1.00 31.14           O  
ATOM   1148  CB  SER L  52      -4.506 -24.670 -13.948  1.00 27.24           C  
ATOM   1149  OG  SER L  52      -5.603 -24.925 -13.110  1.00 27.61           O  
ATOM   1150  N   ASP L  53      -2.995 -24.256 -10.674  1.00 28.38           N  
ATOM   1151  CA  ASP L  53      -2.993 -23.336  -9.564  1.00 32.07           C  
ATOM   1152  C   ASP L  53      -1.572 -22.919  -9.194  1.00 30.80           C  
ATOM   1153  O   ASP L  53      -0.726 -23.766  -8.991  1.00 28.49           O  
ATOM   1154  CB  ASP L  53      -3.653 -23.984  -8.351  1.00 35.52           C  
ATOM   1155  CG  ASP L  53      -5.167 -24.148  -8.527  1.00 40.98           C  
ATOM   1156  OD1 ASP L  53      -5.780 -23.337  -9.259  1.00 44.76           O  
ATOM   1157  OD2 ASP L  53      -5.720 -25.086  -7.941  1.00 43.73           O  
ATOM   1158  N   LEU L  54      -1.360 -21.620  -9.036  1.00 31.61           N  
ATOM   1159  CA  LEU L  54      -0.034 -21.070  -8.761  1.00 30.93           C  
ATOM   1160  C   LEU L  54       0.254 -21.128  -7.284  1.00 32.41           C  
ATOM   1161  O   LEU L  54      -0.628 -20.801  -6.481  1.00 34.11           O  
ATOM   1162  CB  LEU L  54       0.072 -19.633  -9.267  1.00 32.57           C  
ATOM   1163  CG  LEU L  54       0.744 -19.432 -10.624  1.00 32.67           C  
ATOM   1164  CD1 LEU L  54      -0.039 -20.163 -11.705  1.00 34.16           C  
ATOM   1165  CD2 LEU L  54       0.827 -17.944 -10.902  1.00 34.09           C  
ATOM   1166  N   TYR L  55       1.464 -21.559  -6.918  1.00 30.30           N  
ATOM   1167  CA  TYR L  55       1.946 -21.434  -5.557  1.00 32.88           C  
ATOM   1168  C   TYR L  55       2.100 -19.922  -5.210  1.00 34.04           C  
ATOM   1169  O   TYR L  55       2.365 -19.078  -6.088  1.00 32.06           O  
ATOM   1170  CB  TYR L  55       3.275 -22.210  -5.355  1.00 32.32           C  
ATOM   1171  N   SER L  56       1.864 -19.590  -3.939  1.00 37.08           N  
ATOM   1172  CA  SER L  56       2.118 -18.270  -3.389  1.00 39.59           C  
ATOM   1173  C   SER L  56       3.520 -17.829  -3.721  1.00 40.32           C  
ATOM   1174  O   SER L  56       4.485 -18.614  -3.606  1.00 41.43           O  
ATOM   1175  CB  SER L  56       1.976 -18.316  -1.855  1.00 43.97           C  
ATOM   1176  N   GLY L  57       3.661 -16.592  -4.190  1.00 41.54           N  
ATOM   1177  CA  GLY L  57       4.990 -16.098  -4.590  1.00 40.92           C  
ATOM   1178  C   GLY L  57       5.396 -16.299  -6.059  1.00 41.16           C  
ATOM   1179  O   GLY L  57       6.353 -15.683  -6.506  1.00 44.66           O  
ATOM   1180  N   VAL L  58       4.672 -17.135  -6.813  1.00 34.90           N  
ATOM   1181  CA  VAL L  58       4.991 -17.384  -8.184  1.00 32.16           C  
ATOM   1182  C   VAL L  58       4.408 -16.270  -9.061  1.00 33.45           C  
ATOM   1183  O   VAL L  58       3.217 -15.946  -8.956  1.00 30.55           O  
ATOM   1184  CB  VAL L  58       4.444 -18.749  -8.657  1.00 30.32           C  
ATOM   1185  CG1 VAL L  58       4.845 -18.989 -10.094  1.00 29.89           C  
ATOM   1186  CG2 VAL L  58       5.025 -19.882  -7.777  1.00 31.78           C  
ATOM   1187  N   PRO L  59       5.243 -15.679  -9.920  1.00 33.20           N  
ATOM   1188  CA  PRO L  59       4.682 -14.562 -10.695  1.00 33.78           C  
ATOM   1189  C   PRO L  59       3.690 -14.969 -11.747  1.00 31.25           C  
ATOM   1190  O   PRO L  59       3.778 -16.060 -12.283  1.00 29.57           O  
ATOM   1191  CB  PRO L  59       5.915 -13.867 -11.311  1.00 35.21           C  
ATOM   1192  CG  PRO L  59       7.062 -14.783 -11.138  1.00 35.28           C  
ATOM   1193  CD  PRO L  59       6.699 -15.845 -10.117  1.00 34.00           C  
ATOM   1194  N   SER L  60       2.810 -14.030 -12.058  1.00 30.74           N  
ATOM   1195  CA  SER L  60       1.622 -14.205 -12.892  1.00 32.15           C  
ATOM   1196  C   SER L  60       1.985 -14.654 -14.292  1.00 29.48           C  
ATOM   1197  O   SER L  60       1.192 -15.265 -14.958  1.00 28.41           O  
ATOM   1198  CB  SER L  60       0.789 -12.862 -12.975  1.00 33.47           C  
ATOM   1199  N   ARG L  61       3.200 -14.366 -14.745  1.00 27.27           N  
ATOM   1200  CA  ARG L  61       3.608 -14.854 -16.077  1.00 25.69           C  
ATOM   1201  C   ARG L  61       3.638 -16.381 -16.275  1.00 23.08           C  
ATOM   1202  O   ARG L  61       3.648 -16.875 -17.422  1.00 23.05           O  
ATOM   1203  CB  ARG L  61       4.939 -14.192 -16.480  1.00 25.50           C  
ATOM   1204  CG  ARG L  61       6.140 -14.705 -15.717  1.00 24.10           C  
ATOM   1205  CD  ARG L  61       7.419 -13.943 -16.136  1.00 25.52           C  
ATOM   1206  NE  ARG L  61       8.527 -14.301 -15.272  1.00 24.95           N  
ATOM   1207  CZ  ARG L  61       8.871 -13.666 -14.139  1.00 26.43           C  
ATOM   1208  NH1 ARG L  61       8.197 -12.622 -13.650  1.00 25.38           N  
ATOM   1209  NH2 ARG L  61       9.896 -14.124 -13.453  1.00 27.14           N  
ATOM   1210  N   PHE L  62       3.669 -17.141 -15.176  1.00 22.76           N  
ATOM   1211  CA  PHE L  62       3.567 -18.584 -15.233  1.00 21.36           C  
ATOM   1212  C   PHE L  62       2.115 -18.973 -15.244  1.00 24.16           C  
ATOM   1213  O   PHE L  62       1.339 -18.438 -14.421  1.00 22.83           O  
ATOM   1214  CB  PHE L  62       4.223 -19.221 -14.033  1.00 22.07           C  
ATOM   1215  CG  PHE L  62       5.731 -19.124 -14.058  1.00 21.96           C  
ATOM   1216  CD1 PHE L  62       6.475 -20.053 -14.740  1.00 19.88           C  
ATOM   1217  CD2 PHE L  62       6.362 -18.047 -13.465  1.00 22.16           C  
ATOM   1218  CE1 PHE L  62       7.849 -19.948 -14.799  1.00 20.07           C  
ATOM   1219  CE2 PHE L  62       7.760 -17.953 -13.493  1.00 23.99           C  
ATOM   1220  CZ  PHE L  62       8.473 -18.904 -14.145  1.00 22.18           C  
ATOM   1221  N   SER L  63       1.770 -19.896 -16.151  1.00 22.62           N  
ATOM   1222  CA  SER L  63       0.463 -20.510 -16.085  1.00 25.05           C  
ATOM   1223  C   SER L  63       0.497 -21.974 -16.499  1.00 24.46           C  
ATOM   1224  O   SER L  63       1.377 -22.421 -17.282  1.00 22.12           O  
ATOM   1225  CB  SER L  63      -0.579 -19.707 -16.864  1.00 30.73           C  
ATOM   1226  OG  SER L  63      -0.356 -19.725 -18.224  1.00 34.81           O  
ATOM   1227  N   GLY L  64      -0.471 -22.728 -15.969  1.00 22.31           N  
ATOM   1228  CA  GLY L  64      -0.573 -24.135 -16.313  1.00 23.82           C  
ATOM   1229  C   GLY L  64      -1.944 -24.440 -16.870  1.00 23.40           C  
ATOM   1230  O   GLY L  64      -2.938 -23.842 -16.465  1.00 25.17           O  
ATOM   1231  N   SER L  65      -2.006 -25.369 -17.800  1.00 24.07           N  
ATOM   1232  CA  SER L  65      -3.286 -25.823 -18.336  1.00 27.99           C  
ATOM   1233  C   SER L  65      -3.248 -27.290 -18.698  1.00 27.10           C  
ATOM   1234  O   SER L  65      -2.185 -27.927 -18.787  1.00 22.58           O  
ATOM   1235  CB  SER L  65      -3.745 -25.021 -19.541  1.00 33.08           C  
ATOM   1236  OG  SER L  65      -2.750 -25.090 -20.491  1.00 38.63           O  
ATOM   1237  N   ARG L  66      -4.443 -27.831 -18.874  1.00 24.85           N  
ATOM   1238  CA  ARG L  66      -4.618 -29.224 -19.180  1.00 27.04           C  
ATOM   1239  C   ARG L  66      -5.579 -29.327 -20.297  1.00 28.27           C  
ATOM   1240  O   ARG L  66      -6.625 -28.610 -20.328  1.00 27.15           O  
ATOM   1241  CB  ARG L  66      -5.177 -29.882 -17.923  1.00 29.63           C  
ATOM   1242  CG  ARG L  66      -5.559 -31.322 -18.047  1.00 32.65           C  
ATOM   1243  CD  ARG L  66      -6.700 -31.618 -17.115  1.00 37.18           C  
ATOM   1244  NE  ARG L  66      -7.067 -32.971 -17.388  1.00 41.53           N  
ATOM   1245  CZ  ARG L  66      -8.238 -33.505 -17.183  1.00 40.93           C  
ATOM   1246  NH1 ARG L  66      -9.255 -32.821 -16.664  1.00 42.96           N  
ATOM   1247  NH2 ARG L  66      -8.362 -34.779 -17.467  1.00 45.09           N  
ATOM   1248  N   SER L  67      -5.300 -30.240 -21.187  1.00 27.79           N  
ATOM   1249  CA  SER L  67      -6.339 -30.713 -22.077  1.00 33.12           C  
ATOM   1250  C   SER L  67      -6.226 -32.225 -22.210  1.00 29.86           C  
ATOM   1251  O   SER L  67      -5.302 -32.720 -22.863  1.00 27.32           O  
ATOM   1252  CB  SER L  67      -6.146 -30.017 -23.413  1.00 35.90           C  
ATOM   1253  OG  SER L  67      -7.088 -30.475 -24.296  1.00 42.17           O  
ATOM   1254  N   GLY L  68      -7.153 -32.958 -21.582  1.00 29.32           N  
ATOM   1255  CA  GLY L  68      -7.099 -34.394 -21.509  1.00 30.35           C  
ATOM   1256  C   GLY L  68      -5.850 -34.856 -20.739  1.00 27.33           C  
ATOM   1257  O   GLY L  68      -5.634 -34.479 -19.588  1.00 28.27           O  
ATOM   1258  N   THR L  69      -5.019 -35.653 -21.393  1.00 26.37           N  
ATOM   1259  CA  THR L  69      -3.718 -36.057 -20.848  1.00 25.71           C  
ATOM   1260  C   THR L  69      -2.524 -35.124 -21.151  1.00 24.75           C  
ATOM   1261  O   THR L  69      -1.396 -35.478 -20.838  1.00 23.25           O  
ATOM   1262  CB  THR L  69      -3.394 -37.480 -21.370  1.00 27.88           C  
ATOM   1263  OG1 THR L  69      -3.438 -37.470 -22.785  1.00 27.82           O  
ATOM   1264  CG2 THR L  69      -4.466 -38.487 -20.912  1.00 29.44           C  
ATOM   1265  N   ASP L  70      -2.793 -34.032 -21.837  1.00 23.08           N  
ATOM   1266  CA  ASP L  70      -1.810 -33.023 -22.193  1.00 24.20           C  
ATOM   1267  C   ASP L  70      -1.778 -31.858 -21.208  1.00 21.71           C  
ATOM   1268  O   ASP L  70      -2.740 -31.160 -21.014  1.00 24.00           O  
ATOM   1269  CB  ASP L  70      -2.006 -32.491 -23.635  1.00 25.94           C  
ATOM   1270  CG  ASP L  70      -1.790 -33.578 -24.675  1.00 34.23           C  
ATOM   1271  OD1 ASP L  70      -2.682 -33.770 -25.519  1.00 41.23           O  
ATOM   1272  OD2 ASP L  70      -0.772 -34.329 -24.595  1.00 37.42           O  
ATOM   1273  N   PHE L  71      -0.603 -31.632 -20.657  1.00 20.86           N  
ATOM   1274  CA  PHE L  71      -0.415 -30.570 -19.691  1.00 18.71           C  
ATOM   1275  C   PHE L  71       0.597 -29.586 -20.221  1.00 20.31           C  
ATOM   1276  O   PHE L  71       1.677 -30.013 -20.736  1.00 20.97           O  
ATOM   1277  CB  PHE L  71       0.067 -31.185 -18.372  1.00 18.95           C  
ATOM   1278  CG  PHE L  71      -0.974 -32.034 -17.715  1.00 20.70           C  
ATOM   1279  CD1 PHE L  71      -1.163 -33.340 -18.112  1.00 22.06           C  
ATOM   1280  CD2 PHE L  71      -1.803 -31.501 -16.746  1.00 22.19           C  
ATOM   1281  CE1 PHE L  71      -2.159 -34.110 -17.563  1.00 21.46           C  
ATOM   1282  CE2 PHE L  71      -2.786 -32.273 -16.148  1.00 22.18           C  
ATOM   1283  CZ  PHE L  71      -2.970 -33.577 -16.577  1.00 22.18           C  
ATOM   1284  N   THR L  72       0.307 -28.294 -20.107  1.00 18.81           N  
ATOM   1285  CA  THR L  72       1.252 -27.262 -20.600  1.00 19.77           C  
ATOM   1286  C   THR L  72       1.614 -26.266 -19.531  1.00 18.76           C  
ATOM   1287  O   THR L  72       0.719 -25.788 -18.838  1.00 20.93           O  
ATOM   1288  CB  THR L  72       0.560 -26.549 -21.798  1.00 22.51           C  
ATOM   1289  OG1 THR L  72       0.358 -27.550 -22.813  1.00 29.04           O  
ATOM   1290  CG2 THR L  72       1.365 -25.558 -22.429  1.00 25.20           C  
ATOM   1291  N   LEU L  73       2.898 -25.960 -19.402  1.00 17.19           N  
ATOM   1292  CA  LEU L  73       3.381 -24.813 -18.676  1.00 17.49           C  
ATOM   1293  C   LEU L  73       3.719 -23.733 -19.705  1.00 18.73           C  
ATOM   1294  O   LEU L  73       4.430 -23.976 -20.639  1.00 17.88           O  
ATOM   1295  CB  LEU L  73       4.630 -25.175 -17.877  1.00 18.70           C  
ATOM   1296  CG  LEU L  73       5.288 -24.078 -17.074  1.00 19.91           C  
ATOM   1297  CD1 LEU L  73       4.379 -23.693 -15.914  1.00 22.66           C  
ATOM   1298  CD2 LEU L  73       6.646 -24.498 -16.583  1.00 24.12           C  
ATOM   1299  N   THR L  74       3.164 -22.554 -19.514  1.00 19.21           N  
ATOM   1300  CA  THR L  74       3.469 -21.335 -20.355  1.00 20.83           C  
ATOM   1301  C   THR L  74       4.128 -20.245 -19.504  1.00 21.79           C  
ATOM   1302  O   THR L  74       3.714 -20.030 -18.363  1.00 20.42           O  
ATOM   1303  CB  THR L  74       2.117 -20.825 -20.913  1.00 23.46           C  
ATOM   1304  OG1 THR L  74       1.587 -21.869 -21.760  1.00 24.96           O  
ATOM   1305  CG2 THR L  74       2.363 -19.589 -21.800  1.00 26.24           C  
ATOM   1306  N   ILE L  75       5.229 -19.639 -19.992  1.00 19.79           N  
ATOM   1307  CA  ILE L  75       5.802 -18.456 -19.401  1.00 19.07           C  
ATOM   1308  C   ILE L  75       5.527 -17.391 -20.470  1.00 19.65           C  
ATOM   1309  O   ILE L  75       6.034 -17.498 -21.589  1.00 19.89           O  
ATOM   1310  CB  ILE L  75       7.316 -18.607 -19.146  1.00 20.32           C  
ATOM   1311  CG1 ILE L  75       7.619 -19.861 -18.325  1.00 22.65           C  
ATOM   1312  CG2 ILE L  75       7.790 -17.344 -18.459  1.00 22.99           C  
ATOM   1313  CD1 ILE L  75       9.053 -20.284 -18.267  1.00 23.01           C  
ATOM   1314  N   SER L  76       4.647 -16.443 -20.185  1.00 22.66           N  
ATOM   1315  CA  SER L  76       4.147 -15.452 -21.205  1.00 24.77           C  
ATOM   1316  C   SER L  76       5.232 -14.494 -21.730  1.00 28.04           C  
ATOM   1317  O   SER L  76       5.220 -14.114 -22.896  1.00 28.15           O  
ATOM   1318  CB  SER L  76       2.984 -14.630 -20.640  1.00 27.23           C  
ATOM   1319  OG  SER L  76       3.391 -14.050 -19.385  1.00 29.85           O  
ATOM   1320  N   SER L  77       6.181 -14.151 -20.871  1.00 26.98           N  
ATOM   1321  CA  SER L  77       7.239 -13.217 -21.205  1.00 29.50           C  
ATOM   1322  C   SER L  77       8.435 -13.607 -20.343  1.00 26.05           C  
ATOM   1323  O   SER L  77       8.545 -13.219 -19.151  1.00 27.49           O  
ATOM   1324  CB  SER L  77       6.800 -11.767 -20.937  1.00 30.54           C  
ATOM   1325  OG  SER L  77       7.858 -10.927 -21.326  1.00 33.70           O  
ATOM   1326  N   LEU L  78       9.346 -14.369 -20.948  1.00 24.57           N  
ATOM   1327  CA  LEU L  78      10.491 -14.909 -20.282  1.00 23.16           C  
ATOM   1328  C   LEU L  78      11.368 -13.803 -19.633  1.00 22.85           C  
ATOM   1329  O   LEU L  78      11.607 -12.779 -20.245  1.00 23.48           O  
ATOM   1330  CB  LEU L  78      11.252 -15.788 -21.265  1.00 24.08           C  
ATOM   1331  CG  LEU L  78      12.189 -16.815 -20.741  1.00 29.32           C  
ATOM   1332  CD1 LEU L  78      11.449 -17.928 -19.971  1.00 25.50           C  
ATOM   1333  CD2 LEU L  78      12.975 -17.409 -21.924  1.00 30.52           C  
ATOM   1334  N   GLN L  79      11.688 -13.969 -18.350  1.00 20.39           N  
ATOM   1335  CA  GLN L  79      12.521 -13.034 -17.621  1.00 22.20           C  
ATOM   1336  C   GLN L  79      13.908 -13.692 -17.368  1.00 20.12           C  
ATOM   1337  O   GLN L  79      14.029 -14.935 -17.327  1.00 20.19           O  
ATOM   1338  CB  GLN L  79      11.834 -12.617 -16.304  1.00 24.45           C  
ATOM   1339  CG  GLN L  79      10.570 -11.796 -16.480  1.00 28.37           C  
ATOM   1340  CD  GLN L  79      10.779 -10.638 -17.421  1.00 31.36           C  
ATOM   1341  OE1 GLN L  79      10.139 -10.514 -18.495  1.00 36.08           O  
ATOM   1342  NE2 GLN L  79      11.701  -9.838 -17.085  1.00 30.46           N  
ATOM   1343  N   PRO L  80      14.920 -12.878 -17.054  1.00 21.77           N  
ATOM   1344  CA  PRO L  80      16.287 -13.455 -16.793  1.00 21.48           C  
ATOM   1345  C   PRO L  80      16.238 -14.454 -15.650  1.00 20.18           C  
ATOM   1346  O   PRO L  80      16.927 -15.440 -15.693  1.00 21.31           O  
ATOM   1347  CB  PRO L  80      17.121 -12.197 -16.423  1.00 22.84           C  
ATOM   1348  CG  PRO L  80      16.476 -11.095 -17.203  1.00 23.75           C  
ATOM   1349  CD  PRO L  80      14.951 -11.405 -17.185  1.00 22.67           C  
ATOM   1350  N   GLU L  81      15.354 -14.255 -14.676  1.00 22.87           N  
ATOM   1351  CA  GLU L  81      15.260 -15.213 -13.536  1.00 24.44           C  
ATOM   1352  C   GLU L  81      14.571 -16.544 -13.884  1.00 22.70           C  
ATOM   1353  O   GLU L  81      14.660 -17.476 -13.097  1.00 23.49           O  
ATOM   1354  CB  GLU L  81      14.622 -14.605 -12.268  1.00 29.66           C  
ATOM   1355  CG  GLU L  81      13.923 -13.256 -12.262  1.00 36.55           C  
ATOM   1356  CD  GLU L  81      14.633 -11.962 -12.755  1.00 38.58           C  
ATOM   1357  OE1 GLU L  81      15.378 -11.241 -12.006  1.00 45.58           O  
ATOM   1358  OE2 GLU L  81      14.334 -11.585 -13.875  1.00 31.24           O  
ATOM   1359  N   ASP L  82      14.063 -16.713 -15.093  1.00 19.12           N  
ATOM   1360  CA  ASP L  82      13.371 -17.955 -15.495  1.00 19.32           C  
ATOM   1361  C   ASP L  82      14.235 -18.976 -16.219  1.00 20.59           C  
ATOM   1362  O   ASP L  82      13.792 -20.101 -16.514  1.00 20.74           O  
ATOM   1363  CB  ASP L  82      12.168 -17.606 -16.395  1.00 19.89           C  
ATOM   1364  CG  ASP L  82      11.236 -16.609 -15.769  1.00 21.74           C  
ATOM   1365  OD1 ASP L  82      11.146 -16.531 -14.509  1.00 22.82           O  
ATOM   1366  OD2 ASP L  82      10.606 -15.792 -16.518  1.00 23.13           O  
ATOM   1367  N   PHE L  83      15.494 -18.650 -16.530  1.00 21.06           N  
ATOM   1368  CA  PHE L  83      16.328 -19.636 -17.214  1.00 19.76           C  
ATOM   1369  C   PHE L  83      16.669 -20.669 -16.169  1.00 22.06           C  
ATOM   1370  O   PHE L  83      17.207 -20.333 -15.104  1.00 26.19           O  
ATOM   1371  CB  PHE L  83      17.515 -18.942 -17.832  1.00 22.74           C  
ATOM   1372  CG  PHE L  83      17.116 -18.041 -19.015  1.00 23.86           C  
ATOM   1373  CD1 PHE L  83      16.740 -18.587 -20.238  1.00 24.82           C  
ATOM   1374  CD2 PHE L  83      16.994 -16.695 -18.863  1.00 25.02           C  
ATOM   1375  CE1 PHE L  83      16.365 -17.765 -21.314  1.00 25.84           C  
ATOM   1376  CE2 PHE L  83      16.658 -15.881 -19.923  1.00 25.92           C  
ATOM   1377  CZ  PHE L  83      16.350 -16.412 -21.148  1.00 26.58           C  
ATOM   1378  N   ALA L  84      16.282 -21.900 -16.427  1.00 18.53           N  
ATOM   1379  CA  ALA L  84      16.325 -23.002 -15.455  1.00 17.93           C  
ATOM   1380  C   ALA L  84      15.866 -24.282 -16.128  1.00 17.33           C  
ATOM   1381  O   ALA L  84      15.524 -24.270 -17.312  1.00 15.74           O  
ATOM   1382  CB  ALA L  84      15.331 -22.679 -14.348  1.00 19.40           C  
ATOM   1383  N   THR L  85      15.806 -25.393 -15.387  1.00 17.49           N  
ATOM   1384  CA  THR L  85      15.174 -26.617 -15.914  1.00 16.42           C  
ATOM   1385  C   THR L  85      13.811 -26.759 -15.254  1.00 17.98           C  
ATOM   1386  O   THR L  85      13.662 -26.519 -14.049  1.00 20.77           O  
ATOM   1387  CB  THR L  85      16.111 -27.836 -15.603  1.00 18.61           C  
ATOM   1388  OG1 THR L  85      17.320 -27.542 -16.267  1.00 20.51           O  
ATOM   1389  CG2 THR L  85      15.596 -29.138 -16.169  1.00 20.20           C  
ATOM   1390  N   TYR L  86      12.833 -27.147 -16.020  1.00 15.67           N  
ATOM   1391  CA  TYR L  86      11.460 -27.291 -15.559  1.00 14.48           C  
ATOM   1392  C   TYR L  86      11.023 -28.756 -15.699  1.00 16.78           C  
ATOM   1393  O   TYR L  86      11.386 -29.416 -16.688  1.00 15.97           O  
ATOM   1394  CB  TYR L  86      10.499 -26.405 -16.373  1.00 14.45           C  
ATOM   1395  CG  TYR L  86      10.747 -24.976 -16.172  1.00 13.83           C  
ATOM   1396  CD1 TYR L  86      11.670 -24.310 -16.922  1.00 15.75           C  
ATOM   1397  CD2 TYR L  86      10.133 -24.288 -15.162  1.00 15.58           C  
ATOM   1398  CE1 TYR L  86      11.976 -22.938 -16.646  1.00 17.00           C  
ATOM   1399  CE2 TYR L  86      10.353 -22.948 -14.924  1.00 17.17           C  
ATOM   1400  CZ  TYR L  86      11.277 -22.261 -15.657  1.00 17.92           C  
ATOM   1401  OH  TYR L  86      11.541 -20.932 -15.302  1.00 19.24           O  
ATOM   1402  N   TYR L  87      10.295 -29.229 -14.685  1.00 15.50           N  
ATOM   1403  CA  TYR L  87       9.773 -30.611 -14.611  1.00 14.37           C  
ATOM   1404  C   TYR L  87       8.308 -30.639 -14.366  1.00 15.32           C  
ATOM   1405  O   TYR L  87       7.850 -29.908 -13.460  1.00 17.18           O  
ATOM   1406  CB  TYR L  87      10.388 -31.369 -13.424  1.00 14.52           C  
ATOM   1407  CG  TYR L  87      11.849 -31.585 -13.604  1.00 14.22           C  
ATOM   1408  CD1 TYR L  87      12.357 -32.672 -14.395  1.00 15.37           C  
ATOM   1409  CD2 TYR L  87      12.758 -30.721 -13.033  1.00 16.65           C  
ATOM   1410  CE1 TYR L  87      13.704 -32.843 -14.566  1.00 16.40           C  
ATOM   1411  CE2 TYR L  87      14.144 -30.894 -13.240  1.00 16.26           C  
ATOM   1412  CZ  TYR L  87      14.586 -31.940 -14.018  1.00 16.99           C  
ATOM   1413  OH  TYR L  87      15.996 -32.118 -14.221  1.00 18.51           O  
ATOM   1414  N   CYS L  88       7.543 -31.480 -15.081  1.00 15.07           N  
ATOM   1415  CA  CYS L  88       6.179 -31.795 -14.649  1.00 15.96           C  
ATOM   1416  C   CYS L  88       6.316 -33.023 -13.697  1.00 16.87           C  
ATOM   1417  O   CYS L  88       7.337 -33.723 -13.673  1.00 18.62           O  
ATOM   1418  CB  CYS L  88       5.275 -32.131 -15.779  1.00 18.73           C  
ATOM   1419  SG  CYS L  88       5.894 -33.519 -16.717  1.00 22.67           S  
ATOM   1420  N   GLN L  89       5.285 -33.257 -12.923  1.00 18.60           N  
ATOM   1421  CA  GLN L  89       5.292 -34.391 -11.996  1.00 17.97           C  
ATOM   1422  C   GLN L  89       3.856 -34.802 -11.858  1.00 19.57           C  
ATOM   1423  O   GLN L  89       3.023 -33.992 -11.521  1.00 21.55           O  
ATOM   1424  CB  GLN L  89       5.835 -34.001 -10.633  1.00 19.19           C  
ATOM   1425  CG  GLN L  89       5.930 -35.192  -9.667  1.00 20.07           C  
ATOM   1426  CD  GLN L  89       6.157 -34.795  -8.228  1.00 21.70           C  
ATOM   1427  OE1 GLN L  89       5.417 -33.964  -7.693  1.00 24.58           O  
ATOM   1428  NE2 GLN L  89       7.169 -35.348  -7.601  1.00 23.18           N  
ATOM   1429  N   GLN L  90       3.544 -36.067 -12.113  1.00 19.94           N  
ATOM   1430  CA  GLN L  90       2.211 -36.563 -11.763  1.00 21.06           C  
ATOM   1431  C   GLN L  90       2.214 -37.144 -10.363  1.00 20.90           C  
ATOM   1432  O   GLN L  90       3.155 -37.844  -9.974  1.00 19.97           O  
ATOM   1433  CB  GLN L  90       1.712 -37.606 -12.762  1.00 21.88           C  
ATOM   1434  CG  GLN L  90       2.477 -38.924 -12.775  1.00 21.77           C  
ATOM   1435  CD  GLN L  90       2.032 -39.901 -11.702  1.00 25.41           C  
ATOM   1436  OE1 GLN L  90       0.929 -39.811 -11.161  1.00 23.86           O  
ATOM   1437  NE2 GLN L  90       2.961 -40.793 -11.286  1.00 26.13           N  
ATOM   1438  N   HIS L  91       1.155 -36.860  -9.633  1.00 23.19           N  
ATOM   1439  CA  HIS L  91       0.960 -37.446  -8.303  1.00 26.48           C  
ATOM   1440  C   HIS L  91      -0.378 -38.153  -8.202  1.00 27.13           C  
ATOM   1441  O   HIS L  91      -0.939 -38.210  -7.143  1.00 30.61           O  
ATOM   1442  CB  HIS L  91       1.197 -36.350  -7.222  1.00 28.90           C  
ATOM   1443  CG  HIS L  91       0.246 -35.217  -7.292  1.00 31.75           C  
ATOM   1444  ND1 HIS L  91       0.569 -33.983  -7.810  1.00 36.36           N  
ATOM   1445  CD2 HIS L  91      -1.035 -35.138  -6.910  1.00 35.64           C  
ATOM   1446  CE1 HIS L  91      -0.481 -33.201  -7.774  1.00 35.54           C  
ATOM   1447  NE2 HIS L  91      -1.464 -33.878  -7.224  1.00 38.66           N  
ATOM   1448  N   TYR L  92      -0.830 -38.745  -9.312  1.00 25.29           N  
ATOM   1449  CA  TYR L  92      -1.992 -39.600  -9.324  1.00 28.42           C  
ATOM   1450  C   TYR L  92      -1.664 -40.939  -8.690  1.00 28.33           C  
ATOM   1451  O   TYR L  92      -2.501 -41.569  -8.086  1.00 28.90           O  
ATOM   1452  CB  TYR L  92      -2.315 -39.833 -10.779  1.00 27.55           C  
ATOM   1453  CG  TYR L  92      -3.534 -40.583 -11.079  1.00 28.76           C  
ATOM   1454  CD1 TYR L  92      -4.826 -40.036 -10.748  1.00 32.00           C  
ATOM   1455  CD2 TYR L  92      -3.463 -41.741 -11.839  1.00 29.15           C  
ATOM   1456  CE1 TYR L  92      -5.972 -40.677 -11.107  1.00 31.42           C  
ATOM   1457  CE2 TYR L  92      -4.601 -42.407 -12.193  1.00 30.75           C  
ATOM   1458  CZ  TYR L  92      -5.857 -41.840 -11.857  1.00 33.59           C  
ATOM   1459  OH  TYR L  92      -7.016 -42.430 -12.260  1.00 36.84           O  
ATOM   1460  N   THR L  93      -0.465 -41.443  -8.953  1.00 29.65           N  
ATOM   1461  CA  THR L  93       0.003 -42.705  -8.269  1.00 32.79           C  
ATOM   1462  C   THR L  93       1.040 -42.316  -7.261  1.00 31.30           C  
ATOM   1463  O   THR L  93       1.574 -41.217  -7.301  1.00 28.70           O  
ATOM   1464  CB  THR L  93       0.766 -43.615  -9.211  1.00 35.51           C  
ATOM   1465  OG1 THR L  93       1.938 -42.934  -9.656  1.00 39.05           O  
ATOM   1466  CG2 THR L  93      -0.050 -43.945 -10.399  1.00 42.26           C  
ATOM   1467  N   THR L  94       1.406 -43.243  -6.415  1.00 31.39           N  
ATOM   1468  CA  THR L  94       2.500 -42.972  -5.512  1.00 34.24           C  
ATOM   1469  C   THR L  94       3.506 -44.144  -5.661  1.00 32.80           C  
ATOM   1470  O   THR L  94       3.127 -45.288  -5.740  1.00 31.40           O  
ATOM   1471  CB  THR L  94       2.033 -42.833  -4.049  1.00 39.18           C  
ATOM   1472  OG1 THR L  94       1.358 -44.025  -3.723  1.00 39.40           O  
ATOM   1473  CG2 THR L  94       1.077 -41.660  -3.869  1.00 43.02           C  
ATOM   1474  N   PRO L  95       4.791 -43.834  -5.736  1.00 28.59           N  
ATOM   1475  CA  PRO L  95       5.283 -42.499  -5.605  1.00 28.70           C  
ATOM   1476  C   PRO L  95       5.008 -41.669  -6.861  1.00 26.43           C  
ATOM   1477  O   PRO L  95       4.906 -42.234  -7.946  1.00 24.68           O  
ATOM   1478  CB  PRO L  95       6.813 -42.717  -5.426  1.00 27.81           C  
ATOM   1479  CG  PRO L  95       7.069 -43.912  -6.235  1.00 27.74           C  
ATOM   1480  CD  PRO L  95       5.880 -44.812  -5.951  1.00 29.97           C  
ATOM   1481  N   PRO L  96       4.918 -40.333  -6.726  1.00 24.65           N  
ATOM   1482  CA  PRO L  96       4.774 -39.458  -7.909  1.00 23.45           C  
ATOM   1483  C   PRO L  96       5.975 -39.628  -8.831  1.00 22.65           C  
ATOM   1484  O   PRO L  96       7.070 -40.071  -8.386  1.00 22.28           O  
ATOM   1485  CB  PRO L  96       4.770 -38.059  -7.291  1.00 23.37           C  
ATOM   1486  CG  PRO L  96       4.307 -38.286  -5.858  1.00 24.70           C  
ATOM   1487  CD  PRO L  96       4.908 -39.574  -5.465  1.00 25.61           C  
ATOM   1488  N   THR L  97       5.806 -39.342 -10.090  1.00 21.42           N  
ATOM   1489  CA  THR L  97       6.853 -39.530 -11.112  1.00 21.62           C  
ATOM   1490  C   THR L  97       7.011 -38.236 -11.899  1.00 19.72           C  
ATOM   1491  O   THR L  97       6.017 -37.562 -12.287  1.00 17.43           O  
ATOM   1492  CB  THR L  97       6.367 -40.678 -12.061  1.00 26.33           C  
ATOM   1493  OG1 THR L  97       6.462 -41.901 -11.321  1.00 32.44           O  
ATOM   1494  CG2 THR L  97       7.196 -40.843 -13.284  1.00 30.11           C  
ATOM   1495  N   PHE L  98       8.280 -37.862 -12.130  1.00 16.41           N  
ATOM   1496  CA  PHE L  98       8.615 -36.642 -12.898  1.00 16.41           C  
ATOM   1497  C   PHE L  98       8.653 -36.900 -14.387  1.00 17.48           C  
ATOM   1498  O   PHE L  98       9.080 -37.990 -14.838  1.00 17.66           O  
ATOM   1499  CB  PHE L  98       9.979 -36.077 -12.445  1.00 17.29           C  
ATOM   1500  CG  PHE L  98      10.007 -35.514 -11.070  1.00 16.56           C  
ATOM   1501  CD1 PHE L  98      10.471 -36.290  -9.988  1.00 17.30           C  
ATOM   1502  CD2 PHE L  98       9.603 -34.239 -10.807  1.00 18.94           C  
ATOM   1503  CE1 PHE L  98      10.523 -35.781  -8.702  1.00 18.23           C  
ATOM   1504  CE2 PHE L  98       9.627 -33.706  -9.515  1.00 18.69           C  
ATOM   1505  CZ  PHE L  98      10.106 -34.468  -8.445  1.00 20.19           C  
ATOM   1506  N   GLY L  99       8.342 -35.874 -15.215  1.00 17.66           N  
ATOM   1507  CA  GLY L  99       8.866 -35.941 -16.552  1.00 18.13           C  
ATOM   1508  C   GLY L  99      10.422 -35.865 -16.628  1.00 17.95           C  
ATOM   1509  O   GLY L  99      11.107 -35.553 -15.640  1.00 17.15           O  
ATOM   1510  N   GLN L 100      10.965 -35.966 -17.860  1.00 17.57           N  
ATOM   1511  CA  GLN L 100      12.385 -35.957 -18.091  1.00 17.65           C  
ATOM   1512  C   GLN L 100      12.999 -34.563 -18.042  1.00 17.54           C  
ATOM   1513  O   GLN L 100      14.223 -34.451 -18.070  1.00 17.07           O  
ATOM   1514  CB  GLN L 100      12.780 -36.590 -19.444  1.00 20.14           C  
ATOM   1515  N   GLY L 101      12.200 -33.525 -18.037  1.00 16.78           N  
ATOM   1516  CA  GLY L 101      12.725 -32.171 -17.839  1.00 16.52           C  
ATOM   1517  C   GLY L 101      12.867 -31.413 -19.165  1.00 15.99           C  
ATOM   1518  O   GLY L 101      12.885 -32.020 -20.246  1.00 16.61           O  
ATOM   1519  N   THR L 102      12.857 -30.093 -19.050  1.00 14.45           N  
ATOM   1520  CA  THR L 102      13.105 -29.185 -20.141  1.00 14.09           C  
ATOM   1521  C   THR L 102      14.061 -28.104 -19.655  1.00 14.01           C  
ATOM   1522  O   THR L 102      13.712 -27.336 -18.746  1.00 16.18           O  
ATOM   1523  CB  THR L 102      11.828 -28.499 -20.648  1.00 14.02           C  
ATOM   1524  OG1 THR L 102      10.847 -29.472 -21.019  1.00 17.29           O  
ATOM   1525  CG2 THR L 102      12.150 -27.612 -21.859  1.00 15.18           C  
ATOM   1526  N   LYS L 103      15.210 -28.033 -20.254  1.00 14.14           N  
ATOM   1527  CA  LYS L 103      16.191 -27.000 -19.939  1.00 13.85           C  
ATOM   1528  C   LYS L 103      15.835 -25.767 -20.753  1.00 14.77           C  
ATOM   1529  O   LYS L 103      15.838 -25.856 -21.975  1.00 19.37           O  
ATOM   1530  CB  LYS L 103      17.673 -27.439 -20.307  1.00 16.26           C  
ATOM   1531  N   VAL L 104      15.546 -24.627 -20.121  1.00 15.33           N  
ATOM   1532  CA  VAL L 104      15.262 -23.357 -20.851  1.00 16.06           C  
ATOM   1533  C   VAL L 104      16.526 -22.491 -20.740  1.00 18.29           C  
ATOM   1534  O   VAL L 104      16.887 -22.109 -19.615  1.00 16.90           O  
ATOM   1535  CB  VAL L 104      14.076 -22.619 -20.221  1.00 16.54           C  
ATOM   1536  CG1 VAL L 104      13.821 -21.280 -20.810  1.00 17.88           C  
ATOM   1537  CG2 VAL L 104      12.834 -23.464 -20.336  1.00 17.78           C  
ATOM   1538  N   GLU L 105      17.163 -22.208 -21.891  1.00 18.16           N  
ATOM   1539  CA  GLU L 105      18.523 -21.666 -22.028  1.00 21.36           C  
ATOM   1540  C   GLU L 105      18.443 -20.365 -22.810  1.00 24.98           C  
ATOM   1541  O   GLU L 105      17.434 -20.110 -23.545  1.00 25.78           O  
ATOM   1542  CB  GLU L 105      19.406 -22.592 -22.864  1.00 25.13           C  
ATOM   1543  N   ILE L 106      19.429 -19.494 -22.571  1.00 26.85           N  
ATOM   1544  CA  ILE L 106      19.434 -18.129 -23.236  1.00 32.10           C  
ATOM   1545  C   ILE L 106      19.875 -18.299 -24.708  1.00 38.91           C  
ATOM   1546  O   ILE L 106      20.792 -19.103 -25.006  1.00 36.06           O  
ATOM   1547  CB  ILE L 106      20.270 -17.065 -22.461  1.00 32.91           C  
ATOM   1548  N   LYS L 107      19.157 -17.635 -25.623  1.00 41.80           N  
ATOM   1549  CA  LYS L 107      19.502 -17.618 -27.060  1.00 47.60           C  
ATOM   1550  C   LYS L 107      18.266 -17.422 -27.936  1.00 43.85           C  
ATOM   1551  O   LYS L 107      18.308 -16.690 -28.941  1.00 54.12           O  
ATOM   1552  CB  LYS L 107      20.215 -18.907 -27.474  1.00 53.31           C  
TER    1553      LYS L 107                                                      
