# Supplementary material for: SARS-CoV-2 Spike Protein Interaction Space
Source: Int J Mol Sci. 2023 Jul 27;24(15):12058. doi: 10.3390/ijms241512058 (PMC10418891; doi:10.3390/ijms241512058)
Supplement: Supplementary file 1 [file ijms-24-12058-s001.zip › Supplementary Material File S1/5ACM.pdb]

REMARK 950 NUMBERING  Kabat
REMARK 950 METHOD     X-ray crystal structure
REMARK 950 RESOLUTION 1.050
REMARK 950 R-FACTOR   0.111
REMARK 950 R-FREE     0.122
REMARK 950 CHAIN-TYPE LABEL ORIGINAL
REMARK 950 CHAIN L    L    A
REMARK 950 CHAIN L    L    B
REMARK 950 MOLECULE : A : MCG
REMARK 950 SPECIES  : A : HOMO SAPIENS
SEQRES   1 L 111  GLY GLN SER ALA LEU THR GLN PRO PRO SER ALA SER GLY          
SEQRES   2 L 111  SER LEU GLY GLN SER VAL THR ILE SER CYS THR GLY THR          
SEQRES   3 L 111  SER SER ASP VAL GLY GLY TYR ASN TYR VAL SER TRP TYR          
SEQRES   4 L 111  GLN GLN HIS ALA GLY LYS ALA PRO LYS VAL ILE ILE TYR          
SEQRES   5 L 111  GLU VAL ASN LYS ARG PRO SER GLY VAL PRO ASP ARG PHE          
SEQRES   6 L 111  SER GLY SER LYS SER GLY ASN THR ALA SER LEU THR VAL          
SEQRES   7 L 111  SER GLY LEU GLN ALA GLU ASP GLU ALA ASP TYR TYR CYS          
SEQRES   8 L 111  SER SER TYR GLU GLY SER ASP ASN PHE VAL PHE GLY THR          
SEQRES   9 L 111  GLY THR LYS VAL THR VAL LEU                                  
SEQRES   1 L 111  GLY GLN SER ALA LEU THR GLN PRO PRO SER ALA SER GLY          
SEQRES   2 L 111  SER LEU GLY GLN SER VAL THR ILE SER CYS THR GLY THR          
SEQRES   3 L 111  SER SER ASP VAL GLY GLY TYR ASN TYR VAL SER TRP TYR          
SEQRES   4 L 111  GLN GLN HIS ALA GLY LYS ALA PRO LYS VAL ILE ILE TYR          
SEQRES   5 L 111  GLU VAL ASN LYS ARG PRO SER GLY VAL PRO ASP ARG PHE          
SEQRES   6 L 111  SER GLY SER LYS SER GLY ASN THR ALA SER LEU THR VAL          
SEQRES   7 L 111  SER GLY LEU GLN ALA GLU ASP GLU ALA ASP TYR TYR CYS          
SEQRES   8 L 111  SER SER TYR GLU GLY SER ASP ASN PHE VAL PHE GLY THR          
SEQRES   9 L 111  GLY THR LYS VAL THR VAL LEU                                  
ATOM      1  N   SER L   2     -14.123  15.048 -14.314  1.00 37.91           N  
ATOM      2  CA  SER L   2     -14.278  13.747 -13.629  1.00 40.21           C  
ATOM      3  C   SER L   2     -12.962  12.908 -13.527  1.00 28.21           C  
ATOM      4  O   SER L   2     -12.401  12.336 -14.581  1.00 23.24           O  
ATOM      5  CB  SER L   2     -15.379  12.851 -14.174  1.00 46.38           C  
ATOM      6  OG  SER L   2     -15.794  11.943 -13.173  1.00 41.90           O  
ATOM      7  N   ALA L   3     -12.409  12.970 -12.290  1.00 25.07           N  
ATOM      8  CA  ALA L   3     -11.165  12.256 -11.982  1.00 16.68           C  
ATOM      9  C   ALA L   3     -10.954  11.935 -10.565  1.00 16.55           C  
ATOM     10  O   ALA L   3     -10.970  12.842  -9.634  1.00 20.74           O  
ATOM     11  CB  ALA L   3      -9.908  12.993 -12.322  1.00 18.95           C  
ATOM     12  N   LEU L   4     -10.590  10.646 -10.400  1.00 11.66           N  
ATOM     13  CA  LEU L   4     -10.372  10.064  -9.055  1.00 10.71           C  
ATOM     14  C   LEU L   4      -9.217  10.864  -8.388  1.00 11.49           C  
ATOM     15  O   LEU L   4      -8.213  11.219  -9.040  1.00 12.82           O  
ATOM     16  CB  LEU L   4     -10.125   8.573  -9.067  1.00 10.59           C  
ATOM     17  CG  LEU L   4     -11.203   7.781  -9.738  1.00 11.12           C  
ATOM     18  CD1 LEU L   4     -10.845   6.336  -9.790  1.00 11.50           C  
ATOM     19  CD2 LEU L   4     -12.528   8.013  -8.918  1.00 12.72           C  
ATOM     20  N   THR L   5      -9.266  11.005  -7.098  1.00 11.48           N  
ATOM     21  CA  THR L   5      -8.271  11.835  -6.372  1.00 11.95           C  
ATOM     22  C   THR L   5      -7.140  11.016  -5.889  1.00 11.84           C  
ATOM     23  O   THR L   5      -7.324   9.922  -5.227  1.00 12.07           O  
ATOM     24  CB  THR L   5      -8.955  12.516  -5.120  1.00 12.11           C  
ATOM     25  OG1 THR L   5     -10.043  13.268  -5.603  1.00 12.98           O  
ATOM     26  CG2 THR L   5      -7.961  13.354  -4.400  1.00 13.19           C  
ATOM     27  N   GLN L   6      -5.932  11.382  -6.234  1.00 11.53           N  
ATOM     28  CA  GLN L   6      -4.690  10.686  -5.779  1.00 11.98           C  
ATOM     29  C   GLN L   6      -3.694  11.757  -5.263  1.00 12.14           C  
ATOM     30  O   GLN L   6      -3.742  12.909  -5.837  1.00 12.36           O  
ATOM     31  CB  GLN L   6      -3.947  10.031  -6.896  1.00 12.50           C  
ATOM     32  CG  GLN L   6      -4.721   8.904  -7.541  1.00 10.64           C  
ATOM     33  CD  GLN L   6      -3.961   8.129  -8.625  1.00 10.42           C  
ATOM     34  OE1 GLN L   6      -4.437   7.842  -9.685  1.00 11.35           O  
ATOM     35  NE2 GLN L   6      -2.716   7.794  -8.289  1.00 12.48           N  
ATOM     36  N   PRO L   7      -2.857  11.462  -4.381  1.00 12.28           N  
ATOM     37  CA  PRO L   7      -1.765  12.531  -4.015  1.00 11.11           C  
ATOM     38  C   PRO L   7      -0.875  12.699  -5.192  1.00 11.61           C  
ATOM     39  O   PRO L   7      -0.556  11.785  -5.922  1.00 12.55           O  
ATOM     40  CB  PRO L   7      -1.075  11.807  -2.917  1.00 11.04           C  
ATOM     41  CG  PRO L   7      -1.260  10.360  -3.091  1.00 11.86           C  
ATOM     42  CD  PRO L   7      -2.698  10.246  -3.591  1.00 12.04           C  
ATOM     43  N   PRO L   8      -0.436  13.954  -5.384  1.00 12.32           N  
ATOM     44  CA  PRO L   8       0.434  14.168  -6.547  1.00 13.75           C  
ATOM     45  C   PRO L   8       1.764  13.434  -6.488  1.00 12.53           C  
ATOM     46  O   PRO L   8       2.286  13.046  -7.598  1.00 13.06           O  
ATOM     47  CB  PRO L   8       0.542  15.669  -6.739  1.00 15.17           C  
ATOM     48  CG  PRO L   8      -0.803  16.154  -6.235  1.00 14.22           C  
ATOM     49  CD  PRO L   8      -0.942  15.324  -4.975  1.00 16.04           C  
ATOM     50  N   SER L   9       2.288  13.247  -5.299  1.00 11.69           N  
ATOM     51  CA  SER L   9       3.559  12.581  -5.172  1.00 13.01           C  
ATOM     52  C   SER L   9       3.668  11.845  -3.868  1.00 13.32           C  
ATOM     53  O   SER L   9       2.839  12.193  -2.971  1.00 13.42           O  
ATOM     54  CB  SER L   9       4.764  13.466  -5.465  1.00 18.33           C  
ATOM     55  OG  SER L   9       4.934  14.295  -4.397  1.00 19.36           O  
ATOM     56  N   ALA L  11       4.522  10.891  -3.697  1.00 11.54           N  
ATOM     57  CA  ALA L  11       4.763  10.229  -2.413  1.00 11.67           C  
ATOM     58  C   ALA L  11       6.195   9.664  -2.443  1.00 12.28           C  
ATOM     59  O   ALA L  11       6.655   9.334  -3.562  1.00 13.36           O  
ATOM     60  CB  ALA L  11       3.726   9.097  -2.168  1.00 14.61           C  
ATOM     61  N   SER L  12       6.825   9.574  -1.316  1.00 11.30           N  
ATOM     62  CA  SER L  12       8.169   9.051  -1.273  1.00 12.12           C  
ATOM     63  C   SER L  12       8.356   8.103  -0.169  1.00 11.33           C  
ATOM     64  O   SER L  12       7.641   8.076   0.812  1.00 13.03           O  
ATOM     65  CB  SER L  12       9.165  10.161  -0.986  1.00 13.86           C  
ATOM     66  OG  SER L  12       9.000  11.303  -1.843  1.00 16.04           O  
ATOM     67  N   GLY L  13       9.363   7.222  -0.325  1.00 11.34           N  
ATOM     68  CA  GLY L  13       9.761   6.333   0.759  1.00 12.05           C  
ATOM     69  C   GLY L  13      11.217   5.920   0.581  1.00 12.07           C  
ATOM     70  O   GLY L  13      11.816   6.021  -0.477  1.00 12.55           O  
ATOM     71  N   SER L  14      11.794   5.479   1.740  1.00 12.81           N  
ATOM     72  CA  SER L  14      13.155   4.961   1.656  1.00 13.80           C  
ATOM     73  C   SER L  14      13.173   3.565   1.141  1.00 12.62           C  
ATOM     74  O   SER L  14      12.186   2.768   1.152  1.00 11.62           O  
ATOM     75  CB  SER L  14      13.721   4.888   3.060  1.00 14.78           C  
ATOM     76  OG  SER L  14      13.925   6.191   3.651  1.00 17.50           O  
ATOM     77  N   LEU L  15      14.274   3.166   0.597  1.00 12.94           N  
ATOM     78  CA  LEU L  15      14.476   1.784   0.065  1.00 13.13           C  
ATOM     79  C   LEU L  15      14.170   0.826   1.163  1.00 12.43           C  
ATOM     80  O   LEU L  15      14.588   0.990   2.282  1.00 13.25           O  
ATOM     81  CB  LEU L  15      15.961   1.546  -0.406  1.00 14.50           C  
ATOM     82  CG  LEU L  15      16.288   2.303  -1.719  1.00 16.41           C  
ATOM     83  CD1 LEU L  15      17.781   2.098  -1.828  1.00 17.24           C  
ATOM     84  CD2 LEU L  15      15.606   1.698  -2.890  1.00 17.01           C  
ATOM     85  N   GLY L  16      13.424  -0.179   0.823  1.00 11.94           N  
ATOM     86  CA  GLY L  16      12.969  -1.159   1.799  1.00 13.51           C  
ATOM     87  C   GLY L  16      11.794  -0.911   2.513  1.00 12.57           C  
ATOM     88  O   GLY L  16      11.217  -1.862   3.161  1.00 13.82           O  
ATOM     89  N   GLN L  17      11.269   0.350   2.513  1.00 12.46           N  
ATOM     90  CA  GLN L  17      10.130   0.772   3.245  1.00 12.27           C  
ATOM     91  C   GLN L  17       8.937   0.653   2.316  1.00 11.53           C  
ATOM     92  O   GLN L  17       8.906  -0.110   1.352  1.00 13.46           O  
ATOM     93  CB  GLN L  17      10.345   2.157   3.830  1.00 12.41           C  
ATOM     94  CG  GLN L  17      11.444   2.163   4.762  1.00 13.68           C  
ATOM     95  CD  GLN L  17      11.209   1.210   6.016  1.00 14.62           C  
ATOM     96  OE1 GLN L  17      12.111   0.432   6.334  1.00 17.72           O  
ATOM     97  NE2 GLN L  17      10.225   1.224   6.539  1.00 14.01           N  
ATOM     98  N   SER L  18       7.826   1.284   2.612  1.00 13.80           N  
ATOM     99  CA  SER L  18       6.650   1.224   1.778  1.00 14.58           C  
ATOM    100  C   SER L  18       6.147   2.614   1.347  1.00 14.49           C  
ATOM    101  O   SER L  18       6.543   3.709   2.025  1.00 14.13           O  
ATOM    102  CB  SER L  18       5.710   0.479   2.381  1.00 15.51           C  
ATOM    103  OG  SER L  18       5.106   1.078   3.471  1.00 16.93           O  
ATOM    104  N   VAL L  19       5.377   2.641   0.342  1.00 12.59           N  
ATOM    105  CA  VAL L  19       4.648   3.837  -0.055  1.00 13.08           C  
ATOM    106  C   VAL L  19       3.204   3.388  -0.314  1.00 11.62           C  
ATOM    107  O   VAL L  19       2.977   2.346  -0.960  1.00 12.64           O  
ATOM    108  CB  VAL L  19       5.201   4.543  -1.309  1.00 15.65           C  
ATOM    109  CG1 VAL L  19       5.066   3.772  -2.619  1.00 18.84           C  
ATOM    110  CG2 VAL L  19       4.508   5.674  -1.593  1.00 21.10           C  
ATOM    111  N   THR L  20       2.228   4.227   0.113  1.00 11.74           N  
ATOM    112  CA  THR L  20       0.799   3.880  -0.005  1.00 10.81           C  
ATOM    113  C   THR L  20       0.195   4.979  -0.884  1.00 10.04           C  
ATOM    114  O   THR L  20       0.347   6.221  -0.524  1.00 12.33           O  
ATOM    115  CB  THR L  20       0.102   3.742   1.256  1.00 12.75           C  
ATOM    116  OG1 THR L  20       0.704   2.623   1.992  1.00 13.04           O  
ATOM    117  CG2 THR L  20      -1.362   3.419   1.040  1.00 13.41           C  
ATOM    118  N   ILE L  21      -0.449   4.676  -1.917  1.00 11.00           N  
ATOM    120  CA  ILE L  21      -1.010   5.625  -2.844  0.50 11.50           C  
ATOM    121  C   ILE L  21      -2.639   5.446  -2.755  1.00 10.36           C  
ATOM    122  O   ILE L  21      -3.195   4.348  -3.070  1.00 11.30           O  
ATOM    124  CB  ILE L  21      -0.611   5.375  -4.265  0.50 11.45           C  
ATOM    126  CG1 ILE L  21       0.901   5.396  -4.399  0.50 15.10           C  
ATOM    128  CG2 ILE L  21      -1.291   6.447  -5.149  0.50 13.18           C  
ATOM    130  CD1 ILE L  21       1.608   4.060  -4.501  0.50 15.07           C  
ATOM    131  N   SER L  22      -3.355   6.497  -2.290  1.00 12.03           N  
ATOM    132  CA  SER L  22      -4.847   6.340  -2.270  1.00 12.35           C  
ATOM    133  C   SER L  22      -5.466   6.832  -3.538  1.00 11.84           C  
ATOM    134  O   SER L  22      -4.880   7.631  -4.320  1.00 11.95           O  
ATOM    135  CB  SER L  22      -5.274   7.141  -1.114  1.00 11.15           C  
ATOM    136  OG  SER L  22      -5.036   8.540  -1.058  1.00 12.96           O  
ATOM    137  N   CYS L  23      -6.730   6.431  -3.660  1.00 10.99           N  
ATOM    138  CA  CYS L  23      -7.538   6.631  -4.868  1.00 11.35           C  
ATOM    139  C   CYS L  23      -8.916   6.844  -4.372  1.00 10.94           C  
ATOM    140  O   CYS L  23      -9.589   5.833  -4.030  1.00 11.88           O  
ATOM    141  CB  CYS L  23      -7.446   5.373  -5.729  1.00 12.89           C  
ATOM    142  SG  CYS L  23      -8.452   5.460  -7.227  1.00 12.09           S  
ATOM    143  N   THR L  24      -9.402   8.141  -4.361  1.00 11.39           N  
ATOM    144  CA  THR L  24     -10.714   8.399  -3.773  1.00 11.73           C  
ATOM    145  C   THR L  24     -11.656   8.757  -4.772  1.00 12.85           C  
ATOM    146  O   THR L  24     -11.425   9.715  -5.589  1.00 12.46           O  
ATOM    147  CB  THR L  24     -10.595   9.479  -2.616  1.00 11.94           C  
ATOM    148  OG1 THR L  24      -9.682   9.120  -1.666  1.00 12.65           O  
ATOM    149  CG2 THR L  24     -11.968   9.790  -2.029  1.00 12.20           C  
ATOM    150  N   GLY L  25     -12.834   8.179  -4.763  1.00 12.33           N  
ATOM    151  CA  GLY L  25     -13.954   8.473  -5.569  1.00 14.33           C  
ATOM    152  C   GLY L  25     -15.219   8.656  -4.830  1.00 11.37           C  
ATOM    153  O   GLY L  25     -15.173   9.221  -3.729  1.00 14.89           O  
ATOM    154  N   THR L  26     -16.317   8.131  -5.363  1.00 12.57           N  
ATOM    155  CA  THR L  26     -17.596   8.243  -4.746  1.00 13.35           C  
ATOM    156  C   THR L  26     -18.256   6.883  -4.688  1.00 12.02           C  
ATOM    157  O   THR L  26     -17.714   5.861  -5.108  1.00 13.12           O  
ATOM    158  CB  THR L  26     -18.566   9.134  -5.562  1.00 13.89           C  
ATOM    159  OG1 THR L  26     -18.978   8.407  -6.772  1.00 13.99           O  
ATOM    160  CG2 THR L  26     -17.989  10.449  -5.898  1.00 15.06           C  
ATOM    161  N   SER L  27     -19.433   6.848  -4.072  1.00 12.82           N  
ATOM    162  CA  SER L  27     -20.193   5.571  -3.952  1.00 13.78           C  
ATOM    163  C   SER L  27     -20.604   5.037  -5.261  1.00 12.22           C  
ATOM    164  O   SER L  27     -21.041   3.883  -5.343  1.00 15.09           O  
ATOM    165  CB  SER L  27     -21.262   5.700  -2.885  1.00 14.23           C  
ATOM    166  OG  SER L  27     -20.898   6.259  -1.649  1.00 18.35           O  
ATOM    167  N   SER L  27A    -20.618   5.871  -6.284  1.00 12.53           N  
ATOM    168  CA  SER L  27A    -20.948   5.390  -7.565  1.00 13.00           C  
ATOM    169  C   SER L  27A    -19.755   4.863  -8.445  1.00 13.61           C  
ATOM    170  O   SER L  27A    -19.997   4.451  -9.668  1.00 13.74           O  
ATOM    171  CB  SER L  27A    -21.689   6.465  -8.437  1.00 18.19           C  
ATOM    172  OG  SER L  27A    -22.715   7.113  -7.813  1.00 20.24           O  
ATOM    173  N   ASP L  27B    -18.608   4.793  -7.901  1.00 12.53           N  
ATOM    174  CA  ASP L  27B    -17.454   4.315  -8.619  1.00 12.42           C  
ATOM    175  C   ASP L  27B    -16.577   3.555  -7.662  1.00 12.82           C  
ATOM    176  O   ASP L  27B    -16.895   2.324  -7.457  1.00 12.83           O  
ATOM    177  CB  ASP L  27B    -16.744   5.457  -9.365  1.00 12.53           C  
ATOM    178  CG  ASP L  27B    -16.521   6.645  -8.548  1.00 14.11           C  
ATOM    179  OD1 ASP L  27B    -15.696   6.697  -7.685  1.00 14.39           O  
ATOM    180  OD2 ASP L  27B    -17.250   7.724  -8.838  1.00 17.01           O  
ATOM    181  N   VAL L  27C    -15.534   4.125  -7.061  1.00 11.26           N  
ATOM    182  CA  VAL L  27C    -14.689   3.378  -6.159  1.00 12.94           C  
ATOM    183  C   VAL L  27C    -15.393   2.664  -5.122  1.00 10.42           C  
ATOM    184  O   VAL L  27C    -15.186   1.461  -4.822  1.00 11.99           O  
ATOM    185  CB  VAL L  27C    -13.571   4.283  -5.578  1.00 11.77           C  
ATOM    186  CG1 VAL L  27C    -12.749   3.549  -4.500  1.00 12.81           C  
ATOM    187  CG2 VAL L  27C    -12.633   4.851  -6.602  1.00 12.03           C  
ATOM    188  N   GLY L  28     -16.304   3.326  -4.460  1.00 11.89           N  
ATOM    189  CA  GLY L  28     -17.063   2.710  -3.403  1.00 13.50           C  
ATOM    190  C   GLY L  28     -18.200   1.789  -3.827  1.00 13.06           C  
ATOM    191  O   GLY L  28     -18.576   0.893  -3.035  1.00 15.73           O  
ATOM    192  N   GLY L  29     -18.540   1.798  -5.080  1.00 12.93           N  
ATOM    193  CA  GLY L  29     -19.666   0.991  -5.560  1.00 13.39           C  
ATOM    194  C   GLY L  29     -19.390  -0.308  -6.164  1.00 12.26           C  
ATOM    195  O   GLY L  29     -20.377  -1.112  -6.416  1.00 13.79           O  
ATOM    196  N   TYR L  30     -18.201  -0.582  -6.456  1.00 12.85           N  
ATOM    197  CA  TYR L  30     -17.782  -1.806  -7.116  1.00 13.50           C  
ATOM    198  C   TYR L  30     -16.392  -2.215  -6.555  1.00 12.51           C  
ATOM    199  O   TYR L  30     -15.760  -1.451  -5.914  1.00 12.95           O  
ATOM    200  CB  TYR L  30     -17.592  -1.568  -8.600  1.00 12.40           C  
ATOM    201  CG  TYR L  30     -18.802  -0.953  -9.267  1.00 12.38           C  
ATOM    202  CD1 TYR L  30     -19.841  -1.770  -9.805  1.00 13.81           C  
ATOM    203  CD2 TYR L  30     -18.924   0.431  -9.403  1.00 12.10           C  
ATOM    204  CE1 TYR L  30     -20.986  -1.161 -10.364  1.00 12.44           C  
ATOM    205  CE2 TYR L  30     -20.024   0.961  -9.944  1.00 13.62           C  
ATOM    206  CZ  TYR L  30     -21.043   0.204 -10.428  1.00 11.77           C  
ATOM    207  OH  TYR L  30     -22.201   0.796 -10.995  1.00 14.57           O  
ATOM    208  N   ASN L  31     -16.117  -3.518  -6.813  1.00 12.04           N  
ATOM    209  CA  ASN L  31     -14.764  -4.030  -6.525  1.00 12.06           C  
ATOM    210  C   ASN L  31     -13.958  -4.033  -7.856  1.00 11.68           C  
ATOM    211  O   ASN L  31     -13.539  -5.130  -8.309  1.00 13.99           O  
ATOM    212  CB  ASN L  31     -14.848  -5.384  -5.801  1.00 13.77           C  
ATOM    213  CG  ASN L  31     -15.290  -5.309  -4.457  1.00 15.91           C  
ATOM    214  OD1 ASN L  31     -14.972  -4.337  -3.728  1.00 17.49           O  
ATOM    215  ND2 ASN L  31     -16.227  -6.212  -4.128  1.00 19.57           N  
ATOM    216  N   TYR L  32     -13.744  -2.856  -8.404  1.00 12.13           N  
ATOM    217  CA  TYR L  32     -13.298  -2.846  -9.780  1.00 11.94           C  
ATOM    218  C   TYR L  32     -12.314  -1.710  -9.950  1.00 11.54           C  
ATOM    219  O   TYR L  32     -12.440  -0.832 -10.873  1.00 12.28           O  
ATOM    220  CB  TYR L  32     -14.484  -2.813 -10.728  1.00 12.35           C  
ATOM    221  CG  TYR L  32     -14.174  -3.490 -12.015  1.00 13.71           C  
ATOM    222  CD1 TYR L  32     -14.305  -4.876 -12.088  1.00 14.65           C  
ATOM    223  CD2 TYR L  32     -13.519  -2.889 -13.105  1.00 14.67           C  
ATOM    224  CE1 TYR L  32     -13.900  -5.579 -13.221  1.00 20.82           C  
ATOM    225  CE2 TYR L  32     -13.249  -3.619 -14.216  1.00 18.13           C  
ATOM    226  CZ  TYR L  32     -13.311  -4.953 -14.239  1.00 19.40           C  
ATOM    227  OH  TYR L  32     -13.090  -5.715 -15.462  1.00 26.72           O  
ATOM    228  N   VAL L  33     -11.361  -1.649  -9.034  1.00 12.14           N  
ATOM    229  CA  VAL L  33     -10.188  -0.705  -9.085  1.00 10.37           C  
ATOM    230  C   VAL L  33      -8.980  -1.342  -9.706  1.00 11.32           C  
ATOM    231  O   VAL L  33      -8.590  -2.408  -9.162  1.00 11.88           O  
ATOM    232  CB  VAL L  33      -9.920  -0.070  -7.631  1.00 10.96           C  
ATOM    233  CG1 VAL L  33      -8.701   0.801  -7.758  1.00 13.28           C  
ATOM    234  CG2 VAL L  33     -11.110   0.653  -7.147  1.00 12.89           C  
ATOM    235  N   SER L  34      -8.426  -0.672 -10.664  1.00 11.41           N  
ATOM    236  CA  SER L  34      -7.200  -1.119 -11.272  1.00 11.18           C  
ATOM    237  C   SER L  34      -6.110  -0.147 -10.890  1.00 10.33           C  
ATOM    238  O   SER L  34      -6.339   1.087 -10.709  1.00 11.40           O  
ATOM    239  CB  SER L  34      -7.329  -1.261 -12.721  1.00 12.22           C  
ATOM    240  OG  SER L  34      -8.244  -2.280 -13.057  1.00 14.08           O  
ATOM    241  N   TRP L  35      -4.898  -0.591 -10.941  1.00 10.89           N  
ATOM    242  CA  TRP L  35      -3.616   0.232 -10.764  1.00 12.17           C  
ATOM    243  C   TRP L  35      -2.660  -0.083 -11.867  1.00  9.88           C  
ATOM    244  O   TRP L  35      -2.406  -1.294 -12.190  1.00 12.21           O  
ATOM    245  CB  TRP L  35      -2.949  -0.120  -9.407  1.00 12.79           C  
ATOM    246  CG  TRP L  35      -3.785   0.409  -8.198  1.00 12.07           C  
ATOM    247  CD1 TRP L  35      -4.611  -0.291  -7.479  1.00 11.30           C  
ATOM    248  CD2 TRP L  35      -3.757   1.685  -7.713  1.00 11.00           C  
ATOM    249  NE1 TRP L  35      -5.146   0.549  -6.550  1.00 11.66           N  
ATOM    250  CE2 TRP L  35      -4.687   1.771  -6.635  1.00 10.95           C  
ATOM    251  CE3 TRP L  35      -3.018   2.853  -8.047  1.00 10.39           C  
ATOM    252  CZ2 TRP L  35      -4.822   2.922  -5.869  1.00 10.86           C  
ATOM    253  CZ3 TRP L  35      -3.135   4.041  -7.288  1.00 11.30           C  
ATOM    254  CH2 TRP L  35      -4.088   4.071  -6.176  1.00 11.66           C  
ATOM    255  N   TYR L  36      -2.098   0.998 -12.342  1.00 11.47           N  
ATOM    256  CA  TYR L  36      -1.104   0.951 -13.458  1.00 11.45           C  
ATOM    257  C   TYR L  36       0.174   1.609 -13.015  1.00 12.25           C  
ATOM    258  O   TYR L  36       0.114   2.702 -12.279  1.00 13.50           O  
ATOM    259  CB  TYR L  36      -1.643   1.718 -14.732  1.00 13.75           C  
ATOM    260  CG  TYR L  36      -3.001   1.116 -15.146  1.00 13.48           C  
ATOM    261  CD1 TYR L  36      -3.027   0.064 -15.988  1.00 12.83           C  
ATOM    262  CD2 TYR L  36      -4.124   1.553 -14.730  1.00 13.85           C  
ATOM    263  CE1 TYR L  36      -4.148  -0.534 -16.486  1.00 15.76           C  
ATOM    264  CE2 TYR L  36      -5.412   1.005 -15.196  1.00 15.64           C  
ATOM    265  CZ  TYR L  36      -5.311  -0.061 -16.019  1.00 14.06           C  
ATOM    266  OH  TYR L  36      -6.445  -0.717 -16.666  1.00 21.58           O  
ATOM    267  N   GLN L  37       1.241   1.166 -13.356  1.00 12.68           N  
ATOM    268  CA  GLN L  37       2.612   1.757 -13.157  1.00 13.00           C  
ATOM    269  C   GLN L  37       3.256   2.195 -14.430  1.00 12.78           C  
ATOM    270  O   GLN L  37       3.326   1.315 -15.392  1.00 14.24           O  
ATOM    271  CB  GLN L  37       3.448   0.674 -12.474  1.00 12.71           C  
ATOM    272  CG  GLN L  37       4.945   1.068 -12.174  1.00 14.21           C  
ATOM    273  CD  GLN L  37       5.807  -0.109 -11.886  1.00 14.97           C  
ATOM    274  OE1 GLN L  37       5.957  -1.124 -12.725  1.00 16.03           O  
ATOM    275  NE2 GLN L  37       6.208  -0.314 -10.654  1.00 15.19           N  
ATOM    276  N   GLN L  38       3.575   3.416 -14.582  1.00 14.12           N  
ATOM    277  CA  GLN L  38       4.194   3.791 -15.793  1.00 16.40           C  
ATOM    278  C   GLN L  38       5.466   4.539 -15.506  1.00 17.68           C  
ATOM    279  O   GLN L  38       5.429   5.651 -14.835  1.00 18.37           O  
ATOM    280  CB  GLN L  38       3.217   4.647 -16.444  1.00 19.42           C  
ATOM    281  CG  GLN L  38       3.686   4.974 -17.879  1.00 20.34           C  
ATOM    282  CD  GLN L  38       2.670   5.597 -18.689  1.00 21.46           C  
ATOM    283  OE1 GLN L  38       1.960   6.544 -18.191  1.00 30.54           O  
ATOM    284  NE2 GLN L  38       2.712   5.363 -20.029  1.00 22.45           N  
ATOM    285  N   HIS L  39       6.605   4.078 -16.081  1.00 23.16           N  
ATOM    286  CA  HIS L  39       7.817   5.012 -16.266  1.00 26.37           C  
ATOM    287  C   HIS L  39       7.575   5.923 -17.426  1.00 32.51           C  
ATOM    288  O   HIS L  39       7.156   5.360 -18.440  1.00 31.38           O  
ATOM    289  CB  HIS L  39       9.004   4.069 -16.537  1.00 42.02           C  
ATOM    290  CG  HIS L  39       9.386   3.177 -15.350  1.00 60.50           C  
ATOM    291  ND1 HIS L  39       9.753   1.844 -15.473  1.00 69.77           N  
ATOM    292  CD2 HIS L  39       9.457   3.454 -14.028  1.00 63.47           C  
ATOM    293  CE1 HIS L  39      10.050   1.356 -14.278  1.00 72.79           C  
ATOM    294  NE2 HIS L  39       9.868   2.304 -13.381  1.00 74.34           N  
ATOM    295  N   ALA L  40       8.009   7.166 -17.393  1.00 56.59           N  
ATOM    296  CA  ALA L  40       7.768   8.047 -18.529  1.00 71.15           C  
ATOM    297  C   ALA L  40       8.332   7.461 -19.832  1.00 62.09           C  
ATOM    298  O   ALA L  40       9.407   6.755 -19.880  1.00 62.54           O  
ATOM    299  CB  ALA L  40       8.276   9.470 -18.306  1.00 89.30           C  
ATOM    300  N   GLY L  41       7.471   7.645 -20.837  1.00 81.04           N  
ATOM    301  CA  GLY L  41       7.765   7.251 -22.170  1.00 79.56           C  
ATOM    302  C   GLY L  41       7.852   5.759 -22.289  1.00 62.35           C  
ATOM    303  O   GLY L  41       8.476   5.278 -23.296  1.00 40.19           O  
ATOM    304  N   LYS L  42       7.237   5.082 -21.335  1.00 33.48           N  
ATOM    305  CA  LYS L  42       7.165   3.569 -21.451  1.00 28.54           C  
ATOM    306  C   LYS L  42       5.754   3.206 -21.271  1.00 23.20           C  
ATOM    307  O   LYS L  42       5.097   3.985 -20.688  1.00 23.34           O  
ATOM    308  CB  LYS L  42       7.908   2.838 -20.405  1.00 26.75           C  
ATOM    309  CG  LYS L  42       9.363   3.245 -20.285  1.00 32.42           C  
ATOM    310  CD  LYS L  42      10.014   2.269 -19.337  1.00 51.63           C  
ATOM    311  N   ALA L  43       5.413   1.982 -21.712  1.00 23.43           N  
ATOM    312  CA  ALA L  43       4.103   1.530 -21.606  1.00 21.17           C  
ATOM    313  C   ALA L  43       3.690   1.321 -20.227  1.00 18.42           C  
ATOM    314  O   ALA L  43       4.497   0.903 -19.437  1.00 18.07           O  
ATOM    315  CB  ALA L  43       3.809   0.278 -22.372  1.00 21.33           C  
ATOM    316  N   PRO L  44       2.451   1.496 -19.921  1.00 14.26           N  
ATOM    317  CA  PRO L  44       1.951   1.254 -18.532  1.00 14.17           C  
ATOM    318  C   PRO L  44       1.879  -0.187 -18.234  1.00 12.87           C  
ATOM    319  O   PRO L  44       1.463  -1.027 -19.154  1.00 15.28           O  
ATOM    320  CB  PRO L  44       0.742   1.961 -18.499  1.00 16.00           C  
ATOM    321  CG  PRO L  44       0.229   1.889 -19.922  1.00 17.56           C  
ATOM    322  CD  PRO L  44       1.408   1.933 -20.822  1.00 14.57           C  
ATOM    323  N   LYS L  45       2.257  -0.608 -17.038  1.00 13.56           N  
ATOM    324  CA  LYS L  45       2.106  -1.969 -16.523  1.00 13.60           C  
ATOM    325  C   LYS L  45       0.870  -2.135 -15.742  1.00 14.14           C  
ATOM    326  O   LYS L  45       0.586  -1.230 -14.875  1.00 14.12           O  
ATOM    327  CB  LYS L  45       3.312  -2.412 -15.641  1.00 16.62           C  
ATOM    328  CG  LYS L  45       4.457  -2.586 -16.568  1.00 17.36           C  
ATOM    329  N   VAL L  46       0.122  -3.242 -15.801  1.00 13.81           N  
ATOM    330  CA  VAL L  46      -0.991  -3.498 -14.897  1.00 13.50           C  
ATOM    331  C   VAL L  46      -0.484  -4.121 -13.666  1.00 12.19           C  
ATOM    332  O   VAL L  46       0.090  -5.318 -13.723  1.00 15.60           O  
ATOM    333  CB  VAL L  46      -1.987  -4.539 -15.613  1.00 13.76           C  
ATOM    334  CG1 VAL L  46      -3.230  -4.573 -14.647  1.00 15.63           C  
ATOM    335  CG2 VAL L  46      -2.381  -4.019 -16.952  1.00 16.40           C  
ATOM    336  N   ILE L  47      -0.599  -3.487 -12.569  1.00 11.66           N  
ATOM    337  CA  ILE L  47      -0.200  -3.968 -11.300  1.00 11.85           C  
ATOM    338  C   ILE L  47      -1.273  -4.731 -10.598  1.00 11.39           C  
ATOM    339  O   ILE L  47      -0.979  -5.767  -9.977  1.00 13.25           O  
ATOM    340  CB  ILE L  47       0.359  -2.741 -10.408  1.00 12.66           C  
ATOM    341  CG1 ILE L  47       1.522  -2.016 -11.095  1.00 13.72           C  
ATOM    342  CG2 ILE L  47       0.605  -3.232  -8.999  1.00 15.72           C  
ATOM    343  CD1 ILE L  47       2.659  -3.008 -11.342  1.00 16.77           C  
ATOM    344  N   ILE L  48      -2.475  -4.156 -10.552  1.00 12.33           N  
ATOM    345  CA  ILE L  48      -3.586  -4.716  -9.816  1.00 12.89           C  
ATOM    346  C   ILE L  48      -4.890  -4.452 -10.658  1.00 10.74           C  
ATOM    347  O   ILE L  48      -4.972  -3.392 -11.284  1.00 11.45           O  
ATOM    348  CB  ILE L  48      -3.681  -4.067  -8.439  1.00 13.52           C  
ATOM    349  CG1 ILE L  48      -2.864  -5.048  -7.372  1.00 18.71           C  
ATOM    350  CG2 ILE L  48      -5.100  -4.055  -7.830  1.00 13.63           C  
ATOM    351  CD1 ILE L  48      -2.613  -4.522  -6.082  1.00 16.05           C  
ATOM    352  N   TYR L  49      -5.760  -5.411 -10.534  1.00 12.52           N  
ATOM    353  CA  TYR L  49      -7.169  -5.213 -11.015  1.00 12.64           C  
ATOM    354  C   TYR L  49      -8.099  -5.712  -9.925  1.00 11.41           C  
ATOM    355  O   TYR L  49      -7.704  -6.489  -9.011  1.00 12.38           O  
ATOM    356  CB  TYR L  49      -7.342  -5.913 -12.353  1.00 12.44           C  
ATOM    357  CG  TYR L  49      -7.292  -7.366 -12.374  1.00 14.29           C  
ATOM    358  CD1 TYR L  49      -6.050  -7.981 -12.382  1.00 14.30           C  
ATOM    359  CD2 TYR L  49      -8.479  -8.221 -12.319  1.00 14.27           C  
ATOM    360  CE1 TYR L  49      -5.956  -9.365 -12.332  1.00 14.81           C  
ATOM    361  CE2 TYR L  49      -8.373  -9.561 -12.290  1.00 15.73           C  
ATOM    362  CZ  TYR L  49      -7.114 -10.062 -12.262  1.00 16.99           C  
ATOM    363  OH  TYR L  49      -7.059 -11.491 -12.240  1.00 19.29           O  
ATOM    364  N   GLU L  50      -9.323  -5.319 -10.045  1.00 12.35           N  
ATOM    365  CA  GLU L  50     -10.385  -5.726  -9.024  1.00 11.63           C  
ATOM    366  C   GLU L  50      -9.872  -5.559  -7.582  1.00 11.76           C  
ATOM    367  O   GLU L  50     -10.032  -6.479  -6.745  1.00 12.28           O  
ATOM    368  CB  GLU L  50     -10.840  -7.171  -9.313  1.00 12.47           C  
ATOM    369  CG  GLU L  50     -11.612  -7.270 -10.648  1.00 15.63           C  
ATOM    370  CD  GLU L  50     -12.073  -8.591 -10.979  1.00 15.74           C  
ATOM    371  OE1 GLU L  50     -12.557  -9.389 -10.123  1.00 18.59           O  
ATOM    372  OE2 GLU L  50     -12.004  -8.975 -12.170  1.00 18.71           O  
ATOM    373  N   VAL L  51      -9.337  -4.394  -7.309  1.00 11.59           N  
ATOM    374  CA  VAL L  51      -8.921  -3.948  -5.997  1.00 11.59           C  
ATOM    375  C   VAL L  51      -7.560  -4.550  -5.527  1.00 10.75           C  
ATOM    376  O   VAL L  51      -6.751  -3.814  -5.018  1.00 11.01           O  
ATOM    377  CB  VAL L  51      -9.977  -4.054  -4.857  1.00 11.26           C  
ATOM    378  CG1 VAL L  51      -9.563  -3.418  -3.621  1.00 13.31           C  
ATOM    379  CG2 VAL L  51     -11.309  -3.411  -5.341  1.00 14.23           C  
ATOM    380  N   ASN L  52      -7.537  -5.878  -5.607  1.00 10.85           N  
ATOM    381  CA  ASN L  52      -6.329  -6.570  -5.095  1.00 10.44           C  
ATOM    382  C   ASN L  52      -6.105  -7.892  -5.740  1.00 10.53           C  
ATOM    383  O   ASN L  52      -5.759  -8.916  -5.069  1.00 12.68           O  
ATOM    384  CB  ASN L  52      -6.363  -6.746  -3.547  1.00 12.11           C  
ATOM    385  CG  ASN L  52      -5.060  -7.186  -3.051  1.00 11.32           C  
ATOM    386  OD1 ASN L  52      -4.007  -6.842  -3.583  1.00 12.26           O  
ATOM    387  ND2 ASN L  52      -5.029  -7.868  -1.902  1.00 11.84           N  
ATOM    388  N   LYS L  53      -6.261  -7.944  -7.065  1.00 12.10           N  
ATOM    389  CA  LYS L  53      -5.884  -9.134  -7.839  1.00 13.70           C  
ATOM    390  C   LYS L  53      -4.644  -8.771  -8.604  1.00 12.74           C  
ATOM    391  O   LYS L  53      -4.652  -7.706  -9.325  1.00 13.76           O  
ATOM    392  CB  LYS L  53      -6.903  -9.666  -8.715  1.00 14.73           C  
ATOM    393  CG  LYS L  53      -8.163 -10.103  -8.041  1.00 16.09           C  
ATOM    394  CD  LYS L  53      -9.161 -10.798  -8.890  1.00 16.76           C  
ATOM    395  CE  LYS L  53     -10.396 -11.245  -8.163  1.00 17.98           C  
ATOM    396  NZ  LYS L  53     -11.504 -11.739  -8.956  1.00 20.55           N  
ATOM    397  N   ARG L  54      -3.541  -9.507  -8.603  1.00 14.63           N  
ATOM    398  CA  ARG L  54      -2.290  -9.279  -9.371  1.00 14.01           C  
ATOM    399  C   ARG L  54      -2.365 -10.119 -10.551  1.00 13.71           C  
ATOM    400  O   ARG L  54      -2.488 -11.390 -10.530  1.00 15.16           O  
ATOM    401  CB  ARG L  54      -1.016  -9.643  -8.525  1.00 14.66           C  
ATOM    402  CG  ARG L  54      -0.717  -8.599  -7.442  1.00 19.07           C  
ATOM    403  CD  ARG L  54       0.556  -8.963  -6.876  1.00 23.03           C  
ATOM    404  NE  ARG L  54       0.287 -10.053  -5.898  1.00 21.12           N  
ATOM    405  CZ  ARG L  54       1.045 -11.114  -5.634  1.00 21.80           C  
ATOM    406  NH1 ARG L  54       2.215 -11.329  -6.202  1.00 22.11           N  
ATOM    407  NH2 ARG L  54       0.789 -12.064  -4.648  1.00 20.79           N  
ATOM    408  N   PRO L  55      -2.069  -9.596 -11.756  1.00 14.27           N  
ATOM    409  CA  PRO L  55      -1.667 -10.459 -12.878  1.00 15.51           C  
ATOM    410  C   PRO L  55      -0.362 -11.151 -12.491  1.00 14.89           C  
ATOM    411  O   PRO L  55       0.400 -10.823 -11.636  1.00 14.84           O  
ATOM    412  CB  PRO L  55      -1.416  -9.464 -13.991  1.00 16.30           C  
ATOM    413  CG  PRO L  55      -2.120  -8.167 -13.581  1.00 16.96           C  
ATOM    414  CD  PRO L  55      -2.010  -8.153 -12.057  1.00 12.72           C  
ATOM    415  N   SER L  56      -0.296 -12.399 -13.124  1.00 17.58           N  
ATOM    416  CA  SER L  56       1.019 -13.107 -13.001  1.00 18.44           C  
ATOM    417  C   SER L  56       2.177 -12.267 -13.248  1.00 22.17           C  
ATOM    418  O   SER L  56       2.178 -11.264 -14.062  1.00 20.21           O  
ATOM    419  CB  SER L  56       1.031 -14.248 -14.076  1.00 23.03           C  
ATOM    420  OG  SER L  56       1.075 -13.718 -15.355  1.00 26.26           O  
ATOM    421  N   GLY L  57       3.308 -12.372 -12.464  1.00 20.63           N  
ATOM    422  CA  GLY L  57       4.411 -11.575 -12.689  1.00 19.90           C  
ATOM    423  C   GLY L  57       4.582 -10.304 -11.781  1.00 17.66           C  
ATOM    424  O   GLY L  57       5.613  -9.529 -11.911  1.00 22.64           O  
ATOM    425  N   VAL L  58       3.541  -9.859 -11.203  1.00 16.62           N  
ATOM    426  CA  VAL L  58       3.650  -8.751 -10.330  1.00 14.83           C  
ATOM    427  C   VAL L  58       4.089  -9.273  -8.960  1.00 14.03           C  
ATOM    428  O   VAL L  58       3.478 -10.222  -8.433  1.00 16.35           O  
ATOM    429  CB  VAL L  58       2.229  -7.991 -10.255  1.00 13.76           C  
ATOM    430  CG1 VAL L  58       2.354  -6.874  -9.249  1.00 14.31           C  
ATOM    431  CG2 VAL L  58       1.794  -7.409 -11.558  1.00 15.78           C  
ATOM    432  N   PRO L  59       5.137  -8.666  -8.310  1.00 15.76           N  
ATOM    433  CA  PRO L  59       5.628  -9.232  -7.110  1.00 15.94           C  
ATOM    434  C   PRO L  59       4.636  -9.107  -5.953  1.00 12.97           C  
ATOM    435  O   PRO L  59       3.773  -8.261  -5.902  1.00 14.26           O  
ATOM    436  CB  PRO L  59       6.894  -8.184  -6.930  1.00 18.07           C  
ATOM    437  CG  PRO L  59       7.233  -7.793  -8.262  1.00 20.76           C  
ATOM    438  CD  PRO L  59       6.024  -7.644  -8.850  1.00 16.71           C  
ATOM    439  N   ASP L  60       4.928  -9.921  -4.964  1.00 13.25           N  
ATOM    440  CA  ASP L  60       4.078 -10.013  -3.730  1.00 13.01           C  
ATOM    441  C   ASP L  60       4.126  -8.755  -2.889  1.00 12.96           C  
ATOM    442  O   ASP L  60       3.321  -8.614  -1.984  1.00 14.71           O  
ATOM    443  CB  ASP L  60       4.513 -11.204  -2.918  1.00 14.08           C  
ATOM    444  CG  ASP L  60       4.168 -12.576  -3.492  1.00 19.19           C  
ATOM    445  OD1 ASP L  60       3.252 -12.726  -4.293  1.00 20.21           O  
ATOM    446  OD2 ASP L  60       4.825 -13.529  -2.860  1.00 30.44           O  
ATOM    447  N   ARG L  61       5.075  -7.895  -3.155  1.00 12.92           N  
ATOM    448  CA  ARG L  61       5.219  -6.632  -2.442  1.00 12.71           C  
ATOM    449  C   ARG L  61       4.174  -5.582  -2.883  1.00 11.82           C  
ATOM    450  O   ARG L  61       4.160  -4.510  -2.261  1.00 12.05           O  
ATOM    451  CB  ARG L  61       6.629  -6.180  -2.431  1.00 20.42           C  
ATOM    452  CG  ARG L  61       7.226  -5.827  -3.579  1.00 19.26           C  
ATOM    453  CD  ARG L  61       8.873  -5.915  -3.238  1.00 19.43           C  
ATOM    454  NE  ARG L  61       9.334  -5.612  -4.511  1.00 17.21           N  
ATOM    455  CZ  ARG L  61       9.191  -4.449  -5.112  1.00 15.70           C  
ATOM    456  NH1 ARG L  61       8.770  -3.387  -4.430  1.00 15.62           N  
ATOM    457  NH2 ARG L  61       9.659  -4.225  -6.338  1.00 19.09           N  
ATOM    458  N   PHE L  62       3.418  -5.790  -3.934  1.00 12.86           N  
ATOM    459  CA  PHE L  62       2.295  -4.918  -4.344  1.00 12.26           C  
ATOM    460  C   PHE L  62       0.990  -5.398  -3.868  1.00 11.67           C  
ATOM    461  O   PHE L  62       0.660  -6.581  -4.127  1.00 13.24           O  
ATOM    462  CB  PHE L  62       2.253  -4.756  -5.921  1.00 12.59           C  
ATOM    463  CG  PHE L  62       3.498  -4.121  -6.480  1.00 11.53           C  
ATOM    464  CD1 PHE L  62       4.626  -4.835  -6.751  1.00 16.01           C  
ATOM    465  CD2 PHE L  62       3.530  -2.748  -6.743  1.00 11.56           C  
ATOM    466  CE1 PHE L  62       5.806  -4.274  -7.198  1.00 17.88           C  
ATOM    467  CE2 PHE L  62       4.692  -2.153  -7.300  1.00 14.74           C  
ATOM    468  CZ  PHE L  62       5.785  -2.899  -7.506  1.00 17.19           C  
ATOM    469  N   SER L  63       0.245  -4.545  -3.147  1.00 11.27           N  
ATOM    470  CA  SER L  63      -1.058  -4.995  -2.555  1.00 12.19           C  
ATOM    471  C   SER L  63      -2.013  -3.882  -2.654  1.00 11.36           C  
ATOM    472  O   SER L  63      -1.632  -2.657  -2.710  1.00 11.93           O  
ATOM    473  CB  SER L  63      -0.878  -5.493  -1.213  1.00 13.38           C  
ATOM    474  OG  SER L  63      -0.448  -4.464  -0.296  1.00 12.94           O  
ATOM    475  N   GLY L  64      -3.271  -4.232  -2.665  1.00 11.77           N  
ATOM    476  CA  GLY L  64      -4.398  -3.285  -2.586  1.00 12.08           C  
ATOM    477  C   GLY L  64      -5.327  -3.433  -1.430  1.00 11.05           C  
ATOM    478  O   GLY L  64      -5.456  -4.564  -0.891  1.00 12.31           O  
ATOM    479  N   SER L  65      -5.954  -2.308  -1.089  1.00 13.19           N  
ATOM    480  CA  SER L  65      -6.921  -2.315   0.056  1.00 12.11           C  
ATOM    481  C   SER L  65      -8.076  -1.379  -0.442  1.00 12.87           C  
ATOM    482  O   SER L  65      -7.904  -0.532  -1.333  1.00 12.68           O  
ATOM    483  CB  SER L  65      -6.314  -1.802   1.273  1.00 17.21           C  
ATOM    484  OG  SER L  65      -7.133  -1.954   2.404  1.00 25.28           O  
ATOM    485  N   LYS L  66      -9.224  -1.496   0.184  1.00 13.10           N  
ATOM    486  CA  LYS L  66     -10.341  -0.514  -0.040  1.00 13.71           C  
ATOM    487  C   LYS L  66     -11.238  -0.443   1.117  1.00 13.55           C  
ATOM    488  O   LYS L  66     -11.575  -1.559   1.679  1.00 16.98           O  
ATOM    489  CB  LYS L  66     -11.082  -0.909  -1.350  1.00 14.31           C  
ATOM    490  CG  LYS L  66     -12.143   0.151  -1.826  1.00 12.28           C  
ATOM    491  CD  LYS L  66     -12.552  -0.204  -3.287  1.00 14.41           C  
ATOM    492  CE  LYS L  66     -13.700  -1.259  -3.416  1.00 14.14           C  
ATOM    493  NZ  LYS L  66     -15.021  -0.829  -3.183  1.00 14.22           N  
ATOM    494  N   SER L  67     -11.609   0.770   1.446  1.00 14.06           N  
ATOM    495  CA  SER L  67     -12.627   0.923   2.574  1.00 17.29           C  
ATOM    496  C   SER L  67     -13.456   2.167   2.135  1.00 14.68           C  
ATOM    497  O   SER L  67     -12.844   3.224   1.834  1.00 16.16           O  
ATOM    498  CB  SER L  67     -11.887   1.147   3.869  1.00 23.97           C  
ATOM    499  OG  SER L  67     -11.123   2.271   3.881  1.00 26.02           O  
ATOM    500  N   GLY L  68     -14.601   2.104   2.152  1.00 15.42           N  
ATOM    501  CA  GLY L  68     -15.443   3.168   1.808  1.00 15.72           C  
ATOM    502  C   GLY L  68     -15.117   3.602   0.382  1.00 12.80           C  
ATOM    503  O   GLY L  68     -15.063   2.736  -0.518  1.00 14.24           O  
ATOM    504  N   ASN L  69     -15.069   4.914   0.150  1.00 12.14           N  
ATOM    505  CA  ASN L  69     -14.858   5.436  -1.222  1.00 13.77           C  
ATOM    506  C   ASN L  69     -13.398   5.575  -1.594  1.00 12.92           C  
ATOM    507  O   ASN L  69     -13.072   6.222  -2.604  1.00 13.23           O  
ATOM    508  CB  ASN L  69     -15.642   6.712  -1.410  1.00 14.69           C  
ATOM    509  CG  ASN L  69     -17.072   6.397  -1.354  1.00 14.42           C  
ATOM    510  OD1 ASN L  69     -17.593   5.366  -1.703  1.00 15.21           O  
ATOM    511  ND2 ASN L  69     -17.830   7.496  -0.916  1.00 15.85           N  
ATOM    512  N   THR L  70     -12.481   4.975  -0.818  1.00 12.27           N  
ATOM    513  CA  THR L  70     -11.049   5.079  -1.047  1.00 11.96           C  
ATOM    514  C   THR L  70     -10.480   3.744  -1.200  1.00 11.26           C  
ATOM    515  O   THR L  70     -10.418   2.951  -0.282  1.00 13.41           O  
ATOM    516  CB  THR L  70     -10.321   5.883   0.041  1.00 12.87           C  
ATOM    517  OG1 THR L  70     -10.775   7.227   0.000  1.00 14.53           O  
ATOM    518  CG2 THR L  70      -8.807   5.946  -0.246  1.00 14.26           C  
ATOM    519  N   ALA L  71      -9.785   3.526  -2.336  1.00 11.12           N  
ATOM    520  CA  ALA L  71      -8.918   2.317  -2.561  1.00 12.07           C  
ATOM    521  C   ALA L  71      -7.475   2.736  -2.405  1.00 11.29           C  
ATOM    522  O   ALA L  71      -7.180   3.990  -2.507  1.00 11.97           O  
ATOM    523  CB  ALA L  71      -9.185   1.709  -3.886  1.00 11.68           C  
ATOM    524  N   SER L  72      -6.574   1.834  -2.149  1.00 11.45           N  
ATOM    525  CA  SER L  72      -5.154   2.199  -2.028  1.00 11.06           C  
ATOM    526  C   SER L  72      -4.303   1.068  -2.616  1.00 10.76           C  
ATOM    527  O   SER L  72      -4.718  -0.147  -2.659  1.00 11.90           O  
ATOM    528  CB  SER L  72      -4.748   2.626  -0.668  1.00 12.05           C  
ATOM    529  OG  SER L  72      -4.867   1.427   0.154  1.00 14.67           O  
ATOM    530  N   LEU L  73      -3.187   1.450  -3.102  1.00 11.28           N  
ATOM    531  CA  LEU L  73      -2.102   0.601  -3.526  1.00 11.10           C  
ATOM    532  C   LEU L  73      -0.931   0.792  -2.617  1.00 10.93           C  
ATOM    533  O   LEU L  73      -0.527   1.966  -2.394  1.00 11.50           O  
ATOM    534  CB  LEU L  73      -1.640   0.910  -4.957  1.00 11.17           C  
ATOM    535  CG  LEU L  73      -0.431   0.197  -5.462  1.00 11.79           C  
ATOM    536  CD1 LEU L  73      -0.635  -1.284  -5.605  1.00 12.81           C  
ATOM    537  CD2 LEU L  73       0.113   0.790  -6.719  1.00 12.92           C  
ATOM    538  N   THR L  74      -0.380  -0.267  -2.044  1.00 11.02           N  
ATOM    539  CA  THR L  74       0.938  -0.118  -1.326  1.00 11.94           C  
ATOM    540  C   THR L  74       1.944  -0.883  -2.029  1.00 10.38           C  
ATOM    541  O   THR L  74       1.810  -2.059  -2.418  1.00 11.55           O  
ATOM    542  CB  THR L  74       0.789  -0.689   0.110  1.00 10.84           C  
ATOM    543  OG1 THR L  74      -0.103   0.185   0.891  1.00 13.49           O  
ATOM    544  CG2 THR L  74       2.139  -0.628   0.836  1.00 11.86           C  
ATOM    545  N   VAL L  75       3.097  -0.209  -2.236  1.00 10.73           N  
ATOM    546  CA  VAL L  75       4.340  -0.730  -2.826  1.00 11.84           C  
ATOM    547  C   VAL L  75       5.199  -0.884  -1.579  1.00 10.91           C  
ATOM    548  O   VAL L  75       5.694   0.095  -0.975  1.00 12.32           O  
ATOM    549  CB  VAL L  75       4.936   0.211  -3.809  1.00 12.93           C  
ATOM    550  CG1 VAL L  75       6.120  -0.416  -4.383  1.00 14.02           C  
ATOM    551  CG2 VAL L  75       3.906   0.605  -4.931  1.00 13.48           C  
ATOM    552  N   SER L  76       5.372  -2.160  -1.162  1.00 11.31           N  
ATOM    553  CA  SER L  76       6.179  -2.428  -0.040  1.00 12.33           C  
ATOM    554  C   SER L  76       7.582  -2.912  -0.415  1.00 14.08           C  
ATOM    555  O   SER L  76       7.745  -3.305  -1.577  1.00 13.30           O  
ATOM    556  CB  SER L  76       5.454  -3.453   0.876  1.00 12.37           C  
ATOM    557  OG  SER L  76       6.013  -3.372   2.148  1.00 16.09           O  
ATOM    558  N   GLY L  77       8.495  -2.875   0.484  1.00 13.39           N  
ATOM    559  CA  GLY L  77       9.874  -3.255   0.121  1.00 13.94           C  
ATOM    560  C   GLY L  77      10.380  -2.456  -0.971  1.00 11.92           C  
ATOM    561  O   GLY L  77      10.940  -2.990  -1.967  1.00 13.58           O  
ATOM    562  N   LEU L  78      10.259  -1.138  -0.939  1.00 12.58           N  
ATOM    563  CA  LEU L  78      10.521  -0.255  -2.055  1.00 11.03           C  
ATOM    564  C   LEU L  78      11.859  -0.429  -2.651  1.00 11.81           C  
ATOM    565  O   LEU L  78      12.822  -0.449  -1.942  1.00 12.44           O  
ATOM    566  CB  LEU L  78      10.323   1.172  -1.595  1.00 12.38           C  
ATOM    567  CG  LEU L  78      10.076   2.202  -2.576  1.00 13.28           C  
ATOM    568  CD1 LEU L  78       8.708   2.133  -3.290  1.00 15.24           C  
ATOM    569  CD2 LEU L  78      10.192   3.604  -1.928  1.00 16.13           C  
ATOM    570  N   GLN L  79      11.822  -0.482  -3.941  1.00 12.34           N  
ATOM    571  CA  GLN L  79      13.078  -0.582  -4.765  1.00 12.30           C  
ATOM    572  C   GLN L  79      13.189   0.577  -5.754  1.00 13.63           C  
ATOM    573  O   GLN L  79      12.187   1.219  -6.124  1.00 13.73           O  
ATOM    574  CB  GLN L  79      12.989  -1.866  -5.569  1.00 15.03           C  
ATOM    575  CG  GLN L  79      13.036  -3.123  -4.792  1.00 16.86           C  
ATOM    576  CD  GLN L  79      13.047  -4.310  -5.610  1.00 20.68           C  
ATOM    577  OE1 GLN L  79      12.942  -4.261  -6.869  1.00 26.32           O  
ATOM    578  NE2 GLN L  79      12.890  -5.439  -4.913  1.00 20.55           N  
ATOM    579  N   ALA L  80      14.377   0.841  -6.174  1.00 14.55           N  
ATOM    580  CA  ALA L  80      14.615   1.870  -7.153  1.00 14.61           C  
ATOM    581  C   ALA L  80      13.732   1.689  -8.357  1.00 13.35           C  
ATOM    582  O   ALA L  80      13.295   2.634  -8.972  1.00 15.10           O  
ATOM    583  CB  ALA L  80      16.064   1.892  -7.569  1.00 15.20           C  
ATOM    584  N   GLU L  81      13.534   0.393  -8.796  1.00 13.40           N  
ATOM    585  CA  GLU L  81      12.805  -0.032  -9.920  1.00 16.53           C  
ATOM    586  C   GLU L  81      11.296   0.531  -9.825  1.00 15.83           C  
ATOM    587  O   GLU L  81      10.577   0.595 -10.816  1.00 16.75           O  
ATOM    588  CB  GLU L  81      12.835  -1.554 -10.116  1.00 18.11           C  
ATOM    589  CG  GLU L  81      14.200  -2.271 -10.364  1.00 26.61           C  
ATOM    590  CD  GLU L  81      15.076  -2.590  -9.183  1.00 30.14           C  
ATOM    591  OE1 GLU L  81      15.064  -1.946  -8.125  1.00 24.60           O  
ATOM    592  OE2 GLU L  81      15.893  -3.600  -9.289  1.00 28.08           O  
ATOM    593  N   ASP L  82      10.826   0.822  -8.622  1.00 13.47           N  
ATOM    594  CA  ASP L  82       9.516   1.171  -8.385  1.00 13.34           C  
ATOM    595  C   ASP L  82       9.229   2.567  -8.597  1.00 13.77           C  
ATOM    596  O   ASP L  82       8.031   2.980  -8.534  1.00 14.65           O  
ATOM    597  CB  ASP L  82       9.094   0.721  -6.921  1.00 14.26           C  
ATOM    598  CG  ASP L  82       9.222  -0.634  -6.599  1.00 14.39           C  
ATOM    599  OD1 ASP L  82       9.104  -1.583  -7.464  1.00 15.91           O  
ATOM    600  OD2 ASP L  82       9.419  -0.892  -5.382  1.00 13.80           O  
ATOM    601  N   GLU L  83      10.234   3.470  -8.788  1.00 13.42           N  
ATOM    602  CA  GLU L  83      10.010   4.868  -9.063  1.00 14.88           C  
ATOM    603  C   GLU L  83       9.284   5.062 -10.444  1.00 17.88           C  
ATOM    604  O   GLU L  83       9.775   4.568 -11.443  1.00 18.84           O  
ATOM    605  CB  GLU L  83      11.358   5.646  -9.141  1.00 15.26           C  
ATOM    606  CG  GLU L  83      12.001   5.647  -7.804  1.00 16.39           C  
ATOM    607  CD  GLU L  83      13.090   6.742  -7.965  1.00 17.63           C  
ATOM    608  OE1 GLU L  83      13.880   6.852  -8.986  1.00 29.14           O  
ATOM    609  OE2 GLU L  83      13.122   7.740  -7.104  1.00 19.70           O  
ATOM    610  N   ALA L  84       8.058   5.586 -10.388  1.00 13.65           N  
ATOM    611  CA  ALA L  84       7.224   5.630 -11.541  1.00 13.66           C  
ATOM    612  C   ALA L  84       5.953   6.436 -11.194  1.00 12.77           C  
ATOM    613  O   ALA L  84       5.857   6.879 -10.002  1.00 12.59           O  
ATOM    614  CB  ALA L  84       6.788   4.217 -11.791  1.00 15.91           C  
ATOM    615  N   ASP L  85       5.183   6.705 -12.160  1.00 12.13           N  
ATOM    616  CA  ASP L  85       3.820   7.319 -11.860  1.00 12.99           C  
ATOM    617  C   ASP L  85       2.880   6.129 -11.721  1.00 12.91           C  
ATOM    618  O   ASP L  85       2.877   5.205 -12.571  1.00 15.31           O  
ATOM    619  CB  ASP L  85       3.436   8.194 -13.042  1.00 13.91           C  
ATOM    620  CG  ASP L  85       4.347   9.346 -13.193  1.00 16.73           C  
ATOM    621  OD1 ASP L  85       4.981   9.787 -12.229  1.00 19.87           O  
ATOM    622  OD2 ASP L  85       4.735   9.537 -14.368  1.00 22.03           O  
ATOM    623  N   TYR L  86       1.944   6.250 -10.815  1.00 11.62           N  
ATOM    624  CA  TYR L  86       0.947   5.189 -10.525  1.00 11.94           C  
ATOM    625  C   TYR L  86      -0.440   5.790 -10.708  1.00 11.31           C  
ATOM    626  O   TYR L  86      -0.653   6.914 -10.171  1.00 11.79           O  
ATOM    627  CB  TYR L  86       1.128   4.650  -9.169  1.00 11.97           C  
ATOM    628  CG  TYR L  86       2.376   3.842  -8.969  1.00 11.77           C  
ATOM    629  CD1 TYR L  86       3.574   4.436  -8.707  1.00 12.71           C  
ATOM    630  CD2 TYR L  86       2.375   2.464  -9.041  1.00 11.52           C  
ATOM    631  CE1 TYR L  86       4.751   3.677  -8.531  1.00 12.62           C  
ATOM    632  CE2 TYR L  86       3.549   1.716  -8.846  1.00 13.35           C  
ATOM    633  CZ  TYR L  86       4.721   2.295  -8.573  1.00 11.53           C  
ATOM    634  OH  TYR L  86       5.839   1.594  -8.469  1.00 13.38           O  
ATOM    635  N   TYR L  87      -1.240   5.169 -11.434  1.00 11.86           N  
ATOM    636  CA  TYR L  87      -2.638   5.629 -11.754  1.00 12.20           C  
ATOM    637  C   TYR L  87      -3.629   4.623 -11.296  1.00 10.07           C  
ATOM    638  O   TYR L  87      -3.487   3.406 -11.586  1.00 12.35           O  
ATOM    639  CB  TYR L  87      -2.838   5.830 -13.232  1.00 12.26           C  
ATOM    640  CG  TYR L  87      -1.937   6.927 -13.822  1.00 13.25           C  
ATOM    641  CD1 TYR L  87      -0.720   6.648 -14.234  1.00 14.84           C  
ATOM    642  CD2 TYR L  87      -2.322   8.208 -13.859  1.00 13.95           C  
ATOM    643  CE1 TYR L  87       0.152   7.695 -14.842  1.00 17.99           C  
ATOM    644  CE2 TYR L  87      -1.447   9.264 -14.368  1.00 17.22           C  
ATOM    645  CZ  TYR L  87      -0.348   8.898 -14.783  1.00 16.58           C  
ATOM    646  OH  TYR L  87       0.648   9.811 -15.358  1.00 23.00           O  
ATOM    647  N   CYS L  88      -4.701   5.012 -10.698  1.00 10.77           N  
ATOM    648  CA  CYS L  88      -5.866   4.135 -10.496  1.00 10.85           C  
ATOM    649  C   CYS L  88      -6.966   4.379 -11.490  1.00 11.63           C  
ATOM    650  O   CYS L  88      -6.979   5.445 -12.155  1.00 11.48           O  
ATOM    651  CB  CYS L  88      -6.415   4.314  -9.096  1.00 11.06           C  
ATOM    652  SG  CYS L  88      -7.131   5.885  -8.712  1.00 12.09           S  
ATOM    653  N   SER L  89      -7.819   3.419 -11.636  1.00 11.74           N  
ATOM    654  CA  SER L  89      -9.099   3.649 -12.324  1.00 11.96           C  
ATOM    655  C   SER L  89     -10.141   2.832 -11.645  1.00 10.87           C  
ATOM    656  O   SER L  89      -9.863   1.854 -10.869  1.00 11.85           O  
ATOM    657  CB  SER L  89      -9.039   3.145 -13.796  1.00 11.32           C  
ATOM    658  OG  SER L  89      -8.911   1.736 -13.864  1.00 13.01           O  
ATOM    659  N   SER L  90     -11.427   3.215 -11.821  1.00 11.69           N  
ATOM    660  CA  SER L  90     -12.597   2.440 -11.375  1.00 12.29           C  
ATOM    661  C   SER L  90     -13.606   2.431 -12.406  1.00 11.76           C  
ATOM    662  O   SER L  90     -13.884   3.400 -13.185  1.00 11.55           O  
ATOM    663  CB  SER L  90     -13.157   3.071 -10.123  1.00 12.21           C  
ATOM    664  OG  SER L  90     -14.203   2.283  -9.617  1.00 11.92           O  
ATOM    665  N   TYR L  91     -14.404   1.272 -12.470  1.00 12.77           N  
ATOM    666  CA  TYR L  91     -15.727   1.310 -13.118  1.00 11.61           C  
ATOM    667  C   TYR L  91     -16.586   2.370 -12.468  1.00 11.69           C  
ATOM    668  O   TYR L  91     -16.462   2.590 -11.248  1.00 12.71           O  
ATOM    669  CB  TYR L  91     -16.273  -0.066 -13.044  1.00 11.77           C  
ATOM    670  CG  TYR L  91     -17.554  -0.214 -13.802  1.00 12.35           C  
ATOM    671  CD1 TYR L  91     -17.524  -0.093 -15.199  1.00 13.32           C  
ATOM    672  CD2 TYR L  91     -18.746  -0.472 -13.241  1.00 13.30           C  
ATOM    673  CE1 TYR L  91     -18.776  -0.218 -15.927  1.00 14.32           C  
ATOM    674  CE2 TYR L  91     -19.947  -0.599 -13.971  1.00 14.57           C  
ATOM    675  CZ  TYR L  91     -19.878  -0.426 -15.348  1.00 12.89           C  
ATOM    676  OH  TYR L  91     -20.978  -0.584 -16.174  1.00 15.74           O  
ATOM    677  N   GLU L  92     -17.467   2.944 -13.251  1.00 11.98           N  
ATOM    678  CA  GLU L  92     -18.317   4.080 -12.720  1.00 13.54           C  
ATOM    679  C   GLU L  92     -19.743   3.860 -13.274  1.00 14.27           C  
ATOM    680  O   GLU L  92     -20.521   4.880 -13.266  1.00 17.67           O  
ATOM    681  CB  GLU L  92     -17.862   5.464 -12.958  1.00 14.46           C  
ATOM    682  CG  GLU L  92     -17.808   5.818 -14.451  1.00 16.11           C  
ATOM    683  CD  GLU L  92     -17.566   7.248 -14.722  1.00 21.24           C  
ATOM    684  OE1 GLU L  92     -17.415   7.975 -13.702  1.00 18.84           O  
ATOM    685  OE2 GLU L  92     -17.367   7.663 -15.893  1.00 29.00           O  
ATOM    686  N   GLY L  93     -20.144   2.688 -13.614  1.00 14.48           N  
ATOM    687  CA  GLY L  93     -21.464   2.555 -14.143  1.00 16.05           C  
ATOM    688  C   GLY L  93     -21.551   2.904 -15.585  1.00 14.14           C  
ATOM    689  O   GLY L  93     -20.736   3.556 -16.174  1.00 17.36           O  
ATOM    690  N   SER L  94     -22.672   2.464 -16.217  1.00 17.97           N  
ATOM    691  CA  SER L  94     -22.986   2.887 -17.598  1.00 17.48           C  
ATOM    692  C   SER L  94     -21.878   2.567 -18.539  1.00 19.59           C  
ATOM    693  O   SER L  94     -21.655   3.341 -19.495  1.00 19.13           O  
ATOM    694  CB  SER L  94     -23.243   4.410 -17.701  1.00 22.89           C  
ATOM    695  OG  SER L  94     -24.126   4.920 -16.752  1.00 26.63           O  
ATOM    696  N   ASP L  95     -21.219   1.449 -18.398  1.00 16.92           N  
ATOM    697  CA  ASP L  95     -20.177   1.083 -19.294  1.00 16.44           C  
ATOM    698  C   ASP L  95     -18.969   2.056 -19.311  1.00 15.91           C  
ATOM    699  O   ASP L  95     -18.207   1.993 -20.257  1.00 22.04           O  
ATOM    700  CB  ASP L  95     -20.684   0.853 -20.720  1.00 16.00           C  
ATOM    701  CG  ASP L  95     -21.925   0.046 -20.754  1.00 17.50           C  
ATOM    702  OD1 ASP L  95     -22.010  -1.016 -20.122  1.00 19.90           O  
ATOM    703  OD2 ASP L  95     -22.668   0.284 -21.745  1.00 23.96           O  
ATOM    704  N   ASN L  95A    -18.780   2.819 -18.215  1.00 16.45           N  
ATOM    705  CA  ASN L  95A    -17.806   3.850 -18.201  1.00 15.60           C  
ATOM    706  C   ASN L  95A    -16.748   3.591 -17.149  1.00 15.29           C  
ATOM    707  O   ASN L  95A    -17.014   2.955 -16.139  1.00 13.99           O  
ATOM    708  CB  ASN L  95A    -18.395   5.239 -17.999  1.00 17.24           C  
ATOM    709  CG  ASN L  95A    -19.257   5.691 -19.150  1.00 27.57           C  
ATOM    710  OD1 ASN L  95A    -19.011   5.375 -20.282  1.00 27.11           O  
ATOM    711  ND2 ASN L  95A    -20.375   6.211 -18.821  1.00 23.55           N  
ATOM    712  N   PHE L  96     -15.525   4.139 -17.324  1.00 13.92           N  
ATOM    713  CA  PHE L  96     -14.464   4.187 -16.358  1.00 13.72           C  
ATOM    714  C   PHE L  96     -14.023   5.570 -16.047  1.00 13.76           C  
ATOM    715  O   PHE L  96     -14.152   6.531 -16.844  1.00 17.01           O  
ATOM    716  CB  PHE L  96     -13.286   3.377 -16.902  1.00 14.10           C  
ATOM    717  CG  PHE L  96     -13.559   1.939 -16.974  1.00 13.79           C  
ATOM    718  CD1 PHE L  96     -13.336   1.090 -15.905  1.00 15.85           C  
ATOM    719  CD2 PHE L  96     -14.131   1.427 -18.169  1.00 18.17           C  
ATOM    720  CE1 PHE L  96     -13.705  -0.258 -16.014  1.00 18.78           C  
ATOM    721  CE2 PHE L  96     -14.494   0.047 -18.224  1.00 20.47           C  
ATOM    722  CZ  PHE L  96     -14.311  -0.789 -17.225  1.00 20.85           C  
ATOM    723  N   VAL L  97     -13.512   5.712 -14.855  1.00 12.45           N  
ATOM    724  CA  VAL L  97     -12.909   6.982 -14.445  1.00 13.32           C  
ATOM    725  C   VAL L  97     -11.510   6.700 -13.951  1.00 13.24           C  
ATOM    726  O   VAL L  97     -11.312   5.683 -13.223  1.00 12.75           O  
ATOM    727  CB  VAL L  97     -13.777   7.723 -13.408  1.00 15.13           C  
ATOM    728  CG1 VAL L  97     -14.084   6.887 -12.216  1.00 14.61           C  
ATOM    729  CG2 VAL L  97     -13.302   9.089 -12.992  1.00 15.43           C  
ATOM    730  N   PHE L  98     -10.579   7.617 -14.239  1.00 13.32           N  
ATOM    731  CA  PHE L  98      -9.168   7.464 -13.868  1.00 12.92           C  
ATOM    732  C   PHE L  98      -8.752   8.464 -12.798  1.00 11.81           C  
ATOM    733  O   PHE L  98      -9.325   9.584 -12.758  1.00 12.90           O  
ATOM    734  CB  PHE L  98      -8.186   7.594 -15.096  1.00 13.36           C  
ATOM    735  CG  PHE L  98      -8.072   6.309 -15.817  1.00 16.25           C  
ATOM    736  CD1 PHE L  98      -9.134   5.926 -16.553  1.00 17.40           C  
ATOM    737  CD2 PHE L  98      -6.948   5.576 -15.769  1.00 18.71           C  
ATOM    738  CE1 PHE L  98      -9.122   4.660 -17.321  1.00 17.86           C  
ATOM    739  CE2 PHE L  98      -6.933   4.272 -16.500  1.00 25.87           C  
ATOM    740  CZ  PHE L  98      -7.986   3.924 -17.259  1.00 22.21           C  
ATOM    741  N   GLY L  99      -7.796   8.107 -12.033  1.00 11.96           N  
ATOM    742  CA  GLY L  99      -7.115   8.998 -11.146  1.00 12.31           C  
ATOM    743  C   GLY L  99      -6.128   9.933 -11.878  1.00 13.13           C  
ATOM    744  O   GLY L  99      -5.701   9.641 -12.958  1.00 14.45           O  
ATOM    745  N   THR L 100      -5.674  10.941 -11.100  1.00 12.47           N  
ATOM    746  CA  THR L 100      -4.773  11.937 -11.609  1.00 13.74           C  
ATOM    747  C   THR L 100      -3.341  11.545 -11.603  1.00 15.58           C  
ATOM    748  O   THR L 100      -2.501  12.203 -12.218  1.00 16.21           O  
ATOM    749  CB  THR L 100      -4.984  13.287 -10.962  1.00 14.42           C  
ATOM    750  OG1 THR L 100      -4.870  13.073  -9.547  1.00 15.47           O  
ATOM    751  CG2 THR L 100      -6.482  13.805 -11.130  1.00 17.22           C  
ATOM    752  N   GLY L 101      -2.985  10.428 -10.945  1.00 12.75           N  
ATOM    753  CA  GLY L 101      -1.646   9.915 -10.929  1.00 13.00           C  
ATOM    754  C   GLY L 101      -0.829  10.361  -9.764  1.00 13.19           C  
ATOM    755  O   GLY L 101      -1.017  11.513  -9.230  1.00 12.47           O  
ATOM    756  N   THR L 102       0.110   9.545  -9.325  1.00 11.49           N  
ATOM    757  CA  THR L 102       0.988   9.840  -8.186  1.00 13.01           C  
ATOM    758  C   THR L 102       2.365   9.491  -8.677  1.00 11.52           C  
ATOM    759  O   THR L 102       2.677   8.303  -8.997  1.00 12.86           O  
ATOM    760  CB  THR L 102       0.612   8.959  -7.030  1.00 12.60           C  
ATOM    761  OG1 THR L 102      -0.675   9.241  -6.606  1.00 11.28           O  
ATOM    762  CG2 THR L 102       1.557   9.254  -5.837  1.00 12.50           C  
ATOM    763  N   LYS L 103       3.316  10.438  -8.533  1.00 12.56           N  
ATOM    764  CA  LYS L 103       4.774  10.229  -8.764  1.00 12.74           C  
ATOM    765  C   LYS L 103       5.360   9.669  -7.526  1.00 11.66           C  
ATOM    766  O   LYS L 103       5.389  10.398  -6.520  1.00 13.39           O  
ATOM    767  CB  LYS L 103       5.352  11.593  -9.233  1.00 14.22           C  
ATOM    768  CG  LYS L 103       6.876  11.396  -9.438  1.00 15.40           C  
ATOM    769  CD  LYS L 103       7.545  12.737  -9.788  1.00 17.33           C  
ATOM    770  CE  LYS L 103       8.994  12.462 -10.228  1.00 25.79           C  
ATOM    771  NZ  LYS L 103       9.606  13.889 -10.449  1.00 35.83           N  
ATOM    772  N   VAL L 104       5.915   8.504  -7.591  1.00 11.87           N  
ATOM    773  CA  VAL L 104       6.548   7.892  -6.462  1.00 12.93           C  
ATOM    774  C   VAL L 104       8.047   8.082  -6.649  1.00 13.79           C  
ATOM    775  O   VAL L 104       8.660   7.623  -7.682  1.00 14.55           O  
ATOM    776  CB  VAL L 104       6.199   6.391  -6.316  1.00 13.21           C  
ATOM    777  CG1 VAL L 104       7.074   5.681  -5.360  1.00 18.26           C  
ATOM    778  CG2 VAL L 104       4.805   6.308  -5.902  1.00 15.84           C  
ATOM    779  N   THR L 105       8.737   8.497  -5.554  1.00 13.18           N  
ATOM    780  CA  THR L 105      10.251   8.603  -5.546  1.00 14.70           C  
ATOM    781  C   THR L 105      10.833   7.906  -4.352  1.00 12.77           C  
ATOM    782  O   THR L 105      10.114   7.776  -3.299  1.00 14.27           O  
ATOM    783  CB  THR L 105      10.664  10.115  -5.623  1.00 14.58           C  
ATOM    784  OG1 THR L 105      10.138  10.849  -4.484  1.00 17.67           O  
ATOM    785  CG2 THR L 105      10.339  10.777  -6.961  1.00 15.61           C  
ATOM    786  N   VAL L 106      12.023   7.503  -4.459  1.00 13.64           N  
ATOM    787  CA  VAL L 106      12.750   6.848  -3.368  1.00 13.15           C  
ATOM    788  C   VAL L 106      13.670   7.911  -2.731  1.00 14.07           C  
ATOM    789  O   VAL L 106      14.363   8.617  -3.492  1.00 15.26           O  
ATOM    790  CB  VAL L 106      13.599   5.676  -3.876  1.00 16.65           C  
ATOM    791  CG1 VAL L 106      14.335   5.048  -2.764  1.00 17.18           C  
ATOM    792  CG2 VAL L 106      12.811   4.698  -4.572  1.00 20.66           C  
ATOM    793  N   LEU L 106A     13.618   7.979  -1.404  1.00 12.55           N  
ATOM    794  CA  LEU L 106A     14.417   8.868  -0.527  1.00 13.99           C  
ATOM    795  C   LEU L 106A     15.851   8.537  -0.766  1.00 14.93           C  
ATOM    796  O   LEU L 106A     16.169   7.354  -0.834  0.50 13.63           O  
ATOM    797  CB  LEU L 106A     13.929   8.928   0.818  1.00 13.08           C  
ATOM    798  CG  LEU L 106A     12.540   9.461   0.962  1.00 14.55           C  
ATOM    799  CD1 LEU L 106A     12.191   9.256   2.395  1.00 17.81           C  
ATOM    800  CD2 LEU L 106A     12.373  10.908   0.758  1.00 14.97           C  
ATOM    801  OXT LEU L 106A     16.730   9.500  -0.728  0.50 14.75           O  
TER     802      LEU L 106A                                                     
ATOM    803  N   SER L   2     -13.435 -21.856 -24.599  1.00 60.81           N  
ATOM    804  CA  SER L   2     -14.064 -20.601 -24.971  1.00 41.03           C  
ATOM    805  C   SER L   2     -13.022 -19.518 -24.633  1.00 49.74           C  
ATOM    806  O   SER L   2     -13.338 -18.576 -23.988  1.00 60.24           O  
ATOM    807  CB  SER L   2     -15.276 -20.443 -24.199  1.00 28.72           C  
ATOM    808  N   ALA L   3     -11.730 -19.724 -24.885  1.00 25.63           N  
ATOM    809  CA  ALA L   3     -10.818 -18.504 -24.868  1.00 19.37           C  
ATOM    810  C   ALA L   3     -10.817 -17.955 -26.331  1.00 18.54           C  
ATOM    811  O   ALA L   3     -11.049 -18.696 -27.342  1.00 22.40           O  
ATOM    812  CB  ALA L   3      -9.501 -18.894 -24.474  1.00 20.20           C  
ATOM    813  N   LEU L   4     -10.463 -16.657 -26.499  1.00 13.50           N  
ATOM    814  CA  LEU L   4     -10.310 -16.087 -27.820  1.00 12.69           C  
ATOM    815  C   LEU L   4      -9.122 -16.802 -28.474  1.00 12.33           C  
ATOM    816  O   LEU L   4      -8.173 -17.197 -27.785  1.00 13.35           O  
ATOM    817  CB  LEU L   4     -10.021 -14.613 -27.723  1.00 11.52           C  
ATOM    818  CG  LEU L   4     -11.115 -13.793 -27.124  1.00 12.88           C  
ATOM    819  CD1 LEU L   4     -10.774 -12.356 -27.044  1.00 13.50           C  
ATOM    820  CD2 LEU L   4     -12.466 -13.972 -27.889  1.00 14.35           C  
ATOM    821  N   THR L   5      -9.221 -17.027 -29.776  1.00 10.76           N  
ATOM    822  CA  THR L   5      -8.201 -17.781 -30.455  1.00 11.32           C  
ATOM    823  C   THR L   5      -7.030 -16.947 -30.893  1.00 10.63           C  
ATOM    824  O   THR L   5      -7.274 -15.900 -31.601  1.00 11.67           O  
ATOM    825  CB  THR L   5      -8.814 -18.496 -31.641  1.00 11.70           C  
ATOM    826  OG1 THR L   5      -9.894 -19.274 -31.144  1.00 13.33           O  
ATOM    827  CG2 THR L   5      -7.860 -19.414 -32.354  1.00 13.68           C  
ATOM    828  N   GLN L   6      -5.866 -17.391 -30.559  1.00 11.84           N  
ATOM    829  CA  GLN L   6      -4.618 -16.747 -31.037  1.00 10.64           C  
ATOM    830  C   GLN L   6      -3.685 -17.831 -31.539  1.00 11.63           C  
ATOM    831  O   GLN L   6      -3.674 -18.964 -30.990  1.00 12.29           O  
ATOM    832  CB  GLN L   6      -3.948 -16.030 -29.892  1.00 11.90           C  
ATOM    833  CG  GLN L   6      -4.638 -14.802 -29.308  1.00 11.95           C  
ATOM    834  CD  GLN L   6      -3.863 -14.148 -28.228  1.00 11.94           C  
ATOM    835  OE1 GLN L   6      -4.367 -13.889 -27.103  1.00 12.48           O  
ATOM    836  NE2 GLN L   6      -2.695 -13.822 -28.477  1.00 11.78           N  
ATOM    837  N   PRO L   7      -2.749 -17.523 -32.504  1.00 11.15           N  
ATOM    838  CA  PRO L   7      -1.728 -18.518 -32.802  1.00 11.96           C  
ATOM    839  C   PRO L   7      -0.847 -18.695 -31.612  1.00 10.84           C  
ATOM    840  O   PRO L   7      -0.543 -17.822 -30.825  1.00 11.12           O  
ATOM    841  CB  PRO L   7      -0.950 -17.832 -33.962  1.00 11.44           C  
ATOM    842  CG  PRO L   7      -1.193 -16.338 -33.657  1.00 12.79           C  
ATOM    843  CD  PRO L   7      -2.626 -16.273 -33.249  1.00 11.52           C  
ATOM    844  N   PRO L   8      -0.311 -19.954 -31.405  1.00 12.30           N  
ATOM    845  CA  PRO L   8       0.518 -20.204 -30.147  1.00 12.33           C  
ATOM    846  C   PRO L   8       1.870 -19.406 -30.199  1.00 12.42           C  
ATOM    847  O   PRO L   8       2.347 -19.045 -29.214  1.00 12.37           O  
ATOM    848  CB  PRO L   8       0.720 -21.655 -30.244  1.00 14.29           C  
ATOM    849  CG  PRO L   8       0.378 -22.061 -31.588  1.00 21.26           C  
ATOM    850  CD  PRO L   8      -0.799 -21.203 -32.046  1.00 13.93           C  
ATOM    851  N   SER L   9       2.370 -19.228 -31.390  1.00 13.17           N  
ATOM    852  CA  SER L   9       3.656 -18.528 -31.598  1.00 13.64           C  
ATOM    853  C   SER L   9       3.599 -17.826 -32.943  1.00 12.72           C  
ATOM    854  O   SER L   9       2.925 -18.197 -33.827  1.00 14.28           O  
ATOM    855  CB  SER L   9       4.822 -19.514 -31.484  1.00 17.17           C  
ATOM    856  OG  SER L   9       4.741 -20.468 -32.406  1.00 23.61           O  
ATOM    857  N   ALA L  11       4.548 -16.945 -33.085  1.00 13.47           N  
ATOM    858  CA  ALA L  11       4.764 -16.265 -34.369  1.00 13.14           C  
ATOM    859  C   ALA L  11       6.247 -15.675 -34.315  1.00 12.38           C  
ATOM    860  O   ALA L  11       6.717 -15.309 -33.223  1.00 13.89           O  
ATOM    861  CB  ALA L  11       3.795 -15.153 -34.515  1.00 14.20           C  
ATOM    862  N   SER L  12       6.867 -15.578 -35.443  1.00 12.75           N  
ATOM    863  CA  SER L  12       8.250 -15.124 -35.522  1.00 13.25           C  
ATOM    864  C   SER L  12       8.378 -14.041 -36.562  1.00 11.91           C  
ATOM    865  O   SER L  12       7.716 -14.050 -37.600  1.00 12.78           O  
ATOM    866  CB  SER L  12       9.204 -16.274 -35.832  1.00 12.38           C  
ATOM    867  OG  SER L  12       9.151 -17.329 -34.921  1.00 14.84           O  
ATOM    868  N   GLY L  13       9.446 -13.219 -36.436  1.00 12.84           N  
ATOM    869  CA  GLY L  13       9.806 -12.270 -37.513  1.00 13.33           C  
ATOM    870  C   GLY L  13      11.277 -11.906 -37.413  1.00 13.08           C  
ATOM    871  O   GLY L  13      11.867 -12.069 -36.386  1.00 12.74           O  
ATOM    872  N   SER L  14      11.785 -11.450 -38.532  1.00 13.87           N  
ATOM    873  CA  SER L  14      13.176 -10.889 -38.486  1.00 12.74           C  
ATOM    874  C   SER L  14      13.238  -9.540 -37.928  1.00 12.74           C  
ATOM    875  O   SER L  14      12.233  -8.803 -38.028  1.00 13.36           O  
ATOM    876  CB  SER L  14      13.662 -10.889 -39.953  1.00 15.73           C  
ATOM    877  OG  SER L  14      13.809 -12.302 -40.464  1.00 19.37           O  
ATOM    878  N   LEU L  15      14.395  -9.215 -37.351  1.00 12.28           N  
ATOM    879  CA  LEU L  15      14.558  -7.850 -36.912  1.00 12.31           C  
ATOM    880  C   LEU L  15      14.240  -6.850 -37.985  1.00 12.73           C  
ATOM    881  O   LEU L  15      14.624  -6.984 -39.146  1.00 14.24           O  
ATOM    882  CB  LEU L  15      15.941  -7.666 -36.464  1.00 13.56           C  
ATOM    883  CG  LEU L  15      16.397  -8.289 -35.125  1.00 14.17           C  
ATOM    884  CD1 LEU L  15      17.899  -8.202 -34.869  1.00 13.78           C  
ATOM    885  CD2 LEU L  15      15.714  -7.897 -33.951  1.00 15.78           C  
ATOM    886  N   GLY L  16      13.398  -5.809 -37.584  1.00 12.38           N  
ATOM    887  CA  GLY L  16      13.059  -4.788 -38.524  1.00 12.27           C  
ATOM    888  C   GLY L  16      11.775  -5.095 -39.315  1.00 12.03           C  
ATOM    889  O   GLY L  16      11.279  -4.210 -40.018  1.00 14.44           O  
ATOM    890  N   GLN L  17      11.356  -6.331 -39.316  1.00 12.67           N  
ATOM    891  CA  GLN L  17      10.150  -6.821 -40.035  1.00 11.68           C  
ATOM    892  C   GLN L  17       8.905  -6.652 -39.120  1.00 12.43           C  
ATOM    893  O   GLN L  17       8.935  -5.818 -38.211  1.00 13.96           O  
ATOM    894  CB  GLN L  17      10.369  -8.189 -40.602  1.00 11.90           C  
ATOM    895  CG  GLN L  17      11.519  -8.197 -41.653  1.00 14.22           C  
ATOM    896  CD  GLN L  17      11.273  -7.236 -42.859  1.00 15.54           C  
ATOM    897  OE1 GLN L  17      12.124  -6.370 -43.040  1.00 22.37           O  
ATOM    898  NE2 GLN L  17      10.110  -7.252 -43.341  1.00 16.61           N  
ATOM    899  N   SER L  18       7.905  -7.364 -39.394  1.00 16.53           N  
ATOM    900  CA  SER L  18       6.665  -7.222 -38.477  1.00 15.72           C  
ATOM    901  C   SER L  18       6.133  -8.560 -38.137  1.00 18.27           C  
ATOM    902  O   SER L  18       6.508  -9.642 -38.826  1.00 21.04           O  
ATOM    903  CB  SER L  18       5.584  -6.477 -39.148  1.00 17.61           C  
ATOM    904  OG  SER L  18       5.205  -7.186 -40.294  1.00 19.32           O  
ATOM    905  N   VAL L  19       5.449  -8.697 -37.018  1.00 15.17           N  
ATOM    906  CA  VAL L  19       4.675  -9.884 -36.668  1.00 14.23           C  
ATOM    907  C   VAL L  19       3.222  -9.452 -36.535  1.00 11.98           C  
ATOM    908  O   VAL L  19       3.023  -8.345 -35.861  1.00 13.41           O  
ATOM    909  CB  VAL L  19       5.268 -10.473 -35.474  1.00 16.26           C  
ATOM    910  CG1 VAL L  19       4.545 -11.538 -35.103  1.00 14.78           C  
ATOM    911  CG2 VAL L  19       6.668 -11.006 -35.710  1.00 17.56           C  
ATOM    912  N   THR L  20       2.253 -10.189 -36.993  1.00 12.41           N  
ATOM    913  CA  THR L  20       0.879  -9.904 -36.702  1.00 12.89           C  
ATOM    914  C   THR L  20       0.247 -11.039 -35.966  1.00 12.81           C  
ATOM    915  O   THR L  20       0.396 -12.260 -36.380  1.00 14.28           O  
ATOM    916  CB  THR L  20       0.101  -9.718 -38.088  1.00 12.82           C  
ATOM    917  OG1 THR L  20       0.707  -8.625 -38.824  1.00 13.64           O  
ATOM    918  CG2 THR L  20      -1.366  -9.505 -37.955  1.00 14.49           C  
ATOM    919  N   ILE L  21      -0.451 -10.666 -34.948  1.00 12.81           N  
ATOM    921  CA  ILE L  21      -0.963 -11.667 -33.958  0.50 11.43           C  
ATOM    922  C   ILE L  21      -2.640 -11.498 -34.042  1.00 12.46           C  
ATOM    923  O   ILE L  21      -3.103 -10.358 -33.733  1.00 12.42           O  
ATOM    925  CB  ILE L  21      -0.485 -11.388 -32.493  0.50 13.10           C  
ATOM    927  CG1 ILE L  21       1.075 -11.403 -32.366  0.50 12.34           C  
ATOM    929  CG2 ILE L  21      -1.129 -12.476 -31.572  0.50 13.42           C  
ATOM    931  CD1 ILE L  21       1.639 -10.059 -32.159  0.50 17.12           C  
ATOM    932  N   SER L  22      -3.298 -12.471 -34.527  1.00 12.62           N  
ATOM    933  CA  SER L  22      -4.807 -12.396 -34.645  1.00 10.96           C  
ATOM    934  C   SER L  22      -5.434 -12.871 -33.310  1.00 10.34           C  
ATOM    935  O   SER L  22      -4.862 -13.615 -32.533  1.00 12.32           O  
ATOM    936  CB  SER L  22      -5.213 -13.158 -35.860  1.00 11.29           C  
ATOM    937  OG  SER L  22      -4.957 -14.545 -35.766  1.00 12.19           O  
ATOM    938  N   CYS L  23      -6.615 -12.440 -33.179  1.00 11.06           N  
ATOM    939  CA  CYS L  23      -7.386 -12.655 -31.957  1.00 10.99           C  
ATOM    940  C   CYS L  23      -8.925 -12.871 -32.457  1.00 11.52           C  
ATOM    941  O   CYS L  23      -9.569 -11.850 -32.833  1.00 12.01           O  
ATOM    942  CB  CYS L  23      -7.322 -11.426 -31.084  1.00  9.99           C  
ATOM    943  SG  CYS L  23      -8.401 -11.437 -29.626  1.00 12.22           S  
ATOM    944  N   THR L  24      -9.317 -14.094 -32.517  1.00 11.09           N  
ATOM    945  CA  THR L  24     -10.666 -14.432 -33.173  1.00 10.99           C  
ATOM    946  C   THR L  24     -11.631 -14.788 -32.051  1.00 10.83           C  
ATOM    947  O   THR L  24     -11.387 -15.704 -31.174  1.00 11.67           O  
ATOM    948  CB  THR L  24     -10.551 -15.532 -34.107  1.00 11.59           C  
ATOM    949  OG1 THR L  24      -9.623 -15.173 -35.167  1.00 12.81           O  
ATOM    950  CG2 THR L  24     -11.911 -15.809 -34.738  1.00 14.07           C  
ATOM    951  N   GLY L  25     -12.751 -14.144 -32.085  1.00 12.07           N  
ATOM    952  CA  GLY L  25     -13.882 -14.440 -31.205  1.00 12.78           C  
ATOM    953  C   GLY L  25     -15.119 -14.611 -32.053  1.00 13.83           C  
ATOM    954  O   GLY L  25     -15.164 -15.267 -33.110  1.00 13.58           O  
ATOM    955  N   THR L  26     -16.192 -14.173 -31.498  1.00 12.88           N  
ATOM    956  CA  THR L  26     -17.578 -14.294 -32.109  1.00 12.85           C  
ATOM    957  C   THR L  26     -18.135 -12.876 -32.216  1.00 12.19           C  
ATOM    958  O   THR L  26     -17.654 -11.870 -31.618  1.00 11.78           O  
ATOM    959  CB  THR L  26     -18.470 -15.186 -31.224  1.00 14.73           C  
ATOM    960  OG1 THR L  26     -18.952 -14.453 -30.114  1.00 15.91           O  
ATOM    961  CG2 THR L  26     -17.789 -16.535 -30.750  1.00 16.10           C  
ATOM    962  N   SER L  27     -19.383 -12.842 -32.815  1.00 13.62           N  
ATOM    963  CA  SER L  27     -20.096 -11.559 -32.901  1.00 12.87           C  
ATOM    964  C   SER L  27     -20.625 -11.071 -31.560  1.00 12.33           C  
ATOM    965  O   SER L  27     -21.023  -9.846 -31.523  1.00 14.86           O  
ATOM    966  CB  SER L  27     -21.252 -11.813 -33.830  1.00 15.61           C  
ATOM    967  OG  SER L  27     -20.781 -12.295 -35.104  1.00 21.12           O  
ATOM    968  N   SER L  27A    -20.529 -11.836 -30.547  1.00 13.32           N  
ATOM    969  CA  SER L  27A    -20.879 -11.467 -29.244  1.00 14.90           C  
ATOM    970  C   SER L  27A    -19.733 -10.901 -28.403  1.00 14.02           C  
ATOM    971  O   SER L  27A    -19.894 -10.512 -27.255  1.00 14.49           O  
ATOM    972  CB  SER L  27A    -21.516 -12.744 -28.461  1.00 16.80           C  
ATOM    973  OG  SER L  27A    -22.676 -13.221 -29.094  1.00 21.52           O  
ATOM    974  N   ASP L  27B    -18.556 -10.841 -28.951  1.00 12.70           N  
ATOM    975  CA  ASP L  27B    -17.299 -10.335 -28.242  1.00 13.11           C  
ATOM    976  C   ASP L  27B    -16.533  -9.512 -29.180  1.00 11.14           C  
ATOM    977  O   ASP L  27B    -16.816  -8.354 -29.428  1.00 11.82           O  
ATOM    978  CB  ASP L  27B    -16.703 -11.499 -27.433  1.00 12.43           C  
ATOM    979  CG  ASP L  27B    -16.508 -12.729 -28.227  1.00 13.40           C  
ATOM    980  OD1 ASP L  27B    -15.641 -12.754 -29.146  1.00 11.92           O  
ATOM    981  OD2 ASP L  27B    -17.270 -13.742 -28.093  1.00 16.49           O  
ATOM    982  N   VAL L  27C    -15.488 -10.086 -29.785  1.00 12.57           N  
ATOM    983  CA  VAL L  27C    -14.601  -9.374 -30.653  1.00 12.12           C  
ATOM    984  C   VAL L  27C    -15.372  -8.635 -31.705  1.00 11.70           C  
ATOM    985  O   VAL L  27C    -15.109  -7.431 -31.965  1.00 12.07           O  
ATOM    986  CB  VAL L  27C    -13.522 -10.313 -31.242  1.00 11.30           C  
ATOM    987  CG1 VAL L  27C    -12.745  -9.578 -32.348  1.00 13.14           C  
ATOM    988  CG2 VAL L  27C    -12.668 -10.902 -30.202  1.00 12.88           C  
ATOM    989  N   GLY L  28     -16.327  -9.332 -32.391  1.00 11.60           N  
ATOM    990  CA  GLY L  28     -17.012  -8.684 -33.444  1.00 12.43           C  
ATOM    991  C   GLY L  28     -18.089  -7.762 -32.984  1.00 12.54           C  
ATOM    992  O   GLY L  28     -18.561  -6.926 -33.867  1.00 14.38           O  
ATOM    993  N   GLY L  29     -18.519  -7.768 -31.746  1.00 13.19           N  
ATOM    994  CA  GLY L  29     -19.658  -7.046 -31.247  1.00 13.80           C  
ATOM    995  C   GLY L  29     -19.375  -5.737 -30.674  1.00 13.06           C  
ATOM    996  O   GLY L  29     -20.303  -4.906 -30.497  1.00 14.95           O  
ATOM    997  N   TYR L  30     -18.121  -5.451 -30.375  1.00 11.88           N  
ATOM    998  CA  TYR L  30     -17.748  -4.237 -29.711  1.00 11.43           C  
ATOM    999  C   TYR L  30     -16.416  -3.750 -30.313  1.00 12.29           C  
ATOM   1000  O   TYR L  30     -15.646  -4.564 -30.937  1.00 13.51           O  
ATOM   1001  CB  TYR L  30     -17.521  -4.431 -28.171  1.00 12.42           C  
ATOM   1002  CG  TYR L  30     -18.751  -5.037 -27.505  1.00 12.65           C  
ATOM   1003  CD1 TYR L  30     -19.807  -4.281 -27.084  1.00 13.20           C  
ATOM   1004  CD2 TYR L  30     -18.799  -6.394 -27.357  1.00 12.39           C  
ATOM   1005  CE1 TYR L  30     -20.890  -4.879 -26.457  1.00 14.06           C  
ATOM   1006  CE2 TYR L  30     -19.900  -6.959 -26.880  1.00 15.32           C  
ATOM   1007  CZ  TYR L  30     -20.933  -6.231 -26.424  1.00 14.85           C  
ATOM   1008  OH  TYR L  30     -22.082  -6.851 -25.885  1.00 16.31           O  
ATOM   1009  N   ASN L  31     -16.046  -2.520 -30.096  1.00 12.51           N  
ATOM   1010  CA  ASN L  31     -14.617  -2.040 -30.366  1.00 13.01           C  
ATOM   1011  C   ASN L  31     -13.890  -1.932 -29.038  1.00 11.81           C  
ATOM   1012  O   ASN L  31     -13.508  -0.858 -28.586  1.00 13.88           O  
ATOM   1013  CB  ASN L  31     -14.733  -0.678 -30.978  1.00 14.77           C  
ATOM   1014  CG  ASN L  31     -15.346  -0.800 -32.364  1.00 15.68           C  
ATOM   1015  OD1 ASN L  31     -14.949  -1.585 -33.083  1.00 18.67           O  
ATOM   1016  ND2 ASN L  31     -16.168   0.217 -32.762  1.00 19.52           N  
ATOM   1017  N   TYR L  32     -13.689  -3.105 -28.449  1.00 11.74           N  
ATOM   1018  CA  TYR L  32     -13.237  -3.205 -27.092  1.00 12.72           C  
ATOM   1019  C   TYR L  32     -12.262  -4.373 -26.931  1.00 12.17           C  
ATOM   1020  O   TYR L  32     -12.353  -5.201 -25.980  1.00 12.10           O  
ATOM   1021  CB  TYR L  32     -14.430  -3.254 -26.041  1.00 12.33           C  
ATOM   1022  CG  TYR L  32     -14.062  -2.499 -24.861  1.00 13.26           C  
ATOM   1023  CD1 TYR L  32     -14.322  -1.119 -24.762  1.00 17.83           C  
ATOM   1024  CD2 TYR L  32     -13.487  -3.128 -23.830  1.00 15.18           C  
ATOM   1025  CE1 TYR L  32     -13.825  -0.457 -23.637  1.00 25.45           C  
ATOM   1026  CE2 TYR L  32     -13.056  -2.437 -22.672  1.00 16.00           C  
ATOM   1027  CZ  TYR L  32     -13.195  -1.104 -22.602  1.00 16.95           C  
ATOM   1028  OH  TYR L  32     -12.671  -0.492 -21.444  1.00 23.92           O  
ATOM   1029  N   VAL L  33     -11.264  -4.448 -27.815  1.00 12.61           N  
ATOM   1030  CA  VAL L  33     -10.186  -5.388 -27.817  1.00 13.78           C  
ATOM   1031  C   VAL L  33      -8.925  -4.710 -27.215  1.00 11.36           C  
ATOM   1032  O   VAL L  33      -8.550  -3.626 -27.662  1.00 11.52           O  
ATOM   1033  CB  VAL L  33      -9.899  -5.944 -29.162  1.00 12.93           C  
ATOM   1034  CG1 VAL L  33      -8.665  -6.791 -29.203  1.00 12.58           C  
ATOM   1035  CG2 VAL L  33     -11.052  -6.656 -29.740  1.00 12.63           C  
ATOM   1036  N   SER L  34      -8.397  -5.340 -26.188  1.00 10.65           N  
ATOM   1037  CA  SER L  34      -7.094  -4.845 -25.640  1.00 12.95           C  
ATOM   1038  C   SER L  34      -6.042  -5.880 -25.950  1.00 10.89           C  
ATOM   1039  O   SER L  34      -6.287  -7.087 -26.103  1.00 11.48           O  
ATOM   1040  CB  SER L  34      -7.203  -4.700 -24.142  1.00 11.84           C  
ATOM   1041  OG  SER L  34      -8.128  -3.633 -23.815  1.00 14.48           O  
ATOM   1042  N   TRP L  35      -4.799  -5.381 -25.880  1.00 11.67           N  
ATOM   1043  CA  TRP L  35      -3.631  -6.203 -26.083  1.00 12.52           C  
ATOM   1044  C   TRP L  35      -2.557  -5.949 -24.963  1.00 11.23           C  
ATOM   1045  O   TRP L  35      -2.337  -4.756 -24.631  1.00 11.67           O  
ATOM   1046  CB  TRP L  35      -2.921  -5.942 -27.398  1.00 11.59           C  
ATOM   1047  CG  TRP L  35      -3.697  -6.402 -28.572  1.00 10.32           C  
ATOM   1048  CD1 TRP L  35      -4.627  -5.640 -29.367  1.00 12.03           C  
ATOM   1049  CD2 TRP L  35      -3.696  -7.723 -29.055  1.00 11.05           C  
ATOM   1050  NE1 TRP L  35      -5.108  -6.513 -30.318  1.00 11.20           N  
ATOM   1051  CE2 TRP L  35      -4.538  -7.773 -30.203  1.00 11.71           C  
ATOM   1052  CE3 TRP L  35      -2.931  -8.848 -28.767  1.00 12.33           C  
ATOM   1053  CZ2 TRP L  35      -4.703  -8.940 -30.976  1.00 12.37           C  
ATOM   1054  CZ3 TRP L  35      -3.165 -10.011 -29.545  1.00 13.68           C  
ATOM   1055  CH2 TRP L  35      -3.988 -10.009 -30.628  1.00 13.39           C  
ATOM   1056  N   TYR L  36      -2.063  -7.041 -24.428  1.00 12.32           N  
ATOM   1057  CA  TYR L  36      -1.036  -6.954 -23.395  1.00 12.67           C  
ATOM   1058  C   TYR L  36       0.223  -7.665 -23.813  1.00 11.76           C  
ATOM   1059  O   TYR L  36       0.156  -8.741 -24.504  1.00 12.47           O  
ATOM   1060  CB  TYR L  36      -1.575  -7.690 -22.164  1.00 11.97           C  
ATOM   1061  CG  TYR L  36      -2.879  -7.170 -21.694  1.00 11.96           C  
ATOM   1062  CD1 TYR L  36      -2.923  -6.061 -20.747  1.00 15.52           C  
ATOM   1063  CD2 TYR L  36      -4.072  -7.632 -22.134  1.00 16.74           C  
ATOM   1064  CE1 TYR L  36      -4.011  -5.603 -20.271  1.00 20.81           C  
ATOM   1065  CE2 TYR L  36      -5.337  -7.058 -21.667  1.00 16.29           C  
ATOM   1066  CZ  TYR L  36      -5.162  -5.996 -20.750  1.00 17.70           C  
ATOM   1067  OH  TYR L  36      -6.419  -5.334 -20.359  1.00 18.88           O  
ATOM   1068  N   GLN L  37       1.378  -7.137 -23.390  1.00 11.32           N  
ATOM   1069  CA  GLN L  37       2.697  -7.707 -23.667  1.00 12.87           C  
ATOM   1070  C   GLN L  37       3.273  -8.116 -22.348  1.00 12.85           C  
ATOM   1071  O   GLN L  37       3.423  -7.269 -21.446  1.00 14.59           O  
ATOM   1072  CB  GLN L  37       3.595  -6.598 -24.334  1.00 12.86           C  
ATOM   1073  CG  GLN L  37       5.028  -7.033 -24.534  1.00 14.07           C  
ATOM   1074  CD  GLN L  37       5.763  -5.841 -24.899  1.00 16.00           C  
ATOM   1075  OE1 GLN L  37       5.997  -4.917 -24.092  1.00 18.92           O  
ATOM   1076  NE2 GLN L  37       6.353  -5.758 -26.054  1.00 17.20           N  
ATOM   1077  N   GLN L  38       3.702  -9.357 -22.269  1.00 12.19           N  
ATOM   1078  CA  GLN L  38       4.274  -9.866 -21.052  1.00 14.23           C  
ATOM   1079  C   GLN L  38       5.598 -10.639 -21.287  1.00 16.44           C  
ATOM   1080  O   GLN L  38       5.562 -11.649 -21.943  1.00 16.90           O  
ATOM   1081  CB  GLN L  38       3.325 -10.599 -20.278  1.00 15.88           C  
ATOM   1082  CG  GLN L  38       3.775 -10.985 -18.889  1.00 20.09           C  
ATOM   1083  CD  GLN L  38       2.781 -11.644 -18.187  1.00 21.87           C  
ATOM   1084  OE1 GLN L  38       2.031 -12.558 -18.697  1.00 34.42           O  
ATOM   1085  NE2 GLN L  38       2.729 -11.387 -16.806  1.00 23.09           N  
ATOM   1086  N   HIS L  39       6.580 -10.283 -20.563  1.00 23.49           N  
ATOM   1087  CA  HIS L  39       7.854 -10.935 -20.545  1.00 35.31           C  
ATOM   1088  C   HIS L  39       7.727 -11.876 -19.389  1.00 34.33           C  
ATOM   1089  O   HIS L  39       7.141 -11.580 -18.260  1.00 24.88           O  
ATOM   1090  CB  HIS L  39       9.120 -10.005 -20.357  1.00 42.94           C  
ATOM   1091  CG  HIS L  39       9.318  -8.958 -21.410  1.00 41.00           C  
ATOM   1092  ND1 HIS L  39      10.570  -8.668 -21.928  1.00 67.32           N  
ATOM   1093  CD2 HIS L  39       8.429  -8.196 -22.095  1.00 36.09           C  
ATOM   1094  CE1 HIS L  39      10.437  -7.750 -22.873  1.00 80.29           C  
ATOM   1095  NE2 HIS L  39       9.143  -7.485 -23.023  1.00 64.34           N  
ATOM   1096  N   ALA L  40       8.414 -13.004 -19.569  1.00 47.30           N  
ATOM   1097  CA  ALA L  40       8.242 -14.080 -18.608  1.00 51.65           C  
ATOM   1098  C   ALA L  40       8.508 -13.594 -17.187  1.00 36.24           C  
ATOM   1099  O   ALA L  40       9.514 -12.848 -16.879  1.00 33.35           O  
ATOM   1100  CB  ALA L  40       9.110 -15.257 -18.975  1.00 66.25           C  
ATOM   1101  N   GLY L  41       7.518 -13.735 -16.314  1.00 38.56           N  
ATOM   1102  CA  GLY L  41       7.714 -13.423 -14.939  1.00 37.77           C  
ATOM   1103  C   GLY L  41       7.824 -11.935 -14.657  1.00 31.81           C  
ATOM   1104  O   GLY L  41       8.167 -11.593 -13.522  1.00 33.27           O  
ATOM   1105  N   LYS L  42       7.522 -11.024 -15.597  1.00 29.32           N  
ATOM   1106  CA  LYS L  42       7.339  -9.553 -15.356  1.00 31.97           C  
ATOM   1107  C   LYS L  42       5.799  -9.162 -15.411  1.00 24.08           C  
ATOM   1108  O   LYS L  42       4.960 -10.002 -15.834  1.00 23.07           O  
ATOM   1109  CB  LYS L  42       8.085  -8.629 -16.349  1.00 27.95           C  
ATOM   1110  CG  LYS L  42       9.654  -8.724 -16.579  1.00 35.16           C  
ATOM   1111  CD  LYS L  42      10.234  -7.476 -17.204  1.00 39.74           C  
ATOM   1112  CE  LYS L  42       9.825  -7.028 -18.595  1.00 46.54           C  
ATOM   1113  NZ  LYS L  42       9.885  -5.563 -18.737  1.00 37.21           N  
ATOM   1114  N   ALA L  43       5.453  -8.003 -15.010  1.00 22.65           N  
ATOM   1115  CA  ALA L  43       4.059  -7.579 -15.025  1.00 18.42           C  
ATOM   1116  C   ALA L  43       3.665  -7.295 -16.504  1.00 18.53           C  
ATOM   1117  O   ALA L  43       4.525  -6.771 -17.312  1.00 20.38           O  
ATOM   1118  CB  ALA L  43       3.999  -6.310 -14.344  1.00 20.15           C  
ATOM   1119  N   PRO L  44       2.421  -7.445 -16.820  1.00 17.53           N  
ATOM   1120  CA  PRO L  44       2.038  -7.192 -18.164  1.00 15.33           C  
ATOM   1121  C   PRO L  44       1.897  -5.808 -18.512  1.00 14.52           C  
ATOM   1122  O   PRO L  44       1.425  -4.936 -17.705  1.00 20.41           O  
ATOM   1123  CB  PRO L  44       0.708  -7.943 -18.289  1.00 17.67           C  
ATOM   1124  CG  PRO L  44       0.093  -7.960 -16.908  1.00 19.29           C  
ATOM   1125  CD  PRO L  44       1.248  -7.953 -16.032  1.00 19.50           C  
ATOM   1126  N   LYS L  45       2.185  -5.374 -19.710  1.00 13.90           N  
ATOM   1127  CA  LYS L  45       2.017  -4.053 -20.178  1.00 13.77           C  
ATOM   1128  C   LYS L  45       0.896  -3.882 -21.083  1.00 12.22           C  
ATOM   1129  O   LYS L  45       0.560  -4.812 -21.901  1.00 13.78           O  
ATOM   1130  CB  LYS L  45       3.256  -3.650 -20.967  1.00 14.22           C  
ATOM   1131  CG  LYS L  45       4.628  -3.645 -20.148  1.00 22.73           C  
ATOM   1132  CD  LYS L  45       5.777  -3.238 -21.032  1.00 19.85           C  
ATOM   1133  CE  LYS L  45       6.396  -4.319 -21.765  1.00 30.44           C  
ATOM   1134  NZ  LYS L  45       6.800  -5.661 -21.245  1.00 33.41           N  
ATOM   1135  N   VAL L  46       0.158  -2.772 -20.925  1.00 12.89           N  
ATOM   1136  CA  VAL L  46      -0.962  -2.474 -21.867  1.00 13.05           C  
ATOM   1137  C   VAL L  46      -0.380  -1.853 -23.076  1.00 11.81           C  
ATOM   1138  O   VAL L  46       0.170  -0.739 -22.998  1.00 15.05           O  
ATOM   1139  CB  VAL L  46      -1.989  -1.564 -21.288  1.00 17.16           C  
ATOM   1140  CG1 VAL L  46      -3.123  -1.363 -22.225  1.00 17.81           C  
ATOM   1141  CG2 VAL L  46      -2.353  -1.993 -19.785  1.00 21.37           C  
ATOM   1142  N   ILE L  47      -0.583  -2.508 -24.224  1.00 11.00           N  
ATOM   1143  CA  ILE L  47      -0.074  -2.008 -25.553  1.00 12.64           C  
ATOM   1144  C   ILE L  47      -1.216  -1.328 -26.263  1.00 12.88           C  
ATOM   1145  O   ILE L  47      -0.932  -0.176 -26.876  1.00 13.03           O  
ATOM   1146  CB  ILE L  47       0.324  -3.279 -26.361  1.00 14.55           C  
ATOM   1147  CG1 ILE L  47       1.574  -3.945 -25.743  1.00 15.62           C  
ATOM   1148  CG2 ILE L  47       0.735  -2.762 -27.811  1.00 16.30           C  
ATOM   1149  CD1 ILE L  47       2.834  -3.149 -25.733  1.00 19.01           C  
ATOM   1150  N   ILE L  48      -2.369  -1.806 -26.244  1.00 11.78           N  
ATOM   1151  CA  ILE L  48      -3.541  -1.331 -27.037  1.00 11.76           C  
ATOM   1152  C   ILE L  48      -4.752  -1.476 -26.231  1.00 13.16           C  
ATOM   1153  O   ILE L  48      -4.957  -2.566 -25.573  1.00 12.12           O  
ATOM   1154  CB  ILE L  48      -3.647  -1.911 -28.413  1.00 12.47           C  
ATOM   1155  CG1 ILE L  48      -2.744  -0.993 -29.387  1.00 17.06           C  
ATOM   1156  CG2 ILE L  48      -5.078  -1.849 -29.014  1.00 13.09           C  
ATOM   1157  CD1 ILE L  48      -2.655  -1.625 -30.793  1.00 21.61           C  
ATOM   1158  N   TYR L  49      -5.702  -0.567 -26.271  1.00 12.89           N  
ATOM   1159  CA  TYR L  49      -7.102  -0.826 -25.822  1.00 13.34           C  
ATOM   1160  C   TYR L  49      -8.012  -0.342 -26.873  1.00 13.96           C  
ATOM   1161  O   TYR L  49      -7.665   0.463 -27.825  1.00 11.82           O  
ATOM   1162  CB  TYR L  49      -7.289  -0.136 -24.449  1.00 13.03           C  
ATOM   1163  CG  TYR L  49      -7.164   1.344 -24.457  1.00 14.86           C  
ATOM   1164  CD1 TYR L  49      -5.926   2.005 -24.477  1.00 14.80           C  
ATOM   1165  CD2 TYR L  49      -8.294   2.137 -24.526  1.00 15.44           C  
ATOM   1166  CE1 TYR L  49      -5.886   3.401 -24.471  1.00 15.40           C  
ATOM   1167  CE2 TYR L  49      -8.215   3.523 -24.580  1.00 17.84           C  
ATOM   1168  CZ  TYR L  49      -7.024   4.062 -24.551  1.00 18.91           C  
ATOM   1169  OH  TYR L  49      -6.891   5.535 -24.662  1.00 22.78           O  
ATOM   1170  N   GLU L  50      -9.330  -0.697 -26.845  1.00 12.43           N  
ATOM   1171  CA  GLU L  50     -10.262  -0.200 -27.742  1.00 13.35           C  
ATOM   1172  C   GLU L  50      -9.829  -0.400 -29.191  1.00 11.57           C  
ATOM   1173  O   GLU L  50      -9.988   0.434 -30.082  1.00 11.99           O  
ATOM   1174  CB  GLU L  50     -10.682   1.224 -27.482  1.00 12.95           C  
ATOM   1175  CG  GLU L  50     -11.638   1.219 -26.198  1.00 14.04           C  
ATOM   1176  CD  GLU L  50     -11.930   2.586 -25.813  1.00 15.03           C  
ATOM   1177  OE1 GLU L  50     -12.300   3.443 -26.737  1.00 21.11           O  
ATOM   1178  OE2 GLU L  50     -11.798   2.927 -24.578  1.00 21.65           O  
ATOM   1179  N   VAL L  51      -9.269  -1.663 -29.482  1.00 10.89           N  
ATOM   1180  CA  VAL L  51      -8.826  -2.098 -30.886  1.00 12.50           C  
ATOM   1181  C   VAL L  51      -7.553  -1.475 -31.309  1.00 10.24           C  
ATOM   1182  O   VAL L  51      -6.687  -2.158 -31.783  1.00 10.70           O  
ATOM   1183  CB  VAL L  51      -9.961  -1.990 -31.867  1.00 12.24           C  
ATOM   1184  CG1 VAL L  51      -9.448  -2.570 -33.201  1.00 13.04           C  
ATOM   1185  CG2 VAL L  51     -11.236  -2.625 -31.467  1.00 13.09           C  
ATOM   1186  N   ASN L  52      -7.435  -0.138 -31.275  1.00 10.39           N  
ATOM   1187  CA  ASN L  52      -6.275   0.554 -31.751  1.00 11.14           C  
ATOM   1188  C   ASN L  52      -6.060   1.847 -31.074  1.00 12.16           C  
ATOM   1189  O   ASN L  52      -5.666   2.857 -31.734  1.00 13.03           O  
ATOM   1190  CB  ASN L  52      -6.324   0.773 -33.262  1.00 11.46           C  
ATOM   1191  CG  ASN L  52      -4.943   1.126 -33.804  1.00 11.85           C  
ATOM   1192  OD1 ASN L  52      -3.922   0.793 -33.269  1.00 12.52           O  
ATOM   1193  ND2 ASN L  52      -4.975   1.867 -34.912  1.00 12.58           N  
ATOM   1194  N   LYS L  53      -6.190   1.989 -29.817  1.00 12.48           N  
ATOM   1195  CA  LYS L  53      -5.770   3.152 -29.014  1.00 12.05           C  
ATOM   1196  C   LYS L  53      -4.578   2.748 -28.201  1.00 13.58           C  
ATOM   1197  O   LYS L  53      -4.496   1.681 -27.561  1.00 13.74           O  
ATOM   1198  CB  LYS L  53      -6.917   3.619 -28.117  1.00 13.12           C  
ATOM   1199  CG  LYS L  53      -8.084   4.084 -28.880  1.00 15.15           C  
ATOM   1200  CD  LYS L  53      -9.099   4.736 -27.998  1.00 16.03           C  
ATOM   1201  CE  LYS L  53     -10.266   5.272 -28.770  1.00 18.48           C  
ATOM   1202  NZ  LYS L  53     -11.258   5.912 -27.861  1.00 20.40           N  
ATOM   1203  N   ARG L  54      -3.501   3.500 -28.289  1.00 12.98           N  
ATOM   1204  CA  ARG L  54      -2.342   3.264 -27.497  1.00 14.87           C  
ATOM   1205  C   ARG L  54      -2.243   4.119 -26.292  1.00 12.25           C  
ATOM   1206  O   ARG L  54      -2.378   5.397 -26.406  1.00 14.17           O  
ATOM   1207  CB  ARG L  54      -1.043   3.566 -28.203  1.00 15.63           C  
ATOM   1208  CG  ARG L  54      -0.601   2.526 -29.243  1.00 16.54           C  
ATOM   1209  CD  ARG L  54       0.609   3.085 -30.150  1.00 19.41           C  
ATOM   1210  NE  ARG L  54       0.370   4.347 -30.982  1.00 18.03           N  
ATOM   1211  CZ  ARG L  54       1.289   5.304 -31.216  1.00 19.24           C  
ATOM   1212  NH1 ARG L  54       2.306   5.382 -30.574  1.00 20.36           N  
ATOM   1213  NH2 ARG L  54       0.866   6.302 -32.137  1.00 21.33           N  
ATOM   1214  N   PRO L  55      -1.949   3.600 -25.107  1.00 13.21           N  
ATOM   1215  CA  PRO L  55      -1.591   4.462 -23.940  1.00 13.94           C  
ATOM   1216  C   PRO L  55      -0.390   5.194 -24.375  1.00 14.54           C  
ATOM   1217  O   PRO L  55       0.431   4.849 -25.124  1.00 14.56           O  
ATOM   1218  CB  PRO L  55      -1.249   3.356 -22.929  1.00 15.29           C  
ATOM   1219  CG  PRO L  55      -1.991   2.172 -23.313  1.00 17.44           C  
ATOM   1220  CD  PRO L  55      -1.910   2.155 -24.782  1.00 13.27           C  
ATOM   1221  N   SER L  56      -0.023   6.326 -23.635  1.00 18.16           N  
ATOM   1222  CA  SER L  56       1.264   7.001 -23.858  1.00 22.47           C  
ATOM   1223  C   SER L  56       2.360   6.098 -23.441  1.00 19.37           C  
ATOM   1224  O   SER L  56       2.369   5.079 -22.704  1.00 19.50           O  
ATOM   1225  CB  SER L  56       1.192   8.370 -22.997  1.00 23.49           C  
ATOM   1226  OG  SER L  56       0.088   9.195 -23.369  1.00 40.90           O  
ATOM   1227  N   GLY L  57       3.414   6.272 -24.191  1.00 21.62           N  
ATOM   1228  CA  GLY L  57       4.461   5.502 -24.024  1.00 20.70           C  
ATOM   1229  C   GLY L  57       4.614   4.270 -24.910  1.00 18.45           C  
ATOM   1230  O   GLY L  57       5.637   3.700 -24.978  1.00 21.23           O  
ATOM   1231  N   VAL L  58       3.623   3.811 -25.601  1.00 16.08           N  
ATOM   1232  CA  VAL L  58       3.771   2.728 -26.529  1.00 14.74           C  
ATOM   1233  C   VAL L  58       4.191   3.250 -27.838  1.00 14.64           C  
ATOM   1234  O   VAL L  58       3.532   4.150 -28.330  1.00 14.64           O  
ATOM   1235  CB  VAL L  58       2.402   2.026 -26.625  1.00 14.32           C  
ATOM   1236  CG1 VAL L  58       2.421   0.921 -27.591  1.00 13.92           C  
ATOM   1237  CG2 VAL L  58       1.896   1.485 -25.268  1.00 17.47           C  
ATOM   1238  N   PRO L  59       5.210   2.685 -28.378  1.00 14.12           N  
ATOM   1239  CA  PRO L  59       5.712   3.163 -29.661  1.00 15.64           C  
ATOM   1240  C   PRO L  59       4.763   3.095 -30.829  1.00 13.70           C  
ATOM   1241  O   PRO L  59       3.841   2.212 -30.897  1.00 14.20           O  
ATOM   1242  CB  PRO L  59       6.915   2.174 -29.943  1.00 17.01           C  
ATOM   1243  CG  PRO L  59       7.319   1.684 -28.692  1.00 17.60           C  
ATOM   1244  CD  PRO L  59       6.132   1.650 -27.822  1.00 16.90           C  
ATOM   1245  N   ASP L  60       4.933   3.980 -31.824  1.00 15.43           N  
ATOM   1246  CA  ASP L  60       4.254   4.011 -33.086  1.00 13.47           C  
ATOM   1247  C   ASP L  60       4.215   2.755 -33.902  1.00 13.47           C  
ATOM   1248  O   ASP L  60       3.401   2.547 -34.754  1.00 14.40           O  
ATOM   1249  CB  ASP L  60       4.692   5.204 -33.893  1.00 15.76           C  
ATOM   1250  CG  ASP L  60       4.377   6.500 -33.317  1.00 21.74           C  
ATOM   1251  OD1 ASP L  60       3.473   6.593 -32.362  1.00 24.23           O  
ATOM   1252  OD2 ASP L  60       4.896   7.394 -33.964  1.00 26.91           O  
ATOM   1253  N   ARG L  61       5.136   1.842 -33.592  1.00 12.95           N  
ATOM   1254  CA  ARG L  61       5.291   0.577 -34.353  1.00 12.41           C  
ATOM   1255  C   ARG L  61       4.288  -0.458 -33.897  1.00 11.71           C  
ATOM   1256  O   ARG L  61       4.173  -1.518 -34.552  1.00 12.89           O  
ATOM   1257  CB  ARG L  61       6.584   0.176 -34.498  1.00 18.72           C  
ATOM   1258  CG  ARG L  61       7.154  -0.142 -33.360  1.00 21.69           C  
ATOM   1259  CD  ARG L  61       8.956  -0.132 -33.500  1.00 16.76           C  
ATOM   1260  NE  ARG L  61       9.340  -0.446 -32.200  1.00 14.59           N  
ATOM   1261  CZ  ARG L  61       9.234  -1.653 -31.681  1.00 13.26           C  
ATOM   1262  NH1 ARG L  61       8.811  -2.656 -32.338  1.00 16.21           N  
ATOM   1263  NH2 ARG L  61       9.601  -1.725 -30.553  1.00 18.59           N  
ATOM   1264  N   PHE L  62       3.447  -0.214 -32.867  1.00 12.52           N  
ATOM   1265  CA  PHE L  62       2.410  -1.133 -32.441  1.00 12.21           C  
ATOM   1266  C   PHE L  62       1.025  -0.656 -32.979  1.00 11.17           C  
ATOM   1267  O   PHE L  62       0.701   0.583 -32.693  1.00 12.26           O  
ATOM   1268  CB  PHE L  62       2.360  -1.181 -30.943  1.00 11.90           C  
ATOM   1269  CG  PHE L  62       3.536  -1.840 -30.325  1.00 12.61           C  
ATOM   1270  CD1 PHE L  62       4.746  -1.119 -30.125  1.00 14.13           C  
ATOM   1271  CD2 PHE L  62       3.541  -3.217 -30.070  1.00 14.02           C  
ATOM   1272  CE1 PHE L  62       5.812  -1.741 -29.605  1.00 13.38           C  
ATOM   1273  CE2 PHE L  62       4.675  -3.810 -29.573  1.00 14.02           C  
ATOM   1274  CZ  PHE L  62       5.828  -3.101 -29.361  1.00 13.10           C  
ATOM   1275  N   SER L  63       0.323  -1.471 -33.692  1.00 11.20           N  
ATOM   1276  CA  SER L  63      -0.936  -1.004 -34.201  1.00 12.86           C  
ATOM   1277  C   SER L  63      -1.931  -2.102 -34.147  1.00 11.25           C  
ATOM   1278  O   SER L  63      -1.602  -3.343 -34.147  1.00 12.10           O  
ATOM   1279  CB  SER L  63      -0.765  -0.510 -35.697  1.00 12.64           C  
ATOM   1280  OG  SER L  63      -0.435  -1.537 -36.504  1.00 13.25           O  
ATOM   1281  N   GLY L  64      -3.227  -1.760 -34.188  1.00 11.05           N  
ATOM   1282  CA  GLY L  64      -4.333  -2.775 -34.253  1.00 13.04           C  
ATOM   1283  C   GLY L  64      -5.213  -2.593 -35.397  1.00 12.26           C  
ATOM   1284  O   GLY L  64      -5.441  -1.453 -35.961  1.00 11.36           O  
ATOM   1285  N   SER L  65      -5.891  -3.715 -35.765  1.00 11.90           N  
ATOM   1286  CA  SER L  65      -6.884  -3.693 -36.777  1.00 14.32           C  
ATOM   1287  C   SER L  65      -8.055  -4.638 -36.420  1.00 11.69           C  
ATOM   1288  O   SER L  65      -7.852  -5.475 -35.467  1.00 13.03           O  
ATOM   1289  CB  SER L  65      -6.337  -4.046 -38.067  1.00 14.94           C  
ATOM   1290  OG  SER L  65      -6.984  -4.001 -39.334  1.00 25.87           O  
ATOM   1291  N   LYS L  66      -9.183  -4.508 -36.992  1.00 13.35           N  
ATOM   1292  CA  LYS L  66     -10.269  -5.447 -36.795  1.00 12.90           C  
ATOM   1293  C   LYS L  66     -11.159  -5.597 -37.934  1.00 12.91           C  
ATOM   1294  O   LYS L  66     -11.464  -4.521 -38.587  1.00 14.69           O  
ATOM   1295  CB  LYS L  66     -11.088  -5.059 -35.516  1.00 13.13           C  
ATOM   1296  CG  LYS L  66     -12.028  -6.096 -35.053  1.00 14.03           C  
ATOM   1297  CD  LYS L  66     -12.647  -5.882 -33.619  1.00 13.92           C  
ATOM   1298  CE  LYS L  66     -13.603  -4.782 -33.527  1.00 15.07           C  
ATOM   1299  NZ  LYS L  66     -14.979  -5.223 -33.753  1.00 14.65           N  
ATOM   1300  N   SER L  67     -11.611  -6.817 -38.263  1.00 13.22           N  
ATOM   1301  CA  SER L  67     -12.513  -7.044 -39.389  1.00 14.00           C  
ATOM   1302  C   SER L  67     -13.329  -8.234 -39.026  1.00 13.97           C  
ATOM   1303  O   SER L  67     -12.802  -9.260 -38.654  1.00 14.70           O  
ATOM   1304  CB  SER L  67     -11.831  -7.159 -40.689  1.00 17.20           C  
ATOM   1305  OG  SER L  67     -12.694  -7.429 -41.794  1.00 18.83           O  
ATOM   1306  N   GLY L  68     -14.646  -8.098 -39.031  1.00 14.43           N  
ATOM   1307  CA  GLY L  68     -15.462  -9.244 -38.587  1.00 14.29           C  
ATOM   1308  C   GLY L  68     -15.188  -9.659 -37.148  1.00 12.03           C  
ATOM   1309  O   GLY L  68     -15.006  -8.751 -36.310  1.00 14.42           O  
ATOM   1310  N   ASN L  69     -14.992 -10.884 -36.947  1.00 12.97           N  
ATOM   1311  CA  ASN L  69     -14.766 -11.411 -35.613  1.00 12.19           C  
ATOM   1312  C   ASN L  69     -13.335 -11.643 -35.249  1.00 11.72           C  
ATOM   1313  O   ASN L  69     -13.083 -12.259 -34.252  1.00 12.89           O  
ATOM   1314  CB  ASN L  69     -15.618 -12.725 -35.441  1.00 14.00           C  
ATOM   1315  CG  ASN L  69     -17.088 -12.525 -35.459  1.00 13.29           C  
ATOM   1316  OD1 ASN L  69     -17.573 -11.353 -35.227  1.00 15.68           O  
ATOM   1317  ND2 ASN L  69     -17.878 -13.507 -35.884  1.00 15.89           N  
ATOM   1318  N   THR L  70     -12.438 -11.016 -36.038  1.00 13.23           N  
ATOM   1319  CA  THR L  70     -10.972 -11.109 -35.745  1.00 11.49           C  
ATOM   1320  C   THR L  70     -10.298  -9.748 -35.615  1.00 11.79           C  
ATOM   1321  O   THR L  70     -10.459  -8.942 -36.582  1.00 12.89           O  
ATOM   1322  CB  THR L  70     -10.294 -11.943 -36.813  1.00 13.06           C  
ATOM   1323  OG1 THR L  70     -10.779 -13.295 -36.804  1.00 13.87           O  
ATOM   1324  CG2 THR L  70      -8.831 -11.977 -36.664  1.00 14.72           C  
ATOM   1325  N   ALA L  71      -9.749  -9.512 -34.481  1.00 11.32           N  
ATOM   1326  CA  ALA L  71      -8.927  -8.322 -34.295  1.00 11.28           C  
ATOM   1327  C   ALA L  71      -7.433  -8.806 -34.476  1.00 10.93           C  
ATOM   1328  O   ALA L  71      -7.130 -10.008 -34.349  1.00 14.25           O  
ATOM   1329  CB  ALA L  71      -9.100  -7.779 -32.920  1.00 12.02           C  
ATOM   1330  N   SER L  72      -6.551  -7.848 -34.678  1.00 11.34           N  
ATOM   1331  CA  SER L  72      -5.115  -8.230 -34.751  1.00 11.83           C  
ATOM   1332  C   SER L  72      -4.330  -7.097 -34.181  1.00 11.14           C  
ATOM   1333  O   SER L  72      -4.651  -5.862 -34.216  1.00 11.36           O  
ATOM   1334  CB  SER L  72      -4.658  -8.527 -36.107  1.00 12.75           C  
ATOM   1335  OG  SER L  72      -4.780  -7.483 -36.969  1.00 15.50           O  
ATOM   1336  N   LEU L  73      -3.123  -7.489 -33.723  1.00 11.14           N  
ATOM   1337  CA  LEU L  73      -1.981  -6.574 -33.300  1.00 10.94           C  
ATOM   1338  C   LEU L  73      -0.859  -6.814 -34.233  1.00 11.01           C  
ATOM   1339  O   LEU L  73      -0.462  -7.983 -34.440  1.00 11.56           O  
ATOM   1340  CB  LEU L  73      -1.625  -6.905 -31.933  1.00 11.37           C  
ATOM   1341  CG  LEU L  73      -0.236  -6.213 -31.385  1.00 10.32           C  
ATOM   1342  CD1 LEU L  73      -0.476  -4.747 -31.151  1.00 12.96           C  
ATOM   1343  CD2 LEU L  73       0.190  -6.832 -30.132  1.00 12.30           C  
ATOM   1344  N   THR L  74      -0.301  -5.743 -34.826  1.00 11.13           N  
ATOM   1345  CA  THR L  74       0.953  -5.880 -35.556  1.00 10.97           C  
ATOM   1346  C   THR L  74       1.995  -5.150 -34.719  1.00 10.37           C  
ATOM   1347  O   THR L  74       1.864  -3.942 -34.364  1.00 10.82           O  
ATOM   1348  CB  THR L  74       0.846  -5.376 -36.948  1.00 12.64           C  
ATOM   1349  OG1 THR L  74      -0.074  -6.224 -37.687  1.00 12.81           O  
ATOM   1350  CG2 THR L  74       2.124  -5.401 -37.699  1.00 12.68           C  
ATOM   1351  N   VAL L  75       3.086  -5.816 -34.558  1.00 11.90           N  
ATOM   1352  CA  VAL L  75       4.337  -5.305 -34.007  1.00 12.80           C  
ATOM   1353  C   VAL L  75       5.269  -5.074 -35.184  1.00 12.25           C  
ATOM   1354  O   VAL L  75       5.806  -6.087 -35.751  1.00 13.37           O  
ATOM   1355  CB  VAL L  75       4.983  -6.234 -32.935  1.00 13.11           C  
ATOM   1356  CG1 VAL L  75       6.276  -5.506 -32.396  1.00 14.36           C  
ATOM   1357  CG2 VAL L  75       3.975  -6.566 -31.879  1.00 14.12           C  
ATOM   1358  N   SER L  76       5.371  -3.862 -35.668  1.00 13.24           N  
ATOM   1360  CA  SER L  76       6.266  -3.611 -36.803  0.50 14.86           C  
ATOM   1361  C   SER L  76       7.604  -3.090 -36.343  1.00 12.64           C  
ATOM   1362  O   SER L  76       7.874  -2.624 -35.239  1.00 14.93           O  
ATOM   1364  CB  SER L  76       5.666  -2.562 -37.625  0.50 12.43           C  
ATOM   1366  OG  SER L  76       4.459  -2.903 -38.196  0.50 12.39           O  
ATOM   1367  N   GLY L  77       8.565  -3.107 -37.296  1.00 13.34           N  
ATOM   1368  CA  GLY L  77       9.933  -2.735 -36.957  1.00 13.97           C  
ATOM   1369  C   GLY L  77      10.467  -3.545 -35.815  1.00 12.47           C  
ATOM   1370  O   GLY L  77      10.985  -2.988 -34.842  1.00 13.98           O  
ATOM   1371  N   LEU L  78      10.236  -4.865 -35.895  1.00 10.91           N  
ATOM   1372  CA  LEU L  78      10.408  -5.780 -34.766  1.00 12.41           C  
ATOM   1373  C   LEU L  78      11.855  -5.564 -34.132  1.00 12.74           C  
ATOM   1374  O   LEU L  78      12.919  -5.561 -34.826  1.00 13.09           O  
ATOM   1375  CB  LEU L  78      10.336  -7.212 -35.189  1.00 12.19           C  
ATOM   1376  CG  LEU L  78      10.168  -8.282 -34.198  1.00 14.12           C  
ATOM   1377  CD1 LEU L  78       8.852  -8.137 -33.416  1.00 15.46           C  
ATOM   1378  CD2 LEU L  78      10.199  -9.592 -34.868  1.00 16.47           C  
ATOM   1379  N   GLN L  79      11.912  -5.540 -32.794  1.00 13.07           N  
ATOM   1380  CA  GLN L  79      13.071  -5.435 -32.040  1.00 12.52           C  
ATOM   1381  C   GLN L  79      13.217  -6.627 -31.095  1.00 13.41           C  
ATOM   1382  O   GLN L  79      12.266  -7.251 -30.732  1.00 12.17           O  
ATOM   1383  CB  GLN L  79      13.038  -4.171 -31.291  1.00 13.43           C  
ATOM   1384  CG  GLN L  79      12.982  -2.860 -32.033  1.00 15.94           C  
ATOM   1385  CD  GLN L  79      13.133  -1.660 -31.140  1.00 20.78           C  
ATOM   1386  OE1 GLN L  79      13.471  -1.704 -30.006  1.00 22.55           O  
ATOM   1387  NE2 GLN L  79      12.923  -0.531 -31.701  1.00 21.25           N  
ATOM   1388  N   ALA L  80      14.491  -6.853 -30.660  1.00 12.91           N  
ATOM   1389  CA  ALA L  80      14.746  -7.925 -29.647  1.00 12.91           C  
ATOM   1390  C   ALA L  80      13.866  -7.666 -28.350  1.00 12.88           C  
ATOM   1391  O   ALA L  80      13.386  -8.740 -27.869  1.00 14.55           O  
ATOM   1392  CB  ALA L  80      16.220  -7.943 -29.296  1.00 14.13           C  
ATOM   1393  N   GLU L  81      13.668  -6.417 -28.007  1.00 13.92           N  
ATOM   1394  CA  GLU L  81      12.857  -6.068 -26.913  1.00 16.40           C  
ATOM   1395  C   GLU L  81      11.408  -6.471 -27.020  1.00 14.73           C  
ATOM   1396  O   GLU L  81      10.684  -6.582 -25.939  1.00 19.11           O  
ATOM   1397  CB  GLU L  81      12.924  -4.522 -26.514  1.00 23.19           C  
ATOM   1398  CG  GLU L  81      14.327  -3.789 -26.451  1.00 26.27           C  
ATOM   1399  CD  GLU L  81      15.034  -3.322 -27.742  1.00 26.01           C  
ATOM   1400  OE1 GLU L  81      15.052  -4.066 -28.609  1.00 22.39           O  
ATOM   1401  OE2 GLU L  81      15.631  -2.202 -27.781  1.00 42.66           O  
ATOM   1402  N   ASP L  82      10.973  -6.810 -28.226  1.00 13.85           N  
ATOM   1403  CA  ASP L  82       9.525  -7.201 -28.448  1.00 11.91           C  
ATOM   1404  C   ASP L  82       9.295  -8.659 -28.189  1.00 13.87           C  
ATOM   1405  O   ASP L  82       8.153  -9.136 -28.279  1.00 14.24           O  
ATOM   1406  CB  ASP L  82       9.205  -6.790 -29.873  1.00 12.92           C  
ATOM   1407  CG  ASP L  82       9.361  -5.389 -30.177  1.00 13.02           C  
ATOM   1408  OD1 ASP L  82       9.247  -4.518 -29.287  1.00 15.61           O  
ATOM   1409  OD2 ASP L  82       9.490  -5.078 -31.363  1.00 15.74           O  
ATOM   1410  N   GLU L  83      10.345  -9.468 -27.946  1.00 12.94           N  
ATOM   1411  CA  GLU L  83      10.129 -10.811 -27.693  1.00 13.59           C  
ATOM   1412  C   GLU L  83       9.359 -10.962 -26.421  1.00 14.07           C  
ATOM   1413  O   GLU L  83       9.862 -10.502 -25.296  1.00 14.74           O  
ATOM   1414  CB  GLU L  83      11.403 -11.667 -27.559  1.00 14.20           C  
ATOM   1415  CG  GLU L  83      12.147 -11.744 -28.765  1.00 16.73           C  
ATOM   1416  CD  GLU L  83      13.266 -12.693 -28.928  1.00 19.51           C  
ATOM   1417  OE1 GLU L  83      14.138 -12.557 -28.058  1.00 19.63           O  
ATOM   1418  OE2 GLU L  83      13.263 -13.730 -29.664  1.00 16.97           O  
ATOM   1419  N   ALA L  84       8.229 -11.619 -26.352  1.00 13.70           N  
ATOM   1420  CA  ALA L  84       7.283 -11.595 -25.202  1.00 13.04           C  
ATOM   1421  C   ALA L  84       6.134 -12.481 -25.655  1.00 12.52           C  
ATOM   1422  O   ALA L  84       5.951 -12.838 -26.787  1.00 13.17           O  
ATOM   1423  CB  ALA L  84       6.812 -10.164 -24.915  1.00 12.38           C  
ATOM   1424  N   ASP L  85       5.252 -12.734 -24.606  1.00 12.41           N  
ATOM   1425  CA  ASP L  85       3.958 -13.253 -24.809  1.00 14.03           C  
ATOM   1426  C   ASP L  85       2.902 -12.206 -24.975  1.00 12.82           C  
ATOM   1427  O   ASP L  85       2.907 -11.252 -24.149  1.00 13.87           O  
ATOM   1428  CB  ASP L  85       3.561 -14.178 -23.688  1.00 14.19           C  
ATOM   1429  CG  ASP L  85       4.438 -15.449 -23.605  1.00 18.62           C  
ATOM   1430  OD1 ASP L  85       4.932 -15.934 -24.511  1.00 21.55           O  
ATOM   1431  OD2 ASP L  85       4.653 -15.849 -22.458  1.00 24.23           O  
ATOM   1432  N   TYR L  86       2.095 -12.255 -25.993  1.00 12.08           N  
ATOM   1433  CA  TYR L  86       1.053 -11.219 -26.219  1.00 11.44           C  
ATOM   1434  C   TYR L  86      -0.291 -11.840 -26.056  1.00 11.41           C  
ATOM   1435  O   TYR L  86      -0.558 -12.925 -26.630  1.00 12.40           O  
ATOM   1436  CB  TYR L  86       1.196 -10.670 -27.636  1.00 11.99           C  
ATOM   1437  CG  TYR L  86       2.456  -9.841 -27.893  1.00 10.38           C  
ATOM   1438  CD1 TYR L  86       3.682 -10.461 -28.062  1.00 12.84           C  
ATOM   1439  CD2 TYR L  86       2.411  -8.481 -27.791  1.00 11.56           C  
ATOM   1440  CE1 TYR L  86       4.811  -9.756 -28.208  1.00 11.26           C  
ATOM   1441  CE2 TYR L  86       3.606  -7.770 -27.970  1.00 12.04           C  
ATOM   1442  CZ  TYR L  86       4.789  -8.383 -28.139  1.00 11.21           C  
ATOM   1443  OH  TYR L  86       5.939  -7.630 -28.325  1.00 14.41           O  
ATOM   1444  N   TYR L  87      -1.234 -11.184 -25.343  1.00 11.69           N  
ATOM   1445  CA  TYR L  87      -2.524 -11.613 -25.108  1.00 12.57           C  
ATOM   1446  C   TYR L  87      -3.562 -10.626 -25.541  1.00 12.15           C  
ATOM   1447  O   TYR L  87      -3.364  -9.403 -25.241  1.00 12.51           O  
ATOM   1448  CB  TYR L  87      -2.769 -11.902 -23.601  1.00 12.40           C  
ATOM   1449  CG  TYR L  87      -1.922 -12.976 -23.020  1.00 13.76           C  
ATOM   1450  CD1 TYR L  87      -0.624 -12.660 -22.508  1.00 15.71           C  
ATOM   1451  CD2 TYR L  87      -2.253 -14.261 -22.980  1.00 15.30           C  
ATOM   1452  CE1 TYR L  87       0.196 -13.575 -22.015  1.00 16.55           C  
ATOM   1453  CE2 TYR L  87      -1.386 -15.224 -22.428  1.00 18.35           C  
ATOM   1454  CZ  TYR L  87      -0.136 -14.809 -22.010  1.00 18.45           C  
ATOM   1455  OH  TYR L  87       0.552 -15.881 -21.377  1.00 20.60           O  
ATOM   1456  N   CYS L  88      -4.616 -11.043 -26.137  1.00 12.05           N  
ATOM   1457  CA  CYS L  88      -5.845 -10.187 -26.400  1.00 11.95           C  
ATOM   1458  C   CYS L  88      -6.878 -10.378 -25.340  1.00 11.16           C  
ATOM   1459  O   CYS L  88      -6.915 -11.461 -24.632  1.00 11.67           O  
ATOM   1460  CB  CYS L  88      -6.381 -10.374 -27.802  1.00 11.46           C  
ATOM   1461  SG  CYS L  88      -7.047 -11.893 -28.110  1.00 12.29           S  
ATOM   1462  N   SER L  89      -7.807  -9.420 -25.212  1.00 11.74           N  
ATOM   1463  CA  SER L  89      -9.056  -9.587 -24.499  1.00 11.67           C  
ATOM   1464  C   SER L  89     -10.132  -8.864 -25.269  1.00 11.84           C  
ATOM   1465  O   SER L  89      -9.876  -7.855 -25.964  1.00 11.59           O  
ATOM   1466  CB  SER L  89      -8.892  -9.070 -23.099  1.00 12.15           C  
ATOM   1467  OG  SER L  89      -8.802  -7.683 -23.051  1.00 13.59           O  
ATOM   1468  N   SER L  90     -11.308  -9.192 -24.966  1.00 12.06           N  
ATOM   1469  CA  SER L  90     -12.528  -8.435 -25.456  1.00 12.16           C  
ATOM   1470  C   SER L  90     -13.621  -8.412 -24.349  1.00 11.87           C  
ATOM   1471  O   SER L  90     -13.800  -9.394 -23.664  1.00 12.71           O  
ATOM   1472  CB  SER L  90     -13.102  -9.046 -26.699  1.00 11.56           C  
ATOM   1473  OG  SER L  90     -14.195  -8.303 -27.236  1.00 13.24           O  
ATOM   1474  N   TYR L  91     -14.326  -7.324 -24.363  1.00 12.00           N  
ATOM   1475  CA  TYR L  91     -15.599  -7.338 -23.694  1.00 12.93           C  
ATOM   1476  C   TYR L  91     -16.474  -8.381 -24.410  1.00 12.41           C  
ATOM   1477  O   TYR L  91     -16.433  -8.638 -25.563  1.00 12.71           O  
ATOM   1478  CB  TYR L  91     -16.294  -5.938 -23.826  1.00 13.34           C  
ATOM   1479  CG  TYR L  91     -17.529  -5.836 -22.960  1.00 13.45           C  
ATOM   1480  CD1 TYR L  91     -17.480  -5.935 -21.589  1.00 13.65           C  
ATOM   1481  CD2 TYR L  91     -18.769  -5.475 -23.608  1.00 15.17           C  
ATOM   1482  CE1 TYR L  91     -18.656  -5.879 -20.877  1.00 14.28           C  
ATOM   1483  CE2 TYR L  91     -19.911  -5.346 -22.968  1.00 15.04           C  
ATOM   1484  CZ  TYR L  91     -19.789  -5.532 -21.556  1.00 15.86           C  
ATOM   1485  OH  TYR L  91     -21.026  -5.507 -20.783  1.00 16.93           O  
ATOM   1486  N   GLU L  92     -17.352  -9.007 -23.616  1.00 13.78           N  
ATOM   1487  CA  GLU L  92     -18.267 -10.053 -24.089  1.00 15.80           C  
ATOM   1488  C   GLU L  92     -19.657  -9.872 -23.665  1.00 16.46           C  
ATOM   1489  O   GLU L  92     -20.451 -10.947 -23.673  1.00 16.73           O  
ATOM   1490  CB  GLU L  92     -17.707 -11.458 -23.932  1.00 15.07           C  
ATOM   1491  CG  GLU L  92     -17.609 -11.807 -22.547  1.00 15.54           C  
ATOM   1492  CD  GLU L  92     -17.302 -13.246 -22.387  1.00 18.34           C  
ATOM   1493  OE1 GLU L  92     -17.260 -14.149 -23.265  1.00 23.48           O  
ATOM   1494  OE2 GLU L  92     -16.805 -13.661 -21.294  1.00 23.03           O  
ATOM   1495  N   GLY L  93     -20.084  -8.637 -23.210  1.00 15.02           N  
ATOM   1496  CA  GLY L  93     -21.399  -8.398 -22.686  1.00 16.42           C  
ATOM   1497  C   GLY L  93     -21.422  -8.781 -21.319  1.00 17.84           C  
ATOM   1498  O   GLY L  93     -20.634  -9.564 -20.763  1.00 18.64           O  
ATOM   1499  N   SER L  94     -22.604  -8.464 -20.711  1.00 21.11           N  
ATOM   1500  CA  SER L  94     -22.922  -9.052 -19.381  1.00 23.82           C  
ATOM   1501  C   SER L  94     -21.838  -8.658 -18.404  1.00 22.19           C  
ATOM   1502  O   SER L  94     -21.618  -9.456 -17.401  1.00 20.93           O  
ATOM   1503  CB  SER L  94     -23.228 -10.549 -19.372  1.00 27.28           C  
ATOM   1504  OG  SER L  94     -24.296 -10.825 -20.413  1.00 34.14           O  
ATOM   1505  N   ASP L  95     -21.176  -7.508 -18.524  1.00 18.54           N  
ATOM   1506  CA  ASP L  95     -20.089  -7.102 -17.611  1.00 21.83           C  
ATOM   1507  C   ASP L  95     -18.883  -7.897 -17.557  1.00 18.94           C  
ATOM   1508  O   ASP L  95     -18.077  -7.783 -16.720  1.00 20.94           O  
ATOM   1509  CB  ASP L  95     -20.686  -6.892 -16.236  1.00 21.11           C  
ATOM   1510  CG  ASP L  95     -21.839  -6.037 -16.159  1.00 24.97           C  
ATOM   1511  OD1 ASP L  95     -21.897  -5.141 -16.896  1.00 23.40           O  
ATOM   1512  OD2 ASP L  95     -22.794  -6.228 -15.375  1.00 37.43           O  
ATOM   1513  N   ASN L  95A    -18.717  -8.830 -18.524  1.00 17.62           N  
ATOM   1514  CA  ASN L  95A    -17.603  -9.841 -18.567  1.00 16.85           C  
ATOM   1515  C   ASN L  95A    -16.630  -9.618 -19.765  1.00 14.63           C  
ATOM   1516  O   ASN L  95A    -16.967  -8.971 -20.754  1.00 15.48           O  
ATOM   1517  CB  ASN L  95A    -18.180 -11.246 -18.801  1.00 19.84           C  
ATOM   1518  CG  ASN L  95A    -19.009 -11.783 -17.569  1.00 24.06           C  
ATOM   1519  OD1 ASN L  95A    -18.759 -11.367 -16.403  1.00 31.38           O  
ATOM   1520  ND2 ASN L  95A    -19.991 -12.528 -17.882  1.00 32.70           N  
ATOM   1521  N   PHE L  96     -15.475 -10.191 -19.526  1.00 16.79           N  
ATOM   1522  CA  PHE L  96     -14.340 -10.113 -20.480  1.00 17.36           C  
ATOM   1523  C   PHE L  96     -13.898 -11.503 -20.770  1.00 15.45           C  
ATOM   1524  O   PHE L  96     -13.957 -12.391 -19.879  1.00 20.47           O  
ATOM   1525  CB  PHE L  96     -13.130  -9.328 -19.970  1.00 15.51           C  
ATOM   1526  CG  PHE L  96     -13.373  -7.932 -19.780  1.00 17.48           C  
ATOM   1527  CD1 PHE L  96     -14.229  -7.474 -18.704  1.00 19.62           C  
ATOM   1528  CD2 PHE L  96     -13.206  -7.038 -20.806  1.00 16.98           C  
ATOM   1529  CE1 PHE L  96     -14.512  -6.125 -18.719  1.00 21.84           C  
ATOM   1530  CE2 PHE L  96     -13.574  -5.737 -20.808  1.00 16.83           C  
ATOM   1531  CZ  PHE L  96     -14.206  -5.289 -19.706  1.00 20.78           C  
ATOM   1532  N   VAL L  97     -13.406 -11.784 -22.037  1.00 15.40           N  
ATOM   1533  CA  VAL L  97     -12.833 -13.049 -22.423  1.00 15.46           C  
ATOM   1534  C   VAL L  97     -11.495 -12.800 -22.965  1.00 13.58           C  
ATOM   1535  O   VAL L  97     -11.191 -11.696 -23.580  1.00 13.65           O  
ATOM   1536  CB  VAL L  97     -13.751 -13.784 -23.466  1.00 16.10           C  
ATOM   1537  CG1 VAL L  97     -13.976 -12.920 -24.678  1.00 14.53           C  
ATOM   1538  CG2 VAL L  97     -13.185 -15.116 -23.712  1.00 17.32           C  
ATOM   1539  N   PHE L  98     -10.496 -13.632 -22.662  1.00 15.94           N  
ATOM   1540  CA  PHE L  98      -9.105 -13.460 -23.027  1.00 15.11           C  
ATOM   1541  C   PHE L  98      -8.714 -14.482 -24.017  1.00 12.14           C  
ATOM   1542  O   PHE L  98      -9.227 -15.642 -24.054  1.00 13.12           O  
ATOM   1543  CB  PHE L  98      -8.203 -13.657 -21.788  1.00 15.28           C  
ATOM   1544  CG  PHE L  98      -8.009 -12.368 -20.939  1.00 15.78           C  
ATOM   1545  CD1 PHE L  98      -8.970 -11.840 -20.080  1.00 19.83           C  
ATOM   1546  CD2 PHE L  98      -6.880 -11.583 -21.060  1.00 17.09           C  
ATOM   1547  CE1 PHE L  98      -8.720 -10.646 -19.396  1.00 22.69           C  
ATOM   1548  CE2 PHE L  98      -6.700 -10.372 -20.396  1.00 17.89           C  
ATOM   1549  CZ  PHE L  98      -7.667  -9.970 -19.571  1.00 19.16           C  
ATOM   1550  N   GLY L  99      -7.705 -14.133 -24.755  1.00 12.94           N  
ATOM   1551  CA  GLY L  99      -7.038 -15.041 -25.738  1.00 12.53           C  
ATOM   1552  C   GLY L  99      -6.021 -15.900 -24.985  1.00 12.31           C  
ATOM   1553  O   GLY L  99      -5.578 -15.630 -23.857  1.00 13.98           O  
ATOM   1554  N   THR L 100      -5.612 -16.932 -25.694  1.00 13.17           N  
ATOM   1555  CA  THR L 100      -4.659 -17.969 -25.164  1.00 14.82           C  
ATOM   1556  C   THR L 100      -3.220 -17.520 -25.193  1.00 13.17           C  
ATOM   1557  O   THR L 100      -2.378 -18.248 -24.638  1.00 15.70           O  
ATOM   1558  CB  THR L 100      -4.892 -19.304 -25.812  1.00 14.66           C  
ATOM   1559  OG1 THR L 100      -4.830 -19.084 -27.229  1.00 15.72           O  
ATOM   1560  CG2 THR L 100      -6.191 -19.771 -25.506  1.00 17.50           C  
ATOM   1561  N   GLY L 101      -2.932 -16.431 -25.887  1.00 12.97           N  
ATOM   1562  CA  GLY L 101      -1.530 -15.946 -25.884  1.00 13.53           C  
ATOM   1563  C   GLY L 101      -0.724 -16.379 -27.147  1.00 12.27           C  
ATOM   1564  O   GLY L 101      -0.913 -17.545 -27.619  1.00 13.49           O  
ATOM   1565  N   THR L 102       0.184 -15.544 -27.478  1.00 12.32           N  
ATOM   1566  CA  THR L 102       1.081 -15.826 -28.562  1.00 11.43           C  
ATOM   1567  C   THR L 102       2.519 -15.524 -28.156  1.00 12.97           C  
ATOM   1568  O   THR L 102       2.776 -14.329 -27.738  1.00 12.90           O  
ATOM   1569  CB  THR L 102       0.755 -15.022 -29.819  1.00 11.88           C  
ATOM   1570  OG1 THR L 102      -0.649 -15.227 -30.235  1.00 11.22           O  
ATOM   1571  CG2 THR L 102       1.692 -15.248 -30.972  1.00 11.32           C  
ATOM   1572  N   LYS L 103       3.391 -16.475 -28.216  1.00 12.44           N  
ATOM   1573  CA  LYS L 103       4.868 -16.287 -27.969  1.00 13.85           C  
ATOM   1574  C   LYS L 103       5.490 -15.720 -29.214  1.00 10.87           C  
ATOM   1575  O   LYS L 103       5.459 -16.386 -30.302  1.00 13.43           O  
ATOM   1576  CB  LYS L 103       5.519 -17.524 -27.620  1.00 13.80           C  
ATOM   1577  CG  LYS L 103       6.977 -17.360 -27.344  1.00 15.98           C  
ATOM   1578  CD  LYS L 103       7.279 -16.371 -26.214  1.00 24.78           C  
ATOM   1579  CE  LYS L 103       8.658 -15.915 -25.909  1.00 37.43           C  
ATOM   1580  NZ  LYS L 103       9.564 -14.987 -26.642  1.00 23.57           N  
ATOM   1581  N   VAL L 104       5.989 -14.540 -29.165  1.00 12.66           N  
ATOM   1582  CA  VAL L 104       6.722 -13.901 -30.327  1.00 12.62           C  
ATOM   1583  C   VAL L 104       8.189 -13.977 -30.189  1.00 13.04           C  
ATOM   1584  O   VAL L 104       8.708 -13.609 -29.099  1.00 14.24           O  
ATOM   1585  CB  VAL L 104       6.322 -12.408 -30.460  1.00 13.88           C  
ATOM   1586  CG1 VAL L 104       7.162 -11.716 -31.548  1.00 15.58           C  
ATOM   1587  CG2 VAL L 104       4.864 -12.398 -30.867  1.00 15.42           C  
ATOM   1588  N   THR L 105       8.869 -14.499 -31.224  1.00 14.07           N  
ATOM   1589  CA  THR L 105      10.278 -14.623 -31.186  1.00 13.08           C  
ATOM   1590  C   THR L 105      10.798 -13.888 -32.402  1.00 13.55           C  
ATOM   1591  O   THR L 105      10.183 -13.735 -33.435  1.00 13.41           O  
ATOM   1592  CB  THR L 105      10.708 -16.085 -31.149  1.00 15.08           C  
ATOM   1593  OG1 THR L 105      10.219 -16.798 -32.216  1.00 17.09           O  
ATOM   1594  CG2 THR L 105      10.470 -16.736 -29.850  1.00 18.76           C  
ATOM   1595  N   VAL L 106      12.073 -13.512 -32.267  1.00 12.88           N  
ATOM   1596  CA  VAL L 106      12.818 -12.867 -33.386  1.00 13.04           C  
ATOM   1597  C   VAL L 106      13.677 -13.956 -34.013  1.00 12.36           C  
ATOM   1598  O   VAL L 106      14.434 -14.715 -33.362  1.00 14.93           O  
ATOM   1599  CB  VAL L 106      13.622 -11.610 -32.911  1.00 14.87           C  
ATOM   1600  CG1 VAL L 106      12.864 -10.580 -32.390  1.00 18.30           C  
ATOM   1601  CG2 VAL L 106      14.789 -11.960 -31.967  1.00 19.83           C  
ATOM   1602  N   LEU L 106A     13.576 -14.031 -35.290  1.00 12.78           N  
ATOM   1603  CA  LEU L 106A     14.412 -14.973 -36.054  1.00 12.38           C  
ATOM   1604  C   LEU L 106A     15.935 -14.507 -36.087  1.00 15.93           C  
ATOM   1605  O   LEU L 106A     16.184 -13.318 -36.022  1.00 16.09           O  
ATOM   1606  CB  LEU L 106A     13.972 -14.997 -37.456  1.00 14.11           C  
ATOM   1607  CG  LEU L 106A     12.491 -15.491 -37.767  1.00 12.83           C  
ATOM   1608  CD1 LEU L 106A     12.028 -15.255 -39.184  1.00 13.69           C  
ATOM   1609  CD2 LEU L 106A     12.402 -16.943 -37.360  1.00 12.13           C  
ATOM   1610  OXT LEU L 106A     16.841 -15.239 -36.132  1.00 23.48           O  
TER    1611      LEU L 106A                                                     
