# Supplementary material for: SARS-CoV-2 Spike Protein Interaction Space
Source: Int J Mol Sci. 2023 Jul 27;24(15):12058. doi: 10.3390/ijms241512058 (PMC10418891; doi:10.3390/ijms241512058)
Supplement: Supplementary file 1 [file ijms-24-12058-s001.zip › Supplementary Material File S1/5C9K.pdb]

REMARK 950 NUMBERING  Kabat
REMARK 950 METHOD     X-ray crystal structure
REMARK 950 RESOLUTION 1.920
REMARK 950 R-FACTOR   0.173
REMARK 950 R-FREE     0.219
REMARK 950 CHAIN-TYPE LABEL ORIGINAL
REMARK 950 CHAIN L    L    B
REMARK 950 CHAIN L    L    I
REMARK 950 MOLECULE : B : AMYLOID LAMBDA 6 LIGHT CHAIN VARIABLE REGION PIP
REMARK 950 SPECIES  : B : HOMO SAPIENS
SEQRES   1 L 111  ASN PHE MET LEU THR GLN PRO HIS SER VAL SER GLU SER          
SEQRES   2 L 111  PRO GLY LYS THR VAL THR ILE SER CYS THR GLY SER SER          
SEQRES   3 L 111  GLY SER ILE ALA SER ASN TYR VAL GLN TRP TYR GLN GLN          
SEQRES   4 L 111  ARG PRO GLY SER SER PRO THR THR VAL ILE TYR GLU ASP          
SEQRES   5 L 111  ASN GLN ARG PRO SER GLY VAL PRO ASP ARG PHE SER GLY          
SEQRES   6 L 111  SER ILE ASP SER SER SER ASN SER ALA SER LEU THR ILE          
SEQRES   7 L 111  SER GLY LEU LYS THR GLU ASP GLU ALA ASP TYR TYR CYS          
SEQRES   8 L 111  GLN SER TYR ASP SER SER ASN HIS VAL VAL PHE GLY GLY          
SEQRES   9 L 111  GLY THR LYS LEU THR VAL LEU                                  
SEQRES   1 L 111  ASN PHE MET LEU THR GLN PRO HIS SER VAL SER GLU SER          
SEQRES   2 L 111  PRO GLY LYS THR VAL THR ILE SER CYS THR GLY SER SER          
SEQRES   3 L 111  GLY SER ILE ALA SER ASN TYR VAL GLN TRP TYR GLN GLN          
SEQRES   4 L 111  ARG PRO GLY SER SER PRO THR THR VAL ILE TYR GLU ASP          
SEQRES   5 L 111  ASN GLN ARG PRO SER GLY VAL PRO ASP ARG PHE SER GLY          
SEQRES   6 L 111  SER ILE ASP SER SER SER ASN SER ALA SER LEU THR ILE          
SEQRES   7 L 111  SER GLY LEU LYS THR GLU ASP GLU ALA ASP TYR TYR CYS          
SEQRES   8 L 111  GLN SER TYR ASP SER SER ASN HIS VAL VAL PHE GLY GLY          
SEQRES   9 L 111  GLY THR LYS LEU THR VAL LEU                                  
ATOM    835  N   ASN L   1       1.847  42.270   7.322  1.00 37.37           N  
ATOM    836  CA  ASN L   1       2.785  43.376   7.642  1.00 29.94           C  
ATOM    837  C   ASN L   1       3.392  43.164   9.035  1.00 22.74           C  
ATOM    838  O   ASN L   1       2.777  42.512   9.898  1.00 21.28           O  
ATOM    839  CB  ASN L   1       2.069  44.719   7.570  1.00 33.92           C  
ATOM    840  CG  ASN L   1       3.038  45.883   7.486  1.00 37.83           C  
ATOM    841  OD1 ASN L   1       4.071  45.794   6.819  1.00 42.59           O  
ATOM    842  ND2 ASN L   1       2.721  46.972   8.172  1.00 32.84           N  
ATOM    843  N   PHE L   2       4.605  43.677   9.249  1.00 22.32           N  
ATOM    844  CA  PHE L   2       5.250  43.544  10.553  1.00 19.86           C  
ATOM    845  C   PHE L   2       4.331  44.054  11.647  1.00 20.33           C  
ATOM    846  O   PHE L   2       3.729  45.127  11.534  1.00 22.27           O  
ATOM    847  CB  PHE L   2       6.570  44.298  10.597  1.00 23.01           C  
ATOM    848  CG  PHE L   2       7.330  44.125  11.896  1.00 16.59           C  
ATOM    849  CD1 PHE L   2       7.767  42.882  12.295  1.00 18.84           C  
ATOM    850  CD2 PHE L   2       7.628  45.213  12.701  1.00 20.52           C  
ATOM    851  CE1 PHE L   2       8.455  42.722  13.468  1.00 18.25           C  
ATOM    852  CE2 PHE L   2       8.326  45.042  13.897  1.00 18.05           C  
ATOM    853  CZ  PHE L   2       8.742  43.807  14.264  1.00 17.85           C  
ATOM    854  N   MET L   3       4.209  43.272  12.706  1.00 16.26           N  
ATOM    855  CA  MET L   3       3.315  43.612  13.804  1.00 22.54           C  
ATOM    856  C   MET L   3       4.014  43.400  15.089  1.00 18.64           C  
ATOM    857  O   MET L   3       4.886  42.539  15.180  1.00 14.71           O  
ATOM    858  CB  MET L   3       2.065  42.749  13.825  1.00 20.50           C  
ATOM    859  CG  MET L   3       1.044  43.079  12.804  1.00 33.70           C  
ATOM    860  SD  MET L   3      -0.264  41.841  12.918  1.00 42.92           S  
ATOM    861  CE  MET L   3      -0.989  42.223  14.517  1.00 44.07           C  
ATOM    862  N   LEU L   4       3.600  44.164  16.094  1.00 14.59           N  
ATOM    863  CA  LEU L   4       4.039  43.933  17.455  1.00 10.70           C  
ATOM    864  C   LEU L   4       2.877  43.620  18.376  1.00 16.32           C  
ATOM    865  O   LEU L   4       1.864  44.341  18.349  1.00 16.85           O  
ATOM    866  CB  LEU L   4       4.768  45.170  17.968  1.00 11.53           C  
ATOM    867  CG  LEU L   4       6.039  45.538  17.234  1.00 15.11           C  
ATOM    868  CD1 LEU L   4       6.458  46.993  17.605  1.00 14.69           C  
ATOM    869  CD2 LEU L   4       7.115  44.606  17.608  1.00 11.58           C  
ATOM    870  N   THR L   5       3.039  42.589  19.216  1.00 14.08           N  
ATOM    871  CA  THR L   5       1.964  42.160  20.094  1.00 15.94           C  
ATOM    872  C   THR L   5       2.387  42.121  21.554  1.00 11.01           C  
ATOM    873  O   THR L   5       3.374  41.508  21.910  1.00 13.89           O  
ATOM    874  CB  THR L   5       1.429  40.781  19.678  1.00 15.44           C  
ATOM    875  OG1 THR L   5       0.966  40.858  18.326  1.00 16.73           O  
ATOM    876  CG2 THR L   5       0.236  40.368  20.561  1.00 18.42           C  
ATOM    877  N   GLN L   6       1.556  42.782  22.349  1.00 18.51           N  
ATOM    878  CA  GLN L   6       1.688  43.075  23.768  1.00 14.19           C  
ATOM    879  C   GLN L   6       0.470  42.577  24.480  1.00 13.08           C  
ATOM    880  O   GLN L   6      -0.618  42.830  23.977  1.00 16.37           O  
ATOM    881  CB  GLN L   6       1.663  44.582  23.980  1.00 21.07           C  
ATOM    882  CG  GLN L   6       2.900  45.161  24.179  1.00 28.65           C  
ATOM    883  CD  GLN L   6       2.828  46.700  24.427  1.00  8.76           C  
ATOM    884  OE1 GLN L   6       2.734  47.526  23.472  1.00 11.35           O  
ATOM    885  NE2 GLN L   6       2.814  47.060  25.684  1.00 12.31           N  
ATOM    886  N   PRO L   7       0.604  42.033  25.699  1.00 12.10           N  
ATOM    887  CA  PRO L   7      -0.653  41.759  26.436  1.00 11.49           C  
ATOM    888  C   PRO L   7      -1.425  43.039  26.819  1.00 13.61           C  
ATOM    889  O   PRO L   7      -0.793  44.062  26.986  1.00 14.51           O  
ATOM    890  CB  PRO L   7      -0.178  41.045  27.703  1.00 17.96           C  
ATOM    891  CG  PRO L   7       1.253  41.424  27.878  1.00 15.44           C  
ATOM    892  CD  PRO L   7       1.803  41.739  26.501  1.00 11.04           C  
ATOM    893  N   HIS L   8      -2.745  43.000  26.992  1.00 16.56           N  
ATOM    894  CA  HIS L   8      -3.422  44.247  27.322  1.00 14.76           C  
ATOM    895  C   HIS L   8      -3.130  44.706  28.777  1.00 16.79           C  
ATOM    896  O   HIS L   8      -3.209  45.898  29.067  1.00 12.71           O  
ATOM    897  CB  HIS L   8      -4.928  44.130  27.047  1.00 14.53           C  
ATOM    898  CG  HIS L   8      -5.550  42.859  27.538  1.00 13.45           C  
ATOM    899  ND1 HIS L   8      -5.910  42.680  28.849  1.00 15.54           N  
ATOM    900  CD2 HIS L   8      -5.884  41.720  26.892  1.00 13.79           C  
ATOM    901  CE1 HIS L   8      -6.431  41.471  29.007  1.00 15.65           C  
ATOM    902  NE2 HIS L   8      -6.429  40.869  27.832  1.00 13.76           N  
ATOM    903  N   SER L   9      -2.733  43.799  29.669  1.00 12.19           N  
ATOM    904  CA  SER L   9      -2.585  44.170  31.085  1.00 12.65           C  
ATOM    905  C   SER L   9      -1.479  43.468  31.787  1.00 11.58           C  
ATOM    906  O   SER L   9      -1.141  42.344  31.444  1.00 18.39           O  
ATOM    907  CB  SER L   9      -3.848  43.857  31.902  1.00 15.00           C  
ATOM    908  OG  SER L   9      -5.040  44.267  31.245  1.00 16.97           O  
ATOM    909  N   VAL L  11      -0.935  44.124  32.808  1.00 15.28           N  
ATOM    910  CA  VAL L  11       0.015  43.512  33.737  1.00 13.76           C  
ATOM    911  C   VAL L  11      -0.092  44.231  35.073  1.00 18.19           C  
ATOM    912  O   VAL L  11      -0.342  45.436  35.120  1.00 15.43           O  
ATOM    913  CB  VAL L  11       1.475  43.540  33.216  1.00 19.65           C  
ATOM    914  CG1 VAL L  11       2.051  44.971  33.173  1.00 14.76           C  
ATOM    915  CG2 VAL L  11       2.358  42.682  34.094  1.00 24.18           C  
ATOM    916  N   SER L  12       0.116  43.497  36.163  1.00 17.80           N  
ATOM    917  CA  SER L  12       0.029  44.074  37.513  1.00 25.25           C  
ATOM    918  C   SER L  12       1.201  43.586  38.321  1.00 22.46           C  
ATOM    919  O   SER L  12       1.596  42.429  38.200  1.00 25.45           O  
ATOM    920  CB  SER L  12      -1.264  43.674  38.243  1.00 26.38           C  
ATOM    921  OG  SER L  12      -2.423  43.989  37.485  1.00 38.68           O  
ATOM    922  N   GLU L  13       1.725  44.449  39.175  1.00 18.86           N  
ATOM    923  CA  GLU L  13       2.762  44.070  40.124  1.00 21.92           C  
ATOM    924  C   GLU L  13       2.768  45.049  41.318  1.00 27.71           C  
ATOM    925  O   GLU L  13       2.124  46.094  41.278  1.00 21.82           O  
ATOM    926  CB  GLU L  13       4.111  44.018  39.413  1.00 26.67           C  
ATOM    927  CG  GLU L  13       5.268  43.510  40.247  1.00 34.80           C  
ATOM    928  CD  GLU L  13       4.993  42.154  40.862  1.00 30.26           C  
ATOM    929  OE1 GLU L  13       5.093  41.129  40.161  1.00 33.00           O  
ATOM    930  OE2 GLU L  13       4.648  42.120  42.050  1.00 26.69           O1-
ATOM    931  N   SER L  14       3.452  44.696  42.400  1.00 22.07           N  
ATOM    932  CA  SER L  14       3.389  45.492  43.627  1.00 24.51           C  
ATOM    933  C   SER L  14       4.551  46.477  43.742  1.00 21.79           C  
ATOM    934  O   SER L  14       5.611  46.242  43.165  1.00 27.99           O  
ATOM    935  CB  SER L  14       3.377  44.566  44.846  1.00 33.29           C  
ATOM    936  OG  SER L  14       2.216  43.752  44.839  1.00 30.15           O  
ATOM    937  N   PRO L  15       4.364  47.589  44.489  1.00 25.35           N  
ATOM    938  CA  PRO L  15       5.487  48.519  44.668  1.00 23.68           C  
ATOM    939  C   PRO L  15       6.719  47.827  45.150  1.00 26.77           C  
ATOM    940  O   PRO L  15       6.578  46.889  45.918  1.00 27.64           O  
ATOM    941  CB  PRO L  15       4.986  49.506  45.735  1.00 27.33           C  
ATOM    942  CG  PRO L  15       3.511  49.474  45.634  1.00 29.84           C  
ATOM    943  CD  PRO L  15       3.155  48.051  45.197  1.00 28.50           C  
ATOM    944  N   GLY L  16       7.887  48.295  44.707  1.00 16.84           N  
ATOM    945  CA  GLY L  16       9.163  47.728  45.079  1.00 22.39           C  
ATOM    946  C   GLY L  16       9.635  46.577  44.214  1.00 24.53           C  
ATOM    947  O   GLY L  16      10.834  46.311  44.128  1.00 29.61           O  
ATOM    948  N   LYS L  17       8.692  45.885  43.588  1.00 22.68           N  
ATOM    949  CA  LYS L  17       9.011  44.734  42.759  1.00 22.99           C  
ATOM    950  C   LYS L  17       9.447  45.140  41.355  1.00 23.86           C  
ATOM    951  O   LYS L  17       9.542  46.323  41.024  1.00 19.04           O  
ATOM    952  CB  LYS L  17       7.812  43.798  42.648  1.00 24.79           C  
ATOM    953  CG  LYS L  17       7.248  43.305  43.976  1.00 36.64           C  
ATOM    954  CD  LYS L  17       8.251  42.418  44.684  1.00 39.95           C  
ATOM    955  CE  LYS L  17       7.651  41.758  45.933  1.00 47.27           C  
ATOM    956  NZ  LYS L  17       8.618  40.849  46.615  1.00 53.55           N1+
ATOM    957  N   THR L  18       9.688  44.126  40.535  1.00 23.11           N  
ATOM    958  CA  THR L  18      10.113  44.301  39.154  1.00 16.45           C  
ATOM    959  C   THR L  18       9.079  43.728  38.237  1.00 23.03           C  
ATOM    960  O   THR L  18       8.539  42.638  38.487  1.00 17.79           O  
ATOM    961  CB  THR L  18      11.473  43.618  38.911  1.00 24.36           C  
ATOM    962  OG1 THR L  18      12.478  44.291  39.668  1.00 21.19           O  
ATOM    963  CG2 THR L  18      11.854  43.650  37.457  1.00 20.03           C  
ATOM    964  N   VAL L  19       8.786  44.449  37.165  1.00 13.49           N  
ATOM    965  CA  VAL L  19       7.852  43.941  36.198  1.00 17.10           C  
ATOM    966  C   VAL L  19       8.455  44.012  34.820  1.00 16.49           C  
ATOM    967  O   VAL L  19       9.287  44.888  34.542  1.00 19.83           O  
ATOM    968  CB  VAL L  19       6.519  44.716  36.277  1.00 18.89           C  
ATOM    969  CG1 VAL L  19       6.733  46.178  35.947  1.00 21.80           C  
ATOM    970  CG2 VAL L  19       5.502  44.083  35.394  1.00 13.58           C  
ATOM    971  N   THR L  20       8.047  43.068  33.980  1.00 16.22           N  
ATOM    972  CA  THR L  20       8.438  43.022  32.579  1.00 13.68           C  
ATOM    973  C   THR L  20       7.251  43.058  31.652  1.00 20.98           C  
ATOM    974  O   THR L  20       6.242  42.399  31.870  1.00 18.11           O  
ATOM    975  CB  THR L  20       9.301  41.750  32.295  1.00 18.40           C  
ATOM    976  OG1 THR L  20      10.443  41.786  33.145  1.00 25.17           O  
ATOM    977  CG2 THR L  20       9.797  41.734  30.868  1.00 18.75           C  
ATOM    978  N   ILE L  21       7.377  43.877  30.620  1.00 14.53           N  
ATOM    979  CA  ILE L  21       6.366  44.008  29.585  1.00 15.05           C  
ATOM    980  C   ILE L  21       7.053  43.664  28.272  1.00 18.58           C  
ATOM    981  O   ILE L  21       8.080  44.276  27.931  1.00 12.09           O  
ATOM    982  CB  ILE L  21       5.785  45.409  29.532  1.00 14.17           C  
ATOM    983  CG1 ILE L  21       5.074  45.767  30.854  1.00 12.51           C  
ATOM    984  CG2 ILE L  21       4.891  45.581  28.319  1.00 13.82           C  
ATOM    985  CD1 ILE L  21       4.707  47.247  30.975  1.00 18.33           C  
ATOM    986  N   SER L  22       6.508  42.701  27.528  1.00 12.47           N  
ATOM    987  CA  SER L  22       7.181  42.296  26.300  1.00 11.84           C  
ATOM    988  C   SER L  22       6.342  42.500  25.079  1.00 13.29           C  
ATOM    989  O   SER L  22       5.119  42.405  25.143  1.00 17.04           O  
ATOM    990  CB  SER L  22       7.576  40.833  26.373  1.00 20.68           C  
ATOM    991  OG  SER L  22       8.431  40.627  27.454  1.00 23.36           O  
ATOM    992  N   CYS L  23       7.022  42.735  23.956  1.00 10.30           N  
ATOM    993  CA  CYS L  23       6.407  42.821  22.648  1.00 14.64           C  
ATOM    994  C   CYS L  23       7.008  41.720  21.817  1.00 16.72           C  
ATOM    995  O   CYS L  23       8.221  41.615  21.768  1.00 17.87           O  
ATOM    996  CB  CYS L  23       6.652  44.189  21.985  1.00 21.96           C  
ATOM    997  SG  CYS L  23       5.390  45.280  22.513  1.00 25.90           S  
ATOM    998  N   THR L  24       6.160  40.950  21.134  1.00 15.80           N  
ATOM    999  CA  THR L  24       6.627  39.916  20.210  1.00 12.84           C  
ATOM   1000  C   THR L  24       6.302  40.322  18.790  1.00 11.59           C  
ATOM   1001  O   THR L  24       5.178  40.697  18.474  1.00 13.63           O  
ATOM   1002  CB  THR L  24       5.975  38.567  20.548  1.00 21.14           C  
ATOM   1003  OG1 THR L  24       6.212  38.289  21.926  1.00 14.47           O  
ATOM   1004  CG2 THR L  24       6.572  37.449  19.721  1.00 18.76           C  
ATOM   1005  N   GLY L  25       7.299  40.239  17.933  1.00 11.77           N  
ATOM   1006  CA  GLY L  25       7.145  40.650  16.562  1.00 16.14           C  
ATOM   1007  C   GLY L  25       6.681  39.488  15.737  1.00 17.02           C  
ATOM   1008  O   GLY L  25       6.980  38.339  16.072  1.00 16.94           O  
ATOM   1009  N   SER L  26       5.959  39.793  14.660  1.00 20.28           N  
ATOM   1010  CA  SER L  26       5.590  38.794  13.668  1.00 18.94           C  
ATOM   1011  C   SER L  26       5.652  39.422  12.287  1.00 20.57           C  
ATOM   1012  O   SER L  26       5.528  40.644  12.142  1.00 14.78           O  
ATOM   1013  CB  SER L  26       4.202  38.232  13.962  1.00 23.62           C  
ATOM   1014  OG  SER L  26       3.218  39.242  14.013  1.00 15.45           O  
ATOM   1015  N   SER L  27       5.862  38.582  11.273  1.00 17.26           N  
ATOM   1016  CA  SER L  27       6.011  39.043   9.896  1.00 19.98           C  
ATOM   1017  C   SER L  27       7.206  39.962   9.781  1.00 18.82           C  
ATOM   1018  O   SER L  27       7.164  40.963   9.068  1.00 23.80           O  
ATOM   1019  CB  SER L  27       4.745  39.741   9.410  1.00 24.00           C  
ATOM   1020  OG  SER L  27       3.690  38.801   9.343  1.00 23.17           O  
ATOM   1021  N   GLY L  27A      8.270  39.605  10.490  1.00 18.77           N  
ATOM   1022  CA  GLY L  27A      9.526  40.345  10.447  1.00 20.29           C  
ATOM   1023  C   GLY L  27A     10.353  39.970  11.658  1.00 22.30           C  
ATOM   1024  O   GLY L  27A      9.812  39.427  12.627  1.00 20.23           O  
ATOM   1025  N   SER L  27B     11.660  40.213  11.590  1.00 18.02           N  
ATOM   1026  CA  SER L  27B     12.537  39.998  12.725  1.00 14.48           C  
ATOM   1027  C   SER L  27B     12.649  41.230  13.631  1.00 17.75           C  
ATOM   1028  O   SER L  27B     12.822  42.356  13.153  1.00 17.24           O  
ATOM   1029  CB  SER L  27B     13.924  39.623  12.248  1.00 20.47           C  
ATOM   1030  OG  SER L  27B     14.832  39.814  13.315  1.00 26.31           O  
ATOM   1031  N   ILE L  28      12.574  41.000  14.933  1.00 18.14           N  
ATOM   1032  CA  ILE L  28      12.541  42.073  15.919  1.00 14.58           C  
ATOM   1033  C   ILE L  28      13.795  42.931  15.831  1.00 22.89           C  
ATOM   1034  O   ILE L  28      13.752  44.104  16.121  1.00 14.98           O  
ATOM   1035  CB  ILE L  28      12.365  41.493  17.359  1.00 13.26           C  
ATOM   1036  CG1 ILE L  28      12.025  42.597  18.371  1.00 16.25           C  
ATOM   1037  CG2 ILE L  28      13.598  40.739  17.807  1.00 19.69           C  
ATOM   1038  CD1 ILE L  28      10.605  43.131  18.191  1.00 14.58           C  
ATOM   1039  N   ALA L  29      14.900  42.316  15.420  1.00 19.10           N  
ATOM   1040  CA  ALA L  29      16.193  42.976  15.308  1.00 19.56           C  
ATOM   1041  C   ALA L  29      16.357  43.838  14.043  1.00 21.41           C  
ATOM   1042  O   ALA L  29      17.290  44.612  13.969  1.00 20.03           O  
ATOM   1043  CB  ALA L  29      17.298  41.925  15.354  1.00 17.93           C  
ATOM   1044  N   SER L  30      15.455  43.724  13.069  1.00 18.79           N  
ATOM   1045  CA  SER L  30      15.595  44.492  11.846  1.00 20.62           C  
ATOM   1046  C   SER L  30      15.468  46.012  12.076  1.00 21.40           C  
ATOM   1047  O   SER L  30      15.999  46.801  11.312  1.00 19.65           O  
ATOM   1048  CB  SER L  30      14.558  44.058  10.818  1.00 22.07           C  
ATOM   1049  OG  SER L  30      14.734  42.697  10.434  1.00 24.40           O  
ATOM   1050  N   ASN L  31      14.745  46.426  13.111  1.00 18.59           N  
ATOM   1051  CA  ASN L  31      14.535  47.842  13.355  1.00 15.04           C  
ATOM   1052  C   ASN L  31      14.498  48.109  14.849  1.00 14.64           C  
ATOM   1053  O   ASN L  31      14.129  47.253  15.628  1.00 15.05           O  
ATOM   1054  CB  ASN L  31      13.228  48.334  12.733  1.00 17.76           C  
ATOM   1055  CG  ASN L  31      13.339  48.608  11.246  1.00 23.41           C  
ATOM   1056  OD1 ASN L  31      13.953  49.589  10.824  1.00 19.30           O  
ATOM   1057  ND2 ASN L  31      12.696  47.771  10.450  1.00 23.51           N  
ATOM   1058  N   TYR L  32      14.847  49.330  15.219  1.00 10.82           N  
ATOM   1059  CA  TYR L  32      14.886  49.759  16.617  1.00 11.79           C  
ATOM   1060  C   TYR L  32      13.516  49.732  17.252  1.00 11.34           C  
ATOM   1061  O   TYR L  32      12.549  50.108  16.628  1.00 11.87           O  
ATOM   1062  CB  TYR L  32      15.436  51.180  16.711  1.00 15.66           C  
ATOM   1063  CG  TYR L  32      16.933  51.260  16.550  1.00 17.46           C  
ATOM   1064  CD1 TYR L  32      17.784  50.487  17.340  1.00 17.95           C  
ATOM   1065  CD2 TYR L  32      17.496  52.117  15.620  1.00 24.82           C  
ATOM   1066  CE1 TYR L  32      19.150  50.561  17.195  1.00 18.75           C  
ATOM   1067  CE2 TYR L  32      18.841  52.199  15.469  1.00 21.33           C  
ATOM   1068  CZ  TYR L  32      19.669  51.425  16.255  1.00 23.76           C  
ATOM   1069  OH  TYR L  32      21.021  51.534  16.094  1.00 27.45           O  
ATOM   1070  N   VAL L  33      13.482  49.371  18.527  1.00 13.64           N  
ATOM   1071  CA  VAL L  33      12.280  49.405  19.321  1.00 10.67           C  
ATOM   1072  C   VAL L  33      12.313  50.561  20.324  1.00  8.96           C  
ATOM   1073  O   VAL L  33      13.275  50.721  21.100  1.00 12.62           O  
ATOM   1074  CB  VAL L  33      12.095  48.077  20.070  1.00 12.35           C  
ATOM   1075  CG1 VAL L  33      10.825  48.126  20.932  1.00 12.87           C  
ATOM   1076  CG2 VAL L  33      12.029  46.903  19.078  1.00 16.14           C  
ATOM   1077  N   GLN L  34      11.236  51.320  20.342  1.00 11.39           N  
ATOM   1078  CA  GLN L  34      11.029  52.369  21.316  1.00 10.93           C  
ATOM   1079  C   GLN L  34       9.928  51.934  22.284  1.00 12.13           C  
ATOM   1080  O   GLN L  34       9.052  51.141  21.931  1.00 10.45           O  
ATOM   1081  CB  GLN L  34      10.640  53.690  20.634  1.00 11.86           C  
ATOM   1082  CG  GLN L  34      11.729  54.391  19.812  1.00 14.35           C  
ATOM   1083  CD  GLN L  34      12.381  53.477  18.776  1.00 17.05           C  
ATOM   1084  OE1 GLN L  34      13.554  53.135  18.899  1.00 15.92           O  
ATOM   1085  NE2 GLN L  34      11.624  53.076  17.761  1.00 15.81           N  
ATOM   1086  N   TRP L  35      10.000  52.439  23.512  1.00 11.16           N  
ATOM   1087  CA  TRP L  35       8.962  52.221  24.514  1.00 11.08           C  
ATOM   1088  C   TRP L  35       8.453  53.563  24.984  1.00 10.44           C  
ATOM   1089  O   TRP L  35       9.259  54.449  25.297  1.00  9.96           O  
ATOM   1090  CB  TRP L  35       9.512  51.441  25.706  1.00  8.80           C  
ATOM   1091  CG  TRP L  35       9.806  50.047  25.384  1.00  9.21           C  
ATOM   1092  CD1 TRP L  35      11.007  49.525  24.995  1.00 10.45           C  
ATOM   1093  CD2 TRP L  35       8.875  48.958  25.407  1.00  7.12           C  
ATOM   1094  NE1 TRP L  35      10.881  48.172  24.795  1.00 12.19           N  
ATOM   1095  CE2 TRP L  35       9.583  47.797  25.044  1.00 13.84           C  
ATOM   1096  CE3 TRP L  35       7.517  48.855  25.730  1.00  9.22           C  
ATOM   1097  CZ2 TRP L  35       8.970  46.535  24.970  1.00 13.29           C  
ATOM   1098  CZ3 TRP L  35       6.904  47.613  25.651  1.00 13.27           C  
ATOM   1099  CH2 TRP L  35       7.624  46.471  25.274  1.00 11.48           C  
ATOM   1100  N   TYR L  36       7.130  53.715  25.039  1.00  7.29           N  
ATOM   1101  CA  TYR L  36       6.503  54.938  25.540  1.00 11.71           C  
ATOM   1102  C   TYR L  36       5.651  54.676  26.778  1.00 12.63           C  
ATOM   1103  O   TYR L  36       5.063  53.589  26.941  1.00 12.84           O  
ATOM   1104  CB  TYR L  36       5.631  55.557  24.466  1.00  9.71           C  
ATOM   1105  CG  TYR L  36       6.374  55.848  23.207  1.00  9.95           C  
ATOM   1106  CD1 TYR L  36       7.138  56.999  23.094  1.00  8.94           C  
ATOM   1107  CD2 TYR L  36       6.331  54.978  22.138  1.00  7.00           C  
ATOM   1108  CE1 TYR L  36       7.851  57.277  21.938  1.00 10.79           C  
ATOM   1109  CE2 TYR L  36       7.035  55.236  20.969  1.00 11.32           C  
ATOM   1110  CZ  TYR L  36       7.812  56.396  20.873  1.00  9.68           C  
ATOM   1111  OH  TYR L  36       8.526  56.668  19.718  1.00 11.76           O  
ATOM   1112  N   GLN L  37       5.648  55.653  27.669  1.00  8.59           N  
ATOM   1113  CA  GLN L  37       4.660  55.729  28.732  1.00 10.60           C  
ATOM   1114  C   GLN L  37       3.550  56.672  28.291  1.00 10.90           C  
ATOM   1115  O   GLN L  37       3.810  57.735  27.731  1.00  9.43           O  
ATOM   1116  CB  GLN L  37       5.295  56.224  30.027  1.00  9.60           C  
ATOM   1117  CG  GLN L  37       4.358  56.273  31.191  1.00 10.39           C  
ATOM   1118  CD  GLN L  37       4.962  57.035  32.351  1.00 12.11           C  
ATOM   1119  OE1 GLN L  37       5.046  58.288  32.326  1.00 14.93           O  
ATOM   1120  NE2 GLN L  37       5.395  56.309  33.363  1.00 10.79           N  
ATOM   1121  N   GLN L  38       2.300  56.283  28.530  1.00 10.40           N  
ATOM   1122  CA  GLN L  38       1.196  57.189  28.234  1.00  9.66           C  
ATOM   1123  C   GLN L  38       0.202  57.230  29.382  1.00 14.99           C  
ATOM   1124  O   GLN L  38      -0.418  56.209  29.742  1.00 11.17           O  
ATOM   1125  CB  GLN L  38       0.466  56.806  26.955  1.00  9.70           C  
ATOM   1126  CG  GLN L  38      -0.440  57.951  26.452  1.00 13.49           C  
ATOM   1127  CD  GLN L  38      -1.232  57.639  25.196  1.00 13.67           C  
ATOM   1128  OE1 GLN L  38      -1.520  56.467  24.882  1.00 13.64           O  
ATOM   1129  NE2 GLN L  38      -1.613  58.695  24.470  1.00 11.27           N  
ATOM   1130  N   ARG L  39       0.064  58.413  29.963  1.00 14.81           N  
ATOM   1131  CA  ARG L  39      -0.954  58.643  30.982  1.00 11.78           C  
ATOM   1132  C   ARG L  39      -2.269  58.999  30.325  1.00 16.98           C  
ATOM   1133  O   ARG L  39      -2.296  59.402  29.166  1.00 13.19           O  
ATOM   1134  CB  ARG L  39      -0.504  59.720  31.949  1.00 13.50           C  
ATOM   1135  CG  ARG L  39       0.901  59.443  32.478  1.00 16.62           C  
ATOM   1136  CD  ARG L  39       1.155  60.232  33.728  1.00 13.38           C  
ATOM   1137  NE  ARG L  39       2.474  60.018  34.310  1.00 17.17           N  
ATOM   1138  CZ  ARG L  39       2.820  58.958  35.033  1.00 17.37           C  
ATOM   1139  NH1 ARG L  39       1.965  57.971  35.242  1.00 18.96           N1+
ATOM   1140  NH2 ARG L  39       4.040  58.879  35.527  1.00 15.68           N  
ATOM   1141  N   PRO L  40      -3.382  58.783  31.040  1.00 18.71           N  
ATOM   1142  CA  PRO L  40      -4.691  58.913  30.394  1.00 22.65           C  
ATOM   1143  C   PRO L  40      -4.903  60.322  29.846  1.00 13.96           C  
ATOM   1144  O   PRO L  40      -4.740  61.280  30.581  1.00 18.66           O  
ATOM   1145  CB  PRO L  40      -5.673  58.604  31.528  1.00 18.42           C  
ATOM   1146  CG  PRO L  40      -4.889  57.867  32.520  1.00 25.03           C  
ATOM   1147  CD  PRO L  40      -3.500  58.349  32.437  1.00 22.31           C  
ATOM   1148  N   GLY L  41      -5.199  60.434  28.560  1.00 18.54           N  
ATOM   1149  CA  GLY L  41      -5.559  61.719  27.973  1.00 17.37           C  
ATOM   1150  C   GLY L  41      -4.355  62.549  27.583  1.00 15.70           C  
ATOM   1151  O   GLY L  41      -4.501  63.702  27.159  1.00 13.46           O  
ATOM   1152  N   SER L  42      -3.160  61.977  27.727  1.00 14.27           N  
ATOM   1153  CA  SER L  42      -1.910  62.736  27.547  1.00 17.37           C  
ATOM   1154  C   SER L  42      -1.052  62.181  26.414  1.00 17.13           C  
ATOM   1155  O   SER L  42      -1.177  61.031  26.049  1.00 11.90           O  
ATOM   1156  CB  SER L  42      -1.112  62.732  28.848  1.00 12.76           C  
ATOM   1157  OG  SER L  42      -1.812  63.447  29.829  1.00 22.35           O  
ATOM   1158  N   SER L  43      -0.167  62.989  25.851  1.00 14.97           N  
ATOM   1159  CA  SER L  43       0.650  62.475  24.768  1.00 16.96           C  
ATOM   1160  C   SER L  43       1.675  61.479  25.324  1.00 10.74           C  
ATOM   1161  O   SER L  43       2.028  61.537  26.487  1.00 15.16           O  
ATOM   1162  CB  SER L  43       1.361  63.600  24.019  1.00 22.32           C  
ATOM   1163  OG  SER L  43       2.210  64.308  24.894  1.00 21.39           O  
ATOM   1164  N   PRO L  44       2.097  60.519  24.505  1.00 11.76           N  
ATOM   1165  CA  PRO L  44       3.104  59.569  24.976  1.00 13.61           C  
ATOM   1166  C   PRO L  44       4.447  60.250  25.274  1.00 13.42           C  
ATOM   1167  O   PRO L  44       4.790  61.228  24.637  1.00 11.93           O  
ATOM   1168  CB  PRO L  44       3.228  58.599  23.801  1.00 14.65           C  
ATOM   1169  CG  PRO L  44       1.953  58.813  22.966  1.00 14.60           C  
ATOM   1170  CD  PRO L  44       1.717  60.256  23.109  1.00 16.76           C  
ATOM   1171  N   THR L  45       5.184  59.740  26.244  1.00 14.08           N  
ATOM   1172  CA  THR L  45       6.559  60.170  26.451  1.00 13.29           C  
ATOM   1173  C   THR L  45       7.513  58.954  26.312  1.00 14.69           C  
ATOM   1174  O   THR L  45       7.151  57.835  26.675  1.00  8.44           O  
ATOM   1175  CB  THR L  45       6.714  60.867  27.818  1.00 12.75           C  
ATOM   1176  OG1 THR L  45       6.466  59.961  28.889  1.00 15.34           O  
ATOM   1177  CG2 THR L  45       5.694  62.031  27.930  1.00 19.34           C  
ATOM   1178  N   THR L  46       8.717  59.191  25.785  1.00  9.62           N  
ATOM   1179  CA  THR L  46       9.696  58.137  25.586  1.00 11.97           C  
ATOM   1180  C   THR L  46      10.256  57.698  26.923  1.00 12.94           C  
ATOM   1181  O   THR L  46      10.688  58.534  27.725  1.00 11.52           O  
ATOM   1182  CB  THR L  46      10.830  58.618  24.678  1.00 11.72           C  
ATOM   1183  OG1 THR L  46      10.280  59.054  23.431  1.00 10.23           O  
ATOM   1184  CG2 THR L  46      11.831  57.519  24.425  1.00 14.27           C  
ATOM   1185  N   VAL L  47      10.261  56.396  27.185  1.00 10.14           N  
ATOM   1186  CA  VAL L  47      11.114  55.882  28.271  1.00 13.13           C  
ATOM   1187  C   VAL L  47      12.336  55.150  27.732  1.00 12.20           C  
ATOM   1188  O   VAL L  47      13.364  55.136  28.394  1.00 12.76           O  
ATOM   1189  CB  VAL L  47      10.336  54.984  29.241  1.00 19.56           C  
ATOM   1190  CG1 VAL L  47       9.309  55.843  30.020  1.00 22.55           C  
ATOM   1191  CG2 VAL L  47       9.636  53.871  28.508  1.00 16.83           C  
ATOM   1192  N   ILE L  48      12.219  54.538  26.559  1.00 10.17           N  
ATOM   1193  CA  ILE L  48      13.329  53.853  25.902  1.00  8.63           C  
ATOM   1194  C   ILE L  48      13.287  54.132  24.394  1.00 10.73           C  
ATOM   1195  O   ILE L  48      12.214  54.040  23.737  1.00 11.42           O  
ATOM   1196  CB  ILE L  48      13.279  52.315  26.136  1.00  9.23           C  
ATOM   1197  CG1 ILE L  48      13.465  51.928  27.617  1.00 11.02           C  
ATOM   1198  CG2 ILE L  48      14.271  51.610  25.238  1.00 16.17           C  
ATOM   1199  CD1 ILE L  48      14.836  52.216  28.202  1.00 12.22           C  
ATOM   1200  N   TYR L  49      14.440  54.415  23.816  1.00  7.97           N  
ATOM   1201  CA  TYR L  49      14.559  54.439  22.349  1.00 10.79           C  
ATOM   1202  C   TYR L  49      15.770  53.618  21.866  1.00 11.37           C  
ATOM   1203  O   TYR L  49      16.647  53.272  22.648  1.00 11.62           O  
ATOM   1204  CB  TYR L  49      14.640  55.890  21.830  1.00 11.00           C  
ATOM   1205  CG  TYR L  49      15.889  56.626  22.289  1.00 10.55           C  
ATOM   1206  CD1 TYR L  49      16.991  56.735  21.463  1.00 13.95           C  
ATOM   1207  CD2 TYR L  49      15.966  57.181  23.553  1.00 14.40           C  
ATOM   1208  CE1 TYR L  49      18.136  57.395  21.879  1.00 14.64           C  
ATOM   1209  CE2 TYR L  49      17.118  57.842  23.977  1.00 13.10           C  
ATOM   1210  CZ  TYR L  49      18.194  57.934  23.126  1.00 15.44           C  
ATOM   1211  OH  TYR L  49      19.328  58.593  23.538  1.00 18.38           O  
ATOM   1212  N   GLU L  50      15.806  53.276  20.578  1.00 10.06           N  
ATOM   1213  CA  GLU L  50      16.918  52.472  20.038  1.00 14.65           C  
ATOM   1214  C   GLU L  50      17.224  51.268  20.924  1.00 14.20           C  
ATOM   1215  O   GLU L  50      18.368  51.010  21.291  1.00 13.50           O  
ATOM   1216  CB  GLU L  50      18.171  53.346  19.866  1.00 14.28           C  
ATOM   1217  CG  GLU L  50      17.993  54.448  18.819  1.00 17.74           C  
ATOM   1218  CD  GLU L  50      19.173  55.413  18.750  1.00 19.28           C  
ATOM   1219  OE1 GLU L  50      20.129  55.300  19.546  1.00 22.68           O  
ATOM   1220  OE2 GLU L  50      19.125  56.294  17.883  1.00 21.51           O1-
ATOM   1221  N   ASP L  51      16.167  50.536  21.249  1.00 11.82           N  
ATOM   1222  CA  ASP L  51      16.184  49.258  21.954  1.00 13.08           C  
ATOM   1223  C   ASP L  51      16.415  49.390  23.446  1.00 10.38           C  
ATOM   1224  O   ASP L  51      15.736  48.734  24.243  1.00 13.52           O  
ATOM   1225  CB  ASP L  51      17.248  48.290  21.376  1.00 15.59           C  
ATOM   1226  CG  ASP L  51      16.991  47.910  19.943  1.00 16.73           C  
ATOM   1227  OD1 ASP L  51      15.827  47.915  19.506  1.00 14.02           O  
ATOM   1228  OD2 ASP L  51      17.957  47.552  19.244  1.00 18.96           O1-
ATOM   1229  N   ASN L  52      17.381  50.197  23.855  1.00 12.78           N  
ATOM   1230  CA  ASN L  52      17.774  50.189  25.242  1.00 11.89           C  
ATOM   1231  C   ASN L  52      18.367  51.525  25.742  1.00 12.72           C  
ATOM   1232  O   ASN L  52      18.931  51.561  26.829  1.00 11.51           O  
ATOM   1233  CB  ASN L  52      18.793  49.066  25.479  1.00 12.24           C  
ATOM   1234  CG  ASN L  52      20.014  49.172  24.567  1.00 16.03           C  
ATOM   1235  OD1 ASN L  52      20.232  50.192  23.880  1.00 13.41           O  
ATOM   1236  ND2 ASN L  52      20.821  48.123  24.560  1.00 17.53           N  
ATOM   1237  N   GLN L  53      18.233  52.595  24.962  1.00  8.68           N  
ATOM   1238  CA  GLN L  53      18.700  53.932  25.377  1.00 10.34           C  
ATOM   1239  C   GLN L  53      17.654  54.682  26.220  1.00 13.70           C  
ATOM   1240  O   GLN L  53      16.501  54.780  25.843  1.00  9.67           O  
ATOM   1241  CB  GLN L  53      19.044  54.815  24.159  1.00 15.58           C  
ATOM   1242  CG  GLN L  53      20.000  54.206  23.220  1.00 14.15           C  
ATOM   1243  CD  GLN L  53      21.302  53.909  23.901  1.00 12.03           C  
ATOM   1244  OE1 GLN L  53      22.058  54.824  24.216  1.00 12.44           O  
ATOM   1245  NE2 GLN L  53      21.562  52.629  24.174  1.00 12.21           N  
ATOM   1246  N   ARG L  54      18.064  55.201  27.361  1.00 10.00           N  
ATOM   1247  CA  ARG L  54      17.199  56.024  28.177  1.00 14.23           C  
ATOM   1248  C   ARG L  54      17.358  57.514  27.842  1.00 18.23           C  
ATOM   1249  O   ARG L  54      18.459  58.015  27.857  1.00 16.86           O  
ATOM   1250  CB  ARG L  54      17.527  55.840  29.646  1.00 19.91           C  
ATOM   1251  CG  ARG L  54      16.937  54.630  30.287  1.00 21.76           C  
ATOM   1252  CD  ARG L  54      17.318  54.535  31.752  1.00 20.53           C  
ATOM   1253  NE  ARG L  54      18.638  53.913  31.895  1.00 23.90           N  
ATOM   1254  CZ  ARG L  54      19.741  54.540  32.270  1.00 28.55           C  
ATOM   1255  NH1 ARG L  54      20.870  53.845  32.363  1.00 34.75           N1+
ATOM   1256  NH2 ARG L  54      19.737  55.844  32.551  1.00 32.14           N  
ATOM   1257  N   PRO L  55      16.258  58.227  27.583  1.00 15.78           N  
ATOM   1258  CA  PRO L  55      16.371  59.692  27.536  1.00 13.31           C  
ATOM   1259  C   PRO L  55      16.816  60.280  28.879  1.00 15.10           C  
ATOM   1260  O   PRO L  55      16.616  59.660  29.937  1.00 12.72           O  
ATOM   1261  CB  PRO L  55      14.935  60.145  27.201  1.00 17.11           C  
ATOM   1262  CG  PRO L  55      14.247  58.979  26.669  1.00 17.87           C  
ATOM   1263  CD  PRO L  55      14.883  57.774  27.295  1.00 15.26           C  
ATOM   1264  N   SER L  56      17.415  61.468  28.873  1.00 18.14           N  
ATOM   1265  CA  SER L  56      17.809  62.069  30.140  1.00 21.16           C  
ATOM   1266  C   SER L  56      16.551  62.290  30.967  1.00 22.00           C  
ATOM   1267  O   SER L  56      15.482  62.528  30.426  1.00 20.08           O  
ATOM   1268  CB  SER L  56      18.576  63.373  29.929  1.00 31.70           C  
ATOM   1269  OG  SER L  56      17.819  64.254  29.128  1.00 41.93           O  
ATOM   1270  N   GLY L  57      16.676  62.140  32.278  1.00 20.58           N  
ATOM   1271  CA  GLY L  57      15.533  62.234  33.163  1.00 24.59           C  
ATOM   1272  C   GLY L  57      14.827  60.917  33.458  1.00 20.57           C  
ATOM   1273  O   GLY L  57      14.176  60.786  34.482  1.00 21.37           O  
ATOM   1274  N   VAL L  58      14.974  59.928  32.581  1.00 16.71           N  
ATOM   1275  CA  VAL L  58      14.385  58.616  32.822  1.00 11.13           C  
ATOM   1276  C   VAL L  58      15.348  57.826  33.721  1.00 17.80           C  
ATOM   1277  O   VAL L  58      16.485  57.580  33.342  1.00 20.62           O  
ATOM   1278  CB  VAL L  58      14.110  57.894  31.486  1.00 16.02           C  
ATOM   1279  CG1 VAL L  58      13.668  56.456  31.733  1.00 18.43           C  
ATOM   1280  CG2 VAL L  58      13.053  58.659  30.651  1.00 18.13           C  
ATOM   1281  N   PRO L  59      14.905  57.408  34.907  1.00 22.58           N  
ATOM   1282  CA  PRO L  59      15.820  56.689  35.809  1.00 26.38           C  
ATOM   1283  C   PRO L  59      16.219  55.302  35.297  1.00 26.28           C  
ATOM   1284  O   PRO L  59      15.519  54.748  34.456  1.00 18.67           O  
ATOM   1285  CB  PRO L  59      15.019  56.581  37.101  1.00 29.93           C  
ATOM   1286  CG  PRO L  59      13.608  56.656  36.687  1.00 27.17           C  
ATOM   1287  CD  PRO L  59      13.561  57.549  35.475  1.00 24.19           C  
ATOM   1288  N   ASP L  60      17.333  54.766  35.799  1.00 20.31           N  
ATOM   1289  CA  ASP L  60      17.910  53.540  35.263  1.00 24.62           C  
ATOM   1290  C   ASP L  60      17.138  52.291  35.725  1.00 18.73           C  
ATOM   1291  O   ASP L  60      17.420  51.190  35.282  1.00 23.53           O  
ATOM   1292  CB  ASP L  60      19.399  53.440  35.635  1.00 29.89           C  
ATOM   1293  CG  ASP L  60      19.635  53.332  37.130  1.00 39.33           C  
ATOM   1294  OD1 ASP L  60      18.677  53.472  37.918  1.00 36.94           O  
ATOM   1295  OD2 ASP L  60      20.806  53.127  37.519  1.00 44.51           O1-
ATOM   1296  N   ARG L  61      16.126  52.457  36.569  1.00 17.78           N  
ATOM   1297  CA  ARG L  61      15.244  51.318  36.838  1.00 25.35           C  
ATOM   1298  C   ARG L  61      14.331  51.000  35.639  1.00 21.00           C  
ATOM   1299  O   ARG L  61      13.696  49.960  35.607  1.00 16.85           O  
ATOM   1300  CB  ARG L  61      14.419  51.556  38.091  1.00 29.37           C  
ATOM   1301  CG  ARG L  61      13.599  52.812  38.074  1.00 27.40           C  
ATOM   1302  CD  ARG L  61      13.013  53.137  39.447  1.00 23.77           C  
ATOM   1303  NE  ARG L  61      12.036  54.205  39.288  1.00 25.08           N  
ATOM   1304  CZ  ARG L  61      10.751  54.012  39.024  1.00 22.45           C  
ATOM   1305  NH1 ARG L  61      10.263  52.779  38.933  1.00 20.43           N1+
ATOM   1306  NH2 ARG L  61       9.956  55.054  38.866  1.00 17.81           N  
ATOM   1307  N   PHE L  62      14.273  51.882  34.649  1.00 20.02           N  
ATOM   1308  CA  PHE L  62      13.701  51.512  33.355  1.00 14.73           C  
ATOM   1309  C   PHE L  62      14.788  50.956  32.423  1.00 19.03           C  
ATOM   1310  O   PHE L  62      15.788  51.636  32.183  1.00 16.61           O  
ATOM   1311  CB  PHE L  62      13.015  52.735  32.702  1.00 16.00           C  
ATOM   1312  CG  PHE L  62      11.743  53.183  33.405  1.00 19.32           C  
ATOM   1313  CD1 PHE L  62      10.503  52.848  32.904  1.00 17.42           C  
ATOM   1314  CD2 PHE L  62      11.799  53.940  34.555  1.00 22.66           C  
ATOM   1315  CE1 PHE L  62       9.356  53.245  33.540  1.00 19.87           C  
ATOM   1316  CE2 PHE L  62      10.636  54.344  35.196  1.00 21.20           C  
ATOM   1317  CZ  PHE L  62       9.423  53.993  34.678  1.00 22.34           C  
ATOM   1318  N   SER L  63      14.577  49.738  31.905  1.00 11.89           N  
ATOM   1319  CA  SER L  63      15.517  49.055  31.007  1.00 14.08           C  
ATOM   1320  C   SER L  63      14.835  48.425  29.810  1.00 13.96           C  
ATOM   1321  O   SER L  63      13.806  47.760  29.949  1.00 16.89           O  
ATOM   1322  CB  SER L  63      16.276  47.925  31.755  1.00 15.25           C  
ATOM   1323  OG  SER L  63      17.014  48.502  32.788  1.00 27.12           O  
ATOM   1324  N   GLY L  64      15.433  48.608  28.643  1.00 11.38           N  
ATOM   1325  CA  GLY L  64      14.994  47.948  27.430  1.00 10.14           C  
ATOM   1326  C   GLY L  64      15.920  46.822  27.013  1.00 14.01           C  
ATOM   1327  O   GLY L  64      17.136  46.901  27.241  1.00 16.33           O  
ATOM   1328  N   SER L  65      15.359  45.774  26.414  1.00 15.93           N  
ATOM   1329  CA  SER L  65      16.170  44.653  25.962  1.00 16.98           C  
ATOM   1330  C   SER L  65      15.517  43.965  24.755  1.00 17.72           C  
ATOM   1331  O   SER L  65      14.331  44.162  24.478  1.00 14.53           O  
ATOM   1332  CB  SER L  65      16.402  43.652  27.110  1.00 21.91           C  
ATOM   1333  OG  SER L  65      15.190  43.083  27.585  1.00 21.68           O  
ATOM   1334  N   ILE L  66      16.335  43.204  24.019  1.00 13.03           N  
ATOM   1335  CA  ILE L  66      15.912  42.482  22.819  1.00 14.90           C  
ATOM   1336  C   ILE L  66      16.295  41.023  22.991  1.00 18.53           C  
ATOM   1337  O   ILE L  66      17.409  40.728  23.398  1.00 17.27           O  
ATOM   1338  CB  ILE L  66      16.566  43.056  21.542  1.00 17.06           C  
ATOM   1339  CG1 ILE L  66      16.274  44.565  21.394  1.00 17.97           C  
ATOM   1340  CG2 ILE L  66      16.098  42.287  20.342  1.00 19.14           C  
ATOM   1341  CD1 ILE L  66      14.821  44.873  21.197  1.00 14.74           C  
ATOM   1342  N   ASP L  66A     15.365  40.126  22.686  1.00 14.61           N  
ATOM   1343  CA  ASP L  66A     15.616  38.692  22.696  1.00 18.74           C  
ATOM   1344  C   ASP L  66A     15.270  38.151  21.325  1.00 18.11           C  
ATOM   1345  O   ASP L  66A     14.111  37.795  21.036  1.00 17.56           O  
ATOM   1346  CB  ASP L  66A     14.804  37.984  23.789  1.00 22.03           C  
ATOM   1347  CG  ASP L  66A     14.992  36.444  23.776  1.00 23.37           C  
ATOM   1348  OD1 ASP L  66A     15.676  35.945  22.891  1.00 23.85           O  
ATOM   1349  OD2 ASP L  66A     14.415  35.738  24.626  1.00 21.56           O1-
ATOM   1350  N   SER L  66B     16.298  38.062  20.486  1.00 17.60           N  
ATOM   1351  CA  SER L  66B     16.127  37.615  19.113  1.00 23.06           C  
ATOM   1352  C   SER L  66B     15.641  36.154  19.104  1.00 19.48           C  
ATOM   1353  O   SER L  66B     14.875  35.735  18.237  1.00 22.58           O  
ATOM   1354  CB  SER L  66B     17.442  37.753  18.358  1.00 24.73           C  
ATOM   1355  OG  SER L  66B     18.384  36.846  18.902  1.00 40.52           O  
ATOM   1356  N   SER L  67      16.047  35.396  20.107  1.00 18.07           N  
ATOM   1357  CA  SER L  67      15.697  33.974  20.141  1.00 18.61           C  
ATOM   1358  C   SER L  67      14.195  33.796  20.335  1.00 23.05           C  
ATOM   1359  O   SER L  67      13.645  32.734  20.030  1.00 24.36           O  
ATOM   1360  CB  SER L  67      16.453  33.257  21.255  1.00 19.77           C  
ATOM   1361  OG  SER L  67      15.814  33.471  22.506  1.00 24.82           O  
ATOM   1362  N   SER L  68      13.539  34.840  20.843  1.00 22.12           N  
ATOM   1363  CA  SER L  68      12.081  34.848  21.022  1.00 23.07           C  
ATOM   1364  C   SER L  68      11.377  35.817  20.094  1.00 22.47           C  
ATOM   1365  O   SER L  68      10.165  35.993  20.183  1.00 18.18           O  
ATOM   1366  CB  SER L  68      11.728  35.219  22.462  1.00 24.69           C  
ATOM   1367  OG  SER L  68      12.366  34.333  23.348  1.00 31.88           O  
ATOM   1368  N   ASN L  69      12.146  36.464  19.227  1.00 19.93           N  
ATOM   1369  CA  ASN L  69      11.642  37.554  18.395  1.00 15.97           C  
ATOM   1370  C   ASN L  69      10.872  38.610  19.213  1.00 11.55           C  
ATOM   1371  O   ASN L  69       9.847  39.156  18.761  1.00 16.83           O  
ATOM   1372  CB  ASN L  69      10.747  37.034  17.290  1.00 17.91           C  
ATOM   1373  CG  ASN L  69      10.841  37.894  16.057  1.00 16.66           C  
ATOM   1374  OD1 ASN L  69      11.924  38.368  15.723  1.00 17.86           O  
ATOM   1375  ND2 ASN L  69       9.718  38.116  15.380  1.00 13.77           N  
ATOM   1376  N   SER L  70      11.379  38.895  20.396  1.00 14.23           N  
ATOM   1377  CA  SER L  70      10.720  39.827  21.322  1.00 18.40           C  
ATOM   1378  C   SER L  70      11.603  40.987  21.757  1.00 14.23           C  
ATOM   1379  O   SER L  70      12.837  40.902  21.694  1.00 15.78           O  
ATOM   1380  CB  SER L  70      10.280  39.073  22.559  1.00 14.70           C  
ATOM   1381  OG  SER L  70      11.409  38.718  23.309  1.00 15.47           O  
ATOM   1382  N   ALA L  71      10.943  42.056  22.212  1.00 13.08           N  
ATOM   1383  CA  ALA L  71      11.561  43.168  22.919  1.00 14.62           C  
ATOM   1384  C   ALA L  71      10.928  43.243  24.316  1.00 14.85           C  
ATOM   1385  O   ALA L  71       9.758  42.881  24.476  1.00 16.54           O  
ATOM   1386  CB  ALA L  71      11.352  44.499  22.153  1.00 14.24           C  
ATOM   1387  N   SER L  72      11.676  43.681  25.320  1.00 13.25           N  
ATOM   1388  CA  SER L  72      11.077  43.857  26.644  1.00 11.83           C  
ATOM   1389  C   SER L  72      11.425  45.165  27.329  1.00 12.86           C  
ATOM   1390  O   SER L  72      12.557  45.646  27.266  1.00 12.91           O  
ATOM   1391  CB  SER L  72      11.481  42.723  27.593  1.00 14.98           C  
ATOM   1392  OG  SER L  72      11.016  41.471  27.127  1.00 17.48           O  
ATOM   1393  N   LEU L  73      10.416  45.726  27.997  1.00 13.28           N  
ATOM   1394  CA  LEU L  73      10.615  46.813  28.933  1.00 14.39           C  
ATOM   1395  C   LEU L  73      10.593  46.242  30.333  1.00 15.99           C  
ATOM   1396  O   LEU L  73       9.656  45.555  30.699  1.00 10.24           O  
ATOM   1397  CB  LEU L  73       9.527  47.849  28.799  1.00 11.81           C  
ATOM   1398  CG  LEU L  73       9.657  49.040  29.733  1.00 13.17           C  
ATOM   1399  CD1 LEU L  73      10.951  49.820  29.409  1.00 11.97           C  
ATOM   1400  CD2 LEU L  73       8.416  49.899  29.590  1.00 12.73           C  
ATOM   1401  N   THR L  74      11.608  46.546  31.119  1.00  9.66           N  
ATOM   1402  CA  THR L  74      11.662  46.083  32.494  1.00 15.36           C  
ATOM   1403  C   THR L  74      11.747  47.253  33.439  1.00 15.35           C  
ATOM   1404  O   THR L  74      12.599  48.142  33.287  1.00 15.39           O  
ATOM   1405  CB  THR L  74      12.872  45.155  32.736  1.00 16.73           C  
ATOM   1406  OG1 THR L  74      12.780  44.036  31.862  1.00 16.91           O  
ATOM   1407  CG2 THR L  74      12.897  44.656  34.145  1.00 20.20           C  
ATOM   1408  N   ILE L  75      10.864  47.242  34.429  1.00 11.72           N  
ATOM   1409  CA  ILE L  75      10.832  48.301  35.432  1.00 13.23           C  
ATOM   1410  C   ILE L  75      11.049  47.726  36.807  1.00 18.55           C  
ATOM   1411  O   ILE L  75      10.214  46.960  37.290  1.00 18.69           O  
ATOM   1412  CB  ILE L  75       9.500  49.066  35.428  1.00 11.25           C  
ATOM   1413  CG1 ILE L  75       9.114  49.503  34.019  1.00 14.62           C  
ATOM   1414  CG2 ILE L  75       9.627  50.291  36.365  1.00 15.18           C  
ATOM   1415  CD1 ILE L  75       7.729  50.195  33.958  1.00 17.72           C  
ATOM   1416  N   SER L  76      12.147  48.121  37.439  1.00 16.96           N  
ATOM   1417  CA  SER L  76      12.432  47.719  38.804  1.00 20.79           C  
ATOM   1418  C   SER L  76      12.092  48.848  39.780  1.00 25.01           C  
ATOM   1419  O   SER L  76      11.856  49.984  39.373  1.00 19.67           O  
ATOM   1420  CB  SER L  76      13.899  47.321  38.940  1.00 24.34           C  
ATOM   1421  OG  SER L  76      14.756  48.443  38.808  1.00 23.86           O  
ATOM   1422  N   GLY L  77      12.033  48.521  41.069  1.00 19.27           N  
ATOM   1423  CA  GLY L  77      11.804  49.518  42.100  1.00 22.76           C  
ATOM   1424  C   GLY L  77      10.498  50.234  41.846  1.00 15.05           C  
ATOM   1425  O   GLY L  77      10.374  51.442  41.999  1.00 21.61           O  
ATOM   1426  N   LEU L  78       9.539  49.447  41.407  1.00 17.98           N  
ATOM   1427  CA  LEU L  78       8.258  49.921  40.934  1.00 19.32           C  
ATOM   1428  C   LEU L  78       7.624  50.901  41.893  1.00 20.43           C  
ATOM   1429  O   LEU L  78       7.564  50.629  43.078  1.00 21.59           O  
ATOM   1430  CB  LEU L  78       7.366  48.717  40.766  1.00 20.78           C  
ATOM   1431  CG  LEU L  78       6.144  48.745  39.900  1.00 26.42           C  
ATOM   1432  CD1 LEU L  78       6.435  49.319  38.525  1.00 26.85           C  
ATOM   1433  CD2 LEU L  78       5.710  47.277  39.809  1.00 27.01           C  
ATOM   1434  N   LYS L  79       7.168  52.034  41.372  1.00 15.42           N  
ATOM   1435  CA  LYS L  79       6.509  53.057  42.167  1.00 19.22           C  
ATOM   1436  C   LYS L  79       5.079  53.184  41.707  1.00 16.44           C  
ATOM   1437  O   LYS L  79       4.758  52.906  40.552  1.00 16.52           O  
ATOM   1438  CB  LYS L  79       7.211  54.406  42.032  1.00 22.27           C  
ATOM   1439  CG  LYS L  79       8.623  54.419  42.507  1.00 25.16           C  
ATOM   1440  CD  LYS L  79       9.218  55.818  42.301  1.00 35.53           C  
ATOM   1441  CE  LYS L  79      10.653  55.925  42.806  1.00 36.30           C  
ATOM   1442  NZ  LYS L  79      11.202  57.305  42.546  1.00 39.48           N1+
ATOM   1443  N   THR L  80       4.207  53.623  42.597  1.00 17.24           N  
ATOM   1444  CA  THR L  80       2.803  53.739  42.239  1.00 19.74           C  
ATOM   1445  C   THR L  80       2.663  54.718  41.078  1.00 15.82           C  
ATOM   1446  O   THR L  80       1.788  54.556  40.226  1.00 17.61           O  
ATOM   1447  CB  THR L  80       1.929  54.186  43.439  1.00 22.63           C  
ATOM   1448  OG1 THR L  80       2.359  55.457  43.896  1.00 35.66           O  
ATOM   1449  CG2 THR L  80       2.053  53.197  44.583  1.00 22.20           C  
ATOM   1450  N   GLU L  81       3.547  55.696  40.993  1.00 16.10           N  
ATOM   1451  CA  GLU L  81       3.465  56.673  39.888  1.00 13.93           C  
ATOM   1452  C   GLU L  81       3.770  56.054  38.527  1.00 16.81           C  
ATOM   1453  O   GLU L  81       3.497  56.677  37.485  1.00 15.05           O  
ATOM   1454  CB  GLU L  81       4.414  57.841  40.116  1.00 19.26           C  
ATOM   1455  CG  GLU L  81       5.832  57.496  39.946  1.00 21.08           C  
ATOM   1456  CD  GLU L  81       6.751  58.547  40.542  1.00 24.18           C  
ATOM   1457  OE1 GLU L  81       7.520  59.177  39.789  1.00 25.33           O  
ATOM   1458  OE2 GLU L  81       6.672  58.745  41.772  1.00 28.41           O1-
ATOM   1459  N   ASP L  82       4.321  54.837  38.518  1.00 13.30           N  
ATOM   1460  CA  ASP L  82       4.573  54.137  37.256  1.00 11.72           C  
ATOM   1461  C   ASP L  82       3.318  53.564  36.616  1.00 16.30           C  
ATOM   1462  O   ASP L  82       3.356  53.058  35.493  1.00 14.81           O  
ATOM   1463  CB  ASP L  82       5.576  52.984  37.446  1.00 12.38           C  
ATOM   1464  CG  ASP L  82       6.912  53.448  37.927  1.00 14.00           C  
ATOM   1465  OD1 ASP L  82       7.322  54.587  37.595  1.00 16.07           O  
ATOM   1466  OD2 ASP L  82       7.572  52.658  38.648  1.00 14.99           O1-
ATOM   1467  N   GLU L  83       2.213  53.609  37.337  1.00 15.29           N  
ATOM   1468  CA  GLU L  83       0.948  53.129  36.804  1.00 11.42           C  
ATOM   1469  C   GLU L  83       0.515  53.988  35.619  1.00 14.82           C  
ATOM   1470  O   GLU L  83       0.314  55.200  35.758  1.00 15.02           O  
ATOM   1471  CB  GLU L  83      -0.112  53.113  37.911  1.00 18.06           C  
ATOM   1472  CG  GLU L  83      -1.448  52.632  37.438  1.00 18.08           C  
ATOM   1473  CD  GLU L  83      -2.418  52.285  38.572  1.00 21.17           C  
ATOM   1474  OE1 GLU L  83      -2.020  51.574  39.505  1.00 17.57           O  
ATOM   1475  OE2 GLU L  83      -3.584  52.735  38.507  1.00 31.05           O1-
ATOM   1476  N   ALA L  84       0.408  53.342  34.456  1.00 13.96           N  
ATOM   1477  CA  ALA L  84       0.227  54.004  33.163  1.00 11.30           C  
ATOM   1478  C   ALA L  84       0.133  52.944  32.079  1.00  9.51           C  
ATOM   1479  O   ALA L  84       0.405  51.773  32.335  1.00 13.69           O  
ATOM   1480  CB  ALA L  84       1.376  54.923  32.875  1.00 11.05           C  
ATOM   1481  N   ASP L  85      -0.205  53.361  30.869  1.00 14.20           N  
ATOM   1482  CA  ASP L  85      -0.061  52.513  29.699  1.00 11.51           C  
ATOM   1483  C   ASP L  85       1.374  52.582  29.167  1.00 17.35           C  
ATOM   1484  O   ASP L  85       2.012  53.656  29.188  1.00 12.35           O  
ATOM   1485  CB  ASP L  85      -1.033  52.934  28.583  1.00 11.16           C  
ATOM   1486  CG  ASP L  85      -2.476  52.587  28.888  1.00 17.20           C  
ATOM   1487  OD1 ASP L  85      -2.735  51.675  29.721  1.00 13.92           O  
ATOM   1488  OD2 ASP L  85      -3.338  53.250  28.263  1.00 14.35           O1-
ATOM   1489  N   TYR L  86       1.865  51.437  28.685  1.00 12.23           N  
ATOM   1490  CA  TYR L  86       3.158  51.331  28.022  1.00  9.24           C  
ATOM   1491  C   TYR L  86       3.012  50.712  26.640  1.00 11.03           C  
ATOM   1492  O   TYR L  86       2.371  49.670  26.481  1.00  9.46           O  
ATOM   1493  CB  TYR L  86       4.133  50.494  28.864  1.00 10.34           C  
ATOM   1494  CG  TYR L  86       4.474  51.209  30.120  1.00 11.21           C  
ATOM   1495  CD1 TYR L  86       5.547  52.101  30.170  1.00  7.73           C  
ATOM   1496  CD2 TYR L  86       3.682  51.062  31.252  1.00  8.35           C  
ATOM   1497  CE1 TYR L  86       5.828  52.786  31.306  1.00 11.10           C  
ATOM   1498  CE2 TYR L  86       3.926  51.763  32.360  1.00 10.24           C  
ATOM   1499  CZ  TYR L  86       5.011  52.630  32.403  1.00 15.01           C  
ATOM   1500  OH  TYR L  86       5.256  53.335  33.550  1.00 14.60           O  
ATOM   1501  N   TYR L  87       3.625  51.364  25.654  1.00 14.05           N  
ATOM   1502  CA  TYR L  87       3.649  50.907  24.264  1.00 12.54           C  
ATOM   1503  C   TYR L  87       5.053  50.619  23.741  1.00 12.96           C  
ATOM   1504  O   TYR L  87       5.981  51.446  23.945  1.00  8.73           O  
ATOM   1505  CB  TYR L  87       3.053  51.966  23.341  1.00 14.14           C  
ATOM   1506  CG  TYR L  87       1.591  52.252  23.534  1.00 11.66           C  
ATOM   1507  CD1 TYR L  87       0.608  51.543  22.831  1.00 12.38           C  
ATOM   1508  CD2 TYR L  87       1.184  53.209  24.431  1.00 12.44           C  
ATOM   1509  CE1 TYR L  87      -0.727  51.808  23.019  1.00 14.08           C  
ATOM   1510  CE2 TYR L  87      -0.176  53.489  24.624  1.00 15.25           C  
ATOM   1511  CZ  TYR L  87      -1.118  52.790  23.915  1.00 14.86           C  
ATOM   1512  OH  TYR L  87      -2.447  53.088  24.105  1.00 19.44           O  
ATOM   1513  N   CYS L  88       5.193  49.535  22.980  1.00  6.27           N  
ATOM   1514  CA  CYS L  88       6.394  49.338  22.175  1.00  8.75           C  
ATOM   1515  C   CYS L  88       6.081  49.847  20.786  1.00 10.08           C  
ATOM   1516  O   CYS L  88       4.921  49.988  20.387  1.00  8.40           O  
ATOM   1517  CB  CYS L  88       6.828  47.854  22.113  1.00 11.24           C  
ATOM   1518  SG  CYS L  88       5.564  46.886  21.317  1.00 13.72           S  
ATOM   1519  N   GLN L  89       7.121  50.170  20.040  1.00  9.39           N  
ATOM   1520  CA  GLN L  89       6.957  50.794  18.742  1.00 11.79           C  
ATOM   1521  C   GLN L  89       8.199  50.531  17.902  1.00 10.75           C  
ATOM   1522  O   GLN L  89       9.328  50.665  18.394  1.00 10.31           O  
ATOM   1523  CB  GLN L  89       6.742  52.313  18.888  1.00 12.81           C  
ATOM   1524  CG  GLN L  89       6.680  53.069  17.563  1.00 10.69           C  
ATOM   1525  CD  GLN L  89       8.008  53.764  17.227  1.00 11.11           C  
ATOM   1526  OE1 GLN L  89       8.604  54.411  18.075  1.00 12.73           O  
ATOM   1527  NE2 GLN L  89       8.485  53.585  16.006  1.00 13.84           N  
ATOM   1528  N   SER L  90       7.997  50.260  16.621  1.00 12.44           N  
ATOM   1529  CA  SER L  90       9.119  50.123  15.717  1.00 12.93           C  
ATOM   1530  C   SER L  90       8.668  50.488  14.292  1.00 12.72           C  
ATOM   1531  O   SER L  90       7.754  51.307  14.104  1.00 11.77           O  
ATOM   1532  CB  SER L  90       9.672  48.701  15.823  1.00 12.94           C  
ATOM   1533  OG  SER L  90      10.895  48.531  15.147  1.00 14.00           O  
ATOM   1534  N   TYR L  91       9.293  49.875  13.304  1.00 15.15           N  
ATOM   1535  CA  TYR L  91       8.991  50.153  11.907  1.00 16.89           C  
ATOM   1536  C   TYR L  91       8.816  48.836  11.123  1.00 22.49           C  
ATOM   1537  O   TYR L  91       9.424  47.821  11.464  1.00 19.81           O  
ATOM   1538  CB  TYR L  91      10.108  51.027  11.313  1.00 13.85           C  
ATOM   1539  CG  TYR L  91      10.339  52.281  12.124  1.00 18.97           C  
ATOM   1540  CD1 TYR L  91       9.651  53.429  11.842  1.00 22.88           C  
ATOM   1541  CD2 TYR L  91      11.237  52.299  13.182  1.00 17.57           C  
ATOM   1542  CE1 TYR L  91       9.837  54.574  12.576  1.00 23.19           C  
ATOM   1543  CE2 TYR L  91      11.429  53.435  13.922  1.00 19.33           C  
ATOM   1544  CZ  TYR L  91      10.714  54.566  13.617  1.00 19.88           C  
ATOM   1545  OH  TYR L  91      10.862  55.716  14.342  1.00 26.88           O  
ATOM   1546  N   ASP L  92       7.957  48.852  10.099  1.00 15.92           N  
ATOM   1547  CA  ASP L  92       7.812  47.714   9.209  1.00 20.25           C  
ATOM   1548  C   ASP L  92       8.826  47.786   8.049  1.00 23.65           C  
ATOM   1549  O   ASP L  92       9.675  48.682   8.012  1.00 19.99           O  
ATOM   1550  CB  ASP L  92       6.378  47.633   8.678  1.00 20.07           C  
ATOM   1551  CG  ASP L  92       5.991  48.816   7.825  1.00 23.89           C  
ATOM   1552  OD1 ASP L  92       6.883  49.517   7.278  1.00 26.56           O  
ATOM   1553  OD2 ASP L  92       4.767  49.031   7.695  1.00 21.09           O1-
ATOM   1554  N   SER L  93       8.713  46.863   7.092  1.00 24.62           N  
ATOM   1555  CA  SER L  93       9.674  46.782   5.991  1.00 23.62           C  
ATOM   1556  C   SER L  93       9.629  48.002   5.075  1.00 28.47           C  
ATOM   1557  O   SER L  93      10.577  48.250   4.341  1.00 29.39           O  
ATOM   1558  CB  SER L  93       9.436  45.524   5.167  1.00 24.62           C  
ATOM   1559  OG  SER L  93       8.175  45.569   4.515  1.00 26.69           O  
ATOM   1560  N   SER L  94       8.538  48.765   5.123  1.00 24.86           N  
ATOM   1561  CA  SER L  94       8.457  50.031   4.396  1.00 31.50           C  
ATOM   1562  C   SER L  94       8.895  51.216   5.257  1.00 26.40           C  
ATOM   1563  O   SER L  94       8.681  52.366   4.897  1.00 29.56           O  
ATOM   1564  CB  SER L  94       7.028  50.282   3.898  1.00 31.46           C  
ATOM   1565  OG  SER L  94       6.610  49.277   3.000  1.00 43.36           O  
ATOM   1566  N   ASN L  95       9.487  50.922   6.403  1.00 25.18           N  
ATOM   1567  CA  ASN L  95       9.909  51.941   7.359  1.00 18.12           C  
ATOM   1568  C   ASN L  95       8.761  52.817   7.886  1.00 18.94           C  
ATOM   1569  O   ASN L  95       8.999  53.931   8.336  1.00 23.67           O  
ATOM   1570  CB  ASN L  95      11.019  52.807   6.750  1.00 30.46           C  
ATOM   1571  CG  ASN L  95      12.231  51.970   6.351  1.00 38.93           C  
ATOM   1572  OD1 ASN L  95      13.009  51.532   7.203  1.00 45.74           O  
ATOM   1573  ND2 ASN L  95      12.373  51.712   5.058  1.00 43.11           N  
ATOM   1574  N   HIS L  95A      7.544  52.279   7.879  1.00 20.43           N  
ATOM   1575  CA  HIS L  95A      6.388  52.934   8.502  1.00 25.49           C  
ATOM   1576  C   HIS L  95A      6.189  52.498   9.964  1.00 20.76           C  
ATOM   1577  O   HIS L  95A      6.502  51.375  10.327  1.00 16.39           O  
ATOM   1578  CB  HIS L  95A      5.129  52.623   7.721  1.00 17.99           C  
ATOM   1579  CG  HIS L  95A      5.209  53.012   6.284  1.00 26.35           C  
ATOM   1580  ND1 HIS L  95A      4.459  52.395   5.305  1.00 26.07           N  
ATOM   1581  CD2 HIS L  95A      5.960  53.944   5.655  1.00 27.30           C  
ATOM   1582  CE1 HIS L  95A      4.732  52.944   4.137  1.00 30.09           C  
ATOM   1583  NE2 HIS L  95A      5.643  53.885   4.319  1.00 26.80           N  
ATOM   1584  N   VAL L  96       5.638  53.393  10.782  1.00 18.47           N  
ATOM   1585  CA  VAL L  96       5.516  53.151  12.210  1.00 15.52           C  
ATOM   1586  C   VAL L  96       4.608  51.979  12.492  1.00 16.72           C  
ATOM   1587  O   VAL L  96       3.585  51.830  11.862  1.00 16.47           O  
ATOM   1588  CB  VAL L  96       5.013  54.402  12.911  1.00 16.10           C  
ATOM   1589  CG1 VAL L  96       4.560  54.111  14.316  1.00 12.28           C  
ATOM   1590  CG2 VAL L  96       6.112  55.416  12.911  1.00 14.67           C  
ATOM   1591  N   VAL L  97       4.999  51.169  13.465  1.00 12.46           N  
ATOM   1592  CA  VAL L  97       4.160  50.100  13.993  1.00 14.15           C  
ATOM   1593  C   VAL L  97       4.126  50.237  15.507  1.00 11.83           C  
ATOM   1594  O   VAL L  97       5.181  50.385  16.116  1.00 11.57           O  
ATOM   1595  CB  VAL L  97       4.729  48.725  13.577  1.00 19.37           C  
ATOM   1596  CG1 VAL L  97       3.999  47.580  14.263  1.00 24.17           C  
ATOM   1597  CG2 VAL L  97       4.666  48.585  12.087  1.00 23.42           C  
ATOM   1598  N   PHE L  98       2.933  50.190  16.099  1.00 10.01           N  
ATOM   1599  CA  PHE L  98       2.751  50.211  17.551  1.00 12.21           C  
ATOM   1600  C   PHE L  98       2.272  48.849  18.057  1.00 16.64           C  
ATOM   1601  O   PHE L  98       1.448  48.213  17.416  1.00 13.98           O  
ATOM   1602  CB  PHE L  98       1.705  51.266  17.951  1.00 13.17           C  
ATOM   1603  CG  PHE L  98       2.250  52.637  18.166  1.00 15.13           C  
ATOM   1604  CD1 PHE L  98       2.852  52.997  19.371  1.00 13.13           C  
ATOM   1605  CD2 PHE L  98       2.129  53.596  17.177  1.00 12.41           C  
ATOM   1606  CE1 PHE L  98       3.349  54.310  19.561  1.00  8.46           C  
ATOM   1607  CE2 PHE L  98       2.627  54.884  17.385  1.00 14.46           C  
ATOM   1608  CZ  PHE L  98       3.236  55.214  18.575  1.00 15.76           C  
ATOM   1609  N   GLY L  99       2.757  48.409  19.208  1.00 14.11           N  
ATOM   1610  CA  GLY L  99       2.042  47.384  19.967  1.00 13.92           C  
ATOM   1611  C   GLY L  99       0.690  47.915  20.464  1.00 17.20           C  
ATOM   1612  O   GLY L  99       0.426  49.111  20.390  1.00 12.98           O  
ATOM   1613  N   GLY L 100      -0.168  47.033  20.978  1.00 16.99           N  
ATOM   1614  CA  GLY L 100      -1.528  47.409  21.318  1.00 17.07           C  
ATOM   1615  C   GLY L 100      -1.601  48.122  22.655  1.00 15.74           C  
ATOM   1616  O   GLY L 100      -2.643  48.683  23.026  1.00 17.34           O  
ATOM   1617  N   GLY L 101      -0.483  48.117  23.367  1.00 12.16           N  
ATOM   1618  CA  GLY L 101      -0.357  48.780  24.658  1.00 17.11           C  
ATOM   1619  C   GLY L 101      -0.636  47.873  25.847  1.00 11.15           C  
ATOM   1620  O   GLY L 101      -1.500  47.003  25.763  1.00 16.11           O  
ATOM   1621  N   THR L 102       0.105  48.071  26.939  1.00  9.83           N  
ATOM   1622  CA  THR L 102      -0.092  47.305  28.186  1.00 11.18           C  
ATOM   1623  C   THR L 102      -0.402  48.244  29.353  1.00 14.15           C  
ATOM   1624  O   THR L 102       0.408  49.133  29.647  1.00 11.86           O  
ATOM   1625  CB  THR L 102       1.160  46.493  28.589  1.00 13.99           C  
ATOM   1626  OG1 THR L 102       1.649  45.707  27.490  1.00 13.16           O  
ATOM   1627  CG2 THR L 102       0.859  45.633  29.790  1.00 13.62           C  
ATOM   1628  N   LYS L 103      -1.548  48.069  30.027  1.00 12.93           N  
ATOM   1630  CA  LYS L 103      -1.813  48.818  31.265  0.81 13.87           C  
ATOM   1631  C   LYS L 103      -1.054  48.178  32.418  1.00 11.67           C  
ATOM   1632  O   LYS L 103      -1.246  47.000  32.747  1.00 13.09           O  
ATOM   1634  CB  LYS L 103      -3.304  48.878  31.609  0.81 14.75           C  
ATOM   1636  CG  LYS L 103      -3.608  49.552  32.975  0.81 16.75           C  
ATOM   1638  CD  LYS L 103      -3.076  50.975  33.049  0.81 18.40           C  
ATOM   1640  CE  LYS L 103      -3.361  51.646  34.417  0.81 21.13           C  
ATOM   1642  NZ  LYS L 103      -4.801  51.824  34.692  0.81 23.89           N1+
ATOM   1643  N   LEU L 104      -0.180  48.955  33.026  1.00 11.66           N  
ATOM   1644  CA  LEU L 104       0.519  48.525  34.199  1.00 11.55           C  
ATOM   1645  C   LEU L 104      -0.273  49.015  35.402  1.00 18.20           C  
ATOM   1646  O   LEU L 104      -0.437  50.198  35.587  1.00 17.16           O  
ATOM   1647  CB  LEU L 104       1.935  49.069  34.238  1.00 10.25           C  
ATOM   1648  CG  LEU L 104       2.698  48.893  35.552  1.00 12.58           C  
ATOM   1649  CD1 LEU L 104       2.858  47.479  35.932  1.00 19.34           C  
ATOM   1650  CD2 LEU L 104       4.084  49.528  35.460  1.00 18.90           C  
ATOM   1651  N   THR L 105      -0.768  48.092  36.212  1.00 20.76           N  
ATOM   1652  CA  THR L 105      -1.395  48.439  37.483  1.00 24.02           C  
ATOM   1653  C   THR L 105      -0.395  48.177  38.578  1.00 17.18           C  
ATOM   1654  O   THR L 105       0.223  47.117  38.620  1.00 19.46           O  
ATOM   1655  CB  THR L 105      -2.676  47.620  37.746  1.00 21.16           C  
ATOM   1656  OG1 THR L 105      -3.658  47.917  36.741  1.00 20.65           O  
ATOM   1657  CG2 THR L 105      -3.265  47.952  39.113  1.00 21.30           C  
ATOM   1658  N   VAL L 106      -0.215  49.138  39.470  1.00 16.68           N  
ATOM   1659  CA  VAL L 106       0.787  48.981  40.519  1.00 17.24           C  
ATOM   1660  C   VAL L 106      -0.002  48.748  41.796  1.00 28.64           C  
ATOM   1661  O   VAL L 106      -0.766  49.614  42.231  1.00 23.30           O  
ATOM   1662  CB  VAL L 106       1.754  50.209  40.648  1.00 21.21           C  
ATOM   1663  CG1 VAL L 106       2.753  50.006  41.769  1.00 21.62           C  
ATOM   1664  CG2 VAL L 106       2.531  50.436  39.359  1.00 21.19           C  
ATOM   1665  N   LEU L 106A      0.193  47.562  42.360  1.00 28.30           N  
ATOM   1666  CA  LEU L 106A     -0.655  46.999  43.411  1.00 34.09           C  
ATOM   1667  C   LEU L 106A     -0.262  47.497  44.762  1.00 38.70           C  
ATOM   1668  O   LEU L 106A     -0.176  48.697  44.993  1.00 41.38           O  
ATOM   1669  CB  LEU L 106A     -0.551  45.476  43.414  1.00 39.53           C  
ATOM   1670  CG  LEU L 106A     -1.100  44.753  42.179  1.00 47.45           C  
ATOM   1671  CD1 LEU L 106A     -0.718  43.276  42.200  1.00 39.12           C  
ATOM   1672  CD2 LEU L 106A     -2.621  44.928  42.098  1.00 47.38           C  
ATOM   1673  OXT LEU L 106A     -0.001  46.680  45.645  1.00 46.52           O1-
TER    1674      LEU L 106A                                                     
ATOM   5842  N   ASN L   1      14.928  72.213  22.460  1.00 40.23           N  
ATOM   5843  CA  ASN L   1      14.579  71.051  21.592  1.00 34.52           C  
ATOM   5844  C   ASN L   1      13.320  71.351  20.800  1.00 25.56           C  
ATOM   5845  O   ASN L   1      12.417  72.034  21.281  1.00 20.43           O  
ATOM   5846  CB  ASN L   1      14.375  69.789  22.420  1.00 41.17           C  
ATOM   5847  CG  ASN L   1      15.676  69.108  22.775  1.00 55.35           C  
ATOM   5848  OD1 ASN L   1      16.219  68.323  21.987  1.00 57.20           O  
ATOM   5849  ND2 ASN L   1      16.188  69.402  23.971  1.00 56.26           N  
ATOM   5850  N   PHE L   2      13.283  70.839  19.579  1.00 26.58           N  
ATOM   5851  CA  PHE L   2      12.098  70.942  18.743  1.00 21.23           C  
ATOM   5852  C   PHE L   2      10.849  70.454  19.495  1.00 16.41           C  
ATOM   5853  O   PHE L   2      10.880  69.451  20.189  1.00 17.32           O  
ATOM   5854  CB  PHE L   2      12.305  70.124  17.480  1.00 23.22           C  
ATOM   5855  CG  PHE L   2      11.226  70.289  16.468  1.00 17.70           C  
ATOM   5856  CD1 PHE L   2      10.901  71.537  15.976  1.00 23.35           C  
ATOM   5857  CD2 PHE L   2      10.564  69.191  15.971  1.00 19.71           C  
ATOM   5858  CE1 PHE L   2       9.930  71.679  15.035  1.00 18.69           C  
ATOM   5859  CE2 PHE L   2       9.604  69.336  15.033  1.00 17.82           C  
ATOM   5860  CZ  PHE L   2       9.275  70.577  14.567  1.00 16.24           C  
ATOM   5861  N   MET L   3       9.765  71.187  19.372  1.00 15.27           N  
ATOM   5862  CA  MET L   3       8.514  70.765  19.976  1.00 17.99           C  
ATOM   5863  C   MET L   3       7.397  71.028  18.999  1.00 18.96           C  
ATOM   5864  O   MET L   3       7.548  71.845  18.080  1.00 18.30           O  
ATOM   5865  CB  MET L   3       8.261  71.500  21.286  1.00 22.68           C  
ATOM   5866  CG  MET L   3       9.274  71.171  22.382  1.00 28.08           C  
ATOM   5867  SD  MET L   3       9.006  72.216  23.841  1.00 44.56           S  
ATOM   5868  CE  MET L   3       9.451  73.839  23.168  1.00 45.07           C  
ATOM   5869  N   LEU L   4       6.284  70.330  19.207  1.00 13.39           N  
ATOM   5870  CA  LEU L   4       5.112  70.483  18.385  1.00 12.69           C  
ATOM   5871  C   LEU L   4       3.982  70.908  19.280  1.00 13.42           C  
ATOM   5872  O   LEU L   4       3.702  70.282  20.305  1.00 15.53           O  
ATOM   5873  CB  LEU L   4       4.779  69.170  17.670  1.00 16.96           C  
ATOM   5874  CG  LEU L   4       5.856  68.682  16.697  1.00 14.17           C  
ATOM   5875  CD1 LEU L   4       5.661  67.231  16.354  1.00 11.61           C  
ATOM   5876  CD2 LEU L   4       5.841  69.527  15.424  1.00 17.04           C  
ATOM   5877  N   THR L   5       3.303  71.960  18.865  1.00 12.77           N  
ATOM   5878  CA  THR L   5       2.244  72.542  19.663  1.00 15.14           C  
ATOM   5879  C   THR L   5       0.905  72.293  18.988  1.00 16.14           C  
ATOM   5880  O   THR L   5       0.753  72.604  17.820  1.00 15.28           O  
ATOM   5881  CB  THR L   5       2.511  74.047  19.833  1.00 15.98           C  
ATOM   5882  OG1 THR L   5       3.788  74.199  20.445  1.00 28.20           O  
ATOM   5883  CG2 THR L   5       1.463  74.710  20.699  1.00 25.85           C  
ATOM   5884  N   GLN L   6      -0.064  71.728  19.687  1.00 13.43           N  
ATOM   5885  CA  GLN L   6      -1.376  71.660  19.074  1.00 15.07           C  
ATOM   5886  C   GLN L   6      -2.438  72.101  20.075  1.00 16.12           C  
ATOM   5887  O   GLN L   6      -2.232  72.040  21.297  1.00 12.68           O  
ATOM   5888  CB  GLN L   6      -1.622  70.257  18.483  1.00 30.67           C  
ATOM   5889  CG  GLN L   6      -1.795  69.131  19.395  1.00 22.52           C  
ATOM   5890  CD  GLN L   6      -1.769  67.769  18.633  1.00 25.54           C  
ATOM   5891  OE1 GLN L   6      -0.795  67.004  18.695  1.00 14.31           O  
ATOM   5892  NE2 GLN L   6      -2.864  67.467  17.946  1.00 16.54           N  
ATOM   5893  N   PRO L   7      -3.555  72.624  19.553  1.00 16.73           N  
ATOM   5894  CA  PRO L   7      -4.627  73.135  20.416  1.00 16.31           C  
ATOM   5895  C   PRO L   7      -5.263  71.980  21.150  1.00 16.07           C  
ATOM   5896  O   PRO L   7      -5.168  70.846  20.652  1.00 14.09           O  
ATOM   5897  CB  PRO L   7      -5.606  73.782  19.433  1.00 16.73           C  
ATOM   5898  CG  PRO L   7      -5.389  73.029  18.169  1.00 20.95           C  
ATOM   5899  CD  PRO L   7      -3.938  72.647  18.128  1.00 16.53           C  
ATOM   5900  N   HIS L   8      -5.843  72.249  22.315  1.00  9.36           N  
ATOM   5901  CA  HIS L   8      -6.323  71.192  23.193  1.00 14.97           C  
ATOM   5902  C   HIS L   8      -7.537  70.467  22.636  1.00 12.41           C  
ATOM   5903  O   HIS L   8      -7.649  69.241  22.743  1.00 11.96           O  
ATOM   5904  CB  HIS L   8      -6.685  71.750  24.561  1.00 11.84           C  
ATOM   5905  CG  HIS L   8      -5.527  72.297  25.320  1.00 14.04           C  
ATOM   5906  ND1 HIS L   8      -5.632  73.418  26.122  1.00 20.03           N  
ATOM   5907  CD2 HIS L   8      -4.235  71.907  25.390  1.00 13.65           C  
ATOM   5908  CE1 HIS L   8      -4.454  73.687  26.649  1.00 16.77           C  
ATOM   5909  NE2 HIS L   8      -3.591  72.774  26.234  1.00 15.35           N  
ATOM   5910  N   SER L   9      -8.459  71.232  22.060  1.00 13.63           N  
ATOM   5911  CA  SER L   9      -9.724  70.645  21.626  1.00 16.86           C  
ATOM   5912  C   SER L   9     -10.309  71.346  20.422  1.00 16.47           C  
ATOM   5913  O   SER L   9     -10.124  72.545  20.241  1.00 21.14           O  
ATOM   5914  CB  SER L   9     -10.756  70.706  22.741  1.00 19.42           C  
ATOM   5915  OG  SER L   9     -10.245  70.140  23.926  1.00 20.16           O  
ATOM   5916  N   VAL L  11     -11.041  70.581  19.626  1.00 17.68           N  
ATOM   5917  CA  VAL L  11     -11.761  71.114  18.485  1.00 17.92           C  
ATOM   5918  C   VAL L  11     -13.087  70.388  18.417  1.00 23.53           C  
ATOM   5919  O   VAL L  11     -13.206  69.221  18.818  1.00 18.66           O  
ATOM   5920  CB  VAL L  11     -10.982  70.965  17.195  1.00 13.79           C  
ATOM   5921  CG1 VAL L  11      -9.600  71.611  17.338  1.00 24.77           C  
ATOM   5922  CG2 VAL L  11     -10.837  69.534  16.842  1.00 17.04           C  
ATOM   5923  N   SER L  12     -14.087  71.096  17.914  1.00 27.89           N  
ATOM   5924  CA  SER L  12     -15.426  70.565  17.860  1.00 24.31           C  
ATOM   5925  C   SER L  12     -16.097  70.956  16.555  1.00 23.69           C  
ATOM   5926  O   SER L  12     -15.895  72.052  16.045  1.00 26.77           O  
ATOM   5927  CB  SER L  12     -16.250  71.087  19.028  1.00 25.60           C  
ATOM   5928  OG  SER L  12     -17.357  70.244  19.221  1.00 44.56           O  
ATOM   5929  N   GLU L  13     -16.917  70.067  16.013  1.00 25.24           N  
ATOM   5930  CA  GLU L  13     -17.610  70.407  14.790  1.00 25.28           C  
ATOM   5931  C   GLU L  13     -18.736  69.413  14.562  1.00 30.04           C  
ATOM   5932  O   GLU L  13     -18.840  68.389  15.264  1.00 25.76           O  
ATOM   5933  CB  GLU L  13     -16.603  70.461  13.636  1.00 27.68           C  
ATOM   5934  CG  GLU L  13     -17.116  70.963  12.328  1.00 38.28           C  
ATOM   5935  CD  GLU L  13     -17.794  72.310  12.436  1.00 38.99           C  
ATOM   5936  OE1 GLU L  13     -17.090  73.337  12.515  1.00 52.37           O  
ATOM   5937  OE2 GLU L  13     -19.035  72.326  12.455  1.00 35.40           O1-
ATOM   5938  N   SER L  14     -19.615  69.743  13.623  1.00 29.25           N  
ATOM   5939  CA  SER L  14     -20.831  68.966  13.436  1.00 27.98           C  
ATOM   5940  C   SER L  14     -20.727  67.958  12.302  1.00 27.70           C  
ATOM   5941  O   SER L  14     -20.006  68.183  11.325  1.00 33.54           O  
ATOM   5942  CB  SER L  14     -22.012  69.907  13.181  1.00 37.05           C  
ATOM   5943  OG  SER L  14     -22.300  70.669  14.344  1.00 39.30           O  
ATOM   5944  N   PRO L  15     -21.475  66.851  12.414  1.00 26.20           N  
ATOM   5945  CA  PRO L  15     -21.480  65.830  11.360  1.00 33.57           C  
ATOM   5946  C   PRO L  15     -21.554  66.442   9.975  1.00 32.24           C  
ATOM   5947  O   PRO L  15     -22.279  67.410   9.759  1.00 24.46           O  
ATOM   5948  CB  PRO L  15     -22.723  65.018  11.675  1.00 29.68           C  
ATOM   5949  CG  PRO L  15     -22.850  65.107  13.166  1.00 29.47           C  
ATOM   5950  CD  PRO L  15     -22.343  66.475  13.542  1.00 28.67           C  
ATOM   5951  N   GLY L  16     -20.769  65.896   9.059  1.00 26.41           N  
ATOM   5952  CA  GLY L  16     -20.762  66.343   7.682  1.00 27.15           C  
ATOM   5953  C   GLY L  16     -19.869  67.514   7.397  1.00 27.61           C  
ATOM   5954  O   GLY L  16     -19.517  67.755   6.253  1.00 28.56           O  
ATOM   5955  N   LYS L  17     -19.482  68.240   8.438  1.00 26.16           N  
ATOM   5956  CA  LYS L  17     -18.677  69.434   8.251  1.00 24.71           C  
ATOM   5957  C   LYS L  17     -17.180  69.093   8.188  1.00 25.17           C  
ATOM   5958  O   LYS L  17     -16.808  67.951   8.332  1.00 23.04           O  
ATOM   5959  CB  LYS L  17     -18.956  70.403   9.377  1.00 31.63           C  
ATOM   5960  CG  LYS L  17     -20.423  70.859   9.448  1.00 39.60           C  
ATOM   5961  CD  LYS L  17     -20.768  71.794   8.290  1.00 50.72           C  
ATOM   5962  CE  LYS L  17     -22.076  72.535   8.531  1.00 53.75           C  
ATOM   5963  NZ  LYS L  17     -21.996  73.418   9.739  1.00 57.28           N1+
ATOM   5964  N   THR L  18     -16.348  70.100   7.964  1.00 28.49           N  
ATOM   5965  CA  THR L  18     -14.910  69.923   7.877  1.00 32.23           C  
ATOM   5966  C   THR L  18     -14.240  70.592   9.077  1.00 30.66           C  
ATOM   5967  O   THR L  18     -14.575  71.714   9.450  1.00 29.47           O  
ATOM   5968  CB  THR L  18     -14.337  70.526   6.575  1.00 30.64           C  
ATOM   5969  OG1 THR L  18     -14.892  69.855   5.434  1.00 27.14           O  
ATOM   5970  CG2 THR L  18     -12.817  70.396   6.529  1.00 26.30           C  
ATOM   5971  N   VAL L  19     -13.287  69.892   9.671  1.00 32.04           N  
ATOM   5972  CA  VAL L  19     -12.554  70.392  10.826  1.00 25.15           C  
ATOM   5973  C   VAL L  19     -11.059  70.301  10.544  1.00 24.13           C  
ATOM   5974  O   VAL L  19     -10.624  69.374   9.849  1.00 21.82           O  
ATOM   5975  CB  VAL L  19     -12.920  69.592  12.067  1.00 27.17           C  
ATOM   5976  CG1 VAL L  19     -12.458  68.161  11.893  1.00 27.98           C  
ATOM   5977  CG2 VAL L  19     -12.311  70.210  13.307  1.00 29.40           C  
ATOM   5978  N   THR L  20     -10.280  71.229  11.103  1.00 21.57           N  
ATOM   5979  CA  THR L  20      -8.822  71.235  10.933  1.00 23.41           C  
ATOM   5980  C   THR L  20      -8.115  71.230  12.287  1.00 25.81           C  
ATOM   5981  O   THR L  20      -8.490  71.965  13.208  1.00 21.21           O  
ATOM   5982  CB  THR L  20      -8.329  72.458  10.124  1.00 30.69           C  
ATOM   5983  OG1 THR L  20      -8.820  72.379   8.785  1.00 30.90           O  
ATOM   5984  CG2 THR L  20      -6.804  72.484  10.057  1.00 27.05           C  
ATOM   5985  N   ILE L  21      -7.091  70.390  12.404  1.00 20.81           N  
ATOM   5986  CA  ILE L  21      -6.272  70.327  13.613  1.00 19.71           C  
ATOM   5987  C   ILE L  21      -4.864  70.772  13.236  1.00 18.79           C  
ATOM   5988  O   ILE L  21      -4.248  70.217  12.325  1.00 13.73           O  
ATOM   5989  CB  ILE L  21      -6.269  68.914  14.235  1.00 17.65           C  
ATOM   5990  CG1 ILE L  21      -7.698  68.513  14.578  1.00 16.03           C  
ATOM   5991  CG2 ILE L  21      -5.400  68.888  15.488  1.00 15.71           C  
ATOM   5992  CD1 ILE L  21      -7.905  67.119  15.029  1.00 17.41           C  
ATOM   5993  N   SER L  22      -4.355  71.779  13.928  1.00 16.95           N  
ATOM   5994  CA  SER L  22      -3.026  72.271  13.609  1.00 15.96           C  
ATOM   5995  C   SER L  22      -1.941  71.738  14.551  1.00 17.41           C  
ATOM   5996  O   SER L  22      -2.205  71.324  15.677  1.00 20.71           O  
ATOM   5997  CB  SER L  22      -3.013  73.781  13.634  1.00 16.72           C  
ATOM   5998  OG  SER L  22      -3.207  74.239  14.956  1.00 23.67           O  
ATOM   5999  N   CYS L  23      -0.725  71.755  14.047  1.00 15.24           N  
ATOM   6000  CA  CYS L  23       0.445  71.237  14.753  1.00 16.52           C  
ATOM   6001  C   CYS L  23       1.587  72.184  14.407  1.00 16.57           C  
ATOM   6002  O   CYS L  23       2.118  72.150  13.302  1.00 19.83           O  
ATOM   6003  CB  CYS L  23       0.729  69.794  14.328  1.00 16.12           C  
ATOM   6004  SG  CYS L  23       2.228  69.042  14.884  1.00 18.74           S  
ATOM   6005  N   THR L  24       1.940  73.068  15.330  1.00 18.52           N  
ATOM   6006  CA  THR L  24       2.924  74.106  15.021  1.00 11.64           C  
ATOM   6007  C   THR L  24       4.292  73.833  15.620  1.00 17.31           C  
ATOM   6008  O   THR L  24       4.423  73.520  16.803  1.00 14.93           O  
ATOM   6009  CB  THR L  24       2.422  75.461  15.507  1.00 18.23           C  
ATOM   6010  OG1 THR L  24       1.132  75.692  14.940  1.00 18.34           O  
ATOM   6011  CG2 THR L  24       3.340  76.584  15.091  1.00 16.41           C  
ATOM   6012  N   GLY L  25       5.313  73.986  14.790  1.00 15.16           N  
ATOM   6013  CA  GLY L  25       6.680  73.745  15.208  1.00 16.93           C  
ATOM   6014  C   GLY L  25       7.185  74.888  16.053  1.00 18.18           C  
ATOM   6015  O   GLY L  25       6.820  76.046  15.838  1.00 19.93           O  
ATOM   6016  N   SER L  26       8.054  74.534  16.983  1.00 17.61           N  
ATOM   6017  CA  SER L  26       8.607  75.434  17.984  1.00 20.06           C  
ATOM   6018  C   SER L  26      10.092  75.043  18.167  1.00 20.79           C  
ATOM   6019  O   SER L  26      10.419  73.861  18.222  1.00 21.13           O  
ATOM   6020  CB  SER L  26       7.778  75.296  19.279  1.00 25.09           C  
ATOM   6021  OG  SER L  26       8.328  75.954  20.377  1.00 30.15           O  
ATOM   6022  N   SER L  27      10.995  76.022  18.217  1.00 21.75           N  
ATOM   6023  CA  SER L  27      12.439  75.752  18.277  1.00 17.69           C  
ATOM   6024  C   SER L  27      12.903  74.828  17.167  1.00 17.86           C  
ATOM   6025  O   SER L  27      13.654  73.869  17.400  1.00 19.70           O  
ATOM   6026  CB  SER L  27      12.831  75.159  19.629  1.00 23.83           C  
ATOM   6027  OG  SER L  27      12.646  76.114  20.672  1.00 23.67           O  
ATOM   6028  N   GLY L  27A     12.451  75.130  15.957  1.00 21.91           N  
ATOM   6029  CA  GLY L  27A     12.858  74.398  14.767  1.00 17.11           C  
ATOM   6030  C   GLY L  27A     11.882  74.569  13.630  1.00 17.88           C  
ATOM   6031  O   GLY L  27A     10.762  75.012  13.834  1.00 22.30           O  
ATOM   6032  N   SER L  27B     12.287  74.188  12.430  1.00 22.19           N  
ATOM   6033  CA  SER L  27B     11.380  74.225  11.293  1.00 22.01           C  
ATOM   6034  C   SER L  27B     10.563  72.944  11.068  1.00 20.68           C  
ATOM   6035  O   SER L  27B     11.128  71.842  10.952  1.00 16.10           O  
ATOM   6036  CB  SER L  27B     12.164  74.490  10.028  1.00 21.73           C  
ATOM   6037  OG  SER L  27B     11.306  74.281   8.930  1.00 25.85           O  
ATOM   6038  N   ILE L  28       9.251  73.120  10.922  1.00 19.05           N  
ATOM   6039  CA  ILE L  28       8.316  72.030  10.659  1.00 18.07           C  
ATOM   6040  C   ILE L  28       8.724  71.215   9.421  1.00 18.25           C  
ATOM   6041  O   ILE L  28       8.381  70.037   9.287  1.00 17.36           O  
ATOM   6042  CB  ILE L  28       6.894  72.593  10.484  1.00 16.26           C  
ATOM   6043  CG1 ILE L  28       5.840  71.485  10.576  1.00 18.43           C  
ATOM   6044  CG2 ILE L  28       6.764  73.323   9.138  1.00 22.06           C  
ATOM   6045  CD1 ILE L  28       5.636  70.944  11.973  1.00 14.30           C  
ATOM   6046  N   ALA L  29       9.431  71.859   8.499  1.00 19.91           N  
ATOM   6047  CA  ALA L  29       9.758  71.230   7.231  1.00 19.65           C  
ATOM   6048  C   ALA L  29      11.022  70.331   7.305  1.00 20.58           C  
ATOM   6049  O   ALA L  29      11.329  69.612   6.357  1.00 16.62           O  
ATOM   6050  CB  ALA L  29       9.930  72.314   6.151  1.00 23.41           C  
ATOM   6051  N   SER L  30      11.734  70.336   8.426  1.00 20.89           N  
ATOM   6052  CA  SER L  30      12.982  69.566   8.507  1.00 17.34           C  
ATOM   6053  C   SER L  30      12.753  68.076   8.644  1.00 24.32           C  
ATOM   6054  O   SER L  30      13.641  67.277   8.359  1.00 20.52           O  
ATOM   6055  CB  SER L  30      13.857  70.021   9.681  1.00 21.32           C  
ATOM   6056  OG  SER L  30      14.175  71.402   9.595  1.00 22.86           O  
ATOM   6057  N   ASN L  31      11.583  67.690   9.124  1.00 17.08           N  
ATOM   6058  CA  ASN L  31      11.282  66.264   9.273  1.00 16.12           C  
ATOM   6059  C   ASN L  31       9.822  65.992   8.979  1.00 12.88           C  
ATOM   6060  O   ASN L  31       8.968  66.867   9.142  1.00 16.23           O  
ATOM   6061  CB  ASN L  31      11.642  65.775  10.676  1.00 15.16           C  
ATOM   6062  CG  ASN L  31      13.104  65.438  10.811  1.00 19.04           C  
ATOM   6063  OD1 ASN L  31      13.568  64.426  10.287  1.00 21.86           O  
ATOM   6064  ND2 ASN L  31      13.847  66.293  11.503  1.00 20.96           N  
ATOM   6065  N   TYR L  32       9.551  64.784   8.523  1.00 13.07           N  
ATOM   6066  CA  TYR L  32       8.177  64.363   8.212  1.00 14.13           C  
ATOM   6067  C   TYR L  32       7.239  64.398   9.413  1.00 17.64           C  
ATOM   6068  O   TYR L  32       7.638  64.067  10.519  1.00 13.50           O  
ATOM   6069  CB  TYR L  32       8.180  62.947   7.651  1.00 20.89           C  
ATOM   6070  CG  TYR L  32       8.580  62.844   6.196  1.00 22.77           C  
ATOM   6071  CD1 TYR L  32       7.970  63.643   5.229  1.00 20.36           C  
ATOM   6072  CD2 TYR L  32       9.568  61.950   5.788  1.00 22.39           C  
ATOM   6073  CE1 TYR L  32       8.318  63.546   3.902  1.00 22.82           C  
ATOM   6074  CE2 TYR L  32       9.920  61.842   4.453  1.00 18.86           C  
ATOM   6075  CZ  TYR L  32       9.292  62.645   3.519  1.00 23.57           C  
ATOM   6076  OH  TYR L  32       9.648  62.545   2.193  1.00 25.38           O  
ATOM   6077  N   VAL L  33       5.976  64.735   9.161  1.00 12.28           N  
ATOM   6078  CA  VAL L  33       4.964  64.797  10.208  1.00 13.17           C  
ATOM   6079  C   VAL L  33       3.990  63.630  10.028  1.00 14.69           C  
ATOM   6080  O   VAL L  33       3.483  63.371   8.929  1.00 15.40           O  
ATOM   6081  CB  VAL L  33       4.224  66.131  10.208  1.00 12.86           C  
ATOM   6082  CG1 VAL L  33       3.079  66.118  11.227  1.00 10.24           C  
ATOM   6083  CG2 VAL L  33       5.181  67.270  10.541  1.00 14.50           C  
ATOM   6084  N   GLN L  34       3.764  62.908  11.118  1.00 12.96           N  
ATOM   6085  CA  GLN L  34       2.784  61.846  11.159  1.00 14.72           C  
ATOM   6086  C   GLN L  34       1.614  62.292  12.000  1.00 14.07           C  
ATOM   6087  O   GLN L  34       1.784  63.099  12.905  1.00 13.49           O  
ATOM   6088  CB  GLN L  34       3.385  60.575  11.752  1.00 12.40           C  
ATOM   6089  CG  GLN L  34       4.366  59.859  10.879  1.00 14.95           C  
ATOM   6090  CD  GLN L  34       5.483  60.730  10.346  1.00 16.61           C  
ATOM   6091  OE1 GLN L  34       5.584  60.933   9.141  1.00 20.34           O  
ATOM   6092  NE2 GLN L  34       6.371  61.194  11.229  1.00 18.14           N  
ATOM   6093  N   TRP L  35       0.440  61.753  11.696  1.00 14.89           N  
ATOM   6094  CA  TRP L  35      -0.747  62.002  12.489  1.00 12.77           C  
ATOM   6095  C   TRP L  35      -1.354  60.672  12.943  1.00 17.75           C  
ATOM   6096  O   TRP L  35      -1.555  59.729  12.135  1.00 12.39           O  
ATOM   6097  CB  TRP L  35      -1.780  62.813  11.695  1.00 13.81           C  
ATOM   6098  CG  TRP L  35      -1.436  64.248  11.446  1.00 13.47           C  
ATOM   6099  CD1 TRP L  35      -0.830  64.775  10.338  1.00 13.29           C  
ATOM   6100  CD2 TRP L  35      -1.709  65.348  12.314  1.00  8.09           C  
ATOM   6101  NE1 TRP L  35      -0.722  66.134  10.462  1.00 14.60           N  
ATOM   6102  CE2 TRP L  35      -1.254  66.508  11.665  1.00 15.86           C  
ATOM   6103  CE3 TRP L  35      -2.306  65.460  13.564  1.00 12.37           C  
ATOM   6104  CZ2 TRP L  35      -1.376  67.760  12.241  1.00 17.75           C  
ATOM   6105  CZ3 TRP L  35      -2.434  66.685  14.118  1.00 11.35           C  
ATOM   6106  CH2 TRP L  35      -1.981  67.831  13.462  1.00 15.47           C  
ATOM   6107  N   TYR L  36      -1.648  60.596  14.242  1.00 14.53           N  
ATOM   6108  CA  TYR L  36      -2.278  59.431  14.810  1.00 11.30           C  
ATOM   6109  C   TYR L  36      -3.663  59.731  15.349  1.00 14.04           C  
ATOM   6110  O   TYR L  36      -3.891  60.753  16.005  1.00 11.68           O  
ATOM   6111  CB  TYR L  36      -1.419  58.848  15.930  1.00 14.81           C  
ATOM   6112  CG  TYR L  36      -0.028  58.514  15.477  1.00 13.90           C  
ATOM   6113  CD1 TYR L  36       0.242  57.323  14.820  1.00 15.07           C  
ATOM   6114  CD2 TYR L  36       1.022  59.388  15.715  1.00 12.41           C  
ATOM   6115  CE1 TYR L  36       1.513  57.027  14.393  1.00 14.55           C  
ATOM   6116  CE2 TYR L  36       2.287  59.105  15.306  1.00 11.63           C  
ATOM   6117  CZ  TYR L  36       2.533  57.918  14.636  1.00 16.41           C  
ATOM   6118  OH  TYR L  36       3.795  57.640  14.193  1.00 13.71           O  
ATOM   6119  N   GLN L  37      -4.587  58.815  15.077  1.00 13.36           N  
ATOM   6120  CA  GLN L  37      -5.874  58.811  15.730  1.00 12.32           C  
ATOM   6121  C   GLN L  37      -5.767  57.845  16.909  1.00 12.18           C  
ATOM   6122  O   GLN L  37      -5.198  56.769  16.779  1.00 20.48           O  
ATOM   6123  CB  GLN L  37      -6.978  58.370  14.763  1.00 14.33           C  
ATOM   6124  CG  GLN L  37      -8.308  58.364  15.341  1.00 15.84           C  
ATOM   6125  CD  GLN L  37      -9.309  57.741  14.374  1.00 20.03           C  
ATOM   6126  OE1 GLN L  37      -9.304  56.542  14.158  1.00 22.15           O  
ATOM   6127  NE2 GLN L  37     -10.104  58.577  13.737  1.00 18.58           N  
ATOM   6128  N   GLN L  38      -6.281  58.232  18.070  1.00 12.06           N  
ATOM   6129  CA  GLN L  38      -6.312  57.319  19.211  1.00 11.22           C  
ATOM   6130  C   GLN L  38      -7.608  57.406  20.000  1.00 16.39           C  
ATOM   6131  O   GLN L  38      -8.120  58.498  20.301  1.00 16.55           O  
ATOM   6132  CB  GLN L  38      -5.154  57.573  20.158  1.00  9.75           C  
ATOM   6133  CG  GLN L  38      -5.036  56.528  21.267  1.00 14.57           C  
ATOM   6134  CD  GLN L  38      -3.815  56.760  22.132  1.00 18.84           C  
ATOM   6135  OE1 GLN L  38      -3.405  57.900  22.367  1.00 16.89           O  
ATOM   6136  NE2 GLN L  38      -3.232  55.689  22.614  1.00 12.70           N  
ATOM   6137  N   ARG L  39      -8.104  56.224  20.329  1.00 18.04           N  
ATOM   6138  CA  ARG L  39      -9.375  56.001  21.010  1.00 22.01           C  
ATOM   6139  C   ARG L  39      -9.061  55.486  22.401  1.00 14.43           C  
ATOM   6140  O   ARG L  39      -8.113  54.743  22.565  1.00 18.99           O  
ATOM   6141  CB  ARG L  39     -10.234  54.981  20.223  1.00 22.88           C  
ATOM   6142  CG  ARG L  39     -10.566  55.426  18.806  1.00 22.07           C  
ATOM   6143  CD  ARG L  39     -11.208  54.321  17.966  1.00 23.45           C  
ATOM   6144  NE  ARG L  39     -11.368  54.752  16.566  1.00 24.75           N  
ATOM   6145  CZ  ARG L  39     -12.326  55.568  16.129  1.00 22.62           C  
ATOM   6146  NH1 ARG L  39     -12.365  55.929  14.848  1.00 22.83           N1+
ATOM   6147  NH2 ARG L  39     -13.230  56.062  16.968  1.00 21.61           N  
ATOM   6148  N   PRO L  40      -9.844  55.878  23.416  1.00 23.54           N  
ATOM   6149  CA  PRO L  40      -9.501  55.379  24.746  1.00 17.94           C  
ATOM   6150  C   PRO L  40      -9.535  53.856  24.767  1.00 22.78           C  
ATOM   6151  O   PRO L  40     -10.569  53.267  24.508  1.00 30.96           O  
ATOM   6152  CB  PRO L  40     -10.579  55.985  25.652  1.00 21.08           C  
ATOM   6153  CG  PRO L  40     -11.135  57.124  24.899  1.00 23.10           C  
ATOM   6154  CD  PRO L  40     -11.029  56.750  23.446  1.00 23.57           C  
ATOM   6155  N   GLY L  41      -8.390  53.234  25.026  1.00 20.85           N  
ATOM   6156  CA  GLY L  41      -8.284  51.786  25.000  1.00 27.51           C  
ATOM   6157  C   GLY L  41      -7.556  51.225  23.795  1.00 24.47           C  
ATOM   6158  O   GLY L  41      -7.277  50.035  23.729  1.00 22.94           O  
ATOM   6159  N   SER L  42      -7.250  52.069  22.826  1.00 18.09           N  
ATOM   6160  CA  SER L  42      -6.541  51.596  21.647  1.00 23.64           C  
ATOM   6161  C   SER L  42      -5.212  52.316  21.503  1.00 24.68           C  
ATOM   6162  O   SER L  42      -4.931  53.341  22.156  1.00 12.62           O  
ATOM   6163  CB  SER L  42      -7.363  51.791  20.368  1.00 29.49           C  
ATOM   6164  OG  SER L  42      -7.325  53.140  19.939  1.00 31.28           O  
ATOM   6165  N   SER L  43      -4.397  51.744  20.641  1.00 19.36           N  
ATOM   6166  CA  SER L  43      -3.091  52.270  20.376  1.00 13.56           C  
ATOM   6167  C   SER L  43      -3.287  53.346  19.347  1.00 17.81           C  
ATOM   6168  O   SER L  43      -4.317  53.390  18.669  1.00 16.51           O  
ATOM   6169  CB  SER L  43      -2.166  51.177  19.878  1.00 21.19           C  
ATOM   6170  OG  SER L  43      -2.648  50.665  18.647  1.00 21.07           O  
ATOM   6171  N   PRO L  44      -2.304  54.217  19.212  1.00 13.19           N  
ATOM   6172  CA  PRO L  44      -2.350  55.236  18.157  1.00 13.06           C  
ATOM   6173  C   PRO L  44      -2.362  54.562  16.783  1.00 16.35           C  
ATOM   6174  O   PRO L  44      -1.628  53.596  16.607  1.00 20.55           O  
ATOM   6175  CB  PRO L  44      -1.067  56.040  18.392  1.00 16.46           C  
ATOM   6176  CG  PRO L  44      -0.678  55.714  19.821  1.00 13.25           C  
ATOM   6177  CD  PRO L  44      -1.044  54.278  19.964  1.00 14.15           C  
ATOM   6178  N   THR L  45      -3.194  55.042  15.864  1.00 15.77           N  
ATOM   6179  CA  THR L  45      -3.302  54.465  14.532  1.00 18.20           C  
ATOM   6180  C   THR L  45      -3.013  55.551  13.528  1.00 17.73           C  
ATOM   6181  O   THR L  45      -3.506  56.691  13.618  1.00 16.74           O  
ATOM   6182  CB  THR L  45      -4.707  53.822  14.260  1.00 19.34           C  
ATOM   6183  OG1 THR L  45      -5.643  54.818  13.864  1.00 34.61           O  
ATOM   6184  CG2 THR L  45      -5.219  53.188  15.477  1.00 20.66           C  
ATOM   6185  N   THR L  46      -2.152  55.214  12.586  1.00 15.67           N  
ATOM   6186  CA  THR L  46      -1.689  56.192  11.625  1.00 15.48           C  
ATOM   6187  C   THR L  46      -2.854  56.558  10.713  1.00 15.02           C  
ATOM   6188  O   THR L  46      -3.478  55.674  10.112  1.00 13.70           O  
ATOM   6189  CB  THR L  46      -0.536  55.646  10.808  1.00 14.64           C  
ATOM   6190  OG1 THR L  46       0.510  55.200  11.686  1.00 14.61           O  
ATOM   6191  CG2 THR L  46      -0.010  56.702   9.866  1.00 14.86           C  
ATOM   6192  N   VAL L  47      -3.183  57.835  10.641  1.00 10.77           N  
ATOM   6193  CA  VAL L  47      -4.027  58.317   9.559  1.00 12.06           C  
ATOM   6194  C   VAL L  47      -3.240  59.087   8.501  1.00 17.47           C  
ATOM   6195  O   VAL L  47      -3.672  59.137   7.352  1.00 12.70           O  
ATOM   6196  CB  VAL L  47      -5.218  59.149  10.094  1.00 18.54           C  
ATOM   6197  CG1 VAL L  47      -6.142  58.229  10.868  1.00 21.89           C  
ATOM   6198  CG2 VAL L  47      -4.796  60.273  10.979  1.00 18.20           C  
ATOM   6199  N   ILE L  48      -2.085  59.657   8.864  1.00 16.17           N  
ATOM   6200  CA  ILE L  48      -1.204  60.321   7.905  1.00 14.15           C  
ATOM   6201  C   ILE L  48       0.251  60.047   8.266  1.00 17.88           C  
ATOM   6202  O   ILE L  48       0.613  60.154   9.443  1.00 13.34           O  
ATOM   6203  CB  ILE L  48      -1.415  61.861   7.872  1.00 14.03           C  
ATOM   6204  CG1 ILE L  48      -2.818  62.253   7.379  1.00 13.75           C  
ATOM   6205  CG2 ILE L  48      -0.362  62.535   6.995  1.00 15.22           C  
ATOM   6206  CD1 ILE L  48      -3.021  62.079   5.909  1.00 16.30           C  
ATOM   6207  N   TYR L  49       1.082  59.751   7.263  1.00 12.49           N  
ATOM   6208  CA  TYR L  49       2.531  59.722   7.443  1.00 14.32           C  
ATOM   6209  C   TYR L  49       3.202  60.517   6.318  1.00 14.75           C  
ATOM   6210  O   TYR L  49       2.583  60.820   5.287  1.00 15.90           O  
ATOM   6211  CB  TYR L  49       3.048  58.267   7.509  1.00 14.31           C  
ATOM   6212  CG  TYR L  49       2.876  57.488   6.232  1.00 14.36           C  
ATOM   6213  CD1 TYR L  49       3.909  57.374   5.334  1.00 18.32           C  
ATOM   6214  CD2 TYR L  49       1.673  56.867   5.922  1.00 18.14           C  
ATOM   6215  CE1 TYR L  49       3.762  56.674   4.147  1.00 18.68           C  
ATOM   6216  CE2 TYR L  49       1.514  56.161   4.734  1.00 19.76           C  
ATOM   6217  CZ  TYR L  49       2.566  56.063   3.856  1.00 21.12           C  
ATOM   6218  OH  TYR L  49       2.411  55.372   2.678  1.00 23.66           O  
ATOM   6219  N   GLU L  50       4.464  60.889   6.536  1.00 13.87           N  
ATOM   6220  CA  GLU L  50       5.206  61.674   5.571  1.00 16.23           C  
ATOM   6221  C   GLU L  50       4.407  62.881   5.122  1.00 16.45           C  
ATOM   6222  O   GLU L  50       4.265  63.107   3.930  1.00 15.20           O  
ATOM   6223  CB  GLU L  50       5.611  60.805   4.361  1.00 15.55           C  
ATOM   6224  CG  GLU L  50       6.698  59.798   4.687  1.00 17.68           C  
ATOM   6225  CD  GLU L  50       6.995  58.832   3.554  1.00 18.37           C  
ATOM   6226  OE1 GLU L  50       6.492  58.995   2.424  1.00 24.64           O  
ATOM   6227  OE2 GLU L  50       7.743  57.892   3.806  1.00 20.98           O1-
ATOM   6228  N   ASP L  51       3.890  63.645   6.097  1.00 14.61           N  
ATOM   6229  CA  ASP L  51       3.206  64.923   5.873  1.00 13.60           C  
ATOM   6230  C   ASP L  51       1.794  64.795   5.296  1.00 15.64           C  
ATOM   6231  O   ASP L  51       0.894  65.498   5.759  1.00 16.62           O  
ATOM   6232  CB  ASP L  51       3.999  65.843   4.947  1.00 15.68           C  
ATOM   6233  CG  ASP L  51       5.372  66.200   5.491  1.00 19.08           C  
ATOM   6234  OD1 ASP L  51       5.587  66.189   6.729  1.00 15.92           O  
ATOM   6235  OD2 ASP L  51       6.244  66.490   4.660  1.00 24.76           O1-
ATOM   6236  N   ASN L  52       1.596  63.947   4.280  1.00 14.88           N  
ATOM   6237  CA  ASN L  52       0.275  63.883   3.620  1.00 15.06           C  
ATOM   6238  C   ASN L  52      -0.079  62.529   2.994  1.00 16.86           C  
ATOM   6239  O   ASN L  52      -1.026  62.462   2.218  1.00 18.81           O  
ATOM   6240  CB  ASN L  52       0.191  64.948   2.539  1.00 16.63           C  
ATOM   6241  CG  ASN L  52       1.392  64.921   1.613  1.00 21.05           C  
ATOM   6242  OD1 ASN L  52       2.114  63.932   1.569  1.00 14.80           O  
ATOM   6243  ND2 ASN L  52       1.619  66.019   0.880  1.00 22.11           N  
ATOM   6244  N   GLN L  53       0.662  61.464   3.324  1.00 13.92           N  
ATOM   6245  CA  GLN L  53       0.377  60.116   2.818  1.00 22.99           C  
ATOM   6246  C   GLN L  53      -0.630  59.372   3.690  1.00 22.15           C  
ATOM   6247  O   GLN L  53      -0.441  59.260   4.901  1.00 15.60           O  
ATOM   6248  CB  GLN L  53       1.653  59.288   2.734  1.00 16.77           C  
ATOM   6249  CG  GLN L  53       2.750  59.939   1.946  1.00 16.69           C  
ATOM   6250  CD  GLN L  53       2.367  60.132   0.471  1.00 17.86           C  
ATOM   6251  OE1 GLN L  53       2.268  59.160  -0.280  1.00 17.10           O  
ATOM   6252  NE2 GLN L  53       2.159  61.390   0.063  1.00 22.42           N  
ATOM   6253  N   ARG L  54      -1.703  58.872   3.085  1.00 21.00           N  
ATOM   6254  CA  ARG L  54      -2.639  58.015   3.809  1.00 16.96           C  
ATOM   6255  C   ARG L  54      -2.252  56.547   3.716  1.00 18.18           C  
ATOM   6256  O   ARG L  54      -1.986  56.042   2.631  1.00 18.32           O  
ATOM   6257  CB  ARG L  54      -4.061  58.141   3.277  1.00 16.70           C  
ATOM   6258  CG  ARG L  54      -4.720  59.482   3.479  1.00 16.12           C  
ATOM   6259  CD  ARG L  54      -6.121  59.444   2.877  1.00 22.02           C  
ATOM   6260  NE  ARG L  54      -6.093  59.689   1.433  1.00 22.54           N  
ATOM   6261  CZ  ARG L  54      -5.921  60.892   0.875  1.00 32.12           C  
ATOM   6262  NH1 ARG L  54      -5.760  62.011   1.617  1.00 23.53           N1+
ATOM   6263  NH2 ARG L  54      -5.904  60.981  -0.449  1.00 29.60           N  
ATOM   6264  N   PRO L  55      -2.259  55.845   4.853  1.00 14.72           N  
ATOM   6265  CA  PRO L  55      -2.111  54.399   4.751  1.00 20.25           C  
ATOM   6266  C   PRO L  55      -3.300  53.779   4.060  1.00 21.51           C  
ATOM   6267  O   PRO L  55      -4.389  54.382   4.028  1.00 16.28           O  
ATOM   6268  CB  PRO L  55      -2.043  53.937   6.213  1.00 21.11           C  
ATOM   6269  CG  PRO L  55      -1.691  55.135   6.993  1.00 18.30           C  
ATOM   6270  CD  PRO L  55      -2.327  56.293   6.256  1.00 13.88           C  
ATOM   6271  N   SER L  56      -3.088  52.579   3.526  1.00 19.02           N  
ATOM   6272  CA  SER L  56      -4.172  51.818   2.939  1.00 29.63           C  
ATOM   6273  C   SER L  56      -5.267  51.617   3.960  1.00 22.50           C  
ATOM   6274  O   SER L  56      -4.995  51.175   5.066  1.00 22.57           O  
ATOM   6275  CB  SER L  56      -3.683  50.464   2.443  1.00 32.74           C  
ATOM   6276  OG  SER L  56      -4.772  49.710   1.945  1.00 43.29           O  
ATOM   6277  N   GLY L  57      -6.500  51.936   3.569  1.00 22.57           N  
ATOM   6278  CA  GLY L  57      -7.652  51.742   4.420  1.00 28.10           C  
ATOM   6279  C   GLY L  57      -8.116  53.013   5.077  1.00 23.11           C  
ATOM   6280  O   GLY L  57      -9.229  53.081   5.586  1.00 29.12           O  
ATOM   6281  N   VAL L  58      -7.270  54.034   5.063  1.00 24.95           N  
ATOM   6282  CA  VAL L  58      -7.659  55.316   5.615  1.00 18.73           C  
ATOM   6283  C   VAL L  58      -8.387  56.127   4.538  1.00 18.97           C  
ATOM   6284  O   VAL L  58      -7.849  56.380   3.479  1.00 20.88           O  
ATOM   6285  CB  VAL L  58      -6.436  56.056   6.173  1.00 21.16           C  
ATOM   6286  CG1 VAL L  58      -6.775  57.501   6.497  1.00 17.13           C  
ATOM   6287  CG2 VAL L  58      -5.926  55.323   7.409  1.00 25.06           C  
ATOM   6288  N   PRO L  59      -9.620  56.558   4.815  1.00 19.56           N  
ATOM   6289  CA  PRO L  59     -10.352  57.259   3.757  1.00 21.98           C  
ATOM   6290  C   PRO L  59      -9.814  58.637   3.432  1.00 25.92           C  
ATOM   6291  O   PRO L  59      -9.181  59.314   4.257  1.00 23.68           O  
ATOM   6292  CB  PRO L  59     -11.770  57.357   4.323  1.00 24.67           C  
ATOM   6293  CG  PRO L  59     -11.606  57.289   5.771  1.00 23.51           C  
ATOM   6294  CD  PRO L  59     -10.438  56.377   6.018  1.00 21.88           C  
ATOM   6295  N   ASP L  60     -10.083  59.058   2.205  1.00 24.22           N  
ATOM   6296  CA  ASP L  60      -9.583  60.328   1.716  1.00 25.58           C  
ATOM   6297  C   ASP L  60     -10.267  61.497   2.392  1.00 21.80           C  
ATOM   6298  O   ASP L  60      -9.942  62.641   2.108  1.00 23.49           O  
ATOM   6299  CB  ASP L  60      -9.747  60.424   0.196  1.00 26.31           C  
ATOM   6300  CG  ASP L  60     -11.198  60.320  -0.248  1.00 36.05           C  
ATOM   6301  OD1 ASP L  60     -12.092  60.319   0.626  1.00 22.87           O  
ATOM   6302  OD2 ASP L  60     -11.436  60.251  -1.470  1.00 28.33           O1-
ATOM   6303  N   ARG L  61     -11.203  61.225   3.298  1.00 19.66           N  
ATOM   6304  CA  ARG L  61     -11.723  62.272   4.184  1.00 23.25           C  
ATOM   6305  C   ARG L  61     -10.611  62.899   5.031  1.00 17.03           C  
ATOM   6306  O   ARG L  61     -10.730  64.040   5.465  1.00 22.48           O  
ATOM   6307  CB  ARG L  61     -12.791  61.707   5.123  1.00 27.55           C  
ATOM   6308  CG  ARG L  61     -13.944  61.072   4.409  1.00 35.75           C  
ATOM   6309  CD  ARG L  61     -15.150  60.888   5.324  1.00 35.92           C  
ATOM   6310  NE  ARG L  61     -14.971  59.844   6.330  1.00 30.14           N  
ATOM   6311  CZ  ARG L  61     -14.749  60.063   7.621  1.00 27.47           C  
ATOM   6312  NH1 ARG L  61     -14.665  61.301   8.099  1.00 24.66           N1+
ATOM   6313  NH2 ARG L  61     -14.616  59.029   8.437  1.00 33.07           N  
ATOM   6314  N   PHE L  62      -9.564  62.109   5.284  1.00 21.48           N  
ATOM   6315  CA  PHE L  62      -8.399  62.527   6.069  1.00 20.25           C  
ATOM   6316  C   PHE L  62      -7.290  63.047   5.176  1.00 21.46           C  
ATOM   6317  O   PHE L  62      -6.804  62.323   4.300  1.00 21.16           O  
ATOM   6318  CB  PHE L  62      -7.855  61.359   6.887  1.00 17.58           C  
ATOM   6319  CG  PHE L  62      -8.767  60.901   7.970  1.00 20.06           C  
ATOM   6320  CD1 PHE L  62      -8.635  61.394   9.251  1.00 22.11           C  
ATOM   6321  CD2 PHE L  62      -9.770  59.977   7.714  1.00 21.94           C  
ATOM   6322  CE1 PHE L  62      -9.486  60.977  10.256  1.00 19.82           C  
ATOM   6323  CE2 PHE L  62     -10.619  59.567   8.721  1.00 32.28           C  
ATOM   6324  CZ  PHE L  62     -10.470  60.073   9.994  1.00 28.74           C  
ATOM   6325  N   SER L  63      -6.880  64.289   5.387  1.00 21.75           N  
ATOM   6326  CA  SER L  63      -5.791  64.825   4.592  1.00 22.22           C  
ATOM   6327  C   SER L  63      -4.806  65.636   5.429  1.00 17.77           C  
ATOM   6328  O   SER L  63      -5.171  66.359   6.360  1.00 22.17           O  
ATOM   6329  CB  SER L  63      -6.334  65.673   3.434  1.00 23.75           C  
ATOM   6330  OG  SER L  63      -6.920  66.858   3.897  1.00 31.25           O  
ATOM   6331  N   GLY L  64      -3.541  65.514   5.060  1.00 16.88           N  
ATOM   6332  CA  GLY L  64      -2.478  66.174   5.777  1.00 18.26           C  
ATOM   6333  C   GLY L  64      -1.852  67.233   4.908  1.00 18.89           C  
ATOM   6334  O   GLY L  64      -1.743  67.074   3.691  1.00 18.25           O  
ATOM   6335  N   SER L  65      -1.424  68.313   5.536  1.00 20.26           N  
ATOM   6336  CA  SER L  65      -0.802  69.417   4.801  1.00 19.92           C  
ATOM   6337  C   SER L  65       0.258  70.029   5.659  1.00 19.11           C  
ATOM   6338  O   SER L  65       0.266  69.869   6.889  1.00 17.50           O  
ATOM   6339  CB  SER L  65      -1.831  70.478   4.382  1.00 22.18           C  
ATOM   6340  OG  SER L  65      -2.468  71.084   5.493  1.00 19.46           O  
ATOM   6341  N   ILE L  66       1.167  70.710   4.980  1.00 22.08           N  
ATOM   6342  CA  ILE L  66       2.177  71.529   5.606  1.00 17.98           C  
ATOM   6343  C   ILE L  66       2.006  72.983   5.152  1.00 26.75           C  
ATOM   6344  O   ILE L  66       1.815  73.235   3.968  1.00 26.61           O  
ATOM   6345  CB  ILE L  66       3.557  71.054   5.250  1.00 15.76           C  
ATOM   6346  CG1 ILE L  66       3.719  69.544   5.509  1.00 23.46           C  
ATOM   6347  CG2 ILE L  66       4.593  71.867   6.012  1.00 26.02           C  
ATOM   6348  CD1 ILE L  66       3.668  69.149   6.968  1.00 23.18           C  
ATOM   6349  N   ASP L  66A      2.093  73.924   6.087  1.00 24.44           N  
ATOM   6350  CA  ASP L  66A      2.009  75.348   5.772  1.00 23.57           C  
ATOM   6351  C   ASP L  66A      3.257  76.031   6.334  1.00 28.13           C  
ATOM   6352  O   ASP L  66A      3.321  76.367   7.509  1.00 25.37           O  
ATOM   6353  CB  ASP L  66A      0.737  75.975   6.343  1.00 27.05           C  
ATOM   6354  CG  ASP L  66A      0.740  77.485   6.244  1.00 31.54           C  
ATOM   6355  OD1 ASP L  66A      1.572  78.019   5.496  1.00 30.35           O  
ATOM   6356  OD2 ASP L  66A     -0.091  78.132   6.916  1.00 33.25           O1-
ATOM   6357  N   SER L  66B      4.253  76.220   5.486  1.00 25.52           N  
ATOM   6358  CA  SER L  66B      5.553  76.678   5.953  1.00 33.81           C  
ATOM   6359  C   SER L  66B      5.527  78.138   6.433  1.00 30.69           C  
ATOM   6360  O   SER L  66B      6.340  78.529   7.269  1.00 28.33           O  
ATOM   6361  CB  SER L  66B      6.582  76.497   4.850  1.00 35.31           C  
ATOM   6362  OG  SER L  66B      6.238  77.273   3.726  1.00 51.61           O  
ATOM   6363  N   SER L  67       4.585  78.925   5.925  1.00 28.26           N  
ATOM   6364  CA  SER L  67       4.476  80.326   6.320  1.00 35.42           C  
ATOM   6365  C   SER L  67       4.026  80.428   7.766  1.00 34.07           C  
ATOM   6366  O   SER L  67       4.300  81.416   8.423  1.00 34.54           O  
ATOM   6367  CB  SER L  67       3.513  81.103   5.397  1.00 38.35           C  
ATOM   6368  OG  SER L  67       2.146  80.817   5.665  1.00 36.54           O  
ATOM   6369  N   SER L  68       3.350  79.403   8.276  1.00 28.02           N  
ATOM   6370  CA  SER L  68       2.979  79.401   9.678  1.00 23.75           C  
ATOM   6371  C   SER L  68       3.774  78.354  10.455  1.00 21.54           C  
ATOM   6372  O   SER L  68       3.482  78.094  11.621  1.00 19.13           O  
ATOM   6373  CB  SER L  68       1.479  79.178   9.825  1.00 26.16           C  
ATOM   6374  OG  SER L  68       1.092  78.054   9.088  1.00 31.44           O  
ATOM   6375  N   ASN L  69       4.794  77.778   9.812  1.00 20.65           N  
ATOM   6376  CA  ASN L  69       5.609  76.720  10.412  1.00 24.59           C  
ATOM   6377  C   ASN L  69       4.750  75.624  11.052  1.00 18.44           C  
ATOM   6378  O   ASN L  69       5.056  75.147  12.133  1.00 15.47           O  
ATOM   6379  CB  ASN L  69       6.565  77.294  11.463  1.00 19.79           C  
ATOM   6380  CG  ASN L  69       7.732  76.347  11.784  1.00 22.69           C  
ATOM   6381  OD1 ASN L  69       8.276  75.690  10.902  1.00 18.76           O  
ATOM   6382  ND2 ASN L  69       8.091  76.258  13.062  1.00 20.35           N  
ATOM   6383  N   SER L  70       3.688  75.222  10.370  1.00 20.39           N  
ATOM   6384  CA  SER L  70       2.753  74.250  10.928  1.00 15.87           C  
ATOM   6385  C   SER L  70       2.386  73.129   9.973  1.00 21.03           C  
ATOM   6386  O   SER L  70       2.597  73.213   8.765  1.00 20.91           O  
ATOM   6387  CB  SER L  70       1.473  74.926  11.334  1.00 21.39           C  
ATOM   6388  OG  SER L  70       0.751  75.277  10.170  1.00 21.36           O  
ATOM   6389  N   ALA L  71       1.837  72.076  10.561  1.00 19.60           N  
ATOM   6390  CA  ALA L  71       1.238  70.976   9.828  1.00 17.06           C  
ATOM   6391  C   ALA L  71      -0.210  70.905  10.227  1.00 19.19           C  
ATOM   6392  O   ALA L  71      -0.571  71.335  11.327  1.00 23.94           O  
ATOM   6393  CB  ALA L  71       1.945  69.699  10.131  1.00 17.43           C  
ATOM   6394  N   SER L  72      -1.048  70.365   9.347  1.00 16.52           N  
ATOM   6395  CA  SER L  72      -2.463  70.252   9.658  1.00 16.20           C  
ATOM   6396  C   SER L  72      -3.077  68.961   9.185  1.00 16.86           C  
ATOM   6397  O   SER L  72      -2.796  68.474   8.083  1.00 19.71           O  
ATOM   6398  CB  SER L  72      -3.256  71.403   9.044  1.00 24.46           C  
ATOM   6399  OG  SER L  72      -2.913  72.608   9.639  1.00 20.05           O  
ATOM   6400  N   LEU L  73      -3.947  68.444  10.042  1.00 15.55           N  
ATOM   6401  CA  LEU L  73      -4.804  67.332   9.725  1.00 16.91           C  
ATOM   6402  C   LEU L  73      -6.192  67.912   9.463  1.00 18.79           C  
ATOM   6403  O   LEU L  73      -6.747  68.608  10.309  1.00 14.76           O  
ATOM   6404  CB  LEU L  73      -4.835  66.337  10.879  1.00 12.83           C  
ATOM   6405  CG  LEU L  73      -5.751  65.131  10.694  1.00 11.97           C  
ATOM   6406  CD1 LEU L  73      -5.183  64.303   9.549  1.00 14.87           C  
ATOM   6407  CD2 LEU L  73      -5.884  64.282  11.937  1.00 14.00           C  
ATOM   6408  N   THR L  74      -6.726  67.664   8.280  1.00 18.52           N  
ATOM   6409  CA  THR L  74      -8.060  68.155   7.917  1.00 15.97           C  
ATOM   6410  C   THR L  74      -8.937  66.941   7.688  1.00 20.59           C  
ATOM   6411  O   THR L  74      -8.529  66.007   6.994  1.00 19.69           O  
ATOM   6412  CB  THR L  74      -7.976  69.072   6.679  1.00 22.09           C  
ATOM   6413  OG1 THR L  74      -7.142  70.195   7.005  1.00 22.92           O  
ATOM   6414  CG2 THR L  74      -9.368  69.607   6.245  1.00 26.88           C  
ATOM   6415  N   ILE L  75     -10.104  66.931   8.344  1.00 21.48           N  
ATOM   6416  CA  ILE L  75     -11.069  65.844   8.258  1.00 16.57           C  
ATOM   6417  C   ILE L  75     -12.372  66.432   7.715  1.00 31.40           C  
ATOM   6418  O   ILE L  75     -12.980  67.297   8.352  1.00 27.23           O  
ATOM   6419  CB  ILE L  75     -11.340  65.156   9.619  1.00 19.99           C  
ATOM   6420  CG1 ILE L  75     -10.056  64.690  10.310  1.00 22.11           C  
ATOM   6421  CG2 ILE L  75     -12.266  63.948   9.438  1.00 24.64           C  
ATOM   6422  CD1 ILE L  75     -10.289  64.305  11.797  1.00 21.10           C  
ATOM   6423  N   SER L  76     -12.787  65.969   6.539  1.00 32.69           N  
ATOM   6424  CA  SER L  76     -14.032  66.441   5.915  1.00 33.55           C  
ATOM   6425  C   SER L  76     -15.106  65.375   6.081  1.00 26.76           C  
ATOM   6426  O   SER L  76     -14.795  64.220   6.372  1.00 28.48           O  
ATOM   6427  CB  SER L  76     -13.800  66.761   4.432  1.00 32.36           C  
ATOM   6428  OG  SER L  76     -13.355  65.605   3.731  1.00 33.86           O  
ATOM   6429  N   GLY L  77     -16.371  65.749   5.911  1.00 27.75           N  
ATOM   6430  CA  GLY L  77     -17.446  64.787   6.001  1.00 26.25           C  
ATOM   6431  C   GLY L  77     -17.496  64.102   7.343  1.00 28.62           C  
ATOM   6432  O   GLY L  77     -17.635  62.872   7.440  1.00 26.95           O  
ATOM   6433  N   LEU L  78     -17.374  64.903   8.392  1.00 24.90           N  
ATOM   6434  CA  LEU L  78     -17.201  64.366   9.728  1.00 25.21           C  
ATOM   6435  C   LEU L  78     -18.220  63.326  10.093  1.00 29.14           C  
ATOM   6436  O   LEU L  78     -19.422  63.523   9.925  1.00 28.13           O  
ATOM   6437  CB  LEU L  78     -17.251  65.491  10.770  1.00 26.56           C  
ATOM   6438  CG  LEU L  78     -15.907  66.166  10.987  1.00 32.51           C  
ATOM   6439  CD1 LEU L  78     -16.064  67.417  11.844  1.00 33.00           C  
ATOM   6440  CD2 LEU L  78     -14.911  65.184  11.637  1.00 27.44           C  
ATOM   6441  N   LYS L  79     -17.720  62.215  10.610  1.00 31.20           N  
ATOM   6442  CA  LYS L  79     -18.562  61.158  11.125  1.00 22.03           C  
ATOM   6443  C   LYS L  79     -18.419  61.125  12.633  1.00 25.88           C  
ATOM   6444  O   LYS L  79     -17.398  61.551  13.159  1.00 28.37           O  
ATOM   6445  CB  LYS L  79     -18.171  59.806  10.516  1.00 23.75           C  
ATOM   6446  CG  LYS L  79     -18.388  59.708   9.027  1.00 25.46           C  
ATOM   6447  CD  LYS L  79     -18.211  58.280   8.520  1.00 32.50           C  
ATOM   6448  CE  LYS L  79     -18.376  58.242   7.001  1.00 34.56           C  
ATOM   6449  NZ  LYS L  79     -18.020  56.927   6.429  1.00 38.29           N1+
ATOM   6450  N   THR L  80     -19.435  60.630  13.331  1.00 27.67           N  
ATOM   6451  CA  THR L  80     -19.375  60.553  14.783  1.00 25.55           C  
ATOM   6452  C   THR L  80     -18.218  59.651  15.193  1.00 30.56           C  
ATOM   6453  O   THR L  80     -17.577  59.888  16.218  1.00 28.43           O  
ATOM   6454  CB  THR L  80     -20.703  60.050  15.407  1.00 35.76           C  
ATOM   6455  OG1 THR L  80     -20.886  58.658  15.133  1.00 37.14           O  
ATOM   6456  CG2 THR L  80     -21.913  60.856  14.865  1.00 35.59           C  
ATOM   6457  N   GLU L  81     -17.913  58.641  14.382  1.00 25.68           N  
ATOM   6458  CA  GLU L  81     -16.793  57.752  14.687  1.00 28.72           C  
ATOM   6459  C   GLU L  81     -15.421  58.475  14.628  1.00 26.25           C  
ATOM   6460  O   GLU L  81     -14.408  57.925  15.052  1.00 22.90           O  
ATOM   6461  CB  GLU L  81     -16.788  56.565  13.731  1.00 27.61           C  
ATOM   6462  CG  GLU L  81     -16.608  56.939  12.266  1.00 31.91           C  
ATOM   6463  CD  GLU L  81     -16.967  55.781  11.336  1.00 44.85           C  
ATOM   6464  OE1 GLU L  81     -18.102  55.259  11.452  1.00 39.35           O  
ATOM   6465  OE2 GLU L  81     -16.114  55.379  10.512  1.00 43.58           O1-
ATOM   6466  N   ASP L  82     -15.396  59.698  14.109  1.00 22.71           N  
ATOM   6467  CA  ASP L  82     -14.151  60.457  14.019  1.00 22.95           C  
ATOM   6468  C   ASP L  82     -13.790  61.094  15.370  1.00 24.40           C  
ATOM   6469  O   ASP L  82     -12.664  61.534  15.565  1.00 21.69           O  
ATOM   6470  CB  ASP L  82     -14.246  61.531  12.934  1.00 22.73           C  
ATOM   6471  CG  ASP L  82     -14.438  60.951  11.533  1.00 21.07           C  
ATOM   6472  OD1 ASP L  82     -14.049  59.785  11.291  1.00 24.60           O  
ATOM   6473  OD2 ASP L  82     -14.998  61.668  10.669  1.00 23.08           O1-
ATOM   6474  N   GLU L  83     -14.731  61.110  16.310  1.00 22.81           N  
ATOM   6475  CA  GLU L  83     -14.466  61.625  17.642  1.00 21.32           C  
ATOM   6476  C   GLU L  83     -13.414  60.763  18.317  1.00 20.81           C  
ATOM   6477  O   GLU L  83     -13.574  59.560  18.480  1.00 22.36           O  
ATOM   6478  CB  GLU L  83     -15.745  61.684  18.467  1.00 23.62           C  
ATOM   6479  CG  GLU L  83     -15.542  62.034  19.928  1.00 25.82           C  
ATOM   6480  CD  GLU L  83     -16.820  62.551  20.603  1.00 30.80           C  
ATOM   6481  OE1 GLU L  83     -17.643  63.215  19.936  1.00 23.27           O  
ATOM   6482  OE2 GLU L  83     -17.001  62.290  21.809  1.00 29.65           O1-
ATOM   6483  N   ALA L  84     -12.315  61.406  18.687  1.00 18.42           N  
ATOM   6484  CA  ALA L  84     -11.140  60.698  19.166  1.00 15.85           C  
ATOM   6485  C   ALA L  84     -10.050  61.716  19.506  1.00 13.20           C  
ATOM   6486  O   ALA L  84     -10.228  62.907  19.272  1.00 14.86           O  
ATOM   6487  CB  ALA L  84     -10.648  59.757  18.121  1.00 18.07           C  
ATOM   6488  N   ASP L  85      -8.926  61.231  20.018  1.00 16.02           N  
ATOM   6489  CA  ASP L  85      -7.735  62.053  20.192  1.00 11.63           C  
ATOM   6490  C   ASP L  85      -6.852  61.966  18.955  1.00 14.45           C  
ATOM   6491  O   ASP L  85      -6.714  60.902  18.372  1.00 14.87           O  
ATOM   6492  CB  ASP L  85      -6.954  61.617  21.424  1.00 15.70           C  
ATOM   6493  CG  ASP L  85      -7.653  61.960  22.727  1.00 25.83           C  
ATOM   6494  OD1 ASP L  85      -8.575  62.794  22.733  1.00 17.88           O  
ATOM   6495  OD2 ASP L  85      -7.236  61.417  23.765  1.00 33.59           O1-
ATOM   6496  N   TYR L  86      -6.283  63.094  18.550  1.00 13.23           N  
ATOM   6497  CA  TYR L  86      -5.325  63.128  17.447  1.00  9.38           C  
ATOM   6498  C   TYR L  86      -3.980  63.696  17.896  1.00 10.15           C  
ATOM   6499  O   TYR L  86      -3.934  64.742  18.534  1.00 14.26           O  
ATOM   6500  CB  TYR L  86      -5.879  63.941  16.284  1.00 12.53           C  
ATOM   6501  CG  TYR L  86      -7.097  63.285  15.687  1.00 11.75           C  
ATOM   6502  CD1 TYR L  86      -6.980  62.391  14.633  1.00 17.09           C  
ATOM   6503  CD2 TYR L  86      -8.354  63.529  16.200  1.00 11.79           C  
ATOM   6504  CE1 TYR L  86      -8.100  61.755  14.104  1.00 19.79           C  
ATOM   6505  CE2 TYR L  86      -9.475  62.892  15.687  1.00 18.30           C  
ATOM   6506  CZ  TYR L  86      -9.335  62.007  14.637  1.00 19.45           C  
ATOM   6507  OH  TYR L  86     -10.424  61.361  14.109  1.00 16.63           O  
ATOM   6508  N   TYR L  87      -2.899  62.984  17.558  1.00 14.33           N  
ATOM   6509  CA  TYR L  87      -1.534  63.403  17.910  1.00 10.04           C  
ATOM   6510  C   TYR L  87      -0.735  63.581  16.654  1.00 12.70           C  
ATOM   6511  O   TYR L  87      -0.729  62.722  15.795  1.00  9.96           O  
ATOM   6512  CB  TYR L  87      -0.830  62.388  18.813  1.00  7.68           C  
ATOM   6513  CG  TYR L  87      -1.496  62.244  20.149  1.00  9.45           C  
ATOM   6514  CD1 TYR L  87      -1.154  63.056  21.216  1.00 14.42           C  
ATOM   6515  CD2 TYR L  87      -2.537  61.337  20.325  1.00 16.08           C  
ATOM   6516  CE1 TYR L  87      -1.826  62.957  22.447  1.00 10.90           C  
ATOM   6517  CE2 TYR L  87      -3.183  61.212  21.531  1.00 14.65           C  
ATOM   6518  CZ  TYR L  87      -2.831  62.030  22.592  1.00 13.69           C  
ATOM   6519  OH  TYR L  87      -3.517  61.935  23.790  1.00 15.38           O  
ATOM   6520  N   CYS L  88      -0.066  64.712  16.528  1.00 11.86           N  
ATOM   6521  CA  CYS L  88       0.973  64.806  15.506  1.00 12.35           C  
ATOM   6522  C   CYS L  88       2.300  64.360  16.086  1.00 13.50           C  
ATOM   6523  O   CYS L  88       2.507  64.335  17.300  1.00  9.49           O  
ATOM   6524  CB  CYS L  88       1.072  66.230  14.934  1.00 16.19           C  
ATOM   6525  SG  CYS L  88       1.601  67.503  16.103  1.00 13.02           S  
ATOM   6526  N   GLN L  89       3.217  64.010  15.200  1.00 10.24           N  
ATOM   6527  CA  GLN L  89       4.483  63.403  15.625  1.00 11.95           C  
ATOM   6528  C   GLN L  89       5.554  63.680  14.607  1.00 11.30           C  
ATOM   6529  O   GLN L  89       5.285  63.628  13.418  1.00 15.98           O  
ATOM   6530  CB  GLN L  89       4.320  61.897  15.818  1.00 11.91           C  
ATOM   6531  CG  GLN L  89       5.615  61.190  16.154  1.00 12.23           C  
ATOM   6532  CD  GLN L  89       6.181  60.406  14.981  1.00 12.92           C  
ATOM   6533  OE1 GLN L  89       5.453  59.675  14.303  1.00 13.75           O  
ATOM   6534  NE2 GLN L  89       7.490  60.516  14.763  1.00 16.13           N  
ATOM   6535  N   SER L  90       6.771  63.980  15.056  1.00 10.40           N  
ATOM   6536  CA  SER L  90       7.865  64.134  14.128  1.00 11.97           C  
ATOM   6537  C   SER L  90       9.163  63.753  14.851  1.00 18.14           C  
ATOM   6538  O   SER L  90       9.165  62.891  15.737  1.00 13.77           O  
ATOM   6539  CB  SER L  90       7.915  65.561  13.576  1.00 13.55           C  
ATOM   6540  OG  SER L  90       8.817  65.676  12.481  1.00 14.07           O  
ATOM   6541  N   TYR L  91      10.249  64.408  14.487  1.00 13.39           N  
ATOM   6542  CA  TYR L  91      11.569  64.082  15.031  1.00 15.08           C  
ATOM   6543  C   TYR L  91      12.281  65.380  15.308  1.00 17.69           C  
ATOM   6544  O   TYR L  91      12.031  66.365  14.612  1.00 17.84           O  
ATOM   6545  CB  TYR L  91      12.367  63.216  14.050  1.00 17.17           C  
ATOM   6546  CG  TYR L  91      11.651  61.936  13.704  1.00 18.21           C  
ATOM   6547  CD1 TYR L  91      11.807  60.821  14.483  1.00 16.94           C  
ATOM   6548  CD2 TYR L  91      10.774  61.870  12.627  1.00 19.23           C  
ATOM   6549  CE1 TYR L  91      11.131  59.631  14.195  1.00 20.98           C  
ATOM   6550  CE2 TYR L  91      10.079  60.682  12.330  1.00 21.35           C  
ATOM   6551  CZ  TYR L  91      10.266  59.577  13.114  1.00 25.48           C  
ATOM   6552  OH  TYR L  91       9.591  58.394  12.838  1.00 29.30           O  
ATOM   6553  N   ASP L  92      13.126  65.401  16.336  1.00 18.60           N  
ATOM   6554  CA  ASP L  92      13.969  66.576  16.624  1.00 21.06           C  
ATOM   6555  C   ASP L  92      15.281  66.486  15.861  1.00 19.85           C  
ATOM   6556  O   ASP L  92      15.448  65.611  15.004  1.00 17.74           O  
ATOM   6557  CB  ASP L  92      14.242  66.714  18.121  1.00 21.43           C  
ATOM   6558  CG  ASP L  92      15.038  65.537  18.687  1.00 19.45           C  
ATOM   6559  OD1 ASP L  92      15.634  64.749  17.911  1.00 19.17           O  
ATOM   6560  OD2 ASP L  92      15.042  65.410  19.930  1.00 25.35           O1-
ATOM   6561  N   SER L  93      16.229  67.380  16.164  1.00 22.92           N  
ATOM   6562  CA  SER L  93      17.432  67.438  15.347  1.00 25.62           C  
ATOM   6563  C   SER L  93      18.299  66.200  15.594  1.00 26.88           C  
ATOM   6564  O   SER L  93      19.131  65.866  14.763  1.00 28.77           O  
ATOM   6565  CB  SER L  93      18.222  68.718  15.609  1.00 23.77           C  
ATOM   6566  OG  SER L  93      18.484  68.858  16.990  1.00 33.37           O  
ATOM   6567  N   SER L  94      18.081  65.507  16.718  1.00 26.52           N  
ATOM   6568  CA  SER L  94      18.789  64.254  17.002  1.00 29.20           C  
ATOM   6569  C   SER L  94      18.098  63.033  16.405  1.00 29.83           C  
ATOM   6570  O   SER L  94      18.529  61.896  16.626  1.00 21.73           O  
ATOM   6571  CB  SER L  94      18.932  64.067  18.504  1.00 25.30           C  
ATOM   6572  OG  SER L  94      19.789  65.061  19.028  1.00 35.57           O  
ATOM   6573  N   ASN L  95      17.038  63.272  15.635  1.00 21.97           N  
ATOM   6574  CA  ASN L  95      16.215  62.196  15.074  1.00 19.85           C  
ATOM   6575  C   ASN L  95      15.491  61.410  16.158  1.00 25.86           C  
ATOM   6576  O   ASN L  95      15.137  60.253  15.957  1.00 22.88           O  
ATOM   6577  CB  ASN L  95      17.054  61.231  14.223  1.00 32.82           C  
ATOM   6578  CG  ASN L  95      17.733  61.931  13.049  1.00 44.24           C  
ATOM   6579  OD1 ASN L  95      17.243  62.949  12.538  1.00 43.17           O  
ATOM   6580  ND2 ASN L  95      18.860  61.380  12.608  1.00 49.01           N  
ATOM   6581  N   HIS L  95A     15.284  62.025  17.312  1.00 22.02           N  
ATOM   6582  CA  HIS L  95A     14.449  61.393  18.336  1.00 21.22           C  
ATOM   6583  C   HIS L  95A     13.003  61.827  18.160  1.00 21.96           C  
ATOM   6584  O   HIS L  95A     12.741  62.965  17.778  1.00 16.49           O  
ATOM   6585  CB  HIS L  95A     14.936  61.762  19.711  1.00 23.86           C  
ATOM   6586  CG  HIS L  95A     16.312  61.257  20.001  1.00 31.27           C  
ATOM   6587  ND1 HIS L  95A     17.060  61.701  21.072  1.00 36.61           N  
ATOM   6588  CD2 HIS L  95A     17.081  60.353  19.348  1.00 31.29           C  
ATOM   6589  CE1 HIS L  95A     18.228  61.081  21.070  1.00 31.66           C  
ATOM   6590  NE2 HIS L  95A     18.269  60.264  20.031  1.00 30.45           N  
ATOM   6591  N   VAL L  96      12.082  60.919  18.468  1.00 19.60           N  
ATOM   6592  CA  VAL L  96      10.651  61.164  18.329  1.00 16.11           C  
ATOM   6593  C   VAL L  96      10.144  62.295  19.210  1.00 16.72           C  
ATOM   6594  O   VAL L  96      10.478  62.361  20.387  1.00 11.24           O  
ATOM   6595  CB  VAL L  96       9.882  59.871  18.644  1.00 13.52           C  
ATOM   6596  CG1 VAL L  96       8.392  60.097  18.644  1.00 14.49           C  
ATOM   6597  CG2 VAL L  96      10.216  58.838  17.630  1.00 14.26           C  
ATOM   6598  N   VAL L  97       9.316  63.162  18.617  1.00 12.33           N  
ATOM   6599  CA  VAL L  97       8.642  64.252  19.299  0.54 11.51           C  
ATOM   6601  C   VAL L  97       7.139  64.144  19.012  1.00 12.49           C  
ATOM   6602  O   VAL L  97       6.772  64.070  17.848  1.00 11.58           O  
ATOM   6603  CB  VAL L  97       9.174  65.634  18.818  0.54 13.88           C  
ATOM   6605  CG1 VAL L  97       8.387  66.745  19.444  0.54 14.17           C  
ATOM   6607  CG2 VAL L  97      10.680  65.792  19.102  0.54 16.90           C  
ATOM   6609  N   PHE L  98       6.285  64.197  20.048  1.00 11.25           N  
ATOM   6610  CA  PHE L  98       4.826  64.225  19.887  1.00 13.89           C  
ATOM   6611  C   PHE L  98       4.250  65.597  20.196  1.00 10.59           C  
ATOM   6612  O   PHE L  98       4.653  66.241  21.147  1.00 12.82           O  
ATOM   6613  CB  PHE L  98       4.107  63.212  20.814  1.00 13.05           C  
ATOM   6614  CG  PHE L  98       4.198  61.784  20.364  1.00 14.97           C  
ATOM   6615  CD1 PHE L  98       3.273  61.259  19.481  1.00 13.01           C  
ATOM   6616  CD2 PHE L  98       5.190  60.956  20.856  1.00 16.43           C  
ATOM   6617  CE1 PHE L  98       3.361  59.911  19.064  1.00 11.11           C  
ATOM   6618  CE2 PHE L  98       5.275  59.619  20.450  1.00 15.46           C  
ATOM   6619  CZ  PHE L  98       4.367  59.110  19.554  1.00 15.46           C  
ATOM   6620  N   GLY L  99       3.252  66.024  19.439  1.00 13.63           N  
ATOM   6621  CA  GLY L  99       2.413  67.102  19.912  1.00 11.32           C  
ATOM   6622  C   GLY L  99       1.640  66.700  21.165  1.00 12.90           C  
ATOM   6623  O   GLY L  99       1.562  65.514  21.505  1.00 14.04           O  
ATOM   6624  N   GLY L 100       1.061  67.674  21.852  1.00 13.56           N  
ATOM   6625  CA  GLY L 100       0.374  67.406  23.095  1.00 13.60           C  
ATOM   6626  C   GLY L 100      -1.020  66.797  22.948  1.00 10.32           C  
ATOM   6627  O   GLY L 100      -1.644  66.448  23.944  1.00 11.10           O  
ATOM   6628  N   GLY L 101      -1.492  66.656  21.712  1.00  9.15           N  
ATOM   6629  CA  GLY L 101      -2.793  66.070  21.454  1.00 12.65           C  
ATOM   6630  C   GLY L 101      -3.963  67.028  21.375  1.00 12.96           C  
ATOM   6631  O   GLY L 101      -3.976  68.076  22.024  1.00 12.43           O  
ATOM   6632  N   THR L 102      -4.964  66.628  20.588  1.00 15.11           N  
ATOM   6633  CA  THR L 102      -6.192  67.380  20.410  1.00 13.60           C  
ATOM   6634  C   THR L 102      -7.354  66.405  20.465  1.00 17.32           C  
ATOM   6635  O   THR L 102      -7.350  65.379  19.751  1.00 15.17           O  
ATOM   6636  CB  THR L 102      -6.227  68.105  19.073  1.00 11.76           C  
ATOM   6637  OG1 THR L 102      -5.073  68.947  18.925  1.00 14.83           O  
ATOM   6638  CG2 THR L 102      -7.516  68.934  18.954  1.00 13.74           C  
ATOM   6639  N   LYS L 103      -8.328  66.694  21.320  1.00 13.52           N  
ATOM   6640  CA  LYS L 103      -9.563  65.905  21.339  1.00 13.54           C  
ATOM   6641  C   LYS L 103     -10.516  66.539  20.332  1.00 18.26           C  
ATOM   6642  O   LYS L 103     -10.801  67.736  20.420  1.00 19.52           O  
ATOM   6643  CB  LYS L 103     -10.182  65.876  22.728  1.00 18.19           C  
ATOM   6644  CG  LYS L 103     -11.578  65.287  22.779  1.00 16.90           C  
ATOM   6645  CD  LYS L 103     -11.571  63.822  22.461  1.00 23.75           C  
ATOM   6646  CE  LYS L 103     -12.975  63.206  22.596  1.00 31.33           C  
ATOM   6647  NZ  LYS L 103     -13.475  63.196  24.007  1.00 29.55           N1+
ATOM   6648  N   LEU L 104     -10.971  65.739  19.370  1.00 15.76           N  
ATOM   6649  CA  LEU L 104     -11.986  66.161  18.437  1.00 15.67           C  
ATOM   6650  C   LEU L 104     -13.308  65.636  18.947  1.00 19.19           C  
ATOM   6651  O   LEU L 104     -13.448  64.435  19.152  1.00 19.50           O  
ATOM   6652  CB  LEU L 104     -11.717  65.629  17.028  1.00 18.17           C  
ATOM   6653  CG  LEU L 104     -12.925  65.648  16.078  1.00 25.79           C  
ATOM   6654  CD1 LEU L 104     -13.355  67.066  15.730  1.00 26.36           C  
ATOM   6655  CD2 LEU L 104     -12.626  64.849  14.820  1.00 23.66           C  
ATOM   6656  N   THR L 105     -14.263  66.538  19.153  1.00 20.06           N  
ATOM   6657  CA  THR L 105     -15.615  66.153  19.506  1.00 24.99           C  
ATOM   6658  C   THR L 105     -16.546  66.380  18.317  1.00 20.67           C  
ATOM   6659  O   THR L 105     -16.468  67.417  17.667  1.00 19.80           O  
ATOM   6660  CB  THR L 105     -16.135  66.961  20.700  1.00 29.42           C  
ATOM   6661  OG1 THR L 105     -15.282  66.745  21.821  1.00 24.95           O  
ATOM   6662  CG2 THR L 105     -17.549  66.518  21.064  1.00 30.14           C  
ATOM   6663  N   VAL L 106     -17.418  65.416  18.036  1.00 25.91           N  
ATOM   6664  CA  VAL L 106     -18.399  65.579  16.963  1.00 29.63           C  
ATOM   6665  C   VAL L 106     -19.759  65.908  17.576  1.00 31.16           C  
ATOM   6666  O   VAL L 106     -20.372  65.084  18.255  1.00 26.98           O  
ATOM   6667  CB  VAL L 106     -18.487  64.328  16.067  1.00 32.87           C  
ATOM   6668  CG1 VAL L 106     -19.557  64.513  14.982  1.00 32.78           C  
ATOM   6669  CG2 VAL L 106     -17.144  64.042  15.427  1.00 28.49           C  
ATOM   6670  N   LEU L 106A    -20.213  67.122  17.311  1.00 24.47           N  
ATOM   6671  CA  LEU L 106A    -21.463  67.633  17.867  1.00 34.23           C  
ATOM   6672  C   LEU L 106A    -22.676  67.106  17.133  1.00 38.80           C  
ATOM   6673  O   LEU L 106A    -23.255  67.874  16.367  1.00 49.67           O  
ATOM   6674  CB  LEU L 106A    -21.486  69.152  17.791  1.00 33.15           C  
ATOM   6675  CG  LEU L 106A    -20.343  69.839  18.512  1.00 39.34           C  
ATOM   6676  CD1 LEU L 106A    -20.340  71.325  18.181  1.00 36.21           C  
ATOM   6677  CD2 LEU L 106A    -20.466  69.577  20.014  1.00 42.95           C  
ATOM   6678  OXT LEU L 106A    -23.102  65.960  17.263  1.00 36.18           O1-
TER    6679      LEU L 106A                                                     
