# Supplementary material for: SARS-CoV-2 Spike Protein Interaction Space
Source: Int J Mol Sci. 2023 Jul 27;24(15):12058. doi: 10.3390/ijms241512058 (PMC10418891; doi:10.3390/ijms241512058)
Supplement: Supplementary file 1 [file ijms-24-12058-s001.zip › Supplementary Material File S1/5M6A.pdb]

REMARK 950 NUMBERING  Kabat
REMARK 950 METHOD     X-ray crystal structure
REMARK 950 RESOLUTION 1.640
REMARK 950 R-FACTOR   0.184
REMARK 950 R-FREE     0.203
REMARK 950 CHAIN-TYPE LABEL ORIGINAL
REMARK 950 CHAIN L    L    C
REMARK 950 CHAIN L    L    D
REMARK 950 MOLECULE : C : BENCE-JONES LIGHT CHAIN
REMARK 950 SPECIES  : C : HOMO SAPIENS
SEQRES   1 L 216  GLN SER ALA LEU THR GLN PRO PRO SER ALA SER GLY SER          
SEQRES   2 L 216  PRO GLY GLN SER VAL THR ILE SER CYS THR GLY THR SER          
SEQRES   3 L 216  SER ASP VAL GLY GLY SER ASP SER VAL SER TRP TYR GLN          
SEQRES   4 L 216  GLN HIS PRO GLY LYS ALA PRO LYS LEU ILE ILE TYR GLU          
SEQRES   5 L 216  VAL SER GLN ARG PRO SER GLY VAL PRO ASN ARG PHE SER          
SEQRES   6 L 216  GLY SER LYS SER GLY ASN THR ALA SER LEU THR VAL SER          
SEQRES   7 L 216  GLY LEU GLN ALA GLU ASP ASP ALA ASP TYR TYR CYS SER          
SEQRES   8 L 216  SER TYR GLY GLY ASP ASN ASN LEU PHE PHE GLY GLY GLY          
SEQRES   9 L 216  THR LYS VAL THR VAL LEU GLY GLN PRO LYS ALA ALA PRO          
SEQRES  10 L 216  SER VAL THR LEU PHE PRO PRO SER SER GLU GLU LEU GLN          
SEQRES  11 L 216  ALA ASN LYS ALA THR LEU VAL CYS LEU ILE SER ASP PHE          
SEQRES  12 L 216  TYR PRO GLY ALA VAL THR VAL ALA TRP LYS ALA ASP SER          
SEQRES  13 L 216  SER PRO VAL LYS ALA GLY VAL GLU THR THR THR PRO SER          
SEQRES  14 L 216  LYS GLN SER ASN ASN LYS TYR ALA ALA SER SER TYR LEU          
SEQRES  15 L 216  SER LEU THR PRO GLU GLN TRP LYS SER HIS ARG SER TYR          
SEQRES  16 L 216  SER CYS GLN VAL THR HIS GLU GLY SER THR VAL GLU LYS          
SEQRES  17 L 216  THR VAL ALA PRO THR GLU CYS SER                              
SEQRES   1 L 216  GLN SER ALA LEU THR GLN PRO PRO SER ALA SER GLY SER          
SEQRES   2 L 216  PRO GLY GLN SER VAL THR ILE SER CYS THR GLY THR SER          
SEQRES   3 L 216  SER ASP VAL GLY GLY SER ASP SER VAL SER TRP TYR GLN          
SEQRES   4 L 216  GLN HIS PRO GLY LYS ALA PRO LYS LEU ILE ILE TYR GLU          
SEQRES   5 L 216  VAL SER GLN ARG PRO SER GLY VAL PRO ASN ARG PHE SER          
SEQRES   6 L 216  GLY SER LYS SER GLY ASN THR ALA SER LEU THR VAL SER          
SEQRES   7 L 216  GLY LEU GLN ALA GLU ASP ASP ALA ASP TYR TYR CYS SER          
SEQRES   8 L 216  SER TYR GLY GLY ASP ASN ASN LEU PHE PHE GLY GLY GLY          
SEQRES   9 L 216  THR LYS VAL THR VAL LEU GLY GLN PRO LYS ALA ALA PRO          
SEQRES  10 L 216  SER VAL THR LEU PHE PRO PRO SER SER GLU GLU LEU GLN          
SEQRES  11 L 216  ALA ASN LYS ALA THR LEU VAL CYS LEU ILE SER ASP PHE          
SEQRES  12 L 216  TYR PRO GLY ALA VAL THR VAL ALA TRP LYS ALA ASP SER          
SEQRES  13 L 216  SER PRO VAL LYS ALA GLY VAL GLU THR THR THR PRO SER          
SEQRES  14 L 216  LYS GLN SER ASN ASN LYS TYR ALA ALA SER SER TYR LEU          
SEQRES  15 L 216  SER LEU THR PRO GLU GLN TRP LYS SER HIS ARG SER TYR          
SEQRES  16 L 216  SER CYS GLN VAL THR HIS GLU GLY SER THR VAL GLU LYS          
SEQRES  17 L 216  THR VAL ALA PRO THR GLU CYS SER                              
ATOM   3249  N   ALA L   3      34.107  43.358 -55.498  1.00 36.68           N  
ATOM   3250  CA  ALA L   3      33.835  42.132 -54.754  1.00 35.06           C  
ATOM   3251  C   ALA L   3      33.583  40.939 -55.689  1.00 35.83           C  
ATOM   3252  O   ALA L   3      32.737  41.025 -56.581  1.00 37.46           O  
ATOM   3253  CB  ALA L   3      32.651  42.328 -53.828  1.00 36.40           C  
ATOM   3254  N   LEU L   4      34.316  39.825 -55.480  1.00 25.29           N  
ATOM   3255  CA  LEU L   4      34.118  38.596 -56.271  1.00 21.45           C  
ATOM   3256  C   LEU L   4      32.887  37.902 -55.683  1.00 21.48           C  
ATOM   3257  O   LEU L   4      32.552  38.143 -54.520  1.00 22.70           O  
ATOM   3258  CB  LEU L   4      35.383  37.689 -56.231  1.00 19.85           C  
ATOM   3259  CG  LEU L   4      36.717  38.407 -56.612  1.00 21.55           C  
ATOM   3260  CD1 LEU L   4      37.920  37.503 -56.356  1.00 20.67           C  
ATOM   3261  CD2 LEU L   4      36.690  38.893 -58.071  1.00 21.11           C  
ATOM   3262  N   THR L   5      32.157  37.119 -56.482  1.00 19.23           N  
ATOM   3263  CA  THR L   5      30.911  36.522 -55.975  1.00 19.99           C  
ATOM   3264  C   THR L   5      31.081  35.080 -55.581  1.00 22.02           C  
ATOM   3265  O   THR L   5      31.441  34.247 -56.411  1.00 21.55           O  
ATOM   3266  CB  THR L   5      29.755  36.676 -57.000  1.00 27.84           C  
ATOM   3267  OG1 THR L   5      29.690  38.038 -57.438  1.00 23.97           O  
ATOM   3268  CG2 THR L   5      28.392  36.259 -56.410  1.00 27.48           C  
ATOM   3269  N   GLN L   6      30.808  34.802 -54.314  1.00 20.36           N  
ATOM   3270  CA  GLN L   6      30.831  33.458 -53.736  1.00 19.45           C  
ATOM   3271  C   GLN L   6      29.450  33.111 -53.205  1.00 24.11           C  
ATOM   3272  O   GLN L   6      28.791  34.003 -52.656  1.00 23.66           O  
ATOM   3273  CB  GLN L   6      31.807  33.394 -52.537  1.00 19.50           C  
ATOM   3274  CG  GLN L   6      33.284  33.504 -52.924  1.00 20.22           C  
ATOM   3275  CD  GLN L   6      34.181  33.382 -51.704  1.00 22.25           C  
ATOM   3276  OE1 GLN L   6      34.865  34.324 -51.345  1.00 18.49           O  
ATOM   3277  NE2 GLN L   6      34.058  32.288 -50.940  1.00 19.33           N  
ATOM   3278  N   PRO L   7      29.056  31.806 -53.176  1.00 22.24           N  
ATOM   3279  CA  PRO L   7      27.781  31.462 -52.516  1.00 22.63           C  
ATOM   3280  C   PRO L   7      27.904  31.754 -51.022  1.00 25.64           C  
ATOM   3281  O   PRO L   7      28.957  31.507 -50.415  1.00 22.72           O  
ATOM   3282  CB  PRO L   7      27.621  29.956 -52.783  1.00 24.19           C  
ATOM   3283  CG  PRO L   7      29.043  29.454 -52.992  1.00 28.10           C  
ATOM   3284  CD  PRO L   7      29.723  30.601 -53.722  1.00 23.95           C  
ATOM   3285  N   PRO L   8      26.866  32.283 -50.349  1.00 23.53           N  
ATOM   3286  CA  PRO L   8      27.035  32.552 -48.918  1.00 22.22           C  
ATOM   3287  C   PRO L   8      27.291  31.291 -48.090  1.00 22.26           C  
ATOM   3288  O   PRO L   8      27.967  31.363 -47.065  1.00 20.79           O  
ATOM   3289  CB  PRO L   8      25.710  33.217 -48.512  1.00 24.53           C  
ATOM   3290  CG  PRO L   8      25.086  33.659 -49.798  1.00 30.81           C  
ATOM   3291  CD  PRO L   8      25.527  32.689 -50.832  1.00 26.57           C  
ATOM   3293  N   SER L   9      26.748  30.138 -48.526  0.58 20.27           N  
ATOM   3295  CA  SER L   9      26.866  28.901 -47.754  0.58 20.36           C  
ATOM   3297  C   SER L   9      27.039  27.662 -48.610  0.58 24.28           C  
ATOM   3299  O   SER L   9      26.651  27.644 -49.783  0.58 23.70           O  
ATOM   3301  CB  SER L   9      25.628  28.707 -46.876  0.58 23.52           C  
ATOM   3303  OG  SER L   9      25.244  29.894 -46.206  0.58 25.59           O  
ATOM   3304  N   ALA L  11      27.586  26.600 -47.991  1.00 21.45           N  
ATOM   3305  CA  ALA L  11      27.738  25.282 -48.602  1.00 19.10           C  
ATOM   3306  C   ALA L  11      27.781  24.334 -47.428  1.00 23.07           C  
ATOM   3307  O   ALA L  11      28.146  24.728 -46.313  1.00 21.32           O  
ATOM   3308  CB  ALA L  11      29.027  25.174 -49.407  1.00 19.03           C  
ATOM   3309  N   SER L  12      27.437  23.084 -47.666  1.00 19.31           N  
ATOM   3310  CA  SER L  12      27.412  22.119 -46.555  1.00 18.06           C  
ATOM   3311  C   SER L  12      27.597  20.699 -47.057  1.00 20.77           C  
ATOM   3312  O   SER L  12      27.281  20.401 -48.204  1.00 19.99           O  
ATOM   3313  CB  SER L  12      26.096  22.217 -45.776  1.00 19.03           C  
ATOM   3314  OG  SER L  12      25.026  21.826 -46.624  1.00 23.03           O  
ATOM   3315  N   GLY L  13      28.005  19.820 -46.152  1.00 17.29           N  
ATOM   3316  CA  GLY L  13      28.148  18.397 -46.453  1.00 17.89           C  
ATOM   3317  C   GLY L  13      28.378  17.613 -45.189  1.00 20.58           C  
ATOM   3318  O   GLY L  13      28.789  18.194 -44.184  1.00 21.52           O  
ATOM   3319  N   SER L  14      28.130  16.307 -45.231  1.00 16.50           N  
ATOM   3320  CA  SER L  14      28.381  15.427 -44.093  1.00 16.33           C  
ATOM   3321  C   SER L  14      29.818  14.875 -44.254  1.00 20.36           C  
ATOM   3322  O   SER L  14      30.398  14.988 -45.362  1.00 19.54           O  
ATOM   3323  CB  SER L  14      27.356  14.292 -44.031  1.00 20.58           C  
ATOM   3324  OG  SER L  14      27.575  13.441 -45.145  1.00 27.08           O  
ATOM   3325  N   PRO L  15      30.422  14.275 -43.198  1.00 19.77           N  
ATOM   3326  CA  PRO L  15      31.798  13.769 -43.336  1.00 19.72           C  
ATOM   3327  C   PRO L  15      31.944  12.785 -44.484  1.00 21.24           C  
ATOM   3328  O   PRO L  15      31.067  11.941 -44.736  1.00 20.52           O  
ATOM   3329  CB  PRO L  15      32.104  13.139 -41.964  1.00 22.06           C  
ATOM   3330  CG  PRO L  15      31.197  13.876 -41.006  1.00 26.30           C  
ATOM   3331  CD  PRO L  15      29.925  14.100 -41.812  1.00 22.85           C  
ATOM   3332  N   GLY L  16      33.000  12.986 -45.253  1.00 19.01           N  
ATOM   3333  CA  GLY L  16      33.243  12.139 -46.408  1.00 18.98           C  
ATOM   3334  C   GLY L  16      32.663  12.688 -47.695  1.00 21.37           C  
ATOM   3335  O   GLY L  16      33.002  12.203 -48.771  1.00 21.42           O  
ATOM   3336  N   GLN L  17      31.787  13.695 -47.609  1.00 17.92           N  
ATOM   3337  CA  GLN L  17      31.258  14.284 -48.841  1.00 16.97           C  
ATOM   3338  C   GLN L  17      32.249  15.276 -49.453  1.00 20.31           C  
ATOM   3339  O   GLN L  17      33.256  15.623 -48.823  1.00 17.67           O  
ATOM   3340  CB  GLN L  17      29.922  15.012 -48.576  1.00 17.51           C  
ATOM   3341  CG  GLN L  17      28.764  14.052 -48.265  1.00 16.64           C  
ATOM   3342  CD  GLN L  17      27.431  14.706 -48.504  1.00 24.01           C  
ATOM   3343  OE1 GLN L  17      27.049  15.657 -47.835  1.00 19.38           O  
ATOM   3344  NE2 GLN L  17      26.761  14.297 -49.550  1.00 24.24           N  
ATOM   3345  N   SER L  18      31.920  15.775 -50.639  1.00 19.74           N  
ATOM   3346  CA  SER L  18      32.677  16.849 -51.256  1.00 21.10           C  
ATOM   3347  C   SER L  18      31.796  18.076 -51.355  1.00 25.47           C  
ATOM   3348  O   SER L  18      30.561  17.967 -51.447  1.00 26.08           O  
ATOM   3349  CB  SER L  18      33.149  16.471 -52.653  1.00 24.60           C  
ATOM   3350  OG  SER L  18      34.094  15.418 -52.605  1.00 35.42           O  
ATOM   3351  N   VAL L  19      32.442  19.234 -51.353  1.00 20.43           N  
ATOM   3353  CA  VAL L  19      31.795  20.532 -51.545  0.66 20.15           C  
ATOM   3354  C   VAL L  19      32.610  21.300 -52.552  1.00 21.94           C  
ATOM   3355  O   VAL L  19      33.843  21.282 -52.470  1.00 18.88           O  
ATOM   3357  CB  VAL L  19      31.576  21.416 -50.280  0.66 24.56           C  
ATOM   3359  CG1 VAL L  19      30.433  20.905 -49.430  0.66 25.87           C  
ATOM   3361  CG2 VAL L  19      32.861  21.594 -49.454  0.66 23.85           C  
ATOM   3362  N   THR L  20      31.932  22.000 -53.468  1.00 18.85           N  
ATOM   3363  CA  THR L  20      32.591  22.856 -54.448  1.00 19.10           C  
ATOM   3364  C   THR L  20      32.076  24.270 -54.227  1.00 24.18           C  
ATOM   3365  O   THR L  20      30.864  24.466 -54.111  1.00 25.46           O  
ATOM   3366  CB  THR L  20      32.390  22.340 -55.883  1.00 23.99           C  
ATOM   3367  OG1 THR L  20      33.065  21.080 -55.979  1.00 24.12           O  
ATOM   3368  CG2 THR L  20      32.951  23.305 -56.930  1.00 22.02           C  
ATOM   3369  N   ILE L  21      32.998  25.241 -54.140  1.00 19.47           N  
ATOM   3370  CA  ILE L  21      32.705  26.657 -53.896  1.00 17.92           C  
ATOM   3371  C   ILE L  21      33.143  27.453 -55.091  1.00 23.37           C  
ATOM   3372  O   ILE L  21      34.336  27.409 -55.416  1.00 21.44           O  
ATOM   3373  CB  ILE L  21      33.505  27.165 -52.654  1.00 20.88           C  
ATOM   3374  CG1 ILE L  21      33.242  26.311 -51.413  1.00 22.50           C  
ATOM   3375  CG2 ILE L  21      33.228  28.662 -52.412  1.00 24.30           C  
ATOM   3376  CD1 ILE L  21      34.148  26.713 -50.171  1.00 23.42           C  
ATOM   3377  N   SER L  22      32.226  28.259 -55.697  1.00 20.45           N  
ATOM   3378  CA  SER L  22      32.593  29.108 -56.839  1.00 20.02           C  
ATOM   3379  C   SER L  22      33.008  30.513 -56.390  1.00 21.10           C  
ATOM   3380  O   SER L  22      32.689  30.958 -55.282  1.00 19.84           O  
ATOM   3381  CB  SER L  22      31.464  29.197 -57.868  1.00 21.02           C  
ATOM   3382  OG  SER L  22      30.273  29.602 -57.218  1.00 25.71           O  
ATOM   3383  N   CYS L  23      33.735  31.188 -57.270  1.00 18.76           N  
ATOM   3384  CA  CYS L  23      34.270  32.523 -57.028  1.00 18.31           C  
ATOM   3385  C   CYS L  23      34.289  33.213 -58.389  1.00 21.52           C  
ATOM   3386  O   CYS L  23      35.206  32.986 -59.171  1.00 20.74           O  
ATOM   3387  CB  CYS L  23      35.678  32.413 -56.444  1.00 17.57           C  
ATOM   3388  SG  CYS L  23      36.558  33.993 -56.361  1.00 20.05           S  
ATOM   3389  N   THR L  24      33.260  34.011 -58.681  1.00 19.26           N  
ATOM   3390  CA  THR L  24      33.093  34.629 -59.995  1.00 19.07           C  
ATOM   3391  C   THR L  24      33.515  36.083 -59.992  1.00 23.10           C  
ATOM   3392  O   THR L  24      33.037  36.877 -59.178  1.00 24.00           O  
ATOM   3393  CB  THR L  24      31.631  34.470 -60.449  1.00 25.30           C  
ATOM   3394  OG1 THR L  24      31.292  33.070 -60.438  1.00 29.41           O  
ATOM   3395  CG2 THR L  24      31.359  35.088 -61.857  1.00 26.73           C  
ATOM   3396  N   GLY L  25      34.393  36.416 -60.921  1.00 21.54           N  
ATOM   3397  CA  GLY L  25      34.845  37.783 -61.110  1.00 21.99           C  
ATOM   3398  C   GLY L  25      34.569  38.246 -62.525  1.00 27.05           C  
ATOM   3399  O   GLY L  25      33.502  37.952 -63.091  1.00 24.72           O  
ATOM   3400  N   THR L  26      35.552  38.932 -63.117  1.00 24.76           N  
ATOM   3401  CA  THR L  26      35.447  39.444 -64.501  1.00 25.30           C  
ATOM   3402  C   THR L  26      36.718  39.065 -65.265  1.00 27.56           C  
ATOM   3403  O   THR L  26      37.647  38.487 -64.676  1.00 27.82           O  
ATOM   3404  CB  THR L  26      35.220  40.985 -64.513  1.00 30.04           C  
ATOM   3405  OG1 THR L  26      36.411  41.629 -64.053  1.00 30.70           O  
ATOM   3406  CG2 THR L  26      33.992  41.431 -63.718  1.00 30.57           C  
ATOM   3408  N   SER L  27      36.774  39.387 -66.575  0.59 23.35           N  
ATOM   3410  CA  SER L  27      37.936  39.080 -67.405  0.59 22.82           C  
ATOM   3412  C   SER L  27      39.207  39.833 -66.974  0.59 26.41           C  
ATOM   3414  O   SER L  27      40.293  39.381 -67.303  0.59 26.49           O  
ATOM   3416  CB  SER L  27      37.630  39.364 -68.877  0.59 26.13           C  
ATOM   3418  OG  SER L  27      37.395  40.749 -69.057  0.59 31.61           O  
ATOM   3419  N   SER L  27A     39.079  40.983 -66.278  1.00 24.59           N  
ATOM   3420  CA  SER L  27A     40.248  41.779 -65.838  1.00 24.41           C  
ATOM   3421  C   SER L  27A     40.816  41.314 -64.462  1.00 28.99           C  
ATOM   3422  O   SER L  27A     41.886  41.776 -64.047  1.00 29.09           O  
ATOM   3423  CB  SER L  27A     39.951  43.274 -65.864  1.00 25.88           C  
ATOM   3424  OG  SER L  27A     38.750  43.585 -65.177  1.00 32.35           O  
ATOM   3425  N   ASP L  27B     40.108  40.386 -63.774  1.00 23.09           N  
ATOM   3426  CA  ASP L  27B     40.603  39.842 -62.502  1.00 22.87           C  
ATOM   3427  C   ASP L  27B     40.727  38.299 -62.591  1.00 26.48           C  
ATOM   3428  O   ASP L  27B     41.753  37.809 -63.078  1.00 26.22           O  
ATOM   3429  CB  ASP L  27B     39.793  40.346 -61.283  1.00 23.99           C  
ATOM   3430  CG  ASP L  27B     38.284  40.329 -61.453  1.00 28.04           C  
ATOM   3431  OD1 ASP L  27B     37.684  39.223 -61.361  1.00 26.06           O  
ATOM   3432  OD2 ASP L  27B     37.694  41.417 -61.622  1.00 29.55           O  
ATOM   3433  N   VAL L  27C     39.696  37.548 -62.175  1.00 22.29           N  
ATOM   3434  CA  VAL L  27C     39.736  36.081 -62.183  1.00 20.72           C  
ATOM   3435  C   VAL L  27C     40.129  35.532 -63.573  1.00 25.00           C  
ATOM   3436  O   VAL L  27C     41.025  34.713 -63.662  1.00 24.31           O  
ATOM   3437  CB  VAL L  27C     38.437  35.436 -61.627  1.00 23.87           C  
ATOM   3438  CG1 VAL L  27C     38.442  33.915 -61.836  1.00 22.51           C  
ATOM   3439  CG2 VAL L  27C     38.244  35.760 -60.153  1.00 23.48           C  
ATOM   3440  N   GLY L  28      39.517  36.057 -64.634  1.00 25.55           N  
ATOM   3441  CA  GLY L  28      39.787  35.593 -65.993  1.00 27.86           C  
ATOM   3442  C   GLY L  28      41.051  36.118 -66.661  1.00 37.41           C  
ATOM   3443  O   GLY L  28      41.406  35.634 -67.736  1.00 39.68           O  
ATOM   3444  N   GLY L  29      41.729  37.095 -66.048  1.00 34.88           N  
ATOM   3445  CA  GLY L  29      42.912  37.730 -66.633  1.00 36.83           C  
ATOM   3446  C   GLY L  29      44.287  37.274 -66.196  1.00 43.10           C  
ATOM   3447  O   GLY L  29      45.289  37.688 -66.789  1.00 44.66           O  
ATOM   3448  N   SER L  30      44.359  36.434 -65.163  1.00 39.12           N  
ATOM   3449  CA  SER L  30      45.629  35.943 -64.624  1.00 38.69           C  
ATOM   3450  C   SER L  30      45.409  34.683 -63.786  1.00 39.07           C  
ATOM   3451  O   SER L  30      44.265  34.346 -63.452  1.00 37.22           O  
ATOM   3452  CB  SER L  30      46.268  37.008 -63.732  1.00 43.10           C  
ATOM   3453  OG  SER L  30      45.335  37.484 -62.774  1.00 53.23           O  
ATOM   3454  N   ASP L  31      46.527  34.020 -63.419  1.00 33.17           N  
ATOM   3455  CA  ASP L  31      46.529  32.842 -62.569  1.00 31.23           C  
ATOM   3456  C   ASP L  31      46.902  33.271 -61.140  1.00 32.31           C  
ATOM   3457  O   ASP L  31      47.740  32.639 -60.507  1.00 31.14           O  
ATOM   3458  CB  ASP L  31      47.519  31.785 -63.106  1.00 32.89           C  
ATOM   3459  CG  ASP L  31      46.989  30.867 -64.200  1.00 43.67           C  
ATOM   3460  OD1 ASP L  31      45.765  30.890 -64.462  1.00 42.34           O  
ATOM   3461  OD2 ASP L  31      47.791  30.103 -64.768  1.00 53.18           O  
ATOM   3462  N   SER L  32      46.308  34.370 -60.646  1.00 28.04           N  
ATOM   3463  CA  SER L  32      46.643  34.889 -59.315  1.00 27.36           C  
ATOM   3464  C   SER L  32      45.568  34.612 -58.268  1.00 28.09           C  
ATOM   3465  O   SER L  32      45.598  35.239 -57.218  1.00 29.23           O  
ATOM   3466  CB  SER L  32      46.903  36.393 -59.389  1.00 31.62           C  
ATOM   3467  OG  SER L  32      45.681  37.067 -59.647  1.00 42.78           O  
ATOM   3468  N   VAL L  33      44.646  33.675 -58.529  1.00 21.38           N  
ATOM   3469  CA  VAL L  33      43.572  33.331 -57.604  1.00 19.64           C  
ATOM   3470  C   VAL L  33      44.102  32.590 -56.373  1.00 21.30           C  
ATOM   3471  O   VAL L  33      44.826  31.596 -56.507  1.00 19.83           O  
ATOM   3472  CB  VAL L  33      42.429  32.534 -58.302  1.00 22.60           C  
ATOM   3473  CG1 VAL L  33      41.309  32.214 -57.310  1.00 21.21           C  
ATOM   3474  CG2 VAL L  33      41.889  33.289 -59.513  1.00 23.48           C  
ATOM   3475  N   SER L  34      43.703  33.057 -55.173  1.00 17.72           N  
ATOM   3476  CA  SER L  34      44.043  32.427 -53.898  1.00 14.44           C  
ATOM   3477  C   SER L  34      42.774  32.047 -53.155  1.00 17.32           C  
ATOM   3478  O   SER L  34      41.729  32.683 -53.329  1.00 15.54           O  
ATOM   3479  CB  SER L  34      44.895  33.348 -53.015  1.00 15.35           C  
ATOM   3480  OG  SER L  34      46.218  33.373 -53.537  1.00 20.11           O  
ATOM   3481  N   TRP L  35      42.882  31.056 -52.286  1.00 13.84           N  
ATOM   3482  CA  TRP L  35      41.788  30.655 -51.394  1.00 13.44           C  
ATOM   3483  C   TRP L  35      42.327  30.617 -49.979  1.00 18.15           C  
ATOM   3484  O   TRP L  35      43.415  30.090 -49.751  1.00 15.42           O  
ATOM   3485  CB  TRP L  35      41.219  29.256 -51.756  1.00 12.89           C  
ATOM   3486  CG  TRP L  35      40.443  29.237 -53.034  1.00 13.90           C  
ATOM   3487  CD1 TRP L  35      40.935  29.003 -54.289  1.00 16.77           C  
ATOM   3488  CD2 TRP L  35      39.034  29.505 -53.192  1.00 14.22           C  
ATOM   3489  NE1 TRP L  35      39.925  29.111 -55.222  1.00 15.39           N  
ATOM   3490  CE2 TRP L  35      38.741  29.398 -54.571  1.00 16.82           C  
ATOM   3491  CE3 TRP L  35      37.971  29.738 -52.279  1.00 15.24           C  
ATOM   3492  CZ2 TRP L  35      37.432  29.506 -55.069  1.00 17.03           C  
ATOM   3493  CZ3 TRP L  35      36.682  29.899 -52.774  1.00 16.92           C  
ATOM   3494  CH2 TRP L  35      36.412  29.749 -54.146  1.00 17.88           C  
ATOM   3495  N   TYR L  36      41.533  31.129 -49.026  1.00 15.13           N  
ATOM   3496  CA  TYR L  36      41.874  31.141 -47.604  1.00 13.01           C  
ATOM   3497  C   TYR L  36      40.783  30.436 -46.837  1.00 16.89           C  
ATOM   3498  O   TYR L  36      39.603  30.612 -47.146  1.00 17.17           O  
ATOM   3499  CB  TYR L  36      41.907  32.595 -47.092  1.00 13.67           C  
ATOM   3500  CG  TYR L  36      42.995  33.411 -47.746  1.00 14.32           C  
ATOM   3501  CD1 TYR L  36      42.741  34.145 -48.908  1.00 14.05           C  
ATOM   3502  CD2 TYR L  36      44.291  33.422 -47.228  1.00 14.73           C  
ATOM   3503  CE1 TYR L  36      43.765  34.837 -49.561  1.00 13.19           C  
ATOM   3504  CE2 TYR L  36      45.317  34.119 -47.864  1.00 15.98           C  
ATOM   3505  CZ  TYR L  36      45.040  34.858 -49.009  1.00 14.65           C  
ATOM   3506  OH  TYR L  36      46.058  35.546 -49.625  1.00 18.32           O  
ATOM   3507  N   GLN L  37      41.170  29.727 -45.782  1.00 12.74           N  
ATOM   3508  CA  GLN L  37      40.235  29.068 -44.872  1.00 13.73           C  
ATOM   3509  C   GLN L  37      40.379  29.812 -43.546  1.00 17.63           C  
ATOM   3510  O   GLN L  37      41.503  29.964 -43.062  1.00 18.01           O  
ATOM   3511  CB  GLN L  37      40.662  27.607 -44.688  1.00 15.52           C  
ATOM   3512  CG  GLN L  37      39.825  26.825 -43.661  1.00 19.77           C  
ATOM   3513  CD  GLN L  37      40.492  25.520 -43.337  1.00 22.77           C  
ATOM   3514  OE1 GLN L  37      41.575  25.509 -42.738  1.00 18.91           O  
ATOM   3515  NE2 GLN L  37      39.881  24.397 -43.742  1.00 16.89           N  
ATOM   3516  N   GLN L  38      39.270  30.174 -42.918  1.00 14.77           N  
ATOM   3517  CA  GLN L  38      39.342  30.880 -41.651  1.00 12.86           C  
ATOM   3518  C   GLN L  38      38.386  30.311 -40.622  1.00 15.65           C  
ATOM   3519  O   GLN L  38      37.171  30.306 -40.852  1.00 15.53           O  
ATOM   3520  CB  GLN L  38      39.021  32.360 -41.860  1.00 13.30           C  
ATOM   3521  CG  GLN L  38      39.293  33.149 -40.581  1.00 17.54           C  
ATOM   3522  CD  GLN L  38      39.149  34.622 -40.779  1.00 22.40           C  
ATOM   3523  OE1 GLN L  38      38.439  35.080 -41.681  1.00 19.14           O  
ATOM   3524  NE2 GLN L  38      39.920  35.393 -40.013  1.00 19.06           N  
ATOM   3525  N   HIS L  39      38.931  29.913 -39.454  1.00 15.41           N  
ATOM   3526  CA  HIS L  39      38.111  29.532 -38.323  1.00 16.81           C  
ATOM   3527  C   HIS L  39      37.821  30.838 -37.556  1.00 24.13           C  
ATOM   3528  O   HIS L  39      38.736  31.657 -37.397  1.00 22.84           O  
ATOM   3529  CB  HIS L  39      38.842  28.498 -37.442  1.00 17.42           C  
ATOM   3530  CG  HIS L  39      38.993  27.176 -38.139  1.00 20.52           C  
ATOM   3531  ND1 HIS L  39      37.937  26.312 -38.261  1.00 22.54           N  
ATOM   3532  CD2 HIS L  39      40.067  26.648 -38.770  1.00 22.25           C  
ATOM   3533  CE1 HIS L  39      38.397  25.259 -38.926  1.00 21.33           C  
ATOM   3534  NE2 HIS L  39      39.674  25.406 -39.248  1.00 21.66           N  
ATOM   3535  N   PRO L  40      36.568  31.067 -37.076  1.00 25.27           N  
ATOM   3536  CA  PRO L  40      36.272  32.316 -36.346  1.00 24.84           C  
ATOM   3537  C   PRO L  40      37.206  32.516 -35.162  1.00 26.30           C  
ATOM   3538  O   PRO L  40      37.534  31.554 -34.462  1.00 25.01           O  
ATOM   3539  CB  PRO L  40      34.815  32.134 -35.921  1.00 27.76           C  
ATOM   3540  CG  PRO L  40      34.248  31.199 -36.964  1.00 32.54           C  
ATOM   3541  CD  PRO L  40      35.367  30.213 -37.167  1.00 28.18           C  
ATOM   3542  N   GLY L  41      37.682  33.742 -34.992  1.00 24.36           N  
ATOM   3543  CA  GLY L  41      38.653  34.066 -33.948  1.00 23.65           C  
ATOM   3544  C   GLY L  41      40.093  33.707 -34.289  1.00 25.80           C  
ATOM   3545  O   GLY L  41      40.994  33.894 -33.459  1.00 25.46           O  
ATOM   3546  N   LYS L  42      40.342  33.172 -35.508  1.00 20.91           N  
ATOM   3547  CA  LYS L  42      41.706  32.813 -35.937  1.00 19.59           C  
ATOM   3548  C   LYS L  42      42.083  33.521 -37.232  1.00 20.52           C  
ATOM   3549  O   LYS L  42      41.210  34.007 -37.945  1.00 22.55           O  
ATOM   3550  CB  LYS L  42      41.851  31.284 -36.121  1.00 21.93           C  
ATOM   3551  CG  LYS L  42      41.615  30.495 -34.827  1.00 30.25           C  
ATOM   3552  CD  LYS L  42      42.747  30.637 -33.803  1.00 35.81           C  
ATOM   3553  CE  LYS L  42      42.468  29.822 -32.557  1.00 48.51           C  
ATOM   3554  NZ  LYS L  42      42.083  30.678 -31.406  1.00 47.55           N  
ATOM   3555  N   ALA L  43      43.375  33.590 -37.524  1.00 16.65           N  
ATOM   3556  CA  ALA L  43      43.870  34.218 -38.754  1.00 16.36           C  
ATOM   3557  C   ALA L  43      43.474  33.362 -39.972  1.00 18.14           C  
ATOM   3558  O   ALA L  43      43.464  32.138 -39.852  1.00 17.76           O  
ATOM   3559  CB  ALA L  43      45.382  34.342 -38.708  1.00 17.96           C  
ATOM   3560  N   PRO L  44      43.232  33.973 -41.154  1.00 16.37           N  
ATOM   3561  CA  PRO L  44      42.955  33.147 -42.354  1.00 16.96           C  
ATOM   3562  C   PRO L  44      44.207  32.335 -42.695  1.00 19.67           C  
ATOM   3563  O   PRO L  44      45.335  32.823 -42.468  1.00 20.40           O  
ATOM   3564  CB  PRO L  44      42.690  34.178 -43.461  1.00 18.15           C  
ATOM   3565  CG  PRO L  44      42.413  35.519 -42.720  1.00 21.67           C  
ATOM   3566  CD  PRO L  44      43.234  35.424 -41.453  1.00 18.23           C  
ATOM   3567  N   LYS L  45      44.012  31.092 -43.163  1.00 15.39           N  
ATOM   3568  CA  LYS L  45      45.083  30.201 -43.568  1.00 14.75           C  
ATOM   3569  C   LYS L  45      45.027  30.107 -45.086  1.00 18.58           C  
ATOM   3570  O   LYS L  45      43.959  29.792 -45.627  1.00 19.19           O  
ATOM   3571  CB  LYS L  45      44.852  28.811 -42.951  1.00 18.84           C  
ATOM   3572  CG  LYS L  45      45.886  27.730 -43.328  1.00 25.77           C  
ATOM   3573  CD  LYS L  45      45.540  26.431 -42.619  1.00 37.61           C  
ATOM   3574  CE  LYS L  45      46.424  25.291 -43.058  1.00 49.65           C  
ATOM   3575  NZ  LYS L  45      46.058  24.024 -42.365  1.00 53.90           N  
ATOM   3576  N   LEU L  46      46.171  30.344 -45.762  1.00 16.12           N  
ATOM   3577  CA  LEU L  46      46.228  30.204 -47.224  1.00 16.16           C  
ATOM   3578  C   LEU L  46      46.146  28.711 -47.543  1.00 18.33           C  
ATOM   3579  O   LEU L  46      46.968  27.936 -47.039  1.00 19.71           O  
ATOM   3580  CB  LEU L  46      47.520  30.791 -47.781  1.00 16.45           C  
ATOM   3581  CG  LEU L  46      47.727  30.654 -49.289  1.00 18.40           C  
ATOM   3582  CD1 LEU L  46      46.727  31.529 -50.090  1.00 19.17           C  
ATOM   3583  CD2 LEU L  46      49.129  30.998 -49.655  1.00 19.84           C  
ATOM   3584  N   ILE L  47      45.164  28.303 -48.352  1.00 14.18           N  
ATOM   3585  CA  ILE L  47      45.042  26.871 -48.721  1.00 14.96           C  
ATOM   3586  C   ILE L  47      45.314  26.605 -50.224  1.00 16.35           C  
ATOM   3587  O   ILE L  47      45.644  25.473 -50.594  1.00 15.66           O  
ATOM   3588  CB  ILE L  47      43.711  26.214 -48.277  1.00 17.01           C  
ATOM   3589  CG1 ILE L  47      42.499  26.973 -48.865  1.00 16.64           C  
ATOM   3590  CG2 ILE L  47      43.637  26.091 -46.701  1.00 16.87           C  
ATOM   3591  CD1 ILE L  47      41.150  26.209 -48.753  1.00 22.13           C  
ATOM   3592  N   ILE L  48      45.122  27.624 -51.083  1.00 15.77           N  
ATOM   3593  CA  ILE L  48      45.391  27.566 -52.521  1.00 15.61           C  
ATOM   3594  C   ILE L  48      45.985  28.903 -52.982  1.00 18.96           C  
ATOM   3595  O   ILE L  48      45.471  29.955 -52.605  1.00 16.77           O  
ATOM   3596  CB  ILE L  48      44.106  27.281 -53.346  1.00 17.74           C  
ATOM   3597  CG1 ILE L  48      43.478  25.857 -53.079  1.00 16.86           C  
ATOM   3598  CG2 ILE L  48      44.370  27.511 -54.855  1.00 19.15           C  
ATOM   3599  CD1 ILE L  48      44.314  24.637 -53.628  1.00 18.74           C  
ATOM   3600  N   TYR L  49      47.057  28.871 -53.808  1.00 16.02           N  
ATOM   3601  CA  TYR L  49      47.593  30.076 -54.429  1.00 16.46           C  
ATOM   3602  C   TYR L  49      47.834  29.765 -55.900  1.00 20.55           C  
ATOM   3603  O   TYR L  49      47.921  28.579 -56.282  1.00 20.11           O  
ATOM   3604  CB  TYR L  49      48.850  30.627 -53.689  1.00 17.75           C  
ATOM   3605  CG  TYR L  49      50.049  29.710 -53.761  1.00 19.49           C  
ATOM   3606  CD1 TYR L  49      50.214  28.664 -52.852  1.00 20.04           C  
ATOM   3607  CD2 TYR L  49      51.002  29.856 -54.769  1.00 21.21           C  
ATOM   3608  CE1 TYR L  49      51.279  27.765 -52.966  1.00 19.90           C  
ATOM   3609  CE2 TYR L  49      52.062  28.956 -54.897  1.00 22.17           C  
ATOM   3610  CZ  TYR L  49      52.226  27.947 -53.963  1.00 26.51           C  
ATOM   3611  OH  TYR L  49      53.286  27.073 -54.085  1.00 25.20           O  
ATOM   3612  N   GLU L  50      47.878  30.807 -56.751  1.00 17.40           N  
ATOM   3613  CA  GLU L  50      48.102  30.612 -58.188  1.00 19.14           C  
ATOM   3614  C   GLU L  50      47.129  29.581 -58.765  1.00 21.47           C  
ATOM   3615  O   GLU L  50      47.532  28.612 -59.449  1.00 19.96           O  
ATOM   3616  CB  GLU L  50      49.565  30.250 -58.487  1.00 21.42           C  
ATOM   3617  CG  GLU L  50      50.538  31.405 -58.295  1.00 24.33           C  
ATOM   3618  CD  GLU L  50      51.979  30.981 -58.460  1.00 27.22           C  
ATOM   3619  OE1 GLU L  50      52.344  30.532 -59.572  1.00 30.44           O  
ATOM   3620  OE2 GLU L  50      52.737  31.072 -57.470  1.00 33.91           O  
ATOM   3621  N   VAL L  51      45.829  29.763 -58.399  1.00 19.48           N  
ATOM   3622  CA  VAL L  51      44.671  28.971 -58.840  1.00 17.39           C  
ATOM   3623  C   VAL L  51      44.608  27.549 -58.259  1.00 18.65           C  
ATOM   3624  O   VAL L  51      43.541  27.127 -57.818  1.00 17.19           O  
ATOM   3625  CB  VAL L  51      44.540  28.913 -60.389  1.00 21.30           C  
ATOM   3626  CG1 VAL L  51      43.327  28.089 -60.819  1.00 21.16           C  
ATOM   3627  CG2 VAL L  51      44.500  30.314 -61.006  1.00 21.30           C  
ATOM   3628  N   SER L  52      45.704  26.790 -58.330  1.00 16.72           N  
ATOM   3629  CA  SER L  52      45.689  25.345 -58.029  1.00 15.58           C  
ATOM   3630  C   SER L  52      46.728  24.865 -57.046  1.00 18.54           C  
ATOM   3631  O   SER L  52      46.754  23.662 -56.734  1.00 18.06           O  
ATOM   3632  CB  SER L  52      45.948  24.596 -59.331  1.00 17.13           C  
ATOM   3633  OG  SER L  52      47.208  24.962 -59.885  1.00 19.13           O  
ATOM   3634  N   GLN L  53      47.637  25.743 -56.647  1.00 16.42           N  
ATOM   3635  CA  GLN L  53      48.766  25.312 -55.832  1.00 16.46           C  
ATOM   3636  C   GLN L  53      48.471  25.263 -54.373  1.00 19.51           C  
ATOM   3637  O   GLN L  53      47.977  26.236 -53.804  1.00 19.07           O  
ATOM   3638  CB  GLN L  53      50.027  26.165 -56.082  1.00 18.37           C  
ATOM   3639  CG  GLN L  53      50.426  26.364 -57.559  1.00 15.93           C  
ATOM   3640  CD  GLN L  53      50.802  25.063 -58.229  1.00 14.68           C  
ATOM   3641  OE1 GLN L  53      50.040  24.483 -59.027  1.00 18.34           O  
ATOM   3642  NE2 GLN L  53      51.898  24.522 -57.801  1.00 16.71           N  
ATOM   3643  N   ARG L  54      48.858  24.160 -53.729  0.57 16.16           N  
ATOM   3645  CA  ARG L  54      48.672  24.017 -52.294  0.57 16.02           C  
ATOM   3647  C   ARG L  54      49.976  24.337 -51.554  0.57 20.10           C  
ATOM   3649  O   ARG L  54      51.013  23.722 -51.850  0.57 19.11           O  
ATOM   3651  CB  ARG L  54      48.221  22.584 -51.942  0.57 15.19           C  
ATOM   3653  CG  ARG L  54      46.773  22.264 -52.320  0.57 14.99           C  
ATOM   3655  CD  ARG L  54      46.417  20.826 -51.965  0.57 11.99           C  
ATOM   3657  NE  ARG L  54      47.166  19.849 -52.772  0.57 18.24           N  
ATOM   3659  CZ  ARG L  54      46.804  19.409 -53.972  0.57 27.61           C  
ATOM   3661  NH1 ARG L  54      45.682  19.847 -54.542  0.57 13.25           N  
ATOM   3663  NH2 ARG L  54      47.549  18.513 -54.607  0.57 27.82           N  
ATOM   3665  N   PRO L  55      49.934  25.254 -50.563  1.00 18.43           N  
ATOM   3666  CA  PRO L  55      51.141  25.521 -49.743  1.00 18.87           C  
ATOM   3667  C   PRO L  55      51.502  24.259 -48.949  1.00 21.85           C  
ATOM   3668  O   PRO L  55      50.659  23.356 -48.804  1.00 18.81           O  
ATOM   3669  CB  PRO L  55      50.651  26.586 -48.730  1.00 20.42           C  
ATOM   3670  CG  PRO L  55      49.439  27.172 -49.315  1.00 23.87           C  
ATOM   3671  CD  PRO L  55      48.785  26.065 -50.094  1.00 18.42           C  
ATOM   3672  N   SER L  56      52.733  24.201 -48.389  1.00 21.65           N  
ATOM   3673  CA  SER L  56      53.130  23.061 -47.562  1.00 21.57           C  
ATOM   3674  C   SER L  56      52.112  22.848 -46.439  1.00 24.25           C  
ATOM   3675  O   SER L  56      51.591  23.828 -45.887  1.00 23.64           O  
ATOM   3676  CB  SER L  56      54.501  23.308 -46.927  1.00 27.10           C  
ATOM   3677  OG  SER L  56      55.490  23.555 -47.909  1.00 35.81           O  
ATOM   3678  N   GLY L  57      51.824  21.589 -46.151  1.00 23.41           N  
ATOM   3679  CA  GLY L  57      50.945  21.185 -45.051  1.00 24.24           C  
ATOM   3680  C   GLY L  57      49.456  21.181 -45.345  1.00 28.25           C  
ATOM   3681  O   GLY L  57      48.669  20.779 -44.481  1.00 28.82           O  
ATOM   3682  N   VAL L  58      49.040  21.667 -46.539  1.00 21.63           N  
ATOM   3683  CA  VAL L  58      47.624  21.669 -46.910  1.00 19.30           C  
ATOM   3684  C   VAL L  58      47.332  20.313 -47.570  1.00 24.49           C  
ATOM   3685  O   VAL L  58      47.988  19.985 -48.563  1.00 22.68           O  
ATOM   3686  CB  VAL L  58      47.240  22.891 -47.801  1.00 20.77           C  
ATOM   3687  CG1 VAL L  58      45.808  22.777 -48.326  1.00 19.74           C  
ATOM   3688  CG2 VAL L  58      47.429  24.201 -47.036  1.00 20.17           C  
ATOM   3689  N   PRO L  59      46.395  19.499 -47.033  1.00 22.71           N  
ATOM   3690  CA  PRO L  59      46.168  18.165 -47.630  1.00 24.21           C  
ATOM   3691  C   PRO L  59      45.658  18.207 -49.065  1.00 24.97           C  
ATOM   3692  O   PRO L  59      44.993  19.181 -49.458  1.00 22.34           O  
ATOM   3693  CB  PRO L  59      45.180  17.487 -46.656  1.00 25.80           C  
ATOM   3694  CG  PRO L  59      44.574  18.546 -45.913  1.00 30.15           C  
ATOM   3695  CD  PRO L  59      45.538  19.711 -45.852  1.00 26.08           C  
ATOM   3696  N   ASN L  60      45.944  17.152 -49.840  1.00 21.37           N  
ATOM   3697  CA  ASN L  60      45.568  17.065 -51.266  1.00 20.92           C  
ATOM   3698  C   ASN L  60      44.039  16.923 -51.477  1.00 24.68           C  
ATOM   3699  O   ASN L  60      43.599  16.885 -52.611  1.00 23.04           O  
ATOM   3700  CB  ASN L  60      46.373  15.986 -52.021  1.00 21.25           C  
ATOM   3701  CG  ASN L  60      46.186  14.583 -51.470  1.00 32.82           C  
ATOM   3702  OD1 ASN L  60      45.330  14.344 -50.616  1.00 26.95           O  
ATOM   3703  ND2 ASN L  60      46.992  13.627 -51.907  1.00 27.59           N  
ATOM   3704  N   ARG L  61      43.241  16.912 -50.383  1.00 22.49           N  
ATOM   3705  CA  ARG L  61      41.762  16.927 -50.390  1.00 21.95           C  
ATOM   3706  C   ARG L  61      41.248  18.260 -50.958  1.00 22.61           C  
ATOM   3707  O   ARG L  61      40.069  18.342 -51.333  1.00 23.16           O  
ATOM   3708  CB  ARG L  61      41.232  16.868 -48.918  1.00 21.10           C  
ATOM   3709  CG  ARG L  61      41.572  15.598 -48.212  1.00 28.32           C  
ATOM   3710  CD  ARG L  61      40.716  15.401 -46.989  1.00 20.19           C  
ATOM   3711  NE  ARG L  61      41.011  16.285 -45.853  1.00 21.22           N  
ATOM   3712  CZ  ARG L  61      40.214  17.274 -45.478  1.00 19.94           C  
ATOM   3713  NH1 ARG L  61      39.138  17.579 -46.202  1.00 18.43           N  
ATOM   3714  NH2 ARG L  61      40.492  17.982 -44.388  1.00 16.61           N  
ATOM   3715  N   PHE L  62      42.085  19.332 -50.889  1.00 17.31           N  
ATOM   3716  CA  PHE L  62      41.717  20.686 -51.329  1.00 16.15           C  
ATOM   3717  C   PHE L  62      42.244  20.872 -52.719  1.00 22.46           C  
ATOM   3718  O   PHE L  62      43.454  20.756 -52.925  1.00 23.84           O  
ATOM   3719  CB  PHE L  62      42.321  21.768 -50.411  1.00 16.34           C  
ATOM   3720  CG  PHE L  62      41.753  21.709 -49.003  1.00 16.76           C  
ATOM   3721  CD1 PHE L  62      42.336  20.894 -48.030  1.00 21.03           C  
ATOM   3722  CD2 PHE L  62      40.648  22.472 -48.651  1.00 16.88           C  
ATOM   3723  CE1 PHE L  62      41.770  20.785 -46.755  1.00 21.56           C  
ATOM   3724  CE2 PHE L  62      40.102  22.389 -47.364  1.00 19.06           C  
ATOM   3725  CZ  PHE L  62      40.668  21.547 -46.427  1.00 19.03           C  
ATOM   3726  N   SER L  63      41.371  21.181 -53.669  1.00 18.00           N  
ATOM   3727  CA  SER L  63      41.861  21.416 -55.021  1.00 18.02           C  
ATOM   3728  C   SER L  63      41.228  22.669 -55.578  1.00 21.58           C  
ATOM   3729  O   SER L  63      40.078  22.994 -55.241  1.00 21.41           O  
ATOM   3730  CB  SER L  63      41.593  20.211 -55.924  1.00 24.10           C  
ATOM   3731  OG  SER L  63      40.216  19.893 -55.947  1.00 30.20           O  
ATOM   3732  N   GLY L  64      42.019  23.417 -56.335  1.00 19.06           N  
ATOM   3733  CA  GLY L  64      41.567  24.663 -56.940  1.00 18.45           C  
ATOM   3734  C   GLY L  64      41.711  24.611 -58.441  1.00 22.36           C  
ATOM   3735  O   GLY L  64      42.638  23.966 -58.960  1.00 20.22           O  
ATOM   3736  N   SER L  65      40.778  25.270 -59.137  1.00 18.92           N  
ATOM   3737  CA  SER L  65      40.772  25.362 -60.603  1.00 19.59           C  
ATOM   3738  C   SER L  65      40.056  26.641 -61.033  1.00 23.61           C  
ATOM   3739  O   SER L  65      39.568  27.391 -60.187  1.00 19.82           O  
ATOM   3740  CB  SER L  65      40.056  24.149 -61.189  1.00 23.66           C  
ATOM   3741  OG  SER L  65      38.684  24.160 -60.851  1.00 26.71           O  
ATOM   3742  N   LYS L  66      40.018  26.908 -62.345  1.00 20.29           N  
ATOM   3743  CA  LYS L  66      39.281  28.051 -62.856  1.00 20.14           C  
ATOM   3744  C   LYS L  66      38.903  27.797 -64.288  1.00 24.16           C  
ATOM   3745  O   LYS L  66      39.584  27.048 -64.994  1.00 24.18           O  
ATOM   3746  CB  LYS L  66      39.977  29.422 -62.684  1.00 22.85           C  
ATOM   3747  CG  LYS L  66      41.173  29.696 -63.567  1.00 30.44           C  
ATOM   3748  CD  LYS L  66      41.503  31.196 -63.538  1.00 39.03           C  
ATOM   3749  CE  LYS L  66      42.638  31.492 -64.469  1.00 45.67           C  
ATOM   3750  NZ  LYS L  66      42.527  32.845 -65.060  1.00 41.42           N  
ATOM   3751  N   SER L  67      37.791  28.384 -64.683  1.00 23.21           N  
ATOM   3752  CA  SER L  67      37.269  28.284 -66.051  1.00 23.60           C  
ATOM   3753  C   SER L  67      36.636  29.619 -66.346  1.00 27.91           C  
ATOM   3754  O   SER L  67      35.694  30.040 -65.651  1.00 27.55           O  
ATOM   3755  CB  SER L  67      36.238  27.170 -66.160  1.00 29.53           C  
ATOM   3756  OG  SER L  67      35.868  27.020 -67.523  1.00 36.31           O  
ATOM   3757  N   GLY L  68      37.220  30.328 -67.313  1.00 26.09           N  
ATOM   3758  CA  GLY L  68      36.761  31.661 -67.674  1.00 25.77           C  
ATOM   3759  C   GLY L  68      36.928  32.596 -66.493  1.00 28.40           C  
ATOM   3760  O   GLY L  68      38.006  32.639 -65.901  1.00 27.75           O  
ATOM   3761  N   ASN L  69      35.840  33.264 -66.092  1.00 23.95           N  
ATOM   3762  CA  ASN L  69      35.836  34.244 -65.001  1.00 22.39           C  
ATOM   3763  C   ASN L  69      35.438  33.655 -63.645  1.00 23.73           C  
ATOM   3764  O   ASN L  69      35.202  34.419 -62.724  1.00 21.68           O  
ATOM   3765  CB  ASN L  69      34.905  35.407 -65.353  1.00 25.80           C  
ATOM   3766  CG  ASN L  69      35.305  36.140 -66.602  1.00 40.87           C  
ATOM   3767  OD1 ASN L  69      36.483  36.154 -66.981  1.00 30.41           O  
ATOM   3768  ND2 ASN L  69      34.326  36.728 -67.288  1.00 35.39           N  
ATOM   3769  N   THR L  70      35.397  32.308 -63.510  1.00 20.98           N  
ATOM   3770  CA  THR L  70      35.004  31.653 -62.263  1.00 20.96           C  
ATOM   3771  C   THR L  70      36.068  30.674 -61.779  1.00 23.37           C  
ATOM   3772  O   THR L  70      36.386  29.688 -62.461  1.00 21.52           O  
ATOM   3773  CB  THR L  70      33.614  30.955 -62.440  1.00 28.75           C  
ATOM   3774  OG1 THR L  70      32.630  31.939 -62.721  1.00 26.06           O  
ATOM   3775  CG2 THR L  70      33.165  30.160 -61.188  1.00 25.16           C  
ATOM   3776  N   ALA L  71      36.544  30.900 -60.557  1.00 19.38           N  
ATOM   3777  CA  ALA L  71      37.478  29.988 -59.890  1.00 18.30           C  
ATOM   3778  C   ALA L  71      36.644  29.061 -58.998  1.00 21.23           C  
ATOM   3779  O   ALA L  71      35.597  29.463 -58.498  1.00 20.97           O  
ATOM   3780  CB  ALA L  71      38.466  30.774 -59.060  1.00 18.29           C  
ATOM   3781  N   SER L  72      37.119  27.835 -58.768  1.00 18.01           N  
ATOM   3782  CA  SER L  72      36.396  26.892 -57.917  1.00 17.08           C  
ATOM   3783  C   SER L  72      37.341  26.199 -56.978  1.00 21.07           C  
ATOM   3784  O   SER L  72      38.450  25.825 -57.373  1.00 22.06           O  
ATOM   3785  CB  SER L  72      35.691  25.828 -58.763  1.00 21.63           C  
ATOM   3786  OG  SER L  72      34.574  26.394 -59.425  1.00 25.26           O  
ATOM   3787  N   LEU L  73      36.896  26.032 -55.749  1.00 16.45           N  
ATOM   3788  CA  LEU L  73      37.572  25.268 -54.734  1.00 15.33           C  
ATOM   3789  C   LEU L  73      36.722  24.037 -54.454  1.00 19.12           C  
ATOM   3790  O   LEU L  73      35.534  24.169 -54.190  1.00 17.54           O  
ATOM   3791  CB  LEU L  73      37.701  26.078 -53.427  1.00 14.11           C  
ATOM   3792  CG  LEU L  73      38.316  25.319 -52.250  1.00 18.14           C  
ATOM   3793  CD1 LEU L  73      39.822  25.096 -52.450  1.00 18.44           C  
ATOM   3794  CD2 LEU L  73      38.082  26.065 -50.925  1.00 18.49           C  
ATOM   3795  N   THR L  74      37.335  22.830 -54.484  1.00 14.85           N  
ATOM   3796  CA  THR L  74      36.660  21.619 -54.098  1.00 14.74           C  
ATOM   3797  C   THR L  74      37.363  21.087 -52.876  1.00 21.08           C  
ATOM   3798  O   THR L  74      38.592  20.935 -52.867  1.00 20.23           O  
ATOM   3799  CB  THR L  74      36.593  20.580 -55.251  1.00 21.31           C  
ATOM   3800  OG1 THR L  74      35.863  21.161 -56.339  1.00 22.93           O  
ATOM   3801  CG2 THR L  74      35.935  19.243 -54.816  1.00 20.97           C  
ATOM   3802  N   VAL L  75      36.570  20.761 -51.853  1.00 16.52           N  
ATOM   3803  CA  VAL L  75      37.091  20.143 -50.647  1.00 16.57           C  
ATOM   3804  C   VAL L  75      36.469  18.725 -50.670  1.00 21.07           C  
ATOM   3805  O   VAL L  75      35.249  18.594 -50.550  1.00 20.68           O  
ATOM   3806  CB  VAL L  75      36.661  20.901 -49.359  1.00 20.88           C  
ATOM   3807  CG1 VAL L  75      37.257  20.224 -48.112  1.00 21.02           C  
ATOM   3808  CG2 VAL L  75      37.039  22.382 -49.420  1.00 19.88           C  
ATOM   3810  N   SER L  76      37.293  17.690 -50.875  0.58 16.78           N  
ATOM   3812  CA  SER L  76      36.830  16.309 -50.849  0.58 16.95           C  
ATOM   3814  C   SER L  76      37.088  15.721 -49.456  0.58 18.93           C  
ATOM   3816  O   SER L  76      37.870  16.290 -48.670  0.58 17.35           O  
ATOM   3818  CB  SER L  76      37.532  15.480 -51.924  0.58 20.51           C  
ATOM   3820  OG  SER L  76      38.934  15.480 -51.722  0.58 26.48           O  
ATOM   3821  N   GLY L  77      36.430  14.596 -49.165  1.00 17.02           N  
ATOM   3822  CA  GLY L  77      36.557  13.880 -47.903  1.00 17.32           C  
ATOM   3823  C   GLY L  77      36.340  14.785 -46.701  1.00 20.55           C  
ATOM   3824  O   GLY L  77      37.185  14.818 -45.797  1.00 18.95           O  
ATOM   3825  N   LEU L  78      35.219  15.568 -46.714  1.00 18.10           N  
ATOM   3826  CA  LEU L  78      34.967  16.555 -45.654  1.00 18.12           C  
ATOM   3827  C   LEU L  78      35.183  16.008 -44.273  1.00 18.96           C  
ATOM   3828  O   LEU L  78      34.717  14.895 -43.946  1.00 17.43           O  
ATOM   3829  CB  LEU L  78      33.558  17.168 -45.729  1.00 19.87           C  
ATOM   3830  CG  LEU L  78      33.326  18.264 -46.743  1.00 24.00           C  
ATOM   3831  CD1 LEU L  78      31.829  18.474 -46.926  1.00 26.04           C  
ATOM   3832  CD2 LEU L  78      33.996  19.601 -46.312  1.00 17.57           C  
ATOM   3833  N   GLN L  79      35.895  16.791 -43.460  1.00 17.34           N  
ATOM   3834  CA  GLN L  79      36.212  16.481 -42.068  1.00 18.22           C  
ATOM   3835  C   GLN L  79      35.772  17.662 -41.198  1.00 18.44           C  
ATOM   3836  O   GLN L  79      35.608  18.786 -41.718  1.00 16.72           O  
ATOM   3837  CB  GLN L  79      37.733  16.241 -41.904  1.00 20.48           C  
ATOM   3838  CG  GLN L  79      38.197  14.928 -42.550  1.00 37.69           C  
ATOM   3839  CD  GLN L  79      39.655  14.612 -42.314  1.00 70.51           C  
ATOM   3840  OE1 GLN L  79      40.124  14.482 -41.178  1.00 71.66           O  
ATOM   3841  NE2 GLN L  79      40.388  14.380 -43.389  1.00 67.00           N  
ATOM   3842  N   ALA L  80      35.574  17.415 -39.883  1.00 18.13           N  
ATOM   3843  CA  ALA L  80      35.132  18.449 -38.926  1.00 19.01           C  
ATOM   3844  C   ALA L  80      35.955  19.749 -39.024  1.00 19.50           C  
ATOM   3845  O   ALA L  80      35.376  20.836 -38.989  1.00 17.78           O  
ATOM   3846  CB  ALA L  80      35.188  17.897 -37.495  1.00 20.89           C  
ATOM   3847  N   GLU L  81      37.288  19.643 -39.182  1.00 17.46           N  
ATOM   3848  CA  GLU L  81      38.179  20.816 -39.259  1.00 17.79           C  
ATOM   3849  C   GLU L  81      37.946  21.687 -40.471  1.00 18.45           C  
ATOM   3850  O   GLU L  81      38.489  22.779 -40.542  1.00 18.05           O  
ATOM   3851  CB  GLU L  81      39.662  20.404 -39.169  1.00 19.60           C  
ATOM   3852  CG  GLU L  81      40.098  19.417 -40.234  1.00 30.39           C  
ATOM   3853  CD  GLU L  81      39.961  17.945 -39.884  1.00 42.87           C  
ATOM   3854  OE1 GLU L  81      39.089  17.575 -39.057  1.00 27.40           O  
ATOM   3855  OE2 GLU L  81      40.710  17.150 -40.494  1.00 30.18           O  
ATOM   3856  N   ASP L  82      37.204  21.172 -41.479  1.00 14.16           N  
ATOM   3857  CA  ASP L  82      36.915  21.953 -42.687  1.00 14.09           C  
ATOM   3858  C   ASP L  82      35.745  22.926 -42.490  1.00 17.84           C  
ATOM   3859  O   ASP L  82      35.459  23.740 -43.368  1.00 18.03           O  
ATOM   3860  CB  ASP L  82      36.594  21.013 -43.847  1.00 14.48           C  
ATOM   3861  CG  ASP L  82      37.627  19.943 -44.107  1.00 16.61           C  
ATOM   3862  OD1 ASP L  82      38.837  20.194 -43.834  1.00 17.02           O  
ATOM   3863  OD2 ASP L  82      37.258  18.905 -44.689  1.00 16.52           O  
ATOM   3864  N   ASP L  83      35.061  22.821 -41.355  1.00 15.85           N  
ATOM   3865  CA  ASP L  83      33.947  23.708 -41.019  1.00 14.84           C  
ATOM   3866  C   ASP L  83      34.572  25.074 -40.696  1.00 16.64           C  
ATOM   3867  O   ASP L  83      35.278  25.211 -39.687  1.00 15.57           O  
ATOM   3868  CB  ASP L  83      33.194  23.136 -39.809  1.00 14.91           C  
ATOM   3869  CG  ASP L  83      31.918  23.888 -39.546  1.00 19.36           C  
ATOM   3870  OD1 ASP L  83      32.003  25.099 -39.257  1.00 19.86           O  
ATOM   3871  OD2 ASP L  83      30.823  23.255 -39.605  1.00 22.40           O  
ATOM   3872  N   ALA L  84      34.366  26.057 -41.573  1.00 15.07           N  
ATOM   3873  CA  ALA L  84      35.063  27.327 -41.527  1.00 14.84           C  
ATOM   3874  C   ALA L  84      34.515  28.227 -42.604  1.00 17.54           C  
ATOM   3875  O   ALA L  84      33.668  27.804 -43.399  1.00 16.53           O  
ATOM   3876  CB  ALA L  84      36.547  27.071 -41.841  1.00 15.43           C  
ATOM   3877  N   ASP L  85      35.017  29.468 -42.646  1.00 12.99           N  
ATOM   3878  CA  ASP L  85      34.694  30.412 -43.709  1.00 13.19           C  
ATOM   3879  C   ASP L  85      35.806  30.321 -44.744  1.00 18.06           C  
ATOM   3880  O   ASP L  85      36.974  30.155 -44.382  1.00 17.90           O  
ATOM   3881  CB  ASP L  85      34.645  31.834 -43.174  1.00 15.43           C  
ATOM   3882  CG  ASP L  85      33.481  32.040 -42.223  1.00 26.57           C  
ATOM   3883  OD1 ASP L  85      32.351  31.676 -42.589  1.00 23.84           O  
ATOM   3884  OD2 ASP L  85      33.679  32.699 -41.196  1.00 34.69           O  
ATOM   3885  N   TYR L  86      35.456  30.473 -46.016  1.00 14.24           N  
ATOM   3886  CA  TYR L  86      36.422  30.406 -47.119  1.00 12.64           C  
ATOM   3887  C   TYR L  86      36.307  31.652 -47.954  1.00 16.21           C  
ATOM   3888  O   TYR L  86      35.191  32.008 -48.331  1.00 16.81           O  
ATOM   3889  CB  TYR L  86      36.141  29.187 -47.996  1.00 13.74           C  
ATOM   3890  CG  TYR L  86      36.450  27.897 -47.273  1.00 13.57           C  
ATOM   3891  CD1 TYR L  86      37.651  27.218 -47.494  1.00 15.88           C  
ATOM   3892  CD2 TYR L  86      35.541  27.345 -46.362  1.00 13.89           C  
ATOM   3893  CE1 TYR L  86      37.953  26.044 -46.803  1.00 15.73           C  
ATOM   3894  CE2 TYR L  86      35.838  26.179 -45.660  1.00 13.31           C  
ATOM   3895  CZ  TYR L  86      37.046  25.528 -45.886  1.00 16.19           C  
ATOM   3896  OH  TYR L  86      37.322  24.352 -45.208  1.00 15.02           O  
ATOM   3897  N   TYR L  87      37.438  32.294 -48.268  1.00 14.29           N  
ATOM   3898  CA  TYR L  87      37.446  33.513 -49.092  1.00 14.57           C  
ATOM   3899  C   TYR L  87      38.344  33.283 -50.277  1.00 17.63           C  
ATOM   3900  O   TYR L  87      39.414  32.709 -50.100  1.00 17.74           O  
ATOM   3901  CB  TYR L  87      38.054  34.718 -48.306  1.00 16.21           C  
ATOM   3902  CG  TYR L  87      37.202  35.132 -47.140  1.00 17.21           C  
ATOM   3903  CD1 TYR L  87      37.485  34.684 -45.854  1.00 17.98           C  
ATOM   3904  CD2 TYR L  87      36.073  35.924 -47.327  1.00 17.48           C  
ATOM   3905  CE1 TYR L  87      36.664  35.009 -44.779  1.00 17.76           C  
ATOM   3906  CE2 TYR L  87      35.246  36.268 -46.253  1.00 16.84           C  
ATOM   3907  CZ  TYR L  87      35.531  35.783 -44.989  1.00 17.36           C  
ATOM   3908  OH  TYR L  87      34.745  36.147 -43.918  1.00 20.77           O  
ATOM   3909  N   CYS L  88      37.950  33.772 -51.468  1.00 14.45           N  
ATOM   3910  CA  CYS L  88      38.845  33.779 -52.622  1.00 14.07           C  
ATOM   3911  C   CYS L  88      39.335  35.201 -52.799  1.00 16.56           C  
ATOM   3912  O   CYS L  88      38.739  36.156 -52.289  1.00 15.24           O  
ATOM   3913  CB  CYS L  88      38.149  33.310 -53.892  1.00 15.46           C  
ATOM   3914  SG  CYS L  88      36.742  34.343 -54.348  1.00 19.73           S  
ATOM   3915  N   SER L  89      40.432  35.340 -53.524  1.00 15.08           N  
ATOM   3916  CA  SER L  89      40.976  36.629 -53.896  1.00 14.81           C  
ATOM   3917  C   SER L  89      41.603  36.494 -55.258  1.00 17.87           C  
ATOM   3918  O   SER L  89      42.034  35.401 -55.661  1.00 17.73           O  
ATOM   3919  CB  SER L  89      41.990  37.137 -52.863  1.00 16.44           C  
ATOM   3920  OG  SER L  89      43.267  36.507 -52.911  1.00 15.91           O  
ATOM   3921  N   SER L  90      41.628  37.594 -55.994  1.00 15.76           N  
ATOM   3922  CA  SER L  90      42.277  37.622 -57.294  1.00 14.61           C  
ATOM   3923  C   SER L  90      42.828  39.014 -57.518  1.00 19.18           C  
ATOM   3924  O   SER L  90      42.165  40.019 -57.221  1.00 17.89           O  
ATOM   3925  CB  SER L  90      41.312  37.283 -58.435  1.00 17.15           C  
ATOM   3926  OG  SER L  90      42.020  37.392 -59.670  1.00 22.27           O  
ATOM   3927  N   TYR L  91      44.023  39.073 -58.065  1.00 19.54           N  
ATOM   3928  CA  TYR L  91      44.587  40.353 -58.449  1.00 21.04           C  
ATOM   3929  C   TYR L  91      43.911  40.751 -59.738  1.00 27.55           C  
ATOM   3930  O   TYR L  91      43.424  39.887 -60.475  1.00 26.95           O  
ATOM   3931  CB  TYR L  91      46.115  40.281 -58.609  1.00 23.08           C  
ATOM   3932  CG  TYR L  91      46.820  40.439 -57.276  1.00 23.54           C  
ATOM   3933  CD1 TYR L  91      46.997  41.699 -56.706  1.00 25.64           C  
ATOM   3934  CD2 TYR L  91      47.236  39.328 -56.548  1.00 24.65           C  
ATOM   3935  CE1 TYR L  91      47.577  41.852 -55.446  1.00 25.59           C  
ATOM   3936  CE2 TYR L  91      47.836  39.470 -55.289  1.00 25.41           C  
ATOM   3937  CZ  TYR L  91      48.007  40.736 -54.747  1.00 29.29           C  
ATOM   3938  OH  TYR L  91      48.597  40.913 -53.514  1.00 26.63           O  
ATOM   3939  N   GLY L  92      43.794  42.052 -59.940  1.00 24.69           N  
ATOM   3940  CA  GLY L  92      43.227  42.606 -61.162  1.00 25.87           C  
ATOM   3941  C   GLY L  92      44.248  43.506 -61.819  1.00 29.83           C  
ATOM   3942  O   GLY L  92      45.458  43.276 -61.712  1.00 29.20           O  
ATOM   3943  N   GLY L  93      43.770  44.502 -62.535  1.00 28.23           N  
ATOM   3944  CA  GLY L  93      44.663  45.469 -63.145  1.00 28.45           C  
ATOM   3945  C   GLY L  93      44.952  46.569 -62.144  1.00 30.68           C  
ATOM   3946  O   GLY L  93      44.313  46.641 -61.089  1.00 27.72           O  
ATOM   3947  N   ASP L  94      45.947  47.406 -62.458  1.00 29.27           N  
ATOM   3948  CA  ASP L  94      46.310  48.597 -61.711  1.00 29.36           C  
ATOM   3949  C   ASP L  94      46.439  48.362 -60.183  1.00 27.52           C  
ATOM   3950  O   ASP L  94      45.862  49.105 -59.395  1.00 27.05           O  
ATOM   3951  CB  ASP L  94      45.271  49.694 -62.058  1.00 32.31           C  
ATOM   3952  CG  ASP L  94      45.646  51.082 -61.605  1.00 39.00           C  
ATOM   3953  OD1 ASP L  94      46.859  51.376 -61.546  1.00 38.82           O  
ATOM   3954  OD2 ASP L  94      44.726  51.858 -61.249  1.00 42.24           O  
ATOM   3955  N   ASN L  95      47.201  47.312 -59.788  1.00 22.25           N  
ATOM   3956  CA  ASN L  95      47.488  46.889 -58.407  1.00 21.80           C  
ATOM   3957  C   ASN L  95      46.253  46.548 -57.542  1.00 24.41           C  
ATOM   3958  O   ASN L  95      46.396  46.378 -56.330  1.00 23.15           O  
ATOM   3959  CB  ASN L  95      48.345  47.910 -57.680  1.00 23.00           C  
ATOM   3960  CG  ASN L  95      49.653  48.192 -58.368  1.00 38.42           C  
ATOM   3961  OD1 ASN L  95      50.575  47.376 -58.342  1.00 33.44           O  
ATOM   3962  ND2 ASN L  95      49.774  49.386 -58.929  1.00 27.24           N  
ATOM   3963  N   ASN L  95A     45.076  46.388 -58.152  1.00 22.78           N  
ATOM   3964  CA  ASN L  95A     43.858  46.065 -57.382  1.00 23.14           C  
ATOM   3965  C   ASN L  95A     43.897  44.607 -56.899  1.00 22.67           C  
ATOM   3966  O   ASN L  95A     44.398  43.720 -57.603  1.00 21.55           O  
ATOM   3967  CB  ASN L  95A     42.614  46.226 -58.260  1.00 28.73           C  
ATOM   3968  CG  ASN L  95A     42.341  47.591 -58.837  1.00 51.54           C  
ATOM   3969  OD1 ASN L  95A     42.718  48.630 -58.294  1.00 49.29           O  
ATOM   3970  ND2 ASN L  95A     41.622  47.607 -59.948  1.00 46.38           N  
ATOM   3971  N   LEU L  96      43.333  44.376 -55.723  1.00 18.42           N  
ATOM   3972  CA  LEU L  96      43.185  43.029 -55.185  1.00 16.87           C  
ATOM   3973  C   LEU L  96      41.740  42.888 -54.789  1.00 20.04           C  
ATOM   3974  O   LEU L  96      41.254  43.652 -53.969  1.00 18.91           O  
ATOM   3975  CB  LEU L  96      44.096  42.807 -53.976  1.00 16.75           C  
ATOM   3976  CG  LEU L  96      44.016  41.425 -53.290  1.00 18.91           C  
ATOM   3977  CD1 LEU L  96      44.317  40.273 -54.256  1.00 18.24           C  
ATOM   3978  CD2 LEU L  96      44.985  41.357 -52.114  1.00 18.70           C  
ATOM   3979  N   PHE L  97      41.045  41.952 -55.411  1.00 18.87           N  
ATOM   3980  CA  PHE L  97      39.629  41.713 -55.173  1.00 17.24           C  
ATOM   3981  C   PHE L  97      39.473  40.495 -54.286  1.00 19.57           C  
ATOM   3982  O   PHE L  97      40.183  39.520 -54.485  1.00 16.53           O  
ATOM   3983  CB  PHE L  97      38.910  41.444 -56.506  1.00 19.17           C  
ATOM   3984  CG  PHE L  97      38.992  42.572 -57.507  1.00 21.09           C  
ATOM   3985  CD1 PHE L  97      40.067  42.664 -58.391  1.00 24.92           C  
ATOM   3986  CD2 PHE L  97      38.030  43.576 -57.524  1.00 26.29           C  
ATOM   3987  CE1 PHE L  97      40.152  43.719 -59.304  1.00 27.29           C  
ATOM   3988  CE2 PHE L  97      38.129  44.649 -58.428  1.00 30.03           C  
ATOM   3989  CZ  PHE L  97      39.185  44.707 -59.308  1.00 27.93           C  
ATOM   3990  N   PHE L  98      38.521  40.550 -53.356  1.00 16.73           N  
ATOM   3991  CA  PHE L  98      38.164  39.462 -52.436  1.00 16.68           C  
ATOM   3992  C   PHE L  98      36.704  39.084 -52.641  1.00 22.76           C  
ATOM   3993  O   PHE L  98      35.867  39.952 -52.917  1.00 21.48           O  
ATOM   3994  CB  PHE L  98      38.344  39.884 -50.963  1.00 17.95           C  
ATOM   3995  CG  PHE L  98      39.784  39.876 -50.514  1.00 18.23           C  
ATOM   3996  CD1 PHE L  98      40.576  41.011 -50.648  1.00 19.34           C  
ATOM   3997  CD2 PHE L  98      40.363  38.719 -49.995  1.00 17.60           C  
ATOM   3998  CE1 PHE L  98      41.911  41.006 -50.240  1.00 18.11           C  
ATOM   3999  CE2 PHE L  98      41.716  38.719 -49.600  1.00 17.84           C  
ATOM   4000  CZ  PHE L  98      42.462  39.879 -49.702  1.00 16.74           C  
ATOM   4001  N   GLY L  99      36.407  37.796 -52.468  1.00 20.07           N  
ATOM   4002  CA  GLY L  99      35.035  37.319 -52.470  1.00 19.29           C  
ATOM   4003  C   GLY L  99      34.411  37.645 -51.133  1.00 22.21           C  
ATOM   4004  O   GLY L  99      35.125  37.993 -50.181  1.00 21.23           O  
ATOM   4005  N   GLY L 100      33.085  37.569 -51.055  1.00 19.19           N  
ATOM   4006  CA  GLY L 100      32.367  37.861 -49.817  1.00 18.27           C  
ATOM   4007  C   GLY L 100      32.421  36.763 -48.774  1.00 21.40           C  
ATOM   4008  O   GLY L 100      31.931  36.944 -47.659  1.00 22.27           O  
ATOM   4009  N   GLY L 101      32.948  35.600 -49.153  1.00 18.73           N  
ATOM   4010  CA  GLY L 101      33.075  34.469 -48.253  1.00 17.96           C  
ATOM   4011  C   GLY L 101      31.957  33.461 -48.343  1.00 21.98           C  
ATOM   4012  O   GLY L 101      30.808  33.799 -48.662  1.00 20.26           O  
ATOM   4013  N   THR L 102      32.308  32.207 -48.069  1.00 17.95           N  
ATOM   4014  CA  THR L 102      31.358  31.105 -48.034  1.00 17.92           C  
ATOM   4015  C   THR L 102      31.552  30.417 -46.702  1.00 19.77           C  
ATOM   4016  O   THR L 102      32.671  30.016 -46.401  1.00 18.38           O  
ATOM   4017  CB  THR L 102      31.647  30.071 -49.165  1.00 18.79           C  
ATOM   4018  OG1 THR L 102      31.520  30.712 -50.443  1.00 18.50           O  
ATOM   4019  CG2 THR L 102      30.703  28.839 -49.077  1.00 20.10           C  
ATOM   4020  N   LYS L 103      30.468  30.250 -45.912  1.00 16.48           N  
ATOM   4021  CA  LYS L 103      30.569  29.480 -44.669  1.00 16.88           C  
ATOM   4022  C   LYS L 103      30.291  28.030 -45.029  1.00 20.12           C  
ATOM   4023  O   LYS L 103      29.197  27.740 -45.512  1.00 19.93           O  
ATOM   4024  CB  LYS L 103      29.548  29.994 -43.601  1.00 19.73           C  
ATOM   4025  CG  LYS L 103      29.238  28.988 -42.477  1.00 33.02           C  
ATOM   4026  CD  LYS L 103      30.344  28.874 -41.467  1.00 39.53           C  
ATOM   4027  CE  LYS L 103      30.590  27.466 -40.947  1.00 37.91           C  
ATOM   4028  NZ  LYS L 103      29.460  26.908 -40.139  1.00 42.52           N  
ATOM   4029  N   VAL L 104      31.264  27.124 -44.795  1.00 16.22           N  
ATOM   4030  CA  VAL L 104      31.105  25.690 -45.041  1.00 16.39           C  
ATOM   4031  C   VAL L 104      30.695  25.030 -43.753  1.00 18.34           C  
ATOM   4032  O   VAL L 104      31.437  25.111 -42.772  1.00 17.25           O  
ATOM   4033  CB  VAL L 104      32.341  25.016 -45.728  1.00 18.63           C  
ATOM   4034  CG1 VAL L 104      32.186  23.494 -45.831  1.00 18.30           C  
ATOM   4035  CG2 VAL L 104      32.564  25.615 -47.107  1.00 17.58           C  
ATOM   4036  N   THR L 105      29.498  24.412 -43.730  1.00 15.60           N  
ATOM   4037  CA  THR L 105      29.048  23.692 -42.546  1.00 15.29           C  
ATOM   4038  C   THR L 105      29.284  22.190 -42.732  1.00 19.39           C  
ATOM   4039  O   THR L 105      28.833  21.620 -43.732  1.00 18.80           O  
ATOM   4040  CB  THR L 105      27.557  23.991 -42.248  1.00 23.45           C  
ATOM   4041  OG1 THR L 105      27.428  25.371 -41.897  1.00 22.24           O  
ATOM   4042  CG2 THR L 105      26.996  23.108 -41.100  1.00 23.26           C  
ATOM   4043  N   VAL L 106      29.982  21.552 -41.777  1.00 18.12           N  
ATOM   4044  CA  VAL L 106      30.154  20.106 -41.836  1.00 18.48           C  
ATOM   4045  C   VAL L 106      29.008  19.534 -40.971  1.00 23.08           C  
ATOM   4046  O   VAL L 106      28.987  19.693 -39.745  1.00 21.92           O  
ATOM   4047  CB  VAL L 106      31.563  19.621 -41.436  1.00 20.95           C  
ATOM   4048  CG1 VAL L 106      31.634  18.084 -41.395  1.00 20.65           C  
ATOM   4049  CG2 VAL L 106      32.611  20.183 -42.397  1.00 20.39           C  
ATOM   4050  N   LEU L 106A     28.010  18.970 -41.639  1.00 20.90           N  
ATOM   4051  CA  LEU L 106A     26.817  18.424 -40.995  1.00 21.42           C  
ATOM   4052  C   LEU L 106A     27.122  17.167 -40.226  1.00 25.01           C  
ATOM   4053  O   LEU L 106A     28.092  16.471 -40.513  1.00 23.58           O  
ATOM   4054  CB  LEU L 106A     25.745  18.111 -42.059  1.00 22.19           C  
ATOM   4055  CG  LEU L 106A     25.289  19.268 -42.958  1.00 27.04           C  
ATOM   4056  CD1 LEU L 106A     24.566  18.718 -44.224  1.00 28.26           C  
ATOM   4057  CD2 LEU L 106A     24.444  20.296 -42.165  1.00 28.00           C  
ATOM   4058  N   GLY L 107      26.256  16.851 -39.266  1.00 24.90           N  
ATOM   4059  CA  GLY L 107      26.348  15.627 -38.489  1.00 25.65           C  
ATOM   4060  C   GLY L 107      27.674  15.287 -37.862  1.00 28.53           C  
ATOM   4061  O   GLY L 107      28.056  14.123 -37.840  1.00 29.23           O  
ATOM   4062  N   GLN L 108      28.349  16.271 -37.246  1.00 23.89           N  
ATOM   4063  CA  GLN L 108      29.590  15.950 -36.539  1.00 22.93           C  
ATOM   4064  C   GLN L 108      29.241  15.144 -35.259  1.00 30.58           C  
ATOM   4065  O   GLN L 108      28.113  15.261 -34.763  1.00 30.13           O  
ATOM   4066  CB  GLN L 108      30.378  17.226 -36.227  1.00 23.23           C  
ATOM   4067  CG  GLN L 108      30.946  17.912 -37.493  1.00 20.62           C  
ATOM   4068  CD  GLN L 108      31.455  19.283 -37.122  1.00 28.46           C  
ATOM   4069  OE1 GLN L 108      31.072  20.313 -37.699  1.00 24.81           O  
ATOM   4070  NE2 GLN L 108      32.288  19.329 -36.095  1.00 22.84           N  
ATOM   4071  N   PRO L 109      30.139  14.276 -34.752  1.00 30.23           N  
ATOM   4072  CA  PRO L 109      29.767  13.439 -33.600  1.00 30.75           C  
ATOM   4073  C   PRO L 109      29.448  14.184 -32.318  1.00 33.98           C  
ATOM   4074  O   PRO L 109      30.173  15.117 -31.935  1.00 31.27           O  
ATOM   4075  CB  PRO L 109      30.993  12.535 -33.395  1.00 33.07           C  
ATOM   4076  CG  PRO L 109      31.733  12.580 -34.672  1.00 38.14           C  
ATOM   4077  CD  PRO L 109      31.505  13.960 -35.217  1.00 32.71           C  
TER    4078      PRO L 109                                                      
ATOM   4862  N   GLN L   1      55.251  31.255 -35.440  1.00 49.51           N  
ATOM   4863  CA  GLN L   1      54.490  30.383 -36.337  1.00 49.09           C  
ATOM   4864  C   GLN L   1      54.456  30.946 -37.763  1.00 49.36           C  
ATOM   4865  O   GLN L   1      54.918  30.275 -38.692  1.00 50.55           O  
ATOM   4866  CB  GLN L   1      53.067  30.150 -35.795  1.00 49.83           C  
ATOM   4867  N   SER L   2      53.926  32.186 -37.931  1.00 40.55           N  
ATOM   4868  CA  SER L   2      53.848  32.876 -39.228  1.00 38.23           C  
ATOM   4869  C   SER L   2      55.237  33.275 -39.704  1.00 39.86           C  
ATOM   4870  O   SER L   2      56.140  33.441 -38.882  1.00 40.08           O  
ATOM   4871  CB  SER L   2      52.966  34.114 -39.123  1.00 38.76           C  
ATOM   4872  OG  SER L   2      51.707  33.733 -38.599  1.00 43.20           O  
ATOM   4873  N   ALA L   3      55.405  33.425 -41.023  1.00 34.44           N  
ATOM   4874  CA  ALA L   3      56.687  33.781 -41.633  1.00 34.41           C  
ATOM   4875  C   ALA L   3      57.118  35.191 -41.218  1.00 34.46           C  
ATOM   4876  O   ALA L   3      58.300  35.420 -40.943  1.00 35.70           O  
ATOM   4877  CB  ALA L   3      56.606  33.654 -43.147  1.00 35.98           C  
ATOM   4878  N   LEU L   4      56.156  36.116 -41.125  1.00 25.58           N  
ATOM   4879  CA  LEU L   4      56.432  37.481 -40.668  1.00 23.31           C  
ATOM   4880  C   LEU L   4      55.875  37.642 -39.250  1.00 25.85           C  
ATOM   4881  O   LEU L   4      54.904  36.968 -38.881  1.00 23.59           O  
ATOM   4882  CB  LEU L   4      55.877  38.550 -41.644  1.00 22.09           C  
ATOM   4883  CG  LEU L   4      56.189  38.329 -43.144  1.00 24.50           C  
ATOM   4884  CD1 LEU L   4      55.432  39.336 -44.022  1.00 23.24           C  
ATOM   4885  CD2 LEU L   4      57.722  38.385 -43.437  1.00 25.54           C  
ATOM   4886  N   THR L   5      56.525  38.485 -38.430  1.00 22.32           N  
ATOM   4887  CA  THR L   5      56.107  38.644 -37.047  1.00 20.73           C  
ATOM   4888  C   THR L   5      55.399  39.968 -36.854  1.00 21.59           C  
ATOM   4889  O   THR L   5      55.958  41.031 -37.147  1.00 21.14           O  
ATOM   4890  CB  THR L   5      57.277  38.446 -36.073  1.00 29.73           C  
ATOM   4891  OG1 THR L   5      57.882  37.178 -36.353  1.00 28.85           O  
ATOM   4892  CG2 THR L   5      56.814  38.471 -34.597  1.00 26.35           C  
ATOM   4893  N   GLN L   6      54.178  39.872 -36.341  1.00 18.25           N  
ATOM   4894  CA  GLN L   6      53.357  41.013 -35.990  1.00 18.11           C  
ATOM   4895  C   GLN L   6      53.001  40.903 -34.480  1.00 20.78           C  
ATOM   4896  O   GLN L   6      52.755  39.781 -34.006  1.00 21.36           O  
ATOM   4897  CB  GLN L   6      52.049  40.965 -36.795  1.00 18.78           C  
ATOM   4898  CG  GLN L   6      52.223  41.286 -38.279  1.00 20.69           C  
ATOM   4899  CD  GLN L   6      50.859  41.337 -38.932  1.00 22.85           C  
ATOM   4900  OE1 GLN L   6      50.450  40.412 -39.629  1.00 17.18           O  
ATOM   4901  NE2 GLN L   6      50.108  42.430 -38.708  1.00 20.74           N  
ATOM   4902  N   PRO L   7      52.967  42.031 -33.717  1.00 17.86           N  
ATOM   4903  CA  PRO L   7      52.518  41.948 -32.322  1.00 18.33           C  
ATOM   4904  C   PRO L   7      51.057  41.479 -32.313  1.00 21.28           C  
ATOM   4905  O   PRO L   7      50.283  41.855 -33.182  1.00 18.42           O  
ATOM   4906  CB  PRO L   7      52.648  43.393 -31.817  1.00 20.37           C  
ATOM   4907  CG  PRO L   7      52.428  44.244 -33.050  1.00 24.80           C  
ATOM   4908  CD  PRO L   7      53.195  43.438 -34.119  1.00 20.51           C  
ATOM   4909  N   PRO L   8      50.634  40.618 -31.383  1.00 19.99           N  
ATOM   4910  CA  PRO L   8      49.241  40.110 -31.449  1.00 18.08           C  
ATOM   4911  C   PRO L   8      48.151  41.176 -31.282  1.00 20.34           C  
ATOM   4912  O   PRO L   8      47.038  41.013 -31.795  1.00 19.38           O  
ATOM   4913  CB  PRO L   8      49.190  39.061 -30.336  1.00 21.01           C  
ATOM   4914  CG  PRO L   8      50.633  38.707 -30.057  1.00 28.01           C  
ATOM   4915  CD  PRO L   8      51.423  39.953 -30.328  1.00 23.58           C  
ATOM   4916  N   SER L   9      48.460  42.257 -30.554  1.00 17.76           N  
ATOM   4917  CA  SER L   9      47.470  43.306 -30.323  1.00 19.52           C  
ATOM   4918  C   SER L   9      48.068  44.678 -30.159  1.00 22.04           C  
ATOM   4919  O   SER L   9      49.241  44.828 -29.820  1.00 23.13           O  
ATOM   4920  CB  SER L   9      46.585  42.940 -29.126  1.00 23.52           C  
ATOM   4921  OG  SER L   9      47.386  42.721 -27.972  1.00 28.26           O  
ATOM   4922  N   ALA L  11      47.223  45.704 -30.370  1.00 18.61           N  
ATOM   4923  CA  ALA L  11      47.510  47.104 -30.197  1.00 17.22           C  
ATOM   4924  C   ALA L  11      46.167  47.815 -29.909  1.00 16.86           C  
ATOM   4925  O   ALA L  11      45.103  47.254 -30.169  1.00 18.21           O  
ATOM   4926  CB  ALA L  11      48.146  47.672 -31.461  1.00 18.89           C  
ATOM   4927  N   SER L  12      46.229  48.993 -29.350  1.00 15.16           N  
ATOM   4928  CA  SER L  12      45.017  49.755 -29.049  1.00 15.38           C  
ATOM   4929  C   SER L  12      45.274  51.240 -29.084  1.00 21.54           C  
ATOM   4930  O   SER L  12      46.418  51.707 -28.998  1.00 22.85           O  
ATOM   4931  CB  SER L  12      44.446  49.365 -27.675  1.00 16.46           C  
ATOM   4932  OG  SER L  12      45.328  49.703 -26.614  1.00 19.85           O  
ATOM   4933  N   GLY L  13      44.183  51.977 -29.122  1.00 18.88           N  
ATOM   4934  CA  GLY L  13      44.216  53.413 -28.948  1.00 19.44           C  
ATOM   4935  C   GLY L  13      42.826  53.951 -28.730  1.00 23.15           C  
ATOM   4936  O   GLY L  13      41.859  53.271 -29.047  1.00 21.16           O  
ATOM   4937  N   SER L  14      42.707  55.197 -28.253  1.00 22.33           N  
ATOM   4938  CA  SER L  14      41.389  55.787 -28.089  1.00 22.13           C  
ATOM   4939  C   SER L  14      41.002  56.542 -29.380  1.00 23.91           C  
ATOM   4940  O   SER L  14      41.899  56.873 -30.190  1.00 20.80           O  
ATOM   4941  CB  SER L  14      41.358  56.694 -26.853  1.00 29.54           C  
ATOM   4942  OG  SER L  14      42.296  57.747 -26.969  1.00 36.93           O  
ATOM   4943  N   PRO L  15      39.689  56.833 -29.613  1.00 23.47           N  
ATOM   4944  CA  PRO L  15      39.317  57.621 -30.809  1.00 24.89           C  
ATOM   4945  C   PRO L  15      40.149  58.904 -30.923  1.00 28.04           C  
ATOM   4946  O   PRO L  15      40.415  59.573 -29.918  1.00 26.22           O  
ATOM   4947  CB  PRO L  15      37.828  57.941 -30.589  1.00 27.56           C  
ATOM   4948  CG  PRO L  15      37.343  56.895 -29.684  1.00 30.95           C  
ATOM   4949  CD  PRO L  15      38.499  56.513 -28.793  1.00 26.45           C  
ATOM   4950  N   GLY L  16      40.609  59.201 -32.136  1.00 26.40           N  
ATOM   4951  CA  GLY L  16      41.425  60.382 -32.388  1.00 26.00           C  
ATOM   4952  C   GLY L  16      42.917  60.204 -32.230  1.00 28.17           C  
ATOM   4953  O   GLY L  16      43.681  61.020 -32.768  1.00 29.97           O  
ATOM   4954  N   GLN L  17      43.349  59.145 -31.524  1.00 24.25           N  
ATOM   4955  CA  GLN L  17      44.761  58.817 -31.320  1.00 24.79           C  
ATOM   4956  C   GLN L  17      45.317  58.105 -32.563  1.00 27.19           C  
ATOM   4957  O   GLN L  17      44.579  57.807 -33.518  1.00 25.99           O  
ATOM   4958  CB  GLN L  17      44.975  57.891 -30.102  1.00 25.85           C  
ATOM   4959  CG  GLN L  17      44.939  58.595 -28.740  1.00 32.06           C  
ATOM   4960  CD  GLN L  17      45.439  57.713 -27.603  1.00 49.78           C  
ATOM   4961  OE1 GLN L  17      45.190  56.490 -27.535  1.00 35.35           O  
ATOM   4962  NE2 GLN L  17      46.150  58.324 -26.663  1.00 43.20           N  
ATOM   4963  N   SER L  18      46.609  57.803 -32.501  1.00 23.92           N  
ATOM   4964  CA  SER L  18      47.316  57.072 -33.545  1.00 23.29           C  
ATOM   4965  C   SER L  18      47.850  55.787 -32.961  1.00 28.78           C  
ATOM   4966  O   SER L  18      48.070  55.653 -31.737  1.00 30.08           O  
ATOM   4967  CB  SER L  18      48.470  57.891 -34.115  1.00 24.68           C  
ATOM   4968  OG  SER L  18      48.004  59.078 -34.730  1.00 36.32           O  
ATOM   4969  N   VAL L  19      47.980  54.806 -33.833  1.00 23.36           N  
ATOM   4970  CA  VAL L  19      48.530  53.527 -33.468  1.00 21.45           C  
ATOM   4971  C   VAL L  19      49.489  53.135 -34.591  1.00 23.47           C  
ATOM   4972  O   VAL L  19      49.197  53.410 -35.753  1.00 23.42           O  
ATOM   4973  CB  VAL L  19      47.432  52.454 -33.161  1.00 25.59           C  
ATOM   4974  CG1 VAL L  19      46.592  52.106 -34.390  1.00 23.55           C  
ATOM   4975  CG2 VAL L  19      48.045  51.203 -32.563  1.00 25.97           C  
ATOM   4976  N   THR L  20      50.638  52.574 -34.230  1.00 19.82           N  
ATOM   4977  CA  THR L  20      51.639  52.066 -35.167  1.00 19.96           C  
ATOM   4978  C   THR L  20      51.850  50.601 -34.871  1.00 23.66           C  
ATOM   4979  O   THR L  20      52.069  50.217 -33.723  1.00 23.53           O  
ATOM   4980  CB  THR L  20      52.943  52.888 -35.138  1.00 25.66           C  
ATOM   4981  OG1 THR L  20      52.641  54.202 -35.596  1.00 26.22           O  
ATOM   4982  CG2 THR L  20      54.034  52.287 -36.032  1.00 24.85           C  
ATOM   4983  N   ILE L  21      51.720  49.779 -35.895  1.00 19.12           N  
ATOM   4984  CA  ILE L  21      51.900  48.330 -35.749  1.00 18.78           C  
ATOM   4985  C   ILE L  21      53.015  47.868 -36.686  1.00 21.94           C  
ATOM   4986  O   ILE L  21      53.107  48.361 -37.806  1.00 20.91           O  
ATOM   4987  CB  ILE L  21      50.569  47.555 -35.909  1.00 21.06           C  
ATOM   4988  CG1 ILE L  21      49.964  47.706 -37.301  1.00 21.48           C  
ATOM   4989  CG2 ILE L  21      49.541  47.951 -34.793  1.00 21.49           C  
ATOM   4990  CD1 ILE L  21      48.580  46.992 -37.487  1.00 26.59           C  
ATOM   4991  N   SER L  22      53.856  46.937 -36.231  1.00 18.03           N  
ATOM   4992  CA  SER L  22      55.009  46.471 -37.006  1.00 18.18           C  
ATOM   4993  C   SER L  22      54.839  45.091 -37.632  1.00 21.31           C  
ATOM   4994  O   SER L  22      53.995  44.284 -37.228  1.00 18.37           O  
ATOM   4995  CB  SER L  22      56.267  46.488 -36.142  1.00 22.24           C  
ATOM   4996  OG  SER L  22      56.068  45.565 -35.084  1.00 25.62           O  
ATOM   4997  N   CYS L  23      55.690  44.832 -38.638  1.00 19.39           N  
ATOM   4998  CA  CYS L  23      55.694  43.598 -39.413  1.00 19.27           C  
ATOM   4999  C   CYS L  23      57.151  43.308 -39.697  1.00 23.33           C  
ATOM   5000  O   CYS L  23      57.745  43.941 -40.570  1.00 22.11           O  
ATOM   5001  CB  CYS L  23      54.896  43.811 -40.700  1.00 18.89           C  
ATOM   5002  SG  CYS L  23      55.000  42.434 -41.866  1.00 22.64           S  
ATOM   5003  N   THR L  24      57.742  42.399 -38.911  1.00 21.42           N  
ATOM   5004  CA  THR L  24      59.156  42.077 -39.018  1.00 23.37           C  
ATOM   5005  C   THR L  24      59.407  40.775 -39.768  1.00 26.86           C  
ATOM   5006  O   THR L  24      58.880  39.715 -39.401  1.00 24.29           O  
ATOM   5007  CB  THR L  24      59.796  42.086 -37.608  1.00 29.18           C  
ATOM   5008  OG1 THR L  24      59.544  43.364 -37.028  1.00 29.62           O  
ATOM   5009  CG2 THR L  24      61.306  41.801 -37.631  1.00 28.18           C  
ATOM   5010  N   GLY L  25      60.260  40.887 -40.785  1.00 26.18           N  
ATOM   5011  CA  GLY L  25      60.737  39.755 -41.565  1.00 26.88           C  
ATOM   5012  C   GLY L  25      62.247  39.681 -41.490  1.00 33.26           C  
ATOM   5013  O   GLY L  25      62.840  39.968 -40.439  1.00 32.33           O  
ATOM   5014  N   THR L  26      62.874  39.310 -42.619  1.00 31.10           N  
ATOM   5015  CA  THR L  26      64.322  39.173 -42.769  1.00 32.14           C  
ATOM   5016  C   THR L  26      64.777  39.985 -43.978  1.00 35.55           C  
ATOM   5017  O   THR L  26      63.949  40.544 -44.703  1.00 33.46           O  
ATOM   5018  CB  THR L  26      64.740  37.670 -42.887  1.00 38.71           C  
ATOM   5019  OG1 THR L  26      64.223  37.106 -44.097  1.00 39.62           O  
ATOM   5020  CG2 THR L  26      64.328  36.833 -41.685  1.00 35.17           C  
ATOM   5021  N   SER L  27      66.095  40.014 -44.222  1.00 33.54           N  
ATOM   5022  CA  SER L  27      66.696  40.710 -45.350  1.00 33.56           C  
ATOM   5023  C   SER L  27      66.235  40.157 -46.705  1.00 36.30           C  
ATOM   5024  O   SER L  27      66.332  40.872 -47.705  1.00 35.66           O  
ATOM   5025  CB  SER L  27      68.219  40.641 -45.249  1.00 38.83           C  
ATOM   5026  OG  SER L  27      68.635  39.287 -45.205  1.00 47.60           O  
ATOM   5027  N   SER L  27A     65.737  38.899 -46.740  1.00 32.65           N  
ATOM   5028  CA  SER L  27A     65.325  38.277 -48.002  1.00 34.10           C  
ATOM   5029  C   SER L  27A     63.824  38.415 -48.315  1.00 38.21           C  
ATOM   5030  O   SER L  27A     63.410  38.084 -49.432  1.00 38.96           O  
ATOM   5031  CB  SER L  27A     65.776  36.819 -48.065  1.00 38.61           C  
ATOM   5032  OG  SER L  27A     65.191  36.028 -47.048  1.00 44.04           O  
ATOM   5033  N   ASP L  27B     63.016  38.960 -47.369  1.00 32.69           N  
ATOM   5034  CA  ASP L  27B     61.603  39.156 -47.651  1.00 30.69           C  
ATOM   5035  C   ASP L  27B     61.255  40.648 -47.512  1.00 32.90           C  
ATOM   5036  O   ASP L  27B     61.372  41.361 -48.501  1.00 30.59           O  
ATOM   5037  CB  ASP L  27B     60.683  38.183 -46.869  1.00 31.61           C  
ATOM   5038  CG  ASP L  27B     61.017  37.981 -45.398  1.00 37.79           C  
ATOM   5039  OD1 ASP L  27B     60.983  38.964 -44.649  1.00 36.05           O  
ATOM   5040  OD2 ASP L  27B     61.281  36.824 -44.997  1.00 41.66           O  
ATOM   5041  N   VAL L  27C     60.893  41.136 -46.301  1.00 29.26           N  
ATOM   5042  CA  VAL L  27C     60.579  42.552 -46.057  1.00 27.31           C  
ATOM   5043  C   VAL L  27C     61.766  43.457 -46.451  1.00 31.05           C  
ATOM   5044  O   VAL L  27C     61.570  44.476 -47.120  1.00 30.69           O  
ATOM   5045  CB  VAL L  27C     60.132  42.781 -44.584  1.00 28.49           C  
ATOM   5046  CG1 VAL L  27C     59.944  44.264 -44.279  1.00 27.36           C  
ATOM   5047  CG2 VAL L  27C     58.847  42.010 -44.288  1.00 28.16           C  
ATOM   5048  N   GLY L  28      62.966  43.081 -46.039  1.00 29.63           N  
ATOM   5049  CA  GLY L  28      64.165  43.860 -46.340  1.00 30.72           C  
ATOM   5050  C   GLY L  28      64.765  43.708 -47.730  1.00 37.15           C  
ATOM   5051  O   GLY L  28      65.737  44.400 -48.042  1.00 38.82           O  
ATOM   5052  N   GLY L  29      64.191  42.832 -48.565  1.00 33.75           N  
ATOM   5053  CA  GLY L  29      64.709  42.528 -49.898  1.00 34.30           C  
ATOM   5054  C   GLY L  29      64.029  43.151 -51.097  1.00 38.74           C  
ATOM   5055  O   GLY L  29      64.520  43.005 -52.216  1.00 39.32           O  
ATOM   5056  N   SER L  30      62.883  43.819 -50.889  1.00 34.35           N  
ATOM   5057  CA  SER L  30      62.110  44.508 -51.937  1.00 33.27           C  
ATOM   5058  C   SER L  30      61.120  45.453 -51.259  1.00 35.65           C  
ATOM   5059  O   SER L  30      60.987  45.390 -50.041  1.00 36.13           O  
ATOM   5060  CB  SER L  30      61.337  43.498 -52.784  1.00 36.44           C  
ATOM   5061  OG  SER L  30      60.332  42.850 -52.018  1.00 40.12           O  
ATOM   5062  N   ASP L  31      60.425  46.307 -52.038  1.00 30.31           N  
ATOM   5063  CA  ASP L  31      59.399  47.219 -51.539  1.00 28.69           C  
ATOM   5064  C   ASP L  31      58.041  46.620 -51.922  1.00 30.27           C  
ATOM   5065  O   ASP L  31      57.313  47.161 -52.755  1.00 28.78           O  
ATOM   5066  CB  ASP L  31      59.609  48.633 -52.109  1.00 31.45           C  
ATOM   5067  CG  ASP L  31      60.885  49.285 -51.615  1.00 42.74           C  
ATOM   5068  OD1 ASP L  31      61.161  49.210 -50.388  1.00 41.89           O  
ATOM   5069  OD2 ASP L  31      61.616  49.858 -52.451  1.00 54.19           O  
ATOM   5070  N   SER L  32      57.733  45.449 -51.343  1.00 24.40           N  
ATOM   5071  CA  SER L  32      56.548  44.680 -51.718  1.00 23.20           C  
ATOM   5072  C   SER L  32      55.597  44.401 -50.570  1.00 25.09           C  
ATOM   5073  O   SER L  32      54.749  43.529 -50.720  1.00 24.92           O  
ATOM   5074  CB  SER L  32      56.975  43.351 -52.312  1.00 27.98           C  
ATOM   5075  OG  SER L  32      57.692  42.621 -51.333  1.00 33.67           O  
ATOM   5076  N   VAL L  33      55.745  45.093 -49.438  1.00 19.97           N  
ATOM   5077  CA  VAL L  33      54.855  44.853 -48.292  1.00 18.66           C  
ATOM   5078  C   VAL L  33      53.436  45.307 -48.593  1.00 20.42           C  
ATOM   5079  O   VAL L  33      53.245  46.419 -49.071  1.00 19.99           O  
ATOM   5080  CB  VAL L  33      55.383  45.525 -46.997  1.00 22.69           C  
ATOM   5081  CG1 VAL L  33      54.394  45.365 -45.832  1.00 21.79           C  
ATOM   5082  CG2 VAL L  33      56.771  44.987 -46.628  1.00 24.06           C  
ATOM   5083  N   SER L  34      52.440  44.449 -48.278  1.00 17.32           N  
ATOM   5084  CA  SER L  34      51.031  44.808 -48.334  1.00 15.32           C  
ATOM   5085  C   SER L  34      50.446  44.733 -46.929  1.00 18.64           C  
ATOM   5086  O   SER L  34      50.904  43.923 -46.113  1.00 17.85           O  
ATOM   5087  CB  SER L  34      50.248  43.857 -49.233  1.00 17.54           C  
ATOM   5088  OG  SER L  34      50.501  44.159 -50.601  1.00 22.36           O  
ATOM   5089  N   TRP L  35      49.425  45.538 -46.672  1.00 13.88           N  
ATOM   5090  CA  TRP L  35      48.668  45.473 -45.411  1.00 13.79           C  
ATOM   5091  C   TRP L  35      47.231  45.192 -45.763  1.00 16.44           C  
ATOM   5092  O   TRP L  35      46.729  45.740 -46.761  1.00 15.30           O  
ATOM   5093  CB  TRP L  35      48.785  46.774 -44.592  1.00 13.76           C  
ATOM   5094  CG  TRP L  35      50.168  46.990 -44.047  1.00 15.08           C  
ATOM   5095  CD1 TRP L  35      51.213  47.632 -44.666  1.00 17.92           C  
ATOM   5096  CD2 TRP L  35      50.660  46.546 -42.778  1.00 15.28           C  
ATOM   5097  NE1 TRP L  35      52.319  47.626 -43.851  1.00 16.91           N  
ATOM   5098  CE2 TRP L  35      52.010  46.953 -42.685  1.00 18.45           C  
ATOM   5099  CE3 TRP L  35      50.079  45.835 -41.698  1.00 16.32           C  
ATOM   5100  CZ2 TRP L  35      52.783  46.718 -41.536  1.00 18.40           C  
ATOM   5101  CZ3 TRP L  35      50.859  45.565 -40.579  1.00 17.09           C  
ATOM   5102  CH2 TRP L  35      52.183  46.034 -40.495  1.00 18.55           C  
ATOM   5103  N   TYR L  36      46.564  44.345 -44.959  1.00 13.82           N  
ATOM   5104  CA  TYR L  36      45.152  43.986 -45.132  1.00 12.34           C  
ATOM   5105  C   TYR L  36      44.416  44.270 -43.843  1.00 15.50           C  
ATOM   5106  O   TYR L  36      44.965  44.041 -42.762  1.00 14.65           O  
ATOM   5107  CB  TYR L  36      44.997  42.471 -45.428  1.00 13.21           C  
ATOM   5108  CG  TYR L  36      45.962  41.976 -46.486  1.00 13.83           C  
ATOM   5109  CD1 TYR L  36      47.274  41.628 -46.157  1.00 14.43           C  
ATOM   5110  CD2 TYR L  36      45.552  41.798 -47.807  1.00 15.03           C  
ATOM   5111  CE1 TYR L  36      48.172  41.186 -47.128  1.00 16.73           C  
ATOM   5112  CE2 TYR L  36      46.448  41.364 -48.790  1.00 15.38           C  
ATOM   5113  CZ  TYR L  36      47.749  41.036 -48.438  1.00 17.07           C  
ATOM   5114  OH  TYR L  36      48.641  40.565 -49.360  1.00 20.09           O  
ATOM   5115  N   GLN L  37      43.199  44.765 -43.953  1.00 12.82           N  
ATOM   5116  CA  GLN L  37      42.305  45.004 -42.826  1.00 12.22           C  
ATOM   5117  C   GLN L  37      41.191  43.960 -42.909  1.00 16.81           C  
ATOM   5118  O   GLN L  37      40.613  43.777 -43.982  1.00 16.29           O  
ATOM   5119  CB  GLN L  37      41.718  46.424 -42.900  1.00 15.63           C  
ATOM   5120  CG  GLN L  37      40.787  46.782 -41.739  1.00 17.23           C  
ATOM   5121  CD  GLN L  37      40.074  48.070 -42.040  1.00 20.28           C  
ATOM   5122  OE1 GLN L  37      39.327  48.156 -43.013  1.00 20.38           O  
ATOM   5123  NE2 GLN L  37      40.401  49.141 -41.311  1.00 17.08           N  
ATOM   5124  N   GLN L  38      40.788  43.380 -41.762  1.00 13.97           N  
ATOM   5125  CA  GLN L  38      39.656  42.446 -41.786  1.00 13.45           C  
ATOM   5126  C   GLN L  38      38.794  42.625 -40.556  1.00 16.91           C  
ATOM   5127  O   GLN L  38      39.295  42.497 -39.441  1.00 15.69           O  
ATOM   5128  CB  GLN L  38      40.113  40.985 -41.862  1.00 14.98           C  
ATOM   5129  CG  GLN L  38      38.909  40.050 -42.074  1.00 16.21           C  
ATOM   5130  CD  GLN L  38      39.258  38.594 -42.057  1.00 21.42           C  
ATOM   5131  OE1 GLN L  38      40.181  38.169 -41.349  1.00 20.00           O  
ATOM   5132  NE2 GLN L  38      38.428  37.788 -42.710  1.00 18.88           N  
ATOM   5133  N   HIS L  39      37.518  42.962 -40.758  1.00 15.90           N  
ATOM   5134  CA  HIS L  39      36.534  42.977 -39.680  1.00 16.68           C  
ATOM   5135  C   HIS L  39      36.070  41.523 -39.454  1.00 21.44           C  
ATOM   5136  O   HIS L  39      35.776  40.821 -40.416  1.00 19.80           O  
ATOM   5137  CB  HIS L  39      35.349  43.854 -40.035  1.00 17.98           C  
ATOM   5138  CG  HIS L  39      35.731  45.296 -40.092  1.00 21.49           C  
ATOM   5139  ND1 HIS L  39      35.945  46.026 -38.939  1.00 23.30           N  
ATOM   5140  CD2 HIS L  39      35.961  46.088 -41.160  1.00 22.62           C  
ATOM   5141  CE1 HIS L  39      36.298  47.231 -39.337  1.00 22.20           C  
ATOM   5142  NE2 HIS L  39      36.291  47.329 -40.658  1.00 22.78           N  
ATOM   5143  N   PRO L  40      35.908  41.088 -38.181  1.00 25.01           N  
ATOM   5144  CA  PRO L  40      35.464  39.699 -37.927  1.00 26.48           C  
ATOM   5145  C   PRO L  40      34.213  39.301 -38.699  1.00 27.90           C  
ATOM   5146  O   PRO L  40      33.251  40.062 -38.731  1.00 28.13           O  
ATOM   5147  CB  PRO L  40      35.232  39.679 -36.416  1.00 29.39           C  
ATOM   5148  CG  PRO L  40      36.186  40.682 -35.886  1.00 33.91           C  
ATOM   5149  CD  PRO L  40      36.225  41.790 -36.921  1.00 28.62           C  
ATOM   5150  N   GLY L  41      34.305  38.171 -39.400  1.00 27.15           N  
ATOM   5151  CA  GLY L  41      33.228  37.576 -40.198  1.00 26.96           C  
ATOM   5152  C   GLY L  41      33.003  38.189 -41.567  1.00 27.68           C  
ATOM   5153  O   GLY L  41      32.017  37.858 -42.241  1.00 28.53           O  
ATOM   5155  N   LYS L  42      33.906  39.107 -41.977  0.65 20.18           N  
ATOM   5157  CA  LYS L  42      33.838  39.803 -43.250  0.65 18.58           C  
ATOM   5159  C   LYS L  42      35.112  39.550 -44.038  0.65 19.34           C  
ATOM   5161  O   LYS L  42      36.122  39.158 -43.454  0.65 18.00           O  
ATOM   5163  CB  LYS L  42      33.650  41.314 -43.026  0.65 20.34           C  
ATOM   5165  CG  LYS L  42      32.371  41.652 -42.237  0.65 19.81           C  
ATOM   5167  CD  LYS L  42      31.890  43.070 -42.550  0.65 30.24           C  
ATOM   5169  CE  LYS L  42      31.903  43.999 -41.357  0.65 38.17           C  
ATOM   5171  NZ  LYS L  42      32.191  45.404 -41.749  0.65 39.42           N  
ATOM   5172  N   ALA L  43      35.059  39.741 -45.356  1.00 16.65           N  
ATOM   5173  CA  ALA L  43      36.220  39.587 -46.229  1.00 17.26           C  
ATOM   5174  C   ALA L  43      37.375  40.543 -45.826  1.00 18.46           C  
ATOM   5175  O   ALA L  43      37.123  41.686 -45.445  1.00 17.40           O  
ATOM   5176  CB  ALA L  43      35.809  39.876 -47.665  1.00 19.29           C  
ATOM   5177  N   PRO L  44      38.644  40.091 -45.944  1.00 16.97           N  
ATOM   5178  CA  PRO L  44      39.771  41.024 -45.796  1.00 15.94           C  
ATOM   5179  C   PRO L  44      39.693  42.052 -46.929  1.00 18.16           C  
ATOM   5180  O   PRO L  44      39.024  41.812 -47.953  1.00 18.34           O  
ATOM   5181  CB  PRO L  44      41.020  40.140 -46.016  1.00 16.94           C  
ATOM   5182  CG  PRO L  44      40.517  38.701 -45.914  1.00 21.83           C  
ATOM   5183  CD  PRO L  44      39.106  38.767 -46.423  1.00 18.71           C  
ATOM   5184  N   LYS L  45      40.369  43.189 -46.738  1.00 14.74           N  
ATOM   5185  CA  LYS L  45      40.487  44.259 -47.738  1.00 14.87           C  
ATOM   5186  C   LYS L  45      41.940  44.719 -47.803  1.00 16.14           C  
ATOM   5187  O   LYS L  45      42.544  44.968 -46.764  1.00 16.78           O  
ATOM   5188  CB  LYS L  45      39.592  45.454 -47.347  1.00 16.80           C  
ATOM   5189  CG  LYS L  45      39.744  46.651 -48.273  1.00 21.17           C  
ATOM   5190  CD  LYS L  45      39.048  47.893 -47.730  1.00 31.56           C  
ATOM   5191  CE  LYS L  45      39.046  48.949 -48.818  1.00 40.75           C  
ATOM   5192  NZ  LYS L  45      38.223  50.133 -48.445  1.00 52.98           N  
ATOM   5193  N   LEU L  46      42.479  44.856 -49.003  1.00 14.81           N  
ATOM   5194  CA  LEU L  46      43.839  45.389 -49.171  1.00 14.47           C  
ATOM   5195  C   LEU L  46      43.815  46.889 -48.843  1.00 17.81           C  
ATOM   5196  O   LEU L  46      43.007  47.614 -49.412  1.00 18.54           O  
ATOM   5197  CB  LEU L  46      44.300  45.200 -50.612  1.00 14.55           C  
ATOM   5198  CG  LEU L  46      45.690  45.806 -50.938  1.00 17.71           C  
ATOM   5199  CD1 LEU L  46      46.804  45.047 -50.225  1.00 18.71           C  
ATOM   5200  CD2 LEU L  46      45.952  45.790 -52.440  1.00 15.31           C  
ATOM   5201  N   ILE L  47      44.667  47.339 -47.931  1.00 14.55           N  
ATOM   5202  CA  ILE L  47      44.695  48.774 -47.594  1.00 14.59           C  
ATOM   5203  C   ILE L  47      46.019  49.451 -47.940  1.00 17.45           C  
ATOM   5204  O   ILE L  47      46.044  50.673 -48.059  1.00 16.60           O  
ATOM   5205  CB  ILE L  47      44.285  49.072 -46.135  1.00 17.08           C  
ATOM   5206  CG1 ILE L  47      45.228  48.354 -45.127  1.00 15.91           C  
ATOM   5207  CG2 ILE L  47      42.806  48.726 -45.912  1.00 17.26           C  
ATOM   5208  CD1 ILE L  47      45.200  48.942 -43.688  1.00 15.75           C  
ATOM   5209  N   ILE L  48      47.124  48.698 -48.050  1.00 15.00           N  
ATOM   5210  CA  ILE L  48      48.426  49.248 -48.455  1.00 15.54           C  
ATOM   5211  C   ILE L  48      49.072  48.211 -49.339  1.00 18.66           C  
ATOM   5212  O   ILE L  48      48.970  47.026 -49.021  1.00 19.19           O  
ATOM   5213  CB  ILE L  48      49.351  49.510 -47.208  1.00 16.52           C  
ATOM   5214  CG1 ILE L  48      48.812  50.630 -46.266  1.00 16.68           C  
ATOM   5215  CG2 ILE L  48      50.839  49.777 -47.615  1.00 18.84           C  
ATOM   5216  CD1 ILE L  48      48.812  52.082 -46.831  1.00 17.48           C  
ATOM   5217  N   TYR L  49      49.725  48.618 -50.434  1.00 14.62           N  
ATOM   5218  CA  TYR L  49      50.523  47.694 -51.238  1.00 15.69           C  
ATOM   5219  C   TYR L  49      51.845  48.395 -51.532  1.00 17.82           C  
ATOM   5220  O   TYR L  49      51.959  49.626 -51.376  1.00 18.58           O  
ATOM   5221  CB  TYR L  49      49.826  47.195 -52.544  1.00 17.59           C  
ATOM   5222  CG  TYR L  49      49.502  48.303 -53.520  1.00 18.36           C  
ATOM   5223  CD1 TYR L  49      48.317  49.030 -53.409  1.00 20.12           C  
ATOM   5224  CD2 TYR L  49      50.420  48.687 -54.499  1.00 19.03           C  
ATOM   5225  CE1 TYR L  49      48.025  50.077 -54.286  1.00 18.10           C  
ATOM   5226  CE2 TYR L  49      50.154  49.753 -55.363  1.00 19.06           C  
ATOM   5227  CZ  TYR L  49      48.954  50.441 -55.250  1.00 20.61           C  
ATOM   5228  OH  TYR L  49      48.672  51.475 -56.093  1.00 20.44           O  
ATOM   5229  N   GLU L  50      52.875  47.619 -51.858  1.00 17.39           N  
ATOM   5230  CA  GLU L  50      54.202  48.187 -52.177  1.00 17.37           C  
ATOM   5231  C   GLU L  50      54.695  49.179 -51.130  1.00 20.50           C  
ATOM   5232  O   GLU L  50      55.132  50.300 -51.449  1.00 20.06           O  
ATOM   5233  CB  GLU L  50      54.203  48.784 -53.590  1.00 18.50           C  
ATOM   5234  CG  GLU L  50      54.296  47.703 -54.653  1.00 21.59           C  
ATOM   5235  CD  GLU L  50      54.141  48.193 -56.080  1.00 32.83           C  
ATOM   5236  OE1 GLU L  50      53.827  49.388 -56.290  1.00 25.13           O  
ATOM   5237  OE2 GLU L  50      54.299  47.358 -56.993  1.00 30.97           O  
ATOM   5238  N   VAL L  51      54.568  48.763 -49.849  1.00 18.49           N  
ATOM   5239  CA  VAL L  51      55.016  49.487 -48.644  1.00 18.48           C  
ATOM   5240  C   VAL L  51      54.118  50.657 -48.247  1.00 19.34           C  
ATOM   5241  O   VAL L  51      53.752  50.736 -47.068  1.00 17.94           O  
ATOM   5242  CB  VAL L  51      56.514  49.944 -48.744  1.00 23.34           C  
ATOM   5243  CG1 VAL L  51      56.946  50.761 -47.521  1.00 22.60           C  
ATOM   5244  CG2 VAL L  51      57.439  48.748 -48.933  1.00 23.95           C  
ATOM   5245  N   SER L  52      53.804  51.571 -49.195  1.00 16.69           N  
ATOM   5246  CA  SER L  52      53.177  52.855 -48.903  1.00 16.67           C  
ATOM   5247  C   SER L  52      51.990  53.221 -49.730  1.00 17.39           C  
ATOM   5248  O   SER L  52      51.385  54.269 -49.466  1.00 18.47           O  
ATOM   5249  CB  SER L  52      54.213  53.952 -49.143  1.00 20.11           C  
ATOM   5250  OG  SER L  52      54.680  53.845 -50.483  1.00 20.63           O  
ATOM   5251  N   GLN L  53      51.685  52.438 -50.751  1.00 15.67           N  
ATOM   5252  CA  GLN L  53      50.633  52.811 -51.688  1.00 14.83           C  
ATOM   5253  C   GLN L  53      49.247  52.520 -51.177  1.00 17.80           C  
ATOM   5254  O   GLN L  53      48.950  51.379 -50.778  1.00 17.59           O  
ATOM   5255  CB  GLN L  53      50.837  52.122 -53.038  1.00 15.84           C  
ATOM   5256  CG  GLN L  53      52.253  52.219 -53.612  1.00 19.99           C  
ATOM   5257  CD  GLN L  53      52.583  53.679 -53.862  1.00 20.16           C  
ATOM   5258  OE1 GLN L  53      53.316  54.325 -53.089  1.00 18.65           O  
ATOM   5259  NE2 GLN L  53      51.953  54.232 -54.864  1.00 14.32           N  
ATOM   5260  N   ARG L  54      48.365  53.518 -51.265  1.00 16.51           N  
ATOM   5261  CA  ARG L  54      46.983  53.302 -50.860  1.00 15.95           C  
ATOM   5262  C   ARG L  54      46.103  53.008 -52.050  1.00 19.52           C  
ATOM   5263  O   ARG L  54      46.040  53.817 -52.999  1.00 17.37           O  
ATOM   5264  CB  ARG L  54      46.394  54.506 -50.110  1.00 14.31           C  
ATOM   5265  CG  ARG L  54      46.905  54.665 -48.669  1.00 17.45           C  
ATOM   5266  CD  ARG L  54      46.373  55.952 -48.027  1.00 19.97           C  
ATOM   5267  NE  ARG L  54      47.092  57.143 -48.536  1.00 18.91           N  
ATOM   5268  CZ  ARG L  54      46.564  58.094 -49.290  1.00 32.73           C  
ATOM   5269  NH1 ARG L  54      45.275  58.060 -49.611  1.00 26.39           N  
ATOM   5270  NH2 ARG L  54      47.309  59.120 -49.692  1.00 24.88           N  
ATOM   5271  N   PRO L  55      45.393  51.857 -52.048  1.00 18.88           N  
ATOM   5272  CA  PRO L  55      44.363  51.649 -53.068  1.00 17.36           C  
ATOM   5273  C   PRO L  55      43.351  52.811 -53.037  1.00 21.69           C  
ATOM   5274  O   PRO L  55      43.220  53.509 -52.009  1.00 19.79           O  
ATOM   5275  CB  PRO L  55      43.657  50.358 -52.589  1.00 19.14           C  
ATOM   5276  CG  PRO L  55      44.654  49.663 -51.764  1.00 22.24           C  
ATOM   5277  CD  PRO L  55      45.316  50.797 -51.013  1.00 18.69           C  
ATOM   5279  N   SER L  56      42.648  53.028 -54.162  0.50 20.90           N  
ATOM   5281  CA  SER L  56      41.624  54.066 -54.273  0.50 21.54           C  
ATOM   5283  C   SER L  56      40.572  53.892 -53.164  0.50 26.74           C  
ATOM   5285  O   SER L  56      40.155  52.765 -52.869  0.50 26.02           O  
ATOM   5287  CB  SER L  56      40.963  54.009 -55.648  0.50 25.54           C  
ATOM   5289  OG  SER L  56      41.902  54.308 -56.667  0.50 30.55           O  
ATOM   5290  N   GLY L  57      40.203  54.999 -52.524  1.00 24.56           N  
ATOM   5291  CA  GLY L  57      39.219  55.002 -51.448  1.00 24.55           C  
ATOM   5292  C   GLY L  57      39.750  54.762 -50.044  1.00 27.59           C  
ATOM   5293  O   GLY L  57      39.001  54.937 -49.079  1.00 28.97           O  
ATOM   5294  N   VAL L  58      41.038  54.360 -49.905  1.00 19.49           N  
ATOM   5295  CA  VAL L  58      41.660  54.174 -48.581  1.00 18.09           C  
ATOM   5296  C   VAL L  58      42.148  55.573 -48.133  1.00 23.49           C  
ATOM   5297  O   VAL L  58      42.930  56.193 -48.856  1.00 21.16           O  
ATOM   5298  CB  VAL L  58      42.829  53.132 -48.585  1.00 19.03           C  
ATOM   5299  CG1 VAL L  58      43.518  53.085 -47.211  1.00 17.53           C  
ATOM   5300  CG2 VAL L  58      42.325  51.738 -48.982  1.00 18.31           C  
ATOM   5301  N   PRO L  59      41.669  56.092 -46.974  1.00 24.52           N  
ATOM   5302  CA  PRO L  59      42.065  57.455 -46.556  1.00 23.99           C  
ATOM   5303  C   PRO L  59      43.525  57.576 -46.167  1.00 26.03           C  
ATOM   5304  O   PRO L  59      44.141  56.573 -45.751  1.00 23.07           O  
ATOM   5305  CB  PRO L  59      41.149  57.746 -45.359  1.00 26.17           C  
ATOM   5306  CG  PRO L  59      40.762  56.449 -44.852  1.00 29.98           C  
ATOM   5307  CD  PRO L  59      40.732  55.485 -46.009  1.00 25.58           C  
ATOM   5308  N   ASN L  60      44.071  58.816 -46.252  1.00 21.45           N  
ATOM   5309  CA  ASN L  60      45.474  59.105 -45.924  1.00 21.05           C  
ATOM   5310  C   ASN L  60      45.799  58.949 -44.443  1.00 23.52           C  
ATOM   5311  O   ASN L  60      46.966  59.060 -44.085  1.00 23.87           O  
ATOM   5312  CB  ASN L  60      45.950  60.485 -46.465  1.00 24.74           C  
ATOM   5313  CG  ASN L  60      45.356  61.710 -45.795  1.00 45.41           C  
ATOM   5314  OD1 ASN L  60      44.543  61.629 -44.856  1.00 37.91           O  
ATOM   5315  ND2 ASN L  60      45.779  62.885 -46.264  1.00 34.45           N  
ATOM   5316  N   ARG L  61      44.785  58.625 -43.585  1.00 21.12           N  
ATOM   5317  CA  ARG L  61      44.960  58.342 -42.149  1.00 21.90           C  
ATOM   5318  C   ARG L  61      45.791  57.049 -42.016  1.00 21.58           C  
ATOM   5319  O   ARG L  61      46.425  56.837 -40.989  1.00 21.62           O  
ATOM   5320  CB  ARG L  61      43.601  58.111 -41.439  1.00 22.60           C  
ATOM   5321  CG  ARG L  61      42.554  59.190 -41.679  1.00 40.76           C  
ATOM   5322  CD  ARG L  61      41.350  59.037 -40.750  1.00 37.15           C  
ATOM   5323  NE  ARG L  61      40.464  57.923 -41.107  1.00 27.38           N  
ATOM   5324  CZ  ARG L  61      40.448  56.754 -40.476  1.00 31.51           C  
ATOM   5325  NH1 ARG L  61      41.278  56.524 -39.472  1.00 23.22           N  
ATOM   5326  NH2 ARG L  61      39.574  55.819 -40.823  1.00 23.50           N  
ATOM   5327  N   PHE L  62      45.774  56.191 -43.054  1.00 18.01           N  
ATOM   5328  CA  PHE L  62      46.546  54.941 -43.093  1.00 15.75           C  
ATOM   5329  C   PHE L  62      47.826  55.238 -43.862  1.00 20.64           C  
ATOM   5330  O   PHE L  62      47.752  55.758 -44.974  1.00 19.67           O  
ATOM   5331  CB  PHE L  62      45.765  53.845 -43.843  1.00 16.68           C  
ATOM   5332  CG  PHE L  62      44.518  53.411 -43.094  1.00 17.43           C  
ATOM   5333  CD1 PHE L  62      43.304  54.053 -43.301  1.00 20.87           C  
ATOM   5334  CD2 PHE L  62      44.563  52.356 -42.194  1.00 18.20           C  
ATOM   5335  CE1 PHE L  62      42.158  53.669 -42.592  1.00 21.24           C  
ATOM   5336  CE2 PHE L  62      43.409  51.964 -41.490  1.00 20.65           C  
ATOM   5337  CZ  PHE L  62      42.223  52.633 -41.690  1.00 18.77           C  
ATOM   5338  N   SER L  63      48.976  54.950 -43.273  1.00 17.60           N  
ATOM   5339  CA  SER L  63      50.246  55.162 -43.986  1.00 18.93           C  
ATOM   5340  C   SER L  63      51.140  53.994 -43.704  1.00 21.70           C  
ATOM   5341  O   SER L  63      51.153  53.491 -42.590  1.00 23.13           O  
ATOM   5342  CB  SER L  63      50.921  56.475 -43.600  1.00 23.40           C  
ATOM   5343  OG  SER L  63      51.277  56.503 -42.235  1.00 29.59           O  
ATOM   5344  N   GLY L  64      51.888  53.581 -44.706  1.00 17.17           N  
ATOM   5345  CA  GLY L  64      52.799  52.458 -44.583  1.00 16.53           C  
ATOM   5346  C   GLY L  64      54.210  52.918 -44.864  1.00 22.47           C  
ATOM   5347  O   GLY L  64      54.440  53.739 -45.763  1.00 20.87           O  
ATOM   5348  N   SER L  65      55.147  52.393 -44.091  1.00 19.91           N  
ATOM   5349  CA  SER L  65      56.549  52.704 -44.213  1.00 21.98           C  
ATOM   5350  C   SER L  65      57.365  51.439 -43.931  1.00 25.36           C  
ATOM   5351  O   SER L  65      56.819  50.415 -43.511  1.00 22.76           O  
ATOM   5352  CB  SER L  65      56.931  53.823 -43.238  1.00 25.28           C  
ATOM   5353  OG  SER L  65      56.845  53.390 -41.890  1.00 31.50           O  
ATOM   5354  N   LYS L  66      58.663  51.504 -44.209  1.00 24.88           N  
ATOM   5355  CA  LYS L  66      59.559  50.393 -43.956  1.00 25.43           C  
ATOM   5356  C   LYS L  66      60.962  50.925 -43.665  1.00 31.21           C  
ATOM   5357  O   LYS L  66      61.403  51.917 -44.258  1.00 29.77           O  
ATOM   5358  CB  LYS L  66      59.581  49.453 -45.160  1.00 29.62           C  
ATOM   5359  CG  LYS L  66      60.219  48.093 -44.914  1.00 32.84           C  
ATOM   5360  CD  LYS L  66      60.491  47.400 -46.244  1.00 42.11           C  
ATOM   5361  CE  LYS L  66      61.769  47.854 -46.909  1.00 50.57           C  
ATOM   5362  NZ  LYS L  66      62.076  47.044 -48.107  1.00 45.37           N  
ATOM   5363  N   SER L  67      61.638  50.267 -42.732  1.00 28.86           N  
ATOM   5364  CA  SER L  67      63.017  50.567 -42.352  1.00 30.36           C  
ATOM   5365  C   SER L  67      63.665  49.214 -42.136  1.00 33.37           C  
ATOM   5366  O   SER L  67      63.232  48.459 -41.256  1.00 31.34           O  
ATOM   5367  CB  SER L  67      63.060  51.403 -41.069  1.00 34.14           C  
ATOM   5368  OG  SER L  67      64.392  51.789 -40.772  1.00 41.66           O  
ATOM   5369  N   GLY L  68      64.639  48.896 -42.991  1.00 33.32           N  
ATOM   5370  CA  GLY L  68      65.346  47.621 -42.965  1.00 33.59           C  
ATOM   5371  C   GLY L  68      64.385  46.458 -43.146  1.00 36.04           C  
ATOM   5372  O   GLY L  68      63.604  46.445 -44.106  1.00 34.84           O  
ATOM   5373  N   ASN L  69      64.383  45.528 -42.174  1.00 30.61           N  
ATOM   5374  CA  ASN L  69      63.571  44.305 -42.170  1.00 29.20           C  
ATOM   5375  C   ASN L  69      62.193  44.438 -41.498  1.00 28.61           C  
ATOM   5376  O   ASN L  69      61.503  43.430 -41.315  1.00 25.60           O  
ATOM   5377  CB  ASN L  69      64.349  43.182 -41.488  1.00 31.30           C  
ATOM   5378  CG  ASN L  69      65.623  42.835 -42.203  1.00 43.88           C  
ATOM   5379  OD1 ASN L  69      65.768  43.084 -43.396  1.00 33.91           O  
ATOM   5380  ND2 ASN L  69      66.564  42.253 -41.492  1.00 37.76           N  
ATOM   5381  N   THR L  70      61.797  45.663 -41.136  1.00 24.54           N  
ATOM   5382  CA  THR L  70      60.526  45.905 -40.458  1.00 22.02           C  
ATOM   5383  C   THR L  70      59.691  46.919 -41.203  1.00 24.85           C  
ATOM   5384  O   THR L  70      60.152  48.039 -41.478  1.00 25.03           O  
ATOM   5385  CB  THR L  70      60.761  46.316 -38.989  1.00 29.39           C  
ATOM   5386  OG1 THR L  70      61.443  45.258 -38.334  1.00 29.94           O  
ATOM   5387  CG2 THR L  70      59.446  46.580 -38.224  1.00 23.05           C  
ATOM   5388  N   ALA L  71      58.466  46.516 -41.540  1.00 21.65           N  
ATOM   5389  CA  ALA L  71      57.477  47.388 -42.167  1.00 19.88           C  
ATOM   5390  C   ALA L  71      56.544  47.869 -41.045  1.00 22.00           C  
ATOM   5391  O   ALA L  71      56.305  47.133 -40.086  1.00 19.47           O  
ATOM   5392  CB  ALA L  71      56.686  46.601 -43.213  1.00 19.93           C  
ATOM   5393  N   SER L  72      56.012  49.090 -41.155  1.00 19.59           N  
ATOM   5394  CA  SER L  72      55.061  49.590 -40.160  1.00 19.14           C  
ATOM   5395  C   SER L  72      53.854  50.207 -40.817  1.00 20.77           C  
ATOM   5396  O   SER L  72      53.978  50.861 -41.854  1.00 20.84           O  
ATOM   5397  CB  SER L  72      55.728  50.631 -39.253  1.00 24.25           C  
ATOM   5398  OG  SER L  72      56.832  50.042 -38.594  1.00 26.20           O  
ATOM   5399  N   LEU L  73      52.688  50.003 -40.200  1.00 17.70           N  
ATOM   5400  CA  LEU L  73      51.433  50.622 -40.594  1.00 17.09           C  
ATOM   5401  C   LEU L  73      51.112  51.596 -39.464  1.00 21.16           C  
ATOM   5402  O   LEU L  73      51.123  51.205 -38.282  1.00 20.79           O  
ATOM   5403  CB  LEU L  73      50.270  49.598 -40.669  1.00 16.18           C  
ATOM   5404  CG  LEU L  73      48.899  50.185 -41.090  1.00 18.93           C  
ATOM   5405  CD1 LEU L  73      48.908  50.629 -42.547  1.00 17.98           C  
ATOM   5406  CD2 LEU L  73      47.757  49.156 -40.852  1.00 20.91           C  
ATOM   5407  N   THR L  74      50.771  52.832 -39.822  1.00 18.75           N  
ATOM   5408  CA  THR L  74      50.316  53.816 -38.834  1.00 17.85           C  
ATOM   5409  C   THR L  74      48.897  54.199 -39.198  1.00 21.13           C  
ATOM   5410  O   THR L  74      48.610  54.472 -40.362  1.00 20.65           O  
ATOM   5411  CB  THR L  74      51.285  55.033 -38.769  1.00 21.48           C  
ATOM   5412  OG1 THR L  74      52.523  54.560 -38.247  1.00 23.51           O  
ATOM   5413  CG2 THR L  74      50.744  56.192 -37.887  1.00 25.01           C  
ATOM   5414  N   VAL L  75      47.991  54.190 -38.215  1.00 18.37           N  
ATOM   5415  CA  VAL L  75      46.621  54.622 -38.456  1.00 18.84           C  
ATOM   5416  C   VAL L  75      46.438  55.853 -37.562  1.00 24.99           C  
ATOM   5417  O   VAL L  75      46.502  55.721 -36.336  1.00 23.13           O  
ATOM   5418  CB  VAL L  75      45.582  53.509 -38.106  1.00 21.38           C  
ATOM   5419  CG1 VAL L  75      44.170  53.960 -38.434  1.00 21.72           C  
ATOM   5420  CG2 VAL L  75      45.906  52.183 -38.797  1.00 20.00           C  
ATOM   5421  N   SER L  76      46.256  57.027 -38.163  1.00 22.17           N  
ATOM   5422  CA  SER L  76      46.063  58.244 -37.381  1.00 24.26           C  
ATOM   5423  C   SER L  76      44.557  58.571 -37.249  1.00 27.44           C  
ATOM   5424  O   SER L  76      43.727  58.050 -38.008  1.00 24.44           O  
ATOM   5425  CB  SER L  76      46.837  59.398 -38.009  1.00 28.50           C  
ATOM   5426  OG  SER L  76      46.302  59.724 -39.282  1.00 32.81           O  
ATOM   5427  N   GLY L  77      44.210  59.406 -36.271  1.00 25.48           N  
ATOM   5428  CA  GLY L  77      42.813  59.776 -36.060  1.00 25.80           C  
ATOM   5429  C   GLY L  77      41.898  58.568 -35.995  1.00 25.76           C  
ATOM   5430  O   GLY L  77      40.904  58.488 -36.731  1.00 23.31           O  
ATOM   5431  N   LEU L  78      42.226  57.614 -35.104  1.00 21.67           N  
ATOM   5432  CA  LEU L  78      41.444  56.377 -34.961  1.00 20.80           C  
ATOM   5433  C   LEU L  78      39.949  56.617 -34.899  1.00 26.06           C  
ATOM   5434  O   LEU L  78      39.473  57.480 -34.157  1.00 25.69           O  
ATOM   5435  CB  LEU L  78      41.878  55.541 -33.731  1.00 20.21           C  
ATOM   5436  CG  LEU L  78      43.153  54.713 -33.855  1.00 22.25           C  
ATOM   5437  CD1 LEU L  78      43.626  54.246 -32.495  1.00 21.55           C  
ATOM   5438  CD2 LEU L  78      42.968  53.478 -34.794  1.00 18.87           C  
ATOM   5439  N   GLN L  79      39.227  55.888 -35.736  1.00 23.30           N  
ATOM   5440  CA  GLN L  79      37.779  55.923 -35.826  1.00 24.71           C  
ATOM   5441  C   GLN L  79      37.243  54.550 -35.450  1.00 27.06           C  
ATOM   5442  O   GLN L  79      37.991  53.551 -35.525  1.00 22.42           O  
ATOM   5443  CB  GLN L  79      37.348  56.361 -37.245  1.00 26.55           C  
ATOM   5444  CG  GLN L  79      37.473  57.884 -37.418  1.00 40.55           C  
ATOM   5445  CD  GLN L  79      37.494  58.387 -38.842  1.00 55.89           C  
ATOM   5446  OE1 GLN L  79      36.738  57.943 -39.710  1.00 47.76           O  
ATOM   5447  NE2 GLN L  79      38.308  59.405 -39.086  1.00 51.76           N  
ATOM   5448  N   ALA L  80      35.959  54.491 -35.006  1.00 25.41           N  
ATOM   5449  CA  ALA L  80      35.323  53.228 -34.604  1.00 25.63           C  
ATOM   5450  C   ALA L  80      35.524  52.126 -35.643  1.00 26.02           C  
ATOM   5451  O   ALA L  80      35.832  50.988 -35.271  1.00 23.53           O  
ATOM   5452  CB  ALA L  80      33.832  53.432 -34.373  1.00 27.66           C  
ATOM   5453  N   GLU L  81      35.417  52.476 -36.950  1.00 22.85           N  
ATOM   5454  CA  GLU L  81      35.547  51.468 -38.018  1.00 22.57           C  
ATOM   5455  C   GLU L  81      36.985  50.906 -38.217  1.00 23.80           C  
ATOM   5456  O   GLU L  81      37.156  49.955 -38.970  1.00 22.24           O  
ATOM   5457  CB  GLU L  81      34.978  51.993 -39.355  1.00 24.58           C  
ATOM   5458  CG  GLU L  81      35.692  53.232 -39.882  1.00 38.36           C  
ATOM   5459  CD  GLU L  81      35.058  54.578 -39.580  1.00 63.77           C  
ATOM   5460  OE1 GLU L  81      34.406  54.733 -38.520  1.00 53.46           O  
ATOM   5461  OE2 GLU L  81      35.242  55.495 -40.411  1.00 63.37           O  
ATOM   5462  N   ASP L  82      38.013  51.505 -37.572  1.00 18.66           N  
ATOM   5463  CA  ASP L  82      39.403  51.013 -37.655  1.00 16.87           C  
ATOM   5464  C   ASP L  82      39.637  49.821 -36.707  1.00 18.02           C  
ATOM   5465  O   ASP L  82      40.660  49.137 -36.824  1.00 16.46           O  
ATOM   5466  CB  ASP L  82      40.383  52.158 -37.334  1.00 17.81           C  
ATOM   5467  CG  ASP L  82      40.207  53.381 -38.214  1.00 21.59           C  
ATOM   5468  OD1 ASP L  82      39.740  53.223 -39.383  1.00 20.28           O  
ATOM   5469  OD2 ASP L  82      40.601  54.490 -37.770  1.00 19.85           O  
ATOM   5470  N   ASP L  83      38.692  49.579 -35.760  1.00 15.90           N  
ATOM   5471  CA  ASP L  83      38.776  48.413 -34.850  1.00 15.54           C  
ATOM   5472  C   ASP L  83      38.630  47.170 -35.721  1.00 17.86           C  
ATOM   5473  O   ASP L  83      37.570  46.949 -36.313  1.00 20.56           O  
ATOM   5474  CB  ASP L  83      37.654  48.510 -33.790  1.00 16.74           C  
ATOM   5475  CG  ASP L  83      37.779  47.470 -32.711  1.00 19.71           C  
ATOM   5476  OD1 ASP L  83      37.743  46.270 -33.040  1.00 19.75           O  
ATOM   5477  OD2 ASP L  83      37.953  47.852 -31.543  1.00 20.07           O  
ATOM   5478  N   ALA L  84      39.707  46.382 -35.850  1.00 13.93           N  
ATOM   5479  CA  ALA L  84      39.754  45.253 -36.789  1.00 14.77           C  
ATOM   5480  C   ALA L  84      41.060  44.516 -36.606  1.00 17.34           C  
ATOM   5481  O   ALA L  84      41.897  44.916 -35.791  1.00 16.76           O  
ATOM   5482  CB  ALA L  84      39.686  45.818 -38.221  1.00 16.76           C  
ATOM   5483  N   ASP L  85      41.250  43.452 -37.382  1.00 14.05           N  
ATOM   5484  CA  ASP L  85      42.500  42.718 -37.428  1.00 13.62           C  
ATOM   5485  C   ASP L  85      43.274  43.233 -38.635  1.00 17.88           C  
ATOM   5486  O   ASP L  85      42.679  43.475 -39.698  1.00 17.17           O  
ATOM   5487  CB  ASP L  85      42.248  41.210 -37.551  1.00 15.89           C  
ATOM   5488  CG  ASP L  85      41.588  40.636 -36.291  1.00 24.17           C  
ATOM   5489  OD1 ASP L  85      42.076  40.908 -35.186  1.00 21.82           O  
ATOM   5490  OD2 ASP L  85      40.566  39.968 -36.417  1.00 30.04           O  
ATOM   5491  N   TYR L  86      44.594  43.342 -38.493  1.00 13.51           N  
ATOM   5492  CA  TYR L  86      45.462  43.839 -39.571  1.00 12.64           C  
ATOM   5493  C   TYR L  86      46.556  42.842 -39.867  1.00 16.66           C  
ATOM   5494  O   TYR L  86      47.231  42.388 -38.956  1.00 15.06           O  
ATOM   5495  CB  TYR L  86      46.037  45.207 -39.188  1.00 14.77           C  
ATOM   5496  CG  TYR L  86      44.992  46.302 -39.127  1.00 14.24           C  
ATOM   5497  CD1 TYR L  86      44.204  46.485 -37.988  1.00 15.59           C  
ATOM   5498  CD2 TYR L  86      44.787  47.159 -40.207  1.00 15.35           C  
ATOM   5499  CE1 TYR L  86      43.233  47.489 -37.929  1.00 13.11           C  
ATOM   5500  CE2 TYR L  86      43.827  48.167 -40.156  1.00 15.28           C  
ATOM   5501  CZ  TYR L  86      43.037  48.315 -39.026  1.00 16.76           C  
ATOM   5502  OH  TYR L  86      42.094  49.313 -38.987  1.00 16.09           O  
ATOM   5503  N   TYR L  87      46.753  42.541 -41.152  1.00 14.62           N  
ATOM   5504  CA  TYR L  87      47.720  41.569 -41.606  1.00 13.98           C  
ATOM   5505  C   TYR L  87      48.719  42.203 -42.519  1.00 16.58           C  
ATOM   5506  O   TYR L  87      48.367  43.119 -43.259  1.00 15.91           O  
ATOM   5507  CB  TYR L  87      46.998  40.426 -42.360  1.00 15.33           C  
ATOM   5508  CG  TYR L  87      46.096  39.641 -41.436  1.00 15.77           C  
ATOM   5509  CD1 TYR L  87      46.586  38.566 -40.703  1.00 17.91           C  
ATOM   5510  CD2 TYR L  87      44.743  39.947 -41.322  1.00 15.46           C  
ATOM   5511  CE1 TYR L  87      45.778  37.883 -39.801  1.00 16.39           C  
ATOM   5512  CE2 TYR L  87      43.923  39.268 -40.421  1.00 16.34           C  
ATOM   5513  CZ  TYR L  87      44.455  38.253 -39.648  1.00 18.41           C  
ATOM   5514  OH  TYR L  87      43.656  37.543 -38.798  1.00 17.80           O  
ATOM   5515  N   CYS L  88      49.937  41.644 -42.562  1.00 15.76           N  
ATOM   5516  CA  CYS L  88      50.939  42.089 -43.515  1.00 16.48           C  
ATOM   5517  C   CYS L  88      51.391  40.892 -44.384  1.00 19.43           C  
ATOM   5518  O   CYS L  88      51.237  39.721 -44.003  1.00 19.52           O  
ATOM   5519  CB  CYS L  88      52.123  42.752 -42.823  1.00 17.84           C  
ATOM   5520  SG  CYS L  88      53.110  41.614 -41.820  1.00 22.05           S  
ATOM   5521  N   SER L  89      51.943  41.203 -45.553  1.00 17.82           N  
ATOM   5522  CA  SER L  89      52.536  40.217 -46.434  1.00 18.50           C  
ATOM   5523  C   SER L  89      53.708  40.891 -47.154  1.00 20.21           C  
ATOM   5524  O   SER L  89      53.793  42.126 -47.185  1.00 19.94           O  
ATOM   5525  CB  SER L  89      51.526  39.655 -47.432  1.00 21.90           C  
ATOM   5526  OG  SER L  89      51.212  40.609 -48.432  1.00 20.61           O  
ATOM   5527  N   SER L  90      54.625  40.088 -47.656  1.00 20.50           N  
ATOM   5528  CA  SER L  90      55.773  40.565 -48.414  1.00 19.81           C  
ATOM   5529  C   SER L  90      56.204  39.457 -49.363  1.00 26.60           C  
ATOM   5530  O   SER L  90      56.042  38.267 -49.048  1.00 25.01           O  
ATOM   5531  CB  SER L  90      56.944  40.926 -47.493  1.00 22.55           C  
ATOM   5532  OG  SER L  90      58.116  41.270 -48.234  1.00 26.84           O  
ATOM   5533  N   TYR L  91      56.770  39.843 -50.524  1.00 27.01           N  
ATOM   5534  CA  TYR L  91      57.349  38.847 -51.416  1.00 29.98           C  
ATOM   5535  C   TYR L  91      58.525  38.240 -50.655  1.00 36.63           C  
ATOM   5536  O   TYR L  91      59.095  38.911 -49.788  1.00 31.81           O  
ATOM   5537  CB  TYR L  91      57.880  39.493 -52.711  1.00 33.11           C  
ATOM   5538  CG  TYR L  91      56.845  39.807 -53.773  0.59 36.99           C  
ATOM   5539  CD1 TYR L  91      55.663  39.074 -53.865  0.82 39.48           C  
ATOM   5540  CD2 TYR L  91      57.099  40.758 -54.760  0.44 38.30           C  
ATOM   5541  CE1 TYR L  91      54.731  39.328 -54.873  0.63 41.77           C  
ATOM   5542  CE2 TYR L  91      56.164  41.039 -55.754  0.84 39.11           C  
ATOM   5543  CZ  TYR L  91      54.991  40.307 -55.820  0.44 47.82           C  
ATOM   5544  OH  TYR L  91      54.094  40.564 -56.828  0.68 49.36           O  
ATOM   5545  N   GLY L  92      58.853  36.990 -50.975  1.00 40.11           N  
ATOM   5546  CA  GLY L  92      59.993  36.267 -50.423  1.00 43.34           C  
ATOM   5547  C   GLY L  92      61.159  36.301 -51.390  1.00 53.97           C  
ATOM   5548  O   GLY L  92      61.102  36.995 -52.414  1.00 53.86           O  
ATOM   5549  N   GLY L  93      62.215  35.558 -51.064  1.00 55.56           N  
ATOM   5550  CA  GLY L  93      63.423  35.464 -51.882  1.00 57.72           C  
ATOM   5551  C   GLY L  93      63.147  34.945 -53.278  1.00 65.13           C  
ATOM   5552  O   GLY L  93      63.560  35.564 -54.266  1.00 66.76           O  
ATOM   5553  N   ASP L  94      62.423  33.809 -53.362  1.00 61.90           N  
ATOM   5554  CA  ASP L  94      62.029  33.158 -54.618  1.00 62.31           C  
ATOM   5555  C   ASP L  94      60.675  33.758 -55.065  1.00 63.03           C  
ATOM   5556  O   ASP L  94      60.347  34.882 -54.662  1.00 62.95           O  
ATOM   5557  CB  ASP L  94      61.931  31.631 -54.394  1.00 65.61           C  
ATOM   5558  CG  ASP L  94      62.255  30.786 -55.615  1.00 80.60           C  
ATOM   5559  OD1 ASP L  94      63.345  30.173 -55.641  1.00 83.28           O  
ATOM   5560  OD2 ASP L  94      61.402  30.706 -56.525  1.00 87.22           O  
ATOM   5561  N   ASN L  95      59.888  33.035 -55.883  1.00 56.51           N  
ATOM   5562  CA  ASN L  95      58.569  33.519 -56.299  1.00 53.69           C  
ATOM   5563  C   ASN L  95      57.585  33.134 -55.185  1.00 51.70           C  
ATOM   5564  O   ASN L  95      56.732  32.260 -55.378  1.00 52.78           O  
ATOM   5565  CB  ASN L  95      58.160  32.924 -57.661  1.00 56.81           C  
ATOM   5566  CG  ASN L  95      58.934  33.454 -58.849  0.00 79.95           C  
ATOM   5567  OD1 ASN L  95      59.447  34.581 -58.856  0.00 73.67           O  
ATOM   5568  ND2 ASN L  95      58.994  32.662 -59.909  0.00 72.96           N  
ATOM   5569  N   ASN L  95A     57.756  33.744 -53.991  1.00 41.68           N  
ATOM   5570  CA  ASN L  95A     56.928  33.421 -52.830  1.00 38.97           C  
ATOM   5571  C   ASN L  95A     56.293  34.645 -52.182  1.00 38.33           C  
ATOM   5572  O   ASN L  95A     56.761  35.760 -52.363  1.00 37.52           O  
ATOM   5573  CB  ASN L  95A     57.742  32.627 -51.777  1.00 38.39           C  
ATOM   5574  CG  ASN L  95A     58.227  31.255 -52.197  1.00 71.27           C  
ATOM   5575  OD1 ASN L  95A     57.650  30.580 -53.061  1.00 61.30           O  
ATOM   5576  ND2 ASN L  95A     59.278  30.785 -51.533  1.00 67.17           N  
ATOM   5577  N   LEU L  96      55.236  34.419 -51.401  1.00 32.69           N  
ATOM   5578  CA  LEU L  96      54.524  35.451 -50.651  1.00 30.87           C  
ATOM   5579  C   LEU L  96      54.443  34.985 -49.180  1.00 31.44           C  
ATOM   5580  O   LEU L  96      53.938  33.896 -48.895  1.00 31.74           O  
ATOM   5581  CB  LEU L  96      53.121  35.679 -51.263  1.00 31.25           C  
ATOM   5582  CG  LEU L  96      52.347  36.925 -50.820  1.00 34.60           C  
ATOM   5583  CD1 LEU L  96      53.174  38.228 -51.008  1.00 34.17           C  
ATOM   5584  CD2 LEU L  96      51.040  37.043 -51.594  1.00 35.91           C  
ATOM   5585  N   PHE L  97      55.026  35.777 -48.269  1.00 24.48           N  
ATOM   5586  CA  PHE L  97      55.087  35.496 -46.840  1.00 23.93           C  
ATOM   5587  C   PHE L  97      54.066  36.380 -46.120  1.00 26.62           C  
ATOM   5588  O   PHE L  97      53.886  37.525 -46.508  1.00 24.48           O  
ATOM   5589  CB  PHE L  97      56.491  35.803 -46.304  1.00 27.33           C  
ATOM   5590  CG  PHE L  97      57.580  34.812 -46.677  1.00 31.51           C  
ATOM   5591  CD1 PHE L  97      57.457  34.003 -47.803  1.00 37.21           C  
ATOM   5592  CD2 PHE L  97      58.725  34.692 -45.903  1.00 36.31           C  
ATOM   5593  CE1 PHE L  97      58.472  33.106 -48.160  1.00 39.52           C  
ATOM   5594  CE2 PHE L  97      59.732  33.778 -46.249  1.00 41.38           C  
ATOM   5595  CZ  PHE L  97      59.599  33.000 -47.381  1.00 39.75           C  
ATOM   5596  N   PHE L  98      53.436  35.857 -45.072  1.00 23.30           N  
ATOM   5597  CA  PHE L  98      52.414  36.572 -44.296  1.00 22.99           C  
ATOM   5598  C   PHE L  98      52.717  36.663 -42.790  1.00 26.15           C  
ATOM   5599  O   PHE L  98      53.274  35.730 -42.221  1.00 26.08           O  
ATOM   5600  CB  PHE L  98      51.082  35.821 -44.428  1.00 24.80           C  
ATOM   5601  CG  PHE L  98      50.364  36.012 -45.739  1.00 26.84           C  
ATOM   5602  CD1 PHE L  98      49.443  37.046 -45.900  1.00 29.53           C  
ATOM   5603  CD2 PHE L  98      50.543  35.115 -46.785  1.00 31.79           C  
ATOM   5604  CE1 PHE L  98      48.768  37.215 -47.108  1.00 30.40           C  
ATOM   5605  CE2 PHE L  98      49.856  35.279 -47.990  1.00 34.21           C  
ATOM   5606  CZ  PHE L  98      48.973  36.326 -48.141  1.00 30.91           C  
ATOM   5607  N   GLY L  99      52.270  37.751 -42.151  1.00 21.21           N  
ATOM   5608  CA  GLY L  99      52.315  37.894 -40.703  1.00 20.34           C  
ATOM   5609  C   GLY L  99      51.072  37.228 -40.110  1.00 23.09           C  
ATOM   5610  O   GLY L  99      50.130  36.900 -40.842  1.00 23.11           O  
ATOM   5611  N   GLY L 100      51.057  37.031 -38.790  1.00 20.11           N  
ATOM   5612  CA  GLY L 100      49.969  36.366 -38.072  1.00 19.51           C  
ATOM   5613  C   GLY L 100      48.793  37.232 -37.649  1.00 20.33           C  
ATOM   5614  O   GLY L 100      47.827  36.725 -37.060  1.00 20.36           O  
ATOM   5615  N   GLY L 101      48.887  38.544 -37.896  1.00 16.98           N  
ATOM   5616  CA  GLY L 101      47.811  39.461 -37.569  1.00 15.37           C  
ATOM   5617  C   GLY L 101      47.959  40.210 -36.268  1.00 19.50           C  
ATOM   5618  O   GLY L 101      48.463  39.671 -35.283  1.00 19.65           O  
ATOM   5619  N   THR L 102      47.447  41.445 -36.252  1.00 15.97           N  
ATOM   5620  CA  THR L 102      47.402  42.279 -35.060  1.00 14.61           C  
ATOM   5621  C   THR L 102      45.989  42.703 -34.877  1.00 17.96           C  
ATOM   5622  O   THR L 102      45.413  43.307 -35.777  1.00 17.06           O  
ATOM   5623  CB  THR L 102      48.324  43.520 -35.185  1.00 16.99           C  
ATOM   5624  OG1 THR L 102      49.669  43.092 -35.434  1.00 15.09           O  
ATOM   5625  CG2 THR L 102      48.271  44.428 -33.932  1.00 14.85           C  
ATOM   5626  N   LYS L 103      45.436  42.442 -33.692  1.00 16.04           N  
ATOM   5627  CA  LYS L 103      44.105  42.923 -33.325  1.00 15.46           C  
ATOM   5628  C   LYS L 103      44.252  44.377 -32.841  1.00 18.25           C  
ATOM   5629  O   LYS L 103      44.872  44.622 -31.806  1.00 18.00           O  
ATOM   5630  CB  LYS L 103      43.545  42.020 -32.194  1.00 18.17           C  
ATOM   5631  CG  LYS L 103      42.344  42.534 -31.464  1.00 29.62           C  
ATOM   5632  CD  LYS L 103      41.160  42.618 -32.330  1.00 39.11           C  
ATOM   5633  CE  LYS L 103      40.213  43.627 -31.733  1.00 44.69           C  
ATOM   5634  NZ  LYS L 103      39.650  44.447 -32.802  1.00 31.63           N  
ATOM   5635  N   VAL L 104      43.658  45.324 -33.559  1.00 14.34           N  
ATOM   5636  CA  VAL L 104      43.717  46.724 -33.146  1.00 13.42           C  
ATOM   5637  C   VAL L 104      42.348  47.071 -32.489  1.00 16.88           C  
ATOM   5638  O   VAL L 104      41.297  46.957 -33.123  1.00 16.02           O  
ATOM   5639  CB  VAL L 104      44.031  47.684 -34.313  1.00 17.36           C  
ATOM   5640  CG1 VAL L 104      43.818  49.149 -33.880  1.00 17.37           C  
ATOM   5641  CG2 VAL L 104      45.453  47.450 -34.834  1.00 15.86           C  
ATOM   5642  N   THR L 105      42.390  47.466 -31.222  1.00 13.30           N  
ATOM   5643  CA  THR L 105      41.146  47.819 -30.509  1.00 13.90           C  
ATOM   5644  C   THR L 105      41.053  49.300 -30.404  1.00 17.37           C  
ATOM   5645  O   THR L 105      41.998  49.939 -29.909  1.00 16.97           O  
ATOM   5646  CB  THR L 105      41.100  47.207 -29.096  1.00 15.26           C  
ATOM   5647  OG1 THR L 105      41.095  45.780 -29.177  1.00 16.46           O  
ATOM   5648  CG2 THR L 105      39.873  47.705 -28.271  1.00 15.94           C  
ATOM   5649  N   VAL L 106      39.907  49.882 -30.821  1.00 15.15           N  
ATOM   5650  CA  VAL L 106      39.654  51.304 -30.591  1.00 15.12           C  
ATOM   5651  C   VAL L 106      38.938  51.300 -29.229  1.00 17.87           C  
ATOM   5652  O   VAL L 106      37.799  50.822 -29.147  1.00 16.92           O  
ATOM   5653  CB  VAL L 106      38.829  51.973 -31.725  1.00 18.61           C  
ATOM   5654  CG1 VAL L 106      38.457  53.408 -31.350  1.00 18.91           C  
ATOM   5655  CG2 VAL L 106      39.623  51.945 -33.041  1.00 18.94           C  
ATOM   5656  N   LEU L 106A     39.623  51.768 -28.145  1.00 15.55           N  
ATOM   5657  CA  LEU L 106A     39.082  51.619 -26.786  1.00 17.40           C  
ATOM   5658  C   LEU L 106A     37.664  52.115 -26.595  1.00 18.67           C  
ATOM   5659  O   LEU L 106A     37.385  53.272 -26.881  1.00 18.92           O  
ATOM   5660  CB  LEU L 106A     39.986  52.257 -25.710  1.00 17.53           C  
ATOM   5661  CG  LEU L 106A     41.480  51.873 -25.752  1.00 20.46           C  
ATOM   5662  CD1 LEU L 106A     42.276  52.794 -24.812  1.00 22.56           C  
ATOM   5663  CD2 LEU L 106A     41.706  50.432 -25.350  1.00 20.00           C  
ATOM   5664  N   GLY L 107      36.795  51.209 -26.150  1.00 16.51           N  
ATOM   5665  CA  GLY L 107      35.385  51.511 -25.869  1.00 16.81           C  
ATOM   5666  C   GLY L 107      35.064  51.667 -24.401  1.00 19.31           C  
ATOM   5667  O   GLY L 107      33.935  52.017 -24.037  1.00 17.17           O  
ATOM   5668  N   GLN L 108      36.054  51.387 -23.543  1.00 16.33           N  
ATOM   5669  CA  GLN L 108      35.948  51.492 -22.088  1.00 17.24           C  
ATOM   5670  C   GLN L 108      37.374  51.536 -21.533  1.00 20.16           C  
ATOM   5671  O   GLN L 108      38.319  51.329 -22.302  1.00 19.81           O  
ATOM   5672  CB  GLN L 108      35.173  50.279 -21.517  1.00 17.03           C  
ATOM   5673  CG  GLN L 108      35.911  48.959 -21.695  1.00 18.25           C  
ATOM   5674  CD  GLN L 108      34.996  47.784 -21.460  1.00 27.13           C  
ATOM   5675  OE1 GLN L 108      34.138  47.475 -22.290  1.00 21.40           O  
ATOM   5676  NE2 GLN L 108      35.147  47.142 -20.304  1.00 17.05           N  
ATOM   5677  N   PRO L 109      37.573  51.747 -20.212  1.00 18.83           N  
ATOM   5678  CA  PRO L 109      38.949  51.823 -19.701  1.00 19.00           C  
ATOM   5679  C   PRO L 109      39.686  50.499 -19.814  1.00 19.40           C  
ATOM   5680  O   PRO L 109      39.099  49.406 -19.717  1.00 19.29           O  
ATOM   5681  CB  PRO L 109      38.776  52.208 -18.230  1.00 21.13           C  
ATOM   5682  CG  PRO L 109      37.404  52.865 -18.172  1.00 25.30           C  
ATOM   5683  CD  PRO L 109      36.588  52.064 -19.147  1.00 20.65           C  
TER    5684      PRO L 109                                                      
