# Supplementary material for: SARS-CoV-2 Spike Protein Interaction Space
Source: Int J Mol Sci. 2023 Jul 27;24(15):12058. doi: 10.3390/ijms241512058 (PMC10418891; doi:10.3390/ijms241512058)
Supplement: Supplementary file 1 [file ijms-24-12058-s001.zip › Supplementary Material File S1/5M76.pdb]

REMARK 950 NUMBERING  Kabat
REMARK 950 METHOD     X-ray crystal structure
REMARK 950 RESOLUTION 2.500
REMARK 950 R-FACTOR   0.241
REMARK 950 R-FREE     0.282
REMARK 950 CHAIN-TYPE LABEL ORIGINAL
REMARK 950 CHAIN L    L    A
REMARK 950 CHAIN L    L    B
REMARK 950 MOLECULE : A : LIGHT CHAIN DIMER
REMARK 950 SPECIES  : A : HOMO SAPIENS
SEQRES   1 L 215  GLN SER ALA LEU THR GLN GLU ALA SER VAL SER GLY THR          
SEQRES   2 L 215  VAL GLY GLN LYS VAL THR LEU SER CYS THR GLY ASN THR          
SEQRES   3 L 215  ASN ASN ILE GLY SER TYR PRO VAL GLY TRP TYR GLN GLN          
SEQRES   4 L 215  ILE SER HIS GLY PRO PRO LYS THR VAL MET PHE GLY ASN          
SEQRES   5 L 215  SER LEU PRO SER GLY ILE PRO ASP ARG PHE SER GLY SER          
SEQRES   6 L 215  LYS SER GLY THR THR ALA SER LEU THR ILE SER GLY LEU          
SEQRES   7 L 215  GLN PRO GLU ASP GLU ALA ASP TYR TYR CYS SER THR TRP          
SEQRES   8 L 215  ASP SER SER LEU SER VAL GLN VAL ILE GLY GLY GLY THR          
SEQRES   9 L 215  LYS VAL THR VAL LEU GLY GLN PRO LYS ALA ALA PRO SER          
SEQRES  10 L 215  VAL THR LEU PHE PRO PRO SER SER GLU GLU LEU GLN ALA          
SEQRES  11 L 215  ASN LYS ALA THR LEU VAL CYS LEU ILE SER ASP PHE TYR          
SEQRES  12 L 215  PRO GLY ALA VAL THR VAL ALA TRP LYS ALA ASP SER SER          
SEQRES  13 L 215  PRO VAL LYS ALA GLY VAL GLU THR THR THR PRO SER LYS          
SEQRES  14 L 215  GLN SER ASN ASN LYS TYR ALA ALA SER SER TYR LEU SER          
SEQRES  15 L 215  LEU THR PRO GLU GLN TRP LYS SER HIS ARG SER TYR SER          
SEQRES  16 L 215  CYS GLN VAL THR HIS GLU GLY SER THR VAL GLU LYS THR          
SEQRES  17 L 215  VAL ALA PRO THR GLU CYS SER                                  
SEQRES   1 L 215  GLN SER ALA LEU THR GLN GLU ALA SER VAL SER GLY THR          
SEQRES   2 L 215  VAL GLY GLN LYS VAL THR LEU SER CYS THR GLY ASN THR          
SEQRES   3 L 215  ASN ASN ILE GLY SER TYR PRO VAL GLY TRP TYR GLN GLN          
SEQRES   4 L 215  ILE SER HIS GLY PRO PRO LYS THR VAL MET PHE GLY ASN          
SEQRES   5 L 215  SER LEU PRO SER GLY ILE PRO ASP ARG PHE SER GLY SER          
SEQRES   6 L 215  LYS SER GLY THR THR ALA SER LEU THR ILE SER GLY LEU          
SEQRES   7 L 215  GLN PRO GLU ASP GLU ALA ASP TYR TYR CYS SER THR TRP          
SEQRES   8 L 215  ASP SER SER LEU SER VAL GLN VAL ILE GLY GLY GLY THR          
SEQRES   9 L 215  LYS VAL THR VAL LEU GLY GLN PRO LYS ALA ALA PRO SER          
SEQRES  10 L 215  VAL THR LEU PHE PRO PRO SER SER GLU GLU LEU GLN ALA          
SEQRES  11 L 215  ASN LYS ALA THR LEU VAL CYS LEU ILE SER ASP PHE TYR          
SEQRES  12 L 215  PRO GLY ALA VAL THR VAL ALA TRP LYS ALA ASP SER SER          
SEQRES  13 L 215  PRO VAL LYS ALA GLY VAL GLU THR THR THR PRO SER LYS          
SEQRES  14 L 215  GLN SER ASN ASN LYS TYR ALA ALA SER SER TYR LEU SER          
SEQRES  15 L 215  LEU THR PRO GLU GLN TRP LYS SER HIS ARG SER TYR SER          
SEQRES  16 L 215  CYS GLN VAL THR HIS GLU GLY SER THR VAL GLU LYS THR          
SEQRES  17 L 215  VAL ALA PRO THR GLU CYS SER                                  
ATOM      1  N   SER L   2     -11.838  -9.296 -13.866  1.00 56.25           N  
ATOM      2  CA  SER L   2     -10.407  -9.489 -14.070  1.00 57.08           C  
ATOM      3  C   SER L   2     -10.080  -9.665 -15.546  1.00 66.25           C  
ATOM      4  O   SER L   2     -10.818 -10.324 -16.279  1.00 71.17           O  
ATOM      5  CB  SER L   2      -9.909 -10.707 -13.290  1.00 53.27           C  
ATOM      6  OG  SER L   2     -10.448 -10.739 -11.984  1.00 52.54           O  
ATOM      7  N   ALA L   3      -8.968  -9.071 -15.981  1.00 60.32           N  
ATOM      8  CA  ALA L   3      -8.465  -9.330 -17.322  1.00 55.41           C  
ATOM      9  C   ALA L   3      -7.719 -10.654 -17.409  1.00 52.36           C  
ATOM     10  O   ALA L   3      -7.512 -11.164 -18.515  1.00 51.25           O  
ATOM     11  CB  ALA L   3      -7.555  -8.188 -17.778  1.00 55.10           C  
ATOM     12  N   LEU L   4      -7.316 -11.216 -16.272  1.00 50.82           N  
ATOM     13  CA  LEU L   4      -6.649 -12.507 -16.211  1.00 48.94           C  
ATOM     14  C   LEU L   4      -7.516 -13.480 -15.427  1.00 47.39           C  
ATOM     15  O   LEU L   4      -8.043 -13.138 -14.364  1.00 47.46           O  
ATOM     16  CB  LEU L   4      -5.270 -12.388 -15.560  1.00 46.93           C  
ATOM     17  CG  LEU L   4      -4.316 -11.385 -16.210  1.00 47.29           C  
ATOM     18  CD1 LEU L   4      -2.919 -11.514 -15.625  1.00 44.71           C  
ATOM     19  CD2 LEU L   4      -4.291 -11.562 -17.720  1.00 49.56           C  
ATOM     20  N   THR L   5      -7.655 -14.694 -15.951  1.00 45.13           N  
ATOM     21  CA  THR L   5      -8.559 -15.694 -15.402  1.00 43.80           C  
ATOM     22  C   THR L   5      -7.764 -16.814 -14.744  1.00 40.45           C  
ATOM     23  O   THR L   5      -6.883 -17.409 -15.374  1.00 40.80           O  
ATOM     24  CB  THR L   5      -9.466 -16.261 -16.497  1.00 42.48           C  
ATOM     25  OG1 THR L   5     -10.306 -15.220 -17.009  1.00 43.33           O  
ATOM     26  CG2 THR L   5     -10.333 -17.373 -15.947  1.00 39.11           C  
ATOM     27  N   GLN L   6      -8.081 -17.096 -13.481  1.00 37.89           N  
ATOM     28  CA  GLN L   6      -7.469 -18.182 -12.730  1.00 36.10           C  
ATOM     29  C   GLN L   6      -8.552 -19.019 -12.067  1.00 35.90           C  
ATOM     30  O   GLN L   6      -9.630 -18.518 -11.736  1.00 35.08           O  
ATOM     31  CB  GLN L   6      -6.510 -17.664 -11.651  1.00 35.92           C  
ATOM     32  CG  GLN L   6      -5.215 -17.088 -12.173  1.00 36.63           C  
ATOM     33  CD  GLN L   6      -4.288 -16.659 -11.055  1.00 34.67           C  
ATOM     34  OE1 GLN L   6      -4.422 -15.565 -10.507  1.00 37.76           O  
ATOM     35  NE2 GLN L   6      -3.340 -17.522 -10.709  1.00 34.34           N  
ATOM     36  N   GLU L   7      -8.253 -20.300 -11.869  1.00 36.14           N  
ATOM     37  CA  GLU L   7      -9.153 -21.157 -11.113  1.00 36.61           C  
ATOM     38  C   GLU L   7      -9.176 -20.733  -9.648  1.00 34.62           C  
ATOM     39  O   GLU L   7      -8.176 -20.268  -9.095  1.00 38.48           O  
ATOM     40  CB  GLU L   7      -8.737 -22.624 -11.237  1.00 36.54           C  
ATOM     41  CG  GLU L   7      -7.284 -22.903 -10.895  1.00 36.69           C  
ATOM     42  CD  GLU L   7      -6.435 -23.154 -12.126  1.00 37.66           C  
ATOM     43  OE1 GLU L   7      -6.391 -22.273 -13.010  1.00 37.45           O  
ATOM     44  OE2 GLU L   7      -5.816 -24.235 -12.212  1.00 46.56           O  
ATOM     45  N   ALA L   8     -10.341 -20.899  -9.018  1.00 33.38           N  
ATOM     46  CA  ALA L   8     -10.533 -20.374  -7.670  1.00 33.11           C  
ATOM     47  C   ALA L   8      -9.720 -21.150  -6.640  1.00 33.29           C  
ATOM     48  O   ALA L   8      -9.090 -20.550  -5.761  1.00 32.57           O  
ATOM     49  CB  ALA L   8     -12.017 -20.394  -7.306  1.00 32.50           C  
ATOM     50  N   SER L   9      -9.720 -22.478  -6.727  1.00 33.91           N  
ATOM     51  CA  SER L   9      -9.047 -23.293  -5.727  1.00 33.15           C  
ATOM     52  C   SER L   9      -8.589 -24.603  -6.350  1.00 32.72           C  
ATOM     53  O   SER L   9      -9.226 -25.132  -7.266  1.00 32.88           O  
ATOM     54  CB  SER L   9      -9.959 -23.571  -4.527  1.00 34.76           C  
ATOM     55  OG  SER L   9     -11.073 -24.359  -4.908  1.00 37.18           O  
ATOM     56  N   VAL L  11      -7.475 -25.119  -5.834  1.00 31.96           N  
ATOM     57  CA  VAL L  11      -6.894 -26.386  -6.263  1.00 32.02           C  
ATOM     58  C   VAL L  11      -6.303 -27.069  -5.036  1.00 30.61           C  
ATOM     59  O   VAL L  11      -5.684 -26.415  -4.190  1.00 29.87           O  
ATOM     60  CB  VAL L  11      -5.821 -26.179  -7.355  1.00 31.92           C  
ATOM     61  CG1 VAL L  11      -4.895 -27.380  -7.443  1.00 32.57           C  
ATOM     62  CG2 VAL L  11      -6.474 -25.918  -8.705  1.00 33.10           C  
ATOM     63  N   SER L  12      -6.501 -28.381  -4.928  1.00 31.13           N  
ATOM     64  CA  SER L  12      -5.987 -29.144  -3.802  1.00 31.72           C  
ATOM     65  C   SER L  12      -5.169 -30.327  -4.300  1.00 32.21           C  
ATOM     66  O   SER L  12      -5.272 -30.741  -5.457  1.00 33.77           O  
ATOM     67  CB  SER L  12      -7.117 -29.638  -2.889  1.00 31.80           C  
ATOM     68  OG  SER L  12      -7.829 -30.702  -3.493  1.00 39.43           O  
ATOM     69  N   GLY L  13      -4.349 -30.866  -3.401  1.00 31.57           N  
ATOM     70  CA  GLY L  13      -3.514 -32.012  -3.705  1.00 33.72           C  
ATOM     71  C   GLY L  13      -2.750 -32.500  -2.492  1.00 33.16           C  
ATOM     72  O   GLY L  13      -2.321 -31.694  -1.661  1.00 31.74           O  
ATOM     73  N   THR L  14      -2.574 -33.814  -2.373  1.00 34.02           N  
ATOM     74  CA  THR L  14      -1.886 -34.371  -1.220  1.00 33.67           C  
ATOM     75  C   THR L  14      -0.388 -34.079  -1.296  1.00 34.98           C  
ATOM     76  O   THR L  14       0.134 -33.595  -2.304  1.00 35.79           O  
ATOM     77  CB  THR L  14      -2.126 -35.878  -1.120  1.00 36.14           C  
ATOM     78  OG1 THR L  14      -1.817 -36.499  -2.373  1.00 44.40           O  
ATOM     79  CG2 THR L  14      -3.575 -36.167  -0.758  1.00 34.62           C  
ATOM     80  N   VAL L  15       0.304 -34.381  -0.199  1.00 34.27           N  
ATOM     81  CA  VAL L  15       1.744 -34.162  -0.122  1.00 34.80           C  
ATOM     82  C   VAL L  15       2.439 -35.083  -1.115  1.00 36.26           C  
ATOM     83  O   VAL L  15       2.266 -36.307  -1.076  1.00 37.65           O  
ATOM     84  CB  VAL L  15       2.257 -34.393   1.304  1.00 33.64           C  
ATOM     85  CG1 VAL L  15       3.758 -34.155   1.374  1.00 34.22           C  
ATOM     86  CG2 VAL L  15       1.519 -33.493   2.283  1.00 32.18           C  
ATOM     87  N   GLY L  16       3.229 -34.498  -2.012  1.00 36.69           N  
ATOM     88  CA  GLY L  16       3.932 -35.245  -3.031  1.00 38.18           C  
ATOM     89  C   GLY L  16       3.292 -35.208  -4.402  1.00 38.49           C  
ATOM     90  O   GLY L  16       3.922 -35.651  -5.370  1.00 39.07           O  
ATOM     91  N   GLN L  17       2.068 -34.698  -4.516  1.00 39.17           N  
ATOM     92  CA  GLN L  17       1.398 -34.628  -5.804  1.00 40.08           C  
ATOM     93  C   GLN L  17       1.997 -33.528  -6.673  1.00 41.25           C  
ATOM     94  O   GLN L  17       2.646 -32.595  -6.193  1.00 41.30           O  
ATOM     95  CB  GLN L  17      -0.099 -34.371  -5.627  1.00 39.68           C  
ATOM     96  CG  GLN L  17      -0.935 -35.606  -5.348  1.00 39.60           C  
ATOM     97  CD  GLN L  17      -2.412 -35.375  -5.616  1.00 41.34           C  
ATOM     98  OE1 GLN L  17      -3.228 -35.358  -4.696  1.00 41.45           O  
ATOM     99  NE2 GLN L  17      -2.760 -35.196  -6.886  1.00 43.91           N  
ATOM    100  N   LYS L  18       1.767 -33.651  -7.977  1.00 42.96           N  
ATOM    101  CA  LYS L  18       2.085 -32.602  -8.935  1.00 45.02           C  
ATOM    102  C   LYS L  18       0.818 -31.812  -9.231  1.00 43.37           C  
ATOM    103  O   LYS L  18      -0.224 -32.399  -9.539  1.00 45.01           O  
ATOM    104  CB  LYS L  18       2.665 -33.185 -10.225  1.00 48.14           C  
ATOM    105  CG  LYS L  18       2.576 -32.241 -11.414  1.00 49.23           C  
ATOM    106  CD  LYS L  18       3.098 -32.876 -12.693  1.00 55.16           C  
ATOM    107  CE  LYS L  18       4.609 -33.030 -12.660  1.00 60.06           C  
ATOM    108  NZ  LYS L  18       5.143 -33.462 -13.980  1.00 60.30           N  
ATOM    109  N   VAL L  19       0.912 -30.489  -9.133  1.00 42.63           N  
ATOM    110  CA  VAL L  19      -0.227 -29.596  -9.302  1.00 41.21           C  
ATOM    111  C   VAL L  19       0.142 -28.521 -10.314  1.00 40.10           C  
ATOM    112  O   VAL L  19       1.278 -28.035 -10.331  1.00 39.02           O  
ATOM    113  CB  VAL L  19      -0.649 -28.978  -7.951  1.00 41.08           C  
ATOM    114  CG1 VAL L  19      -1.315 -27.626  -8.137  1.00 46.05           C  
ATOM    115  CG2 VAL L  19      -1.578 -29.927  -7.217  1.00 40.12           C  
ATOM    116  N   THR L  20      -0.817 -28.154 -11.164  1.00 38.66           N  
ATOM    117  CA  THR L  20      -0.610 -27.147 -12.197  1.00 37.59           C  
ATOM    118  C   THR L  20      -1.693 -26.085 -12.092  1.00 36.85           C  
ATOM    119  O   THR L  20      -2.884 -26.403 -12.156  1.00 38.64           O  
ATOM    120  CB  THR L  20      -0.621 -27.778 -13.591  1.00 36.46           C  
ATOM    121  OG1 THR L  20       0.478 -28.689 -13.710  1.00 36.32           O  
ATOM    122  CG2 THR L  20      -0.510 -26.707 -14.659  1.00 36.38           C  
ATOM    123  N   LEU L  21      -1.278 -24.834 -11.923  1.00 36.38           N  
ATOM    124  CA  LEU L  21      -2.169 -23.687 -11.981  1.00 36.68           C  
ATOM    125  C   LEU L  21      -2.040 -23.023 -13.346  1.00 36.49           C  
ATOM    126  O   LEU L  21      -0.984 -23.079 -13.980  1.00 36.91           O  
ATOM    127  CB  LEU L  21      -1.842 -22.678 -10.877  1.00 35.65           C  
ATOM    128  CG  LEU L  21      -1.516 -23.237  -9.490  1.00 34.31           C  
ATOM    129  CD1 LEU L  21      -1.234 -22.106  -8.516  1.00 31.78           C  
ATOM    130  CD2 LEU L  21      -2.638 -24.124  -8.975  1.00 34.58           C  
ATOM    131  N   SER L  22      -3.122 -22.394 -13.796  1.00 36.70           N  
ATOM    132  CA  SER L  22      -3.161 -21.790 -15.119  1.00 37.93           C  
ATOM    133  C   SER L  22      -3.563 -20.325 -15.024  1.00 37.86           C  
ATOM    134  O   SER L  22      -4.320 -19.925 -14.135  1.00 36.98           O  
ATOM    135  CB  SER L  22      -4.131 -22.533 -16.045  1.00 38.13           C  
ATOM    136  OG  SER L  22      -5.449 -22.499 -15.532  1.00 38.00           O  
ATOM    137  N   CYS L  23      -3.046 -19.532 -15.961  1.00 39.72           N  
ATOM    138  CA  CYS L  23      -3.329 -18.102 -16.052  1.00 40.45           C  
ATOM    139  C   CYS L  23      -3.742 -17.799 -17.486  1.00 42.91           C  
ATOM    140  O   CYS L  23      -2.924 -17.902 -18.405  1.00 44.98           O  
ATOM    141  CB  CYS L  23      -2.110 -17.275 -15.642  1.00 39.80           C  
ATOM    142  SG  CYS L  23      -2.392 -15.498 -15.442  1.00 37.81           S  
ATOM    143  N   THR L  24      -5.004 -17.426 -17.673  1.00 44.32           N  
ATOM    144  CA  THR L  24      -5.598 -17.221 -18.987  1.00 45.99           C  
ATOM    145  C   THR L  24      -5.763 -15.729 -19.254  1.00 48.14           C  
ATOM    146  O   THR L  24      -6.188 -14.978 -18.371  1.00 47.21           O  
ATOM    147  CB  THR L  24      -6.955 -17.931 -19.068  1.00 45.02           C  
ATOM    148  OG1 THR L  24      -6.764 -19.347 -18.943  1.00 44.14           O  
ATOM    149  CG2 THR L  24      -7.645 -17.638 -20.375  1.00 46.69           C  
ATOM    150  N   GLY L  25      -5.428 -15.295 -20.472  1.00 55.59           N  
ATOM    151  CA  GLY L  25      -5.447 -13.872 -20.765  1.00 54.41           C  
ATOM    152  C   GLY L  25      -5.761 -13.442 -22.186  1.00 57.14           C  
ATOM    153  O   GLY L  25      -6.816 -13.776 -22.732  1.00 56.42           O  
ATOM    154  N   ASN L  26      -4.846 -12.676 -22.784  1.00 66.38           N  
ATOM    155  CA  ASN L  26      -5.056 -12.023 -24.070  1.00 59.14           C  
ATOM    156  C   ASN L  26      -3.774 -12.126 -24.886  1.00 58.60           C  
ATOM    157  O   ASN L  26      -2.797 -12.757 -24.472  1.00 58.36           O  
ATOM    158  CB  ASN L  26      -5.449 -10.550 -23.878  1.00 59.26           C  
ATOM    159  CG  ASN L  26      -6.943 -10.311 -24.005  1.00 60.54           C  
ATOM    160  OD1 ASN L  26      -7.747 -11.239 -23.919  1.00 61.00           O  
ATOM    161  ND2 ASN L  26      -7.322  -9.051 -24.187  1.00 59.65           N  
ATOM    162  N   THR L  27      -3.777 -11.494 -26.060  1.00 58.71           N  
ATOM    163  CA  THR L  27      -2.545 -11.306 -26.814  1.00 59.19           C  
ATOM    164  C   THR L  27      -1.790 -10.061 -26.377  1.00 58.31           C  
ATOM    165  O   THR L  27      -0.556 -10.044 -26.426  1.00 57.99           O  
ATOM    166  CB  THR L  27      -2.835 -11.216 -28.316  1.00 60.34           C  
ATOM    167  OG1 THR L  27      -3.823 -10.207 -28.558  1.00 68.38           O  
ATOM    168  CG2 THR L  27      -3.327 -12.549 -28.847  1.00 57.68           C  
ATOM    169  N   ASN L  27A     -2.503  -9.023 -25.945  1.00 58.48           N  
ATOM    170  CA  ASN L  27A     -1.868  -7.790 -25.505  1.00 58.46           C  
ATOM    171  C   ASN L  27A     -1.356  -7.857 -24.071  1.00 58.60           C  
ATOM    172  O   ASN L  27A     -0.742  -6.890 -23.609  1.00 58.56           O  
ATOM    173  CB  ASN L  27A     -2.838  -6.611 -25.659  1.00 59.28           C  
ATOM    174  CG  ASN L  27A     -4.213  -6.900 -25.089  1.00 61.01           C  
ATOM    175  OD1 ASN L  27A     -4.370  -7.098 -23.885  1.00 61.96           O  
ATOM    176  ND2 ASN L  27A     -5.224  -6.901 -25.953  1.00 61.61           N  
ATOM    177  N   ASN L  27B     -1.584  -8.959 -23.356  1.00 58.28           N  
ATOM    178  CA  ASN L  27B     -1.030  -9.087 -22.013  1.00 57.66           C  
ATOM    179  C   ASN L  27B     -0.269 -10.399 -21.840  1.00 56.85           C  
ATOM    180  O   ASN L  27B      0.966 -10.402 -21.827  1.00 58.21           O  
ATOM    181  CB  ASN L  27B     -2.132  -8.938 -20.954  1.00 56.10           C  
ATOM    182  CG  ASN L  27B     -3.337  -9.818 -21.218  1.00 56.45           C  
ATOM    183  OD1 ASN L  27B     -3.204 -10.967 -21.637  1.00 56.97           O  
ATOM    184  ND2 ASN L  27B     -4.525  -9.283 -20.963  1.00 56.38           N  
ATOM    185  N   ILE L  28      -0.984 -11.518 -21.713  1.00 56.94           N  
ATOM    186  CA  ILE L  28      -0.315 -12.794 -21.476  1.00 56.92           C  
ATOM    187  C   ILE L  28       0.385 -13.279 -22.739  1.00 58.17           C  
ATOM    188  O   ILE L  28       1.498 -13.813 -22.681  1.00 58.37           O  
ATOM    189  CB  ILE L  28      -1.319 -13.834 -20.945  1.00 55.03           C  
ATOM    190  CG1 ILE L  28      -1.739 -13.481 -19.519  1.00 52.64           C  
ATOM    191  CG2 ILE L  28      -0.724 -15.234 -20.990  1.00 58.73           C  
ATOM    192  CD1 ILE L  28      -2.496 -14.581 -18.822  1.00 49.13           C  
ATOM    193  N   GLY L  29      -0.240 -13.087 -23.899  1.00 58.61           N  
ATOM    194  CA  GLY L  29       0.328 -13.585 -25.139  1.00 60.23           C  
ATOM    195  C   GLY L  29       1.591 -12.881 -25.595  1.00 64.24           C  
ATOM    196  O   GLY L  29       2.264 -13.388 -26.499  1.00 67.25           O  
ATOM    197  N   SER L  30       1.937 -11.741 -24.992  1.00 66.60           N  
ATOM    198  CA  SER L  30       3.060 -10.940 -25.458  1.00 62.81           C  
ATOM    199  C   SER L  30       4.147 -10.700 -24.422  1.00 62.27           C  
ATOM    200  O   SER L  30       5.288 -10.431 -24.812  1.00 62.10           O  
ATOM    201  CB  SER L  30       2.570  -9.573 -25.962  1.00 61.69           C  
ATOM    202  OG  SER L  30       1.570  -9.721 -26.953  1.00 65.32           O  
ATOM    203  N   TYR L  31       3.845 -10.787 -23.135  1.00 61.72           N  
ATOM    204  CA  TYR L  31       4.758 -10.363 -22.088  1.00 60.48           C  
ATOM    205  C   TYR L  31       4.999 -11.490 -21.097  1.00 59.64           C  
ATOM    206  O   TYR L  31       4.183 -12.411 -20.980  1.00 68.32           O  
ATOM    207  CB  TYR L  31       4.200  -9.128 -21.366  1.00 59.21           C  
ATOM    208  CG  TYR L  31       3.948  -7.962 -22.297  1.00 60.12           C  
ATOM    209  CD1 TYR L  31       4.978  -7.109 -22.669  1.00 58.72           C  
ATOM    210  CD2 TYR L  31       2.683  -7.727 -22.818  1.00 60.21           C  
ATOM    211  CE1 TYR L  31       4.752  -6.046 -23.524  1.00 60.12           C  
ATOM    212  CE2 TYR L  31       2.446  -6.666 -23.670  1.00 59.99           C  
ATOM    213  CZ  TYR L  31       3.483  -5.829 -24.021  1.00 60.26           C  
ATOM    214  OH  TYR L  31       3.249  -4.774 -24.873  1.00 57.07           O  
ATOM    215  N   PRO L  32       6.122 -11.456 -20.377  1.00 57.14           N  
ATOM    216  CA  PRO L  32       6.399 -12.518 -19.403  1.00 55.19           C  
ATOM    217  C   PRO L  32       5.439 -12.461 -18.224  1.00 52.19           C  
ATOM    218  O   PRO L  32       5.019 -11.386 -17.790  1.00 51.62           O  
ATOM    219  CB  PRO L  32       7.841 -12.234 -18.967  1.00 53.15           C  
ATOM    220  CG  PRO L  32       8.028 -10.778 -19.222  1.00 53.58           C  
ATOM    221  CD  PRO L  32       7.225 -10.482 -20.455  1.00 56.65           C  
ATOM    222  N   VAL L  33       5.099 -13.640 -17.708  1.00 51.18           N  
ATOM    223  CA  VAL L  33       4.156 -13.789 -16.605  1.00 46.89           C  
ATOM    224  C   VAL L  33       4.931 -13.992 -15.312  1.00 42.86           C  
ATOM    225  O   VAL L  33       5.938 -14.712 -15.280  1.00 43.29           O  
ATOM    226  CB  VAL L  33       3.190 -14.963 -16.860  1.00 46.51           C  
ATOM    227  CG1 VAL L  33       2.241 -15.151 -15.683  1.00 41.81           C  
ATOM    228  CG2 VAL L  33       2.411 -14.737 -18.145  1.00 49.65           C  
ATOM    229  N   GLY L  34       4.467 -13.356 -14.247  1.00 40.80           N  
ATOM    230  CA  GLY L  34       5.027 -13.548 -12.918  1.00 38.39           C  
ATOM    231  C   GLY L  34       3.999 -14.168 -11.991  1.00 36.73           C  
ATOM    232  O   GLY L  34       2.806 -13.873 -12.093  1.00 36.39           O  
ATOM    233  N   TRP L  35       4.467 -15.030 -11.092  1.00 35.75           N  
ATOM    234  CA  TRP L  35       3.616 -15.700 -10.118  1.00 34.90           C  
ATOM    235  C   TRP L  35       4.025 -15.280  -8.713  1.00 33.88           C  
ATOM    236  O   TRP L  35       5.217 -15.173  -8.410  1.00 34.84           O  
ATOM    237  CB  TRP L  35       3.703 -17.222 -10.261  1.00 34.55           C  
ATOM    238  CG  TRP L  35       3.202 -17.731 -11.578  1.00 34.34           C  
ATOM    239  CD1 TRP L  35       3.909 -17.834 -12.740  1.00 35.76           C  
ATOM    240  CD2 TRP L  35       1.883 -18.210 -11.869  1.00 34.08           C  
ATOM    241  NE1 TRP L  35       3.113 -18.344 -13.736  1.00 35.58           N  
ATOM    242  CE2 TRP L  35       1.864 -18.584 -13.226  1.00 35.58           C  
ATOM    243  CE3 TRP L  35       0.717 -18.357 -11.113  1.00 33.96           C  
ATOM    244  CZ2 TRP L  35       0.726 -19.096 -13.843  1.00 36.86           C  
ATOM    245  CZ3 TRP L  35      -0.412 -18.866 -11.728  1.00 34.57           C  
ATOM    246  CH2 TRP L  35      -0.399 -19.229 -13.078  1.00 35.98           C  
ATOM    247  N   TYR L  36       3.031 -15.049  -7.854  1.00 33.64           N  
ATOM    248  CA  TYR L  36       3.258 -14.505  -6.522  1.00 33.53           C  
ATOM    249  C   TYR L  36       2.502 -15.323  -5.486  1.00 31.77           C  
ATOM    250  O   TYR L  36       1.362 -15.734  -5.716  1.00 30.59           O  
ATOM    251  CB  TYR L  36       2.831 -13.033  -6.455  1.00 34.11           C  
ATOM    252  CG  TYR L  36       3.377 -12.204  -7.597  1.00 35.32           C  
ATOM    253  CD1 TYR L  36       4.611 -11.576  -7.499  1.00 37.59           C  
ATOM    254  CD2 TYR L  36       2.662 -12.062  -8.779  1.00 35.52           C  
ATOM    255  CE1 TYR L  36       5.115 -10.823  -8.545  1.00 38.42           C  
ATOM    256  CE2 TYR L  36       3.158 -11.314  -9.827  1.00 36.87           C  
ATOM    257  CZ  TYR L  36       4.383 -10.696  -9.706  1.00 36.98           C  
ATOM    258  OH  TYR L  36       4.876  -9.950 -10.751  1.00 41.44           O  
ATOM    259  N   GLN L  37       3.167 -15.611  -4.396  1.00 32.71           N  
ATOM    260  CA  GLN L  37       2.623 -16.445  -3.361  1.00 33.65           C  
ATOM    261  C   GLN L  37       2.371 -15.638  -2.101  1.00 35.68           C  
ATOM    262  O   GLN L  37       3.262 -15.027  -1.580  1.00 35.78           O  
ATOM    263  CB  GLN L  37       3.630 -17.575  -3.127  1.00 33.33           C  
ATOM    264  CG  GLN L  37       3.277 -18.630  -2.114  1.00 34.63           C  
ATOM    265  CD  GLN L  37       4.503 -19.352  -1.617  1.00 35.27           C  
ATOM    266  OE1 GLN L  37       5.454 -18.730  -1.211  1.00 42.90           O  
ATOM    267  NE2 GLN L  37       4.485 -20.655  -1.659  1.00 33.79           N  
ATOM    268  N   GLN L  38       1.146 -15.688  -1.601  1.00 37.77           N  
ATOM    269  CA  GLN L  38       0.769 -15.001  -0.379  1.00 42.75           C  
ATOM    270  C   GLN L  38       0.292 -15.983   0.682  1.00 50.84           C  
ATOM    271  O   GLN L  38      -0.602 -16.761   0.445  1.00 71.84           O  
ATOM    272  CB  GLN L  38      -0.325 -13.968  -0.650  1.00 42.01           C  
ATOM    273  CG  GLN L  38      -1.021 -13.466   0.601  1.00 47.17           C  
ATOM    274  CD  GLN L  38      -1.354 -12.005   0.584  1.00 47.14           C  
ATOM    275  OE1 GLN L  38      -0.684 -11.197   1.230  1.00 55.08           O  
ATOM    276  NE2 GLN L  38      -2.417 -11.659  -0.122  1.00 43.59           N  
ATOM    277  N   ILE L  39       0.872 -15.916   1.868  1.00 47.58           N  
ATOM    278  CA  ILE L  39       0.483 -16.800   2.943  1.00 49.95           C  
ATOM    279  C   ILE L  39       0.036 -16.020   4.162  1.00 55.65           C  
ATOM    280  O   ILE L  39       0.537 -14.948   4.399  1.00 68.70           O  
ATOM    281  CB  ILE L  39       1.666 -17.691   3.324  1.00 49.52           C  
ATOM    282  CG1 ILE L  39       2.175 -18.420   2.102  1.00 45.68           C  
ATOM    283  CG2 ILE L  39       1.271 -18.722   4.361  1.00 50.70           C  
ATOM    284  CD1 ILE L  39       3.274 -19.388   2.427  1.00 46.85           C  
ATOM    285  N   SER L  40      -0.903 -16.562   4.931  1.00 56.46           N  
ATOM    286  CA  SER L  40      -1.424 -15.932   6.157  1.00 56.82           C  
ATOM    287  C   SER L  40      -1.610 -14.450   5.980  1.00 57.93           C  
ATOM    288  O   SER L  40      -1.499 -13.701   6.926  1.00 55.69           O  
ATOM    289  CB  SER L  40      -0.444 -16.156   7.300  1.00 57.00           C  
ATOM    290  OG  SER L  40       0.627 -15.215   7.266  1.00 57.56           O  
ATOM    291  N   HIS L  41      -1.879 -14.030   4.753  1.00 61.69           N  
ATOM    292  CA  HIS L  41      -1.963 -12.631   4.406  1.00 61.14           C  
ATOM    293  C   HIS L  41      -0.669 -11.989   4.885  1.00 62.09           C  
ATOM    294  O   HIS L  41      -0.664 -10.958   5.543  1.00 68.85           O  
ATOM    295  CB  HIS L  41      -3.214 -11.934   4.910  1.00 30.00           C  
ATOM    296  CG  HIS L  41      -3.872 -11.078   3.865  1.00 30.00           C  
ATOM    297  ND1 HIS L  41      -4.299 -11.578   2.652  1.00 30.00           N  
ATOM    298  CD2 HIS L  41      -4.153  -9.754   3.841  1.00 30.00           C  
ATOM    299  CE1 HIS L  41      -4.813 -10.603   1.929  1.00 30.00           C  
ATOM    300  NE2 HIS L  41      -4.737  -9.487   2.625  1.00 30.00           N  
ATOM    301  N   GLY L  42       0.429 -12.647   4.533  1.00 60.56           N  
ATOM    302  CA  GLY L  42       1.765 -12.204   4.862  1.00 63.13           C  
ATOM    303  C   GLY L  42       2.385 -11.479   3.684  1.00 59.32           C  
ATOM    304  O   GLY L  42       1.689 -11.190   2.706  1.00 55.23           O  
ATOM    305  N   PRO L  43       3.739 -11.182   3.788  1.00 51.15           N  
ATOM    306  CA  PRO L  43       4.287 -10.479   2.624  1.00 43.70           C  
ATOM    307  C   PRO L  43       4.370 -11.446   1.487  1.00 43.27           C  
ATOM    308  O   PRO L  43       4.868 -12.541   1.672  1.00 44.48           O  
ATOM    309  CB  PRO L  43       5.679 -10.085   3.071  1.00 42.80           C  
ATOM    310  CG  PRO L  43       6.090 -11.182   3.930  1.00 45.00           C  
ATOM    311  CD  PRO L  43       4.890 -11.433   4.756  1.00 47.78           C  
ATOM    312  N   PRO L  44       3.888 -11.067   0.321  1.00 40.05           N  
ATOM    313  CA  PRO L  44       3.930 -12.018  -0.780  1.00 37.96           C  
ATOM    314  C   PRO L  44       5.292 -12.144  -1.419  1.00 34.86           C  
ATOM    315  O   PRO L  44       6.082 -11.235  -1.461  1.00 34.43           O  
ATOM    316  CB  PRO L  44       2.963 -11.436  -1.792  1.00 36.99           C  
ATOM    317  CG  PRO L  44       2.093 -10.546  -1.037  1.00 38.08           C  
ATOM    318  CD  PRO L  44       3.058  -9.886  -0.158  1.00 41.88           C  
ATOM    319  N   LYS L  45       5.546 -13.321  -1.933  1.00 34.65           N  
ATOM    320  CA  LYS L  45       6.797 -13.617  -2.560  1.00 35.40           C  
ATOM    321  C   LYS L  45       6.612 -14.125  -3.970  1.00 34.51           C  
ATOM    322  O   LYS L  45       5.764 -14.934  -4.227  1.00 33.63           O  
ATOM    323  CB  LYS L  45       7.479 -14.683  -1.727  1.00 37.27           C  
ATOM    324  CG  LYS L  45       8.900 -14.969  -2.123  1.00 41.35           C  
ATOM    325  CD  LYS L  45       9.235 -16.398  -1.799  1.00 43.34           C  
ATOM    326  CE  LYS L  45       9.252 -16.613  -0.314  1.00 48.48           C  
ATOM    327  NZ  LYS L  45       9.367 -18.055  -0.027  1.00 53.10           N  
ATOM    328  N   THR L  46       7.424 -13.645  -4.887  1.00 35.16           N  
ATOM    329  CA  THR L  46       7.347 -14.118  -6.261  1.00 35.10           C  
ATOM    330  C   THR L  46       8.055 -15.459  -6.380  1.00 36.24           C  
ATOM    331  O   THR L  46       9.190 -15.620  -5.922  1.00 36.32           O  
ATOM    332  CB  THR L  46       7.964 -13.105  -7.222  1.00 35.53           C  
ATOM    333  OG1 THR L  46       9.151 -13.658  -7.801  1.00 40.38           O  
ATOM    334  CG2 THR L  46       8.308 -11.827  -6.490  1.00 34.99           C  
ATOM    335  N   VAL L  47       7.376 -16.425  -6.994  1.00 35.94           N  
ATOM    336  CA  VAL L  47       7.894 -17.782  -7.121  1.00 37.44           C  
ATOM    337  C   VAL L  47       8.302 -18.125  -8.543  1.00 38.18           C  
ATOM    338  O   VAL L  47       8.969 -19.152  -8.748  1.00 39.31           O  
ATOM    339  CB  VAL L  47       6.876 -18.818  -6.602  1.00 36.34           C  
ATOM    340  CG1 VAL L  47       6.563 -18.560  -5.137  1.00 35.54           C  
ATOM    341  CG2 VAL L  47       5.607 -18.767  -7.433  1.00 34.22           C  
ATOM    342  N   MET L  48       7.933 -17.306  -9.529  1.00 38.06           N  
ATOM    343  CA  MET L  48       8.258 -17.574 -10.923  1.00 39.05           C  
ATOM    344  C   MET L  48       8.055 -16.320 -11.762  1.00 38.73           C  
ATOM    345  O   MET L  48       6.973 -15.726 -11.739  1.00 38.09           O  
ATOM    346  CB  MET L  48       7.394 -18.714 -11.468  1.00 40.26           C  
ATOM    347  CG  MET L  48       7.823 -19.230 -12.830  1.00 41.20           C  
ATOM    348  SD  MET L  48       9.277 -20.287 -12.718  1.00 40.99           S  
ATOM    349  CE  MET L  48       8.768 -21.422 -11.434  1.00 40.41           C  
ATOM    350  N   PHE L  49       9.079 -15.907 -12.505  1.00 40.49           N  
ATOM    351  CA  PHE L  49       8.973 -14.767 -13.408  1.00 42.78           C  
ATOM    352  C   PHE L  49       9.455 -15.186 -14.787  1.00 44.24           C  
ATOM    353  O   PHE L  49      10.580 -15.675 -14.931  1.00 45.60           O  
ATOM    354  CB  PHE L  49       9.780 -13.569 -12.900  1.00 41.40           C  
ATOM    355  CG  PHE L  49       9.715 -12.374 -13.806  1.00 40.83           C  
ATOM    356  CD1 PHE L  49       8.570 -11.597 -13.871  1.00 40.97           C  
ATOM    357  CD2 PHE L  49      10.798 -12.030 -14.597  1.00 40.77           C  
ATOM    358  CE1 PHE L  49       8.508 -10.499 -14.708  1.00 41.53           C  
ATOM    359  CE2 PHE L  49      10.742 -10.933 -15.434  1.00 41.27           C  
ATOM    360  CZ  PHE L  49       9.596 -10.167 -15.489  1.00 42.37           C  
ATOM    361  N   GLY L  50       8.607 -14.993 -15.792  1.00 45.79           N  
ATOM    362  CA  GLY L  50       8.975 -15.325 -17.160  1.00 49.90           C  
ATOM    363  C   GLY L  50       9.388 -16.768 -17.347  1.00 51.89           C  
ATOM    364  O   GLY L  50      10.330 -17.049 -18.099  1.00 53.27           O  
ATOM    365  N   ASN L  51       8.709 -17.691 -16.665  1.00 51.17           N  
ATOM    366  CA  ASN L  51       8.983 -19.125 -16.738  1.00 51.74           C  
ATOM    367  C   ASN L  51      10.404 -19.469 -16.299  1.00 50.49           C  
ATOM    368  O   ASN L  51      10.943 -20.510 -16.688  1.00 50.58           O  
ATOM    369  CB  ASN L  51       8.715 -19.668 -18.147  1.00 53.49           C  
ATOM    370  CG  ASN L  51       7.412 -19.154 -18.728  1.00 59.94           C  
ATOM    371  OD1 ASN L  51       6.345 -19.711 -18.476  1.00 56.47           O  
ATOM    372  ND2 ASN L  51       7.494 -18.082 -19.509  1.00 61.75           N  
ATOM    373  N   SER L  52      11.020 -18.610 -15.491  1.00 55.07           N  
ATOM    374  CA  SER L  52      12.348 -18.843 -14.945  1.00 49.22           C  
ATOM    375  C   SER L  52      12.294 -18.763 -13.425  1.00 47.33           C  
ATOM    376  O   SER L  52      11.540 -17.970 -12.854  1.00 45.92           O  
ATOM    377  CB  SER L  52      13.364 -17.834 -15.492  1.00 49.02           C  
ATOM    378  OG  SER L  52      12.870 -16.510 -15.395  1.00 53.58           O  
ATOM    379  N   LEU L  53      13.112 -19.589 -12.776  1.00 50.96           N  
ATOM    380  CA  LEU L  53      13.028 -19.781 -11.334  1.00 46.30           C  
ATOM    381  C   LEU L  53      13.870 -18.738 -10.612  1.00 47.56           C  
ATOM    382  O   LEU L  53      15.074 -18.635 -10.885  1.00 48.15           O  
ATOM    383  CB  LEU L  53      13.499 -21.175 -10.961  1.00 45.38           C  
ATOM    384  CG  LEU L  53      13.284 -21.639  -9.522  1.00 45.40           C  
ATOM    385  CD1 LEU L  53      11.800 -21.751  -9.217  1.00 45.08           C  
ATOM    386  CD2 LEU L  53      13.984 -22.967  -9.295  1.00 45.66           C  
ATOM    387  N   PRO L  55      13.298 -17.958  -9.698  1.00 47.48           N  
ATOM    388  CA  PRO L  55      14.102 -17.009  -8.921  1.00 51.95           C  
ATOM    389  C   PRO L  55      15.013 -17.731  -7.939  1.00 49.79           C  
ATOM    390  O   PRO L  55      14.937 -18.944  -7.739  1.00 53.47           O  
ATOM    391  CB  PRO L  55      13.056 -16.162  -8.187  1.00 46.08           C  
ATOM    392  CG  PRO L  55      11.771 -16.400  -8.922  1.00 43.50           C  
ATOM    393  CD  PRO L  55      11.859 -17.802  -9.435  1.00 47.50           C  
ATOM    394  N   SER L  56      15.889 -16.949  -7.312  1.00 49.64           N  
ATOM    395  CA  SER L  56      16.805 -17.496  -6.321  1.00 50.44           C  
ATOM    396  C   SER L  56      16.055 -17.875  -5.050  1.00 50.71           C  
ATOM    397  O   SER L  56      15.125 -17.183  -4.627  1.00 50.62           O  
ATOM    398  CB  SER L  56      17.904 -16.485  -5.998  1.00 50.74           C  
ATOM    399  OG  SER L  56      18.679 -16.913  -4.890  1.00 56.68           O  
ATOM    400  N   GLY L  57      16.467 -18.987  -4.440  1.00 50.12           N  
ATOM    401  CA  GLY L  57      15.873 -19.455  -3.208  1.00 49.28           C  
ATOM    402  C   GLY L  57      14.617 -20.281  -3.364  1.00 48.23           C  
ATOM    403  O   GLY L  57      14.294 -21.063  -2.461  1.00 48.83           O  
ATOM    404  N   ILE L  58      13.897 -20.138  -4.467  1.00 47.75           N  
ATOM    405  CA  ILE L  58      12.686 -20.932  -4.693  1.00 47.68           C  
ATOM    406  C   ILE L  58      13.092 -22.318  -5.177  1.00 48.26           C  
ATOM    407  O   ILE L  58      13.894 -22.427  -6.119  1.00 50.57           O  
ATOM    408  CB  ILE L  58      11.772 -20.241  -5.699  1.00 47.53           C  
ATOM    409  CG1 ILE L  58      11.552 -18.782  -5.299  1.00 45.49           C  
ATOM    410  CG2 ILE L  58      10.440 -20.970  -5.798  1.00 46.17           C  
ATOM    411  CD1 ILE L  58      10.517 -18.598  -4.218  1.00 43.34           C  
ATOM    412  N   PRO L  59      12.568 -23.388  -4.579  1.00 46.92           N  
ATOM    413  CA  PRO L  59      13.040 -24.740  -4.907  1.00 48.66           C  
ATOM    414  C   PRO L  59      12.718 -25.139  -6.341  1.00 49.69           C  
ATOM    415  O   PRO L  59      11.911 -24.518  -7.037  1.00 49.65           O  
ATOM    416  CB  PRO L  59      12.303 -25.628  -3.897  1.00 49.39           C  
ATOM    417  CG  PRO L  59      11.130 -24.814  -3.447  1.00 47.70           C  
ATOM    418  CD  PRO L  59      11.577 -23.391  -3.489  1.00 46.47           C  
ATOM    419  N   ASP L  60      13.383 -26.213  -6.781  1.00 50.98           N  
ATOM    420  CA  ASP L  60      13.244 -26.699  -8.150  1.00 52.28           C  
ATOM    421  C   ASP L  60      11.847 -27.218  -8.455  1.00 57.36           C  
ATOM    422  O   ASP L  60      11.475 -27.293  -9.631  1.00 62.52           O  
ATOM    423  CB  ASP L  60      14.254 -27.814  -8.426  1.00 51.79           C  
ATOM    424  CG  ASP L  60      15.624 -27.286  -8.785  1.00 55.10           C  
ATOM    425  OD1 ASP L  60      15.790 -26.782  -9.917  1.00 52.79           O  
ATOM    426  OD2 ASP L  60      16.538 -27.383  -7.940  1.00 57.96           O  
ATOM    427  N   ARG L  61      11.073 -27.585  -7.430  1.00 49.86           N  
ATOM    428  CA  ARG L  61       9.750 -28.156  -7.653  1.00 48.60           C  
ATOM    429  C   ARG L  61       8.810 -27.186  -8.355  1.00 45.49           C  
ATOM    430  O   ARG L  61       7.761 -27.606  -8.855  1.00 44.38           O  
ATOM    431  CB  ARG L  61       9.140 -28.592  -6.322  1.00 49.42           C  
ATOM    432  CG  ARG L  61       9.432 -27.651  -5.157  1.00 53.39           C  
ATOM    433  CD  ARG L  61       8.494 -27.905  -3.983  1.00 46.90           C  
ATOM    434  NE  ARG L  61       8.717 -26.968  -2.883  1.00 46.95           N  
ATOM    435  CZ  ARG L  61       9.303 -27.287  -1.734  1.00 50.47           C  
ATOM    436  NH1 ARG L  61       9.750 -28.519  -1.557  1.00 50.67           N  
ATOM    437  NH2 ARG L  61       9.453 -26.372  -0.783  1.00 53.64           N  
ATOM    438  N   PHE L  62       9.152 -25.901  -8.389  1.00 44.84           N  
ATOM    439  CA  PHE L  62       8.359 -24.902  -9.091  1.00 42.46           C  
ATOM    440  C   PHE L  62       8.897 -24.748 -10.508  1.00 42.65           C  
ATOM    441  O   PHE L  62      10.084 -24.462 -10.699  1.00 44.87           O  
ATOM    442  CB  PHE L  62       8.394 -23.563  -8.353  1.00 40.51           C  
ATOM    443  CG  PHE L  62       7.592 -23.547  -7.081  1.00 38.39           C  
ATOM    444  CD1 PHE L  62       8.088 -24.126  -5.925  1.00 40.86           C  
ATOM    445  CD2 PHE L  62       6.346 -22.944  -7.041  1.00 36.22           C  
ATOM    446  CE1 PHE L  62       7.353 -24.112  -4.755  1.00 38.02           C  
ATOM    447  CE2 PHE L  62       5.607 -22.925  -5.874  1.00 34.67           C  
ATOM    448  CZ  PHE L  62       6.111 -23.510  -4.730  1.00 34.55           C  
ATOM    449  N   SER L  63       8.029 -24.944 -11.496  1.00 40.44           N  
ATOM    450  CA  SER L  63       8.381 -24.773 -12.896  1.00 40.10           C  
ATOM    451  C   SER L  63       7.305 -23.947 -13.585  1.00 39.73           C  
ATOM    452  O   SER L  63       6.144 -23.940 -13.168  1.00 38.92           O  
ATOM    453  CB  SER L  63       8.547 -26.122 -13.609  1.00 39.80           C  
ATOM    454  OG  SER L  63       7.340 -26.864 -13.590  1.00 40.30           O  
ATOM    455  N   GLY L  64       7.699 -23.252 -14.638  1.00 41.70           N  
ATOM    456  CA  GLY L  64       6.786 -22.383 -15.363  1.00 44.62           C  
ATOM    457  C   GLY L  64       6.770 -22.690 -16.843  1.00 47.42           C  
ATOM    458  O   GLY L  64       7.805 -22.982 -17.441  1.00 47.59           O  
ATOM    459  N   SER L  65       5.576 -22.622 -17.429  1.00 50.93           N  
ATOM    460  CA  SER L  65       5.395 -22.827 -18.857  1.00 49.81           C  
ATOM    461  C   SER L  65       4.361 -21.838 -19.371  1.00 50.28           C  
ATOM    462  O   SER L  65       3.613 -21.233 -18.599  1.00 48.37           O  
ATOM    463  CB  SER L  65       4.957 -24.261 -19.181  1.00 50.06           C  
ATOM    464  OG  SER L  65       3.565 -24.423 -18.973  1.00 51.06           O  
ATOM    465  N   LYS L  66       4.325 -21.683 -20.691  1.00 52.48           N  
ATOM    466  CA  LYS L  66       3.424 -20.730 -21.319  1.00 53.06           C  
ATOM    467  C   LYS L  66       3.283 -21.084 -22.791  1.00 56.55           C  
ATOM    468  O   LYS L  66       4.271 -21.407 -23.454  1.00 60.55           O  
ATOM    469  CB  LYS L  66       3.939 -19.295 -21.155  1.00 54.14           C  
ATOM    470  CG  LYS L  66       3.132 -18.244 -21.894  1.00 53.35           C  
ATOM    471  CD  LYS L  66       3.544 -16.846 -21.465  1.00 53.54           C  
ATOM    472  CE  LYS L  66       3.773 -15.945 -22.663  1.00 56.63           C  
ATOM    473  NZ  LYS L  66       3.832 -14.511 -22.267  1.00 59.42           N  
ATOM    474  N   SER L  67       2.050 -21.029 -23.289  1.00 56.64           N  
ATOM    475  CA  SER L  67       1.772 -21.302 -24.695  1.00 57.91           C  
ATOM    476  C   SER L  67       0.549 -20.499 -25.104  1.00 57.92           C  
ATOM    477  O   SER L  67      -0.542 -20.714 -24.567  1.00 56.16           O  
ATOM    478  CB  SER L  67       1.544 -22.795 -24.935  1.00 59.76           C  
ATOM    479  OG  SER L  67       0.261 -23.192 -24.484  1.00 65.28           O  
ATOM    480  N   GLY L  68       0.732 -19.581 -26.046  1.00 53.36           N  
ATOM    481  CA  GLY L  68      -0.386 -18.760 -26.483  1.00 51.16           C  
ATOM    482  C   GLY L  68      -0.758 -17.756 -25.412  1.00 51.84           C  
ATOM    483  O   GLY L  68       0.091 -17.021 -24.895  1.00 53.34           O  
ATOM    484  N   THR L  69      -2.045 -17.721 -25.065  1.00 52.04           N  
ATOM    485  CA  THR L  69      -2.565 -16.798 -24.065  1.00 52.73           C  
ATOM    486  C   THR L  69      -2.845 -17.487 -22.733  1.00 51.76           C  
ATOM    487  O   THR L  69      -3.687 -17.021 -21.957  1.00 51.29           O  
ATOM    488  CB  THR L  69      -3.830 -16.115 -24.585  1.00 54.25           C  
ATOM    489  OG1 THR L  69      -4.876 -17.083 -24.723  1.00 53.42           O  
ATOM    490  CG2 THR L  69      -3.565 -15.480 -25.940  1.00 54.92           C  
ATOM    491  N   THR L  70      -2.151 -18.588 -22.450  1.00 51.80           N  
ATOM    492  CA  THR L  70      -2.339 -19.329 -21.208  1.00 52.06           C  
ATOM    493  C   THR L  70      -0.978 -19.690 -20.636  1.00 49.09           C  
ATOM    494  O   THR L  70      -0.230 -20.459 -21.248  1.00 50.49           O  
ATOM    495  CB  THR L  70      -3.177 -20.592 -21.431  1.00 49.85           C  
ATOM    496  OG1 THR L  70      -4.531 -20.224 -21.724  1.00 49.78           O  
ATOM    497  CG2 THR L  70      -3.155 -21.472 -20.190  1.00 48.45           C  
ATOM    498  N   ALA L  71      -0.661 -19.137 -19.471  1.00 46.34           N  
ATOM    499  CA  ALA L  71       0.562 -19.460 -18.752  1.00 45.80           C  
ATOM    500  C   ALA L  71       0.247 -20.400 -17.597  1.00 42.70           C  
ATOM    501  O   ALA L  71      -0.851 -20.376 -17.035  1.00 40.97           O  
ATOM    502  CB  ALA L  71       1.243 -18.195 -18.229  1.00 45.19           C  
ATOM    503  N   SER L  72       1.223 -21.231 -17.243  1.00 42.25           N  
ATOM    504  CA  SER L  72       1.016 -22.277 -16.254  1.00 40.57           C  
ATOM    505  C   SER L  72       2.157 -22.308 -15.249  1.00 39.46           C  
ATOM    506  O   SER L  72       3.322 -22.112 -15.608  1.00 43.11           O  
ATOM    507  CB  SER L  72       0.882 -23.650 -16.923  1.00 42.27           C  
ATOM    508  OG  SER L  72      -0.297 -23.721 -17.704  1.00 47.04           O  
ATOM    509  N   LEU L  73       1.808 -22.557 -13.989  1.00 36.69           N  
ATOM    510  CA  LEU L  73       2.768 -22.800 -12.920  1.00 36.78           C  
ATOM    511  C   LEU L  73       2.532 -24.206 -12.392  1.00 36.38           C  
ATOM    512  O   LEU L  73       1.412 -24.539 -11.988  1.00 36.02           O  
ATOM    513  CB  LEU L  73       2.625 -21.770 -11.797  1.00 34.86           C  
ATOM    514  CG  LEU L  73       3.590 -21.916 -10.616  1.00 34.98           C  
ATOM    515  CD1 LEU L  73       5.018 -21.632 -11.053  1.00 36.04           C  
ATOM    516  CD2 LEU L  73       3.187 -21.006  -9.464  1.00 33.13           C  
ATOM    517  N   THR L  74       3.576 -25.028 -12.402  1.00 37.02           N  
ATOM    518  CA  THR L  74       3.484 -26.419 -11.981  1.00 37.59           C  
ATOM    519  C   THR L  74       4.313 -26.627 -10.722  1.00 37.98           C  
ATOM    520  O   THR L  74       5.491 -26.255 -10.679  1.00 38.28           O  
ATOM    521  CB  THR L  74       3.954 -27.361 -13.092  1.00 37.03           C  
ATOM    522  OG1 THR L  74       3.085 -27.234 -14.225  1.00 36.22           O  
ATOM    523  CG2 THR L  74       3.938 -28.803 -12.611  1.00 39.66           C  
ATOM    524  N   ILE L  75       3.695 -27.220  -9.703  1.00 38.22           N  
ATOM    525  CA  ILE L  75       4.339 -27.477  -8.420  1.00 41.23           C  
ATOM    526  C   ILE L  75       4.392 -28.988  -8.240  1.00 43.90           C  
ATOM    527  O   ILE L  75       3.404 -29.610  -7.832  1.00 43.55           O  
ATOM    528  CB  ILE L  75       3.603 -26.810  -7.254  1.00 38.98           C  
ATOM    529  CG1 ILE L  75       3.417 -25.316  -7.519  1.00 36.17           C  
ATOM    530  CG2 ILE L  75       4.361 -27.032  -5.954  1.00 39.20           C  
ATOM    531  CD1 ILE L  75       2.528 -24.631  -6.507  1.00 33.20           C  
ATOM    532  N   SER L  76       5.539 -29.585  -8.543  1.00 46.30           N  
ATOM    533  CA  SER L  76       5.745 -30.997  -8.266  1.00 48.57           C  
ATOM    534  C   SER L  76       6.046 -31.198  -6.787  1.00 49.49           C  
ATOM    535  O   SER L  76       6.634 -30.336  -6.130  1.00 63.57           O  
ATOM    536  CB  SER L  76       6.888 -31.552  -9.115  1.00 51.44           C  
ATOM    537  OG  SER L  76       6.674 -31.289 -10.491  1.00 59.32           O  
ATOM    538  N   GLY L  77       5.628 -32.348  -6.262  1.00 49.52           N  
ATOM    539  CA  GLY L  77       5.850 -32.668  -4.865  1.00 44.10           C  
ATOM    540  C   GLY L  77       5.344 -31.711  -3.806  1.00 42.03           C  
ATOM    541  O   GLY L  77       6.137 -31.118  -3.068  1.00 41.72           O  
ATOM    542  N   LEU L  78       4.024 -31.549  -3.727  1.00 39.34           N  
ATOM    543  CA  LEU L  78       3.430 -30.539  -2.861  1.00 38.26           C  
ATOM    544  C   LEU L  78       3.905 -30.708  -1.425  1.00 37.23           C  
ATOM    545  O   LEU L  78       3.920 -31.818  -0.886  1.00 36.81           O  
ATOM    546  CB  LEU L  78       1.905 -30.623  -2.917  1.00 36.51           C  
ATOM    547  CG  LEU L  78       1.190 -29.758  -3.952  1.00 35.11           C  
ATOM    548  CD1 LEU L  78      -0.308 -29.997  -3.888  1.00 34.44           C  
ATOM    549  CD2 LEU L  78       1.508 -28.293  -3.724  1.00 34.58           C  
ATOM    550  N   GLN L  79       4.287 -29.599  -0.808  1.00 41.35           N  
ATOM    551  CA  GLN L  79       4.734 -29.547   0.572  1.00 36.52           C  
ATOM    552  C   GLN L  79       3.783 -28.682   1.388  1.00 34.95           C  
ATOM    553  O   GLN L  79       3.012 -27.896   0.826  1.00 33.21           O  
ATOM    554  CB  GLN L  79       6.160 -28.984   0.659  1.00 39.33           C  
ATOM    555  CG  GLN L  79       7.193 -29.780  -0.122  1.00 41.12           C  
ATOM    556  CD  GLN L  79       7.393 -31.171   0.439  1.00 39.81           C  
ATOM    557  OE1 GLN L  79       7.291 -31.383   1.646  1.00 39.85           O  
ATOM    558  NE2 GLN L  79       7.682 -32.129  -0.435  1.00 39.67           N  
ATOM    559  N   PRO L  80       3.796 -28.814   2.719  1.00 34.48           N  
ATOM    560  CA  PRO L  80       2.911 -27.964   3.534  1.00 33.56           C  
ATOM    561  C   PRO L  80       3.135 -26.476   3.325  1.00 33.57           C  
ATOM    562  O   PRO L  80       2.172 -25.700   3.370  1.00 36.20           O  
ATOM    563  CB  PRO L  80       3.244 -28.396   4.968  1.00 32.97           C  
ATOM    564  CG  PRO L  80       3.715 -29.798   4.830  1.00 32.26           C  
ATOM    565  CD  PRO L  80       4.454 -29.857   3.526  1.00 34.51           C  
ATOM    566  N   GLU L  81       4.377 -26.050   3.085  1.00 34.58           N  
ATOM    567  CA  GLU L  81       4.637 -24.628   2.891  1.00 35.33           C  
ATOM    568  C   GLU L  81       4.173 -24.121   1.531  1.00 34.05           C  
ATOM    569  O   GLU L  81       4.121 -22.903   1.333  1.00 33.61           O  
ATOM    570  CB  GLU L  81       6.125 -24.325   3.074  1.00 37.06           C  
ATOM    571  CG  GLU L  81       7.040 -25.003   2.072  1.00 39.87           C  
ATOM    572  CD  GLU L  81       7.725 -26.225   2.645  1.00 44.19           C  
ATOM    573  OE1 GLU L  81       7.167 -26.839   3.579  1.00 47.95           O  
ATOM    574  OE2 GLU L  81       8.827 -26.565   2.167  1.00 57.45           O  
ATOM    575  N   ASP L  82       3.836 -25.013   0.597  1.00 33.83           N  
ATOM    576  CA  ASP L  82       3.312 -24.575  -0.691  1.00 31.76           C  
ATOM    577  C   ASP L  82       1.866 -24.110  -0.597  1.00 30.21           C  
ATOM    578  O   ASP L  82       1.405 -23.382  -1.483  1.00 29.57           O  
ATOM    579  CB  ASP L  82       3.426 -25.701  -1.720  1.00 33.79           C  
ATOM    580  CG  ASP L  82       4.860 -26.101  -1.990  1.00 35.95           C  
ATOM    581  OD1 ASP L  82       5.756 -25.249  -1.818  1.00 35.86           O  
ATOM    582  OD2 ASP L  82       5.092 -27.266  -2.375  1.00 41.34           O  
ATOM    583  N   GLU L  83       1.146 -24.517   0.448  1.00 30.79           N  
ATOM    584  CA  GLU L  83      -0.245 -24.128   0.650  1.00 30.25           C  
ATOM    585  C   GLU L  83      -0.373 -22.613   0.761  1.00 29.30           C  
ATOM    586  O   GLU L  83       0.109 -22.017   1.730  1.00 30.81           O  
ATOM    587  CB  GLU L  83      -0.798 -24.814   1.902  1.00 29.68           C  
ATOM    588  CG  GLU L  83      -2.217 -24.430   2.272  1.00 29.43           C  
ATOM    589  CD  GLU L  83      -2.781 -25.308   3.372  1.00 29.61           C  
ATOM    590  OE1 GLU L  83      -3.673 -26.129   3.080  1.00 29.48           O  
ATOM    591  OE2 GLU L  83      -2.325 -25.185   4.527  1.00 33.96           O  
ATOM    592  N   ALA L  84      -1.017 -21.984  -0.217  1.00 28.86           N  
ATOM    593  CA  ALA L  84      -1.056 -20.527  -0.289  1.00 29.20           C  
ATOM    594  C   ALA L  84      -2.076 -20.103  -1.337  1.00 28.65           C  
ATOM    595  O   ALA L  84      -2.748 -20.932  -1.958  1.00 28.94           O  
ATOM    596  CB  ALA L  84       0.319 -19.954  -0.628  1.00 32.00           C  
ATOM    597  N   ASP L  85      -2.185 -18.790  -1.517  1.00 29.90           N  
ATOM    598  CA  ASP L  85      -2.881 -18.191  -2.646  1.00 29.62           C  
ATOM    599  C   ASP L  85      -1.841 -17.726  -3.655  1.00 29.21           C  
ATOM    600  O   ASP L  85      -0.867 -17.062  -3.286  1.00 29.66           O  
ATOM    601  CB  ASP L  85      -3.748 -17.012  -2.201  1.00 30.86           C  
ATOM    602  CG  ASP L  85      -4.788 -17.406  -1.176  1.00 31.50           C  
ATOM    603  OD1 ASP L  85      -5.434 -18.459  -1.355  1.00 31.44           O  
ATOM    604  OD2 ASP L  85      -4.964 -16.661  -0.190  1.00 34.80           O  
ATOM    605  N   TYR L  86      -2.042 -18.078  -4.921  1.00 29.25           N  
ATOM    606  CA  TYR L  86      -1.089 -17.766  -5.977  1.00 29.28           C  
ATOM    607  C   TYR L  86      -1.740 -16.851  -7.002  1.00 30.64           C  
ATOM    608  O   TYR L  86      -2.815 -17.161  -7.525  1.00 30.72           O  
ATOM    609  CB  TYR L  86      -0.578 -19.040  -6.649  1.00 28.85           C  
ATOM    610  CG  TYR L  86       0.260 -19.913  -5.743  1.00 27.99           C  
ATOM    611  CD1 TYR L  86      -0.335 -20.799  -4.857  1.00 27.44           C  
ATOM    612  CD2 TYR L  86       1.646 -19.852  -5.776  1.00 27.82           C  
ATOM    613  CE1 TYR L  86       0.426 -21.601  -4.030  1.00 28.31           C  
ATOM    614  CE2 TYR L  86       2.415 -20.649  -4.953  1.00 28.40           C  
ATOM    615  CZ  TYR L  86       1.800 -21.522  -4.082  1.00 28.29           C  
ATOM    616  OH  TYR L  86       2.561 -22.318  -3.259  1.00 29.92           O  
ATOM    617  N   TYR L  87      -1.082 -15.731  -7.287  1.00 30.82           N  
ATOM    618  CA  TYR L  87      -1.566 -14.747  -8.241  1.00 31.85           C  
ATOM    619  C   TYR L  87      -0.615 -14.664  -9.426  1.00 32.64           C  
ATOM    620  O   TYR L  87       0.603 -14.796  -9.277  1.00 32.67           O  
ATOM    621  CB  TYR L  87      -1.701 -13.361  -7.594  1.00 32.63           C  
ATOM    622  CG  TYR L  87      -2.639 -13.319  -6.411  1.00 32.43           C  
ATOM    623  CD1 TYR L  87      -2.193 -13.633  -5.134  1.00 31.82           C  
ATOM    624  CD2 TYR L  87      -3.970 -12.959  -6.569  1.00 33.63           C  
ATOM    625  CE1 TYR L  87      -3.047 -13.595  -4.050  1.00 32.52           C  
ATOM    626  CE2 TYR L  87      -4.832 -12.918  -5.491  1.00 34.20           C  
ATOM    627  CZ  TYR L  87      -4.365 -13.237  -4.234  1.00 33.11           C  
ATOM    628  OH  TYR L  87      -5.219 -13.197  -3.156  1.00 35.60           O  
ATOM    629  N   CYS L  88      -1.184 -14.447 -10.607  1.00 33.87           N  
ATOM    630  CA  CYS L  88      -0.411 -14.211 -11.816  1.00 35.80           C  
ATOM    631  C   CYS L  88      -0.670 -12.797 -12.310  1.00 37.24           C  
ATOM    632  O   CYS L  88      -1.767 -12.254 -12.146  1.00 38.35           O  
ATOM    633  CB  CYS L  88      -0.753 -15.220 -12.916  1.00 35.92           C  
ATOM    634  SG  CYS L  88      -2.482 -15.228 -13.433  1.00 43.56           S  
ATOM    635  N   SER L  89       0.353 -12.198 -12.909  1.00 38.33           N  
ATOM    636  CA  SER L  89       0.233 -10.834 -13.392  1.00 40.66           C  
ATOM    637  C   SER L  89       1.162 -10.638 -14.575  1.00 41.66           C  
ATOM    638  O   SER L  89       2.188 -11.313 -14.701  1.00 41.41           O  
ATOM    639  CB  SER L  89       0.561  -9.809 -12.301  1.00 41.65           C  
ATOM    640  OG  SER L  89       1.960  -9.705 -12.109  1.00 41.17           O  
ATOM    641  N   THR L  90       0.791  -9.699 -15.438  1.00 44.67           N  
ATOM    642  CA  THR L  90       1.617  -9.330 -16.574  1.00 48.14           C  
ATOM    643  C   THR L  90       1.328  -7.880 -16.935  1.00 50.21           C  
ATOM    644  O   THR L  90       0.586  -7.180 -16.239  1.00 50.86           O  
ATOM    645  CB  THR L  90       1.370 -10.257 -17.765  1.00 49.72           C  
ATOM    646  OG1 THR L  90       2.367 -10.017 -18.763  1.00 52.88           O  
ATOM    647  CG2 THR L  90      -0.011 -10.009 -18.352  1.00 50.71           C  
ATOM    648  N   TRP L  91       1.931  -7.432 -18.032  1.00 53.04           N  
ATOM    649  CA  TRP L  91       1.710  -6.096 -18.565  1.00 55.21           C  
ATOM    650  C   TRP L  91       0.695  -6.169 -19.699  1.00 55.75           C  
ATOM    651  O   TRP L  91       0.833  -6.991 -20.610  1.00 56.12           O  
ATOM    652  CB  TRP L  91       3.022  -5.479 -19.058  1.00 57.04           C  
ATOM    653  CG  TRP L  91       2.838  -4.234 -19.861  1.00 59.20           C  
ATOM    654  CD1 TRP L  91       2.941  -4.104 -21.216  1.00 68.28           C  
ATOM    655  CD2 TRP L  91       2.515  -2.933 -19.365  1.00 58.71           C  
ATOM    656  NE1 TRP L  91       2.704  -2.814 -21.595  1.00 60.27           N  
ATOM    657  CE2 TRP L  91       2.440  -2.072 -20.479  1.00 58.83           C  
ATOM    658  CE3 TRP L  91       2.281  -2.410 -18.087  1.00 58.74           C  
ATOM    659  CZ2 TRP L  91       2.144  -0.734 -20.359  1.00 58.92           C  
ATOM    660  CZ3 TRP L  91       1.988  -1.083 -17.970  1.00 58.12           C  
ATOM    661  CH2 TRP L  91       1.926  -0.256 -19.100  1.00 58.71           C  
ATOM    662  N   ASP L  92      -0.332  -5.331 -19.629  1.00 55.49           N  
ATOM    663  CA  ASP L  92      -1.317  -5.252 -20.696  1.00 57.83           C  
ATOM    664  C   ASP L  92      -0.931  -4.141 -21.663  1.00 58.25           C  
ATOM    665  O   ASP L  92      -0.416  -3.098 -21.250  1.00 58.03           O  
ATOM    666  CB  ASP L  92      -2.717  -5.002 -20.133  1.00 58.15           C  
ATOM    667  CG  ASP L  92      -3.807  -5.211 -21.170  1.00 61.82           C  
ATOM    668  OD1 ASP L  92      -3.991  -4.328 -22.033  1.00 61.76           O  
ATOM    669  OD2 ASP L  92      -4.480  -6.262 -21.125  1.00 61.18           O  
ATOM    670  N   SER L  93      -1.172  -4.369 -22.955  1.00 58.85           N  
ATOM    671  CA  SER L  93      -0.765  -3.395 -23.962  1.00 58.14           C  
ATOM    672  C   SER L  93      -1.926  -2.599 -24.541  1.00 58.83           C  
ATOM    673  O   SER L  93      -1.731  -1.436 -24.908  1.00 59.03           O  
ATOM    674  CB  SER L  93      -0.006  -4.075 -25.107  1.00 56.41           C  
ATOM    675  OG  SER L  93      -0.841  -4.291 -26.230  1.00 57.16           O  
ATOM    676  N   SER L  94      -3.122  -3.184 -24.641  0.76 59.44           N  
ATOM    677  CA  SER L  94      -4.296  -2.399 -25.013  0.76 60.36           C  
ATOM    678  C   SER L  94      -4.543  -1.300 -23.987  0.76 61.87           C  
ATOM    679  O   SER L  94      -4.547  -0.108 -24.316  0.76 62.67           O  
ATOM    680  CB  SER L  94      -5.519  -3.308 -25.150  0.76 59.51           C  
ATOM    681  OG  SER L  94      -6.056  -3.640 -23.882  0.76 61.00           O  
ATOM    682  N   LEU L  95      -4.753  -1.690 -22.733  1.00 65.50           N  
ATOM    683  CA  LEU L  95      -4.580  -0.777 -21.617  1.00 60.95           C  
ATOM    684  C   LEU L  95      -3.085  -0.595 -21.365  1.00 59.91           C  
ATOM    685  O   LEU L  95      -2.242  -1.211 -22.019  1.00 60.28           O  
ATOM    686  CB  LEU L  95      -5.296  -1.309 -20.376  1.00 60.00           C  
ATOM    687  CG  LEU L  95      -6.711  -1.862 -20.566  1.00 59.25           C  
ATOM    688  CD1 LEU L  95      -7.162  -2.617 -19.324  1.00 52.59           C  
ATOM    689  CD2 LEU L  95      -7.691  -0.748 -20.905  1.00 64.08           C  
ATOM    690  N   SER L  95A     -2.731   0.256 -20.407  1.00 58.60           N  
ATOM    691  CA  SER L  95A     -1.332   0.467 -20.044  1.00 58.83           C  
ATOM    692  C   SER L  95A     -1.193   0.291 -18.531  1.00 57.55           C  
ATOM    693  O   SER L  95A     -0.905   1.241 -17.802  1.00 57.12           O  
ATOM    694  CB  SER L  95A     -0.836   1.839 -20.503  1.00 64.19           C  
ATOM    695  OG  SER L  95A     -0.931   2.793 -19.461  1.00 75.73           O  
ATOM    696  N   VAL L  95B     -1.386  -0.943 -18.065  1.00 57.23           N  
ATOM    697  CA  VAL L  95B     -1.373  -1.244 -16.639  1.00 55.99           C  
ATOM    698  C   VAL L  95B     -0.853  -2.656 -16.425  1.00 54.33           C  
ATOM    699  O   VAL L  95B     -0.998  -3.530 -17.284  1.00 54.39           O  
ATOM    700  CB  VAL L  95B     -2.777  -1.103 -16.005  1.00 54.13           C  
ATOM    701  CG1 VAL L  95B     -3.129   0.349 -15.786  1.00 53.01           C  
ATOM    702  CG2 VAL L  95B     -3.821  -1.784 -16.879  1.00 55.51           C  
ATOM    703  N   GLN L  96      -0.241  -2.872 -15.263  1.00 52.60           N  
ATOM    704  CA  GLN L  96      -0.101  -4.219 -14.732  1.00 52.21           C  
ATOM    705  C   GLN L  96      -1.479  -4.740 -14.347  1.00 50.29           C  
ATOM    706  O   GLN L  96      -2.241  -4.055 -13.660  1.00 49.55           O  
ATOM    707  CB  GLN L  96       0.827  -4.220 -13.517  1.00 52.72           C  
ATOM    708  CG  GLN L  96       2.310  -4.304 -13.837  1.00 55.92           C  
ATOM    709  CD  GLN L  96       2.862  -5.705 -13.650  1.00 62.50           C  
ATOM    710  OE1 GLN L  96       2.296  -6.513 -12.914  1.00 58.03           O  
ATOM    711  NE2 GLN L  96       3.977  -5.997 -14.310  1.00 64.70           N  
ATOM    712  N   VAL L  97      -1.810  -5.944 -14.803  1.00 50.07           N  
ATOM    713  CA  VAL L  97      -3.103  -6.556 -14.525  1.00 48.94           C  
ATOM    714  C   VAL L  97      -2.875  -7.843 -13.746  1.00 49.39           C  
ATOM    715  O   VAL L  97      -1.905  -8.566 -13.994  1.00 46.66           O  
ATOM    716  CB  VAL L  97      -3.899  -6.822 -15.819  1.00 55.41           C  
ATOM    717  CG1 VAL L  97      -4.496  -5.524 -16.341  1.00 51.83           C  
ATOM    718  CG2 VAL L  97      -3.006  -7.457 -16.872  1.00 50.51           C  
ATOM    719  N   ILE L  98      -3.771  -8.123 -12.801  1.00 45.82           N  
ATOM    720  CA  ILE L  98      -3.620  -9.233 -11.868  1.00 44.05           C  
ATOM    721  C   ILE L  98      -4.866 -10.107 -11.933  1.00 43.11           C  
ATOM    722  O   ILE L  98      -5.984  -9.602 -12.084  1.00 43.54           O  
ATOM    723  CB  ILE L  98      -3.379  -8.734 -10.425  1.00 43.07           C  
ATOM    724  CG1 ILE L  98      -2.157  -7.813 -10.363  1.00 43.08           C  
ATOM    725  CG2 ILE L  98      -3.195  -9.902  -9.468  1.00 41.74           C  
ATOM    726  CD1 ILE L  98      -2.484  -6.336 -10.459  1.00 43.76           C  
ATOM    727  N   GLY L  99      -4.670 -11.421 -11.821  1.00 42.00           N  
ATOM    728  CA  GLY L  99      -5.771 -12.357 -11.786  1.00 41.45           C  
ATOM    729  C   GLY L  99      -6.390 -12.476 -10.405  1.00 39.36           C  
ATOM    730  O   GLY L  99      -5.937 -11.887  -9.425  1.00 39.16           O  
ATOM    731  N   GLY L 100      -7.459 -13.272 -10.337  1.00 39.36           N  
ATOM    732  CA  GLY L 100      -8.195 -13.430  -9.094  1.00 38.76           C  
ATOM    733  C   GLY L 100      -7.473 -14.240  -8.038  1.00 36.81           C  
ATOM    734  O   GLY L 100      -7.777 -14.098  -6.849  1.00 38.28           O  
ATOM    735  N   GLY L 101      -6.537 -15.083  -8.437  1.00 35.81           N  
ATOM    736  CA  GLY L 101      -5.789 -15.871  -7.479  1.00 34.45           C  
ATOM    737  C   GLY L 101      -6.299 -17.297  -7.380  1.00 32.83           C  
ATOM    738  O   GLY L 101      -7.475 -17.590  -7.624  1.00 33.14           O  
ATOM    739  N   THR L 102      -5.397 -18.204  -7.014  1.00 32.48           N  
ATOM    740  CA  THR L 102      -5.719 -19.617  -6.854  1.00 32.44           C  
ATOM    741  C   THR L 102      -5.309 -20.055  -5.457  1.00 31.47           C  
ATOM    742  O   THR L 102      -4.146 -19.901  -5.073  1.00 29.95           O  
ATOM    743  CB  THR L 102      -5.017 -20.472  -7.913  1.00 32.07           C  
ATOM    744  OG1 THR L 102      -5.476 -20.092  -9.216  1.00 33.34           O  
ATOM    745  CG2 THR L 102      -5.317 -21.944  -7.690  1.00 33.01           C  
ATOM    746  N   LYS L 103      -6.262 -20.598  -4.703  1.00 33.32           N  
ATOM    747  CA  LYS L 103      -6.016 -21.071  -3.344  1.00 33.91           C  
ATOM    748  C   LYS L 103      -5.592 -22.534  -3.403  1.00 31.00           C  
ATOM    749  O   LYS L 103      -6.400 -23.410  -3.727  1.00 31.16           O  
ATOM    750  CB  LYS L 103      -7.264 -20.896  -2.483  1.00 34.59           C  
ATOM    751  CG  LYS L 103      -7.114 -21.389  -1.054  1.00 37.08           C  
ATOM    752  CD  LYS L 103      -8.472 -21.575  -0.398  1.00 45.11           C  
ATOM    753  CE  LYS L 103      -8.337 -21.989   1.057  1.00 45.71           C  
ATOM    754  NZ  LYS L 103      -7.781 -20.891   1.893  1.00 48.14           N  
ATOM    755  N   VAL L 104      -4.328 -22.798  -3.091  1.00 30.20           N  
ATOM    756  CA  VAL L 104      -3.794 -24.155  -3.102  1.00 29.48           C  
ATOM    757  C   VAL L 104      -3.883 -24.725  -1.693  1.00 28.98           C  
ATOM    758  O   VAL L 104      -3.332 -24.154  -0.746  1.00 28.39           O  
ATOM    759  CB  VAL L 104      -2.349 -24.183  -3.621  1.00 30.83           C  
ATOM    760  CG1 VAL L 104      -1.761 -25.575  -3.466  1.00 28.11           C  
ATOM    761  CG2 VAL L 104      -2.305 -23.749  -5.077  1.00 29.69           C  
ATOM    762  N   THR L 105      -4.581 -25.849  -1.555  1.00 29.35           N  
ATOM    763  CA  THR L 105      -4.738 -26.542  -0.282  1.00 29.08           C  
ATOM    764  C   THR L 105      -3.966 -27.852  -0.343  1.00 28.79           C  
ATOM    765  O   THR L 105      -4.207 -28.675  -1.231  1.00 28.77           O  
ATOM    766  CB  THR L 105      -6.212 -26.807   0.023  1.00 28.33           C  
ATOM    767  OG1 THR L 105      -6.921 -25.563   0.090  1.00 29.62           O  
ATOM    768  CG2 THR L 105      -6.356 -27.539   1.347  1.00 29.48           C  
ATOM    769  N   VAL L 106      -3.044 -28.044   0.595  1.00 30.12           N  
ATOM    770  CA  VAL L 106      -2.219 -29.245   0.654  1.00 28.54           C  
ATOM    771  C   VAL L 106      -2.863 -30.223   1.626  1.00 29.00           C  
ATOM    772  O   VAL L 106      -2.975 -29.939   2.825  1.00 29.08           O  
ATOM    773  CB  VAL L 106      -0.777 -28.918   1.069  1.00 29.44           C  
ATOM    774  CG1 VAL L 106       0.054 -30.186   1.124  1.00 31.17           C  
ATOM    775  CG2 VAL L 106      -0.168 -27.921   0.100  1.00 30.50           C  
ATOM    776  N   LEU L 106A     -3.281 -31.374   1.111  1.00 30.10           N  
ATOM    777  CA  LEU L 106A     -3.975 -32.380   1.899  1.00 29.79           C  
ATOM    778  C   LEU L 106A     -2.984 -33.336   2.555  1.00 29.55           C  
ATOM    779  O   LEU L 106A     -1.828 -33.456   2.144  1.00 29.46           O  
ATOM    780  CB  LEU L 106A     -4.950 -33.166   1.022  1.00 30.00           C  
ATOM    781  CG  LEU L 106A     -5.973 -32.349   0.231  1.00 30.34           C  
ATOM    782  CD1 LEU L 106A     -6.653 -33.219  -0.812  1.00 31.35           C  
ATOM    783  CD2 LEU L 106A     -6.999 -31.726   1.161  1.00 30.44           C  
ATOM    784  N   GLY L 107      -3.459 -34.021   3.592  1.00 29.23           N  
ATOM    785  CA  GLY L 107      -2.661 -35.040   4.245  1.00 28.96           C  
ATOM    786  C   GLY L 107      -1.482 -34.521   5.034  1.00 28.31           C  
ATOM    787  O   GLY L 107      -0.498 -35.246   5.210  1.00 29.00           O  
ATOM    788  N   GLN L 108      -1.550 -33.283   5.514  1.00 29.15           N  
ATOM    789  CA  GLN L 108      -0.471 -32.747   6.324  1.00 28.17           C  
ATOM    790  C   GLN L 108      -0.462 -33.421   7.697  1.00 27.46           C  
ATOM    791  O   GLN L 108      -1.512 -33.822   8.207  1.00 27.25           O  
ATOM    792  CB  GLN L 108      -0.618 -31.237   6.477  1.00 29.56           C  
ATOM    793  CG  GLN L 108      -0.663 -30.488   5.156  1.00 30.36           C  
ATOM    794  CD  GLN L 108      -0.675 -28.984   5.339  1.00 33.12           C  
ATOM    795  OE1 GLN L 108       0.075 -28.440   6.149  1.00 35.97           O  
ATOM    796  NE2 GLN L 108      -1.529 -28.303   4.584  1.00 34.39           N  
ATOM    797  N   PRO L 109       0.712 -33.565   8.310  1.00 27.01           N  
ATOM    798  CA  PRO L 109       0.794 -34.306   9.575  1.00 27.46           C  
ATOM    799  C   PRO L 109       0.075 -33.587  10.705  1.00 27.57           C  
ATOM    800  O   PRO L 109       0.147 -32.363  10.837  1.00 30.54           O  
ATOM    801  CB  PRO L 109       2.302 -34.390   9.842  1.00 27.35           C  
ATOM    802  CG  PRO L 109       2.950 -34.126   8.521  1.00 26.37           C  
ATOM    803  CD  PRO L 109       2.041 -33.172   7.816  1.00 26.88           C  
TER     804      PRO L 109                                                      
ATOM   1557  N   SER L   2      10.439  -8.591   4.946  1.00 37.59           N  
ATOM   1558  CA  SER L   2      10.185  -8.048   3.615  1.00 45.12           C  
ATOM   1559  C   SER L   2      11.125  -6.888   3.308  1.00 37.69           C  
ATOM   1560  O   SER L   2      11.408  -6.061   4.173  1.00 47.85           O  
ATOM   1561  CB  SER L   2       8.731  -7.590   3.489  1.00 39.65           C  
ATOM   1562  OG  SER L   2       8.483  -7.032   2.210  1.00 40.96           O  
ATOM   1563  N   ALA L   3      11.606  -6.832   2.064  1.00 35.19           N  
ATOM   1564  CA  ALA L   3      12.519  -5.763   1.678  1.00 33.61           C  
ATOM   1565  C   ALA L   3      11.818  -4.411   1.633  1.00 33.26           C  
ATOM   1566  O   ALA L   3      12.466  -3.374   1.812  1.00 32.32           O  
ATOM   1567  CB  ALA L   3      13.159  -6.080   0.327  1.00 32.30           C  
ATOM   1568  N   LEU L   4      10.509  -4.398   1.396  1.00 33.25           N  
ATOM   1569  CA  LEU L   4       9.717  -3.176   1.389  1.00 32.62           C  
ATOM   1570  C   LEU L   4       8.866  -3.123   2.648  1.00 32.24           C  
ATOM   1571  O   LEU L   4       8.210  -4.109   3.000  1.00 34.56           O  
ATOM   1572  CB  LEU L   4       8.830  -3.096   0.146  1.00 32.11           C  
ATOM   1573  CG  LEU L   4       9.571  -3.076  -1.189  1.00 31.19           C  
ATOM   1574  CD1 LEU L   4       8.621  -2.768  -2.335  1.00 31.99           C  
ATOM   1575  CD2 LEU L   4      10.727  -2.089  -1.157  1.00 32.07           C  
ATOM   1576  N   THR L   5       8.872  -1.974   3.314  1.00 30.90           N  
ATOM   1577  CA  THR L   5       8.208  -1.801   4.598  1.00 29.73           C  
ATOM   1578  C   THR L   5       7.017  -0.867   4.432  1.00 29.62           C  
ATOM   1579  O   THR L   5       7.179   0.287   4.021  1.00 30.15           O  
ATOM   1580  CB  THR L   5       9.177  -1.249   5.643  1.00 29.51           C  
ATOM   1581  OG1 THR L   5      10.292  -2.139   5.780  1.00 28.74           O  
ATOM   1582  CG2 THR L   5       8.482  -1.105   6.987  1.00 28.48           C  
ATOM   1583  N   GLN L   6       5.828  -1.369   4.751  1.00 29.38           N  
ATOM   1584  CA  GLN L   6       4.614  -0.572   4.791  1.00 29.88           C  
ATOM   1585  C   GLN L   6       4.064  -0.571   6.209  1.00 29.41           C  
ATOM   1586  O   GLN L   6       4.247  -1.532   6.963  1.00 29.78           O  
ATOM   1587  CB  GLN L   6       3.548  -1.115   3.832  1.00 29.56           C  
ATOM   1588  CG  GLN L   6       4.011  -1.291   2.403  1.00 30.35           C  
ATOM   1589  CD  GLN L   6       2.942  -1.907   1.520  1.00 29.40           C  
ATOM   1590  OE1 GLN L   6       3.117  -3.000   0.984  1.00 29.94           O  
ATOM   1591  NE2 GLN L   6       1.826  -1.205   1.365  1.00 29.11           N  
ATOM   1592  N   GLU L   7       3.390   0.514   6.572  1.00 30.31           N  
ATOM   1593  CA  GLU L   7       2.719   0.558   7.862  1.00 29.93           C  
ATOM   1594  C   GLU L   7       1.553  -0.424   7.880  1.00 29.30           C  
ATOM   1595  O   GLU L   7       0.989  -0.774   6.840  1.00 29.39           O  
ATOM   1596  CB  GLU L   7       2.234   1.974   8.167  1.00 31.33           C  
ATOM   1597  CG  GLU L   7       1.613   2.675   6.982  1.00 33.42           C  
ATOM   1598  CD  GLU L   7       2.536   3.695   6.352  1.00 35.96           C  
ATOM   1599  OE1 GLU L   7       3.292   4.360   7.092  1.00 36.91           O  
ATOM   1600  OE2 GLU L   7       2.508   3.832   5.113  1.00 34.29           O  
ATOM   1601  N   ALA L   8       1.197  -0.876   9.083  1.00 27.94           N  
ATOM   1602  CA  ALA L   8       0.194  -1.928   9.210  1.00 26.89           C  
ATOM   1603  C   ALA L   8      -1.205  -1.406   8.905  1.00 26.87           C  
ATOM   1604  O   ALA L   8      -1.962  -2.035   8.157  1.00 27.45           O  
ATOM   1605  CB  ALA L   8       0.248  -2.536  10.611  1.00 26.74           C  
ATOM   1606  N   SER L   9      -1.570  -0.261   9.478  1.00 27.63           N  
ATOM   1607  CA  SER L   9      -2.917   0.272   9.329  1.00 28.72           C  
ATOM   1608  C   SER L   9      -2.863   1.775   9.109  1.00 29.20           C  
ATOM   1609  O   SER L   9      -2.053   2.474   9.724  1.00 28.98           O  
ATOM   1610  CB  SER L   9      -3.781  -0.043  10.556  1.00 28.10           C  
ATOM   1611  OG  SER L   9      -5.087   0.483  10.407  1.00 28.90           O  
ATOM   1612  N   VAL L  11      -3.731   2.262   8.223  1.00 30.15           N  
ATOM   1613  CA  VAL L  11      -3.881   3.686   7.936  1.00 31.24           C  
ATOM   1614  C   VAL L  11      -5.367   3.949   7.732  1.00 32.75           C  
ATOM   1615  O   VAL L  11      -5.964   3.427   6.785  1.00 32.87           O  
ATOM   1616  CB  VAL L  11      -3.084   4.123   6.694  1.00 31.55           C  
ATOM   1617  CG1 VAL L  11      -3.391   5.556   6.351  1.00 32.53           C  
ATOM   1618  CG2 VAL L  11      -1.600   3.965   6.928  1.00 31.44           C  
ATOM   1619  N   SER L  12      -5.967   4.750   8.610  1.00 34.01           N  
ATOM   1620  CA  SER L  12      -7.415   4.890   8.636  1.00 35.67           C  
ATOM   1621  C   SER L  12      -7.800   6.360   8.748  1.00 37.85           C  
ATOM   1622  O   SER L  12      -6.948   7.250   8.826  1.00 47.40           O  
ATOM   1623  CB  SER L  12      -8.022   4.076   9.784  1.00 35.16           C  
ATOM   1624  OG  SER L  12      -7.418   4.414  11.019  1.00 33.88           O  
ATOM   1625  N   GLY L  13      -9.105   6.602   8.754  1.00 38.85           N  
ATOM   1626  CA  GLY L  13      -9.640   7.946   8.840  1.00 39.86           C  
ATOM   1627  C   GLY L  13     -11.100   7.946   8.451  1.00 40.98           C  
ATOM   1628  O   GLY L  13     -11.648   6.944   7.983  1.00 40.68           O  
ATOM   1629  N   THR L  14     -11.732   9.098   8.658  1.00 41.26           N  
ATOM   1630  CA  THR L  14     -13.129   9.261   8.290  1.00 41.61           C  
ATOM   1631  C   THR L  14     -13.248   9.575   6.800  1.00 43.15           C  
ATOM   1632  O   THR L  14     -12.255   9.712   6.081  1.00 48.24           O  
ATOM   1633  CB  THR L  14     -13.787  10.352   9.131  1.00 42.88           C  
ATOM   1634  OG1 THR L  14     -12.939  11.507   9.171  1.00 41.44           O  
ATOM   1635  CG2 THR L  14     -14.039   9.855  10.546  1.00 40.62           C  
ATOM   1636  N   VAL L  15     -14.482   9.696   6.329  1.00 43.14           N  
ATOM   1637  CA  VAL L  15     -14.733   9.913   4.909  1.00 43.74           C  
ATOM   1638  C   VAL L  15     -14.410  11.356   4.549  1.00 43.94           C  
ATOM   1639  O   VAL L  15     -14.722  12.290   5.298  1.00 48.53           O  
ATOM   1640  CB  VAL L  15     -16.187   9.557   4.551  1.00 43.68           C  
ATOM   1641  CG1 VAL L  15     -16.362   9.515   3.044  1.00 46.92           C  
ATOM   1642  CG2 VAL L  15     -16.573   8.227   5.173  1.00 43.79           C  
ATOM   1643  N   GLY L  16     -13.788  11.540   3.386  1.00 44.77           N  
ATOM   1644  CA  GLY L  16     -13.341  12.841   2.941  1.00 44.07           C  
ATOM   1645  C   GLY L  16     -12.012  13.283   3.508  1.00 44.86           C  
ATOM   1646  O   GLY L  16     -11.606  14.427   3.269  1.00 50.23           O  
ATOM   1647  N   GLN L  17     -11.320  12.416   4.240  1.00 46.12           N  
ATOM   1648  CA  GLN L  17     -10.079  12.770   4.912  1.00 42.60           C  
ATOM   1649  C   GLN L  17      -8.878  12.458   4.028  1.00 42.88           C  
ATOM   1650  O   GLN L  17      -8.870  11.464   3.296  1.00 43.81           O  
ATOM   1651  CB  GLN L  17      -9.969  12.013   6.237  1.00 42.28           C  
ATOM   1652  CG  GLN L  17      -8.762  12.363   7.085  1.00 41.00           C  
ATOM   1653  CD  GLN L  17      -8.802  11.683   8.437  1.00 41.96           C  
ATOM   1654  OE1 GLN L  17      -9.860  11.246   8.891  1.00 44.04           O  
ATOM   1655  NE2 GLN L  17      -7.649  11.586   9.088  1.00 41.44           N  
ATOM   1656  N   LYS L  18      -7.866  13.319   4.098  1.00 42.17           N  
ATOM   1657  CA  LYS L  18      -6.626  13.099   3.368  1.00 42.36           C  
ATOM   1658  C   LYS L  18      -5.795  12.040   4.080  1.00 42.18           C  
ATOM   1659  O   LYS L  18      -5.497  12.172   5.271  1.00 53.04           O  
ATOM   1660  CB  LYS L  18      -5.837  14.401   3.247  1.00 43.72           C  
ATOM   1661  CG  LYS L  18      -4.607  14.306   2.360  1.00 45.42           C  
ATOM   1662  CD  LYS L  18      -3.786  15.584   2.426  1.00 48.27           C  
ATOM   1663  CE  LYS L  18      -2.735  15.625   1.332  1.00 51.06           C  
ATOM   1664  NZ  LYS L  18      -3.355  15.670  -0.021  1.00 50.04           N  
ATOM   1665  N   VAL L  19      -5.422  10.992   3.351  1.00 40.32           N  
ATOM   1666  CA  VAL L  19      -4.753   9.840   3.938  1.00 39.62           C  
ATOM   1667  C   VAL L  19      -3.531   9.503   3.093  1.00 37.93           C  
ATOM   1668  O   VAL L  19      -3.514   9.717   1.877  1.00 39.03           O  
ATOM   1669  CB  VAL L  19      -5.724   8.639   4.057  1.00 37.70           C  
ATOM   1670  CG1 VAL L  19      -5.491   7.610   2.956  1.00 37.01           C  
ATOM   1671  CG2 VAL L  19      -5.645   8.023   5.439  1.00 36.12           C  
ATOM   1672  N   THR L  20      -2.490   8.990   3.750  1.00 36.77           N  
ATOM   1673  CA  THR L  20      -1.206   8.777   3.092  1.00 36.10           C  
ATOM   1674  C   THR L  20      -0.575   7.475   3.558  1.00 35.15           C  
ATOM   1675  O   THR L  20      -0.433   7.244   4.763  1.00 34.76           O  
ATOM   1676  CB  THR L  20      -0.247   9.943   3.363  1.00 36.72           C  
ATOM   1677  OG1 THR L  20      -0.799  11.152   2.828  1.00 37.76           O  
ATOM   1678  CG2 THR L  20       1.107   9.682   2.719  1.00 36.36           C  
ATOM   1679  N   LEU L  21      -0.189   6.639   2.599  1.00 35.55           N  
ATOM   1680  CA  LEU L  21       0.541   5.407   2.848  1.00 34.44           C  
ATOM   1681  C   LEU L  21       1.983   5.571   2.386  1.00 35.84           C  
ATOM   1682  O   LEU L  21       2.278   6.380   1.502  1.00 34.15           O  
ATOM   1683  CB  LEU L  21      -0.100   4.221   2.119  1.00 34.79           C  
ATOM   1684  CG  LEU L  21      -1.377   3.579   2.670  1.00 35.21           C  
ATOM   1685  CD1 LEU L  21      -2.557   4.542   2.680  1.00 34.17           C  
ATOM   1686  CD2 LEU L  21      -1.712   2.338   1.860  1.00 32.60           C  
ATOM   1687  N   SER L  22       2.884   4.796   2.987  1.00 36.15           N  
ATOM   1688  CA  SER L  22       4.296   4.853   2.642  1.00 33.20           C  
ATOM   1689  C   SER L  22       4.812   3.454   2.332  1.00 32.02           C  
ATOM   1690  O   SER L  22       4.189   2.444   2.670  1.00 31.06           O  
ATOM   1691  CB  SER L  22       5.132   5.491   3.762  1.00 32.58           C  
ATOM   1692  OG  SER L  22       4.975   4.800   4.988  1.00 32.83           O  
ATOM   1693  N   CYS L  23       5.969   3.418   1.677  1.00 32.18           N  
ATOM   1694  CA  CYS L  23       6.595   2.172   1.239  1.00 31.85           C  
ATOM   1695  C   CYS L  23       8.095   2.425   1.222  1.00 32.55           C  
ATOM   1696  O   CYS L  23       8.584   3.166   0.364  1.00 32.92           O  
ATOM   1697  CB  CYS L  23       6.079   1.759  -0.139  1.00 33.08           C  
ATOM   1698  SG  CYS L  23       6.794   0.261  -0.870  1.00 38.70           S  
ATOM   1699  N   THR L  24       8.818   1.833   2.168  1.00 32.40           N  
ATOM   1700  CA  THR L  24      10.225   2.140   2.392  1.00 33.19           C  
ATOM   1701  C   THR L  24      11.096   0.957   1.992  1.00 32.77           C  
ATOM   1702  O   THR L  24      10.838  -0.178   2.405  1.00 34.59           O  
ATOM   1703  CB  THR L  24      10.478   2.501   3.857  1.00 33.26           C  
ATOM   1704  OG1 THR L  24       9.664   3.622   4.221  1.00 32.80           O  
ATOM   1705  CG2 THR L  24      11.942   2.855   4.073  1.00 34.67           C  
ATOM   1706  N   GLY L  25      12.127   1.231   1.196  1.00 33.66           N  
ATOM   1707  CA  GLY L  25      13.084   0.217   0.797  1.00 35.11           C  
ATOM   1708  C   GLY L  25      14.507   0.734   0.831  1.00 36.22           C  
ATOM   1709  O   GLY L  25      14.874   1.486   1.739  1.00 41.31           O  
ATOM   1710  N   ASN L  26      15.319   0.345  -0.150  1.00 36.40           N  
ATOM   1711  CA  ASN L  26      16.689   0.839  -0.230  1.00 37.08           C  
ATOM   1712  C   ASN L  26      16.994   1.370  -1.626  1.00 37.19           C  
ATOM   1713  O   ASN L  26      16.084   1.551  -2.440  1.00 36.35           O  
ATOM   1714  CB  ASN L  26      17.682  -0.258   0.165  1.00 36.85           C  
ATOM   1715  CG  ASN L  26      17.465  -1.552  -0.598  1.00 36.68           C  
ATOM   1716  OD1 ASN L  26      17.090  -1.544  -1.770  1.00 38.56           O  
ATOM   1717  ND2 ASN L  26      17.702  -2.675   0.068  1.00 36.42           N  
ATOM   1718  N   THR L  27      18.274   1.621  -1.909  1.00 37.59           N  
ATOM   1719  CA  THR L  27      18.664   2.173  -3.202  1.00 38.19           C  
ATOM   1720  C   THR L  27      18.472   1.182  -4.342  1.00 36.64           C  
ATOM   1721  O   THR L  27      18.319   1.604  -5.494  1.00 36.23           O  
ATOM   1722  CB  THR L  27      20.124   2.628  -3.166  1.00 39.62           C  
ATOM   1723  OG1 THR L  27      20.961   1.518  -2.821  1.00 42.15           O  
ATOM   1724  CG2 THR L  27      20.315   3.734  -2.141  1.00 42.30           C  
ATOM   1725  N   ASN L  27A     18.477  -0.118  -4.055  1.00 36.05           N  
ATOM   1726  CA  ASN L  27A     18.405  -1.141  -5.090  1.00 34.79           C  
ATOM   1727  C   ASN L  27A     16.980  -1.506  -5.485  1.00 33.92           C  
ATOM   1728  O   ASN L  27A     16.800  -2.299  -6.415  1.00 34.53           O  
ATOM   1729  CB  ASN L  27A     19.150  -2.401  -4.640  1.00 34.33           C  
ATOM   1730  CG  ASN L  27A     20.644  -2.311  -4.877  1.00 32.49           C  
ATOM   1731  OD1 ASN L  27A     21.394  -1.849  -4.019  1.00 31.87           O  
ATOM   1732  ND2 ASN L  27A     21.084  -2.754  -6.049  1.00 33.11           N  
ATOM   1733  N   ASN L  27B     15.968  -0.961  -4.812  1.00 34.33           N  
ATOM   1734  CA  ASN L  27B     14.591  -1.205  -5.227  1.00 34.21           C  
ATOM   1735  C   ASN L  27B     13.856   0.103  -5.495  1.00 34.03           C  
ATOM   1736  O   ASN L  27B     13.721   0.518  -6.650  1.00 33.68           O  
ATOM   1737  CB  ASN L  27B     13.841  -2.039  -4.181  1.00 33.88           C  
ATOM   1738  CG  ASN L  27B     14.217  -1.678  -2.758  1.00 34.11           C  
ATOM   1739  OD1 ASN L  27B     13.913  -0.585  -2.280  1.00 34.13           O  
ATOM   1740  ND2 ASN L  27B     14.868  -2.605  -2.067  1.00 33.62           N  
ATOM   1741  N   ILE L  28      13.384   0.764  -4.436  1.00 33.99           N  
ATOM   1742  CA  ILE L  28      12.585   1.972  -4.614  1.00 34.43           C  
ATOM   1743  C   ILE L  28      13.450   3.139  -5.069  1.00 34.79           C  
ATOM   1744  O   ILE L  28      12.998   3.993  -5.843  1.00 34.71           O  
ATOM   1745  CB  ILE L  28      11.827   2.286  -3.312  1.00 34.29           C  
ATOM   1746  CG1 ILE L  28      10.725   1.251  -3.096  1.00 33.33           C  
ATOM   1747  CG2 ILE L  28      11.239   3.688  -3.339  1.00 34.99           C  
ATOM   1748  CD1 ILE L  28      10.004   1.406  -1.795  1.00 34.73           C  
ATOM   1749  N   GLY L  29      14.706   3.188  -4.629  1.00 34.87           N  
ATOM   1750  CA  GLY L  29      15.588   4.279  -5.004  1.00 35.56           C  
ATOM   1751  C   GLY L  29      15.956   4.328  -6.474  1.00 35.43           C  
ATOM   1752  O   GLY L  29      16.587   5.302  -6.898  1.00 38.54           O  
ATOM   1753  N   SER L  30      15.581   3.318  -7.257  1.00 34.24           N  
ATOM   1754  CA  SER L  30      15.960   3.305  -8.664  1.00 33.82           C  
ATOM   1755  C   SER L  30      14.938   2.654  -9.586  1.00 33.91           C  
ATOM   1756  O   SER L  30      15.208   2.560 -10.786  1.00 33.43           O  
ATOM   1757  CB  SER L  30      17.321   2.604  -8.823  1.00 34.01           C  
ATOM   1758  OG  SER L  30      17.345   1.372  -8.125  1.00 33.99           O  
ATOM   1759  N   TYR L  31      13.822   2.179  -9.081  1.00 34.60           N  
ATOM   1760  CA  TYR L  31      12.871   1.535  -9.954  1.00 35.22           C  
ATOM   1761  C   TYR L  31      11.490   2.037  -9.719  1.00 35.48           C  
ATOM   1762  O   TYR L  31      11.176   2.478  -8.643  1.00 39.67           O  
ATOM   1763  CB  TYR L  31      12.926   0.024  -9.805  1.00 34.14           C  
ATOM   1764  CG  TYR L  31      14.222  -0.531 -10.270  1.00 32.67           C  
ATOM   1765  CD1 TYR L  31      14.468  -0.723 -11.600  1.00 32.37           C  
ATOM   1766  CD2 TYR L  31      15.215  -0.807  -9.387  1.00 32.47           C  
ATOM   1767  CE1 TYR L  31      15.670  -1.204 -12.037  1.00 32.27           C  
ATOM   1768  CE2 TYR L  31      16.409  -1.290  -9.812  1.00 33.43           C  
ATOM   1769  CZ  TYR L  31      16.625  -1.483 -11.139  1.00 33.12           C  
ATOM   1770  OH  TYR L  31      17.814  -1.965 -11.545  1.00 34.62           O  
ATOM   1771  N   PRO L  32      10.647   1.944 -10.809  1.00 37.07           N  
ATOM   1772  CA  PRO L  32       9.296   2.452 -10.565  1.00 39.37           C  
ATOM   1773  C   PRO L  32       8.534   1.639  -9.547  1.00 41.53           C  
ATOM   1774  O   PRO L  32       8.758   0.464  -9.404  1.00 49.02           O  
ATOM   1775  CB  PRO L  32       8.630   2.403 -11.931  1.00 39.99           C  
ATOM   1776  CG  PRO L  32       9.292   1.317 -12.638  1.00 37.14           C  
ATOM   1777  CD  PRO L  32      10.711   1.459 -12.256  1.00 36.18           C  
ATOM   1778  N   VAL L  33       7.633   2.284  -8.836  1.00 41.94           N  
ATOM   1779  CA  VAL L  33       6.866   1.610  -7.827  1.00 42.63           C  
ATOM   1780  C   VAL L  33       5.414   1.505  -8.191  1.00 43.49           C  
ATOM   1781  O   VAL L  33       4.805   2.462  -8.613  1.00 50.47           O  
ATOM   1782  CB  VAL L  33       6.910   2.346  -6.492  1.00 41.38           C  
ATOM   1783  CG1 VAL L  33       6.292   1.487  -5.422  1.00 44.48           C  
ATOM   1784  CG2 VAL L  33       8.311   2.716  -6.116  1.00 39.73           C  
ATOM   1785  N   GLY L  34       4.865   0.322  -7.998  1.00 41.48           N  
ATOM   1786  CA  GLY L  34       3.481   0.071  -8.277  1.00 41.17           C  
ATOM   1787  C   GLY L  34       2.743  -0.177  -6.994  1.00 38.97           C  
ATOM   1788  O   GLY L  34       3.290  -0.690  -6.050  1.00 47.72           O  
ATOM   1789  N   TRP L  35       1.482   0.204  -6.978  1.00 38.17           N  
ATOM   1790  CA  TRP L  35       0.631   0.027  -5.831  1.00 37.76           C  
ATOM   1791  C   TRP L  35      -0.553  -0.758  -6.311  1.00 38.02           C  
ATOM   1792  O   TRP L  35      -1.134  -0.455  -7.305  1.00 38.32           O  
ATOM   1793  CB  TRP L  35       0.183   1.373  -5.285  1.00 36.68           C  
ATOM   1794  CG  TRP L  35       1.253   2.145  -4.642  1.00 35.18           C  
ATOM   1795  CD1 TRP L  35       2.158   2.930  -5.248  1.00 36.19           C  
ATOM   1796  CD2 TRP L  35       1.533   2.213  -3.248  1.00 33.53           C  
ATOM   1797  NE1 TRP L  35       2.986   3.487  -4.335  1.00 34.97           N  
ATOM   1798  CE2 TRP L  35       2.624   3.059  -3.092  1.00 33.44           C  
ATOM   1799  CE3 TRP L  35       0.965   1.634  -2.115  1.00 32.64           C  
ATOM   1800  CZ2 TRP L  35       3.171   3.333  -1.859  1.00 32.98           C  
ATOM   1801  CZ3 TRP L  35       1.501   1.924  -0.906  1.00 31.92           C  
ATOM   1802  CH2 TRP L  35       2.587   2.761  -0.780  1.00 32.06           C  
ATOM   1803  N   TYR L  36      -0.892  -1.799  -5.598  1.00 36.92           N  
ATOM   1804  CA  TYR L  36      -2.031  -2.624  -5.973  1.00 37.26           C  
ATOM   1805  C   TYR L  36      -3.041  -2.716  -4.871  1.00 36.04           C  
ATOM   1806  O   TYR L  36      -2.693  -2.795  -3.728  1.00 34.13           O  
ATOM   1807  CB  TYR L  36      -1.559  -3.994  -6.408  1.00 38.71           C  
ATOM   1808  CG  TYR L  36      -0.402  -3.890  -7.346  1.00 39.82           C  
ATOM   1809  CD1 TYR L  36      -0.589  -3.752  -8.701  1.00 45.76           C  
ATOM   1810  CD2 TYR L  36       0.873  -3.890  -6.871  1.00 40.88           C  
ATOM   1811  CE1 TYR L  36       0.476  -3.630  -9.553  1.00 46.44           C  
ATOM   1812  CE2 TYR L  36       1.933  -3.771  -7.705  1.00 42.11           C  
ATOM   1813  CZ  TYR L  36       1.732  -3.642  -9.044  1.00 47.29           C  
ATOM   1814  OH  TYR L  36       2.819  -3.529  -9.856  1.00 52.78           O  
ATOM   1815  N   GLN L  37      -4.307  -2.701  -5.231  1.00 36.29           N  
ATOM   1816  CA  GLN L  37      -5.378  -2.706  -4.244  1.00 36.32           C  
ATOM   1817  C   GLN L  37      -6.161  -4.009  -4.322  1.00 37.13           C  
ATOM   1818  O   GLN L  37      -6.459  -4.499  -5.415  1.00 38.44           O  
ATOM   1819  CB  GLN L  37      -6.320  -1.514  -4.465  1.00 37.62           C  
ATOM   1820  CG  GLN L  37      -7.681  -1.641  -3.801  1.00 37.77           C  
ATOM   1821  CD  GLN L  37      -8.678  -0.618  -4.313  1.00 40.61           C  
ATOM   1822  OE1 GLN L  37      -9.515  -0.923  -5.163  1.00 43.76           O  
ATOM   1823  NE2 GLN L  37      -8.593   0.602  -3.798  1.00 41.09           N  
ATOM   1824  N   GLN L  38      -6.501  -4.565  -3.159  1.00 36.18           N  
ATOM   1825  CA  GLN L  38      -7.269  -5.805  -3.082  1.00 38.86           C  
ATOM   1826  C   GLN L  38      -8.348  -5.659  -2.021  1.00 38.91           C  
ATOM   1827  O   GLN L  38      -8.038  -5.426  -0.849  1.00 38.30           O  
ATOM   1828  CB  GLN L  38      -6.365  -6.998  -2.760  1.00 39.38           C  
ATOM   1829  CG  GLN L  38      -7.102  -8.324  -2.691  1.00 42.93           C  
ATOM   1830  CD  GLN L  38      -6.188  -9.481  -2.341  1.00 42.20           C  
ATOM   1831  OE1 GLN L  38      -5.248  -9.331  -1.562  1.00 41.84           O  
ATOM   1832  NE2 GLN L  38      -6.459 -10.645  -2.921  1.00 43.72           N  
ATOM   1833  N   ILE L  39      -9.607  -5.810  -2.427  1.00 41.52           N  
ATOM   1834  CA  ILE L  39     -10.751  -5.716  -1.526  1.00 44.56           C  
ATOM   1835  C   ILE L  39     -11.185  -7.122  -1.142  1.00 49.18           C  
ATOM   1836  O   ILE L  39     -11.357  -7.985  -2.013  1.00 50.43           O  
ATOM   1837  CB  ILE L  39     -11.911  -4.942  -2.175  1.00 43.37           C  
ATOM   1838  CG1 ILE L  39     -11.434  -3.572  -2.657  1.00 41.40           C  
ATOM   1839  CG2 ILE L  39     -13.063  -4.791  -1.194  1.00 44.54           C  
ATOM   1840  CD1 ILE L  39     -12.525  -2.725  -3.269  1.00 42.73           C  
ATOM   1841  N   SER L  40     -11.372  -7.350   0.161  1.00 50.34           N  
ATOM   1842  CA  SER L  40     -11.747  -8.658   0.689  1.00 54.66           C  
ATOM   1843  C   SER L  40     -10.729  -9.590   0.047  1.00 58.38           C  
ATOM   1844  O   SER L  40      -9.517  -9.389   0.176  1.00 65.84           O  
ATOM   1845  CB  SER L  40     -13.178  -9.021   0.277  1.00 56.80           C  
ATOM   1846  OG  SER L  40     -14.074  -7.953   0.528  1.00 63.47           O  
ATOM   1847  N   HIS L  41     -11.220 -10.619  -0.646  1.00 59.93           N  
ATOM   1848  CA  HIS L  41     -10.362 -11.515  -1.412  1.00 60.01           C  
ATOM   1849  C   HIS L  41     -10.526 -11.384  -2.921  1.00 59.63           C  
ATOM   1850  O   HIS L  41     -10.159 -12.301  -3.663  1.00 62.39           O  
ATOM   1851  CB  HIS L  41     -10.655 -12.951  -0.972  1.00 30.00           C  
ATOM   1852  CG  HIS L  41      -9.771 -13.972  -1.614  1.00 30.00           C  
ATOM   1853  ND1 HIS L  41      -8.403 -13.989  -1.442  1.00 30.00           N  
ATOM   1854  CD2 HIS L  41     -10.059 -15.014  -2.429  1.00 30.00           C  
ATOM   1855  CE1 HIS L  41      -7.887 -14.996  -2.124  1.00 30.00           C  
ATOM   1856  NE2 HIS L  41      -8.869 -15.635  -2.731  1.00 30.00           N  
ATOM   1857  N   GLY L  42     -11.072 -10.257  -3.386  1.00 57.23           N  
ATOM   1858  CA  GLY L  42     -11.340 -10.070  -4.782  1.00 61.46           C  
ATOM   1859  C   GLY L  42     -10.070  -9.873  -5.589  1.00 60.72           C  
ATOM   1860  O   GLY L  42      -8.950  -9.909  -5.061  1.00 52.75           O  
ATOM   1861  N   PRO L  43     -10.240  -9.657  -6.889  1.00 53.54           N  
ATOM   1862  CA  PRO L  43      -9.088  -9.524  -7.781  1.00 48.24           C  
ATOM   1863  C   PRO L  43      -8.330  -8.240  -7.506  1.00 46.90           C  
ATOM   1864  O   PRO L  43      -8.927  -7.154  -7.452  1.00 47.14           O  
ATOM   1865  CB  PRO L  43      -9.721  -9.504  -9.181  1.00 49.37           C  
ATOM   1866  CG  PRO L  43     -11.120 -10.018  -8.992  1.00 54.07           C  
ATOM   1867  CD  PRO L  43     -11.514  -9.594  -7.621  1.00 56.47           C  
ATOM   1868  N   PRO L  44      -7.016  -8.322  -7.317  1.00 44.17           N  
ATOM   1869  CA  PRO L  44      -6.214  -7.101  -7.197  1.00 43.18           C  
ATOM   1870  C   PRO L  44      -6.214  -6.316  -8.498  1.00 43.93           C  
ATOM   1871  O   PRO L  44      -6.329  -6.876  -9.591  1.00 53.94           O  
ATOM   1872  CB  PRO L  44      -4.812  -7.625  -6.864  1.00 40.76           C  
ATOM   1873  CG  PRO L  44      -5.031  -9.007  -6.331  1.00 40.73           C  
ATOM   1874  CD  PRO L  44      -6.220  -9.535  -7.070  1.00 42.90           C  
ATOM   1875  N   LYS L  45      -6.083  -4.999  -8.369  1.00 42.47           N  
ATOM   1876  CA  LYS L  45      -6.037  -4.114  -9.523  1.00 43.25           C  
ATOM   1877  C   LYS L  45      -5.024  -3.008  -9.271  1.00 42.16           C  
ATOM   1878  O   LYS L  45      -4.907  -2.505  -8.150  1.00 40.79           O  
ATOM   1879  CB  LYS L  45      -7.418  -3.515  -9.829  1.00 45.66           C  
ATOM   1880  CG  LYS L  45      -8.045  -2.757  -8.672  1.00 47.37           C  
ATOM   1881  CD  LYS L  45      -9.465  -2.324  -8.999  1.00 55.46           C  
ATOM   1882  CE  LYS L  45      -9.489  -0.965  -9.680  1.00 50.90           C  
ATOM   1883  NZ  LYS L  45     -10.880  -0.484  -9.907  1.00 48.92           N  
ATOM   1884  N   THR L  46      -4.291  -2.641 -10.318  1.00 41.50           N  
ATOM   1885  CA  THR L  46      -3.287  -1.594 -10.195  1.00 41.94           C  
ATOM   1886  C   THR L  46      -3.963  -0.237 -10.049  1.00 43.04           C  
ATOM   1887  O   THR L  46      -4.804   0.141 -10.870  1.00 51.74           O  
ATOM   1888  CB  THR L  46      -2.366  -1.591 -11.412  1.00 43.02           C  
ATOM   1889  OG1 THR L  46      -1.851  -2.910 -11.628  1.00 44.26           O  
ATOM   1890  CG2 THR L  46      -1.210  -0.630 -11.195  1.00 42.15           C  
ATOM   1891  N   VAL L  47      -3.598   0.496  -9.003  1.00 41.47           N  
ATOM   1892  CA  VAL L  47      -4.149   1.823  -8.779  1.00 42.45           C  
ATOM   1893  C   VAL L  47      -3.103   2.921  -8.905  1.00 42.17           C  
ATOM   1894  O   VAL L  47      -3.478   4.100  -8.996  1.00 50.25           O  
ATOM   1895  CB  VAL L  47      -4.858   1.912  -7.412  1.00 41.34           C  
ATOM   1896  CG1 VAL L  47      -5.847   0.768  -7.259  1.00 40.92           C  
ATOM   1897  CG2 VAL L  47      -3.845   1.908  -6.281  1.00 40.97           C  
ATOM   1898  N   MET L  48      -1.818   2.584  -8.924  1.00 41.45           N  
ATOM   1899  CA  MET L  48      -0.770   3.575  -9.109  1.00 41.51           C  
ATOM   1900  C   MET L  48       0.493   2.864  -9.564  1.00 41.23           C  
ATOM   1901  O   MET L  48       0.861   1.829  -9.006  1.00 41.44           O  
ATOM   1902  CB  MET L  48      -0.503   4.365  -7.823  1.00 41.46           C  
ATOM   1903  CG  MET L  48       0.507   5.487  -7.993  1.00 44.31           C  
ATOM   1904  SD  MET L  48      -0.125   6.817  -9.032  1.00 43.14           S  
ATOM   1905  CE  MET L  48      -1.601   7.266  -8.127  1.00 40.67           C  
ATOM   1906  N   PHE L  49       1.144   3.422 -10.580  1.00 43.38           N  
ATOM   1907  CA  PHE L  49       2.406   2.882 -11.065  1.00 43.18           C  
ATOM   1908  C   PHE L  49       3.264   4.026 -11.576  1.00 44.55           C  
ATOM   1909  O   PHE L  49       2.818   4.801 -12.426  1.00 45.05           O  
ATOM   1910  CB  PHE L  49       2.185   1.845 -12.171  1.00 42.79           C  
ATOM   1911  CG  PHE L  49       3.452   1.202 -12.656  1.00 42.06           C  
ATOM   1912  CD1 PHE L  49       3.990   0.113 -11.991  1.00 42.22           C  
ATOM   1913  CD2 PHE L  49       4.110   1.692 -13.771  1.00 42.41           C  
ATOM   1914  CE1 PHE L  49       5.159  -0.477 -12.433  1.00 41.73           C  
ATOM   1915  CE2 PHE L  49       5.279   1.107 -14.216  1.00 42.69           C  
ATOM   1916  CZ  PHE L  49       5.804   0.020 -13.546  1.00 41.72           C  
ATOM   1917  N   GLY L  50       4.485   4.125 -11.060  1.00 44.56           N  
ATOM   1918  CA  GLY L  50       5.408   5.162 -11.496  1.00 46.29           C  
ATOM   1919  C   GLY L  50       4.862   6.566 -11.358  1.00 47.70           C  
ATOM   1920  O   GLY L  50       5.075   7.401 -12.247  1.00 49.13           O  
ATOM   1921  N   ASN L  51       4.149   6.841 -10.265  1.00 47.02           N  
ATOM   1922  CA  ASN L  51       3.495   8.125 -10.021  1.00 46.13           C  
ATOM   1923  C   ASN L  51       2.493   8.480 -11.116  1.00 45.86           C  
ATOM   1924  O   ASN L  51       2.114   9.647 -11.257  1.00 43.91           O  
ATOM   1925  CB  ASN L  51       4.522   9.256  -9.856  1.00 46.83           C  
ATOM   1926  CG  ASN L  51       5.703   8.854  -8.996  1.00 48.35           C  
ATOM   1927  OD1 ASN L  51       6.856   9.017  -9.394  1.00 49.87           O  
ATOM   1928  ND2 ASN L  51       5.422   8.326  -7.810  1.00 44.78           N  
ATOM   1929  N   SER L  52       2.055   7.489 -11.888  1.00 46.25           N  
ATOM   1930  CA  SER L  52       1.151   7.693 -13.009  1.00 45.84           C  
ATOM   1931  C   SER L  52      -0.202   7.069 -12.697  1.00 45.33           C  
ATOM   1932  O   SER L  52      -0.279   5.905 -12.288  1.00 47.01           O  
ATOM   1933  CB  SER L  52       1.729   7.092 -14.291  1.00 45.59           C  
ATOM   1934  OG  SER L  52       0.698   6.799 -15.223  1.00 48.57           O  
ATOM   1935  N   LEU L  53      -1.260   7.839 -12.909  1.00 44.78           N  
ATOM   1936  CA  LEU L  53      -2.601   7.410 -12.544  1.00 46.14           C  
ATOM   1937  C   LEU L  53      -3.189   6.546 -13.655  1.00 49.81           C  
ATOM   1938  O   LEU L  53      -3.324   7.020 -14.788  1.00 57.92           O  
ATOM   1939  CB  LEU L  53      -3.472   8.634 -12.280  1.00 45.07           C  
ATOM   1940  CG  LEU L  53      -4.772   8.530 -11.482  1.00 45.52           C  
ATOM   1941  CD1 LEU L  53      -5.860   7.886 -12.301  1.00 48.06           C  
ATOM   1942  CD2 LEU L  53      -4.545   7.762 -10.196  1.00 44.64           C  
ATOM   1943  N   PRO L  55      -3.535   5.288 -13.384  1.00 50.20           N  
ATOM   1944  CA  PRO L  55      -4.084   4.428 -14.437  1.00 52.44           C  
ATOM   1945  C   PRO L  55      -5.498   4.827 -14.828  1.00 54.95           C  
ATOM   1946  O   PRO L  55      -6.268   5.353 -14.022  1.00 53.17           O  
ATOM   1947  CB  PRO L  55      -4.067   3.032 -13.800  1.00 51.82           C  
ATOM   1948  CG  PRO L  55      -3.102   3.134 -12.662  1.00 49.28           C  
ATOM   1949  CD  PRO L  55      -3.252   4.532 -12.155  1.00 48.75           C  
ATOM   1950  N   SER L  56      -5.835   4.550 -16.086  1.00 62.31           N  
ATOM   1951  CA  SER L  56      -7.166   4.851 -16.598  1.00 58.26           C  
ATOM   1952  C   SER L  56      -8.230   4.109 -15.800  1.00 56.21           C  
ATOM   1953  O   SER L  56      -8.119   2.902 -15.564  1.00 57.94           O  
ATOM   1954  CB  SER L  56      -7.256   4.472 -18.076  1.00 59.79           C  
ATOM   1955  OG  SER L  56      -8.605   4.345 -18.488  1.00 64.28           O  
ATOM   1956  N   GLY L  57      -9.265   4.838 -15.384  1.00 54.36           N  
ATOM   1957  CA  GLY L  57     -10.362   4.284 -14.626  1.00 53.51           C  
ATOM   1958  C   GLY L  57     -10.296   4.551 -13.137  1.00 51.23           C  
ATOM   1959  O   GLY L  57     -11.335   4.520 -12.468  1.00 51.51           O  
ATOM   1960  N   ILE L  58      -9.107   4.810 -12.604  1.00 50.70           N  
ATOM   1961  CA  ILE L  58      -8.932   5.111 -11.186  1.00 49.69           C  
ATOM   1962  C   ILE L  58      -9.168   6.606 -11.000  1.00 49.34           C  
ATOM   1963  O   ILE L  58      -8.817   7.400 -11.883  1.00 49.48           O  
ATOM   1964  CB  ILE L  58      -7.542   4.666 -10.691  1.00 48.84           C  
ATOM   1965  CG1 ILE L  58      -7.510   3.151 -10.455  1.00 47.72           C  
ATOM   1966  CG2 ILE L  58      -7.142   5.393  -9.415  1.00 48.68           C  
ATOM   1967  CD1 ILE L  58      -7.377   2.316 -11.714  1.00 49.91           C  
ATOM   1968  N   PRO L  59      -9.803   7.032  -9.912  1.00 48.97           N  
ATOM   1969  CA  PRO L  59     -10.017   8.467  -9.691  1.00 50.11           C  
ATOM   1970  C   PRO L  59      -8.747   9.183  -9.257  1.00 50.09           C  
ATOM   1971  O   PRO L  59      -7.869   8.612  -8.605  1.00 48.62           O  
ATOM   1972  CB  PRO L  59     -11.075   8.495  -8.582  1.00 49.24           C  
ATOM   1973  CG  PRO L  59     -10.927   7.181  -7.890  1.00 49.20           C  
ATOM   1974  CD  PRO L  59     -10.534   6.201  -8.940  1.00 48.53           C  
ATOM   1975  N   ASP L  60      -8.665  10.465  -9.623  1.00 52.53           N  
ATOM   1976  CA  ASP L  60      -7.476  11.274  -9.367  1.00 52.54           C  
ATOM   1977  C   ASP L  60      -7.341  11.703  -7.911  1.00 51.78           C  
ATOM   1978  O   ASP L  60      -6.465  12.517  -7.596  1.00 50.94           O  
ATOM   1979  CB  ASP L  60      -7.458  12.507 -10.276  1.00 58.82           C  
ATOM   1980  CG  ASP L  60      -8.755  13.292 -10.234  1.00 69.30           C  
ATOM   1981  OD1 ASP L  60      -9.487  13.212  -9.225  1.00 69.83           O  
ATOM   1982  OD2 ASP L  60      -9.040  13.999 -11.223  1.00 76.56           O  
ATOM   1983  N   ARG L  61      -8.191  11.190  -7.021  1.00 50.49           N  
ATOM   1984  CA  ARG L  61      -7.926  11.314  -5.594  1.00 50.37           C  
ATOM   1985  C   ARG L  61      -6.657  10.570  -5.201  1.00 46.80           C  
ATOM   1986  O   ARG L  61      -6.041  10.899  -4.180  1.00 48.23           O  
ATOM   1987  CB  ARG L  61      -9.115  10.778  -4.794  1.00 51.67           C  
ATOM   1988  CG  ARG L  61      -9.650   9.463  -5.352  1.00 59.86           C  
ATOM   1989  CD  ARG L  61     -10.501   8.686  -4.363  1.00 52.59           C  
ATOM   1990  NE  ARG L  61     -11.703   8.185  -5.025  1.00 54.46           N  
ATOM   1991  CZ  ARG L  61     -12.575   7.343  -4.484  1.00 55.48           C  
ATOM   1992  NH1 ARG L  61     -13.639   6.957  -5.177  1.00 58.02           N  
ATOM   1993  NH2 ARG L  61     -12.368   6.889  -3.262  1.00 53.62           N  
ATOM   1994  N   PHE L  62      -6.274   9.558  -5.974  1.00 45.23           N  
ATOM   1995  CA  PHE L  62      -5.047   8.812  -5.747  1.00 42.78           C  
ATOM   1996  C   PHE L  62      -3.892   9.531  -6.428  1.00 41.38           C  
ATOM   1997  O   PHE L  62      -3.994   9.913  -7.598  1.00 41.33           O  
ATOM   1998  CB  PHE L  62      -5.172   7.385  -6.282  1.00 42.72           C  
ATOM   1999  CG  PHE L  62      -6.152   6.536  -5.525  1.00 43.07           C  
ATOM   2000  CD1 PHE L  62      -7.490   6.522  -5.874  1.00 45.53           C  
ATOM   2001  CD2 PHE L  62      -5.731   5.743  -4.469  1.00 41.43           C  
ATOM   2002  CE1 PHE L  62      -8.393   5.740  -5.182  1.00 46.00           C  
ATOM   2003  CE2 PHE L  62      -6.630   4.958  -3.773  1.00 42.12           C  
ATOM   2004  CZ  PHE L  62      -7.963   4.957  -4.131  1.00 44.88           C  
ATOM   2005  N   SER L  63      -2.802   9.717  -5.690  1.00 39.52           N  
ATOM   2006  CA  SER L  63      -1.611  10.362  -6.218  1.00 39.20           C  
ATOM   2007  C   SER L  63      -0.391   9.727  -5.569  1.00 38.50           C  
ATOM   2008  O   SER L  63      -0.392   9.453  -4.367  1.00 38.17           O  
ATOM   2009  CB  SER L  63      -1.630  11.872  -5.962  1.00 39.25           C  
ATOM   2010  OG  SER L  63      -1.727  12.152  -4.577  1.00 39.75           O  
ATOM   2011  N   GLY L  64       0.639   9.497  -6.368  1.00 38.63           N  
ATOM   2012  CA  GLY L  64       1.857   8.854  -5.899  1.00 38.83           C  
ATOM   2013  C   GLY L  64       3.062   9.755  -6.075  1.00 39.36           C  
ATOM   2014  O   GLY L  64       3.186  10.448  -7.086  1.00 41.25           O  
ATOM   2015  N   SER L  65       3.947   9.741  -5.080  1.00 38.84           N  
ATOM   2016  CA  SER L  65       5.196  10.484  -5.128  1.00 39.69           C  
ATOM   2017  C   SER L  65       6.301   9.609  -4.558  1.00 39.77           C  
ATOM   2018  O   SER L  65       6.049   8.542  -3.992  1.00 37.91           O  
ATOM   2019  CB  SER L  65       5.097  11.808  -4.360  1.00 39.67           C  
ATOM   2020  OG  SER L  65       4.766  11.586  -3.001  1.00 38.19           O  
ATOM   2021  N   LYS L  66       7.541  10.068  -4.708  1.00 41.88           N  
ATOM   2022  CA  LYS L  66       8.685   9.307  -4.228  1.00 40.39           C  
ATOM   2023  C   LYS L  66       9.810  10.262  -3.862  1.00 40.77           C  
ATOM   2024  O   LYS L  66      10.114  11.188  -4.620  1.00 40.85           O  
ATOM   2025  CB  LYS L  66       9.161   8.301  -5.281  1.00 40.60           C  
ATOM   2026  CG  LYS L  66      10.264   7.379  -4.793  1.00 39.42           C  
ATOM   2027  CD  LYS L  66      10.541   6.263  -5.785  1.00 38.86           C  
ATOM   2028  CE  LYS L  66      11.116   6.794  -7.084  1.00 38.34           C  
ATOM   2029  NZ  LYS L  66      11.537   5.682  -7.980  1.00 36.38           N  
ATOM   2030  N   SER L  67      10.421  10.030  -2.703  1.00 41.88           N  
ATOM   2031  CA  SER L  67      11.551  10.827  -2.234  1.00 42.92           C  
ATOM   2032  C   SER L  67      12.589   9.871  -1.664  1.00 41.81           C  
ATOM   2033  O   SER L  67      12.396   9.320  -0.576  1.00 45.60           O  
ATOM   2034  CB  SER L  67      11.116  11.851  -1.186  1.00 44.67           C  
ATOM   2035  OG  SER L  67      12.231  12.554  -0.666  1.00 48.17           O  
ATOM   2036  N   GLY L  68      13.680   9.671  -2.397  1.00 41.53           N  
ATOM   2037  CA  GLY L  68      14.728   8.773  -1.957  1.00 41.11           C  
ATOM   2038  C   GLY L  68      14.314   7.318  -1.990  1.00 40.02           C  
ATOM   2039  O   GLY L  68      13.933   6.796  -3.042  1.00 41.57           O  
ATOM   2040  N   THR L  69      14.380   6.650  -0.839  1.00 41.08           N  
ATOM   2041  CA  THR L  69      14.028   5.242  -0.728  1.00 37.80           C  
ATOM   2042  C   THR L  69      12.637   5.033  -0.142  1.00 36.73           C  
ATOM   2043  O   THR L  69      12.353   3.958   0.396  1.00 35.68           O  
ATOM   2044  CB  THR L  69      15.068   4.503   0.116  1.00 38.28           C  
ATOM   2045  OG1 THR L  69      15.087   5.052   1.439  1.00 37.99           O  
ATOM   2046  CG2 THR L  69      16.449   4.646  -0.504  1.00 38.24           C  
ATOM   2047  N   THR L  70      11.764   6.033  -0.236  1.00 39.16           N  
ATOM   2048  CA  THR L  70      10.415   5.949   0.309  1.00 36.34           C  
ATOM   2049  C   THR L  70       9.423   6.446  -0.729  1.00 36.45           C  
ATOM   2050  O   THR L  70       9.444   7.625  -1.096  1.00 39.15           O  
ATOM   2051  CB  THR L  70      10.281   6.763   1.599  1.00 36.11           C  
ATOM   2052  OG1 THR L  70      11.190   6.257   2.585  1.00 37.13           O  
ATOM   2053  CG2 THR L  70       8.859   6.673   2.135  1.00 35.86           C  
ATOM   2054  N   ALA L  71       8.563   5.551  -1.199  1.00 34.92           N  
ATOM   2055  CA  ALA L  71       7.454   5.905  -2.068  1.00 35.05           C  
ATOM   2056  C   ALA L  71       6.187   6.075  -1.239  1.00 34.27           C  
ATOM   2057  O   ALA L  71       6.059   5.531  -0.141  1.00 33.35           O  
ATOM   2058  CB  ALA L  71       7.242   4.841  -3.146  1.00 34.54           C  
ATOM   2059  N   SER L  72       5.244   6.841  -1.780  1.00 35.31           N  
ATOM   2060  CA  SER L  72       4.036   7.174  -1.043  1.00 34.31           C  
ATOM   2061  C   SER L  72       2.822   7.096  -1.956  1.00 35.03           C  
ATOM   2062  O   SER L  72       2.916   7.314  -3.167  1.00 35.30           O  
ATOM   2063  CB  SER L  72       4.131   8.572  -0.419  1.00 35.49           C  
ATOM   2064  OG  SER L  72       5.222   8.649   0.483  1.00 35.44           O  
ATOM   2065  N   LEU L  73       1.678   6.776  -1.353  1.00 34.83           N  
ATOM   2066  CA  LEU L  73       0.388   6.759  -2.035  1.00 35.15           C  
ATOM   2067  C   LEU L  73      -0.580   7.594  -1.209  1.00 36.75           C  
ATOM   2068  O   LEU L  73      -0.926   7.218  -0.085  1.00 36.54           O  
ATOM   2069  CB  LEU L  73      -0.134   5.332  -2.209  1.00 35.33           C  
ATOM   2070  CG  LEU L  73      -1.507   5.208  -2.874  1.00 35.34           C  
ATOM   2071  CD1 LEU L  73      -1.444   5.670  -4.321  1.00 36.86           C  
ATOM   2072  CD2 LEU L  73      -2.030   3.783  -2.783  1.00 34.72           C  
ATOM   2073  N   THR L  74      -1.011   8.724  -1.761  1.00 39.26           N  
ATOM   2074  CA  THR L  74      -1.892   9.655  -1.070  1.00 39.29           C  
ATOM   2075  C   THR L  74      -3.302   9.530  -1.627  1.00 40.39           C  
ATOM   2076  O   THR L  74      -3.493   9.509  -2.848  1.00 40.87           O  
ATOM   2077  CB  THR L  74      -1.390  11.094  -1.217  1.00 40.61           C  
ATOM   2078  OG1 THR L  74      -0.027  11.171  -0.781  1.00 44.50           O  
ATOM   2079  CG2 THR L  74      -2.236  12.043  -0.382  1.00 42.29           C  
ATOM   2080  N   ILE L  75      -4.283   9.444  -0.734  1.00 40.76           N  
ATOM   2081  CA  ILE L  75      -5.691   9.349  -1.102  1.00 42.75           C  
ATOM   2082  C   ILE L  75      -6.366  10.610  -0.580  1.00 45.85           C  
ATOM   2083  O   ILE L  75      -6.727  10.691   0.600  1.00 44.44           O  
ATOM   2084  CB  ILE L  75      -6.356   8.087  -0.543  1.00 41.19           C  
ATOM   2085  CG1 ILE L  75      -5.552   6.846  -0.931  1.00 39.76           C  
ATOM   2086  CG2 ILE L  75      -7.789   7.974  -1.040  1.00 43.17           C  
ATOM   2087  CD1 ILE L  75      -6.055   5.570  -0.292  1.00 38.01           C  
ATOM   2088  N   SER L  76      -6.538  11.600  -1.454  1.00 48.28           N  
ATOM   2089  CA  SER L  76      -7.160  12.870  -1.085  1.00 50.09           C  
ATOM   2090  C   SER L  76      -8.669  12.715  -1.210  1.00 54.09           C  
ATOM   2091  O   SER L  76      -9.223  12.765  -2.311  1.00 64.21           O  
ATOM   2092  CB  SER L  76      -6.637  13.999  -1.965  1.00 51.72           C  
ATOM   2093  OG  SER L  76      -5.223  14.071  -1.912  1.00 51.92           O  
ATOM   2094  N   GLY L  77      -9.340  12.530  -0.077  1.00 50.52           N  
ATOM   2095  CA  GLY L  77     -10.770  12.299  -0.084  1.00 50.63           C  
ATOM   2096  C   GLY L  77     -11.105  10.836   0.106  1.00 49.48           C  
ATOM   2097  O   GLY L  77     -11.656  10.192  -0.792  1.00 52.23           O  
ATOM   2098  N   LEU L  78     -10.763  10.304   1.278  1.00 47.98           N  
ATOM   2099  CA  LEU L  78     -11.011   8.901   1.580  1.00 47.49           C  
ATOM   2100  C   LEU L  78     -12.500   8.592   1.484  1.00 47.97           C  
ATOM   2101  O   LEU L  78     -13.331   9.306   2.051  1.00 46.99           O  
ATOM   2102  CB  LEU L  78     -10.480   8.577   2.978  1.00 45.79           C  
ATOM   2103  CG  LEU L  78     -10.011   7.159   3.311  1.00 44.05           C  
ATOM   2104  CD1 LEU L  78     -11.097   6.397   4.048  1.00 44.75           C  
ATOM   2105  CD2 LEU L  78      -9.574   6.410   2.061  1.00 43.09           C  
ATOM   2106  N   GLN L  79     -12.833   7.537   0.756  1.00 49.67           N  
ATOM   2107  CA  GLN L  79     -14.207   7.134   0.503  1.00 51.15           C  
ATOM   2108  C   GLN L  79     -14.403   5.682   0.904  1.00 50.29           C  
ATOM   2109  O   GLN L  79     -13.439   4.911   0.969  1.00 49.13           O  
ATOM   2110  CB  GLN L  79     -14.573   7.324  -0.977  1.00 54.77           C  
ATOM   2111  CG  GLN L  79     -14.892   8.760  -1.359  1.00 56.47           C  
ATOM   2112  CD  GLN L  79     -16.318   8.926  -1.846  1.00 62.15           C  
ATOM   2113  OE1 GLN L  79     -17.238   8.282  -1.340  1.00 64.61           O  
ATOM   2114  NE2 GLN L  79     -16.509   9.791  -2.835  1.00 70.11           N  
ATOM   2115  N   PRO L  80     -15.646   5.275   1.185  1.00 50.72           N  
ATOM   2116  CA  PRO L  80     -15.879   3.895   1.644  1.00 50.22           C  
ATOM   2117  C   PRO L  80     -15.418   2.825   0.669  1.00 52.04           C  
ATOM   2118  O   PRO L  80     -15.022   1.738   1.107  1.00 56.32           O  
ATOM   2119  CB  PRO L  80     -17.400   3.851   1.846  1.00 48.12           C  
ATOM   2120  CG  PRO L  80     -17.779   5.262   2.120  1.00 47.25           C  
ATOM   2121  CD  PRO L  80     -16.869   6.094   1.268  1.00 49.95           C  
ATOM   2122  N   GLU L  81     -15.452   3.089  -0.638  1.00 52.42           N  
ATOM   2123  CA  GLU L  81     -15.034   2.072  -1.597  1.00 52.19           C  
ATOM   2124  C   GLU L  81     -13.524   1.871  -1.634  1.00 50.70           C  
ATOM   2125  O   GLU L  81     -13.056   1.004  -2.381  1.00 53.33           O  
ATOM   2126  CB  GLU L  81     -15.546   2.418  -2.999  1.00 54.27           C  
ATOM   2127  CG  GLU L  81     -15.152   3.797  -3.498  1.00 57.25           C  
ATOM   2128  CD  GLU L  81     -16.321   4.763  -3.518  1.00 70.75           C  
ATOM   2129  OE1 GLU L  81     -17.267   4.571  -2.726  1.00 62.46           O  
ATOM   2130  OE2 GLU L  81     -16.295   5.713  -4.330  1.00 64.68           O  
ATOM   2131  N   ASP L  82     -12.758   2.634  -0.855  1.00 48.81           N  
ATOM   2132  CA  ASP L  82     -11.312   2.474  -0.790  1.00 46.45           C  
ATOM   2133  C   ASP L  82     -10.868   1.493   0.284  1.00 43.97           C  
ATOM   2134  O   ASP L  82      -9.687   1.129   0.314  1.00 41.82           O  
ATOM   2135  CB  ASP L  82     -10.638   3.825  -0.533  1.00 46.24           C  
ATOM   2136  CG  ASP L  82     -11.050   4.881  -1.533  1.00 47.89           C  
ATOM   2137  OD1 ASP L  82     -11.211   4.548  -2.726  1.00 48.83           O  
ATOM   2138  OD2 ASP L  82     -11.218   6.050  -1.126  1.00 48.46           O  
ATOM   2139  N   GLU L  83     -11.772   1.068   1.166  1.00 44.44           N  
ATOM   2140  CA  GLU L  83     -11.425   0.150   2.243  1.00 43.22           C  
ATOM   2141  C   GLU L  83     -10.894  -1.157   1.672  1.00 41.21           C  
ATOM   2142  O   GLU L  83     -11.663  -1.979   1.164  1.00 48.02           O  
ATOM   2143  CB  GLU L  83     -12.637  -0.102   3.141  1.00 43.56           C  
ATOM   2144  CG  GLU L  83     -12.325  -0.862   4.417  1.00 43.63           C  
ATOM   2145  CD  GLU L  83     -13.289  -0.524   5.535  1.00 46.94           C  
ATOM   2146  OE1 GLU L  83     -13.962   0.524   5.440  1.00 45.84           O  
ATOM   2147  OE2 GLU L  83     -13.375  -1.302   6.508  1.00 65.27           O  
ATOM   2148  N   ALA L  84      -9.580  -1.352   1.748  1.00 38.26           N  
ATOM   2149  CA  ALA L  84      -8.935  -2.509   1.143  1.00 37.44           C  
ATOM   2150  C   ALA L  84      -7.517  -2.614   1.683  1.00 34.78           C  
ATOM   2151  O   ALA L  84      -7.049  -1.752   2.432  1.00 33.82           O  
ATOM   2152  CB  ALA L  84      -8.922  -2.407  -0.384  1.00 37.98           C  
ATOM   2153  N   ASP L  85      -6.840  -3.691   1.292  1.00 34.34           N  
ATOM   2154  CA  ASP L  85      -5.417  -3.854   1.548  1.00 33.39           C  
ATOM   2155  C   ASP L  85      -4.628  -3.350   0.349  1.00 33.27           C  
ATOM   2156  O   ASP L  85      -4.978  -3.628  -0.802  1.00 33.81           O  
ATOM   2157  CB  ASP L  85      -5.075  -5.320   1.820  1.00 33.66           C  
ATOM   2158  CG  ASP L  85      -5.773  -5.864   3.049  1.00 34.09           C  
ATOM   2159  OD1 ASP L  85      -5.770  -5.176   4.090  1.00 35.08           O  
ATOM   2160  OD2 ASP L  85      -6.326  -6.981   2.973  1.00 35.54           O  
ATOM   2161  N   TYR L  86      -3.561  -2.605   0.621  1.00 31.86           N  
ATOM   2162  CA  TYR L  86      -2.742  -1.999  -0.419  1.00 31.73           C  
ATOM   2163  C   TYR L  86      -1.320  -2.528  -0.320  1.00 31.31           C  
ATOM   2164  O   TYR L  86      -0.693  -2.442   0.740  1.00 30.25           O  
ATOM   2165  CB  TYR L  86      -2.754  -0.473  -0.308  1.00 32.13           C  
ATOM   2166  CG  TYR L  86      -4.080   0.153  -0.677  1.00 33.41           C  
ATOM   2167  CD1 TYR L  86      -5.146   0.145   0.212  1.00 33.71           C  
ATOM   2168  CD2 TYR L  86      -4.266   0.753  -1.915  1.00 35.08           C  
ATOM   2169  CE1 TYR L  86      -6.359   0.717  -0.120  1.00 35.41           C  
ATOM   2170  CE2 TYR L  86      -5.475   1.326  -2.256  1.00 36.22           C  
ATOM   2171  CZ  TYR L  86      -6.518   1.305  -1.355  1.00 37.46           C  
ATOM   2172  OH  TYR L  86      -7.724   1.875  -1.690  1.00 39.60           O  
ATOM   2173  N   TYR L  87      -0.819  -3.070  -1.426  1.00 31.47           N  
ATOM   2174  CA  TYR L  87       0.527  -3.616  -1.502  1.00 31.23           C  
ATOM   2175  C   TYR L  87       1.364  -2.791  -2.469  1.00 31.70           C  
ATOM   2176  O   TYR L  87       0.899  -2.430  -3.554  1.00 32.76           O  
ATOM   2177  CB  TYR L  87       0.502  -5.078  -1.960  1.00 32.44           C  
ATOM   2178  CG  TYR L  87      -0.207  -6.019  -1.012  1.00 32.46           C  
ATOM   2179  CD1 TYR L  87      -1.580  -6.210  -1.089  1.00 33.60           C  
ATOM   2180  CD2 TYR L  87       0.498  -6.722  -0.045  1.00 33.79           C  
ATOM   2181  CE1 TYR L  87      -2.232  -7.071  -0.226  1.00 35.03           C  
ATOM   2182  CE2 TYR L  87      -0.144  -7.584   0.822  1.00 35.46           C  
ATOM   2183  CZ  TYR L  87      -1.509  -7.755   0.727  1.00 37.17           C  
ATOM   2184  OH  TYR L  87      -2.151  -8.614   1.588  1.00 43.64           O  
ATOM   2185  N   CYS L  88       2.597  -2.493  -2.071  1.00 31.78           N  
ATOM   2186  CA  CYS L  88       3.561  -1.832  -2.935  1.00 33.30           C  
ATOM   2187  C   CYS L  88       4.615  -2.836  -3.382  1.00 32.90           C  
ATOM   2188  O   CYS L  88       4.905  -3.807  -2.678  1.00 32.12           O  
ATOM   2189  CB  CYS L  88       4.233  -0.650  -2.230  1.00 32.37           C  
ATOM   2190  SG  CYS L  88       5.280  -1.091  -0.826  1.00 31.50           S  
ATOM   2191  N   SER L  89       5.186  -2.597  -4.561  1.00 34.07           N  
ATOM   2192  CA  SER L  89       6.179  -3.518  -5.093  1.00 34.48           C  
ATOM   2193  C   SER L  89       7.069  -2.804  -6.100  1.00 35.51           C  
ATOM   2194  O   SER L  89       6.640  -1.868  -6.779  1.00 36.57           O  
ATOM   2195  CB  SER L  89       5.521  -4.738  -5.748  1.00 35.77           C  
ATOM   2196  OG  SER L  89       4.840  -4.375  -6.932  1.00 46.92           O  
ATOM   2197  N   THR L  90       8.262  -3.323  -6.278  1.00 34.78           N  
ATOM   2198  CA  THR L  90       9.181  -2.800  -7.244  1.00 35.15           C  
ATOM   2199  C   THR L  90      10.204  -3.881  -7.549  1.00 34.15           C  
ATOM   2200  O   THR L  90      10.202  -4.903  -6.910  1.00 33.67           O  
ATOM   2201  CB  THR L  90       9.834  -1.527  -6.697  1.00 34.76           C  
ATOM   2202  OG1 THR L  90      10.436  -0.815  -7.764  1.00 33.32           O  
ATOM   2203  CG2 THR L  90      10.856  -1.837  -5.666  1.00 41.26           C  
ATOM   2204  N   TRP L  91      11.063  -3.652  -8.534  1.00 32.75           N  
ATOM   2205  CA  TRP L  91      12.140  -4.559  -8.892  1.00 32.03           C  
ATOM   2206  C   TRP L  91      13.317  -4.325  -7.956  1.00 31.27           C  
ATOM   2207  O   TRP L  91      13.613  -3.185  -7.587  1.00 31.55           O  
ATOM   2208  CB  TRP L  91      12.569  -4.343 -10.344  1.00 30.88           C  
ATOM   2209  CG  TRP L  91      13.647  -5.271 -10.787  1.00 30.67           C  
ATOM   2210  CD1 TRP L  91      14.979  -4.996 -10.882  1.00 31.18           C  
ATOM   2211  CD2 TRP L  91      13.488  -6.632 -11.194  1.00 30.40           C  
ATOM   2212  NE1 TRP L  91      15.660  -6.103 -11.325  1.00 30.92           N  
ATOM   2213  CE2 TRP L  91      14.766  -7.122 -11.524  1.00 30.18           C  
ATOM   2214  CE3 TRP L  91      12.387  -7.486 -11.312  1.00 31.38           C  
ATOM   2215  CZ2 TRP L  91      14.974  -8.425 -11.964  1.00 29.60           C  
ATOM   2216  CZ3 TRP L  91      12.596  -8.779 -11.749  1.00 30.55           C  
ATOM   2217  CH2 TRP L  91      13.878  -9.237 -12.070  1.00 30.25           C  
ATOM   2218  N   ASP L  92      13.978  -5.409  -7.563  1.00 31.21           N  
ATOM   2219  CA  ASP L  92      15.104  -5.351  -6.634  1.00 32.42           C  
ATOM   2220  C   ASP L  92      16.326  -5.904  -7.359  1.00 33.43           C  
ATOM   2221  O   ASP L  92      16.529  -7.119  -7.419  1.00 40.88           O  
ATOM   2222  CB  ASP L  92      14.802  -6.123  -5.355  1.00 31.91           C  
ATOM   2223  CG  ASP L  92      15.750  -5.774  -4.226  1.00 31.24           C  
ATOM   2224  OD1 ASP L  92      16.977  -5.892  -4.419  1.00 31.87           O  
ATOM   2225  OD2 ASP L  92      15.268  -5.383  -3.144  1.00 30.74           O  
ATOM   2226  N   SER L  93      17.144  -5.001  -7.904  1.00 33.35           N  
ATOM   2227  CA  SER L  93      18.295  -5.423  -8.693  1.00 33.47           C  
ATOM   2228  C   SER L  93      19.336  -6.141  -7.846  1.00 34.10           C  
ATOM   2229  O   SER L  93      20.110  -6.948  -8.372  1.00 37.53           O  
ATOM   2230  CB  SER L  93      18.921  -4.216  -9.388  1.00 35.49           C  
ATOM   2231  OG  SER L  93      19.453  -3.307  -8.442  1.00 45.18           O  
ATOM   2232  N   SER L  94      19.380  -5.858  -6.542  1.00 33.92           N  
ATOM   2233  CA  SER L  94      20.325  -6.555  -5.677  1.00 33.12           C  
ATOM   2234  C   SER L  94      19.979  -8.033  -5.554  1.00 32.11           C  
ATOM   2235  O   SER L  94      20.877  -8.869  -5.402  1.00 31.97           O  
ATOM   2236  CB  SER L  94      20.363  -5.897  -4.297  1.00 32.17           C  
ATOM   2237  OG  SER L  94      19.117  -6.017  -3.637  1.00 30.84           O  
ATOM   2238  N   LEU L  95      18.693  -8.372  -5.625  1.00 33.03           N  
ATOM   2239  CA  LEU L  95      18.246  -9.755  -5.614  1.00 33.67           C  
ATOM   2240  C   LEU L  95      17.741 -10.233  -6.967  1.00 33.22           C  
ATOM   2241  O   LEU L  95      17.475 -11.431  -7.119  1.00 34.29           O  
ATOM   2242  CB  LEU L  95      17.144  -9.946  -4.563  1.00 33.93           C  
ATOM   2243  CG  LEU L  95      17.493  -9.469  -3.153  1.00 32.03           C  
ATOM   2244  CD1 LEU L  95      16.228  -9.259  -2.343  1.00 30.59           C  
ATOM   2245  CD2 LEU L  95      18.417 -10.461  -2.464  1.00 33.58           C  
ATOM   2246  N   SER L  95A     17.602  -9.334  -7.943  1.00 33.34           N  
ATOM   2247  CA  SER L  95A     17.163  -9.667  -9.299  1.00 31.81           C  
ATOM   2248  C   SER L  95A     15.808 -10.377  -9.282  1.00 32.26           C  
ATOM   2249  O   SER L  95A     15.634 -11.466  -9.833  1.00 31.89           O  
ATOM   2250  CB  SER L  95A     18.221 -10.505 -10.026  1.00 31.24           C  
ATOM   2251  OG  SER L  95A     19.408  -9.760 -10.229  1.00 30.98           O  
ATOM   2252  N   VAL L  95B     14.839  -9.729  -8.638  1.00 32.01           N  
ATOM   2253  CA  VAL L  95B     13.496 -10.282  -8.515  1.00 35.75           C  
ATOM   2254  C   VAL L  95B     12.553  -9.151  -8.140  1.00 32.22           C  
ATOM   2255  O   VAL L  95B     12.954  -8.177  -7.497  1.00 31.86           O  
ATOM   2256  CB  VAL L  95B     13.458 -11.431  -7.473  1.00 32.91           C  
ATOM   2257  CG1 VAL L  95B     13.671 -10.890  -6.065  1.00 32.66           C  
ATOM   2258  CG2 VAL L  95B     12.151 -12.206  -7.566  1.00 33.17           C  
ATOM   2259  N   GLN L  96      11.298  -9.271  -8.567  1.00 36.84           N  
ATOM   2260  CA  GLN L  96      10.254  -8.413  -8.032  1.00 33.18           C  
ATOM   2261  C   GLN L  96      10.167  -8.613  -6.524  1.00 33.75           C  
ATOM   2262  O   GLN L  96      10.480  -9.684  -5.999  1.00 36.86           O  
ATOM   2263  CB  GLN L  96       8.911  -8.728  -8.695  1.00 35.40           C  
ATOM   2264  CG  GLN L  96       7.823  -7.686  -8.467  1.00 37.08           C  
ATOM   2265  CD  GLN L  96       7.988  -6.458  -9.344  1.00 43.20           C  
ATOM   2266  OE1 GLN L  96       8.838  -6.426 -10.233  1.00 51.69           O  
ATOM   2267  NE2 GLN L  96       7.169  -5.441  -9.100  1.00 41.09           N  
ATOM   2268  N   VAL L  97       9.761  -7.565  -5.818  1.00 33.14           N  
ATOM   2269  CA  VAL L  97       9.744  -7.581  -4.361  1.00 31.54           C  
ATOM   2270  C   VAL L  97       8.527  -6.795  -3.892  1.00 30.45           C  
ATOM   2271  O   VAL L  97       8.200  -5.744  -4.453  1.00 31.42           O  
ATOM   2272  CB  VAL L  97      11.072  -7.028  -3.789  1.00 30.81           C  
ATOM   2273  CG1 VAL L  97      10.880  -5.702  -3.087  1.00 31.42           C  
ATOM   2274  CG2 VAL L  97      11.717  -8.046  -2.864  1.00 29.91           C  
ATOM   2275  N   ILE L  98       7.834  -7.327  -2.885  1.00 30.36           N  
ATOM   2276  CA  ILE L  98       6.528  -6.828  -2.468  1.00 30.79           C  
ATOM   2277  C   ILE L  98       6.540  -6.593  -0.963  1.00 31.73           C  
ATOM   2278  O   ILE L  98       7.121  -7.379  -0.207  1.00 32.94           O  
ATOM   2279  CB  ILE L  98       5.396  -7.810  -2.852  1.00 31.35           C  
ATOM   2280  CG1 ILE L  98       5.389  -8.079  -4.360  1.00 31.87           C  
ATOM   2281  CG2 ILE L  98       4.041  -7.276  -2.420  1.00 31.83           C  
ATOM   2282  CD1 ILE L  98       6.108  -9.345  -4.767  1.00 32.48           C  
ATOM   2283  N   GLY L  99       5.891  -5.506  -0.529  1.00 31.25           N  
ATOM   2284  CA  GLY L  99       5.776  -5.210   0.882  1.00 31.68           C  
ATOM   2285  C   GLY L  99       4.693  -6.023   1.570  1.00 31.56           C  
ATOM   2286  O   GLY L  99       3.927  -6.758   0.947  1.00 31.86           O  
ATOM   2287  N   GLY L 100       4.632  -5.872   2.895  1.00 31.32           N  
ATOM   2288  CA  GLY L 100       3.702  -6.649   3.697  1.00 32.39           C  
ATOM   2289  C   GLY L 100       2.256  -6.226   3.565  1.00 31.14           C  
ATOM   2290  O   GLY L 100       1.363  -6.977   3.970  1.00 33.13           O  
ATOM   2291  N   GLY L 101       2.003  -5.048   3.021  1.00 30.18           N  
ATOM   2292  CA  GLY L 101       0.643  -4.597   2.814  1.00 29.95           C  
ATOM   2293  C   GLY L 101       0.151  -3.706   3.938  1.00 28.89           C  
ATOM   2294  O   GLY L 101       0.549  -3.840   5.101  1.00 27.83           O  
ATOM   2295  N   THR L 102      -0.733  -2.777   3.587  1.00 28.79           N  
ATOM   2296  CA  THR L 102      -1.333  -1.851   4.535  1.00 28.59           C  
ATOM   2297  C   THR L 102      -2.846  -1.958   4.445  1.00 29.08           C  
ATOM   2298  O   THR L 102      -3.413  -1.861   3.352  1.00 30.39           O  
ATOM   2299  CB  THR L 102      -0.893  -0.410   4.260  1.00 28.97           C  
ATOM   2300  OG1 THR L 102       0.512  -0.281   4.508  1.00 29.10           O  
ATOM   2301  CG2 THR L 102      -1.651   0.559   5.154  1.00 29.11           C  
ATOM   2302  N   LYS L 103      -3.495  -2.165   5.588  1.00 28.71           N  
ATOM   2303  CA  LYS L 103      -4.951  -2.199   5.662  1.00 30.83           C  
ATOM   2304  C   LYS L 103      -5.461  -0.773   5.836  1.00 31.14           C  
ATOM   2305  O   LYS L 103      -5.204  -0.135   6.863  1.00 30.61           O  
ATOM   2306  CB  LYS L 103      -5.420  -3.091   6.809  1.00 31.40           C  
ATOM   2307  CG  LYS L 103      -6.927  -3.054   7.030  1.00 32.41           C  
ATOM   2308  CD  LYS L 103      -7.339  -3.803   8.289  1.00 33.13           C  
ATOM   2309  CE  LYS L 103      -7.659  -5.259   7.991  1.00 39.87           C  
ATOM   2310  NZ  LYS L 103      -8.189  -5.966   9.189  1.00 39.46           N  
ATOM   2311  N   VAL L 104      -6.179  -0.274   4.837  1.00 32.33           N  
ATOM   2312  CA  VAL L 104      -6.763   1.061   4.875  1.00 33.69           C  
ATOM   2313  C   VAL L 104      -8.234   0.922   5.238  1.00 35.34           C  
ATOM   2314  O   VAL L 104      -9.010   0.305   4.498  1.00 36.19           O  
ATOM   2315  CB  VAL L 104      -6.582   1.792   3.537  1.00 33.34           C  
ATOM   2316  CG1 VAL L 104      -7.185   3.183   3.610  1.00 34.95           C  
ATOM   2317  CG2 VAL L 104      -5.108   1.872   3.189  1.00 32.75           C  
ATOM   2318  N   THR L 105      -8.619   1.497   6.374  1.00 34.85           N  
ATOM   2319  CA  THR L 105      -9.947   1.320   6.940  1.00 37.54           C  
ATOM   2320  C   THR L 105     -10.697   2.644   6.961  1.00 38.99           C  
ATOM   2321  O   THR L 105     -10.139   3.680   7.335  1.00 37.73           O  
ATOM   2322  CB  THR L 105      -9.867   0.757   8.365  1.00 36.75           C  
ATOM   2323  OG1 THR L 105      -9.042  -0.414   8.376  1.00 34.15           O  
ATOM   2324  CG2 THR L 105     -11.253   0.400   8.881  1.00 37.85           C  
ATOM   2325  N   VAL L 106     -11.961   2.604   6.556  1.00 41.33           N  
ATOM   2326  CA  VAL L 106     -12.874   3.724   6.748  1.00 41.75           C  
ATOM   2327  C   VAL L 106     -13.536   3.540   8.106  1.00 41.15           C  
ATOM   2328  O   VAL L 106     -14.229   2.544   8.339  1.00 40.87           O  
ATOM   2329  CB  VAL L 106     -13.918   3.798   5.625  1.00 43.88           C  
ATOM   2330  CG1 VAL L 106     -14.617   5.147   5.645  1.00 43.97           C  
ATOM   2331  CG2 VAL L 106     -13.266   3.543   4.275  1.00 44.82           C  
ATOM   2332  N   LEU L 106A    -13.316   4.495   9.005  1.00 43.86           N  
ATOM   2333  CA  LEU L 106A    -13.692   4.319  10.402  1.00 37.98           C  
ATOM   2334  C   LEU L 106A    -15.207   4.301  10.561  1.00 37.19           C  
ATOM   2335  O   LEU L 106A    -15.881   5.303  10.298  1.00 37.38           O  
ATOM   2336  CB  LEU L 106A    -13.077   5.426  11.254  1.00 37.57           C  
ATOM   2337  CG  LEU L 106A    -11.551   5.431  11.332  1.00 37.11           C  
ATOM   2338  CD1 LEU L 106A    -11.060   6.626  12.134  1.00 37.85           C  
ATOM   2339  CD2 LEU L 106A    -11.047   4.130  11.937  1.00 35.40           C  
ATOM   2340  N   GLY L 107     -15.738   3.159  10.985  1.00 36.26           N  
ATOM   2341  CA  GLY L 107     -17.108   3.036  11.430  1.00 36.10           C  
ATOM   2342  C   GLY L 107     -17.254   2.968  12.933  1.00 34.82           C  
ATOM   2343  O   GLY L 107     -18.366   2.752  13.427  1.00 34.59           O  
ATOM   2344  N   GLN L 108     -16.165   3.145  13.673  1.00 34.25           N  
ATOM   2345  CA  GLN L 108     -16.159   3.083  15.126  1.00 33.99           C  
ATOM   2346  C   GLN L 108     -14.912   3.802  15.619  1.00 33.14           C  
ATOM   2347  O   GLN L 108     -13.985   4.042  14.835  1.00 33.08           O  
ATOM   2348  CB  GLN L 108     -16.190   1.626  15.619  1.00 33.78           C  
ATOM   2349  CG  GLN L 108     -14.953   0.822  15.273  1.00 33.27           C  
ATOM   2350  CD  GLN L 108     -15.112  -0.653  15.581  1.00 33.55           C  
ATOM   2351  OE1 GLN L 108     -15.765  -1.387  14.839  1.00 35.39           O  
ATOM   2352  NE2 GLN L 108     -14.517  -1.095  16.681  1.00 32.75           N  
ATOM   2353  N   PRO L 109     -14.864   4.184  16.896  1.00 32.40           N  
ATOM   2354  CA  PRO L 109     -13.701   4.931  17.390  1.00 33.15           C  
ATOM   2355  C   PRO L 109     -12.406   4.147  17.230  1.00 32.44           C  
ATOM   2356  O   PRO L 109     -12.338   2.951  17.518  1.00 31.86           O  
ATOM   2357  CB  PRO L 109     -14.033   5.164  18.868  1.00 33.81           C  
ATOM   2358  CG  PRO L 109     -15.514   5.127  18.925  1.00 38.22           C  
ATOM   2359  CD  PRO L 109     -15.932   4.106  17.910  1.00 33.65           C  
TER    2360      PRO L 109                                                      
